# Supplementary material for: Thermo-microstratigraphy of shells reveals invisible fire use and possible cooking in the archaeological record
Source: Frontiers journal article supplement (doi:10.3389/feart.2022.869487), 2022-09-01
Supplement: Table_1.XLSX [file Table_1.XLSX]

## Sheet: C.edule_200_1_mFTIR_data
Select spectrum number	Wavenumber	Absorbance
0001.CSV	6,749918e+002	3,094044e-002
0001.CSV	6,788489e+002	3,239321e-002
0001.CSV	6,827060e+002	3,304955e-002
0001.CSV	6,865631e+002	3,474211e-002
0001.CSV	6,904202e+002	3,657947e-002
0001.CSV	6,942773e+002	4,328483e-002
0001.CSV	6,981344e+002	5,100797e-002
0001.CSV	7,019915e+002	4,813928e-002
0001.CSV	7,058486e+002	4,541686e-002
0001.CSV	7,097057e+002	5,824183e-002
0001.CSV	7,135628e+002	5,920912e-002
0001.CSV	7,174199e+002	3,967378e-002
0001.CSV	7,212770e+002	2,745686e-002
0001.CSV	7,251341e+002	2,607720e-002
0001.CSV	7,289911e+002	2,567603e-002
0001.CSV	7,328483e+002	2,568693e-002
0001.CSV	7,367054e+002	2,575028e-002
0001.CSV	7,405624e+002	2,624348e-002
0001.CSV	7,444196e+002	2,652501e-002
0001.CSV	7,482767e+002	2,751355e-002
0001.CSV	7,521337e+002	2,798384e-002
0001.CSV	7,559908e+002	2,856110e-002
0001.CSV	7,598480e+002	2,872749e-002
0001.CSV	7,637050e+002	2,938274e-002
0001.CSV	7,675621e+002	2,972936e-002
0001.CSV	7,714193e+002	3,038620e-002
0001.CSV	7,752763e+002	3,092151e-002
0001.CSV	7,791334e+002	3,166362e-002
0001.CSV	7,829905e+002	3,177443e-002
0001.CSV	7,868476e+002	3,215811e-002
0001.CSV	7,907047e+002	3,251253e-002
0001.CSV	7,945618e+002	3,367956e-002
0001.CSV	7,984189e+002	3,473166e-002
0001.CSV	8,022760e+002	3,603188e-002
0001.CSV	8,061331e+002	3,678923e-002
0001.CSV	8,099902e+002	3,775239e-002
0001.CSV	8,138473e+002	3,886924e-002
0001.CSV	8,177043e+002	4,117247e-002
0001.CSV	8,215615e+002	4,424869e-002
0001.CSV	8,254186e+002	4,829478e-002
0001.CSV	8,292756e+002	5,146562e-002
0001.CSV	8,331328e+002	5,451122e-002
0001.CSV	8,369899e+002	5,903429e-002
0001.CSV	8,408469e+002	6,720103e-002
0001.CSV	8,447040e+002	7,624779e-002
0001.CSV	8,485612e+002	9,313034e-002
0001.CSV	8,524182e+002	1,167801e-001
0001.CSV	8,562753e+002	1,257462e-001
0001.CSV	8,601324e+002	1,125792e-001
0001.CSV	8,639895e+002	8,834217e-002
0001.CSV	8,678466e+002	6,246214e-002
0001.CSV	8,717037e+002	4,275103e-002
0001.CSV	8,755608e+002	3,104185e-002
0001.CSV	8,794179e+002	2,511011e-002
0001.CSV	8,832750e+002	2,166144e-002
0001.CSV	8,871321e+002	2,005822e-002
0001.CSV	8,909892e+002	1,963030e-002
0001.CSV	8,948463e+002	2,002511e-002
0001.CSV	8,987034e+002	2,047975e-002
0001.CSV	9,025605e+002	2,120588e-002
0001.CSV	9,064176e+002	2,191563e-002
0001.CSV	9,102747e+002	2,233046e-002
0001.CSV	9,141318e+002	2,236377e-002
0001.CSV	9,179889e+002	2,285300e-002
0001.CSV	9,218459e+002	2,326337e-002
0001.CSV	9,257031e+002	2,387573e-002
0001.CSV	9,295602e+002	2,443266e-002
0001.CSV	9,334172e+002	2,499813e-002
0001.CSV	9,372744e+002	2,522846e-002
0001.CSV	9,411315e+002	2,560897e-002
0001.CSV	9,449885e+002	2,583713e-002
0001.CSV	9,488456e+002	2,628558e-002
0001.CSV	9,527028e+002	2,660004e-002
0001.CSV	9,565598e+002	2,702205e-002
0001.CSV	9,604169e+002	2,726493e-002
0001.CSV	9,642740e+002	2,762113e-002
0001.CSV	9,681311e+002	2,781248e-002
0001.CSV	9,719882e+002	2,827132e-002
0001.CSV	9,758453e+002	2,864533e-002
0001.CSV	9,797024e+002	2,914229e-002
0001.CSV	9,835595e+002	2,945719e-002
0001.CSV	9,874166e+002	2,994241e-002
0001.CSV	9,912737e+002	3,030181e-002
0001.CSV	9,951308e+002	3,083111e-002
0001.CSV	9,989879e+002	3,126644e-002
0001.CSV	1,002845e+003	3,197786e-002
0001.CSV	1,006702e+003	3,270691e-002
0001.CSV	1,010559e+003	3,356646e-002
0001.CSV	1,014416e+003	3,390040e-002
0001.CSV	1,018273e+003	3,439946e-002
0001.CSV	1,022130e+003	3,500209e-002
0001.CSV	1,025988e+003	3,590180e-002
0001.CSV	1,029845e+003	3,660376e-002
0001.CSV	1,033702e+003	3,746132e-002
0001.CSV	1,037559e+003	3,791735e-002
0001.CSV	1,041416e+003	3,823514e-002
0001.CSV	1,045273e+003	3,818296e-002
0001.CSV	1,049130e+003	3,831605e-002
0001.CSV	1,052987e+003	3,843111e-002
0001.CSV	1,056844e+003	3,902777e-002
0001.CSV	1,060701e+003	3,971201e-002
0001.CSV	1,064559e+003	4,089919e-002
0001.CSV	1,068416e+003	4,216359e-002
0001.CSV	1,072273e+003	4,385465e-002
0001.CSV	1,076130e+003	4,637249e-002
0001.CSV	1,079987e+003	5,054269e-002
0001.CSV	1,083844e+003	5,013919e-002
0001.CSV	1,087701e+003	4,485439e-002
0001.CSV	1,091558e+003	4,225576e-002
0001.CSV	1,095415e+003	4,237362e-002
0001.CSV	1,099272e+003	4,270500e-002
0001.CSV	1,103130e+003	4,312214e-002
0001.CSV	1,106987e+003	4,331481e-002
0001.CSV	1,110844e+003	4,351031e-002
0001.CSV	1,114701e+003	4,341103e-002
0001.CSV	1,118558e+003	4,330979e-002
0001.CSV	1,122415e+003	4,299420e-002
0001.CSV	1,126272e+003	4,272306e-002
0001.CSV	1,130129e+003	4,230057e-002
0001.CSV	1,133986e+003	4,198472e-002
0001.CSV	1,137843e+003	4,163529e-002
0001.CSV	1,141700e+003	4,148222e-002
0001.CSV	1,145558e+003	4,127932e-002
0001.CSV	1,149415e+003	4,128129e-002
0001.CSV	1,153272e+003	4,116802e-002
0001.CSV	1,157129e+003	4,120001e-002
0001.CSV	1,160986e+003	4,131770e-002
0001.CSV	1,164843e+003	4,175915e-002
0001.CSV	1,168700e+003	4,222625e-002
0001.CSV	1,172557e+003	4,304684e-002
0001.CSV	1,176414e+003	4,417271e-002
0001.CSV	1,180271e+003	4,526661e-002
0001.CSV	1,184129e+003	4,501511e-002
0001.CSV	1,187986e+003	4,381848e-002
0001.CSV	1,191843e+003	4,254655e-002
0001.CSV	1,195700e+003	4,199563e-002
0001.CSV	1,199557e+003	4,191279e-002
0001.CSV	1,203414e+003	4,238633e-002
0001.CSV	1,207271e+003	4,302474e-002
0001.CSV	1,211128e+003	4,394901e-002
0001.CSV	1,214985e+003	4,484513e-002
0001.CSV	1,218842e+003	4,583113e-002
0001.CSV	1,222699e+003	4,668137e-002
0001.CSV	1,226557e+003	4,767950e-002
0001.CSV	1,230414e+003	4,852977e-002
0001.CSV	1,234271e+003	4,939200e-002
0001.CSV	1,238128e+003	4,998867e-002
0001.CSV	1,241985e+003	5,059056e-002
0001.CSV	1,245842e+003	5,096061e-002
0001.CSV	1,249699e+003	5,107587e-002
0001.CSV	1,253556e+003	5,045150e-002
0001.CSV	1,257413e+003	4,946592e-002
0001.CSV	1,261271e+003	4,847294e-002
0001.CSV	1,265128e+003	4,829238e-002
0001.CSV	1,268985e+003	4,861422e-002
0001.CSV	1,272842e+003	4,928182e-002
0001.CSV	1,276699e+003	4,990031e-002
0001.CSV	1,280556e+003	5,070263e-002
0001.CSV	1,284413e+003	5,143410e-002
0001.CSV	1,288270e+003	5,231946e-002
0001.CSV	1,292127e+003	5,299560e-002
0001.CSV	1,295984e+003	5,365704e-002
0001.CSV	1,299841e+003	5,406033e-002
0001.CSV	1,303698e+003	5,447681e-002
0001.CSV	1,307556e+003	5,478403e-002
0001.CSV	1,311413e+003	5,536005e-002
0001.CSV	1,315270e+003	5,592164e-002
0001.CSV	1,319127e+003	5,674177e-002
0001.CSV	1,322984e+003	5,753161e-002
0001.CSV	1,326841e+003	5,858528e-002
0001.CSV	1,330698e+003	5,966383e-002
0001.CSV	1,334555e+003	6,098929e-002
0001.CSV	1,338412e+003	6,235798e-002
0001.CSV	1,342270e+003	6,401104e-002
0001.CSV	1,346127e+003	6,546641e-002
0001.CSV	1,349984e+003	6,723885e-002
0001.CSV	1,353841e+003	6,904113e-002
0001.CSV	1,357698e+003	7,113414e-002
0001.CSV	1,361555e+003	7,316392e-002
0001.CSV	1,365412e+003	7,528668e-002
0001.CSV	1,369269e+003	7,707822e-002
0001.CSV	1,373126e+003	7,949486e-002
0001.CSV	1,376983e+003	8,218307e-002
0001.CSV	1,380840e+003	8,489624e-002
0001.CSV	1,384698e+003	8,732490e-002
0001.CSV	1,388555e+003	9,011657e-002
0001.CSV	1,392412e+003	9,233982e-002
0001.CSV	1,396269e+003	9,502093e-002
0001.CSV	1,400126e+003	9,761377e-002
0001.CSV	1,403983e+003	1,003202e-001
0001.CSV	1,407840e+003	1,028995e-001
0001.CSV	1,411697e+003	1,054132e-001
0001.CSV	1,415554e+003	1,071695e-001
0001.CSV	1,419411e+003	1,093556e-001
0001.CSV	1,423269e+003	1,113079e-001
0001.CSV	1,427125e+003	1,138116e-001
0001.CSV	1,430983e+003	1,165028e-001
0001.CSV	1,434840e+003	1,199620e-001
0001.CSV	1,438697e+003	1,236485e-001
0001.CSV	1,442554e+003	1,264610e-001
0001.CSV	1,446411e+003	1,272170e-001
0001.CSV	1,450268e+003	1,265220e-001
0001.CSV	1,454125e+003	1,246447e-001
0001.CSV	1,457982e+003	1,225600e-001
0001.CSV	1,461839e+003	1,211366e-001
0001.CSV	1,465697e+003	1,204587e-001
0001.CSV	1,469554e+003	1,180818e-001
0001.CSV	1,473411e+003	1,128393e-001
0001.CSV	1,477268e+003	1,060698e-001
0001.CSV	1,481125e+003	1,015734e-001
0001.CSV	1,484982e+003	9,722370e-002
0001.CSV	1,488839e+003	9,244168e-002
0001.CSV	1,492696e+003	8,767707e-002
0001.CSV	1,496553e+003	8,412819e-002
0001.CSV	1,500410e+003	8,037757e-002
0001.CSV	1,504268e+003	7,810199e-002
0001.CSV	1,508125e+003	7,340428e-002
0001.CSV	1,511982e+003	6,914271e-002
0001.CSV	1,515839e+003	6,507483e-002
0001.CSV	1,519696e+003	6,005889e-002
0001.CSV	1,523553e+003	5,477820e-002
0001.CSV	1,527410e+003	5,125066e-002
0001.CSV	1,531267e+003	4,822239e-002
0001.CSV	1,535124e+003	4,583768e-002
0001.CSV	1,538981e+003	4,332268e-002
0001.CSV	1,542838e+003	3,905365e-002
0001.CSV	1,546696e+003	3,566174e-002
0001.CSV	1,550553e+003	3,325593e-002
0001.CSV	1,554410e+003	3,088134e-002
0001.CSV	1,558267e+003	2,820837e-002
0001.CSV	1,562124e+003	2,577546e-002
0001.CSV	1,565981e+003	2,480317e-002
0001.CSV	1,569838e+003	2,352137e-002
0001.CSV	1,573695e+003	2,232066e-002
0001.CSV	1,577552e+003	2,034813e-002
0001.CSV	1,581409e+003	1,823090e-002
0001.CSV	1,585267e+003	1,629732e-002
0001.CSV	1,589124e+003	1,483849e-002
0001.CSV	1,592981e+003	1,393593e-002
0001.CSV	1,596838e+003	1,360650e-002
0001.CSV	1,600695e+003	1,346929e-002
0001.CSV	1,604552e+003	1,349222e-002
0001.CSV	1,608409e+003	1,327162e-002
0001.CSV	1,612266e+003	1,281381e-002
0001.CSV	1,616123e+003	1,205629e-002
0001.CSV	1,619980e+003	1,142770e-002
0001.CSV	1,623837e+003	1,092973e-002
0001.CSV	1,627695e+003	1,061942e-002
0001.CSV	1,631552e+003	1,031309e-002
0001.CSV	1,635409e+003	1,002657e-002
0001.CSV	1,639266e+003	9,724457e-003
0001.CSV	1,643123e+003	9,596156e-003
0001.CSV	1,646980e+003	9,428951e-003
0001.CSV	1,650837e+003	9,303377e-003
0001.CSV	1,654694e+003	9,050445e-003
0001.CSV	1,658551e+003	8,954576e-003
0001.CSV	1,662408e+003	8,811455e-003
0001.CSV	1,666266e+003	8,738188e-003
0001.CSV	1,670123e+003	8,601627e-003
0001.CSV	1,673980e+003	8,534444e-003
0001.CSV	1,677837e+003	8,405346e-003
0001.CSV	1,681694e+003	8,365216e-003
0001.CSV	1,685551e+003	8,213880e-003
0001.CSV	1,689408e+003	8,110770e-003
0001.CSV	1,693265e+003	7,954698e-003
0001.CSV	1,697122e+003	7,922876e-003
0001.CSV	1,700979e+003	7,864098e-003
0001.CSV	1,704837e+003	7,946497e-003
0001.CSV	1,708694e+003	7,985205e-003
0001.CSV	1,712551e+003	8,062430e-003
0001.CSV	1,716408e+003	8,218001e-003
0001.CSV	1,720265e+003	8,537418e-003
0001.CSV	1,724122e+003	8,638738e-003
0001.CSV	1,727979e+003	8,689779e-003
0001.CSV	1,731836e+003	8,628463e-003
0001.CSV	1,735693e+003	8,564013e-003
0001.CSV	1,739550e+003	8,317759e-003
0001.CSV	1,743407e+003	8,021723e-003
0001.CSV	1,747265e+003	7,637225e-003
0001.CSV	1,751122e+003	7,291545e-003
0001.CSV	1,754979e+003	7,073930e-003
0001.CSV	1,758836e+003	7,030588e-003
0001.CSV	1,762693e+003	7,001932e-003
0001.CSV	1,766550e+003	7,062850e-003
0001.CSV	1,770407e+003	7,305192e-003
0001.CSV	1,774264e+003	8,118331e-003
0001.CSV	1,778121e+003	9,118486e-003
0001.CSV	1,781978e+003	1,011640e-002
0001.CSV	1,785836e+003	1,052775e-002
0001.CSV	1,789693e+003	1,017908e-002
0001.CSV	1,793550e+003	9,078018e-003
0001.CSV	1,797407e+003	8,221175e-003
0001.CSV	1,801264e+003	7,539712e-003
0001.CSV	1,805121e+003	7,074233e-003
0001.CSV	1,808978e+003	6,815325e-003
0001.CSV	1,812835e+003	6,722539e-003
0001.CSV	1,816692e+003	6,655646e-003
0001.CSV	1,820549e+003	6,666245e-003
0001.CSV	1,824406e+003	6,645620e-003
0001.CSV	1,828264e+003	6,674489e-003
0001.CSV	1,832121e+003	6,685020e-003
0001.CSV	1,835978e+003	6,716146e-003
0001.CSV	1,839835e+003	6,725534e-003
0001.CSV	1,843692e+003	6,801492e-003
0001.CSV	1,847549e+003	6,815796e-003
0001.CSV	1,851406e+003	6,813036e-003
0001.CSV	1,855263e+003	6,807920e-003
0001.CSV	1,859120e+003	6,859924e-003
0001.CSV	1,862977e+003	6,856053e-003
0001.CSV	1,866835e+003	6,905773e-003
0001.CSV	1,870692e+003	6,978968e-003
0001.CSV	1,874549e+003	7,048099e-003
0001.CSV	1,878406e+003	7,053420e-003
0001.CSV	1,882263e+003	7,062917e-003
0001.CSV	1,886120e+003	7,034629e-003
0001.CSV	1,889977e+003	7,088445e-003
0001.CSV	1,893834e+003	7,133274e-003
0001.CSV	1,897691e+003	7,162647e-003
0001.CSV	1,901548e+003	7,108855e-003
0001.CSV	1,905406e+003	7,116131e-003
0001.CSV	1,909263e+003	7,156314e-003
0001.CSV	1,913120e+003	7,180265e-003
0001.CSV	1,916977e+003	7,144255e-003
0001.CSV	1,920834e+003	7,184812e-003
0001.CSV	1,924691e+003	7,180433e-003
0001.CSV	1,928548e+003	7,188451e-003
0001.CSV	1,932405e+003	7,191044e-003
0001.CSV	1,936262e+003	7,218568e-003
0001.CSV	1,940119e+003	7,202161e-003
0001.CSV	1,943976e+003	7,254179e-003
0001.CSV	1,947834e+003	7,272171e-003
0001.CSV	1,951691e+003	7,275742e-003
0001.CSV	1,955548e+003	7,271193e-003
0001.CSV	1,959405e+003	7,289422e-003
0001.CSV	1,963262e+003	7,260008e-003
0001.CSV	1,967119e+003	7,282852e-003
0001.CSV	1,970976e+003	7,294712e-003
0001.CSV	1,974833e+003	7,306809e-003
0001.CSV	1,978690e+003	7,308831e-003
0001.CSV	1,982547e+003	7,356480e-003
0001.CSV	1,986405e+003	7,366894e-003
0001.CSV	1,990262e+003	7,411010e-003
0001.CSV	1,994119e+003	7,436289e-003
0001.CSV	1,997976e+003	7,435548e-003
0001.CSV	2,001833e+003	7,440570e-003
0001.CSV	2,005690e+003	7,503943e-003
0001.CSV	2,009547e+003	7,506472e-003
0001.CSV	2,013404e+003	7,515540e-003
0001.CSV	2,017261e+003	7,525215e-003
0001.CSV	2,021118e+003	7,559570e-003
0001.CSV	2,024975e+003	7,549422e-003
0001.CSV	2,028833e+003	7,555963e-003
0001.CSV	2,032690e+003	7,573293e-003
0001.CSV	2,036547e+003	7,620837e-003
0001.CSV	2,040404e+003	7,633853e-003
0001.CSV	2,044261e+003	7,682853e-003
0001.CSV	2,048118e+003	7,710981e-003
0001.CSV	2,051975e+003	7,750579e-003
0001.CSV	2,055832e+003	7,772403e-003
0001.CSV	2,059689e+003	7,828099e-003
0001.CSV	2,063546e+003	7,835049e-003
0001.CSV	2,067404e+003	7,847026e-003
0001.CSV	2,071261e+003	7,858902e-003
0001.CSV	2,075118e+003	7,886299e-003
0001.CSV	2,078975e+003	7,891428e-003
0001.CSV	2,082832e+003	7,911538e-003
0001.CSV	2,086689e+003	7,922404e-003
0001.CSV	2,090546e+003	7,965362e-003
0001.CSV	2,094403e+003	7,958274e-003
0001.CSV	2,098260e+003	7,988581e-003
0001.CSV	2,102117e+003	8,020947e-003
0001.CSV	2,105975e+003	8,055105e-003
0001.CSV	2,109832e+003	8,063679e-003
0001.CSV	2,113689e+003	8,127311e-003
0001.CSV	2,117546e+003	8,172316e-003
0001.CSV	2,121403e+003	8,219588e-003
0001.CSV	2,125260e+003	8,229515e-003
0001.CSV	2,129117e+003	8,247378e-003
0001.CSV	2,132974e+003	8,272672e-003
0001.CSV	2,136831e+003	8,344780e-003
0001.CSV	2,140688e+003	8,370452e-003
0001.CSV	2,144545e+003	8,377984e-003
0001.CSV	2,148403e+003	8,365857e-003
0001.CSV	2,152260e+003	8,394570e-003
0001.CSV	2,156117e+003	8,425346e-003
0001.CSV	2,159974e+003	8,442000e-003
0001.CSV	2,163831e+003	8,446832e-003
0001.CSV	2,167688e+003	8,460717e-003
0001.CSV	2,171545e+003	8,467745e-003
0001.CSV	2,175402e+003	8,508730e-003
0001.CSV	2,179259e+003	8,519880e-003
0001.CSV	2,183116e+003	8,539108e-003
0001.CSV	2,186974e+003	8,546880e-003
0001.CSV	2,190831e+003	8,575267e-003
0001.CSV	2,194688e+003	8,615113e-003
0001.CSV	2,198545e+003	8,645465e-003
0001.CSV	2,202402e+003	8,635595e-003
0001.CSV	2,206259e+003	8,648405e-003
0001.CSV	2,210116e+003	8,617208e-003
0001.CSV	2,213973e+003	8,617749e-003
0001.CSV	2,217830e+003	8,634851e-003
0001.CSV	2,221688e+003	8,659864e-003
0001.CSV	2,225544e+003	8,670849e-003
0001.CSV	2,229402e+003	8,668077e-003
0001.CSV	2,233259e+003	8,655570e-003
0001.CSV	2,237116e+003	8,678860e-003
0001.CSV	2,240973e+003	8,690725e-003
0001.CSV	2,244830e+003	8,707763e-003
0001.CSV	2,248687e+003	8,712563e-003
0001.CSV	2,252544e+003	8,712361e-003
0001.CSV	2,256401e+003	8,688055e-003
0001.CSV	2,260258e+003	8,682646e-003
0001.CSV	2,264115e+003	8,659931e-003
0001.CSV	2,267973e+003	8,655402e-003
0001.CSV	2,271830e+003	8,651447e-003
0001.CSV	2,275687e+003	8,696168e-003
0001.CSV	2,279544e+003	8,722299e-003
0001.CSV	2,283401e+003	8,705295e-003
0001.CSV	2,287258e+003	8,651413e-003
0001.CSV	2,291115e+003	8,617749e-003
0001.CSV	2,294972e+003	8,529443e-003
0001.CSV	2,298829e+003	8,453589e-003
0001.CSV	2,302687e+003	8,385348e-003
0001.CSV	2,306543e+003	8,265581e-003
0001.CSV	2,310401e+003	8,103444e-003
0001.CSV	2,314258e+003	7,892035e-003
0001.CSV	2,318115e+003	7,519754e-003
0001.CSV	2,321972e+003	7,107104e-003
0001.CSV	2,325829e+003	6,587553e-003
0001.CSV	2,329686e+003	6,043423e-003
0001.CSV	2,333543e+003	5,489571e-003
0001.CSV	2,337400e+003	5,552426e-003
0001.CSV	2,341257e+003	5,619988e-003
0001.CSV	2,345115e+003	6,336197e-003
0001.CSV	2,348972e+003	6,745523e-003
0001.CSV	2,352829e+003	5,923258e-003
0001.CSV	2,356686e+003	2,983107e-003
0001.CSV	2,360543e+003	7,914978e-004
0001.CSV	2,364400e+003	2,511119e-003
0001.CSV	2,368257e+003	5,195188e-003
0001.CSV	2,372114e+003	6,951830e-003
0001.CSV	2,375971e+003	8,010416e-003
0001.CSV	2,379828e+003	8,570164e-003
0001.CSV	2,383686e+003	8,862178e-003
0001.CSV	2,387542e+003	8,972706e-003
0001.CSV	2,391400e+003	9,028624e-003
0001.CSV	2,395257e+003	9,049464e-003
0001.CSV	2,399114e+003	9,052576e-003
0001.CSV	2,402971e+003	9,038096e-003
0001.CSV	2,406828e+003	9,037826e-003
0001.CSV	2,410685e+003	9,045708e-003
0001.CSV	2,414542e+003	9,064485e-003
0001.CSV	2,418399e+003	9,087966e-003
0001.CSV	2,422256e+003	9,112565e-003
0001.CSV	2,426114e+003	9,124171e-003
0001.CSV	2,429971e+003	9,141428e-003
0001.CSV	2,433828e+003	9,155201e-003
0001.CSV	2,437685e+003	9,159566e-003
0001.CSV	2,441542e+003	9,147790e-003
0001.CSV	2,445399e+003	9,168568e-003
0001.CSV	2,449256e+003	9,215609e-003
0001.CSV	2,453113e+003	9,260320e-003
0001.CSV	2,456970e+003	9,276466e-003
0001.CSV	2,460827e+003	9,290141e-003
0001.CSV	2,464685e+003	9,343967e-003
0001.CSV	2,468542e+003	9,428984e-003
0001.CSV	2,472399e+003	9,501691e-003
0001.CSV	2,476256e+003	9,626948e-003
0001.CSV	2,480113e+003	9,770508e-003
0001.CSV	2,483970e+003	9,902250e-003
0001.CSV	2,487827e+003	1,001050e-002
0001.CSV	2,491684e+003	1,011423e-002
0001.CSV	2,495541e+003	1,019024e-002
0001.CSV	2,499398e+003	1,022786e-002
0001.CSV	2,503255e+003	1,023305e-002
0001.CSV	2,507113e+003	1,023119e-002
0001.CSV	2,510970e+003	1,024954e-002
0001.CSV	2,514827e+003	1,033127e-002
0001.CSV	2,518684e+003	1,042253e-002
0001.CSV	2,522541e+003	1,043495e-002
0001.CSV	2,526398e+003	1,036290e-002
0001.CSV	2,530255e+003	1,023902e-002
0001.CSV	2,534112e+003	1,005699e-002
0001.CSV	2,537969e+003	9,921539e-003
0001.CSV	2,541826e+003	9,873438e-003
0001.CSV	2,545684e+003	9,895674e-003
0001.CSV	2,549541e+003	9,880827e-003
0001.CSV	2,553398e+003	9,779522e-003
0001.CSV	2,557255e+003	9,653509e-003
0001.CSV	2,561112e+003	9,558083e-003
0001.CSV	2,564969e+003	9,483810e-003
0001.CSV	2,568826e+003	9,416828e-003
0001.CSV	2,572683e+003	9,366211e-003
0001.CSV	2,576540e+003	9,356595e-003
0001.CSV	2,580397e+003	9,343459e-003
0001.CSV	2,584254e+003	9,342173e-003
0001.CSV	2,588112e+003	9,306187e-003
0001.CSV	2,591969e+003	9,267733e-003
0001.CSV	2,595826e+003	9,226541e-003
0001.CSV	2,599683e+003	9,220483e-003
0001.CSV	2,603540e+003	9,255785e-003
0001.CSV	2,607397e+003	9,258425e-003
0001.CSV	2,611254e+003	9,224679e-003
0001.CSV	2,615111e+003	9,234969e-003
0001.CSV	2,618968e+003	9,260726e-003
0001.CSV	2,622825e+003	9,263773e-003
0001.CSV	2,626683e+003	9,261573e-003
0001.CSV	2,630540e+003	9,275856e-003
0001.CSV	2,634397e+003	9,259305e-003
0001.CSV	2,638254e+003	9,218486e-003
0001.CSV	2,642111e+003	9,160446e-003
0001.CSV	2,645968e+003	9,125626e-003
0001.CSV	2,649825e+003	9,122309e-003
0001.CSV	2,653682e+003	9,102143e-003
0001.CSV	2,657539e+003	9,055519e-003
0001.CSV	2,661396e+003	9,026255e-003
0001.CSV	2,665253e+003	8,999633e-003
0001.CSV	2,669111e+003	8,994964e-003
0001.CSV	2,672968e+003	9,042935e-003
0001.CSV	2,676825e+003	9,115948e-003
0001.CSV	2,680682e+003	9,095578e-003
0001.CSV	2,684539e+003	9,019862e-003
0001.CSV	2,688396e+003	8,993273e-003
0001.CSV	2,692253e+003	9,010153e-003
0001.CSV	2,696110e+003	9,041987e-003
0001.CSV	2,699967e+003	9,043780e-003
0001.CSV	2,703824e+003	9,002000e-003
0001.CSV	2,707682e+003	9,027948e-003
0001.CSV	2,711539e+003	9,053727e-003
0001.CSV	2,715396e+003	9,050783e-003
0001.CSV	2,719253e+003	9,109383e-003
0001.CSV	2,723110e+003	9,193848e-003
0001.CSV	2,726967e+003	9,168703e-003
0001.CSV	2,730824e+003	9,052948e-003
0001.CSV	2,734681e+003	9,043780e-003
0001.CSV	2,738538e+003	9,089014e-003
0001.CSV	2,742396e+003	9,084752e-003
0001.CSV	2,746252e+003	9,145556e-003
0001.CSV	2,750109e+003	9,175166e-003
0001.CSV	2,753967e+003	9,136556e-003
0001.CSV	2,757824e+003	9,090267e-003
0001.CSV	2,761681e+003	9,076158e-003
0001.CSV	2,765538e+003	9,084717e-003
0001.CSV	2,769395e+003	9,142444e-003
0001.CSV	2,773252e+003	9,257646e-003
0001.CSV	2,777109e+003	9,250402e-003
0001.CSV	2,780966e+003	9,191783e-003
0001.CSV	2,784823e+003	9,245969e-003
0001.CSV	2,788681e+003	9,393059e-003
0001.CSV	2,792538e+003	9,475580e-003
0001.CSV	2,796395e+003	9,515576e-003
0001.CSV	2,800252e+003	9,482116e-003
0001.CSV	2,804109e+003	9,429594e-003
0001.CSV	2,807966e+003	9,536237e-003
0001.CSV	2,811823e+003	9,590194e-003
0001.CSV	2,815680e+003	9,585316e-003
0001.CSV	2,819537e+003	9,641754e-003
0001.CSV	2,823395e+003	9,719611e-003
0001.CSV	2,827251e+003	9,821885e-003
0001.CSV	2,831108e+003	1,002061e-002
0001.CSV	2,834966e+003	1,035431e-002
0001.CSV	2,838823e+003	1,075169e-002
0001.CSV	2,842680e+003	1,126006e-002
0001.CSV	2,846537e+003	1,209829e-002
0001.CSV	2,850394e+003	1,254597e-002
0001.CSV	2,854251e+003	1,224036e-002
0001.CSV	2,858108e+003	1,180386e-002
0001.CSV	2,861965e+003	1,145587e-002
0001.CSV	2,865822e+003	1,126951e-002
0001.CSV	2,869680e+003	1,135297e-002
0001.CSV	2,873537e+003	1,137916e-002
0001.CSV	2,877394e+003	1,107841e-002
0001.CSV	2,881251e+003	1,087027e-002
0001.CSV	2,885108e+003	1,089117e-002
0001.CSV	2,888965e+003	1,099902e-002
0001.CSV	2,892822e+003	1,125911e-002
0001.CSV	2,896679e+003	1,149952e-002
0001.CSV	2,900536e+003	1,165690e-002
0001.CSV	2,904394e+003	1,202536e-002
0001.CSV	2,908250e+003	1,273765e-002
0001.CSV	2,912107e+003	1,384513e-002
0001.CSV	2,915965e+003	1,473019e-002
0001.CSV	2,919822e+003	1,468464e-002
0001.CSV	2,923679e+003	1,407911e-002
0001.CSV	2,927536e+003	1,353703e-002
0001.CSV	2,931393e+003	1,292586e-002
0001.CSV	2,935250e+003	1,220263e-002
0001.CSV	2,939107e+003	1,174643e-002
0001.CSV	2,942964e+003	1,168829e-002
0001.CSV	2,946821e+003	1,167712e-002
0001.CSV	2,950679e+003	1,156791e-002
0001.CSV	2,954536e+003	1,137525e-002
0001.CSV	2,958393e+003	1,109361e-002
0001.CSV	2,962250e+003	1,085896e-002
0001.CSV	2,966107e+003	1,050609e-002
0001.CSV	2,969964e+003	1,023455e-002
0001.CSV	2,973821e+003	1,013289e-002
0001.CSV	2,977678e+003	1,000189e-002
0001.CSV	2,981535e+003	9,695554e-003
0001.CSV	2,985393e+003	9,293357e-003
0001.CSV	2,989250e+003	9,166503e-003
0001.CSV	2,993106e+003	9,231584e-003
0001.CSV	2,996964e+003	9,168128e-003
0001.CSV	3,000821e+003	9,010491e-003
0001.CSV	3,004678e+003	8,912534e-003
0001.CSV	3,008535e+003	9,030485e-003
0001.CSV	3,012392e+003	9,204915e-003
0001.CSV	3,016249e+003	9,214052e-003
0001.CSV	3,020106e+003	9,092093e-003
0001.CSV	3,023963e+003	9,015634e-003
0001.CSV	3,027820e+003	9,050039e-003
0001.CSV	3,031678e+003	9,180006e-003
0001.CSV	3,035535e+003	9,212055e-003
0001.CSV	3,039392e+003	9,229283e-003
0001.CSV	3,043249e+003	9,294949e-003
0001.CSV	3,047106e+003	9,278260e-003
0001.CSV	3,050963e+003	9,269900e-003
0001.CSV	3,054820e+003	9,266278e-003
0001.CSV	3,058677e+003	9,151343e-003
0001.CSV	3,062534e+003	9,116895e-003
0001.CSV	3,066392e+003	9,191411e-003
0001.CSV	3,070249e+003	9,177671e-003
0001.CSV	3,074105e+003	9,213815e-003
0001.CSV	3,077963e+003	9,332423e-003
0001.CSV	3,081820e+003	9,348977e-003
0001.CSV	3,085677e+003	9,291225e-003
0001.CSV	3,089534e+003	9,256360e-003
0001.CSV	3,093391e+003	9,207453e-003
0001.CSV	3,097248e+003	9,198925e-003
0001.CSV	3,101105e+003	9,253347e-003
0001.CSV	3,104962e+003	9,278125e-003
0001.CSV	3,108819e+003	9,309335e-003
0001.CSV	3,112677e+003	9,340142e-003
0001.CSV	3,116534e+003	9,414458e-003
0001.CSV	3,120391e+003	9,412223e-003
0001.CSV	3,124248e+003	9,320100e-003
0001.CSV	3,128105e+003	9,299112e-003
0001.CSV	3,131962e+003	9,309539e-003
0001.CSV	3,135819e+003	9,346405e-003
0001.CSV	3,139676e+003	9,377180e-003
0001.CSV	3,143533e+003	9,300940e-003
0001.CSV	3,147391e+003	9,295964e-003
0001.CSV	3,151248e+003	9,384798e-003
0001.CSV	3,155104e+003	9,412291e-003
0001.CSV	3,158962e+003	9,400000e-003
0001.CSV	3,162819e+003	9,416219e-003
0001.CSV	3,166676e+003	9,403995e-003
0001.CSV	3,170533e+003	9,393940e-003
0001.CSV	3,174390e+003	9,418792e-003
0001.CSV	3,178247e+003	9,448997e-003
0001.CSV	3,182104e+003	9,456108e-003
0001.CSV	3,185961e+003	9,495188e-003
0001.CSV	3,189818e+003	9,545381e-003
0001.CSV	3,193676e+003	9,557948e-003
0001.CSV	3,197533e+003	9,552392e-003
0001.CSV	3,201390e+003	9,580608e-003
0001.CSV	3,205247e+003	9,601169e-003
0001.CSV	3,209104e+003	9,619903e-003
0001.CSV	3,212961e+003	9,662623e-003
0001.CSV	3,216818e+003	9,662487e-003
0001.CSV	3,220675e+003	9,620987e-003
0001.CSV	3,224532e+003	9,625967e-003
0001.CSV	3,228390e+003	9,694843e-003
0001.CSV	3,232247e+003	9,774745e-003
0001.CSV	3,236104e+003	9,761053e-003
0001.CSV	3,239961e+003	9,784809e-003
0001.CSV	3,243818e+003	9,833951e-003
0001.CSV	3,247675e+003	9,854321e-003
0001.CSV	3,251532e+003	9,848288e-003
0001.CSV	3,255389e+003	9,844933e-003
0001.CSV	3,259246e+003	9,781488e-003
0001.CSV	3,263104e+003	9,799111e-003
0001.CSV	3,266960e+003	9,899267e-003
0001.CSV	3,270817e+003	9,968120e-003
0001.CSV	3,274675e+003	9,961712e-003
0001.CSV	3,278532e+003	9,924387e-003
0001.CSV	3,282389e+003	9,875166e-003
0001.CSV	3,286246e+003	9,832019e-003
0001.CSV	3,290103e+003	9,896895e-003
0001.CSV	3,293960e+003	1,000192e-002
0001.CSV	3,297817e+003	1,002081e-002
0001.CSV	3,301674e+003	1,005967e-002
0001.CSV	3,305531e+003	1,008751e-002
0001.CSV	3,309389e+003	1,003424e-002
0001.CSV	3,313246e+003	9,908997e-003
0001.CSV	3,317103e+003	9,854660e-003
0001.CSV	3,320960e+003	9,916081e-003
0001.CSV	3,324817e+003	9,988089e-003
0001.CSV	3,328674e+003	9,936692e-003
0001.CSV	3,332531e+003	9,908929e-003
0001.CSV	3,336388e+003	9,952694e-003
0001.CSV	3,340245e+003	9,934082e-003
0001.CSV	3,344103e+003	9,889030e-003
0001.CSV	3,347959e+003	9,927912e-003
0001.CSV	3,351816e+003	9,961339e-003
0001.CSV	3,355674e+003	9,956322e-003
0001.CSV	3,359531e+003	9,954491e-003
0001.CSV	3,363388e+003	9,972324e-003
0001.CSV	3,367245e+003	1,001945e-002
0001.CSV	3,371102e+003	9,974392e-003
0001.CSV	3,374959e+003	9,908725e-003
0001.CSV	3,378816e+003	9,850660e-003
0001.CSV	3,382673e+003	9,765391e-003
0001.CSV	3,386530e+003	9,771796e-003
0001.CSV	3,390388e+003	9,819954e-003
0001.CSV	3,394245e+003	9,854049e-003
0001.CSV	3,398102e+003	9,866185e-003
0001.CSV	3,401959e+003	9,822359e-003
0001.CSV	3,405816e+003	9,737401e-003
0001.CSV	3,409673e+003	9,716765e-003
0001.CSV	3,413530e+003	9,689083e-003
0001.CSV	3,417387e+003	9,602491e-003
0001.CSV	3,421244e+003	9,563638e-003
0001.CSV	3,425102e+003	9,602592e-003
0001.CSV	3,428958e+003	9,628812e-003
0001.CSV	3,432815e+003	9,640838e-003
0001.CSV	3,436673e+003	9,579456e-003
0001.CSV	3,440530e+003	9,437416e-003
0001.CSV	3,444387e+003	9,320980e-003
0001.CSV	3,448244e+003	9,279242e-003
0001.CSV	3,452101e+003	9,242246e-003
0001.CSV	3,455958e+003	9,262419e-003
0001.CSV	3,459815e+003	9,310790e-003
0001.CSV	3,463672e+003	9,347996e-003
0001.CSV	3,467529e+003	9,365161e-003
0001.CSV	3,471387e+003	9,185996e-003
0001.CSV	3,475244e+003	9,047637e-003
0001.CSV	3,479101e+003	9,101263e-003
0001.CSV	3,482958e+003	9,145251e-003
0001.CSV	3,486815e+003	9,123494e-003
0001.CSV	3,490672e+003	9,058260e-003
0001.CSV	3,494529e+003	8,974634e-003
0001.CSV	3,498386e+003	8,925658e-003
0001.CSV	3,502243e+003	8,913786e-003
0001.CSV	3,506101e+003	8,845168e-003
0001.CSV	3,509958e+003	8,813890e-003
0001.CSV	3,513814e+003	8,792791e-003
0001.CSV	3,517672e+003	8,725679e-003
0001.CSV	3,521529e+003	8,773687e-003
0001.CSV	3,525386e+003	8,778793e-003
0001.CSV	3,529243e+003	8,656483e-003
0001.CSV	3,533100e+003	8,594801e-003
0001.CSV	3,536957e+003	8,601797e-003
0001.CSV	3,540814e+003	8,592165e-003
0001.CSV	3,544671e+003	8,612375e-003
0001.CSV	3,548528e+003	8,544616e-003
0001.CSV	3,552386e+003	8,466968e-003
0001.CSV	3,556243e+003	8,415143e-003
0001.CSV	3,560100e+003	8,379132e-003
0001.CSV	3,563957e+003	8,290876e-003
0001.CSV	3,567814e+003	8,262204e-003
0001.CSV	3,571671e+003	8,274057e-003
0001.CSV	3,575528e+003	8,182951e-003
0001.CSV	3,579385e+003	8,129506e-003
0001.CSV	3,583242e+003	8,128088e-003
0001.CSV	3,587100e+003	8,154827e-003
0001.CSV	3,590957e+003	8,075797e-003
0001.CSV	3,594813e+003	7,990842e-003
0001.CSV	3,598671e+003	8,004611e-003
0001.CSV	3,602528e+003	7,939377e-003
0001.CSV	3,606385e+003	7,845777e-003
0001.CSV	3,610242e+003	7,830090e-003
0001.CSV	3,614099e+003	7,844124e-003
0001.CSV	3,617956e+003	7,861736e-003
0001.CSV	3,621813e+003	7,759045e-003
0001.CSV	3,625670e+003	7,656616e-003
0001.CSV	3,629527e+003	7,783940e-003
0001.CSV	3,633385e+003	7,854921e-003
0001.CSV	3,637242e+003	7,748016e-003
0001.CSV	3,641099e+003	7,654424e-003
0001.CSV	3,644956e+003	7,543657e-003
0001.CSV	3,648813e+003	7,527575e-003
0001.CSV	3,652670e+003	7,634291e-003
0001.CSV	3,656527e+003	7,673140e-003
0001.CSV	3,660384e+003	7,623332e-003
0001.CSV	3,664241e+003	7,435143e-003
0001.CSV	3,668099e+003	7,298116e-003
0001.CSV	3,671956e+003	7,336564e-003
0001.CSV	3,675813e+003	7,461401e-003
0001.CSV	3,679670e+003	7,455603e-003
0001.CSV	3,683527e+003	7,417043e-003
0001.CSV	3,687384e+003	7,364063e-003
0001.CSV	3,691241e+003	7,401101e-003
0001.CSV	3,695098e+003	7,381015e-003
0001.CSV	3,698955e+003	7,317693e-003
0001.CSV	3,702813e+003	7,255628e-003
0001.CSV	3,706669e+003	7,188012e-003
0001.CSV	3,710526e+003	7,161704e-003
0001.CSV	3,714384e+003	7,309235e-003
0001.CSV	3,718241e+003	7,304248e-003
0001.CSV	3,722098e+003	7,233391e-003
0001.CSV	3,725955e+003	7,172011e-003
0001.CSV	3,729812e+003	7,174302e-003
0001.CSV	3,733669e+003	7,236356e-003
0001.CSV	3,737526e+003	7,304653e-003
0001.CSV	3,741383e+003	7,286726e-003
0001.CSV	3,745240e+003	7,321737e-003
0001.CSV	3,749098e+003	7,252427e-003
0001.CSV	3,752955e+003	7,279752e-003
0001.CSV	3,756812e+003	7,312975e-003
0001.CSV	3,760669e+003	7,266914e-003
0001.CSV	3,764526e+003	7,207349e-003
0001.CSV	3,768383e+003	7,256605e-003
0001.CSV	3,772240e+003	7,239287e-003
0001.CSV	3,776097e+003	7,172247e-003
0001.CSV	3,779954e+003	7,204957e-003
0001.CSV	3,783812e+003	7,209572e-003
0001.CSV	3,787668e+003	7,175650e-003
0001.CSV	3,791525e+003	7,166184e-003
0001.CSV	3,795383e+003	7,100671e-003
0001.CSV	3,799240e+003	7,079554e-003
0001.CSV	3,803097e+003	7,129603e-003
0001.CSV	3,806954e+003	7,174504e-003
0001.CSV	3,810811e+003	7,104039e-003
0001.CSV	3,814668e+003	7,030217e-003
0001.CSV	3,818525e+003	7,090567e-003
0001.CSV	3,822382e+003	7,191853e-003
0001.CSV	3,826239e+003	7,198961e-003
0001.CSV	3,830097e+003	7,117343e-003
0001.CSV	3,833954e+003	7,006747e-003
0001.CSV	3,837811e+003	7,022001e-003
0001.CSV	3,841668e+003	7,234267e-003
0001.CSV	3,845525e+003	7,255594e-003
0001.CSV	3,849382e+003	7,154697e-003
0001.CSV	3,853239e+003	7,230696e-003
0001.CSV	3,857096e+003	7,305124e-003
0001.CSV	3,860953e+003	7,164769e-003
0001.CSV	3,864811e+003	7,159447e-003
0001.CSV	3,868667e+003	7,299665e-003
0001.CSV	3,872524e+003	7,433930e-003
0001.CSV	3,876382e+003	7,354054e-003
0001.CSV	3,880239e+003	7,264455e-003
0001.CSV	3,884096e+003	7,279449e-003
0001.CSV	3,887953e+003	7,234436e-003
0001.CSV	3,891810e+003	7,208562e-003
0001.CSV	3,895667e+003	7,282683e-003
0001.CSV	3,899524e+003	7,324230e-003
0001.CSV	3,903381e+003	7,359480e-003
0001.CSV	3,907238e+003	7,328308e-003
0001.CSV	3,911096e+003	7,264489e-003
0001.CSV	3,914953e+003	7,176997e-003
0001.CSV	3,918810e+003	7,193942e-003
0001.CSV	3,922667e+003	7,296094e-003
0001.CSV	3,926524e+003	7,352605e-003
0001.CSV	3,930381e+003	7,345629e-003
0001.CSV	3,934238e+003	7,364299e-003
0001.CSV	3,938095e+003	7,317120e-003
0001.CSV	3,941952e+003	7,288344e-003
0001.CSV	3,945810e+003	7,309943e-003
0001.CSV	3,949667e+003	7,341316e-003
0001.CSV	3,953523e+003	7,339630e-003
0001.CSV	3,957381e+003	7,369253e-003
0001.CSV	3,961238e+003	7,423785e-003
0001.CSV	3,965095e+003	7,386946e-003
0001.CSV	3,968952e+003	7,348527e-003
0001.CSV	3,972809e+003	7,376802e-003
0001.CSV	3,976666e+003	7,335485e-003
0001.CSV	3,980523e+003	7,284840e-003
0001.CSV	3,984380e+003	7,288580e-003
0001.CSV	3,988237e+003	7,301081e-003
0001.CSV	3,992095e+003	7,293702e-003
0001.CSV	3,995952e+003	7,295319e-003
0001.CSV	3,999809e+003	7,305360e-003
0002.CSV	6,749918e+002	2,276978e-002
0002.CSV	6,788489e+002	2,386233e-002
0002.CSV	6,827060e+002	2,412596e-002
0002.CSV	6,865631e+002	2,497809e-002
0002.CSV	6,904202e+002	2,629709e-002
0002.CSV	6,942773e+002	3,092567e-002
0002.CSV	6,981344e+002	3,602501e-002
0002.CSV	7,019915e+002	3,376615e-002
0002.CSV	7,058486e+002	3,220176e-002
0002.CSV	7,097057e+002	4,173657e-002
0002.CSV	7,135628e+002	4,186513e-002
0002.CSV	7,174199e+002	2,780972e-002
0002.CSV	7,212770e+002	2,001974e-002
0002.CSV	7,251341e+002	1,957813e-002
0002.CSV	7,289911e+002	1,955334e-002
0002.CSV	7,328483e+002	1,955061e-002
0002.CSV	7,367054e+002	1,953764e-002
0002.CSV	7,405624e+002	1,991916e-002
0002.CSV	7,444196e+002	2,019818e-002
0002.CSV	7,482767e+002	2,082987e-002
0002.CSV	7,521337e+002	2,109498e-002
0002.CSV	7,559908e+002	2,146718e-002
0002.CSV	7,598480e+002	2,155607e-002
0002.CSV	7,637050e+002	2,191688e-002
0002.CSV	7,675621e+002	2,207433e-002
0002.CSV	7,714193e+002	2,249412e-002
0002.CSV	7,752763e+002	2,274153e-002
0002.CSV	7,791334e+002	2,304642e-002
0002.CSV	7,829905e+002	2,311864e-002
0002.CSV	7,868476e+002	2,344173e-002
0002.CSV	7,907047e+002	2,362936e-002
0002.CSV	7,945618e+002	2,441853e-002
0002.CSV	7,984189e+002	2,531475e-002
0002.CSV	8,022760e+002	2,634602e-002
0002.CSV	8,061331e+002	2,701729e-002
0002.CSV	8,099902e+002	2,782661e-002
0002.CSV	8,138473e+002	2,876976e-002
0002.CSV	8,177043e+002	3,062876e-002
0002.CSV	8,215615e+002	3,329661e-002
0002.CSV	8,254186e+002	3,650039e-002
0002.CSV	8,292756e+002	3,847684e-002
0002.CSV	8,331328e+002	3,962390e-002
0002.CSV	8,369899e+002	4,136048e-002
0002.CSV	8,408469e+002	4,537548e-002
0002.CSV	8,447040e+002	4,998994e-002
0002.CSV	8,485612e+002	6,013275e-002
0002.CSV	8,524182e+002	7,772727e-002
0002.CSV	8,562753e+002	8,891615e-002
0002.CSV	8,601324e+002	8,381056e-002
0002.CSV	8,639895e+002	6,711520e-002
0002.CSV	8,678466e+002	4,630355e-002
0002.CSV	8,717037e+002	2,939603e-002
0002.CSV	8,755608e+002	1,991285e-002
0002.CSV	8,794179e+002	1,604671e-002
0002.CSV	8,832750e+002	1,428807e-002
0002.CSV	8,871321e+002	1,372662e-002
0002.CSV	8,909892e+002	1,380073e-002
0002.CSV	8,948463e+002	1,424236e-002
0002.CSV	8,987034e+002	1,455730e-002
0002.CSV	9,025605e+002	1,500580e-002
0002.CSV	9,064176e+002	1,551252e-002
0002.CSV	9,102747e+002	1,597294e-002
0002.CSV	9,141318e+002	1,612759e-002
0002.CSV	9,179889e+002	1,648750e-002
0002.CSV	9,218459e+002	1,684888e-002
0002.CSV	9,257031e+002	1,739297e-002
0002.CSV	9,295602e+002	1,777388e-002
0002.CSV	9,334172e+002	1,816504e-002
0002.CSV	9,372744e+002	1,836354e-002
0002.CSV	9,411315e+002	1,865391e-002
0002.CSV	9,449885e+002	1,881966e-002
0002.CSV	9,488456e+002	1,910300e-002
0002.CSV	9,527028e+002	1,931661e-002
0002.CSV	9,565598e+002	1,963737e-002
0002.CSV	9,604169e+002	1,980318e-002
0002.CSV	9,642740e+002	2,000700e-002
0002.CSV	9,681311e+002	2,014216e-002
0002.CSV	9,719882e+002	2,048514e-002
0002.CSV	9,758453e+002	2,076022e-002
0002.CSV	9,797024e+002	2,110197e-002
0002.CSV	9,835595e+002	2,138764e-002
0002.CSV	9,874166e+002	2,177719e-002
0002.CSV	9,912737e+002	2,205208e-002
0002.CSV	9,951308e+002	2,246349e-002
0002.CSV	9,989879e+002	2,289211e-002
0002.CSV	1,002845e+003	2,356852e-002
0002.CSV	1,006702e+003	2,429013e-002
0002.CSV	1,010559e+003	2,505117e-002
0002.CSV	1,014416e+003	2,533793e-002
0002.CSV	1,018273e+003	2,567614e-002
0002.CSV	1,022130e+003	2,614332e-002
0002.CSV	1,025988e+003	2,690962e-002
0002.CSV	1,029845e+003	2,756086e-002
0002.CSV	1,033702e+003	2,814972e-002
0002.CSV	1,037559e+003	2,832012e-002
0002.CSV	1,041416e+003	2,829126e-002
0002.CSV	1,045273e+003	2,790334e-002
0002.CSV	1,049130e+003	2,759556e-002
0002.CSV	1,052987e+003	2,734615e-002
0002.CSV	1,056844e+003	2,754349e-002
0002.CSV	1,060701e+003	2,779460e-002
0002.CSV	1,064559e+003	2,830477e-002
0002.CSV	1,068416e+003	2,885834e-002
0002.CSV	1,072273e+003	2,973287e-002
0002.CSV	1,076130e+003	3,120666e-002
0002.CSV	1,079987e+003	3,388746e-002
0002.CSV	1,083844e+003	3,331285e-002
0002.CSV	1,087701e+003	2,965397e-002
0002.CSV	1,091558e+003	2,809959e-002
0002.CSV	1,095415e+003	2,821863e-002
0002.CSV	1,099272e+003	2,840511e-002
0002.CSV	1,103130e+003	2,864710e-002
0002.CSV	1,106987e+003	2,870834e-002
0002.CSV	1,110844e+003	2,869414e-002
0002.CSV	1,114701e+003	2,852763e-002
0002.CSV	1,118558e+003	2,837377e-002
0002.CSV	1,122415e+003	2,798656e-002
0002.CSV	1,126272e+003	2,753339e-002
0002.CSV	1,130129e+003	2,703866e-002
0002.CSV	1,133986e+003	2,668420e-002
0002.CSV	1,137843e+003	2,630068e-002
0002.CSV	1,141700e+003	2,604550e-002
0002.CSV	1,145558e+003	2,576762e-002
0002.CSV	1,149415e+003	2,565175e-002
0002.CSV	1,153272e+003	2,547449e-002
0002.CSV	1,157129e+003	2,539350e-002
0002.CSV	1,160986e+003	2,535620e-002
0002.CSV	1,164843e+003	2,561206e-002
0002.CSV	1,168700e+003	2,603843e-002
0002.CSV	1,172557e+003	2,686464e-002
0002.CSV	1,176414e+003	2,803251e-002
0002.CSV	1,180271e+003	2,903720e-002
0002.CSV	1,184129e+003	2,865726e-002
0002.CSV	1,187986e+003	2,731154e-002
0002.CSV	1,191843e+003	2,602228e-002
0002.CSV	1,195700e+003	2,547318e-002
0002.CSV	1,199557e+003	2,543946e-002
0002.CSV	1,203414e+003	2,589115e-002
0002.CSV	1,207271e+003	2,655432e-002
0002.CSV	1,211128e+003	2,739577e-002
0002.CSV	1,214985e+003	2,820042e-002
0002.CSV	1,218842e+003	2,907426e-002
0002.CSV	1,222699e+003	2,981005e-002
0002.CSV	1,226557e+003	3,054525e-002
0002.CSV	1,230414e+003	3,114038e-002
0002.CSV	1,234271e+003	3,170393e-002
0002.CSV	1,238128e+003	3,205872e-002
0002.CSV	1,241985e+003	3,239246e-002
0002.CSV	1,245842e+003	3,249093e-002
0002.CSV	1,249699e+003	3,222049e-002
0002.CSV	1,253556e+003	3,128720e-002
0002.CSV	1,257413e+003	3,002105e-002
0002.CSV	1,261271e+003	2,883763e-002
0002.CSV	1,265128e+003	2,839892e-002
0002.CSV	1,268985e+003	2,847626e-002
0002.CSV	1,272842e+003	2,886369e-002
0002.CSV	1,276699e+003	2,929223e-002
0002.CSV	1,280556e+003	2,990975e-002
0002.CSV	1,284413e+003	3,049107e-002
0002.CSV	1,288270e+003	3,111058e-002
0002.CSV	1,292127e+003	3,154181e-002
0002.CSV	1,295984e+003	3,189997e-002
0002.CSV	1,299841e+003	3,204117e-002
0002.CSV	1,303698e+003	3,215490e-002
0002.CSV	1,307556e+003	3,221357e-002
0002.CSV	1,311413e+003	3,247865e-002
0002.CSV	1,315270e+003	3,276543e-002
0002.CSV	1,319127e+003	3,322957e-002
0002.CSV	1,322984e+003	3,368196e-002
0002.CSV	1,326841e+003	3,431063e-002
0002.CSV	1,330698e+003	3,495734e-002
0002.CSV	1,334555e+003	3,573548e-002
0002.CSV	1,338412e+003	3,657269e-002
0002.CSV	1,342270e+003	3,758963e-002
0002.CSV	1,346127e+003	3,842474e-002
0002.CSV	1,349984e+003	3,950047e-002
0002.CSV	1,353841e+003	4,067433e-002
0002.CSV	1,357698e+003	4,204571e-002
0002.CSV	1,361555e+003	4,329870e-002
0002.CSV	1,365412e+003	4,450741e-002
0002.CSV	1,369269e+003	4,552245e-002
0002.CSV	1,373126e+003	4,703754e-002
0002.CSV	1,376983e+003	4,882740e-002
0002.CSV	1,380840e+003	5,063602e-002
0002.CSV	1,384698e+003	5,230768e-002
0002.CSV	1,388555e+003	5,426006e-002
0002.CSV	1,392412e+003	5,583395e-002
0002.CSV	1,396269e+003	5,786322e-002
0002.CSV	1,400126e+003	6,001662e-002
0002.CSV	1,403983e+003	6,225578e-002
0002.CSV	1,407840e+003	6,454714e-002
0002.CSV	1,411697e+003	6,676742e-002
0002.CSV	1,415554e+003	6,846344e-002
0002.CSV	1,419411e+003	7,067277e-002
0002.CSV	1,423269e+003	7,273199e-002
0002.CSV	1,427125e+003	7,499742e-002
0002.CSV	1,430983e+003	7,743915e-002
0002.CSV	1,434840e+003	8,042011e-002
0002.CSV	1,438697e+003	8,337744e-002
0002.CSV	1,442554e+003	8,521891e-002
0002.CSV	1,446411e+003	8,527914e-002
0002.CSV	1,450268e+003	8,417099e-002
0002.CSV	1,454125e+003	8,238390e-002
0002.CSV	1,457982e+003	8,064407e-002
0002.CSV	1,461839e+003	7,964135e-002
0002.CSV	1,465697e+003	7,922394e-002
0002.CSV	1,469554e+003	7,773416e-002
0002.CSV	1,473411e+003	7,453507e-002
0002.CSV	1,477268e+003	7,030763e-002
0002.CSV	1,481125e+003	6,732741e-002
0002.CSV	1,484982e+003	6,431942e-002
0002.CSV	1,488839e+003	6,097735e-002
0002.CSV	1,492696e+003	5,764491e-002
0002.CSV	1,496553e+003	5,502485e-002
0002.CSV	1,500410e+003	5,226321e-002
0002.CSV	1,504268e+003	5,059067e-002
0002.CSV	1,508125e+003	4,718035e-002
0002.CSV	1,511982e+003	4,391719e-002
0002.CSV	1,515839e+003	4,076786e-002
0002.CSV	1,519696e+003	3,690458e-002
0002.CSV	1,523553e+003	3,286324e-002
0002.CSV	1,527410e+003	3,010478e-002
0002.CSV	1,531267e+003	2,775833e-002
0002.CSV	1,535124e+003	2,580752e-002
0002.CSV	1,538981e+003	2,387104e-002
0002.CSV	1,542838e+003	2,091818e-002
0002.CSV	1,546696e+003	1,857184e-002
0002.CSV	1,550553e+003	1,694413e-002
0002.CSV	1,554410e+003	1,538085e-002
0002.CSV	1,558267e+003	1,380084e-002
0002.CSV	1,562124e+003	1,249754e-002
0002.CSV	1,565981e+003	1,199634e-002
0002.CSV	1,569838e+003	1,128672e-002
0002.CSV	1,573695e+003	1,062526e-002
0002.CSV	1,577552e+003	9,668551e-003
0002.CSV	1,581409e+003	8,678082e-003
0002.CSV	1,585267e+003	7,753817e-003
0002.CSV	1,589124e+003	7,068777e-003
0002.CSV	1,592981e+003	6,674286e-003
0002.CSV	1,596838e+003	6,637377e-003
0002.CSV	1,600695e+003	6,764773e-003
0002.CSV	1,604552e+003	7,000585e-003
0002.CSV	1,608409e+003	7,013279e-003
0002.CSV	1,612266e+003	6,728394e-003
0002.CSV	1,616123e+003	6,212220e-003
0002.CSV	1,619980e+003	5,817835e-003
0002.CSV	1,623837e+003	5,498665e-003
0002.CSV	1,627695e+003	5,322296e-003
0002.CSV	1,631552e+003	5,199145e-003
0002.CSV	1,635409e+003	5,153878e-003
0002.CSV	1,639266e+003	5,080488e-003
0002.CSV	1,643123e+003	5,021154e-003
0002.CSV	1,646980e+003	4,950568e-003
0002.CSV	1,650837e+003	4,898256e-003
0002.CSV	1,654694e+003	4,860425e-003
0002.CSV	1,658551e+003	4,832213e-003
0002.CSV	1,662408e+003	4,750570e-003
0002.CSV	1,666266e+003	4,749933e-003
0002.CSV	1,670123e+003	4,744406e-003
0002.CSV	1,673980e+003	4,755561e-003
0002.CSV	1,677837e+003	4,659966e-003
0002.CSV	1,681694e+003	4,642986e-003
0002.CSV	1,685551e+003	4,591314e-003
0002.CSV	1,689408e+003	4,512260e-003
0002.CSV	1,693265e+003	4,395096e-003
0002.CSV	1,697122e+003	4,405238e-003
0002.CSV	1,700979e+003	4,448653e-003
0002.CSV	1,704837e+003	4,536936e-003
0002.CSV	1,708694e+003	4,544402e-003
0002.CSV	1,712551e+003	4,582574e-003
0002.CSV	1,716408e+003	4,746115e-003
0002.CSV	1,720265e+003	5,002015e-003
0002.CSV	1,724122e+003	5,019445e-003
0002.CSV	1,727979e+003	5,013914e-003
0002.CSV	1,731836e+003	4,958478e-003
0002.CSV	1,735693e+003	4,907270e-003
0002.CSV	1,739550e+003	4,718211e-003
0002.CSV	1,743407e+003	4,523242e-003
0002.CSV	1,747265e+003	4,329096e-003
0002.CSV	1,751122e+003	4,165712e-003
0002.CSV	1,754979e+003	4,050648e-003
0002.CSV	1,758836e+003	4,056768e-003
0002.CSV	1,762693e+003	4,056802e-003
0002.CSV	1,766550e+003	4,124466e-003
0002.CSV	1,770407e+003	4,327188e-003
0002.CSV	1,774264e+003	4,868065e-003
0002.CSV	1,778121e+003	5,470647e-003
0002.CSV	1,781978e+003	6,027565e-003
0002.CSV	1,785836e+003	6,199818e-003
0002.CSV	1,789693e+003	5,929640e-003
0002.CSV	1,793550e+003	5,256054e-003
0002.CSV	1,797407e+003	4,770937e-003
0002.CSV	1,801264e+003	4,401054e-003
0002.CSV	1,805121e+003	4,180030e-003
0002.CSV	1,808978e+003	4,076735e-003
0002.CSV	1,812835e+003	4,084395e-003
0002.CSV	1,816692e+003	4,063089e-003
0002.CSV	1,820549e+003	4,085599e-003
0002.CSV	1,824406e+003	4,105801e-003
0002.CSV	1,828264e+003	4,163738e-003
0002.CSV	1,832121e+003	4,187491e-003
0002.CSV	1,835978e+003	4,198263e-003
0002.CSV	1,839835e+003	4,192844e-003
0002.CSV	1,843692e+003	4,255376e-003
0002.CSV	1,847549e+003	4,277929e-003
0002.CSV	1,851406e+003	4,286362e-003
0002.CSV	1,855263e+003	4,288001e-003
0002.CSV	1,859120e+003	4,324411e-003
0002.CSV	1,862977e+003	4,320964e-003
0002.CSV	1,866835e+003	4,361894e-003
0002.CSV	1,870692e+003	4,428066e-003
0002.CSV	1,874549e+003	4,438744e-003
0002.CSV	1,878406e+003	4,410727e-003
0002.CSV	1,882263e+003	4,426024e-003
0002.CSV	1,886120e+003	4,433288e-003
0002.CSV	1,889977e+003	4,493110e-003
0002.CSV	1,893834e+003	4,511289e-003
0002.CSV	1,897691e+003	4,506401e-003
0002.CSV	1,901548e+003	4,471584e-003
0002.CSV	1,905406e+003	4,469709e-003
0002.CSV	1,909263e+003	4,479317e-003
0002.CSV	1,913120e+003	4,495956e-003
0002.CSV	1,916977e+003	4,500174e-003
0002.CSV	1,920834e+003	4,516546e-003
0002.CSV	1,924691e+003	4,491938e-003
0002.CSV	1,928548e+003	4,495319e-003
0002.CSV	1,932405e+003	4,468437e-003
0002.CSV	1,936262e+003	4,451933e-003
0002.CSV	1,940119e+003	4,447615e-003
0002.CSV	1,943976e+003	4,501480e-003
0002.CSV	1,947834e+003	4,484305e-003
0002.CSV	1,951691e+003	4,448217e-003
0002.CSV	1,955548e+003	4,434828e-003
0002.CSV	1,959405e+003	4,463483e-003
0002.CSV	1,963262e+003	4,469307e-003
0002.CSV	1,967119e+003	4,478447e-003
0002.CSV	1,970976e+003	4,457055e-003
0002.CSV	1,974833e+003	4,450193e-003
0002.CSV	1,978690e+003	4,424752e-003
0002.CSV	1,982547e+003	4,445673e-003
0002.CSV	1,986405e+003	4,451531e-003
0002.CSV	1,990262e+003	4,475567e-003
0002.CSV	1,994119e+003	4,476170e-003
0002.CSV	1,997976e+003	4,478681e-003
0002.CSV	2,001833e+003	4,482866e-003
0002.CSV	2,005690e+003	4,510687e-003
0002.CSV	2,009547e+003	4,505564e-003
0002.CSV	2,013404e+003	4,510151e-003
0002.CSV	2,017261e+003	4,507238e-003
0002.CSV	2,021118e+003	4,499839e-003
0002.CSV	2,024975e+003	4,475166e-003
0002.CSV	2,028833e+003	4,492005e-003
0002.CSV	2,032690e+003	4,503455e-003
0002.CSV	2,036547e+003	4,520831e-003
0002.CSV	2,040404e+003	4,518220e-003
0002.CSV	2,044261e+003	4,556925e-003
0002.CSV	2,048118e+003	4,583311e-003
0002.CSV	2,051975e+003	4,606852e-003
0002.CSV	2,055832e+003	4,616898e-003
0002.CSV	2,059689e+003	4,650187e-003
0002.CSV	2,063546e+003	4,652933e-003
0002.CSV	2,067404e+003	4,684583e-003
0002.CSV	2,071261e+003	4,693995e-003
0002.CSV	2,075118e+003	4,713053e-003
0002.CSV	2,078975e+003	4,705885e-003
0002.CSV	2,082832e+003	4,710173e-003
0002.CSV	2,086689e+003	4,714963e-003
0002.CSV	2,090546e+003	4,745244e-003
0002.CSV	2,094403e+003	4,754322e-003
0002.CSV	2,098260e+003	4,769966e-003
0002.CSV	2,102117e+003	4,773818e-003
0002.CSV	2,105975e+003	4,805310e-003
0002.CSV	2,109832e+003	4,818979e-003
0002.CSV	2,113689e+003	4,852886e-003
0002.CSV	2,117546e+003	4,883009e-003
0002.CSV	2,121403e+003	4,909784e-003
0002.CSV	2,125260e+003	4,916788e-003
0002.CSV	2,129117e+003	4,935018e-003
0002.CSV	2,132974e+003	4,951674e-003
0002.CSV	2,136831e+003	4,982374e-003
0002.CSV	2,140688e+003	4,989144e-003
0002.CSV	2,144545e+003	5,008618e-003
0002.CSV	2,148403e+003	5,004797e-003
0002.CSV	2,152260e+003	5,015858e-003
0002.CSV	2,156117e+003	5,039758e-003
0002.CSV	2,159974e+003	5,043378e-003
0002.CSV	2,163831e+003	5,036171e-003
0002.CSV	2,167688e+003	5,067748e-003
0002.CSV	2,171545e+003	5,101306e-003
0002.CSV	2,175402e+003	5,110425e-003
0002.CSV	2,179259e+003	5,081862e-003
0002.CSV	2,183116e+003	5,096077e-003
0002.CSV	2,186974e+003	5,117064e-003
0002.CSV	2,190831e+003	5,124004e-003
0002.CSV	2,194688e+003	5,133660e-003
0002.CSV	2,198545e+003	5,151061e-003
0002.CSV	2,202402e+003	5,128630e-003
0002.CSV	2,206259e+003	5,133525e-003
0002.CSV	2,210116e+003	5,108615e-003
0002.CSV	2,213973e+003	5,092824e-003
0002.CSV	2,217830e+003	5,082767e-003
0002.CSV	2,221688e+003	5,087427e-003
0002.CSV	2,225544e+003	5,089506e-003
0002.CSV	2,229402e+003	5,081963e-003
0002.CSV	2,233259e+003	5,060039e-003
0002.CSV	2,237116e+003	5,046797e-003
0002.CSV	2,240973e+003	5,027423e-003
0002.CSV	2,244830e+003	5,029266e-003
0002.CSV	2,248687e+003	5,018741e-003
0002.CSV	2,252544e+003	4,990317e-003
0002.CSV	2,256401e+003	4,950233e-003
0002.CSV	2,260258e+003	4,923423e-003
0002.CSV	2,264115e+003	4,869640e-003
0002.CSV	2,267973e+003	4,840121e-003
0002.CSV	2,271830e+003	4,827087e-003
0002.CSV	2,275687e+003	4,853992e-003
0002.CSV	2,279544e+003	4,885422e-003
0002.CSV	2,283401e+003	4,869037e-003
0002.CSV	2,287258e+003	4,775226e-003
0002.CSV	2,291115e+003	4,665492e-003
0002.CSV	2,294972e+003	4,504459e-003
0002.CSV	2,298829e+003	4,363534e-003
0002.CSV	2,302687e+003	4,250759e-003
0002.CSV	2,306543e+003	4,052889e-003
0002.CSV	2,310401e+003	3,709380e-003
0002.CSV	2,314258e+003	3,358163e-003
0002.CSV	2,318115e+003	2,931065e-003
0002.CSV	2,321972e+003	2,341388e-003
0002.CSV	2,325829e+003	1,584773e-003
0002.CSV	2,329686e+003	8,487952e-004
0002.CSV	2,333543e+003	2,750002e-004
0002.CSV	2,337400e+003	1,468086e-004
0002.CSV	2,341257e+003	1,539680e-004
0002.CSV	2,345115e+003	1,240652e-003
0002.CSV	2,348972e+003	1,814162e-003
0002.CSV	2,352829e+003	8,517831e-004
0002.CSV	2,356686e+003	-2,312849e-003
0002.CSV	2,360543e+003	-4,334299e-003
0002.CSV	2,364400e+003	-2,543132e-003
0002.CSV	2,368257e+003	-1,489782e-004
0002.CSV	2,372114e+003	1,925473e-003
0002.CSV	2,375971e+003	3,350917e-003
0002.CSV	2,379828e+003	4,159222e-003
0002.CSV	2,383686e+003	4,640709e-003
0002.CSV	2,387542e+003	4,862369e-003
0002.CSV	2,391400e+003	4,965181e-003
0002.CSV	2,395257e+003	4,981335e-003
0002.CSV	2,399114e+003	4,978185e-003
0002.CSV	2,402971e+003	4,970443e-003
0002.CSV	2,406828e+003	4,965851e-003
0002.CSV	2,410685e+003	4,975704e-003
0002.CSV	2,414542e+003	4,990217e-003
0002.CSV	2,418399e+003	5,007311e-003
0002.CSV	2,422256e+003	5,014853e-003
0002.CSV	2,426114e+003	5,013914e-003
0002.CSV	2,429971e+003	5,026853e-003
0002.CSV	2,433828e+003	5,025646e-003
0002.CSV	2,437685e+003	5,011803e-003
0002.CSV	2,441542e+003	5,001211e-003
0002.CSV	2,445399e+003	5,021690e-003
0002.CSV	2,449256e+003	5,046462e-003
0002.CSV	2,453113e+003	5,059200e-003
0002.CSV	2,456970e+003	5,043613e-003
0002.CSV	2,460827e+003	5,033825e-003
0002.CSV	2,464685e+003	5,055044e-003
0002.CSV	2,468542e+003	5,089874e-003
0002.CSV	2,472399e+003	5,116930e-003
0002.CSV	2,476256e+003	5,172319e-003
0002.CSV	2,480113e+003	5,241768e-003
0002.CSV	2,483970e+003	5,315688e-003
0002.CSV	2,487827e+003	5,345910e-003
0002.CSV	2,491684e+003	5,376471e-003
0002.CSV	2,495541e+003	5,429746e-003
0002.CSV	2,499398e+003	5,442495e-003
0002.CSV	2,503255e+003	5,409918e-003
0002.CSV	2,507113e+003	5,398210e-003
0002.CSV	2,510970e+003	5,430820e-003
0002.CSV	2,514827e+003	5,482189e-003
0002.CSV	2,518684e+003	5,516517e-003
0002.CSV	2,522541e+003	5,528733e-003
0002.CSV	2,526398e+003	5,517961e-003
0002.CSV	2,530255e+003	5,454004e-003
0002.CSV	2,534112e+003	5,326992e-003
0002.CSV	2,537969e+003	5,229561e-003
0002.CSV	2,541826e+003	5,211955e-003
0002.CSV	2,545684e+003	5,257597e-003
0002.CSV	2,549541e+003	5,252433e-003
0002.CSV	2,553398e+003	5,176645e-003
0002.CSV	2,557255e+003	5,125915e-003
0002.CSV	2,561112e+003	5,072375e-003
0002.CSV	2,564969e+003	5,022227e-003
0002.CSV	2,568826e+003	4,996216e-003
0002.CSV	2,572683e+003	4,974163e-003
0002.CSV	2,576540e+003	4,978419e-003
0002.CSV	2,580397e+003	4,975403e-003
0002.CSV	2,584254e+003	4,965214e-003
0002.CSV	2,588112e+003	4,931902e-003
0002.CSV	2,591969e+003	4,889644e-003
0002.CSV	2,595826e+003	4,851278e-003
0002.CSV	2,599683e+003	4,860660e-003
0002.CSV	2,603540e+003	4,902110e-003
0002.CSV	2,607397e+003	4,894536e-003
0002.CSV	2,611254e+003	4,876274e-003
0002.CSV	2,615111e+003	4,899127e-003
0002.CSV	2,618968e+003	4,912163e-003
0002.CSV	2,622825e+003	4,896514e-003
0002.CSV	2,626683e+003	4,894470e-003
0002.CSV	2,630540e+003	4,907673e-003
0002.CSV	2,634397e+003	4,892694e-003
0002.CSV	2,638254e+003	4,855935e-003
0002.CSV	2,642111e+003	4,819549e-003
0002.CSV	2,645968e+003	4,807755e-003
0002.CSV	2,649825e+003	4,805042e-003
0002.CSV	2,653682e+003	4,777671e-003
0002.CSV	2,657539e+003	4,745947e-003
0002.CSV	2,661396e+003	4,733285e-003
0002.CSV	2,665253e+003	4,712819e-003
0002.CSV	2,669111e+003	4,717374e-003
0002.CSV	2,672968e+003	4,748058e-003
0002.CSV	2,676825e+003	4,789530e-003
0002.CSV	2,680682e+003	4,779011e-003
0002.CSV	2,684539e+003	4,737573e-003
0002.CSV	2,688396e+003	4,719149e-003
0002.CSV	2,692253e+003	4,742195e-003
0002.CSV	2,696110e+003	4,765175e-003
0002.CSV	2,699967e+003	4,758945e-003
0002.CSV	2,703824e+003	4,724944e-003
0002.CSV	2,707682e+003	4,721126e-003
0002.CSV	2,711539e+003	4,764975e-003
0002.CSV	2,715396e+003	4,771206e-003
0002.CSV	2,719253e+003	4,789899e-003
0002.CSV	2,723110e+003	4,853657e-003
0002.CSV	2,726967e+003	4,843505e-003
0002.CSV	2,730824e+003	4,775527e-003
0002.CSV	2,734681e+003	4,762462e-003
0002.CSV	2,738538e+003	4,764271e-003
0002.CSV	2,742396e+003	4,760486e-003
0002.CSV	2,746252e+003	4,805679e-003
0002.CSV	2,750109e+003	4,813551e-003
0002.CSV	2,753967e+003	4,792177e-003
0002.CSV	2,757824e+003	4,764137e-003
0002.CSV	2,761681e+003	4,743569e-003
0002.CSV	2,765538e+003	4,733989e-003
0002.CSV	2,769395e+003	4,763434e-003
0002.CSV	2,773252e+003	4,838311e-003
0002.CSV	2,777109e+003	4,841327e-003
0002.CSV	2,780966e+003	4,814154e-003
0002.CSV	2,784823e+003	4,846219e-003
0002.CSV	2,788681e+003	4,923624e-003
0002.CSV	2,792538e+003	4,951674e-003
0002.CSV	2,796395e+003	4,977380e-003
0002.CSV	2,800252e+003	4,983983e-003
0002.CSV	2,804109e+003	4,947451e-003
0002.CSV	2,807966e+003	4,997926e-003
0002.CSV	2,811823e+003	5,036808e-003
0002.CSV	2,815680e+003	5,039557e-003
0002.CSV	2,819537e+003	5,077705e-003
0002.CSV	2,823395e+003	5,114818e-003
0002.CSV	2,827251e+003	5,148010e-003
0002.CSV	2,831108e+003	5,244182e-003
0002.CSV	2,834966e+003	5,420822e-003
0002.CSV	2,838823e+003	5,614751e-003
0002.CSV	2,842680e+003	5,823712e-003
0002.CSV	2,846537e+003	6,163789e-003
0002.CSV	2,850394e+003	6,302779e-003
0002.CSV	2,854251e+003	6,135324e-003
0002.CSV	2,858108e+003	5,998437e-003
0002.CSV	2,861965e+003	5,939549e-003
0002.CSV	2,865822e+003	5,922082e-003
0002.CSV	2,869680e+003	5,997026e-003
0002.CSV	2,873537e+003	5,980565e-003
0002.CSV	2,877394e+003	5,790232e-003
0002.CSV	2,881251e+003	5,678463e-003
0002.CSV	2,885108e+003	5,660671e-003
0002.CSV	2,888965e+003	5,661645e-003
0002.CSV	2,892822e+003	5,765284e-003
0002.CSV	2,896679e+003	5,839764e-003
0002.CSV	2,900536e+003	5,861963e-003
0002.CSV	2,904394e+003	6,012413e-003
0002.CSV	2,908250e+003	6,348435e-003
0002.CSV	2,912107e+003	6,865310e-003
0002.CSV	2,915965e+003	7,224901e-003
0002.CSV	2,919822e+003	7,082619e-003
0002.CSV	2,923679e+003	6,714362e-003
0002.CSV	2,927536e+003	6,479244e-003
0002.CSV	2,931393e+003	6,233295e-003
0002.CSV	2,935250e+003	5,922855e-003
0002.CSV	2,939107e+003	5,794598e-003
0002.CSV	2,942964e+003	5,858839e-003
0002.CSV	2,946821e+003	5,870056e-003
0002.CSV	2,950679e+003	5,798493e-003
0002.CSV	2,954536e+003	5,697565e-003
0002.CSV	2,958393e+003	5,522860e-003
0002.CSV	2,962250e+003	5,363589e-003
0002.CSV	2,966107e+003	5,143215e-003
0002.CSV	2,969964e+003	4,977749e-003
0002.CSV	2,973821e+003	4,893599e-003
0002.CSV	2,977678e+003	4,777403e-003
0002.CSV	2,981535e+003	4,558398e-003
0002.CSV	2,985393e+003	4,270902e-003
0002.CSV	2,989250e+003	4,156312e-003
0002.CSV	2,993106e+003	4,216664e-003
0002.CSV	2,996964e+003	4,195487e-003
0002.CSV	3,000821e+003	4,061183e-003
0002.CSV	3,004678e+003	3,939392e-003
0002.CSV	3,008535e+003	4,022388e-003
0002.CSV	3,012392e+003	4,168957e-003
0002.CSV	3,016249e+003	4,167418e-003
0002.CSV	3,020106e+003	4,103761e-003
0002.CSV	3,023963e+003	4,078307e-003
0002.CSV	3,027820e+003	4,134903e-003
0002.CSV	3,031678e+003	4,253804e-003
0002.CSV	3,035535e+003	4,271471e-003
0002.CSV	3,039392e+003	4,263374e-003
0002.CSV	3,043249e+003	4,266117e-003
0002.CSV	3,047106e+003	4,226267e-003
0002.CSV	3,050963e+003	4,247949e-003
0002.CSV	3,054820e+003	4,257986e-003
0002.CSV	3,058677e+003	4,184714e-003
0002.CSV	3,062534e+003	4,182907e-003
0002.CSV	3,066392e+003	4,223523e-003
0002.CSV	3,070249e+003	4,199903e-003
0002.CSV	3,074105e+003	4,189130e-003
0002.CSV	3,077963e+003	4,220445e-003
0002.CSV	3,081820e+003	4,212248e-003
0002.CSV	3,085677e+003	4,179562e-003
0002.CSV	3,089534e+003	4,177923e-003
0002.CSV	3,093391e+003	4,142362e-003
0002.CSV	3,097248e+003	4,113595e-003
0002.CSV	3,101105e+003	4,105768e-003
0002.CSV	3,104962e+003	4,138114e-003
0002.CSV	3,108819e+003	4,209471e-003
0002.CSV	3,112677e+003	4,236371e-003
0002.CSV	3,116534e+003	4,277963e-003
0002.CSV	3,120391e+003	4,241758e-003
0002.CSV	3,124248e+003	4,148250e-003
0002.CSV	3,128105e+003	4,143767e-003
0002.CSV	3,131962e+003	4,176819e-003
0002.CSV	3,135819e+003	4,186253e-003
0002.CSV	3,139676e+003	4,190435e-003
0002.CSV	3,143533e+003	4,177588e-003
0002.CSV	3,147391e+003	4,182104e-003
0002.CSV	3,151248e+003	4,217702e-003
0002.CSV	3,155104e+003	4,202646e-003
0002.CSV	3,158962e+003	4,162400e-003
0002.CSV	3,162819e+003	4,149822e-003
0002.CSV	3,166676e+003	4,152866e-003
0002.CSV	3,170533e+003	4,151160e-003
0002.CSV	3,174390e+003	4,140422e-003
0002.CSV	3,178247e+003	4,115869e-003
0002.CSV	3,182104e+003	4,120452e-003
0002.CSV	3,185961e+003	4,153702e-003
0002.CSV	3,189818e+003	4,193580e-003
0002.CSV	3,193676e+003	4,197828e-003
0002.CSV	3,197533e+003	4,166783e-003
0002.CSV	3,201390e+003	4,215962e-003
0002.CSV	3,205247e+003	4,292419e-003
0002.CSV	3,209104e+003	4,279502e-003
0002.CSV	3,212961e+003	4,224761e-003
0002.CSV	3,216818e+003	4,232925e-003
0002.CSV	3,220675e+003	4,241189e-003
0002.CSV	3,224532e+003	4,279167e-003
0002.CSV	3,228390e+003	4,356773e-003
0002.CSV	3,232247e+003	4,382745e-003
0002.CSV	3,236104e+003	4,320897e-003
0002.CSV	3,239961e+003	4,338165e-003
0002.CSV	3,243818e+003	4,407212e-003
0002.CSV	3,247675e+003	4,392452e-003
0002.CSV	3,251532e+003	4,347101e-003
0002.CSV	3,255389e+003	4,340943e-003
0002.CSV	3,259246e+003	4,316512e-003
0002.CSV	3,263104e+003	4,306306e-003
0002.CSV	3,266960e+003	4,396301e-003
0002.CSV	3,270817e+003	4,491269e-003
0002.CSV	3,274675e+003	4,474262e-003
0002.CSV	3,278532e+003	4,376085e-003
0002.CSV	3,282389e+003	4,251830e-003
0002.CSV	3,286246e+003	4,251763e-003
0002.CSV	3,290103e+003	4,434660e-003
0002.CSV	3,293960e+003	4,532114e-003
0002.CSV	3,297817e+003	4,459064e-003
0002.CSV	3,301674e+003	4,457390e-003
0002.CSV	3,305531e+003	4,459967e-003
0002.CSV	3,309389e+003	4,372771e-003
0002.CSV	3,313246e+003	4,247112e-003
0002.CSV	3,317103e+003	4,174845e-003
0002.CSV	3,320960e+003	4,259492e-003
0002.CSV	3,324817e+003	4,351184e-003
0002.CSV	3,328674e+003	4,274918e-003
0002.CSV	3,332531e+003	4,254473e-003
0002.CSV	3,336388e+003	4,347402e-003
0002.CSV	3,340245e+003	4,343854e-003
0002.CSV	3,344103e+003	4,223189e-003
0002.CSV	3,347959e+003	4,222486e-003
0002.CSV	3,351816e+003	4,281041e-003
0002.CSV	3,355674e+003	4,264779e-003
0002.CSV	3,359531e+003	4,225263e-003
0002.CSV	3,363388e+003	4,247246e-003
0002.CSV	3,367245e+003	4,314070e-003
0002.CSV	3,371102e+003	4,283651e-003
0002.CSV	3,374959e+003	4,213586e-003
0002.CSV	3,378816e+003	4,120920e-003
0002.CSV	3,382673e+003	4,053925e-003
0002.CSV	3,386530e+003	4,077571e-003
0002.CSV	3,390388e+003	4,166348e-003
0002.CSV	3,394245e+003	4,193713e-003
0002.CSV	3,398102e+003	4,196424e-003
0002.CSV	3,401959e+003	4,150023e-003
0002.CSV	3,405816e+003	4,013994e-003
0002.CSV	3,409673e+003	3,996739e-003
0002.CSV	3,413530e+003	3,976307e-003
0002.CSV	3,417387e+003	3,889074e-003
0002.CSV	3,421244e+003	3,849191e-003
0002.CSV	3,425102e+003	3,854874e-003
0002.CSV	3,428958e+003	3,961661e-003
0002.CSV	3,432815e+003	4,048541e-003
0002.CSV	3,436673e+003	3,956211e-003
0002.CSV	3,440530e+003	3,794806e-003
0002.CSV	3,444387e+003	3,728496e-003
0002.CSV	3,448244e+003	3,713090e-003
0002.CSV	3,452101e+003	3,658988e-003
0002.CSV	3,455958e+003	3,686690e-003
0002.CSV	3,459815e+003	3,764123e-003
0002.CSV	3,463672e+003	3,826193e-003
0002.CSV	3,467529e+003	3,845313e-003
0002.CSV	3,471387e+003	3,687792e-003
0002.CSV	3,475244e+003	3,600049e-003
0002.CSV	3,479101e+003	3,666974e-003
0002.CSV	3,482958e+003	3,637503e-003
0002.CSV	3,486815e+003	3,611008e-003
0002.CSV	3,490672e+003	3,610173e-003
0002.CSV	3,494529e+003	3,603557e-003
0002.CSV	3,498386e+003	3,591263e-003
0002.CSV	3,502243e+003	3,546797e-003
0002.CSV	3,506101e+003	3,443653e-003
0002.CSV	3,509958e+003	3,364674e-003
0002.CSV	3,513814e+003	3,374391e-003
0002.CSV	3,517672e+003	3,347544e-003
0002.CSV	3,521529e+003	3,346676e-003
0002.CSV	3,525386e+003	3,336225e-003
0002.CSV	3,529243e+003	3,297362e-003
0002.CSV	3,533100e+003	3,356927e-003
0002.CSV	3,536957e+003	3,401239e-003
0002.CSV	3,540814e+003	3,333788e-003
0002.CSV	3,544671e+003	3,306910e-003
0002.CSV	3,548528e+003	3,264277e-003
0002.CSV	3,552386e+003	3,249721e-003
0002.CSV	3,556243e+003	3,215305e-003
0002.CSV	3,560100e+003	3,191773e-003
0002.CSV	3,563957e+003	3,190538e-003
0002.CSV	3,567814e+003	3,235567e-003
0002.CSV	3,571671e+003	3,217241e-003
0002.CSV	3,575528e+003	3,125255e-003
0002.CSV	3,579385e+003	3,074263e-003
0002.CSV	3,583242e+003	3,054776e-003
0002.CSV	3,587100e+003	3,061583e-003
0002.CSV	3,590957e+003	2,957886e-003
0002.CSV	3,594813e+003	2,839472e-003
0002.CSV	3,598671e+003	2,865287e-003
0002.CSV	3,602528e+003	2,869156e-003
0002.CSV	3,606385e+003	2,791049e-003
0002.CSV	3,610242e+003	2,807823e-003
0002.CSV	3,614099e+003	2,850012e-003
0002.CSV	3,617956e+003	2,812925e-003
0002.CSV	3,621813e+003	2,706287e-003
0002.CSV	3,625670e+003	2,609242e-003
0002.CSV	3,629527e+003	2,693885e-003
0002.CSV	3,633385e+003	2,802587e-003
0002.CSV	3,637242e+003	2,748800e-003
0002.CSV	3,641099e+003	2,698052e-003
0002.CSV	3,644956e+003	2,601609e-003
0002.CSV	3,648813e+003	2,624843e-003
0002.CSV	3,652670e+003	2,766906e-003
0002.CSV	3,656527e+003	2,800620e-003
0002.CSV	3,660384e+003	2,762371e-003
0002.CSV	3,664241e+003	2,558545e-003
0002.CSV	3,668099e+003	2,367807e-003
0002.CSV	3,671956e+003	2,370638e-003
0002.CSV	3,675813e+003	2,512019e-003
0002.CSV	3,679670e+003	2,515351e-003
0002.CSV	3,683527e+003	2,407220e-003
0002.CSV	3,687384e+003	2,348284e-003
0002.CSV	3,691241e+003	2,428045e-003
0002.CSV	3,695098e+003	2,382366e-003
0002.CSV	3,698955e+003	2,314006e-003
0002.CSV	3,702813e+003	2,248954e-003
0002.CSV	3,706669e+003	2,142022e-003
0002.CSV	3,710526e+003	2,187309e-003
0002.CSV	3,714384e+003	2,385264e-003
0002.CSV	3,718241e+003	2,323633e-003
0002.CSV	3,722098e+003	2,154542e-003
0002.CSV	3,725955e+003	2,074599e-003
0002.CSV	3,729812e+003	2,106727e-003
0002.CSV	3,733669e+003	2,214917e-003
0002.CSV	3,737526e+003	2,399624e-003
0002.CSV	3,741383e+003	2,356080e-003
0002.CSV	3,745240e+003	2,284760e-003
0002.CSV	3,749098e+003	2,225441e-003
0002.CSV	3,752955e+003	2,326831e-003
0002.CSV	3,756812e+003	2,400957e-003
0002.CSV	3,760669e+003	2,393560e-003
0002.CSV	3,764526e+003	2,331062e-003
0002.CSV	3,768383e+003	2,388229e-003
0002.CSV	3,772240e+003	2,404955e-003
0002.CSV	3,776097e+003	2,353948e-003
0002.CSV	3,779954e+003	2,355147e-003
0002.CSV	3,783812e+003	2,339590e-003
0002.CSV	3,787668e+003	2,316604e-003
0002.CSV	3,791525e+003	2,256548e-003
0002.CSV	3,795383e+003	2,180016e-003
0002.CSV	3,799240e+003	2,179417e-003
0002.CSV	3,803097e+003	2,250586e-003
0002.CSV	3,806954e+003	2,330795e-003
0002.CSV	3,810811e+003	2,223809e-003
0002.CSV	3,814668e+003	2,093776e-003
0002.CSV	3,818525e+003	2,139158e-003
0002.CSV	3,822382e+003	2,254750e-003
0002.CSV	3,826239e+003	2,331095e-003
0002.CSV	3,830097e+003	2,320868e-003
0002.CSV	3,833954e+003	2,262577e-003
0002.CSV	3,837811e+003	2,255582e-003
0002.CSV	3,841668e+003	2,349450e-003
0002.CSV	3,845525e+003	2,293687e-003
0002.CSV	3,849382e+003	2,177918e-003
0002.CSV	3,853239e+003	2,257248e-003
0002.CSV	3,857096e+003	2,346119e-003
0002.CSV	3,860953e+003	2,232635e-003
0002.CSV	3,864811e+003	2,279264e-003
0002.CSV	3,868667e+003	2,393160e-003
0002.CSV	3,872524e+003	2,505987e-003
0002.CSV	3,876382e+003	2,455634e-003
0002.CSV	3,880239e+003	2,378135e-003
0002.CSV	3,884096e+003	2,408753e-003
0002.CSV	3,887953e+003	2,401989e-003
0002.CSV	3,891810e+003	2,398025e-003
0002.CSV	3,895667e+003	2,434276e-003
0002.CSV	3,899524e+003	2,455668e-003
0002.CSV	3,903381e+003	2,543413e-003
0002.CSV	3,907238e+003	2,524816e-003
0002.CSV	3,911096e+003	2,417882e-003
0002.CSV	3,914953e+003	2,359645e-003
0002.CSV	3,918810e+003	2,432276e-003
0002.CSV	3,922667e+003	2,458233e-003
0002.CSV	3,926524e+003	2,447770e-003
0002.CSV	3,930381e+003	2,443905e-003
0002.CSV	3,934238e+003	2,465931e-003
0002.CSV	3,938095e+003	2,440340e-003
0002.CSV	3,941952e+003	2,443639e-003
0002.CSV	3,945810e+003	2,461299e-003
0002.CSV	3,949667e+003	2,503920e-003
0002.CSV	3,953523e+003	2,520617e-003
0002.CSV	3,957381e+003	2,505987e-003
0002.CSV	3,961238e+003	2,559145e-003
0002.CSV	3,965095e+003	2,522250e-003
0002.CSV	3,968952e+003	2,455368e-003
0002.CSV	3,972809e+003	2,480360e-003
0002.CSV	3,976666e+003	2,496522e-003
0002.CSV	3,980523e+003	2,487591e-003
0002.CSV	3,984380e+003	2,488191e-003
0002.CSV	3,988237e+003	2,454668e-003
0002.CSV	3,992095e+003	2,442839e-003
0002.CSV	3,995952e+003	2,451936e-003
0002.CSV	3,999809e+003	2,439274e-003
0003.CSV	6,749918e+002	1,930165e-002
0003.CSV	6,788489e+002	2,010507e-002
0003.CSV	6,827060e+002	2,032056e-002
0003.CSV	6,865631e+002	2,116987e-002
0003.CSV	6,904202e+002	2,236524e-002
0003.CSV	6,942773e+002	2,619755e-002
0003.CSV	6,981344e+002	3,075404e-002
0003.CSV	7,019915e+002	2,937153e-002
0003.CSV	7,058486e+002	2,839988e-002
0003.CSV	7,097057e+002	3,690790e-002
0003.CSV	7,135628e+002	3,710082e-002
0003.CSV	7,174199e+002	2,452475e-002
0003.CSV	7,212770e+002	1,700822e-002
0003.CSV	7,251341e+002	1,632044e-002
0003.CSV	7,289911e+002	1,628305e-002
0003.CSV	7,328483e+002	1,648392e-002
0003.CSV	7,367054e+002	1,669990e-002
0003.CSV	7,405624e+002	1,703072e-002
0003.CSV	7,444196e+002	1,727048e-002
0003.CSV	7,482767e+002	1,788915e-002
0003.CSV	7,521337e+002	1,804645e-002
0003.CSV	7,559908e+002	1,835469e-002
0003.CSV	7,598480e+002	1,851223e-002
0003.CSV	7,637050e+002	1,890918e-002
0003.CSV	7,675621e+002	1,913787e-002
0003.CSV	7,714193e+002	1,955972e-002
0003.CSV	7,752763e+002	1,995146e-002
0003.CSV	7,791334e+002	2,047096e-002
0003.CSV	7,829905e+002	2,070513e-002
0003.CSV	7,868476e+002	2,102128e-002
0003.CSV	7,907047e+002	2,118803e-002
0003.CSV	7,945618e+002	2,189134e-002
0003.CSV	7,984189e+002	2,264315e-002
0003.CSV	8,022760e+002	2,353592e-002
0003.CSV	8,061331e+002	2,425562e-002
0003.CSV	8,099902e+002	2,512524e-002
0003.CSV	8,138473e+002	2,606893e-002
0003.CSV	8,177043e+002	2,780598e-002
0003.CSV	8,215615e+002	2,985619e-002
0003.CSV	8,254186e+002	3,248200e-002
0003.CSV	8,292756e+002	3,516952e-002
0003.CSV	8,331328e+002	3,857764e-002
0003.CSV	8,369899e+002	4,333312e-002
0003.CSV	8,408469e+002	4,974691e-002
0003.CSV	8,447040e+002	5,578508e-002
0003.CSV	8,485612e+002	6,440919e-002
0003.CSV	8,524182e+002	7,246463e-002
0003.CSV	8,562753e+002	7,160542e-002
0003.CSV	8,601324e+002	6,246004e-002
0003.CSV	8,639895e+002	4,985880e-002
0003.CSV	8,678466e+002	3,637315e-002
0003.CSV	8,717037e+002	2,532427e-002
0003.CSV	8,755608e+002	1,835034e-002
0003.CSV	8,794179e+002	1,515225e-002
0003.CSV	8,832750e+002	1,366056e-002
0003.CSV	8,871321e+002	1,297048e-002
0003.CSV	8,909892e+002	1,288098e-002
0003.CSV	8,948463e+002	1,322663e-002
0003.CSV	8,987034e+002	1,346085e-002
0003.CSV	9,025605e+002	1,383487e-002
0003.CSV	9,064176e+002	1,427283e-002
0003.CSV	9,102747e+002	1,454698e-002
0003.CSV	9,141318e+002	1,449762e-002
0003.CSV	9,179889e+002	1,474685e-002
0003.CSV	9,218459e+002	1,500518e-002
0003.CSV	9,257031e+002	1,535836e-002
0003.CSV	9,295602e+002	1,559075e-002
0003.CSV	9,334172e+002	1,589282e-002
0003.CSV	9,372744e+002	1,602289e-002
0003.CSV	9,411315e+002	1,626581e-002
0003.CSV	9,449885e+002	1,638068e-002
0003.CSV	9,488456e+002	1,661300e-002
0003.CSV	9,527028e+002	1,680676e-002
0003.CSV	9,565598e+002	1,707724e-002
0003.CSV	9,604169e+002	1,720160e-002
0003.CSV	9,642740e+002	1,740769e-002
0003.CSV	9,681311e+002	1,753798e-002
0003.CSV	9,719882e+002	1,781579e-002
0003.CSV	9,758453e+002	1,801081e-002
0003.CSV	9,797024e+002	1,827102e-002
0003.CSV	9,835595e+002	1,848132e-002
0003.CSV	9,874166e+002	1,876395e-002
0003.CSV	9,912737e+002	1,889849e-002
0003.CSV	9,951308e+002	1,912994e-002
0003.CSV	9,989879e+002	1,930806e-002
0003.CSV	1,002845e+003	1,963421e-002
0003.CSV	1,006702e+003	1,984573e-002
0003.CSV	1,010559e+003	2,008397e-002
0003.CSV	1,014416e+003	2,015768e-002
0003.CSV	1,018273e+003	2,040074e-002
0003.CSV	1,022130e+003	2,059005e-002
0003.CSV	1,025988e+003	2,092214e-002
0003.CSV	1,029845e+003	2,121434e-002
0003.CSV	1,033702e+003	2,154485e-002
0003.CSV	1,037559e+003	2,165173e-002
0003.CSV	1,041416e+003	2,183614e-002
0003.CSV	1,045273e+003	2,185688e-002
0003.CSV	1,049130e+003	2,202367e-002
0003.CSV	1,052987e+003	2,216905e-002
0003.CSV	1,056844e+003	2,250693e-002
0003.CSV	1,060701e+003	2,274000e-002
0003.CSV	1,064559e+003	2,318123e-002
0003.CSV	1,068416e+003	2,365199e-002
0003.CSV	1,072273e+003	2,442516e-002
0003.CSV	1,076130e+003	2,588665e-002
0003.CSV	1,079987e+003	2,870904e-002
0003.CSV	1,083844e+003	2,839599e-002
0003.CSV	1,087701e+003	2,460880e-002
0003.CSV	1,091558e+003	2,278298e-002
0003.CSV	1,095415e+003	2,279695e-002
0003.CSV	1,099272e+003	2,291922e-002
0003.CSV	1,103130e+003	2,310533e-002
0003.CSV	1,106987e+003	2,318763e-002
0003.CSV	1,110844e+003	2,333529e-002
0003.CSV	1,114701e+003	2,334529e-002
0003.CSV	1,118558e+003	2,337494e-002
0003.CSV	1,122415e+003	2,334004e-002
0003.CSV	1,126272e+003	2,333550e-002
0003.CSV	1,130129e+003	2,322926e-002
0003.CSV	1,133986e+003	2,321965e-002
0003.CSV	1,137843e+003	2,318721e-002
0003.CSV	1,141700e+003	2,323838e-002
0003.CSV	1,145558e+003	2,320234e-002
0003.CSV	1,149415e+003	2,329743e-002
0003.CSV	1,153272e+003	2,333763e-002
0003.CSV	1,157129e+003	2,340540e-002
0003.CSV	1,160986e+003	2,348282e-002
0003.CSV	1,164843e+003	2,369647e-002
0003.CSV	1,168700e+003	2,383646e-002
0003.CSV	1,172557e+003	2,410358e-002
0003.CSV	1,176414e+003	2,439057e-002
0003.CSV	1,180271e+003	2,468062e-002
0003.CSV	1,184129e+003	2,461525e-002
0003.CSV	1,187986e+003	2,441100e-002
0003.CSV	1,191843e+003	2,418201e-002
0003.CSV	1,195700e+003	2,414824e-002
0003.CSV	1,199557e+003	2,418586e-002
0003.CSV	1,203414e+003	2,442506e-002
0003.CSV	1,207271e+003	2,469977e-002
0003.CSV	1,211128e+003	2,508827e-002
0003.CSV	1,214985e+003	2,540966e-002
0003.CSV	1,218842e+003	2,577669e-002
0003.CSV	1,222699e+003	2,606485e-002
0003.CSV	1,226557e+003	2,643278e-002
0003.CSV	1,230414e+003	2,671680e-002
0003.CSV	1,234271e+003	2,708038e-002
0003.CSV	1,238128e+003	2,735758e-002
0003.CSV	1,241985e+003	2,767173e-002
0003.CSV	1,245842e+003	2,788176e-002
0003.CSV	1,249699e+003	2,807181e-002
0003.CSV	1,253556e+003	2,814141e-002
0003.CSV	1,257413e+003	2,821778e-002
0003.CSV	1,261271e+003	2,824235e-002
0003.CSV	1,265128e+003	2,847381e-002
0003.CSV	1,268985e+003	2,875149e-002
0003.CSV	1,272842e+003	2,912879e-002
0003.CSV	1,276699e+003	2,946319e-002
0003.CSV	1,280556e+003	2,991894e-002
0003.CSV	1,284413e+003	3,031332e-002
0003.CSV	1,288270e+003	3,076279e-002
0003.CSV	1,292127e+003	3,113351e-002
0003.CSV	1,295984e+003	3,158079e-002
0003.CSV	1,299841e+003	3,195186e-002
0003.CSV	1,303698e+003	3,236600e-002
0003.CSV	1,307556e+003	3,274089e-002
0003.CSV	1,311413e+003	3,325786e-002
0003.CSV	1,315270e+003	3,375673e-002
0003.CSV	1,319127e+003	3,437375e-002
0003.CSV	1,322984e+003	3,493630e-002
0003.CSV	1,326841e+003	3,562401e-002
0003.CSV	1,330698e+003	3,632333e-002
0003.CSV	1,334555e+003	3,713117e-002
0003.CSV	1,338412e+003	3,801541e-002
0003.CSV	1,342270e+003	3,906442e-002
0003.CSV	1,346127e+003	3,991294e-002
0003.CSV	1,349984e+003	4,099426e-002
0003.CSV	1,353841e+003	4,209966e-002
0003.CSV	1,357698e+003	4,328736e-002
0003.CSV	1,361555e+003	4,450991e-002
0003.CSV	1,365412e+003	4,592831e-002
0003.CSV	1,369269e+003	4,708968e-002
0003.CSV	1,373126e+003	4,860344e-002
0003.CSV	1,376983e+003	5,022294e-002
0003.CSV	1,380840e+003	5,178998e-002
0003.CSV	1,384698e+003	5,325918e-002
0003.CSV	1,388555e+003	5,502132e-002
0003.CSV	1,392412e+003	5,639887e-002
0003.CSV	1,396269e+003	5,806189e-002
0003.CSV	1,400126e+003	5,959339e-002
0003.CSV	1,403983e+003	6,104515e-002
0003.CSV	1,407840e+003	6,238364e-002
0003.CSV	1,411697e+003	6,366242e-002
0003.CSV	1,415554e+003	6,456429e-002
0003.CSV	1,419411e+003	6,589460e-002
0003.CSV	1,423269e+003	6,704699e-002
0003.CSV	1,427125e+003	6,835949e-002
0003.CSV	1,430983e+003	6,969932e-002
0003.CSV	1,434840e+003	7,144260e-002
0003.CSV	1,438697e+003	7,326157e-002
0003.CSV	1,442554e+003	7,449856e-002
0003.CSV	1,446411e+003	7,468505e-002
0003.CSV	1,450268e+003	7,427520e-002
0003.CSV	1,454125e+003	7,327843e-002
0003.CSV	1,457982e+003	7,223691e-002
0003.CSV	1,461839e+003	7,124102e-002
0003.CSV	1,465697e+003	7,052479e-002
0003.CSV	1,469554e+003	6,914096e-002
0003.CSV	1,473411e+003	6,684459e-002
0003.CSV	1,477268e+003	6,377742e-002
0003.CSV	1,481125e+003	6,155569e-002
0003.CSV	1,484982e+003	5,929719e-002
0003.CSV	1,488839e+003	5,685446e-002
0003.CSV	1,492696e+003	5,428882e-002
0003.CSV	1,496553e+003	5,221302e-002
0003.CSV	1,500410e+003	4,988686e-002
0003.CSV	1,504268e+003	4,834496e-002
0003.CSV	1,508125e+003	4,546086e-002
0003.CSV	1,511982e+003	4,303652e-002
0003.CSV	1,515839e+003	4,091437e-002
0003.CSV	1,519696e+003	3,838786e-002
0003.CSV	1,523553e+003	3,553108e-002
0003.CSV	1,527410e+003	3,345679e-002
0003.CSV	1,531267e+003	3,158350e-002
0003.CSV	1,535124e+003	3,004043e-002
0003.CSV	1,538981e+003	2,839425e-002
0003.CSV	1,542838e+003	2,592115e-002
0003.CSV	1,546696e+003	2,382235e-002
0003.CSV	1,550553e+003	2,222394e-002
0003.CSV	1,554410e+003	2,055343e-002
0003.CSV	1,558267e+003	1,851800e-002
0003.CSV	1,562124e+003	1,651417e-002
0003.CSV	1,565981e+003	1,556434e-002
0003.CSV	1,569838e+003	1,422661e-002
0003.CSV	1,573695e+003	1,298051e-002
0003.CSV	1,577552e+003	1,149802e-002
0003.CSV	1,581409e+003	1,020843e-002
0003.CSV	1,585267e+003	9,205794e-003
0003.CSV	1,589124e+003	8,488153e-003
0003.CSV	1,592981e+003	8,015479e-003
0003.CSV	1,596838e+003	7,790990e-003
0003.CSV	1,600695e+003	7,677727e-003
0003.CSV	1,604552e+003	7,650984e-003
0003.CSV	1,608409e+003	7,562639e-003
0003.CSV	1,612266e+003	7,424998e-003
0003.CSV	1,616123e+003	7,212504e-003
0003.CSV	1,619980e+003	7,085919e-003
0003.CSV	1,623837e+003	6,901027e-003
0003.CSV	1,627695e+003	6,789274e-003
0003.CSV	1,631552e+003	6,653796e-003
0003.CSV	1,635409e+003	6,623751e-003
0003.CSV	1,639266e+003	6,578032e-003
0003.CSV	1,643123e+003	6,508976e-003
0003.CSV	1,646980e+003	6,464446e-003
0003.CSV	1,650837e+003	6,443393e-003
0003.CSV	1,654694e+003	6,334784e-003
0003.CSV	1,658551e+003	6,240925e-003
0003.CSV	1,662408e+003	6,167284e-003
0003.CSV	1,666266e+003	6,167788e-003
0003.CSV	1,670123e+003	6,165503e-003
0003.CSV	1,673980e+003	6,193230e-003
0003.CSV	1,677837e+003	6,144667e-003
0003.CSV	1,681694e+003	6,180761e-003
0003.CSV	1,685551e+003	6,158042e-003
0003.CSV	1,689408e+003	6,045909e-003
0003.CSV	1,693265e+003	5,912947e-003
0003.CSV	1,697122e+003	5,913249e-003
0003.CSV	1,700979e+003	5,894910e-003
0003.CSV	1,704837e+003	5,872609e-003
0003.CSV	1,708694e+003	5,781133e-003
0003.CSV	1,712551e+003	5,755648e-003
0003.CSV	1,716408e+003	5,848092e-003
0003.CSV	1,720265e+003	5,934477e-003
0003.CSV	1,724122e+003	5,874960e-003
[truncated: 32,521 more rows]

## Sheet: C.edule_200_2_mFTIR_data
Select spectrum number	Wavenumbers	Absorbance
0001.CSV	674.992	0.00923673
0001.CSV	678.849	0.00911459
0001.CSV	682.706	0.00956167
0001.CSV	686.563	0.00981446
0001.CSV	690.42	0.0097763
0001.CSV	694.277	0.0111621
0001.CSV	698.134	0.01322
0001.CSV	701.991	0.0125715
0001.CSV	705.849	0.0112409
0001.CSV	709.706	0.0138756
0001.CSV	713.563	0.014813
0001.CSV	717.42	0.0109795
0001.CSV	721.277	0.00821148
0001.CSV	725.134	0.00759494
0001.CSV	728.991	0.00731894
0001.CSV	732.848	0.0074641
0001.CSV	736.705	0.00758041
0001.CSV	740.562	0.00758159
0001.CSV	744.42	0.00754581
0001.CSV	748.277	0.0078369
0001.CSV	752.134	0.00783768
0001.CSV	755.991	0.0077351
0001.CSV	759.848	0.00742503
0001.CSV	763.705	0.00744613
0001.CSV	767.562	0.00763298
0001.CSV	771.419	0.00752151
0001.CSV	775.276	0.0072061
0001.CSV	779.133	0.00715426
0001.CSV	782.99	0.00699193
0001.CSV	786.848	0.00705783
0001.CSV	790.705	0.00727359
0001.CSV	794.562	0.00734324
0001.CSV	798.419	0.00725559
0001.CSV	802.276	0.00737006
0001.CSV	806.133	0.00742338
0001.CSV	809.99	0.00758833
0001.CSV	813.847	0.00767982
0001.CSV	817.704	0.00781312
0001.CSV	821.562	0.00820679
0001.CSV	825.419	0.00880547
0001.CSV	829.276	0.00933219
0001.CSV	833.133	0.0102025
0001.CSV	836.99	0.0111182
0001.CSV	840.847	0.0123372
0001.CSV	844.704	0.0139045
0001.CSV	848.561	0.0172605
0001.CSV	852.418	0.0221086
0001.CSV	856.275	0.0237873
0001.CSV	860.132	0.0213387
0001.CSV	863.99	0.0171401
0001.CSV	867.847	0.0128245
0001.CSV	871.704	0.00963775
0001.CSV	875.561	0.00793816
0001.CSV	879.418	0.00720819
0001.CSV	883.275	0.00676834
0001.CSV	887.132	0.00666241
0001.CSV	890.989	0.00665565
0001.CSV	894.846	0.00665067
0001.CSV	898.703	0.00675175
0001.CSV	902.561	0.00681866
0001.CSV	906.418	0.0066935
0001.CSV	910.275	0.0066969
0001.CSV	914.132	0.00666941
0001.CSV	917.989	0.00666581
0001.CSV	921.846	0.0068028
0001.CSV	925.703	0.0069725
0001.CSV	929.56	0.00698503
0001.CSV	933.417	0.00716713
0001.CSV	937.274	0.00723393
0001.CSV	941.131	0.00719889
0001.CSV	944.989	0.00719347
0001.CSV	948.846	0.00730381
0001.CSV	952.703	0.0074045
0001.CSV	956.56	0.00756824
0001.CSV	960.417	0.00770049
0001.CSV	964.274	0.0077748
0001.CSV	968.131	0.00770171
0001.CSV	971.988	0.00783161
0001.CSV	975.845	0.00814804
0001.CSV	979.702	0.00831415
0001.CSV	983.559	0.00832124
0001.CSV	987.417	0.00842068
0001.CSV	991.274	0.00850454
0001.CSV	995.131	0.00862255
0001.CSV	998.988	0.00865513
0001.CSV	1002.85	0.00878948
0001.CSV	1006.7	0.00897108
0001.CSV	1010.56	0.00908746
0001.CSV	1014.42	0.00908208
0001.CSV	1018.27	0.0090294
0001.CSV	1022.13	0.00898241
0001.CSV	1025.99	0.00917666
0001.CSV	1029.85	0.00931536
0001.CSV	1033.7	0.0094214
0001.CSV	1037.56	0.00953986
0001.CSV	1041.42	0.00969237
0001.CSV	1045.27	0.00984358
0001.CSV	1049.13	0.0100003
0001.CSV	1052.99	0.0100232
0001.CSV	1056.84	0.0102198
0001.CSV	1060.7	0.0103746
0001.CSV	1064.56	0.0104861
0001.CSV	1068.42	0.0105348
0001.CSV	1072.27	0.0106136
0001.CSV	1076.13	0.0107337
0001.CSV	1079.99	0.011193
0001.CSV	1083.84	0.011164
0001.CSV	1087.7	0.0103883
0001.CSV	1091.56	0.00999487
0001.CSV	1095.41	0.0100697
0001.CSV	1099.27	0.0100717
0001.CSV	1103.13	0.0100354
0001.CSV	1106.99	0.010098
0001.CSV	1110.84	0.0102114
0001.CSV	1114.7	0.0102407
0001.CSV	1118.56	0.0102414
0001.CSV	1122.41	0.0102252
0001.CSV	1126.27	0.0102273
0001.CSV	1130.13	0.0102157
0001.CSV	1133.99	0.0102097
0001.CSV	1137.84	0.0101458
0001.CSV	1141.7	0.0100831
0001.CSV	1145.56	0.0100598
0001.CSV	1149.41	0.0101431
0001.CSV	1153.27	0.0101274
0001.CSV	1157.13	0.0100057
0001.CSV	1160.99	0.00993252
0001.CSV	1164.84	0.00988022
0001.CSV	1168.7	0.00983771
0001.CSV	1172.56	0.00987229
0001.CSV	1176.41	0.00984497
0001.CSV	1180.27	0.00981806
0001.CSV	1184.13	0.00979247
0001.CSV	1187.99	0.00970575
0001.CSV	1191.84	0.00954779
0001.CSV	1195.7	0.00945865
0001.CSV	1199.56	0.00938077
0001.CSV	1203.41	0.00940897
0001.CSV	1207.27	0.00941304
0001.CSV	1211.13	0.00941927
0001.CSV	1214.98	0.00945391
0001.CSV	1218.84	0.00960723
0001.CSV	1222.7	0.00972375
0001.CSV	1226.56	0.00976021
0001.CSV	1230.41	0.00983107
0001.CSV	1234.27	0.00997232
0001.CSV	1238.13	0.0100916
0001.CSV	1241.98	0.010192
0001.CSV	1245.84	0.0102369
0001.CSV	1249.7	0.0103258
0001.CSV	1253.56	0.0103497
0001.CSV	1257.41	0.0103282
0001.CSV	1261.27	0.0103012
0001.CSV	1265.13	0.0103579
0001.CSV	1268.98	0.010468
0001.CSV	1272.84	0.0106163
0001.CSV	1276.7	0.0107153
0001.CSV	1280.56	0.0108502
0001.CSV	1284.41	0.0109277
0001.CSV	1288.27	0.0110004
0001.CSV	1292.13	0.0110587
0001.CSV	1295.98	0.0111401
0001.CSV	1299.84	0.0111969
0001.CSV	1303.7	0.0112238
0001.CSV	1307.56	0.0112394
0001.CSV	1311.41	0.0113157
0001.CSV	1315.27	0.011431
0001.CSV	1319.13	0.0116208
0001.CSV	1322.98	0.0117694
0001.CSV	1326.84	0.011897
0001.CSV	1330.7	0.0120472
0001.CSV	1334.56	0.0121435
0001.CSV	1338.41	0.0123565
0001.CSV	1342.27	0.0127505
0001.CSV	1346.13	0.0129101
0001.CSV	1349.98	0.0131173
0001.CSV	1353.84	0.0134424
0001.CSV	1357.7	0.0137827
0001.CSV	1361.56	0.0141354
0001.CSV	1365.41	0.0146148
0001.CSV	1369.27	0.0148896
0001.CSV	1373.13	0.0153525
0001.CSV	1376.98	0.0159517
0001.CSV	1380.84	0.016359
0001.CSV	1384.7	0.0166942
0001.CSV	1388.56	0.0173163
0001.CSV	1392.41	0.0177501
0001.CSV	1396.27	0.0184716
0001.CSV	1400.13	0.0193807
0001.CSV	1403.98	0.0200782
0001.CSV	1407.84	0.0208363
0001.CSV	1411.7	0.0214595
0001.CSV	1415.55	0.0219124
0001.CSV	1419.41	0.0227783
0001.CSV	1423.27	0.0233645
0001.CSV	1427.12	0.0236667
0001.CSV	1430.98	0.0240278
0001.CSV	1434.84	0.0246812
0001.CSV	1438.7	0.0253921
0001.CSV	1442.55	0.0255352
0001.CSV	1446.41	0.0252508
0001.CSV	1450.27	0.024874
0001.CSV	1454.12	0.0243323
0001.CSV	1457.98	0.024079
0001.CSV	1461.84	0.0236346
0001.CSV	1465.7	0.0231722
0001.CSV	1469.55	0.0225225
0001.CSV	1473.41	0.0217618
0001.CSV	1477.27	0.0210213
0001.CSV	1481.12	0.0203431
0001.CSV	1484.98	0.0196224
0001.CSV	1488.84	0.0191067
0001.CSV	1492.7	0.0185477
0001.CSV	1496.55	0.0179904
0001.CSV	1500.41	0.0174902
0001.CSV	1504.27	0.0169849
0001.CSV	1508.12	0.0164507
0001.CSV	1511.98	0.0160415
0001.CSV	1515.84	0.015573
0001.CSV	1519.7	0.0150008
0001.CSV	1523.55	0.0143883
0001.CSV	1527.41	0.0139287
0001.CSV	1531.27	0.0133999
0001.CSV	1535.12	0.0129428
0001.CSV	1538.98	0.0124986
0001.CSV	1542.84	0.0122402
0001.CSV	1546.7	0.0116821
0001.CSV	1550.55	0.0111521
0001.CSV	1554.41	0.0106941
0001.CSV	1558.27	0.0104666
0001.CSV	1562.12	0.0102857
0001.CSV	1565.98	0.0100425
0001.CSV	1569.84	0.00985008
0001.CSV	1573.69	0.0096197
0001.CSV	1577.55	0.00947036
0001.CSV	1581.41	0.00917117
0001.CSV	1585.27	0.00881014
0001.CSV	1589.12	0.00859517
0001.CSV	1592.98	0.00853992
0001.CSV	1596.84	0.0085434
0001.CSV	1600.69	0.00850451
0001.CSV	1604.55	0.00856489
0001.CSV	1608.41	0.00868582
0001.CSV	1612.27	0.00861484
0001.CSV	1616.12	0.00849194
0001.CSV	1619.98	0.0084845
0001.CSV	1623.84	0.00845785
0001.CSV	1627.69	0.00843565
0001.CSV	1631.55	0.00823002
0001.CSV	1635.41	0.00830364
0001.CSV	1639.27	0.00844028
0001.CSV	1643.12	0.00811178
0001.CSV	1646.98	0.00798888
0001.CSV	1650.84	0.00825346
0001.CSV	1654.69	0.00865013
0001.CSV	1658.55	0.00848204
0001.CSV	1662.41	0.00835295
0001.CSV	1666.27	0.00828345
0001.CSV	1670.12	0.008311
0001.CSV	1673.98	0.00846977
0001.CSV	1677.84	0.00830574
0001.CSV	1681.69	0.00823472
0001.CSV	1685.55	0.008529
0001.CSV	1689.41	0.00846068
0001.CSV	1693.27	0.00814075
0001.CSV	1697.12	0.00810236
0001.CSV	1700.98	0.00852603
0001.CSV	1704.84	0.00859396
0001.CSV	1708.69	0.00849413
0001.CSV	1712.55	0.00832269
0001.CSV	1716.41	0.00858865
0001.CSV	1720.27	0.00903434
0001.CSV	1724.12	0.00887709
0001.CSV	1727.98	0.00870218
0001.CSV	1731.84	0.0086383
0001.CSV	1735.69	0.00879773
0001.CSV	1739.55	0.00872636
0001.CSV	1743.41	0.00851944
0001.CSV	1747.27	0.00838217
0001.CSV	1751.12	0.008447
0001.CSV	1754.98	0.00832857
0001.CSV	1758.84	0.00819629
0001.CSV	1762.69	0.00822114
0001.CSV	1766.55	0.00812215
0001.CSV	1770.41	0.00812856
0001.CSV	1774.26	0.00851042
0001.CSV	1778.12	0.00861335
0001.CSV	1781.98	0.00871175
0001.CSV	1785.84	0.0087275
0001.CSV	1789.69	0.00861647
0001.CSV	1793.55	0.00858635
0001.CSV	1797.41	0.00852735
0001.CSV	1801.26	0.00844707
0001.CSV	1805.12	0.00834948
0001.CSV	1808.98	0.00827831
0001.CSV	1812.84	0.00830594
0001.CSV	1816.69	0.00823958
0001.CSV	1820.55	0.00815236
0001.CSV	1824.41	0.00813508
0001.CSV	1828.26	0.00833353
0001.CSV	1832.12	0.00845295
0001.CSV	1835.98	0.00836707
0001.CSV	1839.84	0.00823363
0001.CSV	1843.69	0.00824559
0001.CSV	1847.55	0.00838123
0001.CSV	1851.41	0.00829844
0001.CSV	1855.26	0.00821594
0001.CSV	1859.12	0.00823421
0001.CSV	1862.98	0.00820406
0001.CSV	1866.84	0.00826727
0001.CSV	1870.69	0.00848113
0001.CSV	1874.55	0.00842717
0001.CSV	1878.41	0.00836093
0001.CSV	1882.26	0.0083338
0001.CSV	1886.12	0.00829858
0001.CSV	1889.98	0.00828385
0001.CSV	1893.83	0.00830894
0001.CSV	1897.69	0.00838126
0001.CSV	1901.55	0.00836788
0001.CSV	1905.41	0.00833597
0001.CSV	1909.26	0.00836157
0001.CSV	1913.12	0.00831617
0001.CSV	1916.98	0.00826602
0001.CSV	1920.83	0.00833059
0001.CSV	1924.69	0.00835056
0001.CSV	1928.55	0.0083309
0001.CSV	1932.4	0.0083439
0001.CSV	1936.26	0.00835687
0001.CSV	1940.12	0.0083514
0001.CSV	1943.98	0.0084194
0001.CSV	1947.83	0.00836528
0001.CSV	1951.69	0.00832283
0001.CSV	1955.55	0.00834711
0001.CSV	1959.4	0.00834904
0001.CSV	1963.26	0.00832728
0001.CSV	1967.12	0.00840342
0001.CSV	1970.98	0.00846579
0001.CSV	1974.83	0.00843193
0001.CSV	1978.69	0.00839585
0001.CSV	1982.55	0.0084071
0001.CSV	1986.4	0.00840626
0001.CSV	1990.26	0.00841166
0001.CSV	1994.12	0.00845062
0001.CSV	1997.98	0.0084618
0001.CSV	2001.83	0.00844828
0001.CSV	2005.69	0.00845491
0001.CSV	2009.55	0.00846508
0001.CSV	2013.4	0.00847845
0001.CSV	2017.26	0.00847156
0001.CSV	2021.12	0.00847068
0001.CSV	2024.97	0.00849825
0001.CSV	2028.83	0.0085333
0001.CSV	2032.69	0.00853965
0001.CSV	2036.55	0.00856364
0001.CSV	2040.4	0.00857199
0001.CSV	2044.26	0.00858814
0001.CSV	2048.12	0.00856388
0001.CSV	2051.97	0.00855364
0001.CSV	2055.83	0.00858635
0001.CSV	2059.69	0.00861265
0001.CSV	2063.55	0.00862059
0001.CSV	2067.4	0.00860704
0001.CSV	2071.26	0.00856638
0001.CSV	2075.12	0.00860136
0001.CSV	2078.97	0.00862877
0001.CSV	2082.83	0.00861822
0001.CSV	2086.69	0.00860737
0001.CSV	2090.55	0.00864695
0001.CSV	2094.4	0.00865682
0001.CSV	2098.26	0.00866081
0001.CSV	2102.12	0.00866984
0001.CSV	2105.97	0.0087295
0001.CSV	2109.83	0.00875837
0001.CSV	2113.69	0.00873177
0001.CSV	2117.55	0.00872298
0001.CSV	2121.4	0.00872757
0001.CSV	2125.26	0.00873565
0001.CSV	2129.12	0.00875168
0001.CSV	2132.97	0.00873224
0001.CSV	2136.83	0.00872426
0001.CSV	2140.69	0.00877271
0001.CSV	2144.55	0.00882471
0001.CSV	2148.4	0.00882522
0001.CSV	2152.26	0.00885078
0001.CSV	2156.12	0.00885376
0001.CSV	2159.97	0.00888504
0001.CSV	2163.83	0.00889414
0001.CSV	2167.69	0.00888869
0001.CSV	2171.55	0.00891084
0001.CSV	2175.4	0.00892897
0001.CSV	2179.26	0.00896455
0001.CSV	2183.12	0.00901408
0001.CSV	2186.97	0.0090291
0001.CSV	2190.83	0.00901205
0001.CSV	2194.69	0.00901316
0001.CSV	2198.55	0.0090273
0001.CSV	2202.4	0.00906043
0001.CSV	2206.26	0.00907497
0001.CSV	2210.12	0.00904087
0001.CSV	2213.97	0.00900863
0001.CSV	2217.83	0.0090335
0001.CSV	2221.69	0.0090949
0001.CSV	2225.54	0.00910275
0001.CSV	2229.4	0.0090994
0001.CSV	2233.26	0.00909121
0001.CSV	2237.12	0.00908296
0001.CSV	2240.97	0.00908468
0001.CSV	2244.83	0.00909947
0001.CSV	2248.69	0.00908299
0001.CSV	2252.54	0.00911757
0001.CSV	2256.4	0.00909937
0001.CSV	2260.26	0.00905467
0001.CSV	2264.11	0.00907003
0001.CSV	2267.97	0.00908012
0001.CSV	2271.83	0.00908644
0001.CSV	2275.69	0.00911977
0001.CSV	2279.54	0.00914776
0001.CSV	2283.4	0.0091348
0001.CSV	2287.26	0.00911629
0001.CSV	2291.11	0.00916424
0001.CSV	2294.97	0.00916742
0001.CSV	2298.83	0.00912285
0001.CSV	2302.69	0.00908272
0001.CSV	2306.54	0.00914579
0001.CSV	2310.4	0.00922644
0001.CSV	2314.26	0.00904564
0001.CSV	2318.11	0.00875621
0001.CSV	2321.97	0.00856121
0001.CSV	2325.83	0.00854898
0001.CSV	2329.69	0.00829243
0001.CSV	2333.54	0.00804734
0001.CSV	2337.4	0.00804457
0001.CSV	2341.26	0.00807921
0001.CSV	2345.11	0.00872534
0001.CSV	2348.97	0.00890438
0001.CSV	2352.83	0.00846612
0001.CSV	2356.69	0.00692729
0001.CSV	2360.54	0.00563623
0001.CSV	2364.4	0.00681707
0001.CSV	2368.26	0.00823802
0001.CSV	2372.11	0.00912826
0001.CSV	2375.97	0.0096116
0001.CSV	2379.83	0.00973909
0001.CSV	2383.69	0.00967208
0001.CSV	2387.54	0.00953007
0001.CSV	2391.4	0.00947694
0001.CSV	2395.26	0.00952807
0001.CSV	2399.11	0.00953522
0001.CSV	2402.97	0.00947307
0001.CSV	2406.83	0.00944781
0001.CSV	2410.68	0.00947524
0001.CSV	2414.54	0.00948608
0001.CSV	2418.4	0.00945875
0001.CSV	2422.26	0.00948273
0001.CSV	2426.11	0.00956892
0001.CSV	2429.97	0.00958704
0001.CSV	2433.83	0.00957163
0001.CSV	2437.68	0.00956408
0001.CSV	2441.54	0.00951642
0001.CSV	2445.4	0.0094811
0001.CSV	2449.26	0.00950812
0001.CSV	2453.11	0.00951879
0001.CSV	2456.97	0.00947548
0001.CSV	2460.83	0.00946721
0001.CSV	2464.68	0.00954545
0001.CSV	2468.54	0.00959097
0001.CSV	2472.4	0.00954531
0001.CSV	2476.26	0.00952316
0001.CSV	2480.11	0.00951849
0001.CSV	2483.97	0.00954152
0001.CSV	2487.83	0.00962851
0001.CSV	2491.68	0.00969881
0001.CSV	2495.54	0.00967573
0001.CSV	2499.4	0.00962925
0001.CSV	2503.26	0.00965361
0001.CSV	2507.11	0.00969494
0001.CSV	2510.97	0.00972209
0001.CSV	2514.83	0.00974872
0001.CSV	2518.68	0.00977207
0001.CSV	2522.54	0.0097456
0001.CSV	2526.4	0.00967136
0001.CSV	2530.26	0.00963911
0001.CSV	2534.11	0.0096466
0001.CSV	2537.97	0.00967411
0001.CSV	2541.83	0.00971575
0001.CSV	2545.68	0.00970887
0001.CSV	2549.54	0.00966686
0001.CSV	2553.4	0.00969986
0001.CSV	2557.26	0.00975309
0001.CSV	2561.11	0.00976973
0001.CSV	2564.97	0.00974658
0001.CSV	2568.83	0.00975417
0001.CSV	2572.68	0.00977586
0001.CSV	2576.54	0.00980179
0001.CSV	2580.4	0.00978708
0001.CSV	2584.25	0.00978135
0001.CSV	2588.11	0.00974719
0001.CSV	2591.97	0.00974181
0001.CSV	2595.83	0.00977403
0001.CSV	2599.68	0.00977193
0001.CSV	2603.54	0.00971022
0001.CSV	2607.4	0.00969434
0001.CSV	2611.25	0.00974845
0001.CSV	2615.11	0.0098023
0001.CSV	2618.97	0.00980619
0001.CSV	2622.82	0.00979975
0001.CSV	2626.68	0.00985256
0001.CSV	2630.54	0.00981789
0001.CSV	2634.4	0.00978935
0001.CSV	2638.25	0.00982751
0001.CSV	2642.11	0.00979348
0001.CSV	2645.97	0.00974255
0001.CSV	2649.82	0.00970721
0001.CSV	2653.68	0.00971548
0001.CSV	2657.54	0.0097579
0001.CSV	2661.4	0.00977217
0001.CSV	2665.25	0.00977454
0001.CSV	2669.11	0.00981433
0001.CSV	2672.97	0.00989337
0001.CSV	2676.82	0.00993923
0001.CSV	2680.68	0.00991595
0001.CSV	2684.54	0.00981734
0001.CSV	2688.4	0.00972134
0001.CSV	2692.25	0.00974587
0001.CSV	2696.11	0.00983371
0001.CSV	2699.97	0.00989198
0001.CSV	2703.82	0.00989103
0001.CSV	2707.68	0.00986134
0001.CSV	2711.54	0.00983663
0001.CSV	2715.4	0.00982151
0001.CSV	2719.25	0.00984598
0001.CSV	2723.11	0.00998856
0001.CSV	2726.97	0.0100163
0001.CSV	2730.82	0.00986629
0001.CSV	2734.68	0.00987581
0001.CSV	2738.54	0.00993178
0001.CSV	2742.4	0.00992964
0001.CSV	2746.25	0.0100363
0001.CSV	2750.11	0.00999429
0001.CSV	2753.97	0.00983971
0001.CSV	2757.82	0.00985341
0001.CSV	2761.68	0.00990703
0001.CSV	2765.54	0.00988337
0001.CSV	2769.39	0.00990879
0001.CSV	2773.25	0.0100537
0001.CSV	2777.11	0.0100556
0001.CSV	2780.97	0.00995239
0001.CSV	2784.82	0.00995958
0001.CSV	2788.68	0.0101618
0001.CSV	2792.54	0.0102472
0001.CSV	2796.39	0.0102494
0001.CSV	2800.25	0.0101986
0001.CSV	2804.11	0.0100664
0001.CSV	2807.97	0.0101164
0001.CSV	2811.82	0.0101511
0001.CSV	2815.68	0.0100322
0001.CSV	2819.54	0.0100756
0001.CSV	2823.39	0.0101309
0001.CSV	2827.25	0.0100688
0001.CSV	2831.11	0.0102043
0001.CSV	2834.97	0.0104316
0001.CSV	2838.82	0.0105523
0001.CSV	2842.68	0.0105661
0001.CSV	2846.54	0.0106675
0001.CSV	2850.39	0.0107435
0001.CSV	2854.25	0.0107149
0001.CSV	2858.11	0.0106455
0001.CSV	2861.97	0.010554
0001.CSV	2865.82	0.0104914
0001.CSV	2869.68	0.010581
0001.CSV	2873.54	0.0106314
0001.CSV	2877.39	0.0104383
0001.CSV	2881.25	0.0102965
0001.CSV	2885.11	0.0102717
0001.CSV	2888.97	0.0103175
0001.CSV	2892.82	0.0105475
0001.CSV	2896.68	0.0106526
0001.CSV	2900.54	0.0105969
0001.CSV	2904.39	0.0106699
0001.CSV	2908.25	0.0109115
0001.CSV	2912.11	0.0112236
0001.CSV	2915.97	0.0113524
0001.CSV	2919.82	0.0112625
0001.CSV	2923.68	0.0111154
0001.CSV	2927.54	0.0110365
0001.CSV	2931.39	0.0108093
0001.CSV	2935.25	0.010438
0001.CSV	2939.11	0.0103176
0001.CSV	2942.96	0.0106066
0001.CSV	2946.82	0.0107575
0001.CSV	2950.68	0.010648
0001.CSV	2954.54	0.0104772
0001.CSV	2958.39	0.0103521
0001.CSV	2962.25	0.0103642
0001.CSV	2966.11	0.0102579
0001.CSV	2969.96	0.0102971
0001.CSV	2973.82	0.0104251
0001.CSV	2977.68	0.0104361
0001.CSV	2981.53	0.0103334
0001.CSV	2985.39	0.0101249
0001.CSV	2989.25	0.0101575
0001.CSV	2993.11	0.0103327
0001.CSV	2996.96	0.010361
0001.CSV	3000.82	0.0102461
0001.CSV	3004.68	0.0100791
0001.CSV	3008.53	0.0101474
0001.CSV	3012.39	0.0103993
0001.CSV	3016.25	0.0104347
0001.CSV	3020.11	0.0103073
0001.CSV	3023.96	0.0102163
0001.CSV	3027.82	0.0101394
0001.CSV	3031.68	0.0102216
0001.CSV	3035.53	0.0103518
0001.CSV	3039.39	0.0103851
0001.CSV	3043.25	0.0104575
0001.CSV	3047.11	0.0104857
0001.CSV	3050.96	0.0103903
0001.CSV	3054.82	0.010214
0001.CSV	3058.68	0.010078
0001.CSV	3062.53	0.0100778
0001.CSV	3066.39	0.0102621
0001.CSV	3070.25	0.0102356
0001.CSV	3074.11	0.0101924
0001.CSV	3077.96	0.0103302
0001.CSV	3081.82	0.0103754
0001.CSV	3085.68	0.0103022
0001.CSV	3089.53	0.0102944
0001.CSV	3093.39	0.0101627
0001.CSV	3097.25	0.01006
0001.CSV	3101.11	0.0101237
0001.CSV	3104.96	0.0102227
0001.CSV	3108.82	0.0102883
0001.CSV	3112.68	0.0103349
0001.CSV	3116.53	0.0103527
0001.CSV	3120.39	0.0103001
0001.CSV	3124.25	0.0101251
0001.CSV	3128.11	0.00999555
0001.CSV	3131.96	0.0100073
0001.CSV	3135.82	0.0101495
0001.CSV	3139.68	0.010227
0001.CSV	3143.53	0.0100388
0001.CSV	3147.39	0.00997893
0001.CSV	3151.25	0.0101881
0001.CSV	3155.1	0.0101981
0001.CSV	3158.96	0.00982697
0001.CSV	3162.82	0.00966022
0001.CSV	3166.68	0.00972114
0001.CSV	3170.53	0.00968986
0001.CSV	3174.39	0.0096423
0001.CSV	3178.25	0.00967787
0001.CSV	3182.1	0.00969464
0001.CSV	3185.96	0.00975329
0001.CSV	3189.82	0.00982273
0001.CSV	3193.68	0.00979501
0001.CSV	3197.53	0.00981328
0001.CSV	3201.39	0.00985808
0001.CSV	3205.25	0.00979064
0001.CSV	3209.1	0.00970192
0001.CSV	3212.96	0.00977793
0001.CSV	3216.82	0.00988208
0001.CSV	3220.68	0.00989452
0001.CSV	3224.53	0.00986202
0001.CSV	3228.39	0.00996585
0001.CSV	3232.25	0.0101191
0001.CSV	3236.1	0.0100977
0001.CSV	3239.96	0.0100714
0001.CSV	3243.82	0.0101653
0001.CSV	3247.68	0.0101312
0001.CSV	3251.53	0.00990506
0001.CSV	3255.39	0.0099612
0001.CSV	3259.25	0.00996958
0001.CSV	3263.1	0.00981087
0001.CSV	3266.96	0.0099353
0001.CSV	3270.82	0.0101394
0001.CSV	3274.68	0.0101456
0001.CSV	3278.53	0.0100569
0001.CSV	3282.39	0.0100097
0001.CSV	3286.25	0.0100271
0001.CSV	3290.1	0.010212
0001.CSV	3293.96	0.0104076
0001.CSV	3297.82	0.0103311
0001.CSV	3301.67	0.0103503
0001.CSV	3305.53	0.0104959
0001.CSV	3309.39	0.0103434
0001.CSV	3313.25	0.010056
0001.CSV	3317.1	0.00995093
0001.CSV	3320.96	0.0100295
0001.CSV	3324.82	0.0101311
0001.CSV	3328.67	0.0100324
0001.CSV	3332.53	0.0100538
0001.CSV	3336.39	0.0103539
0001.CSV	3340.24	0.0104889
0001.CSV	3344.1	0.0103286
0001.CSV	3347.96	0.0102675
0001.CSV	3351.82	0.0102285
0001.CSV	3355.67	0.0100715
0001.CSV	3359.53	0.0101253
0001.CSV	3363.39	0.0102363
0001.CSV	3367.24	0.0104455
0001.CSV	3371.1	0.0104656
0001.CSV	3374.96	0.0102678
0001.CSV	3378.82	0.0100431
0001.CSV	3382.67	0.00992489
0001.CSV	3386.53	0.010141
0001.CSV	3390.39	0.0104769
0001.CSV	3394.24	0.0104931
0001.CSV	3398.1	0.0103626
0001.CSV	3401.96	0.0103354
0001.CSV	3405.82	0.0103185
0001.CSV	3409.67	0.0102797
0001.CSV	3413.53	0.010013
0001.CSV	3417.39	0.00971263
0001.CSV	3421.24	0.00963128
0001.CSV	3425.1	0.00980606
0001.CSV	3428.96	0.0101142
0001.CSV	3432.82	0.0103069
0001.CSV	3436.67	0.0102036
0001.CSV	3440.53	0.00981019
0001.CSV	3444.39	0.00954352
0001.CSV	3448.24	0.00952628
0001.CSV	3452.1	0.00951263
0001.CSV	3455.96	0.00957126
0001.CSV	3459.82	0.00966747
0001.CSV	3463.67	0.00986727
0001.CSV	3467.53	0.0100743
0001.CSV	3471.39	0.00992852
0001.CSV	3475.24	0.0097783
0001.CSV	3479.1	0.00975096
0001.CSV	3482.96	0.00973049
0001.CSV	3486.82	0.00981656
0001.CSV	3490.67	0.00984561
0001.CSV	3494.53	0.00984222
0001.CSV	3498.39	0.0098773
0001.CSV	3502.24	0.00987273
0001.CSV	3506.1	0.00951791
0001.CSV	3509.96	0.00951006
0001.CSV	3513.81	0.00975306
0001.CSV	3517.67	0.00952222
0001.CSV	3521.53	0.00946302
0001.CSV	3525.39	0.00945245
0001.CSV	3529.24	0.00952408
0001.CSV	3533.1	0.00970379
0001.CSV	3536.96	0.0097269
0001.CSV	3540.81	0.00959229
0001.CSV	3544.67	0.00971812
0001.CSV	3548.53	0.00972588
0001.CSV	3552.39	0.00955398
0001.CSV	3556.24	0.00950152
0001.CSV	3560.1	0.00943742
0001.CSV	3563.96	0.00907288
0001.CSV	3567.81	0.0093117
0001.CSV	3571.67	0.00960625
0001.CSV	3575.53	0.00931556
0001.CSV	3579.39	0.00937623
0001.CSV	3583.24	0.00955625
0001.CSV	3587.1	0.00975912
0001.CSV	3590.96	0.00973635
0001.CSV	3594.81	0.0095467
0001.CSV	3598.67	0.00965876
0001.CSV	3602.53	0.00976058
0001.CSV	3606.39	0.00945265
0001.CSV	3610.24	0.0091555
0001.CSV	3614.1	0.0090608
0001.CSV	3617.96	0.00927312
0001.CSV	3621.81	0.00960984
0001.CSV	3625.67	0.00929312
0001.CSV	3629.53	0.00910959
0001.CSV	3633.39	0.00940846
0001.CSV	3637.24	0.00942695
0001.CSV	3641.1	0.00924052
0001.CSV	3644.96	0.00880571
0001.CSV	3648.81	0.00908421
0001.CSV	3652.67	0.00984049
0001.CSV	3656.53	0.00985615
0001.CSV	3660.38	0.00984331
0001.CSV	3664.24	0.00941307
0001.CSV	3668.1	0.00885389
0001.CSV	3671.96	0.00862211
0001.CSV	3675.81	0.0090409
0001.CSV	3679.67	0.00952486
0001.CSV	3683.53	0.00943007
0001.CSV	3687.38	0.00930798
0001.CSV	3691.24	0.0096985
0001.CSV	3695.1	0.00983768
0001.CSV	3698.95	0.00957888
0001.CSV	3702.81	0.00928713
0001.CSV	3706.67	0.00868846
0001.CSV	3710.53	0.00847129
0001.CSV	3714.38	0.00917263
0001.CSV	3718.24	0.00906841
0001.CSV	3722.1	0.00879725
0001.CSV	3725.95	0.00880277
0001.CSV	3729.81	0.00866189
0001.CSV	3733.67	0.00854178
0001.CSV	3737.53	0.00901925
0001.CSV	3741.38	0.00878238
0001.CSV	3745.24	0.00829604
0001.CSV	3749.1	0.00819197
0001.CSV	3752.95	0.0089054
0001.CSV	3756.81	0.00925514
0001.CSV	3760.67	0.00932311
0001.CSV	3764.53	0.00904625
0001.CSV	3768.38	0.00905613
0001.CSV	3772.24	0.00931116
0001.CSV	3776.1	0.00924126
0001.CSV	3779.95	0.00925149
0001.CSV	3783.81	0.00925717
0001.CSV	3787.67	0.00929529
0001.CSV	3791.53	0.00907193
0001.CSV	3795.38	0.0086386
0001.CSV	3799.24	0.00844359
0001.CSV	3803.1	0.00875387
0001.CSV	3806.95	0.00922434
0001.CSV	3810.81	0.00918122
0001.CSV	3814.67	0.00878687
0001.CSV	3818.53	0.00868515
0001.CSV	3822.38	0.00909392
0001.CSV	3826.24	0.00916251
0001.CSV	3830.1	0.00896151
0001.CSV	3833.95	0.00871141
0001.CSV	3837.81	0.0086698
0001.CSV	3841.67	0.00923155
0001.CSV	3845.53	0.00928706
0001.CSV	3849.38	0.00863029
0001.CSV	3853.24	0.00863161
0001.CSV	3857.1	0.00927728
0001.CSV	3860.95	0.00885897
0001.CSV	3864.81	0.00868785
0001.CSV	3868.67	0.00883019
0001.CSV	3872.52	0.00924079
0001.CSV	3876.38	0.00931032
0001.CSV	3880.24	0.00916945
0001.CSV	3884.1	0.00944209
0001.CSV	3887.95	0.00944964
0001.CSV	3891.81	0.00933544
0001.CSV	3895.67	0.00911097
0001.CSV	3899.52	0.00880145
0001.CSV	3903.38	0.00930531
0001.CSV	3907.24	0.00959101
0001.CSV	3911.1	0.009355
0001.CSV	3914.95	0.009206
0001.CSV	3918.81	0.00933012
0001.CSV	3922.67	0.00926127
0001.CSV	3926.52	0.00917513
0001.CSV	3930.38	0.00929566
0001.CSV	3934.24	0.00956811
0001.CSV	3938.09	0.00946603
0001.CSV	3941.95	0.00938649
0001.CSV	3945.81	0.00948544
0001.CSV	3949.67	0.009464
0001.CSV	3953.52	0.00933723
0001.CSV	3957.38	0.00930284
0001.CSV	3961.24	0.00926432
0001.CSV	3965.09	0.00920048
0001.CSV	3968.95	0.00926973
0001.CSV	3972.81	0.0094687
0001.CSV	3976.67	0.00948984
0001.CSV	3980.52	0.0094196
0001.CSV	3984.38	0.00942045
0001.CSV	3988.24	0.00936134
0001.CSV	3992.09	0.00941507
0001.CSV	3995.95	0.00949627
0001.CSV	3999.81	0.00945265
0002.CSV	674.992	0.0209023
0002.CSV	678.849	0.0222224
0002.CSV	682.706	0.0228177
0002.CSV	686.563	0.0239339
0002.CSV	690.42	0.0251686
0002.CSV	694.277	0.0308368
0002.CSV	698.134	0.0378495
0002.CSV	701.991	0.0363488
0002.CSV	705.849	0.0318579
0002.CSV	709.706	0.0383781
0002.CSV	713.563	0.0404932
0002.CSV	717.42	0.0288108
0002.CSV	721.277	0.0200032
0002.CSV	725.134	0.018478
0002.CSV	728.991	0.0181231
0002.CSV	732.848	0.018805
0002.CSV	736.705	0.0193161
0002.CSV	740.562	0.0199217
0002.CSV	744.42	0.0200859
0002.CSV	748.277	0.0203774
0002.CSV	752.134	0.0201786
0002.CSV	755.991	0.0202408
0002.CSV	759.848	0.0198723
0002.CSV	763.705	0.0203051
0002.CSV	767.562	0.0202662
0002.CSV	771.419	0.0200992
0002.CSV	775.276	0.0197397
0002.CSV	779.133	0.0197895
0002.CSV	782.99	0.01951
0002.CSV	786.848	0.019707
0002.CSV	790.705	0.0198428
0002.CSV	794.562	0.0202463
0002.CSV	798.419	0.0201247
0002.CSV	802.276	0.0205537
0002.CSV	806.133	0.0210664
0002.CSV	809.99	0.0218384
0002.CSV	813.847	0.0225236
0002.CSV	817.704	0.0239006
0002.CSV	821.562	0.0255022
0002.CSV	825.419	0.0279084
0002.CSV	829.276	0.0305718
0002.CSV	833.133	0.0346184
0002.CSV	836.99	0.0412046
0002.CSV	840.847	0.0515799
0002.CSV	844.704	0.0623594
0002.CSV	848.561	0.0783761
0002.CSV	852.418	0.0909447
0002.CSV	856.275	0.0816967
0002.CSV	860.132	0.0597775
0002.CSV	863.99	0.0408811
0002.CSV	867.847	0.0281145
0002.CSV	871.704	0.0213834
0002.CSV	875.561	0.0185347
0002.CSV	879.418	0.0171341
0002.CSV	883.275	0.0159175
0002.CSV	887.132	0.0154113
0002.CSV	890.989	0.0152062
0002.CSV	894.846	0.0152737
0002.CSV	898.703	0.0154321
0002.CSV	902.561	0.0158683
0002.CSV	906.418	0.0160063
0002.CSV	910.275	0.0160802
0002.CSV	914.132	0.015879
0002.CSV	917.989	0.015943
0002.CSV	921.846	0.0160962
0002.CSV	925.703	0.0165005
0002.CSV	929.56	0.0166017
0002.CSV	933.417	0.0167907
0002.CSV	937.274	0.0168596
0002.CSV	941.131	0.0170521
0002.CSV	944.989	0.017077
0002.CSV	948.846	0.0172881
0002.CSV	952.703	0.0174297
0002.CSV	956.56	0.0177859
0002.CSV	960.417	0.0180453
0002.CSV	964.274	0.0183184
0002.CSV	968.131	0.0184024
0002.CSV	971.988	0.0187372
0002.CSV	975.845	0.0191491
0002.CSV	979.702	0.0196143
0002.CSV	983.559	0.0197801
0002.CSV	987.417	0.0199985
0002.CSV	991.274	0.0201063
0002.CSV	995.131	0.0203359
0002.CSV	998.988	0.0203198
0002.CSV	1002.85	0.0205775
0002.CSV	1006.7	0.0207174
0002.CSV	1010.56	0.0208981
0002.CSV	1014.42	0.0209759
0002.CSV	1018.27	0.021299
0002.CSV	1022.13	0.0215258
0002.CSV	1025.99	0.0220041
0002.CSV	1029.85	0.022289
0002.CSV	1033.7	0.0226333
0002.CSV	1037.56	0.0229135
0002.CSV	1041.42	0.0234341
0002.CSV	1045.27	0.0237795
0002.CSV	1049.13	0.0243248
0002.CSV	1052.99	0.0248655
0002.CSV	1056.84	0.0258736
0002.CSV	1060.7	0.0267998
0002.CSV	1064.56	0.0276842
0002.CSV	1068.42	0.0282453
0002.CSV	1072.27	0.0288045
0002.CSV	1076.13	0.0296492
0002.CSV	1079.99	0.0323377
0002.CSV	1083.84	0.0325696
0002.CSV	1087.7	0.0282593
0002.CSV	1091.56	0.0253796
0002.CSV	1095.41	0.0251873
0002.CSV	1099.27	0.0253412
0002.CSV	1103.13	0.0256083
0002.CSV	1106.99	0.0260123
0002.CSV	1110.84	0.0266756
0002.CSV	1114.7	0.0270324
0002.CSV	1118.56	0.0272392
0002.CSV	1122.41	0.027148
0002.CSV	1126.27	0.0271118
0002.CSV	1130.13	0.0270296
0002.CSV	1133.99	0.0270583
0002.CSV	1137.84	0.0269792
0002.CSV	1141.7	0.0270086
0002.CSV	1145.56	0.0269502
0002.CSV	1149.41	0.0271264
0002.CSV	1153.27	0.0271712
0002.CSV	1157.13	0.0272181
0002.CSV	1160.99	0.0271768
0002.CSV	1164.84	0.0271383
0002.CSV	1168.7	0.0268658
0002.CSV	1172.56	0.0266981
0002.CSV	1176.41	0.0264298
0002.CSV	1180.27	0.0262015
0002.CSV	1184.13	0.0258311
0002.CSV	1187.99	0.0256108
0002.CSV	1191.84	0.0253798
0002.CSV	1195.7	0.0253297
0002.CSV	1199.56	0.0252138
0002.CSV	1203.41	0.0252439
0002.CSV	1207.27	0.0252269
0002.CSV	1211.13	0.0254632
0002.CSV	1214.98	0.0257374
0002.CSV	1218.84	0.0261187
0002.CSV	1222.7	0.0264717
0002.CSV	1226.56	0.0269917
0002.CSV	1230.41	0.0274593
0002.CSV	1234.27	0.0281541
0002.CSV	1238.13	0.0288368
0002.CSV	1241.98	0.0295725
0002.CSV	1245.84	0.0302777
0002.CSV	1249.7	0.0310568
0002.CSV	1253.56	0.0315686
0002.CSV	1257.41	0.0320906
0002.CSV	1261.27	0.0323977
0002.CSV	1265.13	0.0327933
0002.CSV	1268.98	0.0331346
0002.CSV	1272.84	0.0336649
0002.CSV	1276.7	0.0340759
0002.CSV	1280.56	0.0344814
0002.CSV	1284.41	0.0345864
0002.CSV	1288.27	0.0346837
0002.CSV	1292.13	0.0345696
0002.CSV	1295.98	0.0345374
0002.CSV	1299.84	0.0344567
0002.CSV	1303.7	0.0345998
0002.CSV	1307.56	0.0347776
0002.CSV	1311.41	0.0352354
0002.CSV	1315.27	0.0357353
0002.CSV	1319.13	0.036357
0002.CSV	1322.98	0.0367905
0002.CSV	1326.84	0.0373617
0002.CSV	1330.7	0.0380253
0002.CSV	1334.56	0.0389395
0002.CSV	1338.41	0.0400817
0002.CSV	1342.27	0.0417119
0002.CSV	1346.13	0.0429393
0002.CSV	1349.98	0.0444082
0002.CSV	1353.84	0.0458899
0002.CSV	1357.7	0.0474511
0002.CSV	1361.56	0.0491586
0002.CSV	1365.41	0.0513824
0002.CSV	1369.27	0.0530817
0002.CSV	1373.13	0.0553476
0002.CSV	1376.98	0.0579661
0002.CSV	1380.84	0.0600626
0002.CSV	1384.7	0.0617928
0002.CSV	1388.56	0.0643899
0002.CSV	1392.41	0.0664248
0002.CSV	1396.27	0.0692008
0002.CSV	1400.13	0.0721198
0002.CSV	1403.98	0.074794
0002.CSV	1407.84	0.0773727
0002.CSV	1411.7	0.0797568
0002.CSV	1415.55	0.0814133
0002.CSV	1419.41	0.0838567
0002.CSV	1423.27	0.0857803
0002.CSV	1427.12	0.0876158
0002.CSV	1430.98	0.0895112
0002.CSV	1434.84	0.0924496
0002.CSV	1438.7	0.0960962
0002.CSV	1442.55	0.0987764
0002.CSV	1446.41	0.0999735
0002.CSV	1450.27	0.100265
0002.CSV	1454.12	0.099067
0002.CSV	1457.98	0.0974074
0002.CSV	1461.84	0.0957642
0002.CSV	1465.7	0.0945332
0002.CSV	1469.55	0.0921795
0002.CSV	1473.41	0.0879173
0002.CSV	1477.27	0.0826051
0002.CSV	1481.12	0.0792336
0002.CSV	1484.98	0.0759699
0002.CSV	1488.84	0.0723445
0002.CSV	1492.7	0.0685658
0002.CSV	1496.55	0.0656826
0002.CSV	1500.41	0.0622504
0002.CSV	1504.27	0.0601563
0002.CSV	1508.12	0.0560796
0002.CSV	1511.98	0.0532046
0002.CSV	1515.84	0.0509798
0002.CSV	1519.7	0.048051
0002.CSV	1523.55	0.044421
0002.CSV	1527.41	0.0420355
0002.CSV	1531.27	0.0399159
0002.CSV	1535.12	0.0381575
0002.CSV	1538.98	0.0362518
0002.CSV	1542.84	0.0331839
0002.CSV	1546.7	0.0305696
0002.CSV	1550.55	0.0286199
0002.CSV	1554.41	0.0267012
0002.CSV	1558.27	0.0247055
0002.CSV	1562.12	0.0229483
0002.CSV	1565.98	0.0222219
0002.CSV	1569.84	0.0213062
0002.CSV	1573.69	0.0202821
0002.CSV	1577.55	0.0185924
0002.CSV	1581.41	0.0168542
0002.CSV	1585.27	0.0152076
0002.CSV	1589.12	0.013944
0002.CSV	1592.98	0.0130766
0002.CSV	1596.84	0.0125851
0002.CSV	1600.69	0.0122121
0002.CSV	1604.55	0.0120486
0002.CSV	1608.41	0.011784
0002.CSV	1612.27	0.0114372
0002.CSV	1616.12	0.011092
0002.CSV	1619.98	0.010946
0002.CSV	1623.84	0.0106077
0002.CSV	1627.69	0.0103426
0002.CSV	1631.55	0.00994707
0002.CSV	1635.41	0.00972103
0002.CSV	1639.27	0.0095592
0002.CSV	1643.12	0.00926445
0002.CSV	1646.98	0.00898478
0002.CSV	1650.84	0.00910901
0002.CSV	1654.69	0.00924668
0002.CSV	1658.55	0.00904246
0002.CSV	1662.41	0.00875709
0002.CSV	1666.27	0.00858757
0002.CSV	1670.12	0.00850356
0002.CSV	1673.98	0.00862069
0002.CSV	1677.84	0.00834549
0002.CSV	1681.69	0.00817823
0002.CSV	1685.55	0.00836599
0002.CSV	1689.41	0.00837511
0002.CSV	1693.27	0.00800836
0002.CSV	1697.12	0.00793627
0002.CSV	1700.98	0.0084717
0002.CSV	1704.84	0.00897203
0002.CSV	1708.69	0.0092105
0002.CSV	1712.55	0.00940904
0002.CSV	1716.41	0.0103771
0002.CSV	1720.27	0.0116318
0002.CSV	1724.12	0.0118434
0002.CSV	1727.98	0.0118635
0002.CSV	1731.84	0.0117295
0002.CSV	1735.69	0.0115129
0002.CSV	1739.55	0.0108831
0002.CSV	1743.41	0.0100165
0002.CSV	1747.27	0.00904202
0002.CSV	1751.12	0.0081763
0002.CSV	1754.98	0.00758577
0002.CSV	1758.84	0.00720779
0002.CSV	1762.69	0.0070256
0002.CSV	1766.55	0.00686969
0002.CSV	1770.41	0.00691523
0002.CSV	1774.26	0.00765274
0002.CSV	1778.12	0.00843139
0002.CSV	1781.98	0.00934474
0002.CSV	1785.84	0.00983416
0002.CSV	1789.69	0.00967933
0002.CSV	1793.55	0.00885714
0002.CSV	1797.41	0.00803276
0002.CSV	1801.26	0.00734866
0002.CSV	1805.12	0.00685626
0002.CSV	1808.98	0.00651543
0002.CSV	1812.84	0.00643058
0002.CSV	1816.69	0.00632937
0002.CSV	1820.55	0.00625252
0002.CSV	1824.41	0.00622775
0002.CSV	1828.26	0.00636447
0002.CSV	1832.12	0.00640378
0002.CSV	1835.98	0.00633149
0002.CSV	1839.84	0.00622839
0002.CSV	1843.69	0.00629568
0002.CSV	1847.55	0.00640385
0002.CSV	1851.41	0.0063361
0002.CSV	1855.26	0.00623709
0002.CSV	1859.12	0.00627609
0002.CSV	1862.98	0.00623807
0002.CSV	1866.84	0.00631576
0002.CSV	1870.69	0.00650662
0002.CSV	1874.55	0.00647813
0002.CSV	1878.41	0.0064063
0002.CSV	1882.26	0.00636874
0002.CSV	1886.12	0.00631125
0002.CSV	1889.98	0.006329
0002.CSV	1893.83	0.00635818
0002.CSV	1897.69	0.00642735
0002.CSV	1901.55	0.00638364
0002.CSV	1905.41	0.00633465
0002.CSV	1909.26	0.00635334
0002.CSV	1913.12	0.00639141
0002.CSV	1916.98	0.00638028
0002.CSV	1920.83	0.00643613
0002.CSV	1924.69	0.00642883
0002.CSV	1928.55	0.00643354
0002.CSV	1932.4	0.00642537
0002.CSV	1936.26	0.00640876
0002.CSV	1940.12	0.00638206
0002.CSV	1943.98	0.00652152
0002.CSV	1947.83	0.00655237
0002.CSV	1951.69	0.00653461
0002.CSV	1955.55	0.00653656
0002.CSV	1959.4	0.0065522
0002.CSV	1963.26	0.00650386
0002.CSV	1967.12	0.00656922
0002.CSV	1970.98	0.00664902
0002.CSV	1974.83	0.00666614
0002.CSV	1978.69	0.00663324
0002.CSV	1982.55	0.00664081
0002.CSV	1986.4	0.00661063
0002.CSV	1990.26	0.00663324
0002.CSV	1994.12	0.00668939
0002.CSV	1997.98	0.00671742
0002.CSV	2001.83	0.0066938
0002.CSV	2005.69	0.00671641
0002.CSV	2009.55	0.00675596
0002.CSV	2013.4	0.00676891
0002.CSV	2017.26	0.00672998
0002.CSV	2021.12	0.00677039
0002.CSV	2024.97	0.00679621
0002.CSV	2028.83	0.00683764
0002.CSV	2032.69	0.00683815
0002.CSV	2036.55	0.0068639
0002.CSV	2040.4	0.00686545
0002.CSV	2044.26	0.00689365
0002.CSV	2048.12	0.00690119
0002.CSV	2051.97	0.00692665
0002.CSV	2055.83	0.00690547
0002.CSV	2059.69	0.00689611
0002.CSV	2063.55	0.00694284
0002.CSV	2067.4	0.00702944
0002.CSV	2071.26	0.00700867
0002.CSV	2075.12	0.00701668
0002.CSV	2078.97	0.00705436
0002.CSV	2082.83	0.00713196
0002.CSV	2086.69	0.00716255
0002.CSV	2090.55	0.007158
0002.CSV	2094.4	0.00711596
0002.CSV	2098.26	0.0071294
0002.CSV	2102.12	0.00715385
0002.CSV	2105.97	0.00720533
0002.CSV	2109.83	0.00726729
0002.CSV	2113.69	0.00731641
0002.CSV	2117.55	0.00731992
0002.CSV	2121.4	0.00734573
0002.CSV	2125.26	0.00733208
0002.CSV	2129.12	0.00734135
0002.CSV	2132.97	0.00735008
0002.CSV	2136.83	0.00736854
0002.CSV	2140.69	0.00740767
0002.CSV	2144.55	0.00747006
0002.CSV	2148.4	0.0074969
0002.CSV	2152.26	0.0075242
0002.CSV	2156.12	0.00755583
0002.CSV	2159.97	0.00759929
0002.CSV	2163.83	0.00756851
0002.CSV	2167.69	0.00755451
0002.CSV	2171.55	0.00758981
0002.CSV	2175.4	0.00763675
0002.CSV	2179.26	0.00769897
0002.CSV	2183.12	0.00774215
0002.CSV	2186.97	0.00773162
0002.CSV	2190.83	0.00769628
0002.CSV	2194.69	0.0076755
0002.CSV	2198.55	0.00769567
0002.CSV	2202.4	0.00771341
0002.CSV	2206.26	0.00775925
0002.CSV	2210.12	0.00774677
0002.CSV	2213.97	0.00774238
0002.CSV	2217.83	0.00778357
0002.CSV	2221.69	0.00784399
0002.CSV	2225.54	0.00783802
0002.CSV	2229.4	0.00782078
0002.CSV	2233.26	0.00778259
0002.CSV	2237.12	0.00776745
0002.CSV	2240.97	0.00778384
0002.CSV	2244.83	0.00779949
0002.CSV	2248.69	0.0077807
0002.CSV	2252.54	0.00780367
0002.CSV	2256.4	0.00780259
0002.CSV	2260.26	0.00781238
0002.CSV	2264.11	0.0077971
0002.CSV	2267.97	0.00777706
0002.CSV	2271.83	0.00780158
0002.CSV	2275.69	0.00787955
0002.CSV	2279.54	0.00787965
0002.CSV	2283.4	0.00784011
0002.CSV	2287.26	0.007867
0002.CSV	2291.11	0.00796749
0002.CSV	2294.97	0.00797501
0002.CSV	2298.83	0.00794386
0002.CSV	2302.69	0.00789993
0002.CSV	2306.54	0.00792558
0002.CSV	2310.4	0.00800603
0002.CSV	2314.26	0.00789612
0002.CSV	2318.11	0.00760856
0002.CSV	2321.97	0.0073462
0002.CSV	2325.83	0.00714166
0002.CSV	2329.69	0.00692786
0002.CSV	2333.54	0.00671662
0002.CSV	2337.4	0.00669898
0002.CSV	2341.26	0.00673644
0002.CSV	2345.11	0.0073552
0002.CSV	2348.97	0.00756753
0002.CSV	2352.83	0.00701311
0002.CSV	2356.69	0.0052022
0002.CSV	2360.54	0.00434369
0002.CSV	2364.4	0.00567712
0002.CSV	2368.26	0.00708124
0002.CSV	2372.11	0.00797208
0002.CSV	2375.97	0.00842727
0002.CSV	2379.83	0.00858263
0002.CSV	2383.69	0.00853417
0002.CSV	2387.54	0.00836167
0002.CSV	2391.4	0.00827588
0002.CSV	2395.26	0.00828723
0002.CSV	2399.11	0.0083263
0002.CSV	2402.97	0.00830185
0002.CSV	2406.83	0.00826099
0002.CSV	2410.68	0.00825596
0002.CSV	2414.54	0.00832283
0002.CSV	2418.4	0.00835951
0002.CSV	2422.26	0.00838626
0002.CSV	2426.11	0.00844261
0002.CSV	2429.97	0.00845862
0002.CSV	2433.83	0.00841487
0002.CSV	2437.68	0.00839633
0002.CSV	2441.54	0.0083844
0002.CSV	2445.4	0.00840562
0002.CSV	2449.26	0.00846474
0002.CSV	2453.11	0.00849173
0002.CSV	2456.97	0.00846383
0002.CSV	2460.83	0.00849934
0002.CSV	2464.68	0.00859467
0002.CSV	2468.54	0.0086647
0002.CSV	2472.4	0.00868907
0002.CSV	2476.26	0.00876696
0002.CSV	2480.11	0.00887581
0002.CSV	2483.97	0.00907612
0002.CSV	2487.83	0.0092851
0002.CSV	2491.68	0.00944835
0002.CSV	2495.54	0.00954
0002.CSV	2499.4	0.00958237
0002.CSV	2503.26	0.00961777
0002.CSV	2507.11	0.00966422
0002.CSV	2510.97	0.00968576
0002.CSV	2514.83	0.00972032
0002.CSV	2518.68	0.00982819
0002.CSV	2522.54	0.00990028
0002.CSV	2526.4	0.00984463
0002.CSV	2530.26	0.00975011
0002.CSV	2534.11	0.00960198
0002.CSV	2537.97	0.00947199
0002.CSV	2541.83	0.00945546
0002.CSV	2545.68	0.00948293
0002.CSV	2549.54	0.00943992
0002.CSV	2553.4	0.00941283
0002.CSV	2557.26	0.00933841
0002.CSV	2561.11	0.00924133
0002.CSV	2564.97	0.00920285
0002.CSV	2568.83	0.00915073
0002.CSV	2572.68	0.00909189
0002.CSV	2576.54	0.00908164
0002.CSV	2580.4	0.0090675
0002.CSV	2584.25	0.00905004
0002.CSV	2588.11	0.00900694
0002.CSV	2591.97	0.00897518
0002.CSV	2595.83	0.00896273
0002.CSV	2599.68	0.00894551
0002.CSV	2603.54	0.00892731
0002.CSV	2607.4	0.00894696
0002.CSV	2611.25	0.00899053
0002.CSV	2615.11	0.00899192
0002.CSV	2618.97	0.009034
0002.CSV	2622.82	0.00912468
0002.CSV	2626.68	0.00910847
0002.CSV	2630.54	0.00901874
0002.CSV	2634.4	0.00905203
0002.CSV	2638.25	0.00912089
0002.CSV	2642.11	0.00903366
0002.CSV	2645.97	0.00895732
0002.CSV	2649.82	0.00894818
0002.CSV	2653.68	0.00893952
0002.CSV	2657.54	0.00891595
0002.CSV	2661.4	0.00890665
0002.CSV	2665.25	0.0088686
0002.CSV	2669.11	0.00890242
0002.CSV	2672.97	0.00899706
0002.CSV	2676.82	0.00908089
0002.CSV	2680.68	0.00909839
0002.CSV	2684.54	0.00895014
0002.CSV	2688.4	0.00884879
0002.CSV	2692.25	0.00888108
0002.CSV	2696.11	0.00895579
0002.CSV	2699.97	0.00905018
0002.CSV	2703.82	0.00903664
0002.CSV	2707.68	0.00896618
0002.CSV	2711.54	0.00895481
0002.CSV	2715.4	0.00899902
0002.CSV	2719.25	0.00907809
0002.CSV	2723.11	0.00925941
0002.CSV	2726.97	0.00930327
0002.CSV	2730.82	0.00916305
0002.CSV	2734.68	0.00915544
0002.CSV	2738.54	0.009175
0002.CSV	2742.4	0.00918265
0002.CSV	2746.25	0.00934715
0002.CSV	2750.11	0.00937203
0002.CSV	2753.97	0.00922725
0002.CSV	2757.82	0.00916552
0002.CSV	2761.68	0.00912211
0002.CSV	2765.54	0.00912535
0002.CSV	2769.39	0.00927437
0002.CSV	2773.25	0.00945679
0002.CSV	2777.11	0.00948141
0002.CSV	2780.97	0.00940786
0002.CSV	2784.82	0.00943643
0002.CSV	2788.68	0.00962583
0002.CSV	2792.54	0.00973154
0002.CSV	2796.39	0.00977183
0002.CSV	2800.25	0.00977098
0002.CSV	2804.11	0.00965239
0002.CSV	2807.97	0.00972249
0002.CSV	2811.82	0.00977715
0002.CSV	2815.68	0.00970697
0002.CSV	2819.54	0.00982551
0002.CSV	2823.39	0.00999189
0002.CSV	2827.25	0.0100813
0002.CSV	2831.11	0.010344
0002.CSV	2834.97	0.0107268
0002.CSV	2838.82	0.0111832
0002.CSV	2842.68	0.0118892
0002.CSV	2846.54	0.0131511
0002.CSV	2850.39	0.0140904
0002.CSV	2854.25	0.0139398
0002.CSV	2858.11	0.0133406
0002.CSV	2861.97	0.0127215
0002.CSV	2865.82	0.0123238
0002.CSV	2869.68	0.0123364
0002.CSV	2873.54	0.0122887
0002.CSV	2877.39	0.01195
0002.CSV	2881.25	0.0117693
0002.CSV	2885.11	0.0118283
0002.CSV	2888.97	0.01207
0002.CSV	2892.82	0.0125358
0002.CSV	2896.68	0.0129218
0002.CSV	2900.54	0.0131591
0002.CSV	2904.39	0.0136597
0002.CSV	2908.25	0.014606
0002.CSV	2912.11	0.0161067
0002.CSV	2915.97	0.0175528
0002.CSV	2919.82	0.0181201
0002.CSV	2923.68	0.0178314
0002.CSV	2927.54	0.0171519
0002.CSV	2931.39	0.0160947
0002.CSV	2935.25	0.014857
0002.CSV	2939.11	0.014007
0002.CSV	2942.96	0.013728
0002.CSV	2946.82	0.0135851
0002.CSV	2950.68	0.0134805
0002.CSV	2954.54	0.0134207
0002.CSV	2958.39	0.0131982
0002.CSV	2962.25	0.012864
0002.CSV	2966.11	0.0122272
0002.CSV	2969.96	0.0117955
0002.CSV	2973.82	0.0116995
0002.CSV	2977.68	0.01154
0002.CSV	2981.53	0.0112092
0002.CSV	2985.39	0.0108496
0002.CSV	2989.25	0.0108538
0002.CSV	2993.11	0.011004
0002.CSV	2996.96	0.0109113
0002.CSV	3000.82	0.0107123
0002.CSV	3004.68	0.0104842
0002.CSV	3008.53	0.0104594
0002.CSV	3012.39	0.010679
0002.CSV	3016.25	0.0106923
0002.CSV	3020.11	0.0105007
0002.CSV	3023.96	0.0103958
0002.CSV	3027.82	0.0103768
0002.CSV	3031.68	0.010519
0002.CSV	3035.53	0.0106308
0002.CSV	3039.39	0.010591
0002.CSV	3043.25	0.0105412
0002.CSV	3047.11	0.0105151
0002.CSV	3050.96	0.0105002
0002.CSV	3054.82	0.010302
0002.CSV	3058.68	0.0101526
0002.CSV	3062.53	0.0102706
0002.CSV	3066.39	0.0104469
0002.CSV	3070.25	0.0103778
0002.CSV	3074.11	0.0103473
0002.CSV	3077.96	0.0105156
0002.CSV	3081.82	0.0106052
0002.CSV	3085.68	0.0105589
0002.CSV	3089.53	0.0105497
0002.CSV	3093.39	0.0104126
0002.CSV	3097.25	0.0103047
0002.CSV	3101.11	0.0103688
0002.CSV	3104.96	0.0104973
0002.CSV	3108.82	0.0106331
0002.CSV	3112.68	0.0105941
0002.CSV	3116.53	0.0105693
0002.CSV	3120.39	0.0105636
0002.CSV	3124.25	0.0104656
0002.CSV	3128.11	0.0104011
0002.CSV	3131.96	0.0103797
0002.CSV	3135.82	0.0104666
0002.CSV	3139.68	0.0106248
0002.CSV	3143.53	0.0105848
0002.CSV	3147.39	0.0105425
0002.CSV	3151.25	0.0106839
0002.CSV	3155.1	0.010641
0002.CSV	3158.96	0.0103533
0002.CSV	3162.82	0.0103196
0002.CSV	3166.68	0.0103975
0002.CSV	3170.53	0.0103577
0002.CSV	3174.39	0.0103789
0002.CSV	3178.25	0.0104933
0002.CSV	3182.1	0.0105277
0002.CSV	3185.96	0.0105319
0002.CSV	3189.82	0.0105583
0002.CSV	3193.68	0.0104941
0002.CSV	3197.53	0.0104688
0002.CSV	3201.39	0.0105456
0002.CSV	3205.25	0.0105556
0002.CSV	3209.1	0.0105134
0002.CSV	3212.96	0.010555
0002.CSV	3216.82	0.0106269
0002.CSV	3220.68	0.0106473
0002.CSV	3224.53	0.0107384
0002.CSV	3228.39	0.010951
0002.CSV	3232.25	0.0111307
0002.CSV	3236.1	0.0110831
0002.CSV	3239.96	0.0110238
0002.CSV	3243.82	0.0111608
0002.CSV	3247.68	0.0111872
0002.CSV	3251.53	0.0110556
0002.CSV	3255.39	0.0110846
0002.CSV	3259.25	0.01107
0002.CSV	3263.1	0.0109709
0002.CSV	3266.96	0.0111011
0002.CSV	3270.82	0.0113397
0002.CSV	3274.68	0.0114039
0002.CSV	3278.53	0.0113305
0002.CSV	3282.39	0.011235
0002.CSV	3286.25	0.0112908
0002.CSV	3290.1	0.011437
0002.CSV	3293.96	0.0115547
0002.CSV	3297.82	0.0115544
0002.CSV	3301.67	0.0116333
0002.CSV	3305.53	0.0118012
0002.CSV	3309.39	0.0117357
0002.CSV	3313.25	0.0114632
0002.CSV	3317.1	0.0113149
0002.CSV	3320.96	0.011391
0002.CSV	3324.82	0.0114666
0002.CSV	3328.67	0.0114143
0002.CSV	3332.53	0.011491
0002.CSV	3336.39	0.011721
0002.CSV	3340.24	0.0117729
0002.CSV	3344.1	0.0116594
0002.CSV	3347.96	0.0116734
0002.CSV	3351.82	0.0117069
0002.CSV	3355.67	0.0115895
0002.CSV	3359.53	0.0116145
0002.CSV	3363.39	0.0117071
0002.CSV	3367.24	0.0118329
0002.CSV	3371.1	0.0118417
0002.CSV	3374.96	0.0117297
0002.CSV	3378.82	0.0115894
0002.CSV	3382.67	0.011396
0002.CSV	3386.53	0.0115297
0002.CSV	3390.39	0.0118104
0002.CSV	3394.24	0.0117693
0002.CSV	3398.1	0.011676
0002.CSV	3401.96	0.0116636
0002.CSV	3405.82	0.01169
0002.CSV	3409.67	0.0117491
0002.CSV	3413.53	0.0115017
0002.CSV	3417.39	0.0111673
0002.CSV	3421.24	0.0110824
0002.CSV	3425.1	0.0111722
0002.CSV	3428.96	0.0113819
0002.CSV	3432.82	0.011612
0002.CSV	3436.67	0.0114807
0002.CSV	3440.53	0.0110106
0002.CSV	3444.39	0.0107348
0002.CSV	3448.24	0.0107417
0002.CSV	3452.1	0.0106485
0002.CSV	3455.96	0.0106855
0002.CSV	3459.82	0.0108543
0002.CSV	3463.67	0.0110416
0002.CSV	3467.53	0.0112034
0002.CSV	3471.39	0.01101
0002.CSV	3475.24	0.010787
0002.CSV	3479.1	0.0107664
0002.CSV	3482.96	0.010756
0002.CSV	3486.82	0.0108218
0002.CSV	3490.67	0.0108723
0002.CSV	3494.53	0.0108385
0002.CSV	3498.39	0.0107206
0002.CSV	3502.24	0.010633
0002.CSV	3506.1	0.0104588
0002.CSV	3509.96	0.010435
0002.CSV	3513.81	0.0105029
0002.CSV	3517.67	0.0103707
0002.CSV	3521.53	0.010374
0002.CSV	3525.39	0.0101667
0002.CSV	3529.24	0.00995825
0002.CSV	3533.1	0.0100181
0002.CSV	3536.96	0.0101258
0002.CSV	3540.81	0.0100943
0002.CSV	3544.67	0.0102325
0002.CSV	3548.53	0.0103263
0002.CSV	3552.39	0.0101723
0002.CSV	3556.24	0.0100339
0002.CSV	3560.1	0.00987191
0002.CSV	3563.96	0.00950288
0002.CSV	3567.81	0.00969007
0002.CSV	3571.67	0.00978437
0002.CSV	3575.53	0.00946881
0002.CSV	3579.39	0.0095968
0002.CSV	3583.24	0.00975648
0002.CSV	3587.1	0.00982775
0002.CSV	3590.96	0.00973181
0002.CSV	3594.81	0.00955493
0002.CSV	3598.67	0.00968627
0002.CSV	3602.53	0.00972263
0002.CSV	3606.39	0.00940372
0002.CSV	3610.24	0.0090792
0002.CSV	3614.1	0.00884121
0002.CSV	3617.96	0.00911794
0002.CSV	3621.81	0.00953922
0002.CSV	3625.67	0.00917195
0002.CSV	3629.53	0.00898915
0002.CSV	3633.39	0.00927291
0002.CSV	3637.24	0.00926137
0002.CSV	3641.1	0.00906679
0002.CSV	3644.96	0.0086363
0002.CSV	3648.81	0.00892031
0002.CSV	3652.67	0.00959673
0002.CSV	3656.53	0.0095884
0002.CSV	3660.38	0.00956608
0002.CSV	3664.24	0.00909396
0002.CSV	3668.1	0.00855854
0002.CSV	3671.96	0.00837407
0002.CSV	3675.81	0.00873035
0002.CSV	3679.67	0.00917006
0002.CSV	3683.53	0.00911196
0002.CSV	3687.38	0.00915493
0002.CSV	3691.24	0.00949129
0002.CSV	3695.1	0.00939966
0002.CSV	3698.95	0.00912123
0002.CSV	3702.81	0.00900214
0002.CSV	3706.67	0.00867447
0002.CSV	3710.53	0.00850694
0002.CSV	3714.38	0.00895951
0002.CSV	3718.24	0.00877727
0002.CSV	3722.1	0.00863718
0002.CSV	3725.95	0.00865794
0002.CSV	3729.81	0.00851991
0002.CSV	3733.67	0.00853813
0002.CSV	3737.53	0.00899354
0002.CSV	3741.38	0.00851968
0002.CSV	3745.24	0.00792085
0002.CSV	3749.1	0.0080383
0002.CSV	3752.95	0.00873951
0002.CSV	3756.81	0.00891237
0002.CSV	3760.67	0.00890777
0002.CSV	3764.53	0.00865652
0002.CSV	3768.38	0.00876527
0002.CSV	3772.24	0.00901922
0002.CSV	3776.1	0.00886654
0002.CSV	3779.95	0.00889992
0002.CSV	3783.81	0.00890594
0002.CSV	3787.67	0.00898776
0002.CSV	3791.53	0.00885443
0002.CSV	3795.38	0.00840217
0002.CSV	3799.24	0.00813923
0002.CSV	3803.1	0.00846842
0002.CSV	3806.95	0.00896212
0002.CSV	3810.81	0.00889796
0002.CSV	3814.67	0.00857902
0002.CSV	3818.53	0.00856824
0002.CSV	3822.38	0.00894362
0002.CSV	3826.24	0.00895011
0002.CSV	3830.1	0.00873014
0002.CSV	3833.95	0.00853634
0002.CSV	3837.81	0.00841217
0002.CSV	3841.67	0.00887259
0002.CSV	3845.53	0.00903001
0002.CSV	3849.38	0.00856817
0002.CSV	3853.24	0.00858017
0002.CSV	3857.1	0.00896188
0002.CSV	3860.95	0.00856506
0002.CSV	3864.81	0.00857588
0002.CSV	3868.67	0.00872541
0002.CSV	3872.52	0.00893469
0002.CSV	3876.38	0.00900082
0002.CSV	3880.24	0.00896222
0002.CSV	3884.1	0.00922038
0002.CSV	3887.95	0.00917364
0002.CSV	3891.81	0.00907836
0002.CSV	3895.67	0.00886448
0002.CSV	3899.52	0.00852316
0002.CSV	3903.38	0.0088845
0002.CSV	3907.24	0.00932914
0002.CSV	3911.1	0.00919889
0002.CSV	3914.95	0.00904994
0002.CSV	3918.81	0.00918728
0002.CSV	3922.67	0.00917605
0002.CSV	3926.52	0.00910942
0002.CSV	3930.38	0.00919375
0002.CSV	3934.24	0.00940349
0002.CSV	3938.09	0.00923345
0002.CSV	3941.95	0.00918566
0002.CSV	3945.81	0.00931008
0002.CSV	3949.67	0.0093134
0002.CSV	3953.52	0.00929366
0002.CSV	3957.38	0.00924739
0002.CSV	3961.24	0.00923639
0002.CSV	3965.09	0.00919402
0002.CSV	3968.95	0.00919084
0002.CSV	3972.81	0.00934803
0002.CSV	3976.67	0.00942614
0002.CSV	3980.52	0.00942953
0002.CSV	3984.38	0.00943142
0002.CSV	3988.24	0.0093762
0002.CSV	3992.09	0.00937884
0002.CSV	3995.95	0.00936553
0002.CSV	3999.81	0.00932758
0003.CSV	674.992	0.0362055
0003.CSV	678.849	0.0378894
0003.CSV	682.706	0.0387992
0003.CSV	686.563	0.0414886
0003.CSV	690.42	0.0445769
0003.CSV	694.277	0.0548239
0003.CSV	698.134	0.0673881
0003.CSV	701.991	0.0646155
0003.CSV	705.849	0.05713
0003.CSV	709.706	0.0709123
0003.CSV	713.563	0.0745362
0003.CSV	717.42	0.0508996
0003.CSV	721.277	0.0339044
0003.CSV	725.134	0.0314059
0003.CSV	728.991	0.0312588
0003.CSV	732.848	0.0324658
0003.CSV	736.705	0.0331164
0003.CSV	740.562	0.034426
0003.CSV	744.42	0.034708
0003.CSV	748.277	0.035454
0003.CSV	752.134	0.0354799
0003.CSV	755.991	0.0360705
0003.CSV	759.848	0.0359379
0003.CSV	763.705	0.0366448
0003.CSV	767.562	0.0368815
0003.CSV	771.419	0.037604
0003.CSV	775.276	0.0375275
0003.CSV	779.133	0.0379291
0003.CSV	782.99	0.037892
0003.CSV	786.848	0.0387697
0003.CSV	790.705	0.0392173
0003.CSV	794.562	0.0403859
0003.CSV	798.419	0.041241
0003.CSV	802.276	0.0427583
0003.CSV	806.133	0.0435091
0003.CSV	809.99	0.0448028
0003.CSV	813.847	0.0459753
0003.CSV	817.704	0.0485027
0003.CSV	821.562	0.0512599
0003.CSV	825.419	0.0555044
0003.CSV	829.276	0.0602936
0003.CSV	833.133	0.0681265
0003.CSV	836.99	0.0801432
0003.CSV	840.847	0.0991212
0003.CSV	844.704	0.119785
0003.CSV	848.561	0.153945
0003.CSV	852.418	0.190041
0003.CSV	856.275	0.187761
0003.CSV	860.132	0.153607
0003.CSV	863.99	0.114698
0003.CSV	867.847	0.0794711
0003.CSV	871.704	0.0516932
0003.CSV	875.561	0.0340476
0003.CSV	879.418	0.0263668
0003.CSV	883.275	0.0229974
0003.CSV	887.132	0.0219325
0003.CSV	890.989	0.0217885
0003.CSV	894.846	0.0222768
0003.CSV	898.703	0.0226486
0003.CSV	902.561	0.0236392
0003.CSV	906.418	0.0243557
0003.CSV	910.275	0.0248535
0003.CSV	914.132	0.0247451
0003.CSV	917.989	0.0252531
0003.CSV	921.846	0.0258024
0003.CSV	925.703	0.0267184
0003.CSV	929.56	0.0271788
0003.CSV	933.417	0.0279158
0003.CSV	937.274	0.0282328
0003.CSV	941.131	0.0286265
0003.CSV	944.989	0.0288057
0003.CSV	948.846	0.0294544
0003.CSV	952.703	0.0298978
0003.CSV	956.56	0.0306559
0003.CSV	960.417	0.0311031
0003.CSV	964.274	0.0317108
0003.CSV	968.131	0.0320808
0003.CSV	971.988	0.0329144
0003.CSV	975.845	0.0335385
0003.CSV	979.702	0.0343023
0003.CSV	983.559	0.0347376
0003.CSV	987.417	0.0353958
0003.CSV	991.274	0.0357252
0003.CSV	995.131	0.0363215
0003.CSV	998.988	0.036614
0003.CSV	1002.85	0.0372829
0003.CSV	1006.7	0.0376726
0003.CSV	1010.56	0.0382964
0003.CSV	1014.42	0.0386353
0003.CSV	1018.27	0.039343
0003.CSV	1022.13	0.0398773
0003.CSV	1025.99	0.0408032
0003.CSV	1029.85	0.0413801
0003.CSV	1033.7	0.042304
0003.CSV	1037.56	0.0430293
0003.CSV	1041.42	0.0440223
0003.CSV	1045.27	0.0448234
0003.CSV	1049.13	0.0461178
0003.CSV	1052.99	0.0473801
0003.CSV	1056.84	0.0494955
0003.CSV	1060.7	0.0515062
0003.CSV	1064.56	0.0537128
0003.CSV	1068.42	0.0553782
0003.CSV	1072.27	0.0573794
0003.CSV	1076.13	0.0604209
0003.CSV	1079.99	0.0667437
0003.CSV	1083.84	0.0668036
0003.CSV	1087.7	0.057767
0003.CSV	1091.56	0.0521935
0003.CSV	1095.41	0.0517178
0003.CSV	1099.27	0.0517587
0003.CSV	1103.13	0.0520597
0003.CSV	1106.99	0.0524326
0003.CSV	1110.84	0.0531049
0003.CSV	1114.7	0.0532988
0003.CSV	1118.56	0.0534043
0003.CSV	1122.41	0.0530892
0003.CSV	1126.27	0.052947
0003.CSV	1130.13	0.0527416
0003.CSV	1133.99	0.0527832
0003.CSV	1137.84	0.0525829
0003.CSV	1141.7	0.0526869
0003.CSV	1145.56	0.0525112
0003.CSV	1149.41	0.0526688
0003.CSV	1153.27	0.0527059
0003.CSV	1157.13	0.0528566
0003.CSV	1160.99	0.0528906
0003.CSV	1164.84	0.0531358
0003.CSV	1168.7	0.0529753
0003.CSV	1172.56	0.0529097
0003.CSV	1176.41	0.0526208
0003.CSV	1180.27	0.0524987
0003.CSV	1184.13	0.0519662
0003.CSV	1187.99	0.0514604
0003.CSV	1191.84	0.0507856
0003.CSV	1195.7	0.0505805
0003.CSV	1199.56	0.0504164
0003.CSV	1203.41	0.0506125
0003.CSV	1207.27	0.0507598
0003.CSV	1211.13	0.0512955
0003.CSV	1214.98	0.0518298
0003.CSV	1218.84	0.0527146
0003.CSV	1222.7	0.0533994
0003.CSV	1226.56	0.0542943
0003.CSV	1230.41	0.0551043
0003.CSV	1234.27	0.0562954
0003.CSV	1238.13	0.057382
0003.CSV	1241.98	0.0586293
0003.CSV	1245.84	0.0596638
0003.CSV	1249.7	0.0608818
0003.CSV	1253.56	0.0616469
0003.CSV	1257.41	0.0623858
0003.CSV	1261.27	0.0628135
0003.CSV	1265.13	0.0636169
0003.CSV	1268.98	0.0643952
0003.CSV	1272.84	0.0654783
0003.CSV	1276.7	0.0662371
0003.CSV	1280.56	0.0671066
0003.CSV	1284.41	0.0676636
0003.CSV	1288.27	0.0682994
0003.CSV	1292.13	0.0685159
0003.CSV	1295.98	0.0689588
0003.CSV	1299.84	0.069367
0003.CSV	1303.7	0.0701996
0003.CSV	1307.56	0.0709536
0003.CSV	1311.41	0.0721432
0003.CSV	1315.27	0.0733474
0003.CSV	1319.13	0.0749414
0003.CSV	1322.98	0.0762994
0003.CSV	1326.84	0.0780155
0003.CSV	1330.7	0.0797661
0003.CSV	1334.56	0.0819186
0003.CSV	1338.41	0.084468
0003.CSV	1342.27	0.0878569
0003.CSV	1346.13	0.0905231
0003.CSV	1349.98	0.0938135
0003.CSV	1353.84	0.0971842
0003.CSV	1357.7	0.100817
0003.CSV	1361.56	0.104715
0003.CSV	1365.41	0.109673
0003.CSV	1369.27	0.113661
0003.CSV	1373.13	0.118905
0003.CSV	1376.98	0.124671
0003.CSV	1380.84	0.129759
0003.CSV	1384.7	0.13449
0003.CSV	1388.56	0.14103
0003.CSV	1392.41	0.146214
0003.CSV	1396.27	0.15288
0003.CSV	1400.13	0.15986
0003.CSV	1403.98	0.166479
0003.CSV	1407.84	0.172976
0003.CSV	1411.7	0.179184
0003.CSV	1415.55	0.183693
0003.CSV	1419.41	0.18982
0003.CSV	1423.27	0.194798
0003.CSV	1427.12	0.199966
0003.CSV	1430.98	0.205187
0003.CSV	1434.84	0.211731
0003.CSV	1438.7	0.217823
0003.CSV	1442.55	0.221671
0003.CSV	1446.41	0.221349
0003.CSV	1450.27	0.218783
0003.CSV	1454.12	0.214347
0003.CSV	1457.98	0.208752
0003.CSV	1461.84	0.204577
0003.CSV	1465.7	0.202388
0003.CSV	1469.55	0.197327
0003.CSV	1473.41	0.186553
0003.CSV	1477.27	0.172981
0003.CSV	1481.12	0.164979
0003.CSV	1484.98	0.157285
0003.CSV	1488.84	0.148336
0003.CSV	1492.7	0.139275
0003.CSV	1496.55	0.132878
0003.CSV	1500.41	0.125375
0003.CSV	1504.27	0.121271
0003.CSV	1508.12	0.112205
0003.CSV	1511.98	0.105825
0003.CSV	1515.84	0.101322
0003.CSV	1519.7	0.095091
0003.CSV	1523.55	0.0869784
0003.CSV	1527.41	0.0818691
0003.CSV	1531.27	0.0775897
0003.CSV	1535.12	0.0743175
0003.CSV	1538.98	0.0708488
0003.CSV	1542.84	0.0637806
0003.CSV	1546.7	0.0583447
0003.CSV	1550.55	0.0547096
0003.CSV	1554.41	0.0509495
0003.CSV	1558.27	0.0467175
0003.CSV	1562.12	0.0431059
0003.CSV	1565.98	0.041838
0003.CSV	1569.84	0.0400532
0003.CSV	1573.69	0.038178
0003.CSV	1577.55	0.0347414
0003.CSV	1581.41	0.0312385
0003.CSV	1585.27	0.0280607
0003.CSV	1589.12	0.0255979
0003.CSV	1592.98	0.0238633
0003.CSV	1596.84	0.0229101
0003.CSV	1600.69	0.0221841
0003.CSV	1604.55	0.0216984
0003.CSV	1608.41	0.0211336
0003.CSV	1612.27	0.0206646
0003.CSV	1616.12	0.0200435
0003.CSV	1619.98	0.0195871
0003.CSV	1623.84	0.0188666
0003.CSV	1627.69	0.0183159
0003.CSV	1631.55	0.0176888
0003.CSV	1635.41	0.0173439
0003.CSV	1639.27	0.0169442
0003.CSV	1643.12	0.0165157
0003.CSV	1646.98	0.0160311
0003.CSV	1650.84	0.0158639
0003.CSV	1654.69	0.0157635
0003.CSV	1658.55	0.0157178
0003.CSV	1662.41	0.015433
0003.CSV	1666.27	0.0152017
0003.CSV	1670.12	0.0149916
0003.CSV	1673.98	0.0149888
0003.CSV	1677.84	0.0145308
0003.CSV	1681.69	0.0143493
0003.CSV	1685.55	0.0144756
0003.CSV	1689.41	0.0144741
0003.CSV	1693.27	0.0140704
0003.CSV	1697.12	0.0139767
0003.CSV	1700.98	0.0143413
0003.CSV	1704.84	0.0148202
0003.CSV	1708.69	0.0150987
0003.CSV	1712.55	0.0154277
0003.CSV	1716.41	0.0163946
0003.CSV	1720.27	0.0179036
0003.CSV	1724.12	0.0183634
[truncated: 32,521 more rows]

## Sheet: C.edule_250_1_mFTIR_data
Select spectrum number	Wavenumbers	Absorbance
0001.CSV	674.992	0.0507445
0001.CSV	678.849	0.0526382
0001.CSV	682.706	0.0535211
0001.CSV	686.563	0.0555903
0001.CSV	690.42	0.05763
0001.CSV	694.277	0.0629523
0001.CSV	698.134	0.0690763
0001.CSV	701.991	0.0767227
0001.CSV	705.849	0.0915103
0001.CSV	709.706	0.115169
0001.CSV	713.563	0.111124
0001.CSV	717.42	0.0772972
0001.CSV	721.277	0.0529916
0001.CSV	725.134	0.0464516
0001.CSV	728.991	0.0450102
0001.CSV	732.848	0.0455787
0001.CSV	736.705	0.045746
0001.CSV	740.562	0.0462731
0001.CSV	744.42	0.0465549
0001.CSV	748.277	0.0476242
0001.CSV	752.134	0.0479713
0001.CSV	755.991	0.0491435
0001.CSV	759.848	0.0500464
0001.CSV	763.705	0.0517184
0001.CSV	767.562	0.0528767
0001.CSV	771.419	0.0545575
0001.CSV	775.276	0.0560177
0001.CSV	779.133	0.0577408
0001.CSV	782.99	0.05765
0001.CSV	786.848	0.057753
0001.CSV	790.705	0.0588243
0001.CSV	794.562	0.0615979
0001.CSV	798.419	0.0634446
0001.CSV	802.276	0.0639985
0001.CSV	806.133	0.0626514
0001.CSV	809.99	0.0619229
0001.CSV	813.847	0.0620605
0001.CSV	817.704	0.0644504
0001.CSV	821.562	0.0681608
0001.CSV	825.419	0.0733353
0001.CSV	829.276	0.0768198
0001.CSV	833.133	0.0772703
0001.CSV	836.99	0.0764815
0001.CSV	840.847	0.0798049
0001.CSV	844.704	0.0868514
0001.CSV	848.561	0.0939416
0001.CSV	852.418	0.106003
0001.CSV	856.275	0.133713
0001.CSV	860.132	0.159543
0001.CSV	863.99	0.182087
0001.CSV	867.847	0.227896
0001.CSV	871.704	0.263572
0001.CSV	875.561	0.231109
0001.CSV	879.418	0.166249
0001.CSV	883.275	0.103102
0001.CSV	887.132	0.056487
0001.CSV	890.989	0.0381487
0001.CSV	894.846	0.0376393
0001.CSV	898.703	0.0393562
0001.CSV	902.561	0.0411851
0001.CSV	906.418	0.0425267
0001.CSV	910.275	0.0442344
0001.CSV	914.132	0.0455379
0001.CSV	917.989	0.0471863
0001.CSV	921.846	0.0483569
0001.CSV	925.703	0.0498115
0001.CSV	929.56	0.0509975
0001.CSV	933.417	0.0523462
0001.CSV	937.274	0.0531794
0001.CSV	941.131	0.0542772
0001.CSV	944.989	0.0550986
0001.CSV	948.846	0.056189
0001.CSV	952.703	0.0566661
0001.CSV	956.56	0.0573283
0001.CSV	960.417	0.0579267
0001.CSV	964.274	0.0592062
0001.CSV	968.131	0.0603386
0001.CSV	971.988	0.0617562
0001.CSV	975.845	0.0628629
0001.CSV	979.702	0.0645025
0001.CSV	983.559	0.0662461
0001.CSV	987.417	0.068616
0001.CSV	991.274	0.0708138
0001.CSV	995.131	0.0732324
0001.CSV	998.988	0.0751677
0001.CSV	1002.85	0.077267
0001.CSV	1006.7	0.079144
0001.CSV	1010.56	0.0815814
0001.CSV	1014.42	0.0830885
0001.CSV	1018.27	0.0842564
0001.CSV	1022.13	0.0854703
0001.CSV	1025.99	0.0875471
0001.CSV	1029.85	0.0893209
0001.CSV	1033.7	0.0912787
0001.CSV	1037.56	0.0925825
0001.CSV	1041.42	0.0937659
0001.CSV	1045.27	0.0943302
0001.CSV	1049.13	0.0955309
0001.CSV	1052.99	0.0971794
0001.CSV	1056.84	0.100037
0001.CSV	1060.7	0.103179
0001.CSV	1064.56	0.106959
0001.CSV	1068.42	0.110464
0001.CSV	1072.27	0.114393
0001.CSV	1076.13	0.117924
0001.CSV	1079.99	0.121655
0001.CSV	1083.84	0.123292
0001.CSV	1087.7	0.122235
0001.CSV	1091.56	0.119788
0001.CSV	1095.41	0.117924
0001.CSV	1099.27	0.116172
0001.CSV	1103.13	0.115035
0001.CSV	1106.99	0.113427
0001.CSV	1110.84	0.11187
0001.CSV	1114.7	0.109835
0001.CSV	1118.56	0.10804
0001.CSV	1122.41	0.105976
0001.CSV	1126.27	0.104316
0001.CSV	1130.13	0.102522
0001.CSV	1133.99	0.101377
0001.CSV	1137.84	0.100477
0001.CSV	1141.7	0.100398
0001.CSV	1145.56	0.100315
0001.CSV	1149.41	0.100627
0001.CSV	1153.27	0.100659
0001.CSV	1157.13	0.100968
0001.CSV	1160.99	0.101039
0001.CSV	1164.84	0.101163
0001.CSV	1168.7	0.10086
0001.CSV	1172.56	0.101393
0001.CSV	1176.41	0.102489
0001.CSV	1180.27	0.103531
0001.CSV	1184.13	0.102138
0001.CSV	1187.99	0.0991729
0001.CSV	1191.84	0.0959916
0001.CSV	1195.7	0.0942891
0001.CSV	1199.56	0.093526
0001.CSV	1203.41	0.0938338
0001.CSV	1207.27	0.0945235
0001.CSV	1211.13	0.0961535
0001.CSV	1214.98	0.098087
0001.CSV	1218.84	0.100651
0001.CSV	1222.7	0.102978
0001.CSV	1226.56	0.105439
0001.CSV	1230.41	0.10738
0001.CSV	1234.27	0.109308
0001.CSV	1238.13	0.110663
0001.CSV	1241.98	0.112128
0001.CSV	1245.84	0.11305
0001.CSV	1249.7	0.113677
0001.CSV	1253.56	0.113127
0001.CSV	1257.41	0.112282
0001.CSV	1261.27	0.111305
0001.CSV	1265.13	0.111553
0001.CSV	1268.98	0.112502
0001.CSV	1272.84	0.114374
0001.CSV	1276.7	0.116201
0001.CSV	1280.56	0.118565
0001.CSV	1284.41	0.120857
0001.CSV	1288.27	0.123737
0001.CSV	1292.13	0.126467
0001.CSV	1295.98	0.129578
0001.CSV	1299.84	0.132323
0001.CSV	1303.7	0.135397
0001.CSV	1307.56	0.138372
0001.CSV	1311.41	0.142152
0001.CSV	1315.27	0.145931
0001.CSV	1319.13	0.150507
0001.CSV	1322.98	0.155053
0001.CSV	1326.84	0.16039
0001.CSV	1330.7	0.165866
0001.CSV	1334.56	0.172044
0001.CSV	1338.41	0.179255
0001.CSV	1342.27	0.188512
0001.CSV	1346.13	0.197019
0001.CSV	1349.98	0.207114
0001.CSV	1353.84	0.218046
0001.CSV	1357.7	0.230354
0001.CSV	1361.56	0.243936
0001.CSV	1365.41	0.259618
0001.CSV	1369.27	0.27305
0001.CSV	1373.13	0.289445
0001.CSV	1376.98	0.308812
0001.CSV	1380.84	0.328873
0001.CSV	1384.7	0.348295
0001.CSV	1388.56	0.369923
0001.CSV	1392.41	0.38418
0001.CSV	1396.27	0.392522
0001.CSV	1400.13	0.392618
0001.CSV	1403.98	0.390931
0001.CSV	1407.84	0.384662
0001.CSV	1411.7	0.373659
0001.CSV	1415.55	0.357734
0001.CSV	1419.41	0.338209
0001.CSV	1423.27	0.32047
0001.CSV	1427.12	0.308684
0001.CSV	1430.98	0.296669
0001.CSV	1434.84	0.286251
0001.CSV	1438.7	0.274953
0001.CSV	1442.55	0.267042
0001.CSV	1446.41	0.257839
0001.CSV	1450.27	0.248079
0001.CSV	1454.12	0.238761
0001.CSV	1457.98	0.225599
0001.CSV	1461.84	0.214668
0001.CSV	1465.7	0.206888
0001.CSV	1469.55	0.198594
0001.CSV	1473.41	0.188769
0001.CSV	1477.27	0.177555
0001.CSV	1481.12	0.169894
0001.CSV	1484.98	0.162153
0001.CSV	1488.84	0.153005
0001.CSV	1492.7	0.143641
0001.CSV	1496.55	0.136574
0001.CSV	1500.41	0.12918
0001.CSV	1504.27	0.12481
0001.CSV	1508.12	0.116618
0001.CSV	1511.98	0.109309
0001.CSV	1515.84	0.102663
0001.CSV	1519.7	0.0945421
0001.CSV	1523.55	0.0862535
0001.CSV	1527.41	0.0806725
0001.CSV	1531.27	0.0758041
0001.CSV	1535.12	0.0714684
0001.CSV	1538.98	0.0668059
0001.CSV	1542.84	0.0594179
0001.CSV	1546.7	0.0541476
0001.CSV	1550.55	0.0505725
0001.CSV	1554.41	0.0472983
0001.CSV	1558.27	0.044223
0001.CSV	1562.12	0.0417889
0001.CSV	1565.98	0.0411137
0001.CSV	1569.84	0.0406516
0001.CSV	1573.69	0.0407491
0001.CSV	1577.55	0.0407984
0001.CSV	1581.41	0.04022
0001.CSV	1585.27	0.0389192
0001.CSV	1589.12	0.0375072
0001.CSV	1592.98	0.0360667
0001.CSV	1596.84	0.0349672
0001.CSV	1600.69	0.0340782
0001.CSV	1604.55	0.0335039
0001.CSV	1608.41	0.0325676
0001.CSV	1612.27	0.0314061
0001.CSV	1616.12	0.0298524
0001.CSV	1619.98	0.0285058
0001.CSV	1623.84	0.027438
0001.CSV	1627.69	0.0266848
0001.CSV	1631.55	0.0260908
0001.CSV	1635.41	0.0257828
0001.CSV	1639.27	0.0254495
0001.CSV	1643.12	0.0253004
0001.CSV	1646.98	0.025162
0001.CSV	1650.84	0.0251823
0001.CSV	1654.69	0.024922
0001.CSV	1658.55	0.0247361
0001.CSV	1662.41	0.0244528
0001.CSV	1666.27	0.0242861
0001.CSV	1670.12	0.0241445
0001.CSV	1673.98	0.0242936
0001.CSV	1677.84	0.0244319
0001.CSV	1681.69	0.0250084
0001.CSV	1685.55	0.0259435
0001.CSV	1689.41	0.0258303
0001.CSV	1693.27	0.0250349
0001.CSV	1697.12	0.0247057
0001.CSV	1700.98	0.0250251
0001.CSV	1704.84	0.0257042
0001.CSV	1708.69	0.0263264
0001.CSV	1712.55	0.0270269
0001.CSV	1716.41	0.0281636
0001.CSV	1720.27	0.0295408
0001.CSV	1724.12	0.0302425
0001.CSV	1727.98	0.0307399
0001.CSV	1731.84	0.0305832
0001.CSV	1735.69	0.0293381
0001.CSV	1739.55	0.0274412
0001.CSV	1743.41	0.0251466
0001.CSV	1747.27	0.0228323
0001.CSV	1751.12	0.0208396
0001.CSV	1754.98	0.0196809
0001.CSV	1758.84	0.0191069
0001.CSV	1762.69	0.0187874
0001.CSV	1766.55	0.0187071
0001.CSV	1770.41	0.018797
0001.CSV	1774.26	0.0192315
0001.CSV	1778.12	0.0196958
0001.CSV	1781.98	0.0205769
0001.CSV	1785.84	0.0219068
0001.CSV	1789.69	0.0237844
0001.CSV	1793.55	0.0257014
0001.CSV	1797.41	0.0258013
0001.CSV	1801.26	0.0238367
0001.CSV	1805.12	0.0214368
0001.CSV	1808.98	0.0197289
0001.CSV	1812.84	0.0188035
0001.CSV	1816.69	0.0182882
0001.CSV	1820.55	0.0180651
0001.CSV	1824.41	0.0179099
0001.CSV	1828.26	0.0179301
0001.CSV	1832.12	0.0178548
0001.CSV	1835.98	0.01781
0001.CSV	1839.84	0.0177572
0001.CSV	1843.69	0.0178495
0001.CSV	1847.55	0.0178815
0001.CSV	1851.41	0.0178799
0001.CSV	1855.26	0.01784
0001.CSV	1859.12	0.0178938
0001.CSV	1862.98	0.0178873
0001.CSV	1866.84	0.0179738
0001.CSV	1870.69	0.0180438
0001.CSV	1874.55	0.0180714
0001.CSV	1878.41	0.0180513
0001.CSV	1882.26	0.0181061
0001.CSV	1886.12	0.0180849
0001.CSV	1889.98	0.0181277
0001.CSV	1893.83	0.0181215
0001.CSV	1897.69	0.0181384
0001.CSV	1901.55	0.0181004
0001.CSV	1905.41	0.0181321
0001.CSV	1909.26	0.018137
0001.CSV	1913.12	0.0181533
0001.CSV	1916.98	0.0180854
0001.CSV	1920.83	0.0181313
0001.CSV	1924.69	0.0181478
0001.CSV	1928.55	0.018158
0001.CSV	1932.4	0.0181268
0001.CSV	1936.26	0.0181604
0001.CSV	1940.12	0.0181503
0001.CSV	1943.98	0.0182246
0001.CSV	1947.83	0.0182261
0001.CSV	1951.69	0.018242
0001.CSV	1955.55	0.0182433
0001.CSV	1959.4	0.0182928
0001.CSV	1963.26	0.0182685
0001.CSV	1967.12	0.0182933
0001.CSV	1970.98	0.0182822
0001.CSV	1974.83	0.018318
0001.CSV	1978.69	0.0183182
0001.CSV	1982.55	0.0183389
0001.CSV	1986.4	0.0183222
0001.CSV	1990.26	0.0183964
0001.CSV	1994.12	0.0184236
0001.CSV	1997.98	0.0184445
0001.CSV	2001.83	0.0184366
0001.CSV	2005.69	0.0184896
0001.CSV	2009.55	0.0185164
0001.CSV	2013.4	0.0185492
0001.CSV	2017.26	0.0185468
0001.CSV	2021.12	0.0185959
0001.CSV	2024.97	0.0185864
0001.CSV	2028.83	0.0186004
0001.CSV	2032.69	0.0185868
0001.CSV	2036.55	0.0186235
0001.CSV	2040.4	0.0186401
0001.CSV	2044.26	0.0187081
0001.CSV	2048.12	0.018741
0001.CSV	2051.97	0.0187779
0001.CSV	2055.83	0.018769
0001.CSV	2059.69	0.0187974
0001.CSV	2063.55	0.0187975
0001.CSV	2067.4	0.0188535
0001.CSV	2071.26	0.0188479
0001.CSV	2075.12	0.0188888
0001.CSV	2078.97	0.0188992
0001.CSV	2082.83	0.0189205
0001.CSV	2086.69	0.0189149
0001.CSV	2090.55	0.0189482
0001.CSV	2094.4	0.0189458
0001.CSV	2098.26	0.0189757
0001.CSV	2102.12	0.018981
0001.CSV	2105.97	0.0190411
0001.CSV	2109.83	0.0190581
0001.CSV	2113.69	0.0190945
0001.CSV	2117.55	0.019097
0001.CSV	2121.4	0.0191563
0001.CSV	2125.26	0.0191984
0001.CSV	2129.12	0.019267
0001.CSV	2132.97	0.0193058
0001.CSV	2136.83	0.0193556
0001.CSV	2140.69	0.0193466
0001.CSV	2144.55	0.0193593
0001.CSV	2148.4	0.019342
0001.CSV	2152.26	0.0193567
0001.CSV	2156.12	0.0193411
0001.CSV	2159.97	0.0193432
0001.CSV	2163.83	0.0193328
0001.CSV	2167.69	0.0193623
0001.CSV	2171.55	0.0193455
0001.CSV	2175.4	0.0193716
0001.CSV	2179.26	0.0193774
0001.CSV	2183.12	0.0194033
0001.CSV	2186.97	0.0194141
0001.CSV	2190.83	0.0194328
0001.CSV	2194.69	0.0194193
0001.CSV	2198.55	0.0194428
0001.CSV	2202.4	0.0194475
0001.CSV	2206.26	0.0194872
0001.CSV	2210.12	0.019489
0001.CSV	2213.97	0.0195121
0001.CSV	2217.83	0.0195157
0001.CSV	2221.69	0.019531
0001.CSV	2225.54	0.0195143
0001.CSV	2229.4	0.0195279
0001.CSV	2233.26	0.019524
0001.CSV	2237.12	0.0195431
0001.CSV	2240.97	0.01955
0001.CSV	2244.83	0.0195948
0001.CSV	2248.69	0.0195832
0001.CSV	2252.54	0.0195675
0001.CSV	2256.4	0.0195455
0001.CSV	2260.26	0.0195864
0001.CSV	2264.11	0.0196357
0001.CSV	2267.97	0.0196889
0001.CSV	2271.83	0.019697
0001.CSV	2275.69	0.0196963
0001.CSV	2279.54	0.0196711
0001.CSV	2283.4	0.0197025
0001.CSV	2287.26	0.0197555
0001.CSV	2291.11	0.0198461
0001.CSV	2294.97	0.0199137
0001.CSV	2298.83	0.0200361
0001.CSV	2302.69	0.0201638
0001.CSV	2306.54	0.0203483
0001.CSV	2310.4	0.0205081
0001.CSV	2314.26	0.0206419
0001.CSV	2318.11	0.0207752
0001.CSV	2321.97	0.0209862
0001.CSV	2325.83	0.0210753
0001.CSV	2329.69	0.0210867
0001.CSV	2333.54	0.0210614
0001.CSV	2337.4	0.0212216
0001.CSV	2341.26	0.0213492
0001.CSV	2345.11	0.0213692
0001.CSV	2348.97	0.0211521
0001.CSV	2352.83	0.0211149
0001.CSV	2356.69	0.0211109
0001.CSV	2360.54	0.0210659
0001.CSV	2364.4	0.021071
0001.CSV	2368.26	0.021221
0001.CSV	2372.11	0.0211091
0001.CSV	2375.97	0.0209083
0001.CSV	2379.83	0.0206638
0001.CSV	2383.69	0.0204026
0001.CSV	2387.54	0.0201878
0001.CSV	2391.4	0.0201521
0001.CSV	2395.26	0.0201909
0001.CSV	2399.11	0.0202386
0001.CSV	2402.97	0.0202516
0001.CSV	2406.83	0.0202773
0001.CSV	2410.68	0.0202926
0001.CSV	2414.54	0.0203308
0001.CSV	2418.4	0.0203696
0001.CSV	2422.26	0.0204282
0001.CSV	2426.11	0.0204595
0001.CSV	2429.97	0.0204999
0001.CSV	2433.83	0.0205278
0001.CSV	2437.68	0.0205591
0001.CSV	2441.54	0.0205852
0001.CSV	2445.4	0.020661
0001.CSV	2449.26	0.0207288
0001.CSV	2453.11	0.0207832
0001.CSV	2456.97	0.0208484
0001.CSV	2460.83	0.0209738
0001.CSV	2464.68	0.0210889
0001.CSV	2468.54	0.0212266
0001.CSV	2472.4	0.021412
0001.CSV	2476.26	0.0216518
0001.CSV	2480.11	0.0219084
0001.CSV	2483.97	0.0221952
0001.CSV	2487.83	0.0225177
0001.CSV	2491.68	0.0229786
0001.CSV	2495.54	0.0235723
0001.CSV	2499.4	0.0242485
0001.CSV	2503.26	0.0249124
0001.CSV	2507.11	0.025427
0001.CSV	2510.97	0.0256494
0001.CSV	2514.83	0.0256377
0001.CSV	2518.68	0.025434
0001.CSV	2522.54	0.0250553
0001.CSV	2526.4	0.0245257
0001.CSV	2530.26	0.0239359
0001.CSV	2534.11	0.02333
0001.CSV	2537.97	0.0228265
0001.CSV	2541.83	0.0224929
0001.CSV	2545.68	0.022285
0001.CSV	2549.54	0.0221212
0001.CSV	2553.4	0.0220126
0001.CSV	2557.26	0.0219301
0001.CSV	2561.11	0.0218839
0001.CSV	2564.97	0.0218264
0001.CSV	2568.83	0.0217733
0001.CSV	2572.68	0.0217389
0001.CSV	2576.54	0.0217198
0001.CSV	2580.4	0.0216725
0001.CSV	2584.25	0.021668
0001.CSV	2588.11	0.0216562
0001.CSV	2591.97	0.0216325
0001.CSV	2595.83	0.0216092
0001.CSV	2599.68	0.0215742
0001.CSV	2603.54	0.0214897
0001.CSV	2607.4	0.0214124
0001.CSV	2611.25	0.0213255
0001.CSV	2615.11	0.0212244
0001.CSV	2618.97	0.0211401
0001.CSV	2622.82	0.0211126
0001.CSV	2626.68	0.0210412
0001.CSV	2630.54	0.0209488
0001.CSV	2634.4	0.020912
0001.CSV	2638.25	0.0208898
0001.CSV	2642.11	0.0208172
0001.CSV	2645.97	0.0207648
0001.CSV	2649.82	0.020739
0001.CSV	2653.68	0.0207408
0001.CSV	2657.54	0.0207594
0001.CSV	2661.4	0.0207932
0001.CSV	2665.25	0.0208253
0001.CSV	2669.11	0.0208832
0001.CSV	2672.97	0.021
0001.CSV	2676.82	0.0211654
0001.CSV	2680.68	0.0211608
0001.CSV	2684.54	0.020974
0001.CSV	2688.4	0.0208735
0001.CSV	2692.25	0.0209047
0001.CSV	2696.11	0.0210027
0001.CSV	2699.97	0.0210505
0001.CSV	2703.82	0.0210457
0001.CSV	2707.68	0.0211002
0001.CSV	2711.54	0.0211443
0001.CSV	2715.4	0.0212029
0001.CSV	2719.25	0.0213504
0001.CSV	2723.11	0.0215875
0001.CSV	2726.97	0.0215937
0001.CSV	2730.82	0.0213865
0001.CSV	2734.68	0.0213762
0001.CSV	2738.54	0.0214134
0001.CSV	2742.4	0.0214379
0001.CSV	2746.25	0.0216953
0001.CSV	2750.11	0.0217788
0001.CSV	2753.97	0.0215947
0001.CSV	2757.82	0.021538
0001.CSV	2761.68	0.0214978
0001.CSV	2765.54	0.0214825
0001.CSV	2769.39	0.0216811
0001.CSV	2773.25	0.0220359
0001.CSV	2777.11	0.0220496
0001.CSV	2780.97	0.0219432
0001.CSV	2784.82	0.0222583
0001.CSV	2788.68	0.0227852
0001.CSV	2792.54	0.0229982
0001.CSV	2796.39	0.0231494
0001.CSV	2800.25	0.0231718
0001.CSV	2804.11	0.0231098
0001.CSV	2807.97	0.0234676
0001.CSV	2811.82	0.0236846
0001.CSV	2815.68	0.0237237
0001.CSV	2819.54	0.0240067
0001.CSV	2823.39	0.024373
0001.CSV	2827.25	0.0247582
0001.CSV	2831.11	0.0255061
0001.CSV	2834.97	0.0266946
0001.CSV	2838.82	0.0279298
0001.CSV	2842.68	0.0292259
0001.CSV	2846.54	0.0312379
0001.CSV	2850.39	0.03279
0001.CSV	2854.25	0.0330089
0001.CSV	2858.11	0.0326453
0001.CSV	2861.97	0.0321026
0001.CSV	2865.82	0.0318371
0001.CSV	2869.68	0.032134
0001.CSV	2873.54	0.0321899
0001.CSV	2877.39	0.0314446
0001.CSV	2881.25	0.0308323
0001.CSV	2885.11	0.0307462
0001.CSV	2888.97	0.0309731
0001.CSV	2892.82	0.0315049
0001.CSV	2896.68	0.0320187
0001.CSV	2900.54	0.0324673
0001.CSV	2904.39	0.0332512
0001.CSV	2908.25	0.0345753
0001.CSV	2912.11	0.0366305
0001.CSV	2915.97	0.0386796
0001.CSV	2919.82	0.0396654
0001.CSV	2923.68	0.0395933
0001.CSV	2927.54	0.0389927
0001.CSV	2931.39	0.0376422
0001.CSV	2935.25	0.035861
0001.CSV	2939.11	0.0346413
0001.CSV	2942.96	0.0341844
0001.CSV	2946.82	0.033901
0001.CSV	2950.68	0.0336241
0001.CSV	2954.54	0.0332545
0001.CSV	2958.39	0.0325406
0001.CSV	2962.25	0.0316091
0001.CSV	2966.11	0.0302974
0001.CSV	2969.96	0.029032
0001.CSV	2973.82	0.0280964
0001.CSV	2977.68	0.0273045
0001.CSV	2981.53	0.0263654
0001.CSV	2985.39	0.0253024
0001.CSV	2989.25	0.0246745
0001.CSV	2993.11	0.0243657
0001.CSV	2996.96	0.023865
0001.CSV	3000.82	0.0233182
0001.CSV	3004.68	0.0229529
0001.CSV	3008.53	0.023004
0001.CSV	3012.39	0.0231951
0001.CSV	3016.25	0.0230923
0001.CSV	3020.11	0.0228097
0001.CSV	3023.96	0.0226697
0001.CSV	3027.82	0.0227223
0001.CSV	3031.68	0.0229929
0001.CSV	3035.53	0.0231724
0001.CSV	3039.39	0.0233184
0001.CSV	3043.25	0.0234422
0001.CSV	3047.11	0.023393
0001.CSV	3050.96	0.0233732
0001.CSV	3054.82	0.0233181
0001.CSV	3058.68	0.0231596
0001.CSV	3062.53	0.0231586
0001.CSV	3066.39	0.0232787
0001.CSV	3070.25	0.0232305
0001.CSV	3074.11	0.0232779
0001.CSV	3077.96	0.0234705
0001.CSV	3081.82	0.0235262
0001.CSV	3085.68	0.0235206
0001.CSV	3089.53	0.023508
0001.CSV	3093.39	0.0234546
0001.CSV	3097.25	0.0235134
0001.CSV	3101.11	0.0235738
0001.CSV	3104.96	0.0235979
0001.CSV	3108.82	0.0237374
0001.CSV	3112.68	0.0238907
0001.CSV	3116.53	0.0240409
0001.CSV	3120.39	0.0240552
0001.CSV	3124.25	0.0240081
0001.CSV	3128.11	0.024041
0001.CSV	3131.96	0.0240573
0001.CSV	3135.82	0.0241628
0001.CSV	3139.68	0.0242871
0001.CSV	3143.53	0.0242644
0001.CSV	3147.39	0.0243728
0001.CSV	3151.25	0.0246042
0001.CSV	3155.1	0.0246723
0001.CSV	3158.96	0.0245761
0001.CSV	3162.82	0.0245988
0001.CSV	3166.68	0.0246675
0001.CSV	3170.53	0.0247357
0001.CSV	3174.39	0.0248532
0001.CSV	3178.25	0.0249992
0001.CSV	3182.1	0.025081
0001.CSV	3185.96	0.0252021
0001.CSV	3189.82	0.0253382
0001.CSV	3193.68	0.0253845
0001.CSV	3197.53	0.0254182
0001.CSV	3201.39	0.0255401
0001.CSV	3205.25	0.0256465
0001.CSV	3209.1	0.0257259
0001.CSV	3212.96	0.0258311
0001.CSV	3216.82	0.0259665
0001.CSV	3220.68	0.0260541
0001.CSV	3224.53	0.0260772
0001.CSV	3228.39	0.0261639
0001.CSV	3232.25	0.0263633
0001.CSV	3236.1	0.0264462
0001.CSV	3239.96	0.0264678
0001.CSV	3243.82	0.0265978
0001.CSV	3247.68	0.0267233
0001.CSV	3251.53	0.026718
0001.CSV	3255.39	0.0267753
0001.CSV	3259.25	0.0267767
0001.CSV	3263.1	0.0267837
0001.CSV	3266.96	0.0269436
0001.CSV	3270.82	0.027161
0001.CSV	3274.68	0.027201
0001.CSV	3278.53	0.027159
0001.CSV	3282.39	0.027151
0001.CSV	3286.25	0.0272463
0001.CSV	3290.1	0.0274359
0001.CSV	3293.96	0.0275372
0001.CSV	3297.82	0.02748
0001.CSV	3301.67	0.0275263
0001.CSV	3305.53	0.0276459
0001.CSV	3309.39	0.0276246
0001.CSV	3313.25	0.0274959
0001.CSV	3317.1	0.0274893
0001.CSV	3320.96	0.0275557
0001.CSV	3324.82	0.0276553
0001.CSV	3328.67	0.0276707
0001.CSV	3332.53	0.0276885
0001.CSV	3336.39	0.027809
0001.CSV	3340.24	0.0278568
0001.CSV	3344.1	0.0277799
0001.CSV	3347.96	0.0277862
0001.CSV	3351.82	0.0277816
0001.CSV	3355.67	0.0276895
0001.CSV	3359.53	0.0276576
0001.CSV	3363.39	0.0276859
0001.CSV	3367.24	0.027728
0001.CSV	3371.1	0.0276579
0001.CSV	3374.96	0.0274907
0001.CSV	3378.82	0.0274163
0001.CSV	3382.67	0.0273595
0001.CSV	3386.53	0.0273316
0001.CSV	3390.39	0.0273365
0001.CSV	3394.24	0.0272756
0001.CSV	3398.1	0.0272353
0001.CSV	3401.96	0.0271978
0001.CSV	3405.82	0.0269974
0001.CSV	3409.67	0.0268677
0001.CSV	3413.53	0.0266683
0001.CSV	3417.39	0.0264819
0001.CSV	3421.24	0.0264074
0001.CSV	3425.1	0.0263445
0001.CSV	3428.96	0.026336
0001.CSV	3432.82	0.0262867
0001.CSV	3436.67	0.0261106
0001.CSV	3440.53	0.0258499
0001.CSV	3444.39	0.0256432
0001.CSV	3448.24	0.0254667
0001.CSV	3452.1	0.0252331
0001.CSV	3455.96	0.0250806
0001.CSV	3459.82	0.0250556
0001.CSV	3463.67	0.0250363
0001.CSV	3467.53	0.024904
0001.CSV	3471.39	0.0246588
0001.CSV	3475.24	0.0244397
0001.CSV	3479.1	0.0243231
0001.CSV	3482.96	0.0241002
0001.CSV	3486.82	0.0239152
0001.CSV	3490.67	0.0237015
0001.CSV	3494.53	0.0235436
0001.CSV	3498.39	0.0233963
0001.CSV	3502.24	0.0232345
0001.CSV	3506.1	0.0229768
0001.CSV	3509.96	0.0227681
0001.CSV	3513.81	0.0226263
0001.CSV	3517.67	0.0224055
0001.CSV	3521.53	0.0222674
0001.CSV	3525.39	0.0221499
0001.CSV	3529.24	0.0219386
0001.CSV	3533.1	0.0217985
0001.CSV	3536.96	0.021629
0001.CSV	3540.81	0.0214791
0001.CSV	3544.67	0.0214221
0001.CSV	3548.53	0.0212476
0001.CSV	3552.39	0.0209736
0001.CSV	3556.24	0.0207923
0001.CSV	3560.1	0.0206852
0001.CSV	3563.96	0.0205786
0001.CSV	3567.81	0.0204865
0001.CSV	3571.67	0.0202493
0001.CSV	3575.53	0.0199464
0001.CSV	3579.39	0.0198562
0001.CSV	3583.24	0.01981
0001.CSV	3587.1	0.0196171
0001.CSV	3590.96	0.0194295
0001.CSV	3594.81	0.0192953
0001.CSV	3598.67	0.0191901
0001.CSV	3602.53	0.0189847
0001.CSV	3606.39	0.0187077
0001.CSV	3610.24	0.0185694
0001.CSV	3614.1	0.0184868
0001.CSV	3617.96	0.0184463
0001.CSV	3621.81	0.018383
0001.CSV	3625.67	0.018177
0001.CSV	3629.53	0.0181187
0001.CSV	3633.39	0.0181182
0001.CSV	3637.24	0.0179203
0001.CSV	3641.1	0.0176749
0001.CSV	3644.96	0.0174298
0001.CSV	3648.81	0.0175062
0001.CSV	3652.67	0.0175974
0001.CSV	3656.53	0.017516
0001.CSV	3660.38	0.0174292
0001.CSV	3664.24	0.0171996
0001.CSV	3668.1	0.0170411
0001.CSV	3671.96	0.0170734
0001.CSV	3675.81	0.0172302
0001.CSV	3679.67	0.0171818
0001.CSV	3683.53	0.0170292
0001.CSV	3687.38	0.0170567
0001.CSV	3691.24	0.0172772
0001.CSV	3695.1	0.0171413
0001.CSV	3698.95	0.0169542
0001.CSV	3702.81	0.0169312
0001.CSV	3706.67	0.0168362
0001.CSV	3710.53	0.0168303
0001.CSV	3714.38	0.0169382
0001.CSV	3718.24	0.016822
0001.CSV	3722.1	0.0168371
0001.CSV	3725.95	0.0169478
0001.CSV	3729.81	0.0168187
0001.CSV	3733.67	0.0168557
0001.CSV	3737.53	0.0171328
0001.CSV	3741.38	0.0168261
0001.CSV	3745.24	0.0165999
0001.CSV	3749.1	0.0166518
0001.CSV	3752.95	0.0167892
0001.CSV	3756.81	0.016736
0001.CSV	3760.67	0.0166356
0001.CSV	3764.53	0.0165095
0001.CSV	3768.38	0.0165689
0001.CSV	3772.24	0.0165938
0001.CSV	3776.1	0.0164835
0001.CSV	3779.95	0.0164857
0001.CSV	3783.81	0.0165361
0001.CSV	3787.67	0.0165574
0001.CSV	3791.53	0.0164855
0001.CSV	3795.38	0.016367
0001.CSV	3799.24	0.0164258
0001.CSV	3803.1	0.0166114
0001.CSV	3806.95	0.0166464
0001.CSV	3810.81	0.0164756
0001.CSV	3814.67	0.0163671
0001.CSV	3818.53	0.0165184
0001.CSV	3822.38	0.0167029
0001.CSV	3826.24	0.0166513
0001.CSV	3830.1	0.0165582
0001.CSV	3833.95	0.0165708
0001.CSV	3837.81	0.0167307
0001.CSV	3841.67	0.0168927
0001.CSV	3845.53	0.0167128
0001.CSV	3849.38	0.0164852
0001.CSV	3853.24	0.016699
0001.CSV	3857.1	0.0168092
0001.CSV	3860.95	0.0165404
0001.CSV	3864.81	0.0165401
0001.CSV	3868.67	0.0166574
0001.CSV	3872.52	0.0168031
0001.CSV	3876.38	0.0166712
0001.CSV	3880.24	0.0165234
0001.CSV	3884.1	0.0166101
0001.CSV	3887.95	0.0166411
0001.CSV	3891.81	0.0166649
0001.CSV	3895.67	0.0166278
0001.CSV	3899.52	0.0165344
0001.CSV	3903.38	0.0167532
0001.CSV	3907.24	0.016813
0001.CSV	3911.1	0.0165813
0001.CSV	3914.95	0.0164208
0001.CSV	3918.81	0.0165432
0001.CSV	3922.67	0.0166578
0001.CSV	3926.52	0.0166276
0001.CSV	3930.38	0.0166463
0001.CSV	3934.24	0.0167106
0001.CSV	3938.09	0.0165873
0001.CSV	3941.95	0.0165438
0001.CSV	3945.81	0.016581
0001.CSV	3949.67	0.0165659
0001.CSV	3953.52	0.0164975
0001.CSV	3957.38	0.0164613
0001.CSV	3961.24	0.0165051
0001.CSV	3965.09	0.0165076
0001.CSV	3968.95	0.0164912
0001.CSV	3972.81	0.0165096
0001.CSV	3976.67	0.0164801
0001.CSV	3980.52	0.0164241
0001.CSV	3984.38	0.0163865
0001.CSV	3988.24	0.0163601
0001.CSV	3992.09	0.0163622
0001.CSV	3995.95	0.0163343
0001.CSV	3999.81	0.0163147
0002.CSV	674.992	0.0286869
0002.CSV	678.849	0.0301108
0002.CSV	682.706	0.0309382
0002.CSV	686.563	0.0332857
0002.CSV	690.42	0.0356948
0002.CSV	694.277	0.044181
0002.CSV	698.134	0.0562718
0002.CSV	701.991	0.0538376
0002.CSV	705.849	0.0483801
0002.CSV	709.706	0.0666877
0002.CSV	713.563	0.0726793
0002.CSV	717.42	0.0466986
0002.CSV	721.277	0.028045
0002.CSV	725.134	0.0249111
0002.CSV	728.991	0.0243801
0002.CSV	732.848	0.024922
0002.CSV	736.705	0.0250962
0002.CSV	740.562	0.0258928
0002.CSV	744.42	0.0262752
0002.CSV	748.277	0.0274033
0002.CSV	752.134	0.0278867
0002.CSV	755.991	0.0288524
0002.CSV	759.848	0.0294113
0002.CSV	763.705	0.0306719
0002.CSV	767.562	0.0316389
0002.CSV	771.419	0.0332597
0002.CSV	775.276	0.0345851
0002.CSV	779.133	0.0363834
0002.CSV	782.99	0.0372946
0002.CSV	786.848	0.0383989
0002.CSV	790.705	0.0393687
0002.CSV	794.562	0.0414513
0002.CSV	798.419	0.0431298
0002.CSV	802.276	0.0444318
0002.CSV	806.133	0.0447483
0002.CSV	809.99	0.0461717
0002.CSV	813.847	0.0480426
0002.CSV	817.704	0.0511097
0002.CSV	821.562	0.0544417
0002.CSV	825.419	0.0590119
0002.CSV	829.276	0.0640525
0002.CSV	833.133	0.07101
0002.CSV	836.99	0.0812778
0002.CSV	840.847	0.0971745
0002.CSV	844.704	0.113543
0002.CSV	848.561	0.139741
0002.CSV	852.418	0.170797
0002.CSV	856.275	0.175065
0002.CSV	860.132	0.149281
0002.CSV	863.99	0.113618
0002.CSV	867.847	0.0782042
0002.CSV	871.704	0.0508279
0002.CSV	875.561	0.0344287
0002.CSV	879.418	0.0262379
0002.CSV	883.275	0.0212024
0002.CSV	887.132	0.0189552
0002.CSV	890.989	0.0184471
0002.CSV	894.846	0.0189034
0002.CSV	898.703	0.0192629
0002.CSV	902.561	0.0199835
0002.CSV	906.418	0.0205599
0002.CSV	910.275	0.0209079
0002.CSV	914.132	0.0206562
0002.CSV	917.989	0.0210418
0002.CSV	921.846	0.02146
0002.CSV	925.703	0.0221296
0002.CSV	929.56	0.0224935
0002.CSV	933.417	0.0229828
0002.CSV	937.274	0.0232056
0002.CSV	941.131	0.0236319
0002.CSV	944.989	0.0238743
0002.CSV	948.846	0.0244421
0002.CSV	952.703	0.024771
0002.CSV	956.56	0.025298
0002.CSV	960.417	0.025616
0002.CSV	964.274	0.0261784
0002.CSV	968.131	0.0265107
0002.CSV	971.988	0.0271002
0002.CSV	975.845	0.0275713
0002.CSV	979.702	0.0282776
0002.CSV	983.559	0.028775
0002.CSV	987.417	0.0295155
0002.CSV	991.274	0.0300463
0002.CSV	995.131	0.0307948
0002.CSV	998.988	0.0312614
0002.CSV	1002.85	0.0319059
0002.CSV	1006.7	0.0323606
0002.CSV	1010.56	0.0331028
0002.CSV	1014.42	0.0336138
0002.CSV	1018.27	0.0344098
0002.CSV	1022.13	0.0350735
0002.CSV	1025.99	0.0359753
0002.CSV	1029.85	0.0366092
0002.CSV	1033.7	0.0375361
0002.CSV	1037.56	0.0382412
0002.CSV	1041.42	0.0391619
0002.CSV	1045.27	0.0397795
0002.CSV	1049.13	0.0407904
0002.CSV	1052.99	0.0417449
0002.CSV	1056.84	0.0431647
0002.CSV	1060.7	0.0444221
0002.CSV	1064.56	0.0460049
0002.CSV	1068.42	0.0475752
0002.CSV	1072.27	0.0499301
0002.CSV	1076.13	0.0537741
0002.CSV	1079.99	0.0611704
0002.CSV	1083.84	0.0617606
0002.CSV	1087.7	0.0524406
0002.CSV	1091.56	0.0469579
0002.CSV	1095.41	0.0465367
0002.CSV	1099.27	0.0465387
0002.CSV	1103.13	0.0465766
0002.CSV	1106.99	0.046325
0002.CSV	1110.84	0.0462419
0002.CSV	1114.7	0.0460492
0002.CSV	1118.56	0.0459979
0002.CSV	1122.41	0.0456813
0002.CSV	1126.27	0.0453878
0002.CSV	1130.13	0.0448103
0002.CSV	1133.99	0.0444107
0002.CSV	1137.84	0.04399
0002.CSV	1141.7	0.0439305
0002.CSV	1145.56	0.0438529
0002.CSV	1149.41	0.0439915
0002.CSV	1153.27	0.044067
0002.CSV	1157.13	0.0444193
0002.CSV	1160.99	0.0447315
0002.CSV	1164.84	0.0451628
0002.CSV	1168.7	0.0452538
0002.CSV	1172.56	0.0454395
0002.CSV	1176.41	0.0454676
0002.CSV	1180.27	0.0455823
0002.CSV	1184.13	0.0453026
0002.CSV	1187.99	0.0450013
0002.CSV	1191.84	0.0445749
0002.CSV	1195.7	0.0444845
0002.CSV	1199.56	0.0443787
0002.CSV	1203.41	0.0445229
0002.CSV	1207.27	0.0446273
0002.CSV	1211.13	0.0450164
0002.CSV	1214.98	0.0453564
0002.CSV	1218.84	0.0459736
0002.CSV	1222.7	0.0465341
0002.CSV	1226.56	0.04729
0002.CSV	1230.41	0.0478866
0002.CSV	1234.27	0.0486354
0002.CSV	1238.13	0.049214
0002.CSV	1241.98	0.0499402
0002.CSV	1245.84	0.050432
0002.CSV	1249.7	0.0509609
0002.CSV	1253.56	0.0511774
0002.CSV	1257.41	0.0514928
0002.CSV	1261.27	0.0518229
0002.CSV	1265.13	0.052662
0002.CSV	1268.98	0.0535783
0002.CSV	1272.84	0.0546781
0002.CSV	1276.7	0.0554728
0002.CSV	1280.56	0.0563657
0002.CSV	1284.41	0.0571026
0002.CSV	1288.27	0.0580527
0002.CSV	1292.13	0.0588674
0002.CSV	1295.98	0.0599703
0002.CSV	1299.84	0.0610098
0002.CSV	1303.7	0.0622335
0002.CSV	1307.56	0.0632832
0002.CSV	1311.41	0.0645629
0002.CSV	1315.27	0.0657502
0002.CSV	1319.13	0.0672209
0002.CSV	1322.98	0.0684769
0002.CSV	1326.84	0.0700312
0002.CSV	1330.7	0.0716238
0002.CSV	1334.56	0.0735245
0002.CSV	1338.41	0.0756152
0002.CSV	1342.27	0.0782024
0002.CSV	1346.13	0.0803924
0002.CSV	1349.98	0.0830322
0002.CSV	1353.84	0.0856646
0002.CSV	1357.7	0.0885823
0002.CSV	1361.56	0.0916374
0002.CSV	1365.41	0.0952385
0002.CSV	1369.27	0.0983337
0002.CSV	1373.13	0.10237
0002.CSV	1376.98	0.106891
0002.CSV	1380.84	0.111446
0002.CSV	1384.7	0.115925
0002.CSV	1388.56	0.121565
0002.CSV	1392.41	0.12632
0002.CSV	1396.27	0.132036
0002.CSV	1400.13	0.137513
0002.CSV	1403.98	0.142687
0002.CSV	1407.84	0.147568
0002.CSV	1411.7	0.152059
0002.CSV	1415.55	0.155128
0002.CSV	1419.41	0.158879
0002.CSV	1423.27	0.161886
0002.CSV	1427.12	0.165321
0002.CSV	1430.98	0.168818
0002.CSV	1434.84	0.173459
0002.CSV	1438.7	0.178092
0002.CSV	1442.55	0.181169
0002.CSV	1446.41	0.180864
0002.CSV	1450.27	0.178461
0002.CSV	1454.12	0.174908
0002.CSV	1457.98	0.171037
0002.CSV	1461.84	0.168053
0002.CSV	1465.7	0.166425
0002.CSV	1469.55	0.162623
0002.CSV	1473.41	0.155181
0002.CSV	1477.27	0.145516
0002.CSV	1481.12	0.139172
0002.CSV	1484.98	0.132975
0002.CSV	1488.84	0.126065
0002.CSV	1492.7	0.119026
0002.CSV	1496.55	0.113719
0002.CSV	1500.41	0.107645
0002.CSV	1504.27	0.103831
0002.CSV	1508.12	0.0963168
0002.CSV	1511.98	0.0907034
0002.CSV	1515.84	0.0864312
0002.CSV	1519.7	0.0810288
0002.CSV	1523.55	0.0743372
0002.CSV	1527.41	0.0694067
0002.CSV	1531.27	0.0648131
0002.CSV	1535.12	0.0607185
0002.CSV	1538.98	0.0563483
0002.CSV	1542.84	0.0500224
0002.CSV	1546.7	0.0455015
0002.CSV	1550.55	0.0423133
0002.CSV	1554.41	0.0390018
0002.CSV	1558.27	0.0350305
0002.CSV	1562.12	0.0309902
0002.CSV	1565.98	0.0292475
0002.CSV	1569.84	0.026682
0002.CSV	1573.69	0.0239202
0002.CSV	1577.55	0.020307
0002.CSV	1581.41	0.0175401
0002.CSV	1585.27	0.0156687
0002.CSV	1589.12	0.0144686
0002.CSV	1592.98	0.0136609
0002.CSV	1596.84	0.0131964
0002.CSV	1600.69	0.0127688
0002.CSV	1604.55	0.0125415
0002.CSV	1608.41	0.0122123
0002.CSV	1612.27	0.0119193
0002.CSV	1616.12	0.0114701
0002.CSV	1619.98	0.0111039
0002.CSV	1623.84	0.010621
0002.CSV	1627.69	0.0102594
0002.CSV	1631.55	0.00987262
0002.CSV	1635.41	0.00971819
0002.CSV	1639.27	0.00939008
0002.CSV	1643.12	0.0091819
0002.CSV	1646.98	0.00904825
0002.CSV	1650.84	0.00906553
0002.CSV	1654.69	0.00880348
0002.CSV	1658.55	0.00862944
0002.CSV	1662.41	0.00842981
0002.CSV	1666.27	0.00834569
0002.CSV	1670.12	0.00822573
0002.CSV	1673.98	0.00816104
0002.CSV	1677.84	0.00792203
0002.CSV	1681.69	0.00789872
0002.CSV	1685.55	0.00784227
0002.CSV	1689.41	0.0076953
0002.CSV	1693.27	0.00741826
0002.CSV	1697.12	0.00740208
0002.CSV	1700.98	0.0073277
0002.CSV	1704.84	0.00729916
0002.CSV	1708.69	0.00714762
0002.CSV	1712.55	0.00711249
0002.CSV	1716.41	0.0071872
0002.CSV	1720.27	0.00727301
0002.CSV	1724.12	0.00717019
0002.CSV	1727.98	0.00721247
0002.CSV	1731.84	0.00729734
0002.CSV	1735.69	0.00748931
0002.CSV	1739.55	0.00739507
0002.CSV	1743.41	0.00733889
0002.CSV	1747.27	0.00720826
0002.CSV	1751.12	0.00708679
0002.CSV	1754.98	0.00686218
0002.CSV	1758.84	0.00685521
0002.CSV	1762.69	0.00690392
0002.CSV	1766.55	0.00704032
0002.CSV	1770.41	0.00744138
0002.CSV	1774.26	0.0086625
0002.CSV	1778.12	0.010093
0002.CSV	1781.98	0.0116125
0002.CSV	1785.84	0.0123395
0002.CSV	1789.69	0.0120468
0002.CSV	1793.55	0.0105408
0002.CSV	1797.41	0.00918691
0002.CSV	1801.26	0.0080762
0002.CSV	1805.12	0.00730064
0002.CSV	1808.98	0.00689655
0002.CSV	1812.84	0.00678426
0002.CSV	1816.69	0.00665053
0002.CSV	1820.55	0.00666251
0002.CSV	1824.41	0.00670575
0002.CSV	1828.26	0.00685403
0002.CSV	1832.12	0.00682263
0002.CSV	1835.98	0.00679055
0002.CSV	1839.84	0.00676531
0002.CSV	1843.69	0.0069121
0002.CSV	1847.55	0.00696156
0002.CSV	1851.41	0.00693385
0002.CSV	1855.26	0.00689227
0002.CSV	1859.12	0.00694745
0002.CSV	1862.98	0.00695324
0002.CSV	1866.84	0.00705911
0002.CSV	1870.69	0.00711647
0002.CSV	1874.55	0.00708535
0002.CSV	1878.41	0.00704359
0002.CSV	1882.26	0.00709835
0002.CSV	1886.12	0.00709026
0002.CSV	1889.98	0.00714308
0002.CSV	1893.83	0.00713061
0002.CSV	1897.69	0.00712657
0002.CSV	1901.55	0.00709848
0002.CSV	1905.41	0.00714981
0002.CSV	1909.26	0.00715106
0002.CSV	1913.12	0.00716416
0002.CSV	1916.98	0.00714038
0002.CSV	1920.83	0.00720799
0002.CSV	1924.69	0.00718646
0002.CSV	1928.55	0.00716261
0002.CSV	1932.4	0.00714213
0002.CSV	1936.26	0.00718272
0002.CSV	1940.12	0.00717683
0002.CSV	1943.98	0.00724798
0002.CSV	1947.83	0.00724613
0002.CSV	1951.69	0.00724006
0002.CSV	1955.55	0.00719394
0002.CSV	1959.4	0.00720994
0002.CSV	1963.26	0.00718956
0002.CSV	1967.12	0.00722601
0002.CSV	1970.98	0.00722601
0002.CSV	1974.83	0.00725212
0002.CSV	1978.69	0.00725371
0002.CSV	1982.55	0.00727807
0002.CSV	1986.4	0.0072651
0002.CSV	1990.26	0.00734758
0002.CSV	1994.12	0.00739244
0002.CSV	1997.98	0.00740124
0002.CSV	2001.83	0.00736362
0002.CSV	2005.69	0.00737454
0002.CSV	2009.55	0.00736976
0002.CSV	2013.4	0.00741532
0002.CSV	2017.26	0.00744074
0002.CSV	2021.12	0.00748476
0002.CSV	2024.97	0.00747654
0002.CSV	2028.83	0.00749066
0002.CSV	2032.69	0.00748112
0002.CSV	2036.55	0.00751669
0002.CSV	2040.4	0.00752933
0002.CSV	2044.26	0.00757559
0002.CSV	2048.12	0.00758712
0002.CSV	2051.97	0.00764282
0002.CSV	2055.83	0.00765972
0002.CSV	2059.69	0.0076667
0002.CSV	2063.55	0.00765641
0002.CSV	2067.4	0.00770676
0002.CSV	2071.26	0.00770832
0002.CSV	2075.12	0.00775429
0002.CSV	2078.97	0.00776913
0002.CSV	2082.83	0.0078028
0002.CSV	2086.69	0.00781639
0002.CSV	2090.55	0.00785752
0002.CSV	2094.4	0.0078589
0002.CSV	2098.26	0.00788893
0002.CSV	2102.12	0.00789079
0002.CSV	2105.97	0.00795541
0002.CSV	2109.83	0.00800157
0002.CSV	2113.69	0.00804184
0002.CSV	2117.55	0.00805325
0002.CSV	2121.4	0.00809092
0002.CSV	2125.26	0.008084
0002.CSV	2129.12	0.0081267
0002.CSV	2132.97	0.00817161
0002.CSV	2136.83	0.00820983
0002.CSV	2140.69	0.00820608
0002.CSV	2144.55	0.00823647
0002.CSV	2148.4	0.00824464
0002.CSV	2152.26	0.00829645
0002.CSV	2156.12	0.00830216
0002.CSV	2159.97	0.00829196
0002.CSV	2163.83	0.00825157
0002.CSV	2167.69	0.00827993
0002.CSV	2171.55	0.00830118
0002.CSV	2175.4	0.00835336
0002.CSV	2179.26	0.00836917
0002.CSV	2183.12	0.00838471
0002.CSV	2186.97	0.00841271
0002.CSV	2190.83	0.00843903
0002.CSV	2194.69	0.00841491
0002.CSV	2198.55	0.00841815
0002.CSV	2202.4	0.00840991
0002.CSV	2206.26	0.00844244
0002.CSV	2210.12	0.00845443
0002.CSV	2213.97	0.00846261
0002.CSV	2217.83	0.00844004
0002.CSV	2221.69	0.00844153
0002.CSV	2225.54	0.00842055
0002.CSV	2229.4	0.0084245
0002.CSV	2233.26	0.00843585
0002.CSV	2237.12	0.00847832
0002.CSV	2240.97	0.00849167
0002.CSV	2244.83	0.00850995
0002.CSV	2248.69	0.00847325
0002.CSV	2252.54	0.00847906
0002.CSV	2256.4	0.00849545
0002.CSV	2260.26	0.00851728
0002.CSV	2264.11	0.00853161
0002.CSV	2267.97	0.00857844
0002.CSV	2271.83	0.00858706
0002.CSV	2275.69	0.00858892
0002.CSV	2279.54	0.00856337
0002.CSV	2283.4	0.00857787
0002.CSV	2287.26	0.00865804
0002.CSV	2291.11	0.00882897
0002.CSV	2294.97	0.00900971
0002.CSV	2298.83	0.00923626
0002.CSV	2302.69	0.00945526
0002.CSV	2306.54	0.00977115
0002.CSV	2310.4	0.0101213
0002.CSV	2314.26	0.0104335
0002.CSV	2318.11	0.0107834
0002.CSV	2321.97	0.0113314
0002.CSV	2325.83	0.0117644
0002.CSV	2329.69	0.0120183
0002.CSV	2333.54	0.0121638
0002.CSV	2337.4	0.0124627
0002.CSV	2341.26	0.012595
0002.CSV	2345.11	0.0121875
0002.CSV	2348.97	0.0117247
0002.CSV	2352.83	0.0120652
0002.CSV	2356.69	0.0129677
0002.CSV	2360.54	0.0134711
0002.CSV	2364.4	0.0131939
0002.CSV	2368.26	0.012433
0002.CSV	2372.11	0.0114126
0002.CSV	2375.97	0.0105397
0002.CSV	2379.83	0.00976021
0002.CSV	2383.69	0.00913192
0002.CSV	2387.54	0.00872267
0002.CSV	2391.4	0.00858368
0002.CSV	2395.26	0.00857564
0002.CSV	2399.11	0.00860676
0002.CSV	2402.97	0.00861832
0002.CSV	2406.83	0.00865064
0002.CSV	2410.68	0.00866037
0002.CSV	2414.54	0.00867305
0002.CSV	2418.4	0.00867639
0002.CSV	2422.26	0.00868447
0002.CSV	2426.11	0.00869772
0002.CSV	2429.97	0.00873254
0002.CSV	2433.83	0.00875658
0002.CSV	2437.68	0.00878096
0002.CSV	2441.54	0.00880787
0002.CSV	2445.4	0.00884131
0002.CSV	2449.26	0.00885782
0002.CSV	2453.11	0.00890019
0002.CSV	2456.97	0.00893638
0002.CSV	2460.83	0.00900085
0002.CSV	2464.68	0.00908451
0002.CSV	2468.54	0.00919524
0002.CSV	2472.4	0.00932003
0002.CSV	2476.26	0.00948855
0002.CSV	2480.11	0.00968708
0002.CSV	2483.97	0.0099051
0002.CSV	2487.83	0.0101004
0002.CSV	2491.68	0.0102741
0002.CSV	2495.54	0.0104031
0002.CSV	2499.4	0.0105047
0002.CSV	2503.26	0.0105424
0002.CSV	2507.11	0.0105285
0002.CSV	2510.97	0.0105216
0002.CSV	2514.83	0.0106477
0002.CSV	2518.68	0.0108203
0002.CSV	2522.54	0.0108689
0002.CSV	2526.4	0.0107612
0002.CSV	2530.26	0.0105775
0002.CSV	2534.11	0.0103117
0002.CSV	2537.97	0.0100748
0002.CSV	2541.83	0.00996008
0002.CSV	2545.68	0.00993283
0002.CSV	2549.54	0.00987998
0002.CSV	2553.4	0.00976336
0002.CSV	2557.26	0.00959294
0002.CSV	2561.11	0.0094728
0002.CSV	2564.97	0.00937552
0002.CSV	2568.83	0.00928029
0002.CSV	2572.68	0.00919821
0002.CSV	2576.54	0.00913155
0002.CSV	2580.4	0.00905467
0002.CSV	2584.25	0.00903705
0002.CSV	2588.11	0.00901895
0002.CSV	2591.97	0.0089817
0002.CSV	2595.83	0.00896124
0002.CSV	2599.68	0.00895782
0002.CSV	2603.54	0.00893892
0002.CSV	2607.4	0.00893682
0002.CSV	2611.25	0.00894314
0002.CSV	2615.11	0.00894578
0002.CSV	2618.97	0.00893235
0002.CSV	2622.82	0.00894666
0002.CSV	2626.68	0.00895671
0002.CSV	2630.54	0.00892924
0002.CSV	2634.4	0.0089121
0002.CSV	2638.25	0.00889495
0002.CSV	2642.11	0.00881544
0002.CSV	2645.97	0.00875854
0002.CSV	2649.82	0.00870709
0002.CSV	2653.68	0.00866209
0002.CSV	2657.54	0.00863015
0002.CSV	2661.4	0.00860568
0002.CSV	2665.25	0.00857385
0002.CSV	2669.11	0.00858591
0002.CSV	2672.97	0.00862765
0002.CSV	2676.82	0.00870404
0002.CSV	2680.68	0.00870306
0002.CSV	2684.54	0.00858338
0002.CSV	2688.4	0.00849562
0002.CSV	2692.25	0.00851444
0002.CSV	2696.11	0.0085605
0002.CSV	2699.97	0.0085605
0002.CSV	2703.82	0.00854083
0002.CSV	2707.68	0.00856466
0002.CSV	2711.54	0.00857919
0002.CSV	2715.4	0.0086047
0002.CSV	2719.25	0.00867687
0002.CSV	2723.11	0.00877359
0002.CSV	2726.97	0.00877622
0002.CSV	2730.82	0.00867555
0002.CSV	2734.68	0.00864634
0002.CSV	2738.54	0.00863184
0002.CSV	2742.4	0.00863434
0002.CSV	2746.25	0.00876405
0002.CSV	2750.11	0.00878569
0002.CSV	2753.97	0.00867845
0002.CSV	2757.82	0.00867599
0002.CSV	2761.68	0.00868981
0002.CSV	2765.54	0.00867142
0002.CSV	2769.39	0.00875283
0002.CSV	2773.25	0.0088848
0002.CSV	2777.11	0.00883573
0002.CSV	2780.97	0.00876239
0002.CSV	2784.82	0.00890087
0002.CSV	2788.68	0.00910292
0002.CSV	2792.54	0.00913926
0002.CSV	2796.39	0.00914664
0002.CSV	2800.25	0.00911619
0002.CSV	2804.11	0.00903674
0002.CSV	2807.97	0.00914058
0002.CSV	2811.82	0.0091884
0002.CSV	2815.68	0.00917476
0002.CSV	2819.54	0.0092658
0002.CSV	2823.39	0.00938757
0002.CSV	2827.25	0.00950751
0002.CSV	2831.11	0.0097783
0002.CSV	2834.97	0.0102166
0002.CSV	2838.82	0.0106223
0002.CSV	2842.68	0.0110341
0002.CSV	2846.54	0.0118166
0002.CSV	2850.39	0.0124156
0002.CSV	2854.25	0.012448
0002.CSV	2858.11	0.0121555
0002.CSV	2861.97	0.0116792
0002.CSV	2865.82	0.0113432
0002.CSV	2869.68	0.0113734
0002.CSV	2873.54	0.0113913
0002.CSV	2877.39	0.011029
0002.CSV	2881.25	0.0107721
0002.CSV	2885.11	0.010837
0002.CSV	2888.97	0.0110643
0002.CSV	2892.82	0.0114753
0002.CSV	2896.68	0.0118353
0002.CSV	2900.54	0.0120602
0002.CSV	2904.39	0.0124516
0002.CSV	2908.25	0.0131345
0002.CSV	2912.11	0.0141602
0002.CSV	2915.97	0.0150813
0002.CSV	2919.82	0.0153943
0002.CSV	2923.68	0.0152121
0002.CSV	2927.54	0.0148458
0002.CSV	2931.39	0.0140363
0002.CSV	2935.25	0.0129649
0002.CSV	2939.11	0.0122865
0002.CSV	2942.96	0.0121084
0002.CSV	2946.82	0.011962
0002.CSV	2950.68	0.0117541
0002.CSV	2954.54	0.0115347
0002.CSV	2958.39	0.0112139
0002.CSV	2962.25	0.0108986
0002.CSV	2966.11	0.0104412
0002.CSV	2969.96	0.0101334
0002.CSV	2973.82	0.0100732
0002.CSV	2977.68	0.0100399
0002.CSV	2981.53	0.00979538
0002.CSV	2985.39	0.00941466
0002.CSV	2989.25	0.00937122
0002.CSV	2993.11	0.00947182
0002.CSV	2996.96	0.00934749
0002.CSV	3000.82	0.00911189
0002.CSV	3004.68	0.00895285
0002.CSV	3008.53	0.00910837
0002.CSV	3012.39	0.00933418
0002.CSV	3016.25	0.00928632
0002.CSV	3020.11	0.00907758
0002.CSV	3023.96	0.00894798
0002.CSV	3027.82	0.00891808
0002.CSV	3031.68	0.00904774
0002.CSV	3035.53	0.00908536
0002.CSV	3039.39	0.00911202
0002.CSV	3043.25	0.00918204
0002.CSV	3047.11	0.00915178
0002.CSV	3050.96	0.00914122
0002.CSV	3054.82	0.00908316
0002.CSV	3058.68	0.00895525
0002.CSV	3062.53	0.0089858
0002.CSV	3066.39	0.00913886
0002.CSV	3070.25	0.00911013
0002.CSV	3074.11	0.00913273
0002.CSV	3077.96	0.0093006
0002.CSV	3081.82	0.00937092
0002.CSV	3085.68	0.00933997
0002.CSV	3089.53	0.00927609
0002.CSV	3093.39	0.00916139
0002.CSV	3097.25	0.00917696
0002.CSV	3101.11	0.00922251
0002.CSV	3104.96	0.0092368
0002.CSV	3108.82	0.00933872
0002.CSV	3112.68	0.00943789
0002.CSV	3116.53	0.00952103
0002.CSV	3120.39	0.00945729
0002.CSV	3124.25	0.0093396
0002.CSV	3128.11	0.00933445
0002.CSV	3131.96	0.00934034
0002.CSV	3135.82	0.00938043
0002.CSV	3139.68	0.00942323
0002.CSV	3143.53	0.00935311
0002.CSV	3147.39	0.00940948
0002.CSV	3151.25	0.00957007
0002.CSV	3155.1	0.00955713
0002.CSV	3158.96	0.00940569
0002.CSV	3162.82	0.00938016
0002.CSV	3166.68	0.00939834
0002.CSV	3170.53	0.0094043
0002.CSV	3174.39	0.00945184
0002.CSV	3178.25	0.00950796
0002.CSV	3182.1	0.00953
0002.CSV	3185.96	0.00955964
0002.CSV	3189.82	0.00960639
0002.CSV	3193.68	0.00961276
0002.CSV	3197.53	0.00956963
0002.CSV	3201.39	0.0096054
0002.CSV	3205.25	0.00968305
0002.CSV	3209.1	0.00968424
0002.CSV	3212.96	0.00967509
0002.CSV	3216.82	0.00973601
0002.CSV	3220.68	0.00974862
0002.CSV	3224.53	0.00969657
0002.CSV	3228.39	0.00977674
0002.CSV	3232.25	0.0099312
0002.CSV	3236.1	0.00989523
0002.CSV	3239.96	0.00983693
0002.CSV	3243.82	0.00990242
0002.CSV	3247.68	0.00995174
0002.CSV	3251.53	0.00989771
0002.CSV	3255.39	0.00989323
0002.CSV	3259.25	0.00984947
0002.CSV	3263.1	0.00980928
0002.CSV	3266.96	0.00990045
0002.CSV	3270.82	0.0100506
0002.CSV	3274.68	0.010042
0002.CSV	3278.53	0.00994076
0002.CSV	3282.39	0.00987581
0002.CSV	3286.25	0.00989367
0002.CSV	3290.1	0.0100045
0002.CSV	3293.96	0.0100712
0002.CSV	3297.82	0.00998751
0002.CSV	3301.67	0.0100077
0002.CSV	3305.53	0.0101143
0002.CSV	3309.39	0.0100923
0002.CSV	3313.25	0.00993781
0002.CSV	3317.1	0.00986517
0002.CSV	3320.96	0.00989737
0002.CSV	3324.82	0.009961
0002.CSV	3328.67	0.00990384
0002.CSV	3332.53	0.00988615
0002.CSV	3336.39	0.0100071
0002.CSV	3340.24	0.0100436
0002.CSV	3344.1	0.00998989
0002.CSV	3347.96	0.0099967
0002.CSV	3351.82	0.00997995
0002.CSV	3355.67	0.00991713
0002.CSV	3359.53	0.00993181
0002.CSV	3363.39	0.00997704
0002.CSV	3367.24	0.0100559
0002.CSV	3371.1	0.0100537
0002.CSV	3374.96	0.00995612
0002.CSV	3378.82	0.00986062
0002.CSV	3382.67	0.00973313
0002.CSV	3386.53	0.00975231
0002.CSV	3390.39	0.00991384
0002.CSV	3394.24	0.0099274
0002.CSV	3398.1	0.00993673
0002.CSV	3401.96	0.00990781
0002.CSV	3405.82	0.00980375
0002.CSV	3409.67	0.00978108
0002.CSV	3413.53	0.00959924
0002.CSV	3417.39	0.00943681
0002.CSV	3421.24	0.00945394
0002.CSV	3425.1	0.00949664
0002.CSV	3428.96	0.00956652
0002.CSV	3432.82	0.00961889
0002.CSV	3436.67	0.00954985
0002.CSV	3440.53	0.00935988
0002.CSV	3444.39	0.00924103
0002.CSV	3448.24	0.00918386
0002.CSV	3452.1	0.00905579
0002.CSV	3455.96	0.00902061
0002.CSV	3459.82	0.00912319
0002.CSV	3463.67	0.00922045
0002.CSV	3467.53	0.0092305
0002.CSV	3471.39	0.00907328
0002.CSV	3475.24	0.00895275
0002.CSV	3479.1	0.00894947
0002.CSV	3482.96	0.00885196
0002.CSV	3486.82	0.00875908
0002.CSV	3490.67	0.00869201
0002.CSV	3494.53	0.00866209
0002.CSV	3498.39	0.00856192
0002.CSV	3502.24	0.00846349
0002.CSV	3506.1	0.00834299
0002.CSV	3509.96	0.00827082
0002.CSV	3513.81	0.00823553
0002.CSV	3517.67	0.00812208
0002.CSV	3521.53	0.00813649
0002.CSV	3525.39	0.00814521
0002.CSV	3529.24	0.00805119
0002.CSV	3533.1	0.00801329
0002.CSV	3536.96	0.00794616
0002.CSV	3540.81	0.00791373
0002.CSV	3544.67	0.00798507
0002.CSV	3548.53	0.00787685
0002.CSV	3552.39	0.00767301
0002.CSV	3556.24	0.00757289
0002.CSV	3560.1	0.00759241
0002.CSV	3563.96	0.00758267
0002.CSV	3567.81	0.00760731
0002.CSV	3571.67	0.00748995
0002.CSV	3575.53	0.00732612
0002.CSV	3579.39	0.00735274
0002.CSV	3583.24	0.00740353
0002.CSV	3587.1	0.00741694
0002.CSV	3590.96	0.00736164
0002.CSV	3594.81	0.00732608
0002.CSV	3598.67	0.0073886
0002.CSV	3602.53	0.00727079
0002.CSV	3606.39	0.00702719
0002.CSV	3610.24	0.00692244
0002.CSV	3614.1	0.00688783
0002.CSV	3617.96	0.00699456
0002.CSV	3621.81	0.00706416
0002.CSV	3625.67	0.00687271
0002.CSV	3629.53	0.00689554
0002.CSV	3633.39	0.00690466
0002.CSV	3637.24	0.00668684
0002.CSV	3641.1	0.00651405
0002.CSV	3644.96	0.0063637
0002.CSV	3648.81	0.00659068
0002.CSV	3652.67	0.00671012
0002.CSV	3656.53	0.00660885
0002.CSV	3660.38	0.00653208
0002.CSV	3664.24	0.0062896
0002.CSV	3668.1	0.00617367
0002.CSV	3671.96	0.00626977
0002.CSV	3675.81	0.0064552
0002.CSV	3679.67	0.00644356
0002.CSV	3683.53	0.00627841
0002.CSV	3687.38	0.00631565
0002.CSV	3691.24	0.00667482
0002.CSV	3695.1	0.00662241
0002.CSV	3698.95	0.00645328
0002.CSV	3702.81	0.0064211
0002.CSV	3706.67	0.00629545
0002.CSV	3710.53	0.00630621
0002.CSV	3714.38	0.0063676
0002.CSV	3718.24	0.0062018
0002.CSV	3722.1	0.00631186
0002.CSV	3725.95	0.00655681
0002.CSV	3729.81	0.00645688
0002.CSV	3733.67	0.00647494
0002.CSV	3737.53	0.00668441
0002.CSV	3741.38	0.00624308
0002.CSV	3745.24	0.00589078
0002.CSV	3749.1	0.00600136
0002.CSV	3752.95	0.00630083
0002.CSV	3756.81	0.00622916
0002.CSV	3760.67	0.00608169
0002.CSV	3764.53	0.0059421
0002.CSV	3768.38	0.00595423
0002.CSV	3772.24	0.00594778
0002.CSV	3776.1	0.00587802
0002.CSV	3779.95	0.00594026
0002.CSV	3783.81	0.00601352
0002.CSV	3787.67	0.00602494
0002.CSV	3791.53	0.00590831
0002.CSV	3795.38	0.00574024
0002.CSV	3799.24	0.00581777
0002.CSV	3803.1	0.00600929
0002.CSV	3806.95	0.00604742
0002.CSV	3810.81	0.0059112
0002.CSV	3814.67	0.00578959
0002.CSV	3818.53	0.00596686
0002.CSV	3822.38	0.00621118
0002.CSV	3826.24	0.00614789
0002.CSV	3830.1	0.00601816
0002.CSV	3833.95	0.00599148
0002.CSV	3837.81	0.00611792
0002.CSV	3841.67	0.00631391
0002.CSV	3845.53	0.00613391
0002.CSV	3849.38	0.00586724
0002.CSV	3853.24	0.00610585
0002.CSV	3857.1	0.0062978
0002.CSV	3860.95	0.00603019
0002.CSV	3864.81	0.00602263
0002.CSV	3868.67	0.00610481
0002.CSV	3872.52	0.00619783
0002.CSV	3876.38	0.00603069
0002.CSV	3880.24	0.00594237
0002.CSV	3884.1	0.00611818
0002.CSV	3887.95	0.00609312
0002.CSV	3891.81	0.0060745
0002.CSV	3895.67	0.00602155
0002.CSV	3899.52	0.00593454
0002.CSV	3903.38	0.00624422
0002.CSV	3907.24	0.0062737
0002.CSV	3911.1	0.00602192
0002.CSV	3914.95	0.0059198
0002.CSV	3918.81	0.00607356
0002.CSV	3922.67	0.00611748
0002.CSV	3926.52	0.00603781
0002.CSV	3930.38	0.00605377
0002.CSV	3934.24	0.00616191
0002.CSV	3938.09	0.00605367
0002.CSV	3941.95	0.00597291
0002.CSV	3945.81	0.00598087
0002.CSV	3949.67	0.00603539
0002.CSV	3953.52	0.00604154
0002.CSV	3957.38	0.00594855
0002.CSV	3961.24	0.00592766
0002.CSV	3965.09	0.00592453
0002.CSV	3968.95	0.00591019
0002.CSV	3972.81	0.00592037
0002.CSV	3976.67	0.00588178
0002.CSV	3980.52	0.00583735
0002.CSV	3984.38	0.00583936
0002.CSV	3988.24	0.00584
0002.CSV	3992.09	0.00583819
0002.CSV	3995.95	0.0057863
0002.CSV	3999.81	0.00572916
0003.CSV	674.992	0.036203
0003.CSV	678.849	0.0376832
0003.CSV	682.706	0.0382781
0003.CSV	686.563	0.0394221
0003.CSV	690.42	0.0406707
0003.CSV	694.277	0.0446994
0003.CSV	698.134	0.0498831
0003.CSV	701.991	0.0535832
0003.CSV	705.849	0.0608764
0003.CSV	709.706	0.0752238
0003.CSV	713.563	0.0711712
0003.CSV	717.42	0.0482977
0003.CSV	721.277	0.0329952
0003.CSV	725.134	0.0294016
0003.CSV	728.991	0.028848
0003.CSV	732.848	0.0294628
0003.CSV	736.705	0.0295537
0003.CSV	740.562	0.0300364
0003.CSV	744.42	0.0303146
0003.CSV	748.277	0.0310833
0003.CSV	752.134	0.0314738
0003.CSV	755.991	0.0324504
0003.CSV	759.848	0.0330174
0003.CSV	763.705	0.0340604
0003.CSV	767.562	0.0348857
0003.CSV	771.419	0.0362915
0003.CSV	775.276	0.0375237
0003.CSV	779.133	0.0387248
0003.CSV	782.99	0.0386674
0003.CSV	786.848	0.0387671
0003.CSV	790.705	0.0392907
0003.CSV	794.562	0.0408591
0003.CSV	798.419	0.0417961
0003.CSV	802.276	0.0418948
0003.CSV	806.133	0.0408637
0003.CSV	809.99	0.0405684
0003.CSV	813.847	0.0407345
0003.CSV	817.704	0.0418721
0003.CSV	821.562	0.0433732
0003.CSV	825.419	0.0459913
0003.CSV	829.276	0.0485646
0003.CSV	833.133	0.0508053
0003.CSV	836.99	0.0536104
0003.CSV	840.847	0.0596754
0003.CSV	844.704	0.0670372
0003.CSV	848.561	0.0766776
0003.CSV	852.418	0.0935979
0003.CSV	856.275	0.113371
0003.CSV	860.132	0.118604
0003.CSV	863.99	0.114763
0003.CSV	867.847	0.123426
0003.CSV	871.704	0.135476
0003.CSV	875.561	0.122746
0003.CSV	879.418	0.0923634
0003.CSV	883.275	0.0585676
0003.CSV	887.132	0.0323024
0003.CSV	890.989	0.0223373
0003.CSV	894.846	0.0226533
0003.CSV	898.703	0.0239754
0003.CSV	902.561	0.025281
0003.CSV	906.418	0.0262042
0003.CSV	910.275	0.0271597
0003.CSV	914.132	0.0277326
0003.CSV	917.989	0.0286356
0003.CSV	921.846	0.0293791
0003.CSV	925.703	0.0303243
0003.CSV	929.56	0.0309543
0003.CSV	933.417	0.0316276
0003.CSV	937.274	0.0320196
0003.CSV	941.131	0.0326602
0003.CSV	944.989	0.0331751
0003.CSV	948.846	0.0339255
0003.CSV	952.703	0.0344244
0003.CSV	956.56	0.0350733
0003.CSV	960.417	0.0355221
0003.CSV	964.274	0.036293
0003.CSV	968.131	0.0369125
0003.CSV	971.988	0.0377601
0003.CSV	975.845	0.0384915
0003.CSV	979.702	0.0394695
0003.CSV	983.559	0.040313
0003.CSV	987.417	0.0414145
0003.CSV	991.274	0.0423805
0003.CSV	995.131	0.0435352
0003.CSV	998.988	0.0443478
0003.CSV	1002.85	0.0452737
0003.CSV	1006.7	0.0461043
0003.CSV	1010.56	0.0472223
0003.CSV	1014.42	0.0479074
0003.CSV	1018.27	0.0485665
0003.CSV	1022.13	0.0490917
0003.CSV	1025.99	0.0499997
0003.CSV	1029.85	0.050734
0003.CSV	1033.7	0.0516895
0003.CSV	1037.56	0.0525256
0003.CSV	1041.42	0.0536707
0003.CSV	1045.27	0.0546946
0003.CSV	1049.13	0.056079
0003.CSV	1052.99	0.0574922
0003.CSV	1056.84	0.0594493
0003.CSV	1060.7	0.0612778
0003.CSV	1064.56	0.0632334
0003.CSV	1068.42	0.0649878
0003.CSV	1072.27	0.0671051
0003.CSV	1076.13	0.069167
0003.CSV	1079.99	0.0716514
0003.CSV	1083.84	0.0717093
0003.CSV	1087.7	0.0689199
0003.CSV	1091.56	0.0661635
0003.CSV	1095.41	0.0644747
0003.CSV	1099.27	0.0629998
0003.CSV	1103.13	0.0620514
0003.CSV	1106.99	0.0611806
0003.CSV	1110.84	0.0606594
0003.CSV	1114.7	0.0599739
0003.CSV	1118.56	0.0594571
0003.CSV	1122.41	0.0587438
0003.CSV	1126.27	0.0582231
0003.CSV	1130.13	0.0575345
0003.CSV	1133.99	0.0571443
0003.CSV	1137.84	0.0567853
0003.CSV	1141.7	0.0567558
0003.CSV	1145.56	0.0566576
0003.CSV	1149.41	0.056768
0003.CSV	1153.27	0.056749
0003.CSV	1157.13	0.0570218
0003.CSV	1160.99	0.0572514
0003.CSV	1164.84	0.0574618
0003.CSV	1168.7	0.0571533
0003.CSV	1172.56	0.0569473
0003.CSV	1176.41	0.0566619
0003.CSV	1180.27	0.0565183
0003.CSV	1184.13	0.0560307
0003.CSV	1187.99	0.0555527
0003.CSV	1191.84	0.0549289
0003.CSV	1195.7	0.0546387
0003.CSV	1199.56	0.0543383
0003.CSV	1203.41	0.0542988
0003.CSV	1207.27	0.0542285
0003.CSV	1211.13	0.054513
0003.CSV	1214.98	0.0548092
0003.CSV	1218.84	0.0554612
0003.CSV	1222.7	0.0560552
0003.CSV	1226.56	0.0568685
0003.CSV	1230.41	0.057558
0003.CSV	1234.27	0.0584376
0003.CSV	1238.13	0.0591339
0003.CSV	1241.98	0.0600008
0003.CSV	1245.84	0.0607108
0003.CSV	1249.7	0.0615805
0003.CSV	1253.56	0.062189
0003.CSV	1257.41	0.062892
0003.CSV	1261.27	0.0634911
0003.CSV	1265.13	0.064505
0003.CSV	1268.98	0.0655795
0003.CSV	1272.84	0.0668846
0003.CSV	1276.7	0.0679618
0003.CSV	1280.56	0.069251
0003.CSV	1284.41	0.0704285
0003.CSV	1288.27	0.0719336
0003.CSV	1292.13	0.073357
0003.CSV	1295.98	0.0750925
0003.CSV	1299.84	0.0767606
0003.CSV	1303.7	0.0787122
0003.CSV	1307.56	0.0805721
0003.CSV	1311.41	0.0827402
0003.CSV	1315.27	0.0847635
0003.CSV	1319.13	0.0871023
0003.CSV	1322.98	0.0892687
0003.CSV	1326.84	0.0917978
0003.CSV	1330.7	0.0943841
0003.CSV	1334.56	0.09739
0003.CSV	1338.41	0.100848
0003.CSV	1342.27	0.105061
0003.CSV	1346.13	0.108748
0003.CSV	1349.98	0.113243
0003.CSV	1353.84	0.118082
0003.CSV	1357.7	0.123486
0003.CSV	1361.56	0.129428
0003.CSV	1365.41	0.136306
0003.CSV	1369.27	0.142214
0003.CSV	1373.13	0.149471
0003.CSV	1376.98	0.157666
0003.CSV	1380.84	0.165757
0003.CSV	1384.7	0.173363
0003.CSV	1388.56	0.18162
0003.CSV	1392.41	0.186715
0003.CSV	1396.27	0.189498
0003.CSV	1400.13	0.189332
0003.CSV	1403.98	0.188829
0003.CSV	1407.84	0.18664
0003.CSV	1411.7	0.182803
0003.CSV	1415.55	0.177291
0003.CSV	1419.41	0.170713
0003.CSV	1423.27	0.164578
0003.CSV	1427.12	0.160744
0003.CSV	1430.98	0.156941
0003.CSV	1434.84	0.154067
0003.CSV	1438.7	0.150982
0003.CSV	1442.55	0.14897
0003.CSV	1446.41	0.146197
0003.CSV	1450.27	0.142869
0003.CSV	1454.12	0.139185
0003.CSV	1457.98	0.133982
0003.CSV	1461.84	0.129446
0003.CSV	1465.7	0.126455
0003.CSV	1469.55	0.122923
0003.CSV	1473.41	0.118194
0003.CSV	1477.27	0.11206
0003.CSV	1481.12	0.107735
0003.CSV	1484.98	0.103412
0003.CSV	1488.84	0.0983547
0003.CSV	1492.7	0.09288
0003.CSV	1496.55	0.0885861
0003.CSV	1500.41	0.0837179
0003.CSV	1504.27	0.0806068
0003.CSV	1508.12	0.0748322
0003.CSV	1511.98	0.0701845
0003.CSV	1515.84	0.0667215
0003.CSV	1519.7	0.0625174
0003.CSV	1523.55	0.0573184
0003.CSV	1527.41	0.0533124
0003.CSV	1531.27	0.0497003
0003.CSV	1535.12	0.0465315
0003.CSV	1538.98	0.043243
0003.CSV	1542.84	0.0379942
0003.CSV	1546.7	0.0340783
0003.CSV	1550.55	0.0314273
0003.CSV	1554.41	0.0290107
0003.CSV	1558.27	0.0265181
0003.CSV	1562.12	0.024108
0003.CSV	1565.98	0.0231943
0003.CSV	1569.84	0.0222856
0003.CSV	1573.69	0.0216211
0003.CSV	1577.55	0.0208281
0003.CSV	1581.41	0.0199375
0003.CSV	1585.27	0.0190445
0003.CSV	1589.12	0.0182443
0003.CSV	1592.98	0.0173446
0003.CSV	1596.84	0.0165051
0003.CSV	1600.69	0.0157281
0003.CSV	1604.55	0.015155
0003.CSV	1608.41	0.0145569
0003.CSV	1612.27	0.0140658
0003.CSV	1616.12	0.0135478
0003.CSV	1619.98	0.0131098
0003.CSV	1623.84	0.0126372
0003.CSV	1627.69	0.0122509
0003.CSV	1631.55	0.0118863
0003.CSV	1635.41	0.0117772
0003.CSV	1639.27	0.0115377
0003.CSV	1643.12	0.0113784
0003.CSV	1646.98	0.0113888
0003.CSV	1650.84	0.0114437
0003.CSV	1654.69	0.0112336
0003.CSV	1658.55	0.0110217
0003.CSV	1662.41	0.0108986
0003.CSV	1666.27	0.0109388
0003.CSV	1670.12	0.0110212
0003.CSV	1673.98	0.0111576
0003.CSV	1677.84	0.0112087
0003.CSV	1681.69	0.0115693
0003.CSV	1685.55	0.0120741
0003.CSV	1689.41	0.0118402
0003.CSV	1693.27	0.0112701
0003.CSV	1697.12	0.0110835
0003.CSV	1700.98	0.0110189
0003.CSV	1704.84	0.0109821
0003.CSV	1708.69	0.0108913
0003.CSV	1712.55	0.0109506
0003.CSV	1716.41	0.0112331
0003.CSV	1720.27	0.0113927
0003.CSV	1724.12	0.01133
[truncated: 31,658 more rows]

## Sheet: C.edule_250_2_mFTIR_data
Select spectrum number	Wavenumbers	Absorbance
0001.CSV	674.992	0.0460757
0001.CSV	678.849	0.0480601
0001.CSV	682.706	0.0490661
0001.CSV	686.563	0.0514893
0001.CSV	690.42	0.0540838
0001.CSV	694.277	0.0632429
0001.CSV	698.134	0.0776239
0001.CSV	701.991	0.0770077
0001.CSV	705.849	0.0688389
0001.CSV	709.706	0.0864114
0001.CSV	713.563	0.0980144
0001.CSV	717.42	0.0725041
0001.CSV	721.277	0.0471926
0001.CSV	725.134	0.0406486
0001.CSV	728.991	0.0395414
0001.CSV	732.848	0.040264
0001.CSV	736.705	0.0406489
0001.CSV	740.562	0.0416777
0001.CSV	744.42	0.0420203
0001.CSV	748.277	0.0432694
0001.CSV	752.134	0.0438342
0001.CSV	755.991	0.0451079
0001.CSV	759.848	0.0456995
0001.CSV	763.705	0.0469886
0001.CSV	767.562	0.0477613
0001.CSV	771.419	0.0492596
0001.CSV	775.276	0.0501801
0001.CSV	779.133	0.0515838
0001.CSV	782.99	0.0523554
0001.CSV	786.848	0.0536241
0001.CSV	790.705	0.0544075
0001.CSV	794.562	0.0561316
0001.CSV	798.419	0.0577795
0001.CSV	802.276	0.0600988
0001.CSV	806.133	0.0617094
0001.CSV	809.99	0.0642632
0001.CSV	813.847	0.0669295
0001.CSV	817.704	0.0709969
0001.CSV	821.562	0.0756528
0001.CSV	825.419	0.0823255
0001.CSV	829.276	0.0895754
0001.CSV	833.133	0.0998782
0001.CSV	836.99	0.115886
0001.CSV	840.847	0.139054
0001.CSV	844.704	0.161685
0001.CSV	848.561	0.191404
0001.CSV	852.418	0.210201
0001.CSV	856.275	0.190504
0001.CSV	860.132	0.150175
0001.CSV	863.99	0.111302
0001.CSV	867.847	0.0791645
0001.CSV	871.704	0.0583842
0001.CSV	875.561	0.0482319
0001.CSV	879.418	0.0435131
0001.CSV	883.275	0.0398343
0001.CSV	887.132	0.0380412
0001.CSV	890.989	0.0375166
0001.CSV	894.846	0.0380309
0001.CSV	898.703	0.0385276
0001.CSV	902.561	0.0395363
0001.CSV	906.418	0.0404401
0001.CSV	910.275	0.040929
0001.CSV	914.132	0.0406217
0001.CSV	917.989	0.0411323
0001.CSV	921.846	0.041638
0001.CSV	925.703	0.0424243
0001.CSV	929.56	0.0428577
0001.CSV	933.417	0.0434825
0001.CSV	937.274	0.0437599
0001.CSV	941.131	0.0443055
0001.CSV	944.989	0.0446673
0001.CSV	948.846	0.0453391
0001.CSV	952.703	0.0457677
0001.CSV	956.56	0.046424
0001.CSV	960.417	0.0467351
0001.CSV	964.274	0.0473172
0001.CSV	968.131	0.0477002
0001.CSV	971.988	0.0483932
0001.CSV	975.845	0.0488505
0001.CSV	979.702	0.0495813
0001.CSV	983.559	0.0500619
0001.CSV	987.417	0.0508062
0001.CSV	991.274	0.0513556
0001.CSV	995.131	0.0521996
0001.CSV	998.988	0.0527606
0001.CSV	1002.85	0.0536591
0001.CSV	1006.7	0.0543825
0001.CSV	1010.56	0.0554028
0001.CSV	1014.42	0.0559938
0001.CSV	1018.27	0.0567854
0001.CSV	1022.13	0.057423
0001.CSV	1025.99	0.0584653
0001.CSV	1029.85	0.0591548
0001.CSV	1033.7	0.0600633
0001.CSV	1037.56	0.0606132
0001.CSV	1041.42	0.0613651
0001.CSV	1045.27	0.0617334
0001.CSV	1049.13	0.0623554
0001.CSV	1052.99	0.0627435
0001.CSV	1056.84	0.0636677
0001.CSV	1060.7	0.0645389
0001.CSV	1064.56	0.0659253
0001.CSV	1068.42	0.0673073
0001.CSV	1072.27	0.0694754
0001.CSV	1076.13	0.0731594
0001.CSV	1079.99	0.0816801
0001.CSV	1083.84	0.0854188
0001.CSV	1087.7	0.07667
0001.CSV	1091.56	0.0686552
0001.CSV	1095.41	0.0668069
0001.CSV	1099.27	0.0665554
0001.CSV	1103.13	0.0669297
0001.CSV	1106.99	0.0671748
0001.CSV	1110.84	0.0676063
0001.CSV	1114.7	0.0677057
0001.CSV	1118.56	0.0679186
0001.CSV	1122.41	0.0677333
0001.CSV	1126.27	0.0676225
0001.CSV	1130.13	0.0671995
0001.CSV	1133.99	0.0669556
0001.CSV	1137.84	0.0665347
0001.CSV	1141.7	0.0664501
0001.CSV	1145.56	0.0663231
0001.CSV	1149.41	0.0665796
0001.CSV	1153.27	0.0667007
0001.CSV	1157.13	0.0671229
0001.CSV	1160.99	0.0674265
0001.CSV	1164.84	0.0679979
0001.CSV	1168.7	0.0683218
0001.CSV	1172.56	0.068897
0001.CSV	1176.41	0.0694149
0001.CSV	1180.27	0.070047
0001.CSV	1184.13	0.0698971
0001.CSV	1187.99	0.0694688
0001.CSV	1191.84	0.0688675
0001.CSV	1195.7	0.0687678
0001.CSV	1199.56	0.0687577
0001.CSV	1203.41	0.0691708
0001.CSV	1207.27	0.0695896
0001.CSV	1211.13	0.0704435
0001.CSV	1214.98	0.0712132
0001.CSV	1218.84	0.0722204
0001.CSV	1222.7	0.0730855
0001.CSV	1226.56	0.0742147
0001.CSV	1230.41	0.0751514
0001.CSV	1234.27	0.0762743
0001.CSV	1238.13	0.0770995
0001.CSV	1241.98	0.0780651
0001.CSV	1245.84	0.0787146
0001.CSV	1249.7	0.0793651
0001.CSV	1253.56	0.0794108
0001.CSV	1257.41	0.0794578
0001.CSV	1261.27	0.0795705
0001.CSV	1265.13	0.0804811
0001.CSV	1268.98	0.0815808
0001.CSV	1272.84	0.0830064
0001.CSV	1276.7	0.0841645
0001.CSV	1280.56	0.0855507
0001.CSV	1284.41	0.0866876
0001.CSV	1288.27	0.0880464
0001.CSV	1292.13	0.0892256
0001.CSV	1295.98	0.090709
0001.CSV	1299.84	0.0920245
0001.CSV	1303.7	0.0935895
0001.CSV	1307.56	0.0949592
0001.CSV	1311.41	0.0966973
0001.CSV	1315.27	0.0982883
0001.CSV	1319.13	0.100257
0001.CSV	1322.98	0.102044
0001.CSV	1326.84	0.104186
0001.CSV	1330.7	0.106265
0001.CSV	1334.56	0.108721
0001.CSV	1338.41	0.111449
0001.CSV	1342.27	0.114967
0001.CSV	1346.13	0.117895
0001.CSV	1349.98	0.121419
0001.CSV	1353.84	0.124961
0001.CSV	1357.7	0.128864
0001.CSV	1361.56	0.132915
0001.CSV	1365.41	0.137757
0001.CSV	1369.27	0.141796
0001.CSV	1373.13	0.146991
0001.CSV	1376.98	0.152767
0001.CSV	1380.84	0.158428
0001.CSV	1384.7	0.163702
0001.CSV	1388.56	0.170312
0001.CSV	1392.41	0.175633
0001.CSV	1396.27	0.181991
0001.CSV	1400.13	0.188028
0001.CSV	1403.98	0.193783
0001.CSV	1407.84	0.199148
0001.CSV	1411.7	0.204409
0001.CSV	1415.55	0.208096
0001.CSV	1419.41	0.212935
0001.CSV	1423.27	0.217034
0001.CSV	1427.12	0.221635
0001.CSV	1430.98	0.226138
0001.CSV	1434.84	0.232049
0001.CSV	1438.7	0.23796
0001.CSV	1442.55	0.242508
0001.CSV	1446.41	0.24359
0001.CSV	1450.27	0.242321
0001.CSV	1454.12	0.238298
0001.CSV	1457.98	0.232449
0001.CSV	1461.84	0.227233
0001.CSV	1465.7	0.223861
0001.CSV	1469.55	0.217718
0001.CSV	1473.41	0.206532
0001.CSV	1477.27	0.192269
0001.CSV	1481.12	0.18262
0001.CSV	1484.98	0.173262
0001.CSV	1488.84	0.162981
0001.CSV	1492.7	0.152977
0001.CSV	1496.55	0.145696
0001.CSV	1500.41	0.137755
0001.CSV	1504.27	0.132853
0001.CSV	1508.12	0.124018
0001.CSV	1511.98	0.117533
0001.CSV	1515.84	0.112546
0001.CSV	1519.7	0.106538
0001.CSV	1523.55	0.0995478
0001.CSV	1527.41	0.0947275
0001.CSV	1531.27	0.0902003
0001.CSV	1535.12	0.0861683
0001.CSV	1538.98	0.081796
0001.CSV	1542.84	0.0755878
0001.CSV	1546.7	0.0709205
0001.CSV	1550.55	0.0673884
0001.CSV	1554.41	0.0635566
0001.CSV	1558.27	0.0588408
0001.CSV	1562.12	0.0540025
0001.CSV	1565.98	0.0516751
0001.CSV	1569.84	0.0485435
0001.CSV	1573.69	0.0454319
0001.CSV	1577.55	0.0412072
0001.CSV	1581.41	0.0373784
0001.CSV	1585.27	0.0341748
0001.CSV	1589.12	0.0317397
0001.CSV	1592.98	0.0300731
0001.CSV	1596.84	0.0291186
0001.CSV	1600.69	0.0284082
0001.CSV	1604.55	0.0280445
0001.CSV	1608.41	0.0275657
0001.CSV	1612.27	0.0271018
0001.CSV	1616.12	0.0264205
0001.CSV	1619.98	0.025878
0001.CSV	1623.84	0.0252847
0001.CSV	1627.69	0.0249035
0001.CSV	1631.55	0.0244202
0001.CSV	1635.41	0.0242387
0001.CSV	1639.27	0.0240372
0001.CSV	1643.12	0.0237406
0001.CSV	1646.98	0.0234283
0001.CSV	1650.84	0.0234192
0001.CSV	1654.69	0.0233419
0001.CSV	1658.55	0.0231319
0001.CSV	1662.41	0.0227695
0001.CSV	1666.27	0.0225789
0001.CSV	1670.12	0.022313
0001.CSV	1673.98	0.0221794
0001.CSV	1677.84	0.0217683
0001.CSV	1681.69	0.0214991
0001.CSV	1685.55	0.0212017
0001.CSV	1689.41	0.0209667
0001.CSV	1693.27	0.0204925
0001.CSV	1697.12	0.0202508
0001.CSV	1700.98	0.0201141
0001.CSV	1704.84	0.0200884
0001.CSV	1708.69	0.0198787
0001.CSV	1712.55	0.0196999
0001.CSV	1716.41	0.0196838
0001.CSV	1720.27	0.019922
0001.CSV	1724.12	0.019794
0001.CSV	1727.98	0.0196961
0001.CSV	1731.84	0.0196072
0001.CSV	1735.69	0.0197803
0001.CSV	1739.55	0.0195657
0001.CSV	1743.41	0.019324
0001.CSV	1747.27	0.0190462
0001.CSV	1751.12	0.0190208
0001.CSV	1754.98	0.018812
0001.CSV	1758.84	0.0187609
0001.CSV	1762.69	0.0187818
0001.CSV	1766.55	0.0188488
0001.CSV	1770.41	0.0192293
0001.CSV	1774.26	0.0207066
0001.CSV	1778.12	0.0224272
0001.CSV	1781.98	0.024527
0001.CSV	1785.84	0.0258758
0001.CSV	1789.69	0.0259074
0001.CSV	1793.55	0.0243766
0001.CSV	1797.41	0.0226767
0001.CSV	1801.26	0.0210165
0001.CSV	1805.12	0.0197461
0001.CSV	1808.98	0.0189236
0001.CSV	1812.84	0.0185647
0001.CSV	1816.69	0.0182862
0001.CSV	1820.55	0.0182079
0001.CSV	1824.41	0.0181315
0001.CSV	1828.26	0.0182372
0001.CSV	1832.12	0.0182544
0001.CSV	1835.98	0.0182304
0001.CSV	1839.84	0.0181188
0001.CSV	1843.69	0.0182419
0001.CSV	1847.55	0.0183808
0001.CSV	1851.41	0.0183782
0001.CSV	1855.26	0.0183055
0001.CSV	1859.12	0.0183684
0001.CSV	1862.98	0.0183228
0001.CSV	1866.84	0.018398
0001.CSV	1870.69	0.0185701
0001.CSV	1874.55	0.018603
0001.CSV	1878.41	0.0185546
0001.CSV	1882.26	0.0186088
0001.CSV	1886.12	0.0185892
0001.CSV	1889.98	0.0186913
0001.CSV	1893.83	0.0187546
0001.CSV	1897.69	0.0187972
0001.CSV	1901.55	0.0187496
0001.CSV	1905.41	0.0187634
0001.CSV	1909.26	0.0187642
0001.CSV	1913.12	0.0187893
0001.CSV	1916.98	0.0187569
0001.CSV	1920.83	0.0188691
0001.CSV	1924.69	0.0188778
0001.CSV	1928.55	0.0188671
0001.CSV	1932.4	0.0188435
0001.CSV	1936.26	0.0188564
0001.CSV	1940.12	0.0188203
0001.CSV	1943.98	0.0189471
0001.CSV	1947.83	0.0189691
0001.CSV	1951.69	0.0189839
0001.CSV	1955.55	0.0189801
0001.CSV	1959.4	0.0190251
0001.CSV	1963.26	0.0190068
0001.CSV	1967.12	0.0190683
0001.CSV	1970.98	0.0190651
0001.CSV	1974.83	0.0190544
0001.CSV	1978.69	0.0190242
0001.CSV	1982.55	0.0190715
0001.CSV	1986.4	0.0190759
0001.CSV	1990.26	0.0191557
0001.CSV	1994.12	0.0191806
0001.CSV	1997.98	0.0191848
0001.CSV	2001.83	0.0191512
0001.CSV	2005.69	0.0191806
0001.CSV	2009.55	0.0191837
0001.CSV	2013.4	0.0192152
0001.CSV	2017.26	0.0192455
0001.CSV	2021.12	0.0193065
0001.CSV	2024.97	0.0192581
0001.CSV	2028.83	0.019267
0001.CSV	2032.69	0.0192633
0001.CSV	2036.55	0.0192843
0001.CSV	2040.4	0.0192727
0001.CSV	2044.26	0.01934
0001.CSV	2048.12	0.0193333
0001.CSV	2051.97	0.0193424
0001.CSV	2055.83	0.01932
0001.CSV	2059.69	0.0193334
0001.CSV	2063.55	0.019348
0001.CSV	2067.4	0.0193975
0001.CSV	2071.26	0.0193821
0001.CSV	2075.12	0.019434
0001.CSV	2078.97	0.0194496
0001.CSV	2082.83	0.0194916
0001.CSV	2086.69	0.0194966
0001.CSV	2090.55	0.0195249
0001.CSV	2094.4	0.019516
0001.CSV	2098.26	0.0195481
0001.CSV	2102.12	0.0195657
0001.CSV	2105.97	0.0196212
0001.CSV	2109.83	0.0196269
0001.CSV	2113.69	0.0196889
0001.CSV	2117.55	0.0197235
0001.CSV	2121.4	0.019772
0001.CSV	2125.26	0.0198008
0001.CSV	2129.12	0.0198567
0001.CSV	2132.97	0.0198789
0001.CSV	2136.83	0.0199381
0001.CSV	2140.69	0.0199607
0001.CSV	2144.55	0.0200107
0001.CSV	2148.4	0.0200224
0001.CSV	2152.26	0.0200714
0001.CSV	2156.12	0.0200966
0001.CSV	2159.97	0.0201113
0001.CSV	2163.83	0.0200783
0001.CSV	2167.69	0.020112
0001.CSV	2171.55	0.0201448
0001.CSV	2175.4	0.0201963
0001.CSV	2179.26	0.0202071
0001.CSV	2183.12	0.0202373
0001.CSV	2186.97	0.0202502
0001.CSV	2190.83	0.0202865
0001.CSV	2194.69	0.0203069
0001.CSV	2198.55	0.0203366
0001.CSV	2202.4	0.0203064
0001.CSV	2206.26	0.0203255
0001.CSV	2210.12	0.0203318
0001.CSV	2213.97	0.0203448
0001.CSV	2217.83	0.0203389
0001.CSV	2221.69	0.0203679
0001.CSV	2225.54	0.0203672
0001.CSV	2229.4	0.0204042
0001.CSV	2233.26	0.0204089
0001.CSV	2237.12	0.020421
0001.CSV	2240.97	0.0204166
0001.CSV	2244.83	0.0204397
0001.CSV	2248.69	0.0204472
0001.CSV	2252.54	0.0204709
0001.CSV	2256.4	0.020445
0001.CSV	2260.26	0.0204591
0001.CSV	2264.11	0.0204743
0001.CSV	2267.97	0.0205089
0001.CSV	2271.83	0.0205052
0001.CSV	2275.69	0.0205251
0001.CSV	2279.54	0.0205165
0001.CSV	2283.4	0.0205073
0001.CSV	2287.26	0.0205231
0001.CSV	2291.11	0.0206047
0001.CSV	2294.97	0.0206537
0001.CSV	2298.83	0.0207385
0001.CSV	2302.69	0.0207806
0001.CSV	2306.54	0.0208318
0001.CSV	2310.4	0.0208574
0001.CSV	2314.26	0.0208522
0001.CSV	2318.11	0.0207836
0001.CSV	2321.97	0.0208111
0001.CSV	2325.83	0.0207065
0001.CSV	2329.69	0.0206068
0001.CSV	2333.54	0.0204874
0001.CSV	2337.4	0.0203515
0001.CSV	2341.26	0.0202982
0001.CSV	2345.11	0.020732
0001.CSV	2348.97	0.0207629
0001.CSV	2352.83	0.020249
0001.CSV	2356.69	0.0190634
0001.CSV	2360.54	0.0184665
0001.CSV	2364.4	0.0190862
0001.CSV	2368.26	0.0201627
0001.CSV	2372.11	0.0207532
0001.CSV	2375.97	0.0210039
0001.CSV	2379.83	0.0210018
0001.CSV	2383.69	0.0208413
0001.CSV	2387.54	0.0206203
0001.CSV	2391.4	0.020518
0001.CSV	2395.26	0.0204944
0001.CSV	2399.11	0.0205029
0001.CSV	2402.97	0.0204888
0001.CSV	2406.83	0.0204984
0001.CSV	2410.68	0.0205011
0001.CSV	2414.54	0.0204958
0001.CSV	2418.4	0.0204908
0001.CSV	2422.26	0.0205302
0001.CSV	2426.11	0.0205318
0001.CSV	2429.97	0.0205321
0001.CSV	2433.83	0.0205613
0001.CSV	2437.68	0.0206091
0001.CSV	2441.54	0.020601
0001.CSV	2445.4	0.0206189
0001.CSV	2449.26	0.0206701
0001.CSV	2453.11	0.0207502
0001.CSV	2456.97	0.0208034
0001.CSV	2460.83	0.0208741
0001.CSV	2464.68	0.0209612
0001.CSV	2468.54	0.0210904
0001.CSV	2472.4	0.0212652
0001.CSV	2476.26	0.0215101
0001.CSV	2480.11	0.0217805
0001.CSV	2483.97	0.0220852
0001.CSV	2487.83	0.0223841
0001.CSV	2491.68	0.0226821
0001.CSV	2495.54	0.0229058
0001.CSV	2499.4	0.0230506
0001.CSV	2503.26	0.0230859
0001.CSV	2507.11	0.0230986
0001.CSV	2510.97	0.0231378
0001.CSV	2514.83	0.0232776
0001.CSV	2518.68	0.0234751
0001.CSV	2522.54	0.023606
0001.CSV	2526.4	0.0235724
0001.CSV	2530.26	0.0234173
0001.CSV	2534.11	0.0231566
0001.CSV	2537.97	0.0228693
0001.CSV	2541.83	0.0226576
0001.CSV	2545.68	0.0225302
0001.CSV	2549.54	0.0224007
0001.CSV	2553.4	0.0222519
0001.CSV	2557.26	0.0220571
0001.CSV	2561.11	0.0218756
0001.CSV	2564.97	0.0216831
0001.CSV	2568.83	0.0214899
0001.CSV	2572.68	0.0213216
0001.CSV	2576.54	0.0211894
0001.CSV	2580.4	0.0210409
0001.CSV	2584.25	0.0209602
0001.CSV	2588.11	0.0209025
0001.CSV	2591.97	0.0208479
0001.CSV	2595.83	0.0207804
0001.CSV	2599.68	0.0207245
0001.CSV	2603.54	0.0206917
0001.CSV	2607.4	0.0206786
0001.CSV	2611.25	0.0206713
0001.CSV	2615.11	0.0206786
0001.CSV	2618.97	0.0206734
0001.CSV	2622.82	0.0207241
0001.CSV	2626.68	0.0207392
0001.CSV	2630.54	0.0207041
0001.CSV	2634.4	0.0207066
0001.CSV	2638.25	0.020676
0001.CSV	2642.11	0.0205301
0001.CSV	2645.97	0.0204015
0001.CSV	2649.82	0.0203096
0001.CSV	2653.68	0.0202343
0001.CSV	2657.54	0.0201446
0001.CSV	2661.4	0.0200631
0001.CSV	2665.25	0.0199939
0001.CSV	2669.11	0.0199841
0001.CSV	2672.97	0.0200739
0001.CSV	2676.82	0.0202093
0001.CSV	2680.68	0.0201816
0001.CSV	2684.54	0.0199938
0001.CSV	2688.4	0.0198912
0001.CSV	2692.25	0.0198652
0001.CSV	2696.11	0.0198808
0001.CSV	2699.97	0.0198842
0001.CSV	2703.82	0.0198701
0001.CSV	2707.68	0.0199489
0001.CSV	2711.54	0.019997
0001.CSV	2715.4	0.0199975
0001.CSV	2719.25	0.0201109
0001.CSV	2723.11	0.0203132
0001.CSV	2726.97	0.0202883
0001.CSV	2730.82	0.0200835
0001.CSV	2734.68	0.0200612
0001.CSV	2738.54	0.0201004
0001.CSV	2742.4	0.0201424
0001.CSV	2746.25	0.0203561
0001.CSV	2750.11	0.0203866
0001.CSV	2753.97	0.0202292
0001.CSV	2757.82	0.0201925
0001.CSV	2761.68	0.0201551
0001.CSV	2765.54	0.0201392
0001.CSV	2769.39	0.0202767
0001.CSV	2773.25	0.0205432
0001.CSV	2777.11	0.0205376
0001.CSV	2780.97	0.0203965
0001.CSV	2784.82	0.0205513
0001.CSV	2788.68	0.020893
0001.CSV	2792.54	0.0210131
0001.CSV	2796.39	0.0210233
0001.CSV	2800.25	0.0209476
0001.CSV	2804.11	0.0208417
0001.CSV	2807.97	0.0210307
0001.CSV	2811.82	0.0210869
0001.CSV	2815.68	0.0210087
0001.CSV	2819.54	0.0211262
0001.CSV	2823.39	0.0212968
0001.CSV	2827.25	0.0214272
0001.CSV	2831.11	0.0218173
0001.CSV	2834.97	0.0224622
0001.CSV	2838.82	0.0230082
0001.CSV	2842.68	0.0235195
0001.CSV	2846.54	0.0245898
0001.CSV	2850.39	0.025453
0001.CSV	2854.25	0.0255296
0001.CSV	2858.11	0.0252554
0001.CSV	2861.97	0.0247294
0001.CSV	2865.82	0.0242527
0001.CSV	2869.68	0.0242607
0001.CSV	2873.54	0.0242927
0001.CSV	2877.39	0.0237714
0001.CSV	2881.25	0.0233818
0001.CSV	2885.11	0.0234239
0001.CSV	2888.97	0.0236884
0001.CSV	2892.82	0.0242293
0001.CSV	2896.68	0.024668
0001.CSV	2900.54	0.0248533
0001.CSV	2904.39	0.0253504
0001.CSV	2908.25	0.0263386
0001.CSV	2912.11	0.0278477
0001.CSV	2915.97	0.0291376
0001.CSV	2919.82	0.0294676
0001.CSV	2923.68	0.0292322
0001.CSV	2927.54	0.0289558
0001.CSV	2931.39	0.0281241
0001.CSV	2935.25	0.0268154
0001.CSV	2939.11	0.0260137
0001.CSV	2942.96	0.0258609
0001.CSV	2946.82	0.0255929
0001.CSV	2950.68	0.0251401
0001.CSV	2954.54	0.0246371
0001.CSV	2958.39	0.0240793
0001.CSV	2962.25	0.0236864
0001.CSV	2966.11	0.0230956
0001.CSV	2969.96	0.0227304
0001.CSV	2973.82	0.0227028
0001.CSV	2977.68	0.0226359
0001.CSV	2981.53	0.0222252
0001.CSV	2985.39	0.0215774
0001.CSV	2989.25	0.0214529
0001.CSV	2993.11	0.021589
0001.CSV	2996.96	0.0213639
0001.CSV	3000.82	0.0209736
0001.CSV	3004.68	0.0207265
0001.CSV	3008.53	0.0209316
0001.CSV	3012.39	0.0213055
0001.CSV	3016.25	0.0212385
0001.CSV	3020.11	0.0208515
0001.CSV	3023.96	0.02055
0001.CSV	3027.82	0.0204706
0001.CSV	3031.68	0.0207151
0001.CSV	3035.53	0.0208187
0001.CSV	3039.39	0.020847
0001.CSV	3043.25	0.0209309
0001.CSV	3047.11	0.0208082
0001.CSV	3050.96	0.0207428
0001.CSV	3054.82	0.0206604
0001.CSV	3058.68	0.0204594
0001.CSV	3062.53	0.0205064
0001.CSV	3066.39	0.0207552
0001.CSV	3070.25	0.0207138
0001.CSV	3074.11	0.0207191
0001.CSV	3077.96	0.0209645
0001.CSV	3081.82	0.021095
0001.CSV	3085.68	0.021048
0001.CSV	3089.53	0.0208785
0001.CSV	3093.39	0.0206164
0001.CSV	3097.25	0.0206474
0001.CSV	3101.11	0.0207473
0001.CSV	3104.96	0.0207748
0001.CSV	3108.82	0.0209325
0001.CSV	3112.68	0.0210599
0001.CSV	3116.53	0.0212644
0001.CSV	3120.39	0.021207
0001.CSV	3124.25	0.0209063
0001.CSV	3128.11	0.0208285
0001.CSV	3131.96	0.0207997
0001.CSV	3135.82	0.0209245
0001.CSV	3139.68	0.0210644
0001.CSV	3143.53	0.0208707
0001.CSV	3147.39	0.0209303
0001.CSV	3151.25	0.0212498
0001.CSV	3155.1	0.021191
0001.CSV	3158.96	0.0208757
0001.CSV	3162.82	0.0207848
0001.CSV	3166.68	0.0207848
0001.CSV	3170.53	0.0208276
0001.CSV	3174.39	0.0208575
0001.CSV	3178.25	0.0209526
0001.CSV	3182.1	0.021024
0001.CSV	3185.96	0.0210823
0001.CSV	3189.82	0.0211239
0001.CSV	3193.68	0.021116
0001.CSV	3197.53	0.0211329
0001.CSV	3201.39	0.0212497
0001.CSV	3205.25	0.0213055
0001.CSV	3209.1	0.0212686
0001.CSV	3212.96	0.0213838
0001.CSV	3216.82	0.0215108
0001.CSV	3220.68	0.021425
0001.CSV	3224.53	0.0213475
0001.CSV	3228.39	0.0215252
0001.CSV	3232.25	0.0218902
0001.CSV	3236.1	0.0218733
0001.CSV	3239.96	0.0216701
0001.CSV	3243.82	0.0217845
0001.CSV	3247.68	0.021901
0001.CSV	3251.53	0.0218237
0001.CSV	3255.39	0.0218403
0001.CSV	3259.25	0.0217036
0001.CSV	3263.1	0.0216347
0001.CSV	3266.96	0.0218768
0001.CSV	3270.82	0.0221715
0001.CSV	3274.68	0.022092
0001.CSV	3278.53	0.0218238
0001.CSV	3282.39	0.0216725
0001.CSV	3286.25	0.0217437
0001.CSV	3290.1	0.0220605
0001.CSV	3293.96	0.0222848
0001.CSV	3297.82	0.022093
0001.CSV	3301.67	0.0220719
0001.CSV	3305.53	0.0222688
0001.CSV	3309.39	0.0221439
0001.CSV	3313.25	0.0217287
0001.CSV	3317.1	0.0214428
0001.CSV	3320.96	0.0215032
0001.CSV	3324.82	0.0216946
0001.CSV	3328.67	0.021487
0001.CSV	3332.53	0.021352
0001.CSV	3336.39	0.0216804
0001.CSV	3340.24	0.0218583
0001.CSV	3344.1	0.0216592
0001.CSV	3347.96	0.0216223
0001.CSV	3351.82	0.021565
0001.CSV	3355.67	0.0213544
0001.CSV	3359.53	0.0214182
0001.CSV	3363.39	0.0216075
0001.CSV	3367.24	0.0218566
0001.CSV	3371.1	0.0216929
0001.CSV	3374.96	0.0213678
0001.CSV	3378.82	0.0212272
0001.CSV	3382.67	0.020967
0001.CSV	3386.53	0.0209776
0001.CSV	3390.39	0.0212674
0001.CSV	3394.24	0.0213639
0001.CSV	3398.1	0.0213633
0001.CSV	3401.96	0.0212299
0001.CSV	3405.82	0.0209552
0001.CSV	3409.67	0.0209746
0001.CSV	3413.53	0.020744
0001.CSV	3417.39	0.0203896
0001.CSV	3421.24	0.0203259
0001.CSV	3425.1	0.0204361
0001.CSV	3428.96	0.0206439
0001.CSV	3432.82	0.0207319
0001.CSV	3436.67	0.0205191
0001.CSV	3440.53	0.0200124
0001.CSV	3444.39	0.0197453
0001.CSV	3448.24	0.019674
0001.CSV	3452.1	0.0195174
0001.CSV	3455.96	0.0194877
0001.CSV	3459.82	0.0196078
0001.CSV	3463.67	0.0198266
0001.CSV	3467.53	0.0199892
0001.CSV	3471.39	0.0196221
0001.CSV	3475.24	0.0193066
0001.CSV	3479.1	0.0193144
0001.CSV	3482.96	0.0191538
0001.CSV	3486.82	0.019086
0001.CSV	3490.67	0.0190556
0001.CSV	3494.53	0.0190692
0001.CSV	3498.39	0.0189647
0001.CSV	3502.24	0.018729
0001.CSV	3506.1	0.0183433
0001.CSV	3509.96	0.018205
0001.CSV	3513.81	0.0182725
0001.CSV	3517.67	0.0180375
0001.CSV	3521.53	0.0179455
0001.CSV	3525.39	0.0178222
0001.CSV	3529.24	0.017591
0001.CSV	3533.1	0.0177005
0001.CSV	3536.96	0.0178099
0001.CSV	3540.81	0.0178325
0001.CSV	3544.67	0.0178701
0001.CSV	3548.53	0.0176159
0001.CSV	3552.39	0.0172661
0001.CSV	3556.24	0.0170991
0001.CSV	3560.1	0.0169784
0001.CSV	3563.96	0.01659
0001.CSV	3567.81	0.0167201
0001.CSV	3571.67	0.0168849
0001.CSV	3575.53	0.0166217
0001.CSV	3579.39	0.0166668
0001.CSV	3583.24	0.0167398
0001.CSV	3587.1	0.0167365
0001.CSV	3590.96	0.0166327
0001.CSV	3594.81	0.0164034
0001.CSV	3598.67	0.0164774
0001.CSV	3602.53	0.0164161
0001.CSV	3606.39	0.0159368
0001.CSV	3610.24	0.0156285
0001.CSV	3614.1	0.0156451
0001.CSV	3617.96	0.0158469
0001.CSV	3621.81	0.0159835
0001.CSV	3625.67	0.015497
0001.CSV	3629.53	0.015379
0001.CSV	3633.39	0.0157876
0001.CSV	3637.24	0.0156285
0001.CSV	3641.1	0.0153195
0001.CSV	3644.96	0.0148446
0001.CSV	3648.81	0.01511
0001.CSV	3652.67	0.0157223
0001.CSV	3656.53	0.015758
0001.CSV	3660.38	0.0156899
0001.CSV	3664.24	0.0151369
0001.CSV	3668.1	0.014612
0001.CSV	3671.96	0.0145738
0001.CSV	3675.81	0.0149572
0001.CSV	3679.67	0.015262
0001.CSV	3683.53	0.0150846
0001.CSV	3687.38	0.0150154
0001.CSV	3691.24	0.0154798
0001.CSV	3695.1	0.0153354
0001.CSV	3698.95	0.0149235
0001.CSV	3702.81	0.0147979
0001.CSV	3706.67	0.0144753
0001.CSV	3710.53	0.0143946
0001.CSV	3714.38	0.014837
0001.CSV	3718.24	0.0145713
0001.CSV	3722.1	0.0143906
0001.CSV	3725.95	0.0145258
0001.CSV	3729.81	0.0144224
0001.CSV	3733.67	0.0145068
0001.CSV	3737.53	0.0150632
0001.CSV	3741.38	0.0144305
0001.CSV	3745.24	0.0137454
0001.CSV	3749.1	0.0138115
0001.CSV	3752.95	0.0143637
0001.CSV	3756.81	0.0143625
0001.CSV	3760.67	0.0143249
0001.CSV	3764.53	0.0141859
0001.CSV	3768.38	0.0142611
0001.CSV	3772.24	0.0144898
0001.CSV	3776.1	0.0143973
0001.CSV	3779.95	0.0143742
0001.CSV	3783.81	0.0143813
0001.CSV	3787.67	0.0144395
0001.CSV	3791.53	0.0142784
0001.CSV	3795.38	0.0138464
0001.CSV	3799.24	0.0136891
0001.CSV	3803.1	0.0140238
0001.CSV	3806.95	0.0143791
0001.CSV	3810.81	0.014177
0001.CSV	3814.67	0.0137682
0001.CSV	3818.53	0.0138957
0001.CSV	3822.38	0.0142757
0001.CSV	3826.24	0.0141672
0001.CSV	3830.1	0.0138859
0001.CSV	3833.95	0.0138262
0001.CSV	3837.81	0.0140654
0001.CSV	3841.67	0.0144778
0001.CSV	3845.53	0.0142597
0001.CSV	3849.38	0.0135787
0001.CSV	3853.24	0.0136263
0001.CSV	3857.1	0.0142255
0001.CSV	3860.95	0.0138567
0001.CSV	3864.81	0.0137935
0001.CSV	3868.67	0.01392
0001.CSV	3872.52	0.0141385
0001.CSV	3876.38	0.0139778
0001.CSV	3880.24	0.0138353
0001.CSV	3884.1	0.0141617
0001.CSV	3887.95	0.0142278
0001.CSV	3891.81	0.0142175
0001.CSV	3895.67	0.0139994
0001.CSV	3899.52	0.0136809
0001.CSV	3903.38	0.0141653
0001.CSV	3907.24	0.0144959
0001.CSV	3911.1	0.014214
0001.CSV	3914.95	0.013935
0001.CSV	3918.81	0.0140039
0001.CSV	3922.67	0.0140681
0001.CSV	3926.52	0.0140805
0001.CSV	3930.38	0.0141578
0001.CSV	3934.24	0.0143436
0001.CSV	3938.09	0.0141387
0001.CSV	3941.95	0.0140228
0001.CSV	3945.81	0.0140951
0001.CSV	3949.67	0.0141781
0001.CSV	3953.52	0.0141928
0001.CSV	3957.38	0.014133
0001.CSV	3961.24	0.0141739
0001.CSV	3965.09	0.0141788
0001.CSV	3968.95	0.0141287
0001.CSV	3972.81	0.014197
0001.CSV	3976.67	0.0142912
0001.CSV	3980.52	0.0142675
0001.CSV	3984.38	0.0142251
0001.CSV	3988.24	0.0141953
0001.CSV	3992.09	0.0141969
0001.CSV	3995.95	0.0141987
0001.CSV	3999.81	0.0141918
0002.CSV	674.992	0.0486012
0002.CSV	678.849	0.0510485
0002.CSV	682.706	0.0518856
0002.CSV	686.563	0.0529694
0002.CSV	690.42	0.0536645
0002.CSV	694.277	0.0574872
0002.CSV	698.134	0.0632414
0002.CSV	701.991	0.0720429
0002.CSV	705.849	0.0881323
0002.CSV	709.706	0.111888
0002.CSV	713.563	0.108475
0002.CSV	717.42	0.0766338
0002.CSV	721.277	0.0526953
0002.CSV	725.134	0.0454065
0002.CSV	728.991	0.043503
0002.CSV	732.848	0.0441485
0002.CSV	736.705	0.0442147
0002.CSV	740.562	0.0439169
0002.CSV	744.42	0.0433919
0002.CSV	748.277	0.0443821
0002.CSV	752.134	0.0451178
0002.CSV	755.991	0.0462509
0002.CSV	759.848	0.0467447
0002.CSV	763.705	0.0476562
0002.CSV	767.562	0.04798
0002.CSV	771.419	0.0488225
0002.CSV	775.276	0.0490225
0002.CSV	779.133	0.0496089
0002.CSV	782.99	0.0496727
0002.CSV	786.848	0.0500868
0002.CSV	790.705	0.0504532
0002.CSV	794.562	0.0521491
0002.CSV	798.419	0.0540105
0002.CSV	802.276	0.0564709
0002.CSV	806.133	0.0579917
0002.CSV	809.99	0.0595016
0002.CSV	813.847	0.0610122
0002.CSV	817.704	0.064399
0002.CSV	821.562	0.0695042
0002.CSV	825.419	0.0762858
0002.CSV	829.276	0.0803524
0002.CSV	833.133	0.0802048
0002.CSV	836.99	0.0779157
0002.CSV	840.847	0.0790594
0002.CSV	844.704	0.083895
0002.CSV	848.561	0.089064
0002.CSV	852.418	0.0979922
0002.CSV	856.275	0.120906
0002.CSV	860.132	0.14747
0002.CSV	863.99	0.178687
0002.CSV	867.847	0.225451
0002.CSV	871.704	0.252422
0002.CSV	875.561	0.2229
0002.CSV	879.418	0.169423
0002.CSV	883.275	0.112233
0002.CSV	887.132	0.0640536
0002.CSV	890.989	0.0424774
0002.CSV	894.846	0.0401812
0002.CSV	898.703	0.0412782
0002.CSV	902.561	0.0429244
0002.CSV	906.418	0.044254
0002.CSV	910.275	0.045984
0002.CSV	914.132	0.0473234
0002.CSV	917.989	0.0488253
0002.CSV	921.846	0.0498886
0002.CSV	925.703	0.0512843
0002.CSV	929.56	0.0522734
0002.CSV	933.417	0.0533908
0002.CSV	937.274	0.0540389
0002.CSV	941.131	0.0548931
0002.CSV	944.989	0.0554406
0002.CSV	948.846	0.0562398
0002.CSV	952.703	0.0566929
0002.CSV	956.56	0.0573841
0002.CSV	960.417	0.0577181
0002.CSV	964.274	0.0583292
0002.CSV	968.131	0.0587512
0002.CSV	971.988	0.0595378
0002.CSV	975.845	0.0600623
0002.CSV	979.702	0.0609635
0002.CSV	983.559	0.0618238
0002.CSV	987.417	0.063172
0002.CSV	991.274	0.0644374
0002.CSV	995.131	0.0661733
0002.CSV	998.988	0.0678202
0002.CSV	1002.85	0.0702214
0002.CSV	1006.7	0.0730187
0002.CSV	1010.56	0.0763321
0002.CSV	1014.42	0.078055
0002.CSV	1018.27	0.0787901
0002.CSV	1022.13	0.0794097
0002.CSV	1025.99	0.080878
0002.CSV	1029.85	0.0820443
0002.CSV	1033.7	0.0831775
0002.CSV	1037.56	0.0835612
0002.CSV	1041.42	0.0837328
0002.CSV	1045.27	0.0830969
0002.CSV	1049.13	0.082634
0002.CSV	1052.99	0.0821131
0002.CSV	1056.84	0.0824809
0002.CSV	1060.7	0.0832075
0002.CSV	1064.56	0.0847727
0002.CSV	1068.42	0.086288
0002.CSV	1072.27	0.0882634
0002.CSV	1076.13	0.0901862
0002.CSV	1079.99	0.0932899
0002.CSV	1083.84	0.0957704
0002.CSV	1087.7	0.0961041
0002.CSV	1091.56	0.0943931
0002.CSV	1095.41	0.0926694
0002.CSV	1099.27	0.0915
0002.CSV	1103.13	0.0917387
0002.CSV	1106.99	0.091967
0002.CSV	1110.84	0.0922169
0002.CSV	1114.7	0.0919403
0002.CSV	1118.56	0.0917573
0002.CSV	1122.41	0.0909049
0002.CSV	1126.27	0.0899493
0002.CSV	1130.13	0.0885247
0002.CSV	1133.99	0.0873807
0002.CSV	1137.84	0.0862259
0002.CSV	1141.7	0.085804
0002.CSV	1145.56	0.0856031
0002.CSV	1149.41	0.0860246
0002.CSV	1153.27	0.0863388
0002.CSV	1157.13	0.0869039
0002.CSV	1160.99	0.0872391
0002.CSV	1164.84	0.0879706
0002.CSV	1168.7	0.0889562
0002.CSV	1172.56	0.0914233
0002.CSV	1176.41	0.0952304
0002.CSV	1180.27	0.0991472
0002.CSV	1184.13	0.099634
0002.CSV	1187.99	0.0971946
0002.CSV	1191.84	0.0938448
0002.CSV	1195.7	0.092043
0002.CSV	1199.56	0.0917852
0002.CSV	1203.41	0.0931723
0002.CSV	1207.27	0.0952974
0002.CSV	1211.13	0.098387
0002.CSV	1214.98	0.101555
0002.CSV	1218.84	0.105039
0002.CSV	1222.7	0.108194
0002.CSV	1226.56	0.111437
0002.CSV	1230.41	0.114151
0002.CSV	1234.27	0.116856
0002.CSV	1238.13	0.118876
0002.CSV	1241.98	0.120802
0002.CSV	1245.84	0.122152
0002.CSV	1249.7	0.12318
0002.CSV	1253.56	0.122771
0002.CSV	1257.41	0.12169
0002.CSV	1261.27	0.120292
0002.CSV	1265.13	0.120119
0002.CSV	1268.98	0.120879
0002.CSV	1272.84	0.122951
0002.CSV	1276.7	0.125406
0002.CSV	1280.56	0.128826
0002.CSV	1284.41	0.132491
0002.CSV	1288.27	0.136911
0002.CSV	1292.13	0.141084
0002.CSV	1295.98	0.145373
0002.CSV	1299.84	0.149107
0002.CSV	1303.7	0.153009
0002.CSV	1307.56	0.156683
0002.CSV	1311.41	0.161079
0002.CSV	1315.27	0.165454
0002.CSV	1319.13	0.170827
0002.CSV	1322.98	0.176438
0002.CSV	1326.84	0.183026
0002.CSV	1330.7	0.189887
0002.CSV	1334.56	0.197398
0002.CSV	1338.41	0.205926
0002.CSV	1342.27	0.216286
0002.CSV	1346.13	0.22533
0002.CSV	1349.98	0.235794
0002.CSV	1353.84	0.247045
0002.CSV	1357.7	0.259638
0002.CSV	1361.56	0.272765
0002.CSV	1365.41	0.286298
0002.CSV	1369.27	0.296447
0002.CSV	1373.13	0.308769
0002.CSV	1376.98	0.322934
0002.CSV	1380.84	0.33678
0002.CSV	1384.7	0.348202
0002.CSV	1388.56	0.35917
0002.CSV	1392.41	0.364253
0002.CSV	1396.27	0.364795
0002.CSV	1400.13	0.359733
0002.CSV	1403.98	0.354442
0002.CSV	1407.84	0.345303
0002.CSV	1411.7	0.333272
0002.CSV	1415.55	0.318811
0002.CSV	1419.41	0.302679
0002.CSV	1423.27	0.288931
0002.CSV	1427.12	0.280245
0002.CSV	1430.98	0.271446
0002.CSV	1434.84	0.263787
0002.CSV	1438.7	0.255188
0002.CSV	1442.55	0.248956
0002.CSV	1446.41	0.24164
0002.CSV	1450.27	0.234023
0002.CSV	1454.12	0.226811
0002.CSV	1457.98	0.216849
0002.CSV	1461.84	0.208068
0002.CSV	1465.7	0.201257
0002.CSV	1469.55	0.193841
0002.CSV	1473.41	0.185123
0002.CSV	1477.27	0.175328
0002.CSV	1481.12	0.168655
0002.CSV	1484.98	0.162062
0002.CSV	1488.84	0.154818
0002.CSV	1492.7	0.147851
0002.CSV	1496.55	0.143421
0002.CSV	1500.41	0.139813
0002.CSV	1504.27	0.138369
0002.CSV	1508.12	0.133948
0002.CSV	1511.98	0.126779
0002.CSV	1515.84	0.117635
0002.CSV	1519.7	0.106468
0002.CSV	1523.55	0.0966594
0002.CSV	1527.41	0.0909359
0002.CSV	1531.27	0.0859793
0002.CSV	1535.12	0.0814192
0002.CSV	1538.98	0.0765316
0002.CSV	1542.84	0.0695082
0002.CSV	1546.7	0.0646004
0002.CSV	1550.55	0.0611473
0002.CSV	1554.41	0.0578078
0002.CSV	1558.27	0.0544271
0002.CSV	1562.12	0.0513372
0002.CSV	1565.98	0.0500216
0002.CSV	1569.84	0.0486922
0002.CSV	1573.69	0.0479652
0002.CSV	1577.55	0.0474844
0002.CSV	1581.41	0.0466386
0002.CSV	1585.27	0.0449471
0002.CSV	1589.12	0.0430044
0002.CSV	1592.98	0.0413413
0002.CSV	1596.84	0.0405024
0002.CSV	1600.69	0.0402168
0002.CSV	1604.55	0.0403268
0002.CSV	1608.41	0.0396085
0002.CSV	1612.27	0.0379548
0002.CSV	1616.12	0.0354969
0002.CSV	1619.98	0.0333675
0002.CSV	1623.84	0.0320022
0002.CSV	1627.69	0.0311647
0002.CSV	1631.55	0.0305071
0002.CSV	1635.41	0.030206
0002.CSV	1639.27	0.0299839
0002.CSV	1643.12	0.0297015
0002.CSV	1646.98	0.029439
0002.CSV	1650.84	0.0293745
0002.CSV	1654.69	0.0292522
0002.CSV	1658.55	0.0290477
0002.CSV	1662.41	0.0287513
0002.CSV	1666.27	0.0286461
0002.CSV	1670.12	0.0285482
0002.CSV	1673.98	0.0287117
0002.CSV	1677.84	0.0287498
0002.CSV	1681.69	0.0290788
0002.CSV	1685.55	0.0297566
0002.CSV	1689.41	0.0294743
0002.CSV	1693.27	0.0284606
0002.CSV	1697.12	0.0276825
0002.CSV	1700.98	0.0272176
0002.CSV	1704.84	0.027078
0002.CSV	1708.69	0.0268924
0002.CSV	1712.55	0.0267919
0002.CSV	1716.41	0.0269213
0002.CSV	1720.27	0.027293
0002.CSV	1724.12	0.0272457
0002.CSV	1727.98	0.0272286
0002.CSV	1731.84	0.0271795
0002.CSV	1735.69	0.0272345
0002.CSV	1739.55	0.0268168
0002.CSV	1743.41	0.0263108
0002.CSV	1747.27	0.0257383
0002.CSV	1751.12	0.0254272
0002.CSV	1754.98	0.0251211
0002.CSV	1758.84	0.0249718
0002.CSV	1762.69	0.0249016
0002.CSV	1766.55	0.0249052
0002.CSV	1770.41	0.0250503
0002.CSV	1774.26	0.0256169
0002.CSV	1778.12	0.0260114
0002.CSV	1781.98	0.0268069
0002.CSV	1785.84	0.0280322
0002.CSV	1789.69	0.0297927
0002.CSV	1793.55	0.0316892
0002.CSV	1797.41	0.0318391
0002.CSV	1801.26	0.030041
0002.CSV	1805.12	0.0278621
0002.CSV	1808.98	0.026276
0002.CSV	1812.84	0.0254092
0002.CSV	1816.69	0.0248512
0002.CSV	1820.55	0.0245583
0002.CSV	1824.41	0.024307
0002.CSV	1828.26	0.0242626
0002.CSV	1832.12	0.0241577
0002.CSV	1835.98	0.0240518
0002.CSV	1839.84	0.0238851
0002.CSV	1843.69	0.0239621
0002.CSV	1847.55	0.0240554
0002.CSV	1851.41	0.0240121
0002.CSV	1855.26	0.0239265
0002.CSV	1859.12	0.0239846
0002.CSV	1862.98	0.0239506
0002.CSV	1866.84	0.0240296
0002.CSV	1870.69	0.0241646
0002.CSV	1874.55	0.024147
0002.CSV	1878.41	0.0240786
0002.CSV	1882.26	0.0241483
0002.CSV	1886.12	0.0241376
0002.CSV	1889.98	0.0242111
0002.CSV	1893.83	0.0242285
0002.CSV	1897.69	0.0242346
0002.CSV	1901.55	0.0241546
0002.CSV	1905.41	0.0241395
0002.CSV	1909.26	0.0241408
0002.CSV	1913.12	0.0241386
0002.CSV	1916.98	0.0240836
0002.CSV	1920.83	0.0241696
0002.CSV	1924.69	0.0241521
0002.CSV	1928.55	0.0241191
0002.CSV	1932.4	0.0240845
0002.CSV	1936.26	0.024102
0002.CSV	1940.12	0.02406
0002.CSV	1943.98	0.0241751
0002.CSV	1947.83	0.0241828
0002.CSV	1951.69	0.0241751
0002.CSV	1955.55	0.0241691
0002.CSV	1959.4	0.0242168
0002.CSV	1963.26	0.024206
0002.CSV	1967.12	0.024259
0002.CSV	1970.98	0.0242509
0002.CSV	1974.83	0.0242319
0002.CSV	1978.69	0.0241723
0002.CSV	1982.55	0.0241901
0002.CSV	1986.4	0.0241882
0002.CSV	1990.26	0.02427
0002.CSV	1994.12	0.0242907
0002.CSV	1997.98	0.0242737
0002.CSV	2001.83	0.0242341
0002.CSV	2005.69	0.0242808
0002.CSV	2009.55	0.0242933
0002.CSV	2013.4	0.0242975
0002.CSV	2017.26	0.0242835
0002.CSV	2021.12	0.0243351
0002.CSV	2024.97	0.024301
0002.CSV	2028.83	0.0242968
0002.CSV	2032.69	0.0242662
0002.CSV	2036.55	0.0242753
0002.CSV	2040.4	0.0242732
0002.CSV	2044.26	0.0243382
0002.CSV	2048.12	0.0243175
0002.CSV	2051.97	0.0243097
0002.CSV	2055.83	0.0243056
0002.CSV	2059.69	0.0243323
0002.CSV	2063.55	0.0243341
0002.CSV	2067.4	0.0243924
0002.CSV	2071.26	0.0243711
0002.CSV	2075.12	0.0243796
0002.CSV	2078.97	0.0243915
0002.CSV	2082.83	0.0244259
0002.CSV	2086.69	0.0244047
0002.CSV	2090.55	0.024423
0002.CSV	2094.4	0.0243946
0002.CSV	2098.26	0.0243831
0002.CSV	2102.12	0.0243743
0002.CSV	2105.97	0.0244079
0002.CSV	2109.83	0.0244113
0002.CSV	2113.69	0.0244701
0002.CSV	2117.55	0.0245074
0002.CSV	2121.4	0.0245606
0002.CSV	2125.26	0.0245963
0002.CSV	2129.12	0.0246649
0002.CSV	2132.97	0.0246801
0002.CSV	2136.83	0.0247258
0002.CSV	2140.69	0.024742
0002.CSV	2144.55	0.0247685
0002.CSV	2148.4	0.0247434
0002.CSV	2152.26	0.0247614
0002.CSV	2156.12	0.0247446
0002.CSV	2159.97	0.0247309
0002.CSV	2163.83	0.0247053
0002.CSV	2167.69	0.0247445
0002.CSV	2171.55	0.0247554
0002.CSV	2175.4	0.0247823
0002.CSV	2179.26	0.0247955
0002.CSV	2183.12	0.0248316
0002.CSV	2186.97	0.0248299
0002.CSV	2190.83	0.0248662
0002.CSV	2194.69	0.0248844
0002.CSV	2198.55	0.0248977
0002.CSV	2202.4	0.0248571
0002.CSV	2206.26	0.0248648
0002.CSV	2210.12	0.0248813
0002.CSV	2213.97	0.0249157
0002.CSV	2217.83	0.0249031
0002.CSV	2221.69	0.0249351
0002.CSV	2225.54	0.0249504
0002.CSV	2229.4	0.0249538
0002.CSV	2233.26	0.024931
0002.CSV	2237.12	0.024963
0002.CSV	2240.97	0.0249704
0002.CSV	2244.83	0.0249744
0002.CSV	2248.69	0.0249711
0002.CSV	2252.54	0.0250189
0002.CSV	2256.4	0.0250257
0002.CSV	2260.26	0.0250532
0002.CSV	2264.11	0.0250766
0002.CSV	2267.97	0.0251079
0002.CSV	2271.83	0.0250944
0002.CSV	2275.69	0.0251091
0002.CSV	2279.54	0.025108
0002.CSV	2283.4	0.0251308
0002.CSV	2287.26	0.0251915
0002.CSV	2291.11	0.0253318
0002.CSV	2294.97	0.0254818
0002.CSV	2298.83	0.025662
0002.CSV	2302.69	0.0257894
0002.CSV	2306.54	0.0259788
0002.CSV	2310.4	0.0261892
0002.CSV	2314.26	0.0263292
0002.CSV	2318.11	0.0264126
0002.CSV	2321.97	0.0266263
0002.CSV	2325.83	0.0267814
0002.CSV	2329.69	0.0269342
0002.CSV	2333.54	0.0268429
0002.CSV	2337.4	0.0267923
0002.CSV	2341.26	0.0268149
0002.CSV	2345.11	0.0269748
0002.CSV	2348.97	0.0268355
0002.CSV	2352.83	0.0265265
0002.CSV	2356.69	0.0258472
0002.CSV	2360.54	0.0253059
0002.CSV	2364.4	0.0255237
0002.CSV	2368.26	0.026358
0002.CSV	2372.11	0.0266533
0002.CSV	2375.97	0.0264995
0002.CSV	2379.83	0.0261029
0002.CSV	2383.69	0.0256959
0002.CSV	2387.54	0.0253645
0002.CSV	2391.4	0.0252342
0002.CSV	2395.26	0.0251869
0002.CSV	2399.11	0.0252005
0002.CSV	2402.97	0.0252234
0002.CSV	2406.83	0.0252474
0002.CSV	2410.68	0.0252351
0002.CSV	2414.54	0.025251
0002.CSV	2418.4	0.0253056
0002.CSV	2422.26	0.0253696
0002.CSV	2426.11	0.0253825
0002.CSV	2429.97	0.0254009
0002.CSV	2433.83	0.0254504
0002.CSV	2437.68	0.0255078
0002.CSV	2441.54	0.0255195
0002.CSV	2445.4	0.025558
0002.CSV	2449.26	0.0256097
0002.CSV	2453.11	0.025705
0002.CSV	2456.97	0.0257918
0002.CSV	2460.83	0.0259136
0002.CSV	2464.68	0.0260468
0002.CSV	2468.54	0.0262099
0002.CSV	2472.4	0.0264167
0002.CSV	2476.26	0.0266555
0002.CSV	2480.11	0.0269079
0002.CSV	2483.97	0.0271942
0002.CSV	2487.83	0.0275353
0002.CSV	2491.68	0.0279967
0002.CSV	2495.54	0.0285403
0002.CSV	2499.4	0.0291753
0002.CSV	2503.26	0.0298105
0002.CSV	2507.11	0.0303161
0002.CSV	2510.97	0.0305559
0002.CSV	2514.83	0.0305675
0002.CSV	2518.68	0.0303697
0002.CSV	2522.54	0.0300059
0002.CSV	2526.4	0.0294999
0002.CSV	2530.26	0.0289674
0002.CSV	2534.11	0.0284372
0002.CSV	2537.97	0.0279922
0002.CSV	2541.83	0.0276742
0002.CSV	2545.68	0.0274429
0002.CSV	2549.54	0.027269
0002.CSV	2553.4	0.0271511
0002.CSV	2557.26	0.027048
0002.CSV	2561.11	0.0269857
0002.CSV	2564.97	0.026906
0002.CSV	2568.83	0.026838
0002.CSV	2572.68	0.0268184
0002.CSV	2576.54	0.0268104
0002.CSV	2580.4	0.026742
0002.CSV	2584.25	0.0266993
0002.CSV	2588.11	0.0266616
0002.CSV	2591.97	0.0266435
0002.CSV	2595.83	0.0265943
0002.CSV	2599.68	0.0265363
0002.CSV	2603.54	0.0264533
0002.CSV	2607.4	0.0263306
0002.CSV	2611.25	0.0262314
0002.CSV	2615.11	0.0261719
0002.CSV	2618.97	0.0260597
0002.CSV	2622.82	0.0259941
0002.CSV	2626.68	0.0259427
0002.CSV	2630.54	0.0258337
0002.CSV	2634.4	0.0257751
0002.CSV	2638.25	0.0257324
0002.CSV	2642.11	0.0255747
0002.CSV	2645.97	0.0254466
0002.CSV	2649.82	0.0254117
0002.CSV	2653.68	0.025418
0002.CSV	2657.54	0.0253995
0002.CSV	2661.4	0.0253901
0002.CSV	2665.25	0.0253874
0002.CSV	2669.11	0.0254523
0002.CSV	2672.97	0.0256086
0002.CSV	2676.82	0.0257994
0002.CSV	2680.68	0.0258121
0002.CSV	2684.54	0.0256174
0002.CSV	2688.4	0.0255045
0002.CSV	2692.25	0.0255156
0002.CSV	2696.11	0.0255823
0002.CSV	2699.97	0.0256225
0002.CSV	2703.82	0.0256402
0002.CSV	2707.68	0.0257602
0002.CSV	2711.54	0.0258452
0002.CSV	2715.4	0.025883
0002.CSV	2719.25	0.0260451
0002.CSV	2723.11	0.0263413
0002.CSV	2726.97	0.0263526
0002.CSV	2730.82	0.0260966
0002.CSV	2734.68	0.0261074
0002.CSV	2738.54	0.0262077
0002.CSV	2742.4	0.0262782
0002.CSV	2746.25	0.0265677
0002.CSV	2750.11	0.0266576
0002.CSV	2753.97	0.0265089
0002.CSV	2757.82	0.0265
0002.CSV	2761.68	0.0265035
0002.CSV	2765.54	0.0265524
0002.CSV	2769.39	0.0267954
0002.CSV	2773.25	0.0271863
0002.CSV	2777.11	0.0272542
0002.CSV	2780.97	0.0271858
0002.CSV	2784.82	0.0275222
0002.CSV	2788.68	0.02813
0002.CSV	2792.54	0.0284638
0002.CSV	2796.39	0.0286823
0002.CSV	2800.25	0.0287723
0002.CSV	2804.11	0.0288127
0002.CSV	2807.97	0.0292136
0002.CSV	2811.82	0.0294563
0002.CSV	2815.68	0.0295373
0002.CSV	2819.54	0.0298431
0002.CSV	2823.39	0.0302044
0002.CSV	2827.25	0.0305402
0002.CSV	2831.11	0.0312329
0002.CSV	2834.97	0.0322797
0002.CSV	2838.82	0.0332447
0002.CSV	2842.68	0.0341457
0002.CSV	2846.54	0.0356516
0002.CSV	2850.39	0.0369977
0002.CSV	2854.25	0.0375991
0002.CSV	2858.11	0.0377558
0002.CSV	2861.97	0.0375803
0002.CSV	2865.82	0.0374893
0002.CSV	2869.68	0.0377381
0002.CSV	2873.54	0.0376415
0002.CSV	2877.39	0.0367418
0002.CSV	2881.25	0.0359312
0002.CSV	2885.11	0.0356234
0002.CSV	2888.97	0.0356686
0002.CSV	2892.82	0.0360991
0002.CSV	2896.68	0.0365051
0002.CSV	2900.54	0.0367837
0002.CSV	2904.39	0.0374016
0002.CSV	2908.25	0.0385119
0002.CSV	2912.11	0.0400865
0002.CSV	2915.97	0.0414667
0002.CSV	2919.82	0.0421027
0002.CSV	2923.68	0.0422316
0002.CSV	2927.54	0.0421335
0002.CSV	2931.39	0.0412098
0002.CSV	2935.25	0.0396605
0002.CSV	2939.11	0.0385931
0002.CSV	2942.96	0.0382296
0002.CSV	2946.82	0.0379099
0002.CSV	2950.68	0.0375051
0002.CSV	2954.54	0.037041
0002.CSV	2958.39	0.0364099
0002.CSV	2962.25	0.0357127
0002.CSV	2966.11	0.0346123
0002.CSV	2969.96	0.0335208
0002.CSV	2973.82	0.0326625
0002.CSV	2977.68	0.0318205
0002.CSV	2981.53	0.0306737
0002.CSV	2985.39	0.0293386
0002.CSV	2989.25	0.0286113
0002.CSV	2993.11	0.0282483
0002.CSV	2996.96	0.0276322
0002.CSV	3000.82	0.0269513
0002.CSV	3004.68	0.0265395
0002.CSV	3008.53	0.0266427
0002.CSV	3012.39	0.0269183
0002.CSV	3016.25	0.0268121
0002.CSV	3020.11	0.0264396
0002.CSV	3023.96	0.0262156
0002.CSV	3027.82	0.0262529
0002.CSV	3031.68	0.0266016
0002.CSV	3035.53	0.0267797
0002.CSV	3039.39	0.0268666
0002.CSV	3043.25	0.0269772
0002.CSV	3047.11	0.0268505
0002.CSV	3050.96	0.0267794
0002.CSV	3054.82	0.0267072
0002.CSV	3058.68	0.0265335
0002.CSV	3062.53	0.0265625
0002.CSV	3066.39	0.0267848
0002.CSV	3070.25	0.0267304
0002.CSV	3074.11	0.0266746
0002.CSV	3077.96	0.0268634
0002.CSV	3081.82	0.026958
0002.CSV	3085.68	0.0269185
0002.CSV	3089.53	0.0267827
0002.CSV	3093.39	0.0265815
0002.CSV	3097.25	0.0266269
0002.CSV	3101.11	0.0267058
0002.CSV	3104.96	0.0267286
0002.CSV	3108.82	0.026874
0002.CSV	3112.68	0.0270094
0002.CSV	3116.53	0.0272111
0002.CSV	3120.39	0.0271646
0002.CSV	3124.25	0.0269154
0002.CSV	3128.11	0.0268878
0002.CSV	3131.96	0.0269059
0002.CSV	3135.82	0.0270287
0002.CSV	3139.68	0.0271675
0002.CSV	3143.53	0.0270016
0002.CSV	3147.39	0.0270773
0002.CSV	3151.25	0.0273755
0002.CSV	3155.1	0.0273474
0002.CSV	3158.96	0.0270736
0002.CSV	3162.82	0.0269881
0002.CSV	3166.68	0.0270263
0002.CSV	3170.53	0.0271122
0002.CSV	3174.39	0.0271821
0002.CSV	3178.25	0.0273205
0002.CSV	3182.1	0.0274028
0002.CSV	3185.96	0.0274817
0002.CSV	3189.82	0.0275804
0002.CSV	3193.68	0.0276312
0002.CSV	3197.53	0.027694
0002.CSV	3201.39	0.0278303
0002.CSV	3205.25	0.0278981
0002.CSV	3209.1	0.0279099
0002.CSV	3212.96	0.02804
0002.CSV	3216.82	0.0281875
0002.CSV	3220.68	0.0281901
0002.CSV	3224.53	0.0281874
0002.CSV	3228.39	0.0283926
0002.CSV	3232.25	0.0287572
0002.CSV	3236.1	0.0287758
0002.CSV	3239.96	0.0286148
0002.CSV	3243.82	0.0287458
0002.CSV	3247.68	0.028879
0002.CSV	3251.53	0.0288589
0002.CSV	3255.39	0.0289147
0002.CSV	3259.25	0.0288361
0002.CSV	3263.1	0.0288223
0002.CSV	3266.96	0.0291077
0002.CSV	3270.82	0.0294334
0002.CSV	3274.68	0.029386
0002.CSV	3278.53	0.0291488
0002.CSV	3282.39	0.0290656
0002.CSV	3286.25	0.0291722
0002.CSV	3290.1	0.0294994
0002.CSV	3293.96	0.0297483
0002.CSV	3297.82	0.0295976
0002.CSV	3301.67	0.0296476
0002.CSV	3305.53	0.0298888
0002.CSV	3309.39	0.0297745
0002.CSV	3313.25	0.0293962
0002.CSV	3317.1	0.0292104
0002.CSV	3320.96	0.0293333
0002.CSV	3324.82	0.0295386
0002.CSV	3328.67	0.0293915
0002.CSV	3332.53	0.0293003
0002.CSV	3336.39	0.0296034
0002.CSV	3340.24	0.0297737
0002.CSV	3344.1	0.0296403
0002.CSV	3347.96	0.0296707
0002.CSV	3351.82	0.0295987
0002.CSV	3355.67	0.0293504
0002.CSV	3359.53	0.0294089
0002.CSV	3363.39	0.029622
0002.CSV	3367.24	0.0298875
0002.CSV	3371.1	0.0297284
0002.CSV	3374.96	0.0294157
0002.CSV	3378.82	0.0292466
0002.CSV	3382.67	0.0289892
0002.CSV	3386.53	0.0290312
0002.CSV	3390.39	0.029319
0002.CSV	3394.24	0.0294009
0002.CSV	3398.1	0.0293929
0002.CSV	3401.96	0.0292355
0002.CSV	3405.82	0.0289432
0002.CSV	3409.67	0.0288972
0002.CSV	3413.53	0.0286243
0002.CSV	3417.39	0.0282609
0002.CSV	3421.24	0.0281341
0002.CSV	3425.1	0.0281228
0002.CSV	3428.96	0.0282515
0002.CSV	3432.82	0.0283638
0002.CSV	3436.67	0.0281468
0002.CSV	3440.53	0.0276102
0002.CSV	3444.39	0.0272664
0002.CSV	3448.24	0.0271114
0002.CSV	3452.1	0.0268674
0002.CSV	3455.96	0.0267589
0002.CSV	3459.82	0.0268311
0002.CSV	3463.67	0.026984
0002.CSV	3467.53	0.0270543
0002.CSV	3471.39	0.0265944
0002.CSV	3475.24	0.0262197
0002.CSV	3479.1	0.026162
0002.CSV	3482.96	0.0259315
0002.CSV	3486.82	0.0257897
0002.CSV	3490.67	0.0256645
0002.CSV	3494.53	0.0256129
0002.CSV	3498.39	0.0254826
0002.CSV	3502.24	0.0252477
0002.CSV	3506.1	0.0247909
0002.CSV	3509.96	0.0245455
0002.CSV	3513.81	0.0245459
0002.CSV	3517.67	0.024273
0002.CSV	3521.53	0.0241517
0002.CSV	3525.39	0.0239933
0002.CSV	3529.24	0.0236977
0002.CSV	3533.1	0.0237
0002.CSV	3536.96	0.0237317
0002.CSV	3540.81	0.0237558
0002.CSV	3544.67	0.0237627
0002.CSV	3548.53	0.0234341
0002.CSV	3552.39	0.0231012
0002.CSV	3556.24	0.0229178
0002.CSV	3560.1	0.0227543
0002.CSV	3563.96	0.0223841
0002.CSV	3567.81	0.0224507
0002.CSV	3571.67	0.0225146
0002.CSV	3575.53	0.0222325
0002.CSV	3579.39	0.022288
0002.CSV	3583.24	0.022308
0002.CSV	3587.1	0.0221609
0002.CSV	3590.96	0.0219969
0002.CSV	3594.81	0.0217866
0002.CSV	3598.67	0.0218241
0002.CSV	3602.53	0.0217269
0002.CSV	3606.39	0.0212398
0002.CSV	3610.24	0.0209151
0002.CSV	3614.1	0.02085
0002.CSV	3617.96	0.0210209
0002.CSV	3621.81	0.0211717
0002.CSV	3625.67	0.0207187
0002.CSV	3629.53	0.0205862
0002.CSV	3633.39	0.0208878
0002.CSV	3637.24	0.0206947
0002.CSV	3641.1	0.0203901
0002.CSV	3644.96	0.0199414
0002.CSV	3648.81	0.0202004
0002.CSV	3652.67	0.0206841
0002.CSV	3656.53	0.0206353
0002.CSV	3660.38	0.0205495
0002.CSV	3664.24	0.0200106
0002.CSV	3668.1	0.019524
0002.CSV	3671.96	0.0195207
0002.CSV	3675.81	0.0199515
0002.CSV	3679.67	0.0202144
0002.CSV	3683.53	0.0199659
0002.CSV	3687.38	0.0199008
0002.CSV	3691.24	0.0203337
0002.CSV	3695.1	0.0201416
0002.CSV	3698.95	0.0198058
0002.CSV	3702.81	0.0197641
0002.CSV	3706.67	0.0194595
0002.CSV	3710.53	0.0193274
0002.CSV	3714.38	0.0197012
0002.CSV	3718.24	0.0195395
0002.CSV	3722.1	0.0194941
0002.CSV	3725.95	0.0196135
0002.CSV	3729.81	0.0194555
0002.CSV	3733.67	0.0195154
0002.CSV	3737.53	0.0199575
0002.CSV	3741.38	0.0193263
0002.CSV	3745.24	0.0187279
0002.CSV	3749.1	0.0187802
0002.CSV	3752.95	0.0191491
0002.CSV	3756.81	0.0190978
0002.CSV	3760.67	0.0190901
0002.CSV	3764.53	0.0190031
0002.CSV	3768.38	0.0190747
0002.CSV	3772.24	0.0192711
0002.CSV	3776.1	0.0191579
0002.CSV	3779.95	0.019163
0002.CSV	3783.81	0.0191718
0002.CSV	3787.67	0.0191867
0002.CSV	3791.53	0.0190549
0002.CSV	3795.38	0.0187095
0002.CSV	3799.24	0.018558
0002.CSV	3803.1	0.0188376
0002.CSV	3806.95	0.0191361
0002.CSV	3810.81	0.0189724
0002.CSV	3814.67	0.0186637
0002.CSV	3818.53	0.018767
0002.CSV	3822.38	0.0191075
0002.CSV	3826.24	0.0190417
0002.CSV	3830.1	0.0188209
0002.CSV	3833.95	0.0188181
0002.CSV	3837.81	0.0190636
0002.CSV	3841.67	0.0193895
0002.CSV	3845.53	0.0191808
0002.CSV	3849.38	0.018522
0002.CSV	3853.24	0.0185225
0002.CSV	3857.1	0.0191157
0002.CSV	3860.95	0.0188082
0002.CSV	3864.81	0.0187926
0002.CSV	3868.67	0.0189037
0002.CSV	3872.52	0.019135
0002.CSV	3876.38	0.0190188
0002.CSV	3880.24	0.0188936
0002.CSV	3884.1	0.0191781
0002.CSV	3887.95	0.019184
0002.CSV	3891.81	0.0191802
0002.CSV	3895.67	0.01908
0002.CSV	3899.52	0.0188416
0002.CSV	3903.38	0.0192419
0002.CSV	3907.24	0.0195232
0002.CSV	3911.1	0.0192732
0002.CSV	3914.95	0.0190087
0002.CSV	3918.81	0.0190712
0002.CSV	3922.67	0.0191563
0002.CSV	3926.52	0.0191943
0002.CSV	3930.38	0.0192417
0002.CSV	3934.24	0.0193969
0002.CSV	3938.09	0.0192305
0002.CSV	3941.95	0.0191465
0002.CSV	3945.81	0.0192083
0002.CSV	3949.67	0.0192721
0002.CSV	3953.52	0.0193365
0002.CSV	3957.38	0.0193056
0002.CSV	3961.24	0.0193165
0002.CSV	3965.09	0.0192973
0002.CSV	3968.95	0.0192423
0002.CSV	3972.81	0.0193145
0002.CSV	3976.67	0.0194115
0002.CSV	3980.52	0.0194171
0002.CSV	3984.38	0.0194344
0002.CSV	3988.24	0.0194174
0002.CSV	3992.09	0.0193586
0002.CSV	3995.95	0.0193443
0002.CSV	3999.81	0.019328
0003.CSV	674.992	0.0404243
0003.CSV	678.849	0.0420238
0003.CSV	682.706	0.0426116
0003.CSV	686.563	0.0443224
0003.CSV	690.42	0.0465915
0003.CSV	694.277	0.0549309
0003.CSV	698.134	0.0667468
0003.CSV	701.991	0.0645062
0003.CSV	705.849	0.0590192
0003.CSV	709.706	0.0764426
0003.CSV	713.563	0.0825027
0003.CSV	717.42	0.0566554
0003.CSV	721.277	0.0369027
0003.CSV	725.134	0.0335344
0003.CSV	728.991	0.0332522
0003.CSV	732.848	0.0340038
0003.CSV	736.705	0.0343813
0003.CSV	740.562	0.0352696
0003.CSV	744.42	0.0356937
0003.CSV	748.277	0.0367727
0003.CSV	752.134	0.0372314
0003.CSV	755.991	0.0382131
0003.CSV	759.848	0.03865
0003.CSV	763.705	0.0396206
0003.CSV	767.562	0.0400866
0003.CSV	771.419	0.0411972
0003.CSV	775.276	0.041823
0003.CSV	779.133	0.0429094
0003.CSV	782.99	0.0434572
0003.CSV	786.848	0.0443682
0003.CSV	790.705	0.0449997
0003.CSV	794.562	0.0464908
0003.CSV	798.419	0.0477842
0003.CSV	802.276	0.0495926
0003.CSV	806.133	0.0508019
0003.CSV	809.99	0.0527438
0003.CSV	813.847	0.0548597
0003.CSV	817.704	0.0582899
0003.CSV	821.562	0.0621381
0003.CSV	825.419	0.0674887
0003.CSV	829.276	0.0729293
0003.CSV	833.133	0.0804399
0003.CSV	836.99	0.0924254
0003.CSV	840.847	0.111106
0003.CSV	844.704	0.13099
0003.CSV	848.561	0.160718
0003.CSV	852.418	0.18254
0003.CSV	856.275	0.166388
0003.CSV	860.132	0.130061
0003.CSV	863.99	0.0953894
0003.CSV	867.847	0.0671541
0003.CSV	871.704	0.0499114
0003.CSV	875.561	0.0426624
0003.CSV	879.418	0.0393378
0003.CSV	883.275	0.036027
0003.CSV	887.132	0.03417
0003.CSV	890.989	0.0336104
0003.CSV	894.846	0.0339684
0003.CSV	898.703	0.0343516
0003.CSV	902.561	0.0351638
0003.CSV	906.418	0.0358745
0003.CSV	910.275	0.0362151
0003.CSV	914.132	0.0360086
0003.CSV	917.989	0.0364852
0003.CSV	921.846	0.036937
0003.CSV	925.703	0.0376619
0003.CSV	929.56	0.0380495
0003.CSV	933.417	0.0385478
0003.CSV	937.274	0.0387818
0003.CSV	941.131	0.0392548
0003.CSV	944.989	0.039626
0003.CSV	948.846	0.040224
0003.CSV	952.703	0.040593
0003.CSV	956.56	0.0411623
0003.CSV	960.417	0.0414335
0003.CSV	964.274	0.0418946
0003.CSV	968.131	0.0422288
0003.CSV	971.988	0.0428356
0003.CSV	975.845	0.0431881
0003.CSV	979.702	0.0437252
0003.CSV	983.559	0.0441245
0003.CSV	987.417	0.0447715
0003.CSV	991.274	0.0451526
0003.CSV	995.131	0.0457258
0003.CSV	998.988	0.0461511
0003.CSV	1002.85	0.0468647
0003.CSV	1006.7	0.0473725
0003.CSV	1010.56	0.0481338
0003.CSV	1014.42	0.0485136
0003.CSV	1018.27	0.0490675
0003.CSV	1022.13	0.049555
0003.CSV	1025.99	0.0503478
0003.CSV	1029.85	0.0508434
0003.CSV	1033.7	0.0515363
0003.CSV	1037.56	0.0519629
0003.CSV	1041.42	0.0525362
0003.CSV	1045.27	0.0527283
0003.CSV	1049.13	0.0531268
0003.CSV	1052.99	0.0532942
0003.CSV	1056.84	0.0538367
0003.CSV	1060.7	0.0542878
0003.CSV	1064.56	0.0552088
0003.CSV	1068.42	0.0561552
0003.CSV	1072.27	0.0577254
0003.CSV	1076.13	0.0605717
0003.CSV	1079.99	0.0670346
0003.CSV	1083.84	0.0683468
0003.CSV	1087.7	0.0606388
0003.CSV	1091.56	0.0556118
0003.CSV	1095.41	0.0551618
0003.CSV	1099.27	0.0552531
0003.CSV	1103.13	0.055598
0003.CSV	1106.99	0.0558145
0003.CSV	1110.84	0.0561942
0003.CSV	1114.7	0.0563343
0003.CSV	1118.56	0.0565411
0003.CSV	1122.41	0.0563843
0003.CSV	1126.27	0.0562454
0003.CSV	1130.13	0.0558761
0003.CSV	1133.99	0.0556772
0003.CSV	1137.84	0.055355
0003.CSV	1141.7	0.0553142
0003.CSV	1145.56	0.0552546
0003.CSV	1149.41	0.0555267
0003.CSV	1153.27	0.0557301
0003.CSV	1157.13	0.0560959
0003.CSV	1160.99	0.0563053
0003.CSV	1164.84	0.0566916
0003.CSV	1168.7	0.0569778
0003.CSV	1172.56	0.0576143
0003.CSV	1176.41	0.0582751
0003.CSV	1180.27	0.0589509
0003.CSV	1184.13	0.0588739
0003.CSV	1187.99	0.0585126
0003.CSV	1191.84	0.0579996
0003.CSV	1195.7	0.0578965
0003.CSV	1199.56	0.0579338
0003.CSV	1203.41	0.0583665
0003.CSV	1207.27	0.0588465
0003.CSV	1211.13	0.0596432
0003.CSV	1214.98	0.0603343
0003.CSV	1218.84	0.06123
0003.CSV	1222.7	0.0620111
0003.CSV	1226.56	0.0629636
0003.CSV	1230.41	0.0637424
0003.CSV	1234.27	0.0646468
0003.CSV	1238.13	0.065309
0003.CSV	1241.98	0.0660783
0003.CSV	1245.84	0.0665985
0003.CSV	1249.7	0.0670249
0003.CSV	1253.56	0.0669039
0003.CSV	1257.41	0.0667468
0003.CSV	1261.27	0.0666644
0003.CSV	1265.13	0.0672952
0003.CSV	1268.98	0.0681544
0003.CSV	1272.84	0.0692664
0003.CSV	1276.7	0.0701327
0003.CSV	1280.56	0.0711695
0003.CSV	1284.41	0.0720447
0003.CSV	1288.27	0.0731176
0003.CSV	1292.13	0.0740288
0003.CSV	1295.98	0.0751475
0003.CSV	1299.84	0.0761001
0003.CSV	1303.7	0.077204
0003.CSV	1307.56	0.078145
0003.CSV	1311.41	0.0793565
0003.CSV	1315.27	0.0804832
0003.CSV	1319.13	0.0819293
0003.CSV	1322.98	0.0831917
0003.CSV	1326.84	0.0847335
0003.CSV	1330.7	0.0862394
0003.CSV	1334.56	0.0880009
0003.CSV	1338.41	0.0899997
0003.CSV	1342.27	0.092583
0003.CSV	1346.13	0.0946766
0003.CSV	1349.98	0.097231
0003.CSV	1353.84	0.0998053
0003.CSV	1357.7	0.102667
0003.CSV	1361.56	0.105649
0003.CSV	1365.41	0.109187
0003.CSV	1369.27	0.112098
0003.CSV	1373.13	0.115934
0003.CSV	1376.98	0.120248
0003.CSV	1380.84	0.124544
0003.CSV	1384.7	0.128728
0003.CSV	1388.56	0.134126
0003.CSV	1392.41	0.138621
0003.CSV	1396.27	0.144204
0003.CSV	1400.13	0.149661
0003.CSV	1403.98	0.15483
0003.CSV	1407.84	0.159888
0003.CSV	1411.7	0.164659
0003.CSV	1415.55	0.167946
0003.CSV	1419.41	0.172209
0003.CSV	1423.27	0.175797
0003.CSV	1427.12	0.179469
0003.CSV	1430.98	0.183001
0003.CSV	1434.84	0.187396
0003.CSV	1438.7	0.191476
0003.CSV	1442.55	0.194131
0003.CSV	1446.41	0.194092
0003.CSV	1450.27	0.192591
0003.CSV	1454.12	0.189544
0003.CSV	1457.98	0.185924
0003.CSV	1461.84	0.182566
0003.CSV	1465.7	0.180389
0003.CSV	1469.55	0.176275
0003.CSV	1473.41	0.16909
0003.CSV	1477.27	0.159735
0003.CSV	1481.12	0.153287
0003.CSV	1484.98	0.146861
0003.CSV	1488.84	0.139767
0003.CSV	1492.7	0.132553
0003.CSV	1496.55	0.127054
0003.CSV	1500.41	0.120959
0003.CSV	1504.27	0.117068
0003.CSV	1508.12	0.109954
0003.CSV	1511.98	0.10448
0003.CSV	1515.84	0.100054
0003.CSV	1519.7	0.0947382
0003.CSV	1523.55	0.088441
0003.CSV	1527.41	0.0839914
0003.CSV	1531.27	0.0798113
0003.CSV	1535.12	0.0761039
0003.CSV	1538.98	0.0721851
0003.CSV	1542.84	0.0666475
0003.CSV	1546.7	0.0624169
0003.CSV	1550.55	0.0592784
0003.CSV	1554.41	0.0559812
0003.CSV	1558.27	0.0521235
0003.CSV	1562.12	0.0481894
0003.CSV	1565.98	0.0462825
0003.CSV	1569.84	0.0437158
0003.CSV	1573.69	0.041081
0003.CSV	1577.55	0.0376799
0003.CSV	1581.41	0.034769
0003.CSV	1585.27	0.0325006
0003.CSV	1589.12	0.0308619
0003.CSV	1592.98	0.0297605
0003.CSV	1596.84	0.0291906
0003.CSV	1600.69	0.0287571
0003.CSV	1604.55	0.0285603
0003.CSV	1608.41	0.0281996
0003.CSV	1612.27	0.0277587
0003.CSV	1616.12	0.0271367
0003.CSV	1619.98	0.0266684
0003.CSV	1623.84	0.0261126
0003.CSV	1627.69	0.0256998
0003.CSV	1631.55	0.0252046
0003.CSV	1635.41	0.0249878
0003.CSV	1639.27	0.0247647
0003.CSV	1643.12	0.0244339
0003.CSV	1646.98	0.0241892
0003.CSV	1650.84	0.024213
0003.CSV	1654.69	0.0241634
0003.CSV	1658.55	0.023963
0003.CSV	1662.41	0.0236467
0003.CSV	1666.27	0.0234915
0003.CSV	1670.12	0.0233045
0003.CSV	1673.98	0.0232982
0003.CSV	1677.84	0.0230281
0003.CSV	1681.69	0.0228865
0003.CSV	1685.55	0.0227862
0003.CSV	1689.41	0.0226428
0003.CSV	1693.27	0.0222443
0003.CSV	1697.12	0.0221522
0003.CSV	1700.98	0.0221696
0003.CSV	1704.84	0.0221529
0003.CSV	1708.69	0.0219983
0003.CSV	1712.55	0.021885
0003.CSV	1716.41	0.0219531
0003.CSV	1720.27	0.0221364
0003.CSV	1724.12	0.0219816
[truncated: 32,521 more rows]

## Sheet: C.edule_350_1_mFTIR_data
Select spectrum number	Wavenumbers	Absorbance
0001.CSV	674.992	0.027583
0001.CSV	678.849	0.028321
0001.CSV	682.706	0.028485
0001.CSV	686.563	0.0298536
0001.CSV	690.42	0.0316349
0001.CSV	694.277	0.038592
0001.CSV	698.134	0.0490364
0001.CSV	701.991	0.0477303
0001.CSV	705.849	0.0423837
0001.CSV	709.706	0.0564945
0001.CSV	713.563	0.0634806
0001.CSV	717.42	0.043873
0001.CSV	721.277	0.027479
0001.CSV	725.134	0.0240306
0001.CSV	728.991	0.0231619
0001.CSV	732.848	0.0232387
0001.CSV	736.705	0.0231739
0001.CSV	740.562	0.0235488
0001.CSV	744.42	0.0233432
0001.CSV	748.277	0.0238869
0001.CSV	752.134	0.0240834
0001.CSV	755.991	0.0247025
0001.CSV	759.848	0.024896
0001.CSV	763.705	0.0257078
0001.CSV	767.562	0.026098
0001.CSV	771.419	0.0269269
0001.CSV	775.276	0.0274861
0001.CSV	779.133	0.0284299
0001.CSV	782.99	0.0285971
0001.CSV	786.848	0.028996
0001.CSV	790.705	0.0293563
0001.CSV	794.562	0.0304952
0001.CSV	798.419	0.0314376
0001.CSV	802.276	0.0325735
0001.CSV	806.133	0.0329729
0001.CSV	809.99	0.0338881
0001.CSV	813.847	0.0348847
0001.CSV	817.704	0.037063
0001.CSV	821.562	0.0397922
0001.CSV	825.419	0.0438261
0001.CSV	829.276	0.0478811
0001.CSV	833.133	0.0535159
0001.CSV	836.99	0.0630035
0001.CSV	840.847	0.0789683
0001.CSV	844.704	0.0961405
0001.CSV	848.561	0.120941
0001.CSV	852.418	0.144036
0001.CSV	856.275	0.141162
0001.CSV	860.132	0.117148
0001.CSV	863.99	0.0875811
0001.CSV	867.847	0.060175
0001.CSV	871.704	0.0416294
0001.CSV	875.561	0.0323606
0001.CSV	879.418	0.0274861
0001.CSV	883.275	0.0234376
0001.CSV	887.132	0.0210881
0001.CSV	890.989	0.0199967
0001.CSV	894.846	0.0198387
0001.CSV	898.703	0.0197663
0001.CSV	902.561	0.0200263
0001.CSV	906.418	0.0202926
0001.CSV	910.275	0.0204195
0001.CSV	914.132	0.0201335
0001.CSV	917.989	0.0204004
0001.CSV	921.846	0.0206143
0001.CSV	925.703	0.0210325
0001.CSV	929.56	0.0212786
0001.CSV	933.417	0.0216837
0001.CSV	937.274	0.0218267
0001.CSV	941.131	0.0221121
0001.CSV	944.989	0.0222892
0001.CSV	948.846	0.022748
0001.CSV	952.703	0.0230808
0001.CSV	956.56	0.0235777
0001.CSV	960.417	0.0238525
0001.CSV	964.274	0.0243174
0001.CSV	968.131	0.024686
0001.CSV	971.988	0.025311
0001.CSV	975.845	0.0258504
0001.CSV	979.702	0.0265919
0001.CSV	983.559	0.0272133
0001.CSV	987.417	0.0281281
0001.CSV	991.274	0.0289314
0001.CSV	995.131	0.0298853
0001.CSV	998.988	0.0305886
0001.CSV	1002.85	0.0314651
0001.CSV	1006.7	0.0322377
0001.CSV	1010.56	0.0333017
0001.CSV	1014.42	0.0341452
0001.CSV	1018.27	0.0351807
0001.CSV	1022.13	0.0360687
0001.CSV	1025.99	0.0370795
0001.CSV	1029.85	0.0378122
0001.CSV	1033.7	0.0387705
0001.CSV	1037.56	0.0395209
0001.CSV	1041.42	0.0404093
0001.CSV	1045.27	0.0409515
0001.CSV	1049.13	0.0414776
0001.CSV	1052.99	0.0417699
0001.CSV	1056.84	0.0424481
0001.CSV	1060.7	0.0431776
0001.CSV	1064.56	0.0444377
0001.CSV	1068.42	0.0457944
0001.CSV	1072.27	0.0476102
0001.CSV	1076.13	0.0502823
0001.CSV	1079.99	0.0559728
0001.CSV	1083.84	0.0575582
0001.CSV	1087.7	0.0511648
0001.CSV	1091.56	0.0465915
0001.CSV	1095.41	0.0458875
0001.CSV	1099.27	0.0456555
0001.CSV	1103.13	0.0456125
0001.CSV	1106.99	0.0454208
0001.CSV	1110.84	0.0453502
0001.CSV	1114.7	0.0451384
0001.CSV	1118.56	0.0449141
0001.CSV	1122.41	0.0443588
0001.CSV	1126.27	0.0437575
0001.CSV	1130.13	0.0428316
0001.CSV	1133.99	0.042035
0001.CSV	1137.84	0.041247
0001.CSV	1141.7	0.0408287
0001.CSV	1145.56	0.0405389
0001.CSV	1149.41	0.0405661
0001.CSV	1153.27	0.0404593
0001.CSV	1157.13	0.0404635
0001.CSV	1160.99	0.0403991
0001.CSV	1164.84	0.0404652
0001.CSV	1168.7	0.040388
0001.CSV	1172.56	0.0405581
0001.CSV	1176.41	0.0407796
0001.CSV	1180.27	0.0410162
0001.CSV	1184.13	0.0405276
0001.CSV	1187.99	0.0396412
0001.CSV	1191.84	0.0386591
0001.CSV	1195.7	0.0381604
0001.CSV	1199.56	0.0378624
0001.CSV	1203.41	0.037911
0001.CSV	1207.27	0.0379959
0001.CSV	1211.13	0.0383591
0001.CSV	1214.98	0.0387164
0001.CSV	1218.84	0.0393429
0001.CSV	1222.7	0.0399513
0001.CSV	1226.56	0.0407425
0001.CSV	1230.41	0.041431
0001.CSV	1234.27	0.0422288
0001.CSV	1238.13	0.0428047
0001.CSV	1241.98	0.0434424
0001.CSV	1245.84	0.0438964
0001.CSV	1249.7	0.0442374
0001.CSV	1253.56	0.0440492
0001.CSV	1257.41	0.0437312
0001.CSV	1261.27	0.0434143
0001.CSV	1265.13	0.0436817
0001.CSV	1268.98	0.0442129
0001.CSV	1272.84	0.0449921
0001.CSV	1276.7	0.0456013
0001.CSV	1280.56	0.0463594
0001.CSV	1284.41	0.0470152
0001.CSV	1288.27	0.0478679
0001.CSV	1292.13	0.0486548
0001.CSV	1295.98	0.0496106
0001.CSV	1299.84	0.0504518
0001.CSV	1303.7	0.0513823
0001.CSV	1307.56	0.0521694
0001.CSV	1311.41	0.0531988
0001.CSV	1315.27	0.0541485
0001.CSV	1319.13	0.0553199
0001.CSV	1322.98	0.056362
0001.CSV	1326.84	0.0576428
0001.CSV	1330.7	0.0590047
0001.CSV	1334.56	0.0606031
0001.CSV	1338.41	0.0624179
0001.CSV	1342.27	0.0647602
0001.CSV	1346.13	0.0667261
0001.CSV	1349.98	0.0690973
0001.CSV	1353.84	0.0715136
0001.CSV	1357.7	0.0742014
0001.CSV	1361.56	0.0770798
0001.CSV	1365.41	0.080396
0001.CSV	1369.27	0.0831038
0001.CSV	1373.13	0.0867149
0001.CSV	1376.98	0.0909021
0001.CSV	1380.84	0.0949481
0001.CSV	1384.7	0.0988752
0001.CSV	1388.56	0.103829
0001.CSV	1392.41	0.107946
0001.CSV	1396.27	0.113121
0001.CSV	1400.13	0.118491
0001.CSV	1403.98	0.123486
0001.CSV	1407.84	0.128284
0001.CSV	1411.7	0.132703
0001.CSV	1415.55	0.135911
0001.CSV	1419.41	0.140049
0001.CSV	1423.27	0.143432
0001.CSV	1427.12	0.146729
0001.CSV	1430.98	0.149913
0001.CSV	1434.84	0.153568
0001.CSV	1438.7	0.15644
0001.CSV	1442.55	0.157913
0001.CSV	1446.41	0.157187
0001.CSV	1450.27	0.155383
0001.CSV	1454.12	0.152546
0001.CSV	1457.98	0.149582
0001.CSV	1461.84	0.147019
0001.CSV	1465.7	0.145363
0001.CSV	1469.55	0.142084
0001.CSV	1473.41	0.136521
0001.CSV	1477.27	0.129417
0001.CSV	1481.12	0.124458
0001.CSV	1484.98	0.119482
0001.CSV	1488.84	0.114049
0001.CSV	1492.7	0.108539
0001.CSV	1496.55	0.104246
0001.CSV	1500.41	0.0993923
0001.CSV	1504.27	0.0962635
0001.CSV	1508.12	0.0905947
0001.CSV	1511.98	0.0862876
0001.CSV	1515.84	0.0826141
0001.CSV	1519.7	0.0780902
0001.CSV	1523.55	0.0726964
0001.CSV	1527.41	0.0688498
0001.CSV	1531.27	0.0653098
0001.CSV	1535.12	0.0622263
0001.CSV	1538.98	0.0589825
0001.CSV	1542.84	0.0542979
0001.CSV	1546.7	0.0506582
0001.CSV	1550.55	0.0479798
0001.CSV	1554.41	0.0451796
0001.CSV	1558.27	0.0420098
0001.CSV	1562.12	0.0388928
0001.CSV	1565.98	0.0374229
0001.CSV	1569.84	0.0355043
0001.CSV	1573.69	0.0335957
0001.CSV	1577.55	0.0309968
0001.CSV	1581.41	0.028672
0001.CSV	1585.27	0.0267714
0001.CSV	1589.12	0.0254613
0001.CSV	1592.98	0.0246073
0001.CSV	1596.84	0.0241299
0001.CSV	1600.69	0.0236961
0001.CSV	1604.55	0.0234559
0001.CSV	1608.41	0.0230715
0001.CSV	1612.27	0.0226262
0001.CSV	1616.12	0.0219624
0001.CSV	1619.98	0.0214302
0001.CSV	1623.84	0.0208751
0001.CSV	1627.69	0.0204374
0001.CSV	1631.55	0.0199575
0001.CSV	1635.41	0.019676
0001.CSV	1639.27	0.0194082
0001.CSV	1643.12	0.0191306
0001.CSV	1646.98	0.0187908
0001.CSV	1650.84	0.0187215
0001.CSV	1654.69	0.0186585
0001.CSV	1658.55	0.0184503
0001.CSV	1662.41	0.018118
0001.CSV	1666.27	0.0178868
0001.CSV	1670.12	0.0176295
0001.CSV	1673.98	0.0175076
0001.CSV	1677.84	0.0171765
0001.CSV	1681.69	0.0169468
0001.CSV	1685.55	0.0168209
0001.CSV	1689.41	0.0167121
0001.CSV	1693.27	0.0163822
0001.CSV	1697.12	0.0162143
0001.CSV	1700.98	0.0162421
0001.CSV	1704.84	0.0163951
0001.CSV	1708.69	0.0163372
0001.CSV	1712.55	0.0162813
0001.CSV	1716.41	0.0163399
0001.CSV	1720.27	0.0166592
0001.CSV	1724.12	0.0166394
0001.CSV	1727.98	0.0165751
0001.CSV	1731.84	0.0164983
0001.CSV	1735.69	0.0166331
0001.CSV	1739.55	0.016444
0001.CSV	1743.41	0.0161431
0001.CSV	1747.27	0.0157839
0001.CSV	1751.12	0.0156702
0001.CSV	1754.98	0.0155309
0001.CSV	1758.84	0.0154753
0001.CSV	1762.69	0.0154717
0001.CSV	1766.55	0.0155248
0001.CSV	1770.41	0.0157666
0001.CSV	1774.26	0.016736
0001.CSV	1778.12	0.0178089
0001.CSV	1781.98	0.0190248
0001.CSV	1785.84	0.0196673
0001.CSV	1789.69	0.0194256
0001.CSV	1793.55	0.0183187
0001.CSV	1797.41	0.0173665
0001.CSV	1801.26	0.0165384
0001.CSV	1805.12	0.0159449
0001.CSV	1808.98	0.0156012
0001.CSV	1812.84	0.0155408
0001.CSV	1816.69	0.0154649
0001.CSV	1820.55	0.0154462
0001.CSV	1824.41	0.0154103
0001.CSV	1828.26	0.015512
0001.CSV	1832.12	0.0155529
0001.CSV	1835.98	0.0155703
0001.CSV	1839.84	0.0154893
0001.CSV	1843.69	0.015562
0001.CSV	1847.55	0.0156777
0001.CSV	1851.41	0.0157015
0001.CSV	1855.26	0.0156694
0001.CSV	1859.12	0.0157176
0001.CSV	1862.98	0.0156914
0001.CSV	1866.84	0.0157472
0001.CSV	1870.69	0.0158588
0001.CSV	1874.55	0.0158576
0001.CSV	1878.41	0.0158035
0001.CSV	1882.26	0.0158385
0001.CSV	1886.12	0.0158073
0001.CSV	1889.98	0.0158526
0001.CSV	1893.83	0.0158854
0001.CSV	1897.69	0.0159304
0001.CSV	1901.55	0.015888
0001.CSV	1905.41	0.0158572
0001.CSV	1909.26	0.0158448
0001.CSV	1913.12	0.0158592
0001.CSV	1916.98	0.0158175
0001.CSV	1920.83	0.0158605
0001.CSV	1924.69	0.0158668
0001.CSV	1928.55	0.0158728
0001.CSV	1932.4	0.0158488
0001.CSV	1936.26	0.0158412
0001.CSV	1940.12	0.0157849
0001.CSV	1943.98	0.0158345
0001.CSV	1947.83	0.0158277
0001.CSV	1951.69	0.0157992
0001.CSV	1955.55	0.0157592
0001.CSV	1959.4	0.0157877
0001.CSV	1963.26	0.0157593
0001.CSV	1967.12	0.0157759
0001.CSV	1970.98	0.0157615
0001.CSV	1974.83	0.0157566
0001.CSV	1978.69	0.0157436
0001.CSV	1982.55	0.0157668
0001.CSV	1986.4	0.0157399
0001.CSV	1990.26	0.0157474
0001.CSV	1994.12	0.0157365
0001.CSV	1997.98	0.0157453
0001.CSV	2001.83	0.0157275
0001.CSV	2005.69	0.0157296
0001.CSV	2009.55	0.0157058
0001.CSV	2013.4	0.0157228
0001.CSV	2017.26	0.0157272
0001.CSV	2021.12	0.0157338
0001.CSV	2024.97	0.0156923
0001.CSV	2028.83	0.0157058
0001.CSV	2032.69	0.015687
0001.CSV	2036.55	0.0157003
0001.CSV	2040.4	0.015695
0001.CSV	2044.26	0.0157094
0001.CSV	2048.12	0.0156859
0001.CSV	2051.97	0.0157018
0001.CSV	2055.83	0.0157104
0001.CSV	2059.69	0.0157364
0001.CSV	2063.55	0.0157222
0001.CSV	2067.4	0.0157319
0001.CSV	2071.26	0.0157142
0001.CSV	2075.12	0.0157404
0001.CSV	2078.97	0.0157663
0001.CSV	2082.83	0.015795
0001.CSV	2086.69	0.0157693
0001.CSV	2090.55	0.0157868
0001.CSV	2094.4	0.0157932
0001.CSV	2098.26	0.0158417
0001.CSV	2102.12	0.0158546
0001.CSV	2105.97	0.0158995
0001.CSV	2109.83	0.0159201
0001.CSV	2113.69	0.0159515
0001.CSV	2117.55	0.0159673
0001.CSV	2121.4	0.0160076
0001.CSV	2125.26	0.016034
0001.CSV	2129.12	0.0160692
0001.CSV	2132.97	0.0160799
0001.CSV	2136.83	0.0161291
0001.CSV	2140.69	0.0161404
0001.CSV	2144.55	0.0161723
0001.CSV	2148.4	0.0162053
0001.CSV	2152.26	0.0162458
0001.CSV	2156.12	0.0162538
0001.CSV	2159.97	0.016269
0001.CSV	2163.83	0.0162537
0001.CSV	2167.69	0.0162837
0001.CSV	2171.55	0.0163275
0001.CSV	2175.4	0.0163748
0001.CSV	2179.26	0.0163783
0001.CSV	2183.12	0.0164007
0001.CSV	2186.97	0.0164222
0001.CSV	2190.83	0.0164429
0001.CSV	2194.69	0.0164254
0001.CSV	2198.55	0.0164422
0001.CSV	2202.4	0.0164675
0001.CSV	2206.26	0.0164874
0001.CSV	2210.12	0.0164877
0001.CSV	2213.97	0.0165101
0001.CSV	2217.83	0.0164989
0001.CSV	2221.69	0.0164932
0001.CSV	2225.54	0.0164867
0001.CSV	2229.4	0.0165119
0001.CSV	2233.26	0.0165035
0001.CSV	2237.12	0.0165113
0001.CSV	2240.97	0.0164959
0001.CSV	2244.83	0.0164708
0001.CSV	2248.69	0.0164691
0001.CSV	2252.54	0.0164988
0001.CSV	2256.4	0.0164897
0001.CSV	2260.26	0.0165063
0001.CSV	2264.11	0.0164815
0001.CSV	2267.97	0.0164902
0001.CSV	2271.83	0.0164972
0001.CSV	2275.69	0.0164854
0001.CSV	2279.54	0.0164617
0001.CSV	2283.4	0.0164497
0001.CSV	2287.26	0.016428
0001.CSV	2291.11	0.0164363
0001.CSV	2294.97	0.0164562
0001.CSV	2298.83	0.0165123
0001.CSV	2302.69	0.0165057
0001.CSV	2306.54	0.0164898
0001.CSV	2310.4	0.0164559
0001.CSV	2314.26	0.0164291
0001.CSV	2318.11	0.0163565
0001.CSV	2321.97	0.016358
0001.CSV	2325.83	0.0163075
0001.CSV	2329.69	0.0161035
0001.CSV	2333.54	0.0158873
0001.CSV	2337.4	0.0159551
0001.CSV	2341.26	0.0159743
0001.CSV	2345.11	0.0163433
0001.CSV	2348.97	0.0163912
0001.CSV	2352.83	0.015981
0001.CSV	2356.69	0.0152506
0001.CSV	2360.54	0.0149659
0001.CSV	2364.4	0.0151959
0001.CSV	2368.26	0.0159154
0001.CSV	2372.11	0.0164345
0001.CSV	2375.97	0.0166452
0001.CSV	2379.83	0.0166342
0001.CSV	2383.69	0.0165494
0001.CSV	2387.54	0.0164291
0001.CSV	2391.4	0.0163774
0001.CSV	2395.26	0.0163656
0001.CSV	2399.11	0.0163717
0001.CSV	2402.97	0.0163737
0001.CSV	2406.83	0.0163885
0001.CSV	2410.68	0.0163861
0001.CSV	2414.54	0.0163857
0001.CSV	2418.4	0.0163881
0001.CSV	2422.26	0.0163946
0001.CSV	2426.11	0.0164009
0001.CSV	2429.97	0.0164233
0001.CSV	2433.83	0.0164396
0001.CSV	2437.68	0.0164504
0001.CSV	2441.54	0.0164564
0001.CSV	2445.4	0.0164879
0001.CSV	2449.26	0.0164974
0001.CSV	2453.11	0.0165134
0001.CSV	2456.97	0.0165407
0001.CSV	2460.83	0.0165944
0001.CSV	2464.68	0.0166355
0001.CSV	2468.54	0.0167177
0001.CSV	2472.4	0.01682
0001.CSV	2476.26	0.0169547
0001.CSV	2480.11	0.0171048
0001.CSV	2483.97	0.0172632
0001.CSV	2487.83	0.0174003
0001.CSV	2491.68	0.0175385
0001.CSV	2495.54	0.0176581
0001.CSV	2499.4	0.0177385
0001.CSV	2503.26	0.0177496
0001.CSV	2507.11	0.0177243
0001.CSV	2510.97	0.0177185
0001.CSV	2514.83	0.0178057
0001.CSV	2518.68	0.0179368
0001.CSV	2522.54	0.01801
0001.CSV	2526.4	0.0179572
0001.CSV	2530.26	0.0178361
0001.CSV	2534.11	0.0176768
0001.CSV	2537.97	0.0175397
0001.CSV	2541.83	0.0174752
0001.CSV	2545.68	0.0174404
0001.CSV	2549.54	0.0173672
0001.CSV	2553.4	0.0172672
0001.CSV	2557.26	0.0171539
0001.CSV	2561.11	0.0170691
0001.CSV	2564.97	0.0169918
0001.CSV	2568.83	0.0169263
0001.CSV	2572.68	0.0168514
0001.CSV	2576.54	0.0167872
0001.CSV	2580.4	0.0167235
0001.CSV	2584.25	0.0166691
0001.CSV	2588.11	0.0166343
0001.CSV	2591.97	0.016642
0001.CSV	2595.83	0.0166354
0001.CSV	2599.68	0.0166205
0001.CSV	2603.54	0.0166015
0001.CSV	2607.4	0.0166192
0001.CSV	2611.25	0.0166586
0001.CSV	2615.11	0.0166661
0001.CSV	2618.97	0.016638
0001.CSV	2622.82	0.0166707
0001.CSV	2626.68	0.0166789
0001.CSV	2630.54	0.0166562
0001.CSV	2634.4	0.0166738
0001.CSV	2638.25	0.0166918
0001.CSV	2642.11	0.016622
0001.CSV	2645.97	0.0165195
0001.CSV	2649.82	0.0164643
0001.CSV	2653.68	0.016458
0001.CSV	2657.54	0.0164393
0001.CSV	2661.4	0.0164109
0001.CSV	2665.25	0.0163826
0001.CSV	2669.11	0.0163998
0001.CSV	2672.97	0.0164903
0001.CSV	2676.82	0.0166151
0001.CSV	2680.68	0.0166104
0001.CSV	2684.54	0.0164392
0001.CSV	2688.4	0.0163556
0001.CSV	2692.25	0.0163937
0001.CSV	2696.11	0.0164361
0001.CSV	2699.97	0.0164236
0001.CSV	2703.82	0.0164183
0001.CSV	2707.68	0.0164737
0001.CSV	2711.54	0.0164812
0001.CSV	2715.4	0.0164731
0001.CSV	2719.25	0.0165638
0001.CSV	2723.11	0.0167236
0001.CSV	2726.97	0.0167064
0001.CSV	2730.82	0.0165163
0001.CSV	2734.68	0.0164891
0001.CSV	2738.54	0.0165187
0001.CSV	2742.4	0.0165114
0001.CSV	2746.25	0.0166719
0001.CSV	2750.11	0.0167213
0001.CSV	2753.97	0.0165588
0001.CSV	2757.82	0.0164505
0001.CSV	2761.68	0.0163889
0001.CSV	2765.54	0.0164035
0001.CSV	2769.39	0.016539
0001.CSV	2773.25	0.0167404
0001.CSV	2777.11	0.0166778
0001.CSV	2780.97	0.0165144
0001.CSV	2784.82	0.0166506
0001.CSV	2788.68	0.0169622
0001.CSV	2792.54	0.0170619
0001.CSV	2796.39	0.0170776
0001.CSV	2800.25	0.0169746
0001.CSV	2804.11	0.016808
0001.CSV	2807.97	0.0169697
0001.CSV	2811.82	0.0170297
0001.CSV	2815.68	0.0169424
0001.CSV	2819.54	0.0170216
0001.CSV	2823.39	0.0171173
0001.CSV	2827.25	0.0171578
0001.CSV	2831.11	0.0174804
0001.CSV	2834.97	0.0180582
0001.CSV	2838.82	0.0185115
0001.CSV	2842.68	0.0188915
0001.CSV	2846.54	0.0197446
0001.CSV	2850.39	0.0203506
0001.CSV	2854.25	0.0203145
0001.CSV	2858.11	0.0201454
0001.CSV	2861.97	0.0197562
0001.CSV	2865.82	0.0194212
0001.CSV	2869.68	0.0195696
0001.CSV	2873.54	0.0196582
0001.CSV	2877.39	0.0191499
0001.CSV	2881.25	0.0187908
0001.CSV	2885.11	0.01882
0001.CSV	2888.97	0.0190385
0001.CSV	2892.82	0.0194884
0001.CSV	2896.68	0.0198532
0001.CSV	2900.54	0.0199897
0001.CSV	2904.39	0.0203861
0001.CSV	2908.25	0.0212303
0001.CSV	2912.11	0.0225115
0001.CSV	2915.97	0.0234867
0001.CSV	2919.82	0.0235482
0001.CSV	2923.68	0.0231654
0001.CSV	2927.54	0.0229298
0001.CSV	2931.39	0.0222421
0001.CSV	2935.25	0.0211205
0001.CSV	2939.11	0.0205274
0001.CSV	2942.96	0.0205769
0001.CSV	2946.82	0.020468
0001.CSV	2950.68	0.020144
0001.CSV	2954.54	0.0198067
0001.CSV	2958.39	0.0194117
0001.CSV	2962.25	0.0191205
0001.CSV	2966.11	0.0186063
0001.CSV	2969.96	0.018291
0001.CSV	2973.82	0.0183219
0001.CSV	2977.68	0.0183064
0001.CSV	2981.53	0.0179457
0001.CSV	2985.39	0.0174035
0001.CSV	2989.25	0.0173436
0001.CSV	2993.11	0.0175194
0001.CSV	2996.96	0.0173773
0001.CSV	3000.82	0.0170877
0001.CSV	3004.68	0.0169091
0001.CSV	3008.53	0.0171137
0001.CSV	3012.39	0.0174522
0001.CSV	3016.25	0.0174387
0001.CSV	3020.11	0.0171856
0001.CSV	3023.96	0.0169833
0001.CSV	3027.82	0.0169458
0001.CSV	3031.68	0.0171417
0001.CSV	3035.53	0.0172109
0001.CSV	3039.39	0.0172461
0001.CSV	3043.25	0.0173349
0001.CSV	3047.11	0.0172325
0001.CSV	3050.96	0.0171817
0001.CSV	3054.82	0.0171065
0001.CSV	3058.68	0.0169693
0001.CSV	3062.53	0.0170227
0001.CSV	3066.39	0.0172334
0001.CSV	3070.25	0.0171643
0001.CSV	3074.11	0.0171451
0001.CSV	3077.96	0.0173792
0001.CSV	3081.82	0.0174963
0001.CSV	3085.68	0.0174719
0001.CSV	3089.53	0.0173827
0001.CSV	3093.39	0.0171994
0001.CSV	3097.25	0.0171945
0001.CSV	3101.11	0.0172393
0001.CSV	3104.96	0.0172507
0001.CSV	3108.82	0.0173954
0001.CSV	3112.68	0.017532
0001.CSV	3116.53	0.0176793
0001.CSV	3120.39	0.017618
0001.CSV	3124.25	0.0174013
0001.CSV	3128.11	0.0173313
0001.CSV	3131.96	0.0173444
0001.CSV	3135.82	0.0174815
0001.CSV	3139.68	0.017607
0001.CSV	3143.53	0.0174485
0001.CSV	3147.39	0.0175074
0001.CSV	3151.25	0.0177728
0001.CSV	3155.1	0.0177263
0001.CSV	3158.96	0.0175034
0001.CSV	3162.82	0.0174394
0001.CSV	3166.68	0.0174308
0001.CSV	3170.53	0.0174879
0001.CSV	3174.39	0.017545
0001.CSV	3178.25	0.0176151
0001.CSV	3182.1	0.0176715
0001.CSV	3185.96	0.0177248
0001.CSV	3189.82	0.017799
0001.CSV	3193.68	0.017813
0001.CSV	3197.53	0.0177942
0001.CSV	3201.39	0.017868
0001.CSV	3205.25	0.0179547
0001.CSV	3209.1	0.0179711
0001.CSV	3212.96	0.0180374
0001.CSV	3216.82	0.0181388
0001.CSV	3220.68	0.0181342
0001.CSV	3224.53	0.018134
0001.CSV	3228.39	0.0183196
0001.CSV	3232.25	0.0185984
0001.CSV	3236.1	0.018554
0001.CSV	3239.96	0.0184015
0001.CSV	3243.82	0.018528
0001.CSV	3247.68	0.0186405
0001.CSV	3251.53	0.0185359
0001.CSV	3255.39	0.0185311
0001.CSV	3259.25	0.0184854
0001.CSV	3263.1	0.01848
0001.CSV	3266.96	0.0186863
0001.CSV	3270.82	0.0189482
0001.CSV	3274.68	0.0188785
0001.CSV	3278.53	0.0186417
0001.CSV	3282.39	0.0185717
0001.CSV	3286.25	0.018655
0001.CSV	3290.1	0.0188533
0001.CSV	3293.96	0.0190122
0001.CSV	3297.82	0.0189094
0001.CSV	3301.67	0.0189099
0001.CSV	3305.53	0.0190972
0001.CSV	3309.39	0.0190372
0001.CSV	3313.25	0.0187483
0001.CSV	3317.1	0.0185895
0001.CSV	3320.96	0.0186697
0001.CSV	3324.82	0.0188232
0001.CSV	3328.67	0.0186753
0001.CSV	3332.53	0.0185946
0001.CSV	3336.39	0.0188101
0001.CSV	3340.24	0.0189203
0001.CSV	3344.1	0.0188339
0001.CSV	3347.96	0.0188079
0001.CSV	3351.82	0.0187018
0001.CSV	3355.67	0.018575
0001.CSV	3359.53	0.0186835
0001.CSV	3363.39	0.0188445
0001.CSV	3367.24	0.0190285
0001.CSV	3371.1	0.0189113
0001.CSV	3374.96	0.0186507
0001.CSV	3378.82	0.0185836
0001.CSV	3382.67	0.0184562
0001.CSV	3386.53	0.018448
0001.CSV	3390.39	0.0186362
0001.CSV	3394.24	0.0186806
0001.CSV	3398.1	0.0186339
0001.CSV	3401.96	0.0186316
0001.CSV	3405.82	0.0184877
0001.CSV	3409.67	0.0184078
0001.CSV	3413.53	0.018224
0001.CSV	3417.39	0.0179482
0001.CSV	3421.24	0.0178936
0001.CSV	3425.1	0.0180249
0001.CSV	3428.96	0.0181664
0001.CSV	3432.82	0.0182525
0001.CSV	3436.67	0.018092
0001.CSV	3440.53	0.0177069
0001.CSV	3444.39	0.017505
0001.CSV	3448.24	0.0174091
0001.CSV	3452.1	0.0172658
0001.CSV	3455.96	0.0172676
0001.CSV	3459.82	0.0173744
0001.CSV	3463.67	0.017464
0001.CSV	3467.53	0.0175373
0001.CSV	3471.39	0.0173015
0001.CSV	3475.24	0.0170609
0001.CSV	3479.1	0.0170354
0001.CSV	3482.96	0.0169544
0001.CSV	3486.82	0.0169035
0001.CSV	3490.67	0.016833
0001.CSV	3494.53	0.016801
0001.CSV	3498.39	0.0167254
0001.CSV	3502.24	0.0165763
0001.CSV	3506.1	0.0162817
0001.CSV	3509.96	0.0162104
0001.CSV	3513.81	0.0162857
0001.CSV	3517.67	0.0160911
0001.CSV	3521.53	0.0160137
0001.CSV	3525.39	0.0158732
0001.CSV	3529.24	0.0156515
0001.CSV	3533.1	0.0157117
0001.CSV	3536.96	0.015753
0001.CSV	3540.81	0.0157339
0001.CSV	3544.67	0.0157401
0001.CSV	3548.53	0.015533
0001.CSV	3552.39	0.015317
0001.CSV	3556.24	0.0152079
0001.CSV	3560.1	0.0150143
0001.CSV	3563.96	0.0146622
0001.CSV	3567.81	0.0146813
0001.CSV	3571.67	0.0147739
0001.CSV	3575.53	0.0146483
0001.CSV	3579.39	0.0147392
0001.CSV	3583.24	0.0147597
0001.CSV	3587.1	0.0146859
0001.CSV	3590.96	0.0145828
0001.CSV	3594.81	0.0144198
0001.CSV	3598.67	0.0144794
0001.CSV	3602.53	0.0144384
0001.CSV	3606.39	0.0140476
0001.CSV	3610.24	0.0138483
0001.CSV	3614.1	0.0138378
0001.CSV	3617.96	0.0139409
0001.CSV	3621.81	0.0140234
0001.CSV	3625.67	0.013636
0001.CSV	3629.53	0.0135625
0001.CSV	3633.39	0.0138258
0001.CSV	3637.24	0.0137208
0001.CSV	3641.1	0.0135065
0001.CSV	3644.96	0.0131239
0001.CSV	3648.81	0.01327
0001.CSV	3652.67	0.0136694
0001.CSV	3656.53	0.0137307
0001.CSV	3660.38	0.0137455
0001.CSV	3664.24	0.0133499
0001.CSV	3668.1	0.0128895
0001.CSV	3671.96	0.0127398
0001.CSV	3675.81	0.0130016
0001.CSV	3679.67	0.0132782
0001.CSV	3683.53	0.0131682
0001.CSV	3687.38	0.0130785
0001.CSV	3691.24	0.0133862
0001.CSV	3695.1	0.0133418
0001.CSV	3698.95	0.0130768
0001.CSV	3702.81	0.0129918
0001.CSV	3706.67	0.0127619
0001.CSV	3710.53	0.0126406
0001.CSV	3714.38	0.013042
0001.CSV	3718.24	0.0129016
0001.CSV	3722.1	0.012722
0001.CSV	3725.95	0.0127916
0001.CSV	3729.81	0.0127117
0001.CSV	3733.67	0.0126921
0001.CSV	3737.53	0.0131098
0001.CSV	3741.38	0.012727
0001.CSV	3745.24	0.0122827
0001.CSV	3749.1	0.0123141
0001.CSV	3752.95	0.0127304
0001.CSV	3756.81	0.0127918
0001.CSV	3760.67	0.0128021
0001.CSV	3764.53	0.0126682
0001.CSV	3768.38	0.0127197
0001.CSV	3772.24	0.0129121
0001.CSV	3776.1	0.0128643
0001.CSV	3779.95	0.012867
0001.CSV	3783.81	0.0128873
0001.CSV	3787.67	0.0129438
0001.CSV	3791.53	0.0128246
0001.CSV	3795.38	0.0124784
0001.CSV	3799.24	0.0123029
0001.CSV	3803.1	0.0125495
0001.CSV	3806.95	0.0128986
0001.CSV	3810.81	0.0128276
0001.CSV	3814.67	0.0125381
0001.CSV	3818.53	0.0125906
0001.CSV	3822.38	0.0128687
0001.CSV	3826.24	0.0128227
0001.CSV	3830.1	0.0126455
0001.CSV	3833.95	0.0125218
0001.CSV	3837.81	0.0125731
0001.CSV	3841.67	0.0130032
0001.CSV	3845.53	0.0130392
0001.CSV	3849.38	0.0125867
0001.CSV	3853.24	0.0126057
0001.CSV	3857.1	0.0130507
0001.CSV	3860.95	0.0127468
0001.CSV	3864.81	0.0126067
0001.CSV	3868.67	0.0126647
0001.CSV	3872.52	0.0129522
0001.CSV	3876.38	0.0129583
0001.CSV	3880.24	0.0128296
0001.CSV	3884.1	0.013031
0001.CSV	3887.95	0.0130726
0001.CSV	3891.81	0.0129992
0001.CSV	3895.67	0.0128922
0001.CSV	3899.52	0.0126819
0001.CSV	3903.38	0.0129964
0001.CSV	3907.24	0.0132413
0001.CSV	3911.1	0.0130847
0001.CSV	3914.95	0.0129436
0001.CSV	3918.81	0.0130216
0001.CSV	3922.67	0.0130767
0001.CSV	3926.52	0.0130943
0001.CSV	3930.38	0.0131081
0001.CSV	3934.24	0.0132179
0001.CSV	3938.09	0.0131078
0001.CSV	3941.95	0.0130262
0001.CSV	3945.81	0.0131057
0001.CSV	3949.67	0.0131761
0001.CSV	3953.52	0.0131313
0001.CSV	3957.38	0.0130582
0001.CSV	3961.24	0.0130814
0001.CSV	3965.09	0.0130959
0001.CSV	3968.95	0.0130561
0001.CSV	3972.81	0.0130552
0001.CSV	3976.67	0.0130748
0001.CSV	3980.52	0.01311
0001.CSV	3984.38	0.0131015
0001.CSV	3988.24	0.0130327
0001.CSV	3992.09	0.0130164
0001.CSV	3995.95	0.0130135
0001.CSV	3999.81	0.0129792
0002.CSV	674.992	0.0407763
0002.CSV	678.849	0.0419722
0002.CSV	682.706	0.0425436
0002.CSV	686.563	0.0446304
0002.CSV	690.42	0.0472396
0002.CSV	694.277	0.0560683
0002.CSV	698.134	0.0677163
0002.CSV	701.991	0.0647779
0002.CSV	705.849	0.0583452
0002.CSV	709.706	0.0748622
0002.CSV	713.563	0.0809859
0002.CSV	717.42	0.056307
0002.CSV	721.277	0.0371437
0002.CSV	725.134	0.033636
0002.CSV	728.991	0.0332517
0002.CSV	732.848	0.0339317
0002.CSV	736.705	0.0341841
0002.CSV	740.562	0.0350467
0002.CSV	744.42	0.0352177
0002.CSV	748.277	0.0360453
0002.CSV	752.134	0.0362927
0002.CSV	755.991	0.0372283
0002.CSV	759.848	0.037625
0002.CSV	763.705	0.0385115
0002.CSV	767.562	0.0388197
0002.CSV	771.419	0.0398035
0002.CSV	775.276	0.040382
0002.CSV	779.133	0.0414061
0002.CSV	782.99	0.0415601
0002.CSV	786.848	0.0420653
0002.CSV	790.705	0.0424474
0002.CSV	794.562	0.0437567
0002.CSV	798.419	0.0448402
0002.CSV	802.276	0.0462985
0002.CSV	806.133	0.0469618
0002.CSV	809.99	0.0483148
0002.CSV	813.847	0.0495761
0002.CSV	817.704	0.0521426
0002.CSV	821.562	0.0554322
0002.CSV	825.419	0.0601469
0002.CSV	829.276	0.0642016
0002.CSV	833.133	0.0693874
0002.CSV	836.99	0.0781979
0002.CSV	840.847	0.0939607
0002.CSV	844.704	0.112056
0002.CSV	848.561	0.144065
0002.CSV	852.418	0.177002
0002.CSV	856.275	0.16908
0002.CSV	860.132	0.132455
0002.CSV	863.99	0.0952145
0002.CSV	867.847	0.0647424
0002.CSV	871.704	0.046192
0002.CSV	875.561	0.0383115
0002.CSV	879.418	0.0351988
0002.CSV	883.275	0.0327743
0002.CSV	887.132	0.0318879
0002.CSV	890.989	0.0317922
0002.CSV	894.846	0.0323516
0002.CSV	898.703	0.0327371
0002.CSV	902.561	0.0335451
0002.CSV	906.418	0.0342866
0002.CSV	910.275	0.0347244
0002.CSV	914.132	0.0345901
0002.CSV	917.989	0.0351334
0002.CSV	921.846	0.035535
0002.CSV	925.703	0.0361843
0002.CSV	929.56	0.0366256
0002.CSV	933.417	0.0372258
0002.CSV	937.274	0.037446
0002.CSV	941.131	0.0378965
0002.CSV	944.989	0.0381685
0002.CSV	948.846	0.0387787
0002.CSV	952.703	0.0391972
0002.CSV	956.56	0.0398336
0002.CSV	960.417	0.0401601
0002.CSV	964.274	0.0407194
0002.CSV	968.131	0.0411411
0002.CSV	971.988	0.0419079
0002.CSV	975.845	0.0425583
0002.CSV	979.702	0.0434935
0002.CSV	983.559	0.0442245
0002.CSV	987.417	0.0453079
0002.CSV	991.274	0.0462199
0002.CSV	995.131	0.0473353
0002.CSV	998.988	0.0481314
0002.CSV	1002.85	0.0491758
0002.CSV	1006.7	0.050155
0002.CSV	1010.56	0.0514681
0002.CSV	1014.42	0.0524136
0002.CSV	1018.27	0.0536074
0002.CSV	1022.13	0.0545917
0002.CSV	1025.99	0.0558142
0002.CSV	1029.85	0.0567181
0002.CSV	1033.7	0.0578375
0002.CSV	1037.56	0.058564
0002.CSV	1041.42	0.0593358
0002.CSV	1045.27	0.0596484
0002.CSV	1049.13	0.0600944
0002.CSV	1052.99	0.0602039
0002.CSV	1056.84	0.0607209
0002.CSV	1060.7	0.0612788
0002.CSV	1064.56	0.0624672
0002.CSV	1068.42	0.0636619
0002.CSV	1072.27	0.0654343
0002.CSV	1076.13	0.0681093
0002.CSV	1079.99	0.0740573
0002.CSV	1083.84	0.0756601
0002.CSV	1087.7	0.0688998
0002.CSV	1091.56	0.0637904
0002.CSV	1095.41	0.0628333
0002.CSV	1099.27	0.0625358
0002.CSV	1103.13	0.0625453
0002.CSV	1106.99	0.0623494
0002.CSV	1110.84	0.0623403
0002.CSV	1114.7	0.0620981
0002.CSV	1118.56	0.0618925
0002.CSV	1122.41	0.0612893
0002.CSV	1126.27	0.0607039
0002.CSV	1130.13	0.0597401
0002.CSV	1133.99	0.0589343
0002.CSV	1137.84	0.0580715
0002.CSV	1141.7	0.0576681
0002.CSV	1145.56	0.0573386
0002.CSV	1149.41	0.0573799
0002.CSV	1153.27	0.0573111
0002.CSV	1157.13	0.0574526
0002.CSV	1160.99	0.0574572
0002.CSV	1164.84	0.0576465
0002.CSV	1168.7	0.057742
0002.CSV	1172.56	0.0582759
0002.CSV	1176.41	0.0589093
0002.CSV	1180.27	0.0595336
0002.CSV	1184.13	0.0590825
0002.CSV	1187.99	0.0580874
0002.CSV	1191.84	0.0570044
0002.CSV	1195.7	0.0565825
0002.CSV	1199.56	0.0563939
0002.CSV	1203.41	0.0566808
0002.CSV	1207.27	0.0570118
0002.CSV	1211.13	0.0577208
0002.CSV	1214.98	0.0584378
0002.CSV	1218.84	0.0594538
0002.CSV	1222.7	0.060376
0002.CSV	1226.56	0.0615384
0002.CSV	1230.41	0.0625195
0002.CSV	1234.27	0.0636204
0002.CSV	1238.13	0.0643843
0002.CSV	1241.98	0.0652637
0002.CSV	1245.84	0.0658422
0002.CSV	1249.7	0.0662499
0002.CSV	1253.56	0.0659736
0002.CSV	1257.41	0.0655787
0002.CSV	1261.27	0.0652158
0002.CSV	1265.13	0.0656209
0002.CSV	1268.98	0.0662983
0002.CSV	1272.84	0.0673672
0002.CSV	1276.7	0.0682776
0002.CSV	1280.56	0.06945
0002.CSV	1284.41	0.0704583
0002.CSV	1288.27	0.071691
0002.CSV	1292.13	0.0727767
0002.CSV	1295.98	0.074067
0002.CSV	1299.84	0.0751548
0002.CSV	1303.7	0.0763846
0002.CSV	1307.56	0.0774407
0002.CSV	1311.41	0.0788095
0002.CSV	1315.27	0.0800428
0002.CSV	1319.13	0.0816572
0002.CSV	1322.98	0.0831409
0002.CSV	1326.84	0.0849212
0002.CSV	1330.7	0.0866962
0002.CSV	1334.56	0.0887491
0002.CSV	1338.41	0.0910647
0002.CSV	1342.27	0.0940646
0002.CSV	1346.13	0.0965467
0002.CSV	1349.98	0.0995949
0002.CSV	1353.84	0.102728
0002.CSV	1357.7	0.106178
0002.CSV	1361.56	0.109713
0002.CSV	1365.41	0.113788
0002.CSV	1369.27	0.117068
0002.CSV	1373.13	0.121406
0002.CSV	1376.98	0.126296
0002.CSV	1380.84	0.131011
0002.CSV	1384.7	0.135408
0002.CSV	1388.56	0.140995
0002.CSV	1392.41	0.145588
0002.CSV	1396.27	0.151434
0002.CSV	1400.13	0.157364
0002.CSV	1403.98	0.162977
0002.CSV	1407.84	0.168356
0002.CSV	1411.7	0.173508
0002.CSV	1415.55	0.177201
0002.CSV	1419.41	0.182112
0002.CSV	1423.27	0.186095
0002.CSV	1427.12	0.190103
0002.CSV	1430.98	0.193937
0002.CSV	1434.84	0.198998
0002.CSV	1438.7	0.204017
0002.CSV	1442.55	0.207164
0002.CSV	1446.41	0.206827
0002.CSV	1450.27	0.204689
0002.CSV	1454.12	0.200823
0002.CSV	1457.98	0.196039
0002.CSV	1461.84	0.191683
0002.CSV	1465.7	0.188617
0002.CSV	1469.55	0.183285
0002.CSV	1473.41	0.174497
0002.CSV	1477.27	0.163783
0002.CSV	1481.12	0.156585
0002.CSV	1484.98	0.149432
0002.CSV	1488.84	0.14156
0002.CSV	1492.7	0.133782
0002.CSV	1496.55	0.127882
0002.CSV	1500.41	0.121227
0002.CSV	1504.27	0.11698
0002.CSV	1508.12	0.10909
0002.CSV	1511.98	0.103132
0002.CSV	1515.84	0.0982546
0002.CSV	1519.7	0.0922027
0002.CSV	1523.55	0.0851504
0002.CSV	1527.41	0.0801779
0002.CSV	1531.27	0.0755833
0002.CSV	1535.12	0.0714731
0002.CSV	1538.98	0.0670871
0002.CSV	1542.84	0.0607305
0002.CSV	1546.7	0.0561156
0002.CSV	1550.55	0.0527714
0002.CSV	1554.41	0.0492739
0002.CSV	1558.27	0.0453537
0002.CSV	1562.12	0.0414628
0002.CSV	1565.98	0.0396277
0002.CSV	1569.84	0.037117
0002.CSV	1573.69	0.0346676
0002.CSV	1577.55	0.0315055
0002.CSV	1581.41	0.0288427
0002.CSV	1585.27	0.0266592
0002.CSV	1589.12	0.0250147
0002.CSV	1592.98	0.0238338
0002.CSV	1596.84	0.0231362
0002.CSV	1600.69	0.0225456
0002.CSV	1604.55	0.0222565
0002.CSV	1608.41	0.0218247
0002.CSV	1612.27	0.0212831
0002.CSV	1616.12	0.0204371
0002.CSV	1619.98	0.0197609
0002.CSV	1623.84	0.0190645
0002.CSV	1627.69	0.0185548
0002.CSV	1631.55	0.0180393
0002.CSV	1635.41	0.0177137
0002.CSV	1639.27	0.0173903
0002.CSV	1643.12	0.0171166
0002.CSV	1646.98	0.0167624
0002.CSV	1650.84	0.0166705
0002.CSV	1654.69	0.0165312
0002.CSV	1658.55	0.0163317
0002.CSV	1662.41	0.0159578
0002.CSV	1666.27	0.0157084
0002.CSV	1670.12	0.0154077
0002.CSV	1673.98	0.0152316
0002.CSV	1677.84	0.014841
0002.CSV	1681.69	0.0145464
0002.CSV	1685.55	0.0142749
0002.CSV	1689.41	0.0140933
0002.CSV	1693.27	0.0136976
0002.CSV	1697.12	0.013459
0002.CSV	1700.98	0.0132889
0002.CSV	1704.84	0.0133369
0002.CSV	1708.69	0.0132174
0002.CSV	1712.55	0.0131292
0002.CSV	1716.41	0.0131269
0002.CSV	1720.27	0.0133383
0002.CSV	1724.12	0.0132416
0002.CSV	1727.98	0.0131573
0002.CSV	1731.84	0.0130616
0002.CSV	1735.69	0.0132412
0002.CSV	1739.55	0.0131146
0002.CSV	1743.41	0.0129326
0002.CSV	1747.27	0.0126629
0002.CSV	1751.12	0.0126418
0002.CSV	1754.98	0.0125628
0002.CSV	1758.84	0.0125477
0002.CSV	1762.69	0.0125575
0002.CSV	1766.55	0.0126561
0002.CSV	1770.41	0.0130254
0002.CSV	1774.26	0.0143844
0002.CSV	1778.12	0.01598
0002.CSV	1781.98	0.0178117
0002.CSV	1785.84	0.0188544
0002.CSV	1789.69	0.0186387
0002.CSV	1793.55	0.0170605
0002.CSV	1797.41	0.0156176
0002.CSV	1801.26	0.0143226
0002.CSV	1805.12	0.0133598
0002.CSV	1808.98	0.0127827
0002.CSV	1812.84	0.0125884
0002.CSV	1816.69	0.0124379
0002.CSV	1820.55	0.0123968
0002.CSV	1824.41	0.0123402
0002.CSV	1828.26	0.0124428
0002.CSV	1832.12	0.0124861
0002.CSV	1835.98	0.01252
0002.CSV	1839.84	0.0124322
0002.CSV	1843.69	0.0125039
0002.CSV	1847.55	0.0125965
0002.CSV	1851.41	0.012626
0002.CSV	1855.26	0.0126036
0002.CSV	1859.12	0.0126717
0002.CSV	1862.98	0.0126405
0002.CSV	1866.84	0.0126739
0002.CSV	1870.69	0.0127866
0002.CSV	1874.55	0.0128372
0002.CSV	1878.41	0.0128005
0002.CSV	1882.26	0.0128538
0002.CSV	1886.12	0.0128163
0002.CSV	1889.98	0.0128718
0002.CSV	1893.83	0.0129107
0002.CSV	1897.69	0.0129571
0002.CSV	1901.55	0.0129141
0002.CSV	1905.41	0.0129059
0002.CSV	1909.26	0.0128979
0002.CSV	1913.12	0.0129146
0002.CSV	1916.98	0.0128576
0002.CSV	1920.83	0.0129118
0002.CSV	1924.69	0.0129356
0002.CSV	1928.55	0.0129564
0002.CSV	1932.4	0.0129375
0002.CSV	1936.26	0.0129652
0002.CSV	1940.12	0.0129289
0002.CSV	1943.98	0.0129738
0002.CSV	1947.83	0.0129863
0002.CSV	1951.69	0.0129989
0002.CSV	1955.55	0.0129763
0002.CSV	1959.4	0.0130158
0002.CSV	1963.26	0.0129994
0002.CSV	1967.12	0.0130544
0002.CSV	1970.98	0.0130713
0002.CSV	1974.83	0.0130891
0002.CSV	1978.69	0.0130819
0002.CSV	1982.55	0.0131197
0002.CSV	1986.4	0.0130796
0002.CSV	1990.26	0.0131057
0002.CSV	1994.12	0.013128
0002.CSV	1997.98	0.0131628
0002.CSV	2001.83	0.0131518
0002.CSV	2005.69	0.0131924
0002.CSV	2009.55	0.0132155
0002.CSV	2013.4	0.0132694
0002.CSV	2017.26	0.0132778
0002.CSV	2021.12	0.0133276
0002.CSV	2024.97	0.0133295
0002.CSV	2028.83	0.0133537
0002.CSV	2032.69	0.0133312
0002.CSV	2036.55	0.0133647
0002.CSV	2040.4	0.0133856
0002.CSV	2044.26	0.0134466
0002.CSV	2048.12	0.0134343
0002.CSV	2051.97	0.0134581
0002.CSV	2055.83	0.0134805
0002.CSV	2059.69	0.0135298
0002.CSV	2063.55	0.0135372
0002.CSV	2067.4	0.0135716
0002.CSV	2071.26	0.0135684
0002.CSV	2075.12	0.0136196
0002.CSV	2078.97	0.0136519
0002.CSV	2082.83	0.0136932
0002.CSV	2086.69	0.0136822
0002.CSV	2090.55	0.0137346
0002.CSV	2094.4	0.0137619
0002.CSV	2098.26	0.0138206
0002.CSV	2102.12	0.0138463
0002.CSV	2105.97	0.0138926
0002.CSV	2109.83	0.0139299
0002.CSV	2113.69	0.0140082
0002.CSV	2117.55	0.0140432
0002.CSV	2121.4	0.0140999
0002.CSV	2125.26	0.0141312
0002.CSV	2129.12	0.0141881
0002.CSV	2132.97	0.0142046
0002.CSV	2136.83	0.0142418
0002.CSV	2140.69	0.0142656
0002.CSV	2144.55	0.014338
0002.CSV	2148.4	0.0143843
0002.CSV	2152.26	0.0144271
0002.CSV	2156.12	0.0144298
0002.CSV	2159.97	0.0144582
0002.CSV	2163.83	0.0144447
0002.CSV	2167.69	0.0144642
0002.CSV	2171.55	0.0144944
0002.CSV	2175.4	0.0145522
0002.CSV	2179.26	0.0145699
0002.CSV	2183.12	0.0145957
0002.CSV	2186.97	0.0146085
0002.CSV	2190.83	0.0146696
0002.CSV	2194.69	0.0146803
0002.CSV	2198.55	0.0146994
0002.CSV	2202.4	0.0146931
0002.CSV	2206.26	0.0146979
0002.CSV	2210.12	0.0146981
0002.CSV	2213.97	0.0147227
0002.CSV	2217.83	0.0147219
0002.CSV	2221.69	0.0147424
0002.CSV	2225.54	0.0147321
0002.CSV	2229.4	0.014756
0002.CSV	2233.26	0.0147413
0002.CSV	2237.12	0.0147609
0002.CSV	2240.97	0.0147625
0002.CSV	2244.83	0.0147699
0002.CSV	2248.69	0.0147707
0002.CSV	2252.54	0.0147956
0002.CSV	2256.4	0.0147843
0002.CSV	2260.26	0.0147963
0002.CSV	2264.11	0.0147935
0002.CSV	2267.97	0.0148188
0002.CSV	2271.83	0.0148199
0002.CSV	2275.69	0.0148186
0002.CSV	2279.54	0.0148046
0002.CSV	2283.4	0.0147925
0002.CSV	2287.26	0.0147822
0002.CSV	2291.11	0.0148592
0002.CSV	2294.97	0.0149306
0002.CSV	2298.83	0.0150179
0002.CSV	2302.69	0.0150573
0002.CSV	2306.54	0.0150911
0002.CSV	2310.4	0.0151253
0002.CSV	2314.26	0.0151853
0002.CSV	2318.11	0.0151635
0002.CSV	2321.97	0.0151909
0002.CSV	2325.83	0.0151549
0002.CSV	2329.69	0.015086
0002.CSV	2333.54	0.0149219
0002.CSV	2337.4	0.0148602
0002.CSV	2341.26	0.0148238
0002.CSV	2345.11	0.0152571
0002.CSV	2348.97	0.0153202
0002.CSV	2352.83	0.0148991
0002.CSV	2356.69	0.013918
0002.CSV	2360.54	0.0134241
0002.CSV	2364.4	0.0138628
0002.CSV	2368.26	0.0146706
0002.CSV	2372.11	0.015191
0002.CSV	2375.97	0.0153928
0002.CSV	2379.83	0.0152619
0002.CSV	2383.69	0.0150772
0002.CSV	2387.54	0.0149194
0002.CSV	2391.4	0.0148443
0002.CSV	2395.26	0.014834
0002.CSV	2399.11	0.0148737
0002.CSV	2402.97	0.0148845
0002.CSV	2406.83	0.0148972
0002.CSV	2410.68	0.0148842
0002.CSV	2414.54	0.014898
0002.CSV	2418.4	0.0149186
0002.CSV	2422.26	0.0149461
0002.CSV	2426.11	0.0149592
0002.CSV	2429.97	0.0149784
0002.CSV	2433.83	0.0150001
0002.CSV	2437.68	0.0150232
0002.CSV	2441.54	0.0150161
0002.CSV	2445.4	0.015042
0002.CSV	2449.26	0.0150918
0002.CSV	2453.11	0.0151581
0002.CSV	2456.97	0.0152066
0002.CSV	2460.83	0.0152666
0002.CSV	2464.68	0.0153504
0002.CSV	2468.54	0.0154949
0002.CSV	2472.4	0.0156492
0002.CSV	2476.26	0.0158375
0002.CSV	2480.11	0.0160588
0002.CSV	2483.97	0.0163245
0002.CSV	2487.83	0.0165677
0002.CSV	2491.68	0.0167986
0002.CSV	2495.54	0.0169823
0002.CSV	2499.4	0.0170823
0002.CSV	2503.26	0.0170882
0002.CSV	2507.11	0.0170468
0002.CSV	2510.97	0.017035
0002.CSV	2514.83	0.0171572
0002.CSV	2518.68	0.0173406
0002.CSV	2522.54	0.0174343
0002.CSV	2526.4	0.0173778
0002.CSV	2530.26	0.0172304
0002.CSV	2534.11	0.0170003
0002.CSV	2537.97	0.0167825
0002.CSV	2541.83	0.0166618
0002.CSV	2545.68	0.016594
0002.CSV	2549.54	0.0164874
0002.CSV	2553.4	0.0163298
0002.CSV	2557.26	0.0161534
0002.CSV	2561.11	0.0160243
0002.CSV	2564.97	0.0159115
0002.CSV	2568.83	0.0157882
0002.CSV	2572.68	0.0156742
0002.CSV	2576.54	0.0155822
0002.CSV	2580.4	0.0154626
0002.CSV	2584.25	0.015382
0002.CSV	2588.11	0.0153542
0002.CSV	2591.97	0.015349
0002.CSV	2595.83	0.0153219
0002.CSV	2599.68	0.0153079
0002.CSV	2603.54	0.0152985
0002.CSV	2607.4	0.0153126
0002.CSV	2611.25	0.0153456
0002.CSV	2615.11	0.0153733
0002.CSV	2618.97	0.0153532
0002.CSV	2622.82	0.0153904
0002.CSV	2626.68	0.0154161
0002.CSV	2630.54	0.0154002
0002.CSV	2634.4	0.0154268
0002.CSV	2638.25	0.0154562
0002.CSV	2642.11	0.0153825
0002.CSV	2645.97	0.015279
0002.CSV	2649.82	0.0152089
0002.CSV	2653.68	0.0151735
0002.CSV	2657.54	0.0151325
0002.CSV	2661.4	0.0150878
0002.CSV	2665.25	0.0150486
0002.CSV	2669.11	0.0150734
0002.CSV	2672.97	0.0151939
0002.CSV	2676.82	0.0153565
0002.CSV	2680.68	0.0153438
0002.CSV	2684.54	0.015146
0002.CSV	2688.4	0.0150651
0002.CSV	2692.25	0.0151163
0002.CSV	2696.11	0.0151668
0002.CSV	2699.97	0.0151736
0002.CSV	2703.82	0.0151799
0002.CSV	2707.68	0.0152638
0002.CSV	2711.54	0.0153002
0002.CSV	2715.4	0.0153014
0002.CSV	2719.25	0.0154046
0002.CSV	2723.11	0.0156173
0002.CSV	2726.97	0.0156158
0002.CSV	2730.82	0.0154076
0002.CSV	2734.68	0.0153962
0002.CSV	2738.54	0.0154201
0002.CSV	2742.4	0.0153978
0002.CSV	2746.25	0.0155908
0002.CSV	2750.11	0.0156599
0002.CSV	2753.97	0.0155173
0002.CSV	2757.82	0.0154477
0002.CSV	2761.68	0.0153982
0002.CSV	2765.54	0.0154015
0002.CSV	2769.39	0.0155441
0002.CSV	2773.25	0.0157698
0002.CSV	2777.11	0.0157141
0002.CSV	2780.97	0.0155695
0002.CSV	2784.82	0.0157377
0002.CSV	2788.68	0.0161056
0002.CSV	2792.54	0.0162323
0002.CSV	2796.39	0.0162672
0002.CSV	2800.25	0.0161801
0002.CSV	2804.11	0.0160443
0002.CSV	2807.97	0.0162558
0002.CSV	2811.82	0.0163271
0002.CSV	2815.68	0.0162587
0002.CSV	2819.54	0.0163499
0002.CSV	2823.39	0.016478
0002.CSV	2827.25	0.0166096
0002.CSV	2831.11	0.0170024
0002.CSV	2834.97	0.0176382
0002.CSV	2838.82	0.0181688
0002.CSV	2842.68	0.0186426
0002.CSV	2846.54	0.0196354
0002.CSV	2850.39	0.0204446
0002.CSV	2854.25	0.0206145
0002.CSV	2858.11	0.0204974
0002.CSV	2861.97	0.0200545
0002.CSV	2865.82	0.0196635
0002.CSV	2869.68	0.0197636
0002.CSV	2873.54	0.0197934
0002.CSV	2877.39	0.0192332
0002.CSV	2881.25	0.0188607
0002.CSV	2885.11	0.0189294
0002.CSV	2888.97	0.0192018
0002.CSV	2892.82	0.0197256
0002.CSV	2896.68	0.0201629
0002.CSV	2900.54	0.0203676
0002.CSV	2904.39	0.020865
0002.CSV	2908.25	0.0218055
0002.CSV	2912.11	0.023205
0002.CSV	2915.97	0.0243407
0002.CSV	2919.82	0.0246075
0002.CSV	2923.68	0.0244292
0002.CSV	2927.54	0.0243128
0002.CSV	2931.39	0.0236053
0002.CSV	2935.25	0.0223555
0002.CSV	2939.11	0.0215778
0002.CSV	2942.96	0.0214328
0002.CSV	2946.82	0.0212102
0002.CSV	2950.68	0.0208253
0002.CSV	2954.54	0.020421
0002.CSV	2958.39	0.0199466
0002.CSV	2962.25	0.0195338
0002.CSV	2966.11	0.0188668
0002.CSV	2969.96	0.0184174
0002.CSV	2973.82	0.0183183
0002.CSV	2977.68	0.0181961
0002.CSV	2981.53	0.0177517
0002.CSV	2985.39	0.0171257
0002.CSV	2989.25	0.0169911
0002.CSV	2993.11	0.0171083
0002.CSV	2996.96	0.0169091
0002.CSV	3000.82	0.0165644
0002.CSV	3004.68	0.0163491
0002.CSV	3008.53	0.0165224
0002.CSV	3012.39	0.0168315
0002.CSV	3016.25	0.0167895
0002.CSV	3020.11	0.0165063
0002.CSV	3023.96	0.0162906
0002.CSV	3027.82	0.0162533
0002.CSV	3031.68	0.016474
0002.CSV	3035.53	0.0165601
0002.CSV	3039.39	0.0166224
0002.CSV	3043.25	0.0167574
0002.CSV	3047.11	0.0166708
0002.CSV	3050.96	0.0166133
0002.CSV	3054.82	0.016553
0002.CSV	3058.68	0.0164085
0002.CSV	3062.53	0.0164485
0002.CSV	3066.39	0.016682
0002.CSV	3070.25	0.0166512
0002.CSV	3074.11	0.0166677
0002.CSV	3077.96	0.0169265
0002.CSV	3081.82	0.0170412
0002.CSV	3085.68	0.0170472
0002.CSV	3089.53	0.0169852
0002.CSV	3093.39	0.0167985
0002.CSV	3097.25	0.0168017
0002.CSV	3101.11	0.0169027
0002.CSV	3104.96	0.0169463
0002.CSV	3108.82	0.0170779
0002.CSV	3112.68	0.0172073
0002.CSV	3116.53	0.0173793
0002.CSV	3120.39	0.0173444
0002.CSV	3124.25	0.0171431
0002.CSV	3128.11	0.0171084
0002.CSV	3131.96	0.0171727
0002.CSV	3135.82	0.017313
0002.CSV	3139.68	0.0174219
0002.CSV	3143.53	0.017307
0002.CSV	3147.39	0.0173913
0002.CSV	3151.25	0.017653
0002.CSV	3155.1	0.0176754
0002.CSV	3158.96	0.0174923
0002.CSV	3162.82	0.0174316
0002.CSV	3166.68	0.0174527
0002.CSV	3170.53	0.0175292
0002.CSV	3174.39	0.0175855
0002.CSV	3178.25	0.0176904
0002.CSV	3182.1	0.0177622
0002.CSV	3185.96	0.0177842
0002.CSV	3189.82	0.0178596
0002.CSV	3193.68	0.0179242
0002.CSV	3197.53	0.0179704
0002.CSV	3201.39	0.0180814
0002.CSV	3205.25	0.0181662
0002.CSV	3209.1	0.0181881
0002.CSV	3212.96	0.0182639
0002.CSV	3216.82	0.0183832
0002.CSV	3220.68	0.0184455
0002.CSV	3224.53	0.0184876
0002.CSV	3228.39	0.0186303
0002.CSV	3232.25	0.0188683
0002.CSV	3236.1	0.0188574
0002.CSV	3239.96	0.0187192
0002.CSV	3243.82	0.0188291
0002.CSV	3247.68	0.0189309
0002.CSV	3251.53	0.0188547
0002.CSV	3255.39	0.018884
0002.CSV	3259.25	0.0188662
0002.CSV	3263.1	0.0188614
0002.CSV	3266.96	0.0190763
0002.CSV	3270.82	0.0193378
0002.CSV	3274.68	0.0192553
0002.CSV	3278.53	0.0190698
0002.CSV	3282.39	0.0190064
0002.CSV	3286.25	0.0190624
0002.CSV	3290.1	0.0192543
0002.CSV	3293.96	0.0194214
0002.CSV	3297.82	0.0193235
0002.CSV	3301.67	0.0193197
0002.CSV	3305.53	0.019505
0002.CSV	3309.39	0.0194671
0002.CSV	3313.25	0.0191708
0002.CSV	3317.1	0.0189957
0002.CSV	3320.96	0.0190644
0002.CSV	3324.82	0.0192219
0002.CSV	3328.67	0.0191268
0002.CSV	3332.53	0.0190804
0002.CSV	3336.39	0.0192836
0002.CSV	3340.24	0.0194374
0002.CSV	3344.1	0.019332
0002.CSV	3347.96	0.0193053
0002.CSV	3351.82	0.0192526
0002.CSV	3355.67	0.0191093
0002.CSV	3359.53	0.0191767
0002.CSV	3363.39	0.0193201
0002.CSV	3367.24	0.0194806
0002.CSV	3371.1	0.0194015
0002.CSV	3374.96	0.0191615
0002.CSV	3378.82	0.0190417
0002.CSV	3382.67	0.0188471
0002.CSV	3386.53	0.0188174
0002.CSV	3390.39	0.0190278
0002.CSV	3394.24	0.0190854
0002.CSV	3398.1	0.0190234
0002.CSV	3401.96	0.0189557
0002.CSV	3405.82	0.0187885
0002.CSV	3409.67	0.0187425
0002.CSV	3413.53	0.01858
0002.CSV	3417.39	0.0183364
0002.CSV	3421.24	0.0182295
0002.CSV	3425.1	0.0182835
0002.CSV	3428.96	0.0183692
0002.CSV	3432.82	0.0183822
0002.CSV	3436.67	0.0182044
0002.CSV	3440.53	0.0178459
0002.CSV	3444.39	0.0176576
0002.CSV	3448.24	0.017554
0002.CSV	3452.1	0.0173575
0002.CSV	3455.96	0.0173123
0002.CSV	3459.82	0.0173906
0002.CSV	3463.67	0.0174388
0002.CSV	3467.53	0.0174441
0002.CSV	3471.39	0.0172061
0002.CSV	3475.24	0.0169642
0002.CSV	3479.1	0.0168662
0002.CSV	3482.96	0.0166969
0002.CSV	3486.82	0.0166259
0002.CSV	3490.67	0.01655
0002.CSV	3494.53	0.0164832
0002.CSV	3498.39	0.0163706
0002.CSV	3502.24	0.0161757
0002.CSV	3506.1	0.0158742
0002.CSV	3509.96	0.0157542
0002.CSV	3513.81	0.0157182
0002.CSV	3517.67	0.0154923
0002.CSV	3521.53	0.0154021
0002.CSV	3525.39	0.0152608
0002.CSV	3529.24	0.0150237
0002.CSV	3533.1	0.0150132
0002.CSV	3536.96	0.0149725
0002.CSV	3540.81	0.0148771
0002.CSV	3544.67	0.0148082
0002.CSV	3548.53	0.0145646
0002.CSV	3552.39	0.0143039
0002.CSV	3556.24	0.0141759
0002.CSV	3560.1	0.0139789
0002.CSV	3563.96	0.0136337
0002.CSV	3567.81	0.0136877
0002.CSV	3571.67	0.0137251
0002.CSV	3575.53	0.0134817
0002.CSV	3579.39	0.0135275
0002.CSV	3583.24	0.0135571
0002.CSV	3587.1	0.0134669
0002.CSV	3590.96	0.0133039
0002.CSV	3594.81	0.0131119
0002.CSV	3598.67	0.0131189
0002.CSV	3602.53	0.0130318
0002.CSV	3606.39	0.0126479
0002.CSV	3610.24	0.0124136
0002.CSV	3614.1	0.0123521
0002.CSV	3617.96	0.0124548
0002.CSV	3621.81	0.0125897
0002.CSV	3625.67	0.0121932
0002.CSV	3629.53	0.0120531
0002.CSV	3633.39	0.012259
0002.CSV	3637.24	0.0121102
0002.CSV	3641.1	0.0118859
0002.CSV	3644.96	0.0115047
0002.CSV	3648.81	0.0116267
0002.CSV	3652.67	0.0120213
0002.CSV	3656.53	0.0120582
0002.CSV	3660.38	0.0120441
0002.CSV	3664.24	0.0116303
0002.CSV	3668.1	0.0111919
0002.CSV	3671.96	0.0110872
0002.CSV	3675.81	0.0113593
0002.CSV	3679.67	0.0116055
0002.CSV	3683.53	0.0114751
0002.CSV	3687.38	0.0113492
0002.CSV	3691.24	0.0116994
0002.CSV	3695.1	0.0117145
0002.CSV	3698.95	0.011494
0002.CSV	3702.81	0.0114022
0002.CSV	3706.67	0.0111425
0002.CSV	3710.53	0.0110589
0002.CSV	3714.38	0.0113544
0002.CSV	3718.24	0.0111715
0002.CSV	3722.1	0.0110867
0002.CSV	3725.95	0.0112103
0002.CSV	3729.81	0.0111253
0002.CSV	3733.67	0.0111362
0002.CSV	3737.53	0.0115527
0002.CSV	3741.38	0.011127
0002.CSV	3745.24	0.0106987
0002.CSV	3749.1	0.0107458
0002.CSV	3752.95	0.0110912
0002.CSV	3756.81	0.0110707
0002.CSV	3760.67	0.0110542
0002.CSV	3764.53	0.0109539
0002.CSV	3768.38	0.0110523
0002.CSV	3772.24	0.0112473
0002.CSV	3776.1	0.011145
0002.CSV	3779.95	0.0110767
0002.CSV	3783.81	0.0110559
0002.CSV	3787.67	0.0110994
0002.CSV	3791.53	0.0110329
0002.CSV	3795.38	0.0107649
0002.CSV	3799.24	0.0106314
0002.CSV	3803.1	0.0108807
0002.CSV	3806.95	0.0111499
0002.CSV	3810.81	0.0110239
0002.CSV	3814.67	0.010749
0002.CSV	3818.53	0.0107764
0002.CSV	3822.38	0.0110342
0002.CSV	3826.24	0.010971
0002.CSV	3830.1	0.0107787
0002.CSV	3833.95	0.0106731
0002.CSV	3837.81	0.0107448
0002.CSV	3841.67	0.011151
0002.CSV	3845.53	0.011177
0002.CSV	3849.38	0.0107569
0002.CSV	3853.24	0.0107911
0002.CSV	3857.1	0.0112553
0002.CSV	3860.95	0.0109873
0002.CSV	3864.81	0.0108875
0002.CSV	3868.67	0.0109146
0002.CSV	3872.52	0.0111534
0002.CSV	3876.38	0.0111713
0002.CSV	3880.24	0.0110643
0002.CSV	3884.1	0.0112707
0002.CSV	3887.95	0.0113001
0002.CSV	3891.81	0.0112242
0002.CSV	3895.67	0.0111227
0002.CSV	3899.52	0.0109349
0002.CSV	3903.38	0.0112652
0002.CSV	3907.24	0.0114903
0002.CSV	3911.1	0.0113285
0002.CSV	3914.95	0.0112105
0002.CSV	3918.81	0.0113198
0002.CSV	3922.67	0.0113617
0002.CSV	3926.52	0.0113311
0002.CSV	3930.38	0.0113464
0002.CSV	3934.24	0.0114845
0002.CSV	3938.09	0.0113817
0002.CSV	3941.95	0.0113322
0002.CSV	3945.81	0.0114089
0002.CSV	3949.67	0.0114577
0002.CSV	3953.52	0.0114341
0002.CSV	3957.38	0.0113854
0002.CSV	3961.24	0.0113779
0002.CSV	3965.09	0.0113317
0002.CSV	3968.95	0.0112874
0002.CSV	3972.81	0.0113362
0002.CSV	3976.67	0.0113835
0002.CSV	3980.52	0.01137
0002.CSV	3984.38	0.0113505
0002.CSV	3988.24	0.0113145
0002.CSV	3992.09	0.0112865
0002.CSV	3995.95	0.0112551
0002.CSV	3999.81	0.0112134
0003.CSV	674.992	0.0212114
0003.CSV	678.849	0.0214486
0003.CSV	682.706	0.0214787
0003.CSV	686.563	0.0218998
0003.CSV	690.42	0.0225486
0003.CSV	694.277	0.0261958
0003.CSV	698.134	0.0312668
0003.CSV	701.991	0.0299668
0003.CSV	705.849	0.0274125
0003.CSV	709.706	0.0349719
0003.CSV	713.563	0.037764
0003.CSV	717.42	0.0268988
0003.CSV	721.277	0.0185149
0003.CSV	725.134	0.0169985
0003.CSV	728.991	0.0167608
0003.CSV	732.848	0.0169027
0003.CSV	736.705	0.0168364
0003.CSV	740.562	0.0169383
0003.CSV	744.42	0.0167301
0003.CSV	748.277	0.0168078
0003.CSV	752.134	0.0167018
0003.CSV	755.991	0.0169437
0003.CSV	759.848	0.016979
0003.CSV	763.705	0.0172077
0003.CSV	767.562	0.0172811
0003.CSV	771.419	0.0176282
0003.CSV	775.276	0.0178605
0003.CSV	779.133	0.0182458
0003.CSV	782.99	0.0182067
0003.CSV	786.848	0.0183006
0003.CSV	790.705	0.0183752
0003.CSV	794.562	0.0189482
0003.CSV	798.419	0.0194239
0003.CSV	802.276	0.019871
0003.CSV	806.133	0.0199392
0003.CSV	809.99	0.020309
0003.CSV	813.847	0.0207934
0003.CSV	817.704	0.0219544
0003.CSV	821.562	0.0234157
0003.CSV	825.419	0.0256443
0003.CSV	829.276	0.0277698
0003.CSV	833.133	0.0305551
0003.CSV	836.99	0.0355831
0003.CSV	840.847	0.0442336
0003.CSV	844.704	0.053772
0003.CSV	848.561	0.0680855
0003.CSV	852.418	0.0792119
0003.CSV	856.275	0.0725743
0003.CSV	860.132	0.0557696
0003.CSV	863.99	0.0397363
0003.CSV	867.847	0.0271285
0003.CSV	871.704	0.0199418
0003.CSV	875.561	0.0170285
0003.CSV	879.418	0.0152473
0003.CSV	883.275	0.0133867
0003.CSV	887.132	0.012371
0003.CSV	890.989	0.0119762
0003.CSV	894.846	0.011955
0003.CSV	898.703	0.0119243
0003.CSV	902.561	0.0120961
0003.CSV	906.418	0.012283
0003.CSV	910.275	0.0123683
0003.CSV	914.132	0.0122633
0003.CSV	917.989	0.0124269
0003.CSV	921.846	0.0125186
0003.CSV	925.703	0.0127262
0003.CSV	929.56	0.0128481
0003.CSV	933.417	0.0129824
0003.CSV	937.274	0.0130152
0003.CSV	941.131	0.0131673
0003.CSV	944.989	0.0132576
0003.CSV	948.846	0.0134862
0003.CSV	952.703	0.0136318
0003.CSV	956.56	0.013837
0003.CSV	960.417	0.0139025
0003.CSV	964.274	0.014042
0003.CSV	968.131	0.0142048
0003.CSV	971.988	0.0145623
0003.CSV	975.845	0.0148094
0003.CSV	979.702	0.015096
0003.CSV	983.559	0.015352
0003.CSV	987.417	0.0157759
0003.CSV	991.274	0.0160956
0003.CSV	995.131	0.0164957
0003.CSV	998.988	0.0168106
0003.CSV	1002.85	0.0171877
0003.CSV	1006.7	0.0175266
0003.CSV	1010.56	0.0180222
0003.CSV	1014.42	0.0183529
0003.CSV	1018.27	0.0187257
0003.CSV	1022.13	0.0190082
0003.CSV	1025.99	0.0193822
0003.CSV	1029.85	0.0197157
0003.CSV	1033.7	0.0201858
0003.CSV	1037.56	0.0204867
0003.CSV	1041.42	0.0207631
0003.CSV	1045.27	0.0208498
0003.CSV	1049.13	0.0209517
0003.CSV	1052.99	0.0209376
0003.CSV	1056.84	0.0211695
0003.CSV	1060.7	0.0214778
0003.CSV	1064.56	0.0220005
0003.CSV	1068.42	0.0225046
0003.CSV	1072.27	0.0231957
0003.CSV	1076.13	0.0242807
0003.CSV	1079.99	0.0267686
0003.CSV	1083.84	0.0273954
0003.CSV	1087.7	0.0246267
0003.CSV	1091.56	0.0227028
0003.CSV	1095.41	0.0223292
0003.CSV	1099.27	0.0220612
0003.CSV	1103.13	0.0218933
0003.CSV	1106.99	0.0216708
0003.CSV	1110.84	0.0215131
0003.CSV	1114.7	0.0213141
0003.CSV	1118.56	0.0211216
0003.CSV	1122.41	0.0207773
0003.CSV	1126.27	0.0204111
0003.CSV	1130.13	0.0198754
0003.CSV	1133.99	0.0193988
0003.CSV	1137.84	0.0189514
0003.CSV	1141.7	0.0186956
0003.CSV	1145.56	0.018506
0003.CSV	1149.41	0.0184411
0003.CSV	1153.27	0.0183256
0003.CSV	1157.13	0.0182975
0003.CSV	1160.99	0.0182164
0003.CSV	1164.84	0.0181952
0003.CSV	1168.7	0.0181344
0003.CSV	1172.56	0.018253
0003.CSV	1176.41	0.0184596
0003.CSV	1180.27	0.0186951
0003.CSV	1184.13	0.018493
0003.CSV	1187.99	0.0179685
0003.CSV	1191.84	0.017369
0003.CSV	1195.7	0.0170258
0003.CSV	1199.56	0.0168192
0003.CSV	1203.41	0.0168227
0003.CSV	1207.27	0.0168632
0003.CSV	1211.13	0.0170408
0003.CSV	1214.98	0.0172146
0003.CSV	1218.84	0.0175283
0003.CSV	1222.7	0.0178347
0003.CSV	1226.56	0.0182127
0003.CSV	1230.41	0.0185179
0003.CSV	1234.27	0.0188801
0003.CSV	1238.13	0.0191143
0003.CSV	1241.98	0.0193618
0003.CSV	1245.84	0.0195199
0003.CSV	1249.7	0.0195815
0003.CSV	1253.56	0.0193302
0003.CSV	1257.41	0.0189396
0003.CSV	1261.27	0.0185817
0003.CSV	1265.13	0.0185858
0003.CSV	1268.98	0.0187742
0003.CSV	1272.84	0.0190966
0003.CSV	1276.7	0.0193418
0003.CSV	1280.56	0.0196616
0003.CSV	1284.41	0.0199422
0003.CSV	1288.27	0.0203389
0003.CSV	1292.13	0.0206648
0003.CSV	1295.98	0.0210259
0003.CSV	1299.84	0.021324
0003.CSV	1303.7	0.0216213
0003.CSV	1307.56	0.0218476
0003.CSV	1311.41	0.0222002
0003.CSV	1315.27	0.0225266
0003.CSV	1319.13	0.0229736
0003.CSV	1322.98	0.0233583
0003.CSV	1326.84	0.0238195
0003.CSV	1330.7	0.0242976
0003.CSV	1334.56	0.0248684
0003.CSV	1338.41	0.0255796
0003.CSV	1342.27	0.0265004
0003.CSV	1346.13	0.0272153
0003.CSV	1349.98	0.0281778
0003.CSV	1353.84	0.0291835
0003.CSV	1357.7	0.0302902
0003.CSV	1361.56	0.0314958
0003.CSV	1365.41	0.0328597
0003.CSV	1369.27	0.0339004
0003.CSV	1373.13	0.0354026
0003.CSV	1376.98	0.0372057
0003.CSV	1380.84	0.0388777
0003.CSV	1384.7	0.0405016
0003.CSV	1388.56	0.0426839
0003.CSV	1392.41	0.044534
0003.CSV	1396.27	0.0469604
0003.CSV	1400.13	0.0495282
0003.CSV	1403.98	0.0519102
0003.CSV	1407.84	0.0543202
0003.CSV	1411.7	0.0565429
0003.CSV	1415.55	0.0581522
0003.CSV	1419.41	0.0602585
0003.CSV	1423.27	0.0620276
0003.CSV	1427.12	0.0636867
0003.CSV	1430.98	0.0654521
0003.CSV	1434.84	0.0677814
0003.CSV	1438.7	0.070423
0003.CSV	1442.55	0.072353
0003.CSV	1446.41	0.0733357
0003.CSV	1450.27	0.073661
0003.CSV	1454.12	0.0729649
0003.CSV	1457.98	0.0722355
0003.CSV	1461.84	0.0714063
0003.CSV	1465.7	0.0710072
0003.CSV	1469.55	0.0700821
0003.CSV	1473.41	0.0686314
0003.CSV	1477.27	0.0664725
0003.CSV	1481.12	0.0647037
0003.CSV	1484.98	0.0628305
0003.CSV	1488.84	0.0608991
0003.CSV	1492.7	0.0587724
0003.CSV	1496.55	0.0569425
0003.CSV	1500.41	0.0547904
0003.CSV	1504.27	0.0532119
0003.CSV	1508.12	0.0503451
0003.CSV	1511.98	0.0479374
0003.CSV	1515.84	0.0456697
0003.CSV	1519.7	0.0429376
0003.CSV	1523.55	0.0396413
0003.CSV	1527.41	0.0370877
0003.CSV	1531.27	0.0347087
0003.CSV	1535.12	0.0325877
0003.CSV	1538.98	0.0304533
0003.CSV	1542.84	0.0276698
0003.CSV	1546.7	0.0255928
0003.CSV	1550.55	0.0240709
0003.CSV	1554.41	0.0225515
0003.CSV	1558.27	0.0209839
0003.CSV	1562.12	0.0194148
0003.CSV	1565.98	0.0185694
0003.CSV	1569.84	0.0174941
0003.CSV	1573.69	0.016461
0003.CSV	1577.55	0.0153053
0003.CSV	1581.41	0.0142943
0003.CSV	1585.27	0.0134648
0003.CSV	1589.12	0.0128978
0003.CSV	1592.98	0.0125127
0003.CSV	1596.84	0.0122754
0003.CSV	1600.69	0.0120438
0003.CSV	1604.55	0.0119609
0003.CSV	1608.41	0.0117876
0003.CSV	1612.27	0.0114868
0003.CSV	1616.12	0.0110928
0003.CSV	1619.98	0.010825
0003.CSV	1623.84	0.0105163
0003.CSV	1627.69	0.0103035
0003.CSV	1631.55	0.0100301
0003.CSV	1635.41	0.00991449
0003.CSV	1639.27	0.00984541
0003.CSV	1643.12	0.00962027
0003.CSV	1646.98	0.00945563
0003.CSV	1650.84	0.00947013
0003.CSV	1654.69	0.00948411
0003.CSV	1658.55	0.009318
0003.CSV	1662.41	0.0090793
0003.CSV	1666.27	0.00893936
0003.CSV	1670.12	0.00884182
0003.CSV	1673.98	0.0088383
0003.CSV	1677.84	0.00861265
0003.CSV	1681.69	0.0083995
0003.CSV	1685.55	0.00837778
0003.CSV	1689.41	0.00831543
0003.CSV	1693.27	0.00803256
0003.CSV	1697.12	0.00789922
0003.CSV	1700.98	0.00794667
0003.CSV	1704.84	0.00800411
0003.CSV	1708.69	0.00789865
0003.CSV	1712.55	0.00779021
0003.CSV	1716.41	0.00784939
0003.CSV	1720.27	0.00802098
0003.CSV	1724.12	0.0079032
[truncated: 32,521 more rows]

## Sheet: C.edule_350_2_mFTIR_data
Select spectrum number	Wavenumbers	Absorbance
0001.CSV	674.992	0.0272877
0001.CSV	678.849	0.0280141
0001.CSV	682.706	0.0282554
0001.CSV	686.563	0.0292452
0001.CSV	690.42	0.0299074
0001.CSV	694.277	0.0321864
0001.CSV	698.134	0.0351269
0001.CSV	701.991	0.0383967
0001.CSV	705.849	0.045968
0001.CSV	709.706	0.0582435
0001.CSV	713.563	0.0549036
0001.CSV	717.42	0.0368876
0001.CSV	721.277	0.0252085
0001.CSV	725.134	0.0223301
0001.CSV	728.991	0.0216788
0001.CSV	732.848	0.0217533
0001.CSV	736.705	0.0217304
0001.CSV	740.562	0.0219164
0001.CSV	744.42	0.0219682
0001.CSV	748.277	0.02243
0001.CSV	752.134	0.0227192
0001.CSV	755.991	0.0231217
0001.CSV	759.848	0.0233584
0001.CSV	763.705	0.0238765
0001.CSV	767.562	0.0241655
0001.CSV	771.419	0.0247569
0001.CSV	775.276	0.0251905
0001.CSV	779.133	0.0256705
0001.CSV	782.99	0.0256522
0001.CSV	786.848	0.0258612
0001.CSV	790.705	0.025994
0001.CSV	794.562	0.0265719
0001.CSV	798.419	0.0271307
0001.CSV	802.276	0.0276866
0001.CSV	806.133	0.0277103
0001.CSV	809.99	0.0279401
0001.CSV	813.847	0.0283527
0001.CSV	817.704	0.0292379
0001.CSV	821.562	0.0303502
0001.CSV	825.419	0.0320185
0001.CSV	829.276	0.0334199
0001.CSV	833.133	0.0345647
0001.CSV	836.99	0.0358874
0001.CSV	840.847	0.0386985
0001.CSV	844.704	0.0425949
0001.CSV	848.561	0.0466056
0001.CSV	852.418	0.0509083
0001.CSV	856.275	0.0569652
0001.CSV	860.132	0.0636619
0001.CSV	863.99	0.0744713
0001.CSV	867.847	0.0920404
0001.CSV	871.704	0.103453
0001.CSV	875.561	0.0940979
0001.CSV	879.418	0.072866
0001.CSV	883.275	0.0480598
0001.CSV	887.132	0.0260794
0001.CSV	890.989	0.0161947
0001.CSV	894.846	0.0153641
0001.CSV	898.703	0.0158121
0001.CSV	902.561	0.0163795
0001.CSV	906.418	0.0167947
0001.CSV	910.275	0.0172373
0001.CSV	914.132	0.0174647
0001.CSV	917.989	0.0179083
0001.CSV	921.846	0.0182782
0001.CSV	925.703	0.0188108
0001.CSV	929.56	0.01915
0001.CSV	933.417	0.0195656
0001.CSV	937.274	0.0197627
0001.CSV	941.131	0.0200519
0001.CSV	944.989	0.0202799
0001.CSV	948.846	0.020738
0001.CSV	952.703	0.0210613
0001.CSV	956.56	0.0215111
0001.CSV	960.417	0.0218494
0001.CSV	964.274	0.0223084
0001.CSV	968.131	0.0226566
0001.CSV	971.988	0.0232137
0001.CSV	975.845	0.0237476
0001.CSV	979.702	0.0244779
0001.CSV	983.559	0.0250629
0001.CSV	987.417	0.0258239
0001.CSV	991.274	0.0265118
0001.CSV	995.131	0.0272185
0001.CSV	998.988	0.0276524
0001.CSV	1002.85	0.0281815
0001.CSV	1006.7	0.0286604
0001.CSV	1010.56	0.0293845
0001.CSV	1014.42	0.0299147
0001.CSV	1018.27	0.0304013
0001.CSV	1022.13	0.0307161
0001.CSV	1025.99	0.0311843
0001.CSV	1029.85	0.0315288
0001.CSV	1033.7	0.0320554
0001.CSV	1037.56	0.0324377
0001.CSV	1041.42	0.0329104
0001.CSV	1045.27	0.0331832
0001.CSV	1049.13	0.0335427
0001.CSV	1052.99	0.0337214
0001.CSV	1056.84	0.0341035
0001.CSV	1060.7	0.0344977
0001.CSV	1064.56	0.0351909
0001.CSV	1068.42	0.0357886
0001.CSV	1072.27	0.0365364
0001.CSV	1076.13	0.0372524
0001.CSV	1079.99	0.0382775
0001.CSV	1083.84	0.0385183
0001.CSV	1087.7	0.037908
0001.CSV	1091.56	0.0371954
0001.CSV	1095.41	0.0368002
0001.CSV	1099.27	0.036407
0001.CSV	1103.13	0.0362328
0001.CSV	1106.99	0.0359976
0001.CSV	1110.84	0.0359015
0001.CSV	1114.7	0.0356856
0001.CSV	1118.56	0.035515
0001.CSV	1122.41	0.0351577
0001.CSV	1126.27	0.0348553
0001.CSV	1130.13	0.0343932
0001.CSV	1133.99	0.0340531
0001.CSV	1137.84	0.0337144
0001.CSV	1141.7	0.0336996
0001.CSV	1145.56	0.0337342
0001.CSV	1149.41	0.0339441
0001.CSV	1153.27	0.0340744
0001.CSV	1157.13	0.0342934
0001.CSV	1160.99	0.0343343
0001.CSV	1164.84	0.0343644
0001.CSV	1168.7	0.0342165
0001.CSV	1172.56	0.0342348
0001.CSV	1176.41	0.0342453
0001.CSV	1180.27	0.034362
0001.CSV	1184.13	0.0341967
0001.CSV	1187.99	0.0340055
0001.CSV	1191.84	0.0337757
0001.CSV	1195.7	0.0337521
0001.CSV	1199.56	0.0337086
0001.CSV	1203.41	0.0338254
0001.CSV	1207.27	0.0338914
0001.CSV	1211.13	0.0342027
0001.CSV	1214.98	0.0345473
0001.CSV	1218.84	0.0350989
0001.CSV	1222.7	0.0355827
0001.CSV	1226.56	0.0362135
0001.CSV	1230.41	0.0368198
0001.CSV	1234.27	0.037591
0001.CSV	1238.13	0.0382157
0001.CSV	1241.98	0.0389394
0001.CSV	1245.84	0.0395329
0001.CSV	1249.7	0.0401889
0001.CSV	1253.56	0.0406605
0001.CSV	1257.41	0.0412344
0001.CSV	1261.27	0.0417718
0001.CSV	1265.13	0.0425532
0001.CSV	1268.98	0.0433707
0001.CSV	1272.84	0.0444091
0001.CSV	1276.7	0.045341
0001.CSV	1280.56	0.0464386
0001.CSV	1284.41	0.0474955
0001.CSV	1288.27	0.0488025
0001.CSV	1292.13	0.0500958
0001.CSV	1295.98	0.0516199
0001.CSV	1299.84	0.053102
0001.CSV	1303.7	0.0547794
0001.CSV	1307.56	0.056436
0001.CSV	1311.41	0.0583529
0001.CSV	1315.27	0.0601698
0001.CSV	1319.13	0.0622038
0001.CSV	1322.98	0.0641614
0001.CSV	1326.84	0.0663584
0001.CSV	1330.7	0.0686417
0001.CSV	1334.56	0.071174
0001.CSV	1338.41	0.074038
0001.CSV	1342.27	0.0774968
0001.CSV	1346.13	0.0804849
0001.CSV	1349.98	0.0839685
0001.CSV	1353.84	0.0875488
0001.CSV	1357.7	0.0912899
0001.CSV	1361.56	0.0952517
0001.CSV	1365.41	0.0997325
0001.CSV	1369.27	0.103277
0001.CSV	1373.13	0.107518
0001.CSV	1376.98	0.11203
0001.CSV	1380.84	0.116015
0001.CSV	1384.7	0.11932
0001.CSV	1388.56	0.122591
0001.CSV	1392.41	0.123936
0001.CSV	1396.27	0.123902
0001.CSV	1400.13	0.122465
0001.CSV	1403.98	0.12096
0001.CSV	1407.84	0.118185
0001.CSV	1411.7	0.114549
0001.CSV	1415.55	0.110325
0001.CSV	1419.41	0.105765
0001.CSV	1423.27	0.101701
0001.CSV	1427.12	0.0989807
0001.CSV	1430.98	0.0961832
0001.CSV	1434.84	0.0937142
0001.CSV	1438.7	0.0909654
0001.CSV	1442.55	0.0889043
0001.CSV	1446.41	0.0864019
0001.CSV	1450.27	0.0837574
0001.CSV	1454.12	0.0811792
0001.CSV	1457.98	0.0778001
0001.CSV	1461.84	0.0748556
0001.CSV	1465.7	0.0726056
0001.CSV	1469.55	0.070106
0001.CSV	1473.41	0.0671985
0001.CSV	1477.27	0.0638325
0001.CSV	1481.12	0.0614135
0001.CSV	1484.98	0.0589215
0001.CSV	1488.84	0.0560358
0001.CSV	1492.7	0.0529897
0001.CSV	1496.55	0.0504357
0001.CSV	1500.41	0.0475895
0001.CSV	1504.27	0.0456541
0001.CSV	1508.12	0.0423387
0001.CSV	1511.98	0.0397393
0001.CSV	1515.84	0.0376428
0001.CSV	1519.7	0.035132
0001.CSV	1523.55	0.0323373
0001.CSV	1527.41	0.030248
0001.CSV	1531.27	0.0283476
0001.CSV	1535.12	0.0266289
0001.CSV	1538.98	0.0247574
0001.CSV	1542.84	0.0215727
0001.CSV	1546.7	0.019015
0001.CSV	1550.55	0.0171314
0001.CSV	1554.41	0.0155179
0001.CSV	1558.27	0.0142936
0001.CSV	1562.12	0.0135234
0001.CSV	1565.98	0.0132193
0001.CSV	1569.84	0.0131177
0001.CSV	1573.69	0.0131786
0001.CSV	1577.55	0.0131031
0001.CSV	1581.41	0.0126794
0001.CSV	1585.27	0.0120768
0001.CSV	1589.12	0.0115194
0001.CSV	1592.98	0.0109705
0001.CSV	1596.84	0.0105085
0001.CSV	1600.69	0.0101042
0001.CSV	1604.55	0.00985974
0001.CSV	1608.41	0.00960042
0001.CSV	1612.27	0.00928882
0001.CSV	1616.12	0.00896077
0001.CSV	1619.98	0.00875269
0001.CSV	1623.84	0.00848944
0001.CSV	1627.69	0.00827551
0001.CSV	1631.55	0.00801332
0001.CSV	1635.41	0.00789467
0001.CSV	1639.27	0.00787638
0001.CSV	1643.12	0.00770103
0001.CSV	1646.98	0.00758928
0001.CSV	1650.84	0.00764603
0001.CSV	1654.69	0.00772043
0001.CSV	1658.55	0.00757205
0001.CSV	1662.41	0.00740356
0001.CSV	1666.27	0.0073489
0001.CSV	1670.12	0.00730688
0001.CSV	1673.98	0.00737478
0001.CSV	1677.84	0.00732534
0001.CSV	1681.69	0.00735466
0001.CSV	1685.55	0.00758206
0001.CSV	1689.41	0.00748281
0001.CSV	1693.27	0.00712041
0001.CSV	1697.12	0.00698075
0001.CSV	1700.98	0.0070181
0001.CSV	1704.84	0.007061
0001.CSV	1708.69	0.00704978
0001.CSV	1712.55	0.00700099
0001.CSV	1716.41	0.00708154
0001.CSV	1720.27	0.00731746
0001.CSV	1724.12	0.00731338
0001.CSV	1727.98	0.00731331
0001.CSV	1731.84	0.00734132
0001.CSV	1735.69	0.00748351
0001.CSV	1739.55	0.0073801
0001.CSV	1743.41	0.00724468
0001.CSV	1747.27	0.00706676
0001.CSV	1751.12	0.006979
0001.CSV	1754.98	0.00685114
0001.CSV	1758.84	0.00681108
0001.CSV	1762.69	0.00682061
0001.CSV	1766.55	0.00683202
0001.CSV	1770.41	0.00692092
0001.CSV	1774.26	0.00724131
0001.CSV	1778.12	0.00743642
0001.CSV	1781.98	0.0077977
0001.CSV	1785.84	0.00829841
0001.CSV	1789.69	0.00892853
0001.CSV	1793.55	0.00959717
0001.CSV	1797.41	0.00958234
0001.CSV	1801.26	0.00882647
0001.CSV	1805.12	0.00799611
0001.CSV	1808.98	0.00745409
0001.CSV	1812.84	0.00728437
0001.CSV	1816.69	0.00716362
0001.CSV	1820.55	0.00708147
0001.CSV	1824.41	0.00702092
0001.CSV	1828.26	0.00706895
0001.CSV	1832.12	0.00708804
0001.CSV	1835.98	0.0070878
0001.CSV	1839.84	0.0070483
0001.CSV	1843.69	0.0071323
0001.CSV	1847.55	0.00722069
0001.CSV	1851.41	0.00720145
0001.CSV	1855.26	0.0071834
0001.CSV	1859.12	0.00721166
0001.CSV	1862.98	0.00715928
0001.CSV	1866.84	0.00716871
0001.CSV	1870.69	0.00727244
0001.CSV	1874.55	0.00726142
0001.CSV	1878.41	0.00722588
0001.CSV	1882.26	0.00725138
0001.CSV	1886.12	0.00724111
0001.CSV	1889.98	0.00729198
0001.CSV	1893.83	0.00731234
0001.CSV	1897.69	0.00730115
0001.CSV	1901.55	0.00724215
0001.CSV	1905.41	0.00722871
0001.CSV	1909.26	0.00724134
0001.CSV	1913.12	0.00722557
0001.CSV	1916.98	0.00717511
0001.CSV	1920.83	0.00724148
0001.CSV	1924.69	0.00727318
0001.CSV	1928.55	0.00725667
0001.CSV	1932.4	0.00722318
0001.CSV	1936.26	0.00720236
0001.CSV	1940.12	0.00716362
0001.CSV	1943.98	0.00722675
0001.CSV	1947.83	0.0072151
0001.CSV	1951.69	0.00718188
0001.CSV	1955.55	0.00715985
0001.CSV	1959.4	0.00718909
0001.CSV	1963.26	0.00717295
0001.CSV	1967.12	0.00719179
0001.CSV	1970.98	0.00719118
0001.CSV	1974.83	0.00718589
0001.CSV	1978.69	0.00716187
0001.CSV	1982.55	0.00718158
0001.CSV	1986.4	0.00718323
0001.CSV	1990.26	0.00720654
0001.CSV	1994.12	0.00720954
0001.CSV	1997.98	0.00720257
0001.CSV	2001.83	0.00719158
0001.CSV	2005.69	0.0072123
0001.CSV	2009.55	0.00720182
0001.CSV	2013.4	0.00719502
0001.CSV	2017.26	0.00722338
0001.CSV	2021.12	0.00728312
0001.CSV	2024.97	0.00728103
0001.CSV	2028.83	0.00729101
0001.CSV	2032.69	0.00729168
0001.CSV	2036.55	0.00730529
0001.CSV	2040.4	0.00729026
0001.CSV	2044.26	0.00729616
0001.CSV	2048.12	0.00728056
0001.CSV	2051.97	0.00732871
0001.CSV	2055.83	0.00736578
0001.CSV	2059.69	0.00736285
0001.CSV	2063.55	0.00734876
0001.CSV	2067.4	0.00738701
0001.CSV	2071.26	0.00740801
0001.CSV	2075.12	0.00744229
0001.CSV	2078.97	0.00744286
0001.CSV	2082.83	0.00746241
0001.CSV	2086.69	0.00747721
0001.CSV	2090.55	0.00752373
0001.CSV	2094.4	0.00753031
0001.CSV	2098.26	0.00754163
0001.CSV	2102.12	0.00754568
0001.CSV	2105.97	0.00757039
0001.CSV	2109.83	0.00759126
0001.CSV	2113.69	0.00763712
0001.CSV	2117.55	0.00766181
0001.CSV	2121.4	0.00770359
0001.CSV	2125.26	0.00773361
0001.CSV	2129.12	0.00777419
0001.CSV	2132.97	0.00779504
0001.CSV	2136.83	0.0078366
0001.CSV	2140.69	0.00786956
0001.CSV	2144.55	0.00790708
0001.CSV	2148.4	0.00789359
0001.CSV	2152.26	0.00790432
0001.CSV	2156.12	0.00793462
0001.CSV	2159.97	0.00795122
0001.CSV	2163.83	0.00794545
0001.CSV	2167.69	0.00797302
0001.CSV	2171.55	0.00797987
0001.CSV	2175.4	0.00799398
0001.CSV	2179.26	0.00801139
0001.CSV	2183.12	0.00803235
0001.CSV	2186.97	0.00803246
0001.CSV	2190.83	0.00804387
0001.CSV	2194.69	0.0080336
0001.CSV	2198.55	0.00804049
0001.CSV	2202.4	0.00804943
0001.CSV	2206.26	0.00808494
0001.CSV	2210.12	0.00809581
0001.CSV	2213.97	0.00808619
0001.CSV	2217.83	0.00806837
0001.CSV	2221.69	0.0080573
0001.CSV	2225.54	0.00804704
0001.CSV	2229.4	0.00805882
0001.CSV	2233.26	0.00804879
0001.CSV	2237.12	0.00805487
0001.CSV	2240.97	0.00805959
0001.CSV	2244.83	0.00807354
0001.CSV	2248.69	0.00804113
0001.CSV	2252.54	0.00802196
0001.CSV	2256.4	0.00800957
0001.CSV	2260.26	0.00802716
0001.CSV	2264.11	0.00802095
0001.CSV	2267.97	0.00800704
0001.CSV	2271.83	0.00799334
0001.CSV	2275.69	0.00800859
0001.CSV	2279.54	0.00799715
0001.CSV	2283.4	0.00798382
0001.CSV	2287.26	0.00800029
0001.CSV	2291.11	0.0080469
0001.CSV	2294.97	0.00809163
0001.CSV	2298.83	0.00814791
0001.CSV	2302.69	0.00814953
0001.CSV	2306.54	0.00817444
0001.CSV	2310.4	0.00823428
0001.CSV	2314.26	0.00825167
0001.CSV	2318.11	0.00813865
0001.CSV	2321.97	0.00808916
0001.CSV	2325.83	0.00808646
0001.CSV	2329.69	0.00799297
0001.CSV	2333.54	0.00772936
0001.CSV	2337.4	0.00763571
0001.CSV	2341.26	0.007786
0001.CSV	2345.11	0.00829544
0001.CSV	2348.97	0.00821462
0001.CSV	2352.83	0.00755923
0001.CSV	2356.69	0.0060662
0001.CSV	2360.54	0.00509115
0001.CSV	2364.4	0.00606909
0001.CSV	2368.26	0.00744128
0001.CSV	2372.11	0.00814483
0001.CSV	2375.97	0.00838386
0001.CSV	2379.83	0.00831509
0001.CSV	2383.69	0.00810388
0001.CSV	2387.54	0.00793712
0001.CSV	2391.4	0.00787756
0001.CSV	2395.26	0.00786862
0001.CSV	2399.11	0.00786191
0001.CSV	2402.97	0.00785226
0001.CSV	2406.83	0.00788299
0001.CSV	2410.68	0.00790169
0001.CSV	2414.54	0.00790661
0001.CSV	2418.4	0.00790924
0001.CSV	2422.26	0.0079218
0001.CSV	2426.11	0.00793229
0001.CSV	2429.97	0.00793364
0001.CSV	2433.83	0.00792855
0001.CSV	2437.68	0.00794322
0001.CSV	2441.54	0.00796465
0001.CSV	2445.4	0.00800124
0001.CSV	2449.26	0.00802837
0001.CSV	2453.11	0.00802908
0001.CSV	2456.97	0.00804289
0001.CSV	2460.83	0.00809281
0001.CSV	2464.68	0.00812917
0001.CSV	2468.54	0.00818373
0001.CSV	2472.4	0.00825748
0001.CSV	2476.26	0.00833016
0001.CSV	2480.11	0.00838227
0001.CSV	2483.97	0.0084572
0001.CSV	2487.83	0.00857138
0001.CSV	2491.68	0.00871483
0001.CSV	2495.54	0.00887503
0001.CSV	2499.4	0.00906377
0001.CSV	2503.26	0.00923426
0001.CSV	2507.11	0.00936638
0001.CSV	2510.97	0.00943735
0001.CSV	2514.83	0.00942621
0001.CSV	2518.68	0.00932816
0001.CSV	2522.54	0.00919012
0001.CSV	2526.4	0.00902297
0001.CSV	2530.26	0.00884794
0001.CSV	2534.11	0.00867156
0001.CSV	2537.97	0.00854989
0001.CSV	2541.83	0.00844953
0001.CSV	2545.68	0.00835971
0001.CSV	2549.54	0.00830361
0001.CSV	2553.4	0.00826035
0001.CSV	2557.26	0.00821087
0001.CSV	2561.11	0.00820237
0001.CSV	2564.97	0.00817903
0001.CSV	2568.83	0.00813555
0001.CSV	2572.68	0.00812833
0001.CSV	2576.54	0.00814794
0001.CSV	2580.4	0.00814186
0001.CSV	2584.25	0.00811917
0001.CSV	2588.11	0.00808086
0001.CSV	2591.97	0.00805754
0001.CSV	2595.83	0.00804376
0001.CSV	2599.68	0.00802949
0001.CSV	2603.54	0.00801727
0001.CSV	2607.4	0.00800664
0001.CSV	2611.25	0.00795152
0001.CSV	2615.11	0.00791117
0001.CSV	2618.97	0.00789035
0001.CSV	2622.82	0.00789575
0001.CSV	2626.68	0.00789878
0001.CSV	2630.54	0.00786366
0001.CSV	2634.4	0.00784881
0001.CSV	2638.25	0.00783559
0001.CSV	2642.11	0.0077548
0001.CSV	2645.97	0.00769891
0001.CSV	2649.82	0.00766842
0001.CSV	2653.68	0.00766505
0001.CSV	2657.54	0.00766157
0001.CSV	2661.4	0.00765301
0001.CSV	2665.25	0.00767038
0001.CSV	2669.11	0.00771375
0001.CSV	2672.97	0.00779743
0001.CSV	2676.82	0.0079163
0001.CSV	2680.68	0.00789382
0001.CSV	2684.54	0.00772332
0001.CSV	2688.4	0.00766427
0001.CSV	2692.25	0.00768849
0001.CSV	2696.11	0.00769327
0001.CSV	2699.97	0.00769169
0001.CSV	2703.82	0.00769675
0001.CSV	2707.68	0.00772987
0001.CSV	2711.54	0.00770036
0001.CSV	2715.4	0.00766262
0001.CSV	2719.25	0.00774984
0001.CSV	2723.11	0.00793485
0001.CSV	2726.97	0.00792952
0001.CSV	2730.82	0.00773783
0001.CSV	2734.68	0.00770214
0001.CSV	2738.54	0.00772613
0001.CSV	2742.4	0.00771732
0001.CSV	2746.25	0.0078647
0001.CSV	2750.11	0.00792105
0001.CSV	2753.97	0.00778984
0001.CSV	2757.82	0.00772515
0001.CSV	2761.68	0.00768899
0001.CSV	2765.54	0.00765176
0001.CSV	2769.39	0.00773925
0001.CSV	2773.25	0.00794349
0001.CSV	2777.11	0.00793415
0001.CSV	2780.97	0.00781751
0001.CSV	2784.82	0.00792655
0001.CSV	2788.68	0.00815368
0001.CSV	2792.54	0.00821766
0001.CSV	2796.39	0.00820328
0001.CSV	2800.25	0.00810516
0001.CSV	2804.11	0.00802297
0001.CSV	2807.97	0.00816482
0001.CSV	2811.82	0.00818481
0001.CSV	2815.68	0.00811553
0001.CSV	2819.54	0.00818535
0001.CSV	2823.39	0.008267
0001.CSV	2827.25	0.00835316
0001.CSV	2831.11	0.00860609
0001.CSV	2834.97	0.00898357
0001.CSV	2838.82	0.00929887
0001.CSV	2842.68	0.00958464
0001.CSV	2846.54	0.0102107
0001.CSV	2850.39	0.0106295
0001.CSV	2854.25	0.0105346
0001.CSV	2858.11	0.0103075
0001.CSV	2861.97	0.0100345
0001.CSV	2865.82	0.00986808
0001.CSV	2869.68	0.00996978
0001.CSV	2873.54	0.0100268
0001.CSV	2877.39	0.00973669
0001.CSV	2881.25	0.00948354
0001.CSV	2885.11	0.00940965
0001.CSV	2888.97	0.00949288
0001.CSV	2892.82	0.0097967
0001.CSV	2896.68	0.0100045
0001.CSV	2900.54	0.0100569
0001.CSV	2904.39	0.0102893
0001.CSV	2908.25	0.0107817
0001.CSV	2912.11	0.0115783
0001.CSV	2915.97	0.012233
0001.CSV	2919.82	0.012284
0001.CSV	2923.68	0.0120133
0001.CSV	2927.54	0.0117496
0001.CSV	2931.39	0.0112345
0001.CSV	2935.25	0.0105075
0001.CSV	2939.11	0.0100637
0001.CSV	2942.96	0.0100464
0001.CSV	2946.82	0.00997934
0001.CSV	2950.68	0.0097965
0001.CSV	2954.54	0.00962295
0001.CSV	2958.39	0.00938446
0001.CSV	2962.25	0.00918495
0001.CSV	2966.11	0.00887773
0001.CSV	2969.96	0.00872314
0001.CSV	2973.82	0.00877193
0001.CSV	2977.68	0.00879096
0001.CSV	2981.53	0.0085802
0001.CSV	2985.39	0.00821186
0001.CSV	2989.25	0.00816313
0001.CSV	2993.11	0.00830361
0001.CSV	2996.96	0.00823789
0001.CSV	3000.82	0.00803181
0001.CSV	3004.68	0.0079003
0001.CSV	3008.53	0.00802554
0001.CSV	3012.39	0.00823856
0001.CSV	3016.25	0.00825609
0001.CSV	3020.11	0.0081025
0001.CSV	3023.96	0.00797275
0001.CSV	3027.82	0.00794191
0001.CSV	3031.68	0.00805092
0001.CSV	3035.53	0.00808623
0001.CSV	3039.39	0.00811367
0001.CSV	3043.25	0.0081918
0001.CSV	3047.11	0.00814301
0001.CSV	3050.96	0.00811124
0001.CSV	3054.82	0.00808407
0001.CSV	3058.68	0.00801207
0001.CSV	3062.53	0.00800785
0001.CSV	3066.39	0.00811036
0001.CSV	3070.25	0.00808954
0001.CSV	3074.11	0.00813818
0001.CSV	3077.96	0.0082979
0001.CSV	3081.82	0.0083411
0001.CSV	3085.68	0.00827635
0001.CSV	3089.53	0.0082048
0001.CSV	3093.39	0.00811391
0001.CSV	3097.25	0.00811141
0001.CSV	3101.11	0.00814791
0001.CSV	3104.96	0.00813015
0001.CSV	3108.82	0.00818775
0001.CSV	3112.68	0.00828348
0001.CSV	3116.53	0.00842133
0001.CSV	3120.39	0.00840278
0001.CSV	3124.25	0.00824454
0001.CSV	3128.11	0.00818846
0001.CSV	3131.96	0.00820335
0001.CSV	3135.82	0.00828459
0001.CSV	3139.68	0.00832516
0001.CSV	3143.53	0.00822479
0001.CSV	3147.39	0.00827288
0001.CSV	3151.25	0.00843686
0001.CSV	3155.1	0.00838768
0001.CSV	3158.96	0.00821003
0001.CSV	3162.82	0.00818369
0001.CSV	3166.68	0.00820048
0001.CSV	3170.53	0.0082156
0001.CSV	3174.39	0.00825596
0001.CSV	3178.25	0.0083312
0001.CSV	3182.1	0.00835572
0001.CSV	3185.96	0.00840183
0001.CSV	3189.82	0.00845312
0001.CSV	3193.68	0.00843051
0001.CSV	3197.53	0.00840528
0001.CSV	3201.39	0.00844163
0001.CSV	3205.25	0.00846937
0001.CSV	3209.1	0.00850069
0001.CSV	3212.96	0.00856641
0001.CSV	3216.82	0.00858757
0001.CSV	3220.68	0.00852181
0001.CSV	3224.53	0.00850765
0001.CSV	3228.39	0.00866277
0001.CSV	3232.25	0.00885389
0001.CSV	3236.1	0.00882694
0001.CSV	3239.96	0.00874164
0001.CSV	3243.82	0.00883347
0001.CSV	3247.68	0.00887127
0001.CSV	3251.53	0.00878961
0001.CSV	3255.39	0.00879019
0001.CSV	3259.25	0.00873444
0001.CSV	3263.1	0.00870905
0001.CSV	3266.96	0.00889349
0001.CSV	3270.82	0.00909913
0001.CSV	3274.68	0.00906016
0001.CSV	3278.53	0.0088848
0001.CSV	3282.39	0.008791
0001.CSV	3286.25	0.00884371
0001.CSV	3290.1	0.00905589
0001.CSV	3293.96	0.00922174
0001.CSV	3297.82	0.00910938
0001.CSV	3301.67	0.00908715
0001.CSV	3305.53	0.00924346
0001.CSV	3309.39	0.00917341
0001.CSV	3313.25	0.00890019
0001.CSV	3317.1	0.00877311
0001.CSV	3320.96	0.00885213
0001.CSV	3324.82	0.00899111
0001.CSV	3328.67	0.00887885
0001.CSV	3332.53	0.00882258
0001.CSV	3336.39	0.0090539
0001.CSV	3340.24	0.00915652
0001.CSV	3344.1	0.00902037
0001.CSV	3347.96	0.0090226
0001.CSV	3351.82	0.00901739
0001.CSV	3355.67	0.00888568
0001.CSV	3359.53	0.00893449
0001.CSV	3363.39	0.00908089
0001.CSV	3367.24	0.00925778
0001.CSV	3371.1	0.0091798
0001.CSV	3374.96	0.00897883
0001.CSV	3378.82	0.00886265
0001.CSV	3382.67	0.00873177
0001.CSV	3386.53	0.00877122
0001.CSV	3390.39	0.00899747
0001.CSV	3394.24	0.00910035
0001.CSV	3398.1	0.00912427
0001.CSV	3401.96	0.00904314
0001.CSV	3405.82	0.0088566
0001.CSV	3409.67	0.00884097
0001.CSV	3413.53	0.00871243
0001.CSV	3417.39	0.00850511
0001.CSV	3421.24	0.00847278
0001.CSV	3425.1	0.00855462
0001.CSV	3428.96	0.00869144
0001.CSV	3432.82	0.00876899
0001.CSV	3436.67	0.00865733
0001.CSV	3440.53	0.00833468
0001.CSV	3444.39	0.00812573
0001.CSV	3448.24	0.0080629
0001.CSV	3452.1	0.0079165
0001.CSV	3455.96	0.00790033
0001.CSV	3459.82	0.00807772
0001.CSV	3463.67	0.00821996
0001.CSV	3467.53	0.00826457
0001.CSV	3471.39	0.00805828
0001.CSV	3475.24	0.00788289
0001.CSV	3479.1	0.0078425
0001.CSV	3482.96	0.00775483
0001.CSV	3486.82	0.00776481
0001.CSV	3490.67	0.00772154
0001.CSV	3494.53	0.00766326
0001.CSV	3498.39	0.00765844
0001.CSV	3502.24	0.00756766
0001.CSV	3506.1	0.0072659
0001.CSV	3509.96	0.00710849
0001.CSV	3513.81	0.00714015
0001.CSV	3517.67	0.00700981
0001.CSV	3521.53	0.00698749
0001.CSV	3525.39	0.00686962
0001.CSV	3529.24	0.0067082
0001.CSV	3533.1	0.00674939
0001.CSV	3536.96	0.00680943
0001.CSV	3540.81	0.00686807
0001.CSV	3544.67	0.0069151
0001.CSV	3548.53	0.00676753
0001.CSV	3552.39	0.00658977
0001.CSV	3556.24	0.00645214
0001.CSV	3560.1	0.00629047
0001.CSV	3563.96	0.00608442
0001.CSV	3567.81	0.00624345
0001.CSV	3571.67	0.00627323
0001.CSV	3575.53	0.00602753
0001.CSV	3579.39	0.00608606
0001.CSV	3583.24	0.00616255
0001.CSV	3587.1	0.00612659
0001.CSV	3590.96	0.00603563
0001.CSV	3594.81	0.00591846
0001.CSV	3598.67	0.0059982
0001.CSV	3602.53	0.00596246
0001.CSV	3606.39	0.00561391
0001.CSV	3610.24	0.00537915
0001.CSV	3614.1	0.00535906
0001.CSV	3617.96	0.00545384
0001.CSV	3621.81	0.00559925
0001.CSV	3625.67	0.00526893
0001.CSV	3629.53	0.00521091
0001.CSV	3633.39	0.00551662
0001.CSV	3637.24	0.00538721
0001.CSV	3641.1	0.00519663
0001.CSV	3644.96	0.00489273
0001.CSV	3648.81	0.00506299
0001.CSV	3652.67	0.00539304
0001.CSV	3656.53	0.00538093
0001.CSV	3660.38	0.00538855
0001.CSV	3664.24	0.00505364
0001.CSV	3668.1	0.00468763
0001.CSV	3671.96	0.00459316
0001.CSV	3675.81	0.00488298
0001.CSV	3679.67	0.00515022
0001.CSV	3683.53	0.00504871
0001.CSV	3687.38	0.00497865
0001.CSV	3691.24	0.00529469
0001.CSV	3695.1	0.005236
0001.CSV	3698.95	0.00501978
0001.CSV	3702.81	0.00501284
0001.CSV	3706.67	0.00482588
0001.CSV	3710.53	0.0047442
0001.CSV	3714.38	0.00498093
0001.CSV	3718.24	0.00479586
0001.CSV	3722.1	0.00472334
0001.CSV	3725.95	0.00483479
0001.CSV	3729.81	0.00470505
0001.CSV	3733.67	0.00465779
0001.CSV	3737.53	0.00509809
0001.CSV	3741.38	0.00479613
0001.CSV	3745.24	0.0043646
0001.CSV	3749.1	0.00431584
0001.CSV	3752.95	0.00471074
0001.CSV	3756.81	0.00482863
0001.CSV	3760.67	0.00479352
0001.CSV	3764.53	0.0046818
0001.CSV	3768.38	0.0047365
0001.CSV	3772.24	0.00483556
0001.CSV	3776.1	0.00472679
0001.CSV	3779.95	0.00471382
0001.CSV	3783.81	0.00475409
0001.CSV	3787.67	0.00481077
0001.CSV	3791.53	0.00472786
0001.CSV	3795.38	0.00451129
0001.CSV	3799.24	0.00443633
0001.CSV	3803.1	0.00461331
0001.CSV	3806.95	0.00485121
0001.CSV	3810.81	0.00477553
0001.CSV	3814.67	0.0045439
0001.CSV	3818.53	0.00456955
0001.CSV	3822.38	0.0047694
0001.CSV	3826.24	0.00476397
0001.CSV	3830.1	0.00464386
0001.CSV	3833.95	0.00456486
0001.CSV	3837.81	0.0046954
0001.CSV	3841.67	0.00500473
0001.CSV	3845.53	0.00490348
0001.CSV	3849.38	0.00445367
0001.CSV	3853.24	0.00444828
0001.CSV	3857.1	0.00490198
0001.CSV	3860.95	0.0046252
0001.CSV	3864.81	0.00456791
0001.CSV	3868.67	0.00465206
0001.CSV	3872.52	0.00483459
0001.CSV	3876.38	0.00477442
0001.CSV	3880.24	0.00464215
0001.CSV	3884.1	0.00478953
0001.CSV	3887.95	0.00479379
0001.CSV	3891.81	0.0048024
0001.CSV	3895.67	0.00476765
0001.CSV	3899.52	0.00459908
0001.CSV	3903.38	0.00490694
0001.CSV	3907.24	0.00505099
0001.CSV	3911.1	0.0048236
0001.CSV	3914.95	0.00463167
0001.CSV	3918.81	0.00469353
0001.CSV	3922.67	0.00474689
0001.CSV	3926.52	0.00475024
0001.CSV	3930.38	0.00479687
0001.CSV	3934.24	0.00492959
0001.CSV	3938.09	0.00478595
0001.CSV	3941.95	0.00468766
0001.CSV	3945.81	0.00469681
0001.CSV	3949.67	0.00475194
0001.CSV	3953.52	0.00479851
0001.CSV	3957.38	0.00475958
0001.CSV	3961.24	0.00476199
0001.CSV	3965.09	0.00476223
0001.CSV	3968.95	0.00474477
0001.CSV	3972.81	0.00473335
0001.CSV	3976.67	0.00471948
0001.CSV	3980.52	0.00473942
0001.CSV	3984.38	0.00476015
0001.CSV	3988.24	0.00468137
0001.CSV	3992.09	0.0046182
0001.CSV	3995.95	0.00460109
0001.CSV	3999.81	0.00458257
0002.CSV	674.992	0.0359401
0002.CSV	678.849	0.0367695
0002.CSV	682.706	0.037015
0002.CSV	686.563	0.0385667
0002.CSV	690.42	0.0402358
0002.CSV	694.277	0.0454029
0002.CSV	698.134	0.0511398
0002.CSV	701.991	0.0491345
0002.CSV	705.849	0.0484664
0002.CSV	709.706	0.0603992
0002.CSV	713.563	0.0602218
0002.CSV	717.42	0.0420635
0002.CSV	721.277	0.0307326
0002.CSV	725.134	0.0291559
0002.CSV	728.991	0.0289828
0002.CSV	732.848	0.0293258
0002.CSV	736.705	0.029658
0002.CSV	740.562	0.0302061
0002.CSV	744.42	0.0302932
0002.CSV	748.277	0.0310718
0002.CSV	752.134	0.0315717
0002.CSV	755.991	0.0321862
0002.CSV	759.848	0.0325857
0002.CSV	763.705	0.0333619
0002.CSV	767.562	0.0338823
0002.CSV	771.419	0.0347652
0002.CSV	775.276	0.0353672
0002.CSV	779.133	0.0362282
0002.CSV	782.99	0.0365148
0002.CSV	786.848	0.0368725
0002.CSV	790.705	0.0372088
0002.CSV	794.562	0.0382003
0002.CSV	798.419	0.0390984
0002.CSV	802.276	0.0401975
0002.CSV	806.133	0.0407951
0002.CSV	809.99	0.0416981
0002.CSV	813.847	0.0428336
0002.CSV	817.704	0.0449774
0002.CSV	821.562	0.0474982
0002.CSV	825.419	0.0508087
0002.CSV	829.276	0.0541691
0002.CSV	833.133	0.0585105
0002.CSV	836.99	0.0646107
0002.CSV	840.847	0.0729659
0002.CSV	844.704	0.0814337
0002.CSV	848.561	0.094596
0002.CSV	852.418	0.106374
0002.CSV	856.275	0.103338
0002.CSV	860.132	0.0871775
0002.CSV	863.99	0.0682787
0002.CSV	867.847	0.0536071
0002.CSV	871.704	0.0463592
0002.CSV	875.561	0.042067
0002.CSV	879.418	0.0362475
0002.CSV	883.275	0.0288009
0002.CSV	887.132	0.0228375
0002.CSV	890.989	0.020226
0002.CSV	894.846	0.0202147
0002.CSV	898.703	0.0204549
0002.CSV	902.561	0.0209142
0002.CSV	906.418	0.0213152
0002.CSV	910.275	0.0215862
0002.CSV	914.132	0.02158
0002.CSV	917.989	0.0220019
0002.CSV	921.846	0.0224043
0002.CSV	925.703	0.0229842
0002.CSV	929.56	0.0233302
0002.CSV	933.417	0.023771
0002.CSV	937.274	0.023984
0002.CSV	941.131	0.0243107
0002.CSV	944.989	0.0245951
0002.CSV	948.846	0.0251516
0002.CSV	952.703	0.0255501
0002.CSV	956.56	0.0260326
0002.CSV	960.417	0.0263843
0002.CSV	964.274	0.0269126
0002.CSV	968.131	0.0272773
0002.CSV	971.988	0.0278166
0002.CSV	975.845	0.028316
0002.CSV	979.702	0.0290714
0002.CSV	983.559	0.0297401
0002.CSV	987.417	0.0305836
0002.CSV	991.274	0.0313407
0002.CSV	995.131	0.032205
0002.CSV	998.988	0.0327948
0002.CSV	1002.85	0.0334371
0002.CSV	1006.7	0.0339763
0002.CSV	1010.56	0.0347804
0002.CSV	1014.42	0.0354782
0002.CSV	1018.27	0.0363658
0002.CSV	1022.13	0.0371081
0002.CSV	1025.99	0.0378884
0002.CSV	1029.85	0.038383
0002.CSV	1033.7	0.0390453
0002.CSV	1037.56	0.0395383
0002.CSV	1041.42	0.04016
0002.CSV	1045.27	0.0405826
0002.CSV	1049.13	0.0411478
0002.CSV	1052.99	0.0414943
0002.CSV	1056.84	0.0420734
0002.CSV	1060.7	0.0425716
0002.CSV	1064.56	0.0433589
0002.CSV	1068.42	0.0441157
0002.CSV	1072.27	0.0452772
0002.CSV	1076.13	0.0471455
0002.CSV	1079.99	0.050392
0002.CSV	1083.84	0.049543
0002.CSV	1087.7	0.0446733
0002.CSV	1091.56	0.042352
0002.CSV	1095.41	0.042219
0002.CSV	1099.27	0.0420507
0002.CSV	1103.13	0.0419048
0002.CSV	1106.99	0.0416578
0002.CSV	1110.84	0.0415206
0002.CSV	1114.7	0.0412518
0002.CSV	1118.56	0.0409917
0002.CSV	1122.41	0.0405118
0002.CSV	1126.27	0.0400274
0002.CSV	1130.13	0.0393792
0002.CSV	1133.99	0.0388771
0002.CSV	1137.84	0.0384096
0002.CSV	1141.7	0.0383083
0002.CSV	1145.56	0.0382852
0002.CSV	1149.41	0.0384394
0002.CSV	1153.27	0.0385176
0002.CSV	1157.13	0.0386819
0002.CSV	1160.99	0.0386603
0002.CSV	1164.84	0.0386296
0002.CSV	1168.7	0.0384355
0002.CSV	1172.56	0.0383943
0002.CSV	1176.41	0.0383445
0002.CSV	1180.27	0.0383638
0002.CSV	1184.13	0.0380056
0002.CSV	1187.99	0.0375755
0002.CSV	1191.84	0.0371455
0002.CSV	1195.7	0.0370162
0002.CSV	1199.56	0.0369438
0002.CSV	1203.41	0.0370349
0002.CSV	1207.27	0.0370857
0002.CSV	1211.13	0.0374016
0002.CSV	1214.98	0.0377626
0002.CSV	1218.84	0.0383151
0002.CSV	1222.7	0.0387934
0002.CSV	1226.56	0.0394
0002.CSV	1230.41	0.0399229
0002.CSV	1234.27	0.0405502
0002.CSV	1238.13	0.041007
0002.CSV	1241.98	0.0415321
0002.CSV	1245.84	0.041891
0002.CSV	1249.7	0.0422372
0002.CSV	1253.56	0.0423092
0002.CSV	1257.41	0.0423919
0002.CSV	1261.27	0.0424726
0002.CSV	1265.13	0.0429285
0002.CSV	1268.98	0.0434853
0002.CSV	1272.84	0.0442136
0002.CSV	1276.7	0.0447768
0002.CSV	1280.56	0.0454253
0002.CSV	1284.41	0.0460109
0002.CSV	1288.27	0.0467893
0002.CSV	1292.13	0.0475069
0002.CSV	1295.98	0.0484126
0002.CSV	1299.84	0.049219
0002.CSV	1303.7	0.050156
0002.CSV	1307.56	0.0510181
0002.CSV	1311.41	0.0520264
0002.CSV	1315.27	0.0528982
0002.CSV	1319.13	0.0539347
0002.CSV	1322.98	0.0548477
0002.CSV	1326.84	0.0559647
0002.CSV	1330.7	0.0571246
0002.CSV	1334.56	0.0584739
0002.CSV	1338.41	0.059962
0002.CSV	1342.27	0.0618345
0002.CSV	1346.13	0.0634107
0002.CSV	1349.98	0.0653069
0002.CSV	1353.84	0.0671962
0002.CSV	1357.7	0.0692641
0002.CSV	1361.56	0.0714296
0002.CSV	1365.41	0.0739268
0002.CSV	1369.27	0.0758989
0002.CSV	1373.13	0.0784423
0002.CSV	1376.98	0.0811881
0002.CSV	1380.84	0.0837394
0002.CSV	1384.7	0.086158
0002.CSV	1388.56	0.089202
0002.CSV	1392.41	0.0914902
0002.CSV	1396.27	0.0940928
0002.CSV	1400.13	0.0964711
0002.CSV	1403.98	0.0987954
0002.CSV	1407.84	0.100851
0002.CSV	1411.7	0.102596
0002.CSV	1415.55	0.103494
0002.CSV	1419.41	0.104681
0002.CSV	1423.27	0.10552
0002.CSV	1427.12	0.106703
0002.CSV	1430.98	0.107782
0002.CSV	1434.84	0.109243
0002.CSV	1438.7	0.110417
0002.CSV	1442.55	0.111136
0002.CSV	1446.41	0.110583
0002.CSV	1450.27	0.109336
0002.CSV	1454.12	0.107438
0002.CSV	1457.98	0.105163
0002.CSV	1461.84	0.103261
0002.CSV	1465.7	0.102162
0002.CSV	1469.55	0.100153
0002.CSV	1473.41	0.0967392
0002.CSV	1477.27	0.0921751
0002.CSV	1481.12	0.089021
0002.CSV	1484.98	0.0857743
0002.CSV	1488.84	0.082013
0002.CSV	1492.7	0.0780913
0002.CSV	1496.55	0.0749936
0002.CSV	1500.41	0.0713826
0002.CSV	1504.27	0.0690403
0002.CSV	1508.12	0.0646107
0002.CSV	1511.98	0.0611619
0002.CSV	1515.84	0.0582597
0002.CSV	1519.7	0.0545508
0002.CSV	1523.55	0.0501441
0002.CSV	1527.41	0.0470562
0002.CSV	1531.27	0.0443234
0002.CSV	1535.12	0.0419807
0002.CSV	1538.98	0.0395415
0002.CSV	1542.84	0.0356134
0002.CSV	1546.7	0.0324679
0002.CSV	1550.55	0.0301894
0002.CSV	1554.41	0.0279049
0002.CSV	1558.27	0.0254521
0002.CSV	1562.12	0.0233017
0002.CSV	1565.98	0.0223668
0002.CSV	1569.84	0.0212679
0002.CSV	1573.69	0.0201904
0002.CSV	1577.55	0.0184684
0002.CSV	1581.41	0.0167836
0002.CSV	1585.27	0.0153971
0002.CSV	1589.12	0.0144414
0002.CSV	1592.98	0.0138018
0002.CSV	1596.84	0.0134346
0002.CSV	1600.69	0.0131068
0002.CSV	1604.55	0.0129415
0002.CSV	1608.41	0.0127104
0002.CSV	1612.27	0.012404
0002.CSV	1616.12	0.0119661
0002.CSV	1619.98	0.0116484
0002.CSV	1623.84	0.0112949
0002.CSV	1627.69	0.0110504
0002.CSV	1631.55	0.0107315
0002.CSV	1635.41	0.0105369
0002.CSV	1639.27	0.0104009
0002.CSV	1643.12	0.0101951
0002.CSV	1646.98	0.00999979
0002.CSV	1650.84	0.0100117
0002.CSV	1654.69	0.0100089
0002.CSV	1658.55	0.00985856
0002.CSV	1662.41	0.00963247
0002.CSV	1666.27	0.00952601
0002.CSV	1670.12	0.00941805
0002.CSV	1673.98	0.00941876
0002.CSV	1677.84	0.00922949
0002.CSV	1681.69	0.00913185
0002.CSV	1685.55	0.00916136
0002.CSV	1689.41	0.00909267
0002.CSV	1693.27	0.0088195
0002.CSV	1697.12	0.00873751
0002.CSV	1700.98	0.00883117
0002.CSV	1704.84	0.00896757
0002.CSV	1708.69	0.00896486
0002.CSV	1712.55	0.00893543
0002.CSV	1716.41	0.00904561
0002.CSV	1720.27	0.00932007
0002.CSV	1724.12	0.00928432
0002.CSV	1727.98	0.00926079
0002.CSV	1731.84	0.00930284
0002.CSV	1735.69	0.00950362
0002.CSV	1739.55	0.00939424
0002.CSV	1743.41	0.00923558
0002.CSV	1747.27	0.00899547
0002.CSV	1751.12	0.00890178
0002.CSV	1754.98	0.00877852
0002.CSV	1758.84	0.00876736
0002.CSV	1762.69	0.00884608
0002.CSV	1766.55	0.00892163
0002.CSV	1770.41	0.00914153
0002.CSV	1774.26	0.00993201
0002.CSV	1778.12	0.0106967
0002.CSV	1781.98	0.0114584
0002.CSV	1785.84	0.0117985
0002.CSV	1789.69	0.0116376
0002.CSV	1793.55	0.0109986
0002.CSV	1797.41	0.010386
0002.CSV	1801.26	0.00977061
0002.CSV	1805.12	0.00934617
0002.CSV	1808.98	0.00908089
0002.CSV	1812.84	0.00904642
0002.CSV	1816.69	0.00899557
0002.CSV	1820.55	0.00899209
0002.CSV	1824.41	0.00896872
0002.CSV	1828.26	0.00905359
0002.CSV	1832.12	0.0090991
0002.CSV	1835.98	0.00912089
0002.CSV	1839.84	0.00907186
0002.CSV	1843.69	0.00915094
0002.CSV	1847.55	0.0092611
0002.CSV	1851.41	0.00925105
0002.CSV	1855.26	0.00922982
0002.CSV	1859.12	0.00928865
0002.CSV	1862.98	0.0092415
0002.CSV	1866.84	0.00926438
0002.CSV	1870.69	0.00939289
0002.CSV	1874.55	0.00939462
0002.CSV	1878.41	0.00933039
0002.CSV	1882.26	0.00933808
0002.CSV	1886.12	0.00933195
0002.CSV	1889.98	0.00938781
0002.CSV	1893.83	0.00939052
0002.CSV	1897.69	0.00940725
0002.CSV	1901.55	0.00936106
0002.CSV	1905.41	0.00934451
0002.CSV	1909.26	0.00936299
0002.CSV	1913.12	0.00937207
0002.CSV	1916.98	0.00932528
0002.CSV	1920.83	0.00936594
0002.CSV	1924.69	0.00938944
0002.CSV	1928.55	0.00939008
0002.CSV	1932.4	0.00936631
0002.CSV	1936.26	0.00935487
0002.CSV	1940.12	0.00928615
0002.CSV	1943.98	0.009331
0002.CSV	1947.83	0.00933628
0002.CSV	1951.69	0.00932288
0002.CSV	1955.55	0.00930087
0002.CSV	1959.4	0.00931049
0002.CSV	1963.26	0.00928723
0002.CSV	1967.12	0.00932738
0002.CSV	1970.98	0.00933774
0002.CSV	1974.83	0.00932535
0002.CSV	1978.69	0.00928835
0002.CSV	1982.55	0.00930998
0002.CSV	1986.4	0.00931265
0002.CSV	1990.26	0.00934122
0002.CSV	1994.12	0.00934607
0002.CSV	1997.98	0.00934058
0002.CSV	2001.83	0.00933544
0002.CSV	2005.69	0.00936276
0002.CSV	2009.55	0.00935653
0002.CSV	2013.4	0.00935717
0002.CSV	2017.26	0.00936377
0002.CSV	2021.12	0.00942157
0002.CSV	2024.97	0.00943471
0002.CSV	2028.83	0.00946518
0002.CSV	2032.69	0.00946657
0002.CSV	2036.55	0.00949004
0002.CSV	2040.4	0.00948212
0002.CSV	2044.26	0.00948357
0002.CSV	2048.12	0.00946827
0002.CSV	2051.97	0.00950755
0002.CSV	2055.83	0.00953373
0002.CSV	2059.69	0.00956899
0002.CSV	2063.55	0.00959395
0002.CSV	2067.4	0.00963698
0002.CSV	2071.26	0.00963728
0002.CSV	2075.12	0.00966259
0002.CSV	2078.97	0.00967197
0002.CSV	2082.83	0.00969376
0002.CSV	2086.69	0.00971893
0002.CSV	2090.55	0.00977732
0002.CSV	2094.4	0.00977657
0002.CSV	2098.26	0.00979098
0002.CSV	2102.12	0.00978701
0002.CSV	2105.97	0.00981728
0002.CSV	2109.83	0.00985222
0002.CSV	2113.69	0.00991323
0002.CSV	2117.55	0.00994181
0002.CSV	2121.4	0.0099849
0002.CSV	2125.26	0.0100062
0002.CSV	2129.12	0.0100407
0002.CSV	2132.97	0.0100687
0002.CSV	2136.83	0.0101103
0002.CSV	2140.69	0.0101379
0002.CSV	2144.55	0.0101527
0002.CSV	2148.4	0.0101316
0002.CSV	2152.26	0.0101556
0002.CSV	2156.12	0.0101733
0002.CSV	2159.97	0.0101949
0002.CSV	2163.83	0.0101959
0002.CSV	2167.69	0.0102306
0002.CSV	2171.55	0.0102681
0002.CSV	2175.4	0.0102955
0002.CSV	2179.26	0.0102882
0002.CSV	2183.12	0.0102939
0002.CSV	2186.97	0.0102928
0002.CSV	2190.83	0.0103231
0002.CSV	2194.69	0.0103185
0002.CSV	2198.55	0.010308
0002.CSV	2202.4	0.0103014
0002.CSV	2206.26	0.0103244
0002.CSV	2210.12	0.0103301
0002.CSV	2213.97	0.0103357
0002.CSV	2217.83	0.0103157
0002.CSV	2221.69	0.0102992
0002.CSV	2225.54	0.0102845
0002.CSV	2229.4	0.0102948
0002.CSV	2233.26	0.0102915
0002.CSV	2237.12	0.0102963
0002.CSV	2240.97	0.0102774
0002.CSV	2244.83	0.010293
0002.CSV	2248.69	0.0102787
0002.CSV	2252.54	0.0102777
0002.CSV	2256.4	0.0102724
0002.CSV	2260.26	0.0102883
0002.CSV	2264.11	0.0102985
0002.CSV	2267.97	0.010308
0002.CSV	2271.83	0.0102948
0002.CSV	2275.69	0.0102859
0002.CSV	2279.54	0.0102424
0002.CSV	2283.4	0.0102086
0002.CSV	2287.26	0.0102363
0002.CSV	2291.11	0.0103346
0002.CSV	2294.97	0.0104304
0002.CSV	2298.83	0.0105366
0002.CSV	2302.69	0.0106047
0002.CSV	2306.54	0.0107167
0002.CSV	2310.4	0.0109061
0002.CSV	2314.26	0.0110488
0002.CSV	2318.11	0.0110486
0002.CSV	2321.97	0.0111661
0002.CSV	2325.83	0.0113036
0002.CSV	2329.69	0.0113062
0002.CSV	2333.54	0.0112218
0002.CSV	2337.4	0.0112993
0002.CSV	2341.26	0.0114016
0002.CSV	2345.11	0.0116663
0002.CSV	2348.97	0.0114141
0002.CSV	2352.83	0.0109528
0002.CSV	2356.69	0.0100662
0002.CSV	2360.54	0.00938334
0002.CSV	2364.4	0.0101052
0002.CSV	2368.26	0.0111404
0002.CSV	2372.11	0.0114038
0002.CSV	2375.97	0.0111724
0002.CSV	2379.83	0.0107686
0002.CSV	2383.69	0.0104049
0002.CSV	2387.54	0.0101599
0002.CSV	2391.4	0.0100407
0002.CSV	2395.26	0.0100036
0002.CSV	2399.11	0.00998697
0002.CSV	2402.97	0.00997195
0002.CSV	2406.83	0.0100121
0002.CSV	2410.68	0.0100363
0002.CSV	2414.54	0.0100392
0002.CSV	2418.4	0.010044
0002.CSV	2422.26	0.0100588
0002.CSV	2426.11	0.0100553
0002.CSV	2429.97	0.0100517
0002.CSV	2433.83	0.0100538
0002.CSV	2437.68	0.010076
0002.CSV	2441.54	0.0100883
0002.CSV	2445.4	0.0100902
0002.CSV	2449.26	0.0101125
0002.CSV	2453.11	0.0101534
0002.CSV	2456.97	0.0101833
0002.CSV	2460.83	0.0102212
0002.CSV	2464.68	0.010249
0002.CSV	2468.54	0.0103067
0002.CSV	2472.4	0.0104034
0002.CSV	2476.26	0.0105105
0002.CSV	2480.11	0.0106012
0002.CSV	2483.97	0.0106963
0002.CSV	2487.83	0.0107808
0002.CSV	2491.68	0.0108671
0002.CSV	2495.54	0.0109635
0002.CSV	2499.4	0.0110197
0002.CSV	2503.26	0.0110228
0002.CSV	2507.11	0.0110364
0002.CSV	2510.97	0.011055
0002.CSV	2514.83	0.0110992
0002.CSV	2518.68	0.0111359
0002.CSV	2522.54	0.0111333
0002.CSV	2526.4	0.0110519
0002.CSV	2530.26	0.0109214
0002.CSV	2534.11	0.0107574
0002.CSV	2537.97	0.0106517
0002.CSV	2541.83	0.0106095
0002.CSV	2545.68	0.0105732
0002.CSV	2549.54	0.0105271
0002.CSV	2553.4	0.0104607
0002.CSV	2557.26	0.0103589
0002.CSV	2561.11	0.0102711
0002.CSV	2564.97	0.01021
0002.CSV	2568.83	0.0101569
0002.CSV	2572.68	0.010128
0002.CSV	2576.54	0.010128
0002.CSV	2580.4	0.0100781
0002.CSV	2584.25	0.0100288
0002.CSV	2588.11	0.0100048
0002.CSV	2591.97	0.0100029
0002.CSV	2595.83	0.0099966
0002.CSV	2599.68	0.009975
0002.CSV	2603.54	0.00996222
0002.CSV	2607.4	0.00995741
0002.CSV	2611.25	0.00994249
0002.CSV	2615.11	0.00997117
0002.CSV	2618.97	0.00997609
0002.CSV	2622.82	0.00996768
0002.CSV	2626.68	0.00995659
0002.CSV	2630.54	0.00995097
0002.CSV	2634.4	0.00995446
0002.CSV	2638.25	0.00993171
0002.CSV	2642.11	0.00987035
0002.CSV	2645.97	0.00984175
0002.CSV	2649.82	0.00981606
0002.CSV	2653.68	0.00977739
0002.CSV	2657.54	0.00974069
0002.CSV	2661.4	0.00971975
0002.CSV	2665.25	0.00972493
0002.CSV	2669.11	0.00975909
0002.CSV	2672.97	0.00984273
0002.CSV	2676.82	0.00994588
0002.CSV	2680.68	0.00990923
0002.CSV	2684.54	0.00975072
0002.CSV	2688.4	0.00968644
0002.CSV	2692.25	0.00972303
0002.CSV	2696.11	0.00975994
0002.CSV	2699.97	0.00976868
0002.CSV	2703.82	0.00976088
0002.CSV	2707.68	0.00976312
0002.CSV	2711.54	0.00974042
0002.CSV	2715.4	0.00973039
0002.CSV	2719.25	0.00980812
0002.CSV	2723.11	0.00997599
0002.CSV	2726.97	0.00999541
0002.CSV	2730.82	0.0098489
0002.CSV	2734.68	0.00981192
0002.CSV	2738.54	0.0098247
0002.CSV	2742.4	0.00981667
0002.CSV	2746.25	0.00994439
0002.CSV	2750.11	0.0100097
0002.CSV	2753.97	0.00992056
0002.CSV	2757.82	0.0098593
0002.CSV	2761.68	0.0098471
0002.CSV	2765.54	0.00985466
0002.CSV	2769.39	0.00991791
0002.CSV	2773.25	0.0100712
0002.CSV	2777.11	0.0100599
0002.CSV	2780.97	0.00996765
0002.CSV	2784.82	0.0100735
0002.CSV	2788.68	0.0102881
0002.CSV	2792.54	0.0103699
0002.CSV	2796.39	0.0103831
0002.CSV	2800.25	0.0103058
0002.CSV	2804.11	0.0102514
0002.CSV	2807.97	0.0103946
0002.CSV	2811.82	0.0104017
0002.CSV	2815.68	0.0103435
0002.CSV	2819.54	0.0104301
0002.CSV	2823.39	0.0105299
0002.CSV	2827.25	0.0106313
0002.CSV	2831.11	0.010886
0002.CSV	2834.97	0.0112718
0002.CSV	2838.82	0.0116277
0002.CSV	2842.68	0.0119738
0002.CSV	2846.54	0.0126225
0002.CSV	2850.39	0.0130307
0002.CSV	2854.25	0.0128774
0002.CSV	2858.11	0.0125881
0002.CSV	2861.97	0.0122575
0002.CSV	2865.82	0.0120429
0002.CSV	2869.68	0.0121193
0002.CSV	2873.54	0.0121819
0002.CSV	2877.39	0.0119407
0002.CSV	2881.25	0.0117578
0002.CSV	2885.11	0.0117394
0002.CSV	2888.97	0.0118729
0002.CSV	2892.82	0.012227
0002.CSV	2896.68	0.012484
0002.CSV	2900.54	0.0125827
0002.CSV	2904.39	0.0128675
0002.CSV	2908.25	0.0134616
0002.CSV	2912.11	0.0143449
0002.CSV	2915.97	0.0150049
0002.CSV	2919.82	0.0150021
0002.CSV	2923.68	0.0146157
0002.CSV	2927.54	0.01424
0002.CSV	2931.39	0.0136091
0002.CSV	2935.25	0.0127483
0002.CSV	2939.11	0.0122287
0002.CSV	2942.96	0.0121714
0002.CSV	2946.82	0.0120851
0002.CSV	2950.68	0.0119264
0002.CSV	2954.54	0.0117474
0002.CSV	2958.39	0.011464
0002.CSV	2962.25	0.0112144
0002.CSV	2966.11	0.0108343
0002.CSV	2969.96	0.0106047
0002.CSV	2973.82	0.0105973
0002.CSV	2977.68	0.010597
0002.CSV	2981.53	0.0103734
0002.CSV	2985.39	0.00999233
0002.CSV	2989.25	0.00992907
0002.CSV	2993.11	0.0100471
0002.CSV	2996.96	0.00997666
0002.CSV	3000.82	0.00979589
0002.CSV	3004.68	0.00968746
0002.CSV	3008.53	0.00984876
0002.CSV	3012.39	0.0101116
0002.CSV	3016.25	0.0101294
0002.CSV	3020.11	0.00992768
0002.CSV	3023.96	0.00976671
0002.CSV	3027.82	0.00975048
0002.CSV	3031.68	0.00989015
0002.CSV	3035.53	0.00994615
0002.CSV	3039.39	0.00999562
0002.CSV	3043.25	0.0100703
0002.CSV	3047.11	0.00999952
0002.CSV	3050.96	0.00995225
0002.CSV	3054.82	0.00992334
0002.CSV	3058.68	0.00985771
0002.CSV	3062.53	0.00991273
0002.CSV	3066.39	0.0100441
0002.CSV	3070.25	0.00997151
0002.CSV	3074.11	0.00999063
0002.CSV	3077.96	0.0101821
0002.CSV	3081.82	0.0102389
0002.CSV	3085.68	0.0102018
0002.CSV	3089.53	0.0101584
0002.CSV	3093.39	0.0100429
0002.CSV	3097.25	0.0100378
0002.CSV	3101.11	0.010115
0002.CSV	3104.96	0.0101499
0002.CSV	3108.82	0.0102258
0002.CSV	3112.68	0.0103063
0002.CSV	3116.53	0.0104319
0002.CSV	3120.39	0.0103947
0002.CSV	3124.25	0.0102623
0002.CSV	3128.11	0.0102633
0002.CSV	3131.96	0.010268
0002.CSV	3135.82	0.0103248
0002.CSV	3139.68	0.0103878
0002.CSV	3143.53	0.0102517
0002.CSV	3147.39	0.0102827
0002.CSV	3151.25	0.0104738
0002.CSV	3155.1	0.0104473
0002.CSV	3158.96	0.0102778
0002.CSV	3162.82	0.0102623
0002.CSV	3166.68	0.0103098
0002.CSV	3170.53	0.010341
0002.CSV	3174.39	0.0103645
0002.CSV	3178.25	0.0104464
0002.CSV	3182.1	0.01048
0002.CSV	3185.96	0.0105276
0002.CSV	3189.82	0.0105678
0002.CSV	3193.68	0.0105611
0002.CSV	3197.53	0.0105548
0002.CSV	3201.39	0.0105901
0002.CSV	3205.25	0.0106224
0002.CSV	3209.1	0.0106385
0002.CSV	3212.96	0.0107159
0002.CSV	3216.82	0.0107592
0002.CSV	3220.68	0.0107372
0002.CSV	3224.53	0.010754
0002.CSV	3228.39	0.0109022
0002.CSV	3232.25	0.0110909
0002.CSV	3236.1	0.0110257
0002.CSV	3239.96	0.0109296
0002.CSV	3243.82	0.0110365
0002.CSV	3247.68	0.0110783
0002.CSV	3251.53	0.0109984
0002.CSV	3255.39	0.0110333
0002.CSV	3259.25	0.0109916
0002.CSV	3263.1	0.0109506
0002.CSV	3266.96	0.0111309
0002.CSV	3270.82	0.0113186
0002.CSV	3274.68	0.011254
0002.CSV	3278.53	0.0110915
0002.CSV	3282.39	0.0110085
0002.CSV	3286.25	0.0110651
0002.CSV	3290.1	0.0112664
0002.CSV	3293.96	0.0113954
0002.CSV	3297.82	0.011287
0002.CSV	3301.67	0.0113109
0002.CSV	3305.53	0.0114653
0002.CSV	3309.39	0.0113808
0002.CSV	3313.25	0.0111086
0002.CSV	3317.1	0.0110209
0002.CSV	3320.96	0.0111285
0002.CSV	3324.82	0.0112458
0002.CSV	3328.67	0.0111267
0002.CSV	3332.53	0.0110617
0002.CSV	3336.39	0.0112424
0002.CSV	3340.24	0.011362
0002.CSV	3344.1	0.0112651
0002.CSV	3347.96	0.0112621
0002.CSV	3351.82	0.0112301
0002.CSV	3355.67	0.0110876
0002.CSV	3359.53	0.0111655
0002.CSV	3363.39	0.0112811
0002.CSV	3367.24	0.0114025
0002.CSV	3371.1	0.0113171
0002.CSV	3374.96	0.0111291
0002.CSV	3378.82	0.0110062
0002.CSV	3382.67	0.0108686
0002.CSV	3386.53	0.0109199
0002.CSV	3390.39	0.0111384
0002.CSV	3394.24	0.011219
0002.CSV	3398.1	0.0112115
0002.CSV	3401.96	0.0111249
0002.CSV	3405.82	0.0109324
0002.CSV	3409.67	0.0108979
0002.CSV	3413.53	0.0107837
0002.CSV	3417.39	0.0105727
0002.CSV	3421.24	0.0104861
0002.CSV	3425.1	0.0105216
0002.CSV	3428.96	0.0106621
0002.CSV	3432.82	0.0108138
0002.CSV	3436.67	0.0107257
0002.CSV	3440.53	0.0103528
0002.CSV	3444.39	0.0101035
0002.CSV	3448.24	0.0100167
0002.CSV	3452.1	0.00988618
0002.CSV	3455.96	0.00986022
0002.CSV	3459.82	0.00996653
0002.CSV	3463.67	0.0100772
0002.CSV	3467.53	0.0100978
0002.CSV	3471.39	0.00989201
0002.CSV	3475.24	0.00972612
0002.CSV	3479.1	0.00969613
0002.CSV	3482.96	0.00957719
0002.CSV	3486.82	0.00951697
0002.CSV	3490.67	0.00943532
0002.CSV	3494.53	0.00939201
0002.CSV	3498.39	0.00934959
0002.CSV	3502.24	0.00922712
0002.CSV	3506.1	0.00895289
0002.CSV	3509.96	0.00877541
0002.CSV	3513.81	0.00877409
0002.CSV	3517.67	0.00864445
0002.CSV	3521.53	0.00857997
0002.CSV	3525.39	0.00846764
0002.CSV	3529.24	0.00832127
0002.CSV	3533.1	0.00831499
0002.CSV	3536.96	0.00832549
0002.CSV	3540.81	0.00834535
0002.CSV	3544.67	0.00834954
0002.CSV	3548.53	0.00813231
0002.CSV	3552.39	0.00794049
0002.CSV	3556.24	0.0078391
0002.CSV	3560.1	0.00773881
0002.CSV	3563.96	0.0075094
0002.CSV	3567.81	0.00753486
0002.CSV	3571.67	0.00753749
0002.CSV	3575.53	0.0073
0002.CSV	3579.39	0.00735274
0002.CSV	3583.24	0.00743427
0002.CSV	3587.1	0.00739685
0002.CSV	3590.96	0.00735934
0002.CSV	3594.81	0.00725199
0002.CSV	3598.67	0.00729596
0002.CSV	3602.53	0.00723646
0002.CSV	3606.39	0.0069253
0002.CSV	3610.24	0.00667752
0002.CSV	3614.1	0.00656582
0002.CSV	3617.96	0.00668791
0002.CSV	3621.81	0.00682963
0002.CSV	3625.67	0.0064671
0002.CSV	3629.53	0.00640644
0002.CSV	3633.39	0.00670851
0002.CSV	3637.24	0.00656091
0002.CSV	3641.1	0.00630174
0002.CSV	3644.96	0.00597942
0002.CSV	3648.81	0.00620066
0002.CSV	3652.67	0.00655916
0002.CSV	3656.53	0.00656286
0002.CSV	3660.38	0.00654678
0002.CSV	3664.24	0.00617438
0002.CSV	3668.1	0.00579295
0002.CSV	3671.96	0.00570153
0002.CSV	3675.81	0.00597264
0002.CSV	3679.67	0.00624365
0002.CSV	3683.53	0.00611489
0002.CSV	3687.38	0.00601036
0002.CSV	3691.24	0.00633331
0002.CSV	3695.1	0.00631673
0002.CSV	3698.95	0.0061032
0002.CSV	3702.81	0.00609396
0002.CSV	3706.67	0.00595668
0002.CSV	3710.53	0.00591479
0002.CSV	3714.38	0.00610663
0002.CSV	3718.24	0.00588567
0002.CSV	3722.1	0.00585363
0002.CSV	3725.95	0.00599662
0002.CSV	3729.81	0.0058534
0002.CSV	3733.67	0.00578936
0002.CSV	3737.53	0.00619521
0002.CSV	3741.38	0.00590905
0002.CSV	3745.24	0.00547964
0002.CSV	3749.1	0.00537788
0002.CSV	3752.95	0.00575216
0002.CSV	3756.81	0.00588625
0002.CSV	3760.67	0.00587311
0002.CSV	3764.53	0.00575189
0002.CSV	3768.38	0.0057994
0002.CSV	3772.24	0.00588806
0002.CSV	3776.1	0.00580682
0002.CSV	3779.95	0.00584
0002.CSV	3783.81	0.00589004
0002.CSV	3787.67	0.00592128
0002.CSV	3791.53	0.00579762
0002.CSV	3795.38	0.00554712
0002.CSV	3799.24	0.00549591
0002.CSV	3803.1	0.00576542
0002.CSV	3806.95	0.00597781
0002.CSV	3810.81	0.00585746
0002.CSV	3814.67	0.00561405
0002.CSV	3818.53	0.00566107
0002.CSV	3822.38	0.00588393
0002.CSV	3826.24	0.00584591
0002.CSV	3830.1	0.00570169
0002.CSV	3833.95	0.00567907
0002.CSV	3837.81	0.00587828
0002.CSV	3841.67	0.00619094
0002.CSV	3845.53	0.00608929
0002.CSV	3849.38	0.0056317
0002.CSV	3853.24	0.00562284
0002.CSV	3857.1	0.00603785
0002.CSV	3860.95	0.00581643
0002.CSV	3864.81	0.00581962
0002.CSV	3868.67	0.00586337
0002.CSV	3872.52	0.00597734
0002.CSV	3876.38	0.00586959
0002.CSV	3880.24	0.00578986
0002.CSV	3884.1	0.00600334
0002.CSV	3887.95	0.00602326
0002.CSV	3891.81	0.00604174
0002.CSV	3895.67	0.00594177
0002.CSV	3899.52	0.00573168
0002.CSV	3903.38	0.00604174
0002.CSV	3907.24	0.00621827
0002.CSV	3911.1	0.0060025
0002.CSV	3914.95	0.00581015
0002.CSV	3918.81	0.00586522
0002.CSV	3922.67	0.00592037
0002.CSV	3926.52	0.00590458
0002.CSV	3930.38	0.00590509
0002.CSV	3934.24	0.0060445
0002.CSV	3938.09	0.00592776
0002.CSV	3941.95	0.00584957
0002.CSV	3945.81	0.00585179
0002.CSV	3949.67	0.00587694
0002.CSV	3953.52	0.00592984
0002.CSV	3957.38	0.00585699
0002.CSV	3961.24	0.00583049
0002.CSV	3965.09	0.00584971
0002.CSV	3968.95	0.00583338
0002.CSV	3972.81	0.00581072
0002.CSV	3976.67	0.0057722
0002.CSV	3980.52	0.00578432
0002.CSV	3984.38	0.00584332
0002.CSV	3988.24	0.00580638
0002.CSV	3992.09	0.0057725
0002.CSV	3995.95	0.00574853
0002.CSV	3999.81	0.00571002
0003.CSV	674.992	0.02151
0003.CSV	678.849	0.0221784
0003.CSV	682.706	0.022701
0003.CSV	686.563	0.024039
0003.CSV	690.42	0.0255059
0003.CSV	694.277	0.0296888
0003.CSV	698.134	0.0344591
0003.CSV	701.991	0.0323073
0003.CSV	705.849	0.0303336
0003.CSV	709.706	0.0392111
0003.CSV	713.563	0.0408876
0003.CSV	717.42	0.0278693
0003.CSV	721.277	0.0184503
0003.CSV	725.134	0.0164973
0003.CSV	728.991	0.0161204
0003.CSV	732.848	0.0162847
0003.CSV	736.705	0.0164366
0003.CSV	740.562	0.0167918
0003.CSV	744.42	0.0168031
0003.CSV	748.277	0.0173116
0003.CSV	752.134	0.0175919
0003.CSV	755.991	0.0179723
0003.CSV	759.848	0.0182489
0003.CSV	763.705	0.0188815
0003.CSV	767.562	0.019259
0003.CSV	771.419	0.0197914
0003.CSV	775.276	0.0201457
0003.CSV	779.133	0.0207587
0003.CSV	782.99	0.0209815
0003.CSV	786.848	0.0212737
0003.CSV	790.705	0.02155
0003.CSV	794.562	0.022356
0003.CSV	798.419	0.0230361
0003.CSV	802.276	0.0237118
0003.CSV	806.133	0.0239495
0003.CSV	809.99	0.0245535
0003.CSV	813.847	0.0255047
0003.CSV	817.704	0.0272929
0003.CSV	821.562	0.0295604
0003.CSV	825.419	0.0325105
0003.CSV	829.276	0.0353835
0003.CSV	833.133	0.0389826
0003.CSV	836.99	0.0444364
0003.CSV	840.847	0.0519438
0003.CSV	844.704	0.0594619
0003.CSV	848.561	0.070624
0003.CSV	852.418	0.0778084
0003.CSV	856.275	0.0705366
0003.CSV	860.132	0.0556203
0003.CSV	863.99	0.0410615
0003.CSV	867.847	0.0297285
0003.CSV	871.704	0.023933
0003.CSV	875.561	0.0216542
0003.CSV	879.418	0.0195721
0003.CSV	883.275	0.0167424
0003.CSV	887.132	0.0145619
0003.CSV	890.989	0.0137063
0003.CSV	894.846	0.0138301
0003.CSV	898.703	0.0139775
0003.CSV	902.561	0.0142892
0003.CSV	906.418	0.0145146
0003.CSV	910.275	0.0145626
0003.CSV	914.132	0.014486
0003.CSV	917.989	0.0147979
0003.CSV	921.846	0.0150897
0003.CSV	925.703	0.0154452
0003.CSV	929.56	0.0156662
0003.CSV	933.417	0.0159577
0003.CSV	937.274	0.0160831
0003.CSV	941.131	0.0162613
0003.CSV	944.989	0.0164267
0003.CSV	948.846	0.0167875
0003.CSV	952.703	0.0170525
0003.CSV	956.56	0.0173495
0003.CSV	960.417	0.0175455
0003.CSV	964.274	0.017884
0003.CSV	968.131	0.0181495
0003.CSV	971.988	0.0185344
0003.CSV	975.845	0.0188606
0003.CSV	979.702	0.0193333
0003.CSV	983.559	0.0197594
0003.CSV	987.417	0.0202861
0003.CSV	991.274	0.0207203
0003.CSV	995.131	0.0212555
0003.CSV	998.988	0.0216347
0003.CSV	1002.85	0.0220538
0003.CSV	1006.7	0.022407
0003.CSV	1010.56	0.0229125
0003.CSV	1014.42	0.023282
0003.CSV	1018.27	0.0237844
0003.CSV	1022.13	0.0242199
0003.CSV	1025.99	0.0246795
0003.CSV	1029.85	0.0250447
0003.CSV	1033.7	0.0255666
0003.CSV	1037.56	0.0259678
0003.CSV	1041.42	0.026358
0003.CSV	1045.27	0.0265342
0003.CSV	1049.13	0.0268097
0003.CSV	1052.99	0.0270009
0003.CSV	1056.84	0.0273868
0003.CSV	1060.7	0.0277461
0003.CSV	1064.56	0.0282589
0003.CSV	1068.42	0.028703
0003.CSV	1072.27	0.0293966
0003.CSV	1076.13	0.0305707
0003.CSV	1079.99	0.0328832
0003.CSV	1083.84	0.0328549
0003.CSV	1087.7	0.0297236
0003.CSV	1091.56	0.027804
0003.CSV	1095.41	0.0274408
0003.CSV	1099.27	0.0272879
0003.CSV	1103.13	0.0272203
0003.CSV	1106.99	0.0270839
0003.CSV	1110.84	0.0270199
0003.CSV	1114.7	0.0268361
0003.CSV	1118.56	0.0266481
0003.CSV	1122.41	0.0263391
0003.CSV	1126.27	0.0259962
0003.CSV	1130.13	0.0255139
0003.CSV	1133.99	0.0250751
0003.CSV	1137.84	0.0246921
0003.CSV	1141.7	0.0245569
0003.CSV	1145.56	0.0244408
0003.CSV	1149.41	0.0244214
0003.CSV	1153.27	0.0243598
0003.CSV	1157.13	0.0243732
0003.CSV	1160.99	0.0243272
0003.CSV	1164.84	0.0243275
0003.CSV	1168.7	0.0242659
0003.CSV	1172.56	0.0243108
0003.CSV	1176.41	0.0243766
0003.CSV	1180.27	0.0244929
0003.CSV	1184.13	0.0243125
0003.CSV	1187.99	0.0239882
0003.CSV	1191.84	0.0236026
0003.CSV	1195.7	0.0234122
0003.CSV	1199.56	0.02329
0003.CSV	1203.41	0.0233146
0003.CSV	1207.27	0.0233413
0003.CSV	1211.13	0.0235654
0003.CSV	1214.98	0.0238313
0003.CSV	1218.84	0.0241802
0003.CSV	1222.7	0.0244752
0003.CSV	1226.56	0.0248644
0003.CSV	1230.41	0.0252046
0003.CSV	1234.27	0.0256149
0003.CSV	1238.13	0.0259231
0003.CSV	1241.98	0.0262641
0003.CSV	1245.84	0.0264757
0003.CSV	1249.7	0.0266344
0003.CSV	1253.56	0.0265252
0003.CSV	1257.41	0.0263357
0003.CSV	1261.27	0.0261727
0003.CSV	1265.13	0.026402
0003.CSV	1268.98	0.0268336
0003.CSV	1272.84	0.0273289
0003.CSV	1276.7	0.0276722
0003.CSV	1280.56	0.0280813
0003.CSV	1284.41	0.0284177
0003.CSV	1288.27	0.0288556
0003.CSV	1292.13	0.0292377
0003.CSV	1295.98	0.0297274
0003.CSV	1299.84	0.0301471
0003.CSV	1303.7	0.0306157
0003.CSV	1307.56	0.0310539
0003.CSV	1311.41	0.0315623
0003.CSV	1315.27	0.0319757
0003.CSV	1319.13	0.0324969
0003.CSV	1322.98	0.0329423
0003.CSV	1326.84	0.0335148
0003.CSV	1330.7	0.0340998
0003.CSV	1334.56	0.0348062
0003.CSV	1338.41	0.0355765
0003.CSV	1342.27	0.0365453
0003.CSV	1346.13	0.0373317
0003.CSV	1349.98	0.0383196
0003.CSV	1353.84	0.0393145
0003.CSV	1357.7	0.0404293
0003.CSV	1361.56	0.0415529
0003.CSV	1365.41	0.0427852
0003.CSV	1369.27	0.0437436
0003.CSV	1373.13	0.0450677
0003.CSV	1376.98	0.0465305
0003.CSV	1380.84	0.0478568
0003.CSV	1384.7	0.0490793
0003.CSV	1388.56	0.0506578
0003.CSV	1392.41	0.0518838
0003.CSV	1396.27	0.0534631
0003.CSV	1400.13	0.0550237
0003.CSV	1403.98	0.0565748
0003.CSV	1407.84	0.0580844
0003.CSV	1411.7	0.0595129
0003.CSV	1415.55	0.0604666
0003.CSV	1419.41	0.0616197
0003.CSV	1423.27	0.0625254
0003.CSV	1427.12	0.0636192
0003.CSV	1430.98	0.06475
0003.CSV	1434.84	0.0661536
0003.CSV	1438.7	0.0675336
0003.CSV	1442.55	0.0685672
0003.CSV	1446.41	0.0689439
0003.CSV	1450.27	0.0689606
0003.CSV	1454.12	0.0683708
0003.CSV	1457.98	0.0675132
0003.CSV	1461.84	0.0666451
0003.CSV	1465.7	0.0662229
0003.CSV	1469.55	0.0653064
0003.CSV	1473.41	0.0636364
0003.CSV	1477.27	0.06117
0003.CSV	1481.12	0.0594496
0003.CSV	1484.98	0.0577181
0003.CSV	1488.84	0.0557793
0003.CSV	1492.7	0.0536171
0003.CSV	1496.55	0.0519187
0003.CSV	1500.41	0.0499255
0003.CSV	1504.27	0.0486084
0003.CSV	1508.12	0.0458743
0003.CSV	1511.98	0.0435489
0003.CSV	1515.84	0.0414868
0003.CSV	1519.7	0.0388421
0003.CSV	1523.55	0.0357091
0003.CSV	1527.41	0.0334927
0003.CSV	1531.27	0.0315493
0003.CSV	1535.12	0.029949
0003.CSV	1538.98	0.0283478
0003.CSV	1542.84	0.0257027
0003.CSV	1546.7	0.0233952
0003.CSV	1550.55	0.0216668
0003.CSV	1554.41	0.0200125
0003.CSV	1558.27	0.0182942
0003.CSV	1562.12	0.0167531
0003.CSV	1565.98	0.0160806
0003.CSV	1569.84	0.0153703
0003.CSV	1573.69	0.0146815
0003.CSV	1577.55	0.0134504
0003.CSV	1581.41	0.0120471
0003.CSV	1585.27	0.0108189
0003.CSV	1589.12	0.00993039
0003.CSV	1592.98	0.00936242
0003.CSV	1596.84	0.009099
0003.CSV	1600.69	0.00891122
0003.CSV	1604.55	0.00886657
0003.CSV	1608.41	0.00876804
0003.CSV	1612.27	0.00856945
0003.CSV	1616.12	0.0082823
0003.CSV	1619.98	0.00805176
0003.CSV	1623.84	0.00781309
0003.CSV	1627.69	0.00764633
0003.CSV	1631.55	0.00738513
0003.CSV	1635.41	0.00728154
0003.CSV	1639.27	0.00722372
0003.CSV	1643.12	0.00700186
0003.CSV	1646.98	0.00687847
0003.CSV	1650.84	0.00696028
0003.CSV	1654.69	0.00704076
0003.CSV	1658.55	0.00690409
0003.CSV	1662.41	0.00674061
0003.CSV	1666.27	0.00670194
0003.CSV	1670.12	0.00663919
0003.CSV	1673.98	0.00662099
0003.CSV	1677.84	0.00646236
0003.CSV	1681.69	0.00636787
0003.CSV	1685.55	0.00641673
0003.CSV	1689.41	0.00637503
0003.CSV	1693.27	0.00614887
0003.CSV	1697.12	0.00614725
0003.CSV	1700.98	0.0062375
0003.CSV	1704.84	0.00627125
0003.CSV	1708.69	0.00626456
0003.CSV	1712.55	0.00624664
0003.CSV	1716.41	0.00638653
0003.CSV	1720.27	0.0065849
0003.CSV	1724.12	0.00653942
[truncated: 32,521 more rows]

## Sheet: Cedule_400_1_mFTIR_data
Select spectrum number	Wavenumbers	Absorbance
0001.CSV	674.992	0.0206838
0001.CSV	678.849	0.0212599
0001.CSV	682.706	0.02097
0001.CSV	686.563	0.021857
0001.CSV	690.42	0.023068
0001.CSV	694.277	0.024921
0001.CSV	698.134	0.0269333
0001.CSV	701.991	0.0313427
0001.CSV	705.849	0.040411
0001.CSV	709.706	0.0523817
0001.CSV	713.563	0.0491788
0001.CSV	717.42	0.0324414
0001.CSV	721.277	0.0210269
0001.CSV	725.134	0.0180241
0001.CSV	728.991	0.0172483
0001.CSV	732.848	0.0173932
0001.CSV	736.705	0.0173968
0001.CSV	740.562	0.0176026
0001.CSV	744.42	0.0177533
0001.CSV	748.277	0.0181427
0001.CSV	752.134	0.0182993
0001.CSV	755.991	0.018691
0001.CSV	759.848	0.0188552
0001.CSV	763.705	0.0193258
0001.CSV	767.562	0.019522
0001.CSV	771.419	0.0199315
0001.CSV	775.276	0.0200883
0001.CSV	779.133	0.0204326
0001.CSV	782.99	0.0204923
0001.CSV	786.848	0.0207121
0001.CSV	790.705	0.0208796
0001.CSV	794.562	0.021411
0001.CSV	798.419	0.0219848
0001.CSV	802.276	0.0226015
0001.CSV	806.133	0.0226429
0001.CSV	809.99	0.0227452
0001.CSV	813.847	0.0227528
0001.CSV	817.704	0.0235942
0001.CSV	821.562	0.0249541
0001.CSV	825.419	0.0267125
0001.CSV	829.276	0.0277684
0001.CSV	833.133	0.0282211
0001.CSV	836.99	0.0284622
0001.CSV	840.847	0.0298327
0001.CSV	844.704	0.0324507
0001.CSV	848.561	0.0342945
0001.CSV	852.418	0.0354992
0001.CSV	856.275	0.0410435
0001.CSV	860.132	0.0526055
0001.CSV	863.99	0.0734757
0001.CSV	867.847	0.101226
0001.CSV	871.704	0.115018
0001.CSV	875.561	0.101591
0001.CSV	879.418	0.0772541
0001.CSV	883.275	0.0504688
0001.CSV	887.132	0.0261317
0001.CSV	890.989	0.0144788
0001.CSV	894.846	0.0131515
0001.CSV	898.703	0.0135958
0001.CSV	902.561	0.0142757
0001.CSV	906.418	0.0148346
0001.CSV	910.275	0.01556
0001.CSV	914.132	0.0160726
0001.CSV	917.989	0.016638
0001.CSV	921.846	0.0169836
0001.CSV	925.703	0.0175466
0001.CSV	929.56	0.0179408
0001.CSV	933.417	0.0184265
0001.CSV	937.274	0.0187097
0001.CSV	941.131	0.0190273
0001.CSV	944.989	0.019203
0001.CSV	948.846	0.0196098
0001.CSV	952.703	0.0198681
0001.CSV	956.56	0.0201771
0001.CSV	960.417	0.0202783
0001.CSV	964.274	0.0205851
0001.CSV	968.131	0.0208986
0001.CSV	971.988	0.0214287
0001.CSV	975.845	0.0217693
0001.CSV	979.702	0.0222156
0001.CSV	983.559	0.0225656
0001.CSV	987.417	0.0230689
0001.CSV	991.274	0.0234624
0001.CSV	995.131	0.0240289
0001.CSV	998.988	0.0244929
0001.CSV	1002.85	0.0251792
0001.CSV	1006.7	0.0257691
0001.CSV	1010.56	0.026471
0001.CSV	1014.42	0.0268788
0001.CSV	1018.27	0.0273004
0001.CSV	1022.13	0.027668
0001.CSV	1025.99	0.0282488
0001.CSV	1029.85	0.0286349
0001.CSV	1033.7	0.0291178
0001.CSV	1037.56	0.0293913
0001.CSV	1041.42	0.0296708
0001.CSV	1045.27	0.0297235
0001.CSV	1049.13	0.0298805
0001.CSV	1052.99	0.0299681
0001.CSV	1056.84	0.0303752
0001.CSV	1060.7	0.0308232
0001.CSV	1064.56	0.0315449
0001.CSV	1068.42	0.0320776
0001.CSV	1072.27	0.0328419
0001.CSV	1076.13	0.0336065
0001.CSV	1079.99	0.0345425
0001.CSV	1083.84	0.0352407
0001.CSV	1087.7	0.0356538
0001.CSV	1091.56	0.0352677
0001.CSV	1095.41	0.0346458
0001.CSV	1099.27	0.034065
0001.CSV	1103.13	0.0339356
0001.CSV	1106.99	0.0337848
0001.CSV	1110.84	0.0337528
0001.CSV	1114.7	0.0335689
0001.CSV	1118.56	0.0335046
0001.CSV	1122.41	0.0332419
0001.CSV	1126.27	0.033031
0001.CSV	1130.13	0.0326334
0001.CSV	1133.99	0.0323546
0001.CSV	1137.84	0.0320696
0001.CSV	1141.7	0.0320426
0001.CSV	1145.56	0.0320106
0001.CSV	1149.41	0.032151
0001.CSV	1153.27	0.0321665
0001.CSV	1157.13	0.0323524
0001.CSV	1160.99	0.0324765
0001.CSV	1164.84	0.0327107
0001.CSV	1168.7	0.0328583
0001.CSV	1172.56	0.033356
0001.CSV	1176.41	0.0340872
0001.CSV	1180.27	0.0348791
0001.CSV	1184.13	0.0348076
0001.CSV	1187.99	0.0341684
0001.CSV	1191.84	0.0333487
0001.CSV	1195.7	0.0330022
0001.CSV	1199.56	0.0329476
0001.CSV	1203.41	0.0332969
0001.CSV	1207.27	0.0337295
0001.CSV	1211.13	0.0344038
0001.CSV	1214.98	0.0350528
0001.CSV	1218.84	0.0359045
0001.CSV	1222.7	0.0366808
0001.CSV	1226.56	0.0375753
0001.CSV	1230.41	0.0383868
0001.CSV	1234.27	0.0392499
0001.CSV	1238.13	0.0398782
0001.CSV	1241.98	0.0406025
0001.CSV	1245.84	0.0411405
0001.CSV	1249.7	0.0415482
0001.CSV	1253.56	0.0414687
0001.CSV	1257.41	0.0411792
0001.CSV	1261.27	0.040867
0001.CSV	1265.13	0.0412268
0001.CSV	1268.98	0.0419373
0001.CSV	1272.84	0.0429823
0001.CSV	1276.7	0.0439846
0001.CSV	1280.56	0.0452193
0001.CSV	1284.41	0.0463955
0001.CSV	1288.27	0.0477901
0001.CSV	1292.13	0.0491008
0001.CSV	1295.98	0.0505314
0001.CSV	1299.84	0.0518219
0001.CSV	1303.7	0.0532773
0001.CSV	1307.56	0.054696
0001.CSV	1311.41	0.0563753
0001.CSV	1315.27	0.0580352
0001.CSV	1319.13	0.060069
0001.CSV	1322.98	0.0620475
0001.CSV	1326.84	0.0643233
0001.CSV	1330.7	0.0666697
0001.CSV	1334.56	0.0692498
0001.CSV	1338.41	0.0722308
0001.CSV	1342.27	0.0758934
0001.CSV	1346.13	0.0791289
0001.CSV	1349.98	0.0829963
0001.CSV	1353.84	0.0872125
0001.CSV	1357.7	0.0918561
0001.CSV	1361.56	0.0969008
0001.CSV	1365.41	0.102643
0001.CSV	1369.27	0.107465
0001.CSV	1373.13	0.113125
0001.CSV	1376.98	0.119084
0001.CSV	1380.84	0.124296
0001.CSV	1384.7	0.12852
0001.CSV	1388.56	0.132533
0001.CSV	1392.41	0.134222
0001.CSV	1396.27	0.134065
0001.CSV	1400.13	0.132061
0001.CSV	1403.98	0.129907
0001.CSV	1407.84	0.126285
0001.CSV	1411.7	0.121983
0001.CSV	1415.55	0.117329
0001.CSV	1419.41	0.112449
0001.CSV	1423.27	0.108318
0001.CSV	1427.12	0.105767
0001.CSV	1430.98	0.103069
0001.CSV	1434.84	0.100603
0001.CSV	1438.7	0.0976879
0001.CSV	1442.55	0.0955159
0001.CSV	1446.41	0.0929574
0001.CSV	1450.27	0.0903503
0001.CSV	1454.12	0.0878217
0001.CSV	1457.98	0.0842709
0001.CSV	1461.84	0.081072
0001.CSV	1465.7	0.0785854
0001.CSV	1469.55	0.0758145
0001.CSV	1473.41	0.0725695
0001.CSV	1477.27	0.0689038
0001.CSV	1481.12	0.0663712
0001.CSV	1484.98	0.0637657
0001.CSV	1488.84	0.0606896
0001.CSV	1492.7	0.0574997
0001.CSV	1496.55	0.0550576
0001.CSV	1500.41	0.0525079
0001.CSV	1504.27	0.0509125
0001.CSV	1508.12	0.0478611
0001.CSV	1511.98	0.0448145
0001.CSV	1515.84	0.0417827
0001.CSV	1519.7	0.0381662
0001.CSV	1523.55	0.0346719
0001.CSV	1527.41	0.032378
0001.CSV	1531.27	0.0302985
0001.CSV	1535.12	0.0283182
0001.CSV	1538.98	0.0262096
0001.CSV	1542.84	0.0229964
0001.CSV	1546.7	0.0207719
0001.CSV	1550.55	0.0192413
0001.CSV	1554.41	0.0178447
0001.CSV	1558.27	0.0165768
0001.CSV	1562.12	0.0154913
0001.CSV	1565.98	0.014992
0001.CSV	1569.84	0.0145964
0001.CSV	1573.69	0.0143857
0001.CSV	1577.55	0.0142487
0001.CSV	1581.41	0.0139281
0001.CSV	1585.27	0.013345
0001.CSV	1589.12	0.0127001
0001.CSV	1592.98	0.0121203
0001.CSV	1596.84	0.0117315
0001.CSV	1600.69	0.0114252
0001.CSV	1604.55	0.0112622
0001.CSV	1608.41	0.0109584
0001.CSV	1612.27	0.0104843
0001.CSV	1616.12	0.00984425
0001.CSV	1619.98	0.00933313
0001.CSV	1623.84	0.00899852
0001.CSV	1627.69	0.00878241
0001.CSV	1631.55	0.00848907
0001.CSV	1635.41	0.00834549
0001.CSV	1639.27	0.00829273
0001.CSV	1643.12	0.00811516
0001.CSV	1646.98	0.00802834
0001.CSV	1650.84	0.0080119
0001.CSV	1654.69	0.00801912
0001.CSV	1658.55	0.00796411
0001.CSV	1662.41	0.00784372
0001.CSV	1666.27	0.0078004
0001.CSV	1670.12	0.00772265
0001.CSV	1673.98	0.00777045
0001.CSV	1677.84	0.00766838
0001.CSV	1681.69	0.00758435
0001.CSV	1685.55	0.00764721
0001.CSV	1689.41	0.00763416
0001.CSV	1693.27	0.00743073
0001.CSV	1697.12	0.00743413
0001.CSV	1700.98	0.00756473
0001.CSV	1704.84	0.00767004
0001.CSV	1708.69	0.00765426
0001.CSV	1712.55	0.00759025
0001.CSV	1716.41	0.00773408
0001.CSV	1720.27	0.00802429
0001.CSV	1724.12	0.00799665
0001.CSV	1727.98	0.00795905
0001.CSV	1731.84	0.00789915
0001.CSV	1735.69	0.00798811
0001.CSV	1739.55	0.00785745
0001.CSV	1743.41	0.00763699
0001.CSV	1747.27	0.00739932
0001.CSV	1751.12	0.00734101
0001.CSV	1754.98	0.00720075
0001.CSV	1758.84	0.00714914
0001.CSV	1762.69	0.0071992
0001.CSV	1766.55	0.00721587
0001.CSV	1770.41	0.00726493
0001.CSV	1774.26	0.00751544
0001.CSV	1778.12	0.00760991
0001.CSV	1781.98	0.00787996
0001.CSV	1785.84	0.00836643
0001.CSV	1789.69	0.00905931
0001.CSV	1793.55	0.00986845
0001.CSV	1797.41	0.00994622
0001.CSV	1801.26	0.0092677
0001.CSV	1805.12	0.0084895
0001.CSV	1808.98	0.00794613
0001.CSV	1812.84	0.00771961
0001.CSV	1816.69	0.00752596
0001.CSV	1820.55	0.00741027
0001.CSV	1824.41	0.0073335
0001.CSV	1828.26	0.0073769
0001.CSV	1832.12	0.00740157
0001.CSV	1835.98	0.00737286
0001.CSV	1839.84	0.00727642
0001.CSV	1843.69	0.00731351
0001.CSV	1847.55	0.00740528
0001.CSV	1851.41	0.00739328
0001.CSV	1855.26	0.00734593
0001.CSV	1859.12	0.0073489
0001.CSV	1862.98	0.00729262
0001.CSV	1866.84	0.00731331
0001.CSV	1870.69	0.00742803
0001.CSV	1874.55	0.00742658
0001.CSV	1878.41	0.00737801
0001.CSV	1882.26	0.00739847
0001.CSV	1886.12	0.00737515
0001.CSV	1889.98	0.0074038
0001.CSV	1893.83	0.00743049
0001.CSV	1897.69	0.00745584
0001.CSV	1901.55	0.00741125
0001.CSV	1905.41	0.00736983
0001.CSV	1909.26	0.00734209
0001.CSV	1913.12	0.00733228
0001.CSV	1916.98	0.00727517
0001.CSV	1920.83	0.007287
0001.CSV	1924.69	0.0072907
0001.CSV	1928.55	0.00729437
0001.CSV	1932.4	0.00727109
0001.CSV	1936.26	0.00724454
0001.CSV	1940.12	0.00717211
0001.CSV	1943.98	0.00718926
0001.CSV	1947.83	0.00718444
0001.CSV	1951.69	0.0071679
0001.CSV	1955.55	0.00713964
0001.CSV	1959.4	0.00714799
0001.CSV	1963.26	0.00712586
0001.CSV	1967.12	0.00713721
0001.CSV	1970.98	0.00711017
0001.CSV	1974.83	0.00708023
0001.CSV	1978.69	0.00705497
0001.CSV	1982.55	0.0070547
0001.CSV	1986.4	0.00701308
0001.CSV	1990.26	0.007022
0001.CSV	1994.12	0.00703823
0001.CSV	1997.98	0.0070154
0001.CSV	2001.83	0.00697607
0001.CSV	2005.69	0.00698405
0001.CSV	2009.55	0.00697691
0001.CSV	2013.4	0.0069786
0001.CSV	2017.26	0.00694941
0001.CSV	2021.12	0.00694584
0001.CSV	2024.97	0.00693809
0001.CSV	2028.83	0.00695893
0001.CSV	2032.69	0.00693328
0001.CSV	2036.55	0.00691611
0001.CSV	2040.4	0.00689948
0001.CSV	2044.26	0.00693001
0001.CSV	2048.12	0.00692917
0001.CSV	2051.97	0.00693567
0001.CSV	2055.83	0.00691412
0001.CSV	2059.69	0.00691766
0001.CSV	2063.55	0.00695671
0001.CSV	2067.4	0.00701052
0001.CSV	2071.26	0.00699796
0001.CSV	2075.12	0.00700826
0001.CSV	2078.97	0.00700769
0001.CSV	2082.83	0.0070052
0001.CSV	2086.69	0.00700291
0001.CSV	2090.55	0.00703968
0001.CSV	2094.4	0.00704497
0001.CSV	2098.26	0.00705736
0001.CSV	2102.12	0.00706703
0001.CSV	2105.97	0.00710094
0001.CSV	2109.83	0.00711717
0001.CSV	2113.69	0.00714264
0001.CSV	2117.55	0.00715746
0001.CSV	2121.4	0.00719401
0001.CSV	2125.26	0.00722675
0001.CSV	2129.12	0.00727386
0001.CSV	2132.97	0.00728137
0001.CSV	2136.83	0.0073057
0001.CSV	2140.69	0.0073153
0001.CSV	2144.55	0.00734509
0001.CSV	2148.4	0.00736349
0001.CSV	2152.26	0.00737812
0001.CSV	2156.12	0.00736767
0001.CSV	2159.97	0.00740063
0001.CSV	2163.83	0.0074343
0001.CSV	2167.69	0.00745699
0001.CSV	2171.55	0.00745547
0001.CSV	2175.4	0.00746127
0001.CSV	2179.26	0.00747933
0001.CSV	2183.12	0.00752623
0001.CSV	2186.97	0.0075385
0001.CSV	2190.83	0.00755461
0001.CSV	2194.69	0.00757461
0001.CSV	2198.55	0.00758567
0001.CSV	2202.4	0.00757572
0001.CSV	2206.26	0.00759457
0001.CSV	2210.12	0.00758024
0001.CSV	2213.97	0.00759474
0001.CSV	2217.83	0.00760364
0001.CSV	2221.69	0.007586
0001.CSV	2225.54	0.00755327
0001.CSV	2229.4	0.00756186
0001.CSV	2233.26	0.00756389
0001.CSV	2237.12	0.00756372
0001.CSV	2240.97	0.00754123
0001.CSV	2244.83	0.00752019
0001.CSV	2248.69	0.00750603
0001.CSV	2252.54	0.00751187
0001.CSV	2256.4	0.0074766
0001.CSV	2260.26	0.00744536
0001.CSV	2264.11	0.00743316
0001.CSV	2267.97	0.00744647
0001.CSV	2271.83	0.00744084
0001.CSV	2275.69	0.00744108
0001.CSV	2279.54	0.0074187
0001.CSV	2283.4	0.00737835
0001.CSV	2287.26	0.00731041
0001.CSV	2291.11	0.00726476
0001.CSV	2294.97	0.00719957
0001.CSV	2298.83	0.00713007
0001.CSV	2302.69	0.00703924
0001.CSV	2306.54	0.00695068
0001.CSV	2310.4	0.00679166
0001.CSV	2314.26	0.0066114
0001.CSV	2318.11	0.00629726
0001.CSV	2321.97	0.005881
0001.CSV	2325.83	0.00534202
0001.CSV	2329.69	0.00493274
0001.CSV	2333.54	0.0046176
0001.CSV	2337.4	0.00429111
0001.CSV	2341.26	0.00429637
0001.CSV	2345.11	0.0053182
0001.CSV	2348.97	0.0056169
0001.CSV	2352.83	0.00459094
0001.CSV	2356.69	0.00170474
0001.CSV	2360.54	-0.000112939
0001.CSV	2364.4	0.0012033
0001.CSV	2368.26	0.00381035
0001.CSV	2372.11	0.00572721
0001.CSV	2375.97	0.00668795
0001.CSV	2379.83	0.00707548
0001.CSV	2383.69	0.00718724
0001.CSV	2387.54	0.00714958
0001.CSV	2391.4	0.00709862
0001.CSV	2395.26	0.00708521
0001.CSV	2399.11	0.00707929
0001.CSV	2402.97	0.00706797
0001.CSV	2406.83	0.00708087
0001.CSV	2410.68	0.00707383
0001.CSV	2414.54	0.00707309
0001.CSV	2418.4	0.00705494
0001.CSV	2422.26	0.00704746
0001.CSV	2426.11	0.00705844
0001.CSV	2429.97	0.00704719
0001.CSV	2433.83	0.00702651
0001.CSV	2437.68	0.00703985
0001.CSV	2441.54	0.00706753
0001.CSV	2445.4	0.00706982
0001.CSV	2449.26	0.00705217
0001.CSV	2453.11	0.00708457
0001.CSV	2456.97	0.0071259
0001.CSV	2460.83	0.00715679
0001.CSV	2464.68	0.00721227
0001.CSV	2468.54	0.00727551
0001.CSV	2472.4	0.00731446
0001.CSV	2476.26	0.00736534
0001.CSV	2480.11	0.00742301
0001.CSV	2483.97	0.00749342
0001.CSV	2487.83	0.00759113
0001.CSV	2491.68	0.00777109
0001.CSV	2495.54	0.00795979
0001.CSV	2499.4	0.00815685
0001.CSV	2503.26	0.00836359
0001.CSV	2507.11	0.0085438
0001.CSV	2510.97	0.00861079
0001.CSV	2514.83	0.00859031
0001.CSV	2518.68	0.00853684
0001.CSV	2522.54	0.00841673
0001.CSV	2526.4	0.00819929
0001.CSV	2530.26	0.00799803
0001.CSV	2534.11	0.00780624
0001.CSV	2537.97	0.00765156
0001.CSV	2541.83	0.00751932
0001.CSV	2545.68	0.00742496
0001.CSV	2549.54	0.00740228
0001.CSV	2553.4	0.00738634
0001.CSV	2557.26	0.00730351
0001.CSV	2561.11	0.00725853
0001.CSV	2564.97	0.00724781
0001.CSV	2568.83	0.00723107
0001.CSV	2572.68	0.0072088
0001.CSV	2576.54	0.00717413
0001.CSV	2580.4	0.00712388
0001.CSV	2584.25	0.00712644
0001.CSV	2588.11	0.00713018
0001.CSV	2591.97	0.00710704
0001.CSV	2595.83	0.00707336
0001.CSV	2599.68	0.00703551
0001.CSV	2603.54	0.00700503
0001.CSV	2607.4	0.00698277
0001.CSV	2611.25	0.00695106
0001.CSV	2615.11	0.00690645
0001.CSV	2618.97	0.00685211
0001.CSV	2622.82	0.00683118
0001.CSV	2626.68	0.00683501
0001.CSV	2630.54	0.00681509
0001.CSV	2634.4	0.00679742
0001.CSV	2638.25	0.00675209
0001.CSV	2642.11	0.00666419
0001.CSV	2645.97	0.0066037
0001.CSV	2649.82	0.00658315
0001.CSV	2653.68	0.00657292
0001.CSV	2657.54	0.00655563
0001.CSV	2661.4	0.0065381
0001.CSV	2665.25	0.00655015
0001.CSV	2669.11	0.0066037
0001.CSV	2672.97	0.00668391
0001.CSV	2676.82	0.00679718
0001.CSV	2680.68	0.00677655
0001.CSV	2684.54	0.00659371
0001.CSV	2688.4	0.00652512
0001.CSV	2692.25	0.00653121
0001.CSV	2696.11	0.00653403
0001.CSV	2699.97	0.0065521
0001.CSV	2703.82	0.00653511
0001.CSV	2707.68	0.00655755
0001.CSV	2711.54	0.0065786
0001.CSV	2715.4	0.0065565
0001.CSV	2719.25	0.00662338
0001.CSV	2723.11	0.00680045
0001.CSV	2726.97	0.00678503
0001.CSV	2730.82	0.00658241
0001.CSV	2734.68	0.00654376
0001.CSV	2738.54	0.00656057
0001.CSV	2742.4	0.00655886
0001.CSV	2746.25	0.00671147
0001.CSV	2750.11	0.00670635
0001.CSV	2753.97	0.00654416
0001.CSV	2757.82	0.00649112
0001.CSV	2761.68	0.00641995
0001.CSV	2765.54	0.00638636
0001.CSV	2769.39	0.00650302
0001.CSV	2773.25	0.00671961
0001.CSV	2777.11	0.00667819
0001.CSV	2780.97	0.00653794
0001.CSV	2784.82	0.00669525
0001.CSV	2788.68	0.00701607
0001.CSV	2792.54	0.00709073
0001.CSV	2796.39	0.00708649
0001.CSV	2800.25	0.00698866
0001.CSV	2804.11	0.00685723
0001.CSV	2807.97	0.00703631
0001.CSV	2811.82	0.00710909
0001.CSV	2815.68	0.00705325
0001.CSV	2819.54	0.00712452
0001.CSV	2823.39	0.00719371
0001.CSV	2827.25	0.00723787
0001.CSV	2831.11	0.00751237
0001.CSV	2834.97	0.00795497
0001.CSV	2838.82	0.00826187
0001.CSV	2842.68	0.00845207
0001.CSV	2846.54	0.00894054
0001.CSV	2850.39	0.00931384
0001.CSV	2854.25	0.00940731
0001.CSV	2858.11	0.00948652
0001.CSV	2861.97	0.00939573
0001.CSV	2865.82	0.00927234
0001.CSV	2869.68	0.00938696
0001.CSV	2873.54	0.00943508
0001.CSV	2877.39	0.00906073
0001.CSV	2881.25	0.00869654
0001.CSV	2885.11	0.00857777
0001.CSV	2888.97	0.00861515
0001.CSV	2892.82	0.00883191
0001.CSV	2896.68	0.00899625
0001.CSV	2900.54	0.0090203
0001.CSV	2904.39	0.00923138
0001.CSV	2908.25	0.00968905
0001.CSV	2912.11	0.0103734
0001.CSV	2915.97	0.0108869
0001.CSV	2919.82	0.0109395
0001.CSV	2923.68	0.0108367
0001.CSV	2927.54	0.0108521
0001.CSV	2931.39	0.0105442
0001.CSV	2935.25	0.00989598
0001.CSV	2939.11	0.00951889
0001.CSV	2942.96	0.009574
0001.CSV	2946.82	0.00954853
0001.CSV	2950.68	0.00935097
0001.CSV	2954.54	0.00912251
0001.CSV	2958.39	0.00885697
0001.CSV	2962.25	0.00865794
0001.CSV	2966.11	0.0083289
0001.CSV	2969.96	0.00807148
0001.CSV	2973.82	0.00799121
0001.CSV	2977.68	0.00787574
0001.CSV	2981.53	0.00752697
0001.CSV	2985.39	0.00702864
0001.CSV	2989.25	0.00687931
0001.CSV	2993.11	0.00695341
0001.CSV	2996.96	0.00682125
0001.CSV	3000.82	0.00656249
0001.CSV	3004.68	0.00640146
0001.CSV	3008.53	0.00653289
0001.CSV	3012.39	0.00674647
0001.CSV	3016.25	0.00674219
0001.CSV	3020.11	0.00655455
0001.CSV	3023.96	0.00639746
0001.CSV	3027.82	0.00637607
0001.CSV	3031.68	0.00654204
0001.CSV	3035.53	0.00659765
0001.CSV	3039.39	0.00659573
0001.CSV	3043.25	0.00663384
0001.CSV	3047.11	0.00655398
0001.CSV	3050.96	0.00649811
0001.CSV	3054.82	0.00644067
0001.CSV	3058.68	0.00632877
0001.CSV	3062.53	0.00631784
0001.CSV	3066.39	0.00641689
0001.CSV	3070.25	0.00635435
0001.CSV	3074.11	0.00635257
0001.CSV	3077.96	0.00652088
0001.CSV	3081.82	0.00656737
0001.CSV	3085.68	0.00648607
0001.CSV	3089.53	0.00637012
0001.CSV	3093.39	0.00620708
0001.CSV	3097.25	0.00617562
0001.CSV	3101.11	0.00624294
0001.CSV	3104.96	0.00624691
0001.CSV	3108.82	0.00630325
0001.CSV	3112.68	0.00636525
0001.CSV	3116.53	0.00647013
0001.CSV	3120.39	0.0064367
0001.CSV	3124.25	0.00621914
0001.CSV	3128.11	0.00613707
0001.CSV	3131.96	0.00611684
0001.CSV	3135.82	0.0062054
0001.CSV	3139.68	0.00628936
0001.CSV	3143.53	0.00615582
0001.CSV	3147.39	0.00614171
0001.CSV	3151.25	0.00626846
0001.CSV	3155.1	0.00619494
0001.CSV	3158.96	0.00601463
0001.CSV	3162.82	0.00597623
0001.CSV	3166.68	0.00596515
0001.CSV	3170.53	0.00597139
0001.CSV	3174.39	0.00598829
0001.CSV	3178.25	0.00604967
0001.CSV	3182.1	0.00609812
0001.CSV	3185.96	0.00615038
0001.CSV	3189.82	0.00617017
0001.CSV	3193.68	0.00610158
0001.CSV	3197.53	0.00607692
0001.CSV	3201.39	0.00613032
0001.CSV	3205.25	0.00617102
0001.CSV	3209.1	0.00619431
0001.CSV	3212.96	0.0062261
0001.CSV	3216.82	0.0062854
0001.CSV	3220.68	0.00627834
0001.CSV	3224.53	0.00622966
0001.CSV	3228.39	0.00632164
0001.CSV	3232.25	0.00654843
0001.CSV	3236.1	0.00649549
0001.CSV	3239.96	0.00630083
0001.CSV	3243.82	0.00634016
0001.CSV	3247.68	0.00645624
0001.CSV	3251.53	0.00639998
0001.CSV	3255.39	0.00635889
0001.CSV	3259.25	0.00626856
0001.CSV	3263.1	0.00622634
0001.CSV	3266.96	0.00639026
0001.CSV	3270.82	0.00658745
0001.CSV	3274.68	0.00655516
0001.CSV	3278.53	0.00636747
0001.CSV	3282.39	0.00622869
0001.CSV	3286.25	0.00627931
0001.CSV	3290.1	0.00649236
0001.CSV	3293.96	0.00663233
0001.CSV	3297.82	0.00654194
0001.CSV	3301.67	0.00652044
0001.CSV	3305.53	0.00660609
0001.CSV	3309.39	0.00651563
0001.CSV	3313.25	0.00622624
0001.CSV	3317.1	0.00608996
0001.CSV	3320.96	0.006181
0001.CSV	3324.82	0.00630177
0001.CSV	3328.67	0.00619121
0001.CSV	3332.53	0.00609013
0001.CSV	3336.39	0.00628553
0001.CSV	3340.24	0.00643677
0001.CSV	3344.1	0.00633831
0001.CSV	3347.96	0.00629495
0001.CSV	3351.82	0.00621561
0001.CSV	3355.67	0.00608038
0001.CSV	3359.53	0.00618247
0001.CSV	3363.39	0.00638677
0001.CSV	3367.24	0.00655661
0001.CSV	3371.1	0.0064061
0001.CSV	3374.96	0.00617105
0001.CSV	3378.82	0.00613885
0001.CSV	3382.67	0.00602904
0001.CSV	3386.53	0.00604759
0001.CSV	3390.39	0.006274
0001.CSV	3394.24	0.00638744
0001.CSV	3398.1	0.00640415
0001.CSV	3401.96	0.00632661
0001.CSV	3405.82	0.00618063
0001.CSV	3409.67	0.00621444
0001.CSV	3413.53	0.00608542
0001.CSV	3417.39	0.00583704
0001.CSV	3421.24	0.0057681
0001.CSV	3425.1	0.00585303
0001.CSV	3428.96	0.00601392
0001.CSV	3432.82	0.00613684
0001.CSV	3436.67	0.00606916
0001.CSV	3440.53	0.00577502
0001.CSV	3444.39	0.0055727
0001.CSV	3448.24	0.00547917
0001.CSV	3452.1	0.005422
0001.CSV	3455.96	0.00551088
0001.CSV	3459.82	0.00561912
0001.CSV	3463.67	0.0056745
0001.CSV	3467.53	0.00572573
0001.CSV	3471.39	0.00553474
0001.CSV	3475.24	0.00543126
0001.CSV	3479.1	0.0054691
0001.CSV	3482.96	0.00538492
0001.CSV	3486.82	0.0054177
0001.CSV	3490.67	0.00542495
0001.CSV	3494.53	0.00540925
0001.CSV	3498.39	0.00539962
0001.CSV	3502.24	0.00532263
0001.CSV	3506.1	0.00510114
0001.CSV	3509.96	0.0050412
0001.CSV	3513.81	0.005077
0001.CSV	3517.67	0.00491213
0001.CSV	3521.53	0.00487457
0001.CSV	3525.39	0.00482374
0001.CSV	3529.24	0.00469044
0001.CSV	3533.1	0.00470977
0001.CSV	3536.96	0.00481479
0001.CSV	3540.81	0.00485322
0001.CSV	3544.67	0.00488033
0001.CSV	3548.53	0.00478119
0001.CSV	3552.39	0.00455944
0001.CSV	3556.24	0.00440966
0001.CSV	3560.1	0.00433371
0001.CSV	3563.96	0.00414059
0001.CSV	3567.81	0.00424136
0001.CSV	3571.67	0.00432665
0001.CSV	3575.53	0.00418655
0001.CSV	3579.39	0.0042776
0001.CSV	3583.24	0.00428241
0001.CSV	3587.1	0.00425467
0001.CSV	3590.96	0.00422255
0001.CSV	3594.81	0.00408667
0001.CSV	3598.67	0.00410226
0001.CSV	3602.53	0.00400634
0001.CSV	3606.39	0.00368515
0001.CSV	3610.24	0.00355111
0001.CSV	3614.1	0.00347097
0001.CSV	3617.96	0.00348964
0001.CSV	3621.81	0.00368311
0001.CSV	3625.67	0.00333693
0001.CSV	3629.53	0.00322195
0001.CSV	3633.39	0.00368405
0001.CSV	3637.24	0.00367202
0001.CSV	3641.1	0.00347608
0001.CSV	3644.96	0.0031317
0001.CSV	3648.81	0.00328998
0001.CSV	3652.67	0.00370123
0001.CSV	3656.53	0.00368839
0001.CSV	3660.38	0.00371145
0001.CSV	3664.24	0.00337576
0001.CSV	3668.1	0.00297667
0001.CSV	3671.96	0.00287359
0001.CSV	3675.81	0.00318042
0001.CSV	3679.67	0.00339807
0001.CSV	3683.53	0.00324415
0001.CSV	3687.38	0.00314882
0001.CSV	3691.24	0.00347715
0001.CSV	3695.1	0.00343975
0001.CSV	3698.95	0.00317322
0001.CSV	3702.81	0.00310883
0001.CSV	3706.67	0.00291045
0001.CSV	3710.53	0.00284671
0001.CSV	3714.38	0.00319721
0001.CSV	3718.24	0.00299182
0001.CSV	3722.1	0.00285251
0001.CSV	3725.95	0.00293557
0001.CSV	3729.81	0.00283147
0001.CSV	3733.67	0.00287219
0001.CSV	3737.53	0.0033816
0001.CSV	3741.38	0.00298781
0001.CSV	3745.24	0.00250629
0001.CSV	3749.1	0.00248286
0001.CSV	3752.95	0.00286415
0001.CSV	3756.81	0.00296719
0001.CSV	3760.67	0.00299785
0001.CSV	3764.53	0.00293567
0001.CSV	3768.38	0.00299892
0001.CSV	3772.24	0.00314484
0001.CSV	3776.1	0.00307129
0001.CSV	3779.95	0.00305725
0001.CSV	3783.81	0.0030751
0001.CSV	3787.67	0.00312322
0001.CSV	3791.53	0.00302395
0001.CSV	3795.38	0.00275107
0001.CSV	3799.24	0.00266105
0001.CSV	3803.1	0.00286609
0001.CSV	3806.95	0.00308821
0001.CSV	3810.81	0.00296933
0001.CSV	3814.67	0.00272366
0001.CSV	3818.53	0.00277144
0001.CSV	3822.38	0.00298441
0001.CSV	3826.24	0.00300276
0001.CSV	3830.1	0.00289717
0001.CSV	3833.95	0.00281376
0001.CSV	3837.81	0.00289697
0001.CSV	3841.67	0.00326074
0001.CSV	3845.53	0.00325803
0001.CSV	3849.38	0.00281683
0001.CSV	3853.24	0.00282967
0001.CSV	3857.1	0.00328037
0001.CSV	3860.95	0.00301827
0001.CSV	3864.81	0.00294104
0001.CSV	3868.67	0.00298991
0001.CSV	3872.52	0.00320996
0001.CSV	3876.38	0.00320382
0001.CSV	3880.24	0.0030738
0001.CSV	3884.1	0.00316827
0001.CSV	3887.95	0.00313911
0001.CSV	3891.81	0.00310867
0001.CSV	3895.67	0.00304817
0001.CSV	3899.52	0.00281516
0001.CSV	3903.38	0.00315976
0001.CSV	3907.24	0.00345548
0001.CSV	3911.1	0.0032355
0001.CSV	3914.95	0.00301934
0001.CSV	3918.81	0.00311301
0001.CSV	3922.67	0.00319825
0001.CSV	3926.52	0.00318727
0001.CSV	3930.38	0.00320763
0001.CSV	3934.24	0.00335656
0001.CSV	3938.09	0.00324495
0001.CSV	3941.95	0.00316003
0001.CSV	3945.81	0.00320793
0001.CSV	3949.67	0.00324572
0001.CSV	3953.52	0.00323644
0001.CSV	3957.38	0.00320269
0001.CSV	3961.24	0.00321677
0001.CSV	3965.09	0.00319618
0001.CSV	3968.95	0.00314518
0001.CSV	3972.81	0.00313764
0001.CSV	3976.67	0.0031589
0001.CSV	3980.52	0.00317178
0001.CSV	3984.38	0.00317211
0001.CSV	3988.24	0.00313243
0001.CSV	3992.09	0.00310119
0001.CSV	3995.95	0.00310697
0001.CSV	3999.81	0.00309212
0002.CSV	674.992	0.0416801
0002.CSV	678.849	0.0422943
0002.CSV	682.706	0.0420212
0002.CSV	686.563	0.0432321
0002.CSV	690.42	0.0443562
0002.CSV	694.277	0.0470356
0002.CSV	698.134	0.0503154
0002.CSV	701.991	0.0570608
0002.CSV	705.849	0.0705481
0002.CSV	709.706	0.088759
0002.CSV	713.563	0.0834933
0002.CSV	717.42	0.0567828
0002.CSV	721.277	0.038866
0002.CSV	725.134	0.0346449
0002.CSV	728.991	0.033979
0002.CSV	732.848	0.034406
0002.CSV	736.705	0.0344889
0002.CSV	740.562	0.0346269
0002.CSV	744.42	0.0345136
0002.CSV	748.277	0.0351441
0002.CSV	752.134	0.0356199
0002.CSV	755.991	0.0363965
0002.CSV	759.848	0.0367239
0002.CSV	763.705	0.0374396
0002.CSV	767.562	0.037786
0002.CSV	771.419	0.0385016
0002.CSV	775.276	0.0389191
0002.CSV	779.133	0.0395595
0002.CSV	782.99	0.0396426
0002.CSV	786.848	0.0398889
0002.CSV	790.705	0.0400708
0002.CSV	794.562	0.0410041
0002.CSV	798.419	0.0420045
0002.CSV	802.276	0.0430417
0002.CSV	806.133	0.0431697
0002.CSV	809.99	0.0434045
0002.CSV	813.847	0.0436859
0002.CSV	817.704	0.0452278
0002.CSV	821.562	0.0475706
0002.CSV	825.419	0.0507094
0002.CSV	829.276	0.0528791
0002.CSV	833.133	0.0538634
0002.CSV	836.99	0.0541705
0002.CSV	840.847	0.0562301
0002.CSV	844.704	0.060512
0002.CSV	848.561	0.0633955
0002.CSV	852.418	0.0657061
0002.CSV	856.275	0.075946
0002.CSV	860.132	0.0966567
0002.CSV	863.99	0.131077
0002.CSV	867.847	0.171407
0002.CSV	871.704	0.185687
0002.CSV	875.561	0.1587
0002.CSV	879.418	0.1188
0002.CSV	883.275	0.0777832
0002.CSV	887.132	0.0420893
0002.CSV	890.989	0.0256926
0002.CSV	894.846	0.0240516
0002.CSV	898.703	0.0247678
0002.CSV	902.561	0.0257986
0002.CSV	906.418	0.0265972
0002.CSV	910.275	0.0276353
0002.CSV	914.132	0.0283199
0002.CSV	917.989	0.029159
0002.CSV	921.846	0.0296649
0002.CSV	925.703	0.0304936
0002.CSV	929.56	0.0311039
0002.CSV	933.417	0.0318783
0002.CSV	937.274	0.0323039
0002.CSV	941.131	0.0328188
0002.CSV	944.989	0.0330954
0002.CSV	948.846	0.0336841
0002.CSV	952.703	0.0340445
0002.CSV	956.56	0.0345547
0002.CSV	960.417	0.0347722
0002.CSV	964.274	0.0352755
0002.CSV	968.131	0.0357175
0002.CSV	971.988	0.036506
0002.CSV	975.845	0.0370666
0002.CSV	979.702	0.0378041
0002.CSV	983.559	0.0383787
0002.CSV	987.417	0.0392414
0002.CSV	991.274	0.0399745
0002.CSV	995.131	0.0409242
0002.CSV	998.988	0.0416958
0002.CSV	1002.85	0.0427953
0002.CSV	1006.7	0.0439079
0002.CSV	1010.56	0.0453128
0002.CSV	1014.42	0.046067
0002.CSV	1018.27	0.0467446
0002.CSV	1022.13	0.0473198
0002.CSV	1025.99	0.0482318
0002.CSV	1029.85	0.0489056
0002.CSV	1033.7	0.0497829
0002.CSV	1037.56	0.0502853
0002.CSV	1041.42	0.0507894
0002.CSV	1045.27	0.0509111
0002.CSV	1049.13	0.0512092
0002.CSV	1052.99	0.0513434
0002.CSV	1056.84	0.0519081
0002.CSV	1060.7	0.0525828
0002.CSV	1064.56	0.0536996
0002.CSV	1068.42	0.0546078
0002.CSV	1072.27	0.0558524
0002.CSV	1076.13	0.057104
0002.CSV	1079.99	0.0588347
0002.CSV	1083.84	0.0602408
0002.CSV	1087.7	0.0610421
0002.CSV	1091.56	0.0605246
0002.CSV	1095.41	0.0597386
0002.CSV	1099.27	0.0590011
0002.CSV	1103.13	0.0588695
0002.CSV	1106.99	0.0586507
0002.CSV	1110.84	0.0585504
0002.CSV	1114.7	0.0581423
0002.CSV	1118.56	0.0579191
0002.CSV	1122.41	0.0573679
0002.CSV	1126.27	0.056898
0002.CSV	1130.13	0.0562216
0002.CSV	1133.99	0.0557729
0002.CSV	1137.84	0.0552379
0002.CSV	1141.7	0.0550922
0002.CSV	1145.56	0.0549182
0002.CSV	1149.41	0.0549996
0002.CSV	1153.27	0.0549294
0002.CSV	1157.13	0.0551681
0002.CSV	1160.99	0.0553648
0002.CSV	1164.84	0.0557825
0002.CSV	1168.7	0.0560924
0002.CSV	1172.56	0.057043
0002.CSV	1176.41	0.0584225
0002.CSV	1180.27	0.0599666
0002.CSV	1184.13	0.0601407
0002.CSV	1187.99	0.0592002
0002.CSV	1191.84	0.057741
0002.CSV	1195.7	0.056946
0002.CSV	1199.56	0.0567048
0002.CSV	1203.41	0.0572534
0002.CSV	1207.27	0.0580771
0002.CSV	1211.13	0.059441
0002.CSV	1214.98	0.0608056
0002.CSV	1218.84	0.062431
0002.CSV	1222.7	0.063835
0002.CSV	1226.56	0.0653602
0002.CSV	1230.41	0.0666555
0002.CSV	1234.27	0.0679818
0002.CSV	1238.13	0.0689194
0002.CSV	1241.98	0.0699261
0002.CSV	1245.84	0.0706154
0002.CSV	1249.7	0.0712071
0002.CSV	1253.56	0.0711184
0002.CSV	1257.41	0.070813
0002.CSV	1261.27	0.0703801
0002.CSV	1265.13	0.0707415
0002.CSV	1268.98	0.0715306
0002.CSV	1272.84	0.0729363
0002.CSV	1276.7	0.0743844
0002.CSV	1280.56	0.0762622
0002.CSV	1284.41	0.0781048
0002.CSV	1288.27	0.0803425
0002.CSV	1292.13	0.0824521
0002.CSV	1295.98	0.0847565
0002.CSV	1299.84	0.0868169
0002.CSV	1303.7	0.0890625
0002.CSV	1307.56	0.0911554
0002.CSV	1311.41	0.0936605
0002.CSV	1315.27	0.0961023
0002.CSV	1319.13	0.0990576
0002.CSV	1322.98	0.101964
0002.CSV	1326.84	0.105422
0002.CSV	1330.7	0.10903
0002.CSV	1334.56	0.113091
0002.CSV	1338.41	0.117668
0002.CSV	1342.27	0.123338
0002.CSV	1346.13	0.128407
0002.CSV	1349.98	0.134409
0002.CSV	1353.84	0.140914
0002.CSV	1357.7	0.148258
0002.CSV	1361.56	0.156353
0002.CSV	1365.41	0.165715
0002.CSV	1369.27	0.173805
0002.CSV	1373.13	0.183683
0002.CSV	1376.98	0.19458
0002.CSV	1380.84	0.204712
0002.CSV	1384.7	0.213404
0002.CSV	1388.56	0.221921
0002.CSV	1392.41	0.226122
0002.CSV	1396.27	0.226864
0002.CSV	1400.13	0.224082
0002.CSV	1403.98	0.221071
0002.CSV	1407.84	0.215369
0002.CSV	1411.7	0.208148
0002.CSV	1415.55	0.200041
0002.CSV	1419.41	0.191267
0002.CSV	1423.27	0.18365
0002.CSV	1427.12	0.178888
0002.CSV	1430.98	0.173912
0002.CSV	1434.84	0.169431
0002.CSV	1438.7	0.164132
0002.CSV	1442.55	0.160355
0002.CSV	1446.41	0.155898
0002.CSV	1450.27	0.151378
0002.CSV	1454.12	0.147093
0002.CSV	1457.98	0.140929
0002.CSV	1461.84	0.13549
0002.CSV	1465.7	0.131283
0002.CSV	1469.55	0.126523
0002.CSV	1473.41	0.120727
0002.CSV	1477.27	0.114175
0002.CSV	1481.12	0.109772
0002.CSV	1484.98	0.105211
0002.CSV	1488.84	0.099709
0002.CSV	1492.7	0.0940991
0002.CSV	1496.55	0.0899565
0002.CSV	1500.41	0.0856182
0002.CSV	1504.27	0.0830822
0002.CSV	1508.12	0.0777909
0002.CSV	1511.98	0.0727332
0002.CSV	1515.84	0.0677677
0002.CSV	1519.7	0.0614431
0002.CSV	1523.55	0.0552061
0002.CSV	1527.41	0.0513354
0002.CSV	1531.27	0.047976
0002.CSV	1535.12	0.0448773
0002.CSV	1538.98	0.0414845
0002.CSV	1542.84	0.0360726
0002.CSV	1546.7	0.0324612
0002.CSV	1550.55	0.0299437
0002.CSV	1554.41	0.0275437
0002.CSV	1558.27	0.0253633
0002.CSV	1562.12	0.0237377
0002.CSV	1565.98	0.0231311
0002.CSV	1569.84	0.0225726
0002.CSV	1573.69	0.0223132
0002.CSV	1577.55	0.0221391
0002.CSV	1581.41	0.0217109
0002.CSV	1585.27	0.0208354
0002.CSV	1589.12	0.0198509
0002.CSV	1592.98	0.0188785
0002.CSV	1596.84	0.0182377
0002.CSV	1600.69	0.0178589
0002.CSV	1604.55	0.0177159
0002.CSV	1608.41	0.0172806
0002.CSV	1612.27	0.0165524
0002.CSV	1616.12	0.0154996
0002.CSV	1619.98	0.0146314
0002.CSV	1623.84	0.0140129
0002.CSV	1627.69	0.0136293
0002.CSV	1631.55	0.0132525
0002.CSV	1635.41	0.012998
0002.CSV	1639.27	0.0128324
0002.CSV	1643.12	0.0126427
0002.CSV	1646.98	0.012429
0002.CSV	1650.84	0.012379
0002.CSV	1654.69	0.0123909
0002.CSV	1658.55	0.0123305
0002.CSV	1662.41	0.0121383
0002.CSV	1666.27	0.0120419
0002.CSV	1670.12	0.0118983
0002.CSV	1673.98	0.0119399
0002.CSV	1677.84	0.0118422
0002.CSV	1681.69	0.0117899
0002.CSV	1685.55	0.0118212
0002.CSV	1689.41	0.0118333
0002.CSV	1693.27	0.0116377
0002.CSV	1697.12	0.011621
0002.CSV	1700.98	0.0117286
0002.CSV	1704.84	0.0119021
0002.CSV	1708.69	0.0119675
0002.CSV	1712.55	0.011996
0002.CSV	1716.41	0.0121536
0002.CSV	1720.27	0.0125183
0002.CSV	1724.12	0.0125492
0002.CSV	1727.98	0.0125777
0002.CSV	1731.84	0.0125367
0002.CSV	1735.69	0.0126596
0002.CSV	1739.55	0.0125242
0002.CSV	1743.41	0.0122484
0002.CSV	1747.27	0.0118839
0002.CSV	1751.12	0.0117002
0002.CSV	1754.98	0.0115238
0002.CSV	1758.84	0.0114775
0002.CSV	1762.69	0.0114838
0002.CSV	1766.55	0.0115018
0002.CSV	1770.41	0.0115474
0002.CSV	1774.26	0.0118658
0002.CSV	1778.12	0.0120879
0002.CSV	1781.98	0.012551
0002.CSV	1785.84	0.0133654
0002.CSV	1789.69	0.0146527
0002.CSV	1793.55	0.0160885
0002.CSV	1797.41	0.0162144
0002.CSV	1801.26	0.0149706
0002.CSV	1805.12	0.0135323
0002.CSV	1808.98	0.0125578
0002.CSV	1812.84	0.0121124
0002.CSV	1816.69	0.0118366
0002.CSV	1820.55	0.0117279
0002.CSV	1824.41	0.0116202
0002.CSV	1828.26	0.0116096
0002.CSV	1832.12	0.0115989
0002.CSV	1835.98	0.0116101
0002.CSV	1839.84	0.0115295
0002.CSV	1843.69	0.0115596
0002.CSV	1847.55	0.0116265
0002.CSV	1851.41	0.0116405
0002.CSV	1855.26	0.0116081
0002.CSV	1859.12	0.0116367
0002.CSV	1862.98	0.0116074
0002.CSV	1866.84	0.0116493
0002.CSV	1870.69	0.011737
0002.CSV	1874.55	0.0117672
0002.CSV	1878.41	0.0117466
0002.CSV	1882.26	0.0117805
0002.CSV	1886.12	0.0117438
0002.CSV	1889.98	0.0117839
0002.CSV	1893.83	0.0117948
0002.CSV	1897.69	0.0118165
0002.CSV	1901.55	0.0117763
0002.CSV	1905.41	0.0117646
0002.CSV	1909.26	0.0117266
0002.CSV	1913.12	0.0117272
0002.CSV	1916.98	0.0116635
0002.CSV	1920.83	0.0116692
0002.CSV	1924.69	0.0116561
0002.CSV	1928.55	0.011673
0002.CSV	1932.4	0.0116672
0002.CSV	1936.26	0.0116681
0002.CSV	1940.12	0.0115943
0002.CSV	1943.98	0.0116124
0002.CSV	1947.83	0.0116161
0002.CSV	1951.69	0.0116282
0002.CSV	1955.55	0.0116131
0002.CSV	1959.4	0.0116333
0002.CSV	1963.26	0.0115914
0002.CSV	1967.12	0.0115968
0002.CSV	1970.98	0.0115734
0002.CSV	1974.83	0.0115679
0002.CSV	1978.69	0.0115244
0002.CSV	1982.55	0.0115248
0002.CSV	1986.4	0.0114989
0002.CSV	1990.26	0.0115217
0002.CSV	1994.12	0.0115392
0002.CSV	1997.98	0.0115362
0002.CSV	2001.83	0.0114994
0002.CSV	2005.69	0.0115265
0002.CSV	2009.55	0.0115093
0002.CSV	2013.4	0.0115099
0002.CSV	2017.26	0.0115
0002.CSV	2021.12	0.0115257
0002.CSV	2024.97	0.0115254
0002.CSV	2028.83	0.0115429
0002.CSV	2032.69	0.0115261
0002.CSV	2036.55	0.0115379
0002.CSV	2040.4	0.0115037
0002.CSV	2044.26	0.0115274
0002.CSV	2048.12	0.0115443
0002.CSV	2051.97	0.0115756
0002.CSV	2055.83	0.0115625
0002.CSV	2059.69	0.0115883
0002.CSV	2063.55	0.0115987
0002.CSV	2067.4	0.0116298
0002.CSV	2071.26	0.0116157
0002.CSV	2075.12	0.0116525
0002.CSV	2078.97	0.0116743
0002.CSV	2082.83	0.0116875
0002.CSV	2086.69	0.0116876
0002.CSV	2090.55	0.01173
0002.CSV	2094.4	0.0117224
0002.CSV	2098.26	0.0117523
0002.CSV	2102.12	0.0117768
0002.CSV	2105.97	0.0118115
0002.CSV	2109.83	0.0118279
0002.CSV	2113.69	0.0118558
0002.CSV	2117.55	0.0118588
0002.CSV	2121.4	0.011921
0002.CSV	2125.26	0.0119678
0002.CSV	2129.12	0.0120285
0002.CSV	2132.97	0.012058
0002.CSV	2136.83	0.0121083
0002.CSV	2140.69	0.0121244
0002.CSV	2144.55	0.0121576
0002.CSV	2148.4	0.0121686
0002.CSV	2152.26	0.0121709
0002.CSV	2156.12	0.0121529
0002.CSV	2159.97	0.012213
0002.CSV	2163.83	0.0122482
0002.CSV	2167.69	0.0122722
0002.CSV	2171.55	0.0122619
0002.CSV	2175.4	0.0122793
0002.CSV	2179.26	0.0122958
0002.CSV	2183.12	0.0123451
0002.CSV	2186.97	0.0123552
0002.CSV	2190.83	0.0123839
0002.CSV	2194.69	0.0123902
0002.CSV	2198.55	0.012411
0002.CSV	2202.4	0.0124098
0002.CSV	2206.26	0.0124248
0002.CSV	2210.12	0.0124201
0002.CSV	2213.97	0.0124464
0002.CSV	2217.83	0.0124428
0002.CSV	2221.69	0.0124314
0002.CSV	2225.54	0.0124032
0002.CSV	2229.4	0.0124072
0002.CSV	2233.26	0.0124142
0002.CSV	2237.12	0.0124351
0002.CSV	2240.97	0.0123949
0002.CSV	2244.83	0.0123706
0002.CSV	2248.69	0.0123446
0002.CSV	2252.54	0.0123444
0002.CSV	2256.4	0.0123157
0002.CSV	2260.26	0.012295
0002.CSV	2264.11	0.0122702
0002.CSV	2267.97	0.0122888
0002.CSV	2271.83	0.012293
0002.CSV	2275.69	0.0123047
0002.CSV	2279.54	0.0122642
0002.CSV	2283.4	0.0122262
0002.CSV	2287.26	0.0121499
0002.CSV	2291.11	0.0121087
0002.CSV	2294.97	0.012088
0002.CSV	2298.83	0.0120146
0002.CSV	2302.69	0.0118835
0002.CSV	2306.54	0.0117363
0002.CSV	2310.4	0.0115225
0002.CSV	2314.26	0.0113459
0002.CSV	2318.11	0.0109986
0002.CSV	2321.97	0.0104875
0002.CSV	2325.83	0.00978169
0002.CSV	2329.69	0.00932985
0002.CSV	2333.54	0.00892816
0002.CSV	2337.4	0.00858121
0002.CSV	2341.26	0.00866673
0002.CSV	2345.11	0.00988571
0002.CSV	2348.97	0.0101527
0002.CSV	2352.83	0.00894761
0002.CSV	2356.69	0.00580098
0002.CSV	2360.54	0.00384257
0002.CSV	2364.4	0.00514389
0002.CSV	2368.26	0.00808734
0002.CSV	2372.11	0.010169
0002.CSV	2375.97	0.0113346
0002.CSV	2379.83	0.0118779
0002.CSV	2383.69	0.0120495
0002.CSV	2387.54	0.0120473
0002.CSV	2391.4	0.0120361
0002.CSV	2395.26	0.0120308
0002.CSV	2399.11	0.0120345
0002.CSV	2402.97	0.0120421
0002.CSV	2406.83	0.0120595
0002.CSV	2410.68	0.0120391
0002.CSV	2414.54	0.0120357
0002.CSV	2418.4	0.0120421
0002.CSV	2422.26	0.0120582
0002.CSV	2426.11	0.0120689
0002.CSV	2429.97	0.012084
0002.CSV	2433.83	0.0120735
0002.CSV	2437.68	0.0120722
0002.CSV	2441.54	0.0120933
0002.CSV	2445.4	0.0121266
0002.CSV	2449.26	0.0121317
0002.CSV	2453.11	0.0121793
0002.CSV	2456.97	0.0122471
0002.CSV	2460.83	0.0123117
0002.CSV	2464.68	0.0123757
0002.CSV	2468.54	0.0124692
0002.CSV	2472.4	0.0125638
0002.CSV	2476.26	0.0126714
0002.CSV	2480.11	0.0127842
0002.CSV	2483.97	0.0129234
0002.CSV	2487.83	0.0130807
0002.CSV	2491.68	0.0133301
0002.CSV	2495.54	0.0136609
0002.CSV	2499.4	0.0140345
0002.CSV	2503.26	0.0143718
0002.CSV	2507.11	0.0146586
0002.CSV	2510.97	0.0147908
0002.CSV	2514.83	0.0147583
0002.CSV	2518.68	0.0146172
0002.CSV	2522.54	0.0143685
0002.CSV	2526.4	0.0140271
0002.CSV	2530.26	0.0136922
0002.CSV	2534.11	0.0133723
0002.CSV	2537.97	0.0131173
0002.CSV	2541.83	0.0129393
0002.CSV	2545.68	0.0128299
0002.CSV	2549.54	0.012767
0002.CSV	2553.4	0.0127263
0002.CSV	2557.26	0.0126807
0002.CSV	2561.11	0.0126686
0002.CSV	2564.97	0.0126371
0002.CSV	2568.83	0.0126143
0002.CSV	2572.68	0.0126
0002.CSV	2576.54	0.0125872
0002.CSV	2580.4	0.0125343
0002.CSV	2584.25	0.012507
0002.CSV	2588.11	0.0124829
0002.CSV	2591.97	0.0124653
0002.CSV	2595.83	0.0124356
0002.CSV	2599.68	0.0124122
0002.CSV	2603.54	0.0123768
0002.CSV	2607.4	0.0123365
0002.CSV	2611.25	0.0122817
0002.CSV	2615.11	0.0122158
0002.CSV	2618.97	0.0121562
0002.CSV	2622.82	0.0121333
0002.CSV	2626.68	0.0120924
0002.CSV	2630.54	0.0120384
0002.CSV	2634.4	0.0120162
0002.CSV	2638.25	0.0119836
0002.CSV	2642.11	0.0119127
0002.CSV	2645.97	0.0118517
0002.CSV	2649.82	0.0118307
0002.CSV	2653.68	0.0118328
0002.CSV	2657.54	0.0118348
0002.CSV	2661.4	0.0118314
0002.CSV	2665.25	0.0118249
0002.CSV	2669.11	0.0118778
0002.CSV	2672.97	0.0119816
0002.CSV	2676.82	0.0120972
0002.CSV	2680.68	0.0120898
0002.CSV	2684.54	0.0119476
0002.CSV	2688.4	0.0118705
0002.CSV	2692.25	0.0118547
0002.CSV	2696.11	0.0118696
0002.CSV	2699.97	0.011897
0002.CSV	2703.82	0.0118691
0002.CSV	2707.68	0.0118809
0002.CSV	2711.54	0.0119068
0002.CSV	2715.4	0.0119122
0002.CSV	2719.25	0.0120175
0002.CSV	2723.11	0.0122013
0002.CSV	2726.97	0.0121784
0002.CSV	2730.82	0.012
0002.CSV	2734.68	0.0119873
0002.CSV	2738.54	0.0119901
0002.CSV	2742.4	0.0119662
0002.CSV	2746.25	0.0121238
0002.CSV	2750.11	0.0121629
0002.CSV	2753.97	0.0120156
0002.CSV	2757.82	0.011946
0002.CSV	2761.68	0.0118944
0002.CSV	2765.54	0.0118951
0002.CSV	2769.39	0.0120219
0002.CSV	2773.25	0.0122673
0002.CSV	2777.11	0.0122652
0002.CSV	2780.97	0.0121185
0002.CSV	2784.82	0.0122768
0002.CSV	2788.68	0.0126327
0002.CSV	2792.54	0.0127616
0002.CSV	2796.39	0.0128168
0002.CSV	2800.25	0.0127646
0002.CSV	2804.11	0.0126584
0002.CSV	2807.97	0.0128606
0002.CSV	2811.82	0.0129481
0002.CSV	2815.68	0.012925
0002.CSV	2819.54	0.0130525
0002.CSV	2823.39	0.0131868
0002.CSV	2827.25	0.0132842
0002.CSV	2831.11	0.0136408
0002.CSV	2834.97	0.0142098
0002.CSV	2838.82	0.0146872
0002.CSV	2842.68	0.0151068
0002.CSV	2846.54	0.0159107
0002.CSV	2850.39	0.0165466
0002.CSV	2854.25	0.0167182
0002.CSV	2858.11	0.0167815
0002.CSV	2861.97	0.0166951
0002.CSV	2865.82	0.0166302
0002.CSV	2869.68	0.01682
0002.CSV	2873.54	0.0168889
0002.CSV	2877.39	0.0164332
0002.CSV	2881.25	0.0159588
0002.CSV	2885.11	0.0157613
0002.CSV	2888.97	0.0157716
0002.CSV	2892.82	0.0160148
0002.CSV	2896.68	0.016223
0002.CSV	2900.54	0.0163085
0002.CSV	2904.39	0.0166257
0002.CSV	2908.25	0.0172426
0002.CSV	2912.11	0.0181812
0002.CSV	2915.97	0.0189581
0002.CSV	2919.82	0.01915
0002.CSV	2923.68	0.0190585
0002.CSV	2927.54	0.0189619
0002.CSV	2931.39	0.0184688
0002.CSV	2935.25	0.0176372
0002.CSV	2939.11	0.0170801
0002.CSV	2942.96	0.0169655
0002.CSV	2946.82	0.0168294
0002.CSV	2950.68	0.0165813
0002.CSV	2954.54	0.0163568
0002.CSV	2958.39	0.0160725
0002.CSV	2962.25	0.0158072
0002.CSV	2966.11	0.015342
0002.CSV	2969.96	0.0149249
0002.CSV	2973.82	0.0146872
0002.CSV	2977.68	0.0144283
0002.CSV	2981.53	0.0139243
0002.CSV	2985.39	0.0132633
0002.CSV	2989.25	0.0129594
0002.CSV	2993.11	0.0129024
0002.CSV	2996.96	0.0126412
0002.CSV	3000.82	0.0123046
0002.CSV	3004.68	0.0120949
0002.CSV	3008.53	0.0121876
0002.CSV	3012.39	0.0123776
0002.CSV	3016.25	0.0123342
0002.CSV	3020.11	0.012124
0002.CSV	3023.96	0.0119846
0002.CSV	3027.82	0.0119814
0002.CSV	3031.68	0.0121594
0002.CSV	3035.53	0.0122434
0002.CSV	3039.39	0.0122625
0002.CSV	3043.25	0.0123105
0002.CSV	3047.11	0.0122521
0002.CSV	3050.96	0.0122228
0002.CSV	3054.82	0.0121467
0002.CSV	3058.68	0.0120044
0002.CSV	3062.53	0.0120205
0002.CSV	3066.39	0.0121459
0002.CSV	3070.25	0.0120784
0002.CSV	3074.11	0.0120608
0002.CSV	3077.96	0.0122045
0002.CSV	3081.82	0.0122438
0002.CSV	3085.68	0.012188
0002.CSV	3089.53	0.0120794
0002.CSV	3093.39	0.0119363
0002.CSV	3097.25	0.0119799
0002.CSV	3101.11	0.0120536
0002.CSV	3104.96	0.0120287
0002.CSV	3108.82	0.0120687
0002.CSV	3112.68	0.0121456
0002.CSV	3116.53	0.0122753
0002.CSV	3120.39	0.0122412
0002.CSV	3124.25	0.0120088
0002.CSV	3128.11	0.0119315
0002.CSV	3131.96	0.0119453
0002.CSV	3135.82	0.0120271
0002.CSV	3139.68	0.0121055
0002.CSV	3143.53	0.0120215
0002.CSV	3147.39	0.0120517
0002.CSV	3151.25	0.0121995
0002.CSV	3155.1	0.0121375
0002.CSV	3158.96	0.011981
0002.CSV	3162.82	0.0119772
0002.CSV	3166.68	0.0119803
0002.CSV	3170.53	0.0119627
0002.CSV	3174.39	0.0119546
0002.CSV	3178.25	0.012031
0002.CSV	3182.1	0.0121045
0002.CSV	3185.96	0.0121771
0002.CSV	3189.82	0.0122203
0002.CSV	3193.68	0.0121559
0002.CSV	3197.53	0.012146
0002.CSV	3201.39	0.0122262
0002.CSV	3205.25	0.0122863
0002.CSV	3209.1	0.0123284
0002.CSV	3212.96	0.0123797
0002.CSV	3216.82	0.0124334
0002.CSV	3220.68	0.0124184
0002.CSV	3224.53	0.0123861
0002.CSV	3228.39	0.0125137
0002.CSV	3232.25	0.0127709
0002.CSV	3236.1	0.0127083
0002.CSV	3239.96	0.0125511
0002.CSV	3243.82	0.012628
0002.CSV	3247.68	0.0127039
0002.CSV	3251.53	0.0126426
0002.CSV	3255.39	0.0126386
0002.CSV	3259.25	0.0125644
0002.CSV	3263.1	0.0125224
0002.CSV	3266.96	0.0127065
0002.CSV	3270.82	0.0129109
0002.CSV	3274.68	0.0129188
0002.CSV	3278.53	0.0127697
0002.CSV	3282.39	0.0126531
0002.CSV	3286.25	0.0127029
0002.CSV	3290.1	0.0128935
0002.CSV	3293.96	0.0130423
0002.CSV	3297.82	0.0129566
0002.CSV	3301.67	0.0129356
0002.CSV	3305.53	0.0130495
0002.CSV	3309.39	0.0129748
0002.CSV	3313.25	0.0126855
0002.CSV	3317.1	0.0125766
0002.CSV	3320.96	0.012716
0002.CSV	3324.82	0.0128655
0002.CSV	3328.67	0.0127383
0002.CSV	3332.53	0.012642
0002.CSV	3336.39	0.0128438
0002.CSV	3340.24	0.0129821
0002.CSV	3344.1	0.0128701
0002.CSV	3347.96	0.0128755
0002.CSV	3351.82	0.0128724
0002.CSV	3355.67	0.0127315
0002.CSV	3359.53	0.0127863
0002.CSV	3363.39	0.0129569
0002.CSV	3367.24	0.013157
0002.CSV	3371.1	0.0130374
0002.CSV	3374.96	0.0127356
0002.CSV	3378.82	0.0126248
0002.CSV	3382.67	0.0125666
0002.CSV	3386.53	0.012655
0002.CSV	3390.39	0.0128708
0002.CSV	3394.24	0.0129335
0002.CSV	3398.1	0.0129396
0002.CSV	3401.96	0.0128593
0002.CSV	3405.82	0.0126856
0002.CSV	3409.67	0.0127233
0002.CSV	3413.53	0.012607
0002.CSV	3417.39	0.0123654
0002.CSV	3421.24	0.0123117
0002.CSV	3425.1	0.0124087
0002.CSV	3428.96	0.0125226
0002.CSV	3432.82	0.0126094
0002.CSV	3436.67	0.0124897
0002.CSV	3440.53	0.0121237
0002.CSV	3444.39	0.0118594
0002.CSV	3448.24	0.0117838
0002.CSV	3452.1	0.0117657
0002.CSV	3455.96	0.0118254
0002.CSV	3459.82	0.0118609
0002.CSV	3463.67	0.0118831
0002.CSV	3467.53	0.0119431
0002.CSV	3471.39	0.0117375
0002.CSV	3475.24	0.01159
0002.CSV	3479.1	0.0115812
0002.CSV	3482.96	0.0114665
0002.CSV	3486.82	0.0114343
0002.CSV	3490.67	0.0114323
0002.CSV	3494.53	0.0114752
0002.CSV	3498.39	0.0114201
0002.CSV	3502.24	0.0112607
0002.CSV	3506.1	0.0109683
0002.CSV	3509.96	0.0108447
0002.CSV	3513.81	0.0108972
0002.CSV	3517.67	0.0107638
0002.CSV	3521.53	0.0106714
0002.CSV	3525.39	0.0105735
0002.CSV	3529.24	0.0104682
0002.CSV	3533.1	0.0104646
0002.CSV	3536.96	0.0104875
0002.CSV	3540.81	0.0105317
0002.CSV	3544.67	0.0105582
0002.CSV	3548.53	0.0103973
0002.CSV	3552.39	0.0101624
0002.CSV	3556.24	0.010024
0002.CSV	3560.1	0.00997209
0002.CSV	3563.96	0.00976061
0002.CSV	3567.81	0.00978176
0002.CSV	3571.67	0.00985812
0002.CSV	3575.53	0.00968356
0002.CSV	3579.39	0.00972361
0002.CSV	3583.24	0.00971314
0002.CSV	3587.1	0.00963854
0002.CSV	3590.96	0.0095147
0002.CSV	3594.81	0.00930825
0002.CSV	3598.67	0.00929454
0002.CSV	3602.53	0.00918759
0002.CSV	3606.39	0.00887953
0002.CSV	3610.24	0.00878981
0002.CSV	3614.1	0.00873193
0002.CSV	3617.96	0.00872612
0002.CSV	3621.81	0.0088613
0002.CSV	3625.67	0.00851431
0002.CSV	3629.53	0.00839207
0002.CSV	3633.39	0.00871202
0002.CSV	3637.24	0.0086385
0002.CSV	3641.1	0.00851403
0002.CSV	3644.96	0.0082286
0002.CSV	3648.81	0.00832516
0002.CSV	3652.67	0.00867423
0002.CSV	3656.53	0.00868985
0002.CSV	3660.38	0.00871341
0002.CSV	3664.24	0.00835539
0002.CSV	3668.1	0.00792119
0002.CSV	3671.96	0.00781238
0002.CSV	3675.81	0.00811789
0002.CSV	3679.67	0.0083542
0002.CSV	3683.53	0.00823417
0002.CSV	3687.38	0.00813028
0002.CSV	3691.24	0.00831702
0002.CSV	3695.1	0.0081685
0002.CSV	3698.95	0.0079471
0002.CSV	3702.81	0.00795237
0002.CSV	3706.67	0.00779129
0002.CSV	3710.53	0.00774997
0002.CSV	3714.38	0.00808194
0002.CSV	3718.24	0.00788991
0002.CSV	3722.1	0.00772059
0002.CSV	3725.95	0.00777962
0002.CSV	3729.81	0.00773348
0002.CSV	3733.67	0.00780357
0002.CSV	3737.53	0.00827673
0002.CSV	3741.38	0.00793722
0002.CSV	3745.24	0.00748672
0002.CSV	3749.1	0.00739982
0002.CSV	3752.95	0.00781994
0002.CSV	3756.81	0.00793894
0002.CSV	3760.67	0.00790293
0002.CSV	3764.53	0.00780239
0002.CSV	3768.38	0.00785715
0002.CSV	3772.24	0.00800026
0002.CSV	3776.1	0.00794599
0002.CSV	3779.95	0.00795362
0002.CSV	3783.81	0.00802172
0002.CSV	3787.67	0.00808231
0002.CSV	3791.53	0.00798372
0002.CSV	3795.38	0.00773277
0002.CSV	3799.24	0.00762718
0002.CSV	3803.1	0.0077778
0002.CSV	3806.95	0.00799162
0002.CSV	3810.81	0.0079276
0002.CSV	3814.67	0.00768066
0002.CSV	3818.53	0.0077072
0002.CSV	3822.38	0.00799145
0002.CSV	3826.24	0.00802655
0002.CSV	3830.1	0.0079109
0002.CSV	3833.95	0.007797
0002.CSV	3837.81	0.00774596
0002.CSV	3841.67	0.00808073
0002.CSV	3845.53	0.00813842
0002.CSV	3849.38	0.0077607
0002.CSV	3853.24	0.00778131
0002.CSV	3857.1	0.00812262
0002.CSV	3860.95	0.00784207
0002.CSV	3864.81	0.00782557
0002.CSV	3868.67	0.00796658
0002.CSV	3872.52	0.00820058
0002.CSV	3876.38	0.00815841
0002.CSV	3880.24	0.00804538
0002.CSV	3884.1	0.00814699
0002.CSV	3887.95	0.00811627
0002.CSV	3891.81	0.00806101
0002.CSV	3895.67	0.00801325
0002.CSV	3899.52	0.00784119
0002.CSV	3903.38	0.00819349
0002.CSV	3907.24	0.00844616
0002.CSV	3911.1	0.00823455
0002.CSV	3914.95	0.00801676
0002.CSV	3918.81	0.00811111
0002.CSV	3922.67	0.00821256
0002.CSV	3926.52	0.00821381
0002.CSV	3930.38	0.00821905
0002.CSV	3934.24	0.00832245
0002.CSV	3938.09	0.00818589
0002.CSV	3941.95	0.00809602
0002.CSV	3945.81	0.00814055
0002.CSV	3949.67	0.00820824
0002.CSV	3953.52	0.00823536
0002.CSV	3957.38	0.00815608
0002.CSV	3961.24	0.00814757
0002.CSV	3965.09	0.00817961
0002.CSV	3968.95	0.00813903
0002.CSV	3972.81	0.00816144
0002.CSV	3976.67	0.00818545
0002.CSV	3980.52	0.00813953
0002.CSV	3984.38	0.0081054
0002.CSV	3988.24	0.0080548
0002.CSV	3992.09	0.00806513
0002.CSV	3995.95	0.00811644
0002.CSV	3999.81	0.00808623
0003.CSV	674.992	0.0453776
0003.CSV	678.849	0.0465711
0003.CSV	682.706	0.0462889
0003.CSV	686.563	0.0479944
0003.CSV	690.42	0.0498782
0003.CSV	694.277	0.0536107
0003.CSV	698.134	0.0577915
0003.CSV	701.991	0.0664648
0003.CSV	705.849	0.08382
0003.CSV	709.706	0.107646
0003.CSV	713.563	0.101643
0003.CSV	717.42	0.0686929
0003.CSV	721.277	0.0464411
0003.CSV	725.134	0.0405997
0003.CSV	728.991	0.0392197
0003.CSV	732.848	0.0397956
0003.CSV	736.705	0.0399614
0003.CSV	740.562	0.0402343
0003.CSV	744.42	0.0402688
0003.CSV	748.277	0.0411445
0003.CSV	752.134	0.0416141
0003.CSV	755.991	0.0426832
0003.CSV	759.848	0.0433094
0003.CSV	763.705	0.0443741
0003.CSV	767.562	0.0449862
0003.CSV	771.419	0.0461836
0003.CSV	775.276	0.0471176
0003.CSV	779.133	0.0483229
0003.CSV	782.99	0.0484498
0003.CSV	786.848	0.0486525
0003.CSV	790.705	0.0489084
0003.CSV	794.562	0.0502317
0003.CSV	798.419	0.0513119
0003.CSV	802.276	0.0520791
0003.CSV	806.133	0.0516471
0003.CSV	809.99	0.0516637
0003.CSV	813.847	0.05178
0003.CSV	817.704	0.0531633
0003.CSV	821.562	0.0551009
0003.CSV	825.419	0.057894
0003.CSV	829.276	0.0599506
0003.CSV	833.133	0.0615254
0003.CSV	836.99	0.062851
0003.CSV	840.847	0.0665398
0003.CSV	844.704	0.0730379
0003.CSV	848.561	0.0776793
0003.CSV	852.418	0.0808363
0003.CSV	856.275	0.0937467
0003.CSV	860.132	0.120814
0003.CSV	863.99	0.169779
0003.CSV	867.847	0.230915
0003.CSV	871.704	0.252477
0003.CSV	875.561	0.211493
0003.CSV	879.418	0.154898
0003.CSV	883.275	0.0997149
0003.CSV	887.132	0.0528985
0003.CSV	890.989	0.031587
0003.CSV	894.846	0.0294974
0003.CSV	898.703	0.0305687
0003.CSV	902.561	0.0320195
0003.CSV	906.418	0.0331056
0003.CSV	910.275	0.0345465
0003.CSV	914.132	0.0355608
0003.CSV	917.989	0.036745
0003.CSV	921.846	0.0375151
0003.CSV	925.703	0.0386814
0003.CSV	929.56	0.0395099
0003.CSV	933.417	0.0405377
0003.CSV	937.274	0.0411368
0003.CSV	941.131	0.0419397
0003.CSV	944.989	0.0424782
0003.CSV	948.846	0.043366
0003.CSV	952.703	0.0439246
0003.CSV	956.56	0.0447064
0003.CSV	960.417	0.0451886
0003.CSV	964.274	0.0460468
0003.CSV	968.131	0.0467465
0003.CSV	971.988	0.0478765
0003.CSV	975.845	0.0487463
0003.CSV	979.702	0.0498758
0003.CSV	983.559	0.0507474
0003.CSV	987.417	0.0519383
0003.CSV	991.274	0.0528702
0003.CSV	995.131	0.0540146
0003.CSV	998.988	0.054861
0003.CSV	1002.85	0.0560737
0003.CSV	1006.7	0.0570499
0003.CSV	1010.56	0.0583543
0003.CSV	1014.42	0.0591013
0003.CSV	1018.27	0.0599143
0003.CSV	1022.13	0.0605052
0003.CSV	1025.99	0.0615438
0003.CSV	1029.85	0.0623785
0003.CSV	1033.7	0.0635255
0003.CSV	1037.56	0.0643052
0003.CSV	1041.42	0.0652118
0003.CSV	1045.27	0.0657005
0003.CSV	1049.13	0.0665207
0003.CSV	1052.99	0.0672732
0003.CSV	1056.84	0.0687133
0003.CSV	1060.7	0.0701928
0003.CSV	1064.56	0.0721529
0003.CSV	1068.42	0.0738531
0003.CSV	1072.27	0.0759676
0003.CSV	1076.13	0.0778731
0003.CSV	1079.99	0.0801576
0003.CSV	1083.84	0.0819156
0003.CSV	1087.7	0.0828292
0003.CSV	1091.56	0.0818055
0003.CSV	1095.41	0.080199
0003.CSV	1099.27	0.078636
0003.CSV	1103.13	0.0780637
0003.CSV	1106.99	0.0774733
0003.CSV	1110.84	0.0771288
0003.CSV	1114.7	0.0764822
0003.CSV	1118.56	0.0760842
0003.CSV	1122.41	0.0752952
0003.CSV	1126.27	0.0747522
0003.CSV	1130.13	0.0740268
0003.CSV	1133.99	0.073698
0003.CSV	1137.84	0.0732792
0003.CSV	1141.7	0.0733336
0003.CSV	1145.56	0.0732984
0003.CSV	1149.41	0.073551
0003.CSV	1153.27	0.0736121
0003.CSV	1157.13	0.074137
0003.CSV	1160.99	0.074676
0003.CSV	1164.84	0.0754106
0003.CSV	1168.7	0.0756399
0003.CSV	1172.56	0.0762098
0003.CSV	1176.41	0.0768352
0003.CSV	1180.27	0.0774982
0003.CSV	1184.13	0.0769838
0003.CSV	1187.99	0.0759686
0003.CSV	1191.84	0.0747365
0003.CSV	1195.7	0.0742777
0003.CSV	1199.56	0.0741249
0003.CSV	1203.41	0.0746099
0003.CSV	1207.27	0.0751878
0003.CSV	1211.13	0.0763181
0003.CSV	1214.98	0.0774004
0003.CSV	1218.84	0.0789132
0003.CSV	1222.7	0.0802884
0003.CSV	1226.56	0.0819764
0003.CSV	1230.41	0.0834601
0003.CSV	1234.27	0.0851367
0003.CSV	1238.13	0.0864275
0003.CSV	1241.98	0.0879155
0003.CSV	1245.84	0.0890971
0003.CSV	1249.7	0.0903309
0003.CSV	1253.56	0.0909236
0003.CSV	1257.41	0.0915235
0003.CSV	1261.27	0.0920395
0003.CSV	1265.13	0.0934206
0003.CSV	1268.98	0.0950453
0003.CSV	1272.84	0.0972998
0003.CSV	1276.7	0.0994814
0003.CSV	1280.56	0.102181
0003.CSV	1284.41	0.104764
0003.CSV	1288.27	0.107848
0003.CSV	1292.13	0.110782
0003.CSV	1295.98	0.114128
0003.CSV	1299.84	0.117326
0003.CSV	1303.7	0.120999
0003.CSV	1307.56	0.124547
0003.CSV	1311.41	0.128687
0003.CSV	1315.27	0.132774
0003.CSV	1319.13	0.137626
0003.CSV	1322.98	0.142378
0003.CSV	1326.84	0.147827
0003.CSV	1330.7	0.153491
0003.CSV	1334.56	0.15988
0003.CSV	1338.41	0.167344
0003.CSV	1342.27	0.176744
0003.CSV	1346.13	0.185211
0003.CSV	1349.98	0.195176
0003.CSV	1353.84	0.205963
0003.CSV	1357.7	0.218013
0003.CSV	1361.56	0.231501
0003.CSV	1365.41	0.24755
0003.CSV	1369.27	0.261525
0003.CSV	1373.13	0.278185
0003.CSV	1376.98	0.296087
0003.CSV	1380.84	0.312174
0003.CSV	1384.7	0.32579
0003.CSV	1388.56	0.339767
0003.CSV	1392.41	0.347211
0003.CSV	1396.27	0.348864
0003.CSV	1400.13	0.343727
[truncated: 32,605 more rows]

## Sheet: C.edule_400_2_mFTIR_data
Select spectrum number	Wavenumber	Absorbance
[truncated: 34,520 more rows]

[truncated: 2 more sheets: C.edule_450_1_mFTIR_data, C.edule_450_2_mFTIR_data]
