# Supplementary material for: Thermo-microstratigraphy of shells reveals invisible fire use and possible cooking in the archaeological record
Source: Frontiers journal article supplement (doi:10.3389/feart.2022.869487), 2022-09-01
Supplement: Table_2.XLSX [file Table_2.XLSX]

## Sheet: S.plana_250_1_mFTIR_data
Select spectrum number	Wavenumbers	Absorbance
0001.CSV	674.992	0.0443325
0001.CSV	676.92	0.0453817
0001.CSV	678.849	0.0452054
0001.CSV	680.778	0.0470071
0001.CSV	682.706	0.0474575
0001.CSV	684.635	0.0489172
0001.CSV	686.563	0.0495046
0001.CSV	688.492	0.051762
0001.CSV	690.42	0.0531305
0001.CSV	692.349	0.0564771
0001.CSV	694.277	0.0618327
0001.CSV	696.206	0.0760665
0001.CSV	698.134	0.105212
0001.CSV	700.063	0.117407
0001.CSV	701.991	0.0856929
0001.CSV	703.92	0.0636261
0001.CSV	705.849	0.063912
0001.CSV	707.777	0.0773396
0001.CSV	709.706	0.11197
0001.CSV	711.634	0.165192
0001.CSV	713.563	0.157074
0001.CSV	715.491	0.0924682
0001.CSV	717.42	0.054887
0001.CSV	719.348	0.0440826
0001.CSV	721.277	0.0398878
0001.CSV	723.206	0.0385457
0001.CSV	725.134	0.0378003
0001.CSV	727.063	0.0375776
0001.CSV	728.991	0.0367914
0001.CSV	730.92	0.0365154
0001.CSV	732.848	0.0360896
0001.CSV	734.777	0.0364125
0001.CSV	736.705	0.0365046
0001.CSV	738.634	0.0370964
0001.CSV	740.562	0.0371912
0001.CSV	742.491	0.0375556
0001.CSV	744.42	0.0375811
0001.CSV	746.348	0.0382962
0001.CSV	748.277	0.0384876
0001.CSV	750.205	0.0388068
0001.CSV	752.134	0.0386767
0001.CSV	754.062	0.0392853
0001.CSV	755.991	0.0395565
0001.CSV	757.919	0.040169
0001.CSV	759.848	0.04037
0001.CSV	761.777	0.0410982
0001.CSV	763.705	0.041356
0001.CSV	765.634	0.0420273
0001.CSV	767.562	0.0423837
0001.CSV	769.491	0.0431347
0001.CSV	771.419	0.043187
0001.CSV	773.348	0.0435764
0001.CSV	775.276	0.0438288
0001.CSV	777.205	0.0444902
0001.CSV	779.133	0.0446968
0001.CSV	781.062	0.0451983
0001.CSV	782.99	0.0454523
0001.CSV	784.919	0.0459168
0001.CSV	786.848	0.0461718
0001.CSV	788.776	0.0468653
0001.CSV	790.705	0.0472342
0001.CSV	792.633	0.0480512
0001.CSV	794.562	0.0487551
0001.CSV	796.49	0.0497035
0001.CSV	798.419	0.0502002
0001.CSV	800.347	0.0512711
0001.CSV	802.276	0.052026
0001.CSV	804.205	0.0530529
0001.CSV	806.133	0.0536976
0001.CSV	808.062	0.0546738
0001.CSV	809.99	0.0554526
0001.CSV	811.919	0.0569198
0001.CSV	813.847	0.0581079
0001.CSV	815.776	0.0596592
0001.CSV	817.704	0.0610043
0001.CSV	819.633	0.0631498
0001.CSV	821.562	0.0651979
0001.CSV	823.49	0.0680421
0001.CSV	825.419	0.0708978
0001.CSV	827.347	0.0745943
0001.CSV	829.276	0.0783458
0001.CSV	831.204	0.0835222
0001.CSV	833.133	0.0890977
0001.CSV	835.061	0.0962947
0001.CSV	836.99	0.10494
0001.CSV	838.918	0.117787
0001.CSV	840.847	0.139596
0001.CSV	842.775	0.16791
0001.CSV	844.704	0.174573
0001.CSV	846.633	0.178291
0001.CSV	848.561	0.210876
0001.CSV	850.49	0.259402
0001.CSV	852.418	0.308667
0001.CSV	854.347	0.340859
0001.CSV	856.275	0.343072
0001.CSV	858.204	0.321433
0001.CSV	860.132	0.289226
0001.CSV	862.061	0.25241
0001.CSV	863.99	0.213689
0001.CSV	865.918	0.17439
0001.CSV	867.847	0.137609
0001.CSV	869.775	0.106666
0001.CSV	871.704	0.0829019
0001.CSV	873.632	0.0655613
0001.CSV	875.561	0.0532309
0001.CSV	877.489	0.0461567
0001.CSV	879.418	0.0424628
0001.CSV	881.346	0.0404832
0001.CSV	883.275	0.0390977
0001.CSV	885.204	0.0380548
0001.CSV	887.132	0.0371478
0001.CSV	889.061	0.0369917
0001.CSV	890.989	0.0369452
0001.CSV	892.918	0.0371341
0001.CSV	894.846	0.0372842
0001.CSV	896.775	0.037598
0001.CSV	898.703	0.0376538
0001.CSV	900.632	0.0378901
0001.CSV	902.561	0.0380903
0001.CSV	904.489	0.0387484
0001.CSV	906.418	0.0397879
0001.CSV	908.346	0.0410754
0001.CSV	910.275	0.0402316
0001.CSV	912.203	0.038971
0001.CSV	914.132	0.0386949
0001.CSV	916.06	0.0390653
0001.CSV	917.989	0.0392719
0001.CSV	919.917	0.0395811
0001.CSV	921.846	0.0397722
0001.CSV	923.774	0.04021
0001.CSV	925.703	0.0404541
0001.CSV	927.632	0.0408065
0001.CSV	929.56	0.040931
0001.CSV	931.489	0.0412081
0001.CSV	933.417	0.041406
0001.CSV	935.346	0.0417762
0001.CSV	937.274	0.041845
0001.CSV	939.203	0.0420698
0001.CSV	941.131	0.0422077
0001.CSV	943.06	0.0425467
0001.CSV	944.989	0.0427088
0001.CSV	946.917	0.0429801
0001.CSV	948.846	0.0432076
0001.CSV	950.774	0.0436453
0001.CSV	952.703	0.0439809
0001.CSV	954.631	0.0444117
0001.CSV	956.56	0.0446439
0001.CSV	958.488	0.0449326
0001.CSV	960.417	0.0450872
0001.CSV	962.346	0.0453953
0001.CSV	964.274	0.0455417
0001.CSV	966.203	0.045834
0001.CSV	968.131	0.0460499
0001.CSV	970.06	0.0464526
0001.CSV	971.988	0.0465899
0001.CSV	973.917	0.0469564
0001.CSV	975.845	0.0472431
0001.CSV	977.774	0.0476422
0001.CSV	979.702	0.0479107
0001.CSV	981.631	0.0483101
0001.CSV	983.559	0.0484955
0001.CSV	985.488	0.0488788
0001.CSV	987.417	0.049123
0001.CSV	989.345	0.0495332
0001.CSV	991.274	0.0498197
0001.CSV	993.202	0.0502232
0001.CSV	995.131	0.0504333
0001.CSV	997.059	0.0507771
0001.CSV	998.988	0.0509879
0001.CSV	1000.92	0.0513965
0001.CSV	1002.85	0.051661
0001.CSV	1004.77	0.0519821
0001.CSV	1006.7	0.0521739
0001.CSV	1008.63	0.0525825
0001.CSV	1010.56	0.0528273
0001.CSV	1012.49	0.0532425
0001.CSV	1014.42	0.0535031
0001.CSV	1016.35	0.0539153
0001.CSV	1018.27	0.0541929
0001.CSV	1020.2	0.0545444
0001.CSV	1022.13	0.0547331
0001.CSV	1024.06	0.055114
0001.CSV	1025.99	0.0553412
0001.CSV	1027.92	0.055781
0001.CSV	1029.85	0.0560826
0001.CSV	1031.77	0.0565949
0001.CSV	1033.7	0.0569543
0001.CSV	1035.63	0.0574512
0001.CSV	1037.56	0.0578301
0001.CSV	1039.49	0.0583845
0001.CSV	1041.42	0.0587051
0001.CSV	1043.34	0.0592648
0001.CSV	1045.27	0.0596788
0001.CSV	1047.2	0.0601861
0001.CSV	1049.13	0.0604217
0001.CSV	1051.06	0.0608623
0001.CSV	1052.99	0.0612026
0001.CSV	1054.92	0.0618495
0001.CSV	1056.84	0.0623674
0001.CSV	1058.77	0.0631715
0001.CSV	1060.7	0.0635794
0001.CSV	1062.63	0.0641396
0001.CSV	1064.56	0.0646393
0001.CSV	1066.49	0.0655294
0001.CSV	1068.42	0.0662996
0001.CSV	1070.34	0.0673419
0001.CSV	1072.27	0.068355
0001.CSV	1074.2	0.0700712
0001.CSV	1076.13	0.072266
0001.CSV	1078.06	0.0769448
0001.CSV	1079.99	0.0903887
0001.CSV	1081.92	0.115617
0001.CSV	1083.84	0.115997
0001.CSV	1085.77	0.0868331
0001.CSV	1087.7	0.0699528
0001.CSV	1089.63	0.0661662
0001.CSV	1091.56	0.0655071
0001.CSV	1093.49	0.0655473
0001.CSV	1095.41	0.0658738
0001.CSV	1097.34	0.0661953
0001.CSV	1099.27	0.0665256
0001.CSV	1101.2	0.06684
0001.CSV	1103.13	0.067175
0001.CSV	1105.06	0.0675512
0001.CSV	1106.99	0.0679642
0001.CSV	1108.91	0.0684075
0001.CSV	1110.84	0.0688548
0001.CSV	1112.77	0.0692251
0001.CSV	1114.7	0.0694133
0001.CSV	1116.63	0.0694522
0001.CSV	1118.56	0.0694767
0001.CSV	1120.49	0.069585
0001.CSV	1122.41	0.0697362
0001.CSV	1124.34	0.0699812
0001.CSV	1126.27	0.0702087
0001.CSV	1128.2	0.0704364
0001.CSV	1130.13	0.0706719
0001.CSV	1132.06	0.0709567
0001.CSV	1133.99	0.0712072
0001.CSV	1135.91	0.0715051
0001.CSV	1137.84	0.0717908
0001.CSV	1139.77	0.072122
0001.CSV	1141.7	0.0724652
0001.CSV	1143.63	0.072845
0001.CSV	1145.56	0.0731976
0001.CSV	1147.49	0.0735753
0001.CSV	1149.41	0.0739384
0001.CSV	1151.34	0.0743544
0001.CSV	1153.27	0.0747784
0001.CSV	1155.2	0.0751563
0001.CSV	1157.13	0.0754532
0001.CSV	1159.06	0.075814
0001.CSV	1160.99	0.0761647
0001.CSV	1162.91	0.0766163
0001.CSV	1164.84	0.0770382
0001.CSV	1166.77	0.0774605
0001.CSV	1168.7	0.077809
0001.CSV	1170.63	0.0781288
0001.CSV	1172.56	0.0783112
0001.CSV	1174.49	0.078469
0001.CSV	1176.41	0.0785852
0001.CSV	1178.34	0.0787129
0001.CSV	1180.27	0.078822
0001.CSV	1182.2	0.0789555
0001.CSV	1184.13	0.0790018
0001.CSV	1186.06	0.0790069
0001.CSV	1187.99	0.0790585
0001.CSV	1189.91	0.0791682
0001.CSV	1191.84	0.0792432
0001.CSV	1193.77	0.0793233
0001.CSV	1195.7	0.0794095
0001.CSV	1197.63	0.0795696
0001.CSV	1199.56	0.0797868
0001.CSV	1201.48	0.0800259
0001.CSV	1203.41	0.0802576
0001.CSV	1205.34	0.0805589
0001.CSV	1207.27	0.0808963
0001.CSV	1209.2	0.0813352
0001.CSV	1211.13	0.0817901
0001.CSV	1213.06	0.0822872
0001.CSV	1214.98	0.0827875
0001.CSV	1216.91	0.0833662
0001.CSV	1218.84	0.083922
0001.CSV	1220.77	0.0845253
0001.CSV	1222.7	0.0851647
0001.CSV	1224.63	0.0858056
0001.CSV	1226.56	0.0864424
0001.CSV	1228.48	0.0871325
0001.CSV	1230.41	0.0878186
0001.CSV	1232.34	0.0885593
0001.CSV	1234.27	0.0892794
0001.CSV	1236.2	0.08996
0001.CSV	1238.13	0.0906226
0001.CSV	1240.06	0.0913211
0001.CSV	1241.98	0.0919962
0001.CSV	1243.91	0.0927289
0001.CSV	1245.84	0.0934682
0001.CSV	1247.77	0.0941477
0001.CSV	1249.7	0.0947299
0001.CSV	1251.63	0.0952559
0001.CSV	1253.56	0.0957254
0001.CSV	1255.48	0.0962059
0001.CSV	1257.41	0.0966873
0001.CSV	1259.34	0.0972616
0001.CSV	1261.27	0.0979919
0001.CSV	1263.2	0.0988416
0001.CSV	1265.13	0.0998953
0001.CSV	1267.06	0.101099
0001.CSV	1268.98	0.102312
0001.CSV	1270.91	0.103488
0001.CSV	1272.84	0.104624
0001.CSV	1274.77	0.105646
0001.CSV	1276.7	0.106656
0001.CSV	1278.63	0.107642
0001.CSV	1280.56	0.108581
0001.CSV	1282.48	0.109421
0001.CSV	1284.41	0.110199
0001.CSV	1286.34	0.110942
0001.CSV	1288.27	0.111769
0001.CSV	1290.2	0.112654
0001.CSV	1292.13	0.113604
0001.CSV	1294.06	0.114629
0001.CSV	1295.98	0.115717
0001.CSV	1297.91	0.116844
0001.CSV	1299.84	0.117995
0001.CSV	1301.77	0.119146
0001.CSV	1303.7	0.120275
0001.CSV	1305.63	0.121312
0001.CSV	1307.56	0.122388
0001.CSV	1309.48	0.123406
0001.CSV	1311.41	0.124401
0001.CSV	1313.34	0.125613
0001.CSV	1315.27	0.126831
0001.CSV	1317.2	0.127965
0001.CSV	1319.13	0.129432
0001.CSV	1321.06	0.130858
0001.CSV	1322.98	0.132176
0001.CSV	1324.91	0.133624
0001.CSV	1326.84	0.135248
0001.CSV	1328.77	0.137002
0001.CSV	1330.7	0.138866
0001.CSV	1332.63	0.140748
0001.CSV	1334.56	0.142671
0001.CSV	1336.48	0.144639
0001.CSV	1338.41	0.146901
0001.CSV	1340.34	0.149675
0001.CSV	1342.27	0.151874
0001.CSV	1344.2	0.153835
0001.CSV	1346.13	0.156238
0001.CSV	1348.06	0.158721
0001.CSV	1349.98	0.161428
0001.CSV	1351.91	0.164008
0001.CSV	1353.84	0.166588
0001.CSV	1355.77	0.16939
0001.CSV	1357.7	0.172346
0001.CSV	1359.63	0.175214
0001.CSV	1361.56	0.178685
0001.CSV	1363.48	0.183763
0001.CSV	1365.41	0.187523
0001.CSV	1367.34	0.190243
0001.CSV	1369.27	0.193945
0001.CSV	1371.2	0.197931
0001.CSV	1373.13	0.203017
0001.CSV	1375.06	0.211139
0001.CSV	1376.98	0.21686
0001.CSV	1378.91	0.219587
0001.CSV	1380.84	0.220883
0001.CSV	1382.77	0.222785
0001.CSV	1384.7	0.225656
0001.CSV	1386.63	0.229923
0001.CSV	1388.56	0.236213
0001.CSV	1390.48	0.241
0001.CSV	1392.41	0.245017
0001.CSV	1394.34	0.250185
0001.CSV	1396.27	0.256834
0001.CSV	1398.2	0.262647
0001.CSV	1400.13	0.270332
0001.CSV	1402.05	0.276254
0001.CSV	1403.98	0.282678
0001.CSV	1405.91	0.291985
0001.CSV	1407.84	0.300168
0001.CSV	1409.77	0.308133
0001.CSV	1411.7	0.317283
0001.CSV	1413.63	0.325701
0001.CSV	1415.55	0.333114
0001.CSV	1417.48	0.340666
0001.CSV	1419.41	0.352835
0001.CSV	1421.34	0.361914
0001.CSV	1423.27	0.369697
0001.CSV	1425.2	0.381184
0001.CSV	1427.12	0.390873
0001.CSV	1429.05	0.403334
0001.CSV	1430.98	0.421112
0001.CSV	1432.91	0.437974
0001.CSV	1434.84	0.453826
0001.CSV	1436.77	0.483116
0001.CSV	1438.7	0.514324
0001.CSV	1440.62	0.536371
0001.CSV	1442.55	0.559679
0001.CSV	1444.48	0.578025
0001.CSV	1446.41	0.588067
0001.CSV	1448.34	0.591871
0001.CSV	1450.27	0.588124
0001.CSV	1452.2	0.580207
0001.CSV	1454.12	0.570576
0001.CSV	1456.05	0.562075
0001.CSV	1457.98	0.548137
0001.CSV	1459.91	0.545278
0001.CSV	1461.84	0.543367
0001.CSV	1463.77	0.540011
0001.CSV	1465.7	0.527832
0001.CSV	1467.62	0.511979
0001.CSV	1469.55	0.494307
0001.CSV	1471.48	0.474352
0001.CSV	1473.41	0.437933
0001.CSV	1475.34	0.415633
0001.CSV	1477.27	0.39467
0001.CSV	1479.2	0.378598
0001.CSV	1481.12	0.361644
0001.CSV	1483.05	0.345286
0001.CSV	1484.98	0.332453
0001.CSV	1486.91	0.320438
0001.CSV	1488.84	0.306387
0001.CSV	1490.77	0.291068
0001.CSV	1492.7	0.28076
0001.CSV	1494.62	0.273883
0001.CSV	1496.55	0.262885
0001.CSV	1498.48	0.251974
0001.CSV	1500.41	0.242812
0001.CSV	1502.34	0.235932
0001.CSV	1504.27	0.229859
0001.CSV	1506.2	0.223944
0001.CSV	1508.12	0.207523
0001.CSV	1510.05	0.203582
0001.CSV	1511.98	0.197048
0001.CSV	1513.91	0.191372
0001.CSV	1515.84	0.184769
0001.CSV	1517.77	0.176621
0001.CSV	1519.7	0.17083
0001.CSV	1521.62	0.16397
0001.CSV	1523.55	0.155659
0001.CSV	1525.48	0.151286
0001.CSV	1527.41	0.144268
0001.CSV	1529.34	0.13902
0001.CSV	1531.27	0.134461
0001.CSV	1533.2	0.129533
0001.CSV	1535.12	0.123348
0001.CSV	1537.05	0.120931
0001.CSV	1538.98	0.11715
0001.CSV	1540.91	0.110084
0001.CSV	1542.84	0.104578
0001.CSV	1544.77	0.100223
0001.CSV	1546.7	0.0954608
0001.CSV	1548.62	0.0921454
0001.CSV	1550.55	0.0873053
0001.CSV	1552.48	0.083965
0001.CSV	1554.41	0.0802617
0001.CSV	1556.34	0.077392
0001.CSV	1558.27	0.0745689
0001.CSV	1560.19	0.0701085
0001.CSV	1562.12	0.0680401
0001.CSV	1564.05	0.0665702
0001.CSV	1565.98	0.0644657
0001.CSV	1567.91	0.0628836
0001.CSV	1569.84	0.0603527
0001.CSV	1571.77	0.0580275
0001.CSV	1573.69	0.0557499
0001.CSV	1575.62	0.0535337
0001.CSV	1577.55	0.0498464
0001.CSV	1579.48	0.0472449
0001.CSV	1581.41	0.0442286
0001.CSV	1583.34	0.0417341
0001.CSV	1585.27	0.0394572
0001.CSV	1587.19	0.0379549
0001.CSV	1589.12	0.0364625
0001.CSV	1591.05	0.0355244
0001.CSV	1592.98	0.0345393
0001.CSV	1594.91	0.0341176
0001.CSV	1596.84	0.0334696
0001.CSV	1598.77	0.0331043
0001.CSV	1600.69	0.0326027
0001.CSV	1602.62	0.0325313
0001.CSV	1604.55	0.0321328
0001.CSV	1606.48	0.0320098
0001.CSV	1608.41	0.0317915
0001.CSV	1610.34	0.0318034
0001.CSV	1612.27	0.0313327
0001.CSV	1614.19	0.0308666
0001.CSV	1616.12	0.030281
0001.CSV	1618.05	0.0307463
0001.CSV	1619.98	0.0300295
0001.CSV	1621.91	0.0295457
0001.CSV	1623.84	0.0294546
0001.CSV	1625.77	0.0292815
0001.CSV	1627.69	0.0288153
0001.CSV	1629.62	0.0289255
0001.CSV	1631.55	0.0283164
0001.CSV	1633.48	0.0278158
0001.CSV	1635.41	0.0275605
0001.CSV	1637.34	0.0285436
0001.CSV	1639.27	0.0278764
0001.CSV	1641.19	0.027588
0001.CSV	1643.12	0.0270443
0001.CSV	1645.05	0.0267068
0001.CSV	1646.98	0.0270562
0001.CSV	1648.91	0.027587
0001.CSV	1650.84	0.0265633
0001.CSV	1652.77	0.0267707
0001.CSV	1654.69	0.0275492
0001.CSV	1656.62	0.0270933
0001.CSV	1658.55	0.0264473
0001.CSV	1660.48	0.0260929
0001.CSV	1662.41	0.0260007
0001.CSV	1664.34	0.026311
0001.CSV	1666.27	0.0256712
0001.CSV	1668.19	0.0253858
0001.CSV	1670.12	0.0255622
0001.CSV	1672.05	0.0255776
0001.CSV	1673.98	0.0249198
0001.CSV	1675.91	0.0251348
0001.CSV	1677.84	0.0246313
0001.CSV	1679.77	0.0242878
0001.CSV	1681.69	0.0238605
0001.CSV	1683.62	0.0237772
0001.CSV	1685.55	0.024189
0001.CSV	1687.48	0.0238745
0001.CSV	1689.41	0.0235876
0001.CSV	1691.34	0.0233731
0001.CSV	1693.27	0.0226281
0001.CSV	1695.19	0.0223137
0001.CSV	1697.12	0.0224019
0001.CSV	1699.05	0.0223003
0001.CSV	1700.98	0.022447
0001.CSV	1702.91	0.0221755
0001.CSV	1704.84	0.0216761
0001.CSV	1706.77	0.0220656
0001.CSV	1708.69	0.021724
0001.CSV	1710.62	0.0215078
0001.CSV	1712.55	0.0210907
0001.CSV	1714.48	0.0209747
0001.CSV	1716.41	0.021068
0001.CSV	1718.34	0.0221167
0001.CSV	1720.27	0.0218987
0001.CSV	1722.19	0.0215937
0001.CSV	1724.12	0.0215367
0001.CSV	1726.05	0.0214619
0001.CSV	1727.98	0.0211447
0001.CSV	1729.91	0.0211741
0001.CSV	1731.84	0.0209681
0001.CSV	1733.77	0.0212452
0001.CSV	1735.69	0.0218156
0001.CSV	1737.62	0.0213646
0001.CSV	1739.55	0.0212377
0001.CSV	1741.48	0.0212692
0001.CSV	1743.41	0.0208825
0001.CSV	1745.34	0.0205618
0001.CSV	1747.27	0.0200373
0001.CSV	1749.19	0.0199774
0001.CSV	1751.12	0.019843
0001.CSV	1753.05	0.0195803
0001.CSV	1754.98	0.0188685
0001.CSV	1756.91	0.0188242
0001.CSV	1758.84	0.0187115
0001.CSV	1760.76	0.0185166
0001.CSV	1762.69	0.0187979
0001.CSV	1764.62	0.0186735
0001.CSV	1766.55	0.0183732
0001.CSV	1768.48	0.0186588
0001.CSV	1770.41	0.0186995
0001.CSV	1772.34	0.02004
0001.CSV	1774.26	0.0220898
0001.CSV	1776.19	0.0244575
0001.CSV	1778.12	0.0272319
0001.CSV	1780.05	0.0302504
0001.CSV	1781.98	0.0326335
0001.CSV	1783.91	0.0336924
0001.CSV	1785.84	0.0347525
0001.CSV	1787.76	0.0347817
0001.CSV	1789.69	0.0331804
0001.CSV	1791.62	0.0301902
0001.CSV	1793.55	0.026867
0001.CSV	1795.48	0.0250873
0001.CSV	1797.41	0.0235763
0001.CSV	1799.34	0.0221357
0001.CSV	1801.26	0.0205548
0001.CSV	1803.19	0.0192852
0001.CSV	1805.12	0.0182698
0001.CSV	1807.05	0.0177667
0001.CSV	1808.98	0.01737
0001.CSV	1810.91	0.0174056
0001.CSV	1812.84	0.0173693
0001.CSV	1814.76	0.0171567
0001.CSV	1816.69	0.0169719
0001.CSV	1818.62	0.0170246
0001.CSV	1820.55	0.0169227
0001.CSV	1822.48	0.0168065
0001.CSV	1824.41	0.0167475
0001.CSV	1826.34	0.0169599
0001.CSV	1828.26	0.0166327
0001.CSV	1830.19	0.0170862
0001.CSV	1832.12	0.0170837
0001.CSV	1834.05	0.0168409
0001.CSV	1835.98	0.0167534
0001.CSV	1837.91	0.0168779
0001.CSV	1839.84	0.0167331
0001.CSV	1841.76	0.016478
0001.CSV	1843.69	0.0165656
0001.CSV	1845.62	0.0170619
0001.CSV	1847.55	0.0169424
0001.CSV	1849.48	0.0169463
0001.CSV	1851.41	0.0167905
0001.CSV	1853.34	0.0167692
0001.CSV	1855.26	0.0167019
0001.CSV	1857.19	0.0167321
0001.CSV	1859.12	0.0166911
0001.CSV	1861.05	0.0167175
0001.CSV	1862.98	0.0166471
0001.CSV	1864.91	0.016544
0001.CSV	1866.84	0.016463
0001.CSV	1868.76	0.0170029
0001.CSV	1870.69	0.0171694
0001.CSV	1872.62	0.0169229
0001.CSV	1874.55	0.0167445
0001.CSV	1876.48	0.0167734
0001.CSV	1878.41	0.0167572
0001.CSV	1880.33	0.0167921
0001.CSV	1882.26	0.0167236
0001.CSV	1884.19	0.016771
0001.CSV	1886.12	0.016733
0001.CSV	1888.05	0.0166866
0001.CSV	1889.98	0.0168795
0001.CSV	1891.91	0.0169023
0001.CSV	1893.83	0.016757
0001.CSV	1895.76	0.0169859
0001.CSV	1897.69	0.0169427
0001.CSV	1899.62	0.0168926
0001.CSV	1901.55	0.0168526
0001.CSV	1903.48	0.0168543
0001.CSV	1905.41	0.0167893
0001.CSV	1907.33	0.0168181
0001.CSV	1909.26	0.0169041
0001.CSV	1911.19	0.0170191
0001.CSV	1913.12	0.0168702
0001.CSV	1915.05	0.0167469
0001.CSV	1916.98	0.0166825
0001.CSV	1918.9	0.0170034
0001.CSV	1920.83	0.0168166
0001.CSV	1922.76	0.0169165
0001.CSV	1924.69	0.0170247
0001.CSV	1926.62	0.0168872
0001.CSV	1928.55	0.0168126
0001.CSV	1930.48	0.016857
0001.CSV	1932.4	0.0168412
0001.CSV	1934.33	0.0168733
0001.CSV	1936.26	0.0168241
0001.CSV	1938.19	0.0168311
0001.CSV	1940.12	0.016699
0001.CSV	1942.05	0.016792
0001.CSV	1943.98	0.0169445
0001.CSV	1945.9	0.0169307
0001.CSV	1947.83	0.016868
0001.CSV	1949.76	0.016801
0001.CSV	1951.69	0.0167674
0001.CSV	1953.62	0.0168165
0001.CSV	1955.55	0.0168446
0001.CSV	1957.48	0.0168135
0001.CSV	1959.4	0.0167255
0001.CSV	1961.33	0.0167735
0001.CSV	1963.26	0.0167572
0001.CSV	1965.19	0.0167147
0001.CSV	1967.12	0.0168034
0001.CSV	1969.05	0.0169099
0001.CSV	1970.98	0.0168028
0001.CSV	1972.9	0.0167921
0001.CSV	1974.83	0.0167708
0001.CSV	1976.76	0.0167981
0001.CSV	1978.69	0.016788
0001.CSV	1980.62	0.0168202
0001.CSV	1982.55	0.0167773
0001.CSV	1984.48	0.0167602
0001.CSV	1986.4	0.0167096
0001.CSV	1988.33	0.016771
0001.CSV	1990.26	0.0167258
0001.CSV	1992.19	0.0168963
0001.CSV	1994.12	0.016946
0001.CSV	1996.05	0.0168345
0001.CSV	1997.98	0.0168403
0001.CSV	1999.9	0.0168678
0001.CSV	2001.83	0.0168126
0001.CSV	2003.76	0.016813
0001.CSV	2005.69	0.0168073
0001.CSV	2007.62	0.016848
0001.CSV	2009.55	0.016873
0001.CSV	2011.48	0.016905
0001.CSV	2013.4	0.0169023
0001.CSV	2015.33	0.0169162
0001.CSV	2017.26	0.0170062
0001.CSV	2019.19	0.0170954
0001.CSV	2021.12	0.0170032
0001.CSV	2023.05	0.0170097
0001.CSV	2024.97	0.0169956
0001.CSV	2026.9	0.0170034
0001.CSV	2028.83	0.0169995
0001.CSV	2030.76	0.0170082
0001.CSV	2032.69	0.0169899
0001.CSV	2034.62	0.0170029
0001.CSV	2036.55	0.0169837
0001.CSV	2038.47	0.0169773
0001.CSV	2040.4	0.0169565
0001.CSV	2042.33	0.0170283
0001.CSV	2044.26	0.0170322
0001.CSV	2046.19	0.0170511
0001.CSV	2048.12	0.0170233
0001.CSV	2050.05	0.0170053
0001.CSV	2051.97	0.0169926
0001.CSV	2053.9	0.0170544
0001.CSV	2055.83	0.0170487
0001.CSV	2057.76	0.0170453
0001.CSV	2059.69	0.0170278
0001.CSV	2061.62	0.0170317
0001.CSV	2063.55	0.0170093
0001.CSV	2065.47	0.0171011
0001.CSV	2067.4	0.0171054
0001.CSV	2069.33	0.0170849
0001.CSV	2071.26	0.0170764
0001.CSV	2073.19	0.0170968
0001.CSV	2075.12	0.0171118
0001.CSV	2077.05	0.0171402
0001.CSV	2078.97	0.0171515
0001.CSV	2080.9	0.0171644
0001.CSV	2082.83	0.0171199
0001.CSV	2084.76	0.0171262
0001.CSV	2086.69	0.0171702
0001.CSV	2088.62	0.0172176
0001.CSV	2090.55	0.0172212
0001.CSV	2092.47	0.0172271
0001.CSV	2094.4	0.0171942
0001.CSV	2096.33	0.0172352
0001.CSV	2098.26	0.0172772
0001.CSV	2100.19	0.0173313
0001.CSV	2102.12	0.0173489
0001.CSV	2104.05	0.0173939
0001.CSV	2105.97	0.0174178
0001.CSV	2107.9	0.0174439
0001.CSV	2109.83	0.0174139
0001.CSV	2111.76	0.0174528
0001.CSV	2113.69	0.0174969
0001.CSV	2115.62	0.0175455
0001.CSV	2117.55	0.0175704
0001.CSV	2119.47	0.0176323
0001.CSV	2121.4	0.0176406
0001.CSV	2123.33	0.0176319
0001.CSV	2125.26	0.0176326
0001.CSV	2127.19	0.0177101
0001.CSV	2129.12	0.0177706
0001.CSV	2131.05	0.0177851
0001.CSV	2132.97	0.0177612
0001.CSV	2134.9	0.0177659
0001.CSV	2136.83	0.0177793
0001.CSV	2138.76	0.0178326
0001.CSV	2140.69	0.0178665
0001.CSV	2142.62	0.0178853
0001.CSV	2144.55	0.0178786
0001.CSV	2146.47	0.0179216
0001.CSV	2148.4	0.0179653
0001.CSV	2150.33	0.0180126
0001.CSV	2152.26	0.0180328
0001.CSV	2154.19	0.01806
0001.CSV	2156.12	0.0180456
0001.CSV	2158.05	0.0180352
0001.CSV	2159.97	0.0180176
0001.CSV	2161.9	0.0179757
0001.CSV	2163.83	0.0178945
0001.CSV	2165.76	0.0178696
0001.CSV	2167.69	0.0178959
0001.CSV	2169.62	0.0179603
0001.CSV	2171.55	0.0179972
0001.CSV	2173.47	0.0180564
0001.CSV	2175.4	0.0180782
0001.CSV	2177.33	0.0181066
0001.CSV	2179.26	0.0181121
0001.CSV	2181.19	0.0181302
0001.CSV	2183.12	0.0181304
0001.CSV	2185.05	0.0181425
0001.CSV	2186.97	0.0181438
0001.CSV	2188.9	0.018164
0001.CSV	2190.83	0.0181622
0001.CSV	2192.76	0.0181526
0001.CSV	2194.69	0.0181553
0001.CSV	2196.62	0.0181974
0001.CSV	2198.55	0.0182138
0001.CSV	2200.47	0.018218
0001.CSV	2202.4	0.018197
0001.CSV	2204.33	0.018209
0001.CSV	2206.26	0.0182342
0001.CSV	2208.19	0.0182441
0001.CSV	2210.12	0.0182206
0001.CSV	2212.05	0.0182503
0001.CSV	2213.97	0.0182552
0001.CSV	2215.9	0.0182335
0001.CSV	2217.83	0.0182317
0001.CSV	2219.76	0.0182653
0001.CSV	2221.69	0.0182624
0001.CSV	2223.62	0.0182822
0001.CSV	2225.54	0.0182983
0001.CSV	2227.47	0.0182908
0001.CSV	2229.4	0.0182931
0001.CSV	2231.33	0.0183404
0001.CSV	2233.26	0.0183514
0001.CSV	2235.19	0.0183565
0001.CSV	2237.12	0.0183441
0001.CSV	2239.04	0.0183532
0001.CSV	2240.97	0.0183931
0001.CSV	2242.9	0.0184245
0001.CSV	2244.83	0.0184378
0001.CSV	2246.76	0.0184922
0001.CSV	2248.69	0.0184847
0001.CSV	2250.62	0.0184839
0001.CSV	2252.54	0.0185255
0001.CSV	2254.47	0.0185369
0001.CSV	2256.4	0.0185081
0001.CSV	2258.33	0.0185421
0001.CSV	2260.26	0.0185575
0001.CSV	2262.19	0.0185744
0001.CSV	2264.11	0.0185871
0001.CSV	2266.04	0.0185895
0001.CSV	2267.97	0.0186095
0001.CSV	2269.9	0.0186618
0001.CSV	2271.83	0.0186957
0001.CSV	2273.76	0.018725
0001.CSV	2275.69	0.0187351
0001.CSV	2277.61	0.0187711
0001.CSV	2279.54	0.0187434
0001.CSV	2281.47	0.0186898
0001.CSV	2283.4	0.018657
0001.CSV	2285.33	0.0186666
0001.CSV	2287.26	0.0187317
0001.CSV	2289.19	0.0188086
0001.CSV	2291.11	0.0188717
0001.CSV	2293.04	0.0189504
0001.CSV	2294.97	0.0190251
0001.CSV	2296.9	0.0191416
0001.CSV	2298.83	0.0192434
0001.CSV	2300.76	0.0193032
0001.CSV	2302.69	0.0193014
0001.CSV	2304.61	0.019307
0001.CSV	2306.54	0.0194113
0001.CSV	2308.47	0.0195705
0001.CSV	2310.4	0.0196591
0001.CSV	2312.33	0.0197126
0001.CSV	2314.26	0.0197768
0001.CSV	2316.19	0.0198293
0001.CSV	2318.11	0.0197469
0001.CSV	2320.04	0.0195903
0001.CSV	2321.97	0.0194528
0001.CSV	2323.9	0.0194938
0001.CSV	2325.83	0.019612
0001.CSV	2327.76	0.0196597
0001.CSV	2329.69	0.0192431
0001.CSV	2331.61	0.018925
0001.CSV	2333.54	0.018834
0001.CSV	2335.47	0.01868
0001.CSV	2337.4	0.0185049
0001.CSV	2339.33	0.0184621
0001.CSV	2341.26	0.0183708
0001.CSV	2343.19	0.0187122
0001.CSV	2345.11	0.0195985
0001.CSV	2347.04	0.0205206
0001.CSV	2348.97	0.020278
0001.CSV	2350.9	0.0194616
0001.CSV	2352.83	0.0185518
0001.CSV	2354.76	0.0170351
0001.CSV	2356.69	0.0144805
0001.CSV	2358.61	0.0127544
0001.CSV	2360.54	0.0123892
0001.CSV	2362.47	0.0131127
0001.CSV	2364.4	0.0145324
0001.CSV	2366.33	0.0160547
0001.CSV	2368.26	0.0173574
0001.CSV	2370.19	0.0186214
0001.CSV	2372.11	0.0195041
0001.CSV	2374.04	0.0200216
0001.CSV	2375.97	0.0202349
0001.CSV	2377.9	0.0202744
0001.CSV	2379.83	0.0202186
0001.CSV	2381.76	0.0200785
0001.CSV	2383.69	0.0198789
0001.CSV	2385.61	0.0196899
0001.CSV	2387.54	0.0195198
0001.CSV	2389.47	0.0194369
0001.CSV	2391.4	0.0194216
0001.CSV	2393.33	0.0194074
0001.CSV	2395.26	0.0194132
0001.CSV	2397.18	0.0194343
0001.CSV	2399.11	0.0194606
0001.CSV	2401.04	0.0195042
0001.CSV	2402.97	0.0195294
0001.CSV	2404.9	0.019531
0001.CSV	2406.83	0.0195394
0001.CSV	2408.76	0.019585
0001.CSV	2410.68	0.0195814
0001.CSV	2412.61	0.0195873
0001.CSV	2414.54	0.0195863
0001.CSV	2416.47	0.0195979
0001.CSV	2418.4	0.0196445
0001.CSV	2420.33	0.0196847
0001.CSV	2422.26	0.0197181
0001.CSV	2424.18	0.0197421
0001.CSV	2426.11	0.0197316
0001.CSV	2428.04	0.0197417
0001.CSV	2429.97	0.0197599
0001.CSV	2431.9	0.019789
0001.CSV	2433.83	0.0198367
0001.CSV	2435.76	0.0198816
0001.CSV	2437.68	0.019886
0001.CSV	2439.61	0.0198667
0001.CSV	2441.54	0.0199056
0001.CSV	2443.47	0.0199915
0001.CSV	2445.4	0.0200181
0001.CSV	2447.33	0.0200232
0001.CSV	2449.26	0.0200824
0001.CSV	2451.18	0.0201552
0001.CSV	2453.11	0.0201876
0001.CSV	2455.04	0.0202467
0001.CSV	2456.97	0.0203659
0001.CSV	2458.9	0.0204754
0001.CSV	2460.83	0.0205569
0001.CSV	2462.76	0.0206528
0001.CSV	2464.68	0.0207674
0001.CSV	2466.61	0.020877
0001.CSV	2468.54	0.0210374
0001.CSV	2470.47	0.0212527
0001.CSV	2472.4	0.0214829
0001.CSV	2474.33	0.0217481
0001.CSV	2476.26	0.0220783
0001.CSV	2478.18	0.0224772
0001.CSV	2480.11	0.0228741
0001.CSV	2482.04	0.0232428
0001.CSV	2483.97	0.0235957
0001.CSV	2485.9	0.0239506
0001.CSV	2487.83	0.0243086
0001.CSV	2489.76	0.0246708
0001.CSV	2491.68	0.0250043
0001.CSV	2493.61	0.0252676
0001.CSV	2495.54	0.0254942
0001.CSV	2497.47	0.0256701
0001.CSV	2499.4	0.0257149
0001.CSV	2501.33	0.0256524
0001.CSV	2503.26	0.0255318
0001.CSV	2505.18	0.0253344
0001.CSV	2507.11	0.0251403
0001.CSV	2509.04	0.0250356
0001.CSV	2510.97	0.0250847
0001.CSV	2512.9	0.0253456
0001.CSV	2514.83	0.0258075
0001.CSV	2516.76	0.0263585
0001.CSV	2518.68	0.0268568
0001.CSV	2520.61	0.0271761
0001.CSV	2522.54	0.0272031
0001.CSV	2524.47	0.0270912
0001.CSV	2526.4	0.0269121
0001.CSV	2528.33	0.0266056
0001.CSV	2530.26	0.0261809
0001.CSV	2532.18	0.0256589
0001.CSV	2534.11	0.0251416
0001.CSV	2536.04	0.0247025
0001.CSV	2537.97	0.0243245
0001.CSV	2539.9	0.0241256
0001.CSV	2541.83	0.0242183
0001.CSV	2543.76	0.0244991
0001.CSV	2545.68	0.0246658
0001.CSV	2547.61	0.0246774
0001.CSV	2549.54	0.0245857
0001.CSV	2551.47	0.0243198
0001.CSV	2553.4	0.0239259
0001.CSV	2555.33	0.0235766
0001.CSV	2557.26	0.0233063
0001.CSV	2559.18	0.0231056
0001.CSV	2561.11	0.0229304
0001.CSV	2563.04	0.0227653
0001.CSV	2564.97	0.0226265
0001.CSV	2566.9	0.0225136
0001.CSV	2568.83	0.0223684
0001.CSV	2570.76	0.0222309
0001.CSV	2572.68	0.0221502
0001.CSV	2574.61	0.0220842
0001.CSV	2576.54	0.0219898
0001.CSV	2578.47	0.0218546
0001.CSV	2580.4	0.021786
0001.CSV	2582.33	0.0217505
0001.CSV	2584.25	0.0217141
0001.CSV	2586.18	0.0216571
0001.CSV	2588.11	0.0215971
0001.CSV	2590.04	0.0215656
0001.CSV	2591.97	0.0215775
0001.CSV	2593.9	0.0215718
0001.CSV	2595.83	0.0215459
0001.CSV	2597.75	0.0215357
0001.CSV	2599.68	0.0215265
0001.CSV	2601.61	0.0215411
0001.CSV	2603.54	0.0215732
0001.CSV	2605.47	0.0215961
0001.CSV	2607.4	0.0216019
0001.CSV	2609.33	0.0216125
0001.CSV	2611.25	0.0216339
0001.CSV	2613.18	0.0216482
0001.CSV	2615.11	0.0216858
0001.CSV	2617.04	0.0216851
0001.CSV	2618.97	0.0216585
0001.CSV	2620.9	0.0216737
0001.CSV	2622.82	0.0217377
0001.CSV	2624.75	0.0218936
0001.CSV	2626.68	0.0219175
0001.CSV	2628.61	0.0218253
0001.CSV	2630.54	0.0217454
0001.CSV	2632.47	0.0217653
0001.CSV	2634.4	0.021799
0001.CSV	2636.32	0.0217829
0001.CSV	2638.25	0.0217605
0001.CSV	2640.18	0.0216216
0001.CSV	2642.11	0.0214574
0001.CSV	2644.04	0.0213566
0001.CSV	2645.97	0.0212734
0001.CSV	2647.9	0.0211482
0001.CSV	2649.82	0.0210621
0001.CSV	2651.75	0.0210165
0001.CSV	2653.68	0.0209844
0001.CSV	2655.61	0.0209516
0001.CSV	2657.54	0.0208598
0001.CSV	2659.47	0.0207754
0001.CSV	2661.4	0.0207282
0001.CSV	2663.32	0.0206764
0001.CSV	2665.25	0.0206436
0001.CSV	2667.18	0.0206426
0001.CSV	2669.11	0.0206285
0001.CSV	2671.04	0.0206658
0001.CSV	2672.97	0.0207947
0001.CSV	2674.9	0.0208799
0001.CSV	2676.82	0.0210305
0001.CSV	2678.75	0.0211777
0001.CSV	2680.68	0.0210836
0001.CSV	2682.61	0.020785
0001.CSV	2684.54	0.0206035
0001.CSV	2686.47	0.0205907
0001.CSV	2688.4	0.0205979
0001.CSV	2690.32	0.0205885
0001.CSV	2692.25	0.0205652
0001.CSV	2694.18	0.0205657
0001.CSV	2696.11	0.0206061
0001.CSV	2698.04	0.0206914
0001.CSV	2699.97	0.0206765
0001.CSV	2701.9	0.0206343
0001.CSV	2703.82	0.0206332
0001.CSV	2705.75	0.0206723
0001.CSV	2707.68	0.0207808
0001.CSV	2709.61	0.0209002
0001.CSV	2711.54	0.0208418
0001.CSV	2713.47	0.0207916
0001.CSV	2715.4	0.0208709
0001.CSV	2717.32	0.0209072
0001.CSV	2719.25	0.0209722
0001.CSV	2721.18	0.0212337
0001.CSV	2723.11	0.0214375
0001.CSV	2725.04	0.0216663
0001.CSV	2726.97	0.0216278
0001.CSV	2728.9	0.0212816
0001.CSV	2730.82	0.0211153
0001.CSV	2732.75	0.0210815
0001.CSV	2734.68	0.0211363
0001.CSV	2736.61	0.0213026
0001.CSV	2738.54	0.0212656
0001.CSV	2740.47	0.0210892
0001.CSV	2742.4	0.0210572
0001.CSV	2744.32	0.0211754
0001.CSV	2746.25	0.0214712
0001.CSV	2748.18	0.0216768
0001.CSV	2750.11	0.0215512
0001.CSV	2752.04	0.0212527
0001.CSV	2753.97	0.0211592
0001.CSV	2755.89	0.0212731
0001.CSV	2757.82	0.021312
0001.CSV	2759.75	0.021249
0001.CSV	2761.68	0.0211621
0001.CSV	2763.61	0.0211756
0001.CSV	2765.54	0.0212491
0001.CSV	2767.47	0.0212939
0001.CSV	2769.39	0.0213553
0001.CSV	2771.32	0.0216276
0001.CSV	2773.25	0.0220502
0001.CSV	2775.18	0.0221834
0001.CSV	2777.11	0.0219059
0001.CSV	2779.04	0.021753
0001.CSV	2780.97	0.0218419
0001.CSV	2782.89	0.0219269
0001.CSV	2784.82	0.0220597
0001.CSV	2786.75	0.0224566
0001.CSV	2788.68	0.0229103
0001.CSV	2790.61	0.0230549
0001.CSV	2792.54	0.0229566
0001.CSV	2794.47	0.0229886
0001.CSV	2796.39	0.0233186
0001.CSV	2798.32	0.0235745
0001.CSV	2800.25	0.0233595
0001.CSV	2802.18	0.0231516
0001.CSV	2804.11	0.0232358
0001.CSV	2806.04	0.0234668
0001.CSV	2807.97	0.0239362
0001.CSV	2809.89	0.0243534
0001.CSV	2811.82	0.0243185
0001.CSV	2813.75	0.0242433
0001.CSV	2815.68	0.0244106
0001.CSV	2817.61	0.0247375
0001.CSV	2819.54	0.0251468
0001.CSV	2821.47	0.0255288
0001.CSV	2823.39	0.0259249
0001.CSV	2825.32	0.0261879
0001.CSV	2827.25	0.0265461
0001.CSV	2829.18	0.0271799
0001.CSV	2831.11	0.0281178
0001.CSV	2833.04	0.0293059
0001.CSV	2834.97	0.0307403
0001.CSV	2836.89	0.0326156
0001.CSV	2838.82	0.0350004
0001.CSV	2840.75	0.0376524
0001.CSV	2842.68	0.041121
0001.CSV	2844.61	0.046017
0001.CSV	2846.54	0.0523586
0001.CSV	2848.47	0.0586562
0001.CSV	2850.39	0.0632549
0001.CSV	2852.32	0.0658
0001.CSV	2854.25	0.0659132
0001.CSV	2856.18	0.063835
0001.CSV	2858.11	0.0605013
0001.CSV	2860.04	0.056469
0001.CSV	2861.97	0.0521599
0001.CSV	2863.89	0.0489194
0001.CSV	2865.82	0.0471885
0001.CSV	2867.75	0.0465648
0001.CSV	2869.68	0.0469228
0001.CSV	2871.61	0.0476146
0001.CSV	2873.54	0.0470184
0001.CSV	2875.47	0.0447412
0001.CSV	2877.39	0.0422257
0001.CSV	2879.32	0.0406137
0001.CSV	2881.25	0.0398937
0001.CSV	2883.18	0.0399641
0001.CSV	2885.11	0.0407149
0001.CSV	2887.04	0.0419727
0001.CSV	2888.97	0.0436109
0001.CSV	2890.89	0.0456072
0001.CSV	2892.82	0.0478488
0001.CSV	2894.75	0.0502753
0001.CSV	2896.68	0.052212
0001.CSV	2898.61	0.0535794
0001.CSV	2900.54	0.0552791
0001.CSV	2902.47	0.0575336
0001.CSV	2904.39	0.0598839
0001.CSV	2906.32	0.0622832
0001.CSV	2908.25	0.0656015
0001.CSV	2910.18	0.0699334
0001.CSV	2912.11	0.0750086
0001.CSV	2914.04	0.0807139
0001.CSV	2915.97	0.0865551
0001.CSV	2917.89	0.091857
0001.CSV	2919.82	0.0958958
0001.CSV	2921.75	0.0985307
0001.CSV	2923.68	0.0990716
0001.CSV	2925.61	0.0971072
0001.CSV	2927.54	0.093262
0001.CSV	2929.46	0.0880189
0001.CSV	2931.39	0.0813242
0001.CSV	2933.32	0.074278
0001.CSV	2935.25	0.0678014
0001.CSV	2937.18	0.0620175
0001.CSV	2939.11	0.0571997
0001.CSV	2941.04	0.0536794
0001.CSV	2942.96	0.0514482
0001.CSV	2944.89	0.0501711
0001.CSV	2946.82	0.0499399
0001.CSV	2948.75	0.0508406
0001.CSV	2950.68	0.0531405
0001.CSV	2952.61	0.0560322
0001.CSV	2954.54	0.0576349
0001.CSV	2956.46	0.0578667
0001.CSV	2958.39	0.0570465
0001.CSV	2960.32	0.0554288
0001.CSV	2962.25	0.0530183
0001.CSV	2964.18	0.04942
0001.CSV	2966.11	0.0452394
0001.CSV	2968.04	0.0412574
0001.CSV	2969.96	0.0378088
0001.CSV	2971.89	0.0352093
0001.CSV	2973.82	0.0332007
0001.CSV	2975.75	0.0313305
0001.CSV	2977.68	0.0299283
0001.CSV	2979.61	0.0290721
0001.CSV	2981.53	0.0280326
0001.CSV	2983.46	0.0267372
0001.CSV	2985.39	0.0257421
0001.CSV	2987.32	0.0252563
0001.CSV	2989.25	0.0251621
0001.CSV	2991.18	0.025368
0001.CSV	2993.11	0.0252056
0001.CSV	2995.03	0.0247271
0001.CSV	2996.96	0.0245225
0001.CSV	2998.89	0.0241262
0001.CSV	3000.82	0.0235937
0001.CSV	3002.75	0.0234131
0001.CSV	3004.68	0.0232215
0001.CSV	3006.61	0.0231164
0001.CSV	3008.53	0.0233652
0001.CSV	3010.46	0.0236571
0001.CSV	3012.39	0.0237097
0001.CSV	3014.32	0.023607
0001.CSV	3016.25	0.0234361
0001.CSV	3018.18	0.0232427
0001.CSV	3020.11	0.0229078
0001.CSV	3022.03	0.0226446
0001.CSV	3023.96	0.022652
0001.CSV	3025.89	0.0224193
0001.CSV	3027.82	0.0221818
0001.CSV	3029.75	0.0224153
0001.CSV	3031.68	0.0227329
0001.CSV	3033.61	0.0228806
0001.CSV	3035.53	0.022666
0001.CSV	3037.46	0.0224072
0001.CSV	3039.39	0.0225417
0001.CSV	3041.32	0.022787
0001.CSV	3043.25	0.0228056
0001.CSV	3045.18	0.0226773
0001.CSV	3047.11	0.0224084
0001.CSV	3049.03	0.0224525
0001.CSV	3050.96	0.0225454
0001.CSV	3052.89	0.0223841
0001.CSV	3054.82	0.0223315
0001.CSV	3056.75	0.0222652
0001.CSV	3058.68	0.0219211
0001.CSV	3060.61	0.0217567
0001.CSV	3062.53	0.0219847
0001.CSV	3064.46	0.0222743
0001.CSV	3066.39	0.0224998
0001.CSV	3068.32	0.0224721
0001.CSV	3070.25	0.0221929
0001.CSV	3072.18	0.0220072
0001.CSV	3074.11	0.0220825
0001.CSV	3076.03	0.0223629
0001.CSV	3077.96	0.0225617
0001.CSV	3079.89	0.0226784
0001.CSV	3081.82	0.0227265
0001.CSV	3083.75	0.0227031
0001.CSV	3085.68	0.0226076
0001.CSV	3087.61	0.0225276
0001.CSV	3089.53	0.0225456
0001.CSV	3091.46	0.0223501
0001.CSV	3093.39	0.0219826
0001.CSV	3095.32	0.0219365
0001.CSV	3097.25	0.0221877
0001.CSV	3099.18	0.022434
0001.CSV	3101.11	0.0223859
0001.CSV	3103.03	0.0222045
0001.CSV	3104.96	0.0221878
0001.CSV	3106.89	0.0224313
0001.CSV	3108.82	0.0226026
0001.CSV	3110.75	0.0224817
0001.CSV	3112.68	0.0224947
0001.CSV	3114.61	0.0227281
0001.CSV	3116.53	0.0228531
0001.CSV	3118.46	0.0228829
0001.CSV	3120.39	0.0228239
0001.CSV	3122.32	0.0225911
0001.CSV	3124.25	0.0222977
0001.CSV	3126.18	0.0221904
0001.CSV	3128.11	0.0224333
0001.CSV	3130.03	0.0225355
0001.CSV	3131.96	0.0222779
0001.CSV	3133.89	0.0221979
0001.CSV	3135.82	0.0224307
0001.CSV	3137.75	0.0228598
0001.CSV	3139.68	0.0229501
0001.CSV	3141.61	0.0226383
0001.CSV	3143.53	0.0223729
0001.CSV	3145.46	0.0222959
0001.CSV	3147.39	0.0223667
0001.CSV	3149.32	0.0226694
0001.CSV	3151.25	0.0230589
0001.CSV	3153.18	0.023149
0001.CSV	3155.1	0.0228656
0001.CSV	3157.03	0.0225251
0001.CSV	3158.96	0.022362
0001.CSV	3160.89	0.0223214
0001.CSV	3162.82	0.0223468
0001.CSV	3164.75	0.0223571
0001.CSV	3166.68	0.0223303
0001.CSV	3168.6	0.0223506
0001.CSV	3170.53	0.0223786
0001.CSV	3172.46	0.022349
0001.CSV	3174.39	0.0223297
0001.CSV	3176.32	0.0223099
0001.CSV	3178.25	0.0224932
0001.CSV	3180.18	0.02267
0001.CSV	3182.1	0.0226531
0001.CSV	3184.03	0.02263
0001.CSV	3185.96	0.022636
0001.CSV	3187.89	0.0227476
0001.CSV	3189.82	0.022804
0001.CSV	3191.75	0.0228241
0001.CSV	3193.68	0.0227476
0001.CSV	3195.6	0.02262
0001.CSV	3197.53	0.0226891
0001.CSV	3199.46	0.022781
0001.CSV	3201.39	0.0228022
0001.CSV	3203.32	0.022833
0001.CSV	3205.25	0.0229326
0001.CSV	3207.18	0.0229347
0001.CSV	3209.1	0.0227698
0001.CSV	3211.03	0.0227996
0001.CSV	3212.96	0.0229769
0001.CSV	3214.89	0.0231119
0001.CSV	3216.82	0.0230856
0001.CSV	3218.75	0.0231337
0001.CSV	3220.68	0.0230504
0001.CSV	3222.6	0.0229721
0001.CSV	3224.53	0.0229695
0001.CSV	3226.46	0.0230169
0001.CSV	3228.39	0.0231505
0001.CSV	3230.32	0.0234569
0001.CSV	3232.25	0.0237623
0001.CSV	3234.18	0.0237694
0001.CSV	3236.1	0.0234927
0001.CSV	3238.03	0.0232652
0001.CSV	3239.96	0.0232016
0001.CSV	3241.89	0.0232556
0001.CSV	3243.82	0.0234752
0001.CSV	3245.75	0.0238327
0001.CSV	3247.68	0.0236995
0001.CSV	3249.6	0.0233199
0001.CSV	3251.53	0.0231784
0001.CSV	3253.46	0.0234216
0001.CSV	3255.39	0.0237081
0001.CSV	3257.32	0.0235326
0001.CSV	3259.25	0.023197
0001.CSV	3261.18	0.0231263
0001.CSV	3263.1	0.0231485
0001.CSV	3265.03	0.023265
0001.CSV	3266.96	0.0235324
0001.CSV	3268.89	0.0239091
0001.CSV	3270.82	0.0240882
0001.CSV	3272.75	0.0240255
0001.CSV	3274.68	0.0239544
0001.CSV	3276.6	0.0237081
0001.CSV	3278.53	0.0234359
0001.CSV	3280.46	0.0233577
0001.CSV	3282.39	0.0232534
0001.CSV	3284.32	0.023283
0001.CSV	3286.25	0.0233261
0001.CSV	3288.17	0.0234729
0001.CSV	3290.1	0.0238277
0001.CSV	3292.03	0.0241202
0001.CSV	3293.96	0.0241688
0001.CSV	3295.89	0.0240348
0001.CSV	3297.82	0.0237798
0001.CSV	3299.75	0.0236281
0001.CSV	3301.67	0.0237955
0001.CSV	3303.6	0.0240379
0001.CSV	3305.53	0.0241307
0001.CSV	3307.46	0.024161
0001.CSV	3309.39	0.0240875
0001.CSV	3311.32	0.0237527
0001.CSV	3313.25	0.0235436
0001.CSV	3315.17	0.0234145
0001.CSV	3317.1	0.0232601
0001.CSV	3319.03	0.0232465
0001.CSV	3320.96	0.0233158
0001.CSV	3322.89	0.023559
0001.CSV	3324.82	0.0238653
0001.CSV	3326.75	0.0237832
0001.CSV	3328.67	0.0234149
0001.CSV	3330.6	0.0232298
0001.CSV	3332.53	0.023161
0001.CSV	3334.46	0.0234018
0001.CSV	3336.39	0.0239744
0001.CSV	3338.32	0.0242542
0001.CSV	3340.24	0.0240397
0001.CSV	3342.17	0.0239157
0001.CSV	3344.1	0.023697
0001.CSV	3346.03	0.0234392
0001.CSV	3347.96	0.0236544
0001.CSV	3349.89	0.0239975
0001.CSV	3351.82	0.0238589
0001.CSV	3353.74	0.023498
0001.CSV	3355.67	0.0233423
0001.CSV	3357.6	0.0234321
0001.CSV	3359.53	0.0236717
0001.CSV	3361.46	0.0237029
0001.CSV	3363.39	0.0236426
0001.CSV	3365.32	0.02393
0001.CSV	3367.24	0.0241448
0001.CSV	3369.17	0.0240643
0001.CSV	3371.1	0.0238263
0001.CSV	3373.03	0.0235535
0001.CSV	3374.96	0.0235468
0001.CSV	3376.89	0.0235765
0001.CSV	3378.82	0.0234972
0001.CSV	3380.74	0.0234468
0001.CSV	3382.67	0.0231523
0001.CSV	3384.6	0.0230864
0001.CSV	3386.53	0.0232124
0001.CSV	3388.46	0.0234583
0001.CSV	3390.39	0.0237207
0001.CSV	3392.32	0.0238191
0001.CSV	3394.24	0.0236932
0001.CSV	3396.17	0.023542
0001.CSV	3398.1	0.0237433
0001.CSV	3400.03	0.0238526
0001.CSV	3401.96	0.0237123
0001.CSV	3403.89	0.0234308
0001.CSV	3405.82	0.02322
0001.CSV	3407.74	0.0233132
0001.CSV	3409.67	0.0234091
0001.CSV	3411.6	0.0234039
0001.CSV	3413.53	0.0233015
0001.CSV	3415.46	0.0228844
0001.CSV	3417.39	0.0225037
0001.CSV	3419.32	0.0225468
0001.CSV	3421.24	0.0226692
0001.CSV	3423.17	0.0225628
0001.CSV	3425.1	0.0226281
0001.CSV	3427.03	0.0229177
0001.CSV	3428.96	0.0231807
0001.CSV	3430.89	0.023226
0001.CSV	3432.82	0.0232512
0001.CSV	3434.74	0.0232961
0001.CSV	3436.67	0.0232419
0001.CSV	3438.6	0.0227647
0001.CSV	3440.53	0.0221505
0001.CSV	3442.46	0.0220068
0001.CSV	3444.39	0.021962
0001.CSV	3446.32	0.0220154
0001.CSV	3448.24	0.0222383
0001.CSV	3450.17	0.0219598
0001.CSV	3452.1	0.0217412
0001.CSV	3454.03	0.0216433
0001.CSV	3455.96	0.0216191
0001.CSV	3457.89	0.0219227
0001.CSV	3459.82	0.0222596
0001.CSV	3461.74	0.0221608
0001.CSV	3463.67	0.0221884
0001.CSV	3465.6	0.0223883
0001.CSV	3467.53	0.0225927
0001.CSV	3469.46	0.0224245
0001.CSV	3471.39	0.0219468
0001.CSV	3473.32	0.0216146
0001.CSV	3475.24	0.0216344
0001.CSV	3477.17	0.0217888
0001.CSV	3479.1	0.0219036
0001.CSV	3481.03	0.0216939
0001.CSV	3482.96	0.0214195
0001.CSV	3484.89	0.0214762
0001.CSV	3486.82	0.021648
0001.CSV	3488.74	0.0215557
0001.CSV	3490.67	0.021368
0001.CSV	3492.6	0.0213436
0001.CSV	3494.53	0.0214841
0001.CSV	3496.46	0.021686
0001.CSV	3498.39	0.0215844
0001.CSV	3500.32	0.0212605
0001.CSV	3502.24	0.021327
0001.CSV	3504.17	0.0213901
0001.CSV	3506.1	0.0208882
0001.CSV	3508.03	0.0203251
0001.CSV	3509.96	0.0204815
0001.CSV	3511.89	0.0208991
0001.CSV	3513.81	0.0210124
0001.CSV	3515.74	0.0207177
0001.CSV	3517.67	0.0204155
0001.CSV	3519.6	0.020231
0001.CSV	3521.53	0.0203624
0001.CSV	3523.46	0.0208224
0001.CSV	3525.39	0.0204164
0001.CSV	3527.31	0.019926
0001.CSV	3529.24	0.0201711
0001.CSV	3531.17	0.0201572
0001.CSV	3533.1	0.0200738
0001.CSV	3535.03	0.0202456
0001.CSV	3536.96	0.0204949
0001.CSV	3538.89	0.0202196
0001.CSV	3540.81	0.0202066
0001.CSV	3542.74	0.0203252
0001.CSV	3544.67	0.0205845
0001.CSV	3546.6	0.0205943
0001.CSV	3548.53	0.0202865
0001.CSV	3550.46	0.0198669
0001.CSV	3552.39	0.0197721
0001.CSV	3554.31	0.0196554
0001.CSV	3556.24	0.019483
0001.CSV	3558.17	0.0194829
0001.CSV	3560.1	0.0196227
0001.CSV	3562.03	0.0194375
0001.CSV	3563.96	0.018634
0001.CSV	3565.89	0.0178536
0001.CSV	3567.81	0.0191092
0001.CSV	3569.74	0.0198769
0001.CSV	3571.67	0.0193191
0001.CSV	3573.6	0.0188008
0001.CSV	3575.53	0.0187718
0001.CSV	3577.46	0.0189276
0001.CSV	3579.39	0.0192133
0001.CSV	3581.31	0.0194495
0001.CSV	3583.24	0.0194028
0001.CSV	3585.17	0.0190735
0001.CSV	3587.1	0.0188484
0001.CSV	3589.03	0.0195887
0001.CSV	3590.96	0.0194268
0001.CSV	3592.89	0.0188123
0001.CSV	3594.81	0.0184947
0001.CSV	3596.74	0.0187163
0001.CSV	3598.67	0.0190506
0001.CSV	3600.6	0.019184
0001.CSV	3602.53	0.019191
0001.CSV	3604.46	0.0187044
0001.CSV	3606.39	0.017972
0001.CSV	3608.31	0.0179939
0001.CSV	3610.24	0.0180907
0001.CSV	3612.17	0.0176025
0001.CSV	3614.1	0.0181059
0001.CSV	3616.03	0.0179109
0001.CSV	3617.96	0.0174362
0001.CSV	3619.89	0.0187777
0001.CSV	3621.81	0.0191555
0001.CSV	3623.74	0.018442
0001.CSV	3625.67	0.017729
0001.CSV	3627.6	0.016581
0001.CSV	3629.53	0.0175796
0001.CSV	3631.46	0.0184576
0001.CSV	3633.39	0.018356
0001.CSV	3635.31	0.0183475
0001.CSV	3637.24	0.0178372
0001.CSV	3639.17	0.0178519
0001.CSV	3641.1	0.0178101
0001.CSV	3643.03	0.0177256
0001.CSV	3644.96	0.0169899
0001.CSV	3646.88	0.0161307
0001.CSV	3648.81	0.0170447
0001.CSV	3650.74	0.019134
0001.CSV	3652.67	0.0187088
0001.CSV	3654.6	0.0175422
0001.CSV	3656.53	0.0181139
0001.CSV	3658.46	0.018872
0001.CSV	3660.38	0.0185334
0001.CSV	3662.31	0.0180301
0001.CSV	3664.24	0.0175696
0001.CSV	3666.17	0.0170667
0001.CSV	3668.1	0.016234
0001.CSV	3670.03	0.0167152
0001.CSV	3671.96	0.0176949
0001.CSV	3673.88	0.0165502
0001.CSV	3675.81	0.0171572
0001.CSV	3677.74	0.0180396
0001.CSV	3679.67	0.0179738
0001.CSV	3681.6	0.0180347
0001.CSV	3683.53	0.0176727
0001.CSV	3685.46	0.0173542
0001.CSV	3687.38	0.0172332
0001.CSV	3689.31	0.018177
0001.CSV	3691.24	0.0185987
0001.CSV	3693.17	0.018394
0001.CSV	3695.1	0.0180705
0001.CSV	3697.03	0.0178016
0001.CSV	3698.95	0.0172686
0001.CSV	3700.88	0.0170241
0001.CSV	3702.81	0.0177103
0001.CSV	3704.74	0.0176242
0001.CSV	3706.67	0.0171354
0001.CSV	3708.6	0.0165715
0001.CSV	3710.53	0.0164419
0001.CSV	3712.45	0.0178904
0001.CSV	3714.38	0.0182361
0001.CSV	3716.31	0.017701
0001.CSV	3718.24	0.0173373
0001.CSV	3720.17	0.0172023
0001.CSV	3722.1	0.0172898
0001.CSV	3724.03	0.0174527
0001.CSV	3725.95	0.0175178
0001.CSV	3727.88	0.0179251
0001.CSV	3729.81	0.0172784
0001.CSV	3731.74	0.0169403
0001.CSV	3733.67	0.0173217
0001.CSV	3735.6	0.0183334
0001.CSV	3737.53	0.0189578
0001.CSV	3739.45	0.0179942
0001.CSV	3741.38	0.0171026
0001.CSV	3743.31	0.0161168
0001.CSV	3745.24	0.0166997
0001.CSV	3747.17	0.0166404
0001.CSV	3749.1	0.0156325
0001.CSV	3751.03	0.0163022
0001.CSV	3752.95	0.0177184
0001.CSV	3754.88	0.0175559
0001.CSV	3756.81	0.0170661
0001.CSV	3758.74	0.0170775
0001.CSV	3760.67	0.0176827
0001.CSV	3762.6	0.0173378
0001.CSV	3764.53	0.0167958
0001.CSV	3766.45	0.0171602
0001.CSV	3768.38	0.0168675
0001.CSV	3770.31	0.0175433
0001.CSV	3772.24	0.0178914
0001.CSV	3774.17	0.0173891
0001.CSV	3776.1	0.017037
0001.CSV	3778.03	0.016982
0001.CSV	3779.95	0.0178324
0001.CSV	3781.88	0.0175123
0001.CSV	3783.81	0.0169736
0001.CSV	3785.74	0.0175364
0001.CSV	3787.67	0.0175255
0001.CSV	3789.6	0.0174089
0001.CSV	3791.53	0.017374
0001.CSV	3793.45	0.0168923
0001.CSV	3795.38	0.0163972
0001.CSV	3797.31	0.0169819
0001.CSV	3799.24	0.0165075
0001.CSV	3801.17	0.0161377
0001.CSV	3803.1	0.0178199
0001.CSV	3805.03	0.0169393
0001.CSV	3806.95	0.0171633
0001.CSV	3808.88	0.0179074
0001.CSV	3810.81	0.0172621
0001.CSV	3812.74	0.016695
0001.CSV	3814.67	0.0162381
0001.CSV	3816.6	0.0171993
0001.CSV	3818.53	0.0168536
0001.CSV	3820.45	0.0164067
0001.CSV	3822.38	0.0180772
0001.CSV	3824.31	0.017293
0001.CSV	3826.24	0.0169382
0001.CSV	3828.17	0.017338
0001.CSV	3830.1	0.0166744
0001.CSV	3832.03	0.0167383
0001.CSV	3833.95	0.0170986
0001.CSV	3835.88	0.016943
0001.CSV	3837.81	0.0165981
0001.CSV	3839.74	0.0173023
0001.CSV	3841.67	0.0175174
0001.CSV	3843.6	0.0176214
0001.CSV	3845.53	0.0178975
0001.CSV	3847.45	0.0171009
0001.CSV	3849.38	0.0162573
0001.CSV	3851.31	0.015319
0001.CSV	3853.24	0.0156505
0001.CSV	3855.17	0.0178844
0001.CSV	3857.1	0.0178784
0001.CSV	3859.03	0.0172582
0001.CSV	3860.95	0.0164617
0001.CSV	3862.88	0.0164667
0001.CSV	3864.81	0.0174458
0001.CSV	3866.74	0.017245
0001.CSV	3868.67	0.0160887
0001.CSV	3870.6	0.0173912
0001.CSV	3872.52	0.0171447
0001.CSV	3874.45	0.0173836
0001.CSV	3876.38	0.0175944
0001.CSV	3878.31	0.0164972
0001.CSV	3880.24	0.0165139
0001.CSV	3882.17	0.0174703
0001.CSV	3884.1	0.0171179
0001.CSV	3886.02	0.0178025
0001.CSV	3887.95	0.0175444
0001.CSV	3889.88	0.0165407
0001.CSV	3891.81	0.017228
0001.CSV	3893.74	0.0178147
0001.CSV	3895.67	0.0170527
0001.CSV	3897.6	0.0163878
0001.CSV	3899.52	0.016669
0001.CSV	3901.45	0.0168518
0001.CSV	3903.38	0.0168528
0001.CSV	3905.31	0.0178201
0001.CSV	3907.24	0.0178302
0001.CSV	3909.17	0.017408
0001.CSV	3911.1	0.0172819
0001.CSV	3913.02	0.017151
0001.CSV	3914.95	0.0167729
0001.CSV	3916.88	0.0170328
0001.CSV	3918.81	0.0173961
0001.CSV	3920.74	0.0172938
0001.CSV	3922.67	0.0169928
0001.CSV	3924.59	0.0173835
0001.CSV	3926.52	0.0176227
0001.CSV	3928.45	0.0170608
0001.CSV	3930.38	0.0170898
0001.CSV	3932.31	0.0175475
0001.CSV	3934.24	0.0178599
0001.CSV	3936.17	0.0175051
0001.CSV	3938.09	0.0173278
0001.CSV	3940.02	0.0170808
0001.CSV	3941.95	0.0170747
0001.CSV	3943.88	0.0176113
0001.CSV	3945.81	0.0173849
0001.CSV	3947.74	0.0172178
0001.CSV	3949.67	0.0175843
0001.CSV	3951.59	0.0176598
0001.CSV	3953.52	0.0175323
0001.CSV	3955.45	0.0173977
0001.CSV	3957.38	0.0174776
0001.CSV	3959.31	0.0174842
0001.CSV	3961.24	0.0175023
0001.CSV	3963.17	0.0175894
0001.CSV	3965.09	0.0174738
0001.CSV	3967.02	0.0173693
0001.CSV	3968.95	0.017449
0001.CSV	3970.88	0.0174332
0001.CSV	3972.81	0.0174238
0001.CSV	3974.74	0.0176158
0001.CSV	3976.67	0.0177375
0001.CSV	3978.59	0.0175612
0001.CSV	3980.52	0.0175364
0001.CSV	3982.45	0.0177287
0001.CSV	3984.38	0.0177201
0001.CSV	3986.31	0.017552
0001.CSV	3988.24	0.0174092
0001.CSV	3990.17	0.0174645
0001.CSV	3992.09	0.017598
0001.CSV	3994.02	0.017643
0001.CSV	3995.95	0.0177536
0001.CSV	3997.88	0.0176788
0001.CSV	3999.81	0.0175809
0002.CSV	674.992	0.0439652
0002.CSV	676.92	0.0442072
0002.CSV	678.849	0.0439307
0002.CSV	680.778	0.0450268
0002.CSV	682.706	0.0451831
0002.CSV	684.635	0.0458394
0002.CSV	686.563	0.0460897
0002.CSV	688.492	0.0479391
0002.CSV	690.42	0.0488942
0002.CSV	692.349	0.0507132
0002.CSV	694.277	0.0540954
0002.CSV	696.206	0.0622995
0002.CSV	698.134	0.0777957
0002.CSV	700.063	0.0853853
0002.CSV	701.991	0.0693695
0002.CSV	703.92	0.056122
0002.CSV	705.849	0.0556159
0002.CSV	707.777	0.0629606
0002.CSV	709.706	0.0816316
0002.CSV	711.634	0.11071
0002.CSV	713.563	0.110742
0002.CSV	715.491	0.0763121
0002.CSV	717.42	0.0515031
0002.CSV	719.348	0.0430411
0002.CSV	721.277	0.0398175
0002.CSV	723.206	0.0387017
0002.CSV	725.134	0.0379937
0002.CSV	727.063	0.0377266
0002.CSV	728.991	0.0371293
0002.CSV	730.92	0.0367612
0002.CSV	732.848	0.0363926
0002.CSV	734.777	0.036602
0002.CSV	736.705	0.0366277
0002.CSV	738.634	0.0369239
0002.CSV	740.562	0.0369608
0002.CSV	742.491	0.0372391
0002.CSV	744.42	0.037226
0002.CSV	746.348	0.0374784
0002.CSV	748.277	0.0373572
0002.CSV	750.205	0.037505
0002.CSV	752.134	0.0375314
0002.CSV	754.062	0.037775
0002.CSV	755.991	0.0379081
0002.CSV	757.919	0.0383218
0002.CSV	759.848	0.0384241
0002.CSV	761.777	0.0389036
0002.CSV	763.705	0.0391327
0002.CSV	765.634	0.0395147
0002.CSV	767.562	0.0395869
0002.CSV	769.491	0.0398551
0002.CSV	771.419	0.0398689
0002.CSV	773.348	0.0402073
0002.CSV	775.276	0.0404904
0002.CSV	777.205	0.0408703
0002.CSV	779.133	0.0410255
0002.CSV	781.062	0.0414603
0002.CSV	782.99	0.0416966
0002.CSV	784.919	0.0418144
0002.CSV	786.848	0.0418127
0002.CSV	788.776	0.0421843
0002.CSV	790.705	0.0425035
0002.CSV	792.633	0.0431305
0002.CSV	794.562	0.0437597
0002.CSV	796.49	0.0444874
0002.CSV	798.419	0.0450447
0002.CSV	800.347	0.045867
0002.CSV	802.276	0.0461982
0002.CSV	804.205	0.0467243
0002.CSV	806.133	0.0472188
0002.CSV	808.062	0.0478632
0002.CSV	809.99	0.0483094
0002.CSV	811.919	0.0492842
0002.CSV	813.847	0.0502171
0002.CSV	815.776	0.0514958
0002.CSV	817.704	0.0527268
0002.CSV	819.633	0.0545057
0002.CSV	821.562	0.056232
0002.CSV	823.49	0.0584411
0002.CSV	825.419	0.0606488
0002.CSV	827.347	0.0635486
0002.CSV	829.276	0.0663251
0002.CSV	831.204	0.0696982
0002.CSV	833.133	0.0734941
0002.CSV	835.061	0.0787362
0002.CSV	836.99	0.0852035
0002.CSV	838.918	0.0947772
0002.CSV	840.847	0.109618
0002.CSV	842.775	0.125535
0002.CSV	844.704	0.129643
0002.CSV	846.633	0.135473
0002.CSV	848.561	0.155677
0002.CSV	850.49	0.181025
0002.CSV	852.418	0.20526
0002.CSV	854.347	0.223044
0002.CSV	856.275	0.229931
0002.CSV	858.204	0.224739
0002.CSV	860.132	0.210068
0002.CSV	862.061	0.187923
0002.CSV	863.99	0.160934
0002.CSV	865.918	0.131429
0002.CSV	867.847	0.102934
0002.CSV	869.775	0.0793686
0002.CSV	871.704	0.0625897
0002.CSV	873.632	0.0516672
0002.CSV	875.561	0.0444379
0002.CSV	877.489	0.039943
0002.CSV	879.418	0.0369357
0002.CSV	881.346	0.0346527
0002.CSV	883.275	0.0326771
0002.CSV	885.204	0.0311588
0002.CSV	887.132	0.030068
0002.CSV	889.061	0.0298018
0002.CSV	890.989	0.0297442
0002.CSV	892.918	0.0298794
0002.CSV	894.846	0.0300399
0002.CSV	896.775	0.0303188
0002.CSV	898.703	0.0304114
0002.CSV	900.632	0.0305035
0002.CSV	902.561	0.0305403
0002.CSV	904.489	0.0309714
0002.CSV	906.418	0.0315652
0002.CSV	908.346	0.0321813
0002.CSV	910.275	0.031706
0002.CSV	912.203	0.0310588
0002.CSV	914.132	0.0308891
0002.CSV	916.06	0.0311744
0002.CSV	917.989	0.0313525
0002.CSV	919.917	0.0316145
0002.CSV	921.846	0.0317707
0002.CSV	923.774	0.0320813
0002.CSV	925.703	0.0322521
0002.CSV	927.632	0.0325012
0002.CSV	929.56	0.0326631
0002.CSV	931.489	0.0329599
0002.CSV	933.417	0.0331294
0002.CSV	935.346	0.0333873
0002.CSV	937.274	0.0334476
0002.CSV	939.203	0.0335433
0002.CSV	941.131	0.0336386
0002.CSV	943.06	0.0339218
0002.CSV	944.989	0.0340766
0002.CSV	946.917	0.0343283
0002.CSV	948.846	0.0346088
0002.CSV	950.774	0.0350484
0002.CSV	952.703	0.035336
0002.CSV	954.631	0.0357021
0002.CSV	956.56	0.0360213
0002.CSV	958.488	0.0363581
0002.CSV	960.417	0.0365481
0002.CSV	962.346	0.03685
0002.CSV	964.274	0.0370829
0002.CSV	966.203	0.0374411
0002.CSV	968.131	0.0377486
0002.CSV	970.06	0.0381847
0002.CSV	971.988	0.0384755
0002.CSV	973.917	0.0389412
0002.CSV	975.845	0.0393409
0002.CSV	977.774	0.0398708
0002.CSV	979.702	0.0403605
0002.CSV	981.631	0.0409829
0002.CSV	983.559	0.041499
0002.CSV	985.488	0.0421433
0002.CSV	987.417	0.0426824
0002.CSV	989.345	0.0432922
0002.CSV	991.274	0.0438359
0002.CSV	993.202	0.0444147
0002.CSV	995.131	0.0448414
0002.CSV	997.059	0.0452959
0002.CSV	998.988	0.0456512
0002.CSV	1000.92	0.0460945
0002.CSV	1002.85	0.0464446
0002.CSV	1004.77	0.0468592
0002.CSV	1006.7	0.0471743
0002.CSV	1008.63	0.0476224
0002.CSV	1010.56	0.0480738
0002.CSV	1012.49	0.0486282
0002.CSV	1014.42	0.0490618
0002.CSV	1016.35	0.0496878
0002.CSV	1018.27	0.0502935
0002.CSV	1020.2	0.0509221
0002.CSV	1022.13	0.051496
0002.CSV	1024.06	0.0522216
0002.CSV	1025.99	0.0528263
0002.CSV	1027.92	0.0535259
0002.CSV	1029.85	0.054107
0002.CSV	1031.77	0.0547547
0002.CSV	1033.7	0.0553149
0002.CSV	1035.63	0.055949
0002.CSV	1037.56	0.0564187
0002.CSV	1039.49	0.0569044
0002.CSV	1041.42	0.05718
0002.CSV	1043.34	0.0575534
0002.CSV	1045.27	0.0578552
0002.CSV	1047.2	0.0581202
0002.CSV	1049.13	0.058312
0002.CSV	1051.06	0.0587439
0002.CSV	1052.99	0.0591082
0002.CSV	1054.92	0.0596013
0002.CSV	1056.84	0.0600786
0002.CSV	1058.77	0.0607393
0002.CSV	1060.7	0.0611734
0002.CSV	1062.63	0.0615977
0002.CSV	1064.56	0.0618924
0002.CSV	1066.49	0.0623374
0002.CSV	1068.42	0.0627362
0002.CSV	1070.34	0.0632877
0002.CSV	1072.27	0.0638814
0002.CSV	1074.2	0.064867
0002.CSV	1076.13	0.0662932
0002.CSV	1078.06	0.0692421
0002.CSV	1079.99	0.0764358
0002.CSV	1081.92	0.088449
0002.CSV	1083.84	0.0888912
0002.CSV	1085.77	0.074472
0002.CSV	1087.7	0.0640418
0002.CSV	1089.63	0.0605639
0002.CSV	1091.56	0.059533
0002.CSV	1093.49	0.0592372
0002.CSV	1095.41	0.0591475
0002.CSV	1097.34	0.059152
0002.CSV	1099.27	0.0591348
0002.CSV	1101.2	0.0591167
0002.CSV	1103.13	0.0591263
0002.CSV	1105.06	0.0592524
0002.CSV	1106.99	0.0593791
0002.CSV	1108.91	0.0595362
0002.CSV	1110.84	0.0596553
0002.CSV	1112.77	0.0596715
0002.CSV	1114.7	0.0595078
0002.CSV	1116.63	0.0591777
0002.CSV	1118.56	0.0587797
0002.CSV	1120.49	0.0584368
0002.CSV	1122.41	0.0580838
0002.CSV	1124.34	0.0578127
0002.CSV	1126.27	0.0575135
0002.CSV	1128.2	0.0572043
0002.CSV	1130.13	0.0569022
0002.CSV	1132.06	0.056652
0002.CSV	1133.99	0.0563851
0002.CSV	1135.91	0.0561982
0002.CSV	1137.84	0.0560263
0002.CSV	1139.77	0.0559185
0002.CSV	1141.7	0.0558708
0002.CSV	1143.63	0.0558857
0002.CSV	1145.56	0.055884
0002.CSV	1147.49	0.0560027
0002.CSV	1149.41	0.0561248
0002.CSV	1151.34	0.0562482
0002.CSV	1153.27	0.0563771
0002.CSV	1155.2	0.0564769
0002.CSV	1157.13	0.05656
0002.CSV	1159.06	0.056736
0002.CSV	1160.99	0.0568714
0002.CSV	1162.91	0.0570195
0002.CSV	1164.84	0.0570811
0002.CSV	1166.77	0.0570971
0002.CSV	1168.7	0.0570629
0002.CSV	1170.63	0.0569849
0002.CSV	1172.56	0.0568123
0002.CSV	1174.49	0.0567421
0002.CSV	1176.41	0.0566441
0002.CSV	1178.34	0.0565859
0002.CSV	1180.27	0.056512
0002.CSV	1182.2	0.0563703
0002.CSV	1184.13	0.0561327
0002.CSV	1186.06	0.0558578
0002.CSV	1187.99	0.0555753
0002.CSV	1189.91	0.0553405
0002.CSV	1191.84	0.0551179
0002.CSV	1193.77	0.0549709
0002.CSV	1195.7	0.0548969
0002.CSV	1197.63	0.0549119
0002.CSV	1199.56	0.0549927
0002.CSV	1201.48	0.0550775
[truncated: 103,246 more rows]

## Sheet: S.plana_250_2_mFTIR_data
Select spectrum number	Wavenumbers	Absorbance
0001.CSV	674.992	0.022621
0001.CSV	678.849	0.0212724
0001.CSV	682.706	0.022496
0001.CSV	686.563	0.0219172
0001.CSV	690.42	0.0238075
0001.CSV	694.277	0.0260225
0001.CSV	698.134	0.03001
0001.CSV	701.991	0.0273441
0001.CSV	705.849	0.0267222
0001.CSV	709.706	0.0321664
0001.CSV	713.563	0.0327022
0001.CSV	717.42	0.0224115
0001.CSV	721.277	0.0174398
0001.CSV	725.134	0.0162896
0001.CSV	728.991	0.017106
0001.CSV	732.848	0.0168195
0001.CSV	736.705	0.0177204
0001.CSV	740.562	0.0174238
0001.CSV	744.42	0.0181197
0001.CSV	748.277	0.017841
0001.CSV	752.134	0.0187524
0001.CSV	755.991	0.0184389
0001.CSV	759.848	0.0191424
0001.CSV	763.705	0.0188486
0001.CSV	767.562	0.0196479
0001.CSV	771.419	0.0195612
0001.CSV	775.276	0.0204454
0001.CSV	779.133	0.0203952
0001.CSV	782.99	0.0211161
0001.CSV	786.848	0.0208683
0001.CSV	790.705	0.0215715
0001.CSV	794.562	0.0215424
0001.CSV	798.419	0.0222934
0001.CSV	802.276	0.0220554
0001.CSV	806.133	0.0224483
0001.CSV	809.99	0.0219356
0001.CSV	813.847	0.0225553
0001.CSV	817.704	0.023
0001.CSV	821.562	0.0244561
0001.CSV	825.419	0.0252319
0001.CSV	829.276	0.0268832
0001.CSV	833.133	0.0283938
0001.CSV	836.99	0.0319094
0001.CSV	840.847	0.0361538
0001.CSV	844.704	0.0414216
0001.CSV	848.561	0.0496692
0001.CSV	852.418	0.0594536
0001.CSV	856.275	0.058907
0001.CSV	860.132	0.0504079
0001.CSV	863.99	0.0392902
0001.CSV	867.847	0.0286551
0001.CSV	871.704	0.0202529
0001.CSV	875.561	0.0161557
0001.CSV	879.418	0.0137648
0001.CSV	883.275	0.012354
0001.CSV	887.132	0.0113623
0001.CSV	890.989	0.011339
0001.CSV	894.846	0.0113529
0001.CSV	898.703	0.0116699
0001.CSV	902.561	0.0118316
0001.CSV	906.418	0.0122546
0001.CSV	910.275	0.0122511
0001.CSV	914.132	0.0123302
0001.CSV	917.989	0.0124336
0001.CSV	921.846	0.012713
0001.CSV	925.703	0.0128149
0001.CSV	929.56	0.0130069
0001.CSV	933.417	0.0130975
0001.CSV	937.274	0.0132662
0001.CSV	941.131	0.0133375
0001.CSV	944.989	0.0134728
0001.CSV	948.846	0.01363
0001.CSV	952.703	0.0138708
0001.CSV	956.56	0.0140256
0001.CSV	960.417	0.0141562
0001.CSV	964.274	0.0143291
0001.CSV	968.131	0.014463
0001.CSV	971.988	0.0146702
0001.CSV	975.845	0.0148488
0001.CSV	979.702	0.0150936
0001.CSV	983.559	0.0152865
0001.CSV	987.417	0.0156016
0001.CSV	991.274	0.0157851
0001.CSV	995.131	0.0160316
0001.CSV	998.988	0.0161219
0001.CSV	1002.85	0.0163596
0001.CSV	1006.7	0.0164307
0001.CSV	1010.56	0.0166498
0001.CSV	1014.42	0.0167182
0001.CSV	1018.27	0.0170344
0001.CSV	1022.13	0.0170805
0001.CSV	1025.99	0.0173625
0001.CSV	1029.85	0.0174695
0001.CSV	1033.7	0.0178869
0001.CSV	1037.56	0.0179981
0001.CSV	1041.42	0.0183781
0001.CSV	1045.27	0.0184182
0001.CSV	1049.13	0.0187957
0001.CSV	1052.99	0.0189205
0001.CSV	1056.84	0.0195395
0001.CSV	1060.7	0.019865
0001.CSV	1064.56	0.0206426
0001.CSV	1068.42	0.0210465
0001.CSV	1072.27	0.0220011
0001.CSV	1076.13	0.0229534
0001.CSV	1079.99	0.0248098
0001.CSV	1083.84	0.0243442
0001.CSV	1087.7	0.0223629
0001.CSV	1091.56	0.0210427
0001.CSV	1095.41	0.0210799
0001.CSV	1099.27	0.0207171
0001.CSV	1103.13	0.020777
0001.CSV	1106.99	0.0203324
0001.CSV	1110.84	0.0203135
0001.CSV	1114.7	0.0198795
0001.CSV	1118.56	0.0199792
0001.CSV	1122.41	0.0195756
0001.CSV	1126.27	0.0196409
0001.CSV	1130.13	0.0192
0001.CSV	1133.99	0.0192609
0001.CSV	1137.84	0.0188224
0001.CSV	1141.7	0.0189135
0001.CSV	1145.56	0.0185945
0001.CSV	1149.41	0.0188012
0001.CSV	1153.27	0.0184287
0001.CSV	1157.13	0.0186164
0001.CSV	1160.99	0.0183442
0001.CSV	1164.84	0.018573
0001.CSV	1168.7	0.0182336
0001.CSV	1172.56	0.0184216
0001.CSV	1176.41	0.0181018
0001.CSV	1180.27	0.018325
0001.CSV	1184.13	0.0179503
0001.CSV	1187.99	0.0180326
0001.CSV	1191.84	0.0175145
0001.CSV	1195.7	0.0175596
0001.CSV	1199.56	0.0171214
0001.CSV	1203.41	0.0173058
0001.CSV	1207.27	0.0169917
0001.CSV	1211.13	0.0173087
0001.CSV	1214.98	0.0171375
0001.CSV	1218.84	0.0175348
0001.CSV	1222.7	0.0173973
0001.CSV	1226.56	0.0178698
0001.CSV	1230.41	0.0177292
0001.CSV	1234.27	0.0181345
0001.CSV	1238.13	0.0180073
0001.CSV	1241.98	0.0184297
0001.CSV	1245.84	0.0182218
0001.CSV	1249.7	0.0185936
0001.CSV	1253.56	0.0183255
0001.CSV	1257.41	0.0185291
0001.CSV	1261.27	0.0181981
0001.CSV	1265.13	0.0186638
0001.CSV	1268.98	0.0186775
0001.CSV	1272.84	0.0192966
0001.CSV	1276.7	0.0192495
0001.CSV	1280.56	0.0197231
0001.CSV	1284.41	0.0196449
0001.CSV	1288.27	0.0201573
0001.CSV	1292.13	0.0201336
0001.CSV	1295.98	0.0207179
0001.CSV	1299.84	0.0207589
0001.CSV	1303.7	0.0213561
0001.CSV	1307.56	0.0213555
0001.CSV	1311.41	0.021914
0001.CSV	1315.27	0.0219122
0001.CSV	1319.13	0.0225531
0001.CSV	1322.98	0.0226658
0001.CSV	1326.84	0.0233717
0001.CSV	1330.7	0.0235046
0001.CSV	1334.56	0.0242299
0001.CSV	1338.41	0.0245382
0001.CSV	1342.27	0.0256018
0001.CSV	1346.13	0.025859
0001.CSV	1349.98	0.0267392
0001.CSV	1353.84	0.0271358
0001.CSV	1357.7	0.0281552
0001.CSV	1361.56	0.0286485
0001.CSV	1365.41	0.0299199
0001.CSV	1369.27	0.030396
0001.CSV	1373.13	0.0316474
0001.CSV	1376.98	0.0324565
0001.CSV	1380.84	0.0338058
0001.CSV	1384.7	0.0345659
0001.CSV	1388.56	0.0362169
0001.CSV	1392.41	0.0369733
0001.CSV	1396.27	0.0386078
0001.CSV	1400.13	0.0395174
0001.CSV	1403.98	0.0408824
0001.CSV	1407.84	0.041606
0001.CSV	1411.7	0.0427712
0001.CSV	1415.55	0.0430685
0001.CSV	1419.41	0.0442249
0001.CSV	1423.27	0.0446549
0001.CSV	1427.12	0.0458618
0001.CSV	1430.98	0.0464622
0001.CSV	1434.84	0.047942
0001.CSV	1438.7	0.0488816
0001.CSV	1442.55	0.0498892
0001.CSV	1446.41	0.0495764
0001.CSV	1450.27	0.0493642
0001.CSV	1454.12	0.0482694
0001.CSV	1457.98	0.0476593
0001.CSV	1461.84	0.0465433
0001.CSV	1465.7	0.046482
0001.CSV	1469.55	0.0455073
0001.CSV	1473.41	0.0443449
0001.CSV	1477.27	0.0420773
0001.CSV	1481.12	0.0410562
0001.CSV	1484.98	0.0395514
0001.CSV	1488.84	0.0383194
0001.CSV	1492.7	0.0364976
0001.CSV	1496.55	0.0356056
0001.CSV	1500.41	0.0340234
0001.CSV	1504.27	0.0334682
0001.CSV	1508.12	0.03115
0001.CSV	1511.98	0.0300258
0001.CSV	1515.84	0.0283603
0001.CSV	1519.7	0.0270208
0001.CSV	1523.55	0.0244403
0001.CSV	1527.41	0.0232298
0001.CSV	1531.27	0.0215635
0001.CSV	1535.12	0.0203777
0001.CSV	1538.98	0.0185517
0001.CSV	1542.84	0.0167404
0001.CSV	1546.7	0.0150059
0001.CSV	1550.55	0.014121
0001.CSV	1554.41	0.012743
0001.CSV	1558.27	0.0116429
0001.CSV	1562.12	0.0101932
0001.CSV	1565.98	0.00964795
0001.CSV	1569.84	0.00867372
0001.CSV	1573.69	0.00798699
0001.CSV	1577.55	0.00700897
0001.CSV	1581.41	0.00649583
0001.CSV	1585.27	0.00599172
0001.CSV	1589.12	0.00582176
0001.CSV	1592.98	0.00565825
0001.CSV	1596.84	0.00565238
0001.CSV	1600.69	0.00548008
0001.CSV	1604.55	0.00547816
0001.CSV	1608.41	0.00539116
0001.CSV	1612.27	0.00534353
0001.CSV	1616.12	0.00514848
0001.CSV	1619.98	0.0050818
0001.CSV	1623.84	0.00491394
0001.CSV	1627.69	0.00487343
0001.CSV	1631.55	0.00467276
0001.CSV	1635.41	0.00461311
0001.CSV	1639.27	0.00463468
0001.CSV	1643.12	0.00448635
0001.CSV	1646.98	0.00445414
0001.CSV	1650.84	0.00451219
0001.CSV	1654.69	0.00459262
0001.CSV	1658.55	0.00446981
0001.CSV	1662.41	0.00437739
0001.CSV	1666.27	0.00428713
0001.CSV	1670.12	0.00427592
0001.CSV	1673.98	0.00431133
0001.CSV	1677.84	0.00425029
0001.CSV	1681.69	0.00408961
0001.CSV	1685.55	0.00439556
0001.CSV	1689.41	0.00428947
0001.CSV	1693.27	0.00411935
0001.CSV	1697.12	0.00394668
0001.CSV	1700.98	0.00428616
0001.CSV	1704.84	0.00418632
0001.CSV	1708.69	0.00422423
0001.CSV	1712.55	0.0039409
0001.CSV	1716.41	0.00415979
0001.CSV	1720.27	0.0042359
0001.CSV	1724.12	0.00418679
0001.CSV	1727.98	0.00393314
0001.CSV	1731.84	0.0040466
0001.CSV	1735.69	0.00404068
0001.CSV	1739.55	0.00408169
0001.CSV	1743.41	0.00374354
0001.CSV	1747.27	0.00382877
0001.CSV	1751.12	0.00372639
0001.CSV	1754.98	0.0037819
0001.CSV	1758.84	0.00356193
0001.CSV	1762.69	0.00377542
0001.CSV	1766.55	0.00361208
0001.CSV	1770.41	0.00389081
0001.CSV	1774.26	0.00418652
0001.CSV	1778.12	0.00464593
0001.CSV	1781.98	0.00483607
0001.CSV	1785.84	0.00510838
0001.CSV	1789.69	0.00480471
0001.CSV	1793.55	0.00472836
0001.CSV	1797.41	0.00427261
0001.CSV	1801.26	0.00417852
0001.CSV	1805.12	0.00384675
0001.CSV	1808.98	0.00388834
0001.CSV	1812.84	0.00379751
0001.CSV	1816.69	0.00390816
0001.CSV	1820.55	0.00371509
0001.CSV	1824.41	0.00383679
0001.CSV	1828.26	0.00378896
0001.CSV	1832.12	0.00404918
0001.CSV	1835.98	0.00384481
0001.CSV	1839.84	0.00392271
0001.CSV	1843.69	0.00381235
0001.CSV	1847.55	0.00406914
0001.CSV	1851.41	0.00388961
0001.CSV	1855.26	0.00398728
0001.CSV	1859.12	0.00386861
0001.CSV	1862.98	0.00399527
0001.CSV	1866.84	0.00385675
0001.CSV	1870.69	0.00412383
0001.CSV	1874.55	0.00393892
0001.CSV	1878.41	0.00402587
0001.CSV	1882.26	0.00389021
0001.CSV	1886.12	0.0039843
0001.CSV	1889.98	0.00383485
0001.CSV	1893.83	0.00399838
0001.CSV	1897.69	0.00387824
0001.CSV	1901.55	0.00398905
0001.CSV	1905.41	0.00382425
0001.CSV	1909.26	0.00395802
0001.CSV	1913.12	0.00380182
0001.CSV	1916.98	0.00388643
0001.CSV	1920.83	0.00379905
0001.CSV	1924.69	0.00396564
0001.CSV	1928.55	0.00379039
0001.CSV	1932.4	0.00389091
0001.CSV	1936.26	0.00375102
0001.CSV	1940.12	0.00381616
0001.CSV	1943.98	0.00373324
0001.CSV	1947.83	0.00390602
0001.CSV	1951.69	0.00376853
0001.CSV	1955.55	0.00387039
0001.CSV	1959.4	0.00376105
0001.CSV	1963.26	0.00385477
0001.CSV	1967.12	0.00374213
0001.CSV	1970.98	0.00387704
0001.CSV	1974.83	0.00376683
0001.CSV	1978.69	0.0038533
0001.CSV	1982.55	0.00373104
0001.CSV	1986.4	0.00381022
0001.CSV	1990.26	0.00371844
0001.CSV	1994.12	0.00384388
0001.CSV	1997.98	0.0037443
0001.CSV	2001.83	0.00385518
0001.CSV	2005.69	0.00377525
0001.CSV	2009.55	0.0038521
0001.CSV	2013.4	0.00377458
0001.CSV	2017.26	0.00386226
0001.CSV	2021.12	0.00377706
0001.CSV	2024.97	0.00384662
0001.CSV	2028.83	0.00378311
0001.CSV	2032.69	0.00385691
0001.CSV	2036.55	0.00379624
0001.CSV	2040.4	0.003865
0001.CSV	2044.26	0.003768
0001.CSV	2048.12	0.00380009
0001.CSV	2051.97	0.00377626
0001.CSV	2055.83	0.00387085
0001.CSV	2059.69	0.00381901
0001.CSV	2063.55	0.00384949
0001.CSV	2067.4	0.0038057
0001.CSV	2071.26	0.00383422
0001.CSV	2075.12	0.00378023
0001.CSV	2078.97	0.00382532
0001.CSV	2082.83	0.00379541
0001.CSV	2086.69	0.00384531
0001.CSV	2090.55	0.00381947
0001.CSV	2094.4	0.00382546
0001.CSV	2098.26	0.00378277
0001.CSV	2102.12	0.00379377
0001.CSV	2105.97	0.00378227
0001.CSV	2109.83	0.00380563
0001.CSV	2113.69	0.00380821
0001.CSV	2117.55	0.00383669
0001.CSV	2121.4	0.00384608
0001.CSV	2125.26	0.00385711
0001.CSV	2129.12	0.00386734
0001.CSV	2132.97	0.00387289
0001.CSV	2136.83	0.0038506
0001.CSV	2140.69	0.00382288
0001.CSV	2144.55	0.00384511
0001.CSV	2148.4	0.00384879
0001.CSV	2152.26	0.00385942
0001.CSV	2156.12	0.00384752
0001.CSV	2159.97	0.00385972
0001.CSV	2163.83	0.0038301
0001.CSV	2167.69	0.00387764
0001.CSV	2171.55	0.00384829
0001.CSV	2175.4	0.00388951
0001.CSV	2179.26	0.00388794
0001.CSV	2183.12	0.00394501
0001.CSV	2186.97	0.0038865
0001.CSV	2190.83	0.00388998
0001.CSV	2194.69	0.00384037
0001.CSV	2198.55	0.0038996
0001.CSV	2202.4	0.0038283
0001.CSV	2206.26	0.00384254
0001.CSV	2210.12	0.00375924
0001.CSV	2213.97	0.00378508
0001.CSV	2217.83	0.00366557
0001.CSV	2221.69	0.00366621
0001.CSV	2225.54	0.00355902
0001.CSV	2229.4	0.0035936
0001.CSV	2233.26	0.0034682
0001.CSV	2237.12	0.00346419
0001.CSV	2240.97	0.00334067
0001.CSV	2244.83	0.00335115
0001.CSV	2248.69	0.00318863
0001.CSV	2252.54	0.00319985
0001.CSV	2256.4	0.00305384
0001.CSV	2260.26	0.00305384
0001.CSV	2264.11	0.00290668
0001.CSV	2267.97	0.00293727
0001.CSV	2271.83	0.00278341
0001.CSV	2275.69	0.0028237
0001.CSV	2279.54	0.00267391
0001.CSV	2283.4	0.00273326
0001.CSV	2287.26	0.00267765
0001.CSV	2291.11	0.00283874
0001.CSV	2294.97	0.00281056
0001.CSV	2298.83	0.00302258
0001.CSV	2302.69	0.00306148
0001.CSV	2306.54	0.00336354
0001.CSV	2310.4	0.00338755
0001.CSV	2314.26	0.00377615
0001.CSV	2318.11	0.00379437
0001.CSV	2321.97	0.00429419
0001.CSV	2325.83	0.00418418
0001.CSV	2329.69	0.00463237
0001.CSV	2333.54	0.00430115
0001.CSV	2337.4	0.00480518
0001.CSV	2341.26	0.00441521
0001.CSV	2345.11	0.00477298
0001.CSV	2348.97	0.00426234
0001.CSV	2352.83	0.00440765
0001.CSV	2356.69	0.00378759
0001.CSV	2360.54	0.00434643
0001.CSV	2364.4	0.00371733
0001.CSV	2368.26	0.00437073
0001.CSV	2372.11	0.00377923
0001.CSV	2375.97	0.00384759
0001.CSV	2379.83	0.00337316
0001.CSV	2383.69	0.00322746
0001.CSV	2387.54	0.00285762
0001.CSV	2391.4	0.0028297
0001.CSV	2395.26	0.00265931
0001.CSV	2399.11	0.0027537
0001.CSV	2402.97	0.00260318
0001.CSV	2406.83	0.00269482
0001.CSV	2410.68	0.00260694
0001.CSV	2414.54	0.00276787
0001.CSV	2418.4	0.00270742
0001.CSV	2422.26	0.00286692
0001.CSV	2426.11	0.00275553
0001.CSV	2429.97	0.00290851
0001.CSV	2433.83	0.00283027
0001.CSV	2437.68	0.00299018
0001.CSV	2441.54	0.0029367
0001.CSV	2445.4	0.00309485
0001.CSV	2449.26	0.00302501
0001.CSV	2453.11	0.00319741
0001.CSV	2456.97	0.00310657
0001.CSV	2460.83	0.00324755
0001.CSV	2464.68	0.00319144
0001.CSV	2468.54	0.00334381
0001.CSV	2472.4	0.00327252
0001.CSV	2476.26	0.00343968
0001.CSV	2480.11	0.00338544
0001.CSV	2483.97	0.003546
0001.CSV	2487.83	0.00347034
0001.CSV	2491.68	0.00359634
0001.CSV	2495.54	0.00350651
0001.CSV	2499.4	0.00362701
0001.CSV	2503.26	0.00352846
0001.CSV	2507.11	0.00361779
0001.CSV	2510.97	0.00352238
0001.CSV	2514.83	0.0036369
0001.CSV	2518.68	0.00354944
0001.CSV	2522.54	0.00362594
0001.CSV	2526.4	0.00348657
0001.CSV	2530.26	0.00353617
0001.CSV	2534.11	0.0033995
0001.CSV	2537.97	0.00343644
0001.CSV	2541.83	0.00331052
0001.CSV	2545.68	0.00336504
0001.CSV	2549.54	0.00322191
0001.CSV	2553.4	0.0032805
0001.CSV	2557.26	0.00322398
0001.CSV	2561.11	0.00329225
0001.CSV	2564.97	0.00313326
0001.CSV	2568.83	0.0031612
0001.CSV	2572.68	0.00308114
0001.CSV	2576.54	0.00313423
0001.CSV	2580.4	0.00302962
0001.CSV	2584.25	0.00309108
0001.CSV	2588.11	0.00303792
0001.CSV	2591.97	0.00309092
0001.CSV	2595.83	0.00299455
0001.CSV	2599.68	0.00304627
0001.CSV	2603.54	0.0029716
0001.CSV	2607.4	0.00302077
0001.CSV	2611.25	0.00299358
0001.CSV	2615.11	0.00307229
0001.CSV	2618.97	0.00299525
0001.CSV	2622.82	0.00303896
0001.CSV	2626.68	0.00299719
0001.CSV	2630.54	0.00303002
0001.CSV	2634.4	0.0030067
0001.CSV	2638.25	0.00308588
0001.CSV	2642.11	0.00298171
0001.CSV	2645.97	0.00294965
0001.CSV	2649.82	0.00289961
0001.CSV	2653.68	0.00291795
0001.CSV	2657.54	0.0028343
0001.CSV	2661.4	0.0028371
0001.CSV	2665.25	0.00282
0001.CSV	2669.11	0.00286395
0001.CSV	2672.97	0.00287793
0001.CSV	2676.82	0.00299005
0001.CSV	2680.68	0.00296779
0001.CSV	2684.54	0.00289301
0001.CSV	2688.4	0.00282456
0001.CSV	2692.25	0.00282136
0001.CSV	2696.11	0.00277451
0001.CSV	2699.97	0.00277564
0001.CSV	2703.82	0.00275637
0001.CSV	2707.68	0.00278388
0001.CSV	2711.54	0.00279912
0001.CSV	2715.4	0.00281086
0001.CSV	2719.25	0.00280809
0001.CSV	2723.11	0.00287126
0001.CSV	2726.97	0.00286946
0001.CSV	2730.82	0.00277298
0001.CSV	2734.68	0.00274873
0001.CSV	2738.54	0.0027409
0001.CSV	2742.4	0.00273243
0001.CSV	2746.25	0.00282463
0001.CSV	2750.11	0.00284254
0001.CSV	2753.97	0.00273119
0001.CSV	2757.82	0.00267715
0001.CSV	2761.68	0.00261468
0001.CSV	2765.54	0.00259474
0001.CSV	2769.39	0.00260561
0001.CSV	2773.25	0.00270262
0001.CSV	2777.11	0.00266011
0001.CSV	2780.97	0.00260141
0001.CSV	2784.82	0.00264058
0001.CSV	2788.68	0.00277968
0001.CSV	2792.54	0.00277181
0001.CSV	2796.39	0.00278478
0001.CSV	2800.25	0.00270345
0001.CSV	2804.11	0.00259048
0001.CSV	2807.97	0.00261424
0001.CSV	2811.82	0.00264178
0001.CSV	2815.68	0.00254371
0001.CSV	2819.54	0.00257891
0001.CSV	2823.39	0.00257891
0001.CSV	2827.25	0.00259591
0001.CSV	2831.11	0.00267725
0001.CSV	2834.97	0.00291759
0001.CSV	2838.82	0.00300139
0001.CSV	2842.68	0.00302101
0001.CSV	2846.54	0.00308908
0001.CSV	2850.39	0.00318847
0001.CSV	2854.25	0.00319711
0001.CSV	2858.11	0.00328077
0001.CSV	2861.97	0.00316143
0001.CSV	2865.82	0.00308357
0001.CSV	2869.68	0.00312319
0001.CSV	2873.54	0.00321931
0001.CSV	2877.39	0.00295839
0001.CSV	2881.25	0.00274893
0001.CSV	2885.11	0.00268165
0001.CSV	2888.97	0.00277808
0001.CSV	2892.82	0.00294101
0001.CSV	2896.68	0.00312362
0001.CSV	2900.54	0.00309842
0001.CSV	2904.39	0.00323293
0001.CSV	2908.25	0.00344355
0001.CSV	2912.11	0.00383141
0001.CSV	2915.97	0.00398045
0001.CSV	2919.82	0.00390609
0001.CSV	2923.68	0.00377505
0001.CSV	2927.54	0.00391669
0001.CSV	2931.39	0.0037673
0001.CSV	2935.25	0.00342014
0001.CSV	2939.11	0.0032362
0001.CSV	2942.96	0.00341597
0001.CSV	2946.82	0.00344819
0001.CSV	2950.68	0.00339099
0001.CSV	2954.54	0.00322735
0001.CSV	2958.39	0.0030788
0001.CSV	2962.25	0.00298628
0001.CSV	2966.11	0.00284868
0001.CSV	2969.96	0.00275643
0001.CSV	2973.82	0.00289024
0001.CSV	2977.68	0.00297483
0001.CSV	2981.53	0.00286435
0001.CSV	2985.39	0.00257824
0001.CSV	2989.25	0.00261638
0001.CSV	2993.11	0.00276831
0001.CSV	2996.96	0.00272276
0001.CSV	3000.82	0.00254311
0001.CSV	3004.68	0.00247699
0001.CSV	3008.53	0.00256004
0001.CSV	3012.39	0.00270919
0001.CSV	3016.25	0.00270569
0001.CSV	3020.11	0.00255551
0001.CSV	3023.96	0.00241845
0001.CSV	3027.82	0.00240609
0001.CSV	3031.68	0.00252588
0001.CSV	3035.53	0.00258271
0001.CSV	3039.39	0.00255341
0001.CSV	3043.25	0.00256571
0001.CSV	3047.11	0.00252088
0001.CSV	3050.96	0.00243648
0001.CSV	3054.82	0.00238276
0001.CSV	3058.68	0.00233966
0001.CSV	3062.53	0.00236667
0001.CSV	3066.39	0.00242591
0001.CSV	3070.25	0.00240632
0001.CSV	3074.11	0.0023851
0001.CSV	3077.96	0.00248759
0001.CSV	3081.82	0.00252892
0001.CSV	3085.68	0.00251092
0001.CSV	3089.53	0.00241592
0001.CSV	3093.39	0.0023221
0001.CSV	3097.25	0.00228663
0001.CSV	3101.11	0.00233226
0001.CSV	3104.96	0.00228659
0001.CSV	3108.82	0.00231474
0001.CSV	3112.68	0.00228619
0001.CSV	3116.53	0.00236251
0001.CSV	3120.39	0.00233073
0001.CSV	3124.25	0.00227077
0001.CSV	3128.11	0.00218618
0001.CSV	3131.96	0.00218088
0001.CSV	3135.82	0.00215065
0001.CSV	3139.68	0.00223996
0001.CSV	3143.53	0.00210443
0001.CSV	3147.39	0.00209667
0001.CSV	3151.25	0.00215964
0001.CSV	3155.1	0.00222311
0001.CSV	3158.96	0.00204813
0001.CSV	3162.82	0.00201404
0001.CSV	3166.68	0.00191596
0001.CSV	3170.53	0.00195689
0001.CSV	3174.39	0.00191572
0001.CSV	3178.25	0.00196934
0001.CSV	3182.1	0.0019116
0001.CSV	3185.96	0.00193716
0001.CSV	3189.82	0.00190291
0001.CSV	3193.68	0.00193056
0001.CSV	3197.53	0.00180092
0001.CSV	3201.39	0.00190121
0001.CSV	3205.25	0.00191828
0001.CSV	3209.1	0.00199753
0001.CSV	3212.96	0.0019716
0001.CSV	3216.82	0.00207839
0001.CSV	3220.68	0.00195789
0001.CSV	3224.53	0.00194548
0001.CSV	3228.39	0.00186886
0001.CSV	3232.25	0.00203225
0001.CSV	3236.1	0.00199147
0001.CSV	3239.96	0.00200882
0001.CSV	3243.82	0.00196401
0001.CSV	3247.68	0.00206115
0001.CSV	3251.53	0.00190521
0001.CSV	3255.39	0.00195746
0001.CSV	3259.25	0.00185382
0001.CSV	3263.1	0.00185263
0001.CSV	3266.96	0.00181769
0001.CSV	3270.82	0.00205033
0001.CSV	3274.68	0.00201158
0001.CSV	3278.53	0.00199517
0001.CSV	3282.39	0.00184271
0001.CSV	3286.25	0.0018858
0001.CSV	3290.1	0.00187549
0001.CSV	3293.96	0.00204237
0001.CSV	3297.82	0.00191539
0001.CSV	3301.67	0.00198365
0001.CSV	3305.53	0.00198668
0001.CSV	3309.39	0.00204713
0001.CSV	3313.25	0.00186574
0001.CSV	3317.1	0.00181796
0001.CSV	3320.96	0.00174057
0001.CSV	3324.82	0.00191868
0001.CSV	3328.67	0.00177713
0001.CSV	3332.53	0.00177224
0001.CSV	3336.39	0.00179726
0001.CSV	3340.24	0.00196644
0001.CSV	3344.1	0.00183126
0001.CSV	3347.96	0.00184121
0001.CSV	3351.82	0.00173694
0001.CSV	3355.67	0.00174938
0001.CSV	3359.53	0.00179187
0001.CSV	3363.39	0.00197047
0001.CSV	3367.24	0.00191862
0001.CSV	3371.1	0.00194062
0001.CSV	3374.96	0.00176515
0001.CSV	3378.82	0.00177577
0001.CSV	3382.67	0.00168944
0001.CSV	3386.53	0.00176838
0001.CSV	3390.39	0.00176329
0001.CSV	3394.24	0.00186517
0001.CSV	3398.1	0.00186264
0001.CSV	3401.96	0.00191512
0001.CSV	3405.82	0.0017432
0001.CSV	3409.67	0.00180574
0001.CSV	3413.53	0.00174416
0001.CSV	3417.39	0.00169865
0001.CSV	3421.24	0.00162495
0001.CSV	3425.1	0.00170524
0001.CSV	3428.96	0.00174167
0001.CSV	3432.82	0.00185669
0001.CSV	3436.67	0.00174589
0001.CSV	3440.53	0.00158028
0001.CSV	3444.39	0.00144888
0001.CSV	3448.24	0.00152312
0001.CSV	3452.1	0.001442
0001.CSV	3455.96	0.00144496
0001.CSV	3459.82	0.00147288
0001.CSV	3463.67	0.00158344
0001.CSV	3467.53	0.00163652
0001.CSV	3471.39	0.00161607
0001.CSV	3475.24	0.00152319
0001.CSV	3479.1	0.00155877
0001.CSV	3482.96	0.00152562
0001.CSV	3486.82	0.00150929
0001.CSV	3490.67	0.00145995
0001.CSV	3494.53	0.00152302
0001.CSV	3498.39	0.00155671
0001.CSV	3502.24	0.00147202
0001.CSV	3506.1	0.00129588
0001.CSV	3509.96	0.00123075
0001.CSV	3513.81	0.00132623
0001.CSV	3517.67	0.00129774
0001.CSV	3521.53	0.00126514
0001.CSV	3525.39	0.00125494
0001.CSV	3529.24	0.00120125
0001.CSV	3533.1	0.00118809
0001.CSV	3536.96	0.00125743
0001.CSV	3540.81	0.00128229
0001.CSV	3544.67	0.00130618
0001.CSV	3548.53	0.00117387
0001.CSV	3552.39	0.00113736
0001.CSV	3556.24	0.00109749
0001.CSV	3560.1	0.0011052
0001.CSV	3563.96	0.000923234
0001.CSV	3567.81	0.00100755
0001.CSV	3571.67	0.00106962
0001.CSV	3575.53	0.000989017
0001.CSV	3579.39	0.00101303
0001.CSV	3583.24	0.00118609
0001.CSV	3587.1	0.00121636
0001.CSV	3590.96	0.00126617
0001.CSV	3594.81	0.00107105
0001.CSV	3598.67	0.00110875
0001.CSV	3602.53	0.000990245
0001.CSV	3606.39	0.000837109
0001.CSV	3610.24	0.000611256
0001.CSV	3614.1	0.000634384
0001.CSV	3617.96	0.000699526
0001.CSV	3621.81	0.00104647
0001.CSV	3625.67	0.000833159
0001.CSV	3629.53	0.000849459
0001.CSV	3633.39	0.000944086
0001.CSV	3637.24	0.000915231
0001.CSV	3641.1	0.000668397
0001.CSV	3644.96	0.000522009
0001.CSV	3648.81	0.000544502
0001.CSV	3652.67	0.00102037
0001.CSV	3656.53	0.000992836
0001.CSV	3660.38	0.00109022
0001.CSV	3664.24	0.000756778
0001.CSV	3668.1	0.00051282
0001.CSV	3671.96	0.000311207
0001.CSV	3675.81	0.000695676
0001.CSV	3679.67	0.000751202
0001.CSV	3683.53	0.000754521
0001.CSV	3687.38	0.000647524
0001.CSV	3691.24	0.00100928
0001.CSV	3695.1	0.000853941
0001.CSV	3698.95	0.000750405
0001.CSV	3702.81	0.000549312
0001.CSV	3706.67	0.000543772
0001.CSV	3710.53	0.000381574
0001.CSV	3714.38	0.000741145
0001.CSV	3718.24	0.000610758
0001.CSV	3722.1	0.000654592
0001.CSV	3725.95	0.000559199
0001.CSV	3729.81	0.000662092
0001.CSV	3733.67	0.000514678
0001.CSV	3737.53	0.00090693
0001.CSV	3741.38	0.000495504
0001.CSV	3745.24	0.000320757
0001.CSV	3749.1	2.9656e-05
0001.CSV	3752.95	0.000484557
0001.CSV	3756.81	0.000427872
0001.CSV	3760.67	0.000571607
0001.CSV	3764.53	0.000425749
0001.CSV	3768.38	0.00059231
0001.CSV	3772.24	0.000644737
0001.CSV	3776.1	0.000700057
0001.CSV	3779.95	0.000550473
0001.CSV	3783.81	0.000593571
0001.CSV	3787.67	0.000550573
0001.CSV	3791.53	0.000599377
0001.CSV	3795.38	0.000350534
0001.CSV	3799.24	0.000377727
0001.CSV	3803.1	0.000370995
0001.CSV	3806.95	0.000636939
0001.CSV	3810.81	0.000510332
0001.CSV	3814.67	0.000557108
0001.CSV	3818.53	0.000449862
0001.CSV	3822.38	0.000616897
0001.CSV	3826.24	0.000477791
0001.CSV	3830.1	0.000465949
0001.CSV	3833.95	0.000261904
0001.CSV	3837.81	0.000503001
0001.CSV	3841.67	0.000607905
0001.CSV	3845.53	0.000731918
0001.CSV	3849.38	0.000295723
0001.CSV	3853.24	0.000262368
0001.CSV	3857.1	0.000458784
0001.CSV	3860.95	0.000437523
0001.CSV	3864.81	0.000264689
0001.CSV	3868.67	0.000459514
0001.CSV	3872.52	0.000533156
0001.CSV	3876.38	0.00056872
0001.CSV	3880.24	0.000329875
0001.CSV	3884.1	0.000609829
0001.CSV	3887.95	0.000626154
0001.CSV	3891.81	0.000621642
0001.CSV	3895.67	0.000368275
0001.CSV	3899.52	0.000190496
0001.CSV	3903.38	0.000252555
0001.CSV	3907.24	0.000609862
0001.CSV	3911.1	0.000473777
0001.CSV	3914.95	0.000391954
0001.CSV	3918.81	0.000387178
0001.CSV	3922.67	0.000509204
0001.CSV	3926.52	0.000431653
0001.CSV	3930.38	0.000534118
0001.CSV	3934.24	0.000650112
0001.CSV	3938.09	0.000606843
0001.CSV	3941.95	0.000416794
0001.CSV	3945.81	0.000472152
0001.CSV	3949.67	0.000486912
0001.CSV	3953.52	0.000531729
0001.CSV	3957.38	0.000434704
0001.CSV	3961.24	0.000521843
0001.CSV	3965.09	0.000551502
0001.CSV	3968.95	0.000566132
0001.CSV	3972.81	0.0005378
0001.CSV	3976.67	0.000563744
0001.CSV	3980.52	0.000509071
0001.CSV	3984.38	0.000556843
0001.CSV	3988.24	0.000519057
0001.CSV	3992.09	0.000508143
0001.CSV	3995.95	0.000467541
0001.CSV	3999.81	0.000436761
0002.CSV	674.992	0.0355349
0002.CSV	678.849	0.0342107
0002.CSV	682.706	0.0352109
0002.CSV	686.563	0.0351502
0002.CSV	690.42	0.0376389
0002.CSV	694.277	0.041593
0002.CSV	698.134	0.0478246
0002.CSV	701.991	0.0448978
0002.CSV	705.849	0.042889
0002.CSV	709.706	0.0505227
0002.CSV	713.563	0.0520412
0002.CSV	717.42	0.0376211
0002.CSV	721.277	0.0297565
0002.CSV	725.134	0.0286333
0002.CSV	728.991	0.0295717
0002.CSV	732.848	0.0295222
0002.CSV	736.705	0.0305771
0002.CSV	740.562	0.0302727
0002.CSV	744.42	0.0309613
0002.CSV	748.277	0.0309492
0002.CSV	752.134	0.0319478
0002.CSV	755.991	0.0319008
0002.CSV	759.848	0.0326091
0002.CSV	763.705	0.0323314
0002.CSV	767.562	0.0329087
0002.CSV	771.419	0.0326505
0002.CSV	775.276	0.0333507
0002.CSV	779.133	0.0333522
0002.CSV	782.99	0.033784
0002.CSV	786.848	0.0335489
0002.CSV	790.705	0.0347942
0002.CSV	794.562	0.0358695
0002.CSV	798.419	0.0379248
0002.CSV	802.276	0.0391185
0002.CSV	806.133	0.0403225
0002.CSV	809.99	0.0403946
0002.CSV	813.847	0.041965
0002.CSV	817.704	0.0450777
0002.CSV	821.562	0.0513631
0002.CSV	825.419	0.0576117
0002.CSV	829.276	0.061733
0002.CSV	833.133	0.0623431
0002.CSV	836.99	0.0641561
0002.CSV	840.847	0.0682983
0002.CSV	844.704	0.0741896
0002.CSV	848.561	0.0848962
0002.CSV	852.418	0.0982002
0002.CSV	856.275	0.0976779
0002.CSV	860.132	0.0842878
0002.CSV	863.99	0.066135
0002.CSV	867.847	0.0487706
0002.CSV	871.704	0.0362946
0002.CSV	875.561	0.0306097
0002.CSV	879.418	0.0271866
0002.CSV	883.275	0.0244652
0002.CSV	887.132	0.0225151
0002.CSV	890.989	0.0220389
0002.CSV	894.846	0.0219976
0002.CSV	898.703	0.0223565
0002.CSV	902.561	0.0227787
0002.CSV	906.418	0.0235971
0002.CSV	910.275	0.0241654
0002.CSV	914.132	0.0248357
0002.CSV	917.989	0.0255518
0002.CSV	921.846	0.0262265
0002.CSV	925.703	0.0267971
0002.CSV	929.56	0.0275213
0002.CSV	933.417	0.0281999
0002.CSV	937.274	0.0287881
0002.CSV	941.131	0.02925
0002.CSV	944.989	0.0296817
0002.CSV	948.846	0.0301103
0002.CSV	952.703	0.0303616
0002.CSV	956.56	0.0304685
0002.CSV	960.417	0.0305746
0002.CSV	964.274	0.0309209
0002.CSV	968.131	0.0312545
0002.CSV	971.988	0.0316161
0002.CSV	975.845	0.0318794
0002.CSV	979.702	0.0324935
0002.CSV	983.559	0.0333158
0002.CSV	987.417	0.0344577
0002.CSV	991.274	0.0355044
0002.CSV	995.131	0.0368446
0002.CSV	998.988	0.0381278
0002.CSV	1002.85	0.039847
0002.CSV	1006.7	0.0417579
0002.CSV	1010.56	0.043909
0002.CSV	1014.42	0.0449467
0002.CSV	1018.27	0.0459389
0002.CSV	1022.13	0.0471886
0002.CSV	1025.99	0.0490473
0002.CSV	1029.85	0.0504702
0002.CSV	1033.7	0.051776
0002.CSV	1037.56	0.052005
0002.CSV	1041.42	0.0517942
0002.CSV	1045.27	0.0506401
0002.CSV	1049.13	0.0499242
0002.CSV	1052.99	0.0494476
0002.CSV	1056.84	0.0502023
0002.CSV	1060.7	0.0510562
0002.CSV	1064.56	0.0526961
0002.CSV	1068.42	0.0539632
0002.CSV	1072.27	0.0558745
0002.CSV	1076.13	0.0580378
0002.CSV	1079.99	0.0617473
0002.CSV	1083.84	0.0614584
0002.CSV	1087.7	0.0574802
0002.CSV	1091.56	0.0549974
0002.CSV	1095.41	0.0551419
0002.CSV	1099.27	0.0551147
0002.CSV	1103.13	0.0554179
0002.CSV	1106.99	0.054731
0002.CSV	1110.84	0.0539471
0002.CSV	1114.7	0.0523693
0002.CSV	1118.56	0.0512665
0002.CSV	1122.41	0.0494827
0002.CSV	1126.27	0.0480675
0002.CSV	1130.13	0.0460533
0002.CSV	1133.99	0.0447084
0002.CSV	1137.84	0.0431802
0002.CSV	1141.7	0.0425895
0002.CSV	1145.56	0.0418089
0002.CSV	1149.41	0.0417888
0002.CSV	1153.27	0.0411264
0002.CSV	1157.13	0.0408299
0002.CSV	1160.99	0.0399437
0002.CSV	1164.84	0.0397648
0002.CSV	1168.7	0.0396286
0002.CSV	1172.56	0.0413606
0002.CSV	1176.41	0.0441349
0002.CSV	1180.27	0.0472121
0002.CSV	1184.13	0.0463262
0002.CSV	1187.99	0.042845
0002.CSV	1191.84	0.038324
0002.CSV	1195.7	0.0357925
0002.CSV	1199.56	0.0344345
0002.CSV	1203.41	0.0350002
0002.CSV	1207.27	0.0359097
0002.CSV	1211.13	0.0381407
0002.CSV	1214.98	0.0401676
0002.CSV	1218.84	0.0428027
0002.CSV	1222.7	0.0446195
0002.CSV	1226.56	0.0467439
0002.CSV	1230.41	0.0478907
0002.CSV	1234.27	0.0492211
0002.CSV	1238.13	0.0495506
0002.CSV	1241.98	0.0501428
0002.CSV	1245.84	0.049713
0002.CSV	1249.7	0.0490317
0002.CSV	1253.56	0.0463309
0002.CSV	1257.41	0.0431154
0002.CSV	1261.27	0.0391835
0002.CSV	1265.13	0.0370029
0002.CSV	1268.98	0.035526
0002.CSV	1272.84	0.0354419
0002.CSV	1276.7	0.0351284
0002.CSV	1280.56	0.0358093
0002.CSV	1284.41	0.0362492
0002.CSV	1288.27	0.0375325
0002.CSV	1292.13	0.0381196
0002.CSV	1295.98	0.0389012
0002.CSV	1299.84	0.0385378
0002.CSV	1303.7	0.038341
0002.CSV	1307.56	0.0374161
0002.CSV	1311.41	0.0372244
0002.CSV	1315.27	0.0364947
0002.CSV	1319.13	0.0366548
0002.CSV	1322.98	0.0365955
0002.CSV	1326.84	0.0374114
0002.CSV	1330.7	0.0376762
0002.CSV	1334.56	0.038528
0002.CSV	1338.41	0.0389612
0002.CSV	1342.27	0.0403552
0002.CSV	1346.13	0.0409082
0002.CSV	1349.98	0.0422171
0002.CSV	1353.84	0.0432547
0002.CSV	1357.7	0.0453801
0002.CSV	1361.56	0.0468674
0002.CSV	1365.41	0.0481523
0002.CSV	1369.27	0.0481337
0002.CSV	1373.13	0.0494715
0002.CSV	1376.98	0.0510521
0002.CSV	1380.84	0.0534613
0002.CSV	1384.7	0.054872
0002.CSV	1388.56	0.0565763
0002.CSV	1392.41	0.0571769
0002.CSV	1396.27	0.059097
0002.CSV	1400.13	0.0607152
0002.CSV	1403.98	0.0632153
0002.CSV	1407.84	0.0653765
0002.CSV	1411.7	0.0680076
0002.CSV	1415.55	0.0692254
0002.CSV	1419.41	0.0712639
0002.CSV	1423.27	0.0726239
0002.CSV	1427.12	0.0751956
0002.CSV	1430.98	0.0776805
0002.CSV	1434.84	0.0819198
0002.CSV	1438.7	0.0866372
0002.CSV	1442.55	0.0908995
0002.CSV	1446.41	0.0933496
0002.CSV	1450.27	0.0954847
0002.CSV	1454.12	0.0953773
0002.CSV	1457.98	0.0955589
0002.CSV	1461.84	0.0946925
0002.CSV	1465.7	0.0947299
0002.CSV	1469.55	0.0933032
0002.CSV	1473.41	0.0906054
0002.CSV	1477.27	0.0859827
0002.CSV	1481.12	0.0833073
0002.CSV	1484.98	0.0802603
0002.CSV	1488.84	0.0777171
0002.CSV	1492.7	0.0752029
0002.CSV	1496.55	0.0751796
0002.CSV	1500.41	0.0760714
0002.CSV	1504.27	0.0780934
0002.CSV	1508.12	0.0780106
0002.CSV	1511.98	0.07423
0002.CSV	1515.84	0.0665075
0002.CSV	1519.7	0.0570611
0002.CSV	1523.55	0.048194
0002.CSV	1527.41	0.0442813
0002.CSV	1531.27	0.040766
0002.CSV	1535.12	0.0380098
0002.CSV	1538.98	0.0345794
0002.CSV	1542.84	0.0304044
0002.CSV	1546.7	0.0273336
0002.CSV	1550.55	0.025686
0002.CSV	1554.41	0.0234388
0002.CSV	1558.27	0.0213445
0002.CSV	1562.12	0.0190692
0002.CSV	1565.98	0.0183235
0002.CSV	1569.84	0.0170135
0002.CSV	1573.69	0.0161826
0002.CSV	1577.55	0.01531
0002.CSV	1581.41	0.0147771
0002.CSV	1585.27	0.0136589
0002.CSV	1589.12	0.0128133
0002.CSV	1592.98	0.0125193
0002.CSV	1596.84	0.0131356
0002.CSV	1600.69	0.0140039
0002.CSV	1604.55	0.0151335
0002.CSV	1608.41	0.0152071
0002.CSV	1612.27	0.0141965
0002.CSV	1616.12	0.0122304
0002.CSV	1619.98	0.0105405
0002.CSV	1623.84	0.00952587
0002.CSV	1627.69	0.0090427
0002.CSV	1631.55	0.0086261
0002.CSV	1635.41	0.00841612
0002.CSV	1639.27	0.00836099
0002.CSV	1643.12	0.00823363
0002.CSV	1646.98	0.00815088
0002.CSV	1650.84	0.00822857
0002.CSV	1654.69	0.00819798
0002.CSV	1658.55	0.00801035
0002.CSV	1662.41	0.00777041
0002.CSV	1666.27	0.0075741
0002.CSV	1670.12	0.00740852
0002.CSV	1673.98	0.00732608
0002.CSV	1677.84	0.007193
0002.CSV	1681.69	0.00704601
0002.CSV	1685.55	0.00731631
0002.CSV	1689.41	0.00735298
0002.CSV	1693.27	0.0073459
0002.CSV	1697.12	0.00756247
0002.CSV	1700.98	0.00865381
0002.CSV	1704.84	0.00929001
0002.CSV	1708.69	0.010033
0002.CSV	1712.55	0.01039
0002.CSV	1716.41	0.0115611
0002.CSV	1720.27	0.0127705
0002.CSV	1724.12	0.0133629
0002.CSV	1727.98	0.0134875
0002.CSV	1731.84	0.0135181
0002.CSV	1735.69	0.012541
0002.CSV	1739.55	0.0112794
0002.CSV	1743.41	0.00937329
0002.CSV	1747.27	0.00784767
0002.CSV	1751.12	0.00618624
0002.CSV	1754.98	0.00548387
0002.CSV	1758.84	0.00483918
0002.CSV	1762.69	0.00473576
0002.CSV	1766.55	0.00442151
0002.CSV	1770.41	0.00463639
0002.CSV	1774.26	0.00506443
0002.CSV	1778.12	0.00574124
0002.CSV	1781.98	0.00610283
0002.CSV	1785.84	0.00640751
0002.CSV	1789.69	0.00593548
0002.CSV	1793.55	0.00548722
0002.CSV	1797.41	0.00479898
0002.CSV	1801.26	0.00451966
0002.CSV	1805.12	0.00407901
0002.CSV	1808.98	0.00409858
0002.CSV	1812.84	0.00397758
0002.CSV	1816.69	0.00405436
0002.CSV	1820.55	0.00387279
0002.CSV	1824.41	0.00399814
0002.CSV	1828.26	0.00396377
0002.CSV	1832.12	0.00423614
0002.CSV	1835.98	0.00405643
0002.CSV	1839.84	0.004134
0002.CSV	1843.69	0.00401239
0002.CSV	1847.55	0.00431233
0002.CSV	1851.41	0.00418582
0002.CSV	1855.26	0.00429172
0002.CSV	1859.12	0.00417628
0002.CSV	1862.98	0.00430467
0002.CSV	1866.84	0.00417889
0002.CSV	1870.69	0.0044746
0002.CSV	1874.55	0.00433388
0002.CSV	1878.41	0.00443248
0002.CSV	1882.26	0.00431999
0002.CSV	1886.12	0.00442238
0002.CSV	1889.98	0.00426374
0002.CSV	1893.83	0.00439416
0002.CSV	1897.69	0.00423851
0002.CSV	1901.55	0.00432431
0002.CSV	1905.41	0.00413082
0002.CSV	1909.26	0.00423824
0002.CSV	1913.12	0.00407456
0002.CSV	1916.98	0.00412212
0002.CSV	1920.83	0.00396959
0002.CSV	1924.69	0.00412266
0002.CSV	1928.55	0.00396383
0002.CSV	1932.4	0.00404272
0002.CSV	1936.26	0.00390218
0002.CSV	1940.12	0.00398276
0002.CSV	1943.98	0.00390459
0002.CSV	1947.83	0.00406563
0002.CSV	1951.69	0.00392518
0002.CSV	1955.55	0.00401142
0002.CSV	1959.4	0.00388386
0002.CSV	1963.26	0.00396009
0002.CSV	1967.12	0.00383669
0002.CSV	1970.98	0.00395019
0002.CSV	1974.83	0.00384287
0002.CSV	1978.69	0.00394511
0002.CSV	1982.55	0.00384809
0002.CSV	1986.4	0.003919
0002.CSV	1990.26	0.00379604
0002.CSV	1994.12	0.00391298
0002.CSV	1997.98	0.00383826
0002.CSV	2001.83	0.00394959
0002.CSV	2005.69	0.00386474
0002.CSV	2009.55	0.00394571
0002.CSV	2013.4	0.00388145
0002.CSV	2017.26	0.00397119
0002.CSV	2021.12	0.00389162
0002.CSV	2024.97	0.00396016
0002.CSV	2028.83	0.00387456
0002.CSV	2032.69	0.00392515
0002.CSV	2036.55	0.00387396
0002.CSV	2040.4	0.00394227
0002.CSV	2044.26	0.00389205
0002.CSV	2048.12	0.00397905
0002.CSV	2051.97	0.00394668
0002.CSV	2055.83	0.00400881
0002.CSV	2059.69	0.00396447
0002.CSV	2063.55	0.00399737
0002.CSV	2067.4	0.00395695
0002.CSV	2071.26	0.00397942
0002.CSV	2075.12	0.00391806
0002.CSV	2078.97	0.00396333
0002.CSV	2082.83	0.00393404
0002.CSV	2086.69	0.00395601
0002.CSV	2090.55	0.00391733
0002.CSV	2094.4	0.003919
0002.CSV	2098.26	0.00388229
0002.CSV	2102.12	0.00388479
0002.CSV	2105.97	0.003852
0002.CSV	2109.83	0.00385106
0002.CSV	2113.69	0.00383813
0002.CSV	2117.55	0.00385036
0002.CSV	2121.4	0.0038404
0002.CSV	2125.26	0.00383906
0002.CSV	2129.12	0.00383923
0002.CSV	2132.97	0.00383398
0002.CSV	2136.83	0.00382342
0002.CSV	2140.69	0.00378886
0002.CSV	2144.55	0.00378598
0002.CSV	2148.4	0.00376439
0002.CSV	2152.26	0.00376991
0002.CSV	2156.12	0.00372783
0002.CSV	2159.97	0.00371961
0002.CSV	2163.83	0.00367346
0002.CSV	2167.69	0.00368813
0002.CSV	2171.55	0.00365561
0002.CSV	2175.4	0.00369458
0002.CSV	2179.26	0.00367951
0002.CSV	2183.12	0.00372569
0002.CSV	2186.97	0.00366955
0002.CSV	2190.83	0.00369087
0002.CSV	2194.69	0.00361689
0002.CSV	2198.55	0.00363476
0002.CSV	2202.4	0.00355301
0002.CSV	2206.26	0.00357894
0002.CSV	2210.12	0.00348056
0002.CSV	2213.97	0.00349195
0002.CSV	2217.83	0.00339656
0002.CSV	2221.69	0.00342605
0002.CSV	2225.54	0.00330374
0002.CSV	2229.4	0.00330404
0002.CSV	2233.26	0.00315476
0002.CSV	2237.12	0.00315065
0002.CSV	2240.97	0.00303205
0002.CSV	2244.83	0.0030739
0002.CSV	2248.69	0.0029349
0002.CSV	2252.54	0.00295262
0002.CSV	2256.4	0.00280129
0002.CSV	2260.26	0.00280469
0002.CSV	2264.11	0.00266901
0002.CSV	2267.97	0.00271005
0002.CSV	2271.83	0.00257641
0002.CSV	2275.69	0.00261541
0002.CSV	2279.54	0.00245953
0002.CSV	2283.4	0.00253915
0002.CSV	2287.26	0.00252901
0002.CSV	2291.11	0.0027562
0002.CSV	2294.97	0.00277788
0002.CSV	2298.83	0.00303933
0002.CSV	2302.69	0.00316857
0002.CSV	2306.54	0.00358709
0002.CSV	2310.4	0.00368224
0002.CSV	2314.26	0.00411286
0002.CSV	2318.11	0.00425514
0002.CSV	2321.97	0.0049064
0002.CSV	2325.83	0.00488948
0002.CSV	2329.69	0.00539616
0002.CSV	2333.54	0.0051514
0002.CSV	2337.4	0.00572063
0002.CSV	2341.26	0.00531435
0002.CSV	2345.11	0.00551544
0002.CSV	2348.97	0.00490667
0002.CSV	2352.83	0.00519794
0002.CSV	2356.69	0.00482464
0002.CSV	2360.54	0.00553387
0002.CSV	2364.4	0.00476943
0002.CSV	2368.26	0.00521521
0002.CSV	2372.11	0.00437227
0002.CSV	2375.97	0.00418736
0002.CSV	2379.83	0.00352164
0002.CSV	2383.69	0.00321854
0002.CSV	2387.54	0.00271202
0002.CSV	2391.4	0.00264031
0002.CSV	2395.26	0.00249592
0002.CSV	2399.11	0.00261784
0002.CSV	2402.97	0.00247983
0002.CSV	2406.83	0.00256831
0002.CSV	2410.68	0.00247679
0002.CSV	2414.54	0.00263764
0002.CSV	2418.4	0.00256171
0002.CSV	2422.26	0.00270492
0002.CSV	2426.11	0.00261184
0002.CSV	2429.97	0.00277698
0002.CSV	2433.83	0.00270162
0002.CSV	2437.68	0.00285268
0002.CSV	2441.54	0.00277694
0002.CSV	2445.4	0.0029302
0002.CSV	2449.26	0.00283684
0002.CSV	2453.11	0.00299175
0002.CSV	2456.97	0.00292092
0002.CSV	2460.83	0.00308888
0002.CSV	2464.68	0.00303289
0002.CSV	2468.54	0.00319765
0002.CSV	2472.4	0.0031589
0002.CSV	2476.26	0.00335546
0002.CSV	2480.11	0.00331342
0002.CSV	2483.97	0.00350174
0002.CSV	2487.83	0.00345387
0002.CSV	2491.68	0.00361268
0002.CSV	2495.54	0.00356998
0002.CSV	2499.4	0.00371175
0002.CSV	2503.26	0.00360827
0002.CSV	2507.11	0.00369254
0002.CSV	2510.97	0.0036061
0002.CSV	2514.83	0.00378428
0002.CSV	2518.68	0.00377108
0002.CSV	2522.54	0.00387179
0002.CSV	2526.4	0.00370811
0002.CSV	2530.26	0.00373535
0002.CSV	2534.11	0.00358862
0002.CSV	2537.97	0.00361973
0002.CSV	2541.83	0.00348657
0002.CSV	2545.68	0.00356303
0002.CSV	2549.54	0.00344041
0002.CSV	2553.4	0.0034673
0002.CSV	2557.26	0.00334972
0002.CSV	2561.11	0.00338107
0002.CSV	2564.97	0.00325056
0002.CSV	2568.83	0.00328317
0002.CSV	2572.68	0.00317425
0002.CSV	2576.54	0.00323627
0002.CSV	2580.4	0.00315155
0002.CSV	2584.25	0.00322025
0002.CSV	2588.11	0.00315556
0002.CSV	2591.97	0.00321661
0002.CSV	2595.83	0.0031338
0002.CSV	2599.68	0.0031876
0002.CSV	2603.54	0.00311584
0002.CSV	2607.4	0.00317091
0002.CSV	2611.25	0.00314691
0002.CSV	2615.11	0.00323403
0002.CSV	2618.97	0.00317065
0002.CSV	2622.82	0.00324451
0002.CSV	2626.68	0.00322125
0002.CSV	2630.54	0.0032545
0002.CSV	2634.4	0.0032375
0002.CSV	2638.25	0.00330587
0002.CSV	2642.11	0.00321467
0002.CSV	2645.97	0.00322729
0002.CSV	2649.82	0.00317739
0002.CSV	2653.68	0.00320419
0002.CSV	2657.54	0.00315312
0002.CSV	2661.4	0.0031843
0002.CSV	2665.25	0.00318937
0002.CSV	2669.11	0.00325106
0002.CSV	2672.97	0.00329172
0002.CSV	2676.82	0.0034315
0002.CSV	2680.68	0.00345157
0002.CSV	2684.54	0.00339423
0002.CSV	2688.4	0.00332711
0002.CSV	2692.25	0.00337169
0002.CSV	2696.11	0.00339423
0002.CSV	2699.97	0.00343697
0002.CSV	2703.82	0.00341233
0002.CSV	2707.68	0.00344663
0002.CSV	2711.54	0.00351116
0002.CSV	2715.4	0.00357726
0002.CSV	2719.25	0.00361859
0002.CSV	2723.11	0.00372967
0002.CSV	2726.97	0.00377442
0002.CSV	2730.82	0.00371506
0002.CSV	2734.68	0.00372542
0002.CSV	2738.54	0.0037673
0002.CSV	2742.4	0.00378652
0002.CSV	2746.25	0.00389509
0002.CSV	2750.11	0.00394909
0002.CSV	2753.97	0.00390278
0002.CSV	2757.82	0.0038972
0002.CSV	2761.68	0.00387577
0002.CSV	2765.54	0.00390686
0002.CSV	2769.39	0.00400179
0002.CSV	2773.25	0.00421111
0002.CSV	2777.11	0.00427723
0002.CSV	2780.97	0.00432685
0002.CSV	2784.82	0.00453603
0002.CSV	2788.68	0.00492168
0002.CSV	2792.54	0.00516642
0002.CSV	2796.39	0.00540586
0002.CSV	2800.25	0.0055284
0002.CSV	2804.11	0.00562318
0002.CSV	2807.97	0.00585441
0002.CSV	2811.82	0.00606785
0002.CSV	2815.68	0.00614426
0002.CSV	2819.54	0.00637402
0002.CSV	2823.39	0.00661389
0002.CSV	2827.25	0.00688568
0002.CSV	2831.11	0.00726968
0002.CSV	2834.97	0.00792902
0002.CSV	2838.82	0.00856249
0002.CSV	2842.68	0.0091727
0002.CSV	2846.54	0.00984896
0002.CSV	2850.39	0.0105096
0002.CSV	2854.25	0.0109827
0002.CSV	2858.11	0.0114798
0002.CSV	2861.97	0.0117567
0002.CSV	2865.82	0.0120375
0002.CSV	2869.68	0.012253
0002.CSV	2873.54	0.0121916
0002.CSV	2877.39	0.0115648
0002.CSV	2881.25	0.0110658
0002.CSV	2885.11	0.0108694
0002.CSV	2888.97	0.0109903
0002.CSV	2892.82	0.011255
0002.CSV	2896.68	0.0115335
0002.CSV	2900.54	0.0116742
0002.CSV	2904.39	0.0121122
0002.CSV	2908.25	0.0127165
0002.CSV	2912.11	0.0135347
0002.CSV	2915.97	0.0141639
0002.CSV	2919.82	0.0145576
0002.CSV	2923.68	0.0147929
0002.CSV	2927.54	0.0151484
0002.CSV	2931.39	0.0148922
0002.CSV	2935.25	0.0142282
0002.CSV	2939.11	0.0138133
0002.CSV	2942.96	0.0138748
0002.CSV	2946.82	0.0138103
0002.CSV	2950.68	0.0136169
0002.CSV	2954.54	0.0132521
0002.CSV	2958.39	0.0127181
0002.CSV	2962.25	0.0120389
0002.CSV	2966.11	0.0110265
0002.CSV	2969.96	0.0098553
0002.CSV	2973.82	0.00885183
0002.CSV	2977.68	0.00783532
0002.CSV	2981.53	0.00673509
0002.CSV	2985.39	0.00556947
0002.CSV	2989.25	0.00491521
0002.CSV	2993.11	0.00456895
0002.CSV	2996.96	0.0040857
0002.CSV	3000.82	0.00353701
0002.CSV	3004.68	0.0032144
0002.CSV	3008.53	0.00319558
0002.CSV	3012.39	0.00328371
0002.CSV	3016.25	0.00315282
0002.CSV	3020.11	0.00294217
0002.CSV	3023.96	0.00285008
0002.CSV	3027.82	0.00293777
0002.CSV	3031.68	0.00322278
0002.CSV	3035.53	0.00343751
0002.CSV	3039.39	0.00351443
0002.CSV	3043.25	0.0035473
0002.CSV	3047.11	0.00344646
0002.CSV	3050.96	0.00333502
0002.CSV	3054.82	0.00326
0002.CSV	3058.68	0.00312292
0002.CSV	3062.53	0.00309225
0002.CSV	3066.39	0.00313967
0002.CSV	3070.25	0.00307703
0002.CSV	3074.11	0.00301016
0002.CSV	3077.96	0.00306992
0002.CSV	3081.82	0.00306469
0002.CSV	3085.68	0.00302128
0002.CSV	3089.53	0.00293103
0002.CSV	3093.39	0.0028805
0002.CSV	3097.25	0.00289244
0002.CSV	3101.11	0.00297316
0002.CSV	3104.96	0.00295258
0002.CSV	3108.82	0.00298885
0002.CSV	3112.68	0.00296372
0002.CSV	3116.53	0.00307797
0002.CSV	3120.39	0.00308077
0002.CSV	3124.25	0.00304767
0002.CSV	3128.11	0.00300977
0002.CSV	3131.96	0.00305711
0002.CSV	3135.82	0.00306849
0002.CSV	3139.68	0.00318486
0002.CSV	3143.53	0.00309605
0002.CSV	3147.39	0.0031637
0002.CSV	3151.25	0.00327262
0002.CSV	3155.1	0.00335863
0002.CSV	3158.96	0.00322455
0002.CSV	3162.82	0.0032595
0002.CSV	3166.68	0.00325212
0002.CSV	3170.53	0.00336818
0002.CSV	3174.39	0.00337536
0002.CSV	3178.25	0.00349068
0002.CSV	3182.1	0.0035026
0002.CSV	3185.96	0.00362701
0002.CSV	3189.82	0.00364977
0002.CSV	3193.68	0.0037428
0002.CSV	3197.53	0.00371266
0002.CSV	3201.39	0.003875
0002.CSV	3205.25	0.00393287
0002.CSV	3209.1	0.00405466
0002.CSV	3212.96	0.00407667
0002.CSV	3216.82	0.00424437
0002.CSV	3220.68	0.00418321
0002.CSV	3224.53	0.00425983
0002.CSV	3228.39	0.00431584
0002.CSV	3232.25	0.00456798
0002.CSV	3236.1	0.004528
0002.CSV	3239.96	0.00459858
0002.CSV	3243.82	0.00465049
0002.CSV	3247.68	0.00479529
0002.CSV	3251.53	0.00472186
0002.CSV	3255.39	0.00490043
0002.CSV	3259.25	0.00486622
0002.CSV	3263.1	0.00491967
0002.CSV	3266.96	0.00496555
0002.CSV	3270.82	0.00522943
0002.CSV	3274.68	0.00521273
0002.CSV	3278.53	0.00526477
0002.CSV	3282.39	0.00519821
0002.CSV	3286.25	0.0053225
0002.CSV	3290.1	0.00534836
0002.CSV	3293.96	0.00558458
0002.CSV	3297.82	0.00554994
0002.CSV	3301.67	0.00568175
0002.CSV	3305.53	0.0057302
0002.CSV	3309.39	0.00584618
0002.CSV	3313.25	0.00571999
0002.CSV	3317.1	0.00574594
0002.CSV	3320.96	0.005698
0002.CSV	3324.82	0.00587758
0002.CSV	3328.67	0.00581021
0002.CSV	3332.53	0.00591553
0002.CSV	3336.39	0.00597482
0002.CSV	3340.24	0.00617528
0002.CSV	3344.1	0.00608986
0002.CSV	3347.96	0.00613647
0002.CSV	3351.82	0.00605491
0002.CSV	3355.67	0.00609154
0002.CSV	3359.53	0.00607743
0002.CSV	3363.39	0.00620496
0002.CSV	3367.24	0.00619068
0002.CSV	3371.1	0.00618987
0002.CSV	3374.96	0.00598698
0002.CSV	3378.82	0.00603361
0002.CSV	3382.67	0.00590532
0002.CSV	3386.53	0.00593915
0002.CSV	3390.39	0.00597092
0002.CSV	3394.24	0.00606563
0002.CSV	3398.1	0.00593737
0002.CSV	3401.96	0.00591221
0002.CSV	3405.82	0.00573765
0002.CSV	3409.67	0.00576827
0002.CSV	3413.53	0.00562304
0002.CSV	3417.39	0.00547632
0002.CSV	3421.24	0.00529218
0002.CSV	3425.1	0.00533484
0002.CSV	3428.96	0.0053593
0002.CSV	3432.82	0.0054171
0002.CSV	3436.67	0.00520505
0002.CSV	3440.53	0.004888
0002.CSV	3444.39	0.00463538
0002.CSV	3448.24	0.00462186
0002.CSV	3452.1	0.00440403
0002.CSV	3455.96	0.00430815
0002.CSV	3459.82	0.00426829
0002.CSV	3463.67	0.00424929
0002.CSV	3467.53	0.00416156
0002.CSV	3471.39	0.00399349
0002.CSV	3475.24	0.00375396
0002.CSV	3479.1	0.00367991
0002.CSV	3482.96	0.00352308
0002.CSV	3486.82	0.00341526
0002.CSV	3490.67	0.00328087
0002.CSV	3494.53	0.0032563
0002.CSV	3498.39	0.00310463
0002.CSV	3502.24	0.00290498
0002.CSV	3506.1	0.00270165
0002.CSV	3509.96	0.00252025
0002.CSV	3513.81	0.00243244
0002.CSV	3517.67	0.00221552
0002.CSV	3521.53	0.0020759
0002.CSV	3525.39	0.00200073
0002.CSV	3529.24	0.0018503
0002.CSV	3533.1	0.00175474
0002.CSV	3536.96	0.00171249
0002.CSV	3540.81	0.00159292
0002.CSV	3544.67	0.00151072
0002.CSV	3548.53	0.00132945
0002.CSV	3552.39	0.00114446
0002.CSV	3556.24	0.000966103
0002.CSV	3560.1	0.000911479
0002.CSV	3563.96	0.000663585
0002.CSV	3567.81	0.000590718
0002.CSV	3571.67	0.000547189
0002.CSV	3575.53	0.000376997
0002.CSV	3579.39	0.000327886
0002.CSV	3583.24	0.000441736
0002.CSV	3587.1	0.000315252
0002.CSV	3590.96	0.000215126
0002.CSV	3594.81	-1.86872e-05
0002.CSV	3598.67	-3.57846e-06
0002.CSV	3602.53	-0.000196374
0002.CSV	3606.39	-0.000540742
0002.CSV	3610.24	-0.00092435
0002.CSV	3614.1	-0.000893038
0002.CSV	3617.96	-0.000865691
0002.CSV	3621.81	-0.000637627
0002.CSV	3625.67	-0.000962933
0002.CSV	3629.53	-0.00104961
0002.CSV	3633.39	-0.000991233
0002.CSV	3637.24	-0.00108197
0002.CSV	3641.1	-0.00136675
0002.CSV	3644.96	-0.00160017
0002.CSV	3648.81	-0.00173174
0002.CSV	3652.67	-0.00128281
0002.CSV	3656.53	-0.00132556
0002.CSV	3660.38	-0.00125569
0002.CSV	3664.24	-0.0016279
0002.CSV	3668.1	-0.00192654
0002.CSV	3671.96	-0.00210523
0002.CSV	3675.81	-0.00167035
0002.CSV	3679.67	-0.00169728
0002.CSV	3683.53	-0.00173973
0002.CSV	3687.38	-0.00187244
0002.CSV	3691.24	-0.00151529
0002.CSV	3695.1	-0.00165418
0002.CSV	3698.95	-0.00177292
0002.CSV	3702.81	-0.00199149
0002.CSV	3706.67	-0.00201326
0002.CSV	3710.53	-0.00219237
0002.CSV	3714.38	-0.00190959
0002.CSV	3718.24	-0.00201583
0002.CSV	3722.1	-0.00194294
0002.CSV	3725.95	-0.00206239
0002.CSV	3729.81	-0.00198819
0002.CSV	3733.67	-0.00215762
0002.CSV	3737.53	-0.00166586
0002.CSV	3741.38	-0.0020339
0002.CSV	3745.24	-0.00217064
0002.CSV	3749.1	-0.00259096
0002.CSV	3752.95	-0.00219554
0002.CSV	3756.81	-0.00223971
0002.CSV	3760.67	-0.00206919
0002.CSV	3764.53	-0.00221838
0002.CSV	3768.38	-0.00209867
0002.CSV	3772.24	-0.00209646
0002.CSV	3776.1	-0.00205626
0002.CSV	3779.95	-0.00213042
0002.CSV	3783.81	-0.00198727
0002.CSV	3787.67	-0.00206807
0002.CSV	3791.53	-0.00208373
0002.CSV	3795.38	-0.00234564
0002.CSV	3799.24	-0.00232521
0002.CSV	3803.1	-0.00235879
0002.CSV	3806.95	-0.00209995
0002.CSV	3810.81	-0.00226064
0002.CSV	3814.67	-0.00229508
0002.CSV	3818.53	-0.00239827
0002.CSV	3822.38	-0.00212913
0002.CSV	3826.24	-0.00225434
0002.CSV	3830.1	-0.00227109
0002.CSV	3833.95	-0.00251905
0002.CSV	3837.81	-0.00232227
0002.CSV	3841.67	-0.00217186
0002.CSV	3845.53	-0.00206028
0002.CSV	3849.38	-0.00253005
0002.CSV	3853.24	-0.00256388
0002.CSV	3857.1	-0.00231905
0002.CSV	3860.95	-0.00237784
0002.CSV	3864.81	-0.00253588
0002.CSV	3868.67	-0.00234211
0002.CSV	3872.52	-0.0022613
0002.CSV	3876.38	-0.00218047
0002.CSV	3880.24	-0.00242011
0002.CSV	3884.1	-0.00219867
0002.CSV	3887.95	-0.00226453
0002.CSV	3891.81	-0.00221396
0002.CSV	3895.67	-0.00242288
0002.CSV	3899.52	-0.00267731
0002.CSV	3903.38	-0.00255575
0002.CSV	3907.24	-0.00207816
0002.CSV	3911.1	-0.00224287
0002.CSV	3914.95	-0.00237537
0002.CSV	3918.81	-0.00241922
0002.CSV	3922.67	-0.0022903
0002.CSV	3926.52	-0.00235704
0002.CSV	3930.38	-0.0023169
0002.CSV	3934.24	-0.002208
0002.CSV	3938.09	-0.00221228
0002.CSV	3941.95	-0.00240034
0002.CSV	3945.81	-0.00238977
0002.CSV	3949.67	-0.0023695
0002.CSV	3953.52	-0.00225893
0002.CSV	3957.38	-0.00234953
0002.CSV	3961.24	-0.00230701
0002.CSV	3965.09	-0.00233938
0002.CSV	3968.95	-0.00232893
0002.CSV	3972.81	-0.00229983
0002.CSV	3976.67	-0.00221515
0002.CSV	3980.52	-0.00229647
0002.CSV	3984.38	-0.00227438
0002.CSV	3988.24	-0.0022786
0002.CSV	3992.09	-0.00230451
0002.CSV	3995.95	-0.00237774
0002.CSV	3999.81	-0.00239919
0003.CSV	674.992	0.0367155
0003.CSV	678.849	0.0361228
0003.CSV	682.706	0.0373988
0003.CSV	686.563	0.0378361
0003.CSV	690.42	0.0404338
0003.CSV	694.277	0.0464922
0003.CSV	698.134	0.0556466
0003.CSV	701.991	0.0520051
0003.CSV	705.849	0.0496784
0003.CSV	709.706	0.0634021
0003.CSV	713.563	0.0648774
0003.CSV	717.42	0.0422645
0003.CSV	721.277	0.0296641
0003.CSV	725.134	0.0277434
0003.CSV	728.991	0.0286269
0003.CSV	732.848	0.0288956
0003.CSV	736.705	0.0298582
0003.CSV	740.562	0.0300067
0003.CSV	744.42	0.0309688
0003.CSV	748.277	0.031266
0003.CSV	752.134	0.0322163
0003.CSV	755.991	0.032418
0003.CSV	759.848	0.0332757
0003.CSV	763.705	0.0335068
0003.CSV	767.562	0.0345355
0003.CSV	771.419	0.0350283
0003.CSV	775.276	0.0363861
0003.CSV	779.133	0.0370347
0003.CSV	782.99	0.0377585
0003.CSV	786.848	0.0377429
0003.CSV	790.705	0.0385357
0003.CSV	794.562	0.0391882
0003.CSV	798.419	0.0404833
0003.CSV	802.276	0.0408252
0003.CSV	806.133	0.0412449
0003.CSV	809.99	0.0413275
0003.CSV	813.847	0.0425507
0003.CSV	817.704	0.0442215
0003.CSV	821.562	0.0472262
0003.CSV	825.419	0.0504807
0003.CSV	829.276	0.0547627
0003.CSV	833.133	0.0598838
0003.CSV	836.99	0.0689095
0003.CSV	840.847	0.0821786
0003.CSV	844.704	0.0966202
0003.CSV	848.561	0.119251
0003.CSV	852.418	0.145341
0003.CSV	856.275	0.144788
0003.CSV	860.132	0.120631
0003.CSV	863.99	0.0905123
0003.CSV	867.847	0.0625363
0003.CSV	871.704	0.0433007
0003.CSV	875.561	0.0347601
0003.CSV	879.418	0.0299064
0003.CSV	883.275	0.0258079
0003.CSV	887.132	0.0234347
0003.CSV	890.989	0.0231352
0003.CSV	894.846	0.0235336
0003.CSV	898.703	0.0241287
0003.CSV	902.561	0.0247635
0003.CSV	906.418	0.0254815
0003.CSV	910.275	0.0257265
0003.CSV	914.132	0.0257462
0003.CSV	917.989	0.026063
0003.CSV	921.846	0.0264908
0003.CSV	925.703	0.0269383
0003.CSV	929.56	0.0273061
0003.CSV	933.417	0.0276883
0003.CSV	937.274	0.0279478
0003.CSV	941.131	0.0282641
0003.CSV	944.989	0.0285752
0003.CSV	948.846	0.0290753
0003.CSV	952.703	0.0294685
0003.CSV	956.56	0.0299466
0003.CSV	960.417	0.0302673
0003.CSV	964.274	0.0308198
0003.CSV	968.131	0.031246
0003.CSV	971.988	0.0319071
0003.CSV	975.845	0.0323717
0003.CSV	979.702	0.033092
0003.CSV	983.559	0.033711
0003.CSV	987.417	0.0346208
0003.CSV	991.274	0.0352464
0003.CSV	995.131	0.0361188
0003.CSV	998.988	0.0366134
0003.CSV	1002.85	0.0373039
0003.CSV	1006.7	0.0376579
0003.CSV	1010.56	0.038399
0003.CSV	1014.42	0.0388439
0003.CSV	1018.27	0.0396643
0003.CSV	1022.13	0.0401635
0003.CSV	1025.99	0.0410673
0003.CSV	1029.85	0.0415496
0003.CSV	1033.7	0.0424433
0003.CSV	1037.56	0.0428445
0003.CSV	1041.42	0.0436636
0003.CSV	1045.27	0.043968
0003.CSV	1049.13	0.0447937
0003.CSV	1052.99	0.0452067
0003.CSV	1056.84	0.0464288
0003.CSV	1060.7	0.0473678
0003.CSV	1064.56	0.0490649
0003.CSV	1068.42	0.0504373
0003.CSV	1072.27	0.0528079
0003.CSV	1076.13	0.0559029
0003.CSV	1079.99	0.0616232
0003.CSV	1083.84	0.061463
0003.CSV	1087.7	0.0550563
0003.CSV	1091.56	0.0510551
0003.CSV	1095.41	0.0507621
0003.CSV	1099.27	0.0501762
0003.CSV	1103.13	0.0499927
0003.CSV	1106.99	0.0491878
0003.CSV	1110.84	0.0490147
0003.CSV	1114.7	0.0482634
0003.CSV	1118.56	0.0481005
0003.CSV	1122.41	0.0472837
0003.CSV	1126.27	0.0469964
0003.CSV	1130.13	0.0460145
0003.CSV	1133.99	0.0456782
0003.CSV	1137.84	0.0449135
0003.CSV	1141.7	0.0449953
0003.CSV	1145.56	0.0446111
0003.CSV	1149.41	0.0449289
0003.CSV	1153.27	0.0446677
0003.CSV	1157.13	0.0450287
0003.CSV	1160.99	0.0448047
0003.CSV	1164.84	0.0451821
0003.CSV	1168.7	0.0448419
0003.CSV	1172.56	0.0451442
0003.CSV	1176.41	0.044852
0003.CSV	1180.27	0.0451561
0003.CSV	1184.13	0.0445195
0003.CSV	1187.99	0.0442673
0003.CSV	1191.84	0.043362
0003.CSV	1195.7	0.0433097
0003.CSV	1199.56	0.0427676
0003.CSV	1203.41	0.0429466
0003.CSV	1207.27	0.0425712
0003.CSV	1211.13	0.0430729
0003.CSV	1214.98	0.0430607
0003.CSV	1218.84	0.0438139
0003.CSV	1222.7	0.0439946
0003.CSV	1226.56	0.0449127
0003.CSV	1230.41	0.0451237
0003.CSV	1234.27	0.0459658
0003.CSV	1238.13	0.0461579
0003.CSV	1241.98	0.0469917
0003.CSV	1245.84	0.0470635
0003.CSV	1249.7	0.0477127
0003.CSV	1253.56	0.047451
0003.CSV	1257.41	0.0477276
0003.CSV	1261.27	0.0474622
0003.CSV	1265.13	0.0482983
0003.CSV	1268.98	0.0487653
0003.CSV	1272.84	0.0499883
0003.CSV	1276.7	0.0503971
0003.CSV	1280.56	0.0514
0003.CSV	1284.41	0.0517003
0003.CSV	1288.27	0.0527145
0003.CSV	1292.13	0.0531278
0003.CSV	1295.98	0.0543209
0003.CSV	1299.84	0.0548969
0003.CSV	1303.7	0.0561563
0003.CSV	1307.56	0.0567594
0003.CSV	1311.41	0.0580977
0003.CSV	1315.27	0.0587538
0003.CSV	1319.13	0.0601927
0003.CSV	1322.98	0.0609688
0003.CSV	1326.84	0.0625521
0003.CSV	1330.7	0.0635925
0003.CSV	1334.56	0.065381
0003.CSV	1338.41	0.0667882
0003.CSV	1342.27	0.0693401
0003.CSV	1346.13	0.0708815
0003.CSV	1349.98	0.0733098
0003.CSV	1353.84	0.0751973
0003.CSV	1357.7	0.0778551
0003.CSV	1361.56	0.0799819
0003.CSV	1365.41	0.0832479
0003.CSV	1369.27	0.0854283
0003.CSV	1373.13	0.088953
0003.CSV	1376.98	0.0922834
0003.CSV	1380.84	0.0961352
0003.CSV	1384.7	0.0993192
0003.CSV	1388.56	0.104219
0003.CSV	1392.41	0.107743
0003.CSV	1396.27	0.112761
0003.CSV	1400.13	0.116861
0003.CSV	1403.98	0.12127
0003.CSV	1407.84	0.124878
0003.CSV	1411.7	0.12868
0003.CSV	1415.55	0.130699
0003.CSV	1419.41	0.134059
0003.CSV	1423.27	0.136406
0003.CSV	1427.12	0.139998
0003.CSV	1430.98	0.14307
0003.CSV	1434.84	0.147912
0003.CSV	1438.7	0.152667
0003.CSV	1442.55	0.156935
0003.CSV	1446.41	0.158297
0003.CSV	1450.27	0.158465
0003.CSV	1454.12	0.156077
0003.CSV	1457.98	0.153146
0003.CSV	1461.84	0.15034
0003.CSV	1465.7	0.149764
0003.CSV	1469.55	0.146947
0003.CSV	1473.41	0.141041
0003.CSV	1477.27	0.13237
0003.CSV	1481.12	0.127434
0003.CSV	1484.98	0.121967
0003.CSV	1488.84	0.115951
0003.CSV	1492.7	0.109353
0003.CSV	1496.55	0.105134
0003.CSV	1500.41	0.0995698
0003.CSV	1504.27	0.0967571
0003.CSV	1508.12	0.0892708
0003.CSV	1511.98	0.0845767
0003.CSV	1515.84	0.0803459
0003.CSV	1519.7	0.0753553
0003.CSV	1523.55	0.0680526
0003.CSV	1527.41	0.0636679
0003.CSV	1531.27	0.0590886
0003.CSV	1535.12	0.055112
0003.CSV	1538.98	0.050408
0003.CSV	1542.84	0.0441445
0003.CSV	1546.7	0.0399493
0003.CSV	1550.55	0.037517
0003.CSV	1554.41	0.034347
0003.CSV	1558.27	0.0309712
0003.CSV	1562.12	0.0275443
0003.CSV	1565.98	0.0263117
0003.CSV	1569.84	0.0241878
0003.CSV	1573.69	0.0223202
0003.CSV	1577.55	0.0199081
0003.CSV	1581.41	0.0185028
0003.CSV	1585.27	0.0173987
0003.CSV	1589.12	0.016783
0003.CSV	1592.98	0.0162294
0003.CSV	1596.84	0.0159988
0003.CSV	1600.69	0.0156175
0003.CSV	1604.55	0.0154585
0003.CSV	1608.41	0.0151135
0003.CSV	1612.27	0.0148592
0003.CSV	1616.12	0.0143399
0003.CSV	1619.98	0.0139671
0003.CSV	1623.84	0.0134592
0003.CSV	1627.69	0.0131626
0003.CSV	1631.55	0.0127384
0003.CSV	1635.41	0.0124788
0003.CSV	1639.27	0.0122209
0003.CSV	1643.12	0.0119851
0003.CSV	1646.98	0.01174
0003.CSV	1650.84	0.0116314
0003.CSV	1654.69	0.0114982
0003.CSV	1658.55	0.011369
0003.CSV	1662.41	0.0111212
0003.CSV	1666.27	0.0108727
0003.CSV	1670.12	0.0106696
0003.CSV	1673.98	0.0105749
0003.CSV	1677.84	0.0103814
0003.CSV	1681.69	0.0101446
0003.CSV	1685.55	0.0102106
0003.CSV	1689.41	0.0100667
0003.CSV	1693.27	0.0098124
0003.CSV	1697.12	0.00954318
0003.CSV	1700.98	0.0097598
0003.CSV	1704.84	0.0097043
0003.CSV	1708.69	0.00973666
0003.CSV	1712.55	0.00951192
0003.CSV	1716.41	0.00973083
0003.CSV	1720.27	0.00990405
0003.CSV	1724.12	0.00987781
[truncated: 32,521 more rows]

## Sheet: S.plana_350_1_mFTIR_data
Select spectrum number	Wavenumber	Absorbance
0001.CSV	674.992	0.0421461
0001.CSV	678.849	0.0444669
0001.CSV	682.706	0.0448654
0001.CSV	686.563	0.0479807
0001.CSV	690.42	0.0511989
0001.CSV	694.277	0.0614743
0001.CSV	698.134	0.0754819
0001.CSV	701.991	0.0790933
0001.CSV	705.849	0.0836921
0001.CSV	709.706	0.114046
0001.CSV	713.563	0.117903
0001.CSV	717.42	0.0775367
0001.CSV	721.277	0.047021
0001.CSV	725.134	0.0398152
0001.CSV	728.991	0.037994
0001.CSV	732.848	0.0386137
0001.CSV	736.705	0.0385973
0001.CSV	740.562	0.0397175
0001.CSV	744.42	0.0400212
0001.CSV	748.277	0.0415157
0001.CSV	752.134	0.0423175
0001.CSV	755.991	0.0443172
0001.CSV	759.848	0.0453553
0001.CSV	763.705	0.0474567
0001.CSV	767.562	0.0487001
0001.CSV	771.419	0.0511525
0001.CSV	775.276	0.052977
0001.CSV	779.133	0.0552604
0001.CSV	782.99	0.0557462
0001.CSV	786.848	0.0569671
0001.CSV	790.705	0.0582367
0001.CSV	794.562	0.0613302
0001.CSV	798.419	0.0636152
0001.CSV	802.276	0.0657096
0001.CSV	806.133	0.0661194
0001.CSV	809.99	0.0678338
0001.CSV	813.847	0.0697469
0001.CSV	817.704	0.0738798
0001.CSV	821.562	0.0787357
0001.CSV	825.419	0.0860501
0001.CSV	829.276	0.0936083
0001.CSV	833.133	0.103955
0001.CSV	836.99	0.119716
0001.CSV	840.847	0.144306
0001.CSV	844.704	0.169427
0001.CSV	848.561	0.201605
0001.CSV	852.418	0.233508
0001.CSV	856.275	0.238155
0001.CSV	860.132	0.208833
0001.CSV	863.99	0.176346
0001.CSV	867.847	0.167688
0001.CSV	871.704	0.172972
0001.CSV	875.561	0.156015
0001.CSV	879.418	0.11966
0001.CSV	883.275	0.0791299
0001.CSV	887.132	0.0461293
0001.CSV	890.989	0.0315394
0001.CSV	894.846	0.030324
0001.CSV	898.703	0.0309619
0001.CSV	902.561	0.0321782
0001.CSV	906.418	0.0329785
0001.CSV	910.275	0.0338226
0001.CSV	914.132	0.0338596
0001.CSV	917.989	0.034756
0001.CSV	921.846	0.0354872
0001.CSV	925.703	0.0367048
0001.CSV	929.56	0.0374096
0001.CSV	933.417	0.0384865
0001.CSV	937.274	0.0389639
0001.CSV	941.131	0.0398709
0001.CSV	944.989	0.0404275
0001.CSV	948.846	0.04155
0001.CSV	952.703	0.0423408
0001.CSV	956.56	0.0436047
0001.CSV	960.417	0.0444991
0001.CSV	964.274	0.0459248
0001.CSV	968.131	0.0470143
0001.CSV	971.988	0.0485788
0001.CSV	975.845	0.0497814
0001.CSV	979.702	0.0516253
0001.CSV	983.559	0.0533901
0001.CSV	987.417	0.0559217
0001.CSV	991.274	0.0581292
0001.CSV	995.131	0.0605833
0001.CSV	998.988	0.0622954
0001.CSV	1002.85	0.0643415
0001.CSV	1006.7	0.0661691
0001.CSV	1010.56	0.0688484
0001.CSV	1014.42	0.0711331
0001.CSV	1018.27	0.0738348
0001.CSV	1022.13	0.075992
0001.CSV	1025.99	0.0784209
0001.CSV	1029.85	0.0801494
0001.CSV	1033.7	0.0822795
0001.CSV	1037.56	0.083998
0001.CSV	1041.42	0.0861594
0001.CSV	1045.27	0.0876621
0001.CSV	1049.13	0.0897068
0001.CSV	1052.99	0.0914724
0001.CSV	1056.84	0.0943296
0001.CSV	1060.7	0.0971636
0001.CSV	1064.56	0.100662
0001.CSV	1068.42	0.103765
0001.CSV	1072.27	0.1076
0001.CSV	1076.13	0.11234
0001.CSV	1079.99	0.12162
0001.CSV	1083.84	0.124302
0001.CSV	1087.7	0.114955
0001.CSV	1091.56	0.107375
0001.CSV	1095.41	0.10514
0001.CSV	1099.27	0.103394
0001.CSV	1103.13	0.102329
0001.CSV	1106.99	0.101018
0001.CSV	1110.84	0.100216
0001.CSV	1114.7	0.0988721
0001.CSV	1118.56	0.0977734
0001.CSV	1122.41	0.0961643
0001.CSV	1126.27	0.0948712
0001.CSV	1130.13	0.0932079
0001.CSV	1133.99	0.0920833
0001.CSV	1137.84	0.0909154
0001.CSV	1141.7	0.0906042
0001.CSV	1145.56	0.0903258
0001.CSV	1149.41	0.0906894
0001.CSV	1153.27	0.0907126
0001.CSV	1157.13	0.0912135
0001.CSV	1160.99	0.0914925
0001.CSV	1164.84	0.0919781
0001.CSV	1168.7	0.0916876
0001.CSV	1172.56	0.0915747
0001.CSV	1176.41	0.0912285
0001.CSV	1180.27	0.091094
0001.CSV	1184.13	0.0897944
0001.CSV	1187.99	0.0883207
0001.CSV	1191.84	0.0867491
0001.CSV	1195.7	0.0862525
0001.CSV	1199.56	0.0859445
0001.CSV	1203.41	0.0863242
0001.CSV	1207.27	0.0865868
0001.CSV	1211.13	0.0875249
0001.CSV	1214.98	0.0885102
0001.CSV	1218.84	0.0902099
0001.CSV	1222.7	0.0917779
0001.CSV	1226.56	0.0938901
0001.CSV	1230.41	0.0956581
0001.CSV	1234.27	0.0977765
0001.CSV	1238.13	0.0994109
0001.CSV	1241.98	0.101348
0001.CSV	1245.84	0.102824
0001.CSV	1249.7	0.104398
0001.CSV	1253.56	0.105098
0001.CSV	1257.41	0.105969
0001.CSV	1261.27	0.106699
0001.CSV	1265.13	0.108369
0001.CSV	1268.98	0.110078
0001.CSV	1272.84	0.1125
0001.CSV	1276.7	0.114652
0001.CSV	1280.56	0.117391
0001.CSV	1284.41	0.11985
0001.CSV	1288.27	0.122977
0001.CSV	1292.13	0.12596
0001.CSV	1295.98	0.129577
0001.CSV	1299.84	0.132921
0001.CSV	1303.7	0.136805
0001.CSV	1307.56	0.140351
0001.CSV	1311.41	0.144586
0001.CSV	1315.27	0.148576
0001.CSV	1319.13	0.153409
0001.CSV	1322.98	0.157909
0001.CSV	1326.84	0.163214
0001.CSV	1330.7	0.168629
0001.CSV	1334.56	0.174867
0001.CSV	1338.41	0.182018
0001.CSV	1342.27	0.191279
0001.CSV	1346.13	0.199197
0001.CSV	1349.98	0.208637
0001.CSV	1353.84	0.218282
0001.CSV	1357.7	0.228735
0001.CSV	1361.56	0.23999
0001.CSV	1365.41	0.253571
0001.CSV	1369.27	0.264912
0001.CSV	1373.13	0.279651
0001.CSV	1376.98	0.296128
0001.CSV	1380.84	0.311383
0001.CSV	1384.7	0.325397
0001.CSV	1388.56	0.342529
0001.CSV	1392.41	0.354291
0001.CSV	1396.27	0.364099
0001.CSV	1400.13	0.368876
0001.CSV	1403.98	0.372089
0001.CSV	1407.84	0.370748
0001.CSV	1411.7	0.366495
0001.CSV	1415.55	0.358859
0001.CSV	1419.41	0.350793
0001.CSV	1423.27	0.343882
0001.CSV	1427.12	0.342197
0001.CSV	1430.98	0.340431
0001.CSV	1434.84	0.34128
0001.CSV	1438.7	0.341501
0001.CSV	1442.55	0.342412
0001.CSV	1446.41	0.338904
0001.CSV	1450.27	0.332689
0001.CSV	1454.12	0.323751
0001.CSV	1457.98	0.309382
0001.CSV	1461.84	0.298038
0001.CSV	1465.7	0.291008
0001.CSV	1469.55	0.280861
0001.CSV	1473.41	0.263676
0001.CSV	1477.27	0.242677
0001.CSV	1481.12	0.22986
0001.CSV	1484.98	0.217306
0001.CSV	1488.84	0.202284
0001.CSV	1492.7	0.18765
0001.CSV	1496.55	0.177595
0001.CSV	1500.41	0.166089
0001.CSV	1504.27	0.159708
0001.CSV	1508.12	0.146128
0001.CSV	1511.98	0.13674
0001.CSV	1515.84	0.130215
0001.CSV	1519.7	0.121476
0001.CSV	1523.55	0.110739
0001.CSV	1527.41	0.10377
0001.CSV	1531.27	0.0976587
0001.CSV	1535.12	0.0922305
0001.CSV	1538.98	0.0861881
0001.CSV	1542.84	0.0754042
0001.CSV	1546.7	0.068468
0001.CSV	1550.55	0.0638084
0001.CSV	1554.41	0.0587044
0001.CSV	1558.27	0.0524908
0001.CSV	1562.12	0.0469057
0001.CSV	1565.98	0.0447722
0001.CSV	1569.84	0.0420027
0001.CSV	1573.69	0.0395447
0001.CSV	1577.55	0.0358983
0001.CSV	1581.41	0.0327024
0001.CSV	1585.27	0.0299839
0001.CSV	1589.12	0.0277691
0001.CSV	1592.98	0.0258985
0001.CSV	1596.84	0.0245537
0001.CSV	1600.69	0.0233743
0001.CSV	1604.55	0.0224768
0001.CSV	1608.41	0.021424
0001.CSV	1612.27	0.0205322
0001.CSV	1616.12	0.0193024
0001.CSV	1619.98	0.0182341
0001.CSV	1623.84	0.0172343
0001.CSV	1627.69	0.0164728
0001.CSV	1631.55	0.0157516
0001.CSV	1635.41	0.0152123
0001.CSV	1639.27	0.0146127
0001.CSV	1643.12	0.0143556
0001.CSV	1646.98	0.0139194
0001.CSV	1650.84	0.0137663
0001.CSV	1654.69	0.0134448
0001.CSV	1658.55	0.0132971
0001.CSV	1662.41	0.0129541
0001.CSV	1666.27	0.0127003
0001.CSV	1670.12	0.0123191
0001.CSV	1673.98	0.0121504
0001.CSV	1677.84	0.0118
0001.CSV	1681.69	0.0115731
0001.CSV	1685.55	0.0111634
0001.CSV	1689.41	0.011043
0001.CSV	1693.27	0.0107273
0001.CSV	1697.12	0.0105282
0001.CSV	1700.98	0.010286
0001.CSV	1704.84	0.0104696
0001.CSV	1708.69	0.0104281
0001.CSV	1712.55	0.0103958
0001.CSV	1716.41	0.0103721
0001.CSV	1720.27	0.0107419
0001.CSV	1724.12	0.0107513
0001.CSV	1727.98	0.0107674
0001.CSV	1731.84	0.0106804
0001.CSV	1735.69	0.0108863
0001.CSV	1739.55	0.0107814
0001.CSV	1743.41	0.01042
0001.CSV	1747.27	0.00976905
0001.CSV	1751.12	0.00937633
0001.CSV	1754.98	0.0090948
0001.CSV	1758.84	0.00901418
0001.CSV	1762.69	0.00901347
0001.CSV	1766.55	0.00912671
0001.CSV	1770.41	0.00948005
0001.CSV	1774.26	0.0110289
0001.CSV	1778.12	0.0128798
0001.CSV	1781.98	0.0151918
0001.CSV	1785.84	0.0169686
0001.CSV	1789.69	0.0178235
0001.CSV	1793.55	0.0172554
0001.CSV	1797.41	0.015845
0001.CSV	1801.26	0.0134746
0001.CSV	1805.12	0.0112324
0001.CSV	1808.98	0.00972771
0001.CSV	1812.84	0.00894111
0001.CSV	1816.69	0.00848133
0001.CSV	1820.55	0.00829206
0001.CSV	1824.41	0.00809082
0001.CSV	1828.26	0.00806942
0001.CSV	1832.12	0.00796003
0001.CSV	1835.98	0.00794927
0001.CSV	1839.84	0.00785404
0001.CSV	1843.69	0.00789045
0001.CSV	1847.55	0.00793921
0001.CSV	1851.41	0.00800846
0001.CSV	1855.26	0.00794927
0001.CSV	1859.12	0.00799989
0001.CSV	1862.98	0.00795271
0001.CSV	1866.84	0.00801801
0001.CSV	1870.69	0.00807418
0001.CSV	1874.55	0.00811624
0001.CSV	1878.41	0.00806614
0001.CSV	1882.26	0.00810999
0001.CSV	1886.12	0.00807873
0001.CSV	1889.98	0.0081555
0001.CSV	1893.83	0.00815645
0001.CSV	1897.69	0.00820311
0001.CSV	1901.55	0.00816023
0001.CSV	1905.41	0.00817566
0001.CSV	1909.26	0.00816533
0001.CSV	1913.12	0.00821283
0001.CSV	1916.98	0.008158
0001.CSV	1920.83	0.00822475
0001.CSV	1924.69	0.00824346
0001.CSV	1928.55	0.00829314
0001.CSV	1932.4	0.0082669
0001.CSV	1936.26	0.00831668
0001.CSV	1940.12	0.00831411
0001.CSV	1943.98	0.00842379
0001.CSV	1947.83	0.00842714
0001.CSV	1951.69	0.00847048
0001.CSV	1955.55	0.00848822
0001.CSV	1959.4	0.00859125
0001.CSV	1963.26	0.00857922
0001.CSV	1967.12	0.00860359
0001.CSV	1970.98	0.00862126
0001.CSV	1974.83	0.00868985
0001.CSV	1978.69	0.00866375
0001.CSV	1982.55	0.00869894
0001.CSV	1986.4	0.00869644
0001.CSV	1990.26	0.00874323
0001.CSV	1994.12	0.00876071
0001.CSV	1997.98	0.00884375
0001.CSV	2001.83	0.00884699
0001.CSV	2005.69	0.00888761
0001.CSV	2009.55	0.00891467
0001.CSV	2013.4	0.00899459
0001.CSV	2017.26	0.00899919
0001.CSV	2021.12	0.00906841
0001.CSV	2024.97	0.00906469
0001.CSV	2028.83	0.00910654
0001.CSV	2032.69	0.00910796
0001.CSV	2036.55	0.00917084
0001.CSV	2040.4	0.00916515
0001.CSV	2044.26	0.00920705
0001.CSV	2048.12	0.0091954
0001.CSV	2051.97	0.00923487
0001.CSV	2055.83	0.00925433
0001.CSV	2059.69	0.00934471
0001.CSV	2063.55	0.00937691
0001.CSV	2067.4	0.00943359
0001.CSV	2071.26	0.00940836
0001.CSV	2075.12	0.00942546
0001.CSV	2078.97	0.00942864
0001.CSV	2082.83	0.00949722
0001.CSV	2086.69	0.00950511
0001.CSV	2090.55	0.00954623
0001.CSV	2094.4	0.00955822
0001.CSV	2098.26	0.00961187
0001.CSV	2102.12	0.00961323
0001.CSV	2105.97	0.00967651
0001.CSV	2109.83	0.00970762
0001.CSV	2113.69	0.00977776
0001.CSV	2117.55	0.00983751
0001.CSV	2121.4	0.00992781
0001.CSV	2125.26	0.00993666
0001.CSV	2129.12	0.0100008
0001.CSV	2132.97	0.010024
0001.CSV	2136.83	0.0100698
0001.CSV	2140.69	0.0100581
0001.CSV	2144.55	0.0101047
0001.CSV	2148.4	0.0101111
0001.CSV	2152.26	0.010135
0001.CSV	2156.12	0.0101082
0001.CSV	2159.97	0.0101179
0001.CSV	2163.83	0.0100933
0001.CSV	2167.69	0.0101233
0001.CSV	2171.55	0.0101255
0001.CSV	2175.4	0.0101538
0001.CSV	2179.26	0.0101342
0001.CSV	2183.12	0.0101704
0001.CSV	2186.97	0.0101584
0001.CSV	2190.83	0.0101942
0001.CSV	2194.69	0.0101968
0001.CSV	2198.55	0.0102303
0001.CSV	2202.4	0.0102268
0001.CSV	2206.26	0.0102476
0001.CSV	2210.12	0.0102419
0001.CSV	2213.97	0.0102786
0001.CSV	2217.83	0.0102684
0001.CSV	2221.69	0.0102926
0001.CSV	2225.54	0.0102898
0001.CSV	2229.4	0.0103225
0001.CSV	2233.26	0.0103183
0001.CSV	2237.12	0.0103382
0001.CSV	2240.97	0.0103326
0001.CSV	2244.83	0.0103713
0001.CSV	2248.69	0.0103798
0001.CSV	2252.54	0.0104089
0001.CSV	2256.4	0.0103908
0001.CSV	2260.26	0.0104248
0001.CSV	2264.11	0.0104312
0001.CSV	2267.97	0.0104679
0001.CSV	2271.83	0.01047
0001.CSV	2275.69	0.0105007
0001.CSV	2279.54	0.0104834
0001.CSV	2283.4	0.0104965
0001.CSV	2287.26	0.0105208
0001.CSV	2291.11	0.0106137
0001.CSV	2294.97	0.0107164
0001.CSV	2298.83	0.0108643
0001.CSV	2302.69	0.010942
0001.CSV	2306.54	0.0110705
0001.CSV	2310.4	0.0111913
0001.CSV	2314.26	0.0112743
0001.CSV	2318.11	0.0112178
0001.CSV	2321.97	0.0112093
0001.CSV	2325.83	0.0111569
0001.CSV	2329.69	0.011282
0001.CSV	2333.54	0.0111793
0001.CSV	2337.4	0.0112207
0001.CSV	2341.26	0.011142
0001.CSV	2345.11	0.0114346
0001.CSV	2348.97	0.0113531
0001.CSV	2352.83	0.0108782
0001.CSV	2356.69	0.00950691
0001.CSV	2360.54	0.00885497
0001.CSV	2364.4	0.00941188
0001.CSV	2368.26	0.0107154
0001.CSV	2372.11	0.0113384
0001.CSV	2375.97	0.0115298
0001.CSV	2379.83	0.0114014
0001.CSV	2383.69	0.011226
0001.CSV	2387.54	0.0110341
0001.CSV	2391.4	0.0109587
0001.CSV	2395.26	0.0109299
0001.CSV	2399.11	0.01094
0001.CSV	2402.97	0.0109532
0001.CSV	2406.83	0.0109992
0001.CSV	2410.68	0.0110259
0001.CSV	2414.54	0.0110661
0001.CSV	2418.4	0.0110893
0001.CSV	2422.26	0.0111594
0001.CSV	2426.11	0.0111928
0001.CSV	2429.97	0.0112336
0001.CSV	2433.83	0.0112545
0001.CSV	2437.68	0.0113087
0001.CSV	2441.54	0.0113506
0001.CSV	2445.4	0.0114194
0001.CSV	2449.26	0.0114884
0001.CSV	2453.11	0.0115891
0001.CSV	2456.97	0.0116839
0001.CSV	2460.83	0.0118067
0001.CSV	2464.68	0.0119424
0001.CSV	2468.54	0.012173
0001.CSV	2472.4	0.0124549
0001.CSV	2476.26	0.0128131
0001.CSV	2480.11	0.0132145
0001.CSV	2483.97	0.0137079
0001.CSV	2487.83	0.0142281
0001.CSV	2491.68	0.0147928
0001.CSV	2495.54	0.0153689
0001.CSV	2499.4	0.0159249
0001.CSV	2503.26	0.016369
0001.CSV	2507.11	0.0166882
0001.CSV	2510.97	0.0168586
0001.CSV	2514.83	0.0169738
0001.CSV	2518.68	0.0170011
0001.CSV	2522.54	0.0168428
0001.CSV	2526.4	0.0164368
0001.CSV	2530.26	0.0158907
0001.CSV	2534.11	0.0152225
0001.CSV	2537.97	0.014646
0001.CSV	2541.83	0.0143097
0001.CSV	2545.68	0.0141851
0001.CSV	2549.54	0.0140449
0001.CSV	2553.4	0.0138219
0001.CSV	2557.26	0.0135707
0001.CSV	2561.11	0.0134065
0001.CSV	2564.97	0.0132342
0001.CSV	2568.83	0.0130704
0001.CSV	2572.68	0.012957
0001.CSV	2576.54	0.0128797
0001.CSV	2580.4	0.012776
0001.CSV	2584.25	0.0126914
0001.CSV	2588.11	0.0125972
0001.CSV	2591.97	0.0125564
0001.CSV	2595.83	0.0125317
0001.CSV	2599.68	0.0125201
0001.CSV	2603.54	0.0124734
0001.CSV	2607.4	0.0124149
0001.CSV	2611.25	0.012361
0001.CSV	2615.11	0.0123385
0001.CSV	2618.97	0.0123058
0001.CSV	2622.82	0.0122965
0001.CSV	2626.68	0.0122688
0001.CSV	2630.54	0.012233
0001.CSV	2634.4	0.0121812
0001.CSV	2638.25	0.0121108
0001.CSV	2642.11	0.0119805
0001.CSV	2645.97	0.011897
0001.CSV	2649.82	0.0118336
0001.CSV	2653.68	0.0117884
0001.CSV	2657.54	0.0117615
0001.CSV	2661.4	0.0117242
0001.CSV	2665.25	0.0116969
0001.CSV	2669.11	0.0117528
0001.CSV	2672.97	0.0118738
0001.CSV	2676.82	0.0120447
0001.CSV	2680.68	0.012043
0001.CSV	2684.54	0.0118828
0001.CSV	2688.4	0.0117852
0001.CSV	2692.25	0.0118116
0001.CSV	2696.11	0.0118872
0001.CSV	2699.97	0.0119329
0001.CSV	2703.82	0.0119268
0001.CSV	2707.68	0.0120011
0001.CSV	2711.54	0.0120582
0001.CSV	2715.4	0.0120812
0001.CSV	2719.25	0.0121962
0001.CSV	2723.11	0.0124137
0001.CSV	2726.97	0.0124528
0001.CSV	2730.82	0.0122962
0001.CSV	2734.68	0.0122738
0001.CSV	2738.54	0.0122856
0001.CSV	2742.4	0.0123076
0001.CSV	2746.25	0.0125413
0001.CSV	2750.11	0.0125895
0001.CSV	2753.97	0.0124418
0001.CSV	2757.82	0.0124186
0001.CSV	2761.68	0.0124041
0001.CSV	2765.54	0.012413
0001.CSV	2769.39	0.0125892
0001.CSV	2773.25	0.0129184
0001.CSV	2777.11	0.0129523
0001.CSV	2780.97	0.0128572
0001.CSV	2784.82	0.0131089
0001.CSV	2788.68	0.0135576
0001.CSV	2792.54	0.0137851
0001.CSV	2796.39	0.013922
0001.CSV	2800.25	0.0139463
0001.CSV	2804.11	0.0139306
0001.CSV	2807.97	0.0142855
0001.CSV	2811.82	0.0145011
0001.CSV	2815.68	0.0145936
0001.CSV	2819.54	0.0149401
0001.CSV	2823.39	0.0153854
0001.CSV	2827.25	0.0158274
0001.CSV	2831.11	0.0166703
0001.CSV	2834.97	0.0179687
0001.CSV	2838.82	0.0195587
0001.CSV	2842.68	0.0218399
0001.CSV	2846.54	0.0253253
0001.CSV	2850.39	0.028295
0001.CSV	2854.25	0.028966
0001.CSV	2858.11	0.0277206
0001.CSV	2861.97	0.0258037
0001.CSV	2865.82	0.0245528
0001.CSV	2869.68	0.0243761
0001.CSV	2873.54	0.0241414
0001.CSV	2877.39	0.0231424
0001.CSV	2881.25	0.0224294
0001.CSV	2885.11	0.022562
0001.CSV	2888.97	0.0233144
0001.CSV	2892.82	0.0245451
0001.CSV	2896.68	0.0257264
0001.CSV	2900.54	0.0267748
0001.CSV	2904.39	0.0282544
0001.CSV	2908.25	0.0304833
0001.CSV	2912.11	0.0336993
0001.CSV	2915.97	0.0372666
0001.CSV	2919.82	0.0397315
0001.CSV	2923.68	0.0401746
0001.CSV	2927.54	0.0386512
0001.CSV	2931.39	0.0354723
0001.CSV	2935.25	0.0315879
0001.CSV	2939.11	0.028446
0001.CSV	2942.96	0.0266406
0001.CSV	2946.82	0.0257927
0001.CSV	2950.68	0.0256585
0001.CSV	2954.54	0.0256776
0001.CSV	2958.39	0.0250285
0001.CSV	2962.25	0.0236727
0001.CSV	2966.11	0.0216659
0001.CSV	2969.96	0.019857
0001.CSV	2973.82	0.0186148
0001.CSV	2977.68	0.0176989
0001.CSV	2981.53	0.0167803
0001.CSV	2985.39	0.0158721
0001.CSV	2989.25	0.0154641
0001.CSV	2993.11	0.0153006
0001.CSV	2996.96	0.0149486
0001.CSV	3000.82	0.0145952
0001.CSV	3004.68	0.0143824
0001.CSV	3008.53	0.0144212
0001.CSV	3012.39	0.0145192
0001.CSV	3016.25	0.0143815
0001.CSV	3020.11	0.0141397
0001.CSV	3023.96	0.0139655
0001.CSV	3027.82	0.0139373
0001.CSV	3031.68	0.0141167
0001.CSV	3035.53	0.0141964
0001.CSV	3039.39	0.0142363
0001.CSV	3043.25	0.0143081
0001.CSV	3047.11	0.0143522
0001.CSV	3050.96	0.014392
0001.CSV	3054.82	0.0143698
0001.CSV	3058.68	0.0143506
0001.CSV	3062.53	0.0144618
0001.CSV	3066.39	0.0146435
0001.CSV	3070.25	0.0146992
0001.CSV	3074.11	0.0147706
0001.CSV	3077.96	0.014936
0001.CSV	3081.82	0.0150395
0001.CSV	3085.68	0.0151342
0001.CSV	3089.53	0.0151803
0001.CSV	3093.39	0.0151607
0001.CSV	3097.25	0.0152543
0001.CSV	3101.11	0.0154041
0001.CSV	3104.96	0.0155423
0001.CSV	3108.82	0.0157043
0001.CSV	3112.68	0.0158225
0001.CSV	3116.53	0.0159828
0001.CSV	3120.39	0.0160779
0001.CSV	3124.25	0.0161072
0001.CSV	3128.11	0.0161892
0001.CSV	3131.96	0.0163005
0001.CSV	3135.82	0.0164338
0001.CSV	3139.68	0.0165969
0001.CSV	3143.53	0.0166498
0001.CSV	3147.39	0.0167908
0001.CSV	3151.25	0.0170277
0001.CSV	3155.1	0.0171481
0001.CSV	3158.96	0.0171792
0001.CSV	3162.82	0.0172925
0001.CSV	3166.68	0.0174316
0001.CSV	3170.53	0.0175378
0001.CSV	3174.39	0.0176172
0001.CSV	3178.25	0.0177762
0001.CSV	3182.1	0.0179644
0001.CSV	3185.96	0.0181622
0001.CSV	3189.82	0.0183233
0001.CSV	3193.68	0.0184467
0001.CSV	3197.53	0.0185738
0001.CSV	3201.39	0.0187344
0001.CSV	3205.25	0.0188492
0001.CSV	3209.1	0.0189619
0001.CSV	3212.96	0.0190831
0001.CSV	3216.82	0.0192169
0001.CSV	3220.68	0.0193125
0001.CSV	3224.53	0.0194311
0001.CSV	3228.39	0.0195897
0001.CSV	3232.25	0.019742
0001.CSV	3236.1	0.0198498
0001.CSV	3239.96	0.0199738
0001.CSV	3243.82	0.0201118
0001.CSV	3247.68	0.0202264
0001.CSV	3251.53	0.020303
0001.CSV	3255.39	0.0204148
0001.CSV	3259.25	0.0205254
0001.CSV	3263.1	0.0206444
0001.CSV	3266.96	0.0207751
0001.CSV	3270.82	0.0209335
0001.CSV	3274.68	0.0210728
0001.CSV	3278.53	0.0211054
0001.CSV	3282.39	0.0211331
0001.CSV	3286.25	0.0212424
0001.CSV	3290.1	0.0213846
0001.CSV	3293.96	0.0214963
0001.CSV	3297.82	0.0215617
0001.CSV	3301.67	0.0216852
0001.CSV	3305.53	0.0217996
0001.CSV	3309.39	0.0218614
0001.CSV	3313.25	0.0219039
0001.CSV	3317.1	0.0219585
0001.CSV	3320.96	0.0219747
0001.CSV	3324.82	0.0220648
0001.CSV	3328.67	0.0222097
0001.CSV	3332.53	0.0223358
0001.CSV	3336.39	0.0224315
0001.CSV	3340.24	0.0224905
0001.CSV	3344.1	0.0224989
0001.CSV	3347.96	0.0225479
0001.CSV	3351.82	0.022581
0001.CSV	3355.67	0.0225964
0001.CSV	3359.53	0.0226455
0001.CSV	3363.39	0.0226998
0001.CSV	3367.24	0.0227144
0001.CSV	3371.1	0.0226884
0001.CSV	3374.96	0.0226065
0001.CSV	3378.82	0.0225695
0001.CSV	3382.67	0.0225318
0001.CSV	3386.53	0.0225286
0001.CSV	3390.39	0.0225114
0001.CSV	3394.24	0.0224682
0001.CSV	3398.1	0.0223249
0001.CSV	3401.96	0.0221593
0001.CSV	3405.82	0.0220164
0001.CSV	3409.67	0.0219087
0001.CSV	3413.53	0.0217723
0001.CSV	3417.39	0.0216447
0001.CSV	3421.24	0.0215404
0001.CSV	3425.1	0.0214661
0001.CSV	3428.96	0.0213242
0001.CSV	3432.82	0.0211175
0001.CSV	3436.67	0.0208534
0001.CSV	3440.53	0.0206088
0001.CSV	3444.39	0.0204205
0001.CSV	3448.24	0.0202216
0001.CSV	3452.1	0.0199545
0001.CSV	3455.96	0.0197322
0001.CSV	3459.82	0.0195475
0001.CSV	3463.67	0.0193704
0001.CSV	3467.53	0.0191605
0001.CSV	3471.39	0.018856
0001.CSV	3475.24	0.0185181
0001.CSV	3479.1	0.0182569
0001.CSV	3482.96	0.0179293
0001.CSV	3486.82	0.0176606
0001.CSV	3490.67	0.0174564
0001.CSV	3494.53	0.0172505
0001.CSV	3498.39	0.0170226
0001.CSV	3502.24	0.0167921
0001.CSV	3506.1	0.0164507
0001.CSV	3509.96	0.0161582
0001.CSV	3513.81	0.0159141
0001.CSV	3517.67	0.0155294
0001.CSV	3521.53	0.0152639
0001.CSV	3525.39	0.0151484
0001.CSV	3529.24	0.0148875
0001.CSV	3533.1	0.0145489
0001.CSV	3536.96	0.0143263
0001.CSV	3540.81	0.0141998
0001.CSV	3544.67	0.014008
0001.CSV	3548.53	0.0136762
0001.CSV	3552.39	0.013368
0001.CSV	3556.24	0.0131276
0001.CSV	3560.1	0.0128374
0001.CSV	3563.96	0.0125011
0001.CSV	3567.81	0.0123683
0001.CSV	3571.67	0.0122069
0001.CSV	3575.53	0.0118628
0001.CSV	3579.39	0.0116719
0001.CSV	3583.24	0.0115853
0001.CSV	3587.1	0.0114681
0001.CSV	3590.96	0.0111617
0001.CSV	3594.81	0.0109228
0001.CSV	3598.67	0.0107982
0001.CSV	3602.53	0.0106169
0001.CSV	3606.39	0.0103781
0001.CSV	3610.24	0.0102007
0001.CSV	3614.1	0.0100727
0001.CSV	3617.96	0.00995903
0001.CSV	3621.81	0.00983354
0001.CSV	3625.67	0.00962678
0001.CSV	3629.53	0.00959382
0001.CSV	3633.39	0.0094855
0001.CSV	3637.24	0.00923642
0001.CSV	3641.1	0.00901015
0001.CSV	3644.96	0.00878782
0001.CSV	3648.81	0.00892309
0001.CSV	3652.67	0.00889769
0001.CSV	3656.53	0.00868015
0001.CSV	3660.38	0.00857162
0001.CSV	3664.24	0.00829928
0001.CSV	3668.1	0.00801413
0001.CSV	3671.96	0.00810118
0001.CSV	3675.81	0.00841197
0001.CSV	3679.67	0.00839707
0001.CSV	3683.53	0.00816276
0001.CSV	3687.38	0.00809683
0001.CSV	3691.24	0.00837795
0001.CSV	3695.1	0.00833556
0001.CSV	3698.95	0.0081524
0001.CSV	3702.81	0.00804643
0001.CSV	3706.67	0.00797427
0001.CSV	3710.53	0.00805129
0001.CSV	3714.38	0.00811374
0001.CSV	3718.24	0.00791967
0001.CSV	3722.1	0.00790158
0001.CSV	3725.95	0.00801244
0001.CSV	3729.81	0.00796607
0001.CSV	3733.67	0.00803134
0001.CSV	3737.53	0.00818089
0001.CSV	3741.38	0.00796148
0001.CSV	3745.24	0.00786005
0001.CSV	3749.1	0.00790354
0001.CSV	3752.95	0.00794565
0001.CSV	3756.81	0.0078729
0001.CSV	3760.67	0.00777702
0001.CSV	3764.53	0.00765587
0001.CSV	3768.38	0.00772495
0001.CSV	3772.24	0.00775547
0001.CSV	3776.1	0.00765419
0001.CSV	3779.95	0.00764623
0001.CSV	3783.81	0.00766859
0001.CSV	3787.67	0.00770326
0001.CSV	3791.53	0.00763132
0001.CSV	3795.38	0.00754089
0001.CSV	3799.24	0.00764356
0001.CSV	3803.1	0.00784473
0001.CSV	3806.95	0.00788127
0001.CSV	3810.81	0.0077153
0001.CSV	3814.67	0.00757218
0001.CSV	3818.53	0.00769982
0001.CSV	3822.38	0.00785563
0001.CSV	3826.24	0.00770477
0001.CSV	3830.1	0.0075326
0001.CSV	3833.95	0.00748365
0001.CSV	3837.81	0.0076121
0001.CSV	3841.67	0.00779457
0001.CSV	3845.53	0.00766761
0001.CSV	3849.38	0.00744013
0001.CSV	3853.24	0.00766683
0001.CSV	3857.1	0.00780496
0001.CSV	3860.95	0.00762734
0001.CSV	3864.81	0.0076264
0001.CSV	3868.67	0.00763234
0001.CSV	3872.52	0.00766838
0001.CSV	3876.38	0.00759474
0001.CSV	3880.24	0.00754258
0001.CSV	3884.1	0.00765662
0001.CSV	3887.95	0.00765301
0001.CSV	3891.81	0.00762239
0001.CSV	3895.67	0.00754295
0001.CSV	3899.52	0.00752178
0001.CSV	3903.38	0.00776397
0001.CSV	3907.24	0.00773139
0001.CSV	3911.1	0.00751581
0001.CSV	3914.95	0.00742112
0001.CSV	3918.81	0.00753911
0001.CSV	3922.67	0.00760637
0001.CSV	3926.52	0.00756449
0001.CSV	3930.38	0.00757872
0001.CSV	3934.24	0.00758553
0001.CSV	3938.09	0.00750549
0001.CSV	3941.95	0.00750849
0001.CSV	3945.81	0.00752943
0001.CSV	3949.67	0.00748314
0001.CSV	3953.52	0.00743231
0001.CSV	3957.38	0.00743764
0001.CSV	3961.24	0.00749649
0001.CSV	3965.09	0.00749504
0001.CSV	3968.95	0.0074763
0001.CSV	3972.81	0.00745432
0001.CSV	3976.67	0.00744785
0001.CSV	3980.52	0.00744266
0001.CSV	3984.38	0.00743187
0001.CSV	3988.24	0.00734698
0001.CSV	3992.09	0.00732457
0001.CSV	3995.95	0.00739362
0001.CSV	3999.81	0.00743433
0002.CSV	674.992	0.0364119
0002.CSV	678.849	0.0374257
0002.CSV	682.706	0.0380394
0002.CSV	686.563	0.0396767
0002.CSV	690.42	0.0407745
0002.CSV	694.277	0.0432302
0002.CSV	698.134	0.0465494
0002.CSV	701.991	0.0523825
0002.CSV	705.849	0.0636901
0002.CSV	709.706	0.0797175
0002.CSV	713.563	0.0760458
0002.CSV	717.42	0.0531651
0002.CSV	721.277	0.0367995
0002.CSV	725.134	0.0320434
0002.CSV	728.991	0.0306895
0002.CSV	732.848	0.0307764
0002.CSV	736.705	0.0307674
0002.CSV	740.562	0.0309866
0002.CSV	744.42	0.0309304
0002.CSV	748.277	0.0313471
0002.CSV	752.134	0.0315824
0002.CSV	755.991	0.0322466
0002.CSV	759.848	0.0326988
0002.CSV	763.705	0.0336363
0002.CSV	767.562	0.0341726
0002.CSV	771.419	0.0350993
0002.CSV	775.276	0.0357962
0002.CSV	779.133	0.0365578
0002.CSV	782.99	0.0364433
0002.CSV	786.848	0.0365941
0002.CSV	790.705	0.0368516
0002.CSV	794.562	0.0376574
0002.CSV	798.419	0.0381639
0002.CSV	802.276	0.0385664
0002.CSV	806.133	0.038268
0002.CSV	809.99	0.0384089
0002.CSV	813.847	0.0386246
0002.CSV	817.704	0.0394371
0002.CSV	821.562	0.0404266
0002.CSV	825.419	0.0421423
0002.CSV	829.276	0.0435731
0002.CSV	833.133	0.0448707
0002.CSV	836.99	0.0463514
0002.CSV	840.847	0.0497864
0002.CSV	844.704	0.0550599
0002.CSV	848.561	0.0593256
0002.CSV	852.418	0.0645541
0002.CSV	856.275	0.0778405
0002.CSV	860.132	0.095873
0002.CSV	863.99	0.118403
0002.CSV	867.847	0.144512
0002.CSV	871.704	0.153579
0002.CSV	875.561	0.132027
0002.CSV	879.418	0.0992807
0002.CSV	883.275	0.065484
0002.CSV	887.132	0.0360514
0002.CSV	890.989	0.0224091
0002.CSV	894.846	0.0212782
0002.CSV	898.703	0.022134
0002.CSV	902.561	0.0230498
0002.CSV	906.418	0.0236259
0002.CSV	910.275	0.0243612
0002.CSV	914.132	0.0247813
0002.CSV	917.989	0.0254713
0002.CSV	921.846	0.0259927
0002.CSV	925.703	0.0267353
0002.CSV	929.56	0.0272109
0002.CSV	933.417	0.0277811
0002.CSV	937.274	0.0280251
0002.CSV	941.131	0.028493
0002.CSV	944.989	0.0288041
0002.CSV	948.846	0.0293188
0002.CSV	952.703	0.0296573
0002.CSV	956.56	0.0302017
0002.CSV	960.417	0.0306135
0002.CSV	964.274	0.0312736
0002.CSV	968.131	0.0317844
0002.CSV	971.988	0.0325332
0002.CSV	975.845	0.0331761
0002.CSV	979.702	0.034094
0002.CSV	983.559	0.0349063
0002.CSV	987.417	0.0361159
0002.CSV	991.274	0.0372201
0002.CSV	995.131	0.0383093
0002.CSV	998.988	0.038982
0002.CSV	1002.85	0.0397058
0002.CSV	1006.7	0.0402973
0002.CSV	1010.56	0.0413528
0002.CSV	1014.42	0.0422788
0002.CSV	1018.27	0.0433153
0002.CSV	1022.13	0.0440803
0002.CSV	1025.99	0.0449692
0002.CSV	1029.85	0.0455776
0002.CSV	1033.7	0.046392
0002.CSV	1037.56	0.0471484
0002.CSV	1041.42	0.0481872
0002.CSV	1045.27	0.0489338
0002.CSV	1049.13	0.0498746
0002.CSV	1052.99	0.050657
0002.CSV	1056.84	0.0517298
0002.CSV	1060.7	0.0526216
0002.CSV	1064.56	0.0537808
0002.CSV	1068.42	0.054746
0002.CSV	1072.27	0.0558206
0002.CSV	1076.13	0.0564582
0002.CSV	1079.99	0.0572934
0002.CSV	1083.84	0.0576217
0002.CSV	1087.7	0.0572483
0002.CSV	1091.56	0.0560827
0002.CSV	1095.41	0.0548156
0002.CSV	1099.27	0.0534998
0002.CSV	1103.13	0.0527636
0002.CSV	1106.99	0.05206
0002.CSV	1110.84	0.0516274
0002.CSV	1114.7	0.0510124
0002.CSV	1118.56	0.0505806
0002.CSV	1122.41	0.049956
0002.CSV	1126.27	0.0495112
0002.CSV	1130.13	0.0489376
0002.CSV	1133.99	0.0486364
0002.CSV	1137.84	0.0483297
0002.CSV	1141.7	0.0483855
0002.CSV	1145.56	0.0484322
0002.CSV	1149.41	0.048787
0002.CSV	1153.27	0.0490289
0002.CSV	1157.13	0.0495003
0002.CSV	1160.99	0.0497175
0002.CSV	1164.84	0.0498478
0002.CSV	1168.7	0.0495027
0002.CSV	1172.56	0.0492247
0002.CSV	1176.41	0.0488533
0002.CSV	1180.27	0.0486904
0002.CSV	1184.13	0.048305
0002.CSV	1187.99	0.0480677
0002.CSV	1191.84	0.0477719
0002.CSV	1195.7	0.0478173
0002.CSV	1199.56	0.0477784
0002.CSV	1203.41	0.0479698
0002.CSV	1207.27	0.0480348
0002.CSV	1211.13	0.0483568
0002.CSV	1214.98	0.0486949
0002.CSV	1218.84	0.0493775
0002.CSV	1222.7	0.0499935
0002.CSV	1226.56	0.0508716
0002.CSV	1230.41	0.0516309
0002.CSV	1234.27	0.0525729
0002.CSV	1238.13	0.0533453
0002.CSV	1241.98	0.0542755
0002.CSV	1245.84	0.0549968
0002.CSV	1249.7	0.0558146
0002.CSV	1253.56	0.056328
0002.CSV	1257.41	0.0569668
0002.CSV	1261.27	0.0575773
0002.CSV	1265.13	0.0586918
0002.CSV	1268.98	0.0598141
0002.CSV	1272.84	0.0611544
0002.CSV	1276.7	0.06229
0002.CSV	1280.56	0.0637032
0002.CSV	1284.41	0.0650252
0002.CSV	1288.27	0.0666847
0002.CSV	1292.13	0.0683219
0002.CSV	1295.98	0.0703072
0002.CSV	1299.84	0.0722382
0002.CSV	1303.7	0.0744802
0002.CSV	1307.56	0.0766158
0002.CSV	1311.41	0.0790877
0002.CSV	1315.27	0.0814822
0002.CSV	1319.13	0.0843286
0002.CSV	1322.98	0.08699
0002.CSV	1326.84	0.0900373
0002.CSV	1330.7	0.0931888
0002.CSV	1334.56	0.0966843
0002.CSV	1338.41	0.10067
0002.CSV	1342.27	0.105686
0002.CSV	1346.13	0.110041
0002.CSV	1349.98	0.115185
0002.CSV	1353.84	0.120543
0002.CSV	1357.7	0.126247
0002.CSV	1361.56	0.132467
0002.CSV	1365.41	0.139802
0002.CSV	1369.27	0.145824
0002.CSV	1373.13	0.152901
0002.CSV	1376.98	0.160105
0002.CSV	1380.84	0.166209
0002.CSV	1384.7	0.171269
0002.CSV	1388.56	0.176662
0002.CSV	1392.41	0.179413
0002.CSV	1396.27	0.179884
0002.CSV	1400.13	0.177769
0002.CSV	1403.98	0.175567
0002.CSV	1407.84	0.171311
0002.CSV	1411.7	0.165932
0002.CSV	1415.55	0.159754
0002.CSV	1419.41	0.152419
0002.CSV	1423.27	0.145943
0002.CSV	1427.12	0.141962
0002.CSV	1430.98	0.13781
0002.CSV	1434.84	0.13402
0002.CSV	1438.7	0.129529
0002.CSV	1442.55	0.126458
0002.CSV	1446.41	0.122764
0002.CSV	1450.27	0.118857
0002.CSV	1454.12	0.115342
0002.CSV	1457.98	0.109731
0002.CSV	1461.84	0.105257
0002.CSV	1465.7	0.102274
0002.CSV	1469.55	0.098981
0002.CSV	1473.41	0.0947354
0002.CSV	1477.27	0.0897618
0002.CSV	1481.12	0.0866217
0002.CSV	1484.98	0.0832937
0002.CSV	1488.84	0.0788819
0002.CSV	1492.7	0.074187
0002.CSV	1496.55	0.0705995
0002.CSV	1500.41	0.0662885
0002.CSV	1504.27	0.0637739
0002.CSV	1508.12	0.0583915
0002.CSV	1511.98	0.0545998
0002.CSV	1515.84	0.0521165
0002.CSV	1519.7	0.0487243
0002.CSV	1523.55	0.0444692
0002.CSV	1527.41	0.0415794
0002.CSV	1531.27	0.0389309
0002.CSV	1535.12	0.0362922
0002.CSV	1538.98	0.0335112
0002.CSV	1542.84	0.0286258
0002.CSV	1546.7	0.0256943
0002.CSV	1550.55	0.0238728
0002.CSV	1554.41	0.0221292
0002.CSV	1558.27	0.0203665
0002.CSV	1562.12	0.0190014
0002.CSV	1565.98	0.0185514
0002.CSV	1569.84	0.0180901
0002.CSV	1573.69	0.0178412
0002.CSV	1577.55	0.0174947
0002.CSV	1581.41	0.017088
0002.CSV	1585.27	0.0165328
0002.CSV	1589.12	0.0158338
0002.CSV	1592.98	0.0149295
0002.CSV	1596.84	0.0141019
0002.CSV	1600.69	0.0133197
0002.CSV	1604.55	0.0126489
0002.CSV	1608.41	0.0119838
0002.CSV	1612.27	0.0114608
0002.CSV	1616.12	0.0108442
0002.CSV	1619.98	0.0103292
0002.CSV	1623.84	0.00993506
0002.CSV	1627.69	0.00959826
0002.CSV	1631.55	0.0092197
0002.CSV	1635.41	0.00895559
0002.CSV	1639.27	0.0087178
0002.CSV	1643.12	0.00856891
0002.CSV	1646.98	0.00839248
0002.CSV	1650.84	0.00831141
0002.CSV	1654.69	0.00812461
0002.CSV	1658.55	0.00802895
0002.CSV	1662.41	0.00787301
0002.CSV	1666.27	0.00778178
0002.CSV	1670.12	0.00771688
0002.CSV	1673.98	0.00774437
0002.CSV	1677.84	0.00764593
0002.CSV	1681.69	0.00762151
0002.CSV	1685.55	0.00756561
0002.CSV	1689.41	0.00750418
0002.CSV	1693.27	0.00730489
0002.CSV	1697.12	0.00719145
0002.CSV	1700.98	0.00704514
0002.CSV	1704.84	0.00704126
0002.CSV	1708.69	0.00695611
0002.CSV	1712.55	0.00687891
0002.CSV	1716.41	0.00683427
0002.CSV	1720.27	0.00700978
0002.CSV	1724.12	0.00698961
0002.CSV	1727.98	0.00697961
0002.CSV	1731.84	0.00696951
0002.CSV	1735.69	0.00709127
0002.CSV	1739.55	0.00702443
0002.CSV	1743.41	0.00682246
0002.CSV	1747.27	0.0065196
0002.CSV	1751.12	0.00633774
0002.CSV	1754.98	0.00617905
0002.CSV	1758.84	0.00610078
0002.CSV	1762.69	0.0060702
0002.CSV	1766.55	0.00609473
0002.CSV	1770.41	0.00615035
0002.CSV	1774.26	0.00647837
0002.CSV	1778.12	0.00675737
0002.CSV	1781.98	0.00726813
0002.CSV	1785.84	0.00803749
0002.CSV	1789.69	0.00914034
0002.CSV	1793.55	0.0103717
0002.CSV	1797.41	0.0105046
0002.CSV	1801.26	0.00937874
0002.CSV	1805.12	0.00803522
0002.CSV	1808.98	0.00704419
0002.CSV	1812.84	0.00644151
0002.CSV	1816.69	0.00608731
0002.CSV	1820.55	0.00588403
0002.CSV	1824.41	0.00569706
0002.CSV	1828.26	0.00562348
0002.CSV	1832.12	0.0055534
0002.CSV	1835.98	0.00553101
0002.CSV	1839.84	0.00545092
0002.CSV	1843.69	0.00541502
0002.CSV	1847.55	0.00540589
0002.CSV	1851.41	0.00541411
0002.CSV	1855.26	0.00536013
0002.CSV	1859.12	0.00534373
0002.CSV	1862.98	0.00528289
0002.CSV	1866.84	0.00530834
0002.CSV	1870.69	0.00535389
0002.CSV	1874.55	0.00534551
0002.CSV	1878.41	0.00531213
0002.CSV	1882.26	0.00531783
0002.CSV	1886.12	0.00526072
0002.CSV	1889.98	0.00525877
0002.CSV	1893.83	0.00525723
0002.CSV	1897.69	0.00527319
0002.CSV	1901.55	0.00523067
0002.CSV	1905.41	0.00521601
0002.CSV	1909.26	0.0051971
0002.CSV	1913.12	0.00520062
0002.CSV	1916.98	0.0051528
0002.CSV	1920.83	0.00517896
0002.CSV	1924.69	0.00517111
0002.CSV	1928.55	0.00516712
0002.CSV	1932.4	0.00515291
0002.CSV	1936.26	0.00516142
0002.CSV	1940.12	0.00513547
0002.CSV	1943.98	0.0051739
0002.CSV	1947.83	0.00518144
0002.CSV	1951.69	0.00521182
0002.CSV	1955.55	0.00522416
0002.CSV	1959.4	0.00524512
0002.CSV	1963.26	0.00521363
0002.CSV	1967.12	0.00520756
0002.CSV	1970.98	0.005186
0002.CSV	1974.83	0.00521484
0002.CSV	1978.69	0.00521028
0002.CSV	1982.55	0.00522071
0002.CSV	1986.4	0.00520629
0002.CSV	1990.26	0.0052302
0002.CSV	1994.12	0.00524193
0002.CSV	1997.98	0.0052749
0002.CSV	2001.83	0.00526635
0002.CSV	2005.69	0.00526719
0002.CSV	2009.55	0.00527031
0002.CSV	2013.4	0.00528943
0002.CSV	2017.26	0.00528134
0002.CSV	2021.12	0.00532682
0002.CSV	2024.97	0.00533031
0002.CSV	2028.83	0.00534822
0002.CSV	2032.69	0.00535691
0002.CSV	2036.55	0.00538617
0002.CSV	2040.4	0.00536298
0002.CSV	2044.26	0.00538123
0002.CSV	2048.12	0.00539056
0002.CSV	2051.97	0.00540495
0002.CSV	2055.83	0.00538697
0002.CSV	2059.69	0.00541888
0002.CSV	2063.55	0.00545602
0002.CSV	2067.4	0.00549695
0002.CSV	2071.26	0.00549239
0002.CSV	2075.12	0.0054942
0002.CSV	2078.97	0.00549075
0002.CSV	2082.83	0.00553028
0002.CSV	2086.69	0.00552236
0002.CSV	2090.55	0.00552397
0002.CSV	2094.4	0.00554451
0002.CSV	2098.26	0.00558753
0002.CSV	2102.12	0.00557414
0002.CSV	2105.97	0.00558102
0002.CSV	2109.83	0.00559341
0002.CSV	2113.69	0.00563744
0002.CSV	2117.55	0.0056834
0002.CSV	2121.4	0.00573117
0002.CSV	2125.26	0.00574534
0002.CSV	2129.12	0.0057905
0002.CSV	2132.97	0.00580998
0002.CSV	2136.83	0.00583765
0002.CSV	2140.69	0.00582126
0002.CSV	2144.55	0.00583053
0002.CSV	2148.4	0.00581579
0002.CSV	2152.26	0.00583483
0002.CSV	2156.12	0.00582885
0002.CSV	2159.97	0.00582479
0002.CSV	2163.83	0.00581696
0002.CSV	2167.69	0.00584295
0002.CSV	2171.55	0.00585004
0002.CSV	2175.4	0.00586455
0002.CSV	2179.26	0.00584141
0002.CSV	2183.12	0.00584289
0002.CSV	2186.97	0.00583016
0002.CSV	2190.83	0.00584863
0002.CSV	2194.69	0.00585988
0002.CSV	2198.55	0.00588393
0002.CSV	2202.4	0.00587388
0002.CSV	2206.26	0.00588016
0002.CSV	2210.12	0.00587127
0002.CSV	2213.97	0.00588527
0002.CSV	2217.83	0.00588111
0002.CSV	2221.69	0.00587748
0002.CSV	2225.54	0.00585981
0002.CSV	2229.4	0.00588544
0002.CSV	2233.26	0.0058897
0002.CSV	2237.12	0.00588591
0002.CSV	2240.97	0.00589373
0002.CSV	2244.83	0.0059249
0002.CSV	2248.69	0.00592961
0002.CSV	2252.54	0.00593542
0002.CSV	2256.4	0.00592296
0002.CSV	2260.26	0.00592658
0002.CSV	2264.11	0.00591003
0002.CSV	2267.97	0.00593817
0002.CSV	2271.83	0.00595094
0002.CSV	2275.69	0.00597926
0002.CSV	2279.54	0.00596269
0002.CSV	2283.4	0.00597314
0002.CSV	2287.26	0.00605068
0002.CSV	2291.11	0.00620509
0002.CSV	2294.97	0.00639648
0002.CSV	2298.83	0.0065822
0002.CSV	2302.69	0.00673348
0002.CSV	2306.54	0.00698621
0002.CSV	2310.4	0.00730344
0002.CSV	2314.26	0.00758634
0002.CSV	2318.11	0.00781552
0002.CSV	2321.97	0.00815213
0002.CSV	2325.83	0.00848038
0002.CSV	2329.69	0.00882701
0002.CSV	2333.54	0.00896012
0002.CSV	2337.4	0.00912647
0002.CSV	2341.26	0.00910106
0002.CSV	2345.11	0.00877345
0002.CSV	2348.97	0.00842592
0002.CSV	2352.83	0.00833978
0002.CSV	2356.69	0.00831209
0002.CSV	2360.54	0.00855752
0002.CSV	2364.4	0.00885717
0002.CSV	2368.26	0.00892769
0002.CSV	2372.11	0.00828284
0002.CSV	2375.97	0.00763223
0002.CSV	2379.83	0.00699762
0002.CSV	2383.69	0.00646912
0002.CSV	2387.54	0.00608495
0002.CSV	2391.4	0.00593384
0002.CSV	2395.26	0.00590361
0002.CSV	2399.11	0.00590703
0002.CSV	2402.97	0.00590828
0002.CSV	2406.83	0.00591167
0002.CSV	2410.68	0.00593135
0002.CSV	2414.54	0.00596199
0002.CSV	2418.4	0.00598413
0002.CSV	2422.26	0.00601739
0002.CSV	2426.11	0.00604
0002.CSV	2429.97	0.00608939
0002.CSV	2433.83	0.0061197
0002.CSV	2437.68	0.0061488
0002.CSV	2441.54	0.00614709
0002.CSV	2445.4	0.00616154
0002.CSV	2449.26	0.00618584
0002.CSV	2453.11	0.00621945
0002.CSV	2456.97	0.00624062
0002.CSV	2460.83	0.00630053
0002.CSV	2464.68	0.0063602
0002.CSV	2468.54	0.0064778
0002.CSV	2472.4	0.00661127
0002.CSV	2476.26	0.00672193
0002.CSV	2480.11	0.00687632
0002.CSV	2483.97	0.00710757
0002.CSV	2487.83	0.00730748
0002.CSV	2491.68	0.00756726
0002.CSV	2495.54	0.0079575
0002.CSV	2499.4	0.00841183
0002.CSV	2503.26	0.00883621
0002.CSV	2507.11	0.00916556
0002.CSV	2510.97	0.00930199
0002.CSV	2514.83	0.00928297
0002.CSV	2518.68	0.00914606
0002.CSV	2522.54	0.00889211
0002.CSV	2526.4	0.00853394
0002.CSV	2530.26	0.00816357
0002.CSV	2534.11	0.00781073
0002.CSV	2537.97	0.00752734
0002.CSV	2541.83	0.00731557
0002.CSV	2545.68	0.007196
0002.CSV	2549.54	0.00710993
0002.CSV	2553.4	0.00700156
0002.CSV	2557.26	0.00691796
0002.CSV	2561.11	0.00690621
0002.CSV	2564.97	0.00688456
0002.CSV	2568.83	0.00685191
0002.CSV	2572.68	0.00682095
0002.CSV	2576.54	0.00680728
0002.CSV	2580.4	0.00678123
0002.CSV	2584.25	0.00676359
0002.CSV	2588.11	0.0067148
0002.CSV	2591.97	0.0066864
0002.CSV	2595.83	0.00665605
0002.CSV	2599.68	0.00664071
0002.CSV	2603.54	0.00659919
0002.CSV	2607.4	0.00653202
0002.CSV	2611.25	0.00648658
0002.CSV	2615.11	0.00645318
0002.CSV	2618.97	0.00638572
0002.CSV	2622.82	0.00634151
0002.CSV	2626.68	0.00630285
0002.CSV	2630.54	0.00626237
0002.CSV	2634.4	0.00621565
0002.CSV	2638.25	0.00616954
0002.CSV	2642.11	0.00607769
0002.CSV	2645.97	0.00601859
0002.CSV	2649.82	0.00601272
0002.CSV	2653.68	0.0060146
0002.CSV	2657.54	0.00599262
0002.CSV	2661.4	0.00596995
0002.CSV	2665.25	0.00596995
0002.CSV	2669.11	0.00600418
0002.CSV	2672.97	0.00609295
0002.CSV	2676.82	0.006214
0002.CSV	2680.68	0.00618476
0002.CSV	2684.54	0.00602219
0002.CSV	2688.4	0.0059553
0002.CSV	2692.25	0.00594936
0002.CSV	2696.11	0.00595866
0002.CSV	2699.97	0.00596558
0002.CSV	2703.82	0.00596454
0002.CSV	2707.68	0.00599051
0002.CSV	2711.54	0.00599182
0002.CSV	2715.4	0.0060148
0002.CSV	2719.25	0.00609355
0002.CSV	2723.11	0.00623222
0002.CSV	2726.97	0.00623494
0002.CSV	2730.82	0.00607114
0002.CSV	2734.68	0.00604295
0002.CSV	2738.54	0.00607339
0002.CSV	2742.4	0.00610068
0002.CSV	2746.25	0.00625447
0002.CSV	2750.11	0.006262
0002.CSV	2753.97	0.00612756
0002.CSV	2757.82	0.00606755
0002.CSV	2761.68	0.00600153
0002.CSV	2765.54	0.00599511
0002.CSV	2769.39	0.00611983
0002.CSV	2773.25	0.00635553
0002.CSV	2777.11	0.00638135
0002.CSV	2780.97	0.00628463
0002.CSV	2784.82	0.00641985
0002.CSV	2788.68	0.00670864
0002.CSV	2792.54	0.00683091
0002.CSV	2796.39	0.00688743
0002.CSV	2800.25	0.00685642
0002.CSV	2804.11	0.00677453
0002.CSV	2807.97	0.00694974
0002.CSV	2811.82	0.00703941
0002.CSV	2815.68	0.00704402
0002.CSV	2819.54	0.00723177
0002.CSV	2823.39	0.00745058
0002.CSV	2827.25	0.00762606
0002.CSV	2831.11	0.00805662
0002.CSV	2834.97	0.00873072
0002.CSV	2838.82	0.00947802
0002.CSV	2842.68	0.0104472
0002.CSV	2846.54	0.0119529
0002.CSV	2850.39	0.0133391
0002.CSV	2854.25	0.0138293
0002.CSV	2858.11	0.0134435
0002.CSV	2861.97	0.0126068
0002.CSV	2865.82	0.0120409
0002.CSV	2869.68	0.0120196
0002.CSV	2873.54	0.0119902
0002.CSV	2877.39	0.0115121
0002.CSV	2881.25	0.0110918
0002.CSV	2885.11	0.0110551
0002.CSV	2888.97	0.0113346
0002.CSV	2892.82	0.011847
0002.CSV	2896.68	0.012348
0002.CSV	2900.54	0.0127996
0002.CSV	2904.39	0.0134263
0002.CSV	2908.25	0.0143627
0002.CSV	2912.11	0.0157143
0002.CSV	2915.97	0.0172457
0002.CSV	2919.82	0.0184088
0002.CSV	2923.68	0.0187676
0002.CSV	2927.54	0.0182278
0002.CSV	2931.39	0.0168037
0002.CSV	2935.25	0.0150211
0002.CSV	2939.11	0.0135952
0002.CSV	2942.96	0.0128107
0002.CSV	2946.82	0.012477
0002.CSV	2950.68	0.0124789
0002.CSV	2954.54	0.0125659
0002.CSV	2958.39	0.0123063
0002.CSV	2962.25	0.0116569
0002.CSV	2966.11	0.0106831
0002.CSV	2969.96	0.00985734
0002.CSV	2973.82	0.00932237
0002.CSV	2977.68	0.00892136
0002.CSV	2981.53	0.00848508
0002.CSV	2985.39	0.00802895
0002.CSV	2989.25	0.00786292
0002.CSV	2993.11	0.00780671
0002.CSV	2996.96	0.00759271
0002.CSV	3000.82	0.00737424
0002.CSV	3004.68	0.00726253
0002.CSV	3008.53	0.00731628
0002.CSV	3012.39	0.00739803
0002.CSV	3016.25	0.00732747
0002.CSV	3020.11	0.00721537
0002.CSV	3023.96	0.00711879
0002.CSV	3027.82	0.00707289
0002.CSV	3031.68	0.00718023
0002.CSV	3035.53	0.00723279
0002.CSV	3039.39	0.00722962
0002.CSV	3043.25	0.00725785
0002.CSV	3047.11	0.00728703
0002.CSV	3050.96	0.007281
0002.CSV	3054.82	0.00723012
0002.CSV	3058.68	0.00722015
0002.CSV	3062.53	0.00728029
0002.CSV	3066.39	0.00739035
0002.CSV	3070.25	0.00741303
0002.CSV	3074.11	0.00743568
0002.CSV	3077.96	0.00750816
0002.CSV	3081.82	0.00754501
0002.CSV	3085.68	0.00757643
0002.CSV	3089.53	0.00756618
0002.CSV	3093.39	0.00751972
0002.CSV	3097.25	0.00756308
0002.CSV	3101.11	0.00765722
0002.CSV	3104.96	0.00773442
0002.CSV	3108.82	0.00781703
0002.CSV	3112.68	0.00785813
0002.CSV	3116.53	0.00791302
0002.CSV	3120.39	0.00793469
0002.CSV	3124.25	0.00795281
0002.CSV	3128.11	0.00800508
0002.CSV	3131.96	0.00803863
0002.CSV	3135.82	0.00808751
0002.CSV	3139.68	0.00816269
0002.CSV	3143.53	0.00816695
0002.CSV	3147.39	0.0082099
0002.CSV	3151.25	0.00833282
0002.CSV	3155.1	0.00839815
0002.CSV	3158.96	0.00837491
0002.CSV	3162.82	0.00839923
0002.CSV	3166.68	0.00843899
0002.CSV	3170.53	0.00847552
0002.CSV	3174.39	0.00853431
0002.CSV	3178.25	0.00862546
0002.CSV	3182.1	0.00870807
0002.CSV	3185.96	0.00881436
0002.CSV	3189.82	0.00890127
0002.CSV	3193.68	0.00898025
0002.CSV	3197.53	0.0090608
0002.CSV	3201.39	0.00912309
0002.CSV	3205.25	0.00914925
0002.CSV	3209.1	0.00918948
0002.CSV	3212.96	0.00927582
0002.CSV	3216.82	0.00935697
0002.CSV	3220.68	0.00941869
0002.CSV	3224.53	0.00948002
0002.CSV	3228.39	0.00956682
0002.CSV	3232.25	0.00967133
0002.CSV	3236.1	0.00970436
0002.CSV	3239.96	0.00974265
0002.CSV	3243.82	0.0098428
0002.CSV	3247.68	0.00992635
0002.CSV	3251.53	0.00995185
0002.CSV	3255.39	0.00998582
0002.CSV	3259.25	0.0100184
0002.CSV	3263.1	0.0100597
0002.CSV	3266.96	0.0101536
0002.CSV	3270.82	0.0102976
0002.CSV	3274.68	0.0103798
0002.CSV	3278.53	0.0103544
0002.CSV	3282.39	0.0103433
0002.CSV	3286.25	0.0104149
0002.CSV	3290.1	0.0105274
0002.CSV	3293.96	0.0106198
0002.CSV	3297.82	0.0106545
0002.CSV	3301.67	0.0106989
0002.CSV	3305.53	0.0107609
0002.CSV	3309.39	0.0107749
0002.CSV	3313.25	0.0107531
0002.CSV	3317.1	0.0107764
0002.CSV	3320.96	0.010791
0002.CSV	3324.82	0.0108512
0002.CSV	3328.67	0.0108673
0002.CSV	3332.53	0.0109068
0002.CSV	3336.39	0.0110177
0002.CSV	3340.24	0.0110778
0002.CSV	3344.1	0.011045
0002.CSV	3347.96	0.0110694
0002.CSV	3351.82	0.011087
0002.CSV	3355.67	0.0110708
0002.CSV	3359.53	0.0111192
0002.CSV	3363.39	0.0111784
0002.CSV	3367.24	0.0112427
0002.CSV	3371.1	0.0112162
0002.CSV	3374.96	0.0110854
0002.CSV	3378.82	0.0110345
0002.CSV	3382.67	0.0110228
0002.CSV	3386.53	0.0110865
0002.CSV	3390.39	0.0111417
0002.CSV	3394.24	0.0111185
0002.CSV	3398.1	0.01102
0002.CSV	3401.96	0.0109138
0002.CSV	3405.82	0.0108127
0002.CSV	3409.67	0.0107576
0002.CSV	3413.53	0.0107144
0002.CSV	3417.39	0.0106584
0002.CSV	3421.24	0.0106013
0002.CSV	3425.1	0.0106061
0002.CSV	3428.96	0.0106155
0002.CSV	3432.82	0.0105354
0002.CSV	3436.67	0.0103863
0002.CSV	3440.53	0.0102302
0002.CSV	3444.39	0.0100951
0002.CSV	3448.24	0.00994961
0002.CSV	3452.1	0.00981731
0002.CSV	3455.96	0.00977712
0002.CSV	3459.82	0.00974699
0002.CSV	3463.67	0.00973005
0002.CSV	3467.53	0.00966608
0002.CSV	3471.39	0.0094044
0002.CSV	3475.24	0.00921226
0002.CSV	3479.1	0.0091974
0002.CSV	3482.96	0.00907118
0002.CSV	3486.82	0.00889907
0002.CSV	3490.67	0.00879834
0002.CSV	3494.53	0.00875983
0002.CSV	3498.39	0.00863968
0002.CSV	3502.24	0.00853684
0002.CSV	3506.1	0.00838575
0002.CSV	3509.96	0.00823154
0002.CSV	3513.81	0.00812539
0002.CSV	3517.67	0.00794032
0002.CSV	3521.53	0.0078279
0002.CSV	3525.39	0.00777503
0002.CSV	3529.24	0.0076179
0002.CSV	3533.1	0.0074881
0002.CSV	3536.96	0.00746781
0002.CSV	3540.81	0.0074612
0002.CSV	3544.67	0.00742604
0002.CSV	3548.53	0.00726779
0002.CSV	3552.39	0.00705557
0002.CSV	3556.24	0.00691284
0002.CSV	3560.1	0.00681098
0002.CSV	3563.96	0.0065931
0002.CSV	3567.81	0.00650797
0002.CSV	3571.67	0.00650006
0002.CSV	3575.53	0.00638492
0002.CSV	3579.39	0.00639151
0002.CSV	3583.24	0.00640573
0002.CSV	3587.1	0.00629585
0002.CSV	3590.96	0.006177
0002.CSV	3594.81	0.00610303
0002.CSV	3598.67	0.00610824
0002.CSV	3602.53	0.00602817
0002.CSV	3606.39	0.00579739
0002.CSV	3610.24	0.00561116
0002.CSV	3614.1	0.00563828
0002.CSV	3617.96	0.00573624
0002.CSV	3621.81	0.00573564
0002.CSV	3625.67	0.00562415
0002.CSV	3629.53	0.00561478
0002.CSV	3633.39	0.00557454
0002.CSV	3637.24	0.00538912
0002.CSV	3641.1	0.00524559
0002.CSV	3644.96	0.00511012
0002.CSV	3648.81	0.00520907
0002.CSV	3652.67	0.00520615
0002.CSV	3656.53	0.00509299
0002.CSV	3660.38	0.00504948
0002.CSV	3664.24	0.00488288
0002.CSV	3668.1	0.00470006
0002.CSV	3671.96	0.00480806
0002.CSV	3675.81	0.00503678
0002.CSV	3679.67	0.00501944
0002.CSV	3683.53	0.00490985
0002.CSV	3687.38	0.00489444
0002.CSV	3691.24	0.00512538
0002.CSV	3695.1	0.00508753
0002.CSV	3698.95	0.00494738
0002.CSV	3702.81	0.00488894
0002.CSV	3706.67	0.00483868
0002.CSV	3710.53	0.00486592
0002.CSV	3714.38	0.00495744
0002.CSV	3718.24	0.00492523
0002.CSV	3722.1	0.00505461
0002.CSV	3725.95	0.00516115
0002.CSV	3729.81	0.0050359
0002.CSV	3733.67	0.0049984
0002.CSV	3737.53	0.00513829
0002.CSV	3741.38	0.0049254
0002.CSV	3745.24	0.00475673
0002.CSV	3749.1	0.00475308
0002.CSV	3752.95	0.00473255
0002.CSV	3756.81	0.00469838
0002.CSV	3760.67	0.00468495
0002.CSV	3764.53	0.00459851
0002.CSV	3768.38	0.00459851
0002.CSV	3772.24	0.0045953
0002.CSV	3776.1	0.00454079
0002.CSV	3779.95	0.00460588
0002.CSV	3783.81	0.00464134
0002.CSV	3787.67	0.00468019
0002.CSV	3791.53	0.00466981
0002.CSV	3795.38	0.00456664
0002.CSV	3799.24	0.00450262
0002.CSV	3803.1	0.00461211
0002.CSV	3806.95	0.0047156
0002.CSV	3810.81	0.00464704
0002.CSV	3814.67	0.00454829
0002.CSV	3818.53	0.00459399
0002.CSV	3822.38	0.00470431
0002.CSV	3826.24	0.00459912
0002.CSV	3830.1	0.00444343
0002.CSV	3833.95	0.00446017
0002.CSV	3837.81	0.00465156
0002.CSV	3841.67	0.00478651
0002.CSV	3845.53	0.00466184
0002.CSV	3849.38	0.0044526
0002.CSV	3853.24	0.00453633
0002.CSV	3857.1	0.00468599
0002.CSV	3860.95	0.00459995
0002.CSV	3864.81	0.00458676
0002.CSV	3868.67	0.00453439
0002.CSV	3872.52	0.00453928
0002.CSV	3876.38	0.00449465
0002.CSV	3880.24	0.00447195
0002.CSV	3884.1	0.00453128
0002.CSV	3887.95	0.00451655
0002.CSV	3891.81	0.00456004
0002.CSV	3895.67	0.00455194
0002.CSV	3899.52	0.00445769
0002.CSV	3903.38	0.00459262
0002.CSV	3907.24	0.00463495
0002.CSV	3911.1	0.00449874
0002.CSV	3914.95	0.00443459
0002.CSV	3918.81	0.00449401
0002.CSV	3922.67	0.00454832
0002.CSV	3926.52	0.00453533
0002.CSV	3930.38	0.00454393
0002.CSV	3934.24	0.004552
0002.CSV	3938.09	0.0044366
0002.CSV	3941.95	0.00442385
0002.CSV	3945.81	0.00444132
0002.CSV	3949.67	0.00439409
0002.CSV	3953.52	0.00436481
0002.CSV	3957.38	0.00438726
0002.CSV	3961.24	0.00442378
0002.CSV	3965.09	0.00440885
0002.CSV	3968.95	0.00443553
0002.CSV	3972.81	0.00446663
0002.CSV	3976.67	0.00443757
0002.CSV	3980.52	0.00441766
0002.CSV	3984.38	0.0044193
0002.CSV	3988.24	0.00438515
0002.CSV	3992.09	0.00438917
0002.CSV	3995.95	0.00441909
0002.CSV	3999.81	0.00443429
0003.CSV	674.992	0.056736
0003.CSV	678.849	0.0594329
0003.CSV	682.706	0.0606324
0003.CSV	686.563	0.063461
0003.CSV	690.42	0.0659639
0003.CSV	694.277	0.0721853
0003.CSV	698.134	0.0794568
0003.CSV	701.991	0.0890188
0003.CSV	705.849	0.107539
0003.CSV	709.706	0.134399
0003.CSV	713.563	0.125548
0003.CSV	717.42	0.0855713
0003.CSV	721.277	0.058414
0003.CSV	725.134	0.0511898
0003.CSV	728.991	0.0495246
0003.CSV	732.848	0.0502039
0003.CSV	736.705	0.0503518
0003.CSV	740.562	0.0513553
0003.CSV	744.42	0.0518254
0003.CSV	748.277	0.0530958
0003.CSV	752.134	0.0538666
0003.CSV	755.991	0.0556859
0003.CSV	759.848	0.0569576
0003.CSV	763.705	0.058971
0003.CSV	767.562	0.0603427
0003.CSV	771.419	0.062879
0003.CSV	775.276	0.0651522
0003.CSV	779.133	0.0671671
0003.CSV	782.99	0.0668048
0003.CSV	786.848	0.0669787
0003.CSV	790.705	0.0679152
0003.CSV	794.562	0.0707405
0003.CSV	798.419	0.0726
0003.CSV	802.276	0.0726596
0003.CSV	806.133	0.0704733
0003.CSV	809.99	0.069485
0003.CSV	813.847	0.0691208
0003.CSV	817.704	0.0704464
0003.CSV	821.562	0.0722206
0003.CSV	825.419	0.0752987
0003.CSV	829.276	0.0779954
0003.CSV	833.133	0.0809291
0003.CSV	836.99	0.084256
0003.CSV	840.847	0.091098
0003.CSV	844.704	0.100812
0003.CSV	848.561	0.110978
0003.CSV	852.418	0.123897
0003.CSV	856.275	0.14601
0003.CSV	860.132	0.170753
0003.CSV	863.99	0.205793
0003.CSV	867.847	0.25884
0003.CSV	871.704	0.28721
0003.CSV	875.561	0.246322
0003.CSV	879.418	0.178666
0003.CSV	883.275	0.11315
0003.CSV	887.132	0.0632393
0003.CSV	890.989	0.0430591
0003.CSV	894.846	0.0424533
0003.CSV	898.703	0.0444766
0003.CSV	902.561	0.0467163
0003.CSV	906.418	0.0481995
0003.CSV	910.275	0.0498649
0003.CSV	914.132	0.0509033
0003.CSV	917.989	0.0524531
0003.CSV	921.846	0.0536591
0003.CSV	925.703	0.055246
0003.CSV	929.56	0.056273
0003.CSV	933.417	0.0575904
0003.CSV	937.274	0.0583966
0003.CSV	941.131	0.0595315
0003.CSV	944.989	0.0602823
0003.CSV	948.846	0.0614495
0003.CSV	952.703	0.0622699
0003.CSV	956.56	0.0634767
0003.CSV	960.417	0.0644497
0003.CSV	964.274	0.0659443
0003.CSV	968.131	0.0670113
0003.CSV	971.988	0.0685048
0003.CSV	975.845	0.0697699
0003.CSV	979.702	0.0715048
0003.CSV	983.559	0.0730431
0003.CSV	987.417	0.0752127
0003.CSV	991.274	0.0770903
0003.CSV	995.131	0.0792374
0003.CSV	998.988	0.0807395
0003.CSV	1002.85	0.0824844
0003.CSV	1006.7	0.0839855
0003.CSV	1010.56	0.0862213
0003.CSV	1014.42	0.0880969
0003.CSV	1018.27	0.0902016
0003.CSV	1022.13	0.0917711
0003.CSV	1025.99	0.0936491
0003.CSV	1029.85	0.0950455
0003.CSV	1033.7	0.0969337
0003.CSV	1037.56	0.0986437
0003.CSV	1041.42	0.100858
0003.CSV	1045.27	0.102618
0003.CSV	1049.13	0.105075
0003.CSV	1052.99	0.107468
0003.CSV	1056.84	0.110882
0003.CSV	1060.7	0.114393
0003.CSV	1064.56	0.118473
0003.CSV	1068.42	0.12195
0003.CSV	1072.27	0.125638
0003.CSV	1076.13	0.128583
0003.CSV	1079.99	0.131827
0003.CSV	1083.84	0.13269
0003.CSV	1087.7	0.130807
0003.CSV	1091.56	0.127442
0003.CSV	1095.41	0.124384
0003.CSV	1099.27	0.121275
0003.CSV	1103.13	0.119236
0003.CSV	1106.99	0.117159
0003.CSV	1110.84	0.1157
0003.CSV	1114.7	0.113981
0003.CSV	1118.56	0.112641
0003.CSV	1122.41	0.110974
0003.CSV	1126.27	0.109816
0003.CSV	1130.13	0.108433
0003.CSV	1133.99	0.107685
0003.CSV	1137.84	0.10696
0003.CSV	1141.7	0.106948
0003.CSV	1145.56	0.106783
0003.CSV	1149.41	0.107048
0003.CSV	1153.27	0.106955
0003.CSV	1157.13	0.107471
0003.CSV	1160.99	0.108052
0003.CSV	1164.84	0.108678
0003.CSV	1168.7	0.10816
0003.CSV	1172.56	0.107595
0003.CSV	1176.41	0.1067
0003.CSV	1180.27	0.106069
0003.CSV	1184.13	0.104762
0003.CSV	1187.99	0.103656
0003.CSV	1191.84	0.102398
0003.CSV	1195.7	0.101899
0003.CSV	1199.56	0.101422
0003.CSV	1203.41	0.101536
0003.CSV	1207.27	0.101483
0003.CSV	1211.13	0.102099
0003.CSV	1214.98	0.102777
0003.CSV	1218.84	0.104151
0003.CSV	1222.7	0.105473
0003.CSV	1226.56	0.107375
0003.CSV	1230.41	0.108966
0003.CSV	1234.27	0.110915
0003.CSV	1238.13	0.112463
0003.CSV	1241.98	0.114378
0003.CSV	1245.84	0.115986
0003.CSV	1249.7	0.117943
0003.CSV	1253.56	0.119424
0003.CSV	1257.41	0.121296
0003.CSV	1261.27	0.122933
0003.CSV	1265.13	0.12511
0003.CSV	1268.98	0.127109
0003.CSV	1272.84	0.129814
0003.CSV	1276.7	0.132303
0003.CSV	1280.56	0.135429
0003.CSV	1284.41	0.138319
0003.CSV	1288.27	0.141908
0003.CSV	1292.13	0.145423
0003.CSV	1295.98	0.149725
0003.CSV	1299.84	0.15394
0003.CSV	1303.7	0.158805
0003.CSV	1307.56	0.163524
0003.CSV	1311.41	0.169093
0003.CSV	1315.27	0.174448
0003.CSV	1319.13	0.180716
0003.CSV	1322.98	0.186685
0003.CSV	1326.84	0.193513
0003.CSV	1330.7	0.200526
0003.CSV	1334.56	0.208298
0003.CSV	1338.41	0.217381
0003.CSV	1342.27	0.228876
0003.CSV	1346.13	0.23859
0003.CSV	1349.98	0.250172
0003.CSV	1353.84	0.262303
0003.CSV	1357.7	0.275407
0003.CSV	1361.56	0.290012
0003.CSV	1365.41	0.307754
0003.CSV	1369.27	0.322439
0003.CSV	1373.13	0.340844
0003.CSV	1376.98	0.36098
0003.CSV	1380.84	0.378916
0003.CSV	1384.7	0.394585
0003.CSV	1388.56	0.412182
0003.CSV	1392.41	0.421512
0003.CSV	1396.27	0.424553
0003.CSV	1400.13	0.420042
0003.CSV	1403.98	0.414586
0003.CSV	1407.84	0.402447
0003.CSV	1411.7	0.386267
0003.CSV	1415.55	0.367571
0003.CSV	1419.41	0.346295
0003.CSV	1423.27	0.328098
0003.CSV	1427.12	0.316924
0003.CSV	1430.98	0.305483
0003.CSV	1434.84	0.295552
0003.CSV	1438.7	0.284288
0003.CSV	1442.55	0.276465
0003.CSV	1446.41	0.266891
0003.CSV	1450.27	0.256738
0003.CSV	1454.12	0.247601
0003.CSV	1457.98	0.233786
0003.CSV	1461.84	0.22288
0003.CSV	1465.7	0.215336
0003.CSV	1469.55	0.207011
0003.CSV	1473.41	0.196318
0003.CSV	1477.27	0.184168
0003.CSV	1481.12	0.176589
0003.CSV	1484.98	0.16884
0003.CSV	1488.84	0.159005
0003.CSV	1492.7	0.148871
0003.CSV	1496.55	0.14134
0003.CSV	1500.41	0.132571
0003.CSV	1504.27	0.127495
0003.CSV	1508.12	0.116802
0003.CSV	1511.98	0.109097
0003.CSV	1515.84	0.103916
0003.CSV	1519.7	0.0970091
0003.CSV	1523.55	0.088488
0003.CSV	1527.41	0.0827279
0003.CSV	1531.27	0.07767
0003.CSV	1535.12	0.0728584
0003.CSV	1538.98	0.0677167
0003.CSV	1542.84	0.0586007
0003.CSV	1546.7	0.0532434
0003.CSV	1550.55	0.0498445
0003.CSV	1554.41	0.0464565
0003.CSV	1558.27	0.0429114
0003.CSV	1562.12	0.0403465
0003.CSV	1565.98	0.0395877
0003.CSV	1569.84	0.0387897
0003.CSV	1573.69	0.0383844
0003.CSV	1577.55	0.0378283
0003.CSV	1581.41	0.0370824
0003.CSV	1585.27	0.0360063
0003.CSV	1589.12	0.03473
0003.CSV	1592.98	0.0331157
0003.CSV	1596.84	0.0315979
0003.CSV	1600.69	0.0301908
0003.CSV	1604.55	0.0290156
0003.CSV	1608.41	0.0278148
0003.CSV	1612.27	0.0268587
0003.CSV	1616.12	0.0257565
0003.CSV	1619.98	0.0248227
0003.CSV	1623.84	0.0240355
0003.CSV	1627.69	0.0234122
0003.CSV	1631.55	0.0228514
0003.CSV	1635.41	0.0224291
0003.CSV	1639.27	0.0219956
0003.CSV	1643.12	0.0218092
0003.CSV	1646.98	0.0215479
0003.CSV	1650.84	0.0214786
0003.CSV	1654.69	0.0212655
0003.CSV	1658.55	0.0212125
0003.CSV	1662.41	0.0210324
0003.CSV	1666.27	0.0209211
0003.CSV	1670.12	0.0208129
0003.CSV	1673.98	0.0209747
0003.CSV	1677.84	0.0209139
0003.CSV	1681.69	0.0209346
0003.CSV	1685.55	0.0208864
0003.CSV	1689.41	0.0207792
0003.CSV	1693.27	0.0204587
0003.CSV	1697.12	0.0202939
0003.CSV	1700.98	0.0201892
0003.CSV	1704.84	0.0203545
0003.CSV	1708.69	0.0203246
0003.CSV	1712.55	0.0203132
0003.CSV	1716.41	0.0203387
0003.CSV	1720.27	0.0206908
0003.CSV	1724.12	0.0207921
[truncated: 32,521 more rows]

## Sheet: S.plana_350_2_mFTIR_data
Select spectrum number	Wavenumbers	Absorbance
0001.CSV	674.992	0.0464502
0001.CSV	678.849	0.0479583
0001.CSV	682.706	0.0483037
0001.CSV	686.563	0.0511307
0001.CSV	690.42	0.0542572
0001.CSV	694.277	0.0643297
0001.CSV	698.134	0.0785047
0001.CSV	701.991	0.0765145
0001.CSV	705.849	0.0688192
0001.CSV	709.706	0.0876857
0001.CSV	713.563	0.0970111
0001.CSV	717.42	0.0700588
0001.CSV	721.277	0.0472731
0001.CSV	725.134	0.0426956
0001.CSV	728.991	0.0416825
0001.CSV	732.848	0.0420701
0001.CSV	736.705	0.0419465
0001.CSV	740.562	0.0427031
0001.CSV	744.42	0.0429124
0001.CSV	748.277	0.044137
0001.CSV	752.134	0.0445511
0001.CSV	755.991	0.0456657
0001.CSV	759.848	0.0461347
0001.CSV	763.705	0.0474006
0001.CSV	767.562	0.0479788
0001.CSV	771.419	0.0492614
0001.CSV	775.276	0.0501412
0001.CSV	779.133	0.0516242
0001.CSV	782.99	0.0520871
0001.CSV	786.848	0.0531279
0001.CSV	790.705	0.0538179
0001.CSV	794.562	0.0554936
0001.CSV	798.419	0.0565987
0001.CSV	802.276	0.0581629
0001.CSV	806.133	0.0590868
0001.CSV	809.99	0.0610252
0001.CSV	813.847	0.0629806
0001.CSV	817.704	0.0664765
0001.CSV	821.562	0.0703763
0001.CSV	825.419	0.0758685
0001.CSV	829.276	0.0813982
0001.CSV	833.133	0.0895103
0001.CSV	836.99	0.102572
0001.CSV	840.847	0.12406
0001.CSV	844.704	0.148615
0001.CSV	848.561	0.188536
0001.CSV	852.418	0.222277
0001.CSV	856.275	0.204293
0001.CSV	860.132	0.15702
0001.CSV	863.99	0.111753
0001.CSV	867.847	0.0755496
0001.CSV	871.704	0.0541486
0001.CSV	875.561	0.0451406
0001.CSV	879.418	0.0401357
0001.CSV	883.275	0.0352305
0001.CSV	887.132	0.0330356
0001.CSV	890.989	0.0326503
0001.CSV	894.846	0.0333188
0001.CSV	898.703	0.0337531
0001.CSV	902.561	0.03461
0001.CSV	906.418	0.0353475
0001.CSV	910.275	0.0358695
0001.CSV	914.132	0.035704
0001.CSV	917.989	0.0363104
0001.CSV	921.846	0.0368137
0001.CSV	925.703	0.0376663
0001.CSV	929.56	0.0382031
0001.CSV	933.417	0.0389061
0001.CSV	937.274	0.0392464
0001.CSV	941.131	0.0399511
0001.CSV	944.989	0.0404202
0001.CSV	948.846	0.0411959
0001.CSV	952.703	0.0416967
0001.CSV	956.56	0.0425108
0001.CSV	960.417	0.0430659
0001.CSV	964.274	0.0439
0001.CSV	968.131	0.0444674
0001.CSV	971.988	0.0454265
0001.CSV	975.845	0.0462091
0001.CSV	979.702	0.0473491
0001.CSV	983.559	0.0483644
0001.CSV	987.417	0.0498629
0001.CSV	991.274	0.0510522
0001.CSV	995.131	0.0523969
0001.CSV	998.988	0.0533113
0001.CSV	1002.85	0.0545063
0001.CSV	1006.7	0.0555684
0001.CSV	1010.56	0.0571497
0001.CSV	1014.42	0.0584124
0001.CSV	1018.27	0.0599107
0001.CSV	1022.13	0.0609851
0001.CSV	1025.99	0.0623027
0001.CSV	1029.85	0.0631792
0001.CSV	1033.7	0.0642853
0001.CSV	1037.56	0.0651518
0001.CSV	1041.42	0.0663566
0001.CSV	1045.27	0.0670068
0001.CSV	1049.13	0.0678221
0001.CSV	1052.99	0.0682626
0001.CSV	1056.84	0.069196
0001.CSV	1060.7	0.0699361
0001.CSV	1064.56	0.0713338
0001.CSV	1068.42	0.0727266
0001.CSV	1072.27	0.0746439
0001.CSV	1076.13	0.0777069
0001.CSV	1079.99	0.0846889
0001.CSV	1083.84	0.0852772
0001.CSV	1087.7	0.0755795
0001.CSV	1091.56	0.0693396
0001.CSV	1095.41	0.068566
0001.CSV	1099.27	0.0683298
0001.CSV	1103.13	0.0682976
0001.CSV	1106.99	0.0679772
0001.CSV	1110.84	0.0679235
0001.CSV	1114.7	0.0675714
0001.CSV	1118.56	0.0673121
0001.CSV	1122.41	0.0666321
0001.CSV	1126.27	0.066064
0001.CSV	1130.13	0.065135
0001.CSV	1133.99	0.0644169
0001.CSV	1137.84	0.0636663
0001.CSV	1141.7	0.0634603
0001.CSV	1145.56	0.0632879
0001.CSV	1149.41	0.0635454
0001.CSV	1153.27	0.0636168
0001.CSV	1157.13	0.0638974
0001.CSV	1160.99	0.0638054
0001.CSV	1164.84	0.0638132
0001.CSV	1168.7	0.0636109
0001.CSV	1172.56	0.0637806
0001.CSV	1176.41	0.063907
0001.CSV	1180.27	0.0641656
0001.CSV	1184.13	0.0636269
0001.CSV	1187.99	0.0629048
0001.CSV	1191.84	0.062113
0001.CSV	1195.7	0.0619172
0001.CSV	1199.56	0.0617358
0001.CSV	1203.41	0.0619588
0001.CSV	1207.27	0.0621558
0001.CSV	1211.13	0.0628057
0001.CSV	1214.98	0.0634307
0001.CSV	1218.84	0.0643872
0001.CSV	1222.7	0.0652076
0001.CSV	1226.56	0.0663456
0001.CSV	1230.41	0.0672693
0001.CSV	1234.27	0.0684041
0001.CSV	1238.13	0.0692435
0001.CSV	1241.98	0.0702192
0001.CSV	1245.84	0.0708864
0001.CSV	1249.7	0.0715429
0001.CSV	1253.56	0.0715729
0001.CSV	1257.41	0.071615
0001.CSV	1261.27	0.0716201
0001.CSV	1265.13	0.0723883
0001.CSV	1268.98	0.0733597
0001.CSV	1272.84	0.0747141
0001.CSV	1276.7	0.0757473
0001.CSV	1280.56	0.0769651
0001.CSV	1284.41	0.0779756
0001.CSV	1288.27	0.0793097
0001.CSV	1292.13	0.0804723
0001.CSV	1295.98	0.0819917
0001.CSV	1299.84	0.0833351
0001.CSV	1303.7	0.0849334
0001.CSV	1307.56	0.0862685
0001.CSV	1311.41	0.0879347
0001.CSV	1315.27	0.0894676
0001.CSV	1319.13	0.0914206
0001.CSV	1322.98	0.093095
0001.CSV	1326.84	0.095207
0001.CSV	1330.7	0.097385
0001.CSV	1334.56	0.0999301
0001.CSV	1338.41	0.102849
0001.CSV	1342.27	0.106653
0001.CSV	1346.13	0.109704
0001.CSV	1349.98	0.113456
0001.CSV	1353.84	0.117243
0001.CSV	1357.7	0.121389
0001.CSV	1361.56	0.125785
0001.CSV	1365.41	0.131094
0001.CSV	1369.27	0.135341
0001.CSV	1373.13	0.14124
0001.CSV	1376.98	0.147909
0001.CSV	1380.84	0.153866
0001.CSV	1384.7	0.159571
0001.CSV	1388.56	0.167474
0001.CSV	1392.41	0.174037
0001.CSV	1396.27	0.182558
0001.CSV	1400.13	0.191
0001.CSV	1403.98	0.198645
0001.CSV	1407.84	0.205978
0001.CSV	1411.7	0.212689
0001.CSV	1415.55	0.217083
0001.CSV	1419.41	0.222661
0001.CSV	1423.27	0.226786
0001.CSV	1427.12	0.231238
0001.CSV	1430.98	0.235357
0001.CSV	1434.84	0.240784
0001.CSV	1438.7	0.245348
0001.CSV	1442.55	0.247654
0001.CSV	1446.41	0.245531
0001.CSV	1450.27	0.241127
0001.CSV	1454.12	0.235287
0001.CSV	1457.98	0.2276
0001.CSV	1461.84	0.221054
0001.CSV	1465.7	0.216349
0001.CSV	1469.55	0.208941
0001.CSV	1473.41	0.196426
0001.CSV	1477.27	0.181633
0001.CSV	1481.12	0.172791
0001.CSV	1484.98	0.164333
0001.CSV	1488.84	0.154673
0001.CSV	1492.7	0.145085
0001.CSV	1496.55	0.138415
0001.CSV	1500.41	0.130813
0001.CSV	1504.27	0.126419
0001.CSV	1508.12	0.117618
0001.CSV	1511.98	0.111386
0001.CSV	1515.84	0.106856
0001.CSV	1519.7	0.101139
0001.CSV	1523.55	0.0938158
0001.CSV	1527.41	0.0889001
0001.CSV	1531.27	0.0844945
0001.CSV	1535.12	0.0805781
0001.CSV	1538.98	0.0762844
0001.CSV	1542.84	0.0690296
0001.CSV	1546.7	0.0641742
0001.CSV	1550.55	0.060847
0001.CSV	1554.41	0.0572269
0001.CSV	1558.27	0.0528094
0001.CSV	1562.12	0.0485373
0001.CSV	1565.98	0.0466865
0001.CSV	1569.84	0.04418
0001.CSV	1573.69	0.0416201
0001.CSV	1577.55	0.0378058
0001.CSV	1581.41	0.0345709
0001.CSV	1585.27	0.03219
0001.CSV	1589.12	0.0306018
0001.CSV	1592.98	0.0295939
0001.CSV	1596.84	0.0290521
0001.CSV	1600.69	0.0285499
0001.CSV	1604.55	0.0282461
0001.CSV	1608.41	0.0278389
0001.CSV	1612.27	0.0274045
0001.CSV	1616.12	0.0266947
0001.CSV	1619.98	0.0260899
0001.CSV	1623.84	0.025461
0001.CSV	1627.69	0.0249983
0001.CSV	1631.55	0.0243955
0001.CSV	1635.41	0.0241505
0001.CSV	1639.27	0.023864
0001.CSV	1643.12	0.0234625
0001.CSV	1646.98	0.0231947
0001.CSV	1650.84	0.023337
0001.CSV	1654.69	0.0232829
0001.CSV	1658.55	0.0229851
0001.CSV	1662.41	0.0225964
0001.CSV	1666.27	0.0223944
0001.CSV	1670.12	0.0221813
0001.CSV	1673.98	0.0221424
0001.CSV	1677.84	0.0218129
0001.CSV	1681.69	0.0216335
0001.CSV	1685.55	0.0215146
0001.CSV	1689.41	0.0213133
0001.CSV	1693.27	0.0208645
0001.CSV	1697.12	0.0208264
0001.CSV	1700.98	0.0209364
0001.CSV	1704.84	0.0209897
0001.CSV	1708.69	0.0207958
0001.CSV	1712.55	0.0206214
0001.CSV	1716.41	0.0207916
0001.CSV	1720.27	0.0211741
0001.CSV	1724.12	0.0209935
0001.CSV	1727.98	0.0208741
0001.CSV	1731.84	0.0208552
0001.CSV	1735.69	0.0211777
0001.CSV	1739.55	0.021041
0001.CSV	1743.41	0.0208603
0001.CSV	1747.27	0.0206497
0001.CSV	1751.12	0.0206621
0001.CSV	1754.98	0.0204197
0001.CSV	1758.84	0.0203935
0001.CSV	1762.69	0.0205114
0001.CSV	1766.55	0.0206252
0001.CSV	1770.41	0.0210682
0001.CSV	1774.26	0.0226146
0001.CSV	1778.12	0.0241469
0001.CSV	1781.98	0.025899
0001.CSV	1785.84	0.0267473
0001.CSV	1789.69	0.0263668
0001.CSV	1793.55	0.0246689
0001.CSV	1797.41	0.0231734
0001.CSV	1801.26	0.0218838
0001.CSV	1805.12	0.0209446
0001.CSV	1808.98	0.0204111
0001.CSV	1812.84	0.0202871
0001.CSV	1816.69	0.0201037
0001.CSV	1820.55	0.020052
0001.CSV	1824.41	0.0200274
0001.CSV	1828.26	0.0202249
0001.CSV	1832.12	0.0202805
0001.CSV	1835.98	0.0202454
0001.CSV	1839.84	0.0201426
0001.CSV	1843.69	0.0202673
0001.CSV	1847.55	0.0203794
0001.CSV	1851.41	0.0203453
0001.CSV	1855.26	0.0202617
0001.CSV	1859.12	0.0203178
0001.CSV	1862.98	0.0202726
0001.CSV	1866.84	0.0203797
0001.CSV	1870.69	0.0205488
0001.CSV	1874.55	0.0205011
0001.CSV	1878.41	0.0204191
0001.CSV	1882.26	0.0204471
0001.CSV	1886.12	0.0204352
0001.CSV	1889.98	0.0205552
0001.CSV	1893.83	0.0205807
0001.CSV	1897.69	0.0206
0001.CSV	1901.55	0.0205713
0001.CSV	1905.41	0.0205874
0001.CSV	1909.26	0.0206069
0001.CSV	1913.12	0.0206089
0001.CSV	1916.98	0.0205446
0001.CSV	1920.83	0.0206303
0001.CSV	1924.69	0.020618
0001.CSV	1928.55	0.0206184
0001.CSV	1932.4	0.0205937
0001.CSV	1936.26	0.020614
0001.CSV	1940.12	0.0205829
0001.CSV	1943.98	0.0207256
0001.CSV	1947.83	0.0207346
0001.CSV	1951.69	0.0207397
0001.CSV	1955.55	0.0207543
0001.CSV	1959.4	0.0207993
0001.CSV	1963.26	0.0207617
0001.CSV	1967.12	0.0208317
0001.CSV	1970.98	0.0208501
0001.CSV	1974.83	0.0208592
0001.CSV	1978.69	0.0208397
0001.CSV	1982.55	0.0208671
0001.CSV	1986.4	0.020839
0001.CSV	1990.26	0.0208971
0001.CSV	1994.12	0.0209354
0001.CSV	1997.98	0.0209453
0001.CSV	2001.83	0.0209223
0001.CSV	2005.69	0.0209616
0001.CSV	2009.55	0.020973
0001.CSV	2013.4	0.0209963
0001.CSV	2017.26	0.0210031
0001.CSV	2021.12	0.0210793
0001.CSV	2024.97	0.0210708
0001.CSV	2028.83	0.0210954
0001.CSV	2032.69	0.0210833
0001.CSV	2036.55	0.0211268
0001.CSV	2040.4	0.0211664
0001.CSV	2044.26	0.0212391
0001.CSV	2048.12	0.0212359
0001.CSV	2051.97	0.0212612
0001.CSV	2055.83	0.0212456
0001.CSV	2059.69	0.0212939
0001.CSV	2063.55	0.0213356
0001.CSV	2067.4	0.0214238
0001.CSV	2071.26	0.0214177
0001.CSV	2075.12	0.0214416
0001.CSV	2078.97	0.0214501
0001.CSV	2082.83	0.0215043
0001.CSV	2086.69	0.0215171
0001.CSV	2090.55	0.0215556
0001.CSV	2094.4	0.0215491
0001.CSV	2098.26	0.0215781
0001.CSV	2102.12	0.0215754
0001.CSV	2105.97	0.0216173
0001.CSV	2109.83	0.0216373
0001.CSV	2113.69	0.0216762
0001.CSV	2117.55	0.0216751
0001.CSV	2121.4	0.0217156
0001.CSV	2125.26	0.0217452
0001.CSV	2129.12	0.0217839
0001.CSV	2132.97	0.0217566
0001.CSV	2136.83	0.0217958
0001.CSV	2140.69	0.0218005
0001.CSV	2144.55	0.0218214
0001.CSV	2148.4	0.0218155
0001.CSV	2152.26	0.021839
0001.CSV	2156.12	0.0218369
0001.CSV	2159.97	0.0218372
0001.CSV	2163.83	0.0217792
0001.CSV	2167.69	0.0217794
0001.CSV	2171.55	0.0218071
0001.CSV	2175.4	0.0218572
0001.CSV	2179.26	0.0218631
0001.CSV	2183.12	0.0218898
0001.CSV	2186.97	0.0218945
0001.CSV	2190.83	0.0219057
0001.CSV	2194.69	0.0218923
0001.CSV	2198.55	0.0219264
0001.CSV	2202.4	0.0219089
0001.CSV	2206.26	0.0219212
0001.CSV	2210.12	0.0219176
0001.CSV	2213.97	0.0219316
0001.CSV	2217.83	0.0219107
0001.CSV	2221.69	0.0219129
0001.CSV	2225.54	0.0218936
0001.CSV	2229.4	0.0218854
0001.CSV	2233.26	0.0218631
0001.CSV	2237.12	0.0218674
0001.CSV	2240.97	0.0218559
0001.CSV	2244.83	0.0218874
0001.CSV	2248.69	0.0218871
0001.CSV	2252.54	0.0219
0001.CSV	2256.4	0.0218997
0001.CSV	2260.26	0.0219116
0001.CSV	2264.11	0.0218761
0001.CSV	2267.97	0.0218793
0001.CSV	2271.83	0.0218709
0001.CSV	2275.69	0.0218783
0001.CSV	2279.54	0.0218484
0001.CSV	2283.4	0.0218561
0001.CSV	2287.26	0.0218709
0001.CSV	2291.11	0.0219312
0001.CSV	2294.97	0.0219814
0001.CSV	2298.83	0.0220292
0001.CSV	2302.69	0.0220102
0001.CSV	2306.54	0.0220319
0001.CSV	2310.4	0.022038
0001.CSV	2314.26	0.0219557
0001.CSV	2318.11	0.0217005
0001.CSV	2321.97	0.0214654
0001.CSV	2325.83	0.0210874
0001.CSV	2329.69	0.020768
0001.CSV	2333.54	0.0202983
0001.CSV	2337.4	0.0198946
0001.CSV	2341.26	0.0195936
0001.CSV	2345.11	0.0209097
0001.CSV	2348.97	0.0212802
0001.CSV	2352.83	0.0197062
0001.CSV	2356.69	0.0145924
0001.CSV	2360.54	0.0107983
0001.CSV	2364.4	0.0137615
0001.CSV	2368.26	0.0187563
0001.CSV	2372.11	0.0213516
0001.CSV	2375.97	0.0222246
0001.CSV	2379.83	0.0223382
0001.CSV	2383.69	0.0222125
0001.CSV	2387.54	0.0219751
0001.CSV	2391.4	0.0218467
0001.CSV	2395.26	0.0218076
0001.CSV	2399.11	0.0217888
0001.CSV	2402.97	0.0217758
0001.CSV	2406.83	0.0218115
0001.CSV	2410.68	0.0218022
0001.CSV	2414.54	0.0217889
0001.CSV	2418.4	0.021761
0001.CSV	2422.26	0.0217988
0001.CSV	2426.11	0.0218333
0001.CSV	2429.97	0.0218146
0001.CSV	2433.83	0.0217941
0001.CSV	2437.68	0.0218241
0001.CSV	2441.54	0.0218372
0001.CSV	2445.4	0.021864
0001.CSV	2449.26	0.0218739
0001.CSV	2453.11	0.0219059
0001.CSV	2456.97	0.0219338
0001.CSV	2460.83	0.0219871
0001.CSV	2464.68	0.022058
0001.CSV	2468.54	0.0221598
0001.CSV	2472.4	0.0222818
0001.CSV	2476.26	0.022501
0001.CSV	2480.11	0.0227467
0001.CSV	2483.97	0.0229896
0001.CSV	2487.83	0.0232238
0001.CSV	2491.68	0.0234287
0001.CSV	2495.54	0.0235869
0001.CSV	2499.4	0.023675
0001.CSV	2503.26	0.0236619
0001.CSV	2507.11	0.0236165
0001.CSV	2510.97	0.0236153
0001.CSV	2514.83	0.0237699
0001.CSV	2518.68	0.0239545
0001.CSV	2522.54	0.0240128
0001.CSV	2526.4	0.0238853
0001.CSV	2530.26	0.0236458
0001.CSV	2534.11	0.0233386
0001.CSV	2537.97	0.023084
0001.CSV	2541.83	0.0229382
0001.CSV	2545.68	0.0228858
0001.CSV	2549.54	0.0227804
0001.CSV	2553.4	0.022618
0001.CSV	2557.26	0.0224352
0001.CSV	2561.11	0.0222815
0001.CSV	2564.97	0.0221132
0001.CSV	2568.83	0.0219729
0001.CSV	2572.68	0.0218814
0001.CSV	2576.54	0.0218144
0001.CSV	2580.4	0.021716
0001.CSV	2584.25	0.0216488
0001.CSV	2588.11	0.0215845
0001.CSV	2591.97	0.0215354
0001.CSV	2595.83	0.0214787
0001.CSV	2599.68	0.0214519
0001.CSV	2603.54	0.0214393
0001.CSV	2607.4	0.0214687
0001.CSV	2611.25	0.0214724
0001.CSV	2615.11	0.0214937
0001.CSV	2618.97	0.0214797
0001.CSV	2622.82	0.0215141
0001.CSV	2626.68	0.0215724
0001.CSV	2630.54	0.0215484
0001.CSV	2634.4	0.0215428
0001.CSV	2638.25	0.0215226
0001.CSV	2642.11	0.0213596
0001.CSV	2645.97	0.0212249
0001.CSV	2649.82	0.0211619
0001.CSV	2653.68	0.0211008
0001.CSV	2657.54	0.0210396
0001.CSV	2661.4	0.0210162
0001.CSV	2665.25	0.0209759
0001.CSV	2669.11	0.0210231
0001.CSV	2672.97	0.0211777
0001.CSV	2676.82	0.0213624
0001.CSV	2680.68	0.0213204
0001.CSV	2684.54	0.0210772
0001.CSV	2688.4	0.0209625
0001.CSV	2692.25	0.0209822
0001.CSV	2696.11	0.0210421
0001.CSV	2699.97	0.0210612
0001.CSV	2703.82	0.0210562
0001.CSV	2707.68	0.0211274
0001.CSV	2711.54	0.0211268
0001.CSV	2715.4	0.0211218
0001.CSV	2719.25	0.0212819
0001.CSV	2723.11	0.021547
0001.CSV	2726.97	0.0215304
0001.CSV	2730.82	0.0213175
0001.CSV	2734.68	0.0213348
0001.CSV	2738.54	0.0213576
0001.CSV	2742.4	0.0213555
0001.CSV	2746.25	0.0215974
0001.CSV	2750.11	0.0216336
0001.CSV	2753.97	0.0214211
0001.CSV	2757.82	0.0213364
0001.CSV	2761.68	0.0212754
0001.CSV	2765.54	0.0212753
0001.CSV	2769.39	0.0214525
0001.CSV	2773.25	0.0217561
0001.CSV	2777.11	0.0217167
0001.CSV	2780.97	0.0215331
0001.CSV	2784.82	0.0217241
0001.CSV	2788.68	0.0221217
0001.CSV	2792.54	0.0222747
0001.CSV	2796.39	0.0223422
0001.CSV	2800.25	0.0222597
0001.CSV	2804.11	0.022125
0001.CSV	2807.97	0.0223602
0001.CSV	2811.82	0.0224581
0001.CSV	2815.68	0.0224139
0001.CSV	2819.54	0.0225749
0001.CSV	2823.39	0.022774
0001.CSV	2827.25	0.0229454
0001.CSV	2831.11	0.0235068
0001.CSV	2834.97	0.0244379
0001.CSV	2838.82	0.0253486
0001.CSV	2842.68	0.026417
0001.CSV	2846.54	0.0283064
0001.CSV	2850.39	0.0298643
0001.CSV	2854.25	0.030103
0001.CSV	2858.11	0.0294099
0001.CSV	2861.97	0.0282039
0001.CSV	2865.82	0.027381
0001.CSV	2869.68	0.0273922
0001.CSV	2873.54	0.0273093
0001.CSV	2877.39	0.0264699
0001.CSV	2881.25	0.0258786
0001.CSV	2885.11	0.0259946
0001.CSV	2888.97	0.0265724
0001.CSV	2892.82	0.0275031
0001.CSV	2896.68	0.0282602
0001.CSV	2900.54	0.02877
0001.CSV	2904.39	0.0296802
0001.CSV	2908.25	0.031204
0001.CSV	2912.11	0.0334217
0001.CSV	2915.97	0.0355471
0001.CSV	2919.82	0.0366354
0001.CSV	2923.68	0.036573
0001.CSV	2927.54	0.0356484
0001.CSV	2931.39	0.0335772
0001.CSV	2935.25	0.0309667
0001.CSV	2939.11	0.0291786
0001.CSV	2942.96	0.0284532
0001.CSV	2946.82	0.0281461
0001.CSV	2950.68	0.028047
0001.CSV	2954.54	0.0278795
0001.CSV	2958.39	0.0273598
0001.CSV	2962.25	0.0265888
0001.CSV	2966.11	0.025309
0001.CSV	2969.96	0.0242882
0001.CSV	2973.82	0.0238157
0001.CSV	2977.68	0.0234534
0001.CSV	2981.53	0.0228528
0001.CSV	2985.39	0.0221126
0001.CSV	2989.25	0.0219511
0001.CSV	2993.11	0.0221169
0001.CSV	2996.96	0.0219466
0001.CSV	3000.82	0.0215764
0001.CSV	3004.68	0.0213819
0001.CSV	3008.53	0.0215919
0001.CSV	3012.39	0.0218702
0001.CSV	3016.25	0.0218309
0001.CSV	3020.11	0.0215499
0001.CSV	3023.96	0.021282
0001.CSV	3027.82	0.0211821
0001.CSV	3031.68	0.0214453
0001.CSV	3035.53	0.0215937
0001.CSV	3039.39	0.0216231
0001.CSV	3043.25	0.0217193
0001.CSV	3047.11	0.0216541
0001.CSV	3050.96	0.0216208
0001.CSV	3054.82	0.0215342
0001.CSV	3058.68	0.0213361
0001.CSV	3062.53	0.0214186
0001.CSV	3066.39	0.0216727
0001.CSV	3070.25	0.021625
0001.CSV	3074.11	0.0216316
0001.CSV	3077.96	0.0218663
0001.CSV	3081.82	0.0219945
0001.CSV	3085.68	0.0219814
0001.CSV	3089.53	0.0218828
0001.CSV	3093.39	0.0216617
0001.CSV	3097.25	0.0216476
0001.CSV	3101.11	0.0217217
0001.CSV	3104.96	0.0217757
0001.CSV	3108.82	0.0219327
0001.CSV	3112.68	0.0220362
0001.CSV	3116.53	0.0221644
0001.CSV	3120.39	0.022148
0001.CSV	3124.25	0.0219921
0001.CSV	3128.11	0.0219582
0001.CSV	3131.96	0.0219261
0001.CSV	3135.82	0.0220427
0001.CSV	3139.68	0.022194
0001.CSV	3143.53	0.022036
0001.CSV	3147.39	0.022129
0001.CSV	3151.25	0.0224019
0001.CSV	3155.1	0.0223422
0001.CSV	3158.96	0.0221344
0001.CSV	3162.82	0.0220675
0001.CSV	3166.68	0.0220159
0001.CSV	3170.53	0.0220636
0001.CSV	3174.39	0.0221778
0001.CSV	3178.25	0.0223104
0001.CSV	3182.1	0.0223619
0001.CSV	3185.96	0.022471
0001.CSV	3189.82	0.0225742
0001.CSV	3193.68	0.0225277
0001.CSV	3197.53	0.0225317
0001.CSV	3201.39	0.022722
0001.CSV	3205.25	0.0228133
0001.CSV	3209.1	0.0228051
0001.CSV	3212.96	0.0229152
0001.CSV	3216.82	0.0230843
0001.CSV	3220.68	0.0230808
0001.CSV	3224.53	0.0231041
0001.CSV	3228.39	0.0233636
0001.CSV	3232.25	0.0237146
0001.CSV	3236.1	0.0236358
0001.CSV	3239.96	0.023509
0001.CSV	3243.82	0.0237543
0001.CSV	3247.68	0.0238718
0001.CSV	3251.53	0.0237687
0001.CSV	3255.39	0.0238636
0001.CSV	3259.25	0.0237703
0001.CSV	3263.1	0.0236909
0001.CSV	3266.96	0.023954
0001.CSV	3270.82	0.0242894
0001.CSV	3274.68	0.0242515
0001.CSV	3278.53	0.0240051
0001.CSV	3282.39	0.0239197
0001.CSV	3286.25	0.0240472
0001.CSV	3290.1	0.0243805
0001.CSV	3293.96	0.024639
0001.CSV	3297.82	0.0245204
0001.CSV	3301.67	0.0244983
0001.CSV	3305.53	0.024663
0001.CSV	3309.39	0.0246337
0001.CSV	3313.25	0.0243044
0001.CSV	3317.1	0.0240382
0001.CSV	3320.96	0.02411
0001.CSV	3324.82	0.0243163
0001.CSV	3328.67	0.0241475
0001.CSV	3332.53	0.0240773
0001.CSV	3336.39	0.0244371
0001.CSV	3340.24	0.0246186
0001.CSV	3344.1	0.0244297
0001.CSV	3347.96	0.0243912
0001.CSV	3351.82	0.0243446
0001.CSV	3355.67	0.0241627
0001.CSV	3359.53	0.0242707
0001.CSV	3363.39	0.0244439
0001.CSV	3367.24	0.0246108
0001.CSV	3371.1	0.024516
0001.CSV	3374.96	0.0242692
0001.CSV	3378.82	0.0240628
0001.CSV	3382.67	0.0238225
0001.CSV	3386.53	0.0239069
0001.CSV	3390.39	0.0241657
0001.CSV	3394.24	0.0242122
0001.CSV	3398.1	0.0242161
0001.CSV	3401.96	0.0240875
0001.CSV	3405.82	0.0237954
0001.CSV	3409.67	0.0237329
0001.CSV	3413.53	0.0235107
0001.CSV	3417.39	0.0231373
0001.CSV	3421.24	0.0229599
0001.CSV	3425.1	0.0230094
0001.CSV	3428.96	0.0232218
0001.CSV	3432.82	0.0233499
0001.CSV	3436.67	0.0230632
0001.CSV	3440.53	0.0224643
0001.CSV	3444.39	0.02217
0001.CSV	3448.24	0.0220714
0001.CSV	3452.1	0.0217569
0001.CSV	3455.96	0.0216928
0001.CSV	3459.82	0.0218874
0001.CSV	3463.67	0.0220076
0001.CSV	3467.53	0.0220477
0001.CSV	3471.39	0.0216832
0001.CSV	3475.24	0.0213307
0001.CSV	3479.1	0.0212611
0001.CSV	3482.96	0.0211144
0001.CSV	3486.82	0.0210939
0001.CSV	3490.67	0.020965
0001.CSV	3494.53	0.0208622
0001.CSV	3498.39	0.0207334
0001.CSV	3502.24	0.0204999
0001.CSV	3506.1	0.0200655
0001.CSV	3509.96	0.019874
0001.CSV	3513.81	0.0198843
0001.CSV	3517.67	0.019562
0001.CSV	3521.53	0.0194743
0001.CSV	3525.39	0.0193678
0001.CSV	3529.24	0.0190278
0001.CSV	3533.1	0.0190525
0001.CSV	3536.96	0.0191392
0001.CSV	3540.81	0.0190676
0001.CSV	3544.67	0.0190212
0001.CSV	3548.53	0.0187875
0001.CSV	3552.39	0.0183953
0001.CSV	3556.24	0.0181448
0001.CSV	3560.1	0.0179967
0001.CSV	3563.96	0.0176069
0001.CSV	3567.81	0.0176836
0001.CSV	3571.67	0.0177254
0001.CSV	3575.53	0.0174068
0001.CSV	3579.39	0.0176061
0001.CSV	3583.24	0.0177113
0001.CSV	3587.1	0.0175429
0001.CSV	3590.96	0.01735
0001.CSV	3594.81	0.0170777
0001.CSV	3598.67	0.017159
0001.CSV	3602.53	0.0170846
0001.CSV	3606.39	0.0164944
0001.CSV	3610.24	0.016084
0001.CSV	3614.1	0.016004
0001.CSV	3617.96	0.0162132
0001.CSV	3621.81	0.0163883
0001.CSV	3625.67	0.0158477
0001.CSV	3629.53	0.0156788
0001.CSV	3633.39	0.0161217
0001.CSV	3637.24	0.0159597
0001.CSV	3641.1	0.0156247
0001.CSV	3644.96	0.0150725
0001.CSV	3648.81	0.0153453
0001.CSV	3652.67	0.0159799
0001.CSV	3656.53	0.016003
0001.CSV	3660.38	0.0159075
0001.CSV	3664.24	0.015216
0001.CSV	3668.1	0.0144943
0001.CSV	3671.96	0.0143244
0001.CSV	3675.81	0.0147291
0001.CSV	3679.67	0.0151617
0001.CSV	3683.53	0.0150567
0001.CSV	3687.38	0.0150161
0001.CSV	3691.24	0.0154174
0001.CSV	3695.1	0.015216
0001.CSV	3698.95	0.0148188
0001.CSV	3702.81	0.0146822
0001.CSV	3706.67	0.0143676
0001.CSV	3710.53	0.014216
0001.CSV	3714.38	0.0147053
0001.CSV	3718.24	0.0144975
0001.CSV	3722.1	0.0142605
0001.CSV	3725.95	0.0143009
0001.CSV	3729.81	0.0141193
0001.CSV	3733.67	0.014152
0001.CSV	3737.53	0.0149124
0001.CSV	3741.38	0.0143812
0001.CSV	3745.24	0.0135595
0001.CSV	3749.1	0.013363
0001.CSV	3752.95	0.0141051
0001.CSV	3756.81	0.0143907
0001.CSV	3760.67	0.0143978
0001.CSV	3764.53	0.0142498
0001.CSV	3768.38	0.0143114
0001.CSV	3772.24	0.0144836
0001.CSV	3776.1	0.0143972
0001.CSV	3779.95	0.0144814
0001.CSV	3783.81	0.0145153
0001.CSV	3787.67	0.0145051
0001.CSV	3791.53	0.014314
0001.CSV	3795.38	0.013875
0001.CSV	3799.24	0.013681
0001.CSV	3803.1	0.0140861
0001.CSV	3806.95	0.0144899
0001.CSV	3810.81	0.0143713
0001.CSV	3814.67	0.014006
0001.CSV	3818.53	0.0140947
0001.CSV	3822.38	0.0144951
0001.CSV	3826.24	0.0144162
0001.CSV	3830.1	0.0141453
0001.CSV	3833.95	0.0140254
0001.CSV	3837.81	0.0141168
0001.CSV	3841.67	0.0146529
0001.CSV	3845.53	0.0146138
0001.CSV	3849.38	0.0138469
0001.CSV	3853.24	0.0137001
0001.CSV	3857.1	0.014373
0001.CSV	3860.95	0.0141351
0001.CSV	3864.81	0.0141625
0001.CSV	3868.67	0.014284
0001.CSV	3872.52	0.0145899
0001.CSV	3876.38	0.014507
0001.CSV	3880.24	0.0143578
0001.CSV	3884.1	0.0147036
0001.CSV	3887.95	0.0146684
0001.CSV	3891.81	0.0145969
0001.CSV	3895.67	0.0144628
0001.CSV	3899.52	0.0141041
0001.CSV	3903.38	0.0145634
0001.CSV	3907.24	0.0149133
0001.CSV	3911.1	0.0146001
0001.CSV	3914.95	0.0143116
0001.CSV	3918.81	0.014415
0001.CSV	3922.67	0.0145035
0001.CSV	3926.52	0.0145039
0001.CSV	3930.38	0.0146142
0001.CSV	3934.24	0.0148068
0001.CSV	3938.09	0.0145535
0001.CSV	3941.95	0.0144316
0001.CSV	3945.81	0.0145238
0001.CSV	3949.67	0.0145734
0001.CSV	3953.52	0.0146252
0001.CSV	3957.38	0.0145706
0001.CSV	3961.24	0.0145689
0001.CSV	3965.09	0.014562
0001.CSV	3968.95	0.014495
0001.CSV	3972.81	0.014549
0001.CSV	3976.67	0.014592
0001.CSV	3980.52	0.0145405
0001.CSV	3984.38	0.0145511
0001.CSV	3988.24	0.0144715
0001.CSV	3992.09	0.0144444
0001.CSV	3995.95	0.0144511
0001.CSV	3999.81	0.0143818
0002.CSV	674.992	0.0552134
0002.CSV	678.849	0.0570343
0002.CSV	682.706	0.0575725
0002.CSV	686.563	0.0606923
0002.CSV	690.42	0.0638384
0002.CSV	694.277	0.0757449
0002.CSV	698.134	0.0925155
0002.CSV	701.991	0.0906677
0002.CSV	705.849	0.0818189
0002.CSV	709.706	0.103449
0002.CSV	713.563	0.114384
0002.CSV	717.42	0.083613
0002.CSV	721.277	0.0566795
0002.CSV	725.134	0.0507786
0002.CSV	728.991	0.0493926
0002.CSV	732.848	0.0498065
0002.CSV	736.705	0.0497269
0002.CSV	740.562	0.0506463
0002.CSV	744.42	0.0507728
0002.CSV	748.277	0.0520023
0002.CSV	752.134	0.0523103
0002.CSV	755.991	0.0535451
0002.CSV	759.848	0.053996
0002.CSV	763.705	0.0555117
0002.CSV	767.562	0.0562613
0002.CSV	771.419	0.0580129
0002.CSV	775.276	0.0590214
0002.CSV	779.133	0.0605513
0002.CSV	782.99	0.0608481
0002.CSV	786.848	0.061932
0002.CSV	790.705	0.0625063
0002.CSV	794.562	0.0641318
0002.CSV	798.419	0.0652397
0002.CSV	802.276	0.0669989
0002.CSV	806.133	0.0677806
0002.CSV	809.99	0.0697951
0002.CSV	813.847	0.0716887
0002.CSV	817.704	0.0752769
0002.CSV	821.562	0.0792263
0002.CSV	825.419	0.0854426
0002.CSV	829.276	0.0924912
0002.CSV	833.133	0.103684
0002.CSV	836.99	0.122405
0002.CSV	840.847	0.153376
0002.CSV	844.704	0.188585
0002.CSV	848.561	0.24091
0002.CSV	852.418	0.27741
0002.CSV	856.275	0.246593
0002.CSV	860.132	0.186104
0002.CSV	863.99	0.132021
0002.CSV	867.847	0.0904611
0002.CSV	871.704	0.0663225
0002.CSV	875.561	0.0558411
0002.CSV	879.418	0.0499046
0002.CSV	883.275	0.0441863
0002.CSV	887.132	0.0415601
0002.CSV	890.989	0.0410305
0002.CSV	894.846	0.0417972
0002.CSV	898.703	0.0423658
0002.CSV	902.561	0.0434931
0002.CSV	906.418	0.044567
0002.CSV	910.275	0.0452272
0002.CSV	914.132	0.0449073
0002.CSV	917.989	0.045557
0002.CSV	921.846	0.0461205
0002.CSV	925.703	0.0471305
0002.CSV	929.56	0.0477711
0002.CSV	933.417	0.0486479
0002.CSV	937.274	0.0491594
0002.CSV	941.131	0.0499879
0002.CSV	944.989	0.050478
0002.CSV	948.846	0.051405
0002.CSV	952.703	0.0520616
0002.CSV	956.56	0.0531482
0002.CSV	960.417	0.0538514
0002.CSV	964.274	0.054864
0002.CSV	968.131	0.0556087
0002.CSV	971.988	0.0568218
0002.CSV	975.845	0.0577469
0002.CSV	979.702	0.0591773
0002.CSV	983.559	0.060551
0002.CSV	987.417	0.0625289
0002.CSV	991.274	0.0642014
0002.CSV	995.131	0.0660614
0002.CSV	998.988	0.0672936
0002.CSV	1002.85	0.0687391
0002.CSV	1006.7	0.069928
0002.CSV	1010.56	0.0717531
0002.CSV	1014.42	0.0734044
0002.CSV	1018.27	0.0755244
0002.CSV	1022.13	0.0771117
0002.CSV	1025.99	0.0787607
0002.CSV	1029.85	0.0797566
0002.CSV	1033.7	0.0810713
0002.CSV	1037.56	0.0821111
0002.CSV	1041.42	0.083638
0002.CSV	1045.27	0.0845826
0002.CSV	1049.13	0.0857606
0002.CSV	1052.99	0.0864785
0002.CSV	1056.84	0.0877328
0002.CSV	1060.7	0.0888294
0002.CSV	1064.56	0.0907429
0002.CSV	1068.42	0.0926761
0002.CSV	1072.27	0.0953831
0002.CSV	1076.13	0.0994664
0002.CSV	1079.99	0.108317
0002.CSV	1083.84	0.109966
0002.CSV	1087.7	0.0987367
0002.CSV	1091.56	0.0905927
0002.CSV	1095.41	0.0890427
0002.CSV	1099.27	0.0883033
0002.CSV	1103.13	0.0878474
0002.CSV	1106.99	0.0871117
0002.CSV	1110.84	0.0868887
0002.CSV	1114.7	0.0863248
0002.CSV	1118.56	0.0858803
0002.CSV	1122.41	0.0849528
0002.CSV	1126.27	0.0842183
0002.CSV	1130.13	0.0830896
0002.CSV	1133.99	0.0822636
0002.CSV	1137.84	0.0813614
0002.CSV	1141.7	0.0811037
0002.CSV	1145.56	0.0809188
0002.CSV	1149.41	0.0813128
0002.CSV	1153.27	0.0814646
0002.CSV	1157.13	0.0818307
0002.CSV	1160.99	0.0817986
0002.CSV	1164.84	0.0818505
0002.CSV	1168.7	0.0814436
0002.CSV	1172.56	0.0813104
0002.CSV	1176.41	0.08101
0002.CSV	1180.27	0.0809334
0002.CSV	1184.13	0.0802114
0002.CSV	1187.99	0.0795639
0002.CSV	1191.84	0.0788425
0002.CSV	1195.7	0.0787137
0002.CSV	1199.56	0.0784566
0002.CSV	1203.41	0.0785758
0002.CSV	1207.27	0.0785904
0002.CSV	1211.13	0.0791291
0002.CSV	1214.98	0.079633
0002.CSV	1218.84	0.0806262
0002.CSV	1222.7	0.081538
0002.CSV	1226.56	0.0828744
0002.CSV	1230.41	0.0839591
0002.CSV	1234.27	0.0853271
0002.CSV	1238.13	0.0863731
0002.CSV	1241.98	0.0876908
0002.CSV	1245.84	0.0886854
0002.CSV	1249.7	0.0897937
0002.CSV	1253.56	0.0904194
0002.CSV	1257.41	0.0912697
0002.CSV	1261.27	0.0919678
0002.CSV	1265.13	0.0932461
0002.CSV	1268.98	0.0944514
0002.CSV	1272.84	0.0961101
0002.CSV	1276.7	0.0974353
0002.CSV	1280.56	0.0990218
0002.CSV	1284.41	0.10032
0002.CSV	1288.27	0.102026
0002.CSV	1292.13	0.103578
0002.CSV	1295.98	0.105678
0002.CSV	1299.84	0.107626
0002.CSV	1303.7	0.109919
0002.CSV	1307.56	0.111896
0002.CSV	1311.41	0.114286
0002.CSV	1315.27	0.11651
0002.CSV	1319.13	0.119269
0002.CSV	1322.98	0.12167
0002.CSV	1326.84	0.124583
0002.CSV	1330.7	0.127601
0002.CSV	1334.56	0.131144
0002.CSV	1338.41	0.135238
0002.CSV	1342.27	0.140566
0002.CSV	1346.13	0.144896
0002.CSV	1349.98	0.150173
0002.CSV	1353.84	0.155486
0002.CSV	1357.7	0.161244
0002.CSV	1361.56	0.167453
0002.CSV	1365.41	0.175014
0002.CSV	1369.27	0.181022
0002.CSV	1373.13	0.189106
0002.CSV	1376.98	0.198086
0002.CSV	1380.84	0.206055
0002.CSV	1384.7	0.213556
0002.CSV	1388.56	0.223896
0002.CSV	1392.41	0.232425
0002.CSV	1396.27	0.24328
0002.CSV	1400.13	0.253912
0002.CSV	1403.98	0.263539
0002.CSV	1407.84	0.272662
0002.CSV	1411.7	0.281201
0002.CSV	1415.55	0.286906
0002.CSV	1419.41	0.294474
0002.CSV	1423.27	0.300178
0002.CSV	1427.12	0.306223
0002.CSV	1430.98	0.311743
0002.CSV	1434.84	0.318915
0002.CSV	1438.7	0.324208
0002.CSV	1442.55	0.326545
0002.CSV	1446.41	0.323043
0002.CSV	1450.27	0.316886
0002.CSV	1454.12	0.308901
0002.CSV	1457.98	0.298095
0002.CSV	1461.84	0.288802
0002.CSV	1465.7	0.281859
0002.CSV	1469.55	0.2711
0002.CSV	1473.41	0.25311
0002.CSV	1477.27	0.232335
0002.CSV	1481.12	0.220094
0002.CSV	1484.98	0.208542
0002.CSV	1488.84	0.195566
0002.CSV	1492.7	0.183181
0002.CSV	1496.55	0.174815
0002.CSV	1500.41	0.165382
0002.CSV	1504.27	0.160136
0002.CSV	1508.12	0.149557
0002.CSV	1511.98	0.142075
0002.CSV	1515.84	0.136626
0002.CSV	1519.7	0.129515
0002.CSV	1523.55	0.12054
0002.CSV	1527.41	0.11468
0002.CSV	1531.27	0.109514
0002.CSV	1535.12	0.104967
0002.CSV	1538.98	0.0998228
0002.CSV	1542.84	0.0911698
0002.CSV	1546.7	0.0854285
0002.CSV	1550.55	0.0815506
0002.CSV	1554.41	0.0773097
0002.CSV	1558.27	0.0721587
0002.CSV	1562.12	0.0672184
0002.CSV	1565.98	0.0650739
0002.CSV	1569.84	0.0620253
0002.CSV	1573.69	0.0589693
0002.CSV	1577.55	0.0542313
0002.CSV	1581.41	0.0500924
0002.CSV	1585.27	0.0468738
0002.CSV	1589.12	0.0445651
0002.CSV	1592.98	0.0429568
0002.CSV	1596.84	0.0419582
0002.CSV	1600.69	0.0410561
0002.CSV	1604.55	0.0404746
0002.CSV	1608.41	0.0397938
0002.CSV	1612.27	0.0391214
0002.CSV	1616.12	0.0381327
0002.CSV	1619.98	0.0372998
0002.CSV	1623.84	0.0363829
0002.CSV	1627.69	0.0356768
0002.CSV	1631.55	0.0348984
0002.CSV	1635.41	0.0344781
0002.CSV	1639.27	0.0339369
0002.CSV	1643.12	0.033435
0002.CSV	1646.98	0.0329668
0002.CSV	1650.84	0.0329382
0002.CSV	1654.69	0.0326413
0002.CSV	1658.55	0.0322376
0002.CSV	1662.41	0.031699
0002.CSV	1666.27	0.0313734
0002.CSV	1670.12	0.0310385
0002.CSV	1673.98	0.0308573
0002.CSV	1677.84	0.0303319
0002.CSV	1681.69	0.0299826
0002.CSV	1685.55	0.029716
0002.CSV	1689.41	0.0294177
0002.CSV	1693.27	0.0288018
0002.CSV	1697.12	0.0286285
0002.CSV	1700.98	0.0286105
0002.CSV	1704.84	0.0286071
0002.CSV	1708.69	0.0283083
0002.CSV	1712.55	0.0281058
0002.CSV	1716.41	0.0282399
0002.CSV	1720.27	0.028569
0002.CSV	1724.12	0.028307
0002.CSV	1727.98	0.0281205
0002.CSV	1731.84	0.0280367
0002.CSV	1735.69	0.0283842
0002.CSV	1739.55	0.028239
0002.CSV	1743.41	0.0280238
0002.CSV	1747.27	0.0277354
0002.CSV	1751.12	0.027705
0002.CSV	1754.98	0.027418
0002.CSV	1758.84	0.0273681
0002.CSV	1762.69	0.0274719
0002.CSV	1766.55	0.0276159
0002.CSV	1770.41	0.0281826
0002.CSV	1774.26	0.0301647
0002.CSV	1778.12	0.0322497
0002.CSV	1781.98	0.0346875
0002.CSV	1785.84	0.0360214
0002.CSV	1789.69	0.0357119
0002.CSV	1793.55	0.0335069
0002.CSV	1797.41	0.0314504
0002.CSV	1801.26	0.0296104
0002.CSV	1805.12	0.0282352
0002.CSV	1808.98	0.0273947
0002.CSV	1812.84	0.0270488
0002.CSV	1816.69	0.0267628
0002.CSV	1820.55	0.0266696
0002.CSV	1824.41	0.026568
0002.CSV	1828.26	0.0267346
0002.CSV	1832.12	0.0267614
0002.CSV	1835.98	0.0267022
0002.CSV	1839.84	0.0265578
0002.CSV	1843.69	0.0266839
0002.CSV	1847.55	0.0267748
0002.CSV	1851.41	0.0267208
0002.CSV	1855.26	0.0266069
0002.CSV	1859.12	0.0266544
0002.CSV	1862.98	0.0265861
0002.CSV	1866.84	0.0266852
0002.CSV	1870.69	0.0268765
0002.CSV	1874.55	0.0268336
0002.CSV	1878.41	0.0267227
0002.CSV	1882.26	0.0267493
0002.CSV	1886.12	0.026722
0002.CSV	1889.98	0.0268318
0002.CSV	1893.83	0.0268549
0002.CSV	1897.69	0.0268759
0002.CSV	1901.55	0.0268015
0002.CSV	1905.41	0.0268278
0002.CSV	1909.26	0.0268733
0002.CSV	1913.12	0.0268849
0002.CSV	1916.98	0.0268117
0002.CSV	1920.83	0.0269071
0002.CSV	1924.69	0.0268773
0002.CSV	1928.55	0.0268668
0002.CSV	1932.4	0.0268411
0002.CSV	1936.26	0.0268737
0002.CSV	1940.12	0.0268166
0002.CSV	1943.98	0.0269309
0002.CSV	1947.83	0.0269277
0002.CSV	1951.69	0.0269455
0002.CSV	1955.55	0.026963
0002.CSV	1959.4	0.0270227
0002.CSV	1963.26	0.0269982
0002.CSV	1967.12	0.0270805
0002.CSV	1970.98	0.0270711
0002.CSV	1974.83	0.0270637
0002.CSV	1978.69	0.0270363
0002.CSV	1982.55	0.0270796
0002.CSV	1986.4	0.0270528
0002.CSV	1990.26	0.0271227
0002.CSV	1994.12	0.0271904
0002.CSV	1997.98	0.0272383
0002.CSV	2001.83	0.0272264
0002.CSV	2005.69	0.0272747
0002.CSV	2009.55	0.0272731
0002.CSV	2013.4	0.0273073
0002.CSV	2017.26	0.0273521
0002.CSV	2021.12	0.027438
0002.CSV	2024.97	0.027433
0002.CSV	2028.83	0.0274812
0002.CSV	2032.69	0.027475
0002.CSV	2036.55	0.0275244
0002.CSV	2040.4	0.0275583
0002.CSV	2044.26	0.0276491
0002.CSV	2048.12	0.0276536
0002.CSV	2051.97	0.0276969
0002.CSV	2055.83	0.027689
0002.CSV	2059.69	0.0277598
0002.CSV	2063.55	0.0278189
0002.CSV	2067.4	0.0279244
0002.CSV	2071.26	0.0279438
0002.CSV	2075.12	0.0280033
0002.CSV	2078.97	0.0280407
0002.CSV	2082.83	0.0280944
0002.CSV	2086.69	0.0280869
0002.CSV	2090.55	0.0281589
0002.CSV	2094.4	0.0281915
0002.CSV	2098.26	0.0282593
0002.CSV	2102.12	0.0282848
0002.CSV	2105.97	0.0283601
0002.CSV	2109.83	0.02839
0002.CSV	2113.69	0.0284737
0002.CSV	2117.55	0.0285452
0002.CSV	2121.4	0.0286201
0002.CSV	2125.26	0.0286253
0002.CSV	2129.12	0.0286836
0002.CSV	2132.97	0.028698
0002.CSV	2136.83	0.0287521
0002.CSV	2140.69	0.0287721
0002.CSV	2144.55	0.0288138
0002.CSV	2148.4	0.0288269
0002.CSV	2152.26	0.0288763
0002.CSV	2156.12	0.0288717
0002.CSV	2159.97	0.028881
0002.CSV	2163.83	0.0288507
0002.CSV	2167.69	0.0288744
0002.CSV	2171.55	0.028908
0002.CSV	2175.4	0.0289874
0002.CSV	2179.26	0.0289847
0002.CSV	2183.12	0.0290042
0002.CSV	2186.97	0.0290143
0002.CSV	2190.83	0.029045
0002.CSV	2194.69	0.0290466
0002.CSV	2198.55	0.0290902
0002.CSV	2202.4	0.0290867
0002.CSV	2206.26	0.0291082
0002.CSV	2210.12	0.0290954
0002.CSV	2213.97	0.0291074
0002.CSV	2217.83	0.0290884
0002.CSV	2221.69	0.0291119
0002.CSV	2225.54	0.0290992
0002.CSV	2229.4	0.0291093
0002.CSV	2233.26	0.0290776
0002.CSV	2237.12	0.0290874
0002.CSV	2240.97	0.0291035
0002.CSV	2244.83	0.0291363
0002.CSV	2248.69	0.0291177
0002.CSV	2252.54	0.0291468
0002.CSV	2256.4	0.0291653
0002.CSV	2260.26	0.0292051
0002.CSV	2264.11	0.029196
0002.CSV	2267.97	0.0292058
0002.CSV	2271.83	0.0291913
0002.CSV	2275.69	0.0292055
0002.CSV	2279.54	0.0291721
0002.CSV	2283.4	0.0291701
0002.CSV	2287.26	0.0292212
0002.CSV	2291.11	0.029389
0002.CSV	2294.97	0.0295209
0002.CSV	2298.83	0.0296352
0002.CSV	2302.69	0.0297139
0002.CSV	2306.54	0.0298853
0002.CSV	2310.4	0.0300281
0002.CSV	2314.26	0.030087
0002.CSV	2318.11	0.0299697
0002.CSV	2321.97	0.0299045
0002.CSV	2325.83	0.0297169
0002.CSV	2329.69	0.0295256
0002.CSV	2333.54	0.0290604
0002.CSV	2337.4	0.0288863
0002.CSV	2341.26	0.0289379
0002.CSV	2345.11	0.029966
0002.CSV	2348.97	0.0301058
0002.CSV	2352.83	0.028911
0002.CSV	2356.69	0.0247841
0002.CSV	2360.54	0.0210738
0002.CSV	2364.4	0.0234479
0002.CSV	2368.26	0.0281788
0002.CSV	2372.11	0.0301004
0002.CSV	2375.97	0.0305125
0002.CSV	2379.83	0.0303034
0002.CSV	2383.69	0.0299255
0002.CSV	2387.54	0.0295536
0002.CSV	2391.4	0.0293802
0002.CSV	2395.26	0.029335
0002.CSV	2399.11	0.0293417
0002.CSV	2402.97	0.0293561
0002.CSV	2406.83	0.0293958
0002.CSV	2410.68	0.0293976
0002.CSV	2414.54	0.0294086
0002.CSV	2418.4	0.0294181
0002.CSV	2422.26	0.0294848
0002.CSV	2426.11	0.0295335
0002.CSV	2429.97	0.0295651
0002.CSV	2433.83	0.0295968
0002.CSV	2437.68	0.0296418
0002.CSV	2441.54	0.0296537
0002.CSV	2445.4	0.0296929
0002.CSV	2449.26	0.0297434
0002.CSV	2453.11	0.0298134
0002.CSV	2456.97	0.0298855
0002.CSV	2460.83	0.0299875
0002.CSV	2464.68	0.0301166
0002.CSV	2468.54	0.0303152
0002.CSV	2472.4	0.030554
0002.CSV	2476.26	0.0308667
0002.CSV	2480.11	0.0312068
0002.CSV	2483.97	0.0315802
0002.CSV	2487.83	0.031959
0002.CSV	2491.68	0.0323249
0002.CSV	2495.54	0.0326165
0002.CSV	2499.4	0.0328002
0002.CSV	2503.26	0.0328494
0002.CSV	2507.11	0.0328315
0002.CSV	2510.97	0.0328589
0002.CSV	2514.83	0.0330655
0002.CSV	2518.68	0.0333483
0002.CSV	2522.54	0.0335054
0002.CSV	2526.4	0.0333902
0002.CSV	2530.26	0.0330956
0002.CSV	2534.11	0.0327003
0002.CSV	2537.97	0.0323569
0002.CSV	2541.83	0.0321306
0002.CSV	2545.68	0.0320541
0002.CSV	2549.54	0.0319454
0002.CSV	2553.4	0.0317127
0002.CSV	2557.26	0.0314411
0002.CSV	2561.11	0.0312292
0002.CSV	2564.97	0.0309772
0002.CSV	2568.83	0.0307775
0002.CSV	2572.68	0.0306287
0002.CSV	2576.54	0.0305003
0002.CSV	2580.4	0.0303475
0002.CSV	2584.25	0.0302337
0002.CSV	2588.11	0.0301433
0002.CSV	2591.97	0.0300988
0002.CSV	2595.83	0.0300135
0002.CSV	2599.68	0.0299565
0002.CSV	2603.54	0.0299551
0002.CSV	2607.4	0.0299842
0002.CSV	2611.25	0.0299984
0002.CSV	2615.11	0.0300205
0002.CSV	2618.97	0.0299994
0002.CSV	2622.82	0.0300347
0002.CSV	2626.68	0.0300928
0002.CSV	2630.54	0.0300806
0002.CSV	2634.4	0.0300924
0002.CSV	2638.25	0.030072
0002.CSV	2642.11	0.029906
0002.CSV	2645.97	0.0297617
0002.CSV	2649.82	0.0296611
0002.CSV	2653.68	0.0295826
0002.CSV	2657.54	0.0295181
0002.CSV	2661.4	0.0294659
0002.CSV	2665.25	0.0294025
0002.CSV	2669.11	0.0294316
0002.CSV	2672.97	0.0295861
0002.CSV	2676.82	0.0297864
0002.CSV	2680.68	0.0297437
0002.CSV	2684.54	0.0294969
0002.CSV	2688.4	0.0293702
0002.CSV	2692.25	0.0294003
0002.CSV	2696.11	0.0294824
0002.CSV	2699.97	0.0295153
0002.CSV	2703.82	0.0295173
0002.CSV	2707.68	0.0295988
0002.CSV	2711.54	0.0296423
0002.CSV	2715.4	0.0296529
0002.CSV	2719.25	0.0297935
0002.CSV	2723.11	0.0300888
0002.CSV	2726.97	0.0301152
0002.CSV	2730.82	0.0299279
0002.CSV	2734.68	0.0299514
0002.CSV	2738.54	0.0299782
0002.CSV	2742.4	0.0299895
0002.CSV	2746.25	0.0302636
0002.CSV	2750.11	0.0303462
0002.CSV	2753.97	0.0301546
0002.CSV	2757.82	0.0300689
0002.CSV	2761.68	0.0300259
0002.CSV	2765.54	0.0300337
0002.CSV	2769.39	0.0302178
0002.CSV	2773.25	0.0305285
0002.CSV	2777.11	0.0305414
0002.CSV	2780.97	0.0304344
0002.CSV	2784.82	0.0306546
0002.CSV	2788.68	0.0310553
0002.CSV	2792.54	0.031246
0002.CSV	2796.39	0.031347
0002.CSV	2800.25	0.0313033
0002.CSV	2804.11	0.0312189
0002.CSV	2807.97	0.0315215
0002.CSV	2811.82	0.0316867
0002.CSV	2815.68	0.0317135
0002.CSV	2819.54	0.0319575
0002.CSV	2823.39	0.0322334
0002.CSV	2827.25	0.0325158
0002.CSV	2831.11	0.0331928
0002.CSV	2834.97	0.034298
0002.CSV	2838.82	0.0355819
0002.CSV	2842.68	0.0372823
0002.CSV	2846.54	0.0400008
0002.CSV	2850.39	0.042301
0002.CSV	2854.25	0.0427287
0002.CSV	2858.11	0.041695
0002.CSV	2861.97	0.0400792
0002.CSV	2865.82	0.0390314
0002.CSV	2869.68	0.0389419
0002.CSV	2873.54	0.0387604
0002.CSV	2877.39	0.0378715
0002.CSV	2881.25	0.0372907
0002.CSV	2885.11	0.0374985
0002.CSV	2888.97	0.0382579
0002.CSV	2892.82	0.0394103
0002.CSV	2896.68	0.0404481
0002.CSV	2900.54	0.0412899
0002.CSV	2904.39	0.0425369
0002.CSV	2908.25	0.0444737
0002.CSV	2912.11	0.0473468
0002.CSV	2915.97	0.0503288
0002.CSV	2919.82	0.052125
0002.CSV	2923.68	0.0523337
0002.CSV	2927.54	0.0510963
0002.CSV	2931.39	0.0483201
0002.CSV	2935.25	0.0448937
0002.CSV	2939.11	0.0423225
0002.CSV	2942.96	0.0409951
0002.CSV	2946.82	0.0404099
0002.CSV	2950.68	0.0403427
0002.CSV	2954.54	0.0403369
0002.CSV	2958.39	0.0397553
0002.CSV	2962.25	0.0386712
0002.CSV	2966.11	0.0369859
0002.CSV	2969.96	0.0355217
0002.CSV	2973.82	0.0346741
0002.CSV	2977.68	0.0340254
0002.CSV	2981.53	0.033253
0002.CSV	2985.39	0.0324544
0002.CSV	2989.25	0.0322189
0002.CSV	2993.11	0.0322813
0002.CSV	2996.96	0.0320636
0002.CSV	3000.82	0.031677
0002.CSV	3004.68	0.0314157
0002.CSV	3008.53	0.0315399
0002.CSV	3012.39	0.0317672
0002.CSV	3016.25	0.0317049
0002.CSV	3020.11	0.03141
0002.CSV	3023.96	0.0311413
0002.CSV	3027.82	0.0310625
0002.CSV	3031.68	0.0313077
0002.CSV	3035.53	0.0314195
0002.CSV	3039.39	0.0314347
0002.CSV	3043.25	0.0315319
0002.CSV	3047.11	0.0314783
0002.CSV	3050.96	0.0314784
0002.CSV	3054.82	0.0314213
0002.CSV	3058.68	0.0312738
0002.CSV	3062.53	0.031403
0002.CSV	3066.39	0.0316999
0002.CSV	3070.25	0.0316968
0002.CSV	3074.11	0.031716
0002.CSV	3077.96	0.0319757
0002.CSV	3081.82	0.0321442
0002.CSV	3085.68	0.0321422
0002.CSV	3089.53	0.0320732
0002.CSV	3093.39	0.0319295
0002.CSV	3097.25	0.0320112
0002.CSV	3101.11	0.032162
0002.CSV	3104.96	0.032232
0002.CSV	3108.82	0.0324417
0002.CSV	3112.68	0.0326114
0002.CSV	3116.53	0.0328105
0002.CSV	3120.39	0.0328477
0002.CSV	3124.25	0.0327057
0002.CSV	3128.11	0.0327034
0002.CSV	3131.96	0.0327511
0002.CSV	3135.82	0.0329115
0002.CSV	3139.68	0.0331109
0002.CSV	3143.53	0.0330412
0002.CSV	3147.39	0.0332314
0002.CSV	3151.25	0.0335828
0002.CSV	3155.1	0.033559
0002.CSV	3158.96	0.0333795
0002.CSV	3162.82	0.0333837
0002.CSV	3166.68	0.0334468
0002.CSV	3170.53	0.0335572
0002.CSV	3174.39	0.033706
0002.CSV	3178.25	0.0338787
0002.CSV	3182.1	0.0340258
0002.CSV	3185.96	0.0342145
0002.CSV	3189.82	0.034366
0002.CSV	3193.68	0.0344225
0002.CSV	3197.53	0.0345071
0002.CSV	3201.39	0.0346925
0002.CSV	3205.25	0.0348434
0002.CSV	3209.1	0.0349132
0002.CSV	3212.96	0.0350722
0002.CSV	3216.82	0.0352967
0002.CSV	3220.68	0.0353353
0002.CSV	3224.53	0.0353472
0002.CSV	3228.39	0.0356078
0002.CSV	3232.25	0.0359979
0002.CSV	3236.1	0.0360255
0002.CSV	3239.96	0.0360222
0002.CSV	3243.82	0.0363326
0002.CSV	3247.68	0.0364917
0002.CSV	3251.53	0.0364196
0002.CSV	3255.39	0.0365352
0002.CSV	3259.25	0.0364807
0002.CSV	3263.1	0.0364358
0002.CSV	3266.96	0.0367414
0002.CSV	3270.82	0.0371185
0002.CSV	3274.68	0.0371263
0002.CSV	3278.53	0.0369693
0002.CSV	3282.39	0.0369203
0002.CSV	3286.25	0.0370395
0002.CSV	3290.1	0.0373746
0002.CSV	3293.96	0.0376236
0002.CSV	3297.82	0.0375265
0002.CSV	3301.67	0.0375913
0002.CSV	3305.53	0.0377791
0002.CSV	3309.39	0.0377426
0002.CSV	3313.25	0.0374592
0002.CSV	3317.1	0.0372659
0002.CSV	3320.96	0.0373932
0002.CSV	3324.82	0.0376028
0002.CSV	3328.67	0.0374282
0002.CSV	3332.53	0.0373681
0002.CSV	3336.39	0.0377406
0002.CSV	3340.24	0.0379778
0002.CSV	3344.1	0.0378043
0002.CSV	3347.96	0.0377667
0002.CSV	3351.82	0.0377364
0002.CSV	3355.67	0.0375643
0002.CSV	3359.53	0.0376731
0002.CSV	3363.39	0.0378755
0002.CSV	3367.24	0.0380683
0002.CSV	3371.1	0.0379351
0002.CSV	3374.96	0.0376151
0002.CSV	3378.82	0.0374406
0002.CSV	3382.67	0.0372428
0002.CSV	3386.53	0.0373112
0002.CSV	3390.39	0.0375506
0002.CSV	3394.24	0.0375629
0002.CSV	3398.1	0.0374926
0002.CSV	3401.96	0.0373022
0002.CSV	3405.82	0.0370032
0002.CSV	3409.67	0.0369251
0002.CSV	3413.53	0.0366089
0002.CSV	3417.39	0.0361916
0002.CSV	3421.24	0.0360592
0002.CSV	3425.1	0.0360962
0002.CSV	3428.96	0.0362149
0002.CSV	3432.82	0.0362747
0002.CSV	3436.67	0.0359913
0002.CSV	3440.53	0.035396
0002.CSV	3444.39	0.0349925
0002.CSV	3448.24	0.0348024
0002.CSV	3452.1	0.0345035
0002.CSV	3455.96	0.0343866
0002.CSV	3459.82	0.0344196
0002.CSV	3463.67	0.0344557
0002.CSV	3467.53	0.0344366
0002.CSV	3471.39	0.0339831
0002.CSV	3475.24	0.0335409
0002.CSV	3479.1	0.0334214
0002.CSV	3482.96	0.0332313
0002.CSV	3486.82	0.0331299
0002.CSV	3490.67	0.0329118
0002.CSV	3494.53	0.0327137
0002.CSV	3498.39	0.0324846
0002.CSV	3502.24	0.0321675
0002.CSV	3506.1	0.0316801
0002.CSV	3509.96	0.0313904
0002.CSV	3513.81	0.0312746
0002.CSV	3517.67	0.0308849
0002.CSV	3521.53	0.0307195
0002.CSV	3525.39	0.0305439
0002.CSV	3529.24	0.0302036
0002.CSV	3533.1	0.0301675
0002.CSV	3536.96	0.03014
0002.CSV	3540.81	0.0300031
0002.CSV	3544.67	0.0298908
0002.CSV	3548.53	0.0294927
0002.CSV	3552.39	0.0290334
0002.CSV	3556.24	0.028799
0002.CSV	3560.1	0.028581
0002.CSV	3563.96	0.0280882
0002.CSV	3567.81	0.0280633
0002.CSV	3571.67	0.0281271
0002.CSV	3575.53	0.0277621
0002.CSV	3579.39	0.0278036
0002.CSV	3583.24	0.0278106
0002.CSV	3587.1	0.0276497
0002.CSV	3590.96	0.027433
0002.CSV	3594.81	0.027139
0002.CSV	3598.67	0.0271688
0002.CSV	3602.53	0.0270104
0002.CSV	3606.39	0.026321
0002.CSV	3610.24	0.0257975
0002.CSV	3614.1	0.0256856
0002.CSV	3617.96	0.0259358
0002.CSV	3621.81	0.0260621
0002.CSV	3625.67	0.0254242
0002.CSV	3629.53	0.025163
0002.CSV	3633.39	0.0255515
0002.CSV	3637.24	0.0253549
0002.CSV	3641.1	0.0249859
0002.CSV	3644.96	0.024425
0002.CSV	3648.81	0.0246261
0002.CSV	3652.67	0.0251754
0002.CSV	3656.53	0.0251493
0002.CSV	3660.38	0.025011
0002.CSV	3664.24	0.0243428
0002.CSV	3668.1	0.0236368
0002.CSV	3671.96	0.0234506
0002.CSV	3675.81	0.0238393
0002.CSV	3679.67	0.0242807
0002.CSV	3683.53	0.0241379
0002.CSV	3687.38	0.0241002
0002.CSV	3691.24	0.024628
0002.CSV	3695.1	0.0244321
0002.CSV	3698.95	0.0239043
0002.CSV	3702.81	0.0236843
0002.CSV	3706.67	0.0233327
0002.CSV	3710.53	0.0231963
0002.CSV	3714.38	0.0236927
0002.CSV	3718.24	0.0234729
0002.CSV	3722.1	0.0233291
0002.CSV	3725.95	0.0234396
0002.CSV	3729.81	0.0232077
0002.CSV	3733.67	0.0232325
0002.CSV	3737.53	0.0239108
0002.CSV	3741.38	0.0233374
0002.CSV	3745.24	0.0225579
0002.CSV	3749.1	0.0224219
0002.CSV	3752.95	0.0230932
0002.CSV	3756.81	0.0233263
0002.CSV	3760.67	0.0233454
0002.CSV	3764.53	0.0231796
0002.CSV	3768.38	0.0232653
0002.CSV	3772.24	0.023399
0002.CSV	3776.1	0.0232398
0002.CSV	3779.95	0.0233299
0002.CSV	3783.81	0.0233943
0002.CSV	3787.67	0.0233887
0002.CSV	3791.53	0.0231964
0002.CSV	3795.38	0.0227813
0002.CSV	3799.24	0.0226184
0002.CSV	3803.1	0.0230456
0002.CSV	3806.95	0.0234748
0002.CSV	3810.81	0.0233237
0002.CSV	3814.67	0.0230067
0002.CSV	3818.53	0.0231905
0002.CSV	3822.38	0.0235189
0002.CSV	3826.24	0.0233537
0002.CSV	3830.1	0.0230394
0002.CSV	3833.95	0.0229247
0002.CSV	3837.81	0.0230969
0002.CSV	3841.67	0.0236042
0002.CSV	3845.53	0.0235611
0002.CSV	3849.38	0.02283
0002.CSV	3853.24	0.0228025
0002.CSV	3857.1	0.0235307
0002.CSV	3860.95	0.0232369
0002.CSV	3864.81	0.023256
0002.CSV	3868.67	0.0234101
0002.CSV	3872.52	0.0236773
0002.CSV	3876.38	0.0235501
0002.CSV	3880.24	0.0233779
0002.CSV	3884.1	0.0237881
0002.CSV	3887.95	0.0238047
0002.CSV	3891.81	0.0237651
0002.CSV	3895.67	0.0236185
0002.CSV	3899.52	0.0232829
0002.CSV	3903.38	0.0237934
0002.CSV	3907.24	0.0241351
0002.CSV	3911.1	0.0237552
0002.CSV	3914.95	0.0234712
0002.CSV	3918.81	0.0236084
0002.CSV	3922.67	0.0237182
0002.CSV	3926.52	0.0237504
0002.CSV	3930.38	0.0238672
0002.CSV	3934.24	0.0240416
0002.CSV	3938.09	0.0238058
0002.CSV	3941.95	0.0236916
0002.CSV	3945.81	0.0237465
0002.CSV	3949.67	0.0238272
0002.CSV	3953.52	0.0238987
0002.CSV	3957.38	0.0238055
0002.CSV	3961.24	0.0238116
0002.CSV	3965.09	0.0238531
0002.CSV	3968.95	0.0237796
0002.CSV	3972.81	0.0237953
0002.CSV	3976.67	0.023831
0002.CSV	3980.52	0.0237866
0002.CSV	3984.38	0.0237802
0002.CSV	3988.24	0.0236944
0002.CSV	3992.09	0.0236772
0002.CSV	3995.95	0.0237052
0002.CSV	3999.81	0.0236631
0003.CSV	674.992	0.0360133
0003.CSV	678.849	0.0371653
0003.CSV	682.706	0.0375125
0003.CSV	686.563	0.0393058
0003.CSV	690.42	0.0411932
0003.CSV	694.277	0.0479622
0003.CSV	698.134	0.0570162
0003.CSV	701.991	0.0544622
0003.CSV	705.849	0.049977
0003.CSV	709.706	0.0634892
0003.CSV	713.563	0.0674888
0003.CSV	717.42	0.0481005
0003.CSV	721.277	0.0341728
0003.CSV	725.134	0.0321066
0003.CSV	728.991	0.031773
0003.CSV	732.848	0.032191
0003.CSV	736.705	0.0321975
0003.CSV	740.562	0.032557
0003.CSV	744.42	0.0326705
0003.CSV	748.277	0.0333637
0003.CSV	752.134	0.0335803
0003.CSV	755.991	0.0341861
0003.CSV	759.848	0.0343448
0003.CSV	763.705	0.0350831
0003.CSV	767.562	0.0354229
0003.CSV	771.419	0.0362278
0003.CSV	775.276	0.036796
0003.CSV	779.133	0.0376983
0003.CSV	782.99	0.0378742
0003.CSV	786.848	0.0384983
0003.CSV	790.705	0.0389726
0003.CSV	794.562	0.0400389
0003.CSV	798.419	0.0409616
0003.CSV	802.276	0.0419705
0003.CSV	806.133	0.0423301
0003.CSV	809.99	0.0434099
0003.CSV	813.847	0.0446823
0003.CSV	817.704	0.0470731
0003.CSV	821.562	0.049791
0003.CSV	825.419	0.0535968
0003.CSV	829.276	0.0574043
0003.CSV	833.133	0.062786
0003.CSV	836.99	0.0713648
0003.CSV	840.847	0.0848127
0003.CSV	844.704	0.0996954
0003.CSV	848.561	0.124887
0003.CSV	852.418	0.146547
0003.CSV	856.275	0.13601
0003.CSV	860.132	0.105443
0003.CSV	863.99	0.0744544
0003.CSV	867.847	0.0495519
0003.CSV	871.704	0.0351553
0003.CSV	875.561	0.0293577
0003.CSV	879.418	0.0266972
0003.CSV	883.275	0.0244004
0003.CSV	887.132	0.0235653
0003.CSV	890.989	0.0236177
0003.CSV	894.846	0.0241855
0003.CSV	898.703	0.0245201
0003.CSV	902.561	0.0251071
0003.CSV	906.418	0.0256275
0003.CSV	910.275	0.0260016
0003.CSV	914.132	0.0259904
0003.CSV	917.989	0.026453
0003.CSV	921.846	0.0268449
0003.CSV	925.703	0.0274277
0003.CSV	929.56	0.0277715
0003.CSV	933.417	0.0282582
0003.CSV	937.274	0.0285488
0003.CSV	941.131	0.0290553
0003.CSV	944.989	0.0294292
0003.CSV	948.846	0.0299711
0003.CSV	952.703	0.0303449
0003.CSV	956.56	0.0309521
0003.CSV	960.417	0.0313737
0003.CSV	964.274	0.0319222
0003.CSV	968.131	0.0323341
0003.CSV	971.988	0.0330138
0003.CSV	975.845	0.0335941
0003.CSV	979.702	0.0344448
0003.CSV	983.559	0.0352363
0003.CSV	987.417	0.0363318
0003.CSV	991.274	0.0372219
0003.CSV	995.131	0.038269
0003.CSV	998.988	0.0390239
0003.CSV	1002.85	0.0398583
0003.CSV	1006.7	0.0406077
0003.CSV	1010.56	0.0416969
0003.CSV	1014.42	0.0426234
0003.CSV	1018.27	0.0437627
0003.CSV	1022.13	0.0445786
0003.CSV	1025.99	0.0454549
0003.CSV	1029.85	0.0459882
0003.CSV	1033.7	0.0466637
0003.CSV	1037.56	0.047168
0003.CSV	1041.42	0.0478626
0003.CSV	1045.27	0.0482487
0003.CSV	1049.13	0.0488497
0003.CSV	1052.99	0.049311
0003.CSV	1056.84	0.0500531
0003.CSV	1060.7	0.0507394
0003.CSV	1064.56	0.0518913
0003.CSV	1068.42	0.0529619
0003.CSV	1072.27	0.0542845
0003.CSV	1076.13	0.0562815
0003.CSV	1079.99	0.060298
0003.CSV	1083.84	0.0597274
0003.CSV	1087.7	0.0537244
0003.CSV	1091.56	0.0505608
0003.CSV	1095.41	0.0502392
0003.CSV	1099.27	0.0499015
0003.CSV	1103.13	0.0495937
0003.CSV	1106.99	0.0491123
0003.CSV	1110.84	0.0487586
0003.CSV	1114.7	0.0482723
0003.CSV	1118.56	0.04789
0003.CSV	1122.41	0.0472462
0003.CSV	1126.27	0.0466304
0003.CSV	1130.13	0.0458064
0003.CSV	1133.99	0.0451251
0003.CSV	1137.84	0.0444644
0003.CSV	1141.7	0.0441864
0003.CSV	1145.56	0.043979
0003.CSV	1149.41	0.0440498
0003.CSV	1153.27	0.0439963
0003.CSV	1157.13	0.0440722
0003.CSV	1160.99	0.0439918
0003.CSV	1164.84	0.0439417
0003.CSV	1168.7	0.0436725
0003.CSV	1172.56	0.0436268
0003.CSV	1176.41	0.0436183
0003.CSV	1180.27	0.0436581
0003.CSV	1184.13	0.0430898
0003.CSV	1187.99	0.0423213
0003.CSV	1191.84	0.041626
0003.CSV	1195.7	0.0414026
0003.CSV	1199.56	0.0412292
0003.CSV	1203.41	0.0413273
0003.CSV	1207.27	0.0414276
0003.CSV	1211.13	0.041796
0003.CSV	1214.98	0.0421741
0003.CSV	1218.84	0.0427569
0003.CSV	1222.7	0.0432667
0003.CSV	1226.56	0.043979
0003.CSV	1230.41	0.0445761
0003.CSV	1234.27	0.0452683
0003.CSV	1238.13	0.0457413
0003.CSV	1241.98	0.0463083
0003.CSV	1245.84	0.0466886
0003.CSV	1249.7	0.0470021
0003.CSV	1253.56	0.0468719
0003.CSV	1257.41	0.0466739
0003.CSV	1261.27	0.0464955
0003.CSV	1265.13	0.0469171
0003.CSV	1268.98	0.0475177
0003.CSV	1272.84	0.0483264
0003.CSV	1276.7	0.0489134
0003.CSV	1280.56	0.0496152
0003.CSV	1284.41	0.0502103
0003.CSV	1288.27	0.0509907
0003.CSV	1292.13	0.0516688
0003.CSV	1295.98	0.0525451
0003.CSV	1299.84	0.0533086
0003.CSV	1303.7	0.0541786
0003.CSV	1307.56	0.0548729
0003.CSV	1311.41	0.0557405
0003.CSV	1315.27	0.0565247
0003.CSV	1319.13	0.0575733
0003.CSV	1322.98	0.0584418
0003.CSV	1326.84	0.0595169
0003.CSV	1330.7	0.0606448
0003.CSV	1334.56	0.0619872
0003.CSV	1338.41	0.0635491
0003.CSV	1342.27	0.0655501
0003.CSV	1346.13	0.0670509
0003.CSV	1349.98	0.0689657
0003.CSV	1353.84	0.0708778
0003.CSV	1357.7	0.0729768
0003.CSV	1361.56	0.0752104
0003.CSV	1365.41	0.0778878
0003.CSV	1369.27	0.0799226
0003.CSV	1373.13	0.0828234
0003.CSV	1376.98	0.0860884
0003.CSV	1380.84	0.0888733
0003.CSV	1384.7	0.0914637
0003.CSV	1388.56	0.0952516
0003.CSV	1392.41	0.0984601
0003.CSV	1396.27	0.102947
0003.CSV	1400.13	0.107533
0003.CSV	1403.98	0.111716
0003.CSV	1407.84	0.115941
0003.CSV	1411.7	0.11992
0003.CSV	1415.55	0.122733
0003.CSV	1419.41	0.126422
0003.CSV	1423.27	0.129287
0003.CSV	1427.12	0.132106
0003.CSV	1430.98	0.134778
0003.CSV	1434.84	0.138
0003.CSV	1438.7	0.140615
0003.CSV	1442.55	0.141964
0003.CSV	1446.41	0.141432
0003.CSV	1450.27	0.140055
0003.CSV	1454.12	0.137762
0003.CSV	1457.98	0.135076
0003.CSV	1461.84	0.132494
0003.CSV	1465.7	0.130846
0003.CSV	1469.55	0.127873
0003.CSV	1473.41	0.122503
0003.CSV	1477.27	0.115465
0003.CSV	1481.12	0.110886
0003.CSV	1484.98	0.106321
0003.CSV	1488.84	0.101069
0003.CSV	1492.7	0.0956697
0003.CSV	1496.55	0.091805
0003.CSV	1500.41	0.0873606
0003.CSV	1504.27	0.0847234
0003.CSV	1508.12	0.0794683
0003.CSV	1511.98	0.0754695
0003.CSV	1515.84	0.0722559
0003.CSV	1519.7	0.068138
0003.CSV	1523.55	0.0630027
0003.CSV	1527.41	0.0595372
0003.CSV	1531.27	0.0564135
0003.CSV	1535.12	0.0536053
0003.CSV	1538.98	0.0505833
0003.CSV	1542.84	0.0456435
0003.CSV	1546.7	0.0423668
0003.CSV	1550.55	0.0401339
0003.CSV	1554.41	0.0377562
0003.CSV	1558.27	0.0351508
0003.CSV	1562.12	0.0327453
0003.CSV	1565.98	0.0315858
0003.CSV	1569.84	0.0300686
0003.CSV	1573.69	0.0285139
0003.CSV	1577.55	0.0262486
0003.CSV	1581.41	0.0242658
0003.CSV	1585.27	0.0228017
0003.CSV	1589.12	0.0218954
0003.CSV	1592.98	0.0213723
0003.CSV	1596.84	0.0211144
0003.CSV	1600.69	0.0208514
0003.CSV	1604.55	0.0207281
0003.CSV	1608.41	0.0205146
0003.CSV	1612.27	0.0201934
0003.CSV	1616.12	0.0197184
0003.CSV	1619.98	0.0193151
0003.CSV	1623.84	0.018837
0003.CSV	1627.69	0.0185609
0003.CSV	1631.55	0.0181505
0003.CSV	1635.41	0.0180765
0003.CSV	1639.27	0.0180117
0003.CSV	1643.12	0.0176685
0003.CSV	1646.98	0.0175048
0003.CSV	1650.84	0.0177022
0003.CSV	1654.69	0.0177059
0003.CSV	1658.55	0.0174029
0003.CSV	1662.41	0.017084
0003.CSV	1666.27	0.0169294
0003.CSV	1670.12	0.0168092
0003.CSV	1673.98	0.0168127
0003.CSV	1677.84	0.0165418
0003.CSV	1681.69	0.0163956
0003.CSV	1685.55	0.0164788
0003.CSV	1689.41	0.0163248
0003.CSV	1693.27	0.0158942
0003.CSV	1697.12	0.0158685
0003.CSV	1700.98	0.01606
0003.CSV	1704.84	0.0161043
0003.CSV	1708.69	0.0158953
0003.CSV	1712.55	0.015715
0003.CSV	1716.41	0.0159552
0003.CSV	1720.27	0.0162809
0003.CSV	1724.12	0.0160709
[truncated: 32,521 more rows]

## Sheet: S.plana_400_1_mFTIR_data
Select spectrum number	Wavenumbers	Absorbance
0001.CSV	674.992	0.048594
0001.CSV	678.849	0.0496424
0001.CSV	682.706	0.0498694
0001.CSV	686.563	0.051586
0001.CSV	690.42	0.0530805
0001.CSV	694.277	0.0563124
0001.CSV	698.134	0.0606145
0001.CSV	701.991	0.068613
0001.CSV	705.849	0.0837041
0001.CSV	709.706	0.102181
0001.CSV	713.563	0.0952612
0001.CSV	717.42	0.0678538
0001.CSV	721.277	0.0494823
0001.CSV	725.134	0.0440779
0001.CSV	728.991	0.042352
0001.CSV	732.848	0.0424174
0001.CSV	736.705	0.0422991
0001.CSV	740.562	0.0425008
0001.CSV	744.42	0.0424583
0001.CSV	748.277	0.0432852
0001.CSV	752.134	0.0438833
0001.CSV	755.991	0.0449942
0001.CSV	759.848	0.0456911
0001.CSV	763.705	0.046867
0001.CSV	767.562	0.0475694
0001.CSV	771.419	0.0487857
0001.CSV	775.276	0.0498269
0001.CSV	779.133	0.0509118
0001.CSV	782.99	0.0508254
0001.CSV	786.848	0.0508085
0001.CSV	790.705	0.0510205
0001.CSV	794.562	0.0522312
0001.CSV	798.419	0.0529006
0001.CSV	802.276	0.0530378
0001.CSV	806.133	0.0523238
0001.CSV	809.99	0.0522033
0001.CSV	813.847	0.0523303
0001.CSV	817.704	0.0533495
0001.CSV	821.562	0.0544741
0001.CSV	825.419	0.056329
0001.CSV	829.276	0.0577461
0001.CSV	833.133	0.0591752
0001.CSV	836.99	0.0606611
0001.CSV	840.847	0.0640041
0001.CSV	844.704	0.0693647
0001.CSV	848.561	0.0733543
0001.CSV	852.418	0.0757677
0001.CSV	856.275	0.085036
0001.CSV	860.132	0.103903
0001.CSV	863.99	0.139481
0001.CSV	867.847	0.188871
0001.CSV	871.704	0.213669
0001.CSV	875.561	0.186114
0001.CSV	879.418	0.138564
0001.CSV	883.275	0.0907061
0001.CSV	887.132	0.0525475
0001.CSV	890.989	0.0363557
0001.CSV	894.846	0.035148
0001.CSV	898.703	0.036195
0001.CSV	902.561	0.037541
0001.CSV	906.418	0.0384801
0001.CSV	910.275	0.03969
0001.CSV	914.132	0.0406083
0001.CSV	917.989	0.0417986
0001.CSV	921.846	0.0426307
0001.CSV	925.703	0.0437382
0001.CSV	929.56	0.0445723
0001.CSV	933.417	0.0455591
0001.CSV	937.274	0.046101
0001.CSV	941.131	0.0468789
0001.CSV	944.989	0.0474829
0001.CSV	948.846	0.0484207
0001.CSV	952.703	0.0491163
0001.CSV	956.56	0.0500361
0001.CSV	960.417	0.0507367
0001.CSV	964.274	0.0517469
0001.CSV	968.131	0.052576
0001.CSV	971.988	0.0537059
0001.CSV	975.845	0.0546772
0001.CSV	979.702	0.0560711
0001.CSV	983.559	0.0574183
0001.CSV	987.417	0.059172
0001.CSV	991.274	0.0607397
0001.CSV	995.131	0.0625161
0001.CSV	998.988	0.0638716
0001.CSV	1002.85	0.0652973
0001.CSV	1006.7	0.0663951
0001.CSV	1010.56	0.06786
0001.CSV	1014.42	0.069154
0001.CSV	1018.27	0.070669
0001.CSV	1022.13	0.0718974
0001.CSV	1025.99	0.0733161
0001.CSV	1029.85	0.0743572
0001.CSV	1033.7	0.0756056
0001.CSV	1037.56	0.07655
0001.CSV	1041.42	0.0776831
0001.CSV	1045.27	0.0785647
0001.CSV	1049.13	0.0797908
0001.CSV	1052.99	0.0808737
0001.CSV	1056.84	0.0824468
0001.CSV	1060.7	0.0837562
0001.CSV	1064.56	0.0852556
0001.CSV	1068.42	0.0863911
0001.CSV	1072.27	0.0875349
0001.CSV	1076.13	0.088116
0001.CSV	1079.99	0.0887876
0001.CSV	1083.84	0.0890138
0001.CSV	1087.7	0.0888424
0001.CSV	1091.56	0.087373
0001.CSV	1095.41	0.0857235
0001.CSV	1099.27	0.0841384
0001.CSV	1103.13	0.0832615
0001.CSV	1106.99	0.0824456
0001.CSV	1110.84	0.0820924
0001.CSV	1114.7	0.081436
0001.CSV	1118.56	0.0808028
0001.CSV	1122.41	0.079839
0001.CSV	1126.27	0.0790764
0001.CSV	1130.13	0.0781058
0001.CSV	1133.99	0.0775183
0001.CSV	1137.84	0.0769671
0001.CSV	1141.7	0.0770254
0001.CSV	1145.56	0.0770953
0001.CSV	1149.41	0.0774697
0001.CSV	1153.27	0.0776956
0001.CSV	1157.13	0.0782238
0001.CSV	1160.99	0.0785157
0001.CSV	1164.84	0.0786692
0001.CSV	1168.7	0.0781519
0001.CSV	1172.56	0.0778531
0001.CSV	1176.41	0.0775863
0001.CSV	1180.27	0.0775523
0001.CSV	1184.13	0.0769718
0001.CSV	1187.99	0.0764246
0001.CSV	1191.84	0.075856
0001.CSV	1195.7	0.075879
0001.CSV	1199.56	0.0760045
0001.CSV	1203.41	0.0765228
0001.CSV	1207.27	0.0769859
0001.CSV	1211.13	0.0779053
0001.CSV	1214.98	0.0788559
0001.CSV	1218.84	0.0802251
0001.CSV	1222.7	0.0815158
0001.CSV	1226.56	0.0831345
0001.CSV	1230.41	0.0845276
0001.CSV	1234.27	0.0861074
0001.CSV	1238.13	0.087418
0001.CSV	1241.98	0.0889744
0001.CSV	1245.84	0.0902688
0001.CSV	1249.7	0.0916953
0001.CSV	1253.56	0.0927531
0001.CSV	1257.41	0.0940253
0001.CSV	1261.27	0.0951763
0001.CSV	1265.13	0.0968042
0001.CSV	1268.98	0.0984323
0001.CSV	1272.84	0.100536
0001.CSV	1276.7	0.102529
0001.CSV	1280.56	0.104933
0001.CSV	1284.41	0.107222
0001.CSV	1288.27	0.110016
0001.CSV	1292.13	0.112797
0001.CSV	1295.98	0.11605
0001.CSV	1299.84	0.119226
0001.CSV	1303.7	0.12274
0001.CSV	1307.56	0.12606
0001.CSV	1311.41	0.129844
0001.CSV	1315.27	0.133524
0001.CSV	1319.13	0.137771
0001.CSV	1322.98	0.141762
0001.CSV	1326.84	0.146278
0001.CSV	1330.7	0.150992
0001.CSV	1334.56	0.156178
0001.CSV	1338.41	0.162064
0001.CSV	1342.27	0.16925
0001.CSV	1346.13	0.175343
0001.CSV	1349.98	0.182418
0001.CSV	1353.84	0.189706
0001.CSV	1357.7	0.197567
0001.CSV	1361.56	0.206062
0001.CSV	1365.41	0.215888
0001.CSV	1369.27	0.223797
0001.CSV	1373.13	0.233434
0001.CSV	1376.98	0.243444
0001.CSV	1380.84	0.252029
0001.CSV	1384.7	0.259549
0001.CSV	1388.56	0.268305
0001.CSV	1392.41	0.273292
0001.CSV	1396.27	0.275123
0001.CSV	1400.13	0.272841
0001.CSV	1403.98	0.269546
0001.CSV	1407.84	0.262581
0001.CSV	1411.7	0.253465
0001.CSV	1415.55	0.242871
0001.CSV	1419.41	0.230518
0001.CSV	1423.27	0.219523
0001.CSV	1427.12	0.212191
0001.CSV	1430.98	0.204498
0001.CSV	1434.84	0.197445
0001.CSV	1438.7	0.189368
0001.CSV	1442.55	0.183494
0001.CSV	1446.41	0.176931
0001.CSV	1450.27	0.170274
0001.CSV	1454.12	0.164262
0001.CSV	1457.98	0.155686
0001.CSV	1461.84	0.14866
0001.CSV	1465.7	0.143255
0001.CSV	1469.55	0.137394
0001.CSV	1473.41	0.130554
0001.CSV	1477.27	0.123276
0001.CSV	1481.12	0.118629
0001.CSV	1484.98	0.113975
0001.CSV	1488.84	0.108337
0001.CSV	1492.7	0.102551
0001.CSV	1496.55	0.0980652
0001.CSV	1500.41	0.0929254
0001.CSV	1504.27	0.0896161
0001.CSV	1508.12	0.083563
0001.CSV	1511.98	0.0791613
0001.CSV	1515.84	0.0758477
0001.CSV	1519.7	0.071571
0001.CSV	1523.55	0.0667441
0001.CSV	1527.41	0.0634914
0001.CSV	1531.27	0.0606732
0001.CSV	1535.12	0.0583273
0001.CSV	1538.98	0.0554115
0001.CSV	1542.84	0.0491805
0001.CSV	1546.7	0.0449611
0001.CSV	1550.55	0.0421807
0001.CSV	1554.41	0.0397453
0001.CSV	1558.27	0.0377447
0001.CSV	1562.12	0.0363102
0001.CSV	1565.98	0.0358822
0001.CSV	1569.84	0.0359166
0001.CSV	1573.69	0.0362247
0001.CSV	1577.55	0.0360192
0001.CSV	1581.41	0.0350244
0001.CSV	1585.27	0.0336613
0001.CSV	1589.12	0.0323956
0001.CSV	1592.98	0.0311446
0001.CSV	1596.84	0.0300693
0001.CSV	1600.69	0.0290666
0001.CSV	1604.55	0.0282379
0001.CSV	1608.41	0.0273917
0001.CSV	1612.27	0.0266448
0001.CSV	1616.12	0.0258085
0001.CSV	1619.98	0.0250756
0001.CSV	1623.84	0.0243843
0001.CSV	1627.69	0.023868
0001.CSV	1631.55	0.0233117
0001.CSV	1635.41	0.0229908
0001.CSV	1639.27	0.0226976
0001.CSV	1643.12	0.022373
0001.CSV	1646.98	0.0221457
0001.CSV	1650.84	0.0221323
0001.CSV	1654.69	0.0220918
0001.CSV	1658.55	0.0218835
0001.CSV	1662.41	0.0215778
0001.CSV	1666.27	0.0213836
0001.CSV	1670.12	0.0212524
0001.CSV	1673.98	0.0213069
0001.CSV	1677.84	0.0211016
0001.CSV	1681.69	0.0209799
0001.CSV	1685.55	0.0210622
0001.CSV	1689.41	0.0209861
0001.CSV	1693.27	0.0206643
0001.CSV	1697.12	0.0206551
0001.CSV	1700.98	0.0208528
0001.CSV	1704.84	0.02096
0001.CSV	1708.69	0.0209192
0001.CSV	1712.55	0.0208762
0001.CSV	1716.41	0.0211016
0001.CSV	1720.27	0.0215215
0001.CSV	1724.12	0.0214674
0001.CSV	1727.98	0.0214174
0001.CSV	1731.84	0.0214197
0001.CSV	1735.69	0.0215992
0001.CSV	1739.55	0.0213899
0001.CSV	1743.41	0.02104
0001.CSV	1747.27	0.0206191
0001.CSV	1751.12	0.02041
0001.CSV	1754.98	0.0201825
0001.CSV	1758.84	0.0201032
0001.CSV	1762.69	0.0201142
0001.CSV	1766.55	0.0201031
0001.CSV	1770.41	0.0202332
0001.CSV	1774.26	0.0206845
0001.CSV	1778.12	0.0209012
0001.CSV	1781.98	0.021498
0001.CSV	1785.84	0.0225328
0001.CSV	1789.69	0.0240309
0001.CSV	1793.55	0.0257448
0001.CSV	1797.41	0.0258902
0001.CSV	1801.26	0.0243361
0001.CSV	1805.12	0.0225246
0001.CSV	1808.98	0.0212597
0001.CSV	1812.84	0.0206245
0001.CSV	1816.69	0.020238
0001.CSV	1820.55	0.0200213
0001.CSV	1824.41	0.0198758
0001.CSV	1828.26	0.0199257
0001.CSV	1832.12	0.0199042
0001.CSV	1835.98	0.0198341
0001.CSV	1839.84	0.019708
0001.CSV	1843.69	0.019772
0001.CSV	1847.55	0.0198599
0001.CSV	1851.41	0.0198272
0001.CSV	1855.26	0.0197624
0001.CSV	1859.12	0.0198005
0001.CSV	1862.98	0.0197565
0001.CSV	1866.84	0.019803
0001.CSV	1870.69	0.0199146
0001.CSV	1874.55	0.0198852
0001.CSV	1878.41	0.0198169
0001.CSV	1882.26	0.0198345
0001.CSV	1886.12	0.0198383
0001.CSV	1889.98	0.0199283
0001.CSV	1893.83	0.0199664
0001.CSV	1897.69	0.0199934
0001.CSV	1901.55	0.0199277
0001.CSV	1905.41	0.0199063
0001.CSV	1909.26	0.0199349
0001.CSV	1913.12	0.0199632
0001.CSV	1916.98	0.0199098
0001.CSV	1920.83	0.0199711
0001.CSV	1924.69	0.0199935
0001.CSV	1928.55	0.0200241
0001.CSV	1932.4	0.020029
0001.CSV	1936.26	0.0200384
0001.CSV	1940.12	0.0200143
0001.CSV	1943.98	0.0201323
0001.CSV	1947.83	0.0201527
0001.CSV	1951.69	0.0201426
0001.CSV	1955.55	0.0201688
0001.CSV	1959.4	0.0202416
0001.CSV	1963.26	0.0202489
0001.CSV	1967.12	0.0203105
0001.CSV	1970.98	0.0203275
0001.CSV	1974.83	0.0203204
0001.CSV	1978.69	0.0203114
0001.CSV	1982.55	0.0203479
0001.CSV	1986.4	0.0203404
0001.CSV	1990.26	0.020401
0001.CSV	1994.12	0.0204522
0001.CSV	1997.98	0.0204904
0001.CSV	2001.83	0.020511
0001.CSV	2005.69	0.0205428
0001.CSV	2009.55	0.02054
0001.CSV	2013.4	0.0205938
0001.CSV	2017.26	0.0206181
0001.CSV	2021.12	0.0206377
0001.CSV	2024.97	0.020643
0001.CSV	2028.83	0.0207153
0001.CSV	2032.69	0.0207431
0001.CSV	2036.55	0.0207579
0001.CSV	2040.4	0.0207773
0001.CSV	2044.26	0.0208474
0001.CSV	2048.12	0.020846
0001.CSV	2051.97	0.0208713
0001.CSV	2055.83	0.020881
0001.CSV	2059.69	0.0209339
0001.CSV	2063.55	0.0209749
0001.CSV	2067.4	0.0210441
0001.CSV	2071.26	0.0210371
0001.CSV	2075.12	0.0210501
0001.CSV	2078.97	0.0210463
0001.CSV	2082.83	0.0210892
0001.CSV	2086.69	0.0211006
0001.CSV	2090.55	0.0211201
0001.CSV	2094.4	0.0211244
0001.CSV	2098.26	0.0211789
0001.CSV	2102.12	0.0211903
0001.CSV	2105.97	0.0211961
0001.CSV	2109.83	0.0211709
0001.CSV	2113.69	0.0212035
0001.CSV	2117.55	0.0212346
0001.CSV	2121.4	0.0212801
0001.CSV	2125.26	0.021304
0001.CSV	2129.12	0.0213672
0001.CSV	2132.97	0.0214085
0001.CSV	2136.83	0.0214426
0001.CSV	2140.69	0.0214267
0001.CSV	2144.55	0.021425
0001.CSV	2148.4	0.0214064
0001.CSV	2152.26	0.0214043
0001.CSV	2156.12	0.0214003
0001.CSV	2159.97	0.0214498
0001.CSV	2163.83	0.0214698
0001.CSV	2167.69	0.021491
0001.CSV	2171.55	0.0215107
0001.CSV	2175.4	0.0215513
0001.CSV	2179.26	0.0215331
0001.CSV	2183.12	0.0215356
0001.CSV	2186.97	0.0215223
0001.CSV	2190.83	0.0215642
0001.CSV	2194.69	0.0216056
0001.CSV	2198.55	0.0216507
0001.CSV	2202.4	0.0216739
0001.CSV	2206.26	0.0216973
0001.CSV	2210.12	0.0216858
0001.CSV	2213.97	0.0217035
0001.CSV	2217.83	0.0216885
0001.CSV	2221.69	0.02169
0001.CSV	2225.54	0.0217156
0001.CSV	2229.4	0.0217781
0001.CSV	2233.26	0.0217936
0001.CSV	2237.12	0.0218008
0001.CSV	2240.97	0.0218131
0001.CSV	2244.83	0.0218284
0001.CSV	2248.69	0.021791
0001.CSV	2252.54	0.0218035
0001.CSV	2256.4	0.0217989
0001.CSV	2260.26	0.0218131
0001.CSV	2264.11	0.0218088
0001.CSV	2267.97	0.0218057
0001.CSV	2271.83	0.0217934
0001.CSV	2275.69	0.021813
0001.CSV	2279.54	0.0218204
0001.CSV	2283.4	0.0218421
0001.CSV	2287.26	0.021861
0001.CSV	2291.11	0.0219318
0001.CSV	2294.97	0.0219793
0001.CSV	2298.83	0.0220419
0001.CSV	2302.69	0.0220937
0001.CSV	2306.54	0.0222417
0001.CSV	2310.4	0.0224444
0001.CSV	2314.26	0.0225711
0001.CSV	2318.11	0.022596
0001.CSV	2321.97	0.0227358
0001.CSV	2325.83	0.0228029
0001.CSV	2329.69	0.022856
0001.CSV	2333.54	0.02277
0001.CSV	2337.4	0.0227806
0001.CSV	2341.26	0.0228404
0001.CSV	2345.11	0.0229435
0001.CSV	2348.97	0.0227865
0001.CSV	2352.83	0.022611
0001.CSV	2356.69	0.0224433
0001.CSV	2360.54	0.0223313
0001.CSV	2364.4	0.0224355
0001.CSV	2368.26	0.0227831
0001.CSV	2372.11	0.0228369
0001.CSV	2375.97	0.0226763
0001.CSV	2379.83	0.0223988
0001.CSV	2383.69	0.0221188
0001.CSV	2387.54	0.0219023
0001.CSV	2391.4	0.0218111
0001.CSV	2395.26	0.0217606
0001.CSV	2399.11	0.021749
0001.CSV	2402.97	0.0217483
0001.CSV	2406.83	0.021763
0001.CSV	2410.68	0.0217747
0001.CSV	2414.54	0.0218043
0001.CSV	2418.4	0.0218099
0001.CSV	2422.26	0.0218323
0001.CSV	2426.11	0.0218477
0001.CSV	2429.97	0.0218737
0001.CSV	2433.83	0.0218786
0001.CSV	2437.68	0.021882
0001.CSV	2441.54	0.0219006
0001.CSV	2445.4	0.021947
0001.CSV	2449.26	0.021972
0001.CSV	2453.11	0.0220013
0001.CSV	2456.97	0.0220795
0001.CSV	2460.83	0.0221832
0001.CSV	2464.68	0.0222817
0001.CSV	2468.54	0.0224139
0001.CSV	2472.4	0.0225229
0001.CSV	2476.26	0.0226413
0001.CSV	2480.11	0.0228067
0001.CSV	2483.97	0.0230327
0001.CSV	2487.83	0.0232874
0001.CSV	2491.68	0.0236358
0001.CSV	2495.54	0.0240994
0001.CSV	2499.4	0.0246516
0001.CSV	2503.26	0.0251286
0001.CSV	2507.11	0.0254753
0001.CSV	2510.97	0.0256286
0001.CSV	2514.83	0.025573
0001.CSV	2518.68	0.0253453
0001.CSV	2522.54	0.0250099
0001.CSV	2526.4	0.0245402
0001.CSV	2530.26	0.0240528
0001.CSV	2534.11	0.0236061
0001.CSV	2537.97	0.0232453
0001.CSV	2541.83	0.0230053
0001.CSV	2545.68	0.0228581
0001.CSV	2549.54	0.0227424
0001.CSV	2553.4	0.0226768
0001.CSV	2557.26	0.0226174
0001.CSV	2561.11	0.0225958
0001.CSV	2564.97	0.0225787
0001.CSV	2568.83	0.0225514
0001.CSV	2572.68	0.0225379
0001.CSV	2576.54	0.0225443
0001.CSV	2580.4	0.0225116
0001.CSV	2584.25	0.0224994
0001.CSV	2588.11	0.0224924
0001.CSV	2591.97	0.0224873
0001.CSV	2595.83	0.0224499
0001.CSV	2599.68	0.0224035
0001.CSV	2603.54	0.0223463
0001.CSV	2607.4	0.0222912
0001.CSV	2611.25	0.0222203
0001.CSV	2615.11	0.0221705
0001.CSV	2618.97	0.0220936
0001.CSV	2622.82	0.0220524
0001.CSV	2626.68	0.0220358
0001.CSV	2630.54	0.0219926
0001.CSV	2634.4	0.0219807
0001.CSV	2638.25	0.021962
0001.CSV	2642.11	0.0218564
0001.CSV	2645.97	0.0217687
0001.CSV	2649.82	0.0217033
0001.CSV	2653.68	0.0216754
0001.CSV	2657.54	0.0216923
0001.CSV	2661.4	0.0217067
0001.CSV	2665.25	0.0217
0001.CSV	2669.11	0.0217742
0001.CSV	2672.97	0.0219447
0001.CSV	2676.82	0.02215
0001.CSV	2680.68	0.0221053
0001.CSV	2684.54	0.0218359
0001.CSV	2688.4	0.0217163
0001.CSV	2692.25	0.021736
0001.CSV	2696.11	0.0217841
0001.CSV	2699.97	0.0217897
0001.CSV	2703.82	0.0217788
0001.CSV	2707.68	0.0218551
0001.CSV	2711.54	0.0218755
0001.CSV	2715.4	0.021871
0001.CSV	2719.25	0.022005
0001.CSV	2723.11	0.0222492
0001.CSV	2726.97	0.0222435
0001.CSV	2730.82	0.021997
0001.CSV	2734.68	0.0219646
0001.CSV	2738.54	0.0219762
0001.CSV	2742.4	0.0219838
0001.CSV	2746.25	0.0222269
0001.CSV	2750.11	0.0222613
0001.CSV	2753.97	0.0220592
0001.CSV	2757.82	0.0219874
0001.CSV	2761.68	0.0219297
0001.CSV	2765.54	0.0219264
0001.CSV	2769.39	0.0221176
0001.CSV	2773.25	0.0224367
0001.CSV	2777.11	0.0224309
0001.CSV	2780.97	0.0222954
0001.CSV	2784.82	0.0225008
0001.CSV	2788.68	0.0229362
0001.CSV	2792.54	0.023121
0001.CSV	2796.39	0.0232044
0001.CSV	2800.25	0.0232078
0001.CSV	2804.11	0.0231661
0001.CSV	2807.97	0.0234505
0001.CSV	2811.82	0.0236219
0001.CSV	2815.68	0.023678
0001.CSV	2819.54	0.0239353
0001.CSV	2823.39	0.024281
0001.CSV	2827.25	0.0246722
0001.CSV	2831.11	0.0254216
0001.CSV	2834.97	0.0266347
0001.CSV	2838.82	0.0281583
0001.CSV	2842.68	0.0302279
0001.CSV	2846.54	0.0333922
0001.CSV	2850.39	0.0360476
0001.CSV	2854.25	0.0364237
0001.CSV	2858.11	0.0350565
0001.CSV	2861.97	0.0331578
0001.CSV	2865.82	0.0319595
0001.CSV	2869.68	0.031868
0001.CSV	2873.54	0.0317103
0001.CSV	2877.39	0.0307435
0001.CSV	2881.25	0.0300243
0001.CSV	2885.11	0.0301151
0001.CSV	2888.97	0.030776
0001.CSV	2892.82	0.0318767
0001.CSV	2896.68	0.0329716
0001.CSV	2900.54	0.0339284
0001.CSV	2904.39	0.0352356
0001.CSV	2908.25	0.0372198
0001.CSV	2912.11	0.0401619
0001.CSV	2915.97	0.0434078
0001.CSV	2919.82	0.0455059
0001.CSV	2923.68	0.0456003
0001.CSV	2927.54	0.0437731
0001.CSV	2931.39	0.0403961
0001.CSV	2935.25	0.0365363
0001.CSV	2939.11	0.0336173
0001.CSV	2942.96	0.0321242
0001.CSV	2946.82	0.0317085
0001.CSV	2950.68	0.032066
0001.CSV	2954.54	0.0324393
0001.CSV	2958.39	0.0319823
0001.CSV	2962.25	0.0306709
0001.CSV	2966.11	0.028639
0001.CSV	2969.96	0.0267969
0001.CSV	2973.82	0.0256323
0001.CSV	2977.68	0.0248955
0001.CSV	2981.53	0.0241628
0001.CSV	2985.39	0.0233753
0001.CSV	2989.25	0.0230714
0001.CSV	2993.11	0.0230346
0001.CSV	2996.96	0.0227833
0001.CSV	3000.82	0.0224466
0001.CSV	3004.68	0.0222276
0001.CSV	3008.53	0.0223314
0001.CSV	3012.39	0.022546
0001.CSV	3016.25	0.0225234
0001.CSV	3020.11	0.0222629
0001.CSV	3023.96	0.0220526
0001.CSV	3027.82	0.0220608
0001.CSV	3031.68	0.0222669
0001.CSV	3035.53	0.0223067
0001.CSV	3039.39	0.0222907
0001.CSV	3043.25	0.0223512
0001.CSV	3047.11	0.0223313
0001.CSV	3050.96	0.0223329
0001.CSV	3054.82	0.0222763
0001.CSV	3058.68	0.0221599
0001.CSV	3062.53	0.0222275
0001.CSV	3066.39	0.0224442
0001.CSV	3070.25	0.022379
0001.CSV	3074.11	0.0223727
0001.CSV	3077.96	0.0226106
0001.CSV	3081.82	0.0227767
0001.CSV	3085.68	0.0227781
0001.CSV	3089.53	0.0226554
0001.CSV	3093.39	0.0225067
0001.CSV	3097.25	0.0225435
0001.CSV	3101.11	0.0226649
0001.CSV	3104.96	0.0227842
0001.CSV	3108.82	0.0229306
0001.CSV	3112.68	0.0229995
0001.CSV	3116.53	0.023134
0001.CSV	3120.39	0.0231369
0001.CSV	3124.25	0.0229955
0001.CSV	3128.11	0.0229674
0001.CSV	3131.96	0.0229872
0001.CSV	3135.82	0.0231391
0001.CSV	3139.68	0.0232902
0001.CSV	3143.53	0.0231958
0001.CSV	3147.39	0.0232568
0001.CSV	3151.25	0.023514
0001.CSV	3155.1	0.0235259
0001.CSV	3158.96	0.0233458
0001.CSV	3162.82	0.023291
0001.CSV	3166.68	0.0232925
0001.CSV	3170.53	0.0234039
0001.CSV	3174.39	0.0235362
0001.CSV	3178.25	0.0236897
0001.CSV	3182.1	0.0238027
0001.CSV	3185.96	0.0238838
0001.CSV	3189.82	0.0239468
0001.CSV	3193.68	0.0239271
0001.CSV	3197.53	0.0239589
0001.CSV	3201.39	0.0241186
0001.CSV	3205.25	0.0242304
0001.CSV	3209.1	0.0242737
0001.CSV	3212.96	0.0243935
0001.CSV	3216.82	0.0245375
0001.CSV	3220.68	0.0245664
0001.CSV	3224.53	0.024612
0001.CSV	3228.39	0.0248163
0001.CSV	3232.25	0.0251092
0001.CSV	3236.1	0.0251284
0001.CSV	3239.96	0.025056
0001.CSV	3243.82	0.0251973
0001.CSV	3247.68	0.0252728
0001.CSV	3251.53	0.0252029
0001.CSV	3255.39	0.0252852
0001.CSV	3259.25	0.0252324
0001.CSV	3263.1	0.0252222
0001.CSV	3266.96	0.0254599
0001.CSV	3270.82	0.025743
0001.CSV	3274.68	0.0257911
0001.CSV	3278.53	0.0256381
0001.CSV	3282.39	0.0255614
0001.CSV	3286.25	0.0256954
0001.CSV	3290.1	0.0259964
0001.CSV	3293.96	0.0262259
0001.CSV	3297.82	0.0260985
0001.CSV	3301.67	0.0260612
0001.CSV	3305.53	0.0262349
0001.CSV	3309.39	0.0261902
0001.CSV	3313.25	0.0259517
0001.CSV	3317.1	0.0258389
0001.CSV	3320.96	0.0259285
0001.CSV	3324.82	0.0260862
0001.CSV	3328.67	0.0259675
0001.CSV	3332.53	0.0259242
0001.CSV	3336.39	0.026228
0001.CSV	3340.24	0.0264166
0001.CSV	3344.1	0.0262883
0001.CSV	3347.96	0.0262473
0001.CSV	3351.82	0.0262096
0001.CSV	3355.67	0.0260737
0001.CSV	3359.53	0.0261595
0001.CSV	3363.39	0.0263104
0001.CSV	3367.24	0.026448
0001.CSV	3371.1	0.0263668
0001.CSV	3374.96	0.026115
0001.CSV	3378.82	0.0259481
0001.CSV	3382.67	0.0257976
0001.CSV	3386.53	0.0258229
0001.CSV	3390.39	0.0260696
0001.CSV	3394.24	0.0261665
0001.CSV	3398.1	0.026134
0001.CSV	3401.96	0.0259739
0001.CSV	3405.82	0.0257501
0001.CSV	3409.67	0.0257416
0001.CSV	3413.53	0.0255377
0001.CSV	3417.39	0.0251725
0001.CSV	3421.24	0.0250671
0001.CSV	3425.1	0.025104
0001.CSV	3428.96	0.0252205
0001.CSV	3432.82	0.0253323
0001.CSV	3436.67	0.0251466
0001.CSV	3440.53	0.0246955
0001.CSV	3444.39	0.0244386
0001.CSV	3448.24	0.0243137
0001.CSV	3452.1	0.0240131
0001.CSV	3455.96	0.0239228
0001.CSV	3459.82	0.024054
0001.CSV	3463.67	0.0241336
0001.CSV	3467.53	0.0241124
0001.CSV	3471.39	0.0237899
0001.CSV	3475.24	0.0235141
0001.CSV	3479.1	0.0234652
0001.CSV	3482.96	0.0232865
0001.CSV	3486.82	0.023092
0001.CSV	3490.67	0.0229105
0001.CSV	3494.53	0.0228527
0001.CSV	3498.39	0.0227458
0001.CSV	3502.24	0.0225613
0001.CSV	3506.1	0.0221747
0001.CSV	3509.96	0.0219231
0001.CSV	3513.81	0.0218702
0001.CSV	3517.67	0.0215899
0001.CSV	3521.53	0.0214483
0001.CSV	3525.39	0.0213179
0001.CSV	3529.24	0.0210381
0001.CSV	3533.1	0.0209252
0001.CSV	3536.96	0.0209253
0001.CSV	3540.81	0.0208836
0001.CSV	3544.67	0.0208201
0001.CSV	3548.53	0.020627
0001.CSV	3552.39	0.0203046
0001.CSV	3556.24	0.0200654
0001.CSV	3560.1	0.0198688
0001.CSV	3563.96	0.0194805
0001.CSV	3567.81	0.0195293
0001.CSV	3571.67	0.0195448
0001.CSV	3575.53	0.0192838
0001.CSV	3579.39	0.0193848
0001.CSV	3583.24	0.0193758
0001.CSV	3587.1	0.0192036
0001.CSV	3590.96	0.0190175
0001.CSV	3594.81	0.0187463
0001.CSV	3598.67	0.0186915
0001.CSV	3602.53	0.0186067
0001.CSV	3606.39	0.0182529
0001.CSV	3610.24	0.0180353
0001.CSV	3614.1	0.0179109
0001.CSV	3617.96	0.0179754
0001.CSV	3621.81	0.0181153
0001.CSV	3625.67	0.0176194
0001.CSV	3629.53	0.0175258
0001.CSV	3633.39	0.0178443
0001.CSV	3637.24	0.0176381
0001.CSV	3641.1	0.0173665
0001.CSV	3644.96	0.0169505
0001.CSV	3648.81	0.0171512
0001.CSV	3652.67	0.0174958
0001.CSV	3656.53	0.0174756
0001.CSV	3660.38	0.0174921
0001.CSV	3664.24	0.0169886
0001.CSV	3668.1	0.0164738
0001.CSV	3671.96	0.0164028
0001.CSV	3675.81	0.0168013
0001.CSV	3679.67	0.017095
0001.CSV	3683.53	0.0169195
0001.CSV	3687.38	0.0169551
0001.CSV	3691.24	0.0173951
0001.CSV	3695.1	0.0171665
0001.CSV	3698.95	0.0167859
0001.CSV	3702.81	0.0166879
0001.CSV	3706.67	0.0164803
0001.CSV	3710.53	0.0164053
0001.CSV	3714.38	0.0167913
0001.CSV	3718.24	0.0167055
0001.CSV	3722.1	0.0166455
0001.CSV	3725.95	0.0166774
0001.CSV	3729.81	0.0165165
0001.CSV	3733.67	0.0166316
0001.CSV	3737.53	0.0171614
0001.CSV	3741.38	0.0166482
0001.CSV	3745.24	0.016152
0001.CSV	3749.1	0.0162651
0001.CSV	3752.95	0.0166774
0001.CSV	3756.81	0.0166936
0001.CSV	3760.67	0.0167173
0001.CSV	3764.53	0.0166185
0001.CSV	3768.38	0.0166763
0001.CSV	3772.24	0.0168593
0001.CSV	3776.1	0.0167718
0001.CSV	3779.95	0.0168741
0001.CSV	3783.81	0.0169006
0001.CSV	3787.67	0.0168786
0001.CSV	3791.53	0.0167575
0001.CSV	3795.38	0.016468
0001.CSV	3799.24	0.0164041
0001.CSV	3803.1	0.0167928
0001.CSV	3806.95	0.0170235
0001.CSV	3810.81	0.0168022
0001.CSV	3814.67	0.0164951
0001.CSV	3818.53	0.0166197
0001.CSV	3822.38	0.0169561
0001.CSV	3826.24	0.0168549
0001.CSV	3830.1	0.0166335
0001.CSV	3833.95	0.0165321
0001.CSV	3837.81	0.016692
0001.CSV	3841.67	0.0171046
0001.CSV	3845.53	0.01703
0001.CSV	3849.38	0.0164397
0001.CSV	3853.24	0.0164433
0001.CSV	3857.1	0.016933
0001.CSV	3860.95	0.0166473
0001.CSV	3864.81	0.0165838
0001.CSV	3868.67	0.0166076
0001.CSV	3872.52	0.0168673
0001.CSV	3876.38	0.0168113
0001.CSV	3880.24	0.0166303
0001.CSV	3884.1	0.016849
0001.CSV	3887.95	0.0168776
0001.CSV	3891.81	0.0168438
0001.CSV	3895.67	0.0166397
0001.CSV	3899.52	0.0163571
0001.CSV	3903.38	0.0167667
0001.CSV	3907.24	0.0169554
0001.CSV	3911.1	0.0166671
0001.CSV	3914.95	0.0164216
0001.CSV	3918.81	0.0164233
0001.CSV	3922.67	0.016481
0001.CSV	3926.52	0.0165146
0001.CSV	3930.38	0.0165333
0001.CSV	3934.24	0.0166222
0001.CSV	3938.09	0.0164692
0001.CSV	3941.95	0.0163952
0001.CSV	3945.81	0.0164396
0001.CSV	3949.67	0.0164866
0001.CSV	3953.52	0.0164682
0001.CSV	3957.38	0.0164242
0001.CSV	3961.24	0.0164408
0001.CSV	3965.09	0.0163891
0001.CSV	3968.95	0.0162925
0001.CSV	3972.81	0.0163012
0001.CSV	3976.67	0.0163221
0001.CSV	3980.52	0.0163062
0001.CSV	3984.38	0.0163132
0001.CSV	3988.24	0.0162696
0001.CSV	3992.09	0.0162391
0001.CSV	3995.95	0.0161787
0001.CSV	3999.81	0.0161145
0002.CSV	674.992	0.0363718
0002.CSV	678.849	0.0370672
0002.CSV	682.706	0.0370414
0002.CSV	686.563	0.0381173
0002.CSV	690.42	0.0393982
0002.CSV	694.277	0.0418065
0002.CSV	698.134	0.045101
0002.CSV	701.991	0.0513204
0002.CSV	705.849	0.0629453
0002.CSV	709.706	0.0763421
0002.CSV	713.563	0.0700066
0002.CSV	717.42	0.0486126
0002.CSV	721.277	0.0348416
0002.CSV	725.134	0.0310249
0002.CSV	728.991	0.0301025
0002.CSV	732.848	0.0303311
0002.CSV	736.705	0.0305089
0002.CSV	740.562	0.0310364
0002.CSV	744.42	0.0312021
0002.CSV	748.277	0.0317899
0002.CSV	752.134	0.0323997
0002.CSV	755.991	0.0333671
0002.CSV	759.848	0.0339399
0002.CSV	763.705	0.0346827
0002.CSV	767.562	0.0352
0002.CSV	771.419	0.0360577
0002.CSV	775.276	0.0366104
0002.CSV	779.133	0.0372639
0002.CSV	782.99	0.0373475
0002.CSV	786.848	0.0375495
0002.CSV	790.705	0.0378562
0002.CSV	794.562	0.0387896
0002.CSV	798.419	0.0394649
0002.CSV	802.276	0.0400396
0002.CSV	806.133	0.0401057
0002.CSV	809.99	0.0404612
0002.CSV	813.847	0.0409663
0002.CSV	817.704	0.0420272
0002.CSV	821.562	0.0434438
0002.CSV	825.419	0.0455122
0002.CSV	829.276	0.0468816
0002.CSV	833.133	0.0477449
0002.CSV	836.99	0.0485124
0002.CSV	840.847	0.0505313
0002.CSV	844.704	0.0537406
0002.CSV	848.561	0.0560561
0002.CSV	852.418	0.0578243
0002.CSV	856.275	0.063851
0002.CSV	860.132	0.0752849
0002.CSV	863.99	0.0971222
0002.CSV	867.847	0.130103
0002.CSV	871.704	0.149991
0002.CSV	875.561	0.134087
0002.CSV	879.418	0.100777
0002.CSV	883.275	0.0651553
0002.CSV	887.132	0.0363653
0002.CSV	890.989	0.0243453
0002.CSV	894.846	0.0237356
0002.CSV	898.703	0.0247704
0002.CSV	902.561	0.025969
0002.CSV	906.418	0.0269468
0002.CSV	910.275	0.0280868
0002.CSV	914.132	0.0289996
0002.CSV	917.989	0.0300422
0002.CSV	921.846	0.0308033
0002.CSV	925.703	0.0317333
0002.CSV	929.56	0.032493
0002.CSV	933.417	0.0333062
0002.CSV	937.274	0.0337777
0002.CSV	941.131	0.0343945
0002.CSV	944.989	0.0348998
0002.CSV	948.846	0.0356388
0002.CSV	952.703	0.0361856
0002.CSV	956.56	0.0369168
0002.CSV	960.417	0.0374609
0002.CSV	964.274	0.0382006
0002.CSV	968.131	0.0388012
0002.CSV	971.988	0.0396343
0002.CSV	975.845	0.0403997
0002.CSV	979.702	0.041412
0002.CSV	983.559	0.0423349
0002.CSV	987.417	0.0434725
0002.CSV	991.274	0.0445271
0002.CSV	995.131	0.0457487
0002.CSV	998.988	0.0467158
0002.CSV	1002.85	0.0477498
0002.CSV	1006.7	0.0485724
0002.CSV	1010.56	0.0496007
0002.CSV	1014.42	0.0503371
0002.CSV	1018.27	0.0511331
0002.CSV	1022.13	0.0517317
0002.CSV	1025.99	0.0525472
0002.CSV	1029.85	0.0531305
0002.CSV	1033.7	0.0538315
0002.CSV	1037.56	0.0543402
0002.CSV	1041.42	0.0548753
0002.CSV	1045.27	0.0551155
0002.CSV	1049.13	0.0554624
0002.CSV	1052.99	0.0556138
0002.CSV	1056.84	0.0561396
0002.CSV	1060.7	0.056658
0002.CSV	1064.56	0.0574555
0002.CSV	1068.42	0.0581687
0002.CSV	1072.27	0.059053
0002.CSV	1076.13	0.059768
0002.CSV	1079.99	0.0605734
0002.CSV	1083.84	0.0609088
0002.CSV	1087.7	0.0608674
0002.CSV	1091.56	0.0601744
0002.CSV	1095.41	0.0595263
0002.CSV	1099.27	0.0588748
0002.CSV	1103.13	0.0585782
0002.CSV	1106.99	0.0582134
0002.CSV	1110.84	0.0580633
0002.CSV	1114.7	0.0577032
0002.CSV	1118.56	0.057317
0002.CSV	1122.41	0.0566323
0002.CSV	1126.27	0.0560955
0002.CSV	1130.13	0.0554029
0002.CSV	1133.99	0.0549545
0002.CSV	1137.84	0.0545502
0002.CSV	1141.7	0.0545736
0002.CSV	1145.56	0.0546029
0002.CSV	1149.41	0.0548427
0002.CSV	1153.27	0.0550045
0002.CSV	1157.13	0.0552634
0002.CSV	1160.99	0.0552781
0002.CSV	1164.84	0.0553507
0002.CSV	1168.7	0.0552495
0002.CSV	1172.56	0.055462
0002.CSV	1176.41	0.0557767
0002.CSV	1180.27	0.0561597
0002.CSV	1184.13	0.0558035
0002.CSV	1187.99	0.0551683
0002.CSV	1191.84	0.0545219
0002.CSV	1195.7	0.0543697
0002.CSV	1199.56	0.0543722
0002.CSV	1203.41	0.0547018
0002.CSV	1207.27	0.055041
0002.CSV	1211.13	0.0556977
0002.CSV	1214.98	0.0563195
0002.CSV	1218.84	0.0572434
0002.CSV	1222.7	0.0581631
0002.CSV	1226.56	0.0592594
0002.CSV	1230.41	0.0601666
0002.CSV	1234.27	0.0611303
0002.CSV	1238.13	0.0618865
0002.CSV	1241.98	0.062826
0002.CSV	1245.84	0.0635448
0002.CSV	1249.7	0.0641848
0002.CSV	1253.56	0.0644252
0002.CSV	1257.41	0.064696
0002.CSV	1261.27	0.0649134
0002.CSV	1265.13	0.0655792
0002.CSV	1268.98	0.0663454
0002.CSV	1272.84	0.0674687
0002.CSV	1276.7	0.0685382
0002.CSV	1280.56	0.0699178
0002.CSV	1284.41	0.0712438
0002.CSV	1288.27	0.0728692
0002.CSV	1292.13	0.0744446
0002.CSV	1295.98	0.0762408
0002.CSV	1299.84	0.0779442
0002.CSV	1303.7	0.0798179
0002.CSV	1307.56	0.0815806
0002.CSV	1311.41	0.0836675
0002.CSV	1315.27	0.0857215
0002.CSV	1319.13	0.0881572
0002.CSV	1322.98	0.0904491
0002.CSV	1326.84	0.0930906
0002.CSV	1330.7	0.0958914
0002.CSV	1334.56	0.0989837
0002.CSV	1338.41	0.102612
0002.CSV	1342.27	0.107028
0002.CSV	1346.13	0.110679
0002.CSV	1349.98	0.115045
0002.CSV	1353.84	0.11965
0002.CSV	1357.7	0.124583
0002.CSV	1361.56	0.129975
0002.CSV	1365.41	0.136109
0002.CSV	1369.27	0.140809
0002.CSV	1373.13	0.146481
0002.CSV	1376.98	0.152116
0002.CSV	1380.84	0.156484
0002.CSV	1384.7	0.160133
0002.CSV	1388.56	0.164442
0002.CSV	1392.41	0.166608
0002.CSV	1396.27	0.167396
0002.CSV	1400.13	0.166223
0002.CSV	1403.98	0.164661
0002.CSV	1407.84	0.161522
0002.CSV	1411.7	0.157467
0002.CSV	1415.55	0.152599
0002.CSV	1419.41	0.147014
0002.CSV	1423.27	0.141559
0002.CSV	1427.12	0.137569
0002.CSV	1430.98	0.133272
0002.CSV	1434.84	0.12935
0002.CSV	1438.7	0.12483
0002.CSV	1442.55	0.121404
0002.CSV	1446.41	0.117577
0002.CSV	1450.27	0.113718
0002.CSV	1454.12	0.110063
0002.CSV	1457.98	0.105148
0002.CSV	1461.84	0.100749
0002.CSV	1465.7	0.0971474
0002.CSV	1469.55	0.0931636
0002.CSV	1473.41	0.0886627
0002.CSV	1477.27	0.0838591
0002.CSV	1481.12	0.0805026
0002.CSV	1484.98	0.0771618
0002.CSV	1488.84	0.0733391
0002.CSV	1492.7	0.0693404
0002.CSV	1496.55	0.0661361
0002.CSV	1500.41	0.0626123
0002.CSV	1504.27	0.0602817
0002.CSV	1508.12	0.0565691
0002.CSV	1511.98	0.0534421
0002.CSV	1515.84	0.0506941
0002.CSV	1519.7	0.0473794
0002.CSV	1523.55	0.043975
0002.CSV	1527.41	0.0415017
0002.CSV	1531.27	0.0393616
0002.CSV	1535.12	0.0376613
0002.CSV	1538.98	0.0357167
0002.CSV	1542.84	0.0316138
0002.CSV	1546.7	0.0285627
0002.CSV	1550.55	0.0264976
0002.CSV	1554.41	0.0247589
0002.CSV	1558.27	0.0236238
0002.CSV	1562.12	0.0229792
0002.CSV	1565.98	0.0227024
0002.CSV	1569.84	0.0228859
0002.CSV	1573.69	0.0232797
0002.CSV	1577.55	0.0234897
0002.CSV	1581.41	0.0229768
0002.CSV	1585.27	0.0221561
0002.CSV	1589.12	0.0214505
0002.CSV	1592.98	0.0208056
0002.CSV	1596.84	0.0203069
0002.CSV	1600.69	0.0199003
0002.CSV	1604.55	0.019617
0002.CSV	1608.41	0.0192534
0002.CSV	1612.27	0.0188213
0002.CSV	1616.12	0.0183664
0002.CSV	1619.98	0.0179675
0002.CSV	1623.84	0.0175672
0002.CSV	1627.69	0.0173054
0002.CSV	1631.55	0.0169165
0002.CSV	1635.41	0.0168358
0002.CSV	1639.27	0.0168795
0002.CSV	1643.12	0.0166268
0002.CSV	1646.98	0.0165878
0002.CSV	1650.84	0.016789
0002.CSV	1654.69	0.0169932
0002.CSV	1658.55	0.016771
0002.CSV	1662.41	0.0165568
0002.CSV	1666.27	0.0164716
0002.CSV	1670.12	0.0164465
0002.CSV	1673.98	0.0166099
0002.CSV	1677.84	0.0165019
0002.CSV	1681.69	0.0164621
0002.CSV	1685.55	0.0167108
0002.CSV	1689.41	0.0166627
0002.CSV	1693.27	0.0163602
0002.CSV	1697.12	0.0164526
0002.CSV	1700.98	0.0167843
0002.CSV	1704.84	0.0168852
0002.CSV	1708.69	0.0168474
0002.CSV	1712.55	0.0167856
0002.CSV	1716.41	0.0171378
0002.CSV	1720.27	0.0175564
0002.CSV	1724.12	0.017435
0002.CSV	1727.98	0.0173755
0002.CSV	1731.84	0.0174987
0002.CSV	1735.69	0.017797
0002.CSV	1739.55	0.0176344
0002.CSV	1743.41	0.017398
0002.CSV	1747.27	0.0171912
0002.CSV	1751.12	0.0171237
0002.CSV	1754.98	0.0169416
0002.CSV	1758.84	0.0168906
0002.CSV	1762.69	0.0169416
0002.CSV	1766.55	0.0169177
0002.CSV	1770.41	0.0170704
0002.CSV	1774.26	0.0174952
0002.CSV	1778.12	0.0175928
0002.CSV	1781.98	0.0179731
0002.CSV	1785.84	0.0186341
0002.CSV	1789.69	0.0195471
0002.CSV	1793.55	0.0205727
0002.CSV	1797.41	0.0205038
0002.CSV	1801.26	0.0194462
0002.CSV	1805.12	0.0183297
0002.CSV	1808.98	0.0176406
0002.CSV	1812.84	0.0173819
0002.CSV	1816.69	0.0171938
0002.CSV	1820.55	0.0171125
0002.CSV	1824.41	0.0170948
0002.CSV	1828.26	0.0172291
0002.CSV	1832.12	0.0172766
0002.CSV	1835.98	0.0172404
0002.CSV	1839.84	0.0171399
0002.CSV	1843.69	0.017201
0002.CSV	1847.55	0.0172988
0002.CSV	1851.41	0.0172713
0002.CSV	1855.26	0.017232
0002.CSV	1859.12	0.0172642
0002.CSV	1862.98	0.0172283
0002.CSV	1866.84	0.0172804
0002.CSV	1870.69	0.0174126
0002.CSV	1874.55	0.017365
0002.CSV	1878.41	0.0172967
0002.CSV	1882.26	0.0172964
0002.CSV	1886.12	0.0173053
0002.CSV	1889.98	0.0173962
0002.CSV	1893.83	0.0174209
0002.CSV	1897.69	0.0174228
0002.CSV	1901.55	0.0173762
0002.CSV	1905.41	0.0173715
0002.CSV	1909.26	0.0174156
0002.CSV	1913.12	0.0174184
0002.CSV	1916.98	0.0173599
0002.CSV	1920.83	0.0174118
0002.CSV	1924.69	0.0174031
0002.CSV	1928.55	0.017397
0002.CSV	1932.4	0.017407
0002.CSV	1936.26	0.0174181
0002.CSV	1940.12	0.0174073
0002.CSV	1943.98	0.0175259
0002.CSV	1947.83	0.0175369
0002.CSV	1951.69	0.0174923
0002.CSV	1955.55	0.0174995
0002.CSV	1959.4	0.0175613
0002.CSV	1963.26	0.0175733
0002.CSV	1967.12	0.0176409
0002.CSV	1970.98	0.0176472
0002.CSV	1974.83	0.0176261
0002.CSV	1978.69	0.0176261
0002.CSV	1982.55	0.0176472
0002.CSV	1986.4	0.0176364
0002.CSV	1990.26	0.0177004
0002.CSV	1994.12	0.0177575
0002.CSV	1997.98	0.0177703
0002.CSV	2001.83	0.0177938
0002.CSV	2005.69	0.0178176
0002.CSV	2009.55	0.0178066
0002.CSV	2013.4	0.0178373
0002.CSV	2017.26	0.0178858
0002.CSV	2021.12	0.017927
0002.CSV	2024.97	0.0179209
0002.CSV	2028.83	0.017966
0002.CSV	2032.69	0.0179942
0002.CSV	2036.55	0.0180126
0002.CSV	2040.4	0.0180241
0002.CSV	2044.26	0.0180772
0002.CSV	2048.12	0.0180745
0002.CSV	2051.97	0.0181039
0002.CSV	2055.83	0.018142
0002.CSV	2059.69	0.0182024
0002.CSV	2063.55	0.0182512
0002.CSV	2067.4	0.0183242
0002.CSV	2071.26	0.018301
0002.CSV	2075.12	0.0183027
0002.CSV	2078.97	0.0182887
0002.CSV	2082.83	0.0183013
0002.CSV	2086.69	0.0183392
0002.CSV	2090.55	0.0183864
0002.CSV	2094.4	0.0183837
0002.CSV	2098.26	0.0184215
0002.CSV	2102.12	0.0184197
0002.CSV	2105.97	0.0184114
0002.CSV	2109.83	0.018406
0002.CSV	2113.69	0.0184441
0002.CSV	2117.55	0.0184628
0002.CSV	2121.4	0.0184866
0002.CSV	2125.26	0.0184969
0002.CSV	2129.12	0.0185161
0002.CSV	2132.97	0.0185322
0002.CSV	2136.83	0.0185809
0002.CSV	2140.69	0.0185948
0002.CSV	2144.55	0.0186047
0002.CSV	2148.4	0.0185989
0002.CSV	2152.26	0.0185787
0002.CSV	2156.12	0.0185591
0002.CSV	2159.97	0.0186031
0002.CSV	2163.83	0.0186189
0002.CSV	2167.69	0.0186256
0002.CSV	2171.55	0.0186418
0002.CSV	2175.4	0.0186785
0002.CSV	2179.26	0.0186724
0002.CSV	2183.12	0.0186845
0002.CSV	2186.97	0.0186818
0002.CSV	2190.83	0.0187148
0002.CSV	2194.69	0.0187244
0002.CSV	2198.55	0.0187316
0002.CSV	2202.4	0.0187583
0002.CSV	2206.26	0.0187975
0002.CSV	2210.12	0.0187854
0002.CSV	2213.97	0.0187698
0002.CSV	2217.83	0.0187457
0002.CSV	2221.69	0.0187524
0002.CSV	2225.54	0.0187608
0002.CSV	2229.4	0.0187855
0002.CSV	2233.26	0.01879
0002.CSV	2237.12	0.0188015
0002.CSV	2240.97	0.018809
0002.CSV	2244.83	0.0188432
0002.CSV	2248.69	0.0188463
0002.CSV	2252.54	0.0188472
0002.CSV	2256.4	0.0188406
0002.CSV	2260.26	0.0188586
0002.CSV	2264.11	0.0188615
0002.CSV	2267.97	0.0188646
0002.CSV	2271.83	0.0188513
0002.CSV	2275.69	0.0188517
0002.CSV	2279.54	0.0188295
0002.CSV	2283.4	0.0188361
0002.CSV	2287.26	0.0189097
0002.CSV	2291.11	0.0190514
0002.CSV	2294.97	0.019189
0002.CSV	2298.83	0.0193554
0002.CSV	2302.69	0.0195136
0002.CSV	2306.54	0.0197929
0002.CSV	2310.4	0.0201337
0002.CSV	2314.26	0.0203624
0002.CSV	2318.11	0.0206001
0002.CSV	2321.97	0.0210204
0002.CSV	2325.83	0.0214049
0002.CSV	2329.69	0.0217369
0002.CSV	2333.54	0.0218187
0002.CSV	2337.4	0.0218537
0002.CSV	2341.26	0.021942
0002.CSV	2345.11	0.0217746
0002.CSV	2348.97	0.0213852
0002.CSV	2352.83	0.0214628
0002.CSV	2356.69	0.0219773
0002.CSV	2360.54	0.0223327
0002.CSV	2364.4	0.0222968
0002.CSV	2368.26	0.02195
0002.CSV	2372.11	0.0213047
0002.CSV	2375.97	0.0206006
0002.CSV	2379.83	0.0198945
0002.CSV	2383.69	0.0192936
0002.CSV	2387.54	0.0189046
0002.CSV	2391.4	0.0187689
0002.CSV	2395.26	0.0187432
0002.CSV	2399.11	0.0187346
0002.CSV	2402.97	0.0187132
0002.CSV	2406.83	0.0187088
0002.CSV	2410.68	0.0187028
0002.CSV	2414.54	0.0187241
0002.CSV	2418.4	0.0187163
0002.CSV	2422.26	0.0187135
0002.CSV	2426.11	0.0187313
0002.CSV	2429.97	0.018737
0002.CSV	2433.83	0.0187438
0002.CSV	2437.68	0.0187573
0002.CSV	2441.54	0.0187611
0002.CSV	2445.4	0.0187799
0002.CSV	2449.26	0.0187865
0002.CSV	2453.11	0.0188024
0002.CSV	2456.97	0.0188331
0002.CSV	2460.83	0.0188846
0002.CSV	2464.68	0.018931
0002.CSV	2468.54	0.0189725
0002.CSV	2472.4	0.0190135
0002.CSV	2476.26	0.0190824
0002.CSV	2480.11	0.0191649
0002.CSV	2483.97	0.0192813
0002.CSV	2487.83	0.0194067
0002.CSV	2491.68	0.0195804
0002.CSV	2495.54	0.0198115
0002.CSV	2499.4	0.0200731
0002.CSV	2503.26	0.020279
0002.CSV	2507.11	0.020411
0002.CSV	2510.97	0.0204378
0002.CSV	2514.83	0.0203842
0002.CSV	2518.68	0.0202616
0002.CSV	2522.54	0.0200501
0002.CSV	2526.4	0.0197529
0002.CSV	2530.26	0.0194929
0002.CSV	2534.11	0.0192886
0002.CSV	2537.97	0.0191292
0002.CSV	2541.83	0.0190199
0002.CSV	2545.68	0.0189469
0002.CSV	2549.54	0.0188721
0002.CSV	2553.4	0.0188175
0002.CSV	2557.26	0.0187811
0002.CSV	2561.11	0.0187853
0002.CSV	2564.97	0.0187822
0002.CSV	2568.83	0.0187751
0002.CSV	2572.68	0.0187712
0002.CSV	2576.54	0.0187713
0002.CSV	2580.4	0.0187412
0002.CSV	2584.25	0.0187333
0002.CSV	2588.11	0.0187484
0002.CSV	2591.97	0.0187842
0002.CSV	2595.83	0.018762
0002.CSV	2599.68	0.0187315
0002.CSV	2603.54	0.0186976
0002.CSV	2607.4	0.0186692
0002.CSV	2611.25	0.0186334
0002.CSV	2615.11	0.0186194
0002.CSV	2618.97	0.0185623
0002.CSV	2622.82	0.0185496
0002.CSV	2626.68	0.0185879
0002.CSV	2630.54	0.0185755
0002.CSV	2634.4	0.0185945
0002.CSV	2638.25	0.0186077
0002.CSV	2642.11	0.018516
0002.CSV	2645.97	0.0184407
0002.CSV	2649.82	0.0183935
0002.CSV	2653.68	0.0183902
0002.CSV	2657.54	0.0184177
0002.CSV	2661.4	0.018421
0002.CSV	2665.25	0.0184018
0002.CSV	2669.11	0.0184661
0002.CSV	2672.97	0.0186394
0002.CSV	2676.82	0.0188588
0002.CSV	2680.68	0.0188334
0002.CSV	2684.54	0.0185722
0002.CSV	2688.4	0.0184317
0002.CSV	2692.25	0.0184384
0002.CSV	2696.11	0.0184739
0002.CSV	2699.97	0.018485
0002.CSV	2703.82	0.0184899
0002.CSV	2707.68	0.0185543
0002.CSV	2711.54	0.0185533
0002.CSV	2715.4	0.0185321
0002.CSV	2719.25	0.0186564
0002.CSV	2723.11	0.018896
0002.CSV	2726.97	0.0188899
0002.CSV	2730.82	0.0186463
0002.CSV	2734.68	0.0186101
0002.CSV	2738.54	0.0186174
0002.CSV	2742.4	0.0186042
0002.CSV	2746.25	0.0188371
0002.CSV	2750.11	0.0188649
0002.CSV	2753.97	0.0186516
0002.CSV	2757.82	0.0185577
0002.CSV	2761.68	0.0184938
0002.CSV	2765.54	0.0184858
0002.CSV	2769.39	0.018654
0002.CSV	2773.25	0.0189469
0002.CSV	2777.11	0.0189138
0002.CSV	2780.97	0.0187401
0002.CSV	2784.82	0.0189134
0002.CSV	2788.68	0.0192924
0002.CSV	2792.54	0.0194045
0002.CSV	2796.39	0.0194506
0002.CSV	2800.25	0.0194079
0002.CSV	2804.11	0.0192799
0002.CSV	2807.97	0.0194764
0002.CSV	2811.82	0.0195768
0002.CSV	2815.68	0.0195581
0002.CSV	2819.54	0.0197238
0002.CSV	2823.39	0.0199542
0002.CSV	2827.25	0.0201704
0002.CSV	2831.11	0.020684
0002.CSV	2834.97	0.0215882
0002.CSV	2838.82	0.0226173
0002.CSV	2842.68	0.0238631
0002.CSV	2846.54	0.0258649
0002.CSV	2850.39	0.0275276
0002.CSV	2854.25	0.0277294
0002.CSV	2858.11	0.0268764
0002.CSV	2861.97	0.0256001
0002.CSV	2865.82	0.0247561
0002.CSV	2869.68	0.0247375
0002.CSV	2873.54	0.0246126
0002.CSV	2877.39	0.0237987
0002.CSV	2881.25	0.0232291
0002.CSV	2885.11	0.0232978
0002.CSV	2888.97	0.0237887
0002.CSV	2892.82	0.0245997
0002.CSV	2896.68	0.0253731
0002.CSV	2900.54	0.0259916
0002.CSV	2904.39	0.0268606
0002.CSV	2908.25	0.0282522
0002.CSV	2912.11	0.0303515
0002.CSV	2915.97	0.032539
0002.CSV	2919.82	0.0338285
0002.CSV	2923.68	0.0338304
0002.CSV	2927.54	0.0326501
0002.CSV	2931.39	0.0303214
0002.CSV	2935.25	0.0275783
0002.CSV	2939.11	0.0256396
0002.CSV	2942.96	0.0248454
0002.CSV	2946.82	0.0246902
0002.CSV	2950.68	0.0249417
0002.CSV	2954.54	0.025141
0002.CSV	2958.39	0.0247783
0002.CSV	2962.25	0.0238931
0002.CSV	2966.11	0.0224501
0002.CSV	2969.96	0.0212068
0002.CSV	2973.82	0.0204615
0002.CSV	2977.68	0.0199605
0002.CSV	2981.53	0.019452
0002.CSV	2985.39	0.0188502
0002.CSV	2989.25	0.018645
0002.CSV	2993.11	0.0187036
0002.CSV	2996.96	0.0185642
0002.CSV	3000.82	0.0183144
0002.CSV	3004.68	0.0181735
0002.CSV	3008.53	0.0183364
0002.CSV	3012.39	0.0185691
0002.CSV	3016.25	0.0185638
0002.CSV	3020.11	0.0183364
0002.CSV	3023.96	0.0181323
0002.CSV	3027.82	0.0181023
0002.CSV	3031.68	0.0182902
0002.CSV	3035.53	0.0183298
0002.CSV	3039.39	0.0183258
0002.CSV	3043.25	0.0184187
0002.CSV	3047.11	0.018387
0002.CSV	3050.96	0.0183496
0002.CSV	3054.82	0.0182776
0002.CSV	3058.68	0.0181343
0002.CSV	3062.53	0.0181517
0002.CSV	3066.39	0.0183513
0002.CSV	3070.25	0.0182794
0002.CSV	3074.11	0.0182762
0002.CSV	3077.96	0.0184917
0002.CSV	3081.82	0.0186047
0002.CSV	3085.68	0.0185712
0002.CSV	3089.53	0.0184406
0002.CSV	3093.39	0.018288
0002.CSV	3097.25	0.0183123
0002.CSV	3101.11	0.0183802
0002.CSV	3104.96	0.0183909
0002.CSV	3108.82	0.0184787
0002.CSV	3112.68	0.018559
0002.CSV	3116.53	0.0186639
0002.CSV	3120.39	0.0186072
0002.CSV	3124.25	0.0184064
0002.CSV	3128.11	0.0183495
0002.CSV	3131.96	0.0183521
0002.CSV	3135.82	0.0184421
0002.CSV	3139.68	0.0185409
0002.CSV	3143.53	0.0184025
0002.CSV	3147.39	0.0184159
0002.CSV	3151.25	0.0186461
0002.CSV	3155.1	0.0186413
0002.CSV	3158.96	0.0184008
0002.CSV	3162.82	0.0182994
0002.CSV	3166.68	0.0182987
0002.CSV	3170.53	0.0183395
0002.CSV	3174.39	0.0183761
0002.CSV	3178.25	0.0184467
0002.CSV	3182.1	0.0185003
0002.CSV	3185.96	0.0185526
0002.CSV	3189.82	0.0186037
0002.CSV	3193.68	0.0185566
0002.CSV	3197.53	0.0185056
0002.CSV	3201.39	0.0185662
0002.CSV	3205.25	0.0186272
0002.CSV	3209.1	0.0186462
0002.CSV	3212.96	0.0187511
0002.CSV	3216.82	0.0188317
0002.CSV	3220.68	0.0188012
0002.CSV	3224.53	0.0187783
0002.CSV	3228.39	0.0189151
0002.CSV	3232.25	0.0191574
0002.CSV	3236.1	0.0191182
0002.CSV	3239.96	0.0189723
0002.CSV	3243.82	0.0191125
0002.CSV	3247.68	0.0192155
0002.CSV	3251.53	0.0191341
0002.CSV	3255.39	0.0191682
0002.CSV	3259.25	0.0190418
0002.CSV	3263.1	0.0189769
0002.CSV	3266.96	0.0191917
0002.CSV	3270.82	0.0194199
0002.CSV	3274.68	0.0194016
0002.CSV	3278.53	0.0191956
0002.CSV	3282.39	0.0190719
0002.CSV	3286.25	0.0191534
0002.CSV	3290.1	0.0194523
0002.CSV	3293.96	0.0196945
0002.CSV	3297.82	0.0195385
0002.CSV	3301.67	0.0194629
0002.CSV	3305.53	0.0196086
0002.CSV	3309.39	0.0195266
0002.CSV	3313.25	0.0192297
0002.CSV	3317.1	0.0190688
0002.CSV	3320.96	0.019164
0002.CSV	3324.82	0.0193239
0002.CSV	3328.67	0.0191622
0002.CSV	3332.53	0.0190481
0002.CSV	3336.39	0.0193401
0002.CSV	3340.24	0.0195396
0002.CSV	3344.1	0.0194082
0002.CSV	3347.96	0.0193606
0002.CSV	3351.82	0.0192982
0002.CSV	3355.67	0.019163
0002.CSV	3359.53	0.0192686
0002.CSV	3363.39	0.0194333
0002.CSV	3367.24	0.0196079
0002.CSV	3371.1	0.0195355
0002.CSV	3374.96	0.019314
0002.CSV	3378.82	0.0192146
0002.CSV	3382.67	0.0191002
0002.CSV	3386.53	0.0191311
0002.CSV	3390.39	0.0193747
0002.CSV	3394.24	0.0194762
0002.CSV	3398.1	0.0194484
0002.CSV	3401.96	0.0193491
0002.CSV	3405.82	0.0192115
0002.CSV	3409.67	0.0192388
0002.CSV	3413.53	0.0190474
0002.CSV	3417.39	0.0186911
0002.CSV	3421.24	0.0185735
0002.CSV	3425.1	0.0186479
0002.CSV	3428.96	0.0188817
0002.CSV	3432.82	0.0191011
0002.CSV	3436.67	0.0189613
0002.CSV	3440.53	0.018505
0002.CSV	3444.39	0.018303
0002.CSV	3448.24	0.01829
0002.CSV	3452.1	0.0180292
0002.CSV	3455.96	0.0180013
0002.CSV	3459.82	0.0182393
0002.CSV	3463.67	0.0184059
0002.CSV	3467.53	0.0184673
0002.CSV	3471.39	0.0182314
0002.CSV	3475.24	0.018011
0002.CSV	3479.1	0.0179792
0002.CSV	3482.96	0.0178959
0002.CSV	3486.82	0.0178686
0002.CSV	3490.67	0.0178391
0002.CSV	3494.53	0.0178562
0002.CSV	3498.39	0.0178056
0002.CSV	3502.24	0.0177137
0002.CSV	3506.1	0.0173713
0002.CSV	3509.96	0.0171972
0002.CSV	3513.81	0.0172446
0002.CSV	3517.67	0.0170219
0002.CSV	3521.53	0.0169572
0002.CSV	3525.39	0.0169233
0002.CSV	3529.24	0.0168071
0002.CSV	3533.1	0.0168068
0002.CSV	3536.96	0.0168487
0002.CSV	3540.81	0.0169009
0002.CSV	3544.67	0.0169882
0002.CSV	3548.53	0.0168661
0002.CSV	3552.39	0.0165915
0002.CSV	3556.24	0.0164096
0002.CSV	3560.1	0.0162479
0002.CSV	3563.96	0.0159638
0002.CSV	3567.81	0.0162426
0002.CSV	3571.67	0.0163294
0002.CSV	3575.53	0.0160221
0002.CSV	3579.39	0.0161119
0002.CSV	3583.24	0.0161626
0002.CSV	3587.1	0.016173
0002.CSV	3590.96	0.0161318
0002.CSV	3594.81	0.015944
0002.CSV	3598.67	0.0160302
0002.CSV	3602.53	0.015953
0002.CSV	3606.39	0.0155322
0002.CSV	3610.24	0.0153437
0002.CSV	3614.1	0.0153269
0002.CSV	3617.96	0.0154882
0002.CSV	3621.81	0.0156707
0002.CSV	3625.67	0.0151751
0002.CSV	3629.53	0.0152099
0002.CSV	3633.39	0.0156023
0002.CSV	3637.24	0.0153848
0002.CSV	3641.1	0.0151157
0002.CSV	3644.96	0.0146403
0002.CSV	3648.81	0.0148692
0002.CSV	3652.67	0.0153903
0002.CSV	3656.53	0.0154371
0002.CSV	3660.38	0.0154257
0002.CSV	3664.24	0.0148391
0002.CSV	3668.1	0.0142637
0002.CSV	3671.96	0.0141849
0002.CSV	3675.81	0.0146314
0002.CSV	3679.67	0.0150888
0002.CSV	3683.53	0.0149111
0002.CSV	3687.38	0.0148746
0002.CSV	3691.24	0.0154087
0002.CSV	3695.1	0.0152585
0002.CSV	3698.95	0.0148989
0002.CSV	3702.81	0.0148477
0002.CSV	3706.67	0.0145885
0002.CSV	3710.53	0.0145221
0002.CSV	3714.38	0.0149606
0002.CSV	3718.24	0.0148208
0002.CSV	3722.1	0.0147597
0002.CSV	3725.95	0.0148279
0002.CSV	3729.81	0.0147535
0002.CSV	3733.67	0.014966
0002.CSV	3737.53	0.0155092
0002.CSV	3741.38	0.014898
0002.CSV	3745.24	0.0142842
0002.CSV	3749.1	0.0143008
0002.CSV	3752.95	0.0148487
0002.CSV	3756.81	0.0149524
0002.CSV	3760.67	0.0149239
0002.CSV	3764.53	0.0147909
0002.CSV	3768.38	0.0148589
0002.CSV	3772.24	0.0150252
0002.CSV	3776.1	0.0149116
0002.CSV	3779.95	0.0149537
0002.CSV	3783.81	0.014992
0002.CSV	3787.67	0.0150432
0002.CSV	3791.53	0.0149119
0002.CSV	3795.38	0.0145845
0002.CSV	3799.24	0.0145098
0002.CSV	3803.1	0.0148596
0002.CSV	3806.95	0.0151164
0002.CSV	3810.81	0.0149349
0002.CSV	3814.67	0.0146217
0002.CSV	3818.53	0.0147603
0002.CSV	3822.38	0.0151014
0002.CSV	3826.24	0.0149638
0002.CSV	3830.1	0.014722
0002.CSV	3833.95	0.0146635
0002.CSV	3837.81	0.0148909
0002.CSV	3841.67	0.0153464
0002.CSV	3845.53	0.0152231
0002.CSV	3849.38	0.0145029
0002.CSV	3853.24	0.0145307
0002.CSV	3857.1	0.0151306
0002.CSV	3860.95	0.0147587
0002.CSV	3864.81	0.01471
0002.CSV	3868.67	0.0148041
0002.CSV	3872.52	0.0150865
0002.CSV	3876.38	0.0149731
0002.CSV	3880.24	0.0147818
0002.CSV	3884.1	0.0150525
0002.CSV	3887.95	0.0150117
0002.CSV	3891.81	0.014917
0002.CSV	3895.67	0.0147521
0002.CSV	3899.52	0.0144978
0002.CSV	3903.38	0.0149715
0002.CSV	3907.24	0.0150766
0002.CSV	3911.1	0.0147039
0002.CSV	3914.95	0.0144811
0002.CSV	3918.81	0.0145511
0002.CSV	3922.67	0.0146118
0002.CSV	3926.52	0.0146192
0002.CSV	3930.38	0.0146825
0002.CSV	3934.24	0.0148222
0002.CSV	3938.09	0.0146238
0002.CSV	3941.95	0.0145184
0002.CSV	3945.81	0.0145472
0002.CSV	3949.67	0.0145778
0002.CSV	3953.52	0.0145963
0002.CSV	3957.38	0.0145635
0002.CSV	3961.24	0.0145506
0002.CSV	3965.09	0.0145115
0002.CSV	3968.95	0.0144052
0002.CSV	3972.81	0.0144371
0002.CSV	3976.67	0.0145037
0002.CSV	3980.52	0.0144963
0002.CSV	3984.38	0.0145057
0002.CSV	3988.24	0.0144266
0002.CSV	3992.09	0.0144015
0002.CSV	3995.95	0.0144234
0002.CSV	3999.81	0.0144001
0003.CSV	674.992	0.0400377
0003.CSV	678.849	0.040993
0003.CSV	682.706	0.0407281
0003.CSV	686.563	0.0418431
0003.CSV	690.42	0.042944
0003.CSV	694.277	0.0455062
0003.CSV	698.134	0.0488222
0003.CSV	701.991	0.0556931
0003.CSV	705.849	0.0697081
0003.CSV	709.706	0.0878699
0003.CSV	713.563	0.0821135
0003.CSV	717.42	0.0564128
0003.CSV	721.277	0.0399732
0003.CSV	725.134	0.0356578
0003.CSV	728.991	0.0344224
0003.CSV	732.848	0.0345894
0003.CSV	736.705	0.0348301
0003.CSV	740.562	0.0353433
0003.CSV	744.42	0.0352327
0003.CSV	748.277	0.0357116
0003.CSV	752.134	0.0361575
0003.CSV	755.991	0.0370221
0003.CSV	759.848	0.0375391
0003.CSV	763.705	0.0384769
0003.CSV	767.562	0.038982
0003.CSV	771.419	0.0398103
0003.CSV	775.276	0.040325
0003.CSV	779.133	0.0411894
0003.CSV	782.99	0.0414761
0003.CSV	786.848	0.0419141
0003.CSV	790.705	0.0422437
0003.CSV	794.562	0.0431816
0003.CSV	798.419	0.0438203
0003.CSV	802.276	0.0445816
0003.CSV	806.133	0.0448373
0003.CSV	809.99	0.0454369
0003.CSV	813.847	0.0460497
0003.CSV	817.704	0.0474275
0003.CSV	821.562	0.049053
0003.CSV	825.419	0.0513417
0003.CSV	829.276	0.0532265
0003.CSV	833.133	0.0550977
0003.CSV	836.99	0.0570071
0003.CSV	840.847	0.0606364
0003.CSV	844.704	0.0661278
0003.CSV	848.561	0.0701799
0003.CSV	852.418	0.0736954
0003.CSV	856.275	0.0838949
0003.CSV	860.132	0.101799
0003.CSV	863.99	0.132687
0003.CSV	867.847	0.172593
0003.CSV	871.704	0.189241
0003.CSV	875.561	0.163063
0003.CSV	879.418	0.121703
0003.CSV	883.275	0.0789433
0003.CSV	887.132	0.0429533
0003.CSV	890.989	0.027355
0003.CSV	894.846	0.0265122
0003.CSV	898.703	0.0276457
0003.CSV	902.561	0.0289018
0003.CSV	906.418	0.0297738
0003.CSV	910.275	0.0308982
0003.CSV	914.132	0.0316818
0003.CSV	917.989	0.032649
0003.CSV	921.846	0.0333694
0003.CSV	925.703	0.0343579
0003.CSV	929.56	0.0351142
0003.CSV	933.417	0.0360217
0003.CSV	937.274	0.0365113
0003.CSV	941.131	0.037179
0003.CSV	944.989	0.0376744
0003.CSV	948.846	0.0385248
0003.CSV	952.703	0.0391321
0003.CSV	956.56	0.0399386
0003.CSV	960.417	0.0405151
0003.CSV	964.274	0.0413709
0003.CSV	968.131	0.041985
0003.CSV	971.988	0.0429254
0003.CSV	975.845	0.0437764
0003.CSV	979.702	0.0449604
0003.CSV	983.559	0.0459801
0003.CSV	987.417	0.0472629
0003.CSV	991.274	0.0483744
0003.CSV	995.131	0.0496933
0003.CSV	998.988	0.0506593
0003.CSV	1002.85	0.0517877
0003.CSV	1006.7	0.0527299
0003.CSV	1010.56	0.0539488
0003.CSV	1014.42	0.0548636
0003.CSV	1018.27	0.0559747
0003.CSV	1022.13	0.0568224
0003.CSV	1025.99	0.0578574
0003.CSV	1029.85	0.0585611
0003.CSV	1033.7	0.0594743
0003.CSV	1037.56	0.0601804
0003.CSV	1041.42	0.0610624
0003.CSV	1045.27	0.0616313
0003.CSV	1049.13	0.0624668
0003.CSV	1052.99	0.0632293
0003.CSV	1056.84	0.0643898
0003.CSV	1060.7	0.0652668
0003.CSV	1064.56	0.066277
0003.CSV	1068.42	0.066997
0003.CSV	1072.27	0.0679613
0003.CSV	1076.13	0.0685968
0003.CSV	1079.99	0.0693551
0003.CSV	1083.84	0.0696522
0003.CSV	1087.7	0.0695935
0003.CSV	1091.56	0.0685879
0003.CSV	1095.41	0.0676385
0003.CSV	1099.27	0.0668083
0003.CSV	1103.13	0.0665218
0003.CSV	1106.99	0.0661841
0003.CSV	1110.84	0.0662077
0003.CSV	1114.7	0.0659365
0003.CSV	1118.56	0.0656898
0003.CSV	1122.41	0.0651305
0003.CSV	1126.27	0.0647623
0003.CSV	1130.13	0.0641905
0003.CSV	1133.99	0.063961
0003.CSV	1137.84	0.0637564
0003.CSV	1141.7	0.0640424
0003.CSV	1145.56	0.0643537
0003.CSV	1149.41	0.0650313
0003.CSV	1153.27	0.0655611
0003.CSV	1157.13	0.0662437
0003.CSV	1160.99	0.0665512
0003.CSV	1164.84	0.0667968
0003.CSV	1168.7	0.0666571
0003.CSV	1172.56	0.066858
0003.CSV	1176.41	0.067138
0003.CSV	1180.27	0.0676077
0003.CSV	1184.13	0.06746
0003.CSV	1187.99	0.0672177
0003.CSV	1191.84	0.0669007
0003.CSV	1195.7	0.0671283
0003.CSV	1199.56	0.0674446
0003.CSV	1203.41	0.0681138
0003.CSV	1207.27	0.0687353
0003.CSV	1211.13	0.0697201
0003.CSV	1214.98	0.0706319
0003.CSV	1218.84	0.0719372
0003.CSV	1222.7	0.0731632
0003.CSV	1226.56	0.0746114
0003.CSV	1230.41	0.0758437
0003.CSV	1234.27	0.0772688
0003.CSV	1238.13	0.0784471
0003.CSV	1241.98	0.079838
0003.CSV	1245.84	0.0809816
0003.CSV	1249.7	0.082221
0003.CSV	1253.56	0.0830983
0003.CSV	1257.41	0.0841319
0003.CSV	1261.27	0.0850692
0003.CSV	1265.13	0.0865209
0003.CSV	1268.98	0.0880096
0003.CSV	1272.84	0.0898902
0003.CSV	1276.7	0.0916078
0003.CSV	1280.56	0.093678
0003.CSV	1284.41	0.0956448
0003.CSV	1288.27	0.0980405
0003.CSV	1292.13	0.100348
0003.CSV	1295.98	0.103043
0003.CSV	1299.84	0.105662
0003.CSV	1303.7	0.108595
0003.CSV	1307.56	0.111348
0003.CSV	1311.41	0.114525
0003.CSV	1315.27	0.117572
0003.CSV	1319.13	0.1211
0003.CSV	1322.98	0.124465
0003.CSV	1326.84	0.12829
0003.CSV	1330.7	0.132231
0003.CSV	1334.56	0.13666
0003.CSV	1338.41	0.141749
0003.CSV	1342.27	0.147859
0003.CSV	1346.13	0.153036
0003.CSV	1349.98	0.159172
0003.CSV	1353.84	0.165555
0003.CSV	1357.7	0.172536
0003.CSV	1361.56	0.180173
0003.CSV	1365.41	0.18899
0003.CSV	1369.27	0.196083
0003.CSV	1373.13	0.204724
0003.CSV	1376.98	0.213547
0003.CSV	1380.84	0.220925
0003.CSV	1384.7	0.227411
0003.CSV	1388.56	0.234946
0003.CSV	1392.41	0.239075
0003.CSV	1396.27	0.240474
0003.CSV	1400.13	0.23845
0003.CSV	1403.98	0.235723
0003.CSV	1407.84	0.229951
0003.CSV	1411.7	0.22245
0003.CSV	1415.55	0.213789
0003.CSV	1419.41	0.203863
0003.CSV	1423.27	0.19482
0003.CSV	1427.12	0.188702
0003.CSV	1430.98	0.182203
0003.CSV	1434.84	0.176081
0003.CSV	1438.7	0.168809
0003.CSV	1442.55	0.163405
0003.CSV	1446.41	0.157355
0003.CSV	1450.27	0.151174
0003.CSV	1454.12	0.145612
0003.CSV	1457.98	0.137689
0003.CSV	1461.84	0.130993
0003.CSV	1465.7	0.125897
0003.CSV	1469.55	0.120398
0003.CSV	1473.41	0.11397
0003.CSV	1477.27	0.107078
0003.CSV	1481.12	0.102576
0003.CSV	1484.98	0.0981274
0003.CSV	1488.84	0.0928477
0003.CSV	1492.7	0.0873601
0003.CSV	1496.55	0.0830888
0003.CSV	1500.41	0.078303
0003.CSV	1504.27	0.0752617
0003.CSV	1508.12	0.0700627
0003.CSV	1511.98	0.066038
0003.CSV	1515.84	0.0628964
0003.CSV	1519.7	0.0590567
0003.CSV	1523.55	0.0548133
0003.CSV	1527.41	0.0518175
0003.CSV	1531.27	0.0491456
0003.CSV	1535.12	0.0468854
0003.CSV	1538.98	0.0441642
0003.CSV	1542.84	0.038459
0003.CSV	1546.7	0.0342558
0003.CSV	1550.55	0.0314533
0003.CSV	1554.41	0.0291331
0003.CSV	1558.27	0.0273603
0003.CSV	1562.12	0.026189
0003.CSV	1565.98	0.0257703
0003.CSV	1569.84	0.0257773
0003.CSV	1573.69	0.025984
0003.CSV	1577.55	0.0259035
0003.CSV	1581.41	0.0251439
0003.CSV	1585.27	0.0240921
0003.CSV	1589.12	0.023154
0003.CSV	1592.98	0.0222611
0003.CSV	1596.84	0.0215315
0003.CSV	1600.69	0.0209011
0003.CSV	1604.55	0.0204055
0003.CSV	1608.41	0.019839
0003.CSV	1612.27	0.0192828
0003.CSV	1616.12	0.0187074
0003.CSV	1619.98	0.0182163
0003.CSV	1623.84	0.0177321
0003.CSV	1627.69	0.0173903
0003.CSV	1631.55	0.016902
0003.CSV	1635.41	0.0167563
0003.CSV	1639.27	0.0166735
0003.CSV	1643.12	0.0163203
0003.CSV	1646.98	0.0161627
0003.CSV	1650.84	0.0162709
0003.CSV	1654.69	0.0163269
0003.CSV	1658.55	0.016115
0003.CSV	1662.41	0.0158661
0003.CSV	1666.27	0.015737
0003.CSV	1670.12	0.0156864
0003.CSV	1673.98	0.0157926
0003.CSV	1677.84	0.0155662
0003.CSV	1681.69	0.01545
0003.CSV	1685.55	0.0156511
0003.CSV	1689.41	0.0155911
0003.CSV	1693.27	0.0152497
0003.CSV	1697.12	0.015312
0003.CSV	1700.98	0.0156071
0003.CSV	1704.84	0.0156757
0003.CSV	1708.69	0.0155767
0003.CSV	1712.55	0.0155082
0003.CSV	1716.41	0.0158578
0003.CSV	1720.27	0.0162115
0003.CSV	1724.12	0.0160444
[truncated: 32,521 more rows]

## Sheet: S.plana_400_2_mFTIR_data
Select spectrum number	Wavenumbers	Absorbance
0001.CSV	674.992	0.0461357
0001.CSV	678.849	0.0474637
0001.CSV	682.706	0.0479031
0001.CSV	686.563	0.0501864
0001.CSV	690.42	0.0518756
0001.CSV	694.277	0.0560298
0001.CSV	698.134	0.0613408
0001.CSV	701.991	0.0717041
0001.CSV	705.849	0.0904528
0001.CSV	709.706	0.11469
0001.CSV	713.563	0.1091
0001.CSV	717.42	0.0759621
0001.CSV	721.277	0.0516183
0001.CSV	725.134	0.043419
0001.CSV	728.991	0.0402132
0001.CSV	732.848	0.0399451
0001.CSV	736.705	0.0395628
0001.CSV	740.562	0.0394856
0001.CSV	744.42	0.039047
0001.CSV	748.277	0.0398523
0001.CSV	752.134	0.0402944
0001.CSV	755.991	0.0417992
0001.CSV	759.848	0.0428793
0001.CSV	763.705	0.044558
0001.CSV	767.562	0.0454519
0001.CSV	771.419	0.0471312
0001.CSV	775.276	0.0484908
0001.CSV	779.133	0.0499668
0001.CSV	782.99	0.0497921
0001.CSV	786.848	0.0498734
0001.CSV	790.705	0.0501081
0001.CSV	794.562	0.0516877
0001.CSV	798.419	0.0528811
0001.CSV	802.276	0.0536122
0001.CSV	806.133	0.0527667
0001.CSV	809.99	0.0524361
0001.CSV	813.847	0.0524065
0001.CSV	817.704	0.0536775
0001.CSV	821.562	0.0552002
0001.CSV	825.419	0.0578295
0001.CSV	829.276	0.0598863
0001.CSV	833.133	0.0621069
0001.CSV	836.99	0.0643736
0001.CSV	840.847	0.0695358
0001.CSV	844.704	0.0782327
0001.CSV	848.561	0.0845787
0001.CSV	852.418	0.0886751
0001.CSV	856.275	0.105286
0001.CSV	860.132	0.141101
0001.CSV	863.99	0.204647
0001.CSV	867.847	0.278252
0001.CSV	871.704	0.296958
0001.CSV	875.561	0.240996
0001.CSV	879.418	0.168903
0001.CSV	883.275	0.101875
0001.CSV	887.132	0.0502297
0001.CSV	890.989	0.0284053
0001.CSV	894.846	0.026688
0001.CSV	898.703	0.0279466
0001.CSV	902.561	0.0296339
0001.CSV	906.418	0.0307621
0001.CSV	910.275	0.0321861
0001.CSV	914.132	0.0331418
0001.CSV	917.989	0.0345698
0001.CSV	921.846	0.0355005
0001.CSV	925.703	0.0367989
0001.CSV	929.56	0.0377112
0001.CSV	933.417	0.0388646
0001.CSV	937.274	0.0394182
0001.CSV	941.131	0.0403311
0001.CSV	944.989	0.0409526
0001.CSV	948.846	0.0419397
0001.CSV	952.703	0.0426153
0001.CSV	956.56	0.0437216
0001.CSV	960.417	0.0444825
0001.CSV	964.274	0.045671
0001.CSV	968.131	0.0466012
0001.CSV	971.988	0.0480069
0001.CSV	975.845	0.049185
0001.CSV	979.702	0.0508688
0001.CSV	983.559	0.0524815
0001.CSV	987.417	0.0547749
0001.CSV	991.274	0.0568574
0001.CSV	995.131	0.0591565
0001.CSV	998.988	0.0607863
0001.CSV	1002.85	0.0626326
0001.CSV	1006.7	0.0641788
0001.CSV	1010.56	0.0663007
0001.CSV	1014.42	0.0680769
0001.CSV	1018.27	0.0701184
0001.CSV	1022.13	0.0717596
0001.CSV	1025.99	0.0737293
0001.CSV	1029.85	0.0751159
0001.CSV	1033.7	0.0768736
0001.CSV	1037.56	0.0783442
0001.CSV	1041.42	0.0801177
0001.CSV	1045.27	0.0814524
0001.CSV	1049.13	0.0833233
0001.CSV	1052.99	0.0849376
0001.CSV	1056.84	0.0870433
0001.CSV	1060.7	0.0888887
0001.CSV	1064.56	0.0913357
0001.CSV	1068.42	0.0934503
0001.CSV	1072.27	0.0958038
0001.CSV	1076.13	0.0973394
0001.CSV	1079.99	0.0989838
0001.CSV	1083.84	0.100094
0001.CSV	1087.7	0.100771
0001.CSV	1091.56	0.099098
0001.CSV	1095.41	0.0963081
0001.CSV	1099.27	0.0932677
0001.CSV	1103.13	0.0913772
0001.CSV	1106.99	0.0896968
0001.CSV	1110.84	0.0887619
0001.CSV	1114.7	0.0875626
0001.CSV	1118.56	0.0866512
0001.CSV	1122.41	0.0853156
0001.CSV	1126.27	0.0842973
0001.CSV	1130.13	0.0828996
0001.CSV	1133.99	0.0819456
0001.CSV	1137.84	0.0809794
0001.CSV	1141.7	0.0807971
0001.CSV	1145.56	0.080643
0001.CSV	1149.41	0.0809796
0001.CSV	1153.27	0.0811218
0001.CSV	1157.13	0.0818045
0001.CSV	1160.99	0.0822581
0001.CSV	1164.84	0.0826371
0001.CSV	1168.7	0.0821078
0001.CSV	1172.56	0.0818274
0001.CSV	1176.41	0.0815203
0001.CSV	1180.27	0.0815325
0001.CSV	1184.13	0.0807656
0001.CSV	1187.99	0.079945
0001.CSV	1191.84	0.0789458
0001.CSV	1195.7	0.0787172
0001.CSV	1199.56	0.078605
0001.CSV	1203.41	0.0791068
0001.CSV	1207.27	0.0795008
0001.CSV	1211.13	0.0805605
0001.CSV	1214.98	0.0816608
0001.CSV	1218.84	0.0833312
0001.CSV	1222.7	0.0848586
0001.CSV	1226.56	0.0868618
0001.CSV	1230.41	0.08857
0001.CSV	1234.27	0.0905835
0001.CSV	1238.13	0.0922134
0001.CSV	1241.98	0.0941396
0001.CSV	1245.84	0.0956736
0001.CSV	1249.7	0.0974801
0001.CSV	1253.56	0.0987438
0001.CSV	1257.41	0.100173
0001.CSV	1261.27	0.101371
0001.CSV	1265.13	0.103296
0001.CSV	1268.98	0.105193
0001.CSV	1272.84	0.10778
0001.CSV	1276.7	0.110232
0001.CSV	1280.56	0.113292
0001.CSV	1284.41	0.116203
0001.CSV	1288.27	0.119859
0001.CSV	1292.13	0.123483
0001.CSV	1295.98	0.127792
0001.CSV	1299.84	0.131945
0001.CSV	1303.7	0.136701
0001.CSV	1307.56	0.141334
0001.CSV	1311.41	0.146755
0001.CSV	1315.27	0.152039
0001.CSV	1319.13	0.158271
0001.CSV	1322.98	0.16433
0001.CSV	1326.84	0.171341
0001.CSV	1330.7	0.178725
0001.CSV	1334.56	0.187084
0001.CSV	1338.41	0.196852
0001.CSV	1342.27	0.2092
0001.CSV	1346.13	0.220228
0001.CSV	1349.98	0.233422
0001.CSV	1353.84	0.24765
0001.CSV	1357.7	0.263527
0001.CSV	1361.56	0.281932
0001.CSV	1365.41	0.304588
0001.CSV	1369.27	0.324305
0001.CSV	1373.13	0.348614
0001.CSV	1376.98	0.374858
0001.CSV	1380.84	0.397205
0001.CSV	1384.7	0.415726
0001.CSV	1388.56	0.435394
0001.CSV	1392.41	0.445747
0001.CSV	1396.27	0.448657
0001.CSV	1400.13	0.441858
0001.CSV	1403.98	0.433044
0001.CSV	1407.84	0.416778
0001.CSV	1411.7	0.396819
0001.CSV	1415.55	0.374767
0001.CSV	1419.41	0.350472
0001.CSV	1423.27	0.329925
0001.CSV	1427.12	0.31692
0001.CSV	1430.98	0.303582
0001.CSV	1434.84	0.29129
0001.CSV	1438.7	0.276889
0001.CSV	1442.55	0.266504
0001.CSV	1446.41	0.254764
0001.CSV	1450.27	0.242886
0001.CSV	1454.12	0.232511
0001.CSV	1457.98	0.217633
0001.CSV	1461.84	0.205652
0001.CSV	1465.7	0.196817
0001.CSV	1469.55	0.187486
0001.CSV	1473.41	0.176706
0001.CSV	1477.27	0.165263
0001.CSV	1481.12	0.158111
0001.CSV	1484.98	0.150928
0001.CSV	1488.84	0.142203
0001.CSV	1492.7	0.133236
0001.CSV	1496.55	0.126266
0001.CSV	1500.41	0.118299
0001.CSV	1504.27	0.113469
0001.CSV	1508.12	0.104144
0001.CSV	1511.98	0.0974608
0001.CSV	1515.84	0.0927562
0001.CSV	1519.7	0.0869931
0001.CSV	1523.55	0.0804441
0001.CSV	1527.41	0.075988
0001.CSV	1531.27	0.0718531
0001.CSV	1535.12	0.0680102
0001.CSV	1538.98	0.063412
0001.CSV	1542.84	0.0548192
0001.CSV	1546.7	0.0492275
0001.CSV	1550.55	0.0455223
0001.CSV	1554.41	0.0419707
0001.CSV	1558.27	0.0384081
0001.CSV	1562.12	0.0357544
0001.CSV	1565.98	0.034947
0001.CSV	1569.84	0.034305
0001.CSV	1573.69	0.0341181
0001.CSV	1577.55	0.0335573
0001.CSV	1581.41	0.0325295
0001.CSV	1585.27	0.0310613
0001.CSV	1589.12	0.0294998
0001.CSV	1592.98	0.0277994
0001.CSV	1596.84	0.0262602
0001.CSV	1600.69	0.0247811
0001.CSV	1604.55	0.0235778
0001.CSV	1608.41	0.0223204
0001.CSV	1612.27	0.0212243
0001.CSV	1616.12	0.0199612
0001.CSV	1619.98	0.0188865
0001.CSV	1623.84	0.0179631
0001.CSV	1627.69	0.0172174
0001.CSV	1631.55	0.0165627
0001.CSV	1635.41	0.0160523
0001.CSV	1639.27	0.015545
0001.CSV	1643.12	0.0153059
0001.CSV	1646.98	0.014944
0001.CSV	1650.84	0.0148471
0001.CSV	1654.69	0.0145886
0001.CSV	1658.55	0.0143672
0001.CSV	1662.41	0.0140069
0001.CSV	1666.27	0.013794
0001.CSV	1670.12	0.0135177
0001.CSV	1673.98	0.0133304
0001.CSV	1677.84	0.0130482
0001.CSV	1681.69	0.0128683
0001.CSV	1685.55	0.0126537
0001.CSV	1689.41	0.0125436
0001.CSV	1693.27	0.0122103
0001.CSV	1697.12	0.0119926
0001.CSV	1700.98	0.0118818
0001.CSV	1704.84	0.0120052
0001.CSV	1708.69	0.0119887
0001.CSV	1712.55	0.0119942
0001.CSV	1716.41	0.0120295
0001.CSV	1720.27	0.0123597
0001.CSV	1724.12	0.0123825
0001.CSV	1727.98	0.0123901
0001.CSV	1731.84	0.0122763
0001.CSV	1735.69	0.0122952
0001.CSV	1739.55	0.0120692
0001.CSV	1743.41	0.0117097
0001.CSV	1747.27	0.0112244
0001.CSV	1751.12	0.0109364
0001.CSV	1754.98	0.0107245
0001.CSV	1758.84	0.0106353
0001.CSV	1762.69	0.0105986
0001.CSV	1766.55	0.0106303
0001.CSV	1770.41	0.0107054
0001.CSV	1774.26	0.0111299
0001.CSV	1778.12	0.0115023
0001.CSV	1781.98	0.0122776
0001.CSV	1785.84	0.0136177
0001.CSV	1789.69	0.0156492
0001.CSV	1793.55	0.0179723
0001.CSV	1797.41	0.0183619
0001.CSV	1801.26	0.0165009
0001.CSV	1805.12	0.0141839
0001.CSV	1808.98	0.0124308
0001.CSV	1812.84	0.0113598
0001.CSV	1816.69	0.0107076
0001.CSV	1820.55	0.0103551
0001.CSV	1824.41	0.0100416
0001.CSV	1828.26	0.00988689
0001.CSV	1832.12	0.00975238
0001.CSV	1835.98	0.00968993
0001.CSV	1839.84	0.00956953
0001.CSV	1843.69	0.00956943
0001.CSV	1847.55	0.00954437
0001.CSV	1851.41	0.0095676
0001.CSV	1855.26	0.00951622
0001.CSV	1859.12	0.00954718
0001.CSV	1862.98	0.00951226
0001.CSV	1866.84	0.00952712
0001.CSV	1870.69	0.00956357
0001.CSV	1874.55	0.00958383
0001.CSV	1878.41	0.00951273
0001.CSV	1882.26	0.00951012
0001.CSV	1886.12	0.00945252
0001.CSV	1889.98	0.0094936
0001.CSV	1893.83	0.0095062
0001.CSV	1897.69	0.0095592
0001.CSV	1901.55	0.00954182
0001.CSV	1905.41	0.0095547
0001.CSV	1909.26	0.00953678
0001.CSV	1913.12	0.00957983
0001.CSV	1916.98	0.009553
0001.CSV	1920.83	0.00958975
0001.CSV	1924.69	0.0095867
0001.CSV	1928.55	0.00963644
0001.CSV	1932.4	0.00961804
0001.CSV	1936.26	0.00964836
0001.CSV	1940.12	0.00964446
0001.CSV	1943.98	0.00972459
0001.CSV	1947.83	0.00971575
0001.CSV	1951.69	0.00974638
0001.CSV	1955.55	0.00978298
0001.CSV	1959.4	0.00986642
0001.CSV	1963.26	0.00984995
0001.CSV	1967.12	0.00987283
0001.CSV	1970.98	0.00986795
0001.CSV	1974.83	0.00989232
0001.CSV	1978.69	0.00988713
0001.CSV	1982.55	0.00992273
0001.CSV	1986.4	0.00991449
0001.CSV	1990.26	0.00994886
0001.CSV	1994.12	0.00997626
0001.CSV	1997.98	0.0100252
0001.CSV	2001.83	0.0100258
0001.CSV	2005.69	0.0100901
0001.CSV	2009.55	0.0101055
0001.CSV	2013.4	0.0101282
0001.CSV	2017.26	0.0101295
0001.CSV	2021.12	0.0101929
0001.CSV	2024.97	0.0101995
0001.CSV	2028.83	0.0102416
0001.CSV	2032.69	0.01024
0001.CSV	2036.55	0.0102758
0001.CSV	2040.4	0.0102553
0001.CSV	2044.26	0.0102788
0001.CSV	2048.12	0.0102697
0001.CSV	2051.97	0.0102891
0001.CSV	2055.83	0.010273
0001.CSV	2059.69	0.0103016
0001.CSV	2063.55	0.0103052
0001.CSV	2067.4	0.0103805
0001.CSV	2071.26	0.0103913
0001.CSV	2075.12	0.0104226
0001.CSV	2078.97	0.010412
0001.CSV	2082.83	0.0104172
0001.CSV	2086.69	0.0104158
0001.CSV	2090.55	0.0104569
0001.CSV	2094.4	0.0104415
0001.CSV	2098.26	0.0104746
0001.CSV	2102.12	0.0104804
0001.CSV	2105.97	0.010507
0001.CSV	2109.83	0.010501
0001.CSV	2113.69	0.0105452
0001.CSV	2117.55	0.0105844
0001.CSV	2121.4	0.0106529
0001.CSV	2125.26	0.0106718
0001.CSV	2129.12	0.0107192
0001.CSV	2132.97	0.0107214
0001.CSV	2136.83	0.0107496
0001.CSV	2140.69	0.0107399
0001.CSV	2144.55	0.0107583
0001.CSV	2148.4	0.0107373
0001.CSV	2152.26	0.0107361
0001.CSV	2156.12	0.0106875
0001.CSV	2159.97	0.0106963
0001.CSV	2163.83	0.0106536
0001.CSV	2167.69	0.0106397
0001.CSV	2171.55	0.0106201
0001.CSV	2175.4	0.0106226
0001.CSV	2179.26	0.0106048
0001.CSV	2183.12	0.0106405
0001.CSV	2186.97	0.0106395
0001.CSV	2190.83	0.0106414
0001.CSV	2194.69	0.0106116
0001.CSV	2198.55	0.0106167
0001.CSV	2202.4	0.0105917
0001.CSV	2206.26	0.0106085
0001.CSV	2210.12	0.0105935
0001.CSV	2213.97	0.0106145
0001.CSV	2217.83	0.0106121
0001.CSV	2221.69	0.0106205
0001.CSV	2225.54	0.0106144
0001.CSV	2229.4	0.0106256
0001.CSV	2233.26	0.0105975
0001.CSV	2237.12	0.0105962
0001.CSV	2240.97	0.0105645
0001.CSV	2244.83	0.0105651
0001.CSV	2248.69	0.0105507
0001.CSV	2252.54	0.0105631
0001.CSV	2256.4	0.0105598
0001.CSV	2260.26	0.0105688
0001.CSV	2264.11	0.010543
0001.CSV	2267.97	0.0105439
0001.CSV	2271.83	0.0105429
0001.CSV	2275.69	0.0105358
0001.CSV	2279.54	0.0105232
0001.CSV	2283.4	0.0105307
0001.CSV	2287.26	0.0105183
0001.CSV	2291.11	0.0105694
0001.CSV	2294.97	0.0106187
0001.CSV	2298.83	0.0107014
0001.CSV	2302.69	0.0107472
0001.CSV	2306.54	0.0108284
0001.CSV	2310.4	0.0108981
0001.CSV	2314.26	0.0109681
0001.CSV	2318.11	0.0109622
0001.CSV	2321.97	0.0110029
0001.CSV	2325.83	0.0110037
0001.CSV	2329.69	0.0110351
0001.CSV	2333.54	0.0108904
0001.CSV	2337.4	0.0108225
0001.CSV	2341.26	0.0108969
0001.CSV	2345.11	0.0111449
0001.CSV	2348.97	0.0110776
0001.CSV	2352.83	0.010908
0001.CSV	2356.69	0.010341
0001.CSV	2360.54	0.00995988
0001.CSV	2364.4	0.0103819
0001.CSV	2368.26	0.011009
0001.CSV	2372.11	0.0111724
0001.CSV	2375.97	0.0111618
0001.CSV	2379.83	0.0110028
0001.CSV	2383.69	0.0108413
0001.CSV	2387.54	0.0106726
0001.CSV	2391.4	0.0106057
0001.CSV	2395.26	0.0105835
0001.CSV	2399.11	0.0105993
0001.CSV	2402.97	0.0106152
0001.CSV	2406.83	0.0106491
0001.CSV	2410.68	0.0106643
0001.CSV	2414.54	0.0106886
0001.CSV	2418.4	0.0107066
0001.CSV	2422.26	0.0107583
0001.CSV	2426.11	0.0107827
0001.CSV	2429.97	0.0108057
0001.CSV	2433.83	0.0108448
0001.CSV	2437.68	0.0108978
0001.CSV	2441.54	0.0109143
0001.CSV	2445.4	0.0109649
0001.CSV	2449.26	0.0110158
0001.CSV	2453.11	0.0110978
0001.CSV	2456.97	0.0111764
0001.CSV	2460.83	0.0112704
0001.CSV	2464.68	0.0113703
0001.CSV	2468.54	0.0115425
0001.CSV	2472.4	0.0117265
0001.CSV	2476.26	0.0119607
0001.CSV	2480.11	0.0122256
0001.CSV	2483.97	0.0125504
0001.CSV	2487.83	0.0129384
0001.CSV	2491.68	0.0134662
0001.CSV	2495.54	0.0141171
0001.CSV	2499.4	0.0148518
0001.CSV	2503.26	0.0155513
0001.CSV	2507.11	0.0160995
0001.CSV	2510.97	0.0163758
0001.CSV	2514.83	0.0163727
0001.CSV	2518.68	0.0161173
0001.CSV	2522.54	0.0156794
0001.CSV	2526.4	0.0150812
0001.CSV	2530.26	0.0144342
0001.CSV	2534.11	0.0138122
0001.CSV	2537.97	0.0133152
0001.CSV	2541.83	0.012936
0001.CSV	2545.68	0.0126823
0001.CSV	2549.54	0.0124656
0001.CSV	2553.4	0.0123259
0001.CSV	2557.26	0.0122434
0001.CSV	2561.11	0.0121546
0001.CSV	2564.97	0.0120475
0001.CSV	2568.83	0.0120087
0001.CSV	2572.68	0.0119892
0001.CSV	2576.54	0.0119679
0001.CSV	2580.4	0.0119006
0001.CSV	2584.25	0.0118447
0001.CSV	2588.11	0.0117889
0001.CSV	2591.97	0.0117559
0001.CSV	2595.83	0.0116963
0001.CSV	2599.68	0.0116148
0001.CSV	2603.54	0.0115294
0001.CSV	2607.4	0.0114491
0001.CSV	2611.25	0.0113201
0001.CSV	2615.11	0.0112053
0001.CSV	2618.97	0.0110653
0001.CSV	2622.82	0.010976
0001.CSV	2626.68	0.0108995
0001.CSV	2630.54	0.0107929
0001.CSV	2634.4	0.0107239
0001.CSV	2638.25	0.0106595
0001.CSV	2642.11	0.0105181
0001.CSV	2645.97	0.0104139
0001.CSV	2649.82	0.0103312
0001.CSV	2653.68	0.0102768
0001.CSV	2657.54	0.0102726
0001.CSV	2661.4	0.0102771
0001.CSV	2665.25	0.0102641
0001.CSV	2669.11	0.0103122
0001.CSV	2672.97	0.0104679
0001.CSV	2676.82	0.0106744
0001.CSV	2680.68	0.0106436
0001.CSV	2684.54	0.0103737
0001.CSV	2688.4	0.0102204
0001.CSV	2692.25	0.0102059
0001.CSV	2696.11	0.0102393
0001.CSV	2699.97	0.0102517
0001.CSV	2703.82	0.0102424
0001.CSV	2707.68	0.0103267
0001.CSV	2711.54	0.0103609
0001.CSV	2715.4	0.0103437
0001.CSV	2719.25	0.0104778
0001.CSV	2723.11	0.0107726
0001.CSV	2726.97	0.0107542
0001.CSV	2730.82	0.0104762
0001.CSV	2734.68	0.0104601
0001.CSV	2738.54	0.0104647
0001.CSV	2742.4	0.0104619
0001.CSV	2746.25	0.0107781
0001.CSV	2750.11	0.0108337
0001.CSV	2753.97	0.0105682
0001.CSV	2757.82	0.0104925
0001.CSV	2761.68	0.010456
0001.CSV	2765.54	0.0104606
0001.CSV	2769.39	0.0106996
0001.CSV	2773.25	0.0111139
0001.CSV	2777.11	0.01107
0001.CSV	2780.97	0.0108659
0001.CSV	2784.82	0.0111723
0001.CSV	2788.68	0.0117697
0001.CSV	2792.54	0.012031
0001.CSV	2796.39	0.0121551
0001.CSV	2800.25	0.0120788
0001.CSV	2804.11	0.0119463
0001.CSV	2807.97	0.0123455
0001.CSV	2811.82	0.0125924
0001.CSV	2815.68	0.012637
0001.CSV	2819.54	0.0129428
0001.CSV	2823.39	0.0133417
0001.CSV	2827.25	0.013745
0001.CSV	2831.11	0.0146174
0001.CSV	2834.97	0.0160376
0001.CSV	2838.82	0.0176857
0001.CSV	2842.68	0.0198736
0001.CSV	2846.54	0.0234019
0001.CSV	2850.39	0.0264993
0001.CSV	2854.25	0.0272713
0001.CSV	2858.11	0.0261299
0001.CSV	2861.97	0.0241642
0001.CSV	2865.82	0.0228471
0001.CSV	2869.68	0.0228196
0001.CSV	2873.54	0.0226809
0001.CSV	2877.39	0.0214957
0001.CSV	2881.25	0.0205381
0001.CSV	2885.11	0.020521
0001.CSV	2888.97	0.0211678
0001.CSV	2892.82	0.022329
0001.CSV	2896.68	0.0235128
0001.CSV	2900.54	0.0245284
0001.CSV	2904.39	0.0259214
0001.CSV	2908.25	0.02807
0001.CSV	2912.11	0.0313241
0001.CSV	2915.97	0.0350494
0001.CSV	2919.82	0.0377293
0001.CSV	2923.68	0.0383491
0001.CSV	2927.54	0.0368105
0001.CSV	2931.39	0.033416
0001.CSV	2935.25	0.0293309
0001.CSV	2939.11	0.0261023
0001.CSV	2942.96	0.0242762
0001.CSV	2946.82	0.0235601
0001.CSV	2950.68	0.0237498
0001.CSV	2954.54	0.0241096
0001.CSV	2958.39	0.023665
0001.CSV	2962.25	0.0223191
0001.CSV	2966.11	0.0201116
0001.CSV	2969.96	0.0180343
0001.CSV	2973.82	0.0166537
0001.CSV	2977.68	0.0157279
0001.CSV	2981.53	0.014847
0001.CSV	2985.39	0.0138896
0001.CSV	2989.25	0.0134051
0001.CSV	2993.11	0.0132462
0001.CSV	2996.96	0.0128755
0001.CSV	3000.82	0.0124239
0001.CSV	3004.68	0.0121485
0001.CSV	3008.53	0.0122472
0001.CSV	3012.39	0.0124306
0001.CSV	3016.25	0.0123309
0001.CSV	3020.11	0.012091
0001.CSV	3023.96	0.0119316
0001.CSV	3027.82	0.0119133
0001.CSV	3031.68	0.0120885
0001.CSV	3035.53	0.0121575
0001.CSV	3039.39	0.0121972
0001.CSV	3043.25	0.0122837
0001.CSV	3047.11	0.012293
0001.CSV	3050.96	0.012314
0001.CSV	3054.82	0.0122847
0001.CSV	3058.68	0.012216
0001.CSV	3062.53	0.0122927
0001.CSV	3066.39	0.0124848
0001.CSV	3070.25	0.0125338
0001.CSV	3074.11	0.0125978
0001.CSV	3077.96	0.0127496
0001.CSV	3081.82	0.0128627
0001.CSV	3085.68	0.0129268
0001.CSV	3089.53	0.0128991
0001.CSV	3093.39	0.0128489
0001.CSV	3097.25	0.0129564
0001.CSV	3101.11	0.0130758
0001.CSV	3104.96	0.0131437
0001.CSV	3108.82	0.0132589
0001.CSV	3112.68	0.01336
0001.CSV	3116.53	0.0134917
0001.CSV	3120.39	0.0135632
0001.CSV	3124.25	0.013546
0001.CSV	3128.11	0.0135964
0001.CSV	3131.96	0.0136859
0001.CSV	3135.82	0.0138273
0001.CSV	3139.68	0.0139902
0001.CSV	3143.53	0.0140171
0001.CSV	3147.39	0.0141053
0001.CSV	3151.25	0.0142573
0001.CSV	3155.1	0.0142988
0001.CSV	3158.96	0.0142869
0001.CSV	3162.82	0.0143543
0001.CSV	3166.68	0.0144556
0001.CSV	3170.53	0.014579
0001.CSV	3174.39	0.0146762
0001.CSV	3178.25	0.0147762
0001.CSV	3182.1	0.0148736
0001.CSV	3185.96	0.0149855
0001.CSV	3189.82	0.0151034
0001.CSV	3193.68	0.0151706
0001.CSV	3197.53	0.0152306
0001.CSV	3201.39	0.0153377
0001.CSV	3205.25	0.0154253
0001.CSV	3209.1	0.0155266
0001.CSV	3212.96	0.0156559
0001.CSV	3216.82	0.015794
0001.CSV	3220.68	0.0158998
0001.CSV	3224.53	0.0159782
0001.CSV	3228.39	0.0160898
0001.CSV	3232.25	0.01626
0001.CSV	3236.1	0.0163273
0001.CSV	3239.96	0.0163584
0001.CSV	3243.82	0.016484
0001.CSV	3247.68	0.0165701
0001.CSV	3251.53	0.0165317
0001.CSV	3255.39	0.0166051
0001.CSV	3259.25	0.0167012
0001.CSV	3263.1	0.0167592
0001.CSV	3266.96	0.0168742
0001.CSV	3270.82	0.0170303
0001.CSV	3274.68	0.0170928
0001.CSV	3278.53	0.0171117
0001.CSV	3282.39	0.0171116
0001.CSV	3286.25	0.0171612
0001.CSV	3290.1	0.0173463
0001.CSV	3293.96	0.0174963
0001.CSV	3297.82	0.0174917
0001.CSV	3301.67	0.0174859
0001.CSV	3305.53	0.0175552
0001.CSV	3309.39	0.0176216
0001.CSV	3313.25	0.0176023
0001.CSV	3317.1	0.0175951
0001.CSV	3320.96	0.0176361
0001.CSV	3324.82	0.0177082
0001.CSV	3328.67	0.0177179
0001.CSV	3332.53	0.0177672
0001.CSV	3336.39	0.0178935
0001.CSV	3340.24	0.0179789
0001.CSV	3344.1	0.0179474
0001.CSV	3347.96	0.0179182
0001.CSV	3351.82	0.0178729
0001.CSV	3355.67	0.0178114
0001.CSV	3359.53	0.0178296
0001.CSV	3363.39	0.017886
0001.CSV	3367.24	0.0178751
0001.CSV	3371.1	0.0177633
0001.CSV	3374.96	0.01769
0001.CSV	3378.82	0.0176857
0001.CSV	3382.67	0.0175751
0001.CSV	3386.53	0.0175333
0001.CSV	3390.39	0.0175958
0001.CSV	3394.24	0.0175274
0001.CSV	3398.1	0.0174137
0001.CSV	3401.96	0.0173289
0001.CSV	3405.82	0.0172096
0001.CSV	3409.67	0.0171478
0001.CSV	3413.53	0.017037
0001.CSV	3417.39	0.0168511
0001.CSV	3421.24	0.0167226
0001.CSV	3425.1	0.0166165
0001.CSV	3428.96	0.016516
0001.CSV	3432.82	0.0164614
0001.CSV	3436.67	0.0162967
0001.CSV	3440.53	0.0160374
0001.CSV	3444.39	0.0158181
0001.CSV	3448.24	0.0156256
0001.CSV	3452.1	0.0153922
0001.CSV	3455.96	0.015226
0001.CSV	3459.82	0.0151068
0001.CSV	3463.67	0.014977
0001.CSV	3467.53	0.0148168
0001.CSV	3471.39	0.0145438
0001.CSV	3475.24	0.0142647
0001.CSV	3479.1	0.014094
0001.CSV	3482.96	0.0138632
0001.CSV	3486.82	0.0136809
0001.CSV	3490.67	0.013491
0001.CSV	3494.53	0.013317
0001.CSV	3498.39	0.0130966
0001.CSV	3502.24	0.0128398
0001.CSV	3506.1	0.0125366
0001.CSV	3509.96	0.0122498
0001.CSV	3513.81	0.0120126
0001.CSV	3517.67	0.0118036
0001.CSV	3521.53	0.0116849
0001.CSV	3525.39	0.0116179
0001.CSV	3529.24	0.0114038
0001.CSV	3533.1	0.0111722
0001.CSV	3536.96	0.0109337
0001.CSV	3540.81	0.0107624
0001.CSV	3544.67	0.0105845
0001.CSV	3548.53	0.0103555
0001.CSV	3552.39	0.0101263
0001.CSV	3556.24	0.00996303
0001.CSV	3560.1	0.00979372
0001.CSV	3563.96	0.00953508
0001.CSV	3567.81	0.00942651
0001.CSV	3571.67	0.00934434
0001.CSV	3575.53	0.00912255
0001.CSV	3579.39	0.00906303
0001.CSV	3583.24	0.00901174
0001.CSV	3587.1	0.00886526
0001.CSV	3590.96	0.00862312
0001.CSV	3594.81	0.00838548
0001.CSV	3598.67	0.00829787
0001.CSV	3602.53	0.0081682
0001.CSV	3606.39	0.00786869
0001.CSV	3610.24	0.00768744
0001.CSV	3614.1	0.00764953
0001.CSV	3617.96	0.00763234
0001.CSV	3621.81	0.00755161
0001.CSV	3625.67	0.00734071
0001.CSV	3629.53	0.00725755
0001.CSV	3633.39	0.00726648
0001.CSV	3637.24	0.00708986
0001.CSV	3641.1	0.00688945
0001.CSV	3644.96	0.00665787
0001.CSV	3648.81	0.00666187
0001.CSV	3652.67	0.00680906
0001.CSV	3656.53	0.00675808
0001.CSV	3660.38	0.00665945
0001.CSV	3664.24	0.00644309
0001.CSV	3668.1	0.00619753
0001.CSV	3671.96	0.00606684
0001.CSV	3675.81	0.00619693
0001.CSV	3679.67	0.00633559
0001.CSV	3683.53	0.00628879
0001.CSV	3687.38	0.00626919
0001.CSV	3691.24	0.00640627
0001.CSV	3695.1	0.00636504
0001.CSV	3698.95	0.00626368
0001.CSV	3702.81	0.00619847
0001.CSV	3706.67	0.00605485
0001.CSV	3710.53	0.00597459
0001.CSV	3714.38	0.00608052
0001.CSV	3718.24	0.00601446
0001.CSV	3722.1	0.0060198
0001.CSV	3725.95	0.00607917
0001.CSV	3729.81	0.00590787
0001.CSV	3733.67	0.00584769
0001.CSV	3737.53	0.00610616
0001.CSV	3741.38	0.00596978
0001.CSV	3745.24	0.00581407
0001.CSV	3749.1	0.00573936
0001.CSV	3752.95	0.00590499
0001.CSV	3756.81	0.00586848
0001.CSV	3760.67	0.00576451
0001.CSV	3764.53	0.00570431
0001.CSV	3768.38	0.00581192
0001.CSV	3772.24	0.00591402
0001.CSV	3776.1	0.00585622
0001.CSV	3779.95	0.00586737
0001.CSV	3783.81	0.00586623
0001.CSV	3787.67	0.00577576
0001.CSV	3791.53	0.00567138
0001.CSV	3795.38	0.0055776
0001.CSV	3799.24	0.0055629
0001.CSV	3803.1	0.00568937
0001.CSV	3806.95	0.00580269
0001.CSV	3810.81	0.00575152
0001.CSV	3814.67	0.00564476
0001.CSV	3818.53	0.0056788
0001.CSV	3822.38	0.00580753
0001.CSV	3826.24	0.00575555
0001.CSV	3830.1	0.00563187
0001.CSV	3833.95	0.00555236
0001.CSV	3837.81	0.00564855
0001.CSV	3841.67	0.00581609
0001.CSV	3845.53	0.00575749
0001.CSV	3849.38	0.0055182
0001.CSV	3853.24	0.00561767
0001.CSV	3857.1	0.00574786
0001.CSV	3860.95	0.00550699
0001.CSV	3864.81	0.00547467
0001.CSV	3868.67	0.00565386
0001.CSV	3872.52	0.00571784
0001.CSV	3876.38	0.0055873
0001.CSV	3880.24	0.0055443
0001.CSV	3884.1	0.00572855
0001.CSV	3887.95	0.00578889
0001.CSV	3891.81	0.00572254
0001.CSV	3895.67	0.00558387
0001.CSV	3899.52	0.00551159
0001.CSV	3903.38	0.00568095
0001.CSV	3907.24	0.00572029
0001.CSV	3911.1	0.00563539
0001.CSV	3914.95	0.00560519
0001.CSV	3918.81	0.00564919
0001.CSV	3922.67	0.00564671
0001.CSV	3926.52	0.00559065
0001.CSV	3930.38	0.0055583
0001.CSV	3934.24	0.00564439
0001.CSV	3938.09	0.00564536
0001.CSV	3941.95	0.00561166
0001.CSV	3945.81	0.00559753
0001.CSV	3949.67	0.00560774
0001.CSV	3953.52	0.00564922
0001.CSV	3957.38	0.00563529
0001.CSV	3961.24	0.00558636
0001.CSV	3965.09	0.0055828
0001.CSV	3968.95	0.00564301
0001.CSV	3972.81	0.00564979
0001.CSV	3976.67	0.00553618
0001.CSV	3980.52	0.00551135
0001.CSV	3984.38	0.00561431
0001.CSV	3988.24	0.00564892
0001.CSV	3992.09	0.00564409
0001.CSV	3995.95	0.0056319
0001.CSV	3999.81	0.00564254
0002.CSV	674.992	0.0382806
0002.CSV	678.849	0.039305
0002.CSV	682.706	0.0397831
0002.CSV	686.563	0.0415819
0002.CSV	690.42	0.0431167
0002.CSV	694.277	0.0468793
0002.CSV	698.134	0.0516857
0002.CSV	701.991	0.0611045
0002.CSV	705.849	0.0784516
0002.CSV	709.706	0.100613
0002.CSV	713.563	0.0951125
0002.CSV	717.42	0.0645739
0002.CSV	721.277	0.0424676
0002.CSV	725.134	0.0354519
0002.CSV	728.991	0.033243
0002.CSV	732.848	0.0333603
0002.CSV	736.705	0.0331049
0002.CSV	740.562	0.0331718
0002.CSV	744.42	0.0331046
0002.CSV	748.277	0.0339898
0002.CSV	752.134	0.0343946
0002.CSV	755.991	0.0354208
0002.CSV	759.848	0.0361696
0002.CSV	763.705	0.0374633
0002.CSV	767.562	0.0382178
0002.CSV	771.419	0.0394784
0002.CSV	775.276	0.0402305
0002.CSV	779.133	0.0413259
0002.CSV	782.99	0.0413973
0002.CSV	786.848	0.041718
0002.CSV	790.705	0.0420104
0002.CSV	794.562	0.0432522
0002.CSV	798.419	0.0442919
0002.CSV	802.276	0.0452399
0002.CSV	806.133	0.0452286
0002.CSV	809.99	0.0458304
0002.CSV	813.847	0.0463609
0002.CSV	817.704	0.0477377
0002.CSV	821.562	0.0492243
0002.CSV	825.419	0.051477
0002.CSV	829.276	0.0533854
0002.CSV	833.133	0.0557185
0002.CSV	836.99	0.0582377
0002.CSV	840.847	0.0632453
0002.CSV	844.704	0.0709868
0002.CSV	848.561	0.0766526
0002.CSV	852.418	0.080841
0002.CSV	856.275	0.0956218
0002.CSV	860.132	0.12521
0002.CSV	863.99	0.1735
0002.CSV	867.847	0.226036
0002.CSV	871.704	0.240829
0002.CSV	875.561	0.202099
0002.CSV	879.418	0.14702
0002.CSV	883.275	0.0919116
0002.CSV	887.132	0.0476955
0002.CSV	890.989	0.0288317
0002.CSV	894.846	0.0272736
0002.CSV	898.703	0.0281803
0002.CSV	902.561	0.0293885
0002.CSV	906.418	0.0301145
0002.CSV	910.275	0.0311219
0002.CSV	914.132	0.0317708
0002.CSV	917.989	0.0327912
0002.CSV	921.846	0.0334643
0002.CSV	925.703	0.0345498
0002.CSV	929.56	0.0353187
0002.CSV	933.417	0.0362414
0002.CSV	937.274	0.0366272
0002.CSV	941.131	0.0373329
0002.CSV	944.989	0.0378353
0002.CSV	948.846	0.0386918
0002.CSV	952.703	0.039297
0002.CSV	956.56	0.0402448
0002.CSV	960.417	0.0409122
0002.CSV	964.274	0.0418619
0002.CSV	968.131	0.0425702
0002.CSV	971.988	0.0436925
0002.CSV	975.845	0.0446218
0002.CSV	979.702	0.0459739
0002.CSV	983.559	0.0472575
0002.CSV	987.417	0.049102
0002.CSV	991.274	0.0508002
0002.CSV	995.131	0.0526193
0002.CSV	998.988	0.0538265
0002.CSV	1002.85	0.0551822
0002.CSV	1006.7	0.056251
0002.CSV	1010.56	0.0578479
0002.CSV	1014.42	0.0593436
0002.CSV	1018.27	0.0611259
0002.CSV	1022.13	0.0624425
0002.CSV	1025.99	0.0639087
0002.CSV	1029.85	0.0648069
0002.CSV	1033.7	0.0659877
0002.CSV	1037.56	0.066929
0002.CSV	1041.42	0.0681642
0002.CSV	1045.27	0.0690636
0002.CSV	1049.13	0.0702639
0002.CSV	1052.99	0.0710498
0002.CSV	1056.84	0.0722329
0002.CSV	1060.7	0.0733069
0002.CSV	1064.56	0.074755
0002.CSV	1068.42	0.0757359
0002.CSV	1072.27	0.0768967
0002.CSV	1076.13	0.0775843
0002.CSV	1079.99	0.0786073
0002.CSV	1083.84	0.0794531
0002.CSV	1087.7	0.0802152
0002.CSV	1091.56	0.0793102
0002.CSV	1095.41	0.0775342
0002.CSV	1099.27	0.0755258
0002.CSV	1103.13	0.07445
0002.CSV	1106.99	0.0735554
0002.CSV	1110.84	0.0732633
0002.CSV	1114.7	0.072762
0002.CSV	1118.56	0.0724413
0002.CSV	1122.41	0.0717119
0002.CSV	1126.27	0.071222
0002.CSV	1130.13	0.0704131
0002.CSV	1133.99	0.0699342
0002.CSV	1137.84	0.06945
0002.CSV	1141.7	0.0696951
0002.CSV	1145.56	0.0699875
0002.CSV	1149.41	0.0707356
0002.CSV	1153.27	0.0713642
0002.CSV	1157.13	0.0722262
0002.CSV	1160.99	0.0725953
0002.CSV	1164.84	0.0728782
0002.CSV	1168.7	0.0725825
0002.CSV	1172.56	0.0726116
0002.CSV	1176.41	0.0726363
0002.CSV	1180.27	0.0728911
0002.CSV	1184.13	0.0725986
0002.CSV	1187.99	0.0724656
0002.CSV	1191.84	0.0722421
0002.CSV	1195.7	0.0725229
0002.CSV	1199.56	0.072726
0002.CSV	1203.41	0.0732915
0002.CSV	1207.27	0.0737091
0002.CSV	1211.13	0.0746338
0002.CSV	1214.98	0.075542
0002.CSV	1218.84	0.0769221
0002.CSV	1222.7	0.0781712
0002.CSV	1226.56	0.0798048
0002.CSV	1230.41	0.0812024
0002.CSV	1234.27	0.0828549
0002.CSV	1238.13	0.0841812
0002.CSV	1241.98	0.0857278
0002.CSV	1245.84	0.0869788
0002.CSV	1249.7	0.0885238
0002.CSV	1253.56	0.0897073
0002.CSV	1257.41	0.09111
0002.CSV	1261.27	0.0923695
0002.CSV	1265.13	0.0941318
0002.CSV	1268.98	0.0957586
0002.CSV	1272.84	0.0979147
0002.CSV	1276.7	0.0999374
0002.CSV	1280.56	0.102429
0002.CSV	1284.41	0.104749
0002.CSV	1288.27	0.107657
0002.CSV	1292.13	0.110569
0002.CSV	1295.98	0.114063
0002.CSV	1299.84	0.117409
0002.CSV	1303.7	0.121269
0002.CSV	1307.56	0.125053
0002.CSV	1311.41	0.129446
0002.CSV	1315.27	0.13361
0002.CSV	1319.13	0.138368
0002.CSV	1322.98	0.142899
0002.CSV	1326.84	0.148146
0002.CSV	1330.7	0.153554
0002.CSV	1334.56	0.15956
0002.CSV	1338.41	0.166473
0002.CSV	1342.27	0.175099
0002.CSV	1346.13	0.182551
0002.CSV	1349.98	0.19144
0002.CSV	1353.84	0.200943
0002.CSV	1357.7	0.211542
0002.CSV	1361.56	0.223635
0002.CSV	1365.41	0.238407
0002.CSV	1369.27	0.251202
0002.CSV	1373.13	0.267043
0002.CSV	1376.98	0.284018
0002.CSV	1380.84	0.298688
0002.CSV	1384.7	0.31145
0002.CSV	1388.56	0.325542
0002.CSV	1392.41	0.333092
0002.CSV	1396.27	0.33506
0002.CSV	1400.13	0.33047
0002.CSV	1403.98	0.324657
0002.CSV	1407.84	0.314029
0002.CSV	1411.7	0.301037
0002.CSV	1415.55	0.286512
0002.CSV	1419.41	0.2701
0002.CSV	1423.27	0.255931
0002.CSV	1427.12	0.247015
0002.CSV	1430.98	0.237892
0002.CSV	1434.84	0.229492
0002.CSV	1438.7	0.219625
0002.CSV	1442.55	0.212482
0002.CSV	1446.41	0.20427
0002.CSV	1450.27	0.195809
0002.CSV	1454.12	0.188276
0002.CSV	1457.98	0.177323
0002.CSV	1461.84	0.168296
0002.CSV	1465.7	0.161701
0002.CSV	1469.55	0.154705
0002.CSV	1473.41	0.146512
0002.CSV	1477.27	0.137745
0002.CSV	1481.12	0.132324
0002.CSV	1484.98	0.126818
0002.CSV	1488.84	0.120025
0002.CSV	1492.7	0.112875
0002.CSV	1496.55	0.107266
0002.CSV	1500.41	0.100824
0002.CSV	1504.27	0.096874
0002.CSV	1508.12	0.0892614
0002.CSV	1511.98	0.0839098
0002.CSV	1515.84	0.0801757
0002.CSV	1519.7	0.075629
0002.CSV	1523.55	0.0703851
0002.CSV	1527.41	0.0667702
0002.CSV	1531.27	0.0633905
0002.CSV	1535.12	0.060353
0002.CSV	1538.98	0.0567062
0002.CSV	1542.84	0.0494713
0002.CSV	1546.7	0.0444553
0002.CSV	1550.55	0.041091
0002.CSV	1554.41	0.0378844
0002.CSV	1558.27	0.0345788
0002.CSV	1562.12	0.0320825
0002.CSV	1565.98	0.0313057
0002.CSV	1569.84	0.0306496
0002.CSV	1573.69	0.0303421
0002.CSV	1577.55	0.0296525
0002.CSV	1581.41	0.0285442
0002.CSV	1585.27	0.0270893
0002.CSV	1589.12	0.0256289
0002.CSV	1592.98	0.0240793
0002.CSV	1596.84	0.0226428
0002.CSV	1600.69	0.021263
0002.CSV	1604.55	0.020132
0002.CSV	1608.41	0.0190334
0002.CSV	1612.27	0.0181228
0002.CSV	1616.12	0.0171316
0002.CSV	1619.98	0.0163271
0002.CSV	1623.84	0.0155705
0002.CSV	1627.69	0.0149714
0002.CSV	1631.55	0.0144284
0002.CSV	1635.41	0.0140229
0002.CSV	1639.27	0.0136335
0002.CSV	1643.12	0.0134231
0002.CSV	1646.98	0.0131445
0002.CSV	1650.84	0.0130131
0002.CSV	1654.69	0.0128364
0002.CSV	1658.55	0.012734
0002.CSV	1662.41	0.0124656
0002.CSV	1666.27	0.0123083
0002.CSV	1670.12	0.0121354
0002.CSV	1673.98	0.0120374
0002.CSV	1677.84	0.0117951
0002.CSV	1681.69	0.0116398
0002.CSV	1685.55	0.0115254
0002.CSV	1689.41	0.0114798
0002.CSV	1693.27	0.0112337
0002.CSV	1697.12	0.0111391
0002.CSV	1700.98	0.0111435
0002.CSV	1704.84	0.0112529
0002.CSV	1708.69	0.0112628
0002.CSV	1712.55	0.0112866
0002.CSV	1716.41	0.0113858
0002.CSV	1720.27	0.0116863
0002.CSV	1724.12	0.0116869
0002.CSV	1727.98	0.0116968
0002.CSV	1731.84	0.011644
0002.CSV	1735.69	0.0117399
0002.CSV	1739.55	0.0116184
0002.CSV	1743.41	0.0114081
0002.CSV	1747.27	0.0110739
0002.CSV	1751.12	0.0109072
0002.CSV	1754.98	0.0107992
0002.CSV	1758.84	0.0107806
0002.CSV	1762.69	0.0108128
0002.CSV	1766.55	0.0109079
0002.CSV	1770.41	0.0110463
0002.CSV	1774.26	0.0114929
0002.CSV	1778.12	0.0118478
0002.CSV	1781.98	0.0125519
0002.CSV	1785.84	0.0137491
0002.CSV	1789.69	0.0154878
0002.CSV	1793.55	0.0174026
0002.CSV	1797.41	0.0176341
0002.CSV	1801.26	0.0159841
0002.CSV	1805.12	0.0139895
0002.CSV	1808.98	0.0125106
0002.CSV	1812.84	0.0116796
0002.CSV	1816.69	0.0111931
0002.CSV	1820.55	0.01095
0002.CSV	1824.41	0.0107535
0002.CSV	1828.26	0.0106864
0002.CSV	1832.12	0.0106098
0002.CSV	1835.98	0.0105892
0002.CSV	1839.84	0.010511
0002.CSV	1843.69	0.0105346
0002.CSV	1847.55	0.0105704
0002.CSV	1851.41	0.0105981
0002.CSV	1855.26	0.0105506
0002.CSV	1859.12	0.010594
0002.CSV	1862.98	0.0106037
0002.CSV	1866.84	0.010657
0002.CSV	1870.69	0.010698
0002.CSV	1874.55	0.0107239
0002.CSV	1878.41	0.010694
0002.CSV	1882.26	0.0107321
0002.CSV	1886.12	0.010726
0002.CSV	1889.98	0.0108175
0002.CSV	1893.83	0.0108666
0002.CSV	1897.69	0.0109141
0002.CSV	1901.55	0.0109166
0002.CSV	1905.41	0.0109603
0002.CSV	1909.26	0.0109976
0002.CSV	1913.12	0.0110625
0002.CSV	1916.98	0.0110376
0002.CSV	1920.83	0.0110819
0002.CSV	1924.69	0.0111049
0002.CSV	1928.55	0.0111659
0002.CSV	1932.4	0.01118
0002.CSV	1936.26	0.0112237
0002.CSV	1940.12	0.0112298
0002.CSV	1943.98	0.0113491
0002.CSV	1947.83	0.0113824
0002.CSV	1951.69	0.0114147
0002.CSV	1955.55	0.0114645
0002.CSV	1959.4	0.0115525
0002.CSV	1963.26	0.0115418
0002.CSV	1967.12	0.0115798
0002.CSV	1970.98	0.0116062
0002.CSV	1974.83	0.01167
0002.CSV	1978.69	0.0116898
0002.CSV	1982.55	0.0117209
0002.CSV	1986.4	0.0117041
0002.CSV	1990.26	0.0117578
0002.CSV	1994.12	0.0118145
0002.CSV	1997.98	0.0118818
0002.CSV	2001.83	0.0119089
0002.CSV	2005.69	0.011963
0002.CSV	2009.55	0.0119686
0002.CSV	2013.4	0.0119943
0002.CSV	2017.26	0.0120212
0002.CSV	2021.12	0.0120995
0002.CSV	2024.97	0.0121239
0002.CSV	2028.83	0.0121729
0002.CSV	2032.69	0.0121863
0002.CSV	2036.55	0.012234
0002.CSV	2040.4	0.0122417
0002.CSV	2044.26	0.0122799
0002.CSV	2048.12	0.0122811
0002.CSV	2051.97	0.0123293
0002.CSV	2055.83	0.0123382
0002.CSV	2059.69	0.01238
0002.CSV	2063.55	0.0123785
0002.CSV	2067.4	0.0124274
0002.CSV	2071.26	0.0124536
0002.CSV	2075.12	0.0125107
0002.CSV	2078.97	0.0125168
0002.CSV	2082.83	0.0125341
0002.CSV	2086.69	0.0125411
0002.CSV	2090.55	0.012582
0002.CSV	2094.4	0.0125792
0002.CSV	2098.26	0.0126112
0002.CSV	2102.12	0.0126163
0002.CSV	2105.97	0.0126403
0002.CSV	2109.83	0.0126424
0002.CSV	2113.69	0.0127022
0002.CSV	2117.55	0.0127419
0002.CSV	2121.4	0.012795
0002.CSV	2125.26	0.0128251
0002.CSV	2129.12	0.0128862
0002.CSV	2132.97	0.0129161
0002.CSV	2136.83	0.0129719
0002.CSV	2140.69	0.0129763
0002.CSV	2144.55	0.0130032
0002.CSV	2148.4	0.0130027
0002.CSV	2152.26	0.0130023
0002.CSV	2156.12	0.0129531
0002.CSV	2159.97	0.0129845
0002.CSV	2163.83	0.0129659
0002.CSV	2167.69	0.0129499
0002.CSV	2171.55	0.0129405
0002.CSV	2175.4	0.0129669
0002.CSV	2179.26	0.0129852
0002.CSV	2183.12	0.0130304
0002.CSV	2186.97	0.0130274
0002.CSV	2190.83	0.0130502
0002.CSV	2194.69	0.0130532
0002.CSV	2198.55	0.0130709
0002.CSV	2202.4	0.0130502
0002.CSV	2206.26	0.013072
0002.CSV	2210.12	0.0130757
0002.CSV	2213.97	0.0131018
0002.CSV	2217.83	0.0131202
0002.CSV	2221.69	0.0131615
0002.CSV	2225.54	0.0131597
0002.CSV	2229.4	0.0131929
0002.CSV	2233.26	0.0132081
0002.CSV	2237.12	0.0132195
0002.CSV	2240.97	0.0131938
0002.CSV	2244.83	0.0132102
0002.CSV	2248.69	0.0132272
0002.CSV	2252.54	0.0132796
0002.CSV	2256.4	0.0132982
0002.CSV	2260.26	0.0133279
0002.CSV	2264.11	0.0133238
0002.CSV	2267.97	0.0133507
0002.CSV	2271.83	0.0133797
0002.CSV	2275.69	0.0133856
0002.CSV	2279.54	0.0133652
0002.CSV	2283.4	0.0133912
0002.CSV	2287.26	0.0134319
0002.CSV	2291.11	0.0135537
0002.CSV	2294.97	0.0137054
0002.CSV	2298.83	0.0138888
0002.CSV	2302.69	0.0140349
0002.CSV	2306.54	0.0142652
0002.CSV	2310.4	0.0145077
0002.CSV	2314.26	0.014721
0002.CSV	2318.11	0.014934
0002.CSV	2321.97	0.0152852
0002.CSV	2325.83	0.0155417
0002.CSV	2329.69	0.0157229
0002.CSV	2333.54	0.0157587
0002.CSV	2337.4	0.0158349
0002.CSV	2341.26	0.0158517
0002.CSV	2345.11	0.0157413
0002.CSV	2348.97	0.0155087
0002.CSV	2352.83	0.0156847
0002.CSV	2356.69	0.0160223
0002.CSV	2360.54	0.0161424
0002.CSV	2364.4	0.0159862
0002.CSV	2368.26	0.0158908
0002.CSV	2372.11	0.0154611
0002.CSV	2375.97	0.0149183
0002.CSV	2379.83	0.0143251
0002.CSV	2383.69	0.0138274
0002.CSV	2387.54	0.0135024
0002.CSV	2391.4	0.0134099
0002.CSV	2395.26	0.0133998
0002.CSV	2399.11	0.0134057
0002.CSV	2402.97	0.0134127
0002.CSV	2406.83	0.0134392
0002.CSV	2410.68	0.01345
0002.CSV	2414.54	0.0134858
0002.CSV	2418.4	0.0135143
0002.CSV	2422.26	0.0135314
0002.CSV	2426.11	0.0135257
0002.CSV	2429.97	0.0135638
0002.CSV	2433.83	0.0136252
0002.CSV	2437.68	0.0136772
0002.CSV	2441.54	0.0136834
0002.CSV	2445.4	0.0137323
0002.CSV	2449.26	0.0138005
0002.CSV	2453.11	0.0138907
0002.CSV	2456.97	0.0139799
0002.CSV	2460.83	0.0141064
0002.CSV	2464.68	0.0142247
0002.CSV	2468.54	0.0143762
0002.CSV	2472.4	0.0145263
0002.CSV	2476.26	0.0147373
0002.CSV	2480.11	0.0149862
0002.CSV	2483.97	0.0152691
0002.CSV	2487.83	0.0155937
0002.CSV	2491.68	0.0160106
0002.CSV	2495.54	0.0165314
0002.CSV	2499.4	0.017141
0002.CSV	2503.26	0.0176866
0002.CSV	2507.11	0.0180862
0002.CSV	2510.97	0.0182563
0002.CSV	2514.83	0.0181931
0002.CSV	2518.68	0.0179374
0002.CSV	2522.54	0.0175696
0002.CSV	2526.4	0.0170784
0002.CSV	2530.26	0.0165579
0002.CSV	2534.11	0.0160604
0002.CSV	2537.97	0.0156762
0002.CSV	2541.83	0.0153794
0002.CSV	2545.68	0.0151868
0002.CSV	2549.54	0.0150501
0002.CSV	2553.4	0.0149745
0002.CSV	2557.26	0.0149277
0002.CSV	2561.11	0.0148672
0002.CSV	2564.97	0.0147835
0002.CSV	2568.83	0.0147459
0002.CSV	2572.68	0.0147417
0002.CSV	2576.54	0.014754
0002.CSV	2580.4	0.014717
0002.CSV	2584.25	0.0146974
0002.CSV	2588.11	0.0146761
0002.CSV	2591.97	0.0146617
0002.CSV	2595.83	0.0146194
0002.CSV	2599.68	0.0145224
0002.CSV	2603.54	0.014425
0002.CSV	2607.4	0.0143638
0002.CSV	2611.25	0.0142884
0002.CSV	2615.11	0.0142189
0002.CSV	2618.97	0.0141209
0002.CSV	2622.82	0.0140491
0002.CSV	2626.68	0.0139869
0002.CSV	2630.54	0.0138938
0002.CSV	2634.4	0.0138505
0002.CSV	2638.25	0.0138157
0002.CSV	2642.11	0.0136853
0002.CSV	2645.97	0.0136098
0002.CSV	2649.82	0.0135839
0002.CSV	2653.68	0.0135567
0002.CSV	2657.54	0.0135579
0002.CSV	2661.4	0.0135528
0002.CSV	2665.25	0.0135208
0002.CSV	2669.11	0.0135739
0002.CSV	2672.97	0.0137331
0002.CSV	2676.82	0.0139174
0002.CSV	2680.68	0.0139105
0002.CSV	2684.54	0.0136999
0002.CSV	2688.4	0.013571
0002.CSV	2692.25	0.013553
0002.CSV	2696.11	0.0136049
0002.CSV	2699.97	0.0136301
0002.CSV	2703.82	0.0136007
0002.CSV	2707.68	0.0136691
0002.CSV	2711.54	0.0137079
0002.CSV	2715.4	0.0136958
0002.CSV	2719.25	0.0137985
0002.CSV	2723.11	0.0140582
0002.CSV	2726.97	0.0140599
0002.CSV	2730.82	0.0138183
0002.CSV	2734.68	0.0138096
0002.CSV	2738.54	0.0138593
0002.CSV	2742.4	0.013866
0002.CSV	2746.25	0.0141197
0002.CSV	2750.11	0.0141798
0002.CSV	2753.97	0.0139675
0002.CSV	2757.82	0.0139065
0002.CSV	2761.68	0.0138472
0002.CSV	2765.54	0.0138472
0002.CSV	2769.39	0.0140768
0002.CSV	2773.25	0.0144551
0002.CSV	2777.11	0.0144186
0002.CSV	2780.97	0.0142497
0002.CSV	2784.82	0.0145415
0002.CSV	2788.68	0.0150581
0002.CSV	2792.54	0.0152719
0002.CSV	2796.39	0.0153812
0002.CSV	2800.25	0.0152864
0002.CSV	2804.11	0.0151394
0002.CSV	2807.97	0.015487
0002.CSV	2811.82	0.0156616
0002.CSV	2815.68	0.0156722
0002.CSV	2819.54	0.0159641
0002.CSV	2823.39	0.0163148
0002.CSV	2827.25	0.0166173
0002.CSV	2831.11	0.0173419
0002.CSV	2834.97	0.0185175
0002.CSV	2838.82	0.0197377
0002.CSV	2842.68	0.0212559
0002.CSV	2846.54	0.02374
0002.CSV	2850.39	0.0257672
0002.CSV	2854.25	0.026077
0002.CSV	2858.11	0.0251733
0002.CSV	2861.97	0.0238001
0002.CSV	2865.82	0.0228869
0002.CSV	2869.68	0.0229213
0002.CSV	2873.54	0.0228851
0002.CSV	2877.39	0.022019
0002.CSV	2881.25	0.0213362
0002.CSV	2885.11	0.021344
0002.CSV	2888.97	0.0218623
0002.CSV	2892.82	0.022773
0002.CSV	2896.68	0.0236359
0002.CSV	2900.54	0.0243125
0002.CSV	2904.39	0.0252811
0002.CSV	2908.25	0.0268801
0002.CSV	2912.11	0.0293436
0002.CSV	2915.97	0.0319695
0002.CSV	2919.82	0.0335223
0002.CSV	2923.68	0.0335314
0002.CSV	2927.54	0.0322098
0002.CSV	2931.39	0.0296405
0002.CSV	2935.25	0.0265746
0002.CSV	2939.11	0.0243218
0002.CSV	2942.96	0.0232317
0002.CSV	2946.82	0.0228122
0002.CSV	2950.68	0.0229262
0002.CSV	2954.54	0.0230742
0002.CSV	2958.39	0.022585
0002.CSV	2962.25	0.0215246
0002.CSV	2966.11	0.0198988
0002.CSV	2969.96	0.0184862
0002.CSV	2973.82	0.0176912
0002.CSV	2977.68	0.0171943
0002.CSV	2981.53	0.0165834
0002.CSV	2985.39	0.015859
0002.CSV	2989.25	0.0155997
0002.CSV	2993.11	0.015568
0002.CSV	2996.96	0.0153298
0002.CSV	3000.82	0.0150457
0002.CSV	3004.68	0.0148816
0002.CSV	3008.53	0.0150495
0002.CSV	3012.39	0.0152872
0002.CSV	3016.25	0.0152191
0002.CSV	3020.11	0.0150156
0002.CSV	3023.96	0.0148926
0002.CSV	3027.82	0.0149264
0002.CSV	3031.68	0.0151184
0002.CSV	3035.53	0.0151624
0002.CSV	3039.39	0.0151898
0002.CSV	3043.25	0.0152994
0002.CSV	3047.11	0.0153006
0002.CSV	3050.96	0.0152987
0002.CSV	3054.82	0.0152825
0002.CSV	3058.68	0.0152071
0002.CSV	3062.53	0.0152965
0002.CSV	3066.39	0.0155098
0002.CSV	3070.25	0.0155471
0002.CSV	3074.11	0.015595
0002.CSV	3077.96	0.0157724
0002.CSV	3081.82	0.0159116
0002.CSV	3085.68	0.0159651
0002.CSV	3089.53	0.0159199
0002.CSV	3093.39	0.0158404
0002.CSV	3097.25	0.0159344
0002.CSV	3101.11	0.0160458
0002.CSV	3104.96	0.0160863
0002.CSV	3108.82	0.0162224
0002.CSV	3112.68	0.0163606
0002.CSV	3116.53	0.0164978
0002.CSV	3120.39	0.0165249
0002.CSV	3124.25	0.0164288
0002.CSV	3128.11	0.0164219
0002.CSV	3131.96	0.0165317
0002.CSV	3135.82	0.0166896
0002.CSV	3139.68	0.016834
0002.CSV	3143.53	0.0168513
0002.CSV	3147.39	0.016929
0002.CSV	3151.25	0.0170768
0002.CSV	3155.1	0.0171094
0002.CSV	3158.96	0.0170591
0002.CSV	3162.82	0.0170714
0002.CSV	3166.68	0.0171229
0002.CSV	3170.53	0.0172312
0002.CSV	3174.39	0.0173527
0002.CSV	3178.25	0.0174583
0002.CSV	3182.1	0.017541
0002.CSV	3185.96	0.0176501
0002.CSV	3189.82	0.0177644
0002.CSV	3193.68	0.0177928
0002.CSV	3197.53	0.0178447
0002.CSV	3201.39	0.0179552
0002.CSV	3205.25	0.0180169
0002.CSV	3209.1	0.018102
0002.CSV	3212.96	0.0182479
0002.CSV	3216.82	0.0183574
0002.CSV	3220.68	0.0184167
0002.CSV	3224.53	0.01845
0002.CSV	3228.39	0.0185617
0002.CSV	3232.25	0.0187536
0002.CSV	3236.1	0.0188073
0002.CSV	3239.96	0.0188059
0002.CSV	3243.82	0.0188977
0002.CSV	3247.68	0.0189509
0002.CSV	3251.53	0.018895
0002.CSV	3255.39	0.0189936
0002.CSV	3259.25	0.0190743
0002.CSV	3263.1	0.0191353
0002.CSV	3266.96	0.0192832
0002.CSV	3270.82	0.0194379
0002.CSV	3274.68	0.0194726
0002.CSV	3278.53	0.019451
0002.CSV	3282.39	0.0194041
0002.CSV	3286.25	0.0194289
0002.CSV	3290.1	0.0196039
0002.CSV	3293.96	0.0197687
0002.CSV	3297.82	0.0197837
0002.CSV	3301.67	0.0198035
0002.CSV	3305.53	0.019901
0002.CSV	3309.39	0.0199122
0002.CSV	3313.25	0.0197765
0002.CSV	3317.1	0.0197198
0002.CSV	3320.96	0.0198131
0002.CSV	3324.82	0.0199156
0002.CSV	3328.67	0.0198934
0002.CSV	3332.53	0.0199267
0002.CSV	3336.39	0.0200608
0002.CSV	3340.24	0.0201364
0002.CSV	3344.1	0.0200715
0002.CSV	3347.96	0.0200569
0002.CSV	3351.82	0.0200291
0002.CSV	3355.67	0.0199587
0002.CSV	3359.53	0.019976
0002.CSV	3363.39	0.0199783
0002.CSV	3367.24	0.020009
0002.CSV	3371.1	0.0199958
0002.CSV	3374.96	0.0199115
0002.CSV	3378.82	0.019859
0002.CSV	3382.67	0.0197516
0002.CSV	3386.53	0.0196666
0002.CSV	3390.39	0.0197009
0002.CSV	3394.24	0.0197066
0002.CSV	3398.1	0.0196638
0002.CSV	3401.96	0.019591
0002.CSV	3405.82	0.0194719
0002.CSV	3409.67	0.0194599
0002.CSV	3413.53	0.0193363
0002.CSV	3417.39	0.0191181
0002.CSV	3421.24	0.0189792
0002.CSV	3425.1	0.0188794
0002.CSV	3428.96	0.0188243
0002.CSV	3432.82	0.0188518
0002.CSV	3436.67	0.0187284
0002.CSV	3440.53	0.0184056
0002.CSV	3444.39	0.0182145
0002.CSV	3448.24	0.0181279
0002.CSV	3452.1	0.0179115
0002.CSV	3455.96	0.0177431
0002.CSV	3459.82	0.0176517
0002.CSV	3463.67	0.0175875
0002.CSV	3467.53	0.0175025
0002.CSV	3471.39	0.0172601
0002.CSV	3475.24	0.0170388
0002.CSV	3479.1	0.0169444
0002.CSV	3482.96	0.0167463
0002.CSV	3486.82	0.0165783
0002.CSV	3490.67	0.016401
0002.CSV	3494.53	0.0162533
0002.CSV	3498.39	0.0160414
0002.CSV	3502.24	0.0157693
0002.CSV	3506.1	0.015521
0002.CSV	3509.96	0.0153603
0002.CSV	3513.81	0.0152062
0002.CSV	3517.67	0.0150171
0002.CSV	3521.53	0.0148954
0002.CSV	3525.39	0.0148195
0002.CSV	3529.24	0.0146398
0002.CSV	3533.1	0.0144593
0002.CSV	3536.96	0.0142757
0002.CSV	3540.81	0.0141186
0002.CSV	3544.67	0.014011
0002.CSV	3548.53	0.0138531
0002.CSV	3552.39	0.0136465
0002.CSV	3556.24	0.0134832
0002.CSV	3560.1	0.0133529
0002.CSV	3563.96	0.0131395
0002.CSV	3567.81	0.01305
0002.CSV	3571.67	0.0130092
0002.CSV	3575.53	0.0128237
0002.CSV	3579.39	0.0127867
0002.CSV	3583.24	0.0127573
0002.CSV	3587.1	0.0127324
0002.CSV	3590.96	0.0125638
0002.CSV	3594.81	0.012341
0002.CSV	3598.67	0.012329
0002.CSV	3602.53	0.0122737
0002.CSV	3606.39	0.0120046
0002.CSV	3610.24	0.0118237
0002.CSV	3614.1	0.0117431
0002.CSV	3617.96	0.0117916
0002.CSV	3621.81	0.0118484
0002.CSV	3625.67	0.0116739
0002.CSV	3629.53	0.011609
0002.CSV	3633.39	0.011637
0002.CSV	3637.24	0.0114766
0002.CSV	3641.1	0.0113176
0002.CSV	3644.96	0.0111002
0002.CSV	3648.81	0.0111469
0002.CSV	3652.67	0.0113187
0002.CSV	3656.53	0.0112608
0002.CSV	3660.38	0.0111693
0002.CSV	3664.24	0.0109245
0002.CSV	3668.1	0.0106945
0002.CSV	3671.96	0.0106983
0002.CSV	3675.81	0.0108272
0002.CSV	3679.67	0.0109023
0002.CSV	3683.53	0.0108458
0002.CSV	3687.38	0.01084
0002.CSV	3691.24	0.0110807
0002.CSV	3695.1	0.0110645
0002.CSV	3698.95	0.0109399
0002.CSV	3702.81	0.0109202
0002.CSV	3706.67	0.0107727
0002.CSV	3710.53	0.0106796
0002.CSV	3714.38	0.0108283
0002.CSV	3718.24	0.0107631
0002.CSV	3722.1	0.0107894
0002.CSV	3725.95	0.0109118
0002.CSV	3729.81	0.010806
0002.CSV	3733.67	0.0107473
0002.CSV	3737.53	0.0108788
0002.CSV	3741.38	0.0106878
0002.CSV	3745.24	0.0105667
0002.CSV	3749.1	0.0104623
0002.CSV	3752.95	0.0106062
0002.CSV	3756.81	0.010584
0002.CSV	3760.67	0.0105305
0002.CSV	3764.53	0.0104769
0002.CSV	3768.38	0.0104998
0002.CSV	3772.24	0.0105972
0002.CSV	3776.1	0.0105727
0002.CSV	3779.95	0.0106178
0002.CSV	3783.81	0.0106086
0002.CSV	3787.67	0.0105182
0002.CSV	3791.53	0.0104321
0002.CSV	3795.38	0.0102956
0002.CSV	3799.24	0.0102039
0002.CSV	3803.1	0.0103873
0002.CSV	3806.95	0.0105557
0002.CSV	3810.81	0.0104596
0002.CSV	3814.67	0.0103275
0002.CSV	3818.53	0.0103971
0002.CSV	3822.38	0.0105668
0002.CSV	3826.24	0.0105268
0002.CSV	3830.1	0.010383
0002.CSV	3833.95	0.0103341
0002.CSV	3837.81	0.0105064
0002.CSV	3841.67	0.0106717
0002.CSV	3845.53	0.0105283
0002.CSV	3849.38	0.0101578
0002.CSV	3853.24	0.0101788
0002.CSV	3857.1	0.0104018
0002.CSV	3860.95	0.0102138
0002.CSV	3864.81	0.0102288
0002.CSV	3868.67	0.0103729
0002.CSV	3872.52	0.0104885
0002.CSV	3876.38	0.0104034
0002.CSV	3880.24	0.0103658
0002.CSV	3884.1	0.0104975
0002.CSV	3887.95	0.0104723
0002.CSV	3891.81	0.0104149
0002.CSV	3895.67	0.0102829
0002.CSV	3899.52	0.0101536
0002.CSV	3903.38	0.0103453
0002.CSV	3907.24	0.0104338
0002.CSV	3911.1	0.0102927
0002.CSV	3914.95	0.0101924
0002.CSV	3918.81	0.0102279
0002.CSV	3922.67	0.010283
0002.CSV	3926.52	0.010269
0002.CSV	3930.38	0.0102449
0002.CSV	3934.24	0.0103252
0002.CSV	3938.09	0.0103045
0002.CSV	3941.95	0.0102293
0002.CSV	3945.81	0.0102303
0002.CSV	3949.67	0.0102774
0002.CSV	3953.52	0.0103023
0002.CSV	3957.38	0.0102854
0002.CSV	3961.24	0.0102754
0002.CSV	3965.09	0.0102517
0002.CSV	3968.95	0.0102692
0002.CSV	3972.81	0.0102826
0002.CSV	3976.67	0.0102046
0002.CSV	3980.52	0.0101652
0002.CSV	3984.38	0.0102306
0002.CSV	3988.24	0.0102628
0002.CSV	3992.09	0.0102812
0002.CSV	3995.95	0.0102737
0002.CSV	3999.81	0.0102557
0003.CSV	674.992	0.0282756
0003.CSV	678.849	0.0293796
0003.CSV	682.706	0.0297636
0003.CSV	686.563	0.0312397
0003.CSV	690.42	0.0325781
0003.CSV	694.277	0.0356126
0003.CSV	698.134	0.0396297
0003.CSV	701.991	0.0478051
0003.CSV	705.849	0.0637773
0003.CSV	709.706	0.084085
0003.CSV	713.563	0.077719
0003.CSV	717.42	0.0491069
0003.CSV	721.277	0.0300497
0003.CSV	725.134	0.0244819
0003.CSV	728.991	0.022785
0003.CSV	732.848	0.0229859
0003.CSV	736.705	0.0229346
0003.CSV	740.562	0.0229528
0003.CSV	744.42	0.0228895
0003.CSV	748.277	0.0233677
0003.CSV	752.134	0.0234696
0003.CSV	755.991	0.0242582
0003.CSV	759.848	0.0247975
0003.CSV	763.705	0.0257396
0003.CSV	767.562	0.0262945
0003.CSV	771.419	0.0272199
0003.CSV	775.276	0.0277696
0003.CSV	779.133	0.0284707
0003.CSV	782.99	0.0282891
0003.CSV	786.848	0.0285734
0003.CSV	790.705	0.0289466
0003.CSV	794.562	0.0298687
0003.CSV	798.419	0.030349
0003.CSV	802.276	0.0306243
0003.CSV	806.133	0.0301803
0003.CSV	809.99	0.0302889
0003.CSV	813.847	0.0305653
0003.CSV	817.704	0.0315076
0003.CSV	821.562	0.0324343
0003.CSV	825.419	0.0338811
0003.CSV	829.276	0.0350865
0003.CSV	833.133	0.0365685
0003.CSV	836.99	0.0380021
0003.CSV	840.847	0.0410597
0003.CSV	844.704	0.0459863
0003.CSV	848.561	0.0498628
0003.CSV	852.418	0.0523555
0003.CSV	856.275	0.0612412
0003.CSV	860.132	0.079835
0003.CSV	863.99	0.113707
0003.CSV	867.847	0.158773
0003.CSV	871.704	0.183269
0003.CSV	875.561	0.162023
0003.CSV	879.418	0.120935
0003.CSV	883.275	0.0766251
0003.CSV	887.132	0.038478
0003.CSV	890.989	0.0210814
0003.CSV	894.846	0.0190121
0003.CSV	898.703	0.0194989
0003.CSV	902.561	0.0203166
0003.CSV	906.418	0.0208204
0003.CSV	910.275	0.0216199
0003.CSV	914.132	0.0222222
0003.CSV	917.989	0.0230868
0003.CSV	921.846	0.023669
0003.CSV	925.703	0.0244982
0003.CSV	929.56	0.0250394
0003.CSV	933.417	0.0257525
0003.CSV	937.274	0.0261051
0003.CSV	941.131	0.0267076
0003.CSV	944.989	0.0271138
0003.CSV	948.846	0.0277331
0003.CSV	952.703	0.0281682
0003.CSV	956.56	0.0288803
0003.CSV	960.417	0.0293861
0003.CSV	964.274	0.0301341
0003.CSV	968.131	0.0307177
0003.CSV	971.988	0.0316473
0003.CSV	975.845	0.0324074
0003.CSV	979.702	0.0333889
0003.CSV	983.559	0.0343151
0003.CSV	987.417	0.0356467
0003.CSV	991.274	0.0368067
0003.CSV	995.131	0.0381096
0003.CSV	998.988	0.039027
0003.CSV	1002.85	0.0401379
0003.CSV	1006.7	0.0410187
0003.CSV	1010.56	0.0422659
0003.CSV	1014.42	0.043366
0003.CSV	1018.27	0.0445964
0003.CSV	1022.13	0.0455036
0003.CSV	1025.99	0.0466545
0003.CSV	1029.85	0.0474863
0003.CSV	1033.7	0.0485528
0003.CSV	1037.56	0.0493856
0003.CSV	1041.42	0.0504177
0003.CSV	1045.27	0.0512774
0003.CSV	1049.13	0.0524622
0003.CSV	1052.99	0.0533518
0003.CSV	1056.84	0.0543975
0003.CSV	1060.7	0.0551424
0003.CSV	1064.56	0.0560466
0003.CSV	1068.42	0.0566428
0003.CSV	1072.27	0.0575842
0003.CSV	1076.13	0.0583867
0003.CSV	1079.99	0.0594933
0003.CSV	1083.84	0.0603505
0003.CSV	1087.7	0.0610186
0003.CSV	1091.56	0.0602721
0003.CSV	1095.41	0.0588744
0003.CSV	1099.27	0.0574372
0003.CSV	1103.13	0.0568072
0003.CSV	1106.99	0.0562771
0003.CSV	1110.84	0.0561252
0003.CSV	1114.7	0.0557752
0003.CSV	1118.56	0.0555171
0003.CSV	1122.41	0.0549842
0003.CSV	1126.27	0.0547287
0003.CSV	1130.13	0.0542588
0003.CSV	1133.99	0.054025
0003.CSV	1137.84	0.0538015
0003.CSV	1141.7	0.054089
0003.CSV	1145.56	0.0543321
0003.CSV	1149.41	0.0548003
0003.CSV	1153.27	0.0551295
0003.CSV	1157.13	0.0557618
0003.CSV	1160.99	0.0561358
0003.CSV	1164.84	0.0564258
0003.CSV	1168.7	0.0562194
0003.CSV	1172.56	0.0562401
0003.CSV	1176.41	0.056258
0003.CSV	1180.27	0.0565006
0003.CSV	1184.13	0.0563414
0003.CSV	1187.99	0.0562892
0003.CSV	1191.84	0.0561298
0003.CSV	1195.7	0.056369
0003.CSV	1199.56	0.0565734
0003.CSV	1203.41	0.0570921
0003.CSV	1207.27	0.0575263
0003.CSV	1211.13	0.0583665
0003.CSV	1214.98	0.0591582
0003.CSV	1218.84	0.0602861
0003.CSV	1222.7	0.0613176
0003.CSV	1226.56	0.0626367
0003.CSV	1230.41	0.0638212
0003.CSV	1234.27	0.0652508
0003.CSV	1238.13	0.0664398
0003.CSV	1241.98	0.0678139
0003.CSV	1245.84	0.0689745
0003.CSV	1249.7	0.0703695
0003.CSV	1253.56	0.0714559
0003.CSV	1257.41	0.072751
0003.CSV	1261.27	0.0739796
0003.CSV	1265.13	0.0755767
0003.CSV	1268.98	0.0771063
0003.CSV	1272.84	0.0790934
0003.CSV	1276.7	0.0809427
0003.CSV	1280.56	0.0831431
0003.CSV	1284.41	0.0852751
0003.CSV	1288.27	0.0879172
0003.CSV	1292.13	0.0905236
0003.CSV	1295.98	0.0935484
0003.CSV	1299.84	0.0965225
0003.CSV	1303.7	0.0999263
0003.CSV	1307.56	0.103273
0003.CSV	1311.41	0.107096
0003.CSV	1315.27	0.110804
0003.CSV	1319.13	0.115046
0003.CSV	1322.98	0.119122
0003.CSV	1326.84	0.123724
0003.CSV	1330.7	0.128467
0003.CSV	1334.56	0.133657
0003.CSV	1338.41	0.139654
0003.CSV	1342.27	0.146891
0003.CSV	1346.13	0.152984
0003.CSV	1349.98	0.160065
0003.CSV	1353.84	0.167384
0003.CSV	1357.7	0.175106
0003.CSV	1361.56	0.183443
0003.CSV	1365.41	0.193149
0003.CSV	1369.27	0.200937
0003.CSV	1373.13	0.209976
0003.CSV	1376.98	0.218807
0003.CSV	1380.84	0.225906
0003.CSV	1384.7	0.231456
0003.CSV	1388.56	0.237288
0003.CSV	1392.41	0.239593
0003.CSV	1396.27	0.238728
0003.CSV	1400.13	0.234316
0003.CSV	1403.98	0.229561
0003.CSV	1407.84	0.221692
0003.CSV	1411.7	0.212662
0003.CSV	1415.55	0.203316
0003.CSV	1419.41	0.193199
0003.CSV	1423.27	0.184572
0003.CSV	1427.12	0.179147
0003.CSV	1430.98	0.173433
0003.CSV	1434.84	0.168034
0003.CSV	1438.7	0.161521
0003.CSV	1442.55	0.156794
0003.CSV	1446.41	0.151313
0003.CSV	1450.27	0.145695
0003.CSV	1454.12	0.140726
0003.CSV	1457.98	0.133411
0003.CSV	1461.84	0.127322
0003.CSV	1465.7	0.122806
0003.CSV	1469.55	0.117921
0003.CSV	1473.41	0.112083
0003.CSV	1477.27	0.105761
0003.CSV	1481.12	0.101815
0003.CSV	1484.98	0.0977998
0003.CSV	1488.84	0.0928349
0003.CSV	1492.7	0.0875585
0003.CSV	1496.55	0.0833644
0003.CSV	1500.41	0.0784949
0003.CSV	1504.27	0.0755309
0003.CSV	1508.12	0.0697352
0003.CSV	1511.98	0.0654955
0003.CSV	1515.84	0.0625065
0003.CSV	1519.7	0.0588544
0003.CSV	1523.55	0.0546708
0003.CSV	1527.41	0.051707
0003.CSV	1531.27	0.0489481
0003.CSV	1535.12	0.0464823
0003.CSV	1538.98	0.0435736
0003.CSV	1542.84	0.0380158
0003.CSV	1546.7	0.0342537
0003.CSV	1550.55	0.0317555
0003.CSV	1554.41	0.02934
0003.CSV	1558.27	0.0268461
0003.CSV	1562.12	0.024904
0003.CSV	1565.98	0.02425
0003.CSV	1569.84	0.023652
0003.CSV	1573.69	0.0233132
0003.CSV	1577.55	0.0226935
0003.CSV	1581.41	0.0217954
0003.CSV	1585.27	0.0206633
0003.CSV	1589.12	0.0195401
0003.CSV	1592.98	0.0183972
0003.CSV	1596.84	0.0173477
0003.CSV	1600.69	0.0163341
0003.CSV	1604.55	0.0155344
0003.CSV	1608.41	0.0147569
0003.CSV	1612.27	0.014079
0003.CSV	1616.12	0.0133113
0003.CSV	1619.98	0.0126817
0003.CSV	1623.84	0.0121206
0003.CSV	1627.69	0.0116791
0003.CSV	1631.55	0.0112467
0003.CSV	1635.41	0.0109076
0003.CSV	1639.27	0.0105544
0003.CSV	1643.12	0.0103507
0003.CSV	1646.98	0.0100655
0003.CSV	1650.84	0.00995347
0003.CSV	1654.69	0.00981863
0003.CSV	1658.55	0.00966947
0003.CSV	1662.41	0.00944487
0003.CSV	1666.27	0.00933852
0003.CSV	1670.12	0.00920576
0003.CSV	1673.98	0.00913903
0003.CSV	1677.84	0.00896347
0003.CSV	1681.69	0.00885535
0003.CSV	1685.55	0.0087721
0003.CSV	1689.41	0.00872071
0003.CSV	1693.27	0.00852718
0003.CSV	1697.12	0.00847386
0003.CSV	1700.98	0.00851272
0003.CSV	1704.84	0.00860166
0003.CSV	1708.69	0.00855073
0003.CSV	1712.55	0.00852012
0003.CSV	1716.41	0.00861477
0003.CSV	1720.27	0.00887638
0003.CSV	1724.12	0.0088592
[truncated: 32,521 more rows]

## Sheet: S.plana_450_1_mFTIR_data
Select spectrum number	Wavenumbers	Absorbance
0001.CSV	674.992	0.05514
0001.CSV	678.849	0.0554541
0001.CSV	682.706	0.0555016
0001.CSV	686.563	0.056777
0001.CSV	690.42	0.0580816
0001.CSV	694.277	0.0610915
0001.CSV	698.134	0.0639356
0001.CSV	701.991	0.0692456
0001.CSV	705.849	0.0813477
0001.CSV	709.706	0.0980403
0001.CSV	713.563	0.092098
0001.CSV	717.42	0.0673223
0001.CSV	721.277	0.0532912
0001.CSV	725.134	0.0511315
0001.CSV	728.991	0.0508238
0001.CSV	732.848	0.0512717
0001.CSV	736.705	0.0515195
0001.CSV	740.562	0.0514457
0001.CSV	744.42	0.051348
0001.CSV	748.277	0.0523708
0001.CSV	752.134	0.0531301
0001.CSV	755.991	0.0540398
0001.CSV	759.848	0.0544875
0001.CSV	763.705	0.0553129
0001.CSV	767.562	0.05593
0001.CSV	771.419	0.0564769
0001.CSV	775.276	0.0569123
0001.CSV	779.133	0.0574498
0001.CSV	782.99	0.0570948
0001.CSV	786.848	0.0573261
0001.CSV	790.705	0.0584814
0001.CSV	794.562	0.0614053
0001.CSV	798.419	0.0649303
0001.CSV	802.276	0.067978
0001.CSV	806.133	0.0692247
0001.CSV	809.99	0.0698531
0001.CSV	813.847	0.0712405
0001.CSV	817.704	0.0765241
0001.CSV	821.562	0.0865464
0001.CSV	825.419	0.0977349
0001.CSV	829.276	0.101383
0001.CSV	833.133	0.0962792
0001.CSV	836.99	0.0878229
0001.CSV	840.847	0.0816666
0001.CSV	844.704	0.0794652
0001.CSV	848.561	0.0783925
0001.CSV	852.418	0.0775632
0001.CSV	856.275	0.0820731
0001.CSV	860.132	0.0927631
0001.CSV	863.99	0.113978
0001.CSV	867.847	0.14877
0001.CSV	871.704	0.175663
0001.CSV	875.561	0.163808
0001.CSV	879.418	0.128077
0001.CSV	883.275	0.0899771
0001.CSV	887.132	0.0596693
0001.CSV	890.989	0.0466807
0001.CSV	894.846	0.0459377
0001.CSV	898.703	0.0472058
0001.CSV	902.561	0.0488751
0001.CSV	906.418	0.0505997
0001.CSV	910.275	0.0527703
0001.CSV	914.132	0.0547239
0001.CSV	917.989	0.0566833
0001.CSV	921.846	0.058155
0001.CSV	925.703	0.0597983
0001.CSV	929.56	0.0612806
0001.CSV	933.417	0.0628078
0001.CSV	937.274	0.0638549
0001.CSV	941.131	0.064871
0001.CSV	944.989	0.065609
0001.CSV	948.846	0.0666147
0001.CSV	952.703	0.067407
0001.CSV	956.56	0.0681315
0001.CSV	960.417	0.0684565
0001.CSV	964.274	0.0688904
0001.CSV	968.131	0.0691337
0001.CSV	971.988	0.0696461
0001.CSV	975.845	0.0702507
0001.CSV	979.702	0.0714733
0001.CSV	983.559	0.0730384
0001.CSV	987.417	0.0752349
0001.CSV	991.274	0.077625
0001.CSV	995.131	0.0806062
0001.CSV	998.988	0.0839398
0001.CSV	1002.85	0.0883823
0001.CSV	1006.7	0.0940558
0001.CSV	1010.56	0.100087
0001.CSV	1014.42	0.103466
0001.CSV	1018.27	0.10569
0001.CSV	1022.13	0.108553
0001.CSV	1025.99	0.112204
0001.CSV	1029.85	0.115256
0001.CSV	1033.7	0.117403
0001.CSV	1037.56	0.117741
0001.CSV	1041.42	0.116656
0001.CSV	1045.27	0.114159
0001.CSV	1049.13	0.111844
0001.CSV	1052.99	0.110325
0001.CSV	1056.84	0.110401
0001.CSV	1060.7	0.111712
0001.CSV	1064.56	0.114372
0001.CSV	1068.42	0.11747
0001.CSV	1072.27	0.120909
0001.CSV	1076.13	0.123656
0001.CSV	1079.99	0.125676
0001.CSV	1083.84	0.12631
0001.CSV	1087.7	0.125559
0001.CSV	1091.56	0.123759
0001.CSV	1095.41	0.122785
0001.CSV	1099.27	0.12256
0001.CSV	1103.13	0.122871
0001.CSV	1106.99	0.12224
0001.CSV	1110.84	0.120723
0001.CSV	1114.7	0.118385
0001.CSV	1118.56	0.115707
0001.CSV	1122.41	0.112025
0001.CSV	1126.27	0.107895
0001.CSV	1130.13	0.103398
0001.CSV	1133.99	0.0992323
0001.CSV	1137.84	0.095587
0001.CSV	1141.7	0.0933727
0001.CSV	1145.56	0.0921326
0001.CSV	1149.41	0.0916387
0001.CSV	1153.27	0.0909189
0001.CSV	1157.13	0.0902051
0001.CSV	1160.99	0.0895405
0001.CSV	1164.84	0.0897022
0001.CSV	1168.7	0.0910579
0001.CSV	1172.56	0.095456
0001.CSV	1176.41	0.103415
0001.CSV	1180.27	0.110837
0001.CSV	1184.13	0.109805
0001.CSV	1187.99	0.101408
0001.CSV	1191.84	0.0922535
0001.CSV	1195.7	0.0869329
0001.CSV	1199.56	0.0855725
0001.CSV	1203.41	0.0873395
0001.CSV	1207.27	0.090832
0001.CSV	1211.13	0.0958431
0001.CSV	1214.98	0.101432
0001.CSV	1218.84	0.107251
0001.CSV	1222.7	0.112494
0001.CSV	1226.56	0.117319
0001.CSV	1230.41	0.121243
0001.CSV	1234.27	0.124373
0001.CSV	1238.13	0.126188
0001.CSV	1241.98	0.127412
0001.CSV	1245.84	0.127619
0001.CSV	1249.7	0.125892
0001.CSV	1253.56	0.120556
0001.CSV	1257.41	0.112806
0001.CSV	1261.27	0.105058
0001.CSV	1265.13	0.100423
0001.CSV	1268.98	0.0987437
0001.CSV	1272.84	0.0992012
0001.CSV	1276.7	0.1006
0001.CSV	1280.56	0.103226
0001.CSV	1284.41	0.106555
0001.CSV	1288.27	0.110508
0001.CSV	1292.13	0.113808
0001.CSV	1295.98	0.116234
0001.CSV	1299.84	0.117215
0001.CSV	1303.7	0.117466
0001.CSV	1307.56	0.117376
0001.CSV	1311.41	0.117883
0001.CSV	1315.27	0.118406
0001.CSV	1319.13	0.119687
0001.CSV	1322.98	0.121494
0001.CSV	1326.84	0.124179
0001.CSV	1330.7	0.127036
0001.CSV	1334.56	0.130155
0001.CSV	1338.41	0.13347
0001.CSV	1342.27	0.137333
0001.CSV	1346.13	0.14051
0001.CSV	1349.98	0.144639
0001.CSV	1353.84	0.149728
0001.CSV	1357.7	0.156505
0001.CSV	1361.56	0.163344
0001.CSV	1365.41	0.168207
0001.CSV	1369.27	0.170886
0001.CSV	1373.13	0.176074
0001.CSV	1376.98	0.182943
0001.CSV	1380.84	0.188831
0001.CSV	1384.7	0.193245
0001.CSV	1388.56	0.197709
0001.CSV	1392.41	0.200738
0001.CSV	1396.27	0.203658
0001.CSV	1400.13	0.205266
0001.CSV	1403.98	0.207293
0001.CSV	1407.84	0.208355
0001.CSV	1411.7	0.207638
0001.CSV	1415.55	0.204218
0001.CSV	1419.41	0.198362
0001.CSV	1423.27	0.1921
0001.CSV	1427.12	0.18782
0001.CSV	1430.98	0.182973
0001.CSV	1434.84	0.178387
0001.CSV	1438.7	0.173091
0001.CSV	1442.55	0.169718
0001.CSV	1446.41	0.165946
0001.CSV	1450.27	0.1623
0001.CSV	1454.12	0.15884
0001.CSV	1457.98	0.152717
0001.CSV	1461.84	0.146336
0001.CSV	1465.7	0.140144
0001.CSV	1469.55	0.132907
0001.CSV	1473.41	0.123166
0001.CSV	1477.27	0.113119
0001.CSV	1481.12	0.106923
0001.CSV	1484.98	0.101534
0001.CSV	1488.84	0.0962728
0001.CSV	1492.7	0.092579
0001.CSV	1496.55	0.0925941
0001.CSV	1500.41	0.0962218
0001.CSV	1504.27	0.100894
0001.CSV	1508.12	0.105933
0001.CSV	1511.98	0.0991117
0001.CSV	1515.84	0.0848219
0001.CSV	1519.7	0.0675114
0001.CSV	1523.55	0.0558632
0001.CSV	1527.41	0.0513901
0001.CSV	1531.27	0.0488503
0001.CSV	1535.12	0.047112
0001.CSV	1538.98	0.0452482
0001.CSV	1542.84	0.0416347
0001.CSV	1546.7	0.0389837
0001.CSV	1550.55	0.037312
0001.CSV	1554.41	0.0359129
0001.CSV	1558.27	0.0351793
0001.CSV	1562.12	0.0349607
0001.CSV	1565.98	0.0351421
0001.CSV	1569.84	0.0360525
0001.CSV	1573.69	0.0376198
0001.CSV	1577.55	0.039516
0001.CSV	1581.41	0.0396238
0001.CSV	1585.27	0.0378225
0001.CSV	1589.12	0.0358683
0001.CSV	1592.98	0.0351456
0001.CSV	1596.84	0.0361499
0001.CSV	1600.69	0.0382659
0001.CSV	1604.55	0.0408038
0001.CSV	1608.41	0.0412132
0001.CSV	1612.27	0.0388895
0001.CSV	1616.12	0.0348122
0001.CSV	1619.98	0.0312676
0001.CSV	1623.84	0.0295272
0001.CSV	1627.69	0.0285737
0001.CSV	1631.55	0.0279975
0001.CSV	1635.41	0.0278537
0001.CSV	1639.27	0.0278285
0001.CSV	1643.12	0.0276047
0001.CSV	1646.98	0.0275024
0001.CSV	1650.84	0.0276382
0001.CSV	1654.69	0.0276259
0001.CSV	1658.55	0.0273064
0001.CSV	1662.41	0.0268433
0001.CSV	1666.27	0.026488
0001.CSV	1670.12	0.0261214
0001.CSV	1673.98	0.025846
0001.CSV	1677.84	0.0253841
0001.CSV	1681.69	0.0250447
0001.CSV	1685.55	0.0248142
0001.CSV	1689.41	0.0246036
0001.CSV	1693.27	0.0242391
0001.CSV	1697.12	0.024267
0001.CSV	1700.98	0.0246126
0001.CSV	1704.84	0.0249397
0001.CSV	1708.69	0.0251605
0001.CSV	1712.55	0.0253264
0001.CSV	1716.41	0.0258596
0001.CSV	1720.27	0.0266019
0001.CSV	1724.12	0.0268117
0001.CSV	1727.98	0.027013
0001.CSV	1731.84	0.0272124
0001.CSV	1735.69	0.0273746
0001.CSV	1739.55	0.026952
0001.CSV	1743.41	0.0261982
0001.CSV	1747.27	0.0251864
0001.CSV	1751.12	0.0242901
0001.CSV	1754.98	0.0236417
0001.CSV	1758.84	0.023286
0001.CSV	1762.69	0.0231105
0001.CSV	1766.55	0.0229608
0001.CSV	1770.41	0.0229364
0001.CSV	1774.26	0.0231911
0001.CSV	1778.12	0.0232865
0001.CSV	1781.98	0.0237372
0001.CSV	1785.84	0.0246092
0001.CSV	1789.69	0.0260297
0001.CSV	1793.55	0.0277698
0001.CSV	1797.41	0.027828
0001.CSV	1801.26	0.0261682
0001.CSV	1805.12	0.0243706
0001.CSV	1808.98	0.0233298
0001.CSV	1812.84	0.0228982
0001.CSV	1816.69	0.0226357
0001.CSV	1820.55	0.0225292
0001.CSV	1824.41	0.0224695
0001.CSV	1828.26	0.0225736
0001.CSV	1832.12	0.0226024
0001.CSV	1835.98	0.0225613
0001.CSV	1839.84	0.0224906
0001.CSV	1843.69	0.0226134
0001.CSV	1847.55	0.0227478
0001.CSV	1851.41	0.0227302
0001.CSV	1855.26	0.0227098
0001.CSV	1859.12	0.0227917
0001.CSV	1862.98	0.0227876
0001.CSV	1866.84	0.022889
0001.CSV	1870.69	0.0231082
0001.CSV	1874.55	0.02312
0001.CSV	1878.41	0.0230996
0001.CSV	1882.26	0.0231512
0001.CSV	1886.12	0.0231265
0001.CSV	1889.98	0.0231624
0001.CSV	1893.83	0.0231244
0001.CSV	1897.69	0.0230616
0001.CSV	1901.55	0.0229486
0001.CSV	1905.41	0.0228561
0001.CSV	1909.26	0.022797
0001.CSV	1913.12	0.0227664
0001.CSV	1916.98	0.0226941
0001.CSV	1920.83	0.0227212
0001.CSV	1924.69	0.0227153
0001.CSV	1928.55	0.022703
0001.CSV	1932.4	0.0226822
0001.CSV	1936.26	0.0226927
0001.CSV	1940.12	0.0226728
0001.CSV	1943.98	0.0227605
0001.CSV	1947.83	0.0227669
0001.CSV	1951.69	0.0227401
0001.CSV	1955.55	0.0227129
0001.CSV	1959.4	0.0227407
0001.CSV	1963.26	0.0227363
0001.CSV	1967.12	0.0227675
0001.CSV	1970.98	0.0227622
0001.CSV	1974.83	0.022787
0001.CSV	1978.69	0.0228007
0001.CSV	1982.55	0.0228267
0001.CSV	1986.4	0.0228152
0001.CSV	1990.26	0.022856
0001.CSV	1994.12	0.0228805
0001.CSV	1997.98	0.0228888
0001.CSV	2001.83	0.0229013
0001.CSV	2005.69	0.0229471
0001.CSV	2009.55	0.0229622
0001.CSV	2013.4	0.0229891
0001.CSV	2017.26	0.0230238
0001.CSV	2021.12	0.0230629
0001.CSV	2024.97	0.0230469
0001.CSV	2028.83	0.0230733
0001.CSV	2032.69	0.0230791
0001.CSV	2036.55	0.0230974
0001.CSV	2040.4	0.0231026
0001.CSV	2044.26	0.0231525
0001.CSV	2048.12	0.0231477
0001.CSV	2051.97	0.0231688
0001.CSV	2055.83	0.0232186
0001.CSV	2059.69	0.023304
0001.CSV	2063.55	0.0233277
0001.CSV	2067.4	0.0233539
0001.CSV	2071.26	0.0233429
0001.CSV	2075.12	0.0233515
0001.CSV	2078.97	0.0233281
0001.CSV	2082.83	0.0233052
0001.CSV	2086.69	0.0232588
0001.CSV	2090.55	0.0232712
0001.CSV	2094.4	0.0232816
0001.CSV	2098.26	0.0232912
0001.CSV	2102.12	0.0232472
0001.CSV	2105.97	0.0232293
0001.CSV	2109.83	0.0232073
0001.CSV	2113.69	0.0232121
0001.CSV	2117.55	0.023205
0001.CSV	2121.4	0.0232372
0001.CSV	2125.26	0.0232534
0001.CSV	2129.12	0.0232747
0001.CSV	2132.97	0.0232756
0001.CSV	2136.83	0.0232988
0001.CSV	2140.69	0.0232919
0001.CSV	2144.55	0.0232729
0001.CSV	2148.4	0.0232464
0001.CSV	2152.26	0.0232363
0001.CSV	2156.12	0.0232037
0001.CSV	2159.97	0.0232018
0001.CSV	2163.83	0.0231753
0001.CSV	2167.69	0.023187
0001.CSV	2171.55	0.0232104
0001.CSV	2175.4	0.0232489
0001.CSV	2179.26	0.0232482
0001.CSV	2183.12	0.0232572
0001.CSV	2186.97	0.0232646
0001.CSV	2190.83	0.0232926
0001.CSV	2194.69	0.0233007
0001.CSV	2198.55	0.0233188
0001.CSV	2202.4	0.0233055
0001.CSV	2206.26	0.0233074
0001.CSV	2210.12	0.0233232
0001.CSV	2213.97	0.0233597
0001.CSV	2217.83	0.0233686
0001.CSV	2221.69	0.0233742
0001.CSV	2225.54	0.0233302
0001.CSV	2229.4	0.023341
0001.CSV	2233.26	0.0233497
0001.CSV	2237.12	0.0233367
0001.CSV	2240.97	0.0233089
0001.CSV	2244.83	0.0233423
0001.CSV	2248.69	0.0233587
0001.CSV	2252.54	0.0233585
0001.CSV	2256.4	0.0233626
0001.CSV	2260.26	0.0233811
0001.CSV	2264.11	0.0233511
0001.CSV	2267.97	0.0233585
0001.CSV	2271.83	0.0233608
0001.CSV	2275.69	0.0233735
0001.CSV	2279.54	0.0233563
0001.CSV	2283.4	0.0233287
0001.CSV	2287.26	0.0233402
0001.CSV	2291.11	0.0234301
0001.CSV	2294.97	0.0234846
0001.CSV	2298.83	0.023541
0001.CSV	2302.69	0.0235789
0001.CSV	2306.54	0.0236229
0001.CSV	2310.4	0.0236888
0001.CSV	2314.26	0.0237095
0001.CSV	2318.11	0.0235976
0001.CSV	2321.97	0.0234354
0001.CSV	2325.83	0.0232431
0001.CSV	2329.69	0.0231118
0001.CSV	2333.54	0.0230149
0001.CSV	2337.4	0.0230026
0001.CSV	2341.26	0.0228938
0001.CSV	2345.11	0.0232803
0001.CSV	2348.97	0.023244
0001.CSV	2352.83	0.0223328
0001.CSV	2356.69	0.0202816
0001.CSV	2360.54	0.0189272
0001.CSV	2364.4	0.0199198
0001.CSV	2368.26	0.0220346
0001.CSV	2372.11	0.0232661
0001.CSV	2375.97	0.023721
0001.CSV	2379.83	0.0237628
0001.CSV	2383.69	0.0236183
0001.CSV	2387.54	0.0234164
0001.CSV	2391.4	0.0233334
0001.CSV	2395.26	0.0233354
0001.CSV	2399.11	0.0233348
0001.CSV	2402.97	0.0233279
0001.CSV	2406.83	0.0233476
0001.CSV	2410.68	0.023369
0001.CSV	2414.54	0.0233925
0001.CSV	2418.4	0.0234269
0001.CSV	2422.26	0.0234647
0001.CSV	2426.11	0.0234625
0001.CSV	2429.97	0.023466
0001.CSV	2433.83	0.0234788
0001.CSV	2437.68	0.0234857
0001.CSV	2441.54	0.0234827
0001.CSV	2445.4	0.0234734
0001.CSV	2449.26	0.0234776
0001.CSV	2453.11	0.0235293
0001.CSV	2456.97	0.0235894
0001.CSV	2460.83	0.0236456
0001.CSV	2464.68	0.0237078
0001.CSV	2468.54	0.0238429
0001.CSV	2472.4	0.0239723
0001.CSV	2476.26	0.0240837
0001.CSV	2480.11	0.0242033
0001.CSV	2483.97	0.0243596
0001.CSV	2487.83	0.0245662
0001.CSV	2491.68	0.0248927
0001.CSV	2495.54	0.0253332
0001.CSV	2499.4	0.0258337
0001.CSV	2503.26	0.0263008
0001.CSV	2507.11	0.0266565
0001.CSV	2510.97	0.0268032
0001.CSV	2514.83	0.0267509
0001.CSV	2518.68	0.0265788
0001.CSV	2522.54	0.0263184
0001.CSV	2526.4	0.0259331
0001.CSV	2530.26	0.0255241
0001.CSV	2534.11	0.0251263
0001.CSV	2537.97	0.0248442
0001.CSV	2541.83	0.0247064
0001.CSV	2545.68	0.0246358
0001.CSV	2549.54	0.0245812
0001.CSV	2553.4	0.0245615
0001.CSV	2557.26	0.0245348
0001.CSV	2561.11	0.0245012
0001.CSV	2564.97	0.0244907
0001.CSV	2568.83	0.0245193
0001.CSV	2572.68	0.024533
0001.CSV	2576.54	0.0245348
0001.CSV	2580.4	0.0245338
0001.CSV	2584.25	0.0245552
0001.CSV	2588.11	0.0246023
0001.CSV	2591.97	0.0246593
0001.CSV	2595.83	0.0246459
0001.CSV	2599.68	0.0246125
0001.CSV	2603.54	0.0245893
0001.CSV	2607.4	0.0245716
0001.CSV	2611.25	0.0245441
0001.CSV	2615.11	0.0245416
0001.CSV	2618.97	0.0245431
0001.CSV	2622.82	0.0245552
0001.CSV	2626.68	0.0245553
0001.CSV	2630.54	0.0245429
0001.CSV	2634.4	0.0245869
0001.CSV	2638.25	0.0246
0001.CSV	2642.11	0.0245592
0001.CSV	2645.97	0.0245631
0001.CSV	2649.82	0.0245989
0001.CSV	2653.68	0.024666
0001.CSV	2657.54	0.0247285
0001.CSV	2661.4	0.0247972
0001.CSV	2665.25	0.0248694
0001.CSV	2669.11	0.0249798
0001.CSV	2672.97	0.0251534
0001.CSV	2676.82	0.0253753
0001.CSV	2680.68	0.0254256
0001.CSV	2684.54	0.0252863
0001.CSV	2688.4	0.0252724
0001.CSV	2692.25	0.025358
0001.CSV	2696.11	0.0254403
0001.CSV	2699.97	0.0255225
0001.CSV	2703.82	0.0256389
0001.CSV	2707.68	0.0258168
0001.CSV	2711.54	0.0259352
0001.CSV	2715.4	0.0260587
0001.CSV	2719.25	0.0262579
0001.CSV	2723.11	0.0265721
0001.CSV	2726.97	0.0267144
0001.CSV	2730.82	0.0266012
0001.CSV	2734.68	0.0266214
0001.CSV	2738.54	0.0267155
0001.CSV	2742.4	0.0268003
0001.CSV	2746.25	0.0270668
0001.CSV	2750.11	0.027212
0001.CSV	2753.97	0.0271377
0001.CSV	2757.82	0.0271677
0001.CSV	2761.68	0.0272642
0001.CSV	2765.54	0.0274247
0001.CSV	2769.39	0.0277589
0001.CSV	2773.25	0.0282641
0001.CSV	2777.11	0.0285503
0001.CSV	2780.97	0.0287822
0001.CSV	2784.82	0.0293544
0001.CSV	2788.68	0.0301462
0001.CSV	2792.54	0.0307829
0001.CSV	2796.39	0.0313968
0001.CSV	2800.25	0.0319468
0001.CSV	2804.11	0.0324477
0001.CSV	2807.97	0.0331902
0001.CSV	2811.82	0.033787
0001.CSV	2815.68	0.0342738
0001.CSV	2819.54	0.0349831
0001.CSV	2823.39	0.035819
0001.CSV	2827.25	0.036763
0001.CSV	2831.11	0.0382373
0001.CSV	2834.97	0.040512
0001.CSV	2838.82	0.0436269
0001.CSV	2842.68	0.0479923
0001.CSV	2846.54	0.0540869
0001.CSV	2850.39	0.0597034
0001.CSV	2854.25	0.0619128
0001.CSV	2858.11	0.0606814
0001.CSV	2861.97	0.058242
0001.CSV	2865.82	0.0567465
0001.CSV	2869.68	0.0563439
0001.CSV	2873.54	0.0551193
0001.CSV	2877.39	0.0525121
0001.CSV	2881.25	0.0505908
0001.CSV	2885.11	0.0503815
0001.CSV	2888.97	0.0514838
0001.CSV	2892.82	0.0534307
0001.CSV	2896.68	0.0555631
0001.CSV	2900.54	0.057744
0001.CSV	2904.39	0.060445
0001.CSV	2908.25	0.0640844
0001.CSV	2912.11	0.0690591
0001.CSV	2915.97	0.0747912
0001.CSV	2919.82	0.0794202
0001.CSV	2923.68	0.0809592
0001.CSV	2927.54	0.0785494
0001.CSV	2931.39	0.0729628
0001.CSV	2935.25	0.0662649
0001.CSV	2939.11	0.0606687
0001.CSV	2942.96	0.0572789
0001.CSV	2946.82	0.056181
0001.CSV	2950.68	0.0569522
0001.CSV	2954.54	0.0579272
0001.CSV	2958.39	0.057105
0001.CSV	2962.25	0.0540889
0001.CSV	2966.11	0.049273
0001.CSV	2969.96	0.0440706
0001.CSV	2973.82	0.0395707
0001.CSV	2977.68	0.0359704
0001.CSV	2981.53	0.0329349
0001.CSV	2985.39	0.0303378
0001.CSV	2989.25	0.0285958
0001.CSV	2993.11	0.0274744
0001.CSV	2996.96	0.0264695
0001.CSV	3000.82	0.0256181
0001.CSV	3004.68	0.0250147
0001.CSV	3008.53	0.0247844
0001.CSV	3012.39	0.0247511
0001.CSV	3016.25	0.024569
0001.CSV	3020.11	0.0243114
0001.CSV	3023.96	0.0242331
0001.CSV	3027.82	0.0244084
0001.CSV	3031.68	0.0248693
0001.CSV	3035.53	0.0251649
0001.CSV	3039.39	0.0252215
0001.CSV	3043.25	0.0252184
0001.CSV	3047.11	0.0250948
0001.CSV	3050.96	0.0250314
0001.CSV	3054.82	0.025006
0001.CSV	3058.68	0.0249045
0001.CSV	3062.53	0.0248791
0001.CSV	3066.39	0.0249481
0001.CSV	3070.25	0.0248307
0001.CSV	3074.11	0.0247507
0001.CSV	3077.96	0.0248378
0001.CSV	3081.82	0.0248581
0001.CSV	3085.68	0.024782
0001.CSV	3089.53	0.0246558
0001.CSV	3093.39	0.0245409
0001.CSV	3097.25	0.0246122
0001.CSV	3101.11	0.0247217
0001.CSV	3104.96	0.0247435
0001.CSV	3108.82	0.024839
0001.CSV	3112.68	0.024979
0001.CSV	3116.53	0.0251842
0001.CSV	3120.39	0.0252182
0001.CSV	3124.25	0.0251135
0001.CSV	3128.11	0.0251529
0001.CSV	3131.96	0.0251913
0001.CSV	3135.82	0.0253238
0001.CSV	3139.68	0.0255103
0001.CSV	3143.53	0.0254789
0001.CSV	3147.39	0.0255795
0001.CSV	3151.25	0.0258497
0001.CSV	3155.1	0.0259095
0001.CSV	3158.96	0.0257991
0001.CSV	3162.82	0.025836
0001.CSV	3166.68	0.0259403
0001.CSV	3170.53	0.0260579
0001.CSV	3174.39	0.0262076
0001.CSV	3178.25	0.0263909
0001.CSV	3182.1	0.0265391
0001.CSV	3185.96	0.0266855
0001.CSV	3189.82	0.0268516
0001.CSV	3193.68	0.0269338
0001.CSV	3197.53	0.0270095
0001.CSV	3201.39	0.027214
0001.CSV	3205.25	0.0273885
0001.CSV	3209.1	0.0274644
0001.CSV	3212.96	0.027608
0001.CSV	3216.82	0.0278485
0001.CSV	3220.68	0.0279927
0001.CSV	3224.53	0.0280665
0001.CSV	3228.39	0.0283211
0001.CSV	3232.25	0.0287385
0001.CSV	3236.1	0.0288951
0001.CSV	3239.96	0.0288911
0001.CSV	3243.82	0.0290786
0001.CSV	3247.68	0.0292533
0001.CSV	3251.53	0.0293012
0001.CSV	3255.39	0.0294762
0001.CSV	3259.25	0.0295364
0001.CSV	3263.1	0.0295994
0001.CSV	3266.96	0.0299073
0001.CSV	3270.82	0.0302686
0001.CSV	3274.68	0.0303929
0001.CSV	3278.53	0.0303284
0001.CSV	3282.39	0.0303004
0001.CSV	3286.25	0.030466
0001.CSV	3290.1	0.0308281
0001.CSV	3293.96	0.0311037
0001.CSV	3297.82	0.0311062
0001.CSV	3301.67	0.0312277
0001.CSV	3305.53	0.031506
0001.CSV	3309.39	0.0315473
0001.CSV	3313.25	0.0313397
0001.CSV	3317.1	0.0312713
0001.CSV	3320.96	0.0315097
0001.CSV	3324.82	0.031777
0001.CSV	3328.67	0.0316961
0001.CSV	3332.53	0.0317298
0001.CSV	3336.39	0.0321251
0001.CSV	3340.24	0.0324092
0001.CSV	3344.1	0.0323496
0001.CSV	3347.96	0.0323736
0001.CSV	3351.82	0.0323753
0001.CSV	3355.67	0.0322707
0001.CSV	3359.53	0.0323901
0001.CSV	3363.39	0.0325561
0001.CSV	3367.24	0.0326909
0001.CSV	3371.1	0.0326067
0001.CSV	3374.96	0.0324365
0001.CSV	3378.82	0.0323242
0001.CSV	3382.67	0.0321821
0001.CSV	3386.53	0.0322955
0001.CSV	3390.39	0.0325206
0001.CSV	3394.24	0.032549
0001.CSV	3398.1	0.0324572
0001.CSV	3401.96	0.0323156
0001.CSV	3405.82	0.032086
0001.CSV	3409.67	0.0319792
0001.CSV	3413.53	0.0316939
0001.CSV	3417.39	0.0313133
0001.CSV	3421.24	0.0311172
0001.CSV	3425.1	0.0310979
0001.CSV	3428.96	0.0311723
0001.CSV	3432.82	0.0311373
0001.CSV	3436.67	0.0307661
0001.CSV	3440.53	0.0301673
0001.CSV	3444.39	0.0297695
0001.CSV	3448.24	0.0295249
0001.CSV	3452.1	0.0291342
0001.CSV	3455.96	0.0289042
0001.CSV	3459.82	0.0288089
0001.CSV	3463.67	0.0287032
0001.CSV	3467.53	0.0285298
0001.CSV	3471.39	0.0280902
0001.CSV	3475.24	0.0276129
0001.CSV	3479.1	0.0272715
0001.CSV	3482.96	0.0268653
0001.CSV	3486.82	0.0265911
0001.CSV	3490.67	0.026254
0001.CSV	3494.53	0.0260302
0001.CSV	3498.39	0.0258369
0001.CSV	3502.24	0.0254431
0001.CSV	3506.1	0.0247959
0001.CSV	3509.96	0.0244273
0001.CSV	3513.81	0.0242407
0001.CSV	3517.67	0.0237667
0001.CSV	3521.53	0.0235162
0001.CSV	3525.39	0.0232839
0001.CSV	3529.24	0.0228867
0001.CSV	3533.1	0.0226986
0001.CSV	3536.96	0.0225618
0001.CSV	3540.81	0.0223753
0001.CSV	3544.67	0.0222329
0001.CSV	3548.53	0.0219131
0001.CSV	3552.39	0.0215144
0001.CSV	3556.24	0.0212165
0001.CSV	3560.1	0.0209594
0001.CSV	3563.96	0.0206598
0001.CSV	3567.81	0.0206691
0001.CSV	3571.67	0.0204312
0001.CSV	3575.53	0.0199375
0001.CSV	3579.39	0.0198697
0001.CSV	3583.24	0.0197704
0001.CSV	3587.1	0.0195201
0001.CSV	3590.96	0.0192532
0001.CSV	3594.81	0.0189094
0001.CSV	3598.67	0.0187844
0001.CSV	3602.53	0.0185271
0001.CSV	3606.39	0.0179373
0001.CSV	3610.24	0.0176658
0001.CSV	3614.1	0.0175845
0001.CSV	3617.96	0.017637
0001.CSV	3621.81	0.0177043
0001.CSV	3625.67	0.0171941
0001.CSV	3629.53	0.0170262
0001.CSV	3633.39	0.0172344
0001.CSV	3637.24	0.0169809
0001.CSV	3641.1	0.016719
0001.CSV	3644.96	0.0163937
0001.CSV	3648.81	0.016814
0001.CSV	3652.67	0.0170656
0001.CSV	3656.53	0.016902
0001.CSV	3660.38	0.0167964
0001.CSV	3664.24	0.0162308
0001.CSV	3668.1	0.0157609
0001.CSV	3671.96	0.0157326
0001.CSV	3675.81	0.0161265
0001.CSV	3679.67	0.0164687
0001.CSV	3683.53	0.0162873
0001.CSV	3687.38	0.0163029
0001.CSV	3691.24	0.0167471
0001.CSV	3695.1	0.0165282
0001.CSV	3698.95	0.0161894
0001.CSV	3702.81	0.0160939
0001.CSV	3706.67	0.0158083
0001.CSV	3710.53	0.0157506
0001.CSV	3714.38	0.0161067
0001.CSV	3718.24	0.0159068
0001.CSV	3722.1	0.0158812
0001.CSV	3725.95	0.01603
0001.CSV	3729.81	0.0158355
0001.CSV	3733.67	0.0159482
0001.CSV	3737.53	0.0165788
0001.CSV	3741.38	0.0160801
0001.CSV	3745.24	0.0156083
0001.CSV	3749.1	0.015738
0001.CSV	3752.95	0.0160613
0001.CSV	3756.81	0.0160013
0001.CSV	3760.67	0.016023
0001.CSV	3764.53	0.0159548
0001.CSV	3768.38	0.0160536
0001.CSV	3772.24	0.0161687
0001.CSV	3776.1	0.0160306
0001.CSV	3779.95	0.0160829
0001.CSV	3783.81	0.0161389
0001.CSV	3787.67	0.0161428
0001.CSV	3791.53	0.0159248
0001.CSV	3795.38	0.0156155
0001.CSV	3799.24	0.0155781
0001.CSV	3803.1	0.0159235
0001.CSV	3806.95	0.0162105
0001.CSV	3810.81	0.016009
0001.CSV	3814.67	0.0157268
0001.CSV	3818.53	0.0159067
0001.CSV	3822.38	0.0162288
0001.CSV	3826.24	0.0161041
0001.CSV	3830.1	0.015885
0001.CSV	3833.95	0.0157951
0001.CSV	3837.81	0.0160247
0001.CSV	3841.67	0.0164238
0001.CSV	3845.53	0.0162399
0001.CSV	3849.38	0.0156238
0001.CSV	3853.24	0.0156863
0001.CSV	3857.1	0.0161134
0001.CSV	3860.95	0.0157707
0001.CSV	3864.81	0.0157532
0001.CSV	3868.67	0.0157739
0001.CSV	3872.52	0.0159456
0001.CSV	3876.38	0.015867
0001.CSV	3880.24	0.0157792
0001.CSV	3884.1	0.0159874
0001.CSV	3887.95	0.0158796
0001.CSV	3891.81	0.0157863
0001.CSV	3895.67	0.0156494
0001.CSV	3899.52	0.0154772
0001.CSV	3903.38	0.0159076
0001.CSV	3907.24	0.0159602
0001.CSV	3911.1	0.0155626
0001.CSV	3914.95	0.0153336
0001.CSV	3918.81	0.015459
0001.CSV	3922.67	0.0155565
0001.CSV	3926.52	0.0155564
0001.CSV	3930.38	0.0155424
0001.CSV	3934.24	0.0156264
0001.CSV	3938.09	0.0154607
0001.CSV	3941.95	0.0153885
0001.CSV	3945.81	0.0153854
0001.CSV	3949.67	0.0153945
0001.CSV	3953.52	0.015443
0001.CSV	3957.38	0.0154235
0001.CSV	3961.24	0.0153964
0001.CSV	3965.09	0.0153498
0001.CSV	3968.95	0.0153178
0001.CSV	3972.81	0.015327
0001.CSV	3976.67	0.015334
0001.CSV	3980.52	0.0153289
0001.CSV	3984.38	0.0153157
0001.CSV	3988.24	0.0152756
0001.CSV	3992.09	0.01529
0001.CSV	3995.95	0.015295
0001.CSV	3999.81	0.0153085
0002.CSV	674.992	0.0500185
0002.CSV	678.849	0.0516139
0002.CSV	682.706	0.0525304
0002.CSV	686.563	0.0548716
0002.CSV	690.42	0.0569081
0002.CSV	694.277	0.0616234
0002.CSV	698.134	0.0669839
0002.CSV	701.991	0.076815
0002.CSV	705.849	0.0963195
0002.CSV	709.706	0.120294
0002.CSV	713.563	0.110502
0002.CSV	717.42	0.0740313
0002.CSV	721.277	0.0509038
0002.CSV	725.134	0.0450745
0002.CSV	728.991	0.0438503
0002.CSV	732.848	0.0446948
0002.CSV	736.705	0.0451591
0002.CSV	740.562	0.045678
0002.CSV	744.42	0.0458208
0002.CSV	748.277	0.0468853
0002.CSV	752.134	0.0476477
0002.CSV	755.991	0.0491607
0002.CSV	759.848	0.0501116
0002.CSV	763.705	0.0516115
0002.CSV	767.562	0.0529503
0002.CSV	771.419	0.0546892
0002.CSV	775.276	0.0563269
0002.CSV	779.133	0.0581758
0002.CSV	782.99	0.0582591
0002.CSV	786.848	0.0583697
0002.CSV	790.705	0.0591023
0002.CSV	794.562	0.0612438
0002.CSV	798.419	0.0628612
0002.CSV	802.276	0.0633541
0002.CSV	806.133	0.0623295
0002.CSV	809.99	0.0620318
0002.CSV	813.847	0.0623537
0002.CSV	817.704	0.0642056
0002.CSV	821.562	0.0665112
0002.CSV	825.419	0.069538
0002.CSV	829.276	0.0718108
0002.CSV	833.133	0.0739636
0002.CSV	836.99	0.0760829
0002.CSV	840.847	0.0805823
0002.CSV	844.704	0.0880222
0002.CSV	848.561	0.0932909
0002.CSV	852.418	0.0966968
0002.CSV	856.275	0.109402
0002.CSV	860.132	0.134758
0002.CSV	863.99	0.180991
0002.CSV	867.847	0.241602
0002.CSV	871.704	0.26424
0002.CSV	875.561	0.221321
0002.CSV	879.418	0.161037
0002.CSV	883.275	0.103074
0002.CSV	887.132	0.0560545
0002.CSV	890.989	0.036537
0002.CSV	894.846	0.0361926
0002.CSV	898.703	0.0383059
0002.CSV	902.561	0.0404581
0002.CSV	906.418	0.042053
0002.CSV	910.275	0.0438647
0002.CSV	914.132	0.0451983
0002.CSV	917.989	0.046757
0002.CSV	921.846	0.0478571
0002.CSV	925.703	0.0492664
0002.CSV	929.56	0.0503186
0002.CSV	933.417	0.0515126
0002.CSV	937.274	0.0521912
0002.CSV	941.131	0.0531262
0002.CSV	944.989	0.0537616
0002.CSV	948.846	0.0547501
0002.CSV	952.703	0.0554741
0002.CSV	956.56	0.056451
0002.CSV	960.417	0.0570964
0002.CSV	964.274	0.0580797
0002.CSV	968.131	0.0588308
0002.CSV	971.988	0.059959
0002.CSV	975.845	0.0609098
0002.CSV	979.702	0.0622068
0002.CSV	983.559	0.0632132
0002.CSV	987.417	0.0645271
0002.CSV	991.274	0.0655267
0002.CSV	995.131	0.0668347
0002.CSV	998.988	0.0678613
0002.CSV	1002.85	0.0692214
0002.CSV	1006.7	0.0703882
0002.CSV	1010.56	0.0718723
0002.CSV	1014.42	0.072746
0002.CSV	1018.27	0.0737319
0002.CSV	1022.13	0.0744708
0002.CSV	1025.99	0.0756971
0002.CSV	1029.85	0.0766556
0002.CSV	1033.7	0.0778938
0002.CSV	1037.56	0.0788437
0002.CSV	1041.42	0.0800496
0002.CSV	1045.27	0.0808798
0002.CSV	1049.13	0.0822627
0002.CSV	1052.99	0.0836521
0002.CSV	1056.84	0.0859465
0002.CSV	1060.7	0.0886166
0002.CSV	1064.56	0.091901
0002.CSV	1068.42	0.0948153
0002.CSV	1072.27	0.0980291
0002.CSV	1076.13	0.100806
0002.CSV	1079.99	0.103286
0002.CSV	1083.84	0.104325
0002.CSV	1087.7	0.104261
0002.CSV	1091.56	0.10253
0002.CSV	1095.41	0.100693
0002.CSV	1099.27	0.0990497
0002.CSV	1103.13	0.0982628
0002.CSV	1106.99	0.0973944
0002.CSV	1110.84	0.0968879
0002.CSV	1114.7	0.0961145
0002.CSV	1118.56	0.0956518
0002.CSV	1122.41	0.0949005
0002.CSV	1126.27	0.0944849
0002.CSV	1130.13	0.0938725
0002.CSV	1133.99	0.093824
0002.CSV	1137.84	0.0938693
0002.CSV	1141.7	0.0944253
0002.CSV	1145.56	0.094792
0002.CSV	1149.41	0.0954253
0002.CSV	1153.27	0.0956231
0002.CSV	1157.13	0.0961068
0002.CSV	1160.99	0.0965923
0002.CSV	1164.84	0.0974001
0002.CSV	1168.7	0.0976455
0002.CSV	1172.56	0.0980173
0002.CSV	1176.41	0.0982157
0002.CSV	1180.27	0.098448
0002.CSV	1184.13	0.0975683
0002.CSV	1187.99	0.0963677
0002.CSV	1191.84	0.0950052
0002.CSV	1195.7	0.0944141
0002.CSV	1199.56	0.0941395
0002.CSV	1203.41	0.0946707
0002.CSV	1207.27	0.0953007
0002.CSV	1211.13	0.0964935
0002.CSV	1214.98	0.0976938
0002.CSV	1218.84	0.0994255
0002.CSV	1222.7	0.101038
0002.CSV	1226.56	0.102917
0002.CSV	1230.41	0.104501
0002.CSV	1234.27	0.106409
0002.CSV	1238.13	0.107939
0002.CSV	1241.98	0.109692
0002.CSV	1245.84	0.111104
0002.CSV	1249.7	0.11263
0002.CSV	1253.56	0.113509
0002.CSV	1257.41	0.114435
0002.CSV	1261.27	0.115217
0002.CSV	1265.13	0.116848
0002.CSV	1268.98	0.118663
0002.CSV	1272.84	0.12113
0002.CSV	1276.7	0.123442
0002.CSV	1280.56	0.126199
0002.CSV	1284.41	0.128728
0002.CSV	1288.27	0.131799
0002.CSV	1292.13	0.134784
0002.CSV	1295.98	0.138327
0002.CSV	1299.84	0.141681
0002.CSV	1303.7	0.145409
0002.CSV	1307.56	0.148897
0002.CSV	1311.41	0.15301
0002.CSV	1315.27	0.157004
0002.CSV	1319.13	0.16173
0002.CSV	1322.98	0.166281
0002.CSV	1326.84	0.171604
0002.CSV	1330.7	0.177146
0002.CSV	1334.56	0.183377
0002.CSV	1338.41	0.190434
0002.CSV	1342.27	0.19905
0002.CSV	1346.13	0.206411
0002.CSV	1349.98	0.215123
0002.CSV	1353.84	0.224206
0002.CSV	1357.7	0.234108
0002.CSV	1361.56	0.244951
0002.CSV	1365.41	0.257575
0002.CSV	1369.27	0.267871
0002.CSV	1373.13	0.280972
0002.CSV	1376.98	0.294268
0002.CSV	1380.84	0.304169
0002.CSV	1384.7	0.312207
0002.CSV	1388.56	0.321941
0002.CSV	1392.41	0.327031
0002.CSV	1396.27	0.327401
0002.CSV	1400.13	0.322217
0002.CSV	1403.98	0.316702
0002.CSV	1407.84	0.306555
0002.CSV	1411.7	0.294147
0002.CSV	1415.55	0.280645
0002.CSV	1419.41	0.265671
0002.CSV	1423.27	0.252817
0002.CSV	1427.12	0.244584
0002.CSV	1430.98	0.235745
0002.CSV	1434.84	0.227307
0002.CSV	1438.7	0.217267
0002.CSV	1442.55	0.210104
0002.CSV	1446.41	0.202095
0002.CSV	1450.27	0.194145
0002.CSV	1454.12	0.187216
0002.CSV	1457.98	0.176735
0002.CSV	1461.84	0.1678
0002.CSV	1465.7	0.160592
0002.CSV	1469.55	0.152458
0002.CSV	1473.41	0.142652
0002.CSV	1477.27	0.132941
0002.CSV	1481.12	0.127225
0002.CSV	1484.98	0.121619
0002.CSV	1488.84	0.114797
0002.CSV	1492.7	0.107809
0002.CSV	1496.55	0.102451
0002.CSV	1500.41	0.0965006
0002.CSV	1504.27	0.0928699
0002.CSV	1508.12	0.086207
0002.CSV	1511.98	0.0810193
0002.CSV	1515.84	0.0769648
0002.CSV	1519.7	0.0718612
0002.CSV	1523.55	0.0661143
0002.CSV	1527.41	0.0621262
0002.CSV	1531.27	0.0584289
0002.CSV	1535.12	0.0547876
0002.CSV	1538.98	0.050802
0002.CSV	1542.84	0.0441864
0002.CSV	1546.7	0.0399712
0002.CSV	1550.55	0.0371055
0002.CSV	1554.41	0.0344681
0002.CSV	1558.27	0.0319005
0002.CSV	1562.12	0.0298634
0002.CSV	1565.98	0.0290495
0002.CSV	1569.84	0.0284033
0002.CSV	1573.69	0.0281182
0002.CSV	1577.55	0.0279237
0002.CSV	1581.41	0.0273758
0002.CSV	1585.27	0.0264329
0002.CSV	1589.12	0.0253496
0002.CSV	1592.98	0.0241868
0002.CSV	1596.84	0.0232426
0002.CSV	1600.69	0.0224413
0002.CSV	1604.55	0.0218588
0002.CSV	1608.41	0.0212266
0002.CSV	1612.27	0.020542
0002.CSV	1616.12	0.0197239
0002.CSV	1619.98	0.0190364
0002.CSV	1623.84	0.0184362
0002.CSV	1627.69	0.0180271
0002.CSV	1631.55	0.0175367
0002.CSV	1635.41	0.0173528
0002.CSV	1639.27	0.0172567
0002.CSV	1643.12	0.0169375
0002.CSV	1646.98	0.0167103
0002.CSV	1650.84	0.0167902
0002.CSV	1654.69	0.0168745
0002.CSV	1658.55	0.0166643
0002.CSV	1662.41	0.0164051
0002.CSV	1666.27	0.0163169
0002.CSV	1670.12	0.0162325
0002.CSV	1673.98	0.0162867
0002.CSV	1677.84	0.0160947
0002.CSV	1681.69	0.0160461
0002.CSV	1685.55	0.0162821
0002.CSV	1689.41	0.0162288
0002.CSV	1693.27	0.0158713
0002.CSV	1697.12	0.0159257
0002.CSV	1700.98	0.0163008
0002.CSV	1704.84	0.0165233
0002.CSV	1708.69	0.0165257
0002.CSV	1712.55	0.0164757
0002.CSV	1716.41	0.016805
0002.CSV	1720.27	0.0173917
0002.CSV	1724.12	0.0174646
0002.CSV	1727.98	0.0175596
0002.CSV	1731.84	0.0177836
0002.CSV	1735.69	0.0183652
0002.CSV	1739.55	0.0184499
0002.CSV	1743.41	0.0182044
0002.CSV	1747.27	0.0175467
0002.CSV	1751.12	0.016877
0002.CSV	1754.98	0.0162926
0002.CSV	1758.84	0.01597
0002.CSV	1762.69	0.0158423
0002.CSV	1766.55	0.0157419
0002.CSV	1770.41	0.0158008
0002.CSV	1774.26	0.016284
0002.CSV	1778.12	0.0165841
0002.CSV	1781.98	0.0173627
0002.CSV	1785.84	0.0188166
0002.CSV	1789.69	0.0210292
0002.CSV	1793.55	0.0236085
0002.CSV	1797.41	0.0238469
0002.CSV	1801.26	0.021611
0002.CSV	1805.12	0.0189894
0002.CSV	1808.98	0.0172453
0002.CSV	1812.84	0.0163358
0002.CSV	1816.69	0.0157888
0002.CSV	1820.55	0.015519
0002.CSV	1824.41	0.0153413
0002.CSV	1828.26	0.0153674
0002.CSV	1832.12	0.0152996
0002.CSV	1835.98	0.0151998
0002.CSV	1839.84	0.0150692
0002.CSV	1843.69	0.0151801
0002.CSV	1847.55	0.0152741
0002.CSV	1851.41	0.0152164
0002.CSV	1855.26	0.0151509
0002.CSV	1859.12	0.0152047
0002.CSV	1862.98	0.0151592
0002.CSV	1866.84	0.0152455
0002.CSV	1870.69	0.0154117
0002.CSV	1874.55	0.0153726
0002.CSV	1878.41	0.0153081
0002.CSV	1882.26	0.0153416
0002.CSV	1886.12	0.0153032
0002.CSV	1889.98	0.0153751
0002.CSV	1893.83	0.015403
0002.CSV	1897.69	0.0154413
0002.CSV	1901.55	0.0154078
0002.CSV	1905.41	0.0154125
0002.CSV	1909.26	0.0154167
0002.CSV	1913.12	0.0154065
0002.CSV	1916.98	0.0153814
0002.CSV	1920.83	0.0155161
0002.CSV	1924.69	0.0155579
0002.CSV	1928.55	0.0155539
0002.CSV	1932.4	0.015532
0002.CSV	1936.26	0.015577
0002.CSV	1940.12	0.0155727
0002.CSV	1943.98	0.0156942
0002.CSV	1947.83	0.0157047
0002.CSV	1951.69	0.0156999
0002.CSV	1955.55	0.0157194
0002.CSV	1959.4	0.0158115
0002.CSV	1963.26	0.0158189
0002.CSV	1967.12	0.0158733
0002.CSV	1970.98	0.0158934
0002.CSV	1974.83	0.0159386
0002.CSV	1978.69	0.0159512
0002.CSV	1982.55	0.0159985
0002.CSV	1986.4	0.0160056
0002.CSV	1990.26	0.0160691
0002.CSV	1994.12	0.0161137
0002.CSV	1997.98	0.0161594
0002.CSV	2001.83	0.0161628
0002.CSV	2005.69	0.0162056
0002.CSV	2009.55	0.0162357
0002.CSV	2013.4	0.0162965
0002.CSV	2017.26	0.0163582
0002.CSV	2021.12	0.0164383
0002.CSV	2024.97	0.0164281
0002.CSV	2028.83	0.0164707
0002.CSV	2032.69	0.0165093
0002.CSV	2036.55	0.0165571
0002.CSV	2040.4	0.0165744
0002.CSV	2044.26	0.0166558
0002.CSV	2048.12	0.016688
0002.CSV	2051.97	0.016743
0002.CSV	2055.83	0.0167688
0002.CSV	2059.69	0.0168313
0002.CSV	2063.55	0.0168625
0002.CSV	2067.4	0.0169475
0002.CSV	2071.26	0.0169815
0002.CSV	2075.12	0.0170413
0002.CSV	2078.97	0.0170591
0002.CSV	2082.83	0.0170983
0002.CSV	2086.69	0.017114
0002.CSV	2090.55	0.0171651
0002.CSV	2094.4	0.0171883
0002.CSV	2098.26	0.0172491
0002.CSV	2102.12	0.0172835
0002.CSV	2105.97	0.0173308
0002.CSV	2109.83	0.0173413
0002.CSV	2113.69	0.0174076
0002.CSV	2117.55	0.0174555
0002.CSV	2121.4	0.0175412
0002.CSV	2125.26	0.0176022
0002.CSV	2129.12	0.0176889
0002.CSV	2132.97	0.0177155
0002.CSV	2136.83	0.0177708
0002.CSV	2140.69	0.0178027
0002.CSV	2144.55	0.0178285
0002.CSV	2148.4	0.0178154
0002.CSV	2152.26	0.0178296
0002.CSV	2156.12	0.0178141
0002.CSV	2159.97	0.0178304
0002.CSV	2163.83	0.0178127
0002.CSV	2167.69	0.0178252
0002.CSV	2171.55	0.0178583
0002.CSV	2175.4	0.0179262
0002.CSV	2179.26	0.0179437
0002.CSV	2183.12	0.0179741
0002.CSV	2186.97	0.0179846
0002.CSV	2190.83	0.0180249
0002.CSV	2194.69	0.0180468
0002.CSV	2198.55	0.0181017
0002.CSV	2202.4	0.0181159
0002.CSV	2206.26	0.0181569
0002.CSV	2210.12	0.018164
0002.CSV	2213.97	0.0182045
0002.CSV	2217.83	0.0182106
0002.CSV	2221.69	0.0182198
0002.CSV	2225.54	0.0182121
0002.CSV	2229.4	0.0182426
0002.CSV	2233.26	0.0182603
0002.CSV	2237.12	0.0183068
0002.CSV	2240.97	0.0183095
0002.CSV	2244.83	0.0183288
0002.CSV	2248.69	0.0183244
0002.CSV	2252.54	0.0183581
0002.CSV	2256.4	0.0183931
0002.CSV	2260.26	0.0184305
0002.CSV	2264.11	0.0184236
0002.CSV	2267.97	0.0184592
0002.CSV	2271.83	0.0184549
0002.CSV	2275.69	0.0184521
0002.CSV	2279.54	0.0184085
0002.CSV	2283.4	0.0183942
0002.CSV	2287.26	0.0184505
0002.CSV	2291.11	0.0186292
0002.CSV	2294.97	0.0187885
0002.CSV	2298.83	0.0189557
0002.CSV	2302.69	0.0190689
0002.CSV	2306.54	0.0192081
0002.CSV	2310.4	0.0193617
0002.CSV	2314.26	0.0194787
0002.CSV	2318.11	0.0195061
0002.CSV	2321.97	0.0196069
0002.CSV	2325.83	0.0196195
0002.CSV	2329.69	0.0196013
0002.CSV	2333.54	0.0194662
0002.CSV	2337.4	0.0195341
0002.CSV	2341.26	0.0195849
0002.CSV	2345.11	0.0199291
0002.CSV	2348.97	0.0197776
0002.CSV	2352.83	0.0191498
0002.CSV	2356.69	0.0178504
0002.CSV	2360.54	0.0173642
0002.CSV	2364.4	0.0182662
0002.CSV	2368.26	0.0196049
0002.CSV	2372.11	0.0201345
0002.CSV	2375.97	0.0200962
0002.CSV	2379.83	0.0197451
0002.CSV	2383.69	0.0193451
0002.CSV	2387.54	0.0189705
0002.CSV	2391.4	0.018807
0002.CSV	2395.26	0.0187946
0002.CSV	2399.11	0.0188105
0002.CSV	2402.97	0.0188239
0002.CSV	2406.83	0.0188843
0002.CSV	2410.68	0.0189088
0002.CSV	2414.54	0.0189334
0002.CSV	2418.4	0.0189462
0002.CSV	2422.26	0.0189807
0002.CSV	2426.11	0.0190211
0002.CSV	2429.97	0.0190676
0002.CSV	2433.83	0.0191094
0002.CSV	2437.68	0.0191926
0002.CSV	2441.54	0.0192555
0002.CSV	2445.4	0.0193055
0002.CSV	2449.26	0.0193409
0002.CSV	2453.11	0.0194046
0002.CSV	2456.97	0.0194996
0002.CSV	2460.83	0.0196071
0002.CSV	2464.68	0.0197114
0002.CSV	2468.54	0.0198902
0002.CSV	2472.4	0.0201023
0002.CSV	2476.26	0.0203397
0002.CSV	2480.11	0.0205727
0002.CSV	2483.97	0.0208831
0002.CSV	2487.83	0.0212726
0002.CSV	2491.68	0.0218221
0002.CSV	2495.54	0.0225
0002.CSV	2499.4	0.02325
0002.CSV	2503.26	0.0239477
0002.CSV	2507.11	0.0244489
0002.CSV	2510.97	0.0246012
0002.CSV	2514.83	0.024467
0002.CSV	2518.68	0.0240938
0002.CSV	2522.54	0.023548
0002.CSV	2526.4	0.0228714
0002.CSV	2530.26	0.0221935
0002.CSV	2534.11	0.021544
0002.CSV	2537.97	0.0210488
0002.CSV	2541.83	0.0207462
0002.CSV	2545.68	0.020551
0002.CSV	2549.54	0.0204116
0002.CSV	2553.4	0.0203522
0002.CSV	2557.26	0.0202948
0002.CSV	2561.11	0.0202661
0002.CSV	2564.97	0.0202594
0002.CSV	2568.83	0.0202817
0002.CSV	2572.68	0.0202699
0002.CSV	2576.54	0.0202647
0002.CSV	2580.4	0.0202386
0002.CSV	2584.25	0.0202365
0002.CSV	2588.11	0.0202406
0002.CSV	2591.97	0.0202441
0002.CSV	2595.83	0.0202094
0002.CSV	2599.68	0.0201611
0002.CSV	2603.54	0.0200819
0002.CSV	2607.4	0.0200139
0002.CSV	2611.25	0.0199355
0002.CSV	2615.11	0.0198638
0002.CSV	2618.97	0.0197667
0002.CSV	2622.82	0.0197044
0002.CSV	2626.68	0.019645
0002.CSV	2630.54	0.0195535
0002.CSV	2634.4	0.0195326
0002.CSV	2638.25	0.0195148
0002.CSV	2642.11	0.0193974
0002.CSV	2645.97	0.0193347
0002.CSV	2649.82	0.0193068
0002.CSV	2653.68	0.0192939
0002.CSV	2657.54	0.0192907
0002.CSV	2661.4	0.0193265
0002.CSV	2665.25	0.0193641
0002.CSV	2669.11	0.0194413
0002.CSV	2672.97	0.0196026
0002.CSV	2676.82	0.0198106
0002.CSV	2680.68	0.0198014
0002.CSV	2684.54	0.0195688
0002.CSV	2688.4	0.0194545
0002.CSV	2692.25	0.0194548
0002.CSV	2696.11	0.0194668
0002.CSV	2699.97	0.0195021
0002.CSV	2703.82	0.0195161
0002.CSV	2707.68	0.0195879
0002.CSV	2711.54	0.0196271
0002.CSV	2715.4	0.0196901
0002.CSV	2719.25	0.0198534
0002.CSV	2723.11	0.0201385
0002.CSV	2726.97	0.0201861
0002.CSV	2730.82	0.0199378
0002.CSV	2734.68	0.019866
0002.CSV	2738.54	0.0198563
0002.CSV	2742.4	0.0198585
0002.CSV	2746.25	0.0201213
0002.CSV	2750.11	0.0201539
0002.CSV	2753.97	0.0199483
0002.CSV	2757.82	0.0199169
0002.CSV	2761.68	0.0199074
0002.CSV	2765.54	0.0199376
0002.CSV	2769.39	0.0201574
0002.CSV	2773.25	0.0205251
0002.CSV	2777.11	0.0205527
0002.CSV	2780.97	0.0204808
0002.CSV	2784.82	0.0207857
0002.CSV	2788.68	0.0213241
0002.CSV	2792.54	0.0216066
0002.CSV	2796.39	0.0217734
0002.CSV	2800.25	0.0218338
0002.CSV	2804.11	0.0218795
0002.CSV	2807.97	0.0223164
0002.CSV	2811.82	0.0226372
0002.CSV	2815.68	0.0228308
0002.CSV	2819.54	0.0233363
0002.CSV	2823.39	0.0240083
0002.CSV	2827.25	0.0247506
0002.CSV	2831.11	0.0260899
0002.CSV	2834.97	0.0283529
0002.CSV	2838.82	0.0316374
0002.CSV	2842.68	0.0364995
0002.CSV	2846.54	0.0435953
0002.CSV	2850.39	0.0505904
0002.CSV	2854.25	0.0533029
0002.CSV	2858.11	0.0505897
0002.CSV	2861.97	0.0456334
0002.CSV	2865.82	0.0423029
0002.CSV	2869.68	0.0414822
0002.CSV	2873.54	0.0404829
0002.CSV	2877.39	0.0378885
0002.CSV	2881.25	0.0360177
0002.CSV	2885.11	0.036191
0002.CSV	2888.97	0.0379654
0002.CSV	2892.82	0.0407197
0002.CSV	2896.68	0.0435562
0002.CSV	2900.54	0.0462682
0002.CSV	2904.39	0.0495019
0002.CSV	2908.25	0.0538409
0002.CSV	2912.11	0.0598793
0002.CSV	2915.97	0.0672932
0002.CSV	2919.82	0.0741208
0002.CSV	2923.68	0.0768402
0002.CSV	2927.54	0.0733203
0002.CSV	2931.39	0.0651445
0002.CSV	2935.25	0.0557387
0002.CSV	2939.11	0.0480956
0002.CSV	2942.96	0.0436737
0002.CSV	2946.82	0.042698
0002.CSV	2950.68	0.0445571
0002.CSV	2954.54	0.0467506
0002.CSV	2958.39	0.0464109
0002.CSV	2962.25	0.0431578
0002.CSV	2966.11	0.0378605
0002.CSV	2969.96	0.0325549
0002.CSV	2973.82	0.0286699
0002.CSV	2977.68	0.026164
0002.CSV	2981.53	0.0243621
0002.CSV	2985.39	0.0228685
0002.CSV	2989.25	0.0220494
0002.CSV	2993.11	0.021679
0002.CSV	2996.96	0.02122
0002.CSV	3000.82	0.0207117
0002.CSV	3004.68	0.0203702
0002.CSV	3008.53	0.0203671
0002.CSV	3012.39	0.0204765
0002.CSV	3016.25	0.0203605
0002.CSV	3020.11	0.020053
0002.CSV	3023.96	0.0197964
0002.CSV	3027.82	0.0197033
0002.CSV	3031.68	0.0198632
0002.CSV	3035.53	0.0199202
0002.CSV	3039.39	0.0198958
0002.CSV	3043.25	0.0199117
0002.CSV	3047.11	0.0198106
0002.CSV	3050.96	0.019728
0002.CSV	3054.82	0.0196156
0002.CSV	3058.68	0.0194573
0002.CSV	3062.53	0.0194551
0002.CSV	3066.39	0.019604
0002.CSV	3070.25	0.0195514
0002.CSV	3074.11	0.0195387
0002.CSV	3077.96	0.0197262
0002.CSV	3081.82	0.0198087
0002.CSV	3085.68	0.0197381
0002.CSV	3089.53	0.0195972
0002.CSV	3093.39	0.0193975
0002.CSV	3097.25	0.0193909
0002.CSV	3101.11	0.0194647
0002.CSV	3104.96	0.0194761
0002.CSV	3108.82	0.019564
0002.CSV	3112.68	0.0196448
0002.CSV	3116.53	0.0197618
0002.CSV	3120.39	0.0197193
0002.CSV	3124.25	0.0195396
0002.CSV	3128.11	0.0194742
0002.CSV	3131.96	0.0194327
0002.CSV	3135.82	0.0195311
0002.CSV	3139.68	0.0196383
0002.CSV	3143.53	0.0195143
0002.CSV	3147.39	0.0195065
0002.CSV	3151.25	0.0196412
0002.CSV	3155.1	0.0195416
0002.CSV	3158.96	0.0193357
0002.CSV	3162.82	0.0192811
0002.CSV	3166.68	0.0192506
0002.CSV	3170.53	0.0192446
0002.CSV	3174.39	0.0192627
0002.CSV	3178.25	0.0193092
0002.CSV	3182.1	0.0193361
0002.CSV	3185.96	0.0194027
0002.CSV	3189.82	0.0194384
0002.CSV	3193.68	0.0193682
0002.CSV	3197.53	0.0193282
0002.CSV	3201.39	0.0194084
0002.CSV	3205.25	0.0194807
0002.CSV	3209.1	0.0194131
0002.CSV	3212.96	0.0194101
0002.CSV	3216.82	0.0195171
0002.CSV	3220.68	0.0195212
0002.CSV	3224.53	0.0194337
0002.CSV	3228.39	0.0195359
0002.CSV	3232.25	0.0198
0002.CSV	3236.1	0.0197722
0002.CSV	3239.96	0.0196076
0002.CSV	3243.82	0.0196769
0002.CSV	3247.68	0.0197159
0002.CSV	3251.53	0.0195557
0002.CSV	3255.39	0.0195479
0002.CSV	3259.25	0.0194596
0002.CSV	3263.1	0.019394
0002.CSV	3266.96	0.0195938
0002.CSV	3270.82	0.0198616
0002.CSV	3274.68	0.0198459
0002.CSV	3278.53	0.0196128
0002.CSV	3282.39	0.0194419
0002.CSV	3286.25	0.0194598
0002.CSV	3290.1	0.0197019
0002.CSV	3293.96	0.0198326
0002.CSV	3297.82	0.0197019
0002.CSV	3301.67	0.0196978
0002.CSV	3305.53	0.0198619
0002.CSV	3309.39	0.0198215
0002.CSV	3313.25	0.0195041
0002.CSV	3317.1	0.0192799
0002.CSV	3320.96	0.0193245
0002.CSV	3324.82	0.0194238
0002.CSV	3328.67	0.0192616
0002.CSV	3332.53	0.019251
0002.CSV	3336.39	0.0196134
0002.CSV	3340.24	0.0197953
0002.CSV	3344.1	0.0196323
0002.CSV	3347.96	0.0196077
0002.CSV	3351.82	0.0195404
0002.CSV	3355.67	0.0193474
0002.CSV	3359.53	0.019407
0002.CSV	3363.39	0.0195469
0002.CSV	3367.24	0.0196737
0002.CSV	3371.1	0.0195907
0002.CSV	3374.96	0.0194198
0002.CSV	3378.82	0.0192831
0002.CSV	3382.67	0.0191246
0002.CSV	3386.53	0.0192601
0002.CSV	3390.39	0.0195579
0002.CSV	3394.24	0.0196381
0002.CSV	3398.1	0.0196121
0002.CSV	3401.96	0.0195444
0002.CSV	3405.82	0.0193524
0002.CSV	3409.67	0.0193011
0002.CSV	3413.53	0.0191255
0002.CSV	3417.39	0.0188007
0002.CSV	3421.24	0.0187197
0002.CSV	3425.1	0.0188921
0002.CSV	3428.96	0.0191371
0002.CSV	3432.82	0.0192348
0002.CSV	3436.67	0.0190778
0002.CSV	3440.53	0.0186678
0002.CSV	3444.39	0.018451
0002.CSV	3448.24	0.0184232
0002.CSV	3452.1	0.0182936
0002.CSV	3455.96	0.0183136
0002.CSV	3459.82	0.0184385
0002.CSV	3463.67	0.0185936
0002.CSV	3467.53	0.01869
0002.CSV	3471.39	0.018488
0002.CSV	3475.24	0.0183003
0002.CSV	3479.1	0.0182555
0002.CSV	3482.96	0.0181208
0002.CSV	3486.82	0.0180924
0002.CSV	3490.67	0.0180058
0002.CSV	3494.53	0.0180139
0002.CSV	3498.39	0.0180432
0002.CSV	3502.24	0.0179334
0002.CSV	3506.1	0.0176024
0002.CSV	3509.96	0.0174545
0002.CSV	3513.81	0.0174932
0002.CSV	3517.67	0.0172952
0002.CSV	3521.53	0.0172921
0002.CSV	3525.39	0.0172194
0002.CSV	3529.24	0.0170328
0002.CSV	3533.1	0.0171033
0002.CSV	3536.96	0.0171966
0002.CSV	3540.81	0.0171583
0002.CSV	3544.67	0.0171409
0002.CSV	3548.53	0.0169718
0002.CSV	3552.39	0.0167554
0002.CSV	3556.24	0.0166685
0002.CSV	3560.1	0.0165954
0002.CSV	3563.96	0.0163691
0002.CSV	3567.81	0.0165417
0002.CSV	3571.67	0.0165256
0002.CSV	3575.53	0.0162029
0002.CSV	3579.39	0.0163444
0002.CSV	3583.24	0.0164172
0002.CSV	3587.1	0.0163958
0002.CSV	3590.96	0.0163735
0002.CSV	3594.81	0.0162122
0002.CSV	3598.67	0.0163105
0002.CSV	3602.53	0.016192
0002.CSV	3606.39	0.0157069
0002.CSV	3610.24	0.0155349
0002.CSV	3614.1	0.0155575
0002.CSV	3617.96	0.0158175
0002.CSV	3621.81	0.0160699
0002.CSV	3625.67	0.0156058
0002.CSV	3629.53	0.0155663
0002.CSV	3633.39	0.0158565
0002.CSV	3637.24	0.0155935
0002.CSV	3641.1	0.0153378
0002.CSV	3644.96	0.0149887
0002.CSV	3648.81	0.0154143
0002.CSV	3652.67	0.0158155
0002.CSV	3656.53	0.0157579
0002.CSV	3660.38	0.0157028
0002.CSV	3664.24	0.0151108
0002.CSV	3668.1	0.0146446
0002.CSV	3671.96	0.0146998
0002.CSV	3675.81	0.0150113
0002.CSV	3679.67	0.0153784
0002.CSV	3683.53	0.0152836
0002.CSV	3687.38	0.0153065
0002.CSV	3691.24	0.0157804
0002.CSV	3695.1	0.0156181
0002.CSV	3698.95	0.015258
0002.CSV	3702.81	0.0151693
0002.CSV	3706.67	0.0148906
0002.CSV	3710.53	0.01482
0002.CSV	3714.38	0.0152739
0002.CSV	3718.24	0.0151342
0002.CSV	3722.1	0.015128
0002.CSV	3725.95	0.0152961
0002.CSV	3729.81	0.0151324
0002.CSV	3733.67	0.0152939
0002.CSV	3737.53	0.0159323
0002.CSV	3741.38	0.0153088
0002.CSV	3745.24	0.0146647
0002.CSV	3749.1	0.0148058
0002.CSV	3752.95	0.0152417
0002.CSV	3756.81	0.0152212
0002.CSV	3760.67	0.0152211
0002.CSV	3764.53	0.0150808
0002.CSV	3768.38	0.0151818
0002.CSV	3772.24	0.0153442
0002.CSV	3776.1	0.0152111
0002.CSV	3779.95	0.0152386
0002.CSV	3783.81	0.015247
0002.CSV	3787.67	0.0152392
0002.CSV	3791.53	0.015075
0002.CSV	3795.38	0.0147765
0002.CSV	3799.24	0.0147338
0002.CSV	3803.1	0.0150963
0002.CSV	3806.95	0.0153534
0002.CSV	3810.81	0.0151678
0002.CSV	3814.67	0.0149057
0002.CSV	3818.53	0.0150589
0002.CSV	3822.38	0.0153034
0002.CSV	3826.24	0.0151136
0002.CSV	3830.1	0.0148608
0002.CSV	3833.95	0.0148394
0002.CSV	3837.81	0.0151726
0002.CSV	3841.67	0.015574
0002.CSV	3845.53	0.0153476
0002.CSV	3849.38	0.0146773
0002.CSV	3853.24	0.0148311
0002.CSV	3857.1	0.0153615
0002.CSV	3860.95	0.0149548
0002.CSV	3864.81	0.0148836
0002.CSV	3868.67	0.0148518
0002.CSV	3872.52	0.0150574
0002.CSV	3876.38	0.0149712
0002.CSV	3880.24	0.0148217
0002.CSV	3884.1	0.0150937
0002.CSV	3887.95	0.0149982
0002.CSV	3891.81	0.0148968
0002.CSV	3895.67	0.0147549
0002.CSV	3899.52	0.0145124
0002.CSV	3903.38	0.0149773
0002.CSV	3907.24	0.0150995
0002.CSV	3911.1	0.0146725
0002.CSV	3914.95	0.014376
0002.CSV	3918.81	0.014512
0002.CSV	3922.67	0.0146485
0002.CSV	3926.52	0.0146463
0002.CSV	3930.38	0.0147008
0002.CSV	3934.24	0.0148158
0002.CSV	3938.09	0.0145555
0002.CSV	3941.95	0.0144522
0002.CSV	3945.81	0.0144928
0002.CSV	3949.67	0.0144872
0002.CSV	3953.52	0.0144543
0002.CSV	3957.38	0.0144141
0002.CSV	3961.24	0.0144581
0002.CSV	3965.09	0.0144299
0002.CSV	3968.95	0.0143703
0002.CSV	3972.81	0.0143791
0002.CSV	3976.67	0.0143964
0002.CSV	3980.52	0.014411
0002.CSV	3984.38	0.0143939
0002.CSV	3988.24	0.0143495
0002.CSV	3992.09	0.0143795
0002.CSV	3995.95	0.0143529
0002.CSV	3999.81	0.0143168
0003.CSV	674.992	0.0488211
0003.CSV	678.849	0.0499208
0003.CSV	682.706	0.0502902
0003.CSV	686.563	0.0519314
0003.CSV	690.42	0.0532438
0003.CSV	694.277	0.0562319
0003.CSV	698.134	0.059629
0003.CSV	701.991	0.0665078
0003.CSV	705.849	0.0810998
0003.CSV	709.706	0.100686
0003.CSV	713.563	0.0942012
0003.CSV	717.42	0.0658292
0003.CSV	721.277	0.048895
0003.CSV	725.134	0.0454421
0003.CSV	728.991	0.0447894
0003.CSV	732.848	0.0455432
0003.CSV	736.705	0.0460651
0003.CSV	740.562	0.04622
0003.CSV	744.42	0.0462219
0003.CSV	748.277	0.0471226
0003.CSV	752.134	0.047789
0003.CSV	755.991	0.0487359
0003.CSV	759.848	0.0491641
0003.CSV	763.705	0.0501092
0003.CSV	767.562	0.0508381
0003.CSV	771.419	0.0513815
0003.CSV	775.276	0.0515033
0003.CSV	779.133	0.0518917
0003.CSV	782.99	0.0517519
0003.CSV	786.848	0.0522029
0003.CSV	790.705	0.0530954
0003.CSV	794.562	0.0551157
0003.CSV	798.419	0.0574961
0003.CSV	802.276	0.0601106
0003.CSV	806.133	0.0615201
0003.CSV	809.99	0.0626001
0003.CSV	813.847	0.0641322
0003.CSV	817.704	0.0682219
0003.CSV	821.562	0.0752738
0003.CSV	825.419	0.0833104
0003.CSV	829.276	0.0864579
0003.CSV	833.133	0.0842836
0003.CSV	836.99	0.0800691
0003.CSV	840.847	0.0780804
0003.CSV	844.704	0.0795452
0003.CSV	848.561	0.0808115
0003.CSV	852.418	0.0816019
0003.CSV	856.275	0.089078
0003.CSV	860.132	0.104873
0003.CSV	863.99	0.135282
0003.CSV	867.847	0.179908
0003.CSV	871.704	0.203791
0003.CSV	875.561	0.177638
0003.CSV	879.418	0.132161
0003.CSV	883.275	0.0880626
0003.CSV	887.132	0.0531011
0003.CSV	890.989	0.0387221
0003.CSV	894.846	0.0386229
0003.CSV	898.703	0.0403514
0003.CSV	902.561	0.042167
0003.CSV	906.418	0.0438198
0003.CSV	910.275	0.0458605
0003.CSV	914.132	0.0475502
0003.CSV	917.989	0.0492989
0003.CSV	921.846	0.0505705
0003.CSV	925.703	0.0520278
0003.CSV	929.56	0.053215
0003.CSV	933.417	0.0544559
0003.CSV	937.274	0.0551985
0003.CSV	941.131	0.0560376
0003.CSV	944.989	0.0566176
0003.CSV	948.846	0.0574868
0003.CSV	952.703	0.0580953
0003.CSV	956.56	0.0587508
0003.CSV	960.417	0.0589807
0003.CSV	964.274	0.0593854
0003.CSV	968.131	0.0595764
0003.CSV	971.988	0.0600307
0003.CSV	975.845	0.0604255
0003.CSV	979.702	0.0612866
0003.CSV	983.559	0.0622158
0003.CSV	987.417	0.0636161
0003.CSV	991.274	0.064971
0003.CSV	995.131	0.0668274
0003.CSV	998.988	0.0688603
0003.CSV	1002.85	0.071777
0003.CSV	1006.7	0.0754332
0003.CSV	1010.56	0.0793024
0003.CSV	1014.42	0.0812597
0003.CSV	1018.27	0.0826895
0003.CSV	1022.13	0.0845195
0003.CSV	1025.99	0.0870192
0003.CSV	1029.85	0.0890637
0003.CSV	1033.7	0.0905886
0003.CSV	1037.56	0.0908284
0003.CSV	1041.42	0.0902734
0003.CSV	1045.27	0.0886542
0003.CSV	1049.13	0.0872378
0003.CSV	1052.99	0.0862526
0003.CSV	1056.84	0.0863943
0003.CSV	1060.7	0.0871998
0003.CSV	1064.56	0.0888863
0003.CSV	1068.42	0.0905621
0003.CSV	1072.27	0.092452
0003.CSV	1076.13	0.094045
0003.CSV	1079.99	0.0958673
0003.CSV	1083.84	0.0969942
0003.CSV	1087.7	0.0970843
0003.CSV	1091.56	0.0960778
0003.CSV	1095.41	0.0956683
0003.CSV	1099.27	0.0958279
0003.CSV	1103.13	0.0965816
0003.CSV	1106.99	0.096603
0003.CSV	1110.84	0.0960806
0003.CSV	1114.7	0.0949033
0003.CSV	1118.56	0.0936643
0003.CSV	1122.41	0.091688
0003.CSV	1126.27	0.0894927
0003.CSV	1130.13	0.0868793
0003.CSV	1133.99	0.0845344
0003.CSV	1137.84	0.0824676
0003.CSV	1141.7	0.0813756
0003.CSV	1145.56	0.0807561
0003.CSV	1149.41	0.0806823
0003.CSV	1153.27	0.0803424
0003.CSV	1157.13	0.0801035
0003.CSV	1160.99	0.0798043
0003.CSV	1164.84	0.08015
0003.CSV	1168.7	0.0812079
0003.CSV	1172.56	0.0844052
0003.CSV	1176.41	0.0900081
0003.CSV	1180.27	0.0953627
0003.CSV	1184.13	0.0949369
0003.CSV	1187.99	0.0896488
0003.CSV	1191.84	0.0837554
0003.CSV	1195.7	0.0805337
0003.CSV	1199.56	0.0798927
0003.CSV	1203.41	0.0814794
0003.CSV	1207.27	0.0841746
0003.CSV	1211.13	0.087964
0003.CSV	1214.98	0.0920338
0003.CSV	1218.84	0.0963423
0003.CSV	1222.7	0.100163
0003.CSV	1226.56	0.10381
0003.CSV	1230.41	0.106812
0003.CSV	1234.27	0.109431
0003.CSV	1238.13	0.111124
0003.CSV	1241.98	0.112561
0003.CSV	1245.84	0.113215
0003.CSV	1249.7	0.112618
0003.CSV	1253.56	0.109444
0003.CSV	1257.41	0.104632
0003.CSV	1261.27	0.0997061
0003.CSV	1265.13	0.0970857
0003.CSV	1268.98	0.0964596
0003.CSV	1272.84	0.0974119
0003.CSV	1276.7	0.0989062
0003.CSV	1280.56	0.101387
0003.CSV	1284.41	0.104297
0003.CSV	1288.27	0.107745
0003.CSV	1292.13	0.110673
0003.CSV	1295.98	0.113186
0003.CSV	1299.84	0.114671
0003.CSV	1303.7	0.115771
0003.CSV	1307.56	0.116595
0003.CSV	1311.41	0.117972
0003.CSV	1315.27	0.119262
0003.CSV	1319.13	0.121232
0003.CSV	1322.98	0.123533
0003.CSV	1326.84	0.126644
0003.CSV	1330.7	0.129919
0003.CSV	1334.56	0.133555
0003.CSV	1338.41	0.137503
0003.CSV	1342.27	0.142311
0003.CSV	1346.13	0.146417
0003.CSV	1349.98	0.151589
0003.CSV	1353.84	0.157695
0003.CSV	1357.7	0.165399
0003.CSV	1361.56	0.173681
0003.CSV	1365.41	0.181424
0003.CSV	1369.27	0.187022
0003.CSV	1373.13	0.195179
0003.CSV	1376.98	0.204523
0003.CSV	1380.84	0.21224
0003.CSV	1384.7	0.218374
0003.CSV	1388.56	0.224677
0003.CSV	1392.41	0.228126
0003.CSV	1396.27	0.229736
0003.CSV	1400.13	0.228789
0003.CSV	1403.98	0.227998
0003.CSV	1407.84	0.224931
0003.CSV	1411.7	0.219893
0003.CSV	1415.55	0.212867
0003.CSV	1419.41	0.204005
0003.CSV	1423.27	0.195837
0003.CSV	1427.12	0.190375
0003.CSV	1430.98	0.184366
0003.CSV	1434.84	0.178716
0003.CSV	1438.7	0.172144
0003.CSV	1442.55	0.167718
0003.CSV	1446.41	0.162831
0003.CSV	1450.27	0.157965
0003.CSV	1454.12	0.15344
0003.CSV	1457.98	0.146017
0003.CSV	1461.84	0.138999
0003.CSV	1465.7	0.132722
0003.CSV	1469.55	0.125586
0003.CSV	1473.41	0.116532
0003.CSV	1477.27	0.107358
0003.CSV	1481.12	0.101763
0003.CSV	1484.98	0.0966936
0003.CSV	1488.84	0.091331
0003.CSV	1492.7	0.0868346
0003.CSV	1496.55	0.0850458
0003.CSV	1500.41	0.0852012
0003.CSV	1504.27	0.0867846
0003.CSV	1508.12	0.0877209
0003.CSV	1511.98	0.081812
0003.CSV	1515.84	0.0716138
0003.CSV	1519.7	0.0591256
0003.CSV	1523.55	0.0498305
0003.CSV	1527.41	0.0454378
0003.CSV	1531.27	0.0422621
0003.CSV	1535.12	0.0394789
0003.CSV	1538.98	0.0366903
0003.CSV	1542.84	0.032387
0003.CSV	1546.7	0.029602
0003.CSV	1550.55	0.0278232
0003.CSV	1554.41	0.0262562
0003.CSV	1558.27	0.0251078
0003.CSV	1562.12	0.024284
0003.CSV	1565.98	0.0240173
0003.CSV	1569.84	0.024131
0003.CSV	1573.69	0.0247635
0003.CSV	1577.55	0.0258848
0003.CSV	1581.41	0.0260194
0003.CSV	1585.27	0.0248821
0003.CSV	1589.12	0.0235477
0003.CSV	1592.98	0.0228799
0003.CSV	1596.84	0.023299
0003.CSV	1600.69	0.0244348
0003.CSV	1604.55	0.0259043
0003.CSV	1608.41	0.0260598
0003.CSV	1612.27	0.0245097
0003.CSV	1616.12	0.0218949
0003.CSV	1619.98	0.0196026
0003.CSV	1623.84	0.0184148
0003.CSV	1627.69	0.017767
0003.CSV	1631.55	0.0173002
0003.CSV	1635.41	0.0172201
0003.CSV	1639.27	0.0172175
0003.CSV	1643.12	0.0170023
0003.CSV	1646.98	0.016901
0003.CSV	1650.84	0.0170015
0003.CSV	1654.69	0.0170336
0003.CSV	1658.55	0.0168224
0003.CSV	1662.41	0.0165582
0003.CSV	1666.27	0.0163987
0003.CSV	1670.12	0.0161896
0003.CSV	1673.98	0.0160966
0003.CSV	1677.84	0.0158077
0003.CSV	1681.69	0.015645
0003.CSV	1685.55	0.0156728
0003.CSV	1689.41	0.015544
0003.CSV	1693.27	0.0152087
0003.CSV	1697.12	0.0152637
0003.CSV	1700.98	0.0155797
0003.CSV	1704.84	0.0157908
0003.CSV	1708.69	0.0158474
0003.CSV	1712.55	0.0158751
0003.CSV	1716.41	0.0162558
0003.CSV	1720.27	0.0168064
0003.CSV	1724.12	0.0168683
[truncated: 32,521 more rows]

## Sheet: S.plana_450_2_mFTIR_data
Select spectrum number	Wavenumbers	Absorbance
0001.CSV	674.992	0.0333144
0001.CSV	678.849	0.0346349
0001.CSV	682.706	0.0348833
0001.CSV	686.563	0.0365827
0001.CSV	690.42	0.0378629
0001.CSV	694.277	0.0409907
0001.CSV	698.134	0.0445541
0001.CSV	701.991	0.0521861
0001.CSV	705.849	0.0687157
0001.CSV	709.706	0.0923263
0001.CSV	713.563	0.08857
0001.CSV	717.42	0.0591238
0001.CSV	721.277	0.0389367
0001.CSV	725.134	0.0331724
0001.CSV	728.991	0.0312557
0001.CSV	732.848	0.0311171
0001.CSV	736.705	0.0306527
0001.CSV	740.562	0.0307896
0001.CSV	744.42	0.0306528
0001.CSV	748.277	0.0312949
0001.CSV	752.134	0.031676
0001.CSV	755.991	0.0327141
0001.CSV	759.848	0.0332086
0001.CSV	763.705	0.0342077
0001.CSV	767.562	0.0348567
0001.CSV	771.419	0.0359609
0001.CSV	775.276	0.0365885
0001.CSV	779.133	0.0375324
0001.CSV	782.99	0.0374352
0001.CSV	786.848	0.0376698
0001.CSV	790.705	0.0379912
0001.CSV	794.562	0.0393876
0001.CSV	798.419	0.0403467
0001.CSV	802.276	0.0411814
0001.CSV	806.133	0.0411311
0001.CSV	809.99	0.0416642
0001.CSV	813.847	0.0421637
0001.CSV	817.704	0.0436875
0001.CSV	821.562	0.0454565
0001.CSV	825.419	0.04794
0001.CSV	829.276	0.0499324
0001.CSV	833.133	0.0523677
0001.CSV	836.99	0.0551313
0001.CSV	840.847	0.0602117
0001.CSV	844.704	0.0674414
0001.CSV	848.561	0.0725587
0001.CSV	852.418	0.0762169
0001.CSV	856.275	0.0890576
0001.CSV	860.132	0.113407
0001.CSV	863.99	0.154034
0001.CSV	867.847	0.20602
0001.CSV	871.704	0.230962
0001.CSV	875.561	0.200162
0001.CSV	879.418	0.148329
0001.CSV	883.275	0.0942213
0001.CSV	887.132	0.0484199
0001.CSV	890.989	0.0276526
0001.CSV	894.846	0.0251528
0001.CSV	898.703	0.0255784
0001.CSV	902.561	0.0264445
0001.CSV	906.418	0.0269206
0001.CSV	910.275	0.0277202
0001.CSV	914.132	0.0281717
0001.CSV	917.989	0.0289761
0001.CSV	921.846	0.029423
0001.CSV	925.703	0.0302141
0001.CSV	929.56	0.0306847
0001.CSV	933.417	0.0314017
0001.CSV	937.274	0.0316431
0001.CSV	941.131	0.0321954
0001.CSV	944.989	0.0325158
0001.CSV	948.846	0.0331669
0001.CSV	952.703	0.0334549
0001.CSV	956.56	0.0340565
0001.CSV	960.417	0.0343231
0001.CSV	964.274	0.0348665
0001.CSV	968.131	0.035231
0001.CSV	971.988	0.036027
0001.CSV	975.845	0.0366249
0001.CSV	979.702	0.0374673
0001.CSV	983.559	0.0379764
0001.CSV	987.417	0.0388648
0001.CSV	991.274	0.039581
0001.CSV	995.131	0.040567
0001.CSV	998.988	0.041215
0001.CSV	1002.85	0.0421122
0001.CSV	1006.7	0.0427077
0001.CSV	1010.56	0.0436489
0001.CSV	1014.42	0.0441564
0001.CSV	1018.27	0.0448257
0001.CSV	1022.13	0.0452142
0001.CSV	1025.99	0.0459471
0001.CSV	1029.85	0.0464262
0001.CSV	1033.7	0.0472356
0001.CSV	1037.56	0.0477316
0001.CSV	1041.42	0.0486286
0001.CSV	1045.27	0.0492439
0001.CSV	1049.13	0.050291
0001.CSV	1052.99	0.0512841
0001.CSV	1056.84	0.0528732
0001.CSV	1060.7	0.0543908
0001.CSV	1064.56	0.0561786
0001.CSV	1068.42	0.0574755
0001.CSV	1072.27	0.0590114
0001.CSV	1076.13	0.0602643
0001.CSV	1079.99	0.0618932
0001.CSV	1083.84	0.0629455
0001.CSV	1087.7	0.0634929
0001.CSV	1091.56	0.0626216
0001.CSV	1095.41	0.0614574
0001.CSV	1099.27	0.0602937
0001.CSV	1103.13	0.0599756
0001.CSV	1106.99	0.0596319
0001.CSV	1110.84	0.0596926
0001.CSV	1114.7	0.0595048
0001.CSV	1118.56	0.0595779
0001.CSV	1122.41	0.0593398
0001.CSV	1126.27	0.0593904
0001.CSV	1130.13	0.0591915
0001.CSV	1133.99	0.0593337
0001.CSV	1137.84	0.0593282
0001.CSV	1141.7	0.0596809
0001.CSV	1145.56	0.0598194
0001.CSV	1149.41	0.0602413
0001.CSV	1153.27	0.0603837
0001.CSV	1157.13	0.0608409
0001.CSV	1160.99	0.0611032
0001.CSV	1164.84	0.0615059
0001.CSV	1168.7	0.0614248
0001.CSV	1172.56	0.0616625
0001.CSV	1176.41	0.0618789
0001.CSV	1180.27	0.0622657
0001.CSV	1184.13	0.0619172
0001.CSV	1187.99	0.0615133
0001.CSV	1191.84	0.0609113
0001.CSV	1195.7	0.0608281
0001.CSV	1199.56	0.0607188
0001.CSV	1203.41	0.0610139
0001.CSV	1207.27	0.0611962
0001.CSV	1211.13	0.0618466
0001.CSV	1214.98	0.0624192
0001.CSV	1218.84	0.0634098
0001.CSV	1222.7	0.064296
0001.CSV	1226.56	0.0655255
0001.CSV	1230.41	0.066594
0001.CSV	1234.27	0.0680232
0001.CSV	1238.13	0.0691503
0001.CSV	1241.98	0.0705679
0001.CSV	1245.84	0.0717749
0001.CSV	1249.7	0.0732526
0001.CSV	1253.56	0.0742953
0001.CSV	1257.41	0.0755277
0001.CSV	1261.27	0.0766996
0001.CSV	1265.13	0.0784724
0001.CSV	1268.98	0.0801877
0001.CSV	1272.84	0.0823802
0001.CSV	1276.7	0.084431
0001.CSV	1280.56	0.0869755
0001.CSV	1284.41	0.0893443
0001.CSV	1288.27	0.0921876
0001.CSV	1292.13	0.0948534
0001.CSV	1295.98	0.0980422
0001.CSV	1299.84	0.101218
0001.CSV	1303.7	0.104896
0001.CSV	1307.56	0.108496
0001.CSV	1311.41	0.11271
0001.CSV	1315.27	0.116779
0001.CSV	1319.13	0.12157
0001.CSV	1322.98	0.126152
0001.CSV	1326.84	0.131329
0001.CSV	1330.7	0.136777
0001.CSV	1334.56	0.142845
0001.CSV	1338.41	0.149969
0001.CSV	1342.27	0.158937
0001.CSV	1346.13	0.166589
0001.CSV	1349.98	0.175713
0001.CSV	1353.84	0.185443
0001.CSV	1357.7	0.196134
0001.CSV	1361.56	0.208285
0001.CSV	1365.41	0.222953
0001.CSV	1369.27	0.235122
0001.CSV	1373.13	0.250096
0001.CSV	1376.98	0.266325
0001.CSV	1380.84	0.280285
0001.CSV	1384.7	0.292515
0001.CSV	1388.56	0.30614
0001.CSV	1392.41	0.31328
0001.CSV	1396.27	0.315108
0001.CSV	1400.13	0.310666
0001.CSV	1403.98	0.304766
0001.CSV	1407.84	0.293741
0001.CSV	1411.7	0.28043
0001.CSV	1415.55	0.266541
0001.CSV	1419.41	0.25157
0001.CSV	1423.27	0.238802
0001.CSV	1427.12	0.230698
0001.CSV	1430.98	0.222282
0001.CSV	1434.84	0.214532
0001.CSV	1438.7	0.205498
0001.CSV	1442.55	0.19897
0001.CSV	1446.41	0.191537
0001.CSV	1450.27	0.183804
0001.CSV	1454.12	0.177
0001.CSV	1457.98	0.167245
0001.CSV	1461.84	0.159211
0001.CSV	1465.7	0.153252
0001.CSV	1469.55	0.146981
0001.CSV	1473.41	0.139817
0001.CSV	1477.27	0.132017
0001.CSV	1481.12	0.127112
0001.CSV	1484.98	0.122117
0001.CSV	1488.84	0.11596
0001.CSV	1492.7	0.109361
0001.CSV	1496.55	0.104245
0001.CSV	1500.41	0.0982625
0001.CSV	1504.27	0.0945895
0001.CSV	1508.12	0.0875901
0001.CSV	1511.98	0.0826264
0001.CSV	1515.84	0.0790542
0001.CSV	1519.7	0.0744795
0001.CSV	1523.55	0.0689155
0001.CSV	1527.41	0.0648683
0001.CSV	1531.27	0.060917
0001.CSV	1535.12	0.0570026
0001.CSV	1538.98	0.0527136
0001.CSV	1542.84	0.0449994
0001.CSV	1546.7	0.040166
0001.CSV	1550.55	0.0369559
0001.CSV	1554.41	0.0339293
0001.CSV	1558.27	0.0311738
0001.CSV	1562.12	0.0290866
0001.CSV	1565.98	0.0281994
0001.CSV	1569.84	0.0274662
0001.CSV	1573.69	0.0270694
0001.CSV	1577.55	0.0267226
0001.CSV	1581.41	0.0261261
0001.CSV	1585.27	0.0252501
0001.CSV	1589.12	0.0242913
0001.CSV	1592.98	0.0231751
0001.CSV	1596.84	0.0221798
0001.CSV	1600.69	0.0212748
0001.CSV	1604.55	0.0205779
0001.CSV	1608.41	0.0199074
0001.CSV	1612.27	0.0192811
0001.CSV	1616.12	0.0185855
0001.CSV	1619.98	0.0181045
0001.CSV	1623.84	0.0176505
0001.CSV	1627.69	0.017321
0001.CSV	1631.55	0.0168639
0001.CSV	1635.41	0.0167397
0001.CSV	1639.27	0.0166617
0001.CSV	1643.12	0.0163374
0001.CSV	1646.98	0.0161108
0001.CSV	1650.84	0.0162009
0001.CSV	1654.69	0.0163553
0001.CSV	1658.55	0.0161643
0001.CSV	1662.41	0.0158579
0001.CSV	1666.27	0.0156996
0001.CSV	1670.12	0.0156008
0001.CSV	1673.98	0.0156855
0001.CSV	1677.84	0.0154033
0001.CSV	1681.69	0.0152241
0001.CSV	1685.55	0.0153907
0001.CSV	1689.41	0.015372
0001.CSV	1693.27	0.0149634
0001.CSV	1697.12	0.0149107
0001.CSV	1700.98	0.0151383
0001.CSV	1704.84	0.0152539
0001.CSV	1708.69	0.0151294
0001.CSV	1712.55	0.0149735
0001.CSV	1716.41	0.0151808
0001.CSV	1720.27	0.0156332
0001.CSV	1724.12	0.0155179
0001.CSV	1727.98	0.0154128
0001.CSV	1731.84	0.0153678
0001.CSV	1735.69	0.0156266
0001.CSV	1739.55	0.0154879
0001.CSV	1743.41	0.015295
0001.CSV	1747.27	0.0150266
0001.CSV	1751.12	0.0149772
0001.CSV	1754.98	0.0147622
0001.CSV	1758.84	0.0146497
0001.CSV	1762.69	0.0146565
0001.CSV	1766.55	0.0146226
0001.CSV	1770.41	0.0147128
0001.CSV	1774.26	0.0152157
0001.CSV	1778.12	0.0154182
0001.CSV	1781.98	0.0159789
0001.CSV	1785.84	0.0169626
0001.CSV	1789.69	0.0184594
0001.CSV	1793.55	0.0203697
0001.CSV	1797.41	0.0205603
0001.CSV	1801.26	0.0188975
0001.CSV	1805.12	0.0170561
0001.CSV	1808.98	0.015834
0001.CSV	1812.84	0.0152601
0001.CSV	1816.69	0.0148685
0001.CSV	1820.55	0.014645
0001.CSV	1824.41	0.0144733
0001.CSV	1828.26	0.0145464
0001.CSV	1832.12	0.0145294
0001.CSV	1835.98	0.0144444
0001.CSV	1839.84	0.0142899
0001.CSV	1843.69	0.0143666
0001.CSV	1847.55	0.0145112
0001.CSV	1851.41	0.0144803
0001.CSV	1855.26	0.0143749
0001.CSV	1859.12	0.0144018
0001.CSV	1862.98	0.0143151
0001.CSV	1866.84	0.0143905
0001.CSV	1870.69	0.0146393
0001.CSV	1874.55	0.0146107
0001.CSV	1878.41	0.0145338
0001.CSV	1882.26	0.0145762
0001.CSV	1886.12	0.014556
0001.CSV	1889.98	0.0146389
0001.CSV	1893.83	0.0146748
0001.CSV	1897.69	0.0147217
0001.CSV	1901.55	0.0147035
0001.CSV	1905.41	0.0147223
0001.CSV	1909.26	0.0147613
0001.CSV	1913.12	0.0147744
0001.CSV	1916.98	0.0147087
0001.CSV	1920.83	0.0148139
0001.CSV	1924.69	0.0148683
0001.CSV	1928.55	0.0148965
0001.CSV	1932.4	0.0148923
0001.CSV	1936.26	0.0149234
0001.CSV	1940.12	0.0149009
0001.CSV	1943.98	0.015049
0001.CSV	1947.83	0.0150754
0001.CSV	1951.69	0.0150595
0001.CSV	1955.55	0.0150695
0001.CSV	1959.4	0.0151445
0001.CSV	1963.26	0.0151241
0001.CSV	1967.12	0.0151872
0001.CSV	1970.98	0.0151893
0001.CSV	1974.83	0.0151951
0001.CSV	1978.69	0.015196
0001.CSV	1982.55	0.0152119
0001.CSV	1986.4	0.015178
0001.CSV	1990.26	0.0152462
0001.CSV	1994.12	0.0152882
0001.CSV	1997.98	0.0153173
0001.CSV	2001.83	0.0152955
0001.CSV	2005.69	0.0153272
0001.CSV	2009.55	0.0153606
0001.CSV	2013.4	0.0154021
0001.CSV	2017.26	0.0154407
0001.CSV	2021.12	0.0155044
0001.CSV	2024.97	0.0154467
0001.CSV	2028.83	0.0154598
0001.CSV	2032.69	0.0154716
0001.CSV	2036.55	0.0154867
0001.CSV	2040.4	0.015483
0001.CSV	2044.26	0.0155478
0001.CSV	2048.12	0.0155542
0001.CSV	2051.97	0.0155839
0001.CSV	2055.83	0.0155636
0001.CSV	2059.69	0.0155987
0001.CSV	2063.55	0.0156207
0001.CSV	2067.4	0.0156819
0001.CSV	2071.26	0.0156663
0001.CSV	2075.12	0.0157073
0001.CSV	2078.97	0.0157273
0001.CSV	2082.83	0.0157528
0001.CSV	2086.69	0.0157477
0001.CSV	2090.55	0.0157927
0001.CSV	2094.4	0.0158084
0001.CSV	2098.26	0.015839
0001.CSV	2102.12	0.0158391
0001.CSV	2105.97	0.0158684
0001.CSV	2109.83	0.015874
0001.CSV	2113.69	0.0159436
0001.CSV	2117.55	0.015978
0001.CSV	2121.4	0.0160184
0001.CSV	2125.26	0.0160218
0001.CSV	2129.12	0.0160805
0001.CSV	2132.97	0.016133
0001.CSV	2136.83	0.0161906
0001.CSV	2140.69	0.0162253
0001.CSV	2144.55	0.016276
0001.CSV	2148.4	0.0162704
0001.CSV	2152.26	0.0162946
0001.CSV	2156.12	0.0162969
0001.CSV	2159.97	0.0163421
0001.CSV	2163.83	0.0163624
0001.CSV	2167.69	0.016404
0001.CSV	2171.55	0.0164397
0001.CSV	2175.4	0.0164906
0001.CSV	2179.26	0.0164994
0001.CSV	2183.12	0.0165548
0001.CSV	2186.97	0.0165691
0001.CSV	2190.83	0.0165939
0001.CSV	2194.69	0.0166298
0001.CSV	2198.55	0.0167126
0001.CSV	2202.4	0.0167436
0001.CSV	2206.26	0.0167627
0001.CSV	2210.12	0.0167645
0001.CSV	2213.97	0.0167913
0001.CSV	2217.83	0.0167826
0001.CSV	2221.69	0.0168185
0001.CSV	2225.54	0.0168162
0001.CSV	2229.4	0.0168252
0001.CSV	2233.26	0.0168371
0001.CSV	2237.12	0.0168815
0001.CSV	2240.97	0.0168928
0001.CSV	2244.83	0.016909
0001.CSV	2248.69	0.0168956
0001.CSV	2252.54	0.0169259
0001.CSV	2256.4	0.0169226
0001.CSV	2260.26	0.016927
0001.CSV	2264.11	0.0169311
0001.CSV	2267.97	0.0169835
0001.CSV	2271.83	0.0170003
0001.CSV	2275.69	0.0170116
0001.CSV	2279.54	0.0170154
0001.CSV	2283.4	0.0170271
0001.CSV	2287.26	0.0169976
0001.CSV	2291.11	0.017042
0001.CSV	2294.97	0.0171007
0001.CSV	2298.83	0.0171361
0001.CSV	2302.69	0.0171046
0001.CSV	2306.54	0.0171273
0001.CSV	2310.4	0.0171166
0001.CSV	2314.26	0.0170717
0001.CSV	2318.11	0.0168633
0001.CSV	2321.97	0.0166969
0001.CSV	2325.83	0.0165232
0001.CSV	2329.69	0.0164372
0001.CSV	2333.54	0.0162737
0001.CSV	2337.4	0.0162431
0001.CSV	2341.26	0.0162551
0001.CSV	2345.11	0.0167714
0001.CSV	2348.97	0.0168206
0001.CSV	2352.83	0.0161032
0001.CSV	2356.69	0.0146236
0001.CSV	2360.54	0.0141028
0001.CSV	2364.4	0.0147464
0001.CSV	2368.26	0.0161416
0001.CSV	2372.11	0.0172224
0001.CSV	2375.97	0.0177662
0001.CSV	2379.83	0.0178947
0001.CSV	2383.69	0.0178265
0001.CSV	2387.54	0.017674
0001.CSV	2391.4	0.0175959
0001.CSV	2395.26	0.0175899
0001.CSV	2399.11	0.0176142
0001.CSV	2402.97	0.0176186
0001.CSV	2406.83	0.017652
0001.CSV	2410.68	0.0176797
0001.CSV	2414.54	0.0177005
0001.CSV	2418.4	0.0177201
0001.CSV	2422.26	0.0177464
0001.CSV	2426.11	0.0177446
0001.CSV	2429.97	0.0177805
0001.CSV	2433.83	0.0178088
0001.CSV	2437.68	0.0178356
0001.CSV	2441.54	0.0178436
0001.CSV	2445.4	0.0178772
0001.CSV	2449.26	0.0179062
0001.CSV	2453.11	0.0179716
0001.CSV	2456.97	0.0180272
0001.CSV	2460.83	0.0180958
0001.CSV	2464.68	0.0181618
0001.CSV	2468.54	0.0182664
0001.CSV	2472.4	0.018388
0001.CSV	2476.26	0.0185361
0001.CSV	2480.11	0.0186936
0001.CSV	2483.97	0.0188996
0001.CSV	2487.83	0.0191406
0001.CSV	2491.68	0.0194803
0001.CSV	2495.54	0.0199239
0001.CSV	2499.4	0.0204321
0001.CSV	2503.26	0.0209237
0001.CSV	2507.11	0.0213469
0001.CSV	2510.97	0.0215459
0001.CSV	2514.83	0.0215261
0001.CSV	2518.68	0.0213476
0001.CSV	2522.54	0.0210315
0001.CSV	2526.4	0.0206061
0001.CSV	2530.26	0.0201986
0001.CSV	2534.11	0.0198175
0001.CSV	2537.97	0.0195014
0001.CSV	2541.83	0.0192639
0001.CSV	2545.68	0.0191175
0001.CSV	2549.54	0.018997
0001.CSV	2553.4	0.0189507
0001.CSV	2557.26	0.0189377
0001.CSV	2561.11	0.0189274
0001.CSV	2564.97	0.0188827
0001.CSV	2568.83	0.018886
0001.CSV	2572.68	0.0189227
0001.CSV	2576.54	0.0189484
0001.CSV	2580.4	0.0188905
0001.CSV	2584.25	0.018826
0001.CSV	2588.11	0.0188201
0001.CSV	2591.97	0.0188574
0001.CSV	2595.83	0.0188149
0001.CSV	2599.68	0.0187619
0001.CSV	2603.54	0.0187119
0001.CSV	2607.4	0.0186456
0001.CSV	2611.25	0.0185619
0001.CSV	2615.11	0.0185315
0001.CSV	2618.97	0.0184461
0001.CSV	2622.82	0.0184113
0001.CSV	2626.68	0.0183948
0001.CSV	2630.54	0.0183341
0001.CSV	2634.4	0.0183268
0001.CSV	2638.25	0.0182991
0001.CSV	2642.11	0.0181221
0001.CSV	2645.97	0.0180209
0001.CSV	2649.82	0.0179969
0001.CSV	2653.68	0.0180008
0001.CSV	2657.54	0.018021
0001.CSV	2661.4	0.018
0001.CSV	2665.25	0.0179766
0001.CSV	2669.11	0.0180403
0001.CSV	2672.97	0.0182367
0001.CSV	2676.82	0.0184936
0001.CSV	2680.68	0.0184717
0001.CSV	2684.54	0.0181712
0001.CSV	2688.4	0.0179932
0001.CSV	2692.25	0.0179774
0001.CSV	2696.11	0.0180338
0001.CSV	2699.97	0.0180588
0001.CSV	2703.82	0.0180334
0001.CSV	2707.68	0.0181054
0001.CSV	2711.54	0.018119
0001.CSV	2715.4	0.0181154
0001.CSV	2719.25	0.0182811
0001.CSV	2723.11	0.0185876
0001.CSV	2726.97	0.0185671
0001.CSV	2730.82	0.0182594
0001.CSV	2734.68	0.0182276
0001.CSV	2738.54	0.018243
0001.CSV	2742.4	0.0182419
0001.CSV	2746.25	0.0185631
0001.CSV	2750.11	0.0186265
0001.CSV	2753.97	0.0183404
0001.CSV	2757.82	0.0182371
0001.CSV	2761.68	0.0181805
0001.CSV	2765.54	0.0181264
0001.CSV	2769.39	0.0183379
0001.CSV	2773.25	0.0187965
0001.CSV	2777.11	0.0187639
0001.CSV	2780.97	0.0184859
0001.CSV	2784.82	0.018699
0001.CSV	2788.68	0.0192162
0001.CSV	2792.54	0.019353
0001.CSV	2796.39	0.0193709
0001.CSV	2800.25	0.0192268
0001.CSV	2804.11	0.0190049
0001.CSV	2807.97	0.0192666
0001.CSV	2811.82	0.019364
0001.CSV	2815.68	0.0192636
0001.CSV	2819.54	0.0194639
0001.CSV	2823.39	0.0197035
0001.CSV	2827.25	0.0198725
0001.CSV	2831.11	0.0204695
0001.CSV	2834.97	0.0214585
0001.CSV	2838.82	0.0223975
0001.CSV	2842.68	0.0233724
0001.CSV	2846.54	0.025077
0001.CSV	2850.39	0.0265504
0001.CSV	2854.25	0.0269076
0001.CSV	2858.11	0.0263994
0001.CSV	2861.97	0.0253266
0001.CSV	2865.82	0.0245303
0001.CSV	2869.68	0.0245675
0001.CSV	2873.54	0.02454
0001.CSV	2877.39	0.0236604
0001.CSV	2881.25	0.0228727
0001.CSV	2885.11	0.022731
0001.CSV	2888.97	0.023118
0001.CSV	2892.82	0.0239409
0001.CSV	2896.68	0.0246459
0001.CSV	2900.54	0.025092
0001.CSV	2904.39	0.025898
0001.CSV	2908.25	0.0272303
0001.CSV	2912.11	0.0291466
0001.CSV	2915.97	0.0311043
0001.CSV	2919.82	0.0323472
0001.CSV	2923.68	0.0326236
0001.CSV	2927.54	0.0319811
0001.CSV	2931.39	0.0301155
0001.CSV	2935.25	0.0276181
0001.CSV	2939.11	0.0258505
0001.CSV	2942.96	0.0252224
0001.CSV	2946.82	0.0251145
0001.CSV	2950.68	0.025273
0001.CSV	2954.54	0.0253786
0001.CSV	2958.39	0.0250051
0001.CSV	2962.25	0.024267
0001.CSV	2966.11	0.0229732
0001.CSV	2969.96	0.0218536
0001.CSV	2973.82	0.0213208
0001.CSV	2977.68	0.0210151
0001.CSV	2981.53	0.0204853
0001.CSV	2985.39	0.0197714
0001.CSV	2989.25	0.0196341
0001.CSV	2993.11	0.0198012
0001.CSV	2996.96	0.019633
0001.CSV	3000.82	0.0193231
0001.CSV	3004.68	0.0191764
0001.CSV	3008.53	0.0194382
0001.CSV	3012.39	0.0197912
0001.CSV	3016.25	0.0198046
0001.CSV	3020.11	0.0195895
0001.CSV	3023.96	0.0194011
0001.CSV	3027.82	0.0193814
0001.CSV	3031.68	0.019618
0001.CSV	3035.53	0.0197015
0001.CSV	3039.39	0.019744
0001.CSV	3043.25	0.0198546
0001.CSV	3047.11	0.019767
0001.CSV	3050.96	0.0197096
0001.CSV	3054.82	0.0196467
0001.CSV	3058.68	0.019465
0001.CSV	3062.53	0.0194911
0001.CSV	3066.39	0.0197325
0001.CSV	3070.25	0.0197082
0001.CSV	3074.11	0.0196842
0001.CSV	3077.96	0.0198598
0001.CSV	3081.82	0.0199452
0001.CSV	3085.68	0.0199047
0001.CSV	3089.53	0.0197933
0001.CSV	3093.39	0.0195933
0001.CSV	3097.25	0.0195986
0001.CSV	3101.11	0.0196918
0001.CSV	3104.96	0.0196886
0001.CSV	3108.82	0.0197913
0001.CSV	3112.68	0.0198858
0001.CSV	3116.53	0.0199653
0001.CSV	3120.39	0.019898
0001.CSV	3124.25	0.019711
0001.CSV	3128.11	0.0196588
0001.CSV	3131.96	0.0196295
0001.CSV	3135.82	0.0197012
0001.CSV	3139.68	0.0197679
0001.CSV	3143.53	0.0195784
0001.CSV	3147.39	0.0196151
0001.CSV	3151.25	0.019851
0001.CSV	3155.1	0.0197957
0001.CSV	3158.96	0.0194999
0001.CSV	3162.82	0.0193661
0001.CSV	3166.68	0.0193688
0001.CSV	3170.53	0.0193746
0001.CSV	3174.39	0.0193497
0001.CSV	3178.25	0.0194217
0001.CSV	3182.1	0.019471
0001.CSV	3185.96	0.0195273
0001.CSV	3189.82	0.0195866
0001.CSV	3193.68	0.0195006
0001.CSV	3197.53	0.0194346
0001.CSV	3201.39	0.0195278
0001.CSV	3205.25	0.0196079
0001.CSV	3209.1	0.019587
0001.CSV	3212.96	0.0196399
0001.CSV	3216.82	0.0197189
0001.CSV	3220.68	0.0196816
0001.CSV	3224.53	0.0196439
0001.CSV	3228.39	0.0197955
0001.CSV	3232.25	0.0200374
0001.CSV	3236.1	0.020018
0001.CSV	3239.96	0.0199147
0001.CSV	3243.82	0.0199946
0001.CSV	3247.68	0.0200385
0001.CSV	3251.53	0.0199629
0001.CSV	3255.39	0.0200136
0001.CSV	3259.25	0.0199184
0001.CSV	3263.1	0.0198805
0001.CSV	3266.96	0.0201307
0001.CSV	3270.82	0.0203416
0001.CSV	3274.68	0.020285
0001.CSV	3278.53	0.0201472
0001.CSV	3282.39	0.020046
0001.CSV	3286.25	0.0201051
0001.CSV	3290.1	0.020351
0001.CSV	3293.96	0.0205233
0001.CSV	3297.82	0.0203934
0001.CSV	3301.67	0.0203165
0001.CSV	3305.53	0.020467
0001.CSV	3309.39	0.0204826
0001.CSV	3313.25	0.0202575
0001.CSV	3317.1	0.020106
0001.CSV	3320.96	0.0202335
0001.CSV	3324.82	0.0204077
0001.CSV	3328.67	0.020212
0001.CSV	3332.53	0.0200733
0001.CSV	3336.39	0.0203751
0001.CSV	3340.24	0.0205539
0001.CSV	3344.1	0.0204186
0001.CSV	3347.96	0.0204374
0001.CSV	3351.82	0.0204388
0001.CSV	3355.67	0.0203261
0001.CSV	3359.53	0.0204215
0001.CSV	3363.39	0.0206
0001.CSV	3367.24	0.0207319
0001.CSV	3371.1	0.0205981
0001.CSV	3374.96	0.0204189
0001.CSV	3378.82	0.0202883
0001.CSV	3382.67	0.0200485
0001.CSV	3386.53	0.0200998
0001.CSV	3390.39	0.0204004
0001.CSV	3394.24	0.0205477
0001.CSV	3398.1	0.0205528
0001.CSV	3401.96	0.0204536
0001.CSV	3405.82	0.02028
0001.CSV	3409.67	0.020235
0001.CSV	3413.53	0.0200833
0001.CSV	3417.39	0.0198346
0001.CSV	3421.24	0.0197533
0001.CSV	3425.1	0.0198236
0001.CSV	3428.96	0.0200791
0001.CSV	3432.82	0.0202309
0001.CSV	3436.67	0.0200433
0001.CSV	3440.53	0.0196482
0001.CSV	3444.39	0.0194323
0001.CSV	3448.24	0.0194024
0001.CSV	3452.1	0.0192959
0001.CSV	3455.96	0.0192859
0001.CSV	3459.82	0.0194402
0001.CSV	3463.67	0.0196378
0001.CSV	3467.53	0.019722
0001.CSV	3471.39	0.0194954
0001.CSV	3475.24	0.0193065
0001.CSV	3479.1	0.0193395
0001.CSV	3482.96	0.019301
0001.CSV	3486.82	0.0192689
0001.CSV	3490.67	0.0192323
0001.CSV	3494.53	0.0193286
0001.CSV	3498.39	0.0192994
0001.CSV	3502.24	0.0191715
0001.CSV	3506.1	0.0189472
0001.CSV	3509.96	0.0188392
0001.CSV	3513.81	0.0189456
0001.CSV	3517.67	0.0187904
0001.CSV	3521.53	0.01878
[truncated: 33,781 more rows]
