# Supplementary material for: Thermo-microstratigraphy of shells reveals invisible fire use and possible cooking in the archaeological record
Source: Frontiers journal article supplement (doi:10.3389/feart.2022.869487), 2022-09-01
Supplement: Table_3.XLSX [file Table_3.XLSX]

## Sheet: CAM109_map1
Map	Select spectrum number	Wavenumbers	Absorbance
CAM109_map1	0001.CSV	674.992	0.031577
CAM109_map1	0001.CSV	678.849	0.0337236
CAM109_map1	0001.CSV	682.706	0.0341702
CAM109_map1	0001.CSV	686.563	0.036785
CAM109_map1	0001.CSV	690.42	0.040095
CAM109_map1	0001.CSV	694.277	0.0502569
CAM109_map1	0001.CSV	698.134	0.0648336
CAM109_map1	0001.CSV	701.991	0.0639322
CAM109_map1	0001.CSV	705.849	0.0545566
CAM109_map1	0001.CSV	709.706	0.0693869
CAM109_map1	0001.CSV	713.563	0.0803925
CAM109_map1	0001.CSV	717.42	0.0580282
CAM109_map1	0001.CSV	721.277	0.0349521
CAM109_map1	0001.CSV	725.134	0.029226
CAM109_map1	0001.CSV	728.991	0.0281088
CAM109_map1	0001.CSV	732.848	0.02864
CAM109_map1	0001.CSV	736.705	0.0288702
CAM109_map1	0001.CSV	740.562	0.0305768
CAM109_map1	0001.CSV	744.42	0.0315524
CAM109_map1	0001.CSV	748.277	0.0325739
CAM109_map1	0001.CSV	752.134	0.0323265
CAM109_map1	0001.CSV	755.991	0.0330837
CAM109_map1	0001.CSV	759.848	0.0332723
CAM109_map1	0001.CSV	763.705	0.0343331
CAM109_map1	0001.CSV	767.562	0.0348258
CAM109_map1	0001.CSV	771.419	0.0356794
CAM109_map1	0001.CSV	775.276	0.0359163
CAM109_map1	0001.CSV	779.133	0.037137
CAM109_map1	0001.CSV	782.99	0.037697
CAM109_map1	0001.CSV	786.848	0.0386828
CAM109_map1	0001.CSV	790.705	0.0392529
CAM109_map1	0001.CSV	794.562	0.0409823
CAM109_map1	0001.CSV	798.419	0.0422399
CAM109_map1	0001.CSV	802.276	0.0441561
CAM109_map1	0001.CSV	806.133	0.0456247
CAM109_map1	0001.CSV	809.99	0.0484868
CAM109_map1	0001.CSV	813.847	0.0516106
CAM109_map1	0001.CSV	817.704	0.0563822
CAM109_map1	0001.CSV	821.562	0.0617388
CAM109_map1	0001.CSV	825.419	0.06928
CAM109_map1	0001.CSV	829.276	0.0785987
CAM109_map1	0001.CSV	833.133	0.0918686
CAM109_map1	0001.CSV	836.99	0.109909
CAM109_map1	0001.CSV	840.847	0.130623
CAM109_map1	0001.CSV	844.704	0.145266
CAM109_map1	0001.CSV	848.561	0.160575
CAM109_map1	0001.CSV	852.418	0.172129
CAM109_map1	0001.CSV	856.275	0.166204
CAM109_map1	0001.CSV	860.132	0.141624
CAM109_map1	0001.CSV	863.99	0.111468
CAM109_map1	0001.CSV	867.847	0.0827705
CAM109_map1	0001.CSV	871.704	0.0604298
CAM109_map1	0001.CSV	875.561	0.0454278
CAM109_map1	0001.CSV	879.418	0.0375989
CAM109_map1	0001.CSV	883.275	0.0329829
CAM109_map1	0001.CSV	887.132	0.030489
CAM109_map1	0001.CSV	890.989	0.0290973
CAM109_map1	0001.CSV	894.846	0.0290074
CAM109_map1	0001.CSV	898.703	0.0289343
CAM109_map1	0001.CSV	902.561	0.0295484
CAM109_map1	0001.CSV	906.418	0.0301326
CAM109_map1	0001.CSV	910.275	0.030483
CAM109_map1	0001.CSV	914.132	0.0298527
CAM109_map1	0001.CSV	917.989	0.0300382
CAM109_map1	0001.CSV	921.846	0.0301669
CAM109_map1	0001.CSV	925.703	0.0306468
CAM109_map1	0001.CSV	929.56	0.0307877
CAM109_map1	0001.CSV	933.417	0.0313446
CAM109_map1	0001.CSV	937.274	0.0315095
CAM109_map1	0001.CSV	941.131	0.0318991
CAM109_map1	0001.CSV	944.989	0.0319347
CAM109_map1	0001.CSV	948.846	0.0322097
CAM109_map1	0001.CSV	952.703	0.0324385
CAM109_map1	0001.CSV	956.56	0.0331112
CAM109_map1	0001.CSV	960.417	0.0331109
CAM109_map1	0001.CSV	964.274	0.0332681
CAM109_map1	0001.CSV	968.131	0.033455
CAM109_map1	0001.CSV	971.988	0.0341903
CAM109_map1	0001.CSV	975.845	0.0346247
CAM109_map1	0001.CSV	979.702	0.0353727
CAM109_map1	0001.CSV	983.559	0.0358837
CAM109_map1	0001.CSV	987.417	0.0366476
CAM109_map1	0001.CSV	991.274	0.0370549
CAM109_map1	0001.CSV	995.131	0.0377136
CAM109_map1	0001.CSV	998.988	0.0381286
CAM109_map1	0001.CSV	1002.85	0.0388929
CAM109_map1	0001.CSV	1006.7	0.0393277
CAM109_map1	0001.CSV	1010.56	0.039954
CAM109_map1	0001.CSV	1014.42	0.0403444
CAM109_map1	0001.CSV	1018.27	0.0410827
CAM109_map1	0001.CSV	1022.13	0.0415202
CAM109_map1	0001.CSV	1025.99	0.0423631
CAM109_map1	0001.CSV	1029.85	0.0429122
CAM109_map1	0001.CSV	1033.7	0.043909
CAM109_map1	0001.CSV	1037.56	0.0446298
CAM109_map1	0001.CSV	1041.42	0.0453382
CAM109_map1	0001.CSV	1045.27	0.0455842
CAM109_map1	0001.CSV	1049.13	0.0464386
CAM109_map1	0001.CSV	1052.99	0.0473284
CAM109_map1	0001.CSV	1056.84	0.0488604
CAM109_map1	0001.CSV	1060.7	0.0503241
CAM109_map1	0001.CSV	1064.56	0.0523738
CAM109_map1	0001.CSV	1068.42	0.0541745
CAM109_map1	0001.CSV	1072.27	0.0563176
CAM109_map1	0001.CSV	1076.13	0.059714
CAM109_map1	0001.CSV	1079.99	0.0687188
CAM109_map1	0001.CSV	1083.84	0.0740243
CAM109_map1	0001.CSV	1087.7	0.0647809
CAM109_map1	0001.CSV	1091.56	0.0545947
CAM109_map1	0001.CSV	1095.41	0.0517833
CAM109_map1	0001.CSV	1099.27	0.051396
CAM109_map1	0001.CSV	1103.13	0.0519223
CAM109_map1	0001.CSV	1106.99	0.0523823
CAM109_map1	0001.CSV	1110.84	0.0533276
CAM109_map1	0001.CSV	1114.7	0.0538328
CAM109_map1	0001.CSV	1118.56	0.0543758
CAM109_map1	0001.CSV	1122.41	0.0545566
CAM109_map1	0001.CSV	1126.27	0.0549037
CAM109_map1	0001.CSV	1130.13	0.0548604
CAM109_map1	0001.CSV	1133.99	0.0550895
CAM109_map1	0001.CSV	1137.84	0.0551661
CAM109_map1	0001.CSV	1141.7	0.0555644
CAM109_map1	0001.CSV	1145.56	0.0555911
CAM109_map1	0001.CSV	1149.41	0.0557706
CAM109_map1	0001.CSV	1153.27	0.0558198
CAM109_map1	0001.CSV	1157.13	0.0563625
CAM109_map1	0001.CSV	1160.99	0.0567915
CAM109_map1	0001.CSV	1164.84	0.0574878
CAM109_map1	0001.CSV	1168.7	0.0577144
CAM109_map1	0001.CSV	1172.56	0.0580876
CAM109_map1	0001.CSV	1176.41	0.0581693
CAM109_map1	0001.CSV	1180.27	0.0583566
CAM109_map1	0001.CSV	1184.13	0.0581896
CAM109_map1	0001.CSV	1187.99	0.0582643
CAM109_map1	0001.CSV	1191.84	0.0580693
CAM109_map1	0001.CSV	1195.7	0.0581866
CAM109_map1	0001.CSV	1199.56	0.0581914
CAM109_map1	0001.CSV	1203.41	0.0586089
CAM109_map1	0001.CSV	1207.27	0.0589229
CAM109_map1	0001.CSV	1211.13	0.0596566
CAM109_map1	0001.CSV	1214.98	0.0603006
CAM109_map1	0001.CSV	1218.84	0.0613566
CAM109_map1	0001.CSV	1222.7	0.0622359
CAM109_map1	0001.CSV	1226.56	0.0634577
CAM109_map1	0001.CSV	1230.41	0.0645227
CAM109_map1	0001.CSV	1234.27	0.065858
CAM109_map1	0001.CSV	1238.13	0.0670199
CAM109_map1	0001.CSV	1241.98	0.0686005
CAM109_map1	0001.CSV	1245.84	0.0700221
CAM109_map1	0001.CSV	1249.7	0.0716454
CAM109_map1	0001.CSV	1253.56	0.0728515
CAM109_map1	0001.CSV	1257.41	0.0740845
CAM109_map1	0001.CSV	1261.27	0.0750331
CAM109_map1	0001.CSV	1265.13	0.0764529
CAM109_map1	0001.CSV	1268.98	0.0778803
CAM109_map1	0001.CSV	1272.84	0.0797384
CAM109_map1	0001.CSV	1276.7	0.0812441
CAM109_map1	0001.CSV	1280.56	0.0828465
CAM109_map1	0001.CSV	1284.41	0.0840505
CAM109_map1	0001.CSV	1288.27	0.0853774
CAM109_map1	0001.CSV	1292.13	0.0862129
CAM109_map1	0001.CSV	1295.98	0.087291
CAM109_map1	0001.CSV	1299.84	0.0881829
CAM109_map1	0001.CSV	1303.7	0.089471
CAM109_map1	0001.CSV	1307.56	0.090699
CAM109_map1	0001.CSV	1311.41	0.0924495
CAM109_map1	0001.CSV	1315.27	0.0941026
CAM109_map1	0001.CSV	1319.13	0.0962093
CAM109_map1	0001.CSV	1322.98	0.0979524
CAM109_map1	0001.CSV	1326.84	0.100088
CAM109_map1	0001.CSV	1330.7	0.102296
CAM109_map1	0001.CSV	1334.56	0.104963
CAM109_map1	0001.CSV	1338.41	0.10808
CAM109_map1	0001.CSV	1342.27	0.112274
CAM109_map1	0001.CSV	1346.13	0.115694
CAM109_map1	0001.CSV	1349.98	0.119842
CAM109_map1	0001.CSV	1353.84	0.123982
CAM109_map1	0001.CSV	1357.7	0.12852
CAM109_map1	0001.CSV	1361.56	0.133303
CAM109_map1	0001.CSV	1365.41	0.13913
CAM109_map1	0001.CSV	1369.27	0.143669
CAM109_map1	0001.CSV	1373.13	0.149501
CAM109_map1	0001.CSV	1376.98	0.155761
CAM109_map1	0001.CSV	1380.84	0.161284
CAM109_map1	0001.CSV	1384.7	0.165966
CAM109_map1	0001.CSV	1388.56	0.172188
CAM109_map1	0001.CSV	1392.41	0.177082
CAM109_map1	0001.CSV	1396.27	0.183413
CAM109_map1	0001.CSV	1400.13	0.18923
CAM109_map1	0001.CSV	1403.98	0.194637
CAM109_map1	0001.CSV	1407.84	0.199581
CAM109_map1	0001.CSV	1411.7	0.204508
CAM109_map1	0001.CSV	1415.55	0.207856
CAM109_map1	0001.CSV	1419.41	0.21233
CAM109_map1	0001.CSV	1423.27	0.215287
CAM109_map1	0001.CSV	1427.12	0.218898
CAM109_map1	0001.CSV	1430.98	0.222588
CAM109_map1	0001.CSV	1434.84	0.227896
CAM109_map1	0001.CSV	1438.7	0.232891
CAM109_map1	0001.CSV	1442.55	0.23727
CAM109_map1	0001.CSV	1446.41	0.239386
CAM109_map1	0001.CSV	1450.27	0.240337
CAM109_map1	0001.CSV	1454.12	0.238084
CAM109_map1	0001.CSV	1457.98	0.234144
CAM109_map1	0001.CSV	1461.84	0.229978
CAM109_map1	0001.CSV	1465.7	0.226866
CAM109_map1	0001.CSV	1469.55	0.220487
CAM109_map1	0001.CSV	1473.41	0.20742
CAM109_map1	0001.CSV	1477.27	0.190209
CAM109_map1	0001.CSV	1481.12	0.17942
CAM109_map1	0001.CSV	1484.98	0.169203
CAM109_map1	0001.CSV	1488.84	0.157361
CAM109_map1	0001.CSV	1492.7	0.14581
CAM109_map1	0001.CSV	1496.55	0.13807
CAM109_map1	0001.CSV	1500.41	0.129554
CAM109_map1	0001.CSV	1504.27	0.124814
CAM109_map1	0001.CSV	1508.12	0.115467
CAM109_map1	0001.CSV	1511.98	0.109112
CAM109_map1	0001.CSV	1515.84	0.104812
CAM109_map1	0001.CSV	1519.7	0.0992812
CAM109_map1	0001.CSV	1523.55	0.0925416
CAM109_map1	0001.CSV	1527.41	0.0886074
CAM109_map1	0001.CSV	1531.27	0.08546
CAM109_map1	0001.CSV	1535.12	0.0834842
CAM109_map1	0001.CSV	1538.98	0.0811011
CAM109_map1	0001.CSV	1542.84	0.0763312
CAM109_map1	0001.CSV	1546.7	0.07203
CAM109_map1	0001.CSV	1550.55	0.0690437
CAM109_map1	0001.CSV	1554.41	0.0657211
CAM109_map1	0001.CSV	1558.27	0.0613345
CAM109_map1	0001.CSV	1562.12	0.0566965
CAM109_map1	0001.CSV	1565.98	0.0545763
CAM109_map1	0001.CSV	1569.84	0.0516474
CAM109_map1	0001.CSV	1573.69	0.0485292
CAM109_map1	0001.CSV	1577.55	0.0433552
CAM109_map1	0001.CSV	1581.41	0.0383995
CAM109_map1	0001.CSV	1585.27	0.0341984
CAM109_map1	0001.CSV	1589.12	0.0309536
CAM109_map1	0001.CSV	1592.98	0.0287189
CAM109_map1	0001.CSV	1596.84	0.0273868
CAM109_map1	0001.CSV	1600.69	0.0263855
CAM109_map1	0001.CSV	1604.55	0.0258099
CAM109_map1	0001.CSV	1608.41	0.0251323
CAM109_map1	0001.CSV	1612.27	0.0246197
CAM109_map1	0001.CSV	1616.12	0.023998
CAM109_map1	0001.CSV	1619.98	0.0235721
CAM109_map1	0001.CSV	1623.84	0.0228979
CAM109_map1	0001.CSV	1627.69	0.0223247
CAM109_map1	0001.CSV	1631.55	0.0215512
CAM109_map1	0001.CSV	1635.41	0.0211804
CAM109_map1	0001.CSV	1639.27	0.0206998
CAM109_map1	0001.CSV	1643.12	0.020126
CAM109_map1	0001.CSV	1646.98	0.0197219
CAM109_map1	0001.CSV	1650.84	0.0197735
CAM109_map1	0001.CSV	1654.69	0.0194133
CAM109_map1	0001.CSV	1658.55	0.0190782
CAM109_map1	0001.CSV	1662.41	0.0186738
CAM109_map1	0001.CSV	1666.27	0.0184204
CAM109_map1	0001.CSV	1670.12	0.018142
CAM109_map1	0001.CSV	1673.98	0.0180741
CAM109_map1	0001.CSV	1677.84	0.0176483
CAM109_map1	0001.CSV	1681.69	0.0174755
CAM109_map1	0001.CSV	1685.55	0.0174979
CAM109_map1	0001.CSV	1689.41	0.0173855
CAM109_map1	0001.CSV	1693.27	0.0168143
CAM109_map1	0001.CSV	1697.12	0.0166006
CAM109_map1	0001.CSV	1700.98	0.016572
CAM109_map1	0001.CSV	1704.84	0.0167197
CAM109_map1	0001.CSV	1708.69	0.01667
CAM109_map1	0001.CSV	1712.55	0.0166802
CAM109_map1	0001.CSV	1716.41	0.0173683
CAM109_map1	0001.CSV	1720.27	0.0183443
CAM109_map1	0001.CSV	1724.12	0.0182495
CAM109_map1	0001.CSV	1727.98	0.0181183
CAM109_map1	0001.CSV	1731.84	0.0179349
CAM109_map1	0001.CSV	1735.69	0.0177708
CAM109_map1	0001.CSV	1739.55	0.0170404
CAM109_map1	0001.CSV	1743.41	0.0160258
CAM109_map1	0001.CSV	1747.27	0.0147284
CAM109_map1	0001.CSV	1751.12	0.0135036
CAM109_map1	0001.CSV	1754.98	0.0125417
CAM109_map1	0001.CSV	1758.84	0.0120376
CAM109_map1	0001.CSV	1762.69	0.0117239
CAM109_map1	0001.CSV	1766.55	0.0115553
CAM109_map1	0001.CSV	1770.41	0.0117985
CAM109_map1	0001.CSV	1774.26	0.0132696
CAM109_map1	0001.CSV	1778.12	0.0149299
CAM109_map1	0001.CSV	1781.98	0.0172622
CAM109_map1	0001.CSV	1785.84	0.0188622
CAM109_map1	0001.CSV	1789.69	0.0189463
CAM109_map1	0001.CSV	1793.55	0.0172134
CAM109_map1	0001.CSV	1797.41	0.0151561
CAM109_map1	0001.CSV	1801.26	0.0131848
CAM109_map1	0001.CSV	1805.12	0.0116788
CAM109_map1	0001.CSV	1808.98	0.0106151
CAM109_map1	0001.CSV	1812.84	0.0100638
CAM109_map1	0001.CSV	1816.69	0.00967479
CAM109_map1	0001.CSV	1820.55	0.00950111
CAM109_map1	0001.CSV	1824.41	0.00933845
CAM109_map1	0001.CSV	1828.26	0.0094341
CAM109_map1	0001.CSV	1832.12	0.00942688
CAM109_map1	0001.CSV	1835.98	0.00935866
CAM109_map1	0001.CSV	1839.84	0.00917009
CAM109_map1	0001.CSV	1843.69	0.00926855
CAM109_map1	0001.CSV	1847.55	0.00937715
CAM109_map1	0001.CSV	1851.41	0.00928202
CAM109_map1	0001.CSV	1855.26	0.00916197
CAM109_map1	0001.CSV	1859.12	0.00921388
CAM109_map1	0001.CSV	1862.98	0.00914106
CAM109_map1	0001.CSV	1866.84	0.00927295
CAM109_map1	0001.CSV	1870.69	0.00950904
CAM109_map1	0001.CSV	1874.55	0.00942888
CAM109_map1	0001.CSV	1878.41	0.00931763
CAM109_map1	0001.CSV	1882.26	0.00937566
CAM109_map1	0001.CSV	1886.12	0.00933371
CAM109_map1	0001.CSV	1889.98	0.00942099
CAM109_map1	0001.CSV	1893.83	0.00947941
CAM109_map1	0001.CSV	1897.69	0.00955554
CAM109_map1	0001.CSV	1901.55	0.00950301
CAM109_map1	0001.CSV	1905.41	0.00953468
CAM109_map1	0001.CSV	1909.26	0.00962373
CAM109_map1	0001.CSV	1913.12	0.00967035
CAM109_map1	0001.CSV	1916.98	0.00961394
CAM109_map1	0001.CSV	1920.83	0.00979243
CAM109_map1	0001.CSV	1924.69	0.00985724
CAM109_map1	0001.CSV	1928.55	0.00984286
CAM109_map1	0001.CSV	1932.4	0.00983351
CAM109_map1	0001.CSV	1936.26	0.00991645
CAM109_map1	0001.CSV	1940.12	0.00994547
CAM109_map1	0001.CSV	1943.98	0.0101408
CAM109_map1	0001.CSV	1947.83	0.0101274
CAM109_map1	0001.CSV	1951.69	0.0101106
CAM109_map1	0001.CSV	1955.55	0.0101266
CAM109_map1	0001.CSV	1959.4	0.0101913
CAM109_map1	0001.CSV	1963.26	0.0101372
CAM109_map1	0001.CSV	1967.12	0.0102285
CAM109_map1	0001.CSV	1970.98	0.0102558
CAM109_map1	0001.CSV	1974.83	0.01027
CAM109_map1	0001.CSV	1978.69	0.0102918
CAM109_map1	0001.CSV	1982.55	0.0103459
CAM109_map1	0001.CSV	1986.4	0.0103356
CAM109_map1	0001.CSV	1990.26	0.0104099
CAM109_map1	0001.CSV	1994.12	0.010435
CAM109_map1	0001.CSV	1997.98	0.0104353
CAM109_map1	0001.CSV	2001.83	0.0103929
CAM109_map1	0001.CSV	2005.69	0.0104143
CAM109_map1	0001.CSV	2009.55	0.0104169
CAM109_map1	0001.CSV	2013.4	0.0104291
CAM109_map1	0001.CSV	2017.26	0.010449
CAM109_map1	0001.CSV	2021.12	0.0104961
CAM109_map1	0001.CSV	2024.97	0.0104303
CAM109_map1	0001.CSV	2028.83	0.0104795
CAM109_map1	0001.CSV	2032.69	0.0104935
CAM109_map1	0001.CSV	2036.55	0.0104971
CAM109_map1	0001.CSV	2040.4	0.0105018
CAM109_map1	0001.CSV	2044.26	0.0105767
CAM109_map1	0001.CSV	2048.12	0.010548
CAM109_map1	0001.CSV	2051.97	0.0105536
CAM109_map1	0001.CSV	2055.83	0.0105588
CAM109_map1	0001.CSV	2059.69	0.0105726
CAM109_map1	0001.CSV	2063.55	0.0105397
CAM109_map1	0001.CSV	2067.4	0.0105989
CAM109_map1	0001.CSV	2071.26	0.0105925
CAM109_map1	0001.CSV	2075.12	0.0106579
CAM109_map1	0001.CSV	2078.97	0.0106711
CAM109_map1	0001.CSV	2082.83	0.0106948
CAM109_map1	0001.CSV	2086.69	0.0107203
CAM109_map1	0001.CSV	2090.55	0.0107765
CAM109_map1	0001.CSV	2094.4	0.0107507
CAM109_map1	0001.CSV	2098.26	0.0107857
CAM109_map1	0001.CSV	2102.12	0.0108082
CAM109_map1	0001.CSV	2105.97	0.0108807
CAM109_map1	0001.CSV	2109.83	0.010854
CAM109_map1	0001.CSV	2113.69	0.0108857
CAM109_map1	0001.CSV	2117.55	0.0109503
CAM109_map1	0001.CSV	2121.4	0.0110232
CAM109_map1	0001.CSV	2125.26	0.0110065
CAM109_map1	0001.CSV	2129.12	0.0110123
CAM109_map1	0001.CSV	2132.97	0.0110229
CAM109_map1	0001.CSV	2136.83	0.0110876
CAM109_map1	0001.CSV	2140.69	0.0111051
CAM109_map1	0001.CSV	2144.55	0.0111245
CAM109_map1	0001.CSV	2148.4	0.0111098
CAM109_map1	0001.CSV	2152.26	0.0111461
CAM109_map1	0001.CSV	2156.12	0.0111659
CAM109_map1	0001.CSV	2159.97	0.0111953
CAM109_map1	0001.CSV	2163.83	0.0111669
CAM109_map1	0001.CSV	2167.69	0.0111615
CAM109_map1	0001.CSV	2171.55	0.0111343
CAM109_map1	0001.CSV	2175.4	0.0111891
CAM109_map1	0001.CSV	2179.26	0.0112339
CAM109_map1	0001.CSV	2183.12	0.0113064
CAM109_map1	0001.CSV	2186.97	0.0113242
CAM109_map1	0001.CSV	2190.83	0.0113354
CAM109_map1	0001.CSV	2194.69	0.0113348
CAM109_map1	0001.CSV	2198.55	0.0113726
CAM109_map1	0001.CSV	2202.4	0.0114033
CAM109_map1	0001.CSV	2206.26	0.011463
CAM109_map1	0001.CSV	2210.12	0.0114463
CAM109_map1	0001.CSV	2213.97	0.0114525
CAM109_map1	0001.CSV	2217.83	0.0114672
CAM109_map1	0001.CSV	2221.69	0.0115022
CAM109_map1	0001.CSV	2225.54	0.0114792
CAM109_map1	0001.CSV	2229.4	0.0115117
CAM109_map1	0001.CSV	2233.26	0.0115268
CAM109_map1	0001.CSV	2237.12	0.0115469
CAM109_map1	0001.CSV	2240.97	0.0115269
CAM109_map1	0001.CSV	2244.83	0.0115369
CAM109_map1	0001.CSV	2248.69	0.0115246
CAM109_map1	0001.CSV	2252.54	0.0115858
CAM109_map1	0001.CSV	2256.4	0.0116002
CAM109_map1	0001.CSV	2260.26	0.0115875
CAM109_map1	0001.CSV	2264.11	0.011562
CAM109_map1	0001.CSV	2267.97	0.011559
CAM109_map1	0001.CSV	2271.83	0.01156
CAM109_map1	0001.CSV	2275.69	0.0116067
CAM109_map1	0001.CSV	2279.54	0.0115984
CAM109_map1	0001.CSV	2283.4	0.0115737
CAM109_map1	0001.CSV	2287.26	0.0115237
CAM109_map1	0001.CSV	2291.11	0.0115587
CAM109_map1	0001.CSV	2294.97	0.0115412
CAM109_map1	0001.CSV	2298.83	0.0115011
CAM109_map1	0001.CSV	2302.69	0.011419
CAM109_map1	0001.CSV	2306.54	0.0113386
CAM109_map1	0001.CSV	2310.4	0.0112908
CAM109_map1	0001.CSV	2314.26	0.0112486
CAM109_map1	0001.CSV	2318.11	0.0109136
CAM109_map1	0001.CSV	2321.97	0.0104064
CAM109_map1	0001.CSV	2325.83	0.00987076
CAM109_map1	0001.CSV	2329.69	0.00966371
CAM109_map1	0001.CSV	2333.54	0.00946014
CAM109_map1	0001.CSV	2337.4	0.00936675
CAM109_map1	0001.CSV	2341.26	0.00963992
CAM109_map1	0001.CSV	2345.11	0.0105484
CAM109_map1	0001.CSV	2348.97	0.0104342
CAM109_map1	0001.CSV	2352.83	0.00935676
CAM109_map1	0001.CSV	2356.69	0.00721159
CAM109_map1	0001.CSV	2360.54	0.00630799
CAM109_map1	0001.CSV	2364.4	0.00770366
CAM109_map1	0001.CSV	2368.26	0.0095235
CAM109_map1	0001.CSV	2372.11	0.010736
CAM109_map1	0001.CSV	2375.97	0.0114746
CAM109_map1	0001.CSV	2379.83	0.0117489
CAM109_map1	0001.CSV	2383.69	0.011705
CAM109_map1	0001.CSV	2387.54	0.0115117
CAM109_map1	0001.CSV	2391.4	0.0114135
CAM109_map1	0001.CSV	2395.26	0.0114116
CAM109_map1	0001.CSV	2399.11	0.0113995
CAM109_map1	0001.CSV	2402.97	0.0114207
CAM109_map1	0001.CSV	2406.83	0.0115021
CAM109_map1	0001.CSV	2410.68	0.0115107
CAM109_map1	0001.CSV	2414.54	0.0114947
CAM109_map1	0001.CSV	2418.4	0.0115056
CAM109_map1	0001.CSV	2422.26	0.0115582
CAM109_map1	0001.CSV	2426.11	0.0115874
CAM109_map1	0001.CSV	2429.97	0.0116312
CAM109_map1	0001.CSV	2433.83	0.0116645
CAM109_map1	0001.CSV	2437.68	0.0116918
CAM109_map1	0001.CSV	2441.54	0.0117112
CAM109_map1	0001.CSV	2445.4	0.011793
CAM109_map1	0001.CSV	2449.26	0.0119306
CAM109_map1	0001.CSV	2453.11	0.0120345
CAM109_map1	0001.CSV	2456.97	0.0120635
CAM109_map1	0001.CSV	2460.83	0.0121851
CAM109_map1	0001.CSV	2464.68	0.0123809
CAM109_map1	0001.CSV	2468.54	0.0125448
CAM109_map1	0001.CSV	2472.4	0.0127256
CAM109_map1	0001.CSV	2476.26	0.0130712
CAM109_map1	0001.CSV	2480.11	0.0134977
CAM109_map1	0001.CSV	2483.97	0.013963
CAM109_map1	0001.CSV	2487.83	0.0143971
CAM109_map1	0001.CSV	2491.68	0.014759
CAM109_map1	0001.CSV	2495.54	0.0150678
CAM109_map1	0001.CSV	2499.4	0.0152586
CAM109_map1	0001.CSV	2503.26	0.0152802
CAM109_map1	0001.CSV	2507.11	0.0152314
CAM109_map1	0001.CSV	2510.97	0.0152008
CAM109_map1	0001.CSV	2514.83	0.015348
CAM109_map1	0001.CSV	2518.68	0.0156059
CAM109_map1	0001.CSV	2522.54	0.0157954
CAM109_map1	0001.CSV	2526.4	0.0158144
CAM109_map1	0001.CSV	2530.26	0.0156774
CAM109_map1	0001.CSV	2534.11	0.015339
CAM109_map1	0001.CSV	2537.97	0.0149648
CAM109_map1	0001.CSV	2541.83	0.0146597
CAM109_map1	0001.CSV	2545.68	0.0145
CAM109_map1	0001.CSV	2549.54	0.0144263
CAM109_map1	0001.CSV	2553.4	0.0143373
CAM109_map1	0001.CSV	2557.26	0.0141558
CAM109_map1	0001.CSV	2561.11	0.0138793
CAM109_map1	0001.CSV	2564.97	0.0135869
CAM109_map1	0001.CSV	2568.83	0.0133798
CAM109_map1	0001.CSV	2572.68	0.0132261
CAM109_map1	0001.CSV	2576.54	0.013082
CAM109_map1	0001.CSV	2580.4	0.0129047
CAM109_map1	0001.CSV	2584.25	0.0127895
CAM109_map1	0001.CSV	2588.11	0.0127097
CAM109_map1	0001.CSV	2591.97	0.012636
CAM109_map1	0001.CSV	2595.83	0.0125702
CAM109_map1	0001.CSV	2599.68	0.0125422
CAM109_map1	0001.CSV	2603.54	0.0124934
CAM109_map1	0001.CSV	2607.4	0.0124646
CAM109_map1	0001.CSV	2611.25	0.0124874
CAM109_map1	0001.CSV	2615.11	0.0125632
CAM109_map1	0001.CSV	2618.97	0.0125778
CAM109_map1	0001.CSV	2622.82	0.0125701
CAM109_map1	0001.CSV	2626.68	0.0125735
CAM109_map1	0001.CSV	2630.54	0.0125186
CAM109_map1	0001.CSV	2634.4	0.0124883
CAM109_map1	0001.CSV	2638.25	0.0124725
CAM109_map1	0001.CSV	2642.11	0.0123128
CAM109_map1	0001.CSV	2645.97	0.0121533
CAM109_map1	0001.CSV	2649.82	0.0120419
CAM109_map1	0001.CSV	2653.68	0.0119682
CAM109_map1	0001.CSV	2657.54	0.0118944
CAM109_map1	0001.CSV	2661.4	0.0117752
CAM109_map1	0001.CSV	2665.25	0.0116464
CAM109_map1	0001.CSV	2669.11	0.0116343
CAM109_map1	0001.CSV	2672.97	0.0118204
CAM109_map1	0001.CSV	2676.82	0.0120698
CAM109_map1	0001.CSV	2680.68	0.0120097
CAM109_map1	0001.CSV	2684.54	0.0116683
CAM109_map1	0001.CSV	2688.4	0.0115167
CAM109_map1	0001.CSV	2692.25	0.011532
CAM109_map1	0001.CSV	2696.11	0.0115471
CAM109_map1	0001.CSV	2699.97	0.0115975
CAM109_map1	0001.CSV	2703.82	0.0116205
CAM109_map1	0001.CSV	2707.68	0.0117138
CAM109_map1	0001.CSV	2711.54	0.0117488
CAM109_map1	0001.CSV	2715.4	0.0117458
CAM109_map1	0001.CSV	2719.25	0.0118909
CAM109_map1	0001.CSV	2723.11	0.0121777
CAM109_map1	0001.CSV	2726.97	0.0122155
CAM109_map1	0001.CSV	2730.82	0.011999
CAM109_map1	0001.CSV	2734.68	0.0119801
CAM109_map1	0001.CSV	2738.54	0.0120301
CAM109_map1	0001.CSV	2742.4	0.012079
CAM109_map1	0001.CSV	2746.25	0.0123662
CAM109_map1	0001.CSV	2750.11	0.0124132
CAM109_map1	0001.CSV	2753.97	0.0121933
CAM109_map1	0001.CSV	2757.82	0.0121586
CAM109_map1	0001.CSV	2761.68	0.012108
CAM109_map1	0001.CSV	2765.54	0.0120871
CAM109_map1	0001.CSV	2769.39	0.0123104
CAM109_map1	0001.CSV	2773.25	0.012707
CAM109_map1	0001.CSV	2777.11	0.0126625
CAM109_map1	0001.CSV	2780.97	0.0124167
CAM109_map1	0001.CSV	2784.82	0.012602
CAM109_map1	0001.CSV	2788.68	0.0130751
CAM109_map1	0001.CSV	2792.54	0.0132129
CAM109_map1	0001.CSV	2796.39	0.013237
CAM109_map1	0001.CSV	2800.25	0.0130948
CAM109_map1	0001.CSV	2804.11	0.012896
CAM109_map1	0001.CSV	2807.97	0.0131584
CAM109_map1	0001.CSV	2811.82	0.0132473
CAM109_map1	0001.CSV	2815.68	0.0131435
CAM109_map1	0001.CSV	2819.54	0.0133518
CAM109_map1	0001.CSV	2823.39	0.0135789
CAM109_map1	0001.CSV	2827.25	0.0137287
CAM109_map1	0001.CSV	2831.11	0.0142784
CAM109_map1	0001.CSV	2834.97	0.015226
CAM109_map1	0001.CSV	2838.82	0.0161832
CAM109_map1	0001.CSV	2842.68	0.0174686
CAM109_map1	0001.CSV	2846.54	0.0199528
CAM109_map1	0001.CSV	2850.39	0.0219626
CAM109_map1	0001.CSV	2854.25	0.0219081
CAM109_map1	0001.CSV	2858.11	0.0208674
CAM109_map1	0001.CSV	2861.97	0.0195287
CAM109_map1	0001.CSV	2865.82	0.0185275
CAM109_map1	0001.CSV	2869.68	0.0183827
CAM109_map1	0001.CSV	2873.54	0.0182636
CAM109_map1	0001.CSV	2877.39	0.017489
CAM109_map1	0001.CSV	2881.25	0.0169887
CAM109_map1	0001.CSV	2885.11	0.0170812
CAM109_map1	0001.CSV	2888.97	0.0175438
CAM109_map1	0001.CSV	2892.82	0.0184452
CAM109_map1	0001.CSV	2896.68	0.0192804
CAM109_map1	0001.CSV	2900.54	0.0198771
CAM109_map1	0001.CSV	2904.39	0.0209172
CAM109_map1	0001.CSV	2908.25	0.0227716
CAM109_map1	0001.CSV	2912.11	0.0257275
CAM109_map1	0001.CSV	2915.97	0.0286151
CAM109_map1	0001.CSV	2919.82	0.0297161
CAM109_map1	0001.CSV	2923.68	0.0292675
CAM109_map1	0001.CSV	2927.54	0.0285028
CAM109_map1	0001.CSV	2931.39	0.0269366
CAM109_map1	0001.CSV	2935.25	0.0247773
CAM109_map1	0001.CSV	2939.11	0.0233132
CAM109_map1	0001.CSV	2942.96	0.0226842
CAM109_map1	0001.CSV	2946.82	0.0220005
CAM109_map1	0001.CSV	2950.68	0.0211397
CAM109_map1	0001.CSV	2954.54	0.0202988
CAM109_map1	0001.CSV	2958.39	0.0195206
CAM109_map1	0001.CSV	2962.25	0.018965
CAM109_map1	0001.CSV	2966.11	0.0181297
CAM109_map1	0001.CSV	2969.96	0.017544
CAM109_map1	0001.CSV	2973.82	0.0174223
CAM109_map1	0001.CSV	2977.68	0.0172286
CAM109_map1	0001.CSV	2981.53	0.0165888
CAM109_map1	0001.CSV	2985.39	0.0157387
CAM109_map1	0001.CSV	2989.25	0.0155672
CAM109_map1	0001.CSV	2993.11	0.0157502
CAM109_map1	0001.CSV	2996.96	0.015498
CAM109_map1	0001.CSV	3000.82	0.0150408
CAM109_map1	0001.CSV	3004.68	0.0147773
CAM109_map1	0001.CSV	3008.53	0.0149443
CAM109_map1	0001.CSV	3012.39	0.0152474
CAM109_map1	0001.CSV	3016.25	0.0152283
CAM109_map1	0001.CSV	3020.11	0.0149483
CAM109_map1	0001.CSV	3023.96	0.0146714
CAM109_map1	0001.CSV	3027.82	0.0145801
CAM109_map1	0001.CSV	3031.68	0.0148065
CAM109_map1	0001.CSV	3035.53	0.0149154
CAM109_map1	0001.CSV	3039.39	0.0149034
CAM109_map1	0001.CSV	3043.25	0.0149719
CAM109_map1	0001.CSV	3047.11	0.0149062
CAM109_map1	0001.CSV	3050.96	0.0148426
CAM109_map1	0001.CSV	3054.82	0.0147367
CAM109_map1	0001.CSV	3058.68	0.014578
CAM109_map1	0001.CSV	3062.53	0.0146758
CAM109_map1	0001.CSV	3066.39	0.0149085
CAM109_map1	0001.CSV	3070.25	0.0147959
CAM109_map1	0001.CSV	3074.11	0.0148287
CAM109_map1	0001.CSV	3077.96	0.0151111
CAM109_map1	0001.CSV	3081.82	0.0153058
CAM109_map1	0001.CSV	3085.68	0.0152991
CAM109_map1	0001.CSV	3089.53	0.0151212
CAM109_map1	0001.CSV	3093.39	0.0148596
CAM109_map1	0001.CSV	3097.25	0.0148859
CAM109_map1	0001.CSV	3101.11	0.0149634
CAM109_map1	0001.CSV	3104.96	0.0149927
CAM109_map1	0001.CSV	3108.82	0.0151139
CAM109_map1	0001.CSV	3112.68	0.0152298
CAM109_map1	0001.CSV	3116.53	0.0154157
CAM109_map1	0001.CSV	3120.39	0.0153919
CAM109_map1	0001.CSV	3124.25	0.0151683
CAM109_map1	0001.CSV	3128.11	0.0151092
CAM109_map1	0001.CSV	3131.96	0.0150745
CAM109_map1	0001.CSV	3135.82	0.0152324
CAM109_map1	0001.CSV	3139.68	0.0153889
CAM109_map1	0001.CSV	3143.53	0.0152289
CAM109_map1	0001.CSV	3147.39	0.0152949
CAM109_map1	0001.CSV	3151.25	0.0155264
CAM109_map1	0001.CSV	3155.1	0.0154633
CAM109_map1	0001.CSV	3158.96	0.0151652
CAM109_map1	0001.CSV	3162.82	0.0150698
CAM109_map1	0001.CSV	3166.68	0.0150417
CAM109_map1	0001.CSV	3170.53	0.0150177
CAM109_map1	0001.CSV	3174.39	0.0150749
CAM109_map1	0001.CSV	3178.25	0.0152626
CAM109_map1	0001.CSV	3182.1	0.015379
CAM109_map1	0001.CSV	3185.96	0.0154595
CAM109_map1	0001.CSV	3189.82	0.0155751
CAM109_map1	0001.CSV	3193.68	0.0155159
CAM109_map1	0001.CSV	3197.53	0.0154749
CAM109_map1	0001.CSV	3201.39	0.0155902
CAM109_map1	0001.CSV	3205.25	0.0156311
CAM109_map1	0001.CSV	3209.1	0.0155927
CAM109_map1	0001.CSV	3212.96	0.0156208
CAM109_map1	0001.CSV	3216.82	0.0157522
CAM109_map1	0001.CSV	3220.68	0.015803
CAM109_map1	0001.CSV	3224.53	0.0157072
CAM109_map1	0001.CSV	3228.39	0.0157783
CAM109_map1	0001.CSV	3232.25	0.0160838
CAM109_map1	0001.CSV	3236.1	0.0161258
CAM109_map1	0001.CSV	3239.96	0.0160566
CAM109_map1	0001.CSV	3243.82	0.0161536
CAM109_map1	0001.CSV	3247.68	0.0161892
CAM109_map1	0001.CSV	3251.53	0.0160407
CAM109_map1	0001.CSV	3255.39	0.016088
CAM109_map1	0001.CSV	3259.25	0.0160744
CAM109_map1	0001.CSV	3263.1	0.0160221
CAM109_map1	0001.CSV	3266.96	0.016172
CAM109_map1	0001.CSV	3270.82	0.0164677
CAM109_map1	0001.CSV	3274.68	0.0165019
CAM109_map1	0001.CSV	3278.53	0.0162543
CAM109_map1	0001.CSV	3282.39	0.0161516
CAM109_map1	0001.CSV	3286.25	0.0162507
CAM109_map1	0001.CSV	3290.1	0.0164851
CAM109_map1	0001.CSV	3293.96	0.0166466
CAM109_map1	0001.CSV	3297.82	0.0164685
CAM109_map1	0001.CSV	3301.67	0.0164425
CAM109_map1	0001.CSV	3305.53	0.0166065
CAM109_map1	0001.CSV	3309.39	0.0165487
CAM109_map1	0001.CSV	3313.25	0.0162332
CAM109_map1	0001.CSV	3317.1	0.0159848
CAM109_map1	0001.CSV	3320.96	0.0160003
CAM109_map1	0001.CSV	3324.82	0.0161951
CAM109_map1	0001.CSV	3328.67	0.0161531
CAM109_map1	0001.CSV	3332.53	0.016111
CAM109_map1	0001.CSV	3336.39	0.0163764
CAM109_map1	0001.CSV	3340.24	0.0165533
CAM109_map1	0001.CSV	3344.1	0.0164221
CAM109_map1	0001.CSV	3347.96	0.0163774
CAM109_map1	0001.CSV	3351.82	0.0163142
CAM109_map1	0001.CSV	3355.67	0.0162243
CAM109_map1	0001.CSV	3359.53	0.0163543
CAM109_map1	0001.CSV	3363.39	0.0165347
CAM109_map1	0001.CSV	3367.24	0.016655
CAM109_map1	0001.CSV	3371.1	0.0164573
CAM109_map1	0001.CSV	3374.96	0.0161382
CAM109_map1	0001.CSV	3378.82	0.0160341
CAM109_map1	0001.CSV	3382.67	0.0159483
CAM109_map1	0001.CSV	3386.53	0.0159462
CAM109_map1	0001.CSV	3390.39	0.0161716
CAM109_map1	0001.CSV	3394.24	0.0163387
CAM109_map1	0001.CSV	3398.1	0.0163162
CAM109_map1	0001.CSV	3401.96	0.0161411
CAM109_map1	0001.CSV	3405.82	0.0159485
CAM109_map1	0001.CSV	3409.67	0.01598
CAM109_map1	0001.CSV	3413.53	0.0157876
CAM109_map1	0001.CSV	3417.39	0.0154544
CAM109_map1	0001.CSV	3421.24	0.0152732
CAM109_map1	0001.CSV	3425.1	0.0152175
CAM109_map1	0001.CSV	3428.96	0.0152741
CAM109_map1	0001.CSV	3432.82	0.0153353
CAM109_map1	0001.CSV	3436.67	0.0152358
CAM109_map1	0001.CSV	3440.53	0.0148686
CAM109_map1	0001.CSV	3444.39	0.0145142
CAM109_map1	0001.CSV	3448.24	0.0144148
CAM109_map1	0001.CSV	3452.1	0.0143205
CAM109_map1	0001.CSV	3455.96	0.0142337
CAM109_map1	0001.CSV	3459.82	0.0142866
CAM109_map1	0001.CSV	3463.67	0.0144611
CAM109_map1	0001.CSV	3467.53	0.0145009
CAM109_map1	0001.CSV	3471.39	0.014257
CAM109_map1	0001.CSV	3475.24	0.0140122
CAM109_map1	0001.CSV	3479.1	0.0139858
CAM109_map1	0001.CSV	3482.96	0.0139383
CAM109_map1	0001.CSV	3486.82	0.0138552
CAM109_map1	0001.CSV	3490.67	0.0136632
CAM109_map1	0001.CSV	3494.53	0.0136702
CAM109_map1	0001.CSV	3498.39	0.0137031
CAM109_map1	0001.CSV	3502.24	0.0135485
CAM109_map1	0001.CSV	3506.1	0.0132552
CAM109_map1	0001.CSV	3509.96	0.0131411
CAM109_map1	0001.CSV	3513.81	0.0131477
CAM109_map1	0001.CSV	3517.67	0.0128051
CAM109_map1	0001.CSV	3521.53	0.0126834
CAM109_map1	0001.CSV	3525.39	0.0126755
CAM109_map1	0001.CSV	3529.24	0.0125868
CAM109_map1	0001.CSV	3533.1	0.0125921
CAM109_map1	0001.CSV	3536.96	0.0125673
CAM109_map1	0001.CSV	3540.81	0.012484
CAM109_map1	0001.CSV	3544.67	0.01259
CAM109_map1	0001.CSV	3548.53	0.0124688
CAM109_map1	0001.CSV	3552.39	0.0121563
CAM109_map1	0001.CSV	3556.24	0.0119427
CAM109_map1	0001.CSV	3560.1	0.0116673
CAM109_map1	0001.CSV	3563.96	0.0112979
CAM109_map1	0001.CSV	3567.81	0.0114931
CAM109_map1	0001.CSV	3571.67	0.0114645
CAM109_map1	0001.CSV	3575.53	0.0111254
CAM109_map1	0001.CSV	3579.39	0.0111843
CAM109_map1	0001.CSV	3583.24	0.0111313
CAM109_map1	0001.CSV	3587.1	0.0112038
CAM109_map1	0001.CSV	3590.96	0.0111221
CAM109_map1	0001.CSV	3594.81	0.0108106
CAM109_map1	0001.CSV	3598.67	0.0109823
CAM109_map1	0001.CSV	3602.53	0.0109386
CAM109_map1	0001.CSV	3606.39	0.010476
CAM109_map1	0001.CSV	3610.24	0.010287
CAM109_map1	0001.CSV	3614.1	0.0101677
CAM109_map1	0001.CSV	3617.96	0.0102664
CAM109_map1	0001.CSV	3621.81	0.0103705
CAM109_map1	0001.CSV	3625.67	0.00978213
CAM109_map1	0001.CSV	3629.53	0.00972602
CAM109_map1	0001.CSV	3633.39	0.0100667
CAM109_map1	0001.CSV	3637.24	0.00976132
CAM109_map1	0001.CSV	3641.1	0.00936682
CAM109_map1	0001.CSV	3644.96	0.00882255
CAM109_map1	0001.CSV	3648.81	0.00935934
CAM109_map1	0001.CSV	3652.67	0.0100581
CAM109_map1	0001.CSV	3656.53	0.00993574
CAM109_map1	0001.CSV	3660.38	0.0097843
CAM109_map1	0001.CSV	3664.24	0.00911131
CAM109_map1	0001.CSV	3668.1	0.00855229
CAM109_map1	0001.CSV	3671.96	0.00871723
CAM109_map1	0001.CSV	3675.81	0.00924187
CAM109_map1	0001.CSV	3679.67	0.00947385
CAM109_map1	0001.CSV	3683.53	0.00906577
CAM109_map1	0001.CSV	3687.38	0.00899567
CAM109_map1	0001.CSV	3691.24	0.00958159
CAM109_map1	0001.CSV	3695.1	0.00930497
CAM109_map1	0001.CSV	3698.95	0.00878329
CAM109_map1	0001.CSV	3702.81	0.00860359
CAM109_map1	0001.CSV	3706.67	0.00835397
CAM109_map1	0001.CSV	3710.53	0.00855232
CAM109_map1	0001.CSV	3714.38	0.00898472
CAM109_map1	0001.CSV	3718.24	0.00855273
CAM109_map1	0001.CSV	3722.1	0.00839761
CAM109_map1	0001.CSV	3725.95	0.00854218
CAM109_map1	0001.CSV	3729.81	0.00823411
CAM109_map1	0001.CSV	3733.67	0.00823894
CAM109_map1	0001.CSV	3737.53	0.00898627
CAM109_map1	0001.CSV	3741.38	0.00840045
CAM109_map1	0001.CSV	3745.24	0.00789166
CAM109_map1	0001.CSV	3749.1	0.00810655
CAM109_map1	0001.CSV	3752.95	0.00867038
CAM109_map1	0001.CSV	3756.81	0.00857905
CAM109_map1	0001.CSV	3760.67	0.00842984
CAM109_map1	0001.CSV	3764.53	0.00811026
CAM109_map1	0001.CSV	3768.38	0.00821101
CAM109_map1	0001.CSV	3772.24	0.00844926
CAM109_map1	0001.CSV	3776.1	0.00828368
CAM109_map1	0001.CSV	3779.95	0.00833664
CAM109_map1	0001.CSV	3783.81	0.00836045
CAM109_map1	0001.CSV	3787.67	0.00828074
CAM109_map1	0001.CSV	3791.53	0.00794059
CAM109_map1	0001.CSV	3795.38	0.00760104
CAM109_map1	0001.CSV	3799.24	0.00784045
CAM109_map1	0001.CSV	3803.1	0.00836093
CAM109_map1	0001.CSV	3806.95	0.00855289
CAM109_map1	0001.CSV	3810.81	0.00815577
CAM109_map1	0001.CSV	3814.67	0.00765014
CAM109_map1	0001.CSV	3818.53	0.00792986
CAM109_map1	0001.CSV	3822.38	0.00855154
CAM109_map1	0001.CSV	3826.24	0.00838805
CAM109_map1	0001.CSV	3830.1	0.00807654
CAM109_map1	0001.CSV	3833.95	0.00792035
CAM109_map1	0001.CSV	3837.81	0.0081606
CAM109_map1	0001.CSV	3841.67	0.00863975
CAM109_map1	0001.CSV	3845.53	0.00835924
CAM109_map1	0001.CSV	3849.38	0.00760364
CAM109_map1	0001.CSV	3853.24	0.00776211
CAM109_map1	0001.CSV	3857.1	0.00847839
CAM109_map1	0001.CSV	3860.95	0.00801713
CAM109_map1	0001.CSV	3864.81	0.00793678
CAM109_map1	0001.CSV	3868.67	0.00805372
CAM109_map1	0001.CSV	3872.52	0.00830077
CAM109_map1	0001.CSV	3876.38	0.00828243
CAM109_map1	0001.CSV	3880.24	0.00815712
CAM109_map1	0001.CSV	3884.1	0.00845197
CAM109_map1	0001.CSV	3887.95	0.0085285
CAM109_map1	0001.CSV	3891.81	0.00855134
CAM109_map1	0001.CSV	3895.67	0.00828314
CAM109_map1	0001.CSV	3899.52	0.00801541
CAM109_map1	0001.CSV	3903.38	0.00873484
CAM109_map1	0001.CSV	3907.24	0.00882829
CAM109_map1	0001.CSV	3911.1	0.00833914
CAM109_map1	0001.CSV	3914.95	0.00806567
CAM109_map1	0001.CSV	3918.81	0.00821115
CAM109_map1	0001.CSV	3922.67	0.00830793
CAM109_map1	0001.CSV	3926.52	0.00826166
CAM109_map1	0001.CSV	3930.38	0.00829874
CAM109_map1	0001.CSV	3934.24	0.00845166
CAM109_map1	0001.CSV	3938.09	0.00819659
CAM109_map1	0001.CSV	3941.95	0.00814092
CAM109_map1	0001.CSV	3945.81	0.008218
CAM109_map1	0001.CSV	3949.67	0.00830337
CAM109_map1	0001.CSV	3953.52	0.00832732
CAM109_map1	0001.CSV	3957.38	0.00820926
CAM109_map1	0001.CSV	3961.24	0.00824836
CAM109_map1	0001.CSV	3965.09	0.00823255
CAM109_map1	0001.CSV	3968.95	0.00814325
CAM109_map1	0001.CSV	3972.81	0.00816742
CAM109_map1	0001.CSV	3976.67	0.00823033
CAM109_map1	0001.CSV	3980.52	0.00818906
CAM109_map1	0001.CSV	3984.38	0.00802044
CAM109_map1	0001.CSV	3988.24	0.0078725
CAM109_map1	0001.CSV	3992.09	0.00791771
CAM109_map1	0001.CSV	3995.95	0.00807992
CAM109_map1	0001.CSV	3999.81	0.00808832
CAM109_map1	0002.CSV	674.992	0.0409325
CAM109_map1	0002.CSV	678.849	0.0439899
CAM109_map1	0002.CSV	682.706	0.0448223
CAM109_map1	0002.CSV	686.563	0.0482448
CAM109_map1	0002.CSV	690.42	0.0520259
CAM109_map1	0002.CSV	694.277	0.0662832
CAM109_map1	0002.CSV	698.134	0.086664
CAM109_map1	0002.CSV	701.991	0.0839081
CAM109_map1	0002.CSV	705.849	0.0735373
CAM109_map1	0002.CSV	709.706	0.0995415
CAM109_map1	0002.CSV	713.563	0.109963
CAM109_map1	0002.CSV	717.42	0.0712418
CAM109_map1	0002.CSV	721.277	0.0417921
CAM109_map1	0002.CSV	725.134	0.0366442
CAM109_map1	0002.CSV	728.991	0.0356219
CAM109_map1	0002.CSV	732.848	0.0360341
CAM109_map1	0002.CSV	736.705	0.0363724
CAM109_map1	0002.CSV	740.562	0.0387549
CAM109_map1	0002.CSV	744.42	0.0397516
CAM109_map1	0002.CSV	748.277	0.0410753
CAM109_map1	0002.CSV	752.134	0.0413337
CAM109_map1	0002.CSV	755.991	0.0426024
CAM109_map1	0002.CSV	759.848	0.0427157
CAM109_map1	0002.CSV	763.705	0.0441942
CAM109_map1	0002.CSV	767.562	0.0448728
CAM109_map1	0002.CSV	771.419	0.0462509
CAM109_map1	0002.CSV	775.276	0.046626
CAM109_map1	0002.CSV	779.133	0.0479624
CAM109_map1	0002.CSV	782.99	0.0485699
CAM109_map1	0002.CSV	786.848	0.0499936
CAM109_map1	0002.CSV	790.705	0.0510756
CAM109_map1	0002.CSV	794.562	0.0538639
CAM109_map1	0002.CSV	798.419	0.0560706
CAM109_map1	0002.CSV	802.276	0.0588052
CAM109_map1	0002.CSV	806.133	0.0607465
CAM109_map1	0002.CSV	809.99	0.0643053
CAM109_map1	0002.CSV	813.847	0.0679935
CAM109_map1	0002.CSV	817.704	0.0739582
CAM109_map1	0002.CSV	821.562	0.0804784
CAM109_map1	0002.CSV	825.419	0.0899161
CAM109_map1	0002.CSV	829.276	0.101749
CAM109_map1	0002.CSV	833.133	0.119084
CAM109_map1	0002.CSV	836.99	0.143878
CAM109_map1	0002.CSV	840.847	0.174751
CAM109_map1	0002.CSV	844.704	0.198359
CAM109_map1	0002.CSV	848.561	0.2243
CAM109_map1	0002.CSV	852.418	0.243723
CAM109_map1	0002.CSV	856.275	0.234398
CAM109_map1	0002.CSV	860.132	0.196947
CAM109_map1	0002.CSV	863.99	0.151844
CAM109_map1	0002.CSV	867.847	0.10945
CAM109_map1	0002.CSV	871.704	0.0775141
CAM109_map1	0002.CSV	875.561	0.0570671
CAM109_map1	0002.CSV	879.418	0.0468507
CAM109_map1	0002.CSV	883.275	0.0409436
CAM109_map1	0002.CSV	887.132	0.0378175
CAM109_map1	0002.CSV	890.989	0.0362059
CAM109_map1	0002.CSV	894.846	0.036176
CAM109_map1	0002.CSV	898.703	0.0360617
CAM109_map1	0002.CSV	902.561	0.0368549
CAM109_map1	0002.CSV	906.418	0.0376338
CAM109_map1	0002.CSV	910.275	0.0380272
CAM109_map1	0002.CSV	914.132	0.0371743
CAM109_map1	0002.CSV	917.989	0.0375742
CAM109_map1	0002.CSV	921.846	0.0378897
CAM109_map1	0002.CSV	925.703	0.0386825
CAM109_map1	0002.CSV	929.56	0.0390833
CAM109_map1	0002.CSV	933.417	0.0398479
CAM109_map1	0002.CSV	937.274	0.0399418
CAM109_map1	0002.CSV	941.131	0.040437
CAM109_map1	0002.CSV	944.989	0.0405826
CAM109_map1	0002.CSV	948.846	0.0410938
CAM109_map1	0002.CSV	952.703	0.0414386
CAM109_map1	0002.CSV	956.56	0.0422789
CAM109_map1	0002.CSV	960.417	0.0423449
CAM109_map1	0002.CSV	964.274	0.0427658
CAM109_map1	0002.CSV	968.131	0.0430275
CAM109_map1	0002.CSV	971.988	0.0439372
CAM109_map1	0002.CSV	975.845	0.0444494
CAM109_map1	0002.CSV	979.702	0.0453907
CAM109_map1	0002.CSV	983.559	0.0459824
CAM109_map1	0002.CSV	987.417	0.047056
CAM109_map1	0002.CSV	991.274	0.0476431
CAM109_map1	0002.CSV	995.131	0.0484497
CAM109_map1	0002.CSV	998.988	0.0489167
CAM109_map1	0002.CSV	1002.85	0.0499321
CAM109_map1	0002.CSV	1006.7	0.050524
CAM109_map1	0002.CSV	1010.56	0.0514979
CAM109_map1	0002.CSV	1014.42	0.0520692
CAM109_map1	0002.CSV	1018.27	0.0530706
CAM109_map1	0002.CSV	1022.13	0.0536009
CAM109_map1	0002.CSV	1025.99	0.0545965
CAM109_map1	0002.CSV	1029.85	0.0552902
CAM109_map1	0002.CSV	1033.7	0.0564887
CAM109_map1	0002.CSV	1037.56	0.0572097
CAM109_map1	0002.CSV	1041.42	0.0583026
CAM109_map1	0002.CSV	1045.27	0.0587714
CAM109_map1	0002.CSV	1049.13	0.0598417
CAM109_map1	0002.CSV	1052.99	0.0608949
CAM109_map1	0002.CSV	1056.84	0.0629475
CAM109_map1	0002.CSV	1060.7	0.0648852
CAM109_map1	0002.CSV	1064.56	0.0675916
CAM109_map1	0002.CSV	1068.42	0.0697855
CAM109_map1	0002.CSV	1072.27	0.0725372
CAM109_map1	0002.CSV	1076.13	0.0775377
CAM109_map1	0002.CSV	1079.99	0.0903359
CAM109_map1	0002.CSV	1083.84	0.0941816
CAM109_map1	0002.CSV	1087.7	0.0784868
CAM109_map1	0002.CSV	1091.56	0.0669191
CAM109_map1	0002.CSV	1095.41	0.0653165
CAM109_map1	0002.CSV	1099.27	0.0655244
CAM109_map1	0002.CSV	1103.13	0.0666496
CAM109_map1	0002.CSV	1106.99	0.0677234
CAM109_map1	0002.CSV	1110.84	0.0692798
CAM109_map1	0002.CSV	1114.7	0.0701796
CAM109_map1	0002.CSV	1118.56	0.0708931
CAM109_map1	0002.CSV	1122.41	0.0710793
CAM109_map1	0002.CSV	1126.27	0.0715875
CAM109_map1	0002.CSV	1130.13	0.0716014
CAM109_map1	0002.CSV	1133.99	0.0719818
CAM109_map1	0002.CSV	1137.84	0.0721628
CAM109_map1	0002.CSV	1141.7	0.0727504
CAM109_map1	0002.CSV	1145.56	0.0729105
CAM109_map1	0002.CSV	1149.41	0.0733381
CAM109_map1	0002.CSV	1153.27	0.0736272
CAM109_map1	0002.CSV	1157.13	0.0744483
CAM109_map1	0002.CSV	1160.99	0.0750304
CAM109_map1	0002.CSV	1164.84	0.0760082
CAM109_map1	0002.CSV	1168.7	0.0764351
CAM109_map1	0002.CSV	1172.56	0.0768958
CAM109_map1	0002.CSV	1176.41	0.0766916
CAM109_map1	0002.CSV	1180.27	0.0766224
CAM109_map1	0002.CSV	1184.13	0.076221
CAM109_map1	0002.CSV	1187.99	0.0763107
CAM109_map1	0002.CSV	1191.84	0.0761204
CAM109_map1	0002.CSV	1195.7	0.0763552
CAM109_map1	0002.CSV	1199.56	0.0764183
CAM109_map1	0002.CSV	1203.41	0.0770059
CAM109_map1	0002.CSV	1207.27	0.077575
CAM109_map1	0002.CSV	1211.13	0.0787401
CAM109_map1	0002.CSV	1214.98	0.0796263
CAM109_map1	0002.CSV	1218.84	0.080959
CAM109_map1	0002.CSV	1222.7	0.082045
CAM109_map1	0002.CSV	1226.56	0.0836205
CAM109_map1	0002.CSV	1230.41	0.0850531
CAM109_map1	0002.CSV	1234.27	0.0869379
CAM109_map1	0002.CSV	1238.13	0.0885787
CAM109_map1	0002.CSV	1241.98	0.0907369
CAM109_map1	0002.CSV	1245.84	0.0927732
CAM109_map1	0002.CSV	1249.7	0.0951406
CAM109_map1	0002.CSV	1253.56	0.0969627
CAM109_map1	0002.CSV	1257.41	0.099001
CAM109_map1	0002.CSV	1261.27	0.100672
CAM109_map1	0002.CSV	1265.13	0.102734
CAM109_map1	0002.CSV	1268.98	0.10463
CAM109_map1	0002.CSV	1272.84	0.107094
CAM109_map1	0002.CSV	1276.7	0.109026
CAM109_map1	0002.CSV	1280.56	0.111098
CAM109_map1	0002.CSV	1284.41	0.112597
CAM109_map1	0002.CSV	1288.27	0.114251
CAM109_map1	0002.CSV	1292.13	0.115246
CAM109_map1	0002.CSV	1295.98	0.116598
CAM109_map1	0002.CSV	1299.84	0.117696
CAM109_map1	0002.CSV	1303.7	0.119318
CAM109_map1	0002.CSV	1307.56	0.120889
CAM109_map1	0002.CSV	1311.41	0.123233
CAM109_map1	0002.CSV	1315.27	0.125425
CAM109_map1	0002.CSV	1319.13	0.128256
CAM109_map1	0002.CSV	1322.98	0.130617
CAM109_map1	0002.CSV	1326.84	0.133586
CAM109_map1	0002.CSV	1330.7	0.136635
CAM109_map1	0002.CSV	1334.56	0.140316
CAM109_map1	0002.CSV	1338.41	0.144669
CAM109_map1	0002.CSV	1342.27	0.150638
CAM109_map1	0002.CSV	1346.13	0.155501
CAM109_map1	0002.CSV	1349.98	0.161459
CAM109_map1	0002.CSV	1353.84	0.167386
CAM109_map1	0002.CSV	1357.7	0.173692
CAM109_map1	0002.CSV	1361.56	0.180451
CAM109_map1	0002.CSV	1365.41	0.18906
CAM109_map1	0002.CSV	1369.27	0.195983
CAM109_map1	0002.CSV	1373.13	0.205055
CAM109_map1	0002.CSV	1376.98	0.214852
CAM109_map1	0002.CSV	1380.84	0.223415
CAM109_map1	0002.CSV	1384.7	0.230946
CAM109_map1	0002.CSV	1388.56	0.241016
CAM109_map1	0002.CSV	1392.41	0.248939
CAM109_map1	0002.CSV	1396.27	0.259317
CAM109_map1	0002.CSV	1400.13	0.269193
CAM109_map1	0002.CSV	1403.98	0.278383
CAM109_map1	0002.CSV	1407.84	0.286939
CAM109_map1	0002.CSV	1411.7	0.295313
CAM109_map1	0002.CSV	1415.55	0.300745
CAM109_map1	0002.CSV	1419.41	0.307666
CAM109_map1	0002.CSV	1423.27	0.312113
CAM109_map1	0002.CSV	1427.12	0.317748
CAM109_map1	0002.CSV	1430.98	0.323288
CAM109_map1	0002.CSV	1434.84	0.331156
CAM109_map1	0002.CSV	1438.7	0.338376
CAM109_map1	0002.CSV	1442.55	0.344674
CAM109_map1	0002.CSV	1446.41	0.346451
CAM109_map1	0002.CSV	1450.27	0.345687
CAM109_map1	0002.CSV	1454.12	0.340387
CAM109_map1	0002.CSV	1457.98	0.332778
CAM109_map1	0002.CSV	1461.84	0.325374
CAM109_map1	0002.CSV	1465.7	0.319913
CAM109_map1	0002.CSV	1469.55	0.309162
CAM109_map1	0002.CSV	1473.41	0.288046
CAM109_map1	0002.CSV	1477.27	0.261791
CAM109_map1	0002.CSV	1481.12	0.246237
CAM109_map1	0002.CSV	1484.98	0.232054
CAM109_map1	0002.CSV	1488.84	0.21614
CAM109_map1	0002.CSV	1492.7	0.200467
CAM109_map1	0002.CSV	1496.55	0.189486
CAM109_map1	0002.CSV	1500.41	0.176925
CAM109_map1	0002.CSV	1504.27	0.16985
CAM109_map1	0002.CSV	1508.12	0.155686
CAM109_map1	0002.CSV	1511.98	0.146014
CAM109_map1	0002.CSV	1515.84	0.139525
CAM109_map1	0002.CSV	1519.7	0.131364
CAM109_map1	0002.CSV	1523.55	0.121562
CAM109_map1	0002.CSV	1527.41	0.116037
CAM109_map1	0002.CSV	1531.27	0.112187
CAM109_map1	0002.CSV	1535.12	0.110698
CAM109_map1	0002.CSV	1538.98	0.108391
CAM109_map1	0002.CSV	1542.84	0.100676
CAM109_map1	0002.CSV	1546.7	0.0928772
CAM109_map1	0002.CSV	1550.55	0.0874735
CAM109_map1	0002.CSV	1554.41	0.0819436
CAM109_map1	0002.CSV	1558.27	0.075444
CAM109_map1	0002.CSV	1562.12	0.0693577
CAM109_map1	0002.CSV	1565.98	0.0669302
CAM109_map1	0002.CSV	1569.84	0.0638869
CAM109_map1	0002.CSV	1573.69	0.0606386
CAM109_map1	0002.CSV	1577.55	0.0540426
CAM109_map1	0002.CSV	1581.41	0.0470748
CAM109_map1	0002.CSV	1585.27	0.0409137
CAM109_map1	0002.CSV	1589.12	0.0362971
CAM109_map1	0002.CSV	1592.98	0.033297
CAM109_map1	0002.CSV	1596.84	0.0316046
CAM109_map1	0002.CSV	1600.69	0.0303696
CAM109_map1	0002.CSV	1604.55	0.0296886
CAM109_map1	0002.CSV	1608.41	0.0288827
CAM109_map1	0002.CSV	1612.27	0.0282966
CAM109_map1	0002.CSV	1616.12	0.0275013
CAM109_map1	0002.CSV	1619.98	0.0269564
CAM109_map1	0002.CSV	1623.84	0.0260627
CAM109_map1	0002.CSV	1627.69	0.02527
CAM109_map1	0002.CSV	1631.55	0.0242726
CAM109_map1	0002.CSV	1635.41	0.0235784
CAM109_map1	0002.CSV	1639.27	0.0227195
CAM109_map1	0002.CSV	1643.12	0.0221452
CAM109_map1	0002.CSV	1646.98	0.0216238
CAM109_map1	0002.CSV	1650.84	0.0214773
CAM109_map1	0002.CSV	1654.69	0.0208973
CAM109_map1	0002.CSV	1658.55	0.0205123
CAM109_map1	0002.CSV	1662.41	0.0199549
CAM109_map1	0002.CSV	1666.27	0.0196498
CAM109_map1	0002.CSV	1670.12	0.019325
CAM109_map1	0002.CSV	1673.98	0.0191872
CAM109_map1	0002.CSV	1677.84	0.0186492
CAM109_map1	0002.CSV	1681.69	0.0184391
CAM109_map1	0002.CSV	1685.55	0.0182741
CAM109_map1	0002.CSV	1689.41	0.0180956
CAM109_map1	0002.CSV	1693.27	0.0175315
CAM109_map1	0002.CSV	1697.12	0.0174317
CAM109_map1	0002.CSV	1700.98	0.0174622
CAM109_map1	0002.CSV	1704.84	0.0177918
CAM109_map1	0002.CSV	1708.69	0.0179366
CAM109_map1	0002.CSV	1712.55	0.0182209
CAM109_map1	0002.CSV	1716.41	0.01936
CAM109_map1	0002.CSV	1720.27	0.020872
CAM109_map1	0002.CSV	1724.12	0.0210747
CAM109_map1	0002.CSV	1727.98	0.0211819
CAM109_map1	0002.CSV	1731.84	0.0210999
CAM109_map1	0002.CSV	1735.69	0.0209978
CAM109_map1	0002.CSV	1739.55	0.0201569
CAM109_map1	0002.CSV	1743.41	0.0187953
CAM109_map1	0002.CSV	1747.27	0.0168533
CAM109_map1	0002.CSV	1751.12	0.0148562
CAM109_map1	0002.CSV	1754.98	0.0134595
CAM109_map1	0002.CSV	1758.84	0.0127316
CAM109_map1	0002.CSV	1762.69	0.0122509
CAM109_map1	0002.CSV	1766.55	0.0120915
CAM109_map1	0002.CSV	1770.41	0.0124815
CAM109_map1	0002.CSV	1774.26	0.0144257
CAM109_map1	0002.CSV	1778.12	0.016678
CAM109_map1	0002.CSV	1781.98	0.0193529
CAM109_map1	0002.CSV	1785.84	0.0207696
CAM109_map1	0002.CSV	1789.69	0.0203053
CAM109_map1	0002.CSV	1793.55	0.0175425
CAM109_map1	0002.CSV	1797.41	0.0149888
CAM109_map1	0002.CSV	1801.26	0.0128405
CAM109_map1	0002.CSV	1805.12	0.0113072
CAM109_map1	0002.CSV	1808.98	0.0104081
CAM109_map1	0002.CSV	1812.84	0.0100235
CAM109_map1	0002.CSV	1816.69	0.00967739
CAM109_map1	0002.CSV	1820.55	0.00952736
CAM109_map1	0002.CSV	1824.41	0.00933422
CAM109_map1	0002.CSV	1828.26	0.009417
CAM109_map1	0002.CSV	1832.12	0.00941002
CAM109_map1	0002.CSV	1835.98	0.00935368
CAM109_map1	0002.CSV	1839.84	0.0092108
CAM109_map1	0002.CSV	1843.69	0.00937244
CAM109_map1	0002.CSV	1847.55	0.00943254
CAM109_map1	0002.CSV	1851.41	0.00937691
CAM109_map1	0002.CSV	1855.26	0.00930351
CAM109_map1	0002.CSV	1859.12	0.00935947
CAM109_map1	0002.CSV	1862.98	0.00930229
CAM109_map1	0002.CSV	1866.84	0.00944253
CAM109_map1	0002.CSV	1870.69	0.00960683
CAM109_map1	0002.CSV	1874.55	0.009555
CAM109_map1	0002.CSV	1878.41	0.00946552
CAM109_map1	0002.CSV	1882.26	0.00953305
CAM109_map1	0002.CSV	1886.12	0.00946854
CAM109_map1	0002.CSV	1889.98	0.00956648
CAM109_map1	0002.CSV	1893.83	0.00961624
CAM109_map1	0002.CSV	1897.69	0.00966635
CAM109_map1	0002.CSV	1901.55	0.00961868
CAM109_map1	0002.CSV	1905.41	0.00970728
CAM109_map1	0002.CSV	1909.26	0.00977108
CAM109_map1	0002.CSV	1913.12	0.00978535
CAM109_map1	0002.CSV	1916.98	0.00971372
CAM109_map1	0002.CSV	1920.83	0.0098531
CAM109_map1	0002.CSV	1924.69	0.00990445
CAM109_map1	0002.CSV	1928.55	0.00995771
CAM109_map1	0002.CSV	1932.4	0.00997185
CAM109_map1	0002.CSV	1936.26	0.010044
CAM109_map1	0002.CSV	1940.12	0.0100152
CAM109_map1	0002.CSV	1943.98	0.0101672
CAM109_map1	0002.CSV	1947.83	0.0101897
CAM109_map1	0002.CSV	1951.69	0.0101626
CAM109_map1	0002.CSV	1955.55	0.010153
CAM109_map1	0002.CSV	1959.4	0.0102586
CAM109_map1	0002.CSV	1963.26	0.0102205
CAM109_map1	0002.CSV	1967.12	0.0103161
CAM109_map1	0002.CSV	1970.98	0.0103097
CAM109_map1	0002.CSV	1974.83	0.0103028
CAM109_map1	0002.CSV	1978.69	0.0103212
CAM109_map1	0002.CSV	1982.55	0.0103793
CAM109_map1	0002.CSV	1986.4	0.0103351
CAM109_map1	0002.CSV	1990.26	0.0103934
CAM109_map1	0002.CSV	1994.12	0.010387
CAM109_map1	0002.CSV	1997.98	0.01039
CAM109_map1	0002.CSV	2001.83	0.0103878
CAM109_map1	0002.CSV	2005.69	0.0104054
CAM109_map1	0002.CSV	2009.55	0.010393
CAM109_map1	0002.CSV	2013.4	0.0104623
CAM109_map1	0002.CSV	2017.26	0.0105153
CAM109_map1	0002.CSV	2021.12	0.010572
CAM109_map1	0002.CSV	2024.97	0.0104692
CAM109_map1	0002.CSV	2028.83	0.0104847
CAM109_map1	0002.CSV	2032.69	0.0104991
CAM109_map1	0002.CSV	2036.55	0.010561
CAM109_map1	0002.CSV	2040.4	0.0105785
CAM109_map1	0002.CSV	2044.26	0.0106253
CAM109_map1	0002.CSV	2048.12	0.0105703
CAM109_map1	0002.CSV	2051.97	0.0105831
CAM109_map1	0002.CSV	2055.83	0.0105883
CAM109_map1	0002.CSV	2059.69	0.0106243
CAM109_map1	0002.CSV	2063.55	0.010612
CAM109_map1	0002.CSV	2067.4	0.010676
CAM109_map1	0002.CSV	2071.26	0.0106706
CAM109_map1	0002.CSV	2075.12	0.0107083
CAM109_map1	0002.CSV	2078.97	0.0107112
CAM109_map1	0002.CSV	2082.83	0.0107691
CAM109_map1	0002.CSV	2086.69	0.0107887
CAM109_map1	0002.CSV	2090.55	0.0108491
CAM109_map1	0002.CSV	2094.4	0.0108368
CAM109_map1	0002.CSV	2098.26	0.010886
CAM109_map1	0002.CSV	2102.12	0.0108989
CAM109_map1	0002.CSV	2105.97	0.010979
CAM109_map1	0002.CSV	2109.83	0.0109789
CAM109_map1	0002.CSV	2113.69	0.0110249
CAM109_map1	0002.CSV	2117.55	0.0110584
CAM109_map1	0002.CSV	2121.4	0.0111352
CAM109_map1	0002.CSV	2125.26	0.0111496
CAM109_map1	0002.CSV	2129.12	0.0111774
CAM109_map1	0002.CSV	2132.97	0.0111579
CAM109_map1	0002.CSV	2136.83	0.0111989
CAM109_map1	0002.CSV	2140.69	0.011193
CAM109_map1	0002.CSV	2144.55	0.011231
CAM109_map1	0002.CSV	2148.4	0.0112446
CAM109_map1	0002.CSV	2152.26	0.0112943
CAM109_map1	0002.CSV	2156.12	0.0113108
CAM109_map1	0002.CSV	2159.97	0.0113255
CAM109_map1	0002.CSV	2163.83	0.0112383
CAM109_map1	0002.CSV	2167.69	0.0111873
CAM109_map1	0002.CSV	2171.55	0.0112006
CAM109_map1	0002.CSV	2175.4	0.011353
CAM109_map1	0002.CSV	2179.26	0.0114298
CAM109_map1	0002.CSV	2183.12	0.011495
CAM109_map1	0002.CSV	2186.97	0.0114783
CAM109_map1	0002.CSV	2190.83	0.0114979
CAM109_map1	0002.CSV	2194.69	0.0114863
CAM109_map1	0002.CSV	2198.55	0.0115099
CAM109_map1	0002.CSV	2202.4	0.0115223
CAM109_map1	0002.CSV	2206.26	0.0115774
CAM109_map1	0002.CSV	2210.12	0.0115546
CAM109_map1	0002.CSV	2213.97	0.0115622
CAM109_map1	0002.CSV	2217.83	0.0115916
CAM109_map1	0002.CSV	2221.69	0.0116419
CAM109_map1	0002.CSV	2225.54	0.0116147
CAM109_map1	0002.CSV	2229.4	0.0116579
CAM109_map1	0002.CSV	2233.26	0.011679
CAM109_map1	0002.CSV	2237.12	0.0117006
CAM109_map1	0002.CSV	2240.97	0.0116749
CAM109_map1	0002.CSV	2244.83	0.0116876
CAM109_map1	0002.CSV	2248.69	0.0116834
CAM109_map1	0002.CSV	2252.54	0.0117314
CAM109_map1	0002.CSV	2256.4	0.0117
CAM109_map1	0002.CSV	2260.26	0.0116721
CAM109_map1	0002.CSV	2264.11	0.0116418
CAM109_map1	0002.CSV	2267.97	0.0116712
CAM109_map1	0002.CSV	2271.83	0.0117261
CAM109_map1	0002.CSV	2275.69	0.0118107
CAM109_map1	0002.CSV	2279.54	0.0118143
CAM109_map1	0002.CSV	2283.4	0.0117909
CAM109_map1	0002.CSV	2287.26	0.0117129
CAM109_map1	0002.CSV	2291.11	0.0116872
CAM109_map1	0002.CSV	2294.97	0.0116925
CAM109_map1	0002.CSV	2298.83	0.0116988
CAM109_map1	0002.CSV	2302.69	0.0115948
CAM109_map1	0002.CSV	2306.54	0.0114883
CAM109_map1	0002.CSV	2310.4	0.011366
CAM109_map1	0002.CSV	2314.26	0.0113054
CAM109_map1	0002.CSV	2318.11	0.0110157
CAM109_map1	0002.CSV	2321.97	0.0105117
CAM109_map1	0002.CSV	2325.83	0.00988961
CAM109_map1	0002.CSV	2329.69	0.00962231
CAM109_map1	0002.CSV	2333.54	0.00937738
CAM109_map1	0002.CSV	2337.4	0.00915077
CAM109_map1	0002.CSV	2341.26	0.00915158
CAM109_map1	0002.CSV	2345.11	0.0104055
CAM109_map1	0002.CSV	2348.97	0.010571
CAM109_map1	0002.CSV	2352.83	0.00941825
CAM109_map1	0002.CSV	2356.69	0.00705655
CAM109_map1	0002.CSV	2360.54	0.00554451
CAM109_map1	0002.CSV	2364.4	0.00653901
CAM109_map1	0002.CSV	2368.26	0.0091103
CAM109_map1	0002.CSV	2372.11	0.010725
CAM109_map1	0002.CSV	2375.97	0.011568
CAM109_map1	0002.CSV	2379.83	0.0119312
CAM109_map1	0002.CSV	2383.69	0.0119627
CAM109_map1	0002.CSV	2387.54	0.011815
CAM109_map1	0002.CSV	2391.4	0.0117665
CAM109_map1	0002.CSV	2395.26	0.0117641
CAM109_map1	0002.CSV	2399.11	0.0117748
CAM109_map1	0002.CSV	2402.97	0.0117912
CAM109_map1	0002.CSV	2406.83	0.0118743
CAM109_map1	0002.CSV	2410.68	0.0119261
CAM109_map1	0002.CSV	2414.54	0.0119339
CAM109_map1	0002.CSV	2418.4	0.0119558
CAM109_map1	0002.CSV	2422.26	0.0119909
CAM109_map1	0002.CSV	2426.11	0.011992
CAM109_map1	0002.CSV	2429.97	0.0120131
CAM109_map1	0002.CSV	2433.83	0.012057
CAM109_map1	0002.CSV	2437.68	0.012123
CAM109_map1	0002.CSV	2441.54	0.0121423
CAM109_map1	0002.CSV	2445.4	0.0122256
CAM109_map1	0002.CSV	2449.26	0.0123602
CAM109_map1	0002.CSV	2453.11	0.0124775
CAM109_map1	0002.CSV	2456.97	0.0125483
CAM109_map1	0002.CSV	2460.83	0.0126658
CAM109_map1	0002.CSV	2464.68	0.0128349
CAM109_map1	0002.CSV	2468.54	0.0130812
CAM109_map1	0002.CSV	2472.4	0.0133773
CAM109_map1	0002.CSV	2476.26	0.0137545
CAM109_map1	0002.CSV	2480.11	0.0141974
CAM109_map1	0002.CSV	2483.97	0.0146793
CAM109_map1	0002.CSV	2487.83	0.015136
CAM109_map1	0002.CSV	2491.68	0.015545
CAM109_map1	0002.CSV	2495.54	0.0158723
CAM109_map1	0002.CSV	2499.4	0.0160351
CAM109_map1	0002.CSV	2503.26	0.0159886
CAM109_map1	0002.CSV	2507.11	0.0158947
CAM109_map1	0002.CSV	2510.97	0.0158913
CAM109_map1	0002.CSV	2514.83	0.0162007
CAM109_map1	0002.CSV	2518.68	0.0166032
CAM109_map1	0002.CSV	2522.54	0.0167463
CAM109_map1	0002.CSV	2526.4	0.0166158
CAM109_map1	0002.CSV	2530.26	0.016303
CAM109_map1	0002.CSV	2534.11	0.0158252
CAM109_map1	0002.CSV	2537.97	0.0154482
CAM109_map1	0002.CSV	2541.83	0.0152466
CAM109_map1	0002.CSV	2545.68	0.0151874
CAM109_map1	0002.CSV	2549.54	0.0150964
CAM109_map1	0002.CSV	2553.4	0.0148656
CAM109_map1	0002.CSV	2557.26	0.0145563
CAM109_map1	0002.CSV	2561.11	0.0143081
CAM109_map1	0002.CSV	2564.97	0.0140807
CAM109_map1	0002.CSV	2568.83	0.0138549
CAM109_map1	0002.CSV	2572.68	0.0136931
CAM109_map1	0002.CSV	2576.54	0.0135947
CAM109_map1	0002.CSV	2580.4	0.0134336
CAM109_map1	0002.CSV	2584.25	0.0133289
CAM109_map1	0002.CSV	2588.11	0.0132746
CAM109_map1	0002.CSV	2591.97	0.0132163
CAM109_map1	0002.CSV	2595.83	0.0131331
CAM109_map1	0002.CSV	2599.68	0.0130994
CAM109_map1	0002.CSV	2603.54	0.0130861
CAM109_map1	0002.CSV	2607.4	0.013071
CAM109_map1	0002.CSV	2611.25	0.0130825
CAM109_map1	0002.CSV	2615.11	0.0131906
CAM109_map1	0002.CSV	2618.97	0.0132382
CAM109_map1	0002.CSV	2622.82	0.0132593
CAM109_map1	0002.CSV	2626.68	0.0132592
CAM109_map1	0002.CSV	2630.54	0.0132052
CAM109_map1	0002.CSV	2634.4	0.0131997
CAM109_map1	0002.CSV	2638.25	0.0131714
CAM109_map1	0002.CSV	2642.11	0.0129283
CAM109_map1	0002.CSV	2645.97	0.0127268
CAM109_map1	0002.CSV	2649.82	0.0126254
CAM109_map1	0002.CSV	2653.68	0.0125582
CAM109_map1	0002.CSV	2657.54	0.0124714
CAM109_map1	0002.CSV	2661.4	0.0123602
CAM109_map1	0002.CSV	2665.25	0.0122899
CAM109_map1	0002.CSV	2669.11	0.0123195
CAM109_map1	0002.CSV	2672.97	0.0124853
CAM109_map1	0002.CSV	2676.82	0.0127804
CAM109_map1	0002.CSV	2680.68	0.0127808
CAM109_map1	0002.CSV	2684.54	0.0124604
CAM109_map1	0002.CSV	2688.4	0.012321
CAM109_map1	0002.CSV	2692.25	0.0123137
CAM109_map1	0002.CSV	2696.11	0.0123115
CAM109_map1	0002.CSV	2699.97	0.0123557
CAM109_map1	0002.CSV	2703.82	0.0123915
CAM109_map1	0002.CSV	2707.68	0.012498
CAM109_map1	0002.CSV	2711.54	0.0125077
CAM109_map1	0002.CSV	2715.4	0.0125359
CAM109_map1	0002.CSV	2719.25	0.0127215
CAM109_map1	0002.CSV	2723.11	0.0130148
CAM109_map1	0002.CSV	2726.97	0.0130384
CAM109_map1	0002.CSV	2730.82	0.012793
CAM109_map1	0002.CSV	2734.68	0.0127883
CAM109_map1	0002.CSV	2738.54	0.0128761
CAM109_map1	0002.CSV	2742.4	0.0129446
CAM109_map1	0002.CSV	2746.25	0.0132637
CAM109_map1	0002.CSV	2750.11	0.0133377
CAM109_map1	0002.CSV	2753.97	0.0131221
CAM109_map1	0002.CSV	2757.82	0.0130578
CAM109_map1	0002.CSV	2761.68	0.0129875
CAM109_map1	0002.CSV	2765.54	0.0129362
CAM109_map1	0002.CSV	2769.39	0.0131874
CAM109_map1	0002.CSV	2773.25	0.0136444
CAM109_map1	0002.CSV	2777.11	0.0135585
CAM109_map1	0002.CSV	2780.97	0.0132567
CAM109_map1	0002.CSV	2784.82	0.0134831
CAM109_map1	0002.CSV	2788.68	0.0140185
CAM109_map1	0002.CSV	2792.54	0.0142161
CAM109_map1	0002.CSV	2796.39	0.0142624
CAM109_map1	0002.CSV	2800.25	0.0141224
CAM109_map1	0002.CSV	2804.11	0.013932
CAM109_map1	0002.CSV	2807.97	0.0142471
CAM109_map1	0002.CSV	2811.82	0.0143872
CAM109_map1	0002.CSV	2815.68	0.0143462
CAM109_map1	0002.CSV	2819.54	0.0146041
CAM109_map1	0002.CSV	2823.39	0.0149311
CAM109_map1	0002.CSV	2827.25	0.0152323
CAM109_map1	0002.CSV	2831.11	0.0160398
CAM109_map1	0002.CSV	2834.97	0.0174209
CAM109_map1	0002.CSV	2838.82	0.0191472
CAM109_map1	0002.CSV	2842.68	0.0219568
CAM109_map1	0002.CSV	2846.54	0.0267601
CAM109_map1	0002.CSV	2850.39	0.0297833
CAM109_map1	0002.CSV	2854.25	0.0283877
CAM109_map1	0002.CSV	2858.11	0.0256018
CAM109_map1	0002.CSV	2861.97	0.0231432
CAM109_map1	0002.CSV	2865.82	0.0215973
CAM109_map1	0002.CSV	2869.68	0.0213829
CAM109_map1	0002.CSV	2873.54	0.0213168
CAM109_map1	0002.CSV	2877.39	0.0203295
CAM109_map1	0002.CSV	2881.25	0.019721
CAM109_map1	0002.CSV	2885.11	0.0200195
CAM109_map1	0002.CSV	2888.97	0.020824
CAM109_map1	0002.CSV	2892.82	0.0221953
CAM109_map1	0002.CSV	2896.68	0.0235475
CAM109_map1	0002.CSV	2900.54	0.024662
CAM109_map1	0002.CSV	2904.39	0.0264355
CAM109_map1	0002.CSV	2908.25	0.0296962
CAM109_map1	0002.CSV	2912.11	0.0351481
CAM109_map1	0002.CSV	2915.97	0.0404329
CAM109_map1	0002.CSV	2919.82	0.041825
CAM109_map1	0002.CSV	2923.68	0.0397152
CAM109_map1	0002.CSV	2927.54	0.0368243
CAM109_map1	0002.CSV	2931.39	0.0333415
CAM109_map1	0002.CSV	2935.25	0.0295556
CAM109_map1	0002.CSV	2939.11	0.0269932
CAM109_map1	0002.CSV	2942.96	0.0258486
CAM109_map1	0002.CSV	2946.82	0.0249924
CAM109_map1	0002.CSV	2950.68	0.0243004
CAM109_map1	0002.CSV	2954.54	0.0237066
CAM109_map1	0002.CSV	2958.39	0.0228328
CAM109_map1	0002.CSV	2962.25	0.0218772
CAM109_map1	0002.CSV	2966.11	0.0204563
CAM109_map1	0002.CSV	2969.96	0.0193869
CAM109_map1	0002.CSV	2973.82	0.0189738
CAM109_map1	0002.CSV	2977.68	0.0186077
CAM109_map1	0002.CSV	2981.53	0.0178481
CAM109_map1	0002.CSV	2985.39	0.016891
CAM109_map1	0002.CSV	2989.25	0.0166426
CAM109_map1	0002.CSV	2993.11	0.0167842
CAM109_map1	0002.CSV	2996.96	0.0164964
CAM109_map1	0002.CSV	3000.82	0.0160207
CAM109_map1	0002.CSV	3004.68	0.0157406
CAM109_map1	0002.CSV	3008.53	0.0159477
CAM109_map1	0002.CSV	3012.39	0.0162778
CAM109_map1	0002.CSV	3016.25	0.0162683
CAM109_map1	0002.CSV	3020.11	0.016011
CAM109_map1	0002.CSV	3023.96	0.0157838
CAM109_map1	0002.CSV	3027.82	0.0157188
CAM109_map1	0002.CSV	3031.68	0.0159069
CAM109_map1	0002.CSV	3035.53	0.0159599
CAM109_map1	0002.CSV	3039.39	0.0159743
CAM109_map1	0002.CSV	3043.25	0.0160815
CAM109_map1	0002.CSV	3047.11	0.0160247
CAM109_map1	0002.CSV	3050.96	0.0159841
CAM109_map1	0002.CSV	3054.82	0.015905
CAM109_map1	0002.CSV	3058.68	0.0157894
CAM109_map1	0002.CSV	3062.53	0.0159409
CAM109_map1	0002.CSV	3066.39	0.016196
CAM109_map1	0002.CSV	3070.25	0.016057
CAM109_map1	0002.CSV	3074.11	0.0160042
CAM109_map1	0002.CSV	3077.96	0.0162695
CAM109_map1	0002.CSV	3081.82	0.0164622
CAM109_map1	0002.CSV	3085.68	0.0164369
CAM109_map1	0002.CSV	3089.53	0.0162674
CAM109_map1	0002.CSV	3093.39	0.016022
CAM109_map1	0002.CSV	3097.25	0.0160743
CAM109_map1	0002.CSV	3101.11	0.0161617
CAM109_map1	0002.CSV	3104.96	0.0161734
CAM109_map1	0002.CSV	3108.82	0.0163379
CAM109_map1	0002.CSV	3112.68	0.0164823
CAM109_map1	0002.CSV	3116.53	0.0166567
CAM109_map1	0002.CSV	3120.39	0.0166518
CAM109_map1	0002.CSV	3124.25	0.0164414
CAM109_map1	0002.CSV	3128.11	0.0163854
CAM109_map1	0002.CSV	3131.96	0.016389
CAM109_map1	0002.CSV	3135.82	0.0164933
CAM109_map1	0002.CSV	3139.68	0.0166312
CAM109_map1	0002.CSV	3143.53	0.0164897
CAM109_map1	0002.CSV	3147.39	0.0165742
CAM109_map1	0002.CSV	3151.25	0.0168237
CAM109_map1	0002.CSV	3155.1	0.0167442
CAM109_map1	0002.CSV	3158.96	0.0164334
CAM109_map1	0002.CSV	3162.82	0.0163637
CAM109_map1	0002.CSV	3166.68	0.0163577
CAM109_map1	0002.CSV	3170.53	0.0164016
CAM109_map1	0002.CSV	3174.39	0.0165331
CAM109_map1	0002.CSV	3178.25	0.0167138
CAM109_map1	0002.CSV	3182.1	0.0168279
CAM109_map1	0002.CSV	3185.96	0.0169242
CAM109_map1	0002.CSV	3189.82	0.0170161
CAM109_map1	0002.CSV	3193.68	0.0169198
CAM109_map1	0002.CSV	3197.53	0.0169075
CAM109_map1	0002.CSV	3201.39	0.0170321
CAM109_map1	0002.CSV	3205.25	0.0170518
CAM109_map1	0002.CSV	3209.1	0.0170487
CAM109_map1	0002.CSV	3212.96	0.017124
CAM109_map1	0002.CSV	3216.82	0.0172525
CAM109_map1	0002.CSV	3220.68	0.0172692
CAM109_map1	0002.CSV	3224.53	0.017207
CAM109_map1	0002.CSV	3228.39	0.0173767
CAM109_map1	0002.CSV	3232.25	0.0176645
CAM109_map1	0002.CSV	3236.1	0.0175843
CAM109_map1	0002.CSV	3239.96	0.0175108
CAM109_map1	0002.CSV	3243.82	0.0176535
CAM109_map1	0002.CSV	3247.68	0.0177201
CAM109_map1	0002.CSV	3251.53	0.0176473
CAM109_map1	0002.CSV	3255.39	0.0176601
CAM109_map1	0002.CSV	3259.25	0.0175719
CAM109_map1	0002.CSV	3263.1	0.0175512
CAM109_map1	0002.CSV	3266.96	0.0177583
CAM109_map1	0002.CSV	3270.82	0.0180415
CAM109_map1	0002.CSV	3274.68	0.0179738
CAM109_map1	0002.CSV	3278.53	0.0177008
CAM109_map1	0002.CSV	3282.39	0.0176521
CAM109_map1	0002.CSV	3286.25	0.0178163
CAM109_map1	0002.CSV	3290.1	0.0180357
CAM109_map1	0002.CSV	3293.96	0.018134
CAM109_map1	0002.CSV	3297.82	0.0180257
CAM109_map1	0002.CSV	3301.67	0.0180796
CAM109_map1	0002.CSV	3305.53	0.0182139
CAM109_map1	0002.CSV	3309.39	0.0181473
CAM109_map1	0002.CSV	3313.25	0.0178166
CAM109_map1	0002.CSV	3317.1	0.0176012
CAM109_map1	0002.CSV	3320.96	0.0176824
CAM109_map1	0002.CSV	3324.82	0.0179279
CAM109_map1	0002.CSV	3328.67	0.0179611
CAM109_map1	0002.CSV	3332.53	0.0179903
CAM109_map1	0002.CSV	3336.39	0.0182179
CAM109_map1	0002.CSV	3340.24	0.0183257
CAM109_map1	0002.CSV	3344.1	0.0181478
CAM109_map1	0002.CSV	3347.96	0.0180383
CAM109_map1	0002.CSV	3351.82	0.0180051
CAM109_map1	0002.CSV	3355.67	0.0178866
CAM109_map1	0002.CSV	3359.53	0.0179537
CAM109_map1	0002.CSV	3363.39	0.0181723
CAM109_map1	0002.CSV	3367.24	0.0183436
CAM109_map1	0002.CSV	3371.1	0.0182464
CAM109_map1	0002.CSV	3374.96	0.0180173
CAM109_map1	0002.CSV	3378.82	0.0179839
CAM109_map1	0002.CSV	3382.67	0.0178391
CAM109_map1	0002.CSV	3386.53	0.0177343
CAM109_map1	0002.CSV	3390.39	0.0179769
CAM109_map1	0002.CSV	3394.24	0.0182186
CAM109_map1	0002.CSV	3398.1	0.0182448
CAM109_map1	0002.CSV	3401.96	0.0180285
CAM109_map1	0002.CSV	3405.82	0.0178305
CAM109_map1	0002.CSV	3409.67	0.0178377
CAM109_map1	0002.CSV	3413.53	0.0175601
CAM109_map1	0002.CSV	3417.39	0.0171662
CAM109_map1	0002.CSV	3421.24	0.0170339
CAM109_map1	0002.CSV	3425.1	0.0171005
CAM109_map1	0002.CSV	3428.96	0.0172376
CAM109_map1	0002.CSV	3432.82	0.0172582
CAM109_map1	0002.CSV	3436.67	0.0170046
CAM109_map1	0002.CSV	3440.53	0.0165674
CAM109_map1	0002.CSV	3444.39	0.0163207
CAM109_map1	0002.CSV	3448.24	0.0162808
CAM109_map1	0002.CSV	3452.1	0.0160654
CAM109_map1	0002.CSV	3455.96	0.0159755
CAM109_map1	0002.CSV	3459.82	0.0160506
CAM109_map1	0002.CSV	3463.67	0.0161932
CAM109_map1	0002.CSV	3467.53	0.016344
CAM109_map1	0002.CSV	3471.39	0.016129
CAM109_map1	0002.CSV	3475.24	0.0158
CAM109_map1	0002.CSV	3479.1	0.0156617
CAM109_map1	0002.CSV	3482.96	0.0155564
CAM109_map1	0002.CSV	3486.82	0.0156247
CAM109_map1	0002.CSV	3490.67	0.015542
CAM109_map1	0002.CSV	3494.53	0.0155116
CAM109_map1	0002.CSV	3498.39	0.0154602
CAM109_map1	0002.CSV	3502.24	0.0152683
CAM109_map1	0002.CSV	3506.1	0.015053
CAM109_map1	0002.CSV	3509.96	0.0149143
CAM109_map1	0002.CSV	3513.81	0.0147945
CAM109_map1	0002.CSV	3517.67	0.0144771
CAM109_map1	0002.CSV	3521.53	0.0143827
CAM109_map1	0002.CSV	3525.39	0.0144791
CAM109_map1	0002.CSV	3529.24	0.0144752
CAM109_map1	0002.CSV	3533.1	0.0144396
CAM109_map1	0002.CSV	3536.96	0.0144181
CAM109_map1	0002.CSV	3540.81	0.0142957
CAM109_map1	0002.CSV	3544.67	0.0142408
CAM109_map1	0002.CSV	3548.53	0.0140454
CAM109_map1	0002.CSV	3552.39	0.0138348
CAM109_map1	0002.CSV	3556.24	0.0137292
CAM109_map1	0002.CSV	3560.1	0.0134469
CAM109_map1	0002.CSV	3563.96	0.0130128
CAM109_map1	0002.CSV	3567.81	0.0131398
CAM109_map1	0002.CSV	3571.67	0.0131137
CAM109_map1	0002.CSV	3575.53	0.0127573
CAM109_map1	0002.CSV	3579.39	0.012756
CAM109_map1	0002.CSV	3583.24	0.0126546
CAM109_map1	0002.CSV	3587.1	0.0127126
CAM109_map1	0002.CSV	3590.96	0.0126302
CAM109_map1	0002.CSV	3594.81	0.0123223
CAM109_map1	0002.CSV	3598.67	0.0124471
CAM109_map1	0002.CSV	3602.53	0.012357
CAM109_map1	0002.CSV	3606.39	0.0118448
CAM109_map1	0002.CSV	3610.24	0.0116177
CAM109_map1	0002.CSV	3614.1	0.011515
CAM109_map1	0002.CSV	3617.96	0.0115337
CAM109_map1	0002.CSV	3621.81	0.0115354
CAM109_map1	0002.CSV	3625.67	0.0109625
CAM109_map1	0002.CSV	3629.53	0.0109691
CAM109_map1	0002.CSV	3633.39	0.0113993
CAM109_map1	0002.CSV	3637.24	0.0111008
CAM109_map1	0002.CSV	3641.1	0.0107436
CAM109_map1	0002.CSV	3644.96	0.0103297
CAM109_map1	0002.CSV	3648.81	0.0107794
CAM109_map1	0002.CSV	3652.67	0.0113629
CAM109_map1	0002.CSV	3656.53	0.011163
CAM109_map1	0002.CSV	3660.38	0.0109373
CAM109_map1	0002.CSV	3664.24	0.0102542
CAM109_map1	0002.CSV	3668.1	0.00963921
CAM109_map1	0002.CSV	3671.96	0.00979677
CAM109_map1	0002.CSV	3675.81	0.0104744
CAM109_map1	0002.CSV	3679.67	0.0105545
CAM109_map1	0002.CSV	3683.53	0.0101027
CAM109_map1	0002.CSV	3687.38	0.0100786
CAM109_map1	0002.CSV	3691.24	0.010665
CAM109_map1	0002.CSV	3695.1	0.0103845
CAM109_map1	0002.CSV	3698.95	0.00998063
CAM109_map1	0002.CSV	3702.81	0.00988964
CAM109_map1	0002.CSV	3706.67	0.00964152
CAM109_map1	0002.CSV	3710.53	0.0098168
CAM109_map1	0002.CSV	3714.38	0.010254
CAM109_map1	0002.CSV	3718.24	0.0097333
CAM109_map1	0002.CSV	3722.1	0.00940593
CAM109_map1	0002.CSV	3725.95	0.009519
CAM109_map1	0002.CSV	3729.81	0.00928767
CAM109_map1	0002.CSV	3733.67	0.00934244
CAM109_map1	0002.CSV	3737.53	0.0101457
CAM109_map1	0002.CSV	3741.38	0.00968414
CAM109_map1	0002.CSV	3745.24	0.00920221
CAM109_map1	0002.CSV	3749.1	0.00938043
CAM109_map1	0002.CSV	3752.95	0.00978278
CAM109_map1	0002.CSV	3756.81	0.00969515
CAM109_map1	0002.CSV	3760.67	0.00967363
CAM109_map1	0002.CSV	3764.53	0.00939631
CAM109_map1	0002.CSV	3768.38	0.00941845
CAM109_map1	0002.CSV	3772.24	0.00959246
CAM109_map1	0002.CSV	3776.1	0.00944727
CAM109_map1	0002.CSV	3779.95	0.00952763
CAM109_map1	0002.CSV	3783.81	0.00956716
CAM109_map1	0002.CSV	3787.67	0.00952245
CAM109_map1	0002.CSV	3791.53	0.0092938
CAM109_map1	0002.CSV	3795.38	0.00904317
CAM109_map1	0002.CSV	3799.24	0.00916051
CAM109_map1	0002.CSV	3803.1	0.0096382
CAM109_map1	0002.CSV	3806.95	0.00985442
CAM109_map1	0002.CSV	3810.81	0.0094532
CAM109_map1	0002.CSV	3814.67	0.00894551
CAM109_map1	0002.CSV	3818.53	0.00924956
CAM109_map1	0002.CSV	3822.38	0.00986134
CAM109_map1	0002.CSV	3826.24	0.00964836
CAM109_map1	0002.CSV	3830.1	0.00939479
CAM109_map1	0002.CSV	3833.95	0.00937596
CAM109_map1	0002.CSV	3837.81	0.00975272
CAM109_map1	0002.CSV	3841.67	0.0101851
CAM109_map1	0002.CSV	3845.53	0.00984632
CAM109_map1	0002.CSV	3849.38	0.00917625
CAM109_map1	0002.CSV	3853.24	0.00941002
CAM109_map1	0002.CSV	3857.1	0.0098432
CAM109_map1	0002.CSV	3860.95	0.00932057
CAM109_map1	0002.CSV	3864.81	0.00934001
CAM109_map1	0002.CSV	3868.67	0.00945231
CAM109_map1	0002.CSV	3872.52	0.00965585
CAM109_map1	0002.CSV	3876.38	0.00960218
CAM109_map1	0002.CSV	3880.24	0.00947389
CAM109_map1	0002.CSV	3884.1	0.00979233
CAM109_map1	0002.CSV	3887.95	0.00985114
CAM109_map1	0002.CSV	3891.81	0.009833
CAM109_map1	0002.CSV	3895.67	0.00953776
CAM109_map1	0002.CSV	3899.52	0.00939993
CAM109_map1	0002.CSV	3903.38	0.0101505
CAM109_map1	0002.CSV	3907.24	0.0101178
CAM109_map1	0002.CSV	3911.1	0.00960686
CAM109_map1	0002.CSV	3914.95	0.00940389
CAM109_map1	0002.CSV	3918.81	0.00962851
CAM109_map1	0002.CSV	3922.67	0.00975126
CAM109_map1	0002.CSV	3926.52	0.00971334
CAM109_map1	0002.CSV	3930.38	0.00978437
CAM109_map1	0002.CSV	3934.24	0.00992439
CAM109_map1	0002.CSV	3938.09	0.00959643
CAM109_map1	0002.CSV	3941.95	0.00947304
CAM109_map1	0002.CSV	3945.81	0.00957878
CAM109_map1	0002.CSV	3949.67	0.00973266
CAM109_map1	0002.CSV	3953.52	0.00975133
CAM109_map1	0002.CSV	3957.38	0.00958311
CAM109_map1	0002.CSV	3961.24	0.00953231
CAM109_map1	0002.CSV	3965.09	0.0095316
CAM109_map1	0002.CSV	3968.95	0.00952337
CAM109_map1	0002.CSV	3972.81	0.00956946
CAM109_map1	0002.CSV	3976.67	0.00961167
CAM109_map1	0002.CSV	3980.52	0.00951145
CAM109_map1	0002.CSV	3984.38	0.00932162
CAM109_map1	0002.CSV	3988.24	0.00925413
CAM109_map1	0002.CSV	3992.09	0.00933384
CAM109_map1	0002.CSV	3995.95	0.00945042
CAM109_map1	0002.CSV	3999.81	0.00944277
CAM109_map1	0003.CSV	674.992	0.0105442
CAM109_map1	0003.CSV	678.849	0.010755
CAM109_map1	0003.CSV	682.706	0.0106002
CAM109_map1	0003.CSV	686.563	0.0107998
CAM109_map1	0003.CSV	690.42	0.0113318
CAM109_map1	0003.CSV	694.277	0.0131991
CAM109_map1	0003.CSV	698.134	0.0155024
CAM109_map1	0003.CSV	701.991	0.0146629
CAM109_map1	0003.CSV	705.849	0.0136071
CAM109_map1	0003.CSV	709.706	0.0160831
CAM109_map1	0003.CSV	713.563	0.0159795
CAM109_map1	0003.CSV	717.42	0.0114543
CAM109_map1	0003.CSV	721.277	0.00860707
CAM109_map1	0003.CSV	725.134	0.0081603
CAM109_map1	0003.CSV	728.991	0.0083308
CAM109_map1	0003.CSV	732.848	0.00868505
CAM109_map1	0003.CSV	736.705	0.00896283
CAM109_map1	0003.CSV	740.562	0.0093911
CAM109_map1	0003.CSV	744.42	0.00971754
CAM109_map1	0003.CSV	748.277	0.00983432
CAM109_map1	0003.CSV	752.134	0.00962139
CAM109_map1	0003.CSV	755.991	0.00957827
CAM109_map1	0003.CSV	759.848	0.00983744
CAM109_map1	0003.CSV	763.705	0.0101686
CAM109_map1	0003.CSV	767.562	0.0103895
CAM109_map1	0003.CSV	771.419	0.0103682
CAM109_map1	0003.CSV	775.276	0.0100496
CAM109_map1	0003.CSV	779.133	0.00995978
CAM109_map1	0003.CSV	782.99	0.00993998
CAM109_map1	0003.CSV	786.848	0.00990672
CAM109_map1	0003.CSV	790.705	0.00994001
CAM109_map1	0003.CSV	794.562	0.0101571
CAM109_map1	0003.CSV	798.419	0.0105007
CAM109_map1	0003.CSV	802.276	0.0107556
CAM109_map1	0003.CSV	806.133	0.0109282
CAM109_map1	0003.CSV	809.99	0.0112421
CAM109_map1	0003.CSV	813.847	0.0116647
CAM109_map1	0003.CSV	817.704	0.0124462
CAM109_map1	0003.CSV	821.562	0.0133081
CAM109_map1	0003.CSV	825.419	0.0143894
CAM109_map1	0003.CSV	829.276	0.015677
CAM109_map1	0003.CSV	833.133	0.0169352
CAM109_map1	0003.CSV	836.99	0.0183615
CAM109_map1	0003.CSV	840.847	0.0200756
CAM109_map1	0003.CSV	844.704	0.021762
CAM109_map1	0003.CSV	848.561	0.0243698
CAM109_map1	0003.CSV	852.418	0.0268062
CAM109_map1	0003.CSV	856.275	0.0268008
CAM109_map1	0003.CSV	860.132	0.0248532
CAM109_map1	0003.CSV	863.99	0.0216397
CAM109_map1	0003.CSV	867.847	0.0176708
CAM109_map1	0003.CSV	871.704	0.0143797
CAM109_map1	0003.CSV	875.561	0.0124739
CAM109_map1	0003.CSV	879.418	0.0115606
CAM109_map1	0003.CSV	883.275	0.0109539
CAM109_map1	0003.CSV	887.132	0.0105972
CAM109_map1	0003.CSV	890.989	0.0104623
CAM109_map1	0003.CSV	894.846	0.0104282
CAM109_map1	0003.CSV	898.703	0.0104139
CAM109_map1	0003.CSV	902.561	0.0104264
CAM109_map1	0003.CSV	906.418	0.0104619
CAM109_map1	0003.CSV	910.275	0.0106075
CAM109_map1	0003.CSV	914.132	0.0106176
CAM109_map1	0003.CSV	917.989	0.0107027
CAM109_map1	0003.CSV	921.846	0.0108304
CAM109_map1	0003.CSV	925.703	0.0109447
CAM109_map1	0003.CSV	929.56	0.0109506
CAM109_map1	0003.CSV	933.417	0.0110236
CAM109_map1	0003.CSV	937.274	0.0109869
CAM109_map1	0003.CSV	941.131	0.0109435
CAM109_map1	0003.CSV	944.989	0.0110527
CAM109_map1	0003.CSV	948.846	0.0110869
CAM109_map1	0003.CSV	952.703	0.0111622
CAM109_map1	0003.CSV	956.56	0.0112571
CAM109_map1	0003.CSV	960.417	0.0111742
CAM109_map1	0003.CSV	964.274	0.0110952
CAM109_map1	0003.CSV	968.131	0.0111534
CAM109_map1	0003.CSV	971.988	0.0113477
CAM109_map1	0003.CSV	975.845	0.0114199
CAM109_map1	0003.CSV	979.702	0.0114751
CAM109_map1	0003.CSV	983.559	0.0115522
CAM109_map1	0003.CSV	987.417	0.0117596
CAM109_map1	0003.CSV	991.274	0.0120301
CAM109_map1	0003.CSV	995.131	0.0121593
CAM109_map1	0003.CSV	998.988	0.0122437
CAM109_map1	0003.CSV	1002.85	0.0124209
CAM109_map1	0003.CSV	1006.7	0.0125507
CAM109_map1	0003.CSV	1010.56	0.0126389
CAM109_map1	0003.CSV	1014.42	0.0127788
CAM109_map1	0003.CSV	1018.27	0.0129324
CAM109_map1	0003.CSV	1022.13	0.0129738
CAM109_map1	0003.CSV	1025.99	0.0130489
CAM109_map1	0003.CSV	1029.85	0.0131626
CAM109_map1	0003.CSV	1033.7	0.0133652
CAM109_map1	0003.CSV	1037.56	0.0134912
CAM109_map1	0003.CSV	1041.42	0.0135091
CAM109_map1	0003.CSV	1045.27	0.0135073
CAM109_map1	0003.CSV	1049.13	0.0135993
CAM109_map1	0003.CSV	1052.99	0.0137862
CAM109_map1	0003.CSV	1056.84	0.0140363
CAM109_map1	0003.CSV	1060.7	0.0142045
CAM109_map1	0003.CSV	1064.56	0.0144266
CAM109_map1	0003.CSV	1068.42	0.0145662
CAM109_map1	0003.CSV	1072.27	0.0146975
CAM109_map1	0003.CSV	1076.13	0.0149948
CAM109_map1	0003.CSV	1079.99	0.0155867
CAM109_map1	0003.CSV	1083.84	0.0154056
CAM109_map1	0003.CSV	1087.7	0.014419
CAM109_map1	0003.CSV	1091.56	0.0139156
CAM109_map1	0003.CSV	1095.41	0.0139003
CAM109_map1	0003.CSV	1099.27	0.0140204
CAM109_map1	0003.CSV	1103.13	0.0141666
CAM109_map1	0003.CSV	1106.99	0.0143478
CAM109_map1	0003.CSV	1110.84	0.0145722
CAM109_map1	0003.CSV	1114.7	0.0146704
CAM109_map1	0003.CSV	1118.56	0.0146704
CAM109_map1	0003.CSV	1122.41	0.0146744
CAM109_map1	0003.CSV	1126.27	0.0146483
CAM109_map1	0003.CSV	1130.13	0.0145286
CAM109_map1	0003.CSV	1133.99	0.0144152
CAM109_map1	0003.CSV	1137.84	0.0143362
CAM109_map1	0003.CSV	1141.7	0.014268
CAM109_map1	0003.CSV	1145.56	0.0142288
CAM109_map1	0003.CSV	1149.41	0.0142171
CAM109_map1	0003.CSV	1153.27	0.0141746
CAM109_map1	0003.CSV	1157.13	0.0141348
CAM109_map1	0003.CSV	1160.99	0.0141409
CAM109_map1	0003.CSV	1164.84	0.014163
CAM109_map1	0003.CSV	1168.7	0.0140883
CAM109_map1	0003.CSV	1172.56	0.0140693
CAM109_map1	0003.CSV	1176.41	0.0140869
CAM109_map1	0003.CSV	1180.27	0.0140846
CAM109_map1	0003.CSV	1184.13	0.0140103
CAM109_map1	0003.CSV	1187.99	0.0139209
CAM109_map1	0003.CSV	1191.84	0.0137897
CAM109_map1	0003.CSV	1195.7	0.0136579
CAM109_map1	0003.CSV	1199.56	0.0136128
CAM109_map1	0003.CSV	1203.41	0.0136729
CAM109_map1	0003.CSV	1207.27	0.0136875
CAM109_map1	0003.CSV	1211.13	0.0137299
CAM109_map1	0003.CSV	1214.98	0.013819
CAM109_map1	0003.CSV	1218.84	0.0139073
CAM109_map1	0003.CSV	1222.7	0.0140129
CAM109_map1	0003.CSV	1226.56	0.0142344
CAM109_map1	0003.CSV	1230.41	0.0144331
CAM109_map1	0003.CSV	1234.27	0.014616
CAM109_map1	0003.CSV	1238.13	0.0147792
CAM109_map1	0003.CSV	1241.98	0.014967
CAM109_map1	0003.CSV	1245.84	0.0152041
CAM109_map1	0003.CSV	1249.7	0.0154293
CAM109_map1	0003.CSV	1253.56	0.0155444
CAM109_map1	0003.CSV	1257.41	0.0155662
CAM109_map1	0003.CSV	1261.27	0.0155516
CAM109_map1	0003.CSV	1265.13	0.0155768
CAM109_map1	0003.CSV	1268.98	0.0156628
CAM109_map1	0003.CSV	1272.84	0.0158117
CAM109_map1	0003.CSV	1276.7	0.0158983
CAM109_map1	0003.CSV	1280.56	0.0159463
CAM109_map1	0003.CSV	1284.41	0.0159713
CAM109_map1	0003.CSV	1288.27	0.016057
CAM109_map1	0003.CSV	1292.13	0.0160698
CAM109_map1	0003.CSV	1295.98	0.0160776
CAM109_map1	0003.CSV	1299.84	0.0160399
CAM109_map1	0003.CSV	1303.7	0.0160084
CAM109_map1	0003.CSV	1307.56	0.0160637
CAM109_map1	0003.CSV	1311.41	0.0161275
CAM109_map1	0003.CSV	1315.27	0.0161628
CAM109_map1	0003.CSV	1319.13	0.0162427
CAM109_map1	0003.CSV	1322.98	0.0162481
CAM109_map1	0003.CSV	1326.84	0.0162451
CAM109_map1	0003.CSV	1330.7	0.0162721
CAM109_map1	0003.CSV	1334.56	0.0163271
CAM109_map1	0003.CSV	1338.41	0.0165226
CAM109_map1	0003.CSV	1342.27	0.0168145
CAM109_map1	0003.CSV	1346.13	0.0168788
CAM109_map1	0003.CSV	1349.98	0.0170001
CAM109_map1	0003.CSV	1353.84	0.017178
CAM109_map1	0003.CSV	1357.7	0.0173591
CAM109_map1	0003.CSV	1361.56	0.0176076
CAM109_map1	0003.CSV	1365.41	0.0179439
CAM109_map1	0003.CSV	1369.27	0.0180647
CAM109_map1	0003.CSV	1373.13	0.0183766
CAM109_map1	0003.CSV	1376.98	0.0188097
CAM109_map1	0003.CSV	1380.84	0.0190356
CAM109_map1	0003.CSV	1384.7	0.0191929
CAM109_map1	0003.CSV	1388.56	0.019617
CAM109_map1	0003.CSV	1392.41	0.0199075
CAM109_map1	0003.CSV	1396.27	0.0204526
CAM109_map1	0003.CSV	1400.13	0.0210059
CAM109_map1	0003.CSV	1403.98	0.0214375
CAM109_map1	0003.CSV	1407.84	0.0219455
CAM109_map1	0003.CSV	1411.7	0.0223775
CAM109_map1	0003.CSV	1415.55	0.0226808
CAM109_map1	0003.CSV	1419.41	0.0232294
CAM109_map1	0003.CSV	1423.27	0.0235077
CAM109_map1	0003.CSV	1427.12	0.0236775
CAM109_map1	0003.CSV	1430.98	0.0239555
CAM109_map1	0003.CSV	1434.84	0.0243407
CAM109_map1	0003.CSV	1438.7	0.0246572
CAM109_map1	0003.CSV	1442.55	0.0246636
CAM109_map1	0003.CSV	1446.41	0.024729
CAM109_map1	0003.CSV	1450.27	0.024927
CAM109_map1	0003.CSV	1454.12	0.0248227
CAM109_map1	0003.CSV	1457.98	0.0251315
CAM109_map1	0003.CSV	1461.84	0.025138
CAM109_map1	0003.CSV	1465.7	0.0251617
CAM109_map1	0003.CSV	1469.55	0.0250709
CAM109_map1	0003.CSV	1473.41	0.0249171
CAM109_map1	0003.CSV	1477.27	0.0243186
CAM109_map1	0003.CSV	1481.12	0.0236009
CAM109_map1	0003.CSV	1484.98	0.0229398
CAM109_map1	0003.CSV	1488.84	0.0224868
CAM109_map1	0003.CSV	1492.7	0.0219933
CAM109_map1	0003.CSV	1496.55	0.0215044
CAM109_map1	0003.CSV	1500.41	0.0209305
CAM109_map1	0003.CSV	1504.27	0.0203221
CAM109_map1	0003.CSV	1508.12	0.0200686
CAM109_map1	0003.CSV	1511.98	0.0196566
CAM109_map1	0003.CSV	1515.84	0.0188775
CAM109_map1	0003.CSV	1519.7	0.0180466
CAM109_map1	0003.CSV	1523.55	0.0175145
CAM109_map1	0003.CSV	1527.41	0.0171442
CAM109_map1	0003.CSV	1531.27	0.0167328
CAM109_map1	0003.CSV	1535.12	0.0166649
CAM109_map1	0003.CSV	1538.98	0.0167776
CAM109_map1	0003.CSV	1542.84	0.0169985
CAM109_map1	0003.CSV	1546.7	0.0162265
CAM109_map1	0003.CSV	1550.55	0.0156325
CAM109_map1	0003.CSV	1554.41	0.0152328
CAM109_map1	0003.CSV	1558.27	0.0150327
CAM109_map1	0003.CSV	1562.12	0.0148646
CAM109_map1	0003.CSV	1565.98	0.0146445
CAM109_map1	0003.CSV	1569.84	0.0146745
CAM109_map1	0003.CSV	1573.69	0.0146891
CAM109_map1	0003.CSV	1577.55	0.0146275
CAM109_map1	0003.CSV	1581.41	0.0141782
CAM109_map1	0003.CSV	1585.27	0.013646
CAM109_map1	0003.CSV	1589.12	0.0132374
CAM109_map1	0003.CSV	1592.98	0.0129801
CAM109_map1	0003.CSV	1596.84	0.0128519
CAM109_map1	0003.CSV	1600.69	0.012731
CAM109_map1	0003.CSV	1604.55	0.0127582
CAM109_map1	0003.CSV	1608.41	0.0127911
CAM109_map1	0003.CSV	1612.27	0.0126959
CAM109_map1	0003.CSV	1616.12	0.0126881
CAM109_map1	0003.CSV	1619.98	0.0127309
CAM109_map1	0003.CSV	1623.84	0.0126863
CAM109_map1	0003.CSV	1627.69	0.0126645
CAM109_map1	0003.CSV	1631.55	0.0123635
CAM109_map1	0003.CSV	1635.41	0.0123869
CAM109_map1	0003.CSV	1639.27	0.0125576
CAM109_map1	0003.CSV	1643.12	0.0122413
CAM109_map1	0003.CSV	1646.98	0.0123106
CAM109_map1	0003.CSV	1650.84	0.0125561
CAM109_map1	0003.CSV	1654.69	0.0125701
CAM109_map1	0003.CSV	1658.55	0.0122422
CAM109_map1	0003.CSV	1662.41	0.012034
CAM109_map1	0003.CSV	1666.27	0.0119378
CAM109_map1	0003.CSV	1670.12	0.0119757
CAM109_map1	0003.CSV	1673.98	0.0121061
CAM109_map1	0003.CSV	1677.84	0.0119014
CAM109_map1	0003.CSV	1681.69	0.0118562
CAM109_map1	0003.CSV	1685.55	0.0121217
CAM109_map1	0003.CSV	1689.41	0.0119279
CAM109_map1	0003.CSV	1693.27	0.0115377
CAM109_map1	0003.CSV	1697.12	0.011601
CAM109_map1	0003.CSV	1700.98	0.0118671
CAM109_map1	0003.CSV	1704.84	0.0118696
CAM109_map1	0003.CSV	1708.69	0.0117641
CAM109_map1	0003.CSV	1712.55	0.0116222
CAM109_map1	0003.CSV	1716.41	0.0120364
CAM109_map1	0003.CSV	1720.27	0.0123225
CAM109_map1	0003.CSV	1724.12	0.0120146
[truncated: 117,958 more rows]

## Sheet: CAM109_map2
Map	Select spectrum number	Wavenumbers	Absorbance
CAM109_map2	0001.CSV	674.992	0.0502134
CAM109_map2	0001.CSV	678.849	0.0530592
CAM109_map2	0001.CSV	682.706	0.0548768
CAM109_map2	0001.CSV	686.563	0.0586447
CAM109_map2	0001.CSV	690.42	0.0624157
CAM109_map2	0001.CSV	694.277	0.077569
CAM109_map2	0001.CSV	698.134	0.0974254
CAM109_map2	0001.CSV	701.991	0.0939611
CAM109_map2	0001.CSV	705.849	0.0845655
CAM109_map2	0001.CSV	709.706	0.110384
CAM109_map2	0001.CSV	713.563	0.11814
CAM109_map2	0001.CSV	717.42	0.0791619
CAM109_map2	0001.CSV	721.277	0.0495401
CAM109_map2	0001.CSV	725.134	0.0435517
CAM109_map2	0001.CSV	728.991	0.0415204
CAM109_map2	0001.CSV	732.848	0.0417782
CAM109_map2	0001.CSV	736.705	0.0424626
CAM109_map2	0001.CSV	740.562	0.0444175
CAM109_map2	0001.CSV	744.42	0.0449139
CAM109_map2	0001.CSV	748.277	0.0463085
CAM109_map2	0001.CSV	752.134	0.0466473
CAM109_map2	0001.CSV	755.991	0.0484557
CAM109_map2	0001.CSV	759.848	0.0491329
CAM109_map2	0001.CSV	763.705	0.0509154
CAM109_map2	0001.CSV	767.562	0.0518768
CAM109_map2	0001.CSV	771.419	0.0539279
CAM109_map2	0001.CSV	775.276	0.0548668
CAM109_map2	0001.CSV	779.133	0.0567505
CAM109_map2	0001.CSV	782.99	0.0581722
CAM109_map2	0001.CSV	786.848	0.0611446
CAM109_map2	0001.CSV	790.705	0.0632277
CAM109_map2	0001.CSV	794.562	0.0651936
CAM109_map2	0001.CSV	798.419	0.0650423
CAM109_map2	0001.CSV	802.276	0.0657788
CAM109_map2	0001.CSV	806.133	0.066298
CAM109_map2	0001.CSV	809.99	0.069178
CAM109_map2	0001.CSV	813.847	0.0724201
CAM109_map2	0001.CSV	817.704	0.0778435
CAM109_map2	0001.CSV	821.562	0.0839272
CAM109_map2	0001.CSV	825.419	0.0929365
CAM109_map2	0001.CSV	829.276	0.103457
CAM109_map2	0001.CSV	833.133	0.118953
CAM109_map2	0001.CSV	836.99	0.141999
CAM109_map2	0001.CSV	840.847	0.17534
CAM109_map2	0001.CSV	844.704	0.207867
CAM109_map2	0001.CSV	848.561	0.252798
CAM109_map2	0001.CSV	852.418	0.291056
CAM109_map2	0001.CSV	856.275	0.275364
CAM109_map2	0001.CSV	860.132	0.22344
CAM109_map2	0001.CSV	863.99	0.171376
CAM109_map2	0001.CSV	867.847	0.12589
CAM109_map2	0001.CSV	871.704	0.0942173
CAM109_map2	0001.CSV	875.561	0.0759914
CAM109_map2	0001.CSV	879.418	0.0659078
CAM109_map2	0001.CSV	883.275	0.0581044
CAM109_map2	0001.CSV	887.132	0.053395
CAM109_map2	0001.CSV	890.989	0.0511452
CAM109_map2	0001.CSV	894.846	0.0511009
CAM109_map2	0001.CSV	898.703	0.0510345
CAM109_map2	0001.CSV	902.561	0.0519059
CAM109_map2	0001.CSV	906.418	0.0526932
CAM109_map2	0001.CSV	910.275	0.0530331
CAM109_map2	0001.CSV	914.132	0.0521704
CAM109_map2	0001.CSV	917.989	0.0526504
CAM109_map2	0001.CSV	921.846	0.0528548
CAM109_map2	0001.CSV	925.703	0.0535162
CAM109_map2	0001.CSV	929.56	0.0538549
CAM109_map2	0001.CSV	933.417	0.0547431
CAM109_map2	0001.CSV	937.274	0.0550455
CAM109_map2	0001.CSV	941.131	0.0556758
CAM109_map2	0001.CSV	944.989	0.0556967
CAM109_map2	0001.CSV	948.846	0.0561387
CAM109_map2	0001.CSV	952.703	0.0561276
CAM109_map2	0001.CSV	956.56	0.0565539
CAM109_map2	0001.CSV	960.417	0.0565138
CAM109_map2	0001.CSV	964.274	0.0568899
CAM109_map2	0001.CSV	968.131	0.0569796
CAM109_map2	0001.CSV	971.988	0.0577558
CAM109_map2	0001.CSV	975.845	0.0581961
CAM109_map2	0001.CSV	979.702	0.0589923
CAM109_map2	0001.CSV	983.559	0.0594035
CAM109_map2	0001.CSV	987.417	0.0603156
CAM109_map2	0001.CSV	991.274	0.0607537
CAM109_map2	0001.CSV	995.131	0.0616198
CAM109_map2	0001.CSV	998.988	0.0619321
CAM109_map2	0001.CSV	1002.85	0.0627004
CAM109_map2	0001.CSV	1006.7	0.0632149
CAM109_map2	0001.CSV	1010.56	0.0643572
CAM109_map2	0001.CSV	1014.42	0.0649936
CAM109_map2	0001.CSV	1018.27	0.0659859
CAM109_map2	0001.CSV	1022.13	0.0665525
CAM109_map2	0001.CSV	1025.99	0.0675624
CAM109_map2	0001.CSV	1029.85	0.0681333
CAM109_map2	0001.CSV	1033.7	0.0692765
CAM109_map2	0001.CSV	1037.56	0.0700237
CAM109_map2	0001.CSV	1041.42	0.0712953
CAM109_map2	0001.CSV	1045.27	0.0720391
CAM109_map2	0001.CSV	1049.13	0.0732953
CAM109_map2	0001.CSV	1052.99	0.0742087
CAM109_map2	0001.CSV	1056.84	0.0760633
CAM109_map2	0001.CSV	1060.7	0.0777919
CAM109_map2	0001.CSV	1064.56	0.080338
CAM109_map2	0001.CSV	1068.42	0.0825839
CAM109_map2	0001.CSV	1072.27	0.0858531
CAM109_map2	0001.CSV	1076.13	0.0913978
CAM109_map2	0001.CSV	1079.99	0.103158
CAM109_map2	0001.CSV	1083.84	0.105086
CAM109_map2	0001.CSV	1087.7	0.0908558
CAM109_map2	0001.CSV	1091.56	0.0809552
CAM109_map2	0001.CSV	1095.41	0.0795794
CAM109_map2	0001.CSV	1099.27	0.0799398
CAM109_map2	0001.CSV	1103.13	0.0813318
CAM109_map2	0001.CSV	1106.99	0.0828137
CAM109_map2	0001.CSV	1110.84	0.0851035
CAM109_map2	0001.CSV	1114.7	0.086944
CAM109_map2	0001.CSV	1118.56	0.0885108
CAM109_map2	0001.CSV	1122.41	0.0889464
CAM109_map2	0001.CSV	1126.27	0.0893032
CAM109_map2	0001.CSV	1130.13	0.0892147
CAM109_map2	0001.CSV	1133.99	0.0898131
CAM109_map2	0001.CSV	1137.84	0.0903998
CAM109_map2	0001.CSV	1141.7	0.091574
CAM109_map2	0001.CSV	1145.56	0.0922709
CAM109_map2	0001.CSV	1149.41	0.0931373
CAM109_map2	0001.CSV	1153.27	0.0934424
CAM109_map2	0001.CSV	1157.13	0.0941763
CAM109_map2	0001.CSV	1160.99	0.0945493
CAM109_map2	0001.CSV	1164.84	0.0950355
CAM109_map2	0001.CSV	1168.7	0.0947241
CAM109_map2	0001.CSV	1172.56	0.0944296
CAM109_map2	0001.CSV	1176.41	0.0936684
CAM109_map2	0001.CSV	1180.27	0.0934206
CAM109_map2	0001.CSV	1184.13	0.0929831
CAM109_map2	0001.CSV	1187.99	0.0931244
CAM109_map2	0001.CSV	1191.84	0.0931167
CAM109_map2	0001.CSV	1195.7	0.0936841
CAM109_map2	0001.CSV	1199.56	0.0940639
CAM109_map2	0001.CSV	1203.41	0.0949909
CAM109_map2	0001.CSV	1207.27	0.0957038
CAM109_map2	0001.CSV	1211.13	0.0969609
CAM109_map2	0001.CSV	1214.98	0.0980337
CAM109_map2	0001.CSV	1218.84	0.0996528
CAM109_map2	0001.CSV	1222.7	0.100931
CAM109_map2	0001.CSV	1226.56	0.102618
CAM109_map2	0001.CSV	1230.41	0.104019
CAM109_map2	0001.CSV	1234.27	0.105932
CAM109_map2	0001.CSV	1238.13	0.1076
CAM109_map2	0001.CSV	1241.98	0.109724
CAM109_map2	0001.CSV	1245.84	0.111542
CAM109_map2	0001.CSV	1249.7	0.113793
CAM109_map2	0001.CSV	1253.56	0.115495
CAM109_map2	0001.CSV	1257.41	0.117399
CAM109_map2	0001.CSV	1261.27	0.11895
CAM109_map2	0001.CSV	1265.13	0.121163
CAM109_map2	0001.CSV	1268.98	0.12318
CAM109_map2	0001.CSV	1272.84	0.125675
CAM109_map2	0001.CSV	1276.7	0.127551
CAM109_map2	0001.CSV	1280.56	0.129727
CAM109_map2	0001.CSV	1284.41	0.131385
CAM109_map2	0001.CSV	1288.27	0.133371
CAM109_map2	0001.CSV	1292.13	0.134794
CAM109_map2	0001.CSV	1295.98	0.136636
CAM109_map2	0001.CSV	1299.84	0.138257
CAM109_map2	0001.CSV	1303.7	0.140597
CAM109_map2	0001.CSV	1307.56	0.142843
CAM109_map2	0001.CSV	1311.41	0.145877
CAM109_map2	0001.CSV	1315.27	0.148706
CAM109_map2	0001.CSV	1319.13	0.152293
CAM109_map2	0001.CSV	1322.98	0.155575
CAM109_map2	0001.CSV	1326.84	0.159725
CAM109_map2	0001.CSV	1330.7	0.163994
CAM109_map2	0001.CSV	1334.56	0.1692
CAM109_map2	0001.CSV	1338.41	0.175511
CAM109_map2	0001.CSV	1342.27	0.184014
CAM109_map2	0001.CSV	1346.13	0.191313
CAM109_map2	0001.CSV	1349.98	0.200158
CAM109_map2	0001.CSV	1353.84	0.20911
CAM109_map2	0001.CSV	1357.7	0.218201
CAM109_map2	0001.CSV	1361.56	0.226512
CAM109_map2	0001.CSV	1365.41	0.235286
CAM109_map2	0001.CSV	1369.27	0.241849
CAM109_map2	0001.CSV	1373.13	0.251372
CAM109_map2	0001.CSV	1376.98	0.262532
CAM109_map2	0001.CSV	1380.84	0.272857
CAM109_map2	0001.CSV	1384.7	0.281432
CAM109_map2	0001.CSV	1388.56	0.291682
CAM109_map2	0001.CSV	1392.41	0.298803
CAM109_map2	0001.CSV	1396.27	0.307407
CAM109_map2	0001.CSV	1400.13	0.315528
CAM109_map2	0001.CSV	1403.98	0.324217
CAM109_map2	0001.CSV	1407.84	0.332433
CAM109_map2	0001.CSV	1411.7	0.340559
CAM109_map2	0001.CSV	1415.55	0.345405
CAM109_map2	0001.CSV	1419.41	0.352034
CAM109_map2	0001.CSV	1423.27	0.356989
CAM109_map2	0001.CSV	1427.12	0.363935
CAM109_map2	0001.CSV	1430.98	0.370758
CAM109_map2	0001.CSV	1434.84	0.381027
CAM109_map2	0001.CSV	1438.7	0.392085
CAM109_map2	0001.CSV	1442.55	0.401622
CAM109_map2	0001.CSV	1446.41	0.404918
CAM109_map2	0001.CSV	1450.27	0.403828
CAM109_map2	0001.CSV	1454.12	0.396387
CAM109_map2	0001.CSV	1457.98	0.384954
CAM109_map2	0001.CSV	1461.84	0.375033
CAM109_map2	0001.CSV	1465.7	0.367997
CAM109_map2	0001.CSV	1469.55	0.355268
CAM109_map2	0001.CSV	1473.41	0.33145
CAM109_map2	0001.CSV	1477.27	0.303104
CAM109_map2	0001.CSV	1481.12	0.2868
CAM109_map2	0001.CSV	1484.98	0.271101
CAM109_map2	0001.CSV	1488.84	0.25236
CAM109_map2	0001.CSV	1492.7	0.233862
CAM109_map2	0001.CSV	1496.55	0.221024
CAM109_map2	0001.CSV	1500.41	0.206357
CAM109_map2	0001.CSV	1504.27	0.198106
CAM109_map2	0001.CSV	1508.12	0.181388
CAM109_map2	0001.CSV	1511.98	0.170111
CAM109_map2	0001.CSV	1515.84	0.162553
CAM109_map2	0001.CSV	1519.7	0.152854
CAM109_map2	0001.CSV	1523.55	0.140977
CAM109_map2	0001.CSV	1527.41	0.133782
CAM109_map2	0001.CSV	1531.27	0.127999
CAM109_map2	0001.CSV	1535.12	0.123935
CAM109_map2	0001.CSV	1538.98	0.119352
CAM109_map2	0001.CSV	1542.84	0.10956
CAM109_map2	0001.CSV	1546.7	0.101515
CAM109_map2	0001.CSV	1550.55	0.0960864
CAM109_map2	0001.CSV	1554.41	0.09055
CAM109_map2	0001.CSV	1558.27	0.0841774
CAM109_map2	0001.CSV	1562.12	0.0782736
CAM109_map2	0001.CSV	1565.98	0.0761654
CAM109_map2	0001.CSV	1569.84	0.0735877
CAM109_map2	0001.CSV	1573.69	0.0715041
CAM109_map2	0001.CSV	1577.55	0.0683253
CAM109_map2	0001.CSV	1581.41	0.0658138
CAM109_map2	0001.CSV	1585.27	0.0645511
CAM109_map2	0001.CSV	1589.12	0.0646047
CAM109_map2	0001.CSV	1592.98	0.0639829
CAM109_map2	0001.CSV	1596.84	0.0622351
CAM109_map2	0001.CSV	1600.69	0.0595963
CAM109_map2	0001.CSV	1604.55	0.0570589
CAM109_map2	0001.CSV	1608.41	0.0543178
CAM109_map2	0001.CSV	1612.27	0.0521442
CAM109_map2	0001.CSV	1616.12	0.0497379
CAM109_map2	0001.CSV	1619.98	0.0477596
CAM109_map2	0001.CSV	1623.84	0.0455465
CAM109_map2	0001.CSV	1627.69	0.0432485
CAM109_map2	0001.CSV	1631.55	0.0410659
CAM109_map2	0001.CSV	1635.41	0.0389577
CAM109_map2	0001.CSV	1639.27	0.0365448
CAM109_map2	0001.CSV	1643.12	0.0351167
CAM109_map2	0001.CSV	1646.98	0.0330424
CAM109_map2	0001.CSV	1650.84	0.0314764
CAM109_map2	0001.CSV	1654.69	0.0296989
CAM109_map2	0001.CSV	1658.55	0.0285766
CAM109_map2	0001.CSV	1662.41	0.027435
CAM109_map2	0001.CSV	1666.27	0.0265713
CAM109_map2	0001.CSV	1670.12	0.0257443
CAM109_map2	0001.CSV	1673.98	0.0252796
CAM109_map2	0001.CSV	1677.84	0.0245501
CAM109_map2	0001.CSV	1681.69	0.0241846
CAM109_map2	0001.CSV	1685.55	0.0239351
CAM109_map2	0001.CSV	1689.41	0.023678
CAM109_map2	0001.CSV	1693.27	0.0229234
CAM109_map2	0001.CSV	1697.12	0.0225101
CAM109_map2	0001.CSV	1700.98	0.0221163
CAM109_map2	0001.CSV	1704.84	0.0221159
CAM109_map2	0001.CSV	1708.69	0.0219694
CAM109_map2	0001.CSV	1712.55	0.0220221
CAM109_map2	0001.CSV	1716.41	0.0225424
CAM109_map2	0001.CSV	1720.27	0.0234632
CAM109_map2	0001.CSV	1724.12	0.0234838
CAM109_map2	0001.CSV	1727.98	0.0234376
CAM109_map2	0001.CSV	1731.84	0.0232198
CAM109_map2	0001.CSV	1735.69	0.0231025
CAM109_map2	0001.CSV	1739.55	0.0223403
CAM109_map2	0001.CSV	1743.41	0.0214196
CAM109_map2	0001.CSV	1747.27	0.0202236
CAM109_map2	0001.CSV	1751.12	0.0191909
CAM109_map2	0001.CSV	1754.98	0.0183067
CAM109_map2	0001.CSV	1758.84	0.0179214
CAM109_map2	0001.CSV	1762.69	0.0177127
CAM109_map2	0001.CSV	1766.55	0.0177478
CAM109_map2	0001.CSV	1770.41	0.0184778
CAM109_map2	0001.CSV	1774.26	0.020944
CAM109_map2	0001.CSV	1778.12	0.0234633
CAM109_map2	0001.CSV	1781.98	0.0262201
CAM109_map2	0001.CSV	1785.84	0.0274498
CAM109_map2	0001.CSV	1789.69	0.0266891
CAM109_map2	0001.CSV	1793.55	0.0236941
CAM109_map2	0001.CSV	1797.41	0.0211199
CAM109_map2	0001.CSV	1801.26	0.0189944
CAM109_map2	0001.CSV	1805.12	0.0174221
CAM109_map2	0001.CSV	1808.98	0.0164872
CAM109_map2	0001.CSV	1812.84	0.0160786
CAM109_map2	0001.CSV	1816.69	0.0156638
CAM109_map2	0001.CSV	1820.55	0.0155073
CAM109_map2	0001.CSV	1824.41	0.0153811
CAM109_map2	0001.CSV	1828.26	0.0155403
CAM109_map2	0001.CSV	1832.12	0.0155125
CAM109_map2	0001.CSV	1835.98	0.0154339
CAM109_map2	0001.CSV	1839.84	0.0152555
CAM109_map2	0001.CSV	1843.69	0.0154296
CAM109_map2	0001.CSV	1847.55	0.0155211
CAM109_map2	0001.CSV	1851.41	0.0154319
CAM109_map2	0001.CSV	1855.26	0.0153562
CAM109_map2	0001.CSV	1859.12	0.0154209
CAM109_map2	0001.CSV	1862.98	0.015351
CAM109_map2	0001.CSV	1866.84	0.0155295
CAM109_map2	0001.CSV	1870.69	0.0157307
CAM109_map2	0001.CSV	1874.55	0.0156901
CAM109_map2	0001.CSV	1878.41	0.0155625
CAM109_map2	0001.CSV	1882.26	0.0155879
CAM109_map2	0001.CSV	1886.12	0.0155638
CAM109_map2	0001.CSV	1889.98	0.0157289
CAM109_map2	0001.CSV	1893.83	0.0158338
CAM109_map2	0001.CSV	1897.69	0.0159159
CAM109_map2	0001.CSV	1901.55	0.015883
CAM109_map2	0001.CSV	1905.41	0.0159696
CAM109_map2	0001.CSV	1909.26	0.016055
CAM109_map2	0001.CSV	1913.12	0.0160743
CAM109_map2	0001.CSV	1916.98	0.0160143
CAM109_map2	0001.CSV	1920.83	0.0161872
CAM109_map2	0001.CSV	1924.69	0.0162484
CAM109_map2	0001.CSV	1928.55	0.0163222
CAM109_map2	0001.CSV	1932.4	0.016338
CAM109_map2	0001.CSV	1936.26	0.0164373
CAM109_map2	0001.CSV	1940.12	0.0164474
CAM109_map2	0001.CSV	1943.98	0.0166401
CAM109_map2	0001.CSV	1947.83	0.0166736
CAM109_map2	0001.CSV	1951.69	0.0167318
CAM109_map2	0001.CSV	1955.55	0.0167893
CAM109_map2	0001.CSV	1959.4	0.01687
CAM109_map2	0001.CSV	1963.26	0.0168275
CAM109_map2	0001.CSV	1967.12	0.016952
CAM109_map2	0001.CSV	1970.98	0.0170077
CAM109_map2	0001.CSV	1974.83	0.0170708
CAM109_map2	0001.CSV	1978.69	0.0170975
CAM109_map2	0001.CSV	1982.55	0.0171723
CAM109_map2	0001.CSV	1986.4	0.0171111
CAM109_map2	0001.CSV	1990.26	0.0171894
CAM109_map2	0001.CSV	1994.12	0.0172966
CAM109_map2	0001.CSV	1997.98	0.0173585
CAM109_map2	0001.CSV	2001.83	0.0173363
CAM109_map2	0001.CSV	2005.69	0.0174327
CAM109_map2	0001.CSV	2009.55	0.0174986
CAM109_map2	0001.CSV	2013.4	0.0175933
CAM109_map2	0001.CSV	2017.26	0.0176436
CAM109_map2	0001.CSV	2021.12	0.0177153
CAM109_map2	0001.CSV	2024.97	0.0177063
CAM109_map2	0001.CSV	2028.83	0.0177568
CAM109_map2	0001.CSV	2032.69	0.0177265
CAM109_map2	0001.CSV	2036.55	0.0178039
CAM109_map2	0001.CSV	2040.4	0.0178578
CAM109_map2	0001.CSV	2044.26	0.0179536
CAM109_map2	0001.CSV	2048.12	0.0179334
CAM109_map2	0001.CSV	2051.97	0.0179828
CAM109_map2	0001.CSV	2055.83	0.0180294
CAM109_map2	0001.CSV	2059.69	0.0180928
CAM109_map2	0001.CSV	2063.55	0.0181262
CAM109_map2	0001.CSV	2067.4	0.018198
CAM109_map2	0001.CSV	2071.26	0.0181751
CAM109_map2	0001.CSV	2075.12	0.01824
CAM109_map2	0001.CSV	2078.97	0.0182634
CAM109_map2	0001.CSV	2082.83	0.01833
CAM109_map2	0001.CSV	2086.69	0.0183522
CAM109_map2	0001.CSV	2090.55	0.0183994
CAM109_map2	0001.CSV	2094.4	0.0183869
CAM109_map2	0001.CSV	2098.26	0.0184715
CAM109_map2	0001.CSV	2102.12	0.0185006
CAM109_map2	0001.CSV	2105.97	0.0186028
CAM109_map2	0001.CSV	2109.83	0.0186963
CAM109_map2	0001.CSV	2113.69	0.0187964
CAM109_map2	0001.CSV	2117.55	0.0188131
CAM109_map2	0001.CSV	2121.4	0.0188403
CAM109_map2	0001.CSV	2125.26	0.018867
CAM109_map2	0001.CSV	2129.12	0.0189699
CAM109_map2	0001.CSV	2132.97	0.0189751
CAM109_map2	0001.CSV	2136.83	0.0190424
CAM109_map2	0001.CSV	2140.69	0.0191028
CAM109_map2	0001.CSV	2144.55	0.0191693
CAM109_map2	0001.CSV	2148.4	0.0191824
CAM109_map2	0001.CSV	2152.26	0.0192521
CAM109_map2	0001.CSV	2156.12	0.0192007
CAM109_map2	0001.CSV	2159.97	0.0192004
CAM109_map2	0001.CSV	2163.83	0.0191713
CAM109_map2	0001.CSV	2167.69	0.0192045
CAM109_map2	0001.CSV	2171.55	0.019293
CAM109_map2	0001.CSV	2175.4	0.0193922
CAM109_map2	0001.CSV	2179.26	0.019406
CAM109_map2	0001.CSV	2183.12	0.0194751
CAM109_map2	0001.CSV	2186.97	0.0194898
CAM109_map2	0001.CSV	2190.83	0.0195266
CAM109_map2	0001.CSV	2194.69	0.0195592
CAM109_map2	0001.CSV	2198.55	0.0196398
CAM109_map2	0001.CSV	2202.4	0.0196519
CAM109_map2	0001.CSV	2206.26	0.0196867
CAM109_map2	0001.CSV	2210.12	0.0196963
CAM109_map2	0001.CSV	2213.97	0.019748
CAM109_map2	0001.CSV	2217.83	0.0197386
CAM109_map2	0001.CSV	2221.69	0.0197913
CAM109_map2	0001.CSV	2225.54	0.0198399
CAM109_map2	0001.CSV	2229.4	0.0198975
CAM109_map2	0001.CSV	2233.26	0.0199073
CAM109_map2	0001.CSV	2237.12	0.0199368
CAM109_map2	0001.CSV	2240.97	0.0199168
CAM109_map2	0001.CSV	2244.83	0.0199423
CAM109_map2	0001.CSV	2248.69	0.0199576
CAM109_map2	0001.CSV	2252.54	0.0200558
CAM109_map2	0001.CSV	2256.4	0.0200663
CAM109_map2	0001.CSV	2260.26	0.0200431
CAM109_map2	0001.CSV	2264.11	0.0200171
CAM109_map2	0001.CSV	2267.97	0.0200671
CAM109_map2	0001.CSV	2271.83	0.0200953
CAM109_map2	0001.CSV	2275.69	0.0201424
CAM109_map2	0001.CSV	2279.54	0.0201193
CAM109_map2	0001.CSV	2283.4	0.0201156
CAM109_map2	0001.CSV	2287.26	0.0201038
CAM109_map2	0001.CSV	2291.11	0.0201316
CAM109_map2	0001.CSV	2294.97	0.0201246
CAM109_map2	0001.CSV	2298.83	0.0201869
CAM109_map2	0001.CSV	2302.69	0.020202
CAM109_map2	0001.CSV	2306.54	0.0202323
CAM109_map2	0001.CSV	2310.4	0.020184
CAM109_map2	0001.CSV	2314.26	0.0200773
CAM109_map2	0001.CSV	2318.11	0.0198321
CAM109_map2	0001.CSV	2321.97	0.0195663
CAM109_map2	0001.CSV	2325.83	0.01912
CAM109_map2	0001.CSV	2329.69	0.018795
CAM109_map2	0001.CSV	2333.54	0.018606
CAM109_map2	0001.CSV	2337.4	0.0185735
CAM109_map2	0001.CSV	2341.26	0.0186236
CAM109_map2	0001.CSV	2345.11	0.0194572
CAM109_map2	0001.CSV	2348.97	0.0195611
CAM109_map2	0001.CSV	2352.83	0.0185084
CAM109_map2	0001.CSV	2356.69	0.0163955
CAM109_map2	0001.CSV	2360.54	0.0156701
CAM109_map2	0001.CSV	2364.4	0.0165933
CAM109_map2	0001.CSV	2368.26	0.0185817
CAM109_map2	0001.CSV	2372.11	0.0200278
CAM109_map2	0001.CSV	2375.97	0.0207579
CAM109_map2	0001.CSV	2379.83	0.0208615
CAM109_map2	0001.CSV	2383.69	0.0207509
CAM109_map2	0001.CSV	2387.54	0.0206007
CAM109_map2	0001.CSV	2391.4	0.0205368
CAM109_map2	0001.CSV	2395.26	0.0205228
CAM109_map2	0001.CSV	2399.11	0.0205857
CAM109_map2	0001.CSV	2402.97	0.0206051
CAM109_map2	0001.CSV	2406.83	0.0206317
CAM109_map2	0001.CSV	2410.68	0.0206617
CAM109_map2	0001.CSV	2414.54	0.0207249
CAM109_map2	0001.CSV	2418.4	0.0207324
CAM109_map2	0001.CSV	2422.26	0.0207558
CAM109_map2	0001.CSV	2426.11	0.0208138
CAM109_map2	0001.CSV	2429.97	0.0208954
CAM109_map2	0001.CSV	2433.83	0.0209106
CAM109_map2	0001.CSV	2437.68	0.0209643
CAM109_map2	0001.CSV	2441.54	0.0210569
CAM109_map2	0001.CSV	2445.4	0.0211569
CAM109_map2	0001.CSV	2449.26	0.0212221
CAM109_map2	0001.CSV	2453.11	0.0213173
CAM109_map2	0001.CSV	2456.97	0.0214459
CAM109_map2	0001.CSV	2460.83	0.021662
CAM109_map2	0001.CSV	2464.68	0.0219186
CAM109_map2	0001.CSV	2468.54	0.0222511
CAM109_map2	0001.CSV	2472.4	0.0225775
CAM109_map2	0001.CSV	2476.26	0.0229766
CAM109_map2	0001.CSV	2480.11	0.0234214
CAM109_map2	0001.CSV	2483.97	0.023883
CAM109_map2	0001.CSV	2487.83	0.0243269
CAM109_map2	0001.CSV	2491.68	0.0246925
CAM109_map2	0001.CSV	2495.54	0.0249503
CAM109_map2	0001.CSV	2499.4	0.0251029
CAM109_map2	0001.CSV	2503.26	0.0251085
CAM109_map2	0001.CSV	2507.11	0.0250699
CAM109_map2	0001.CSV	2510.97	0.0251032
CAM109_map2	0001.CSV	2514.83	0.0253168
CAM109_map2	0001.CSV	2518.68	0.0255747
CAM109_map2	0001.CSV	2522.54	0.0256682
CAM109_map2	0001.CSV	2526.4	0.025429
CAM109_map2	0001.CSV	2530.26	0.0250083
CAM109_map2	0001.CSV	2534.11	0.0245319
CAM109_map2	0001.CSV	2537.97	0.0241636
CAM109_map2	0001.CSV	2541.83	0.0240174
CAM109_map2	0001.CSV	2545.68	0.0239699
CAM109_map2	0001.CSV	2549.54	0.0238126
CAM109_map2	0001.CSV	2553.4	0.0235712
CAM109_map2	0001.CSV	2557.26	0.0232275
CAM109_map2	0001.CSV	2561.11	0.0229236
CAM109_map2	0001.CSV	2564.97	0.0226801
CAM109_map2	0001.CSV	2568.83	0.0224755
CAM109_map2	0001.CSV	2572.68	0.0223196
CAM109_map2	0001.CSV	2576.54	0.0222018
CAM109_map2	0001.CSV	2580.4	0.0220673
CAM109_map2	0001.CSV	2584.25	0.0219727
CAM109_map2	0001.CSV	2588.11	0.0219107
CAM109_map2	0001.CSV	2591.97	0.0218815
CAM109_map2	0001.CSV	2595.83	0.0217942
CAM109_map2	0001.CSV	2599.68	0.0217381
CAM109_map2	0001.CSV	2603.54	0.0217067
CAM109_map2	0001.CSV	2607.4	0.0217272
CAM109_map2	0001.CSV	2611.25	0.0217561
CAM109_map2	0001.CSV	2615.11	0.0218035
CAM109_map2	0001.CSV	2618.97	0.0218105
CAM109_map2	0001.CSV	2622.82	0.0218481
CAM109_map2	0001.CSV	2626.68	0.021882
CAM109_map2	0001.CSV	2630.54	0.0218406
CAM109_map2	0001.CSV	2634.4	0.0218245
CAM109_map2	0001.CSV	2638.25	0.0218064
CAM109_map2	0001.CSV	2642.11	0.0216235
CAM109_map2	0001.CSV	2645.97	0.0214118
CAM109_map2	0001.CSV	2649.82	0.0212543
CAM109_map2	0001.CSV	2653.68	0.0211409
CAM109_map2	0001.CSV	2657.54	0.0210924
CAM109_map2	0001.CSV	2661.4	0.0210666
CAM109_map2	0001.CSV	2665.25	0.020981
CAM109_map2	0001.CSV	2669.11	0.0210122
CAM109_map2	0001.CSV	2672.97	0.0211938
CAM109_map2	0001.CSV	2676.82	0.0214172
CAM109_map2	0001.CSV	2680.68	0.0213448
CAM109_map2	0001.CSV	2684.54	0.0210347
CAM109_map2	0001.CSV	2688.4	0.0209424
CAM109_map2	0001.CSV	2692.25	0.0210231
CAM109_map2	0001.CSV	2696.11	0.0211265
CAM109_map2	0001.CSV	2699.97	0.0211412
CAM109_map2	0001.CSV	2703.82	0.0211368
CAM109_map2	0001.CSV	2707.68	0.0212952
CAM109_map2	0001.CSV	2711.54	0.0213844
CAM109_map2	0001.CSV	2715.4	0.0214171
CAM109_map2	0001.CSV	2719.25	0.0216083
CAM109_map2	0001.CSV	2723.11	0.0219857
CAM109_map2	0001.CSV	2726.97	0.0219922
CAM109_map2	0001.CSV	2730.82	0.0216897
CAM109_map2	0001.CSV	2734.68	0.0217125
CAM109_map2	0001.CSV	2738.54	0.0217804
CAM109_map2	0001.CSV	2742.4	0.0218228
CAM109_map2	0001.CSV	2746.25	0.0222092
CAM109_map2	0001.CSV	2750.11	0.0223262
CAM109_map2	0001.CSV	2753.97	0.0220277
CAM109_map2	0001.CSV	2757.82	0.0218914
CAM109_map2	0001.CSV	2761.68	0.0218932
CAM109_map2	0001.CSV	2765.54	0.0219279
CAM109_map2	0001.CSV	2769.39	0.0221689
CAM109_map2	0001.CSV	2773.25	0.0225743
CAM109_map2	0001.CSV	2777.11	0.0225341
CAM109_map2	0001.CSV	2780.97	0.0223152
CAM109_map2	0001.CSV	2784.82	0.0224929
CAM109_map2	0001.CSV	2788.68	0.0229466
CAM109_map2	0001.CSV	2792.54	0.0231762
CAM109_map2	0001.CSV	2796.39	0.0232519
CAM109_map2	0001.CSV	2800.25	0.0231634
CAM109_map2	0001.CSV	2804.11	0.0230604
CAM109_map2	0001.CSV	2807.97	0.023446
CAM109_map2	0001.CSV	2811.82	0.0236003
CAM109_map2	0001.CSV	2815.68	0.0235097
CAM109_map2	0001.CSV	2819.54	0.0237762
CAM109_map2	0001.CSV	2823.39	0.0241408
CAM109_map2	0001.CSV	2827.25	0.0244695
CAM109_map2	0001.CSV	2831.11	0.0252412
CAM109_map2	0001.CSV	2834.97	0.0264461
CAM109_map2	0001.CSV	2838.82	0.0277186
CAM109_map2	0001.CSV	2842.68	0.0295083
CAM109_map2	0001.CSV	2846.54	0.0326282
CAM109_map2	0001.CSV	2850.39	0.0349504
CAM109_map2	0001.CSV	2854.25	0.0347431
CAM109_map2	0001.CSV	2858.11	0.0332784
CAM109_map2	0001.CSV	2861.97	0.0315615
CAM109_map2	0001.CSV	2865.82	0.0304765
CAM109_map2	0001.CSV	2869.68	0.0306151
CAM109_map2	0001.CSV	2873.54	0.0307732
CAM109_map2	0001.CSV	2877.39	0.0298816
CAM109_map2	0001.CSV	2881.25	0.0289453
CAM109_map2	0001.CSV	2885.11	0.0287008
CAM109_map2	0001.CSV	2888.97	0.0290636
CAM109_map2	0001.CSV	2892.82	0.0300651
CAM109_map2	0001.CSV	2896.68	0.0310046
CAM109_map2	0001.CSV	2900.54	0.0317144
CAM109_map2	0001.CSV	2904.39	0.0330457
CAM109_map2	0001.CSV	2908.25	0.0353263
CAM109_map2	0001.CSV	2912.11	0.0387839
CAM109_map2	0001.CSV	2915.97	0.0423275
CAM109_map2	0001.CSV	2919.82	0.044011
CAM109_map2	0001.CSV	2923.68	0.0434702
CAM109_map2	0001.CSV	2927.54	0.0418374
CAM109_map2	0001.CSV	2931.39	0.0391423
CAM109_map2	0001.CSV	2935.25	0.0358882
CAM109_map2	0001.CSV	2939.11	0.0336485
CAM109_map2	0001.CSV	2942.96	0.0327387
CAM109_map2	0001.CSV	2946.82	0.0321363
CAM109_map2	0001.CSV	2950.68	0.0317053
CAM109_map2	0001.CSV	2954.54	0.0313857
CAM109_map2	0001.CSV	2958.39	0.0307534
CAM109_map2	0001.CSV	2962.25	0.0299164
CAM109_map2	0001.CSV	2966.11	0.0286555
CAM109_map2	0001.CSV	2969.96	0.0277958
CAM109_map2	0001.CSV	2973.82	0.0274856
CAM109_map2	0001.CSV	2977.68	0.0271739
CAM109_map2	0001.CSV	2981.53	0.026527
CAM109_map2	0001.CSV	2985.39	0.0257269
CAM109_map2	0001.CSV	2989.25	0.0255466
CAM109_map2	0001.CSV	2993.11	0.0256379
CAM109_map2	0001.CSV	2996.96	0.0253295
CAM109_map2	0001.CSV	3000.82	0.0249527
CAM109_map2	0001.CSV	3004.68	0.0247573
CAM109_map2	0001.CSV	3008.53	0.0249192
CAM109_map2	0001.CSV	3012.39	0.025201
CAM109_map2	0001.CSV	3016.25	0.0250944
CAM109_map2	0001.CSV	3020.11	0.0247439
CAM109_map2	0001.CSV	3023.96	0.0244873
CAM109_map2	0001.CSV	3027.82	0.0244112
CAM109_map2	0001.CSV	3031.68	0.0246572
CAM109_map2	0001.CSV	3035.53	0.0246905
CAM109_map2	0001.CSV	3039.39	0.0246473
CAM109_map2	0001.CSV	3043.25	0.0247478
CAM109_map2	0001.CSV	3047.11	0.0247624
CAM109_map2	0001.CSV	3050.96	0.0247745
CAM109_map2	0001.CSV	3054.82	0.0246571
CAM109_map2	0001.CSV	3058.68	0.0244492
CAM109_map2	0001.CSV	3062.53	0.0245646
CAM109_map2	0001.CSV	3066.39	0.0248058
CAM109_map2	0001.CSV	3070.25	0.0246993
CAM109_map2	0001.CSV	3074.11	0.0247371
CAM109_map2	0001.CSV	3077.96	0.0250217
CAM109_map2	0001.CSV	3081.82	0.0251315
CAM109_map2	0001.CSV	3085.68	0.0251367
CAM109_map2	0001.CSV	3089.53	0.0250661
CAM109_map2	0001.CSV	3093.39	0.0248229
CAM109_map2	0001.CSV	3097.25	0.0248388
CAM109_map2	0001.CSV	3101.11	0.0250167
CAM109_map2	0001.CSV	3104.96	0.0251135
CAM109_map2	0001.CSV	3108.82	0.0253208
CAM109_map2	0001.CSV	3112.68	0.025467
CAM109_map2	0001.CSV	3116.53	0.0255897
CAM109_map2	0001.CSV	3120.39	0.0256007
CAM109_map2	0001.CSV	3124.25	0.0254286
CAM109_map2	0001.CSV	3128.11	0.0253425
CAM109_map2	0001.CSV	3131.96	0.0252974
CAM109_map2	0001.CSV	3135.82	0.02543
CAM109_map2	0001.CSV	3139.68	0.0255967
CAM109_map2	0001.CSV	3143.53	0.0254456
CAM109_map2	0001.CSV	3147.39	0.0255241
CAM109_map2	0001.CSV	3151.25	0.0258124
CAM109_map2	0001.CSV	3155.1	0.0257728
CAM109_map2	0001.CSV	3158.96	0.0254932
CAM109_map2	0001.CSV	3162.82	0.0254085
CAM109_map2	0001.CSV	3166.68	0.0254003
CAM109_map2	0001.CSV	3170.53	0.0254166
CAM109_map2	0001.CSV	3174.39	0.0254662
CAM109_map2	0001.CSV	3178.25	0.0255985
CAM109_map2	0001.CSV	3182.1	0.025681
CAM109_map2	0001.CSV	3185.96	0.025788
CAM109_map2	0001.CSV	3189.82	0.0259283
CAM109_map2	0001.CSV	3193.68	0.0258685
CAM109_map2	0001.CSV	3197.53	0.025826
CAM109_map2	0001.CSV	3201.39	0.0259542
CAM109_map2	0001.CSV	3205.25	0.0260165
CAM109_map2	0001.CSV	3209.1	0.0260924
CAM109_map2	0001.CSV	3212.96	0.0262579
CAM109_map2	0001.CSV	3216.82	0.0263718
CAM109_map2	0001.CSV	3220.68	0.0262801
CAM109_map2	0001.CSV	3224.53	0.0261905
CAM109_map2	0001.CSV	3228.39	0.0263689
CAM109_map2	0001.CSV	3232.25	0.0266432
CAM109_map2	0001.CSV	3236.1	0.026563
CAM109_map2	0001.CSV	3239.96	0.0264658
CAM109_map2	0001.CSV	3243.82	0.0266716
CAM109_map2	0001.CSV	3247.68	0.026758
CAM109_map2	0001.CSV	3251.53	0.0266009
CAM109_map2	0001.CSV	3255.39	0.0265788
CAM109_map2	0001.CSV	3259.25	0.0265131
CAM109_map2	0001.CSV	3263.1	0.0264796
CAM109_map2	0001.CSV	3266.96	0.0266188
CAM109_map2	0001.CSV	3270.82	0.0269098
CAM109_map2	0001.CSV	3274.68	0.0268548
CAM109_map2	0001.CSV	3278.53	0.0266378
CAM109_map2	0001.CSV	3282.39	0.0265448
CAM109_map2	0001.CSV	3286.25	0.0266074
CAM109_map2	0001.CSV	3290.1	0.0268394
CAM109_map2	0001.CSV	3293.96	0.0269727
CAM109_map2	0001.CSV	3297.82	0.0268923
CAM109_map2	0001.CSV	3301.67	0.0269623
CAM109_map2	0001.CSV	3305.53	0.0271126
CAM109_map2	0001.CSV	3309.39	0.0270594
CAM109_map2	0001.CSV	3313.25	0.0268241
CAM109_map2	0001.CSV	3317.1	0.0266083
CAM109_map2	0001.CSV	3320.96	0.026635
CAM109_map2	0001.CSV	3324.82	0.0267979
CAM109_map2	0001.CSV	3328.67	0.0266899
CAM109_map2	0001.CSV	3332.53	0.0266586
CAM109_map2	0001.CSV	3336.39	0.0269311
CAM109_map2	0001.CSV	3340.24	0.0269944
CAM109_map2	0001.CSV	3344.1	0.0268168
CAM109_map2	0001.CSV	3347.96	0.0268292
CAM109_map2	0001.CSV	3351.82	0.026827
CAM109_map2	0001.CSV	3355.67	0.0267965
CAM109_map2	0001.CSV	3359.53	0.0269039
CAM109_map2	0001.CSV	3363.39	0.0269295
CAM109_map2	0001.CSV	3367.24	0.0270423
CAM109_map2	0001.CSV	3371.1	0.0270854
CAM109_map2	0001.CSV	3374.96	0.0269689
CAM109_map2	0001.CSV	3378.82	0.0268611
CAM109_map2	0001.CSV	3382.67	0.0266599
CAM109_map2	0001.CSV	3386.53	0.0265983
CAM109_map2	0001.CSV	3390.39	0.0267912
CAM109_map2	0001.CSV	3394.24	0.0269912
CAM109_map2	0001.CSV	3398.1	0.0271414
CAM109_map2	0001.CSV	3401.96	0.027121
CAM109_map2	0001.CSV	3405.82	0.0269345
CAM109_map2	0001.CSV	3409.67	0.0268274
CAM109_map2	0001.CSV	3413.53	0.0264746
CAM109_map2	0001.CSV	3417.39	0.0260014
CAM109_map2	0001.CSV	3421.24	0.0257516
CAM109_map2	0001.CSV	3425.1	0.0256344
CAM109_map2	0001.CSV	3428.96	0.0256748
CAM109_map2	0001.CSV	3432.82	0.0256934
CAM109_map2	0001.CSV	3436.67	0.0254515
CAM109_map2	0001.CSV	3440.53	0.024977
CAM109_map2	0001.CSV	3444.39	0.0246427
CAM109_map2	0001.CSV	3448.24	0.0244878
CAM109_map2	0001.CSV	3452.1	0.0242944
CAM109_map2	0001.CSV	3455.96	0.0242616
CAM109_map2	0001.CSV	3459.82	0.024318
CAM109_map2	0001.CSV	3463.67	0.0243936
CAM109_map2	0001.CSV	3467.53	0.0243836
CAM109_map2	0001.CSV	3471.39	0.024054
CAM109_map2	0001.CSV	3475.24	0.0237168
CAM109_map2	0001.CSV	3479.1	0.0236453
CAM109_map2	0001.CSV	3482.96	0.0235139
CAM109_map2	0001.CSV	3486.82	0.0235024
CAM109_map2	0001.CSV	3490.67	0.0234285
CAM109_map2	0001.CSV	3494.53	0.0232929
CAM109_map2	0001.CSV	3498.39	0.0231314
CAM109_map2	0001.CSV	3502.24	0.023008
CAM109_map2	0001.CSV	3506.1	0.0227223
CAM109_map2	0001.CSV	3509.96	0.0226471
CAM109_map2	0001.CSV	3513.81	0.0227527
CAM109_map2	0001.CSV	3517.67	0.0225007
CAM109_map2	0001.CSV	3521.53	0.0223385
CAM109_map2	0001.CSV	3525.39	0.0223617
CAM109_map2	0001.CSV	3529.24	0.0223144
CAM109_map2	0001.CSV	3533.1	0.0224108
CAM109_map2	0001.CSV	3536.96	0.0225744
CAM109_map2	0001.CSV	3540.81	0.0225457
CAM109_map2	0001.CSV	3544.67	0.0224859
CAM109_map2	0001.CSV	3548.53	0.0222293
CAM109_map2	0001.CSV	3552.39	0.0218624
CAM109_map2	0001.CSV	3556.24	0.021642
CAM109_map2	0001.CSV	3560.1	0.0213055
CAM109_map2	0001.CSV	3563.96	0.0208009
CAM109_map2	0001.CSV	3567.81	0.0208696
CAM109_map2	0001.CSV	3571.67	0.0208235
CAM109_map2	0001.CSV	3575.53	0.0204399
CAM109_map2	0001.CSV	3579.39	0.0202968
CAM109_map2	0001.CSV	3583.24	0.0200804
CAM109_map2	0001.CSV	3587.1	0.0200595
CAM109_map2	0001.CSV	3590.96	0.0199273
CAM109_map2	0001.CSV	3594.81	0.0195302
CAM109_map2	0001.CSV	3598.67	0.0194815
CAM109_map2	0001.CSV	3602.53	0.0193568
CAM109_map2	0001.CSV	3606.39	0.0187573
CAM109_map2	0001.CSV	3610.24	0.0184677
CAM109_map2	0001.CSV	3614.1	0.0182883
CAM109_map2	0001.CSV	3617.96	0.0183206
CAM109_map2	0001.CSV	3621.81	0.0185751
CAM109_map2	0001.CSV	3625.67	0.0181051
CAM109_map2	0001.CSV	3629.53	0.0180278
CAM109_map2	0001.CSV	3633.39	0.0182421
CAM109_map2	0001.CSV	3637.24	0.0179329
CAM109_map2	0001.CSV	3641.1	0.017604
CAM109_map2	0001.CSV	3644.96	0.0171099
CAM109_map2	0001.CSV	3648.81	0.0175207
CAM109_map2	0001.CSV	3652.67	0.0181674
CAM109_map2	0001.CSV	3656.53	0.0179899
CAM109_map2	0001.CSV	3660.38	0.0176792
CAM109_map2	0001.CSV	3664.24	0.0169744
CAM109_map2	0001.CSV	3668.1	0.0165087
CAM109_map2	0001.CSV	3671.96	0.0167987
CAM109_map2	0001.CSV	3675.81	0.01738
CAM109_map2	0001.CSV	3679.67	0.0174583
CAM109_map2	0001.CSV	3683.53	0.0169608
CAM109_map2	0001.CSV	3687.38	0.0169178
CAM109_map2	0001.CSV	3691.24	0.0176531
CAM109_map2	0001.CSV	3695.1	0.0172487
CAM109_map2	0001.CSV	3698.95	0.0166143
CAM109_map2	0001.CSV	3702.81	0.0164817
CAM109_map2	0001.CSV	3706.67	0.0161771
CAM109_map2	0001.CSV	3710.53	0.0162229
CAM109_map2	0001.CSV	3714.38	0.0167053
CAM109_map2	0001.CSV	3718.24	0.0164038
CAM109_map2	0001.CSV	3722.1	0.0162633
CAM109_map2	0001.CSV	3725.95	0.0162767
CAM109_map2	0001.CSV	3729.81	0.0160403
CAM109_map2	0001.CSV	3733.67	0.0163201
CAM109_map2	0001.CSV	3737.53	0.0172108
CAM109_map2	0001.CSV	3741.38	0.0165564
CAM109_map2	0001.CSV	3745.24	0.015792
CAM109_map2	0001.CSV	3749.1	0.0156678
CAM109_map2	0001.CSV	3752.95	0.0163474
CAM109_map2	0001.CSV	3756.81	0.0163873
CAM109_map2	0001.CSV	3760.67	0.0162897
CAM109_map2	0001.CSV	3764.53	0.0160038
CAM109_map2	0001.CSV	3768.38	0.0160686
CAM109_map2	0001.CSV	3772.24	0.0162763
CAM109_map2	0001.CSV	3776.1	0.0160388
CAM109_map2	0001.CSV	3779.95	0.0159803
CAM109_map2	0001.CSV	3783.81	0.0159817
CAM109_map2	0001.CSV	3787.67	0.0159597
CAM109_map2	0001.CSV	3791.53	0.015835
CAM109_map2	0001.CSV	3795.38	0.0155903
CAM109_map2	0001.CSV	3799.24	0.0157215
CAM109_map2	0001.CSV	3803.1	0.0162444
CAM109_map2	0001.CSV	3806.95	0.0163398
CAM109_map2	0001.CSV	3810.81	0.0158795
CAM109_map2	0001.CSV	3814.67	0.0155188
CAM109_map2	0001.CSV	3818.53	0.0159161
CAM109_map2	0001.CSV	3822.38	0.0162635
CAM109_map2	0001.CSV	3826.24	0.0159348
CAM109_map2	0001.CSV	3830.1	0.0156133
CAM109_map2	0001.CSV	3833.95	0.0155234
CAM109_map2	0001.CSV	3837.81	0.015932
CAM109_map2	0001.CSV	3841.67	0.0163287
CAM109_map2	0001.CSV	3845.53	0.0160573
CAM109_map2	0001.CSV	3849.38	0.0155348
CAM109_map2	0001.CSV	3853.24	0.0160642
CAM109_map2	0001.CSV	3857.1	0.016461
CAM109_map2	0001.CSV	3860.95	0.0158625
CAM109_map2	0001.CSV	3864.81	0.0158505
CAM109_map2	0001.CSV	3868.67	0.0159696
CAM109_map2	0001.CSV	3872.52	0.0161018
CAM109_map2	0001.CSV	3876.38	0.0159151
CAM109_map2	0001.CSV	3880.24	0.015748
CAM109_map2	0001.CSV	3884.1	0.0161038
CAM109_map2	0001.CSV	3887.95	0.0161242
CAM109_map2	0001.CSV	3891.81	0.0160292
CAM109_map2	0001.CSV	3895.67	0.0157896
CAM109_map2	0001.CSV	3899.52	0.0156103
CAM109_map2	0001.CSV	3903.38	0.0164292
CAM109_map2	0001.CSV	3907.24	0.0164758
CAM109_map2	0001.CSV	3911.1	0.015857
CAM109_map2	0001.CSV	3914.95	0.0156351
CAM109_map2	0001.CSV	3918.81	0.0158583
CAM109_map2	0001.CSV	3922.67	0.0159257
CAM109_map2	0001.CSV	3926.52	0.0160212
CAM109_map2	0001.CSV	3930.38	0.0161977
CAM109_map2	0001.CSV	3934.24	0.0162548
CAM109_map2	0001.CSV	3938.09	0.0158802
CAM109_map2	0001.CSV	3941.95	0.0157059
CAM109_map2	0001.CSV	3945.81	0.0157616
CAM109_map2	0001.CSV	3949.67	0.0158726
CAM109_map2	0001.CSV	3953.52	0.0158722
CAM109_map2	0001.CSV	3957.38	0.0157552
CAM109_map2	0001.CSV	3961.24	0.0157926
CAM109_map2	0001.CSV	3965.09	0.0158033
CAM109_map2	0001.CSV	3968.95	0.0157737
CAM109_map2	0001.CSV	3972.81	0.0158669
CAM109_map2	0001.CSV	3976.67	0.0158789
CAM109_map2	0001.CSV	3980.52	0.0158035
CAM109_map2	0001.CSV	3984.38	0.015748
CAM109_map2	0001.CSV	3988.24	0.0156278
CAM109_map2	0001.CSV	3992.09	0.015645
CAM109_map2	0001.CSV	3995.95	0.0156921
CAM109_map2	0001.CSV	3999.81	0.0156228
CAM109_map2	0002.CSV	674.992	0.0149013
CAM109_map2	0002.CSV	678.849	0.0148702
CAM109_map2	0002.CSV	682.706	0.0151526
CAM109_map2	0002.CSV	686.563	0.0160363
CAM109_map2	0002.CSV	690.42	0.0175906
CAM109_map2	0002.CSV	694.277	0.0221847
CAM109_map2	0002.CSV	698.134	0.0277206
CAM109_map2	0002.CSV	701.991	0.0263845
CAM109_map2	0002.CSV	705.849	0.0239541
CAM109_map2	0002.CSV	709.706	0.0297291
CAM109_map2	0002.CSV	713.563	0.0296594
CAM109_map2	0002.CSV	717.42	0.0193431
CAM109_map2	0002.CSV	721.277	0.0132485
CAM109_map2	0002.CSV	725.134	0.0125617
CAM109_map2	0002.CSV	728.991	0.0122601
CAM109_map2	0002.CSV	732.848	0.0124783
CAM109_map2	0002.CSV	736.705	0.0132617
CAM109_map2	0002.CSV	740.562	0.0141721
CAM109_map2	0002.CSV	744.42	0.0144968
CAM109_map2	0002.CSV	748.277	0.0144888
CAM109_map2	0002.CSV	752.134	0.014371
CAM109_map2	0002.CSV	755.991	0.0145797
CAM109_map2	0002.CSV	759.848	0.014574
CAM109_map2	0002.CSV	763.705	0.0148943
CAM109_map2	0002.CSV	767.562	0.0150097
CAM109_map2	0002.CSV	771.419	0.014961
CAM109_map2	0002.CSV	775.276	0.0148692
CAM109_map2	0002.CSV	779.133	0.0152277
CAM109_map2	0002.CSV	782.99	0.015718
CAM109_map2	0002.CSV	786.848	0.016256
CAM109_map2	0002.CSV	790.705	0.0165012
CAM109_map2	0002.CSV	794.562	0.0167096
CAM109_map2	0002.CSV	798.419	0.0169805
CAM109_map2	0002.CSV	802.276	0.0176787
CAM109_map2	0002.CSV	806.133	0.0185547
CAM109_map2	0002.CSV	809.99	0.0197526
CAM109_map2	0002.CSV	813.847	0.0209625
CAM109_map2	0002.CSV	817.704	0.0226204
CAM109_map2	0002.CSV	821.562	0.0245629
CAM109_map2	0002.CSV	825.419	0.0268232
CAM109_map2	0002.CSV	829.276	0.0289386
CAM109_map2	0002.CSV	833.133	0.0315307
CAM109_map2	0002.CSV	836.99	0.0352
CAM109_map2	0002.CSV	840.847	0.0399253
CAM109_map2	0002.CSV	844.704	0.0442354
CAM109_map2	0002.CSV	848.561	0.0515752
CAM109_map2	0002.CSV	852.418	0.0608213
CAM109_map2	0002.CSV	856.275	0.0636115
CAM109_map2	0002.CSV	860.132	0.0579205
CAM109_map2	0002.CSV	863.99	0.0471615
CAM109_map2	0002.CSV	867.847	0.0348351
CAM109_map2	0002.CSV	871.704	0.0256108
CAM109_map2	0002.CSV	875.561	0.0208769
CAM109_map2	0002.CSV	879.418	0.0186297
CAM109_map2	0002.CSV	883.275	0.0169407
CAM109_map2	0002.CSV	887.132	0.0159607
CAM109_map2	0002.CSV	890.989	0.0155775
CAM109_map2	0002.CSV	894.846	0.015454
CAM109_map2	0002.CSV	898.703	0.0154167
CAM109_map2	0002.CSV	902.561	0.0156353
CAM109_map2	0002.CSV	906.418	0.0158211
CAM109_map2	0002.CSV	910.275	0.0158368
CAM109_map2	0002.CSV	914.132	0.0157135
CAM109_map2	0002.CSV	917.989	0.0158005
CAM109_map2	0002.CSV	921.846	0.0158433
CAM109_map2	0002.CSV	925.703	0.0159581
CAM109_map2	0002.CSV	929.56	0.0161065
CAM109_map2	0002.CSV	933.417	0.0164464
CAM109_map2	0002.CSV	937.274	0.0166108
CAM109_map2	0002.CSV	941.131	0.0167279
CAM109_map2	0002.CSV	944.989	0.0167553
CAM109_map2	0002.CSV	948.846	0.0168036
CAM109_map2	0002.CSV	952.703	0.0167452
CAM109_map2	0002.CSV	956.56	0.0166876
CAM109_map2	0002.CSV	960.417	0.0164467
CAM109_map2	0002.CSV	964.274	0.016274
CAM109_map2	0002.CSV	968.131	0.0162298
CAM109_map2	0002.CSV	971.988	0.0163854
CAM109_map2	0002.CSV	975.845	0.016526
CAM109_map2	0002.CSV	979.702	0.0166748
CAM109_map2	0002.CSV	983.559	0.0168655
CAM109_map2	0002.CSV	987.417	0.0171258
CAM109_map2	0002.CSV	991.274	0.0172128
CAM109_map2	0002.CSV	995.131	0.0174229
CAM109_map2	0002.CSV	998.988	0.0175816
CAM109_map2	0002.CSV	1002.85	0.0177823
CAM109_map2	0002.CSV	1006.7	0.017966
CAM109_map2	0002.CSV	1010.56	0.0182698
CAM109_map2	0002.CSV	1014.42	0.0184573
CAM109_map2	0002.CSV	1018.27	0.0186775
CAM109_map2	0002.CSV	1022.13	0.0188639
CAM109_map2	0002.CSV	1025.99	0.0191716
CAM109_map2	0002.CSV	1029.85	0.0194271
CAM109_map2	0002.CSV	1033.7	0.0196699
CAM109_map2	0002.CSV	1037.56	0.0198764
CAM109_map2	0002.CSV	1041.42	0.0200629
CAM109_map2	0002.CSV	1045.27	0.0201864
CAM109_map2	0002.CSV	1049.13	0.0204361
CAM109_map2	0002.CSV	1052.99	0.0206481
CAM109_map2	0002.CSV	1056.84	0.0211988
CAM109_map2	0002.CSV	1060.7	0.0219093
CAM109_map2	0002.CSV	1064.56	0.0227003
CAM109_map2	0002.CSV	1068.42	0.023166
CAM109_map2	0002.CSV	1072.27	0.0235111
CAM109_map2	0002.CSV	1076.13	0.0241816
CAM109_map2	0002.CSV	1079.99	0.0255924
CAM109_map2	0002.CSV	1083.84	0.0249531
CAM109_map2	0002.CSV	1087.7	0.0224064
CAM109_map2	0002.CSV	1091.56	0.0212825
CAM109_map2	0002.CSV	1095.41	0.021362
CAM109_map2	0002.CSV	1099.27	0.0216156
CAM109_map2	0002.CSV	1103.13	0.0221354
CAM109_map2	0002.CSV	1106.99	0.0228874
CAM109_map2	0002.CSV	1110.84	0.0238781
CAM109_map2	0002.CSV	1114.7	0.0247396
CAM109_map2	0002.CSV	1118.56	0.0251667
CAM109_map2	0002.CSV	1122.41	0.0250732
CAM109_map2	0002.CSV	1126.27	0.0247575
CAM109_map2	0002.CSV	1130.13	0.0244105
CAM109_map2	0002.CSV	1133.99	0.0243775
CAM109_map2	0002.CSV	1137.84	0.0245499
CAM109_map2	0002.CSV	1141.7	0.0247895
CAM109_map2	0002.CSV	1145.56	0.0248831
CAM109_map2	0002.CSV	1149.41	0.024959
CAM109_map2	0002.CSV	1153.27	0.0249138
CAM109_map2	0002.CSV	1157.13	0.024767
CAM109_map2	0002.CSV	1160.99	0.0244932
CAM109_map2	0002.CSV	1164.84	0.0240901
CAM109_map2	0002.CSV	1168.7	0.0235012
CAM109_map2	0002.CSV	1172.56	0.0229213
CAM109_map2	0002.CSV	1176.41	0.0224011
CAM109_map2	0002.CSV	1180.27	0.0220679
CAM109_map2	0002.CSV	1184.13	0.0217668
CAM109_map2	0002.CSV	1187.99	0.0215434
CAM109_map2	0002.CSV	1191.84	0.0213422
CAM109_map2	0002.CSV	1195.7	0.0212737
CAM109_map2	0002.CSV	1199.56	0.0212504
CAM109_map2	0002.CSV	1203.41	0.0213236
CAM109_map2	0002.CSV	1207.27	0.021412
CAM109_map2	0002.CSV	1211.13	0.0215923
CAM109_map2	0002.CSV	1214.98	0.0217335
CAM109_map2	0002.CSV	1218.84	0.021985
CAM109_map2	0002.CSV	1222.7	0.0222293
CAM109_map2	0002.CSV	1226.56	0.0225581
CAM109_map2	0002.CSV	1230.41	0.0228575
CAM109_map2	0002.CSV	1234.27	0.023232
CAM109_map2	0002.CSV	1238.13	0.0236339
CAM109_map2	0002.CSV	1241.98	0.0241624
CAM109_map2	0002.CSV	1245.84	0.0246787
CAM109_map2	0002.CSV	1249.7	0.0252291
CAM109_map2	0002.CSV	1253.56	0.0256044
CAM109_map2	0002.CSV	1257.41	0.0258099
CAM109_map2	0002.CSV	1261.27	0.025899
CAM109_map2	0002.CSV	1265.13	0.0261424
CAM109_map2	0002.CSV	1268.98	0.0264811
CAM109_map2	0002.CSV	1272.84	0.0268537
CAM109_map2	0002.CSV	1276.7	0.0270577
CAM109_map2	0002.CSV	1280.56	0.0272374
CAM109_map2	0002.CSV	1284.41	0.0273475
CAM109_map2	0002.CSV	1288.27	0.0274706
CAM109_map2	0002.CSV	1292.13	0.0274361
CAM109_map2	0002.CSV	1295.98	0.0273519
CAM109_map2	0002.CSV	1299.84	0.0272221
CAM109_map2	0002.CSV	1303.7	0.0271756
CAM109_map2	0002.CSV	1307.56	0.027206
CAM109_map2	0002.CSV	1311.41	0.0274178
CAM109_map2	0002.CSV	1315.27	0.0276701
CAM109_map2	0002.CSV	1319.13	0.0279509
CAM109_map2	0002.CSV	1322.98	0.0281409
CAM109_map2	0002.CSV	1326.84	0.0283882
CAM109_map2	0002.CSV	1330.7	0.0286715
CAM109_map2	0002.CSV	1334.56	0.0290783
CAM109_map2	0002.CSV	1338.41	0.0297045
CAM109_map2	0002.CSV	1342.27	0.0304888
CAM109_map2	0002.CSV	1346.13	0.0310087
CAM109_map2	0002.CSV	1349.98	0.0316912
CAM109_map2	0002.CSV	1353.84	0.0323934
CAM109_map2	0002.CSV	1357.7	0.0330486
CAM109_map2	0002.CSV	1361.56	0.033697
CAM109_map2	0002.CSV	1365.41	0.0344132
CAM109_map2	0002.CSV	1369.27	0.0348453
CAM109_map2	0002.CSV	1373.13	0.0356672
CAM109_map2	0002.CSV	1376.98	0.0366859
CAM109_map2	0002.CSV	1380.84	0.0373958
CAM109_map2	0002.CSV	1384.7	0.0379195
CAM109_map2	0002.CSV	1388.56	0.0387251
CAM109_map2	0002.CSV	1392.41	0.0391986
CAM109_map2	0002.CSV	1396.27	0.039948
CAM109_map2	0002.CSV	1400.13	0.0407672
CAM109_map2	0002.CSV	1403.98	0.0415395
CAM109_map2	0002.CSV	1407.84	0.0423781
CAM109_map2	0002.CSV	1411.7	0.0431887
CAM109_map2	0002.CSV	1415.55	0.0437258
CAM109_map2	0002.CSV	1419.41	0.0445283
CAM109_map2	0002.CSV	1423.27	0.045082
CAM109_map2	0002.CSV	1427.12	0.0456503
CAM109_map2	0002.CSV	1430.98	0.0463257
CAM109_map2	0002.CSV	1434.84	0.0472866
CAM109_map2	0002.CSV	1438.7	0.048254
CAM109_map2	0002.CSV	1442.55	0.0488499
CAM109_map2	0002.CSV	1446.41	0.0492048
CAM109_map2	0002.CSV	1450.27	0.0494168
CAM109_map2	0002.CSV	1454.12	0.0490657
CAM109_map2	0002.CSV	1457.98	0.0487819
CAM109_map2	0002.CSV	1461.84	0.0484385
CAM109_map2	0002.CSV	1465.7	0.0484142
CAM109_map2	0002.CSV	1469.55	0.0480676
CAM109_map2	0002.CSV	1473.41	0.0475055
CAM109_map2	0002.CSV	1477.27	0.046408
CAM109_map2	0002.CSV	1481.12	0.0454422
CAM109_map2	0002.CSV	1484.98	0.0444948
CAM109_map2	0002.CSV	1488.84	0.0436781
CAM109_map2	0002.CSV	1492.7	0.0425733
CAM109_map2	0002.CSV	1496.55	0.0415321
CAM109_map2	0002.CSV	1500.41	0.0403949
CAM109_map2	0002.CSV	1504.27	0.0395498
CAM109_map2	0002.CSV	1508.12	0.037964
CAM109_map2	0002.CSV	1511.98	0.0365708
CAM109_map2	0002.CSV	1515.84	0.03517
CAM109_map2	0002.CSV	1519.7	0.0333466
CAM109_map2	0002.CSV	1523.55	0.0309391
CAM109_map2	0002.CSV	1527.41	0.0291315
CAM109_map2	0002.CSV	1531.27	0.0278249
CAM109_map2	0002.CSV	1535.12	0.0271136
CAM109_map2	0002.CSV	1538.98	0.0265485
CAM109_map2	0002.CSV	1542.84	0.025314
CAM109_map2	0002.CSV	1546.7	0.0236543
CAM109_map2	0002.CSV	1550.55	0.0225304
CAM109_map2	0002.CSV	1554.41	0.0216188
CAM109_map2	0002.CSV	1558.27	0.020858
CAM109_map2	0002.CSV	1562.12	0.0199775
CAM109_map2	0002.CSV	1565.98	0.0195043
CAM109_map2	0002.CSV	1569.84	0.0193211
CAM109_map2	0002.CSV	1573.69	0.019249
CAM109_map2	0002.CSV	1577.55	0.0190118
CAM109_map2	0002.CSV	1581.41	0.0184833
CAM109_map2	0002.CSV	1585.27	0.0179224
CAM109_map2	0002.CSV	1589.12	0.0175824
CAM109_map2	0002.CSV	1592.98	0.0174035
CAM109_map2	0002.CSV	1596.84	0.0173358
CAM109_map2	0002.CSV	1600.69	0.0171562
CAM109_map2	0002.CSV	1604.55	0.0170529
CAM109_map2	0002.CSV	1608.41	0.0169216
CAM109_map2	0002.CSV	1612.27	0.0166498
CAM109_map2	0002.CSV	1616.12	0.0163335
CAM109_map2	0002.CSV	1619.98	0.0162253
CAM109_map2	0002.CSV	1623.84	0.015951
CAM109_map2	0002.CSV	1627.69	0.0156136
CAM109_map2	0002.CSV	1631.55	0.0151114
CAM109_map2	0002.CSV	1635.41	0.0148093
CAM109_map2	0002.CSV	1639.27	0.0146315
CAM109_map2	0002.CSV	1643.12	0.0142617
CAM109_map2	0002.CSV	1646.98	0.0139721
CAM109_map2	0002.CSV	1650.84	0.0139006
CAM109_map2	0002.CSV	1654.69	0.0139466
CAM109_map2	0002.CSV	1658.55	0.0137137
CAM109_map2	0002.CSV	1662.41	0.0135023
CAM109_map2	0002.CSV	1666.27	0.0134144
CAM109_map2	0002.CSV	1670.12	0.0133977
CAM109_map2	0002.CSV	1673.98	0.0135192
CAM109_map2	0002.CSV	1677.84	0.0132574
CAM109_map2	0002.CSV	1681.69	0.0131337
CAM109_map2	0002.CSV	1685.55	0.0134029
CAM109_map2	0002.CSV	1689.41	0.013375
CAM109_map2	0002.CSV	1693.27	0.0130619
CAM109_map2	0002.CSV	1697.12	0.0131249
CAM109_map2	0002.CSV	1700.98	0.0134139
CAM109_map2	0002.CSV	1704.84	0.0135377
CAM109_map2	0002.CSV	1708.69	0.013583
CAM109_map2	0002.CSV	1712.55	0.013599
CAM109_map2	0002.CSV	1716.41	0.0140814
CAM109_map2	0002.CSV	1720.27	0.0146748
CAM109_map2	0002.CSV	1724.12	0.0146734
CAM109_map2	0002.CSV	1727.98	0.0145573
CAM109_map2	0002.CSV	1731.84	0.0144768
CAM109_map2	0002.CSV	1735.69	0.0143989
CAM109_map2	0002.CSV	1739.55	0.0139536
CAM109_map2	0002.CSV	1743.41	0.0134343
CAM109_map2	0002.CSV	1747.27	0.0129005
CAM109_map2	0002.CSV	1751.12	0.0124627
CAM109_map2	0002.CSV	1754.98	0.0120493
CAM109_map2	0002.CSV	1758.84	0.0118207
CAM109_map2	0002.CSV	1762.69	0.0117558
CAM109_map2	0002.CSV	1766.55	0.0116673
CAM109_map2	0002.CSV	1770.41	0.0117541
CAM109_map2	0002.CSV	1774.26	0.012102
CAM109_map2	0002.CSV	1778.12	0.0121972
CAM109_map2	0002.CSV	1781.98	0.01234
CAM109_map2	0002.CSV	1785.84	0.0123231
CAM109_map2	0002.CSV	1789.69	0.0121379
CAM109_map2	0002.CSV	1793.55	0.0119659
CAM109_map2	0002.CSV	1797.41	0.0117581
CAM109_map2	0002.CSV	1801.26	0.0116066
CAM109_map2	0002.CSV	1805.12	0.0114794
CAM109_map2	0002.CSV	1808.98	0.0113807
CAM109_map2	0002.CSV	1812.84	0.011361
CAM109_map2	0002.CSV	1816.69	0.0112403
CAM109_map2	0002.CSV	1820.55	0.0112052
CAM109_map2	0002.CSV	1824.41	0.0112231
CAM109_map2	0002.CSV	1828.26	0.0114351
CAM109_map2	0002.CSV	1832.12	0.0115158
CAM109_map2	0002.CSV	1835.98	0.0114101
CAM109_map2	0002.CSV	1839.84	0.0113071
CAM109_map2	0002.CSV	1843.69	0.0114142
CAM109_map2	0002.CSV	1847.55	0.0115494
CAM109_map2	0002.CSV	1851.41	0.01142
CAM109_map2	0002.CSV	1855.26	0.0113484
CAM109_map2	0002.CSV	1859.12	0.0113888
CAM109_map2	0002.CSV	1862.98	0.0113528
CAM109_map2	0002.CSV	1866.84	0.0114439
CAM109_map2	0002.CSV	1870.69	0.0116326
CAM109_map2	0002.CSV	1874.55	0.0115508
CAM109_map2	0002.CSV	1878.41	0.0114624
CAM109_map2	0002.CSV	1882.26	0.0114567
CAM109_map2	0002.CSV	1886.12	0.0114589
CAM109_map2	0002.CSV	1889.98	0.0115613
CAM109_map2	0002.CSV	1893.83	0.0116261
CAM109_map2	0002.CSV	1897.69	0.0116201
CAM109_map2	0002.CSV	1901.55	0.0115889
CAM109_map2	0002.CSV	1905.41	0.0116143
CAM109_map2	0002.CSV	1909.26	0.0117104
CAM109_map2	0002.CSV	1913.12	0.0117176
CAM109_map2	0002.CSV	1916.98	0.011706
CAM109_map2	0002.CSV	1920.83	0.0118347
CAM109_map2	0002.CSV	1924.69	0.0118771
CAM109_map2	0002.CSV	1928.55	0.0118267
CAM109_map2	0002.CSV	1932.4	0.011825
CAM109_map2	0002.CSV	1936.26	0.0118615
CAM109_map2	0002.CSV	1940.12	0.0118742
CAM109_map2	0002.CSV	1943.98	0.0120241
CAM109_map2	0002.CSV	1947.83	0.0120209
CAM109_map2	0002.CSV	1951.69	0.0119622
CAM109_map2	0002.CSV	1955.55	0.0119985
CAM109_map2	0002.CSV	1959.4	0.0120235
CAM109_map2	0002.CSV	1963.26	0.0119893
CAM109_map2	0002.CSV	1967.12	0.0120508
CAM109_map2	0002.CSV	1970.98	0.0120685
CAM109_map2	0002.CSV	1974.83	0.012035
CAM109_map2	0002.CSV	1978.69	0.0120121
CAM109_map2	0002.CSV	1982.55	0.0120337
CAM109_map2	0002.CSV	1986.4	0.0120271
CAM109_map2	0002.CSV	1990.26	0.0120319
CAM109_map2	0002.CSV	1994.12	0.0120962
CAM109_map2	0002.CSV	1997.98	0.0120786
CAM109_map2	0002.CSV	2001.83	0.0120228
CAM109_map2	0002.CSV	2005.69	0.0120218
CAM109_map2	0002.CSV	2009.55	0.0120268
CAM109_map2	0002.CSV	2013.4	0.0120135
CAM109_map2	0002.CSV	2017.26	0.0120627
CAM109_map2	0002.CSV	2021.12	0.0120717
CAM109_map2	0002.CSV	2024.97	0.0119948
CAM109_map2	0002.CSV	2028.83	0.0119588
CAM109_map2	0002.CSV	2032.69	0.0119623
CAM109_map2	0002.CSV	2036.55	0.0119803
CAM109_map2	0002.CSV	2040.4	0.0119863
CAM109_map2	0002.CSV	2044.26	0.0120003
CAM109_map2	0002.CSV	2048.12	0.0119798
CAM109_map2	0002.CSV	2051.97	0.0119877
CAM109_map2	0002.CSV	2055.83	0.0119685
CAM109_map2	0002.CSV	2059.69	0.0119346
CAM109_map2	0002.CSV	2063.55	0.0119259
CAM109_map2	0002.CSV	2067.4	0.0119424
CAM109_map2	0002.CSV	2071.26	0.0119148
CAM109_map2	0002.CSV	2075.12	0.0119159
CAM109_map2	0002.CSV	2078.97	0.0119331
CAM109_map2	0002.CSV	2082.83	0.0119618
CAM109_map2	0002.CSV	2086.69	0.0119529
CAM109_map2	0002.CSV	2090.55	0.0119407
CAM109_map2	0002.CSV	2094.4	0.0118776
CAM109_map2	0002.CSV	2098.26	0.0118395
CAM109_map2	0002.CSV	2102.12	0.011824
CAM109_map2	0002.CSV	2105.97	0.011869
CAM109_map2	0002.CSV	2109.83	0.0119179
CAM109_map2	0002.CSV	2113.69	0.0119337
CAM109_map2	0002.CSV	2117.55	0.0119348
CAM109_map2	0002.CSV	2121.4	0.0119328
CAM109_map2	0002.CSV	2125.26	0.0119224
CAM109_map2	0002.CSV	2129.12	0.0119291
CAM109_map2	0002.CSV	2132.97	0.0118837
CAM109_map2	0002.CSV	2136.83	0.011869
CAM109_map2	0002.CSV	2140.69	0.0119156
CAM109_map2	0002.CSV	2144.55	0.0119304
CAM109_map2	0002.CSV	2148.4	0.0119136
CAM109_map2	0002.CSV	2152.26	0.0119479
CAM109_map2	0002.CSV	2156.12	0.0119395
CAM109_map2	0002.CSV	2159.97	0.0119187
CAM109_map2	0002.CSV	2163.83	0.0118993
CAM109_map2	0002.CSV	2167.69	0.0119091
CAM109_map2	0002.CSV	2171.55	0.0119415
CAM109_map2	0002.CSV	2175.4	0.0119702
CAM109_map2	0002.CSV	2179.26	0.0119979
CAM109_map2	0002.CSV	2183.12	0.012017
CAM109_map2	0002.CSV	2186.97	0.0119986
CAM109_map2	0002.CSV	2190.83	0.0119803
CAM109_map2	0002.CSV	2194.69	0.0119903
CAM109_map2	0002.CSV	2198.55	0.0120311
CAM109_map2	0002.CSV	2202.4	0.0120539
CAM109_map2	0002.CSV	2206.26	0.0120909
CAM109_map2	0002.CSV	2210.12	0.0120913
CAM109_map2	0002.CSV	2213.97	0.0120674
CAM109_map2	0002.CSV	2217.83	0.0120508
CAM109_map2	0002.CSV	2221.69	0.0120516
CAM109_map2	0002.CSV	2225.54	0.0120938
CAM109_map2	0002.CSV	2229.4	0.0121491
CAM109_map2	0002.CSV	2233.26	0.0121225
CAM109_map2	0002.CSV	2237.12	0.0120662
CAM109_map2	0002.CSV	2240.97	0.0120761
CAM109_map2	0002.CSV	2244.83	0.0120929
CAM109_map2	0002.CSV	2248.69	0.0120623
CAM109_map2	0002.CSV	2252.54	0.0120675
CAM109_map2	0002.CSV	2256.4	0.0120744
CAM109_map2	0002.CSV	2260.26	0.0120466
CAM109_map2	0002.CSV	2264.11	0.0120278
CAM109_map2	0002.CSV	2267.97	0.0120369
CAM109_map2	0002.CSV	2271.83	0.0120062
CAM109_map2	0002.CSV	2275.69	0.0119884
CAM109_map2	0002.CSV	2279.54	0.0119603
CAM109_map2	0002.CSV	2283.4	0.0119563
CAM109_map2	0002.CSV	2287.26	0.0119569
CAM109_map2	0002.CSV	2291.11	0.0119814
CAM109_map2	0002.CSV	2294.97	0.0120327
CAM109_map2	0002.CSV	2298.83	0.0120977
CAM109_map2	0002.CSV	2302.69	0.0120744
CAM109_map2	0002.CSV	2306.54	0.0120457
CAM109_map2	0002.CSV	2310.4	0.0120987
CAM109_map2	0002.CSV	2314.26	0.0120982
CAM109_map2	0002.CSV	2318.11	0.0119854
CAM109_map2	0002.CSV	2321.97	0.0120006
CAM109_map2	0002.CSV	2325.83	0.0120706
CAM109_map2	0002.CSV	2329.69	0.0119679
CAM109_map2	0002.CSV	2333.54	0.0119049
CAM109_map2	0002.CSV	2337.4	0.0120036
CAM109_map2	0002.CSV	2341.26	0.0120924
CAM109_map2	0002.CSV	2345.11	0.0122802
CAM109_map2	0002.CSV	2348.97	0.0122374
CAM109_map2	0002.CSV	2352.83	0.0118226
CAM109_map2	0002.CSV	2356.69	0.011279
CAM109_map2	0002.CSV	2360.54	0.0109605
CAM109_map2	0002.CSV	2364.4	0.0112809
CAM109_map2	0002.CSV	2368.26	0.0120111
CAM109_map2	0002.CSV	2372.11	0.012475
CAM109_map2	0002.CSV	2375.97	0.0124375
CAM109_map2	0002.CSV	2379.83	0.0121185
CAM109_map2	0002.CSV	2383.69	0.0117636
CAM109_map2	0002.CSV	2387.54	0.0115406
CAM109_map2	0002.CSV	2391.4	0.0114347
CAM109_map2	0002.CSV	2395.26	0.0113999
CAM109_map2	0002.CSV	2399.11	0.0113849
CAM109_map2	0002.CSV	2402.97	0.0113388
CAM109_map2	0002.CSV	2406.83	0.0113074
CAM109_map2	0002.CSV	2410.68	0.0112748
CAM109_map2	0002.CSV	2414.54	0.0113072
CAM109_map2	0002.CSV	2418.4	0.0113205
CAM109_map2	0002.CSV	2422.26	0.0112912
CAM109_map2	0002.CSV	2426.11	0.011262
CAM109_map2	0002.CSV	2429.97	0.0112489
CAM109_map2	0002.CSV	2433.83	0.0112474
CAM109_map2	0002.CSV	2437.68	0.0112229
CAM109_map2	0002.CSV	2441.54	0.011197
CAM109_map2	0002.CSV	2445.4	0.0111707
CAM109_map2	0002.CSV	2449.26	0.0111611
CAM109_map2	0002.CSV	2453.11	0.0111602
CAM109_map2	0002.CSV	2456.97	0.011168
CAM109_map2	0002.CSV	2460.83	0.0111754
CAM109_map2	0002.CSV	2464.68	0.0111763
CAM109_map2	0002.CSV	2468.54	0.0112583
CAM109_map2	0002.CSV	2472.4	0.0113145
CAM109_map2	0002.CSV	2476.26	0.0113282
CAM109_map2	0002.CSV	2480.11	0.0113229
CAM109_map2	0002.CSV	2483.97	0.0113149
CAM109_map2	0002.CSV	2487.83	0.0113557
CAM109_map2	0002.CSV	2491.68	0.01141
CAM109_map2	0002.CSV	2495.54	0.0114355
CAM109_map2	0002.CSV	2499.4	0.0114246
CAM109_map2	0002.CSV	2503.26	0.0114076
CAM109_map2	0002.CSV	2507.11	0.0113892
CAM109_map2	0002.CSV	2510.97	0.0114227
CAM109_map2	0002.CSV	2514.83	0.0114579
CAM109_map2	0002.CSV	2518.68	0.011418
CAM109_map2	0002.CSV	2522.54	0.0113821
CAM109_map2	0002.CSV	2526.4	0.0113752
CAM109_map2	0002.CSV	2530.26	0.0113698
CAM109_map2	0002.CSV	2534.11	0.0112893
CAM109_map2	0002.CSV	2537.97	0.0112585
CAM109_map2	0002.CSV	2541.83	0.0113104
CAM109_map2	0002.CSV	2545.68	0.0112613
CAM109_map2	0002.CSV	2549.54	0.0112114
CAM109_map2	0002.CSV	2553.4	0.0112542
CAM109_map2	0002.CSV	2557.26	0.0112016
CAM109_map2	0002.CSV	2561.11	0.0111276
CAM109_map2	0002.CSV	2564.97	0.0111119
CAM109_map2	0002.CSV	2568.83	0.0111106
CAM109_map2	0002.CSV	2572.68	0.0111099
CAM109_map2	0002.CSV	2576.54	0.0111143
CAM109_map2	0002.CSV	2580.4	0.011114
CAM109_map2	0002.CSV	2584.25	0.0110965
CAM109_map2	0002.CSV	2588.11	0.0110597
CAM109_map2	0002.CSV	2591.97	0.0110353
CAM109_map2	0002.CSV	2595.83	0.0109923
CAM109_map2	0002.CSV	2599.68	0.0109823
CAM109_map2	0002.CSV	2603.54	0.011005
CAM109_map2	0002.CSV	2607.4	0.010991
CAM109_map2	0002.CSV	2611.25	0.0109145
CAM109_map2	0002.CSV	2615.11	0.010872
CAM109_map2	0002.CSV	2618.97	0.0108798
CAM109_map2	0002.CSV	2622.82	0.0109166
CAM109_map2	0002.CSV	2626.68	0.0109796
CAM109_map2	0002.CSV	2630.54	0.010945
CAM109_map2	0002.CSV	2634.4	0.0108986
CAM109_map2	0002.CSV	2638.25	0.0108851
CAM109_map2	0002.CSV	2642.11	0.0108424
CAM109_map2	0002.CSV	2645.97	0.0107952
CAM109_map2	0002.CSV	2649.82	0.0107756
CAM109_map2	0002.CSV	2653.68	0.0107437
CAM109_map2	0002.CSV	2657.54	0.0107085
CAM109_map2	0002.CSV	2661.4	0.0107337
CAM109_map2	0002.CSV	2665.25	0.0107055
CAM109_map2	0002.CSV	2669.11	0.0107257
CAM109_map2	0002.CSV	2672.97	0.0108491
CAM109_map2	0002.CSV	2676.82	0.0109674
CAM109_map2	0002.CSV	2680.68	0.0108984
CAM109_map2	0002.CSV	2684.54	0.0107274
CAM109_map2	0002.CSV	2688.4	0.0107286
CAM109_map2	0002.CSV	2692.25	0.0107694
CAM109_map2	0002.CSV	2696.11	0.0108129
CAM109_map2	0002.CSV	2699.97	0.0108283
CAM109_map2	0002.CSV	2703.82	0.0108253
CAM109_map2	0002.CSV	2707.68	0.0108594
CAM109_map2	0002.CSV	2711.54	0.0108411
CAM109_map2	0002.CSV	2715.4	0.0108327
CAM109_map2	0002.CSV	2719.25	0.0109416
CAM109_map2	0002.CSV	2723.11	0.0110954
CAM109_map2	0002.CSV	2726.97	0.0110955
CAM109_map2	0002.CSV	2730.82	0.0110147
CAM109_map2	0002.CSV	2734.68	0.0110037
CAM109_map2	0002.CSV	2738.54	0.0109794
CAM109_map2	0002.CSV	2742.4	0.0109865
CAM109_map2	0002.CSV	2746.25	0.0111878
CAM109_map2	0002.CSV	2750.11	0.0112798
CAM109_map2	0002.CSV	2753.97	0.0111313
CAM109_map2	0002.CSV	2757.82	0.0110382
CAM109_map2	0002.CSV	2761.68	0.0110064
CAM109_map2	0002.CSV	2765.54	0.0109706
CAM109_map2	0002.CSV	2769.39	0.0110782
CAM109_map2	0002.CSV	2773.25	0.0112807
CAM109_map2	0002.CSV	2777.11	0.0112036
CAM109_map2	0002.CSV	2780.97	0.0110633
CAM109_map2	0002.CSV	2784.82	0.0111234
CAM109_map2	0002.CSV	2788.68	0.0112849
CAM109_map2	0002.CSV	2792.54	0.0113356
CAM109_map2	0002.CSV	2796.39	0.0113387
CAM109_map2	0002.CSV	2800.25	0.0112559
CAM109_map2	0002.CSV	2804.11	0.0111868
CAM109_map2	0002.CSV	2807.97	0.0113352
CAM109_map2	0002.CSV	2811.82	0.011357
CAM109_map2	0002.CSV	2815.68	0.0112502
CAM109_map2	0002.CSV	2819.54	0.0112647
CAM109_map2	0002.CSV	2823.39	0.0113362
CAM109_map2	0002.CSV	2827.25	0.0113631
CAM109_map2	0002.CSV	2831.11	0.0114928
CAM109_map2	0002.CSV	2834.97	0.0117573
CAM109_map2	0002.CSV	2838.82	0.0119371
CAM109_map2	0002.CSV	2842.68	0.0120741
CAM109_map2	0002.CSV	2846.54	0.012501
CAM109_map2	0002.CSV	2850.39	0.0128441
CAM109_map2	0002.CSV	2854.25	0.0128221
CAM109_map2	0002.CSV	2858.11	0.0126531
CAM109_map2	0002.CSV	2861.97	0.0123439
CAM109_map2	0002.CSV	2865.82	0.0121217
CAM109_map2	0002.CSV	2869.68	0.0122241
CAM109_map2	0002.CSV	2873.54	0.0123069
CAM109_map2	0002.CSV	2877.39	0.0120486
CAM109_map2	0002.CSV	2881.25	0.0117643
CAM109_map2	0002.CSV	2885.11	0.011667
CAM109_map2	0002.CSV	2888.97	0.0117167
CAM109_map2	0002.CSV	2892.82	0.0119617
CAM109_map2	0002.CSV	2896.68	0.0121155
CAM109_map2	0002.CSV	2900.54	0.0121232
CAM109_map2	0002.CSV	2904.39	0.0123582
CAM109_map2	0002.CSV	2908.25	0.0127492
CAM109_map2	0002.CSV	2912.11	0.0133065
CAM109_map2	0002.CSV	2915.97	0.0138236
CAM109_map2	0002.CSV	2919.82	0.0139592
CAM109_map2	0002.CSV	2923.68	0.0137985
CAM109_map2	0002.CSV	2927.54	0.013681
CAM109_map2	0002.CSV	2931.39	0.0133039
CAM109_map2	0002.CSV	2935.25	0.0126579
CAM109_map2	0002.CSV	2939.11	0.0123183
CAM109_map2	0002.CSV	2942.96	0.0124208
CAM109_map2	0002.CSV	2946.82	0.0124324
CAM109_map2	0002.CSV	2950.68	0.0122443
CAM109_map2	0002.CSV	2954.54	0.0120591
CAM109_map2	0002.CSV	2958.39	0.0118715
CAM109_map2	0002.CSV	2962.25	0.0116734
CAM109_map2	0002.CSV	2966.11	0.011395
CAM109_map2	0002.CSV	2969.96	0.0113745
CAM109_map2	0002.CSV	2973.82	0.0115052
CAM109_map2	0002.CSV	2977.68	0.0115162
CAM109_map2	0002.CSV	2981.53	0.0113192
CAM109_map2	0002.CSV	2985.39	0.0110448
CAM109_map2	0002.CSV	2989.25	0.0110616
CAM109_map2	0002.CSV	2993.11	0.0111223
CAM109_map2	0002.CSV	2996.96	0.0110048
CAM109_map2	0002.CSV	3000.82	0.0109051
CAM109_map2	0002.CSV	3004.68	0.0108484
CAM109_map2	0002.CSV	3008.53	0.0109887
CAM109_map2	0002.CSV	3012.39	0.0112085
CAM109_map2	0002.CSV	3016.25	0.0112056
CAM109_map2	0002.CSV	3020.11	0.0110315
CAM109_map2	0002.CSV	3023.96	0.0109105
CAM109_map2	0002.CSV	3027.82	0.0109039
CAM109_map2	0002.CSV	3031.68	0.0110734
CAM109_map2	0002.CSV	3035.53	0.0111666
CAM109_map2	0002.CSV	3039.39	0.0111656
CAM109_map2	0002.CSV	3043.25	0.0111877
CAM109_map2	0002.CSV	3047.11	0.0111357
CAM109_map2	0002.CSV	3050.96	0.0111091
CAM109_map2	0002.CSV	3054.82	0.0110426
CAM109_map2	0002.CSV	3058.68	0.0109732
CAM109_map2	0002.CSV	3062.53	0.0110842
CAM109_map2	0002.CSV	3066.39	0.0112134
CAM109_map2	0002.CSV	3070.25	0.0110819
CAM109_map2	0002.CSV	3074.11	0.0110631
CAM109_map2	0002.CSV	3077.96	0.0112083
CAM109_map2	0002.CSV	3081.82	0.0112862
CAM109_map2	0002.CSV	3085.68	0.0112345
CAM109_map2	0002.CSV	3089.53	0.011133
CAM109_map2	0002.CSV	3093.39	0.0109676
CAM109_map2	0002.CSV	3097.25	0.0109715
CAM109_map2	0002.CSV	3101.11	0.0110807
CAM109_map2	0002.CSV	3104.96	0.0111062
CAM109_map2	0002.CSV	3108.82	0.0111744
CAM109_map2	0002.CSV	3112.68	0.0112606
CAM109_map2	0002.CSV	3116.53	0.0113228
CAM109_map2	0002.CSV	3120.39	0.0113173
CAM109_map2	0002.CSV	3124.25	0.0112209
CAM109_map2	0002.CSV	3128.11	0.011095
CAM109_map2	0002.CSV	3131.96	0.0110106
CAM109_map2	0002.CSV	3135.82	0.011067
CAM109_map2	0002.CSV	3139.68	0.0110796
CAM109_map2	0002.CSV	3143.53	0.0109524
CAM109_map2	0002.CSV	3147.39	0.0109716
CAM109_map2	0002.CSV	3151.25	0.0111134
CAM109_map2	0002.CSV	3155.1	0.0110571
CAM109_map2	0002.CSV	3158.96	0.0108685
CAM109_map2	0002.CSV	3162.82	0.0107754
CAM109_map2	0002.CSV	3166.68	0.0107431
CAM109_map2	0002.CSV	3170.53	0.0107284
CAM109_map2	0002.CSV	3174.39	0.0107362
CAM109_map2	0002.CSV	3178.25	0.0108316
CAM109_map2	0002.CSV	3182.1	0.0108464
CAM109_map2	0002.CSV	3185.96	0.0108209
CAM109_map2	0002.CSV	3189.82	0.0108709
CAM109_map2	0002.CSV	3193.68	0.0108242
CAM109_map2	0002.CSV	3197.53	0.0107651
CAM109_map2	0002.CSV	3201.39	0.010867
CAM109_map2	0002.CSV	3205.25	0.0109486
CAM109_map2	0002.CSV	3209.1	0.0109335
CAM109_map2	0002.CSV	3212.96	0.0109679
CAM109_map2	0002.CSV	3216.82	0.0110213
CAM109_map2	0002.CSV	3220.68	0.0109975
CAM109_map2	0002.CSV	3224.53	0.0109242
CAM109_map2	0002.CSV	3228.39	0.0110041
CAM109_map2	0002.CSV	3232.25	0.0112128
CAM109_map2	0002.CSV	3236.1	0.011195
CAM109_map2	0002.CSV	3239.96	0.0110506
CAM109_map2	0002.CSV	3243.82	0.011161
CAM109_map2	0002.CSV	3247.68	0.0112168
CAM109_map2	0002.CSV	3251.53	0.0110812
CAM109_map2	0002.CSV	3255.39	0.0111033
CAM109_map2	0002.CSV	3259.25	0.0110792
CAM109_map2	0002.CSV	3263.1	0.0110482
CAM109_map2	0002.CSV	3266.96	0.0111847
CAM109_map2	0002.CSV	3270.82	0.0114147
CAM109_map2	0002.CSV	3274.68	0.0113785
CAM109_map2	0002.CSV	3278.53	0.0111742
CAM109_map2	0002.CSV	3282.39	0.0110706
CAM109_map2	0002.CSV	3286.25	0.0111276
CAM109_map2	0002.CSV	3290.1	0.0113546
CAM109_map2	0002.CSV	3293.96	0.0114736
CAM109_map2	0002.CSV	3297.82	0.0113128
CAM109_map2	0002.CSV	3301.67	0.0112827
CAM109_map2	0002.CSV	3305.53	0.0113633
CAM109_map2	0002.CSV	3309.39	0.0113298
CAM109_map2	0002.CSV	3313.25	0.0111957
CAM109_map2	0002.CSV	3317.1	0.0110283
CAM109_map2	0002.CSV	3320.96	0.0110325
CAM109_map2	0002.CSV	3324.82	0.0111458
CAM109_map2	0002.CSV	3328.67	0.0110433
CAM109_map2	0002.CSV	3332.53	0.0110205
CAM109_map2	0002.CSV	3336.39	0.0112695
CAM109_map2	0002.CSV	3340.24	0.0113584
CAM109_map2	0002.CSV	3344.1	0.0112715
CAM109_map2	0002.CSV	3347.96	0.011294
CAM109_map2	0002.CSV	3351.82	0.0112094
CAM109_map2	0002.CSV	3355.67	0.0110889
CAM109_map2	0002.CSV	3359.53	0.011228
CAM109_map2	0002.CSV	3363.39	0.011343
CAM109_map2	0002.CSV	3367.24	0.0114327
CAM109_map2	0002.CSV	3371.1	0.0113782
CAM109_map2	0002.CSV	3374.96	0.0112247
CAM109_map2	0002.CSV	3378.82	0.0110711
CAM109_map2	0002.CSV	3382.67	0.0108918
CAM109_map2	0002.CSV	3386.53	0.0109649
CAM109_map2	0002.CSV	3390.39	0.0112354
CAM109_map2	0002.CSV	3394.24	0.0114161
CAM109_map2	0002.CSV	3398.1	0.0115
CAM109_map2	0002.CSV	3401.96	0.0114102
CAM109_map2	0002.CSV	3405.82	0.0112515
CAM109_map2	0002.CSV	3409.67	0.0112661
CAM109_map2	0002.CSV	3413.53	0.0110823
CAM109_map2	0002.CSV	3417.39	0.010793
CAM109_map2	0002.CSV	3421.24	0.010724
CAM109_map2	0002.CSV	3425.1	0.0106428
CAM109_map2	0002.CSV	3428.96	0.010714
CAM109_map2	0002.CSV	3432.82	0.0108696
CAM109_map2	0002.CSV	3436.67	0.0107914
CAM109_map2	0002.CSV	3440.53	0.0104087
CAM109_map2	0002.CSV	3444.39	0.0101841
CAM109_map2	0002.CSV	3448.24	0.010194
CAM109_map2	0002.CSV	3452.1	0.0100748
CAM109_map2	0002.CSV	3455.96	0.0100704
CAM109_map2	0002.CSV	3459.82	0.0102001
CAM109_map2	0002.CSV	3463.67	0.0102992
CAM109_map2	0002.CSV	3467.53	0.0104017
CAM109_map2	0002.CSV	3471.39	0.0103067
CAM109_map2	0002.CSV	3475.24	0.0102351
CAM109_map2	0002.CSV	3479.1	0.0102778
CAM109_map2	0002.CSV	3482.96	0.0101717
CAM109_map2	0002.CSV	3486.82	0.0101477
CAM109_map2	0002.CSV	3490.67	0.0101491
CAM109_map2	0002.CSV	3494.53	0.0101503
CAM109_map2	0002.CSV	3498.39	0.0100204
CAM109_map2	0002.CSV	3502.24	0.00995819
CAM109_map2	0002.CSV	3506.1	0.00981172
CAM109_map2	0002.CSV	3509.96	0.00975638
CAM109_map2	0002.CSV	3513.81	0.00985368
CAM109_map2	0002.CSV	3517.67	0.00971948
CAM109_map2	0002.CSV	3521.53	0.00977807
CAM109_map2	0002.CSV	3525.39	0.009899
CAM109_map2	0002.CSV	3529.24	0.0097801
CAM109_map2	0002.CSV	3533.1	0.00978355
CAM109_map2	0002.CSV	3536.96	0.00999134
CAM109_map2	0002.CSV	3540.81	0.0100635
CAM109_map2	0002.CSV	3544.67	0.0100369
CAM109_map2	0002.CSV	3548.53	0.00987327
CAM109_map2	0002.CSV	3552.39	0.00963732
CAM109_map2	0002.CSV	3556.24	0.00958904
CAM109_map2	0002.CSV	3560.1	0.00951002
CAM109_map2	0002.CSV	3563.96	0.00929451
CAM109_map2	0002.CSV	3567.81	0.00963345
CAM109_map2	0002.CSV	3571.67	0.00972588
CAM109_map2	0002.CSV	3575.53	0.00950443
CAM109_map2	0002.CSV	3579.39	0.00959436
CAM109_map2	0002.CSV	3583.24	0.00961137
CAM109_map2	0002.CSV	3587.1	0.00979565
CAM109_map2	0002.CSV	3590.96	0.00985581
CAM109_map2	0002.CSV	3594.81	0.009661
CAM109_map2	0002.CSV	3598.67	0.00974404
CAM109_map2	0002.CSV	3602.53	0.00963128
CAM109_map2	0002.CSV	3606.39	0.00912559
CAM109_map2	0002.CSV	3610.24	0.00894727
CAM109_map2	0002.CSV	3614.1	0.00889184
CAM109_map2	0002.CSV	3617.96	0.00894839
CAM109_map2	0002.CSV	3621.81	0.00920573
CAM109_map2	0002.CSV	3625.67	0.00896256
CAM109_map2	0002.CSV	3629.53	0.00917916
CAM109_map2	0002.CSV	3633.39	0.00947389
CAM109_map2	0002.CSV	3637.24	0.00917581
CAM109_map2	0002.CSV	3641.1	0.00885944
CAM109_map2	0002.CSV	3644.96	0.00835599
CAM109_map2	0002.CSV	3648.81	0.00870753
CAM109_map2	0002.CSV	3652.67	0.00957468
CAM109_map2	0002.CSV	3656.53	0.00956533
CAM109_map2	0002.CSV	3660.38	0.00929221
CAM109_map2	0002.CSV	3664.24	0.0086169
CAM109_map2	0002.CSV	3668.1	0.0081688
CAM109_map2	0002.CSV	3671.96	0.00842447
CAM109_map2	0002.CSV	3675.81	0.0090543
CAM109_map2	0002.CSV	3679.67	0.00925365
CAM109_map2	0002.CSV	3683.53	0.00878887
CAM109_map2	0002.CSV	3687.38	0.00871344
CAM109_map2	0002.CSV	3691.24	0.00938012
CAM109_map2	0002.CSV	3695.1	0.00908837
CAM109_map2	0002.CSV	3698.95	0.00854776
CAM109_map2	0002.CSV	3702.81	0.00844592
CAM109_map2	0002.CSV	3706.67	0.00823698
CAM109_map2	0002.CSV	3710.53	0.00825518
CAM109_map2	0002.CSV	3714.38	0.0087128
CAM109_map2	0002.CSV	3718.24	0.00843991
CAM109_map2	0002.CSV	3722.1	0.00833529
CAM109_map2	0002.CSV	3725.95	0.00834664
CAM109_map2	0002.CSV	3729.81	0.00800394
CAM109_map2	0002.CSV	3733.67	0.00801544
CAM109_map2	0002.CSV	3737.53	0.009002
CAM109_map2	0002.CSV	3741.38	0.00848109
CAM109_map2	0002.CSV	3745.24	0.00764417
CAM109_map2	0002.CSV	3749.1	0.00763213
CAM109_map2	0002.CSV	3752.95	0.00833691
CAM109_map2	0002.CSV	3756.81	0.00837643
CAM109_map2	0002.CSV	3760.67	0.00828777
CAM109_map2	0002.CSV	3764.53	0.00804781
CAM109_map2	0002.CSV	3768.38	0.00809541
CAM109_map2	0002.CSV	3772.24	0.00838532
CAM109_map2	0002.CSV	3776.1	0.00826605
CAM109_map2	0002.CSV	3779.95	0.00822269
CAM109_map2	0002.CSV	3783.81	0.00816668
CAM109_map2	0002.CSV	3787.67	0.00819149
CAM109_map2	0002.CSV	3791.53	0.00804329
CAM109_map2	0002.CSV	3795.38	0.00774228
CAM109_map2	0002.CSV	3799.24	0.00775807
CAM109_map2	0002.CSV	3803.1	0.0081738
CAM109_map2	0002.CSV	3806.95	0.00835566
CAM109_map2	0002.CSV	3810.81	0.00802864
CAM109_map2	0002.CSV	3814.67	0.00763379
CAM109_map2	0002.CSV	3818.53	0.00787722
CAM109_map2	0002.CSV	3822.38	0.00827058
CAM109_map2	0002.CSV	3826.24	0.00800326
CAM109_map2	0002.CSV	3830.1	0.00764808
CAM109_map2	0002.CSV	3833.95	0.00750273
CAM109_map2	0002.CSV	3837.81	0.00794663
CAM109_map2	0002.CSV	3841.67	0.00849707
CAM109_map2	0002.CSV	3845.53	0.00823184
CAM109_map2	0002.CSV	3849.38	0.00753742
CAM109_map2	0002.CSV	3853.24	0.00755495
CAM109_map2	0002.CSV	3857.1	0.00816219
CAM109_map2	0002.CSV	3860.95	0.00787574
CAM109_map2	0002.CSV	3864.81	0.00798507
CAM109_map2	0002.CSV	3868.67	0.00807762
CAM109_map2	0002.CSV	3872.52	0.00828388
CAM109_map2	0002.CSV	3876.38	0.00817249
CAM109_map2	0002.CSV	3880.24	0.00796698
CAM109_map2	0002.CSV	3884.1	0.00826504
CAM109_map2	0002.CSV	3887.95	0.00820605
CAM109_map2	0002.CSV	3891.81	0.00809494
CAM109_map2	0002.CSV	3895.67	0.00790067
CAM109_map2	0002.CSV	3899.52	0.00770353
CAM109_map2	0002.CSV	3903.38	0.00848974
CAM109_map2	0002.CSV	3907.24	0.00870259
CAM109_map2	0002.CSV	3911.1	0.00817063
CAM109_map2	0002.CSV	3914.95	0.00793108
CAM109_map2	0002.CSV	3918.81	0.00817964
CAM109_map2	0002.CSV	3922.67	0.00820946
CAM109_map2	0002.CSV	3926.52	0.00814946
CAM109_map2	0002.CSV	3930.38	0.00827001
CAM109_map2	0002.CSV	3934.24	0.00840822
CAM109_map2	0002.CSV	3938.09	0.00810071
CAM109_map2	0002.CSV	3941.95	0.00791579
CAM109_map2	0002.CSV	3945.81	0.0079084
CAM109_map2	0002.CSV	3949.67	0.00805041
CAM109_map2	0002.CSV	3953.52	0.00811931
CAM109_map2	0002.CSV	3957.38	0.00799452
CAM109_map2	0002.CSV	3961.24	0.0080275
CAM109_map2	0002.CSV	3965.09	0.00808366
CAM109_map2	0002.CSV	3968.95	0.00812286
CAM109_map2	0002.CSV	3972.81	0.00823559
CAM109_map2	0002.CSV	3976.67	0.00822921
CAM109_map2	0002.CSV	3980.52	0.0081183
CAM109_map2	0002.CSV	3984.38	0.00807343
CAM109_map2	0002.CSV	3988.24	0.0080357
CAM109_map2	0002.CSV	3992.09	0.00805119
CAM109_map2	0002.CSV	3995.95	0.00805578
CAM109_map2	0002.CSV	3999.81	0.00796384
CAM109_map2	0003.CSV	674.992	0.0197377
CAM109_map2	0003.CSV	678.849	0.0192744
CAM109_map2	0003.CSV	682.706	0.0193117
CAM109_map2	0003.CSV	686.563	0.020543
CAM109_map2	0003.CSV	690.42	0.0225622
CAM109_map2	0003.CSV	694.277	0.0276205
CAM109_map2	0003.CSV	698.134	0.0329563
CAM109_map2	0003.CSV	701.991	0.0312202
CAM109_map2	0003.CSV	705.849	0.0284004
CAM109_map2	0003.CSV	709.706	0.0331045
CAM109_map2	0003.CSV	713.563	0.0315903
CAM109_map2	0003.CSV	717.42	0.0211237
CAM109_map2	0003.CSV	721.277	0.0161087
CAM109_map2	0003.CSV	725.134	0.0161133
CAM109_map2	0003.CSV	728.991	0.0159954
CAM109_map2	0003.CSV	732.848	0.0164955
CAM109_map2	0003.CSV	736.705	0.0176996
CAM109_map2	0003.CSV	740.562	0.0189736
CAM109_map2	0003.CSV	744.42	0.0196317
CAM109_map2	0003.CSV	748.277	0.0197331
CAM109_map2	0003.CSV	752.134	0.0191463
CAM109_map2	0003.CSV	755.991	0.0191309
CAM109_map2	0003.CSV	759.848	0.0191873
CAM109_map2	0003.CSV	763.705	0.0194156
CAM109_map2	0003.CSV	767.562	0.0195164
CAM109_map2	0003.CSV	771.419	0.0197859
CAM109_map2	0003.CSV	775.276	0.0199291
CAM109_map2	0003.CSV	779.133	0.0199103
CAM109_map2	0003.CSV	782.99	0.0196955
CAM109_map2	0003.CSV	786.848	0.0198514
CAM109_map2	0003.CSV	790.705	0.0199307
CAM109_map2	0003.CSV	794.562	0.0201607
CAM109_map2	0003.CSV	798.419	0.0204739
CAM109_map2	0003.CSV	802.276	0.0210697
CAM109_map2	0003.CSV	806.133	0.0215137
CAM109_map2	0003.CSV	809.99	0.022787
CAM109_map2	0003.CSV	813.847	0.0246567
CAM109_map2	0003.CSV	817.704	0.0266048
CAM109_map2	0003.CSV	821.562	0.0279927
CAM109_map2	0003.CSV	825.419	0.0296644
CAM109_map2	0003.CSV	829.276	0.0315225
CAM109_map2	0003.CSV	833.133	0.0337618
CAM109_map2	0003.CSV	836.99	0.0368858
CAM109_map2	0003.CSV	840.847	0.0413833
CAM109_map2	0003.CSV	844.704	0.0454595
CAM109_map2	0003.CSV	848.561	0.0517128
CAM109_map2	0003.CSV	852.418	0.0596194
CAM109_map2	0003.CSV	856.275	0.0627019
CAM109_map2	0003.CSV	860.132	0.0587404
CAM109_map2	0003.CSV	863.99	0.0489839
CAM109_map2	0003.CSV	867.847	0.0370325
CAM109_map2	0003.CSV	871.704	0.0282886
CAM109_map2	0003.CSV	875.561	0.0240377
CAM109_map2	0003.CSV	879.418	0.0221468
CAM109_map2	0003.CSV	883.275	0.0207108
CAM109_map2	0003.CSV	887.132	0.0198993
CAM109_map2	0003.CSV	890.989	0.0195473
CAM109_map2	0003.CSV	894.846	0.0193681
CAM109_map2	0003.CSV	898.703	0.0193343
CAM109_map2	0003.CSV	902.561	0.0195321
CAM109_map2	0003.CSV	906.418	0.0196468
CAM109_map2	0003.CSV	910.275	0.0196318
CAM109_map2	0003.CSV	914.132	0.0194956
CAM109_map2	0003.CSV	917.989	0.0195759
CAM109_map2	0003.CSV	921.846	0.0195665
CAM109_map2	0003.CSV	925.703	0.0195643
CAM109_map2	0003.CSV	929.56	0.0195684
CAM109_map2	0003.CSV	933.417	0.0197801
CAM109_map2	0003.CSV	937.274	0.0199436
CAM109_map2	0003.CSV	941.131	0.0200962
CAM109_map2	0003.CSV	944.989	0.0200127
CAM109_map2	0003.CSV	948.846	0.0200014
CAM109_map2	0003.CSV	952.703	0.0198833
CAM109_map2	0003.CSV	956.56	0.0197754
CAM109_map2	0003.CSV	960.417	0.0196852
CAM109_map2	0003.CSV	964.274	0.0197394
CAM109_map2	0003.CSV	968.131	0.0197919
CAM109_map2	0003.CSV	971.988	0.0199784
CAM109_map2	0003.CSV	975.845	0.0202573
CAM109_map2	0003.CSV	979.702	0.0206551
CAM109_map2	0003.CSV	983.559	0.021083
CAM109_map2	0003.CSV	987.417	0.021621
CAM109_map2	0003.CSV	991.274	0.0220372
CAM109_map2	0003.CSV	995.131	0.0226583
CAM109_map2	0003.CSV	998.988	0.0232459
CAM109_map2	0003.CSV	1002.85	0.0237911
CAM109_map2	0003.CSV	1006.7	0.0240315
CAM109_map2	0003.CSV	1010.56	0.0242034
CAM109_map2	0003.CSV	1014.42	0.0242791
CAM109_map2	0003.CSV	1018.27	0.0245008
CAM109_map2	0003.CSV	1022.13	0.0246695
CAM109_map2	0003.CSV	1025.99	0.0249837
CAM109_map2	0003.CSV	1029.85	0.0253181
CAM109_map2	0003.CSV	1033.7	0.0257531
CAM109_map2	0003.CSV	1037.56	0.0261992
CAM109_map2	0003.CSV	1041.42	0.0264582
CAM109_map2	0003.CSV	1045.27	0.0263362
CAM109_map2	0003.CSV	1049.13	0.0263917
CAM109_map2	0003.CSV	1052.99	0.0266795
CAM109_map2	0003.CSV	1056.84	0.0274594
CAM109_map2	0003.CSV	1060.7	0.0284684
CAM109_map2	0003.CSV	1064.56	0.0294658
CAM109_map2	0003.CSV	1068.42	0.0299586
CAM109_map2	0003.CSV	1072.27	0.0301008
CAM109_map2	0003.CSV	1076.13	0.0303881
CAM109_map2	0003.CSV	1079.99	0.0314772
CAM109_map2	0003.CSV	1083.84	0.0306501
CAM109_map2	0003.CSV	1087.7	0.0279835
CAM109_map2	0003.CSV	1091.56	0.0267907
CAM109_map2	0003.CSV	1095.41	0.0268385
CAM109_map2	0003.CSV	1099.27	0.0272067
CAM109_map2	0003.CSV	1103.13	0.0278786
CAM109_map2	0003.CSV	1106.99	0.0286477
CAM109_map2	0003.CSV	1110.84	0.0295843
CAM109_map2	0003.CSV	1114.7	0.0304219
CAM109_map2	0003.CSV	1118.56	0.0308563
CAM109_map2	0003.CSV	1122.41	0.030658
CAM109_map2	0003.CSV	1126.27	0.030186
CAM109_map2	0003.CSV	1130.13	0.0296953
CAM109_map2	0003.CSV	1133.99	0.029527
CAM109_map2	0003.CSV	1137.84	0.0296285
CAM109_map2	0003.CSV	1141.7	0.0298564
CAM109_map2	0003.CSV	1145.56	0.0298213
CAM109_map2	0003.CSV	1149.41	0.0297272
CAM109_map2	0003.CSV	1153.27	0.0295888
CAM109_map2	0003.CSV	1157.13	0.0293903
CAM109_map2	0003.CSV	1160.99	0.028988
CAM109_map2	0003.CSV	1164.84	0.0283901
CAM109_map2	0003.CSV	1168.7	0.0275094
CAM109_map2	0003.CSV	1172.56	0.0266279
CAM109_map2	0003.CSV	1176.41	0.0258454
CAM109_map2	0003.CSV	1180.27	0.0253256
CAM109_map2	0003.CSV	1184.13	0.0248871
CAM109_map2	0003.CSV	1187.99	0.0245728
CAM109_map2	0003.CSV	1191.84	0.024277
CAM109_map2	0003.CSV	1195.7	0.0241307
CAM109_map2	0003.CSV	1199.56	0.0240279
CAM109_map2	0003.CSV	1203.41	0.024052
CAM109_map2	0003.CSV	1207.27	0.0241284
CAM109_map2	0003.CSV	1211.13	0.0242627
CAM109_map2	0003.CSV	1214.98	0.0243828
CAM109_map2	0003.CSV	1218.84	0.0246227
CAM109_map2	0003.CSV	1222.7	0.0248347
CAM109_map2	0003.CSV	1226.56	0.0251442
CAM109_map2	0003.CSV	1230.41	0.0254759
CAM109_map2	0003.CSV	1234.27	0.0259234
CAM109_map2	0003.CSV	1238.13	0.0264371
CAM109_map2	0003.CSV	1241.98	0.0271503
CAM109_map2	0003.CSV	1245.84	0.0278347
CAM109_map2	0003.CSV	1249.7	0.0285096
CAM109_map2	0003.CSV	1253.56	0.0290052
CAM109_map2	0003.CSV	1257.41	0.0293005
CAM109_map2	0003.CSV	1261.27	0.0293968
CAM109_map2	0003.CSV	1265.13	0.0295631
CAM109_map2	0003.CSV	1268.98	0.0297898
CAM109_map2	0003.CSV	1272.84	0.0301058
CAM109_map2	0003.CSV	1276.7	0.0302245
CAM109_map2	0003.CSV	1280.56	0.0303475
CAM109_map2	0003.CSV	1284.41	0.0303569
CAM109_map2	0003.CSV	1288.27	0.0302512
CAM109_map2	0003.CSV	1292.13	0.0299066
CAM109_map2	0003.CSV	1295.98	0.029483
CAM109_map2	0003.CSV	1299.84	0.0290386
CAM109_map2	0003.CSV	1303.7	0.028756
CAM109_map2	0003.CSV	1307.56	0.0285789
CAM109_map2	0003.CSV	1311.41	0.0286259
CAM109_map2	0003.CSV	1315.27	0.0286869
CAM109_map2	0003.CSV	1319.13	0.0287522
CAM109_map2	0003.CSV	1322.98	0.028771
CAM109_map2	0003.CSV	1326.84	0.0288426
CAM109_map2	0003.CSV	1330.7	0.0289677
CAM109_map2	0003.CSV	1334.56	0.0292859
CAM109_map2	0003.CSV	1338.41	0.0297809
CAM109_map2	0003.CSV	1342.27	0.0303973
CAM109_map2	0003.CSV	1346.13	0.030747
CAM109_map2	0003.CSV	1349.98	0.0312698
CAM109_map2	0003.CSV	1353.84	0.0318097
CAM109_map2	0003.CSV	1357.7	0.0323447
CAM109_map2	0003.CSV	1361.56	0.0328983
CAM109_map2	0003.CSV	1365.41	0.0336287
CAM109_map2	0003.CSV	1369.27	0.0341358
CAM109_map2	0003.CSV	1373.13	0.0350094
CAM109_map2	0003.CSV	1376.98	0.0360143
CAM109_map2	0003.CSV	1380.84	0.0367573
CAM109_map2	0003.CSV	1384.7	0.0373995
CAM109_map2	0003.CSV	1388.56	0.0384647
CAM109_map2	0003.CSV	1392.41	0.0392457
CAM109_map2	0003.CSV	1396.27	0.0404063
CAM109_map2	0003.CSV	1400.13	0.041729
CAM109_map2	0003.CSV	1403.98	0.0430338
CAM109_map2	0003.CSV	1407.84	0.0443382
CAM109_map2	0003.CSV	1411.7	0.0453525
CAM109_map2	0003.CSV	1415.55	0.0459965
CAM109_map2	0003.CSV	1419.41	0.0472395
CAM109_map2	0003.CSV	1423.27	0.048346
CAM109_map2	0003.CSV	1427.12	0.0494438
CAM109_map2	0003.CSV	1430.98	0.0506471
CAM109_map2	0003.CSV	1434.84	0.052216
CAM109_map2	0003.CSV	1438.7	0.0541083
CAM109_map2	0003.CSV	1442.55	0.0558104
CAM109_map2	0003.CSV	1446.41	0.0573669
CAM109_map2	0003.CSV	1450.27	0.058603
CAM109_map2	0003.CSV	1454.12	0.0586034
CAM109_map2	0003.CSV	1457.98	0.05866
CAM109_map2	0003.CSV	1461.84	0.0585895
CAM109_map2	0003.CSV	1465.7	0.0589373
CAM109_map2	0003.CSV	1469.55	0.0587898
CAM109_map2	0003.CSV	1473.41	0.0580578
CAM109_map2	0003.CSV	1477.27	0.0564429
CAM109_map2	0003.CSV	1481.12	0.0549604
CAM109_map2	0003.CSV	1484.98	0.0533326
CAM109_map2	0003.CSV	1488.84	0.0516233
CAM109_map2	0003.CSV	1492.7	0.0496841
CAM109_map2	0003.CSV	1496.55	0.0478389
CAM109_map2	0003.CSV	1500.41	0.0456654
CAM109_map2	0003.CSV	1504.27	0.0441577
CAM109_map2	0003.CSV	1508.12	0.0417961
CAM109_map2	0003.CSV	1511.98	0.0398802
CAM109_map2	0003.CSV	1515.84	0.0381112
CAM109_map2	0003.CSV	1519.7	0.0359762
CAM109_map2	0003.CSV	1523.55	0.033511
CAM109_map2	0003.CSV	1527.41	0.0316786
CAM109_map2	0003.CSV	1531.27	0.0302184
CAM109_map2	0003.CSV	1535.12	0.0293917
CAM109_map2	0003.CSV	1538.98	0.0288655
CAM109_map2	0003.CSV	1542.84	0.0280173
CAM109_map2	0003.CSV	1546.7	0.0264485
CAM109_map2	0003.CSV	1550.55	0.0252745
CAM109_map2	0003.CSV	1554.41	0.0242588
CAM109_map2	0003.CSV	1558.27	0.0234101
CAM109_map2	0003.CSV	1562.12	0.0223953
CAM109_map2	0003.CSV	1565.98	0.0218936
CAM109_map2	0003.CSV	1569.84	0.0216505
CAM109_map2	0003.CSV	1573.69	0.0215947
CAM109_map2	0003.CSV	1577.55	0.0214266
CAM109_map2	0003.CSV	1581.41	0.0206891
CAM109_map2	0003.CSV	1585.27	0.0197126
CAM109_map2	0003.CSV	1589.12	0.0190579
CAM109_map2	0003.CSV	1592.98	0.0187473
CAM109_map2	0003.CSV	1596.84	0.0185989
CAM109_map2	0003.CSV	1600.69	0.018335
CAM109_map2	0003.CSV	1604.55	0.0181455
CAM109_map2	0003.CSV	1608.41	0.0179916
CAM109_map2	0003.CSV	1612.27	0.0177514
CAM109_map2	0003.CSV	1616.12	0.0174706
CAM109_map2	0003.CSV	1619.98	0.0173932
CAM109_map2	0003.CSV	1623.84	0.0171673
CAM109_map2	0003.CSV	1627.69	0.016852
CAM109_map2	0003.CSV	1631.55	0.0163425
CAM109_map2	0003.CSV	1635.41	0.0161704
CAM109_map2	0003.CSV	1639.27	0.0161956
CAM109_map2	0003.CSV	1643.12	0.0158773
CAM109_map2	0003.CSV	1646.98	0.0156841
CAM109_map2	0003.CSV	1650.84	0.015855
CAM109_map2	0003.CSV	1654.69	0.0159094
CAM109_map2	0003.CSV	1658.55	0.0155975
CAM109_map2	0003.CSV	1662.41	0.0153296
CAM109_map2	0003.CSV	1666.27	0.0151774
CAM109_map2	0003.CSV	1670.12	0.0150734
CAM109_map2	0003.CSV	1673.98	0.0151956
CAM109_map2	0003.CSV	1677.84	0.0150011
CAM109_map2	0003.CSV	1681.69	0.0149414
CAM109_map2	0003.CSV	1685.55	0.0152563
CAM109_map2	0003.CSV	1689.41	0.0152568
CAM109_map2	0003.CSV	1693.27	0.0149162
CAM109_map2	0003.CSV	1697.12	0.0150017
CAM109_map2	0003.CSV	1700.98	0.0154555
CAM109_map2	0003.CSV	1704.84	0.0157763
CAM109_map2	0003.CSV	1708.69	0.0160312
CAM109_map2	0003.CSV	1712.55	0.0162277
CAM109_map2	0003.CSV	1716.41	0.0171328
CAM109_map2	0003.CSV	1720.27	0.0181942
CAM109_map2	0003.CSV	1724.12	0.018265
[truncated: 140,396 more rows]

## Sheet: CAM109_map3
Map	Select spectrum number	Wavenumbers	Absorbance
CAM109_map3	0001.CSV	674.992	0.0473443
CAM109_map3	0001.CSV	678.849	0.0487755
CAM109_map3	0001.CSV	682.706	0.049247
CAM109_map3	0001.CSV	686.563	0.0519071
CAM109_map3	0001.CSV	690.42	0.0563559
CAM109_map3	0001.CSV	694.277	0.0693916
CAM109_map3	0001.CSV	698.134	0.0833591
CAM109_map3	0001.CSV	701.991	0.0784779
CAM109_map3	0001.CSV	705.849	0.071998
CAM109_map3	0001.CSV	709.706	0.0876843
CAM109_map3	0001.CSV	713.563	0.0846937
CAM109_map3	0001.CSV	717.42	0.0557053
CAM109_map3	0001.CSV	721.277	0.0407341
CAM109_map3	0001.CSV	725.134	0.0398775
CAM109_map3	0001.CSV	728.991	0.0400096
CAM109_map3	0001.CSV	732.848	0.04163
CAM109_map3	0001.CSV	736.705	0.0437482
CAM109_map3	0001.CSV	740.562	0.0468437
CAM109_map3	0001.CSV	744.42	0.0483704
CAM109_map3	0001.CSV	748.277	0.0490635
CAM109_map3	0001.CSV	752.134	0.0484265
CAM109_map3	0001.CSV	755.991	0.048395
CAM109_map3	0001.CSV	759.848	0.0481873
CAM109_map3	0001.CSV	763.705	0.0489102
CAM109_map3	0001.CSV	767.562	0.0491522
CAM109_map3	0001.CSV	771.419	0.0497349
CAM109_map3	0001.CSV	775.276	0.0495799
CAM109_map3	0001.CSV	779.133	0.0500821
CAM109_map3	0001.CSV	782.99	0.0500147
CAM109_map3	0001.CSV	786.848	0.0505685
CAM109_map3	0001.CSV	790.705	0.0510606
CAM109_map3	0001.CSV	794.562	0.0524859
CAM109_map3	0001.CSV	798.419	0.0537286
CAM109_map3	0001.CSV	802.276	0.0554588
CAM109_map3	0001.CSV	806.133	0.0565875
CAM109_map3	0001.CSV	809.99	0.0587186
CAM109_map3	0001.CSV	813.847	0.061378
CAM109_map3	0001.CSV	817.704	0.0653775
CAM109_map3	0001.CSV	821.562	0.0695986
CAM109_map3	0001.CSV	825.419	0.0754479
CAM109_map3	0001.CSV	829.276	0.0813618
CAM109_map3	0001.CSV	833.133	0.088522
CAM109_map3	0001.CSV	836.99	0.0981541
CAM109_map3	0001.CSV	840.847	0.113059
CAM109_map3	0001.CSV	844.704	0.12736
CAM109_map3	0001.CSV	848.561	0.149996
CAM109_map3	0001.CSV	852.418	0.182989
CAM109_map3	0001.CSV	856.275	0.199333
CAM109_map3	0001.CSV	860.132	0.181264
CAM109_map3	0001.CSV	863.99	0.141011
CAM109_map3	0001.CSV	867.847	0.0998775
CAM109_map3	0001.CSV	871.704	0.0739211
CAM109_map3	0001.CSV	875.561	0.060791
CAM109_map3	0001.CSV	879.418	0.0537741
CAM109_map3	0001.CSV	883.275	0.0491679
CAM109_map3	0001.CSV	887.132	0.047087
CAM109_map3	0001.CSV	890.989	0.0462269
CAM109_map3	0001.CSV	894.846	0.0461715
CAM109_map3	0001.CSV	898.703	0.0460329
CAM109_map3	0001.CSV	902.561	0.0467038
CAM109_map3	0001.CSV	906.418	0.047243
CAM109_map3	0001.CSV	910.275	0.0472778
CAM109_map3	0001.CSV	914.132	0.0468139
CAM109_map3	0001.CSV	917.989	0.0472975
CAM109_map3	0001.CSV	921.846	0.0476871
CAM109_map3	0001.CSV	925.703	0.0482203
CAM109_map3	0001.CSV	929.56	0.0484967
CAM109_map3	0001.CSV	933.417	0.0491077
CAM109_map3	0001.CSV	937.274	0.049366
CAM109_map3	0001.CSV	941.131	0.0496187
CAM109_map3	0001.CSV	944.989	0.0492825
CAM109_map3	0001.CSV	948.846	0.0490927
CAM109_map3	0001.CSV	952.703	0.048513
CAM109_map3	0001.CSV	956.56	0.0482219
CAM109_map3	0001.CSV	960.417	0.0478481
CAM109_map3	0001.CSV	964.274	0.0478855
CAM109_map3	0001.CSV	968.131	0.0479495
CAM109_map3	0001.CSV	971.988	0.0485787
CAM109_map3	0001.CSV	975.845	0.0491764
CAM109_map3	0001.CSV	979.702	0.0502308
CAM109_map3	0001.CSV	983.559	0.0511211
CAM109_map3	0001.CSV	987.417	0.0523547
CAM109_map3	0001.CSV	991.274	0.053334
CAM109_map3	0001.CSV	995.131	0.0543593
CAM109_map3	0001.CSV	998.988	0.0550304
CAM109_map3	0001.CSV	1002.85	0.0560645
CAM109_map3	0001.CSV	1006.7	0.0569562
CAM109_map3	0001.CSV	1010.56	0.0581317
CAM109_map3	0001.CSV	1014.42	0.059146
CAM109_map3	0001.CSV	1018.27	0.0604119
CAM109_map3	0001.CSV	1022.13	0.0613693
CAM109_map3	0001.CSV	1025.99	0.0626702
CAM109_map3	0001.CSV	1029.85	0.0635463
CAM109_map3	0001.CSV	1033.7	0.0647589
CAM109_map3	0001.CSV	1037.56	0.0658666
CAM109_map3	0001.CSV	1041.42	0.0668402
CAM109_map3	0001.CSV	1045.27	0.067184
CAM109_map3	0001.CSV	1049.13	0.0683232
CAM109_map3	0001.CSV	1052.99	0.070162
CAM109_map3	0001.CSV	1056.84	0.0733498
CAM109_map3	0001.CSV	1060.7	0.076879
CAM109_map3	0001.CSV	1064.56	0.0804834
CAM109_map3	0001.CSV	1068.42	0.0825853
CAM109_map3	0001.CSV	1072.27	0.0838215
CAM109_map3	0001.CSV	1076.13	0.0854034
CAM109_map3	0001.CSV	1079.99	0.0895844
CAM109_map3	0001.CSV	1083.84	0.086602
CAM109_map3	0001.CSV	1087.7	0.0770338
CAM109_map3	0001.CSV	1091.56	0.0728541
CAM109_map3	0001.CSV	1095.41	0.0731055
CAM109_map3	0001.CSV	1099.27	0.0740863
CAM109_map3	0001.CSV	1103.13	0.0758447
CAM109_map3	0001.CSV	1106.99	0.0783894
CAM109_map3	0001.CSV	1110.84	0.0820593
CAM109_map3	0001.CSV	1114.7	0.0852193
CAM109_map3	0001.CSV	1118.56	0.0867515
CAM109_map3	0001.CSV	1122.41	0.0860438
CAM109_map3	0001.CSV	1126.27	0.084431
CAM109_map3	0001.CSV	1130.13	0.0828118
CAM109_map3	0001.CSV	1133.99	0.082418
CAM109_map3	0001.CSV	1137.84	0.0828416
CAM109_map3	0001.CSV	1141.7	0.0838429
CAM109_map3	0001.CSV	1145.56	0.0844838
CAM109_map3	0001.CSV	1149.41	0.0848366
CAM109_map3	0001.CSV	1153.27	0.0845149
CAM109_map3	0001.CSV	1157.13	0.0839938
CAM109_map3	0001.CSV	1160.99	0.082825
CAM109_map3	0001.CSV	1164.84	0.0811018
CAM109_map3	0001.CSV	1168.7	0.0781578
CAM109_map3	0001.CSV	1172.56	0.0749702
CAM109_map3	0001.CSV	1176.41	0.072059
CAM109_map3	0001.CSV	1180.27	0.0700947
CAM109_map3	0001.CSV	1184.13	0.068464
CAM109_map3	0001.CSV	1187.99	0.0673462
CAM109_map3	0001.CSV	1191.84	0.0662942
CAM109_map3	0001.CSV	1195.7	0.0657659
CAM109_map3	0001.CSV	1199.56	0.0653807
CAM109_map3	0001.CSV	1203.41	0.0654093
CAM109_map3	0001.CSV	1207.27	0.065447
CAM109_map3	0001.CSV	1211.13	0.0658716
CAM109_map3	0001.CSV	1214.98	0.0662435
CAM109_map3	0001.CSV	1218.84	0.0669586
CAM109_map3	0001.CSV	1222.7	0.0676971
CAM109_map3	0001.CSV	1226.56	0.0688389
CAM109_map3	0001.CSV	1230.41	0.070005
CAM109_map3	0001.CSV	1234.27	0.071657
CAM109_map3	0001.CSV	1238.13	0.0735235
CAM109_map3	0001.CSV	1241.98	0.0759693
CAM109_map3	0001.CSV	1245.84	0.0784104
CAM109_map3	0001.CSV	1249.7	0.0809043
CAM109_map3	0001.CSV	1253.56	0.0828069
CAM109_map3	0001.CSV	1257.41	0.0843283
CAM109_map3	0001.CSV	1261.27	0.0852726
CAM109_map3	0001.CSV	1265.13	0.0862365
CAM109_map3	0001.CSV	1268.98	0.0869833
CAM109_map3	0001.CSV	1272.84	0.0879694
CAM109_map3	0001.CSV	1276.7	0.0885637
CAM109_map3	0001.CSV	1280.56	0.0890493
CAM109_map3	0001.CSV	1284.41	0.0889444
CAM109_map3	0001.CSV	1288.27	0.0885613
CAM109_map3	0001.CSV	1292.13	0.0873428
CAM109_map3	0001.CSV	1295.98	0.0859501
CAM109_map3	0001.CSV	1299.84	0.084467
CAM109_map3	0001.CSV	1303.7	0.0835555
CAM109_map3	0001.CSV	1307.56	0.0829397
CAM109_map3	0001.CSV	1311.41	0.0830478
CAM109_map3	0001.CSV	1315.27	0.0833088
CAM109_map3	0001.CSV	1319.13	0.0838054
CAM109_map3	0001.CSV	1322.98	0.083893
CAM109_map3	0001.CSV	1326.84	0.0842999
CAM109_map3	0001.CSV	1330.7	0.0848982
CAM109_map3	0001.CSV	1334.56	0.0860552
CAM109_map3	0001.CSV	1338.41	0.0878093
CAM109_map3	0001.CSV	1342.27	0.0903027
CAM109_map3	0001.CSV	1346.13	0.0921341
CAM109_map3	0001.CSV	1349.98	0.0945064
CAM109_map3	0001.CSV	1353.84	0.0967128
CAM109_map3	0001.CSV	1357.7	0.0989478
CAM109_map3	0001.CSV	1361.56	0.101303
CAM109_map3	0001.CSV	1365.41	0.104505
CAM109_map3	0001.CSV	1369.27	0.107048
CAM109_map3	0001.CSV	1373.13	0.110767
CAM109_map3	0001.CSV	1376.98	0.114894
CAM109_map3	0001.CSV	1380.84	0.118277
CAM109_map3	0001.CSV	1384.7	0.121235
CAM109_map3	0001.CSV	1388.56	0.125715
CAM109_map3	0001.CSV	1392.41	0.12935
CAM109_map3	0001.CSV	1396.27	0.134582
CAM109_map3	0001.CSV	1400.13	0.139959
CAM109_map3	0001.CSV	1403.98	0.145163
CAM109_map3	0001.CSV	1407.84	0.150681
CAM109_map3	0001.CSV	1411.7	0.156155
CAM109_map3	0001.CSV	1415.55	0.16014
CAM109_map3	0001.CSV	1419.41	0.165337
CAM109_map3	0001.CSV	1423.27	0.169341
CAM109_map3	0001.CSV	1427.12	0.173489
CAM109_map3	0001.CSV	1430.98	0.178146
CAM109_map3	0001.CSV	1434.84	0.185128
CAM109_map3	0001.CSV	1438.7	0.194179
CAM109_map3	0001.CSV	1442.55	0.20201
CAM109_map3	0001.CSV	1446.41	0.207824
CAM109_map3	0001.CSV	1450.27	0.211661
CAM109_map3	0001.CSV	1454.12	0.210835
CAM109_map3	0001.CSV	1457.98	0.209217
CAM109_map3	0001.CSV	1461.84	0.208117
CAM109_map3	0001.CSV	1465.7	0.209423
CAM109_map3	0001.CSV	1469.55	0.208447
CAM109_map3	0001.CSV	1473.41	0.203774
CAM109_map3	0001.CSV	1477.27	0.195312
CAM109_map3	0001.CSV	1481.12	0.188937
CAM109_map3	0001.CSV	1484.98	0.182036
CAM109_map3	0001.CSV	1488.84	0.173521
CAM109_map3	0001.CSV	1492.7	0.163962
CAM109_map3	0001.CSV	1496.55	0.15636
CAM109_map3	0001.CSV	1500.41	0.147335
CAM109_map3	0001.CSV	1504.27	0.141789
CAM109_map3	0001.CSV	1508.12	0.130509
CAM109_map3	0001.CSV	1511.98	0.122219
CAM109_map3	0001.CSV	1515.84	0.115903
CAM109_map3	0001.CSV	1519.7	0.107447
CAM109_map3	0001.CSV	1523.55	0.0967001
CAM109_map3	0001.CSV	1527.41	0.0893055
CAM109_map3	0001.CSV	1531.27	0.0835723
CAM109_map3	0001.CSV	1535.12	0.0792565
CAM109_map3	0001.CSV	1538.98	0.0754692
CAM109_map3	0001.CSV	1542.84	0.0701762
CAM109_map3	0001.CSV	1546.7	0.0657974
CAM109_map3	0001.CSV	1550.55	0.0628686
CAM109_map3	0001.CSV	1554.41	0.0599825
CAM109_map3	0001.CSV	1558.27	0.057534
CAM109_map3	0001.CSV	1562.12	0.0550928
CAM109_map3	0001.CSV	1565.98	0.0538655
CAM109_map3	0001.CSV	1569.84	0.0524247
CAM109_map3	0001.CSV	1573.69	0.0511796
CAM109_map3	0001.CSV	1577.55	0.0494977
CAM109_map3	0001.CSV	1581.41	0.0474086
CAM109_map3	0001.CSV	1585.27	0.0452034
CAM109_map3	0001.CSV	1589.12	0.0436361
CAM109_map3	0001.CSV	1592.98	0.0425866
CAM109_map3	0001.CSV	1596.84	0.0420379
CAM109_map3	0001.CSV	1600.69	0.0414
CAM109_map3	0001.CSV	1604.55	0.0408048
CAM109_map3	0001.CSV	1608.41	0.0400079
CAM109_map3	0001.CSV	1612.27	0.0394507
CAM109_map3	0001.CSV	1616.12	0.0389074
CAM109_map3	0001.CSV	1619.98	0.0385115
CAM109_map3	0001.CSV	1623.84	0.0374708
CAM109_map3	0001.CSV	1627.69	0.0362759
CAM109_map3	0001.CSV	1631.55	0.0348843
CAM109_map3	0001.CSV	1635.41	0.0341863
CAM109_map3	0001.CSV	1639.27	0.0335446
CAM109_map3	0001.CSV	1643.12	0.032727
CAM109_map3	0001.CSV	1646.98	0.0322129
CAM109_map3	0001.CSV	1650.84	0.0321804
CAM109_map3	0001.CSV	1654.69	0.0319861
CAM109_map3	0001.CSV	1658.55	0.0314152
CAM109_map3	0001.CSV	1662.41	0.0307667
CAM109_map3	0001.CSV	1666.27	0.0303563
CAM109_map3	0001.CSV	1670.12	0.0300997
CAM109_map3	0001.CSV	1673.98	0.0303438
CAM109_map3	0001.CSV	1677.84	0.0299768
CAM109_map3	0001.CSV	1681.69	0.0298896
CAM109_map3	0001.CSV	1685.55	0.030233
CAM109_map3	0001.CSV	1689.41	0.0300656
CAM109_map3	0001.CSV	1693.27	0.0294428
CAM109_map3	0001.CSV	1697.12	0.0298395
CAM109_map3	0001.CSV	1700.98	0.0309233
CAM109_map3	0001.CSV	1704.84	0.0319991
CAM109_map3	0001.CSV	1708.69	0.0331009
CAM109_map3	0001.CSV	1712.55	0.0343079
CAM109_map3	0001.CSV	1716.41	0.0376821
CAM109_map3	0001.CSV	1720.27	0.0414132
CAM109_map3	0001.CSV	1724.12	0.042299
CAM109_map3	0001.CSV	1727.98	0.0425657
CAM109_map3	0001.CSV	1731.84	0.0422534
CAM109_map3	0001.CSV	1735.69	0.0410626
CAM109_map3	0001.CSV	1739.55	0.0387961
CAM109_map3	0001.CSV	1743.41	0.0358624
CAM109_map3	0001.CSV	1747.27	0.0326471
CAM109_map3	0001.CSV	1751.12	0.029233
CAM109_map3	0001.CSV	1754.98	0.0268284
CAM109_map3	0001.CSV	1758.84	0.0255245
CAM109_map3	0001.CSV	1762.69	0.0247868
CAM109_map3	0001.CSV	1766.55	0.0242666
CAM109_map3	0001.CSV	1770.41	0.0243767
CAM109_map3	0001.CSV	1774.26	0.0257648
CAM109_map3	0001.CSV	1778.12	0.0267444
CAM109_map3	0001.CSV	1781.98	0.0276974
CAM109_map3	0001.CSV	1785.84	0.0278626
CAM109_map3	0001.CSV	1789.69	0.0271604
CAM109_map3	0001.CSV	1793.55	0.0258838
CAM109_map3	0001.CSV	1797.41	0.0248503
CAM109_map3	0001.CSV	1801.26	0.0240146
CAM109_map3	0001.CSV	1805.12	0.0233845
CAM109_map3	0001.CSV	1808.98	0.0230422
CAM109_map3	0001.CSV	1812.84	0.0231
CAM109_map3	0001.CSV	1816.69	0.0229107
CAM109_map3	0001.CSV	1820.55	0.0228512
CAM109_map3	0001.CSV	1824.41	0.0228561
CAM109_map3	0001.CSV	1828.26	0.0230764
CAM109_map3	0001.CSV	1832.12	0.0231184
CAM109_map3	0001.CSV	1835.98	0.0230201
CAM109_map3	0001.CSV	1839.84	0.0227917
CAM109_map3	0001.CSV	1843.69	0.0229692
CAM109_map3	0001.CSV	1847.55	0.0232298
CAM109_map3	0001.CSV	1851.41	0.023066
CAM109_map3	0001.CSV	1855.26	0.0229346
CAM109_map3	0001.CSV	1859.12	0.0230124
CAM109_map3	0001.CSV	1862.98	0.0229425
CAM109_map3	0001.CSV	1866.84	0.0231021
CAM109_map3	0001.CSV	1870.69	0.0234387
CAM109_map3	0001.CSV	1874.55	0.0232609
CAM109_map3	0001.CSV	1878.41	0.0231296
CAM109_map3	0001.CSV	1882.26	0.0231901
CAM109_map3	0001.CSV	1886.12	0.0231269
CAM109_map3	0001.CSV	1889.98	0.0232189
CAM109_map3	0001.CSV	1893.83	0.023309
CAM109_map3	0001.CSV	1897.69	0.0233635
CAM109_map3	0001.CSV	1901.55	0.0232433
CAM109_map3	0001.CSV	1905.41	0.0232084
CAM109_map3	0001.CSV	1909.26	0.0232982
CAM109_map3	0001.CSV	1913.12	0.023305
CAM109_map3	0001.CSV	1916.98	0.0232743
CAM109_map3	0001.CSV	1920.83	0.0234687
CAM109_map3	0001.CSV	1924.69	0.0235048
CAM109_map3	0001.CSV	1928.55	0.0234165
CAM109_map3	0001.CSV	1932.4	0.0233896
CAM109_map3	0001.CSV	1936.26	0.0234765
CAM109_map3	0001.CSV	1940.12	0.0234986
CAM109_map3	0001.CSV	1943.98	0.0237735
CAM109_map3	0001.CSV	1947.83	0.0237981
CAM109_map3	0001.CSV	1951.69	0.0237842
CAM109_map3	0001.CSV	1955.55	0.0238378
CAM109_map3	0001.CSV	1959.4	0.0238292
CAM109_map3	0001.CSV	1963.26	0.023716
CAM109_map3	0001.CSV	1967.12	0.0238468
CAM109_map3	0001.CSV	1970.98	0.023868
CAM109_map3	0001.CSV	1974.83	0.0238127
CAM109_map3	0001.CSV	1978.69	0.0237942
CAM109_map3	0001.CSV	1982.55	0.0237941
CAM109_map3	0001.CSV	1986.4	0.0237585
CAM109_map3	0001.CSV	1990.26	0.0238792
CAM109_map3	0001.CSV	1994.12	0.0239647
CAM109_map3	0001.CSV	1997.98	0.023937
CAM109_map3	0001.CSV	2001.83	0.0238873
CAM109_map3	0001.CSV	2005.69	0.0238961
CAM109_map3	0001.CSV	2009.55	0.0238992
CAM109_map3	0001.CSV	2013.4	0.0239057
CAM109_map3	0001.CSV	2017.26	0.0239607
CAM109_map3	0001.CSV	2021.12	0.0240583
CAM109_map3	0001.CSV	2024.97	0.0240247
CAM109_map3	0001.CSV	2028.83	0.0240302
CAM109_map3	0001.CSV	2032.69	0.0240071
CAM109_map3	0001.CSV	2036.55	0.0239987
CAM109_map3	0001.CSV	2040.4	0.0239959
CAM109_map3	0001.CSV	2044.26	0.0240661
CAM109_map3	0001.CSV	2048.12	0.0240833
CAM109_map3	0001.CSV	2051.97	0.0241222
CAM109_map3	0001.CSV	2055.83	0.0241144
CAM109_map3	0001.CSV	2059.69	0.0241101
CAM109_map3	0001.CSV	2063.55	0.0241046
CAM109_map3	0001.CSV	2067.4	0.0241789
CAM109_map3	0001.CSV	2071.26	0.0241284
CAM109_map3	0001.CSV	2075.12	0.0241414
CAM109_map3	0001.CSV	2078.97	0.0241536
CAM109_map3	0001.CSV	2082.83	0.0241744
CAM109_map3	0001.CSV	2086.69	0.024151
CAM109_map3	0001.CSV	2090.55	0.0242363
CAM109_map3	0001.CSV	2094.4	0.0242731
CAM109_map3	0001.CSV	2098.26	0.0242833
CAM109_map3	0001.CSV	2102.12	0.0242913
CAM109_map3	0001.CSV	2105.97	0.0243301
CAM109_map3	0001.CSV	2109.83	0.0243406
CAM109_map3	0001.CSV	2113.69	0.0243721
CAM109_map3	0001.CSV	2117.55	0.0243609
CAM109_map3	0001.CSV	2121.4	0.0243757
CAM109_map3	0001.CSV	2125.26	0.0243671
CAM109_map3	0001.CSV	2129.12	0.0243887
CAM109_map3	0001.CSV	2132.97	0.024415
CAM109_map3	0001.CSV	2136.83	0.0244803
CAM109_map3	0001.CSV	2140.69	0.0244799
CAM109_map3	0001.CSV	2144.55	0.024535
CAM109_map3	0001.CSV	2148.4	0.0245789
CAM109_map3	0001.CSV	2152.26	0.0246336
CAM109_map3	0001.CSV	2156.12	0.0245957
CAM109_map3	0001.CSV	2159.97	0.0245656
CAM109_map3	0001.CSV	2163.83	0.0245728
CAM109_map3	0001.CSV	2167.69	0.0246707
CAM109_map3	0001.CSV	2171.55	0.0247481
CAM109_map3	0001.CSV	2175.4	0.0247932
CAM109_map3	0001.CSV	2179.26	0.0248566
CAM109_map3	0001.CSV	2183.12	0.0249337
CAM109_map3	0001.CSV	2186.97	0.0249293
CAM109_map3	0001.CSV	2190.83	0.0249584
CAM109_map3	0001.CSV	2194.69	0.0249533
CAM109_map3	0001.CSV	2198.55	0.0249775
CAM109_map3	0001.CSV	2202.4	0.0250029
CAM109_map3	0001.CSV	2206.26	0.0250669
CAM109_map3	0001.CSV	2210.12	0.0250984
CAM109_map3	0001.CSV	2213.97	0.0251435
CAM109_map3	0001.CSV	2217.83	0.0251506
CAM109_map3	0001.CSV	2221.69	0.0251698
CAM109_map3	0001.CSV	2225.54	0.0251559
CAM109_map3	0001.CSV	2229.4	0.0252025
CAM109_map3	0001.CSV	2233.26	0.0252005
CAM109_map3	0001.CSV	2237.12	0.0251795
CAM109_map3	0001.CSV	2240.97	0.0251761
CAM109_map3	0001.CSV	2244.83	0.0252038
CAM109_map3	0001.CSV	2248.69	0.0251883
CAM109_map3	0001.CSV	2252.54	0.0251864
CAM109_map3	0001.CSV	2256.4	0.02518
CAM109_map3	0001.CSV	2260.26	0.025172
CAM109_map3	0001.CSV	2264.11	0.0251076
CAM109_map3	0001.CSV	2267.97	0.0251212
CAM109_map3	0001.CSV	2271.83	0.0251651
CAM109_map3	0001.CSV	2275.69	0.0251756
CAM109_map3	0001.CSV	2279.54	0.0251087
CAM109_map3	0001.CSV	2283.4	0.0250555
CAM109_map3	0001.CSV	2287.26	0.0250367
CAM109_map3	0001.CSV	2291.11	0.0250433
CAM109_map3	0001.CSV	2294.97	0.0249776
CAM109_map3	0001.CSV	2298.83	0.0249283
CAM109_map3	0001.CSV	2302.69	0.0248668
CAM109_map3	0001.CSV	2306.54	0.0248301
CAM109_map3	0001.CSV	2310.4	0.0247312
CAM109_map3	0001.CSV	2314.26	0.0246232
CAM109_map3	0001.CSV	2318.11	0.0243237
CAM109_map3	0001.CSV	2321.97	0.023834
CAM109_map3	0001.CSV	2325.83	0.0232475
CAM109_map3	0001.CSV	2329.69	0.0229058
CAM109_map3	0001.CSV	2333.54	0.0227762
CAM109_map3	0001.CSV	2337.4	0.0227543
CAM109_map3	0001.CSV	2341.26	0.0228199
CAM109_map3	0001.CSV	2345.11	0.0237821
CAM109_map3	0001.CSV	2348.97	0.0237561
CAM109_map3	0001.CSV	2352.83	0.0223998
CAM109_map3	0001.CSV	2356.69	0.0200578
CAM109_map3	0001.CSV	2360.54	0.0194977
CAM109_map3	0001.CSV	2364.4	0.0210005
CAM109_map3	0001.CSV	2368.26	0.0230497
CAM109_map3	0001.CSV	2372.11	0.0247131
CAM109_map3	0001.CSV	2375.97	0.0255804
CAM109_map3	0001.CSV	2379.83	0.0257326
CAM109_map3	0001.CSV	2383.69	0.0256182
CAM109_map3	0001.CSV	2387.54	0.0254549
CAM109_map3	0001.CSV	2391.4	0.0253594
CAM109_map3	0001.CSV	2395.26	0.0253292
CAM109_map3	0001.CSV	2399.11	0.0253464
CAM109_map3	0001.CSV	2402.97	0.0253295
CAM109_map3	0001.CSV	2406.83	0.0253086
CAM109_map3	0001.CSV	2410.68	0.0252938
CAM109_map3	0001.CSV	2414.54	0.025288
CAM109_map3	0001.CSV	2418.4	0.0252641
CAM109_map3	0001.CSV	2422.26	0.025286
CAM109_map3	0001.CSV	2426.11	0.0253487
CAM109_map3	0001.CSV	2429.97	0.0253902
CAM109_map3	0001.CSV	2433.83	0.0253862
CAM109_map3	0001.CSV	2437.68	0.0254105
CAM109_map3	0001.CSV	2441.54	0.0253857
CAM109_map3	0001.CSV	2445.4	0.025362
CAM109_map3	0001.CSV	2449.26	0.0253827
CAM109_map3	0001.CSV	2453.11	0.0253472
CAM109_map3	0001.CSV	2456.97	0.0252939
CAM109_map3	0001.CSV	2460.83	0.0253562
CAM109_map3	0001.CSV	2464.68	0.0254098
CAM109_map3	0001.CSV	2468.54	0.0254719
CAM109_map3	0001.CSV	2472.4	0.0256154
CAM109_map3	0001.CSV	2476.26	0.0257888
CAM109_map3	0001.CSV	2480.11	0.0259271
CAM109_map3	0001.CSV	2483.97	0.0260946
CAM109_map3	0001.CSV	2487.83	0.0262298
CAM109_map3	0001.CSV	2491.68	0.0263336
CAM109_map3	0001.CSV	2495.54	0.0264103
CAM109_map3	0001.CSV	2499.4	0.026417
CAM109_map3	0001.CSV	2503.26	0.0263827
CAM109_map3	0001.CSV	2507.11	0.0263463
CAM109_map3	0001.CSV	2510.97	0.0263768
CAM109_map3	0001.CSV	2514.83	0.0265243
CAM109_map3	0001.CSV	2518.68	0.0266888
CAM109_map3	0001.CSV	2522.54	0.0267042
CAM109_map3	0001.CSV	2526.4	0.0265287
CAM109_map3	0001.CSV	2530.26	0.0263121
CAM109_map3	0001.CSV	2534.11	0.0260992
CAM109_map3	0001.CSV	2537.97	0.0260303
CAM109_map3	0001.CSV	2541.83	0.0260284
CAM109_map3	0001.CSV	2545.68	0.0259777
CAM109_map3	0001.CSV	2549.54	0.0258849
CAM109_map3	0001.CSV	2553.4	0.0257636
CAM109_map3	0001.CSV	2557.26	0.0256611
CAM109_map3	0001.CSV	2561.11	0.0256226
CAM109_map3	0001.CSV	2564.97	0.02555
CAM109_map3	0001.CSV	2568.83	0.0254741
CAM109_map3	0001.CSV	2572.68	0.0254649
CAM109_map3	0001.CSV	2576.54	0.0255011
CAM109_map3	0001.CSV	2580.4	0.0254773
CAM109_map3	0001.CSV	2584.25	0.0254619
CAM109_map3	0001.CSV	2588.11	0.0254467
CAM109_map3	0001.CSV	2591.97	0.0254928
CAM109_map3	0001.CSV	2595.83	0.0255641
CAM109_map3	0001.CSV	2599.68	0.0255893
CAM109_map3	0001.CSV	2603.54	0.0255752
CAM109_map3	0001.CSV	2607.4	0.0256248
CAM109_map3	0001.CSV	2611.25	0.0256831
CAM109_map3	0001.CSV	2615.11	0.0257224
CAM109_map3	0001.CSV	2618.97	0.0257097
CAM109_map3	0001.CSV	2622.82	0.0257636
CAM109_map3	0001.CSV	2626.68	0.0258456
CAM109_map3	0001.CSV	2630.54	0.0258639
CAM109_map3	0001.CSV	2634.4	0.0259022
CAM109_map3	0001.CSV	2638.25	0.0259252
CAM109_map3	0001.CSV	2642.11	0.0258064
CAM109_map3	0001.CSV	2645.97	0.0256954
CAM109_map3	0001.CSV	2649.82	0.025611
CAM109_map3	0001.CSV	2653.68	0.0255923
CAM109_map3	0001.CSV	2657.54	0.0256163
CAM109_map3	0001.CSV	2661.4	0.0256074
CAM109_map3	0001.CSV	2665.25	0.0255976
CAM109_map3	0001.CSV	2669.11	0.0256643
CAM109_map3	0001.CSV	2672.97	0.0259059
CAM109_map3	0001.CSV	2676.82	0.0262082
CAM109_map3	0001.CSV	2680.68	0.0261487
CAM109_map3	0001.CSV	2684.54	0.0258238
CAM109_map3	0001.CSV	2688.4	0.0256901
CAM109_map3	0001.CSV	2692.25	0.0256718
CAM109_map3	0001.CSV	2696.11	0.0257257
CAM109_map3	0001.CSV	2699.97	0.0258015
CAM109_map3	0001.CSV	2703.82	0.0257714
CAM109_map3	0001.CSV	2707.68	0.0258022
CAM109_map3	0001.CSV	2711.54	0.0258764
CAM109_map3	0001.CSV	2715.4	0.0258968
CAM109_map3	0001.CSV	2719.25	0.0260527
CAM109_map3	0001.CSV	2723.11	0.026341
CAM109_map3	0001.CSV	2726.97	0.0263254
CAM109_map3	0001.CSV	2730.82	0.0260339
CAM109_map3	0001.CSV	2734.68	0.0260313
CAM109_map3	0001.CSV	2738.54	0.0260707
CAM109_map3	0001.CSV	2742.4	0.0260757
CAM109_map3	0001.CSV	2746.25	0.0263448
CAM109_map3	0001.CSV	2750.11	0.0263967
CAM109_map3	0001.CSV	2753.97	0.0261335
CAM109_map3	0001.CSV	2757.82	0.0260467
CAM109_map3	0001.CSV	2761.68	0.0259834
CAM109_map3	0001.CSV	2765.54	0.0259787
CAM109_map3	0001.CSV	2769.39	0.0261912
CAM109_map3	0001.CSV	2773.25	0.0264918
CAM109_map3	0001.CSV	2777.11	0.0263904
CAM109_map3	0001.CSV	2780.97	0.0262178
CAM109_map3	0001.CSV	2784.82	0.0264231
CAM109_map3	0001.CSV	2788.68	0.0268436
CAM109_map3	0001.CSV	2792.54	0.0269858
CAM109_map3	0001.CSV	2796.39	0.0269913
CAM109_map3	0001.CSV	2800.25	0.0268452
CAM109_map3	0001.CSV	2804.11	0.0267007
CAM109_map3	0001.CSV	2807.97	0.027006
CAM109_map3	0001.CSV	2811.82	0.0271083
CAM109_map3	0001.CSV	2815.68	0.0270202
CAM109_map3	0001.CSV	2819.54	0.0272277
CAM109_map3	0001.CSV	2823.39	0.0275084
CAM109_map3	0001.CSV	2827.25	0.0277237
CAM109_map3	0001.CSV	2831.11	0.0282962
CAM109_map3	0001.CSV	2834.97	0.0292182
CAM109_map3	0001.CSV	2838.82	0.0301006
CAM109_map3	0001.CSV	2842.68	0.0311834
CAM109_map3	0001.CSV	2846.54	0.0332173
CAM109_map3	0001.CSV	2850.39	0.0346798
CAM109_map3	0001.CSV	2854.25	0.0344383
CAM109_map3	0001.CSV	2858.11	0.033453
CAM109_map3	0001.CSV	2861.97	0.0322393
CAM109_map3	0001.CSV	2865.82	0.0314555
CAM109_map3	0001.CSV	2869.68	0.0315259
CAM109_map3	0001.CSV	2873.54	0.0315884
CAM109_map3	0001.CSV	2877.39	0.0309021
CAM109_map3	0001.CSV	2881.25	0.0303335
CAM109_map3	0001.CSV	2885.11	0.0304046
CAM109_map3	0001.CSV	2888.97	0.0309688
CAM109_map3	0001.CSV	2892.82	0.0319217
CAM109_map3	0001.CSV	2896.68	0.0326314
CAM109_map3	0001.CSV	2900.54	0.0330676
CAM109_map3	0001.CSV	2904.39	0.0340229
CAM109_map3	0001.CSV	2908.25	0.035697
CAM109_map3	0001.CSV	2912.11	0.0381283
CAM109_map3	0001.CSV	2915.97	0.0403636
CAM109_map3	0001.CSV	2919.82	0.0410943
CAM109_map3	0001.CSV	2923.68	0.0405384
CAM109_map3	0001.CSV	2927.54	0.0396041
CAM109_map3	0001.CSV	2931.39	0.0378833
CAM109_map3	0001.CSV	2935.25	0.0356958
CAM109_map3	0001.CSV	2939.11	0.0343169
CAM109_map3	0001.CSV	2942.96	0.0338653
CAM109_map3	0001.CSV	2946.82	0.0334214
CAM109_map3	0001.CSV	2950.68	0.0329381
CAM109_map3	0001.CSV	2954.54	0.0324728
CAM109_map3	0001.CSV	2958.39	0.0318306
CAM109_map3	0001.CSV	2962.25	0.0312722
CAM109_map3	0001.CSV	2966.11	0.0304183
CAM109_map3	0001.CSV	2969.96	0.0298546
CAM109_map3	0001.CSV	2973.82	0.0298244
CAM109_map3	0001.CSV	2977.68	0.029833
CAM109_map3	0001.CSV	2981.53	0.0292934
CAM109_map3	0001.CSV	2985.39	0.0283973
CAM109_map3	0001.CSV	2989.25	0.0282455
CAM109_map3	0001.CSV	2993.11	0.028485
CAM109_map3	0001.CSV	2996.96	0.0282851
CAM109_map3	0001.CSV	3000.82	0.0278342
CAM109_map3	0001.CSV	3004.68	0.027534
CAM109_map3	0001.CSV	3008.53	0.0277163
CAM109_map3	0001.CSV	3012.39	0.0280654
CAM109_map3	0001.CSV	3016.25	0.0281178
CAM109_map3	0001.CSV	3020.11	0.0279363
CAM109_map3	0001.CSV	3023.96	0.027803
CAM109_map3	0001.CSV	3027.82	0.0278111
CAM109_map3	0001.CSV	3031.68	0.0280637
CAM109_map3	0001.CSV	3035.53	0.0280698
CAM109_map3	0001.CSV	3039.39	0.0279535
CAM109_map3	0001.CSV	3043.25	0.0279943
CAM109_map3	0001.CSV	3047.11	0.027972
CAM109_map3	0001.CSV	3050.96	0.0279966
CAM109_map3	0001.CSV	3054.82	0.0279536
CAM109_map3	0001.CSV	3058.68	0.0278122
CAM109_map3	0001.CSV	3062.53	0.0279591
CAM109_map3	0001.CSV	3066.39	0.0282988
CAM109_map3	0001.CSV	3070.25	0.0281633
CAM109_map3	0001.CSV	3074.11	0.0280736
CAM109_map3	0001.CSV	3077.96	0.0283362
CAM109_map3	0001.CSV	3081.82	0.028528
CAM109_map3	0001.CSV	3085.68	0.0284668
CAM109_map3	0001.CSV	3089.53	0.0282912
CAM109_map3	0001.CSV	3093.39	0.0280074
CAM109_map3	0001.CSV	3097.25	0.0280195
CAM109_map3	0001.CSV	3101.11	0.0281804
CAM109_map3	0001.CSV	3104.96	0.028189
CAM109_map3	0001.CSV	3108.82	0.0283226
CAM109_map3	0001.CSV	3112.68	0.0285086
CAM109_map3	0001.CSV	3116.53	0.0287255
CAM109_map3	0001.CSV	3120.39	0.0287003
CAM109_map3	0001.CSV	3124.25	0.0284462
CAM109_map3	0001.CSV	3128.11	0.0283614
CAM109_map3	0001.CSV	3131.96	0.0283784
CAM109_map3	0001.CSV	3135.82	0.0285722
CAM109_map3	0001.CSV	3139.68	0.0286964
CAM109_map3	0001.CSV	3143.53	0.0285035
CAM109_map3	0001.CSV	3147.39	0.0286354
CAM109_map3	0001.CSV	3151.25	0.0289647
CAM109_map3	0001.CSV	3155.1	0.0288689
CAM109_map3	0001.CSV	3158.96	0.028526
CAM109_map3	0001.CSV	3162.82	0.0284015
CAM109_map3	0001.CSV	3166.68	0.0284142
CAM109_map3	0001.CSV	3170.53	0.0284858
CAM109_map3	0001.CSV	3174.39	0.0285587
CAM109_map3	0001.CSV	3178.25	0.0287233
CAM109_map3	0001.CSV	3182.1	0.0288091
CAM109_map3	0001.CSV	3185.96	0.0289154
CAM109_map3	0001.CSV	3189.82	0.029008
CAM109_map3	0001.CSV	3193.68	0.0289513
CAM109_map3	0001.CSV	3197.53	0.0290069
CAM109_map3	0001.CSV	3201.39	0.0291729
CAM109_map3	0001.CSV	3205.25	0.0292734
CAM109_map3	0001.CSV	3209.1	0.0292652
CAM109_map3	0001.CSV	3212.96	0.0293779
CAM109_map3	0001.CSV	3216.82	0.0295673
CAM109_map3	0001.CSV	3220.68	0.0295867
CAM109_map3	0001.CSV	3224.53	0.0295122
CAM109_map3	0001.CSV	3228.39	0.0297837
CAM109_map3	0001.CSV	3232.25	0.0302944
CAM109_map3	0001.CSV	3236.1	0.0302836
CAM109_map3	0001.CSV	3239.96	0.030109
CAM109_map3	0001.CSV	3243.82	0.0303384
CAM109_map3	0001.CSV	3247.68	0.0304965
CAM109_map3	0001.CSV	3251.53	0.0303736
CAM109_map3	0001.CSV	3255.39	0.030411
CAM109_map3	0001.CSV	3259.25	0.0302653
CAM109_map3	0001.CSV	3263.1	0.0302298
CAM109_map3	0001.CSV	3266.96	0.0306404
CAM109_map3	0001.CSV	3270.82	0.031063
CAM109_map3	0001.CSV	3274.68	0.031078
CAM109_map3	0001.CSV	3278.53	0.0307769
CAM109_map3	0001.CSV	3282.39	0.0305293
CAM109_map3	0001.CSV	3286.25	0.0306144
CAM109_map3	0001.CSV	3290.1	0.0310717
CAM109_map3	0001.CSV	3293.96	0.0313756
CAM109_map3	0001.CSV	3297.82	0.0312025
CAM109_map3	0001.CSV	3301.67	0.0312468
CAM109_map3	0001.CSV	3305.53	0.03149
CAM109_map3	0001.CSV	3309.39	0.0313818
CAM109_map3	0001.CSV	3313.25	0.0309108
CAM109_map3	0001.CSV	3317.1	0.0306065
CAM109_map3	0001.CSV	3320.96	0.030782
CAM109_map3	0001.CSV	3324.82	0.0311169
CAM109_map3	0001.CSV	3328.67	0.0308917
CAM109_map3	0001.CSV	3332.53	0.0307724
CAM109_map3	0001.CSV	3336.39	0.0313058
CAM109_map3	0001.CSV	3340.24	0.031599
CAM109_map3	0001.CSV	3344.1	0.0313612
CAM109_map3	0001.CSV	3347.96	0.0312946
CAM109_map3	0001.CSV	3351.82	0.0312183
CAM109_map3	0001.CSV	3355.67	0.0310647
CAM109_map3	0001.CSV	3359.53	0.0312649
CAM109_map3	0001.CSV	3363.39	0.0315528
CAM109_map3	0001.CSV	3367.24	0.0318548
CAM109_map3	0001.CSV	3371.1	0.0318183
CAM109_map3	0001.CSV	3374.96	0.0315868
CAM109_map3	0001.CSV	3378.82	0.0314437
CAM109_map3	0001.CSV	3382.67	0.0312553
CAM109_map3	0001.CSV	3386.53	0.0314755
CAM109_map3	0001.CSV	3390.39	0.03205
CAM109_map3	0001.CSV	3394.24	0.032464
CAM109_map3	0001.CSV	3398.1	0.0326734
CAM109_map3	0001.CSV	3401.96	0.0326266
CAM109_map3	0001.CSV	3405.82	0.0323264
CAM109_map3	0001.CSV	3409.67	0.0321372
CAM109_map3	0001.CSV	3413.53	0.0317063
CAM109_map3	0001.CSV	3417.39	0.0309583
CAM109_map3	0001.CSV	3421.24	0.0305975
CAM109_map3	0001.CSV	3425.1	0.0306958
CAM109_map3	0001.CSV	3428.96	0.0309403
CAM109_map3	0001.CSV	3432.82	0.0310938
CAM109_map3	0001.CSV	3436.67	0.0306702
CAM109_map3	0001.CSV	3440.53	0.0298007
CAM109_map3	0001.CSV	3444.39	0.0293391
CAM109_map3	0001.CSV	3448.24	0.0292222
CAM109_map3	0001.CSV	3452.1	0.0289158
CAM109_map3	0001.CSV	3455.96	0.028958
CAM109_map3	0001.CSV	3459.82	0.0292893
CAM109_map3	0001.CSV	3463.67	0.0295552
CAM109_map3	0001.CSV	3467.53	0.0296452
CAM109_map3	0001.CSV	3471.39	0.0291825
CAM109_map3	0001.CSV	3475.24	0.0288637
CAM109_map3	0001.CSV	3479.1	0.0289419
CAM109_map3	0001.CSV	3482.96	0.0289268
CAM109_map3	0001.CSV	3486.82	0.0289577
CAM109_map3	0001.CSV	3490.67	0.0288207
CAM109_map3	0001.CSV	3494.53	0.0287928
CAM109_map3	0001.CSV	3498.39	0.0286856
CAM109_map3	0001.CSV	3502.24	0.0284186
CAM109_map3	0001.CSV	3506.1	0.0279794
CAM109_map3	0001.CSV	3509.96	0.027977
CAM109_map3	0001.CSV	3513.81	0.0283499
CAM109_map3	0001.CSV	3517.67	0.0280271
CAM109_map3	0001.CSV	3521.53	0.0280529
CAM109_map3	0001.CSV	3525.39	0.0283032
CAM109_map3	0001.CSV	3529.24	0.0283357
CAM109_map3	0001.CSV	3533.1	0.0284847
CAM109_map3	0001.CSV	3536.96	0.0287226
CAM109_map3	0001.CSV	3540.81	0.0288157
CAM109_map3	0001.CSV	3544.67	0.0291062
CAM109_map3	0001.CSV	3548.53	0.0289823
CAM109_map3	0001.CSV	3552.39	0.0283394
CAM109_map3	0001.CSV	3556.24	0.0279473
CAM109_map3	0001.CSV	3560.1	0.0274594
CAM109_map3	0001.CSV	3563.96	0.0266452
CAM109_map3	0001.CSV	3567.81	0.0269043
CAM109_map3	0001.CSV	3571.67	0.0268538
CAM109_map3	0001.CSV	3575.53	0.0261745
CAM109_map3	0001.CSV	3579.39	0.0261674
CAM109_map3	0001.CSV	3583.24	0.0260169
CAM109_map3	0001.CSV	3587.1	0.0260288
CAM109_map3	0001.CSV	3590.96	0.0258762
CAM109_map3	0001.CSV	3594.81	0.0253489
CAM109_map3	0001.CSV	3598.67	0.0255127
CAM109_map3	0001.CSV	3602.53	0.025329
CAM109_map3	0001.CSV	3606.39	0.0244465
CAM109_map3	0001.CSV	3610.24	0.0240425
CAM109_map3	0001.CSV	3614.1	0.0240375
CAM109_map3	0001.CSV	3617.96	0.0245313
CAM109_map3	0001.CSV	3621.81	0.0247832
CAM109_map3	0001.CSV	3625.67	0.0237701
CAM109_map3	0001.CSV	3629.53	0.0239158
CAM109_map3	0001.CSV	3633.39	0.0245316
CAM109_map3	0001.CSV	3637.24	0.0240879
CAM109_map3	0001.CSV	3641.1	0.023585
CAM109_map3	0001.CSV	3644.96	0.0227302
CAM109_map3	0001.CSV	3648.81	0.0234745
CAM109_map3	0001.CSV	3652.67	0.0246754
CAM109_map3	0001.CSV	3656.53	0.0245755
CAM109_map3	0001.CSV	3660.38	0.0243899
CAM109_map3	0001.CSV	3664.24	0.0233572
CAM109_map3	0001.CSV	3668.1	0.0224073
CAM109_map3	0001.CSV	3671.96	0.0224572
CAM109_map3	0001.CSV	3675.81	0.0234683
CAM109_map3	0001.CSV	3679.67	0.024181
CAM109_map3	0001.CSV	3683.53	0.0236244
CAM109_map3	0001.CSV	3687.38	0.0233343
CAM109_map3	0001.CSV	3691.24	0.0243121
CAM109_map3	0001.CSV	3695.1	0.0240881
CAM109_map3	0001.CSV	3698.95	0.0233455
CAM109_map3	0001.CSV	3702.81	0.0231793
CAM109_map3	0001.CSV	3706.67	0.0226462
CAM109_map3	0001.CSV	3710.53	0.0226705
CAM109_map3	0001.CSV	3714.38	0.0236016
CAM109_map3	0001.CSV	3718.24	0.0229792
CAM109_map3	0001.CSV	3722.1	0.0226475
CAM109_map3	0001.CSV	3725.95	0.0229727
CAM109_map3	0001.CSV	3729.81	0.0225865
CAM109_map3	0001.CSV	3733.67	0.0226534
CAM109_map3	0001.CSV	3737.53	0.0239881
CAM109_map3	0001.CSV	3741.38	0.023103
CAM109_map3	0001.CSV	3745.24	0.0223463
CAM109_map3	0001.CSV	3749.1	0.022458
CAM109_map3	0001.CSV	3752.95	0.0233433
CAM109_map3	0001.CSV	3756.81	0.0233965
CAM109_map3	0001.CSV	3760.67	0.0233298
CAM109_map3	0001.CSV	3764.53	0.0230389
CAM109_map3	0001.CSV	3768.38	0.0232882
CAM109_map3	0001.CSV	3772.24	0.0236057
CAM109_map3	0001.CSV	3776.1	0.0231923
CAM109_map3	0001.CSV	3779.95	0.0232566
CAM109_map3	0001.CSV	3783.81	0.0233804
CAM109_map3	0001.CSV	3787.67	0.0232613
CAM109_map3	0001.CSV	3791.53	0.022788
CAM109_map3	0001.CSV	3795.38	0.0222123
CAM109_map3	0001.CSV	3799.24	0.022351
CAM109_map3	0001.CSV	3803.1	0.0231286
CAM109_map3	0001.CSV	3806.95	0.023511
CAM109_map3	0001.CSV	3810.81	0.0228953
CAM109_map3	0001.CSV	3814.67	0.0221754
CAM109_map3	0001.CSV	3818.53	0.0227304
CAM109_map3	0001.CSV	3822.38	0.0235291
CAM109_map3	0001.CSV	3826.24	0.0231706
CAM109_map3	0001.CSV	3830.1	0.0226967
CAM109_map3	0001.CSV	3833.95	0.0224547
CAM109_map3	0001.CSV	3837.81	0.0227269
CAM109_map3	0001.CSV	3841.67	0.023584
CAM109_map3	0001.CSV	3845.53	0.0232229
CAM109_map3	0001.CSV	3849.38	0.021831
CAM109_map3	0001.CSV	3853.24	0.0218342
CAM109_map3	0001.CSV	3857.1	0.0230736
CAM109_map3	0001.CSV	3860.95	0.0225897
CAM109_map3	0001.CSV	3864.81	0.0226557
CAM109_map3	0001.CSV	3868.67	0.0226649
CAM109_map3	0001.CSV	3872.52	0.0231262
CAM109_map3	0001.CSV	3876.38	0.0228935
CAM109_map3	0001.CSV	3880.24	0.0224204
CAM109_map3	0001.CSV	3884.1	0.022961
CAM109_map3	0001.CSV	3887.95	0.0229153
CAM109_map3	0001.CSV	3891.81	0.0228481
CAM109_map3	0001.CSV	3895.67	0.0225573
CAM109_map3	0001.CSV	3899.52	0.0221093
CAM109_map3	0001.CSV	3903.38	0.0232712
CAM109_map3	0001.CSV	3907.24	0.0236093
CAM109_map3	0001.CSV	3911.1	0.0228057
CAM109_map3	0001.CSV	3914.95	0.0223305
CAM109_map3	0001.CSV	3918.81	0.0225456
CAM109_map3	0001.CSV	3922.67	0.0225626
CAM109_map3	0001.CSV	3926.52	0.0226209
CAM109_map3	0001.CSV	3930.38	0.0229012
CAM109_map3	0001.CSV	3934.24	0.0231858
CAM109_map3	0001.CSV	3938.09	0.022751
CAM109_map3	0001.CSV	3941.95	0.0225975
CAM109_map3	0001.CSV	3945.81	0.0227336
CAM109_map3	0001.CSV	3949.67	0.0229079
CAM109_map3	0001.CSV	3953.52	0.0229552
CAM109_map3	0001.CSV	3957.38	0.0228237
CAM109_map3	0001.CSV	3961.24	0.0228899
CAM109_map3	0001.CSV	3965.09	0.0229005
CAM109_map3	0001.CSV	3968.95	0.0227487
CAM109_map3	0001.CSV	3972.81	0.0227809
CAM109_map3	0001.CSV	3976.67	0.0229735
CAM109_map3	0001.CSV	3980.52	0.0230155
CAM109_map3	0001.CSV	3984.38	0.0229874
CAM109_map3	0001.CSV	3988.24	0.0228267
CAM109_map3	0001.CSV	3992.09	0.0228159
CAM109_map3	0001.CSV	3995.95	0.0229526
CAM109_map3	0001.CSV	3999.81	0.0229331
CAM109_map3	0002.CSV	674.992	0.0526175
CAM109_map3	0002.CSV	678.849	0.0543778
CAM109_map3	0002.CSV	682.706	0.0552353
CAM109_map3	0002.CSV	686.563	0.0582419
CAM109_map3	0002.CSV	690.42	0.0631965
CAM109_map3	0002.CSV	694.277	0.0775274
CAM109_map3	0002.CSV	698.134	0.0923079
CAM109_map3	0002.CSV	701.991	0.0859642
CAM109_map3	0002.CSV	705.849	0.0766032
CAM109_map3	0002.CSV	709.706	0.0939205
CAM109_map3	0002.CSV	713.563	0.09577
CAM109_map3	0002.CSV	717.42	0.0659417
CAM109_map3	0002.CSV	721.277	0.0475558
CAM109_map3	0002.CSV	725.134	0.0456476
CAM109_map3	0002.CSV	728.991	0.0448772
CAM109_map3	0002.CSV	732.848	0.045602
CAM109_map3	0002.CSV	736.705	0.0466167
CAM109_map3	0002.CSV	740.562	0.0490452
CAM109_map3	0002.CSV	744.42	0.0507571
CAM109_map3	0002.CSV	748.277	0.0524964
CAM109_map3	0002.CSV	752.134	0.0529606
CAM109_map3	0002.CSV	755.991	0.0540009
CAM109_map3	0002.CSV	759.848	0.0540322
CAM109_map3	0002.CSV	763.705	0.0544439
CAM109_map3	0002.CSV	767.562	0.0539855
CAM109_map3	0002.CSV	771.419	0.0540804
CAM109_map3	0002.CSV	775.276	0.0534252
CAM109_map3	0002.CSV	779.133	0.0538056
CAM109_map3	0002.CSV	782.99	0.0539402
CAM109_map3	0002.CSV	786.848	0.0547491
CAM109_map3	0002.CSV	790.705	0.0549519
CAM109_map3	0002.CSV	794.562	0.0560018
CAM109_map3	0002.CSV	798.419	0.0568727
CAM109_map3	0002.CSV	802.276	0.0585557
CAM109_map3	0002.CSV	806.133	0.059687
CAM109_map3	0002.CSV	809.99	0.0619612
CAM109_map3	0002.CSV	813.847	0.0643119
CAM109_map3	0002.CSV	817.704	0.0680388
CAM109_map3	0002.CSV	821.562	0.0723796
CAM109_map3	0002.CSV	825.419	0.0786857
CAM109_map3	0002.CSV	829.276	0.0851155
CAM109_map3	0002.CSV	833.133	0.0938383
CAM109_map3	0002.CSV	836.99	0.106598
CAM109_map3	0002.CSV	840.847	0.125781
CAM109_map3	0002.CSV	844.704	0.144203
CAM109_map3	0002.CSV	848.561	0.170982
CAM109_map3	0002.CSV	852.418	0.204328
CAM109_map3	0002.CSV	856.275	0.212985
CAM109_map3	0002.CSV	860.132	0.187109
CAM109_map3	0002.CSV	863.99	0.146144
CAM109_map3	0002.CSV	867.847	0.105981
CAM109_map3	0002.CSV	871.704	0.0790836
CAM109_map3	0002.CSV	875.561	0.0649924
CAM109_map3	0002.CSV	879.418	0.0579349
CAM109_map3	0002.CSV	883.275	0.0531686
CAM109_map3	0002.CSV	887.132	0.0510358
CAM109_map3	0002.CSV	890.989	0.0501199
CAM109_map3	0002.CSV	894.846	0.0501636
CAM109_map3	0002.CSV	898.703	0.0501467
CAM109_map3	0002.CSV	902.561	0.0508985
CAM109_map3	0002.CSV	906.418	0.0513093
CAM109_map3	0002.CSV	910.275	0.0512084
CAM109_map3	0002.CSV	914.132	0.050359
CAM109_map3	0002.CSV	917.989	0.0505164
CAM109_map3	0002.CSV	921.846	0.0505609
CAM109_map3	0002.CSV	925.703	0.0509985
CAM109_map3	0002.CSV	929.56	0.0512765
CAM109_map3	0002.CSV	933.417	0.05189
CAM109_map3	0002.CSV	937.274	0.0519838
CAM109_map3	0002.CSV	941.131	0.0521443
CAM109_map3	0002.CSV	944.989	0.0518732
CAM109_map3	0002.CSV	948.846	0.0519914
CAM109_map3	0002.CSV	952.703	0.0517968
CAM109_map3	0002.CSV	956.56	0.0519368
CAM109_map3	0002.CSV	960.417	0.0516701
CAM109_map3	0002.CSV	964.274	0.0516556
CAM109_map3	0002.CSV	968.131	0.0515097
CAM109_map3	0002.CSV	971.988	0.0519444
CAM109_map3	0002.CSV	975.845	0.0522988
CAM109_map3	0002.CSV	979.702	0.0530738
CAM109_map3	0002.CSV	983.559	0.0535119
CAM109_map3	0002.CSV	987.417	0.0542088
CAM109_map3	0002.CSV	991.274	0.0546663
CAM109_map3	0002.CSV	995.131	0.0553812
CAM109_map3	0002.CSV	998.988	0.0558017
CAM109_map3	0002.CSV	1002.85	0.0566376
CAM109_map3	0002.CSV	1006.7	0.0571463
CAM109_map3	0002.CSV	1010.56	0.0579486
CAM109_map3	0002.CSV	1014.42	0.0585288
CAM109_map3	0002.CSV	1018.27	0.0595581
CAM109_map3	0002.CSV	1022.13	0.0602905
CAM109_map3	0002.CSV	1025.99	0.061307
CAM109_map3	0002.CSV	1029.85	0.0618409
CAM109_map3	0002.CSV	1033.7	0.0626331
CAM109_map3	0002.CSV	1037.56	0.0631912
CAM109_map3	0002.CSV	1041.42	0.0639362
CAM109_map3	0002.CSV	1045.27	0.0642455
CAM109_map3	0002.CSV	1049.13	0.0650615
CAM109_map3	0002.CSV	1052.99	0.065858
CAM109_map3	0002.CSV	1056.84	0.0676236
CAM109_map3	0002.CSV	1060.7	0.0694856
CAM109_map3	0002.CSV	1064.56	0.0717796
CAM109_map3	0002.CSV	1068.42	0.0734877
CAM109_map3	0002.CSV	1072.27	0.075293
CAM109_map3	0002.CSV	1076.13	0.0781941
CAM109_map3	0002.CSV	1079.99	0.0849554
CAM109_map3	0002.CSV	1083.84	0.084487
CAM109_map3	0002.CSV	1087.7	0.0744626
CAM109_map3	0002.CSV	1091.56	0.0689756
CAM109_map3	0002.CSV	1095.41	0.0690071
CAM109_map3	0002.CSV	1099.27	0.0697211
CAM109_map3	0002.CSV	1103.13	0.071046
CAM109_map3	0002.CSV	1106.99	0.0727967
CAM109_map3	0002.CSV	1110.84	0.0753061
CAM109_map3	0002.CSV	1114.7	0.0771482
CAM109_map3	0002.CSV	1118.56	0.0781362
CAM109_map3	0002.CSV	1122.41	0.0779388
CAM109_map3	0002.CSV	1126.27	0.0774141
CAM109_map3	0002.CSV	1130.13	0.0765941
CAM109_map3	0002.CSV	1133.99	0.0765256
CAM109_map3	0002.CSV	1137.84	0.0767859
CAM109_map3	0002.CSV	1141.7	0.077608
CAM109_map3	0002.CSV	1145.56	0.0781462
CAM109_map3	0002.CSV	1149.41	0.0787121
CAM109_map3	0002.CSV	1153.27	0.0788516
CAM109_map3	0002.CSV	1157.13	0.0790844
CAM109_map3	0002.CSV	1160.99	0.0789141
CAM109_map3	0002.CSV	1164.84	0.0786089
CAM109_map3	0002.CSV	1168.7	0.077472
CAM109_map3	0002.CSV	1172.56	0.0762524
CAM109_map3	0002.CSV	1176.41	0.0749085
CAM109_map3	0002.CSV	1180.27	0.0741084
CAM109_map3	0002.CSV	1184.13	0.0733181
CAM109_map3	0002.CSV	1187.99	0.0729061
CAM109_map3	0002.CSV	1191.84	0.0723478
CAM109_map3	0002.CSV	1195.7	0.072206
CAM109_map3	0002.CSV	1199.56	0.072103
CAM109_map3	0002.CSV	1203.41	0.0724438
CAM109_map3	0002.CSV	1207.27	0.0726542
CAM109_map3	0002.CSV	1211.13	0.073266
CAM109_map3	0002.CSV	1214.98	0.0737808
CAM109_map3	0002.CSV	1218.84	0.0745732
CAM109_map3	0002.CSV	1222.7	0.0752096
CAM109_map3	0002.CSV	1226.56	0.0762287
CAM109_map3	0002.CSV	1230.41	0.0771699
CAM109_map3	0002.CSV	1234.27	0.0785042
CAM109_map3	0002.CSV	1238.13	0.0797281
CAM109_map3	0002.CSV	1241.98	0.0813686
CAM109_map3	0002.CSV	1245.84	0.0829609
CAM109_map3	0002.CSV	1249.7	0.0846947
CAM109_map3	0002.CSV	1253.56	0.0859741
CAM109_map3	0002.CSV	1257.41	0.0872845
CAM109_map3	0002.CSV	1261.27	0.0882095
CAM109_map3	0002.CSV	1265.13	0.0894049
CAM109_map3	0002.CSV	1268.98	0.0904664
CAM109_map3	0002.CSV	1272.84	0.091822
CAM109_map3	0002.CSV	1276.7	0.09276
CAM109_map3	0002.CSV	1280.56	0.0937472
CAM109_map3	0002.CSV	1284.41	0.0942751
CAM109_map3	0002.CSV	1288.27	0.0948681
CAM109_map3	0002.CSV	1292.13	0.0948964
CAM109_map3	0002.CSV	1295.98	0.0949986
CAM109_map3	0002.CSV	1299.84	0.0949031
CAM109_map3	0002.CSV	1303.7	0.095263
CAM109_map3	0002.CSV	1307.56	0.0957035
CAM109_map3	0002.CSV	1311.41	0.0967172
CAM109_map3	0002.CSV	1315.27	0.097699
CAM109_map3	0002.CSV	1319.13	0.0990134
CAM109_map3	0002.CSV	1322.98	0.0998889
CAM109_map3	0002.CSV	1326.84	0.101182
CAM109_map3	0002.CSV	1330.7	0.102579
CAM109_map3	0002.CSV	1334.56	0.104442
CAM109_map3	0002.CSV	1338.41	0.106884
CAM109_map3	0002.CSV	1342.27	0.110304
CAM109_map3	0002.CSV	1346.13	0.112875
CAM109_map3	0002.CSV	1349.98	0.11608
CAM109_map3	0002.CSV	1353.84	0.119141
CAM109_map3	0002.CSV	1357.7	0.122307
CAM109_map3	0002.CSV	1361.56	0.125537
CAM109_map3	0002.CSV	1365.41	0.129633
CAM109_map3	0002.CSV	1369.27	0.13281
CAM109_map3	0002.CSV	1373.13	0.1375
CAM109_map3	0002.CSV	1376.98	0.142924
CAM109_map3	0002.CSV	1380.84	0.147704
CAM109_map3	0002.CSV	1384.7	0.152133
CAM109_map3	0002.CSV	1388.56	0.158665
CAM109_map3	0002.CSV	1392.41	0.164146
CAM109_map3	0002.CSV	1396.27	0.171575
CAM109_map3	0002.CSV	1400.13	0.179174
CAM109_map3	0002.CSV	1403.98	0.18654
CAM109_map3	0002.CSV	1407.84	0.194153
CAM109_map3	0002.CSV	1411.7	0.201521
CAM109_map3	0002.CSV	1415.55	0.206728
CAM109_map3	0002.CSV	1419.41	0.213128
CAM109_map3	0002.CSV	1423.27	0.217782
CAM109_map3	0002.CSV	1427.12	0.222944
CAM109_map3	0002.CSV	1430.98	0.228615
CAM109_map3	0002.CSV	1434.84	0.236519
CAM109_map3	0002.CSV	1438.7	0.245727
CAM109_map3	0002.CSV	1442.55	0.253983
CAM109_map3	0002.CSV	1446.41	0.259619
CAM109_map3	0002.CSV	1450.27	0.26276
CAM109_map3	0002.CSV	1454.12	0.260828
CAM109_map3	0002.CSV	1457.98	0.25806
CAM109_map3	0002.CSV	1461.84	0.25581
CAM109_map3	0002.CSV	1465.7	0.25547
CAM109_map3	0002.CSV	1469.55	0.251394
CAM109_map3	0002.CSV	1473.41	0.240975
CAM109_map3	0002.CSV	1477.27	0.226642
CAM109_map3	0002.CSV	1481.12	0.217948
CAM109_map3	0002.CSV	1484.98	0.209507
CAM109_map3	0002.CSV	1488.84	0.199281
CAM109_map3	0002.CSV	1492.7	0.187912
CAM109_map3	0002.CSV	1496.55	0.178977
CAM109_map3	0002.CSV	1500.41	0.168161
CAM109_map3	0002.CSV	1504.27	0.161614
CAM109_map3	0002.CSV	1508.12	0.148009
CAM109_map3	0002.CSV	1511.98	0.138286
CAM109_map3	0002.CSV	1515.84	0.13135
CAM109_map3	0002.CSV	1519.7	0.1223
CAM109_map3	0002.CSV	1523.55	0.111245
CAM109_map3	0002.CSV	1527.41	0.10458
CAM109_map3	0002.CSV	1531.27	0.10022
CAM109_map3	0002.CSV	1535.12	0.0985073
CAM109_map3	0002.CSV	1538.98	0.0965665
CAM109_map3	0002.CSV	1542.84	0.089748
CAM109_map3	0002.CSV	1546.7	0.082225
CAM109_map3	0002.CSV	1550.55	0.0768323
CAM109_map3	0002.CSV	1554.41	0.0718844
CAM109_map3	0002.CSV	1558.27	0.0676671
CAM109_map3	0002.CSV	1562.12	0.0645864
CAM109_map3	0002.CSV	1565.98	0.0637122
CAM109_map3	0002.CSV	1569.84	0.0635506
CAM109_map3	0002.CSV	1573.69	0.0635317
CAM109_map3	0002.CSV	1577.55	0.0613318
CAM109_map3	0002.CSV	1581.41	0.0571925
CAM109_map3	0002.CSV	1585.27	0.0526059
CAM109_map3	0002.CSV	1589.12	0.0491979
CAM109_map3	0002.CSV	1592.98	0.0469929
CAM109_map3	0002.CSV	1596.84	0.045731
CAM109_map3	0002.CSV	1600.69	0.0446728
CAM109_map3	0002.CSV	1604.55	0.0439324
CAM109_map3	0002.CSV	1608.41	0.0430445
CAM109_map3	0002.CSV	1612.27	0.0423765
CAM109_map3	0002.CSV	1616.12	0.041599
CAM109_map3	0002.CSV	1619.98	0.0409655
CAM109_map3	0002.CSV	1623.84	0.0397856
CAM109_map3	0002.CSV	1627.69	0.0385937
CAM109_map3	0002.CSV	1631.55	0.0370745
CAM109_map3	0002.CSV	1635.41	0.0360241
CAM109_map3	0002.CSV	1639.27	0.0348632
CAM109_map3	0002.CSV	1643.12	0.0337379
CAM109_map3	0002.CSV	1646.98	0.0327358
CAM109_map3	0002.CSV	1650.84	0.0323138
CAM109_map3	0002.CSV	1654.69	0.0318651
CAM109_map3	0002.CSV	1658.55	0.031276
CAM109_map3	0002.CSV	1662.41	0.030653
CAM109_map3	0002.CSV	1666.27	0.0302057
CAM109_map3	0002.CSV	1670.12	0.0297875
CAM109_map3	0002.CSV	1673.98	0.0299152
CAM109_map3	0002.CSV	1677.84	0.0294428
CAM109_map3	0002.CSV	1681.69	0.029302
CAM109_map3	0002.CSV	1685.55	0.0295299
CAM109_map3	0002.CSV	1689.41	0.0291974
CAM109_map3	0002.CSV	1693.27	0.0284215
CAM109_map3	0002.CSV	1697.12	0.0285509
CAM109_map3	0002.CSV	1700.98	0.0289835
CAM109_map3	0002.CSV	1704.84	0.0292851
CAM109_map3	0002.CSV	1708.69	0.0294279
CAM109_map3	0002.CSV	1712.55	0.0296473
CAM109_map3	0002.CSV	1716.41	0.0312104
CAM109_map3	0002.CSV	1720.27	0.033254
CAM109_map3	0002.CSV	1724.12	0.0335047
CAM109_map3	0002.CSV	1727.98	0.0335724
CAM109_map3	0002.CSV	1731.84	0.0335881
CAM109_map3	0002.CSV	1735.69	0.0336132
CAM109_map3	0002.CSV	1739.55	0.03257
CAM109_map3	0002.CSV	1743.41	0.0310552
CAM109_map3	0002.CSV	1747.27	0.0292996
CAM109_map3	0002.CSV	1751.12	0.0275766
CAM109_map3	0002.CSV	1754.98	0.0261484
CAM109_map3	0002.CSV	1758.84	0.0254386
CAM109_map3	0002.CSV	1762.69	0.0250398
CAM109_map3	0002.CSV	1766.55	0.0247434
CAM109_map3	0002.CSV	1770.41	0.0251726
CAM109_map3	0002.CSV	1774.26	0.0271474
CAM109_map3	0002.CSV	1778.12	0.0285655
CAM109_map3	0002.CSV	1781.98	0.0299936
CAM109_map3	0002.CSV	1785.84	0.0303362
CAM109_map3	0002.CSV	1789.69	0.0295169
CAM109_map3	0002.CSV	1793.55	0.0277393
CAM109_map3	0002.CSV	1797.41	0.0262919
CAM109_map3	0002.CSV	1801.26	0.0251279
CAM109_map3	0002.CSV	1805.12	0.0242865
CAM109_map3	0002.CSV	1808.98	0.02382
CAM109_map3	0002.CSV	1812.84	0.0238179
CAM109_map3	0002.CSV	1816.69	0.0236105
CAM109_map3	0002.CSV	1820.55	0.0235513
CAM109_map3	0002.CSV	1824.41	0.0235348
CAM109_map3	0002.CSV	1828.26	0.0238011
CAM109_map3	0002.CSV	1832.12	0.0238396
CAM109_map3	0002.CSV	1835.98	0.0237148
CAM109_map3	0002.CSV	1839.84	0.0235123
CAM109_map3	0002.CSV	1843.69	0.0237349
CAM109_map3	0002.CSV	1847.55	0.0239876
CAM109_map3	0002.CSV	1851.41	0.0238404
CAM109_map3	0002.CSV	1855.26	0.0236835
CAM109_map3	0002.CSV	1859.12	0.0237656
CAM109_map3	0002.CSV	1862.98	0.0237088
CAM109_map3	0002.CSV	1866.84	0.0239127
CAM109_map3	0002.CSV	1870.69	0.0242864
CAM109_map3	0002.CSV	1874.55	0.0241221
CAM109_map3	0002.CSV	1878.41	0.0239501
CAM109_map3	0002.CSV	1882.26	0.02397
CAM109_map3	0002.CSV	1886.12	0.0239297
CAM109_map3	0002.CSV	1889.98	0.0240777
CAM109_map3	0002.CSV	1893.83	0.0241458
CAM109_map3	0002.CSV	1897.69	0.0241713
CAM109_map3	0002.CSV	1901.55	0.0240615
CAM109_map3	0002.CSV	1905.41	0.0240655
CAM109_map3	0002.CSV	1909.26	0.0241544
CAM109_map3	0002.CSV	1913.12	0.0241869
CAM109_map3	0002.CSV	1916.98	0.0241847
CAM109_map3	0002.CSV	1920.83	0.0244268
CAM109_map3	0002.CSV	1924.69	0.024456
CAM109_map3	0002.CSV	1928.55	0.024386
CAM109_map3	0002.CSV	1932.4	0.0243753
CAM109_map3	0002.CSV	1936.26	0.0244603
CAM109_map3	0002.CSV	1940.12	0.0244786
CAM109_map3	0002.CSV	1943.98	0.0247435
CAM109_map3	0002.CSV	1947.83	0.024737
CAM109_map3	0002.CSV	1951.69	0.0247218
CAM109_map3	0002.CSV	1955.55	0.0247655
CAM109_map3	0002.CSV	1959.4	0.0248082
CAM109_map3	0002.CSV	1963.26	0.0247528
CAM109_map3	0002.CSV	1967.12	0.0248896
CAM109_map3	0002.CSV	1970.98	0.0248983
CAM109_map3	0002.CSV	1974.83	0.0248734
CAM109_map3	0002.CSV	1978.69	0.0248615
CAM109_map3	0002.CSV	1982.55	0.0249313
CAM109_map3	0002.CSV	1986.4	0.024937
CAM109_map3	0002.CSV	1990.26	0.0250389
CAM109_map3	0002.CSV	1994.12	0.0251077
CAM109_map3	0002.CSV	1997.98	0.0250924
CAM109_map3	0002.CSV	2001.83	0.0250744
CAM109_map3	0002.CSV	2005.69	0.0251304
CAM109_map3	0002.CSV	2009.55	0.0251493
CAM109_map3	0002.CSV	2013.4	0.0251577
CAM109_map3	0002.CSV	2017.26	0.0252376
CAM109_map3	0002.CSV	2021.12	0.0253552
CAM109_map3	0002.CSV	2024.97	0.02532
CAM109_map3	0002.CSV	2028.83	0.0253838
CAM109_map3	0002.CSV	2032.69	0.0254054
CAM109_map3	0002.CSV	2036.55	0.025431
CAM109_map3	0002.CSV	2040.4	0.0254424
CAM109_map3	0002.CSV	2044.26	0.0255362
CAM109_map3	0002.CSV	2048.12	0.0255489
CAM109_map3	0002.CSV	2051.97	0.0255887
CAM109_map3	0002.CSV	2055.83	0.0255775
CAM109_map3	0002.CSV	2059.69	0.0255838
CAM109_map3	0002.CSV	2063.55	0.0255976
CAM109_map3	0002.CSV	2067.4	0.0257235
CAM109_map3	0002.CSV	2071.26	0.0256961
CAM109_map3	0002.CSV	2075.12	0.0257074
CAM109_map3	0002.CSV	2078.97	0.0257542
CAM109_map3	0002.CSV	2082.83	0.0258283
CAM109_map3	0002.CSV	2086.69	0.0258015
CAM109_map3	0002.CSV	2090.55	0.0258774
CAM109_map3	0002.CSV	2094.4	0.0259068
CAM109_map3	0002.CSV	2098.26	0.0259158
CAM109_map3	0002.CSV	2102.12	0.0259443
CAM109_map3	0002.CSV	2105.97	0.0260424
CAM109_map3	0002.CSV	2109.83	0.0260496
CAM109_map3	0002.CSV	2113.69	0.0260787
CAM109_map3	0002.CSV	2117.55	0.0260967
CAM109_map3	0002.CSV	2121.4	0.0261603
CAM109_map3	0002.CSV	2125.26	0.0261753
CAM109_map3	0002.CSV	2129.12	0.0261999
CAM109_map3	0002.CSV	2132.97	0.026228
CAM109_map3	0002.CSV	2136.83	0.0263132
CAM109_map3	0002.CSV	2140.69	0.0263227
CAM109_map3	0002.CSV	2144.55	0.0263936
CAM109_map3	0002.CSV	2148.4	0.0264447
CAM109_map3	0002.CSV	2152.26	0.0265108
CAM109_map3	0002.CSV	2156.12	0.0264994
CAM109_map3	0002.CSV	2159.97	0.0265179
CAM109_map3	0002.CSV	2163.83	0.0265511
CAM109_map3	0002.CSV	2167.69	0.0266267
CAM109_map3	0002.CSV	2171.55	0.0266878
CAM109_map3	0002.CSV	2175.4	0.026774
CAM109_map3	0002.CSV	2179.26	0.0268438
CAM109_map3	0002.CSV	2183.12	0.0269323
CAM109_map3	0002.CSV	2186.97	0.0269373
CAM109_map3	0002.CSV	2190.83	0.0269781
CAM109_map3	0002.CSV	2194.69	0.0269731
CAM109_map3	0002.CSV	2198.55	0.0270006
CAM109_map3	0002.CSV	2202.4	0.027022
CAM109_map3	0002.CSV	2206.26	0.0270801
CAM109_map3	0002.CSV	2210.12	0.0271335
CAM109_map3	0002.CSV	2213.97	0.0271868
CAM109_map3	0002.CSV	2217.83	0.0271937
CAM109_map3	0002.CSV	2221.69	0.0272585
CAM109_map3	0002.CSV	2225.54	0.0272528
CAM109_map3	0002.CSV	2229.4	0.0272857
CAM109_map3	0002.CSV	2233.26	0.0272993
CAM109_map3	0002.CSV	2237.12	0.0273063
CAM109_map3	0002.CSV	2240.97	0.0273211
CAM109_map3	0002.CSV	2244.83	0.0273722
CAM109_map3	0002.CSV	2248.69	0.0273791
CAM109_map3	0002.CSV	2252.54	0.0273667
CAM109_map3	0002.CSV	2256.4	0.0273424
CAM109_map3	0002.CSV	2260.26	0.0274127
CAM109_map3	0002.CSV	2264.11	0.0274294
CAM109_map3	0002.CSV	2267.97	0.0274434
CAM109_map3	0002.CSV	2271.83	0.0274767
CAM109_map3	0002.CSV	2275.69	0.0275061
CAM109_map3	0002.CSV	2279.54	0.0274695
CAM109_map3	0002.CSV	2283.4	0.0274491
CAM109_map3	0002.CSV	2287.26	0.0273963
CAM109_map3	0002.CSV	2291.11	0.0273788
CAM109_map3	0002.CSV	2294.97	0.0273287
CAM109_map3	0002.CSV	2298.83	0.0273002
CAM109_map3	0002.CSV	2302.69	0.0272308
CAM109_map3	0002.CSV	2306.54	0.0271508
CAM109_map3	0002.CSV	2310.4	0.0270675
CAM109_map3	0002.CSV	2314.26	0.0270432
CAM109_map3	0002.CSV	2318.11	0.0267383
CAM109_map3	0002.CSV	2321.97	0.0261924
CAM109_map3	0002.CSV	2325.83	0.0256261
CAM109_map3	0002.CSV	2329.69	0.0253141
CAM109_map3	0002.CSV	2333.54	0.0251091
CAM109_map3	0002.CSV	2337.4	0.0249937
CAM109_map3	0002.CSV	2341.26	0.0250011
CAM109_map3	0002.CSV	2345.11	0.0262108
CAM109_map3	0002.CSV	2348.97	0.0264486
CAM109_map3	0002.CSV	2352.83	0.0251948
CAM109_map3	0002.CSV	2356.69	0.0227861
CAM109_map3	0002.CSV	2360.54	0.022141
CAM109_map3	0002.CSV	2364.4	0.0235975
CAM109_map3	0002.CSV	2368.26	0.0258086
CAM109_map3	0002.CSV	2372.11	0.0272941
CAM109_map3	0002.CSV	2375.97	0.0280389
CAM109_map3	0002.CSV	2379.83	0.0283361
CAM109_map3	0002.CSV	2383.69	0.0283423
CAM109_map3	0002.CSV	2387.54	0.0281683
CAM109_map3	0002.CSV	2391.4	0.0280524
CAM109_map3	0002.CSV	2395.26	0.0280152
CAM109_map3	0002.CSV	2399.11	0.0280359
CAM109_map3	0002.CSV	2402.97	0.0280499
CAM109_map3	0002.CSV	2406.83	0.0280261
CAM109_map3	0002.CSV	2410.68	0.0280094
CAM109_map3	0002.CSV	2414.54	0.0280531
CAM109_map3	0002.CSV	2418.4	0.0280738
CAM109_map3	0002.CSV	2422.26	0.0281247
CAM109_map3	0002.CSV	2426.11	0.0281635
CAM109_map3	0002.CSV	2429.97	0.0281857
CAM109_map3	0002.CSV	2433.83	0.0281959
CAM109_map3	0002.CSV	2437.68	0.0282399
CAM109_map3	0002.CSV	2441.54	0.0282406
CAM109_map3	0002.CSV	2445.4	0.028245
CAM109_map3	0002.CSV	2449.26	0.0282697
CAM109_map3	0002.CSV	2453.11	0.0282994
CAM109_map3	0002.CSV	2456.97	0.0283286
CAM109_map3	0002.CSV	2460.83	0.0284468
CAM109_map3	0002.CSV	2464.68	0.0285615
CAM109_map3	0002.CSV	2468.54	0.0286703
CAM109_map3	0002.CSV	2472.4	0.0288155
CAM109_map3	0002.CSV	2476.26	0.0290381
CAM109_map3	0002.CSV	2480.11	0.0292617
CAM109_map3	0002.CSV	2483.97	0.0295056
CAM109_map3	0002.CSV	2487.83	0.0296675
CAM109_map3	0002.CSV	2491.68	0.029783
CAM109_map3	0002.CSV	2495.54	0.0298768
CAM109_map3	0002.CSV	2499.4	0.0299082
CAM109_map3	0002.CSV	2503.26	0.0298722
CAM109_map3	0002.CSV	2507.11	0.0298494
CAM109_map3	0002.CSV	2510.97	0.0298847
CAM109_map3	0002.CSV	2514.83	0.0300134
CAM109_map3	0002.CSV	2518.68	0.0301809
CAM109_map3	0002.CSV	2522.54	0.0302047
CAM109_map3	0002.CSV	2526.4	0.029982
CAM109_map3	0002.CSV	2530.26	0.0297293
CAM109_map3	0002.CSV	2534.11	0.0294879
CAM109_map3	0002.CSV	2537.97	0.0293306
CAM109_map3	0002.CSV	2541.83	0.0292848
CAM109_map3	0002.CSV	2545.68	0.0292619
CAM109_map3	0002.CSV	2549.54	0.0291859
CAM109_map3	0002.CSV	2553.4	0.0290384
CAM109_map3	0002.CSV	2557.26	0.0288894
CAM109_map3	0002.CSV	2561.11	0.0288109
CAM109_map3	0002.CSV	2564.97	0.0287124
CAM109_map3	0002.CSV	2568.83	0.0286514
CAM109_map3	0002.CSV	2572.68	0.0286502
CAM109_map3	0002.CSV	2576.54	0.0286553
CAM109_map3	0002.CSV	2580.4	0.0285901
CAM109_map3	0002.CSV	2584.25	0.0285393
CAM109_map3	0002.CSV	2588.11	0.0285326
CAM109_map3	0002.CSV	2591.97	0.0286035
CAM109_map3	0002.CSV	2595.83	0.0286554
CAM109_map3	0002.CSV	2599.68	0.0287071
CAM109_map3	0002.CSV	2603.54	0.0287656
CAM109_map3	0002.CSV	2607.4	0.0287901
CAM109_map3	0002.CSV	2611.25	0.0287975
CAM109_map3	0002.CSV	2615.11	0.0288633
CAM109_map3	0002.CSV	2618.97	0.0289033
CAM109_map3	0002.CSV	2622.82	0.0290122
CAM109_map3	0002.CSV	2626.68	0.0291054
CAM109_map3	0002.CSV	2630.54	0.0291291
CAM109_map3	0002.CSV	2634.4	0.0291549
CAM109_map3	0002.CSV	2638.25	0.029175
CAM109_map3	0002.CSV	2642.11	0.029054
CAM109_map3	0002.CSV	2645.97	0.0289088
CAM109_map3	0002.CSV	2649.82	0.028816
CAM109_map3	0002.CSV	2653.68	0.0288083
CAM109_map3	0002.CSV	2657.54	0.0288306
CAM109_map3	0002.CSV	2661.4	0.0288441
CAM109_map3	0002.CSV	2665.25	0.0288546
CAM109_map3	0002.CSV	2669.11	0.0289252
CAM109_map3	0002.CSV	2672.97	0.0291671
CAM109_map3	0002.CSV	2676.82	0.0294553
CAM109_map3	0002.CSV	2680.68	0.0294001
CAM109_map3	0002.CSV	2684.54	0.0291032
CAM109_map3	0002.CSV	2688.4	0.0289956
CAM109_map3	0002.CSV	2692.25	0.0290372
CAM109_map3	0002.CSV	2696.11	0.0291016
CAM109_map3	0002.CSV	2699.97	0.0291317
CAM109_map3	0002.CSV	2703.82	0.0290882
CAM109_map3	0002.CSV	2707.68	0.0291641
CAM109_map3	0002.CSV	2711.54	0.0292085
CAM109_map3	0002.CSV	2715.4	0.0292175
CAM109_map3	0002.CSV	2719.25	0.0294163
CAM109_map3	0002.CSV	2723.11	0.0297467
CAM109_map3	0002.CSV	2726.97	0.0297496
CAM109_map3	0002.CSV	2730.82	0.0294716
CAM109_map3	0002.CSV	2734.68	0.0294856
CAM109_map3	0002.CSV	2738.54	0.0295318
CAM109_map3	0002.CSV	2742.4	0.0295304
CAM109_map3	0002.CSV	2746.25	0.0298427
CAM109_map3	0002.CSV	2750.11	0.0299319
CAM109_map3	0002.CSV	2753.97	0.0296523
CAM109_map3	0002.CSV	2757.82	0.0295423
CAM109_map3	0002.CSV	2761.68	0.0295226
CAM109_map3	0002.CSV	2765.54	0.0295611
CAM109_map3	0002.CSV	2769.39	0.0297498
CAM109_map3	0002.CSV	2773.25	0.030087
CAM109_map3	0002.CSV	2777.11	0.0300664
CAM109_map3	0002.CSV	2780.97	0.0299176
CAM109_map3	0002.CSV	2784.82	0.0301385
CAM109_map3	0002.CSV	2788.68	0.0305744
CAM109_map3	0002.CSV	2792.54	0.0307478
CAM109_map3	0002.CSV	2796.39	0.0307903
CAM109_map3	0002.CSV	2800.25	0.0306761
CAM109_map3	0002.CSV	2804.11	0.0305611
CAM109_map3	0002.CSV	2807.97	0.0308721
CAM109_map3	0002.CSV	2811.82	0.0310061
CAM109_map3	0002.CSV	2815.68	0.0309893
CAM109_map3	0002.CSV	2819.54	0.0312279
CAM109_map3	0002.CSV	2823.39	0.0315726
CAM109_map3	0002.CSV	2827.25	0.0319172
CAM109_map3	0002.CSV	2831.11	0.032632
CAM109_map3	0002.CSV	2834.97	0.0338002
CAM109_map3	0002.CSV	2838.82	0.0352394
CAM109_map3	0002.CSV	2842.68	0.0375012
CAM109_map3	0002.CSV	2846.54	0.0413393
CAM109_map3	0002.CSV	2850.39	0.0436146
CAM109_map3	0002.CSV	2854.25	0.0422267
CAM109_map3	0002.CSV	2858.11	0.0397173
CAM109_map3	0002.CSV	2861.97	0.0375756
CAM109_map3	0002.CSV	2865.82	0.036382
CAM109_map3	0002.CSV	2869.68	0.0363865
CAM109_map3	0002.CSV	2873.54	0.0364538
CAM109_map3	0002.CSV	2877.39	0.0356273
CAM109_map3	0002.CSV	2881.25	0.0350118
CAM109_map3	0002.CSV	2885.11	0.0351921
CAM109_map3	0002.CSV	2888.97	0.0359344
CAM109_map3	0002.CSV	2892.82	0.0371919
CAM109_map3	0002.CSV	2896.68	0.038286
CAM109_map3	0002.CSV	2900.54	0.0391637
CAM109_map3	0002.CSV	2904.39	0.0406994
CAM109_map3	0002.CSV	2908.25	0.0433887
CAM109_map3	0002.CSV	2912.11	0.0476094
CAM109_map3	0002.CSV	2915.97	0.0517074
CAM109_map3	0002.CSV	2919.82	0.0528157
CAM109_map3	0002.CSV	2923.68	0.0508472
CAM109_map3	0002.CSV	2927.54	0.0479576
CAM109_map3	0002.CSV	2931.39	0.0445766
CAM109_map3	0002.CSV	2935.25	0.0412046
CAM109_map3	0002.CSV	2939.11	0.0391289
CAM109_map3	0002.CSV	2942.96	0.0382894
CAM109_map3	0002.CSV	2946.82	0.0377318
CAM109_map3	0002.CSV	2950.68	0.0373665
CAM109_map3	0002.CSV	2954.54	0.0370798
CAM109_map3	0002.CSV	2958.39	0.0364647
CAM109_map3	0002.CSV	2962.25	0.0356275
CAM109_map3	0002.CSV	2966.11	0.0343744
CAM109_map3	0002.CSV	2969.96	0.0335188
CAM109_map3	0002.CSV	2973.82	0.0332698
CAM109_map3	0002.CSV	2977.68	0.0330524
CAM109_map3	0002.CSV	2981.53	0.0324311
CAM109_map3	0002.CSV	2985.39	0.0315694
CAM109_map3	0002.CSV	2989.25	0.0314236
CAM109_map3	0002.CSV	2993.11	0.0316674
CAM109_map3	0002.CSV	2996.96	0.0315309
CAM109_map3	0002.CSV	3000.82	0.0311471
CAM109_map3	0002.CSV	3004.68	0.0309255
CAM109_map3	0002.CSV	3008.53	0.0311883
CAM109_map3	0002.CSV	3012.39	0.0315881
CAM109_map3	0002.CSV	3016.25	0.0315783
CAM109_map3	0002.CSV	3020.11	0.0312558
CAM109_map3	0002.CSV	3023.96	0.0310407
CAM109_map3	0002.CSV	3027.82	0.0310247
CAM109_map3	0002.CSV	3031.68	0.0312706
CAM109_map3	0002.CSV	3035.53	0.0313269
CAM109_map3	0002.CSV	3039.39	0.0312796
CAM109_map3	0002.CSV	3043.25	0.0312983
CAM109_map3	0002.CSV	3047.11	0.0312141
CAM109_map3	0002.CSV	3050.96	0.0312223
CAM109_map3	0002.CSV	3054.82	0.0311256
CAM109_map3	0002.CSV	3058.68	0.0309778
CAM109_map3	0002.CSV	3062.53	0.03111
CAM109_map3	0002.CSV	3066.39	0.0314554
CAM109_map3	0002.CSV	3070.25	0.031358
CAM109_map3	0002.CSV	3074.11	0.0313292
CAM109_map3	0002.CSV	3077.96	0.031635
CAM109_map3	0002.CSV	3081.82	0.0318333
CAM109_map3	0002.CSV	3085.68	0.0318071
CAM109_map3	0002.CSV	3089.53	0.0316084
CAM109_map3	0002.CSV	3093.39	0.0312778
CAM109_map3	0002.CSV	3097.25	0.0313015
CAM109_map3	0002.CSV	3101.11	0.0314743
CAM109_map3	0002.CSV	3104.96	0.0315059
CAM109_map3	0002.CSV	3108.82	0.031639
CAM109_map3	0002.CSV	3112.68	0.0318283
CAM109_map3	0002.CSV	3116.53	0.0320655
CAM109_map3	0002.CSV	3120.39	0.0320176
CAM109_map3	0002.CSV	3124.25	0.0317512
CAM109_map3	0002.CSV	3128.11	0.0316852
CAM109_map3	0002.CSV	3131.96	0.0317571
CAM109_map3	0002.CSV	3135.82	0.0319287
CAM109_map3	0002.CSV	3139.68	0.0319704
CAM109_map3	0002.CSV	3143.53	0.0317546
CAM109_map3	0002.CSV	3147.39	0.0319034
CAM109_map3	0002.CSV	3151.25	0.0322613
CAM109_map3	0002.CSV	3155.1	0.0321433
CAM109_map3	0002.CSV	3158.96	0.0317711
CAM109_map3	0002.CSV	3162.82	0.0316818
CAM109_map3	0002.CSV	3166.68	0.0316869
CAM109_map3	0002.CSV	3170.53	0.0317025
CAM109_map3	0002.CSV	3174.39	0.0317041
CAM109_map3	0002.CSV	3178.25	0.0318426
CAM109_map3	0002.CSV	3182.1	0.0319566
CAM109_map3	0002.CSV	3185.96	0.0320371
CAM109_map3	0002.CSV	3189.82	0.0321338
CAM109_map3	0002.CSV	3193.68	0.0320912
CAM109_map3	0002.CSV	3197.53	0.0321051
CAM109_map3	0002.CSV	3201.39	0.0322315
CAM109_map3	0002.CSV	3205.25	0.0323313
CAM109_map3	0002.CSV	3209.1	0.0323577
CAM109_map3	0002.CSV	3212.96	0.0324493
CAM109_map3	0002.CSV	3216.82	0.0326016
CAM109_map3	0002.CSV	3220.68	0.0325857
CAM109_map3	0002.CSV	3224.53	0.0325462
CAM109_map3	0002.CSV	3228.39	0.0328984
CAM109_map3	0002.CSV	3232.25	0.033353
CAM109_map3	0002.CSV	3236.1	0.0331989
CAM109_map3	0002.CSV	3239.96	0.0329344
CAM109_map3	0002.CSV	3243.82	0.0331507
CAM109_map3	0002.CSV	3247.68	0.0333144
CAM109_map3	0002.CSV	3251.53	0.033194
CAM109_map3	0002.CSV	3255.39	0.0332823
CAM109_map3	0002.CSV	3259.25	0.0331012
CAM109_map3	0002.CSV	3263.1	0.0329799
CAM109_map3	0002.CSV	3266.96	0.0334005
CAM109_map3	0002.CSV	3270.82	0.0338439
CAM109_map3	0002.CSV	3274.68	0.0337819
CAM109_map3	0002.CSV	3278.53	0.0333666
CAM109_map3	0002.CSV	3282.39	0.0331683
CAM109_map3	0002.CSV	3286.25	0.0334011
CAM109_map3	0002.CSV	3290.1	0.0338389
CAM109_map3	0002.CSV	3293.96	0.0341159
CAM109_map3	0002.CSV	3297.82	0.0339079
CAM109_map3	0002.CSV	3301.67	0.0338574
CAM109_map3	0002.CSV	3305.53	0.0340786
CAM109_map3	0002.CSV	3309.39	0.0340606
CAM109_map3	0002.CSV	3313.25	0.0336587
CAM109_map3	0002.CSV	3317.1	0.0333028
CAM109_map3	0002.CSV	3320.96	0.0333571
CAM109_map3	0002.CSV	3324.82	0.03368
CAM109_map3	0002.CSV	3328.67	0.033513
CAM109_map3	0002.CSV	3332.53	0.033402
CAM109_map3	0002.CSV	3336.39	0.0339066
CAM109_map3	0002.CSV	3340.24	0.0341834
CAM109_map3	0002.CSV	3344.1	0.0339308
CAM109_map3	0002.CSV	3347.96	0.0338369
CAM109_map3	0002.CSV	3351.82	0.0338176
CAM109_map3	0002.CSV	3355.67	0.0337079
CAM109_map3	0002.CSV	3359.53	0.0337864
CAM109_map3	0002.CSV	3363.39	0.0340004
CAM109_map3	0002.CSV	3367.24	0.0343582
CAM109_map3	0002.CSV	3371.1	0.034352
CAM109_map3	0002.CSV	3374.96	0.0341291
CAM109_map3	0002.CSV	3378.82	0.0339648
CAM109_map3	0002.CSV	3382.67	0.0336731
CAM109_map3	0002.CSV	3386.53	0.0337579
CAM109_map3	0002.CSV	3390.39	0.0342055
CAM109_map3	0002.CSV	3394.24	0.0345125
CAM109_map3	0002.CSV	3398.1	0.0346385
CAM109_map3	0002.CSV	3401.96	0.0346049
CAM109_map3	0002.CSV	3405.82	0.0343206
CAM109_map3	0002.CSV	3409.67	0.0341515
CAM109_map3	0002.CSV	3413.53	0.0337418
CAM109_map3	0002.CSV	3417.39	0.033202
CAM109_map3	0002.CSV	3421.24	0.0330244
CAM109_map3	0002.CSV	3425.1	0.0332385
CAM109_map3	0002.CSV	3428.96	0.0335926
CAM109_map3	0002.CSV	3432.82	0.0337971
CAM109_map3	0002.CSV	3436.67	0.0335075
CAM109_map3	0002.CSV	3440.53	0.0327045
CAM109_map3	0002.CSV	3444.39	0.0322229
CAM109_map3	0002.CSV	3448.24	0.032144
CAM109_map3	0002.CSV	3452.1	0.0318492
CAM109_map3	0002.CSV	3455.96	0.0318659
CAM109_map3	0002.CSV	3459.82	0.0322257
CAM109_map3	0002.CSV	3463.67	0.0325562
CAM109_map3	0002.CSV	3467.53	0.0326602
CAM109_map3	0002.CSV	3471.39	0.0322649
CAM109_map3	0002.CSV	3475.24	0.031903
CAM109_map3	0002.CSV	3479.1	0.0319028
CAM109_map3	0002.CSV	3482.96	0.0318689
CAM109_map3	0002.CSV	3486.82	0.031912
CAM109_map3	0002.CSV	3490.67	0.0318711
CAM109_map3	0002.CSV	3494.53	0.0319453
CAM109_map3	0002.CSV	3498.39	0.0317876
CAM109_map3	0002.CSV	3502.24	0.0314501
CAM109_map3	0002.CSV	3506.1	0.0310852
CAM109_map3	0002.CSV	3509.96	0.031098
CAM109_map3	0002.CSV	3513.81	0.0313726
CAM109_map3	0002.CSV	3517.67	0.0310103
CAM109_map3	0002.CSV	3521.53	0.0309636
CAM109_map3	0002.CSV	3525.39	0.0311196
CAM109_map3	0002.CSV	3529.24	0.0309515
CAM109_map3	0002.CSV	3533.1	0.0308772
CAM109_map3	0002.CSV	3536.96	0.0311205
CAM109_map3	0002.CSV	3540.81	0.0311948
CAM109_map3	0002.CSV	3544.67	0.031373
CAM109_map3	0002.CSV	3548.53	0.0312368
CAM109_map3	0002.CSV	3552.39	0.0306594
CAM109_map3	0002.CSV	3556.24	0.0303795
CAM109_map3	0002.CSV	3560.1	0.0301763
CAM109_map3	0002.CSV	3563.96	0.0296195
CAM109_map3	0002.CSV	3567.81	0.0300488
CAM109_map3	0002.CSV	3571.67	0.0301389
CAM109_map3	0002.CSV	3575.53	0.0295722
CAM109_map3	0002.CSV	3579.39	0.0295963
CAM109_map3	0002.CSV	3583.24	0.0294647
CAM109_map3	0002.CSV	3587.1	0.02951
CAM109_map3	0002.CSV	3590.96	0.0294993
CAM109_map3	0002.CSV	3594.81	0.0291894
CAM109_map3	0002.CSV	3598.67	0.029433
CAM109_map3	0002.CSV	3602.53	0.0291412
CAM109_map3	0002.CSV	3606.39	0.0281858
CAM109_map3	0002.CSV	3610.24	0.0279167
CAM109_map3	0002.CSV	3614.1	0.0281342
CAM109_map3	0002.CSV	3617.96	0.0286655
CAM109_map3	0002.CSV	3621.81	0.0287524
CAM109_map3	0002.CSV	3625.67	0.0276741
CAM109_map3	0002.CSV	3629.53	0.0278713
CAM109_map3	0002.CSV	3633.39	0.0285542
CAM109_map3	0002.CSV	3637.24	0.0281037
CAM109_map3	0002.CSV	3641.1	0.0276084
CAM109_map3	0002.CSV	3644.96	0.0268284
CAM109_map3	0002.CSV	3648.81	0.0276639
CAM109_map3	0002.CSV	3652.67	0.0288504
CAM109_map3	0002.CSV	3656.53	0.0287887
CAM109_map3	0002.CSV	3660.38	0.0287046
CAM109_map3	0002.CSV	3664.24	0.0276996
CAM109_map3	0002.CSV	3668.1	0.0267856
CAM109_map3	0002.CSV	3671.96	0.0268496
CAM109_map3	0002.CSV	3675.81	0.0278303
CAM109_map3	0002.CSV	3679.67	0.0285193
CAM109_map3	0002.CSV	3683.53	0.0278368
CAM109_map3	0002.CSV	3687.38	0.0275061
CAM109_map3	0002.CSV	3691.24	0.0286036
CAM109_map3	0002.CSV	3695.1	0.0283669
CAM109_map3	0002.CSV	3698.95	0.0276437
CAM109_map3	0002.CSV	3702.81	0.0275501
CAM109_map3	0002.CSV	3706.67	0.0271023
CAM109_map3	0002.CSV	3710.53	0.0271989
CAM109_map3	0002.CSV	3714.38	0.0280447
CAM109_map3	0002.CSV	3718.24	0.0274083
CAM109_map3	0002.CSV	3722.1	0.0271863
CAM109_map3	0002.CSV	3725.95	0.0275658
CAM109_map3	0002.CSV	3729.81	0.0271782
CAM109_map3	0002.CSV	3733.67	0.027383
CAM109_map3	0002.CSV	3737.53	0.0288145
CAM109_map3	0002.CSV	3741.38	0.0277974
CAM109_map3	0002.CSV	3745.24	0.0267694
CAM109_map3	0002.CSV	3749.1	0.0269289
CAM109_map3	0002.CSV	3752.95	0.0279637
CAM109_map3	0002.CSV	3756.81	0.0279318
CAM109_map3	0002.CSV	3760.67	0.0278219
CAM109_map3	0002.CSV	3764.53	0.027484
CAM109_map3	0002.CSV	3768.38	0.0276638
CAM109_map3	0002.CSV	3772.24	0.0279767
CAM109_map3	0002.CSV	3776.1	0.0276547
CAM109_map3	0002.CSV	3779.95	0.0277774
CAM109_map3	0002.CSV	3783.81	0.0278409
CAM109_map3	0002.CSV	3787.67	0.0276992
CAM109_map3	0002.CSV	3791.53	0.0273036
CAM109_map3	0002.CSV	3795.38	0.0267407
CAM109_map3	0002.CSV	3799.24	0.0268521
CAM109_map3	0002.CSV	3803.1	0.0277736
CAM109_map3	0002.CSV	3806.95	0.0281687
CAM109_map3	0002.CSV	3810.81	0.0274587
CAM109_map3	0002.CSV	3814.67	0.0266488
CAM109_map3	0002.CSV	3818.53	0.0270394
CAM109_map3	0002.CSV	3822.38	0.027925
CAM109_map3	0002.CSV	3826.24	0.0276203
CAM109_map3	0002.CSV	3830.1	0.0270765
CAM109_map3	0002.CSV	3833.95	0.0268518
CAM109_map3	0002.CSV	3837.81	0.0271486
CAM109_map3	0002.CSV	3841.67	0.0279999
CAM109_map3	0002.CSV	3845.53	0.0276809
CAM109_map3	0002.CSV	3849.38	0.0263469
CAM109_map3	0002.CSV	3853.24	0.0264723
CAM109_map3	0002.CSV	3857.1	0.0275487
CAM109_map3	0002.CSV	3860.95	0.0269013
CAM109_map3	0002.CSV	3864.81	0.0269583
CAM109_map3	0002.CSV	3868.67	0.0270426
CAM109_map3	0002.CSV	3872.52	0.0274478
CAM109_map3	0002.CSV	3876.38	0.0271858
CAM109_map3	0002.CSV	3880.24	0.0268799
CAM109_map3	0002.CSV	3884.1	0.0275224
CAM109_map3	0002.CSV	3887.95	0.0274327
CAM109_map3	0002.CSV	3891.81	0.0273591
CAM109_map3	0002.CSV	3895.67	0.0270723
CAM109_map3	0002.CSV	3899.52	0.0266873
CAM109_map3	0002.CSV	3903.38	0.0277744
CAM109_map3	0002.CSV	3907.24	0.0279934
CAM109_map3	0002.CSV	3911.1	0.0272104
CAM109_map3	0002.CSV	3914.95	0.0267703
CAM109_map3	0002.CSV	3918.81	0.0270469
CAM109_map3	0002.CSV	3922.67	0.0271865
CAM109_map3	0002.CSV	3926.52	0.0271921
CAM109_map3	0002.CSV	3930.38	0.0273177
CAM109_map3	0002.CSV	3934.24	0.0275766
CAM109_map3	0002.CSV	3938.09	0.0271664
CAM109_map3	0002.CSV	3941.95	0.0270763
CAM109_map3	0002.CSV	3945.81	0.0272557
CAM109_map3	0002.CSV	3949.67	0.0274315
CAM109_map3	0002.CSV	3953.52	0.0274594
CAM109_map3	0002.CSV	3957.38	0.0272577
CAM109_map3	0002.CSV	3961.24	0.0272953
CAM109_map3	0002.CSV	3965.09	0.0273288
CAM109_map3	0002.CSV	3968.95	0.0272007
CAM109_map3	0002.CSV	3972.81	0.0272674
CAM109_map3	0002.CSV	3976.67	0.0274518
CAM109_map3	0002.CSV	3980.52	0.0274847
CAM109_map3	0002.CSV	3984.38	0.0274019
CAM109_map3	0002.CSV	3988.24	0.0272275
CAM109_map3	0002.CSV	3992.09	0.027298
CAM109_map3	0002.CSV	3995.95	0.0274834
CAM109_map3	0002.CSV	3999.81	0.0274363
CAM109_map3	0003.CSV	674.992	0.0423366
CAM109_map3	0003.CSV	678.849	0.043686
CAM109_map3	0003.CSV	682.706	0.0451919
CAM109_map3	0003.CSV	686.563	0.048741
CAM109_map3	0003.CSV	690.42	0.0534607
CAM109_map3	0003.CSV	694.277	0.0659964
CAM109_map3	0003.CSV	698.134	0.0791042
CAM109_map3	0003.CSV	701.991	0.0732035
CAM109_map3	0003.CSV	705.849	0.0641628
CAM109_map3	0003.CSV	709.706	0.0769079
CAM109_map3	0003.CSV	713.563	0.0762543
CAM109_map3	0003.CSV	717.42	0.0506685
CAM109_map3	0003.CSV	721.277	0.0365378
CAM109_map3	0003.CSV	725.134	0.0359035
CAM109_map3	0003.CSV	728.991	0.0364131
CAM109_map3	0003.CSV	732.848	0.0383727
CAM109_map3	0003.CSV	736.705	0.0404037
CAM109_map3	0003.CSV	740.562	0.0430327
CAM109_map3	0003.CSV	744.42	0.0444347
CAM109_map3	0003.CSV	748.277	0.0451027
CAM109_map3	0003.CSV	752.134	0.0444316
CAM109_map3	0003.CSV	755.991	0.0444417
CAM109_map3	0003.CSV	759.848	0.0442339
CAM109_map3	0003.CSV	763.705	0.0445953
CAM109_map3	0003.CSV	767.562	0.0448277
CAM109_map3	0003.CSV	771.419	0.0450321
CAM109_map3	0003.CSV	775.276	0.0445281
CAM109_map3	0003.CSV	779.133	0.0448935
CAM109_map3	0003.CSV	782.99	0.0449849
CAM109_map3	0003.CSV	786.848	0.0455059
CAM109_map3	0003.CSV	790.705	0.0458298
CAM109_map3	0003.CSV	794.562	0.0471046
CAM109_map3	0003.CSV	798.419	0.0483685
CAM109_map3	0003.CSV	802.276	0.0500073
CAM109_map3	0003.CSV	806.133	0.0510595
CAM109_map3	0003.CSV	809.99	0.0529722
CAM109_map3	0003.CSV	813.847	0.0551059
CAM109_map3	0003.CSV	817.704	0.0583556
CAM109_map3	0003.CSV	821.562	0.0621655
CAM109_map3	0003.CSV	825.419	0.0674744
CAM109_map3	0003.CSV	829.276	0.072841
CAM109_map3	0003.CSV	833.133	0.0799912
CAM109_map3	0003.CSV	836.99	0.0895795
CAM109_map3	0003.CSV	840.847	0.103528
CAM109_map3	0003.CSV	844.704	0.116935
CAM109_map3	0003.CSV	848.561	0.137436
CAM109_map3	0003.CSV	852.418	0.162781
CAM109_map3	0003.CSV	856.275	0.168152
CAM109_map3	0003.CSV	860.132	0.148253
CAM109_map3	0003.CSV	863.99	0.11681
CAM109_map3	0003.CSV	867.847	0.0846777
CAM109_map3	0003.CSV	871.704	0.0616354
CAM109_map3	0003.CSV	875.561	0.049014
CAM109_map3	0003.CSV	879.418	0.0438071
CAM109_map3	0003.CSV	883.275	0.0413447
CAM109_map3	0003.CSV	887.132	0.0405475
CAM109_map3	0003.CSV	890.989	0.040284
CAM109_map3	0003.CSV	894.846	0.0405567
CAM109_map3	0003.CSV	898.703	0.0406581
CAM109_map3	0003.CSV	902.561	0.0412678
CAM109_map3	0003.CSV	906.418	0.0418142
CAM109_map3	0003.CSV	910.275	0.0419419
CAM109_map3	0003.CSV	914.132	0.0413583
CAM109_map3	0003.CSV	917.989	0.0415417
CAM109_map3	0003.CSV	921.846	0.0417865
CAM109_map3	0003.CSV	925.703	0.0422415
CAM109_map3	0003.CSV	929.56	0.0425152
CAM109_map3	0003.CSV	933.417	0.0430395
CAM109_map3	0003.CSV	937.274	0.0433067
CAM109_map3	0003.CSV	941.131	0.0436537
CAM109_map3	0003.CSV	944.989	0.0436011
CAM109_map3	0003.CSV	948.846	0.0437122
CAM109_map3	0003.CSV	952.703	0.0435965
CAM109_map3	0003.CSV	956.56	0.0436928
CAM109_map3	0003.CSV	960.417	0.0435528
CAM109_map3	0003.CSV	964.274	0.0436554
CAM109_map3	0003.CSV	968.131	0.0436783
CAM109_map3	0003.CSV	971.988	0.0441414
CAM109_map3	0003.CSV	975.845	0.0445803
CAM109_map3	0003.CSV	979.702	0.0453874
CAM109_map3	0003.CSV	983.559	0.0460525
CAM109_map3	0003.CSV	987.417	0.0469105
CAM109_map3	0003.CSV	991.274	0.04745
CAM109_map3	0003.CSV	995.131	0.0480667
CAM109_map3	0003.CSV	998.988	0.048442
CAM109_map3	0003.CSV	1002.85	0.0490987
CAM109_map3	0003.CSV	1006.7	0.0495671
CAM109_map3	0003.CSV	1010.56	0.0503261
CAM109_map3	0003.CSV	1014.42	0.050907
CAM109_map3	0003.CSV	1018.27	0.0517926
CAM109_map3	0003.CSV	1022.13	0.0524726
CAM109_map3	0003.CSV	1025.99	0.0534518
CAM109_map3	0003.CSV	1029.85	0.0541454
CAM109_map3	0003.CSV	1033.7	0.0550033
CAM109_map3	0003.CSV	1037.56	0.0556665
CAM109_map3	0003.CSV	1041.42	0.0563538
CAM109_map3	0003.CSV	1045.27	0.0564787
CAM109_map3	0003.CSV	1049.13	0.0571595
CAM109_map3	0003.CSV	1052.99	0.0583034
CAM109_map3	0003.CSV	1056.84	0.0603342
CAM109_map3	0003.CSV	1060.7	0.0623524
CAM109_map3	0003.CSV	1064.56	0.0643523
CAM109_map3	0003.CSV	1068.42	0.0653365
CAM109_map3	0003.CSV	1072.27	0.0660028
CAM109_map3	0003.CSV	1076.13	0.0674291
CAM109_map3	0003.CSV	1079.99	0.0720491
CAM109_map3	0003.CSV	1083.84	0.0706224
CAM109_map3	0003.CSV	1087.7	0.0619244
CAM109_map3	0003.CSV	1091.56	0.0578817
CAM109_map3	0003.CSV	1095.41	0.0581231
CAM109_map3	0003.CSV	1099.27	0.0589357
CAM109_map3	0003.CSV	1103.13	0.0602625
CAM109_map3	0003.CSV	1106.99	0.0618295
CAM109_map3	0003.CSV	1110.84	0.0638846
CAM109_map3	0003.CSV	1114.7	0.0655836
CAM109_map3	0003.CSV	1118.56	0.0666508
CAM109_map3	0003.CSV	1122.41	0.0666188
CAM109_map3	0003.CSV	1126.27	0.0661335
CAM109_map3	0003.CSV	1130.13	0.0654509
CAM109_map3	0003.CSV	1133.99	0.0653712
CAM109_map3	0003.CSV	1137.84	0.0655233
CAM109_map3	0003.CSV	1141.7	0.0658446
CAM109_map3	0003.CSV	1145.56	0.0658897
CAM109_map3	0003.CSV	1149.41	0.0660959
CAM109_map3	0003.CSV	1153.27	0.0662107
CAM109_map3	0003.CSV	1157.13	0.0663456
CAM109_map3	0003.CSV	1160.99	0.0660129
CAM109_map3	0003.CSV	1164.84	0.0654803
CAM109_map3	0003.CSV	1168.7	0.0643835
CAM109_map3	0003.CSV	1172.56	0.0633253
CAM109_map3	0003.CSV	1176.41	0.0622607
CAM109_map3	0003.CSV	1180.27	0.061594
CAM109_map3	0003.CSV	1184.13	0.060976
CAM109_map3	0003.CSV	1187.99	0.0605999
CAM109_map3	0003.CSV	1191.84	0.0601795
CAM109_map3	0003.CSV	1195.7	0.0601294
CAM109_map3	0003.CSV	1199.56	0.0601353
CAM109_map3	0003.CSV	1203.41	0.0604399
CAM109_map3	0003.CSV	1207.27	0.0606755
CAM109_map3	0003.CSV	1211.13	0.0612121
CAM109_map3	0003.CSV	1214.98	0.0616732
CAM109_map3	0003.CSV	1218.84	0.062365
CAM109_map3	0003.CSV	1222.7	0.0630257
CAM109_map3	0003.CSV	1226.56	0.0639523
CAM109_map3	0003.CSV	1230.41	0.0648782
CAM109_map3	0003.CSV	1234.27	0.0661314
CAM109_map3	0003.CSV	1238.13	0.0673827
CAM109_map3	0003.CSV	1241.98	0.0690237
CAM109_map3	0003.CSV	1245.84	0.0706443
CAM109_map3	0003.CSV	1249.7	0.072226
CAM109_map3	0003.CSV	1253.56	0.0733265
CAM109_map3	0003.CSV	1257.41	0.0743399
CAM109_map3	0003.CSV	1261.27	0.0749619
CAM109_map3	0003.CSV	1265.13	0.0756644
CAM109_map3	0003.CSV	1268.98	0.0762831
CAM109_map3	0003.CSV	1272.84	0.07709
CAM109_map3	0003.CSV	1276.7	0.0775117
CAM109_map3	0003.CSV	1280.56	0.0779273
CAM109_map3	0003.CSV	1284.41	0.0779747
CAM109_map3	0003.CSV	1288.27	0.0778711
CAM109_map3	0003.CSV	1292.13	0.0772317
CAM109_map3	0003.CSV	1295.98	0.0766287
CAM109_map3	0003.CSV	1299.84	0.0759919
CAM109_map3	0003.CSV	1303.7	0.0758465
CAM109_map3	0003.CSV	1307.56	0.0758899
CAM109_map3	0003.CSV	1311.41	0.0764638
CAM109_map3	0003.CSV	1315.27	0.0770714
CAM109_map3	0003.CSV	1319.13	0.0778761
CAM109_map3	0003.CSV	1322.98	0.078374
CAM109_map3	0003.CSV	1326.84	0.0791327
CAM109_map3	0003.CSV	1330.7	0.0799856
CAM109_map3	0003.CSV	1334.56	0.0812183
CAM109_map3	0003.CSV	1338.41	0.0828933
CAM109_map3	0003.CSV	1342.27	0.0851083
CAM109_map3	0003.CSV	1346.13	0.0866509
CAM109_map3	0003.CSV	1349.98	0.0886965
CAM109_map3	0003.CSV	1353.84	0.090683
CAM109_map3	0003.CSV	1357.7	0.0927666
CAM109_map3	0003.CSV	1361.56	0.0950002
CAM109_map3	0003.CSV	1365.41	0.0979547
CAM109_map3	0003.CSV	1369.27	0.100189
CAM109_map3	0003.CSV	1373.13	0.103449
CAM109_map3	0003.CSV	1376.98	0.1071
CAM109_map3	0003.CSV	1380.84	0.1101
CAM109_map3	0003.CSV	1384.7	0.11282
CAM109_map3	0003.CSV	1388.56	0.116834
CAM109_map3	0003.CSV	1392.41	0.119858
CAM109_map3	0003.CSV	1396.27	0.124203
CAM109_map3	0003.CSV	1400.13	0.128837
CAM109_map3	0003.CSV	1403.98	0.133145
CAM109_map3	0003.CSV	1407.84	0.137547
CAM109_map3	0003.CSV	1411.7	0.14189
CAM109_map3	0003.CSV	1415.55	0.145092
CAM109_map3	0003.CSV	1419.41	0.149737
CAM109_map3	0003.CSV	1423.27	0.153413
CAM109_map3	0003.CSV	1427.12	0.156982
CAM109_map3	0003.CSV	1430.98	0.160845
CAM109_map3	0003.CSV	1434.84	0.166589
CAM109_map3	0003.CSV	1438.7	0.173488
CAM109_map3	0003.CSV	1442.55	0.178493
CAM109_map3	0003.CSV	1446.41	0.180851
CAM109_map3	0003.CSV	1450.27	0.181264
CAM109_map3	0003.CSV	1454.12	0.178999
CAM109_map3	0003.CSV	1457.98	0.176708
CAM109_map3	0003.CSV	1461.84	0.174898
CAM109_map3	0003.CSV	1465.7	0.174167
CAM109_map3	0003.CSV	1469.55	0.171265
CAM109_map3	0003.CSV	1473.41	0.165103
CAM109_map3	0003.CSV	1477.27	0.156637
CAM109_map3	0003.CSV	1481.12	0.150971
CAM109_map3	0003.CSV	1484.98	0.145285
CAM109_map3	0003.CSV	1488.84	0.13882
CAM109_map3	0003.CSV	1492.7	0.131751
CAM109_map3	0003.CSV	1496.55	0.126159
CAM109_map3	0003.CSV	1500.41	0.119577
CAM109_map3	0003.CSV	1504.27	0.115358
CAM109_map3	0003.CSV	1508.12	0.107315
CAM109_map3	0003.CSV	1511.98	0.101354
CAM109_map3	0003.CSV	1515.84	0.0967272
CAM109_map3	0003.CSV	1519.7	0.0906654
CAM109_map3	0003.CSV	1523.55	0.0829586
CAM109_map3	0003.CSV	1527.41	0.077496
CAM109_map3	0003.CSV	1531.27	0.0729383
CAM109_map3	0003.CSV	1535.12	0.0693175
CAM109_map3	0003.CSV	1538.98	0.0660726
CAM109_map3	0003.CSV	1542.84	0.061604
CAM109_map3	0003.CSV	1546.7	0.0576264
CAM109_map3	0003.CSV	1550.55	0.0548072
CAM109_map3	0003.CSV	1554.41	0.0520328
CAM109_map3	0003.CSV	1558.27	0.0495155
CAM109_map3	0003.CSV	1562.12	0.0470592
CAM109_map3	0003.CSV	1565.98	0.0455994
CAM109_map3	0003.CSV	1569.84	0.0438166
CAM109_map3	0003.CSV	1573.69	0.0422004
CAM109_map3	0003.CSV	1577.55	0.0403554
CAM109_map3	0003.CSV	1581.41	0.0384133
CAM109_map3	0003.CSV	1585.27	0.036502
CAM109_map3	0003.CSV	1589.12	0.0351098
CAM109_map3	0003.CSV	1592.98	0.0342478
CAM109_map3	0003.CSV	1596.84	0.0339018
CAM109_map3	0003.CSV	1600.69	0.0335798
CAM109_map3	0003.CSV	1604.55	0.0333112
CAM109_map3	0003.CSV	1608.41	0.0329601
CAM109_map3	0003.CSV	1612.27	0.0326561
CAM109_map3	0003.CSV	1616.12	0.0322467
CAM109_map3	0003.CSV	1619.98	0.0320212
CAM109_map3	0003.CSV	1623.84	0.0314948
CAM109_map3	0003.CSV	1627.69	0.0309995
CAM109_map3	0003.CSV	1631.55	0.0301506
CAM109_map3	0003.CSV	1635.41	0.0299432
CAM109_map3	0003.CSV	1639.27	0.0298327
CAM109_map3	0003.CSV	1643.12	0.029221
CAM109_map3	0003.CSV	1646.98	0.0290297
CAM109_map3	0003.CSV	1650.84	0.029226
CAM109_map3	0003.CSV	1654.69	0.0293231
CAM109_map3	0003.CSV	1658.55	0.0288918
CAM109_map3	0003.CSV	1662.41	0.0284229
CAM109_map3	0003.CSV	1666.27	0.0281095
CAM109_map3	0003.CSV	1670.12	0.0278752
CAM109_map3	0003.CSV	1673.98	0.0281038
CAM109_map3	0003.CSV	1677.84	0.0276984
CAM109_map3	0003.CSV	1681.69	0.0275616
CAM109_map3	0003.CSV	1685.55	0.0279302
CAM109_map3	0003.CSV	1689.41	0.0276668
CAM109_map3	0003.CSV	1693.27	0.0269452
CAM109_map3	0003.CSV	1697.12	0.0271245
CAM109_map3	0003.CSV	1700.98	0.0278681
CAM109_map3	0003.CSV	1704.84	0.0283445
CAM109_map3	0003.CSV	1708.69	0.0287051
CAM109_map3	0003.CSV	1712.55	0.0291092
CAM109_map3	0003.CSV	1716.41	0.0311081
CAM109_map3	0003.CSV	1720.27	0.0335253
CAM109_map3	0003.CSV	1724.12	0.0339278
[truncated: 97,246 more rows]

## Sheet: CAM109_map4
Map	Select spectrum number	Wavenumbers	Absorbance
CAM109_map4	0001.CSV	674.992	0.0407141
CAM109_map4	0001.CSV	678.849	0.0428924
CAM109_map4	0001.CSV	682.706	0.0442746
CAM109_map4	0001.CSV	686.563	0.0463908
CAM109_map4	0001.CSV	690.42	0.0502658
CAM109_map4	0001.CSV	694.277	0.0613203
CAM109_map4	0001.CSV	698.134	0.0737941
CAM109_map4	0001.CSV	701.991	0.0712662
CAM109_map4	0001.CSV	705.849	0.0642766
CAM109_map4	0001.CSV	709.706	0.0735166
CAM109_map4	0001.CSV	713.563	0.0722903
CAM109_map4	0001.CSV	717.42	0.0513997
CAM109_map4	0001.CSV	721.277	0.0393617
CAM109_map4	0001.CSV	725.134	0.0386277
CAM109_map4	0001.CSV	728.991	0.039217
CAM109_map4	0001.CSV	732.848	0.0410678
CAM109_map4	0001.CSV	736.705	0.0439562
CAM109_map4	0001.CSV	740.562	0.0478146
CAM109_map4	0001.CSV	744.42	0.0498321
CAM109_map4	0001.CSV	748.277	0.051095
CAM109_map4	0001.CSV	752.134	0.0513764
CAM109_map4	0001.CSV	755.991	0.0519438
CAM109_map4	0001.CSV	759.848	0.0520062
CAM109_map4	0001.CSV	763.705	0.052016
CAM109_map4	0001.CSV	767.562	0.0514369
CAM109_map4	0001.CSV	771.419	0.0514773
CAM109_map4	0001.CSV	775.276	0.0510082
CAM109_map4	0001.CSV	779.133	0.0512788
CAM109_map4	0001.CSV	782.99	0.0516905
CAM109_map4	0001.CSV	786.848	0.0527767
CAM109_map4	0001.CSV	790.705	0.0534219
CAM109_map4	0001.CSV	794.562	0.0550425
CAM109_map4	0001.CSV	798.419	0.0569666
CAM109_map4	0001.CSV	802.276	0.0590352
CAM109_map4	0001.CSV	806.133	0.0602766
CAM109_map4	0001.CSV	809.99	0.0620871
CAM109_map4	0001.CSV	813.847	0.0645611
CAM109_map4	0001.CSV	817.704	0.0682831
CAM109_map4	0001.CSV	821.562	0.0723349
CAM109_map4	0001.CSV	825.419	0.0776332
CAM109_map4	0001.CSV	829.276	0.0832105
CAM109_map4	0001.CSV	833.133	0.090103
CAM109_map4	0001.CSV	836.99	0.0990715
CAM109_map4	0001.CSV	840.847	0.110574
CAM109_map4	0001.CSV	844.704	0.120878
CAM109_map4	0001.CSV	848.561	0.13388
CAM109_map4	0001.CSV	852.418	0.14388
CAM109_map4	0001.CSV	856.275	0.141051
CAM109_map4	0001.CSV	860.132	0.125507
CAM109_map4	0001.CSV	863.99	0.102015
CAM109_map4	0001.CSV	867.847	0.0782886
CAM109_map4	0001.CSV	871.704	0.0624095
CAM109_map4	0001.CSV	875.561	0.0537114
CAM109_map4	0001.CSV	879.418	0.0487027
CAM109_map4	0001.CSV	883.275	0.0447721
CAM109_map4	0001.CSV	887.132	0.0424815
CAM109_map4	0001.CSV	890.989	0.0412905
CAM109_map4	0001.CSV	894.846	0.0408212
CAM109_map4	0001.CSV	898.703	0.0404849
CAM109_map4	0001.CSV	902.561	0.0406889
CAM109_map4	0001.CSV	906.418	0.0409905
CAM109_map4	0001.CSV	910.275	0.0411207
CAM109_map4	0001.CSV	914.132	0.0406945
CAM109_map4	0001.CSV	917.989	0.0408559
CAM109_map4	0001.CSV	921.846	0.0410821
CAM109_map4	0001.CSV	925.703	0.041498
CAM109_map4	0001.CSV	929.56	0.0417574
CAM109_map4	0001.CSV	933.417	0.0420751
CAM109_map4	0001.CSV	937.274	0.042025
CAM109_map4	0001.CSV	941.131	0.0420157
CAM109_map4	0001.CSV	944.989	0.0416457
CAM109_map4	0001.CSV	948.846	0.0412614
CAM109_map4	0001.CSV	952.703	0.0406621
CAM109_map4	0001.CSV	956.56	0.0404705
CAM109_map4	0001.CSV	960.417	0.0402185
CAM109_map4	0001.CSV	964.274	0.0401785
CAM109_map4	0001.CSV	968.131	0.0404019
CAM109_map4	0001.CSV	971.988	0.0413264
CAM109_map4	0001.CSV	975.845	0.0422512
CAM109_map4	0001.CSV	979.702	0.0434413
CAM109_map4	0001.CSV	983.559	0.0445419
CAM109_map4	0001.CSV	987.417	0.0459517
CAM109_map4	0001.CSV	991.274	0.0471792
CAM109_map4	0001.CSV	995.131	0.0484705
CAM109_map4	0001.CSV	998.988	0.0495939
CAM109_map4	0001.CSV	1002.85	0.0508529
CAM109_map4	0001.CSV	1006.7	0.0518629
CAM109_map4	0001.CSV	1010.56	0.0531186
CAM109_map4	0001.CSV	1014.42	0.0540174
CAM109_map4	0001.CSV	1018.27	0.0550062
CAM109_map4	0001.CSV	1022.13	0.0559837
CAM109_map4	0001.CSV	1025.99	0.0572446
CAM109_map4	0001.CSV	1029.85	0.0582399
CAM109_map4	0001.CSV	1033.7	0.0594102
CAM109_map4	0001.CSV	1037.56	0.060237
CAM109_map4	0001.CSV	1041.42	0.0607746
CAM109_map4	0001.CSV	1045.27	0.0608367
CAM109_map4	0001.CSV	1049.13	0.0616939
CAM109_map4	0001.CSV	1052.99	0.063305
CAM109_map4	0001.CSV	1056.84	0.066004
CAM109_map4	0001.CSV	1060.7	0.068876
CAM109_map4	0001.CSV	1064.56	0.0716406
CAM109_map4	0001.CSV	1068.42	0.0731707
CAM109_map4	0001.CSV	1072.27	0.0740899
CAM109_map4	0001.CSV	1076.13	0.0753053
CAM109_map4	0001.CSV	1079.99	0.0786126
CAM109_map4	0001.CSV	1083.84	0.0772945
CAM109_map4	0001.CSV	1087.7	0.0704004
CAM109_map4	0001.CSV	1091.56	0.0663098
CAM109_map4	0001.CSV	1095.41	0.0654765
CAM109_map4	0001.CSV	1099.27	0.0652256
CAM109_map4	0001.CSV	1103.13	0.0654641
CAM109_map4	0001.CSV	1106.99	0.0660009
CAM109_map4	0001.CSV	1110.84	0.0669125
CAM109_map4	0001.CSV	1114.7	0.0675225
CAM109_map4	0001.CSV	1118.56	0.0676897
CAM109_map4	0001.CSV	1122.41	0.0671155
CAM109_map4	0001.CSV	1126.27	0.066309
CAM109_map4	0001.CSV	1130.13	0.0653898
CAM109_map4	0001.CSV	1133.99	0.0649744
CAM109_map4	0001.CSV	1137.84	0.0647141
CAM109_map4	0001.CSV	1141.7	0.0644876
CAM109_map4	0001.CSV	1145.56	0.0639103
CAM109_map4	0001.CSV	1149.41	0.0635125
CAM109_map4	0001.CSV	1153.27	0.0631382
CAM109_map4	0001.CSV	1157.13	0.0630355
CAM109_map4	0001.CSV	1160.99	0.062886
CAM109_map4	0001.CSV	1164.84	0.0626795
CAM109_map4	0001.CSV	1168.7	0.0619274
CAM109_map4	0001.CSV	1172.56	0.0610759
CAM109_map4	0001.CSV	1176.41	0.0600557
CAM109_map4	0001.CSV	1180.27	0.0592476
CAM109_map4	0001.CSV	1184.13	0.058283
CAM109_map4	0001.CSV	1187.99	0.0574735
CAM109_map4	0001.CSV	1191.84	0.0566121
CAM109_map4	0001.CSV	1195.7	0.0559892
CAM109_map4	0001.CSV	1199.56	0.0553935
CAM109_map4	0001.CSV	1203.41	0.0551805
CAM109_map4	0001.CSV	1207.27	0.0550378
CAM109_map4	0001.CSV	1211.13	0.0551475
CAM109_map4	0001.CSV	1214.98	0.0552627
CAM109_map4	0001.CSV	1218.84	0.0556769
CAM109_map4	0001.CSV	1222.7	0.0560582
CAM109_map4	0001.CSV	1226.56	0.0568491
CAM109_map4	0001.CSV	1230.41	0.0578139
CAM109_map4	0001.CSV	1234.27	0.0590854
CAM109_map4	0001.CSV	1238.13	0.0604962
CAM109_map4	0001.CSV	1241.98	0.062314
CAM109_map4	0001.CSV	1245.84	0.0642253
CAM109_map4	0001.CSV	1249.7	0.0661949
CAM109_map4	0001.CSV	1253.56	0.0676079
CAM109_map4	0001.CSV	1257.41	0.0687275
CAM109_map4	0001.CSV	1261.27	0.0693843
CAM109_map4	0001.CSV	1265.13	0.0700098
CAM109_map4	0001.CSV	1268.98	0.0705207
CAM109_map4	0001.CSV	1272.84	0.0711906
CAM109_map4	0001.CSV	1276.7	0.0715124
CAM109_map4	0001.CSV	1280.56	0.0718222
CAM109_map4	0001.CSV	1284.41	0.0718107
CAM109_map4	0001.CSV	1288.27	0.0715247
CAM109_map4	0001.CSV	1292.13	0.0705125
CAM109_map4	0001.CSV	1295.98	0.0692823
CAM109_map4	0001.CSV	1299.84	0.0679855
CAM109_map4	0001.CSV	1303.7	0.0672043
CAM109_map4	0001.CSV	1307.56	0.0667684
CAM109_map4	0001.CSV	1311.41	0.0668997
CAM109_map4	0001.CSV	1315.27	0.0671932
CAM109_map4	0001.CSV	1319.13	0.0677004
CAM109_map4	0001.CSV	1322.98	0.0678439
CAM109_map4	0001.CSV	1326.84	0.0681609
CAM109_map4	0001.CSV	1330.7	0.0686283
CAM109_map4	0001.CSV	1334.56	0.0694992
CAM109_map4	0001.CSV	1338.41	0.0708554
CAM109_map4	0001.CSV	1342.27	0.0727673
CAM109_map4	0001.CSV	1346.13	0.0741295
CAM109_map4	0001.CSV	1349.98	0.0759114
CAM109_map4	0001.CSV	1353.84	0.0776352
CAM109_map4	0001.CSV	1357.7	0.079453
CAM109_map4	0001.CSV	1361.56	0.0815302
CAM109_map4	0001.CSV	1365.41	0.0843238
CAM109_map4	0001.CSV	1369.27	0.0864435
CAM109_map4	0001.CSV	1373.13	0.0894548
CAM109_map4	0001.CSV	1376.98	0.0928449
CAM109_map4	0001.CSV	1380.84	0.0955
CAM109_map4	0001.CSV	1384.7	0.0977213
CAM109_map4	0001.CSV	1388.56	0.101022
CAM109_map4	0001.CSV	1392.41	0.103502
CAM109_map4	0001.CSV	1396.27	0.106983
CAM109_map4	0001.CSV	1400.13	0.11055
CAM109_map4	0001.CSV	1403.98	0.113987
CAM109_map4	0001.CSV	1407.84	0.117707
CAM109_map4	0001.CSV	1411.7	0.121407
CAM109_map4	0001.CSV	1415.55	0.124053
CAM109_map4	0001.CSV	1419.41	0.127635
CAM109_map4	0001.CSV	1423.27	0.130022
CAM109_map4	0001.CSV	1427.12	0.132123
CAM109_map4	0001.CSV	1430.98	0.134506
CAM109_map4	0001.CSV	1434.84	0.138237
CAM109_map4	0001.CSV	1438.7	0.14267
CAM109_map4	0001.CSV	1442.55	0.146634
CAM109_map4	0001.CSV	1446.41	0.149819
CAM109_map4	0001.CSV	1450.27	0.15221
CAM109_map4	0001.CSV	1454.12	0.151812
CAM109_map4	0001.CSV	1457.98	0.151309
CAM109_map4	0001.CSV	1461.84	0.150607
CAM109_map4	0001.CSV	1465.7	0.151157
CAM109_map4	0001.CSV	1469.55	0.150269
CAM109_map4	0001.CSV	1473.41	0.146742
CAM109_map4	0001.CSV	1477.27	0.140087
CAM109_map4	0001.CSV	1481.12	0.134862
CAM109_map4	0001.CSV	1484.98	0.129531
CAM109_map4	0001.CSV	1488.84	0.123484
CAM109_map4	0001.CSV	1492.7	0.116995
CAM109_map4	0001.CSV	1496.55	0.111747
CAM109_map4	0001.CSV	1500.41	0.105528
CAM109_map4	0001.CSV	1504.27	0.101702
CAM109_map4	0001.CSV	1508.12	0.0945801
CAM109_map4	0001.CSV	1511.98	0.0892185
CAM109_map4	0001.CSV	1515.84	0.0850399
CAM109_map4	0001.CSV	1519.7	0.0797523
CAM109_map4	0001.CSV	1523.55	0.0735633
CAM109_map4	0001.CSV	1527.41	0.0696883
CAM109_map4	0001.CSV	1531.27	0.0668046
CAM109_map4	0001.CSV	1535.12	0.0651281
CAM109_map4	0001.CSV	1538.98	0.0634464
CAM109_map4	0001.CSV	1542.84	0.0602912
CAM109_map4	0001.CSV	1546.7	0.0567503
CAM109_map4	0001.CSV	1550.55	0.0541883
CAM109_map4	0001.CSV	1554.41	0.0516735
CAM109_map4	0001.CSV	1558.27	0.0493354
CAM109_map4	0001.CSV	1562.12	0.0470701
CAM109_map4	0001.CSV	1565.98	0.0458513
CAM109_map4	0001.CSV	1569.84	0.0445676
CAM109_map4	0001.CSV	1573.69	0.0435459
CAM109_map4	0001.CSV	1577.55	0.0419678
CAM109_map4	0001.CSV	1581.41	0.0395516
CAM109_map4	0001.CSV	1585.27	0.0367722
CAM109_map4	0001.CSV	1589.12	0.0346395
CAM109_map4	0001.CSV	1592.98	0.0334445
CAM109_map4	0001.CSV	1596.84	0.0330104
CAM109_map4	0001.CSV	1600.69	0.0325592
CAM109_map4	0001.CSV	1604.55	0.0321799
CAM109_map4	0001.CSV	1608.41	0.0317715
CAM109_map4	0001.CSV	1612.27	0.0314073
CAM109_map4	0001.CSV	1616.12	0.0310313
CAM109_map4	0001.CSV	1619.98	0.0309173
CAM109_map4	0001.CSV	1623.84	0.0305064
CAM109_map4	0001.CSV	1627.69	0.0300902
CAM109_map4	0001.CSV	1631.55	0.0293726
CAM109_map4	0001.CSV	1635.41	0.0292482
CAM109_map4	0001.CSV	1639.27	0.029172
CAM109_map4	0001.CSV	1643.12	0.0286542
CAM109_map4	0001.CSV	1646.98	0.0284966
CAM109_map4	0001.CSV	1650.84	0.0288442
CAM109_map4	0001.CSV	1654.69	0.0289072
CAM109_map4	0001.CSV	1658.55	0.0284725
CAM109_map4	0001.CSV	1662.41	0.0279891
CAM109_map4	0001.CSV	1666.27	0.0276766
CAM109_map4	0001.CSV	1670.12	0.0274826
CAM109_map4	0001.CSV	1673.98	0.027658
CAM109_map4	0001.CSV	1677.84	0.0272745
CAM109_map4	0001.CSV	1681.69	0.027202
CAM109_map4	0001.CSV	1685.55	0.0277303
CAM109_map4	0001.CSV	1689.41	0.0276437
CAM109_map4	0001.CSV	1693.27	0.027087
CAM109_map4	0001.CSV	1697.12	0.0275149
CAM109_map4	0001.CSV	1700.98	0.0286625
CAM109_map4	0001.CSV	1704.84	0.0296992
CAM109_map4	0001.CSV	1708.69	0.0307156
CAM109_map4	0001.CSV	1712.55	0.0317195
CAM109_map4	0001.CSV	1716.41	0.0346879
CAM109_map4	0001.CSV	1720.27	0.0379774
CAM109_map4	0001.CSV	1724.12	0.0388147
CAM109_map4	0001.CSV	1727.98	0.0390976
CAM109_map4	0001.CSV	1731.84	0.0388882
CAM109_map4	0001.CSV	1735.69	0.0377706
CAM109_map4	0001.CSV	1739.55	0.0356167
CAM109_map4	0001.CSV	1743.41	0.0328582
CAM109_map4	0001.CSV	1747.27	0.0299023
CAM109_map4	0001.CSV	1751.12	0.0268191
CAM109_map4	0001.CSV	1754.98	0.0246843
CAM109_map4	0001.CSV	1758.84	0.02344
CAM109_map4	0001.CSV	1762.69	0.022719
CAM109_map4	0001.CSV	1766.55	0.0222617
CAM109_map4	0001.CSV	1770.41	0.0223261
CAM109_map4	0001.CSV	1774.26	0.0233644
CAM109_map4	0001.CSV	1778.12	0.0241586
CAM109_map4	0001.CSV	1781.98	0.0249837
CAM109_map4	0001.CSV	1785.84	0.0252074
CAM109_map4	0001.CSV	1789.69	0.0247244
CAM109_map4	0001.CSV	1793.55	0.0237179
CAM109_map4	0001.CSV	1797.41	0.022771
CAM109_map4	0001.CSV	1801.26	0.0219598
CAM109_map4	0001.CSV	1805.12	0.0213019
CAM109_map4	0001.CSV	1808.98	0.0209381
CAM109_map4	0001.CSV	1812.84	0.0208995
CAM109_map4	0001.CSV	1816.69	0.020697
CAM109_map4	0001.CSV	1820.55	0.0205938
CAM109_map4	0001.CSV	1824.41	0.0205667
CAM109_map4	0001.CSV	1828.26	0.0207719
CAM109_map4	0001.CSV	1832.12	0.0208405
CAM109_map4	0001.CSV	1835.98	0.020802
CAM109_map4	0001.CSV	1839.84	0.0206672
CAM109_map4	0001.CSV	1843.69	0.0208856
CAM109_map4	0001.CSV	1847.55	0.0211234
CAM109_map4	0001.CSV	1851.41	0.0209233
CAM109_map4	0001.CSV	1855.26	0.0207711
CAM109_map4	0001.CSV	1859.12	0.0208785
CAM109_map4	0001.CSV	1862.98	0.0208346
CAM109_map4	0001.CSV	1866.84	0.0209262
CAM109_map4	0001.CSV	1870.69	0.0212635
CAM109_map4	0001.CSV	1874.55	0.0211649
CAM109_map4	0001.CSV	1878.41	0.0210158
CAM109_map4	0001.CSV	1882.26	0.0209892
CAM109_map4	0001.CSV	1886.12	0.0209567
CAM109_map4	0001.CSV	1889.98	0.0211073
CAM109_map4	0001.CSV	1893.83	0.0211909
CAM109_map4	0001.CSV	1897.69	0.0212131
CAM109_map4	0001.CSV	1901.55	0.021137
CAM109_map4	0001.CSV	1905.41	0.0211218
CAM109_map4	0001.CSV	1909.26	0.0211847
CAM109_map4	0001.CSV	1913.12	0.0211609
CAM109_map4	0001.CSV	1916.98	0.0211076
CAM109_map4	0001.CSV	1920.83	0.0213274
CAM109_map4	0001.CSV	1924.69	0.021433
CAM109_map4	0001.CSV	1928.55	0.0214057
CAM109_map4	0001.CSV	1932.4	0.0213907
CAM109_map4	0001.CSV	1936.26	0.0214255
CAM109_map4	0001.CSV	1940.12	0.0214578
CAM109_map4	0001.CSV	1943.98	0.021741
CAM109_map4	0001.CSV	1947.83	0.0217745
CAM109_map4	0001.CSV	1951.69	0.0216994
CAM109_map4	0001.CSV	1955.55	0.0216946
CAM109_map4	0001.CSV	1959.4	0.0216933
CAM109_map4	0001.CSV	1963.26	0.0216679
CAM109_map4	0001.CSV	1967.12	0.02184
CAM109_map4	0001.CSV	1970.98	0.0218627
CAM109_map4	0001.CSV	1974.83	0.0217787
CAM109_map4	0001.CSV	1978.69	0.0217886
CAM109_map4	0001.CSV	1982.55	0.0218626
CAM109_map4	0001.CSV	1986.4	0.0218316
CAM109_map4	0001.CSV	1990.26	0.0219127
CAM109_map4	0001.CSV	1994.12	0.021997
CAM109_map4	0001.CSV	1997.98	0.021966
CAM109_map4	0001.CSV	2001.83	0.021952
CAM109_map4	0001.CSV	2005.69	0.0220036
CAM109_map4	0001.CSV	2009.55	0.0220378
CAM109_map4	0001.CSV	2013.4	0.0220364
CAM109_map4	0001.CSV	2017.26	0.0220868
CAM109_map4	0001.CSV	2021.12	0.0221925
CAM109_map4	0001.CSV	2024.97	0.022146
CAM109_map4	0001.CSV	2028.83	0.0221275
CAM109_map4	0001.CSV	2032.69	0.0221089
CAM109_map4	0001.CSV	2036.55	0.0221613
CAM109_map4	0001.CSV	2040.4	0.0222474
CAM109_map4	0001.CSV	2044.26	0.0223393
CAM109_map4	0001.CSV	2048.12	0.0223058
CAM109_map4	0001.CSV	2051.97	0.0223014
CAM109_map4	0001.CSV	2055.83	0.0223123
CAM109_map4	0001.CSV	2059.69	0.0223535
CAM109_map4	0001.CSV	2063.55	0.0224342
CAM109_map4	0001.CSV	2067.4	0.0225189
CAM109_map4	0001.CSV	2071.26	0.0225068
CAM109_map4	0001.CSV	2075.12	0.0225692
CAM109_map4	0001.CSV	2078.97	0.0226097
CAM109_map4	0001.CSV	2082.83	0.0226109
CAM109_map4	0001.CSV	2086.69	0.0225974
CAM109_map4	0001.CSV	2090.55	0.0226695
CAM109_map4	0001.CSV	2094.4	0.0227169
CAM109_map4	0001.CSV	2098.26	0.0227688
CAM109_map4	0001.CSV	2102.12	0.0227842
CAM109_map4	0001.CSV	2105.97	0.0228077
CAM109_map4	0001.CSV	2109.83	0.0228026
CAM109_map4	0001.CSV	2113.69	0.022915
CAM109_map4	0001.CSV	2117.55	0.023004
CAM109_map4	0001.CSV	2121.4	0.0230176
CAM109_map4	0001.CSV	2125.26	0.023004
CAM109_map4	0001.CSV	2129.12	0.0230206
CAM109_map4	0001.CSV	2132.97	0.0230767
CAM109_map4	0001.CSV	2136.83	0.0232161
CAM109_map4	0001.CSV	2140.69	0.0232546
CAM109_map4	0001.CSV	2144.55	0.0232901
CAM109_map4	0001.CSV	2148.4	0.0233434
CAM109_map4	0001.CSV	2152.26	0.0233687
CAM109_map4	0001.CSV	2156.12	0.0233544
CAM109_map4	0001.CSV	2159.97	0.0233808
CAM109_map4	0001.CSV	2163.83	0.0234139
CAM109_map4	0001.CSV	2167.69	0.0234902
CAM109_map4	0001.CSV	2171.55	0.0235296
CAM109_map4	0001.CSV	2175.4	0.0235939
CAM109_map4	0001.CSV	2179.26	0.023629
CAM109_map4	0001.CSV	2183.12	0.023657
CAM109_map4	0001.CSV	2186.97	0.0236545
CAM109_map4	0001.CSV	2190.83	0.0236883
CAM109_map4	0001.CSV	2194.69	0.0237286
CAM109_map4	0001.CSV	2198.55	0.0237744
CAM109_map4	0001.CSV	2202.4	0.0237953
CAM109_map4	0001.CSV	2206.26	0.0238104
CAM109_map4	0001.CSV	2210.12	0.0238296
CAM109_map4	0001.CSV	2213.97	0.0238982
CAM109_map4	0001.CSV	2217.83	0.0238949
CAM109_map4	0001.CSV	2221.69	0.0238997
CAM109_map4	0001.CSV	2225.54	0.0239102
CAM109_map4	0001.CSV	2229.4	0.0239122
CAM109_map4	0001.CSV	2233.26	0.0239259
CAM109_map4	0001.CSV	2237.12	0.0239716
CAM109_map4	0001.CSV	2240.97	0.0239628
CAM109_map4	0001.CSV	2244.83	0.0240098
CAM109_map4	0001.CSV	2248.69	0.0240283
CAM109_map4	0001.CSV	2252.54	0.0240169
CAM109_map4	0001.CSV	2256.4	0.0239924
CAM109_map4	0001.CSV	2260.26	0.024028
CAM109_map4	0001.CSV	2264.11	0.024008
CAM109_map4	0001.CSV	2267.97	0.0239959
CAM109_map4	0001.CSV	2271.83	0.0240229
CAM109_map4	0001.CSV	2275.69	0.0240662
CAM109_map4	0001.CSV	2279.54	0.0240553
CAM109_map4	0001.CSV	2283.4	0.0240398
CAM109_map4	0001.CSV	2287.26	0.0240154
CAM109_map4	0001.CSV	2291.11	0.0240518
CAM109_map4	0001.CSV	2294.97	0.0240952
CAM109_map4	0001.CSV	2298.83	0.024126
CAM109_map4	0001.CSV	2302.69	0.0241081
CAM109_map4	0001.CSV	2306.54	0.0240787
CAM109_map4	0001.CSV	2310.4	0.024013
CAM109_map4	0001.CSV	2314.26	0.0238743
CAM109_map4	0001.CSV	2318.11	0.0236434
CAM109_map4	0001.CSV	2321.97	0.023432
CAM109_map4	0001.CSV	2325.83	0.0230501
CAM109_map4	0001.CSV	2329.69	0.0227751
CAM109_map4	0001.CSV	2333.54	0.0226847
CAM109_map4	0001.CSV	2337.4	0.0226972
CAM109_map4	0001.CSV	2341.26	0.0227576
CAM109_map4	0001.CSV	2345.11	0.023382
CAM109_map4	0001.CSV	2348.97	0.0234579
CAM109_map4	0001.CSV	2352.83	0.0225312
CAM109_map4	0001.CSV	2356.69	0.0207186
CAM109_map4	0001.CSV	2360.54	0.0198896
CAM109_map4	0001.CSV	2364.4	0.0209183
CAM109_map4	0001.CSV	2368.26	0.0229006
CAM109_map4	0001.CSV	2372.11	0.024294
CAM109_map4	0001.CSV	2375.97	0.0248751
CAM109_map4	0001.CSV	2379.83	0.0250339
CAM109_map4	0001.CSV	2383.69	0.0249604
CAM109_map4	0001.CSV	2387.54	0.0247881
CAM109_map4	0001.CSV	2391.4	0.0247184
CAM109_map4	0001.CSV	2395.26	0.0246962
CAM109_map4	0001.CSV	2399.11	0.0246777
CAM109_map4	0001.CSV	2402.97	0.0246926
CAM109_map4	0001.CSV	2406.83	0.0247454
CAM109_map4	0001.CSV	2410.68	0.0247621
CAM109_map4	0001.CSV	2414.54	0.0247452
CAM109_map4	0001.CSV	2418.4	0.0247743
CAM109_map4	0001.CSV	2422.26	0.0248118
CAM109_map4	0001.CSV	2426.11	0.0248243
CAM109_map4	0001.CSV	2429.97	0.0248502
CAM109_map4	0001.CSV	2433.83	0.0248898
CAM109_map4	0001.CSV	2437.68	0.0249248
CAM109_map4	0001.CSV	2441.54	0.0249439
CAM109_map4	0001.CSV	2445.4	0.0249389
CAM109_map4	0001.CSV	2449.26	0.0249271
CAM109_map4	0001.CSV	2453.11	0.024954
CAM109_map4	0001.CSV	2456.97	0.0249989
CAM109_map4	0001.CSV	2460.83	0.0250618
CAM109_map4	0001.CSV	2464.68	0.0251118
CAM109_map4	0001.CSV	2468.54	0.0252035
CAM109_map4	0001.CSV	2472.4	0.0253271
CAM109_map4	0001.CSV	2476.26	0.0254774
CAM109_map4	0001.CSV	2480.11	0.0255836
CAM109_map4	0001.CSV	2483.97	0.0257038
CAM109_map4	0001.CSV	2487.83	0.0258332
CAM109_map4	0001.CSV	2491.68	0.0259801
CAM109_map4	0001.CSV	2495.54	0.0261104
CAM109_map4	0001.CSV	2499.4	0.0261385
CAM109_map4	0001.CSV	2503.26	0.0260619
CAM109_map4	0001.CSV	2507.11	0.0260243
CAM109_map4	0001.CSV	2510.97	0.0260261
CAM109_map4	0001.CSV	2514.83	0.0261008
CAM109_map4	0001.CSV	2518.68	0.0262251
CAM109_map4	0001.CSV	2522.54	0.0262803
CAM109_map4	0001.CSV	2526.4	0.0261917
CAM109_map4	0001.CSV	2530.26	0.0260172
CAM109_map4	0001.CSV	2534.11	0.0258714
CAM109_map4	0001.CSV	2537.97	0.0258361
CAM109_map4	0001.CSV	2541.83	0.0258086
CAM109_map4	0001.CSV	2545.68	0.0257587
CAM109_map4	0001.CSV	2549.54	0.025692
CAM109_map4	0001.CSV	2553.4	0.0256306
CAM109_map4	0001.CSV	2557.26	0.0255592
CAM109_map4	0001.CSV	2561.11	0.0254935
CAM109_map4	0001.CSV	2564.97	0.0254181
CAM109_map4	0001.CSV	2568.83	0.025383
CAM109_map4	0001.CSV	2572.68	0.0254174
CAM109_map4	0001.CSV	2576.54	0.025455
CAM109_map4	0001.CSV	2580.4	0.0254383
CAM109_map4	0001.CSV	2584.25	0.0254139
CAM109_map4	0001.CSV	2588.11	0.0253768
CAM109_map4	0001.CSV	2591.97	0.0254149
CAM109_map4	0001.CSV	2595.83	0.0254801
CAM109_map4	0001.CSV	2599.68	0.0255046
CAM109_map4	0001.CSV	2603.54	0.0254911
CAM109_map4	0001.CSV	2607.4	0.025498
CAM109_map4	0001.CSV	2611.25	0.0255446
CAM109_map4	0001.CSV	2615.11	0.0255887
CAM109_map4	0001.CSV	2618.97	0.0255593
CAM109_map4	0001.CSV	2622.82	0.0256305
CAM109_map4	0001.CSV	2626.68	0.0257093
CAM109_map4	0001.CSV	2630.54	0.0256992
CAM109_map4	0001.CSV	2634.4	0.0257682
CAM109_map4	0001.CSV	2638.25	0.02584
CAM109_map4	0001.CSV	2642.11	0.0257306
CAM109_map4	0001.CSV	2645.97	0.02559
CAM109_map4	0001.CSV	2649.82	0.0255181
CAM109_map4	0001.CSV	2653.68	0.0254882
CAM109_map4	0001.CSV	2657.54	0.0255035
CAM109_map4	0001.CSV	2661.4	0.0255662
CAM109_map4	0001.CSV	2665.25	0.0256332
CAM109_map4	0001.CSV	2669.11	0.0257039
CAM109_map4	0001.CSV	2672.97	0.0258647
CAM109_map4	0001.CSV	2676.82	0.0260616
CAM109_map4	0001.CSV	2680.68	0.0259713
CAM109_map4	0001.CSV	2684.54	0.0257225
CAM109_map4	0001.CSV	2688.4	0.0256375
CAM109_map4	0001.CSV	2692.25	0.025657
CAM109_map4	0001.CSV	2696.11	0.0257365
CAM109_map4	0001.CSV	2699.97	0.0257417
CAM109_map4	0001.CSV	2703.82	0.0256717
CAM109_map4	0001.CSV	2707.68	0.0257854
CAM109_map4	0001.CSV	2711.54	0.0258607
CAM109_map4	0001.CSV	2715.4	0.0258592
CAM109_map4	0001.CSV	2719.25	0.0259743
CAM109_map4	0001.CSV	2723.11	0.0262822
CAM109_map4	0001.CSV	2726.97	0.0263422
CAM109_map4	0001.CSV	2730.82	0.0260677
CAM109_map4	0001.CSV	2734.68	0.0260628
CAM109_map4	0001.CSV	2738.54	0.0261544
CAM109_map4	0001.CSV	2742.4	0.0261641
CAM109_map4	0001.CSV	2746.25	0.0263646
CAM109_map4	0001.CSV	2750.11	0.0264433
CAM109_map4	0001.CSV	2753.97	0.026308
CAM109_map4	0001.CSV	2757.82	0.0262604
CAM109_map4	0001.CSV	2761.68	0.0261857
CAM109_map4	0001.CSV	2765.54	0.0261978
CAM109_map4	0001.CSV	2769.39	0.0263908
CAM109_map4	0001.CSV	2773.25	0.0267057
CAM109_map4	0001.CSV	2777.11	0.026682
CAM109_map4	0001.CSV	2780.97	0.0265017
CAM109_map4	0001.CSV	2784.82	0.0266795
CAM109_map4	0001.CSV	2788.68	0.0271015
CAM109_map4	0001.CSV	2792.54	0.0272557
CAM109_map4	0001.CSV	2796.39	0.0272265
CAM109_map4	0001.CSV	2800.25	0.0270856
CAM109_map4	0001.CSV	2804.11	0.027009
CAM109_map4	0001.CSV	2807.97	0.0273139
CAM109_map4	0001.CSV	2811.82	0.0274361
CAM109_map4	0001.CSV	2815.68	0.0273355
CAM109_map4	0001.CSV	2819.54	0.0274778
CAM109_map4	0001.CSV	2823.39	0.0277177
CAM109_map4	0001.CSV	2827.25	0.0278906
CAM109_map4	0001.CSV	2831.11	0.0283981
CAM109_map4	0001.CSV	2834.97	0.0293216
CAM109_map4	0001.CSV	2838.82	0.0303077
CAM109_map4	0001.CSV	2842.68	0.0315528
CAM109_map4	0001.CSV	2846.54	0.0336063
CAM109_map4	0001.CSV	2850.39	0.034759
CAM109_map4	0001.CSV	2854.25	0.0341295
CAM109_map4	0001.CSV	2858.11	0.0331
CAM109_map4	0001.CSV	2861.97	0.0320786
CAM109_map4	0001.CSV	2865.82	0.0314119
CAM109_map4	0001.CSV	2869.68	0.0314423
CAM109_map4	0001.CSV	2873.54	0.0314631
CAM109_map4	0001.CSV	2877.39	0.0309124
CAM109_map4	0001.CSV	2881.25	0.0305356
CAM109_map4	0001.CSV	2885.11	0.0306612
CAM109_map4	0001.CSV	2888.97	0.0311329
CAM109_map4	0001.CSV	2892.82	0.0319387
CAM109_map4	0001.CSV	2896.68	0.0326623
CAM109_map4	0001.CSV	2900.54	0.0331425
CAM109_map4	0001.CSV	2904.39	0.0339861
CAM109_map4	0001.CSV	2908.25	0.0355765
CAM109_map4	0001.CSV	2912.11	0.0380385
CAM109_map4	0001.CSV	2915.97	0.0402049
CAM109_map4	0001.CSV	2919.82	0.0405585
CAM109_map4	0001.CSV	2923.68	0.0394962
CAM109_map4	0001.CSV	2927.54	0.0383831
CAM109_map4	0001.CSV	2931.39	0.03685
CAM109_map4	0001.CSV	2935.25	0.0349685
CAM109_map4	0001.CSV	2939.11	0.0338276
CAM109_map4	0001.CSV	2942.96	0.0335044
CAM109_map4	0001.CSV	2946.82	0.0331701
CAM109_map4	0001.CSV	2950.68	0.0326934
CAM109_map4	0001.CSV	2954.54	0.0321499
CAM109_map4	0001.CSV	2958.39	0.0315561
CAM109_map4	0001.CSV	2962.25	0.0310426
CAM109_map4	0001.CSV	2966.11	0.0302075
CAM109_map4	0001.CSV	2969.96	0.0297022
CAM109_map4	0001.CSV	2973.82	0.0296505
CAM109_map4	0001.CSV	2977.68	0.0295679
CAM109_map4	0001.CSV	2981.53	0.0291269
CAM109_map4	0001.CSV	2985.39	0.0284433
CAM109_map4	0001.CSV	2989.25	0.0282975
CAM109_map4	0001.CSV	2993.11	0.0284464
CAM109_map4	0001.CSV	2996.96	0.0282527
CAM109_map4	0001.CSV	3000.82	0.027921
CAM109_map4	0001.CSV	3004.68	0.0277485
CAM109_map4	0001.CSV	3008.53	0.0279203
CAM109_map4	0001.CSV	3012.39	0.0281994
CAM109_map4	0001.CSV	3016.25	0.0282295
CAM109_map4	0001.CSV	3020.11	0.0280974
CAM109_map4	0001.CSV	3023.96	0.0280583
CAM109_map4	0001.CSV	3027.82	0.0280814
CAM109_map4	0001.CSV	3031.68	0.0282704
CAM109_map4	0001.CSV	3035.53	0.0282473
CAM109_map4	0001.CSV	3039.39	0.0282223
CAM109_map4	0001.CSV	3043.25	0.0283044
CAM109_map4	0001.CSV	3047.11	0.0282547
CAM109_map4	0001.CSV	3050.96	0.0282597
CAM109_map4	0001.CSV	3054.82	0.028224
CAM109_map4	0001.CSV	3058.68	0.0281389
CAM109_map4	0001.CSV	3062.53	0.0282048
CAM109_map4	0001.CSV	3066.39	0.0284252
CAM109_map4	0001.CSV	3070.25	0.0282747
CAM109_map4	0001.CSV	3074.11	0.0282627
CAM109_map4	0001.CSV	3077.96	0.0286601
CAM109_map4	0001.CSV	3081.82	0.0289049
CAM109_map4	0001.CSV	3085.68	0.0288154
CAM109_map4	0001.CSV	3089.53	0.0285593
CAM109_map4	0001.CSV	3093.39	0.0282801
CAM109_map4	0001.CSV	3097.25	0.0282634
CAM109_map4	0001.CSV	3101.11	0.028375
CAM109_map4	0001.CSV	3104.96	0.0284711
CAM109_map4	0001.CSV	3108.82	0.0286552
CAM109_map4	0001.CSV	3112.68	0.0288064
CAM109_map4	0001.CSV	3116.53	0.0289097
CAM109_map4	0001.CSV	3120.39	0.0288059
CAM109_map4	0001.CSV	3124.25	0.0285618
CAM109_map4	0001.CSV	3128.11	0.0285588
CAM109_map4	0001.CSV	3131.96	0.0285573
CAM109_map4	0001.CSV	3135.82	0.0287198
CAM109_map4	0001.CSV	3139.68	0.0288761
CAM109_map4	0001.CSV	3143.53	0.0287021
CAM109_map4	0001.CSV	3147.39	0.0287857
CAM109_map4	0001.CSV	3151.25	0.0291086
CAM109_map4	0001.CSV	3155.1	0.0290392
CAM109_map4	0001.CSV	3158.96	0.0287146
CAM109_map4	0001.CSV	3162.82	0.0285458
CAM109_map4	0001.CSV	3166.68	0.0285025
CAM109_map4	0001.CSV	3170.53	0.0285155
CAM109_map4	0001.CSV	3174.39	0.0285507
CAM109_map4	0001.CSV	3178.25	0.0287493
CAM109_map4	0001.CSV	3182.1	0.0289088
CAM109_map4	0001.CSV	3185.96	0.0289589
CAM109_map4	0001.CSV	3189.82	0.0290247
CAM109_map4	0001.CSV	3193.68	0.028912
CAM109_map4	0001.CSV	3197.53	0.0288598
CAM109_map4	0001.CSV	3201.39	0.0289935
CAM109_map4	0001.CSV	3205.25	0.0290577
CAM109_map4	0001.CSV	3209.1	0.0291146
CAM109_map4	0001.CSV	3212.96	0.0293397
CAM109_map4	0001.CSV	3216.82	0.029492
CAM109_map4	0001.CSV	3220.68	0.0293916
CAM109_map4	0001.CSV	3224.53	0.0293294
CAM109_map4	0001.CSV	3228.39	0.0296202
CAM109_map4	0001.CSV	3232.25	0.0300579
CAM109_map4	0001.CSV	3236.1	0.0300105
CAM109_map4	0001.CSV	3239.96	0.0298267
CAM109_map4	0001.CSV	3243.82	0.0299881
CAM109_map4	0001.CSV	3247.68	0.0300851
CAM109_map4	0001.CSV	3251.53	0.0299293
CAM109_map4	0001.CSV	3255.39	0.0299549
CAM109_map4	0001.CSV	3259.25	0.0298064
CAM109_map4	0001.CSV	3263.1	0.0297774
CAM109_map4	0001.CSV	3266.96	0.0301509
CAM109_map4	0001.CSV	3270.82	0.030574
CAM109_map4	0001.CSV	3274.68	0.0305932
CAM109_map4	0001.CSV	3278.53	0.030261
CAM109_map4	0001.CSV	3282.39	0.0300783
CAM109_map4	0001.CSV	3286.25	0.0300967
CAM109_map4	0001.CSV	3290.1	0.0303906
CAM109_map4	0001.CSV	3293.96	0.0307145
CAM109_map4	0001.CSV	3297.82	0.0305968
CAM109_map4	0001.CSV	3301.67	0.0305974
CAM109_map4	0001.CSV	3305.53	0.0308459
CAM109_map4	0001.CSV	3309.39	0.0307537
CAM109_map4	0001.CSV	3313.25	0.0302664
CAM109_map4	0001.CSV	3317.1	0.0300062
CAM109_map4	0001.CSV	3320.96	0.0301873
CAM109_map4	0001.CSV	3324.82	0.0304462
CAM109_map4	0001.CSV	3328.67	0.0301543
CAM109_map4	0001.CSV	3332.53	0.0300215
CAM109_map4	0001.CSV	3336.39	0.0305523
CAM109_map4	0001.CSV	3340.24	0.0307516
CAM109_map4	0001.CSV	3344.1	0.030522
CAM109_map4	0001.CSV	3347.96	0.0306139
CAM109_map4	0001.CSV	3351.82	0.0305557
CAM109_map4	0001.CSV	3355.67	0.0302987
CAM109_map4	0001.CSV	3359.53	0.0304874
CAM109_map4	0001.CSV	3363.39	0.0307792
CAM109_map4	0001.CSV	3367.24	0.0311573
CAM109_map4	0001.CSV	3371.1	0.0310166
CAM109_map4	0001.CSV	3374.96	0.0305574
CAM109_map4	0001.CSV	3378.82	0.030331
CAM109_map4	0001.CSV	3382.67	0.0301357
CAM109_map4	0001.CSV	3386.53	0.0303146
CAM109_map4	0001.CSV	3390.39	0.0306944
CAM109_map4	0001.CSV	3394.24	0.0308439
CAM109_map4	0001.CSV	3398.1	0.0309181
CAM109_map4	0001.CSV	3401.96	0.0308254
CAM109_map4	0001.CSV	3405.82	0.0305786
CAM109_map4	0001.CSV	3409.67	0.0304937
CAM109_map4	0001.CSV	3413.53	0.0301975
CAM109_map4	0001.CSV	3417.39	0.0297305
CAM109_map4	0001.CSV	3421.24	0.0295633
CAM109_map4	0001.CSV	3425.1	0.0296674
CAM109_map4	0001.CSV	3428.96	0.0300329
CAM109_map4	0001.CSV	3432.82	0.0303454
CAM109_map4	0001.CSV	3436.67	0.0300872
CAM109_map4	0001.CSV	3440.53	0.029314
CAM109_map4	0001.CSV	3444.39	0.0289727
CAM109_map4	0001.CSV	3448.24	0.0288919
CAM109_map4	0001.CSV	3452.1	0.0285512
CAM109_map4	0001.CSV	3455.96	0.0285708
CAM109_map4	0001.CSV	3459.82	0.0289715
CAM109_map4	0001.CSV	3463.67	0.0292894
CAM109_map4	0001.CSV	3467.53	0.0293415
CAM109_map4	0001.CSV	3471.39	0.028969
CAM109_map4	0001.CSV	3475.24	0.028675
CAM109_map4	0001.CSV	3479.1	0.0287059
CAM109_map4	0001.CSV	3482.96	0.0286317
CAM109_map4	0001.CSV	3486.82	0.0286362
CAM109_map4	0001.CSV	3490.67	0.0285652
CAM109_map4	0001.CSV	3494.53	0.028613
CAM109_map4	0001.CSV	3498.39	0.0286048
CAM109_map4	0001.CSV	3502.24	0.0284571
CAM109_map4	0001.CSV	3506.1	0.0280924
CAM109_map4	0001.CSV	3509.96	0.0279661
CAM109_map4	0001.CSV	3513.81	0.0281232
CAM109_map4	0001.CSV	3517.67	0.0276951
CAM109_map4	0001.CSV	3521.53	0.0275795
CAM109_map4	0001.CSV	3525.39	0.0276213
CAM109_map4	0001.CSV	3529.24	0.0273507
CAM109_map4	0001.CSV	3533.1	0.0274002
CAM109_map4	0001.CSV	3536.96	0.0276677
CAM109_map4	0001.CSV	3540.81	0.0277714
CAM109_map4	0001.CSV	3544.67	0.0279169
CAM109_map4	0001.CSV	3548.53	0.0276391
CAM109_map4	0001.CSV	3552.39	0.0271683
CAM109_map4	0001.CSV	3556.24	0.0268944
CAM109_map4	0001.CSV	3560.1	0.0265598
CAM109_map4	0001.CSV	3563.96	0.026093
CAM109_map4	0001.CSV	3567.81	0.0265546
CAM109_map4	0001.CSV	3571.67	0.0266197
CAM109_map4	0001.CSV	3575.53	0.0261202
CAM109_map4	0001.CSV	3579.39	0.0262269
CAM109_map4	0001.CSV	3583.24	0.0262488
CAM109_map4	0001.CSV	3587.1	0.0264213
CAM109_map4	0001.CSV	3590.96	0.0262843
CAM109_map4	0001.CSV	3594.81	0.025812
CAM109_map4	0001.CSV	3598.67	0.0260712
CAM109_map4	0001.CSV	3602.53	0.0260557
CAM109_map4	0001.CSV	3606.39	0.0252786
CAM109_map4	0001.CSV	3610.24	0.0248893
CAM109_map4	0001.CSV	3614.1	0.0248608
CAM109_map4	0001.CSV	3617.96	0.0253016
CAM109_map4	0001.CSV	3621.81	0.0256228
CAM109_map4	0001.CSV	3625.67	0.0248069
CAM109_map4	0001.CSV	3629.53	0.0248708
CAM109_map4	0001.CSV	3633.39	0.0255732
CAM109_map4	0001.CSV	3637.24	0.0252751
CAM109_map4	0001.CSV	3641.1	0.0248074
CAM109_map4	0001.CSV	3644.96	0.0240038
CAM109_map4	0001.CSV	3648.81	0.0245414
CAM109_map4	0001.CSV	3652.67	0.0256798
CAM109_map4	0001.CSV	3656.53	0.0257179
CAM109_map4	0001.CSV	3660.38	0.0256086
CAM109_map4	0001.CSV	3664.24	0.0247049
CAM109_map4	0001.CSV	3668.1	0.0238483
CAM109_map4	0001.CSV	3671.96	0.0238489
CAM109_map4	0001.CSV	3675.81	0.0246627
CAM109_map4	0001.CSV	3679.67	0.0252557
CAM109_map4	0001.CSV	3683.53	0.0247756
CAM109_map4	0001.CSV	3687.38	0.0246186
CAM109_map4	0001.CSV	3691.24	0.0255895
CAM109_map4	0001.CSV	3695.1	0.0253951
CAM109_map4	0001.CSV	3698.95	0.0247217
CAM109_map4	0001.CSV	3702.81	0.0245515
CAM109_map4	0001.CSV	3706.67	0.0241065
CAM109_map4	0001.CSV	3710.53	0.0240425
CAM109_map4	0001.CSV	3714.38	0.0246939
CAM109_map4	0001.CSV	3718.24	0.0242083
CAM109_map4	0001.CSV	3722.1	0.0239763
CAM109_map4	0001.CSV	3725.95	0.0241009
CAM109_map4	0001.CSV	3729.81	0.0236589
CAM109_map4	0001.CSV	3733.67	0.0237677
CAM109_map4	0001.CSV	3737.53	0.02512
CAM109_map4	0001.CSV	3741.38	0.0243033
CAM109_map4	0001.CSV	3745.24	0.0233054
CAM109_map4	0001.CSV	3749.1	0.0235001
CAM109_map4	0001.CSV	3752.95	0.0245524
CAM109_map4	0001.CSV	3756.81	0.0246669
CAM109_map4	0001.CSV	3760.67	0.0246466
CAM109_map4	0001.CSV	3764.53	0.0243876
CAM109_map4	0001.CSV	3768.38	0.0244905
CAM109_map4	0001.CSV	3772.24	0.024621
CAM109_map4	0001.CSV	3776.1	0.0242348
CAM109_map4	0001.CSV	3779.95	0.0243085
CAM109_map4	0001.CSV	3783.81	0.0244585
CAM109_map4	0001.CSV	3787.67	0.0244654
CAM109_map4	0001.CSV	3791.53	0.0240923
CAM109_map4	0001.CSV	3795.38	0.0234962
CAM109_map4	0001.CSV	3799.24	0.0234522
CAM109_map4	0001.CSV	3803.1	0.0242057
CAM109_map4	0001.CSV	3806.95	0.024681
CAM109_map4	0001.CSV	3810.81	0.024205
CAM109_map4	0001.CSV	3814.67	0.0235904
CAM109_map4	0001.CSV	3818.53	0.023864
CAM109_map4	0001.CSV	3822.38	0.0244847
CAM109_map4	0001.CSV	3826.24	0.0244019
CAM109_map4	0001.CSV	3830.1	0.0240043
CAM109_map4	0001.CSV	3833.95	0.023666
CAM109_map4	0001.CSV	3837.81	0.023765
CAM109_map4	0001.CSV	3841.67	0.0246147
CAM109_map4	0001.CSV	3845.53	0.0243405
CAM109_map4	0001.CSV	3849.38	0.0231042
CAM109_map4	0001.CSV	3853.24	0.0230942
CAM109_map4	0001.CSV	3857.1	0.0242683
CAM109_map4	0001.CSV	3860.95	0.0237217
CAM109_map4	0001.CSV	3864.81	0.0236815
CAM109_map4	0001.CSV	3868.67	0.0238372
CAM109_map4	0001.CSV	3872.52	0.0241919
CAM109_map4	0001.CSV	3876.38	0.0239173
CAM109_map4	0001.CSV	3880.24	0.0235814
CAM109_map4	0001.CSV	3884.1	0.0241723
CAM109_map4	0001.CSV	3887.95	0.0242701
CAM109_map4	0001.CSV	3891.81	0.0241813
CAM109_map4	0001.CSV	3895.67	0.0238503
CAM109_map4	0001.CSV	3899.52	0.0234845
CAM109_map4	0001.CSV	3903.38	0.0243865
CAM109_map4	0001.CSV	3907.24	0.0246498
CAM109_map4	0001.CSV	3911.1	0.0240401
CAM109_map4	0001.CSV	3914.95	0.0237693
CAM109_map4	0001.CSV	3918.81	0.0241024
CAM109_map4	0001.CSV	3922.67	0.0241905
CAM109_map4	0001.CSV	3926.52	0.0240667
CAM109_map4	0001.CSV	3930.38	0.0242192
CAM109_map4	0001.CSV	3934.24	0.0245714
CAM109_map4	0001.CSV	3938.09	0.024239
CAM109_map4	0001.CSV	3941.95	0.0240544
CAM109_map4	0001.CSV	3945.81	0.024059
CAM109_map4	0001.CSV	3949.67	0.0241532
CAM109_map4	0001.CSV	3953.52	0.0242451
CAM109_map4	0001.CSV	3957.38	0.0241341
CAM109_map4	0001.CSV	3961.24	0.0241152
CAM109_map4	0001.CSV	3965.09	0.0241356
CAM109_map4	0001.CSV	3968.95	0.0241274
CAM109_map4	0001.CSV	3972.81	0.0242104
CAM109_map4	0001.CSV	3976.67	0.0243201
CAM109_map4	0001.CSV	3980.52	0.0243119
CAM109_map4	0001.CSV	3984.38	0.024263
CAM109_map4	0001.CSV	3988.24	0.0241474
CAM109_map4	0001.CSV	3992.09	0.0241723
CAM109_map4	0001.CSV	3995.95	0.0242391
CAM109_map4	0001.CSV	3999.81	0.0242137
CAM109_map4	0002.CSV	674.992	0.0180909
CAM109_map4	0002.CSV	678.849	0.0187065
CAM109_map4	0002.CSV	682.706	0.0187442
CAM109_map4	0002.CSV	686.563	0.0191157
CAM109_map4	0002.CSV	690.42	0.0199358
CAM109_map4	0002.CSV	694.277	0.0223975
CAM109_map4	0002.CSV	698.134	0.0245901
CAM109_map4	0002.CSV	701.991	0.0232495
CAM109_map4	0002.CSV	705.849	0.0220749
CAM109_map4	0002.CSV	709.706	0.0242815
CAM109_map4	0002.CSV	713.563	0.0230135
CAM109_map4	0002.CSV	717.42	0.0180455
CAM109_map4	0002.CSV	721.277	0.0159788
CAM109_map4	0002.CSV	725.134	0.0159113
CAM109_map4	0002.CSV	728.991	0.0159555
CAM109_map4	0002.CSV	732.848	0.0161506
CAM109_map4	0002.CSV	736.705	0.0167862
CAM109_map4	0002.CSV	740.562	0.0175656
CAM109_map4	0002.CSV	744.42	0.0176261
CAM109_map4	0002.CSV	748.277	0.0173575
CAM109_map4	0002.CSV	752.134	0.0171957
CAM109_map4	0002.CSV	755.991	0.0174854
CAM109_map4	0002.CSV	759.848	0.0176551
CAM109_map4	0002.CSV	763.705	0.0174317
CAM109_map4	0002.CSV	767.562	0.0172626
CAM109_map4	0002.CSV	771.419	0.0174872
CAM109_map4	0002.CSV	775.276	0.0176075
CAM109_map4	0002.CSV	779.133	0.0176608
CAM109_map4	0002.CSV	782.99	0.0175815
CAM109_map4	0002.CSV	786.848	0.0176024
CAM109_map4	0002.CSV	790.705	0.0176182
CAM109_map4	0002.CSV	794.562	0.0178332
CAM109_map4	0002.CSV	798.419	0.0181506
CAM109_map4	0002.CSV	802.276	0.0184014
CAM109_map4	0002.CSV	806.133	0.0186461
CAM109_map4	0002.CSV	809.99	0.0191031
CAM109_map4	0002.CSV	813.847	0.0198065
CAM109_map4	0002.CSV	817.704	0.0207333
CAM109_map4	0002.CSV	821.562	0.0215065
CAM109_map4	0002.CSV	825.419	0.0224366
CAM109_map4	0002.CSV	829.276	0.0235217
CAM109_map4	0002.CSV	833.133	0.0245568
CAM109_map4	0002.CSV	836.99	0.0256662
CAM109_map4	0002.CSV	840.847	0.0269861
CAM109_map4	0002.CSV	844.704	0.0282124
CAM109_map4	0002.CSV	848.561	0.0302121
CAM109_map4	0002.CSV	852.418	0.0325844
CAM109_map4	0002.CSV	856.275	0.0333961
CAM109_map4	0002.CSV	860.132	0.0321214
CAM109_map4	0002.CSV	863.99	0.0287321
CAM109_map4	0002.CSV	867.847	0.0240916
CAM109_map4	0002.CSV	871.704	0.0204521
CAM109_map4	0002.CSV	875.561	0.0187591
CAM109_map4	0002.CSV	879.418	0.0180688
CAM109_map4	0002.CSV	883.275	0.0174849
CAM109_map4	0002.CSV	887.132	0.0171418
CAM109_map4	0002.CSV	890.989	0.0170699
CAM109_map4	0002.CSV	894.846	0.0171543
CAM109_map4	0002.CSV	898.703	0.0173079
CAM109_map4	0002.CSV	902.561	0.0174303
CAM109_map4	0002.CSV	906.418	0.017455
CAM109_map4	0002.CSV	910.275	0.0174286
CAM109_map4	0002.CSV	914.132	0.0175221
CAM109_map4	0002.CSV	917.989	0.0177495
CAM109_map4	0002.CSV	921.846	0.0178154
CAM109_map4	0002.CSV	925.703	0.0178394
CAM109_map4	0002.CSV	929.56	0.0179572
CAM109_map4	0002.CSV	933.417	0.0180097
CAM109_map4	0002.CSV	937.274	0.0179909
CAM109_map4	0002.CSV	941.131	0.0180623
CAM109_map4	0002.CSV	944.989	0.0181323
CAM109_map4	0002.CSV	948.846	0.0182273
CAM109_map4	0002.CSV	952.703	0.0182649
CAM109_map4	0002.CSV	956.56	0.0182893
CAM109_map4	0002.CSV	960.417	0.0182638
CAM109_map4	0002.CSV	964.274	0.0181916
CAM109_map4	0002.CSV	968.131	0.018258
CAM109_map4	0002.CSV	971.988	0.0185126
CAM109_map4	0002.CSV	975.845	0.0186334
CAM109_map4	0002.CSV	979.702	0.0186966
CAM109_map4	0002.CSV	983.559	0.0188396
CAM109_map4	0002.CSV	987.417	0.0190438
CAM109_map4	0002.CSV	991.274	0.0191755
CAM109_map4	0002.CSV	995.131	0.0193657
CAM109_map4	0002.CSV	998.988	0.0196071
CAM109_map4	0002.CSV	1002.85	0.0198423
CAM109_map4	0002.CSV	1006.7	0.0199952
CAM109_map4	0002.CSV	1010.56	0.0201907
CAM109_map4	0002.CSV	1014.42	0.0202809
CAM109_map4	0002.CSV	1018.27	0.0203923
CAM109_map4	0002.CSV	1022.13	0.0205526
CAM109_map4	0002.CSV	1025.99	0.0207425
CAM109_map4	0002.CSV	1029.85	0.0208519
CAM109_map4	0002.CSV	1033.7	0.0209801
CAM109_map4	0002.CSV	1037.56	0.0210783
CAM109_map4	0002.CSV	1041.42	0.0211208
CAM109_map4	0002.CSV	1045.27	0.0211326
CAM109_map4	0002.CSV	1049.13	0.02118
CAM109_map4	0002.CSV	1052.99	0.0213752
CAM109_map4	0002.CSV	1056.84	0.0217337
CAM109_map4	0002.CSV	1060.7	0.0220089
CAM109_map4	0002.CSV	1064.56	0.0222148
CAM109_map4	0002.CSV	1068.42	0.0223517
CAM109_map4	0002.CSV	1072.27	0.02246
CAM109_map4	0002.CSV	1076.13	0.0226073
CAM109_map4	0002.CSV	1079.99	0.0228851
CAM109_map4	0002.CSV	1083.84	0.02239
CAM109_map4	0002.CSV	1087.7	0.0214333
CAM109_map4	0002.CSV	1091.56	0.0210276
CAM109_map4	0002.CSV	1095.41	0.0210004
CAM109_map4	0002.CSV	1099.27	0.0211836
CAM109_map4	0002.CSV	1103.13	0.021466
CAM109_map4	0002.CSV	1106.99	0.0217161
CAM109_map4	0002.CSV	1110.84	0.0219778
CAM109_map4	0002.CSV	1114.7	0.0221479
CAM109_map4	0002.CSV	1118.56	0.0222661
CAM109_map4	0002.CSV	1122.41	0.0223558
CAM109_map4	0002.CSV	1126.27	0.0223111
CAM109_map4	0002.CSV	1130.13	0.0221903
CAM109_map4	0002.CSV	1133.99	0.0221675
CAM109_map4	0002.CSV	1137.84	0.0221293
CAM109_map4	0002.CSV	1141.7	0.0220808
CAM109_map4	0002.CSV	1145.56	0.0220496
CAM109_map4	0002.CSV	1149.41	0.021991
CAM109_map4	0002.CSV	1153.27	0.0218117
CAM109_map4	0002.CSV	1157.13	0.0217223
CAM109_map4	0002.CSV	1160.99	0.0217241
CAM109_map4	0002.CSV	1164.84	0.0216824
CAM109_map4	0002.CSV	1168.7	0.0215719
CAM109_map4	0002.CSV	1172.56	0.0214657
CAM109_map4	0002.CSV	1176.41	0.021402
CAM109_map4	0002.CSV	1180.27	0.0214133
CAM109_map4	0002.CSV	1184.13	0.0213725
CAM109_map4	0002.CSV	1187.99	0.0212181
CAM109_map4	0002.CSV	1191.84	0.0209858
CAM109_map4	0002.CSV	1195.7	0.0208246
CAM109_map4	0002.CSV	1199.56	0.0207788
CAM109_map4	0002.CSV	1203.41	0.020768
CAM109_map4	0002.CSV	1207.27	0.0207266
CAM109_map4	0002.CSV	1211.13	0.0207762
CAM109_map4	0002.CSV	1214.98	0.0208365
CAM109_map4	0002.CSV	1218.84	0.0209116
CAM109_map4	0002.CSV	1222.7	0.0210121
CAM109_map4	0002.CSV	1226.56	0.0211938
CAM109_map4	0002.CSV	1230.41	0.0213637
CAM109_map4	0002.CSV	1234.27	0.0215531
CAM109_map4	0002.CSV	1238.13	0.0217922
CAM109_map4	0002.CSV	1241.98	0.022014
CAM109_map4	0002.CSV	1245.84	0.0222451
CAM109_map4	0002.CSV	1249.7	0.0224501
CAM109_map4	0002.CSV	1253.56	0.0225151
CAM109_map4	0002.CSV	1257.41	0.0224862
CAM109_map4	0002.CSV	1261.27	0.0224336
CAM109_map4	0002.CSV	1265.13	0.0224252
CAM109_map4	0002.CSV	1268.98	0.0224454
CAM109_map4	0002.CSV	1272.84	0.0225378
CAM109_map4	0002.CSV	1276.7	0.0225262
CAM109_map4	0002.CSV	1280.56	0.0224877
CAM109_map4	0002.CSV	1284.41	0.0224648
CAM109_map4	0002.CSV	1288.27	0.0224891
CAM109_map4	0002.CSV	1292.13	0.0224501
CAM109_map4	0002.CSV	1295.98	0.0223481
CAM109_map4	0002.CSV	1299.84	0.022169
CAM109_map4	0002.CSV	1303.7	0.022026
CAM109_map4	0002.CSV	1307.56	0.0219627
CAM109_map4	0002.CSV	1311.41	0.0219496
CAM109_map4	0002.CSV	1315.27	0.0219839
CAM109_map4	0002.CSV	1319.13	0.0220883
CAM109_map4	0002.CSV	1322.98	0.0220963
CAM109_map4	0002.CSV	1326.84	0.0220625
CAM109_map4	0002.CSV	1330.7	0.0220797
CAM109_map4	0002.CSV	1334.56	0.0221035
CAM109_map4	0002.CSV	1338.41	0.0223237
CAM109_map4	0002.CSV	1342.27	0.0225735
CAM109_map4	0002.CSV	1346.13	0.0225706
CAM109_map4	0002.CSV	1349.98	0.0226845
CAM109_map4	0002.CSV	1353.84	0.0228058
CAM109_map4	0002.CSV	1357.7	0.0229571
CAM109_map4	0002.CSV	1361.56	0.0232088
CAM109_map4	0002.CSV	1365.41	0.0235045
CAM109_map4	0002.CSV	1369.27	0.0235469
CAM109_map4	0002.CSV	1373.13	0.0238313
CAM109_map4	0002.CSV	1376.98	0.0242739
CAM109_map4	0002.CSV	1380.84	0.0244569
CAM109_map4	0002.CSV	1384.7	0.0245527
CAM109_map4	0002.CSV	1388.56	0.0248846
CAM109_map4	0002.CSV	1392.41	0.024976
CAM109_map4	0002.CSV	1396.27	0.025379
CAM109_map4	0002.CSV	1400.13	0.0258373
CAM109_map4	0002.CSV	1403.98	0.0260774
CAM109_map4	0002.CSV	1407.84	0.0264161
CAM109_map4	0002.CSV	1411.7	0.0267353
CAM109_map4	0002.CSV	1415.55	0.0269734
CAM109_map4	0002.CSV	1419.41	0.0275713
CAM109_map4	0002.CSV	1423.27	0.0278345
CAM109_map4	0002.CSV	1427.12	0.0278477
CAM109_map4	0002.CSV	1430.98	0.0279962
CAM109_map4	0002.CSV	1434.84	0.0283534
CAM109_map4	0002.CSV	1438.7	0.0288002
CAM109_map4	0002.CSV	1442.55	0.0288615
CAM109_map4	0002.CSV	1446.41	0.029072
CAM109_map4	0002.CSV	1450.27	0.0294351
CAM109_map4	0002.CSV	1454.12	0.0293365
CAM109_map4	0002.CSV	1457.98	0.0298541
CAM109_map4	0002.CSV	1461.84	0.0299282
CAM109_map4	0002.CSV	1465.7	0.0298817
CAM109_map4	0002.CSV	1469.55	0.0297037
CAM109_map4	0002.CSV	1473.41	0.0297935
CAM109_map4	0002.CSV	1477.27	0.029643
CAM109_map4	0002.CSV	1481.12	0.0290236
CAM109_map4	0002.CSV	1484.98	0.028387
CAM109_map4	0002.CSV	1488.84	0.0280566
CAM109_map4	0002.CSV	1492.7	0.0276785
CAM109_map4	0002.CSV	1496.55	0.0272301
CAM109_map4	0002.CSV	1500.41	0.0268172
CAM109_map4	0002.CSV	1504.27	0.0262016
CAM109_map4	0002.CSV	1508.12	0.0261012
CAM109_map4	0002.CSV	1511.98	0.025677
CAM109_map4	0002.CSV	1515.84	0.0248723
CAM109_map4	0002.CSV	1519.7	0.0242064
CAM109_map4	0002.CSV	1523.55	0.023555
CAM109_map4	0002.CSV	1527.41	0.022855
CAM109_map4	0002.CSV	1531.27	0.0221977
CAM109_map4	0002.CSV	1535.12	0.021734
CAM109_map4	0002.CSV	1538.98	0.0213756
CAM109_map4	0002.CSV	1542.84	0.0217329
CAM109_map4	0002.CSV	1546.7	0.0212887
CAM109_map4	0002.CSV	1550.55	0.0206705
CAM109_map4	0002.CSV	1554.41	0.0202051
CAM109_map4	0002.CSV	1558.27	0.0203189
CAM109_map4	0002.CSV	1562.12	0.0203519
CAM109_map4	0002.CSV	1565.98	0.0199396
CAM109_map4	0002.CSV	1569.84	0.0198214
CAM109_map4	0002.CSV	1573.69	0.0197275
CAM109_map4	0002.CSV	1577.55	0.0199048
CAM109_map4	0002.CSV	1581.41	0.019671
CAM109_map4	0002.CSV	1585.27	0.019226
CAM109_map4	0002.CSV	1589.12	0.0189284
CAM109_map4	0002.CSV	1592.98	0.0188707
CAM109_map4	0002.CSV	1596.84	0.0189316
CAM109_map4	0002.CSV	1600.69	0.0189454
CAM109_map4	0002.CSV	1604.55	0.0190218
CAM109_map4	0002.CSV	1608.41	0.0191059
CAM109_map4	0002.CSV	1612.27	0.0189918
CAM109_map4	0002.CSV	1616.12	0.018986
CAM109_map4	0002.CSV	1619.98	0.0191031
CAM109_map4	0002.CSV	1623.84	0.0190207
CAM109_map4	0002.CSV	1627.69	0.0189144
CAM109_map4	0002.CSV	1631.55	0.0185013
CAM109_map4	0002.CSV	1635.41	0.018631
CAM109_map4	0002.CSV	1639.27	0.0189003
CAM109_map4	0002.CSV	1643.12	0.0183935
CAM109_map4	0002.CSV	1646.98	0.0183451
CAM109_map4	0002.CSV	1650.84	0.0187029
CAM109_map4	0002.CSV	1654.69	0.0189874
CAM109_map4	0002.CSV	1658.55	0.0185849
CAM109_map4	0002.CSV	1662.41	0.018299
CAM109_map4	0002.CSV	1666.27	0.0181273
CAM109_map4	0002.CSV	1670.12	0.0181228
CAM109_map4	0002.CSV	1673.98	0.0183181
CAM109_map4	0002.CSV	1677.84	0.0180562
CAM109_map4	0002.CSV	1681.69	0.0179428
CAM109_map4	0002.CSV	1685.55	0.0184247
CAM109_map4	0002.CSV	1689.41	0.0181987
CAM109_map4	0002.CSV	1693.27	0.0176309
CAM109_map4	0002.CSV	1697.12	0.0177637
CAM109_map4	0002.CSV	1700.98	0.0182757
CAM109_map4	0002.CSV	1704.84	0.0182532
CAM109_map4	0002.CSV	1708.69	0.0180664
CAM109_map4	0002.CSV	1712.55	0.0178564
CAM109_map4	0002.CSV	1716.41	0.0185519
CAM109_map4	0002.CSV	1720.27	0.0190327
CAM109_map4	0002.CSV	1724.12	0.0187033
CAM109_map4	0002.CSV	1727.98	0.0184231
CAM109_map4	0002.CSV	1731.84	0.0183831
CAM109_map4	0002.CSV	1735.69	0.0185384
CAM109_map4	0002.CSV	1739.55	0.0181061
CAM109_map4	0002.CSV	1743.41	0.0176581
CAM109_map4	0002.CSV	1747.27	0.0174315
CAM109_map4	0002.CSV	1751.12	0.0173027
CAM109_map4	0002.CSV	1754.98	0.0168141
CAM109_map4	0002.CSV	1758.84	0.0166106
CAM109_map4	0002.CSV	1762.69	0.0166055
CAM109_map4	0002.CSV	1766.55	0.0164079
CAM109_map4	0002.CSV	1770.41	0.0164952
CAM109_map4	0002.CSV	1774.26	0.0169779
CAM109_map4	0002.CSV	1778.12	0.0169149
CAM109_map4	0002.CSV	1781.98	0.0169222
CAM109_map4	0002.CSV	1785.84	0.0168304
CAM109_map4	0002.CSV	1789.69	0.0166603
CAM109_map4	0002.CSV	1793.55	0.0168129
CAM109_map4	0002.CSV	1797.41	0.0167827
CAM109_map4	0002.CSV	1801.26	0.0167099
CAM109_map4	0002.CSV	1805.12	0.0165687
CAM109_map4	0002.CSV	1808.98	0.0164811
CAM109_map4	0002.CSV	1812.84	0.0165563
CAM109_map4	0002.CSV	1816.69	0.0164366
CAM109_map4	0002.CSV	1820.55	0.0163856
CAM109_map4	0002.CSV	1824.41	0.0164162
CAM109_map4	0002.CSV	1828.26	0.0166439
CAM109_map4	0002.CSV	1832.12	0.0167521
CAM109_map4	0002.CSV	1835.98	0.016634
CAM109_map4	0002.CSV	1839.84	0.0164457
CAM109_map4	0002.CSV	1843.69	0.0165726
CAM109_map4	0002.CSV	1847.55	0.0168152
CAM109_map4	0002.CSV	1851.41	0.0166514
CAM109_map4	0002.CSV	1855.26	0.0165198
CAM109_map4	0002.CSV	1859.12	0.0165353
CAM109_map4	0002.CSV	1862.98	0.0164186
CAM109_map4	0002.CSV	1866.84	0.0164443
CAM109_map4	0002.CSV	1870.69	0.0167912
CAM109_map4	0002.CSV	1874.55	0.0166503
CAM109_map4	0002.CSV	1878.41	0.0164823
CAM109_map4	0002.CSV	1882.26	0.0164827
CAM109_map4	0002.CSV	1886.12	0.0164596
CAM109_map4	0002.CSV	1889.98	0.0165372
CAM109_map4	0002.CSV	1893.83	0.0166149
CAM109_map4	0002.CSV	1897.69	0.0165866
CAM109_map4	0002.CSV	1901.55	0.0165229
CAM109_map4	0002.CSV	1905.41	0.0164787
CAM109_map4	0002.CSV	1909.26	0.0165484
CAM109_map4	0002.CSV	1913.12	0.0165476
CAM109_map4	0002.CSV	1916.98	0.0165158
CAM109_map4	0002.CSV	1920.83	0.0166693
CAM109_map4	0002.CSV	1924.69	0.0166744
CAM109_map4	0002.CSV	1928.55	0.016556
CAM109_map4	0002.CSV	1932.4	0.0165445
CAM109_map4	0002.CSV	1936.26	0.0165755
CAM109_map4	0002.CSV	1940.12	0.0165826
CAM109_map4	0002.CSV	1943.98	0.0167728
CAM109_map4	0002.CSV	1947.83	0.0167799
CAM109_map4	0002.CSV	1951.69	0.0166815
CAM109_map4	0002.CSV	1955.55	0.0166939
CAM109_map4	0002.CSV	1959.4	0.0166778
CAM109_map4	0002.CSV	1963.26	0.0166318
CAM109_map4	0002.CSV	1967.12	0.0167856
CAM109_map4	0002.CSV	1970.98	0.0168111
CAM109_map4	0002.CSV	1974.83	0.0166891
CAM109_map4	0002.CSV	1978.69	0.0166724
CAM109_map4	0002.CSV	1982.55	0.016701
CAM109_map4	0002.CSV	1986.4	0.0166647
CAM109_map4	0002.CSV	1990.26	0.0167043
CAM109_map4	0002.CSV	1994.12	0.016773
CAM109_map4	0002.CSV	1997.98	0.0167022
CAM109_map4	0002.CSV	2001.83	0.0166722
CAM109_map4	0002.CSV	2005.69	0.0166946
CAM109_map4	0002.CSV	2009.55	0.0166903
CAM109_map4	0002.CSV	2013.4	0.0166567
CAM109_map4	0002.CSV	2017.26	0.016734
CAM109_map4	0002.CSV	2021.12	0.01679
CAM109_map4	0002.CSV	2024.97	0.0167021
CAM109_map4	0002.CSV	2028.83	0.0166432
CAM109_map4	0002.CSV	2032.69	0.0166256
CAM109_map4	0002.CSV	2036.55	0.0166462
CAM109_map4	0002.CSV	2040.4	0.016678
CAM109_map4	0002.CSV	2044.26	0.016711
CAM109_map4	0002.CSV	2048.12	0.0166654
CAM109_map4	0002.CSV	2051.97	0.0166788
CAM109_map4	0002.CSV	2055.83	0.0166929
CAM109_map4	0002.CSV	2059.69	0.0166886
CAM109_map4	0002.CSV	2063.55	0.0167196
CAM109_map4	0002.CSV	2067.4	0.0167752
CAM109_map4	0002.CSV	2071.26	0.0167408
CAM109_map4	0002.CSV	2075.12	0.0167469
CAM109_map4	0002.CSV	2078.97	0.0167754
CAM109_map4	0002.CSV	2082.83	0.0167666
CAM109_map4	0002.CSV	2086.69	0.0167115
CAM109_map4	0002.CSV	2090.55	0.0167306
CAM109_map4	0002.CSV	2094.4	0.0167761
CAM109_map4	0002.CSV	2098.26	0.0167966
CAM109_map4	0002.CSV	2102.12	0.0168107
CAM109_map4	0002.CSV	2105.97	0.0168339
CAM109_map4	0002.CSV	2109.83	0.0168392
CAM109_map4	0002.CSV	2113.69	0.0168977
CAM109_map4	0002.CSV	2117.55	0.0169652
CAM109_map4	0002.CSV	2121.4	0.01698
CAM109_map4	0002.CSV	2125.26	0.0169636
CAM109_map4	0002.CSV	2129.12	0.0169641
CAM109_map4	0002.CSV	2132.97	0.0170069
CAM109_map4	0002.CSV	2136.83	0.0170837
CAM109_map4	0002.CSV	2140.69	0.0170795
CAM109_map4	0002.CSV	2144.55	0.0171038
CAM109_map4	0002.CSV	2148.4	0.0171713
CAM109_map4	0002.CSV	2152.26	0.017194
CAM109_map4	0002.CSV	2156.12	0.0171835
CAM109_map4	0002.CSV	2159.97	0.0172046
CAM109_map4	0002.CSV	2163.83	0.0172216
CAM109_map4	0002.CSV	2167.69	0.0172649
CAM109_map4	0002.CSV	2171.55	0.0172877
CAM109_map4	0002.CSV	2175.4	0.0173141
CAM109_map4	0002.CSV	2179.26	0.0173535
CAM109_map4	0002.CSV	2183.12	0.0173962
CAM109_map4	0002.CSV	2186.97	0.01743
CAM109_map4	0002.CSV	2190.83	0.0174652
CAM109_map4	0002.CSV	2194.69	0.017441
CAM109_map4	0002.CSV	2198.55	0.0174241
CAM109_map4	0002.CSV	2202.4	0.0174682
CAM109_map4	0002.CSV	2206.26	0.0175039
CAM109_map4	0002.CSV	2210.12	0.0175086
CAM109_map4	0002.CSV	2213.97	0.0175306
CAM109_map4	0002.CSV	2217.83	0.0175159
CAM109_map4	0002.CSV	2221.69	0.0174987
CAM109_map4	0002.CSV	2225.54	0.0175186
CAM109_map4	0002.CSV	2229.4	0.0175254
CAM109_map4	0002.CSV	2233.26	0.0175106
CAM109_map4	0002.CSV	2237.12	0.0175149
CAM109_map4	0002.CSV	2240.97	0.0175009
CAM109_map4	0002.CSV	2244.83	0.0175067
CAM109_map4	0002.CSV	2248.69	0.0175027
CAM109_map4	0002.CSV	2252.54	0.0174726
CAM109_map4	0002.CSV	2256.4	0.0174403
CAM109_map4	0002.CSV	2260.26	0.0174375
CAM109_map4	0002.CSV	2264.11	0.0174329
CAM109_map4	0002.CSV	2267.97	0.0174388
CAM109_map4	0002.CSV	2271.83	0.0174533
CAM109_map4	0002.CSV	2275.69	0.0174695
CAM109_map4	0002.CSV	2279.54	0.0174778
CAM109_map4	0002.CSV	2283.4	0.0174032
CAM109_map4	0002.CSV	2287.26	0.0173253
CAM109_map4	0002.CSV	2291.11	0.0173554
CAM109_map4	0002.CSV	2294.97	0.0173842
CAM109_map4	0002.CSV	2298.83	0.017356
CAM109_map4	0002.CSV	2302.69	0.0173142
CAM109_map4	0002.CSV	2306.54	0.0172672
CAM109_map4	0002.CSV	2310.4	0.0172081
CAM109_map4	0002.CSV	2314.26	0.0171273
CAM109_map4	0002.CSV	2318.11	0.016953
CAM109_map4	0002.CSV	2321.97	0.0167552
CAM109_map4	0002.CSV	2325.83	0.0165137
CAM109_map4	0002.CSV	2329.69	0.0163304
CAM109_map4	0002.CSV	2333.54	0.0162012
CAM109_map4	0002.CSV	2337.4	0.0160371
CAM109_map4	0002.CSV	2341.26	0.0161589
CAM109_map4	0002.CSV	2345.11	0.0167513
CAM109_map4	0002.CSV	2348.97	0.0166235
CAM109_map4	0002.CSV	2352.83	0.015753
CAM109_map4	0002.CSV	2356.69	0.0143836
CAM109_map4	0002.CSV	2360.54	0.0137468
CAM109_map4	0002.CSV	2364.4	0.0146543
CAM109_map4	0002.CSV	2368.26	0.0160658
CAM109_map4	0002.CSV	2372.11	0.0171547
CAM109_map4	0002.CSV	2375.97	0.017704
CAM109_map4	0002.CSV	2379.83	0.0178634
CAM109_map4	0002.CSV	2383.69	0.0177533
CAM109_map4	0002.CSV	2387.54	0.0175583
CAM109_map4	0002.CSV	2391.4	0.0174535
CAM109_map4	0002.CSV	2395.26	0.017415
CAM109_map4	0002.CSV	2399.11	0.0173619
CAM109_map4	0002.CSV	2402.97	0.0173307
CAM109_map4	0002.CSV	2406.83	0.0173821
CAM109_map4	0002.CSV	2410.68	0.0174286
CAM109_map4	0002.CSV	2414.54	0.0174046
CAM109_map4	0002.CSV	2418.4	0.0173895
CAM109_map4	0002.CSV	2422.26	0.0174119
CAM109_map4	0002.CSV	2426.11	0.0174187
CAM109_map4	0002.CSV	2429.97	0.0174086
CAM109_map4	0002.CSV	2433.83	0.0173941
CAM109_map4	0002.CSV	2437.68	0.0173838
CAM109_map4	0002.CSV	2441.54	0.0174015
CAM109_map4	0002.CSV	2445.4	0.0174065
CAM109_map4	0002.CSV	2449.26	0.0174137
CAM109_map4	0002.CSV	2453.11	0.0174065
CAM109_map4	0002.CSV	2456.97	0.0173927
CAM109_map4	0002.CSV	2460.83	0.0173813
CAM109_map4	0002.CSV	2464.68	0.0173787
CAM109_map4	0002.CSV	2468.54	0.0174279
CAM109_map4	0002.CSV	2472.4	0.0174605
CAM109_map4	0002.CSV	2476.26	0.0174602
CAM109_map4	0002.CSV	2480.11	0.0174351
CAM109_map4	0002.CSV	2483.97	0.0174389
CAM109_map4	0002.CSV	2487.83	0.0174722
CAM109_map4	0002.CSV	2491.68	0.0175079
CAM109_map4	0002.CSV	2495.54	0.0175418
CAM109_map4	0002.CSV	2499.4	0.0175473
CAM109_map4	0002.CSV	2503.26	0.0175291
CAM109_map4	0002.CSV	2507.11	0.0174767
CAM109_map4	0002.CSV	2510.97	0.0174412
CAM109_map4	0002.CSV	2514.83	0.0174645
CAM109_map4	0002.CSV	2518.68	0.0174967
CAM109_map4	0002.CSV	2522.54	0.017494
CAM109_map4	0002.CSV	2526.4	0.0174579
CAM109_map4	0002.CSV	2530.26	0.0174098
CAM109_map4	0002.CSV	2534.11	0.0174158
CAM109_map4	0002.CSV	2537.97	0.0174626
CAM109_map4	0002.CSV	2541.83	0.0174869
CAM109_map4	0002.CSV	2545.68	0.0174621
CAM109_map4	0002.CSV	2549.54	0.017432
CAM109_map4	0002.CSV	2553.4	0.0174323
CAM109_map4	0002.CSV	2557.26	0.0174288
CAM109_map4	0002.CSV	2561.11	0.0173903
CAM109_map4	0002.CSV	2564.97	0.0173526
CAM109_map4	0002.CSV	2568.83	0.0174097
CAM109_map4	0002.CSV	2572.68	0.0174982
CAM109_map4	0002.CSV	2576.54	0.0175364
CAM109_map4	0002.CSV	2580.4	0.0175284
CAM109_map4	0002.CSV	2584.25	0.0175237
CAM109_map4	0002.CSV	2588.11	0.0175192
CAM109_map4	0002.CSV	2591.97	0.0175425
CAM109_map4	0002.CSV	2595.83	0.0175929
CAM109_map4	0002.CSV	2599.68	0.0175812
CAM109_map4	0002.CSV	2603.54	0.0175375
CAM109_map4	0002.CSV	2607.4	0.0175353
CAM109_map4	0002.CSV	2611.25	0.0175707
CAM109_map4	0002.CSV	2615.11	0.0175832
CAM109_map4	0002.CSV	2618.97	0.0175615
CAM109_map4	0002.CSV	2622.82	0.0176402
CAM109_map4	0002.CSV	2626.68	0.017693
CAM109_map4	0002.CSV	2630.54	0.0176856
CAM109_map4	0002.CSV	2634.4	0.0177611
CAM109_map4	0002.CSV	2638.25	0.0177726
CAM109_map4	0002.CSV	2642.11	0.0176828
CAM109_map4	0002.CSV	2645.97	0.0176283
CAM109_map4	0002.CSV	2649.82	0.0175833
CAM109_map4	0002.CSV	2653.68	0.0175504
CAM109_map4	0002.CSV	2657.54	0.0175726
CAM109_map4	0002.CSV	2661.4	0.0176325
CAM109_map4	0002.CSV	2665.25	0.0176657
CAM109_map4	0002.CSV	2669.11	0.0177102
CAM109_map4	0002.CSV	2672.97	0.0178783
CAM109_map4	0002.CSV	2676.82	0.0180339
CAM109_map4	0002.CSV	2680.68	0.0179326
CAM109_map4	0002.CSV	2684.54	0.0177149
CAM109_map4	0002.CSV	2688.4	0.0176693
CAM109_map4	0002.CSV	2692.25	0.0176635
CAM109_map4	0002.CSV	2696.11	0.0177031
CAM109_map4	0002.CSV	2699.97	0.0177118
CAM109_map4	0002.CSV	2703.82	0.0176649
CAM109_map4	0002.CSV	2707.68	0.0177506
CAM109_map4	0002.CSV	2711.54	0.0178138
CAM109_map4	0002.CSV	2715.4	0.0178155
CAM109_map4	0002.CSV	2719.25	0.0178857
CAM109_map4	0002.CSV	2723.11	0.0180941
CAM109_map4	0002.CSV	2726.97	0.0181293
CAM109_map4	0002.CSV	2730.82	0.0179088
CAM109_map4	0002.CSV	2734.68	0.0178928
CAM109_map4	0002.CSV	2738.54	0.0179339
CAM109_map4	0002.CSV	2742.4	0.0179413
CAM109_map4	0002.CSV	2746.25	0.0181093
CAM109_map4	0002.CSV	2750.11	0.0181357
CAM109_map4	0002.CSV	2753.97	0.0179784
CAM109_map4	0002.CSV	2757.82	0.0179281
CAM109_map4	0002.CSV	2761.68	0.0178891
CAM109_map4	0002.CSV	2765.54	0.0178957
CAM109_map4	0002.CSV	2769.39	0.0179817
CAM109_map4	0002.CSV	2773.25	0.0181683
CAM109_map4	0002.CSV	2777.11	0.0181156
CAM109_map4	0002.CSV	2780.97	0.0179633
CAM109_map4	0002.CSV	2784.82	0.0180982
CAM109_map4	0002.CSV	2788.68	0.0183689
CAM109_map4	0002.CSV	2792.54	0.0184454
CAM109_map4	0002.CSV	2796.39	0.0184479
CAM109_map4	0002.CSV	2800.25	0.0183367
CAM109_map4	0002.CSV	2804.11	0.0182221
CAM109_map4	0002.CSV	2807.97	0.0183622
CAM109_map4	0002.CSV	2811.82	0.0183774
CAM109_map4	0002.CSV	2815.68	0.0182814
CAM109_map4	0002.CSV	2819.54	0.0183449
CAM109_map4	0002.CSV	2823.39	0.0183983
CAM109_map4	0002.CSV	2827.25	0.0184141
CAM109_map4	0002.CSV	2831.11	0.0186101
CAM109_map4	0002.CSV	2834.97	0.0189068
CAM109_map4	0002.CSV	2838.82	0.0191116
CAM109_map4	0002.CSV	2842.68	0.0192063
CAM109_map4	0002.CSV	2846.54	0.0194739
CAM109_map4	0002.CSV	2850.39	0.0195969
CAM109_map4	0002.CSV	2854.25	0.0195251
CAM109_map4	0002.CSV	2858.11	0.0195297
CAM109_map4	0002.CSV	2861.97	0.0193977
CAM109_map4	0002.CSV	2865.82	0.0192918
CAM109_map4	0002.CSV	2869.68	0.0194208
CAM109_map4	0002.CSV	2873.54	0.0195155
CAM109_map4	0002.CSV	2877.39	0.0192376
CAM109_map4	0002.CSV	2881.25	0.0189494
CAM109_map4	0002.CSV	2885.11	0.0189342
CAM109_map4	0002.CSV	2888.97	0.0191069
CAM109_map4	0002.CSV	2892.82	0.0193604
CAM109_map4	0002.CSV	2896.68	0.0194411
CAM109_map4	0002.CSV	2900.54	0.0193728
CAM109_map4	0002.CSV	2904.39	0.0195305
CAM109_map4	0002.CSV	2908.25	0.0199621
CAM109_map4	0002.CSV	2912.11	0.02057
CAM109_map4	0002.CSV	2915.97	0.0209352
CAM109_map4	0002.CSV	2919.82	0.020808
CAM109_map4	0002.CSV	2923.68	0.0204527
CAM109_map4	0002.CSV	2927.54	0.0203844
CAM109_map4	0002.CSV	2931.39	0.0201544
CAM109_map4	0002.CSV	2935.25	0.0196946
CAM109_map4	0002.CSV	2939.11	0.0195529
CAM109_map4	0002.CSV	2942.96	0.0198067
CAM109_map4	0002.CSV	2946.82	0.0198704
CAM109_map4	0002.CSV	2950.68	0.0196617
CAM109_map4	0002.CSV	2954.54	0.019353
CAM109_map4	0002.CSV	2958.39	0.0191174
CAM109_map4	0002.CSV	2962.25	0.0190738
CAM109_map4	0002.CSV	2966.11	0.0188454
CAM109_map4	0002.CSV	2969.96	0.0188208
CAM109_map4	0002.CSV	2973.82	0.0190581
CAM109_map4	0002.CSV	2977.68	0.0191541
CAM109_map4	0002.CSV	2981.53	0.0189179
CAM109_map4	0002.CSV	2985.39	0.0185182
CAM109_map4	0002.CSV	2989.25	0.0185189
CAM109_map4	0002.CSV	2993.11	0.018719
CAM109_map4	0002.CSV	2996.96	0.0186824
CAM109_map4	0002.CSV	3000.82	0.0185175
CAM109_map4	0002.CSV	3004.68	0.0184434
CAM109_map4	0002.CSV	3008.53	0.0186392
CAM109_map4	0002.CSV	3012.39	0.0188975
CAM109_map4	0002.CSV	3016.25	0.0188458
CAM109_map4	0002.CSV	3020.11	0.0186789
CAM109_map4	0002.CSV	3023.96	0.0185883
CAM109_map4	0002.CSV	3027.82	0.0185427
CAM109_map4	0002.CSV	3031.68	0.0187486
CAM109_map4	0002.CSV	3035.53	0.0188522
CAM109_map4	0002.CSV	3039.39	0.0189089
CAM109_map4	0002.CSV	3043.25	0.0190347
CAM109_map4	0002.CSV	3047.11	0.018987
CAM109_map4	0002.CSV	3050.96	0.0189384
CAM109_map4	0002.CSV	3054.82	0.0188444
CAM109_map4	0002.CSV	3058.68	0.0186852
CAM109_map4	0002.CSV	3062.53	0.0187494
CAM109_map4	0002.CSV	3066.39	0.0189871
CAM109_map4	0002.CSV	3070.25	0.0188892
CAM109_map4	0002.CSV	3074.11	0.0188794
CAM109_map4	0002.CSV	3077.96	0.0191994
CAM109_map4	0002.CSV	3081.82	0.019362
CAM109_map4	0002.CSV	3085.68	0.0192801
CAM109_map4	0002.CSV	3089.53	0.0190531
CAM109_map4	0002.CSV	3093.39	0.0187957
CAM109_map4	0002.CSV	3097.25	0.0188553
CAM109_map4	0002.CSV	3101.11	0.0189926
CAM109_map4	0002.CSV	3104.96	0.0190605
CAM109_map4	0002.CSV	3108.82	0.0192316
CAM109_map4	0002.CSV	3112.68	0.019329
CAM109_map4	0002.CSV	3116.53	0.0193692
CAM109_map4	0002.CSV	3120.39	0.0192997
CAM109_map4	0002.CSV	3124.25	0.0190985
CAM109_map4	0002.CSV	3128.11	0.0190228
CAM109_map4	0002.CSV	3131.96	0.0189515
CAM109_map4	0002.CSV	3135.82	0.0190693
CAM109_map4	0002.CSV	3139.68	0.0191479
CAM109_map4	0002.CSV	3143.53	0.0189768
CAM109_map4	0002.CSV	3147.39	0.0190416
CAM109_map4	0002.CSV	3151.25	0.0193339
CAM109_map4	0002.CSV	3155.1	0.0192228
CAM109_map4	0002.CSV	3158.96	0.0188069
CAM109_map4	0002.CSV	3162.82	0.0186269
CAM109_map4	0002.CSV	3166.68	0.0186421
CAM109_map4	0002.CSV	3170.53	0.0186056
CAM109_map4	0002.CSV	3174.39	0.018553
CAM109_map4	0002.CSV	3178.25	0.0187011
CAM109_map4	0002.CSV	3182.1	0.0188544
CAM109_map4	0002.CSV	3185.96	0.0189282
CAM109_map4	0002.CSV	3189.82	0.0189695
CAM109_map4	0002.CSV	3193.68	0.0188362
CAM109_map4	0002.CSV	3197.53	0.0188231
CAM109_map4	0002.CSV	3201.39	0.0189125
CAM109_map4	0002.CSV	3205.25	0.018922
CAM109_map4	0002.CSV	3209.1	0.0189432
CAM109_map4	0002.CSV	3212.96	0.0191237
CAM109_map4	0002.CSV	3216.82	0.019219
CAM109_map4	0002.CSV	3220.68	0.0190804
CAM109_map4	0002.CSV	3224.53	0.018984
CAM109_map4	0002.CSV	3228.39	0.0192222
CAM109_map4	0002.CSV	3232.25	0.0196282
CAM109_map4	0002.CSV	3236.1	0.0195916
CAM109_map4	0002.CSV	3239.96	0.0193691
CAM109_map4	0002.CSV	3243.82	0.0195905
CAM109_map4	0002.CSV	3247.68	0.0197236
CAM109_map4	0002.CSV	3251.53	0.0194928
CAM109_map4	0002.CSV	3255.39	0.0194432
CAM109_map4	0002.CSV	3259.25	0.0192094
CAM109_map4	0002.CSV	3263.1	0.0191262
CAM109_map4	0002.CSV	3266.96	0.0195085
CAM109_map4	0002.CSV	3270.82	0.0199671
CAM109_map4	0002.CSV	3274.68	0.01996
CAM109_map4	0002.CSV	3278.53	0.0196108
CAM109_map4	0002.CSV	3282.39	0.0193674
CAM109_map4	0002.CSV	3286.25	0.0193859
CAM109_map4	0002.CSV	3290.1	0.0197333
CAM109_map4	0002.CSV	3293.96	0.0200186
CAM109_map4	0002.CSV	3297.82	0.0198717
CAM109_map4	0002.CSV	3301.67	0.0198859
CAM109_map4	0002.CSV	3305.53	0.0201176
CAM109_map4	0002.CSV	3309.39	0.0200031
CAM109_map4	0002.CSV	3313.25	0.0195022
CAM109_map4	0002.CSV	3317.1	0.0191802
CAM109_map4	0002.CSV	3320.96	0.0193243
CAM109_map4	0002.CSV	3324.82	0.0195991
CAM109_map4	0002.CSV	3328.67	0.0193592
CAM109_map4	0002.CSV	3332.53	0.0192018
CAM109_map4	0002.CSV	3336.39	0.0196633
CAM109_map4	0002.CSV	3340.24	0.019895
CAM109_map4	0002.CSV	3344.1	0.0197378
CAM109_map4	0002.CSV	3347.96	0.0197574
CAM109_map4	0002.CSV	3351.82	0.0196869
CAM109_map4	0002.CSV	3355.67	0.0194648
CAM109_map4	0002.CSV	3359.53	0.0196675
CAM109_map4	0002.CSV	3363.39	0.0199679
CAM109_map4	0002.CSV	3367.24	0.0202739
CAM109_map4	0002.CSV	3371.1	0.0200655
CAM109_map4	0002.CSV	3374.96	0.0196446
CAM109_map4	0002.CSV	3378.82	0.019518
CAM109_map4	0002.CSV	3382.67	0.0193562
CAM109_map4	0002.CSV	3386.53	0.0194409
CAM109_map4	0002.CSV	3390.39	0.0198732
CAM109_map4	0002.CSV	3394.24	0.0200512
CAM109_map4	0002.CSV	3398.1	0.0200723
CAM109_map4	0002.CSV	3401.96	0.0199885
CAM109_map4	0002.CSV	3405.82	0.0197943
CAM109_map4	0002.CSV	3409.67	0.0197683
CAM109_map4	0002.CSV	3413.53	0.0194614
CAM109_map4	0002.CSV	3417.39	0.0190671
CAM109_map4	0002.CSV	3421.24	0.0190714
CAM109_map4	0002.CSV	3425.1	0.0192555
CAM109_map4	0002.CSV	3428.96	0.0196342
CAM109_map4	0002.CSV	3432.82	0.019908
CAM109_map4	0002.CSV	3436.67	0.0196616
CAM109_map4	0002.CSV	3440.53	0.0189885
CAM109_map4	0002.CSV	3444.39	0.0187501
CAM109_map4	0002.CSV	3448.24	0.0188193
CAM109_map4	0002.CSV	3452.1	0.0185837
CAM109_map4	0002.CSV	3455.96	0.0185161
CAM109_map4	0002.CSV	3459.82	0.018926
CAM109_map4	0002.CSV	3463.67	0.0193849
CAM109_map4	0002.CSV	3467.53	0.0194892
CAM109_map4	0002.CSV	3471.39	0.0191473
CAM109_map4	0002.CSV	3475.24	0.0188701
CAM109_map4	0002.CSV	3479.1	0.0188856
CAM109_map4	0002.CSV	3482.96	0.0189231
CAM109_map4	0002.CSV	3486.82	0.0190078
CAM109_map4	0002.CSV	3490.67	0.0189434
CAM109_map4	0002.CSV	3494.53	0.0189778
CAM109_map4	0002.CSV	3498.39	0.0189359
CAM109_map4	0002.CSV	3502.24	0.018813
CAM109_map4	0002.CSV	3506.1	0.0185555
CAM109_map4	0002.CSV	3509.96	0.0184768
CAM109_map4	0002.CSV	3513.81	0.018684
CAM109_map4	0002.CSV	3517.67	0.0184279
CAM109_map4	0002.CSV	3521.53	0.01844
CAM109_map4	0002.CSV	3525.39	0.0184596
CAM109_map4	0002.CSV	3529.24	0.0182195
CAM109_map4	0002.CSV	3533.1	0.0182765
CAM109_map4	0002.CSV	3536.96	0.0185012
CAM109_map4	0002.CSV	3540.81	0.0186048
CAM109_map4	0002.CSV	3544.67	0.0188561
CAM109_map4	0002.CSV	3548.53	0.0186791
CAM109_map4	0002.CSV	3552.39	0.0182154
CAM109_map4	0002.CSV	3556.24	0.0180487
CAM109_map4	0002.CSV	3560.1	0.0178824
CAM109_map4	0002.CSV	3563.96	0.0175094
CAM109_map4	0002.CSV	3567.81	0.0181242
CAM109_map4	0002.CSV	3571.67	0.0183145
CAM109_map4	0002.CSV	3575.53	0.0179591
CAM109_map4	0002.CSV	3579.39	0.0182901
CAM109_map4	0002.CSV	3583.24	0.0183886
CAM109_map4	0002.CSV	3587.1	0.0184869
CAM109_map4	0002.CSV	3590.96	0.0183899
CAM109_map4	0002.CSV	3594.81	0.0180212
CAM109_map4	0002.CSV	3598.67	0.0183733
CAM109_map4	0002.CSV	3602.53	0.0184002
CAM109_map4	0002.CSV	3606.39	0.0176912
CAM109_map4	0002.CSV	3610.24	0.0174573
CAM109_map4	0002.CSV	3614.1	0.0174814
CAM109_map4	0002.CSV	3617.96	0.0179025
CAM109_map4	0002.CSV	3621.81	0.0182423
CAM109_map4	0002.CSV	3625.67	0.0175231
CAM109_map4	0002.CSV	3629.53	0.017861
CAM109_map4	0002.CSV	3633.39	0.0186031
CAM109_map4	0002.CSV	3637.24	0.018258
CAM109_map4	0002.CSV	3641.1	0.0178881
CAM109_map4	0002.CSV	3644.96	0.0172179
CAM109_map4	0002.CSV	3648.81	0.0177053
CAM109_map4	0002.CSV	3652.67	0.018823
CAM109_map4	0002.CSV	3656.53	0.0188734
CAM109_map4	0002.CSV	3660.38	0.0187991
CAM109_map4	0002.CSV	3664.24	0.0179261
CAM109_map4	0002.CSV	3668.1	0.0170582
CAM109_map4	0002.CSV	3671.96	0.0171007
CAM109_map4	0002.CSV	3675.81	0.0179692
CAM109_map4	0002.CSV	3679.67	0.0186405
CAM109_map4	0002.CSV	3683.53	0.0182053
CAM109_map4	0002.CSV	3687.38	0.017933
CAM109_map4	0002.CSV	3691.24	0.0187986
CAM109_map4	0002.CSV	3695.1	0.0186974
CAM109_map4	0002.CSV	3698.95	0.0181545
CAM109_map4	0002.CSV	3702.81	0.0179983
CAM109_map4	0002.CSV	3706.67	0.0174527
CAM109_map4	0002.CSV	3710.53	0.0175142
CAM109_map4	0002.CSV	3714.38	0.0183966
CAM109_map4	0002.CSV	3718.24	0.0178736
CAM109_map4	0002.CSV	3722.1	0.0175905
CAM109_map4	0002.CSV	3725.95	0.0177247
CAM109_map4	0002.CSV	3729.81	0.0173544
CAM109_map4	0002.CSV	3733.67	0.0175521
CAM109_map4	0002.CSV	3737.53	0.0187889
CAM109_map4	0002.CSV	3741.38	0.017846
CAM109_map4	0002.CSV	3745.24	0.0166769
CAM109_map4	0002.CSV	3749.1	0.016792
CAM109_map4	0002.CSV	3752.95	0.0179708
CAM109_map4	0002.CSV	3756.81	0.0180867
CAM109_map4	0002.CSV	3760.67	0.0181093
CAM109_map4	0002.CSV	3764.53	0.0178463
CAM109_map4	0002.CSV	3768.38	0.0179643
CAM109_map4	0002.CSV	3772.24	0.0182258
CAM109_map4	0002.CSV	3776.1	0.0178937
CAM109_map4	0002.CSV	3779.95	0.0179385
CAM109_map4	0002.CSV	3783.81	0.0180669
CAM109_map4	0002.CSV	3787.67	0.0180901
CAM109_map4	0002.CSV	3791.53	0.0177237
CAM109_map4	0002.CSV	3795.38	0.0170679
CAM109_map4	0002.CSV	3799.24	0.0170269
CAM109_map4	0002.CSV	3803.1	0.0178084
CAM109_map4	0002.CSV	3806.95	0.0182851
CAM109_map4	0002.CSV	3810.81	0.017855
CAM109_map4	0002.CSV	3814.67	0.017254
CAM109_map4	0002.CSV	3818.53	0.0174339
CAM109_map4	0002.CSV	3822.38	0.0179178
CAM109_map4	0002.CSV	3826.24	0.0179668
CAM109_map4	0002.CSV	3830.1	0.0177191
CAM109_map4	0002.CSV	3833.95	0.0174211
CAM109_map4	0002.CSV	3837.81	0.0175102
CAM109_map4	0002.CSV	3841.67	0.0183588
CAM109_map4	0002.CSV	3845.53	0.0181034
CAM109_map4	0002.CSV	3849.38	0.0169215
CAM109_map4	0002.CSV	3853.24	0.0170585
CAM109_map4	0002.CSV	3857.1	0.0181167
CAM109_map4	0002.CSV	3860.95	0.0173852
CAM109_map4	0002.CSV	3864.81	0.0172942
CAM109_map4	0002.CSV	3868.67	0.0173884
CAM109_map4	0002.CSV	3872.52	0.0176831
CAM109_map4	0002.CSV	3876.38	0.0175338
CAM109_map4	0002.CSV	3880.24	0.0173555
CAM109_map4	0002.CSV	3884.1	0.0180325
CAM109_map4	0002.CSV	3887.95	0.0180302
CAM109_map4	0002.CSV	3891.81	0.0179051
CAM109_map4	0002.CSV	3895.67	0.0175453
CAM109_map4	0002.CSV	3899.52	0.0170434
CAM109_map4	0002.CSV	3903.38	0.0180677
CAM109_map4	0002.CSV	3907.24	0.0184832
CAM109_map4	0002.CSV	3911.1	0.0178408
CAM109_map4	0002.CSV	3914.95	0.0174725
CAM109_map4	0002.CSV	3918.81	0.0177207
CAM109_map4	0002.CSV	3922.67	0.0178211
CAM109_map4	0002.CSV	3926.52	0.0178104
CAM109_map4	0002.CSV	3930.38	0.0179848
CAM109_map4	0002.CSV	3934.24	0.0183754
CAM109_map4	0002.CSV	3938.09	0.0180155
CAM109_map4	0002.CSV	3941.95	0.0177984
CAM109_map4	0002.CSV	3945.81	0.017884
CAM109_map4	0002.CSV	3949.67	0.0180105
CAM109_map4	0002.CSV	3953.52	0.0180372
CAM109_map4	0002.CSV	3957.38	0.0179221
CAM109_map4	0002.CSV	3961.24	0.0179865
CAM109_map4	0002.CSV	3965.09	0.0179888
CAM109_map4	0002.CSV	3968.95	0.0179113
CAM109_map4	0002.CSV	3972.81	0.0180425
CAM109_map4	0002.CSV	3976.67	0.0182378
CAM109_map4	0002.CSV	3980.52	0.018239
CAM109_map4	0002.CSV	3984.38	0.0182037
CAM109_map4	0002.CSV	3988.24	0.0180921
CAM109_map4	0002.CSV	3992.09	0.0180718
CAM109_map4	0002.CSV	3995.95	0.0180802
CAM109_map4	0002.CSV	3999.81	0.0180644
CAM109_map4	0003.CSV	674.992	0.0432752
CAM109_map4	0003.CSV	678.849	0.0451122
CAM109_map4	0003.CSV	682.706	0.0464445
CAM109_map4	0003.CSV	686.563	0.0492821
CAM109_map4	0003.CSV	690.42	0.0534508
CAM109_map4	0003.CSV	694.277	0.0663513
CAM109_map4	0003.CSV	698.134	0.0809293
CAM109_map4	0003.CSV	701.991	0.0770679
CAM109_map4	0003.CSV	705.849	0.0693747
CAM109_map4	0003.CSV	709.706	0.0813967
CAM109_map4	0003.CSV	713.563	0.0790194
CAM109_map4	0003.CSV	717.42	0.0544364
CAM109_map4	0003.CSV	721.277	0.0412794
CAM109_map4	0003.CSV	725.134	0.0401464
CAM109_map4	0003.CSV	728.991	0.0401482
CAM109_map4	0003.CSV	732.848	0.0415319
CAM109_map4	0003.CSV	736.705	0.0440425
CAM109_map4	0003.CSV	740.562	0.047316
CAM109_map4	0003.CSV	744.42	0.048733
CAM109_map4	0003.CSV	748.277	0.0492293
CAM109_map4	0003.CSV	752.134	0.0486113
CAM109_map4	0003.CSV	755.991	0.048838
CAM109_map4	0003.CSV	759.848	0.0490413
CAM109_map4	0003.CSV	763.705	0.0494823
CAM109_map4	0003.CSV	767.562	0.0495358
CAM109_map4	0003.CSV	771.419	0.0505092
CAM109_map4	0003.CSV	775.276	0.0512629
CAM109_map4	0003.CSV	779.133	0.0522027
CAM109_map4	0003.CSV	782.99	0.0524268
CAM109_map4	0003.CSV	786.848	0.0534528
CAM109_map4	0003.CSV	790.705	0.0544124
CAM109_map4	0003.CSV	794.562	0.05656
CAM109_map4	0003.CSV	798.419	0.0590165
CAM109_map4	0003.CSV	802.276	0.0616828
CAM109_map4	0003.CSV	806.133	0.0635552
CAM109_map4	0003.CSV	809.99	0.0658644
CAM109_map4	0003.CSV	813.847	0.068321
CAM109_map4	0003.CSV	817.704	0.0724051
CAM109_map4	0003.CSV	821.562	0.0768375
CAM109_map4	0003.CSV	825.419	0.0817918
CAM109_map4	0003.CSV	829.276	0.0867676
CAM109_map4	0003.CSV	833.133	0.0942645
CAM109_map4	0003.CSV	836.99	0.10529
CAM109_map4	0003.CSV	840.847	0.119512
CAM109_map4	0003.CSV	844.704	0.131106
CAM109_map4	0003.CSV	848.561	0.145362
CAM109_map4	0003.CSV	852.418	0.159159
CAM109_map4	0003.CSV	856.275	0.161815
CAM109_map4	0003.CSV	860.132	0.146588
CAM109_map4	0003.CSV	863.99	0.117543
CAM109_map4	0003.CSV	867.847	0.0871317
CAM109_map4	0003.CSV	871.704	0.0658781
CAM109_map4	0003.CSV	875.561	0.0540608
CAM109_map4	0003.CSV	879.418	0.0481605
CAM109_map4	0003.CSV	883.275	0.0443143
CAM109_map4	0003.CSV	887.132	0.0423283
CAM109_map4	0003.CSV	890.989	0.0413689
CAM109_map4	0003.CSV	894.846	0.0412421
CAM109_map4	0003.CSV	898.703	0.0412723
CAM109_map4	0003.CSV	902.561	0.0419131
CAM109_map4	0003.CSV	906.418	0.0424694
CAM109_map4	0003.CSV	910.275	0.0427232
CAM109_map4	0003.CSV	914.132	0.0423596
CAM109_map4	0003.CSV	917.989	0.0426038
CAM109_map4	0003.CSV	921.846	0.0427942
CAM109_map4	0003.CSV	925.703	0.0432929
CAM109_map4	0003.CSV	929.56	0.0437494
CAM109_map4	0003.CSV	933.417	0.0444336
CAM109_map4	0003.CSV	937.274	0.0447864
CAM109_map4	0003.CSV	941.131	0.0451795
CAM109_map4	0003.CSV	944.989	0.0451039
CAM109_map4	0003.CSV	948.846	0.0452001
CAM109_map4	0003.CSV	952.703	0.0450434
CAM109_map4	0003.CSV	956.56	0.0450118
CAM109_map4	0003.CSV	960.417	0.0446834
CAM109_map4	0003.CSV	964.274	0.04456
CAM109_map4	0003.CSV	968.131	0.0446898
CAM109_map4	0003.CSV	971.988	0.0455603
CAM109_map4	0003.CSV	975.845	0.0463827
CAM109_map4	0003.CSV	979.702	0.0475828
CAM109_map4	0003.CSV	983.559	0.0487557
CAM109_map4	0003.CSV	987.417	0.0502101
CAM109_map4	0003.CSV	991.274	0.0513822
CAM109_map4	0003.CSV	995.131	0.0525959
CAM109_map4	0003.CSV	998.988	0.0535319
CAM109_map4	0003.CSV	1002.85	0.054746
CAM109_map4	0003.CSV	1006.7	0.0556624
CAM109_map4	0003.CSV	1010.56	0.056779
CAM109_map4	0003.CSV	1014.42	0.0575975
CAM109_map4	0003.CSV	1018.27	0.0585554
CAM109_map4	0003.CSV	1022.13	0.0593328
CAM109_map4	0003.CSV	1025.99	0.0604531
CAM109_map4	0003.CSV	1029.85	0.0612482
CAM109_map4	0003.CSV	1033.7	0.0623735
CAM109_map4	0003.CSV	1037.56	0.0632683
CAM109_map4	0003.CSV	1041.42	0.0638937
CAM109_map4	0003.CSV	1045.27	0.0640585
CAM109_map4	0003.CSV	1049.13	0.0651951
CAM109_map4	0003.CSV	1052.99	0.0670538
CAM109_map4	0003.CSV	1056.84	0.0701671
CAM109_map4	0003.CSV	1060.7	0.0735174
CAM109_map4	0003.CSV	1064.56	0.0768583
CAM109_map4	0003.CSV	1068.42	0.0788711
CAM109_map4	0003.CSV	1072.27	0.0803583
CAM109_map4	0003.CSV	1076.13	0.082496
CAM109_map4	0003.CSV	1079.99	0.087391
CAM109_map4	0003.CSV	1083.84	0.0852814
CAM109_map4	0003.CSV	1087.7	0.0757129
CAM109_map4	0003.CSV	1091.56	0.0707408
CAM109_map4	0003.CSV	1095.41	0.0699047
CAM109_map4	0003.CSV	1099.27	0.0696745
CAM109_map4	0003.CSV	1103.13	0.0700507
CAM109_map4	0003.CSV	1106.99	0.0709202
CAM109_map4	0003.CSV	1110.84	0.0723098
CAM109_map4	0003.CSV	1114.7	0.07324
CAM109_map4	0003.CSV	1118.56	0.0735511
CAM109_map4	0003.CSV	1122.41	0.0730727
CAM109_map4	0003.CSV	1126.27	0.0724251
CAM109_map4	0003.CSV	1130.13	0.0716111
CAM109_map4	0003.CSV	1133.99	0.0712694
CAM109_map4	0003.CSV	1137.84	0.0710512
CAM109_map4	0003.CSV	1141.7	0.0708703
CAM109_map4	0003.CSV	1145.56	0.0702415
CAM109_map4	0003.CSV	1149.41	0.0697035
CAM109_map4	0003.CSV	1153.27	0.0691814
CAM109_map4	0003.CSV	1157.13	0.0690312
CAM109_map4	0003.CSV	1160.99	0.0688258
CAM109_map4	0003.CSV	1164.84	0.0686275
CAM109_map4	0003.CSV	1168.7	0.0678655
CAM109_map4	0003.CSV	1172.56	0.0670293
CAM109_map4	0003.CSV	1176.41	0.0659511
CAM109_map4	0003.CSV	1180.27	0.064959
CAM109_map4	0003.CSV	1184.13	0.0637552
CAM109_map4	0003.CSV	1187.99	0.0627915
CAM109_map4	0003.CSV	1191.84	0.061705
CAM109_map4	0003.CSV	1195.7	0.0609054
CAM109_map4	0003.CSV	1199.56	0.060222
CAM109_map4	0003.CSV	1203.41	0.0599806
CAM109_map4	0003.CSV	1207.27	0.0597843
CAM109_map4	0003.CSV	1211.13	0.0599278
CAM109_map4	0003.CSV	1214.98	0.0600768
CAM109_map4	0003.CSV	1218.84	0.0605635
CAM109_map4	0003.CSV	1222.7	0.0610723
CAM109_map4	0003.CSV	1226.56	0.0619837
CAM109_map4	0003.CSV	1230.41	0.0629828
CAM109_map4	0003.CSV	1234.27	0.0643721
CAM109_map4	0003.CSV	1238.13	0.0659413
CAM109_map4	0003.CSV	1241.98	0.0679919
CAM109_map4	0003.CSV	1245.84	0.0701384
CAM109_map4	0003.CSV	1249.7	0.072417
CAM109_map4	0003.CSV	1253.56	0.0740978
CAM109_map4	0003.CSV	1257.41	0.0754682
CAM109_map4	0003.CSV	1261.27	0.0764005
CAM109_map4	0003.CSV	1265.13	0.0773259
CAM109_map4	0003.CSV	1268.98	0.0780573
CAM109_map4	0003.CSV	1272.84	0.0790179
CAM109_map4	0003.CSV	1276.7	0.0796329
CAM109_map4	0003.CSV	1280.56	0.0801171
CAM109_map4	0003.CSV	1284.41	0.0800992
CAM109_map4	0003.CSV	1288.27	0.0798318
CAM109_map4	0003.CSV	1292.13	0.0788318
CAM109_map4	0003.CSV	1295.98	0.0776393
CAM109_map4	0003.CSV	1299.84	0.0763013
CAM109_map4	0003.CSV	1303.7	0.0754853
CAM109_map4	0003.CSV	1307.56	0.0750151
CAM109_map4	0003.CSV	1311.41	0.0751947
CAM109_map4	0003.CSV	1315.27	0.0755179
CAM109_map4	0003.CSV	1319.13	0.0760883
CAM109_map4	0003.CSV	1322.98	0.0763276
CAM109_map4	0003.CSV	1326.84	0.07684
CAM109_map4	0003.CSV	1330.7	0.0774612
CAM109_map4	0003.CSV	1334.56	0.0785009
CAM109_map4	0003.CSV	1338.41	0.0800597
CAM109_map4	0003.CSV	1342.27	0.082287
CAM109_map4	0003.CSV	1346.13	0.083965
CAM109_map4	0003.CSV	1349.98	0.0861355
CAM109_map4	0003.CSV	1353.84	0.0881743
CAM109_map4	0003.CSV	1357.7	0.09033
CAM109_map4	0003.CSV	1361.56	0.0927987
CAM109_map4	0003.CSV	1365.41	0.0961395
CAM109_map4	0003.CSV	1369.27	0.0987612
CAM109_map4	0003.CSV	1373.13	0.102452
CAM109_map4	0003.CSV	1376.98	0.10653
CAM109_map4	0003.CSV	1380.84	0.10976
CAM109_map4	0003.CSV	1384.7	0.112408
CAM109_map4	0003.CSV	1388.56	0.116259
CAM109_map4	0003.CSV	1392.41	0.119316
CAM109_map4	0003.CSV	1396.27	0.123711
CAM109_map4	0003.CSV	1400.13	0.128096
CAM109_map4	0003.CSV	1403.98	0.132206
CAM109_map4	0003.CSV	1407.84	0.136602
CAM109_map4	0003.CSV	1411.7	0.141017
CAM109_map4	0003.CSV	1415.55	0.144173
CAM109_map4	0003.CSV	1419.41	0.148318
CAM109_map4	0003.CSV	1423.27	0.151003
CAM109_map4	0003.CSV	1427.12	0.153582
CAM109_map4	0003.CSV	1430.98	0.156501
CAM109_map4	0003.CSV	1434.84	0.160941
CAM109_map4	0003.CSV	1438.7	0.165973
CAM109_map4	0003.CSV	1442.55	0.170176
CAM109_map4	0003.CSV	1446.41	0.173316
CAM109_map4	0003.CSV	1450.27	0.175695
CAM109_map4	0003.CSV	1454.12	0.174827
CAM109_map4	0003.CSV	1457.98	0.173639
CAM109_map4	0003.CSV	1461.84	0.17251
CAM109_map4	0003.CSV	1465.7	0.172927
CAM109_map4	0003.CSV	1469.55	0.171354
CAM109_map4	0003.CSV	1473.41	0.165985
CAM109_map4	0003.CSV	1477.27	0.156837
CAM109_map4	0003.CSV	1481.12	0.150053
CAM109_map4	0003.CSV	1484.98	0.143378
CAM109_map4	0003.CSV	1488.84	0.135877
CAM109_map4	0003.CSV	1492.7	0.127981
CAM109_map4	0003.CSV	1496.55	0.12158
CAM109_map4	0003.CSV	1500.41	0.114175
CAM109_map4	0003.CSV	1504.27	0.109868
CAM109_map4	0003.CSV	1508.12	0.101953
CAM109_map4	0003.CSV	1511.98	0.0959985
CAM109_map4	0003.CSV	1515.84	0.0915506
CAM109_map4	0003.CSV	1519.7	0.0860256
CAM109_map4	0003.CSV	1523.55	0.0795141
CAM109_map4	0003.CSV	1527.41	0.0755373
CAM109_map4	0003.CSV	1531.27	0.0728874
CAM109_map4	0003.CSV	1535.12	0.071809
CAM109_map4	0003.CSV	1538.98	0.0705375
CAM109_map4	0003.CSV	1542.84	0.067044
CAM109_map4	0003.CSV	1546.7	0.062814
CAM109_map4	0003.CSV	1550.55	0.0597145
CAM109_map4	0003.CSV	1554.41	0.0566796
CAM109_map4	0003.CSV	1558.27	0.0537332
CAM109_map4	0003.CSV	1562.12	0.0507975
CAM109_map4	0003.CSV	1565.98	0.0492475
CAM109_map4	0003.CSV	1569.84	0.0476979
CAM109_map4	0003.CSV	1573.69	0.0465001
CAM109_map4	0003.CSV	1577.55	0.0445726
CAM109_map4	0003.CSV	1581.41	0.0416793
CAM109_map4	0003.CSV	1585.27	0.0385339
CAM109_map4	0003.CSV	1589.12	0.0362393
CAM109_map4	0003.CSV	1592.98	0.0349636
CAM109_map4	0003.CSV	1596.84	0.0344906
CAM109_map4	0003.CSV	1600.69	0.0340195
CAM109_map4	0003.CSV	1604.55	0.0335813
CAM109_map4	0003.CSV	1608.41	0.0330748
CAM109_map4	0003.CSV	1612.27	0.0326943
CAM109_map4	0003.CSV	1616.12	0.0322818
CAM109_map4	0003.CSV	1619.98	0.0320702
CAM109_map4	0003.CSV	1623.84	0.0315732
CAM109_map4	0003.CSV	1627.69	0.0311286
CAM109_map4	0003.CSV	1631.55	0.0303607
CAM109_map4	0003.CSV	1635.41	0.0301977
CAM109_map4	0003.CSV	1639.27	0.0300387
CAM109_map4	0003.CSV	1643.12	0.0294165
CAM109_map4	0003.CSV	1646.98	0.029112
CAM109_map4	0003.CSV	1650.84	0.0294367
CAM109_map4	0003.CSV	1654.69	0.0294537
CAM109_map4	0003.CSV	1658.55	0.028975
CAM109_map4	0003.CSV	1662.41	0.0284884
CAM109_map4	0003.CSV	1666.27	0.0281969
CAM109_map4	0003.CSV	1670.12	0.0279723
CAM109_map4	0003.CSV	1673.98	0.0281416
CAM109_map4	0003.CSV	1677.84	0.0277708
CAM109_map4	0003.CSV	1681.69	0.0276682
CAM109_map4	0003.CSV	1685.55	0.0280429
CAM109_map4	0003.CSV	1689.41	0.028014
CAM109_map4	0003.CSV	1693.27	0.0274975
CAM109_map4	0003.CSV	1697.12	0.0278646
CAM109_map4	0003.CSV	1700.98	0.0289809
CAM109_map4	0003.CSV	1704.84	0.0299475
CAM109_map4	0003.CSV	1708.69	0.0308527
CAM109_map4	0003.CSV	1712.55	0.031842
CAM109_map4	0003.CSV	1716.41	0.0348076
CAM109_map4	0003.CSV	1720.27	0.0380844
CAM109_map4	0003.CSV	1724.12	0.0388666
[truncated: 46,329 more rows]

## Sheet: CAM109_map5
Map	Select spectrum number	Wavenumbers	Absorbance
CAM109_map5	0001.CSV	674.992	0.0432152
CAM109_map5	0001.CSV	678.849	0.0438983
CAM109_map5	0001.CSV	682.706	0.047565
CAM109_map5	0001.CSV	686.563	0.0504414
CAM109_map5	0001.CSV	690.42	0.0581097
CAM109_map5	0001.CSV	694.277	0.0742987
CAM109_map5	0001.CSV	698.134	0.0968394
CAM109_map5	0001.CSV	701.991	0.0934882
CAM109_map5	0001.CSV	705.849	0.0822384
CAM109_map5	0001.CSV	709.706	0.0961529
CAM109_map5	0001.CSV	713.563	0.0989875
CAM109_map5	0001.CSV	717.42	0.0664312
CAM109_map5	0001.CSV	721.277	0.0462766
CAM109_map5	0001.CSV	725.134	0.0430171
CAM109_map5	0001.CSV	728.991	0.0439366
CAM109_map5	0001.CSV	732.848	0.0452993
CAM109_map5	0001.CSV	736.705	0.0488931
CAM109_map5	0001.CSV	740.562	0.0523679
CAM109_map5	0001.CSV	744.42	0.0550733
CAM109_map5	0001.CSV	748.277	0.0554245
CAM109_map5	0001.CSV	752.134	0.0555546
CAM109_map5	0001.CSV	755.991	0.0552354
CAM109_map5	0001.CSV	759.848	0.0560089
CAM109_map5	0001.CSV	763.705	0.0568566
CAM109_map5	0001.CSV	767.562	0.0582419
CAM109_map5	0001.CSV	771.419	0.0594041
CAM109_map5	0001.CSV	775.276	0.0609937
CAM109_map5	0001.CSV	779.133	0.0620444
CAM109_map5	0001.CSV	782.99	0.0624905
CAM109_map5	0001.CSV	786.848	0.062224
CAM109_map5	0001.CSV	790.705	0.0630651
CAM109_map5	0001.CSV	794.562	0.0652968
CAM109_map5	0001.CSV	798.419	0.0682829
CAM109_map5	0001.CSV	802.276	0.0708077
CAM109_map5	0001.CSV	806.133	0.0736793
CAM109_map5	0001.CSV	809.99	0.0771336
CAM109_map5	0001.CSV	813.847	0.0819216
CAM109_map5	0001.CSV	817.704	0.0879753
CAM109_map5	0001.CSV	821.562	0.0939589
CAM109_map5	0001.CSV	825.419	0.099306
CAM109_map5	0001.CSV	829.276	0.105612
CAM109_map5	0001.CSV	833.133	0.114831
CAM109_map5	0001.CSV	836.99	0.129231
CAM109_map5	0001.CSV	840.847	0.149396
CAM109_map5	0001.CSV	844.704	0.168634
CAM109_map5	0001.CSV	848.561	0.195677
CAM109_map5	0001.CSV	852.418	0.227286
CAM109_map5	0001.CSV	856.275	0.230469
CAM109_map5	0001.CSV	860.132	0.198495
CAM109_map5	0001.CSV	863.99	0.150828
CAM109_map5	0001.CSV	867.847	0.107248
CAM109_map5	0001.CSV	871.704	0.0786566
CAM109_map5	0001.CSV	875.561	0.0639098
CAM109_map5	0001.CSV	879.418	0.0557641
CAM109_map5	0001.CSV	883.275	0.0499953
CAM109_map5	0001.CSV	887.132	0.0466313
CAM109_map5	0001.CSV	890.989	0.0451655
CAM109_map5	0001.CSV	894.846	0.0447
CAM109_map5	0001.CSV	898.703	0.0446831
CAM109_map5	0001.CSV	902.561	0.0453124
CAM109_map5	0001.CSV	906.418	0.0461384
CAM109_map5	0001.CSV	910.275	0.0463657
CAM109_map5	0001.CSV	914.132	0.0460427
CAM109_map5	0001.CSV	917.989	0.0465128
CAM109_map5	0001.CSV	921.846	0.0470759
CAM109_map5	0001.CSV	925.703	0.047752
CAM109_map5	0001.CSV	929.56	0.0483317
CAM109_map5	0001.CSV	933.417	0.0491319
CAM109_map5	0001.CSV	937.274	0.0496034
CAM109_map5	0001.CSV	941.131	0.0498116
CAM109_map5	0001.CSV	944.989	0.0492549
CAM109_map5	0001.CSV	948.846	0.04871
CAM109_map5	0001.CSV	952.703	0.0481318
CAM109_map5	0001.CSV	956.56	0.0478055
CAM109_map5	0001.CSV	960.417	0.0473437
CAM109_map5	0001.CSV	964.274	0.0473967
CAM109_map5	0001.CSV	968.131	0.0477738
CAM109_map5	0001.CSV	971.988	0.0488711
CAM109_map5	0001.CSV	975.845	0.0499993
CAM109_map5	0001.CSV	979.702	0.0516656
CAM109_map5	0001.CSV	983.559	0.0533479
CAM109_map5	0001.CSV	987.417	0.0552801
CAM109_map5	0001.CSV	991.274	0.056989
CAM109_map5	0001.CSV	995.131	0.0589042
CAM109_map5	0001.CSV	998.988	0.0606717
CAM109_map5	0001.CSV	1002.85	0.0627338
CAM109_map5	0001.CSV	1006.7	0.0644233
CAM109_map5	0001.CSV	1010.56	0.0663204
CAM109_map5	0001.CSV	1014.42	0.0676621
CAM109_map5	0001.CSV	1018.27	0.0691905
CAM109_map5	0001.CSV	1022.13	0.0705676
CAM109_map5	0001.CSV	1025.99	0.0724417
CAM109_map5	0001.CSV	1029.85	0.0737828
CAM109_map5	0001.CSV	1033.7	0.0753325
CAM109_map5	0001.CSV	1037.56	0.0765968
CAM109_map5	0001.CSV	1041.42	0.0778118
CAM109_map5	0001.CSV	1045.27	0.0783019
CAM109_map5	0001.CSV	1049.13	0.0797741
CAM109_map5	0001.CSV	1052.99	0.082125
CAM109_map5	0001.CSV	1056.84	0.0863037
CAM109_map5	0001.CSV	1060.7	0.0910616
CAM109_map5	0001.CSV	1064.56	0.0959757
CAM109_map5	0001.CSV	1068.42	0.0988486
CAM109_map5	0001.CSV	1072.27	0.10067
CAM109_map5	0001.CSV	1076.13	0.103199
CAM109_map5	0001.CSV	1079.99	0.109725
CAM109_map5	0001.CSV	1083.84	0.107307
CAM109_map5	0001.CSV	1087.7	0.0934216
CAM109_map5	0001.CSV	1091.56	0.0853229
CAM109_map5	0001.CSV	1095.41	0.0843606
CAM109_map5	0001.CSV	1099.27	0.0845997
CAM109_map5	0001.CSV	1103.13	0.0858279
CAM109_map5	0001.CSV	1106.99	0.0875951
CAM109_map5	0001.CSV	1110.84	0.090256
CAM109_map5	0001.CSV	1114.7	0.0921055
CAM109_map5	0001.CSV	1118.56	0.093014
CAM109_map5	0001.CSV	1122.41	0.0925113
CAM109_map5	0001.CSV	1126.27	0.0917535
CAM109_map5	0001.CSV	1130.13	0.0906741
CAM109_map5	0001.CSV	1133.99	0.0903315
CAM109_map5	0001.CSV	1137.84	0.0899586
CAM109_map5	0001.CSV	1141.7	0.0896738
CAM109_map5	0001.CSV	1145.56	0.0886787
CAM109_map5	0001.CSV	1149.41	0.088067
CAM109_map5	0001.CSV	1153.27	0.0874842
CAM109_map5	0001.CSV	1157.13	0.0873363
CAM109_map5	0001.CSV	1160.99	0.0868817
CAM109_map5	0001.CSV	1164.84	0.0865198
CAM109_map5	0001.CSV	1168.7	0.08529
CAM109_map5	0001.CSV	1172.56	0.0839937
CAM109_map5	0001.CSV	1176.41	0.0823843
CAM109_map5	0001.CSV	1180.27	0.0812209
CAM109_map5	0001.CSV	1184.13	0.0798248
CAM109_map5	0001.CSV	1187.99	0.0788298
CAM109_map5	0001.CSV	1191.84	0.0775663
CAM109_map5	0001.CSV	1195.7	0.0768332
CAM109_map5	0001.CSV	1199.56	0.0761377
CAM109_map5	0001.CSV	1203.41	0.0761115
CAM109_map5	0001.CSV	1207.27	0.0760592
CAM109_map5	0001.CSV	1211.13	0.0765807
CAM109_map5	0001.CSV	1214.98	0.0769973
CAM109_map5	0001.CSV	1218.84	0.0779553
CAM109_map5	0001.CSV	1222.7	0.0788317
CAM109_map5	0001.CSV	1226.56	0.0803692
CAM109_map5	0001.CSV	1230.41	0.0819415
CAM109_map5	0001.CSV	1234.27	0.084259
CAM109_map5	0001.CSV	1238.13	0.0867316
CAM109_map5	0001.CSV	1241.98	0.0900617
CAM109_map5	0001.CSV	1245.84	0.093473
CAM109_map5	0001.CSV	1249.7	0.0971079
CAM109_map5	0001.CSV	1253.56	0.0998226
CAM109_map5	0001.CSV	1257.41	0.102095
CAM109_map5	0001.CSV	1261.27	0.103443
CAM109_map5	0001.CSV	1265.13	0.104934
CAM109_map5	0001.CSV	1268.98	0.106156
CAM109_map5	0001.CSV	1272.84	0.107821
CAM109_map5	0001.CSV	1276.7	0.108879
CAM109_map5	0001.CSV	1280.56	0.109893
CAM109_map5	0001.CSV	1284.41	0.11012
CAM109_map5	0001.CSV	1288.27	0.109956
CAM109_map5	0001.CSV	1292.13	0.108522
CAM109_map5	0001.CSV	1295.98	0.106867
CAM109_map5	0001.CSV	1299.84	0.104948
CAM109_map5	0001.CSV	1303.7	0.10401
CAM109_map5	0001.CSV	1307.56	0.103484
CAM109_map5	0001.CSV	1311.41	0.103974
CAM109_map5	0001.CSV	1315.27	0.10454
CAM109_map5	0001.CSV	1319.13	0.105542
CAM109_map5	0001.CSV	1322.98	0.105894
CAM109_map5	0001.CSV	1326.84	0.106825
CAM109_map5	0001.CSV	1330.7	0.107955
CAM109_map5	0001.CSV	1334.56	0.109902
CAM109_map5	0001.CSV	1338.41	0.112443
CAM109_map5	0001.CSV	1342.27	0.116282
CAM109_map5	0001.CSV	1346.13	0.119365
CAM109_map5	0001.CSV	1349.98	0.123256
CAM109_map5	0001.CSV	1353.84	0.126882
CAM109_map5	0001.CSV	1357.7	0.13081
CAM109_map5	0001.CSV	1361.56	0.134901
CAM109_map5	0001.CSV	1365.41	0.140268
CAM109_map5	0001.CSV	1369.27	0.144619
CAM109_map5	0001.CSV	1373.13	0.15082
CAM109_map5	0001.CSV	1376.98	0.157671
CAM109_map5	0001.CSV	1380.84	0.163577
CAM109_map5	0001.CSV	1384.7	0.168686
CAM109_map5	0001.CSV	1388.56	0.176013
CAM109_map5	0001.CSV	1392.41	0.181863
CAM109_map5	0001.CSV	1396.27	0.189559
CAM109_map5	0001.CSV	1400.13	0.197078
CAM109_map5	0001.CSV	1403.98	0.204449
CAM109_map5	0001.CSV	1407.84	0.211839
CAM109_map5	0001.CSV	1411.7	0.219129
CAM109_map5	0001.CSV	1415.55	0.224175
CAM109_map5	0001.CSV	1419.41	0.23059
CAM109_map5	0001.CSV	1423.27	0.23507
CAM109_map5	0001.CSV	1427.12	0.24015
CAM109_map5	0001.CSV	1430.98	0.245454
CAM109_map5	0001.CSV	1434.84	0.253291
CAM109_map5	0001.CSV	1438.7	0.261918
CAM109_map5	0001.CSV	1442.55	0.269466
CAM109_map5	0001.CSV	1446.41	0.273941
CAM109_map5	0001.CSV	1450.27	0.276355
CAM109_map5	0001.CSV	1454.12	0.273608
CAM109_map5	0001.CSV	1457.98	0.267938
CAM109_map5	0001.CSV	1461.84	0.263521
CAM109_map5	0001.CSV	1465.7	0.262313
CAM109_map5	0001.CSV	1469.55	0.257261
CAM109_map5	0001.CSV	1473.41	0.244601
CAM109_map5	0001.CSV	1477.27	0.227102
CAM109_map5	0001.CSV	1481.12	0.216163
CAM109_map5	0001.CSV	1484.98	0.2054
CAM109_map5	0001.CSV	1488.84	0.192809
CAM109_map5	0001.CSV	1492.7	0.179888
CAM109_map5	0001.CSV	1496.55	0.170393
CAM109_map5	0001.CSV	1500.41	0.159329
CAM109_map5	0001.CSV	1504.27	0.153261
CAM109_map5	0001.CSV	1508.12	0.140811
CAM109_map5	0001.CSV	1511.98	0.132164
CAM109_map5	0001.CSV	1515.84	0.125728
CAM109_map5	0001.CSV	1519.7	0.117271
CAM109_map5	0001.CSV	1523.55	0.107125
CAM109_map5	0001.CSV	1527.41	0.101443
CAM109_map5	0001.CSV	1531.27	0.0971961
CAM109_map5	0001.CSV	1535.12	0.094564
CAM109_map5	0001.CSV	1538.98	0.0915012
CAM109_map5	0001.CSV	1542.84	0.0858385
CAM109_map5	0001.CSV	1546.7	0.0804956
CAM109_map5	0001.CSV	1550.55	0.076672
CAM109_map5	0001.CSV	1554.41	0.0725057
CAM109_map5	0001.CSV	1558.27	0.0679421
CAM109_map5	0001.CSV	1562.12	0.0638516
CAM109_map5	0001.CSV	1565.98	0.0623293
CAM109_map5	0001.CSV	1569.84	0.0602404
CAM109_map5	0001.CSV	1573.69	0.058217
CAM109_map5	0001.CSV	1577.55	0.0547946
CAM109_map5	0001.CSV	1581.41	0.0510267
CAM109_map5	0001.CSV	1585.27	0.0470861
CAM109_map5	0001.CSV	1589.12	0.0439399
CAM109_map5	0001.CSV	1592.98	0.0419053
CAM109_map5	0001.CSV	1596.84	0.0410153
CAM109_map5	0001.CSV	1600.69	0.0401064
CAM109_map5	0001.CSV	1604.55	0.0392162
CAM109_map5	0001.CSV	1608.41	0.0381464
CAM109_map5	0001.CSV	1612.27	0.0374024
CAM109_map5	0001.CSV	1616.12	0.0364137
CAM109_map5	0001.CSV	1619.98	0.0356211
CAM109_map5	0001.CSV	1623.84	0.03453
CAM109_map5	0001.CSV	1627.69	0.0336539
CAM109_map5	0001.CSV	1631.55	0.0326199
CAM109_map5	0001.CSV	1635.41	0.0319946
CAM109_map5	0001.CSV	1639.27	0.0312308
CAM109_map5	0001.CSV	1643.12	0.0305709
CAM109_map5	0001.CSV	1646.98	0.0299074
CAM109_map5	0001.CSV	1650.84	0.0296969
CAM109_map5	0001.CSV	1654.69	0.0293614
CAM109_map5	0001.CSV	1658.55	0.0290299
CAM109_map5	0001.CSV	1662.41	0.0284898
CAM109_map5	0001.CSV	1666.27	0.0281364
CAM109_map5	0001.CSV	1670.12	0.0277046
CAM109_map5	0001.CSV	1673.98	0.027703
CAM109_map5	0001.CSV	1677.84	0.0272322
CAM109_map5	0001.CSV	1681.69	0.0270062
CAM109_map5	0001.CSV	1685.55	0.0272072
CAM109_map5	0001.CSV	1689.41	0.0273502
CAM109_map5	0001.CSV	1693.27	0.0269395
CAM109_map5	0001.CSV	1697.12	0.0274138
CAM109_map5	0001.CSV	1700.98	0.0288025
CAM109_map5	0001.CSV	1704.84	0.0303947
CAM109_map5	0001.CSV	1708.69	0.0322533
CAM109_map5	0001.CSV	1712.55	0.034143
CAM109_map5	0001.CSV	1716.41	0.038472
CAM109_map5	0001.CSV	1720.27	0.0437015
CAM109_map5	0001.CSV	1724.12	0.0454609
CAM109_map5	0001.CSV	1727.98	0.0461799
CAM109_map5	0001.CSV	1731.84	0.0458191
CAM109_map5	0001.CSV	1735.69	0.043953
CAM109_map5	0001.CSV	1739.55	0.0410397
CAM109_map5	0001.CSV	1743.41	0.0369997
CAM109_map5	0001.CSV	1747.27	0.0323566
CAM109_map5	0001.CSV	1751.12	0.0273886
CAM109_map5	0001.CSV	1754.98	0.0242131
CAM109_map5	0001.CSV	1758.84	0.0222318
CAM109_map5	0001.CSV	1762.69	0.0209453
CAM109_map5	0001.CSV	1766.55	0.0202654
CAM109_map5	0001.CSV	1770.41	0.0203316
CAM109_map5	0001.CSV	1774.26	0.021808
CAM109_map5	0001.CSV	1778.12	0.0235058
CAM109_map5	0001.CSV	1781.98	0.0252312
CAM109_map5	0001.CSV	1785.84	0.0258927
CAM109_map5	0001.CSV	1789.69	0.0251216
CAM109_map5	0001.CSV	1793.55	0.0229993
CAM109_map5	0001.CSV	1797.41	0.0211302
CAM109_map5	0001.CSV	1801.26	0.0196009
CAM109_map5	0001.CSV	1805.12	0.0184758
CAM109_map5	0001.CSV	1808.98	0.0178836
CAM109_map5	0001.CSV	1812.84	0.017718
CAM109_map5	0001.CSV	1816.69	0.0174925
CAM109_map5	0001.CSV	1820.55	0.0173473
CAM109_map5	0001.CSV	1824.41	0.0172781
CAM109_map5	0001.CSV	1828.26	0.0174267
CAM109_map5	0001.CSV	1832.12	0.0175306
CAM109_map5	0001.CSV	1835.98	0.0174914
CAM109_map5	0001.CSV	1839.84	0.0173552
CAM109_map5	0001.CSV	1843.69	0.0175218
CAM109_map5	0001.CSV	1847.55	0.017781
CAM109_map5	0001.CSV	1851.41	0.0176696
CAM109_map5	0001.CSV	1855.26	0.0176048
CAM109_map5	0001.CSV	1859.12	0.017655
CAM109_map5	0001.CSV	1862.98	0.017575
CAM109_map5	0001.CSV	1866.84	0.0176762
CAM109_map5	0001.CSV	1870.69	0.0180582
CAM109_map5	0001.CSV	1874.55	0.0179964
CAM109_map5	0001.CSV	1878.41	0.0178649
CAM109_map5	0001.CSV	1882.26	0.0178799
CAM109_map5	0001.CSV	1886.12	0.0179342
CAM109_map5	0001.CSV	1889.98	0.0180724
CAM109_map5	0001.CSV	1893.83	0.0181484
CAM109_map5	0001.CSV	1897.69	0.0181873
CAM109_map5	0001.CSV	1901.55	0.0181898
CAM109_map5	0001.CSV	1905.41	0.0181877
CAM109_map5	0001.CSV	1909.26	0.0182876
CAM109_map5	0001.CSV	1913.12	0.0183365
CAM109_map5	0001.CSV	1916.98	0.0183325
CAM109_map5	0001.CSV	1920.83	0.0184992
CAM109_map5	0001.CSV	1924.69	0.0186474
CAM109_map5	0001.CSV	1928.55	0.0187135
CAM109_map5	0001.CSV	1932.4	0.0187985
CAM109_map5	0001.CSV	1936.26	0.0188378
CAM109_map5	0001.CSV	1940.12	0.0188817
CAM109_map5	0001.CSV	1943.98	0.019159
CAM109_map5	0001.CSV	1947.83	0.0192914
CAM109_map5	0001.CSV	1951.69	0.0192842
CAM109_map5	0001.CSV	1955.55	0.0193715
CAM109_map5	0001.CSV	1959.4	0.0194134
CAM109_map5	0001.CSV	1963.26	0.0194164
CAM109_map5	0001.CSV	1967.12	0.019554
CAM109_map5	0001.CSV	1970.98	0.0196151
CAM109_map5	0001.CSV	1974.83	0.0195691
CAM109_map5	0001.CSV	1978.69	0.0196191
CAM109_map5	0001.CSV	1982.55	0.0196727
CAM109_map5	0001.CSV	1986.4	0.0197095
CAM109_map5	0001.CSV	1990.26	0.0197685
CAM109_map5	0001.CSV	1994.12	0.0198623
CAM109_map5	0001.CSV	1997.98	0.019839
CAM109_map5	0001.CSV	2001.83	0.0198196
CAM109_map5	0001.CSV	2005.69	0.0198488
CAM109_map5	0001.CSV	2009.55	0.0199011
CAM109_map5	0001.CSV	2013.4	0.0199316
CAM109_map5	0001.CSV	2017.26	0.0200417
CAM109_map5	0001.CSV	2021.12	0.0201063
CAM109_map5	0001.CSV	2024.97	0.0200996
CAM109_map5	0001.CSV	2028.83	0.0200975
CAM109_map5	0001.CSV	2032.69	0.0201427
CAM109_map5	0001.CSV	2036.55	0.0201544
CAM109_map5	0001.CSV	2040.4	0.020165
CAM109_map5	0001.CSV	2044.26	0.0202208
CAM109_map5	0001.CSV	2048.12	0.0202713
CAM109_map5	0001.CSV	2051.97	0.0202813
CAM109_map5	0001.CSV	2055.83	0.020323
CAM109_map5	0001.CSV	2059.69	0.0203928
CAM109_map5	0001.CSV	2063.55	0.0204685
CAM109_map5	0001.CSV	2067.4	0.0204903
CAM109_map5	0001.CSV	2071.26	0.0204735
CAM109_map5	0001.CSV	2075.12	0.0204901
CAM109_map5	0001.CSV	2078.97	0.0205537
CAM109_map5	0001.CSV	2082.83	0.0205965
CAM109_map5	0001.CSV	2086.69	0.020598
CAM109_map5	0001.CSV	2090.55	0.0206312
CAM109_map5	0001.CSV	2094.4	0.020706
CAM109_map5	0001.CSV	2098.26	0.0207438
CAM109_map5	0001.CSV	2102.12	0.0207551
CAM109_map5	0001.CSV	2105.97	0.0207693
CAM109_map5	0001.CSV	2109.83	0.0208157
CAM109_map5	0001.CSV	2113.69	0.0208804
CAM109_map5	0001.CSV	2117.55	0.0209456
CAM109_map5	0001.CSV	2121.4	0.0209583
CAM109_map5	0001.CSV	2125.26	0.0210188
CAM109_map5	0001.CSV	2129.12	0.0210563
CAM109_map5	0001.CSV	2132.97	0.0210857
CAM109_map5	0001.CSV	2136.83	0.0211332
CAM109_map5	0001.CSV	2140.69	0.0212137
CAM109_map5	0001.CSV	2144.55	0.0212514
CAM109_map5	0001.CSV	2148.4	0.0212616
CAM109_map5	0001.CSV	2152.26	0.0212814
CAM109_map5	0001.CSV	2156.12	0.0213412
CAM109_map5	0001.CSV	2159.97	0.0213283
CAM109_map5	0001.CSV	2163.83	0.021341
CAM109_map5	0001.CSV	2167.69	0.0214081
CAM109_map5	0001.CSV	2171.55	0.0214937
CAM109_map5	0001.CSV	2175.4	0.0215244
CAM109_map5	0001.CSV	2179.26	0.0215707
CAM109_map5	0001.CSV	2183.12	0.0216058
CAM109_map5	0001.CSV	2186.97	0.0216489
CAM109_map5	0001.CSV	2190.83	0.0216974
CAM109_map5	0001.CSV	2194.69	0.02171
CAM109_map5	0001.CSV	2198.55	0.0217075
CAM109_map5	0001.CSV	2202.4	0.0217652
CAM109_map5	0001.CSV	2206.26	0.0218308
CAM109_map5	0001.CSV	2210.12	0.021869
CAM109_map5	0001.CSV	2213.97	0.0218879
CAM109_map5	0001.CSV	2217.83	0.0219381
CAM109_map5	0001.CSV	2221.69	0.0219599
CAM109_map5	0001.CSV	2225.54	0.0219642
CAM109_map5	0001.CSV	2229.4	0.0220005
CAM109_map5	0001.CSV	2233.26	0.0220263
CAM109_map5	0001.CSV	2237.12	0.0220311
CAM109_map5	0001.CSV	2240.97	0.0220844
CAM109_map5	0001.CSV	2244.83	0.0221031
CAM109_map5	0001.CSV	2248.69	0.0220746
CAM109_map5	0001.CSV	2252.54	0.0220706
CAM109_map5	0001.CSV	2256.4	0.0221029
CAM109_map5	0001.CSV	2260.26	0.0221421
CAM109_map5	0001.CSV	2264.11	0.0221663
CAM109_map5	0001.CSV	2267.97	0.0221559
CAM109_map5	0001.CSV	2271.83	0.0221523
CAM109_map5	0001.CSV	2275.69	0.0221824
CAM109_map5	0001.CSV	2279.54	0.0222085
CAM109_map5	0001.CSV	2283.4	0.0221821
CAM109_map5	0001.CSV	2287.26	0.0221648
CAM109_map5	0001.CSV	2291.11	0.0222016
CAM109_map5	0001.CSV	2294.97	0.0222177
CAM109_map5	0001.CSV	2298.83	0.0222168
CAM109_map5	0001.CSV	2302.69	0.0221777
CAM109_map5	0001.CSV	2306.54	0.0221023
CAM109_map5	0001.CSV	2310.4	0.0220308
CAM109_map5	0001.CSV	2314.26	0.0219819
CAM109_map5	0001.CSV	2318.11	0.021726
CAM109_map5	0001.CSV	2321.97	0.0213123
CAM109_map5	0001.CSV	2325.83	0.0208797
CAM109_map5	0001.CSV	2329.69	0.020658
CAM109_map5	0001.CSV	2333.54	0.0205008
CAM109_map5	0001.CSV	2337.4	0.0203687
CAM109_map5	0001.CSV	2341.26	0.0204805
CAM109_map5	0001.CSV	2345.11	0.0215058
CAM109_map5	0001.CSV	2348.97	0.0217045
CAM109_map5	0001.CSV	2352.83	0.0208012
CAM109_map5	0001.CSV	2356.69	0.0191826
CAM109_map5	0001.CSV	2360.54	0.0186119
CAM109_map5	0001.CSV	2364.4	0.019146
CAM109_map5	0001.CSV	2368.26	0.0208638
CAM109_map5	0001.CSV	2372.11	0.0222707
CAM109_map5	0001.CSV	2375.97	0.0229508
CAM109_map5	0001.CSV	2379.83	0.0231177
CAM109_map5	0001.CSV	2383.69	0.023054
CAM109_map5	0001.CSV	2387.54	0.0228192
CAM109_map5	0001.CSV	2391.4	0.022658
CAM109_map5	0001.CSV	2395.26	0.022654
CAM109_map5	0001.CSV	2399.11	0.0227321
CAM109_map5	0001.CSV	2402.97	0.022707
CAM109_map5	0001.CSV	2406.83	0.0226916
CAM109_map5	0001.CSV	2410.68	0.0227069
CAM109_map5	0001.CSV	2414.54	0.0227689
CAM109_map5	0001.CSV	2418.4	0.0227768
CAM109_map5	0001.CSV	2422.26	0.0228363
CAM109_map5	0001.CSV	2426.11	0.0228331
CAM109_map5	0001.CSV	2429.97	0.022878
CAM109_map5	0001.CSV	2433.83	0.0229374
CAM109_map5	0001.CSV	2437.68	0.0230219
CAM109_map5	0001.CSV	2441.54	0.0230309
CAM109_map5	0001.CSV	2445.4	0.0230735
CAM109_map5	0001.CSV	2449.26	0.0231047
CAM109_map5	0001.CSV	2453.11	0.0231904
CAM109_map5	0001.CSV	2456.97	0.0232379
CAM109_map5	0001.CSV	2460.83	0.0233428
CAM109_map5	0001.CSV	2464.68	0.0234618
CAM109_map5	0001.CSV	2468.54	0.0236425
CAM109_map5	0001.CSV	2472.4	0.023796
CAM109_map5	0001.CSV	2476.26	0.024045
CAM109_map5	0001.CSV	2480.11	0.0243278
CAM109_map5	0001.CSV	2483.97	0.0246975
CAM109_map5	0001.CSV	2487.83	0.024962
CAM109_map5	0001.CSV	2491.68	0.0252271
CAM109_map5	0001.CSV	2495.54	0.0253548
CAM109_map5	0001.CSV	2499.4	0.025411
CAM109_map5	0001.CSV	2503.26	0.0253515
CAM109_map5	0001.CSV	2507.11	0.0253662
CAM109_map5	0001.CSV	2510.97	0.0254285
CAM109_map5	0001.CSV	2514.83	0.0256662
CAM109_map5	0001.CSV	2518.68	0.0258496
CAM109_map5	0001.CSV	2522.54	0.025913
CAM109_map5	0001.CSV	2526.4	0.0257371
CAM109_map5	0001.CSV	2530.26	0.0255234
CAM109_map5	0001.CSV	2534.11	0.0251718
CAM109_map5	0001.CSV	2537.97	0.0249614
CAM109_map5	0001.CSV	2541.83	0.0248803
CAM109_map5	0001.CSV	2545.68	0.0249481
CAM109_map5	0001.CSV	2549.54	0.024858
CAM109_map5	0001.CSV	2553.4	0.0246789
CAM109_map5	0001.CSV	2557.26	0.0244056
CAM109_map5	0001.CSV	2561.11	0.024289
CAM109_map5	0001.CSV	2564.97	0.0241227
CAM109_map5	0001.CSV	2568.83	0.0240857
CAM109_map5	0001.CSV	2572.68	0.0240544
CAM109_map5	0001.CSV	2576.54	0.0240809
CAM109_map5	0001.CSV	2580.4	0.0239322
CAM109_map5	0001.CSV	2584.25	0.0239567
CAM109_map5	0001.CSV	2588.11	0.0239357
CAM109_map5	0001.CSV	2591.97	0.0239449
CAM109_map5	0001.CSV	2595.83	0.0238756
CAM109_map5	0001.CSV	2599.68	0.0239357
CAM109_map5	0001.CSV	2603.54	0.0239078
CAM109_map5	0001.CSV	2607.4	0.0239662
CAM109_map5	0001.CSV	2611.25	0.0239838
CAM109_map5	0001.CSV	2615.11	0.0241035
CAM109_map5	0001.CSV	2618.97	0.024087
CAM109_map5	0001.CSV	2622.82	0.0241703
CAM109_map5	0001.CSV	2626.68	0.0241733
CAM109_map5	0001.CSV	2630.54	0.0241476
CAM109_map5	0001.CSV	2634.4	0.0241047
CAM109_map5	0001.CSV	2638.25	0.0241806
CAM109_map5	0001.CSV	2642.11	0.024033
CAM109_map5	0001.CSV	2645.97	0.0239465
CAM109_map5	0001.CSV	2649.82	0.0237739
CAM109_map5	0001.CSV	2653.68	0.0237471
CAM109_map5	0001.CSV	2657.54	0.0236792
CAM109_map5	0001.CSV	2661.4	0.0237138
CAM109_map5	0001.CSV	2665.25	0.0236348
CAM109_map5	0001.CSV	2669.11	0.0236917
CAM109_map5	0001.CSV	2672.97	0.0238164
CAM109_map5	0001.CSV	2676.82	0.0241284
CAM109_map5	0001.CSV	2680.68	0.0240294
CAM109_map5	0001.CSV	2684.54	0.0238041
CAM109_map5	0001.CSV	2688.4	0.023703
CAM109_map5	0001.CSV	2692.25	0.0237709
CAM109_map5	0001.CSV	2696.11	0.0237582
CAM109_map5	0001.CSV	2699.97	0.0238348
CAM109_map5	0001.CSV	2703.82	0.0237929
CAM109_map5	0001.CSV	2707.68	0.023914
CAM109_map5	0001.CSV	2711.54	0.0238787
CAM109_map5	0001.CSV	2715.4	0.0239567
CAM109_map5	0001.CSV	2719.25	0.0240818
CAM109_map5	0001.CSV	2723.11	0.0244591
CAM109_map5	0001.CSV	2726.97	0.0244324
CAM109_map5	0001.CSV	2730.82	0.0242352
CAM109_map5	0001.CSV	2734.68	0.0241875
CAM109_map5	0001.CSV	2738.54	0.0243125
CAM109_map5	0001.CSV	2742.4	0.0243505
CAM109_map5	0001.CSV	2746.25	0.0247345
CAM109_map5	0001.CSV	2750.11	0.0247389
CAM109_map5	0001.CSV	2753.97	0.0245831
CAM109_map5	0001.CSV	2757.82	0.0244628
CAM109_map5	0001.CSV	2761.68	0.0245376
CAM109_map5	0001.CSV	2765.54	0.0245064
CAM109_map5	0001.CSV	2769.39	0.0247203
CAM109_map5	0001.CSV	2773.25	0.0250021
CAM109_map5	0001.CSV	2777.11	0.0250167
CAM109_map5	0001.CSV	2780.97	0.0248204
CAM109_map5	0001.CSV	2784.82	0.0252022
CAM109_map5	0001.CSV	2788.68	0.0256056
CAM109_map5	0001.CSV	2792.54	0.0258523
CAM109_map5	0001.CSV	2796.39	0.0258989
CAM109_map5	0001.CSV	2800.25	0.0258417
CAM109_map5	0001.CSV	2804.11	0.0256747
CAM109_map5	0001.CSV	2807.97	0.0260824
CAM109_map5	0001.CSV	2811.82	0.0261951
CAM109_map5	0001.CSV	2815.68	0.0262769
CAM109_map5	0001.CSV	2819.54	0.0264913
CAM109_map5	0001.CSV	2823.39	0.0269069
CAM109_map5	0001.CSV	2827.25	0.027194
CAM109_map5	0001.CSV	2831.11	0.0280863
CAM109_map5	0001.CSV	2834.97	0.0293467
CAM109_map5	0001.CSV	2838.82	0.0310191
CAM109_map5	0001.CSV	2842.68	0.0333803
CAM109_map5	0001.CSV	2846.54	0.0373506
CAM109_map5	0001.CSV	2850.39	0.0397648
CAM109_map5	0001.CSV	2854.25	0.0389961
CAM109_map5	0001.CSV	2858.11	0.0368007
CAM109_map5	0001.CSV	2861.97	0.0347548
CAM109_map5	0001.CSV	2865.82	0.0333328
CAM109_map5	0001.CSV	2869.68	0.0332394
CAM109_map5	0001.CSV	2873.54	0.0330865
CAM109_map5	0001.CSV	2877.39	0.0323604
CAM109_map5	0001.CSV	2881.25	0.0318141
CAM109_map5	0001.CSV	2885.11	0.0321334
CAM109_map5	0001.CSV	2888.97	0.0328317
CAM109_map5	0001.CSV	2892.82	0.0341383
CAM109_map5	0001.CSV	2896.68	0.0352434
CAM109_map5	0001.CSV	2900.54	0.0363369
CAM109_map5	0001.CSV	2904.39	0.0378568
CAM109_map5	0001.CSV	2908.25	0.040631
CAM109_map5	0001.CSV	2912.11	0.0449049
CAM109_map5	0001.CSV	2915.97	0.0492039
CAM109_map5	0001.CSV	2919.82	0.050478
CAM109_map5	0001.CSV	2923.68	0.0491849
CAM109_map5	0001.CSV	2927.54	0.0469169
CAM109_map5	0001.CSV	2931.39	0.0440103
CAM109_map5	0001.CSV	2935.25	0.0405798
CAM109_map5	0001.CSV	2939.11	0.0382767
CAM109_map5	0001.CSV	2942.96	0.0369831
CAM109_map5	0001.CSV	2946.82	0.0361325
CAM109_map5	0001.CSV	2950.68	0.0353458
CAM109_map5	0001.CSV	2954.54	0.0347752
CAM109_map5	0001.CSV	2958.39	0.0337821
CAM109_map5	0001.CSV	2962.25	0.0328815
CAM109_map5	0001.CSV	2966.11	0.0314748
CAM109_map5	0001.CSV	2969.96	0.030606
CAM109_map5	0001.CSV	2973.82	0.0302258
CAM109_map5	0001.CSV	2977.68	0.0300648
CAM109_map5	0001.CSV	2981.53	0.0292903
CAM109_map5	0001.CSV	2985.39	0.0283877
CAM109_map5	0001.CSV	2989.25	0.0280463
CAM109_map5	0001.CSV	2993.11	0.0281713
CAM109_map5	0001.CSV	2996.96	0.0278658
CAM109_map5	0001.CSV	3000.82	0.0274893
CAM109_map5	0001.CSV	3004.68	0.0270778
CAM109_map5	0001.CSV	3008.53	0.0272317
CAM109_map5	0001.CSV	3012.39	0.0274332
CAM109_map5	0001.CSV	3016.25	0.0275381
CAM109_map5	0001.CSV	3020.11	0.0274242
CAM109_map5	0001.CSV	3023.96	0.0276097
CAM109_map5	0001.CSV	3027.82	0.0276885
CAM109_map5	0001.CSV	3031.68	0.0278715
CAM109_map5	0001.CSV	3035.53	0.0276237
CAM109_map5	0001.CSV	3039.39	0.0274685
CAM109_map5	0001.CSV	3043.25	0.0273578
CAM109_map5	0001.CSV	3047.11	0.0273247
CAM109_map5	0001.CSV	3050.96	0.0273261
CAM109_map5	0001.CSV	3054.82	0.0275367
CAM109_map5	0001.CSV	3058.68	0.0274921
CAM109_map5	0001.CSV	3062.53	0.0277182
CAM109_map5	0001.CSV	3066.39	0.0279217
CAM109_map5	0001.CSV	3070.25	0.0278064
CAM109_map5	0001.CSV	3074.11	0.0276599
CAM109_map5	0001.CSV	3077.96	0.0279939
CAM109_map5	0001.CSV	3081.82	0.0281311
CAM109_map5	0001.CSV	3085.68	0.028119
CAM109_map5	0001.CSV	3089.53	0.0278282
CAM109_map5	0001.CSV	3093.39	0.0276066
CAM109_map5	0001.CSV	3097.25	0.0275824
CAM109_map5	0001.CSV	3101.11	0.027811
CAM109_map5	0001.CSV	3104.96	0.0278527
CAM109_map5	0001.CSV	3108.82	0.0280012
CAM109_map5	0001.CSV	3112.68	0.0280298
CAM109_map5	0001.CSV	3116.53	0.0282697
CAM109_map5	0001.CSV	3120.39	0.0282008
CAM109_map5	0001.CSV	3124.25	0.0280548
CAM109_map5	0001.CSV	3128.11	0.0279526
CAM109_map5	0001.CSV	3131.96	0.0280031
CAM109_map5	0001.CSV	3135.82	0.0281578
CAM109_map5	0001.CSV	3139.68	0.0283662
CAM109_map5	0001.CSV	3143.53	0.0280997
CAM109_map5	0001.CSV	3147.39	0.0282616
CAM109_map5	0001.CSV	3151.25	0.0285836
CAM109_map5	0001.CSV	3155.1	0.0285602
CAM109_map5	0001.CSV	3158.96	0.0281323
CAM109_map5	0001.CSV	3162.82	0.0281126
CAM109_map5	0001.CSV	3166.68	0.0281325
CAM109_map5	0001.CSV	3170.53	0.0282883
CAM109_map5	0001.CSV	3174.39	0.0283719
CAM109_map5	0001.CSV	3178.25	0.0285595
CAM109_map5	0001.CSV	3182.1	0.0285796
CAM109_map5	0001.CSV	3185.96	0.0286927
CAM109_map5	0001.CSV	3189.82	0.0287929
CAM109_map5	0001.CSV	3193.68	0.0288327
CAM109_map5	0001.CSV	3197.53	0.0288137
CAM109_map5	0001.CSV	3201.39	0.0290849
CAM109_map5	0001.CSV	3205.25	0.0291405
CAM109_map5	0001.CSV	3209.1	0.0291409
CAM109_map5	0001.CSV	3212.96	0.0292043
CAM109_map5	0001.CSV	3216.82	0.0293549
CAM109_map5	0001.CSV	3220.68	0.0292616
CAM109_map5	0001.CSV	3224.53	0.0293098
CAM109_map5	0001.CSV	3228.39	0.0296334
CAM109_map5	0001.CSV	3232.25	0.0300384
CAM109_map5	0001.CSV	3236.1	0.0298608
CAM109_map5	0001.CSV	3239.96	0.0297482
CAM109_map5	0001.CSV	3243.82	0.0299491
CAM109_map5	0001.CSV	3247.68	0.0300022
CAM109_map5	0001.CSV	3251.53	0.0297866
CAM109_map5	0001.CSV	3255.39	0.0299244
CAM109_map5	0001.CSV	3259.25	0.0299107
CAM109_map5	0001.CSV	3263.1	0.0299082
CAM109_map5	0001.CSV	3266.96	0.0301721
CAM109_map5	0001.CSV	3270.82	0.0305547
CAM109_map5	0001.CSV	3274.68	0.0305508
CAM109_map5	0001.CSV	3278.53	0.030323
CAM109_map5	0001.CSV	3282.39	0.0301033
CAM109_map5	0001.CSV	3286.25	0.0301137
CAM109_map5	0001.CSV	3290.1	0.030356
CAM109_map5	0001.CSV	3293.96	0.0306599
CAM109_map5	0001.CSV	3297.82	0.0305848
CAM109_map5	0001.CSV	3301.67	0.0306151
CAM109_map5	0001.CSV	3305.53	0.0307263
CAM109_map5	0001.CSV	3309.39	0.0306089
CAM109_map5	0001.CSV	3313.25	0.0302242
CAM109_map5	0001.CSV	3317.1	0.0300398
CAM109_map5	0001.CSV	3320.96	0.0302032
CAM109_map5	0001.CSV	3324.82	0.0304848
CAM109_map5	0001.CSV	3328.67	0.0303752
CAM109_map5	0001.CSV	3332.53	0.03033
CAM109_map5	0001.CSV	3336.39	0.0306523
CAM109_map5	0001.CSV	3340.24	0.0308477
CAM109_map5	0001.CSV	3344.1	0.0306832
CAM109_map5	0001.CSV	3347.96	0.0306344
CAM109_map5	0001.CSV	3351.82	0.0305046
CAM109_map5	0001.CSV	3355.67	0.0303562
CAM109_map5	0001.CSV	3359.53	0.0305272
CAM109_map5	0001.CSV	3363.39	0.0307158
CAM109_map5	0001.CSV	3367.24	0.0309559
CAM109_map5	0001.CSV	3371.1	0.0308684
CAM109_map5	0001.CSV	3374.96	0.0305916
CAM109_map5	0001.CSV	3378.82	0.0304206
CAM109_map5	0001.CSV	3382.67	0.0302551
CAM109_map5	0001.CSV	3386.53	0.0304003
CAM109_map5	0001.CSV	3390.39	0.0307206
CAM109_map5	0001.CSV	3394.24	0.0307917
CAM109_map5	0001.CSV	3398.1	0.0308264
CAM109_map5	0001.CSV	3401.96	0.0306236
CAM109_map5	0001.CSV	3405.82	0.0302824
CAM109_map5	0001.CSV	3409.67	0.0303429
CAM109_map5	0001.CSV	3413.53	0.0302423
CAM109_map5	0001.CSV	3417.39	0.0297601
CAM109_map5	0001.CSV	3421.24	0.0295598
CAM109_map5	0001.CSV	3425.1	0.0295566
CAM109_map5	0001.CSV	3428.96	0.0296827
CAM109_map5	0001.CSV	3432.82	0.0296206
CAM109_map5	0001.CSV	3436.67	0.0292709
CAM109_map5	0001.CSV	3440.53	0.0284656
CAM109_map5	0001.CSV	3444.39	0.0280594
CAM109_map5	0001.CSV	3448.24	0.0279844
CAM109_map5	0001.CSV	3452.1	0.0277812
CAM109_map5	0001.CSV	3455.96	0.0276947
CAM109_map5	0001.CSV	3459.82	0.027892
CAM109_map5	0001.CSV	3463.67	0.0280639
CAM109_map5	0001.CSV	3467.53	0.0282217
CAM109_map5	0001.CSV	3471.39	0.0277013
CAM109_map5	0001.CSV	3475.24	0.0273774
CAM109_map5	0001.CSV	3479.1	0.0274134
CAM109_map5	0001.CSV	3482.96	0.0273894
CAM109_map5	0001.CSV	3486.82	0.0271411
CAM109_map5	0001.CSV	3490.67	0.0269248
CAM109_map5	0001.CSV	3494.53	0.0269913
CAM109_map5	0001.CSV	3498.39	0.0270951
CAM109_map5	0001.CSV	3502.24	0.0268176
CAM109_map5	0001.CSV	3506.1	0.0263859
CAM109_map5	0001.CSV	3509.96	0.0260545
CAM109_map5	0001.CSV	3513.81	0.0262156
CAM109_map5	0001.CSV	3517.67	0.0259775
CAM109_map5	0001.CSV	3521.53	0.0258738
CAM109_map5	0001.CSV	3525.39	0.0256592
CAM109_map5	0001.CSV	3529.24	0.025627
CAM109_map5	0001.CSV	3533.1	0.0255528
CAM109_map5	0001.CSV	3536.96	0.0255669
CAM109_map5	0001.CSV	3540.81	0.025409
CAM109_map5	0001.CSV	3544.67	0.0256354
CAM109_map5	0001.CSV	3548.53	0.0254879
CAM109_map5	0001.CSV	3552.39	0.0250331
CAM109_map5	0001.CSV	3556.24	0.024676
CAM109_map5	0001.CSV	3560.1	0.0243726
CAM109_map5	0001.CSV	3563.96	0.0236652
CAM109_map5	0001.CSV	3567.81	0.023838
CAM109_map5	0001.CSV	3571.67	0.0236979
CAM109_map5	0001.CSV	3575.53	0.0232428
CAM109_map5	0001.CSV	3579.39	0.0232157
CAM109_map5	0001.CSV	3583.24	0.0231626
CAM109_map5	0001.CSV	3587.1	0.0230263
CAM109_map5	0001.CSV	3590.96	0.0230188
CAM109_map5	0001.CSV	3594.81	0.0225468
CAM109_map5	0001.CSV	3598.67	0.0224766
CAM109_map5	0001.CSV	3602.53	0.0220694
CAM109_map5	0001.CSV	3606.39	0.0213999
CAM109_map5	0001.CSV	3610.24	0.0209123
CAM109_map5	0001.CSV	3614.1	0.0210837
CAM109_map5	0001.CSV	3617.96	0.0214436
CAM109_map5	0001.CSV	3621.81	0.0216608
CAM109_map5	0001.CSV	3625.67	0.0208081
CAM109_map5	0001.CSV	3629.53	0.0210877
CAM109_map5	0001.CSV	3633.39	0.021382
CAM109_map5	0001.CSV	3637.24	0.020964
CAM109_map5	0001.CSV	3641.1	0.0204986
CAM109_map5	0001.CSV	3644.96	0.0198621
CAM109_map5	0001.CSV	3648.81	0.0200568
CAM109_map5	0001.CSV	3652.67	0.0209641
CAM109_map5	0001.CSV	3656.53	0.0209594
CAM109_map5	0001.CSV	3660.38	0.0209069
CAM109_map5	0001.CSV	3664.24	0.0199314
CAM109_map5	0001.CSV	3668.1	0.0190459
CAM109_map5	0001.CSV	3671.96	0.0188187
CAM109_map5	0001.CSV	3675.81	0.0196669
CAM109_map5	0001.CSV	3679.67	0.0200128
CAM109_map5	0001.CSV	3683.53	0.0196104
CAM109_map5	0001.CSV	3687.38	0.0193738
CAM109_map5	0001.CSV	3691.24	0.0203254
CAM109_map5	0001.CSV	3695.1	0.0201095
CAM109_map5	0001.CSV	3698.95	0.0195719
CAM109_map5	0001.CSV	3702.81	0.0192897
CAM109_map5	0001.CSV	3706.67	0.018944
CAM109_map5	0001.CSV	3710.53	0.0189276
CAM109_map5	0001.CSV	3714.38	0.0195905
CAM109_map5	0001.CSV	3718.24	0.018937
CAM109_map5	0001.CSV	3722.1	0.0188176
CAM109_map5	0001.CSV	3725.95	0.0190284
CAM109_map5	0001.CSV	3729.81	0.0187162
CAM109_map5	0001.CSV	3733.67	0.0186521
CAM109_map5	0001.CSV	3737.53	0.0198139
CAM109_map5	0001.CSV	3741.38	0.0189325
CAM109_map5	0001.CSV	3745.24	0.0181458
CAM109_map5	0001.CSV	3749.1	0.0181002
CAM109_map5	0001.CSV	3752.95	0.0191609
CAM109_map5	0001.CSV	3756.81	0.0190535
CAM109_map5	0001.CSV	3760.67	0.0189788
CAM109_map5	0001.CSV	3764.53	0.0186164
CAM109_map5	0001.CSV	3768.38	0.0188087
CAM109_map5	0001.CSV	3772.24	0.018985
CAM109_map5	0001.CSV	3776.1	0.0186431
CAM109_map5	0001.CSV	3779.95	0.0185775
CAM109_map5	0001.CSV	3783.81	0.0187192
CAM109_map5	0001.CSV	3787.67	0.0186842
CAM109_map5	0001.CSV	3791.53	0.0184067
CAM109_map5	0001.CSV	3795.38	0.017873
CAM109_map5	0001.CSV	3799.24	0.0178647
CAM109_map5	0001.CSV	3803.1	0.0184079
CAM109_map5	0001.CSV	3806.95	0.0187837
CAM109_map5	0001.CSV	3810.81	0.0182775
CAM109_map5	0001.CSV	3814.67	0.0176842
CAM109_map5	0001.CSV	3818.53	0.0177697
CAM109_map5	0001.CSV	3822.38	0.0185368
CAM109_map5	0001.CSV	3826.24	0.0183989
CAM109_map5	0001.CSV	3830.1	0.0179743
CAM109_map5	0001.CSV	3833.95	0.0177101
CAM109_map5	0001.CSV	3837.81	0.018081
CAM109_map5	0001.CSV	3841.67	0.0187915
CAM109_map5	0001.CSV	3845.53	0.018461
CAM109_map5	0001.CSV	3849.38	0.0174786
CAM109_map5	0001.CSV	3853.24	0.0177815
CAM109_map5	0001.CSV	3857.1	0.0183787
CAM109_map5	0001.CSV	3860.95	0.0176522
CAM109_map5	0001.CSV	3864.81	0.0176218
CAM109_map5	0001.CSV	3868.67	0.0178608
CAM109_map5	0001.CSV	3872.52	0.0181081
CAM109_map5	0001.CSV	3876.38	0.0179041
CAM109_map5	0001.CSV	3880.24	0.0176538
CAM109_map5	0001.CSV	3884.1	0.0180792
CAM109_map5	0001.CSV	3887.95	0.0179769
CAM109_map5	0001.CSV	3891.81	0.0179752
CAM109_map5	0001.CSV	3895.67	0.0177456
CAM109_map5	0001.CSV	3899.52	0.0175122
CAM109_map5	0001.CSV	3903.38	0.0185269
CAM109_map5	0001.CSV	3907.24	0.0186205
CAM109_map5	0001.CSV	3911.1	0.0178511
CAM109_map5	0001.CSV	3914.95	0.0175409
CAM109_map5	0001.CSV	3918.81	0.0179306
CAM109_map5	0001.CSV	3922.67	0.0181098
CAM109_map5	0001.CSV	3926.52	0.0180525
CAM109_map5	0001.CSV	3930.38	0.0181138
CAM109_map5	0001.CSV	3934.24	0.0183323
CAM109_map5	0001.CSV	3938.09	0.017986
CAM109_map5	0001.CSV	3941.95	0.0178114
CAM109_map5	0001.CSV	3945.81	0.0178128
CAM109_map5	0001.CSV	3949.67	0.0179484
CAM109_map5	0001.CSV	3953.52	0.0179636
CAM109_map5	0001.CSV	3957.38	0.0178667
CAM109_map5	0001.CSV	3961.24	0.018027
CAM109_map5	0001.CSV	3965.09	0.0180455
CAM109_map5	0001.CSV	3968.95	0.0178621
CAM109_map5	0001.CSV	3972.81	0.0179339
CAM109_map5	0001.CSV	3976.67	0.0180237
CAM109_map5	0001.CSV	3980.52	0.0179379
CAM109_map5	0001.CSV	3984.38	0.0178328
CAM109_map5	0001.CSV	3988.24	0.0178531
CAM109_map5	0001.CSV	3992.09	0.0178879
CAM109_map5	0001.CSV	3995.95	0.0179748
CAM109_map5	0001.CSV	3999.81	0.0179033
CAM109_map5	0002.CSV	674.992	0.0450566
CAM109_map5	0002.CSV	678.849	0.0469788
CAM109_map5	0002.CSV	682.706	0.051498
CAM109_map5	0002.CSV	686.563	0.0553626
CAM109_map5	0002.CSV	690.42	0.062393
CAM109_map5	0002.CSV	694.277	0.0792421
CAM109_map5	0002.CSV	698.134	0.11024
CAM109_map5	0002.CSV	701.991	0.112784
CAM109_map5	0002.CSV	705.849	0.0958294
CAM109_map5	0002.CSV	709.706	0.120179
CAM109_map5	0002.CSV	713.563	0.144965
CAM109_map5	0002.CSV	717.42	0.103681
CAM109_map5	0002.CSV	721.277	0.0589141
CAM109_map5	0002.CSV	725.134	0.0449378
CAM109_map5	0002.CSV	728.991	0.0421862
CAM109_map5	0002.CSV	732.848	0.0416529
CAM109_map5	0002.CSV	736.705	0.0425872
CAM109_map5	0002.CSV	740.562	0.0439829
CAM109_map5	0002.CSV	744.42	0.0451588
CAM109_map5	0002.CSV	748.277	0.0462591
CAM109_map5	0002.CSV	752.134	0.0471668
CAM109_map5	0002.CSV	755.991	0.0480175
CAM109_map5	0002.CSV	759.848	0.048847
CAM109_map5	0002.CSV	763.705	0.0500214
CAM109_map5	0002.CSV	767.562	0.0509766
CAM109_map5	0002.CSV	771.419	0.0517726
CAM109_map5	0002.CSV	775.276	0.0523646
CAM109_map5	0002.CSV	779.133	0.0533556
CAM109_map5	0002.CSV	782.99	0.0543696
CAM109_map5	0002.CSV	786.848	0.0554816
CAM109_map5	0002.CSV	790.705	0.0562569
CAM109_map5	0002.CSV	794.562	0.0577886
CAM109_map5	0002.CSV	798.419	0.0596057
CAM109_map5	0002.CSV	802.276	0.0618984
CAM109_map5	0002.CSV	806.133	0.0640368
CAM109_map5	0002.CSV	809.99	0.0669032
CAM109_map5	0002.CSV	813.847	0.0702766
CAM109_map5	0002.CSV	817.704	0.0752981
CAM109_map5	0002.CSV	821.562	0.0814607
CAM109_map5	0002.CSV	825.419	0.0903628
CAM109_map5	0002.CSV	829.276	0.101704
CAM109_map5	0002.CSV	833.133	0.119456
CAM109_map5	0002.CSV	836.99	0.149767
CAM109_map5	0002.CSV	840.847	0.196447
CAM109_map5	0002.CSV	844.704	0.242741
CAM109_map5	0002.CSV	848.561	0.299856
CAM109_map5	0002.CSV	852.418	0.344928
CAM109_map5	0002.CSV	856.275	0.320352
CAM109_map5	0002.CSV	860.132	0.255245
CAM109_map5	0002.CSV	863.99	0.192739
CAM109_map5	0002.CSV	867.847	0.140929
CAM109_map5	0002.CSV	871.704	0.102298
CAM109_map5	0002.CSV	875.561	0.0773743
CAM109_map5	0002.CSV	879.418	0.0635878
CAM109_map5	0002.CSV	883.275	0.0547475
CAM109_map5	0002.CSV	887.132	0.049481
CAM109_map5	0002.CSV	890.989	0.0470009
CAM109_map5	0002.CSV	894.846	0.0464768
CAM109_map5	0002.CSV	898.703	0.0463268
CAM109_map5	0002.CSV	902.561	0.0471285
CAM109_map5	0002.CSV	906.418	0.048243
CAM109_map5	0002.CSV	910.275	0.0485476
CAM109_map5	0002.CSV	914.132	0.0472935
CAM109_map5	0002.CSV	917.989	0.0473407
CAM109_map5	0002.CSV	921.846	0.0476799
CAM109_map5	0002.CSV	925.703	0.0484555
CAM109_map5	0002.CSV	929.56	0.0490109
CAM109_map5	0002.CSV	933.417	0.0500094
CAM109_map5	0002.CSV	937.274	0.0504985
CAM109_map5	0002.CSV	941.131	0.0511866
CAM109_map5	0002.CSV	944.989	0.0512902
CAM109_map5	0002.CSV	948.846	0.0518407
CAM109_map5	0002.CSV	952.703	0.0521967
CAM109_map5	0002.CSV	956.56	0.0528247
CAM109_map5	0002.CSV	960.417	0.0527573
CAM109_map5	0002.CSV	964.274	0.0531004
CAM109_map5	0002.CSV	968.131	0.0534082
CAM109_map5	0002.CSV	971.988	0.0543278
CAM109_map5	0002.CSV	975.845	0.0549403
CAM109_map5	0002.CSV	979.702	0.0560046
CAM109_map5	0002.CSV	983.559	0.0567389
CAM109_map5	0002.CSV	987.417	0.057894
CAM109_map5	0002.CSV	991.274	0.0586034
CAM109_map5	0002.CSV	995.131	0.0596656
CAM109_map5	0002.CSV	998.988	0.060378
CAM109_map5	0002.CSV	1002.85	0.061543
CAM109_map5	0002.CSV	1006.7	0.0622397
CAM109_map5	0002.CSV	1010.56	0.063467
CAM109_map5	0002.CSV	1014.42	0.0641822
CAM109_map5	0002.CSV	1018.27	0.0653765
CAM109_map5	0002.CSV	1022.13	0.0662421
CAM109_map5	0002.CSV	1025.99	0.0676537
CAM109_map5	0002.CSV	1029.85	0.0684159
CAM109_map5	0002.CSV	1033.7	0.069621
CAM109_map5	0002.CSV	1037.56	0.0704373
CAM109_map5	0002.CSV	1041.42	0.071814
CAM109_map5	0002.CSV	1045.27	0.0725433
CAM109_map5	0002.CSV	1049.13	0.0739934
CAM109_map5	0002.CSV	1052.99	0.0753008
CAM109_map5	0002.CSV	1056.84	0.0778029
CAM109_map5	0002.CSV	1060.7	0.0803177
CAM109_map5	0002.CSV	1064.56	0.0835787
CAM109_map5	0002.CSV	1068.42	0.0863402
CAM109_map5	0002.CSV	1072.27	0.0899335
CAM109_map5	0002.CSV	1076.13	0.095323
CAM109_map5	0002.CSV	1079.99	0.110007
CAM109_map5	0002.CSV	1083.84	0.120811
CAM109_map5	0002.CSV	1087.7	0.106781
CAM109_map5	0002.CSV	1091.56	0.0882392
CAM109_map5	0002.CSV	1095.41	0.082404
CAM109_map5	0002.CSV	1099.27	0.0814955
CAM109_map5	0002.CSV	1103.13	0.0825531
CAM109_map5	0002.CSV	1106.99	0.0837375
CAM109_map5	0002.CSV	1110.84	0.0859416
CAM109_map5	0002.CSV	1114.7	0.0871771
CAM109_map5	0002.CSV	1118.56	0.0882464
CAM109_map5	0002.CSV	1122.41	0.0884313
CAM109_map5	0002.CSV	1126.27	0.0891328
CAM109_map5	0002.CSV	1130.13	0.0891942
CAM109_map5	0002.CSV	1133.99	0.0899314
CAM109_map5	0002.CSV	1137.84	0.0902619
CAM109_map5	0002.CSV	1141.7	0.0911466
CAM109_map5	0002.CSV	1145.56	0.0914803
CAM109_map5	0002.CSV	1149.41	0.0925536
CAM109_map5	0002.CSV	1153.27	0.0933356
CAM109_map5	0002.CSV	1157.13	0.094701
CAM109_map5	0002.CSV	1160.99	0.0956646
CAM109_map5	0002.CSV	1164.84	0.0972314
CAM109_map5	0002.CSV	1168.7	0.0979779
CAM109_map5	0002.CSV	1172.56	0.0988551
CAM109_map5	0002.CSV	1176.41	0.0989985
CAM109_map5	0002.CSV	1180.27	0.0996543
CAM109_map5	0002.CSV	1184.13	0.0997276
CAM109_map5	0002.CSV	1187.99	0.100282
CAM109_map5	0002.CSV	1191.84	0.100258
CAM109_map5	0002.CSV	1195.7	0.100785
CAM109_map5	0002.CSV	1199.56	0.100933
CAM109_map5	0002.CSV	1203.41	0.10188
CAM109_map5	0002.CSV	1207.27	0.102618
CAM109_map5	0002.CSV	1211.13	0.104183
CAM109_map5	0002.CSV	1214.98	0.105302
CAM109_map5	0002.CSV	1218.84	0.107067
CAM109_map5	0002.CSV	1222.7	0.108547
CAM109_map5	0002.CSV	1226.56	0.110869
CAM109_map5	0002.CSV	1230.41	0.112873
CAM109_map5	0002.CSV	1234.27	0.115629
CAM109_map5	0002.CSV	1238.13	0.117945
CAM109_map5	0002.CSV	1241.98	0.12094
CAM109_map5	0002.CSV	1245.84	0.123566
CAM109_map5	0002.CSV	1249.7	0.126778
CAM109_map5	0002.CSV	1253.56	0.129184
CAM109_map5	0002.CSV	1257.41	0.131862
CAM109_map5	0002.CSV	1261.27	0.133947
CAM109_map5	0002.CSV	1265.13	0.136912
CAM109_map5	0002.CSV	1268.98	0.139697
CAM109_map5	0002.CSV	1272.84	0.143454
CAM109_map5	0002.CSV	1276.7	0.146537
CAM109_map5	0002.CSV	1280.56	0.149929
CAM109_map5	0002.CSV	1284.41	0.152399
CAM109_map5	0002.CSV	1288.27	0.155152
CAM109_map5	0002.CSV	1292.13	0.156961
CAM109_map5	0002.CSV	1295.98	0.159239
CAM109_map5	0002.CSV	1299.84	0.161149
CAM109_map5	0002.CSV	1303.7	0.164116
CAM109_map5	0002.CSV	1307.56	0.166931
CAM109_map5	0002.CSV	1311.41	0.170853
CAM109_map5	0002.CSV	1315.27	0.174561
CAM109_map5	0002.CSV	1319.13	0.179305
CAM109_map5	0002.CSV	1322.98	0.183198
CAM109_map5	0002.CSV	1326.84	0.188106
CAM109_map5	0002.CSV	1330.7	0.193167
CAM109_map5	0002.CSV	1334.56	0.199364
CAM109_map5	0002.CSV	1338.41	0.206741
CAM109_map5	0002.CSV	1342.27	0.216821
CAM109_map5	0002.CSV	1346.13	0.225202
CAM109_map5	0002.CSV	1349.98	0.235571
CAM109_map5	0002.CSV	1353.84	0.245926
CAM109_map5	0002.CSV	1357.7	0.257004
CAM109_map5	0002.CSV	1361.56	0.268859
CAM109_map5	0002.CSV	1365.41	0.283994
CAM109_map5	0002.CSV	1369.27	0.296339
CAM109_map5	0002.CSV	1373.13	0.312692
CAM109_map5	0002.CSV	1376.98	0.331211
CAM109_map5	0002.CSV	1380.84	0.348639
CAM109_map5	0002.CSV	1384.7	0.364937
CAM109_map5	0002.CSV	1388.56	0.386932
CAM109_map5	0002.CSV	1392.41	0.404221
CAM109_map5	0002.CSV	1396.27	0.425172
CAM109_map5	0002.CSV	1400.13	0.444301
CAM109_map5	0002.CSV	1403.98	0.461232
CAM109_map5	0002.CSV	1407.84	0.475428
CAM109_map5	0002.CSV	1411.7	0.488471
CAM109_map5	0002.CSV	1415.55	0.495435
CAM109_map5	0002.CSV	1419.41	0.504637
CAM109_map5	0002.CSV	1423.27	0.509222
CAM109_map5	0002.CSV	1427.12	0.516365
CAM109_map5	0002.CSV	1430.98	0.521412
CAM109_map5	0002.CSV	1434.84	0.529716
CAM109_map5	0002.CSV	1438.7	0.534555
CAM109_map5	0002.CSV	1442.55	0.539674
CAM109_map5	0002.CSV	1446.41	0.536847
CAM109_map5	0002.CSV	1450.27	0.529913
CAM109_map5	0002.CSV	1454.12	0.515832
CAM109_map5	0002.CSV	1457.98	0.493789
CAM109_map5	0002.CSV	1461.84	0.473858
CAM109_map5	0002.CSV	1465.7	0.458582
CAM109_map5	0002.CSV	1469.55	0.434967
CAM109_map5	0002.CSV	1473.41	0.393799
CAM109_map5	0002.CSV	1477.27	0.348114
CAM109_map5	0002.CSV	1481.12	0.32294
CAM109_map5	0002.CSV	1484.98	0.30024
CAM109_map5	0002.CSV	1488.84	0.275334
CAM109_map5	0002.CSV	1492.7	0.252459
CAM109_map5	0002.CSV	1496.55	0.2378
CAM109_map5	0002.CSV	1500.41	0.221665
CAM109_map5	0002.CSV	1504.27	0.212955
CAM109_map5	0002.CSV	1508.12	0.196295
CAM109_map5	0002.CSV	1511.98	0.185645
CAM109_map5	0002.CSV	1515.84	0.178523
CAM109_map5	0002.CSV	1519.7	0.169678
CAM109_map5	0002.CSV	1523.55	0.159294
CAM109_map5	0002.CSV	1527.41	0.154091
CAM109_map5	0002.CSV	1531.27	0.150195
CAM109_map5	0002.CSV	1535.12	0.148772
CAM109_map5	0002.CSV	1538.98	0.145988
CAM109_map5	0002.CSV	1542.84	0.137817
CAM109_map5	0002.CSV	1546.7	0.129152
CAM109_map5	0002.CSV	1550.55	0.122562
CAM109_map5	0002.CSV	1554.41	0.115327
CAM109_map5	0002.CSV	1558.27	0.106458
CAM109_map5	0002.CSV	1562.12	0.0985656
CAM109_map5	0002.CSV	1565.98	0.0956589
CAM109_map5	0002.CSV	1569.84	0.0919016
CAM109_map5	0002.CSV	1573.69	0.0882226
CAM109_map5	0002.CSV	1577.55	0.0807464
CAM109_map5	0002.CSV	1581.41	0.0723469
CAM109_map5	0002.CSV	1585.27	0.0640689
CAM109_map5	0002.CSV	1589.12	0.0572729
CAM109_map5	0002.CSV	1592.98	0.0524863
CAM109_map5	0002.CSV	1596.84	0.0496629
CAM109_map5	0002.CSV	1600.69	0.0475515
CAM109_map5	0002.CSV	1604.55	0.0461903
CAM109_map5	0002.CSV	1608.41	0.0447579
CAM109_map5	0002.CSV	1612.27	0.0437281
CAM109_map5	0002.CSV	1616.12	0.0423103
CAM109_map5	0002.CSV	1619.98	0.0410428
CAM109_map5	0002.CSV	1623.84	0.0394412
CAM109_map5	0002.CSV	1627.69	0.0380591
CAM109_map5	0002.CSV	1631.55	0.0364384
CAM109_map5	0002.CSV	1635.41	0.0350017
CAM109_map5	0002.CSV	1639.27	0.0333365
CAM109_map5	0002.CSV	1643.12	0.032344
CAM109_map5	0002.CSV	1646.98	0.0310024
CAM109_map5	0002.CSV	1650.84	0.0300659
CAM109_map5	0002.CSV	1654.69	0.0290793
CAM109_map5	0002.CSV	1658.55	0.0284831
CAM109_map5	0002.CSV	1662.41	0.0276274
CAM109_map5	0002.CSV	1666.27	0.0270518
CAM109_map5	0002.CSV	1670.12	0.0263833
CAM109_map5	0002.CSV	1673.98	0.0260236
CAM109_map5	0002.CSV	1677.84	0.0252607
CAM109_map5	0002.CSV	1681.69	0.0247661
CAM109_map5	0002.CSV	1685.55	0.0242815
CAM109_map5	0002.CSV	1689.41	0.0239637
CAM109_map5	0002.CSV	1693.27	0.0231686
CAM109_map5	0002.CSV	1697.12	0.0227927
CAM109_map5	0002.CSV	1700.98	0.0225184
CAM109_map5	0002.CSV	1704.84	0.0225999
CAM109_map5	0002.CSV	1708.69	0.0225685
CAM109_map5	0002.CSV	1712.55	0.0226389
CAM109_map5	0002.CSV	1716.41	0.0233731
CAM109_map5	0002.CSV	1720.27	0.0248004
CAM109_map5	0002.CSV	1724.12	0.0249635
CAM109_map5	0002.CSV	1727.98	0.0249054
CAM109_map5	0002.CSV	1731.84	0.0246312
CAM109_map5	0002.CSV	1735.69	0.0245691
CAM109_map5	0002.CSV	1739.55	0.0236501
CAM109_map5	0002.CSV	1743.41	0.0221138
CAM109_map5	0002.CSV	1747.27	0.0201956
CAM109_map5	0002.CSV	1751.12	0.0184054
CAM109_map5	0002.CSV	1754.98	0.0169973
CAM109_map5	0002.CSV	1758.84	0.0161965
CAM109_map5	0002.CSV	1762.69	0.0157087
CAM109_map5	0002.CSV	1766.55	0.0154688
CAM109_map5	0002.CSV	1770.41	0.0158638
CAM109_map5	0002.CSV	1774.26	0.0182201
CAM109_map5	0002.CSV	1778.12	0.0213759
CAM109_map5	0002.CSV	1781.98	0.0256455
CAM109_map5	0002.CSV	1785.84	0.028559
CAM109_map5	0002.CSV	1789.69	0.028883
CAM109_map5	0002.CSV	1793.55	0.0259891
CAM109_map5	0002.CSV	1797.41	0.0224156
CAM109_map5	0002.CSV	1801.26	0.0189114
CAM109_map5	0002.CSV	1805.12	0.0161295
CAM109_map5	0002.CSV	1808.98	0.0142376
CAM109_map5	0002.CSV	1812.84	0.0132033
CAM109_map5	0002.CSV	1816.69	0.0125077
CAM109_map5	0002.CSV	1820.55	0.0121058
CAM109_map5	0002.CSV	1824.41	0.0117823
CAM109_map5	0002.CSV	1828.26	0.0118131
CAM109_map5	0002.CSV	1832.12	0.0117649
CAM109_map5	0002.CSV	1835.98	0.0116582
CAM109_map5	0002.CSV	1839.84	0.011415
CAM109_map5	0002.CSV	1843.69	0.0114926
CAM109_map5	0002.CSV	1847.55	0.0115736
CAM109_map5	0002.CSV	1851.41	0.0114375
CAM109_map5	0002.CSV	1855.26	0.0113045
CAM109_map5	0002.CSV	1859.12	0.0113073
CAM109_map5	0002.CSV	1862.98	0.0111696
CAM109_map5	0002.CSV	1866.84	0.0112567
CAM109_map5	0002.CSV	1870.69	0.0115352
CAM109_map5	0002.CSV	1874.55	0.01144
CAM109_map5	0002.CSV	1878.41	0.0112362
CAM109_map5	0002.CSV	1882.26	0.0112369
CAM109_map5	0002.CSV	1886.12	0.0112374
CAM109_map5	0002.CSV	1889.98	0.0114027
CAM109_map5	0002.CSV	1893.83	0.0114555
CAM109_map5	0002.CSV	1897.69	0.0114713
CAM109_map5	0002.CSV	1901.55	0.0114191
CAM109_map5	0002.CSV	1905.41	0.0114126
CAM109_map5	0002.CSV	1909.26	0.0114582
CAM109_map5	0002.CSV	1913.12	0.011457
CAM109_map5	0002.CSV	1916.98	0.0113819
CAM109_map5	0002.CSV	1920.83	0.0115377
CAM109_map5	0002.CSV	1924.69	0.0116453
CAM109_map5	0002.CSV	1928.55	0.0116651
CAM109_map5	0002.CSV	1932.4	0.0116929
CAM109_map5	0002.CSV	1936.26	0.0117742
CAM109_map5	0002.CSV	1940.12	0.0117726
CAM109_map5	0002.CSV	1943.98	0.0119842
CAM109_map5	0002.CSV	1947.83	0.0120431
CAM109_map5	0002.CSV	1951.69	0.0120048
CAM109_map5	0002.CSV	1955.55	0.0120395
CAM109_map5	0002.CSV	1959.4	0.0120965
CAM109_map5	0002.CSV	1963.26	0.0121286
CAM109_map5	0002.CSV	1967.12	0.0122852
CAM109_map5	0002.CSV	1970.98	0.0123228
CAM109_map5	0002.CSV	1974.83	0.0122967
CAM109_map5	0002.CSV	1978.69	0.0122973
CAM109_map5	0002.CSV	1982.55	0.0123361
CAM109_map5	0002.CSV	1986.4	0.012357
CAM109_map5	0002.CSV	1990.26	0.0124399
CAM109_map5	0002.CSV	1994.12	0.0125054
CAM109_map5	0002.CSV	1997.98	0.0125001
CAM109_map5	0002.CSV	2001.83	0.012532
CAM109_map5	0002.CSV	2005.69	0.0126185
CAM109_map5	0002.CSV	2009.55	0.0126501
CAM109_map5	0002.CSV	2013.4	0.0126824
CAM109_map5	0002.CSV	2017.26	0.0127622
CAM109_map5	0002.CSV	2021.12	0.012838
CAM109_map5	0002.CSV	2024.97	0.0128351
CAM109_map5	0002.CSV	2028.83	0.0128738
CAM109_map5	0002.CSV	2032.69	0.01291
CAM109_map5	0002.CSV	2036.55	0.0129289
CAM109_map5	0002.CSV	2040.4	0.0129284
CAM109_map5	0002.CSV	2044.26	0.0130034
CAM109_map5	0002.CSV	2048.12	0.0130365
CAM109_map5	0002.CSV	2051.97	0.0130734
CAM109_map5	0002.CSV	2055.83	0.0131191
CAM109_map5	0002.CSV	2059.69	0.0131702
CAM109_map5	0002.CSV	2063.55	0.0131787
CAM109_map5	0002.CSV	2067.4	0.0132207
CAM109_map5	0002.CSV	2071.26	0.0132319
CAM109_map5	0002.CSV	2075.12	0.013254
CAM109_map5	0002.CSV	2078.97	0.013309
CAM109_map5	0002.CSV	2082.83	0.0133793
CAM109_map5	0002.CSV	2086.69	0.0134125
CAM109_map5	0002.CSV	2090.55	0.0134568
CAM109_map5	0002.CSV	2094.4	0.0134784
CAM109_map5	0002.CSV	2098.26	0.0135339
CAM109_map5	0002.CSV	2102.12	0.0135738
CAM109_map5	0002.CSV	2105.97	0.0136512
CAM109_map5	0002.CSV	2109.83	0.013744
CAM109_map5	0002.CSV	2113.69	0.0138304
CAM109_map5	0002.CSV	2117.55	0.0139012
CAM109_map5	0002.CSV	2121.4	0.0139771
CAM109_map5	0002.CSV	2125.26	0.0140738
CAM109_map5	0002.CSV	2129.12	0.0141515
CAM109_map5	0002.CSV	2132.97	0.0141884
CAM109_map5	0002.CSV	2136.83	0.0142395
CAM109_map5	0002.CSV	2140.69	0.0143206
CAM109_map5	0002.CSV	2144.55	0.0143777
CAM109_map5	0002.CSV	2148.4	0.014389
CAM109_map5	0002.CSV	2152.26	0.0144486
CAM109_map5	0002.CSV	2156.12	0.0145219
CAM109_map5	0002.CSV	2159.97	0.0145091
CAM109_map5	0002.CSV	2163.83	0.0144511
CAM109_map5	0002.CSV	2167.69	0.014449
CAM109_map5	0002.CSV	2171.55	0.0145088
CAM109_map5	0002.CSV	2175.4	0.0145742
CAM109_map5	0002.CSV	2179.26	0.0146284
CAM109_map5	0002.CSV	2183.12	0.0146707
CAM109_map5	0002.CSV	2186.97	0.0146939
CAM109_map5	0002.CSV	2190.83	0.0147515
CAM109_map5	0002.CSV	2194.69	0.0147594
CAM109_map5	0002.CSV	2198.55	0.014703
CAM109_map5	0002.CSV	2202.4	0.0147041
CAM109_map5	0002.CSV	2206.26	0.0147887
CAM109_map5	0002.CSV	2210.12	0.0148378
CAM109_map5	0002.CSV	2213.97	0.0148871
CAM109_map5	0002.CSV	2217.83	0.0148926
CAM109_map5	0002.CSV	2221.69	0.0148671
CAM109_map5	0002.CSV	2225.54	0.0148711
CAM109_map5	0002.CSV	2229.4	0.0149458
CAM109_map5	0002.CSV	2233.26	0.0149672
CAM109_map5	0002.CSV	2237.12	0.0149866
CAM109_map5	0002.CSV	2240.97	0.0150148
CAM109_map5	0002.CSV	2244.83	0.0150445
CAM109_map5	0002.CSV	2248.69	0.0150361
CAM109_map5	0002.CSV	2252.54	0.0150819
CAM109_map5	0002.CSV	2256.4	0.0151058
CAM109_map5	0002.CSV	2260.26	0.0151173
CAM109_map5	0002.CSV	2264.11	0.0151146
CAM109_map5	0002.CSV	2267.97	0.0151187
CAM109_map5	0002.CSV	2271.83	0.0151315
CAM109_map5	0002.CSV	2275.69	0.0151773
CAM109_map5	0002.CSV	2279.54	0.0152057
CAM109_map5	0002.CSV	2283.4	0.0151941
CAM109_map5	0002.CSV	2287.26	0.0151523
CAM109_map5	0002.CSV	2291.11	0.0151781
CAM109_map5	0002.CSV	2294.97	0.0151848
CAM109_map5	0002.CSV	2298.83	0.0151827
CAM109_map5	0002.CSV	2302.69	0.0151306
CAM109_map5	0002.CSV	2306.54	0.0150677
CAM109_map5	0002.CSV	2310.4	0.0149603
CAM109_map5	0002.CSV	2314.26	0.01486
CAM109_map5	0002.CSV	2318.11	0.0145904
CAM109_map5	0002.CSV	2321.97	0.0142758
CAM109_map5	0002.CSV	2325.83	0.0137494
CAM109_map5	0002.CSV	2329.69	0.0133534
CAM109_map5	0002.CSV	2333.54	0.0130969
CAM109_map5	0002.CSV	2337.4	0.013008
CAM109_map5	0002.CSV	2341.26	0.0130404
CAM109_map5	0002.CSV	2345.11	0.0141081
CAM109_map5	0002.CSV	2348.97	0.0143578
CAM109_map5	0002.CSV	2352.83	0.0132816
CAM109_map5	0002.CSV	2356.69	0.0111745
CAM109_map5	0002.CSV	2360.54	0.0103724
CAM109_map5	0002.CSV	2364.4	0.0112758
CAM109_map5	0002.CSV	2368.26	0.0133137
CAM109_map5	0002.CSV	2372.11	0.0148431
CAM109_map5	0002.CSV	2375.97	0.0157668
CAM109_map5	0002.CSV	2379.83	0.0160362
CAM109_map5	0002.CSV	2383.69	0.0161144
CAM109_map5	0002.CSV	2387.54	0.0159961
CAM109_map5	0002.CSV	2391.4	0.0158969
CAM109_map5	0002.CSV	2395.26	0.0158832
CAM109_map5	0002.CSV	2399.11	0.0159397
CAM109_map5	0002.CSV	2402.97	0.0159162
CAM109_map5	0002.CSV	2406.83	0.0159354
CAM109_map5	0002.CSV	2410.68	0.015969
CAM109_map5	0002.CSV	2414.54	0.0160566
CAM109_map5	0002.CSV	2418.4	0.0161018
CAM109_map5	0002.CSV	2422.26	0.0161674
CAM109_map5	0002.CSV	2426.11	0.0161872
CAM109_map5	0002.CSV	2429.97	0.0162787
CAM109_map5	0002.CSV	2433.83	0.0163602
CAM109_map5	0002.CSV	2437.68	0.0164799
CAM109_map5	0002.CSV	2441.54	0.0165248
CAM109_map5	0002.CSV	2445.4	0.0166273
CAM109_map5	0002.CSV	2449.26	0.0167175
CAM109_map5	0002.CSV	2453.11	0.0169215
CAM109_map5	0002.CSV	2456.97	0.0171228
CAM109_map5	0002.CSV	2460.83	0.0173763
CAM109_map5	0002.CSV	2464.68	0.0176029
CAM109_map5	0002.CSV	2468.54	0.0179664
CAM109_map5	0002.CSV	2472.4	0.0183917
CAM109_map5	0002.CSV	2476.26	0.0189699
CAM109_map5	0002.CSV	2480.11	0.0196572
CAM109_map5	0002.CSV	2483.97	0.0204812
CAM109_map5	0002.CSV	2487.83	0.0212316
CAM109_map5	0002.CSV	2491.68	0.0220016
CAM109_map5	0002.CSV	2495.54	0.0226155
CAM109_map5	0002.CSV	2499.4	0.0231018
CAM109_map5	0002.CSV	2503.26	0.0232503
CAM109_map5	0002.CSV	2507.11	0.0232674
CAM109_map5	0002.CSV	2510.97	0.0232767
CAM109_map5	0002.CSV	2514.83	0.0235921
CAM109_map5	0002.CSV	2518.68	0.0240442
CAM109_map5	0002.CSV	2522.54	0.0244348
CAM109_map5	0002.CSV	2526.4	0.0244106
CAM109_map5	0002.CSV	2530.26	0.0241275
CAM109_map5	0002.CSV	2534.11	0.0235023
CAM109_map5	0002.CSV	2537.97	0.0228502
CAM109_map5	0002.CSV	2541.83	0.0222817
CAM109_map5	0002.CSV	2545.68	0.0220537
CAM109_map5	0002.CSV	2549.54	0.0218737
CAM109_map5	0002.CSV	2553.4	0.0216076
CAM109_map5	0002.CSV	2557.26	0.0211176
CAM109_map5	0002.CSV	2561.11	0.020673
CAM109_map5	0002.CSV	2564.97	0.020171
CAM109_map5	0002.CSV	2568.83	0.0198398
CAM109_map5	0002.CSV	2572.68	0.0195565
CAM109_map5	0002.CSV	2576.54	0.0193837
CAM109_map5	0002.CSV	2580.4	0.0190459
CAM109_map5	0002.CSV	2584.25	0.0188245
CAM109_map5	0002.CSV	2588.11	0.0186423
CAM109_map5	0002.CSV	2591.97	0.0185968
CAM109_map5	0002.CSV	2595.83	0.0184825
CAM109_map5	0002.CSV	2599.68	0.0184828
CAM109_map5	0002.CSV	2603.54	0.0184288
CAM109_map5	0002.CSV	2607.4	0.0184789
CAM109_map5	0002.CSV	2611.25	0.018459
CAM109_map5	0002.CSV	2615.11	0.0185631
CAM109_map5	0002.CSV	2618.97	0.0185712
CAM109_map5	0002.CSV	2622.82	0.0187444
CAM109_map5	0002.CSV	2626.68	0.0187878
CAM109_map5	0002.CSV	2630.54	0.018784
CAM109_map5	0002.CSV	2634.4	0.0187467
CAM109_map5	0002.CSV	2638.25	0.0187343
CAM109_map5	0002.CSV	2642.11	0.0184871
CAM109_map5	0002.CSV	2645.97	0.0182869
CAM109_map5	0002.CSV	2649.82	0.017983
CAM109_map5	0002.CSV	2653.68	0.0178472
CAM109_map5	0002.CSV	2657.54	0.0176867
CAM109_map5	0002.CSV	2661.4	0.0176126
CAM109_map5	0002.CSV	2665.25	0.0173959
CAM109_map5	0002.CSV	2669.11	0.0174012
CAM109_map5	0002.CSV	2672.97	0.0175491
CAM109_map5	0002.CSV	2676.82	0.0178725
CAM109_map5	0002.CSV	2680.68	0.0176779
CAM109_map5	0002.CSV	2684.54	0.0172837
CAM109_map5	0002.CSV	2688.4	0.017086
CAM109_map5	0002.CSV	2692.25	0.0171759
CAM109_map5	0002.CSV	2696.11	0.0172317
CAM109_map5	0002.CSV	2699.97	0.0173202
CAM109_map5	0002.CSV	2703.82	0.017235
CAM109_map5	0002.CSV	2707.68	0.0174168
CAM109_map5	0002.CSV	2711.54	0.017433
CAM109_map5	0002.CSV	2715.4	0.0175284
CAM109_map5	0002.CSV	2719.25	0.0177353
CAM109_map5	0002.CSV	2723.11	0.0182307
CAM109_map5	0002.CSV	2726.97	0.0181983
CAM109_map5	0002.CSV	2730.82	0.017923
CAM109_map5	0002.CSV	2734.68	0.0178925
CAM109_map5	0002.CSV	2738.54	0.0180376
CAM109_map5	0002.CSV	2742.4	0.018021
CAM109_map5	0002.CSV	2746.25	0.0184723
CAM109_map5	0002.CSV	2750.11	0.0184956
CAM109_map5	0002.CSV	2753.97	0.0183212
CAM109_map5	0002.CSV	2757.82	0.0182493
CAM109_map5	0002.CSV	2761.68	0.0182923
CAM109_map5	0002.CSV	2765.54	0.0182065
CAM109_map5	0002.CSV	2769.39	0.0185044
CAM109_map5	0002.CSV	2773.25	0.0189423
CAM109_map5	0002.CSV	2777.11	0.0190075
CAM109_map5	0002.CSV	2780.97	0.0187552
CAM109_map5	0002.CSV	2784.82	0.0191699
CAM109_map5	0002.CSV	2788.68	0.0197632
CAM109_map5	0002.CSV	2792.54	0.0200787
CAM109_map5	0002.CSV	2796.39	0.0201557
CAM109_map5	0002.CSV	2800.25	0.0200979
CAM109_map5	0002.CSV	2804.11	0.0198674
CAM109_map5	0002.CSV	2807.97	0.0204328
CAM109_map5	0002.CSV	2811.82	0.0206045
CAM109_map5	0002.CSV	2815.68	0.020682
CAM109_map5	0002.CSV	2819.54	0.0210323
CAM109_map5	0002.CSV	2823.39	0.0216416
CAM109_map5	0002.CSV	2827.25	0.0221321
CAM109_map5	0002.CSV	2831.11	0.023347
CAM109_map5	0002.CSV	2834.97	0.0251333
CAM109_map5	0002.CSV	2838.82	0.0276004
CAM109_map5	0002.CSV	2842.68	0.0316154
CAM109_map5	0002.CSV	2846.54	0.0388908
CAM109_map5	0002.CSV	2850.39	0.0446098
CAM109_map5	0002.CSV	2854.25	0.0443621
CAM109_map5	0002.CSV	2858.11	0.0405171
CAM109_map5	0002.CSV	2861.97	0.036547
CAM109_map5	0002.CSV	2865.82	0.033788
CAM109_map5	0002.CSV	2869.68	0.0331152
CAM109_map5	0002.CSV	2873.54	0.0326186
CAM109_map5	0002.CSV	2877.39	0.0312739
CAM109_map5	0002.CSV	2881.25	0.0303337
CAM109_map5	0002.CSV	2885.11	0.0307283
CAM109_map5	0002.CSV	2888.97	0.0318294
CAM109_map5	0002.CSV	2892.82	0.0338762
CAM109_map5	0002.CSV	2896.68	0.0357658
CAM109_map5	0002.CSV	2900.54	0.0376094
CAM109_map5	0002.CSV	2904.39	0.0402102
CAM109_map5	0002.CSV	2908.25	0.0447659
CAM109_map5	0002.CSV	2912.11	0.0519912
CAM109_map5	0002.CSV	2915.97	0.0603221
CAM109_map5	0002.CSV	2919.82	0.0647524
CAM109_map5	0002.CSV	2923.68	0.0640174
CAM109_map5	0002.CSV	2927.54	0.0603282
CAM109_map5	0002.CSV	2931.39	0.0552084
CAM109_map5	0002.CSV	2935.25	0.0494108
CAM109_map5	0002.CSV	2939.11	0.0450519
CAM109_map5	0002.CSV	2942.96	0.0422006
CAM109_map5	0002.CSV	2946.82	0.0401605
CAM109_map5	0002.CSV	2950.68	0.0386757
CAM109_map5	0002.CSV	2954.54	0.0377658
CAM109_map5	0002.CSV	2958.39	0.0364206
CAM109_map5	0002.CSV	2962.25	0.0349991
CAM109_map5	0002.CSV	2966.11	0.0328261
CAM109_map5	0002.CSV	2969.96	0.0312163
CAM109_map5	0002.CSV	2973.82	0.0302437
CAM109_map5	0002.CSV	2977.68	0.0294809
CAM109_map5	0002.CSV	2981.53	0.0280877
CAM109_map5	0002.CSV	2985.39	0.0266783
CAM109_map5	0002.CSV	2989.25	0.0260879
CAM109_map5	0002.CSV	2993.11	0.0261279
CAM109_map5	0002.CSV	2996.96	0.0256315
CAM109_map5	0002.CSV	3000.82	0.0250048
CAM109_map5	0002.CSV	3004.68	0.0244615
CAM109_map5	0002.CSV	3008.53	0.0246709
CAM109_map5	0002.CSV	3012.39	0.0248567
CAM109_map5	0002.CSV	3016.25	0.0247712
CAM109_map5	0002.CSV	3020.11	0.0242457
CAM109_map5	0002.CSV	3023.96	0.0239717
CAM109_map5	0002.CSV	3027.82	0.0238273
CAM109_map5	0002.CSV	3031.68	0.0240833
CAM109_map5	0002.CSV	3035.53	0.0240174
CAM109_map5	0002.CSV	3039.39	0.0239699
CAM109_map5	0002.CSV	3043.25	0.0239224
CAM109_map5	0002.CSV	3047.11	0.0238772
CAM109_map5	0002.CSV	3050.96	0.0237844
CAM109_map5	0002.CSV	3054.82	0.0238486
CAM109_map5	0002.CSV	3058.68	0.0236395
CAM109_map5	0002.CSV	3062.53	0.0238123
CAM109_map5	0002.CSV	3066.39	0.0241028
CAM109_map5	0002.CSV	3070.25	0.0241008
CAM109_map5	0002.CSV	3074.11	0.0240485
CAM109_map5	0002.CSV	3077.96	0.0244065
CAM109_map5	0002.CSV	3081.82	0.0245063
CAM109_map5	0002.CSV	3085.68	0.0245191
CAM109_map5	0002.CSV	3089.53	0.0243314
CAM109_map5	0002.CSV	3093.39	0.0241371
CAM109_map5	0002.CSV	3097.25	0.0241714
CAM109_map5	0002.CSV	3101.11	0.0244095
CAM109_map5	0002.CSV	3104.96	0.0243793
CAM109_map5	0002.CSV	3108.82	0.0246584
CAM109_map5	0002.CSV	3112.68	0.0248451
CAM109_map5	0002.CSV	3116.53	0.0251494
CAM109_map5	0002.CSV	3120.39	0.0250593
CAM109_map5	0002.CSV	3124.25	0.0248955
CAM109_map5	0002.CSV	3128.11	0.0248533
CAM109_map5	0002.CSV	3131.96	0.0249168
CAM109_map5	0002.CSV	3135.82	0.0250558
CAM109_map5	0002.CSV	3139.68	0.0252844
CAM109_map5	0002.CSV	3143.53	0.0249406
CAM109_map5	0002.CSV	3147.39	0.0250928
CAM109_map5	0002.CSV	3151.25	0.0255553
CAM109_map5	0002.CSV	3155.1	0.0256148
CAM109_map5	0002.CSV	3158.96	0.0252058
CAM109_map5	0002.CSV	3162.82	0.0251569
CAM109_map5	0002.CSV	3166.68	0.0251676
CAM109_map5	0002.CSV	3170.53	0.0253706
CAM109_map5	0002.CSV	3174.39	0.0254301
CAM109_map5	0002.CSV	3178.25	0.025633
CAM109_map5	0002.CSV	3182.1	0.0256691
CAM109_map5	0002.CSV	3185.96	0.0258019
CAM109_map5	0002.CSV	3189.82	0.0259089
CAM109_map5	0002.CSV	3193.68	0.0259663
CAM109_map5	0002.CSV	3197.53	0.0259702
CAM109_map5	0002.CSV	3201.39	0.0262432
CAM109_map5	0002.CSV	3205.25	0.0262293
CAM109_map5	0002.CSV	3209.1	0.0262419
CAM109_map5	0002.CSV	3212.96	0.0263936
CAM109_map5	0002.CSV	3216.82	0.0265582
CAM109_map5	0002.CSV	3220.68	0.0264454
CAM109_map5	0002.CSV	3224.53	0.026497
CAM109_map5	0002.CSV	3228.39	0.0267697
CAM109_map5	0002.CSV	3232.25	0.0271408
CAM109_map5	0002.CSV	3236.1	0.0270097
CAM109_map5	0002.CSV	3239.96	0.0269204
CAM109_map5	0002.CSV	3243.82	0.0271394
CAM109_map5	0002.CSV	3247.68	0.0272761
CAM109_map5	0002.CSV	3251.53	0.0270345
CAM109_map5	0002.CSV	3255.39	0.0271319
CAM109_map5	0002.CSV	3259.25	0.0270363
CAM109_map5	0002.CSV	3263.1	0.0269563
CAM109_map5	0002.CSV	3266.96	0.0271485
CAM109_map5	0002.CSV	3270.82	0.0275804
CAM109_map5	0002.CSV	3274.68	0.0276088
CAM109_map5	0002.CSV	3278.53	0.0273673
CAM109_map5	0002.CSV	3282.39	0.0271683
CAM109_map5	0002.CSV	3286.25	0.0272361
CAM109_map5	0002.CSV	3290.1	0.0275799
CAM109_map5	0002.CSV	3293.96	0.0279072
CAM109_map5	0002.CSV	3297.82	0.0277346
CAM109_map5	0002.CSV	3301.67	0.0276913
CAM109_map5	0002.CSV	3305.53	0.0278352
CAM109_map5	0002.CSV	3309.39	0.027745
CAM109_map5	0002.CSV	3313.25	0.0273224
CAM109_map5	0002.CSV	3317.1	0.0270873
CAM109_map5	0002.CSV	3320.96	0.0273266
CAM109_map5	0002.CSV	3324.82	0.0276413
CAM109_map5	0002.CSV	3328.67	0.0275014
CAM109_map5	0002.CSV	3332.53	0.0274538
CAM109_map5	0002.CSV	3336.39	0.027751
CAM109_map5	0002.CSV	3340.24	0.0279394
CAM109_map5	0002.CSV	3344.1	0.027747
CAM109_map5	0002.CSV	3347.96	0.0276856
CAM109_map5	0002.CSV	3351.82	0.0275263
CAM109_map5	0002.CSV	3355.67	0.0273607
CAM109_map5	0002.CSV	3359.53	0.0276397
CAM109_map5	0002.CSV	3363.39	0.0279014
CAM109_map5	0002.CSV	3367.24	0.028156
CAM109_map5	0002.CSV	3371.1	0.0280208
CAM109_map5	0002.CSV	3374.96	0.027657
CAM109_map5	0002.CSV	3378.82	0.0274223
CAM109_map5	0002.CSV	3382.67	0.0271679
CAM109_map5	0002.CSV	3386.53	0.0272905
CAM109_map5	0002.CSV	3390.39	0.0276412
CAM109_map5	0002.CSV	3394.24	0.0276653
CAM109_map5	0002.CSV	3398.1	0.0275881
CAM109_map5	0002.CSV	3401.96	0.0273944
CAM109_map5	0002.CSV	3405.82	0.0270811
CAM109_map5	0002.CSV	3409.67	0.026981
CAM109_map5	0002.CSV	3413.53	0.0268104
CAM109_map5	0002.CSV	3417.39	0.0263852
CAM109_map5	0002.CSV	3421.24	0.0262133
CAM109_map5	0002.CSV	3425.1	0.0262863
CAM109_map5	0002.CSV	3428.96	0.0264462
CAM109_map5	0002.CSV	3432.82	0.0263591
CAM109_map5	0002.CSV	3436.67	0.026003
CAM109_map5	0002.CSV	3440.53	0.02529
CAM109_map5	0002.CSV	3444.39	0.0249518
CAM109_map5	0002.CSV	3448.24	0.0248064
CAM109_map5	0002.CSV	3452.1	0.0245561
CAM109_map5	0002.CSV	3455.96	0.0244816
CAM109_map5	0002.CSV	3459.82	0.0246199
CAM109_map5	0002.CSV	3463.67	0.0247433
CAM109_map5	0002.CSV	3467.53	0.0248576
CAM109_map5	0002.CSV	3471.39	0.0243693
CAM109_map5	0002.CSV	3475.24	0.0239727
CAM109_map5	0002.CSV	3479.1	0.0237964
CAM109_map5	0002.CSV	3482.96	0.0236671
CAM109_map5	0002.CSV	3486.82	0.0235226
CAM109_map5	0002.CSV	3490.67	0.0233364
CAM109_map5	0002.CSV	3494.53	0.0231681
CAM109_map5	0002.CSV	3498.39	0.023083
CAM109_map5	0002.CSV	3502.24	0.0227838
CAM109_map5	0002.CSV	3506.1	0.0223293
CAM109_map5	0002.CSV	3509.96	0.0219253
CAM109_map5	0002.CSV	3513.81	0.0219615
CAM109_map5	0002.CSV	3517.67	0.0215599
CAM109_map5	0002.CSV	3521.53	0.0214011
CAM109_map5	0002.CSV	3525.39	0.0212598
CAM109_map5	0002.CSV	3529.24	0.0211667
CAM109_map5	0002.CSV	3533.1	0.0209239
CAM109_map5	0002.CSV	3536.96	0.0208794
CAM109_map5	0002.CSV	3540.81	0.0206813
CAM109_map5	0002.CSV	3544.67	0.0207426
CAM109_map5	0002.CSV	3548.53	0.0205381
CAM109_map5	0002.CSV	3552.39	0.0201474
CAM109_map5	0002.CSV	3556.24	0.0197866
CAM109_map5	0002.CSV	3560.1	0.0194698
CAM109_map5	0002.CSV	3563.96	0.0188162
CAM109_map5	0002.CSV	3567.81	0.0191183
CAM109_map5	0002.CSV	3571.67	0.0188541
CAM109_map5	0002.CSV	3575.53	0.0182992
CAM109_map5	0002.CSV	3579.39	0.0182353
CAM109_map5	0002.CSV	3583.24	0.0182022
CAM109_map5	0002.CSV	3587.1	0.0180267
CAM109_map5	0002.CSV	3590.96	0.017977
CAM109_map5	0002.CSV	3594.81	0.0175317
CAM109_map5	0002.CSV	3598.67	0.017454
CAM109_map5	0002.CSV	3602.53	0.0170758
CAM109_map5	0002.CSV	3606.39	0.0164732
CAM109_map5	0002.CSV	3610.24	0.0160028
CAM109_map5	0002.CSV	3614.1	0.0160915
CAM109_map5	0002.CSV	3617.96	0.0162343
CAM109_map5	0002.CSV	3621.81	0.0163039
CAM109_map5	0002.CSV	3625.67	0.015488
CAM109_map5	0002.CSV	3629.53	0.0156208
CAM109_map5	0002.CSV	3633.39	0.0157905
CAM109_map5	0002.CSV	3637.24	0.0154455
CAM109_map5	0002.CSV	3641.1	0.0149666
CAM109_map5	0002.CSV	3644.96	0.0143535
CAM109_map5	0002.CSV	3648.81	0.0146904
CAM109_map5	0002.CSV	3652.67	0.01565
CAM109_map5	0002.CSV	3656.53	0.0154906
CAM109_map5	0002.CSV	3660.38	0.0153394
CAM109_map5	0002.CSV	3664.24	0.0144548
CAM109_map5	0002.CSV	3668.1	0.0137215
CAM109_map5	0002.CSV	3671.96	0.0134821
CAM109_map5	0002.CSV	3675.81	0.0142606
CAM109_map5	0002.CSV	3679.67	0.0146012
CAM109_map5	0002.CSV	3683.53	0.0141378
CAM109_map5	0002.CSV	3687.38	0.0138614
CAM109_map5	0002.CSV	3691.24	0.0148502
CAM109_map5	0002.CSV	3695.1	0.0145618
CAM109_map5	0002.CSV	3698.95	0.0139825
CAM109_map5	0002.CSV	3702.81	0.0136395
CAM109_map5	0002.CSV	3706.67	0.0132865
CAM109_map5	0002.CSV	3710.53	0.013377
CAM109_map5	0002.CSV	3714.38	0.0141978
CAM109_map5	0002.CSV	3718.24	0.013643
CAM109_map5	0002.CSV	3722.1	0.0134365
CAM109_map5	0002.CSV	3725.95	0.0134937
CAM109_map5	0002.CSV	3729.81	0.0132088
CAM109_map5	0002.CSV	3733.67	0.0131436
CAM109_map5	0002.CSV	3737.53	0.0143306
CAM109_map5	0002.CSV	3741.38	0.0134758
CAM109_map5	0002.CSV	3745.24	0.0127076
CAM109_map5	0002.CSV	3749.1	0.0127106
CAM109_map5	0002.CSV	3752.95	0.0136417
CAM109_map5	0002.CSV	3756.81	0.0134748
CAM109_map5	0002.CSV	3760.67	0.0134748
CAM109_map5	0002.CSV	3764.53	0.0131503
CAM109_map5	0002.CSV	3768.38	0.0133696
CAM109_map5	0002.CSV	3772.24	0.0135014
CAM109_map5	0002.CSV	3776.1	0.0131368
CAM109_map5	0002.CSV	3779.95	0.0131652
CAM109_map5	0002.CSV	3783.81	0.0133483
CAM109_map5	0002.CSV	3787.67	0.0132357
CAM109_map5	0002.CSV	3791.53	0.0128609
CAM109_map5	0002.CSV	3795.38	0.0123183
CAM109_map5	0002.CSV	3799.24	0.0123951
CAM109_map5	0002.CSV	3803.1	0.0128582
CAM109_map5	0002.CSV	3806.95	0.0132123
CAM109_map5	0002.CSV	3810.81	0.012814
CAM109_map5	0002.CSV	3814.67	0.0124151
CAM109_map5	0002.CSV	3818.53	0.0125793
CAM109_map5	0002.CSV	3822.38	0.0130772
CAM109_map5	0002.CSV	3826.24	0.0128517
CAM109_map5	0002.CSV	3830.1	0.0125482
CAM109_map5	0002.CSV	3833.95	0.0123369
CAM109_map5	0002.CSV	3837.81	0.0126521
CAM109_map5	0002.CSV	3841.67	0.0133439
CAM109_map5	0002.CSV	3845.53	0.0130012
CAM109_map5	0002.CSV	3849.38	0.011998
CAM109_map5	0002.CSV	3853.24	0.0122722
CAM109_map5	0002.CSV	3857.1	0.012846
CAM109_map5	0002.CSV	3860.95	0.0122222
CAM109_map5	0002.CSV	3864.81	0.0122527
CAM109_map5	0002.CSV	3868.67	0.0125672
CAM109_map5	0002.CSV	3872.52	0.0128895
CAM109_map5	0002.CSV	3876.38	0.0125506
CAM109_map5	0002.CSV	3880.24	0.0122268
CAM109_map5	0002.CSV	3884.1	0.0127147
CAM109_map5	0002.CSV	3887.95	0.0126995
CAM109_map5	0002.CSV	3891.81	0.0126304
CAM109_map5	0002.CSV	3895.67	0.0123993
CAM109_map5	0002.CSV	3899.52	0.0123334
CAM109_map5	0002.CSV	3903.38	0.0132898
CAM109_map5	0002.CSV	3907.24	0.013155
CAM109_map5	0002.CSV	3911.1	0.0123608
CAM109_map5	0002.CSV	3914.95	0.0121342
CAM109_map5	0002.CSV	3918.81	0.0126125
CAM109_map5	0002.CSV	3922.67	0.012803
CAM109_map5	0002.CSV	3926.52	0.0126443
CAM109_map5	0002.CSV	3930.38	0.0126204
CAM109_map5	0002.CSV	3934.24	0.012851
CAM109_map5	0002.CSV	3938.09	0.0125793
CAM109_map5	0002.CSV	3941.95	0.0125043
CAM109_map5	0002.CSV	3945.81	0.0125895
CAM109_map5	0002.CSV	3949.67	0.0126721
CAM109_map5	0002.CSV	3953.52	0.0126296
CAM109_map5	0002.CSV	3957.38	0.0125296
CAM109_map5	0002.CSV	3961.24	0.0126752
CAM109_map5	0002.CSV	3965.09	0.0127109
CAM109_map5	0002.CSV	3968.95	0.0125566
CAM109_map5	0002.CSV	3972.81	0.0126509
CAM109_map5	0002.CSV	3976.67	0.0127552
CAM109_map5	0002.CSV	3980.52	0.012724
CAM109_map5	0002.CSV	3984.38	0.0126374
CAM109_map5	0002.CSV	3988.24	0.012583
CAM109_map5	0002.CSV	3992.09	0.0125546
CAM109_map5	0002.CSV	3995.95	0.0126228
CAM109_map5	0002.CSV	3999.81	0.0126032
CAM109_map5	0003.CSV	674.992	0.00520931
CAM109_map5	0003.CSV	678.849	0.00359146
CAM109_map5	0003.CSV	682.706	0.00617555
CAM109_map5	0003.CSV	686.563	0.00558602
CAM109_map5	0003.CSV	690.42	0.00796084
CAM109_map5	0003.CSV	694.277	0.008551
CAM109_map5	0003.CSV	698.134	0.0121286
CAM109_map5	0003.CSV	701.991	0.0115497
CAM109_map5	0003.CSV	705.849	0.0112386
CAM109_map5	0003.CSV	709.706	0.011825
CAM109_map5	0003.CSV	713.563	0.0133811
CAM109_map5	0003.CSV	717.42	0.0100322
CAM109_map5	0003.CSV	721.277	0.00907247
CAM109_map5	0003.CSV	725.134	0.00808494
CAM109_map5	0003.CSV	728.991	0.00850437
CAM109_map5	0003.CSV	732.848	0.00778951
CAM109_map5	0003.CSV	736.705	0.00872281
CAM109_map5	0003.CSV	740.562	0.00821729
CAM109_map5	0003.CSV	744.42	0.00899896
CAM109_map5	0003.CSV	748.277	0.00840413
CAM109_map5	0003.CSV	752.134	0.00911449
CAM109_map5	0003.CSV	755.991	0.0085607
CAM109_map5	0003.CSV	759.848	0.00884892
CAM109_map5	0003.CSV	763.705	0.00812843
CAM109_map5	0003.CSV	767.562	0.00880087
CAM109_map5	0003.CSV	771.419	0.0083436
CAM109_map5	0003.CSV	775.276	0.00872247
CAM109_map5	0003.CSV	779.133	0.00822708
CAM109_map5	0003.CSV	782.99	0.00852485
CAM109_map5	0003.CSV	786.848	0.0079056
CAM109_map5	0003.CSV	790.705	0.00834498
CAM109_map5	0003.CSV	794.562	0.00818248
CAM109_map5	0003.CSV	798.419	0.00891477
CAM109_map5	0003.CSV	802.276	0.00865405
CAM109_map5	0003.CSV	806.133	0.00921507
CAM109_map5	0003.CSV	809.99	0.00903099
CAM109_map5	0003.CSV	813.847	0.00976512
CAM109_map5	0003.CSV	817.704	0.010239
CAM109_map5	0003.CSV	821.562	0.0114187
CAM109_map5	0003.CSV	825.419	0.0118662
CAM109_map5	0003.CSV	829.276	0.0128438
CAM109_map5	0003.CSV	833.133	0.0132582
CAM109_map5	0003.CSV	836.99	0.0145378
CAM109_map5	0003.CSV	840.847	0.0158934
CAM109_map5	0003.CSV	844.704	0.0177968
CAM109_map5	0003.CSV	848.561	0.020136
CAM109_map5	0003.CSV	852.418	0.0240234
CAM109_map5	0003.CSV	856.275	0.0252454
CAM109_map5	0003.CSV	860.132	0.0238284
CAM109_map5	0003.CSV	863.99	0.0201686
CAM109_map5	0003.CSV	867.847	0.0166493
CAM109_map5	0003.CSV	871.704	0.0137754
CAM109_map5	0003.CSV	875.561	0.0125487
CAM109_map5	0003.CSV	879.418	0.0116685
CAM109_map5	0003.CSV	883.275	0.0115104
CAM109_map5	0003.CSV	887.132	0.011287
CAM109_map5	0003.CSV	890.989	0.0112352
CAM109_map5	0003.CSV	894.846	0.0109533
CAM109_map5	0003.CSV	898.703	0.0112947
CAM109_map5	0003.CSV	902.561	0.0114285
CAM109_map5	0003.CSV	906.418	0.0115521
CAM109_map5	0003.CSV	910.275	0.0114268
CAM109_map5	0003.CSV	914.132	0.0115931
CAM109_map5	0003.CSV	917.989	0.011666
CAM109_map5	0003.CSV	921.846	0.0119796
CAM109_map5	0003.CSV	925.703	0.012022
CAM109_map5	0003.CSV	929.56	0.0121084
CAM109_map5	0003.CSV	933.417	0.0121089
CAM109_map5	0003.CSV	937.274	0.0123768
CAM109_map5	0003.CSV	941.131	0.0124378
CAM109_map5	0003.CSV	944.989	0.0125026
CAM109_map5	0003.CSV	948.846	0.0124972
CAM109_map5	0003.CSV	952.703	0.012728
CAM109_map5	0003.CSV	956.56	0.0128604
CAM109_map5	0003.CSV	960.417	0.0129534
CAM109_map5	0003.CSV	964.274	0.0128461
CAM109_map5	0003.CSV	968.131	0.0128831
CAM109_map5	0003.CSV	971.988	0.0130398
CAM109_map5	0003.CSV	975.845	0.013255
CAM109_map5	0003.CSV	979.702	0.0134167
CAM109_map5	0003.CSV	983.559	0.0136988
CAM109_map5	0003.CSV	987.417	0.0138362
CAM109_map5	0003.CSV	991.274	0.014042
CAM109_map5	0003.CSV	995.131	0.0141849
CAM109_map5	0003.CSV	998.988	0.0143538
CAM109_map5	0003.CSV	1002.85	0.0145393
CAM109_map5	0003.CSV	1006.7	0.0147094
CAM109_map5	0003.CSV	1010.56	0.0148906
CAM109_map5	0003.CSV	1014.42	0.0150651
CAM109_map5	0003.CSV	1018.27	0.0151386
CAM109_map5	0003.CSV	1022.13	0.0153381
CAM109_map5	0003.CSV	1025.99	0.0156286
CAM109_map5	0003.CSV	1029.85	0.0156771
CAM109_map5	0003.CSV	1033.7	0.0157473
CAM109_map5	0003.CSV	1037.56	0.0159076
CAM109_map5	0003.CSV	1041.42	0.0160382
CAM109_map5	0003.CSV	1045.27	0.0160465
CAM109_map5	0003.CSV	1049.13	0.0161993
CAM109_map5	0003.CSV	1052.99	0.0163649
CAM109_map5	0003.CSV	1056.84	0.0166331
CAM109_map5	0003.CSV	1060.7	0.0168741
CAM109_map5	0003.CSV	1064.56	0.0171748
CAM109_map5	0003.CSV	1068.42	0.0173724
CAM109_map5	0003.CSV	1072.27	0.017519
CAM109_map5	0003.CSV	1076.13	0.0176735
CAM109_map5	0003.CSV	1079.99	0.0182489
CAM109_map5	0003.CSV	1083.84	0.0182435
CAM109_map5	0003.CSV	1087.7	0.0174054
CAM109_map5	0003.CSV	1091.56	0.0169646
CAM109_map5	0003.CSV	1095.41	0.0170413
CAM109_map5	0003.CSV	1099.27	0.0171649
CAM109_map5	0003.CSV	1103.13	0.0174249
CAM109_map5	0003.CSV	1106.99	0.0177151
CAM109_map5	0003.CSV	1110.84	0.018166
CAM109_map5	0003.CSV	1114.7	0.018406
CAM109_map5	0003.CSV	1118.56	0.0184539
CAM109_map5	0003.CSV	1122.41	0.018378
CAM109_map5	0003.CSV	1126.27	0.0183559
CAM109_map5	0003.CSV	1130.13	0.0181812
CAM109_map5	0003.CSV	1133.99	0.0181443
CAM109_map5	0003.CSV	1137.84	0.0181128
CAM109_map5	0003.CSV	1141.7	0.0180898
CAM109_map5	0003.CSV	1145.56	0.018046
CAM109_map5	0003.CSV	1149.41	0.0181541
CAM109_map5	0003.CSV	1153.27	0.0181572
CAM109_map5	0003.CSV	1157.13	0.0181826
CAM109_map5	0003.CSV	1160.99	0.0181366
CAM109_map5	0003.CSV	1164.84	0.0182016
CAM109_map5	0003.CSV	1168.7	0.0181323
CAM109_map5	0003.CSV	1172.56	0.0180472
CAM109_map5	0003.CSV	1176.41	0.0179499
CAM109_map5	0003.CSV	1180.27	0.0179766
CAM109_map5	0003.CSV	1184.13	0.0178984
CAM109_map5	0003.CSV	1187.99	0.0178162
CAM109_map5	0003.CSV	1191.84	0.0175612
CAM109_map5	0003.CSV	1195.7	0.0174866
CAM109_map5	0003.CSV	1199.56	0.017418
CAM109_map5	0003.CSV	1203.41	0.0174883
CAM109_map5	0003.CSV	1207.27	0.0175098
CAM109_map5	0003.CSV	1211.13	0.0176776
CAM109_map5	0003.CSV	1214.98	0.0177422
CAM109_map5	0003.CSV	1218.84	0.0179358
CAM109_map5	0003.CSV	1222.7	0.0180616
CAM109_map5	0003.CSV	1226.56	0.0182299
CAM109_map5	0003.CSV	1230.41	0.0183582
CAM109_map5	0003.CSV	1234.27	0.0186306
CAM109_map5	0003.CSV	1238.13	0.0188386
CAM109_map5	0003.CSV	1241.98	0.0191946
CAM109_map5	0003.CSV	1245.84	0.0194814
CAM109_map5	0003.CSV	1249.7	0.0197936
CAM109_map5	0003.CSV	1253.56	0.0198847
CAM109_map5	0003.CSV	1257.41	0.0199725
CAM109_map5	0003.CSV	1261.27	0.0199936
CAM109_map5	0003.CSV	1265.13	0.0201005
CAM109_map5	0003.CSV	1268.98	0.0201814
CAM109_map5	0003.CSV	1272.84	0.0204152
CAM109_map5	0003.CSV	1276.7	0.0205145
CAM109_map5	0003.CSV	1280.56	0.0207043
CAM109_map5	0003.CSV	1284.41	0.0207816
CAM109_map5	0003.CSV	1288.27	0.0209038
CAM109_map5	0003.CSV	1292.13	0.0208654
CAM109_map5	0003.CSV	1295.98	0.0209104
CAM109_map5	0003.CSV	1299.84	0.0208735
CAM109_map5	0003.CSV	1303.7	0.0208825
CAM109_map5	0003.CSV	1307.56	0.0208318
CAM109_map5	0003.CSV	1311.41	0.0209657
CAM109_map5	0003.CSV	1315.27	0.0210585
CAM109_map5	0003.CSV	1319.13	0.021216
CAM109_map5	0003.CSV	1322.98	0.0211611
CAM109_map5	0003.CSV	1326.84	0.0212268
CAM109_map5	0003.CSV	1330.7	0.0212974
CAM109_map5	0003.CSV	1334.56	0.0213853
CAM109_map5	0003.CSV	1338.41	0.0215763
CAM109_map5	0003.CSV	1342.27	0.0220514
CAM109_map5	0003.CSV	1346.13	0.0221859
CAM109_map5	0003.CSV	1349.98	0.0224605
CAM109_map5	0003.CSV	1353.84	0.0226612
CAM109_map5	0003.CSV	1357.7	0.022957
CAM109_map5	0003.CSV	1361.56	0.0232692
CAM109_map5	0003.CSV	1365.41	0.0237341
CAM109_map5	0003.CSV	1369.27	0.0238779
CAM109_map5	0003.CSV	1373.13	0.0243845
CAM109_map5	0003.CSV	1376.98	0.0249146
CAM109_map5	0003.CSV	1380.84	0.0252329
CAM109_map5	0003.CSV	1384.7	0.0253897
CAM109_map5	0003.CSV	1388.56	0.0259064
CAM109_map5	0003.CSV	1392.41	0.0261279
CAM109_map5	0003.CSV	1396.27	0.0268764
CAM109_map5	0003.CSV	1400.13	0.0276273
CAM109_map5	0003.CSV	1403.98	0.0282596
CAM109_map5	0003.CSV	1407.84	0.0289791
CAM109_map5	0003.CSV	1411.7	0.0297785
CAM109_map5	0003.CSV	1415.55	0.0302959
CAM109_map5	0003.CSV	1419.41	0.0312226
CAM109_map5	0003.CSV	1423.27	0.0317048
CAM109_map5	0003.CSV	1427.12	0.0320647
CAM109_map5	0003.CSV	1430.98	0.0324769
CAM109_map5	0003.CSV	1434.84	0.0331634
CAM109_map5	0003.CSV	1438.7	0.0337032
CAM109_map5	0003.CSV	1442.55	0.0339857
CAM109_map5	0003.CSV	1446.41	0.0342537
CAM109_map5	0003.CSV	1450.27	0.03475
CAM109_map5	0003.CSV	1454.12	0.0347034
CAM109_map5	0003.CSV	1457.98	0.0354955
CAM109_map5	0003.CSV	1461.84	0.0357926
CAM109_map5	0003.CSV	1465.7	0.0362191
CAM109_map5	0003.CSV	1469.55	0.0361421
CAM109_map5	0003.CSV	1473.41	0.0356421
CAM109_map5	0003.CSV	1477.27	0.0344193
CAM109_map5	0003.CSV	1481.12	0.0333035
CAM109_map5	0003.CSV	1484.98	0.0322162
CAM109_map5	0003.CSV	1488.84	0.0314851
CAM109_map5	0003.CSV	1492.7	0.0306239
CAM109_map5	0003.CSV	1496.55	0.0299153
CAM109_map5	0003.CSV	1500.41	0.0291319
CAM109_map5	0003.CSV	1504.27	0.0285503
CAM109_map5	0003.CSV	1508.12	0.0283006
CAM109_map5	0003.CSV	1511.98	0.0277234
CAM109_map5	0003.CSV	1515.84	0.0267589
CAM109_map5	0003.CSV	1519.7	0.0259397
CAM109_map5	0003.CSV	1523.55	0.0252406
CAM109_map5	0003.CSV	1527.41	0.0249257
CAM109_map5	0003.CSV	1531.27	0.0248072
CAM109_map5	0003.CSV	1535.12	0.0255684
CAM109_map5	0003.CSV	1538.98	0.0263151
CAM109_map5	0003.CSV	1542.84	0.0270712
CAM109_map5	0003.CSV	1546.7	0.025791
CAM109_map5	0003.CSV	1550.55	0.0246
CAM109_map5	0003.CSV	1554.41	0.0236844
CAM109_map5	0003.CSV	1558.27	0.023482
CAM109_map5	0003.CSV	1562.12	0.0233532
CAM109_map5	0003.CSV	1565.98	0.0231788
CAM109_map5	0003.CSV	1569.84	0.0234745
CAM109_map5	0003.CSV	1573.69	0.0239458
CAM109_map5	0003.CSV	1577.55	0.0240678
CAM109_map5	0003.CSV	1581.41	0.0232016
CAM109_map5	0003.CSV	1585.27	0.0219357
CAM109_map5	0003.CSV	1589.12	0.0208665
CAM109_map5	0003.CSV	1592.98	0.0201541
CAM109_map5	0003.CSV	1596.84	0.0198094
CAM109_map5	0003.CSV	1600.69	0.0195467
CAM109_map5	0003.CSV	1604.55	0.0194513
CAM109_map5	0003.CSV	1608.41	0.0194605
CAM109_map5	0003.CSV	1612.27	0.0193463
CAM109_map5	0003.CSV	1616.12	0.0191787
CAM109_map5	0003.CSV	1619.98	0.0190471
CAM109_map5	0003.CSV	1623.84	0.0188181
CAM109_map5	0003.CSV	1627.69	0.0186934
CAM109_map5	0003.CSV	1631.55	0.0183029
CAM109_map5	0003.CSV	1635.41	0.0182643
CAM109_map5	0003.CSV	1639.27	0.0183989
CAM109_map5	0003.CSV	1643.12	0.0180236
CAM109_map5	0003.CSV	1646.98	0.0178462
CAM109_map5	0003.CSV	1650.84	0.0179731
CAM109_map5	0003.CSV	1654.69	0.0181633
CAM109_map5	0003.CSV	1658.55	0.0178378
CAM109_map5	0003.CSV	1662.41	0.0175528
CAM109_map5	0003.CSV	1666.27	0.0174073
CAM109_map5	0003.CSV	1670.12	0.0174217
CAM109_map5	0003.CSV	1673.98	0.0176289
CAM109_map5	0003.CSV	1677.84	0.0173399
CAM109_map5	0003.CSV	1681.69	0.0171022
CAM109_map5	0003.CSV	1685.55	0.017394
CAM109_map5	0003.CSV	1689.41	0.0172575
CAM109_map5	0003.CSV	1693.27	0.0168383
CAM109_map5	0003.CSV	1697.12	0.0168432
CAM109_map5	0003.CSV	1700.98	0.0171918
CAM109_map5	0003.CSV	1704.84	0.017187
CAM109_map5	0003.CSV	1708.69	0.0171414
CAM109_map5	0003.CSV	1712.55	0.0170019
CAM109_map5	0003.CSV	1716.41	0.0174526
CAM109_map5	0003.CSV	1720.27	0.0179229
CAM109_map5	0003.CSV	1724.12	0.0177441
[truncated: 70,493 more rows]

## Sheet: CAM109_map6
Map	Select spectrum number	Wavenumbers	Absorbance
CAM109_map6	0001.CSV	674.992	0.0201718
CAM109_map6	0001.CSV	678.849	0.019453
CAM109_map6	0001.CSV	682.706	0.0220855
CAM109_map6	0001.CSV	686.563	0.0219132
CAM109_map6	0001.CSV	690.42	0.0250359
CAM109_map6	0001.CSV	694.277	0.0289019
CAM109_map6	0001.CSV	698.134	0.0370186
CAM109_map6	0001.CSV	701.991	0.0362073
CAM109_map6	0001.CSV	705.849	0.0332619
CAM109_map6	0001.CSV	709.706	0.0371471
CAM109_map6	0001.CSV	713.563	0.0405531
CAM109_map6	0001.CSV	717.42	0.0305349
CAM109_map6	0001.CSV	721.277	0.0232174
CAM109_map6	0001.CSV	725.134	0.020957
CAM109_map6	0001.CSV	728.991	0.0214454
CAM109_map6	0001.CSV	732.848	0.020883
CAM109_map6	0001.CSV	736.705	0.0221041
CAM109_map6	0001.CSV	740.562	0.0222827
CAM109_map6	0001.CSV	744.42	0.0231682
CAM109_map6	0001.CSV	748.277	0.022671
CAM109_map6	0001.CSV	752.134	0.0232201
CAM109_map6	0001.CSV	755.991	0.0226851
CAM109_map6	0001.CSV	759.848	0.023122
CAM109_map6	0001.CSV	763.705	0.0227519
CAM109_map6	0001.CSV	767.562	0.0235257
CAM109_map6	0001.CSV	771.419	0.0234281
CAM109_map6	0001.CSV	775.276	0.024162
CAM109_map6	0001.CSV	779.133	0.0243732
CAM109_map6	0001.CSV	782.99	0.024847
CAM109_map6	0001.CSV	786.848	0.0240894
CAM109_map6	0001.CSV	790.705	0.0245154
CAM109_map6	0001.CSV	794.562	0.0249064
CAM109_map6	0001.CSV	798.419	0.0257888
CAM109_map6	0001.CSV	802.276	0.025718
CAM109_map6	0001.CSV	806.133	0.0261671
CAM109_map6	0001.CSV	809.99	0.0260603
CAM109_map6	0001.CSV	813.847	0.0270976
CAM109_map6	0001.CSV	817.704	0.0281231
CAM109_map6	0001.CSV	821.562	0.0297979
CAM109_map6	0001.CSV	825.419	0.0313396
CAM109_map6	0001.CSV	829.276	0.0339892
CAM109_map6	0001.CSV	833.133	0.0369692
CAM109_map6	0001.CSV	836.99	0.042453
CAM109_map6	0001.CSV	840.847	0.0495761
CAM109_map6	0001.CSV	844.704	0.0569468
CAM109_map6	0001.CSV	848.561	0.0656899
CAM109_map6	0001.CSV	852.418	0.0740501
CAM109_map6	0001.CSV	856.275	0.073957
CAM109_map6	0001.CSV	860.132	0.0669095
CAM109_map6	0001.CSV	863.99	0.0554971
CAM109_map6	0001.CSV	867.847	0.0439734
CAM109_map6	0001.CSV	871.704	0.034899
CAM109_map6	0001.CSV	875.561	0.0295427
CAM109_map6	0001.CSV	879.418	0.0262497
CAM109_map6	0001.CSV	883.275	0.0241499
CAM109_map6	0001.CSV	887.132	0.0225824
CAM109_map6	0001.CSV	890.989	0.0220146
CAM109_map6	0001.CSV	894.846	0.0218013
CAM109_map6	0001.CSV	898.703	0.0219859
CAM109_map6	0001.CSV	902.561	0.0220841
CAM109_map6	0001.CSV	906.418	0.0223335
CAM109_map6	0001.CSV	910.275	0.0221678
CAM109_map6	0001.CSV	914.132	0.0221161
CAM109_map6	0001.CSV	917.989	0.0221386
CAM109_map6	0001.CSV	921.846	0.0222889
CAM109_map6	0001.CSV	925.703	0.0223327
CAM109_map6	0001.CSV	929.56	0.0225279
CAM109_map6	0001.CSV	933.417	0.0227389
CAM109_map6	0001.CSV	937.274	0.0229362
CAM109_map6	0001.CSV	941.131	0.0229389
CAM109_map6	0001.CSV	944.989	0.0230064
CAM109_map6	0001.CSV	948.846	0.0231313
CAM109_map6	0001.CSV	952.703	0.0233122
CAM109_map6	0001.CSV	956.56	0.0233331
CAM109_map6	0001.CSV	960.417	0.0232406
CAM109_map6	0001.CSV	964.274	0.0230967
CAM109_map6	0001.CSV	968.131	0.0231666
CAM109_map6	0001.CSV	971.988	0.0234719
CAM109_map6	0001.CSV	975.845	0.0238508
CAM109_map6	0001.CSV	979.702	0.0242009
CAM109_map6	0001.CSV	983.559	0.0245677
CAM109_map6	0001.CSV	987.417	0.0249294
CAM109_map6	0001.CSV	991.274	0.0252683
CAM109_map6	0001.CSV	995.131	0.0256691
CAM109_map6	0001.CSV	998.988	0.0259858
CAM109_map6	0001.CSV	1002.85	0.0263349
CAM109_map6	0001.CSV	1006.7	0.0267497
CAM109_map6	0001.CSV	1010.56	0.0272547
CAM109_map6	0001.CSV	1014.42	0.027653
CAM109_map6	0001.CSV	1018.27	0.028003
CAM109_map6	0001.CSV	1022.13	0.0282589
CAM109_map6	0001.CSV	1025.99	0.0287343
CAM109_map6	0001.CSV	1029.85	0.0291919
CAM109_map6	0001.CSV	1033.7	0.0296628
CAM109_map6	0001.CSV	1037.56	0.0300906
CAM109_map6	0001.CSV	1041.42	0.030564
CAM109_map6	0001.CSV	1045.27	0.0308459
CAM109_map6	0001.CSV	1049.13	0.0314258
CAM109_map6	0001.CSV	1052.99	0.032044
CAM109_map6	0001.CSV	1056.84	0.0328358
CAM109_map6	0001.CSV	1060.7	0.03363
CAM109_map6	0001.CSV	1064.56	0.0345538
CAM109_map6	0001.CSV	1068.42	0.0350615
CAM109_map6	0001.CSV	1072.27	0.0354414
CAM109_map6	0001.CSV	1076.13	0.0361858
CAM109_map6	0001.CSV	1079.99	0.0384478
CAM109_map6	0001.CSV	1083.84	0.0390489
CAM109_map6	0001.CSV	1087.7	0.0359817
CAM109_map6	0001.CSV	1091.56	0.0333477
CAM109_map6	0001.CSV	1095.41	0.0327051
CAM109_map6	0001.CSV	1099.27	0.032566
CAM109_map6	0001.CSV	1103.13	0.032755
CAM109_map6	0001.CSV	1106.99	0.0329993
CAM109_map6	0001.CSV	1110.84	0.0335232
CAM109_map6	0001.CSV	1114.7	0.0338976
CAM109_map6	0001.CSV	1118.56	0.034087
CAM109_map6	0001.CSV	1122.41	0.0338444
CAM109_map6	0001.CSV	1126.27	0.0336705
CAM109_map6	0001.CSV	1130.13	0.0334513
CAM109_map6	0001.CSV	1133.99	0.0333202
CAM109_map6	0001.CSV	1137.84	0.0330648
CAM109_map6	0001.CSV	1141.7	0.0330383
CAM109_map6	0001.CSV	1145.56	0.0328784
CAM109_map6	0001.CSV	1149.41	0.0327992
CAM109_map6	0001.CSV	1153.27	0.0326206
CAM109_map6	0001.CSV	1157.13	0.0326905
CAM109_map6	0001.CSV	1160.99	0.0327163
CAM109_map6	0001.CSV	1164.84	0.0328031
CAM109_map6	0001.CSV	1168.7	0.0325983
CAM109_map6	0001.CSV	1172.56	0.0324009
CAM109_map6	0001.CSV	1176.41	0.0320307
CAM109_map6	0001.CSV	1180.27	0.0318815
CAM109_map6	0001.CSV	1184.13	0.0315346
CAM109_map6	0001.CSV	1187.99	0.0311968
CAM109_map6	0001.CSV	1191.84	0.0306393
CAM109_map6	0001.CSV	1195.7	0.0303452
CAM109_map6	0001.CSV	1199.56	0.0300728
CAM109_map6	0001.CSV	1203.41	0.0300391
CAM109_map6	0001.CSV	1207.27	0.029952
CAM109_map6	0001.CSV	1211.13	0.0300794
CAM109_map6	0001.CSV	1214.98	0.030102
CAM109_map6	0001.CSV	1218.84	0.0303072
CAM109_map6	0001.CSV	1222.7	0.0304939
CAM109_map6	0001.CSV	1226.56	0.030878
CAM109_map6	0001.CSV	1230.41	0.0311621
CAM109_map6	0001.CSV	1234.27	0.0317263
CAM109_map6	0001.CSV	1238.13	0.0322182
CAM109_map6	0001.CSV	1241.98	0.0329239
CAM109_map6	0001.CSV	1245.84	0.0336026
CAM109_map6	0001.CSV	1249.7	0.034382
CAM109_map6	0001.CSV	1253.56	0.0348642
CAM109_map6	0001.CSV	1257.41	0.0353622
CAM109_map6	0001.CSV	1261.27	0.0356677
CAM109_map6	0001.CSV	1265.13	0.036075
CAM109_map6	0001.CSV	1268.98	0.0363163
CAM109_map6	0001.CSV	1272.84	0.0367844
CAM109_map6	0001.CSV	1276.7	0.0370494
CAM109_map6	0001.CSV	1280.56	0.0373556
CAM109_map6	0001.CSV	1284.41	0.0374784
CAM109_map6	0001.CSV	1288.27	0.0376777
CAM109_map6	0001.CSV	1292.13	0.0375046
CAM109_map6	0001.CSV	1295.98	0.0373412
CAM109_map6	0001.CSV	1299.84	0.0370871
CAM109_map6	0001.CSV	1303.7	0.0371598
CAM109_map6	0001.CSV	1307.56	0.0371912
CAM109_map6	0001.CSV	1311.41	0.0375366
CAM109_map6	0001.CSV	1315.27	0.0378992
CAM109_map6	0001.CSV	1319.13	0.0384927
CAM109_map6	0001.CSV	1322.98	0.0387887
CAM109_map6	0001.CSV	1326.84	0.0391853
CAM109_map6	0001.CSV	1330.7	0.0396198
CAM109_map6	0001.CSV	1334.56	0.0403112
CAM109_map6	0001.CSV	1338.41	0.0413135
CAM109_map6	0001.CSV	1342.27	0.0427273
CAM109_map6	0001.CSV	1346.13	0.0436025
CAM109_map6	0001.CSV	1349.98	0.0449018
CAM109_map6	0001.CSV	1353.84	0.0461357
CAM109_map6	0001.CSV	1357.7	0.0475352
CAM109_map6	0001.CSV	1361.56	0.0491308
CAM109_map6	0001.CSV	1365.41	0.0512389
CAM109_map6	0001.CSV	1369.27	0.0527335
CAM109_map6	0001.CSV	1373.13	0.0550082
CAM109_map6	0001.CSV	1376.98	0.0575616
CAM109_map6	0001.CSV	1380.84	0.0596144
CAM109_map6	0001.CSV	1384.7	0.061358
CAM109_map6	0001.CSV	1388.56	0.0640582
CAM109_map6	0001.CSV	1392.41	0.0660386
CAM109_map6	0001.CSV	1396.27	0.0688374
CAM109_map6	0001.CSV	1400.13	0.0713071
CAM109_map6	0001.CSV	1403.98	0.0732433
CAM109_map6	0001.CSV	1407.84	0.0751525
CAM109_map6	0001.CSV	1411.7	0.0769965
CAM109_map6	0001.CSV	1415.55	0.0781025
CAM109_map6	0001.CSV	1419.41	0.079996
CAM109_map6	0001.CSV	1423.27	0.0811232
CAM109_map6	0001.CSV	1427.12	0.0821359
CAM109_map6	0001.CSV	1430.98	0.0831521
CAM109_map6	0001.CSV	1434.84	0.0847447
CAM109_map6	0001.CSV	1438.7	0.0860544
CAM109_map6	0001.CSV	1442.55	0.0868223
CAM109_map6	0001.CSV	1446.41	0.0872477
CAM109_map6	0001.CSV	1450.27	0.0876632
CAM109_map6	0001.CSV	1454.12	0.0869246
CAM109_map6	0001.CSV	1457.98	0.0871014
CAM109_map6	0001.CSV	1461.84	0.0864392
CAM109_map6	0001.CSV	1465.7	0.0860223
CAM109_map6	0001.CSV	1469.55	0.0847824
CAM109_map6	0001.CSV	1473.41	0.0828243
CAM109_map6	0001.CSV	1477.27	0.0794429
CAM109_map6	0001.CSV	1481.12	0.0766643
CAM109_map6	0001.CSV	1484.98	0.0739172
[truncated: 73,144 more rows]

## Sheet: CAM109_map7
Map	Select spectrum number	Wavenumbers	Absorbance
[truncated: 60,410 more rows]

[truncated: 1 more sheets: CAM109_map8]
