# Supplementary material for: Thermo-microstratigraphy of shells reveals invisible fire use and possible cooking in the archaeological record
Source: Frontiers journal article supplement (doi:10.3389/feart.2022.869487), 2022-09-01
Supplement: Table_4.XLSX [file Table_4.XLSX]

## Sheet: CAM109_map9
Map	Select spectrum number	Wavenumbers	Absorbance
CAM109_map9	0001.CSV	674.992	0.0463424
CAM109_map9	0001.CSV	678.849	0.0487821
CAM109_map9	0001.CSV	682.706	0.0498136
CAM109_map9	0001.CSV	686.563	0.0536043
CAM109_map9	0001.CSV	690.42	0.0591707
CAM109_map9	0001.CSV	694.277	0.0758102
CAM109_map9	0001.CSV	698.134	0.0972898
CAM109_map9	0001.CSV	701.991	0.0958959
CAM109_map9	0001.CSV	705.849	0.0834561
CAM109_map9	0001.CSV	709.706	0.0984177
CAM109_map9	0001.CSV	713.563	0.103366
CAM109_map9	0001.CSV	717.42	0.0721373
CAM109_map9	0001.CSV	721.277	0.0482539
CAM109_map9	0001.CSV	725.134	0.0444421
CAM109_map9	0001.CSV	728.991	0.0441328
CAM109_map9	0001.CSV	732.848	0.0458065
CAM109_map9	0001.CSV	736.705	0.0483573
CAM109_map9	0001.CSV	740.562	0.0524625
CAM109_map9	0001.CSV	744.42	0.054722
CAM109_map9	0001.CSV	748.277	0.0559277
CAM109_map9	0001.CSV	752.134	0.0552635
CAM109_map9	0001.CSV	755.991	0.0555819
CAM109_map9	0001.CSV	759.848	0.0555153
CAM109_map9	0001.CSV	763.705	0.0571653
CAM109_map9	0001.CSV	767.562	0.0583413
CAM109_map9	0001.CSV	771.419	0.0600736
CAM109_map9	0001.CSV	775.276	0.0612476
CAM109_map9	0001.CSV	779.133	0.0629578
CAM109_map9	0001.CSV	782.99	0.0631479
CAM109_map9	0001.CSV	786.848	0.0639599
CAM109_map9	0001.CSV	790.705	0.0651625
CAM109_map9	0001.CSV	794.562	0.0681222
CAM109_map9	0001.CSV	798.419	0.070325
CAM109_map9	0001.CSV	802.276	0.0726015
CAM109_map9	0001.CSV	806.133	0.0741564
CAM109_map9	0001.CSV	809.99	0.0777945
CAM109_map9	0001.CSV	813.847	0.0825623
CAM109_map9	0001.CSV	817.704	0.0894965
CAM109_map9	0001.CSV	821.562	0.0971719
CAM109_map9	0001.CSV	825.419	0.10745
CAM109_map9	0001.CSV	829.276	0.1188
CAM109_map9	0001.CSV	833.133	0.133889
CAM109_map9	0001.CSV	836.99	0.154108
CAM109_map9	0001.CSV	840.847	0.176864
CAM109_map9	0001.CSV	844.704	0.191773
CAM109_map9	0001.CSV	848.561	0.205862
CAM109_map9	0001.CSV	852.418	0.217373
CAM109_map9	0001.CSV	856.275	0.215965
CAM109_map9	0001.CSV	860.132	0.191868
CAM109_map9	0001.CSV	863.99	0.152611
CAM109_map9	0001.CSV	867.847	0.113852
CAM109_map9	0001.CSV	871.704	0.0864397
CAM109_map9	0001.CSV	875.561	0.0686644
CAM109_map9	0001.CSV	879.418	0.0581606
CAM109_map9	0001.CSV	883.275	0.0515629
CAM109_map9	0001.CSV	887.132	0.0483473
CAM109_map9	0001.CSV	890.989	0.0468342
CAM109_map9	0001.CSV	894.846	0.0466567
CAM109_map9	0001.CSV	898.703	0.046318
CAM109_map9	0001.CSV	902.561	0.0469137
CAM109_map9	0001.CSV	906.418	0.0476549
CAM109_map9	0001.CSV	910.275	0.0480882
CAM109_map9	0001.CSV	914.132	0.0473245
CAM109_map9	0001.CSV	917.989	0.0474276
CAM109_map9	0001.CSV	921.846	0.0476744
CAM109_map9	0001.CSV	925.703	0.0485881
CAM109_map9	0001.CSV	929.56	0.0491981
CAM109_map9	0001.CSV	933.417	0.049994
CAM109_map9	0001.CSV	937.274	0.0501612
CAM109_map9	0001.CSV	941.131	0.0504202
CAM109_map9	0001.CSV	944.989	0.0499969
CAM109_map9	0001.CSV	948.846	0.0496946
CAM109_map9	0001.CSV	952.703	0.0490708
CAM109_map9	0001.CSV	956.56	0.0488966
CAM109_map9	0001.CSV	960.417	0.0484959
CAM109_map9	0001.CSV	964.274	0.048781
CAM109_map9	0001.CSV	968.131	0.0490323
CAM109_map9	0001.CSV	971.988	0.0499505
CAM109_map9	0001.CSV	975.845	0.0510535
CAM109_map9	0001.CSV	979.702	0.0528726
CAM109_map9	0001.CSV	983.559	0.0545235
CAM109_map9	0001.CSV	987.417	0.0566376
CAM109_map9	0001.CSV	991.274	0.0584568
CAM109_map9	0001.CSV	995.131	0.0605437
CAM109_map9	0001.CSV	998.988	0.0622919
CAM109_map9	0001.CSV	1002.85	0.0645142
CAM109_map9	0001.CSV	1006.7	0.0662471
CAM109_map9	0001.CSV	1010.56	0.0680853
CAM109_map9	0001.CSV	1014.42	0.0693872
CAM109_map9	0001.CSV	1018.27	0.0710152
CAM109_map9	0001.CSV	1022.13	0.072342
CAM109_map9	0001.CSV	1025.99	0.0740826
CAM109_map9	0001.CSV	1029.85	0.0755815
CAM109_map9	0001.CSV	1033.7	0.0775766
CAM109_map9	0001.CSV	1037.56	0.0792962
CAM109_map9	0001.CSV	1041.42	0.0811217
CAM109_map9	0001.CSV	1045.27	0.0822915
CAM109_map9	0001.CSV	1049.13	0.0846891
CAM109_map9	0001.CSV	1052.99	0.0882155
CAM109_map9	0001.CSV	1056.84	0.0934083
CAM109_map9	0001.CSV	1060.7	0.0987168
CAM109_map9	0001.CSV	1064.56	0.103804
CAM109_map9	0001.CSV	1068.42	0.106979
CAM109_map9	0001.CSV	1072.27	0.109432
CAM109_map9	0001.CSV	1076.13	0.112718
CAM109_map9	0001.CSV	1079.99	0.121142
CAM109_map9	0001.CSV	1083.84	0.122429
CAM109_map9	0001.CSV	1087.7	0.108004
CAM109_map9	0001.CSV	1091.56	0.095716
CAM109_map9	0001.CSV	1095.41	0.0920036
CAM109_map9	0001.CSV	1099.27	0.090844
CAM109_map9	0001.CSV	1103.13	0.0909138
CAM109_map9	0001.CSV	1106.99	0.0915162
CAM109_map9	0001.CSV	1110.84	0.0932523
CAM109_map9	0001.CSV	1114.7	0.0946182
CAM109_map9	0001.CSV	1118.56	0.0953775
CAM109_map9	0001.CSV	1122.41	0.0947782
CAM109_map9	0001.CSV	1126.27	0.0936823
CAM109_map9	0001.CSV	1130.13	0.0920396
CAM109_map9	0001.CSV	1133.99	0.0911649
CAM109_map9	0001.CSV	1137.84	0.090506
CAM109_map9	0001.CSV	1141.7	0.0900483
CAM109_map9	0001.CSV	1145.56	0.0888125
CAM109_map9	0001.CSV	1149.41	0.087823
CAM109_map9	0001.CSV	1153.27	0.0868932
CAM109_map9	0001.CSV	1157.13	0.0865736
CAM109_map9	0001.CSV	1160.99	0.0861984
CAM109_map9	0001.CSV	1164.84	0.0858154
CAM109_map9	0001.CSV	1168.7	0.0844512
CAM109_map9	0001.CSV	1172.56	0.0828812
CAM109_map9	0001.CSV	1176.41	0.081031
CAM109_map9	0001.CSV	1180.27	0.0796146
CAM109_map9	0001.CSV	1184.13	0.0779303
CAM109_map9	0001.CSV	1187.99	0.0764768
CAM109_map9	0001.CSV	1191.84	0.0748006
CAM109_map9	0001.CSV	1195.7	0.073738
CAM109_map9	0001.CSV	1199.56	0.0727886
CAM109_map9	0001.CSV	1203.41	0.0724148
CAM109_map9	0001.CSV	1207.27	0.0720975
CAM109_map9	0001.CSV	1211.13	0.0723658
CAM109_map9	0001.CSV	1214.98	0.072667
CAM109_map9	0001.CSV	1218.84	0.073509
CAM109_map9	0001.CSV	1222.7	0.0743354
CAM109_map9	0001.CSV	1226.56	0.0757431
CAM109_map9	0001.CSV	1230.41	0.0772654
CAM109_map9	0001.CSV	1234.27	0.0794495
CAM109_map9	0001.CSV	1238.13	0.0818488
CAM109_map9	0001.CSV	1241.98	0.0850787
CAM109_map9	0001.CSV	1245.84	0.0884643
CAM109_map9	0001.CSV	1249.7	0.0921122
CAM109_map9	0001.CSV	1253.56	0.0949801
CAM109_map9	0001.CSV	1257.41	0.0973998
CAM109_map9	0001.CSV	1261.27	0.0989821
CAM109_map9	0001.CSV	1265.13	0.10061
CAM109_map9	0001.CSV	1268.98	0.101977
CAM109_map9	0001.CSV	1272.84	0.103622
CAM109_map9	0001.CSV	1276.7	0.104728
CAM109_map9	0001.CSV	1280.56	0.105817
CAM109_map9	0001.CSV	1284.41	0.106146
CAM109_map9	0001.CSV	1288.27	0.106044
CAM109_map9	0001.CSV	1292.13	0.104698
CAM109_map9	0001.CSV	1295.98	0.103026
CAM109_map9	0001.CSV	1299.84	0.101204
CAM109_map9	0001.CSV	1303.7	0.100297
CAM109_map9	0001.CSV	1307.56	0.0999227
CAM109_map9	0001.CSV	1311.41	0.100559
CAM109_map9	0001.CSV	1315.27	0.101365
CAM109_map9	0001.CSV	1319.13	0.102568
CAM109_map9	0001.CSV	1322.98	0.103058
CAM109_map9	0001.CSV	1326.84	0.103955
CAM109_map9	0001.CSV	1330.7	0.105195
CAM109_map9	0001.CSV	1334.56	0.107312
CAM109_map9	0001.CSV	1338.41	0.110235
CAM109_map9	0001.CSV	1342.27	0.114435
CAM109_map9	0001.CSV	1346.13	0.117914
CAM109_map9	0001.CSV	1349.98	0.12232
CAM109_map9	0001.CSV	1353.84	0.126718
CAM109_map9	0001.CSV	1357.7	0.131353
CAM109_map9	0001.CSV	1361.56	0.136427
CAM109_map9	0001.CSV	1365.41	0.143045
CAM109_map9	0001.CSV	1369.27	0.148423
CAM109_map9	0001.CSV	1373.13	0.155787
CAM109_map9	0001.CSV	1376.98	0.163997
CAM109_map9	0001.CSV	1380.84	0.170773
CAM109_map9	0001.CSV	1384.7	0.176679
CAM109_map9	0001.CSV	1388.56	0.185054
CAM109_map9	0001.CSV	1392.41	0.191706
CAM109_map9	0001.CSV	1396.27	0.200475
CAM109_map9	0001.CSV	1400.13	0.209164
CAM109_map9	0001.CSV	1403.98	0.217374
CAM109_map9	0001.CSV	1407.84	0.226064
CAM109_map9	0001.CSV	1411.7	0.234872
CAM109_map9	0001.CSV	1415.55	0.241364
CAM109_map9	0001.CSV	1419.41	0.250034
CAM109_map9	0001.CSV	1423.27	0.256384
CAM109_map9	0001.CSV	1427.12	0.262605
CAM109_map9	0001.CSV	1430.98	0.269082
CAM109_map9	0001.CSV	1434.84	0.278174
CAM109_map9	0001.CSV	1438.7	0.288165
CAM109_map9	0001.CSV	1442.55	0.296671
CAM109_map9	0001.CSV	1446.41	0.302528
CAM109_map9	0001.CSV	1450.27	0.306273
CAM109_map9	0001.CSV	1454.12	0.303641
CAM109_map9	0001.CSV	1457.98	0.298584
CAM109_map9	0001.CSV	1461.84	0.293611
CAM109_map9	0001.CSV	1465.7	0.291702
CAM109_map9	0001.CSV	1469.55	0.286126
CAM109_map9	0001.CSV	1473.41	0.272999
CAM109_map9	0001.CSV	1477.27	0.253853
CAM109_map9	0001.CSV	1481.12	0.240676
CAM109_map9	0001.CSV	1484.98	0.227784
CAM109_map9	0001.CSV	1488.84	0.213105
CAM109_map9	0001.CSV	1492.7	0.198248
CAM109_map9	0001.CSV	1496.55	0.187099
CAM109_map9	0001.CSV	1500.41	0.1746
CAM109_map9	0001.CSV	1504.27	0.16753
CAM109_map9	0001.CSV	1508.12	0.154504
CAM109_map9	0001.CSV	1511.98	0.145216
CAM109_map9	0001.CSV	1515.84	0.138386
CAM109_map9	0001.CSV	1519.7	0.129914
CAM109_map9	0001.CSV	1523.55	0.120047
CAM109_map9	0001.CSV	1527.41	0.113916
CAM109_map9	0001.CSV	1531.27	0.109171
CAM109_map9	0001.CSV	1535.12	0.106139
CAM109_map9	0001.CSV	1538.98	0.102964
CAM109_map9	0001.CSV	1542.84	0.097866
CAM109_map9	0001.CSV	1546.7	0.0929326
CAM109_map9	0001.CSV	1550.55	0.0892575
CAM109_map9	0001.CSV	1554.41	0.0851613
CAM109_map9	0001.CSV	1558.27	0.0802738
CAM109_map9	0001.CSV	1562.12	0.0750949
CAM109_map9	0001.CSV	1565.98	0.0724351
CAM109_map9	0001.CSV	1569.84	0.0688925
CAM109_map9	0001.CSV	1573.69	0.0656399
CAM109_map9	0001.CSV	1577.55	0.0608416
CAM109_map9	0001.CSV	1581.41	0.0560957
CAM109_map9	0001.CSV	1585.27	0.0516665
CAM109_map9	0001.CSV	1589.12	0.0482977
CAM109_map9	0001.CSV	1592.98	0.0461695
CAM109_map9	0001.CSV	1596.84	0.0452202
CAM109_map9	0001.CSV	1600.69	0.0442991
CAM109_map9	0001.CSV	1604.55	0.0432955
CAM109_map9	0001.CSV	1608.41	0.0421016
CAM109_map9	0001.CSV	1612.27	0.0412466
CAM109_map9	0001.CSV	1616.12	0.0403174
CAM109_map9	0001.CSV	1619.98	0.0396814
CAM109_map9	0001.CSV	1623.84	0.0386112
CAM109_map9	0001.CSV	1627.69	0.0376646
CAM109_map9	0001.CSV	1631.55	0.0364901
CAM109_map9	0001.CSV	1635.41	0.035924
CAM109_map9	0001.CSV	1639.27	0.0352498
CAM109_map9	0001.CSV	1643.12	0.0345031
CAM109_map9	0001.CSV	1646.98	0.0339288
CAM109_map9	0001.CSV	1650.84	0.0339078
CAM109_map9	0001.CSV	1654.69	0.0336876
CAM109_map9	0001.CSV	1658.55	0.0331771
CAM109_map9	0001.CSV	1662.41	0.0324892
CAM109_map9	0001.CSV	1666.27	0.0320948
CAM109_map9	0001.CSV	1670.12	0.0318138
CAM109_map9	0001.CSV	1673.98	0.0319354
CAM109_map9	0001.CSV	1677.84	0.0313499
CAM109_map9	0001.CSV	1681.69	0.0310336
CAM109_map9	0001.CSV	1685.55	0.0313082
CAM109_map9	0001.CSV	1689.41	0.0314228
CAM109_map9	0001.CSV	1693.27	0.0307954
CAM109_map9	0001.CSV	1697.12	0.0310559
CAM109_map9	0001.CSV	1700.98	0.0323856
CAM109_map9	0001.CSV	1704.84	0.0340213
CAM109_map9	0001.CSV	1708.69	0.0357811
CAM109_map9	0001.CSV	1712.55	0.0376441
CAM109_map9	0001.CSV	1716.41	0.0420761
CAM109_map9	0001.CSV	1720.27	0.0473986
CAM109_map9	0001.CSV	1724.12	0.0490228
CAM109_map9	0001.CSV	1727.98	0.0495446
CAM109_map9	0001.CSV	1731.84	0.0489022
CAM109_map9	0001.CSV	1735.69	0.0467328
CAM109_map9	0001.CSV	1739.55	0.043394
CAM109_map9	0001.CSV	1743.41	0.0390695
CAM109_map9	0001.CSV	1747.27	0.0341719
CAM109_map9	0001.CSV	1751.12	0.0287769
CAM109_map9	0001.CSV	1754.98	0.0251491
CAM109_map9	0001.CSV	1758.84	0.0228847
CAM109_map9	0001.CSV	1762.69	0.0213885
CAM109_map9	0001.CSV	1766.55	0.0205016
CAM109_map9	0001.CSV	1770.41	0.0203663
CAM109_map9	0001.CSV	1774.26	0.0216022
CAM109_map9	0001.CSV	1778.12	0.0230758
CAM109_map9	0001.CSV	1781.98	0.0250858
CAM109_map9	0001.CSV	1785.84	0.0261494
CAM109_map9	0001.CSV	1789.69	0.0257411
CAM109_map9	0001.CSV	1793.55	0.0238127
CAM109_map9	0001.CSV	1797.41	0.0217885
CAM109_map9	0001.CSV	1801.26	0.0199957
CAM109_map9	0001.CSV	1805.12	0.0186416
CAM109_map9	0001.CSV	1808.98	0.0177365
CAM109_map9	0001.CSV	1812.84	0.0173851
CAM109_map9	0001.CSV	1816.69	0.0170229
CAM109_map9	0001.CSV	1820.55	0.0167834
CAM109_map9	0001.CSV	1824.41	0.0166259
CAM109_map9	0001.CSV	1828.26	0.0168106
CAM109_map9	0001.CSV	1832.12	0.0167864
CAM109_map9	0001.CSV	1835.98	0.0166297
CAM109_map9	0001.CSV	1839.84	0.0163805
CAM109_map9	0001.CSV	1843.69	0.0165318
CAM109_map9	0001.CSV	1847.55	0.0167396
CAM109_map9	0001.CSV	1851.41	0.0165975
CAM109_map9	0001.CSV	1855.26	0.0164252
CAM109_map9	0001.CSV	1859.12	0.0164633
CAM109_map9	0001.CSV	1862.98	0.0163965
CAM109_map9	0001.CSV	1866.84	0.0165713
CAM109_map9	0001.CSV	1870.69	0.0168732
CAM109_map9	0001.CSV	1874.55	0.0167295
CAM109_map9	0001.CSV	1878.41	0.0165398
CAM109_map9	0001.CSV	1882.26	0.0165149
CAM109_map9	0001.CSV	1886.12	0.0164651
CAM109_map9	0001.CSV	1889.98	0.0165792
CAM109_map9	0001.CSV	1893.83	0.0165911
CAM109_map9	0001.CSV	1897.69	0.0165657
CAM109_map9	0001.CSV	1901.55	0.0164354
CAM109_map9	0001.CSV	1905.41	0.0163903
CAM109_map9	0001.CSV	1909.26	0.0164524
CAM109_map9	0001.CSV	1913.12	0.0164746
CAM109_map9	0001.CSV	1916.98	0.0163997
CAM109_map9	0001.CSV	1920.83	0.0166046
CAM109_map9	0001.CSV	1924.69	0.0166561
CAM109_map9	0001.CSV	1928.55	0.0166211
CAM109_map9	0001.CSV	1932.4	0.0166012
CAM109_map9	0001.CSV	1936.26	0.016682
CAM109_map9	0001.CSV	1940.12	0.0167003
CAM109_map9	0001.CSV	1943.98	0.0169498
CAM109_map9	0001.CSV	1947.83	0.0169721
CAM109_map9	0001.CSV	1951.69	0.016892
CAM109_map9	0001.CSV	1955.55	0.0168481
CAM109_map9	0001.CSV	1959.4	0.0168804
CAM109_map9	0001.CSV	1963.26	0.0167851
CAM109_map9	0001.CSV	1967.12	0.016874
CAM109_map9	0001.CSV	1970.98	0.0168736
CAM109_map9	0001.CSV	1974.83	0.0167914
CAM109_map9	0001.CSV	1978.69	0.0167534
CAM109_map9	0001.CSV	1982.55	0.0167819
CAM109_map9	0001.CSV	1986.4	0.0167161
CAM109_map9	0001.CSV	1990.26	0.0167818
CAM109_map9	0001.CSV	1994.12	0.0167936
CAM109_map9	0001.CSV	1997.98	0.0167349
CAM109_map9	0001.CSV	2001.83	0.0167102
CAM109_map9	0001.CSV	2005.69	0.0167557
CAM109_map9	0001.CSV	2009.55	0.0166819
CAM109_map9	0001.CSV	2013.4	0.0165724
CAM109_map9	0001.CSV	2017.26	0.0165892
CAM109_map9	0001.CSV	2021.12	0.0166805
CAM109_map9	0001.CSV	2024.97	0.0166093
CAM109_map9	0001.CSV	2028.83	0.0166079
CAM109_map9	0001.CSV	2032.69	0.0165592
CAM109_map9	0001.CSV	2036.55	0.0165533
CAM109_map9	0001.CSV	2040.4	0.0165405
CAM109_map9	0001.CSV	2044.26	0.0165687
CAM109_map9	0001.CSV	2048.12	0.0165072
CAM109_map9	0001.CSV	2051.97	0.0165343
CAM109_map9	0001.CSV	2055.83	0.0165375
CAM109_map9	0001.CSV	2059.69	0.016537
CAM109_map9	0001.CSV	2063.55	0.0165477
CAM109_map9	0001.CSV	2067.4	0.0166359
CAM109_map9	0001.CSV	2071.26	0.0166151
CAM109_map9	0001.CSV	2075.12	0.0166355
CAM109_map9	0001.CSV	2078.97	0.0166283
CAM109_map9	0001.CSV	2082.83	0.0166413
CAM109_map9	0001.CSV	2086.69	0.016601
CAM109_map9	0001.CSV	2090.55	0.0166322
CAM109_map9	0001.CSV	2094.4	0.0166376
CAM109_map9	0001.CSV	2098.26	0.0166867
CAM109_map9	0001.CSV	2102.12	0.016677
CAM109_map9	0001.CSV	2105.97	0.0167043
CAM109_map9	0001.CSV	2109.83	0.0166852
CAM109_map9	0001.CSV	2113.69	0.0166931
CAM109_map9	0001.CSV	2117.55	0.0167359
CAM109_map9	0001.CSV	2121.4	0.016835
CAM109_map9	0001.CSV	2125.26	0.0168242
CAM109_map9	0001.CSV	2129.12	0.0168205
CAM109_map9	0001.CSV	2132.97	0.0168309
CAM109_map9	0001.CSV	2136.83	0.0168774
CAM109_map9	0001.CSV	2140.69	0.0168787
CAM109_map9	0001.CSV	2144.55	0.0169313
CAM109_map9	0001.CSV	2148.4	0.0169327
CAM109_map9	0001.CSV	2152.26	0.0169093
CAM109_map9	0001.CSV	2156.12	0.0168488
CAM109_map9	0001.CSV	2159.97	0.0168577
CAM109_map9	0001.CSV	2163.83	0.0168065
CAM109_map9	0001.CSV	2167.69	0.0168034
CAM109_map9	0001.CSV	2171.55	0.0168505
CAM109_map9	0001.CSV	2175.4	0.016911
CAM109_map9	0001.CSV	2179.26	0.0169207
CAM109_map9	0001.CSV	2183.12	0.0169726
CAM109_map9	0001.CSV	2186.97	0.0169731
CAM109_map9	0001.CSV	2190.83	0.0169973
CAM109_map9	0001.CSV	2194.69	0.0169915
CAM109_map9	0001.CSV	2198.55	0.0170111
CAM109_map9	0001.CSV	2202.4	0.0169952
CAM109_map9	0001.CSV	2206.26	0.0169997
CAM109_map9	0001.CSV	2210.12	0.0169808
CAM109_map9	0001.CSV	2213.97	0.0169755
CAM109_map9	0001.CSV	2217.83	0.0169246
CAM109_map9	0001.CSV	2221.69	0.0169385
CAM109_map9	0001.CSV	2225.54	0.0169683
CAM109_map9	0001.CSV	2229.4	0.0170126
CAM109_map9	0001.CSV	2233.26	0.0170381
CAM109_map9	0001.CSV	2237.12	0.0170612
CAM109_map9	0001.CSV	2240.97	0.0170281
CAM109_map9	0001.CSV	2244.83	0.0170236
CAM109_map9	0001.CSV	2248.69	0.0170015
CAM109_map9	0001.CSV	2252.54	0.0169712
CAM109_map9	0001.CSV	2256.4	0.0169218
CAM109_map9	0001.CSV	2260.26	0.0169221
CAM109_map9	0001.CSV	2264.11	0.0168976
CAM109_map9	0001.CSV	2267.97	0.0169041
CAM109_map9	0001.CSV	2271.83	0.0169025
CAM109_map9	0001.CSV	2275.69	0.0169228
CAM109_map9	0001.CSV	2279.54	0.0169293
CAM109_map9	0001.CSV	2283.4	0.0168914
CAM109_map9	0001.CSV	2287.26	0.0168257
CAM109_map9	0001.CSV	2291.11	0.0168306
CAM109_map9	0001.CSV	2294.97	0.0168052
CAM109_map9	0001.CSV	2298.83	0.016805
CAM109_map9	0001.CSV	2302.69	0.0167348
CAM109_map9	0001.CSV	2306.54	0.0166145
CAM109_map9	0001.CSV	2310.4	0.01645
CAM109_map9	0001.CSV	2314.26	0.0163131
CAM109_map9	0001.CSV	2318.11	0.0160583
CAM109_map9	0001.CSV	2321.97	0.0156822
CAM109_map9	0001.CSV	2325.83	0.0151823
CAM109_map9	0001.CSV	2329.69	0.0147702
CAM109_map9	0001.CSV	2333.54	0.0144299
CAM109_map9	0001.CSV	2337.4	0.0143195
CAM109_map9	0001.CSV	2341.26	0.014387
CAM109_map9	0001.CSV	2345.11	0.0154577
CAM109_map9	0001.CSV	2348.97	0.015535
CAM109_map9	0001.CSV	2352.83	0.0141124
CAM109_map9	0001.CSV	2356.69	0.0117185
CAM109_map9	0001.CSV	2360.54	0.0105666
CAM109_map9	0001.CSV	2364.4	0.0114007
CAM109_map9	0001.CSV	2368.26	0.0138453
CAM109_map9	0001.CSV	2372.11	0.0158691
CAM109_map9	0001.CSV	2375.97	0.016778
CAM109_map9	0001.CSV	2379.83	0.0168883
CAM109_map9	0001.CSV	2383.69	0.01673
CAM109_map9	0001.CSV	2387.54	0.0165325
CAM109_map9	0001.CSV	2391.4	0.0164545
CAM109_map9	0001.CSV	2395.26	0.0164491
CAM109_map9	0001.CSV	2399.11	0.0164327
CAM109_map9	0001.CSV	2402.97	0.0163947
CAM109_map9	0001.CSV	2406.83	0.0164155
CAM109_map9	0001.CSV	2410.68	0.0164145
CAM109_map9	0001.CSV	2414.54	0.0163872
CAM109_map9	0001.CSV	2418.4	0.0163429
CAM109_map9	0001.CSV	2422.26	0.0163601
CAM109_map9	0001.CSV	2426.11	0.0163841
CAM109_map9	0001.CSV	2429.97	0.0164256
CAM109_map9	0001.CSV	2433.83	0.0164286
CAM109_map9	0001.CSV	2437.68	0.0164478
CAM109_map9	0001.CSV	2441.54	0.0165166
CAM109_map9	0001.CSV	2445.4	0.0165873
CAM109_map9	0001.CSV	2449.26	0.0166248
CAM109_map9	0001.CSV	2453.11	0.0166939
CAM109_map9	0001.CSV	2456.97	0.0167647
CAM109_map9	0001.CSV	2460.83	0.0168512
CAM109_map9	0001.CSV	2464.68	0.0169617
CAM109_map9	0001.CSV	2468.54	0.0171354
CAM109_map9	0001.CSV	2472.4	0.017375
CAM109_map9	0001.CSV	2476.26	0.0177046
CAM109_map9	0001.CSV	2480.11	0.018057
CAM109_map9	0001.CSV	2483.97	0.0184166
CAM109_map9	0001.CSV	2487.83	0.018764
CAM109_map9	0001.CSV	2491.68	0.0191237
CAM109_map9	0001.CSV	2495.54	0.0193648
CAM109_map9	0001.CSV	2499.4	0.0194872
CAM109_map9	0001.CSV	2503.26	0.0195604
CAM109_map9	0001.CSV	2507.11	0.0195529
CAM109_map9	0001.CSV	2510.97	0.0195375
CAM109_map9	0001.CSV	2514.83	0.019738
CAM109_map9	0001.CSV	2518.68	0.0200679
CAM109_map9	0001.CSV	2522.54	0.0203035
CAM109_map9	0001.CSV	2526.4	0.0202902
CAM109_map9	0001.CSV	2530.26	0.0200845
CAM109_map9	0001.CSV	2534.11	0.019726
CAM109_map9	0001.CSV	2537.97	0.019373
CAM109_map9	0001.CSV	2541.83	0.019144
CAM109_map9	0001.CSV	2545.68	0.0190937
CAM109_map9	0001.CSV	2549.54	0.0190467
CAM109_map9	0001.CSV	2553.4	0.0188978
CAM109_map9	0001.CSV	2557.26	0.018653
CAM109_map9	0001.CSV	2561.11	0.0184244
CAM109_map9	0001.CSV	2564.97	0.018216
CAM109_map9	0001.CSV	2568.83	0.0180773
CAM109_map9	0001.CSV	2572.68	0.0179857
CAM109_map9	0001.CSV	2576.54	0.0178885
CAM109_map9	0001.CSV	2580.4	0.0177767
CAM109_map9	0001.CSV	2584.25	0.0176959
CAM109_map9	0001.CSV	2588.11	0.0176298
CAM109_map9	0001.CSV	2591.97	0.0176289
CAM109_map9	0001.CSV	2595.83	0.0175923
CAM109_map9	0001.CSV	2599.68	0.0175656
CAM109_map9	0001.CSV	2603.54	0.0175551
CAM109_map9	0001.CSV	2607.4	0.0175595
CAM109_map9	0001.CSV	2611.25	0.0175715
CAM109_map9	0001.CSV	2615.11	0.0176042
CAM109_map9	0001.CSV	2618.97	0.0175822
CAM109_map9	0001.CSV	2622.82	0.0176303
CAM109_map9	0001.CSV	2626.68	0.0177388
CAM109_map9	0001.CSV	2630.54	0.0177163
CAM109_map9	0001.CSV	2634.4	0.0176973
CAM109_map9	0001.CSV	2638.25	0.0176935
CAM109_map9	0001.CSV	2642.11	0.0174926
CAM109_map9	0001.CSV	2645.97	0.0172802
CAM109_map9	0001.CSV	2649.82	0.0171217
CAM109_map9	0001.CSV	2653.68	0.0170214
CAM109_map9	0001.CSV	2657.54	0.0169744
CAM109_map9	0001.CSV	2661.4	0.0168918
CAM109_map9	0001.CSV	2665.25	0.0167697
CAM109_map9	0001.CSV	2669.11	0.0167824
CAM109_map9	0001.CSV	2672.97	0.0170108
CAM109_map9	0001.CSV	2676.82	0.0173587
CAM109_map9	0001.CSV	2680.68	0.017255
CAM109_map9	0001.CSV	2684.54	0.0167904
CAM109_map9	0001.CSV	2688.4	0.0166578
CAM109_map9	0001.CSV	2692.25	0.0166819
CAM109_map9	0001.CSV	2696.11	0.0167115
CAM109_map9	0001.CSV	2699.97	0.016752
CAM109_map9	0001.CSV	2703.82	0.0167659
CAM109_map9	0001.CSV	2707.68	0.0168447
CAM109_map9	0001.CSV	2711.54	0.0168362
CAM109_map9	0001.CSV	2715.4	0.0168355
CAM109_map9	0001.CSV	2719.25	0.0170622
CAM109_map9	0001.CSV	2723.11	0.0174861
CAM109_map9	0001.CSV	2726.97	0.0174901
CAM109_map9	0001.CSV	2730.82	0.017095
CAM109_map9	0001.CSV	2734.68	0.0170722
CAM109_map9	0001.CSV	2738.54	0.0171604
CAM109_map9	0001.CSV	2742.4	0.0172302
CAM109_map9	0001.CSV	2746.25	0.0175594
CAM109_map9	0001.CSV	2750.11	0.0175715
CAM109_map9	0001.CSV	2753.97	0.0172934
CAM109_map9	0001.CSV	2757.82	0.0172128
CAM109_map9	0001.CSV	2761.68	0.0171215
CAM109_map9	0001.CSV	2765.54	0.0170982
CAM109_map9	0001.CSV	2769.39	0.0173899
CAM109_map9	0001.CSV	2773.25	0.0178766
CAM109_map9	0001.CSV	2777.11	0.0178179
CAM109_map9	0001.CSV	2780.97	0.0175305
CAM109_map9	0001.CSV	2784.82	0.0177717
CAM109_map9	0001.CSV	2788.68	0.0183375
CAM109_map9	0001.CSV	2792.54	0.0185162
CAM109_map9	0001.CSV	2796.39	0.0185635
CAM109_map9	0001.CSV	2800.25	0.0184265
CAM109_map9	0001.CSV	2804.11	0.0182528
CAM109_map9	0001.CSV	2807.97	0.0186277
CAM109_map9	0001.CSV	2811.82	0.0187518
CAM109_map9	0001.CSV	2815.68	0.0186113
CAM109_map9	0001.CSV	2819.54	0.0188318
CAM109_map9	0001.CSV	2823.39	0.0191688
CAM109_map9	0001.CSV	2827.25	0.0194847
CAM109_map9	0001.CSV	2831.11	0.0203386
CAM109_map9	0001.CSV	2834.97	0.0218196
CAM109_map9	0001.CSV	2838.82	0.0233869
CAM109_map9	0001.CSV	2842.68	0.0253485
CAM109_map9	0001.CSV	2846.54	0.0287123
CAM109_map9	0001.CSV	2850.39	0.0311688
CAM109_map9	0001.CSV	2854.25	0.0311152
CAM109_map9	0001.CSV	2858.11	0.0297917
CAM109_map9	0001.CSV	2861.97	0.0279433
CAM109_map9	0001.CSV	2865.82	0.0265768
CAM109_map9	0001.CSV	2869.68	0.0264205
CAM109_map9	0001.CSV	2873.54	0.0263844
CAM109_map9	0001.CSV	2877.39	0.0253149
CAM109_map9	0001.CSV	2881.25	0.0245406
CAM109_map9	0001.CSV	2885.11	0.024688
CAM109_map9	0001.CSV	2888.97	0.0254952
CAM109_map9	0001.CSV	2892.82	0.0269329
CAM109_map9	0001.CSV	2896.68	0.0281579
CAM109_map9	0001.CSV	2900.54	0.0289932
CAM109_map9	0001.CSV	2904.39	0.0304928
CAM109_map9	0001.CSV	2908.25	0.0331591
CAM109_map9	0001.CSV	2912.11	0.0371689
CAM109_map9	0001.CSV	2915.97	0.0409364
CAM109_map9	0001.CSV	2919.82	0.0425027
CAM109_map9	0001.CSV	2923.68	0.0421243
CAM109_map9	0001.CSV	2927.54	0.0411516
CAM109_map9	0001.CSV	2931.39	0.0388519
CAM109_map9	0001.CSV	2935.25	0.0354995
CAM109_map9	0001.CSV	2939.11	0.0331303
CAM109_map9	0001.CSV	2942.96	0.0320692
CAM109_map9	0001.CSV	2946.82	0.031091
CAM109_map9	0001.CSV	2950.68	0.030046
CAM109_map9	0001.CSV	2954.54	0.0290284
CAM109_map9	0001.CSV	2958.39	0.0279148
CAM109_map9	0001.CSV	2962.25	0.0269559
CAM109_map9	0001.CSV	2966.11	0.0255537
CAM109_map9	0001.CSV	2969.96	0.0246082
CAM109_map9	0001.CSV	2973.82	0.0244238
CAM109_map9	0001.CSV	2977.68	0.0242134
CAM109_map9	0001.CSV	2981.53	0.0233491
CAM109_map9	0001.CSV	2985.39	0.0221424
CAM109_map9	0001.CSV	2989.25	0.0218637
CAM109_map9	0001.CSV	2993.11	0.0220528
CAM109_map9	0001.CSV	2996.96	0.0217157
CAM109_map9	0001.CSV	3000.82	0.0211152
CAM109_map9	0001.CSV	3004.68	0.0206991
CAM109_map9	0001.CSV	3008.53	0.0208729
CAM109_map9	0001.CSV	3012.39	0.0212984
CAM109_map9	0001.CSV	3016.25	0.021395
CAM109_map9	0001.CSV	3020.11	0.0211998
CAM109_map9	0001.CSV	3023.96	0.021159
CAM109_map9	0001.CSV	3027.82	0.0212373
CAM109_map9	0001.CSV	3031.68	0.0214492
CAM109_map9	0001.CSV	3035.53	0.021323
CAM109_map9	0001.CSV	3039.39	0.0211747
CAM109_map9	0001.CSV	3043.25	0.0211877
CAM109_map9	0001.CSV	3047.11	0.0210002
CAM109_map9	0001.CSV	3050.96	0.0210434
CAM109_map9	0001.CSV	3054.82	0.021162
CAM109_map9	0001.CSV	3058.68	0.0210719
CAM109_map9	0001.CSV	3062.53	0.0211473
CAM109_map9	0001.CSV	3066.39	0.0214624
CAM109_map9	0001.CSV	3070.25	0.0213207
CAM109_map9	0001.CSV	3074.11	0.021296
CAM109_map9	0001.CSV	3077.96	0.0217211
CAM109_map9	0001.CSV	3081.82	0.0219639
CAM109_map9	0001.CSV	3085.68	0.0218377
CAM109_map9	0001.CSV	3089.53	0.0214941
CAM109_map9	0001.CSV	3093.39	0.0210184
CAM109_map9	0001.CSV	3097.25	0.021044
CAM109_map9	0001.CSV	3101.11	0.0212701
CAM109_map9	0001.CSV	3104.96	0.0213879
CAM109_map9	0001.CSV	3108.82	0.0217002
CAM109_map9	0001.CSV	3112.68	0.0218893
CAM109_map9	0001.CSV	3116.53	0.0220587
CAM109_map9	0001.CSV	3120.39	0.0219323
CAM109_map9	0001.CSV	3124.25	0.0215052
CAM109_map9	0001.CSV	3128.11	0.0213849
CAM109_map9	0001.CSV	3131.96	0.0214447
CAM109_map9	0001.CSV	3135.82	0.0216704
CAM109_map9	0001.CSV	3139.68	0.0218976
CAM109_map9	0001.CSV	3143.53	0.0216958
CAM109_map9	0001.CSV	3147.39	0.0217749
CAM109_map9	0001.CSV	3151.25	0.0222047
CAM109_map9	0001.CSV	3155.1	0.0221579
CAM109_map9	0001.CSV	3158.96	0.0217748
CAM109_map9	0001.CSV	3162.82	0.021707
CAM109_map9	0001.CSV	3166.68	0.0218044
CAM109_map9	0001.CSV	3170.53	0.0218624
CAM109_map9	0001.CSV	3174.39	0.0218533
CAM109_map9	0001.CSV	3178.25	0.0220303
CAM109_map9	0001.CSV	3182.1	0.0221847
CAM109_map9	0001.CSV	3185.96	0.0223261
CAM109_map9	0001.CSV	3189.82	0.022501
CAM109_map9	0001.CSV	3193.68	0.0225202
CAM109_map9	0001.CSV	3197.53	0.0225582
CAM109_map9	0001.CSV	3201.39	0.0228042
CAM109_map9	0001.CSV	3205.25	0.0229496
CAM109_map9	0001.CSV	3209.1	0.0229174
CAM109_map9	0001.CSV	3212.96	0.0230668
CAM109_map9	0001.CSV	3216.82	0.0232992
CAM109_map9	0001.CSV	3220.68	0.0232816
CAM109_map9	0001.CSV	3224.53	0.0232354
CAM109_map9	0001.CSV	3228.39	0.0236013
CAM109_map9	0001.CSV	3232.25	0.0241649
CAM109_map9	0001.CSV	3236.1	0.0240536
CAM109_map9	0001.CSV	3239.96	0.0237877
CAM109_map9	0001.CSV	3243.82	0.0240299
CAM109_map9	0001.CSV	3247.68	0.0242326
CAM109_map9	0001.CSV	3251.53	0.0241031
CAM109_map9	0001.CSV	3255.39	0.0241484
CAM109_map9	0001.CSV	3259.25	0.0240203
CAM109_map9	0001.CSV	3263.1	0.0239946
CAM109_map9	0001.CSV	3266.96	0.0243963
CAM109_map9	0001.CSV	3270.82	0.0247987
CAM109_map9	0001.CSV	3274.68	0.024789
CAM109_map9	0001.CSV	3278.53	0.0245665
CAM109_map9	0001.CSV	3282.39	0.0244363
CAM109_map9	0001.CSV	3286.25	0.0245158
CAM109_map9	0001.CSV	3290.1	0.0248444
CAM109_map9	0001.CSV	3293.96	0.0251494
CAM109_map9	0001.CSV	3297.82	0.025067
CAM109_map9	0001.CSV	3301.67	0.0251285
CAM109_map9	0001.CSV	3305.53	0.025375
CAM109_map9	0001.CSV	3309.39	0.0253494
CAM109_map9	0001.CSV	3313.25	0.0248935
CAM109_map9	0001.CSV	3317.1	0.0244624
CAM109_map9	0001.CSV	3320.96	0.0245462
CAM109_map9	0001.CSV	3324.82	0.0248964
CAM109_map9	0001.CSV	3328.67	0.0247369
CAM109_map9	0001.CSV	3332.53	0.0245986
CAM109_map9	0001.CSV	3336.39	0.0250644
CAM109_map9	0001.CSV	3340.24	0.0253281
CAM109_map9	0001.CSV	3344.1	0.02515
CAM109_map9	0001.CSV	3347.96	0.0251758
CAM109_map9	0001.CSV	3351.82	0.0251395
CAM109_map9	0001.CSV	3355.67	0.024895
CAM109_map9	0001.CSV	3359.53	0.0249979
CAM109_map9	0001.CSV	3363.39	0.0252525
CAM109_map9	0001.CSV	3367.24	0.0255151
CAM109_map9	0001.CSV	3371.1	0.0254233
CAM109_map9	0001.CSV	3374.96	0.0252223
CAM109_map9	0001.CSV	3378.82	0.0250738
CAM109_map9	0001.CSV	3382.67	0.0247819
CAM109_map9	0001.CSV	3386.53	0.0249
CAM109_map9	0001.CSV	3390.39	0.0253022
CAM109_map9	0001.CSV	3394.24	0.0254385
CAM109_map9	0001.CSV	3398.1	0.0255313
CAM109_map9	0001.CSV	3401.96	0.0254428
CAM109_map9	0001.CSV	3405.82	0.0250506
CAM109_map9	0001.CSV	3409.67	0.0249208
CAM109_map9	0001.CSV	3413.53	0.0245277
CAM109_map9	0001.CSV	3417.39	0.0239767
CAM109_map9	0001.CSV	3421.24	0.0238127
CAM109_map9	0001.CSV	3425.1	0.0238715
CAM109_map9	0001.CSV	3428.96	0.0240763
CAM109_map9	0001.CSV	3432.82	0.024211
CAM109_map9	0001.CSV	3436.67	0.023839
CAM109_map9	0001.CSV	3440.53	0.022973
CAM109_map9	0001.CSV	3444.39	0.0225243
CAM109_map9	0001.CSV	3448.24	0.0224929
CAM109_map9	0001.CSV	3452.1	0.0220631
CAM109_map9	0001.CSV	3455.96	0.0218897
CAM109_map9	0001.CSV	3459.82	0.0221974
CAM109_map9	0001.CSV	3463.67	0.0226461
CAM109_map9	0001.CSV	3467.53	0.0227657
CAM109_map9	0001.CSV	3471.39	0.0221917
CAM109_map9	0001.CSV	3475.24	0.0217255
CAM109_map9	0001.CSV	3479.1	0.0217315
CAM109_map9	0001.CSV	3482.96	0.0215811
CAM109_map9	0001.CSV	3486.82	0.0214939
CAM109_map9	0001.CSV	3490.67	0.0213683
CAM109_map9	0001.CSV	3494.53	0.0213205
CAM109_map9	0001.CSV	3498.39	0.0212033
CAM109_map9	0001.CSV	3502.24	0.0210837
CAM109_map9	0001.CSV	3506.1	0.0206297
CAM109_map9	0001.CSV	3509.96	0.0201613
CAM109_map9	0001.CSV	3513.81	0.0201663
CAM109_map9	0001.CSV	3517.67	0.0198381
CAM109_map9	0001.CSV	3521.53	0.0197107
CAM109_map9	0001.CSV	3525.39	0.019735
CAM109_map9	0001.CSV	3529.24	0.0195972
CAM109_map9	0001.CSV	3533.1	0.0196523
CAM109_map9	0001.CSV	3536.96	0.019797
CAM109_map9	0001.CSV	3540.81	0.019776
CAM109_map9	0001.CSV	3544.67	0.0198589
CAM109_map9	0001.CSV	3548.53	0.0196274
CAM109_map9	0001.CSV	3552.39	0.0189606
CAM109_map9	0001.CSV	3556.24	0.0185429
CAM109_map9	0001.CSV	3560.1	0.0181085
CAM109_map9	0001.CSV	3563.96	0.0174389
CAM109_map9	0001.CSV	3567.81	0.0176677
CAM109_map9	0001.CSV	3571.67	0.0175814
CAM109_map9	0001.CSV	3575.53	0.0170302
CAM109_map9	0001.CSV	3579.39	0.0171276
CAM109_map9	0001.CSV	3583.24	0.0170586
CAM109_map9	0001.CSV	3587.1	0.0170046
CAM109_map9	0001.CSV	3590.96	0.0168945
CAM109_map9	0001.CSV	3594.81	0.0164751
CAM109_map9	0001.CSV	3598.67	0.0165318
CAM109_map9	0001.CSV	3602.53	0.0163008
CAM109_map9	0001.CSV	3606.39	0.0154599
CAM109_map9	0001.CSV	3610.24	0.0151232
CAM109_map9	0001.CSV	3614.1	0.0151137
CAM109_map9	0001.CSV	3617.96	0.0153454
CAM109_map9	0001.CSV	3621.81	0.0155776
CAM109_map9	0001.CSV	3625.67	0.0147908
CAM109_map9	0001.CSV	3629.53	0.0147092
CAM109_map9	0001.CSV	3633.39	0.0150973
CAM109_map9	0001.CSV	3637.24	0.01466
CAM109_map9	0001.CSV	3641.1	0.0141794
CAM109_map9	0001.CSV	3644.96	0.0133737
CAM109_map9	0001.CSV	3648.81	0.0138414
CAM109_map9	0001.CSV	3652.67	0.0147905
CAM109_map9	0001.CSV	3656.53	0.0148547
CAM109_map9	0001.CSV	3660.38	0.0147923
CAM109_map9	0001.CSV	3664.24	0.0137268
CAM109_map9	0001.CSV	3668.1	0.0125728
CAM109_map9	0001.CSV	3671.96	0.0124614
CAM109_map9	0001.CSV	3675.81	0.0132285
CAM109_map9	0001.CSV	3679.67	0.0138386
CAM109_map9	0001.CSV	3683.53	0.013396
CAM109_map9	0001.CSV	3687.38	0.0131592
CAM109_map9	0001.CSV	3691.24	0.0141023
CAM109_map9	0001.CSV	3695.1	0.0138243
CAM109_map9	0001.CSV	3698.95	0.0129714
CAM109_map9	0001.CSV	3702.81	0.0126616
CAM109_map9	0001.CSV	3706.67	0.0121352
CAM109_map9	0001.CSV	3710.53	0.0122043
CAM109_map9	0001.CSV	3714.38	0.0129928
CAM109_map9	0001.CSV	3718.24	0.0123454
CAM109_map9	0001.CSV	3722.1	0.0119976
CAM109_map9	0001.CSV	3725.95	0.0123034
CAM109_map9	0001.CSV	3729.81	0.011946
CAM109_map9	0001.CSV	3733.67	0.0119855
CAM109_map9	0001.CSV	3737.53	0.0132712
CAM109_map9	0001.CSV	3741.38	0.0122772
CAM109_map9	0001.CSV	3745.24	0.010988
CAM109_map9	0001.CSV	3749.1	0.0111844
CAM109_map9	0001.CSV	3752.95	0.0125142
CAM109_map9	0001.CSV	3756.81	0.0124952
CAM109_map9	0001.CSV	3760.67	0.012312
CAM109_map9	0001.CSV	3764.53	0.0120234
CAM109_map9	0001.CSV	3768.38	0.0121987
CAM109_map9	0001.CSV	3772.24	0.0125451
CAM109_map9	0001.CSV	3776.1	0.0121923
CAM109_map9	0001.CSV	3779.95	0.0121728
CAM109_map9	0001.CSV	3783.81	0.0123408
CAM109_map9	0001.CSV	3787.67	0.0124053
CAM109_map9	0001.CSV	3791.53	0.0119829
CAM109_map9	0001.CSV	3795.38	0.0112616
CAM109_map9	0001.CSV	3799.24	0.0111805
CAM109_map9	0001.CSV	3803.1	0.0118841
CAM109_map9	0001.CSV	3806.95	0.0123844
CAM109_map9	0001.CSV	3810.81	0.012008
CAM109_map9	0001.CSV	3814.67	0.0112954
CAM109_map9	0001.CSV	3818.53	0.0116146
CAM109_map9	0001.CSV	3822.38	0.0124006
CAM109_map9	0001.CSV	3826.24	0.0122503
CAM109_map9	0001.CSV	3830.1	0.0118346
CAM109_map9	0001.CSV	3833.95	0.0115327
CAM109_map9	0001.CSV	3837.81	0.011804
CAM109_map9	0001.CSV	3841.67	0.0127407
CAM109_map9	0001.CSV	3845.53	0.0124248
CAM109_map9	0001.CSV	3849.38	0.011127
CAM109_map9	0001.CSV	3853.24	0.0111291
CAM109_map9	0001.CSV	3857.1	0.0121835
CAM109_map9	0001.CSV	3860.95	0.0116537
CAM109_map9	0001.CSV	3864.81	0.0116692
CAM109_map9	0001.CSV	3868.67	0.0118108
CAM109_map9	0001.CSV	3872.52	0.0121766
CAM109_map9	0001.CSV	3876.38	0.0120179
CAM109_map9	0001.CSV	3880.24	0.011806
CAM109_map9	0001.CSV	3884.1	0.0123717
CAM109_map9	0001.CSV	3887.95	0.0123288
CAM109_map9	0001.CSV	3891.81	0.012215
CAM109_map9	0001.CSV	3895.67	0.0118883
CAM109_map9	0001.CSV	3899.52	0.011316
CAM109_map9	0001.CSV	3903.38	0.0123158
CAM109_map9	0001.CSV	3907.24	0.0127757
CAM109_map9	0001.CSV	3911.1	0.0120716
CAM109_map9	0001.CSV	3914.95	0.0116919
CAM109_map9	0001.CSV	3918.81	0.0119962
CAM109_map9	0001.CSV	3922.67	0.0120813
CAM109_map9	0001.CSV	3926.52	0.0120444
CAM109_map9	0001.CSV	3930.38	0.0122488
CAM109_map9	0001.CSV	3934.24	0.0126205
CAM109_map9	0001.CSV	3938.09	0.0122616
CAM109_map9	0001.CSV	3941.95	0.0120229
CAM109_map9	0001.CSV	3945.81	0.0121283
CAM109_map9	0001.CSV	3949.67	0.0123385
CAM109_map9	0001.CSV	3953.52	0.0124707
CAM109_map9	0001.CSV	3957.38	0.012288
CAM109_map9	0001.CSV	3961.24	0.0121917
CAM109_map9	0001.CSV	3965.09	0.0121504
CAM109_map9	0001.CSV	3968.95	0.0120373
CAM109_map9	0001.CSV	3972.81	0.0120353
CAM109_map9	0001.CSV	3976.67	0.0121449
CAM109_map9	0001.CSV	3980.52	0.0122071
CAM109_map9	0001.CSV	3984.38	0.012148
CAM109_map9	0001.CSV	3988.24	0.0119054
CAM109_map9	0001.CSV	3992.09	0.0118902
CAM109_map9	0001.CSV	3995.95	0.012017
CAM109_map9	0001.CSV	3999.81	0.0119967
CAM109_map9	0002.CSV	674.992	0.0438481
CAM109_map9	0002.CSV	678.849	0.0462647
CAM109_map9	0002.CSV	682.706	0.047492
CAM109_map9	0002.CSV	686.563	0.0509171
CAM109_map9	0002.CSV	690.42	0.0558186
CAM109_map9	0002.CSV	694.277	0.0712988
CAM109_map9	0002.CSV	698.134	0.0915495
CAM109_map9	0002.CSV	701.991	0.0900421
CAM109_map9	0002.CSV	705.849	0.0792011
CAM109_map9	0002.CSV	709.706	0.0937386
CAM109_map9	0002.CSV	713.563	0.0965086
CAM109_map9	0002.CSV	717.42	0.0665542
CAM109_map9	0002.CSV	721.277	0.0452235
CAM109_map9	0002.CSV	725.134	0.0420473
CAM109_map9	0002.CSV	728.991	0.0420611
CAM109_map9	0002.CSV	732.848	0.0438393
CAM109_map9	0002.CSV	736.705	0.0467042
CAM109_map9	0002.CSV	740.562	0.0509413
CAM109_map9	0002.CSV	744.42	0.0531804
CAM109_map9	0002.CSV	748.277	0.0542714
CAM109_map9	0002.CSV	752.134	0.0540892
CAM109_map9	0002.CSV	755.991	0.0550145
CAM109_map9	0002.CSV	759.848	0.055584
CAM109_map9	0002.CSV	763.705	0.0575354
CAM109_map9	0002.CSV	767.562	0.0586278
CAM109_map9	0002.CSV	771.419	0.0597958
CAM109_map9	0002.CSV	775.276	0.0603803
CAM109_map9	0002.CSV	779.133	0.0615305
CAM109_map9	0002.CSV	782.99	0.061948
CAM109_map9	0002.CSV	786.848	0.0632453
CAM109_map9	0002.CSV	790.705	0.0647285
CAM109_map9	0002.CSV	794.562	0.0676534
CAM109_map9	0002.CSV	798.419	0.0701854
CAM109_map9	0002.CSV	802.276	0.0730249
CAM109_map9	0002.CSV	806.133	0.0752481
CAM109_map9	0002.CSV	809.99	0.0787566
CAM109_map9	0002.CSV	813.847	0.0832102
CAM109_map9	0002.CSV	817.704	0.0895157
CAM109_map9	0002.CSV	821.562	0.0961739
CAM109_map9	0002.CSV	825.419	0.104835
CAM109_map9	0002.CSV	829.276	0.114508
CAM109_map9	0002.CSV	833.133	0.127133
CAM109_map9	0002.CSV	836.99	0.14317
CAM109_map9	0002.CSV	840.847	0.160588
CAM109_map9	0002.CSV	844.704	0.172022
CAM109_map9	0002.CSV	848.561	0.183704
CAM109_map9	0002.CSV	852.418	0.194307
CAM109_map9	0002.CSV	856.275	0.194765
CAM109_map9	0002.CSV	860.132	0.175842
CAM109_map9	0002.CSV	863.99	0.142051
CAM109_map9	0002.CSV	867.847	0.106501
CAM109_map9	0002.CSV	871.704	0.0800737
CAM109_map9	0002.CSV	875.561	0.0626604
CAM109_map9	0002.CSV	879.418	0.0528378
CAM109_map9	0002.CSV	883.275	0.0469558
CAM109_map9	0002.CSV	887.132	0.0441159
CAM109_map9	0002.CSV	890.989	0.0429251
CAM109_map9	0002.CSV	894.846	0.0428664
CAM109_map9	0002.CSV	898.703	0.0426937
CAM109_map9	0002.CSV	902.561	0.0433342
CAM109_map9	0002.CSV	906.418	0.0440028
CAM109_map9	0002.CSV	910.275	0.0444008
CAM109_map9	0002.CSV	914.132	0.0438452
CAM109_map9	0002.CSV	917.989	0.0441476
CAM109_map9	0002.CSV	921.846	0.04445
CAM109_map9	0002.CSV	925.703	0.0451946
CAM109_map9	0002.CSV	929.56	0.0456472
CAM109_map9	0002.CSV	933.417	0.0463615
CAM109_map9	0002.CSV	937.274	0.0466558
CAM109_map9	0002.CSV	941.131	0.0469882
CAM109_map9	0002.CSV	944.989	0.046629
CAM109_map9	0002.CSV	948.846	0.0464769
CAM109_map9	0002.CSV	952.703	0.0460806
CAM109_map9	0002.CSV	956.56	0.0460078
CAM109_map9	0002.CSV	960.417	0.0457045
CAM109_map9	0002.CSV	964.274	0.0460001
CAM109_map9	0002.CSV	968.131	0.0463222
CAM109_map9	0002.CSV	971.988	0.047245
CAM109_map9	0002.CSV	975.845	0.0483026
CAM109_map9	0002.CSV	979.702	0.0500248
CAM109_map9	0002.CSV	983.559	0.0516705
CAM109_map9	0002.CSV	987.417	0.0536501
CAM109_map9	0002.CSV	991.274	0.0552976
CAM109_map9	0002.CSV	995.131	0.0571279
CAM109_map9	0002.CSV	998.988	0.0586758
CAM109_map9	0002.CSV	1002.85	0.0606077
CAM109_map9	0002.CSV	1006.7	0.0620977
CAM109_map9	0002.CSV	1010.56	0.0638123
CAM109_map9	0002.CSV	1014.42	0.0651797
CAM109_map9	0002.CSV	1018.27	0.0666903
CAM109_map9	0002.CSV	1022.13	0.0678067
CAM109_map9	0002.CSV	1025.99	0.0693544
CAM109_map9	0002.CSV	1029.85	0.0706422
CAM109_map9	0002.CSV	1033.7	0.0721999
CAM109_map9	0002.CSV	1037.56	0.0733893
CAM109_map9	0002.CSV	1041.42	0.0744637
CAM109_map9	0002.CSV	1045.27	0.0748152
CAM109_map9	0002.CSV	1049.13	0.0762176
CAM109_map9	0002.CSV	1052.99	0.078616
CAM109_map9	0002.CSV	1056.84	0.0828595
CAM109_map9	0002.CSV	1060.7	0.0875666
CAM109_map9	0002.CSV	1064.56	0.0922465
CAM109_map9	0002.CSV	1068.42	0.095158
CAM109_map9	0002.CSV	1072.27	0.0973464
CAM109_map9	0002.CSV	1076.13	0.100641
CAM109_map9	0002.CSV	1079.99	0.108577
CAM109_map9	0002.CSV	1083.84	0.108464
CAM109_map9	0002.CSV	1087.7	0.0949662
CAM109_map9	0002.CSV	1091.56	0.0851615
CAM109_map9	0002.CSV	1095.41	0.0826449
CAM109_map9	0002.CSV	1099.27	0.0821386
CAM109_map9	0002.CSV	1103.13	0.0828921
CAM109_map9	0002.CSV	1106.99	0.0841754
CAM109_map9	0002.CSV	1110.84	0.0862437
CAM109_map9	0002.CSV	1114.7	0.0878268
CAM109_map9	0002.CSV	1118.56	0.0886663
CAM109_map9	0002.CSV	1122.41	0.0882639
CAM109_map9	0002.CSV	1126.27	0.0874585
CAM109_map9	0002.CSV	1130.13	0.0862877
CAM109_map9	0002.CSV	1133.99	0.0857599
CAM109_map9	0002.CSV	1137.84	0.0853848
CAM109_map9	0002.CSV	1141.7	0.0850883
CAM109_map9	0002.CSV	1145.56	0.084094
CAM109_map9	0002.CSV	1149.41	0.0834179
CAM109_map9	0002.CSV	1153.27	0.0828392
CAM109_map9	0002.CSV	1157.13	0.0826651
CAM109_map9	0002.CSV	1160.99	0.0823841
CAM109_map9	0002.CSV	1164.84	0.0821948
CAM109_map9	0002.CSV	1168.7	0.0812235
CAM109_map9	0002.CSV	1172.56	0.0800671
CAM109_map9	0002.CSV	1176.41	0.0787079
CAM109_map9	0002.CSV	1180.27	0.07764
CAM109_map9	0002.CSV	1184.13	0.076208
CAM109_map9	0002.CSV	1187.99	0.0749772
CAM109_map9	0002.CSV	1191.84	0.0736857
CAM109_map9	0002.CSV	1195.7	0.0729008
CAM109_map9	0002.CSV	1199.56	0.0721504
CAM109_map9	0002.CSV	1203.41	0.0719292
CAM109_map9	0002.CSV	1207.27	0.0717742
CAM109_map9	0002.CSV	1211.13	0.0720876
CAM109_map9	0002.CSV	1214.98	0.0723576
CAM109_map9	0002.CSV	1218.84	0.0730869
CAM109_map9	0002.CSV	1222.7	0.0739134
CAM109_map9	0002.CSV	1226.56	0.0752493
CAM109_map9	0002.CSV	1230.41	0.0766384
CAM109_map9	0002.CSV	1234.27	0.0786318
CAM109_map9	0002.CSV	1238.13	0.0808604
CAM109_map9	0002.CSV	1241.98	0.083767
CAM109_map9	0002.CSV	1245.84	0.0867987
CAM109_map9	0002.CSV	1249.7	0.0900595
CAM109_map9	0002.CSV	1253.56	0.0925736
CAM109_map9	0002.CSV	1257.41	0.094687
CAM109_map9	0002.CSV	1261.27	0.0960861
CAM109_map9	0002.CSV	1265.13	0.0975131
CAM109_map9	0002.CSV	1268.98	0.0987585
CAM109_map9	0002.CSV	1272.84	0.100263
CAM109_map9	0002.CSV	1276.7	0.101244
CAM109_map9	0002.CSV	1280.56	0.102196
CAM109_map9	0002.CSV	1284.41	0.102532
CAM109_map9	0002.CSV	1288.27	0.102525
CAM109_map9	0002.CSV	1292.13	0.101395
CAM109_map9	0002.CSV	1295.98	0.0999567
CAM109_map9	0002.CSV	1299.84	0.0983864
CAM109_map9	0002.CSV	1303.7	0.097577
CAM109_map9	0002.CSV	1307.56	0.097223
CAM109_map9	0002.CSV	1311.41	0.0977503
CAM109_map9	0002.CSV	1315.27	0.0984293
CAM109_map9	0002.CSV	1319.13	0.0994605
CAM109_map9	0002.CSV	1322.98	0.0999143
CAM109_map9	0002.CSV	1326.84	0.100726
CAM109_map9	0002.CSV	1330.7	0.10184
CAM109_map9	0002.CSV	1334.56	0.103693
CAM109_map9	0002.CSV	1338.41	0.106147
CAM109_map9	0002.CSV	1342.27	0.109605
CAM109_map9	0002.CSV	1346.13	0.112425
CAM109_map9	0002.CSV	1349.98	0.116073
CAM109_map9	0002.CSV	1353.84	0.11967
CAM109_map9	0002.CSV	1357.7	0.1234
CAM109_map9	0002.CSV	1361.56	0.127396
CAM109_map9	0002.CSV	1365.41	0.132694
CAM109_map9	0002.CSV	1369.27	0.137138
CAM109_map9	0002.CSV	1373.13	0.143158
CAM109_map9	0002.CSV	1376.98	0.149686
CAM109_map9	0002.CSV	1380.84	0.155031
CAM109_map9	0002.CSV	1384.7	0.159623
CAM109_map9	0002.CSV	1388.56	0.166183
CAM109_map9	0002.CSV	1392.41	0.171422
CAM109_map9	0002.CSV	1396.27	0.178268
CAM109_map9	0002.CSV	1400.13	0.184992
CAM109_map9	0002.CSV	1403.98	0.191491
CAM109_map9	0002.CSV	1407.84	0.198318
CAM109_map9	0002.CSV	1411.7	0.205178
CAM109_map9	0002.CSV	1415.55	0.210186
CAM109_map9	0002.CSV	1419.41	0.216765
CAM109_map9	0002.CSV	1423.27	0.221695
CAM109_map9	0002.CSV	1427.12	0.226603
CAM109_map9	0002.CSV	1430.98	0.231586
CAM109_map9	0002.CSV	1434.84	0.238286
CAM109_map9	0002.CSV	1438.7	0.244692
CAM109_map9	0002.CSV	1442.55	0.249675
CAM109_map9	0002.CSV	1446.41	0.252116
CAM109_map9	0002.CSV	1450.27	0.253062
CAM109_map9	0002.CSV	1454.12	0.25021
CAM109_map9	0002.CSV	1457.98	0.245492
CAM109_map9	0002.CSV	1461.84	0.241572
CAM109_map9	0002.CSV	1465.7	0.239798
CAM109_map9	0002.CSV	1469.55	0.234699
CAM109_map9	0002.CSV	1473.41	0.223169
CAM109_map9	0002.CSV	1477.27	0.207268
CAM109_map9	0002.CSV	1481.12	0.196784
CAM109_map9	0002.CSV	1484.98	0.1867
CAM109_map9	0002.CSV	1488.84	0.175228
CAM109_map9	0002.CSV	1492.7	0.163657
CAM109_map9	0002.CSV	1496.55	0.154987
CAM109_map9	0002.CSV	1500.41	0.145079
CAM109_map9	0002.CSV	1504.27	0.13936
CAM109_map9	0002.CSV	1508.12	0.128812
CAM109_map9	0002.CSV	1511.98	0.121358
CAM109_map9	0002.CSV	1515.84	0.115809
CAM109_map9	0002.CSV	1519.7	0.108669
CAM109_map9	0002.CSV	1523.55	0.100158
CAM109_map9	0002.CSV	1527.41	0.0950555
CAM109_map9	0002.CSV	1531.27	0.0912726
CAM109_map9	0002.CSV	1535.12	0.0891199
CAM109_map9	0002.CSV	1538.98	0.0867646
CAM109_map9	0002.CSV	1542.84	0.0820875
CAM109_map9	0002.CSV	1546.7	0.0773999
CAM109_map9	0002.CSV	1550.55	0.073937
CAM109_map9	0002.CSV	1554.41	0.0702063
CAM109_map9	0002.CSV	1558.27	0.0659774
CAM109_map9	0002.CSV	1562.12	0.0617516
CAM109_map9	0002.CSV	1565.98	0.0596271
CAM109_map9	0002.CSV	1569.84	0.0569591
CAM109_map9	0002.CSV	1573.69	0.0545744
CAM109_map9	0002.CSV	1577.55	0.0507167
CAM109_map9	0002.CSV	1581.41	0.0464455
CAM109_map9	0002.CSV	1585.27	0.0422778
CAM109_map9	0002.CSV	1589.12	0.0391758
CAM109_map9	0002.CSV	1592.98	0.0373264
CAM109_map9	0002.CSV	1596.84	0.0365556
CAM109_map9	0002.CSV	1600.69	0.0358973
CAM109_map9	0002.CSV	1604.55	0.035172
CAM109_map9	0002.CSV	1608.41	0.0342671
CAM109_map9	0002.CSV	1612.27	0.0336257
CAM109_map9	0002.CSV	1616.12	0.0329705
CAM109_map9	0002.CSV	1619.98	0.0325769
CAM109_map9	0002.CSV	1623.84	0.0318253
CAM109_map9	0002.CSV	1627.69	0.0311301
CAM109_map9	0002.CSV	1631.55	0.0300896
CAM109_map9	0002.CSV	1635.41	0.0296706
CAM109_map9	0002.CSV	1639.27	0.0292568
CAM109_map9	0002.CSV	1643.12	0.0286251
CAM109_map9	0002.CSV	1646.98	0.028258
CAM109_map9	0002.CSV	1650.84	0.0283158
CAM109_map9	0002.CSV	1654.69	0.0282484
CAM109_map9	0002.CSV	1658.55	0.0278808
CAM109_map9	0002.CSV	1662.41	0.0273548
CAM109_map9	0002.CSV	1666.27	0.0270582
CAM109_map9	0002.CSV	1670.12	0.0267902
CAM109_map9	0002.CSV	1673.98	0.0269145
CAM109_map9	0002.CSV	1677.84	0.0264387
CAM109_map9	0002.CSV	1681.69	0.0261493
CAM109_map9	0002.CSV	1685.55	0.0265162
CAM109_map9	0002.CSV	1689.41	0.0267052
CAM109_map9	0002.CSV	1693.27	0.0261752
CAM109_map9	0002.CSV	1697.12	0.0264978
CAM109_map9	0002.CSV	1700.98	0.027672
CAM109_map9	0002.CSV	1704.84	0.0289613
CAM109_map9	0002.CSV	1708.69	0.0303318
CAM109_map9	0002.CSV	1712.55	0.0317992
CAM109_map9	0002.CSV	1716.41	0.035659
CAM109_map9	0002.CSV	1720.27	0.0404377
CAM109_map9	0002.CSV	1724.12	0.041841
CAM109_map9	0002.CSV	1727.98	0.0422932
CAM109_map9	0002.CSV	1731.84	0.0418956
CAM109_map9	0002.CSV	1735.69	0.0403495
CAM109_map9	0002.CSV	1739.55	0.0375647
CAM109_map9	0002.CSV	1743.41	0.0338669
CAM109_map9	0002.CSV	1747.27	0.029725
CAM109_map9	0002.CSV	1751.12	0.0252368
CAM109_map9	0002.CSV	1754.98	0.0221901
CAM109_map9	0002.CSV	1758.84	0.020374
CAM109_map9	0002.CSV	1762.69	0.019248
CAM109_map9	0002.CSV	1766.55	0.0185674
CAM109_map9	0002.CSV	1770.41	0.0185843
CAM109_map9	0002.CSV	1774.26	0.0198953
CAM109_map9	0002.CSV	1778.12	0.0212317
CAM109_map9	0002.CSV	1781.98	0.0229401
CAM109_map9	0002.CSV	1785.84	0.0237442
CAM109_map9	0002.CSV	1789.69	0.0232362
CAM109_map9	0002.CSV	1793.55	0.0215299
CAM109_map9	0002.CSV	1797.41	0.0198004
CAM109_map9	0002.CSV	1801.26	0.0182512
CAM109_map9	0002.CSV	1805.12	0.0171116
CAM109_map9	0002.CSV	1808.98	0.0164038
CAM109_map9	0002.CSV	1812.84	0.0162096
CAM109_map9	0002.CSV	1816.69	0.0159213
CAM109_map9	0002.CSV	1820.55	0.0157151
CAM109_map9	0002.CSV	1824.41	0.0155895
CAM109_map9	0002.CSV	1828.26	0.0158088
CAM109_map9	0002.CSV	1832.12	0.0158459
CAM109_map9	0002.CSV	1835.98	0.0157132
CAM109_map9	0002.CSV	1839.84	0.0155149
CAM109_map9	0002.CSV	1843.69	0.0157137
CAM109_map9	0002.CSV	1847.55	0.0159486
CAM109_map9	0002.CSV	1851.41	0.0158124
CAM109_map9	0002.CSV	1855.26	0.01567
CAM109_map9	0002.CSV	1859.12	0.01574
CAM109_map9	0002.CSV	1862.98	0.0156378
CAM109_map9	0002.CSV	1866.84	0.0157816
CAM109_map9	0002.CSV	1870.69	0.0161319
CAM109_map9	0002.CSV	1874.55	0.0160296
CAM109_map9	0002.CSV	1878.41	0.0158695
CAM109_map9	0002.CSV	1882.26	0.015857
CAM109_map9	0002.CSV	1886.12	0.0158111
CAM109_map9	0002.CSV	1889.98	0.0159382
CAM109_map9	0002.CSV	1893.83	0.0160115
CAM109_map9	0002.CSV	1897.69	0.0159961
CAM109_map9	0002.CSV	1901.55	0.0158547
CAM109_map9	0002.CSV	1905.41	0.0158197
CAM109_map9	0002.CSV	1909.26	0.0159129
CAM109_map9	0002.CSV	1913.12	0.0159363
CAM109_map9	0002.CSV	1916.98	0.0158848
CAM109_map9	0002.CSV	1920.83	0.0161086
CAM109_map9	0002.CSV	1924.69	0.0161781
CAM109_map9	0002.CSV	1928.55	0.0161292
CAM109_map9	0002.CSV	1932.4	0.0161095
CAM109_map9	0002.CSV	1936.26	0.0161768
CAM109_map9	0002.CSV	1940.12	0.0161798
CAM109_map9	0002.CSV	1943.98	0.0164599
CAM109_map9	0002.CSV	1947.83	0.0165247
CAM109_map9	0002.CSV	1951.69	0.0164436
CAM109_map9	0002.CSV	1955.55	0.0164223
CAM109_map9	0002.CSV	1959.4	0.0164945
CAM109_map9	0002.CSV	1963.26	0.0164332
CAM109_map9	0002.CSV	1967.12	0.0165227
CAM109_map9	0002.CSV	1970.98	0.0165481
CAM109_map9	0002.CSV	1974.83	0.0165041
CAM109_map9	0002.CSV	1978.69	0.0164407
CAM109_map9	0002.CSV	1982.55	0.016421
CAM109_map9	0002.CSV	1986.4	0.0163653
CAM109_map9	0002.CSV	1990.26	0.0164646
CAM109_map9	0002.CSV	1994.12	0.0165759
CAM109_map9	0002.CSV	1997.98	0.0165306
CAM109_map9	0002.CSV	2001.83	0.0164549
CAM109_map9	0002.CSV	2005.69	0.0164645
CAM109_map9	0002.CSV	2009.55	0.0164255
CAM109_map9	0002.CSV	2013.4	0.0163621
CAM109_map9	0002.CSV	2017.26	0.0163907
CAM109_map9	0002.CSV	2021.12	0.0164875
CAM109_map9	0002.CSV	2024.97	0.0164134
CAM109_map9	0002.CSV	2028.83	0.0164217
CAM109_map9	0002.CSV	2032.69	0.01643
CAM109_map9	0002.CSV	2036.55	0.016479
CAM109_map9	0002.CSV	2040.4	0.016479
CAM109_map9	0002.CSV	2044.26	0.0165075
CAM109_map9	0002.CSV	2048.12	0.0164749
CAM109_map9	0002.CSV	2051.97	0.0164672
CAM109_map9	0002.CSV	2055.83	0.0164339
CAM109_map9	0002.CSV	2059.69	0.0164719
CAM109_map9	0002.CSV	2063.55	0.0165416
CAM109_map9	0002.CSV	2067.4	0.0166441
CAM109_map9	0002.CSV	2071.26	0.0166288
CAM109_map9	0002.CSV	2075.12	0.0166526
CAM109_map9	0002.CSV	2078.97	0.0166637
CAM109_map9	0002.CSV	2082.83	0.0167033
CAM109_map9	0002.CSV	2086.69	0.0166747
CAM109_map9	0002.CSV	2090.55	0.0167466
CAM109_map9	0002.CSV	2094.4	0.016784
CAM109_map9	0002.CSV	2098.26	0.0168375
CAM109_map9	0002.CSV	2102.12	0.0168396
CAM109_map9	0002.CSV	2105.97	0.0168593
CAM109_map9	0002.CSV	2109.83	0.016841
CAM109_map9	0002.CSV	2113.69	0.0168613
CAM109_map9	0002.CSV	2117.55	0.0169007
CAM109_map9	0002.CSV	2121.4	0.0169644
CAM109_map9	0002.CSV	2125.26	0.0169766
CAM109_map9	0002.CSV	2129.12	0.0170256
CAM109_map9	0002.CSV	2132.97	0.0170481
CAM109_map9	0002.CSV	2136.83	0.017112
CAM109_map9	0002.CSV	2140.69	0.0171288
CAM109_map9	0002.CSV	2144.55	0.0171678
CAM109_map9	0002.CSV	2148.4	0.0171704
CAM109_map9	0002.CSV	2152.26	0.0171797
CAM109_map9	0002.CSV	2156.12	0.0171659
CAM109_map9	0002.CSV	2159.97	0.0171905
CAM109_map9	0002.CSV	2163.83	0.0171729
CAM109_map9	0002.CSV	2167.69	0.0171894
CAM109_map9	0002.CSV	2171.55	0.0172224
CAM109_map9	0002.CSV	2175.4	0.0172801
CAM109_map9	0002.CSV	2179.26	0.0173023
CAM109_map9	0002.CSV	2183.12	0.0173781
CAM109_map9	0002.CSV	2186.97	0.0173879
CAM109_map9	0002.CSV	2190.83	0.017402
CAM109_map9	0002.CSV	2194.69	0.0173954
CAM109_map9	0002.CSV	2198.55	0.0174387
CAM109_map9	0002.CSV	2202.4	0.0174548
CAM109_map9	0002.CSV	2206.26	0.0174578
CAM109_map9	0002.CSV	2210.12	0.0174455
CAM109_map9	0002.CSV	2213.97	0.0174634
CAM109_map9	0002.CSV	2217.83	0.0174709
CAM109_map9	0002.CSV	2221.69	0.0175314
CAM109_map9	0002.CSV	2225.54	0.0175317
CAM109_map9	0002.CSV	2229.4	0.0175015
CAM109_map9	0002.CSV	2233.26	0.0175359
CAM109_map9	0002.CSV	2237.12	0.017623
CAM109_map9	0002.CSV	2240.97	0.0176266
CAM109_map9	0002.CSV	2244.83	0.0176389
CAM109_map9	0002.CSV	2248.69	0.0176326
CAM109_map9	0002.CSV	2252.54	0.0176088
CAM109_map9	0002.CSV	2256.4	0.0175931
CAM109_map9	0002.CSV	2260.26	0.0176439
CAM109_map9	0002.CSV	2264.11	0.0176133
CAM109_map9	0002.CSV	2267.97	0.0175945
CAM109_map9	0002.CSV	2271.83	0.0176088
CAM109_map9	0002.CSV	2275.69	0.0176647
CAM109_map9	0002.CSV	2279.54	0.0176759
CAM109_map9	0002.CSV	2283.4	0.0176301
CAM109_map9	0002.CSV	2287.26	0.0176141
CAM109_map9	0002.CSV	2291.11	0.0176902
CAM109_map9	0002.CSV	2294.97	0.0176976
CAM109_map9	0002.CSV	2298.83	0.0176954
CAM109_map9	0002.CSV	2302.69	0.0176687
CAM109_map9	0002.CSV	2306.54	0.017623
CAM109_map9	0002.CSV	2310.4	0.0175424
CAM109_map9	0002.CSV	2314.26	0.0174492
CAM109_map9	0002.CSV	2318.11	0.017178
CAM109_map9	0002.CSV	2321.97	0.0169208
CAM109_map9	0002.CSV	2325.83	0.0165935
CAM109_map9	0002.CSV	2329.69	0.0162208
CAM109_map9	0002.CSV	2333.54	0.0158732
CAM109_map9	0002.CSV	2337.4	0.0157576
CAM109_map9	0002.CSV	2341.26	0.0157955
CAM109_map9	0002.CSV	2345.11	0.0168553
CAM109_map9	0002.CSV	2348.97	0.0169351
CAM109_map9	0002.CSV	2352.83	0.0156851
CAM109_map9	0002.CSV	2356.69	0.0134113
CAM109_map9	0002.CSV	2360.54	0.0123858
CAM109_map9	0002.CSV	2364.4	0.0134345
CAM109_map9	0002.CSV	2368.26	0.0154765
CAM109_map9	0002.CSV	2372.11	0.0170643
CAM109_map9	0002.CSV	2375.97	0.0178807
CAM109_map9	0002.CSV	2379.83	0.0180484
CAM109_map9	0002.CSV	2383.69	0.0178907
CAM109_map9	0002.CSV	2387.54	0.0176528
CAM109_map9	0002.CSV	2391.4	0.0175658
CAM109_map9	0002.CSV	2395.26	0.0175438
CAM109_map9	0002.CSV	2399.11	0.0175335
CAM109_map9	0002.CSV	2402.97	0.0175114
CAM109_map9	0002.CSV	2406.83	0.0175192
CAM109_map9	0002.CSV	2410.68	0.0175061
CAM109_map9	0002.CSV	2414.54	0.017507
CAM109_map9	0002.CSV	2418.4	0.0175165
CAM109_map9	0002.CSV	2422.26	0.0175405
CAM109_map9	0002.CSV	2426.11	0.0175251
CAM109_map9	0002.CSV	2429.97	0.0175479
CAM109_map9	0002.CSV	2433.83	0.0175911
CAM109_map9	0002.CSV	2437.68	0.0176246
CAM109_map9	0002.CSV	2441.54	0.0176653
CAM109_map9	0002.CSV	2445.4	0.0176813
CAM109_map9	0002.CSV	2449.26	0.0177029
CAM109_map9	0002.CSV	2453.11	0.0177775
CAM109_map9	0002.CSV	2456.97	0.0178388
CAM109_map9	0002.CSV	2460.83	0.0179247
CAM109_map9	0002.CSV	2464.68	0.018051
CAM109_map9	0002.CSV	2468.54	0.0181891
CAM109_map9	0002.CSV	2472.4	0.0183541
CAM109_map9	0002.CSV	2476.26	0.018654
CAM109_map9	0002.CSV	2480.11	0.0189859
CAM109_map9	0002.CSV	2483.97	0.0193177
CAM109_map9	0002.CSV	2487.83	0.0195953
CAM109_map9	0002.CSV	2491.68	0.0198427
CAM109_map9	0002.CSV	2495.54	0.0200383
CAM109_map9	0002.CSV	2499.4	0.020134
CAM109_map9	0002.CSV	2503.26	0.0201215
CAM109_map9	0002.CSV	2507.11	0.0200298
CAM109_map9	0002.CSV	2510.97	0.0199814
CAM109_map9	0002.CSV	2514.83	0.0201635
CAM109_map9	0002.CSV	2518.68	0.020439
CAM109_map9	0002.CSV	2522.54	0.020617
CAM109_map9	0002.CSV	2526.4	0.0206086
CAM109_map9	0002.CSV	2530.26	0.0204609
CAM109_map9	0002.CSV	2534.11	0.0201721
CAM109_map9	0002.CSV	2537.97	0.0198758
CAM109_map9	0002.CSV	2541.83	0.0196628
CAM109_map9	0002.CSV	2545.68	0.0195821
CAM109_map9	0002.CSV	2549.54	0.0194975
CAM109_map9	0002.CSV	2553.4	0.0193635
CAM109_map9	0002.CSV	2557.26	0.0191909
CAM109_map9	0002.CSV	2561.11	0.019031
CAM109_map9	0002.CSV	2564.97	0.0188768
CAM109_map9	0002.CSV	2568.83	0.0187604
CAM109_map9	0002.CSV	2572.68	0.0186842
CAM109_map9	0002.CSV	2576.54	0.0186231
CAM109_map9	0002.CSV	2580.4	0.0185005
CAM109_map9	0002.CSV	2584.25	0.0184525
CAM109_map9	0002.CSV	2588.11	0.0184461
CAM109_map9	0002.CSV	2591.97	0.0184637
CAM109_map9	0002.CSV	2595.83	0.0184039
CAM109_map9	0002.CSV	2599.68	0.0183449
CAM109_map9	0002.CSV	2603.54	0.0183588
CAM109_map9	0002.CSV	2607.4	0.0183934
CAM109_map9	0002.CSV	2611.25	0.0184122
CAM109_map9	0002.CSV	2615.11	0.0184506
CAM109_map9	0002.CSV	2618.97	0.0184419
CAM109_map9	0002.CSV	2622.82	0.0185063
CAM109_map9	0002.CSV	2626.68	0.0185774
CAM109_map9	0002.CSV	2630.54	0.0185397
CAM109_map9	0002.CSV	2634.4	0.0185444
CAM109_map9	0002.CSV	2638.25	0.018569
CAM109_map9	0002.CSV	2642.11	0.0184249
CAM109_map9	0002.CSV	2645.97	0.0182431
CAM109_map9	0002.CSV	2649.82	0.0180991
CAM109_map9	0002.CSV	2653.68	0.0180091
CAM109_map9	0002.CSV	2657.54	0.0179605
CAM109_map9	0002.CSV	2661.4	0.0179022
CAM109_map9	0002.CSV	2665.25	0.0177931
CAM109_map9	0002.CSV	2669.11	0.0177852
CAM109_map9	0002.CSV	2672.97	0.017994
CAM109_map9	0002.CSV	2676.82	0.0183407
CAM109_map9	0002.CSV	2680.68	0.0183042
CAM109_map9	0002.CSV	2684.54	0.0179046
CAM109_map9	0002.CSV	2688.4	0.0177619
CAM109_map9	0002.CSV	2692.25	0.0178153
CAM109_map9	0002.CSV	2696.11	0.0178614
CAM109_map9	0002.CSV	2699.97	0.0178628
CAM109_map9	0002.CSV	2703.82	0.0178443
CAM109_map9	0002.CSV	2707.68	0.0179436
CAM109_map9	0002.CSV	2711.54	0.0180119
CAM109_map9	0002.CSV	2715.4	0.0180095
CAM109_map9	0002.CSV	2719.25	0.0181722
CAM109_map9	0002.CSV	2723.11	0.0185303
CAM109_map9	0002.CSV	2726.97	0.0185508
CAM109_map9	0002.CSV	2730.82	0.0182348
CAM109_map9	0002.CSV	2734.68	0.0182655
CAM109_map9	0002.CSV	2738.54	0.0183944
CAM109_map9	0002.CSV	2742.4	0.018433
CAM109_map9	0002.CSV	2746.25	0.0186709
CAM109_map9	0002.CSV	2750.11	0.018725
CAM109_map9	0002.CSV	2753.97	0.0185264
CAM109_map9	0002.CSV	2757.82	0.0184573
CAM109_map9	0002.CSV	2761.68	0.0183898
CAM109_map9	0002.CSV	2765.54	0.0184075
CAM109_map9	0002.CSV	2769.39	0.0186782
CAM109_map9	0002.CSV	2773.25	0.0190584
CAM109_map9	0002.CSV	2777.11	0.0190074
CAM109_map9	0002.CSV	2780.97	0.0188231
CAM109_map9	0002.CSV	2784.82	0.0190459
CAM109_map9	0002.CSV	2788.68	0.0195104
CAM109_map9	0002.CSV	2792.54	0.0196701
CAM109_map9	0002.CSV	2796.39	0.0197202
CAM109_map9	0002.CSV	2800.25	0.0196279
CAM109_map9	0002.CSV	2804.11	0.019479
CAM109_map9	0002.CSV	2807.97	0.0198048
CAM109_map9	0002.CSV	2811.82	0.0199185
CAM109_map9	0002.CSV	2815.68	0.0198162
CAM109_map9	0002.CSV	2819.54	0.020087
CAM109_map9	0002.CSV	2823.39	0.0204327
CAM109_map9	0002.CSV	2827.25	0.0206671
CAM109_map9	0002.CSV	2831.11	0.0213483
CAM109_map9	0002.CSV	2834.97	0.0225824
CAM109_map9	0002.CSV	2838.82	0.0239765
CAM109_map9	0002.CSV	2842.68	0.0258576
CAM109_map9	0002.CSV	2846.54	0.0289786
CAM109_map9	0002.CSV	2850.39	0.0309675
CAM109_map9	0002.CSV	2854.25	0.0304066
CAM109_map9	0002.CSV	2858.11	0.0288613
CAM109_map9	0002.CSV	2861.97	0.0272016
CAM109_map9	0002.CSV	2865.82	0.0261277
CAM109_map9	0002.CSV	2869.68	0.0260866
CAM109_map9	0002.CSV	2873.54	0.0260854
CAM109_map9	0002.CSV	2877.39	0.0251887
CAM109_map9	0002.CSV	2881.25	0.0245544
CAM109_map9	0002.CSV	2885.11	0.0246697
CAM109_map9	0002.CSV	2888.97	0.0253605
CAM109_map9	0002.CSV	2892.82	0.0266398
CAM109_map9	0002.CSV	2896.68	0.027708
CAM109_map9	0002.CSV	2900.54	0.0283922
CAM109_map9	0002.CSV	2904.39	0.0296548
CAM109_map9	0002.CSV	2908.25	0.0320284
CAM109_map9	0002.CSV	2912.11	0.0357002
CAM109_map9	0002.CSV	2915.97	0.0390837
CAM109_map9	0002.CSV	2919.82	0.0401246
CAM109_map9	0002.CSV	2923.68	0.0390992
CAM109_map9	0002.CSV	2927.54	0.0375779
CAM109_map9	0002.CSV	2931.39	0.0352825
CAM109_map9	0002.CSV	2935.25	0.0323713
CAM109_map9	0002.CSV	2939.11	0.0303912
CAM109_map9	0002.CSV	2942.96	0.0295792
CAM109_map9	0002.CSV	2946.82	0.0289064
CAM109_map9	0002.CSV	2950.68	0.0282168
CAM109_map9	0002.CSV	2954.54	0.0274993
CAM109_map9	0002.CSV	2958.39	0.0265684
CAM109_map9	0002.CSV	2962.25	0.0256773
CAM109_map9	0002.CSV	2966.11	0.0244851
CAM109_map9	0002.CSV	2969.96	0.0237437
CAM109_map9	0002.CSV	2973.82	0.0236068
CAM109_map9	0002.CSV	2977.68	0.0234469
CAM109_map9	0002.CSV	2981.53	0.0227749
CAM109_map9	0002.CSV	2985.39	0.0218102
CAM109_map9	0002.CSV	2989.25	0.0216103
CAM109_map9	0002.CSV	2993.11	0.0218002
CAM109_map9	0002.CSV	2996.96	0.0215385
CAM109_map9	0002.CSV	3000.82	0.0210793
CAM109_map9	0002.CSV	3004.68	0.0207913
CAM109_map9	0002.CSV	3008.53	0.0209674
CAM109_map9	0002.CSV	3012.39	0.0213794
CAM109_map9	0002.CSV	3016.25	0.0214876
CAM109_map9	0002.CSV	3020.11	0.0212746
CAM109_map9	0002.CSV	3023.96	0.0211647
CAM109_map9	0002.CSV	3027.82	0.0212077
CAM109_map9	0002.CSV	3031.68	0.0214391
CAM109_map9	0002.CSV	3035.53	0.0213609
CAM109_map9	0002.CSV	3039.39	0.0212359
CAM109_map9	0002.CSV	3043.25	0.0212619
CAM109_map9	0002.CSV	3047.11	0.0211546
CAM109_map9	0002.CSV	3050.96	0.0212058
CAM109_map9	0002.CSV	3054.82	0.0212513
CAM109_map9	0002.CSV	3058.68	0.0211388
CAM109_map9	0002.CSV	3062.53	0.0212335
CAM109_map9	0002.CSV	3066.39	0.021535
CAM109_map9	0002.CSV	3070.25	0.021389
CAM109_map9	0002.CSV	3074.11	0.0213576
CAM109_map9	0002.CSV	3077.96	0.0217669
CAM109_map9	0002.CSV	3081.82	0.0219764
CAM109_map9	0002.CSV	3085.68	0.0218785
CAM109_map9	0002.CSV	3089.53	0.0216185
CAM109_map9	0002.CSV	3093.39	0.0212148
CAM109_map9	0002.CSV	3097.25	0.0212166
CAM109_map9	0002.CSV	3101.11	0.021405
CAM109_map9	0002.CSV	3104.96	0.0215203
CAM109_map9	0002.CSV	3108.82	0.0217642
CAM109_map9	0002.CSV	3112.68	0.0219155
CAM109_map9	0002.CSV	3116.53	0.0220906
CAM109_map9	0002.CSV	3120.39	0.0220228
CAM109_map9	0002.CSV	3124.25	0.0216866
CAM109_map9	0002.CSV	3128.11	0.0215482
CAM109_map9	0002.CSV	3131.96	0.0215766
CAM109_map9	0002.CSV	3135.82	0.0217668
CAM109_map9	0002.CSV	3139.68	0.0219458
CAM109_map9	0002.CSV	3143.53	0.0217411
CAM109_map9	0002.CSV	3147.39	0.021827
CAM109_map9	0002.CSV	3151.25	0.0222945
CAM109_map9	0002.CSV	3155.1	0.0222419
CAM109_map9	0002.CSV	3158.96	0.0218024
CAM109_map9	0002.CSV	3162.82	0.0216443
CAM109_map9	0002.CSV	3166.68	0.0216531
CAM109_map9	0002.CSV	3170.53	0.0216818
CAM109_map9	0002.CSV	3174.39	0.0217121
CAM109_map9	0002.CSV	3178.25	0.0218922
CAM109_map9	0002.CSV	3182.1	0.0220213
CAM109_map9	0002.CSV	3185.96	0.0221423
CAM109_map9	0002.CSV	3189.82	0.0223252
CAM109_map9	0002.CSV	3193.68	0.0222655
CAM109_map9	0002.CSV	3197.53	0.0221985
CAM109_map9	0002.CSV	3201.39	0.0223874
CAM109_map9	0002.CSV	3205.25	0.0225424
CAM109_map9	0002.CSV	3209.1	0.0225721
CAM109_map9	0002.CSV	3212.96	0.0227374
CAM109_map9	0002.CSV	3216.82	0.0229095
CAM109_map9	0002.CSV	3220.68	0.022855
CAM109_map9	0002.CSV	3224.53	0.0228084
CAM109_map9	0002.CSV	3228.39	0.0231474
CAM109_map9	0002.CSV	3232.25	0.02369
CAM109_map9	0002.CSV	3236.1	0.023604
CAM109_map9	0002.CSV	3239.96	0.0233139
CAM109_map9	0002.CSV	3243.82	0.0235105
CAM109_map9	0002.CSV	3247.68	0.0236978
CAM109_map9	0002.CSV	3251.53	0.0235731
CAM109_map9	0002.CSV	3255.39	0.023581
CAM109_map9	0002.CSV	3259.25	0.0233817
CAM109_map9	0002.CSV	3263.1	0.023353
CAM109_map9	0002.CSV	3266.96	0.0238081
CAM109_map9	0002.CSV	3270.82	0.0242547
CAM109_map9	0002.CSV	3274.68	0.0242133
CAM109_map9	0002.CSV	3278.53	0.0238667
CAM109_map9	0002.CSV	3282.39	0.0236948
CAM109_map9	0002.CSV	3286.25	0.023785
CAM109_map9	0002.CSV	3290.1	0.0241706
CAM109_map9	0002.CSV	3293.96	0.0244975
CAM109_map9	0002.CSV	3297.82	0.0244033
CAM109_map9	0002.CSV	3301.67	0.0244294
CAM109_map9	0002.CSV	3305.53	0.0246706
CAM109_map9	0002.CSV	3309.39	0.0246427
CAM109_map9	0002.CSV	3313.25	0.0241761
CAM109_map9	0002.CSV	3317.1	0.0237914
CAM109_map9	0002.CSV	3320.96	0.0238941
CAM109_map9	0002.CSV	3324.82	0.0242113
CAM109_map9	0002.CSV	3328.67	0.0240186
CAM109_map9	0002.CSV	3332.53	0.0239522
CAM109_map9	0002.CSV	3336.39	0.0245386
CAM109_map9	0002.CSV	3340.24	0.0247941
CAM109_map9	0002.CSV	3344.1	0.0245029
CAM109_map9	0002.CSV	3347.96	0.0244297
CAM109_map9	0002.CSV	3351.82	0.0243393
CAM109_map9	0002.CSV	3355.67	0.0240787
CAM109_map9	0002.CSV	3359.53	0.0242648
CAM109_map9	0002.CSV	3363.39	0.024613
CAM109_map9	0002.CSV	3367.24	0.0248568
CAM109_map9	0002.CSV	3371.1	0.024723
CAM109_map9	0002.CSV	3374.96	0.0244532
CAM109_map9	0002.CSV	3378.82	0.024217
CAM109_map9	0002.CSV	3382.67	0.0239364
CAM109_map9	0002.CSV	3386.53	0.0240506
CAM109_map9	0002.CSV	3390.39	0.0244451
CAM109_map9	0002.CSV	3394.24	0.0247213
CAM109_map9	0002.CSV	3398.1	0.0248796
CAM109_map9	0002.CSV	3401.96	0.0247047
CAM109_map9	0002.CSV	3405.82	0.0242401
CAM109_map9	0002.CSV	3409.67	0.024147
CAM109_map9	0002.CSV	3413.53	0.0238036
CAM109_map9	0002.CSV	3417.39	0.0232852
CAM109_map9	0002.CSV	3421.24	0.0231313
CAM109_map9	0002.CSV	3425.1	0.0231823
CAM109_map9	0002.CSV	3428.96	0.0234836
CAM109_map9	0002.CSV	3432.82	0.0237346
CAM109_map9	0002.CSV	3436.67	0.0234087
CAM109_map9	0002.CSV	3440.53	0.0225643
CAM109_map9	0002.CSV	3444.39	0.0220265
CAM109_map9	0002.CSV	3448.24	0.0219312
CAM109_map9	0002.CSV	3452.1	0.0215179
CAM109_map9	0002.CSV	3455.96	0.0214429
CAM109_map9	0002.CSV	3459.82	0.0218791
CAM109_map9	0002.CSV	3463.67	0.0222944
CAM109_map9	0002.CSV	3467.53	0.0224711
CAM109_map9	0002.CSV	3471.39	0.0219624
CAM109_map9	0002.CSV	3475.24	0.0215185
CAM109_map9	0002.CSV	3479.1	0.021532
CAM109_map9	0002.CSV	3482.96	0.0212823
CAM109_map9	0002.CSV	3486.82	0.02115
CAM109_map9	0002.CSV	3490.67	0.0211449
CAM109_map9	0002.CSV	3494.53	0.0211997
CAM109_map9	0002.CSV	3498.39	0.0210515
CAM109_map9	0002.CSV	3502.24	0.0208444
CAM109_map9	0002.CSV	3506.1	0.0204207
CAM109_map9	0002.CSV	3509.96	0.0200889
CAM109_map9	0002.CSV	3513.81	0.0201518
CAM109_map9	0002.CSV	3517.67	0.0197866
CAM109_map9	0002.CSV	3521.53	0.0196404
CAM109_map9	0002.CSV	3525.39	0.0196852
CAM109_map9	0002.CSV	3529.24	0.0195693
CAM109_map9	0002.CSV	3533.1	0.0196416
CAM109_map9	0002.CSV	3536.96	0.0198719
CAM109_map9	0002.CSV	3540.81	0.019902
CAM109_map9	0002.CSV	3544.67	0.0199805
CAM109_map9	0002.CSV	3548.53	0.0196631
CAM109_map9	0002.CSV	3552.39	0.0190427
CAM109_map9	0002.CSV	3556.24	0.0187574
CAM109_map9	0002.CSV	3560.1	0.0184019
CAM109_map9	0002.CSV	3563.96	0.0177616
CAM109_map9	0002.CSV	3567.81	0.018078
CAM109_map9	0002.CSV	3571.67	0.0180375
CAM109_map9	0002.CSV	3575.53	0.0174641
CAM109_map9	0002.CSV	3579.39	0.01763
CAM109_map9	0002.CSV	3583.24	0.0177411
CAM109_map9	0002.CSV	3587.1	0.0177872
CAM109_map9	0002.CSV	3590.96	0.017507
CAM109_map9	0002.CSV	3594.81	0.0171034
CAM109_map9	0002.CSV	3598.67	0.0173234
CAM109_map9	0002.CSV	3602.53	0.0170936
CAM109_map9	0002.CSV	3606.39	0.0162198
CAM109_map9	0002.CSV	3610.24	0.0158162
CAM109_map9	0002.CSV	3614.1	0.0158903
CAM109_map9	0002.CSV	3617.96	0.0163075
CAM109_map9	0002.CSV	3621.81	0.0165715
CAM109_map9	0002.CSV	3625.67	0.0157036
CAM109_map9	0002.CSV	3629.53	0.0157595
CAM109_map9	0002.CSV	3633.39	0.0162963
CAM109_map9	0002.CSV	3637.24	0.0158584
CAM109_map9	0002.CSV	3641.1	0.0153827
CAM109_map9	0002.CSV	3644.96	0.0146289
CAM109_map9	0002.CSV	3648.81	0.0151963
CAM109_map9	0002.CSV	3652.67	0.0160612
CAM109_map9	0002.CSV	3656.53	0.0160872
CAM109_map9	0002.CSV	3660.38	0.0160843
CAM109_map9	0002.CSV	3664.24	0.0149827
CAM109_map9	0002.CSV	3668.1	0.013845
CAM109_map9	0002.CSV	3671.96	0.0138831
CAM109_map9	0002.CSV	3675.81	0.0147452
CAM109_map9	0002.CSV	3679.67	0.0153369
CAM109_map9	0002.CSV	3683.53	0.0148489
CAM109_map9	0002.CSV	3687.38	0.014654
CAM109_map9	0002.CSV	3691.24	0.0156827
CAM109_map9	0002.CSV	3695.1	0.0154175
CAM109_map9	0002.CSV	3698.95	0.0146298
CAM109_map9	0002.CSV	3702.81	0.0143335
CAM109_map9	0002.CSV	3706.67	0.013755
CAM109_map9	0002.CSV	3710.53	0.0137344
CAM109_map9	0002.CSV	3714.38	0.014595
CAM109_map9	0002.CSV	3718.24	0.0140723
CAM109_map9	0002.CSV	3722.1	0.0137311
CAM109_map9	0002.CSV	3725.95	0.0139821
CAM109_map9	0002.CSV	3729.81	0.0136236
CAM109_map9	0002.CSV	3733.67	0.0138569
CAM109_map9	0002.CSV	3737.53	0.0153382
CAM109_map9	0002.CSV	3741.38	0.0142462
CAM109_map9	0002.CSV	3745.24	0.0127898
CAM109_map9	0002.CSV	3749.1	0.012732
CAM109_map9	0002.CSV	3752.95	0.0141134
CAM109_map9	0002.CSV	3756.81	0.0142211
CAM109_map9	0002.CSV	3760.67	0.0140958
CAM109_map9	0002.CSV	3764.53	0.0138129
CAM109_map9	0002.CSV	3768.38	0.0138938
CAM109_map9	0002.CSV	3772.24	0.0141964
CAM109_map9	0002.CSV	3776.1	0.0138873
CAM109_map9	0002.CSV	3779.95	0.0139328
CAM109_map9	0002.CSV	3783.81	0.0140907
CAM109_map9	0002.CSV	3787.67	0.0141317
CAM109_map9	0002.CSV	3791.53	0.0137759
CAM109_map9	0002.CSV	3795.38	0.0129798
CAM109_map9	0002.CSV	3799.24	0.0128153
CAM109_map9	0002.CSV	3803.1	0.0136355
CAM109_map9	0002.CSV	3806.95	0.0141722
CAM109_map9	0002.CSV	3810.81	0.01383
CAM109_map9	0002.CSV	3814.67	0.0131714
CAM109_map9	0002.CSV	3818.53	0.0134388
CAM109_map9	0002.CSV	3822.38	0.0140613
CAM109_map9	0002.CSV	3826.24	0.0139434
CAM109_map9	0002.CSV	3830.1	0.0135939
CAM109_map9	0002.CSV	3833.95	0.0133957
CAM109_map9	0002.CSV	3837.81	0.0136725
CAM109_map9	0002.CSV	3841.67	0.0144104
CAM109_map9	0002.CSV	3845.53	0.0140521
CAM109_map9	0002.CSV	3849.38	0.0128052
CAM109_map9	0002.CSV	3853.24	0.0130842
CAM109_map9	0002.CSV	3857.1	0.0141687
CAM109_map9	0002.CSV	3860.95	0.0134689
CAM109_map9	0002.CSV	3864.81	0.0134619
CAM109_map9	0002.CSV	3868.67	0.0135531
CAM109_map9	0002.CSV	3872.52	0.0139005
CAM109_map9	0002.CSV	3876.38	0.0137124
CAM109_map9	0002.CSV	3880.24	0.0135016
CAM109_map9	0002.CSV	3884.1	0.0141008
CAM109_map9	0002.CSV	3887.95	0.0139875
CAM109_map9	0002.CSV	3891.81	0.0138989
CAM109_map9	0002.CSV	3895.67	0.0136376
CAM109_map9	0002.CSV	3899.52	0.0130486
CAM109_map9	0002.CSV	3903.38	0.0139517
CAM109_map9	0002.CSV	3907.24	0.0144145
CAM109_map9	0002.CSV	3911.1	0.0137189
CAM109_map9	0002.CSV	3914.95	0.0133208
CAM109_map9	0002.CSV	3918.81	0.0137332
CAM109_map9	0002.CSV	3922.67	0.0138788
CAM109_map9	0002.CSV	3926.52	0.0137329
CAM109_map9	0002.CSV	3930.38	0.0138847
CAM109_map9	0002.CSV	3934.24	0.0143103
CAM109_map9	0002.CSV	3938.09	0.0139595
CAM109_map9	0002.CSV	3941.95	0.013693
CAM109_map9	0002.CSV	3945.81	0.0137632
CAM109_map9	0002.CSV	3949.67	0.0138839
CAM109_map9	0002.CSV	3953.52	0.0139005
CAM109_map9	0002.CSV	3957.38	0.013708
CAM109_map9	0002.CSV	3961.24	0.013739
CAM109_map9	0002.CSV	3965.09	0.0137225
CAM109_map9	0002.CSV	3968.95	0.0135888
CAM109_map9	0002.CSV	3972.81	0.0136726
CAM109_map9	0002.CSV	3976.67	0.0138094
CAM109_map9	0002.CSV	3980.52	0.0138135
CAM109_map9	0002.CSV	3984.38	0.013763
CAM109_map9	0002.CSV	3988.24	0.0135922
CAM109_map9	0002.CSV	3992.09	0.0135653
CAM109_map9	0002.CSV	3995.95	0.0136996
CAM109_map9	0002.CSV	3999.81	0.0137243
CAM109_map9	0003.CSV	674.992	0.0284623
CAM109_map9	0003.CSV	678.849	0.0300403
CAM109_map9	0003.CSV	682.706	0.0306113
CAM109_map9	0003.CSV	686.563	0.0318844
CAM109_map9	0003.CSV	690.42	0.0341781
CAM109_map9	0003.CSV	694.277	0.0420191
CAM109_map9	0003.CSV	698.134	0.0514198
CAM109_map9	0003.CSV	701.991	0.0504022
CAM109_map9	0003.CSV	705.849	0.0458871
CAM109_map9	0003.CSV	709.706	0.0530857
CAM109_map9	0003.CSV	713.563	0.052934
CAM109_map9	0003.CSV	717.42	0.0379037
CAM109_map9	0003.CSV	721.277	0.028179
CAM109_map9	0003.CSV	725.134	0.026896
CAM109_map9	0003.CSV	728.991	0.0265599
CAM109_map9	0003.CSV	732.848	0.0273309
CAM109_map9	0003.CSV	736.705	0.0289676
CAM109_map9	0003.CSV	740.562	0.0309052
CAM109_map9	0003.CSV	744.42	0.031794
CAM109_map9	0003.CSV	748.277	0.0320477
CAM109_map9	0003.CSV	752.134	0.0314069
CAM109_map9	0003.CSV	755.991	0.031348
CAM109_map9	0003.CSV	759.848	0.0312105
CAM109_map9	0003.CSV	763.705	0.0317149
CAM109_map9	0003.CSV	767.562	0.0320057
CAM109_map9	0003.CSV	771.419	0.0324856
CAM109_map9	0003.CSV	775.276	0.0327523
CAM109_map9	0003.CSV	779.133	0.0334933
CAM109_map9	0003.CSV	782.99	0.0339844
CAM109_map9	0003.CSV	786.848	0.0347074
CAM109_map9	0003.CSV	790.705	0.0352976
CAM109_map9	0003.CSV	794.562	0.0363856
CAM109_map9	0003.CSV	798.419	0.0372381
CAM109_map9	0003.CSV	802.276	0.0389439
CAM109_map9	0003.CSV	806.133	0.0408996
CAM109_map9	0003.CSV	809.99	0.0437464
CAM109_map9	0003.CSV	813.847	0.046843
CAM109_map9	0003.CSV	817.704	0.0498578
CAM109_map9	0003.CSV	821.562	0.0522069
CAM109_map9	0003.CSV	825.419	0.0553909
CAM109_map9	0003.CSV	829.276	0.0592885
CAM109_map9	0003.CSV	833.133	0.0647404
CAM109_map9	0003.CSV	836.99	0.0721174
CAM109_map9	0003.CSV	840.847	0.081062
CAM109_map9	0003.CSV	844.704	0.087845
CAM109_map9	0003.CSV	848.561	0.095309
CAM109_map9	0003.CSV	852.418	0.101776
CAM109_map9	0003.CSV	856.275	0.102249
CAM109_map9	0003.CSV	860.132	0.0935631
CAM109_map9	0003.CSV	863.99	0.0775556
CAM109_map9	0003.CSV	867.847	0.0606228
CAM109_map9	0003.CSV	871.704	0.0485106
CAM109_map9	0003.CSV	875.561	0.0408391
CAM109_map9	0003.CSV	879.418	0.0361495
CAM109_map9	0003.CSV	883.275	0.033063
CAM109_map9	0003.CSV	887.132	0.0313579
CAM109_map9	0003.CSV	890.989	0.0304392
CAM109_map9	0003.CSV	894.846	0.0302928
CAM109_map9	0003.CSV	898.703	0.0301244
CAM109_map9	0003.CSV	902.561	0.0303533
CAM109_map9	0003.CSV	906.418	0.0307221
CAM109_map9	0003.CSV	910.275	0.0309515
CAM109_map9	0003.CSV	914.132	0.0306065
CAM109_map9	0003.CSV	917.989	0.0306161
CAM109_map9	0003.CSV	921.846	0.0307614
CAM109_map9	0003.CSV	925.703	0.0312559
CAM109_map9	0003.CSV	929.56	0.0315216
CAM109_map9	0003.CSV	933.417	0.0317725
CAM109_map9	0003.CSV	937.274	0.0318092
CAM109_map9	0003.CSV	941.131	0.0318766
CAM109_map9	0003.CSV	944.989	0.0316549
CAM109_map9	0003.CSV	948.846	0.0316289
CAM109_map9	0003.CSV	952.703	0.0314036
CAM109_map9	0003.CSV	956.56	0.0311102
CAM109_map9	0003.CSV	960.417	0.0305787
CAM109_map9	0003.CSV	964.274	0.0304474
CAM109_map9	0003.CSV	968.131	0.0305632
CAM109_map9	0003.CSV	971.988	0.0310974
CAM109_map9	0003.CSV	975.845	0.0317511
CAM109_map9	0003.CSV	979.702	0.0326527
CAM109_map9	0003.CSV	983.559	0.0334182
CAM109_map9	0003.CSV	987.417	0.0343071
CAM109_map9	0003.CSV	991.274	0.0350875
CAM109_map9	0003.CSV	995.131	0.0359299
CAM109_map9	0003.CSV	998.988	0.0366007
CAM109_map9	0003.CSV	1002.85	0.0375084
CAM109_map9	0003.CSV	1006.7	0.0382082
CAM109_map9	0003.CSV	1010.56	0.038921
CAM109_map9	0003.CSV	1014.42	0.0393853
CAM109_map9	0003.CSV	1018.27	0.0400162
CAM109_map9	0003.CSV	1022.13	0.0404955
CAM109_map9	0003.CSV	1025.99	0.0411199
CAM109_map9	0003.CSV	1029.85	0.0416821
CAM109_map9	0003.CSV	1033.7	0.0423737
CAM109_map9	0003.CSV	1037.56	0.0427848
CAM109_map9	0003.CSV	1041.42	0.0430866
CAM109_map9	0003.CSV	1045.27	0.0430777
CAM109_map9	0003.CSV	1049.13	0.0436033
CAM109_map9	0003.CSV	1052.99	0.0445107
CAM109_map9	0003.CSV	1056.84	0.046268
CAM109_map9	0003.CSV	1060.7	0.0482239
CAM109_map9	0003.CSV	1064.56	0.0501574
CAM109_map9	0003.CSV	1068.42	0.051228
CAM109_map9	0003.CSV	1072.27	0.051814
CAM109_map9	0003.CSV	1076.13	0.0528298
CAM109_map9	0003.CSV	1079.99	0.0559724
CAM109_map9	0003.CSV	1083.84	0.0557286
CAM109_map9	0003.CSV	1087.7	0.0503754
CAM109_map9	0003.CSV	1091.56	0.0468404
CAM109_map9	0003.CSV	1095.41	0.0459201
CAM109_map9	0003.CSV	1099.27	0.0458048
CAM109_map9	0003.CSV	1103.13	0.0462374
CAM109_map9	0003.CSV	1106.99	0.0468448
CAM109_map9	0003.CSV	1110.84	0.0478684
CAM109_map9	0003.CSV	1114.7	0.048636
CAM109_map9	0003.CSV	1118.56	0.0489347
CAM109_map9	0003.CSV	1122.41	0.0486955
CAM109_map9	0003.CSV	1126.27	0.0482269
CAM109_map9	0003.CSV	1130.13	0.0475431
CAM109_map9	0003.CSV	1133.99	0.047201
CAM109_map9	0003.CSV	1137.84	0.0469811
CAM109_map9	0003.CSV	1141.7	0.0468566
CAM109_map9	0003.CSV	1145.56	0.046473
CAM109_map9	0003.CSV	1149.41	0.0461643
CAM109_map9	0003.CSV	1153.27	0.0459145
CAM109_map9	0003.CSV	1157.13	0.0458911
CAM109_map9	0003.CSV	1160.99	0.0457155
CAM109_map9	0003.CSV	1164.84	0.0454282
CAM109_map9	0003.CSV	1168.7	0.0447695
CAM109_map9	0003.CSV	1172.56	0.0440859
CAM109_map9	0003.CSV	1176.41	0.0433882
CAM109_map9	0003.CSV	1180.27	0.0428354
CAM109_map9	0003.CSV	1184.13	0.0421205
CAM109_map9	0003.CSV	1187.99	0.0415198
CAM109_map9	0003.CSV	1191.84	0.0408779
CAM109_map9	0003.CSV	1195.7	0.0404125
CAM109_map9	0003.CSV	1199.56	0.0400508
CAM109_map9	0003.CSV	1203.41	0.0400353
CAM109_map9	0003.CSV	1207.27	0.0400632
CAM109_map9	0003.CSV	1211.13	0.0402572
CAM109_map9	0003.CSV	1214.98	0.0404286
CAM109_map9	0003.CSV	1218.84	0.0407838
CAM109_map9	0003.CSV	1222.7	0.0411335
CAM109_map9	0003.CSV	1226.56	0.041743
CAM109_map9	0003.CSV	1230.41	0.0424063
CAM109_map9	0003.CSV	1234.27	0.0433092
CAM109_map9	0003.CSV	1238.13	0.0443489
CAM109_map9	0003.CSV	1241.98	0.04572
CAM109_map9	0003.CSV	1245.84	0.0471222
CAM109_map9	0003.CSV	1249.7	0.0486105
CAM109_map9	0003.CSV	1253.56	0.0497529
CAM109_map9	0003.CSV	1257.41	0.0506995
CAM109_map9	0003.CSV	1261.27	0.0513168
CAM109_map9	0003.CSV	1265.13	0.0518786
CAM109_map9	0003.CSV	1268.98	0.0523713
CAM109_map9	0003.CSV	1272.84	0.0530331
CAM109_map9	0003.CSV	1276.7	0.053466
CAM109_map9	0003.CSV	1280.56	0.0538339
CAM109_map9	0003.CSV	1284.41	0.0539018
CAM109_map9	0003.CSV	1288.27	0.0538562
CAM109_map9	0003.CSV	1292.13	0.0532315
CAM109_map9	0003.CSV	1295.98	0.052431
CAM109_map9	0003.CSV	1299.84	0.051622
CAM109_map9	0003.CSV	1303.7	0.0511159
CAM109_map9	0003.CSV	1307.56	0.0508221
CAM109_map9	0003.CSV	1311.41	0.0510145
CAM109_map9	0003.CSV	1315.27	0.0513591
CAM109_map9	0003.CSV	1319.13	0.0518159
CAM109_map9	0003.CSV	1322.98	0.0519456
CAM109_map9	0003.CSV	1326.84	0.0522468
CAM109_map9	0003.CSV	1330.7	0.0527037
CAM109_map9	0003.CSV	1334.56	0.0534408
CAM109_map9	0003.CSV	1338.41	0.0545982
CAM109_map9	0003.CSV	1342.27	0.0561959
CAM109_map9	0003.CSV	1346.13	0.057294
CAM109_map9	0003.CSV	1349.98	0.0587939
CAM109_map9	0003.CSV	1353.84	0.0603375
CAM109_map9	0003.CSV	1357.7	0.0619178
CAM109_map9	0003.CSV	1361.56	0.0637093
CAM109_map9	0003.CSV	1365.41	0.0660898
CAM109_map9	0003.CSV	1369.27	0.0678575
CAM109_map9	0003.CSV	1373.13	0.0704772
CAM109_map9	0003.CSV	1376.98	0.0734732
CAM109_map9	0003.CSV	1380.84	0.0757346
CAM109_map9	0003.CSV	1384.7	0.0776988
CAM109_map9	0003.CSV	1388.56	0.08069
CAM109_map9	0003.CSV	1392.41	0.0828871
CAM109_map9	0003.CSV	1396.27	0.0859576
CAM109_map9	0003.CSV	1400.13	0.0888987
CAM109_map9	0003.CSV	1403.98	0.0913989
CAM109_map9	0003.CSV	1407.84	0.0940816
CAM109_map9	0003.CSV	1411.7	0.0966192
CAM109_map9	0003.CSV	1415.55	0.0983524
CAM109_map9	0003.CSV	1419.41	0.100846
CAM109_map9	0003.CSV	1423.27	0.102359
CAM109_map9	0003.CSV	1427.12	0.103682
CAM109_map9	0003.CSV	1430.98	0.105239
CAM109_map9	0003.CSV	1434.84	0.107612
CAM109_map9	0003.CSV	1438.7	0.110032
CAM109_map9	0003.CSV	1442.55	0.111699
CAM109_map9	0003.CSV	1446.41	0.112916
CAM109_map9	0003.CSV	1450.27	0.113963
CAM109_map9	0003.CSV	1454.12	0.113231
CAM109_map9	0003.CSV	1457.98	0.112763
CAM109_map9	0003.CSV	1461.84	0.111881
CAM109_map9	0003.CSV	1465.7	0.111751
CAM109_map9	0003.CSV	1469.55	0.110672
CAM109_map9	0003.CSV	1473.41	0.108041
CAM109_map9	0003.CSV	1477.27	0.103272
CAM109_map9	0003.CSV	1481.12	0.0992498
CAM109_map9	0003.CSV	1484.98	0.0952386
CAM109_map9	0003.CSV	1488.84	0.0910028
CAM109_map9	0003.CSV	1492.7	0.0865201
CAM109_map9	0003.CSV	1496.55	0.0828637
CAM109_map9	0003.CSV	1500.41	0.0786918
CAM109_map9	0003.CSV	1504.27	0.0759805
CAM109_map9	0003.CSV	1508.12	0.0722151
CAM109_map9	0003.CSV	1511.98	0.068958
CAM109_map9	0003.CSV	1515.84	0.0660005
CAM109_map9	0003.CSV	1519.7	0.0628468
CAM109_map9	0003.CSV	1523.55	0.0595601
CAM109_map9	0003.CSV	1527.41	0.0571724
CAM109_map9	0003.CSV	1531.27	0.0552487
CAM109_map9	0003.CSV	1535.12	0.0542667
CAM109_map9	0003.CSV	1538.98	0.0533659
CAM109_map9	0003.CSV	1542.84	0.0519189
CAM109_map9	0003.CSV	1546.7	0.0494331
CAM109_map9	0003.CSV	1550.55	0.0473927
CAM109_map9	0003.CSV	1554.41	0.0454377
CAM109_map9	0003.CSV	1558.27	0.0436487
CAM109_map9	0003.CSV	1562.12	0.0416109
CAM109_map9	0003.CSV	1565.98	0.0402555
CAM109_map9	0003.CSV	1569.84	0.0390706
CAM109_map9	0003.CSV	1573.69	0.0381811
CAM109_map9	0003.CSV	1577.55	0.03666
CAM109_map9	0003.CSV	1581.41	0.0345712
CAM109_map9	0003.CSV	1585.27	0.0323959
CAM109_map9	0003.CSV	1589.12	0.0307408
CAM109_map9	0003.CSV	1592.98	0.0297496
CAM109_map9	0003.CSV	1596.84	0.029349
CAM109_map9	0003.CSV	1600.69	0.029031
CAM109_map9	0003.CSV	1604.55	0.0287544
CAM109_map9	0003.CSV	1608.41	0.028404
CAM109_map9	0003.CSV	1612.27	0.0280558
CAM109_map9	0003.CSV	1616.12	0.0277986
CAM109_map9	0003.CSV	1619.98	0.027655
CAM109_map9	0003.CSV	1623.84	0.0272855
CAM109_map9	0003.CSV	1627.69	0.0269654
CAM109_map9	0003.CSV	1631.55	0.0262507
CAM109_map9	0003.CSV	1635.41	0.0260824
CAM109_map9	0003.CSV	1639.27	0.0259391
CAM109_map9	0003.CSV	1643.12	0.0253301
CAM109_map9	0003.CSV	1646.98	0.0251154
CAM109_map9	0003.CSV	1650.84	0.0253026
CAM109_map9	0003.CSV	1654.69	0.0254708
CAM109_map9	0003.CSV	1658.55	0.0250253
CAM109_map9	0003.CSV	1662.41	0.0245578
CAM109_map9	0003.CSV	1666.27	0.0243636
CAM109_map9	0003.CSV	1670.12	0.0243521
CAM109_map9	0003.CSV	1673.98	0.024557
CAM109_map9	0003.CSV	1677.84	0.0241489
CAM109_map9	0003.CSV	1681.69	0.0239457
CAM109_map9	0003.CSV	1685.55	0.0243987
CAM109_map9	0003.CSV	1689.41	0.0243297
CAM109_map9	0003.CSV	1693.27	0.0237651
CAM109_map9	0003.CSV	1697.12	0.0239292
CAM109_map9	0003.CSV	1700.98	0.0247459
CAM109_map9	0003.CSV	1704.84	0.025417
CAM109_map9	0003.CSV	1708.69	0.0260098
CAM109_map9	0003.CSV	1712.55	0.0265124
CAM109_map9	0003.CSV	1716.41	0.028549
CAM109_map9	0003.CSV	1720.27	0.0310852
CAM109_map9	0003.CSV	1724.12	0.0315559
[truncated: 49,781 more rows]

## Sheet: CAM109_map10
Map	Select spectrum number	Wavenumbers	Absorbance
CAM109_map10	0001.CSV	674.992	0.0219177
CAM109_map10	0001.CSV	678.849	0.0227291
CAM109_map10	0001.CSV	682.706	0.0230954
CAM109_map10	0001.CSV	686.563	0.0242484
CAM109_map10	0001.CSV	690.42	0.0261668
CAM109_map10	0001.CSV	694.277	0.0308285
CAM109_map10	0001.CSV	698.134	0.0357635
CAM109_map10	0001.CSV	701.991	0.0339506
CAM109_map10	0001.CSV	705.849	0.0308786
CAM109_map10	0001.CSV	709.706	0.0353764
CAM109_map10	0001.CSV	713.563	0.0345743
CAM109_map10	0001.CSV	717.42	0.0249793
CAM109_map10	0001.CSV	721.277	0.0195751
CAM109_map10	0001.CSV	725.134	0.0193806
CAM109_map10	0001.CSV	728.991	0.0195605
CAM109_map10	0001.CSV	732.848	0.0198261
CAM109_map10	0001.CSV	736.705	0.0205896
CAM109_map10	0001.CSV	740.562	0.0216869
CAM109_map10	0001.CSV	744.42	0.0224683
CAM109_map10	0001.CSV	748.277	0.0229933
CAM109_map10	0001.CSV	752.134	0.0229858
CAM109_map10	0001.CSV	755.991	0.0228565
CAM109_map10	0001.CSV	759.848	0.0225579
CAM109_map10	0001.CSV	763.705	0.0229248
CAM109_map10	0001.CSV	767.562	0.0231559
CAM109_map10	0001.CSV	771.419	0.0233162
CAM109_map10	0001.CSV	775.276	0.0233657
CAM109_map10	0001.CSV	779.133	0.0237828
CAM109_map10	0001.CSV	782.99	0.0238945
CAM109_map10	0001.CSV	786.848	0.0240886
CAM109_map10	0001.CSV	790.705	0.0243062
CAM109_map10	0001.CSV	794.562	0.0249468
CAM109_map10	0001.CSV	798.419	0.025775
CAM109_map10	0001.CSV	802.276	0.0268251
CAM109_map10	0001.CSV	806.133	0.0275689
CAM109_map10	0001.CSV	809.99	0.0285633
CAM109_map10	0001.CSV	813.847	0.0297014
CAM109_map10	0001.CSV	817.704	0.0313601
CAM109_map10	0001.CSV	821.562	0.0333507
CAM109_map10	0001.CSV	825.419	0.0355306
CAM109_map10	0001.CSV	829.276	0.0376487
CAM109_map10	0001.CSV	833.133	0.0402319
CAM109_map10	0001.CSV	836.99	0.0438856
CAM109_map10	0001.CSV	840.847	0.0487582
CAM109_map10	0001.CSV	844.704	0.0530438
CAM109_map10	0001.CSV	848.561	0.0587491
CAM109_map10	0001.CSV	852.418	0.0626783
CAM109_map10	0001.CSV	856.275	0.0602864
CAM109_map10	0001.CSV	860.132	0.0530573
CAM109_map10	0001.CSV	863.99	0.0433735
CAM109_map10	0001.CSV	867.847	0.0335909
CAM109_map10	0001.CSV	871.704	0.0269768
CAM109_map10	0001.CSV	875.561	0.023593
CAM109_map10	0001.CSV	879.418	0.0217873
CAM109_map10	0001.CSV	883.275	0.0204915
CAM109_map10	0001.CSV	887.132	0.0198793
CAM109_map10	0001.CSV	890.989	0.0196627
CAM109_map10	0001.CSV	894.846	0.0198291
CAM109_map10	0001.CSV	898.703	0.0200544
CAM109_map10	0001.CSV	902.561	0.0203085
CAM109_map10	0001.CSV	906.418	0.0204798
CAM109_map10	0001.CSV	910.275	0.0207123
CAM109_map10	0001.CSV	914.132	0.0208039
CAM109_map10	0001.CSV	917.989	0.0210149
CAM109_map10	0001.CSV	921.846	0.0211001
CAM109_map10	0001.CSV	925.703	0.0212313
CAM109_map10	0001.CSV	929.56	0.0214234
CAM109_map10	0001.CSV	933.417	0.0217144
CAM109_map10	0001.CSV	937.274	0.0218774
CAM109_map10	0001.CSV	941.131	0.021915
CAM109_map10	0001.CSV	944.989	0.0217905
CAM109_map10	0001.CSV	948.846	0.0217413
CAM109_map10	0001.CSV	952.703	0.02166
CAM109_map10	0001.CSV	956.56	0.0217842
CAM109_map10	0001.CSV	960.417	0.0217913
CAM109_map10	0001.CSV	964.274	0.021809
CAM109_map10	0001.CSV	968.131	0.021834
CAM109_map10	0001.CSV	971.988	0.0221272
CAM109_map10	0001.CSV	975.845	0.0224326
CAM109_map10	0001.CSV	979.702	0.0228032
CAM109_map10	0001.CSV	983.559	0.0231356
CAM109_map10	0001.CSV	987.417	0.0234836
CAM109_map10	0001.CSV	991.274	0.0236938
CAM109_map10	0001.CSV	995.131	0.0240183
CAM109_map10	0001.CSV	998.988	0.0242465
CAM109_map10	0001.CSV	1002.85	0.0246098
CAM109_map10	0001.CSV	1006.7	0.0249495
CAM109_map10	0001.CSV	1010.56	0.0253398
CAM109_map10	0001.CSV	1014.42	0.0255245
CAM109_map10	0001.CSV	1018.27	0.0257396
CAM109_map10	0001.CSV	1022.13	0.0259199
CAM109_map10	0001.CSV	1025.99	0.026219
CAM109_map10	0001.CSV	1029.85	0.0264686
CAM109_map10	0001.CSV	1033.7	0.0267373
CAM109_map10	0001.CSV	1037.56	0.0269373
CAM109_map10	0001.CSV	1041.42	0.0271263
CAM109_map10	0001.CSV	1045.27	0.0272105
CAM109_map10	0001.CSV	1049.13	0.027509
CAM109_map10	0001.CSV	1052.99	0.0279079
CAM109_map10	0001.CSV	1056.84	0.0286411
CAM109_map10	0001.CSV	1060.7	0.0294757
CAM109_map10	0001.CSV	1064.56	0.0302628
CAM109_map10	0001.CSV	1068.42	0.0306199
CAM109_map10	0001.CSV	1072.27	0.0308913
CAM109_map10	0001.CSV	1076.13	0.031558
CAM109_map10	0001.CSV	1079.99	0.032951
CAM109_map10	0001.CSV	1083.84	0.0321433
CAM109_map10	0001.CSV	1087.7	0.0292844
CAM109_map10	0001.CSV	1091.56	0.0278977
CAM109_map10	0001.CSV	1095.41	0.0278369
CAM109_map10	0001.CSV	1099.27	0.0280435
CAM109_map10	0001.CSV	1103.13	0.0283139
CAM109_map10	0001.CSV	1106.99	0.0286533
CAM109_map10	0001.CSV	1110.84	0.0291185
CAM109_map10	0001.CSV	1114.7	0.0295217
CAM109_map10	0001.CSV	1118.56	0.029785
CAM109_map10	0001.CSV	1122.41	0.0296537
CAM109_map10	0001.CSV	1126.27	0.0294911
CAM109_map10	0001.CSV	1130.13	0.0292732
CAM109_map10	0001.CSV	1133.99	0.0291673
CAM109_map10	0001.CSV	1137.84	0.0290785
CAM109_map10	0001.CSV	1141.7	0.0289835
CAM109_map10	0001.CSV	1145.56	0.0288049
CAM109_map10	0001.CSV	1149.41	0.0287965
CAM109_map10	0001.CSV	1153.27	0.0287053
CAM109_map10	0001.CSV	1157.13	0.0285671
CAM109_map10	0001.CSV	1160.99	0.0284364
CAM109_map10	0001.CSV	1164.84	0.0283956
CAM109_map10	0001.CSV	1168.7	0.028265
CAM109_map10	0001.CSV	1172.56	0.0281021
CAM109_map10	0001.CSV	1176.41	0.0279117
CAM109_map10	0001.CSV	1180.27	0.0277687
CAM109_map10	0001.CSV	1184.13	0.0275089
CAM109_map10	0001.CSV	1187.99	0.0272912
CAM109_map10	0001.CSV	1191.84	0.02701
CAM109_map10	0001.CSV	1195.7	0.0267961
CAM109_map10	0001.CSV	1199.56	0.0266147
CAM109_map10	0001.CSV	1203.41	0.0265702
CAM109_map10	0001.CSV	1207.27	0.0265541
CAM109_map10	0001.CSV	1211.13	0.0266316
CAM109_map10	0001.CSV	1214.98	0.0267212
CAM109_map10	0001.CSV	1218.84	0.0268807
CAM109_map10	0001.CSV	1222.7	0.0270304
CAM109_map10	0001.CSV	1226.56	0.0273239
CAM109_map10	0001.CSV	1230.41	0.0276005
CAM109_map10	0001.CSV	1234.27	0.0279553
CAM109_map10	0001.CSV	1238.13	0.0283071
CAM109_map10	0001.CSV	1241.98	0.0288041
CAM109_map10	0001.CSV	1245.84	0.0293271
CAM109_map10	0001.CSV	1249.7	0.029834
CAM109_map10	0001.CSV	1253.56	0.0300932
CAM109_map10	0001.CSV	1257.41	0.0302638
CAM109_map10	0001.CSV	1261.27	0.0303383
CAM109_map10	0001.CSV	1265.13	0.0304828
CAM109_map10	0001.CSV	1268.98	0.0306794
CAM109_map10	0001.CSV	1272.84	0.0309521
CAM109_map10	0001.CSV	1276.7	0.031088
CAM109_map10	0001.CSV	1280.56	0.0312054
CAM109_map10	0001.CSV	1284.41	0.0312382
CAM109_map10	0001.CSV	1288.27	0.031267
CAM109_map10	0001.CSV	1292.13	0.0310628
CAM109_map10	0001.CSV	1295.98	0.0308594
CAM109_map10	0001.CSV	1299.84	0.0306535
CAM109_map10	0001.CSV	1303.7	0.0305458
CAM109_map10	0001.CSV	1307.56	0.0305268
CAM109_map10	0001.CSV	1311.41	0.0306807
CAM109_map10	0001.CSV	1315.27	0.030898
CAM109_map10	0001.CSV	1319.13	0.031164
CAM109_map10	0001.CSV	1322.98	0.0312482
CAM109_map10	0001.CSV	1326.84	0.0313736
CAM109_map10	0001.CSV	1330.7	0.0315898
CAM109_map10	0001.CSV	1334.56	0.031892
CAM109_map10	0001.CSV	1338.41	0.0324472
CAM109_map10	0001.CSV	1342.27	0.0331685
CAM109_map10	0001.CSV	1346.13	0.0335375
CAM109_map10	0001.CSV	1349.98	0.034086
CAM109_map10	0001.CSV	1353.84	0.0346154
CAM109_map10	0001.CSV	1357.7	0.0351815
CAM109_map10	0001.CSV	1361.56	0.0359153
CAM109_map10	0001.CSV	1365.41	0.0368078
CAM109_map10	0001.CSV	1369.27	0.037331
CAM109_map10	0001.CSV	1373.13	0.0383082
CAM109_map10	0001.CSV	1376.98	0.0394353
CAM109_map10	0001.CSV	1380.84	0.0401752
CAM109_map10	0001.CSV	1384.7	0.0408003
CAM109_map10	0001.CSV	1388.56	0.0418746
CAM109_map10	0001.CSV	1392.41	0.0426097
CAM109_map10	0001.CSV	1396.27	0.0438044
CAM109_map10	0001.CSV	1400.13	0.0449207
CAM109_map10	0001.CSV	1403.98	0.045782
CAM109_map10	0001.CSV	1407.84	0.0466906
CAM109_map10	0001.CSV	1411.7	0.0474417
CAM109_map10	0001.CSV	1415.55	0.0478812
CAM109_map10	0001.CSV	1419.41	0.04879
CAM109_map10	0001.CSV	1423.27	0.0492652
CAM109_map10	0001.CSV	1427.12	0.0496159
CAM109_map10	0001.CSV	1430.98	0.0500399
CAM109_map10	0001.CSV	1434.84	0.0508436
CAM109_map10	0001.CSV	1438.7	0.0517627
CAM109_map10	0001.CSV	1442.55	0.0523803
CAM109_map10	0001.CSV	1446.41	0.0530076
CAM109_map10	0001.CSV	1450.27	0.0536739
CAM109_map10	0001.CSV	1454.12	0.0535783
CAM109_map10	0001.CSV	1457.98	0.0543445
CAM109_map10	0001.CSV	1461.84	0.0545409
CAM109_map10	0001.CSV	1465.7	0.0548499
CAM109_map10	0001.CSV	1469.55	0.0548161
CAM109_map10	0001.CSV	1473.41	0.0543898
CAM109_map10	0001.CSV	1477.27	0.0530379
CAM109_map10	0001.CSV	1481.12	0.05153
CAM109_map10	0001.CSV	1484.98	0.0498936
CAM109_map10	0001.CSV	1488.84	0.04819
CAM109_map10	0001.CSV	1492.7	0.0461959
CAM109_map10	0001.CSV	1496.55	0.0444826
CAM109_map10	0001.CSV	1500.41	0.0425364
CAM109_map10	0001.CSV	1504.27	0.0409463
CAM109_map10	0001.CSV	1508.12	0.0388536
CAM109_map10	0001.CSV	1511.98	0.0370518
CAM109_map10	0001.CSV	1515.84	0.0353161
CAM109_map10	0001.CSV	1519.7	0.0334016
CAM109_map10	0001.CSV	1523.55	0.0313323
CAM109_map10	0001.CSV	1527.41	0.0297692
CAM109_map10	0001.CSV	1531.27	0.0284871
CAM109_map10	0001.CSV	1535.12	0.0276512
CAM109_map10	0001.CSV	1538.98	0.0267969
CAM109_map10	0001.CSV	1542.84	0.0259671
CAM109_map10	0001.CSV	1546.7	0.0246641
CAM109_map10	0001.CSV	1550.55	0.0235026
CAM109_map10	0001.CSV	1554.41	0.0225879
CAM109_map10	0001.CSV	1558.27	0.0221618
CAM109_map10	0001.CSV	1562.12	0.0213068
CAM109_map10	0001.CSV	1565.98	0.0204707
CAM109_map10	0001.CSV	1569.84	0.0198639
CAM109_map10	0001.CSV	1573.69	0.0194319
CAM109_map10	0001.CSV	1577.55	0.018894
CAM109_map10	0001.CSV	1581.41	0.0179225
CAM109_map10	0001.CSV	1585.27	0.016894
CAM109_map10	0001.CSV	1589.12	0.0162168
CAM109_map10	0001.CSV	1592.98	0.0159179
CAM109_map10	0001.CSV	1596.84	0.0158037
CAM109_map10	0001.CSV	1600.69	0.0156661
CAM109_map10	0001.CSV	1604.55	0.0156625
CAM109_map10	0001.CSV	1608.41	0.015618
CAM109_map10	0001.CSV	1612.27	0.0154096
CAM109_map10	0001.CSV	1616.12	0.015353
CAM109_map10	0001.CSV	1619.98	0.0154536
CAM109_map10	0001.CSV	1623.84	0.0152728
CAM109_map10	0001.CSV	1627.69	0.0151094
CAM109_map10	0001.CSV	1631.55	0.0146255
CAM109_map10	0001.CSV	1635.41	0.0147385
CAM109_map10	0001.CSV	1639.27	0.0150139
CAM109_map10	0001.CSV	1643.12	0.0144921
CAM109_map10	0001.CSV	1646.98	0.0143027
CAM109_map10	0001.CSV	1650.84	0.0145039
CAM109_map10	0001.CSV	1654.69	0.0149393
CAM109_map10	0001.CSV	1658.55	0.0145745
CAM109_map10	0001.CSV	1662.41	0.014178
CAM109_map10	0001.CSV	1666.27	0.0139694
CAM109_map10	0001.CSV	1670.12	0.0139848
CAM109_map10	0001.CSV	1673.98	0.0142794
CAM109_map10	0001.CSV	1677.84	0.0139564
CAM109_map10	0001.CSV	1681.69	0.0137315
CAM109_map10	0001.CSV	1685.55	0.0141035
CAM109_map10	0001.CSV	1689.41	0.0139034
CAM109_map10	0001.CSV	1693.27	0.0132724
CAM109_map10	0001.CSV	1697.12	0.0133536
CAM109_map10	0001.CSV	1700.98	0.014007
CAM109_map10	0001.CSV	1704.84	0.0141297
CAM109_map10	0001.CSV	1708.69	0.0140301
CAM109_map10	0001.CSV	1712.55	0.0138887
CAM109_map10	0001.CSV	1716.41	0.0146539
CAM109_map10	0001.CSV	1720.27	0.0155398
CAM109_map10	0001.CSV	1724.12	0.0153116
CAM109_map10	0001.CSV	1727.98	0.0150444
CAM109_map10	0001.CSV	1731.84	0.0150638
CAM109_map10	0001.CSV	1735.69	0.0152477
CAM109_map10	0001.CSV	1739.55	0.0146021
CAM109_map10	0001.CSV	1743.41	0.0137904
CAM109_map10	0001.CSV	1747.27	0.0131988
CAM109_map10	0001.CSV	1751.12	0.0127779
CAM109_map10	0001.CSV	1754.98	0.0120834
CAM109_map10	0001.CSV	1758.84	0.0116774
CAM109_map10	0001.CSV	1762.69	0.0115642
CAM109_map10	0001.CSV	1766.55	0.0113493
CAM109_map10	0001.CSV	1770.41	0.0114369
CAM109_map10	0001.CSV	1774.26	0.012153
CAM109_map10	0001.CSV	1778.12	0.0123045
CAM109_map10	0001.CSV	1781.98	0.0125545
CAM109_map10	0001.CSV	1785.84	0.0125724
CAM109_map10	0001.CSV	1789.69	0.0123087
CAM109_map10	0001.CSV	1793.55	0.0121564
CAM109_map10	0001.CSV	1797.41	0.0118768
CAM109_map10	0001.CSV	1801.26	0.0115929
CAM109_map10	0001.CSV	1805.12	0.0113135
CAM109_map10	0001.CSV	1808.98	0.0111372
CAM109_map10	0001.CSV	1812.84	0.0112186
CAM109_map10	0001.CSV	1816.69	0.0110249
CAM109_map10	0001.CSV	1820.55	0.0108567
CAM109_map10	0001.CSV	1824.41	0.0108432
CAM109_map10	0001.CSV	1828.26	0.0111329
CAM109_map10	0001.CSV	1832.12	0.0112459
CAM109_map10	0001.CSV	1835.98	0.0110886
CAM109_map10	0001.CSV	1839.84	0.0108834
CAM109_map10	0001.CSV	1843.69	0.0110597
CAM109_map10	0001.CSV	1847.55	0.0113527
CAM109_map10	0001.CSV	1851.41	0.0111606
CAM109_map10	0001.CSV	1855.26	0.0109799
CAM109_map10	0001.CSV	1859.12	0.0109802
CAM109_map10	0001.CSV	1862.98	0.0108714
CAM109_map10	0001.CSV	1866.84	0.0109579
CAM109_map10	0001.CSV	1870.69	0.0113681
CAM109_map10	0001.CSV	1874.55	0.0112186
CAM109_map10	0001.CSV	1878.41	0.0110075
CAM109_map10	0001.CSV	1882.26	0.0109677
CAM109_map10	0001.CSV	1886.12	0.0109561
CAM109_map10	0001.CSV	1889.98	0.0110695
CAM109_map10	0001.CSV	1893.83	0.0111218
CAM109_map10	0001.CSV	1897.69	0.0110612
CAM109_map10	0001.CSV	1901.55	0.0109559
CAM109_map10	0001.CSV	1905.41	0.0109001
CAM109_map10	0001.CSV	1909.26	0.0110088
CAM109_map10	0001.CSV	1913.12	0.0110353
CAM109_map10	0001.CSV	1916.98	0.0109496
CAM109_map10	0001.CSV	1920.83	0.0110565
CAM109_map10	0001.CSV	1924.69	0.0111198
CAM109_map10	0001.CSV	1928.55	0.0110745
CAM109_map10	0001.CSV	1932.4	0.011036
CAM109_map10	0001.CSV	1936.26	0.0109976
CAM109_map10	0001.CSV	1940.12	0.0109719
CAM109_map10	0001.CSV	1943.98	0.011219
CAM109_map10	0001.CSV	1947.83	0.0112459
CAM109_map10	0001.CSV	1951.69	0.0111676
CAM109_map10	0001.CSV	1955.55	0.0111715
CAM109_map10	0001.CSV	1959.4	0.0111859
CAM109_map10	0001.CSV	1963.26	0.0111643
CAM109_map10	0001.CSV	1967.12	0.0112729
CAM109_map10	0001.CSV	1970.98	0.0112784
CAM109_map10	0001.CSV	1974.83	0.0112077
CAM109_map10	0001.CSV	1978.69	0.0111907
CAM109_map10	0001.CSV	1982.55	0.0111532
CAM109_map10	0001.CSV	1986.4	0.0110756
CAM109_map10	0001.CSV	1990.26	0.0111489
CAM109_map10	0001.CSV	1994.12	0.0112659
CAM109_map10	0001.CSV	1997.98	0.0111969
CAM109_map10	0001.CSV	2001.83	0.0111128
CAM109_map10	0001.CSV	2005.69	0.0111043
CAM109_map10	0001.CSV	2009.55	0.0110942
CAM109_map10	0001.CSV	2013.4	0.0110839
CAM109_map10	0001.CSV	2017.26	0.0111384
CAM109_map10	0001.CSV	2021.12	0.0111681
CAM109_map10	0001.CSV	2024.97	0.0110799
CAM109_map10	0001.CSV	2028.83	0.0110669
CAM109_map10	0001.CSV	2032.69	0.0110616
CAM109_map10	0001.CSV	2036.55	0.0110566
CAM109_map10	0001.CSV	2040.4	0.0110621
CAM109_map10	0001.CSV	2044.26	0.0111167
CAM109_map10	0001.CSV	2048.12	0.0111198
CAM109_map10	0001.CSV	2051.97	0.0111244
CAM109_map10	0001.CSV	2055.83	0.0111256
CAM109_map10	0001.CSV	2059.69	0.0111471
CAM109_map10	0001.CSV	2063.55	0.0111731
CAM109_map10	0001.CSV	2067.4	0.0112092
CAM109_map10	0001.CSV	2071.26	0.0111596
CAM109_map10	0001.CSV	2075.12	0.0111886
CAM109_map10	0001.CSV	2078.97	0.011226
CAM109_map10	0001.CSV	2082.83	0.0112143
CAM109_map10	0001.CSV	2086.69	0.0111807
CAM109_map10	0001.CSV	2090.55	0.0112378
CAM109_map10	0001.CSV	2094.4	0.0112798
CAM109_map10	0001.CSV	2098.26	0.011308
CAM109_map10	0001.CSV	2102.12	0.011319
CAM109_map10	0001.CSV	2105.97	0.0113377
CAM109_map10	0001.CSV	2109.83	0.0113499
CAM109_map10	0001.CSV	2113.69	0.0113467
CAM109_map10	0001.CSV	2117.55	0.0113457
CAM109_map10	0001.CSV	2121.4	0.0113526
CAM109_map10	0001.CSV	2125.26	0.0113532
CAM109_map10	0001.CSV	2129.12	0.011392
CAM109_map10	0001.CSV	2132.97	0.0114264
CAM109_map10	0001.CSV	2136.83	0.0114386
CAM109_map10	0001.CSV	2140.69	0.0114429
CAM109_map10	0001.CSV	2144.55	0.0114826
CAM109_map10	0001.CSV	2148.4	0.0115089
CAM109_map10	0001.CSV	2152.26	0.0115149
CAM109_map10	0001.CSV	2156.12	0.0115012
CAM109_map10	0001.CSV	2159.97	0.0115209
CAM109_map10	0001.CSV	2163.83	0.0115142
CAM109_map10	0001.CSV	2167.69	0.0115251
CAM109_map10	0001.CSV	2171.55	0.0115298
CAM109_map10	0001.CSV	2175.4	0.0115724
CAM109_map10	0001.CSV	2179.26	0.0116033
CAM109_map10	0001.CSV	2183.12	0.0116195
CAM109_map10	0001.CSV	2186.97	0.0116034
CAM109_map10	0001.CSV	2190.83	0.0116213
CAM109_map10	0001.CSV	2194.69	0.0116676
CAM109_map10	0001.CSV	2198.55	0.0117192
CAM109_map10	0001.CSV	2202.4	0.0117016
CAM109_map10	0001.CSV	2206.26	0.0116668
CAM109_map10	0001.CSV	2210.12	0.0116793
CAM109_map10	0001.CSV	2213.97	0.0116932
CAM109_map10	0001.CSV	2217.83	0.0116768
CAM109_map10	0001.CSV	2221.69	0.0117096
CAM109_map10	0001.CSV	2225.54	0.011697
CAM109_map10	0001.CSV	2229.4	0.0116828
CAM109_map10	0001.CSV	2233.26	0.0116559
CAM109_map10	0001.CSV	2237.12	0.0116566
CAM109_map10	0001.CSV	2240.97	0.0116933
CAM109_map10	0001.CSV	2244.83	0.0117142
CAM109_map10	0001.CSV	2248.69	0.0117024
CAM109_map10	0001.CSV	2252.54	0.0117193
CAM109_map10	0001.CSV	2256.4	0.0116855
CAM109_map10	0001.CSV	2260.26	0.0116812
CAM109_map10	0001.CSV	2264.11	0.0117016
CAM109_map10	0001.CSV	2267.97	0.0116805
CAM109_map10	0001.CSV	2271.83	0.0116887
CAM109_map10	0001.CSV	2275.69	0.0117305
CAM109_map10	0001.CSV	2279.54	0.0116706
CAM109_map10	0001.CSV	2283.4	0.0115965
CAM109_map10	0001.CSV	2287.26	0.01157
CAM109_map10	0001.CSV	2291.11	0.011599
CAM109_map10	0001.CSV	2294.97	0.0116187
CAM109_map10	0001.CSV	2298.83	0.0116072
CAM109_map10	0001.CSV	2302.69	0.0115907
CAM109_map10	0001.CSV	2306.54	0.0115848
CAM109_map10	0001.CSV	2310.4	0.0115339
CAM109_map10	0001.CSV	2314.26	0.0113994
CAM109_map10	0001.CSV	2318.11	0.0112615
CAM109_map10	0001.CSV	2321.97	0.0110653
CAM109_map10	0001.CSV	2325.83	0.0105625
CAM109_map10	0001.CSV	2329.69	0.0101522
CAM109_map10	0001.CSV	2333.54	0.0100472
CAM109_map10	0001.CSV	2337.4	0.00970884
CAM109_map10	0001.CSV	2341.26	0.00953292
CAM109_map10	0001.CSV	2345.11	0.0107535
CAM109_map10	0001.CSV	2348.97	0.0108437
CAM109_map10	0001.CSV	2352.83	0.00946918
CAM109_map10	0001.CSV	2356.69	0.00711428
CAM109_map10	0001.CSV	2360.54	0.00603402
CAM109_map10	0001.CSV	2364.4	0.00761433
CAM109_map10	0001.CSV	2368.26	0.00986069
CAM109_map10	0001.CSV	2372.11	0.0112063
CAM109_map10	0001.CSV	2375.97	0.0118309
CAM109_map10	0001.CSV	2379.83	0.0119732
CAM109_map10	0001.CSV	2383.69	0.0118121
CAM109_map10	0001.CSV	2387.54	0.011533
CAM109_map10	0001.CSV	2391.4	0.0113739
CAM109_map10	0001.CSV	2395.26	0.0113455
CAM109_map10	0001.CSV	2399.11	0.01133
CAM109_map10	0001.CSV	2402.97	0.0113173
CAM109_map10	0001.CSV	2406.83	0.01133
CAM109_map10	0001.CSV	2410.68	0.0113435
CAM109_map10	0001.CSV	2414.54	0.0112935
CAM109_map10	0001.CSV	2418.4	0.011271
CAM109_map10	0001.CSV	2422.26	0.0112728
CAM109_map10	0001.CSV	2426.11	0.011232
CAM109_map10	0001.CSV	2429.97	0.0112458
CAM109_map10	0001.CSV	2433.83	0.0112732
CAM109_map10	0001.CSV	2437.68	0.011289
CAM109_map10	0001.CSV	2441.54	0.0113202
CAM109_map10	0001.CSV	2445.4	0.0113544
CAM109_map10	0001.CSV	2449.26	0.0113262
CAM109_map10	0001.CSV	2453.11	0.0113045
CAM109_map10	0001.CSV	2456.97	0.0113127
CAM109_map10	0001.CSV	2460.83	0.0113112
CAM109_map10	0001.CSV	2464.68	0.0113155
CAM109_map10	0001.CSV	2468.54	0.0113444
CAM109_map10	0001.CSV	2472.4	0.0113647
CAM109_map10	0001.CSV	2476.26	0.0113759
CAM109_map10	0001.CSV	2480.11	0.0114384
CAM109_map10	0001.CSV	2483.97	0.0115231
CAM109_map10	0001.CSV	2487.83	0.0115522
CAM109_map10	0001.CSV	2491.68	0.0115244
CAM109_map10	0001.CSV	2495.54	0.0115243
CAM109_map10	0001.CSV	2499.4	0.011563
CAM109_map10	0001.CSV	2503.26	0.0116001
CAM109_map10	0001.CSV	2507.11	0.0116042
CAM109_map10	0001.CSV	2510.97	0.0116123
CAM109_map10	0001.CSV	2514.83	0.0116578
CAM109_map10	0001.CSV	2518.68	0.0117366
CAM109_map10	0001.CSV	2522.54	0.0117243
CAM109_map10	0001.CSV	2526.4	0.0116723
CAM109_map10	0001.CSV	2530.26	0.0116617
CAM109_map10	0001.CSV	2534.11	0.0116021
CAM109_map10	0001.CSV	2537.97	0.0115589
CAM109_map10	0001.CSV	2541.83	0.0115506
CAM109_map10	0001.CSV	2545.68	0.0115143
CAM109_map10	0001.CSV	2549.54	0.0114535
CAM109_map10	0001.CSV	2553.4	0.0114175
CAM109_map10	0001.CSV	2557.26	0.0114182
CAM109_map10	0001.CSV	2561.11	0.0114107
CAM109_map10	0001.CSV	2564.97	0.0113922
CAM109_map10	0001.CSV	2568.83	0.0113921
CAM109_map10	0001.CSV	2572.68	0.011425
CAM109_map10	0001.CSV	2576.54	0.0114816
CAM109_map10	0001.CSV	2580.4	0.01145
CAM109_map10	0001.CSV	2584.25	0.0113907
CAM109_map10	0001.CSV	2588.11	0.0113558
CAM109_map10	0001.CSV	2591.97	0.0113833
CAM109_map10	0001.CSV	2595.83	0.011384
CAM109_map10	0001.CSV	2599.68	0.011396
CAM109_map10	0001.CSV	2603.54	0.0114091
CAM109_map10	0001.CSV	2607.4	0.0114345
CAM109_map10	0001.CSV	2611.25	0.0115039
CAM109_map10	0001.CSV	2615.11	0.0115408
CAM109_map10	0001.CSV	2618.97	0.0115058
CAM109_map10	0001.CSV	2622.82	0.0115528
CAM109_map10	0001.CSV	2626.68	0.0116146
CAM109_map10	0001.CSV	2630.54	0.0115747
CAM109_map10	0001.CSV	2634.4	0.0115782
CAM109_map10	0001.CSV	2638.25	0.0115795
CAM109_map10	0001.CSV	2642.11	0.011469
CAM109_map10	0001.CSV	2645.97	0.0113934
CAM109_map10	0001.CSV	2649.82	0.011411
CAM109_map10	0001.CSV	2653.68	0.0114042
CAM109_map10	0001.CSV	2657.54	0.0113627
CAM109_map10	0001.CSV	2661.4	0.0113581
CAM109_map10	0001.CSV	2665.25	0.0113525
CAM109_map10	0001.CSV	2669.11	0.0113653
CAM109_map10	0001.CSV	2672.97	0.0115172
CAM109_map10	0001.CSV	2676.82	0.0117263
CAM109_map10	0001.CSV	2680.68	0.0116931
CAM109_map10	0001.CSV	2684.54	0.0114299
CAM109_map10	0001.CSV	2688.4	0.0113011
CAM109_map10	0001.CSV	2692.25	0.011302
CAM109_map10	0001.CSV	2696.11	0.0113414
CAM109_map10	0001.CSV	2699.97	0.0113622
CAM109_map10	0001.CSV	2703.82	0.0113775
CAM109_map10	0001.CSV	2707.68	0.0114636
CAM109_map10	0001.CSV	2711.54	0.0114645
CAM109_map10	0001.CSV	2715.4	0.011457
CAM109_map10	0001.CSV	2719.25	0.0115698
CAM109_map10	0001.CSV	2723.11	0.0117755
CAM109_map10	0001.CSV	2726.97	0.0117798
CAM109_map10	0001.CSV	2730.82	0.0115981
CAM109_map10	0001.CSV	2734.68	0.0116267
CAM109_map10	0001.CSV	2738.54	0.0116849
CAM109_map10	0001.CSV	2742.4	0.0117173
CAM109_map10	0001.CSV	2746.25	0.0119292
CAM109_map10	0001.CSV	2750.11	0.0119665
CAM109_map10	0001.CSV	2753.97	0.0117966
CAM109_map10	0001.CSV	2757.82	0.0117519
CAM109_map10	0001.CSV	2761.68	0.0116734
CAM109_map10	0001.CSV	2765.54	0.0116191
CAM109_map10	0001.CSV	2769.39	0.0117848
CAM109_map10	0001.CSV	2773.25	0.0120526
CAM109_map10	0001.CSV	2777.11	0.0120033
CAM109_map10	0001.CSV	2780.97	0.0118653
CAM109_map10	0001.CSV	2784.82	0.0119688
CAM109_map10	0001.CSV	2788.68	0.012281
CAM109_map10	0001.CSV	2792.54	0.012375
CAM109_map10	0001.CSV	2796.39	0.0123711
CAM109_map10	0001.CSV	2800.25	0.0122567
CAM109_map10	0001.CSV	2804.11	0.0121218
CAM109_map10	0001.CSV	2807.97	0.0122806
CAM109_map10	0001.CSV	2811.82	0.0122496
CAM109_map10	0001.CSV	2815.68	0.0120694
CAM109_map10	0001.CSV	2819.54	0.0121281
CAM109_map10	0001.CSV	2823.39	0.012242
CAM109_map10	0001.CSV	2827.25	0.0122845
CAM109_map10	0001.CSV	2831.11	0.0125497
CAM109_map10	0001.CSV	2834.97	0.0129967
CAM109_map10	0001.CSV	2838.82	0.0132948
CAM109_map10	0001.CSV	2842.68	0.0134826
CAM109_map10	0001.CSV	2846.54	0.0140142
CAM109_map10	0001.CSV	2850.39	0.0143154
CAM109_map10	0001.CSV	2854.25	0.0141108
CAM109_map10	0001.CSV	2858.11	0.0139272
CAM109_map10	0001.CSV	2861.97	0.013671
CAM109_map10	0001.CSV	2865.82	0.0134774
CAM109_map10	0001.CSV	2869.68	0.0136263
CAM109_map10	0001.CSV	2873.54	0.0137758
CAM109_map10	0001.CSV	2877.39	0.0134345
CAM109_map10	0001.CSV	2881.25	0.0130893
CAM109_map10	0001.CSV	2885.11	0.0130603
CAM109_map10	0001.CSV	2888.97	0.0132022
CAM109_map10	0001.CSV	2892.82	0.0134868
CAM109_map10	0001.CSV	2896.68	0.0136863
CAM109_map10	0001.CSV	2900.54	0.0137713
CAM109_map10	0001.CSV	2904.39	0.0140426
CAM109_map10	0001.CSV	2908.25	0.0146325
CAM109_map10	0001.CSV	2912.11	0.0156088
CAM109_map10	0001.CSV	2915.97	0.016309
CAM109_map10	0001.CSV	2919.82	0.0161952
CAM109_map10	0001.CSV	2923.68	0.0156634
CAM109_map10	0001.CSV	2927.54	0.0153897
CAM109_map10	0001.CSV	2931.39	0.0149211
CAM109_map10	0001.CSV	2935.25	0.0142124
CAM109_map10	0001.CSV	2939.11	0.0139519
CAM109_map10	0001.CSV	2942.96	0.0141767
CAM109_map10	0001.CSV	2946.82	0.0142244
CAM109_map10	0001.CSV	2950.68	0.0139979
CAM109_map10	0001.CSV	2954.54	0.0136524
CAM109_map10	0001.CSV	2958.39	0.0133775
CAM109_map10	0001.CSV	2962.25	0.0132986
CAM109_map10	0001.CSV	2966.11	0.0130041
CAM109_map10	0001.CSV	2969.96	0.0128582
CAM109_map10	0001.CSV	2973.82	0.0130662
CAM109_map10	0001.CSV	2977.68	0.0131935
CAM109_map10	0001.CSV	2981.53	0.0129553
CAM109_map10	0001.CSV	2985.39	0.0124637
CAM109_map10	0001.CSV	2989.25	0.0124599
CAM109_map10	0001.CSV	2993.11	0.0127397
CAM109_map10	0001.CSV	2996.96	0.012661
CAM109_map10	0001.CSV	3000.82	0.0123739
CAM109_map10	0001.CSV	3004.68	0.0122615
CAM109_map10	0001.CSV	3008.53	0.0124975
CAM109_map10	0001.CSV	3012.39	0.0127887
CAM109_map10	0001.CSV	3016.25	0.0127933
CAM109_map10	0001.CSV	3020.11	0.0126198
CAM109_map10	0001.CSV	3023.96	0.0124698
CAM109_map10	0001.CSV	3027.82	0.0124144
CAM109_map10	0001.CSV	3031.68	0.0126537
CAM109_map10	0001.CSV	3035.53	0.012821
CAM109_map10	0001.CSV	3039.39	0.0128676
CAM109_map10	0001.CSV	3043.25	0.0129649
CAM109_map10	0001.CSV	3047.11	0.0129117
CAM109_map10	0001.CSV	3050.96	0.0128976
CAM109_map10	0001.CSV	3054.82	0.0128747
CAM109_map10	0001.CSV	3058.68	0.0127574
CAM109_map10	0001.CSV	3062.53	0.012766
CAM109_map10	0001.CSV	3066.39	0.0130134
CAM109_map10	0001.CSV	3070.25	0.0129513
CAM109_map10	0001.CSV	3074.11	0.012903
CAM109_map10	0001.CSV	3077.96	0.0130938
CAM109_map10	0001.CSV	3081.82	0.0132337
CAM109_map10	0001.CSV	3085.68	0.0131871
CAM109_map10	0001.CSV	3089.53	0.0130146
CAM109_map10	0001.CSV	3093.39	0.0127249
CAM109_map10	0001.CSV	3097.25	0.0127198
CAM109_map10	0001.CSV	3101.11	0.0128199
CAM109_map10	0001.CSV	3104.96	0.0128706
CAM109_map10	0001.CSV	3108.82	0.0130551
CAM109_map10	0001.CSV	3112.68	0.0131831
CAM109_map10	0001.CSV	3116.53	0.0133413
CAM109_map10	0001.CSV	3120.39	0.0132576
CAM109_map10	0001.CSV	3124.25	0.0129365
CAM109_map10	0001.CSV	3128.11	0.0127716
CAM109_map10	0001.CSV	3131.96	0.012759
CAM109_map10	0001.CSV	3135.82	0.0129474
CAM109_map10	0001.CSV	3139.68	0.0130911
CAM109_map10	0001.CSV	3143.53	0.0128928
CAM109_map10	0001.CSV	3147.39	0.0129706
CAM109_map10	0001.CSV	3151.25	0.0133183
CAM109_map10	0001.CSV	3155.1	0.0131967
CAM109_map10	0001.CSV	3158.96	0.0127445
CAM109_map10	0001.CSV	3162.82	0.0124917
CAM109_map10	0001.CSV	3166.68	0.0123888
CAM109_map10	0001.CSV	3170.53	0.0124093
CAM109_map10	0001.CSV	3174.39	0.0124582
CAM109_map10	0001.CSV	3178.25	0.0125769
CAM109_map10	0001.CSV	3182.1	0.0127157
CAM109_map10	0001.CSV	3185.96	0.0127768
CAM109_map10	0001.CSV	3189.82	0.0128232
CAM109_map10	0001.CSV	3193.68	0.0127711
CAM109_map10	0001.CSV	3197.53	0.0127487
CAM109_map10	0001.CSV	3201.39	0.0128728
CAM109_map10	0001.CSV	3205.25	0.0129051
CAM109_map10	0001.CSV	3209.1	0.0128743
CAM109_map10	0001.CSV	3212.96	0.0130303
CAM109_map10	0001.CSV	3216.82	0.0131008
CAM109_map10	0001.CSV	3220.68	0.0129704
CAM109_map10	0001.CSV	3224.53	0.0129076
CAM109_map10	0001.CSV	3228.39	0.0131994
CAM109_map10	0001.CSV	3232.25	0.0136833
CAM109_map10	0001.CSV	3236.1	0.0136418
CAM109_map10	0001.CSV	3239.96	0.0133968
CAM109_map10	0001.CSV	3243.82	0.0135595
CAM109_map10	0001.CSV	3247.68	0.0136266
CAM109_map10	0001.CSV	3251.53	0.0134289
CAM109_map10	0001.CSV	3255.39	0.0135072
CAM109_map10	0001.CSV	3259.25	0.0133671
CAM109_map10	0001.CSV	3263.1	0.0133042
CAM109_map10	0001.CSV	3266.96	0.0137071
CAM109_map10	0001.CSV	3270.82	0.0141403
CAM109_map10	0001.CSV	3274.68	0.0140785
CAM109_map10	0001.CSV	3278.53	0.0137189
CAM109_map10	0001.CSV	3282.39	0.0135068
CAM109_map10	0001.CSV	3286.25	0.0135742
CAM109_map10	0001.CSV	3290.1	0.0139534
CAM109_map10	0001.CSV	3293.96	0.0142394
CAM109_map10	0001.CSV	3297.82	0.0140772
CAM109_map10	0001.CSV	3301.67	0.0141025
CAM109_map10	0001.CSV	3305.53	0.0143528
CAM109_map10	0001.CSV	3309.39	0.0142214
CAM109_map10	0001.CSV	3313.25	0.0136917
CAM109_map10	0001.CSV	3317.1	0.0133669
CAM109_map10	0001.CSV	3320.96	0.0135934
CAM109_map10	0001.CSV	3324.82	0.0138967
CAM109_map10	0001.CSV	3328.67	0.0135997
CAM109_map10	0001.CSV	3332.53	0.0134534
CAM109_map10	0001.CSV	3336.39	0.013992
CAM109_map10	0001.CSV	3340.24	0.0142773
CAM109_map10	0001.CSV	3344.1	0.0140333
CAM109_map10	0001.CSV	3347.96	0.0139417
CAM109_map10	0001.CSV	3351.82	0.0138913
CAM109_map10	0001.CSV	3355.67	0.0137243
CAM109_map10	0001.CSV	3359.53	0.0138862
CAM109_map10	0001.CSV	3363.39	0.0141673
CAM109_map10	0001.CSV	3367.24	0.014519
CAM109_map10	0001.CSV	3371.1	0.0143464
CAM109_map10	0001.CSV	3374.96	0.0138823
CAM109_map10	0001.CSV	3378.82	0.0137068
CAM109_map10	0001.CSV	3382.67	0.0135178
CAM109_map10	0001.CSV	3386.53	0.0136589
CAM109_map10	0001.CSV	3390.39	0.014189
CAM109_map10	0001.CSV	3394.24	0.0144082
CAM109_map10	0001.CSV	3398.1	0.0143865
CAM109_map10	0001.CSV	3401.96	0.0142204
CAM109_map10	0001.CSV	3405.82	0.0139627
CAM109_map10	0001.CSV	3409.67	0.0139694
CAM109_map10	0001.CSV	3413.53	0.0137355
CAM109_map10	0001.CSV	3417.39	0.0132403
CAM109_map10	0001.CSV	3421.24	0.0132085
CAM109_map10	0001.CSV	3425.1	0.0133878
CAM109_map10	0001.CSV	3428.96	0.0137223
CAM109_map10	0001.CSV	3432.82	0.0140221
CAM109_map10	0001.CSV	3436.67	0.0137852
CAM109_map10	0001.CSV	3440.53	0.0131005
CAM109_map10	0001.CSV	3444.39	0.0127558
CAM109_map10	0001.CSV	3448.24	0.0126418
CAM109_map10	0001.CSV	3452.1	0.0123638
CAM109_map10	0001.CSV	3455.96	0.0124811
CAM109_map10	0001.CSV	3459.82	0.0129895
CAM109_map10	0001.CSV	3463.67	0.0134498
CAM109_map10	0001.CSV	3467.53	0.0135867
CAM109_map10	0001.CSV	3471.39	0.0131118
CAM109_map10	0001.CSV	3475.24	0.0127206
CAM109_map10	0001.CSV	3479.1	0.0127555
CAM109_map10	0001.CSV	3482.96	0.0128137
CAM109_map10	0001.CSV	3486.82	0.0129278
CAM109_map10	0001.CSV	3490.67	0.0128751
CAM109_map10	0001.CSV	3494.53	0.0128466
CAM109_map10	0001.CSV	3498.39	0.0127179
CAM109_map10	0001.CSV	3502.24	0.0125737
CAM109_map10	0001.CSV	3506.1	0.0123158
CAM109_map10	0001.CSV	3509.96	0.0122521
CAM109_map10	0001.CSV	3513.81	0.0123312
CAM109_map10	0001.CSV	3517.67	0.0119375
CAM109_map10	0001.CSV	3521.53	0.0119874
CAM109_map10	0001.CSV	3525.39	0.0120825
CAM109_map10	0001.CSV	3529.24	0.0119661
CAM109_map10	0001.CSV	3533.1	0.0120422
CAM109_map10	0001.CSV	3536.96	0.0121219
CAM109_map10	0001.CSV	3540.81	0.0121093
CAM109_map10	0001.CSV	3544.67	0.0123546
CAM109_map10	0001.CSV	3548.53	0.0123251
CAM109_map10	0001.CSV	3552.39	0.0119229
CAM109_map10	0001.CSV	3556.24	0.0117641
CAM109_map10	0001.CSV	3560.1	0.011501
CAM109_map10	0001.CSV	3563.96	0.0109979
CAM109_map10	0001.CSV	3567.81	0.0115993
CAM109_map10	0001.CSV	3571.67	0.011898
CAM109_map10	0001.CSV	3575.53	0.0115853
CAM109_map10	0001.CSV	3579.39	0.0118601
CAM109_map10	0001.CSV	3583.24	0.0118234
CAM109_map10	0001.CSV	3587.1	0.0118674
CAM109_map10	0001.CSV	3590.96	0.0119788
CAM109_map10	0001.CSV	3594.81	0.0117356
CAM109_map10	0001.CSV	3598.67	0.0119393
CAM109_map10	0001.CSV	3602.53	0.0119201
CAM109_map10	0001.CSV	3606.39	0.0111532
CAM109_map10	0001.CSV	3610.24	0.0108156
CAM109_map10	0001.CSV	3614.1	0.0110379
CAM109_map10	0001.CSV	3617.96	0.0115307
CAM109_map10	0001.CSV	3621.81	0.011944
CAM109_map10	0001.CSV	3625.67	0.0110595
CAM109_map10	0001.CSV	3629.53	0.0110402
CAM109_map10	0001.CSV	3633.39	0.0117969
CAM109_map10	0001.CSV	3637.24	0.0115371
CAM109_map10	0001.CSV	3641.1	0.0110762
CAM109_map10	0001.CSV	3644.96	0.0101461
CAM109_map10	0001.CSV	3648.81	0.0107963
CAM109_map10	0001.CSV	3652.67	0.0121867
CAM109_map10	0001.CSV	3656.53	0.0123065
CAM109_map10	0001.CSV	3660.38	0.012321
CAM109_map10	0001.CSV	3664.24	0.0112949
CAM109_map10	0001.CSV	3668.1	0.0102659
CAM109_map10	0001.CSV	3671.96	0.0103293
CAM109_map10	0001.CSV	3675.81	0.0113445
CAM109_map10	0001.CSV	3679.67	0.0120402
CAM109_map10	0001.CSV	3683.53	0.0115218
CAM109_map10	0001.CSV	3687.38	0.0113738
CAM109_map10	0001.CSV	3691.24	0.012489
CAM109_map10	0001.CSV	3695.1	0.0121772
CAM109_map10	0001.CSV	3698.95	0.0113364
CAM109_map10	0001.CSV	3702.81	0.0110865
CAM109_map10	0001.CSV	3706.67	0.0105896
CAM109_map10	0001.CSV	3710.53	0.010657
CAM109_map10	0001.CSV	3714.38	0.0116981
CAM109_map10	0001.CSV	3718.24	0.0111398
CAM109_map10	0001.CSV	3722.1	0.0106326
CAM109_map10	0001.CSV	3725.95	0.010645
CAM109_map10	0001.CSV	3729.81	0.0102387
CAM109_map10	0001.CSV	3733.67	0.0105749
CAM109_map10	0001.CSV	3737.53	0.0120553
CAM109_map10	0001.CSV	3741.38	0.0109005
CAM109_map10	0001.CSV	3745.24	0.00966963
CAM109_map10	0001.CSV	3749.1	0.0097944
CAM109_map10	0001.CSV	3752.95	0.0109293
CAM109_map10	0001.CSV	3756.81	0.011017
CAM109_map10	0001.CSV	3760.67	0.0109415
CAM109_map10	0001.CSV	3764.53	0.0106353
CAM109_map10	0001.CSV	3768.38	0.0108838
CAM109_map10	0001.CSV	3772.24	0.0112755
CAM109_map10	0001.CSV	3776.1	0.0108863
CAM109_map10	0001.CSV	3779.95	0.0108483
CAM109_map10	0001.CSV	3783.81	0.0109327
CAM109_map10	0001.CSV	3787.67	0.0110365
CAM109_map10	0001.CSV	3791.53	0.0107047
CAM109_map10	0001.CSV	3795.38	0.0100675
CAM109_map10	0001.CSV	3799.24	0.00998663
CAM109_map10	0001.CSV	3803.1	0.0106096
CAM109_map10	0001.CSV	3806.95	0.0111369
CAM109_map10	0001.CSV	3810.81	0.0107618
CAM109_map10	0001.CSV	3814.67	0.010047
CAM109_map10	0001.CSV	3818.53	0.0102957
CAM109_map10	0001.CSV	3822.38	0.0109759
CAM109_map10	0001.CSV	3826.24	0.0108063
CAM109_map10	0001.CSV	3830.1	0.0103868
CAM109_map10	0001.CSV	3833.95	0.0103164
CAM109_map10	0001.CSV	3837.81	0.010812
CAM109_map10	0001.CSV	3841.67	0.0116039
CAM109_map10	0001.CSV	3845.53	0.0111469
CAM109_map10	0001.CSV	3849.38	0.00977807
CAM109_map10	0001.CSV	3853.24	0.010049
CAM109_map10	0001.CSV	3857.1	0.0111972
CAM109_map10	0001.CSV	3860.95	0.0103169
CAM109_map10	0001.CSV	3864.81	0.0102066
CAM109_map10	0001.CSV	3868.67	0.0104641
CAM109_map10	0001.CSV	3872.52	0.0109774
CAM109_map10	0001.CSV	3876.38	0.0108082
CAM109_map10	0001.CSV	3880.24	0.010673
CAM109_map10	0001.CSV	3884.1	0.0112646
CAM109_map10	0001.CSV	3887.95	0.0110928
CAM109_map10	0001.CSV	3891.81	0.0109116
CAM109_map10	0001.CSV	3895.67	0.010609
CAM109_map10	0001.CSV	3899.52	0.0100785
CAM109_map10	0001.CSV	3903.38	0.0111097
CAM109_map10	0001.CSV	3907.24	0.0116564
CAM109_map10	0001.CSV	3911.1	0.0110361
CAM109_map10	0001.CSV	3914.95	0.0106008
CAM109_map10	0001.CSV	3918.81	0.0108226
CAM109_map10	0001.CSV	3922.67	0.0109497
CAM109_map10	0001.CSV	3926.52	0.0110476
CAM109_map10	0001.CSV	3930.38	0.0113237
CAM109_map10	0001.CSV	3934.24	0.0116372
CAM109_map10	0001.CSV	3938.09	0.0110826
CAM109_map10	0001.CSV	3941.95	0.0107597
CAM109_map10	0001.CSV	3945.81	0.0108787
CAM109_map10	0001.CSV	3949.67	0.0111287
CAM109_map10	0001.CSV	3953.52	0.0111555
CAM109_map10	0001.CSV	3957.38	0.0109909
CAM109_map10	0001.CSV	3961.24	0.0110831
CAM109_map10	0001.CSV	3965.09	0.0111745
CAM109_map10	0001.CSV	3968.95	0.0111088
CAM109_map10	0001.CSV	3972.81	0.0110796
CAM109_map10	0001.CSV	3976.67	0.011178
CAM109_map10	0001.CSV	3980.52	0.0112734
CAM109_map10	0001.CSV	3984.38	0.0112887
CAM109_map10	0001.CSV	3988.24	0.0111072
CAM109_map10	0001.CSV	3992.09	0.0110067
CAM109_map10	0001.CSV	3995.95	0.0110806
CAM109_map10	0001.CSV	3999.81	0.0110797
CAM109_map10	0002.CSV	674.992	0.0282954
CAM109_map10	0002.CSV	678.849	0.030888
CAM109_map10	0002.CSV	682.706	0.031772
CAM109_map10	0002.CSV	686.563	0.0342017
CAM109_map10	0002.CSV	690.42	0.0376938
CAM109_map10	0002.CSV	694.277	0.0503837
CAM109_map10	0002.CSV	698.134	0.0652004
CAM109_map10	0002.CSV	701.991	0.0607352
CAM109_map10	0002.CSV	705.849	0.0524223
CAM109_map10	0002.CSV	709.706	0.0697086
CAM109_map10	0002.CSV	713.563	0.0730428
CAM109_map10	0002.CSV	717.42	0.0458272
CAM109_map10	0002.CSV	721.277	0.0283947
CAM109_map10	0002.CSV	725.134	0.0262287
CAM109_map10	0002.CSV	728.991	0.025847
CAM109_map10	0002.CSV	732.848	0.0265662
CAM109_map10	0002.CSV	736.705	0.0276658
CAM109_map10	0002.CSV	740.562	0.0298188
CAM109_map10	0002.CSV	744.42	0.0310279
CAM109_map10	0002.CSV	748.277	0.032163
CAM109_map10	0002.CSV	752.134	0.0321404
CAM109_map10	0002.CSV	755.991	0.0329028
CAM109_map10	0002.CSV	759.848	0.0330683
CAM109_map10	0002.CSV	763.705	0.0340007
CAM109_map10	0002.CSV	767.562	0.0342133
CAM109_map10	0002.CSV	771.419	0.0348167
CAM109_map10	0002.CSV	775.276	0.0352266
CAM109_map10	0002.CSV	779.133	0.0367111
CAM109_map10	0002.CSV	782.99	0.0372214
CAM109_map10	0002.CSV	786.848	0.0382636
CAM109_map10	0002.CSV	790.705	0.0393163
CAM109_map10	0002.CSV	794.562	0.0414652
CAM109_map10	0002.CSV	798.419	0.0433518
CAM109_map10	0002.CSV	802.276	0.045952
CAM109_map10	0002.CSV	806.133	0.048065
CAM109_map10	0002.CSV	809.99	0.0513512
CAM109_map10	0002.CSV	813.847	0.0547697
CAM109_map10	0002.CSV	817.704	0.0595561
CAM109_map10	0002.CSV	821.562	0.0643627
CAM109_map10	0002.CSV	825.419	0.070474
CAM109_map10	0002.CSV	829.276	0.0778324
CAM109_map10	0002.CSV	833.133	0.0883126
CAM109_map10	0002.CSV	836.99	0.102111
CAM109_map10	0002.CSV	840.847	0.119242
CAM109_map10	0002.CSV	844.704	0.133015
CAM109_map10	0002.CSV	848.561	0.151171
CAM109_map10	0002.CSV	852.418	0.171503
CAM109_map10	0002.CSV	856.275	0.178363
CAM109_map10	0002.CSV	860.132	0.162368
CAM109_map10	0002.CSV	863.99	0.130173
CAM109_map10	0002.CSV	867.847	0.0938729
CAM109_map10	0002.CSV	871.704	0.0657533
CAM109_map10	0002.CSV	875.561	0.0489111
CAM109_map10	0002.CSV	879.418	0.0405591
CAM109_map10	0002.CSV	883.275	0.0354312
CAM109_map10	0002.CSV	887.132	0.0325746
CAM109_map10	0002.CSV	890.989	0.0309791
CAM109_map10	0002.CSV	894.846	0.0306466
CAM109_map10	0002.CSV	898.703	0.0303149
CAM109_map10	0002.CSV	902.561	0.0305563
CAM109_map10	0002.CSV	906.418	0.0307368
CAM109_map10	0002.CSV	910.275	0.0308157
CAM109_map10	0002.CSV	914.132	0.0301608
CAM109_map10	0002.CSV	917.989	0.0301524
CAM109_map10	0002.CSV	921.846	0.0301091
CAM109_map10	0002.CSV	925.703	0.0306234
CAM109_map10	0002.CSV	929.56	0.0308756
CAM109_map10	0002.CSV	933.417	0.0312694
CAM109_map10	0002.CSV	937.274	0.0313365
CAM109_map10	0002.CSV	941.131	0.0315427
CAM109_map10	0002.CSV	944.989	0.0312329
CAM109_map10	0002.CSV	948.846	0.0312755
CAM109_map10	0002.CSV	952.703	0.0311643
CAM109_map10	0002.CSV	956.56	0.031393
CAM109_map10	0002.CSV	960.417	0.0312469
CAM109_map10	0002.CSV	964.274	0.0314303
CAM109_map10	0002.CSV	968.131	0.0315147
CAM109_map10	0002.CSV	971.988	0.0321548
CAM109_map10	0002.CSV	975.845	0.0326989
CAM109_map10	0002.CSV	979.702	0.033531
CAM109_map10	0002.CSV	983.559	0.0341102
CAM109_map10	0002.CSV	987.417	0.0349321
CAM109_map10	0002.CSV	991.274	0.0354164
CAM109_map10	0002.CSV	995.131	0.0361804
CAM109_map10	0002.CSV	998.988	0.0366983
CAM109_map10	0002.CSV	1002.85	0.037591
CAM109_map10	0002.CSV	1006.7	0.038194
CAM109_map10	0002.CSV	1010.56	0.0391144
CAM109_map10	0002.CSV	1014.42	0.0397146
CAM109_map10	0002.CSV	1018.27	0.0405718
CAM109_map10	0002.CSV	1022.13	0.0410879
CAM109_map10	0002.CSV	1025.99	0.0419382
CAM109_map10	0002.CSV	1029.85	0.0425466
CAM109_map10	0002.CSV	1033.7	0.0433754
CAM109_map10	0002.CSV	1037.56	0.0438203
CAM109_map10	0002.CSV	1041.42	0.0444619
CAM109_map10	0002.CSV	1045.27	0.0446328
CAM109_map10	0002.CSV	1049.13	0.0455129
CAM109_map10	0002.CSV	1052.99	0.0466536
CAM109_map10	0002.CSV	1056.84	0.0486991
CAM109_map10	0002.CSV	1060.7	0.0506827
CAM109_map10	0002.CSV	1064.56	0.0529044
CAM109_map10	0002.CSV	1068.42	0.0543797
CAM109_map10	0002.CSV	1072.27	0.0560886
CAM109_map10	0002.CSV	1076.13	0.0596047
CAM109_map10	0002.CSV	1079.99	0.0685765
CAM109_map10	0002.CSV	1083.84	0.0688902
CAM109_map10	0002.CSV	1087.7	0.0567901
CAM109_map10	0002.CSV	1091.56	0.0502719
CAM109_map10	0002.CSV	1095.41	0.0497606
CAM109_map10	0002.CSV	1099.27	0.0499476
CAM109_map10	0002.CSV	1103.13	0.0505321
CAM109_map10	0002.CSV	1106.99	0.0512468
CAM109_map10	0002.CSV	1110.84	0.0523857
CAM109_map10	0002.CSV	1114.7	0.0533045
CAM109_map10	0002.CSV	1118.56	0.0540242
CAM109_map10	0002.CSV	1122.41	0.0540263
CAM109_map10	0002.CSV	1126.27	0.0539492
CAM109_map10	0002.CSV	1130.13	0.0536112
CAM109_map10	0002.CSV	1133.99	0.0536725
CAM109_map10	0002.CSV	1137.84	0.0537515
CAM109_map10	0002.CSV	1141.7	0.0538937
CAM109_map10	0002.CSV	1145.56	0.0536801
CAM109_map10	0002.CSV	1149.41	0.0538578
CAM109_map10	0002.CSV	1153.27	0.0539024
CAM109_map10	0002.CSV	1157.13	0.0542081
CAM109_map10	0002.CSV	1160.99	0.0544772
CAM109_map10	0002.CSV	1164.84	0.0549388
CAM109_map10	0002.CSV	1168.7	0.0549762
CAM109_map10	0002.CSV	1172.56	0.054936
CAM109_map10	0002.CSV	1176.41	0.054619
CAM109_map10	0002.CSV	1180.27	0.0544808
CAM109_map10	0002.CSV	1184.13	0.0540482
CAM109_map10	0002.CSV	1187.99	0.0537789
CAM109_map10	0002.CSV	1191.84	0.0533999
CAM109_map10	0002.CSV	1195.7	0.0533462
CAM109_map10	0002.CSV	1199.56	0.0532065
CAM109_map10	0002.CSV	1203.41	0.0534319
CAM109_map10	0002.CSV	1207.27	0.0536324
CAM109_map10	0002.CSV	1211.13	0.054182
CAM109_map10	0002.CSV	1214.98	0.0546898
CAM109_map10	0002.CSV	1218.84	0.0554725
CAM109_map10	0002.CSV	1222.7	0.0560917
CAM109_map10	0002.CSV	1226.56	0.0571088
CAM109_map10	0002.CSV	1230.41	0.0580943
CAM109_map10	0002.CSV	1234.27	0.0593879
CAM109_map10	0002.CSV	1238.13	0.060599
CAM109_map10	0002.CSV	1241.98	0.0622112
CAM109_map10	0002.CSV	1245.84	0.0638112
CAM109_map10	0002.CSV	1249.7	0.0655808
CAM109_map10	0002.CSV	1253.56	0.0669154
CAM109_map10	0002.CSV	1257.41	0.0682997
CAM109_map10	0002.CSV	1261.27	0.0693734
CAM109_map10	0002.CSV	1265.13	0.0705127
CAM109_map10	0002.CSV	1268.98	0.0714684
CAM109_map10	0002.CSV	1272.84	0.0726987
CAM109_map10	0002.CSV	1276.7	0.0736138
CAM109_map10	0002.CSV	1280.56	0.0746232
CAM109_map10	0002.CSV	1284.41	0.0751787
CAM109_map10	0002.CSV	1288.27	0.0757046
CAM109_map10	0002.CSV	1292.13	0.0757552
CAM109_map10	0002.CSV	1295.98	0.0759381
CAM109_map10	0002.CSV	1299.84	0.0759937
CAM109_map10	0002.CSV	1303.7	0.0764046
CAM109_map10	0002.CSV	1307.56	0.076905
CAM109_map10	0002.CSV	1311.41	0.0779444
CAM109_map10	0002.CSV	1315.27	0.0790269
CAM109_map10	0002.CSV	1319.13	0.0804559
CAM109_map10	0002.CSV	1322.98	0.0814953
CAM109_map10	0002.CSV	1326.84	0.0828191
CAM109_map10	0002.CSV	1330.7	0.0842901
CAM109_map10	0002.CSV	1334.56	0.0862044
CAM109_map10	0002.CSV	1338.41	0.0886938
CAM109_map10	0002.CSV	1342.27	0.0920073
CAM109_map10	0002.CSV	1346.13	0.0945298
CAM109_map10	0002.CSV	1349.98	0.0977723
CAM109_map10	0002.CSV	1353.84	0.100979
CAM109_map10	0002.CSV	1357.7	0.104337
CAM109_map10	0002.CSV	1361.56	0.108117
CAM109_map10	0002.CSV	1365.41	0.112913
CAM109_map10	0002.CSV	1369.27	0.116695
CAM109_map10	0002.CSV	1373.13	0.122025
CAM109_map10	0002.CSV	1376.98	0.128084
CAM109_map10	0002.CSV	1380.84	0.1333
CAM109_map10	0002.CSV	1384.7	0.138004
CAM109_map10	0002.CSV	1388.56	0.144349
CAM109_map10	0002.CSV	1392.41	0.149234
CAM109_map10	0002.CSV	1396.27	0.155728
CAM109_map10	0002.CSV	1400.13	0.162053
CAM109_map10	0002.CSV	1403.98	0.167628
CAM109_map10	0002.CSV	1407.84	0.17304
CAM109_map10	0002.CSV	1411.7	0.178014
CAM109_map10	0002.CSV	1415.55	0.181293
CAM109_map10	0002.CSV	1419.41	0.186043
CAM109_map10	0002.CSV	1423.27	0.189519
CAM109_map10	0002.CSV	1427.12	0.193109
CAM109_map10	0002.CSV	1430.98	0.196895
CAM109_map10	0002.CSV	1434.84	0.202344
CAM109_map10	0002.CSV	1438.7	0.208007
CAM109_map10	0002.CSV	1442.55	0.212195
CAM109_map10	0002.CSV	1446.41	0.214023
CAM109_map10	0002.CSV	1450.27	0.214368
CAM109_map10	0002.CSV	1454.12	0.211836
CAM109_map10	0002.CSV	1457.98	0.20963
CAM109_map10	0002.CSV	1461.84	0.20708
CAM109_map10	0002.CSV	1465.7	0.205807
CAM109_map10	0002.CSV	1469.55	0.201952
CAM109_map10	0002.CSV	1473.41	0.193898
CAM109_map10	0002.CSV	1477.27	0.182708
CAM109_map10	0002.CSV	1481.12	0.175003
CAM109_map10	0002.CSV	1484.98	0.167343
CAM109_map10	0002.CSV	1488.84	0.159001
CAM109_map10	0002.CSV	1492.7	0.150456
CAM109_map10	0002.CSV	1496.55	0.144018
CAM109_map10	0002.CSV	1500.41	0.136513
CAM109_map10	0002.CSV	1504.27	0.131903
CAM109_map10	0002.CSV	1508.12	0.123427
CAM109_map10	0002.CSV	1511.98	0.117102
CAM109_map10	0002.CSV	1515.84	0.112111
CAM109_map10	0002.CSV	1519.7	0.106069
CAM109_map10	0002.CSV	1523.55	0.0986299
CAM109_map10	0002.CSV	1527.41	0.0936504
CAM109_map10	0002.CSV	1531.27	0.0893299
CAM109_map10	0002.CSV	1535.12	0.0860329
CAM109_map10	0002.CSV	1538.98	0.0825709
CAM109_map10	0002.CSV	1542.84	0.0773391
CAM109_map10	0002.CSV	1546.7	0.0725843
CAM109_map10	0002.CSV	1550.55	0.0690064
CAM109_map10	0002.CSV	1554.41	0.065283
CAM109_map10	0002.CSV	1558.27	0.0609779
CAM109_map10	0002.CSV	1562.12	0.0561059
CAM109_map10	0002.CSV	1565.98	0.0535185
CAM109_map10	0002.CSV	1569.84	0.0500642
CAM109_map10	0002.CSV	1573.69	0.0466982
CAM109_map10	0002.CSV	1577.55	0.0423165
CAM109_map10	0002.CSV	1581.41	0.0385608
CAM109_map10	0002.CSV	1585.27	0.0355113
CAM109_map10	0002.CSV	1589.12	0.0333027
CAM109_map10	0002.CSV	1592.98	0.0319225
CAM109_map10	0002.CSV	1596.84	0.0311983
CAM109_map10	0002.CSV	1600.69	0.0305609
CAM109_map10	0002.CSV	1604.55	0.0301419
CAM109_map10	0002.CSV	1608.41	0.0295884
CAM109_map10	0002.CSV	1612.27	0.0290762
CAM109_map10	0002.CSV	1616.12	0.0285376
CAM109_map10	0002.CSV	1619.98	0.0281935
CAM109_map10	0002.CSV	1623.84	0.0275211
CAM109_map10	0002.CSV	1627.69	0.027023
CAM109_map10	0002.CSV	1631.55	0.0262162
CAM109_map10	0002.CSV	1635.41	0.0260417
CAM109_map10	0002.CSV	1639.27	0.0257408
CAM109_map10	0002.CSV	1643.12	0.0249946
CAM109_map10	0002.CSV	1646.98	0.0245539
CAM109_map10	0002.CSV	1650.84	0.024681
CAM109_map10	0002.CSV	1654.69	0.0248284
CAM109_map10	0002.CSV	1658.55	0.0243654
CAM109_map10	0002.CSV	1662.41	0.0237575
CAM109_map10	0002.CSV	1666.27	0.0234121
CAM109_map10	0002.CSV	1670.12	0.0231863
CAM109_map10	0002.CSV	1673.98	0.0233426
CAM109_map10	0002.CSV	1677.84	0.0227936
CAM109_map10	0002.CSV	1681.69	0.0224674
CAM109_map10	0002.CSV	1685.55	0.0227092
CAM109_map10	0002.CSV	1689.41	0.0225052
CAM109_map10	0002.CSV	1693.27	0.0217074
CAM109_map10	0002.CSV	1697.12	0.0216844
CAM109_map10	0002.CSV	1700.98	0.02226
CAM109_map10	0002.CSV	1704.84	0.0227703
CAM109_map10	0002.CSV	1708.69	0.0229962
CAM109_map10	0002.CSV	1712.55	0.0231572
CAM109_map10	0002.CSV	1716.41	0.0246147
CAM109_map10	0002.CSV	1720.27	0.02655
CAM109_map10	0002.CSV	1724.12	0.0266861
CAM109_map10	0002.CSV	1727.98	0.0266066
CAM109_map10	0002.CSV	1731.84	0.0265157
CAM109_map10	0002.CSV	1735.69	0.0264663
CAM109_map10	0002.CSV	1739.55	0.025358
CAM109_map10	0002.CSV	1743.41	0.023852
CAM109_map10	0002.CSV	1747.27	0.0223023
CAM109_map10	0002.CSV	1751.12	0.0208668
CAM109_map10	0002.CSV	1754.98	0.0195538
CAM109_map10	0002.CSV	1758.84	0.0188073
CAM109_map10	0002.CSV	1762.69	0.0184317
CAM109_map10	0002.CSV	1766.55	0.0181629
CAM109_map10	0002.CSV	1770.41	0.0184441
CAM109_map10	0002.CSV	1774.26	0.0201327
CAM109_map10	0002.CSV	1778.12	0.0215329
CAM109_map10	0002.CSV	1781.98	0.0229558
CAM109_map10	0002.CSV	1785.84	0.0233411
CAM109_map10	0002.CSV	1789.69	0.0225588
CAM109_map10	0002.CSV	1793.55	0.0208562
CAM109_map10	0002.CSV	1797.41	0.0194636
CAM109_map10	0002.CSV	1801.26	0.0183099
CAM109_map10	0002.CSV	1805.12	0.0174723
CAM109_map10	0002.CSV	1808.98	0.017072
CAM109_map10	0002.CSV	1812.84	0.0170883
CAM109_map10	0002.CSV	1816.69	0.0168204
CAM109_map10	0002.CSV	1820.55	0.0166452
CAM109_map10	0002.CSV	1824.41	0.0165851
CAM109_map10	0002.CSV	1828.26	0.0168798
CAM109_map10	0002.CSV	1832.12	0.0169683
CAM109_map10	0002.CSV	1835.98	0.0168776
CAM109_map10	0002.CSV	1839.84	0.0166819
CAM109_map10	0002.CSV	1843.69	0.0168943
CAM109_map10	0002.CSV	1847.55	0.0171346
CAM109_map10	0002.CSV	1851.41	0.0169209
CAM109_map10	0002.CSV	1855.26	0.0167389
CAM109_map10	0002.CSV	1859.12	0.0168065
CAM109_map10	0002.CSV	1862.98	0.0166986
CAM109_map10	0002.CSV	1866.84	0.0167981
CAM109_map10	0002.CSV	1870.69	0.0171858
CAM109_map10	0002.CSV	1874.55	0.0170821
CAM109_map10	0002.CSV	1878.41	0.0168955
CAM109_map10	0002.CSV	1882.26	0.0169011
CAM109_map10	0002.CSV	1886.12	0.0169088
CAM109_map10	0002.CSV	1889.98	0.0170895
CAM109_map10	0002.CSV	1893.83	0.0171246
CAM109_map10	0002.CSV	1897.69	0.0171245
CAM109_map10	0002.CSV	1901.55	0.0170461
CAM109_map10	0002.CSV	1905.41	0.0170133
CAM109_map10	0002.CSV	1909.26	0.0170729
CAM109_map10	0002.CSV	1913.12	0.0170981
CAM109_map10	0002.CSV	1916.98	0.017054
CAM109_map10	0002.CSV	1920.83	0.0172379
CAM109_map10	0002.CSV	1924.69	0.0172845
CAM109_map10	0002.CSV	1928.55	0.0172612
CAM109_map10	0002.CSV	1932.4	0.0172486
CAM109_map10	0002.CSV	1936.26	0.0172614
CAM109_map10	0002.CSV	1940.12	0.0172272
CAM109_map10	0002.CSV	1943.98	0.0175269
CAM109_map10	0002.CSV	1947.83	0.0175585
CAM109_map10	0002.CSV	1951.69	0.0175048
CAM109_map10	0002.CSV	1955.55	0.0175009
CAM109_map10	0002.CSV	1959.4	0.0175325
CAM109_map10	0002.CSV	1963.26	0.0174892
CAM109_map10	0002.CSV	1967.12	0.0175931
CAM109_map10	0002.CSV	1970.98	0.0175952
CAM109_map10	0002.CSV	1974.83	0.0175392
CAM109_map10	0002.CSV	1978.69	0.017522
CAM109_map10	0002.CSV	1982.55	0.0175334
CAM109_map10	0002.CSV	1986.4	0.0174734
CAM109_map10	0002.CSV	1990.26	0.0175606
CAM109_map10	0002.CSV	1994.12	0.0176896
CAM109_map10	0002.CSV	1997.98	0.0176672
CAM109_map10	0002.CSV	2001.83	0.0175905
CAM109_map10	0002.CSV	2005.69	0.0175878
CAM109_map10	0002.CSV	2009.55	0.0175557
CAM109_map10	0002.CSV	2013.4	0.017551
CAM109_map10	0002.CSV	2017.26	0.0175837
CAM109_map10	0002.CSV	2021.12	0.0176524
CAM109_map10	0002.CSV	2024.97	0.0175877
CAM109_map10	0002.CSV	2028.83	0.0175715
CAM109_map10	0002.CSV	2032.69	0.0175813
CAM109_map10	0002.CSV	2036.55	0.0176355
CAM109_map10	0002.CSV	2040.4	0.0176375
CAM109_map10	0002.CSV	2044.26	0.0177185
CAM109_map10	0002.CSV	2048.12	0.0177075
CAM109_map10	0002.CSV	2051.97	0.0177103
CAM109_map10	0002.CSV	2055.83	0.0176957
CAM109_map10	0002.CSV	2059.69	0.0177338
CAM109_map10	0002.CSV	2063.55	0.0177778
CAM109_map10	0002.CSV	2067.4	0.0178775
CAM109_map10	0002.CSV	2071.26	0.0178465
CAM109_map10	0002.CSV	2075.12	0.0178846
CAM109_map10	0002.CSV	2078.97	0.0178995
CAM109_map10	0002.CSV	2082.83	0.0179108
CAM109_map10	0002.CSV	2086.69	0.0179035
CAM109_map10	0002.CSV	2090.55	0.0179822
CAM109_map10	0002.CSV	2094.4	0.0180159
CAM109_map10	0002.CSV	2098.26	0.0180805
CAM109_map10	0002.CSV	2102.12	0.0180995
CAM109_map10	0002.CSV	2105.97	0.0181542
CAM109_map10	0002.CSV	2109.83	0.0182158
CAM109_map10	0002.CSV	2113.69	0.0182508
CAM109_map10	0002.CSV	2117.55	0.0182223
CAM109_map10	0002.CSV	2121.4	0.0182561
CAM109_map10	0002.CSV	2125.26	0.0182586
CAM109_map10	0002.CSV	2129.12	0.0182772
CAM109_map10	0002.CSV	2132.97	0.0183015
CAM109_map10	0002.CSV	2136.83	0.0183604
CAM109_map10	0002.CSV	2140.69	0.0183622
CAM109_map10	0002.CSV	2144.55	0.0183957
CAM109_map10	0002.CSV	2148.4	0.0183876
CAM109_map10	0002.CSV	2152.26	0.0184349
CAM109_map10	0002.CSV	2156.12	0.0184516
CAM109_map10	0002.CSV	2159.97	0.0184342
CAM109_map10	0002.CSV	2163.83	0.0183864
CAM109_map10	0002.CSV	2167.69	0.0184388
CAM109_map10	0002.CSV	2171.55	0.0184876
CAM109_map10	0002.CSV	2175.4	0.0185505
CAM109_map10	0002.CSV	2179.26	0.0185961
CAM109_map10	0002.CSV	2183.12	0.0186517
CAM109_map10	0002.CSV	2186.97	0.0186321
CAM109_map10	0002.CSV	2190.83	0.018677
CAM109_map10	0002.CSV	2194.69	0.0186988
CAM109_map10	0002.CSV	2198.55	0.0187256
CAM109_map10	0002.CSV	2202.4	0.0187003
CAM109_map10	0002.CSV	2206.26	0.0187044
CAM109_map10	0002.CSV	2210.12	0.0187027
CAM109_map10	0002.CSV	2213.97	0.0187296
CAM109_map10	0002.CSV	2217.83	0.0187297
CAM109_map10	0002.CSV	2221.69	0.01876
CAM109_map10	0002.CSV	2225.54	0.0187288
CAM109_map10	0002.CSV	2229.4	0.0187215
CAM109_map10	0002.CSV	2233.26	0.0186935
CAM109_map10	0002.CSV	2237.12	0.0187228
CAM109_map10	0002.CSV	2240.97	0.0187757
CAM109_map10	0002.CSV	2244.83	0.0188157
CAM109_map10	0002.CSV	2248.69	0.0188062
CAM109_map10	0002.CSV	2252.54	0.0188315
CAM109_map10	0002.CSV	2256.4	0.0187916
CAM109_map10	0002.CSV	2260.26	0.0187753
CAM109_map10	0002.CSV	2264.11	0.0187723
CAM109_map10	0002.CSV	2267.97	0.0187876
CAM109_map10	0002.CSV	2271.83	0.0188105
CAM109_map10	0002.CSV	2275.69	0.0188464
CAM109_map10	0002.CSV	2279.54	0.0187907
CAM109_map10	0002.CSV	2283.4	0.0187312
CAM109_map10	0002.CSV	2287.26	0.0186837
CAM109_map10	0002.CSV	2291.11	0.018753
CAM109_map10	0002.CSV	2294.97	0.0187897
CAM109_map10	0002.CSV	2298.83	0.0187613
CAM109_map10	0002.CSV	2302.69	0.0187012
CAM109_map10	0002.CSV	2306.54	0.0186835
CAM109_map10	0002.CSV	2310.4	0.0185856
CAM109_map10	0002.CSV	2314.26	0.0184282
CAM109_map10	0002.CSV	2318.11	0.0182363
CAM109_map10	0002.CSV	2321.97	0.0180349
CAM109_map10	0002.CSV	2325.83	0.0174427
CAM109_map10	0002.CSV	2329.69	0.016927
CAM109_map10	0002.CSV	2333.54	0.0169104
CAM109_map10	0002.CSV	2337.4	0.0168384
CAM109_map10	0002.CSV	2341.26	0.016557
CAM109_map10	0002.CSV	2345.11	0.0178633
CAM109_map10	0002.CSV	2348.97	0.0180395
CAM109_map10	0002.CSV	2352.83	0.0165876
CAM109_map10	0002.CSV	2356.69	0.0138757
CAM109_map10	0002.CSV	2360.54	0.0122654
CAM109_map10	0002.CSV	2364.4	0.0136378
CAM109_map10	0002.CSV	2368.26	0.0165695
CAM109_map10	0002.CSV	2372.11	0.0183662
CAM109_map10	0002.CSV	2375.97	0.0191157
CAM109_map10	0002.CSV	2379.83	0.0192503
CAM109_map10	0002.CSV	2383.69	0.0191075
CAM109_map10	0002.CSV	2387.54	0.0188475
CAM109_map10	0002.CSV	2391.4	0.0186769
CAM109_map10	0002.CSV	2395.26	0.0186347
CAM109_map10	0002.CSV	2399.11	0.0186931
CAM109_map10	0002.CSV	2402.97	0.0187094
CAM109_map10	0002.CSV	2406.83	0.0187043
CAM109_map10	0002.CSV	2410.68	0.0186637
CAM109_map10	0002.CSV	2414.54	0.0185981
CAM109_map10	0002.CSV	2418.4	0.0185997
CAM109_map10	0002.CSV	2422.26	0.0186514
CAM109_map10	0002.CSV	2426.11	0.0186462
CAM109_map10	0002.CSV	2429.97	0.0186815
CAM109_map10	0002.CSV	2433.83	0.0186975
CAM109_map10	0002.CSV	2437.68	0.0187109
CAM109_map10	0002.CSV	2441.54	0.0187456
CAM109_map10	0002.CSV	2445.4	0.018807
CAM109_map10	0002.CSV	2449.26	0.0188288
CAM109_map10	0002.CSV	2453.11	0.018831
CAM109_map10	0002.CSV	2456.97	0.0188613
CAM109_map10	0002.CSV	2460.83	0.0189485
CAM109_map10	0002.CSV	2464.68	0.0189991
CAM109_map10	0002.CSV	2468.54	0.0191154
CAM109_map10	0002.CSV	2472.4	0.0192893
CAM109_map10	0002.CSV	2476.26	0.0194615
CAM109_map10	0002.CSV	2480.11	0.0196679
CAM109_map10	0002.CSV	2483.97	0.0199155
CAM109_map10	0002.CSV	2487.83	0.0201124
CAM109_map10	0002.CSV	2491.68	0.0202844
CAM109_map10	0002.CSV	2495.54	0.0204432
CAM109_map10	0002.CSV	2499.4	0.0205329
CAM109_map10	0002.CSV	2503.26	0.0204975
CAM109_map10	0002.CSV	2507.11	0.020453
CAM109_map10	0002.CSV	2510.97	0.020513
CAM109_map10	0002.CSV	2514.83	0.0207229
CAM109_map10	0002.CSV	2518.68	0.0209457
CAM109_map10	0002.CSV	2522.54	0.0209666
CAM109_map10	0002.CSV	2526.4	0.0208208
CAM109_map10	0002.CSV	2530.26	0.0206422
CAM109_map10	0002.CSV	2534.11	0.0204036
CAM109_map10	0002.CSV	2537.97	0.0201975
CAM109_map10	0002.CSV	2541.83	0.0201106
CAM109_map10	0002.CSV	2545.68	0.0200772
CAM109_map10	0002.CSV	2549.54	0.0200046
CAM109_map10	0002.CSV	2553.4	0.0198673
CAM109_map10	0002.CSV	2557.26	0.0196904
CAM109_map10	0002.CSV	2561.11	0.0195523
CAM109_map10	0002.CSV	2564.97	0.0194364
CAM109_map10	0002.CSV	2568.83	0.0193716
CAM109_map10	0002.CSV	2572.68	0.0193484
CAM109_map10	0002.CSV	2576.54	0.0193388
CAM109_map10	0002.CSV	2580.4	0.0192975
CAM109_map10	0002.CSV	2584.25	0.0192646
CAM109_map10	0002.CSV	2588.11	0.0192297
CAM109_map10	0002.CSV	2591.97	0.0192639
CAM109_map10	0002.CSV	2595.83	0.0192684
CAM109_map10	0002.CSV	2599.68	0.0192704
CAM109_map10	0002.CSV	2603.54	0.0192817
CAM109_map10	0002.CSV	2607.4	0.0192909
CAM109_map10	0002.CSV	2611.25	0.0193344
CAM109_map10	0002.CSV	2615.11	0.0194092
CAM109_map10	0002.CSV	2618.97	0.0193765
CAM109_map10	0002.CSV	2622.82	0.0193932
CAM109_map10	0002.CSV	2626.68	0.0194291
CAM109_map10	0002.CSV	2630.54	0.0193981
CAM109_map10	0002.CSV	2634.4	0.019437
CAM109_map10	0002.CSV	2638.25	0.01943
CAM109_map10	0002.CSV	2642.11	0.0192563
CAM109_map10	0002.CSV	2645.97	0.0191234
CAM109_map10	0002.CSV	2649.82	0.0190992
CAM109_map10	0002.CSV	2653.68	0.0190558
CAM109_map10	0002.CSV	2657.54	0.0189566
CAM109_map10	0002.CSV	2661.4	0.0189173
CAM109_map10	0002.CSV	2665.25	0.0188938
CAM109_map10	0002.CSV	2669.11	0.0189288
CAM109_map10	0002.CSV	2672.97	0.0191329
CAM109_map10	0002.CSV	2676.82	0.0193775
CAM109_map10	0002.CSV	2680.68	0.0193155
CAM109_map10	0002.CSV	2684.54	0.0190038
CAM109_map10	0002.CSV	2688.4	0.0188436
CAM109_map10	0002.CSV	2692.25	0.0188195
CAM109_map10	0002.CSV	2696.11	0.0188893
CAM109_map10	0002.CSV	2699.97	0.0189441
CAM109_map10	0002.CSV	2703.82	0.0189434
CAM109_map10	0002.CSV	2707.68	0.0190586
CAM109_map10	0002.CSV	2711.54	0.0191121
CAM109_map10	0002.CSV	2715.4	0.0191038
CAM109_map10	0002.CSV	2719.25	0.0192203
CAM109_map10	0002.CSV	2723.11	0.0194705
CAM109_map10	0002.CSV	2726.97	0.0194254
CAM109_map10	0002.CSV	2730.82	0.0191777
CAM109_map10	0002.CSV	2734.68	0.019242
CAM109_map10	0002.CSV	2738.54	0.0193035
CAM109_map10	0002.CSV	2742.4	0.019317
CAM109_map10	0002.CSV	2746.25	0.0196239
CAM109_map10	0002.CSV	2750.11	0.019694
CAM109_map10	0002.CSV	2753.97	0.0194425
CAM109_map10	0002.CSV	2757.82	0.0193677
CAM109_map10	0002.CSV	2761.68	0.0193116
CAM109_map10	0002.CSV	2765.54	0.0192771
CAM109_map10	0002.CSV	2769.39	0.0194771
CAM109_map10	0002.CSV	2773.25	0.019837
CAM109_map10	0002.CSV	2777.11	0.0197598
CAM109_map10	0002.CSV	2780.97	0.019551
CAM109_map10	0002.CSV	2784.82	0.0197499
CAM109_map10	0002.CSV	2788.68	0.0201859
CAM109_map10	0002.CSV	2792.54	0.0203411
CAM109_map10	0002.CSV	2796.39	0.0203625
CAM109_map10	0002.CSV	2800.25	0.0201709
CAM109_map10	0002.CSV	2804.11	0.0199801
CAM109_map10	0002.CSV	2807.97	0.0202465
CAM109_map10	0002.CSV	2811.82	0.0202776
CAM109_map10	0002.CSV	2815.68	0.0201645
CAM109_map10	0002.CSV	2819.54	0.0203195
CAM109_map10	0002.CSV	2823.39	0.020509
CAM109_map10	0002.CSV	2827.25	0.0206425
CAM109_map10	0002.CSV	2831.11	0.0211565
CAM109_map10	0002.CSV	2834.97	0.0220569
CAM109_map10	0002.CSV	2838.82	0.0228592
CAM109_map10	0002.CSV	2842.68	0.0237151
CAM109_map10	0002.CSV	2846.54	0.0253406
CAM109_map10	0002.CSV	2850.39	0.0262853
CAM109_map10	0002.CSV	2854.25	0.0258276
CAM109_map10	0002.CSV	2858.11	0.0250574
CAM109_map10	0002.CSV	2861.97	0.0241261
CAM109_map10	0002.CSV	2865.82	0.0234765
CAM109_map10	0002.CSV	2869.68	0.0235822
CAM109_map10	0002.CSV	2873.54	0.0237033
CAM109_map10	0002.CSV	2877.39	0.0230709
CAM109_map10	0002.CSV	2881.25	0.0225908
CAM109_map10	0002.CSV	2885.11	0.0226583
CAM109_map10	0002.CSV	2888.97	0.0230428
CAM109_map10	0002.CSV	2892.82	0.0237836
CAM109_map10	0002.CSV	2896.68	0.0244331
CAM109_map10	0002.CSV	2900.54	0.0248264
CAM109_map10	0002.CSV	2904.39	0.0255478
CAM109_map10	0002.CSV	2908.25	0.027028
CAM109_map10	0002.CSV	2912.11	0.0293668
CAM109_map10	0002.CSV	2915.97	0.031334
CAM109_map10	0002.CSV	2919.82	0.0316318
CAM109_map10	0002.CSV	2923.68	0.0306868
CAM109_map10	0002.CSV	2927.54	0.0296795
CAM109_map10	0002.CSV	2931.39	0.0282146
CAM109_map10	0002.CSV	2935.25	0.0263659
CAM109_map10	0002.CSV	2939.11	0.0253131
CAM109_map10	0002.CSV	2942.96	0.0252394
CAM109_map10	0002.CSV	2946.82	0.0250811
CAM109_map10	0002.CSV	2950.68	0.0246486
CAM109_map10	0002.CSV	2954.54	0.0241057
CAM109_map10	0002.CSV	2958.39	0.0235156
CAM109_map10	0002.CSV	2962.25	0.0230939
CAM109_map10	0002.CSV	2966.11	0.0223235
CAM109_map10	0002.CSV	2969.96	0.0218925
CAM109_map10	0002.CSV	2973.82	0.0221036
CAM109_map10	0002.CSV	2977.68	0.0222563
CAM109_map10	0002.CSV	2981.53	0.021771
CAM109_map10	0002.CSV	2985.39	0.0209832
CAM109_map10	0002.CSV	2989.25	0.0209505
CAM109_map10	0002.CSV	2993.11	0.0212627
CAM109_map10	0002.CSV	2996.96	0.0210762
CAM109_map10	0002.CSV	3000.82	0.0206318
CAM109_map10	0002.CSV	3004.68	0.0203575
CAM109_map10	0002.CSV	3008.53	0.0206632
CAM109_map10	0002.CSV	3012.39	0.0211752
CAM109_map10	0002.CSV	3016.25	0.0212263
CAM109_map10	0002.CSV	3020.11	0.0209552
CAM109_map10	0002.CSV	3023.96	0.0207699
CAM109_map10	0002.CSV	3027.82	0.0207508
CAM109_map10	0002.CSV	3031.68	0.0210439
CAM109_map10	0002.CSV	3035.53	0.021082
CAM109_map10	0002.CSV	3039.39	0.0210266
CAM109_map10	0002.CSV	3043.25	0.0211708
CAM109_map10	0002.CSV	3047.11	0.0211548
CAM109_map10	0002.CSV	3050.96	0.021126
CAM109_map10	0002.CSV	3054.82	0.0210555
CAM109_map10	0002.CSV	3058.68	0.0208856
CAM109_map10	0002.CSV	3062.53	0.0209659
CAM109_map10	0002.CSV	3066.39	0.0213218
CAM109_map10	0002.CSV	3070.25	0.0212077
CAM109_map10	0002.CSV	3074.11	0.0211237
CAM109_map10	0002.CSV	3077.96	0.0214409
CAM109_map10	0002.CSV	3081.82	0.0216745
CAM109_map10	0002.CSV	3085.68	0.021601
CAM109_map10	0002.CSV	3089.53	0.0213376
CAM109_map10	0002.CSV	3093.39	0.0209717
CAM109_map10	0002.CSV	3097.25	0.0209924
CAM109_map10	0002.CSV	3101.11	0.0211498
CAM109_map10	0002.CSV	3104.96	0.0212246
CAM109_map10	0002.CSV	3108.82	0.0214322
CAM109_map10	0002.CSV	3112.68	0.0215644
CAM109_map10	0002.CSV	3116.53	0.0217926
CAM109_map10	0002.CSV	3120.39	0.0217534
CAM109_map10	0002.CSV	3124.25	0.0214028
CAM109_map10	0002.CSV	3128.11	0.0212633
CAM109_map10	0002.CSV	3131.96	0.0212455
CAM109_map10	0002.CSV	3135.82	0.0214603
CAM109_map10	0002.CSV	3139.68	0.0216223
CAM109_map10	0002.CSV	3143.53	0.0213503
CAM109_map10	0002.CSV	3147.39	0.0214276
CAM109_map10	0002.CSV	3151.25	0.0218247
CAM109_map10	0002.CSV	3155.1	0.0217285
CAM109_map10	0002.CSV	3158.96	0.0213371
CAM109_map10	0002.CSV	3162.82	0.0211683
CAM109_map10	0002.CSV	3166.68	0.021052
CAM109_map10	0002.CSV	3170.53	0.0210646
CAM109_map10	0002.CSV	3174.39	0.02116
CAM109_map10	0002.CSV	3178.25	0.0212918
CAM109_map10	0002.CSV	3182.1	0.0213766
CAM109_map10	0002.CSV	3185.96	0.0214417
CAM109_map10	0002.CSV	3189.82	0.0215432
CAM109_map10	0002.CSV	3193.68	0.0215043
CAM109_map10	0002.CSV	3197.53	0.0215327
CAM109_map10	0002.CSV	3201.39	0.0217048
CAM109_map10	0002.CSV	3205.25	0.0216828
CAM109_map10	0002.CSV	3209.1	0.021598
CAM109_map10	0002.CSV	3212.96	0.0217958
CAM109_map10	0002.CSV	3216.82	0.0220276
CAM109_map10	0002.CSV	3220.68	0.0219438
CAM109_map10	0002.CSV	3224.53	0.0217623
CAM109_map10	0002.CSV	3228.39	0.0220081
CAM109_map10	0002.CSV	3232.25	0.0225317
CAM109_map10	0002.CSV	3236.1	0.0225495
CAM109_map10	0002.CSV	3239.96	0.0223364
CAM109_map10	0002.CSV	3243.82	0.0225061
CAM109_map10	0002.CSV	3247.68	0.0225906
CAM109_map10	0002.CSV	3251.53	0.02236
CAM109_map10	0002.CSV	3255.39	0.0224064
CAM109_map10	0002.CSV	3259.25	0.0222641
CAM109_map10	0002.CSV	3263.1	0.0221556
CAM109_map10	0002.CSV	3266.96	0.0225645
CAM109_map10	0002.CSV	3270.82	0.0230541
CAM109_map10	0002.CSV	3274.68	0.0229805
CAM109_map10	0002.CSV	3278.53	0.0226022
CAM109_map10	0002.CSV	3282.39	0.0223449
CAM109_map10	0002.CSV	3286.25	0.0224011
CAM109_map10	0002.CSV	3290.1	0.0228805
CAM109_map10	0002.CSV	3293.96	0.0232297
CAM109_map10	0002.CSV	3297.82	0.0230389
CAM109_map10	0002.CSV	3301.67	0.0230501
CAM109_map10	0002.CSV	3305.53	0.0232836
CAM109_map10	0002.CSV	3309.39	0.023125
CAM109_map10	0002.CSV	3313.25	0.0225901
CAM109_map10	0002.CSV	3317.1	0.0222671
CAM109_map10	0002.CSV	3320.96	0.0225273
CAM109_map10	0002.CSV	3324.82	0.0229668
CAM109_map10	0002.CSV	3328.67	0.022692
CAM109_map10	0002.CSV	3332.53	0.0224675
CAM109_map10	0002.CSV	3336.39	0.0229827
CAM109_map10	0002.CSV	3340.24	0.0232141
CAM109_map10	0002.CSV	3344.1	0.0229285
CAM109_map10	0002.CSV	3347.96	0.0228495
CAM109_map10	0002.CSV	3351.82	0.022789
CAM109_map10	0002.CSV	3355.67	0.0225734
CAM109_map10	0002.CSV	3359.53	0.0227215
CAM109_map10	0002.CSV	3363.39	0.0229892
CAM109_map10	0002.CSV	3367.24	0.0233225
CAM109_map10	0002.CSV	3371.1	0.0231789
CAM109_map10	0002.CSV	3374.96	0.0227588
CAM109_map10	0002.CSV	3378.82	0.0225389
CAM109_map10	0002.CSV	3382.67	0.0222772
CAM109_map10	0002.CSV	3386.53	0.0224093
CAM109_map10	0002.CSV	3390.39	0.0229112
CAM109_map10	0002.CSV	3394.24	0.0231457
CAM109_map10	0002.CSV	3398.1	0.0231332
CAM109_map10	0002.CSV	3401.96	0.0230138
CAM109_map10	0002.CSV	3405.82	0.0227931
CAM109_map10	0002.CSV	3409.67	0.0227026
CAM109_map10	0002.CSV	3413.53	0.0223195
CAM109_map10	0002.CSV	3417.39	0.021822
CAM109_map10	0002.CSV	3421.24	0.0217735
CAM109_map10	0002.CSV	3425.1	0.0219731
CAM109_map10	0002.CSV	3428.96	0.0222951
CAM109_map10	0002.CSV	3432.82	0.0225221
CAM109_map10	0002.CSV	3436.67	0.0222057
CAM109_map10	0002.CSV	3440.53	0.0214293
CAM109_map10	0002.CSV	3444.39	0.0210373
CAM109_map10	0002.CSV	3448.24	0.0209222
CAM109_map10	0002.CSV	3452.1	0.0206701
CAM109_map10	0002.CSV	3455.96	0.0207906
CAM109_map10	0002.CSV	3459.82	0.021193
CAM109_map10	0002.CSV	3463.67	0.0215957
CAM109_map10	0002.CSV	3467.53	0.0217704
CAM109_map10	0002.CSV	3471.39	0.0212787
CAM109_map10	0002.CSV	3475.24	0.0208059
CAM109_map10	0002.CSV	3479.1	0.0208744
CAM109_map10	0002.CSV	3482.96	0.0209911
CAM109_map10	0002.CSV	3486.82	0.0210255
CAM109_map10	0002.CSV	3490.67	0.0208308
CAM109_map10	0002.CSV	3494.53	0.0207579
CAM109_map10	0002.CSV	3498.39	0.020655
CAM109_map10	0002.CSV	3502.24	0.0204557
CAM109_map10	0002.CSV	3506.1	0.0200986
CAM109_map10	0002.CSV	3509.96	0.0199395
CAM109_map10	0002.CSV	3513.81	0.0200399
CAM109_map10	0002.CSV	3517.67	0.0197305
CAM109_map10	0002.CSV	3521.53	0.0196921
CAM109_map10	0002.CSV	3525.39	0.019676
CAM109_map10	0002.CSV	3529.24	0.0196236
CAM109_map10	0002.CSV	3533.1	0.0196781
CAM109_map10	0002.CSV	3536.96	0.0197019
CAM109_map10	0002.CSV	3540.81	0.0197266
CAM109_map10	0002.CSV	3544.67	0.0200333
CAM109_map10	0002.CSV	3548.53	0.0198812
CAM109_map10	0002.CSV	3552.39	0.0193291
CAM109_map10	0002.CSV	3556.24	0.0191779
CAM109_map10	0002.CSV	3560.1	0.0188969
CAM109_map10	0002.CSV	3563.96	0.0182699
CAM109_map10	0002.CSV	3567.81	0.0187097
CAM109_map10	0002.CSV	3571.67	0.0189051
CAM109_map10	0002.CSV	3575.53	0.0185756
CAM109_map10	0002.CSV	3579.39	0.018867
CAM109_map10	0002.CSV	3583.24	0.0188217
CAM109_map10	0002.CSV	3587.1	0.018867
CAM109_map10	0002.CSV	3590.96	0.0188237
CAM109_map10	0002.CSV	3594.81	0.0184171
CAM109_map10	0002.CSV	3598.67	0.0186352
CAM109_map10	0002.CSV	3602.53	0.0186698
CAM109_map10	0002.CSV	3606.39	0.0178863
CAM109_map10	0002.CSV	3610.24	0.0174929
CAM109_map10	0002.CSV	3614.1	0.0176973
CAM109_map10	0002.CSV	3617.96	0.0183264
CAM109_map10	0002.CSV	3621.81	0.0185652
CAM109_map10	0002.CSV	3625.67	0.017487
CAM109_map10	0002.CSV	3629.53	0.0175065
CAM109_map10	0002.CSV	3633.39	0.0183096
CAM109_map10	0002.CSV	3637.24	0.0179838
CAM109_map10	0002.CSV	3641.1	0.0175842
CAM109_map10	0002.CSV	3644.96	0.0167493
CAM109_map10	0002.CSV	3648.81	0.0173965
CAM109_map10	0002.CSV	3652.67	0.0186412
CAM109_map10	0002.CSV	3656.53	0.0187086
CAM109_map10	0002.CSV	3660.38	0.0187397
CAM109_map10	0002.CSV	3664.24	0.0176766
CAM109_map10	0002.CSV	3668.1	0.0165438
CAM109_map10	0002.CSV	3671.96	0.016552
CAM109_map10	0002.CSV	3675.81	0.0175382
CAM109_map10	0002.CSV	3679.67	0.0182121
CAM109_map10	0002.CSV	3683.53	0.0176234
CAM109_map10	0002.CSV	3687.38	0.0174425
CAM109_map10	0002.CSV	3691.24	0.0187524
CAM109_map10	0002.CSV	3695.1	0.0184529
CAM109_map10	0002.CSV	3698.95	0.017574
CAM109_map10	0002.CSV	3702.81	0.017334
CAM109_map10	0002.CSV	3706.67	0.0167758
CAM109_map10	0002.CSV	3710.53	0.0167632
CAM109_map10	0002.CSV	3714.38	0.0177371
CAM109_map10	0002.CSV	3718.24	0.0171498
CAM109_map10	0002.CSV	3722.1	0.0167667
CAM109_map10	0002.CSV	3725.95	0.0168885
CAM109_map10	0002.CSV	3729.81	0.0164814
CAM109_map10	0002.CSV	3733.67	0.0167175
CAM109_map10	0002.CSV	3737.53	0.0180671
CAM109_map10	0002.CSV	3741.38	0.016984
CAM109_map10	0002.CSV	3745.24	0.0157
CAM109_map10	0002.CSV	3749.1	0.0157225
CAM109_map10	0002.CSV	3752.95	0.0170887
CAM109_map10	0002.CSV	3756.81	0.0172512
CAM109_map10	0002.CSV	3760.67	0.017121
CAM109_map10	0002.CSV	3764.53	0.0167634
CAM109_map10	0002.CSV	3768.38	0.0170057
CAM109_map10	0002.CSV	3772.24	0.0174083
CAM109_map10	0002.CSV	3776.1	0.0170347
CAM109_map10	0002.CSV	3779.95	0.017023
CAM109_map10	0002.CSV	3783.81	0.0171279
CAM109_map10	0002.CSV	3787.67	0.0171269
CAM109_map10	0002.CSV	3791.53	0.016698
CAM109_map10	0002.CSV	3795.38	0.0160301
CAM109_map10	0002.CSV	3799.24	0.0159975
CAM109_map10	0002.CSV	3803.1	0.0166512
CAM109_map10	0002.CSV	3806.95	0.0171992
CAM109_map10	0002.CSV	3810.81	0.0167809
CAM109_map10	0002.CSV	3814.67	0.0159579
CAM109_map10	0002.CSV	3818.53	0.0161846
CAM109_map10	0002.CSV	3822.38	0.0171268
CAM109_map10	0002.CSV	3826.24	0.0171094
CAM109_map10	0002.CSV	3830.1	0.0165587
CAM109_map10	0002.CSV	3833.95	0.0161957
CAM109_map10	0002.CSV	3837.81	0.0165986
CAM109_map10	0002.CSV	3841.67	0.0175762
CAM109_map10	0002.CSV	3845.53	0.0172184
CAM109_map10	0002.CSV	3849.38	0.015861
CAM109_map10	0002.CSV	3853.24	0.0162366
CAM109_map10	0002.CSV	3857.1	0.0174126
CAM109_map10	0002.CSV	3860.95	0.0164442
CAM109_map10	0002.CSV	3864.81	0.0163028
CAM109_map10	0002.CSV	3868.67	0.0164729
CAM109_map10	0002.CSV	3872.52	0.0169629
CAM109_map10	0002.CSV	3876.38	0.0167201
CAM109_map10	0002.CSV	3880.24	0.0164857
CAM109_map10	0002.CSV	3884.1	0.0171428
CAM109_map10	0002.CSV	3887.95	0.01709
CAM109_map10	0002.CSV	3891.81	0.0170614
CAM109_map10	0002.CSV	3895.67	0.0168032
CAM109_map10	0002.CSV	3899.52	0.0162696
CAM109_map10	0002.CSV	3903.38	0.0172396
CAM109_map10	0002.CSV	3907.24	0.017573
CAM109_map10	0002.CSV	3911.1	0.0169057
CAM109_map10	0002.CSV	3914.95	0.0165697
CAM109_map10	0002.CSV	3918.81	0.0168348
CAM109_map10	0002.CSV	3922.67	0.0168934
CAM109_map10	0002.CSV	3926.52	0.0169291
CAM109_map10	0002.CSV	3930.38	0.0171498
CAM109_map10	0002.CSV	3934.24	0.0174545
CAM109_map10	0002.CSV	3938.09	0.0170027
CAM109_map10	0002.CSV	3941.95	0.0167773
CAM109_map10	0002.CSV	3945.81	0.0168615
CAM109_map10	0002.CSV	3949.67	0.0170682
CAM109_map10	0002.CSV	3953.52	0.0171192
CAM109_map10	0002.CSV	3957.38	0.0168456
CAM109_map10	0002.CSV	3961.24	0.0168664
CAM109_map10	0002.CSV	3965.09	0.0169407
CAM109_map10	0002.CSV	3968.95	0.0168514
CAM109_map10	0002.CSV	3972.81	0.0168926
CAM109_map10	0002.CSV	3976.67	0.0170548
CAM109_map10	0002.CSV	3980.52	0.0171419
CAM109_map10	0002.CSV	3984.38	0.0171749
CAM109_map10	0002.CSV	3988.24	0.0169994
CAM109_map10	0002.CSV	3992.09	0.0169343
CAM109_map10	0002.CSV	3995.95	0.0169953
CAM109_map10	0002.CSV	3999.81	0.0169553
CAM109_map10	0003.CSV	674.992	0.0530298
CAM109_map10	0003.CSV	678.849	0.0551603
CAM109_map10	0003.CSV	682.706	0.056331
CAM109_map10	0003.CSV	686.563	0.0597582
CAM109_map10	0003.CSV	690.42	0.0645458
CAM109_map10	0003.CSV	694.277	0.0793148
CAM109_map10	0003.CSV	698.134	0.097214
CAM109_map10	0003.CSV	701.991	0.093671
CAM109_map10	0003.CSV	705.849	0.083058
CAM109_map10	0003.CSV	709.706	0.100155
CAM109_map10	0003.CSV	713.563	0.105638
CAM109_map10	0003.CSV	717.42	0.0763502
CAM109_map10	0003.CSV	721.277	0.0545462
CAM109_map10	0003.CSV	725.134	0.0504219
CAM109_map10	0003.CSV	728.991	0.049074
CAM109_map10	0003.CSV	732.848	0.0491555
CAM109_map10	0003.CSV	736.705	0.0502156
CAM109_map10	0003.CSV	740.562	0.0529605
CAM109_map10	0003.CSV	744.42	0.0544722
CAM109_map10	0003.CSV	748.277	0.0556712
CAM109_map10	0003.CSV	752.134	0.0557902
CAM109_map10	0003.CSV	755.991	0.0569297
CAM109_map10	0003.CSV	759.848	0.0573313
CAM109_map10	0003.CSV	763.705	0.0589434
CAM109_map10	0003.CSV	767.562	0.0603056
CAM109_map10	0003.CSV	771.419	0.062421
CAM109_map10	0003.CSV	775.276	0.0638598
CAM109_map10	0003.CSV	779.133	0.0654551
CAM109_map10	0003.CSV	782.99	0.0652723
CAM109_map10	0003.CSV	786.848	0.0659109
CAM109_map10	0003.CSV	790.705	0.0673558
CAM109_map10	0003.CSV	794.562	0.0702661
CAM109_map10	0003.CSV	798.419	0.0720902
CAM109_map10	0003.CSV	802.276	0.0737452
CAM109_map10	0003.CSV	806.133	0.0746421
CAM109_map10	0003.CSV	809.99	0.0776301
CAM109_map10	0003.CSV	813.847	0.0817173
CAM109_map10	0003.CSV	817.704	0.0876499
CAM109_map10	0003.CSV	821.562	0.0938004
CAM109_map10	0003.CSV	825.419	0.10206
CAM109_map10	0003.CSV	829.276	0.112099
CAM109_map10	0003.CSV	833.133	0.125677
CAM109_map10	0003.CSV	836.99	0.143735
CAM109_map10	0003.CSV	840.847	0.165251
CAM109_map10	0003.CSV	844.704	0.181024
CAM109_map10	0003.CSV	848.561	0.200244
CAM109_map10	0003.CSV	852.418	0.220149
CAM109_map10	0003.CSV	856.275	0.222496
CAM109_map10	0003.CSV	860.132	0.197587
CAM109_map10	0003.CSV	863.99	0.154598
CAM109_map10	0003.CSV	867.847	0.11094
CAM109_map10	0003.CSV	871.704	0.0810033
CAM109_map10	0003.CSV	875.561	0.0641486
CAM109_map10	0003.CSV	879.418	0.0552434
CAM109_map10	0003.CSV	883.275	0.0489151
CAM109_map10	0003.CSV	887.132	0.045259
CAM109_map10	0003.CSV	890.989	0.0435278
CAM109_map10	0003.CSV	894.846	0.0433499
CAM109_map10	0003.CSV	898.703	0.0432404
CAM109_map10	0003.CSV	902.561	0.0439397
CAM109_map10	0003.CSV	906.418	0.0445934
CAM109_map10	0003.CSV	910.275	0.0449004
CAM109_map10	0003.CSV	914.132	0.0443683
CAM109_map10	0003.CSV	917.989	0.0446887
CAM109_map10	0003.CSV	921.846	0.0448539
CAM109_map10	0003.CSV	925.703	0.0455249
CAM109_map10	0003.CSV	929.56	0.0460715
CAM109_map10	0003.CSV	933.417	0.0469548
CAM109_map10	0003.CSV	937.274	0.0472652
CAM109_map10	0003.CSV	941.131	0.0475484
CAM109_map10	0003.CSV	944.989	0.047333
CAM109_map10	0003.CSV	948.846	0.0474519
CAM109_map10	0003.CSV	952.703	0.0473674
CAM109_map10	0003.CSV	956.56	0.0477266
CAM109_map10	0003.CSV	960.417	0.0475713
CAM109_map10	0003.CSV	964.274	0.0477233
CAM109_map10	0003.CSV	968.131	0.0479255
CAM109_map10	0003.CSV	971.988	0.0489099
CAM109_map10	0003.CSV	975.845	0.0498368
CAM109_map10	0003.CSV	979.702	0.0512287
CAM109_map10	0003.CSV	983.559	0.0526022
CAM109_map10	0003.CSV	987.417	0.0543704
CAM109_map10	0003.CSV	991.274	0.0557051
CAM109_map10	0003.CSV	995.131	0.0572964
CAM109_map10	0003.CSV	998.988	0.0585721
CAM109_map10	0003.CSV	1002.85	0.0604675
CAM109_map10	0003.CSV	1006.7	0.0621954
CAM109_map10	0003.CSV	1010.56	0.0642536
CAM109_map10	0003.CSV	1014.42	0.0660047
CAM109_map10	0003.CSV	1018.27	0.0680954
CAM109_map10	0003.CSV	1022.13	0.0698716
CAM109_map10	0003.CSV	1025.99	0.0720524
CAM109_map10	0003.CSV	1029.85	0.0738721
CAM109_map10	0003.CSV	1033.7	0.0759243
CAM109_map10	0003.CSV	1037.56	0.077216
CAM109_map10	0003.CSV	1041.42	0.0781812
CAM109_map10	0003.CSV	1045.27	0.078324
CAM109_map10	0003.CSV	1049.13	0.0790553
CAM109_map10	0003.CSV	1052.99	0.0801218
CAM109_map10	0003.CSV	1056.84	0.0825892
CAM109_map10	0003.CSV	1060.7	0.0852544
CAM109_map10	0003.CSV	1064.56	0.0882393
CAM109_map10	0003.CSV	1068.42	0.0903821
CAM109_map10	0003.CSV	1072.27	0.0927734
CAM109_map10	0003.CSV	1076.13	0.0969582
CAM109_map10	0003.CSV	1079.99	0.106421
CAM109_map10	0003.CSV	1083.84	0.107338
CAM109_map10	0003.CSV	1087.7	0.0941088
CAM109_map10	0003.CSV	1091.56	0.0850242
CAM109_map10	0003.CSV	1095.41	0.083358
CAM109_map10	0003.CSV	1099.27	0.0830636
CAM109_map10	0003.CSV	1103.13	0.083329
CAM109_map10	0003.CSV	1106.99	0.0839996
CAM109_map10	0003.CSV	1110.84	0.08546
CAM109_map10	0003.CSV	1114.7	0.0860842
CAM109_map10	0003.CSV	1118.56	0.0858459
CAM109_map10	0003.CSV	1122.41	0.084773
CAM109_map10	0003.CSV	1126.27	0.0839106
CAM109_map10	0003.CSV	1130.13	0.0827557
CAM109_map10	0003.CSV	1133.99	0.0821094
CAM109_map10	0003.CSV	1137.84	0.081699
CAM109_map10	0003.CSV	1141.7	0.0816657
CAM109_map10	0003.CSV	1145.56	0.0811699
CAM109_map10	0003.CSV	1149.41	0.0810706
CAM109_map10	0003.CSV	1153.27	0.0810068
CAM109_map10	0003.CSV	1157.13	0.0814538
CAM109_map10	0003.CSV	1160.99	0.0817719
CAM109_map10	0003.CSV	1164.84	0.0819272
CAM109_map10	0003.CSV	1168.7	0.0811983
CAM109_map10	0003.CSV	1172.56	0.0802989
CAM109_map10	0003.CSV	1176.41	0.0789123
CAM109_map10	0003.CSV	1180.27	0.077725
CAM109_map10	0003.CSV	1184.13	0.0764971
CAM109_map10	0003.CSV	1187.99	0.0757352
CAM109_map10	0003.CSV	1191.84	0.0747716
CAM109_map10	0003.CSV	1195.7	0.0741832
CAM109_map10	0003.CSV	1199.56	0.0737034
CAM109_map10	0003.CSV	1203.41	0.0737862
CAM109_map10	0003.CSV	1207.27	0.073873
CAM109_map10	0003.CSV	1211.13	0.0744125
CAM109_map10	0003.CSV	1214.98	0.0747999
CAM109_map10	0003.CSV	1218.84	0.0756064
CAM109_map10	0003.CSV	1222.7	0.0764076
CAM109_map10	0003.CSV	1226.56	0.0777443
CAM109_map10	0003.CSV	1230.41	0.0790648
CAM109_map10	0003.CSV	1234.27	0.0808151
CAM109_map10	0003.CSV	1238.13	0.0824855
CAM109_map10	0003.CSV	1241.98	0.0846257
CAM109_map10	0003.CSV	1245.84	0.0867283
CAM109_map10	0003.CSV	1249.7	0.0889947
CAM109_map10	0003.CSV	1253.56	0.090683
CAM109_map10	0003.CSV	1257.41	0.0922596
CAM109_map10	0003.CSV	1261.27	0.0933024
CAM109_map10	0003.CSV	1265.13	0.0945302
CAM109_map10	0003.CSV	1268.98	0.0956494
CAM109_map10	0003.CSV	1272.84	0.0971779
CAM109_map10	0003.CSV	1276.7	0.0983102
CAM109_map10	0003.CSV	1280.56	0.0994205
CAM109_map10	0003.CSV	1284.41	0.0999819
CAM109_map10	0003.CSV	1288.27	0.100467
CAM109_map10	0003.CSV	1292.13	0.100174
CAM109_map10	0003.CSV	1295.98	0.0999399
CAM109_map10	0003.CSV	1299.84	0.0995205
CAM109_map10	0003.CSV	1303.7	0.0996024
CAM109_map10	0003.CSV	1307.56	0.0999144
CAM109_map10	0003.CSV	1311.41	0.101074
CAM109_map10	0003.CSV	1315.27	0.10238
CAM109_map10	0003.CSV	1319.13	0.104038
CAM109_map10	0003.CSV	1322.98	0.104967
CAM109_map10	0003.CSV	1326.84	0.106307
CAM109_map10	0003.CSV	1330.7	0.107965
CAM109_map10	0003.CSV	1334.56	0.110217
CAM109_map10	0003.CSV	1338.41	0.113099
CAM109_map10	0003.CSV	1342.27	0.117045
CAM109_map10	0003.CSV	1346.13	0.120266
CAM109_map10	0003.CSV	1349.98	0.124371
CAM109_map10	0003.CSV	1353.84	0.128353
CAM109_map10	0003.CSV	1357.7	0.132569
CAM109_map10	0003.CSV	1361.56	0.13736
CAM109_map10	0003.CSV	1365.41	0.143603
CAM109_map10	0003.CSV	1369.27	0.148665
CAM109_map10	0003.CSV	1373.13	0.155532
CAM109_map10	0003.CSV	1376.98	0.162961
CAM109_map10	0003.CSV	1380.84	0.168773
CAM109_map10	0003.CSV	1384.7	0.173709
CAM109_map10	0003.CSV	1388.56	0.180914
CAM109_map10	0003.CSV	1392.41	0.186819
CAM109_map10	0003.CSV	1396.27	0.194443
CAM109_map10	0003.CSV	1400.13	0.201948
CAM109_map10	0003.CSV	1403.98	0.209348
CAM109_map10	0003.CSV	1407.84	0.216897
CAM109_map10	0003.CSV	1411.7	0.224051
CAM109_map10	0003.CSV	1415.55	0.228784
CAM109_map10	0003.CSV	1419.41	0.234124
CAM109_map10	0003.CSV	1423.27	0.23702
CAM109_map10	0003.CSV	1427.12	0.24086
CAM109_map10	0003.CSV	1430.98	0.245637
CAM109_map10	0003.CSV	1434.84	0.25251
CAM109_map10	0003.CSV	1438.7	0.259543
CAM109_map10	0003.CSV	1442.55	0.266304
CAM109_map10	0003.CSV	1446.41	0.271479
CAM109_map10	0003.CSV	1450.27	0.275686
CAM109_map10	0003.CSV	1454.12	0.275
CAM109_map10	0003.CSV	1457.98	0.273696
CAM109_map10	0003.CSV	1461.84	0.271975
CAM109_map10	0003.CSV	1465.7	0.271415
CAM109_map10	0003.CSV	1469.55	0.26607
CAM109_map10	0003.CSV	1473.41	0.251246
CAM109_map10	0003.CSV	1477.27	0.230894
CAM109_map10	0003.CSV	1481.12	0.218197
CAM109_map10	0003.CSV	1484.98	0.2066
CAM109_map10	0003.CSV	1488.84	0.193856
CAM109_map10	0003.CSV	1492.7	0.181151
CAM109_map10	0003.CSV	1496.55	0.171748
CAM109_map10	0003.CSV	1500.41	0.16103
CAM109_map10	0003.CSV	1504.27	0.154806
CAM109_map10	0003.CSV	1508.12	0.143158
CAM109_map10	0003.CSV	1511.98	0.1347
CAM109_map10	0003.CSV	1515.84	0.128614
CAM109_map10	0003.CSV	1519.7	0.121096
CAM109_map10	0003.CSV	1523.55	0.112809
CAM109_map10	0003.CSV	1527.41	0.108775
CAM109_map10	0003.CSV	1531.27	0.107116
CAM109_map10	0003.CSV	1535.12	0.108693
CAM109_map10	0003.CSV	1538.98	0.109248
CAM109_map10	0003.CSV	1542.84	0.103058
CAM109_map10	0003.CSV	1546.7	0.0946445
CAM109_map10	0003.CSV	1550.55	0.088689
CAM109_map10	0003.CSV	1554.41	0.0834437
CAM109_map10	0003.CSV	1558.27	0.0786285
CAM109_map10	0003.CSV	1562.12	0.0748985
CAM109_map10	0003.CSV	1565.98	0.0738516
CAM109_map10	0003.CSV	1569.84	0.073839
CAM109_map10	0003.CSV	1573.69	0.073764
CAM109_map10	0003.CSV	1577.55	0.0694781
CAM109_map10	0003.CSV	1581.41	0.0621623
CAM109_map10	0003.CSV	1585.27	0.0545676
CAM109_map10	0003.CSV	1589.12	0.0488549
CAM109_map10	0003.CSV	1592.98	0.0454377
CAM109_map10	0003.CSV	1596.84	0.0436357
CAM109_map10	0003.CSV	1600.69	0.0423387
CAM109_map10	0003.CSV	1604.55	0.0415413
CAM109_map10	0003.CSV	1608.41	0.0409062
CAM109_map10	0003.CSV	1612.27	0.0405416
CAM109_map10	0003.CSV	1616.12	0.0401628
CAM109_map10	0003.CSV	1619.98	0.0401034
CAM109_map10	0003.CSV	1623.84	0.0396757
CAM109_map10	0003.CSV	1627.69	0.039426
CAM109_map10	0003.CSV	1631.55	0.0386723
CAM109_map10	0003.CSV	1635.41	0.0385595
CAM109_map10	0003.CSV	1639.27	0.0385424
CAM109_map10	0003.CSV	1643.12	0.0381003
CAM109_map10	0003.CSV	1646.98	0.0380069
CAM109_map10	0003.CSV	1650.84	0.0384306
CAM109_map10	0003.CSV	1654.69	0.038167
CAM109_map10	0003.CSV	1658.55	0.0373154
CAM109_map10	0003.CSV	1662.41	0.0360433
CAM109_map10	0003.CSV	1666.27	0.0350295
CAM109_map10	0003.CSV	1670.12	0.0340944
CAM109_map10	0003.CSV	1673.98	0.0334616
CAM109_map10	0003.CSV	1677.84	0.0323054
CAM109_map10	0003.CSV	1681.69	0.0315027
CAM109_map10	0003.CSV	1685.55	0.030779
CAM109_map10	0003.CSV	1689.41	0.0300518
CAM109_map10	0003.CSV	1693.27	0.0288692
CAM109_map10	0003.CSV	1697.12	0.0284575
CAM109_map10	0003.CSV	1700.98	0.0286736
CAM109_map10	0003.CSV	1704.84	0.0292059
CAM109_map10	0003.CSV	1708.69	0.0296163
CAM109_map10	0003.CSV	1712.55	0.0302385
CAM109_map10	0003.CSV	1716.41	0.0325408
CAM109_map10	0003.CSV	1720.27	0.0353081
CAM109_map10	0003.CSV	1724.12	0.0357448
[truncated: 63,589 more rows]

## Sheet: CAM109_map11
Map	Select spectrum number	Wavenumbers	Absorbance
CAM109_map11	0001.CSV	674.992	0.0215755
CAM109_map11	0001.CSV	678.849	0.0228364
CAM109_map11	0001.CSV	682.706	0.0236839
CAM109_map11	0001.CSV	686.563	0.0245445
CAM109_map11	0001.CSV	690.42	0.0257158
CAM109_map11	0001.CSV	694.277	0.030402
CAM109_map11	0001.CSV	698.134	0.0360658
CAM109_map11	0001.CSV	701.991	0.0347096
CAM109_map11	0001.CSV	705.849	0.0317221
CAM109_map11	0001.CSV	709.706	0.0367749
CAM109_map11	0001.CSV	713.563	0.0369757
CAM109_map11	0001.CSV	717.42	0.027292
CAM109_map11	0001.CSV	721.277	0.0209336
CAM109_map11	0001.CSV	725.134	0.0196953
CAM109_map11	0001.CSV	728.991	0.0192816
CAM109_map11	0001.CSV	732.848	0.0194896
CAM109_map11	0001.CSV	736.705	0.0201883
CAM109_map11	0001.CSV	740.562	0.0212662
CAM109_map11	0001.CSV	744.42	0.0216439
CAM109_map11	0001.CSV	748.277	0.0216019
CAM109_map11	0001.CSV	752.134	0.0212844
CAM109_map11	0001.CSV	755.991	0.0213393
CAM109_map11	0001.CSV	759.848	0.0212586
CAM109_map11	0001.CSV	763.705	0.0216678
CAM109_map11	0001.CSV	767.562	0.0218458
CAM109_map11	0001.CSV	771.419	0.0219697
CAM109_map11	0001.CSV	775.276	0.0219872
CAM109_map11	0001.CSV	779.133	0.0221862
CAM109_map11	0001.CSV	782.99	0.0222178
CAM109_map11	0001.CSV	786.848	0.0224815
CAM109_map11	0001.CSV	790.705	0.0225638
CAM109_map11	0001.CSV	794.562	0.0229933
CAM109_map11	0001.CSV	798.419	0.023382
CAM109_map11	0001.CSV	802.276	0.0237239
CAM109_map11	0001.CSV	806.133	0.0240158
CAM109_map11	0001.CSV	809.99	0.0248665
CAM109_map11	0001.CSV	813.847	0.0259353
CAM109_map11	0001.CSV	817.704	0.0274385
CAM109_map11	0001.CSV	821.562	0.0291577
CAM109_map11	0001.CSV	825.419	0.0313183
CAM109_map11	0001.CSV	829.276	0.0333898
CAM109_map11	0001.CSV	833.133	0.036077
CAM109_map11	0001.CSV	836.99	0.0398643
CAM109_map11	0001.CSV	840.847	0.0452274
CAM109_map11	0001.CSV	844.704	0.050105
CAM109_map11	0001.CSV	848.561	0.0559616
CAM109_map11	0001.CSV	852.418	0.0614217
CAM109_map11	0001.CSV	856.275	0.0627097
CAM109_map11	0001.CSV	860.132	0.0587079
CAM109_map11	0001.CSV	863.99	0.0497933
CAM109_map11	0001.CSV	867.847	0.0388515
CAM109_map11	0001.CSV	871.704	0.0304748
CAM109_map11	0001.CSV	875.561	0.0256571
CAM109_map11	0001.CSV	879.418	0.0231801
CAM109_map11	0001.CSV	883.275	0.0216767
CAM109_map11	0001.CSV	887.132	0.0208459
CAM109_map11	0001.CSV	890.989	0.020504
CAM109_map11	0001.CSV	894.846	0.0205664
CAM109_map11	0001.CSV	898.703	0.0205903
CAM109_map11	0001.CSV	902.561	0.0208449
CAM109_map11	0001.CSV	906.418	0.0211468
CAM109_map11	0001.CSV	910.275	0.0211458
CAM109_map11	0001.CSV	914.132	0.0210202
CAM109_map11	0001.CSV	917.989	0.0213133
CAM109_map11	0001.CSV	921.846	0.0214463
CAM109_map11	0001.CSV	925.703	0.0215693
CAM109_map11	0001.CSV	929.56	0.0216762
CAM109_map11	0001.CSV	933.417	0.0218423
CAM109_map11	0001.CSV	937.274	0.0219649
CAM109_map11	0001.CSV	941.131	0.0220838
CAM109_map11	0001.CSV	944.989	0.0220467
CAM109_map11	0001.CSV	948.846	0.0221933
CAM109_map11	0001.CSV	952.703	0.0224069
CAM109_map11	0001.CSV	956.56	0.0226246
CAM109_map11	0001.CSV	960.417	0.0225621
CAM109_map11	0001.CSV	964.274	0.0225245
CAM109_map11	0001.CSV	968.131	0.0226414
CAM109_map11	0001.CSV	971.988	0.0230479
CAM109_map11	0001.CSV	975.845	0.0233276
CAM109_map11	0001.CSV	979.702	0.0237496
CAM109_map11	0001.CSV	983.559	0.0242407
CAM109_map11	0001.CSV	987.417	0.0246168
CAM109_map11	0001.CSV	991.274	0.0248654
CAM109_map11	0001.CSV	995.131	0.0252193
CAM109_map11	0001.CSV	998.988	0.0256226
CAM109_map11	0001.CSV	1002.85	0.0261558
CAM109_map11	0001.CSV	1006.7	0.0265266
CAM109_map11	0001.CSV	1010.56	0.0269402
CAM109_map11	0001.CSV	1014.42	0.0271905
CAM109_map11	0001.CSV	1018.27	0.0275755
CAM109_map11	0001.CSV	1022.13	0.0278942
CAM109_map11	0001.CSV	1025.99	0.0282331
CAM109_map11	0001.CSV	1029.85	0.0284602
CAM109_map11	0001.CSV	1033.7	0.0287976
CAM109_map11	0001.CSV	1037.56	0.0290471
CAM109_map11	0001.CSV	1041.42	0.0291278
CAM109_map11	0001.CSV	1045.27	0.0290842
CAM109_map11	0001.CSV	1049.13	0.0294416
CAM109_map11	0001.CSV	1052.99	0.0299581
CAM109_map11	0001.CSV	1056.84	0.0307341
CAM109_map11	0001.CSV	1060.7	0.0315684
CAM109_map11	0001.CSV	1064.56	0.0323998
CAM109_map11	0001.CSV	1068.42	0.0329626
CAM109_map11	0001.CSV	1072.27	0.0335251
CAM109_map11	0001.CSV	1076.13	0.0343659
CAM109_map11	0001.CSV	1079.99	0.0362231
CAM109_map11	0001.CSV	1083.84	0.0361589
CAM109_map11	0001.CSV	1087.7	0.0334637
CAM109_map11	0001.CSV	1091.56	0.0317459
CAM109_map11	0001.CSV	1095.41	0.0313543
CAM109_map11	0001.CSV	1099.27	0.031238
CAM109_map11	0001.CSV	1103.13	0.0313339
CAM109_map11	0001.CSV	1106.99	0.031529
CAM109_map11	0001.CSV	1110.84	0.0318599
CAM109_map11	0001.CSV	1114.7	0.0320447
CAM109_map11	0001.CSV	1118.56	0.0321088
CAM109_map11	0001.CSV	1122.41	0.031942
CAM109_map11	0001.CSV	1126.27	0.0317432
CAM109_map11	0001.CSV	1130.13	0.0314673
CAM109_map11	0001.CSV	1133.99	0.0313282
CAM109_map11	0001.CSV	1137.84	0.0311662
CAM109_map11	0001.CSV	1141.7	0.0310112
CAM109_map11	0001.CSV	1145.56	0.0308075
CAM109_map11	0001.CSV	1149.41	0.0306497
CAM109_map11	0001.CSV	1153.27	0.0304686
CAM109_map11	0001.CSV	1157.13	0.0303645
CAM109_map11	0001.CSV	1160.99	0.0302617
CAM109_map11	0001.CSV	1164.84	0.0302232
CAM109_map11	0001.CSV	1168.7	0.0300459
CAM109_map11	0001.CSV	1172.56	0.0298496
CAM109_map11	0001.CSV	1176.41	0.0295938
CAM109_map11	0001.CSV	1180.27	0.0294142
CAM109_map11	0001.CSV	1184.13	0.0291209
CAM109_map11	0001.CSV	1187.99	0.0287828
CAM109_map11	0001.CSV	1191.84	0.0283823
CAM109_map11	0001.CSV	1195.7	0.0281211
CAM109_map11	0001.CSV	1199.56	0.0279238
CAM109_map11	0001.CSV	1203.41	0.0278504
CAM109_map11	0001.CSV	1207.27	0.0277956
CAM109_map11	0001.CSV	1211.13	0.0278671
CAM109_map11	0001.CSV	1214.98	0.027963
CAM109_map11	0001.CSV	1218.84	0.0281672
CAM109_map11	0001.CSV	1222.7	0.0283747
CAM109_map11	0001.CSV	1226.56	0.0287084
CAM109_map11	0001.CSV	1230.41	0.0289926
CAM109_map11	0001.CSV	1234.27	0.0294092
CAM109_map11	0001.CSV	1238.13	0.0298655
CAM109_map11	0001.CSV	1241.98	0.0304433
CAM109_map11	0001.CSV	1245.84	0.0310082
CAM109_map11	0001.CSV	1249.7	0.0316063
CAM109_map11	0001.CSV	1253.56	0.0319922
CAM109_map11	0001.CSV	1257.41	0.032212
CAM109_map11	0001.CSV	1261.27	0.0322882
CAM109_map11	0001.CSV	1265.13	0.0324415
CAM109_map11	0001.CSV	1268.98	0.0326944
CAM109_map11	0001.CSV	1272.84	0.0330107
CAM109_map11	0001.CSV	1276.7	0.0331846
CAM109_map11	0001.CSV	1280.56	0.0333979
CAM109_map11	0001.CSV	1284.41	0.0335177
CAM109_map11	0001.CSV	1288.27	0.0336065
CAM109_map11	0001.CSV	1292.13	0.0334232
CAM109_map11	0001.CSV	1295.98	0.0332479
CAM109_map11	0001.CSV	1299.84	0.0331413
CAM109_map11	0001.CSV	1303.7	0.0331117
CAM109_map11	0001.CSV	1307.56	0.0330721
CAM109_map11	0001.CSV	1311.41	0.0332487
CAM109_map11	0001.CSV	1315.27	0.0334991
CAM109_map11	0001.CSV	1319.13	0.0338605
CAM109_map11	0001.CSV	1322.98	0.0340715
CAM109_map11	0001.CSV	1326.84	0.0343575
CAM109_map11	0001.CSV	1330.7	0.0347047
CAM109_map11	0001.CSV	1334.56	0.0351542
CAM109_map11	0001.CSV	1338.41	0.035948
CAM109_map11	0001.CSV	1342.27	0.036976
CAM109_map11	0001.CSV	1346.13	0.0375901
CAM109_map11	0001.CSV	1349.98	0.0384148
CAM109_map11	0001.CSV	1353.84	0.039276
CAM109_map11	0001.CSV	1357.7	0.0401963
CAM109_map11	0001.CSV	1361.56	0.0414158
CAM109_map11	0001.CSV	1365.41	0.0429595
CAM109_map11	0001.CSV	1369.27	0.0438912
CAM109_map11	0001.CSV	1373.13	0.0453311
CAM109_map11	0001.CSV	1376.98	0.0470398
CAM109_map11	0001.CSV	1380.84	0.0481843
CAM109_map11	0001.CSV	1384.7	0.0491194
CAM109_map11	0001.CSV	1388.56	0.0505895
CAM109_map11	0001.CSV	1392.41	0.051543
CAM109_map11	0001.CSV	1396.27	0.0529919
CAM109_map11	0001.CSV	1400.13	0.0544001
CAM109_map11	0001.CSV	1403.98	0.0554597
CAM109_map11	0001.CSV	1407.84	0.0565104
CAM109_map11	0001.CSV	1411.7	0.057456
CAM109_map11	0001.CSV	1415.55	0.058081
CAM109_map11	0001.CSV	1419.41	0.059354
CAM109_map11	0001.CSV	1423.27	0.0602038
CAM109_map11	0001.CSV	1427.12	0.0608356
CAM109_map11	0001.CSV	1430.98	0.0615879
CAM109_map11	0001.CSV	1434.84	0.0626692
CAM109_map11	0001.CSV	1438.7	0.0635152
CAM109_map11	0001.CSV	1442.55	0.0635522
CAM109_map11	0001.CSV	1446.41	0.0632347
CAM109_map11	0001.CSV	1450.27	0.0628835
CAM109_map11	0001.CSV	1454.12	0.0619874
CAM109_map11	0001.CSV	1457.98	0.0618005
CAM109_map11	0001.CSV	1461.84	0.0611422
CAM109_map11	0001.CSV	1465.7	0.0605389
CAM109_map11	0001.CSV	1469.55	0.0593898
CAM109_map11	0001.CSV	1473.41	0.0578474
CAM109_map11	0001.CSV	1477.27	0.0555041
CAM109_map11	0001.CSV	1481.12	0.053391
CAM109_map11	0001.CSV	1484.98	0.0514057
CAM109_map11	0001.CSV	1488.84	0.0497135
CAM109_map11	0001.CSV	1492.7	0.0478271
CAM109_map11	0001.CSV	1496.55	0.0462106
CAM109_map11	0001.CSV	1500.41	0.0444997
CAM109_map11	0001.CSV	1504.27	0.0430257
CAM109_map11	0001.CSV	1508.12	0.0414947
CAM109_map11	0001.CSV	1511.98	0.0402234
CAM109_map11	0001.CSV	1515.84	0.0386381
CAM109_map11	0001.CSV	1519.7	0.0368716
CAM109_map11	0001.CSV	1523.55	0.0352722
CAM109_map11	0001.CSV	1527.41	0.0339732
CAM109_map11	0001.CSV	1531.27	0.0327225
CAM109_map11	0001.CSV	1535.12	0.0320651
CAM109_map11	0001.CSV	1538.98	0.031504
CAM109_map11	0001.CSV	1542.84	0.0308136
CAM109_map11	0001.CSV	1546.7	0.0296469
CAM109_map11	0001.CSV	1550.55	0.0285413
CAM109_map11	0001.CSV	1554.41	0.0274135
CAM109_map11	0001.CSV	1558.27	0.0264761
CAM109_map11	0001.CSV	1562.12	0.0257933
CAM109_map11	0001.CSV	1565.98	0.0251789
CAM109_map11	0001.CSV	1569.84	0.0247139
CAM109_map11	0001.CSV	1573.69	0.0242137
CAM109_map11	0001.CSV	1577.55	0.0235473
CAM109_map11	0001.CSV	1581.41	0.022461
CAM109_map11	0001.CSV	1585.27	0.0212205
CAM109_map11	0001.CSV	1589.12	0.0202248
CAM109_map11	0001.CSV	1592.98	0.0196057
CAM109_map11	0001.CSV	1596.84	0.0193982
CAM109_map11	0001.CSV	1600.69	0.0193188
CAM109_map11	0001.CSV	1604.55	0.0193465
CAM109_map11	0001.CSV	1608.41	0.0193245
CAM109_map11	0001.CSV	1612.27	0.0191043
CAM109_map11	0001.CSV	1616.12	0.0190213
CAM109_map11	0001.CSV	1619.98	0.019147
CAM109_map11	0001.CSV	1623.84	0.019085
CAM109_map11	0001.CSV	1627.69	0.0190015
CAM109_map11	0001.CSV	1631.55	0.0185548
CAM109_map11	0001.CSV	1635.41	0.0186248
CAM109_map11	0001.CSV	1639.27	0.0189048
CAM109_map11	0001.CSV	1643.12	0.0184849
CAM109_map11	0001.CSV	1646.98	0.0185057
CAM109_map11	0001.CSV	1650.84	0.0188631
CAM109_map11	0001.CSV	1654.69	0.0190371
CAM109_map11	0001.CSV	1658.55	0.0185735
CAM109_map11	0001.CSV	1662.41	0.0181854
CAM109_map11	0001.CSV	1666.27	0.0179757
CAM109_map11	0001.CSV	1670.12	0.0178686
CAM109_map11	0001.CSV	1673.98	0.0179942
CAM109_map11	0001.CSV	1677.84	0.017622
CAM109_map11	0001.CSV	1681.69	0.0172675
CAM109_map11	0001.CSV	1685.55	0.017538
CAM109_map11	0001.CSV	1689.41	0.0174451
CAM109_map11	0001.CSV	1693.27	0.0168549
CAM109_map11	0001.CSV	1697.12	0.0167726
CAM109_map11	0001.CSV	1700.98	0.0172228
CAM109_map11	0001.CSV	1704.84	0.0174279
CAM109_map11	0001.CSV	1708.69	0.0173845
CAM109_map11	0001.CSV	1712.55	0.0172412
CAM109_map11	0001.CSV	1716.41	0.018064
CAM109_map11	0001.CSV	1720.27	0.0190412
CAM109_map11	0001.CSV	1724.12	0.0188502
CAM109_map11	0001.CSV	1727.98	0.0186011
CAM109_map11	0001.CSV	1731.84	0.0185528
CAM109_map11	0001.CSV	1735.69	0.0185752
CAM109_map11	0001.CSV	1739.55	0.0179319
CAM109_map11	0001.CSV	1743.41	0.0171008
CAM109_map11	0001.CSV	1747.27	0.0162032
CAM109_map11	0001.CSV	1751.12	0.0155054
CAM109_map11	0001.CSV	1754.98	0.0148271
CAM109_map11	0001.CSV	1758.84	0.0144862
CAM109_map11	0001.CSV	1762.69	0.014368
CAM109_map11	0001.CSV	1766.55	0.0140883
CAM109_map11	0001.CSV	1770.41	0.0141347
CAM109_map11	0001.CSV	1774.26	0.0147303
CAM109_map11	0001.CSV	1778.12	0.0148381
CAM109_map11	0001.CSV	1781.98	0.0150427
CAM109_map11	0001.CSV	1785.84	0.0150394
CAM109_map11	0001.CSV	1789.69	0.0148115
CAM109_map11	0001.CSV	1793.55	0.0146923
CAM109_map11	0001.CSV	1797.41	0.0144028
CAM109_map11	0001.CSV	1801.26	0.0140808
CAM109_map11	0001.CSV	1805.12	0.0137529
CAM109_map11	0001.CSV	1808.98	0.0135279
CAM109_map11	0001.CSV	1812.84	0.0136034
CAM109_map11	0001.CSV	1816.69	0.0134395
CAM109_map11	0001.CSV	1820.55	0.0132813
CAM109_map11	0001.CSV	1824.41	0.0132542
CAM109_map11	0001.CSV	1828.26	0.0134838
CAM109_map11	0001.CSV	1832.12	0.0135382
CAM109_map11	0001.CSV	1835.98	0.0134083
CAM109_map11	0001.CSV	1839.84	0.0132118
CAM109_map11	0001.CSV	1843.69	0.0133088
CAM109_map11	0001.CSV	1847.55	0.0135092
CAM109_map11	0001.CSV	1851.41	0.0133321
CAM109_map11	0001.CSV	1855.26	0.0131609
CAM109_map11	0001.CSV	1859.12	0.0131761
CAM109_map11	0001.CSV	1862.98	0.0130858
CAM109_map11	0001.CSV	1866.84	0.0131762
CAM109_map11	0001.CSV	1870.69	0.0135177
CAM109_map11	0001.CSV	1874.55	0.0133429
CAM109_map11	0001.CSV	1878.41	0.0131582
CAM109_map11	0001.CSV	1882.26	0.013115
CAM109_map11	0001.CSV	1886.12	0.0131182
CAM109_map11	0001.CSV	1889.98	0.0132117
CAM109_map11	0001.CSV	1893.83	0.0132174
CAM109_map11	0001.CSV	1897.69	0.0131713
CAM109_map11	0001.CSV	1901.55	0.0131112
CAM109_map11	0001.CSV	1905.41	0.013143
CAM109_map11	0001.CSV	1909.26	0.0132376
CAM109_map11	0001.CSV	1913.12	0.0131204
CAM109_map11	0001.CSV	1916.98	0.0129698
CAM109_map11	0001.CSV	1920.83	0.0131398
CAM109_map11	0001.CSV	1924.69	0.013245
CAM109_map11	0001.CSV	1928.55	0.0131611
CAM109_map11	0001.CSV	1932.4	0.0131297
CAM109_map11	0001.CSV	1936.26	0.0131347
CAM109_map11	0001.CSV	1940.12	0.0131092
CAM109_map11	0001.CSV	1943.98	0.0132952
CAM109_map11	0001.CSV	1947.83	0.0132975
CAM109_map11	0001.CSV	1951.69	0.0132298
CAM109_map11	0001.CSV	1955.55	0.0132683
CAM109_map11	0001.CSV	1959.4	0.0132792
CAM109_map11	0001.CSV	1963.26	0.0132374
CAM109_map11	0001.CSV	1967.12	0.013334
CAM109_map11	0001.CSV	1970.98	0.013304
CAM109_map11	0001.CSV	1974.83	0.0132091
CAM109_map11	0001.CSV	1978.69	0.0131814
CAM109_map11	0001.CSV	1982.55	0.0131716
CAM109_map11	0001.CSV	1986.4	0.0131354
CAM109_map11	0001.CSV	1990.26	0.0132056
CAM109_map11	0001.CSV	1994.12	0.0133056
CAM109_map11	0001.CSV	1997.98	0.0132656
CAM109_map11	0001.CSV	2001.83	0.0132084
CAM109_map11	0001.CSV	2005.69	0.013223
CAM109_map11	0001.CSV	2009.55	0.0132152
CAM109_map11	0001.CSV	2013.4	0.0131531
CAM109_map11	0001.CSV	2017.26	0.0132125
CAM109_map11	0001.CSV	2021.12	0.0132313
CAM109_map11	0001.CSV	2024.97	0.0131546
CAM109_map11	0001.CSV	2028.83	0.0131335
CAM109_map11	0001.CSV	2032.69	0.0130833
CAM109_map11	0001.CSV	2036.55	0.0130736
CAM109_map11	0001.CSV	2040.4	0.0131031
CAM109_map11	0001.CSV	2044.26	0.0131047
CAM109_map11	0001.CSV	2048.12	0.0130387
CAM109_map11	0001.CSV	2051.97	0.0130415
CAM109_map11	0001.CSV	2055.83	0.0130535
CAM109_map11	0001.CSV	2059.69	0.0130791
CAM109_map11	0001.CSV	2063.55	0.0131115
CAM109_map11	0001.CSV	2067.4	0.0131601
CAM109_map11	0001.CSV	2071.26	0.0131263
CAM109_map11	0001.CSV	2075.12	0.0131131
CAM109_map11	0001.CSV	2078.97	0.0131054
CAM109_map11	0001.CSV	2082.83	0.0131286
CAM109_map11	0001.CSV	2086.69	0.0131311
CAM109_map11	0001.CSV	2090.55	0.0131474
CAM109_map11	0001.CSV	2094.4	0.0131319
CAM109_map11	0001.CSV	2098.26	0.0131379
CAM109_map11	0001.CSV	2102.12	0.0131337
CAM109_map11	0001.CSV	2105.97	0.0131587
CAM109_map11	0001.CSV	2109.83	0.0131449
CAM109_map11	0001.CSV	2113.69	0.0131393
CAM109_map11	0001.CSV	2117.55	0.0131708
CAM109_map11	0001.CSV	2121.4	0.0131882
CAM109_map11	0001.CSV	2125.26	0.0131759
CAM109_map11	0001.CSV	2129.12	0.0131576
CAM109_map11	0001.CSV	2132.97	0.0131409
CAM109_map11	0001.CSV	2136.83	0.0131356
CAM109_map11	0001.CSV	2140.69	0.0131173
CAM109_map11	0001.CSV	2144.55	0.0131286
CAM109_map11	0001.CSV	2148.4	0.013131
CAM109_map11	0001.CSV	2152.26	0.013137
CAM109_map11	0001.CSV	2156.12	0.0131541
CAM109_map11	0001.CSV	2159.97	0.013149
CAM109_map11	0001.CSV	2163.83	0.0131027
CAM109_map11	0001.CSV	2167.69	0.0130979
CAM109_map11	0001.CSV	2171.55	0.0130894
CAM109_map11	0001.CSV	2175.4	0.0131209
CAM109_map11	0001.CSV	2179.26	0.0131501
CAM109_map11	0001.CSV	2183.12	0.0131901
CAM109_map11	0001.CSV	2186.97	0.0132059
CAM109_map11	0001.CSV	2190.83	0.0131716
CAM109_map11	0001.CSV	2194.69	0.0131249
CAM109_map11	0001.CSV	2198.55	0.0131177
CAM109_map11	0001.CSV	2202.4	0.013133
CAM109_map11	0001.CSV	2206.26	0.0131559
CAM109_map11	0001.CSV	2210.12	0.0131632
CAM109_map11	0001.CSV	2213.97	0.0131382
CAM109_map11	0001.CSV	2217.83	0.013123
CAM109_map11	0001.CSV	2221.69	0.013137
CAM109_map11	0001.CSV	2225.54	0.0131275
CAM109_map11	0001.CSV	2229.4	0.0131001
CAM109_map11	0001.CSV	2233.26	0.0130542
CAM109_map11	0001.CSV	2237.12	0.0130486
CAM109_map11	0001.CSV	2240.97	0.0130505
CAM109_map11	0001.CSV	2244.83	0.0130656
CAM109_map11	0001.CSV	2248.69	0.0130645
CAM109_map11	0001.CSV	2252.54	0.0130807
CAM109_map11	0001.CSV	2256.4	0.013067
CAM109_map11	0001.CSV	2260.26	0.0130198
CAM109_map11	0001.CSV	2264.11	0.0129831
CAM109_map11	0001.CSV	2267.97	0.0129833
CAM109_map11	0001.CSV	2271.83	0.0129612
CAM109_map11	0001.CSV	2275.69	0.0129644
CAM109_map11	0001.CSV	2279.54	0.0129495
CAM109_map11	0001.CSV	2283.4	0.0129191
CAM109_map11	0001.CSV	2287.26	0.0128691
CAM109_map11	0001.CSV	2291.11	0.0129205
CAM109_map11	0001.CSV	2294.97	0.0129466
CAM109_map11	0001.CSV	2298.83	0.0129456
CAM109_map11	0001.CSV	2302.69	0.0129046
CAM109_map11	0001.CSV	2306.54	0.0128154
CAM109_map11	0001.CSV	2310.4	0.0127626
CAM109_map11	0001.CSV	2314.26	0.0126893
CAM109_map11	0001.CSV	2318.11	0.0123308
CAM109_map11	0001.CSV	2321.97	0.0118581
CAM109_map11	0001.CSV	2325.83	0.0114585
CAM109_map11	0001.CSV	2329.69	0.0108935
CAM109_map11	0001.CSV	2333.54	0.010367
CAM109_map11	0001.CSV	2337.4	0.0101468
CAM109_map11	0001.CSV	2341.26	0.0103398
CAM109_map11	0001.CSV	2345.11	0.0115193
CAM109_map11	0001.CSV	2348.97	0.0116566
CAM109_map11	0001.CSV	2352.83	0.0102723
CAM109_map11	0001.CSV	2356.69	0.00716628
CAM109_map11	0001.CSV	2360.54	0.00521776
CAM109_map11	0001.CSV	2364.4	0.00691103
CAM109_map11	0001.CSV	2368.26	0.00984866
CAM109_map11	0001.CSV	2372.11	0.0119168
CAM109_map11	0001.CSV	2375.97	0.0128601
CAM109_map11	0001.CSV	2379.83	0.0131485
CAM109_map11	0001.CSV	2383.69	0.0129814
CAM109_map11	0001.CSV	2387.54	0.0127027
CAM109_map11	0001.CSV	2391.4	0.0125862
CAM109_map11	0001.CSV	2395.26	0.012541
CAM109_map11	0001.CSV	2399.11	0.0124543
CAM109_map11	0001.CSV	2402.97	0.0124075
CAM109_map11	0001.CSV	2406.83	0.0124227
CAM109_map11	0001.CSV	2410.68	0.012432
CAM109_map11	0001.CSV	2414.54	0.0124289
CAM109_map11	0001.CSV	2418.4	0.0124214
CAM109_map11	0001.CSV	2422.26	0.0124322
CAM109_map11	0001.CSV	2426.11	0.0124039
CAM109_map11	0001.CSV	2429.97	0.012353
CAM109_map11	0001.CSV	2433.83	0.0123587
CAM109_map11	0001.CSV	2437.68	0.0123485
CAM109_map11	0001.CSV	2441.54	0.0123165
CAM109_map11	0001.CSV	2445.4	0.012364
CAM109_map11	0001.CSV	2449.26	0.0123894
CAM109_map11	0001.CSV	2453.11	0.0123421
CAM109_map11	0001.CSV	2456.97	0.0122692
CAM109_map11	0001.CSV	2460.83	0.0122643
CAM109_map11	0001.CSV	2464.68	0.0123187
CAM109_map11	0001.CSV	2468.54	0.012353
CAM109_map11	0001.CSV	2472.4	0.0123418
CAM109_map11	0001.CSV	2476.26	0.0123553
CAM109_map11	0001.CSV	2480.11	0.0124305
CAM109_map11	0001.CSV	2483.97	0.0124675
CAM109_map11	0001.CSV	2487.83	0.012499
CAM109_map11	0001.CSV	2491.68	0.012567
CAM109_map11	0001.CSV	2495.54	0.0125893
CAM109_map11	0001.CSV	2499.4	0.0125794
CAM109_map11	0001.CSV	2503.26	0.012587
CAM109_map11	0001.CSV	2507.11	0.0125962
CAM109_map11	0001.CSV	2510.97	0.0126269
CAM109_map11	0001.CSV	2514.83	0.0126903
CAM109_map11	0001.CSV	2518.68	0.0127273
CAM109_map11	0001.CSV	2522.54	0.01272
CAM109_map11	0001.CSV	2526.4	0.0126797
CAM109_map11	0001.CSV	2530.26	0.0126174
CAM109_map11	0001.CSV	2534.11	0.0125853
CAM109_map11	0001.CSV	2537.97	0.0125682
CAM109_map11	0001.CSV	2541.83	0.0125385
CAM109_map11	0001.CSV	2545.68	0.0124938
CAM109_map11	0001.CSV	2549.54	0.012396
CAM109_map11	0001.CSV	2553.4	0.0123518
CAM109_map11	0001.CSV	2557.26	0.0123007
CAM109_map11	0001.CSV	2561.11	0.0122724
CAM109_map11	0001.CSV	2564.97	0.0122756
CAM109_map11	0001.CSV	2568.83	0.0122272
CAM109_map11	0001.CSV	2572.68	0.0122055
CAM109_map11	0001.CSV	2576.54	0.0122395
CAM109_map11	0001.CSV	2580.4	0.0121944
CAM109_map11	0001.CSV	2584.25	0.0121163
CAM109_map11	0001.CSV	2588.11	0.0120811
CAM109_map11	0001.CSV	2591.97	0.0121394
CAM109_map11	0001.CSV	2595.83	0.0122314
CAM109_map11	0001.CSV	2599.68	0.0122249
CAM109_map11	0001.CSV	2603.54	0.0121565
CAM109_map11	0001.CSV	2607.4	0.0121377
CAM109_map11	0001.CSV	2611.25	0.012167
CAM109_map11	0001.CSV	2615.11	0.0121834
CAM109_map11	0001.CSV	2618.97	0.0121781
CAM109_map11	0001.CSV	2622.82	0.0122285
CAM109_map11	0001.CSV	2626.68	0.0122737
CAM109_map11	0001.CSV	2630.54	0.0122313
CAM109_map11	0001.CSV	2634.4	0.0122521
CAM109_map11	0001.CSV	2638.25	0.0122608
CAM109_map11	0001.CSV	2642.11	0.0121632
CAM109_map11	0001.CSV	2645.97	0.0120885
CAM109_map11	0001.CSV	2649.82	0.012032
CAM109_map11	0001.CSV	2653.68	0.0119827
CAM109_map11	0001.CSV	2657.54	0.0119547
CAM109_map11	0001.CSV	2661.4	0.0119157
CAM109_map11	0001.CSV	2665.25	0.0118835
CAM109_map11	0001.CSV	2669.11	0.0119272
CAM109_map11	0001.CSV	2672.97	0.0120934
CAM109_map11	0001.CSV	2676.82	0.0122708
CAM109_map11	0001.CSV	2680.68	0.0121818
CAM109_map11	0001.CSV	2684.54	0.0118586
CAM109_map11	0001.CSV	2688.4	0.0117297
CAM109_map11	0001.CSV	2692.25	0.0117575
CAM109_map11	0001.CSV	2696.11	0.0118335
CAM109_map11	0001.CSV	2699.97	0.0118494
CAM109_map11	0001.CSV	2703.82	0.0118154
CAM109_map11	0001.CSV	2707.68	0.0118654
CAM109_map11	0001.CSV	2711.54	0.0119127
CAM109_map11	0001.CSV	2715.4	0.011903
CAM109_map11	0001.CSV	2719.25	0.0120013
CAM109_map11	0001.CSV	2723.11	0.0122658
CAM109_map11	0001.CSV	2726.97	0.0122636
CAM109_map11	0001.CSV	2730.82	0.0119947
CAM109_map11	0001.CSV	2734.68	0.0120327
CAM109_map11	0001.CSV	2738.54	0.0121016
CAM109_map11	0001.CSV	2742.4	0.0121029
CAM109_map11	0001.CSV	2746.25	0.0123597
CAM109_map11	0001.CSV	2750.11	0.0124349
CAM109_map11	0001.CSV	2753.97	0.012196
CAM109_map11	0001.CSV	2757.82	0.0121056
CAM109_map11	0001.CSV	2761.68	0.0120133
CAM109_map11	0001.CSV	2765.54	0.0119387
CAM109_map11	0001.CSV	2769.39	0.012119
CAM109_map11	0001.CSV	2773.25	0.0124835
CAM109_map11	0001.CSV	2777.11	0.0124408
CAM109_map11	0001.CSV	2780.97	0.0122087
CAM109_map11	0001.CSV	2784.82	0.0123624
CAM109_map11	0001.CSV	2788.68	0.0127091
CAM109_map11	0001.CSV	2792.54	0.0127588
CAM109_map11	0001.CSV	2796.39	0.0127306
CAM109_map11	0001.CSV	2800.25	0.0125627
CAM109_map11	0001.CSV	2804.11	0.0123742
CAM109_map11	0001.CSV	2807.97	0.0126074
CAM109_map11	0001.CSV	2811.82	0.0126115
CAM109_map11	0001.CSV	2815.68	0.0123979
CAM109_map11	0001.CSV	2819.54	0.012479
CAM109_map11	0001.CSV	2823.39	0.0125836
CAM109_map11	0001.CSV	2827.25	0.0125961
CAM109_map11	0001.CSV	2831.11	0.0129067
CAM109_map11	0001.CSV	2834.97	0.0135161
CAM109_map11	0001.CSV	2838.82	0.0138756
CAM109_map11	0001.CSV	2842.68	0.0140827
CAM109_map11	0001.CSV	2846.54	0.0148784
CAM109_map11	0001.CSV	2850.39	0.0153087
CAM109_map11	0001.CSV	2854.25	0.0149691
CAM109_map11	0001.CSV	2858.11	0.014658
CAM109_map11	0001.CSV	2861.97	0.0142635
CAM109_map11	0001.CSV	2865.82	0.0139827
CAM109_map11	0001.CSV	2869.68	0.0141749
CAM109_map11	0001.CSV	2873.54	0.0143205
CAM109_map11	0001.CSV	2877.39	0.0138178
CAM109_map11	0001.CSV	2881.25	0.0134262
CAM109_map11	0001.CSV	2885.11	0.0134232
CAM109_map11	0001.CSV	2888.97	0.0135529
CAM109_map11	0001.CSV	2892.82	0.0140232
CAM109_map11	0001.CSV	2896.68	0.0143803
CAM109_map11	0001.CSV	2900.54	0.014394
CAM109_map11	0001.CSV	2904.39	0.0146985
CAM109_map11	0001.CSV	2908.25	0.0155029
CAM109_map11	0001.CSV	2912.11	0.0167945
CAM109_map11	0001.CSV	2915.97	0.0176796
CAM109_map11	0001.CSV	2919.82	0.0175006
CAM109_map11	0001.CSV	2923.68	0.016827
CAM109_map11	0001.CSV	2927.54	0.0165694
CAM109_map11	0001.CSV	2931.39	0.0160007
CAM109_map11	0001.CSV	2935.25	0.0150283
CAM109_map11	0001.CSV	2939.11	0.0146243
CAM109_map11	0001.CSV	2942.96	0.0148926
CAM109_map11	0001.CSV	2946.82	0.0149512
CAM109_map11	0001.CSV	2950.68	0.0146503
CAM109_map11	0001.CSV	2954.54	0.0141878
CAM109_map11	0001.CSV	2958.39	0.0137596
CAM109_map11	0001.CSV	2962.25	0.0135988
CAM109_map11	0001.CSV	2966.11	0.0132791
CAM109_map11	0001.CSV	2969.96	0.0132593
CAM109_map11	0001.CSV	2973.82	0.013512
CAM109_map11	0001.CSV	2977.68	0.0135689
CAM109_map11	0001.CSV	2981.53	0.0132823
CAM109_map11	0001.CSV	2985.39	0.0127599
CAM109_map11	0001.CSV	2989.25	0.0127161
CAM109_map11	0001.CSV	2993.11	0.0129997
CAM109_map11	0001.CSV	2996.96	0.0129514
CAM109_map11	0001.CSV	3000.82	0.0126316
CAM109_map11	0001.CSV	3004.68	0.0124448
CAM109_map11	0001.CSV	3008.53	0.0127131
CAM109_map11	0001.CSV	3012.39	0.0131879
CAM109_map11	0001.CSV	3016.25	0.0132566
CAM109_map11	0001.CSV	3020.11	0.0129684
CAM109_map11	0001.CSV	3023.96	0.0128209
CAM109_map11	0001.CSV	3027.82	0.0128534
CAM109_map11	0001.CSV	3031.68	0.0130679
CAM109_map11	0001.CSV	3035.53	0.0131541
CAM109_map11	0001.CSV	3039.39	0.0131831
CAM109_map11	0001.CSV	3043.25	0.013285
CAM109_map11	0001.CSV	3047.11	0.0132152
CAM109_map11	0001.CSV	3050.96	0.0131886
CAM109_map11	0001.CSV	3054.82	0.0131077
CAM109_map11	0001.CSV	3058.68	0.0129036
CAM109_map11	0001.CSV	3062.53	0.0129462
CAM109_map11	0001.CSV	3066.39	0.0132067
CAM109_map11	0001.CSV	3070.25	0.0131374
CAM109_map11	0001.CSV	3074.11	0.0130888
CAM109_map11	0001.CSV	3077.96	0.013317
CAM109_map11	0001.CSV	3081.82	0.0135008
CAM109_map11	0001.CSV	3085.68	0.0134806
CAM109_map11	0001.CSV	3089.53	0.0132799
CAM109_map11	0001.CSV	3093.39	0.0129807
CAM109_map11	0001.CSV	3097.25	0.0129675
CAM109_map11	0001.CSV	3101.11	0.0130733
CAM109_map11	0001.CSV	3104.96	0.0131035
CAM109_map11	0001.CSV	3108.82	0.0132299
CAM109_map11	0001.CSV	3112.68	0.0133427
CAM109_map11	0001.CSV	3116.53	0.0135423
CAM109_map11	0001.CSV	3120.39	0.0135156
CAM109_map11	0001.CSV	3124.25	0.0131876
CAM109_map11	0001.CSV	3128.11	0.0130191
CAM109_map11	0001.CSV	3131.96	0.0129844
CAM109_map11	0001.CSV	3135.82	0.0131332
CAM109_map11	0001.CSV	3139.68	0.0132737
CAM109_map11	0001.CSV	3143.53	0.0130626
CAM109_map11	0001.CSV	3147.39	0.0130208
CAM109_map11	0001.CSV	3151.25	0.0133033
CAM109_map11	0001.CSV	3155.1	0.0132268
CAM109_map11	0001.CSV	3158.96	0.012814
CAM109_map11	0001.CSV	3162.82	0.0126622
CAM109_map11	0001.CSV	3166.68	0.0126228
CAM109_map11	0001.CSV	3170.53	0.0125638
CAM109_map11	0001.CSV	3174.39	0.0125722
CAM109_map11	0001.CSV	3178.25	0.0127508
CAM109_map11	0001.CSV	3182.1	0.0128703
CAM109_map11	0001.CSV	3185.96	0.0129201
CAM109_map11	0001.CSV	3189.82	0.0130083
CAM109_map11	0001.CSV	3193.68	0.0129466
CAM109_map11	0001.CSV	3197.53	0.0128378
CAM109_map11	0001.CSV	3201.39	0.0129372
CAM109_map11	0001.CSV	3205.25	0.0130061
CAM109_map11	0001.CSV	3209.1	0.0129744
CAM109_map11	0001.CSV	3212.96	0.0131109
CAM109_map11	0001.CSV	3216.82	0.0132901
CAM109_map11	0001.CSV	3220.68	0.0132348
CAM109_map11	0001.CSV	3224.53	0.0131655
CAM109_map11	0001.CSV	3228.39	0.0134741
CAM109_map11	0001.CSV	3232.25	0.0138556
CAM109_map11	0001.CSV	3236.1	0.0137051
CAM109_map11	0001.CSV	3239.96	0.0134525
CAM109_map11	0001.CSV	3243.82	0.0137242
CAM109_map11	0001.CSV	3247.68	0.0139056
CAM109_map11	0001.CSV	3251.53	0.0136413
CAM109_map11	0001.CSV	3255.39	0.0135815
CAM109_map11	0001.CSV	3259.25	0.013435
CAM109_map11	0001.CSV	3263.1	0.0134086
CAM109_map11	0001.CSV	3266.96	0.0137958
CAM109_map11	0001.CSV	3270.82	0.0142237
CAM109_map11	0001.CSV	3274.68	0.0141751
CAM109_map11	0001.CSV	3278.53	0.0138192
CAM109_map11	0001.CSV	3282.39	0.0136109
CAM109_map11	0001.CSV	3286.25	0.0137155
CAM109_map11	0001.CSV	3290.1	0.0141131
CAM109_map11	0001.CSV	3293.96	0.014404
CAM109_map11	0001.CSV	3297.82	0.0142518
CAM109_map11	0001.CSV	3301.67	0.014206
CAM109_map11	0001.CSV	3305.53	0.0144531
CAM109_map11	0001.CSV	3309.39	0.0143682
CAM109_map11	0001.CSV	3313.25	0.0138498
CAM109_map11	0001.CSV	3317.1	0.0135025
CAM109_map11	0001.CSV	3320.96	0.0136119
CAM109_map11	0001.CSV	3324.82	0.0138119
CAM109_map11	0001.CSV	3328.67	0.0136343
CAM109_map11	0001.CSV	3332.53	0.0136471
CAM109_map11	0001.CSV	3336.39	0.0142081
CAM109_map11	0001.CSV	3340.24	0.0144551
CAM109_map11	0001.CSV	3344.1	0.0141607
CAM109_map11	0001.CSV	3347.96	0.014077
CAM109_map11	0001.CSV	3351.82	0.0139864
CAM109_map11	0001.CSV	3355.67	0.0137079
CAM109_map11	0001.CSV	3359.53	0.013795
CAM109_map11	0001.CSV	3363.39	0.014063
CAM109_map11	0001.CSV	3367.24	0.0144421
CAM109_map11	0001.CSV	3371.1	0.0143495
CAM109_map11	0001.CSV	3374.96	0.0139824
CAM109_map11	0001.CSV	3378.82	0.013714
CAM109_map11	0001.CSV	3382.67	0.0133665
CAM109_map11	0001.CSV	3386.53	0.0134104
CAM109_map11	0001.CSV	3390.39	0.0138918
CAM109_map11	0001.CSV	3394.24	0.0141052
CAM109_map11	0001.CSV	3398.1	0.0140412
CAM109_map11	0001.CSV	3401.96	0.0139381
CAM109_map11	0001.CSV	3405.82	0.0138165
CAM109_map11	0001.CSV	3409.67	0.0138805
CAM109_map11	0001.CSV	3413.53	0.0136523
CAM109_map11	0001.CSV	3417.39	0.013218
CAM109_map11	0001.CSV	3421.24	0.0130465
CAM109_map11	0001.CSV	3425.1	0.0132362
CAM109_map11	0001.CSV	3428.96	0.0136226
CAM109_map11	0001.CSV	3432.82	0.0137453
CAM109_map11	0001.CSV	3436.67	0.0134288
CAM109_map11	0001.CSV	3440.53	0.0127843
CAM109_map11	0001.CSV	3444.39	0.0123843
CAM109_map11	0001.CSV	3448.24	0.0122902
CAM109_map11	0001.CSV	3452.1	0.0120649
CAM109_map11	0001.CSV	3455.96	0.0121863
CAM109_map11	0001.CSV	3459.82	0.0125527
CAM109_map11	0001.CSV	3463.67	0.0129429
CAM109_map11	0001.CSV	3467.53	0.0132059
CAM109_map11	0001.CSV	3471.39	0.0128357
CAM109_map11	0001.CSV	3475.24	0.0124928
CAM109_map11	0001.CSV	3479.1	0.0124283
CAM109_map11	0001.CSV	3482.96	0.0122943
CAM109_map11	0001.CSV	3486.82	0.0123266
CAM109_map11	0001.CSV	3490.67	0.012234
CAM109_map11	0001.CSV	3494.53	0.0123441
CAM109_map11	0001.CSV	3498.39	0.0124169
CAM109_map11	0001.CSV	3502.24	0.0122247
CAM109_map11	0001.CSV	3506.1	0.0118444
CAM109_map11	0001.CSV	3509.96	0.011676
CAM109_map11	0001.CSV	3513.81	0.0117973
CAM109_map11	0001.CSV	3517.67	0.0114681
CAM109_map11	0001.CSV	3521.53	0.0114312
CAM109_map11	0001.CSV	3525.39	0.011565
CAM109_map11	0001.CSV	3529.24	0.0114187
CAM109_map11	0001.CSV	3533.1	0.0115174
CAM109_map11	0001.CSV	3536.96	0.0117152
CAM109_map11	0001.CSV	3540.81	0.0118273
CAM109_map11	0001.CSV	3544.67	0.01205
CAM109_map11	0001.CSV	3548.53	0.0118414
CAM109_map11	0001.CSV	3552.39	0.0112485
CAM109_map11	0001.CSV	3556.24	0.0110244
CAM109_map11	0001.CSV	3560.1	0.0108481
CAM109_map11	0001.CSV	3563.96	0.0104085
CAM109_map11	0001.CSV	3567.81	0.0110446
CAM109_map11	0001.CSV	3571.67	0.0112512
CAM109_map11	0001.CSV	3575.53	0.0107002
CAM109_map11	0001.CSV	3579.39	0.0108664
CAM109_map11	0001.CSV	3583.24	0.0109548
CAM109_map11	0001.CSV	3587.1	0.011227
CAM109_map11	0001.CSV	3590.96	0.011275
CAM109_map11	0001.CSV	3594.81	0.0108654
CAM109_map11	0001.CSV	3598.67	0.0110979
CAM109_map11	0001.CSV	3602.53	0.0111305
CAM109_map11	0001.CSV	3606.39	0.0103477
CAM109_map11	0001.CSV	3610.24	0.00978765
CAM109_map11	0001.CSV	3614.1	0.00984466
CAM109_map11	0001.CSV	3617.96	0.0105055
CAM109_map11	0001.CSV	3621.81	0.0109686
CAM109_map11	0001.CSV	3625.67	0.0102194
CAM109_map11	0001.CSV	3629.53	0.0103266
CAM109_map11	0001.CSV	3633.39	0.0110123
CAM109_map11	0001.CSV	3637.24	0.0106757
CAM109_map11	0001.CSV	3641.1	0.0102114
CAM109_map11	0001.CSV	3644.96	0.00936215
CAM109_map11	0001.CSV	3648.81	0.010047
CAM109_map11	0001.CSV	3652.67	0.0112566
CAM109_map11	0001.CSV	3656.53	0.0112427
CAM109_map11	0001.CSV	3660.38	0.0112149
CAM109_map11	0001.CSV	3664.24	0.0102687
CAM109_map11	0001.CSV	3668.1	0.00934004
CAM109_map11	0001.CSV	3671.96	0.00920464
CAM109_map11	0001.CSV	3675.81	0.00997497
CAM109_map11	0001.CSV	3679.67	0.0108153
CAM109_map11	0001.CSV	3683.53	0.0103774
CAM109_map11	0001.CSV	3687.38	0.0101949
CAM109_map11	0001.CSV	3691.24	0.0112444
CAM109_map11	0001.CSV	3695.1	0.0109556
CAM109_map11	0001.CSV	3698.95	0.0101565
CAM109_map11	0001.CSV	3702.81	0.00986886
CAM109_map11	0001.CSV	3706.67	0.00931736
CAM109_map11	0001.CSV	3710.53	0.0092241
CAM109_map11	0001.CSV	3714.38	0.0102128
CAM109_map11	0001.CSV	3718.24	0.00976254
CAM109_map11	0001.CSV	3722.1	0.00937924
CAM109_map11	0001.CSV	3725.95	0.00959704
CAM109_map11	0001.CSV	3729.81	0.00926404
CAM109_map11	0001.CSV	3733.67	0.00925724
CAM109_map11	0001.CSV	3737.53	0.0105933
CAM109_map11	0001.CSV	3741.38	0.00960889
CAM109_map11	0001.CSV	3745.24	0.00832641
CAM109_map11	0001.CSV	3749.1	0.00835464
CAM109_map11	0001.CSV	3752.95	0.00964419
CAM109_map11	0001.CSV	3756.81	0.00985212
CAM109_map11	0001.CSV	3760.67	0.00976451
CAM109_map11	0001.CSV	3764.53	0.00946583
CAM109_map11	0001.CSV	3768.38	0.00968739
CAM109_map11	0001.CSV	3772.24	0.00996053
CAM109_map11	0001.CSV	3776.1	0.00952662
CAM109_map11	0001.CSV	3779.95	0.00962332
CAM109_map11	0001.CSV	3783.81	0.00978152
CAM109_map11	0001.CSV	3787.67	0.00978589
CAM109_map11	0001.CSV	3791.53	0.0094169
CAM109_map11	0001.CSV	3795.38	0.00875083
CAM109_map11	0001.CSV	3799.24	0.00860244
CAM109_map11	0001.CSV	3803.1	0.00924678
CAM109_map11	0001.CSV	3806.95	0.00981673
CAM109_map11	0001.CSV	3810.81	0.00945289
CAM109_map11	0001.CSV	3814.67	0.00869015
CAM109_map11	0001.CSV	3818.53	0.00885609
CAM109_map11	0001.CSV	3822.38	0.00963284
CAM109_map11	0001.CSV	3826.24	0.00959412
CAM109_map11	0001.CSV	3830.1	0.00920319
CAM109_map11	0001.CSV	3833.95	0.00887408
CAM109_map11	0001.CSV	3837.81	0.00911267
CAM109_map11	0001.CSV	3841.67	0.0101436
CAM109_map11	0001.CSV	3845.53	0.00990252
CAM109_map11	0001.CSV	3849.38	0.0085363
CAM109_map11	0001.CSV	3853.24	0.00852015
CAM109_map11	0001.CSV	3857.1	0.00978108
CAM109_map11	0001.CSV	3860.95	0.00900768
CAM109_map11	0001.CSV	3864.81	0.00884743
CAM109_map11	0001.CSV	3868.67	0.00904429
CAM109_map11	0001.CSV	3872.52	0.0095443
CAM109_map11	0001.CSV	3876.38	0.00943261
CAM109_map11	0001.CSV	3880.24	0.00907995
CAM109_map11	0001.CSV	3884.1	0.0096138
CAM109_map11	0001.CSV	3887.95	0.00960168
CAM109_map11	0001.CSV	3891.81	0.00955846
CAM109_map11	0001.CSV	3895.67	0.00936448
CAM109_map11	0001.CSV	3899.52	0.00880736
CAM109_map11	0001.CSV	3903.38	0.0097701
CAM109_map11	0001.CSV	3907.24	0.010292
CAM109_map11	0001.CSV	3911.1	0.00972544
CAM109_map11	0001.CSV	3914.95	0.00935731
CAM109_map11	0001.CSV	3918.81	0.00955747
CAM109_map11	0001.CSV	3922.67	0.00970914
CAM109_map11	0001.CSV	3926.52	0.00976739
CAM109_map11	0001.CSV	3930.38	0.00986764
CAM109_map11	0001.CSV	3934.24	0.0101019
CAM109_map11	0001.CSV	3938.09	0.00974309
CAM109_map11	0001.CSV	3941.95	0.00954206
CAM109_map11	0001.CSV	3945.81	0.00960503
CAM109_map11	0001.CSV	3949.67	0.00979203
CAM109_map11	0001.CSV	3953.52	0.0098975
CAM109_map11	0001.CSV	3957.38	0.00973896
CAM109_map11	0001.CSV	3961.24	0.0097067
CAM109_map11	0001.CSV	3965.09	0.0096735
CAM109_map11	0001.CSV	3968.95	0.00957864
CAM109_map11	0001.CSV	3972.81	0.00963955
CAM109_map11	0001.CSV	3976.67	0.0097985
CAM109_map11	0001.CSV	3980.52	0.00983781
CAM109_map11	0001.CSV	3984.38	0.00980748
CAM109_map11	0001.CSV	3988.24	0.0096902
CAM109_map11	0001.CSV	3992.09	0.00966449
CAM109_map11	0001.CSV	3995.95	0.00965829
CAM109_map11	0001.CSV	3999.81	0.0095108
CAM109_map11	0002.CSV	674.992	0.00324652
CAM109_map11	0002.CSV	678.849	0.00419107
CAM109_map11	0002.CSV	682.706	0.00435443
CAM109_map11	0002.CSV	686.563	0.0041525
CAM109_map11	0002.CSV	690.42	0.00395588
CAM109_map11	0002.CSV	694.277	0.00373966
CAM109_map11	0002.CSV	698.134	0.00380818
CAM109_map11	0002.CSV	701.991	0.00405178
CAM109_map11	0002.CSV	705.849	0.00401329
CAM109_map11	0002.CSV	709.706	0.0039414
CAM109_map11	0002.CSV	713.563	0.00387072
CAM109_map11	0002.CSV	717.42	0.00390857
CAM109_map11	0002.CSV	721.277	0.00393107
CAM109_map11	0002.CSV	725.134	0.00371366
CAM109_map11	0002.CSV	728.991	0.00356701
CAM109_map11	0002.CSV	732.848	0.00368565
CAM109_map11	0002.CSV	736.705	0.00391993
CAM109_map11	0002.CSV	740.562	0.00392712
CAM109_map11	0002.CSV	744.42	0.00375918
CAM109_map11	0002.CSV	748.277	0.00364352
CAM109_map11	0002.CSV	752.134	0.00337733
CAM109_map11	0002.CSV	755.991	0.00338718
CAM109_map11	0002.CSV	759.848	0.00353972
CAM109_map11	0002.CSV	763.705	0.00363633
CAM109_map11	0002.CSV	767.562	0.00346052
CAM109_map11	0002.CSV	771.419	0.00330648
CAM109_map11	0002.CSV	775.276	0.00316627
CAM109_map11	0002.CSV	779.133	0.00304553
CAM109_map11	0002.CSV	782.99	0.00309352
CAM109_map11	0002.CSV	786.848	0.00321724
CAM109_map11	0002.CSV	790.705	0.00317138
CAM109_map11	0002.CSV	794.562	0.00292883
CAM109_map11	0002.CSV	798.419	0.00281813
CAM109_map11	0002.CSV	802.276	0.00307356
CAM109_map11	0002.CSV	806.133	0.00341236
CAM109_map11	0002.CSV	809.99	0.00353166
CAM109_map11	0002.CSV	813.847	0.00358799
CAM109_map11	0002.CSV	817.704	0.00381189
CAM109_map11	0002.CSV	821.562	0.00423564
CAM109_map11	0002.CSV	825.419	0.00468341
CAM109_map11	0002.CSV	829.276	0.00493137
CAM109_map11	0002.CSV	833.133	0.00501978
CAM109_map11	0002.CSV	836.99	0.00509403
CAM109_map11	0002.CSV	840.847	0.00523744
CAM109_map11	0002.CSV	844.704	0.00534407
CAM109_map11	0002.CSV	848.561	0.00530633
CAM109_map11	0002.CSV	852.418	0.00528842
CAM109_map11	0002.CSV	856.275	0.00552108
CAM109_map11	0002.CSV	860.132	0.00588235
CAM109_map11	0002.CSV	863.99	0.00619995
CAM109_map11	0002.CSV	867.847	0.00625309
CAM109_map11	0002.CSV	871.704	0.00617538
CAM109_map11	0002.CSV	875.561	0.00620439
CAM109_map11	0002.CSV	879.418	0.0063323
CAM109_map11	0002.CSV	883.275	0.00630496
CAM109_map11	0002.CSV	887.132	0.00624469
CAM109_map11	0002.CSV	890.989	0.00631572
CAM109_map11	0002.CSV	894.846	0.00638791
CAM109_map11	0002.CSV	898.703	0.00636807
CAM109_map11	0002.CSV	902.561	0.00643468
CAM109_map11	0002.CSV	906.418	0.00659923
CAM109_map11	0002.CSV	910.275	0.00661823
CAM109_map11	0002.CSV	914.132	0.00662059
CAM109_map11	0002.CSV	917.989	0.00676498
CAM109_map11	0002.CSV	921.846	0.00683683
CAM109_map11	0002.CSV	925.703	0.00683683
CAM109_map11	0002.CSV	929.56	0.00689584
CAM109_map11	0002.CSV	933.417	0.00686891
CAM109_map11	0002.CSV	937.274	0.00679311
CAM109_map11	0002.CSV	941.131	0.00675666
CAM109_map11	0002.CSV	944.989	0.00677612
CAM109_map11	0002.CSV	948.846	0.00692419
CAM109_map11	0002.CSV	952.703	0.00701958
CAM109_map11	0002.CSV	956.56	0.00701429
CAM109_map11	0002.CSV	960.417	0.00688837
CAM109_map11	0002.CSV	964.274	0.0067253
CAM109_map11	0002.CSV	968.131	0.0066938
CAM109_map11	0002.CSV	971.988	0.00677588
CAM109_map11	0002.CSV	975.845	0.00674465
CAM109_map11	0002.CSV	979.702	0.00676514
CAM109_map11	0002.CSV	983.559	0.00694547
CAM109_map11	0002.CSV	987.417	0.00702533
CAM109_map11	0002.CSV	991.274	0.00703005
CAM109_map11	0002.CSV	995.131	0.00703961
CAM109_map11	0002.CSV	998.988	0.00703116
CAM109_map11	0002.CSV	1002.85	0.0070742
CAM109_map11	0002.CSV	1006.7	0.00715571
CAM109_map11	0002.CSV	1010.56	0.00724842
CAM109_map11	0002.CSV	1014.42	0.0072686
CAM109_map11	0002.CSV	1018.27	0.00733629
CAM109_map11	0002.CSV	1022.13	0.00740242
CAM109_map11	0002.CSV	1025.99	0.00738135
CAM109_map11	0002.CSV	1029.85	0.00736612
CAM109_map11	0002.CSV	1033.7	0.00745543
CAM109_map11	0002.CSV	1037.56	0.00753466
CAM109_map11	0002.CSV	1041.42	0.00745014
CAM109_map11	0002.CSV	1045.27	0.00741785
CAM109_map11	0002.CSV	1049.13	0.00748854
CAM109_map11	0002.CSV	1052.99	0.00752879
CAM109_map11	0002.CSV	1056.84	0.00747077
CAM109_map11	0002.CSV	1060.7	0.00745992
CAM109_map11	0002.CSV	1064.56	0.00751891
CAM109_map11	0002.CSV	1068.42	0.0075241
CAM109_map11	0002.CSV	1072.27	0.00752127
CAM109_map11	0002.CSV	1076.13	0.00749858
CAM109_map11	0002.CSV	1079.99	0.00761247
CAM109_map11	0002.CSV	1083.84	0.00775152
CAM109_map11	0002.CSV	1087.7	0.00773574
CAM109_map11	0002.CSV	1091.56	0.0076928
CAM109_map11	0002.CSV	1095.41	0.00771641
CAM109_map11	0002.CSV	1099.27	0.00782095
CAM109_map11	0002.CSV	1103.13	0.00792028
CAM109_map11	0002.CSV	1106.99	0.00804805
CAM109_map11	0002.CSV	1110.84	0.0082333
CAM109_map11	0002.CSV	1114.7	0.00839795
CAM109_map11	0002.CSV	1118.56	0.00851843
CAM109_map11	0002.CSV	1122.41	0.00858503
CAM109_map11	0002.CSV	1126.27	0.00868339
CAM109_map11	0002.CSV	1130.13	0.008739
CAM109_map11	0002.CSV	1133.99	0.00867129
CAM109_map11	0002.CSV	1137.84	0.00862417
CAM109_map11	0002.CSV	1141.7	0.00860315
CAM109_map11	0002.CSV	1145.56	0.00862823
CAM109_map11	0002.CSV	1149.41	0.00863401
CAM109_map11	0002.CSV	1153.27	0.00860666
CAM109_map11	0002.CSV	1157.13	0.00852022
CAM109_map11	0002.CSV	1160.99	0.00846028
CAM109_map11	0002.CSV	1164.84	0.00849657
CAM109_map11	0002.CSV	1168.7	0.00853914
CAM109_map11	0002.CSV	1172.56	0.00859629
CAM109_map11	0002.CSV	1176.41	0.00869583
CAM109_map11	0002.CSV	1180.27	0.00879823
CAM109_map11	0002.CSV	1184.13	0.008864
CAM109_map11	0002.CSV	1187.99	0.00883012
CAM109_map11	0002.CSV	1191.84	0.00870448
CAM109_map11	0002.CSV	1195.7	0.00857594
CAM109_map11	0002.CSV	1199.56	0.00851383
CAM109_map11	0002.CSV	1203.41	0.0085142
CAM109_map11	0002.CSV	1207.27	0.00852715
CAM109_map11	0002.CSV	1211.13	0.00855181
CAM109_map11	0002.CSV	1214.98	0.00854992
CAM109_map11	0002.CSV	1218.84	0.00858108
CAM109_map11	0002.CSV	1222.7	0.0086647
CAM109_map11	0002.CSV	1226.56	0.00876578
CAM109_map11	0002.CSV	1230.41	0.00884114
CAM109_map11	0002.CSV	1234.27	0.00889157
CAM109_map11	0002.CSV	1238.13	0.00892001
CAM109_map11	0002.CSV	1241.98	0.00899249
CAM109_map11	0002.CSV	1245.84	0.0091351
CAM109_map11	0002.CSV	1249.7	0.00928185
CAM109_map11	0002.CSV	1253.56	0.00929275
CAM109_map11	0002.CSV	1257.41	0.00913057
CAM109_map11	0002.CSV	1261.27	0.0089998
CAM109_map11	0002.CSV	1265.13	0.00898346
CAM109_map11	0002.CSV	1268.98	0.0090429
CAM109_map11	0002.CSV	1272.84	0.00913101
CAM109_map11	0002.CSV	1276.7	0.0091886
CAM109_map11	0002.CSV	1280.56	0.00925656
CAM109_map11	0002.CSV	1284.41	0.00931411
CAM109_map11	0002.CSV	1288.27	0.0093895
CAM109_map11	0002.CSV	1292.13	0.00943708
CAM109_map11	0002.CSV	1295.98	0.00944781
CAM109_map11	0002.CSV	1299.84	0.00950491
CAM109_map11	0002.CSV	1303.7	0.00951876
CAM109_map11	0002.CSV	1307.56	0.00944487
CAM109_map11	0002.CSV	1311.41	0.00939628
CAM109_map11	0002.CSV	1315.27	0.0094147
CAM109_map11	0002.CSV	1319.13	0.00946725
CAM109_map11	0002.CSV	1322.98	0.00948178
CAM109_map11	0002.CSV	1326.84	0.0094683
CAM109_map11	0002.CSV	1330.7	0.0094702
CAM109_map11	0002.CSV	1334.56	0.00939702
CAM109_map11	0002.CSV	1338.41	0.00952157
CAM109_map11	0002.CSV	1342.27	0.00972862
CAM109_map11	0002.CSV	1346.13	0.00964318
CAM109_map11	0002.CSV	1349.98	0.00960307
CAM109_map11	0002.CSV	1353.84	0.00962024
CAM109_map11	0002.CSV	1357.7	0.00960368
CAM109_map11	0002.CSV	1361.56	0.00970128
CAM109_map11	0002.CSV	1365.41	0.00989723
CAM109_map11	0002.CSV	1369.27	0.00978871
CAM109_map11	0002.CSV	1373.13	0.00982975
CAM109_map11	0002.CSV	1376.98	0.0100236
CAM109_map11	0002.CSV	1380.84	0.00996286
CAM109_map11	0002.CSV	1384.7	0.00986815
CAM109_map11	0002.CSV	1388.56	0.00996737
CAM109_map11	0002.CSV	1392.41	0.00988117
CAM109_map11	0002.CSV	1396.27	0.0100034
CAM109_map11	0002.CSV	1400.13	0.0102003
CAM109_map11	0002.CSV	1403.98	0.0102014
CAM109_map11	0002.CSV	1407.84	0.0102095
CAM109_map11	0002.CSV	1411.7	0.0101493
CAM109_map11	0002.CSV	1415.55	0.0101235
CAM109_map11	0002.CSV	1419.41	0.0105684
CAM109_map11	0002.CSV	1423.27	0.0108156
CAM109_map11	0002.CSV	1427.12	0.0107875
CAM109_map11	0002.CSV	1430.98	0.0108387
CAM109_map11	0002.CSV	1434.84	0.0110782
CAM109_map11	0002.CSV	1438.7	0.0114698
CAM109_map11	0002.CSV	1442.55	0.0114916
CAM109_map11	0002.CSV	1446.41	0.0117422
CAM109_map11	0002.CSV	1450.27	0.0121607
CAM109_map11	0002.CSV	1454.12	0.0121633
CAM109_map11	0002.CSV	1457.98	0.012899
CAM109_map11	0002.CSV	1461.84	0.013028
CAM109_map11	0002.CSV	1465.7	0.0128954
CAM109_map11	0002.CSV	1469.55	0.0127566
CAM109_map11	0002.CSV	1473.41	0.0131642
CAM109_map11	0002.CSV	1477.27	0.0134503
CAM109_map11	0002.CSV	1481.12	0.0130125
CAM109_map11	0002.CSV	1484.98	0.0126177
CAM109_map11	0002.CSV	1488.84	0.0126864
CAM109_map11	0002.CSV	1492.7	0.0127032
CAM109_map11	0002.CSV	1496.55	0.0125219
CAM109_map11	0002.CSV	1500.41	0.0125709
CAM109_map11	0002.CSV	1504.27	0.0121355
CAM109_map11	0002.CSV	1508.12	0.0127605
CAM109_map11	0002.CSV	1511.98	0.0129041
CAM109_map11	0002.CSV	1515.84	0.0122382
CAM109_map11	0002.CSV	1519.7	0.0118701
CAM109_map11	0002.CSV	1523.55	0.0121004
CAM109_map11	0002.CSV	1527.41	0.0118727
CAM109_map11	0002.CSV	1531.27	0.0114157
CAM109_map11	0002.CSV	1535.12	0.0111432
CAM109_map11	0002.CSV	1538.98	0.0109503
CAM109_map11	0002.CSV	1542.84	0.0114834
CAM109_map11	0002.CSV	1546.7	0.0114814
CAM109_map11	0002.CSV	1550.55	0.0111506
CAM109_map11	0002.CSV	1554.41	0.0109226
CAM109_map11	0002.CSV	1558.27	0.0112982
CAM109_map11	0002.CSV	1562.12	0.0116177
CAM109_map11	0002.CSV	1565.98	0.011186
CAM109_map11	0002.CSV	1569.84	0.0111029
CAM109_map11	0002.CSV	1573.69	0.0111094
CAM109_map11	0002.CSV	1577.55	0.0113764
CAM109_map11	0002.CSV	1581.41	0.0113197
CAM109_map11	0002.CSV	1585.27	0.0110627
CAM109_map11	0002.CSV	1589.12	0.010882
CAM109_map11	0002.CSV	1592.98	0.0108378
CAM109_map11	0002.CSV	1596.84	0.0108842
CAM109_map11	0002.CSV	1600.69	0.0109056
CAM109_map11	0002.CSV	1604.55	0.011002
CAM109_map11	0002.CSV	1608.41	0.0111315
CAM109_map11	0002.CSV	1612.27	0.0110051
CAM109_map11	0002.CSV	1616.12	0.0109862
CAM109_map11	0002.CSV	1619.98	0.01104
CAM109_map11	0002.CSV	1623.84	0.0110603
CAM109_map11	0002.CSV	1627.69	0.0111031
CAM109_map11	0002.CSV	1631.55	0.0107695
CAM109_map11	0002.CSV	1635.41	0.01097
CAM109_map11	0002.CSV	1639.27	0.0113925
CAM109_map11	0002.CSV	1643.12	0.0109415
CAM109_map11	0002.CSV	1646.98	0.010902
CAM109_map11	0002.CSV	1650.84	0.0112632
CAM109_map11	0002.CSV	1654.69	0.0116305
CAM109_map11	0002.CSV	1658.55	0.0112403
CAM109_map11	0002.CSV	1662.41	0.0109978
CAM109_map11	0002.CSV	1666.27	0.0108905
CAM109_map11	0002.CSV	1670.12	0.0108522
CAM109_map11	0002.CSV	1673.98	0.0110434
CAM109_map11	0002.CSV	1677.84	0.0108374
CAM109_map11	0002.CSV	1681.69	0.0106118
CAM109_map11	0002.CSV	1685.55	0.0109657
CAM109_map11	0002.CSV	1689.41	0.01086
CAM109_map11	0002.CSV	1693.27	0.0103425
CAM109_map11	0002.CSV	1697.12	0.0102831
CAM109_map11	0002.CSV	1700.98	0.0107207
CAM109_map11	0002.CSV	1704.84	0.0106876
CAM109_map11	0002.CSV	1708.69	0.0104065
CAM109_map11	0002.CSV	1712.55	0.00998995
CAM109_map11	0002.CSV	1716.41	0.0103101
CAM109_map11	0002.CSV	1720.27	0.0107576
CAM109_map11	0002.CSV	1724.12	0.0103868
CAM109_map11	0002.CSV	1727.98	0.0100631
CAM109_map11	0002.CSV	1731.84	0.0101044
CAM109_map11	0002.CSV	1735.69	0.0104157
CAM109_map11	0002.CSV	1739.55	0.0101376
CAM109_map11	0002.CSV	1743.41	0.00980911
CAM109_map11	0002.CSV	1747.27	0.0096279
CAM109_map11	0002.CSV	1751.12	0.00974794
CAM109_map11	0002.CSV	1754.98	0.00951212
CAM109_map11	0002.CSV	1758.84	0.00936276
CAM109_map11	0002.CSV	1762.69	0.00933953
CAM109_map11	0002.CSV	1766.55	0.00913547
CAM109_map11	0002.CSV	1770.41	0.00921239
CAM109_map11	0002.CSV	1774.26	0.00955446
CAM109_map11	0002.CSV	1778.12	0.00935023
CAM109_map11	0002.CSV	1781.98	0.00928412
CAM109_map11	0002.CSV	1785.84	0.00915358
CAM109_map11	0002.CSV	1789.69	0.00898387
CAM109_map11	0002.CSV	1793.55	0.00922688
CAM109_map11	0002.CSV	1797.41	0.00920644
CAM109_map11	0002.CSV	1801.26	0.00911561
CAM109_map11	0002.CSV	1805.12	0.00902101
CAM109_map11	0002.CSV	1808.98	0.00894774
CAM109_map11	0002.CSV	1812.84	0.0090656
CAM109_map11	0002.CSV	1816.69	0.00889748
CAM109_map11	0002.CSV	1820.55	0.0087364
CAM109_map11	0002.CSV	1824.41	0.00873626
CAM109_map11	0002.CSV	1828.26	0.0089587
CAM109_map11	0002.CSV	1832.12	0.0090409
CAM109_map11	0002.CSV	1835.98	0.00889116
CAM109_map11	0002.CSV	1839.84	0.00870205
CAM109_map11	0002.CSV	1843.69	0.00881227
CAM109_map11	0002.CSV	1847.55	0.00906679
CAM109_map11	0002.CSV	1851.41	0.00890763
CAM109_map11	0002.CSV	1855.26	0.00874143
CAM109_map11	0002.CSV	1859.12	0.00872558
CAM109_map11	0002.CSV	1862.98	0.00862069
CAM109_map11	0002.CSV	1866.84	0.00869147
CAM109_map11	0002.CSV	1870.69	0.00904615
CAM109_map11	0002.CSV	1874.55	0.00888771
CAM109_map11	0002.CSV	1878.41	0.00872977
CAM109_map11	0002.CSV	1882.26	0.00869451
CAM109_map11	0002.CSV	1886.12	0.00867541
CAM109_map11	0002.CSV	1889.98	0.00876838
CAM109_map11	0002.CSV	1893.83	0.00881382
CAM109_map11	0002.CSV	1897.69	0.00877991
CAM109_map11	0002.CSV	1901.55	0.00872639
CAM109_map11	0002.CSV	1905.41	0.00874252
CAM109_map11	0002.CSV	1909.26	0.00884882
CAM109_map11	0002.CSV	1913.12	0.00878278
CAM109_map11	0002.CSV	1916.98	0.00867342
CAM109_map11	0002.CSV	1920.83	0.00878731
CAM109_map11	0002.CSV	1924.69	0.00885237
CAM109_map11	0002.CSV	1928.55	0.00878353
CAM109_map11	0002.CSV	1932.4	0.00876987
CAM109_map11	0002.CSV	1936.26	0.00877629
CAM109_map11	0002.CSV	1940.12	0.0087436
CAM109_map11	0002.CSV	1943.98	0.00891233
CAM109_map11	0002.CSV	1947.83	0.00892829
CAM109_map11	0002.CSV	1951.69	0.00883712
CAM109_map11	0002.CSV	1955.55	0.00885836
CAM109_map11	0002.CSV	1959.4	0.00886529
CAM109_map11	0002.CSV	1963.26	0.00883736
CAM109_map11	0002.CSV	1967.12	0.00895826
CAM109_map11	0002.CSV	1970.98	0.00901442
CAM109_map11	0002.CSV	1974.83	0.00894064
CAM109_map11	0002.CSV	1978.69	0.00891044
CAM109_map11	0002.CSV	1982.55	0.00890317
CAM109_map11	0002.CSV	1986.4	0.00887888
CAM109_map11	0002.CSV	1990.26	0.00895566
CAM109_map11	0002.CSV	1994.12	0.00904344
CAM109_map11	0002.CSV	1997.98	0.00897514
CAM109_map11	0002.CSV	2001.83	0.00893039
CAM109_map11	0002.CSV	2005.69	0.00894653
CAM109_map11	0002.CSV	2009.55	0.008947
CAM109_map11	0002.CSV	2013.4	0.00889546
CAM109_map11	0002.CSV	2017.26	0.00897511
CAM109_map11	0002.CSV	2021.12	0.00900061
CAM109_map11	0002.CSV	2024.97	0.0089354
CAM109_map11	0002.CSV	2028.83	0.00888247
CAM109_map11	0002.CSV	2032.69	0.00882332
CAM109_map11	0002.CSV	2036.55	0.00884148
CAM109_map11	0002.CSV	2040.4	0.0088983
CAM109_map11	0002.CSV	2044.26	0.00890648
CAM109_map11	0002.CSV	2048.12	0.00885136
CAM109_map11	0002.CSV	2051.97	0.00884652
CAM109_map11	0002.CSV	2055.83	0.0088474
CAM109_map11	0002.CSV	2059.69	0.00886982
CAM109_map11	0002.CSV	2063.55	0.00891761
CAM109_map11	0002.CSV	2067.4	0.00898698
CAM109_map11	0002.CSV	2071.26	0.00898221
CAM109_map11	0002.CSV	2075.12	0.00896672
CAM109_map11	0002.CSV	2078.97	0.00894419
CAM109_map11	0002.CSV	2082.83	0.00896804
CAM109_map11	0002.CSV	2086.69	0.00899145
CAM109_map11	0002.CSV	2090.55	0.00897528
CAM109_map11	0002.CSV	2094.4	0.00894829
CAM109_map11	0002.CSV	2098.26	0.00899943
CAM109_map11	0002.CSV	2102.12	0.0090493
CAM109_map11	0002.CSV	2105.97	0.00905325
CAM109_map11	0002.CSV	2109.83	0.00903989
CAM109_map11	0002.CSV	2113.69	0.00904672
CAM109_map11	0002.CSV	2117.55	0.00906046
CAM109_map11	0002.CSV	2121.4	0.00907386
CAM109_map11	0002.CSV	2125.26	0.00907047
CAM109_map11	0002.CSV	2129.12	0.00905775
CAM109_map11	0002.CSV	2132.97	0.00905254
CAM109_map11	0002.CSV	2136.83	0.00906323
CAM109_map11	0002.CSV	2140.69	0.0090748
CAM109_map11	0002.CSV	2144.55	0.00907463
CAM109_map11	0002.CSV	2148.4	0.00905231
CAM109_map11	0002.CSV	2152.26	0.00906046
CAM109_map11	0002.CSV	2156.12	0.00910218
CAM109_map11	0002.CSV	2159.97	0.00914194
CAM109_map11	0002.CSV	2163.83	0.00915171
CAM109_map11	0002.CSV	2167.69	0.00916935
CAM109_map11	0002.CSV	2171.55	0.00916308
CAM109_map11	0002.CSV	2175.4	0.0091951
CAM109_map11	0002.CSV	2179.26	0.00921927
CAM109_map11	0002.CSV	2183.12	0.00922647
CAM109_map11	0002.CSV	2186.97	0.00922877
CAM109_map11	0002.CSV	2190.83	0.00922901
CAM109_map11	0002.CSV	2194.69	0.00924624
CAM109_map11	0002.CSV	2198.55	0.00925413
CAM109_map11	0002.CSV	2202.4	0.0092127
CAM109_map11	0002.CSV	2206.26	0.00920464
CAM109_map11	0002.CSV	2210.12	0.00921189
CAM109_map11	0002.CSV	2213.97	0.00921266
CAM109_map11	0002.CSV	2217.83	0.00921683
CAM109_map11	0002.CSV	2221.69	0.00924441
CAM109_map11	0002.CSV	2225.54	0.00924455
CAM109_map11	0002.CSV	2229.4	0.00922725
CAM109_map11	0002.CSV	2233.26	0.00922471
CAM109_map11	0002.CSV	2237.12	0.0092241
CAM109_map11	0002.CSV	2240.97	0.00923128
CAM109_map11	0002.CSV	2244.83	0.00926946
CAM109_map11	0002.CSV	2248.69	0.00927345
CAM109_map11	0002.CSV	2252.54	0.00926641
CAM109_map11	0002.CSV	2256.4	0.00926411
CAM109_map11	0002.CSV	2260.26	0.00924736
CAM109_map11	0002.CSV	2264.11	0.00921669
CAM109_map11	0002.CSV	2267.97	0.00923615
CAM109_map11	0002.CSV	2271.83	0.00926279
CAM109_map11	0002.CSV	2275.69	0.00926117
CAM109_map11	0002.CSV	2279.54	0.00925985
CAM109_map11	0002.CSV	2283.4	0.00925612
CAM109_map11	0002.CSV	2287.26	0.00921013
CAM109_map11	0002.CSV	2291.11	0.00924492
CAM109_map11	0002.CSV	2294.97	0.00924289
CAM109_map11	0002.CSV	2298.83	0.00921023
CAM109_map11	0002.CSV	2302.69	0.0091953
CAM109_map11	0002.CSV	2306.54	0.00916704
CAM109_map11	0002.CSV	2310.4	0.00922316
CAM109_map11	0002.CSV	2314.26	0.00923219
CAM109_map11	0002.CSV	2318.11	0.00902345
CAM109_map11	0002.CSV	2321.97	0.00866456
CAM109_map11	0002.CSV	2325.83	0.00819612
CAM109_map11	0002.CSV	2329.69	0.00769344
CAM109_map11	0002.CSV	2333.54	0.00750091
CAM109_map11	0002.CSV	2337.4	0.00767152
CAM109_map11	0002.CSV	2341.26	0.00788498
CAM109_map11	0002.CSV	2345.11	0.00855398
CAM109_map11	0002.CSV	2348.97	0.0085138
CAM109_map11	0002.CSV	2352.83	0.0074254
CAM109_map11	0002.CSV	2356.69	0.00465963
CAM109_map11	0002.CSV	2360.54	0.00272019
CAM109_map11	0002.CSV	2364.4	0.00466546
CAM109_map11	0002.CSV	2368.26	0.0070941
CAM109_map11	0002.CSV	2372.11	0.0087509
CAM109_map11	0002.CSV	2375.97	0.00948276
CAM109_map11	0002.CSV	2379.83	0.0095841
CAM109_map11	0002.CSV	2383.69	0.00937867
CAM109_map11	0002.CSV	2387.54	0.00914048
CAM109_map11	0002.CSV	2391.4	0.00903708
CAM109_map11	0002.CSV	2395.26	0.008977
CAM109_map11	0002.CSV	2399.11	0.00891108
CAM109_map11	0002.CSV	2402.97	0.00886296
CAM109_map11	0002.CSV	2406.83	0.00880246
CAM109_map11	0002.CSV	2410.68	0.00877984
CAM109_map11	0002.CSV	2414.54	0.00880239
CAM109_map11	0002.CSV	2418.4	0.00880618
CAM109_map11	0002.CSV	2422.26	0.00879776
CAM109_map11	0002.CSV	2426.11	0.00875773
CAM109_map11	0002.CSV	2429.97	0.00871733
CAM109_map11	0002.CSV	2433.83	0.00874809
CAM109_map11	0002.CSV	2437.68	0.00876385
CAM109_map11	0002.CSV	2441.54	0.00875969
CAM109_map11	0002.CSV	2445.4	0.00876469
CAM109_map11	0002.CSV	2449.26	0.00876473
CAM109_map11	0002.CSV	2453.11	0.00874735
CAM109_map11	0002.CSV	2456.97	0.00872622
CAM109_map11	0002.CSV	2460.83	0.00868991
CAM109_map11	0002.CSV	2464.68	0.00869076
CAM109_map11	0002.CSV	2468.54	0.00871926
CAM109_map11	0002.CSV	2472.4	0.00870411
CAM109_map11	0002.CSV	2476.26	0.00869438
CAM109_map11	0002.CSV	2480.11	0.00874978
CAM109_map11	0002.CSV	2483.97	0.00875749
CAM109_map11	0002.CSV	2487.83	0.00872057
CAM109_map11	0002.CSV	2491.68	0.00871398
CAM109_map11	0002.CSV	2495.54	0.008713
CAM109_map11	0002.CSV	2499.4	0.00873772
CAM109_map11	0002.CSV	2503.26	0.0088149
CAM109_map11	0002.CSV	2507.11	0.00885257
CAM109_map11	0002.CSV	2510.97	0.00885352
CAM109_map11	0002.CSV	2514.83	0.00884618
CAM109_map11	0002.CSV	2518.68	0.00884845
CAM109_map11	0002.CSV	2522.54	0.00884598
CAM109_map11	0002.CSV	2526.4	0.00879702
CAM109_map11	0002.CSV	2530.26	0.0087772
CAM109_map11	0002.CSV	2534.11	0.00880057
CAM109_map11	0002.CSV	2537.97	0.00882867
CAM109_map11	0002.CSV	2541.83	0.00884108
CAM109_map11	0002.CSV	2545.68	0.00881501
CAM109_map11	0002.CSV	2549.54	0.00878275
CAM109_map11	0002.CSV	2553.4	0.00882129
CAM109_map11	0002.CSV	2557.26	0.00883107
CAM109_map11	0002.CSV	2561.11	0.0088027
CAM109_map11	0002.CSV	2564.97	0.00879029
CAM109_map11	0002.CSV	2568.83	0.00877024
CAM109_map11	0002.CSV	2572.68	0.00878836
CAM109_map11	0002.CSV	2576.54	0.00884557
CAM109_map11	0002.CSV	2580.4	0.0088381
CAM109_map11	0002.CSV	2584.25	0.00877315
CAM109_map11	0002.CSV	2588.11	0.00872977
CAM109_map11	0002.CSV	2591.97	0.00876307
CAM109_map11	0002.CSV	2595.83	0.00882674
CAM109_map11	0002.CSV	2599.68	0.00882008
CAM109_map11	0002.CSV	2603.54	0.00875496
CAM109_map11	0002.CSV	2607.4	0.00876584
CAM109_map11	0002.CSV	2611.25	0.00884395
CAM109_map11	0002.CSV	2615.11	0.00886353
CAM109_map11	0002.CSV	2618.97	0.00883235
CAM109_map11	0002.CSV	2622.82	0.00886556
CAM109_map11	0002.CSV	2626.68	0.00892623
CAM109_map11	0002.CSV	2630.54	0.00891646
CAM109_map11	0002.CSV	2634.4	0.00894298
CAM109_map11	0002.CSV	2638.25	0.00895366
CAM109_map11	0002.CSV	2642.11	0.00883759
CAM109_map11	0002.CSV	2645.97	0.00876635
CAM109_map11	0002.CSV	2649.82	0.00875895
CAM109_map11	0002.CSV	2653.68	0.00874708
CAM109_map11	0002.CSV	2657.54	0.0087795
CAM109_map11	0002.CSV	2661.4	0.00871344
CAM109_map11	0002.CSV	2665.25	0.00863962
CAM109_map11	0002.CSV	2669.11	0.00871959
CAM109_map11	0002.CSV	2672.97	0.0088825
CAM109_map11	0002.CSV	2676.82	0.00901783
CAM109_map11	0002.CSV	2680.68	0.00897504
CAM109_map11	0002.CSV	2684.54	0.00874556
CAM109_map11	0002.CSV	2688.4	0.00866733
CAM109_map11	0002.CSV	2692.25	0.00871338
CAM109_map11	0002.CSV	2696.11	0.00876824
CAM109_map11	0002.CSV	2699.97	0.00874701
CAM109_map11	0002.CSV	2703.82	0.00867369
CAM109_map11	0002.CSV	2707.68	0.00875763
CAM109_map11	0002.CSV	2711.54	0.00884409
CAM109_map11	0002.CSV	2715.4	0.00878779
CAM109_map11	0002.CSV	2719.25	0.00883343
CAM109_map11	0002.CSV	2723.11	0.00906225
CAM109_map11	0002.CSV	2726.97	0.00912644
CAM109_map11	0002.CSV	2730.82	0.00893543
CAM109_map11	0002.CSV	2734.68	0.00892512
CAM109_map11	0002.CSV	2738.54	0.00897122
CAM109_map11	0002.CSV	2742.4	0.00900863
CAM109_map11	0002.CSV	2746.25	0.00918417
CAM109_map11	0002.CSV	2750.11	0.00922522
CAM109_map11	0002.CSV	2753.97	0.00905484
CAM109_map11	0002.CSV	2757.82	0.00899896
CAM109_map11	0002.CSV	2761.68	0.00899266
CAM109_map11	0002.CSV	2765.54	0.00899605
CAM109_map11	0002.CSV	2769.39	0.00911811
CAM109_map11	0002.CSV	2773.25	0.00933496
CAM109_map11	0002.CSV	2777.11	0.00926066
CAM109_map11	0002.CSV	2780.97	0.00909236
CAM109_map11	0002.CSV	2784.82	0.0092108
CAM109_map11	0002.CSV	2788.68	0.00947534
CAM109_map11	0002.CSV	2792.54	0.00955575
CAM109_map11	0002.CSV	2796.39	0.00956377
CAM109_map11	0002.CSV	2800.25	0.00946342
CAM109_map11	0002.CSV	2804.11	0.00931722
CAM109_map11	0002.CSV	2807.97	0.0094494
CAM109_map11	0002.CSV	2811.82	0.00941175
CAM109_map11	0002.CSV	2815.68	0.00920518
CAM109_map11	0002.CSV	2819.54	0.00924929
CAM109_map11	0002.CSV	2823.39	0.00934255
CAM109_map11	0002.CSV	2827.25	0.00934228
CAM109_map11	0002.CSV	2831.11	0.0095257
CAM109_map11	0002.CSV	2834.97	0.00989008
CAM109_map11	0002.CSV	2838.82	0.0100443
CAM109_map11	0002.CSV	2842.68	0.0100047
CAM109_map11	0002.CSV	2846.54	0.0102901
CAM109_map11	0002.CSV	2850.39	0.0104536
CAM109_map11	0002.CSV	2854.25	0.0103454
CAM109_map11	0002.CSV	2858.11	0.0103566
CAM109_map11	0002.CSV	2861.97	0.0102187
CAM109_map11	0002.CSV	2865.82	0.0101005
CAM109_map11	0002.CSV	2869.68	0.0102875
CAM109_map11	0002.CSV	2873.54	0.0104115
CAM109_map11	0002.CSV	2877.39	0.0100544
CAM109_map11	0002.CSV	2881.25	0.00975797
CAM109_map11	0002.CSV	2885.11	0.0097392
CAM109_map11	0002.CSV	2888.97	0.00974662
CAM109_map11	0002.CSV	2892.82	0.00992351
CAM109_map11	0002.CSV	2896.68	0.0100745
CAM109_map11	0002.CSV	2900.54	0.0100473
CAM109_map11	0002.CSV	2904.39	0.0102128
CAM109_map11	0002.CSV	2908.25	0.0105939
CAM109_map11	0002.CSV	2912.11	0.0111896
CAM109_map11	0002.CSV	2915.97	0.0115234
CAM109_map11	0002.CSV	2919.82	0.0113063
CAM109_map11	0002.CSV	2923.68	0.0109199
CAM109_map11	0002.CSV	2927.54	0.0109424
CAM109_map11	0002.CSV	2931.39	0.010785
CAM109_map11	0002.CSV	2935.25	0.0103196
CAM109_map11	0002.CSV	2939.11	0.0102202
CAM109_map11	0002.CSV	2942.96	0.010541
CAM109_map11	0002.CSV	2946.82	0.010627
CAM109_map11	0002.CSV	2950.68	0.0104075
CAM109_map11	0002.CSV	2954.54	0.0100506
CAM109_map11	0002.CSV	2958.39	0.00978142
CAM109_map11	0002.CSV	2962.25	0.00977732
CAM109_map11	0002.CSV	2966.11	0.00966269
CAM109_map11	0002.CSV	2969.96	0.00970992
CAM109_map11	0002.CSV	2973.82	0.00994005
CAM109_map11	0002.CSV	2977.68	0.0100628
CAM109_map11	0002.CSV	2981.53	0.00987978
CAM109_map11	0002.CSV	2985.39	0.00949732
CAM109_map11	0002.CSV	2989.25	0.0095191
CAM109_map11	0002.CSV	2993.11	0.00974245
CAM109_map11	0002.CSV	2996.96	0.00970138
CAM109_map11	0002.CSV	3000.82	0.00947463
CAM109_map11	0002.CSV	3004.68	0.00933506
CAM109_map11	0002.CSV	3008.53	0.00956052
CAM109_map11	0002.CSV	3012.39	0.00991957
CAM109_map11	0002.CSV	3016.25	0.00996629
CAM109_map11	0002.CSV	3020.11	0.00974658
CAM109_map11	0002.CSV	3023.96	0.00960683
CAM109_map11	0002.CSV	3027.82	0.00963345
CAM109_map11	0002.CSV	3031.68	0.00983917
CAM109_map11	0002.CSV	3035.53	0.00994245
CAM109_map11	0002.CSV	3039.39	0.00994184
CAM109_map11	0002.CSV	3043.25	0.0100218
CAM109_map11	0002.CSV	3047.11	0.0100102
CAM109_map11	0002.CSV	3050.96	0.0100076
CAM109_map11	0002.CSV	3054.82	0.0099189
CAM109_map11	0002.CSV	3058.68	0.00972449
CAM109_map11	0002.CSV	3062.53	0.00978752
CAM109_map11	0002.CSV	3066.39	0.0100205
CAM109_map11	0002.CSV	3070.25	0.00995575
CAM109_map11	0002.CSV	3074.11	0.00992679
CAM109_map11	0002.CSV	3077.96	0.0101007
CAM109_map11	0002.CSV	3081.82	0.010244
CAM109_map11	0002.CSV	3085.68	0.0102542
CAM109_map11	0002.CSV	3089.53	0.0101403
CAM109_map11	0002.CSV	3093.39	0.00985202
CAM109_map11	0002.CSV	3097.25	0.00980914
CAM109_map11	0002.CSV	3101.11	0.00991862
CAM109_map11	0002.CSV	3104.96	0.00996941
CAM109_map11	0002.CSV	3108.82	0.0100919
CAM109_map11	0002.CSV	3112.68	0.0101862
CAM109_map11	0002.CSV	3116.53	0.0103259
CAM109_map11	0002.CSV	3120.39	0.0102804
CAM109_map11	0002.CSV	3124.25	0.00999918
CAM109_map11	0002.CSV	3128.11	0.00988798
CAM109_map11	0002.CSV	3131.96	0.00987351
CAM109_map11	0002.CSV	3135.82	0.00996717
CAM109_map11	0002.CSV	3139.68	0.0100331
CAM109_map11	0002.CSV	3143.53	0.00986581
CAM109_map11	0002.CSV	3147.39	0.00990896
CAM109_map11	0002.CSV	3151.25	0.0101793
CAM109_map11	0002.CSV	3155.1	0.0100614
CAM109_map11	0002.CSV	3158.96	0.00966025
CAM109_map11	0002.CSV	3162.82	0.00952357
CAM109_map11	0002.CSV	3166.68	0.00949011
CAM109_map11	0002.CSV	3170.53	0.00937061
CAM109_map11	0002.CSV	3174.39	0.00930138
CAM109_map11	0002.CSV	3178.25	0.00949319
CAM109_map11	0002.CSV	3182.1	0.00963654
CAM109_map11	0002.CSV	3185.96	0.00967448
CAM109_map11	0002.CSV	3189.82	0.00979298
CAM109_map11	0002.CSV	3193.68	0.00971975
CAM109_map11	0002.CSV	3197.53	0.00955625
CAM109_map11	0002.CSV	3201.39	0.00969152
CAM109_map11	0002.CSV	3205.25	0.00982304
CAM109_map11	0002.CSV	3209.1	0.0097416
CAM109_map11	0002.CSV	3212.96	0.00984175
CAM109_map11	0002.CSV	3216.82	0.0100146
CAM109_map11	0002.CSV	3220.68	0.00990696
CAM109_map11	0002.CSV	3224.53	0.00978752
CAM109_map11	0002.CSV	3228.39	0.0100691
CAM109_map11	0002.CSV	3232.25	0.0104498
CAM109_map11	0002.CSV	3236.1	0.0103134
CAM109_map11	0002.CSV	3239.96	0.0101583
CAM109_map11	0002.CSV	3243.82	0.0103859
CAM109_map11	0002.CSV	3247.68	0.0104538
CAM109_map11	0002.CSV	3251.53	0.0102615
CAM109_map11	0002.CSV	3255.39	0.010258
CAM109_map11	0002.CSV	3259.25	0.0101016
CAM109_map11	0002.CSV	3263.1	0.0100275
CAM109_map11	0002.CSV	3266.96	0.0103845
CAM109_map11	0002.CSV	3270.82	0.010773
CAM109_map11	0002.CSV	3274.68	0.0107043
CAM109_map11	0002.CSV	3278.53	0.0103563
CAM109_map11	0002.CSV	3282.39	0.0102083
CAM109_map11	0002.CSV	3286.25	0.010339
CAM109_map11	0002.CSV	3290.1	0.0107587
CAM109_map11	0002.CSV	3293.96	0.0110057
CAM109_map11	0002.CSV	3297.82	0.0107743
CAM109_map11	0002.CSV	3301.67	0.0107952
CAM109_map11	0002.CSV	3305.53	0.011047
CAM109_map11	0002.CSV	3309.39	0.0109446
CAM109_map11	0002.CSV	3313.25	0.0104916
CAM109_map11	0002.CSV	3317.1	0.0101807
CAM109_map11	0002.CSV	3320.96	0.0103149
CAM109_map11	0002.CSV	3324.82	0.0105524
CAM109_map11	0002.CSV	3328.67	0.0103254
CAM109_map11	0002.CSV	3332.53	0.0102557
CAM109_map11	0002.CSV	3336.39	0.0107846
CAM109_map11	0002.CSV	3340.24	0.0110804
CAM109_map11	0002.CSV	3344.1	0.0108839
CAM109_map11	0002.CSV	3347.96	0.010827
CAM109_map11	0002.CSV	3351.82	0.0107227
CAM109_map11	0002.CSV	3355.67	0.0104238
CAM109_map11	0002.CSV	3359.53	0.0105389
CAM109_map11	0002.CSV	3363.39	0.0108452
CAM109_map11	0002.CSV	3367.24	0.0110926
CAM109_map11	0002.CSV	3371.1	0.0109147
CAM109_map11	0002.CSV	3374.96	0.0106776
CAM109_map11	0002.CSV	3378.82	0.010495
CAM109_map11	0002.CSV	3382.67	0.0101379
CAM109_map11	0002.CSV	3386.53	0.010201
CAM109_map11	0002.CSV	3390.39	0.0107075
CAM109_map11	0002.CSV	3394.24	0.0108873
CAM109_map11	0002.CSV	3398.1	0.0108693
CAM109_map11	0002.CSV	3401.96	0.0108248
CAM109_map11	0002.CSV	3405.82	0.0106729
CAM109_map11	0002.CSV	3409.67	0.0107457
CAM109_map11	0002.CSV	3413.53	0.0105267
CAM109_map11	0002.CSV	3417.39	0.0100709
CAM109_map11	0002.CSV	3421.24	0.00994791
CAM109_map11	0002.CSV	3425.1	0.0101338
CAM109_map11	0002.CSV	3428.96	0.0105456
CAM109_map11	0002.CSV	3432.82	0.0107218
CAM109_map11	0002.CSV	3436.67	0.0103946
CAM109_map11	0002.CSV	3440.53	0.00977756
CAM109_map11	0002.CSV	3444.39	0.00950149
CAM109_map11	0002.CSV	3448.24	0.00949045
CAM109_map11	0002.CSV	3452.1	0.00919189
CAM109_map11	0002.CSV	3455.96	0.00923416
CAM109_map11	0002.CSV	3459.82	0.00965361
CAM109_map11	0002.CSV	3463.67	0.0100374
CAM109_map11	0002.CSV	3467.53	0.0102462
CAM109_map11	0002.CSV	3471.39	0.00992215
CAM109_map11	0002.CSV	3475.24	0.00968261
CAM109_map11	0002.CSV	3479.1	0.00968556
CAM109_map11	0002.CSV	3482.96	0.00964982
CAM109_map11	0002.CSV	3486.82	0.00975309
CAM109_map11	0002.CSV	3490.67	0.00968339
CAM109_map11	0002.CSV	3494.53	0.00974197
CAM109_map11	0002.CSV	3498.39	0.00975265
CAM109_map11	0002.CSV	3502.24	0.0095274
CAM109_map11	0002.CSV	3506.1	0.0090746
CAM109_map11	0002.CSV	3509.96	0.0088757
CAM109_map11	0002.CSV	3513.81	0.00909642
CAM109_map11	0002.CSV	3517.67	0.00888463
CAM109_map11	0002.CSV	3521.53	0.00895738
CAM109_map11	0002.CSV	3525.39	0.0090335
CAM109_map11	0002.CSV	3529.24	0.00881149
CAM109_map11	0002.CSV	3533.1	0.0089101
CAM109_map11	0002.CSV	3536.96	0.00916183
CAM109_map11	0002.CSV	3540.81	0.00931475
CAM109_map11	0002.CSV	3544.67	0.0094811
CAM109_map11	0002.CSV	3548.53	0.00926678
CAM109_map11	0002.CSV	3552.39	0.00880946
CAM109_map11	0002.CSV	3556.24	0.00866213
CAM109_map11	0002.CSV	3560.1	0.00843146
CAM109_map11	0002.CSV	3563.96	0.00793739
CAM109_map11	0002.CSV	3567.81	0.00862589
CAM109_map11	0002.CSV	3571.67	0.00896259
CAM109_map11	0002.CSV	3575.53	0.00853218
CAM109_map11	0002.CSV	3579.39	0.00873559
CAM109_map11	0002.CSV	3583.24	0.00880892
CAM109_map11	0002.CSV	3587.1	0.00893594
CAM109_map11	0002.CSV	3590.96	0.00887384
CAM109_map11	0002.CSV	3594.81	0.008655
CAM109_map11	0002.CSV	3598.67	0.00900088
CAM109_map11	0002.CSV	3602.53	0.00899378
CAM109_map11	0002.CSV	3606.39	0.00823367
CAM109_map11	0002.CSV	3610.24	0.00776121
CAM109_map11	0002.CSV	3614.1	0.00778296
CAM109_map11	0002.CSV	3617.96	0.00837045
CAM109_map11	0002.CSV	3621.81	0.00886921
CAM109_map11	0002.CSV	3625.67	0.00800643
CAM109_map11	0002.CSV	3629.53	0.0079952
CAM109_map11	0002.CSV	3633.39	0.00885504
CAM109_map11	0002.CSV	3637.24	0.00862387
CAM109_map11	0002.CSV	3641.1	0.00817441
CAM109_map11	0002.CSV	3644.96	0.00736143
CAM109_map11	0002.CSV	3648.81	0.00795669
CAM109_map11	0002.CSV	3652.67	0.00926597
CAM109_map11	0002.CSV	3656.53	0.00941808
CAM109_map11	0002.CSV	3660.38	0.0093568
CAM109_map11	0002.CSV	3664.24	0.00833552
CAM109_map11	0002.CSV	3668.1	0.00734327
CAM109_map11	0002.CSV	3671.96	0.00723558
CAM109_map11	0002.CSV	3675.81	0.00800272
CAM109_map11	0002.CSV	3679.67	0.00885653
CAM109_map11	0002.CSV	3683.53	0.00854624
CAM109_map11	0002.CSV	3687.38	0.00836248
CAM109_map11	0002.CSV	3691.24	0.00915879
CAM109_map11	0002.CSV	3695.1	0.00891737
CAM109_map11	0002.CSV	3698.95	0.00829118
CAM109_map11	0002.CSV	3702.81	0.00810726
CAM109_map11	0002.CSV	3706.67	0.00755408
CAM109_map11	0002.CSV	3710.53	0.00747849
CAM109_map11	0002.CSV	3714.38	0.00833303
CAM109_map11	0002.CSV	3718.24	0.00780394
CAM109_map11	0002.CSV	3722.1	0.00745146
CAM109_map11	0002.CSV	3725.95	0.00760688
CAM109_map11	0002.CSV	3729.81	0.00717235
CAM109_map11	0002.CSV	3733.67	0.00727776
CAM109_map11	0002.CSV	3737.53	0.00861275
CAM109_map11	0002.CSV	3741.38	0.00755971
CAM109_map11	0002.CSV	3745.24	0.00630039
CAM109_map11	0002.CSV	3749.1	0.00630029
CAM109_map11	0002.CSV	3752.95	0.00769618
CAM109_map11	0002.CSV	3756.81	0.00794859
CAM109_map11	0002.CSV	3760.67	0.00789511
CAM109_map11	0002.CSV	3764.53	0.00762852
CAM109_map11	0002.CSV	3768.38	0.00784726
CAM109_map11	0002.CSV	3772.24	0.00811951
CAM109_map11	0002.CSV	3776.1	0.00773209
CAM109_map11	0002.CSV	3779.95	0.00785937
CAM109_map11	0002.CSV	3783.81	0.00798959
CAM109_map11	0002.CSV	3787.67	0.00798163
CAM109_map11	0002.CSV	3791.53	0.00759521
CAM109_map11	0002.CSV	3795.38	0.00693543
CAM109_map11	0002.CSV	3799.24	0.00683465
CAM109_map11	0002.CSV	3803.1	0.00744478
CAM109_map11	0002.CSV	3806.95	0.00795426
CAM109_map11	0002.CSV	3810.81	0.00761736
CAM109_map11	0002.CSV	3814.67	0.00688453
CAM109_map11	0002.CSV	3818.53	0.00696537
CAM109_map11	0002.CSV	3822.38	0.00763733
CAM109_map11	0002.CSV	3826.24	0.00763487
CAM109_map11	0002.CSV	3830.1	0.00731132
CAM109_map11	0002.CSV	3833.95	0.0070871
CAM109_map11	0002.CSV	3837.81	0.00736056
CAM109_map11	0002.CSV	3841.67	0.0082642
CAM109_map11	0002.CSV	3845.53	0.00796165
CAM109_map11	0002.CSV	3849.38	0.00667614
CAM109_map11	0002.CSV	3853.24	0.00675225
CAM109_map11	0002.CSV	3857.1	0.00785657
CAM109_map11	0002.CSV	3860.95	0.00709491
CAM109_map11	0002.CSV	3864.81	0.00691449
CAM109_map11	0002.CSV	3868.67	0.00704413
CAM109_map11	0002.CSV	3872.52	0.00766437
CAM109_map11	0002.CSV	3876.38	0.00765264
CAM109_map11	0002.CSV	3880.24	0.00735995
CAM109_map11	0002.CSV	3884.1	0.00791373
CAM109_map11	0002.CSV	3887.95	0.00791059
CAM109_map11	0002.CSV	3891.81	0.00784908
CAM109_map11	0002.CSV	3895.67	0.00757343
CAM109_map11	0002.CSV	3899.52	0.00699334
CAM109_map11	0002.CSV	3903.38	0.00798099
CAM109_map11	0002.CSV	3907.24	0.00848677
CAM109_map11	0002.CSV	3911.1	0.00789895
CAM109_map11	0002.CSV	3914.95	0.00747903
CAM109_map11	0002.CSV	3918.81	0.0077265
CAM109_map11	0002.CSV	3922.67	0.00792611
CAM109_map11	0002.CSV	3926.52	0.00798483
CAM109_map11	0002.CSV	3930.38	0.00807971
CAM109_map11	0002.CSV	3934.24	0.00830111
CAM109_map11	0002.CSV	3938.09	0.00791852
CAM109_map11	0002.CSV	3941.95	0.00772457
CAM109_map11	0002.CSV	3945.81	0.00781767
CAM109_map11	0002.CSV	3949.67	0.00789001
CAM109_map11	0002.CSV	3953.52	0.00796168
CAM109_map11	0002.CSV	3957.38	0.00795807
CAM109_map11	0002.CSV	3961.24	0.00796212
CAM109_map11	0002.CSV	3965.09	0.00795318
CAM109_map11	0002.CSV	3968.95	0.00790101
CAM109_map11	0002.CSV	3972.81	0.0078808
CAM109_map11	0002.CSV	3976.67	0.00796084
CAM109_map11	0002.CSV	3980.52	0.00804724
CAM109_map11	0002.CSV	3984.38	0.00806479
CAM109_map11	0002.CSV	3988.24	0.00796914
CAM109_map11	0002.CSV	3992.09	0.0079165
CAM109_map11	0002.CSV	3995.95	0.00782965
CAM109_map11	0002.CSV	3999.81	0.0077015
CAM109_map11	0003.CSV	674.992	0.0506257
CAM109_map11	0003.CSV	678.849	0.0532657
CAM109_map11	0003.CSV	682.706	0.0549624
CAM109_map11	0003.CSV	686.563	0.059859
CAM109_map11	0003.CSV	690.42	0.0677092
CAM109_map11	0003.CSV	694.277	0.088296
CAM109_map11	0003.CSV	698.134	0.111487
CAM109_map11	0003.CSV	701.991	0.107891
CAM109_map11	0003.CSV	705.849	0.0911742
CAM109_map11	0003.CSV	709.706	0.0983852
CAM109_map11	0003.CSV	713.563	0.0966136
CAM109_map11	0003.CSV	717.42	0.0685517
CAM109_map11	0003.CSV	721.277	0.0509023
CAM109_map11	0003.CSV	725.134	0.0490648
CAM109_map11	0003.CSV	728.991	0.0497529
CAM109_map11	0003.CSV	732.848	0.0534914
CAM109_map11	0003.CSV	736.705	0.059152
CAM109_map11	0003.CSV	740.562	0.0649262
CAM109_map11	0003.CSV	744.42	0.0661383
CAM109_map11	0003.CSV	748.277	0.064419
CAM109_map11	0003.CSV	752.134	0.0612015
CAM109_map11	0003.CSV	755.991	0.0601438
CAM109_map11	0003.CSV	759.848	0.0596123
CAM109_map11	0003.CSV	763.705	0.0607028
CAM109_map11	0003.CSV	767.562	0.0609572
CAM109_map11	0003.CSV	771.419	0.0610672
CAM109_map11	0003.CSV	775.276	0.0604528
CAM109_map11	0003.CSV	779.133	0.0606804
CAM109_map11	0003.CSV	782.99	0.0599282
CAM109_map11	0003.CSV	786.848	0.0600551
CAM109_map11	0003.CSV	790.705	0.0605553
CAM109_map11	0003.CSV	794.562	0.062955
CAM109_map11	0003.CSV	798.419	0.0650141
CAM109_map11	0003.CSV	802.276	0.0667128
CAM109_map11	0003.CSV	806.133	0.0676536
CAM109_map11	0003.CSV	809.99	0.070532
CAM109_map11	0003.CSV	813.847	0.0739071
CAM109_map11	0003.CSV	817.704	0.0790993
CAM109_map11	0003.CSV	821.562	0.0842576
CAM109_map11	0003.CSV	825.419	0.0902915
CAM109_map11	0003.CSV	829.276	0.0962926
CAM109_map11	0003.CSV	833.133	0.105304
CAM109_map11	0003.CSV	836.99	0.119025
CAM109_map11	0003.CSV	840.847	0.140069
CAM109_map11	0003.CSV	844.704	0.160149
CAM109_map11	0003.CSV	848.561	0.187954
CAM109_map11	0003.CSV	852.418	0.216937
CAM109_map11	0003.CSV	856.275	0.219344
CAM109_map11	0003.CSV	860.132	0.190703
CAM109_map11	0003.CSV	863.99	0.146777
CAM109_map11	0003.CSV	867.847	0.105761
CAM109_map11	0003.CSV	871.704	0.0805354
CAM109_map11	0003.CSV	875.561	0.0678524
CAM109_map11	0003.CSV	879.418	0.0605709
CAM109_map11	0003.CSV	883.275	0.0546337
CAM109_map11	0003.CSV	887.132	0.0508777
CAM109_map11	0003.CSV	890.989	0.0489511
CAM109_map11	0003.CSV	894.846	0.0486709
CAM109_map11	0003.CSV	898.703	0.0484325
CAM109_map11	0003.CSV	902.561	0.0490751
CAM109_map11	0003.CSV	906.418	0.0499458
CAM109_map11	0003.CSV	910.275	0.0504067
CAM109_map11	0003.CSV	914.132	0.0498239
CAM109_map11	0003.CSV	917.989	0.0502368
CAM109_map11	0003.CSV	921.846	0.0505605
CAM109_map11	0003.CSV	925.703	0.0512951
CAM109_map11	0003.CSV	929.56	0.0519846
CAM109_map11	0003.CSV	933.417	0.0530923
CAM109_map11	0003.CSV	937.274	0.0537369
CAM109_map11	0003.CSV	941.131	0.0542158
CAM109_map11	0003.CSV	944.989	0.0538709
CAM109_map11	0003.CSV	948.846	0.0536509
CAM109_map11	0003.CSV	952.703	0.0533106
CAM109_map11	0003.CSV	956.56	0.0534925
CAM109_map11	0003.CSV	960.417	0.0534318
CAM109_map11	0003.CSV	964.274	0.0538573
CAM109_map11	0003.CSV	968.131	0.0543492
CAM109_map11	0003.CSV	971.988	0.0556639
CAM109_map11	0003.CSV	975.845	0.0571738
CAM109_map11	0003.CSV	979.702	0.059477
CAM109_map11	0003.CSV	983.559	0.0616874
CAM109_map11	0003.CSV	987.417	0.0639995
CAM109_map11	0003.CSV	991.274	0.0657159
CAM109_map11	0003.CSV	995.131	0.0674779
CAM109_map11	0003.CSV	998.988	0.0691456
CAM109_map11	0003.CSV	1002.85	0.0712852
CAM109_map11	0003.CSV	1006.7	0.0729881
CAM109_map11	0003.CSV	1010.56	0.0750815
CAM109_map11	0003.CSV	1014.42	0.0767991
CAM109_map11	0003.CSV	1018.27	0.0786994
CAM109_map11	0003.CSV	1022.13	0.0802609
CAM109_map11	0003.CSV	1025.99	0.0822568
CAM109_map11	0003.CSV	1029.85	0.084014
CAM109_map11	0003.CSV	1033.7	0.0862091
CAM109_map11	0003.CSV	1037.56	0.0878442
CAM109_map11	0003.CSV	1041.42	0.0886295
CAM109_map11	0003.CSV	1045.27	0.0886339
CAM109_map11	0003.CSV	1049.13	0.090669
CAM109_map11	0003.CSV	1052.99	0.0946828
CAM109_map11	0003.CSV	1056.84	0.101281
CAM109_map11	0003.CSV	1060.7	0.108666
CAM109_map11	0003.CSV	1064.56	0.115071
CAM109_map11	0003.CSV	1068.42	0.117672
CAM109_map11	0003.CSV	1072.27	0.117887
CAM109_map11	0003.CSV	1076.13	0.118067
CAM109_map11	0003.CSV	1079.99	0.122385
CAM109_map11	0003.CSV	1083.84	0.119446
CAM109_map11	0003.CSV	1087.7	0.105717
CAM109_map11	0003.CSV	1091.56	0.0969844
CAM109_map11	0003.CSV	1095.41	0.0953247
CAM109_map11	0003.CSV	1099.27	0.0957314
CAM109_map11	0003.CSV	1103.13	0.0976335
CAM109_map11	0003.CSV	1106.99	0.100374
CAM109_map11	0003.CSV	1110.84	0.103741
CAM109_map11	0003.CSV	1114.7	0.105841
CAM109_map11	0003.CSV	1118.56	0.106247
CAM109_map11	0003.CSV	1122.41	0.104761
CAM109_map11	0003.CSV	1126.27	0.102836
CAM109_map11	0003.CSV	1130.13	0.100691
CAM109_map11	0003.CSV	1133.99	0.0993938
CAM109_map11	0003.CSV	1137.84	0.0983817
CAM109_map11	0003.CSV	1141.7	0.0972614
CAM109_map11	0003.CSV	1145.56	0.0953031
CAM109_map11	0003.CSV	1149.41	0.0939651
CAM109_map11	0003.CSV	1153.27	0.0930496
CAM109_map11	0003.CSV	1157.13	0.0924791
CAM109_map11	0003.CSV	1160.99	0.09173
CAM109_map11	0003.CSV	1164.84	0.0910416
CAM109_map11	0003.CSV	1168.7	0.0893539
CAM109_map11	0003.CSV	1172.56	0.0874155
CAM109_map11	0003.CSV	1176.41	0.0853058
CAM109_map11	0003.CSV	1180.27	0.0836728
CAM109_map11	0003.CSV	1184.13	0.0819083
CAM109_map11	0003.CSV	1187.99	0.0803486
CAM109_map11	0003.CSV	1191.84	0.0786779
CAM109_map11	0003.CSV	1195.7	0.0775996
CAM109_map11	0003.CSV	1199.56	0.0766872
CAM109_map11	0003.CSV	1203.41	0.0763121
CAM109_map11	0003.CSV	1207.27	0.0760436
CAM109_map11	0003.CSV	1211.13	0.0763687
CAM109_map11	0003.CSV	1214.98	0.0767719
CAM109_map11	0003.CSV	1218.84	0.0777842
CAM109_map11	0003.CSV	1222.7	0.0789615
CAM109_map11	0003.CSV	1226.56	0.0807524
CAM109_map11	0003.CSV	1230.41	0.082825
CAM109_map11	0003.CSV	1234.27	0.0858791
CAM109_map11	0003.CSV	1238.13	0.0894378
CAM109_map11	0003.CSV	1241.98	0.0939054
CAM109_map11	0003.CSV	1245.84	0.0985564
CAM109_map11	0003.CSV	1249.7	0.103142
CAM109_map11	0003.CSV	1253.56	0.10641
CAM109_map11	0003.CSV	1257.41	0.108657
CAM109_map11	0003.CSV	1261.27	0.109832
CAM109_map11	0003.CSV	1265.13	0.110907
CAM109_map11	0003.CSV	1268.98	0.111713
CAM109_map11	0003.CSV	1272.84	0.112769
CAM109_map11	0003.CSV	1276.7	0.113279
CAM109_map11	0003.CSV	1280.56	0.113625
CAM109_map11	0003.CSV	1284.41	0.113098
CAM109_map11	0003.CSV	1288.27	0.111718
CAM109_map11	0003.CSV	1292.13	0.108764
CAM109_map11	0003.CSV	1295.98	0.105351
CAM109_map11	0003.CSV	1299.84	0.101987
CAM109_map11	0003.CSV	1303.7	0.099682
CAM109_map11	0003.CSV	1307.56	0.098185
CAM109_map11	0003.CSV	1311.41	0.097924
CAM109_map11	0003.CSV	1315.27	0.0979459
CAM109_map11	0003.CSV	1319.13	0.0982573
CAM109_map11	0003.CSV	1322.98	0.097964
CAM109_map11	0003.CSV	1326.84	0.0981427
CAM109_map11	0003.CSV	1330.7	0.0987382
CAM109_map11	0003.CSV	1334.56	0.100252
CAM109_map11	0003.CSV	1338.41	0.102616
CAM109_map11	0003.CSV	1342.27	0.106189
CAM109_map11	0003.CSV	1346.13	0.10914
CAM109_map11	0003.CSV	1349.98	0.112887
CAM109_map11	0003.CSV	1353.84	0.116405
CAM109_map11	0003.CSV	1357.7	0.119966
CAM109_map11	0003.CSV	1361.56	0.124038
CAM109_map11	0003.CSV	1365.41	0.129661
CAM109_map11	0003.CSV	1369.27	0.134457
CAM109_map11	0003.CSV	1373.13	0.141161
CAM109_map11	0003.CSV	1376.98	0.148567
CAM109_map11	0003.CSV	1380.84	0.154378
CAM109_map11	0003.CSV	1384.7	0.159261
CAM109_map11	0003.CSV	1388.56	0.166476
CAM109_map11	0003.CSV	1392.41	0.172452
CAM109_map11	0003.CSV	1396.27	0.180099
CAM109_map11	0003.CSV	1400.13	0.187796
CAM109_map11	0003.CSV	1403.98	0.195505
CAM109_map11	0003.CSV	1407.84	0.203684
CAM109_map11	0003.CSV	1411.7	0.211583
CAM109_map11	0003.CSV	1415.55	0.217239
CAM109_map11	0003.CSV	1419.41	0.224504
CAM109_map11	0003.CSV	1423.27	0.229595
CAM109_map11	0003.CSV	1427.12	0.234695
CAM109_map11	0003.CSV	1430.98	0.240331
CAM109_map11	0003.CSV	1434.84	0.248113
CAM109_map11	0003.CSV	1438.7	0.256095
CAM109_map11	0003.CSV	1442.55	0.262764
CAM109_map11	0003.CSV	1446.41	0.267091
CAM109_map11	0003.CSV	1450.27	0.269874
CAM109_map11	0003.CSV	1454.12	0.267532
CAM109_map11	0003.CSV	1457.98	0.262716
CAM109_map11	0003.CSV	1461.84	0.25905
CAM109_map11	0003.CSV	1465.7	0.258051
CAM109_map11	0003.CSV	1469.55	0.253166
CAM109_map11	0003.CSV	1473.41	0.240717
CAM109_map11	0003.CSV	1477.27	0.223195
CAM109_map11	0003.CSV	1481.12	0.211534
CAM109_map11	0003.CSV	1484.98	0.200462
CAM109_map11	0003.CSV	1488.84	0.188367
CAM109_map11	0003.CSV	1492.7	0.176196
CAM109_map11	0003.CSV	1496.55	0.166562
CAM109_map11	0003.CSV	1500.41	0.155573
CAM109_map11	0003.CSV	1504.27	0.149477
CAM109_map11	0003.CSV	1508.12	0.138303
CAM109_map11	0003.CSV	1511.98	0.130389
CAM109_map11	0003.CSV	1515.84	0.12429
CAM109_map11	0003.CSV	1519.7	0.116499
CAM109_map11	0003.CSV	1523.55	0.107511
CAM109_map11	0003.CSV	1527.41	0.102174
CAM109_map11	0003.CSV	1531.27	0.0986001
CAM109_map11	0003.CSV	1535.12	0.0971984
CAM109_map11	0003.CSV	1538.98	0.0953042
CAM109_map11	0003.CSV	1542.84	0.0897675
CAM109_map11	0003.CSV	1546.7	0.0838341
CAM109_map11	0003.CSV	1550.55	0.079466
CAM109_map11	0003.CSV	1554.41	0.0751399
CAM109_map11	0003.CSV	1558.27	0.0707078
CAM109_map11	0003.CSV	1562.12	0.0671721
CAM109_map11	0003.CSV	1565.98	0.0659176
CAM109_map11	0003.CSV	1569.84	0.0646367
CAM109_map11	0003.CSV	1573.69	0.0635552
CAM109_map11	0003.CSV	1577.55	0.060717
CAM109_map11	0003.CSV	1581.41	0.0562283
CAM109_map11	0003.CSV	1585.27	0.0509615
CAM109_map11	0003.CSV	1589.12	0.0468812
CAM109_map11	0003.CSV	1592.98	0.0446831
CAM109_map11	0003.CSV	1596.84	0.0439664
CAM109_map11	0003.CSV	1600.69	0.0431276
CAM109_map11	0003.CSV	1604.55	0.0419651
CAM109_map11	0003.CSV	1608.41	0.0407464
CAM109_map11	0003.CSV	1612.27	0.0400272
CAM109_map11	0003.CSV	1616.12	0.0393421
CAM109_map11	0003.CSV	1619.98	0.0389524
CAM109_map11	0003.CSV	1623.84	0.0382679
CAM109_map11	0003.CSV	1627.69	0.0376773
CAM109_map11	0003.CSV	1631.55	0.0366988
CAM109_map11	0003.CSV	1635.41	0.0362922
CAM109_map11	0003.CSV	1639.27	0.0359342
CAM109_map11	0003.CSV	1643.12	0.0353651
CAM109_map11	0003.CSV	1646.98	0.0349481
CAM109_map11	0003.CSV	1650.84	0.0350606
CAM109_map11	0003.CSV	1654.69	0.0349521
CAM109_map11	0003.CSV	1658.55	0.0345037
CAM109_map11	0003.CSV	1662.41	0.0339063
CAM109_map11	0003.CSV	1666.27	0.033619
CAM109_map11	0003.CSV	1670.12	0.0333625
CAM109_map11	0003.CSV	1673.98	0.0335843
CAM109_map11	0003.CSV	1677.84	0.0332187
CAM109_map11	0003.CSV	1681.69	0.0330784
CAM109_map11	0003.CSV	1685.55	0.03357
CAM109_map11	0003.CSV	1689.41	0.034021
CAM109_map11	0003.CSV	1693.27	0.0338198
CAM109_map11	0003.CSV	1697.12	0.0348118
CAM109_map11	0003.CSV	1700.98	0.0373268
CAM109_map11	0003.CSV	1704.84	0.0399808
CAM109_map11	0003.CSV	1708.69	0.0428779
CAM109_map11	0003.CSV	1712.55	0.0456522
CAM109_map11	0003.CSV	1716.41	0.0515249
CAM109_map11	0003.CSV	1720.27	0.0579709
CAM109_map11	0003.CSV	1724.12	0.059605
[truncated: 49,781 more rows]

## Sheet: CAM109_map12
Map	Select spectrum number	Wavenumbers	Absorbance
CAM109_map12	0001.CSV	674.992	0.0454818
CAM109_map12	0001.CSV	678.849	0.0483989
CAM109_map12	0001.CSV	682.706	0.0499806
CAM109_map12	0001.CSV	686.563	0.0533441
CAM109_map12	0001.CSV	690.42	0.0586573
CAM109_map12	0001.CSV	694.277	0.0709044
CAM109_map12	0001.CSV	698.134	0.0851735
CAM109_map12	0001.CSV	701.991	0.0970266
CAM109_map12	0001.CSV	705.849	0.111287
CAM109_map12	0001.CSV	709.706	0.132759
CAM109_map12	0001.CSV	713.563	0.120452
CAM109_map12	0001.CSV	717.42	0.0768706
CAM109_map12	0001.CSV	721.277	0.0489217
CAM109_map12	0001.CSV	725.134	0.0429872
CAM109_map12	0001.CSV	728.991	0.0430357
CAM109_map12	0001.CSV	732.848	0.0460463
CAM109_map12	0001.CSV	736.705	0.049604
CAM109_map12	0001.CSV	740.562	0.0535281
CAM109_map12	0001.CSV	744.42	0.0557574
CAM109_map12	0001.CSV	748.277	0.0571762
CAM109_map12	0001.CSV	752.134	0.0572159
CAM109_map12	0001.CSV	755.991	0.0579042
CAM109_map12	0001.CSV	759.848	0.0582775
CAM109_map12	0001.CSV	763.705	0.0594952
CAM109_map12	0001.CSV	767.562	0.0604283
CAM109_map12	0001.CSV	771.419	0.0619789
CAM109_map12	0001.CSV	775.276	0.0634472
CAM109_map12	0001.CSV	779.133	0.0656511
CAM109_map12	0001.CSV	782.99	0.066531
CAM109_map12	0001.CSV	786.848	0.0673539
CAM109_map12	0001.CSV	790.705	0.0683273
CAM109_map12	0001.CSV	794.562	0.0712467
CAM109_map12	0001.CSV	798.419	0.0738549
CAM109_map12	0001.CSV	802.276	0.0754061
CAM109_map12	0001.CSV	806.133	0.0756735
CAM109_map12	0001.CSV	809.99	0.077182
CAM109_map12	0001.CSV	813.847	0.0791446
CAM109_map12	0001.CSV	817.704	0.0822789
CAM109_map12	0001.CSV	821.562	0.0854919
CAM109_map12	0001.CSV	825.419	0.0888681
CAM109_map12	0001.CSV	829.276	0.0915311
CAM109_map12	0001.CSV	833.133	0.0946078
CAM109_map12	0001.CSV	836.99	0.0974535
CAM109_map12	0001.CSV	840.847	0.102803
CAM109_map12	0001.CSV	844.704	0.110669
CAM109_map12	0001.CSV	848.561	0.116573
CAM109_map12	0001.CSV	852.418	0.124349
CAM109_map12	0001.CSV	856.275	0.148125
CAM109_map12	0001.CSV	860.132	0.181349
CAM109_map12	0001.CSV	863.99	0.21887
CAM109_map12	0001.CSV	867.847	0.259089
CAM109_map12	0001.CSV	871.704	0.266762
CAM109_map12	0001.CSV	875.561	0.225496
CAM109_map12	0001.CSV	879.418	0.172734
CAM109_map12	0001.CSV	883.275	0.117909
CAM109_map12	0001.CSV	887.132	0.0707345
CAM109_map12	0001.CSV	890.989	0.0508075
CAM109_map12	0001.CSV	894.846	0.0505777
CAM109_map12	0001.CSV	898.703	0.052852
CAM109_map12	0001.CSV	902.561	0.0551102
CAM109_map12	0001.CSV	906.418	0.0567743
CAM109_map12	0001.CSV	910.275	0.0586268
CAM109_map12	0001.CSV	914.132	0.0597056
CAM109_map12	0001.CSV	917.989	0.0610142
CAM109_map12	0001.CSV	921.846	0.0620301
CAM109_map12	0001.CSV	925.703	0.0636185
CAM109_map12	0001.CSV	929.56	0.0648094
CAM109_map12	0001.CSV	933.417	0.0663023
CAM109_map12	0001.CSV	937.274	0.0671903
CAM109_map12	0001.CSV	941.131	0.0679657
CAM109_map12	0001.CSV	944.989	0.0678901
CAM109_map12	0001.CSV	948.846	0.0677746
CAM109_map12	0001.CSV	952.703	0.0671538
CAM109_map12	0001.CSV	956.56	0.0667771
CAM109_map12	0001.CSV	960.417	0.0662103
CAM109_map12	0001.CSV	964.274	0.066395
CAM109_map12	0001.CSV	968.131	0.0668404
CAM109_map12	0001.CSV	971.988	0.0681616
CAM109_map12	0001.CSV	975.845	0.0695979
CAM109_map12	0001.CSV	979.702	0.0716976
CAM109_map12	0001.CSV	983.559	0.0738414
CAM109_map12	0001.CSV	987.417	0.0766139
CAM109_map12	0001.CSV	991.274	0.0790599
CAM109_map12	0001.CSV	995.131	0.0815282
CAM109_map12	0001.CSV	998.988	0.0834147
CAM109_map12	0001.CSV	1002.85	0.0855304
CAM109_map12	0001.CSV	1006.7	0.0872145
CAM109_map12	0001.CSV	1010.56	0.0891173
CAM109_map12	0001.CSV	1014.42	0.0905404
CAM109_map12	0001.CSV	1018.27	0.0920517
CAM109_map12	0001.CSV	1022.13	0.0931563
CAM109_map12	0001.CSV	1025.99	0.0948974
CAM109_map12	0001.CSV	1029.85	0.0964946
CAM109_map12	0001.CSV	1033.7	0.098451
CAM109_map12	0001.CSV	1037.56	0.100227
CAM109_map12	0001.CSV	1041.42	0.102088
CAM109_map12	0001.CSV	1045.27	0.103391
CAM109_map12	0001.CSV	1049.13	0.105771
CAM109_map12	0001.CSV	1052.99	0.109125
CAM109_map12	0001.CSV	1056.84	0.114459
CAM109_map12	0001.CSV	1060.7	0.120768
CAM109_map12	0001.CSV	1064.56	0.126967
CAM109_map12	0001.CSV	1068.42	0.130616
CAM109_map12	0001.CSV	1072.27	0.132545
CAM109_map12	0001.CSV	1076.13	0.132799
CAM109_map12	0001.CSV	1079.99	0.132999
CAM109_map12	0001.CSV	1083.84	0.132055
CAM109_map12	0001.CSV	1087.7	0.129962
CAM109_map12	0001.CSV	1091.56	0.126573
CAM109_map12	0001.CSV	1095.41	0.12348
CAM109_map12	0001.CSV	1099.27	0.12112
CAM109_map12	0001.CSV	1103.13	0.120675
CAM109_map12	0001.CSV	1106.99	0.121101
CAM109_map12	0001.CSV	1110.84	0.122643
CAM109_map12	0001.CSV	1114.7	0.123856
CAM109_map12	0001.CSV	1118.56	0.124617
CAM109_map12	0001.CSV	1122.41	0.124004
CAM109_map12	0001.CSV	1126.27	0.123096
CAM109_map12	0001.CSV	1130.13	0.121904
CAM109_map12	0001.CSV	1133.99	0.121569
CAM109_map12	0001.CSV	1137.84	0.121362
CAM109_map12	0001.CSV	1141.7	0.121293
CAM109_map12	0001.CSV	1145.56	0.120387
CAM109_map12	0001.CSV	1149.41	0.119803
CAM109_map12	0001.CSV	1153.27	0.119185
CAM109_map12	0001.CSV	1157.13	0.119219
CAM109_map12	0001.CSV	1160.99	0.119206
CAM109_map12	0001.CSV	1164.84	0.119034
CAM109_map12	0001.CSV	1168.7	0.117596
CAM109_map12	0001.CSV	1172.56	0.116057
CAM109_map12	0001.CSV	1176.41	0.114335
CAM109_map12	0001.CSV	1180.27	0.113093
CAM109_map12	0001.CSV	1184.13	0.111626
CAM109_map12	0001.CSV	1187.99	0.110506
CAM109_map12	0001.CSV	1191.84	0.109212
CAM109_map12	0001.CSV	1195.7	0.108608
CAM109_map12	0001.CSV	1199.56	0.108036
CAM109_map12	0001.CSV	1203.41	0.108135
CAM109_map12	0001.CSV	1207.27	0.108328
CAM109_map12	0001.CSV	1211.13	0.109116
CAM109_map12	0001.CSV	1214.98	0.109851
CAM109_map12	0001.CSV	1218.84	0.111175
CAM109_map12	0001.CSV	1222.7	0.11254
CAM109_map12	0001.CSV	1226.56	0.114633
CAM109_map12	0001.CSV	1230.41	0.116813
CAM109_map12	0001.CSV	1234.27	0.119839
CAM109_map12	0001.CSV	1238.13	0.123113
CAM109_map12	0001.CSV	1241.98	0.127222
CAM109_map12	0001.CSV	1245.84	0.131401
CAM109_map12	0001.CSV	1249.7	0.135996
CAM109_map12	0001.CSV	1253.56	0.13971
CAM109_map12	0001.CSV	1257.41	0.142973
CAM109_map12	0001.CSV	1261.27	0.145452
CAM109_map12	0001.CSV	1265.13	0.148196
CAM109_map12	0001.CSV	1268.98	0.150544
CAM109_map12	0001.CSV	1272.84	0.153274
CAM109_map12	0001.CSV	1276.7	0.15555
CAM109_map12	0001.CSV	1280.56	0.15806
CAM109_map12	0001.CSV	1284.41	0.159873
CAM109_map12	0001.CSV	1288.27	0.161446
CAM109_map12	0001.CSV	1292.13	0.161876
CAM109_map12	0001.CSV	1295.98	0.162277
CAM109_map12	0001.CSV	1299.84	0.162586
CAM109_map12	0001.CSV	1303.7	0.164153
CAM109_map12	0001.CSV	1307.56	0.166313
CAM109_map12	0001.CSV	1311.41	0.169743
CAM109_map12	0001.CSV	1315.27	0.173325
CAM109_map12	0001.CSV	1319.13	0.177618
CAM109_map12	0001.CSV	1322.98	0.181361
CAM109_map12	0001.CSV	1326.84	0.185846
CAM109_map12	0001.CSV	1330.7	0.190697
CAM109_map12	0001.CSV	1334.56	0.196607
CAM109_map12	0001.CSV	1338.41	0.203884
CAM109_map12	0001.CSV	1342.27	0.213218
CAM109_map12	0001.CSV	1346.13	0.221134
CAM109_map12	0001.CSV	1349.98	0.23066
CAM109_map12	0001.CSV	1353.84	0.24039
CAM109_map12	0001.CSV	1357.7	0.250518
CAM109_map12	0001.CSV	1361.56	0.261494
CAM109_map12	0001.CSV	1365.41	0.275075
CAM109_map12	0001.CSV	1369.27	0.286409
CAM109_map12	0001.CSV	1373.13	0.300178
CAM109_map12	0001.CSV	1376.98	0.314706
CAM109_map12	0001.CSV	1380.84	0.327294
CAM109_map12	0001.CSV	1384.7	0.337781
CAM109_map12	0001.CSV	1388.56	0.349926
CAM109_map12	0001.CSV	1392.41	0.356754
CAM109_map12	0001.CSV	1396.27	0.358881
CAM109_map12	0001.CSV	1400.13	0.354809
CAM109_map12	0001.CSV	1403.98	0.350016
CAM109_map12	0001.CSV	1407.84	0.339863
CAM109_map12	0001.CSV	1411.7	0.326436
CAM109_map12	0001.CSV	1415.55	0.311141
CAM109_map12	0001.CSV	1419.41	0.293739
CAM109_map12	0001.CSV	1423.27	0.279122
CAM109_map12	0001.CSV	1427.12	0.270511
CAM109_map12	0001.CSV	1430.98	0.261638
CAM109_map12	0001.CSV	1434.84	0.253557
CAM109_map12	0001.CSV	1438.7	0.244279
CAM109_map12	0001.CSV	1442.55	0.238482
CAM109_map12	0001.CSV	1446.41	0.232087
CAM109_map12	0001.CSV	1450.27	0.22538
CAM109_map12	0001.CSV	1454.12	0.218419
CAM109_map12	0001.CSV	1457.98	0.206943
CAM109_map12	0001.CSV	1461.84	0.198384
CAM109_map12	0001.CSV	1465.7	0.19356
CAM109_map12	0001.CSV	1469.55	0.188268
CAM109_map12	0001.CSV	1473.41	0.181062
CAM109_map12	0001.CSV	1477.27	0.171559
CAM109_map12	0001.CSV	1481.12	0.164977
CAM109_map12	0001.CSV	1484.98	0.157971
CAM109_map12	0001.CSV	1488.84	0.149339
CAM109_map12	0001.CSV	1492.7	0.140155
CAM109_map12	0001.CSV	1496.55	0.132475
CAM109_map12	0001.CSV	1500.41	0.123342
CAM109_map12	0001.CSV	1504.27	0.118054
CAM109_map12	0001.CSV	1508.12	0.1082
CAM109_map12	0001.CSV	1511.98	0.101173
CAM109_map12	0001.CSV	1515.84	0.0962405
CAM109_map12	0001.CSV	1519.7	0.0898579
CAM109_map12	0001.CSV	1523.55	0.082399
CAM109_map12	0001.CSV	1527.41	0.0775789
CAM109_map12	0001.CSV	1531.27	0.0734629
CAM109_map12	0001.CSV	1535.12	0.0699282
CAM109_map12	0001.CSV	1538.98	0.0660272
CAM109_map12	0001.CSV	1542.84	0.0600384
CAM109_map12	0001.CSV	1546.7	0.0556464
CAM109_map12	0001.CSV	1550.55	0.0521374
CAM109_map12	0001.CSV	1554.41	0.0485935
CAM109_map12	0001.CSV	1558.27	0.0453631
CAM109_map12	0001.CSV	1562.12	0.0430917
CAM109_map12	0001.CSV	1565.98	0.0419843
CAM109_map12	0001.CSV	1569.84	0.0408018
CAM109_map12	0001.CSV	1573.69	0.0402567
CAM109_map12	0001.CSV	1577.55	0.0397721
CAM109_map12	0001.CSV	1581.41	0.0384551
CAM109_map12	0001.CSV	1585.27	0.0363338
CAM109_map12	0001.CSV	1589.12	0.0342672
CAM109_map12	0001.CSV	1592.98	0.0325687
CAM109_map12	0001.CSV	1596.84	0.0315325
CAM109_map12	0001.CSV	1600.69	0.0305091
CAM109_map12	0001.CSV	1604.55	0.0293259
CAM109_map12	0001.CSV	1608.41	0.0280441
CAM109_map12	0001.CSV	1612.27	0.027112
CAM109_map12	0001.CSV	1616.12	0.0262703
CAM109_map12	0001.CSV	1619.98	0.0257205
CAM109_map12	0001.CSV	1623.84	0.02501
CAM109_map12	0001.CSV	1627.69	0.0243666
CAM109_map12	0001.CSV	1631.55	0.0234089
CAM109_map12	0001.CSV	1635.41	0.0229772
CAM109_map12	0001.CSV	1639.27	0.0227985
CAM109_map12	0001.CSV	1643.12	0.0223658
CAM109_map12	0001.CSV	1646.98	0.0221379
CAM109_map12	0001.CSV	1650.84	0.022365
CAM109_map12	0001.CSV	1654.69	0.0223863
CAM109_map12	0001.CSV	1658.55	0.0220455
CAM109_map12	0001.CSV	1662.41	0.021521
CAM109_map12	0001.CSV	1666.27	0.0212059
CAM109_map12	0001.CSV	1670.12	0.0209545
CAM109_map12	0001.CSV	1673.98	0.0211908
CAM109_map12	0001.CSV	1677.84	0.0209452
CAM109_map12	0001.CSV	1681.69	0.0208998
CAM109_map12	0001.CSV	1685.55	0.0213643
CAM109_map12	0001.CSV	1689.41	0.0213845
CAM109_map12	0001.CSV	1693.27	0.0208602
CAM109_map12	0001.CSV	1697.12	0.0213577
CAM109_map12	0001.CSV	1700.98	0.0229272
CAM109_map12	0001.CSV	1704.84	0.0246927
CAM109_map12	0001.CSV	1708.69	0.0265315
CAM109_map12	0001.CSV	1712.55	0.0283852
CAM109_map12	0001.CSV	1716.41	0.0329907
CAM109_map12	0001.CSV	1720.27	0.0385066
CAM109_map12	0001.CSV	1724.12	0.0403522
CAM109_map12	0001.CSV	1727.98	0.0411556
CAM109_map12	0001.CSV	1731.84	0.0409243
CAM109_map12	0001.CSV	1735.69	0.039114
CAM109_map12	0001.CSV	1739.55	0.036103
CAM109_map12	0001.CSV	1743.41	0.0319747
CAM109_map12	0001.CSV	1747.27	0.0272402
CAM109_map12	0001.CSV	1751.12	0.0219722
CAM109_map12	0001.CSV	1754.98	0.0184258
CAM109_map12	0001.CSV	1758.84	0.0160937
CAM109_map12	0001.CSV	1762.69	0.0144623
CAM109_map12	0001.CSV	1766.55	0.0134379
CAM109_map12	0001.CSV	1770.41	0.0130355
CAM109_map12	0001.CSV	1774.26	0.0132312
CAM109_map12	0001.CSV	1778.12	0.0133313
CAM109_map12	0001.CSV	1781.98	0.0139293
CAM109_map12	0001.CSV	1785.84	0.0150676
CAM109_map12	0001.CSV	1789.69	0.0169918
CAM109_map12	0001.CSV	1793.55	0.0199319
CAM109_map12	0001.CSV	1797.41	0.0204922
CAM109_map12	0001.CSV	1801.26	0.0181744
CAM109_map12	0001.CSV	1805.12	0.0151536
CAM109_map12	0001.CSV	1808.98	0.0128784
CAM109_map12	0001.CSV	1812.84	0.011619
CAM109_map12	0001.CSV	1816.69	0.0108348
CAM109_map12	0001.CSV	1820.55	0.0103576
CAM109_map12	0001.CSV	1824.41	0.0100248
CAM109_map12	0001.CSV	1828.26	0.0100083
CAM109_map12	0001.CSV	1832.12	0.0100059
CAM109_map12	0001.CSV	1835.98	0.00986747
CAM109_map12	0001.CSV	1839.84	0.00956652
CAM109_map12	0001.CSV	1843.69	0.00959307
CAM109_map12	0001.CSV	1847.55	0.00982189
CAM109_map12	0001.CSV	1851.41	0.00973079
CAM109_map12	0001.CSV	1855.26	0.00961194
CAM109_map12	0001.CSV	1859.12	0.00967987
CAM109_map12	0001.CSV	1862.98	0.009576
CAM109_map12	0001.CSV	1866.84	0.00966686
CAM109_map12	0001.CSV	1870.69	0.00996185
CAM109_map12	0001.CSV	1874.55	0.00986622
CAM109_map12	0001.CSV	1878.41	0.00974377
CAM109_map12	0001.CSV	1882.26	0.00979135
CAM109_map12	0001.CSV	1886.12	0.00976458
CAM109_map12	0001.CSV	1889.98	0.00982605
CAM109_map12	0001.CSV	1893.83	0.00987198
CAM109_map12	0001.CSV	1897.69	0.00989591
CAM109_map12	0001.CSV	1901.55	0.00981531
CAM109_map12	0001.CSV	1905.41	0.00982802
CAM109_map12	0001.CSV	1909.26	0.0099091
CAM109_map12	0001.CSV	1913.12	0.00998978
CAM109_map12	0001.CSV	1916.98	0.00998049
CAM109_map12	0001.CSV	1920.83	0.0101179
CAM109_map12	0001.CSV	1924.69	0.0101618
CAM109_map12	0001.CSV	1928.55	0.0101671
CAM109_map12	0001.CSV	1932.4	0.0102078
CAM109_map12	0001.CSV	1936.26	0.0103064
CAM109_map12	0001.CSV	1940.12	0.0103412
CAM109_map12	0001.CSV	1943.98	0.0106093
CAM109_map12	0001.CSV	1947.83	0.0106832
CAM109_map12	0001.CSV	1951.69	0.0106614
CAM109_map12	0001.CSV	1955.55	0.0107163
CAM109_map12	0001.CSV	1959.4	0.0108142
CAM109_map12	0001.CSV	1963.26	0.0107518
CAM109_map12	0001.CSV	1967.12	0.0108222
CAM109_map12	0001.CSV	1970.98	0.0108606
CAM109_map12	0001.CSV	1974.83	0.0108534
CAM109_map12	0001.CSV	1978.69	0.0108237
CAM109_map12	0001.CSV	1982.55	0.0108787
CAM109_map12	0001.CSV	1986.4	0.0108704
CAM109_map12	0001.CSV	1990.26	0.0109181
CAM109_map12	0001.CSV	1994.12	0.0109769
CAM109_map12	0001.CSV	1997.98	0.0109558
CAM109_map12	0001.CSV	2001.83	0.0109114
CAM109_map12	0001.CSV	2005.69	0.0109582
CAM109_map12	0001.CSV	2009.55	0.0109921
CAM109_map12	0001.CSV	2013.4	0.0110278
CAM109_map12	0001.CSV	2017.26	0.0110865
CAM109_map12	0001.CSV	2021.12	0.0111758
CAM109_map12	0001.CSV	2024.97	0.011126
CAM109_map12	0001.CSV	2028.83	0.0111492
CAM109_map12	0001.CSV	2032.69	0.0111401
CAM109_map12	0001.CSV	2036.55	0.0111503
CAM109_map12	0001.CSV	2040.4	0.0111709
CAM109_map12	0001.CSV	2044.26	0.0112666
CAM109_map12	0001.CSV	2048.12	0.0112464
CAM109_map12	0001.CSV	2051.97	0.0112567
CAM109_map12	0001.CSV	2055.83	0.0112733
CAM109_map12	0001.CSV	2059.69	0.0113458
CAM109_map12	0001.CSV	2063.55	0.0113668
CAM109_map12	0001.CSV	2067.4	0.0114432
CAM109_map12	0001.CSV	2071.26	0.0114885
CAM109_map12	0001.CSV	2075.12	0.0115971
CAM109_map12	0001.CSV	2078.97	0.0116689
CAM109_map12	0001.CSV	2082.83	0.0116631
CAM109_map12	0001.CSV	2086.69	0.0116622
CAM109_map12	0001.CSV	2090.55	0.0117883
CAM109_map12	0001.CSV	2094.4	0.0118357
CAM109_map12	0001.CSV	2098.26	0.0118809
CAM109_map12	0001.CSV	2102.12	0.0119086
CAM109_map12	0001.CSV	2105.97	0.0119313
CAM109_map12	0001.CSV	2109.83	0.0119456
CAM109_map12	0001.CSV	2113.69	0.0120392
CAM109_map12	0001.CSV	2117.55	0.0120809
CAM109_map12	0001.CSV	2121.4	0.0121698
CAM109_map12	0001.CSV	2125.26	0.012227
CAM109_map12	0001.CSV	2129.12	0.0122802
CAM109_map12	0001.CSV	2132.97	0.0123471
CAM109_map12	0001.CSV	2136.83	0.0124795
CAM109_map12	0001.CSV	2140.69	0.0125347
CAM109_map12	0001.CSV	2144.55	0.0125685
CAM109_map12	0001.CSV	2148.4	0.012551
CAM109_map12	0001.CSV	2152.26	0.0125583
CAM109_map12	0001.CSV	2156.12	0.0125377
CAM109_map12	0001.CSV	2159.97	0.0125213
CAM109_map12	0001.CSV	2163.83	0.0124791
CAM109_map12	0001.CSV	2167.69	0.0124878
CAM109_map12	0001.CSV	2171.55	0.012539
CAM109_map12	0001.CSV	2175.4	0.0126547
CAM109_map12	0001.CSV	2179.26	0.0126721
CAM109_map12	0001.CSV	2183.12	0.012714
CAM109_map12	0001.CSV	2186.97	0.012726
CAM109_map12	0001.CSV	2190.83	0.0127709
CAM109_map12	0001.CSV	2194.69	0.0127725
CAM109_map12	0001.CSV	2198.55	0.0128105
CAM109_map12	0001.CSV	2202.4	0.0128496
CAM109_map12	0001.CSV	2206.26	0.0129154
CAM109_map12	0001.CSV	2210.12	0.0129651
CAM109_map12	0001.CSV	2213.97	0.0130119
CAM109_map12	0001.CSV	2217.83	0.0129776
CAM109_map12	0001.CSV	2221.69	0.0129885
CAM109_map12	0001.CSV	2225.54	0.0130024
CAM109_map12	0001.CSV	2229.4	0.0130699
CAM109_map12	0001.CSV	2233.26	0.0131436
CAM109_map12	0001.CSV	2237.12	0.0132052
CAM109_map12	0001.CSV	2240.97	0.0132296
CAM109_map12	0001.CSV	2244.83	0.0132818
CAM109_map12	0001.CSV	2248.69	0.0132856
CAM109_map12	0001.CSV	2252.54	0.0133157
CAM109_map12	0001.CSV	2256.4	0.0133221
CAM109_map12	0001.CSV	2260.26	0.0133592
CAM109_map12	0001.CSV	2264.11	0.013379
CAM109_map12	0001.CSV	2267.97	0.013434
CAM109_map12	0001.CSV	2271.83	0.0134869
CAM109_map12	0001.CSV	2275.69	0.0135403
CAM109_map12	0001.CSV	2279.54	0.0135105
CAM109_map12	0001.CSV	2283.4	0.0134655
CAM109_map12	0001.CSV	2287.26	0.0134434
CAM109_map12	0001.CSV	2291.11	0.0134982
CAM109_map12	0001.CSV	2294.97	0.0135457
CAM109_map12	0001.CSV	2298.83	0.0135791
CAM109_map12	0001.CSV	2302.69	0.0134699
CAM109_map12	0001.CSV	2306.54	0.0133426
CAM109_map12	0001.CSV	2310.4	0.0131529
CAM109_map12	0001.CSV	2314.26	0.0129417
CAM109_map12	0001.CSV	2318.11	0.01236
CAM109_map12	0001.CSV	2321.97	0.0114771
CAM109_map12	0001.CSV	2325.83	0.0106543
CAM109_map12	0001.CSV	2329.69	0.00979077
CAM109_map12	0001.CSV	2333.54	0.00873477
CAM109_map12	0001.CSV	2337.4	0.0082283
CAM109_map12	0001.CSV	2341.26	0.00816789
CAM109_map12	0001.CSV	2345.11	0.0106702
CAM109_map12	0001.CSV	2348.97	0.0115419
CAM109_map12	0001.CSV	2352.83	0.00941737
CAM109_map12	0001.CSV	2356.69	0.00344275
CAM109_map12	0001.CSV	2360.54	-0.00132262
CAM109_map12	0001.CSV	2364.4	0.00179746
CAM109_map12	0001.CSV	2368.26	0.00816988
CAM109_map12	0001.CSV	2372.11	0.012021
CAM109_map12	0001.CSV	2375.97	0.013761
CAM109_map12	0001.CSV	2379.83	0.0143065
CAM109_map12	0001.CSV	2383.69	0.0143699
CAM109_map12	0001.CSV	2387.54	0.014208
CAM109_map12	0001.CSV	2391.4	0.014092
CAM109_map12	0001.CSV	2395.26	0.0140839
CAM109_map12	0001.CSV	2399.11	0.0141194
CAM109_map12	0001.CSV	2402.97	0.0141155
CAM109_map12	0001.CSV	2406.83	0.0141371
CAM109_map12	0001.CSV	2410.68	0.0141403
CAM109_map12	0001.CSV	2414.54	0.0141496
CAM109_map12	0001.CSV	2418.4	0.01419
CAM109_map12	0001.CSV	2422.26	0.014226
CAM109_map12	0001.CSV	2426.11	0.0142528
CAM109_map12	0001.CSV	2429.97	0.01432
CAM109_map12	0001.CSV	2433.83	0.0143722
CAM109_map12	0001.CSV	2437.68	0.0144736
CAM109_map12	0001.CSV	2441.54	0.0145424
CAM109_map12	0001.CSV	2445.4	0.0145811
CAM109_map12	0001.CSV	2449.26	0.0145996
CAM109_map12	0001.CSV	2453.11	0.0146935
CAM109_map12	0001.CSV	2456.97	0.014867
CAM109_map12	0001.CSV	2460.83	0.0150106
CAM109_map12	0001.CSV	2464.68	0.0151427
CAM109_map12	0001.CSV	2468.54	0.015395
CAM109_map12	0001.CSV	2472.4	0.015675
CAM109_map12	0001.CSV	2476.26	0.0160045
CAM109_map12	0001.CSV	2480.11	0.0163785
CAM109_map12	0001.CSV	2483.97	0.0167976
CAM109_map12	0001.CSV	2487.83	0.017279
CAM109_map12	0001.CSV	2491.68	0.0178872
CAM109_map12	0001.CSV	2495.54	0.0186931
CAM109_map12	0001.CSV	2499.4	0.0196527
CAM109_map12	0001.CSV	2503.26	0.0205361
CAM109_map12	0001.CSV	2507.11	0.0212529
CAM109_map12	0001.CSV	2510.97	0.0216249
CAM109_map12	0001.CSV	2514.83	0.0215913
CAM109_map12	0001.CSV	2518.68	0.0212898
CAM109_map12	0001.CSV	2522.54	0.0207421
CAM109_map12	0001.CSV	2526.4	0.0199629
CAM109_map12	0001.CSV	2530.26	0.0191674
CAM109_map12	0001.CSV	2534.11	0.018367
CAM109_map12	0001.CSV	2537.97	0.0177315
CAM109_map12	0001.CSV	2541.83	0.0172966
CAM109_map12	0001.CSV	2545.68	0.0170106
CAM109_map12	0001.CSV	2549.54	0.0167969
CAM109_map12	0001.CSV	2553.4	0.0166857
CAM109_map12	0001.CSV	2557.26	0.0166115
CAM109_map12	0001.CSV	2561.11	0.0165627
CAM109_map12	0001.CSV	2564.97	0.0164831
CAM109_map12	0001.CSV	2568.83	0.016466
CAM109_map12	0001.CSV	2572.68	0.0165299
CAM109_map12	0001.CSV	2576.54	0.0165577
CAM109_map12	0001.CSV	2580.4	0.0164923
CAM109_map12	0001.CSV	2584.25	0.0164524
CAM109_map12	0001.CSV	2588.11	0.0164524
CAM109_map12	0001.CSV	2591.97	0.0164689
CAM109_map12	0001.CSV	2595.83	0.0164232
CAM109_map12	0001.CSV	2599.68	0.0163408
CAM109_map12	0001.CSV	2603.54	0.016242
CAM109_map12	0001.CSV	2607.4	0.0161681
CAM109_map12	0001.CSV	2611.25	0.0160817
CAM109_map12	0001.CSV	2615.11	0.0159898
CAM109_map12	0001.CSV	2618.97	0.0158492
CAM109_map12	0001.CSV	2622.82	0.0158013
CAM109_map12	0001.CSV	2626.68	0.0158017
CAM109_map12	0001.CSV	2630.54	0.0156946
CAM109_map12	0001.CSV	2634.4	0.0156066
CAM109_map12	0001.CSV	2638.25	0.015531
CAM109_map12	0001.CSV	2642.11	0.0153823
CAM109_map12	0001.CSV	2645.97	0.015259
CAM109_map12	0001.CSV	2649.82	0.0152054
CAM109_map12	0001.CSV	2653.68	0.0152312
CAM109_map12	0001.CSV	2657.54	0.0152481
CAM109_map12	0001.CSV	2661.4	0.0152342
CAM109_map12	0001.CSV	2665.25	0.0151839
CAM109_map12	0001.CSV	2669.11	0.0152791
CAM109_map12	0001.CSV	2672.97	0.0155416
CAM109_map12	0001.CSV	2676.82	0.0158419
CAM109_map12	0001.CSV	2680.68	0.0158036
CAM109_map12	0001.CSV	2684.54	0.0154434
CAM109_map12	0001.CSV	2688.4	0.015312
CAM109_map12	0001.CSV	2692.25	0.015389
CAM109_map12	0001.CSV	2696.11	0.0154894
CAM109_map12	0001.CSV	2699.97	0.0155357
CAM109_map12	0001.CSV	2703.82	0.0155595
CAM109_map12	0001.CSV	2707.68	0.0156753
CAM109_map12	0001.CSV	2711.54	0.0156986
CAM109_map12	0001.CSV	2715.4	0.0156951
CAM109_map12	0001.CSV	2719.25	0.0159005
CAM109_map12	0001.CSV	2723.11	0.0162731
CAM109_map12	0001.CSV	2726.97	0.0163009
CAM109_map12	0001.CSV	2730.82	0.0160065
CAM109_map12	0001.CSV	2734.68	0.0160424
CAM109_map12	0001.CSV	2738.54	0.0161666
CAM109_map12	0001.CSV	2742.4	0.0162205
CAM109_map12	0001.CSV	2746.25	0.0165251
CAM109_map12	0001.CSV	2750.11	0.0166531
CAM109_map12	0001.CSV	2753.97	0.0164954
CAM109_map12	0001.CSV	2757.82	0.0164291
CAM109_map12	0001.CSV	2761.68	0.016361
CAM109_map12	0001.CSV	2765.54	0.0164158
CAM109_map12	0001.CSV	2769.39	0.0166642
CAM109_map12	0001.CSV	2773.25	0.0170772
CAM109_map12	0001.CSV	2777.11	0.0171036
CAM109_map12	0001.CSV	2780.97	0.0169031
CAM109_map12	0001.CSV	2784.82	0.0171705
CAM109_map12	0001.CSV	2788.68	0.0177064
CAM109_map12	0001.CSV	2792.54	0.0179259
CAM109_map12	0001.CSV	2796.39	0.0180348
CAM109_map12	0001.CSV	2800.25	0.0179884
CAM109_map12	0001.CSV	2804.11	0.0179179
CAM109_map12	0001.CSV	2807.97	0.0182892
CAM109_map12	0001.CSV	2811.82	0.01845
CAM109_map12	0001.CSV	2815.68	0.0184459
CAM109_map12	0001.CSV	2819.54	0.0187688
CAM109_map12	0001.CSV	2823.39	0.0192151
CAM109_map12	0001.CSV	2827.25	0.0196456
CAM109_map12	0001.CSV	2831.11	0.0204961
CAM109_map12	0001.CSV	2834.97	0.0219115
CAM109_map12	0001.CSV	2838.82	0.0236415
CAM109_map12	0001.CSV	2842.68	0.0259218
CAM109_map12	0001.CSV	2846.54	0.0294308
CAM109_map12	0001.CSV	2850.39	0.0321675
CAM109_map12	0001.CSV	2854.25	0.0322967
CAM109_map12	0001.CSV	2858.11	0.0309276
CAM109_map12	0001.CSV	2861.97	0.0292103
CAM109_map12	0001.CSV	2865.82	0.0280365
CAM109_map12	0001.CSV	2869.68	0.0278607
CAM109_map12	0001.CSV	2873.54	0.0276598
CAM109_map12	0001.CSV	2877.39	0.0267423
CAM109_map12	0001.CSV	2881.25	0.0261072
CAM109_map12	0001.CSV	2885.11	0.026105
CAM109_map12	0001.CSV	2888.97	0.0265572
CAM109_map12	0001.CSV	2892.82	0.027578
CAM109_map12	0001.CSV	2896.68	0.0286741
CAM109_map12	0001.CSV	2900.54	0.0295783
CAM109_map12	0001.CSV	2904.39	0.0309124
CAM109_map12	0001.CSV	2908.25	0.033151
CAM109_map12	0001.CSV	2912.11	0.0365661
CAM109_map12	0001.CSV	2915.97	0.0401449
CAM109_map12	0001.CSV	2919.82	0.0421572
CAM109_map12	0001.CSV	2923.68	0.0421676
CAM109_map12	0001.CSV	2927.54	0.0410712
CAM109_map12	0001.CSV	2931.39	0.0387963
CAM109_map12	0001.CSV	2935.25	0.0357619
CAM109_map12	0001.CSV	2939.11	0.0332776
CAM109_map12	0001.CSV	2942.96	0.0317496
CAM109_map12	0001.CSV	2946.82	0.0306431
CAM109_map12	0001.CSV	2950.68	0.0297929
CAM109_map12	0001.CSV	2954.54	0.0290247
CAM109_map12	0001.CSV	2958.39	0.0281083
CAM109_map12	0001.CSV	2962.25	0.0271417
CAM109_map12	0001.CSV	2966.11	0.0258247
CAM109_map12	0001.CSV	2969.96	0.0247807
CAM109_map12	0001.CSV	2973.82	0.0242871
CAM109_map12	0001.CSV	2977.68	0.023909
CAM109_map12	0001.CSV	2981.53	0.0232075
CAM109_map12	0001.CSV	2985.39	0.0221859
CAM109_map12	0001.CSV	2989.25	0.0216797
CAM109_map12	0001.CSV	2993.11	0.0214911
CAM109_map12	0001.CSV	2996.96	0.0209759
CAM109_map12	0001.CSV	3000.82	0.0203451
CAM109_map12	0001.CSV	3004.68	0.0199559
CAM109_map12	0001.CSV	3008.53	0.0199827
CAM109_map12	0001.CSV	3012.39	0.02021
CAM109_map12	0001.CSV	3016.25	0.0202916
CAM109_map12	0001.CSV	3020.11	0.0202711
CAM109_map12	0001.CSV	3023.96	0.0203565
CAM109_map12	0001.CSV	3027.82	0.0205026
CAM109_map12	0001.CSV	3031.68	0.0206434
CAM109_map12	0001.CSV	3035.53	0.0204411
CAM109_map12	0001.CSV	3039.39	0.0202046
CAM109_map12	0001.CSV	3043.25	0.0202033
CAM109_map12	0001.CSV	3047.11	0.0201415
CAM109_map12	0001.CSV	3050.96	0.0201583
CAM109_map12	0001.CSV	3054.82	0.0202744
CAM109_map12	0001.CSV	3058.68	0.02028
CAM109_map12	0001.CSV	3062.53	0.0203872
CAM109_map12	0001.CSV	3066.39	0.0206252
CAM109_map12	0001.CSV	3070.25	0.0204982
CAM109_map12	0001.CSV	3074.11	0.0204326
CAM109_map12	0001.CSV	3077.96	0.0206533
CAM109_map12	0001.CSV	3081.82	0.0208101
CAM109_map12	0001.CSV	3085.68	0.0207978
CAM109_map12	0001.CSV	3089.53	0.0205919
CAM109_map12	0001.CSV	3093.39	0.0202604
CAM109_map12	0001.CSV	3097.25	0.020269
CAM109_map12	0001.CSV	3101.11	0.0204125
CAM109_map12	0001.CSV	3104.96	0.02045
CAM109_map12	0001.CSV	3108.82	0.0205708
CAM109_map12	0001.CSV	3112.68	0.0206285
CAM109_map12	0001.CSV	3116.53	0.0207719
CAM109_map12	0001.CSV	3120.39	0.0207622
CAM109_map12	0001.CSV	3124.25	0.0205611
CAM109_map12	0001.CSV	3128.11	0.0204955
CAM109_map12	0001.CSV	3131.96	0.0204789
CAM109_map12	0001.CSV	3135.82	0.0207032
CAM109_map12	0001.CSV	3139.68	0.0209138
CAM109_map12	0001.CSV	3143.53	0.020763
CAM109_map12	0001.CSV	3147.39	0.0208726
CAM109_map12	0001.CSV	3151.25	0.0212928
CAM109_map12	0001.CSV	3155.1	0.0213134
CAM109_map12	0001.CSV	3158.96	0.0210333
CAM109_map12	0001.CSV	3162.82	0.0209532
CAM109_map12	0001.CSV	3166.68	0.0209952
CAM109_map12	0001.CSV	3170.53	0.0211355
CAM109_map12	0001.CSV	3174.39	0.0212098
CAM109_map12	0001.CSV	3178.25	0.0213437
CAM109_map12	0001.CSV	3182.1	0.0214385
CAM109_map12	0001.CSV	3185.96	0.0215069
CAM109_map12	0001.CSV	3189.82	0.0215978
CAM109_map12	0001.CSV	3193.68	0.0215409
CAM109_map12	0001.CSV	3197.53	0.0216042
CAM109_map12	0001.CSV	3201.39	0.0218324
CAM109_map12	0001.CSV	3205.25	0.0219695
CAM109_map12	0001.CSV	3209.1	0.0220909
CAM109_map12	0001.CSV	3212.96	0.0222962
CAM109_map12	0001.CSV	3216.82	0.0223953
CAM109_map12	0001.CSV	3220.68	0.022319
CAM109_map12	0001.CSV	3224.53	0.0223101
CAM109_map12	0001.CSV	3228.39	0.0226227
CAM109_map12	0001.CSV	3232.25	0.0230629
CAM109_map12	0001.CSV	3236.1	0.0230429
CAM109_map12	0001.CSV	3239.96	0.0228581
CAM109_map12	0001.CSV	3243.82	0.0230418
CAM109_map12	0001.CSV	3247.68	0.0231912
CAM109_map12	0001.CSV	3251.53	0.0230454
CAM109_map12	0001.CSV	3255.39	0.0231145
CAM109_map12	0001.CSV	3259.25	0.0230152
CAM109_map12	0001.CSV	3263.1	0.0230129
CAM109_map12	0001.CSV	3266.96	0.0234479
CAM109_map12	0001.CSV	3270.82	0.0238492
CAM109_map12	0001.CSV	3274.68	0.0238673
CAM109_map12	0001.CSV	3278.53	0.0236304
CAM109_map12	0001.CSV	3282.39	0.0234562
CAM109_map12	0001.CSV	3286.25	0.0235866
CAM109_map12	0001.CSV	3290.1	0.0239314
CAM109_map12	0001.CSV	3293.96	0.024123
CAM109_map12	0001.CSV	3297.82	0.0239883
CAM109_map12	0001.CSV	3301.67	0.024112
CAM109_map12	0001.CSV	3305.53	0.0243677
CAM109_map12	0001.CSV	3309.39	0.0242447
CAM109_map12	0001.CSV	3313.25	0.0238546
CAM109_map12	0001.CSV	3317.1	0.0235406
CAM109_map12	0001.CSV	3320.96	0.0236267
CAM109_map12	0001.CSV	3324.82	0.023961
CAM109_map12	0001.CSV	3328.67	0.0238686
CAM109_map12	0001.CSV	3332.53	0.0238235
CAM109_map12	0001.CSV	3336.39	0.0242639
CAM109_map12	0001.CSV	3340.24	0.0244486
CAM109_map12	0001.CSV	3344.1	0.0242426
CAM109_map12	0001.CSV	3347.96	0.0243464
CAM109_map12	0001.CSV	3351.82	0.0243412
CAM109_map12	0001.CSV	3355.67	0.0240382
CAM109_map12	0001.CSV	3359.53	0.0241449
CAM109_map12	0001.CSV	3363.39	0.0244413
CAM109_map12	0001.CSV	3367.24	0.0246238
CAM109_map12	0001.CSV	3371.1	0.0244428
CAM109_map12	0001.CSV	3374.96	0.0242082
CAM109_map12	0001.CSV	3378.82	0.0240818
CAM109_map12	0001.CSV	3382.67	0.0237888
CAM109_map12	0001.CSV	3386.53	0.0238245
CAM109_map12	0001.CSV	3390.39	0.0242855
CAM109_map12	0001.CSV	3394.24	0.024546
CAM109_map12	0001.CSV	3398.1	0.0245238
CAM109_map12	0001.CSV	3401.96	0.0244275
CAM109_map12	0001.CSV	3405.82	0.0241603
CAM109_map12	0001.CSV	3409.67	0.0240657
CAM109_map12	0001.CSV	3413.53	0.0238044
CAM109_map12	0001.CSV	3417.39	0.023269
CAM109_map12	0001.CSV	3421.24	0.0229844
CAM109_map12	0001.CSV	3425.1	0.0230599
CAM109_map12	0001.CSV	3428.96	0.0232885
CAM109_map12	0001.CSV	3432.82	0.0234531
CAM109_map12	0001.CSV	3436.67	0.0231715
CAM109_map12	0001.CSV	3440.53	0.0223759
CAM109_map12	0001.CSV	3444.39	0.0218396
CAM109_map12	0001.CSV	3448.24	0.0217337
CAM109_map12	0001.CSV	3452.1	0.0215278
CAM109_map12	0001.CSV	3455.96	0.0214726
CAM109_map12	0001.CSV	3459.82	0.0217088
CAM109_map12	0001.CSV	3463.67	0.0219882
CAM109_map12	0001.CSV	3467.53	0.0220674
CAM109_map12	0001.CSV	3471.39	0.0216565
CAM109_map12	0001.CSV	3475.24	0.0212089
CAM109_map12	0001.CSV	3479.1	0.0211576
CAM109_map12	0001.CSV	3482.96	0.0210495
CAM109_map12	0001.CSV	3486.82	0.0210303
CAM109_map12	0001.CSV	3490.67	0.0208975
CAM109_map12	0001.CSV	3494.53	0.0208657
CAM109_map12	0001.CSV	3498.39	0.0207593
CAM109_map12	0001.CSV	3502.24	0.0205171
CAM109_map12	0001.CSV	3506.1	0.0200859
CAM109_map12	0001.CSV	3509.96	0.0198872
CAM109_map12	0001.CSV	3513.81	0.0199838
CAM109_map12	0001.CSV	3517.67	0.0195927
CAM109_map12	0001.CSV	3521.53	0.0194556
CAM109_map12	0001.CSV	3525.39	0.0194702
CAM109_map12	0001.CSV	3529.24	0.0192833
CAM109_map12	0001.CSV	3533.1	0.0192872
CAM109_map12	0001.CSV	3536.96	0.0194305
CAM109_map12	0001.CSV	3540.81	0.0194891
CAM109_map12	0001.CSV	3544.67	0.0196008
CAM109_map12	0001.CSV	3548.53	0.019289
CAM109_map12	0001.CSV	3552.39	0.0186821
CAM109_map12	0001.CSV	3556.24	0.0182565
CAM109_map12	0001.CSV	3560.1	0.0178436
CAM109_map12	0001.CSV	3563.96	0.0173207
CAM109_map12	0001.CSV	3567.81	0.0176573
CAM109_map12	0001.CSV	3571.67	0.0176333
CAM109_map12	0001.CSV	3575.53	0.0170415
CAM109_map12	0001.CSV	3579.39	0.0170635
CAM109_map12	0001.CSV	3583.24	0.0169064
CAM109_map12	0001.CSV	3587.1	0.0166798
CAM109_map12	0001.CSV	3590.96	0.0164652
CAM109_map12	0001.CSV	3594.81	0.0161575
CAM109_map12	0001.CSV	3598.67	0.0163367
CAM109_map12	0001.CSV	3602.53	0.0161728
CAM109_map12	0001.CSV	3606.39	0.015356
CAM109_map12	0001.CSV	3610.24	0.0149598
CAM109_map12	0001.CSV	3614.1	0.0149411
CAM109_map12	0001.CSV	3617.96	0.0153036
CAM109_map12	0001.CSV	3621.81	0.0155805
CAM109_map12	0001.CSV	3625.67	0.0147559
CAM109_map12	0001.CSV	3629.53	0.0147439
CAM109_map12	0001.CSV	3633.39	0.0152399
CAM109_map12	0001.CSV	3637.24	0.0147802
CAM109_map12	0001.CSV	3641.1	0.0143126
CAM109_map12	0001.CSV	3644.96	0.0136407
CAM109_map12	0001.CSV	3648.81	0.0143735
CAM109_map12	0001.CSV	3652.67	0.0151563
CAM109_map12	0001.CSV	3656.53	0.0149219
CAM109_map12	0001.CSV	3660.38	0.0147731
CAM109_map12	0001.CSV	3664.24	0.0137974
CAM109_map12	0001.CSV	3668.1	0.012862
CAM109_map12	0001.CSV	3671.96	0.0130247
CAM109_map12	0001.CSV	3675.81	0.0136986
CAM109_map12	0001.CSV	3679.67	0.0139843
CAM109_map12	0001.CSV	3683.53	0.0135215
CAM109_map12	0001.CSV	3687.38	0.0134519
CAM109_map12	0001.CSV	3691.24	0.014361
CAM109_map12	0001.CSV	3695.1	0.0140573
CAM109_map12	0001.CSV	3698.95	0.0134142
CAM109_map12	0001.CSV	3702.81	0.0132313
CAM109_map12	0001.CSV	3706.67	0.0126337
CAM109_map12	0001.CSV	3710.53	0.0125441
CAM109_map12	0001.CSV	3714.38	0.0132415
CAM109_map12	0001.CSV	3718.24	0.0127681
CAM109_map12	0001.CSV	3722.1	0.0124803
CAM109_map12	0001.CSV	3725.95	0.0125885
CAM109_map12	0001.CSV	3729.81	0.0123669
CAM109_map12	0001.CSV	3733.67	0.0126514
CAM109_map12	0001.CSV	3737.53	0.0138056
CAM109_map12	0001.CSV	3741.38	0.0127144
CAM109_map12	0001.CSV	3745.24	0.0114941
CAM109_map12	0001.CSV	3749.1	0.0115873
CAM109_map12	0001.CSV	3752.95	0.0126861
CAM109_map12	0001.CSV	3756.81	0.0128381
CAM109_map12	0001.CSV	3760.67	0.0127978
CAM109_map12	0001.CSV	3764.53	0.0124359
CAM109_map12	0001.CSV	3768.38	0.0124923
CAM109_map12	0001.CSV	3772.24	0.0128578
CAM109_map12	0001.CSV	3776.1	0.0126251
CAM109_map12	0001.CSV	3779.95	0.0125986
CAM109_map12	0001.CSV	3783.81	0.0126001
CAM109_map12	0001.CSV	3787.67	0.012609
CAM109_map12	0001.CSV	3791.53	0.0123229
CAM109_map12	0001.CSV	3795.38	0.0117494
CAM109_map12	0001.CSV	3799.24	0.011641
CAM109_map12	0001.CSV	3803.1	0.0122488
CAM109_map12	0001.CSV	3806.95	0.0127086
CAM109_map12	0001.CSV	3810.81	0.0123629
CAM109_map12	0001.CSV	3814.67	0.0118929
CAM109_map12	0001.CSV	3818.53	0.0122271
CAM109_map12	0001.CSV	3822.38	0.0126067
CAM109_map12	0001.CSV	3826.24	0.0124002
CAM109_map12	0001.CSV	3830.1	0.0120805
CAM109_map12	0001.CSV	3833.95	0.0118117
CAM109_map12	0001.CSV	3837.81	0.0120129
CAM109_map12	0001.CSV	3841.67	0.012851
CAM109_map12	0001.CSV	3845.53	0.0125781
CAM109_map12	0001.CSV	3849.38	0.0114468
CAM109_map12	0001.CSV	3853.24	0.0116709
CAM109_map12	0001.CSV	3857.1	0.0127403
CAM109_map12	0001.CSV	3860.95	0.0120456
CAM109_map12	0001.CSV	3864.81	0.0119792
CAM109_map12	0001.CSV	3868.67	0.0122189
CAM109_map12	0001.CSV	3872.52	0.0127029
CAM109_map12	0001.CSV	3876.38	0.0125303
CAM109_map12	0001.CSV	3880.24	0.0122526
CAM109_map12	0001.CSV	3884.1	0.0127146
CAM109_map12	0001.CSV	3887.95	0.0126316
CAM109_map12	0001.CSV	3891.81	0.0125703
CAM109_map12	0001.CSV	3895.67	0.0122371
CAM109_map12	0001.CSV	3899.52	0.0118777
CAM109_map12	0001.CSV	3903.38	0.0128827
CAM109_map12	0001.CSV	3907.24	0.0131124
CAM109_map12	0001.CSV	3911.1	0.0125309
CAM109_map12	0001.CSV	3914.95	0.0122125
CAM109_map12	0001.CSV	3918.81	0.0124785
CAM109_map12	0001.CSV	3922.67	0.012566
CAM109_map12	0001.CSV	3926.52	0.0124022
CAM109_map12	0001.CSV	3930.38	0.0124426
CAM109_map12	0001.CSV	3934.24	0.0127873
CAM109_map12	0001.CSV	3938.09	0.0124755
CAM109_map12	0001.CSV	3941.95	0.0122929
CAM109_map12	0001.CSV	3945.81	0.0124438
CAM109_map12	0001.CSV	3949.67	0.0126102
CAM109_map12	0001.CSV	3953.52	0.0125685
CAM109_map12	0001.CSV	3957.38	0.0123662
CAM109_map12	0001.CSV	3961.24	0.0123687
CAM109_map12	0001.CSV	3965.09	0.0122833
CAM109_map12	0001.CSV	3968.95	0.0122314
CAM109_map12	0001.CSV	3972.81	0.0123885
CAM109_map12	0001.CSV	3976.67	0.0123786
CAM109_map12	0001.CSV	3980.52	0.0122768
CAM109_map12	0001.CSV	3984.38	0.0123374
CAM109_map12	0001.CSV	3988.24	0.0122911
CAM109_map12	0001.CSV	3992.09	0.012284
CAM109_map12	0001.CSV	3995.95	0.0122631
CAM109_map12	0001.CSV	3999.81	0.0122034
CAM109_map12	0002.CSV	674.992	0.0346061
CAM109_map12	0002.CSV	678.849	0.0363728
CAM109_map12	0002.CSV	682.706	0.037229
CAM109_map12	0002.CSV	686.563	0.0389531
CAM109_map12	0002.CSV	690.42	0.0414655
CAM109_map12	0002.CSV	694.277	0.0476257
CAM109_map12	0002.CSV	698.134	0.0550399
CAM109_map12	0002.CSV	701.991	0.0622651
CAM109_map12	0002.CSV	705.849	0.071783
CAM109_map12	0002.CSV	709.706	0.0847442
CAM109_map12	0002.CSV	713.563	0.07711
CAM109_map12	0002.CSV	717.42	0.0519038
CAM109_map12	0002.CSV	721.277	0.0361949
CAM109_map12	0002.CSV	725.134	0.0328502
CAM109_map12	0002.CSV	728.991	0.0322232
CAM109_map12	0002.CSV	732.848	0.0332765
CAM109_map12	0002.CSV	736.705	0.0346962
CAM109_map12	0002.CSV	740.562	0.0368513
CAM109_map12	0002.CSV	744.42	0.0378835
CAM109_map12	0002.CSV	748.277	0.0387168
CAM109_map12	0002.CSV	752.134	0.0391424
CAM109_map12	0002.CSV	755.991	0.0401437
CAM109_map12	0002.CSV	759.848	0.0406854
CAM109_map12	0002.CSV	763.705	0.0411332
CAM109_map12	0002.CSV	767.562	0.0406824
CAM109_map12	0002.CSV	771.419	0.0408147
CAM109_map12	0002.CSV	775.276	0.0409971
CAM109_map12	0002.CSV	779.133	0.0416591
CAM109_map12	0002.CSV	782.99	0.0416506
CAM109_map12	0002.CSV	786.848	0.0418476
CAM109_map12	0002.CSV	790.705	0.0420314
CAM109_map12	0002.CSV	794.562	0.043088
CAM109_map12	0002.CSV	798.419	0.0439096
CAM109_map12	0002.CSV	802.276	0.0449092
CAM109_map12	0002.CSV	806.133	0.0455384
CAM109_map12	0002.CSV	809.99	0.0468314
CAM109_map12	0002.CSV	813.847	0.0481687
CAM109_map12	0002.CSV	817.704	0.0501173
CAM109_map12	0002.CSV	821.562	0.0517987
CAM109_map12	0002.CSV	825.419	0.053567
CAM109_map12	0002.CSV	829.276	0.0552554
CAM109_map12	0002.CSV	833.133	0.057761
CAM109_map12	0002.CSV	836.99	0.0603168
CAM109_map12	0002.CSV	840.847	0.0644225
CAM109_map12	0002.CSV	844.704	0.07019
CAM109_map12	0002.CSV	848.561	0.0745888
CAM109_map12	0002.CSV	852.418	0.0799322
CAM109_map12	0002.CSV	856.275	0.0951962
CAM109_map12	0002.CSV	860.132	0.116893
CAM109_map12	0002.CSV	863.99	0.141367
CAM109_map12	0002.CSV	867.847	0.163171
CAM109_map12	0002.CSV	871.704	0.164427
CAM109_map12	0002.CSV	875.561	0.140667
CAM109_map12	0002.CSV	879.418	0.109993
CAM109_map12	0002.CSV	883.275	0.0764371
CAM109_map12	0002.CSV	887.132	0.0467632
CAM109_map12	0002.CSV	890.989	0.0337629
CAM109_map12	0002.CSV	894.846	0.0330526
CAM109_map12	0002.CSV	898.703	0.034169
CAM109_map12	0002.CSV	902.561	0.0354249
CAM109_map12	0002.CSV	906.418	0.0362057
CAM109_map12	0002.CSV	910.275	0.0371739
CAM109_map12	0002.CSV	914.132	0.0377583
CAM109_map12	0002.CSV	917.989	0.0384423
CAM109_map12	0002.CSV	921.846	0.0389033
CAM109_map12	0002.CSV	925.703	0.039654
CAM109_map12	0002.CSV	929.56	0.0401806
CAM109_map12	0002.CSV	933.417	0.0409685
CAM109_map12	0002.CSV	937.274	0.0413603
CAM109_map12	0002.CSV	941.131	0.0416487
CAM109_map12	0002.CSV	944.989	0.0415935
CAM109_map12	0002.CSV	948.846	0.0417566
CAM109_map12	0002.CSV	952.703	0.041632
CAM109_map12	0002.CSV	956.56	0.0416036
CAM109_map12	0002.CSV	960.417	0.0413647
CAM109_map12	0002.CSV	964.274	0.0414875
CAM109_map12	0002.CSV	968.131	0.0415834
CAM109_map12	0002.CSV	971.988	0.0420837
CAM109_map12	0002.CSV	975.845	0.0426618
CAM109_map12	0002.CSV	979.702	0.0435648
CAM109_map12	0002.CSV	983.559	0.0443825
CAM109_map12	0002.CSV	987.417	0.045446
CAM109_map12	0002.CSV	991.274	0.0463161
CAM109_map12	0002.CSV	995.131	0.0474433
CAM109_map12	0002.CSV	998.988	0.0482866
CAM109_map12	0002.CSV	1002.85	0.0492274
CAM109_map12	0002.CSV	1006.7	0.0499023
CAM109_map12	0002.CSV	1010.56	0.0507676
CAM109_map12	0002.CSV	1014.42	0.0513319
CAM109_map12	0002.CSV	1018.27	0.0519993
CAM109_map12	0002.CSV	1022.13	0.0524584
CAM109_map12	0002.CSV	1025.99	0.053235
CAM109_map12	0002.CSV	1029.85	0.0538316
CAM109_map12	0002.CSV	1033.7	0.0545746
CAM109_map12	0002.CSV	1037.56	0.0551359
CAM109_map12	0002.CSV	1041.42	0.0558136
CAM109_map12	0002.CSV	1045.27	0.0561838
CAM109_map12	0002.CSV	1049.13	0.0570671
CAM109_map12	0002.CSV	1052.99	0.0583278
CAM109_map12	0002.CSV	1056.84	0.0605586
CAM109_map12	0002.CSV	1060.7	0.0631438
CAM109_map12	0002.CSV	1064.56	0.0658347
CAM109_map12	0002.CSV	1068.42	0.0675795
CAM109_map12	0002.CSV	1072.27	0.0688481
CAM109_map12	0002.CSV	1076.13	0.0693214
CAM109_map12	0002.CSV	1079.99	0.0697644
CAM109_map12	0002.CSV	1083.84	0.0696005
CAM109_map12	0002.CSV	1087.7	0.0689546
CAM109_map12	0002.CSV	1091.56	0.0675475
CAM109_map12	0002.CSV	1095.41	0.0662067
CAM109_map12	0002.CSV	1099.27	0.0651802
CAM109_map12	0002.CSV	1103.13	0.0651362
CAM109_map12	0002.CSV	1106.99	0.0655182
CAM109_map12	0002.CSV	1110.84	0.0664742
CAM109_map12	0002.CSV	1114.7	0.0670768
CAM109_map12	0002.CSV	1118.56	0.0674851
CAM109_map12	0002.CSV	1122.41	0.0673091
CAM109_map12	0002.CSV	1126.27	0.0670723
CAM109_map12	0002.CSV	1130.13	0.066559
CAM109_map12	0002.CSV	1133.99	0.0664557
CAM109_map12	0002.CSV	1137.84	0.0663639
CAM109_map12	0002.CSV	1141.7	0.0664803
CAM109_map12	0002.CSV	1145.56	0.066259
CAM109_map12	0002.CSV	1149.41	0.0662371
CAM109_map12	0002.CSV	1153.27	0.0661791
CAM109_map12	0002.CSV	1157.13	0.0664289
CAM109_map12	0002.CSV	1160.99	0.0665196
CAM109_map12	0002.CSV	1164.84	0.066597
CAM109_map12	0002.CSV	1168.7	0.0661287
CAM109_map12	0002.CSV	1172.56	0.0656056
CAM109_map12	0002.CSV	1176.41	0.0648939
CAM109_map12	0002.CSV	1180.27	0.0643879
CAM109_map12	0002.CSV	1184.13	0.0636855
CAM109_map12	0002.CSV	1187.99	0.0632533
CAM109_map12	0002.CSV	1191.84	0.0626747
CAM109_map12	0002.CSV	1195.7	0.062452
CAM109_map12	0002.CSV	1199.56	0.0622542
CAM109_map12	0002.CSV	1203.41	0.0624202
CAM109_map12	0002.CSV	1207.27	0.0625594
CAM109_map12	0002.CSV	1211.13	0.0630033
CAM109_map12	0002.CSV	1214.98	0.0633345
CAM109_map12	0002.CSV	1218.84	0.0640055
CAM109_map12	0002.CSV	1222.7	0.0646788
CAM109_map12	0002.CSV	1226.56	0.0657603
CAM109_map12	0002.CSV	1230.41	0.066866
CAM109_map12	0002.CSV	1234.27	0.0683529
CAM109_map12	0002.CSV	1238.13	0.069875
CAM109_map12	0002.CSV	1241.98	0.0717965
CAM109_map12	0002.CSV	1245.84	0.0736918
CAM109_map12	0002.CSV	1249.7	0.0759228
CAM109_map12	0002.CSV	1253.56	0.0778031
CAM109_map12	0002.CSV	1257.41	0.0795602
CAM109_map12	0002.CSV	1261.27	0.0809399
CAM109_map12	0002.CSV	1265.13	0.0824429
CAM109_map12	0002.CSV	1268.98	0.0837215
CAM109_map12	0002.CSV	1272.84	0.08531
CAM109_map12	0002.CSV	1276.7	0.0866466
CAM109_map12	0002.CSV	1280.56	0.088129
CAM109_map12	0002.CSV	1284.41	0.0892629
CAM109_map12	0002.CSV	1288.27	0.0903931
CAM109_map12	0002.CSV	1292.13	0.0909813
CAM109_map12	0002.CSV	1295.98	0.0916153
CAM109_map12	0002.CSV	1299.84	0.0921269
CAM109_map12	0002.CSV	1303.7	0.0932203
CAM109_map12	0002.CSV	1307.56	0.0945598
CAM109_map12	0002.CSV	1311.41	0.0965897
CAM109_map12	0002.CSV	1315.27	0.0987109
CAM109_map12	0002.CSV	1319.13	0.101181
CAM109_map12	0002.CSV	1322.98	0.103219
CAM109_map12	0002.CSV	1326.84	0.105676
CAM109_map12	0002.CSV	1330.7	0.10827
CAM109_map12	0002.CSV	1334.56	0.111256
CAM109_map12	0002.CSV	1338.41	0.115065
CAM109_map12	0002.CSV	1342.27	0.119915
CAM109_map12	0002.CSV	1346.13	0.123722
CAM109_map12	0002.CSV	1349.98	0.128379
CAM109_map12	0002.CSV	1353.84	0.133275
CAM109_map12	0002.CSV	1357.7	0.138453
CAM109_map12	0002.CSV	1361.56	0.14429
CAM109_map12	0002.CSV	1365.41	0.151781
CAM109_map12	0002.CSV	1369.27	0.158106
CAM109_map12	0002.CSV	1373.13	0.166235
CAM109_map12	0002.CSV	1376.98	0.175225
CAM109_map12	0002.CSV	1380.84	0.182934
CAM109_map12	0002.CSV	1384.7	0.18981
CAM109_map12	0002.CSV	1388.56	0.198124
CAM109_map12	0002.CSV	1392.41	0.203023
CAM109_map12	0002.CSV	1396.27	0.205514
CAM109_map12	0002.CSV	1400.13	0.204565
CAM109_map12	0002.CSV	1403.98	0.202647
CAM109_map12	0002.CSV	1407.84	0.198385
CAM109_map12	0002.CSV	1411.7	0.192591
CAM109_map12	0002.CSV	1415.55	0.185686
CAM109_map12	0002.CSV	1419.41	0.177977
CAM109_map12	0002.CSV	1423.27	0.171188
CAM109_map12	0002.CSV	1427.12	0.167032
CAM109_map12	0002.CSV	1430.98	0.162772
CAM109_map12	0002.CSV	1434.84	0.159136
CAM109_map12	0002.CSV	1438.7	0.15482
CAM109_map12	0002.CSV	1442.55	0.151827
CAM109_map12	0002.CSV	1446.41	0.148502
CAM109_map12	0002.CSV	1450.27	0.145115
CAM109_map12	0002.CSV	1454.12	0.14121
CAM109_map12	0002.CSV	1457.98	0.135403
CAM109_map12	0002.CSV	1461.84	0.130688
CAM109_map12	0002.CSV	1465.7	0.12765
CAM109_map12	0002.CSV	1469.55	0.124108
CAM109_map12	0002.CSV	1473.41	0.119442
CAM109_map12	0002.CSV	1477.27	0.113462
CAM109_map12	0002.CSV	1481.12	0.109211
CAM109_map12	0002.CSV	1484.98	0.104782
CAM109_map12	0002.CSV	1488.84	0.0994976
CAM109_map12	0002.CSV	1492.7	0.093795
CAM109_map12	0002.CSV	1496.55	0.0890213
CAM109_map12	0002.CSV	1500.41	0.0833904
CAM109_map12	0002.CSV	1504.27	0.079865
CAM109_map12	0002.CSV	1508.12	0.0739064
CAM109_map12	0002.CSV	1511.98	0.0694129
CAM109_map12	0002.CSV	1515.84	0.0660345
CAM109_map12	0002.CSV	1519.7	0.0620379
CAM109_map12	0002.CSV	1523.55	0.0577205
CAM109_map12	0002.CSV	1527.41	0.0548835
CAM109_map12	0002.CSV	1531.27	0.0524537
CAM109_map12	0002.CSV	1535.12	0.0507096
CAM109_map12	0002.CSV	1538.98	0.0487329
CAM109_map12	0002.CSV	1542.84	0.045068
CAM109_map12	0002.CSV	1546.7	0.0414436
CAM109_map12	0002.CSV	1550.55	0.0385559
CAM109_map12	0002.CSV	1554.41	0.0359034
CAM109_map12	0002.CSV	1558.27	0.0337128
CAM109_map12	0002.CSV	1562.12	0.0322675
CAM109_map12	0002.CSV	1565.98	0.0315571
CAM109_map12	0002.CSV	1569.84	0.0310533
CAM109_map12	0002.CSV	1573.69	0.0309082
CAM109_map12	0002.CSV	1577.55	0.0304977
CAM109_map12	0002.CSV	1581.41	0.0291601
CAM109_map12	0002.CSV	1585.27	0.0273195
CAM109_map12	0002.CSV	1589.12	0.0257055
CAM109_map12	0002.CSV	1592.98	0.0244364
CAM109_map12	0002.CSV	1596.84	0.0235765
CAM109_map12	0002.CSV	1600.69	0.0228182
CAM109_map12	0002.CSV	1604.55	0.0221582
CAM109_map12	0002.CSV	1608.41	0.021533
CAM109_map12	0002.CSV	1612.27	0.0210191
CAM109_map12	0002.CSV	1616.12	0.0204918
CAM109_map12	0002.CSV	1619.98	0.0201401
CAM109_map12	0002.CSV	1623.84	0.0196048
CAM109_map12	0002.CSV	1627.69	0.019202
CAM109_map12	0002.CSV	1631.55	0.0185258
CAM109_map12	0002.CSV	1635.41	0.0183166
CAM109_map12	0002.CSV	1639.27	0.0182355
CAM109_map12	0002.CSV	1643.12	0.0177397
CAM109_map12	0002.CSV	1646.98	0.0174599
CAM109_map12	0002.CSV	1650.84	0.0176325
CAM109_map12	0002.CSV	1654.69	0.0177271
CAM109_map12	0002.CSV	1658.55	0.0173421
CAM109_map12	0002.CSV	1662.41	0.0168829
CAM109_map12	0002.CSV	1666.27	0.016591
CAM109_map12	0002.CSV	1670.12	0.0163636
CAM109_map12	0002.CSV	1673.98	0.0164473
CAM109_map12	0002.CSV	1677.84	0.016142
CAM109_map12	0002.CSV	1681.69	0.0160295
CAM109_map12	0002.CSV	1685.55	0.0162971
CAM109_map12	0002.CSV	1689.41	0.0161225
CAM109_map12	0002.CSV	1693.27	0.0154979
CAM109_map12	0002.CSV	1697.12	0.0156773
CAM109_map12	0002.CSV	1700.98	0.0165569
CAM109_map12	0002.CSV	1704.84	0.0172125
CAM109_map12	0002.CSV	1708.69	0.0177319
CAM109_map12	0002.CSV	1712.55	0.0182646
CAM109_map12	0002.CSV	1716.41	0.0202928
CAM109_map12	0002.CSV	1720.27	0.0227867
CAM109_map12	0002.CSV	1724.12	0.0233438
CAM109_map12	0002.CSV	1727.98	0.0234938
CAM109_map12	0002.CSV	1731.84	0.023341
CAM109_map12	0002.CSV	1735.69	0.0228206
CAM109_map12	0002.CSV	1739.55	0.021498
CAM109_map12	0002.CSV	1743.41	0.0196012
CAM109_map12	0002.CSV	1747.27	0.0174843
CAM109_map12	0002.CSV	1751.12	0.015308
CAM109_map12	0002.CSV	1754.98	0.0136577
CAM109_map12	0002.CSV	1758.84	0.0126235
CAM109_map12	0002.CSV	1762.69	0.0119892
CAM109_map12	0002.CSV	1766.55	0.0114973
CAM109_map12	0002.CSV	1770.41	0.0113239
CAM109_map12	0002.CSV	1774.26	0.0116075
CAM109_map12	0002.CSV	1778.12	0.0116018
CAM109_map12	0002.CSV	1781.98	0.011891
CAM109_map12	0002.CSV	1785.84	0.0124254
CAM109_map12	0002.CSV	1789.69	0.0133279
CAM109_map12	0002.CSV	1793.55	0.0148429
CAM109_map12	0002.CSV	1797.41	0.0151246
CAM109_map12	0002.CSV	1801.26	0.0139675
CAM109_map12	0002.CSV	1805.12	0.0124756
CAM109_map12	0002.CSV	1808.98	0.0113164
CAM109_map12	0002.CSV	1812.84	0.010697
CAM109_map12	0002.CSV	1816.69	0.0101763
CAM109_map12	0002.CSV	1820.55	0.00984737
CAM109_map12	0002.CSV	1824.41	0.00968614
CAM109_map12	0002.CSV	1828.26	0.00976742
CAM109_map12	0002.CSV	1832.12	0.00970362
CAM109_map12	0002.CSV	1835.98	0.00949641
CAM109_map12	0002.CSV	1839.84	0.00920647
CAM109_map12	0002.CSV	1843.69	0.0092415
CAM109_map12	0002.CSV	1847.55	0.00949204
CAM109_map12	0002.CSV	1851.41	0.00936838
CAM109_map12	0002.CSV	1855.26	0.00920261
CAM109_map12	0002.CSV	1859.12	0.00924617
CAM109_map12	0002.CSV	1862.98	0.00916481
CAM109_map12	0002.CSV	1866.84	0.00921202
CAM109_map12	0002.CSV	1870.69	0.00942956
CAM109_map12	0002.CSV	1874.55	0.00929414
CAM109_map12	0002.CSV	1878.41	0.00916596
CAM109_map12	0002.CSV	1882.26	0.00917019
CAM109_map12	0002.CSV	1886.12	0.00911605
CAM109_map12	0002.CSV	1889.98	0.00915774
CAM109_map12	0002.CSV	1893.83	0.00921608
CAM109_map12	0002.CSV	1897.69	0.00921588
CAM109_map12	0002.CSV	1901.55	0.00909541
CAM109_map12	0002.CSV	1905.41	0.00905752
CAM109_map12	0002.CSV	1909.26	0.00910045
CAM109_map12	0002.CSV	1913.12	0.00912769
CAM109_map12	0002.CSV	1916.98	0.00910952
CAM109_map12	0002.CSV	1920.83	0.00919893
CAM109_map12	0002.CSV	1924.69	0.00917608
CAM109_map12	0002.CSV	1928.55	0.00909659
CAM109_map12	0002.CSV	1932.4	0.00910221
CAM109_map12	0002.CSV	1936.26	0.0091842
CAM109_map12	0002.CSV	1940.12	0.00916298
CAM109_map12	0002.CSV	1943.98	0.00931455
CAM109_map12	0002.CSV	1947.83	0.00932941
CAM109_map12	0002.CSV	1951.69	0.00927139
CAM109_map12	0002.CSV	1955.55	0.00926675
CAM109_map12	0002.CSV	1959.4	0.00930114
CAM109_map12	0002.CSV	1963.26	0.00922651
CAM109_map12	0002.CSV	1967.12	0.00928039
CAM109_map12	0002.CSV	1970.98	0.00927894
CAM109_map12	0002.CSV	1974.83	0.00921195
CAM109_map12	0002.CSV	1978.69	0.0091616
CAM109_map12	0002.CSV	1982.55	0.00917046
CAM109_map12	0002.CSV	1986.4	0.00911101
CAM109_map12	0002.CSV	1990.26	0.00914749
CAM109_map12	0002.CSV	1994.12	0.00921382
CAM109_map12	0002.CSV	1997.98	0.00914677
CAM109_map12	0002.CSV	2001.83	0.00904395
CAM109_map12	0002.CSV	2005.69	0.00906601
CAM109_map12	0002.CSV	2009.55	0.00911179
CAM109_map12	0002.CSV	2013.4	0.00911828
CAM109_map12	0002.CSV	2017.26	0.00912035
CAM109_map12	0002.CSV	2021.12	0.00911872
CAM109_map12	0002.CSV	2024.97	0.00902555
CAM109_map12	0002.CSV	2028.83	0.00900954
CAM109_map12	0002.CSV	2032.69	0.00899337
CAM109_map12	0002.CSV	2036.55	0.00900362
CAM109_map12	0002.CSV	2040.4	0.00899665
CAM109_map12	0002.CSV	2044.26	0.00901326
CAM109_map12	0002.CSV	2048.12	0.00896648
CAM109_map12	0002.CSV	2051.97	0.00898627
CAM109_map12	0002.CSV	2055.83	0.00899402
CAM109_map12	0002.CSV	2059.69	0.00902521
CAM109_map12	0002.CSV	2063.55	0.00902098
CAM109_map12	0002.CSV	2067.4	0.0090656
CAM109_map12	0002.CSV	2071.26	0.00906492
CAM109_map12	0002.CSV	2075.12	0.0090995
CAM109_map12	0002.CSV	2078.97	0.00911591
CAM109_map12	0002.CSV	2082.83	0.00908543
CAM109_map12	0002.CSV	2086.69	0.0090474
CAM109_map12	0002.CSV	2090.55	0.00910715
CAM109_map12	0002.CSV	2094.4	0.00909571
CAM109_map12	0002.CSV	2098.26	0.00909687
CAM109_map12	0002.CSV	2102.12	0.00912799
CAM109_map12	0002.CSV	2105.97	0.00915713
CAM109_map12	0002.CSV	2109.83	0.00911849
CAM109_map12	0002.CSV	2113.69	0.00913226
CAM109_map12	0002.CSV	2117.55	0.00913706
CAM109_map12	0002.CSV	2121.4	0.00917263
CAM109_map12	0002.CSV	2125.26	0.00919365
CAM109_map12	0002.CSV	2129.12	0.00920688
CAM109_map12	0002.CSV	2132.97	0.00921165
CAM109_map12	0002.CSV	2136.83	0.0092524
CAM109_map12	0002.CSV	2140.69	0.00925538
CAM109_map12	0002.CSV	2144.55	0.00925419
CAM109_map12	0002.CSV	2148.4	0.00922779
CAM109_map12	0002.CSV	2152.26	0.00922282
CAM109_map12	0002.CSV	2156.12	0.00921446
CAM109_map12	0002.CSV	2159.97	0.0091931
CAM109_map12	0002.CSV	2163.83	0.00916163
CAM109_map12	0002.CSV	2167.69	0.00918143
CAM109_map12	0002.CSV	2171.55	0.00917212
CAM109_map12	0002.CSV	2175.4	0.00922058
CAM109_map12	0002.CSV	2179.26	0.00923443
CAM109_map12	0002.CSV	2183.12	0.00921825
CAM109_map12	0002.CSV	2186.97	0.00921927
CAM109_map12	0002.CSV	2190.83	0.00925409
CAM109_map12	0002.CSV	2194.69	0.00919422
CAM109_map12	0002.CSV	2198.55	0.00920535
CAM109_map12	0002.CSV	2202.4	0.0092305
CAM109_map12	0002.CSV	2206.26	0.00923686
CAM109_map12	0002.CSV	2210.12	0.00923551
CAM109_map12	0002.CSV	2213.97	0.00920603
CAM109_map12	0002.CSV	2217.83	0.00915645
CAM109_map12	0002.CSV	2221.69	0.00918897
CAM109_map12	0002.CSV	2225.54	0.00918965
CAM109_map12	0002.CSV	2229.4	0.00921151
CAM109_map12	0002.CSV	2233.26	0.00923784
CAM109_map12	0002.CSV	2237.12	0.00923978
CAM109_map12	0002.CSV	2240.97	0.00923037
CAM109_map12	0002.CSV	2244.83	0.00924137
CAM109_map12	0002.CSV	2248.69	0.00921839
CAM109_map12	0002.CSV	2252.54	0.00922712
CAM109_map12	0002.CSV	2256.4	0.00921524
CAM109_map12	0002.CSV	2260.26	0.00920211
CAM109_map12	0002.CSV	2264.11	0.00917794
CAM109_map12	0002.CSV	2267.97	0.00917226
CAM109_map12	0002.CSV	2271.83	0.0091772
CAM109_map12	0002.CSV	2275.69	0.00920038
CAM109_map12	0002.CSV	2279.54	0.00913974
CAM109_map12	0002.CSV	2283.4	0.00905461
CAM109_map12	0002.CSV	2287.26	0.0090337
CAM109_map12	0002.CSV	2291.11	0.00908861
CAM109_map12	0002.CSV	2294.97	0.00913656
CAM109_map12	0002.CSV	2298.83	0.0091129
CAM109_map12	0002.CSV	2302.69	0.00895583
CAM109_map12	0002.CSV	2306.54	0.00888
CAM109_map12	0002.CSV	2310.4	0.00874891
CAM109_map12	0002.CSV	2314.26	0.00851191
CAM109_map12	0002.CSV	2318.11	0.00802982
CAM109_map12	0002.CSV	2321.97	0.00733545
CAM109_map12	0002.CSV	2325.83	0.00657968
CAM109_map12	0002.CSV	2329.69	0.00590522
CAM109_map12	0002.CSV	2333.54	0.00507452
CAM109_map12	0002.CSV	2337.4	0.00461375
CAM109_map12	0002.CSV	2341.26	0.00442639
CAM109_map12	0002.CSV	2345.11	0.00627676
CAM109_map12	0002.CSV	2348.97	0.00703587
CAM109_map12	0002.CSV	2352.83	0.00529157
CAM109_map12	0002.CSV	2356.69	-6.18568e-05
CAM109_map12	0002.CSV	2360.54	-0.00425303
CAM109_map12	0002.CSV	2364.4	-0.00120302
CAM109_map12	0002.CSV	2368.26	0.00425946
CAM109_map12	0002.CSV	2372.11	0.0074376
CAM109_map12	0002.CSV	2375.97	0.00884169
CAM109_map12	0002.CSV	2379.83	0.00925392
CAM109_map12	0002.CSV	2383.69	0.00916836
CAM109_map12	0002.CSV	2387.54	0.00892194
CAM109_map12	0002.CSV	2391.4	0.00880726
CAM109_map12	0002.CSV	2395.26	0.00877298
CAM109_map12	0002.CSV	2399.11	0.00875245
CAM109_map12	0002.CSV	2402.97	0.00872216
CAM109_map12	0002.CSV	2406.83	0.00870107
CAM109_map12	0002.CSV	2410.68	0.00869887
CAM109_map12	0002.CSV	2414.54	0.00869282
CAM109_map12	0002.CSV	2418.4	0.00866838
CAM109_map12	0002.CSV	2422.26	0.00867768
CAM109_map12	0002.CSV	2426.11	0.00869312
CAM109_map12	0002.CSV	2429.97	0.00872271
CAM109_map12	0002.CSV	2433.83	0.00872991
CAM109_map12	0002.CSV	2437.68	0.0087742
CAM109_map12	0002.CSV	2441.54	0.00881163
CAM109_map12	0002.CSV	2445.4	0.00881501
CAM109_map12	0002.CSV	2449.26	0.00878637
CAM109_map12	0002.CSV	2453.11	0.00881031
CAM109_map12	0002.CSV	2456.97	0.00886127
CAM109_map12	0002.CSV	2460.83	0.00893293
CAM109_map12	0002.CSV	2464.68	0.00898093
CAM109_map12	0002.CSV	2468.54	0.00908983
CAM109_map12	0002.CSV	2472.4	0.00925568
CAM109_map12	0002.CSV	2476.26	0.00942069
CAM109_map12	0002.CSV	2480.11	0.00959981
CAM109_map12	0002.CSV	2483.97	0.00980904
CAM109_map12	0002.CSV	2487.83	0.010051
CAM109_map12	0002.CSV	2491.68	0.0103467
CAM109_map12	0002.CSV	2495.54	0.0107077
CAM109_map12	0002.CSV	2499.4	0.0111521
CAM109_map12	0002.CSV	2503.26	0.0115567
CAM109_map12	0002.CSV	2507.11	0.0118824
CAM109_map12	0002.CSV	2510.97	0.0120867
CAM109_map12	0002.CSV	2514.83	0.01211
CAM109_map12	0002.CSV	2518.68	0.0119777
CAM109_map12	0002.CSV	2522.54	0.0116989
CAM109_map12	0002.CSV	2526.4	0.011331
CAM109_map12	0002.CSV	2530.26	0.01098
CAM109_map12	0002.CSV	2534.11	0.0106127
CAM109_map12	0002.CSV	2537.97	0.0103178
CAM109_map12	0002.CSV	2541.83	0.0101126
CAM109_map12	0002.CSV	2545.68	0.00991296
CAM109_map12	0002.CSV	2549.54	0.00973903
CAM109_map12	0002.CSV	2553.4	0.00966991
CAM109_map12	0002.CSV	2557.26	0.00962847
CAM109_map12	0002.CSV	2561.11	0.00958579
CAM109_map12	0002.CSV	2564.97	0.00953481
CAM109_map12	0002.CSV	2568.83	0.00952398
CAM109_map12	0002.CSV	2572.68	0.00954054
CAM109_map12	0002.CSV	2576.54	0.00953522
CAM109_map12	0002.CSV	2580.4	0.0094621
CAM109_map12	0002.CSV	2584.25	0.00944487
CAM109_map12	0002.CSV	2588.11	0.00942116
CAM109_map12	0002.CSV	2591.97	0.00937623
CAM109_map12	0002.CSV	2595.83	0.00935544
CAM109_map12	0002.CSV	2599.68	0.00932321
CAM109_map12	0002.CSV	2603.54	0.00925179
CAM109_map12	0002.CSV	2607.4	0.00918772
CAM109_map12	0002.CSV	2611.25	0.00912275
CAM109_map12	0002.CSV	2615.11	0.00911886
CAM109_map12	0002.CSV	2618.97	0.00904639
CAM109_map12	0002.CSV	2622.82	0.00899902
CAM109_map12	0002.CSV	2626.68	0.00900379
CAM109_map12	0002.CSV	2630.54	0.00893046
CAM109_map12	0002.CSV	2634.4	0.008926
CAM109_map12	0002.CSV	2638.25	0.00891111
CAM109_map12	0002.CSV	2642.11	0.0087319
CAM109_map12	0002.CSV	2645.97	0.00857608
CAM109_map12	0002.CSV	2649.82	0.00854911
CAM109_map12	0002.CSV	2653.68	0.00853647
CAM109_map12	0002.CSV	2657.54	0.00848893
CAM109_map12	0002.CSV	2661.4	0.00843261
CAM109_map12	0002.CSV	2665.25	0.00840014
CAM109_map12	0002.CSV	2669.11	0.00847538
CAM109_map12	0002.CSV	2672.97	0.00867741
CAM109_map12	0002.CSV	2676.82	0.00894906
CAM109_map12	0002.CSV	2680.68	0.00887909
CAM109_map12	0002.CSV	2684.54	0.00849606
CAM109_map12	0002.CSV	2688.4	0.00834478
CAM109_map12	0002.CSV	2692.25	0.00837531
CAM109_map12	0002.CSV	2696.11	0.00843075
CAM109_map12	0002.CSV	2699.97	0.00844075
CAM109_map12	0002.CSV	2703.82	0.00840052
CAM109_map12	0002.CSV	2707.68	0.00848835
CAM109_map12	0002.CSV	2711.54	0.00853931
CAM109_map12	0002.CSV	2715.4	0.00853989
CAM109_map12	0002.CSV	2719.25	0.00875621
CAM109_map12	0002.CSV	2723.11	0.00907771
CAM109_map12	0002.CSV	2726.97	0.00899239
CAM109_map12	0002.CSV	2730.82	0.00864573
CAM109_map12	0002.CSV	2734.68	0.00869546
CAM109_map12	0002.CSV	2738.54	0.00879989
CAM109_map12	0002.CSV	2742.4	0.00881585
CAM109_map12	0002.CSV	2746.25	0.00910333
CAM109_map12	0002.CSV	2750.11	0.00917364
CAM109_map12	0002.CSV	2753.97	0.00894338
CAM109_map12	0002.CSV	2757.82	0.00882339
CAM109_map12	0002.CSV	2761.68	0.00875891
CAM109_map12	0002.CSV	2765.54	0.00880148
CAM109_map12	0002.CSV	2769.39	0.00900565
CAM109_map12	0002.CSV	2773.25	0.00938216
CAM109_map12	0002.CSV	2777.11	0.00934644
CAM109_map12	0002.CSV	2780.97	0.00908472
CAM109_map12	0002.CSV	2784.82	0.00931275
CAM109_map12	0002.CSV	2788.68	0.00983998
CAM109_map12	0002.CSV	2792.54	0.00996819
CAM109_map12	0002.CSV	2796.39	0.00993052
CAM109_map12	0002.CSV	2800.25	0.00974235
CAM109_map12	0002.CSV	2804.11	0.00953078
CAM109_map12	0002.CSV	2807.97	0.00983459
CAM109_map12	0002.CSV	2811.82	0.00995927
CAM109_map12	0002.CSV	2815.68	0.00985239
CAM109_map12	0002.CSV	2819.54	0.0100296
CAM109_map12	0002.CSV	2823.39	0.0102893
CAM109_map12	0002.CSV	2827.25	0.0104735
CAM109_map12	0002.CSV	2831.11	0.0110672
CAM109_map12	0002.CSV	2834.97	0.0121209
CAM109_map12	0002.CSV	2838.82	0.0131793
CAM109_map12	0002.CSV	2842.68	0.0144885
CAM109_map12	0002.CSV	2846.54	0.0168627
CAM109_map12	0002.CSV	2850.39	0.0185252
CAM109_map12	0002.CSV	2854.25	0.0181469
CAM109_map12	0002.CSV	2858.11	0.0170331
CAM109_map12	0002.CSV	2861.97	0.0158781
CAM109_map12	0002.CSV	2865.82	0.015148
CAM109_map12	0002.CSV	2869.68	0.015149
CAM109_map12	0002.CSV	2873.54	0.0151083
CAM109_map12	0002.CSV	2877.39	0.014434
CAM109_map12	0002.CSV	2881.25	0.0138955
CAM109_map12	0002.CSV	2885.11	0.0138294
CAM109_map12	0002.CSV	2888.97	0.014154
CAM109_map12	0002.CSV	2892.82	0.0149321
CAM109_map12	0002.CSV	2896.68	0.0156792
CAM109_map12	0002.CSV	2900.54	0.0161949
CAM109_map12	0002.CSV	2904.39	0.0170813
CAM109_map12	0002.CSV	2908.25	0.0186795
CAM109_map12	0002.CSV	2912.11	0.0212769
CAM109_map12	0002.CSV	2915.97	0.0238158
CAM109_map12	0002.CSV	2919.82	0.0246611
CAM109_map12	0002.CSV	2923.68	0.0239192
CAM109_map12	0002.CSV	2927.54	0.0228909
CAM109_map12	0002.CSV	2931.39	0.0213019
CAM109_map12	0002.CSV	2935.25	0.0192772
CAM109_map12	0002.CSV	2939.11	0.0178685
CAM109_map12	0002.CSV	2942.96	0.0172785
CAM109_map12	0002.CSV	2946.82	0.0168447
CAM109_map12	0002.CSV	2950.68	0.0163389
CAM109_map12	0002.CSV	2954.54	0.0157259
CAM109_map12	0002.CSV	2958.39	0.0150835
CAM109_map12	0002.CSV	2962.25	0.0145379
CAM109_map12	0002.CSV	2966.11	0.013724
CAM109_map12	0002.CSV	2969.96	0.013157
CAM109_map12	0002.CSV	2973.82	0.0130663
CAM109_map12	0002.CSV	2977.68	0.0129918
CAM109_map12	0002.CSV	2981.53	0.0124571
CAM109_map12	0002.CSV	2985.39	0.0116157
CAM109_map12	0002.CSV	2989.25	0.0114271
CAM109_map12	0002.CSV	2993.11	0.0115757
CAM109_map12	0002.CSV	2996.96	0.0113202
CAM109_map12	0002.CSV	3000.82	0.0108404
CAM109_map12	0002.CSV	3004.68	0.0105542
CAM109_map12	0002.CSV	3008.53	0.0107366
CAM109_map12	0002.CSV	3012.39	0.0110828
CAM109_map12	0002.CSV	3016.25	0.0111129
CAM109_map12	0002.CSV	3020.11	0.0109052
CAM109_map12	0002.CSV	3023.96	0.0108078
CAM109_map12	0002.CSV	3027.82	0.0109059
CAM109_map12	0002.CSV	3031.68	0.0111258
CAM109_map12	0002.CSV	3035.53	0.0110329
CAM109_map12	0002.CSV	3039.39	0.0109371
CAM109_map12	0002.CSV	3043.25	0.0110223
CAM109_map12	0002.CSV	3047.11	0.0109543
CAM109_map12	0002.CSV	3050.96	0.0109106
CAM109_map12	0002.CSV	3054.82	0.0109148
CAM109_map12	0002.CSV	3058.68	0.0108364
CAM109_map12	0002.CSV	3062.53	0.0108722
CAM109_map12	0002.CSV	3066.39	0.0110873
CAM109_map12	0002.CSV	3070.25	0.0109988
CAM109_map12	0002.CSV	3074.11	0.0110006
CAM109_map12	0002.CSV	3077.96	0.0112113
CAM109_map12	0002.CSV	3081.82	0.0112825
CAM109_map12	0002.CSV	3085.68	0.0112894
CAM109_map12	0002.CSV	3089.53	0.0111954
CAM109_map12	0002.CSV	3093.39	0.0108561
CAM109_map12	0002.CSV	3097.25	0.010841
CAM109_map12	0002.CSV	3101.11	0.0109715
CAM109_map12	0002.CSV	3104.96	0.0109723
CAM109_map12	0002.CSV	3108.82	0.0111151
CAM109_map12	0002.CSV	3112.68	0.0112587
CAM109_map12	0002.CSV	3116.53	0.0113949
CAM109_map12	0002.CSV	3120.39	0.0113285
CAM109_map12	0002.CSV	3124.25	0.0111047
CAM109_map12	0002.CSV	3128.11	0.0109858
CAM109_map12	0002.CSV	3131.96	0.0109217
CAM109_map12	0002.CSV	3135.82	0.011096
CAM109_map12	0002.CSV	3139.68	0.0112927
CAM109_map12	0002.CSV	3143.53	0.0111239
CAM109_map12	0002.CSV	3147.39	0.0111464
CAM109_map12	0002.CSV	3151.25	0.0114792
CAM109_map12	0002.CSV	3155.1	0.0114223
CAM109_map12	0002.CSV	3158.96	0.0110933
CAM109_map12	0002.CSV	3162.82	0.0109327
CAM109_map12	0002.CSV	3166.68	0.0108911
CAM109_map12	0002.CSV	3170.53	0.0109568
CAM109_map12	0002.CSV	3174.39	0.0109828
CAM109_map12	0002.CSV	3178.25	0.0111391
CAM109_map12	0002.CSV	3182.1	0.0112524
CAM109_map12	0002.CSV	3185.96	0.0113025
CAM109_map12	0002.CSV	3189.82	0.011387
CAM109_map12	0002.CSV	3193.68	0.0113387
CAM109_map12	0002.CSV	3197.53	0.0113501
CAM109_map12	0002.CSV	3201.39	0.0114794
CAM109_map12	0002.CSV	3205.25	0.0115268
CAM109_map12	0002.CSV	3209.1	0.0115751
CAM109_map12	0002.CSV	3212.96	0.0117417
CAM109_map12	0002.CSV	3216.82	0.0118821
CAM109_map12	0002.CSV	3220.68	0.0118603
CAM109_map12	0002.CSV	3224.53	0.0118034
CAM109_map12	0002.CSV	3228.39	0.0119951
CAM109_map12	0002.CSV	3232.25	0.0123417
CAM109_map12	0002.CSV	3236.1	0.0123293
CAM109_map12	0002.CSV	3239.96	0.0121718
CAM109_map12	0002.CSV	3243.82	0.0123769
CAM109_map12	0002.CSV	3247.68	0.01256
CAM109_map12	0002.CSV	3251.53	0.0123498
CAM109_map12	0002.CSV	3255.39	0.0123216
CAM109_map12	0002.CSV	3259.25	0.0122413
CAM109_map12	0002.CSV	3263.1	0.01225
CAM109_map12	0002.CSV	3266.96	0.0126572
CAM109_map12	0002.CSV	3270.82	0.0130382
CAM109_map12	0002.CSV	3274.68	0.0130149
CAM109_map12	0002.CSV	3278.53	0.0127896
CAM109_map12	0002.CSV	3282.39	0.0126107
CAM109_map12	0002.CSV	3286.25	0.0126148
CAM109_map12	0002.CSV	3290.1	0.0129
CAM109_map12	0002.CSV	3293.96	0.0132164
CAM109_map12	0002.CSV	3297.82	0.0131082
CAM109_map12	0002.CSV	3301.67	0.0131348
CAM109_map12	0002.CSV	3305.53	0.0133549
CAM109_map12	0002.CSV	3309.39	0.0132286
CAM109_map12	0002.CSV	3313.25	0.01275
CAM109_map12	0002.CSV	3317.1	0.0124017
CAM109_map12	0002.CSV	3320.96	0.0125682
CAM109_map12	0002.CSV	3324.82	0.0129321
CAM109_map12	0002.CSV	3328.67	0.0127006
CAM109_map12	0002.CSV	3332.53	0.0125805
CAM109_map12	0002.CSV	3336.39	0.0130691
CAM109_map12	0002.CSV	3340.24	0.0132796
CAM109_map12	0002.CSV	3344.1	0.0131238
CAM109_map12	0002.CSV	3347.96	0.0130957
CAM109_map12	0002.CSV	3351.82	0.0129956
CAM109_map12	0002.CSV	3355.67	0.0128137
CAM109_map12	0002.CSV	3359.53	0.0129559
CAM109_map12	0002.CSV	3363.39	0.0132111
CAM109_map12	0002.CSV	3367.24	0.0134356
CAM109_map12	0002.CSV	3371.1	0.0133388
CAM109_map12	0002.CSV	3374.96	0.0131331
CAM109_map12	0002.CSV	3378.82	0.0129672
CAM109_map12	0002.CSV	3382.67	0.0126324
CAM109_map12	0002.CSV	3386.53	0.012695
CAM109_map12	0002.CSV	3390.39	0.013079
CAM109_map12	0002.CSV	3394.24	0.013211
CAM109_map12	0002.CSV	3398.1	0.013227
CAM109_map12	0002.CSV	3401.96	0.0131869
CAM109_map12	0002.CSV	3405.82	0.012967
CAM109_map12	0002.CSV	3409.67	0.012907
CAM109_map12	0002.CSV	3413.53	0.0127048
CAM109_map12	0002.CSV	3417.39	0.012289
CAM109_map12	0002.CSV	3421.24	0.0121174
CAM109_map12	0002.CSV	3425.1	0.012237
CAM109_map12	0002.CSV	3428.96	0.0124656
CAM109_map12	0002.CSV	3432.82	0.0126264
CAM109_map12	0002.CSV	3436.67	0.0124443
CAM109_map12	0002.CSV	3440.53	0.0118142
CAM109_map12	0002.CSV	3444.39	0.0113866
CAM109_map12	0002.CSV	3448.24	0.0113048
CAM109_map12	0002.CSV	3452.1	0.0110777
CAM109_map12	0002.CSV	3455.96	0.0111028
CAM109_map12	0002.CSV	3459.82	0.0114594
CAM109_map12	0002.CSV	3463.67	0.0117891
CAM109_map12	0002.CSV	3467.53	0.0118558
CAM109_map12	0002.CSV	3471.39	0.0115145
CAM109_map12	0002.CSV	3475.24	0.0111661
CAM109_map12	0002.CSV	3479.1	0.0111103
CAM109_map12	0002.CSV	3482.96	0.0110185
CAM109_map12	0002.CSV	3486.82	0.0110293
CAM109_map12	0002.CSV	3490.67	0.0109745
CAM109_map12	0002.CSV	3494.53	0.010974
CAM109_map12	0002.CSV	3498.39	0.0109125
CAM109_map12	0002.CSV	3502.24	0.0107007
CAM109_map12	0002.CSV	3506.1	0.0103292
CAM109_map12	0002.CSV	3509.96	0.0102513
CAM109_map12	0002.CSV	3513.81	0.0104266
CAM109_map12	0002.CSV	3517.67	0.0100215
CAM109_map12	0002.CSV	3521.53	0.00990327
CAM109_map12	0002.CSV	3525.39	0.0100087
CAM109_map12	0002.CSV	3529.24	0.00987527
CAM109_map12	0002.CSV	3533.1	0.00996558
CAM109_map12	0002.CSV	3536.96	0.0101353
CAM109_map12	0002.CSV	3540.81	0.0101511
CAM109_map12	0002.CSV	3544.67	0.0103308
CAM109_map12	0002.CSV	3548.53	0.0101395
CAM109_map12	0002.CSV	3552.39	0.00960649
CAM109_map12	0002.CSV	3556.24	0.00929715
CAM109_map12	0002.CSV	3560.1	0.00901222
CAM109_map12	0002.CSV	3563.96	0.00864364
CAM109_map12	0002.CSV	3567.81	0.00907365
CAM109_map12	0002.CSV	3571.67	0.00910417
CAM109_map12	0002.CSV	3575.53	0.00866338
CAM109_map12	0002.CSV	3579.39	0.00886279
CAM109_map12	0002.CSV	3583.24	0.0088002
CAM109_map12	0002.CSV	3587.1	0.00874245
CAM109_map12	0002.CSV	3590.96	0.00863269
CAM109_map12	0002.CSV	3594.81	0.00833897
CAM109_map12	0002.CSV	3598.67	0.00857486
CAM109_map12	0002.CSV	3602.53	0.00843065
CAM109_map12	0002.CSV	3606.39	0.00768528
CAM109_map12	0002.CSV	3610.24	0.00740252
CAM109_map12	0002.CSV	3614.1	0.00740306
CAM109_map12	0002.CSV	3617.96	0.00779912
CAM109_map12	0002.CSV	3621.81	0.00813312
CAM109_map12	0002.CSV	3625.67	0.00727995
CAM109_map12	0002.CSV	3629.53	0.00735938
CAM109_map12	0002.CSV	3633.39	0.0080599
CAM109_map12	0002.CSV	3637.24	0.00772801
CAM109_map12	0002.CSV	3641.1	0.00732231
CAM109_map12	0002.CSV	3644.96	0.00662786
CAM109_map12	0002.CSV	3648.81	0.00726813
CAM109_map12	0002.CSV	3652.67	0.0080469
CAM109_map12	0002.CSV	3656.53	0.00786848
CAM109_map12	0002.CSV	3660.38	0.00784993
CAM109_map12	0002.CSV	3664.24	0.00695375
CAM109_map12	0002.CSV	3668.1	0.00597643
CAM109_map12	0002.CSV	3671.96	0.00608979
CAM109_map12	0002.CSV	3675.81	0.0068848
CAM109_map12	0002.CSV	3679.67	0.00734566
CAM109_map12	0002.CSV	3683.53	0.00688073
CAM109_map12	0002.CSV	3687.38	0.00668623
CAM109_map12	0002.CSV	3691.24	0.00766967
CAM109_map12	0002.CSV	3695.1	0.00752178
CAM109_map12	0002.CSV	3698.95	0.00690729
CAM109_map12	0002.CSV	3702.81	0.0066468
CAM109_map12	0002.CSV	3706.67	0.00605333
CAM109_map12	0002.CSV	3710.53	0.00601332
CAM109_map12	0002.CSV	3714.38	0.00666591
CAM109_map12	0002.CSV	3718.24	0.00615038
CAM109_map12	0002.CSV	3722.1	0.00589874
CAM109_map12	0002.CSV	3725.95	0.00604584
CAM109_map12	0002.CSV	3729.81	0.00576609
CAM109_map12	0002.CSV	3733.67	0.00593888
CAM109_map12	0002.CSV	3737.53	0.00703891
CAM109_map12	0002.CSV	3741.38	0.00614393
CAM109_map12	0002.CSV	3745.24	0.00506916
CAM109_map12	0002.CSV	3749.1	0.00518637
CAM109_map12	0002.CSV	3752.95	0.00615277
CAM109_map12	0002.CSV	3756.81	0.00623487
CAM109_map12	0002.CSV	3760.67	0.00625481
CAM109_map12	0002.CSV	3764.53	0.0059159
CAM109_map12	0002.CSV	3768.38	0.00595826
CAM109_map12	0002.CSV	3772.24	0.006387
CAM109_map12	0002.CSV	3776.1	0.00622106
CAM109_map12	0002.CSV	3779.95	0.00619871
CAM109_map12	0002.CSV	3783.81	0.00624983
CAM109_map12	0002.CSV	3787.67	0.00631868
CAM109_map12	0002.CSV	3791.53	0.00593901
CAM109_map12	0002.CSV	3795.38	0.00522128
CAM109_map12	0002.CSV	3799.24	0.00509782
CAM109_map12	0002.CSV	3803.1	0.00580266
CAM109_map12	0002.CSV	3806.95	0.00626913
CAM109_map12	0002.CSV	3810.81	0.00595362
CAM109_map12	0002.CSV	3814.67	0.00538804
CAM109_map12	0002.CSV	3818.53	0.00564187
CAM109_map12	0002.CSV	3822.38	0.00615666
CAM109_map12	0002.CSV	3826.24	0.00603576
CAM109_map12	0002.CSV	3830.1	0.00572409
CAM109_map12	0002.CSV	3833.95	0.00543894
CAM109_map12	0002.CSV	3837.81	0.00564546
CAM109_map12	0002.CSV	3841.67	0.00646431
CAM109_map12	0002.CSV	3845.53	0.0062295
CAM109_map12	0002.CSV	3849.38	0.00505115
CAM109_map12	0002.CSV	3853.24	0.00513822
CAM109_map12	0002.CSV	3857.1	0.0062583
CAM109_map12	0002.CSV	3860.95	0.00564872
CAM109_map12	0002.CSV	3864.81	0.0056077
CAM109_map12	0002.CSV	3868.67	0.00573466
CAM109_map12	0002.CSV	3872.52	0.00615828
CAM109_map12	0002.CSV	3876.38	0.00604188
CAM109_map12	0002.CSV	3880.24	0.00578993
CAM109_map12	0002.CSV	3884.1	0.00632399
CAM109_map12	0002.CSV	3887.95	0.00627619
CAM109_map12	0002.CSV	3891.81	0.00617844
CAM109_map12	0002.CSV	3895.67	0.00597059
CAM109_map12	0002.CSV	3899.52	0.00563539
CAM109_map12	0002.CSV	3903.38	0.00647719
CAM109_map12	0002.CSV	3907.24	0.00673923
CAM109_map12	0002.CSV	3911.1	0.00618758
CAM109_map12	0002.CSV	3914.95	0.00588215
CAM109_map12	0002.CSV	3918.81	0.00608909
CAM109_map12	0002.CSV	3922.67	0.00616298
CAM109_map12	0002.CSV	3926.52	0.00615354
CAM109_map12	0002.CSV	3930.38	0.00620499
CAM109_map12	0002.CSV	3934.24	0.00637496
CAM109_map12	0002.CSV	3938.09	0.0060701
CAM109_map12	0002.CSV	3941.95	0.00601446
CAM109_map12	0002.CSV	3945.81	0.00616261
CAM109_map12	0002.CSV	3949.67	0.00625518
CAM109_map12	0002.CSV	3953.52	0.00617165
CAM109_map12	0002.CSV	3957.38	0.00602867
CAM109_map12	0002.CSV	3961.24	0.00608724
CAM109_map12	0002.CSV	3965.09	0.00606231
CAM109_map12	0002.CSV	3968.95	0.00603119
CAM109_map12	0002.CSV	3972.81	0.00608677
CAM109_map12	0002.CSV	3976.67	0.00605209
CAM109_map12	0002.CSV	3980.52	0.00596128
CAM109_map12	0002.CSV	3984.38	0.00601369
CAM109_map12	0002.CSV	3988.24	0.0059336
CAM109_map12	0002.CSV	3992.09	0.00592443
CAM109_map12	0002.CSV	3995.95	0.00598681
CAM109_map12	0002.CSV	3999.81	0.00586878
CAM109_map12	0003.CSV	674.992	0.0408515
CAM109_map12	0003.CSV	678.849	0.0424123
CAM109_map12	0003.CSV	682.706	0.0426819
CAM109_map12	0003.CSV	686.563	0.044597
CAM109_map12	0003.CSV	690.42	0.0484031
CAM109_map12	0003.CSV	694.277	0.0568956
CAM109_map12	0003.CSV	698.134	0.0662473
CAM109_map12	0003.CSV	701.991	0.0742903
CAM109_map12	0003.CSV	705.849	0.0853753
CAM109_map12	0003.CSV	709.706	0.100131
CAM109_map12	0003.CSV	713.563	0.0878404
CAM109_map12	0003.CSV	717.42	0.0557032
CAM109_map12	0003.CSV	721.277	0.0375283
CAM109_map12	0003.CSV	725.134	0.0345273
CAM109_map12	0003.CSV	728.991	0.0347748
CAM109_map12	0003.CSV	732.848	0.0365149
CAM109_map12	0003.CSV	736.705	0.0389515
CAM109_map12	0003.CSV	740.562	0.0418935
CAM109_map12	0003.CSV	744.42	0.0433812
CAM109_map12	0003.CSV	748.277	0.0442342
CAM109_map12	0003.CSV	752.134	0.0441207
CAM109_map12	0003.CSV	755.991	0.0442582
CAM109_map12	0003.CSV	759.848	0.0441515
CAM109_map12	0003.CSV	763.705	0.0447952
CAM109_map12	0003.CSV	767.562	0.0452814
CAM109_map12	0003.CSV	771.419	0.0457924
CAM109_map12	0003.CSV	775.276	0.0459366
CAM109_map12	0003.CSV	779.133	0.0465675
CAM109_map12	0003.CSV	782.99	0.0465775
CAM109_map12	0003.CSV	786.848	0.0469376
CAM109_map12	0003.CSV	790.705	0.0474029
CAM109_map12	0003.CSV	794.562	0.0487775
CAM109_map12	0003.CSV	798.419	0.0498299
CAM109_map12	0003.CSV	802.276	0.0507449
CAM109_map12	0003.CSV	806.133	0.0513636
CAM109_map12	0003.CSV	809.99	0.0532049
CAM109_map12	0003.CSV	813.847	0.0555949
CAM109_map12	0003.CSV	817.704	0.0587366
CAM109_map12	0003.CSV	821.562	0.0613566
CAM109_map12	0003.CSV	825.419	0.0635491
CAM109_map12	0003.CSV	829.276	0.065052
CAM109_map12	0003.CSV	833.133	0.0664088
CAM109_map12	0003.CSV	836.99	0.0675305
CAM109_map12	0003.CSV	840.847	0.0703288
CAM109_map12	0003.CSV	844.704	0.0747492
CAM109_map12	0003.CSV	848.561	0.0780327
CAM109_map12	0003.CSV	852.418	0.0821465
CAM109_map12	0003.CSV	856.275	0.0953107
CAM109_map12	0003.CSV	860.132	0.112859
CAM109_map12	0003.CSV	863.99	0.131901
CAM109_map12	0003.CSV	867.847	0.158009
CAM109_map12	0003.CSV	871.704	0.173032
CAM109_map12	0003.CSV	875.561	0.154846
CAM109_map12	0003.CSV	879.418	0.121089
CAM109_map12	0003.CSV	883.275	0.083774
CAM109_map12	0003.CSV	887.132	0.0521882
CAM109_map12	0003.CSV	890.989	0.039126
CAM109_map12	0003.CSV	894.846	0.0388545
CAM109_map12	0003.CSV	898.703	0.0400396
CAM109_map12	0003.CSV	902.561	0.0413253
CAM109_map12	0003.CSV	906.418	0.0423454
CAM109_map12	0003.CSV	910.275	0.0434405
CAM109_map12	0003.CSV	914.132	0.0440472
CAM109_map12	0003.CSV	917.989	0.0448677
CAM109_map12	0003.CSV	921.846	0.0454746
CAM109_map12	0003.CSV	925.703	0.0463713
CAM109_map12	0003.CSV	929.56	0.0470519
CAM109_map12	0003.CSV	933.417	0.0480146
CAM109_map12	0003.CSV	937.274	0.0484711
CAM109_map12	0003.CSV	941.131	0.048728
CAM109_map12	0003.CSV	944.989	0.0486516
CAM109_map12	0003.CSV	948.846	0.0486793
CAM109_map12	0003.CSV	952.703	0.0483687
CAM109_map12	0003.CSV	956.56	0.0482272
CAM109_map12	0003.CSV	960.417	0.0480213
CAM109_map12	0003.CSV	964.274	0.0483222
CAM109_map12	0003.CSV	968.131	0.0486604
CAM109_map12	0003.CSV	971.988	0.0494587
CAM109_map12	0003.CSV	975.845	0.0503526
CAM109_map12	0003.CSV	979.702	0.0516446
CAM109_map12	0003.CSV	983.559	0.0528448
CAM109_map12	0003.CSV	987.417	0.054287
CAM109_map12	0003.CSV	991.274	0.0554609
CAM109_map12	0003.CSV	995.131	0.0568021
CAM109_map12	0003.CSV	998.988	0.0580013
CAM109_map12	0003.CSV	1002.85	0.0594119
CAM109_map12	0003.CSV	1006.7	0.0604616
CAM109_map12	0003.CSV	1010.56	0.0615615
CAM109_map12	0003.CSV	1014.42	0.0623197
CAM109_map12	0003.CSV	1018.27	0.0632071
CAM109_map12	0003.CSV	1022.13	0.0640023
CAM109_map12	0003.CSV	1025.99	0.0650875
CAM109_map12	0003.CSV	1029.85	0.0658751
CAM109_map12	0003.CSV	1033.7	0.0668361
CAM109_map12	0003.CSV	1037.56	0.0676626
CAM109_map12	0003.CSV	1041.42	0.0683819
CAM109_map12	0003.CSV	1045.27	0.0685834
CAM109_map12	0003.CSV	1049.13	0.0694704
CAM109_map12	0003.CSV	1052.99	0.071064
CAM109_map12	0003.CSV	1056.84	0.0739065
CAM109_map12	0003.CSV	1060.7	0.0772856
CAM109_map12	0003.CSV	1064.56	0.0807222
CAM109_map12	0003.CSV	1068.42	0.0828233
CAM109_map12	0003.CSV	1072.27	0.0839677
CAM109_map12	0003.CSV	1076.13	0.0840093
CAM109_map12	0003.CSV	1079.99	0.083931
CAM109_map12	0003.CSV	1083.84	0.0832048
CAM109_map12	0003.CSV	1087.7	0.0818233
CAM109_map12	0003.CSV	1091.56	0.0799025
CAM109_map12	0003.CSV	1095.41	0.0784754
CAM109_map12	0003.CSV	1099.27	0.077513
CAM109_map12	0003.CSV	1103.13	0.0775462
CAM109_map12	0003.CSV	1106.99	0.0781418
CAM109_map12	0003.CSV	1110.84	0.0795076
CAM109_map12	0003.CSV	1114.7	0.0804853
CAM109_map12	0003.CSV	1118.56	0.080934
CAM109_map12	0003.CSV	1122.41	0.0805417
CAM109_map12	0003.CSV	1126.27	0.0799446
CAM109_map12	0003.CSV	1130.13	0.0790664
CAM109_map12	0003.CSV	1133.99	0.0787428
CAM109_map12	0003.CSV	1137.84	0.0785329
CAM109_map12	0003.CSV	1141.7	0.0784129
CAM109_map12	0003.CSV	1145.56	0.0778289
CAM109_map12	0003.CSV	1149.41	0.0775491
CAM109_map12	0003.CSV	1153.27	0.0773145
CAM109_map12	0003.CSV	1157.13	0.0773436
CAM109_map12	0003.CSV	1160.99	0.0771854
CAM109_map12	0003.CSV	1164.84	0.0769871
CAM109_map12	0003.CSV	1168.7	0.0761403
CAM109_map12	0003.CSV	1172.56	0.0752901
CAM109_map12	0003.CSV	1176.41	0.0743323
CAM109_map12	0003.CSV	1180.27	0.0736665
CAM109_map12	0003.CSV	1184.13	0.0729068
CAM109_map12	0003.CSV	1187.99	0.0723374
CAM109_map12	0003.CSV	1191.84	0.0715399
CAM109_map12	0003.CSV	1195.7	0.0711196
CAM109_map12	0003.CSV	1199.56	0.070799
CAM109_map12	0003.CSV	1203.41	0.0709329
CAM109_map12	0003.CSV	1207.27	0.0710498
CAM109_map12	0003.CSV	1211.13	0.0714925
CAM109_map12	0003.CSV	1214.98	0.0718951
CAM109_map12	0003.CSV	1218.84	0.0726788
CAM109_map12	0003.CSV	1222.7	0.0735218
CAM109_map12	0003.CSV	1226.56	0.0748498
CAM109_map12	0003.CSV	1230.41	0.076227
CAM109_map12	0003.CSV	1234.27	0.0780868
CAM109_map12	0003.CSV	1238.13	0.0800652
CAM109_map12	0003.CSV	1241.98	0.0825193
CAM109_map12	0003.CSV	1245.84	0.0850077
CAM109_map12	0003.CSV	1249.7	0.0877998
CAM109_map12	0003.CSV	1253.56	0.090047
CAM109_map12	0003.CSV	1257.41	0.0919746
CAM109_map12	0003.CSV	1261.27	0.0933469
CAM109_map12	0003.CSV	1265.13	0.0947904
CAM109_map12	0003.CSV	1268.98	0.0961488
CAM109_map12	0003.CSV	1272.84	0.097809
CAM109_map12	0003.CSV	1276.7	0.0991491
CAM109_map12	0003.CSV	1280.56	0.100606
CAM109_map12	0003.CSV	1284.41	0.101632
CAM109_map12	0003.CSV	1288.27	0.102489
CAM109_map12	0003.CSV	1292.13	0.102647
CAM109_map12	0003.CSV	1295.98	0.102777
CAM109_map12	0003.CSV	1299.84	0.102855
CAM109_map12	0003.CSV	1303.7	0.103697
CAM109_map12	0003.CSV	1307.56	0.104883
CAM109_map12	0003.CSV	1311.41	0.106834
CAM109_map12	0003.CSV	1315.27	0.108874
CAM109_map12	0003.CSV	1319.13	0.1112
CAM109_map12	0003.CSV	1322.98	0.113166
CAM109_map12	0003.CSV	1326.84	0.115588
CAM109_map12	0003.CSV	1330.7	0.118222
CAM109_map12	0003.CSV	1334.56	0.121387
CAM109_map12	0003.CSV	1338.41	0.125362
CAM109_map12	0003.CSV	1342.27	0.130277
CAM109_map12	0003.CSV	1346.13	0.134031
CAM109_map12	0003.CSV	1349.98	0.138562
CAM109_map12	0003.CSV	1353.84	0.143219
CAM109_map12	0003.CSV	1357.7	0.148114
CAM109_map12	0003.CSV	1361.56	0.153513
CAM109_map12	0003.CSV	1365.41	0.160143
CAM109_map12	0003.CSV	1369.27	0.165457
CAM109_map12	0003.CSV	1373.13	0.172296
CAM109_map12	0003.CSV	1376.98	0.179558
CAM109_map12	0003.CSV	1380.84	0.185553
CAM109_map12	0003.CSV	1384.7	0.19055
CAM109_map12	0003.CSV	1388.56	0.196392
CAM109_map12	0003.CSV	1392.41	0.199282
CAM109_map12	0003.CSV	1396.27	0.20046
CAM109_map12	0003.CSV	1400.13	0.199093
CAM109_map12	0003.CSV	1403.98	0.197063
CAM109_map12	0003.CSV	1407.84	0.192827
CAM109_map12	0003.CSV	1411.7	0.187281
CAM109_map12	0003.CSV	1415.55	0.18076
CAM109_map12	0003.CSV	1419.41	0.173492
CAM109_map12	0003.CSV	1423.27	0.166827
CAM109_map12	0003.CSV	1427.12	0.162433
CAM109_map12	0003.CSV	1430.98	0.157924
CAM109_map12	0003.CSV	1434.84	0.153993
CAM109_map12	0003.CSV	1438.7	0.149481
CAM109_map12	0003.CSV	1442.55	0.146446
CAM109_map12	0003.CSV	1446.41	0.143332
CAM109_map12	0003.CSV	1450.27	0.140288
CAM109_map12	0003.CSV	1454.12	0.136699
CAM109_map12	0003.CSV	1457.98	0.131055
CAM109_map12	0003.CSV	1461.84	0.126413
CAM109_map12	0003.CSV	1465.7	0.123663
CAM109_map12	0003.CSV	1469.55	0.120637
CAM109_map12	0003.CSV	1473.41	0.11687
CAM109_map12	0003.CSV	1477.27	0.111472
CAM109_map12	0003.CSV	1481.12	0.107265
CAM109_map12	0003.CSV	1484.98	0.102939
CAM109_map12	0003.CSV	1488.84	0.0978732
CAM109_map12	0003.CSV	1492.7	0.0922521
CAM109_map12	0003.CSV	1496.55	0.0873011
CAM109_map12	0003.CSV	1500.41	0.0815227
CAM109_map12	0003.CSV	1504.27	0.0779867
CAM109_map12	0003.CSV	1508.12	0.0721576
CAM109_map12	0003.CSV	1511.98	0.0675059
CAM109_map12	0003.CSV	1515.84	0.0638615
CAM109_map12	0003.CSV	1519.7	0.0594177
CAM109_map12	0003.CSV	1523.55	0.0544393
CAM109_map12	0003.CSV	1527.41	0.0510034
CAM109_map12	0003.CSV	1531.27	0.048358
CAM109_map12	0003.CSV	1535.12	0.0465486
CAM109_map12	0003.CSV	1538.98	0.0445769
CAM109_map12	0003.CSV	1542.84	0.0409345
CAM109_map12	0003.CSV	1546.7	0.0377048
CAM109_map12	0003.CSV	1550.55	0.0352354
CAM109_map12	0003.CSV	1554.41	0.0330681
CAM109_map12	0003.CSV	1558.27	0.0315682
CAM109_map12	0003.CSV	1562.12	0.0306276
CAM109_map12	0003.CSV	1565.98	0.0301274
CAM109_map12	0003.CSV	1569.84	0.0300302
CAM109_map12	0003.CSV	1573.69	0.0302341
CAM109_map12	0003.CSV	1577.55	0.0301968
CAM109_map12	0003.CSV	1581.41	0.0291203
CAM109_map12	0003.CSV	1585.27	0.0274309
CAM109_map12	0003.CSV	1589.12	0.0259734
CAM109_map12	0003.CSV	1592.98	0.0249038
CAM109_map12	0003.CSV	1596.84	0.0243243
CAM109_map12	0003.CSV	1600.69	0.0237659
CAM109_map12	0003.CSV	1604.55	0.0231337
CAM109_map12	0003.CSV	1608.41	0.0225009
CAM109_map12	0003.CSV	1612.27	0.0219927
CAM109_map12	0003.CSV	1616.12	0.0215227
CAM109_map12	0003.CSV	1619.98	0.0212031
CAM109_map12	0003.CSV	1623.84	0.0207013
CAM109_map12	0003.CSV	1627.69	0.0203242
CAM109_map12	0003.CSV	1631.55	0.0196333
CAM109_map12	0003.CSV	1635.41	0.0194506
CAM109_map12	0003.CSV	1639.27	0.0194074
CAM109_map12	0003.CSV	1643.12	0.0189346
CAM109_map12	0003.CSV	1646.98	0.0187387
CAM109_map12	0003.CSV	1650.84	0.0189792
CAM109_map12	0003.CSV	1654.69	0.0190195
CAM109_map12	0003.CSV	1658.55	0.0186374
CAM109_map12	0003.CSV	1662.41	0.0181969
CAM109_map12	0003.CSV	1666.27	0.0179716
CAM109_map12	0003.CSV	1670.12	0.0178752
CAM109_map12	0003.CSV	1673.98	0.0180547
CAM109_map12	0003.CSV	1677.84	0.0177188
CAM109_map12	0003.CSV	1681.69	0.0175367
CAM109_map12	0003.CSV	1685.55	0.0178831
CAM109_map12	0003.CSV	1689.41	0.0178431
CAM109_map12	0003.CSV	1693.27	0.017367
CAM109_map12	0003.CSV	1697.12	0.0177251
CAM109_map12	0003.CSV	1700.98	0.0188382
CAM109_map12	0003.CSV	1704.84	0.0199104
CAM109_map12	0003.CSV	1708.69	0.0209281
CAM109_map12	0003.CSV	1712.55	0.0218857
CAM109_map12	0003.CSV	1716.41	0.0247901
CAM109_map12	0003.CSV	1720.27	0.0283314
CAM109_map12	0003.CSV	1724.12	0.0293637
[truncated: 102,424 more rows]

## Sheet: CAM109_map13
Map	Select spectrum number	Wavenumbers	Absorbance
CAM109_map13	0001.CSV	674.992	0.051353
CAM109_map13	0001.CSV	678.849	0.0538527
CAM109_map13	0001.CSV	682.706	0.0548623
CAM109_map13	0001.CSV	686.563	0.0588088
CAM109_map13	0001.CSV	690.42	0.064411
CAM109_map13	0001.CSV	694.277	0.0808721
CAM109_map13	0001.CSV	698.134	0.0989866
CAM109_map13	0001.CSV	701.991	0.0941735
CAM109_map13	0001.CSV	705.849	0.0856062
CAM109_map13	0001.CSV	709.706	0.103703
CAM109_map13	0001.CSV	713.563	0.100338
CAM109_map13	0001.CSV	717.42	0.0644299
CAM109_map13	0001.CSV	721.277	0.045125
CAM109_map13	0001.CSV	725.134	0.0444673
CAM109_map13	0001.CSV	728.991	0.0454937
CAM109_map13	0001.CSV	732.848	0.0478149
CAM109_map13	0001.CSV	736.705	0.0505983
CAM109_map13	0001.CSV	740.562	0.0544068
CAM109_map13	0001.CSV	744.42	0.0563466
CAM109_map13	0001.CSV	748.277	0.0575642
CAM109_map13	0001.CSV	752.134	0.0568956
CAM109_map13	0001.CSV	755.991	0.0573063
CAM109_map13	0001.CSV	759.848	0.0575546
CAM109_map13	0001.CSV	763.705	0.0586278
CAM109_map13	0001.CSV	767.562	0.0590113
CAM109_map13	0001.CSV	771.419	0.0605071
CAM109_map13	0001.CSV	775.276	0.0615786
CAM109_map13	0001.CSV	779.133	0.062762
CAM109_map13	0001.CSV	782.99	0.0626721
CAM109_map13	0001.CSV	786.848	0.0635826
CAM109_map13	0001.CSV	790.705	0.0648373
CAM109_map13	0001.CSV	794.562	0.067914
CAM109_map13	0001.CSV	798.419	0.0711379
CAM109_map13	0001.CSV	802.276	0.0747316
CAM109_map13	0001.CSV	806.133	0.0771956
CAM109_map13	0001.CSV	809.99	0.080395
CAM109_map13	0001.CSV	813.847	0.0833139
CAM109_map13	0001.CSV	817.704	0.0878334
CAM109_map13	0001.CSV	821.562	0.0922876
CAM109_map13	0001.CSV	825.419	0.0984407
CAM109_map13	0001.CSV	829.276	0.105369
CAM109_map13	0001.CSV	833.133	0.114814
CAM109_map13	0001.CSV	836.99	0.127714
CAM109_map13	0001.CSV	840.847	0.14665
CAM109_map13	0001.CSV	844.704	0.16508
CAM109_map13	0001.CSV	848.561	0.194478
CAM109_map13	0001.CSV	852.418	0.226614
CAM109_map13	0001.CSV	856.275	0.22567
CAM109_map13	0001.CSV	860.132	0.190935
CAM109_map13	0001.CSV	863.99	0.146811
CAM109_map13	0001.CSV	867.847	0.108308
CAM109_map13	0001.CSV	871.704	0.0828915
CAM109_map13	0001.CSV	875.561	0.0669552
CAM109_map13	0001.CSV	879.418	0.0581856
CAM109_map13	0001.CSV	883.275	0.0534096
CAM109_map13	0001.CSV	887.132	0.0516336
CAM109_map13	0001.CSV	890.989	0.0513038
CAM109_map13	0001.CSV	894.846	0.0518261
CAM109_map13	0001.CSV	898.703	0.0522554
CAM109_map13	0001.CSV	902.561	0.0536646
CAM109_map13	0001.CSV	906.418	0.0549359
CAM109_map13	0001.CSV	910.275	0.0556299
CAM109_map13	0001.CSV	914.132	0.0553757
CAM109_map13	0001.CSV	917.989	0.0560925
CAM109_map13	0001.CSV	921.846	0.0566482
CAM109_map13	0001.CSV	925.703	0.0576601
CAM109_map13	0001.CSV	929.56	0.0585115
CAM109_map13	0001.CSV	933.417	0.0596902
CAM109_map13	0001.CSV	937.274	0.0603237
CAM109_map13	0001.CSV	941.131	0.0609283
CAM109_map13	0001.CSV	944.989	0.0607316
CAM109_map13	0001.CSV	948.846	0.06065
CAM109_map13	0001.CSV	952.703	0.0602934
CAM109_map13	0001.CSV	956.56	0.0602114
CAM109_map13	0001.CSV	960.417	0.0597192
CAM109_map13	0001.CSV	964.274	0.059777
CAM109_map13	0001.CSV	968.131	0.0599097
CAM109_map13	0001.CSV	971.988	0.0609428
CAM109_map13	0001.CSV	975.845	0.0621847
CAM109_map13	0001.CSV	979.702	0.0639327
CAM109_map13	0001.CSV	983.559	0.065372
CAM109_map13	0001.CSV	987.417	0.0671522
CAM109_map13	0001.CSV	991.274	0.0685628
CAM109_map13	0001.CSV	995.131	0.0702079
CAM109_map13	0001.CSV	998.988	0.0716361
CAM109_map13	0001.CSV	1002.85	0.0734931
CAM109_map13	0001.CSV	1006.7	0.0748316
CAM109_map13	0001.CSV	1010.56	0.0764332
CAM109_map13	0001.CSV	1014.42	0.0776186
CAM109_map13	0001.CSV	1018.27	0.078993
CAM109_map13	0001.CSV	1022.13	0.0800682
CAM109_map13	0001.CSV	1025.99	0.0817435
CAM109_map13	0001.CSV	1029.85	0.0832166
CAM109_map13	0001.CSV	1033.7	0.0852067
CAM109_map13	0001.CSV	1037.56	0.0867569
CAM109_map13	0001.CSV	1041.42	0.0881727
CAM109_map13	0001.CSV	1045.27	0.0888563
CAM109_map13	0001.CSV	1049.13	0.0905741
CAM109_map13	0001.CSV	1052.99	0.0932347
CAM109_map13	0001.CSV	1056.84	0.0979067
CAM109_map13	0001.CSV	1060.7	0.10339
CAM109_map13	0001.CSV	1064.56	0.109149
CAM109_map13	0001.CSV	1068.42	0.113032
CAM109_map13	0001.CSV	1072.27	0.115857
CAM109_map13	0001.CSV	1076.13	0.119036
CAM109_map13	0001.CSV	1079.99	0.125623
CAM109_map13	0001.CSV	1083.84	0.122758
CAM109_map13	0001.CSV	1087.7	0.109705
CAM109_map13	0001.CSV	1091.56	0.103009
CAM109_map13	0001.CSV	1095.41	0.102042
CAM109_map13	0001.CSV	1099.27	0.101786
CAM109_map13	0001.CSV	1103.13	0.102515
CAM109_map13	0001.CSV	1106.99	0.103946
CAM109_map13	0001.CSV	1110.84	0.106412
CAM109_map13	0001.CSV	1114.7	0.108277
CAM109_map13	0001.CSV	1118.56	0.108989
CAM109_map13	0001.CSV	1122.41	0.108173
CAM109_map13	0001.CSV	1126.27	0.106948
CAM109_map13	0001.CSV	1130.13	0.105551
CAM109_map13	0001.CSV	1133.99	0.10512
CAM109_map13	0001.CSV	1137.84	0.104931
CAM109_map13	0001.CSV	1141.7	0.104858
CAM109_map13	0001.CSV	1145.56	0.103928
CAM109_map13	0001.CSV	1149.41	0.103027
CAM109_map13	0001.CSV	1153.27	0.101999
CAM109_map13	0001.CSV	1157.13	0.101434
CAM109_map13	0001.CSV	1160.99	0.100828
CAM109_map13	0001.CSV	1164.84	0.100062
CAM109_map13	0001.CSV	1168.7	0.0981576
CAM109_map13	0001.CSV	1172.56	0.0960262
CAM109_map13	0001.CSV	1176.41	0.0936461
CAM109_map13	0001.CSV	1180.27	0.0917722
CAM109_map13	0001.CSV	1184.13	0.0898272
CAM109_map13	0001.CSV	1187.99	0.0881942
CAM109_map13	0001.CSV	1191.84	0.0864715
CAM109_map13	0001.CSV	1195.7	0.0853339
CAM109_map13	0001.CSV	1199.56	0.0844254
CAM109_map13	0001.CSV	1203.41	0.0842396
CAM109_map13	0001.CSV	1207.27	0.0841204
CAM109_map13	0001.CSV	1211.13	0.0844986
CAM109_map13	0001.CSV	1214.98	0.0848564
CAM109_map13	0001.CSV	1218.84	0.0857337
CAM109_map13	0001.CSV	1222.7	0.0866622
CAM109_map13	0001.CSV	1226.56	0.0881023
CAM109_map13	0001.CSV	1230.41	0.0895825
CAM109_map13	0001.CSV	1234.27	0.09175
CAM109_map13	0001.CSV	1238.13	0.0941745
CAM109_map13	0001.CSV	1241.98	0.0973281
CAM109_map13	0001.CSV	1245.84	0.100517
CAM109_map13	0001.CSV	1249.7	0.103879
CAM109_map13	0001.CSV	1253.56	0.10635
CAM109_map13	0001.CSV	1257.41	0.108293
CAM109_map13	0001.CSV	1261.27	0.109506
CAM109_map13	0001.CSV	1265.13	0.110838
CAM109_map13	0001.CSV	1268.98	0.111948
CAM109_map13	0001.CSV	1272.84	0.113336
CAM109_map13	0001.CSV	1276.7	0.114282
CAM109_map13	0001.CSV	1280.56	0.115131
CAM109_map13	0001.CSV	1284.41	0.11522
CAM109_map13	0001.CSV	1288.27	0.114863
CAM109_map13	0001.CSV	1292.13	0.113374
CAM109_map13	0001.CSV	1295.98	0.111709
CAM109_map13	0001.CSV	1299.84	0.109906
CAM109_map13	0001.CSV	1303.7	0.108846
CAM109_map13	0001.CSV	1307.56	0.10818
CAM109_map13	0001.CSV	1311.41	0.108445
CAM109_map13	0001.CSV	1315.27	0.108905
CAM109_map13	0001.CSV	1319.13	0.109764
CAM109_map13	0001.CSV	1322.98	0.110079
CAM109_map13	0001.CSV	1326.84	0.110886
CAM109_map13	0001.CSV	1330.7	0.111982
CAM109_map13	0001.CSV	1334.56	0.113756
CAM109_map13	0001.CSV	1338.41	0.116027
CAM109_map13	0001.CSV	1342.27	0.11932
CAM109_map13	0001.CSV	1346.13	0.121986
CAM109_map13	0001.CSV	1349.98	0.125313
CAM109_map13	0001.CSV	1353.84	0.128461
CAM109_map13	0001.CSV	1357.7	0.131874
CAM109_map13	0001.CSV	1361.56	0.135535
CAM109_map13	0001.CSV	1365.41	0.140477
CAM109_map13	0001.CSV	1369.27	0.144619
CAM109_map13	0001.CSV	1373.13	0.150284
CAM109_map13	0001.CSV	1376.98	0.156409
CAM109_map13	0001.CSV	1380.84	0.161637
CAM109_map13	0001.CSV	1384.7	0.166172
CAM109_map13	0001.CSV	1388.56	0.172729
CAM109_map13	0001.CSV	1392.41	0.178053
CAM109_map13	0001.CSV	1396.27	0.184888
CAM109_map13	0001.CSV	1400.13	0.191614
CAM109_map13	0001.CSV	1403.98	0.19819
CAM109_map13	0001.CSV	1407.84	0.204883
CAM109_map13	0001.CSV	1411.7	0.211351
CAM109_map13	0001.CSV	1415.55	0.215734
CAM109_map13	0001.CSV	1419.41	0.221423
CAM109_map13	0001.CSV	1423.27	0.225714
CAM109_map13	0001.CSV	1427.12	0.230757
CAM109_map13	0001.CSV	1430.98	0.236334
CAM109_map13	0001.CSV	1434.84	0.244508
CAM109_map13	0001.CSV	1438.7	0.254173
CAM109_map13	0001.CSV	1442.55	0.262475
CAM109_map13	0001.CSV	1446.41	0.26764
CAM109_map13	0001.CSV	1450.27	0.27027
CAM109_map13	0001.CSV	1454.12	0.267812
CAM109_map13	0001.CSV	1457.98	0.263494
CAM109_map13	0001.CSV	1461.84	0.260212
CAM109_map13	0001.CSV	1465.7	0.259495
CAM109_map13	0001.CSV	1469.55	0.255061
CAM109_map13	0001.CSV	1473.41	0.243358
CAM109_map13	0001.CSV	1477.27	0.227036
CAM109_map13	0001.CSV	1481.12	0.216624
CAM109_map13	0001.CSV	1484.98	0.206281
CAM109_map13	0001.CSV	1488.84	0.193928
CAM109_map13	0001.CSV	1492.7	0.180967
CAM109_map13	0001.CSV	1496.55	0.171102
CAM109_map13	0001.CSV	1500.41	0.159689
CAM109_map13	0001.CSV	1504.27	0.153032
CAM109_map13	0001.CSV	1508.12	0.139655
CAM109_map13	0001.CSV	1511.98	0.130127
CAM109_map13	0001.CSV	1515.84	0.123275
CAM109_map13	0001.CSV	1519.7	0.114182
CAM109_map13	0001.CSV	1523.55	0.103167
CAM109_map13	0001.CSV	1527.41	0.0962522
CAM109_map13	0001.CSV	1531.27	0.0910679
CAM109_map13	0001.CSV	1535.12	0.087567
CAM109_map13	0001.CSV	1538.98	0.0842343
CAM109_map13	0001.CSV	1542.84	0.0784703
CAM109_map13	0001.CSV	1546.7	0.0732533
CAM109_map13	0001.CSV	1550.55	0.0695661
CAM109_map13	0001.CSV	1554.41	0.0657946
CAM109_map13	0001.CSV	1558.27	0.0620809
CAM109_map13	0001.CSV	1562.12	0.0588491
CAM109_map13	0001.CSV	1565.98	0.0573726
CAM109_map13	0001.CSV	1569.84	0.0554073
CAM109_map13	0001.CSV	1573.69	0.0535882
CAM109_map13	0001.CSV	1577.55	0.0506556
CAM109_map13	0001.CSV	1581.41	0.0472219
CAM109_map13	0001.CSV	1585.27	0.0435976
CAM109_map13	0001.CSV	1589.12	0.0407747
CAM109_map13	0001.CSV	1592.98	0.0389716
CAM109_map13	0001.CSV	1596.84	0.0381835
CAM109_map13	0001.CSV	1600.69	0.0374819
CAM109_map13	0001.CSV	1604.55	0.0367913
CAM109_map13	0001.CSV	1608.41	0.0359216
CAM109_map13	0001.CSV	1612.27	0.0352779
CAM109_map13	0001.CSV	1616.12	0.0346398
CAM109_map13	0001.CSV	1619.98	0.0342514
CAM109_map13	0001.CSV	1623.84	0.0333059
CAM109_map13	0001.CSV	1627.69	0.0324655
CAM109_map13	0001.CSV	1631.55	0.0313627
CAM109_map13	0001.CSV	1635.41	0.0307646
CAM109_map13	0001.CSV	1639.27	0.0302226
CAM109_map13	0001.CSV	1643.12	0.0296055
CAM109_map13	0001.CSV	1646.98	0.029124
CAM109_map13	0001.CSV	1650.84	0.029284
CAM109_map13	0001.CSV	1654.69	0.0293322
CAM109_map13	0001.CSV	1658.55	0.0288813
CAM109_map13	0001.CSV	1662.41	0.0282516
CAM109_map13	0001.CSV	1666.27	0.0278752
CAM109_map13	0001.CSV	1670.12	0.0275349
CAM109_map13	0001.CSV	1673.98	0.0276453
CAM109_map13	0001.CSV	1677.84	0.0272005
CAM109_map13	0001.CSV	1681.69	0.0270511
CAM109_map13	0001.CSV	1685.55	0.0275002
CAM109_map13	0001.CSV	1689.41	0.0276438
CAM109_map13	0001.CSV	1693.27	0.0270998
CAM109_map13	0001.CSV	1697.12	0.0275776
CAM109_map13	0001.CSV	1700.98	0.0291394
CAM109_map13	0001.CSV	1704.84	0.0309404
CAM109_map13	0001.CSV	1708.69	0.0328848
CAM109_map13	0001.CSV	1712.55	0.0348252
CAM109_map13	0001.CSV	1716.41	0.0393693
CAM109_map13	0001.CSV	1720.27	0.0447443
CAM109_map13	0001.CSV	1724.12	0.04637
CAM109_map13	0001.CSV	1727.98	0.0469421
CAM109_map13	0001.CSV	1731.84	0.0465105
CAM109_map13	0001.CSV	1735.69	0.0446052
CAM109_map13	0001.CSV	1739.55	0.0414381
CAM109_map13	0001.CSV	1743.41	0.0371409
CAM109_map13	0001.CSV	1747.27	0.0322717
CAM109_map13	0001.CSV	1751.12	0.0270624
CAM109_map13	0001.CSV	1754.98	0.0236824
CAM109_map13	0001.CSV	1758.84	0.021648
CAM109_map13	0001.CSV	1762.69	0.0203353
CAM109_map13	0001.CSV	1766.55	0.0195606
CAM109_map13	0001.CSV	1770.41	0.0196533
CAM109_map13	0001.CSV	1774.26	0.0215422
CAM109_map13	0001.CSV	1778.12	0.0234702
CAM109_map13	0001.CSV	1781.98	0.0253465
CAM109_map13	0001.CSV	1785.84	0.0259499
CAM109_map13	0001.CSV	1789.69	0.0249694
CAM109_map13	0001.CSV	1793.55	0.0225591
CAM109_map13	0001.CSV	1797.41	0.0206531
CAM109_map13	0001.CSV	1801.26	0.0191112
CAM109_map13	0001.CSV	1805.12	0.0179471
CAM109_map13	0001.CSV	1808.98	0.0173442
CAM109_map13	0001.CSV	1812.84	0.0172459
CAM109_map13	0001.CSV	1816.69	0.0170146
CAM109_map13	0001.CSV	1820.55	0.0169008
CAM109_map13	0001.CSV	1824.41	0.0168047
CAM109_map13	0001.CSV	1828.26	0.0170223
CAM109_map13	0001.CSV	1832.12	0.0171223
CAM109_map13	0001.CSV	1835.98	0.0170437
CAM109_map13	0001.CSV	1839.84	0.0168618
CAM109_map13	0001.CSV	1843.69	0.0170412
CAM109_map13	0001.CSV	1847.55	0.0172783
CAM109_map13	0001.CSV	1851.41	0.017205
CAM109_map13	0001.CSV	1855.26	0.017104
CAM109_map13	0001.CSV	1859.12	0.0171574
CAM109_map13	0001.CSV	1862.98	0.0170526
CAM109_map13	0001.CSV	1866.84	0.0172028
CAM109_map13	0001.CSV	1870.69	0.0175935
CAM109_map13	0001.CSV	1874.55	0.017477
CAM109_map13	0001.CSV	1878.41	0.0172924
CAM109_map13	0001.CSV	1882.26	0.017286
CAM109_map13	0001.CSV	1886.12	0.0172342
CAM109_map13	0001.CSV	1889.98	0.0173683
CAM109_map13	0001.CSV	1893.83	0.0174579
CAM109_map13	0001.CSV	1897.69	0.0174811
CAM109_map13	0001.CSV	1901.55	0.0174172
CAM109_map13	0001.CSV	1905.41	0.0174492
CAM109_map13	0001.CSV	1909.26	0.0175213
CAM109_map13	0001.CSV	1913.12	0.0175184
CAM109_map13	0001.CSV	1916.98	0.0174543
CAM109_map13	0001.CSV	1920.83	0.0176821
CAM109_map13	0001.CSV	1924.69	0.0177609
CAM109_map13	0001.CSV	1928.55	0.01774
CAM109_map13	0001.CSV	1932.4	0.0177137
CAM109_map13	0001.CSV	1936.26	0.0177663
CAM109_map13	0001.CSV	1940.12	0.0177575
CAM109_map13	0001.CSV	1943.98	0.0179968
CAM109_map13	0001.CSV	1947.83	0.0180621
CAM109_map13	0001.CSV	1951.69	0.0180755
CAM109_map13	0001.CSV	1955.55	0.0180707
CAM109_map13	0001.CSV	1959.4	0.0180866
CAM109_map13	0001.CSV	1963.26	0.0180634
CAM109_map13	0001.CSV	1967.12	0.0181891
CAM109_map13	0001.CSV	1970.98	0.0181991
CAM109_map13	0001.CSV	1974.83	0.0181582
CAM109_map13	0001.CSV	1978.69	0.0181274
CAM109_map13	0001.CSV	1982.55	0.0181353
CAM109_map13	0001.CSV	1986.4	0.0181147
CAM109_map13	0001.CSV	1990.26	0.0182286
CAM109_map13	0001.CSV	1994.12	0.0182806
CAM109_map13	0001.CSV	1997.98	0.0182424
CAM109_map13	0001.CSV	2001.83	0.0182109
CAM109_map13	0001.CSV	2005.69	0.0182522
CAM109_map13	0001.CSV	2009.55	0.0182483
CAM109_map13	0001.CSV	2013.4	0.0182409
CAM109_map13	0001.CSV	2017.26	0.0182684
CAM109_map13	0001.CSV	2021.12	0.0183114
CAM109_map13	0001.CSV	2024.97	0.0182612
CAM109_map13	0001.CSV	2028.83	0.0183361
CAM109_map13	0001.CSV	2032.69	0.0183503
CAM109_map13	0001.CSV	2036.55	0.0183288
CAM109_map13	0001.CSV	2040.4	0.0182976
CAM109_map13	0001.CSV	2044.26	0.0183887
CAM109_map13	0001.CSV	2048.12	0.018427
CAM109_map13	0001.CSV	2051.97	0.018507
CAM109_map13	0001.CSV	2055.83	0.0185458
CAM109_map13	0001.CSV	2059.69	0.0185688
CAM109_map13	0001.CSV	2063.55	0.0185741
CAM109_map13	0001.CSV	2067.4	0.0186819
CAM109_map13	0001.CSV	2071.26	0.0187079
CAM109_map13	0001.CSV	2075.12	0.0187658
CAM109_map13	0001.CSV	2078.97	0.0188003
CAM109_map13	0001.CSV	2082.83	0.0188757
CAM109_map13	0001.CSV	2086.69	0.0189114
CAM109_map13	0001.CSV	2090.55	0.0190321
CAM109_map13	0001.CSV	2094.4	0.0190713
CAM109_map13	0001.CSV	2098.26	0.0191523
CAM109_map13	0001.CSV	2102.12	0.0191883
CAM109_map13	0001.CSV	2105.97	0.0192524
CAM109_map13	0001.CSV	2109.83	0.0192865
CAM109_map13	0001.CSV	2113.69	0.0193679
CAM109_map13	0001.CSV	2117.55	0.0194267
CAM109_map13	0001.CSV	2121.4	0.0194686
CAM109_map13	0001.CSV	2125.26	0.0194915
CAM109_map13	0001.CSV	2129.12	0.0195917
CAM109_map13	0001.CSV	2132.97	0.0196239
CAM109_map13	0001.CSV	2136.83	0.0196769
CAM109_map13	0001.CSV	2140.69	0.0197122
CAM109_map13	0001.CSV	2144.55	0.0197946
CAM109_map13	0001.CSV	2148.4	0.0198409
CAM109_map13	0001.CSV	2152.26	0.0199062
CAM109_map13	0001.CSV	2156.12	0.0199432
CAM109_map13	0001.CSV	2159.97	0.0199755
CAM109_map13	0001.CSV	2163.83	0.0199382
CAM109_map13	0001.CSV	2167.69	0.019996
CAM109_map13	0001.CSV	2171.55	0.020071
CAM109_map13	0001.CSV	2175.4	0.0201193
CAM109_map13	0001.CSV	2179.26	0.0201421
CAM109_map13	0001.CSV	2183.12	0.0202356
CAM109_map13	0001.CSV	2186.97	0.0202771
CAM109_map13	0001.CSV	2190.83	0.0203168
CAM109_map13	0001.CSV	2194.69	0.0203236
CAM109_map13	0001.CSV	2198.55	0.0203389
CAM109_map13	0001.CSV	2202.4	0.0203597
CAM109_map13	0001.CSV	2206.26	0.020442
CAM109_map13	0001.CSV	2210.12	0.0204552
CAM109_map13	0001.CSV	2213.97	0.020535
CAM109_map13	0001.CSV	2217.83	0.0205678
CAM109_map13	0001.CSV	2221.69	0.0205664
CAM109_map13	0001.CSV	2225.54	0.0205306
CAM109_map13	0001.CSV	2229.4	0.020542
CAM109_map13	0001.CSV	2233.26	0.0205451
CAM109_map13	0001.CSV	2237.12	0.0205654
CAM109_map13	0001.CSV	2240.97	0.0205663
CAM109_map13	0001.CSV	2244.83	0.0206347
CAM109_map13	0001.CSV	2248.69	0.0206603
CAM109_map13	0001.CSV	2252.54	0.0207062
CAM109_map13	0001.CSV	2256.4	0.020703
CAM109_map13	0001.CSV	2260.26	0.0206821
CAM109_map13	0001.CSV	2264.11	0.0206617
CAM109_map13	0001.CSV	2267.97	0.0206602
CAM109_map13	0001.CSV	2271.83	0.0206715
CAM109_map13	0001.CSV	2275.69	0.0207386
CAM109_map13	0001.CSV	2279.54	0.0207309
CAM109_map13	0001.CSV	2283.4	0.0207139
CAM109_map13	0001.CSV	2287.26	0.0206636
CAM109_map13	0001.CSV	2291.11	0.0206653
CAM109_map13	0001.CSV	2294.97	0.0206133
CAM109_map13	0001.CSV	2298.83	0.0205875
CAM109_map13	0001.CSV	2302.69	0.0205501
CAM109_map13	0001.CSV	2306.54	0.0204311
CAM109_map13	0001.CSV	2310.4	0.0202505
CAM109_map13	0001.CSV	2314.26	0.0200253
CAM109_map13	0001.CSV	2318.11	0.0194658
CAM109_map13	0001.CSV	2321.97	0.0186416
CAM109_map13	0001.CSV	2325.83	0.0177272
CAM109_map13	0001.CSV	2329.69	0.0172417
CAM109_map13	0001.CSV	2333.54	0.0164675
CAM109_map13	0001.CSV	2337.4	0.0156095
CAM109_map13	0001.CSV	2341.26	0.0156297
CAM109_map13	0001.CSV	2345.11	0.0179519
CAM109_map13	0001.CSV	2348.97	0.018458
CAM109_map13	0001.CSV	2352.83	0.0161778
CAM109_map13	0001.CSV	2356.69	0.0101619
CAM109_map13	0001.CSV	2360.54	0.00602757
CAM109_map13	0001.CSV	2364.4	0.00915875
CAM109_map13	0001.CSV	2368.26	0.0151178
CAM109_map13	0001.CSV	2372.11	0.0191345
CAM109_map13	0001.CSV	2375.97	0.0209255
CAM109_map13	0001.CSV	2379.83	0.0214749
CAM109_map13	0001.CSV	2383.69	0.0215767
CAM109_map13	0001.CSV	2387.54	0.0214487
CAM109_map13	0001.CSV	2391.4	0.0212919
CAM109_map13	0001.CSV	2395.26	0.0212199
CAM109_map13	0001.CSV	2399.11	0.0212744
CAM109_map13	0001.CSV	2402.97	0.0213487
CAM109_map13	0001.CSV	2406.83	0.0214172
CAM109_map13	0001.CSV	2410.68	0.0214111
CAM109_map13	0001.CSV	2414.54	0.0214167
CAM109_map13	0001.CSV	2418.4	0.0214556
CAM109_map13	0001.CSV	2422.26	0.0215204
CAM109_map13	0001.CSV	2426.11	0.0215278
CAM109_map13	0001.CSV	2429.97	0.0215512
CAM109_map13	0001.CSV	2433.83	0.0215874
CAM109_map13	0001.CSV	2437.68	0.0216031
CAM109_map13	0001.CSV	2441.54	0.0216172
CAM109_map13	0001.CSV	2445.4	0.0216793
CAM109_map13	0001.CSV	2449.26	0.0217178
CAM109_map13	0001.CSV	2453.11	0.0217516
CAM109_map13	0001.CSV	2456.97	0.0218014
CAM109_map13	0001.CSV	2460.83	0.0219458
CAM109_map13	0001.CSV	2464.68	0.0221313
CAM109_map13	0001.CSV	2468.54	0.0222797
CAM109_map13	0001.CSV	2472.4	0.0224685
CAM109_map13	0001.CSV	2476.26	0.0227725
CAM109_map13	0001.CSV	2480.11	0.0231291
CAM109_map13	0001.CSV	2483.97	0.0235035
CAM109_map13	0001.CSV	2487.83	0.0238311
CAM109_map13	0001.CSV	2491.68	0.0241053
CAM109_map13	0001.CSV	2495.54	0.0242796
CAM109_map13	0001.CSV	2499.4	0.0243548
CAM109_map13	0001.CSV	2503.26	0.0242971
CAM109_map13	0001.CSV	2507.11	0.024231
CAM109_map13	0001.CSV	2510.97	0.0242921
CAM109_map13	0001.CSV	2514.83	0.0245591
CAM109_map13	0001.CSV	2518.68	0.0248364
CAM109_map13	0001.CSV	2522.54	0.0249098
CAM109_map13	0001.CSV	2526.4	0.0246704
CAM109_map13	0001.CSV	2530.26	0.0243206
CAM109_map13	0001.CSV	2534.11	0.0239759
CAM109_map13	0001.CSV	2537.97	0.0237323
CAM109_map13	0001.CSV	2541.83	0.0236773
CAM109_map13	0001.CSV	2545.68	0.0236663
CAM109_map13	0001.CSV	2549.54	0.0234887
CAM109_map13	0001.CSV	2553.4	0.0232139
CAM109_map13	0001.CSV	2557.26	0.0229384
CAM109_map13	0001.CSV	2561.11	0.0227875
CAM109_map13	0001.CSV	2564.97	0.0227044
CAM109_map13	0001.CSV	2568.83	0.0226117
CAM109_map13	0001.CSV	2572.68	0.0225693
CAM109_map13	0001.CSV	2576.54	0.0225991
CAM109_map13	0001.CSV	2580.4	0.022541
CAM109_map13	0001.CSV	2584.25	0.0224837
CAM109_map13	0001.CSV	2588.11	0.0224312
CAM109_map13	0001.CSV	2591.97	0.0224824
CAM109_map13	0001.CSV	2595.83	0.0225179
CAM109_map13	0001.CSV	2599.68	0.0224987
CAM109_map13	0001.CSV	2603.54	0.0225158
CAM109_map13	0001.CSV	2607.4	0.022589
CAM109_map13	0001.CSV	2611.25	0.0226259
CAM109_map13	0001.CSV	2615.11	0.0226687
CAM109_map13	0001.CSV	2618.97	0.0226915
CAM109_map13	0001.CSV	2622.82	0.0227929
CAM109_map13	0001.CSV	2626.68	0.0228311
CAM109_map13	0001.CSV	2630.54	0.0227617
CAM109_map13	0001.CSV	2634.4	0.0227833
CAM109_map13	0001.CSV	2638.25	0.0227711
CAM109_map13	0001.CSV	2642.11	0.0225936
CAM109_map13	0001.CSV	2645.97	0.022462
CAM109_map13	0001.CSV	2649.82	0.0224117
CAM109_map13	0001.CSV	2653.68	0.0223637
CAM109_map13	0001.CSV	2657.54	0.0222916
CAM109_map13	0001.CSV	2661.4	0.0222467
CAM109_map13	0001.CSV	2665.25	0.0222208
CAM109_map13	0001.CSV	2669.11	0.0222659
CAM109_map13	0001.CSV	2672.97	0.0224546
CAM109_map13	0001.CSV	2676.82	0.0227307
CAM109_map13	0001.CSV	2680.68	0.0226885
CAM109_map13	0001.CSV	2684.54	0.0223408
CAM109_map13	0001.CSV	2688.4	0.0221954
CAM109_map13	0001.CSV	2692.25	0.022235
CAM109_map13	0001.CSV	2696.11	0.022317
CAM109_map13	0001.CSV	2699.97	0.0223674
CAM109_map13	0001.CSV	2703.82	0.0224102
CAM109_map13	0001.CSV	2707.68	0.0225352
CAM109_map13	0001.CSV	2711.54	0.0225346
CAM109_map13	0001.CSV	2715.4	0.0224765
CAM109_map13	0001.CSV	2719.25	0.0226692
CAM109_map13	0001.CSV	2723.11	0.0230434
CAM109_map13	0001.CSV	2726.97	0.0230649
CAM109_map13	0001.CSV	2730.82	0.0227852
CAM109_map13	0001.CSV	2734.68	0.0227619
CAM109_map13	0001.CSV	2738.54	0.0228179
CAM109_map13	0001.CSV	2742.4	0.0228807
CAM109_map13	0001.CSV	2746.25	0.0232207
CAM109_map13	0001.CSV	2750.11	0.023291
CAM109_map13	0001.CSV	2753.97	0.0230678
CAM109_map13	0001.CSV	2757.82	0.0230154
CAM109_map13	0001.CSV	2761.68	0.0229907
CAM109_map13	0001.CSV	2765.54	0.0230116
CAM109_map13	0001.CSV	2769.39	0.0231994
CAM109_map13	0001.CSV	2773.25	0.0235929
CAM109_map13	0001.CSV	2777.11	0.0235926
CAM109_map13	0001.CSV	2780.97	0.0234257
CAM109_map13	0001.CSV	2784.82	0.0236705
CAM109_map13	0001.CSV	2788.68	0.0241746
CAM109_map13	0001.CSV	2792.54	0.0243662
CAM109_map13	0001.CSV	2796.39	0.0244195
CAM109_map13	0001.CSV	2800.25	0.0243236
CAM109_map13	0001.CSV	2804.11	0.0242347
CAM109_map13	0001.CSV	2807.97	0.0245705
CAM109_map13	0001.CSV	2811.82	0.0247058
CAM109_map13	0001.CSV	2815.68	0.0247337
CAM109_map13	0001.CSV	2819.54	0.0250728
CAM109_map13	0001.CSV	2823.39	0.0254175
CAM109_map13	0001.CSV	2827.25	0.0257511
CAM109_map13	0001.CSV	2831.11	0.0266496
CAM109_map13	0001.CSV	2834.97	0.0280771
CAM109_map13	0001.CSV	2838.82	0.0297783
CAM109_map13	0001.CSV	2842.68	0.032339
CAM109_map13	0001.CSV	2846.54	0.0364616
CAM109_map13	0001.CSV	2850.39	0.0389426
CAM109_map13	0001.CSV	2854.25	0.0378342
CAM109_map13	0001.CSV	2858.11	0.035547
CAM109_map13	0001.CSV	2861.97	0.0334145
CAM109_map13	0001.CSV	2865.82	0.0321002
CAM109_map13	0001.CSV	2869.68	0.0319547
CAM109_map13	0001.CSV	2873.54	0.0318713
CAM109_map13	0001.CSV	2877.39	0.0310256
CAM109_map13	0001.CSV	2881.25	0.0305859
CAM109_map13	0001.CSV	2885.11	0.0309526
CAM109_map13	0001.CSV	2888.97	0.031857
CAM109_map13	0001.CSV	2892.82	0.0332334
CAM109_map13	0001.CSV	2896.68	0.0344792
CAM109_map13	0001.CSV	2900.54	0.0355197
CAM109_map13	0001.CSV	2904.39	0.037236
CAM109_map13	0001.CSV	2908.25	0.0402038
CAM109_map13	0001.CSV	2912.11	0.0447322
CAM109_map13	0001.CSV	2915.97	0.0488828
CAM109_map13	0001.CSV	2919.82	0.0500125
CAM109_map13	0001.CSV	2923.68	0.0484589
CAM109_map13	0001.CSV	2927.54	0.0460622
CAM109_map13	0001.CSV	2931.39	0.0429298
CAM109_map13	0001.CSV	2935.25	0.0394153
CAM109_map13	0001.CSV	2939.11	0.0368907
CAM109_map13	0001.CSV	2942.96	0.0356944
CAM109_map13	0001.CSV	2946.82	0.0349158
CAM109_map13	0001.CSV	2950.68	0.0342886
CAM109_map13	0001.CSV	2954.54	0.0335992
CAM109_map13	0001.CSV	2958.39	0.0326286
CAM109_map13	0001.CSV	2962.25	0.0315993
CAM109_map13	0001.CSV	2966.11	0.0301246
CAM109_map13	0001.CSV	2969.96	0.0290768
CAM109_map13	0001.CSV	2973.82	0.0287283
CAM109_map13	0001.CSV	2977.68	0.0284788
CAM109_map13	0001.CSV	2981.53	0.0277281
CAM109_map13	0001.CSV	2985.39	0.0266363
CAM109_map13	0001.CSV	2989.25	0.0263669
CAM109_map13	0001.CSV	2993.11	0.0265162
CAM109_map13	0001.CSV	2996.96	0.0262358
CAM109_map13	0001.CSV	3000.82	0.0256618
CAM109_map13	0001.CSV	3004.68	0.0252026
CAM109_map13	0001.CSV	3008.53	0.0253169
CAM109_map13	0001.CSV	3012.39	0.0256606
CAM109_map13	0001.CSV	3016.25	0.0256693
CAM109_map13	0001.CSV	3020.11	0.0255747
CAM109_map13	0001.CSV	3023.96	0.025671
CAM109_map13	0001.CSV	3027.82	0.0257431
CAM109_map13	0001.CSV	3031.68	0.0258709
CAM109_map13	0001.CSV	3035.53	0.02579
CAM109_map13	0001.CSV	3039.39	0.0256657
CAM109_map13	0001.CSV	3043.25	0.0256444
CAM109_map13	0001.CSV	3047.11	0.0255136
CAM109_map13	0001.CSV	3050.96	0.0255592
CAM109_map13	0001.CSV	3054.82	0.0256342
CAM109_map13	0001.CSV	3058.68	0.0255823
CAM109_map13	0001.CSV	3062.53	0.0257073
CAM109_map13	0001.CSV	3066.39	0.0259766
CAM109_map13	0001.CSV	3070.25	0.0258339
CAM109_map13	0001.CSV	3074.11	0.0257961
CAM109_map13	0001.CSV	3077.96	0.0261245
CAM109_map13	0001.CSV	3081.82	0.0263644
CAM109_map13	0001.CSV	3085.68	0.0262404
CAM109_map13	0001.CSV	3089.53	0.0258824
CAM109_map13	0001.CSV	3093.39	0.0254987
CAM109_map13	0001.CSV	3097.25	0.0255152
CAM109_map13	0001.CSV	3101.11	0.0257185
CAM109_map13	0001.CSV	3104.96	0.0257717
CAM109_map13	0001.CSV	3108.82	0.0258831
CAM109_map13	0001.CSV	3112.68	0.0260209
CAM109_map13	0001.CSV	3116.53	0.0261967
CAM109_map13	0001.CSV	3120.39	0.0261648
CAM109_map13	0001.CSV	3124.25	0.0259251
CAM109_map13	0001.CSV	3128.11	0.0257827
CAM109_map13	0001.CSV	3131.96	0.0257297
CAM109_map13	0001.CSV	3135.82	0.0259487
CAM109_map13	0001.CSV	3139.68	0.0261901
CAM109_map13	0001.CSV	3143.53	0.0260447
CAM109_map13	0001.CSV	3147.39	0.0261452
CAM109_map13	0001.CSV	3151.25	0.0265466
CAM109_map13	0001.CSV	3155.1	0.0264969
CAM109_map13	0001.CSV	3158.96	0.0260942
CAM109_map13	0001.CSV	3162.82	0.0259454
CAM109_map13	0001.CSV	3166.68	0.025975
CAM109_map13	0001.CSV	3170.53	0.0260878
CAM109_map13	0001.CSV	3174.39	0.0262151
CAM109_map13	0001.CSV	3178.25	0.026364
CAM109_map13	0001.CSV	3182.1	0.0265002
CAM109_map13	0001.CSV	3185.96	0.0267047
CAM109_map13	0001.CSV	3189.82	0.0267883
CAM109_map13	0001.CSV	3193.68	0.0267226
CAM109_map13	0001.CSV	3197.53	0.0267651
CAM109_map13	0001.CSV	3201.39	0.0269437
CAM109_map13	0001.CSV	3205.25	0.027063
CAM109_map13	0001.CSV	3209.1	0.0270831
CAM109_map13	0001.CSV	3212.96	0.0272373
CAM109_map13	0001.CSV	3216.82	0.0274319
CAM109_map13	0001.CSV	3220.68	0.0274255
CAM109_map13	0001.CSV	3224.53	0.0274798
CAM109_map13	0001.CSV	3228.39	0.0278839
CAM109_map13	0001.CSV	3232.25	0.0283194
CAM109_map13	0001.CSV	3236.1	0.0281212
CAM109_map13	0001.CSV	3239.96	0.0278951
CAM109_map13	0001.CSV	3243.82	0.0281916
CAM109_map13	0001.CSV	3247.68	0.0282991
CAM109_map13	0001.CSV	3251.53	0.0280971
CAM109_map13	0001.CSV	3255.39	0.0281515
CAM109_map13	0001.CSV	3259.25	0.0280472
CAM109_map13	0001.CSV	3263.1	0.0281004
CAM109_map13	0001.CSV	3266.96	0.0285421
CAM109_map13	0001.CSV	3270.82	0.0289993
CAM109_map13	0001.CSV	3274.68	0.0289222
CAM109_map13	0001.CSV	3278.53	0.0285754
CAM109_map13	0001.CSV	3282.39	0.0284512
CAM109_map13	0001.CSV	3286.25	0.0285277
CAM109_map13	0001.CSV	3290.1	0.0289388
CAM109_map13	0001.CSV	3293.96	0.0293301
CAM109_map13	0001.CSV	3297.82	0.029098
CAM109_map13	0001.CSV	3301.67	0.0290748
CAM109_map13	0001.CSV	3305.53	0.0293257
CAM109_map13	0001.CSV	3309.39	0.0291678
CAM109_map13	0001.CSV	3313.25	0.0287454
CAM109_map13	0001.CSV	3317.1	0.0285756
CAM109_map13	0001.CSV	3320.96	0.0288118
CAM109_map13	0001.CSV	3324.82	0.0290342
CAM109_map13	0001.CSV	3328.67	0.0287552
CAM109_map13	0001.CSV	3332.53	0.0287405
CAM109_map13	0001.CSV	3336.39	0.0292631
CAM109_map13	0001.CSV	3340.24	0.0295163
CAM109_map13	0001.CSV	3344.1	0.0293131
CAM109_map13	0001.CSV	3347.96	0.0292928
CAM109_map13	0001.CSV	3351.82	0.0292741
CAM109_map13	0001.CSV	3355.67	0.0291201
CAM109_map13	0001.CSV	3359.53	0.029262
CAM109_map13	0001.CSV	3363.39	0.029568
CAM109_map13	0001.CSV	3367.24	0.0298905
CAM109_map13	0001.CSV	3371.1	0.0297578
CAM109_map13	0001.CSV	3374.96	0.0294726
CAM109_map13	0001.CSV	3378.82	0.029372
CAM109_map13	0001.CSV	3382.67	0.0291745
CAM109_map13	0001.CSV	3386.53	0.029363
CAM109_map13	0001.CSV	3390.39	0.0299107
CAM109_map13	0001.CSV	3394.24	0.0301759
CAM109_map13	0001.CSV	3398.1	0.0302941
CAM109_map13	0001.CSV	3401.96	0.0301972
CAM109_map13	0001.CSV	3405.82	0.0298723
CAM109_map13	0001.CSV	3409.67	0.0298184
CAM109_map13	0001.CSV	3413.53	0.0294745
CAM109_map13	0001.CSV	3417.39	0.0287358
CAM109_map13	0001.CSV	3421.24	0.0282656
CAM109_map13	0001.CSV	3425.1	0.0283325
CAM109_map13	0001.CSV	3428.96	0.0286401
CAM109_map13	0001.CSV	3432.82	0.028858
CAM109_map13	0001.CSV	3436.67	0.0285483
CAM109_map13	0001.CSV	3440.53	0.0276198
CAM109_map13	0001.CSV	3444.39	0.0270332
CAM109_map13	0001.CSV	3448.24	0.0268899
CAM109_map13	0001.CSV	3452.1	0.0266147
CAM109_map13	0001.CSV	3455.96	0.0266775
CAM109_map13	0001.CSV	3459.82	0.0270133
CAM109_map13	0001.CSV	3463.67	0.0273531
CAM109_map13	0001.CSV	3467.53	0.0275158
CAM109_map13	0001.CSV	3471.39	0.0269936
CAM109_map13	0001.CSV	3475.24	0.0265299
CAM109_map13	0001.CSV	3479.1	0.0265355
CAM109_map13	0001.CSV	3482.96	0.0264223
CAM109_map13	0001.CSV	3486.82	0.0264331
CAM109_map13	0001.CSV	3490.67	0.0264619
CAM109_map13	0001.CSV	3494.53	0.0265041
CAM109_map13	0001.CSV	3498.39	0.0263935
CAM109_map13	0001.CSV	3502.24	0.0262391
CAM109_map13	0001.CSV	3506.1	0.0258137
CAM109_map13	0001.CSV	3509.96	0.0256416
CAM109_map13	0001.CSV	3513.81	0.0258553
CAM109_map13	0001.CSV	3517.67	0.0255446
CAM109_map13	0001.CSV	3521.53	0.0255082
CAM109_map13	0001.CSV	3525.39	0.0256102
CAM109_map13	0001.CSV	3529.24	0.0255428
CAM109_map13	0001.CSV	3533.1	0.0256718
CAM109_map13	0001.CSV	3536.96	0.0259789
CAM109_map13	0001.CSV	3540.81	0.0261742
CAM109_map13	0001.CSV	3544.67	0.0263801
CAM109_map13	0001.CSV	3548.53	0.0260211
CAM109_map13	0001.CSV	3552.39	0.0252741
CAM109_map13	0001.CSV	3556.24	0.0248491
CAM109_map13	0001.CSV	3560.1	0.0244265
CAM109_map13	0001.CSV	3563.96	0.0236392
CAM109_map13	0001.CSV	3567.81	0.0237631
CAM109_map13	0001.CSV	3571.67	0.0237816
CAM109_map13	0001.CSV	3575.53	0.0231565
CAM109_map13	0001.CSV	3579.39	0.0231585
CAM109_map13	0001.CSV	3583.24	0.0231658
CAM109_map13	0001.CSV	3587.1	0.0231552
CAM109_map13	0001.CSV	3590.96	0.022732
CAM109_map13	0001.CSV	3594.81	0.0222204
CAM109_map13	0001.CSV	3598.67	0.0223728
CAM109_map13	0001.CSV	3602.53	0.0222868
CAM109_map13	0001.CSV	3606.39	0.0214803
CAM109_map13	0001.CSV	3610.24	0.0208407
CAM109_map13	0001.CSV	3614.1	0.0207613
CAM109_map13	0001.CSV	3617.96	0.0213907
CAM109_map13	0001.CSV	3621.81	0.0215116
CAM109_map13	0001.CSV	3625.67	0.0204546
CAM109_map13	0001.CSV	3629.53	0.0205479
CAM109_map13	0001.CSV	3633.39	0.0212782
CAM109_map13	0001.CSV	3637.24	0.0208466
CAM109_map13	0001.CSV	3641.1	0.0203337
CAM109_map13	0001.CSV	3644.96	0.0195197
CAM109_map13	0001.CSV	3648.81	0.0202713
CAM109_map13	0001.CSV	3652.67	0.0212989
CAM109_map13	0001.CSV	3656.53	0.0210628
CAM109_map13	0001.CSV	3660.38	0.0208757
CAM109_map13	0001.CSV	3664.24	0.0198934
CAM109_map13	0001.CSV	3668.1	0.0189031
CAM109_map13	0001.CSV	3671.96	0.0188653
CAM109_map13	0001.CSV	3675.81	0.0195855
CAM109_map13	0001.CSV	3679.67	0.0202329
CAM109_map13	0001.CSV	3683.53	0.0198311
CAM109_map13	0001.CSV	3687.38	0.0196965
CAM109_map13	0001.CSV	3691.24	0.0205483
CAM109_map13	0001.CSV	3695.1	0.0201949
CAM109_map13	0001.CSV	3698.95	0.0194663
CAM109_map13	0001.CSV	3702.81	0.0191882
CAM109_map13	0001.CSV	3706.67	0.0187381
CAM109_map13	0001.CSV	3710.53	0.0188881
CAM109_map13	0001.CSV	3714.38	0.0196775
CAM109_map13	0001.CSV	3718.24	0.0190288
CAM109_map13	0001.CSV	3722.1	0.0186057
CAM109_map13	0001.CSV	3725.95	0.018846
CAM109_map13	0001.CSV	3729.81	0.0185973
CAM109_map13	0001.CSV	3733.67	0.0187144
CAM109_map13	0001.CSV	3737.53	0.019835
CAM109_map13	0001.CSV	3741.38	0.0188602
CAM109_map13	0001.CSV	3745.24	0.0177121
CAM109_map13	0001.CSV	3749.1	0.0179274
CAM109_map13	0001.CSV	3752.95	0.019155
CAM109_map13	0001.CSV	3756.81	0.0192957
CAM109_map13	0001.CSV	3760.67	0.0191324
CAM109_map13	0001.CSV	3764.53	0.018745
CAM109_map13	0001.CSV	3768.38	0.0188296
CAM109_map13	0001.CSV	3772.24	0.0191988
CAM109_map13	0001.CSV	3776.1	0.0190269
CAM109_map13	0001.CSV	3779.95	0.0191195
CAM109_map13	0001.CSV	3783.81	0.0191789
CAM109_map13	0001.CSV	3787.67	0.0191307
CAM109_map13	0001.CSV	3791.53	0.0187344
CAM109_map13	0001.CSV	3795.38	0.0180831
CAM109_map13	0001.CSV	3799.24	0.0179708
CAM109_map13	0001.CSV	3803.1	0.0187153
CAM109_map13	0001.CSV	3806.95	0.0192749
CAM109_map13	0001.CSV	3810.81	0.0189113
CAM109_map13	0001.CSV	3814.67	0.0182338
CAM109_map13	0001.CSV	3818.53	0.0182548
CAM109_map13	0001.CSV	3822.38	0.0188283
CAM109_map13	0001.CSV	3826.24	0.0187427
CAM109_map13	0001.CSV	3830.1	0.0184639
CAM109_map13	0001.CSV	3833.95	0.0183089
CAM109_map13	0001.CSV	3837.81	0.0184749
CAM109_map13	0001.CSV	3841.67	0.0193021
CAM109_map13	0001.CSV	3845.53	0.0190985
CAM109_map13	0001.CSV	3849.38	0.0179123
CAM109_map13	0001.CSV	3853.24	0.0179773
CAM109_map13	0001.CSV	3857.1	0.0190159
CAM109_map13	0001.CSV	3860.95	0.0183768
CAM109_map13	0001.CSV	3864.81	0.0182897
CAM109_map13	0001.CSV	3868.67	0.0184646
CAM109_map13	0001.CSV	3872.52	0.0190604
CAM109_map13	0001.CSV	3876.38	0.019008
CAM109_map13	0001.CSV	3880.24	0.0187117
CAM109_map13	0001.CSV	3884.1	0.0191293
CAM109_map13	0001.CSV	3887.95	0.0190497
CAM109_map13	0001.CSV	3891.81	0.0189926
CAM109_map13	0001.CSV	3895.67	0.0186172
CAM109_map13	0001.CSV	3899.52	0.0181818
CAM109_map13	0001.CSV	3903.38	0.0192027
CAM109_map13	0001.CSV	3907.24	0.0196146
CAM109_map13	0001.CSV	3911.1	0.0190574
CAM109_map13	0001.CSV	3914.95	0.0186885
CAM109_map13	0001.CSV	3918.81	0.0189336
CAM109_map13	0001.CSV	3922.67	0.0190103
CAM109_map13	0001.CSV	3926.52	0.0189744
CAM109_map13	0001.CSV	3930.38	0.0190925
CAM109_map13	0001.CSV	3934.24	0.0194674
CAM109_map13	0001.CSV	3938.09	0.0191943
CAM109_map13	0001.CSV	3941.95	0.0189378
CAM109_map13	0001.CSV	3945.81	0.01902
CAM109_map13	0001.CSV	3949.67	0.0191817
CAM109_map13	0001.CSV	3953.52	0.0192401
CAM109_map13	0001.CSV	3957.38	0.0191406
CAM109_map13	0001.CSV	3961.24	0.019176
CAM109_map13	0001.CSV	3965.09	0.019101
CAM109_map13	0001.CSV	3968.95	0.0189722
CAM109_map13	0001.CSV	3972.81	0.0190989
CAM109_map13	0001.CSV	3976.67	0.0193057
CAM109_map13	0001.CSV	3980.52	0.0193171
CAM109_map13	0001.CSV	3984.38	0.0193093
CAM109_map13	0001.CSV	3988.24	0.019206
CAM109_map13	0001.CSV	3992.09	0.0191395
CAM109_map13	0001.CSV	3995.95	0.0191219
CAM109_map13	0001.CSV	3999.81	0.0190198
CAM109_map13	0002.CSV	674.992	0.0329522
CAM109_map13	0002.CSV	678.849	0.0354993
CAM109_map13	0002.CSV	682.706	0.0366926
CAM109_map13	0002.CSV	686.563	0.0392606
CAM109_map13	0002.CSV	690.42	0.0427409
CAM109_map13	0002.CSV	694.277	0.0539484
CAM109_map13	0002.CSV	698.134	0.066181
CAM109_map13	0002.CSV	701.991	0.0620967
CAM109_map13	0002.CSV	705.849	0.0567826
CAM109_map13	0002.CSV	709.706	0.0726912
CAM109_map13	0002.CSV	713.563	0.0720597
CAM109_map13	0002.CSV	717.42	0.0443551
CAM109_map13	0002.CSV	721.277	0.0277595
CAM109_map13	0002.CSV	725.134	0.0261177
CAM109_map13	0002.CSV	728.991	0.0263549
CAM109_map13	0002.CSV	732.848	0.0277052
CAM109_map13	0002.CSV	736.705	0.0291135
CAM109_map13	0002.CSV	740.562	0.0310805
CAM109_map13	0002.CSV	744.42	0.0320977
CAM109_map13	0002.CSV	748.277	0.0332593
CAM109_map13	0002.CSV	752.134	0.033182
CAM109_map13	0002.CSV	755.991	0.0337486
CAM109_map13	0002.CSV	759.848	0.0341441
CAM109_map13	0002.CSV	763.705	0.0351362
CAM109_map13	0002.CSV	767.562	0.0354379
CAM109_map13	0002.CSV	771.419	0.0363499
CAM109_map13	0002.CSV	775.276	0.0368055
CAM109_map13	0002.CSV	779.133	0.0376753
CAM109_map13	0002.CSV	782.99	0.0381193
CAM109_map13	0002.CSV	786.848	0.0391586
CAM109_map13	0002.CSV	790.705	0.0400178
CAM109_map13	0002.CSV	794.562	0.0417458
CAM109_map13	0002.CSV	798.419	0.0430503
CAM109_map13	0002.CSV	802.276	0.0445887
CAM109_map13	0002.CSV	806.133	0.0457022
CAM109_map13	0002.CSV	809.99	0.0479606
CAM109_map13	0002.CSV	813.847	0.0503812
CAM109_map13	0002.CSV	817.704	0.0540677
CAM109_map13	0002.CSV	821.562	0.0580961
CAM109_map13	0002.CSV	825.419	0.0631909
CAM109_map13	0002.CSV	829.276	0.0685881
CAM109_map13	0002.CSV	833.133	0.0763073
CAM109_map13	0002.CSV	836.99	0.08773
CAM109_map13	0002.CSV	840.847	0.104794
CAM109_map13	0002.CSV	844.704	0.121616
CAM109_map13	0002.CSV	848.561	0.144948
CAM109_map13	0002.CSV	852.418	0.162879
CAM109_map13	0002.CSV	856.275	0.153022
CAM109_map13	0002.CSV	860.132	0.126362
CAM109_map13	0002.CSV	863.99	0.0986046
CAM109_map13	0002.CSV	867.847	0.0737027
CAM109_map13	0002.CSV	871.704	0.0562257
CAM109_map13	0002.CSV	875.561	0.0456439
CAM109_map13	0002.CSV	879.418	0.0398574
CAM109_map13	0002.CSV	883.275	0.0361125
CAM109_map13	0002.CSV	887.132	0.0343868
CAM109_map13	0002.CSV	890.989	0.0338615
CAM109_map13	0002.CSV	894.846	0.0341062
CAM109_map13	0002.CSV	898.703	0.0343847
CAM109_map13	0002.CSV	902.561	0.0353091
CAM109_map13	0002.CSV	906.418	0.0360556
CAM109_map13	0002.CSV	910.275	0.0362934
CAM109_map13	0002.CSV	914.132	0.0359341
CAM109_map13	0002.CSV	917.989	0.0364758
CAM109_map13	0002.CSV	921.846	0.0368874
CAM109_map13	0002.CSV	925.703	0.0374474
CAM109_map13	0002.CSV	929.56	0.0377735
CAM109_map13	0002.CSV	933.417	0.0383625
CAM109_map13	0002.CSV	937.274	0.0387072
CAM109_map13	0002.CSV	941.131	0.0391898
CAM109_map13	0002.CSV	944.989	0.0392615
CAM109_map13	0002.CSV	948.846	0.0395642
CAM109_map13	0002.CSV	952.703	0.0396683
CAM109_map13	0002.CSV	956.56	0.039775
CAM109_map13	0002.CSV	960.417	0.0394563
CAM109_map13	0002.CSV	964.274	0.0394443
CAM109_map13	0002.CSV	968.131	0.0394863
CAM109_map13	0002.CSV	971.988	0.040036
CAM109_map13	0002.CSV	975.845	0.0405072
CAM109_map13	0002.CSV	979.702	0.041135
CAM109_map13	0002.CSV	983.559	0.0414919
CAM109_map13	0002.CSV	987.417	0.0421193
CAM109_map13	0002.CSV	991.274	0.0425644
CAM109_map13	0002.CSV	995.131	0.0431924
CAM109_map13	0002.CSV	998.988	0.0435268
CAM109_map13	0002.CSV	1002.85	0.0441498
CAM109_map13	0002.CSV	1006.7	0.0446028
CAM109_map13	0002.CSV	1010.56	0.0453178
CAM109_map13	0002.CSV	1014.42	0.0458178
CAM109_map13	0002.CSV	1018.27	0.0465074
CAM109_map13	0002.CSV	1022.13	0.0468691
CAM109_map13	0002.CSV	1025.99	0.0475504
CAM109_map13	0002.CSV	1029.85	0.0481595
CAM109_map13	0002.CSV	1033.7	0.0490465
CAM109_map13	0002.CSV	1037.56	0.0495797
CAM109_map13	0002.CSV	1041.42	0.0502674
CAM109_map13	0002.CSV	1045.27	0.0506779
CAM109_map13	0002.CSV	1049.13	0.0515632
CAM109_map13	0002.CSV	1052.99	0.0525603
CAM109_map13	0002.CSV	1056.84	0.0542807
CAM109_map13	0002.CSV	1060.7	0.0558685
CAM109_map13	0002.CSV	1064.56	0.0575686
CAM109_map13	0002.CSV	1068.42	0.0587487
CAM109_map13	0002.CSV	1072.27	0.060241
CAM109_map13	0002.CSV	1076.13	0.0630486
CAM109_map13	0002.CSV	1079.99	0.0690719
CAM109_map13	0002.CSV	1083.84	0.0688202
CAM109_map13	0002.CSV	1087.7	0.0605545
CAM109_map13	0002.CSV	1091.56	0.0560966
CAM109_map13	0002.CSV	1095.41	0.0559264
CAM109_map13	0002.CSV	1099.27	0.0561825
CAM109_map13	0002.CSV	1103.13	0.0567634
CAM109_map13	0002.CSV	1106.99	0.0574592
CAM109_map13	0002.CSV	1110.84	0.0585903
CAM109_map13	0002.CSV	1114.7	0.0593825
CAM109_map13	0002.CSV	1118.56	0.0598389
CAM109_map13	0002.CSV	1122.41	0.0598222
CAM109_map13	0002.CSV	1126.27	0.0598104
CAM109_map13	0002.CSV	1130.13	0.0595523
CAM109_map13	0002.CSV	1133.99	0.0596814
CAM109_map13	0002.CSV	1137.84	0.0598803
CAM109_map13	0002.CSV	1141.7	0.0602323
CAM109_map13	0002.CSV	1145.56	0.0602876
CAM109_map13	0002.CSV	1149.41	0.0605077
CAM109_map13	0002.CSV	1153.27	0.0605552
CAM109_map13	0002.CSV	1157.13	0.0608316
CAM109_map13	0002.CSV	1160.99	0.0609968
CAM109_map13	0002.CSV	1164.84	0.0612292
CAM109_map13	0002.CSV	1168.7	0.0609645
CAM109_map13	0002.CSV	1172.56	0.0606666
CAM109_map13	0002.CSV	1176.41	0.0601474
CAM109_map13	0002.CSV	1180.27	0.0597765
CAM109_map13	0002.CSV	1184.13	0.0592971
CAM109_map13	0002.CSV	1187.99	0.0589838
CAM109_map13	0002.CSV	1191.84	0.0585003
CAM109_map13	0002.CSV	1195.7	0.0582938
CAM109_map13	0002.CSV	1199.56	0.0581121
CAM109_map13	0002.CSV	1203.41	0.058316
CAM109_map13	0002.CSV	1207.27	0.0583969
CAM109_map13	0002.CSV	1211.13	0.0586802
CAM109_map13	0002.CSV	1214.98	0.0589314
CAM109_map13	0002.CSV	1218.84	0.0594872
CAM109_map13	0002.CSV	1222.7	0.0599422
CAM109_map13	0002.CSV	1226.56	0.0606569
CAM109_map13	0002.CSV	1230.41	0.0612941
CAM109_map13	0002.CSV	1234.27	0.0622053
CAM109_map13	0002.CSV	1238.13	0.0630942
CAM109_map13	0002.CSV	1241.98	0.0642647
CAM109_map13	0002.CSV	1245.84	0.0652937
CAM109_map13	0002.CSV	1249.7	0.0664788
CAM109_map13	0002.CSV	1253.56	0.0673383
CAM109_map13	0002.CSV	1257.41	0.0682726
CAM109_map13	0002.CSV	1261.27	0.0689786
CAM109_map13	0002.CSV	1265.13	0.0697884
CAM109_map13	0002.CSV	1268.98	0.0705194
CAM109_map13	0002.CSV	1272.84	0.0714588
CAM109_map13	0002.CSV	1276.7	0.072139
CAM109_map13	0002.CSV	1280.56	0.0729105
CAM109_map13	0002.CSV	1284.41	0.0733535
CAM109_map13	0002.CSV	1288.27	0.0738516
CAM109_map13	0002.CSV	1292.13	0.0740049
CAM109_map13	0002.CSV	1295.98	0.0742267
CAM109_map13	0002.CSV	1299.84	0.0743624
CAM109_map13	0002.CSV	1303.7	0.0748287
CAM109_map13	0002.CSV	1307.56	0.0752762
CAM109_map13	0002.CSV	1311.41	0.0760887
CAM109_map13	0002.CSV	1315.27	0.076936
CAM109_map13	0002.CSV	1319.13	0.0781122
CAM109_map13	0002.CSV	1322.98	0.0789416
CAM109_map13	0002.CSV	1326.84	0.0800291
CAM109_map13	0002.CSV	1330.7	0.0812154
CAM109_map13	0002.CSV	1334.56	0.0826775
CAM109_map13	0002.CSV	1338.41	0.0845106
CAM109_map13	0002.CSV	1342.27	0.0869321
CAM109_map13	0002.CSV	1346.13	0.0886793
CAM109_map13	0002.CSV	1349.98	0.0909194
CAM109_map13	0002.CSV	1353.84	0.093126
CAM109_map13	0002.CSV	1357.7	0.0955069
CAM109_map13	0002.CSV	1361.56	0.0980991
CAM109_map13	0002.CSV	1365.41	0.101531
CAM109_map13	0002.CSV	1369.27	0.104213
CAM109_map13	0002.CSV	1373.13	0.107903
CAM109_map13	0002.CSV	1376.98	0.111922
CAM109_map13	0002.CSV	1380.84	0.115354
CAM109_map13	0002.CSV	1384.7	0.11847
CAM109_map13	0002.CSV	1388.56	0.122857
CAM109_map13	0002.CSV	1392.41	0.126186
CAM109_map13	0002.CSV	1396.27	0.130553
CAM109_map13	0002.CSV	1400.13	0.134812
CAM109_map13	0002.CSV	1403.98	0.138672
CAM109_map13	0002.CSV	1407.84	0.142336
CAM109_map13	0002.CSV	1411.7	0.145617
CAM109_map13	0002.CSV	1415.55	0.14768
CAM109_map13	0002.CSV	1419.41	0.150954
CAM109_map13	0002.CSV	1423.27	0.153505
CAM109_map13	0002.CSV	1427.12	0.156234
CAM109_map13	0002.CSV	1430.98	0.159066
CAM109_map13	0002.CSV	1434.84	0.163211
CAM109_map13	0002.CSV	1438.7	0.167822
CAM109_map13	0002.CSV	1442.55	0.171265
CAM109_map13	0002.CSV	1446.41	0.172801
CAM109_map13	0002.CSV	1450.27	0.173192
CAM109_map13	0002.CSV	1454.12	0.171455
CAM109_map13	0002.CSV	1457.98	0.169814
CAM109_map13	0002.CSV	1461.84	0.168013
CAM109_map13	0002.CSV	1465.7	0.16712
CAM109_map13	0002.CSV	1469.55	0.164507
CAM109_map13	0002.CSV	1473.41	0.159297
CAM109_map13	0002.CSV	1477.27	0.15181
CAM109_map13	0002.CSV	1481.12	0.146639
CAM109_map13	0002.CSV	1484.98	0.141255
CAM109_map13	0002.CSV	1488.84	0.135024
CAM109_map13	0002.CSV	1492.7	0.128184
CAM109_map13	0002.CSV	1496.55	0.122574
CAM109_map13	0002.CSV	1500.41	0.115767
CAM109_map13	0002.CSV	1504.27	0.111408
CAM109_map13	0002.CSV	1508.12	0.102997
CAM109_map13	0002.CSV	1511.98	0.0967499
CAM109_map13	0002.CSV	1515.84	0.0920185
CAM109_map13	0002.CSV	1519.7	0.0861446
CAM109_map13	0002.CSV	1523.55	0.0786963
CAM109_map13	0002.CSV	1527.41	0.0735852
CAM109_map13	0002.CSV	1531.27	0.069579
CAM109_map13	0002.CSV	1535.12	0.0667927
CAM109_map13	0002.CSV	1538.98	0.0641657
CAM109_map13	0002.CSV	1542.84	0.0600755
CAM109_map13	0002.CSV	1546.7	0.0558903
CAM109_map13	0002.CSV	1550.55	0.0526953
CAM109_map13	0002.CSV	1554.41	0.0495789
CAM109_map13	0002.CSV	1558.27	0.046657
CAM109_map13	0002.CSV	1562.12	0.0437485
CAM109_map13	0002.CSV	1565.98	0.0422087
CAM109_map13	0002.CSV	1569.84	0.040477
CAM109_map13	0002.CSV	1573.69	0.0388689
CAM109_map13	0002.CSV	1577.55	0.0362351
CAM109_map13	0002.CSV	1581.41	0.0333902
CAM109_map13	0002.CSV	1585.27	0.0307855
CAM109_map13	0002.CSV	1589.12	0.0288387
CAM109_map13	0002.CSV	1592.98	0.0275275
CAM109_map13	0002.CSV	1596.84	0.0268122
CAM109_map13	0002.CSV	1600.69	0.0262291
CAM109_map13	0002.CSV	1604.55	0.0259312
CAM109_map13	0002.CSV	1608.41	0.0255881
CAM109_map13	0002.CSV	1612.27	0.0252141
CAM109_map13	0002.CSV	1616.12	0.0248089
CAM109_map13	0002.CSV	1619.98	0.0245981
CAM109_map13	0002.CSV	1623.84	0.0241271
CAM109_map13	0002.CSV	1627.69	0.0237693
CAM109_map13	0002.CSV	1631.55	0.0230347
CAM109_map13	0002.CSV	1635.41	0.0227592
CAM109_map13	0002.CSV	1639.27	0.0225268
CAM109_map13	0002.CSV	1643.12	0.0219731
CAM109_map13	0002.CSV	1646.98	0.0216949
CAM109_map13	0002.CSV	1650.84	0.0219869
CAM109_map13	0002.CSV	1654.69	0.0222285
CAM109_map13	0002.CSV	1658.55	0.021797
CAM109_map13	0002.CSV	1662.41	0.0212991
CAM109_map13	0002.CSV	1666.27	0.0210495
CAM109_map13	0002.CSV	1670.12	0.0209175
CAM109_map13	0002.CSV	1673.98	0.0211033
CAM109_map13	0002.CSV	1677.84	0.02067
CAM109_map13	0002.CSV	1681.69	0.0204585
CAM109_map13	0002.CSV	1685.55	0.0207201
CAM109_map13	0002.CSV	1689.41	0.0205484
CAM109_map13	0002.CSV	1693.27	0.0198973
CAM109_map13	0002.CSV	1697.12	0.0199177
CAM109_map13	0002.CSV	1700.98	0.0203608
CAM109_map13	0002.CSV	1704.84	0.0206294
CAM109_map13	0002.CSV	1708.69	0.0207167
CAM109_map13	0002.CSV	1712.55	0.0207984
CAM109_map13	0002.CSV	1716.41	0.02184
CAM109_map13	0002.CSV	1720.27	0.0231058
CAM109_map13	0002.CSV	1724.12	0.0230607
CAM109_map13	0002.CSV	1727.98	0.0229381
CAM109_map13	0002.CSV	1731.84	0.0229233
CAM109_map13	0002.CSV	1735.69	0.0231382
CAM109_map13	0002.CSV	1739.55	0.022429
CAM109_map13	0002.CSV	1743.41	0.0213534
CAM109_map13	0002.CSV	1747.27	0.0202224
CAM109_map13	0002.CSV	1751.12	0.0192053
CAM109_map13	0002.CSV	1754.98	0.018221
CAM109_map13	0002.CSV	1758.84	0.0177517
CAM109_map13	0002.CSV	1762.69	0.0175419
CAM109_map13	0002.CSV	1766.55	0.0173653
CAM109_map13	0002.CSV	1770.41	0.0177209
CAM109_map13	0002.CSV	1774.26	0.0193087
CAM109_map13	0002.CSV	1778.12	0.0205821
CAM109_map13	0002.CSV	1781.98	0.0218911
CAM109_map13	0002.CSV	1785.84	0.0222922
CAM109_map13	0002.CSV	1789.69	0.0216717
CAM109_map13	0002.CSV	1793.55	0.0202917
CAM109_map13	0002.CSV	1797.41	0.0191289
CAM109_map13	0002.CSV	1801.26	0.0180713
CAM109_map13	0002.CSV	1805.12	0.0172629
CAM109_map13	0002.CSV	1808.98	0.0168627
CAM109_map13	0002.CSV	1812.84	0.0168544
CAM109_map13	0002.CSV	1816.69	0.0166501
CAM109_map13	0002.CSV	1820.55	0.0165955
CAM109_map13	0002.CSV	1824.41	0.0166284
CAM109_map13	0002.CSV	1828.26	0.0169007
CAM109_map13	0002.CSV	1832.12	0.0169687
CAM109_map13	0002.CSV	1835.98	0.0168602
CAM109_map13	0002.CSV	1839.84	0.0166969
CAM109_map13	0002.CSV	1843.69	0.0168724
CAM109_map13	0002.CSV	1847.55	0.0171152
CAM109_map13	0002.CSV	1851.41	0.0170347
CAM109_map13	0002.CSV	1855.26	0.0169492
CAM109_map13	0002.CSV	1859.12	0.0170302
CAM109_map13	0002.CSV	1862.98	0.0169472
CAM109_map13	0002.CSV	1866.84	0.017063
CAM109_map13	0002.CSV	1870.69	0.0174059
CAM109_map13	0002.CSV	1874.55	0.0172965
CAM109_map13	0002.CSV	1878.41	0.0171554
CAM109_map13	0002.CSV	1882.26	0.0171467
CAM109_map13	0002.CSV	1886.12	0.0170871
CAM109_map13	0002.CSV	1889.98	0.0172302
CAM109_map13	0002.CSV	1893.83	0.0173573
CAM109_map13	0002.CSV	1897.69	0.0174017
CAM109_map13	0002.CSV	1901.55	0.0173354
CAM109_map13	0002.CSV	1905.41	0.0173316
CAM109_map13	0002.CSV	1909.26	0.0174264
CAM109_map13	0002.CSV	1913.12	0.0174589
CAM109_map13	0002.CSV	1916.98	0.0173904
CAM109_map13	0002.CSV	1920.83	0.0175657
CAM109_map13	0002.CSV	1924.69	0.0176024
CAM109_map13	0002.CSV	1928.55	0.0175437
CAM109_map13	0002.CSV	1932.4	0.0175067
CAM109_map13	0002.CSV	1936.26	0.0175377
CAM109_map13	0002.CSV	1940.12	0.0175216
CAM109_map13	0002.CSV	1943.98	0.0177413
CAM109_map13	0002.CSV	1947.83	0.017767
CAM109_map13	0002.CSV	1951.69	0.0177331
CAM109_map13	0002.CSV	1955.55	0.0177615
CAM109_map13	0002.CSV	1959.4	0.0177765
CAM109_map13	0002.CSV	1963.26	0.0177526
CAM109_map13	0002.CSV	1967.12	0.0179255
CAM109_map13	0002.CSV	1970.98	0.017958
CAM109_map13	0002.CSV	1974.83	0.0178908
CAM109_map13	0002.CSV	1978.69	0.0178277
CAM109_map13	0002.CSV	1982.55	0.0178537
CAM109_map13	0002.CSV	1986.4	0.0178615
CAM109_map13	0002.CSV	1990.26	0.017938
CAM109_map13	0002.CSV	1994.12	0.0179534
CAM109_map13	0002.CSV	1997.98	0.0179357
CAM109_map13	0002.CSV	2001.83	0.0179539
CAM109_map13	0002.CSV	2005.69	0.0179783
CAM109_map13	0002.CSV	2009.55	0.0179399
CAM109_map13	0002.CSV	2013.4	0.0179203
CAM109_map13	0002.CSV	2017.26	0.0179658
CAM109_map13	0002.CSV	2021.12	0.0180141
CAM109_map13	0002.CSV	2024.97	0.0179458
CAM109_map13	0002.CSV	2028.83	0.0179601
CAM109_map13	0002.CSV	2032.69	0.0179445
CAM109_map13	0002.CSV	2036.55	0.0179385
CAM109_map13	0002.CSV	2040.4	0.0179544
CAM109_map13	0002.CSV	2044.26	0.0180309
CAM109_map13	0002.CSV	2048.12	0.0180108
CAM109_map13	0002.CSV	2051.97	0.0180629
CAM109_map13	0002.CSV	2055.83	0.0181115
CAM109_map13	0002.CSV	2059.69	0.0181349
CAM109_map13	0002.CSV	2063.55	0.018151
CAM109_map13	0002.CSV	2067.4	0.0182484
CAM109_map13	0002.CSV	2071.26	0.0182601
CAM109_map13	0002.CSV	2075.12	0.0182944
CAM109_map13	0002.CSV	2078.97	0.0183219
CAM109_map13	0002.CSV	2082.83	0.0184138
CAM109_map13	0002.CSV	2086.69	0.0184218
CAM109_map13	0002.CSV	2090.55	0.0184548
CAM109_map13	0002.CSV	2094.4	0.0184527
CAM109_map13	0002.CSV	2098.26	0.0185022
CAM109_map13	0002.CSV	2102.12	0.0185263
CAM109_map13	0002.CSV	2105.97	0.0185766
CAM109_map13	0002.CSV	2109.83	0.0186199
CAM109_map13	0002.CSV	2113.69	0.0187286
CAM109_map13	0002.CSV	2117.55	0.0188027
CAM109_map13	0002.CSV	2121.4	0.0188307
CAM109_map13	0002.CSV	2125.26	0.0188509
CAM109_map13	0002.CSV	2129.12	0.0189333
CAM109_map13	0002.CSV	2132.97	0.0189357
CAM109_map13	0002.CSV	2136.83	0.0189889
CAM109_map13	0002.CSV	2140.69	0.0190458
CAM109_map13	0002.CSV	2144.55	0.0190942
CAM109_map13	0002.CSV	2148.4	0.0191269
CAM109_map13	0002.CSV	2152.26	0.0191887
CAM109_map13	0002.CSV	2156.12	0.0192069
CAM109_map13	0002.CSV	2159.97	0.0192348
CAM109_map13	0002.CSV	2163.83	0.019237
CAM109_map13	0002.CSV	2167.69	0.0192905
CAM109_map13	0002.CSV	2171.55	0.0193585
CAM109_map13	0002.CSV	2175.4	0.0194246
CAM109_map13	0002.CSV	2179.26	0.0194287
CAM109_map13	0002.CSV	2183.12	0.0194872
CAM109_map13	0002.CSV	2186.97	0.0195339
CAM109_map13	0002.CSV	2190.83	0.0195472
CAM109_map13	0002.CSV	2194.69	0.0195246
CAM109_map13	0002.CSV	2198.55	0.0195394
CAM109_map13	0002.CSV	2202.4	0.0195535
CAM109_map13	0002.CSV	2206.26	0.0196519
CAM109_map13	0002.CSV	2210.12	0.0197209
CAM109_map13	0002.CSV	2213.97	0.0197536
CAM109_map13	0002.CSV	2217.83	0.0197065
CAM109_map13	0002.CSV	2221.69	0.0197116
CAM109_map13	0002.CSV	2225.54	0.0196951
CAM109_map13	0002.CSV	2229.4	0.0196718
CAM109_map13	0002.CSV	2233.26	0.0196836
CAM109_map13	0002.CSV	2237.12	0.0197361
CAM109_map13	0002.CSV	2240.97	0.0197311
CAM109_map13	0002.CSV	2244.83	0.0197536
CAM109_map13	0002.CSV	2248.69	0.0197791
CAM109_map13	0002.CSV	2252.54	0.01982
CAM109_map13	0002.CSV	2256.4	0.0198446
CAM109_map13	0002.CSV	2260.26	0.0198592
CAM109_map13	0002.CSV	2264.11	0.0198084
CAM109_map13	0002.CSV	2267.97	0.0197617
CAM109_map13	0002.CSV	2271.83	0.0197508
CAM109_map13	0002.CSV	2275.69	0.0198013
CAM109_map13	0002.CSV	2279.54	0.0197785
CAM109_map13	0002.CSV	2283.4	0.0197115
CAM109_map13	0002.CSV	2287.26	0.0196866
CAM109_map13	0002.CSV	2291.11	0.0197573
CAM109_map13	0002.CSV	2294.97	0.0197158
CAM109_map13	0002.CSV	2298.83	0.0196894
CAM109_map13	0002.CSV	2302.69	0.0196701
CAM109_map13	0002.CSV	2306.54	0.0195814
CAM109_map13	0002.CSV	2310.4	0.0194773
CAM109_map13	0002.CSV	2314.26	0.0193703
CAM109_map13	0002.CSV	2318.11	0.0189261
CAM109_map13	0002.CSV	2321.97	0.0183388
CAM109_map13	0002.CSV	2325.83	0.017678
CAM109_map13	0002.CSV	2329.69	0.0172485
CAM109_map13	0002.CSV	2333.54	0.0166682
CAM109_map13	0002.CSV	2337.4	0.0159418
CAM109_map13	0002.CSV	2341.26	0.0159251
CAM109_map13	0002.CSV	2345.11	0.0178092
CAM109_map13	0002.CSV	2348.97	0.018166
CAM109_map13	0002.CSV	2352.83	0.0164871
CAM109_map13	0002.CSV	2356.69	0.0119665
CAM109_map13	0002.CSV	2360.54	0.00871412
CAM109_map13	0002.CSV	2364.4	0.0112493
CAM109_map13	0002.CSV	2368.26	0.015983
CAM109_map13	0002.CSV	2372.11	0.0190322
CAM109_map13	0002.CSV	2375.97	0.0202266
CAM109_map13	0002.CSV	2379.83	0.0203966
CAM109_map13	0002.CSV	2383.69	0.02023
CAM109_map13	0002.CSV	2387.54	0.0199568
CAM109_map13	0002.CSV	2391.4	0.0197486
CAM109_map13	0002.CSV	2395.26	0.0196575
CAM109_map13	0002.CSV	2399.11	0.0197016
CAM109_map13	0002.CSV	2402.97	0.0197555
CAM109_map13	0002.CSV	2406.83	0.019768
CAM109_map13	0002.CSV	2410.68	0.019753
CAM109_map13	0002.CSV	2414.54	0.0197552
CAM109_map13	0002.CSV	2418.4	0.0197628
CAM109_map13	0002.CSV	2422.26	0.0198284
CAM109_map13	0002.CSV	2426.11	0.0198521
CAM109_map13	0002.CSV	2429.97	0.019819
CAM109_map13	0002.CSV	2433.83	0.0198158
CAM109_map13	0002.CSV	2437.68	0.0198465
CAM109_map13	0002.CSV	2441.54	0.0198722
CAM109_map13	0002.CSV	2445.4	0.0199039
CAM109_map13	0002.CSV	2449.26	0.0198822
CAM109_map13	0002.CSV	2453.11	0.0198713
CAM109_map13	0002.CSV	2456.97	0.0199329
CAM109_map13	0002.CSV	2460.83	0.0200638
CAM109_map13	0002.CSV	2464.68	0.0201598
CAM109_map13	0002.CSV	2468.54	0.0202221
CAM109_map13	0002.CSV	2472.4	0.0203454
CAM109_map13	0002.CSV	2476.26	0.0205574
CAM109_map13	0002.CSV	2480.11	0.020768
CAM109_map13	0002.CSV	2483.97	0.0209717
CAM109_map13	0002.CSV	2487.83	0.0211434
CAM109_map13	0002.CSV	2491.68	0.0212837
CAM109_map13	0002.CSV	2495.54	0.0214118
CAM109_map13	0002.CSV	2499.4	0.0214753
CAM109_map13	0002.CSV	2503.26	0.0214319
CAM109_map13	0002.CSV	2507.11	0.0213958
CAM109_map13	0002.CSV	2510.97	0.0214433
CAM109_map13	0002.CSV	2514.83	0.0215938
CAM109_map13	0002.CSV	2518.68	0.0217475
CAM109_map13	0002.CSV	2522.54	0.0217722
CAM109_map13	0002.CSV	2526.4	0.0216022
CAM109_map13	0002.CSV	2530.26	0.0214182
CAM109_map13	0002.CSV	2534.11	0.0212642
CAM109_map13	0002.CSV	2537.97	0.0211501
CAM109_map13	0002.CSV	2541.83	0.021056
CAM109_map13	0002.CSV	2545.68	0.0209828
CAM109_map13	0002.CSV	2549.54	0.0208972
CAM109_map13	0002.CSV	2553.4	0.0207776
CAM109_map13	0002.CSV	2557.26	0.0206276
CAM109_map13	0002.CSV	2561.11	0.0205495
CAM109_map13	0002.CSV	2564.97	0.0204949
CAM109_map13	0002.CSV	2568.83	0.0204216
CAM109_map13	0002.CSV	2572.68	0.0203686
CAM109_map13	0002.CSV	2576.54	0.0203525
CAM109_map13	0002.CSV	2580.4	0.0202768
CAM109_map13	0002.CSV	2584.25	0.020231
CAM109_map13	0002.CSV	2588.11	0.0202434
CAM109_map13	0002.CSV	2591.97	0.0202975
CAM109_map13	0002.CSV	2595.83	0.0202627
CAM109_map13	0002.CSV	2599.68	0.0202203
CAM109_map13	0002.CSV	2603.54	0.0202145
CAM109_map13	0002.CSV	2607.4	0.0202565
CAM109_map13	0002.CSV	2611.25	0.0202831
CAM109_map13	0002.CSV	2615.11	0.0203178
CAM109_map13	0002.CSV	2618.97	0.0203314
CAM109_map13	0002.CSV	2622.82	0.0204272
CAM109_map13	0002.CSV	2626.68	0.0204803
CAM109_map13	0002.CSV	2630.54	0.020418
CAM109_map13	0002.CSV	2634.4	0.0204076
CAM109_map13	0002.CSV	2638.25	0.0203947
CAM109_map13	0002.CSV	2642.11	0.0202354
CAM109_map13	0002.CSV	2645.97	0.020103
CAM109_map13	0002.CSV	2649.82	0.0200717
CAM109_map13	0002.CSV	2653.68	0.0200255
CAM109_map13	0002.CSV	2657.54	0.0199554
CAM109_map13	0002.CSV	2661.4	0.0199331
CAM109_map13	0002.CSV	2665.25	0.019914
CAM109_map13	0002.CSV	2669.11	0.0199456
CAM109_map13	0002.CSV	2672.97	0.0201013
CAM109_map13	0002.CSV	2676.82	0.0203112
CAM109_map13	0002.CSV	2680.68	0.0202545
CAM109_map13	0002.CSV	2684.54	0.0199427
CAM109_map13	0002.CSV	2688.4	0.0198081
CAM109_map13	0002.CSV	2692.25	0.0198702
CAM109_map13	0002.CSV	2696.11	0.019959
CAM109_map13	0002.CSV	2699.97	0.0199692
CAM109_map13	0002.CSV	2703.82	0.0199427
CAM109_map13	0002.CSV	2707.68	0.0200171
CAM109_map13	0002.CSV	2711.54	0.0200284
CAM109_map13	0002.CSV	2715.4	0.0200135
CAM109_map13	0002.CSV	2719.25	0.0201747
CAM109_map13	0002.CSV	2723.11	0.020468
CAM109_map13	0002.CSV	2726.97	0.0204463
CAM109_map13	0002.CSV	2730.82	0.020123
CAM109_map13	0002.CSV	2734.68	0.0200934
CAM109_map13	0002.CSV	2738.54	0.0201692
CAM109_map13	0002.CSV	2742.4	0.0202247
CAM109_map13	0002.CSV	2746.25	0.0204991
CAM109_map13	0002.CSV	2750.11	0.0205317
CAM109_map13	0002.CSV	2753.97	0.0203222
CAM109_map13	0002.CSV	2757.82	0.0202578
CAM109_map13	0002.CSV	2761.68	0.0202134
CAM109_map13	0002.CSV	2765.54	0.0202468
CAM109_map13	0002.CSV	2769.39	0.0204367
CAM109_map13	0002.CSV	2773.25	0.0206988
CAM109_map13	0002.CSV	2777.11	0.0206643
CAM109_map13	0002.CSV	2780.97	0.0205197
CAM109_map13	0002.CSV	2784.82	0.0206904
CAM109_map13	0002.CSV	2788.68	0.0210576
CAM109_map13	0002.CSV	2792.54	0.0211757
CAM109_map13	0002.CSV	2796.39	0.021199
CAM109_map13	0002.CSV	2800.25	0.0210595
CAM109_map13	0002.CSV	2804.11	0.0208709
CAM109_map13	0002.CSV	2807.97	0.0210745
CAM109_map13	0002.CSV	2811.82	0.0211112
CAM109_map13	0002.CSV	2815.68	0.0210448
CAM109_map13	0002.CSV	2819.54	0.0212389
CAM109_map13	0002.CSV	2823.39	0.0214182
CAM109_map13	0002.CSV	2827.25	0.0215169
CAM109_map13	0002.CSV	2831.11	0.0219698
CAM109_map13	0002.CSV	2834.97	0.0226853
CAM109_map13	0002.CSV	2838.82	0.0233445
CAM109_map13	0002.CSV	2842.68	0.0241132
CAM109_map13	0002.CSV	2846.54	0.0255952
CAM109_map13	0002.CSV	2850.39	0.0263887
CAM109_map13	0002.CSV	2854.25	0.0258005
CAM109_map13	0002.CSV	2858.11	0.0250105
CAM109_map13	0002.CSV	2861.97	0.0242641
CAM109_map13	0002.CSV	2865.82	0.0237492
CAM109_map13	0002.CSV	2869.68	0.0237891
CAM109_map13	0002.CSV	2873.54	0.0238958
CAM109_map13	0002.CSV	2877.39	0.0234027
CAM109_map13	0002.CSV	2881.25	0.0230505
CAM109_map13	0002.CSV	2885.11	0.0231927
CAM109_map13	0002.CSV	2888.97	0.0235628
CAM109_map13	0002.CSV	2892.82	0.0241681
CAM109_map13	0002.CSV	2896.68	0.0246609
CAM109_map13	0002.CSV	2900.54	0.0249787
CAM109_map13	0002.CSV	2904.39	0.0256701
CAM109_map13	0002.CSV	2908.25	0.0269101
CAM109_map13	0002.CSV	2912.11	0.0288173
CAM109_map13	0002.CSV	2915.97	0.0303919
CAM109_map13	0002.CSV	2919.82	0.0304219
CAM109_map13	0002.CSV	2923.68	0.029425
CAM109_map13	0002.CSV	2927.54	0.0285083
CAM109_map13	0002.CSV	2931.39	0.027279
CAM109_map13	0002.CSV	2935.25	0.0257939
CAM109_map13	0002.CSV	2939.11	0.0249656
CAM109_map13	0002.CSV	2942.96	0.0248936
CAM109_map13	0002.CSV	2946.82	0.0247669
CAM109_map13	0002.CSV	2950.68	0.0244249
CAM109_map13	0002.CSV	2954.54	0.0239223
CAM109_map13	0002.CSV	2958.39	0.0233521
CAM109_map13	0002.CSV	2962.25	0.0230253
CAM109_map13	0002.CSV	2966.11	0.0224259
CAM109_map13	0002.CSV	2969.96	0.0221094
CAM109_map13	0002.CSV	2973.82	0.022292
CAM109_map13	0002.CSV	2977.68	0.022389
CAM109_map13	0002.CSV	2981.53	0.0219639
CAM109_map13	0002.CSV	2985.39	0.0212362
CAM109_map13	0002.CSV	2989.25	0.0211939
CAM109_map13	0002.CSV	2993.11	0.0215265
CAM109_map13	0002.CSV	2996.96	0.0214407
CAM109_map13	0002.CSV	3000.82	0.0210284
CAM109_map13	0002.CSV	3004.68	0.0207751
CAM109_map13	0002.CSV	3008.53	0.0210403
CAM109_map13	0002.CSV	3012.39	0.0214416
CAM109_map13	0002.CSV	3016.25	0.0214454
CAM109_map13	0002.CSV	3020.11	0.0212093
CAM109_map13	0002.CSV	3023.96	0.0210329
CAM109_map13	0002.CSV	3027.82	0.0210058
CAM109_map13	0002.CSV	3031.68	0.0212536
CAM109_map13	0002.CSV	3035.53	0.0213179
CAM109_map13	0002.CSV	3039.39	0.0212998
CAM109_map13	0002.CSV	3043.25	0.0213723
CAM109_map13	0002.CSV	3047.11	0.021262
CAM109_map13	0002.CSV	3050.96	0.0212219
CAM109_map13	0002.CSV	3054.82	0.0211934
CAM109_map13	0002.CSV	3058.68	0.0210418
CAM109_map13	0002.CSV	3062.53	0.0211288
CAM109_map13	0002.CSV	3066.39	0.0213907
CAM109_map13	0002.CSV	3070.25	0.0212877
CAM109_map13	0002.CSV	3074.11	0.0212688
CAM109_map13	0002.CSV	3077.96	0.0215343
CAM109_map13	0002.CSV	3081.82	0.0217706
CAM109_map13	0002.CSV	3085.68	0.0217469
CAM109_map13	0002.CSV	3089.53	0.0215092
CAM109_map13	0002.CSV	3093.39	0.0212237
CAM109_map13	0002.CSV	3097.25	0.0212588
CAM109_map13	0002.CSV	3101.11	0.0213435
CAM109_map13	0002.CSV	3104.96	0.0213105
CAM109_map13	0002.CSV	3108.82	0.0215076
CAM109_map13	0002.CSV	3112.68	0.0217026
CAM109_map13	0002.CSV	3116.53	0.0218519
CAM109_map13	0002.CSV	3120.39	0.0218054
CAM109_map13	0002.CSV	3124.25	0.0215498
CAM109_map13	0002.CSV	3128.11	0.0213677
CAM109_map13	0002.CSV	3131.96	0.0212241
CAM109_map13	0002.CSV	3135.82	0.021356
CAM109_map13	0002.CSV	3139.68	0.0215674
CAM109_map13	0002.CSV	3143.53	0.0213818
CAM109_map13	0002.CSV	3147.39	0.0214245
CAM109_map13	0002.CSV	3151.25	0.0217746
CAM109_map13	0002.CSV	3155.1	0.021651
CAM109_map13	0002.CSV	3158.96	0.0212214
CAM109_map13	0002.CSV	3162.82	0.0210561
CAM109_map13	0002.CSV	3166.68	0.0210445
CAM109_map13	0002.CSV	3170.53	0.0210874
CAM109_map13	0002.CSV	3174.39	0.0211168
CAM109_map13	0002.CSV	3178.25	0.0212155
CAM109_map13	0002.CSV	3182.1	0.0212933
CAM109_map13	0002.CSV	3185.96	0.021372
CAM109_map13	0002.CSV	3189.82	0.0213545
CAM109_map13	0002.CSV	3193.68	0.021233
CAM109_map13	0002.CSV	3197.53	0.0212328
CAM109_map13	0002.CSV	3201.39	0.0213876
CAM109_map13	0002.CSV	3205.25	0.0215122
CAM109_map13	0002.CSV	3209.1	0.0215339
CAM109_map13	0002.CSV	3212.96	0.0216814
CAM109_map13	0002.CSV	3216.82	0.021818
CAM109_map13	0002.CSV	3220.68	0.021712
CAM109_map13	0002.CSV	3224.53	0.0216728
CAM109_map13	0002.CSV	3228.39	0.0219987
CAM109_map13	0002.CSV	3232.25	0.022328
CAM109_map13	0002.CSV	3236.1	0.0221533
CAM109_map13	0002.CSV	3239.96	0.0219043
CAM109_map13	0002.CSV	3243.82	0.0221074
CAM109_map13	0002.CSV	3247.68	0.0222783
CAM109_map13	0002.CSV	3251.53	0.0221352
CAM109_map13	0002.CSV	3255.39	0.0220887
CAM109_map13	0002.CSV	3259.25	0.0218661
CAM109_map13	0002.CSV	3263.1	0.0218756
CAM109_map13	0002.CSV	3266.96	0.0223213
CAM109_map13	0002.CSV	3270.82	0.0227366
CAM109_map13	0002.CSV	3274.68	0.022585
CAM109_map13	0002.CSV	3278.53	0.022208
CAM109_map13	0002.CSV	3282.39	0.0220755
CAM109_map13	0002.CSV	3286.25	0.0221288
CAM109_map13	0002.CSV	3290.1	0.0224767
CAM109_map13	0002.CSV	3293.96	0.0228324
CAM109_map13	0002.CSV	3297.82	0.022652
CAM109_map13	0002.CSV	3301.67	0.0226123
CAM109_map13	0002.CSV	3305.53	0.0228886
CAM109_map13	0002.CSV	3309.39	0.0227018
CAM109_map13	0002.CSV	3313.25	0.0221953
CAM109_map13	0002.CSV	3317.1	0.0219549
CAM109_map13	0002.CSV	3320.96	0.0221253
CAM109_map13	0002.CSV	3324.82	0.0223791
CAM109_map13	0002.CSV	3328.67	0.0221317
CAM109_map13	0002.CSV	3332.53	0.0220132
CAM109_map13	0002.CSV	3336.39	0.022493
CAM109_map13	0002.CSV	3340.24	0.0227959
CAM109_map13	0002.CSV	3344.1	0.0225606
CAM109_map13	0002.CSV	3347.96	0.0224937
CAM109_map13	0002.CSV	3351.82	0.0224484
CAM109_map13	0002.CSV	3355.67	0.0222186
CAM109_map13	0002.CSV	3359.53	0.0223495
CAM109_map13	0002.CSV	3363.39	0.0226392
CAM109_map13	0002.CSV	3367.24	0.0229234
CAM109_map13	0002.CSV	3371.1	0.0227701
CAM109_map13	0002.CSV	3374.96	0.0224374
CAM109_map13	0002.CSV	3378.82	0.0221741
CAM109_map13	0002.CSV	3382.67	0.0218751
CAM109_map13	0002.CSV	3386.53	0.022076
CAM109_map13	0002.CSV	3390.39	0.0225701
CAM109_map13	0002.CSV	3394.24	0.0227849
CAM109_map13	0002.CSV	3398.1	0.0227996
CAM109_map13	0002.CSV	3401.96	0.0225839
CAM109_map13	0002.CSV	3405.82	0.0223103
CAM109_map13	0002.CSV	3409.67	0.0223621
CAM109_map13	0002.CSV	3413.53	0.0221295
CAM109_map13	0002.CSV	3417.39	0.021608
CAM109_map13	0002.CSV	3421.24	0.0213242
CAM109_map13	0002.CSV	3425.1	0.0215067
CAM109_map13	0002.CSV	3428.96	0.0219077
CAM109_map13	0002.CSV	3432.82	0.0221511
CAM109_map13	0002.CSV	3436.67	0.0219599
CAM109_map13	0002.CSV	3440.53	0.0212364
CAM109_map13	0002.CSV	3444.39	0.0208046
CAM109_map13	0002.CSV	3448.24	0.0208169
CAM109_map13	0002.CSV	3452.1	0.0206438
CAM109_map13	0002.CSV	3455.96	0.0206986
CAM109_map13	0002.CSV	3459.82	0.0210715
CAM109_map13	0002.CSV	3463.67	0.0214839
CAM109_map13	0002.CSV	3467.53	0.0216766
CAM109_map13	0002.CSV	3471.39	0.0212213
CAM109_map13	0002.CSV	3475.24	0.0208282
CAM109_map13	0002.CSV	3479.1	0.020893
CAM109_map13	0002.CSV	3482.96	0.0209356
CAM109_map13	0002.CSV	3486.82	0.0209719
CAM109_map13	0002.CSV	3490.67	0.0208552
CAM109_map13	0002.CSV	3494.53	0.0208587
CAM109_map13	0002.CSV	3498.39	0.020805
CAM109_map13	0002.CSV	3502.24	0.0206867
CAM109_map13	0002.CSV	3506.1	0.0204192
CAM109_map13	0002.CSV	3509.96	0.0202451
CAM109_map13	0002.CSV	3513.81	0.020362
CAM109_map13	0002.CSV	3517.67	0.0199466
CAM109_map13	0002.CSV	3521.53	0.0198856
CAM109_map13	0002.CSV	3525.39	0.0200079
CAM109_map13	0002.CSV	3529.24	0.019868
CAM109_map13	0002.CSV	3533.1	0.0199434
CAM109_map13	0002.CSV	3536.96	0.0202107
CAM109_map13	0002.CSV	3540.81	0.0203817
CAM109_map13	0002.CSV	3544.67	0.0207229
CAM109_map13	0002.CSV	3548.53	0.0205754
CAM109_map13	0002.CSV	3552.39	0.0199513
CAM109_map13	0002.CSV	3556.24	0.0196629
CAM109_map13	0002.CSV	3560.1	0.0194493
CAM109_map13	0002.CSV	3563.96	0.0190348
CAM109_map13	0002.CSV	3567.81	0.0196412
CAM109_map13	0002.CSV	3571.67	0.0196709
CAM109_map13	0002.CSV	3575.53	0.0191185
CAM109_map13	0002.CSV	3579.39	0.0194075
CAM109_map13	0002.CSV	3583.24	0.0196539
CAM109_map13	0002.CSV	3587.1	0.0198294
CAM109_map13	0002.CSV	3590.96	0.0196421
CAM109_map13	0002.CSV	3594.81	0.0192072
CAM109_map13	0002.CSV	3598.67	0.0194262
CAM109_map13	0002.CSV	3602.53	0.0194832
CAM109_map13	0002.CSV	3606.39	0.0187739
CAM109_map13	0002.CSV	3610.24	0.0182565
CAM109_map13	0002.CSV	3614.1	0.0182241
CAM109_map13	0002.CSV	3617.96	0.0188333
CAM109_map13	0002.CSV	3621.81	0.0191875
CAM109_map13	0002.CSV	3625.67	0.0182807
CAM109_map13	0002.CSV	3629.53	0.0183837
CAM109_map13	0002.CSV	3633.39	0.0192151
CAM109_map13	0002.CSV	3637.24	0.0189224
CAM109_map13	0002.CSV	3641.1	0.0185161
CAM109_map13	0002.CSV	3644.96	0.0177804
CAM109_map13	0002.CSV	3648.81	0.0185374
CAM109_map13	0002.CSV	3652.67	0.0197593
CAM109_map13	0002.CSV	3656.53	0.0196
CAM109_map13	0002.CSV	3660.38	0.0193807
CAM109_map13	0002.CSV	3664.24	0.0184459
CAM109_map13	0002.CSV	3668.1	0.0175038
CAM109_map13	0002.CSV	3671.96	0.0173741
CAM109_map13	0002.CSV	3675.81	0.0181756
CAM109_map13	0002.CSV	3679.67	0.0190368
CAM109_map13	0002.CSV	3683.53	0.0187343
CAM109_map13	0002.CSV	3687.38	0.0185749
CAM109_map13	0002.CSV	3691.24	0.0195073
CAM109_map13	0002.CSV	3695.1	0.0191926
CAM109_map13	0002.CSV	3698.95	0.0184316
CAM109_map13	0002.CSV	3702.81	0.0181993
CAM109_map13	0002.CSV	3706.67	0.0177779
CAM109_map13	0002.CSV	3710.53	0.0178653
CAM109_map13	0002.CSV	3714.38	0.0186643
CAM109_map13	0002.CSV	3718.24	0.0180973
CAM109_map13	0002.CSV	3722.1	0.0177177
CAM109_map13	0002.CSV	3725.95	0.0179354
CAM109_map13	0002.CSV	3729.81	0.0177004
CAM109_map13	0002.CSV	3733.67	0.0177893
CAM109_map13	0002.CSV	3737.53	0.0189831
CAM109_map13	0002.CSV	3741.38	0.0180685
CAM109_map13	0002.CSV	3745.24	0.0168079
CAM109_map13	0002.CSV	3749.1	0.0168336
CAM109_map13	0002.CSV	3752.95	0.0180912
CAM109_map13	0002.CSV	3756.81	0.0183543
CAM109_map13	0002.CSV	3760.67	0.0182067
CAM109_map13	0002.CSV	3764.53	0.0178464
CAM109_map13	0002.CSV	3768.38	0.018028
CAM109_map13	0002.CSV	3772.24	0.0183995
CAM109_map13	0002.CSV	3776.1	0.0181762
CAM109_map13	0002.CSV	3779.95	0.0183477
CAM109_map13	0002.CSV	3783.81	0.0184618
CAM109_map13	0002.CSV	3787.67	0.0184082
CAM109_map13	0002.CSV	3791.53	0.0180051
CAM109_map13	0002.CSV	3795.38	0.0172765
CAM109_map13	0002.CSV	3799.24	0.017057
CAM109_map13	0002.CSV	3803.1	0.0178372
CAM109_map13	0002.CSV	3806.95	0.0184124
CAM109_map13	0002.CSV	3810.81	0.0180426
CAM109_map13	0002.CSV	3814.67	0.017421
CAM109_map13	0002.CSV	3818.53	0.0174827
CAM109_map13	0002.CSV	3822.38	0.0180291
CAM109_map13	0002.CSV	3826.24	0.017939
CAM109_map13	0002.CSV	3830.1	0.0176697
CAM109_map13	0002.CSV	3833.95	0.0175644
CAM109_map13	0002.CSV	3837.81	0.0177351
CAM109_map13	0002.CSV	3841.67	0.0185341
CAM109_map13	0002.CSV	3845.53	0.0183113
CAM109_map13	0002.CSV	3849.38	0.0170583
CAM109_map13	0002.CSV	3853.24	0.0170624
CAM109_map13	0002.CSV	3857.1	0.0182205
CAM109_map13	0002.CSV	3860.95	0.0175367
CAM109_map13	0002.CSV	3864.81	0.0174427
CAM109_map13	0002.CSV	3868.67	0.0176877
CAM109_map13	0002.CSV	3872.52	0.0182268
CAM109_map13	0002.CSV	3876.38	0.0181895
CAM109_map13	0002.CSV	3880.24	0.0178144
CAM109_map13	0002.CSV	3884.1	0.018293
CAM109_map13	0002.CSV	3887.95	0.01835
CAM109_map13	0002.CSV	3891.81	0.0182225
CAM109_map13	0002.CSV	3895.67	0.0177829
CAM109_map13	0002.CSV	3899.52	0.0172195
CAM109_map13	0002.CSV	3903.38	0.018163
CAM109_map13	0002.CSV	3907.24	0.0187691
CAM109_map13	0002.CSV	3911.1	0.0182617
CAM109_map13	0002.CSV	3914.95	0.0178453
CAM109_map13	0002.CSV	3918.81	0.0181126
CAM109_map13	0002.CSV	3922.67	0.0182239
CAM109_map13	0002.CSV	3926.52	0.0181611
CAM109_map13	0002.CSV	3930.38	0.0183449
CAM109_map13	0002.CSV	3934.24	0.0188251
CAM109_map13	0002.CSV	3938.09	0.0184879
CAM109_map13	0002.CSV	3941.95	0.0181754
CAM109_map13	0002.CSV	3945.81	0.0182618
CAM109_map13	0002.CSV	3949.67	0.0184208
CAM109_map13	0002.CSV	3953.52	0.0184928
CAM109_map13	0002.CSV	3957.38	0.0184244
CAM109_map13	0002.CSV	3961.24	0.0184478
CAM109_map13	0002.CSV	3965.09	0.0184311
CAM109_map13	0002.CSV	3968.95	0.0183432
CAM109_map13	0002.CSV	3972.81	0.018359
CAM109_map13	0002.CSV	3976.67	0.0184985
CAM109_map13	0002.CSV	3980.52	0.018527
CAM109_map13	0002.CSV	3984.38	0.0185476
CAM109_map13	0002.CSV	3988.24	0.0184282
CAM109_map13	0002.CSV	3992.09	0.0184392
CAM109_map13	0002.CSV	3995.95	0.0185284
CAM109_map13	0002.CSV	3999.81	0.018357
CAM109_map13	0003.CSV	674.992	0.0168913
CAM109_map13	0003.CSV	678.849	0.0175034
CAM109_map13	0003.CSV	682.706	0.0180886
CAM109_map13	0003.CSV	686.563	0.0191266
CAM109_map13	0003.CSV	690.42	0.0197282
CAM109_map13	0003.CSV	694.277	0.0225276
CAM109_map13	0003.CSV	698.134	0.0258677
CAM109_map13	0003.CSV	701.991	0.0249182
CAM109_map13	0003.CSV	705.849	0.0236614
CAM109_map13	0003.CSV	709.706	0.0273684
CAM109_map13	0003.CSV	713.563	0.0263924
CAM109_map13	0003.CSV	717.42	0.0191947
CAM109_map13	0003.CSV	721.277	0.0153654
CAM109_map13	0003.CSV	725.134	0.0152481
CAM109_map13	0003.CSV	728.991	0.015382
CAM109_map13	0003.CSV	732.848	0.0156754
CAM109_map13	0003.CSV	736.705	0.0159872
CAM109_map13	0003.CSV	740.562	0.0160859
CAM109_map13	0003.CSV	744.42	0.0162493
CAM109_map13	0003.CSV	748.277	0.0165894
CAM109_map13	0003.CSV	752.134	0.0163843
CAM109_map13	0003.CSV	755.991	0.0164678
CAM109_map13	0003.CSV	759.848	0.0167008
CAM109_map13	0003.CSV	763.705	0.0168456
CAM109_map13	0003.CSV	767.562	0.0166998
CAM109_map13	0003.CSV	771.419	0.0168915
CAM109_map13	0003.CSV	775.276	0.0170441
CAM109_map13	0003.CSV	779.133	0.0169433
CAM109_map13	0003.CSV	782.99	0.0167163
CAM109_map13	0003.CSV	786.848	0.0167832
CAM109_map13	0003.CSV	790.705	0.0167673
CAM109_map13	0003.CSV	794.562	0.0170607
CAM109_map13	0003.CSV	798.419	0.0176061
CAM109_map13	0003.CSV	802.276	0.0180528
CAM109_map13	0003.CSV	806.133	0.0181936
CAM109_map13	0003.CSV	809.99	0.0185573
CAM109_map13	0003.CSV	813.847	0.0189769
CAM109_map13	0003.CSV	817.704	0.0200766
CAM109_map13	0003.CSV	821.562	0.0213496
CAM109_map13	0003.CSV	825.419	0.0226399
CAM109_map13	0003.CSV	829.276	0.0239806
CAM109_map13	0003.CSV	833.133	0.025971
CAM109_map13	0003.CSV	836.99	0.0284762
CAM109_map13	0003.CSV	840.847	0.031802
CAM109_map13	0003.CSV	844.704	0.0350031
CAM109_map13	0003.CSV	848.561	0.0396165
CAM109_map13	0003.CSV	852.418	0.0436645
CAM109_map13	0003.CSV	856.275	0.0431813
CAM109_map13	0003.CSV	860.132	0.0390228
CAM109_map13	0003.CSV	863.99	0.0330397
CAM109_map13	0003.CSV	867.847	0.0265456
CAM109_map13	0003.CSV	871.704	0.0214889
CAM109_map13	0003.CSV	875.561	0.0184565
CAM109_map13	0003.CSV	879.418	0.0171517
CAM109_map13	0003.CSV	883.275	0.0165465
CAM109_map13	0003.CSV	887.132	0.0162995
CAM109_map13	0003.CSV	890.989	0.0162476
CAM109_map13	0003.CSV	894.846	0.0162588
CAM109_map13	0003.CSV	898.703	0.0163022
CAM109_map13	0003.CSV	902.561	0.0165097
CAM109_map13	0003.CSV	906.418	0.0166884
CAM109_map13	0003.CSV	910.275	0.0167322
CAM109_map13	0003.CSV	914.132	0.0166496
CAM109_map13	0003.CSV	917.989	0.0168142
CAM109_map13	0003.CSV	921.846	0.0169719
CAM109_map13	0003.CSV	925.703	0.0171266
CAM109_map13	0003.CSV	929.56	0.0171735
CAM109_map13	0003.CSV	933.417	0.017283
CAM109_map13	0003.CSV	937.274	0.0173924
CAM109_map13	0003.CSV	941.131	0.0174944
CAM109_map13	0003.CSV	944.989	0.0173789
CAM109_map13	0003.CSV	948.846	0.0174482
CAM109_map13	0003.CSV	952.703	0.0175766
CAM109_map13	0003.CSV	956.56	0.0176143
CAM109_map13	0003.CSV	960.417	0.0174506
CAM109_map13	0003.CSV	964.274	0.0173098
CAM109_map13	0003.CSV	968.131	0.0172809
CAM109_map13	0003.CSV	971.988	0.0174557
CAM109_map13	0003.CSV	975.845	0.0176922
CAM109_map13	0003.CSV	979.702	0.017924
CAM109_map13	0003.CSV	983.559	0.018038
CAM109_map13	0003.CSV	987.417	0.0182285
CAM109_map13	0003.CSV	991.274	0.0184024
CAM109_map13	0003.CSV	995.131	0.018579
CAM109_map13	0003.CSV	998.988	0.0186582
CAM109_map13	0003.CSV	1002.85	0.0188147
CAM109_map13	0003.CSV	1006.7	0.018988
CAM109_map13	0003.CSV	1010.56	0.0192911
CAM109_map13	0003.CSV	1014.42	0.019488
CAM109_map13	0003.CSV	1018.27	0.0195172
CAM109_map13	0003.CSV	1022.13	0.0194758
CAM109_map13	0003.CSV	1025.99	0.0196173
CAM109_map13	0003.CSV	1029.85	0.0197838
CAM109_map13	0003.CSV	1033.7	0.0200506
CAM109_map13	0003.CSV	1037.56	0.0201797
CAM109_map13	0003.CSV	1041.42	0.0203071
CAM109_map13	0003.CSV	1045.27	0.0203135
CAM109_map13	0003.CSV	1049.13	0.0203898
CAM109_map13	0003.CSV	1052.99	0.0205617
CAM109_map13	0003.CSV	1056.84	0.0210093
CAM109_map13	0003.CSV	1060.7	0.0215258
CAM109_map13	0003.CSV	1064.56	0.0220263
CAM109_map13	0003.CSV	1068.42	0.0223605
CAM109_map13	0003.CSV	1072.27	0.0226635
CAM109_map13	0003.CSV	1076.13	0.0230985
CAM109_map13	0003.CSV	1079.99	0.0240697
CAM109_map13	0003.CSV	1083.84	0.0237276
CAM109_map13	0003.CSV	1087.7	0.0220771
CAM109_map13	0003.CSV	1091.56	0.0212877
CAM109_map13	0003.CSV	1095.41	0.0212292
CAM109_map13	0003.CSV	1099.27	0.0212892
CAM109_map13	0003.CSV	1103.13	0.0214275
CAM109_map13	0003.CSV	1106.99	0.0217026
CAM109_map13	0003.CSV	1110.84	0.0221049
CAM109_map13	0003.CSV	1114.7	0.0223639
CAM109_map13	0003.CSV	1118.56	0.0224302
CAM109_map13	0003.CSV	1122.41	0.022389
CAM109_map13	0003.CSV	1126.27	0.0223544
CAM109_map13	0003.CSV	1130.13	0.0221985
CAM109_map13	0003.CSV	1133.99	0.0221274
CAM109_map13	0003.CSV	1137.84	0.0220927
CAM109_map13	0003.CSV	1141.7	0.0220655
CAM109_map13	0003.CSV	1145.56	0.0220044
CAM109_map13	0003.CSV	1149.41	0.0219978
CAM109_map13	0003.CSV	1153.27	0.0219222
CAM109_map13	0003.CSV	1157.13	0.0218661
CAM109_map13	0003.CSV	1160.99	0.0217416
CAM109_map13	0003.CSV	1164.84	0.0216308
CAM109_map13	0003.CSV	1168.7	0.0214262
CAM109_map13	0003.CSV	1172.56	0.0212825
CAM109_map13	0003.CSV	1176.41	0.0211614
CAM109_map13	0003.CSV	1180.27	0.0210678
CAM109_map13	0003.CSV	1184.13	0.0209579
CAM109_map13	0003.CSV	1187.99	0.0207696
CAM109_map13	0003.CSV	1191.84	0.0204591
CAM109_map13	0003.CSV	1195.7	0.0202963
CAM109_map13	0003.CSV	1199.56	0.0201729
CAM109_map13	0003.CSV	1203.41	0.0201362
CAM109_map13	0003.CSV	1207.27	0.0201261
CAM109_map13	0003.CSV	1211.13	0.0201731
CAM109_map13	0003.CSV	1214.98	0.0202215
CAM109_map13	0003.CSV	1218.84	0.0203175
CAM109_map13	0003.CSV	1222.7	0.0204049
CAM109_map13	0003.CSV	1226.56	0.0205192
CAM109_map13	0003.CSV	1230.41	0.0206464
CAM109_map13	0003.CSV	1234.27	0.0208992
CAM109_map13	0003.CSV	1238.13	0.0211777
CAM109_map13	0003.CSV	1241.98	0.0215327
CAM109_map13	0003.CSV	1245.84	0.0218549
CAM109_map13	0003.CSV	1249.7	0.0221553
CAM109_map13	0003.CSV	1253.56	0.0222821
CAM109_map13	0003.CSV	1257.41	0.0223673
CAM109_map13	0003.CSV	1261.27	0.0224743
CAM109_map13	0003.CSV	1265.13	0.0226409
CAM109_map13	0003.CSV	1268.98	0.0227702
CAM109_map13	0003.CSV	1272.84	0.0228898
CAM109_map13	0003.CSV	1276.7	0.0229736
CAM109_map13	0003.CSV	1280.56	0.0231061
CAM109_map13	0003.CSV	1284.41	0.0231732
CAM109_map13	0003.CSV	1288.27	0.023178
CAM109_map13	0003.CSV	1292.13	0.0230887
CAM109_map13	0003.CSV	1295.98	0.0229705
CAM109_map13	0003.CSV	1299.84	0.0228029
CAM109_map13	0003.CSV	1303.7	0.0227016
CAM109_map13	0003.CSV	1307.56	0.0226515
CAM109_map13	0003.CSV	1311.41	0.0226909
CAM109_map13	0003.CSV	1315.27	0.0227815
CAM109_map13	0003.CSV	1319.13	0.0229833
CAM109_map13	0003.CSV	1322.98	0.0230286
CAM109_map13	0003.CSV	1326.84	0.0230451
CAM109_map13	0003.CSV	1330.7	0.0231492
CAM109_map13	0003.CSV	1334.56	0.0232892
CAM109_map13	0003.CSV	1338.41	0.0236269
CAM109_map13	0003.CSV	1342.27	0.0240814
CAM109_map13	0003.CSV	1346.13	0.0242306
CAM109_map13	0003.CSV	1349.98	0.0245113
CAM109_map13	0003.CSV	1353.84	0.0248598
CAM109_map13	0003.CSV	1357.7	0.0252526
CAM109_map13	0003.CSV	1361.56	0.0257253
CAM109_map13	0003.CSV	1365.41	0.026354
CAM109_map13	0003.CSV	1369.27	0.0267288
CAM109_map13	0003.CSV	1373.13	0.0274028
CAM109_map13	0003.CSV	1376.98	0.0281698
CAM109_map13	0003.CSV	1380.84	0.0286456
CAM109_map13	0003.CSV	1384.7	0.0290546
CAM109_map13	0003.CSV	1388.56	0.0297961
CAM109_map13	0003.CSV	1392.41	0.0302484
CAM109_map13	0003.CSV	1396.27	0.0311202
CAM109_map13	0003.CSV	1400.13	0.031968
CAM109_map13	0003.CSV	1403.98	0.0325461
CAM109_map13	0003.CSV	1407.84	0.0332018
CAM109_map13	0003.CSV	1411.7	0.0337246
CAM109_map13	0003.CSV	1415.55	0.0339911
CAM109_map13	0003.CSV	1419.41	0.0348297
CAM109_map13	0003.CSV	1423.27	0.0355678
CAM109_map13	0003.CSV	1427.12	0.0361043
CAM109_map13	0003.CSV	1430.98	0.0367004
CAM109_map13	0003.CSV	1434.84	0.0376301
CAM109_map13	0003.CSV	1438.7	0.0387695
CAM109_map13	0003.CSV	1442.55	0.0394142
CAM109_map13	0003.CSV	1446.41	0.0399758
CAM109_map13	0003.CSV	1450.27	0.0404519
CAM109_map13	0003.CSV	1454.12	0.0401779
CAM109_map13	0003.CSV	1457.98	0.0405509
CAM109_map13	0003.CSV	1461.84	0.0403745
CAM109_map13	0003.CSV	1465.7	0.0402261
CAM109_map13	0003.CSV	1469.55	0.0399296
CAM109_map13	0003.CSV	1473.41	0.0395806
CAM109_map13	0003.CSV	1477.27	0.0386787
CAM109_map13	0003.CSV	1481.12	0.0375216
CAM109_map13	0003.CSV	1484.98	0.0363515
CAM109_map13	0003.CSV	1488.84	0.035478
CAM109_map13	0003.CSV	1492.7	0.0343545
CAM109_map13	0003.CSV	1496.55	0.033213
CAM109_map13	0003.CSV	1500.41	0.0320579
CAM109_map13	0003.CSV	1504.27	0.0309791
CAM109_map13	0003.CSV	1508.12	0.0299817
CAM109_map13	0003.CSV	1511.98	0.0289384
CAM109_map13	0003.CSV	1515.84	0.027761
CAM109_map13	0003.CSV	1519.7	0.0265667
CAM109_map13	0003.CSV	1523.55	0.0252256
CAM109_map13	0003.CSV	1527.41	0.0239885
CAM109_map13	0003.CSV	1531.27	0.0228148
CAM109_map13	0003.CSV	1535.12	0.021923
CAM109_map13	0003.CSV	1538.98	0.0213036
CAM109_map13	0003.CSV	1542.84	0.0214491
CAM109_map13	0003.CSV	1546.7	0.0207324
CAM109_map13	0003.CSV	1550.55	0.0198219
CAM109_map13	0003.CSV	1554.41	0.0191109
CAM109_map13	0003.CSV	1558.27	0.0189314
CAM109_map13	0003.CSV	1562.12	0.0185911
CAM109_map13	0003.CSV	1565.98	0.0179702
CAM109_map13	0003.CSV	1569.84	0.0176654
CAM109_map13	0003.CSV	1573.69	0.0175809
CAM109_map13	0003.CSV	1577.55	0.0174966
CAM109_map13	0003.CSV	1581.41	0.0169306
CAM109_map13	0003.CSV	1585.27	0.0162532
CAM109_map13	0003.CSV	1589.12	0.0158094
CAM109_map13	0003.CSV	1592.98	0.0155896
CAM109_map13	0003.CSV	1596.84	0.0154814
CAM109_map13	0003.CSV	1600.69	0.0153863
CAM109_map13	0003.CSV	1604.55	0.015399
CAM109_map13	0003.CSV	1608.41	0.0154077
CAM109_map13	0003.CSV	1612.27	0.0151906
CAM109_map13	0003.CSV	1616.12	0.0150761
CAM109_map13	0003.CSV	1619.98	0.0151038
CAM109_map13	0003.CSV	1623.84	0.0149877
CAM109_map13	0003.CSV	1627.69	0.0149428
CAM109_map13	0003.CSV	1631.55	0.0145467
CAM109_map13	0003.CSV	1635.41	0.0145675
CAM109_map13	0003.CSV	1639.27	0.014733
CAM109_map13	0003.CSV	1643.12	0.0142463
CAM109_map13	0003.CSV	1646.98	0.0141575
CAM109_map13	0003.CSV	1650.84	0.0145319
CAM109_map13	0003.CSV	1654.69	0.0149739
CAM109_map13	0003.CSV	1658.55	0.0145322
CAM109_map13	0003.CSV	1662.41	0.0141116
CAM109_map13	0003.CSV	1666.27	0.0138792
CAM109_map13	0003.CSV	1670.12	0.0138624
CAM109_map13	0003.CSV	1673.98	0.014162
CAM109_map13	0003.CSV	1677.84	0.0138959
CAM109_map13	0003.CSV	1681.69	0.0136694
CAM109_map13	0003.CSV	1685.55	0.0140363
[truncated: 53,243 more rows]

## Sheet: CAM109_map14
Map	Select spectrum number	Wavenumbers	Absorbance
[truncated: 46,602 more rows]

[truncated: 1 more sheets: CAM109_map15]
