# Supplementary material for: Thermo-microstratigraphy of shells reveals invisible fire use and possible cooking in the archaeological record
Source: Frontiers journal article supplement (doi:10.3389/feart.2022.869487), 2022-09-01
Supplement: Table_5.XLSX [file Table_5.XLSX]

## Sheet: CAM112_map1
Map	Select spectrum number	Wavenumbers	Absorbance
CAM112A_map1	0001.CSV	674.992	0.059089
CAM112A_map1	0001.CSV	678.849	0.0606427
CAM112A_map1	0001.CSV	682.706	0.0606337
CAM112A_map1	0001.CSV	686.563	0.0623464
CAM112A_map1	0001.CSV	690.42	0.0640234
CAM112A_map1	0001.CSV	694.277	0.0688251
CAM112A_map1	0001.CSV	698.134	0.0744079
CAM112A_map1	0001.CSV	701.991	0.0840708
CAM112A_map1	0001.CSV	705.849	0.104612
CAM112A_map1	0001.CSV	709.706	0.131433
CAM112A_map1	0001.CSV	713.563	0.121257
CAM112A_map1	0001.CSV	717.42	0.0835276
CAM112A_map1	0001.CSV	721.277	0.0609014
CAM112A_map1	0001.CSV	725.134	0.0548892
CAM112A_map1	0001.CSV	728.991	0.0519886
CAM112A_map1	0001.CSV	732.848	0.0503678
CAM112A_map1	0001.CSV	736.705	0.0494339
CAM112A_map1	0001.CSV	740.562	0.0501356
CAM112A_map1	0001.CSV	744.42	0.0505573
CAM112A_map1	0001.CSV	748.277	0.0514574
CAM112A_map1	0001.CSV	752.134	0.0518719
CAM112A_map1	0001.CSV	755.991	0.0528917
CAM112A_map1	0001.CSV	759.848	0.0536686
CAM112A_map1	0001.CSV	763.705	0.0552037
CAM112A_map1	0001.CSV	767.562	0.0558408
CAM112A_map1	0001.CSV	771.419	0.0563
CAM112A_map1	0001.CSV	775.276	0.0559304
CAM112A_map1	0001.CSV	779.133	0.0560811
CAM112A_map1	0001.CSV	782.99	0.0556374
CAM112A_map1	0001.CSV	786.848	0.0553556
CAM112A_map1	0001.CSV	790.705	0.0548384
CAM112A_map1	0001.CSV	794.562	0.0556318
CAM112A_map1	0001.CSV	798.419	0.0563026
CAM112A_map1	0001.CSV	802.276	0.0571088
CAM112A_map1	0001.CSV	806.133	0.0573415
CAM112A_map1	0001.CSV	809.99	0.0581797
CAM112A_map1	0001.CSV	813.847	0.0587049
CAM112A_map1	0001.CSV	817.704	0.0600771
CAM112A_map1	0001.CSV	821.562	0.0614396
CAM112A_map1	0001.CSV	825.419	0.0636138
CAM112A_map1	0001.CSV	829.276	0.0658131
CAM112A_map1	0001.CSV	833.133	0.0685039
CAM112A_map1	0001.CSV	836.99	0.0711783
CAM112A_map1	0001.CSV	840.847	0.076244
CAM112A_map1	0001.CSV	844.704	0.0844455
CAM112A_map1	0001.CSV	848.561	0.0903698
CAM112A_map1	0001.CSV	852.418	0.0931051
CAM112A_map1	0001.CSV	856.275	0.105134
CAM112A_map1	0001.CSV	860.132	0.129093
CAM112A_map1	0001.CSV	863.99	0.172863
CAM112A_map1	0001.CSV	867.847	0.236517
CAM112A_map1	0001.CSV	871.704	0.273534
CAM112A_map1	0001.CSV	875.561	0.24312
CAM112A_map1	0001.CSV	879.418	0.184621
CAM112A_map1	0001.CSV	883.275	0.121693
CAM112A_map1	0001.CSV	887.132	0.0695135
CAM112A_map1	0001.CSV	890.989	0.0474391
CAM112A_map1	0001.CSV	894.846	0.0457907
CAM112A_map1	0001.CSV	898.703	0.0470792
CAM112A_map1	0001.CSV	902.561	0.0488631
CAM112A_map1	0001.CSV	906.418	0.0501579
CAM112A_map1	0001.CSV	910.275	0.051504
CAM112A_map1	0001.CSV	914.132	0.0523195
CAM112A_map1	0001.CSV	917.989	0.053478
CAM112A_map1	0001.CSV	921.846	0.0542988
CAM112A_map1	0001.CSV	925.703	0.0554228
CAM112A_map1	0001.CSV	929.56	0.0563021
CAM112A_map1	0001.CSV	933.417	0.0574844
CAM112A_map1	0001.CSV	937.274	0.0578756
CAM112A_map1	0001.CSV	941.131	0.0581601
CAM112A_map1	0001.CSV	944.989	0.0583266
CAM112A_map1	0001.CSV	948.846	0.0592221
CAM112A_map1	0001.CSV	952.703	0.0600391
CAM112A_map1	0001.CSV	956.56	0.0610906
CAM112A_map1	0001.CSV	960.417	0.0613269
CAM112A_map1	0001.CSV	964.274	0.0615889
CAM112A_map1	0001.CSV	968.131	0.0619045
CAM112A_map1	0001.CSV	971.988	0.0628794
CAM112A_map1	0001.CSV	975.845	0.0635867
CAM112A_map1	0001.CSV	979.702	0.0643552
CAM112A_map1	0001.CSV	983.559	0.0648243
CAM112A_map1	0001.CSV	987.417	0.0657231
CAM112A_map1	0001.CSV	991.274	0.0664613
CAM112A_map1	0001.CSV	995.131	0.0674569
CAM112A_map1	0001.CSV	998.988	0.0680881
CAM112A_map1	0001.CSV	1002.85	0.068999
CAM112A_map1	0001.CSV	1006.7	0.0697192
CAM112A_map1	0001.CSV	1010.56	0.0707244
CAM112A_map1	0001.CSV	1014.42	0.0713465
CAM112A_map1	0001.CSV	1018.27	0.0722393
CAM112A_map1	0001.CSV	1022.13	0.0728024
CAM112A_map1	0001.CSV	1025.99	0.0736266
CAM112A_map1	0001.CSV	1029.85	0.0741374
CAM112A_map1	0001.CSV	1033.7	0.0750248
CAM112A_map1	0001.CSV	1037.56	0.0757411
CAM112A_map1	0001.CSV	1041.42	0.0767294
CAM112A_map1	0001.CSV	1045.27	0.0772467
CAM112A_map1	0001.CSV	1049.13	0.0780719
CAM112A_map1	0001.CSV	1052.99	0.0787881
CAM112A_map1	0001.CSV	1056.84	0.0801701
CAM112A_map1	0001.CSV	1060.7	0.081546
CAM112A_map1	0001.CSV	1064.56	0.0831863
CAM112A_map1	0001.CSV	1068.42	0.0841921
CAM112A_map1	0001.CSV	1072.27	0.0852538
CAM112A_map1	0001.CSV	1076.13	0.086028
CAM112A_map1	0001.CSV	1079.99	0.0873794
CAM112A_map1	0001.CSV	1083.84	0.0884221
CAM112A_map1	0001.CSV	1087.7	0.0892056
CAM112A_map1	0001.CSV	1091.56	0.0888738
CAM112A_map1	0001.CSV	1095.41	0.0887116
CAM112A_map1	0001.CSV	1099.27	0.0886398
CAM112A_map1	0001.CSV	1103.13	0.0894083
CAM112A_map1	0001.CSV	1106.99	0.090867
CAM112A_map1	0001.CSV	1110.84	0.0929834
CAM112A_map1	0001.CSV	1114.7	0.0932465
CAM112A_map1	0001.CSV	1118.56	0.0923147
CAM112A_map1	0001.CSV	1122.41	0.091509
CAM112A_map1	0001.CSV	1126.27	0.0917286
CAM112A_map1	0001.CSV	1130.13	0.091786
CAM112A_map1	0001.CSV	1133.99	0.0921838
CAM112A_map1	0001.CSV	1137.84	0.0925705
CAM112A_map1	0001.CSV	1141.7	0.0934356
CAM112A_map1	0001.CSV	1145.56	0.0940343
CAM112A_map1	0001.CSV	1149.41	0.0950433
CAM112A_map1	0001.CSV	1153.27	0.0960251
CAM112A_map1	0001.CSV	1157.13	0.0975303
CAM112A_map1	0001.CSV	1160.99	0.0988246
CAM112A_map1	0001.CSV	1164.84	0.100141
CAM112A_map1	0001.CSV	1168.7	0.100654
CAM112A_map1	0001.CSV	1172.56	0.100826
CAM112A_map1	0001.CSV	1176.41	0.100234
CAM112A_map1	0001.CSV	1180.27	0.0997215
CAM112A_map1	0001.CSV	1184.13	0.0990925
CAM112A_map1	0001.CSV	1187.99	0.099002
CAM112A_map1	0001.CSV	1191.84	0.0987163
CAM112A_map1	0001.CSV	1195.7	0.0987535
CAM112A_map1	0001.CSV	1199.56	0.0988109
CAM112A_map1	0001.CSV	1203.41	0.0995202
CAM112A_map1	0001.CSV	1207.27	0.100294
CAM112A_map1	0001.CSV	1211.13	0.101552
CAM112A_map1	0001.CSV	1214.98	0.10248
CAM112A_map1	0001.CSV	1218.84	0.103694
CAM112A_map1	0001.CSV	1222.7	0.104859
CAM112A_map1	0001.CSV	1226.56	0.106569
CAM112A_map1	0001.CSV	1230.41	0.108239
CAM112A_map1	0001.CSV	1234.27	0.110311
CAM112A_map1	0001.CSV	1238.13	0.111986
CAM112A_map1	0001.CSV	1241.98	0.113928
CAM112A_map1	0001.CSV	1245.84	0.115664
CAM112A_map1	0001.CSV	1249.7	0.117805
CAM112A_map1	0001.CSV	1253.56	0.119841
CAM112A_map1	0001.CSV	1257.41	0.122208
CAM112A_map1	0001.CSV	1261.27	0.124005
CAM112A_map1	0001.CSV	1265.13	0.125951
CAM112A_map1	0001.CSV	1268.98	0.127849
CAM112A_map1	0001.CSV	1272.84	0.13055
CAM112A_map1	0001.CSV	1276.7	0.133093
CAM112A_map1	0001.CSV	1280.56	0.135955
CAM112A_map1	0001.CSV	1284.41	0.138648
CAM112A_map1	0001.CSV	1288.27	0.141905
CAM112A_map1	0001.CSV	1292.13	0.144687
CAM112A_map1	0001.CSV	1295.98	0.147631
CAM112A_map1	0001.CSV	1299.84	0.150297
CAM112A_map1	0001.CSV	1303.7	0.15347
CAM112A_map1	0001.CSV	1307.56	0.156706
CAM112A_map1	0001.CSV	1311.41	0.160963
CAM112A_map1	0001.CSV	1315.27	0.165441
CAM112A_map1	0001.CSV	1319.13	0.170255
CAM112A_map1	0001.CSV	1322.98	0.174048
CAM112A_map1	0001.CSV	1326.84	0.17862
CAM112A_map1	0001.CSV	1330.7	0.183707
CAM112A_map1	0001.CSV	1334.56	0.189539
CAM112A_map1	0001.CSV	1338.41	0.196355
CAM112A_map1	0001.CSV	1342.27	0.204956
CAM112A_map1	0001.CSV	1346.13	0.212442
CAM112A_map1	0001.CSV	1349.98	0.221418
CAM112A_map1	0001.CSV	1353.84	0.230689
CAM112A_map1	0001.CSV	1357.7	0.240908
CAM112A_map1	0001.CSV	1361.56	0.252942
CAM112A_map1	0001.CSV	1365.41	0.268199
CAM112A_map1	0001.CSV	1369.27	0.281314
CAM112A_map1	0001.CSV	1373.13	0.297835
CAM112A_map1	0001.CSV	1376.98	0.315941
CAM112A_map1	0001.CSV	1380.84	0.33153
CAM112A_map1	0001.CSV	1384.7	0.346079
CAM112A_map1	0001.CSV	1388.56	0.364374
CAM112A_map1	0001.CSV	1392.41	0.376539
CAM112A_map1	0001.CSV	1396.27	0.384245
CAM112A_map1	0001.CSV	1400.13	0.385262
CAM112A_map1	0001.CSV	1403.98	0.383657
CAM112A_map1	0001.CSV	1407.84	0.375497
CAM112A_map1	0001.CSV	1411.7	0.36268
CAM112A_map1	0001.CSV	1415.55	0.346237
CAM112A_map1	0001.CSV	1419.41	0.325592
CAM112A_map1	0001.CSV	1423.27	0.306928
CAM112A_map1	0001.CSV	1427.12	0.295493
CAM112A_map1	0001.CSV	1430.98	0.284137
CAM112A_map1	0001.CSV	1434.84	0.272861
CAM112A_map1	0001.CSV	1438.7	0.25914
CAM112A_map1	0001.CSV	1442.55	0.249644
CAM112A_map1	0001.CSV	1446.41	0.239845
CAM112A_map1	0001.CSV	1450.27	0.230358
CAM112A_map1	0001.CSV	1454.12	0.222206
CAM112A_map1	0001.CSV	1457.98	0.211922
CAM112A_map1	0001.CSV	1461.84	0.204198
CAM112A_map1	0001.CSV	1465.7	0.19849
CAM112A_map1	0001.CSV	1469.55	0.190267
CAM112A_map1	0001.CSV	1473.41	0.176347
CAM112A_map1	0001.CSV	1477.27	0.159831
CAM112A_map1	0001.CSV	1481.12	0.149804
CAM112A_map1	0001.CSV	1484.98	0.141509
CAM112A_map1	0001.CSV	1488.84	0.133464
CAM112A_map1	0001.CSV	1492.7	0.12596
CAM112A_map1	0001.CSV	1496.55	0.12023
CAM112A_map1	0001.CSV	1500.41	0.113961
CAM112A_map1	0001.CSV	1504.27	0.110107
CAM112A_map1	0001.CSV	1508.12	0.103936
CAM112A_map1	0001.CSV	1511.98	0.0996457
CAM112A_map1	0001.CSV	1515.84	0.0965191
CAM112A_map1	0001.CSV	1519.7	0.0931591
CAM112A_map1	0001.CSV	1523.55	0.0908222
CAM112A_map1	0001.CSV	1527.41	0.0920657
CAM112A_map1	0001.CSV	1531.27	0.0975134
CAM112A_map1	0001.CSV	1535.12	0.110024
CAM112A_map1	0001.CSV	1538.98	0.118538
CAM112A_map1	0001.CSV	1542.84	0.105576
CAM112A_map1	0001.CSV	1546.7	0.0881407
CAM112A_map1	0001.CSV	1550.55	0.0766787
CAM112A_map1	0001.CSV	1554.41	0.0691423
CAM112A_map1	0001.CSV	1558.27	0.0656489
CAM112A_map1	0001.CSV	1562.12	0.0668838
CAM112A_map1	0001.CSV	1565.98	0.0706834
CAM112A_map1	0001.CSV	1569.84	0.0805191
CAM112A_map1	0001.CSV	1573.69	0.0896794
CAM112A_map1	0001.CSV	1577.55	0.0886599
CAM112A_map1	0001.CSV	1581.41	0.0772035
CAM112A_map1	0001.CSV	1585.27	0.0637813
CAM112A_map1	0001.CSV	1589.12	0.0537689
CAM112A_map1	0001.CSV	1592.98	0.0476412
CAM112A_map1	0001.CSV	1596.84	0.0440384
CAM112A_map1	0001.CSV	1600.69	0.0418872
CAM112A_map1	0001.CSV	1604.55	0.0409042
CAM112A_map1	0001.CSV	1608.41	0.040341
CAM112A_map1	0001.CSV	1612.27	0.0400795
CAM112A_map1	0001.CSV	1616.12	0.0396969
CAM112A_map1	0001.CSV	1619.98	0.0393857
CAM112A_map1	0001.CSV	1623.84	0.0386
CAM112A_map1	0001.CSV	1627.69	0.0377249
CAM112A_map1	0001.CSV	1631.55	0.0363749
CAM112A_map1	0001.CSV	1635.41	0.034988
CAM112A_map1	0001.CSV	1639.27	0.0333779
CAM112A_map1	0001.CSV	1643.12	0.0323099
CAM112A_map1	0001.CSV	1646.98	0.0314317
CAM112A_map1	0001.CSV	1650.84	0.0311545
CAM112A_map1	0001.CSV	1654.69	0.0309112
CAM112A_map1	0001.CSV	1658.55	0.0304365
CAM112A_map1	0001.CSV	1662.41	0.0298771
CAM112A_map1	0001.CSV	1666.27	0.0295261
CAM112A_map1	0001.CSV	1670.12	0.0292574
CAM112A_map1	0001.CSV	1673.98	0.0292696
CAM112A_map1	0001.CSV	1677.84	0.028816
CAM112A_map1	0001.CSV	1681.69	0.0284793
CAM112A_map1	0001.CSV	1685.55	0.0284295
CAM112A_map1	0001.CSV	1689.41	0.028335
CAM112A_map1	0001.CSV	1693.27	0.0278573
CAM112A_map1	0001.CSV	1697.12	0.0279016
CAM112A_map1	0001.CSV	1700.98	0.0282877
CAM112A_map1	0001.CSV	1704.84	0.0285092
CAM112A_map1	0001.CSV	1708.69	0.0284847
CAM112A_map1	0001.CSV	1712.55	0.0285336
CAM112A_map1	0001.CSV	1716.41	0.0293065
CAM112A_map1	0001.CSV	1720.27	0.0303336
CAM112A_map1	0001.CSV	1724.12	0.0303508
CAM112A_map1	0001.CSV	1727.98	0.0303936
CAM112A_map1	0001.CSV	1731.84	0.0309063
CAM112A_map1	0001.CSV	1735.69	0.0323081
CAM112A_map1	0001.CSV	1739.55	0.0321546
CAM112A_map1	0001.CSV	1743.41	0.0307043
CAM112A_map1	0001.CSV	1747.27	0.0287104
CAM112A_map1	0001.CSV	1751.12	0.0269274
CAM112A_map1	0001.CSV	1754.98	0.0256687
CAM112A_map1	0001.CSV	1758.84	0.0249058
CAM112A_map1	0001.CSV	1762.69	0.0244503
CAM112A_map1	0001.CSV	1766.55	0.0241459
CAM112A_map1	0001.CSV	1770.41	0.0240713
CAM112A_map1	0001.CSV	1774.26	0.0244759
CAM112A_map1	0001.CSV	1778.12	0.0246109
CAM112A_map1	0001.CSV	1781.98	0.0252524
CAM112A_map1	0001.CSV	1785.84	0.0265421
CAM112A_map1	0001.CSV	1789.69	0.028579
CAM112A_map1	0001.CSV	1793.55	0.0310942
CAM112A_map1	0001.CSV	1797.41	0.0313175
CAM112A_map1	0001.CSV	1801.26	0.0290958
CAM112A_map1	0001.CSV	1805.12	0.0264788
CAM112A_map1	0001.CSV	1808.98	0.0247222
CAM112A_map1	0001.CSV	1812.84	0.0238657
CAM112A_map1	0001.CSV	1816.69	0.0232974
CAM112A_map1	0001.CSV	1820.55	0.0230172
CAM112A_map1	0001.CSV	1824.41	0.0228185
CAM112A_map1	0001.CSV	1828.26	0.0229122
CAM112A_map1	0001.CSV	1832.12	0.0228794
CAM112A_map1	0001.CSV	1835.98	0.0227401
CAM112A_map1	0001.CSV	1839.84	0.0225432
CAM112A_map1	0001.CSV	1843.69	0.0226492
CAM112A_map1	0001.CSV	1847.55	0.0227955
CAM112A_map1	0001.CSV	1851.41	0.0227205
CAM112A_map1	0001.CSV	1855.26	0.0225934
CAM112A_map1	0001.CSV	1859.12	0.0225991
CAM112A_map1	0001.CSV	1862.98	0.0225136
CAM112A_map1	0001.CSV	1866.84	0.0226054
CAM112A_map1	0001.CSV	1870.69	0.022826
CAM112A_map1	0001.CSV	1874.55	0.0227355
CAM112A_map1	0001.CSV	1878.41	0.0226001
CAM112A_map1	0001.CSV	1882.26	0.0226192
CAM112A_map1	0001.CSV	1886.12	0.0225835
CAM112A_map1	0001.CSV	1889.98	0.0226549
CAM112A_map1	0001.CSV	1893.83	0.0226958
CAM112A_map1	0001.CSV	1897.69	0.0227284
CAM112A_map1	0001.CSV	1901.55	0.0226426
CAM112A_map1	0001.CSV	1905.41	0.0226323
CAM112A_map1	0001.CSV	1909.26	0.0226981
CAM112A_map1	0001.CSV	1913.12	0.0227314
CAM112A_map1	0001.CSV	1916.98	0.0226557
CAM112A_map1	0001.CSV	1920.83	0.0227328
CAM112A_map1	0001.CSV	1924.69	0.022772
CAM112A_map1	0001.CSV	1928.55	0.0227718
CAM112A_map1	0001.CSV	1932.4	0.0227412
CAM112A_map1	0001.CSV	1936.26	0.0228101
CAM112A_map1	0001.CSV	1940.12	0.0227953
CAM112A_map1	0001.CSV	1943.98	0.0229132
CAM112A_map1	0001.CSV	1947.83	0.0229159
CAM112A_map1	0001.CSV	1951.69	0.0228944
CAM112A_map1	0001.CSV	1955.55	0.0228778
CAM112A_map1	0001.CSV	1959.4	0.022925
CAM112A_map1	0001.CSV	1963.26	0.0228913
CAM112A_map1	0001.CSV	1967.12	0.0229452
CAM112A_map1	0001.CSV	1970.98	0.0229351
CAM112A_map1	0001.CSV	1974.83	0.0228909
CAM112A_map1	0001.CSV	1978.69	0.0228425
CAM112A_map1	0001.CSV	1982.55	0.0228606
CAM112A_map1	0001.CSV	1986.4	0.022842
CAM112A_map1	0001.CSV	1990.26	0.0229324
CAM112A_map1	0001.CSV	1994.12	0.0230057
CAM112A_map1	0001.CSV	1997.98	0.0229774
CAM112A_map1	0001.CSV	2001.83	0.0229306
CAM112A_map1	0001.CSV	2005.69	0.0229761
CAM112A_map1	0001.CSV	2009.55	0.0229673
CAM112A_map1	0001.CSV	2013.4	0.0229899
CAM112A_map1	0001.CSV	2017.26	0.0230518
CAM112A_map1	0001.CSV	2021.12	0.0231152
CAM112A_map1	0001.CSV	2024.97	0.0230615
CAM112A_map1	0001.CSV	2028.83	0.0230728
CAM112A_map1	0001.CSV	2032.69	0.0230558
CAM112A_map1	0001.CSV	2036.55	0.0230542
CAM112A_map1	0001.CSV	2040.4	0.02305
CAM112A_map1	0001.CSV	2044.26	0.0231175
CAM112A_map1	0001.CSV	2048.12	0.0231019
CAM112A_map1	0001.CSV	2051.97	0.0231184
CAM112A_map1	0001.CSV	2055.83	0.0231067
CAM112A_map1	0001.CSV	2059.69	0.0231327
CAM112A_map1	0001.CSV	2063.55	0.0231604
CAM112A_map1	0001.CSV	2067.4	0.0231927
CAM112A_map1	0001.CSV	2071.26	0.0231418
CAM112A_map1	0001.CSV	2075.12	0.023175
CAM112A_map1	0001.CSV	2078.97	0.0231895
CAM112A_map1	0001.CSV	2082.83	0.0232343
CAM112A_map1	0001.CSV	2086.69	0.0232349
CAM112A_map1	0001.CSV	2090.55	0.0232911
CAM112A_map1	0001.CSV	2094.4	0.0233121
CAM112A_map1	0001.CSV	2098.26	0.0233472
CAM112A_map1	0001.CSV	2102.12	0.0233609
CAM112A_map1	0001.CSV	2105.97	0.0234191
CAM112A_map1	0001.CSV	2109.83	0.02348
CAM112A_map1	0001.CSV	2113.69	0.0235824
CAM112A_map1	0001.CSV	2117.55	0.0236132
CAM112A_map1	0001.CSV	2121.4	0.0236801
CAM112A_map1	0001.CSV	2125.26	0.0237454
CAM112A_map1	0001.CSV	2129.12	0.0238225
CAM112A_map1	0001.CSV	2132.97	0.0238597
CAM112A_map1	0001.CSV	2136.83	0.0239221
CAM112A_map1	0001.CSV	2140.69	0.0239476
CAM112A_map1	0001.CSV	2144.55	0.0239736
CAM112A_map1	0001.CSV	2148.4	0.0239478
CAM112A_map1	0001.CSV	2152.26	0.0239649
CAM112A_map1	0001.CSV	2156.12	0.0239675
CAM112A_map1	0001.CSV	2159.97	0.0239908
CAM112A_map1	0001.CSV	2163.83	0.0240103
CAM112A_map1	0001.CSV	2167.69	0.0240525
CAM112A_map1	0001.CSV	2171.55	0.0240644
CAM112A_map1	0001.CSV	2175.4	0.0241284
CAM112A_map1	0001.CSV	2179.26	0.0241865
CAM112A_map1	0001.CSV	2183.12	0.0242582
CAM112A_map1	0001.CSV	2186.97	0.0242834
CAM112A_map1	0001.CSV	2190.83	0.0243287
CAM112A_map1	0001.CSV	2194.69	0.0243277
CAM112A_map1	0001.CSV	2198.55	0.0243517
CAM112A_map1	0001.CSV	2202.4	0.0243876
CAM112A_map1	0001.CSV	2206.26	0.0244989
CAM112A_map1	0001.CSV	2210.12	0.0245663
CAM112A_map1	0001.CSV	2213.97	0.0245919
CAM112A_map1	0001.CSV	2217.83	0.0245746
CAM112A_map1	0001.CSV	2221.69	0.0246139
CAM112A_map1	0001.CSV	2225.54	0.0246266
CAM112A_map1	0001.CSV	2229.4	0.0246671
CAM112A_map1	0001.CSV	2233.26	0.0246806
CAM112A_map1	0001.CSV	2237.12	0.0246811
CAM112A_map1	0001.CSV	2240.97	0.0246819
CAM112A_map1	0001.CSV	2244.83	0.0247217
CAM112A_map1	0001.CSV	2248.69	0.0247314
CAM112A_map1	0001.CSV	2252.54	0.0247725
CAM112A_map1	0001.CSV	2256.4	0.0248007
CAM112A_map1	0001.CSV	2260.26	0.0248495
CAM112A_map1	0001.CSV	2264.11	0.0248532
CAM112A_map1	0001.CSV	2267.97	0.0248725
CAM112A_map1	0001.CSV	2271.83	0.024868
CAM112A_map1	0001.CSV	2275.69	0.0248909
CAM112A_map1	0001.CSV	2279.54	0.0248728
CAM112A_map1	0001.CSV	2283.4	0.0248615
CAM112A_map1	0001.CSV	2287.26	0.0248418
CAM112A_map1	0001.CSV	2291.11	0.0249031
CAM112A_map1	0001.CSV	2294.97	0.024933
CAM112A_map1	0001.CSV	2298.83	0.0249672
CAM112A_map1	0001.CSV	2302.69	0.0249244
CAM112A_map1	0001.CSV	2306.54	0.0248422
CAM112A_map1	0001.CSV	2310.4	0.0247135
CAM112A_map1	0001.CSV	2314.26	0.0246135
CAM112A_map1	0001.CSV	2318.11	0.0243112
CAM112A_map1	0001.CSV	2321.97	0.0238265
CAM112A_map1	0001.CSV	2325.83	0.0232174
CAM112A_map1	0001.CSV	2329.69	0.0226419
CAM112A_map1	0001.CSV	2333.54	0.0219336
CAM112A_map1	0001.CSV	2337.4	0.0213568
CAM112A_map1	0001.CSV	2341.26	0.0214379
CAM112A_map1	0001.CSV	2345.11	0.0231123
CAM112A_map1	0001.CSV	2348.97	0.0235702
CAM112A_map1	0001.CSV	2352.83	0.0218679
CAM112A_map1	0001.CSV	2356.69	0.0171838
CAM112A_map1	0001.CSV	2360.54	0.0140079
CAM112A_map1	0001.CSV	2364.4	0.0165704
CAM112A_map1	0001.CSV	2368.26	0.0210671
CAM112A_map1	0001.CSV	2372.11	0.0238653
CAM112A_map1	0001.CSV	2375.97	0.0251696
CAM112A_map1	0001.CSV	2379.83	0.0255208
CAM112A_map1	0001.CSV	2383.69	0.0254954
CAM112A_map1	0001.CSV	2387.54	0.0253503
CAM112A_map1	0001.CSV	2391.4	0.0252635
CAM112A_map1	0001.CSV	2395.26	0.0252322
CAM112A_map1	0001.CSV	2399.11	0.0252393
CAM112A_map1	0001.CSV	2402.97	0.025271
CAM112A_map1	0001.CSV	2406.83	0.025336
CAM112A_map1	0001.CSV	2410.68	0.0253396
CAM112A_map1	0001.CSV	2414.54	0.0253459
CAM112A_map1	0001.CSV	2418.4	0.0253745
CAM112A_map1	0001.CSV	2422.26	0.0254266
CAM112A_map1	0001.CSV	2426.11	0.0254575
CAM112A_map1	0001.CSV	2429.97	0.0255134
CAM112A_map1	0001.CSV	2433.83	0.0255642
CAM112A_map1	0001.CSV	2437.68	0.0256308
CAM112A_map1	0001.CSV	2441.54	0.0256721
CAM112A_map1	0001.CSV	2445.4	0.025721
CAM112A_map1	0001.CSV	2449.26	0.0257542
CAM112A_map1	0001.CSV	2453.11	0.0257957
CAM112A_map1	0001.CSV	2456.97	0.0258634
CAM112A_map1	0001.CSV	2460.83	0.0259694
CAM112A_map1	0001.CSV	2464.68	0.0260967
CAM112A_map1	0001.CSV	2468.54	0.0262884
CAM112A_map1	0001.CSV	2472.4	0.0264918
CAM112A_map1	0001.CSV	2476.26	0.0267105
CAM112A_map1	0001.CSV	2480.11	0.0269606
CAM112A_map1	0001.CSV	2483.97	0.0273062
CAM112A_map1	0001.CSV	2487.83	0.0277285
CAM112A_map1	0001.CSV	2491.68	0.0282726
CAM112A_map1	0001.CSV	2495.54	0.028927
CAM112A_map1	0001.CSV	2499.4	0.0296507
CAM112A_map1	0001.CSV	2503.26	0.0303178
CAM112A_map1	0001.CSV	2507.11	0.0308479
CAM112A_map1	0001.CSV	2510.97	0.0310703
CAM112A_map1	0001.CSV	2514.83	0.0309557
CAM112A_map1	0001.CSV	2518.68	0.0305947
CAM112A_map1	0001.CSV	2522.54	0.0300547
CAM112A_map1	0001.CSV	2526.4	0.0293534
CAM112A_map1	0001.CSV	2530.26	0.0286616
CAM112A_map1	0001.CSV	2534.11	0.0280359
CAM112A_map1	0001.CSV	2537.97	0.0275729
CAM112A_map1	0001.CSV	2541.83	0.0272783
CAM112A_map1	0001.CSV	2545.68	0.0271072
CAM112A_map1	0001.CSV	2549.54	0.0269886
CAM112A_map1	0001.CSV	2553.4	0.0269318
CAM112A_map1	0001.CSV	2557.26	0.0269007
CAM112A_map1	0001.CSV	2561.11	0.0268786
CAM112A_map1	0001.CSV	2564.97	0.0268438
CAM112A_map1	0001.CSV	2568.83	0.0268454
CAM112A_map1	0001.CSV	2572.68	0.0268384
CAM112A_map1	0001.CSV	2576.54	0.026864
CAM112A_map1	0001.CSV	2580.4	0.0268702
CAM112A_map1	0001.CSV	2584.25	0.0268534
CAM112A_map1	0001.CSV	2588.11	0.0268083
CAM112A_map1	0001.CSV	2591.97	0.0267963
CAM112A_map1	0001.CSV	2595.83	0.0267629
CAM112A_map1	0001.CSV	2599.68	0.0267411
CAM112A_map1	0001.CSV	2603.54	0.0266755
CAM112A_map1	0001.CSV	2607.4	0.0265871
CAM112A_map1	0001.CSV	2611.25	0.0264827
CAM112A_map1	0001.CSV	2615.11	0.0264042
CAM112A_map1	0001.CSV	2618.97	0.0263208
CAM112A_map1	0001.CSV	2622.82	0.0263275
CAM112A_map1	0001.CSV	2626.68	0.0263215
CAM112A_map1	0001.CSV	2630.54	0.0262367
CAM112A_map1	0001.CSV	2634.4	0.0262358
CAM112A_map1	0001.CSV	2638.25	0.0261959
CAM112A_map1	0001.CSV	2642.11	0.026011
CAM112A_map1	0001.CSV	2645.97	0.0258989
CAM112A_map1	0001.CSV	2649.82	0.0258711
CAM112A_map1	0001.CSV	2653.68	0.0258871
CAM112A_map1	0001.CSV	2657.54	0.0259015
CAM112A_map1	0001.CSV	2661.4	0.0259068
CAM112A_map1	0001.CSV	2665.25	0.0259061
CAM112A_map1	0001.CSV	2669.11	0.0259906
CAM112A_map1	0001.CSV	2672.97	0.0262178
CAM112A_map1	0001.CSV	2676.82	0.0265059
CAM112A_map1	0001.CSV	2680.68	0.0264397
CAM112A_map1	0001.CSV	2684.54	0.0260493
CAM112A_map1	0001.CSV	2688.4	0.0258842
CAM112A_map1	0001.CSV	2692.25	0.025906
CAM112A_map1	0001.CSV	2696.11	0.0259475
CAM112A_map1	0001.CSV	2699.97	0.0259839
CAM112A_map1	0001.CSV	2703.82	0.0259778
CAM112A_map1	0001.CSV	2707.68	0.0260878
CAM112A_map1	0001.CSV	2711.54	0.026163
CAM112A_map1	0001.CSV	2715.4	0.0261831
CAM112A_map1	0001.CSV	2719.25	0.02638
CAM112A_map1	0001.CSV	2723.11	0.0267722
CAM112A_map1	0001.CSV	2726.97	0.0267949
CAM112A_map1	0001.CSV	2730.82	0.026455
CAM112A_map1	0001.CSV	2734.68	0.0264604
CAM112A_map1	0001.CSV	2738.54	0.0265387
CAM112A_map1	0001.CSV	2742.4	0.0265178
CAM112A_map1	0001.CSV	2746.25	0.0268318
CAM112A_map1	0001.CSV	2750.11	0.0269026
CAM112A_map1	0001.CSV	2753.97	0.0266499
CAM112A_map1	0001.CSV	2757.82	0.0265609
CAM112A_map1	0001.CSV	2761.68	0.0264862
CAM112A_map1	0001.CSV	2765.54	0.0264558
CAM112A_map1	0001.CSV	2769.39	0.0267064
CAM112A_map1	0001.CSV	2773.25	0.0271838
CAM112A_map1	0001.CSV	2777.11	0.0271498
CAM112A_map1	0001.CSV	2780.97	0.0269577
CAM112A_map1	0001.CSV	2784.82	0.0273375
CAM112A_map1	0001.CSV	2788.68	0.0280021
CAM112A_map1	0001.CSV	2792.54	0.0282812
CAM112A_map1	0001.CSV	2796.39	0.0284738
CAM112A_map1	0001.CSV	2800.25	0.0284642
CAM112A_map1	0001.CSV	2804.11	0.0283619
CAM112A_map1	0001.CSV	2807.97	0.0288774
CAM112A_map1	0001.CSV	2811.82	0.0292116
CAM112A_map1	0001.CSV	2815.68	0.0293449
CAM112A_map1	0001.CSV	2819.54	0.0298975
CAM112A_map1	0001.CSV	2823.39	0.0307422
CAM112A_map1	0001.CSV	2827.25	0.0317046
CAM112A_map1	0001.CSV	2831.11	0.0334788
CAM112A_map1	0001.CSV	2834.97	0.036489
CAM112A_map1	0001.CSV	2838.82	0.0414382
CAM112A_map1	0001.CSV	2842.68	0.0508243
CAM112A_map1	0001.CSV	2846.54	0.0652761
CAM112A_map1	0001.CSV	2850.39	0.0728873
CAM112A_map1	0001.CSV	2854.25	0.0663172
CAM112A_map1	0001.CSV	2858.11	0.0563327
CAM112A_map1	0001.CSV	2861.97	0.0493113
CAM112A_map1	0001.CSV	2865.82	0.0456512
CAM112A_map1	0001.CSV	2869.68	0.0449517
CAM112A_map1	0001.CSV	2873.54	0.0446074
CAM112A_map1	0001.CSV	2877.39	0.0429855
CAM112A_map1	0001.CSV	2881.25	0.0420296
CAM112A_map1	0001.CSV	2885.11	0.0426583
CAM112A_map1	0001.CSV	2888.97	0.0445632
CAM112A_map1	0001.CSV	2892.82	0.0473441
CAM112A_map1	0001.CSV	2896.68	0.0503818
CAM112A_map1	0001.CSV	2900.54	0.0536481
CAM112A_map1	0001.CSV	2904.39	0.0584109
CAM112A_map1	0001.CSV	2908.25	0.0668015
CAM112A_map1	0001.CSV	2912.11	0.081012
CAM112A_map1	0001.CSV	2915.97	0.0953406
CAM112A_map1	0001.CSV	2919.82	0.0982549
CAM112A_map1	0001.CSV	2923.68	0.0895423
CAM112A_map1	0001.CSV	2927.54	0.0778528
CAM112A_map1	0001.CSV	2931.39	0.0672448
CAM112A_map1	0001.CSV	2935.25	0.0583907
CAM112A_map1	0001.CSV	2939.11	0.0522155
CAM112A_map1	0001.CSV	2942.96	0.0486308
CAM112A_map1	0001.CSV	2946.82	0.0466427
CAM112A_map1	0001.CSV	2950.68	0.0462795
CAM112A_map1	0001.CSV	2954.54	0.0464566
CAM112A_map1	0001.CSV	2958.39	0.045198
CAM112A_map1	0001.CSV	2962.25	0.0425987
CAM112A_map1	0001.CSV	2966.11	0.0392942
CAM112A_map1	0001.CSV	2969.96	0.0364991
CAM112A_map1	0001.CSV	2973.82	0.034699
CAM112A_map1	0001.CSV	2977.68	0.0333374
CAM112A_map1	0001.CSV	2981.53	0.0318898
CAM112A_map1	0001.CSV	2985.39	0.0303816
CAM112A_map1	0001.CSV	2989.25	0.0296558
CAM112A_map1	0001.CSV	2993.11	0.0294187
CAM112A_map1	0001.CSV	2996.96	0.0289266
CAM112A_map1	0001.CSV	3000.82	0.0283974
CAM112A_map1	0001.CSV	3004.68	0.0281525
CAM112A_map1	0001.CSV	3008.53	0.0283668
CAM112A_map1	0001.CSV	3012.39	0.028672
CAM112A_map1	0001.CSV	3016.25	0.0285433
CAM112A_map1	0001.CSV	3020.11	0.028071
CAM112A_map1	0001.CSV	3023.96	0.02771
CAM112A_map1	0001.CSV	3027.82	0.0276567
CAM112A_map1	0001.CSV	3031.68	0.0279328
CAM112A_map1	0001.CSV	3035.53	0.0280007
CAM112A_map1	0001.CSV	3039.39	0.0280001
CAM112A_map1	0001.CSV	3043.25	0.0280519
CAM112A_map1	0001.CSV	3047.11	0.0279417
CAM112A_map1	0001.CSV	3050.96	0.0278977
CAM112A_map1	0001.CSV	3054.82	0.0278307
CAM112A_map1	0001.CSV	3058.68	0.0276277
CAM112A_map1	0001.CSV	3062.53	0.0276645
CAM112A_map1	0001.CSV	3066.39	0.0279381
CAM112A_map1	0001.CSV	3070.25	0.0278147
CAM112A_map1	0001.CSV	3074.11	0.0278204
CAM112A_map1	0001.CSV	3077.96	0.0281648
CAM112A_map1	0001.CSV	3081.82	0.0283087
CAM112A_map1	0001.CSV	3085.68	0.0283063
CAM112A_map1	0001.CSV	3089.53	0.0281661
CAM112A_map1	0001.CSV	3093.39	0.0278535
CAM112A_map1	0001.CSV	3097.25	0.027879
CAM112A_map1	0001.CSV	3101.11	0.0279959
CAM112A_map1	0001.CSV	3104.96	0.0280678
CAM112A_map1	0001.CSV	3108.82	0.0282935
CAM112A_map1	0001.CSV	3112.68	0.0284765
CAM112A_map1	0001.CSV	3116.53	0.0286478
CAM112A_map1	0001.CSV	3120.39	0.028565
CAM112A_map1	0001.CSV	3124.25	0.028265
CAM112A_map1	0001.CSV	3128.11	0.0281995
CAM112A_map1	0001.CSV	3131.96	0.0281728
CAM112A_map1	0001.CSV	3135.82	0.0282739
CAM112A_map1	0001.CSV	3139.68	0.0284253
CAM112A_map1	0001.CSV	3143.53	0.0282115
CAM112A_map1	0001.CSV	3147.39	0.0283279
CAM112A_map1	0001.CSV	3151.25	0.0287718
CAM112A_map1	0001.CSV	3155.1	0.0286953
CAM112A_map1	0001.CSV	3158.96	0.0282933
CAM112A_map1	0001.CSV	3162.82	0.0282356
CAM112A_map1	0001.CSV	3166.68	0.028265
CAM112A_map1	0001.CSV	3170.53	0.0283191
CAM112A_map1	0001.CSV	3174.39	0.028462
CAM112A_map1	0001.CSV	3178.25	0.0286298
CAM112A_map1	0001.CSV	3182.1	0.0287298
CAM112A_map1	0001.CSV	3185.96	0.0288451
CAM112A_map1	0001.CSV	3189.82	0.0289722
CAM112A_map1	0001.CSV	3193.68	0.0289686
CAM112A_map1	0001.CSV	3197.53	0.0289873
CAM112A_map1	0001.CSV	3201.39	0.0291621
CAM112A_map1	0001.CSV	3205.25	0.0292397
CAM112A_map1	0001.CSV	3209.1	0.0292858
CAM112A_map1	0001.CSV	3212.96	0.0294917
CAM112A_map1	0001.CSV	3216.82	0.0296248
CAM112A_map1	0001.CSV	3220.68	0.0295449
CAM112A_map1	0001.CSV	3224.53	0.0295216
CAM112A_map1	0001.CSV	3228.39	0.029807
CAM112A_map1	0001.CSV	3232.25	0.0302276
CAM112A_map1	0001.CSV	3236.1	0.0301721
CAM112A_map1	0001.CSV	3239.96	0.0300069
CAM112A_map1	0001.CSV	3243.82	0.0302599
CAM112A_map1	0001.CSV	3247.68	0.030397
CAM112A_map1	0001.CSV	3251.53	0.0302513
CAM112A_map1	0001.CSV	3255.39	0.0303249
CAM112A_map1	0001.CSV	3259.25	0.0302151
CAM112A_map1	0001.CSV	3263.1	0.0301608
CAM112A_map1	0001.CSV	3266.96	0.0304725
CAM112A_map1	0001.CSV	3270.82	0.0308648
CAM112A_map1	0001.CSV	3274.68	0.0308839
CAM112A_map1	0001.CSV	3278.53	0.0307199
CAM112A_map1	0001.CSV	3282.39	0.0306703
CAM112A_map1	0001.CSV	3286.25	0.0307837
CAM112A_map1	0001.CSV	3290.1	0.0311371
CAM112A_map1	0001.CSV	3293.96	0.0314186
CAM112A_map1	0001.CSV	3297.82	0.031281
CAM112A_map1	0001.CSV	3301.67	0.0313481
CAM112A_map1	0001.CSV	3305.53	0.0316191
CAM112A_map1	0001.CSV	3309.39	0.0315163
CAM112A_map1	0001.CSV	3313.25	0.0311479
CAM112A_map1	0001.CSV	3317.1	0.0309398
CAM112A_map1	0001.CSV	3320.96	0.0311363
CAM112A_map1	0001.CSV	3324.82	0.0314711
CAM112A_map1	0001.CSV	3328.67	0.0312939
CAM112A_map1	0001.CSV	3332.53	0.0312287
CAM112A_map1	0001.CSV	3336.39	0.0317506
CAM112A_map1	0001.CSV	3340.24	0.0320052
CAM112A_map1	0001.CSV	3344.1	0.0318156
CAM112A_map1	0001.CSV	3347.96	0.0318855
CAM112A_map1	0001.CSV	3351.82	0.0318963
CAM112A_map1	0001.CSV	3355.67	0.0316666
CAM112A_map1	0001.CSV	3359.53	0.0317677
CAM112A_map1	0001.CSV	3363.39	0.0320428
CAM112A_map1	0001.CSV	3367.24	0.0322944
CAM112A_map1	0001.CSV	3371.1	0.0321926
CAM112A_map1	0001.CSV	3374.96	0.0319502
CAM112A_map1	0001.CSV	3378.82	0.0318182
CAM112A_map1	0001.CSV	3382.67	0.0316145
CAM112A_map1	0001.CSV	3386.53	0.0316856
CAM112A_map1	0001.CSV	3390.39	0.0320278
CAM112A_map1	0001.CSV	3394.24	0.0321942
CAM112A_map1	0001.CSV	3398.1	0.0322391
CAM112A_map1	0001.CSV	3401.96	0.03209
CAM112A_map1	0001.CSV	3405.82	0.031741
CAM112A_map1	0001.CSV	3409.67	0.0316749
CAM112A_map1	0001.CSV	3413.53	0.0313997
CAM112A_map1	0001.CSV	3417.39	0.0310048
CAM112A_map1	0001.CSV	3421.24	0.0309782
CAM112A_map1	0001.CSV	3425.1	0.031106
CAM112A_map1	0001.CSV	3428.96	0.0313523
CAM112A_map1	0001.CSV	3432.82	0.0315174
CAM112A_map1	0001.CSV	3436.67	0.0312181
CAM112A_map1	0001.CSV	3440.53	0.0305684
CAM112A_map1	0001.CSV	3444.39	0.0302251
CAM112A_map1	0001.CSV	3448.24	0.0301747
CAM112A_map1	0001.CSV	3452.1	0.0299706
CAM112A_map1	0001.CSV	3455.96	0.0299618
CAM112A_map1	0001.CSV	3459.82	0.0301717
CAM112A_map1	0001.CSV	3463.67	0.0304259
CAM112A_map1	0001.CSV	3467.53	0.0305683
CAM112A_map1	0001.CSV	3471.39	0.03025
CAM112A_map1	0001.CSV	3475.24	0.0299132
CAM112A_map1	0001.CSV	3479.1	0.029866
CAM112A_map1	0001.CSV	3482.96	0.0297759
CAM112A_map1	0001.CSV	3486.82	0.0298133
CAM112A_map1	0001.CSV	3490.67	0.0297474
CAM112A_map1	0001.CSV	3494.53	0.0297068
CAM112A_map1	0001.CSV	3498.39	0.0295987
CAM112A_map1	0001.CSV	3502.24	0.0293653
CAM112A_map1	0001.CSV	3506.1	0.0290214
CAM112A_map1	0001.CSV	3509.96	0.0288776
CAM112A_map1	0001.CSV	3513.81	0.0289886
CAM112A_map1	0001.CSV	3517.67	0.0287512
CAM112A_map1	0001.CSV	3521.53	0.0286677
CAM112A_map1	0001.CSV	3525.39	0.0286753
CAM112A_map1	0001.CSV	3529.24	0.0284991
CAM112A_map1	0001.CSV	3533.1	0.0285351
CAM112A_map1	0001.CSV	3536.96	0.0286496
CAM112A_map1	0001.CSV	3540.81	0.0286133
CAM112A_map1	0001.CSV	3544.67	0.0286906
CAM112A_map1	0001.CSV	3548.53	0.0285206
CAM112A_map1	0001.CSV	3552.39	0.0281783
CAM112A_map1	0001.CSV	3556.24	0.0279846
CAM112A_map1	0001.CSV	3560.1	0.0277353
CAM112A_map1	0001.CSV	3563.96	0.0273851
CAM112A_map1	0001.CSV	3567.81	0.027661
CAM112A_map1	0001.CSV	3571.67	0.0276698
CAM112A_map1	0001.CSV	3575.53	0.02727
CAM112A_map1	0001.CSV	3579.39	0.0273255
CAM112A_map1	0001.CSV	3583.24	0.0272072
CAM112A_map1	0001.CSV	3587.1	0.0270678
CAM112A_map1	0001.CSV	3590.96	0.0268696
CAM112A_map1	0001.CSV	3594.81	0.0266174
CAM112A_map1	0001.CSV	3598.67	0.0267249
CAM112A_map1	0001.CSV	3602.53	0.0265363
CAM112A_map1	0001.CSV	3606.39	0.0258301
CAM112A_map1	0001.CSV	3610.24	0.0254329
CAM112A_map1	0001.CSV	3614.1	0.0253246
CAM112A_map1	0001.CSV	3617.96	0.025518
CAM112A_map1	0001.CSV	3621.81	0.0256687
CAM112A_map1	0001.CSV	3625.67	0.0249374
CAM112A_map1	0001.CSV	3629.53	0.0247549
CAM112A_map1	0001.CSV	3633.39	0.0252135
CAM112A_map1	0001.CSV	3637.24	0.0249887
CAM112A_map1	0001.CSV	3641.1	0.0245569
CAM112A_map1	0001.CSV	3644.96	0.0238893
CAM112A_map1	0001.CSV	3648.81	0.0243281
CAM112A_map1	0001.CSV	3652.67	0.0252284
CAM112A_map1	0001.CSV	3656.53	0.0252518
CAM112A_map1	0001.CSV	3660.38	0.0251565
CAM112A_map1	0001.CSV	3664.24	0.0243836
CAM112A_map1	0001.CSV	3668.1	0.0236379
CAM112A_map1	0001.CSV	3671.96	0.0236435
CAM112A_map1	0001.CSV	3675.81	0.0243393
CAM112A_map1	0001.CSV	3679.67	0.0247138
CAM112A_map1	0001.CSV	3683.53	0.0243054
CAM112A_map1	0001.CSV	3687.38	0.0241995
CAM112A_map1	0001.CSV	3691.24	0.0248182
CAM112A_map1	0001.CSV	3695.1	0.0246457
CAM112A_map1	0001.CSV	3698.95	0.024178
CAM112A_map1	0001.CSV	3702.81	0.0240424
CAM112A_map1	0001.CSV	3706.67	0.0236712
CAM112A_map1	0001.CSV	3710.53	0.0237305
CAM112A_map1	0001.CSV	3714.38	0.024326
CAM112A_map1	0001.CSV	3718.24	0.0239223
CAM112A_map1	0001.CSV	3722.1	0.0236723
CAM112A_map1	0001.CSV	3725.95	0.0237943
CAM112A_map1	0001.CSV	3729.81	0.0235415
CAM112A_map1	0001.CSV	3733.67	0.0236648
CAM112A_map1	0001.CSV	3737.53	0.0245636
CAM112A_map1	0001.CSV	3741.38	0.0237894
CAM112A_map1	0001.CSV	3745.24	0.0229093
CAM112A_map1	0001.CSV	3749.1	0.0229245
CAM112A_map1	0001.CSV	3752.95	0.0236622
CAM112A_map1	0001.CSV	3756.81	0.023818
CAM112A_map1	0001.CSV	3760.67	0.0238374
CAM112A_map1	0001.CSV	3764.53	0.0236531
CAM112A_map1	0001.CSV	3768.38	0.0237984
CAM112A_map1	0001.CSV	3772.24	0.024006
CAM112A_map1	0001.CSV	3776.1	0.0237918
CAM112A_map1	0001.CSV	3779.95	0.0238736
CAM112A_map1	0001.CSV	3783.81	0.0239575
CAM112A_map1	0001.CSV	3787.67	0.0238778
CAM112A_map1	0001.CSV	3791.53	0.0235712
CAM112A_map1	0001.CSV	3795.38	0.0231086
CAM112A_map1	0001.CSV	3799.24	0.0231412
CAM112A_map1	0001.CSV	3803.1	0.0237474
CAM112A_map1	0001.CSV	3806.95	0.0240643
CAM112A_map1	0001.CSV	3810.81	0.0237325
CAM112A_map1	0001.CSV	3814.67	0.0232982
CAM112A_map1	0001.CSV	3818.53	0.0234465
CAM112A_map1	0001.CSV	3822.38	0.0238904
CAM112A_map1	0001.CSV	3826.24	0.0237842
CAM112A_map1	0001.CSV	3830.1	0.0234774
CAM112A_map1	0001.CSV	3833.95	0.0233652
CAM112A_map1	0001.CSV	3837.81	0.0237041
CAM112A_map1	0001.CSV	3841.67	0.0243293
CAM112A_map1	0001.CSV	3845.53	0.0240009
CAM112A_map1	0001.CSV	3849.38	0.0231194
CAM112A_map1	0001.CSV	3853.24	0.0232643
CAM112A_map1	0001.CSV	3857.1	0.0239434
CAM112A_map1	0001.CSV	3860.95	0.0234444
CAM112A_map1	0001.CSV	3864.81	0.0233241
CAM112A_map1	0001.CSV	3868.67	0.0234201
CAM112A_map1	0001.CSV	3872.52	0.0238644
CAM112A_map1	0001.CSV	3876.38	0.0237881
CAM112A_map1	0001.CSV	3880.24	0.0236167
CAM112A_map1	0001.CSV	3884.1	0.0240149
CAM112A_map1	0001.CSV	3887.95	0.0240003
CAM112A_map1	0001.CSV	3891.81	0.0238475
CAM112A_map1	0001.CSV	3895.67	0.023549
CAM112A_map1	0001.CSV	3899.52	0.0232458
CAM112A_map1	0001.CSV	3903.38	0.024043
CAM112A_map1	0001.CSV	3907.24	0.0243382
CAM112A_map1	0001.CSV	3911.1	0.023863
CAM112A_map1	0001.CSV	3914.95	0.0236527
CAM112A_map1	0001.CSV	3918.81	0.0238682
CAM112A_map1	0001.CSV	3922.67	0.0238804
CAM112A_map1	0001.CSV	3926.52	0.023834
CAM112A_map1	0001.CSV	3930.38	0.0239502
CAM112A_map1	0001.CSV	3934.24	0.0241301
CAM112A_map1	0001.CSV	3938.09	0.0238426
CAM112A_map1	0001.CSV	3941.95	0.0237424
CAM112A_map1	0001.CSV	3945.81	0.0238586
CAM112A_map1	0001.CSV	3949.67	0.0239946
CAM112A_map1	0001.CSV	3953.52	0.0240202
CAM112A_map1	0001.CSV	3957.38	0.023939
CAM112A_map1	0001.CSV	3961.24	0.0239591
CAM112A_map1	0001.CSV	3965.09	0.0239585
CAM112A_map1	0001.CSV	3968.95	0.0239688
CAM112A_map1	0001.CSV	3972.81	0.024066
CAM112A_map1	0001.CSV	3976.67	0.0240853
CAM112A_map1	0001.CSV	3980.52	0.0240636
CAM112A_map1	0001.CSV	3984.38	0.0240232
CAM112A_map1	0001.CSV	3988.24	0.0239417
CAM112A_map1	0001.CSV	3992.09	0.0240004
CAM112A_map1	0001.CSV	3995.95	0.024094
CAM112A_map1	0001.CSV	3999.81	0.0240229
CAM112A_map1	0002.CSV	674.992	0.0465124
CAM112A_map1	0002.CSV	678.849	0.0483829
CAM112A_map1	0002.CSV	682.706	0.0488072
CAM112A_map1	0002.CSV	686.563	0.050827
CAM112A_map1	0002.CSV	690.42	0.0525732
CAM112A_map1	0002.CSV	694.277	0.0574524
CAM112A_map1	0002.CSV	698.134	0.0634891
CAM112A_map1	0002.CSV	701.991	0.0735635
CAM112A_map1	0002.CSV	705.849	0.0933178
CAM112A_map1	0002.CSV	709.706	0.120046
CAM112A_map1	0002.CSV	713.563	0.111884
CAM112A_map1	0002.CSV	717.42	0.0741997
CAM112A_map1	0002.CSV	721.277	0.0497757
CAM112A_map1	0002.CSV	725.134	0.0431185
CAM112A_map1	0002.CSV	728.991	0.0409972
CAM112A_map1	0002.CSV	732.848	0.0406862
CAM112A_map1	0002.CSV	736.705	0.0404975
CAM112A_map1	0002.CSV	740.562	0.0412521
CAM112A_map1	0002.CSV	744.42	0.0416068
CAM112A_map1	0002.CSV	748.277	0.04264
CAM112A_map1	0002.CSV	752.134	0.0430698
CAM112A_map1	0002.CSV	755.991	0.0440281
CAM112A_map1	0002.CSV	759.848	0.0447075
CAM112A_map1	0002.CSV	763.705	0.0458446
CAM112A_map1	0002.CSV	767.562	0.0462119
CAM112A_map1	0002.CSV	771.419	0.0469394
CAM112A_map1	0002.CSV	775.276	0.0470026
CAM112A_map1	0002.CSV	779.133	0.0473052
CAM112A_map1	0002.CSV	782.99	0.0469835
CAM112A_map1	0002.CSV	786.848	0.0470737
CAM112A_map1	0002.CSV	790.705	0.0469465
CAM112A_map1	0002.CSV	794.562	0.0476028
CAM112A_map1	0002.CSV	798.419	0.0480188
CAM112A_map1	0002.CSV	802.276	0.0490629
CAM112A_map1	0002.CSV	806.133	0.0495609
CAM112A_map1	0002.CSV	809.99	0.0506128
CAM112A_map1	0002.CSV	813.847	0.051518
CAM112A_map1	0002.CSV	817.704	0.0532136
CAM112A_map1	0002.CSV	821.562	0.0547806
CAM112A_map1	0002.CSV	825.419	0.0570338
CAM112A_map1	0002.CSV	829.276	0.0593156
CAM112A_map1	0002.CSV	833.133	0.062304
CAM112A_map1	0002.CSV	836.99	0.0650443
CAM112A_map1	0002.CSV	840.847	0.0701297
CAM112A_map1	0002.CSV	844.704	0.0786717
CAM112A_map1	0002.CSV	848.561	0.0849973
CAM112A_map1	0002.CSV	852.418	0.0884087
CAM112A_map1	0002.CSV	856.275	0.101571
CAM112A_map1	0002.CSV	860.132	0.128313
CAM112A_map1	0002.CSV	863.99	0.177998
CAM112A_map1	0002.CSV	867.847	0.240876
CAM112A_map1	0002.CSV	871.704	0.262746
CAM112A_map1	0002.CSV	875.561	0.225359
CAM112A_map1	0002.CSV	879.418	0.173219
CAM112A_map1	0002.CSV	883.275	0.115816
CAM112A_map1	0002.CSV	887.132	0.0638875
CAM112A_map1	0002.CSV	890.989	0.0403461
CAM112A_map1	0002.CSV	894.846	0.0378106
CAM112A_map1	0002.CSV	898.703	0.0388089
CAM112A_map1	0002.CSV	902.561	0.0403488
CAM112A_map1	0002.CSV	906.418	0.0414799
CAM112A_map1	0002.CSV	910.275	0.0428664
CAM112A_map1	0002.CSV	914.132	0.0437792
CAM112A_map1	0002.CSV	917.989	0.044942
CAM112A_map1	0002.CSV	921.846	0.0457385
CAM112A_map1	0002.CSV	925.703	0.0469041
CAM112A_map1	0002.CSV	929.56	0.0477289
CAM112A_map1	0002.CSV	933.417	0.0487539
CAM112A_map1	0002.CSV	937.274	0.0491435
CAM112A_map1	0002.CSV	941.131	0.0496242
CAM112A_map1	0002.CSV	944.989	0.0498892
CAM112A_map1	0002.CSV	948.846	0.05068
CAM112A_map1	0002.CSV	952.703	0.0513447
CAM112A_map1	0002.CSV	956.56	0.0522848
CAM112A_map1	0002.CSV	960.417	0.0526124
CAM112A_map1	0002.CSV	964.274	0.0530452
CAM112A_map1	0002.CSV	968.131	0.0533984
CAM112A_map1	0002.CSV	971.988	0.0543528
CAM112A_map1	0002.CSV	975.845	0.0551171
CAM112A_map1	0002.CSV	979.702	0.0559919
CAM112A_map1	0002.CSV	983.559	0.05654
CAM112A_map1	0002.CSV	987.417	0.0574601
CAM112A_map1	0002.CSV	991.274	0.0581438
CAM112A_map1	0002.CSV	995.131	0.0590379
CAM112A_map1	0002.CSV	998.988	0.0595728
CAM112A_map1	0002.CSV	1002.85	0.0604439
CAM112A_map1	0002.CSV	1006.7	0.0611121
CAM112A_map1	0002.CSV	1010.56	0.062091
CAM112A_map1	0002.CSV	1014.42	0.0627496
CAM112A_map1	0002.CSV	1018.27	0.0636343
CAM112A_map1	0002.CSV	1022.13	0.0641299
CAM112A_map1	0002.CSV	1025.99	0.0648378
CAM112A_map1	0002.CSV	1029.85	0.0652655
CAM112A_map1	0002.CSV	1033.7	0.0660821
CAM112A_map1	0002.CSV	1037.56	0.0667221
CAM112A_map1	0002.CSV	1041.42	0.0676283
CAM112A_map1	0002.CSV	1045.27	0.0680174
CAM112A_map1	0002.CSV	1049.13	0.0686371
CAM112A_map1	0002.CSV	1052.99	0.0690753
CAM112A_map1	0002.CSV	1056.84	0.0700914
CAM112A_map1	0002.CSV	1060.7	0.0709906
CAM112A_map1	0002.CSV	1064.56	0.0722567
CAM112A_map1	0002.CSV	1068.42	0.0730447
CAM112A_map1	0002.CSV	1072.27	0.0738968
CAM112A_map1	0002.CSV	1076.13	0.0744592
CAM112A_map1	0002.CSV	1079.99	0.0757217
CAM112A_map1	0002.CSV	1083.84	0.0768108
CAM112A_map1	0002.CSV	1087.7	0.0776544
CAM112A_map1	0002.CSV	1091.56	0.0772137
CAM112A_map1	0002.CSV	1095.41	0.0765598
CAM112A_map1	0002.CSV	1099.27	0.0761022
CAM112A_map1	0002.CSV	1103.13	0.0767445
CAM112A_map1	0002.CSV	1106.99	0.0777854
CAM112A_map1	0002.CSV	1110.84	0.0793882
CAM112A_map1	0002.CSV	1114.7	0.080014
CAM112A_map1	0002.CSV	1118.56	0.0801501
CAM112A_map1	0002.CSV	1122.41	0.0800926
CAM112A_map1	0002.CSV	1126.27	0.0806251
CAM112A_map1	0002.CSV	1130.13	0.0808322
CAM112A_map1	0002.CSV	1133.99	0.0813096
CAM112A_map1	0002.CSV	1137.84	0.0816985
CAM112A_map1	0002.CSV	1141.7	0.0824814
CAM112A_map1	0002.CSV	1145.56	0.0829767
CAM112A_map1	0002.CSV	1149.41	0.0838777
CAM112A_map1	0002.CSV	1153.27	0.0847262
CAM112A_map1	0002.CSV	1157.13	0.0860398
CAM112A_map1	0002.CSV	1160.99	0.0870487
CAM112A_map1	0002.CSV	1164.84	0.0880269
CAM112A_map1	0002.CSV	1168.7	0.0883321
CAM112A_map1	0002.CSV	1172.56	0.0886566
CAM112A_map1	0002.CSV	1176.41	0.0885624
CAM112A_map1	0002.CSV	1180.27	0.0886306
CAM112A_map1	0002.CSV	1184.13	0.0883961
CAM112A_map1	0002.CSV	1187.99	0.0885081
CAM112A_map1	0002.CSV	1191.84	0.0884258
CAM112A_map1	0002.CSV	1195.7	0.0887156
CAM112A_map1	0002.CSV	1199.56	0.0889501
CAM112A_map1	0002.CSV	1203.41	0.0897548
CAM112A_map1	0002.CSV	1207.27	0.0905079
CAM112A_map1	0002.CSV	1211.13	0.0916704
CAM112A_map1	0002.CSV	1214.98	0.0925884
CAM112A_map1	0002.CSV	1218.84	0.0938704
CAM112A_map1	0002.CSV	1222.7	0.0950575
CAM112A_map1	0002.CSV	1226.56	0.0967319
CAM112A_map1	0002.CSV	1230.41	0.0983146
CAM112A_map1	0002.CSV	1234.27	0.100335
CAM112A_map1	0002.CSV	1238.13	0.10207
CAM112A_map1	0002.CSV	1241.98	0.104152
CAM112A_map1	0002.CSV	1245.84	0.106062
CAM112A_map1	0002.CSV	1249.7	0.108373
CAM112A_map1	0002.CSV	1253.56	0.110476
CAM112A_map1	0002.CSV	1257.41	0.112893
CAM112A_map1	0002.CSV	1261.27	0.114905
CAM112A_map1	0002.CSV	1265.13	0.11712
CAM112A_map1	0002.CSV	1268.98	0.11919
CAM112A_map1	0002.CSV	1272.84	0.121911
CAM112A_map1	0002.CSV	1276.7	0.124507
CAM112A_map1	0002.CSV	1280.56	0.127551
CAM112A_map1	0002.CSV	1284.41	0.130321
CAM112A_map1	0002.CSV	1288.27	0.133544
CAM112A_map1	0002.CSV	1292.13	0.13643
CAM112A_map1	0002.CSV	1295.98	0.139712
CAM112A_map1	0002.CSV	1299.84	0.142857
CAM112A_map1	0002.CSV	1303.7	0.146644
CAM112A_map1	0002.CSV	1307.56	0.150469
CAM112A_map1	0002.CSV	1311.41	0.155151
CAM112A_map1	0002.CSV	1315.27	0.159891
CAM112A_map1	0002.CSV	1319.13	0.165174
CAM112A_map1	0002.CSV	1322.98	0.16975
CAM112A_map1	0002.CSV	1326.84	0.174967
CAM112A_map1	0002.CSV	1330.7	0.180569
CAM112A_map1	0002.CSV	1334.56	0.186908
CAM112A_map1	0002.CSV	1338.41	0.194347
CAM112A_map1	0002.CSV	1342.27	0.203622
CAM112A_map1	0002.CSV	1346.13	0.211452
CAM112A_map1	0002.CSV	1349.98	0.220595
CAM112A_map1	0002.CSV	1353.84	0.230065
CAM112A_map1	0002.CSV	1357.7	0.240269
CAM112A_map1	0002.CSV	1361.56	0.251716
CAM112A_map1	0002.CSV	1365.41	0.265837
CAM112A_map1	0002.CSV	1369.27	0.277681
CAM112A_map1	0002.CSV	1373.13	0.292444
CAM112A_map1	0002.CSV	1376.98	0.308753
CAM112A_map1	0002.CSV	1380.84	0.323361
CAM112A_map1	0002.CSV	1384.7	0.336909
CAM112A_map1	0002.CSV	1388.56	0.353462
CAM112A_map1	0002.CSV	1392.41	0.364155
CAM112A_map1	0002.CSV	1396.27	0.370403
CAM112A_map1	0002.CSV	1400.13	0.369207
CAM112A_map1	0002.CSV	1403.98	0.364241
CAM112A_map1	0002.CSV	1407.84	0.352274
CAM112A_map1	0002.CSV	1411.7	0.336759
CAM112A_map1	0002.CSV	1415.55	0.319808
CAM112A_map1	0002.CSV	1419.41	0.301408
CAM112A_map1	0002.CSV	1423.27	0.285881
CAM112A_map1	0002.CSV	1427.12	0.27629
CAM112A_map1	0002.CSV	1430.98	0.266443
CAM112A_map1	0002.CSV	1434.84	0.256839
CAM112A_map1	0002.CSV	1438.7	0.245155
CAM112A_map1	0002.CSV	1442.55	0.236465
CAM112A_map1	0002.CSV	1446.41	0.226785
CAM112A_map1	0002.CSV	1450.27	0.216932
CAM112A_map1	0002.CSV	1454.12	0.208208
CAM112A_map1	0002.CSV	1457.98	0.196465
CAM112A_map1	0002.CSV	1461.84	0.187148
CAM112A_map1	0002.CSV	1465.7	0.180329
CAM112A_map1	0002.CSV	1469.55	0.172448
CAM112A_map1	0002.CSV	1473.41	0.162041
CAM112A_map1	0002.CSV	1477.27	0.150401
CAM112A_map1	0002.CSV	1481.12	0.143211
CAM112A_map1	0002.CSV	1484.98	0.136661
CAM112A_map1	0002.CSV	1488.84	0.12947
CAM112A_map1	0002.CSV	1492.7	0.122209
CAM112A_map1	0002.CSV	1496.55	0.11647
CAM112A_map1	0002.CSV	1500.41	0.11003
CAM112A_map1	0002.CSV	1504.27	0.105899
CAM112A_map1	0002.CSV	1508.12	0.0993543
CAM112A_map1	0002.CSV	1511.98	0.094782
CAM112A_map1	0002.CSV	1515.84	0.0913883
CAM112A_map1	0002.CSV	1519.7	0.0876832
CAM112A_map1	0002.CSV	1523.55	0.0840294
CAM112A_map1	0002.CSV	1527.41	0.082311
CAM112A_map1	0002.CSV	1531.27	0.0822197
CAM112A_map1	0002.CSV	1535.12	0.0851785
CAM112A_map1	0002.CSV	1538.98	0.0869594
CAM112A_map1	0002.CSV	1542.84	0.0802024
CAM112A_map1	0002.CSV	1546.7	0.0705189
CAM112A_map1	0002.CSV	1550.55	0.0631728
CAM112A_map1	0002.CSV	1554.41	0.0574465
CAM112A_map1	0002.CSV	1558.27	0.0536011
CAM112A_map1	0002.CSV	1562.12	0.0520931
CAM112A_map1	0002.CSV	1565.98	0.0525492
CAM112A_map1	0002.CSV	1569.84	0.0554118
CAM112A_map1	0002.CSV	1573.69	0.0585581
CAM112A_map1	0002.CSV	1577.55	0.0584199
CAM112A_map1	0002.CSV	1581.41	0.0536731
CAM112A_map1	0002.CSV	1585.27	0.0473635
CAM112A_map1	0002.CSV	1589.12	0.042168
CAM112A_map1	0002.CSV	1592.98	0.0385412
CAM112A_map1	0002.CSV	1596.84	0.0361306
CAM112A_map1	0002.CSV	1600.69	0.0344179
CAM112A_map1	0002.CSV	1604.55	0.0334228
CAM112A_map1	0002.CSV	1608.41	0.0326949
CAM112A_map1	0002.CSV	1612.27	0.0321473
CAM112A_map1	0002.CSV	1616.12	0.0314823
CAM112A_map1	0002.CSV	1619.98	0.0309811
CAM112A_map1	0002.CSV	1623.84	0.0302838
CAM112A_map1	0002.CSV	1627.69	0.0295825
CAM112A_map1	0002.CSV	1631.55	0.0284894
CAM112A_map1	0002.CSV	1635.41	0.0276413
CAM112A_map1	0002.CSV	1639.27	0.0267948
CAM112A_map1	0002.CSV	1643.12	0.0259994
CAM112A_map1	0002.CSV	1646.98	0.0253575
CAM112A_map1	0002.CSV	1650.84	0.025185
CAM112A_map1	0002.CSV	1654.69	0.0251551
CAM112A_map1	0002.CSV	1658.55	0.0247925
CAM112A_map1	0002.CSV	1662.41	0.0243365
CAM112A_map1	0002.CSV	1666.27	0.0240504
CAM112A_map1	0002.CSV	1670.12	0.0238262
CAM112A_map1	0002.CSV	1673.98	0.0238815
CAM112A_map1	0002.CSV	1677.84	0.0234821
CAM112A_map1	0002.CSV	1681.69	0.0232357
CAM112A_map1	0002.CSV	1685.55	0.0233923
CAM112A_map1	0002.CSV	1689.41	0.0232444
CAM112A_map1	0002.CSV	1693.27	0.0226701
CAM112A_map1	0002.CSV	1697.12	0.0227092
CAM112A_map1	0002.CSV	1700.98	0.023158
CAM112A_map1	0002.CSV	1704.84	0.0233757
CAM112A_map1	0002.CSV	1708.69	0.0232953
CAM112A_map1	0002.CSV	1712.55	0.0232504
CAM112A_map1	0002.CSV	1716.41	0.0239903
CAM112A_map1	0002.CSV	1720.27	0.0249877
CAM112A_map1	0002.CSV	1724.12	0.0249524
CAM112A_map1	0002.CSV	1727.98	0.0248951
CAM112A_map1	0002.CSV	1731.84	0.0251139
CAM112A_map1	0002.CSV	1735.69	0.025727
CAM112A_map1	0002.CSV	1739.55	0.0252407
CAM112A_map1	0002.CSV	1743.41	0.0241195
CAM112A_map1	0002.CSV	1747.27	0.0227878
CAM112A_map1	0002.CSV	1751.12	0.0216499
CAM112A_map1	0002.CSV	1754.98	0.0207321
CAM112A_map1	0002.CSV	1758.84	0.0202093
CAM112A_map1	0002.CSV	1762.69	0.0199447
CAM112A_map1	0002.CSV	1766.55	0.0197316
CAM112A_map1	0002.CSV	1770.41	0.0197735
CAM112A_map1	0002.CSV	1774.26	0.0202841
CAM112A_map1	0002.CSV	1778.12	0.0204442
CAM112A_map1	0002.CSV	1781.98	0.0211188
CAM112A_map1	0002.CSV	1785.84	0.0223812
CAM112A_map1	0002.CSV	1789.69	0.0243644
CAM112A_map1	0002.CSV	1793.55	0.0269058
CAM112A_map1	0002.CSV	1797.41	0.0272566
CAM112A_map1	0002.CSV	1801.26	0.0251723
CAM112A_map1	0002.CSV	1805.12	0.0226547
CAM112A_map1	0002.CSV	1808.98	0.0208919
CAM112A_map1	0002.CSV	1812.84	0.0199459
CAM112A_map1	0002.CSV	1816.69	0.0192859
CAM112A_map1	0002.CSV	1820.55	0.018964
CAM112A_map1	0002.CSV	1824.41	0.0187148
CAM112A_map1	0002.CSV	1828.26	0.0187583
CAM112A_map1	0002.CSV	1832.12	0.018718
CAM112A_map1	0002.CSV	1835.98	0.018578
CAM112A_map1	0002.CSV	1839.84	0.0183778
CAM112A_map1	0002.CSV	1843.69	0.0184971
CAM112A_map1	0002.CSV	1847.55	0.0186702
CAM112A_map1	0002.CSV	1851.41	0.0185891
CAM112A_map1	0002.CSV	1855.26	0.0184476
CAM112A_map1	0002.CSV	1859.12	0.0184766
CAM112A_map1	0002.CSV	1862.98	0.0184284
CAM112A_map1	0002.CSV	1866.84	0.0185547
CAM112A_map1	0002.CSV	1870.69	0.0187961
CAM112A_map1	0002.CSV	1874.55	0.0187106
CAM112A_map1	0002.CSV	1878.41	0.0185931
CAM112A_map1	0002.CSV	1882.26	0.0186122
CAM112A_map1	0002.CSV	1886.12	0.0185638
CAM112A_map1	0002.CSV	1889.98	0.0186657
CAM112A_map1	0002.CSV	1893.83	0.0187245
CAM112A_map1	0002.CSV	1897.69	0.0187638
CAM112A_map1	0002.CSV	1901.55	0.0187027
CAM112A_map1	0002.CSV	1905.41	0.0187121
CAM112A_map1	0002.CSV	1909.26	0.0187961
CAM112A_map1	0002.CSV	1913.12	0.0188246
CAM112A_map1	0002.CSV	1916.98	0.0187599
CAM112A_map1	0002.CSV	1920.83	0.0188982
CAM112A_map1	0002.CSV	1924.69	0.0189704
CAM112A_map1	0002.CSV	1928.55	0.0189901
CAM112A_map1	0002.CSV	1932.4	0.0189801
CAM112A_map1	0002.CSV	1936.26	0.0190262
CAM112A_map1	0002.CSV	1940.12	0.0190032
CAM112A_map1	0002.CSV	1943.98	0.019178
CAM112A_map1	0002.CSV	1947.83	0.0192211
CAM112A_map1	0002.CSV	1951.69	0.0192097
CAM112A_map1	0002.CSV	1955.55	0.0192153
CAM112A_map1	0002.CSV	1959.4	0.0192871
CAM112A_map1	0002.CSV	1963.26	0.0192805
CAM112A_map1	0002.CSV	1967.12	0.0193655
CAM112A_map1	0002.CSV	1970.98	0.0193479
CAM112A_map1	0002.CSV	1974.83	0.019298
CAM112A_map1	0002.CSV	1978.69	0.0192618
CAM112A_map1	0002.CSV	1982.55	0.0192963
CAM112A_map1	0002.CSV	1986.4	0.0192774
CAM112A_map1	0002.CSV	1990.26	0.0193626
CAM112A_map1	0002.CSV	1994.12	0.0194397
CAM112A_map1	0002.CSV	1997.98	0.019431
CAM112A_map1	0002.CSV	2001.83	0.0194068
CAM112A_map1	0002.CSV	2005.69	0.0194492
CAM112A_map1	0002.CSV	2009.55	0.0194365
CAM112A_map1	0002.CSV	2013.4	0.0194473
CAM112A_map1	0002.CSV	2017.26	0.0195235
CAM112A_map1	0002.CSV	2021.12	0.0195951
CAM112A_map1	0002.CSV	2024.97	0.0195299
CAM112A_map1	0002.CSV	2028.83	0.0195361
CAM112A_map1	0002.CSV	2032.69	0.0195096
CAM112A_map1	0002.CSV	2036.55	0.0195349
CAM112A_map1	0002.CSV	2040.4	0.0195696
CAM112A_map1	0002.CSV	2044.26	0.0196427
CAM112A_map1	0002.CSV	2048.12	0.0196079
CAM112A_map1	0002.CSV	2051.97	0.0196374
CAM112A_map1	0002.CSV	2055.83	0.0196513
CAM112A_map1	0002.CSV	2059.69	0.0196913
CAM112A_map1	0002.CSV	2063.55	0.0197122
CAM112A_map1	0002.CSV	2067.4	0.019768
CAM112A_map1	0002.CSV	2071.26	0.0197322
CAM112A_map1	0002.CSV	2075.12	0.0197589
CAM112A_map1	0002.CSV	2078.97	0.0197777
CAM112A_map1	0002.CSV	2082.83	0.0198032
CAM112A_map1	0002.CSV	2086.69	0.0197895
CAM112A_map1	0002.CSV	2090.55	0.0198642
CAM112A_map1	0002.CSV	2094.4	0.0198843
CAM112A_map1	0002.CSV	2098.26	0.0198919
CAM112A_map1	0002.CSV	2102.12	0.019887
CAM112A_map1	0002.CSV	2105.97	0.0199434
CAM112A_map1	0002.CSV	2109.83	0.0199964
CAM112A_map1	0002.CSV	2113.69	0.0200965
CAM112A_map1	0002.CSV	2117.55	0.0201397
CAM112A_map1	0002.CSV	2121.4	0.0202045
CAM112A_map1	0002.CSV	2125.26	0.0202603
CAM112A_map1	0002.CSV	2129.12	0.0203524
CAM112A_map1	0002.CSV	2132.97	0.0203976
CAM112A_map1	0002.CSV	2136.83	0.0204474
CAM112A_map1	0002.CSV	2140.69	0.0204763
CAM112A_map1	0002.CSV	2144.55	0.0205205
CAM112A_map1	0002.CSV	2148.4	0.0205172
CAM112A_map1	0002.CSV	2152.26	0.0205572
CAM112A_map1	0002.CSV	2156.12	0.020561
CAM112A_map1	0002.CSV	2159.97	0.0205891
CAM112A_map1	0002.CSV	2163.83	0.0206028
CAM112A_map1	0002.CSV	2167.69	0.0206563
CAM112A_map1	0002.CSV	2171.55	0.0206696
CAM112A_map1	0002.CSV	2175.4	0.0207192
CAM112A_map1	0002.CSV	2179.26	0.0207635
CAM112A_map1	0002.CSV	2183.12	0.0208388
CAM112A_map1	0002.CSV	2186.97	0.0208576
CAM112A_map1	0002.CSV	2190.83	0.0208933
CAM112A_map1	0002.CSV	2194.69	0.0209124
CAM112A_map1	0002.CSV	2198.55	0.0209661
CAM112A_map1	0002.CSV	2202.4	0.0209956
CAM112A_map1	0002.CSV	2206.26	0.0210803
CAM112A_map1	0002.CSV	2210.12	0.0211295
CAM112A_map1	0002.CSV	2213.97	0.0211508
CAM112A_map1	0002.CSV	2217.83	0.0211286
CAM112A_map1	0002.CSV	2221.69	0.0211394
CAM112A_map1	0002.CSV	2225.54	0.0211443
CAM112A_map1	0002.CSV	2229.4	0.0211823
CAM112A_map1	0002.CSV	2233.26	0.0211797
CAM112A_map1	0002.CSV	2237.12	0.0212162
CAM112A_map1	0002.CSV	2240.97	0.0212566
CAM112A_map1	0002.CSV	2244.83	0.0212972
CAM112A_map1	0002.CSV	2248.69	0.0212873
CAM112A_map1	0002.CSV	2252.54	0.021309
CAM112A_map1	0002.CSV	2256.4	0.0213424
CAM112A_map1	0002.CSV	2260.26	0.0214038
CAM112A_map1	0002.CSV	2264.11	0.0213782
CAM112A_map1	0002.CSV	2267.97	0.0213723
CAM112A_map1	0002.CSV	2271.83	0.0213652
CAM112A_map1	0002.CSV	2275.69	0.0213936
CAM112A_map1	0002.CSV	2279.54	0.0213707
CAM112A_map1	0002.CSV	2283.4	0.0213674
CAM112A_map1	0002.CSV	2287.26	0.0213659
CAM112A_map1	0002.CSV	2291.11	0.021446
CAM112A_map1	0002.CSV	2294.97	0.0215373
CAM112A_map1	0002.CSV	2298.83	0.0216378
CAM112A_map1	0002.CSV	2302.69	0.0216567
CAM112A_map1	0002.CSV	2306.54	0.0216613
CAM112A_map1	0002.CSV	2310.4	0.0216291
CAM112A_map1	0002.CSV	2314.26	0.0216008
CAM112A_map1	0002.CSV	2318.11	0.0213652
CAM112A_map1	0002.CSV	2321.97	0.02101
CAM112A_map1	0002.CSV	2325.83	0.0205407
CAM112A_map1	0002.CSV	2329.69	0.0200588
CAM112A_map1	0002.CSV	2333.54	0.0194393
CAM112A_map1	0002.CSV	2337.4	0.0191145
CAM112A_map1	0002.CSV	2341.26	0.0191552
CAM112A_map1	0002.CSV	2345.11	0.0205277
CAM112A_map1	0002.CSV	2348.97	0.0208615
CAM112A_map1	0002.CSV	2352.83	0.0194396
CAM112A_map1	0002.CSV	2356.69	0.0153041
CAM112A_map1	0002.CSV	2360.54	0.0124907
CAM112A_map1	0002.CSV	2364.4	0.0147376
CAM112A_map1	0002.CSV	2368.26	0.0188771
CAM112A_map1	0002.CSV	2372.11	0.021289
CAM112A_map1	0002.CSV	2375.97	0.0221506
CAM112A_map1	0002.CSV	2379.83	0.0222521
CAM112A_map1	0002.CSV	2383.69	0.0220894
CAM112A_map1	0002.CSV	2387.54	0.0218429
CAM112A_map1	0002.CSV	2391.4	0.0217107
CAM112A_map1	0002.CSV	2395.26	0.0216811
CAM112A_map1	0002.CSV	2399.11	0.0217182
CAM112A_map1	0002.CSV	2402.97	0.0217519
CAM112A_map1	0002.CSV	2406.83	0.0217869
CAM112A_map1	0002.CSV	2410.68	0.0218006
CAM112A_map1	0002.CSV	2414.54	0.0218325
CAM112A_map1	0002.CSV	2418.4	0.0218467
CAM112A_map1	0002.CSV	2422.26	0.0218961
CAM112A_map1	0002.CSV	2426.11	0.0219374
CAM112A_map1	0002.CSV	2429.97	0.0220023
CAM112A_map1	0002.CSV	2433.83	0.0220674
CAM112A_map1	0002.CSV	2437.68	0.022151
CAM112A_map1	0002.CSV	2441.54	0.0221948
CAM112A_map1	0002.CSV	2445.4	0.0222465
CAM112A_map1	0002.CSV	2449.26	0.0223157
CAM112A_map1	0002.CSV	2453.11	0.0223763
CAM112A_map1	0002.CSV	2456.97	0.022443
CAM112A_map1	0002.CSV	2460.83	0.0225685
CAM112A_map1	0002.CSV	2464.68	0.0226995
CAM112A_map1	0002.CSV	2468.54	0.0228641
CAM112A_map1	0002.CSV	2472.4	0.0230766
CAM112A_map1	0002.CSV	2476.26	0.0233402
CAM112A_map1	0002.CSV	2480.11	0.0236246
CAM112A_map1	0002.CSV	2483.97	0.0239624
CAM112A_map1	0002.CSV	2487.83	0.0243402
CAM112A_map1	0002.CSV	2491.68	0.0248611
CAM112A_map1	0002.CSV	2495.54	0.0255555
CAM112A_map1	0002.CSV	2499.4	0.0263117
CAM112A_map1	0002.CSV	2503.26	0.0269834
CAM112A_map1	0002.CSV	2507.11	0.0275378
CAM112A_map1	0002.CSV	2510.97	0.0278044
CAM112A_map1	0002.CSV	2514.83	0.0277143
CAM112A_map1	0002.CSV	2518.68	0.0273761
CAM112A_map1	0002.CSV	2522.54	0.026846
CAM112A_map1	0002.CSV	2526.4	0.0261634
CAM112A_map1	0002.CSV	2530.26	0.025496
CAM112A_map1	0002.CSV	2534.11	0.0248826
CAM112A_map1	0002.CSV	2537.97	0.024408
CAM112A_map1	0002.CSV	2541.83	0.0240472
CAM112A_map1	0002.CSV	2545.68	0.0238061
CAM112A_map1	0002.CSV	2549.54	0.023657
CAM112A_map1	0002.CSV	2553.4	0.0235845
CAM112A_map1	0002.CSV	2557.26	0.0235124
CAM112A_map1	0002.CSV	2561.11	0.0234606
CAM112A_map1	0002.CSV	2564.97	0.0234029
CAM112A_map1	0002.CSV	2568.83	0.0233572
CAM112A_map1	0002.CSV	2572.68	0.0233302
CAM112A_map1	0002.CSV	2576.54	0.0233496
CAM112A_map1	0002.CSV	2580.4	0.0233303
CAM112A_map1	0002.CSV	2584.25	0.0232971
CAM112A_map1	0002.CSV	2588.11	0.0232592
CAM112A_map1	0002.CSV	2591.97	0.0232655
CAM112A_map1	0002.CSV	2595.83	0.0231992
CAM112A_map1	0002.CSV	2599.68	0.023118
CAM112A_map1	0002.CSV	2603.54	0.023042
CAM112A_map1	0002.CSV	2607.4	0.0229379
CAM112A_map1	0002.CSV	2611.25	0.0228087
CAM112A_map1	0002.CSV	2615.11	0.0227093
CAM112A_map1	0002.CSV	2618.97	0.0225836
CAM112A_map1	0002.CSV	2622.82	0.0225614
CAM112A_map1	0002.CSV	2626.68	0.0225287
CAM112A_map1	0002.CSV	2630.54	0.0224032
CAM112A_map1	0002.CSV	2634.4	0.0223756
CAM112A_map1	0002.CSV	2638.25	0.0223384
CAM112A_map1	0002.CSV	2642.11	0.0221481
CAM112A_map1	0002.CSV	2645.97	0.0219948
CAM112A_map1	0002.CSV	2649.82	0.0218977
CAM112A_map1	0002.CSV	2653.68	0.0218774
CAM112A_map1	0002.CSV	2657.54	0.0219197
CAM112A_map1	0002.CSV	2661.4	0.0219404
CAM112A_map1	0002.CSV	2665.25	0.0218983
CAM112A_map1	0002.CSV	2669.11	0.0219343
CAM112A_map1	0002.CSV	2672.97	0.022131
CAM112A_map1	0002.CSV	2676.82	0.0224039
CAM112A_map1	0002.CSV	2680.68	0.0223508
CAM112A_map1	0002.CSV	2684.54	0.0219639
CAM112A_map1	0002.CSV	2688.4	0.0217906
CAM112A_map1	0002.CSV	2692.25	0.0217728
CAM112A_map1	0002.CSV	2696.11	0.021841
CAM112A_map1	0002.CSV	2699.97	0.0219031
CAM112A_map1	0002.CSV	2703.82	0.0218622
CAM112A_map1	0002.CSV	2707.68	0.0219254
CAM112A_map1	0002.CSV	2711.54	0.0219493
CAM112A_map1	0002.CSV	2715.4	0.0219525
CAM112A_map1	0002.CSV	2719.25	0.0221644
CAM112A_map1	0002.CSV	2723.11	0.0225742
CAM112A_map1	0002.CSV	2726.97	0.0225939
CAM112A_map1	0002.CSV	2730.82	0.0222014
CAM112A_map1	0002.CSV	2734.68	0.0221573
CAM112A_map1	0002.CSV	2738.54	0.0222223
CAM112A_map1	0002.CSV	2742.4	0.0222359
CAM112A_map1	0002.CSV	2746.25	0.0225935
CAM112A_map1	0002.CSV	2750.11	0.022655
CAM112A_map1	0002.CSV	2753.97	0.0223583
CAM112A_map1	0002.CSV	2757.82	0.0222641
CAM112A_map1	0002.CSV	2761.68	0.0221888
CAM112A_map1	0002.CSV	2765.54	0.0221471
CAM112A_map1	0002.CSV	2769.39	0.0223777
CAM112A_map1	0002.CSV	2773.25	0.0228335
CAM112A_map1	0002.CSV	2777.11	0.0227368
CAM112A_map1	0002.CSV	2780.97	0.022478
CAM112A_map1	0002.CSV	2784.82	0.0227857
CAM112A_map1	0002.CSV	2788.68	0.0234172
CAM112A_map1	0002.CSV	2792.54	0.023628
CAM112A_map1	0002.CSV	2796.39	0.0236993
CAM112A_map1	0002.CSV	2800.25	0.0235539
CAM112A_map1	0002.CSV	2804.11	0.0233279
CAM112A_map1	0002.CSV	2807.97	0.0237265
CAM112A_map1	0002.CSV	2811.82	0.023898
CAM112A_map1	0002.CSV	2815.68	0.0238494
CAM112A_map1	0002.CSV	2819.54	0.0241864
CAM112A_map1	0002.CSV	2823.39	0.0246573
CAM112A_map1	0002.CSV	2827.25	0.0251388
CAM112A_map1	0002.CSV	2831.11	0.0262018
CAM112A_map1	0002.CSV	2834.97	0.0279889
CAM112A_map1	0002.CSV	2838.82	0.030431
CAM112A_map1	0002.CSV	2842.68	0.0347062
CAM112A_map1	0002.CSV	2846.54	0.0418977
CAM112A_map1	0002.CSV	2850.39	0.0463316
CAM112A_map1	0002.CSV	2854.25	0.0439358
CAM112A_map1	0002.CSV	2858.11	0.0394822
CAM112A_map1	0002.CSV	2861.97	0.0359987
CAM112A_map1	0002.CSV	2865.82	0.0339695
CAM112A_map1	0002.CSV	2869.68	0.0336255
CAM112A_map1	0002.CSV	2873.54	0.0334856
CAM112A_map1	0002.CSV	2877.39	0.0323579
CAM112A_map1	0002.CSV	2881.25	0.0315087
CAM112A_map1	0002.CSV	2885.11	0.0315998
CAM112A_map1	0002.CSV	2888.97	0.032456
CAM112A_map1	0002.CSV	2892.82	0.0339446
CAM112A_map1	0002.CSV	2896.68	0.0354447
CAM112A_map1	0002.CSV	2900.54	0.0368727
CAM112A_map1	0002.CSV	2904.39	0.0391597
CAM112A_map1	0002.CSV	2908.25	0.0434024
CAM112A_map1	0002.CSV	2912.11	0.0507193
CAM112A_map1	0002.CSV	2915.97	0.0583267
CAM112A_map1	0002.CSV	2919.82	0.0606162
CAM112A_map1	0002.CSV	2923.68	0.057217
CAM112A_map1	0002.CSV	2927.54	0.0521121
CAM112A_map1	0002.CSV	2931.39	0.0468676
CAM112A_map1	0002.CSV	2935.25	0.0419905
CAM112A_map1	0002.CSV	2939.11	0.0386053
CAM112A_map1	0002.CSV	2942.96	0.0367973
CAM112A_map1	0002.CSV	2946.82	0.0355995
CAM112A_map1	0002.CSV	2950.68	0.0350123
CAM112A_map1	0002.CSV	2954.54	0.0347184
CAM112A_map1	0002.CSV	2958.39	0.0338834
CAM112A_map1	0002.CSV	2962.25	0.0325887
CAM112A_map1	0002.CSV	2966.11	0.0308006
CAM112A_map1	0002.CSV	2969.96	0.0294377
CAM112A_map1	0002.CSV	2973.82	0.0287543
CAM112A_map1	0002.CSV	2977.68	0.0281628
CAM112A_map1	0002.CSV	2981.53	0.0272506
CAM112A_map1	0002.CSV	2985.39	0.0261156
CAM112A_map1	0002.CSV	2989.25	0.0256553
CAM112A_map1	0002.CSV	2993.11	0.0255607
CAM112A_map1	0002.CSV	2996.96	0.0251329
CAM112A_map1	0002.CSV	3000.82	0.0246058
CAM112A_map1	0002.CSV	3004.68	0.0243186
CAM112A_map1	0002.CSV	3008.53	0.0245121
CAM112A_map1	0002.CSV	3012.39	0.0248673
CAM112A_map1	0002.CSV	3016.25	0.0248131
CAM112A_map1	0002.CSV	3020.11	0.0244224
CAM112A_map1	0002.CSV	3023.96	0.0241074
CAM112A_map1	0002.CSV	3027.82	0.0240565
CAM112A_map1	0002.CSV	3031.68	0.0243707
CAM112A_map1	0002.CSV	3035.53	0.0244572
CAM112A_map1	0002.CSV	3039.39	0.0244256
CAM112A_map1	0002.CSV	3043.25	0.0245102
CAM112A_map1	0002.CSV	3047.11	0.0244115
CAM112A_map1	0002.CSV	3050.96	0.024329
CAM112A_map1	0002.CSV	3054.82	0.0242216
CAM112A_map1	0002.CSV	3058.68	0.0240152
CAM112A_map1	0002.CSV	3062.53	0.0240656
CAM112A_map1	0002.CSV	3066.39	0.0243427
CAM112A_map1	0002.CSV	3070.25	0.0242329
CAM112A_map1	0002.CSV	3074.11	0.0242395
CAM112A_map1	0002.CSV	3077.96	0.0245589
CAM112A_map1	0002.CSV	3081.82	0.0246836
CAM112A_map1	0002.CSV	3085.68	0.0246427
CAM112A_map1	0002.CSV	3089.53	0.024482
CAM112A_map1	0002.CSV	3093.39	0.0241984
CAM112A_map1	0002.CSV	3097.25	0.0242396
CAM112A_map1	0002.CSV	3101.11	0.0243474
CAM112A_map1	0002.CSV	3104.96	0.0243883
CAM112A_map1	0002.CSV	3108.82	0.0245871
CAM112A_map1	0002.CSV	3112.68	0.0247412
CAM112A_map1	0002.CSV	3116.53	0.0249213
CAM112A_map1	0002.CSV	3120.39	0.0248423
CAM112A_map1	0002.CSV	3124.25	0.024512
CAM112A_map1	0002.CSV	3128.11	0.0243966
CAM112A_map1	0002.CSV	3131.96	0.0243428
CAM112A_map1	0002.CSV	3135.82	0.0244583
CAM112A_map1	0002.CSV	3139.68	0.0245819
CAM112A_map1	0002.CSV	3143.53	0.0243463
CAM112A_map1	0002.CSV	3147.39	0.0244474
CAM112A_map1	0002.CSV	3151.25	0.024874
CAM112A_map1	0002.CSV	3155.1	0.0247858
CAM112A_map1	0002.CSV	3158.96	0.0243564
CAM112A_map1	0002.CSV	3162.82	0.0242043
CAM112A_map1	0002.CSV	3166.68	0.0241812
CAM112A_map1	0002.CSV	3170.53	0.0241636
CAM112A_map1	0002.CSV	3174.39	0.024227
CAM112A_map1	0002.CSV	3178.25	0.0244025
CAM112A_map1	0002.CSV	3182.1	0.0245048
CAM112A_map1	0002.CSV	3185.96	0.0246147
CAM112A_map1	0002.CSV	3189.82	0.0247414
CAM112A_map1	0002.CSV	3193.68	0.0246712
CAM112A_map1	0002.CSV	3197.53	0.0245777
CAM112A_map1	0002.CSV	3201.39	0.0246999
CAM112A_map1	0002.CSV	3205.25	0.0248191
CAM112A_map1	0002.CSV	3209.1	0.0248402
CAM112A_map1	0002.CSV	3212.96	0.0249663
CAM112A_map1	0002.CSV	3216.82	0.0251207
CAM112A_map1	0002.CSV	3220.68	0.0250675
CAM112A_map1	0002.CSV	3224.53	0.024981
CAM112A_map1	0002.CSV	3228.39	0.0252088
CAM112A_map1	0002.CSV	3232.25	0.0256432
CAM112A_map1	0002.CSV	3236.1	0.025589
CAM112A_map1	0002.CSV	3239.96	0.0253732
CAM112A_map1	0002.CSV	3243.82	0.0256029
CAM112A_map1	0002.CSV	3247.68	0.025746
CAM112A_map1	0002.CSV	3251.53	0.0255746
CAM112A_map1	0002.CSV	3255.39	0.0256124
CAM112A_map1	0002.CSV	3259.25	0.0254441
CAM112A_map1	0002.CSV	3263.1	0.0253183
CAM112A_map1	0002.CSV	3266.96	0.0256499
CAM112A_map1	0002.CSV	3270.82	0.0261138
CAM112A_map1	0002.CSV	3274.68	0.0261111
CAM112A_map1	0002.CSV	3278.53	0.0257988
CAM112A_map1	0002.CSV	3282.39	0.0256443
CAM112A_map1	0002.CSV	3286.25	0.0257804
CAM112A_map1	0002.CSV	3290.1	0.0261617
CAM112A_map1	0002.CSV	3293.96	0.0264485
CAM112A_map1	0002.CSV	3297.82	0.0262855
CAM112A_map1	0002.CSV	3301.67	0.0263295
CAM112A_map1	0002.CSV	3305.53	0.0266382
CAM112A_map1	0002.CSV	3309.39	0.026547
CAM112A_map1	0002.CSV	3313.25	0.0260899
CAM112A_map1	0002.CSV	3317.1	0.0258154
CAM112A_map1	0002.CSV	3320.96	0.025972
CAM112A_map1	0002.CSV	3324.82	0.0262703
CAM112A_map1	0002.CSV	3328.67	0.0260668
CAM112A_map1	0002.CSV	3332.53	0.0259385
CAM112A_map1	0002.CSV	3336.39	0.0263828
CAM112A_map1	0002.CSV	3340.24	0.0266158
CAM112A_map1	0002.CSV	3344.1	0.0264408
CAM112A_map1	0002.CSV	3347.96	0.0264833
CAM112A_map1	0002.CSV	3351.82	0.0264823
CAM112A_map1	0002.CSV	3355.67	0.0262793
CAM112A_map1	0002.CSV	3359.53	0.0263963
CAM112A_map1	0002.CSV	3363.39	0.0266555
CAM112A_map1	0002.CSV	3367.24	0.0269334
CAM112A_map1	0002.CSV	3371.1	0.0268123
CAM112A_map1	0002.CSV	3374.96	0.0264988
CAM112A_map1	0002.CSV	3378.82	0.0263253
CAM112A_map1	0002.CSV	3382.67	0.0261078
CAM112A_map1	0002.CSV	3386.53	0.026178
CAM112A_map1	0002.CSV	3390.39	0.0265403
CAM112A_map1	0002.CSV	3394.24	0.0267246
CAM112A_map1	0002.CSV	3398.1	0.0267431
CAM112A_map1	0002.CSV	3401.96	0.0266423
CAM112A_map1	0002.CSV	3405.82	0.0263084
CAM112A_map1	0002.CSV	3409.67	0.0262543
CAM112A_map1	0002.CSV	3413.53	0.0259845
CAM112A_map1	0002.CSV	3417.39	0.0255316
CAM112A_map1	0002.CSV	3421.24	0.0254792
CAM112A_map1	0002.CSV	3425.1	0.0256754
CAM112A_map1	0002.CSV	3428.96	0.0260281
CAM112A_map1	0002.CSV	3432.82	0.0263148
CAM112A_map1	0002.CSV	3436.67	0.0260605
CAM112A_map1	0002.CSV	3440.53	0.0253737
CAM112A_map1	0002.CSV	3444.39	0.02498
CAM112A_map1	0002.CSV	3448.24	0.0248793
CAM112A_map1	0002.CSV	3452.1	0.0247157
CAM112A_map1	0002.CSV	3455.96	0.0248001
CAM112A_map1	0002.CSV	3459.82	0.0250824
CAM112A_map1	0002.CSV	3463.67	0.0253065
CAM112A_map1	0002.CSV	3467.53	0.0254461
CAM112A_map1	0002.CSV	3471.39	0.0251429
CAM112A_map1	0002.CSV	3475.24	0.0248005
CAM112A_map1	0002.CSV	3479.1	0.0247389
CAM112A_map1	0002.CSV	3482.96	0.0246412
CAM112A_map1	0002.CSV	3486.82	0.0246963
CAM112A_map1	0002.CSV	3490.67	0.0246717
CAM112A_map1	0002.CSV	3494.53	0.0246943
CAM112A_map1	0002.CSV	3498.39	0.0246558
CAM112A_map1	0002.CSV	3502.24	0.024444
CAM112A_map1	0002.CSV	3506.1	0.0240091
CAM112A_map1	0002.CSV	3509.96	0.0238812
CAM112A_map1	0002.CSV	3513.81	0.0239892
CAM112A_map1	0002.CSV	3517.67	0.0237043
CAM112A_map1	0002.CSV	3521.53	0.0236693
CAM112A_map1	0002.CSV	3525.39	0.0236693
CAM112A_map1	0002.CSV	3529.24	0.0235094
CAM112A_map1	0002.CSV	3533.1	0.0235951
CAM112A_map1	0002.CSV	3536.96	0.0237193
CAM112A_map1	0002.CSV	3540.81	0.0237068
CAM112A_map1	0002.CSV	3544.67	0.0237933
CAM112A_map1	0002.CSV	3548.53	0.023561
CAM112A_map1	0002.CSV	3552.39	0.0231759
CAM112A_map1	0002.CSV	3556.24	0.0230331
CAM112A_map1	0002.CSV	3560.1	0.0228243
CAM112A_map1	0002.CSV	3563.96	0.0224049
CAM112A_map1	0002.CSV	3567.81	0.0227791
CAM112A_map1	0002.CSV	3571.67	0.0229288
CAM112A_map1	0002.CSV	3575.53	0.0225137
CAM112A_map1	0002.CSV	3579.39	0.0226201
CAM112A_map1	0002.CSV	3583.24	0.0226669
CAM112A_map1	0002.CSV	3587.1	0.0225956
CAM112A_map1	0002.CSV	3590.96	0.0225457
CAM112A_map1	0002.CSV	3594.81	0.0224382
CAM112A_map1	0002.CSV	3598.67	0.0225639
CAM112A_map1	0002.CSV	3602.53	0.0223667
CAM112A_map1	0002.CSV	3606.39	0.0216475
CAM112A_map1	0002.CSV	3610.24	0.021264
CAM112A_map1	0002.CSV	3614.1	0.0212666
CAM112A_map1	0002.CSV	3617.96	0.0215978
CAM112A_map1	0002.CSV	3621.81	0.0218642
CAM112A_map1	0002.CSV	3625.67	0.0211582
CAM112A_map1	0002.CSV	3629.53	0.0211113
CAM112A_map1	0002.CSV	3633.39	0.0217118
CAM112A_map1	0002.CSV	3637.24	0.0214823
CAM112A_map1	0002.CSV	3641.1	0.0210393
CAM112A_map1	0002.CSV	3644.96	0.0203639
CAM112A_map1	0002.CSV	3648.81	0.0209097
CAM112A_map1	0002.CSV	3652.67	0.0217668
CAM112A_map1	0002.CSV	3656.53	0.0216659
CAM112A_map1	0002.CSV	3660.38	0.0215495
CAM112A_map1	0002.CSV	3664.24	0.0207877
CAM112A_map1	0002.CSV	3668.1	0.0200712
CAM112A_map1	0002.CSV	3671.96	0.0200763
CAM112A_map1	0002.CSV	3675.81	0.0207051
CAM112A_map1	0002.CSV	3679.67	0.0212088
CAM112A_map1	0002.CSV	3683.53	0.0208662
CAM112A_map1	0002.CSV	3687.38	0.0207719
CAM112A_map1	0002.CSV	3691.24	0.0214509
CAM112A_map1	0002.CSV	3695.1	0.0212288
CAM112A_map1	0002.CSV	3698.95	0.020652
CAM112A_map1	0002.CSV	3702.81	0.0205191
CAM112A_map1	0002.CSV	3706.67	0.0201712
CAM112A_map1	0002.CSV	3710.53	0.0202413
CAM112A_map1	0002.CSV	3714.38	0.0209154
CAM112A_map1	0002.CSV	3718.24	0.0205157
CAM112A_map1	0002.CSV	3722.1	0.0202549
CAM112A_map1	0002.CSV	3725.95	0.0204199
CAM112A_map1	0002.CSV	3729.81	0.0201596
CAM112A_map1	0002.CSV	3733.67	0.0202411
CAM112A_map1	0002.CSV	3737.53	0.021074
CAM112A_map1	0002.CSV	3741.38	0.0203053
CAM112A_map1	0002.CSV	3745.24	0.0194505
CAM112A_map1	0002.CSV	3749.1	0.0194086
CAM112A_map1	0002.CSV	3752.95	0.0202321
CAM112A_map1	0002.CSV	3756.81	0.0203762
CAM112A_map1	0002.CSV	3760.67	0.0203364
CAM112A_map1	0002.CSV	3764.53	0.0201971
CAM112A_map1	0002.CSV	3768.38	0.0203834
CAM112A_map1	0002.CSV	3772.24	0.0205567
CAM112A_map1	0002.CSV	3776.1	0.0203333
CAM112A_map1	0002.CSV	3779.95	0.0204261
CAM112A_map1	0002.CSV	3783.81	0.0204762
CAM112A_map1	0002.CSV	3787.67	0.0204017
CAM112A_map1	0002.CSV	3791.53	0.0201057
CAM112A_map1	0002.CSV	3795.38	0.019626
CAM112A_map1	0002.CSV	3799.24	0.0195365
CAM112A_map1	0002.CSV	3803.1	0.0201221
CAM112A_map1	0002.CSV	3806.95	0.0206137
CAM112A_map1	0002.CSV	3810.81	0.0202799
CAM112A_map1	0002.CSV	3814.67	0.0197467
CAM112A_map1	0002.CSV	3818.53	0.0199146
CAM112A_map1	0002.CSV	3822.38	0.0204303
CAM112A_map1	0002.CSV	3826.24	0.0203299
CAM112A_map1	0002.CSV	3830.1	0.0199957
CAM112A_map1	0002.CSV	3833.95	0.019805
CAM112A_map1	0002.CSV	3837.81	0.020015
CAM112A_map1	0002.CSV	3841.67	0.0207118
CAM112A_map1	0002.CSV	3845.53	0.0204865
CAM112A_map1	0002.CSV	3849.38	0.0195856
CAM112A_map1	0002.CSV	3853.24	0.0197558
CAM112A_map1	0002.CSV	3857.1	0.0204827
CAM112A_map1	0002.CSV	3860.95	0.0199683
CAM112A_map1	0002.CSV	3864.81	0.0198883
CAM112A_map1	0002.CSV	3868.67	0.0199221
CAM112A_map1	0002.CSV	3872.52	0.0203168
CAM112A_map1	0002.CSV	3876.38	0.0202593
CAM112A_map1	0002.CSV	3880.24	0.0201224
CAM112A_map1	0002.CSV	3884.1	0.0205986
CAM112A_map1	0002.CSV	3887.95	0.0206141
CAM112A_map1	0002.CSV	3891.81	0.020474
CAM112A_map1	0002.CSV	3895.67	0.02012
CAM112A_map1	0002.CSV	3899.52	0.0198028
CAM112A_map1	0002.CSV	3903.38	0.0206397
CAM112A_map1	0002.CSV	3907.24	0.0209585
CAM112A_map1	0002.CSV	3911.1	0.0204814
CAM112A_map1	0002.CSV	3914.95	0.0202267
CAM112A_map1	0002.CSV	3918.81	0.02043
CAM112A_map1	0002.CSV	3922.67	0.0204265
CAM112A_map1	0002.CSV	3926.52	0.0203642
CAM112A_map1	0002.CSV	3930.38	0.0204943
CAM112A_map1	0002.CSV	3934.24	0.0207192
CAM112A_map1	0002.CSV	3938.09	0.0204704
CAM112A_map1	0002.CSV	3941.95	0.0203665
CAM112A_map1	0002.CSV	3945.81	0.020484
CAM112A_map1	0002.CSV	3949.67	0.0206407
CAM112A_map1	0002.CSV	3953.52	0.0206863
CAM112A_map1	0002.CSV	3957.38	0.0206273
CAM112A_map1	0002.CSV	3961.24	0.0206045
CAM112A_map1	0002.CSV	3965.09	0.0205831
CAM112A_map1	0002.CSV	3968.95	0.0205633
CAM112A_map1	0002.CSV	3972.81	0.0206358
CAM112A_map1	0002.CSV	3976.67	0.0206925
CAM112A_map1	0002.CSV	3980.52	0.0207011
CAM112A_map1	0002.CSV	3984.38	0.0206965
CAM112A_map1	0002.CSV	3988.24	0.0206511
CAM112A_map1	0002.CSV	3992.09	0.0206899
CAM112A_map1	0002.CSV	3995.95	0.0207587
CAM112A_map1	0002.CSV	3999.81	0.0206601
CAM112A_map1	0003.CSV	674.992	0.0352858
CAM112A_map1	0003.CSV	678.849	0.0366082
CAM112A_map1	0003.CSV	682.706	0.0369952
CAM112A_map1	0003.CSV	686.563	0.038864
CAM112A_map1	0003.CSV	690.42	0.0407787
CAM112A_map1	0003.CSV	694.277	0.0452333
CAM112A_map1	0003.CSV	698.134	0.0504073
CAM112A_map1	0003.CSV	701.991	0.0583293
CAM112A_map1	0003.CSV	705.849	0.0748364
CAM112A_map1	0003.CSV	709.706	0.0991579
CAM112A_map1	0003.CSV	713.563	0.0936845
CAM112A_map1	0003.CSV	717.42	0.060067
CAM112A_map1	0003.CSV	721.277	0.0379176
CAM112A_map1	0003.CSV	725.134	0.0322468
CAM112A_map1	0003.CSV	728.991	0.030877
CAM112A_map1	0003.CSV	732.848	0.0311328
CAM112A_map1	0003.CSV	736.705	0.0313829
CAM112A_map1	0003.CSV	740.562	0.0323904
CAM112A_map1	0003.CSV	744.42	0.033026
CAM112A_map1	0003.CSV	748.277	0.033839
CAM112A_map1	0003.CSV	752.134	0.0341627
CAM112A_map1	0003.CSV	755.991	0.0349509
CAM112A_map1	0003.CSV	759.848	0.0355574
CAM112A_map1	0003.CSV	763.705	0.036654
CAM112A_map1	0003.CSV	767.562	0.0370262
CAM112A_map1	0003.CSV	771.419	0.03758
CAM112A_map1	0003.CSV	775.276	0.0377553
CAM112A_map1	0003.CSV	779.133	0.038253
CAM112A_map1	0003.CSV	782.99	0.03821
CAM112A_map1	0003.CSV	786.848	0.0384035
CAM112A_map1	0003.CSV	790.705	0.0384721
CAM112A_map1	0003.CSV	794.562	0.0392537
CAM112A_map1	0003.CSV	798.419	0.0399699
CAM112A_map1	0003.CSV	802.276	0.0410326
CAM112A_map1	0003.CSV	806.133	0.0415791
CAM112A_map1	0003.CSV	809.99	0.0423656
CAM112A_map1	0003.CSV	813.847	0.0430362
CAM112A_map1	0003.CSV	817.704	0.0445178
CAM112A_map1	0003.CSV	821.562	0.0459402
CAM112A_map1	0003.CSV	825.419	0.0478659
CAM112A_map1	0003.CSV	829.276	0.0498989
CAM112A_map1	0003.CSV	833.133	0.0525212
CAM112A_map1	0003.CSV	836.99	0.0551607
CAM112A_map1	0003.CSV	840.847	0.0597729
CAM112A_map1	0003.CSV	844.704	0.0670775
CAM112A_map1	0003.CSV	848.561	0.0724013
CAM112A_map1	0003.CSV	852.418	0.0759592
CAM112A_map1	0003.CSV	856.275	0.0875888
CAM112A_map1	0003.CSV	860.132	0.10904
CAM112A_map1	0003.CSV	863.99	0.147716
CAM112A_map1	0003.CSV	867.847	0.196963
CAM112A_map1	0003.CSV	871.704	0.212057
CAM112A_map1	0003.CSV	875.561	0.18039
CAM112A_map1	0003.CSV	879.418	0.138243
CAM112A_map1	0003.CSV	883.275	0.0924671
CAM112A_map1	0003.CSV	887.132	0.0499129
CAM112A_map1	0003.CSV	890.989	0.0294214
CAM112A_map1	0003.CSV	894.846	0.0266962
CAM112A_map1	0003.CSV	898.703	0.027277
CAM112A_map1	0003.CSV	902.561	0.0285956
CAM112A_map1	0003.CSV	906.418	0.0296462
CAM112A_map1	0003.CSV	910.275	0.0309018
CAM112A_map1	0003.CSV	914.132	0.0317948
CAM112A_map1	0003.CSV	917.989	0.0328366
CAM112A_map1	0003.CSV	921.846	0.0335804
CAM112A_map1	0003.CSV	925.703	0.0346404
CAM112A_map1	0003.CSV	929.56	0.0353255
CAM112A_map1	0003.CSV	933.417	0.0362362
CAM112A_map1	0003.CSV	937.274	0.0366934
CAM112A_map1	0003.CSV	941.131	0.0372328
CAM112A_map1	0003.CSV	944.989	0.037573
CAM112A_map1	0003.CSV	948.846	0.0382439
CAM112A_map1	0003.CSV	952.703	0.0387106
CAM112A_map1	0003.CSV	956.56	0.0394552
CAM112A_map1	0003.CSV	960.417	0.0398065
CAM112A_map1	0003.CSV	964.274	0.0402675
CAM112A_map1	0003.CSV	968.131	0.0406095
CAM112A_map1	0003.CSV	971.988	0.0414468
CAM112A_map1	0003.CSV	975.845	0.0421649
CAM112A_map1	0003.CSV	979.702	0.0430063
CAM112A_map1	0003.CSV	983.559	0.0435839
CAM112A_map1	0003.CSV	987.417	0.044451
CAM112A_map1	0003.CSV	991.274	0.0450784
CAM112A_map1	0003.CSV	995.131	0.0458465
CAM112A_map1	0003.CSV	998.988	0.0463439
CAM112A_map1	0003.CSV	1002.85	0.0471136
CAM112A_map1	0003.CSV	1006.7	0.047698
CAM112A_map1	0003.CSV	1010.56	0.0484977
CAM112A_map1	0003.CSV	1014.42	0.048992
CAM112A_map1	0003.CSV	1018.27	0.0497227
CAM112A_map1	0003.CSV	1022.13	0.0501239
CAM112A_map1	0003.CSV	1025.99	0.0507607
CAM112A_map1	0003.CSV	1029.85	0.0512205
CAM112A_map1	0003.CSV	1033.7	0.0519992
CAM112A_map1	0003.CSV	1037.56	0.052578
CAM112A_map1	0003.CSV	1041.42	0.053313
CAM112A_map1	0003.CSV	1045.27	0.0536346
CAM112A_map1	0003.CSV	1049.13	0.0542225
CAM112A_map1	0003.CSV	1052.99	0.0547597
CAM112A_map1	0003.CSV	1056.84	0.0558369
CAM112A_map1	0003.CSV	1060.7	0.0568835
CAM112A_map1	0003.CSV	1064.56	0.0582392
CAM112A_map1	0003.CSV	1068.42	0.0591272
CAM112A_map1	0003.CSV	1072.27	0.0599474
CAM112A_map1	0003.CSV	1076.13	0.0604197
CAM112A_map1	0003.CSV	1079.99	0.0613907
CAM112A_map1	0003.CSV	1083.84	0.0621153
CAM112A_map1	0003.CSV	1087.7	0.062492
CAM112A_map1	0003.CSV	1091.56	0.061943
CAM112A_map1	0003.CSV	1095.41	0.0614434
CAM112A_map1	0003.CSV	1099.27	0.0610245
CAM112A_map1	0003.CSV	1103.13	0.0613521
CAM112A_map1	0003.CSV	1106.99	0.0619429
CAM112A_map1	0003.CSV	1110.84	0.0629672
CAM112A_map1	0003.CSV	1114.7	0.0633731
CAM112A_map1	0003.CSV	1118.56	0.0635436
CAM112A_map1	0003.CSV	1122.41	0.0635424
CAM112A_map1	0003.CSV	1126.27	0.0639438
CAM112A_map1	0003.CSV	1130.13	0.0640678
CAM112A_map1	0003.CSV	1133.99	0.0643692
CAM112A_map1	0003.CSV	1137.84	0.0646113
CAM112A_map1	0003.CSV	1141.7	0.0651981
CAM112A_map1	0003.CSV	1145.56	0.0655125
CAM112A_map1	0003.CSV	1149.41	0.0661016
CAM112A_map1	0003.CSV	1153.27	0.0666358
CAM112A_map1	0003.CSV	1157.13	0.0675525
CAM112A_map1	0003.CSV	1160.99	0.0682301
CAM112A_map1	0003.CSV	1164.84	0.0689296
CAM112A_map1	0003.CSV	1168.7	0.0691344
CAM112A_map1	0003.CSV	1172.56	0.0693544
CAM112A_map1	0003.CSV	1176.41	0.0692301
CAM112A_map1	0003.CSV	1180.27	0.0692323
CAM112A_map1	0003.CSV	1184.13	0.0689068
CAM112A_map1	0003.CSV	1187.99	0.068812
CAM112A_map1	0003.CSV	1191.84	0.068616
CAM112A_map1	0003.CSV	1195.7	0.0687695
CAM112A_map1	0003.CSV	1199.56	0.0688614
CAM112A_map1	0003.CSV	1203.41	0.069368
CAM112A_map1	0003.CSV	1207.27	0.0698361
CAM112A_map1	0003.CSV	1211.13	0.0706431
CAM112A_map1	0003.CSV	1214.98	0.0713126
CAM112A_map1	0003.CSV	1218.84	0.0722995
CAM112A_map1	0003.CSV	1222.7	0.0732448
CAM112A_map1	0003.CSV	1226.56	0.074578
CAM112A_map1	0003.CSV	1230.41	0.0757925
CAM112A_map1	0003.CSV	1234.27	0.0773712
CAM112A_map1	0003.CSV	1238.13	0.0787902
CAM112A_map1	0003.CSV	1241.98	0.0804506
CAM112A_map1	0003.CSV	1245.84	0.0819214
CAM112A_map1	0003.CSV	1249.7	0.083713
CAM112A_map1	0003.CSV	1253.56	0.085313
CAM112A_map1	0003.CSV	1257.41	0.0871356
CAM112A_map1	0003.CSV	1261.27	0.0887059
CAM112A_map1	0003.CSV	1265.13	0.0904973
CAM112A_map1	0003.CSV	1268.98	0.0921412
CAM112A_map1	0003.CSV	1272.84	0.0942187
CAM112A_map1	0003.CSV	1276.7	0.0961724
CAM112A_map1	0003.CSV	1280.56	0.0985244
CAM112A_map1	0003.CSV	1284.41	0.100658
CAM112A_map1	0003.CSV	1288.27	0.103103
CAM112A_map1	0003.CSV	1292.13	0.105303
CAM112A_map1	0003.CSV	1295.98	0.107848
CAM112A_map1	0003.CSV	1299.84	0.110323
CAM112A_map1	0003.CSV	1303.7	0.113288
CAM112A_map1	0003.CSV	1307.56	0.116267
CAM112A_map1	0003.CSV	1311.41	0.119884
CAM112A_map1	0003.CSV	1315.27	0.12357
CAM112A_map1	0003.CSV	1319.13	0.127745
CAM112A_map1	0003.CSV	1322.98	0.131434
CAM112A_map1	0003.CSV	1326.84	0.135625
CAM112A_map1	0003.CSV	1330.7	0.140084
CAM112A_map1	0003.CSV	1334.56	0.145081
CAM112A_map1	0003.CSV	1338.41	0.15097
CAM112A_map1	0003.CSV	1342.27	0.158343
CAM112A_map1	0003.CSV	1346.13	0.164608
CAM112A_map1	0003.CSV	1349.98	0.171962
CAM112A_map1	0003.CSV	1353.84	0.179647
CAM112A_map1	0003.CSV	1357.7	0.187837
CAM112A_map1	0003.CSV	1361.56	0.196862
CAM112A_map1	0003.CSV	1365.41	0.207762
CAM112A_map1	0003.CSV	1369.27	0.216702
CAM112A_map1	0003.CSV	1373.13	0.227179
CAM112A_map1	0003.CSV	1376.98	0.237774
CAM112A_map1	0003.CSV	1380.84	0.246155
CAM112A_map1	0003.CSV	1384.7	0.25261
CAM112A_map1	0003.CSV	1388.56	0.259501
CAM112A_map1	0003.CSV	1392.41	0.26227
CAM112A_map1	0003.CSV	1396.27	0.261682
CAM112A_map1	0003.CSV	1400.13	0.257471
CAM112A_map1	0003.CSV	1403.98	0.252607
CAM112A_map1	0003.CSV	1407.84	0.244616
CAM112A_map1	0003.CSV	1411.7	0.236167
CAM112A_map1	0003.CSV	1415.55	0.227669
CAM112A_map1	0003.CSV	1419.41	0.218798
CAM112A_map1	0003.CSV	1423.27	0.210907
CAM112A_map1	0003.CSV	1427.12	0.205839
CAM112A_map1	0003.CSV	1430.98	0.200349
CAM112A_map1	0003.CSV	1434.84	0.195025
CAM112A_map1	0003.CSV	1438.7	0.188269
CAM112A_map1	0003.CSV	1442.55	0.183271
CAM112A_map1	0003.CSV	1446.41	0.177618
CAM112A_map1	0003.CSV	1450.27	0.171805
CAM112A_map1	0003.CSV	1454.12	0.166246
CAM112A_map1	0003.CSV	1457.98	0.158739
CAM112A_map1	0003.CSV	1461.84	0.152474
CAM112A_map1	0003.CSV	1465.7	0.14773
CAM112A_map1	0003.CSV	1469.55	0.142017
CAM112A_map1	0003.CSV	1473.41	0.134297
CAM112A_map1	0003.CSV	1477.27	0.125496
CAM112A_map1	0003.CSV	1481.12	0.119986
CAM112A_map1	0003.CSV	1484.98	0.114884
CAM112A_map1	0003.CSV	1488.84	0.1091
CAM112A_map1	0003.CSV	1492.7	0.102956
CAM112A_map1	0003.CSV	1496.55	0.0978086
CAM112A_map1	0003.CSV	1500.41	0.0919429
CAM112A_map1	0003.CSV	1504.27	0.0881742
CAM112A_map1	0003.CSV	1508.12	0.0819075
CAM112A_map1	0003.CSV	1511.98	0.0773609
CAM112A_map1	0003.CSV	1515.84	0.0740937
CAM112A_map1	0003.CSV	1519.7	0.0703941
CAM112A_map1	0003.CSV	1523.55	0.0665304
CAM112A_map1	0003.CSV	1527.41	0.0642856
CAM112A_map1	0003.CSV	1531.27	0.0632531
CAM112A_map1	0003.CSV	1535.12	0.0644316
CAM112A_map1	0003.CSV	1538.98	0.0651263
CAM112A_map1	0003.CSV	1542.84	0.0601122
CAM112A_map1	0003.CSV	1546.7	0.0527275
CAM112A_map1	0003.CSV	1550.55	0.0469994
CAM112A_map1	0003.CSV	1554.41	0.0423909
CAM112A_map1	0003.CSV	1558.27	0.0391588
CAM112A_map1	0003.CSV	1562.12	0.0377251
CAM112A_map1	0003.CSV	1565.98	0.0377248
CAM112A_map1	0003.CSV	1569.84	0.0393385
CAM112A_map1	0003.CSV	1573.69	0.0413299
CAM112A_map1	0003.CSV	1577.55	0.041511
CAM112A_map1	0003.CSV	1581.41	0.0385613
CAM112A_map1	0003.CSV	1585.27	0.0343891
CAM112A_map1	0003.CSV	1589.12	0.0308845
CAM112A_map1	0003.CSV	1592.98	0.0283737
CAM112A_map1	0003.CSV	1596.84	0.0267274
CAM112A_map1	0003.CSV	1600.69	0.0255916
CAM112A_map1	0003.CSV	1604.55	0.0249248
CAM112A_map1	0003.CSV	1608.41	0.0244312
CAM112A_map1	0003.CSV	1612.27	0.0240296
CAM112A_map1	0003.CSV	1616.12	0.0235518
CAM112A_map1	0003.CSV	1619.98	0.0232307
CAM112A_map1	0003.CSV	1623.84	0.0227537
CAM112A_map1	0003.CSV	1627.69	0.0223528
CAM112A_map1	0003.CSV	1631.55	0.021655
CAM112A_map1	0003.CSV	1635.41	0.021238
CAM112A_map1	0003.CSV	1639.27	0.0208107
CAM112A_map1	0003.CSV	1643.12	0.0202117
CAM112A_map1	0003.CSV	1646.98	0.019783
CAM112A_map1	0003.CSV	1650.84	0.0197617
CAM112A_map1	0003.CSV	1654.69	0.0199309
CAM112A_map1	0003.CSV	1658.55	0.0196583
CAM112A_map1	0003.CSV	1662.41	0.0192724
CAM112A_map1	0003.CSV	1666.27	0.019094
CAM112A_map1	0003.CSV	1670.12	0.0190366
CAM112A_map1	0003.CSV	1673.98	0.0192377
CAM112A_map1	0003.CSV	1677.84	0.0189241
CAM112A_map1	0003.CSV	1681.69	0.0186545
CAM112A_map1	0003.CSV	1685.55	0.0187638
CAM112A_map1	0003.CSV	1689.41	0.0187197
CAM112A_map1	0003.CSV	1693.27	0.0182915
CAM112A_map1	0003.CSV	1697.12	0.0183884
CAM112A_map1	0003.CSV	1700.98	0.0188635
CAM112A_map1	0003.CSV	1704.84	0.0190695
CAM112A_map1	0003.CSV	1708.69	0.019037
CAM112A_map1	0003.CSV	1712.55	0.0190019
CAM112A_map1	0003.CSV	1716.41	0.0196153
CAM112A_map1	0003.CSV	1720.27	0.0204639
CAM112A_map1	0003.CSV	1724.12	0.0204587
[truncated: 128,314 more rows]

## Sheet: CAM112_map2
Map	Select spectrum number	Wavenumbers	Absorbance
CAM112A_map2	0001.CSV	674.992	94.9828
CAM112A_map2	0001.CSV	678.849	94.5465
CAM112A_map2	0001.CSV	682.706	94.211
CAM112A_map2	0001.CSV	686.563	93.9455
CAM112A_map2	0001.CSV	690.42	93.6902
CAM112A_map2	0001.CSV	694.277	93.0225
CAM112A_map2	0001.CSV	698.134	92.4423
CAM112A_map2	0001.CSV	701.991	92.3265
CAM112A_map2	0001.CSV	705.849	92.0109
CAM112A_map2	0001.CSV	709.706	91.2199
CAM112A_map2	0001.CSV	713.563	92.0529
CAM112A_map2	0001.CSV	717.42	94.2848
CAM112A_map2	0001.CSV	721.277	95.3989
CAM112A_map2	0001.CSV	725.134	95.3935
CAM112A_map2	0001.CSV	728.991	95.2736
CAM112A_map2	0001.CSV	732.848	95.0687
CAM112A_map2	0001.CSV	736.705	94.883
CAM112A_map2	0001.CSV	740.562	94.6386
CAM112A_map2	0001.CSV	744.42	94.5094
CAM112A_map2	0001.CSV	748.277	94.6521
CAM112A_map2	0001.CSV	752.134	94.8997
CAM112A_map2	0001.CSV	755.991	94.9147
CAM112A_map2	0001.CSV	759.848	94.8562
CAM112A_map2	0001.CSV	763.705	94.8439
CAM112A_map2	0001.CSV	767.562	94.8452
CAM112A_map2	0001.CSV	771.419	94.7755
CAM112A_map2	0001.CSV	775.276	94.7956
CAM112A_map2	0001.CSV	779.133	94.8979
CAM112A_map2	0001.CSV	782.99	95.0906
CAM112A_map2	0001.CSV	786.848	95.1906
CAM112A_map2	0001.CSV	790.705	95.144
CAM112A_map2	0001.CSV	794.562	95.0422
CAM112A_map2	0001.CSV	798.419	95.0261
CAM112A_map2	0001.CSV	802.276	95.0493
CAM112A_map2	0001.CSV	806.133	95.0636
CAM112A_map2	0001.CSV	809.99	95.0307
CAM112A_map2	0001.CSV	813.847	94.936
CAM112A_map2	0001.CSV	817.704	94.7386
CAM112A_map2	0001.CSV	821.562	94.5559
CAM112A_map2	0001.CSV	825.419	94.3837
CAM112A_map2	0001.CSV	829.276	94.1264
CAM112A_map2	0001.CSV	833.133	93.9333
CAM112A_map2	0001.CSV	836.99	93.8659
CAM112A_map2	0001.CSV	840.847	93.6953
CAM112A_map2	0001.CSV	844.704	93.3454
CAM112A_map2	0001.CSV	848.561	93.0565
CAM112A_map2	0001.CSV	852.418	92.8428
CAM112A_map2	0001.CSV	856.275	92.2965
CAM112A_map2	0001.CSV	860.132	91.2743
CAM112A_map2	0001.CSV	863.99	89.6255
CAM112A_map2	0001.CSV	867.847	87.5996
CAM112A_map2	0001.CSV	871.704	86.7879
CAM112A_map2	0001.CSV	875.561	87.8543
CAM112A_map2	0001.CSV	879.418	89.6895
CAM112A_map2	0001.CSV	883.275	91.9918
CAM112A_map2	0001.CSV	887.132	94.2545
CAM112A_map2	0001.CSV	890.989	95.2685
CAM112A_map2	0001.CSV	894.846	95.3133
CAM112A_map2	0001.CSV	898.703	95.2707
CAM112A_map2	0001.CSV	902.561	95.2089
CAM112A_map2	0001.CSV	906.418	95.1117
CAM112A_map2	0001.CSV	910.275	95.0126
CAM112A_map2	0001.CSV	914.132	94.954
CAM112A_map2	0001.CSV	917.989	94.8933
CAM112A_map2	0001.CSV	921.846	94.8881
CAM112A_map2	0001.CSV	925.703	94.8472
CAM112A_map2	0001.CSV	929.56	94.7938
CAM112A_map2	0001.CSV	933.417	94.7745
CAM112A_map2	0001.CSV	937.274	94.775
CAM112A_map2	0001.CSV	941.131	94.7656
CAM112A_map2	0001.CSV	944.989	94.8065
CAM112A_map2	0001.CSV	948.846	94.8314
CAM112A_map2	0001.CSV	952.703	94.83
CAM112A_map2	0001.CSV	956.56	94.782
CAM112A_map2	0001.CSV	960.417	94.7395
CAM112A_map2	0001.CSV	964.274	94.6862
CAM112A_map2	0001.CSV	968.131	94.6668
CAM112A_map2	0001.CSV	971.988	94.6464
CAM112A_map2	0001.CSV	975.845	94.6052
CAM112A_map2	0001.CSV	979.702	94.5769
CAM112A_map2	0001.CSV	983.559	94.5617
CAM112A_map2	0001.CSV	987.417	94.5155
CAM112A_map2	0001.CSV	991.274	94.4801
CAM112A_map2	0001.CSV	995.131	94.4804
CAM112A_map2	0001.CSV	998.988	94.4405
CAM112A_map2	0001.CSV	1002.85	94.3756
CAM112A_map2	0001.CSV	1006.7	94.3656
CAM112A_map2	0001.CSV	1010.56	94.338
CAM112A_map2	0001.CSV	1014.42	94.2939
CAM112A_map2	0001.CSV	1018.27	94.2425
CAM112A_map2	0001.CSV	1022.13	94.2147
CAM112A_map2	0001.CSV	1025.99	94.192
CAM112A_map2	0001.CSV	1029.85	94.1621
CAM112A_map2	0001.CSV	1033.7	94.1082
CAM112A_map2	0001.CSV	1037.56	94.0797
CAM112A_map2	0001.CSV	1041.42	94.0629
CAM112A_map2	0001.CSV	1045.27	94.0532
CAM112A_map2	0001.CSV	1049.13	94.007
CAM112A_map2	0001.CSV	1052.99	93.9232
CAM112A_map2	0001.CSV	1056.84	93.753
CAM112A_map2	0001.CSV	1060.7	93.6004
CAM112A_map2	0001.CSV	1064.56	93.5083
CAM112A_map2	0001.CSV	1068.42	93.5731
CAM112A_map2	0001.CSV	1072.27	93.7103
CAM112A_map2	0001.CSV	1076.13	93.8115
CAM112A_map2	0001.CSV	1079.99	93.8652
CAM112A_map2	0001.CSV	1083.84	93.9662
CAM112A_map2	0001.CSV	1087.7	94.0438
CAM112A_map2	0001.CSV	1091.56	94.1086
CAM112A_map2	0001.CSV	1095.41	94.1117
CAM112A_map2	0001.CSV	1099.27	94.0632
CAM112A_map2	0001.CSV	1103.13	93.935
CAM112A_map2	0001.CSV	1106.99	93.8014
CAM112A_map2	0001.CSV	1110.84	93.6723
CAM112A_map2	0001.CSV	1114.7	93.5696
CAM112A_map2	0001.CSV	1118.56	93.5265
CAM112A_map2	0001.CSV	1122.41	93.5369
CAM112A_map2	0001.CSV	1126.27	93.5515
CAM112A_map2	0001.CSV	1130.13	93.5988
CAM112A_map2	0001.CSV	1133.99	93.6463
CAM112A_map2	0001.CSV	1137.84	93.6849
CAM112A_map2	0001.CSV	1141.7	93.7061
CAM112A_map2	0001.CSV	1145.56	93.7554
CAM112A_map2	0001.CSV	1149.41	93.7939
CAM112A_map2	0001.CSV	1153.27	93.7904
CAM112A_map2	0001.CSV	1157.13	93.7444
CAM112A_map2	0001.CSV	1160.99	93.7224
CAM112A_map2	0001.CSV	1164.84	93.7335
CAM112A_map2	0001.CSV	1168.7	93.771
CAM112A_map2	0001.CSV	1172.56	93.7874
CAM112A_map2	0001.CSV	1176.41	93.8098
CAM112A_map2	0001.CSV	1180.27	93.817
CAM112A_map2	0001.CSV	1184.13	93.8402
CAM112A_map2	0001.CSV	1187.99	93.8821
CAM112A_map2	0001.CSV	1191.84	93.9382
CAM112A_map2	0001.CSV	1195.7	93.9477
CAM112A_map2	0001.CSV	1199.56	93.941
CAM112A_map2	0001.CSV	1203.41	93.9288
CAM112A_map2	0001.CSV	1207.27	93.9248
CAM112A_map2	0001.CSV	1211.13	93.904
CAM112A_map2	0001.CSV	1214.98	93.8631
CAM112A_map2	0001.CSV	1218.84	93.8034
CAM112A_map2	0001.CSV	1222.7	93.7477
CAM112A_map2	0001.CSV	1226.56	93.6713
CAM112A_map2	0001.CSV	1230.41	93.5978
CAM112A_map2	0001.CSV	1234.27	93.4699
CAM112A_map2	0001.CSV	1238.13	93.324
CAM112A_map2	0001.CSV	1241.98	93.2031
CAM112A_map2	0001.CSV	1245.84	93.1031
CAM112A_map2	0001.CSV	1249.7	92.9911
CAM112A_map2	0001.CSV	1253.56	92.9138
CAM112A_map2	0001.CSV	1257.41	92.8556
CAM112A_map2	0001.CSV	1261.27	92.8256
CAM112A_map2	0001.CSV	1265.13	92.7878
CAM112A_map2	0001.CSV	1268.98	92.7447
CAM112A_map2	0001.CSV	1272.84	92.6954
CAM112A_map2	0001.CSV	1276.7	92.6552
CAM112A_map2	0001.CSV	1280.56	92.582
CAM112A_map2	0001.CSV	1284.41	92.5319
CAM112A_map2	0001.CSV	1288.27	92.522
CAM112A_map2	0001.CSV	1292.13	92.5535
CAM112A_map2	0001.CSV	1295.98	92.5846
CAM112A_map2	0001.CSV	1299.84	92.614
CAM112A_map2	0001.CSV	1303.7	92.5975
CAM112A_map2	0001.CSV	1307.56	92.5752
CAM112A_map2	0001.CSV	1311.41	92.4974
CAM112A_map2	0001.CSV	1315.27	92.4127
CAM112A_map2	0001.CSV	1319.13	92.337
CAM112A_map2	0001.CSV	1322.98	92.2481
CAM112A_map2	0001.CSV	1326.84	92.137
CAM112A_map2	0001.CSV	1330.7	92.0158
CAM112A_map2	0001.CSV	1334.56	91.8815
CAM112A_map2	0001.CSV	1338.41	91.6727
CAM112A_map2	0001.CSV	1342.27	91.4114
CAM112A_map2	0001.CSV	1346.13	91.24
CAM112A_map2	0001.CSV	1349.98	91.0073
CAM112A_map2	0001.CSV	1353.84	90.7623
CAM112A_map2	0001.CSV	1357.7	90.5127
CAM112A_map2	0001.CSV	1361.56	90.2258
CAM112A_map2	0001.CSV	1365.41	89.872
CAM112A_map2	0001.CSV	1369.27	89.6081
CAM112A_map2	0001.CSV	1373.13	89.2357
CAM112A_map2	0001.CSV	1376.98	88.8211
CAM112A_map2	0001.CSV	1380.84	88.5003
CAM112A_map2	0001.CSV	1384.7	88.2418
CAM112A_map2	0001.CSV	1388.56	87.9627
CAM112A_map2	0001.CSV	1392.41	87.8954
CAM112A_map2	0001.CSV	1396.27	87.9373
CAM112A_map2	0001.CSV	1400.13	88.0333
CAM112A_map2	0001.CSV	1403.98	88.0929
CAM112A_map2	0001.CSV	1407.84	88.1832
CAM112A_map2	0001.CSV	1411.7	88.3118
CAM112A_map2	0001.CSV	1415.55	88.4475
CAM112A_map2	0001.CSV	1419.41	88.4842
CAM112A_map2	0001.CSV	1423.27	88.5207
CAM112A_map2	0001.CSV	1427.12	88.559
CAM112A_map2	0001.CSV	1430.98	88.6294
CAM112A_map2	0001.CSV	1434.84	88.7095
CAM112A_map2	0001.CSV	1438.7	88.8723
CAM112A_map2	0001.CSV	1442.55	89.0529
CAM112A_map2	0001.CSV	1446.41	89.2002
CAM112A_map2	0001.CSV	1450.27	89.2982
CAM112A_map2	0001.CSV	1454.12	89.4958
CAM112A_map2	0001.CSV	1457.98	89.7086
CAM112A_map2	0001.CSV	1461.84	89.996
CAM112A_map2	0001.CSV	1465.7	90.2605
CAM112A_map2	0001.CSV	1469.55	90.5332
CAM112A_map2	0001.CSV	1473.41	90.7727
CAM112A_map2	0001.CSV	1477.27	91.0947
CAM112A_map2	0001.CSV	1481.12	91.3952
CAM112A_map2	0001.CSV	1484.98	91.6792
CAM112A_map2	0001.CSV	1488.84	91.8953
CAM112A_map2	0001.CSV	1492.7	92.132
CAM112A_map2	0001.CSV	1496.55	92.4856
CAM112A_map2	0001.CSV	1500.41	92.8672
CAM112A_map2	0001.CSV	1504.27	93.1138
CAM112A_map2	0001.CSV	1508.12	93.3512
CAM112A_map2	0001.CSV	1511.98	93.6661
CAM112A_map2	0001.CSV	1515.84	93.9678
CAM112A_map2	0001.CSV	1519.7	94.1971
CAM112A_map2	0001.CSV	1523.55	94.3272
CAM112A_map2	0001.CSV	1527.41	94.4991
CAM112A_map2	0001.CSV	1531.27	94.6902
CAM112A_map2	0001.CSV	1535.12	94.7341
CAM112A_map2	0001.CSV	1538.98	94.7087
CAM112A_map2	0001.CSV	1542.84	94.6315
CAM112A_map2	0001.CSV	1546.7	94.8413
CAM112A_map2	0001.CSV	1550.55	95.1553
CAM112A_map2	0001.CSV	1554.41	95.4079
CAM112A_map2	0001.CSV	1558.27	95.4925
CAM112A_map2	0001.CSV	1562.12	95.5188
CAM112A_map2	0001.CSV	1565.98	95.5792
CAM112A_map2	0001.CSV	1569.84	95.4978
CAM112A_map2	0001.CSV	1573.69	95.3679
CAM112A_map2	0001.CSV	1577.55	95.2693
CAM112A_map2	0001.CSV	1581.41	95.4062
CAM112A_map2	0001.CSV	1585.27	95.638
CAM112A_map2	0001.CSV	1589.12	95.7946
CAM112A_map2	0001.CSV	1592.98	95.8719
CAM112A_map2	0001.CSV	1596.84	95.9327
CAM112A_map2	0001.CSV	1600.69	95.9938
CAM112A_map2	0001.CSV	1604.55	96.0224
CAM112A_map2	0001.CSV	1608.41	96.0678
CAM112A_map2	0001.CSV	1612.27	96.1438
CAM112A_map2	0001.CSV	1616.12	96.1607
CAM112A_map2	0001.CSV	1619.98	96.1583
CAM112A_map2	0001.CSV	1623.84	96.1968
CAM112A_map2	0001.CSV	1627.69	96.1963
CAM112A_map2	0001.CSV	1631.55	96.2772
CAM112A_map2	0001.CSV	1635.41	96.2651
CAM112A_map2	0001.CSV	1639.27	96.181
CAM112A_map2	0001.CSV	1643.12	96.2678
CAM112A_map2	0001.CSV	1646.98	96.2921
CAM112A_map2	0001.CSV	1650.84	96.236
CAM112A_map2	0001.CSV	1654.69	96.1306
CAM112A_map2	0001.CSV	1658.55	96.1834
CAM112A_map2	0001.CSV	1662.41	96.2698
CAM112A_map2	0001.CSV	1666.27	96.3323
CAM112A_map2	0001.CSV	1670.12	96.3146
CAM112A_map2	0001.CSV	1673.98	96.2465
CAM112A_map2	0001.CSV	1677.84	96.317
CAM112A_map2	0001.CSV	1681.69	96.3644
CAM112A_map2	0001.CSV	1685.55	96.2443
CAM112A_map2	0001.CSV	1689.41	96.2493
CAM112A_map2	0001.CSV	1693.27	96.3646
CAM112A_map2	0001.CSV	1697.12	96.3229
CAM112A_map2	0001.CSV	1700.98	96.1206
CAM112A_map2	0001.CSV	1704.84	96.0825
CAM112A_map2	0001.CSV	1708.69	96.075
CAM112A_map2	0001.CSV	1712.55	96.0669
CAM112A_map2	0001.CSV	1716.41	95.8898
CAM112A_map2	0001.CSV	1720.27	95.741
CAM112A_map2	0001.CSV	1724.12	95.791
CAM112A_map2	0001.CSV	1727.98	95.8544
CAM112A_map2	0001.CSV	1731.84	95.8687
CAM112A_map2	0001.CSV	1735.69	95.8709
CAM112A_map2	0001.CSV	1739.55	96.0369
CAM112A_map2	0001.CSV	1743.41	96.2381
CAM112A_map2	0001.CSV	1747.27	96.4031
CAM112A_map2	0001.CSV	1751.12	96.4875
CAM112A_map2	0001.CSV	1754.98	96.6011
CAM112A_map2	0001.CSV	1758.84	96.6703
CAM112A_map2	0001.CSV	1762.69	96.6868
CAM112A_map2	0001.CSV	1766.55	96.7473
CAM112A_map2	0001.CSV	1770.41	96.7585
CAM112A_map2	0001.CSV	1774.26	96.6814
CAM112A_map2	0001.CSV	1778.12	96.6932
CAM112A_map2	0001.CSV	1781.98	96.6732
CAM112A_map2	0001.CSV	1785.84	96.6627
CAM112A_map2	0001.CSV	1789.69	96.646
CAM112A_map2	0001.CSV	1793.55	96.5211
CAM112A_map2	0001.CSV	1797.41	96.4928
CAM112A_map2	0001.CSV	1801.26	96.556
CAM112A_map2	0001.CSV	1805.12	96.6449
CAM112A_map2	0001.CSV	1808.98	96.7128
CAM112A_map2	0001.CSV	1812.84	96.7091
CAM112A_map2	0001.CSV	1816.69	96.7389
CAM112A_map2	0001.CSV	1820.55	96.759
CAM112A_map2	0001.CSV	1824.41	96.7682
CAM112A_map2	0001.CSV	1828.26	96.7268
CAM112A_map2	0001.CSV	1832.12	96.6949
CAM112A_map2	0001.CSV	1835.98	96.7249
CAM112A_map2	0001.CSV	1839.84	96.7622
CAM112A_map2	0001.CSV	1843.69	96.7224
CAM112A_map2	0001.CSV	1847.55	96.666
CAM112A_map2	0001.CSV	1851.41	96.7039
CAM112A_map2	0001.CSV	1855.26	96.7522
CAM112A_map2	0001.CSV	1859.12	96.778
CAM112A_map2	0001.CSV	1862.98	96.7868
CAM112A_map2	0001.CSV	1866.84	96.7418
CAM112A_map2	0001.CSV	1870.69	96.675
CAM112A_map2	0001.CSV	1874.55	96.7064
CAM112A_map2	0001.CSV	1878.41	96.721
CAM112A_map2	0001.CSV	1882.26	96.7105
CAM112A_map2	0001.CSV	1886.12	96.7377
CAM112A_map2	0001.CSV	1889.98	96.7451
CAM112A_map2	0001.CSV	1893.83	96.7277
CAM112A_map2	0001.CSV	1897.69	96.7347
CAM112A_map2	0001.CSV	1901.55	96.7472
CAM112A_map2	0001.CSV	1905.41	96.7438
CAM112A_map2	0001.CSV	1909.26	96.7327
CAM112A_map2	0001.CSV	1913.12	96.739
CAM112A_map2	0001.CSV	1916.98	96.7546
CAM112A_map2	0001.CSV	1920.83	96.7303
CAM112A_map2	0001.CSV	1924.69	96.7213
CAM112A_map2	0001.CSV	1928.55	96.7191
CAM112A_map2	0001.CSV	1932.4	96.7155
CAM112A_map2	0001.CSV	1936.26	96.7267
CAM112A_map2	0001.CSV	1940.12	96.7543
CAM112A_map2	0001.CSV	1943.98	96.7343
CAM112A_map2	0001.CSV	1947.83	96.7164
CAM112A_map2	0001.CSV	1951.69	96.7135
CAM112A_map2	0001.CSV	1955.55	96.7131
CAM112A_map2	0001.CSV	1959.4	96.7113
CAM112A_map2	0001.CSV	1963.26	96.7083
CAM112A_map2	0001.CSV	1967.12	96.6792
CAM112A_map2	0001.CSV	1970.98	96.6681
CAM112A_map2	0001.CSV	1974.83	96.6737
CAM112A_map2	0001.CSV	1978.69	96.6786
CAM112A_map2	0001.CSV	1982.55	96.7044
CAM112A_map2	0001.CSV	1986.4	96.7203
CAM112A_map2	0001.CSV	1990.26	96.6949
CAM112A_map2	0001.CSV	1994.12	96.679
CAM112A_map2	0001.CSV	1997.98	96.6923
CAM112A_map2	0001.CSV	2001.83	96.6877
CAM112A_map2	0001.CSV	2005.69	96.678
CAM112A_map2	0001.CSV	2009.55	96.685
CAM112A_map2	0001.CSV	2013.4	96.6847
CAM112A_map2	0001.CSV	2017.26	96.6638
CAM112A_map2	0001.CSV	2021.12	96.649
CAM112A_map2	0001.CSV	2024.97	96.666
CAM112A_map2	0001.CSV	2028.83	96.6678
CAM112A_map2	0001.CSV	2032.69	96.6474
CAM112A_map2	0001.CSV	2036.55	96.6204
CAM112A_map2	0001.CSV	2040.4	96.6202
CAM112A_map2	0001.CSV	2044.26	96.6234
CAM112A_map2	0001.CSV	2048.12	96.6264
CAM112A_map2	0001.CSV	2051.97	96.6178
CAM112A_map2	0001.CSV	2055.83	96.594
CAM112A_map2	0001.CSV	2059.69	96.5816
CAM112A_map2	0001.CSV	2063.55	96.5716
CAM112A_map2	0001.CSV	2067.4	96.5443
CAM112A_map2	0001.CSV	2071.26	96.5364
CAM112A_map2	0001.CSV	2075.12	96.5248
CAM112A_map2	0001.CSV	2078.97	96.5054
CAM112A_map2	0001.CSV	2082.83	96.5055
CAM112A_map2	0001.CSV	2086.69	96.5355
CAM112A_map2	0001.CSV	2090.55	96.5385
CAM112A_map2	0001.CSV	2094.4	96.5106
CAM112A_map2	0001.CSV	2098.26	96.4778
CAM112A_map2	0001.CSV	2102.12	96.473
CAM112A_map2	0001.CSV	2105.97	96.4713
CAM112A_map2	0001.CSV	2109.83	96.464
CAM112A_map2	0001.CSV	2113.69	96.4477
CAM112A_map2	0001.CSV	2117.55	96.4291
CAM112A_map2	0001.CSV	2121.4	96.4165
CAM112A_map2	0001.CSV	2125.26	96.4229
CAM112A_map2	0001.CSV	2129.12	96.4301
CAM112A_map2	0001.CSV	2132.97	96.4241
CAM112A_map2	0001.CSV	2136.83	96.4074
CAM112A_map2	0001.CSV	2140.69	96.3966
CAM112A_map2	0001.CSV	2144.55	96.3889
CAM112A_map2	0001.CSV	2148.4	96.3923
CAM112A_map2	0001.CSV	2152.26	96.4019
CAM112A_map2	0001.CSV	2156.12	96.3959
CAM112A_map2	0001.CSV	2159.97	96.3724
CAM112A_map2	0001.CSV	2163.83	96.3688
CAM112A_map2	0001.CSV	2167.69	96.3721
CAM112A_map2	0001.CSV	2171.55	96.3745
CAM112A_map2	0001.CSV	2175.4	96.3852
CAM112A_map2	0001.CSV	2179.26	96.3896
CAM112A_map2	0001.CSV	2183.12	96.366
CAM112A_map2	0001.CSV	2186.97	96.3544
CAM112A_map2	0001.CSV	2190.83	96.3489
CAM112A_map2	0001.CSV	2194.69	96.3484
CAM112A_map2	0001.CSV	2198.55	96.3551
CAM112A_map2	0001.CSV	2202.4	96.3566
CAM112A_map2	0001.CSV	2206.26	96.3522
CAM112A_map2	0001.CSV	2210.12	96.3539
CAM112A_map2	0001.CSV	2213.97	96.3622
CAM112A_map2	0001.CSV	2217.83	96.3611
CAM112A_map2	0001.CSV	2221.69	96.3538
CAM112A_map2	0001.CSV	2225.54	96.3761
CAM112A_map2	0001.CSV	2229.4	96.3873
CAM112A_map2	0001.CSV	2233.26	96.3746
CAM112A_map2	0001.CSV	2237.12	96.3686
CAM112A_map2	0001.CSV	2240.97	96.384
CAM112A_map2	0001.CSV	2244.83	96.3959
CAM112A_map2	0001.CSV	2248.69	96.3814
CAM112A_map2	0001.CSV	2252.54	96.3644
CAM112A_map2	0001.CSV	2256.4	96.3745
CAM112A_map2	0001.CSV	2260.26	96.3843
CAM112A_map2	0001.CSV	2264.11	96.3755
CAM112A_map2	0001.CSV	2267.97	96.3702
CAM112A_map2	0001.CSV	2271.83	96.3945
CAM112A_map2	0001.CSV	2275.69	96.3934
CAM112A_map2	0001.CSV	2279.54	96.3838
CAM112A_map2	0001.CSV	2283.4	96.3928
CAM112A_map2	0001.CSV	2287.26	96.403
CAM112A_map2	0001.CSV	2291.11	96.4158
CAM112A_map2	0001.CSV	2294.97	96.4359
CAM112A_map2	0001.CSV	2298.83	96.4506
CAM112A_map2	0001.CSV	2302.69	96.4745
CAM112A_map2	0001.CSV	2306.54	96.5243
CAM112A_map2	0001.CSV	2310.4	96.6052
CAM112A_map2	0001.CSV	2314.26	96.6891
CAM112A_map2	0001.CSV	2318.11	96.8099
CAM112A_map2	0001.CSV	2321.97	97.0059
CAM112A_map2	0001.CSV	2325.83	97.3816
CAM112A_map2	0001.CSV	2329.69	97.7582
CAM112A_map2	0001.CSV	2333.54	98.0407
CAM112A_map2	0001.CSV	2337.4	98.227
CAM112A_map2	0001.CSV	2341.26	97.9766
CAM112A_map2	0001.CSV	2345.11	97.0807
CAM112A_map2	0001.CSV	2348.97	97.0148
CAM112A_map2	0001.CSV	2352.83	97.7349
CAM112A_map2	0001.CSV	2356.69	99.6291
CAM112A_map2	0001.CSV	2360.54	101.392
CAM112A_map2	0001.CSV	2364.4	100.327
CAM112A_map2	0001.CSV	2368.26	98.3596
CAM112A_map2	0001.CSV	2372.11	97.1141
CAM112A_map2	0001.CSV	2375.97	96.5242
CAM112A_map2	0001.CSV	2379.83	96.3224
CAM112A_map2	0001.CSV	2383.69	96.2816
CAM112A_map2	0001.CSV	2387.54	96.2928
CAM112A_map2	0001.CSV	2391.4	96.3166
CAM112A_map2	0001.CSV	2395.26	96.3231
CAM112A_map2	0001.CSV	2399.11	96.3122
CAM112A_map2	0001.CSV	2402.97	96.3166
CAM112A_map2	0001.CSV	2406.83	96.3134
CAM112A_map2	0001.CSV	2410.68	96.3014
CAM112A_map2	0001.CSV	2414.54	96.3006
CAM112A_map2	0001.CSV	2418.4	96.303
CAM112A_map2	0001.CSV	2422.26	96.313
CAM112A_map2	0001.CSV	2426.11	96.308
CAM112A_map2	0001.CSV	2429.97	96.2695
CAM112A_map2	0001.CSV	2433.83	96.2431
CAM112A_map2	0001.CSV	2437.68	96.2648
CAM112A_map2	0001.CSV	2441.54	96.2941
CAM112A_map2	0001.CSV	2445.4	96.2883
CAM112A_map2	0001.CSV	2449.26	96.2658
CAM112A_map2	0001.CSV	2453.11	96.2494
CAM112A_map2	0001.CSV	2456.97	96.245
CAM112A_map2	0001.CSV	2460.83	96.2504
CAM112A_map2	0001.CSV	2464.68	96.2721
CAM112A_map2	0001.CSV	2468.54	96.2777
CAM112A_map2	0001.CSV	2472.4	96.2704
CAM112A_map2	0001.CSV	2476.26	96.2626
CAM112A_map2	0001.CSV	2480.11	96.2551
CAM112A_map2	0001.CSV	2483.97	96.249
CAM112A_map2	0001.CSV	2487.83	96.244
CAM112A_map2	0001.CSV	2491.68	96.2325
CAM112A_map2	0001.CSV	2495.54	96.2107
CAM112A_map2	0001.CSV	2499.4	96.1889
CAM112A_map2	0001.CSV	2503.26	96.1744
CAM112A_map2	0001.CSV	2507.11	96.1641
CAM112A_map2	0001.CSV	2510.97	96.1644
CAM112A_map2	0001.CSV	2514.83	96.1684
CAM112A_map2	0001.CSV	2518.68	96.1684
CAM112A_map2	0001.CSV	2522.54	96.1798
CAM112A_map2	0001.CSV	2526.4	96.1875
CAM112A_map2	0001.CSV	2530.26	96.2073
CAM112A_map2	0001.CSV	2534.11	96.2459
CAM112A_map2	0001.CSV	2537.97	96.2516
CAM112A_map2	0001.CSV	2541.83	96.2507
CAM112A_map2	0001.CSV	2545.68	96.2716
CAM112A_map2	0001.CSV	2549.54	96.2867
CAM112A_map2	0001.CSV	2553.4	96.2912
CAM112A_map2	0001.CSV	2557.26	96.2792
CAM112A_map2	0001.CSV	2561.11	96.255
CAM112A_map2	0001.CSV	2564.97	96.2599
CAM112A_map2	0001.CSV	2568.83	96.2672
CAM112A_map2	0001.CSV	2572.68	96.2469
CAM112A_map2	0001.CSV	2576.54	96.238
CAM112A_map2	0001.CSV	2580.4	96.2578
CAM112A_map2	0001.CSV	2584.25	96.2751
CAM112A_map2	0001.CSV	2588.11	96.2737
CAM112A_map2	0001.CSV	2591.97	96.2615
CAM112A_map2	0001.CSV	2595.83	96.2646
CAM112A_map2	0001.CSV	2599.68	96.2725
CAM112A_map2	0001.CSV	2603.54	96.269
CAM112A_map2	0001.CSV	2607.4	96.266
CAM112A_map2	0001.CSV	2611.25	96.2409
CAM112A_map2	0001.CSV	2615.11	96.2364
CAM112A_map2	0001.CSV	2618.97	96.278
CAM112A_map2	0001.CSV	2622.82	96.2769
CAM112A_map2	0001.CSV	2626.68	96.2569
CAM112A_map2	0001.CSV	2630.54	96.2719
CAM112A_map2	0001.CSV	2634.4	96.259
CAM112A_map2	0001.CSV	2638.25	96.2391
CAM112A_map2	0001.CSV	2642.11	96.2572
CAM112A_map2	0001.CSV	2645.97	96.2827
CAM112A_map2	0001.CSV	2649.82	96.3045
CAM112A_map2	0001.CSV	2653.68	96.3102
CAM112A_map2	0001.CSV	2657.54	96.2774
CAM112A_map2	0001.CSV	2661.4	96.247
CAM112A_map2	0001.CSV	2665.25	96.2441
CAM112A_map2	0001.CSV	2669.11	96.2477
CAM112A_map2	0001.CSV	2672.97	96.2111
CAM112A_map2	0001.CSV	2676.82	96.1518
CAM112A_map2	0001.CSV	2680.68	96.1583
CAM112A_map2	0001.CSV	2684.54	96.2076
CAM112A_map2	0001.CSV	2688.4	96.2278
CAM112A_map2	0001.CSV	2692.25	96.2271
CAM112A_map2	0001.CSV	2696.11	96.2098
CAM112A_map2	0001.CSV	2699.97	96.1869
CAM112A_map2	0001.CSV	2703.82	96.1799
CAM112A_map2	0001.CSV	2707.68	96.1567
CAM112A_map2	0001.CSV	2711.54	96.1475
CAM112A_map2	0001.CSV	2715.4	96.1653
CAM112A_map2	0001.CSV	2719.25	96.1606
CAM112A_map2	0001.CSV	2723.11	96.1095
CAM112A_map2	0001.CSV	2726.97	96.0938
CAM112A_map2	0001.CSV	2730.82	96.1569
CAM112A_map2	0001.CSV	2734.68	96.1851
CAM112A_map2	0001.CSV	2738.54	96.175
CAM112A_map2	0001.CSV	2742.4	96.1424
CAM112A_map2	0001.CSV	2746.25	96.0805
CAM112A_map2	0001.CSV	2750.11	96.0968
CAM112A_map2	0001.CSV	2753.97	96.1243
CAM112A_map2	0001.CSV	2757.82	96.1004
CAM112A_map2	0001.CSV	2761.68	96.1149
CAM112A_map2	0001.CSV	2765.54	96.1473
CAM112A_map2	0001.CSV	2769.39	96.1073
CAM112A_map2	0001.CSV	2773.25	96.0347
CAM112A_map2	0001.CSV	2777.11	96.0632
CAM112A_map2	0001.CSV	2780.97	96.1111
CAM112A_map2	0001.CSV	2784.82	96.0568
CAM112A_map2	0001.CSV	2788.68	95.9846
CAM112A_map2	0001.CSV	2792.54	95.9981
CAM112A_map2	0001.CSV	2796.39	96.0021
CAM112A_map2	0001.CSV	2800.25	96.0184
CAM112A_map2	0001.CSV	2804.11	96.053
CAM112A_map2	0001.CSV	2807.97	96.0303
CAM112A_map2	0001.CSV	2811.82	96.0307
CAM112A_map2	0001.CSV	2815.68	96.0726
CAM112A_map2	0001.CSV	2819.54	96.0577
CAM112A_map2	0001.CSV	2823.39	96.0197
CAM112A_map2	0001.CSV	2827.25	96.0084
CAM112A_map2	0001.CSV	2831.11	95.9402
CAM112A_map2	0001.CSV	2834.97	95.826
CAM112A_map2	0001.CSV	2838.82	95.7483
CAM112A_map2	0001.CSV	2842.68	95.7025
CAM112A_map2	0001.CSV	2846.54	95.5613
CAM112A_map2	0001.CSV	2850.39	95.4554
CAM112A_map2	0001.CSV	2854.25	95.4841
CAM112A_map2	0001.CSV	2858.11	95.5398
CAM112A_map2	0001.CSV	2861.97	95.6342
CAM112A_map2	0001.CSV	2865.82	95.7035
CAM112A_map2	0001.CSV	2869.68	95.6931
CAM112A_map2	0001.CSV	2873.54	95.6956
CAM112A_map2	0001.CSV	2877.39	95.7887
CAM112A_map2	0001.CSV	2881.25	95.8377
CAM112A_map2	0001.CSV	2885.11	95.8404
CAM112A_map2	0001.CSV	2888.97	95.8191
CAM112A_map2	0001.CSV	2892.82	95.7276
CAM112A_map2	0001.CSV	2896.68	95.6686
CAM112A_map2	0001.CSV	2900.54	95.6605
CAM112A_map2	0001.CSV	2904.39	95.5957
CAM112A_map2	0001.CSV	2908.25	95.4656
CAM112A_map2	0001.CSV	2912.11	95.2193
CAM112A_map2	0001.CSV	2915.97	95.0353
CAM112A_map2	0001.CSV	2919.82	95.0462
CAM112A_map2	0001.CSV	2923.68	95.1704
CAM112A_map2	0001.CSV	2927.54	95.2469
CAM112A_map2	0001.CSV	2931.39	95.3568
CAM112A_map2	0001.CSV	2935.25	95.5387
CAM112A_map2	0001.CSV	2939.11	95.5982
CAM112A_map2	0001.CSV	2942.96	95.543
CAM112A_map2	0001.CSV	2946.82	95.5323
CAM112A_map2	0001.CSV	2950.68	95.569
CAM112A_map2	0001.CSV	2954.54	95.6613
CAM112A_map2	0001.CSV	2958.39	95.7567
CAM112A_map2	0001.CSV	2962.25	95.7882
CAM112A_map2	0001.CSV	2966.11	95.8438
CAM112A_map2	0001.CSV	2969.96	95.8488
CAM112A_map2	0001.CSV	2973.82	95.7909
CAM112A_map2	0001.CSV	2977.68	95.7392
CAM112A_map2	0001.CSV	2981.53	95.8037
CAM112A_map2	0001.CSV	2985.39	95.9412
CAM112A_map2	0001.CSV	2989.25	95.9656
CAM112A_map2	0001.CSV	2993.11	95.9119
CAM112A_map2	0001.CSV	2996.96	95.8891
CAM112A_map2	0001.CSV	3000.82	95.949
CAM112A_map2	0001.CSV	3004.68	95.9801
CAM112A_map2	0001.CSV	3008.53	95.9278
CAM112A_map2	0001.CSV	3012.39	95.862
CAM112A_map2	0001.CSV	3016.25	95.8609
CAM112A_map2	0001.CSV	3020.11	95.8941
CAM112A_map2	0001.CSV	3023.96	95.9185
CAM112A_map2	0001.CSV	3027.82	95.9135
CAM112A_map2	0001.CSV	3031.68	95.8502
CAM112A_map2	0001.CSV	3035.53	95.8465
CAM112A_map2	0001.CSV	3039.39	95.8481
CAM112A_map2	0001.CSV	3043.25	95.8219
CAM112A_map2	0001.CSV	3047.11	95.8508
CAM112A_map2	0001.CSV	3050.96	95.8604
CAM112A_map2	0001.CSV	3054.82	95.894
CAM112A_map2	0001.CSV	3058.68	95.9473
CAM112A_map2	0001.CSV	3062.53	95.9157
CAM112A_map2	0001.CSV	3066.39	95.8487
CAM112A_map2	0001.CSV	3070.25	95.899
CAM112A_map2	0001.CSV	3074.11	95.9061
CAM112A_map2	0001.CSV	3077.96	95.846
CAM112A_map2	0001.CSV	3081.82	95.8153
CAM112A_map2	0001.CSV	3085.68	95.8195
CAM112A_map2	0001.CSV	3089.53	95.8448
CAM112A_map2	0001.CSV	3093.39	95.91
CAM112A_map2	0001.CSV	3097.25	95.9363
CAM112A_map2	0001.CSV	3101.11	95.9347
CAM112A_map2	0001.CSV	3104.96	95.925
CAM112A_map2	0001.CSV	3108.82	95.8644
CAM112A_map2	0001.CSV	3112.68	95.8111
CAM112A_map2	0001.CSV	3116.53	95.7626
CAM112A_map2	0001.CSV	3120.39	95.7965
CAM112A_map2	0001.CSV	3124.25	95.8783
CAM112A_map2	0001.CSV	3128.11	95.9096
CAM112A_map2	0001.CSV	3131.96	95.9293
CAM112A_map2	0001.CSV	3135.82	95.8987
CAM112A_map2	0001.CSV	3139.68	95.8654
CAM112A_map2	0001.CSV	3143.53	95.8996
CAM112A_map2	0001.CSV	3147.39	95.8769
CAM112A_map2	0001.CSV	3151.25	95.792
CAM112A_map2	0001.CSV	3155.1	95.8266
CAM112A_map2	0001.CSV	3158.96	95.9413
CAM112A_map2	0001.CSV	3162.82	95.9903
CAM112A_map2	0001.CSV	3166.68	96.0144
CAM112A_map2	0001.CSV	3170.53	96.0067
CAM112A_map2	0001.CSV	3174.39	95.9814
CAM112A_map2	0001.CSV	3178.25	95.9816
CAM112A_map2	0001.CSV	3182.1	95.9747
CAM112A_map2	0001.CSV	3185.96	95.9518
CAM112A_map2	0001.CSV	3189.82	95.9428
CAM112A_map2	0001.CSV	3193.68	95.9805
CAM112A_map2	0001.CSV	3197.53	95.9981
CAM112A_map2	0001.CSV	3201.39	95.9741
CAM112A_map2	0001.CSV	3205.25	95.9444
CAM112A_map2	0001.CSV	3209.1	95.9237
CAM112A_map2	0001.CSV	3212.96	95.9186
CAM112A_map2	0001.CSV	3216.82	95.8863
CAM112A_map2	0001.CSV	3220.68	95.8502
CAM112A_map2	0001.CSV	3224.53	95.8598
CAM112A_map2	0001.CSV	3228.39	95.8278
CAM112A_map2	0001.CSV	3232.25	95.7541
CAM112A_map2	0001.CSV	3236.1	95.7523
CAM112A_map2	0001.CSV	3239.96	95.7982
CAM112A_map2	0001.CSV	3243.82	95.7615
CAM112A_map2	0001.CSV	3247.68	95.6993
CAM112A_map2	0001.CSV	3251.53	95.7508
CAM112A_map2	0001.CSV	3255.39	95.7895
CAM112A_map2	0001.CSV	3259.25	95.8349
CAM112A_map2	0001.CSV	3263.1	95.8393
CAM112A_map2	0001.CSV	3266.96	95.7512
CAM112A_map2	0001.CSV	3270.82	95.6882
CAM112A_map2	0001.CSV	3274.68	95.7287
CAM112A_map2	0001.CSV	3278.53	95.7846
CAM112A_map2	0001.CSV	3282.39	95.7808
CAM112A_map2	0001.CSV	3286.25	95.753
CAM112A_map2	0001.CSV	3290.1	95.6689
CAM112A_map2	0001.CSV	3293.96	95.6081
CAM112A_map2	0001.CSV	3297.82	95.6795
CAM112A_map2	0001.CSV	3301.67	95.6914
CAM112A_map2	0001.CSV	3305.53	95.5956
CAM112A_map2	0001.CSV	3309.39	95.6119
CAM112A_map2	0001.CSV	3313.25	95.7524
CAM112A_map2	0001.CSV	3317.1	95.8583
CAM112A_map2	0001.CSV	3320.96	95.8253
CAM112A_map2	0001.CSV	3324.82	95.7403
CAM112A_map2	0001.CSV	3328.67	95.7568
CAM112A_map2	0001.CSV	3332.53	95.7425
CAM112A_map2	0001.CSV	3336.39	95.6435
CAM112A_map2	0001.CSV	3340.24	95.5966
CAM112A_map2	0001.CSV	3344.1	95.6584
CAM112A_map2	0001.CSV	3347.96	95.6819
CAM112A_map2	0001.CSV	3351.82	95.7234
CAM112A_map2	0001.CSV	3355.67	95.7887
CAM112A_map2	0001.CSV	3359.53	95.7257
CAM112A_map2	0001.CSV	3363.39	95.6363
CAM112A_map2	0001.CSV	3367.24	95.5748
CAM112A_map2	0001.CSV	3371.1	95.632
CAM112A_map2	0001.CSV	3374.96	95.716
CAM112A_map2	0001.CSV	3378.82	95.7291
CAM112A_map2	0001.CSV	3382.67	95.749
CAM112A_map2	0001.CSV	3386.53	95.7602
CAM112A_map2	0001.CSV	3390.39	95.7047
CAM112A_map2	0001.CSV	3394.24	95.6628
CAM112A_map2	0001.CSV	3398.1	95.6363
CAM112A_map2	0001.CSV	3401.96	95.6176
CAM112A_map2	0001.CSV	3405.82	95.6901
CAM112A_map2	0001.CSV	3409.67	95.7241
CAM112A_map2	0001.CSV	3413.53	95.7574
CAM112A_map2	0001.CSV	3417.39	95.8234
CAM112A_map2	0001.CSV	3421.24	95.8628
CAM112A_map2	0001.CSV	3425.1	95.8362
CAM112A_map2	0001.CSV	3428.96	95.7717
CAM112A_map2	0001.CSV	3432.82	95.6846
CAM112A_map2	0001.CSV	3436.67	95.699
CAM112A_map2	0001.CSV	3440.53	95.827
CAM112A_map2	0001.CSV	3444.39	95.9185
CAM112A_map2	0001.CSV	3448.24	95.9303
CAM112A_map2	0001.CSV	3452.1	95.9317
CAM112A_map2	0001.CSV	3455.96	95.9137
CAM112A_map2	0001.CSV	3459.82	95.8518
CAM112A_map2	0001.CSV	3463.67	95.79
CAM112A_map2	0001.CSV	3467.53	95.7723
CAM112A_map2	0001.CSV	3471.39	95.8653
CAM112A_map2	0001.CSV	3475.24	95.9186
CAM112A_map2	0001.CSV	3479.1	95.8599
CAM112A_map2	0001.CSV	3482.96	95.8316
CAM112A_map2	0001.CSV	3486.82	95.8149
CAM112A_map2	0001.CSV	3490.67	95.815
CAM112A_map2	0001.CSV	3494.53	95.8125
CAM112A_map2	0001.CSV	3498.39	95.8453
CAM112A_map2	0001.CSV	3502.24	95.9024
CAM112A_map2	0001.CSV	3506.1	96.0343
CAM112A_map2	0001.CSV	3509.96	96.0622
CAM112A_map2	0001.CSV	3513.81	95.9857
CAM112A_map2	0001.CSV	3517.67	96.0288
CAM112A_map2	0001.CSV	3521.53	96.0178
CAM112A_map2	0001.CSV	3525.39	95.9886
CAM112A_map2	0001.CSV	3529.24	96.04
CAM112A_map2	0001.CSV	3533.1	96.0372
CAM112A_map2	0001.CSV	3536.96	95.9774
CAM112A_map2	0001.CSV	3540.81	95.9481
CAM112A_map2	0001.CSV	3544.67	95.9178
CAM112A_map2	0001.CSV	3548.53	95.9476
CAM112A_map2	0001.CSV	3552.39	96.0254
CAM112A_map2	0001.CSV	3556.24	96.0393
CAM112A_map2	0001.CSV	3560.1	96.0829
CAM112A_map2	0001.CSV	3563.96	96.1927
CAM112A_map2	0001.CSV	3567.81	96.1009
CAM112A_map2	0001.CSV	3571.67	96.033
CAM112A_map2	0001.CSV	3575.53	96.0984
CAM112A_map2	0001.CSV	3579.39	96.0871
CAM112A_map2	0001.CSV	3583.24	96.0501
CAM112A_map2	0001.CSV	3587.1	95.9872
CAM112A_map2	0001.CSV	3590.96	96.0311
CAM112A_map2	0001.CSV	3594.81	96.0899
CAM112A_map2	0001.CSV	3598.67	95.9891
CAM112A_map2	0001.CSV	3602.53	95.9797
CAM112A_map2	0001.CSV	3606.39	96.1479
CAM112A_map2	0001.CSV	3610.24	96.2246
CAM112A_map2	0001.CSV	3614.1	96.165
CAM112A_map2	0001.CSV	3617.96	96.0653
CAM112A_map2	0001.CSV	3621.81	96.0212
CAM112A_map2	0001.CSV	3625.67	96.1671
CAM112A_map2	0001.CSV	3629.53	96.1755
CAM112A_map2	0001.CSV	3633.39	96.0181
CAM112A_map2	0001.CSV	3637.24	96.0439
CAM112A_map2	0001.CSV	3641.1	96.124
CAM112A_map2	0001.CSV	3644.96	96.2807
CAM112A_map2	0001.CSV	3648.81	96.1655
CAM112A_map2	0001.CSV	3652.67	95.9681
CAM112A_map2	0001.CSV	3656.53	95.9832
CAM112A_map2	0001.CSV	3660.38	95.9943
CAM112A_map2	0001.CSV	3664.24	96.1889
CAM112A_map2	0001.CSV	3668.1	96.3863
CAM112A_map2	0001.CSV	3671.96	96.3371
CAM112A_map2	0001.CSV	3675.81	96.0868
CAM112A_map2	0001.CSV	3679.67	95.9795
CAM112A_map2	0001.CSV	3683.53	96.1074
CAM112A_map2	0001.CSV	3687.38	96.1289
CAM112A_map2	0001.CSV	3691.24	95.9467
CAM112A_map2	0001.CSV	3695.1	96.0268
CAM112A_map2	0001.CSV	3698.95	96.1718
CAM112A_map2	0001.CSV	3702.81	96.2007
CAM112A_map2	0001.CSV	3706.67	96.2687
CAM112A_map2	0001.CSV	3710.53	96.2682
CAM112A_map2	0001.CSV	3714.38	96.1416
CAM112A_map2	0001.CSV	3718.24	96.2375
CAM112A_map2	0001.CSV	3722.1	96.308
CAM112A_map2	0001.CSV	3725.95	96.2846
CAM112A_map2	0001.CSV	3729.81	96.3889
CAM112A_map2	0001.CSV	3733.67	96.4069
CAM112A_map2	0001.CSV	3737.53	96.0797
CAM112A_map2	0001.CSV	3741.38	96.1958
CAM112A_map2	0001.CSV	3745.24	96.4467
CAM112A_map2	0001.CSV	3749.1	96.4579
CAM112A_map2	0001.CSV	3752.95	96.2096
CAM112A_map2	0001.CSV	3756.81	96.1571
CAM112A_map2	0001.CSV	3760.67	96.1413
CAM112A_map2	0001.CSV	3764.53	96.2177
CAM112A_map2	0001.CSV	3768.38	96.177
CAM112A_map2	0001.CSV	3772.24	96.0855
CAM112A_map2	0001.CSV	3776.1	96.1593
CAM112A_map2	0001.CSV	3779.95	96.1618
CAM112A_map2	0001.CSV	3783.81	96.1308
CAM112A_map2	0001.CSV	3787.67	96.109
CAM112A_map2	0001.CSV	3791.53	96.1671
CAM112A_map2	0001.CSV	3795.38	96.2861
CAM112A_map2	0001.CSV	3799.24	96.3049
CAM112A_map2	0001.CSV	3803.1	96.1873
CAM112A_map2	0001.CSV	3806.95	96.1302
CAM112A_map2	0001.CSV	3810.81	96.2313
CAM112A_map2	0001.CSV	3814.67	96.3767
CAM112A_map2	0001.CSV	3818.53	96.3366
CAM112A_map2	0001.CSV	3822.38	96.1608
CAM112A_map2	0001.CSV	3826.24	96.186
CAM112A_map2	0001.CSV	3830.1	96.2641
CAM112A_map2	0001.CSV	3833.95	96.2755
CAM112A_map2	0001.CSV	3837.81	96.2112
CAM112A_map2	0001.CSV	3841.67	96.0857
CAM112A_map2	0001.CSV	3845.53	96.1536
CAM112A_map2	0001.CSV	3849.38	96.3844
CAM112A_map2	0001.CSV	3853.24	96.3642
CAM112A_map2	0001.CSV	3857.1	96.1636
CAM112A_map2	0001.CSV	3860.95	96.2767
CAM112A_map2	0001.CSV	3864.81	96.2732
CAM112A_map2	0001.CSV	3868.67	96.2572
CAM112A_map2	0001.CSV	3872.52	96.2023
CAM112A_map2	0001.CSV	3876.38	96.2193
CAM112A_map2	0001.CSV	3880.24	96.2231
CAM112A_map2	0001.CSV	3884.1	96.0736
CAM112A_map2	0001.CSV	3887.95	96.0982
CAM112A_map2	0001.CSV	3891.81	96.1349
CAM112A_map2	0001.CSV	3895.67	96.1541
CAM112A_map2	0001.CSV	3899.52	96.2022
CAM112A_map2	0001.CSV	3903.38	96.042
CAM112A_map2	0001.CSV	3907.24	96.0112
CAM112A_map2	0001.CSV	3911.1	96.1097
CAM112A_map2	0001.CSV	3914.95	96.1376
CAM112A_map2	0001.CSV	3918.81	96.1104
CAM112A_map2	0001.CSV	3922.67	96.0909
CAM112A_map2	0001.CSV	3926.52	96.0478
CAM112A_map2	0001.CSV	3930.38	96.0323
CAM112A_map2	0001.CSV	3934.24	95.9772
CAM112A_map2	0001.CSV	3938.09	96.0389
CAM112A_map2	0001.CSV	3941.95	96.0774
CAM112A_map2	0001.CSV	3945.81	96.07
CAM112A_map2	0001.CSV	3949.67	96.0508
CAM112A_map2	0001.CSV	3953.52	96.0381
CAM112A_map2	0001.CSV	3957.38	96.0896
CAM112A_map2	0001.CSV	3961.24	96.0836
CAM112A_map2	0001.CSV	3965.09	96.0601
CAM112A_map2	0001.CSV	3968.95	96.0785
CAM112A_map2	0001.CSV	3972.81	96.0731
CAM112A_map2	0001.CSV	3976.67	96.0465
CAM112A_map2	0001.CSV	3980.52	96.0484
CAM112A_map2	0001.CSV	3984.38	96.0628
CAM112A_map2	0001.CSV	3988.24	96.1168
CAM112A_map2	0001.CSV	3992.09	96.1252
CAM112A_map2	0001.CSV	3995.95	96.0935
CAM112A_map2	0001.CSV	3999.81	96.1049
CAM112A_map2	0002.CSV	674.992	91.861
CAM112A_map2	0002.CSV	678.849	91.3541
CAM112A_map2	0002.CSV	682.706	90.9742
CAM112A_map2	0002.CSV	686.563	90.2674
CAM112A_map2	0002.CSV	690.42	89.7525
CAM112A_map2	0002.CSV	694.277	88.7253
CAM112A_map2	0002.CSV	698.134	87.6562
CAM112A_map2	0002.CSV	701.991	85.6196
CAM112A_map2	0002.CSV	705.849	81.1614
CAM112A_map2	0002.CSV	709.706	75.5645
CAM112A_map2	0002.CSV	713.563	77.411
CAM112A_map2	0002.CSV	717.42	85.4375
CAM112A_map2	0002.CSV	721.277	90.9534
CAM112A_map2	0002.CSV	725.134	92.3309
CAM112A_map2	0002.CSV	728.991	92.6525
CAM112A_map2	0002.CSV	732.848	92.6426
CAM112A_map2	0002.CSV	736.705	92.6082
CAM112A_map2	0002.CSV	740.562	92.2215
CAM112A_map2	0002.CSV	744.42	91.974
CAM112A_map2	0002.CSV	748.277	91.7605
CAM112A_map2	0002.CSV	752.134	91.7233
CAM112A_map2	0002.CSV	755.991	91.5268
CAM112A_map2	0002.CSV	759.848	91.2763
CAM112A_map2	0002.CSV	763.705	90.9772
CAM112A_map2	0002.CSV	767.562	90.9157
CAM112A_map2	0002.CSV	771.419	90.6725
CAM112A_map2	0002.CSV	775.276	90.6101
CAM112A_map2	0002.CSV	779.133	90.5645
CAM112A_map2	0002.CSV	782.99	90.5653
CAM112A_map2	0002.CSV	786.848	90.5179
CAM112A_map2	0002.CSV	790.705	90.4926
CAM112A_map2	0002.CSV	794.562	90.2829
CAM112A_map2	0002.CSV	798.419	90.2248
CAM112A_map2	0002.CSV	802.276	90.0345
CAM112A_map2	0002.CSV	806.133	89.9022
CAM112A_map2	0002.CSV	809.99	89.6527
CAM112A_map2	0002.CSV	813.847	89.4693
CAM112A_map2	0002.CSV	817.704	89.1053
CAM112A_map2	0002.CSV	821.562	88.8047
CAM112A_map2	0002.CSV	825.419	88.3843
CAM112A_map2	0002.CSV	829.276	87.95
CAM112A_map2	0002.CSV	833.133	87.439
CAM112A_map2	0002.CSV	836.99	86.8968
CAM112A_map2	0002.CSV	840.847	85.8165
CAM112A_map2	0002.CSV	844.704	84.1179
CAM112A_map2	0002.CSV	848.561	82.9426
CAM112A_map2	0002.CSV	852.418	82.4481
CAM112A_map2	0002.CSV	856.275	80.1584
CAM112A_map2	0002.CSV	860.132	75.4657
CAM112A_map2	0002.CSV	863.99	67.1509
CAM112A_map2	0002.CSV	867.847	56.8839
CAM112A_map2	0002.CSV	871.704	52.4459
CAM112A_map2	0002.CSV	875.561	56.8618
CAM112A_map2	0002.CSV	879.418	64.8264
CAM112A_map2	0002.CSV	883.275	75.0215
CAM112A_map2	0002.CSV	887.132	85.5563
CAM112A_map2	0002.CSV	890.989	90.8796
CAM112A_map2	0002.CSV	894.846	91.5069
CAM112A_map2	0002.CSV	898.703	91.3041
CAM112A_map2	0002.CSV	902.561	90.9871
CAM112A_map2	0002.CSV	906.418	90.741
CAM112A_map2	0002.CSV	910.275	90.4413
CAM112A_map2	0002.CSV	914.132	90.2423
CAM112A_map2	0002.CSV	917.989	89.9722
CAM112A_map2	0002.CSV	921.846	89.8624
CAM112A_map2	0002.CSV	925.703	89.6522
CAM112A_map2	0002.CSV	929.56	89.4858
CAM112A_map2	0002.CSV	933.417	89.3114
CAM112A_map2	0002.CSV	937.274	89.2431
CAM112A_map2	0002.CSV	941.131	89.1184
CAM112A_map2	0002.CSV	944.989	89.1215
CAM112A_map2	0002.CSV	948.846	89.0141
CAM112A_map2	0002.CSV	952.703	88.9242
CAM112A_map2	0002.CSV	956.56	88.7922
CAM112A_map2	0002.CSV	960.417	88.7595
CAM112A_map2	0002.CSV	964.274	88.6236
CAM112A_map2	0002.CSV	968.131	88.5215
CAM112A_map2	0002.CSV	971.988	88.3495
CAM112A_map2	0002.CSV	975.845	88.2514
CAM112A_map2	0002.CSV	979.702	88.1091
CAM112A_map2	0002.CSV	983.559	88.0135
CAM112A_map2	0002.CSV	987.417	87.8757
CAM112A_map2	0002.CSV	991.274	87.8041
CAM112A_map2	0002.CSV	995.131	87.6554
CAM112A_map2	0002.CSV	998.988	87.5506
CAM112A_map2	0002.CSV	1002.85	87.3936
CAM112A_map2	0002.CSV	1006.7	87.3027
CAM112A_map2	0002.CSV	1010.56	87.1485
CAM112A_map2	0002.CSV	1014.42	87.0703
CAM112A_map2	0002.CSV	1018.27	86.9287
CAM112A_map2	0002.CSV	1022.13	86.8659
CAM112A_map2	0002.CSV	1025.99	86.7335
CAM112A_map2	0002.CSV	1029.85	86.6601
CAM112A_map2	0002.CSV	1033.7	86.5157
CAM112A_map2	0002.CSV	1037.56	86.4305
CAM112A_map2	0002.CSV	1041.42	86.2489
CAM112A_map2	0002.CSV	1045.27	86.1501
CAM112A_map2	0002.CSV	1049.13	85.9867
CAM112A_map2	0002.CSV	1052.99	85.8692
CAM112A_map2	0002.CSV	1056.84	85.674
CAM112A_map2	0002.CSV	1060.7	85.5006
CAM112A_map2	0002.CSV	1064.56	85.2452
CAM112A_map2	0002.CSV	1068.42	85.1325
CAM112A_map2	0002.CSV	1072.27	84.9774
CAM112A_map2	0002.CSV	1076.13	84.8157
CAM112A_map2	0002.CSV	1079.99	84.5195
CAM112A_map2	0002.CSV	1083.84	84.3286
CAM112A_map2	0002.CSV	1087.7	84.1881
CAM112A_map2	0002.CSV	1091.56	84.2521
CAM112A_map2	0002.CSV	1095.41	84.2816
CAM112A_map2	0002.CSV	1099.27	84.3108
CAM112A_map2	0002.CSV	1103.13	84.134
CAM112A_map2	0002.CSV	1106.99	83.9211
CAM112A_map2	0002.CSV	1110.84	83.6295
CAM112A_map2	0002.CSV	1114.7	83.5065
CAM112A_map2	0002.CSV	1118.56	83.4162
CAM112A_map2	0002.CSV	1122.41	83.3479
CAM112A_map2	0002.CSV	1126.27	83.205
CAM112A_map2	0002.CSV	1130.13	83.1329
CAM112A_map2	0002.CSV	1133.99	82.9752
CAM112A_map2	0002.CSV	1137.84	82.8564
CAM112A_map2	0002.CSV	1141.7	82.6785
CAM112A_map2	0002.CSV	1145.56	82.5514
CAM112A_map2	0002.CSV	1149.41	82.3449
CAM112A_map2	0002.CSV	1153.27	82.1622
CAM112A_map2	0002.CSV	1157.13	81.9112
CAM112A_map2	0002.CSV	1160.99	81.7163
CAM112A_map2	0002.CSV	1164.84	81.4996
CAM112A_map2	0002.CSV	1168.7	81.3983
CAM112A_map2	0002.CSV	1172.56	81.2735
CAM112A_map2	0002.CSV	1176.41	81.23
CAM112A_map2	0002.CSV	1180.27	81.1482
CAM112A_map2	0002.CSV	1184.13	81.1015
CAM112A_map2	0002.CSV	1187.99	80.9884
CAM112A_map2	0002.CSV	1191.84	80.9513
CAM112A_map2	0002.CSV	1195.7	80.8122
CAM112A_map2	0002.CSV	1199.56	80.6947
CAM112A_map2	0002.CSV	1203.41	80.5232
CAM112A_map2	0002.CSV	1207.27	80.3675
CAM112A_map2	0002.CSV	1211.13	80.1215
CAM112A_map2	0002.CSV	1214.98	79.9369
CAM112A_map2	0002.CSV	1218.84	79.6593
CAM112A_map2	0002.CSV	1222.7	79.3956
CAM112A_map2	0002.CSV	1226.56	79.0605
CAM112A_map2	0002.CSV	1230.41	78.7738
CAM112A_map2	0002.CSV	1234.27	78.3788
CAM112A_map2	0002.CSV	1238.13	78.0179
CAM112A_map2	0002.CSV	1241.98	77.6105
CAM112A_map2	0002.CSV	1245.84	77.2714
CAM112A_map2	0002.CSV	1249.7	76.8599
CAM112A_map2	0002.CSV	1253.56	76.4915
CAM112A_map2	0002.CSV	1257.41	76.0428
CAM112A_map2	0002.CSV	1261.27	75.6626
CAM112A_map2	0002.CSV	1265.13	75.2316
CAM112A_map2	0002.CSV	1268.98	74.8289
CAM112A_map2	0002.CSV	1272.84	74.3272
CAM112A_map2	0002.CSV	1276.7	73.8779
CAM112A_map2	0002.CSV	1280.56	73.3339
CAM112A_map2	0002.CSV	1284.41	72.8334
CAM112A_map2	0002.CSV	1288.27	72.2727
CAM112A_map2	0002.CSV	1292.13	71.7529
CAM112A_map2	0002.CSV	1295.98	71.1332
CAM112A_map2	0002.CSV	1299.84	70.547
CAM112A_map2	0002.CSV	1303.7	69.8432
CAM112A_map2	0002.CSV	1307.56	69.1381
CAM112A_map2	0002.CSV	1311.41	68.3115
CAM112A_map2	0002.CSV	1315.27	67.4998
CAM112A_map2	0002.CSV	1319.13	66.5987
CAM112A_map2	0002.CSV	1322.98	65.7992
CAM112A_map2	0002.CSV	1326.84	64.8923
CAM112A_map2	0002.CSV	1330.7	63.9722
CAM112A_map2	0002.CSV	1334.56	62.9878
CAM112A_map2	0002.CSV	1338.41	61.871
CAM112A_map2	0002.CSV	1342.27	60.4891
CAM112A_map2	0002.CSV	1346.13	59.3574
CAM112A_map2	0002.CSV	1349.98	58.0746
CAM112A_map2	0002.CSV	1353.84	56.7585
CAM112A_map2	0002.CSV	1357.7	55.3504
CAM112A_map2	0002.CSV	1361.56	53.8381
CAM112A_map2	0002.CSV	1365.41	51.9691
CAM112A_map2	0002.CSV	1369.27	50.3796
CAM112A_map2	0002.CSV	1373.13	48.3745
CAM112A_map2	0002.CSV	1376.98	46.17
CAM112A_map2	0002.CSV	1380.84	44.191
CAM112A_map2	0002.CSV	1384.7	42.4068
CAM112A_map2	0002.CSV	1388.56	40.4649
CAM112A_map2	0002.CSV	1392.41	39.4781
CAM112A_map2	0002.CSV	1396.27	39.3373
CAM112A_map2	0002.CSV	1400.13	40.0804
CAM112A_map2	0002.CSV	1403.98	41.0953
CAM112A_map2	0002.CSV	1407.84	42.7921
CAM112A_map2	0002.CSV	1411.7	44.616
CAM112A_map2	0002.CSV	1415.55	46.3854
CAM112A_map2	0002.CSV	1419.41	48.1947
CAM112A_map2	0002.CSV	1423.27	49.7551
CAM112A_map2	0002.CSV	1427.12	50.7508
CAM112A_map2	0002.CSV	1430.98	51.8667
CAM112A_map2	0002.CSV	1434.84	52.9883
CAM112A_map2	0002.CSV	1438.7	54.3826
CAM112A_map2	0002.CSV	1442.55	55.4206
CAM112A_map2	0002.CSV	1446.41	56.6331
CAM112A_map2	0002.CSV	1450.27	57.8988
CAM112A_map2	0002.CSV	1454.12	59.0731
CAM112A_map2	0002.CSV	1457.98	60.7398
CAM112A_map2	0002.CSV	1461.84	62.1703
CAM112A_map2	0002.CSV	1465.7	63.2872
CAM112A_map2	0002.CSV	1469.55	64.5481
CAM112A_map2	0002.CSV	1473.41	66.1033
CAM112A_map2	0002.CSV	1477.27	67.8333
CAM112A_map2	0002.CSV	1481.12	68.9196
CAM112A_map2	0002.CSV	1484.98	69.9952
CAM112A_map2	0002.CSV	1488.84	71.3138
CAM112A_map2	0002.CSV	1492.7	72.7642
CAM112A_map2	0002.CSV	1496.55	73.9731
CAM112A_map2	0002.CSV	1500.41	75.3669
CAM112A_map2	0002.CSV	1504.27	76.2719
CAM112A_map2	0002.CSV	1508.12	77.9285
CAM112A_map2	0002.CSV	1511.98	79.1332
CAM112A_map2	0002.CSV	1515.84	79.9817
CAM112A_map2	0002.CSV	1519.7	81.0335
CAM112A_map2	0002.CSV	1523.55	82.2215
CAM112A_map2	0002.CSV	1527.41	83.003
CAM112A_map2	0002.CSV	1531.27	83.6274
CAM112A_map2	0002.CSV	1535.12	83.9303
CAM112A_map2	0002.CSV	1538.98	84.3572
CAM112A_map2	0002.CSV	1542.84	85.8411
CAM112A_map2	0002.CSV	1546.7	87.2749
CAM112A_map2	0002.CSV	1550.55	88.3576
CAM112A_map2	0002.CSV	1554.41	89.2739
CAM112A_map2	0002.CSV	1558.27	90.0029
CAM112A_map2	0002.CSV	1562.12	90.4884
CAM112A_map2	0002.CSV	1565.98	90.6251
CAM112A_map2	0002.CSV	1569.84	90.5037
CAM112A_map2	0002.CSV	1573.69	90.2842
CAM112A_map2	0002.CSV	1577.55	90.3747
CAM112A_map2	0002.CSV	1581.41	90.9319
CAM112A_map2	0002.CSV	1585.27	91.6778
CAM112A_map2	0002.CSV	1589.12	92.3079
CAM112A_map2	0002.CSV	1592.98	92.7828
CAM112A_map2	0002.CSV	1596.84	93.1227
CAM112A_map2	0002.CSV	1600.69	93.3701
CAM112A_map2	0002.CSV	1604.55	93.4954
CAM112A_map2	0002.CSV	1608.41	93.6432
CAM112A_map2	0002.CSV	1612.27	93.7793
CAM112A_map2	0002.CSV	1616.12	93.9111
CAM112A_map2	0002.CSV	1619.98	93.9768
CAM112A_map2	0002.CSV	1623.84	94.1018
CAM112A_map2	0002.CSV	1627.69	94.2413
CAM112A_map2	0002.CSV	1631.55	94.4355
CAM112A_map2	0002.CSV	1635.41	94.5502
CAM112A_map2	0002.CSV	1639.27	94.5958
CAM112A_map2	0002.CSV	1643.12	94.6948
CAM112A_map2	0002.CSV	1646.98	94.7691
CAM112A_map2	0002.CSV	1650.84	94.7694
CAM112A_map2	0002.CSV	1654.69	94.771
CAM112A_map2	0002.CSV	1658.55	94.8504
CAM112A_map2	0002.CSV	1662.41	94.9417
CAM112A_map2	0002.CSV	1666.27	94.98
CAM112A_map2	0002.CSV	1670.12	94.961
CAM112A_map2	0002.CSV	1673.98	94.9122
CAM112A_map2	0002.CSV	1677.84	95.0293
CAM112A_map2	0002.CSV	1681.69	95.1224
CAM112A_map2	0002.CSV	1685.55	95.0614
CAM112A_map2	0002.CSV	1689.41	95.0285
CAM112A_map2	0002.CSV	1693.27	95.1381
CAM112A_map2	0002.CSV	1697.12	95.0979
CAM112A_map2	0002.CSV	1700.98	94.9665
CAM112A_map2	0002.CSV	1704.84	94.9595
CAM112A_map2	0002.CSV	1708.69	95.0217
CAM112A_map2	0002.CSV	1712.55	95.0615
CAM112A_map2	0002.CSV	1716.41	94.9712
CAM112A_map2	0002.CSV	1720.27	94.8114
CAM112A_map2	0002.CSV	1724.12	94.8258
CAM112A_map2	0002.CSV	1727.98	94.8513
CAM112A_map2	0002.CSV	1731.84	94.8208
CAM112A_map2	0002.CSV	1735.69	94.6979
CAM112A_map2	0002.CSV	1739.55	94.7672
CAM112A_map2	0002.CSV	1743.41	94.8757
CAM112A_map2	0002.CSV	1747.27	95.0052
CAM112A_map2	0002.CSV	1751.12	95.0864
CAM112A_map2	0002.CSV	1754.98	95.1985
CAM112A_map2	0002.CSV	1758.84	95.2438
CAM112A_map2	0002.CSV	1762.69	95.2519
CAM112A_map2	0002.CSV	1766.55	95.2962
CAM112A_map2	0002.CSV	1770.41	95.2842
CAM112A_map2	0002.CSV	1774.26	95.1278
CAM112A_map2	0002.CSV	1778.12	95.0517
CAM112A_map2	0002.CSV	1781.98	94.8752
CAM112A_map2	0002.CSV	1785.84	94.5692
CAM112A_map2	0002.CSV	1789.69	94.1016
CAM112A_map2	0002.CSV	1793.55	93.5148
CAM112A_map2	0002.CSV	1797.41	93.4329
CAM112A_map2	0002.CSV	1801.26	93.9285
CAM112A_map2	0002.CSV	1805.12	94.5449
CAM112A_map2	0002.CSV	1808.98	94.9735
CAM112A_map2	0002.CSV	1812.84	95.1675
CAM112A_map2	0002.CSV	1816.69	95.2746
CAM112A_map2	0002.CSV	1820.55	95.335
CAM112A_map2	0002.CSV	1824.41	95.3925
CAM112A_map2	0002.CSV	1828.26	95.3591
CAM112A_map2	0002.CSV	1832.12	95.354
CAM112A_map2	0002.CSV	1835.98	95.3977
CAM112A_map2	0002.CSV	1839.84	95.4581
CAM112A_map2	0002.CSV	1843.69	95.4077
CAM112A_map2	0002.CSV	1847.55	95.3467
CAM112A_map2	0002.CSV	1851.41	95.3757
CAM112A_map2	0002.CSV	1855.26	95.4163
CAM112A_map2	0002.CSV	1859.12	95.4025
CAM112A_map2	0002.CSV	1862.98	95.4099
CAM112A_map2	0002.CSV	1866.84	95.3919
CAM112A_map2	0002.CSV	1870.69	95.3491
CAM112A_map2	0002.CSV	1874.55	95.368
CAM112A_map2	0002.CSV	1878.41	95.3922
CAM112A_map2	0002.CSV	1882.26	95.3662
CAM112A_map2	0002.CSV	1886.12	95.3688
CAM112A_map2	0002.CSV	1889.98	95.3674
CAM112A_map2	0002.CSV	1893.83	95.3613
CAM112A_map2	0002.CSV	1897.69	95.35
CAM112A_map2	0002.CSV	1901.55	95.3641
CAM112A_map2	0002.CSV	1905.41	95.36
CAM112A_map2	0002.CSV	1909.26	95.3503
CAM112A_map2	0002.CSV	1913.12	95.3387
CAM112A_map2	0002.CSV	1916.98	95.3281
CAM112A_map2	0002.CSV	1920.83	95.2892
CAM112A_map2	0002.CSV	1924.69	95.2993
CAM112A_map2	0002.CSV	1928.55	95.3028
CAM112A_map2	0002.CSV	1932.4	95.305
CAM112A_map2	0002.CSV	1936.26	95.2967
CAM112A_map2	0002.CSV	1940.12	95.3116
CAM112A_map2	0002.CSV	1943.98	95.2884
CAM112A_map2	0002.CSV	1947.83	95.273
CAM112A_map2	0002.CSV	1951.69	95.2551
CAM112A_map2	0002.CSV	1955.55	95.2439
CAM112A_map2	0002.CSV	1959.4	95.2126
CAM112A_map2	0002.CSV	1963.26	95.2155
CAM112A_map2	0002.CSV	1967.12	95.2044
CAM112A_map2	0002.CSV	1970.98	95.1964
CAM112A_map2	0002.CSV	1974.83	95.1932
CAM112A_map2	0002.CSV	1978.69	95.2007
CAM112A_map2	0002.CSV	1982.55	95.2091
CAM112A_map2	0002.CSV	1986.4	95.2129
CAM112A_map2	0002.CSV	1990.26	95.1749
CAM112A_map2	0002.CSV	1994.12	95.1519
CAM112A_map2	0002.CSV	1997.98	95.1662
CAM112A_map2	0002.CSV	2001.83	95.1656
CAM112A_map2	0002.CSV	2005.69	95.1389
CAM112A_map2	0002.CSV	2009.55	95.1441
CAM112A_map2	0002.CSV	2013.4	95.1378
CAM112A_map2	0002.CSV	2017.26	95.1269
CAM112A_map2	0002.CSV	2021.12	95.1016
CAM112A_map2	0002.CSV	2024.97	95.0977
CAM112A_map2	0002.CSV	2028.83	95.0742
CAM112A_map2	0002.CSV	2032.69	95.0516
CAM112A_map2	0002.CSV	2036.55	95.0389
CAM112A_map2	0002.CSV	2040.4	95.0474
CAM112A_map2	0002.CSV	2044.26	95.0222
CAM112A_map2	0002.CSV	2048.12	95.0103
CAM112A_map2	0002.CSV	2051.97	95.0003
CAM112A_map2	0002.CSV	2055.83	94.9832
CAM112A_map2	0002.CSV	2059.69	94.9673
CAM112A_map2	0002.CSV	2063.55	94.9561
CAM112A_map2	0002.CSV	2067.4	94.9206
CAM112A_map2	0002.CSV	2071.26	94.9074
CAM112A_map2	0002.CSV	2075.12	94.8985
CAM112A_map2	0002.CSV	2078.97	94.8986
CAM112A_map2	0002.CSV	2082.83	94.8856
CAM112A_map2	0002.CSV	2086.69	94.8955
CAM112A_map2	0002.CSV	2090.55	94.8873
CAM112A_map2	0002.CSV	2094.4	94.8628
CAM112A_map2	0002.CSV	2098.26	94.8274
CAM112A_map2	0002.CSV	2102.12	94.8245
CAM112A_map2	0002.CSV	2105.97	94.8111
CAM112A_map2	0002.CSV	2109.83	94.7978
CAM112A_map2	0002.CSV	2113.69	94.7652
CAM112A_map2	0002.CSV	2117.55	94.7408
CAM112A_map2	0002.CSV	2121.4	94.7171
CAM112A_map2	0002.CSV	2125.26	94.7202
CAM112A_map2	0002.CSV	2129.12	94.7215
CAM112A_map2	0002.CSV	2132.97	94.7087
CAM112A_map2	0002.CSV	2136.83	94.6786
CAM112A_map2	0002.CSV	2140.69	94.6697
CAM112A_map2	0002.CSV	2144.55	94.6629
CAM112A_map2	0002.CSV	2148.4	94.661
CAM112A_map2	0002.CSV	2152.26	94.6582
CAM112A_map2	0002.CSV	2156.12	94.6576
CAM112A_map2	0002.CSV	2159.97	94.6428
CAM112A_map2	0002.CSV	2163.83	94.6405
CAM112A_map2	0002.CSV	2167.69	94.6402
CAM112A_map2	0002.CSV	2171.55	94.6375
CAM112A_map2	0002.CSV	2175.4	94.6184
CAM112A_map2	0002.CSV	2179.26	94.6248
CAM112A_map2	0002.CSV	2183.12	94.6081
CAM112A_map2	0002.CSV	2186.97	94.5899
CAM112A_map2	0002.CSV	2190.83	94.5853
CAM112A_map2	0002.CSV	2194.69	94.5913
CAM112A_map2	0002.CSV	2198.55	94.5917
CAM112A_map2	0002.CSV	2202.4	94.5983
CAM112A_map2	0002.CSV	2206.26	94.58
CAM112A_map2	0002.CSV	2210.12	94.575
CAM112A_map2	0002.CSV	2213.97	94.5757
CAM112A_map2	0002.CSV	2217.83	94.567
CAM112A_map2	0002.CSV	2221.69	94.5542
CAM112A_map2	0002.CSV	2225.54	94.5728
CAM112A_map2	0002.CSV	2229.4	94.5764
CAM112A_map2	0002.CSV	2233.26	94.574
CAM112A_map2	0002.CSV	2237.12	94.5709
CAM112A_map2	0002.CSV	2240.97	94.5737
CAM112A_map2	0002.CSV	2244.83	94.5583
CAM112A_map2	0002.CSV	2248.69	94.5451
CAM112A_map2	0002.CSV	2252.54	94.527
CAM112A_map2	0002.CSV	2256.4	94.5419
CAM112A_map2	0002.CSV	2260.26	94.5512
CAM112A_map2	0002.CSV	2264.11	94.5427
CAM112A_map2	0002.CSV	2267.97	94.5326
CAM112A_map2	0002.CSV	2271.83	94.5416
CAM112A_map2	0002.CSV	2275.69	94.5217
CAM112A_map2	0002.CSV	2279.54	94.5116
CAM112A_map2	0002.CSV	2283.4	94.5292
CAM112A_map2	0002.CSV	2287.26	94.5465
CAM112A_map2	0002.CSV	2291.11	94.5494
CAM112A_map2	0002.CSV	2294.97	94.5621
CAM112A_map2	0002.CSV	2298.83	94.5829
CAM112A_map2	0002.CSV	2302.69	94.6182
CAM112A_map2	0002.CSV	2306.54	94.6749
CAM112A_map2	0002.CSV	2310.4	94.7541
CAM112A_map2	0002.CSV	2314.26	94.8671
CAM112A_map2	0002.CSV	2318.11	95.0371
CAM112A_map2	0002.CSV	2321.97	95.2804
CAM112A_map2	0002.CSV	2325.83	95.8295
CAM112A_map2	0002.CSV	2329.69	96.3288
CAM112A_map2	0002.CSV	2333.54	96.5281
CAM112A_map2	0002.CSV	2337.4	96.7738
CAM112A_map2	0002.CSV	2341.26	96.9167
CAM112A_map2	0002.CSV	2345.11	95.8669
CAM112A_map2	0002.CSV	2348.97	95.5422
CAM112A_map2	0002.CSV	2352.83	96.5007
CAM112A_map2	0002.CSV	2356.69	99.6785
CAM112A_map2	0002.CSV	2360.54	102.092
CAM112A_map2	0002.CSV	2364.4	100.23
CAM112A_map2	0002.CSV	2368.26	97.1188
CAM112A_map2	0002.CSV	2372.11	95.3918
CAM112A_map2	0002.CSV	2375.97	94.6639
CAM112A_map2	0002.CSV	2379.83	94.4166
CAM112A_map2	0002.CSV	2383.69	94.3653
CAM112A_map2	0002.CSV	2387.54	94.3628
CAM112A_map2	0002.CSV	2391.4	94.3661
CAM112A_map2	0002.CSV	2395.26	94.3644
CAM112A_map2	0002.CSV	2399.11	94.3453
CAM112A_map2	0002.CSV	2402.97	94.3537
CAM112A_map2	0002.CSV	2406.83	94.3546
CAM112A_map2	0002.CSV	2410.68	94.3394
CAM112A_map2	0002.CSV	2414.54	94.3278
CAM112A_map2	0002.CSV	2418.4	94.3312
CAM112A_map2	0002.CSV	2422.26	94.3129
CAM112A_map2	0002.CSV	2426.11	94.2969
CAM112A_map2	0002.CSV	2429.97	94.2886
CAM112A_map2	0002.CSV	2433.83	94.2813
CAM112A_map2	0002.CSV	2437.68	94.2725
CAM112A_map2	0002.CSV	2441.54	94.2711
CAM112A_map2	0002.CSV	2445.4	94.2596
CAM112A_map2	0002.CSV	2449.26	94.2403
CAM112A_map2	0002.CSV	2453.11	94.2168
CAM112A_map2	0002.CSV	2456.97	94.2008
CAM112A_map2	0002.CSV	2460.83	94.1897
CAM112A_map2	0002.CSV	2464.68	94.1838
CAM112A_map2	0002.CSV	2468.54	94.1405
CAM112A_map2	0002.CSV	2472.4	94.0918
CAM112A_map2	0002.CSV	2476.26	94.0495
CAM112A_map2	0002.CSV	2480.11	93.9994
CAM112A_map2	0002.CSV	2483.97	93.9356
CAM112A_map2	0002.CSV	2487.83	93.8567
CAM112A_map2	0002.CSV	2491.68	93.7267
CAM112A_map2	0002.CSV	2495.54	93.5637
CAM112A_map2	0002.CSV	2499.4	93.3937
CAM112A_map2	0002.CSV	2503.26	93.2335
CAM112A_map2	0002.CSV	2507.11	93.1218
CAM112A_map2	0002.CSV	2510.97	93.094
CAM112A_map2	0002.CSV	2514.83	93.1147
CAM112A_map2	0002.CSV	2518.68	93.184
CAM112A_map2	0002.CSV	2522.54	93.3034
CAM112A_map2	0002.CSV	2526.4	93.4442
CAM112A_map2	0002.CSV	2530.26	93.5789
CAM112A_map2	0002.CSV	2534.11	93.7231
CAM112A_map2	0002.CSV	2537.97	93.814
CAM112A_map2	0002.CSV	2541.83	93.8749
CAM112A_map2	0002.CSV	2545.68	93.9434
CAM112A_map2	0002.CSV	2549.54	93.9855
CAM112A_map2	0002.CSV	2553.4	94.0069
CAM112A_map2	0002.CSV	2557.26	94.0016
CAM112A_map2	0002.CSV	2561.11	93.9962
CAM112A_map2	0002.CSV	2564.97	94.0269
CAM112A_map2	0002.CSV	2568.83	94.0252
CAM112A_map2	0002.CSV	2572.68	94.0061
CAM112A_map2	0002.CSV	2576.54	94.0047
CAM112A_map2	0002.CSV	2580.4	94.0224
CAM112A_map2	0002.CSV	2584.25	94.0391
CAM112A_map2	0002.CSV	2588.11	94.0481
CAM112A_map2	0002.CSV	2591.97	94.0476
CAM112A_map2	0002.CSV	2595.83	94.0437
CAM112A_map2	0002.CSV	2599.68	94.0584
CAM112A_map2	0002.CSV	2603.54	94.0932
CAM112A_map2	0002.CSV	2607.4	94.1212
CAM112A_map2	0002.CSV	2611.25	94.1268
CAM112A_map2	0002.CSV	2615.11	94.1281
CAM112A_map2	0002.CSV	2618.97	94.1663
CAM112A_map2	0002.CSV	2622.82	94.1899
CAM112A_map2	0002.CSV	2626.68	94.1781
CAM112A_map2	0002.CSV	2630.54	94.1862
CAM112A_map2	0002.CSV	2634.4	94.1857
CAM112A_map2	0002.CSV	2638.25	94.1817
CAM112A_map2	0002.CSV	2642.11	94.2113
CAM112A_map2	0002.CSV	2645.97	94.25
CAM112A_map2	0002.CSV	2649.82	94.2649
CAM112A_map2	0002.CSV	2653.68	94.2748
CAM112A_map2	0002.CSV	2657.54	94.2869
CAM112A_map2	0002.CSV	2661.4	94.2663
CAM112A_map2	0002.CSV	2665.25	94.2389
CAM112A_map2	0002.CSV	2669.11	94.2207
CAM112A_map2	0002.CSV	2672.97	94.1743
CAM112A_map2	0002.CSV	2676.82	94.1054
CAM112A_map2	0002.CSV	2680.68	94.1152
CAM112A_map2	0002.CSV	2684.54	94.1905
CAM112A_map2	0002.CSV	2688.4	94.2231
CAM112A_map2	0002.CSV	2692.25	94.2213
CAM112A_map2	0002.CSV	2696.11	94.217
CAM112A_map2	0002.CSV	2699.97	94.1933
CAM112A_map2	0002.CSV	2703.82	94.1746
CAM112A_map2	0002.CSV	2707.68	94.1568
CAM112A_map2	0002.CSV	2711.54	94.1612
CAM112A_map2	0002.CSV	2715.4	94.1783
CAM112A_map2	0002.CSV	2719.25	94.1466
CAM112A_map2	0002.CSV	2723.11	94.052
CAM112A_map2	0002.CSV	2726.97	94.0262
CAM112A_map2	0002.CSV	2730.82	94.0957
CAM112A_map2	0002.CSV	2734.68	94.1094
CAM112A_map2	0002.CSV	2738.54	94.112
CAM112A_map2	0002.CSV	2742.4	94.1026
CAM112A_map2	0002.CSV	2746.25	94.0194
CAM112A_map2	0002.CSV	2750.11	94.0075
CAM112A_map2	0002.CSV	2753.97	94.0539
CAM112A_map2	0002.CSV	2757.82	94.0827
CAM112A_map2	0002.CSV	2761.68	94.1171
CAM112A_map2	0002.CSV	2765.54	94.1153
CAM112A_map2	0002.CSV	2769.39	94.0671
CAM112A_map2	0002.CSV	2773.25	93.9728
CAM112A_map2	0002.CSV	2777.11	93.9954
CAM112A_map2	0002.CSV	2780.97	94.0697
CAM112A_map2	0002.CSV	2784.82	93.9943
CAM112A_map2	0002.CSV	2788.68	93.8492
CAM112A_map2	0002.CSV	2792.54	93.8144
CAM112A_map2	0002.CSV	2796.39	93.8012
CAM112A_map2	0002.CSV	2800.25	93.8298
CAM112A_map2	0002.CSV	2804.11	93.8721
CAM112A_map2	0002.CSV	2807.97	93.8139
CAM112A_map2	0002.CSV	2811.82	93.8121
CAM112A_map2	0002.CSV	2815.68	93.8438
CAM112A_map2	0002.CSV	2819.54	93.7808
CAM112A_map2	0002.CSV	2823.39	93.6996
CAM112A_map2	0002.CSV	2827.25	93.6483
CAM112A_map2	0002.CSV	2831.11	93.4717
CAM112A_map2	0002.CSV	2834.97	93.1845
CAM112A_map2	0002.CSV	2838.82	92.9054
CAM112A_map2	0002.CSV	2842.68	92.5308
CAM112A_map2	0002.CSV	2846.54	91.8727
CAM112A_map2	0002.CSV	2850.39	91.4952
CAM112A_map2	0002.CSV	2854.25	91.7066
CAM112A_map2	0002.CSV	2858.11	92.0642
CAM112A_map2	0002.CSV	2861.97	92.3812
CAM112A_map2	0002.CSV	2865.82	92.5894
CAM112A_map2	0002.CSV	2869.68	92.6095
CAM112A_map2	0002.CSV	2873.54	92.6057
CAM112A_map2	0002.CSV	2877.39	92.7625
CAM112A_map2	0002.CSV	2881.25	92.8876
CAM112A_map2	0002.CSV	2885.11	92.9132
CAM112A_map2	0002.CSV	2888.97	92.8653
CAM112A_map2	0002.CSV	2892.82	92.684
CAM112A_map2	0002.CSV	2896.68	92.5021
CAM112A_map2	0002.CSV	2900.54	92.3819
CAM112A_map2	0002.CSV	2904.39	92.1521
CAM112A_map2	0002.CSV	2908.25	91.7106
CAM112A_map2	0002.CSV	2912.11	90.9623
CAM112A_map2	0002.CSV	2915.97	90.2689
CAM112A_map2	0002.CSV	2919.82	90.1471
CAM112A_map2	0002.CSV	2923.68	90.5267
CAM112A_map2	0002.CSV	2927.54	90.9741
CAM112A_map2	0002.CSV	2931.39	91.4765
CAM112A_map2	0002.CSV	2935.25	92.0131
CAM112A_map2	0002.CSV	2939.11	92.3269
CAM112A_map2	0002.CSV	2942.96	92.4206
CAM112A_map2	0002.CSV	2946.82	92.4931
CAM112A_map2	0002.CSV	2950.68	92.5631
CAM112A_map2	0002.CSV	2954.54	92.6612
CAM112A_map2	0002.CSV	2958.39	92.7865
CAM112A_map2	0002.CSV	2962.25	92.9057
CAM112A_map2	0002.CSV	2966.11	93.1247
CAM112A_map2	0002.CSV	2969.96	93.2669
CAM112A_map2	0002.CSV	2973.82	93.2726
CAM112A_map2	0002.CSV	2977.68	93.2867
CAM112A_map2	0002.CSV	2981.53	93.3886
CAM112A_map2	0002.CSV	2985.39	93.5533
CAM112A_map2	0002.CSV	2989.25	93.6321
CAM112A_map2	0002.CSV	2993.11	93.6166
CAM112A_map2	0002.CSV	2996.96	93.641
CAM112A_map2	0002.CSV	3000.82	93.7286
CAM112A_map2	0002.CSV	3004.68	93.7785
CAM112A_map2	0002.CSV	3008.53	93.7195
CAM112A_map2	0002.CSV	3012.39	93.6401
CAM112A_map2	0002.CSV	3016.25	93.6477
CAM112A_map2	0002.CSV	3020.11	93.7153
CAM112A_map2	0002.CSV	3023.96	93.7559
CAM112A_map2	0002.CSV	3027.82	93.7552
CAM112A_map2	0002.CSV	3031.68	93.686
CAM112A_map2	0002.CSV	3035.53	93.645
CAM112A_map2	0002.CSV	3039.39	93.6466
CAM112A_map2	0002.CSV	3043.25	93.6392
CAM112A_map2	0002.CSV	3047.11	93.6703
CAM112A_map2	0002.CSV	3050.96	93.6899
CAM112A_map2	0002.CSV	3054.82	93.7313
CAM112A_map2	0002.CSV	3058.68	93.7762
CAM112A_map2	0002.CSV	3062.53	93.7419
CAM112A_map2	0002.CSV	3066.39	93.6906
CAM112A_map2	0002.CSV	3070.25	93.7152
CAM112A_map2	0002.CSV	3074.11	93.6937
CAM112A_map2	0002.CSV	3077.96	93.643
CAM112A_map2	0002.CSV	3081.82	93.6296
CAM112A_map2	0002.CSV	3085.68	93.6235
CAM112A_map2	0002.CSV	3089.53	93.6514
CAM112A_map2	0002.CSV	3093.39	93.7187
CAM112A_map2	0002.CSV	3097.25	93.7101
CAM112A_map2	0002.CSV	3101.11	93.6839
CAM112A_map2	0002.CSV	3104.96	93.6892
CAM112A_map2	0002.CSV	3108.82	93.6565
CAM112A_map2	0002.CSV	3112.68	93.6205
CAM112A_map2	0002.CSV	3116.53	93.5781
CAM112A_map2	0002.CSV	3120.39	93.5927
CAM112A_map2	0002.CSV	3124.25	93.6806
CAM112A_map2	0002.CSV	3128.11	93.7015
CAM112A_map2	0002.CSV	3131.96	93.6864
CAM112A_map2	0002.CSV	3135.82	93.6463
CAM112A_map2	0002.CSV	3139.68	93.6377
CAM112A_map2	0002.CSV	3143.53	93.7132
CAM112A_map2	0002.CSV	3147.39	93.6934
CAM112A_map2	0002.CSV	3151.25	93.5841
CAM112A_map2	0002.CSV	3155.1	93.5889
CAM112A_map2	0002.CSV	3158.96	93.6938
CAM112A_map2	0002.CSV	3162.82	93.7368
CAM112A_map2	0002.CSV	3166.68	93.7243
CAM112A_map2	0002.CSV	3170.53	93.7056
CAM112A_map2	0002.CSV	3174.39	93.7015
CAM112A_map2	0002.CSV	3178.25	93.6962
CAM112A_map2	0002.CSV	3182.1	93.6785
CAM112A_map2	0002.CSV	3185.96	93.6501
CAM112A_map2	0002.CSV	3189.82	93.644
CAM112A_map2	0002.CSV	3193.68	93.6758
CAM112A_map2	0002.CSV	3197.53	93.6557
CAM112A_map2	0002.CSV	3201.39	93.5996
CAM112A_map2	0002.CSV	3205.25	93.5733
CAM112A_map2	0002.CSV	3209.1	93.5552
CAM112A_map2	0002.CSV	3212.96	93.5523
CAM112A_map2	0002.CSV	3216.82	93.5254
CAM112A_map2	0002.CSV	3220.68	93.5221
CAM112A_map2	0002.CSV	3224.53	93.5556
CAM112A_map2	0002.CSV	3228.39	93.5068
CAM112A_map2	0002.CSV	3232.25	93.394
CAM112A_map2	0002.CSV	3236.1	93.3925
CAM112A_map2	0002.CSV	3239.96	93.455
CAM112A_map2	0002.CSV	3243.82	93.4308
CAM112A_map2	0002.CSV	3247.68	93.3936
CAM112A_map2	0002.CSV	3251.53	93.4218
CAM112A_map2	0002.CSV	3255.39	93.4454
CAM112A_map2	0002.CSV	3259.25	93.502
CAM112A_map2	0002.CSV	3263.1	93.5069
CAM112A_map2	0002.CSV	3266.96	93.3838
CAM112A_map2	0002.CSV	3270.82	93.2819
CAM112A_map2	0002.CSV	3274.68	93.3098
CAM112A_map2	0002.CSV	3278.53	93.3972
CAM112A_map2	0002.CSV	3282.39	93.4662
CAM112A_map2	0002.CSV	3286.25	93.4687
CAM112A_map2	0002.CSV	3290.1	93.3534
CAM112A_map2	0002.CSV	3293.96	93.2612
CAM112A_map2	0002.CSV	3297.82	93.3225
CAM112A_map2	0002.CSV	3301.67	93.3336
CAM112A_map2	0002.CSV	3305.53	93.2648
CAM112A_map2	0002.CSV	3309.39	93.2795
CAM112A_map2	0002.CSV	3313.25	93.3776
CAM112A_map2	0002.CSV	3317.1	93.4489
CAM112A_map2	0002.CSV	3320.96	93.4256
CAM112A_map2	0002.CSV	3324.82	93.3854
CAM112A_map2	0002.CSV	3328.67	93.4556
CAM112A_map2	0002.CSV	3332.53	93.4731
CAM112A_map2	0002.CSV	3336.39	93.3777
CAM112A_map2	0002.CSV	3340.24	93.3112
CAM112A_map2	0002.CSV	3344.1	93.3368
CAM112A_map2	0002.CSV	3347.96	93.3324
CAM112A_map2	0002.CSV	3351.82	93.3599
CAM112A_map2	0002.CSV	3355.67	93.4271
CAM112A_map2	0002.CSV	3359.53	93.3599
CAM112A_map2	0002.CSV	3363.39	93.2846
CAM112A_map2	0002.CSV	3367.24	93.2427
CAM112A_map2	0002.CSV	3371.1	93.2803
CAM112A_map2	0002.CSV	3374.96	93.3572
CAM112A_map2	0002.CSV	3378.82	93.4146
CAM112A_map2	0002.CSV	3382.67	93.481
CAM112A_map2	0002.CSV	3386.53	93.4601
CAM112A_map2	0002.CSV	3390.39	93.3564
CAM112A_map2	0002.CSV	3394.24	93.3273
CAM112A_map2	0002.CSV	3398.1	93.2955
CAM112A_map2	0002.CSV	3401.96	93.2704
CAM112A_map2	0002.CSV	3405.82	93.3528
CAM112A_map2	0002.CSV	3409.67	93.3773
CAM112A_map2	0002.CSV	3413.53	93.4396
CAM112A_map2	0002.CSV	3417.39	93.5255
CAM112A_map2	0002.CSV	3421.24	93.5257
CAM112A_map2	0002.CSV	3425.1	93.475
CAM112A_map2	0002.CSV	3428.96	93.4307
CAM112A_map2	0002.CSV	3432.82	93.3872
CAM112A_map2	0002.CSV	3436.67	93.4313
CAM112A_map2	0002.CSV	3440.53	93.543
CAM112A_map2	0002.CSV	3444.39	93.627
CAM112A_map2	0002.CSV	3448.24	93.6657
CAM112A_map2	0002.CSV	3452.1	93.6967
CAM112A_map2	0002.CSV	3455.96	93.671
CAM112A_map2	0002.CSV	3459.82	93.604
CAM112A_map2	0002.CSV	3463.67	93.5747
CAM112A_map2	0002.CSV	3467.53	93.544
CAM112A_map2	0002.CSV	3471.39	93.602
CAM112A_map2	0002.CSV	3475.24	93.6523
CAM112A_map2	0002.CSV	3479.1	93.5963
CAM112A_map2	0002.CSV	3482.96	93.5957
CAM112A_map2	0002.CSV	3486.82	93.6095
CAM112A_map2	0002.CSV	3490.67	93.6292
CAM112A_map2	0002.CSV	3494.53	93.6229
CAM112A_map2	0002.CSV	3498.39	93.664
CAM112A_map2	0002.CSV	3502.24	93.731
CAM112A_map2	0002.CSV	3506.1	93.8005
CAM112A_map2	0002.CSV	3509.96	93.796
CAM112A_map2	0002.CSV	3513.81	93.7564
CAM112A_map2	0002.CSV	3517.67	93.8366
CAM112A_map2	0002.CSV	3521.53	93.8732
CAM112A_map2	0002.CSV	3525.39	93.8621
CAM112A_map2	0002.CSV	3529.24	93.8892
CAM112A_map2	0002.CSV	3533.1	93.8619
CAM112A_map2	0002.CSV	3536.96	93.7747
CAM112A_map2	0002.CSV	3540.81	93.7618
CAM112A_map2	0002.CSV	3544.67	93.773
CAM112A_map2	0002.CSV	3548.53	93.8131
CAM112A_map2	0002.CSV	3552.39	93.8934
CAM112A_map2	0002.CSV	3556.24	93.9197
CAM112A_map2	0002.CSV	3560.1	93.9605
CAM112A_map2	0002.CSV	3563.96	94.0797
CAM112A_map2	0002.CSV	3567.81	94.0175
CAM112A_map2	0002.CSV	3571.67	93.9377
CAM112A_map2	0002.CSV	3575.53	93.9838
CAM112A_map2	0002.CSV	3579.39	94.0018
CAM112A_map2	0002.CSV	3583.24	94.0135
CAM112A_map2	0002.CSV	3587.1	93.9011
CAM112A_map2	0002.CSV	3590.96	93.8845
CAM112A_map2	0002.CSV	3594.81	94.0058
CAM112A_map2	0002.CSV	3598.67	93.9823
CAM112A_map2	0002.CSV	3602.53	94.0058
CAM112A_map2	0002.CSV	3606.39	94.1334
CAM112A_map2	0002.CSV	3610.24	94.1744
CAM112A_map2	0002.CSV	3614.1	94.1848
CAM112A_map2	0002.CSV	3617.96	94.1469
CAM112A_map2	0002.CSV	3621.81	94.0854
CAM112A_map2	0002.CSV	3625.67	94.2023
CAM112A_map2	0002.CSV	3629.53	94.2043
CAM112A_map2	0002.CSV	3633.39	94.0455
CAM112A_map2	0002.CSV	3637.24	94.055
CAM112A_map2	0002.CSV	3641.1	94.1125
CAM112A_map2	0002.CSV	3644.96	94.2434
CAM112A_map2	0002.CSV	3648.81	94.1268
CAM112A_map2	0002.CSV	3652.67	94.0185
CAM112A_map2	0002.CSV	3656.53	94.0667
CAM112A_map2	0002.CSV	3660.38	94.0745
CAM112A_map2	0002.CSV	3664.24	94.2357
CAM112A_map2	0002.CSV	3668.1	94.3693
CAM112A_map2	0002.CSV	3671.96	94.3012
CAM112A_map2	0002.CSV	3675.81	94.1432
CAM112A_map2	0002.CSV	3679.67	94.0849
CAM112A_map2	0002.CSV	3683.53	94.1673
CAM112A_map2	0002.CSV	3687.38	94.1543
CAM112A_map2	0002.CSV	3691.24	93.9543
CAM112A_map2	0002.CSV	3695.1	94.0239
CAM112A_map2	0002.CSV	3698.95	94.2215
CAM112A_map2	0002.CSV	3702.81	94.2929
CAM112A_map2	0002.CSV	3706.67	94.3296
CAM112A_map2	0002.CSV	3710.53	94.2788
CAM112A_map2	0002.CSV	3714.38	94.205
CAM112A_map2	0002.CSV	3718.24	94.3436
CAM112A_map2	0002.CSV	3722.1	94.3865
CAM112A_map2	0002.CSV	3725.95	94.3136
CAM112A_map2	0002.CSV	3729.81	94.3951
CAM112A_map2	0002.CSV	3733.67	94.3825
CAM112A_map2	0002.CSV	3737.53	94.1195
CAM112A_map2	0002.CSV	3741.38	94.252
CAM112A_map2	0002.CSV	3745.24	94.4676
CAM112A_map2	0002.CSV	3749.1	94.5007
CAM112A_map2	0002.CSV	3752.95	94.2531
CAM112A_map2	0002.CSV	3756.81	94.196
CAM112A_map2	0002.CSV	3760.67	94.2064
CAM112A_map2	0002.CSV	3764.53	94.2842
CAM112A_map2	0002.CSV	3768.38	94.255
CAM112A_map2	0002.CSV	3772.24	94.1718
CAM112A_map2	0002.CSV	3776.1	94.2293
CAM112A_map2	0002.CSV	3779.95	94.2557
CAM112A_map2	0002.CSV	3783.81	94.2533
CAM112A_map2	0002.CSV	3787.67	94.2267
CAM112A_map2	0002.CSV	3791.53	94.2812
CAM112A_map2	0002.CSV	3795.38	94.3839
CAM112A_map2	0002.CSV	3799.24	94.4071
CAM112A_map2	0002.CSV	3803.1	94.3178
CAM112A_map2	0002.CSV	3806.95	94.2612
CAM112A_map2	0002.CSV	3810.81	94.3177
CAM112A_map2	0002.CSV	3814.67	94.4003
CAM112A_map2	0002.CSV	3818.53	94.3413
CAM112A_map2	0002.CSV	3822.38	94.2324
CAM112A_map2	0002.CSV	3826.24	94.2702
CAM112A_map2	0002.CSV	3830.1	94.337
CAM112A_map2	0002.CSV	3833.95	94.3473
CAM112A_map2	0002.CSV	3837.81	94.2629
CAM112A_map2	0002.CSV	3841.67	94.164
CAM112A_map2	0002.CSV	3845.53	94.2505
CAM112A_map2	0002.CSV	3849.38	94.4879
CAM112A_map2	0002.CSV	3853.24	94.4728
CAM112A_map2	0002.CSV	3857.1	94.2636
CAM112A_map2	0002.CSV	3860.95	94.319
CAM112A_map2	0002.CSV	3864.81	94.2731
CAM112A_map2	0002.CSV	3868.67	94.252
CAM112A_map2	0002.CSV	3872.52	94.2423
CAM112A_map2	0002.CSV	3876.38	94.3218
CAM112A_map2	0002.CSV	3880.24	94.3742
CAM112A_map2	0002.CSV	3884.1	94.2424
CAM112A_map2	0002.CSV	3887.95	94.2481
CAM112A_map2	0002.CSV	3891.81	94.2551
CAM112A_map2	0002.CSV	3895.67	94.2582
CAM112A_map2	0002.CSV	3899.52	94.3119
CAM112A_map2	0002.CSV	3903.38	94.138
CAM112A_map2	0002.CSV	3907.24	94.102
CAM112A_map2	0002.CSV	3911.1	94.2212
CAM112A_map2	0002.CSV	3914.95	94.2709
CAM112A_map2	0002.CSV	3918.81	94.2291
CAM112A_map2	0002.CSV	3922.67	94.1927
CAM112A_map2	0002.CSV	3926.52	94.1606
CAM112A_map2	0002.CSV	3930.38	94.1166
CAM112A_map2	0002.CSV	3934.24	94.0619
CAM112A_map2	0002.CSV	3938.09	94.1444
CAM112A_map2	0002.CSV	3941.95	94.2015
CAM112A_map2	0002.CSV	3945.81	94.2117
CAM112A_map2	0002.CSV	3949.67	94.171
CAM112A_map2	0002.CSV	3953.52	94.154
CAM112A_map2	0002.CSV	3957.38	94.2027
CAM112A_map2	0002.CSV	3961.24	94.1939
CAM112A_map2	0002.CSV	3965.09	94.2111
CAM112A_map2	0002.CSV	3968.95	94.2559
CAM112A_map2	0002.CSV	3972.81	94.2313
CAM112A_map2	0002.CSV	3976.67	94.2003
CAM112A_map2	0002.CSV	3980.52	94.1781
CAM112A_map2	0002.CSV	3984.38	94.172
CAM112A_map2	0002.CSV	3988.24	94.2328
CAM112A_map2	0002.CSV	3992.09	94.2439
CAM112A_map2	0002.CSV	3995.95	94.2058
CAM112A_map2	0002.CSV	3999.81	94.2103
CAM112A_map2	0003.CSV	674.992	92.7867
CAM112A_map2	0003.CSV	678.849	92.3387
CAM112A_map2	0003.CSV	682.706	92.1421
CAM112A_map2	0003.CSV	686.563	91.6043
CAM112A_map2	0003.CSV	690.42	91.2282
CAM112A_map2	0003.CSV	694.277	90.5687
CAM112A_map2	0003.CSV	698.134	89.8023
CAM112A_map2	0003.CSV	701.991	88.1627
CAM112A_map2	0003.CSV	705.849	84.7036
CAM112A_map2	0003.CSV	709.706	80.416
CAM112A_map2	0003.CSV	713.563	82.1874
CAM112A_map2	0003.CSV	717.42	88.7552
CAM112A_map2	0003.CSV	721.277	92.8687
CAM112A_map2	0003.CSV	725.134	93.6923
CAM112A_map2	0003.CSV	728.991	93.7821
CAM112A_map2	0003.CSV	732.848	93.6972
CAM112A_map2	0003.CSV	736.705	93.659
CAM112A_map2	0003.CSV	740.562	93.2998
CAM112A_map2	0003.CSV	744.42	93.0326
CAM112A_map2	0003.CSV	748.277	92.8742
CAM112A_map2	0003.CSV	752.134	92.856
CAM112A_map2	0003.CSV	755.991	92.7
CAM112A_map2	0003.CSV	759.848	92.5733
CAM112A_map2	0003.CSV	763.705	92.3611
CAM112A_map2	0003.CSV	767.562	92.3242
CAM112A_map2	0003.CSV	771.419	92.2194
CAM112A_map2	0003.CSV	775.276	92.1564
CAM112A_map2	0003.CSV	779.133	92.0745
CAM112A_map2	0003.CSV	782.99	92.1575
CAM112A_map2	0003.CSV	786.848	92.1242
CAM112A_map2	0003.CSV	790.705	92.0361
CAM112A_map2	0003.CSV	794.562	91.9191
CAM112A_map2	0003.CSV	798.419	91.8685
CAM112A_map2	0003.CSV	802.276	91.6576
CAM112A_map2	0003.CSV	806.133	91.5374
CAM112A_map2	0003.CSV	809.99	91.4449
CAM112A_map2	0003.CSV	813.847	91.3187
CAM112A_map2	0003.CSV	817.704	90.9131
CAM112A_map2	0003.CSV	821.562	90.5232
CAM112A_map2	0003.CSV	825.419	90.17
CAM112A_map2	0003.CSV	829.276	89.858
CAM112A_map2	0003.CSV	833.133	89.4339
CAM112A_map2	0003.CSV	836.99	88.9858
CAM112A_map2	0003.CSV	840.847	88.1872
CAM112A_map2	0003.CSV	844.704	86.9309
CAM112A_map2	0003.CSV	848.561	85.9742
CAM112A_map2	0003.CSV	852.418	85.4978
CAM112A_map2	0003.CSV	856.275	83.7343
CAM112A_map2	0003.CSV	860.132	80.2667
CAM112A_map2	0003.CSV	863.99	74.172
CAM112A_map2	0003.CSV	867.847	66.1123
CAM112A_map2	0003.CSV	871.704	61.9243
CAM112A_map2	0003.CSV	875.561	65.0451
CAM112A_map2	0003.CSV	879.418	71.754
CAM112A_map2	0003.CSV	883.275	80.4238
CAM112A_map2	0003.CSV	887.132	89.0414
CAM112A_map2	0003.CSV	890.989	93.2035
CAM112A_map2	0003.CSV	894.846	93.5557
CAM112A_map2	0003.CSV	898.703	93.2931
CAM112A_map2	0003.CSV	902.561	92.9813
CAM112A_map2	0003.CSV	906.418	92.739
CAM112A_map2	0003.CSV	910.275	92.4675
CAM112A_map2	0003.CSV	914.132	92.2757
CAM112A_map2	0003.CSV	917.989	92.0138
CAM112A_map2	0003.CSV	921.846	91.8581
CAM112A_map2	0003.CSV	925.703	91.6566
CAM112A_map2	0003.CSV	929.56	91.5318
CAM112A_map2	0003.CSV	933.417	91.3958
CAM112A_map2	0003.CSV	937.274	91.3156
CAM112A_map2	0003.CSV	941.131	91.1914
CAM112A_map2	0003.CSV	944.989	91.1545
CAM112A_map2	0003.CSV	948.846	91.053
CAM112A_map2	0003.CSV	952.703	90.9365
CAM112A_map2	0003.CSV	956.56	90.7678
CAM112A_map2	0003.CSV	960.417	90.6932
CAM112A_map2	0003.CSV	964.274	90.6005
CAM112A_map2	0003.CSV	968.131	90.5358
CAM112A_map2	0003.CSV	971.988	90.375
CAM112A_map2	0003.CSV	975.845	90.2455
CAM112A_map2	0003.CSV	979.702	90.1219
CAM112A_map2	0003.CSV	983.559	90.0693
CAM112A_map2	0003.CSV	987.417	89.9129
CAM112A_map2	0003.CSV	991.274	89.7709
CAM112A_map2	0003.CSV	995.131	89.635
CAM112A_map2	0003.CSV	998.988	89.5448
CAM112A_map2	0003.CSV	1002.85	89.3944
CAM112A_map2	0003.CSV	1006.7	89.2994
CAM112A_map2	0003.CSV	1010.56	89.1605
CAM112A_map2	0003.CSV	1014.42	89.097
CAM112A_map2	0003.CSV	1018.27	89.008
CAM112A_map2	0003.CSV	1022.13	88.9588
CAM112A_map2	0003.CSV	1025.99	88.8649
CAM112A_map2	0003.CSV	1029.85	88.8198
CAM112A_map2	0003.CSV	1033.7	88.7295
CAM112A_map2	0003.CSV	1037.56	88.6852
CAM112A_map2	0003.CSV	1041.42	88.5543
CAM112A_map2	0003.CSV	1045.27	88.5008
CAM112A_map2	0003.CSV	1049.13	88.4263
CAM112A_map2	0003.CSV	1052.99	88.3399
CAM112A_map2	0003.CSV	1056.84	88.1926
CAM112A_map2	0003.CSV	1060.7	88.0992
CAM112A_map2	0003.CSV	1064.56	87.9251
CAM112A_map2	0003.CSV	1068.42	87.834
CAM112A_map2	0003.CSV	1072.27	87.7099
CAM112A_map2	0003.CSV	1076.13	87.6073
CAM112A_map2	0003.CSV	1079.99	87.4297
CAM112A_map2	0003.CSV	1083.84	87.3572
CAM112A_map2	0003.CSV	1087.7	87.345
CAM112A_map2	0003.CSV	1091.56	87.4207
CAM112A_map2	0003.CSV	1095.41	87.4306
CAM112A_map2	0003.CSV	1099.27	87.439
CAM112A_map2	0003.CSV	1103.13	87.3253
CAM112A_map2	0003.CSV	1106.99	87.2005
CAM112A_map2	0003.CSV	1110.84	87.0349
CAM112A_map2	0003.CSV	1114.7	86.9608
CAM112A_map2	0003.CSV	1118.56	86.8954
CAM112A_map2	0003.CSV	1122.41	86.8816
CAM112A_map2	0003.CSV	1126.27	86.791
CAM112A_map2	0003.CSV	1130.13	86.7599
CAM112A_map2	0003.CSV	1133.99	86.6936
CAM112A_map2	0003.CSV	1137.84	86.6392
CAM112A_map2	0003.CSV	1141.7	86.5129
CAM112A_map2	0003.CSV	1145.56	86.4395
CAM112A_map2	0003.CSV	1149.41	86.3211
CAM112A_map2	0003.CSV	1153.27	86.1996
CAM112A_map2	0003.CSV	1157.13	86.0197
CAM112A_map2	0003.CSV	1160.99	85.9066
CAM112A_map2	0003.CSV	1164.84	85.7824
CAM112A_map2	0003.CSV	1168.7	85.7235
CAM112A_map2	0003.CSV	1172.56	85.647
CAM112A_map2	0003.CSV	1176.41	85.6306
CAM112A_map2	0003.CSV	1180.27	85.5765
CAM112A_map2	0003.CSV	1184.13	85.571
CAM112A_map2	0003.CSV	1187.99	85.5351
CAM112A_map2	0003.CSV	1191.84	85.5493
CAM112A_map2	0003.CSV	1195.7	85.4824
CAM112A_map2	0003.CSV	1199.56	85.4157
CAM112A_map2	0003.CSV	1203.41	85.3002
CAM112A_map2	0003.CSV	1207.27	85.171
CAM112A_map2	0003.CSV	1211.13	84.9616
CAM112A_map2	0003.CSV	1214.98	84.8007
CAM112A_map2	0003.CSV	1218.84	84.5869
CAM112A_map2	0003.CSV	1222.7	84.4017
CAM112A_map2	0003.CSV	1226.56	84.1589
CAM112A_map2	0003.CSV	1230.41	83.9331
CAM112A_map2	0003.CSV	1234.27	83.641
CAM112A_map2	0003.CSV	1238.13	83.3705
CAM112A_map2	0003.CSV	1241.98	83.0825
CAM112A_map2	0003.CSV	1245.84	82.8525
CAM112A_map2	0003.CSV	1249.7	82.5531
CAM112A_map2	0003.CSV	1253.56	82.2996
CAM112A_map2	0003.CSV	1257.41	81.9991
CAM112A_map2	0003.CSV	1261.27	81.7447
CAM112A_map2	0003.CSV	1265.13	81.4759
CAM112A_map2	0003.CSV	1268.98	81.246
CAM112A_map2	0003.CSV	1272.84	80.9092
CAM112A_map2	0003.CSV	1276.7	80.6014
CAM112A_map2	0003.CSV	1280.56	80.2428
CAM112A_map2	0003.CSV	1284.41	79.8978
CAM112A_map2	0003.CSV	1288.27	79.5124
CAM112A_map2	0003.CSV	1292.13	79.1736
CAM112A_map2	0003.CSV	1295.98	78.7589
CAM112A_map2	0003.CSV	1299.84	78.3755
CAM112A_map2	0003.CSV	1303.7	77.9125
CAM112A_map2	0003.CSV	1307.56	77.4462
CAM112A_map2	0003.CSV	1311.41	76.9114
CAM112A_map2	0003.CSV	1315.27	76.4232
CAM112A_map2	0003.CSV	1319.13	75.8568
CAM112A_map2	0003.CSV	1322.98	75.3246
CAM112A_map2	0003.CSV	1326.84	74.7184
CAM112A_map2	0003.CSV	1330.7	74.0896
CAM112A_map2	0003.CSV	1334.56	73.3942
CAM112A_map2	0003.CSV	1338.41	72.5677
CAM112A_map2	0003.CSV	1342.27	71.5511
CAM112A_map2	0003.CSV	1346.13	70.7369
CAM112A_map2	0003.CSV	1349.98	69.7726
CAM112A_map2	0003.CSV	1353.84	68.7679
CAM112A_map2	0003.CSV	1357.7	67.6748
CAM112A_map2	0003.CSV	1361.56	66.4258
CAM112A_map2	0003.CSV	1365.41	64.881
CAM112A_map2	0003.CSV	1369.27	63.6242
CAM112A_map2	0003.CSV	1373.13	62.0897
CAM112A_map2	0003.CSV	1376.98	60.4439
CAM112A_map2	0003.CSV	1380.84	59.0166
CAM112A_map2	0003.CSV	1384.7	57.7843
CAM112A_map2	0003.CSV	1388.56	56.4749
CAM112A_map2	0003.CSV	1392.41	55.8672
CAM112A_map2	0003.CSV	1396.27	55.8657
CAM112A_map2	0003.CSV	1400.13	56.4244
CAM112A_map2	0003.CSV	1403.98	57.0554
CAM112A_map2	0003.CSV	1407.84	58.0908
CAM112A_map2	0003.CSV	1411.7	59.1537
CAM112A_map2	0003.CSV	1415.55	60.1893
CAM112A_map2	0003.CSV	1419.41	61.287
CAM112A_map2	0003.CSV	1423.27	62.302
CAM112A_map2	0003.CSV	1427.12	63.0092
CAM112A_map2	0003.CSV	1430.98	63.8259
CAM112A_map2	0003.CSV	1434.84	64.6022
CAM112A_map2	0003.CSV	1438.7	65.5806
CAM112A_map2	0003.CSV	1442.55	66.3078
CAM112A_map2	0003.CSV	1446.41	67.1679
CAM112A_map2	0003.CSV	1450.27	68.0465
CAM112A_map2	0003.CSV	1454.12	68.8816
CAM112A_map2	0003.CSV	1457.98	70.0876
CAM112A_map2	0003.CSV	1461.84	71.1544
CAM112A_map2	0003.CSV	1465.7	71.9805
CAM112A_map2	0003.CSV	1469.55	72.9392
CAM112A_map2	0003.CSV	1473.41	74.1246
CAM112A_map2	0003.CSV	1477.27	75.4356
CAM112A_map2	0003.CSV	1481.12	76.3046
CAM112A_map2	0003.CSV	1484.98	77.1792
CAM112A_map2	0003.CSV	1488.84	78.2181
CAM112A_map2	0003.CSV	1492.7	79.3043
CAM112A_map2	0003.CSV	1496.55	80.2145
CAM112A_map2	0003.CSV	1500.41	81.2543
CAM112A_map2	0003.CSV	1504.27	81.9279
CAM112A_map2	0003.CSV	1508.12	83.1304
CAM112A_map2	0003.CSV	1511.98	84.0516
CAM112A_map2	0003.CSV	1515.84	84.7794
CAM112A_map2	0003.CSV	1519.7	85.687
CAM112A_map2	0003.CSV	1523.55	86.6955
CAM112A_map2	0003.CSV	1527.41	87.4005
CAM112A_map2	0003.CSV	1531.27	87.9877
CAM112A_map2	0003.CSV	1535.12	88.3396
CAM112A_map2	0003.CSV	1538.98	88.7189
CAM112A_map2	0003.CSV	1542.84	89.7623
CAM112A_map2	0003.CSV	1546.7	90.8013
CAM112A_map2	0003.CSV	1550.55	91.5828
CAM112A_map2	0003.CSV	1554.41	92.2141
CAM112A_map2	0003.CSV	1558.27	92.6826
CAM112A_map2	0003.CSV	1562.12	93.0002
CAM112A_map2	0003.CSV	1565.98	93.1047
CAM112A_map2	0003.CSV	1569.84	93.0121
CAM112A_map2	0003.CSV	1573.69	92.8456
CAM112A_map2	0003.CSV	1577.55	92.8432
CAM112A_map2	0003.CSV	1581.41	93.1657
CAM112A_map2	0003.CSV	1585.27	93.6538
CAM112A_map2	0003.CSV	1589.12	94.0776
CAM112A_map2	0003.CSV	1592.98	94.4175
CAM112A_map2	0003.CSV	1596.84	94.678
CAM112A_map2	0003.CSV	1600.69	94.8541
CAM112A_map2	0003.CSV	1604.55	94.9259
CAM112A_map2	0003.CSV	1608.41	95.0325
CAM112A_map2	0003.CSV	1612.27	95.1307
CAM112A_map2	0003.CSV	1616.12	95.1966
CAM112A_map2	0003.CSV	1619.98	95.2464
CAM112A_map2	0003.CSV	1623.84	95.3683
CAM112A_map2	0003.CSV	1627.69	95.4762
CAM112A_map2	0003.CSV	1631.55	95.637
CAM112A_map2	0003.CSV	1635.41	95.6951
CAM112A_map2	0003.CSV	1639.27	95.6836
CAM112A_map2	0003.CSV	1643.12	95.7762
CAM112A_map2	0003.CSV	1646.98	95.8449
CAM112A_map2	0003.CSV	1650.84	95.8109
CAM112A_map2	0003.CSV	1654.69	95.7595
CAM112A_map2	0003.CSV	1658.55	95.8403
CAM112A_map2	0003.CSV	1662.41	95.95
CAM112A_map2	0003.CSV	1666.27	96.009
CAM112A_map2	0003.CSV	1670.12	95.993
CAM112A_map2	0003.CSV	1673.98	95.9296
CAM112A_map2	0003.CSV	1677.84	95.9925
CAM112A_map2	0003.CSV	1681.69	96.0404
CAM112A_map2	0003.CSV	1685.55	95.9852
CAM112A_map2	0003.CSV	1689.41	95.9826
CAM112A_map2	0003.CSV	1693.27	96.0821
CAM112A_map2	0003.CSV	1697.12	96.0477
CAM112A_map2	0003.CSV	1700.98	95.9463
CAM112A_map2	0003.CSV	1704.84	95.9492
CAM112A_map2	0003.CSV	1708.69	95.971
CAM112A_map2	0003.CSV	1712.55	95.9914
CAM112A_map2	0003.CSV	1716.41	95.8778
CAM112A_map2	0003.CSV	1720.27	95.7395
CAM112A_map2	0003.CSV	1724.12	95.7813
[truncated: 135,218 more rows]

## Sheet: CAM112_map3
Map	Select spectrum number	Wavenumbers	Absorbance
CAM112A_map3	0001.CSV	674.992	0.0343965
CAM112A_map3	0001.CSV	678.849	0.0377175
CAM112A_map3	0001.CSV	682.706	0.0398078
CAM112A_map3	0001.CSV	686.563	0.0436397
CAM112A_map3	0001.CSV	690.42	0.0481685
CAM112A_map3	0001.CSV	694.277	0.0615379
CAM112A_map3	0001.CSV	698.134	0.0805056
CAM112A_map3	0001.CSV	701.991	0.0790619
CAM112A_map3	0001.CSV	705.849	0.0689851
CAM112A_map3	0001.CSV	709.706	0.0889717
CAM112A_map3	0001.CSV	713.563	0.0989798
CAM112A_map3	0001.CSV	717.42	0.0669564
CAM112A_map3	0001.CSV	721.277	0.038789
CAM112A_map3	0001.CSV	725.134	0.033181
CAM112A_map3	0001.CSV	728.991	0.0325141
CAM112A_map3	0001.CSV	732.848	0.0333713
CAM112A_map3	0001.CSV	736.705	0.0341239
CAM112A_map3	0001.CSV	740.562	0.0358048
CAM112A_map3	0001.CSV	744.42	0.0365591
CAM112A_map3	0001.CSV	748.277	0.0377815
CAM112A_map3	0001.CSV	752.134	0.0379632
CAM112A_map3	0001.CSV	755.991	0.0388026
CAM112A_map3	0001.CSV	759.848	0.0389229
CAM112A_map3	0001.CSV	763.705	0.0400498
CAM112A_map3	0001.CSV	767.562	0.040587
CAM112A_map3	0001.CSV	771.419	0.0415399
CAM112A_map3	0001.CSV	775.276	0.0419713
CAM112A_map3	0001.CSV	779.133	0.0430219
CAM112A_map3	0001.CSV	782.99	0.0433744
CAM112A_map3	0001.CSV	786.848	0.0441102
CAM112A_map3	0001.CSV	790.705	0.0445515
CAM112A_map3	0001.CSV	794.562	0.0460212
CAM112A_map3	0001.CSV	798.419	0.047157
CAM112A_map3	0001.CSV	802.276	0.0486262
CAM112A_map3	0001.CSV	806.133	0.0498141
CAM112A_map3	0001.CSV	809.99	0.0522609
CAM112A_map3	0001.CSV	813.847	0.0544358
CAM112A_map3	0001.CSV	817.704	0.0578288
CAM112A_map3	0001.CSV	821.562	0.0619484
CAM112A_map3	0001.CSV	825.419	0.0679205
CAM112A_map3	0001.CSV	829.276	0.075041
CAM112A_map3	0001.CSV	833.133	0.0862139
CAM112A_map3	0001.CSV	836.99	0.105132
CAM112A_map3	0001.CSV	840.847	0.133609
CAM112A_map3	0001.CSV	844.704	0.162019
CAM112A_map3	0001.CSV	848.561	0.19414
CAM112A_map3	0001.CSV	852.418	0.212262
CAM112A_map3	0001.CSV	856.275	0.192808
CAM112A_map3	0001.CSV	860.132	0.157404
CAM112A_map3	0001.CSV	863.99	0.126061
CAM112A_map3	0001.CSV	867.847	0.0984446
CAM112A_map3	0001.CSV	871.704	0.0761715
CAM112A_map3	0001.CSV	875.561	0.0609711
CAM112A_map3	0001.CSV	879.418	0.0521981
CAM112A_map3	0001.CSV	883.275	0.0462544
CAM112A_map3	0001.CSV	887.132	0.042692
CAM112A_map3	0001.CSV	890.989	0.0412357
CAM112A_map3	0001.CSV	894.846	0.0413914
CAM112A_map3	0001.CSV	898.703	0.041852
CAM112A_map3	0001.CSV	902.561	0.0427605
CAM112A_map3	0001.CSV	906.418	0.0437275
CAM112A_map3	0001.CSV	910.275	0.0442373
CAM112A_map3	0001.CSV	914.132	0.0436195
CAM112A_map3	0001.CSV	917.989	0.0438322
CAM112A_map3	0001.CSV	921.846	0.04428
CAM112A_map3	0001.CSV	925.703	0.0449574
CAM112A_map3	0001.CSV	929.56	0.0453196
CAM112A_map3	0001.CSV	933.417	0.045822
CAM112A_map3	0001.CSV	937.274	0.0460714
CAM112A_map3	0001.CSV	941.131	0.0464512
CAM112A_map3	0001.CSV	944.989	0.0465969
CAM112A_map3	0001.CSV	948.846	0.0470383
CAM112A_map3	0001.CSV	952.703	0.0474545
CAM112A_map3	0001.CSV	956.56	0.0480429
CAM112A_map3	0001.CSV	960.417	0.0481702
CAM112A_map3	0001.CSV	964.274	0.0484924
CAM112A_map3	0001.CSV	968.131	0.0488876
CAM112A_map3	0001.CSV	971.988	0.0495371
CAM112A_map3	0001.CSV	975.845	0.0499338
CAM112A_map3	0001.CSV	979.702	0.0505606
CAM112A_map3	0001.CSV	983.559	0.0510087
CAM112A_map3	0001.CSV	987.417	0.0516361
CAM112A_map3	0001.CSV	991.274	0.0521285
CAM112A_map3	0001.CSV	995.131	0.052805
CAM112A_map3	0001.CSV	998.988	0.053331
CAM112A_map3	0001.CSV	1002.85	0.0540518
CAM112A_map3	0001.CSV	1006.7	0.054592
CAM112A_map3	0001.CSV	1010.56	0.0552878
CAM112A_map3	0001.CSV	1014.42	0.0557742
CAM112A_map3	0001.CSV	1018.27	0.0565088
CAM112A_map3	0001.CSV	1022.13	0.0571286
CAM112A_map3	0001.CSV	1025.99	0.0579651
CAM112A_map3	0001.CSV	1029.85	0.0586499
CAM112A_map3	0001.CSV	1033.7	0.0596006
CAM112A_map3	0001.CSV	1037.56	0.0603857
CAM112A_map3	0001.CSV	1041.42	0.0612615
CAM112A_map3	0001.CSV	1045.27	0.0617721
CAM112A_map3	0001.CSV	1049.13	0.0625187
CAM112A_map3	0001.CSV	1052.99	0.0632435
CAM112A_map3	0001.CSV	1056.84	0.0644713
CAM112A_map3	0001.CSV	1060.7	0.0656871
CAM112A_map3	0001.CSV	1064.56	0.0671124
CAM112A_map3	0001.CSV	1068.42	0.0683745
CAM112A_map3	0001.CSV	1072.27	0.0701554
CAM112A_map3	0001.CSV	1076.13	0.0735429
CAM112A_map3	0001.CSV	1079.99	0.0819266
CAM112A_map3	0001.CSV	1083.84	0.0858204
CAM112A_map3	0001.CSV	1087.7	0.0766371
CAM112A_map3	0001.CSV	1091.56	0.068303
CAM112A_map3	0001.CSV	1095.41	0.0666157
CAM112A_map3	0001.CSV	1099.27	0.0666091
CAM112A_map3	0001.CSV	1103.13	0.0671911
CAM112A_map3	0001.CSV	1106.99	0.0679968
CAM112A_map3	0001.CSV	1110.84	0.0691374
CAM112A_map3	0001.CSV	1114.7	0.069721
CAM112A_map3	0001.CSV	1118.56	0.0701245
CAM112A_map3	0001.CSV	1122.41	0.0703483
CAM112A_map3	0001.CSV	1126.27	0.0708317
CAM112A_map3	0001.CSV	1130.13	0.0711168
CAM112A_map3	0001.CSV	1133.99	0.0715842
CAM112A_map3	0001.CSV	1137.84	0.0719614
CAM112A_map3	0001.CSV	1141.7	0.0725606
CAM112A_map3	0001.CSV	1145.56	0.0729896
CAM112A_map3	0001.CSV	1149.41	0.0736771
CAM112A_map3	0001.CSV	1153.27	0.0743086
CAM112A_map3	0001.CSV	1157.13	0.0751843
CAM112A_map3	0001.CSV	1160.99	0.0759321
CAM112A_map3	0001.CSV	1164.84	0.0767739
CAM112A_map3	0001.CSV	1168.7	0.0772212
CAM112A_map3	0001.CSV	1172.56	0.0776073
CAM112A_map3	0001.CSV	1176.41	0.0776342
CAM112A_map3	0001.CSV	1180.27	0.0776132
CAM112A_map3	0001.CSV	1184.13	0.0773343
CAM112A_map3	0001.CSV	1187.99	0.0772479
CAM112A_map3	0001.CSV	1191.84	0.0769951
CAM112A_map3	0001.CSV	1195.7	0.077014
CAM112A_map3	0001.CSV	1199.56	0.0770626
CAM112A_map3	0001.CSV	1203.41	0.0774281
CAM112A_map3	0001.CSV	1207.27	0.0777374
CAM112A_map3	0001.CSV	1211.13	0.0783507
CAM112A_map3	0001.CSV	1214.98	0.0788932
CAM112A_map3	0001.CSV	1218.84	0.0797275
CAM112A_map3	0001.CSV	1222.7	0.0805207
CAM112A_map3	0001.CSV	1226.56	0.0817104
CAM112A_map3	0001.CSV	1230.41	0.0827934
CAM112A_map3	0001.CSV	1234.27	0.0841035
CAM112A_map3	0001.CSV	1238.13	0.0852994
CAM112A_map3	0001.CSV	1241.98	0.0867362
CAM112A_map3	0001.CSV	1245.84	0.0879374
CAM112A_map3	0001.CSV	1249.7	0.0892561
CAM112A_map3	0001.CSV	1253.56	0.0901679
CAM112A_map3	0001.CSV	1257.41	0.0910492
CAM112A_map3	0001.CSV	1261.27	0.0918114
CAM112A_map3	0001.CSV	1265.13	0.0931113
CAM112A_map3	0001.CSV	1268.98	0.0945336
CAM112A_map3	0001.CSV	1272.84	0.0962656
CAM112A_map3	0001.CSV	1276.7	0.0976796
CAM112A_map3	0001.CSV	1280.56	0.0991332
CAM112A_map3	0001.CSV	1284.41	0.100245
CAM112A_map3	0001.CSV	1288.27	0.101438
CAM112A_map3	0001.CSV	1292.13	0.102318
CAM112A_map3	0001.CSV	1295.98	0.103483
CAM112A_map3	0001.CSV	1299.84	0.104592
CAM112A_map3	0001.CSV	1303.7	0.10607
CAM112A_map3	0001.CSV	1307.56	0.107474
CAM112A_map3	0001.CSV	1311.41	0.109355
CAM112A_map3	0001.CSV	1315.27	0.111306
CAM112A_map3	0001.CSV	1319.13	0.113541
CAM112A_map3	0001.CSV	1322.98	0.115233
CAM112A_map3	0001.CSV	1326.84	0.117282
CAM112A_map3	0001.CSV	1330.7	0.119445
CAM112A_map3	0001.CSV	1334.56	0.122046
CAM112A_map3	0001.CSV	1338.41	0.1252
CAM112A_map3	0001.CSV	1342.27	0.129397
CAM112A_map3	0001.CSV	1346.13	0.132893
CAM112A_map3	0001.CSV	1349.98	0.13706
CAM112A_map3	0001.CSV	1353.84	0.141208
CAM112A_map3	0001.CSV	1357.7	0.145664
CAM112A_map3	0001.CSV	1361.56	0.150591
CAM112A_map3	0001.CSV	1365.41	0.156719
CAM112A_map3	0001.CSV	1369.27	0.161705
CAM112A_map3	0001.CSV	1373.13	0.168042
CAM112A_map3	0001.CSV	1376.98	0.174845
CAM112A_map3	0001.CSV	1380.84	0.180741
CAM112A_map3	0001.CSV	1384.7	0.185937
CAM112A_map3	0001.CSV	1388.56	0.192661
CAM112A_map3	0001.CSV	1392.41	0.197954
CAM112A_map3	0001.CSV	1396.27	0.204577
CAM112A_map3	0001.CSV	1400.13	0.210679
CAM112A_map3	0001.CSV	1403.98	0.216338
CAM112A_map3	0001.CSV	1407.84	0.221593
CAM112A_map3	0001.CSV	1411.7	0.226575
CAM112A_map3	0001.CSV	1415.55	0.229799
CAM112A_map3	0001.CSV	1419.41	0.233913
CAM112A_map3	0001.CSV	1423.27	0.236671
CAM112A_map3	0001.CSV	1427.12	0.239983
CAM112A_map3	0001.CSV	1430.98	0.24318
CAM112A_map3	0001.CSV	1434.84	0.247535
CAM112A_map3	0001.CSV	1438.7	0.251049
CAM112A_map3	0001.CSV	1442.55	0.253342
CAM112A_map3	0001.CSV	1446.41	0.252259
CAM112A_map3	0001.CSV	1450.27	0.249218
CAM112A_map3	0001.CSV	1454.12	0.244203
CAM112A_map3	0001.CSV	1457.98	0.237442
CAM112A_map3	0001.CSV	1461.84	0.231368
CAM112A_map3	0001.CSV	1465.7	0.22677
CAM112A_map3	0001.CSV	1469.55	0.219629
CAM112A_map3	0001.CSV	1473.41	0.207986
CAM112A_map3	0001.CSV	1477.27	0.194318
CAM112A_map3	0001.CSV	1481.12	0.186144
CAM112A_map3	0001.CSV	1484.98	0.178599
CAM112A_map3	0001.CSV	1488.84	0.170701
CAM112A_map3	0001.CSV	1492.7	0.162704
CAM112A_map3	0001.CSV	1496.55	0.156473
CAM112A_map3	0001.CSV	1500.41	0.149006
CAM112A_map3	0001.CSV	1504.27	0.143997
CAM112A_map3	0001.CSV	1508.12	0.133878
CAM112A_map3	0001.CSV	1511.98	0.126489
CAM112A_map3	0001.CSV	1515.84	0.120697
CAM112A_map3	0001.CSV	1519.7	0.113398
CAM112A_map3	0001.CSV	1523.55	0.104843
CAM112A_map3	0001.CSV	1527.41	0.0992962
CAM112A_map3	0001.CSV	1531.27	0.094986
CAM112A_map3	0001.CSV	1535.12	0.0924184
CAM112A_map3	0001.CSV	1538.98	0.0896572
CAM112A_map3	0001.CSV	1542.84	0.0841623
CAM112A_map3	0001.CSV	1546.7	0.0784748
CAM112A_map3	0001.CSV	1550.55	0.0741714
CAM112A_map3	0001.CSV	1554.41	0.0698371
CAM112A_map3	0001.CSV	1558.27	0.0652555
CAM112A_map3	0001.CSV	1562.12	0.0608394
CAM112A_map3	0001.CSV	1565.98	0.0589355
CAM112A_map3	0001.CSV	1569.84	0.056806
CAM112A_map3	0001.CSV	1573.69	0.0545923
CAM112A_map3	0001.CSV	1577.55	0.0503386
CAM112A_map3	0001.CSV	1581.41	0.0455386
CAM112A_map3	0001.CSV	1585.27	0.0409251
CAM112A_map3	0001.CSV	1589.12	0.0373227
CAM112A_map3	0001.CSV	1592.98	0.0348647
CAM112A_map3	0001.CSV	1596.84	0.0334473
CAM112A_map3	0001.CSV	1600.69	0.0323662
CAM112A_map3	0001.CSV	1604.55	0.0318253
CAM112A_map3	0001.CSV	1608.41	0.0313962
CAM112A_map3	0001.CSV	1612.27	0.0310985
CAM112A_map3	0001.CSV	1616.12	0.0305282
CAM112A_map3	0001.CSV	1619.98	0.0302066
CAM112A_map3	0001.CSV	1623.84	0.0295887
CAM112A_map3	0001.CSV	1627.69	0.0290083
CAM112A_map3	0001.CSV	1631.55	0.0280553
CAM112A_map3	0001.CSV	1635.41	0.0276782
CAM112A_map3	0001.CSV	1639.27	0.0272378
CAM112A_map3	0001.CSV	1643.12	0.0265482
CAM112A_map3	0001.CSV	1646.98	0.0260469
CAM112A_map3	0001.CSV	1650.84	0.0261202
CAM112A_map3	0001.CSV	1654.69	0.0262317
CAM112A_map3	0001.CSV	1658.55	0.0258857
CAM112A_map3	0001.CSV	1662.41	0.025366
CAM112A_map3	0001.CSV	1666.27	0.0251317
CAM112A_map3	0001.CSV	1670.12	0.0249061
CAM112A_map3	0001.CSV	1673.98	0.0250148
CAM112A_map3	0001.CSV	1677.84	0.0243958
CAM112A_map3	0001.CSV	1681.69	0.0240411
CAM112A_map3	0001.CSV	1685.55	0.0241736
CAM112A_map3	0001.CSV	1689.41	0.0241051
CAM112A_map3	0001.CSV	1693.27	0.0234244
CAM112A_map3	0001.CSV	1697.12	0.0234778
CAM112A_map3	0001.CSV	1700.98	0.0238868
CAM112A_map3	0001.CSV	1704.84	0.0242484
CAM112A_map3	0001.CSV	1708.69	0.0241906
CAM112A_map3	0001.CSV	1712.55	0.0241097
CAM112A_map3	0001.CSV	1716.41	0.0248746
CAM112A_map3	0001.CSV	1720.27	0.0259399
CAM112A_map3	0001.CSV	1724.12	0.0257336
CAM112A_map3	0001.CSV	1727.98	0.0256626
CAM112A_map3	0001.CSV	1731.84	0.0257795
CAM112A_map3	0001.CSV	1735.69	0.0265028
CAM112A_map3	0001.CSV	1739.55	0.0261559
CAM112A_map3	0001.CSV	1743.41	0.0253773
CAM112A_map3	0001.CSV	1747.27	0.0241955
CAM112A_map3	0001.CSV	1751.12	0.0231352
CAM112A_map3	0001.CSV	1754.98	0.0220089
CAM112A_map3	0001.CSV	1758.84	0.0214439
CAM112A_map3	0001.CSV	1762.69	0.0211061
CAM112A_map3	0001.CSV	1766.55	0.0208627
CAM112A_map3	0001.CSV	1770.41	0.0211721
CAM112A_map3	0001.CSV	1774.26	0.0230813
CAM112A_map3	0001.CSV	1778.12	0.0248866
CAM112A_map3	0001.CSV	1781.98	0.0271602
CAM112A_map3	0001.CSV	1785.84	0.0283441
CAM112A_map3	0001.CSV	1789.69	0.0280275
CAM112A_map3	0001.CSV	1793.55	0.0261851
CAM112A_map3	0001.CSV	1797.41	0.024297
CAM112A_map3	0001.CSV	1801.26	0.0224309
CAM112A_map3	0001.CSV	1805.12	0.0210165
CAM112A_map3	0001.CSV	1808.98	0.0201453
CAM112A_map3	0001.CSV	1812.84	0.0199889
CAM112A_map3	0001.CSV	1816.69	0.0196337
CAM112A_map3	0001.CSV	1820.55	0.0194606
CAM112A_map3	0001.CSV	1824.41	0.0192774
CAM112A_map3	0001.CSV	1828.26	0.0195556
CAM112A_map3	0001.CSV	1832.12	0.0196486
CAM112A_map3	0001.CSV	1835.98	0.0195869
CAM112A_map3	0001.CSV	1839.84	0.0193129
CAM112A_map3	0001.CSV	1843.69	0.0194822
CAM112A_map3	0001.CSV	1847.55	0.0196806
CAM112A_map3	0001.CSV	1851.41	0.0195979
CAM112A_map3	0001.CSV	1855.26	0.0194809
CAM112A_map3	0001.CSV	1859.12	0.0195767
CAM112A_map3	0001.CSV	1862.98	0.0194069
CAM112A_map3	0001.CSV	1866.84	0.0195968
CAM112A_map3	0001.CSV	1870.69	0.0199682
CAM112A_map3	0001.CSV	1874.55	0.0198757
CAM112A_map3	0001.CSV	1878.41	0.0196721
CAM112A_map3	0001.CSV	1882.26	0.0197233
CAM112A_map3	0001.CSV	1886.12	0.0196695
CAM112A_map3	0001.CSV	1889.98	0.0198602
CAM112A_map3	0001.CSV	1893.83	0.0199091
CAM112A_map3	0001.CSV	1897.69	0.0199845
CAM112A_map3	0001.CSV	1901.55	0.0198754
CAM112A_map3	0001.CSV	1905.41	0.0199243
CAM112A_map3	0001.CSV	1909.26	0.0199935
CAM112A_map3	0001.CSV	1913.12	0.0200276
CAM112A_map3	0001.CSV	1916.98	0.0199103
CAM112A_map3	0001.CSV	1920.83	0.0201488
CAM112A_map3	0001.CSV	1924.69	0.020232
CAM112A_map3	0001.CSV	1928.55	0.0202096
CAM112A_map3	0001.CSV	1932.4	0.020129
CAM112A_map3	0001.CSV	1936.26	0.0202277
CAM112A_map3	0001.CSV	1940.12	0.0202007
CAM112A_map3	0001.CSV	1943.98	0.0204429
CAM112A_map3	0001.CSV	1947.83	0.0204401
CAM112A_map3	0001.CSV	1951.69	0.0204614
CAM112A_map3	0001.CSV	1955.55	0.0204787
CAM112A_map3	0001.CSV	1959.4	0.0205819
CAM112A_map3	0001.CSV	1963.26	0.0205244
CAM112A_map3	0001.CSV	1967.12	0.0206981
CAM112A_map3	0001.CSV	1970.98	0.0207108
CAM112A_map3	0001.CSV	1974.83	0.0207098
CAM112A_map3	0001.CSV	1978.69	0.0206931
CAM112A_map3	0001.CSV	1982.55	0.0207777
CAM112A_map3	0001.CSV	1986.4	0.020729
CAM112A_map3	0001.CSV	1990.26	0.0208913
CAM112A_map3	0001.CSV	1994.12	0.0209703
CAM112A_map3	0001.CSV	1997.98	0.0209887
CAM112A_map3	0001.CSV	2001.83	0.0209065
CAM112A_map3	0001.CSV	2005.69	0.0210018
CAM112A_map3	0001.CSV	2009.55	0.0210551
CAM112A_map3	0001.CSV	2013.4	0.021167
CAM112A_map3	0001.CSV	2017.26	0.0212236
CAM112A_map3	0001.CSV	2021.12	0.0213557
CAM112A_map3	0001.CSV	2024.97	0.0213395
CAM112A_map3	0001.CSV	2028.83	0.0214135
CAM112A_map3	0001.CSV	2032.69	0.0213629
CAM112A_map3	0001.CSV	2036.55	0.0214427
CAM112A_map3	0001.CSV	2040.4	0.0214677
CAM112A_map3	0001.CSV	2044.26	0.0216158
CAM112A_map3	0001.CSV	2048.12	0.0216343
CAM112A_map3	0001.CSV	2051.97	0.0217154
CAM112A_map3	0001.CSV	2055.83	0.0217172
CAM112A_map3	0001.CSV	2059.69	0.0218422
CAM112A_map3	0001.CSV	2063.55	0.0218863
CAM112A_map3	0001.CSV	2067.4	0.0220308
CAM112A_map3	0001.CSV	2071.26	0.0220496
CAM112A_map3	0001.CSV	2075.12	0.0221684
CAM112A_map3	0001.CSV	2078.97	0.0221924
CAM112A_map3	0001.CSV	2082.83	0.0222762
CAM112A_map3	0001.CSV	2086.69	0.0222857
CAM112A_map3	0001.CSV	2090.55	0.0224415
CAM112A_map3	0001.CSV	2094.4	0.0225002
CAM112A_map3	0001.CSV	2098.26	0.0225827
CAM112A_map3	0001.CSV	2102.12	0.0225726
CAM112A_map3	0001.CSV	2105.97	0.0226825
CAM112A_map3	0001.CSV	2109.83	0.0227476
CAM112A_map3	0001.CSV	2113.69	0.0228805
CAM112A_map3	0001.CSV	2117.55	0.0229177
CAM112A_map3	0001.CSV	2121.4	0.023057
CAM112A_map3	0001.CSV	2125.26	0.0231106
CAM112A_map3	0001.CSV	2129.12	0.0231802
CAM112A_map3	0001.CSV	2132.97	0.0231763
CAM112A_map3	0001.CSV	2136.83	0.0232829
CAM112A_map3	0001.CSV	2140.69	0.0232897
CAM112A_map3	0001.CSV	2144.55	0.0233929
CAM112A_map3	0001.CSV	2148.4	0.0234195
CAM112A_map3	0001.CSV	2152.26	0.0235193
CAM112A_map3	0001.CSV	2156.12	0.0235361
CAM112A_map3	0001.CSV	2159.97	0.0236139
CAM112A_map3	0001.CSV	2163.83	0.0236078
CAM112A_map3	0001.CSV	2167.69	0.0236536
CAM112A_map3	0001.CSV	2171.55	0.0236562
CAM112A_map3	0001.CSV	2175.4	0.0237407
CAM112A_map3	0001.CSV	2179.26	0.0237674
CAM112A_map3	0001.CSV	2183.12	0.0238738
CAM112A_map3	0001.CSV	2186.97	0.0238927
CAM112A_map3	0001.CSV	2190.83	0.0239621
CAM112A_map3	0001.CSV	2194.69	0.0239392
CAM112A_map3	0001.CSV	2198.55	0.0239671
CAM112A_map3	0001.CSV	2202.4	0.023928
CAM112A_map3	0001.CSV	2206.26	0.0239522
CAM112A_map3	0001.CSV	2210.12	0.0239875
CAM112A_map3	0001.CSV	2213.97	0.0240721
CAM112A_map3	0001.CSV	2217.83	0.0240446
CAM112A_map3	0001.CSV	2221.69	0.0240874
CAM112A_map3	0001.CSV	2225.54	0.0240735
CAM112A_map3	0001.CSV	2229.4	0.0241366
CAM112A_map3	0001.CSV	2233.26	0.0241257
CAM112A_map3	0001.CSV	2237.12	0.024179
CAM112A_map3	0001.CSV	2240.97	0.0241799
CAM112A_map3	0001.CSV	2244.83	0.0242107
CAM112A_map3	0001.CSV	2248.69	0.0241845
CAM112A_map3	0001.CSV	2252.54	0.0242393
CAM112A_map3	0001.CSV	2256.4	0.0242489
CAM112A_map3	0001.CSV	2260.26	0.0242581
CAM112A_map3	0001.CSV	2264.11	0.0242448
CAM112A_map3	0001.CSV	2267.97	0.0243266
CAM112A_map3	0001.CSV	2271.83	0.0243281
CAM112A_map3	0001.CSV	2275.69	0.0243838
CAM112A_map3	0001.CSV	2279.54	0.0244192
CAM112A_map3	0001.CSV	2283.4	0.0244137
CAM112A_map3	0001.CSV	2287.26	0.0243036
CAM112A_map3	0001.CSV	2291.11	0.0243023
CAM112A_map3	0001.CSV	2294.97	0.0242119
CAM112A_map3	0001.CSV	2298.83	0.0241432
CAM112A_map3	0001.CSV	2302.69	0.0239491
CAM112A_map3	0001.CSV	2306.54	0.0236585
CAM112A_map3	0001.CSV	2310.4	0.0232702
CAM112A_map3	0001.CSV	2314.26	0.0228863
CAM112A_map3	0001.CSV	2318.11	0.0217327
CAM112A_map3	0001.CSV	2321.97	0.0201305
CAM112A_map3	0001.CSV	2325.83	0.0178755
CAM112A_map3	0001.CSV	2329.69	0.0153986
CAM112A_map3	0001.CSV	2333.54	0.0129317
CAM112A_map3	0001.CSV	2337.4	0.0115402
CAM112A_map3	0001.CSV	2341.26	0.0115618
CAM112A_map3	0001.CSV	2345.11	0.0174539
CAM112A_map3	0001.CSV	2348.97	0.0191215
CAM112A_map3	0001.CSV	2352.83	0.014979
CAM112A_map3	0001.CSV	2356.69	-0.0023349
CAM112A_map3	0001.CSV	2360.54	-0.0220553
CAM112A_map3	0001.CSV	2364.4	-0.0099638
CAM112A_map3	0001.CSV	2368.26	0.0109639
CAM112A_map3	0001.CSV	2372.11	0.0208152
CAM112A_map3	0001.CSV	2375.97	0.0242905
CAM112A_map3	0001.CSV	2379.83	0.0253237
CAM112A_map3	0001.CSV	2383.69	0.0254904
CAM112A_map3	0001.CSV	2387.54	0.0252846
CAM112A_map3	0001.CSV	2391.4	0.0251386
CAM112A_map3	0001.CSV	2395.26	0.0251211
CAM112A_map3	0001.CSV	2399.11	0.0251268
CAM112A_map3	0001.CSV	2402.97	0.0251303
CAM112A_map3	0001.CSV	2406.83	0.025171
CAM112A_map3	0001.CSV	2410.68	0.0252185
CAM112A_map3	0001.CSV	2414.54	0.025256
CAM112A_map3	0001.CSV	2418.4	0.0253074
CAM112A_map3	0001.CSV	2422.26	0.025384
CAM112A_map3	0001.CSV	2426.11	0.0253918
CAM112A_map3	0001.CSV	2429.97	0.0254382
CAM112A_map3	0001.CSV	2433.83	0.0255306
CAM112A_map3	0001.CSV	2437.68	0.0256071
CAM112A_map3	0001.CSV	2441.54	0.0256241
CAM112A_map3	0001.CSV	2445.4	0.0256135
CAM112A_map3	0001.CSV	2449.26	0.0256759
CAM112A_map3	0001.CSV	2453.11	0.0257981
CAM112A_map3	0001.CSV	2456.97	0.0259354
CAM112A_map3	0001.CSV	2460.83	0.0260721
CAM112A_map3	0001.CSV	2464.68	0.0261836
CAM112A_map3	0001.CSV	2468.54	0.0263642
CAM112A_map3	0001.CSV	2472.4	0.0266683
CAM112A_map3	0001.CSV	2476.26	0.0270004
CAM112A_map3	0001.CSV	2480.11	0.0273348
CAM112A_map3	0001.CSV	2483.97	0.0277049
CAM112A_map3	0001.CSV	2487.83	0.0281
CAM112A_map3	0001.CSV	2491.68	0.0284069
CAM112A_map3	0001.CSV	2495.54	0.0286703
CAM112A_map3	0001.CSV	2499.4	0.028828
CAM112A_map3	0001.CSV	2503.26	0.0289086
CAM112A_map3	0001.CSV	2507.11	0.0288929
CAM112A_map3	0001.CSV	2510.97	0.0288883
CAM112A_map3	0001.CSV	2514.83	0.0290197
CAM112A_map3	0001.CSV	2518.68	0.0293004
CAM112A_map3	0001.CSV	2522.54	0.0294452
CAM112A_map3	0001.CSV	2526.4	0.0293434
CAM112A_map3	0001.CSV	2530.26	0.029073
CAM112A_map3	0001.CSV	2534.11	0.0287357
CAM112A_map3	0001.CSV	2537.97	0.0283601
CAM112A_map3	0001.CSV	2541.83	0.0281002
CAM112A_map3	0001.CSV	2545.68	0.0279649
CAM112A_map3	0001.CSV	2549.54	0.0279079
CAM112A_map3	0001.CSV	2553.4	0.0277707
CAM112A_map3	0001.CSV	2557.26	0.0275741
CAM112A_map3	0001.CSV	2561.11	0.0273423
CAM112A_map3	0001.CSV	2564.97	0.0271226
CAM112A_map3	0001.CSV	2568.83	0.0269307
CAM112A_map3	0001.CSV	2572.68	0.0268403
CAM112A_map3	0001.CSV	2576.54	0.0267537
CAM112A_map3	0001.CSV	2580.4	0.0266775
CAM112A_map3	0001.CSV	2584.25	0.0265631
CAM112A_map3	0001.CSV	2588.11	0.0264821
CAM112A_map3	0001.CSV	2591.97	0.0264425
CAM112A_map3	0001.CSV	2595.83	0.0264539
CAM112A_map3	0001.CSV	2599.68	0.026438
CAM112A_map3	0001.CSV	2603.54	0.0264511
CAM112A_map3	0001.CSV	2607.4	0.0264451
CAM112A_map3	0001.CSV	2611.25	0.0265196
CAM112A_map3	0001.CSV	2615.11	0.0265871
CAM112A_map3	0001.CSV	2618.97	0.0266141
CAM112A_map3	0001.CSV	2622.82	0.0266437
CAM112A_map3	0001.CSV	2626.68	0.0267487
CAM112A_map3	0001.CSV	2630.54	0.0267284
CAM112A_map3	0001.CSV	2634.4	0.0268061
CAM112A_map3	0001.CSV	2638.25	0.026801
CAM112A_map3	0001.CSV	2642.11	0.0266124
CAM112A_map3	0001.CSV	2645.97	0.026378
CAM112A_map3	0001.CSV	2649.82	0.0263254
CAM112A_map3	0001.CSV	2653.68	0.026265
CAM112A_map3	0001.CSV	2657.54	0.0262547
CAM112A_map3	0001.CSV	2661.4	0.0261769
CAM112A_map3	0001.CSV	2665.25	0.0261471
CAM112A_map3	0001.CSV	2669.11	0.026153
CAM112A_map3	0001.CSV	2672.97	0.0263931
CAM112A_map3	0001.CSV	2676.82	0.0266706
CAM112A_map3	0001.CSV	2680.68	0.0266559
CAM112A_map3	0001.CSV	2684.54	0.0262906
CAM112A_map3	0001.CSV	2688.4	0.0261665
CAM112A_map3	0001.CSV	2692.25	0.0262048
CAM112A_map3	0001.CSV	2696.11	0.0263568
CAM112A_map3	0001.CSV	2699.97	0.0263768
CAM112A_map3	0001.CSV	2703.82	0.0263866
CAM112A_map3	0001.CSV	2707.68	0.0264418
CAM112A_map3	0001.CSV	2711.54	0.0265493
CAM112A_map3	0001.CSV	2715.4	0.0265272
CAM112A_map3	0001.CSV	2719.25	0.0267475
CAM112A_map3	0001.CSV	2723.11	0.027094
CAM112A_map3	0001.CSV	2726.97	0.0271789
CAM112A_map3	0001.CSV	2730.82	0.0268288
CAM112A_map3	0001.CSV	2734.68	0.0268559
CAM112A_map3	0001.CSV	2738.54	0.026905
CAM112A_map3	0001.CSV	2742.4	0.0269876
CAM112A_map3	0001.CSV	2746.25	0.0273431
CAM112A_map3	0001.CSV	2750.11	0.0274645
CAM112A_map3	0001.CSV	2753.97	0.027106
CAM112A_map3	0001.CSV	2757.82	0.0270342
CAM112A_map3	0001.CSV	2761.68	0.0269785
CAM112A_map3	0001.CSV	2765.54	0.0270107
CAM112A_map3	0001.CSV	2769.39	0.027167
CAM112A_map3	0001.CSV	2773.25	0.0276365
CAM112A_map3	0001.CSV	2777.11	0.0275486
CAM112A_map3	0001.CSV	2780.97	0.0272987
CAM112A_map3	0001.CSV	2784.82	0.0275174
CAM112A_map3	0001.CSV	2788.68	0.0280583
CAM112A_map3	0001.CSV	2792.54	0.0281493
CAM112A_map3	0001.CSV	2796.39	0.0282307
CAM112A_map3	0001.CSV	2800.25	0.0280736
CAM112A_map3	0001.CSV	2804.11	0.0279446
CAM112A_map3	0001.CSV	2807.97	0.0282135
CAM112A_map3	0001.CSV	2811.82	0.0283437
CAM112A_map3	0001.CSV	2815.68	0.0282248
CAM112A_map3	0001.CSV	2819.54	0.0284954
CAM112A_map3	0001.CSV	2823.39	0.0287251
CAM112A_map3	0001.CSV	2827.25	0.0289573
CAM112A_map3	0001.CSV	2831.11	0.0295728
CAM112A_map3	0001.CSV	2834.97	0.0307467
CAM112A_map3	0001.CSV	2838.82	0.0318756
CAM112A_map3	0001.CSV	2842.68	0.0335273
CAM112A_map3	0001.CSV	2846.54	0.0363964
CAM112A_map3	0001.CSV	2850.39	0.0382096
CAM112A_map3	0001.CSV	2854.25	0.0375005
CAM112A_map3	0001.CSV	2858.11	0.0361281
CAM112A_map3	0001.CSV	2861.97	0.0345171
CAM112A_map3	0001.CSV	2865.82	0.033517
CAM112A_map3	0001.CSV	2869.68	0.0334108
CAM112A_map3	0001.CSV	2873.54	0.0334255
CAM112A_map3	0001.CSV	2877.39	0.032564
CAM112A_map3	0001.CSV	2881.25	0.0320776
CAM112A_map3	0001.CSV	2885.11	0.032184
CAM112A_map3	0001.CSV	2888.97	0.0328297
CAM112A_map3	0001.CSV	2892.82	0.0338794
CAM112A_map3	0001.CSV	2896.68	0.0348771
CAM112A_map3	0001.CSV	2900.54	0.0355125
CAM112A_map3	0001.CSV	2904.39	0.0367613
CAM112A_map3	0001.CSV	2908.25	0.0389061
CAM112A_map3	0001.CSV	2912.11	0.042437
CAM112A_map3	0001.CSV	2915.97	0.0455473
CAM112A_map3	0001.CSV	2919.82	0.0461911
CAM112A_map3	0001.CSV	2923.68	0.0448135
CAM112A_map3	0001.CSV	2927.54	0.0433423
CAM112A_map3	0001.CSV	2931.39	0.0410774
CAM112A_map3	0001.CSV	2935.25	0.0385353
CAM112A_map3	0001.CSV	2939.11	0.0368659
CAM112A_map3	0001.CSV	2942.96	0.0363089
CAM112A_map3	0001.CSV	2946.82	0.03568
CAM112A_map3	0001.CSV	2950.68	0.0350828
CAM112A_map3	0001.CSV	2954.54	0.0343678
CAM112A_map3	0001.CSV	2958.39	0.0335607
CAM112A_map3	0001.CSV	2962.25	0.0327106
CAM112A_map3	0001.CSV	2966.11	0.0316599
CAM112A_map3	0001.CSV	2969.96	0.031009
CAM112A_map3	0001.CSV	2973.82	0.0309925
CAM112A_map3	0001.CSV	2977.68	0.0308209
CAM112A_map3	0001.CSV	2981.53	0.0301754
CAM112A_map3	0001.CSV	2985.39	0.0290934
CAM112A_map3	0001.CSV	2989.25	0.0289903
CAM112A_map3	0001.CSV	2993.11	0.0292138
CAM112A_map3	0001.CSV	2996.96	0.0289348
CAM112A_map3	0001.CSV	3000.82	0.0283898
CAM112A_map3	0001.CSV	3004.68	0.0281602
CAM112A_map3	0001.CSV	3008.53	0.0284071
CAM112A_map3	0001.CSV	3012.39	0.0288897
CAM112A_map3	0001.CSV	3016.25	0.028822
CAM112A_map3	0001.CSV	3020.11	0.0284906
CAM112A_map3	0001.CSV	3023.96	0.0281192
CAM112A_map3	0001.CSV	3027.82	0.0281109
CAM112A_map3	0001.CSV	3031.68	0.0284218
CAM112A_map3	0001.CSV	3035.53	0.0285742
CAM112A_map3	0001.CSV	3039.39	0.0285512
CAM112A_map3	0001.CSV	3043.25	0.0287602
CAM112A_map3	0001.CSV	3047.11	0.0285439
CAM112A_map3	0001.CSV	3050.96	0.0284519
CAM112A_map3	0001.CSV	3054.82	0.0283079
CAM112A_map3	0001.CSV	3058.68	0.0281393
CAM112A_map3	0001.CSV	3062.53	0.0282187
CAM112A_map3	0001.CSV	3066.39	0.0286076
CAM112A_map3	0001.CSV	3070.25	0.028452
CAM112A_map3	0001.CSV	3074.11	0.0284809
CAM112A_map3	0001.CSV	3077.96	0.0288353
CAM112A_map3	0001.CSV	3081.82	0.0290533
CAM112A_map3	0001.CSV	3085.68	0.0289278
CAM112A_map3	0001.CSV	3089.53	0.028713
CAM112A_map3	0001.CSV	3093.39	0.0282244
CAM112A_map3	0001.CSV	3097.25	0.0282739
CAM112A_map3	0001.CSV	3101.11	0.0284075
CAM112A_map3	0001.CSV	3104.96	0.028506
CAM112A_map3	0001.CSV	3108.82	0.0287081
CAM112A_map3	0001.CSV	3112.68	0.0288823
CAM112A_map3	0001.CSV	3116.53	0.028997
CAM112A_map3	0001.CSV	3120.39	0.028949
CAM112A_map3	0001.CSV	3124.25	0.0285319
CAM112A_map3	0001.CSV	3128.11	0.028467
CAM112A_map3	0001.CSV	3131.96	0.0283778
CAM112A_map3	0001.CSV	3135.82	0.0286442
CAM112A_map3	0001.CSV	3139.68	0.0288082
CAM112A_map3	0001.CSV	3143.53	0.0285031
CAM112A_map3	0001.CSV	3147.39	0.0284856
CAM112A_map3	0001.CSV	3151.25	0.0289736
CAM112A_map3	0001.CSV	3155.1	0.0288345
CAM112A_map3	0001.CSV	3158.96	0.0283086
CAM112A_map3	0001.CSV	3162.82	0.0280755
CAM112A_map3	0001.CSV	3166.68	0.0280833
CAM112A_map3	0001.CSV	3170.53	0.0280004
CAM112A_map3	0001.CSV	3174.39	0.0280671
CAM112A_map3	0001.CSV	3178.25	0.028199
CAM112A_map3	0001.CSV	3182.1	0.0283753
CAM112A_map3	0001.CSV	3185.96	0.0284466
CAM112A_map3	0001.CSV	3189.82	0.0285575
CAM112A_map3	0001.CSV	3193.68	0.0284176
CAM112A_map3	0001.CSV	3197.53	0.0284112
CAM112A_map3	0001.CSV	3201.39	0.028549
CAM112A_map3	0001.CSV	3205.25	0.0286564
CAM112A_map3	0001.CSV	3209.1	0.0286142
CAM112A_map3	0001.CSV	3212.96	0.0288429
CAM112A_map3	0001.CSV	3216.82	0.0289685
CAM112A_map3	0001.CSV	3220.68	0.0289092
CAM112A_map3	0001.CSV	3224.53	0.028845
CAM112A_map3	0001.CSV	3228.39	0.0292157
CAM112A_map3	0001.CSV	3232.25	0.0297093
CAM112A_map3	0001.CSV	3236.1	0.0295812
CAM112A_map3	0001.CSV	3239.96	0.0291713
CAM112A_map3	0001.CSV	3243.82	0.029405
CAM112A_map3	0001.CSV	3247.68	0.029503
CAM112A_map3	0001.CSV	3251.53	0.0293386
CAM112A_map3	0001.CSV	3255.39	0.0294413
CAM112A_map3	0001.CSV	3259.25	0.0292416
CAM112A_map3	0001.CSV	3263.1	0.0290654
CAM112A_map3	0001.CSV	3266.96	0.029511
CAM112A_map3	0001.CSV	3270.82	0.0299864
CAM112A_map3	0001.CSV	3274.68	0.0299549
CAM112A_map3	0001.CSV	3278.53	0.0295413
CAM112A_map3	0001.CSV	3282.39	0.0293025
CAM112A_map3	0001.CSV	3286.25	0.0293279
CAM112A_map3	0001.CSV	3290.1	0.0298448
CAM112A_map3	0001.CSV	3293.96	0.0301879
CAM112A_map3	0001.CSV	3297.82	0.0300124
CAM112A_map3	0001.CSV	3301.67	0.0300638
CAM112A_map3	0001.CSV	3305.53	0.0304195
CAM112A_map3	0001.CSV	3309.39	0.0301863
CAM112A_map3	0001.CSV	3313.25	0.029515
CAM112A_map3	0001.CSV	3317.1	0.0291094
CAM112A_map3	0001.CSV	3320.96	0.0293218
CAM112A_map3	0001.CSV	3324.82	0.0297222
CAM112A_map3	0001.CSV	3328.67	0.0295392
CAM112A_map3	0001.CSV	3332.53	0.0293749
CAM112A_map3	0001.CSV	3336.39	0.0298382
CAM112A_map3	0001.CSV	3340.24	0.030128
CAM112A_map3	0001.CSV	3344.1	0.0298924
CAM112A_map3	0001.CSV	3347.96	0.029778
CAM112A_map3	0001.CSV	3351.82	0.0296902
CAM112A_map3	0001.CSV	3355.67	0.0293206
CAM112A_map3	0001.CSV	3359.53	0.0294805
CAM112A_map3	0001.CSV	3363.39	0.0298347
CAM112A_map3	0001.CSV	3367.24	0.0301431
CAM112A_map3	0001.CSV	3371.1	0.0298605
CAM112A_map3	0001.CSV	3374.96	0.0294451
CAM112A_map3	0001.CSV	3378.82	0.0291996
CAM112A_map3	0001.CSV	3382.67	0.0288854
CAM112A_map3	0001.CSV	3386.53	0.0290133
CAM112A_map3	0001.CSV	3390.39	0.0295316
CAM112A_map3	0001.CSV	3394.24	0.0297694
CAM112A_map3	0001.CSV	3398.1	0.0298567
CAM112A_map3	0001.CSV	3401.96	0.0296457
CAM112A_map3	0001.CSV	3405.82	0.0291956
CAM112A_map3	0001.CSV	3409.67	0.0292068
CAM112A_map3	0001.CSV	3413.53	0.0289615
CAM112A_map3	0001.CSV	3417.39	0.0283664
CAM112A_map3	0001.CSV	3421.24	0.0282178
CAM112A_map3	0001.CSV	3425.1	0.0284453
CAM112A_map3	0001.CSV	3428.96	0.0288149
CAM112A_map3	0001.CSV	3432.82	0.0290541
CAM112A_map3	0001.CSV	3436.67	0.028781
CAM112A_map3	0001.CSV	3440.53	0.0280233
CAM112A_map3	0001.CSV	3444.39	0.0276267
CAM112A_map3	0001.CSV	3448.24	0.0276224
CAM112A_map3	0001.CSV	3452.1	0.0273174
CAM112A_map3	0001.CSV	3455.96	0.0272799
CAM112A_map3	0001.CSV	3459.82	0.0275829
CAM112A_map3	0001.CSV	3463.67	0.0279891
CAM112A_map3	0001.CSV	3467.53	0.0282475
CAM112A_map3	0001.CSV	3471.39	0.0277904
CAM112A_map3	0001.CSV	3475.24	0.027387
CAM112A_map3	0001.CSV	3479.1	0.027392
CAM112A_map3	0001.CSV	3482.96	0.0272257
CAM112A_map3	0001.CSV	3486.82	0.0272307
CAM112A_map3	0001.CSV	3490.67	0.0270796
CAM112A_map3	0001.CSV	3494.53	0.0270499
CAM112A_map3	0001.CSV	3498.39	0.0269952
CAM112A_map3	0001.CSV	3502.24	0.0267898
CAM112A_map3	0001.CSV	3506.1	0.0263008
CAM112A_map3	0001.CSV	3509.96	0.0262065
CAM112A_map3	0001.CSV	3513.81	0.026364
CAM112A_map3	0001.CSV	3517.67	0.0259766
CAM112A_map3	0001.CSV	3521.53	0.0258379
CAM112A_map3	0001.CSV	3525.39	0.0258944
CAM112A_map3	0001.CSV	3529.24	0.0256825
CAM112A_map3	0001.CSV	3533.1	0.0258097
CAM112A_map3	0001.CSV	3536.96	0.0260581
CAM112A_map3	0001.CSV	3540.81	0.0261133
CAM112A_map3	0001.CSV	3544.67	0.0261836
CAM112A_map3	0001.CSV	3548.53	0.0258738
CAM112A_map3	0001.CSV	3552.39	0.0253283
CAM112A_map3	0001.CSV	3556.24	0.0252029
CAM112A_map3	0001.CSV	3560.1	0.0249638
CAM112A_map3	0001.CSV	3563.96	0.0244264
CAM112A_map3	0001.CSV	3567.81	0.0249006
CAM112A_map3	0001.CSV	3571.67	0.0251133
CAM112A_map3	0001.CSV	3575.53	0.0245653
CAM112A_map3	0001.CSV	3579.39	0.0248258
CAM112A_map3	0001.CSV	3583.24	0.0248915
CAM112A_map3	0001.CSV	3587.1	0.0249011
CAM112A_map3	0001.CSV	3590.96	0.0247459
CAM112A_map3	0001.CSV	3594.81	0.0244627
CAM112A_map3	0001.CSV	3598.67	0.0246338
CAM112A_map3	0001.CSV	3602.53	0.0245446
CAM112A_map3	0001.CSV	3606.39	0.0237265
CAM112A_map3	0001.CSV	3610.24	0.0233909
CAM112A_map3	0001.CSV	3614.1	0.0233454
CAM112A_map3	0001.CSV	3617.96	0.0237849
CAM112A_map3	0001.CSV	3621.81	0.0239686
CAM112A_map3	0001.CSV	3625.67	0.0229918
CAM112A_map3	0001.CSV	3629.53	0.0230779
CAM112A_map3	0001.CSV	3633.39	0.0240035
CAM112A_map3	0001.CSV	3637.24	0.0237121
CAM112A_map3	0001.CSV	3641.1	0.0233755
CAM112A_map3	0001.CSV	3644.96	0.0225259
CAM112A_map3	0001.CSV	3648.81	0.0230826
CAM112A_map3	0001.CSV	3652.67	0.0241136
CAM112A_map3	0001.CSV	3656.53	0.024232
CAM112A_map3	0001.CSV	3660.38	0.0241436
CAM112A_map3	0001.CSV	3664.24	0.0230964
CAM112A_map3	0001.CSV	3668.1	0.0220546
CAM112A_map3	0001.CSV	3671.96	0.0221429
CAM112A_map3	0001.CSV	3675.81	0.0229468
CAM112A_map3	0001.CSV	3679.67	0.0236451
CAM112A_map3	0001.CSV	3683.53	0.0231272
CAM112A_map3	0001.CSV	3687.38	0.02294
CAM112A_map3	0001.CSV	3691.24	0.0237592
CAM112A_map3	0001.CSV	3695.1	0.0235653
CAM112A_map3	0001.CSV	3698.95	0.022823
CAM112A_map3	0001.CSV	3702.81	0.0227292
CAM112A_map3	0001.CSV	3706.67	0.0222144
CAM112A_map3	0001.CSV	3710.53	0.0222807
CAM112A_map3	0001.CSV	3714.38	0.023004
CAM112A_map3	0001.CSV	3718.24	0.0223973
CAM112A_map3	0001.CSV	3722.1	0.0219135
CAM112A_map3	0001.CSV	3725.95	0.0221951
CAM112A_map3	0001.CSV	3729.81	0.0219443
CAM112A_map3	0001.CSV	3733.67	0.022409
CAM112A_map3	0001.CSV	3737.53	0.0237189
CAM112A_map3	0001.CSV	3741.38	0.0226372
CAM112A_map3	0001.CSV	3745.24	0.0214394
CAM112A_map3	0001.CSV	3749.1	0.0215914
CAM112A_map3	0001.CSV	3752.95	0.0225666
CAM112A_map3	0001.CSV	3756.81	0.0226753
CAM112A_map3	0001.CSV	3760.67	0.0225255
CAM112A_map3	0001.CSV	3764.53	0.0223004
CAM112A_map3	0001.CSV	3768.38	0.0225583
CAM112A_map3	0001.CSV	3772.24	0.02283
CAM112A_map3	0001.CSV	3776.1	0.022309
CAM112A_map3	0001.CSV	3779.95	0.0223876
CAM112A_map3	0001.CSV	3783.81	0.0224203
CAM112A_map3	0001.CSV	3787.67	0.0224734
CAM112A_map3	0001.CSV	3791.53	0.0220393
CAM112A_map3	0001.CSV	3795.38	0.0214047
CAM112A_map3	0001.CSV	3799.24	0.0213868
CAM112A_map3	0001.CSV	3803.1	0.0222341
CAM112A_map3	0001.CSV	3806.95	0.0226249
CAM112A_map3	0001.CSV	3810.81	0.0221763
CAM112A_map3	0001.CSV	3814.67	0.0215044
CAM112A_map3	0001.CSV	3818.53	0.021934
CAM112A_map3	0001.CSV	3822.38	0.0225014
CAM112A_map3	0001.CSV	3826.24	0.0222355
CAM112A_map3	0001.CSV	3830.1	0.0216606
CAM112A_map3	0001.CSV	3833.95	0.0214488
CAM112A_map3	0001.CSV	3837.81	0.0217571
CAM112A_map3	0001.CSV	3841.67	0.0227746
CAM112A_map3	0001.CSV	3845.53	0.0224503
CAM112A_map3	0001.CSV	3849.38	0.0212391
CAM112A_map3	0001.CSV	3853.24	0.0214083
CAM112A_map3	0001.CSV	3857.1	0.022669
CAM112A_map3	0001.CSV	3860.95	0.0219081
CAM112A_map3	0001.CSV	3864.81	0.0218637
CAM112A_map3	0001.CSV	3868.67	0.0219957
CAM112A_map3	0001.CSV	3872.52	0.022571
CAM112A_map3	0001.CSV	3876.38	0.022278
CAM112A_map3	0001.CSV	3880.24	0.0219489
CAM112A_map3	0001.CSV	3884.1	0.0223975
CAM112A_map3	0001.CSV	3887.95	0.0224442
CAM112A_map3	0001.CSV	3891.81	0.0222809
CAM112A_map3	0001.CSV	3895.67	0.0220103
CAM112A_map3	0001.CSV	3899.52	0.0215014
CAM112A_map3	0001.CSV	3903.38	0.0225602
CAM112A_map3	0001.CSV	3907.24	0.0228339
CAM112A_map3	0001.CSV	3911.1	0.0221362
CAM112A_map3	0001.CSV	3914.95	0.021736
CAM112A_map3	0001.CSV	3918.81	0.0221648
CAM112A_map3	0001.CSV	3922.67	0.0222683
CAM112A_map3	0001.CSV	3926.52	0.0222949
CAM112A_map3	0001.CSV	3930.38	0.0223806
CAM112A_map3	0001.CSV	3934.24	0.0228188
CAM112A_map3	0001.CSV	3938.09	0.0223815
CAM112A_map3	0001.CSV	3941.95	0.0222164
CAM112A_map3	0001.CSV	3945.81	0.022362
CAM112A_map3	0001.CSV	3949.67	0.0225536
CAM112A_map3	0001.CSV	3953.52	0.022493
CAM112A_map3	0001.CSV	3957.38	0.0224289
CAM112A_map3	0001.CSV	3961.24	0.022423
CAM112A_map3	0001.CSV	3965.09	0.0224606
CAM112A_map3	0001.CSV	3968.95	0.0223941
CAM112A_map3	0001.CSV	3972.81	0.0224785
CAM112A_map3	0001.CSV	3976.67	0.0224851
CAM112A_map3	0001.CSV	3980.52	0.0224382
CAM112A_map3	0001.CSV	3984.38	0.0223108
CAM112A_map3	0001.CSV	3988.24	0.0222385
CAM112A_map3	0001.CSV	3992.09	0.0221991
CAM112A_map3	0001.CSV	3995.95	0.0222606
CAM112A_map3	0001.CSV	3999.81	0.0221991
CAM112A_map3	0002.CSV	674.992	0.040351
CAM112A_map3	0002.CSV	678.849	0.0443083
CAM112A_map3	0002.CSV	682.706	0.0464616
CAM112A_map3	0002.CSV	686.563	0.0518515
CAM112A_map3	0002.CSV	690.42	0.0583806
CAM112A_map3	0002.CSV	694.277	0.0784637
CAM112A_map3	0002.CSV	698.134	0.10417
CAM112A_map3	0002.CSV	701.991	0.0987065
CAM112A_map3	0002.CSV	705.849	0.08463
CAM112A_map3	0002.CSV	709.706	0.115993
CAM112A_map3	0002.CSV	713.563	0.128566
CAM112A_map3	0002.CSV	717.42	0.0814736
CAM112A_map3	0002.CSV	721.277	0.0452639
CAM112A_map3	0002.CSV	725.134	0.0390036
CAM112A_map3	0002.CSV	728.991	0.0379188
CAM112A_map3	0002.CSV	732.848	0.0388565
CAM112A_map3	0002.CSV	736.705	0.0396463
CAM112A_map3	0002.CSV	740.562	0.0418921
CAM112A_map3	0002.CSV	744.42	0.042897
CAM112A_map3	0002.CSV	748.277	0.0444842
CAM112A_map3	0002.CSV	752.134	0.0447365
CAM112A_map3	0002.CSV	755.991	0.0462449
CAM112A_map3	0002.CSV	759.848	0.0463208
CAM112A_map3	0002.CSV	763.705	0.0475238
CAM112A_map3	0002.CSV	767.562	0.0478831
CAM112A_map3	0002.CSV	771.419	0.048968
CAM112A_map3	0002.CSV	775.276	0.0491843
CAM112A_map3	0002.CSV	779.133	0.0504323
CAM112A_map3	0002.CSV	782.99	0.0505047
CAM112A_map3	0002.CSV	786.848	0.0515184
CAM112A_map3	0002.CSV	790.705	0.0518005
CAM112A_map3	0002.CSV	794.562	0.0533383
CAM112A_map3	0002.CSV	798.419	0.0544623
CAM112A_map3	0002.CSV	802.276	0.0564561
CAM112A_map3	0002.CSV	806.133	0.0575576
CAM112A_map3	0002.CSV	809.99	0.0600734
CAM112A_map3	0002.CSV	813.847	0.0621349
CAM112A_map3	0002.CSV	817.704	0.0658707
CAM112A_map3	0002.CSV	821.562	0.0697504
CAM112A_map3	0002.CSV	825.419	0.075547
CAM112A_map3	0002.CSV	829.276	0.0820674
CAM112A_map3	0002.CSV	833.133	0.0927111
CAM112A_map3	0002.CSV	836.99	0.110721
CAM112A_map3	0002.CSV	840.847	0.14373
CAM112A_map3	0002.CSV	844.704	0.180439
CAM112A_map3	0002.CSV	848.561	0.236287
CAM112A_map3	0002.CSV	852.418	0.305303
CAM112A_map3	0002.CSV	856.275	0.312267
CAM112A_map3	0002.CSV	860.132	0.258719
CAM112A_map3	0002.CSV	863.99	0.197527
CAM112A_map3	0002.CSV	867.847	0.142709
CAM112A_map3	0002.CSV	871.704	0.100775
CAM112A_map3	0002.CSV	875.561	0.0739573
CAM112A_map3	0002.CSV	879.418	0.0601079
CAM112A_map3	0002.CSV	883.275	0.0517036
CAM112A_map3	0002.CSV	887.132	0.0471459
CAM112A_map3	0002.CSV	890.989	0.0454281
CAM112A_map3	0002.CSV	894.846	0.0458483
CAM112A_map3	0002.CSV	898.703	0.0464043
CAM112A_map3	0002.CSV	902.561	0.0477856
CAM112A_map3	0002.CSV	906.418	0.0491745
CAM112A_map3	0002.CSV	910.275	0.0498409
CAM112A_map3	0002.CSV	914.132	0.0488895
CAM112A_map3	0002.CSV	917.989	0.0493077
CAM112A_map3	0002.CSV	921.846	0.0499511
CAM112A_map3	0002.CSV	925.703	0.0509358
CAM112A_map3	0002.CSV	929.56	0.0515538
CAM112A_map3	0002.CSV	933.417	0.052433
CAM112A_map3	0002.CSV	937.274	0.0528049
CAM112A_map3	0002.CSV	941.131	0.0535199
CAM112A_map3	0002.CSV	944.989	0.0537478
CAM112A_map3	0002.CSV	948.846	0.0543992
CAM112A_map3	0002.CSV	952.703	0.0549122
CAM112A_map3	0002.CSV	956.56	0.0557745
CAM112A_map3	0002.CSV	960.417	0.0560274
CAM112A_map3	0002.CSV	964.274	0.0565612
CAM112A_map3	0002.CSV	968.131	0.0569238
CAM112A_map3	0002.CSV	971.988	0.057812
CAM112A_map3	0002.CSV	975.845	0.0584247
CAM112A_map3	0002.CSV	979.702	0.0593478
CAM112A_map3	0002.CSV	983.559	0.0598857
CAM112A_map3	0002.CSV	987.417	0.0607474
CAM112A_map3	0002.CSV	991.274	0.0613155
CAM112A_map3	0002.CSV	995.131	0.0622363
CAM112A_map3	0002.CSV	998.988	0.0628199
CAM112A_map3	0002.CSV	1002.85	0.0638736
CAM112A_map3	0002.CSV	1006.7	0.0645631
CAM112A_map3	0002.CSV	1010.56	0.065593
CAM112A_map3	0002.CSV	1014.42	0.0662955
CAM112A_map3	0002.CSV	1018.27	0.0675273
CAM112A_map3	0002.CSV	1022.13	0.0684156
CAM112A_map3	0002.CSV	1025.99	0.0696714
CAM112A_map3	0002.CSV	1029.85	0.0705584
CAM112A_map3	0002.CSV	1033.7	0.0718653
CAM112A_map3	0002.CSV	1037.56	0.072874
CAM112A_map3	0002.CSV	1041.42	0.0743022
CAM112A_map3	0002.CSV	1045.27	0.0751864
CAM112A_map3	0002.CSV	1049.13	0.0765053
CAM112A_map3	0002.CSV	1052.99	0.0776448
CAM112A_map3	0002.CSV	1056.84	0.0795963
CAM112A_map3	0002.CSV	1060.7	0.081435
CAM112A_map3	0002.CSV	1064.56	0.0838442
CAM112A_map3	0002.CSV	1068.42	0.086013
CAM112A_map3	0002.CSV	1072.27	0.0890141
CAM112A_map3	0002.CSV	1076.13	0.0946415
CAM112A_map3	0002.CSV	1079.99	0.108647
CAM112A_map3	0002.CSV	1083.84	0.113216
CAM112A_map3	0002.CSV	1087.7	0.0969277
CAM112A_map3	0002.CSV	1091.56	0.0852761
CAM112A_map3	0002.CSV	1095.41	0.0841319
CAM112A_map3	0002.CSV	1099.27	0.0845909
CAM112A_map3	0002.CSV	1103.13	0.0855639
CAM112A_map3	0002.CSV	1106.99	0.0865642
CAM112A_map3	0002.CSV	1110.84	0.0880202
CAM112A_map3	0002.CSV	1114.7	0.0887074
CAM112A_map3	0002.CSV	1118.56	0.0894613
CAM112A_map3	0002.CSV	1122.41	0.0899286
CAM112A_map3	0002.CSV	1126.27	0.0906652
CAM112A_map3	0002.CSV	1130.13	0.0909744
CAM112A_map3	0002.CSV	1133.99	0.0916483
CAM112A_map3	0002.CSV	1137.84	0.0922132
CAM112A_map3	0002.CSV	1141.7	0.093205
CAM112A_map3	0002.CSV	1145.56	0.0939304
CAM112A_map3	0002.CSV	1149.41	0.0950827
CAM112A_map3	0002.CSV	1153.27	0.0960571
CAM112A_map3	0002.CSV	1157.13	0.0974448
CAM112A_map3	0002.CSV	1160.99	0.0986285
CAM112A_map3	0002.CSV	1164.84	0.100099
CAM112A_map3	0002.CSV	1168.7	0.100963
CAM112A_map3	0002.CSV	1172.56	0.101733
CAM112A_map3	0002.CSV	1176.41	0.10175
CAM112A_map3	0002.CSV	1180.27	0.101831
CAM112A_map3	0002.CSV	1184.13	0.101491
CAM112A_map3	0002.CSV	1187.99	0.101342
CAM112A_map3	0002.CSV	1191.84	0.10095
CAM112A_map3	0002.CSV	1195.7	0.101061
CAM112A_map3	0002.CSV	1199.56	0.100988
CAM112A_map3	0002.CSV	1203.41	0.101462
CAM112A_map3	0002.CSV	1207.27	0.101895
CAM112A_map3	0002.CSV	1211.13	0.102888
CAM112A_map3	0002.CSV	1214.98	0.103745
CAM112A_map3	0002.CSV	1218.84	0.105047
CAM112A_map3	0002.CSV	1222.7	0.106229
CAM112A_map3	0002.CSV	1226.56	0.10804
CAM112A_map3	0002.CSV	1230.41	0.10965
CAM112A_map3	0002.CSV	1234.27	0.111659
CAM112A_map3	0002.CSV	1238.13	0.113441
CAM112A_map3	0002.CSV	1241.98	0.115624
CAM112A_map3	0002.CSV	1245.84	0.117461
CAM112A_map3	0002.CSV	1249.7	0.119577
CAM112A_map3	0002.CSV	1253.56	0.121101
CAM112A_map3	0002.CSV	1257.41	0.122773
CAM112A_map3	0002.CSV	1261.27	0.124192
CAM112A_map3	0002.CSV	1265.13	0.126381
CAM112A_map3	0002.CSV	1268.98	0.128565
CAM112A_map3	0002.CSV	1272.84	0.131204
CAM112A_map3	0002.CSV	1276.7	0.133283
CAM112A_map3	0002.CSV	1280.56	0.135566
CAM112A_map3	0002.CSV	1284.41	0.13725
CAM112A_map3	0002.CSV	1288.27	0.139149
CAM112A_map3	0002.CSV	1292.13	0.140597
CAM112A_map3	0002.CSV	1295.98	0.142606
CAM112A_map3	0002.CSV	1299.84	0.144465
CAM112A_map3	0002.CSV	1303.7	0.146919
CAM112A_map3	0002.CSV	1307.56	0.149199
CAM112A_map3	0002.CSV	1311.41	0.152321
CAM112A_map3	0002.CSV	1315.27	0.155497
CAM112A_map3	0002.CSV	1319.13	0.159063
CAM112A_map3	0002.CSV	1322.98	0.161679
CAM112A_map3	0002.CSV	1326.84	0.164953
CAM112A_map3	0002.CSV	1330.7	0.168559
CAM112A_map3	0002.CSV	1334.56	0.173021
CAM112A_map3	0002.CSV	1338.41	0.178275
CAM112A_map3	0002.CSV	1342.27	0.185268
CAM112A_map3	0002.CSV	1346.13	0.191157
CAM112A_map3	0002.CSV	1349.98	0.198371
CAM112A_map3	0002.CSV	1353.84	0.205614
CAM112A_map3	0002.CSV	1357.7	0.213463
CAM112A_map3	0002.CSV	1361.56	0.222111
CAM112A_map3	0002.CSV	1365.41	0.233067
CAM112A_map3	0002.CSV	1369.27	0.24222
CAM112A_map3	0002.CSV	1373.13	0.254183
CAM112A_map3	0002.CSV	1376.98	0.267655
CAM112A_map3	0002.CSV	1380.84	0.280179
CAM112A_map3	0002.CSV	1384.7	0.292078
CAM112A_map3	0002.CSV	1388.56	0.308088
CAM112A_map3	0002.CSV	1392.41	0.321433
CAM112A_map3	0002.CSV	1396.27	0.338194
CAM112A_map3	0002.CSV	1400.13	0.354673
CAM112A_map3	0002.CSV	1403.98	0.370266
CAM112A_map3	0002.CSV	1407.84	0.385226
CAM112A_map3	0002.CSV	1411.7	0.399303
CAM112A_map3	0002.CSV	1415.55	0.408546
CAM112A_map3	0002.CSV	1419.41	0.420065
CAM112A_map3	0002.CSV	1423.27	0.428672
CAM112A_map3	0002.CSV	1427.12	0.439132
CAM112A_map3	0002.CSV	1430.98	0.44964
CAM112A_map3	0002.CSV	1434.84	0.463958
CAM112A_map3	0002.CSV	1438.7	0.476588
CAM112A_map3	0002.CSV	1442.55	0.484856
CAM112A_map3	0002.CSV	1446.41	0.481857
CAM112A_map3	0002.CSV	1450.27	0.471647
CAM112A_map3	0002.CSV	1454.12	0.456064
CAM112A_map3	0002.CSV	1457.98	0.434418
CAM112A_map3	0002.CSV	1461.84	0.416716
CAM112A_map3	0002.CSV	1465.7	0.403248
CAM112A_map3	0002.CSV	1469.55	0.382726
CAM112A_map3	0002.CSV	1473.41	0.349504
CAM112A_map3	0002.CSV	1477.27	0.314119
CAM112A_map3	0002.CSV	1481.12	0.294598
CAM112A_map3	0002.CSV	1484.98	0.277005
CAM112A_map3	0002.CSV	1488.84	0.257867
CAM112A_map3	0002.CSV	1492.7	0.239653
CAM112A_map3	0002.CSV	1496.55	0.226764
CAM112A_map3	0002.CSV	1500.41	0.212433
CAM112A_map3	0002.CSV	1504.27	0.203845
CAM112A_map3	0002.CSV	1508.12	0.187197
CAM112A_map3	0002.CSV	1511.98	0.175638
CAM112A_map3	0002.CSV	1515.84	0.167354
CAM112A_map3	0002.CSV	1519.7	0.156969
CAM112A_map3	0002.CSV	1523.55	0.144576
CAM112A_map3	0002.CSV	1527.41	0.136614
CAM112A_map3	0002.CSV	1531.27	0.130126
CAM112A_map3	0002.CSV	1535.12	0.125509
CAM112A_map3	0002.CSV	1538.98	0.12032
CAM112A_map3	0002.CSV	1542.84	0.110571
CAM112A_map3	0002.CSV	1546.7	0.102129
CAM112A_map3	0002.CSV	1550.55	0.0959656
CAM112A_map3	0002.CSV	1554.41	0.0895795
CAM112A_map3	0002.CSV	1558.27	0.0825885
CAM112A_map3	0002.CSV	1562.12	0.0764619
CAM112A_map3	0002.CSV	1565.98	0.0739468
CAM112A_map3	0002.CSV	1569.84	0.0707315
CAM112A_map3	0002.CSV	1573.69	0.0675119
CAM112A_map3	0002.CSV	1577.55	0.0619832
CAM112A_map3	0002.CSV	1581.41	0.0561049
CAM112A_map3	0002.CSV	1585.27	0.0505954
CAM112A_map3	0002.CSV	1589.12	0.046338
CAM112A_map3	0002.CSV	1592.98	0.0433474
CAM112A_map3	0002.CSV	1596.84	0.0415783
CAM112A_map3	0002.CSV	1600.69	0.0402151
CAM112A_map3	0002.CSV	1604.55	0.0395295
CAM112A_map3	0002.CSV	1608.41	0.038902
CAM112A_map3	0002.CSV	1612.27	0.0384032
CAM112A_map3	0002.CSV	1616.12	0.0374827
CAM112A_map3	0002.CSV	1619.98	0.0368584
CAM112A_map3	0002.CSV	1623.84	0.0358249
CAM112A_map3	0002.CSV	1627.69	0.0348144
CAM112A_map3	0002.CSV	1631.55	0.033371
CAM112A_map3	0002.CSV	1635.41	0.0324409
CAM112A_map3	0002.CSV	1639.27	0.0314306
CAM112A_map3	0002.CSV	1643.12	0.0305612
CAM112A_map3	0002.CSV	1646.98	0.0297376
CAM112A_map3	0002.CSV	1650.84	0.0296298
CAM112A_map3	0002.CSV	1654.69	0.0294511
CAM112A_map3	0002.CSV	1658.55	0.0289249
CAM112A_map3	0002.CSV	1662.41	0.0282024
CAM112A_map3	0002.CSV	1666.27	0.0278785
CAM112A_map3	0002.CSV	1670.12	0.0275342
CAM112A_map3	0002.CSV	1673.98	0.0274971
CAM112A_map3	0002.CSV	1677.84	0.0266944
CAM112A_map3	0002.CSV	1681.69	0.0263273
CAM112A_map3	0002.CSV	1685.55	0.0263096
CAM112A_map3	0002.CSV	1689.41	0.0262129
CAM112A_map3	0002.CSV	1693.27	0.0254815
CAM112A_map3	0002.CSV	1697.12	0.0254788
CAM112A_map3	0002.CSV	1700.98	0.0258566
CAM112A_map3	0002.CSV	1704.84	0.0262718
CAM112A_map3	0002.CSV	1708.69	0.02628
CAM112A_map3	0002.CSV	1712.55	0.0263951
CAM112A_map3	0002.CSV	1716.41	0.0273563
CAM112A_map3	0002.CSV	1720.27	0.0287447
CAM112A_map3	0002.CSV	1724.12	0.0287042
CAM112A_map3	0002.CSV	1727.98	0.0288247
CAM112A_map3	0002.CSV	1731.84	0.0290834
CAM112A_map3	0002.CSV	1735.69	0.030117
CAM112A_map3	0002.CSV	1739.55	0.0298581
CAM112A_map3	0002.CSV	1743.41	0.0288581
CAM112A_map3	0002.CSV	1747.27	0.027103
CAM112A_map3	0002.CSV	1751.12	0.0251859
CAM112A_map3	0002.CSV	1754.98	0.0233531
CAM112A_map3	0002.CSV	1758.84	0.0223597
CAM112A_map3	0002.CSV	1762.69	0.0217564
CAM112A_map3	0002.CSV	1766.55	0.0215038
CAM112A_map3	0002.CSV	1770.41	0.0220784
CAM112A_map3	0002.CSV	1774.26	0.0251063
CAM112A_map3	0002.CSV	1778.12	0.0283493
CAM112A_map3	0002.CSV	1781.98	0.0319162
CAM112A_map3	0002.CSV	1785.84	0.0335313
CAM112A_map3	0002.CSV	1789.69	0.0326266
CAM112A_map3	0002.CSV	1793.55	0.0289637
CAM112A_map3	0002.CSV	1797.41	0.0257449
CAM112A_map3	0002.CSV	1801.26	0.0229706
CAM112A_map3	0002.CSV	1805.12	0.0209954
CAM112A_map3	0002.CSV	1808.98	0.0197953
CAM112A_map3	0002.CSV	1812.84	0.019432
CAM112A_map3	0002.CSV	1816.69	0.0189911
CAM112A_map3	0002.CSV	1820.55	0.0187989
CAM112A_map3	0002.CSV	1824.41	0.018571
CAM112A_map3	0002.CSV	1828.26	0.0189056
CAM112A_map3	0002.CSV	1832.12	0.0189961
CAM112A_map3	0002.CSV	1835.98	0.0188977
CAM112A_map3	0002.CSV	1839.84	0.0185696
CAM112A_map3	0002.CSV	1843.69	0.0187568
CAM112A_map3	0002.CSV	1847.55	0.0189381
CAM112A_map3	0002.CSV	1851.41	0.0188887
CAM112A_map3	0002.CSV	1855.26	0.0187537
CAM112A_map3	0002.CSV	1859.12	0.0189014
CAM112A_map3	0002.CSV	1862.98	0.0187566
CAM112A_map3	0002.CSV	1866.84	0.0189041
CAM112A_map3	0002.CSV	1870.69	0.0191994
CAM112A_map3	0002.CSV	1874.55	0.0191638
CAM112A_map3	0002.CSV	1878.41	0.0189753
CAM112A_map3	0002.CSV	1882.26	0.0190277
CAM112A_map3	0002.CSV	1886.12	0.0189344
CAM112A_map3	0002.CSV	1889.98	0.0191468
CAM112A_map3	0002.CSV	1893.83	0.0192357
CAM112A_map3	0002.CSV	1897.69	0.0193278
CAM112A_map3	0002.CSV	1901.55	0.0191951
CAM112A_map3	0002.CSV	1905.41	0.0192469
CAM112A_map3	0002.CSV	1909.26	0.0192849
CAM112A_map3	0002.CSV	1913.12	0.0193385
CAM112A_map3	0002.CSV	1916.98	0.0192596
CAM112A_map3	0002.CSV	1920.83	0.0195485
CAM112A_map3	0002.CSV	1924.69	0.0195933
CAM112A_map3	0002.CSV	1928.55	0.0196032
CAM112A_map3	0002.CSV	1932.4	0.0195642
CAM112A_map3	0002.CSV	1936.26	0.019681
CAM112A_map3	0002.CSV	1940.12	0.0196581
CAM112A_map3	0002.CSV	1943.98	0.0199514
CAM112A_map3	0002.CSV	1947.83	0.0199583
CAM112A_map3	0002.CSV	1951.69	0.0199985
CAM112A_map3	0002.CSV	1955.55	0.0200075
CAM112A_map3	0002.CSV	1959.4	0.0201384
CAM112A_map3	0002.CSV	1963.26	0.0200877
CAM112A_map3	0002.CSV	1967.12	0.0202735
CAM112A_map3	0002.CSV	1970.98	0.0202771
CAM112A_map3	0002.CSV	1974.83	0.0203026
CAM112A_map3	0002.CSV	1978.69	0.0203011
CAM112A_map3	0002.CSV	1982.55	0.020419
CAM112A_map3	0002.CSV	1986.4	0.0203572
CAM112A_map3	0002.CSV	1990.26	0.0205301
CAM112A_map3	0002.CSV	1994.12	0.0205969
CAM112A_map3	0002.CSV	1997.98	0.0206322
CAM112A_map3	0002.CSV	2001.83	0.0205684
CAM112A_map3	0002.CSV	2005.69	0.0206899
CAM112A_map3	0002.CSV	2009.55	0.0207475
CAM112A_map3	0002.CSV	2013.4	0.0209028
CAM112A_map3	0002.CSV	2017.26	0.0209691
CAM112A_map3	0002.CSV	2021.12	0.0211085
CAM112A_map3	0002.CSV	2024.97	0.0210687
CAM112A_map3	0002.CSV	2028.83	0.0211717
CAM112A_map3	0002.CSV	2032.69	0.0211631
CAM112A_map3	0002.CSV	2036.55	0.0212791
CAM112A_map3	0002.CSV	2040.4	0.0213135
CAM112A_map3	0002.CSV	2044.26	0.021477
CAM112A_map3	0002.CSV	2048.12	0.0214871
CAM112A_map3	0002.CSV	2051.97	0.0215794
CAM112A_map3	0002.CSV	2055.83	0.0215662
CAM112A_map3	0002.CSV	2059.69	0.0216924
CAM112A_map3	0002.CSV	2063.55	0.0217397
CAM112A_map3	0002.CSV	2067.4	0.021902
CAM112A_map3	0002.CSV	2071.26	0.0218959
CAM112A_map3	0002.CSV	2075.12	0.0220348
CAM112A_map3	0002.CSV	2078.97	0.0220929
CAM112A_map3	0002.CSV	2082.83	0.0222256
CAM112A_map3	0002.CSV	2086.69	0.0222505
CAM112A_map3	0002.CSV	2090.55	0.0223827
CAM112A_map3	0002.CSV	2094.4	0.0224062
CAM112A_map3	0002.CSV	2098.26	0.0225544
CAM112A_map3	0002.CSV	2102.12	0.0226138
CAM112A_map3	0002.CSV	2105.97	0.0227457
CAM112A_map3	0002.CSV	2109.83	0.0227671
CAM112A_map3	0002.CSV	2113.69	0.0229437
CAM112A_map3	0002.CSV	2117.55	0.0230309
CAM112A_map3	0002.CSV	2121.4	0.0231883
CAM112A_map3	0002.CSV	2125.26	0.0232631
CAM112A_map3	0002.CSV	2129.12	0.0233811
CAM112A_map3	0002.CSV	2132.97	0.0233895
CAM112A_map3	0002.CSV	2136.83	0.0235449
CAM112A_map3	0002.CSV	2140.69	0.0235609
CAM112A_map3	0002.CSV	2144.55	0.0236411
CAM112A_map3	0002.CSV	2148.4	0.0236965
CAM112A_map3	0002.CSV	2152.26	0.023861
CAM112A_map3	0002.CSV	2156.12	0.0238338
CAM112A_map3	0002.CSV	2159.97	0.0238571
CAM112A_map3	0002.CSV	2163.83	0.0238502
CAM112A_map3	0002.CSV	2167.69	0.0239542
CAM112A_map3	0002.CSV	2171.55	0.0239856
CAM112A_map3	0002.CSV	2175.4	0.0240991
CAM112A_map3	0002.CSV	2179.26	0.0241365
CAM112A_map3	0002.CSV	2183.12	0.0242144
CAM112A_map3	0002.CSV	2186.97	0.0242203
CAM112A_map3	0002.CSV	2190.83	0.024351
CAM112A_map3	0002.CSV	2194.69	0.0243516
CAM112A_map3	0002.CSV	2198.55	0.0244113
CAM112A_map3	0002.CSV	2202.4	0.0243937
CAM112A_map3	0002.CSV	2206.26	0.0244396
CAM112A_map3	0002.CSV	2210.12	0.0244831
CAM112A_map3	0002.CSV	2213.97	0.0245877
CAM112A_map3	0002.CSV	2217.83	0.0245961
CAM112A_map3	0002.CSV	2221.69	0.0246791
CAM112A_map3	0002.CSV	2225.54	0.0246572
CAM112A_map3	0002.CSV	2229.4	0.0247375
CAM112A_map3	0002.CSV	2233.26	0.0247356
CAM112A_map3	0002.CSV	2237.12	0.0247953
CAM112A_map3	0002.CSV	2240.97	0.0248175
CAM112A_map3	0002.CSV	2244.83	0.0249144
CAM112A_map3	0002.CSV	2248.69	0.0249106
CAM112A_map3	0002.CSV	2252.54	0.0249852
CAM112A_map3	0002.CSV	2256.4	0.0250092
CAM112A_map3	0002.CSV	2260.26	0.0250357
CAM112A_map3	0002.CSV	2264.11	0.0250438
CAM112A_map3	0002.CSV	2267.97	0.0251894
CAM112A_map3	0002.CSV	2271.83	0.0252111
CAM112A_map3	0002.CSV	2275.69	0.0252742
CAM112A_map3	0002.CSV	2279.54	0.0252903
CAM112A_map3	0002.CSV	2283.4	0.0252988
CAM112A_map3	0002.CSV	2287.26	0.0252266
CAM112A_map3	0002.CSV	2291.11	0.0252736
CAM112A_map3	0002.CSV	2294.97	0.0252435
CAM112A_map3	0002.CSV	2298.83	0.025195
CAM112A_map3	0002.CSV	2302.69	0.0249355
CAM112A_map3	0002.CSV	2306.54	0.0246687
CAM112A_map3	0002.CSV	2310.4	0.0242681
CAM112A_map3	0002.CSV	2314.26	0.0238704
CAM112A_map3	0002.CSV	2318.11	0.0226468
CAM112A_map3	0002.CSV	2321.97	0.0208617
CAM112A_map3	0002.CSV	2325.83	0.018365
CAM112A_map3	0002.CSV	2329.69	0.0157273
CAM112A_map3	0002.CSV	2333.54	0.0130862
CAM112A_map3	0002.CSV	2337.4	0.0116048
CAM112A_map3	0002.CSV	2341.26	0.0116776
CAM112A_map3	0002.CSV	2345.11	0.0182547
CAM112A_map3	0002.CSV	2348.97	0.0200086
CAM112A_map3	0002.CSV	2352.83	0.015103
CAM112A_map3	0002.CSV	2356.69	-0.00446842
CAM112A_map3	0002.CSV	2360.54	-0.0248362
CAM112A_map3	0002.CSV	2364.4	-0.0115552
CAM112A_map3	0002.CSV	2368.26	0.0114041
CAM112A_map3	0002.CSV	2372.11	0.02216
CAM112A_map3	0002.CSV	2375.97	0.0258099
CAM112A_map3	0002.CSV	2379.83	0.0267449
CAM112A_map3	0002.CSV	2383.69	0.0269021
CAM112A_map3	0002.CSV	2387.54	0.0267328
CAM112A_map3	0002.CSV	2391.4	0.0265957
CAM112A_map3	0002.CSV	2395.26	0.0265708
CAM112A_map3	0002.CSV	2399.11	0.0265936
CAM112A_map3	0002.CSV	2402.97	0.0266178
CAM112A_map3	0002.CSV	2406.83	0.0266912
CAM112A_map3	0002.CSV	2410.68	0.0267643
CAM112A_map3	0002.CSV	2414.54	0.0268621
CAM112A_map3	0002.CSV	2418.4	0.0269084
CAM112A_map3	0002.CSV	2422.26	0.0269837
CAM112A_map3	0002.CSV	2426.11	0.0270263
CAM112A_map3	0002.CSV	2429.97	0.0270774
CAM112A_map3	0002.CSV	2433.83	0.0271586
CAM112A_map3	0002.CSV	2437.68	0.0272544
CAM112A_map3	0002.CSV	2441.54	0.0273261
CAM112A_map3	0002.CSV	2445.4	0.027394
CAM112A_map3	0002.CSV	2449.26	0.0274946
CAM112A_map3	0002.CSV	2453.11	0.0276275
CAM112A_map3	0002.CSV	2456.97	0.0278035
CAM112A_map3	0002.CSV	2460.83	0.028016
CAM112A_map3	0002.CSV	2464.68	0.028249
CAM112A_map3	0002.CSV	2468.54	0.0285869
CAM112A_map3	0002.CSV	2472.4	0.029021
CAM112A_map3	0002.CSV	2476.26	0.029525
CAM112A_map3	0002.CSV	2480.11	0.0301151
CAM112A_map3	0002.CSV	2483.97	0.030768
CAM112A_map3	0002.CSV	2487.83	0.0313838
CAM112A_map3	0002.CSV	2491.68	0.0318792
CAM112A_map3	0002.CSV	2495.54	0.0322705
CAM112A_map3	0002.CSV	2499.4	0.0324791
CAM112A_map3	0002.CSV	2503.26	0.0325405
CAM112A_map3	0002.CSV	2507.11	0.0325126
CAM112A_map3	0002.CSV	2510.97	0.0325685
CAM112A_map3	0002.CSV	2514.83	0.0328899
CAM112A_map3	0002.CSV	2518.68	0.0333477
CAM112A_map3	0002.CSV	2522.54	0.0335042
CAM112A_map3	0002.CSV	2526.4	0.0332413
CAM112A_map3	0002.CSV	2530.26	0.0327088
CAM112A_map3	0002.CSV	2534.11	0.0320643
CAM112A_map3	0002.CSV	2537.97	0.031485
CAM112A_map3	0002.CSV	2541.83	0.0311738
CAM112A_map3	0002.CSV	2545.68	0.0310956
CAM112A_map3	0002.CSV	2549.54	0.0310383
CAM112A_map3	0002.CSV	2553.4	0.0307302
CAM112A_map3	0002.CSV	2557.26	0.0303049
CAM112A_map3	0002.CSV	2561.11	0.0299296
CAM112A_map3	0002.CSV	2564.97	0.0296577
CAM112A_map3	0002.CSV	2568.83	0.0294395
CAM112A_map3	0002.CSV	2572.68	0.0293035
CAM112A_map3	0002.CSV	2576.54	0.0291518
CAM112A_map3	0002.CSV	2580.4	0.0289996
CAM112A_map3	0002.CSV	2584.25	0.0288648
CAM112A_map3	0002.CSV	2588.11	0.0288027
CAM112A_map3	0002.CSV	2591.97	0.0287891
CAM112A_map3	0002.CSV	2595.83	0.0287891
CAM112A_map3	0002.CSV	2599.68	0.0287454
CAM112A_map3	0002.CSV	2603.54	0.0287655
CAM112A_map3	0002.CSV	2607.4	0.028815
CAM112A_map3	0002.CSV	2611.25	0.0288819
CAM112A_map3	0002.CSV	2615.11	0.0289115
CAM112A_map3	0002.CSV	2618.97	0.0289577
CAM112A_map3	0002.CSV	2622.82	0.0290053
CAM112A_map3	0002.CSV	2626.68	0.0290987
CAM112A_map3	0002.CSV	2630.54	0.0290518
CAM112A_map3	0002.CSV	2634.4	0.0290714
CAM112A_map3	0002.CSV	2638.25	0.0290367
CAM112A_map3	0002.CSV	2642.11	0.0288212
CAM112A_map3	0002.CSV	2645.97	0.028577
CAM112A_map3	0002.CSV	2649.82	0.0284769
CAM112A_map3	0002.CSV	2653.68	0.0283898
CAM112A_map3	0002.CSV	2657.54	0.0283523
CAM112A_map3	0002.CSV	2661.4	0.0282218
CAM112A_map3	0002.CSV	2665.25	0.0281212
CAM112A_map3	0002.CSV	2669.11	0.0281194
CAM112A_map3	0002.CSV	2672.97	0.0284261
CAM112A_map3	0002.CSV	2676.82	0.0287862
CAM112A_map3	0002.CSV	2680.68	0.0287945
CAM112A_map3	0002.CSV	2684.54	0.0283919
CAM112A_map3	0002.CSV	2688.4	0.0282462
CAM112A_map3	0002.CSV	2692.25	0.028268
CAM112A_map3	0002.CSV	2696.11	0.0284397
CAM112A_map3	0002.CSV	2699.97	0.0284913
CAM112A_map3	0002.CSV	2703.82	0.0284948
CAM112A_map3	0002.CSV	2707.68	0.028608
CAM112A_map3	0002.CSV	2711.54	0.0287628
CAM112A_map3	0002.CSV	2715.4	0.0287518
CAM112A_map3	0002.CSV	2719.25	0.0289874
CAM112A_map3	0002.CSV	2723.11	0.0293735
CAM112A_map3	0002.CSV	2726.97	0.0294625
CAM112A_map3	0002.CSV	2730.82	0.0290853
CAM112A_map3	0002.CSV	2734.68	0.0291308
CAM112A_map3	0002.CSV	2738.54	0.0292464
CAM112A_map3	0002.CSV	2742.4	0.0293475
CAM112A_map3	0002.CSV	2746.25	0.0296855
CAM112A_map3	0002.CSV	2750.11	0.029777
CAM112A_map3	0002.CSV	2753.97	0.0294236
CAM112A_map3	0002.CSV	2757.82	0.0293699
CAM112A_map3	0002.CSV	2761.68	0.0293095
CAM112A_map3	0002.CSV	2765.54	0.0293582
CAM112A_map3	0002.CSV	2769.39	0.029586
CAM112A_map3	0002.CSV	2773.25	0.0301298
CAM112A_map3	0002.CSV	2777.11	0.0300816
CAM112A_map3	0002.CSV	2780.97	0.0299055
CAM112A_map3	0002.CSV	2784.82	0.0301939
CAM112A_map3	0002.CSV	2788.68	0.0307987
CAM112A_map3	0002.CSV	2792.54	0.0309702
CAM112A_map3	0002.CSV	2796.39	0.0311056
CAM112A_map3	0002.CSV	2800.25	0.0309873
CAM112A_map3	0002.CSV	2804.11	0.0308632
CAM112A_map3	0002.CSV	2807.97	0.03119
CAM112A_map3	0002.CSV	2811.82	0.0313819
CAM112A_map3	0002.CSV	2815.68	0.03135
CAM112A_map3	0002.CSV	2819.54	0.0317568
CAM112A_map3	0002.CSV	2823.39	0.0321433
CAM112A_map3	0002.CSV	2827.25	0.0325906
CAM112A_map3	0002.CSV	2831.11	0.0335958
CAM112A_map3	0002.CSV	2834.97	0.0354226
CAM112A_map3	0002.CSV	2838.82	0.0376232
CAM112A_map3	0002.CSV	2842.68	0.0411695
CAM112A_map3	0002.CSV	2846.54	0.0468531
CAM112A_map3	0002.CSV	2850.39	0.0507625
CAM112A_map3	0002.CSV	2854.25	0.0497979
CAM112A_map3	0002.CSV	2858.11	0.0467594
CAM112A_map3	0002.CSV	2861.97	0.0434708
CAM112A_map3	0002.CSV	2865.82	0.0414246
CAM112A_map3	0002.CSV	2869.68	0.0409762
CAM112A_map3	0002.CSV	2873.54	0.0407418
CAM112A_map3	0002.CSV	2877.39	0.0394306
CAM112A_map3	0002.CSV	2881.25	0.0387148
CAM112A_map3	0002.CSV	2885.11	0.0390588
CAM112A_map3	0002.CSV	2888.97	0.0402677
CAM112A_map3	0002.CSV	2892.82	0.0420725
CAM112A_map3	0002.CSV	2896.68	0.0438214
CAM112A_map3	0002.CSV	2900.54	0.0452138
CAM112A_map3	0002.CSV	2904.39	0.0475243
CAM112A_map3	0002.CSV	2908.25	0.0513895
CAM112A_map3	0002.CSV	2912.11	0.0576845
CAM112A_map3	0002.CSV	2915.97	0.0638722
CAM112A_map3	0002.CSV	2919.82	0.0661014
CAM112A_map3	0002.CSV	2923.68	0.0642727
CAM112A_map3	0002.CSV	2927.54	0.0611032
CAM112A_map3	0002.CSV	2931.39	0.0566324
CAM112A_map3	0002.CSV	2935.25	0.051768
CAM112A_map3	0002.CSV	2939.11	0.0481051
CAM112A_map3	0002.CSV	2942.96	0.0462665
CAM112A_map3	0002.CSV	2946.82	0.0449997
CAM112A_map3	0002.CSV	2950.68	0.0442455
CAM112A_map3	0002.CSV	2954.54	0.043482
CAM112A_map3	0002.CSV	2958.39	0.0422865
CAM112A_map3	0002.CSV	2962.25	0.040771
CAM112A_map3	0002.CSV	2966.11	0.0388674
CAM112A_map3	0002.CSV	2969.96	0.0373439
CAM112A_map3	0002.CSV	2973.82	0.0366704
CAM112A_map3	0002.CSV	2977.68	0.0360692
CAM112A_map3	0002.CSV	2981.53	0.0350799
CAM112A_map3	0002.CSV	2985.39	0.0336567
CAM112A_map3	0002.CSV	2989.25	0.0332755
CAM112A_map3	0002.CSV	2993.11	0.0333329
CAM112A_map3	0002.CSV	2996.96	0.0329045
CAM112A_map3	0002.CSV	3000.82	0.0322311
CAM112A_map3	0002.CSV	3004.68	0.0319186
CAM112A_map3	0002.CSV	3008.53	0.032111
CAM112A_map3	0002.CSV	3012.39	0.0326079
CAM112A_map3	0002.CSV	3016.25	0.0325869
CAM112A_map3	0002.CSV	3020.11	0.032288
CAM112A_map3	0002.CSV	3023.96	0.0318992
CAM112A_map3	0002.CSV	3027.82	0.0318228
CAM112A_map3	0002.CSV	3031.68	0.032087
CAM112A_map3	0002.CSV	3035.53	0.03218
CAM112A_map3	0002.CSV	3039.39	0.0321232
CAM112A_map3	0002.CSV	3043.25	0.0323015
CAM112A_map3	0002.CSV	3047.11	0.0320583
CAM112A_map3	0002.CSV	3050.96	0.03197
CAM112A_map3	0002.CSV	3054.82	0.0318774
CAM112A_map3	0002.CSV	3058.68	0.0317749
CAM112A_map3	0002.CSV	3062.53	0.0318543
CAM112A_map3	0002.CSV	3066.39	0.0322564
CAM112A_map3	0002.CSV	3070.25	0.0320919
CAM112A_map3	0002.CSV	3074.11	0.0321512
CAM112A_map3	0002.CSV	3077.96	0.0325894
CAM112A_map3	0002.CSV	3081.82	0.0328536
CAM112A_map3	0002.CSV	3085.68	0.0326629
CAM112A_map3	0002.CSV	3089.53	0.0324352
CAM112A_map3	0002.CSV	3093.39	0.0320538
CAM112A_map3	0002.CSV	3097.25	0.0321217
CAM112A_map3	0002.CSV	3101.11	0.0322219
CAM112A_map3	0002.CSV	3104.96	0.0323425
CAM112A_map3	0002.CSV	3108.82	0.0325531
CAM112A_map3	0002.CSV	3112.68	0.0327544
CAM112A_map3	0002.CSV	3116.53	0.0329245
CAM112A_map3	0002.CSV	3120.39	0.0328391
CAM112A_map3	0002.CSV	3124.25	0.0323893
CAM112A_map3	0002.CSV	3128.11	0.0323901
CAM112A_map3	0002.CSV	3131.96	0.0323968
CAM112A_map3	0002.CSV	3135.82	0.0325998
CAM112A_map3	0002.CSV	3139.68	0.0327394
CAM112A_map3	0002.CSV	3143.53	0.0325826
CAM112A_map3	0002.CSV	3147.39	0.0326967
CAM112A_map3	0002.CSV	3151.25	0.0331239
CAM112A_map3	0002.CSV	3155.1	0.0329486
CAM112A_map3	0002.CSV	3158.96	0.0324763
CAM112A_map3	0002.CSV	3162.82	0.0322763
CAM112A_map3	0002.CSV	3166.68	0.0323572
CAM112A_map3	0002.CSV	3170.53	0.0323921
CAM112A_map3	0002.CSV	3174.39	0.0325027
CAM112A_map3	0002.CSV	3178.25	0.0326067
CAM112A_map3	0002.CSV	3182.1	0.0328071
CAM112A_map3	0002.CSV	3185.96	0.0329026
CAM112A_map3	0002.CSV	3189.82	0.033066
CAM112A_map3	0002.CSV	3193.68	0.0329729
CAM112A_map3	0002.CSV	3197.53	0.0329621
CAM112A_map3	0002.CSV	3201.39	0.0331378
CAM112A_map3	0002.CSV	3205.25	0.0332808
CAM112A_map3	0002.CSV	3209.1	0.0332527
CAM112A_map3	0002.CSV	3212.96	0.0334338
CAM112A_map3	0002.CSV	3216.82	0.0335752
CAM112A_map3	0002.CSV	3220.68	0.0335838
CAM112A_map3	0002.CSV	3224.53	0.0335237
CAM112A_map3	0002.CSV	3228.39	0.0338796
CAM112A_map3	0002.CSV	3232.25	0.0343743
CAM112A_map3	0002.CSV	3236.1	0.0342566
CAM112A_map3	0002.CSV	3239.96	0.0338726
CAM112A_map3	0002.CSV	3243.82	0.0341071
CAM112A_map3	0002.CSV	3247.68	0.03425
CAM112A_map3	0002.CSV	3251.53	0.0341237
CAM112A_map3	0002.CSV	3255.39	0.0342126
CAM112A_map3	0002.CSV	3259.25	0.0340346
CAM112A_map3	0002.CSV	3263.1	0.0338209
CAM112A_map3	0002.CSV	3266.96	0.0342305
CAM112A_map3	0002.CSV	3270.82	0.0347379
CAM112A_map3	0002.CSV	3274.68	0.0347609
CAM112A_map3	0002.CSV	3278.53	0.0343984
CAM112A_map3	0002.CSV	3282.39	0.0342364
CAM112A_map3	0002.CSV	3286.25	0.0343507
CAM112A_map3	0002.CSV	3290.1	0.0348873
CAM112A_map3	0002.CSV	3293.96	0.0352485
CAM112A_map3	0002.CSV	3297.82	0.0350454
CAM112A_map3	0002.CSV	3301.67	0.0349732
CAM112A_map3	0002.CSV	3305.53	0.035256
CAM112A_map3	0002.CSV	3309.39	0.0351004
CAM112A_map3	0002.CSV	3313.25	0.0344956
CAM112A_map3	0002.CSV	3317.1	0.034119
CAM112A_map3	0002.CSV	3320.96	0.0343995
CAM112A_map3	0002.CSV	3324.82	0.0348254
CAM112A_map3	0002.CSV	3328.67	0.0346404
CAM112A_map3	0002.CSV	3332.53	0.0344952
CAM112A_map3	0002.CSV	3336.39	0.0349847
CAM112A_map3	0002.CSV	3340.24	0.0352302
CAM112A_map3	0002.CSV	3344.1	0.0349804
CAM112A_map3	0002.CSV	3347.96	0.034954
CAM112A_map3	0002.CSV	3351.82	0.0348108
CAM112A_map3	0002.CSV	3355.67	0.0344534
CAM112A_map3	0002.CSV	3359.53	0.0346634
CAM112A_map3	0002.CSV	3363.39	0.0351142
CAM112A_map3	0002.CSV	3367.24	0.0354861
CAM112A_map3	0002.CSV	3371.1	0.0351696
CAM112A_map3	0002.CSV	3374.96	0.0347456
CAM112A_map3	0002.CSV	3378.82	0.0345376
CAM112A_map3	0002.CSV	3382.67	0.0342146
CAM112A_map3	0002.CSV	3386.53	0.034241
CAM112A_map3	0002.CSV	3390.39	0.0347493
CAM112A_map3	0002.CSV	3394.24	0.0350545
CAM112A_map3	0002.CSV	3398.1	0.0351121
CAM112A_map3	0002.CSV	3401.96	0.0348492
CAM112A_map3	0002.CSV	3405.82	0.0343738
CAM112A_map3	0002.CSV	3409.67	0.0343051
CAM112A_map3	0002.CSV	3413.53	0.033991
CAM112A_map3	0002.CSV	3417.39	0.0334717
CAM112A_map3	0002.CSV	3421.24	0.0333446
CAM112A_map3	0002.CSV	3425.1	0.033451
CAM112A_map3	0002.CSV	3428.96	0.033826
CAM112A_map3	0002.CSV	3432.82	0.0341811
CAM112A_map3	0002.CSV	3436.67	0.0338693
CAM112A_map3	0002.CSV	3440.53	0.0330115
CAM112A_map3	0002.CSV	3444.39	0.0325705
CAM112A_map3	0002.CSV	3448.24	0.0325133
CAM112A_map3	0002.CSV	3452.1	0.0322037
CAM112A_map3	0002.CSV	3455.96	0.0321525
CAM112A_map3	0002.CSV	3459.82	0.0324906
CAM112A_map3	0002.CSV	3463.67	0.0328424
CAM112A_map3	0002.CSV	3467.53	0.0329566
CAM112A_map3	0002.CSV	3471.39	0.0324639
CAM112A_map3	0002.CSV	3475.24	0.0320916
CAM112A_map3	0002.CSV	3479.1	0.0321409
CAM112A_map3	0002.CSV	3482.96	0.0319779
CAM112A_map3	0002.CSV	3486.82	0.0318683
CAM112A_map3	0002.CSV	3490.67	0.0316036
CAM112A_map3	0002.CSV	3494.53	0.0315984
CAM112A_map3	0002.CSV	3498.39	0.0315288
CAM112A_map3	0002.CSV	3502.24	0.0312154
CAM112A_map3	0002.CSV	3506.1	0.0307166
CAM112A_map3	0002.CSV	3509.96	0.0306192
CAM112A_map3	0002.CSV	3513.81	0.030763
CAM112A_map3	0002.CSV	3517.67	0.0303981
CAM112A_map3	0002.CSV	3521.53	0.030271
CAM112A_map3	0002.CSV	3525.39	0.0302797
CAM112A_map3	0002.CSV	3529.24	0.0300332
CAM112A_map3	0002.CSV	3533.1	0.0301152
CAM112A_map3	0002.CSV	3536.96	0.0304111
CAM112A_map3	0002.CSV	3540.81	0.0305138
CAM112A_map3	0002.CSV	3544.67	0.0304531
CAM112A_map3	0002.CSV	3548.53	0.0300357
CAM112A_map3	0002.CSV	3552.39	0.0294092
CAM112A_map3	0002.CSV	3556.24	0.0292002
CAM112A_map3	0002.CSV	3560.1	0.0289546
CAM112A_map3	0002.CSV	3563.96	0.0283325
CAM112A_map3	0002.CSV	3567.81	0.028745
CAM112A_map3	0002.CSV	3571.67	0.0289179
CAM112A_map3	0002.CSV	3575.53	0.0282746
CAM112A_map3	0002.CSV	3579.39	0.0285188
CAM112A_map3	0002.CSV	3583.24	0.0285896
CAM112A_map3	0002.CSV	3587.1	0.0286661
CAM112A_map3	0002.CSV	3590.96	0.0284852
CAM112A_map3	0002.CSV	3594.81	0.0281886
CAM112A_map3	0002.CSV	3598.67	0.0282404
CAM112A_map3	0002.CSV	3602.53	0.0279831
CAM112A_map3	0002.CSV	3606.39	0.0271993
CAM112A_map3	0002.CSV	3610.24	0.0269466
CAM112A_map3	0002.CSV	3614.1	0.0268618
CAM112A_map3	0002.CSV	3617.96	0.0272954
CAM112A_map3	0002.CSV	3621.81	0.0274601
CAM112A_map3	0002.CSV	3625.67	0.0264597
CAM112A_map3	0002.CSV	3629.53	0.0264044
CAM112A_map3	0002.CSV	3633.39	0.027211
CAM112A_map3	0002.CSV	3637.24	0.0269788
CAM112A_map3	0002.CSV	3641.1	0.0265943
CAM112A_map3	0002.CSV	3644.96	0.0257735
CAM112A_map3	0002.CSV	3648.81	0.026432
CAM112A_map3	0002.CSV	3652.67	0.0273527
CAM112A_map3	0002.CSV	3656.53	0.0274116
CAM112A_map3	0002.CSV	3660.38	0.0272977
CAM112A_map3	0002.CSV	3664.24	0.0262501
CAM112A_map3	0002.CSV	3668.1	0.0251613
CAM112A_map3	0002.CSV	3671.96	0.0252845
CAM112A_map3	0002.CSV	3675.81	0.0260772
CAM112A_map3	0002.CSV	3679.67	0.0266541
CAM112A_map3	0002.CSV	3683.53	0.0261664
CAM112A_map3	0002.CSV	3687.38	0.0259454
CAM112A_map3	0002.CSV	3691.24	0.0268442
CAM112A_map3	0002.CSV	3695.1	0.0267716
CAM112A_map3	0002.CSV	3698.95	0.0259957
CAM112A_map3	0002.CSV	3702.81	0.0257674
CAM112A_map3	0002.CSV	3706.67	0.0251637
CAM112A_map3	0002.CSV	3710.53	0.025334
CAM112A_map3	0002.CSV	3714.38	0.0261528
CAM112A_map3	0002.CSV	3718.24	0.0254827
CAM112A_map3	0002.CSV	3722.1	0.0249507
CAM112A_map3	0002.CSV	3725.95	0.0252073
CAM112A_map3	0002.CSV	3729.81	0.0250099
CAM112A_map3	0002.CSV	3733.67	0.0253977
CAM112A_map3	0002.CSV	3737.53	0.0263138
CAM112A_map3	0002.CSV	3741.38	0.0252898
CAM112A_map3	0002.CSV	3745.24	0.0243752
CAM112A_map3	0002.CSV	3749.1	0.0247036
CAM112A_map3	0002.CSV	3752.95	0.025616
CAM112A_map3	0002.CSV	3756.81	0.0257142
CAM112A_map3	0002.CSV	3760.67	0.0255847
CAM112A_map3	0002.CSV	3764.53	0.0253646
CAM112A_map3	0002.CSV	3768.38	0.0255117
CAM112A_map3	0002.CSV	3772.24	0.0257356
CAM112A_map3	0002.CSV	3776.1	0.0253216
CAM112A_map3	0002.CSV	3779.95	0.02547
CAM112A_map3	0002.CSV	3783.81	0.0254933
CAM112A_map3	0002.CSV	3787.67	0.0254823
CAM112A_map3	0002.CSV	3791.53	0.0250599
CAM112A_map3	0002.CSV	3795.38	0.0244806
CAM112A_map3	0002.CSV	3799.24	0.0243846
CAM112A_map3	0002.CSV	3803.1	0.0251293
CAM112A_map3	0002.CSV	3806.95	0.0255796
CAM112A_map3	0002.CSV	3810.81	0.0252016
CAM112A_map3	0002.CSV	3814.67	0.0244829
CAM112A_map3	0002.CSV	3818.53	0.0247924
CAM112A_map3	0002.CSV	3822.38	0.0253454
CAM112A_map3	0002.CSV	3826.24	0.0252295
CAM112A_map3	0002.CSV	3830.1	0.0247026
CAM112A_map3	0002.CSV	3833.95	0.0244033
CAM112A_map3	0002.CSV	3837.81	0.0246892
CAM112A_map3	0002.CSV	3841.67	0.0256889
CAM112A_map3	0002.CSV	3845.53	0.0252747
CAM112A_map3	0002.CSV	3849.38	0.024137
CAM112A_map3	0002.CSV	3853.24	0.0244578
CAM112A_map3	0002.CSV	3857.1	0.025613
CAM112A_map3	0002.CSV	3860.95	0.0249156
CAM112A_map3	0002.CSV	3864.81	0.0250943
CAM112A_map3	0002.CSV	3868.67	0.0252141
CAM112A_map3	0002.CSV	3872.52	0.0256075
CAM112A_map3	0002.CSV	3876.38	0.0251918
CAM112A_map3	0002.CSV	3880.24	0.0248662
CAM112A_map3	0002.CSV	3884.1	0.0254063
CAM112A_map3	0002.CSV	3887.95	0.025498
CAM112A_map3	0002.CSV	3891.81	0.0253309
CAM112A_map3	0002.CSV	3895.67	0.0250782
CAM112A_map3	0002.CSV	3899.52	0.0247069
CAM112A_map3	0002.CSV	3903.38	0.0258041
CAM112A_map3	0002.CSV	3907.24	0.0259569
CAM112A_map3	0002.CSV	3911.1	0.0252594
CAM112A_map3	0002.CSV	3914.95	0.0248643
CAM112A_map3	0002.CSV	3918.81	0.0251985
CAM112A_map3	0002.CSV	3922.67	0.0252336
CAM112A_map3	0002.CSV	3926.52	0.0252219
CAM112A_map3	0002.CSV	3930.38	0.0253349
CAM112A_map3	0002.CSV	3934.24	0.0257943
CAM112A_map3	0002.CSV	3938.09	0.0253754
CAM112A_map3	0002.CSV	3941.95	0.0251942
CAM112A_map3	0002.CSV	3945.81	0.0253049
CAM112A_map3	0002.CSV	3949.67	0.0255502
CAM112A_map3	0002.CSV	3953.52	0.0255502
CAM112A_map3	0002.CSV	3957.38	0.0254218
CAM112A_map3	0002.CSV	3961.24	0.0254149
CAM112A_map3	0002.CSV	3965.09	0.0255326
CAM112A_map3	0002.CSV	3968.95	0.0253561
CAM112A_map3	0002.CSV	3972.81	0.0253714
CAM112A_map3	0002.CSV	3976.67	0.02543
CAM112A_map3	0002.CSV	3980.52	0.0253829
CAM112A_map3	0002.CSV	3984.38	0.0252483
CAM112A_map3	0002.CSV	3988.24	0.0252329
CAM112A_map3	0002.CSV	3992.09	0.0252442
CAM112A_map3	0002.CSV	3995.95	0.0253015
CAM112A_map3	0002.CSV	3999.81	0.0251835
CAM112A_map3	0003.CSV	674.992	0.0364139
CAM112A_map3	0003.CSV	678.849	0.0394721
CAM112A_map3	0003.CSV	682.706	0.0413973
CAM112A_map3	0003.CSV	686.563	0.0456601
CAM112A_map3	0003.CSV	690.42	0.0500986
CAM112A_map3	0003.CSV	694.277	0.0641031
CAM112A_map3	0003.CSV	698.134	0.0834408
CAM112A_map3	0003.CSV	701.991	0.0815067
CAM112A_map3	0003.CSV	705.849	0.0736337
CAM112A_map3	0003.CSV	709.706	0.0987518
CAM112A_map3	0003.CSV	713.563	0.106418
CAM112A_map3	0003.CSV	717.42	0.068558
CAM112A_map3	0003.CSV	721.277	0.0393496
CAM112A_map3	0003.CSV	725.134	0.0342348
CAM112A_map3	0003.CSV	728.991	0.0338815
CAM112A_map3	0003.CSV	732.848	0.0351293
CAM112A_map3	0003.CSV	736.705	0.03573
CAM112A_map3	0003.CSV	740.562	0.0371196
CAM112A_map3	0003.CSV	744.42	0.0376946
CAM112A_map3	0003.CSV	748.277	0.0388879
CAM112A_map3	0003.CSV	752.134	0.039331
CAM112A_map3	0003.CSV	755.991	0.0409274
CAM112A_map3	0003.CSV	759.848	0.0413209
CAM112A_map3	0003.CSV	763.705	0.0424222
CAM112A_map3	0003.CSV	767.562	0.0428781
CAM112A_map3	0003.CSV	771.419	0.0440039
CAM112A_map3	0003.CSV	775.276	0.0445663
CAM112A_map3	0003.CSV	779.133	0.0458472
CAM112A_map3	0003.CSV	782.99	0.0462595
CAM112A_map3	0003.CSV	786.848	0.0473415
CAM112A_map3	0003.CSV	790.705	0.0478
CAM112A_map3	0003.CSV	794.562	0.0491224
CAM112A_map3	0003.CSV	798.419	0.0501465
CAM112A_map3	0003.CSV	802.276	0.0521547
CAM112A_map3	0003.CSV	806.133	0.0536717
CAM112A_map3	0003.CSV	809.99	0.0560907
CAM112A_map3	0003.CSV	813.847	0.0579528
CAM112A_map3	0003.CSV	817.704	0.0612617
CAM112A_map3	0003.CSV	821.562	0.0650387
CAM112A_map3	0003.CSV	825.419	0.0706464
CAM112A_map3	0003.CSV	829.276	0.0771314
CAM112A_map3	0003.CSV	833.133	0.0871376
CAM112A_map3	0003.CSV	836.99	0.103621
CAM112A_map3	0003.CSV	840.847	0.130964
CAM112A_map3	0003.CSV	844.704	0.160567
CAM112A_map3	0003.CSV	848.561	0.202916
CAM112A_map3	0003.CSV	852.418	0.242812
CAM112A_map3	0003.CSV	856.275	0.234705
CAM112A_map3	0003.CSV	860.132	0.19586
CAM112A_map3	0003.CSV	863.99	0.155811
CAM112A_map3	0003.CSV	867.847	0.116798
CAM112A_map3	0003.CSV	871.704	0.0843551
CAM112A_map3	0003.CSV	875.561	0.063837
CAM112A_map3	0003.CSV	879.418	0.0531072
CAM112A_map3	0003.CSV	883.275	0.0456034
CAM112A_map3	0003.CSV	887.132	0.0411155
CAM112A_map3	0003.CSV	890.989	0.0394495
CAM112A_map3	0003.CSV	894.846	0.0397827
CAM112A_map3	0003.CSV	898.703	0.0404117
CAM112A_map3	0003.CSV	902.561	0.0415162
CAM112A_map3	0003.CSV	906.418	0.0425642
CAM112A_map3	0003.CSV	910.275	0.0431489
CAM112A_map3	0003.CSV	914.132	0.042566
CAM112A_map3	0003.CSV	917.989	0.0430002
CAM112A_map3	0003.CSV	921.846	0.04357
CAM112A_map3	0003.CSV	925.703	0.0443541
CAM112A_map3	0003.CSV	929.56	0.0447989
CAM112A_map3	0003.CSV	933.417	0.0454701
CAM112A_map3	0003.CSV	937.274	0.0457868
CAM112A_map3	0003.CSV	941.131	0.046261
CAM112A_map3	0003.CSV	944.989	0.0464628
CAM112A_map3	0003.CSV	948.846	0.0470124
CAM112A_map3	0003.CSV	952.703	0.0475136
CAM112A_map3	0003.CSV	956.56	0.048179
CAM112A_map3	0003.CSV	960.417	0.0483115
CAM112A_map3	0003.CSV	964.274	0.0486766
CAM112A_map3	0003.CSV	968.131	0.0490317
CAM112A_map3	0003.CSV	971.988	0.0497729
CAM112A_map3	0003.CSV	975.845	0.0502565
CAM112A_map3	0003.CSV	979.702	0.0510008
CAM112A_map3	0003.CSV	983.559	0.051444
CAM112A_map3	0003.CSV	987.417	0.0521221
CAM112A_map3	0003.CSV	991.274	0.0525845
CAM112A_map3	0003.CSV	995.131	0.053215
CAM112A_map3	0003.CSV	998.988	0.0536008
CAM112A_map3	0003.CSV	1002.85	0.0543209
CAM112A_map3	0003.CSV	1006.7	0.0547891
CAM112A_map3	0003.CSV	1010.56	0.0555137
CAM112A_map3	0003.CSV	1014.42	0.0559952
CAM112A_map3	0003.CSV	1018.27	0.0567355
CAM112A_map3	0003.CSV	1022.13	0.057282
CAM112A_map3	0003.CSV	1025.99	0.0581442
CAM112A_map3	0003.CSV	1029.85	0.0587664
CAM112A_map3	0003.CSV	1033.7	0.0596811
CAM112A_map3	0003.CSV	1037.56	0.0603637
CAM112A_map3	0003.CSV	1041.42	0.0613308
CAM112A_map3	0003.CSV	1045.27	0.0619153
CAM112A_map3	0003.CSV	1049.13	0.0627465
CAM112A_map3	0003.CSV	1052.99	0.0633782
CAM112A_map3	0003.CSV	1056.84	0.0645938
CAM112A_map3	0003.CSV	1060.7	0.0657955
CAM112A_map3	0003.CSV	1064.56	0.067429
CAM112A_map3	0003.CSV	1068.42	0.0690302
CAM112A_map3	0003.CSV	1072.27	0.0714099
CAM112A_map3	0003.CSV	1076.13	0.0758981
CAM112A_map3	0003.CSV	1079.99	0.0862218
CAM112A_map3	0003.CSV	1083.84	0.0893424
CAM112A_map3	0003.CSV	1087.7	0.0775033
CAM112A_map3	0003.CSV	1091.56	0.0685901
CAM112A_map3	0003.CSV	1095.41	0.0672353
CAM112A_map3	0003.CSV	1099.27	0.0673741
CAM112A_map3	0003.CSV	1103.13	0.0680342
CAM112A_map3	0003.CSV	1106.99	0.0686413
CAM112A_map3	0003.CSV	1110.84	0.0694925
CAM112A_map3	0003.CSV	1114.7	0.0699436
CAM112A_map3	0003.CSV	1118.56	0.0705625
CAM112A_map3	0003.CSV	1122.41	0.0710276
CAM112A_map3	0003.CSV	1126.27	0.0717131
CAM112A_map3	0003.CSV	1130.13	0.0720714
CAM112A_map3	0003.CSV	1133.99	0.0726167
CAM112A_map3	0003.CSV	1137.84	0.0730893
CAM112A_map3	0003.CSV	1141.7	0.0738686
CAM112A_map3	0003.CSV	1145.56	0.0744149
CAM112A_map3	0003.CSV	1149.41	0.0752398
CAM112A_map3	0003.CSV	1153.27	0.0759558
CAM112A_map3	0003.CSV	1157.13	0.0769632
CAM112A_map3	0003.CSV	1160.99	0.0777374
CAM112A_map3	0003.CSV	1164.84	0.0787206
CAM112A_map3	0003.CSV	1168.7	0.0793644
CAM112A_map3	0003.CSV	1172.56	0.0800224
CAM112A_map3	0003.CSV	1176.41	0.0803648
CAM112A_map3	0003.CSV	1180.27	0.0807856
CAM112A_map3	0003.CSV	1184.13	0.0808377
CAM112A_map3	0003.CSV	1187.99	0.0809721
CAM112A_map3	0003.CSV	1191.84	0.0808338
CAM112A_map3	0003.CSV	1195.7	0.0809988
CAM112A_map3	0003.CSV	1199.56	0.0811258
CAM112A_map3	0003.CSV	1203.41	0.0816206
CAM112A_map3	0003.CSV	1207.27	0.0819864
CAM112A_map3	0003.CSV	1211.13	0.0827677
CAM112A_map3	0003.CSV	1214.98	0.0834802
CAM112A_map3	0003.CSV	1218.84	0.0845097
CAM112A_map3	0003.CSV	1222.7	0.0854749
CAM112A_map3	0003.CSV	1226.56	0.086831
CAM112A_map3	0003.CSV	1230.41	0.0879592
CAM112A_map3	0003.CSV	1234.27	0.0893489
CAM112A_map3	0003.CSV	1238.13	0.0905993
CAM112A_map3	0003.CSV	1241.98	0.0921366
CAM112A_map3	0003.CSV	1245.84	0.0933817
CAM112A_map3	0003.CSV	1249.7	0.0948149
CAM112A_map3	0003.CSV	1253.56	0.0957671
CAM112A_map3	0003.CSV	1257.41	0.096801
CAM112A_map3	0003.CSV	1261.27	0.0978226
CAM112A_map3	0003.CSV	1265.13	0.0994314
CAM112A_map3	0003.CSV	1268.98	0.101052
CAM112A_map3	0003.CSV	1272.84	0.103071
CAM112A_map3	0003.CSV	1276.7	0.104683
CAM112A_map3	0003.CSV	1280.56	0.1064
CAM112A_map3	0003.CSV	1284.41	0.107766
CAM112A_map3	0003.CSV	1288.27	0.109361
CAM112A_map3	0003.CSV	1292.13	0.110669
CAM112A_map3	0003.CSV	1295.98	0.112362
CAM112A_map3	0003.CSV	1299.84	0.114003
CAM112A_map3	0003.CSV	1303.7	0.116058
CAM112A_map3	0003.CSV	1307.56	0.11793
CAM112A_map3	0003.CSV	1311.41	0.120317
CAM112A_map3	0003.CSV	1315.27	0.122677
CAM112A_map3	0003.CSV	1319.13	0.125468
CAM112A_map3	0003.CSV	1322.98	0.127832
CAM112A_map3	0003.CSV	1326.84	0.130685
CAM112A_map3	0003.CSV	1330.7	0.133649
CAM112A_map3	0003.CSV	1334.56	0.13707
CAM112A_map3	0003.CSV	1338.41	0.141157
CAM112A_map3	0003.CSV	1342.27	0.146558
CAM112A_map3	0003.CSV	1346.13	0.151008
CAM112A_map3	0003.CSV	1349.98	0.156364
CAM112A_map3	0003.CSV	1353.84	0.161766
CAM112A_map3	0003.CSV	1357.7	0.167602
CAM112A_map3	0003.CSV	1361.56	0.174028
CAM112A_map3	0003.CSV	1365.41	0.181933
CAM112A_map3	0003.CSV	1369.27	0.188363
CAM112A_map3	0003.CSV	1373.13	0.196725
CAM112A_map3	0003.CSV	1376.98	0.205975
CAM112A_map3	0003.CSV	1380.84	0.214329
CAM112A_map3	0003.CSV	1384.7	0.222143
CAM112A_map3	0003.CSV	1388.56	0.232597
CAM112A_map3	0003.CSV	1392.41	0.241185
CAM112A_map3	0003.CSV	1396.27	0.251751
CAM112A_map3	0003.CSV	1400.13	0.261707
CAM112A_map3	0003.CSV	1403.98	0.27081
CAM112A_map3	0003.CSV	1407.84	0.279275
CAM112A_map3	0003.CSV	1411.7	0.28675
CAM112A_map3	0003.CSV	1415.55	0.29125
CAM112A_map3	0003.CSV	1419.41	0.297309
CAM112A_map3	0003.CSV	1423.27	0.301971
CAM112A_map3	0003.CSV	1427.12	0.307574
CAM112A_map3	0003.CSV	1430.98	0.313186
CAM112A_map3	0003.CSV	1434.84	0.320949
CAM112A_map3	0003.CSV	1438.7	0.327678
CAM112A_map3	0003.CSV	1442.55	0.331203
CAM112A_map3	0003.CSV	1446.41	0.328115
CAM112A_map3	0003.CSV	1450.27	0.32121
CAM112A_map3	0003.CSV	1454.12	0.312221
CAM112A_map3	0003.CSV	1457.98	0.301268
CAM112A_map3	0003.CSV	1461.84	0.291733
CAM112A_map3	0003.CSV	1465.7	0.284036
CAM112A_map3	0003.CSV	1469.55	0.272522
CAM112A_map3	0003.CSV	1473.41	0.254899
CAM112A_map3	0003.CSV	1477.27	0.235416
CAM112A_map3	0003.CSV	1481.12	0.224179
CAM112A_map3	0003.CSV	1484.98	0.21394
CAM112A_map3	0003.CSV	1488.84	0.20321
CAM112A_map3	0003.CSV	1492.7	0.192691
CAM112A_map3	0003.CSV	1496.55	0.18506
CAM112A_map3	0003.CSV	1500.41	0.176352
CAM112A_map3	0003.CSV	1504.27	0.170799
CAM112A_map3	0003.CSV	1508.12	0.159792
CAM112A_map3	0003.CSV	1511.98	0.151901
CAM112A_map3	0003.CSV	1515.84	0.145557
CAM112A_map3	0003.CSV	1519.7	0.137469
CAM112A_map3	0003.CSV	1523.55	0.127297
CAM112A_map3	0003.CSV	1527.41	0.12031
CAM112A_map3	0003.CSV	1531.27	0.114018
CAM112A_map3	0003.CSV	1535.12	0.108769
CAM112A_map3	0003.CSV	1538.98	0.103276
CAM112A_map3	0003.CSV	1542.84	0.0950691
CAM112A_map3	0003.CSV	1546.7	0.0885974
CAM112A_map3	0003.CSV	1550.55	0.0838383
CAM112A_map3	0003.CSV	1554.41	0.0786382
CAM112A_map3	0003.CSV	1558.27	0.0724179
CAM112A_map3	0003.CSV	1562.12	0.0663081
CAM112A_map3	0003.CSV	1565.98	0.0633956
CAM112A_map3	0003.CSV	1569.84	0.0594916
CAM112A_map3	0003.CSV	1573.69	0.0556661
CAM112A_map3	0003.CSV	1577.55	0.0505831
CAM112A_map3	0003.CSV	1581.41	0.0462315
CAM112A_map3	0003.CSV	1585.27	0.0426585
CAM112A_map3	0003.CSV	1589.12	0.0398948
CAM112A_map3	0003.CSV	1592.98	0.0378393
CAM112A_map3	0003.CSV	1596.84	0.0365672
CAM112A_map3	0003.CSV	1600.69	0.0354853
CAM112A_map3	0003.CSV	1604.55	0.034908
CAM112A_map3	0003.CSV	1608.41	0.0343537
CAM112A_map3	0003.CSV	1612.27	0.033893
CAM112A_map3	0003.CSV	1616.12	0.0331638
CAM112A_map3	0003.CSV	1619.98	0.0325794
CAM112A_map3	0003.CSV	1623.84	0.0316999
CAM112A_map3	0003.CSV	1627.69	0.0309995
CAM112A_map3	0003.CSV	1631.55	0.0299585
CAM112A_map3	0003.CSV	1635.41	0.0295469
CAM112A_map3	0003.CSV	1639.27	0.0291068
CAM112A_map3	0003.CSV	1643.12	0.0283895
CAM112A_map3	0003.CSV	1646.98	0.0278072
CAM112A_map3	0003.CSV	1650.84	0.0277763
CAM112A_map3	0003.CSV	1654.69	0.0277617
CAM112A_map3	0003.CSV	1658.55	0.0273839
CAM112A_map3	0003.CSV	1662.41	0.0268393
CAM112A_map3	0003.CSV	1666.27	0.0265865
CAM112A_map3	0003.CSV	1670.12	0.0263583
CAM112A_map3	0003.CSV	1673.98	0.0264793
CAM112A_map3	0003.CSV	1677.84	0.0258176
CAM112A_map3	0003.CSV	1681.69	0.0254415
CAM112A_map3	0003.CSV	1685.55	0.0255214
CAM112A_map3	0003.CSV	1689.41	0.0254012
CAM112A_map3	0003.CSV	1693.27	0.0246654
CAM112A_map3	0003.CSV	1697.12	0.0246873
CAM112A_map3	0003.CSV	1700.98	0.024919
CAM112A_map3	0003.CSV	1704.84	0.0250142
CAM112A_map3	0003.CSV	1708.69	0.0247685
CAM112A_map3	0003.CSV	1712.55	0.0245907
CAM112A_map3	0003.CSV	1716.41	0.0250409
CAM112A_map3	0003.CSV	1720.27	0.025817
CAM112A_map3	0003.CSV	1724.12	0.0254945
[truncated: 129,177 more rows]

## Sheet: CAM112_map4
Map	Select spectrum number	Wavenumbers	Absorbance
CAM112A_map4	0001.CSV	674.992	0.0333879
CAM112A_map4	0001.CSV	678.849	0.0353149
CAM112A_map4	0001.CSV	682.706	0.0360839
CAM112A_map4	0001.CSV	686.563	0.0407925
CAM112A_map4	0001.CSV	690.42	0.0469328
CAM112A_map4	0001.CSV	694.277	0.0642344
CAM112A_map4	0001.CSV	698.134	0.0873362
CAM112A_map4	0001.CSV	701.991	0.0856455
CAM112A_map4	0001.CSV	705.849	0.0727278
CAM112A_map4	0001.CSV	709.706	0.0958261
CAM112A_map4	0001.CSV	713.563	0.10937
CAM112A_map4	0001.CSV	717.42	0.0736597
CAM112A_map4	0001.CSV	721.277	0.0398656
CAM112A_map4	0001.CSV	725.134	0.0313975
CAM112A_map4	0001.CSV	728.991	0.0295681
CAM112A_map4	0001.CSV	732.848	0.0301381
CAM112A_map4	0001.CSV	736.705	0.0306519
CAM112A_map4	0001.CSV	740.562	0.0327013
CAM112A_map4	0001.CSV	744.42	0.033402
CAM112A_map4	0001.CSV	748.277	0.0349012
CAM112A_map4	0001.CSV	752.134	0.0350032
CAM112A_map4	0001.CSV	755.991	0.0360369
CAM112A_map4	0001.CSV	759.848	0.0362997
CAM112A_map4	0001.CSV	763.705	0.0374217
CAM112A_map4	0001.CSV	767.562	0.0374159
CAM112A_map4	0001.CSV	771.419	0.0382698
CAM112A_map4	0001.CSV	775.276	0.0380994
CAM112A_map4	0001.CSV	779.133	0.0388306
CAM112A_map4	0001.CSV	782.99	0.0390224
CAM112A_map4	0001.CSV	786.848	0.040026
CAM112A_map4	0001.CSV	790.705	0.040298
CAM112A_map4	0001.CSV	794.562	0.0417179
CAM112A_map4	0001.CSV	798.419	0.0426995
CAM112A_map4	0001.CSV	802.276	0.0447075
CAM112A_map4	0001.CSV	806.133	0.0458107
CAM112A_map4	0001.CSV	809.99	0.0480798
CAM112A_map4	0001.CSV	813.847	0.0501409
CAM112A_map4	0001.CSV	817.704	0.0538232
CAM112A_map4	0001.CSV	821.562	0.0576909
CAM112A_map4	0001.CSV	825.419	0.0638735
CAM112A_map4	0001.CSV	829.276	0.0713093
CAM112A_map4	0001.CSV	833.133	0.0837511
CAM112A_map4	0001.CSV	836.99	0.105477
CAM112A_map4	0001.CSV	840.847	0.141168
CAM112A_map4	0001.CSV	844.704	0.177385
CAM112A_map4	0001.CSV	848.561	0.222204
CAM112A_map4	0001.CSV	852.418	0.256873
CAM112A_map4	0001.CSV	856.275	0.236766
CAM112A_map4	0001.CSV	860.132	0.186751
CAM112A_map4	0001.CSV	863.99	0.141439
CAM112A_map4	0001.CSV	867.847	0.104017
CAM112A_map4	0001.CSV	871.704	0.0779433
CAM112A_map4	0001.CSV	875.561	0.0622802
CAM112A_map4	0001.CSV	879.418	0.0527165
CAM112A_map4	0001.CSV	883.275	0.0445508
CAM112A_map4	0001.CSV	887.132	0.0391081
CAM112A_map4	0001.CSV	890.989	0.0365107
CAM112A_map4	0001.CSV	894.846	0.0365221
CAM112A_map4	0001.CSV	898.703	0.0366
CAM112A_map4	0001.CSV	902.561	0.0374562
CAM112A_map4	0001.CSV	906.418	0.038528
CAM112A_map4	0001.CSV	910.275	0.0391715
CAM112A_map4	0001.CSV	914.132	0.0381833
CAM112A_map4	0001.CSV	917.989	0.0381361
CAM112A_map4	0001.CSV	921.846	0.0382953
CAM112A_map4	0001.CSV	925.703	0.0391149
CAM112A_map4	0001.CSV	929.56	0.0394363
CAM112A_map4	0001.CSV	933.417	0.0401303
CAM112A_map4	0001.CSV	937.274	0.0403942
CAM112A_map4	0001.CSV	941.131	0.04093
CAM112A_map4	0001.CSV	944.989	0.0409632
CAM112A_map4	0001.CSV	948.846	0.0415112
CAM112A_map4	0001.CSV	952.703	0.0418813
CAM112A_map4	0001.CSV	956.56	0.0426752
CAM112A_map4	0001.CSV	960.417	0.0428473
CAM112A_map4	0001.CSV	964.274	0.0433849
CAM112A_map4	0001.CSV	968.131	0.0437029
CAM112A_map4	0001.CSV	971.988	0.0444698
CAM112A_map4	0001.CSV	975.845	0.0448967
CAM112A_map4	0001.CSV	979.702	0.0457865
CAM112A_map4	0001.CSV	983.559	0.0462698
CAM112A_map4	0001.CSV	987.417	0.0470787
CAM112A_map4	0001.CSV	991.274	0.0474963
CAM112A_map4	0001.CSV	995.131	0.0483274
CAM112A_map4	0001.CSV	998.988	0.0488115
CAM112A_map4	0001.CSV	1002.85	0.0496832
CAM112A_map4	0001.CSV	1006.7	0.0502377
CAM112A_map4	0001.CSV	1010.56	0.0513092
CAM112A_map4	0001.CSV	1014.42	0.0520522
CAM112A_map4	0001.CSV	1018.27	0.0532428
CAM112A_map4	0001.CSV	1022.13	0.054116
CAM112A_map4	0001.CSV	1025.99	0.0553749
CAM112A_map4	0001.CSV	1029.85	0.05611
CAM112A_map4	0001.CSV	1033.7	0.0571729
CAM112A_map4	0001.CSV	1037.56	0.0579085
CAM112A_map4	0001.CSV	1041.42	0.0590316
CAM112A_map4	0001.CSV	1045.27	0.0595652
CAM112A_map4	0001.CSV	1049.13	0.0605239
CAM112A_map4	0001.CSV	1052.99	0.0613424
CAM112A_map4	0001.CSV	1056.84	0.0629994
CAM112A_map4	0001.CSV	1060.7	0.0645678
CAM112A_map4	0001.CSV	1064.56	0.0666384
CAM112A_map4	0001.CSV	1068.42	0.0681801
CAM112A_map4	0001.CSV	1072.27	0.0703776
CAM112A_map4	0001.CSV	1076.13	0.0745208
CAM112A_map4	0001.CSV	1079.99	0.0861143
CAM112A_map4	0001.CSV	1083.84	0.0920947
CAM112A_map4	0001.CSV	1087.7	0.0800094
CAM112A_map4	0001.CSV	1091.56	0.0683354
CAM112A_map4	0001.CSV	1095.41	0.0657036
CAM112A_map4	0001.CSV	1099.27	0.0653107
CAM112A_map4	0001.CSV	1103.13	0.0658632
CAM112A_map4	0001.CSV	1106.99	0.0664586
CAM112A_map4	0001.CSV	1110.84	0.0674911
CAM112A_map4	0001.CSV	1114.7	0.0679478
CAM112A_map4	0001.CSV	1118.56	0.0684679
CAM112A_map4	0001.CSV	1122.41	0.0684785
CAM112A_map4	0001.CSV	1126.27	0.0689459
CAM112A_map4	0001.CSV	1130.13	0.0690638
CAM112A_map4	0001.CSV	1133.99	0.0696089
CAM112A_map4	0001.CSV	1137.84	0.0700027
CAM112A_map4	0001.CSV	1141.7	0.0708026
CAM112A_map4	0001.CSV	1145.56	0.0712371
CAM112A_map4	0001.CSV	1149.41	0.0721196
CAM112A_map4	0001.CSV	1153.27	0.0728663
CAM112A_map4	0001.CSV	1157.13	0.0740131
CAM112A_map4	0001.CSV	1160.99	0.0749453
CAM112A_map4	0001.CSV	1164.84	0.0762403
CAM112A_map4	0001.CSV	1168.7	0.0769015
CAM112A_map4	0001.CSV	1172.56	0.077573
CAM112A_map4	0001.CSV	1176.41	0.0777566
CAM112A_map4	0001.CSV	1180.27	0.0781017
CAM112A_map4	0001.CSV	1184.13	0.0779367
CAM112A_map4	0001.CSV	1187.99	0.0780803
CAM112A_map4	0001.CSV	1191.84	0.0778834
CAM112A_map4	0001.CSV	1195.7	0.0780731
CAM112A_map4	0001.CSV	1199.56	0.0780698
CAM112A_map4	0001.CSV	1203.41	0.0785637
CAM112A_map4	0001.CSV	1207.27	0.0789741
CAM112A_map4	0001.CSV	1211.13	0.0799043
CAM112A_map4	0001.CSV	1214.98	0.0806143
CAM112A_map4	0001.CSV	1218.84	0.0818294
CAM112A_map4	0001.CSV	1222.7	0.0829504
CAM112A_map4	0001.CSV	1226.56	0.0845505
CAM112A_map4	0001.CSV	1230.41	0.0859434
CAM112A_map4	0001.CSV	1234.27	0.0878589
CAM112A_map4	0001.CSV	1238.13	0.0895361
CAM112A_map4	0001.CSV	1241.98	0.0916455
CAM112A_map4	0001.CSV	1245.84	0.0934419
CAM112A_map4	0001.CSV	1249.7	0.0954173
CAM112A_map4	0001.CSV	1253.56	0.0968461
CAM112A_map4	0001.CSV	1257.41	0.0984645
CAM112A_map4	0001.CSV	1261.27	0.0997688
CAM112A_map4	0001.CSV	1265.13	0.101697
CAM112A_map4	0001.CSV	1268.98	0.103662
CAM112A_map4	0001.CSV	1272.84	0.106158
CAM112A_map4	0001.CSV	1276.7	0.108149
CAM112A_map4	0001.CSV	1280.56	0.110321
CAM112A_map4	0001.CSV	1284.41	0.111908
CAM112A_map4	0001.CSV	1288.27	0.113711
CAM112A_map4	0001.CSV	1292.13	0.115046
CAM112A_map4	0001.CSV	1295.98	0.116801
CAM112A_map4	0001.CSV	1299.84	0.118394
CAM112A_map4	0001.CSV	1303.7	0.12062
CAM112A_map4	0001.CSV	1307.56	0.122704
CAM112A_map4	0001.CSV	1311.41	0.125522
CAM112A_map4	0001.CSV	1315.27	0.128321
CAM112A_map4	0001.CSV	1319.13	0.131668
CAM112A_map4	0001.CSV	1322.98	0.134381
CAM112A_map4	0001.CSV	1326.84	0.137639
CAM112A_map4	0001.CSV	1330.7	0.141061
CAM112A_map4	0001.CSV	1334.56	0.145197
CAM112A_map4	0001.CSV	1338.41	0.149984
CAM112A_map4	0001.CSV	1342.27	0.156407
CAM112A_map4	0001.CSV	1346.13	0.161862
CAM112A_map4	0001.CSV	1349.98	0.168393
CAM112A_map4	0001.CSV	1353.84	0.174905
CAM112A_map4	0001.CSV	1357.7	0.181981
CAM112A_map4	0001.CSV	1361.56	0.189634
CAM112A_map4	0001.CSV	1365.41	0.199214
CAM112A_map4	0001.CSV	1369.27	0.207019
CAM112A_map4	0001.CSV	1373.13	0.216803
CAM112A_map4	0001.CSV	1376.98	0.227225
CAM112A_map4	0001.CSV	1380.84	0.236347
CAM112A_map4	0001.CSV	1384.7	0.24415
CAM112A_map4	0001.CSV	1388.56	0.254419
CAM112A_map4	0001.CSV	1392.41	0.262525
CAM112A_map4	0001.CSV	1396.27	0.272511
CAM112A_map4	0001.CSV	1400.13	0.281633
CAM112A_map4	0001.CSV	1403.98	0.29018
CAM112A_map4	0001.CSV	1407.84	0.297875
CAM112A_map4	0001.CSV	1411.7	0.305242
CAM112A_map4	0001.CSV	1415.55	0.309619
CAM112A_map4	0001.CSV	1419.41	0.31549
CAM112A_map4	0001.CSV	1423.27	0.319506
CAM112A_map4	0001.CSV	1427.12	0.324994
CAM112A_map4	0001.CSV	1430.98	0.330576
CAM112A_map4	0001.CSV	1434.84	0.339115
CAM112A_map4	0001.CSV	1438.7	0.347994
CAM112A_map4	0001.CSV	1442.55	0.356003
CAM112A_map4	0001.CSV	1446.41	0.358881
CAM112A_map4	0001.CSV	1450.27	0.357997
CAM112A_map4	0001.CSV	1454.12	0.351258
CAM112A_map4	0001.CSV	1457.98	0.340371
CAM112A_map4	0001.CSV	1461.84	0.330007
CAM112A_map4	0001.CSV	1465.7	0.321618
CAM112A_map4	0001.CSV	1469.55	0.307895
CAM112A_map4	0001.CSV	1473.41	0.283784
CAM112A_map4	0001.CSV	1477.27	0.25612
CAM112A_map4	0001.CSV	1481.12	0.239847
CAM112A_map4	0001.CSV	1484.98	0.22501
CAM112A_map4	0001.CSV	1488.84	0.2088
CAM112A_map4	0001.CSV	1492.7	0.193664
CAM112A_map4	0001.CSV	1496.55	0.182971
CAM112A_map4	0001.CSV	1500.41	0.170897
CAM112A_map4	0001.CSV	1504.27	0.163684
CAM112A_map4	0001.CSV	1508.12	0.150213
CAM112A_map4	0001.CSV	1511.98	0.141005
CAM112A_map4	0001.CSV	1515.84	0.134467
CAM112A_map4	0001.CSV	1519.7	0.126332
CAM112A_map4	0001.CSV	1523.55	0.117039
CAM112A_map4	0001.CSV	1527.41	0.111412
CAM112A_map4	0001.CSV	1531.27	0.106916
CAM112A_map4	0001.CSV	1535.12	0.103875
CAM112A_map4	0001.CSV	1538.98	0.10031
CAM112A_map4	0001.CSV	1542.84	0.0936188
CAM112A_map4	0001.CSV	1546.7	0.0871928
CAM112A_map4	0001.CSV	1550.55	0.0822248
CAM112A_map4	0001.CSV	1554.41	0.0769646
CAM112A_map4	0001.CSV	1558.27	0.0708825
CAM112A_map4	0001.CSV	1562.12	0.0653145
CAM112A_map4	0001.CSV	1565.98	0.0629333
CAM112A_map4	0001.CSV	1569.84	0.059842
CAM112A_map4	0001.CSV	1573.69	0.0567178
CAM112A_map4	0001.CSV	1577.55	0.0515719
CAM112A_map4	0001.CSV	1581.41	0.0463276
CAM112A_map4	0001.CSV	1585.27	0.0413967
CAM112A_map4	0001.CSV	1589.12	0.0374323
CAM112A_map4	0001.CSV	1592.98	0.0345914
CAM112A_map4	0001.CSV	1596.84	0.0327585
CAM112A_map4	0001.CSV	1600.69	0.0313158
CAM112A_map4	0001.CSV	1604.55	0.03051
CAM112A_map4	0001.CSV	1608.41	0.0297777
CAM112A_map4	0001.CSV	1612.27	0.0291572
CAM112A_map4	0001.CSV	1616.12	0.0282756
CAM112A_map4	0001.CSV	1619.98	0.0276925
CAM112A_map4	0001.CSV	1623.84	0.026785
CAM112A_map4	0001.CSV	1627.69	0.0259983
CAM112A_map4	0001.CSV	1631.55	0.0249363
CAM112A_map4	0001.CSV	1635.41	0.0241456
CAM112A_map4	0001.CSV	1639.27	0.0234171
CAM112A_map4	0001.CSV	1643.12	0.0227673
CAM112A_map4	0001.CSV	1646.98	0.0220873
CAM112A_map4	0001.CSV	1650.84	0.0219196
CAM112A_map4	0001.CSV	1654.69	0.0217507
CAM112A_map4	0001.CSV	1658.55	0.0214412
CAM112A_map4	0001.CSV	1662.41	0.0208743
CAM112A_map4	0001.CSV	1666.27	0.0204229
CAM112A_map4	0001.CSV	1670.12	0.0199436
CAM112A_map4	0001.CSV	1673.98	0.0199297
CAM112A_map4	0001.CSV	1677.84	0.0193852
CAM112A_map4	0001.CSV	1681.69	0.0189372
CAM112A_map4	0001.CSV	1685.55	0.0188475
CAM112A_map4	0001.CSV	1689.41	0.0188644
CAM112A_map4	0001.CSV	1693.27	0.018284
CAM112A_map4	0001.CSV	1697.12	0.0181165
CAM112A_map4	0001.CSV	1700.98	0.0183791
CAM112A_map4	0001.CSV	1704.84	0.0187339
CAM112A_map4	0001.CSV	1708.69	0.0187779
CAM112A_map4	0001.CSV	1712.55	0.0188482
CAM112A_map4	0001.CSV	1716.41	0.0195281
CAM112A_map4	0001.CSV	1720.27	0.0207267
CAM112A_map4	0001.CSV	1724.12	0.0208033
CAM112A_map4	0001.CSV	1727.98	0.0208194
CAM112A_map4	0001.CSV	1731.84	0.0209262
CAM112A_map4	0001.CSV	1735.69	0.0215153
CAM112A_map4	0001.CSV	1739.55	0.0211551
CAM112A_map4	0001.CSV	1743.41	0.0202118
CAM112A_map4	0001.CSV	1747.27	0.0187737
CAM112A_map4	0001.CSV	1751.12	0.0172548
CAM112A_map4	0001.CSV	1754.98	0.0159373
CAM112A_map4	0001.CSV	1758.84	0.0151402
CAM112A_map4	0001.CSV	1762.69	0.0146364
CAM112A_map4	0001.CSV	1766.55	0.0143966
CAM112A_map4	0001.CSV	1770.41	0.014775
CAM112A_map4	0001.CSV	1774.26	0.017116
CAM112A_map4	0001.CSV	1778.12	0.0198841
CAM112A_map4	0001.CSV	1781.98	0.0231081
CAM112A_map4	0001.CSV	1785.84	0.0249702
CAM112A_map4	0001.CSV	1789.69	0.0245682
CAM112A_map4	0001.CSV	1793.55	0.021642
CAM112A_map4	0001.CSV	1797.41	0.0187668
CAM112A_map4	0001.CSV	1801.26	0.0161388
CAM112A_map4	0001.CSV	1805.12	0.014193
CAM112A_map4	0001.CSV	1808.98	0.0129576
CAM112A_map4	0001.CSV	1812.84	0.0123007
CAM112A_map4	0001.CSV	1816.69	0.0117794
CAM112A_map4	0001.CSV	1820.55	0.0114981
CAM112A_map4	0001.CSV	1824.41	0.0112178
CAM112A_map4	0001.CSV	1828.26	0.0113359
CAM112A_map4	0001.CSV	1832.12	0.0113324
CAM112A_map4	0001.CSV	1835.98	0.0111721
CAM112A_map4	0001.CSV	1839.84	0.0109451
CAM112A_map4	0001.CSV	1843.69	0.0110799
CAM112A_map4	0001.CSV	1847.55	0.0111981
CAM112A_map4	0001.CSV	1851.41	0.0111212
CAM112A_map4	0001.CSV	1855.26	0.0109802
CAM112A_map4	0001.CSV	1859.12	0.0109777
CAM112A_map4	0001.CSV	1862.98	0.0108703
CAM112A_map4	0001.CSV	1866.84	0.010957
CAM112A_map4	0001.CSV	1870.69	0.0111585
CAM112A_map4	0001.CSV	1874.55	0.0110836
CAM112A_map4	0001.CSV	1878.41	0.0109425
CAM112A_map4	0001.CSV	1882.26	0.0109662
CAM112A_map4	0001.CSV	1886.12	0.0108923
CAM112A_map4	0001.CSV	1889.98	0.0109996
CAM112A_map4	0001.CSV	1893.83	0.011056
CAM112A_map4	0001.CSV	1897.69	0.0110795
CAM112A_map4	0001.CSV	1901.55	0.010987
CAM112A_map4	0001.CSV	1905.41	0.011002
CAM112A_map4	0001.CSV	1909.26	0.0110138
CAM112A_map4	0001.CSV	1913.12	0.0110369
CAM112A_map4	0001.CSV	1916.98	0.0109989
CAM112A_map4	0001.CSV	1920.83	0.0112104
CAM112A_map4	0001.CSV	1924.69	0.0112899
CAM112A_map4	0001.CSV	1928.55	0.0112556
CAM112A_map4	0001.CSV	1932.4	0.0112192
CAM112A_map4	0001.CSV	1936.26	0.0112783
CAM112A_map4	0001.CSV	1940.12	0.011249
CAM112A_map4	0001.CSV	1943.98	0.0114711
CAM112A_map4	0001.CSV	1947.83	0.0115217
CAM112A_map4	0001.CSV	1951.69	0.0115584
CAM112A_map4	0001.CSV	1955.55	0.0116221
CAM112A_map4	0001.CSV	1959.4	0.0116921
CAM112A_map4	0001.CSV	1963.26	0.0116247
CAM112A_map4	0001.CSV	1967.12	0.0117288
CAM112A_map4	0001.CSV	1970.98	0.0117781
CAM112A_map4	0001.CSV	1974.83	0.0118362
CAM112A_map4	0001.CSV	1978.69	0.0118622
CAM112A_map4	0001.CSV	1982.55	0.0119185
CAM112A_map4	0001.CSV	1986.4	0.0118918
CAM112A_map4	0001.CSV	1990.26	0.0119994
CAM112A_map4	0001.CSV	1994.12	0.0120985
CAM112A_map4	0001.CSV	1997.98	0.0121351
CAM112A_map4	0001.CSV	2001.83	0.0121559
CAM112A_map4	0001.CSV	2005.69	0.0122015
CAM112A_map4	0001.CSV	2009.55	0.0121491
CAM112A_map4	0001.CSV	2013.4	0.0122021
CAM112A_map4	0001.CSV	2017.26	0.0122473
CAM112A_map4	0001.CSV	2021.12	0.0123359
CAM112A_map4	0001.CSV	2024.97	0.0123544
CAM112A_map4	0001.CSV	2028.83	0.0124259
CAM112A_map4	0001.CSV	2032.69	0.0124403
CAM112A_map4	0001.CSV	2036.55	0.0124732
CAM112A_map4	0001.CSV	2040.4	0.0125149
CAM112A_map4	0001.CSV	2044.26	0.0126186
CAM112A_map4	0001.CSV	2048.12	0.012591
CAM112A_map4	0001.CSV	2051.97	0.0126383
CAM112A_map4	0001.CSV	2055.83	0.0126388
CAM112A_map4	0001.CSV	2059.69	0.0126876
CAM112A_map4	0001.CSV	2063.55	0.0127223
CAM112A_map4	0001.CSV	2067.4	0.012832
CAM112A_map4	0001.CSV	2071.26	0.0128456
CAM112A_map4	0001.CSV	2075.12	0.012924
CAM112A_map4	0001.CSV	2078.97	0.01292
CAM112A_map4	0001.CSV	2082.83	0.0129176
CAM112A_map4	0001.CSV	2086.69	0.0129461
CAM112A_map4	0001.CSV	2090.55	0.0130514
CAM112A_map4	0001.CSV	2094.4	0.0130448
CAM112A_map4	0001.CSV	2098.26	0.0130793
CAM112A_map4	0001.CSV	2102.12	0.0131074
CAM112A_map4	0001.CSV	2105.97	0.0131786
CAM112A_map4	0001.CSV	2109.83	0.0131693
CAM112A_map4	0001.CSV	2113.69	0.0132477
CAM112A_map4	0001.CSV	2117.55	0.0133257
CAM112A_map4	0001.CSV	2121.4	0.0134116
CAM112A_map4	0001.CSV	2125.26	0.0134111
CAM112A_map4	0001.CSV	2129.12	0.0134428
CAM112A_map4	0001.CSV	2132.97	0.0134246
CAM112A_map4	0001.CSV	2136.83	0.0134667
CAM112A_map4	0001.CSV	2140.69	0.0134842
CAM112A_map4	0001.CSV	2144.55	0.0135399
CAM112A_map4	0001.CSV	2148.4	0.0135692
CAM112A_map4	0001.CSV	2152.26	0.013619
CAM112A_map4	0001.CSV	2156.12	0.0136027
CAM112A_map4	0001.CSV	2159.97	0.0136299
CAM112A_map4	0001.CSV	2163.83	0.0135684
CAM112A_map4	0001.CSV	2167.69	0.013543
CAM112A_map4	0001.CSV	2171.55	0.0135432
CAM112A_map4	0001.CSV	2175.4	0.0136505
CAM112A_map4	0001.CSV	2179.26	0.0136588
CAM112A_map4	0001.CSV	2183.12	0.0136666
CAM112A_map4	0001.CSV	2186.97	0.0136651
CAM112A_map4	0001.CSV	2190.83	0.0136863
CAM112A_map4	0001.CSV	2194.69	0.0136749
CAM112A_map4	0001.CSV	2198.55	0.0137127
CAM112A_map4	0001.CSV	2202.4	0.0137204
CAM112A_map4	0001.CSV	2206.26	0.0137765
CAM112A_map4	0001.CSV	2210.12	0.0137439
CAM112A_map4	0001.CSV	2213.97	0.0137454
CAM112A_map4	0001.CSV	2217.83	0.013741
CAM112A_map4	0001.CSV	2221.69	0.0137384
CAM112A_map4	0001.CSV	2225.54	0.0137313
CAM112A_map4	0001.CSV	2229.4	0.0138166
CAM112A_map4	0001.CSV	2233.26	0.0138484
CAM112A_map4	0001.CSV	2237.12	0.0138964
CAM112A_map4	0001.CSV	2240.97	0.0138823
CAM112A_map4	0001.CSV	2244.83	0.0139272
CAM112A_map4	0001.CSV	2248.69	0.0139519
CAM112A_map4	0001.CSV	2252.54	0.0139858
CAM112A_map4	0001.CSV	2256.4	0.0139942
CAM112A_map4	0001.CSV	2260.26	0.0140181
CAM112A_map4	0001.CSV	2264.11	0.0140145
CAM112A_map4	0001.CSV	2267.97	0.0140482
CAM112A_map4	0001.CSV	2271.83	0.0140619
CAM112A_map4	0001.CSV	2275.69	0.0141145
CAM112A_map4	0001.CSV	2279.54	0.014129
CAM112A_map4	0001.CSV	2283.4	0.0141108
CAM112A_map4	0001.CSV	2287.26	0.0140409
CAM112A_map4	0001.CSV	2291.11	0.0140107
CAM112A_map4	0001.CSV	2294.97	0.0138908
CAM112A_map4	0001.CSV	2298.83	0.0137856
CAM112A_map4	0001.CSV	2302.69	0.0136091
CAM112A_map4	0001.CSV	2306.54	0.0133211
CAM112A_map4	0001.CSV	2310.4	0.0128492
CAM112A_map4	0001.CSV	2314.26	0.012262
CAM112A_map4	0001.CSV	2318.11	0.0109275
CAM112A_map4	0001.CSV	2321.97	0.00851346
CAM112A_map4	0001.CSV	2325.83	0.00448702
CAM112A_map4	0001.CSV	2329.69	0.000834188
CAM112A_map4	0001.CSV	2333.54	-0.0030418
CAM112A_map4	0001.CSV	2337.4	-0.00631716
CAM112A_map4	0001.CSV	2341.26	-0.00549064
CAM112A_map4	0001.CSV	2345.11	0.00400547
CAM112A_map4	0001.CSV	2348.97	0.00682313
CAM112A_map4	0001.CSV	2352.83	0.00133164
CAM112A_map4	0001.CSV	2356.69	-0.028101
CAM112A_map4	0001.CSV	2360.54	-0.0717182
CAM112A_map4	0001.CSV	2364.4	-0.0415153
CAM112A_map4	0001.CSV	2368.26	-0.00651001
CAM112A_map4	0001.CSV	2372.11	0.00769125
CAM112A_map4	0001.CSV	2375.97	0.0128861
CAM112A_map4	0001.CSV	2379.83	0.0145124
CAM112A_map4	0001.CSV	2383.69	0.0149235
CAM112A_map4	0001.CSV	2387.54	0.0148772
CAM112A_map4	0001.CSV	2391.4	0.0148046
CAM112A_map4	0001.CSV	2395.26	0.01477
CAM112A_map4	0001.CSV	2399.11	0.014774
CAM112A_map4	0001.CSV	2402.97	0.0147751
CAM112A_map4	0001.CSV	2406.83	0.0148318
CAM112A_map4	0001.CSV	2410.68	0.0148635
CAM112A_map4	0001.CSV	2414.54	0.0149177
CAM112A_map4	0001.CSV	2418.4	0.0149322
CAM112A_map4	0001.CSV	2422.26	0.0149458
CAM112A_map4	0001.CSV	2426.11	0.0149416
CAM112A_map4	0001.CSV	2429.97	0.0149713
CAM112A_map4	0001.CSV	2433.83	0.0150768
CAM112A_map4	0001.CSV	2437.68	0.0152131
CAM112A_map4	0001.CSV	2441.54	0.0152806
CAM112A_map4	0001.CSV	2445.4	0.0153672
CAM112A_map4	0001.CSV	2449.26	0.0154756
CAM112A_map4	0001.CSV	2453.11	0.0155803
CAM112A_map4	0001.CSV	2456.97	0.0156666
CAM112A_map4	0001.CSV	2460.83	0.0158569
CAM112A_map4	0001.CSV	2464.68	0.0161112
CAM112A_map4	0001.CSV	2468.54	0.0164348
CAM112A_map4	0001.CSV	2472.4	0.0167893
CAM112A_map4	0001.CSV	2476.26	0.0172793
CAM112A_map4	0001.CSV	2480.11	0.0178505
CAM112A_map4	0001.CSV	2483.97	0.0184585
CAM112A_map4	0001.CSV	2487.83	0.0191181
CAM112A_map4	0001.CSV	2491.68	0.0197523
CAM112A_map4	0001.CSV	2495.54	0.0202847
CAM112A_map4	0001.CSV	2499.4	0.0206865
CAM112A_map4	0001.CSV	2503.26	0.0207862
CAM112A_map4	0001.CSV	2507.11	0.0208008
CAM112A_map4	0001.CSV	2510.97	0.0208667
CAM112A_map4	0001.CSV	2514.83	0.0211084
CAM112A_map4	0001.CSV	2518.68	0.0214866
CAM112A_map4	0001.CSV	2522.54	0.0217468
CAM112A_map4	0001.CSV	2526.4	0.0216291
CAM112A_map4	0001.CSV	2530.26	0.0212226
CAM112A_map4	0001.CSV	2534.11	0.0206598
CAM112A_map4	0001.CSV	2537.97	0.0201451
CAM112A_map4	0001.CSV	2541.83	0.0197687
CAM112A_map4	0001.CSV	2545.68	0.0196125
CAM112A_map4	0001.CSV	2549.54	0.0194309
CAM112A_map4	0001.CSV	2553.4	0.0191074
CAM112A_map4	0001.CSV	2557.26	0.0187176
CAM112A_map4	0001.CSV	2561.11	0.0183724
CAM112A_map4	0001.CSV	2564.97	0.0180381
CAM112A_map4	0001.CSV	2568.83	0.0177611
CAM112A_map4	0001.CSV	2572.68	0.0175519
CAM112A_map4	0001.CSV	2576.54	0.0173627
CAM112A_map4	0001.CSV	2580.4	0.0171081
CAM112A_map4	0001.CSV	2584.25	0.0169267
CAM112A_map4	0001.CSV	2588.11	0.0168456
CAM112A_map4	0001.CSV	2591.97	0.0168259
CAM112A_map4	0001.CSV	2595.83	0.0167522
CAM112A_map4	0001.CSV	2599.68	0.0167026
CAM112A_map4	0001.CSV	2603.54	0.0166926
CAM112A_map4	0001.CSV	2607.4	0.0167404
CAM112A_map4	0001.CSV	2611.25	0.0168054
CAM112A_map4	0001.CSV	2615.11	0.0168789
CAM112A_map4	0001.CSV	2618.97	0.0168798
CAM112A_map4	0001.CSV	2622.82	0.0169802
CAM112A_map4	0001.CSV	2626.68	0.0170753
CAM112A_map4	0001.CSV	2630.54	0.017042
CAM112A_map4	0001.CSV	2634.4	0.0170507
CAM112A_map4	0001.CSV	2638.25	0.0170228
CAM112A_map4	0001.CSV	2642.11	0.0167906
CAM112A_map4	0001.CSV	2645.97	0.0165416
CAM112A_map4	0001.CSV	2649.82	0.0164073
CAM112A_map4	0001.CSV	2653.68	0.0163078
CAM112A_map4	0001.CSV	2657.54	0.0161442
CAM112A_map4	0001.CSV	2661.4	0.0160055
CAM112A_map4	0001.CSV	2665.25	0.0159383
CAM112A_map4	0001.CSV	2669.11	0.015969
CAM112A_map4	0001.CSV	2672.97	0.0161335
CAM112A_map4	0001.CSV	2676.82	0.0164227
CAM112A_map4	0001.CSV	2680.68	0.0163957
CAM112A_map4	0001.CSV	2684.54	0.0159819
CAM112A_map4	0001.CSV	2688.4	0.0158333
CAM112A_map4	0001.CSV	2692.25	0.0159023
CAM112A_map4	0001.CSV	2696.11	0.0159826
CAM112A_map4	0001.CSV	2699.97	0.0160215
CAM112A_map4	0001.CSV	2703.82	0.0160129
CAM112A_map4	0001.CSV	2707.68	0.0161584
CAM112A_map4	0001.CSV	2711.54	0.0162459
CAM112A_map4	0001.CSV	2715.4	0.0162409
CAM112A_map4	0001.CSV	2719.25	0.0164401
CAM112A_map4	0001.CSV	2723.11	0.0169047
CAM112A_map4	0001.CSV	2726.97	0.0169611
CAM112A_map4	0001.CSV	2730.82	0.0165896
CAM112A_map4	0001.CSV	2734.68	0.0165374
CAM112A_map4	0001.CSV	2738.54	0.0166343
CAM112A_map4	0001.CSV	2742.4	0.0166884
CAM112A_map4	0001.CSV	2746.25	0.0170654
CAM112A_map4	0001.CSV	2750.11	0.017207
CAM112A_map4	0001.CSV	2753.97	0.0169811
CAM112A_map4	0001.CSV	2757.82	0.0168907
CAM112A_map4	0001.CSV	2761.68	0.016806
CAM112A_map4	0001.CSV	2765.54	0.0167575
CAM112A_map4	0001.CSV	2769.39	0.0170084
CAM112A_map4	0001.CSV	2773.25	0.0175039
CAM112A_map4	0001.CSV	2777.11	0.0174641
CAM112A_map4	0001.CSV	2780.97	0.0172055
CAM112A_map4	0001.CSV	2784.82	0.0174489
CAM112A_map4	0001.CSV	2788.68	0.0180447
CAM112A_map4	0001.CSV	2792.54	0.0182602
CAM112A_map4	0001.CSV	2796.39	0.0183147
CAM112A_map4	0001.CSV	2800.25	0.0182162
CAM112A_map4	0001.CSV	2804.11	0.0179917
CAM112A_map4	0001.CSV	2807.97	0.0182806
CAM112A_map4	0001.CSV	2811.82	0.0184263
CAM112A_map4	0001.CSV	2815.68	0.0183601
CAM112A_map4	0001.CSV	2819.54	0.0185781
CAM112A_map4	0001.CSV	2823.39	0.0188577
CAM112A_map4	0001.CSV	2827.25	0.0191929
CAM112A_map4	0001.CSV	2831.11	0.0200958
CAM112A_map4	0001.CSV	2834.97	0.0215271
CAM112A_map4	0001.CSV	2838.82	0.0230982
CAM112A_map4	0001.CSV	2842.68	0.0253512
CAM112A_map4	0001.CSV	2846.54	0.0292031
CAM112A_map4	0001.CSV	2850.39	0.0320254
CAM112A_map4	0001.CSV	2854.25	0.0318165
CAM112A_map4	0001.CSV	2858.11	0.0301247
CAM112A_map4	0001.CSV	2861.97	0.0280697
CAM112A_map4	0001.CSV	2865.82	0.0265762
CAM112A_map4	0001.CSV	2869.68	0.0262955
CAM112A_map4	0001.CSV	2873.54	0.0261106
CAM112A_map4	0001.CSV	2877.39	0.0249454
CAM112A_map4	0001.CSV	2881.25	0.0241402
CAM112A_map4	0001.CSV	2885.11	0.0243305
CAM112A_map4	0001.CSV	2888.97	0.025226
CAM112A_map4	0001.CSV	2892.82	0.026718
CAM112A_map4	0001.CSV	2896.68	0.0280914
CAM112A_map4	0001.CSV	2900.54	0.0291102
CAM112A_map4	0001.CSV	2904.39	0.030772
CAM112A_map4	0001.CSV	2908.25	0.0336818
CAM112A_map4	0001.CSV	2912.11	0.0381357
CAM112A_map4	0001.CSV	2915.97	0.0424617
CAM112A_map4	0001.CSV	2919.82	0.0441752
CAM112A_map4	0001.CSV	2923.68	0.0434583
CAM112A_map4	0001.CSV	2927.54	0.0419449
CAM112A_map4	0001.CSV	2931.39	0.0391001
CAM112A_map4	0001.CSV	2935.25	0.0354276
CAM112A_map4	0001.CSV	2939.11	0.0327937
CAM112A_map4	0001.CSV	2942.96	0.0314936
CAM112A_map4	0001.CSV	2946.82	0.0305796
CAM112A_map4	0001.CSV	2950.68	0.0298543
CAM112A_map4	0001.CSV	2954.54	0.0291943
CAM112A_map4	0001.CSV	2958.39	0.0281733
CAM112A_map4	0001.CSV	2962.25	0.0270191
CAM112A_map4	0001.CSV	2966.11	0.0254437
CAM112A_map4	0001.CSV	2969.96	0.0243162
CAM112A_map4	0001.CSV	2973.82	0.0239025
CAM112A_map4	0001.CSV	2977.68	0.0234874
CAM112A_map4	0001.CSV	2981.53	0.0226111
CAM112A_map4	0001.CSV	2985.39	0.0214958
CAM112A_map4	0001.CSV	2989.25	0.0212352
CAM112A_map4	0001.CSV	2993.11	0.0214359
CAM112A_map4	0001.CSV	2996.96	0.0211359
CAM112A_map4	0001.CSV	3000.82	0.0205138
CAM112A_map4	0001.CSV	3004.68	0.0200733
CAM112A_map4	0001.CSV	3008.53	0.0202446
CAM112A_map4	0001.CSV	3012.39	0.0206466
CAM112A_map4	0001.CSV	3016.25	0.0205903
CAM112A_map4	0001.CSV	3020.11	0.0201687
CAM112A_map4	0001.CSV	3023.96	0.0198652
CAM112A_map4	0001.CSV	3027.82	0.0198093
CAM112A_map4	0001.CSV	3031.68	0.0200261
CAM112A_map4	0001.CSV	3035.53	0.0200288
CAM112A_map4	0001.CSV	3039.39	0.0199902
CAM112A_map4	0001.CSV	3043.25	0.0200762
CAM112A_map4	0001.CSV	3047.11	0.0199866
CAM112A_map4	0001.CSV	3050.96	0.0199612
CAM112A_map4	0001.CSV	3054.82	0.0198792
CAM112A_map4	0001.CSV	3058.68	0.019585
CAM112A_map4	0001.CSV	3062.53	0.0196881
CAM112A_map4	0001.CSV	3066.39	0.0200864
CAM112A_map4	0001.CSV	3070.25	0.019983
CAM112A_map4	0001.CSV	3074.11	0.0199493
CAM112A_map4	0001.CSV	3077.96	0.0202227
CAM112A_map4	0001.CSV	3081.82	0.0203558
CAM112A_map4	0001.CSV	3085.68	0.0203298
CAM112A_map4	0001.CSV	3089.53	0.0201838
CAM112A_map4	0001.CSV	3093.39	0.0199104
CAM112A_map4	0001.CSV	3097.25	0.0199252
CAM112A_map4	0001.CSV	3101.11	0.0200134
CAM112A_map4	0001.CSV	3104.96	0.0200751
CAM112A_map4	0001.CSV	3108.82	0.0203196
CAM112A_map4	0001.CSV	3112.68	0.0204542
CAM112A_map4	0001.CSV	3116.53	0.0205885
CAM112A_map4	0001.CSV	3120.39	0.020562
CAM112A_map4	0001.CSV	3124.25	0.0203444
CAM112A_map4	0001.CSV	3128.11	0.0202801
CAM112A_map4	0001.CSV	3131.96	0.0202476
CAM112A_map4	0001.CSV	3135.82	0.0203025
CAM112A_map4	0001.CSV	3139.68	0.0204804
CAM112A_map4	0001.CSV	3143.53	0.0203195
CAM112A_map4	0001.CSV	3147.39	0.0204131
CAM112A_map4	0001.CSV	3151.25	0.0208135
CAM112A_map4	0001.CSV	3155.1	0.0207428
CAM112A_map4	0001.CSV	3158.96	0.0203502
CAM112A_map4	0001.CSV	3162.82	0.0202564
CAM112A_map4	0001.CSV	3166.68	0.0203064
CAM112A_map4	0001.CSV	3170.53	0.0203782
CAM112A_map4	0001.CSV	3174.39	0.0203977
CAM112A_map4	0001.CSV	3178.25	0.02049
CAM112A_map4	0001.CSV	3182.1	0.0205738
CAM112A_map4	0001.CSV	3185.96	0.0207034
CAM112A_map4	0001.CSV	3189.82	0.0208648
CAM112A_map4	0001.CSV	3193.68	0.0208055
CAM112A_map4	0001.CSV	3197.53	0.020758
CAM112A_map4	0001.CSV	3201.39	0.020835
CAM112A_map4	0001.CSV	3205.25	0.0208813
CAM112A_map4	0001.CSV	3209.1	0.0209562
CAM112A_map4	0001.CSV	3212.96	0.0211256
CAM112A_map4	0001.CSV	3216.82	0.0213135
CAM112A_map4	0001.CSV	3220.68	0.021323
CAM112A_map4	0001.CSV	3224.53	0.0212225
CAM112A_map4	0001.CSV	3228.39	0.0214069
CAM112A_map4	0001.CSV	3232.25	0.0217533
CAM112A_map4	0001.CSV	3236.1	0.0216976
CAM112A_map4	0001.CSV	3239.96	0.0215208
CAM112A_map4	0001.CSV	3243.82	0.0217858
CAM112A_map4	0001.CSV	3247.68	0.0219724
CAM112A_map4	0001.CSV	3251.53	0.0217858
CAM112A_map4	0001.CSV	3255.39	0.0217664
CAM112A_map4	0001.CSV	3259.25	0.0216775
CAM112A_map4	0001.CSV	3263.1	0.0216597
CAM112A_map4	0001.CSV	3266.96	0.021903
CAM112A_map4	0001.CSV	3270.82	0.0222227
CAM112A_map4	0001.CSV	3274.68	0.0222394
CAM112A_map4	0001.CSV	3278.53	0.0220082
CAM112A_map4	0001.CSV	3282.39	0.0218215
CAM112A_map4	0001.CSV	3286.25	0.0219527
CAM112A_map4	0001.CSV	3290.1	0.0223496
CAM112A_map4	0001.CSV	3293.96	0.022639
CAM112A_map4	0001.CSV	3297.82	0.0224137
CAM112A_map4	0001.CSV	3301.67	0.0223296
CAM112A_map4	0001.CSV	3305.53	0.0225919
CAM112A_map4	0001.CSV	3309.39	0.0225138
CAM112A_map4	0001.CSV	3313.25	0.0220875
CAM112A_map4	0001.CSV	3317.1	0.0218665
CAM112A_map4	0001.CSV	3320.96	0.0220314
CAM112A_map4	0001.CSV	3324.82	0.0222584
CAM112A_map4	0001.CSV	3328.67	0.0220118
CAM112A_map4	0001.CSV	3332.53	0.0219663
CAM112A_map4	0001.CSV	3336.39	0.0224195
CAM112A_map4	0001.CSV	3340.24	0.0226536
CAM112A_map4	0001.CSV	3344.1	0.0224287
CAM112A_map4	0001.CSV	3347.96	0.0223027
CAM112A_map4	0001.CSV	3351.82	0.0223584
CAM112A_map4	0001.CSV	3355.67	0.0222527
CAM112A_map4	0001.CSV	3359.53	0.0222944
CAM112A_map4	0001.CSV	3363.39	0.0224375
CAM112A_map4	0001.CSV	3367.24	0.0226735
CAM112A_map4	0001.CSV	3371.1	0.0226208
CAM112A_map4	0001.CSV	3374.96	0.02229
CAM112A_map4	0001.CSV	3378.82	0.0221181
CAM112A_map4	0001.CSV	3382.67	0.021882
CAM112A_map4	0001.CSV	3386.53	0.0219451
CAM112A_map4	0001.CSV	3390.39	0.0223028
CAM112A_map4	0001.CSV	3394.24	0.0224515
CAM112A_map4	0001.CSV	3398.1	0.0223278
CAM112A_map4	0001.CSV	3401.96	0.0221896
CAM112A_map4	0001.CSV	3405.82	0.0219893
CAM112A_map4	0001.CSV	3409.67	0.0220235
CAM112A_map4	0001.CSV	3413.53	0.0218549
CAM112A_map4	0001.CSV	3417.39	0.0214318
CAM112A_map4	0001.CSV	3421.24	0.0212694
CAM112A_map4	0001.CSV	3425.1	0.0213703
CAM112A_map4	0001.CSV	3428.96	0.0216039
CAM112A_map4	0001.CSV	3432.82	0.021717
CAM112A_map4	0001.CSV	3436.67	0.0214837
CAM112A_map4	0001.CSV	3440.53	0.021036
CAM112A_map4	0001.CSV	3444.39	0.0207437
CAM112A_map4	0001.CSV	3448.24	0.0206491
CAM112A_map4	0001.CSV	3452.1	0.0205192
CAM112A_map4	0001.CSV	3455.96	0.0204917
CAM112A_map4	0001.CSV	3459.82	0.0205681
CAM112A_map4	0001.CSV	3463.67	0.020763
CAM112A_map4	0001.CSV	3467.53	0.0209646
CAM112A_map4	0001.CSV	3471.39	0.0206932
CAM112A_map4	0001.CSV	3475.24	0.0203137
CAM112A_map4	0001.CSV	3479.1	0.0202823
CAM112A_map4	0001.CSV	3482.96	0.0201322
CAM112A_map4	0001.CSV	3486.82	0.020118
CAM112A_map4	0001.CSV	3490.67	0.0201038
CAM112A_map4	0001.CSV	3494.53	0.0201811
CAM112A_map4	0001.CSV	3498.39	0.0202086
CAM112A_map4	0001.CSV	3502.24	0.0199927
CAM112A_map4	0001.CSV	3506.1	0.0196204
CAM112A_map4	0001.CSV	3509.96	0.0194547
CAM112A_map4	0001.CSV	3513.81	0.0194394
CAM112A_map4	0001.CSV	3517.67	0.0191812
CAM112A_map4	0001.CSV	3521.53	0.0191226
CAM112A_map4	0001.CSV	3525.39	0.0190016
CAM112A_map4	0001.CSV	3529.24	0.018741
CAM112A_map4	0001.CSV	3533.1	0.0188441
CAM112A_map4	0001.CSV	3536.96	0.0189562
CAM112A_map4	0001.CSV	3540.81	0.0188503
CAM112A_map4	0001.CSV	3544.67	0.018829
CAM112A_map4	0001.CSV	3548.53	0.0186834
CAM112A_map4	0001.CSV	3552.39	0.0183606
CAM112A_map4	0001.CSV	3556.24	0.0182296
CAM112A_map4	0001.CSV	3560.1	0.0179347
CAM112A_map4	0001.CSV	3563.96	0.0173143
CAM112A_map4	0001.CSV	3567.81	0.0175965
CAM112A_map4	0001.CSV	3571.67	0.0178588
CAM112A_map4	0001.CSV	3575.53	0.0175344
CAM112A_map4	0001.CSV	3579.39	0.0176315
CAM112A_map4	0001.CSV	3583.24	0.0175776
CAM112A_map4	0001.CSV	3587.1	0.017426
CAM112A_map4	0001.CSV	3590.96	0.017293
CAM112A_map4	0001.CSV	3594.81	0.0171062
CAM112A_map4	0001.CSV	3598.67	0.0172144
CAM112A_map4	0001.CSV	3602.53	0.0170218
CAM112A_map4	0001.CSV	3606.39	0.0162268
CAM112A_map4	0001.CSV	3610.24	0.0159658
CAM112A_map4	0001.CSV	3614.1	0.0161708
CAM112A_map4	0001.CSV	3617.96	0.0162907
CAM112A_map4	0001.CSV	3621.81	0.0163145
CAM112A_map4	0001.CSV	3625.67	0.0156126
CAM112A_map4	0001.CSV	3629.53	0.0156435
CAM112A_map4	0001.CSV	3633.39	0.016331
CAM112A_map4	0001.CSV	3637.24	0.0161872
CAM112A_map4	0001.CSV	3641.1	0.0157081
CAM112A_map4	0001.CSV	3644.96	0.0149954
CAM112A_map4	0001.CSV	3648.81	0.0154644
CAM112A_map4	0001.CSV	3652.67	0.0162097
CAM112A_map4	0001.CSV	3656.53	0.0161622
CAM112A_map4	0001.CSV	3660.38	0.0160915
CAM112A_map4	0001.CSV	3664.24	0.0153967
CAM112A_map4	0001.CSV	3668.1	0.0146862
CAM112A_map4	0001.CSV	3671.96	0.0147007
CAM112A_map4	0001.CSV	3675.81	0.0152079
CAM112A_map4	0001.CSV	3679.67	0.0155428
CAM112A_map4	0001.CSV	3683.53	0.0151574
CAM112A_map4	0001.CSV	3687.38	0.0149313
CAM112A_map4	0001.CSV	3691.24	0.0156099
CAM112A_map4	0001.CSV	3695.1	0.0154695
CAM112A_map4	0001.CSV	3698.95	0.0149555
CAM112A_map4	0001.CSV	3702.81	0.0148259
CAM112A_map4	0001.CSV	3706.67	0.0144456
CAM112A_map4	0001.CSV	3710.53	0.0144984
CAM112A_map4	0001.CSV	3714.38	0.0151161
CAM112A_map4	0001.CSV	3718.24	0.0146994
CAM112A_map4	0001.CSV	3722.1	0.0143998
CAM112A_map4	0001.CSV	3725.95	0.0145434
CAM112A_map4	0001.CSV	3729.81	0.0144146
CAM112A_map4	0001.CSV	3733.67	0.0145927
CAM112A_map4	0001.CSV	3737.53	0.0154996
CAM112A_map4	0001.CSV	3741.38	0.0147715
CAM112A_map4	0001.CSV	3745.24	0.0139269
CAM112A_map4	0001.CSV	3749.1	0.0138103
CAM112A_map4	0001.CSV	3752.95	0.0145809
CAM112A_map4	0001.CSV	3756.81	0.0147711
CAM112A_map4	0001.CSV	3760.67	0.014798
CAM112A_map4	0001.CSV	3764.53	0.0146707
CAM112A_map4	0001.CSV	3768.38	0.0148456
CAM112A_map4	0001.CSV	3772.24	0.0151474
CAM112A_map4	0001.CSV	3776.1	0.014951
CAM112A_map4	0001.CSV	3779.95	0.014951
CAM112A_map4	0001.CSV	3783.81	0.0149759
CAM112A_map4	0001.CSV	3787.67	0.015073
CAM112A_map4	0001.CSV	3791.53	0.0149191
CAM112A_map4	0001.CSV	3795.38	0.014415
CAM112A_map4	0001.CSV	3799.24	0.0143256
CAM112A_map4	0001.CSV	3803.1	0.014923
CAM112A_map4	0001.CSV	3806.95	0.0153668
CAM112A_map4	0001.CSV	3810.81	0.0151215
CAM112A_map4	0001.CSV	3814.67	0.0145904
CAM112A_map4	0001.CSV	3818.53	0.0146283
CAM112A_map4	0001.CSV	3822.38	0.0152045
CAM112A_map4	0001.CSV	3826.24	0.0151515
CAM112A_map4	0001.CSV	3830.1	0.0148121
CAM112A_map4	0001.CSV	3833.95	0.0146122
CAM112A_map4	0001.CSV	3837.81	0.0149097
CAM112A_map4	0001.CSV	3841.67	0.0156039
CAM112A_map4	0001.CSV	3845.53	0.0154059
CAM112A_map4	0001.CSV	3849.38	0.014429
CAM112A_map4	0001.CSV	3853.24	0.0146326
CAM112A_map4	0001.CSV	3857.1	0.0156098
CAM112A_map4	0001.CSV	3860.95	0.0150945
CAM112A_map4	0001.CSV	3864.81	0.0150581
CAM112A_map4	0001.CSV	3868.67	0.0151786
CAM112A_map4	0001.CSV	3872.52	0.0154095
CAM112A_map4	0001.CSV	3876.38	0.0151621
CAM112A_map4	0001.CSV	3880.24	0.0148724
CAM112A_map4	0001.CSV	3884.1	0.0153542
CAM112A_map4	0001.CSV	3887.95	0.0154202
CAM112A_map4	0001.CSV	3891.81	0.0152931
CAM112A_map4	0001.CSV	3895.67	0.015063
CAM112A_map4	0001.CSV	3899.52	0.0147594
CAM112A_map4	0001.CSV	3903.38	0.0154538
CAM112A_map4	0001.CSV	3907.24	0.0156837
CAM112A_map4	0001.CSV	3911.1	0.0152613
CAM112A_map4	0001.CSV	3914.95	0.0149952
CAM112A_map4	0001.CSV	3918.81	0.0151318
CAM112A_map4	0001.CSV	3922.67	0.0151597
CAM112A_map4	0001.CSV	3926.52	0.0150778
CAM112A_map4	0001.CSV	3930.38	0.0150988
CAM112A_map4	0001.CSV	3934.24	0.0154008
CAM112A_map4	0001.CSV	3938.09	0.0151996
CAM112A_map4	0001.CSV	3941.95	0.0149506
CAM112A_map4	0001.CSV	3945.81	0.0148683
CAM112A_map4	0001.CSV	3949.67	0.0149223
CAM112A_map4	0001.CSV	3953.52	0.015024
CAM112A_map4	0001.CSV	3957.38	0.0149507
CAM112A_map4	0001.CSV	3961.24	0.0149282
CAM112A_map4	0001.CSV	3965.09	0.0148993
CAM112A_map4	0001.CSV	3968.95	0.0148633
CAM112A_map4	0001.CSV	3972.81	0.0149185
CAM112A_map4	0001.CSV	3976.67	0.0149713
CAM112A_map4	0001.CSV	3980.52	0.014921
CAM112A_map4	0001.CSV	3984.38	0.0149117
CAM112A_map4	0001.CSV	3988.24	0.014877
CAM112A_map4	0001.CSV	3992.09	0.0148472
CAM112A_map4	0001.CSV	3995.95	0.0148299
CAM112A_map4	0001.CSV	3999.81	0.0148292
CAM112A_map4	0002.CSV	674.992	0.0329621
CAM112A_map4	0002.CSV	678.849	0.0344396
CAM112A_map4	0002.CSV	682.706	0.0352891
CAM112A_map4	0002.CSV	686.563	0.0398256
CAM112A_map4	0002.CSV	690.42	0.047945
CAM112A_map4	0002.CSV	694.277	0.0638028
CAM112A_map4	0002.CSV	698.134	0.0767005
CAM112A_map4	0002.CSV	701.991	0.0694547
CAM112A_map4	0002.CSV	705.849	0.0564657
CAM112A_map4	0002.CSV	709.706	0.0604818
CAM112A_map4	0002.CSV	713.563	0.0580643
CAM112A_map4	0002.CSV	717.42	0.038692
CAM112A_map4	0002.CSV	721.277	0.0284058
CAM112A_map4	0002.CSV	725.134	0.0289884
CAM112A_map4	0002.CSV	728.991	0.030478
CAM112A_map4	0002.CSV	732.848	0.0331732
CAM112A_map4	0002.CSV	736.705	0.0368792
CAM112A_map4	0002.CSV	740.562	0.0407293
CAM112A_map4	0002.CSV	744.42	0.0416345
CAM112A_map4	0002.CSV	748.277	0.0406559
CAM112A_map4	0002.CSV	752.134	0.0386818
CAM112A_map4	0002.CSV	755.991	0.0377181
CAM112A_map4	0002.CSV	759.848	0.0369104
CAM112A_map4	0002.CSV	763.705	0.0365652
CAM112A_map4	0002.CSV	767.562	0.0360536
CAM112A_map4	0002.CSV	771.419	0.0359842
CAM112A_map4	0002.CSV	775.276	0.035145
CAM112A_map4	0002.CSV	779.133	0.0333791
CAM112A_map4	0002.CSV	782.99	0.0314564
CAM112A_map4	0002.CSV	786.848	0.0307625
CAM112A_map4	0002.CSV	790.705	0.0304251
CAM112A_map4	0002.CSV	794.562	0.031035
CAM112A_map4	0002.CSV	798.419	0.0315806
CAM112A_map4	0002.CSV	802.276	0.0318892
CAM112A_map4	0002.CSV	806.133	0.0314979
CAM112A_map4	0002.CSV	809.99	0.0321859
CAM112A_map4	0002.CSV	813.847	0.0333693
CAM112A_map4	0002.CSV	817.704	0.0353392
CAM112A_map4	0002.CSV	821.562	0.0370819
CAM112A_map4	0002.CSV	825.419	0.0396434
CAM112A_map4	0002.CSV	829.276	0.0428862
CAM112A_map4	0002.CSV	833.133	0.0481199
CAM112A_map4	0002.CSV	836.99	0.0546201
CAM112A_map4	0002.CSV	840.847	0.0640809
CAM112A_map4	0002.CSV	844.704	0.0743312
CAM112A_map4	0002.CSV	848.561	0.0929708
CAM112A_map4	0002.CSV	852.418	0.116771
CAM112A_map4	0002.CSV	856.275	0.122131
CAM112A_map4	0002.CSV	860.132	0.105429
CAM112A_map4	0002.CSV	863.99	0.0796378
CAM112A_map4	0002.CSV	867.847	0.0550443
CAM112A_map4	0002.CSV	871.704	0.0400128
CAM112A_map4	0002.CSV	875.561	0.0344894
CAM112A_map4	0002.CSV	879.418	0.0319316
CAM112A_map4	0002.CSV	883.275	0.0287573
CAM112A_map4	0002.CSV	887.132	0.0270834
CAM112A_map4	0002.CSV	890.989	0.0268132
CAM112A_map4	0002.CSV	894.846	0.027314
CAM112A_map4	0002.CSV	898.703	0.0277183
CAM112A_map4	0002.CSV	902.561	0.0287246
CAM112A_map4	0002.CSV	906.418	0.0297582
CAM112A_map4	0002.CSV	910.275	0.0302984
CAM112A_map4	0002.CSV	914.132	0.0301789
CAM112A_map4	0002.CSV	917.989	0.0303469
CAM112A_map4	0002.CSV	921.846	0.0303951
CAM112A_map4	0002.CSV	925.703	0.0307419
CAM112A_map4	0002.CSV	929.56	0.0310509
CAM112A_map4	0002.CSV	933.417	0.0314974
CAM112A_map4	0002.CSV	937.274	0.0316908
CAM112A_map4	0002.CSV	941.131	0.0319261
CAM112A_map4	0002.CSV	944.989	0.0318846
CAM112A_map4	0002.CSV	948.846	0.0321831
CAM112A_map4	0002.CSV	952.703	0.0326908
CAM112A_map4	0002.CSV	956.56	0.0335486
CAM112A_map4	0002.CSV	960.417	0.0341074
CAM112A_map4	0002.CSV	964.274	0.0346744
CAM112A_map4	0002.CSV	968.131	0.0350133
CAM112A_map4	0002.CSV	971.988	0.0354607
CAM112A_map4	0002.CSV	975.845	0.0359533
CAM112A_map4	0002.CSV	979.702	0.0368354
CAM112A_map4	0002.CSV	983.559	0.0374686
CAM112A_map4	0002.CSV	987.417	0.0380425
CAM112A_map4	0002.CSV	991.274	0.0382198
CAM112A_map4	0002.CSV	995.131	0.0384955
CAM112A_map4	0002.CSV	998.988	0.0386899
CAM112A_map4	0002.CSV	1002.85	0.0390344
CAM112A_map4	0002.CSV	1006.7	0.0392772
CAM112A_map4	0002.CSV	1010.56	0.0398691
CAM112A_map4	0002.CSV	1014.42	0.0403446
CAM112A_map4	0002.CSV	1018.27	0.0410688
CAM112A_map4	0002.CSV	1022.13	0.0417953
CAM112A_map4	0002.CSV	1025.99	0.0427446
CAM112A_map4	0002.CSV	1029.85	0.0435953
CAM112A_map4	0002.CSV	1033.7	0.0446158
CAM112A_map4	0002.CSV	1037.56	0.0452226
CAM112A_map4	0002.CSV	1041.42	0.045436
CAM112A_map4	0002.CSV	1045.27	0.045336
CAM112A_map4	0002.CSV	1049.13	0.0462479
CAM112A_map4	0002.CSV	1052.99	0.0479076
CAM112A_map4	0002.CSV	1056.84	0.0504865
CAM112A_map4	0002.CSV	1060.7	0.0531236
CAM112A_map4	0002.CSV	1064.56	0.0548421
CAM112A_map4	0002.CSV	1068.42	0.0544607
CAM112A_map4	0002.CSV	1072.27	0.053029
CAM112A_map4	0002.CSV	1076.13	0.0517951
CAM112A_map4	0002.CSV	1079.99	0.0531495
CAM112A_map4	0002.CSV	1083.84	0.0514577
CAM112A_map4	0002.CSV	1087.7	0.0454206
CAM112A_map4	0002.CSV	1091.56	0.0424753
CAM112A_map4	0002.CSV	1095.41	0.0425673
CAM112A_map4	0002.CSV	1099.27	0.0434303
CAM112A_map4	0002.CSV	1103.13	0.0450069
CAM112A_map4	0002.CSV	1106.99	0.0469154
CAM112A_map4	0002.CSV	1110.84	0.0488717
CAM112A_map4	0002.CSV	1114.7	0.0501388
CAM112A_map4	0002.CSV	1118.56	0.0506547
CAM112A_map4	0002.CSV	1122.41	0.0502233
CAM112A_map4	0002.CSV	1126.27	0.0494674
CAM112A_map4	0002.CSV	1130.13	0.048607
CAM112A_map4	0002.CSV	1133.99	0.0481372
CAM112A_map4	0002.CSV	1137.84	0.0476662
CAM112A_map4	0002.CSV	1141.7	0.0471312
CAM112A_map4	0002.CSV	1145.56	0.0463291
CAM112A_map4	0002.CSV	1149.41	0.0460266
CAM112A_map4	0002.CSV	1153.27	0.0460618
CAM112A_map4	0002.CSV	1157.13	0.0462706
CAM112A_map4	0002.CSV	1160.99	0.046183
CAM112A_map4	0002.CSV	1164.84	0.0458954
CAM112A_map4	0002.CSV	1168.7	0.0452229
CAM112A_map4	0002.CSV	1172.56	0.0446491
CAM112A_map4	0002.CSV	1176.41	0.0440527
CAM112A_map4	0002.CSV	1180.27	0.0435898
CAM112A_map4	0002.CSV	1184.13	0.0430876
CAM112A_map4	0002.CSV	1187.99	0.0428104
CAM112A_map4	0002.CSV	1191.84	0.0424542
CAM112A_map4	0002.CSV	1195.7	0.0423166
CAM112A_map4	0002.CSV	1199.56	0.0422512
CAM112A_map4	0002.CSV	1203.41	0.042406
CAM112A_map4	0002.CSV	1207.27	0.0426578
CAM112A_map4	0002.CSV	1211.13	0.0431788
CAM112A_map4	0002.CSV	1214.98	0.0435977
CAM112A_map4	0002.CSV	1218.84	0.044271
CAM112A_map4	0002.CSV	1222.7	0.0450516
CAM112A_map4	0002.CSV	1226.56	0.0461153
CAM112A_map4	0002.CSV	1230.41	0.047258
CAM112A_map4	0002.CSV	1234.27	0.0487911
CAM112A_map4	0002.CSV	1238.13	0.0504738
CAM112A_map4	0002.CSV	1241.98	0.0524929
CAM112A_map4	0002.CSV	1245.84	0.0544374
CAM112A_map4	0002.CSV	1249.7	0.0561496
CAM112A_map4	0002.CSV	1253.56	0.057119
CAM112A_map4	0002.CSV	1257.41	0.0575761
CAM112A_map4	0002.CSV	1261.27	0.0576368
CAM112A_map4	0002.CSV	1265.13	0.0578126
CAM112A_map4	0002.CSV	1268.98	0.057891
CAM112A_map4	0002.CSV	1272.84	0.0580994
CAM112A_map4	0002.CSV	1276.7	0.058128
CAM112A_map4	0002.CSV	1280.56	0.0580613
CAM112A_map4	0002.CSV	1284.41	0.0575233
CAM112A_map4	0002.CSV	1288.27	0.0565776
CAM112A_map4	0002.CSV	1292.13	0.0549458
CAM112A_map4	0002.CSV	1295.98	0.0532953
CAM112A_map4	0002.CSV	1299.84	0.0517866
CAM112A_map4	0002.CSV	1303.7	0.0509008
CAM112A_map4	0002.CSV	1307.56	0.0504364
CAM112A_map4	0002.CSV	1311.41	0.0505275
CAM112A_map4	0002.CSV	1315.27	0.0507271
CAM112A_map4	0002.CSV	1319.13	0.0510396
CAM112A_map4	0002.CSV	1322.98	0.0510995
CAM112A_map4	0002.CSV	1326.84	0.0514173
CAM112A_map4	0002.CSV	1330.7	0.0518543
CAM112A_map4	0002.CSV	1334.56	0.0525633
CAM112A_map4	0002.CSV	1338.41	0.0536745
CAM112A_map4	0002.CSV	1342.27	0.0553825
CAM112A_map4	0002.CSV	1346.13	0.0567204
CAM112A_map4	0002.CSV	1349.98	0.0583535
CAM112A_map4	0002.CSV	1353.84	0.0598577
CAM112A_map4	0002.CSV	1357.7	0.0613934
CAM112A_map4	0002.CSV	1361.56	0.0631158
CAM112A_map4	0002.CSV	1365.41	0.0654846
CAM112A_map4	0002.CSV	1369.27	0.067518
CAM112A_map4	0002.CSV	1373.13	0.0701456
CAM112A_map4	0002.CSV	1376.98	0.0730293
CAM112A_map4	0002.CSV	1380.84	0.0754058
CAM112A_map4	0002.CSV	1384.7	0.077391
CAM112A_map4	0002.CSV	1388.56	0.080331
CAM112A_map4	0002.CSV	1392.41	0.0828972
CAM112A_map4	0002.CSV	1396.27	0.0866353
CAM112A_map4	0002.CSV	1400.13	0.091275
CAM112A_map4	0002.CSV	1403.98	0.0962504
CAM112A_map4	0002.CSV	1407.84	0.100858
CAM112A_map4	0002.CSV	1411.7	0.103777
CAM112A_map4	0002.CSV	1415.55	0.105207
CAM112A_map4	0002.CSV	1419.41	0.108328
CAM112A_map4	0002.CSV	1423.27	0.11197
CAM112A_map4	0002.CSV	1427.12	0.115992
CAM112A_map4	0002.CSV	1430.98	0.120119
CAM112A_map4	0002.CSV	1434.84	0.123083
CAM112A_map4	0002.CSV	1438.7	0.123079
CAM112A_map4	0002.CSV	1442.55	0.123855
CAM112A_map4	0002.CSV	1446.41	0.125728
CAM112A_map4	0002.CSV	1450.27	0.127709
CAM112A_map4	0002.CSV	1454.12	0.127283
CAM112A_map4	0002.CSV	1457.98	0.125511
CAM112A_map4	0002.CSV	1461.84	0.123756
CAM112A_map4	0002.CSV	1465.7	0.123684
CAM112A_map4	0002.CSV	1469.55	0.122961
CAM112A_map4	0002.CSV	1473.41	0.121002
CAM112A_map4	0002.CSV	1477.27	0.117435
CAM112A_map4	0002.CSV	1481.12	0.114633
CAM112A_map4	0002.CSV	1484.98	0.111321
CAM112A_map4	0002.CSV	1488.84	0.10707
CAM112A_map4	0002.CSV	1492.7	0.101854
CAM112A_map4	0002.CSV	1496.55	0.0969565
CAM112A_map4	0002.CSV	1500.41	0.0911312
CAM112A_map4	0002.CSV	1504.27	0.0877137
CAM112A_map4	0002.CSV	1508.12	0.0810543
CAM112A_map4	0002.CSV	1511.98	0.0762593
CAM112A_map4	0002.CSV	1515.84	0.0723735
CAM112A_map4	0002.CSV	1519.7	0.0670572
CAM112A_map4	0002.CSV	1523.55	0.0608654
CAM112A_map4	0002.CSV	1527.41	0.0569244
CAM112A_map4	0002.CSV	1531.27	0.0538813
CAM112A_map4	0002.CSV	1535.12	0.0521775
CAM112A_map4	0002.CSV	1538.98	0.0516684
CAM112A_map4	0002.CSV	1542.84	0.0521028
CAM112A_map4	0002.CSV	1546.7	0.0489377
CAM112A_map4	0002.CSV	1550.55	0.0450033
CAM112A_map4	0002.CSV	1554.41	0.0407761
CAM112A_map4	0002.CSV	1558.27	0.0367902
CAM112A_map4	0002.CSV	1562.12	0.0339593
CAM112A_map4	0002.CSV	1565.98	0.033241
CAM112A_map4	0002.CSV	1569.84	0.0332535
CAM112A_map4	0002.CSV	1573.69	0.0337297
CAM112A_map4	0002.CSV	1577.55	0.0330352
CAM112A_map4	0002.CSV	1581.41	0.03069
CAM112A_map4	0002.CSV	1585.27	0.0281304
CAM112A_map4	0002.CSV	1589.12	0.0268098
CAM112A_map4	0002.CSV	1592.98	0.0260873
CAM112A_map4	0002.CSV	1596.84	0.0250938
CAM112A_map4	0002.CSV	1600.69	0.0238039
CAM112A_map4	0002.CSV	1604.55	0.0229341
CAM112A_map4	0002.CSV	1608.41	0.022059
CAM112A_map4	0002.CSV	1612.27	0.0212707
CAM112A_map4	0002.CSV	1616.12	0.0205365
CAM112A_map4	0002.CSV	1619.98	0.0202289
CAM112A_map4	0002.CSV	1623.84	0.0199662
CAM112A_map4	0002.CSV	1627.69	0.0198607
CAM112A_map4	0002.CSV	1631.55	0.0194408
CAM112A_map4	0002.CSV	1635.41	0.0195038
CAM112A_map4	0002.CSV	1639.27	0.019752
CAM112A_map4	0002.CSV	1643.12	0.019358
CAM112A_map4	0002.CSV	1646.98	0.0185518
CAM112A_map4	0002.CSV	1650.84	0.0182121
CAM112A_map4	0002.CSV	1654.69	0.01822
CAM112A_map4	0002.CSV	1658.55	0.0179428
CAM112A_map4	0002.CSV	1662.41	0.0175275
CAM112A_map4	0002.CSV	1666.27	0.0172804
CAM112A_map4	0002.CSV	1670.12	0.017027
CAM112A_map4	0002.CSV	1673.98	0.0171641
CAM112A_map4	0002.CSV	1677.84	0.0169336
CAM112A_map4	0002.CSV	1681.69	0.0167625
CAM112A_map4	0002.CSV	1685.55	0.0171934
CAM112A_map4	0002.CSV	1689.41	0.0175617
CAM112A_map4	0002.CSV	1693.27	0.017364
CAM112A_map4	0002.CSV	1697.12	0.0175797
CAM112A_map4	0002.CSV	1700.98	0.0185753
CAM112A_map4	0002.CSV	1704.84	0.0197983
CAM112A_map4	0002.CSV	1708.69	0.0209309
CAM112A_map4	0002.CSV	1712.55	0.0219225
CAM112A_map4	0002.CSV	1716.41	0.024127
CAM112A_map4	0002.CSV	1720.27	0.026737
CAM112A_map4	0002.CSV	1724.12	0.0273567
CAM112A_map4	0002.CSV	1727.98	0.0273523
CAM112A_map4	0002.CSV	1731.84	0.0268332
CAM112A_map4	0002.CSV	1735.69	0.0256781
CAM112A_map4	0002.CSV	1739.55	0.0239965
CAM112A_map4	0002.CSV	1743.41	0.0218527
CAM112A_map4	0002.CSV	1747.27	0.0194178
CAM112A_map4	0002.CSV	1751.12	0.0168799
CAM112A_map4	0002.CSV	1754.98	0.0152068
CAM112A_map4	0002.CSV	1758.84	0.0142285
CAM112A_map4	0002.CSV	1762.69	0.0136721
CAM112A_map4	0002.CSV	1766.55	0.0133423
CAM112A_map4	0002.CSV	1770.41	0.0133332
CAM112A_map4	0002.CSV	1774.26	0.0140666
CAM112A_map4	0002.CSV	1778.12	0.0147189
CAM112A_map4	0002.CSV	1781.98	0.0153913
CAM112A_map4	0002.CSV	1785.84	0.0155892
CAM112A_map4	0002.CSV	1789.69	0.0151074
CAM112A_map4	0002.CSV	1793.55	0.0141233
CAM112A_map4	0002.CSV	1797.41	0.0133594
CAM112A_map4	0002.CSV	1801.26	0.0127373
CAM112A_map4	0002.CSV	1805.12	0.0123798
CAM112A_map4	0002.CSV	1808.98	0.0121969
CAM112A_map4	0002.CSV	1812.84	0.0121221
CAM112A_map4	0002.CSV	1816.69	0.011969
CAM112A_map4	0002.CSV	1820.55	0.0119278
CAM112A_map4	0002.CSV	1824.41	0.0118432
CAM112A_map4	0002.CSV	1828.26	0.011975
CAM112A_map4	0002.CSV	1832.12	0.0120869
CAM112A_map4	0002.CSV	1835.98	0.0119783
CAM112A_map4	0002.CSV	1839.84	0.0118187
CAM112A_map4	0002.CSV	1843.69	0.0119279
CAM112A_map4	0002.CSV	1847.55	0.0121242
CAM112A_map4	0002.CSV	1851.41	0.0120813
CAM112A_map4	0002.CSV	1855.26	0.0119736
CAM112A_map4	0002.CSV	1859.12	0.0119748
CAM112A_map4	0002.CSV	1862.98	0.011906
CAM112A_map4	0002.CSV	1866.84	0.0119454
CAM112A_map4	0002.CSV	1870.69	0.0121817
CAM112A_map4	0002.CSV	1874.55	0.0121704
CAM112A_map4	0002.CSV	1878.41	0.0121146
CAM112A_map4	0002.CSV	1882.26	0.0121442
CAM112A_map4	0002.CSV	1886.12	0.012062
CAM112A_map4	0002.CSV	1889.98	0.0120717
CAM112A_map4	0002.CSV	1893.83	0.0121158
CAM112A_map4	0002.CSV	1897.69	0.0121541
CAM112A_map4	0002.CSV	1901.55	0.0121372
CAM112A_map4	0002.CSV	1905.41	0.0121271
CAM112A_map4	0002.CSV	1909.26	0.0121296
CAM112A_map4	0002.CSV	1913.12	0.0121671
CAM112A_map4	0002.CSV	1916.98	0.0121703
CAM112A_map4	0002.CSV	1920.83	0.0122974
CAM112A_map4	0002.CSV	1924.69	0.0123562
CAM112A_map4	0002.CSV	1928.55	0.0123456
CAM112A_map4	0002.CSV	1932.4	0.0123515
CAM112A_map4	0002.CSV	1936.26	0.0124014
CAM112A_map4	0002.CSV	1940.12	0.0124102
CAM112A_map4	0002.CSV	1943.98	0.0125748
CAM112A_map4	0002.CSV	1947.83	0.0126286
CAM112A_map4	0002.CSV	1951.69	0.0126646
CAM112A_map4	0002.CSV	1955.55	0.0127057
CAM112A_map4	0002.CSV	1959.4	0.0127069
CAM112A_map4	0002.CSV	1963.26	0.0126177
CAM112A_map4	0002.CSV	1967.12	0.0126681
CAM112A_map4	0002.CSV	1970.98	0.0127176
CAM112A_map4	0002.CSV	1974.83	0.012725
CAM112A_map4	0002.CSV	1978.69	0.0127331
CAM112A_map4	0002.CSV	1982.55	0.0127676
CAM112A_map4	0002.CSV	1986.4	0.0127506
CAM112A_map4	0002.CSV	1990.26	0.0128015
CAM112A_map4	0002.CSV	1994.12	0.0128442
CAM112A_map4	0002.CSV	1997.98	0.0128415
CAM112A_map4	0002.CSV	2001.83	0.0128556
CAM112A_map4	0002.CSV	2005.69	0.0129015
CAM112A_map4	0002.CSV	2009.55	0.0129187
CAM112A_map4	0002.CSV	2013.4	0.0129463
CAM112A_map4	0002.CSV	2017.26	0.0129541
CAM112A_map4	0002.CSV	2021.12	0.0129979
CAM112A_map4	0002.CSV	2024.97	0.013031
CAM112A_map4	0002.CSV	2028.83	0.0130697
CAM112A_map4	0002.CSV	2032.69	0.0130586
CAM112A_map4	0002.CSV	2036.55	0.0130699
CAM112A_map4	0002.CSV	2040.4	0.0131002
CAM112A_map4	0002.CSV	2044.26	0.0131254
CAM112A_map4	0002.CSV	2048.12	0.0131059
CAM112A_map4	0002.CSV	2051.97	0.0131448
CAM112A_map4	0002.CSV	2055.83	0.0131502
CAM112A_map4	0002.CSV	2059.69	0.0131803
CAM112A_map4	0002.CSV	2063.55	0.0132181
CAM112A_map4	0002.CSV	2067.4	0.0133086
CAM112A_map4	0002.CSV	2071.26	0.0133271
CAM112A_map4	0002.CSV	2075.12	0.0133828
CAM112A_map4	0002.CSV	2078.97	0.0133917
CAM112A_map4	0002.CSV	2082.83	0.0133607
CAM112A_map4	0002.CSV	2086.69	0.0133614
CAM112A_map4	0002.CSV	2090.55	0.0134217
CAM112A_map4	0002.CSV	2094.4	0.0134221
CAM112A_map4	0002.CSV	2098.26	0.0134316
CAM112A_map4	0002.CSV	2102.12	0.0134729
CAM112A_map4	0002.CSV	2105.97	0.0135213
CAM112A_map4	0002.CSV	2109.83	0.0135115
CAM112A_map4	0002.CSV	2113.69	0.0135575
CAM112A_map4	0002.CSV	2117.55	0.0135787
CAM112A_map4	0002.CSV	2121.4	0.0135932
CAM112A_map4	0002.CSV	2125.26	0.0135889
CAM112A_map4	0002.CSV	2129.12	0.0136046
CAM112A_map4	0002.CSV	2132.97	0.0135975
CAM112A_map4	0002.CSV	2136.83	0.0135896
CAM112A_map4	0002.CSV	2140.69	0.0135896
CAM112A_map4	0002.CSV	2144.55	0.0136292
CAM112A_map4	0002.CSV	2148.4	0.0136527
CAM112A_map4	0002.CSV	2152.26	0.0136472
CAM112A_map4	0002.CSV	2156.12	0.0136177
CAM112A_map4	0002.CSV	2159.97	0.0136482
CAM112A_map4	0002.CSV	2163.83	0.0136664
CAM112A_map4	0002.CSV	2167.69	0.0137099
CAM112A_map4	0002.CSV	2171.55	0.0137403
CAM112A_map4	0002.CSV	2175.4	0.0137892
CAM112A_map4	0002.CSV	2179.26	0.0137946
CAM112A_map4	0002.CSV	2183.12	0.0137913
CAM112A_map4	0002.CSV	2186.97	0.0137818
CAM112A_map4	0002.CSV	2190.83	0.0138054
CAM112A_map4	0002.CSV	2194.69	0.0137862
CAM112A_map4	0002.CSV	2198.55	0.013809
CAM112A_map4	0002.CSV	2202.4	0.0138322
CAM112A_map4	0002.CSV	2206.26	0.0138492
CAM112A_map4	0002.CSV	2210.12	0.0138102
CAM112A_map4	0002.CSV	2213.97	0.013803
CAM112A_map4	0002.CSV	2217.83	0.0138183
CAM112A_map4	0002.CSV	2221.69	0.0138176
CAM112A_map4	0002.CSV	2225.54	0.0138162
CAM112A_map4	0002.CSV	2229.4	0.0138648
CAM112A_map4	0002.CSV	2233.26	0.0138879
CAM112A_map4	0002.CSV	2237.12	0.0139332
CAM112A_map4	0002.CSV	2240.97	0.0139415
CAM112A_map4	0002.CSV	2244.83	0.0139417
CAM112A_map4	0002.CSV	2248.69	0.013934
CAM112A_map4	0002.CSV	2252.54	0.0139709
CAM112A_map4	0002.CSV	2256.4	0.0139729
CAM112A_map4	0002.CSV	2260.26	0.0139361
CAM112A_map4	0002.CSV	2264.11	0.0139192
CAM112A_map4	0002.CSV	2267.97	0.0139167
CAM112A_map4	0002.CSV	2271.83	0.0139369
CAM112A_map4	0002.CSV	2275.69	0.0140192
CAM112A_map4	0002.CSV	2279.54	0.0140444
CAM112A_map4	0002.CSV	2283.4	0.0139816
CAM112A_map4	0002.CSV	2287.26	0.0138763
CAM112A_map4	0002.CSV	2291.11	0.0137845
CAM112A_map4	0002.CSV	2294.97	0.0136822
CAM112A_map4	0002.CSV	2298.83	0.0136558
CAM112A_map4	0002.CSV	2302.69	0.0135079
CAM112A_map4	0002.CSV	2306.54	0.0131871
CAM112A_map4	0002.CSV	2310.4	0.012821
CAM112A_map4	0002.CSV	2314.26	0.0123776
CAM112A_map4	0002.CSV	2318.11	0.0114649
CAM112A_map4	0002.CSV	2321.97	0.00967956
CAM112A_map4	0002.CSV	2325.83	0.00672493
CAM112A_map4	0002.CSV	2329.69	0.004047
CAM112A_map4	0002.CSV	2333.54	0.000837508
CAM112A_map4	0002.CSV	2337.4	-0.00256955
CAM112A_map4	0002.CSV	2341.26	-0.00199376
CAM112A_map4	0002.CSV	2345.11	0.00580689
CAM112A_map4	0002.CSV	2348.97	0.00833867
CAM112A_map4	0002.CSV	2352.83	0.00466382
CAM112A_map4	0002.CSV	2356.69	-0.0166364
CAM112A_map4	0002.CSV	2360.54	-0.049958
CAM112A_map4	0002.CSV	2364.4	-0.0267261
CAM112A_map4	0002.CSV	2368.26	-0.0004865
CAM112A_map4	0002.CSV	2372.11	0.00996602
CAM112A_map4	0002.CSV	2375.97	0.0131598
CAM112A_map4	0002.CSV	2379.83	0.0140721
CAM112A_map4	0002.CSV	2383.69	0.0142777
CAM112A_map4	0002.CSV	2387.54	0.0141663
CAM112A_map4	0002.CSV	2391.4	0.0140299
CAM112A_map4	0002.CSV	2395.26	0.0139848
CAM112A_map4	0002.CSV	2399.11	0.0139787
CAM112A_map4	0002.CSV	2402.97	0.0139591
CAM112A_map4	0002.CSV	2406.83	0.0139826
CAM112A_map4	0002.CSV	2410.68	0.0139805
CAM112A_map4	0002.CSV	2414.54	0.0139807
CAM112A_map4	0002.CSV	2418.4	0.0139864
CAM112A_map4	0002.CSV	2422.26	0.0139743
CAM112A_map4	0002.CSV	2426.11	0.0139533
CAM112A_map4	0002.CSV	2429.97	0.0139469
CAM112A_map4	0002.CSV	2433.83	0.0139649
CAM112A_map4	0002.CSV	2437.68	0.0139769
CAM112A_map4	0002.CSV	2441.54	0.0140042
CAM112A_map4	0002.CSV	2445.4	0.0140684
CAM112A_map4	0002.CSV	2449.26	0.0141025
CAM112A_map4	0002.CSV	2453.11	0.0141246
CAM112A_map4	0002.CSV	2456.97	0.0141263
CAM112A_map4	0002.CSV	2460.83	0.0141641
CAM112A_map4	0002.CSV	2464.68	0.0142346
CAM112A_map4	0002.CSV	2468.54	0.0143104
CAM112A_map4	0002.CSV	2472.4	0.0143728
CAM112A_map4	0002.CSV	2476.26	0.0144735
CAM112A_map4	0002.CSV	2480.11	0.0145445
CAM112A_map4	0002.CSV	2483.97	0.014629
CAM112A_map4	0002.CSV	2487.83	0.0147963
CAM112A_map4	0002.CSV	2491.68	0.0149269
CAM112A_map4	0002.CSV	2495.54	0.0150052
CAM112A_map4	0002.CSV	2499.4	0.0150754
CAM112A_map4	0002.CSV	2503.26	0.0150387
CAM112A_map4	0002.CSV	2507.11	0.0149816
CAM112A_map4	0002.CSV	2510.97	0.0150128
CAM112A_map4	0002.CSV	2514.83	0.015117
CAM112A_map4	0002.CSV	2518.68	0.0151892
CAM112A_map4	0002.CSV	2522.54	0.0151972
CAM112A_map4	0002.CSV	2526.4	0.0151379
CAM112A_map4	0002.CSV	2530.26	0.0150579
CAM112A_map4	0002.CSV	2534.11	0.0149251
CAM112A_map4	0002.CSV	2537.97	0.0148273
CAM112A_map4	0002.CSV	2541.83	0.0147954
CAM112A_map4	0002.CSV	2545.68	0.0147632
CAM112A_map4	0002.CSV	2549.54	0.014669
CAM112A_map4	0002.CSV	2553.4	0.0145571
CAM112A_map4	0002.CSV	2557.26	0.0144869
CAM112A_map4	0002.CSV	2561.11	0.0144444
CAM112A_map4	0002.CSV	2564.97	0.0144177
CAM112A_map4	0002.CSV	2568.83	0.0143908
CAM112A_map4	0002.CSV	2572.68	0.0143864
CAM112A_map4	0002.CSV	2576.54	0.0144058
CAM112A_map4	0002.CSV	2580.4	0.0143414
CAM112A_map4	0002.CSV	2584.25	0.0142813
CAM112A_map4	0002.CSV	2588.11	0.0142836
CAM112A_map4	0002.CSV	2591.97	0.0143356
CAM112A_map4	0002.CSV	2595.83	0.0143602
CAM112A_map4	0002.CSV	2599.68	0.0143326
CAM112A_map4	0002.CSV	2603.54	0.014324
CAM112A_map4	0002.CSV	2607.4	0.0143547
CAM112A_map4	0002.CSV	2611.25	0.0143938
CAM112A_map4	0002.CSV	2615.11	0.0144443
CAM112A_map4	0002.CSV	2618.97	0.0144513
CAM112A_map4	0002.CSV	2622.82	0.0144959
CAM112A_map4	0002.CSV	2626.68	0.0145773
CAM112A_map4	0002.CSV	2630.54	0.0145902
CAM112A_map4	0002.CSV	2634.4	0.0145936
CAM112A_map4	0002.CSV	2638.25	0.0145432
CAM112A_map4	0002.CSV	2642.11	0.0144183
CAM112A_map4	0002.CSV	2645.97	0.014316
CAM112A_map4	0002.CSV	2649.82	0.0143046
CAM112A_map4	0002.CSV	2653.68	0.0143353
CAM112A_map4	0002.CSV	2657.54	0.0143225
CAM112A_map4	0002.CSV	2661.4	0.0143167
CAM112A_map4	0002.CSV	2665.25	0.0142952
CAM112A_map4	0002.CSV	2669.11	0.0143109
CAM112A_map4	0002.CSV	2672.97	0.0144458
CAM112A_map4	0002.CSV	2676.82	0.0146531
CAM112A_map4	0002.CSV	2680.68	0.0146729
CAM112A_map4	0002.CSV	2684.54	0.0144452
CAM112A_map4	0002.CSV	2688.4	0.0143577
CAM112A_map4	0002.CSV	2692.25	0.0143822
CAM112A_map4	0002.CSV	2696.11	0.0144446
CAM112A_map4	0002.CSV	2699.97	0.0144769
CAM112A_map4	0002.CSV	2703.82	0.0144613
CAM112A_map4	0002.CSV	2707.68	0.0145087
CAM112A_map4	0002.CSV	2711.54	0.0145648
CAM112A_map4	0002.CSV	2715.4	0.0145916
CAM112A_map4	0002.CSV	2719.25	0.0147313
CAM112A_map4	0002.CSV	2723.11	0.0150096
CAM112A_map4	0002.CSV	2726.97	0.0150474
CAM112A_map4	0002.CSV	2730.82	0.0148572
CAM112A_map4	0002.CSV	2734.68	0.0148282
CAM112A_map4	0002.CSV	2738.54	0.0148811
CAM112A_map4	0002.CSV	2742.4	0.0149306
CAM112A_map4	0002.CSV	2746.25	0.0151323
CAM112A_map4	0002.CSV	2750.11	0.0151705
CAM112A_map4	0002.CSV	2753.97	0.015061
CAM112A_map4	0002.CSV	2757.82	0.015042
CAM112A_map4	0002.CSV	2761.68	0.0150109
CAM112A_map4	0002.CSV	2765.54	0.0149378
CAM112A_map4	0002.CSV	2769.39	0.0150096
CAM112A_map4	0002.CSV	2773.25	0.0152673
CAM112A_map4	0002.CSV	2777.11	0.0152648
CAM112A_map4	0002.CSV	2780.97	0.0151328
CAM112A_map4	0002.CSV	2784.82	0.0152728
CAM112A_map4	0002.CSV	2788.68	0.0155916
CAM112A_map4	0002.CSV	2792.54	0.0156763
CAM112A_map4	0002.CSV	2796.39	0.0157006
CAM112A_map4	0002.CSV	2800.25	0.0156101
CAM112A_map4	0002.CSV	2804.11	0.0154343
CAM112A_map4	0002.CSV	2807.97	0.015576
CAM112A_map4	0002.CSV	2811.82	0.0155829
CAM112A_map4	0002.CSV	2815.68	0.015461
CAM112A_map4	0002.CSV	2819.54	0.0155233
CAM112A_map4	0002.CSV	2823.39	0.0155922
CAM112A_map4	0002.CSV	2827.25	0.0156522
CAM112A_map4	0002.CSV	2831.11	0.0160142
CAM112A_map4	0002.CSV	2834.97	0.0167073
CAM112A_map4	0002.CSV	2838.82	0.0173438
CAM112A_map4	0002.CSV	2842.68	0.0179347
CAM112A_map4	0002.CSV	2846.54	0.019082
CAM112A_map4	0002.CSV	2850.39	0.0199589
CAM112A_map4	0002.CSV	2854.25	0.0198617
CAM112A_map4	0002.CSV	2858.11	0.0193656
CAM112A_map4	0002.CSV	2861.97	0.0187053
CAM112A_map4	0002.CSV	2865.82	0.0182041
CAM112A_map4	0002.CSV	2869.68	0.0182468
CAM112A_map4	0002.CSV	2873.54	0.0182856
CAM112A_map4	0002.CSV	2877.39	0.0176896
CAM112A_map4	0002.CSV	2881.25	0.0172468
CAM112A_map4	0002.CSV	2885.11	0.0172656
CAM112A_map4	0002.CSV	2888.97	0.0175685
CAM112A_map4	0002.CSV	2892.82	0.0181899
CAM112A_map4	0002.CSV	2896.68	0.018693
CAM112A_map4	0002.CSV	2900.54	0.0189314
CAM112A_map4	0002.CSV	2904.39	0.0194364
CAM112A_map4	0002.CSV	2908.25	0.0204694
CAM112A_map4	0002.CSV	2912.11	0.0221014
CAM112A_map4	0002.CSV	2915.97	0.0235626
CAM112A_map4	0002.CSV	2919.82	0.0239931
CAM112A_map4	0002.CSV	2923.68	0.023704
CAM112A_map4	0002.CSV	2927.54	0.0233456
CAM112A_map4	0002.CSV	2931.39	0.0223235
CAM112A_map4	0002.CSV	2935.25	0.0208337
CAM112A_map4	0002.CSV	2939.11	0.0199441
CAM112A_map4	0002.CSV	2942.96	0.0197545
CAM112A_map4	0002.CSV	2946.82	0.0195286
CAM112A_map4	0002.CSV	2950.68	0.0191302
CAM112A_map4	0002.CSV	2954.54	0.0187265
CAM112A_map4	0002.CSV	2958.39	0.0182514
CAM112A_map4	0002.CSV	2962.25	0.0178941
CAM112A_map4	0002.CSV	2966.11	0.0173176
CAM112A_map4	0002.CSV	2969.96	0.0169907
CAM112A_map4	0002.CSV	2973.82	0.0171021
CAM112A_map4	0002.CSV	2977.68	0.0171414
CAM112A_map4	0002.CSV	2981.53	0.0167781
CAM112A_map4	0002.CSV	2985.39	0.0160896
CAM112A_map4	0002.CSV	2989.25	0.0159502
CAM112A_map4	0002.CSV	2993.11	0.0162067
CAM112A_map4	0002.CSV	2996.96	0.0161717
CAM112A_map4	0002.CSV	3000.82	0.0158438
CAM112A_map4	0002.CSV	3004.68	0.0155913
CAM112A_map4	0002.CSV	3008.53	0.0158004
CAM112A_map4	0002.CSV	3012.39	0.0162033
CAM112A_map4	0002.CSV	3016.25	0.0162699
CAM112A_map4	0002.CSV	3020.11	0.0160562
CAM112A_map4	0002.CSV	3023.96	0.0159674
CAM112A_map4	0002.CSV	3027.82	0.0159727
CAM112A_map4	0002.CSV	3031.68	0.0160895
CAM112A_map4	0002.CSV	3035.53	0.0160479
CAM112A_map4	0002.CSV	3039.39	0.0159974
CAM112A_map4	0002.CSV	3043.25	0.0161104
CAM112A_map4	0002.CSV	3047.11	0.0161458
CAM112A_map4	0002.CSV	3050.96	0.0161966
CAM112A_map4	0002.CSV	3054.82	0.0161354
CAM112A_map4	0002.CSV	3058.68	0.0158773
CAM112A_map4	0002.CSV	3062.53	0.0158956
CAM112A_map4	0002.CSV	3066.39	0.0161786
CAM112A_map4	0002.CSV	3070.25	0.0161195
CAM112A_map4	0002.CSV	3074.11	0.0161247
CAM112A_map4	0002.CSV	3077.96	0.0162733
CAM112A_map4	0002.CSV	3081.82	0.0163146
CAM112A_map4	0002.CSV	3085.68	0.0163149
CAM112A_map4	0002.CSV	3089.53	0.016166
CAM112A_map4	0002.CSV	3093.39	0.01588
CAM112A_map4	0002.CSV	3097.25	0.0158949
CAM112A_map4	0002.CSV	3101.11	0.0159923
CAM112A_map4	0002.CSV	3104.96	0.0159744
CAM112A_map4	0002.CSV	3108.82	0.0161343
CAM112A_map4	0002.CSV	3112.68	0.0162836
CAM112A_map4	0002.CSV	3116.53	0.0163851
CAM112A_map4	0002.CSV	3120.39	0.0163537
CAM112A_map4	0002.CSV	3124.25	0.0161763
CAM112A_map4	0002.CSV	3128.11	0.0160742
CAM112A_map4	0002.CSV	3131.96	0.016028
CAM112A_map4	0002.CSV	3135.82	0.0161489
CAM112A_map4	0002.CSV	3139.68	0.0163093
CAM112A_map4	0002.CSV	3143.53	0.0160953
CAM112A_map4	0002.CSV	3147.39	0.0161489
CAM112A_map4	0002.CSV	3151.25	0.0164678
CAM112A_map4	0002.CSV	3155.1	0.0163349
CAM112A_map4	0002.CSV	3158.96	0.0159871
CAM112A_map4	0002.CSV	3162.82	0.0159734
CAM112A_map4	0002.CSV	3166.68	0.0160701
CAM112A_map4	0002.CSV	3170.53	0.0160926
CAM112A_map4	0002.CSV	3174.39	0.0160057
CAM112A_map4	0002.CSV	3178.25	0.016036
CAM112A_map4	0002.CSV	3182.1	0.0160963
CAM112A_map4	0002.CSV	3185.96	0.0162049
CAM112A_map4	0002.CSV	3189.82	0.0162764
CAM112A_map4	0002.CSV	3193.68	0.0162288
CAM112A_map4	0002.CSV	3197.53	0.0162843
CAM112A_map4	0002.CSV	3201.39	0.0164002
CAM112A_map4	0002.CSV	3205.25	0.0163929
CAM112A_map4	0002.CSV	3209.1	0.0163592
CAM112A_map4	0002.CSV	3212.96	0.0164795
CAM112A_map4	0002.CSV	3216.82	0.0166469
CAM112A_map4	0002.CSV	3220.68	0.0166878
CAM112A_map4	0002.CSV	3224.53	0.0166153
CAM112A_map4	0002.CSV	3228.39	0.016777
CAM112A_map4	0002.CSV	3232.25	0.0170969
CAM112A_map4	0002.CSV	3236.1	0.0171202
CAM112A_map4	0002.CSV	3239.96	0.0169481
CAM112A_map4	0002.CSV	3243.82	0.0171268
CAM112A_map4	0002.CSV	3247.68	0.0172185
CAM112A_map4	0002.CSV	3251.53	0.0170096
CAM112A_map4	0002.CSV	3255.39	0.0170309
CAM112A_map4	0002.CSV	3259.25	0.0169539
CAM112A_map4	0002.CSV	3263.1	0.0169113
CAM112A_map4	0002.CSV	3266.96	0.0171908
CAM112A_map4	0002.CSV	3270.82	0.0175048
CAM112A_map4	0002.CSV	3274.68	0.0174673
CAM112A_map4	0002.CSV	3278.53	0.0172416
CAM112A_map4	0002.CSV	3282.39	0.017066
CAM112A_map4	0002.CSV	3286.25	0.0171165
CAM112A_map4	0002.CSV	3290.1	0.0175329
CAM112A_map4	0002.CSV	3293.96	0.0178602
CAM112A_map4	0002.CSV	3297.82	0.017609
CAM112A_map4	0002.CSV	3301.67	0.0174965
CAM112A_map4	0002.CSV	3305.53	0.0177273
CAM112A_map4	0002.CSV	3309.39	0.0177506
CAM112A_map4	0002.CSV	3313.25	0.0174128
CAM112A_map4	0002.CSV	3317.1	0.0171339
CAM112A_map4	0002.CSV	3320.96	0.0172571
CAM112A_map4	0002.CSV	3324.82	0.0175146
CAM112A_map4	0002.CSV	3328.67	0.0173817
CAM112A_map4	0002.CSV	3332.53	0.0172773
CAM112A_map4	0002.CSV	3336.39	0.0176508
CAM112A_map4	0002.CSV	3340.24	0.0179318
CAM112A_map4	0002.CSV	3344.1	0.0177576
CAM112A_map4	0002.CSV	3347.96	0.0176787
CAM112A_map4	0002.CSV	3351.82	0.0177706
CAM112A_map4	0002.CSV	3355.67	0.0176253
CAM112A_map4	0002.CSV	3359.53	0.0175911
CAM112A_map4	0002.CSV	3363.39	0.0178066
CAM112A_map4	0002.CSV	3367.24	0.0180666
CAM112A_map4	0002.CSV	3371.1	0.0179187
CAM112A_map4	0002.CSV	3374.96	0.0175939
CAM112A_map4	0002.CSV	3378.82	0.0174199
CAM112A_map4	0002.CSV	3382.67	0.0171859
CAM112A_map4	0002.CSV	3386.53	0.0172716
CAM112A_map4	0002.CSV	3390.39	0.0176998
CAM112A_map4	0002.CSV	3394.24	0.0178477
CAM112A_map4	0002.CSV	3398.1	0.0177984
CAM112A_map4	0002.CSV	3401.96	0.0177714
CAM112A_map4	0002.CSV	3405.82	0.0176198
CAM112A_map4	0002.CSV	3409.67	0.01766
CAM112A_map4	0002.CSV	3413.53	0.0175214
CAM112A_map4	0002.CSV	3417.39	0.0171677
CAM112A_map4	0002.CSV	3421.24	0.0171207
CAM112A_map4	0002.CSV	3425.1	0.0172469
CAM112A_map4	0002.CSV	3428.96	0.0175384
CAM112A_map4	0002.CSV	3432.82	0.0177611
CAM112A_map4	0002.CSV	3436.67	0.0175891
CAM112A_map4	0002.CSV	3440.53	0.0170821
CAM112A_map4	0002.CSV	3444.39	0.016697
CAM112A_map4	0002.CSV	3448.24	0.0165033
CAM112A_map4	0002.CSV	3452.1	0.0164067
CAM112A_map4	0002.CSV	3455.96	0.0164759
CAM112A_map4	0002.CSV	3459.82	0.0166042
CAM112A_map4	0002.CSV	3463.67	0.0168507
CAM112A_map4	0002.CSV	3467.53	0.0171027
CAM112A_map4	0002.CSV	3471.39	0.0167802
CAM112A_map4	0002.CSV	3475.24	0.0164206
CAM112A_map4	0002.CSV	3479.1	0.0164489
CAM112A_map4	0002.CSV	3482.96	0.0163411
CAM112A_map4	0002.CSV	3486.82	0.0163003
CAM112A_map4	0002.CSV	3490.67	0.0162453
CAM112A_map4	0002.CSV	3494.53	0.0162764
CAM112A_map4	0002.CSV	3498.39	0.0163138
CAM112A_map4	0002.CSV	3502.24	0.0161959
CAM112A_map4	0002.CSV	3506.1	0.0159238
CAM112A_map4	0002.CSV	3509.96	0.015839
CAM112A_map4	0002.CSV	3513.81	0.0159309
CAM112A_map4	0002.CSV	3517.67	0.0157011
CAM112A_map4	0002.CSV	3521.53	0.0156315
CAM112A_map4	0002.CSV	3525.39	0.0155529
CAM112A_map4	0002.CSV	3529.24	0.0154321
CAM112A_map4	0002.CSV	3533.1	0.0156122
CAM112A_map4	0002.CSV	3536.96	0.0157157
CAM112A_map4	0002.CSV	3540.81	0.0157077
CAM112A_map4	0002.CSV	3544.67	0.015767
CAM112A_map4	0002.CSV	3548.53	0.0155634
CAM112A_map4	0002.CSV	3552.39	0.0153116
CAM112A_map4	0002.CSV	3556.24	0.0152692
CAM112A_map4	0002.CSV	3560.1	0.0149924
CAM112A_map4	0002.CSV	3563.96	0.014468
CAM112A_map4	0002.CSV	3567.81	0.0146937
CAM112A_map4	0002.CSV	3571.67	0.0149595
CAM112A_map4	0002.CSV	3575.53	0.0147231
CAM112A_map4	0002.CSV	3579.39	0.0147897
CAM112A_map4	0002.CSV	3583.24	0.0148407
CAM112A_map4	0002.CSV	3587.1	0.0149629
CAM112A_map4	0002.CSV	3590.96	0.0148595
CAM112A_map4	0002.CSV	3594.81	0.0145113
CAM112A_map4	0002.CSV	3598.67	0.0146136
CAM112A_map4	0002.CSV	3602.53	0.0146683
CAM112A_map4	0002.CSV	3606.39	0.0142115
CAM112A_map4	0002.CSV	3610.24	0.0139038
CAM112A_map4	0002.CSV	3614.1	0.0137566
CAM112A_map4	0002.CSV	3617.96	0.0139199
CAM112A_map4	0002.CSV	3621.81	0.0141606
CAM112A_map4	0002.CSV	3625.67	0.0135381
CAM112A_map4	0002.CSV	3629.53	0.0135233
CAM112A_map4	0002.CSV	3633.39	0.0142099
CAM112A_map4	0002.CSV	3637.24	0.0140779
CAM112A_map4	0002.CSV	3641.1	0.013671
CAM112A_map4	0002.CSV	3644.96	0.0130147
CAM112A_map4	0002.CSV	3648.81	0.0133151
CAM112A_map4	0002.CSV	3652.67	0.0141953
CAM112A_map4	0002.CSV	3656.53	0.0142685
CAM112A_map4	0002.CSV	3660.38	0.0142105
CAM112A_map4	0002.CSV	3664.24	0.0134756
CAM112A_map4	0002.CSV	3668.1	0.0126991
CAM112A_map4	0002.CSV	3671.96	0.0126739
CAM112A_map4	0002.CSV	3675.81	0.0132263
CAM112A_map4	0002.CSV	3679.67	0.0136101
CAM112A_map4	0002.CSV	3683.53	0.0132917
CAM112A_map4	0002.CSV	3687.38	0.0131323
CAM112A_map4	0002.CSV	3691.24	0.0138586
CAM112A_map4	0002.CSV	3695.1	0.0137111
CAM112A_map4	0002.CSV	3698.95	0.0131354
CAM112A_map4	0002.CSV	3702.81	0.0129933
CAM112A_map4	0002.CSV	3706.67	0.0126553
CAM112A_map4	0002.CSV	3710.53	0.0125528
CAM112A_map4	0002.CSV	3714.38	0.0130979
CAM112A_map4	0002.CSV	3718.24	0.0127313
CAM112A_map4	0002.CSV	3722.1	0.0124519
CAM112A_map4	0002.CSV	3725.95	0.0126426
CAM112A_map4	0002.CSV	3729.81	0.0125129
CAM112A_map4	0002.CSV	3733.67	0.0126093
CAM112A_map4	0002.CSV	3737.53	0.0133495
CAM112A_map4	0002.CSV	3741.38	0.012784
CAM112A_map4	0002.CSV	3745.24	0.0120129
CAM112A_map4	0002.CSV	3749.1	0.0118895
CAM112A_map4	0002.CSV	3752.95	0.0128139
CAM112A_map4	0002.CSV	3756.81	0.0130967
CAM112A_map4	0002.CSV	3760.67	0.013144
CAM112A_map4	0002.CSV	3764.53	0.0130108
CAM112A_map4	0002.CSV	3768.38	0.0130634
CAM112A_map4	0002.CSV	3772.24	0.0133736
CAM112A_map4	0002.CSV	3776.1	0.0132654
CAM112A_map4	0002.CSV	3779.95	0.0132509
CAM112A_map4	0002.CSV	3783.81	0.0133346
CAM112A_map4	0002.CSV	3787.67	0.0135416
CAM112A_map4	0002.CSV	3791.53	0.0133755
CAM112A_map4	0002.CSV	3795.38	0.0128238
CAM112A_map4	0002.CSV	3799.24	0.0127264
CAM112A_map4	0002.CSV	3803.1	0.0132666
CAM112A_map4	0002.CSV	3806.95	0.0136536
CAM112A_map4	0002.CSV	3810.81	0.0134386
CAM112A_map4	0002.CSV	3814.67	0.0129452
CAM112A_map4	0002.CSV	3818.53	0.0129838
CAM112A_map4	0002.CSV	3822.38	0.0134689
CAM112A_map4	0002.CSV	3826.24	0.0134561
CAM112A_map4	0002.CSV	3830.1	0.0132578
CAM112A_map4	0002.CSV	3833.95	0.0130704
CAM112A_map4	0002.CSV	3837.81	0.0130501
CAM112A_map4	0002.CSV	3841.67	0.0135804
CAM112A_map4	0002.CSV	3845.53	0.013598
CAM112A_map4	0002.CSV	3849.38	0.0127658
CAM112A_map4	0002.CSV	3853.24	0.0128746
CAM112A_map4	0002.CSV	3857.1	0.0137618
CAM112A_map4	0002.CSV	3860.95	0.0133
CAM112A_map4	0002.CSV	3864.81	0.0132409
CAM112A_map4	0002.CSV	3868.67	0.0132845
CAM112A_map4	0002.CSV	3872.52	0.0135117
CAM112A_map4	0002.CSV	3876.38	0.0134263
CAM112A_map4	0002.CSV	3880.24	0.0132128
CAM112A_map4	0002.CSV	3884.1	0.0136185
CAM112A_map4	0002.CSV	3887.95	0.0136347
CAM112A_map4	0002.CSV	3891.81	0.013504
CAM112A_map4	0002.CSV	3895.67	0.0132646
CAM112A_map4	0002.CSV	3899.52	0.0129189
CAM112A_map4	0002.CSV	3903.38	0.0134732
CAM112A_map4	0002.CSV	3907.24	0.0138181
CAM112A_map4	0002.CSV	3911.1	0.0134857
CAM112A_map4	0002.CSV	3914.95	0.0132257
CAM112A_map4	0002.CSV	3918.81	0.0133915
CAM112A_map4	0002.CSV	3922.67	0.0133894
CAM112A_map4	0002.CSV	3926.52	0.0133081
CAM112A_map4	0002.CSV	3930.38	0.01336
CAM112A_map4	0002.CSV	3934.24	0.0135548
CAM112A_map4	0002.CSV	3938.09	0.0133277
CAM112A_map4	0002.CSV	3941.95	0.013134
CAM112A_map4	0002.CSV	3945.81	0.013093
CAM112A_map4	0002.CSV	3949.67	0.0131305
CAM112A_map4	0002.CSV	3953.52	0.0132092
CAM112A_map4	0002.CSV	3957.38	0.0131909
CAM112A_map4	0002.CSV	3961.24	0.013186
CAM112A_map4	0002.CSV	3965.09	0.0131772
CAM112A_map4	0002.CSV	3968.95	0.0131146
CAM112A_map4	0002.CSV	3972.81	0.0131002
CAM112A_map4	0002.CSV	3976.67	0.0131251
CAM112A_map4	0002.CSV	3980.52	0.0131473
CAM112A_map4	0002.CSV	3984.38	0.0132075
CAM112A_map4	0002.CSV	3988.24	0.0131827
CAM112A_map4	0002.CSV	3992.09	0.0130843
CAM112A_map4	0002.CSV	3995.95	0.0130254
CAM112A_map4	0002.CSV	3999.81	0.0130002
CAM112A_map4	0003.CSV	674.992	0.0314309
CAM112A_map4	0003.CSV	678.849	0.0331064
CAM112A_map4	0003.CSV	682.706	0.0333232
CAM112A_map4	0003.CSV	686.563	0.0377266
CAM112A_map4	0003.CSV	690.42	0.045307
CAM112A_map4	0003.CSV	694.277	0.0635445
CAM112A_map4	0003.CSV	698.134	0.0805583
CAM112A_map4	0003.CSV	701.991	0.0720673
CAM112A_map4	0003.CSV	705.849	0.0610651
CAM112A_map4	0003.CSV	709.706	0.0805037
CAM112A_map4	0003.CSV	713.563	0.0826648
CAM112A_map4	0003.CSV	717.42	0.0489976
CAM112A_map4	0003.CSV	721.277	0.0277328
CAM112A_map4	0003.CSV	725.134	0.0256278
CAM112A_map4	0003.CSV	728.991	0.0258389
CAM112A_map4	0003.CSV	732.848	0.0270653
CAM112A_map4	0003.CSV	736.705	0.0285571
CAM112A_map4	0003.CSV	740.562	0.0315753
CAM112A_map4	0003.CSV	744.42	0.0334923
CAM112A_map4	0003.CSV	748.277	0.0350603
CAM112A_map4	0003.CSV	752.134	0.0350619
CAM112A_map4	0003.CSV	755.991	0.0355678
CAM112A_map4	0003.CSV	759.848	0.0352472
CAM112A_map4	0003.CSV	763.705	0.0352406
CAM112A_map4	0003.CSV	767.562	0.0345688
CAM112A_map4	0003.CSV	771.419	0.0348244
CAM112A_map4	0003.CSV	775.276	0.034473
CAM112A_map4	0003.CSV	779.133	0.0346777
CAM112A_map4	0003.CSV	782.99	0.0344165
CAM112A_map4	0003.CSV	786.848	0.0349526
CAM112A_map4	0003.CSV	790.705	0.0352916
CAM112A_map4	0003.CSV	794.562	0.0364937
CAM112A_map4	0003.CSV	798.419	0.0372818
CAM112A_map4	0003.CSV	802.276	0.038831
CAM112A_map4	0003.CSV	806.133	0.0397581
CAM112A_map4	0003.CSV	809.99	0.0413737
CAM112A_map4	0003.CSV	813.847	0.0427023
CAM112A_map4	0003.CSV	817.704	0.0454872
CAM112A_map4	0003.CSV	821.562	0.0485333
CAM112A_map4	0003.CSV	825.419	0.0528858
CAM112A_map4	0003.CSV	829.276	0.0574897
CAM112A_map4	0003.CSV	833.133	0.0647733
CAM112A_map4	0003.CSV	836.99	0.0763512
CAM112A_map4	0003.CSV	840.847	0.0949987
CAM112A_map4	0003.CSV	844.704	0.113661
CAM112A_map4	0003.CSV	848.561	0.1417
CAM112A_map4	0003.CSV	852.418	0.17557
CAM112A_map4	0003.CSV	856.275	0.181554
CAM112A_map4	0003.CSV	860.132	0.156156
CAM112A_map4	0003.CSV	863.99	0.120479
CAM112A_map4	0003.CSV	867.847	0.0850306
CAM112A_map4	0003.CSV	871.704	0.0596945
CAM112A_map4	0003.CSV	875.561	0.0459419
CAM112A_map4	0003.CSV	879.418	0.0394237
CAM112A_map4	0003.CSV	883.275	0.0351568
CAM112A_map4	0003.CSV	887.132	0.0327896
CAM112A_map4	0003.CSV	890.989	0.031872
CAM112A_map4	0003.CSV	894.846	0.0323277
CAM112A_map4	0003.CSV	898.703	0.0326555
CAM112A_map4	0003.CSV	902.561	0.0335041
CAM112A_map4	0003.CSV	906.418	0.0343057
CAM112A_map4	0003.CSV	910.275	0.0346248
CAM112A_map4	0003.CSV	914.132	0.0339974
CAM112A_map4	0003.CSV	917.989	0.0342242
CAM112A_map4	0003.CSV	921.846	0.0344251
CAM112A_map4	0003.CSV	925.703	0.0350514
CAM112A_map4	0003.CSV	929.56	0.0353041
CAM112A_map4	0003.CSV	933.417	0.0357678
CAM112A_map4	0003.CSV	937.274	0.0359662
CAM112A_map4	0003.CSV	941.131	0.0363854
CAM112A_map4	0003.CSV	944.989	0.036459
CAM112A_map4	0003.CSV	948.846	0.0369322
CAM112A_map4	0003.CSV	952.703	0.0372203
CAM112A_map4	0003.CSV	956.56	0.0378364
CAM112A_map4	0003.CSV	960.417	0.0380301
CAM112A_map4	0003.CSV	964.274	0.0384483
CAM112A_map4	0003.CSV	968.131	0.03867
CAM112A_map4	0003.CSV	971.988	0.0392504
CAM112A_map4	0003.CSV	975.845	0.0396352
CAM112A_map4	0003.CSV	979.702	0.0402986
CAM112A_map4	0003.CSV	983.559	0.040588
CAM112A_map4	0003.CSV	987.417	0.0411135
CAM112A_map4	0003.CSV	991.274	0.0412821
CAM112A_map4	0003.CSV	995.131	0.0418041
CAM112A_map4	0003.CSV	998.988	0.0420838
CAM112A_map4	0003.CSV	1002.85	0.0426604
CAM112A_map4	0003.CSV	1006.7	0.0430201
CAM112A_map4	0003.CSV	1010.56	0.0437707
CAM112A_map4	0003.CSV	1014.42	0.0442631
CAM112A_map4	0003.CSV	1018.27	0.0451494
CAM112A_map4	0003.CSV	1022.13	0.0459011
CAM112A_map4	0003.CSV	1025.99	0.0469939
CAM112A_map4	0003.CSV	1029.85	0.0476393
CAM112A_map4	0003.CSV	1033.7	0.0484845
CAM112A_map4	0003.CSV	1037.56	0.0490555
CAM112A_map4	0003.CSV	1041.42	0.0498228
CAM112A_map4	0003.CSV	1045.27	0.0500806
CAM112A_map4	0003.CSV	1049.13	0.0507717
CAM112A_map4	0003.CSV	1052.99	0.0515224
CAM112A_map4	0003.CSV	1056.84	0.0529646
CAM112A_map4	0003.CSV	1060.7	0.0542753
CAM112A_map4	0003.CSV	1064.56	0.0558294
CAM112A_map4	0003.CSV	1068.42	0.0567523
CAM112A_map4	0003.CSV	1072.27	0.0579834
CAM112A_map4	0003.CSV	1076.13	0.0606382
CAM112A_map4	0003.CSV	1079.99	0.0680502
CAM112A_map4	0003.CSV	1083.84	0.068825
CAM112A_map4	0003.CSV	1087.7	0.05872
CAM112A_map4	0003.CSV	1091.56	0.052889
CAM112A_map4	0003.CSV	1095.41	0.0527213
CAM112A_map4	0003.CSV	1099.27	0.0530887
CAM112A_map4	0003.CSV	1103.13	0.0539308
CAM112A_map4	0003.CSV	1106.99	0.0547738
CAM112A_map4	0003.CSV	1110.84	0.0558454
CAM112A_map4	0003.CSV	1114.7	0.0565329
CAM112A_map4	0003.CSV	1118.56	0.0571745
CAM112A_map4	0003.CSV	1122.41	0.0574091
CAM112A_map4	0003.CSV	1126.27	0.0577366
CAM112A_map4	0003.CSV	1130.13	0.0578104
CAM112A_map4	0003.CSV	1133.99	0.0581771
CAM112A_map4	0003.CSV	1137.84	0.0584079
CAM112A_map4	0003.CSV	1141.7	0.0588691
CAM112A_map4	0003.CSV	1145.56	0.0590981
CAM112A_map4	0003.CSV	1149.41	0.0597278
CAM112A_map4	0003.CSV	1153.27	0.0602574
CAM112A_map4	0003.CSV	1157.13	0.0609287
CAM112A_map4	0003.CSV	1160.99	0.061389
CAM112A_map4	0003.CSV	1164.84	0.0620203
CAM112A_map4	0003.CSV	1168.7	0.0622489
CAM112A_map4	0003.CSV	1172.56	0.0625525
CAM112A_map4	0003.CSV	1176.41	0.0625801
CAM112A_map4	0003.CSV	1180.27	0.0626972
CAM112A_map4	0003.CSV	1184.13	0.0624374
CAM112A_map4	0003.CSV	1187.99	0.0623879
CAM112A_map4	0003.CSV	1191.84	0.0621261
CAM112A_map4	0003.CSV	1195.7	0.0621619
CAM112A_map4	0003.CSV	1199.56	0.0621275
CAM112A_map4	0003.CSV	1203.41	0.0624498
CAM112A_map4	0003.CSV	1207.27	0.0628374
CAM112A_map4	0003.CSV	1211.13	0.0636345
CAM112A_map4	0003.CSV	1214.98	0.0642115
CAM112A_map4	0003.CSV	1218.84	0.0650682
CAM112A_map4	0003.CSV	1222.7	0.0658826
CAM112A_map4	0003.CSV	1226.56	0.0670504
CAM112A_map4	0003.CSV	1230.41	0.0681043
CAM112A_map4	0003.CSV	1234.27	0.0694421
CAM112A_map4	0003.CSV	1238.13	0.0706481
CAM112A_map4	0003.CSV	1241.98	0.0722231
CAM112A_map4	0003.CSV	1245.84	0.0735993
CAM112A_map4	0003.CSV	1249.7	0.0749777
CAM112A_map4	0003.CSV	1253.56	0.0758082
CAM112A_map4	0003.CSV	1257.41	0.0765749
CAM112A_map4	0003.CSV	1261.27	0.0771352
CAM112A_map4	0003.CSV	1265.13	0.0782377
CAM112A_map4	0003.CSV	1268.98	0.0794048
CAM112A_map4	0003.CSV	1272.84	0.0808477
CAM112A_map4	0003.CSV	1276.7	0.0818938
CAM112A_map4	0003.CSV	1280.56	0.0829979
CAM112A_map4	0003.CSV	1284.41	0.0836496
CAM112A_map4	0003.CSV	1288.27	0.0843596
CAM112A_map4	0003.CSV	1292.13	0.0847903
CAM112A_map4	0003.CSV	1295.98	0.085507
CAM112A_map4	0003.CSV	1299.84	0.0860433
CAM112A_map4	0003.CSV	1303.7	0.0869729
CAM112A_map4	0003.CSV	1307.56	0.0878012
CAM112A_map4	0003.CSV	1311.41	0.0891137
CAM112A_map4	0003.CSV	1315.27	0.0904312
CAM112A_map4	0003.CSV	1319.13	0.0920194
CAM112A_map4	0003.CSV	1322.98	0.0931787
CAM112A_map4	0003.CSV	1326.84	0.094684
CAM112A_map4	0003.CSV	1330.7	0.0962784
CAM112A_map4	0003.CSV	1334.56	0.098322
CAM112A_map4	0003.CSV	1338.41	0.100739
CAM112A_map4	0003.CSV	1342.27	0.104092
CAM112A_map4	0003.CSV	1346.13	0.106805
CAM112A_map4	0003.CSV	1349.98	0.110069
CAM112A_map4	0003.CSV	1353.84	0.113278
CAM112A_map4	0003.CSV	1357.7	0.116839
CAM112A_map4	0003.CSV	1361.56	0.120648
CAM112A_map4	0003.CSV	1365.41	0.125473
CAM112A_map4	0003.CSV	1369.27	0.129474
CAM112A_map4	0003.CSV	1373.13	0.134608
CAM112A_map4	0003.CSV	1376.98	0.140274
CAM112A_map4	0003.CSV	1380.84	0.145571
CAM112A_map4	0003.CSV	1384.7	0.150451
CAM112A_map4	0003.CSV	1388.56	0.156947
CAM112A_map4	0003.CSV	1392.41	0.162206
CAM112A_map4	0003.CSV	1396.27	0.168845
CAM112A_map4	0003.CSV	1400.13	0.175475
CAM112A_map4	0003.CSV	1403.98	0.181826
CAM112A_map4	0003.CSV	1407.84	0.187768
CAM112A_map4	0003.CSV	1411.7	0.193092
CAM112A_map4	0003.CSV	1415.55	0.196528
CAM112A_map4	0003.CSV	1419.41	0.201096
CAM112A_map4	0003.CSV	1423.27	0.20488
CAM112A_map4	0003.CSV	1427.12	0.209312
CAM112A_map4	0003.CSV	1430.98	0.213837
CAM112A_map4	0003.CSV	1434.84	0.219672
CAM112A_map4	0003.CSV	1438.7	0.225037
CAM112A_map4	0003.CSV	1442.55	0.228581
CAM112A_map4	0003.CSV	1446.41	0.228197
CAM112A_map4	0003.CSV	1450.27	0.225502
CAM112A_map4	0003.CSV	1454.12	0.221008
CAM112A_map4	0003.CSV	1457.98	0.216086
CAM112A_map4	0003.CSV	1461.84	0.212154
CAM112A_map4	0003.CSV	1465.7	0.209602
CAM112A_map4	0003.CSV	1469.55	0.204204
CAM112A_map4	0003.CSV	1473.41	0.194496
CAM112A_map4	0003.CSV	1477.27	0.182748
CAM112A_map4	0003.CSV	1481.12	0.17557
CAM112A_map4	0003.CSV	1484.98	0.168369
CAM112A_map4	0003.CSV	1488.84	0.160011
CAM112A_map4	0003.CSV	1492.7	0.151346
CAM112A_map4	0003.CSV	1496.55	0.1446
CAM112A_map4	0003.CSV	1500.41	0.136542
CAM112A_map4	0003.CSV	1504.27	0.131509
CAM112A_map4	0003.CSV	1508.12	0.120947
CAM112A_map4	0003.CSV	1511.98	0.113539
CAM112A_map4	0003.CSV	1515.84	0.1078
CAM112A_map4	0003.CSV	1519.7	0.100104
CAM112A_map4	0003.CSV	1523.55	0.0907544
CAM112A_map4	0003.CSV	1527.41	0.0845948
CAM112A_map4	0003.CSV	1531.27	0.0793934
CAM112A_map4	0003.CSV	1535.12	0.075177
CAM112A_map4	0003.CSV	1538.98	0.0708047
CAM112A_map4	0003.CSV	1542.84	0.0643871
CAM112A_map4	0003.CSV	1546.7	0.0596194
CAM112A_map4	0003.CSV	1550.55	0.0560226
CAM112A_map4	0003.CSV	1554.41	0.0520253
CAM112A_map4	0003.CSV	1558.27	0.0476958
CAM112A_map4	0003.CSV	1562.12	0.0437058
CAM112A_map4	0003.CSV	1565.98	0.041878
CAM112A_map4	0003.CSV	1569.84	0.0393702
CAM112A_map4	0003.CSV	1573.69	0.0367792
CAM112A_map4	0003.CSV	1577.55	0.0332957
CAM112A_map4	0003.CSV	1581.41	0.0304074
CAM112A_map4	0003.CSV	1585.27	0.0279102
CAM112A_map4	0003.CSV	1589.12	0.0259144
CAM112A_map4	0003.CSV	1592.98	0.0243544
CAM112A_map4	0003.CSV	1596.84	0.0234231
CAM112A_map4	0003.CSV	1600.69	0.0226958
CAM112A_map4	0003.CSV	1604.55	0.0223527
CAM112A_map4	0003.CSV	1608.41	0.0219468
CAM112A_map4	0003.CSV	1612.27	0.0215356
CAM112A_map4	0003.CSV	1616.12	0.0208989
CAM112A_map4	0003.CSV	1619.98	0.020488
CAM112A_map4	0003.CSV	1623.84	0.0199125
CAM112A_map4	0003.CSV	1627.69	0.01951
CAM112A_map4	0003.CSV	1631.55	0.018741
CAM112A_map4	0003.CSV	1635.41	0.0182484
CAM112A_map4	0003.CSV	1639.27	0.0178837
CAM112A_map4	0003.CSV	1643.12	0.0174032
CAM112A_map4	0003.CSV	1646.98	0.0168096
CAM112A_map4	0003.CSV	1650.84	0.0167028
CAM112A_map4	0003.CSV	1654.69	0.016887
CAM112A_map4	0003.CSV	1658.55	0.0167459
CAM112A_map4	0003.CSV	1662.41	0.0163557
CAM112A_map4	0003.CSV	1666.27	0.0161054
CAM112A_map4	0003.CSV	1670.12	0.0158347
CAM112A_map4	0003.CSV	1673.98	0.0159393
CAM112A_map4	0003.CSV	1677.84	0.0156264
CAM112A_map4	0003.CSV	1681.69	0.0153969
CAM112A_map4	0003.CSV	1685.55	0.0155848
CAM112A_map4	0003.CSV	1689.41	0.0157241
CAM112A_map4	0003.CSV	1693.27	0.0153136
CAM112A_map4	0003.CSV	1697.12	0.0152833
CAM112A_map4	0003.CSV	1700.98	0.0157707
CAM112A_map4	0003.CSV	1704.84	0.0163917
CAM112A_map4	0003.CSV	1708.69	0.0167272
CAM112A_map4	0003.CSV	1712.55	0.016929
CAM112A_map4	0003.CSV	1716.41	0.0178234
CAM112A_map4	0003.CSV	1720.27	0.0191869
CAM112A_map4	0003.CSV	1724.12	0.0193702
[truncated: 136,944 more rows]

## Sheet: CAM112_map5
Map	Select spectrum number	Wavenumbers	Absorbance
CAM112A_map5	0001.CSV	674.992	0.0396575
CAM112A_map5	0001.CSV	678.849	0.0425144
CAM112A_map5	0001.CSV	682.706	0.0438569
CAM112A_map5	0001.CSV	686.563	0.0489178
CAM112A_map5	0001.CSV	690.42	0.0575024
CAM112A_map5	0001.CSV	694.277	0.0818262
CAM112A_map5	0001.CSV	698.134	0.109999
CAM112A_map5	0001.CSV	701.991	0.103327
CAM112A_map5	0001.CSV	705.849	0.0818886
CAM112A_map5	0001.CSV	709.706	0.103852
CAM112A_map5	0001.CSV	713.563	0.119805
CAM112A_map5	0001.CSV	717.42	0.0794336
CAM112A_map5	0001.CSV	721.277	0.0428801
CAM112A_map5	0001.CSV	725.134	0.0355256
CAM112A_map5	0001.CSV	728.991	0.0348799
CAM112A_map5	0001.CSV	732.848	0.0369316
CAM112A_map5	0001.CSV	736.705	0.03878
CAM112A_map5	0001.CSV	740.562	0.0422903
CAM112A_map5	0001.CSV	744.42	0.0442245
CAM112A_map5	0001.CSV	748.277	0.0462392
CAM112A_map5	0001.CSV	752.134	0.0462891
CAM112A_map5	0001.CSV	755.991	0.0476947
CAM112A_map5	0001.CSV	759.848	0.047573
CAM112A_map5	0001.CSV	763.705	0.048134
CAM112A_map5	0001.CSV	767.562	0.0472994
CAM112A_map5	0001.CSV	771.419	0.0471118
CAM112A_map5	0001.CSV	775.276	0.0460879
CAM112A_map5	0001.CSV	779.133	0.0465742
CAM112A_map5	0001.CSV	782.99	0.0462675
CAM112A_map5	0001.CSV	786.848	0.0472499
CAM112A_map5	0001.CSV	790.705	0.0475334
CAM112A_map5	0001.CSV	794.562	0.0491789
CAM112A_map5	0001.CSV	798.419	0.0501637
CAM112A_map5	0001.CSV	802.276	0.0522206
CAM112A_map5	0001.CSV	806.133	0.0537895
CAM112A_map5	0001.CSV	809.99	0.0570486
CAM112A_map5	0001.CSV	813.847	0.0598994
CAM112A_map5	0001.CSV	817.704	0.0643309
CAM112A_map5	0001.CSV	821.562	0.0689724
CAM112A_map5	0001.CSV	825.419	0.076779
CAM112A_map5	0001.CSV	829.276	0.0861629
CAM112A_map5	0001.CSV	833.133	0.10104
CAM112A_map5	0001.CSV	836.99	0.125339
CAM112A_map5	0001.CSV	840.847	0.164575
CAM112A_map5	0001.CSV	844.704	0.203713
CAM112A_map5	0001.CSV	848.561	0.253933
CAM112A_map5	0001.CSV	852.418	0.3005
CAM112A_map5	0001.CSV	856.275	0.290921
CAM112A_map5	0001.CSV	860.132	0.234595
CAM112A_map5	0001.CSV	863.99	0.173029
CAM112A_map5	0001.CSV	867.847	0.119233
CAM112A_map5	0001.CSV	871.704	0.0808628
CAM112A_map5	0001.CSV	875.561	0.0589487
CAM112A_map5	0001.CSV	879.418	0.0484792
CAM112A_map5	0001.CSV	883.275	0.0414693
CAM112A_map5	0001.CSV	887.132	0.0373922
CAM112A_map5	0001.CSV	890.989	0.0354251
CAM112A_map5	0001.CSV	894.846	0.0354031
CAM112A_map5	0001.CSV	898.703	0.03545
CAM112A_map5	0001.CSV	902.561	0.0366332
CAM112A_map5	0001.CSV	906.418	0.0378392
CAM112A_map5	0001.CSV	910.275	0.0383274
CAM112A_map5	0001.CSV	914.132	0.037207
CAM112A_map5	0001.CSV	917.989	0.0374693
CAM112A_map5	0001.CSV	921.846	0.0378048
CAM112A_map5	0001.CSV	925.703	0.0387358
CAM112A_map5	0001.CSV	929.56	0.0392645
CAM112A_map5	0001.CSV	933.417	0.0402298
CAM112A_map5	0001.CSV	937.274	0.0404839
CAM112A_map5	0001.CSV	941.131	0.0411312
CAM112A_map5	0001.CSV	944.989	0.0413896
CAM112A_map5	0001.CSV	948.846	0.0421404
CAM112A_map5	0001.CSV	952.703	0.0426487
CAM112A_map5	0001.CSV	956.56	0.0437454
CAM112A_map5	0001.CSV	960.417	0.0442297
CAM112A_map5	0001.CSV	964.274	0.0449384
CAM112A_map5	0001.CSV	968.131	0.045142
CAM112A_map5	0001.CSV	971.988	0.0459227
CAM112A_map5	0001.CSV	975.845	0.0464699
CAM112A_map5	0001.CSV	979.702	0.0475455
CAM112A_map5	0001.CSV	983.559	0.0482376
CAM112A_map5	0001.CSV	987.417	0.0493062
CAM112A_map5	0001.CSV	991.274	0.049848
CAM112A_map5	0001.CSV	995.131	0.0508659
CAM112A_map5	0001.CSV	998.988	0.0516022
CAM112A_map5	0001.CSV	1002.85	0.0529505
CAM112A_map5	0001.CSV	1006.7	0.0540556
CAM112A_map5	0001.CSV	1010.56	0.0557952
CAM112A_map5	0001.CSV	1014.42	0.0572465
CAM112A_map5	0001.CSV	1018.27	0.0593512
CAM112A_map5	0001.CSV	1022.13	0.0612343
CAM112A_map5	0001.CSV	1025.99	0.0636493
CAM112A_map5	0001.CSV	1029.85	0.0651425
CAM112A_map5	0001.CSV	1033.7	0.0667382
CAM112A_map5	0001.CSV	1037.56	0.0677773
CAM112A_map5	0001.CSV	1041.42	0.0690402
CAM112A_map5	0001.CSV	1045.27	0.0695454
CAM112A_map5	0001.CSV	1049.13	0.0705893
CAM112A_map5	0001.CSV	1052.99	0.0713728
CAM112A_map5	0001.CSV	1056.84	0.0730965
CAM112A_map5	0001.CSV	1060.7	0.0746817
CAM112A_map5	0001.CSV	1064.56	0.0766695
CAM112A_map5	0001.CSV	1068.42	0.0777615
CAM112A_map5	0001.CSV	1072.27	0.0792259
CAM112A_map5	0001.CSV	1076.13	0.0826667
CAM112A_map5	0001.CSV	1079.99	0.0952077
CAM112A_map5	0001.CSV	1083.84	0.101307
CAM112A_map5	0001.CSV	1087.7	0.0851796
CAM112A_map5	0001.CSV	1091.56	0.0709234
CAM112A_map5	0001.CSV	1095.41	0.0684015
CAM112A_map5	0001.CSV	1099.27	0.0684184
CAM112A_map5	0001.CSV	1103.13	0.0692504
CAM112A_map5	0001.CSV	1106.99	0.0696987
CAM112A_map5	0001.CSV	1110.84	0.070659
CAM112A_map5	0001.CSV	1114.7	0.070953
CAM112A_map5	0001.CSV	1118.56	0.0712909
CAM112A_map5	0001.CSV	1122.41	0.0710703
CAM112A_map5	0001.CSV	1126.27	0.0712193
CAM112A_map5	0001.CSV	1130.13	0.0708468
CAM112A_map5	0001.CSV	1133.99	0.0710505
CAM112A_map5	0001.CSV	1137.84	0.0710286
CAM112A_map5	0001.CSV	1141.7	0.0714567
CAM112A_map5	0001.CSV	1145.56	0.0715723
CAM112A_map5	0001.CSV	1149.41	0.0722384
CAM112A_map5	0001.CSV	1153.27	0.0727346
CAM112A_map5	0001.CSV	1157.13	0.0738034
CAM112A_map5	0001.CSV	1160.99	0.0744734
CAM112A_map5	0001.CSV	1164.84	0.0754168
CAM112A_map5	0001.CSV	1168.7	0.0758112
CAM112A_map5	0001.CSV	1172.56	0.076469
CAM112A_map5	0001.CSV	1176.41	0.0766854
CAM112A_map5	0001.CSV	1180.27	0.0771896
CAM112A_map5	0001.CSV	1184.13	0.0771258
CAM112A_map5	0001.CSV	1187.99	0.0773462
CAM112A_map5	0001.CSV	1191.84	0.0772233
CAM112A_map5	0001.CSV	1195.7	0.0775403
CAM112A_map5	0001.CSV	1199.56	0.0775429
CAM112A_map5	0001.CSV	1203.41	0.0781753
CAM112A_map5	0001.CSV	1207.27	0.0786746
CAM112A_map5	0001.CSV	1211.13	0.0797132
CAM112A_map5	0001.CSV	1214.98	0.0804441
CAM112A_map5	0001.CSV	1218.84	0.0817363
CAM112A_map5	0001.CSV	1222.7	0.0828658
CAM112A_map5	0001.CSV	1226.56	0.0845567
CAM112A_map5	0001.CSV	1230.41	0.0861136
CAM112A_map5	0001.CSV	1234.27	0.0882421
CAM112A_map5	0001.CSV	1238.13	0.0901202
CAM112A_map5	0001.CSV	1241.98	0.09255
CAM112A_map5	0001.CSV	1245.84	0.0946493
CAM112A_map5	0001.CSV	1249.7	0.0970562
CAM112A_map5	0001.CSV	1253.56	0.0987947
CAM112A_map5	0001.CSV	1257.41	0.100586
CAM112A_map5	0001.CSV	1261.27	0.101991
CAM112A_map5	0001.CSV	1265.13	0.104048
CAM112A_map5	0001.CSV	1268.98	0.10589
CAM112A_map5	0001.CSV	1272.84	0.108285
CAM112A_map5	0001.CSV	1276.7	0.110187
CAM112A_map5	0001.CSV	1280.56	0.112304
CAM112A_map5	0001.CSV	1284.41	0.113715
CAM112A_map5	0001.CSV	1288.27	0.115154
CAM112A_map5	0001.CSV	1292.13	0.115827
CAM112A_map5	0001.CSV	1295.98	0.116971
CAM112A_map5	0001.CSV	1299.84	0.118013
CAM112A_map5	0001.CSV	1303.7	0.11978
CAM112A_map5	0001.CSV	1307.56	0.121407
CAM112A_map5	0001.CSV	1311.41	0.12389
CAM112A_map5	0001.CSV	1315.27	0.126285
CAM112A_map5	0001.CSV	1319.13	0.12933
CAM112A_map5	0001.CSV	1322.98	0.131798
CAM112A_map5	0001.CSV	1326.84	0.134915
CAM112A_map5	0001.CSV	1330.7	0.13816
CAM112A_map5	0001.CSV	1334.56	0.142265
CAM112A_map5	0001.CSV	1338.41	0.147146
CAM112A_map5	0001.CSV	1342.27	0.15382
CAM112A_map5	0001.CSV	1346.13	0.159332
CAM112A_map5	0001.CSV	1349.98	0.16613
CAM112A_map5	0001.CSV	1353.84	0.173059
CAM112A_map5	0001.CSV	1357.7	0.180638
CAM112A_map5	0001.CSV	1361.56	0.188969
CAM112A_map5	0001.CSV	1365.41	0.199683
CAM112A_map5	0001.CSV	1369.27	0.208724
CAM112A_map5	0001.CSV	1373.13	0.220742
CAM112A_map5	0001.CSV	1376.98	0.234505
CAM112A_map5	0001.CSV	1380.84	0.247346
CAM112A_map5	0001.CSV	1384.7	0.259581
CAM112A_map5	0001.CSV	1388.56	0.276103
CAM112A_map5	0001.CSV	1392.41	0.289768
CAM112A_map5	0001.CSV	1396.27	0.306866
CAM112A_map5	0001.CSV	1400.13	0.323862
CAM112A_map5	0001.CSV	1403.98	0.339607
CAM112A_map5	0001.CSV	1407.84	0.354522
CAM112A_map5	0001.CSV	1411.7	0.368452
CAM112A_map5	0001.CSV	1415.55	0.377801
CAM112A_map5	0001.CSV	1419.41	0.389866
CAM112A_map5	0001.CSV	1423.27	0.398597
CAM112A_map5	0001.CSV	1427.12	0.408429
CAM112A_map5	0001.CSV	1430.98	0.417803
CAM112A_map5	0001.CSV	1434.84	0.429952
CAM112A_map5	0001.CSV	1438.7	0.439679
CAM112A_map5	0001.CSV	1442.55	0.446481
CAM112A_map5	0001.CSV	1446.41	0.445099
CAM112A_map5	0001.CSV	1450.27	0.438961
CAM112A_map5	0001.CSV	1454.12	0.427363
CAM112A_map5	0001.CSV	1457.98	0.411597
CAM112A_map5	0001.CSV	1461.84	0.398011
CAM112A_map5	0001.CSV	1465.7	0.38739
CAM112A_map5	0001.CSV	1469.55	0.369316
CAM112A_map5	0001.CSV	1473.41	0.337507
CAM112A_map5	0001.CSV	1477.27	0.302394
CAM112A_map5	0001.CSV	1481.12	0.283058
CAM112A_map5	0001.CSV	1484.98	0.265763
CAM112A_map5	0001.CSV	1488.84	0.2469
CAM112A_map5	0001.CSV	1492.7	0.228856
CAM112A_map5	0001.CSV	1496.55	0.216367
CAM112A_map5	0001.CSV	1500.41	0.202308
CAM112A_map5	0001.CSV	1504.27	0.1943
CAM112A_map5	0001.CSV	1508.12	0.178416
CAM112A_map5	0001.CSV	1511.98	0.16749
CAM112A_map5	0001.CSV	1515.84	0.159799
CAM112A_map5	0001.CSV	1519.7	0.14995
CAM112A_map5	0001.CSV	1523.55	0.138029
CAM112A_map5	0001.CSV	1527.41	0.130554
CAM112A_map5	0001.CSV	1531.27	0.124343
CAM112A_map5	0001.CSV	1535.12	0.119822
CAM112A_map5	0001.CSV	1538.98	0.114854
CAM112A_map5	0001.CSV	1542.84	0.105583
CAM112A_map5	0001.CSV	1546.7	0.0975418
CAM112A_map5	0001.CSV	1550.55	0.0915359
CAM112A_map5	0001.CSV	1554.41	0.0850361
CAM112A_map5	0001.CSV	1558.27	0.0773633
CAM112A_map5	0001.CSV	1562.12	0.0702829
CAM112A_map5	0001.CSV	1565.98	0.0674345
CAM112A_map5	0001.CSV	1569.84	0.0636762
CAM112A_map5	0001.CSV	1573.69	0.0599138
CAM112A_map5	0001.CSV	1577.55	0.0536896
CAM112A_map5	0001.CSV	1581.41	0.0476483
CAM112A_map5	0001.CSV	1585.27	0.0421632
CAM112A_map5	0001.CSV	1589.12	0.0378264
CAM112A_map5	0001.CSV	1592.98	0.0348562
CAM112A_map5	0001.CSV	1596.84	0.0331556
CAM112A_map5	0001.CSV	1600.69	0.0319027
CAM112A_map5	0001.CSV	1604.55	0.0311414
CAM112A_map5	0001.CSV	1608.41	0.0302642
CAM112A_map5	0001.CSV	1612.27	0.0295765
CAM112A_map5	0001.CSV	1616.12	0.0286584
CAM112A_map5	0001.CSV	1619.98	0.0280939
CAM112A_map5	0001.CSV	1623.84	0.0272055
CAM112A_map5	0001.CSV	1627.69	0.026342
CAM112A_map5	0001.CSV	1631.55	0.0252392
CAM112A_map5	0001.CSV	1635.41	0.0246307
CAM112A_map5	0001.CSV	1639.27	0.0239138
CAM112A_map5	0001.CSV	1643.12	0.0232877
CAM112A_map5	0001.CSV	1646.98	0.0226657
CAM112A_map5	0001.CSV	1650.84	0.0225726
CAM112A_map5	0001.CSV	1654.69	0.0222292
CAM112A_map5	0001.CSV	1658.55	0.0218044
CAM112A_map5	0001.CSV	1662.41	0.0212467
CAM112A_map5	0001.CSV	1666.27	0.0209269
CAM112A_map5	0001.CSV	1670.12	0.0204346
CAM112A_map5	0001.CSV	1673.98	0.0202831
CAM112A_map5	0001.CSV	1677.84	0.0197375
CAM112A_map5	0001.CSV	1681.69	0.0194552
CAM112A_map5	0001.CSV	1685.55	0.0191896
CAM112A_map5	0001.CSV	1689.41	0.0189551
CAM112A_map5	0001.CSV	1693.27	0.0183919
CAM112A_map5	0001.CSV	1697.12	0.0185036
CAM112A_map5	0001.CSV	1700.98	0.0187182
CAM112A_map5	0001.CSV	1704.84	0.0190297
CAM112A_map5	0001.CSV	1708.69	0.0191664
CAM112A_map5	0001.CSV	1712.55	0.0193551
CAM112A_map5	0001.CSV	1716.41	0.0202127
CAM112A_map5	0001.CSV	1720.27	0.0215306
CAM112A_map5	0001.CSV	1724.12	0.0216427
CAM112A_map5	0001.CSV	1727.98	0.0217584
CAM112A_map5	0001.CSV	1731.84	0.02183
CAM112A_map5	0001.CSV	1735.69	0.021986
CAM112A_map5	0001.CSV	1739.55	0.0211991
CAM112A_map5	0001.CSV	1743.41	0.0200214
CAM112A_map5	0001.CSV	1747.27	0.018363
CAM112A_map5	0001.CSV	1751.12	0.0166869
CAM112A_map5	0001.CSV	1754.98	0.0153477
CAM112A_map5	0001.CSV	1758.84	0.0146634
CAM112A_map5	0001.CSV	1762.69	0.0142543
CAM112A_map5	0001.CSV	1766.55	0.0140589
CAM112A_map5	0001.CSV	1770.41	0.0144893
CAM112A_map5	0001.CSV	1774.26	0.0169129
CAM112A_map5	0001.CSV	1778.12	0.0198514
CAM112A_map5	0001.CSV	1781.98	0.0234468
CAM112A_map5	0001.CSV	1785.84	0.0254968
CAM112A_map5	0001.CSV	1789.69	0.0251665
CAM112A_map5	0001.CSV	1793.55	0.0218873
CAM112A_map5	0001.CSV	1797.41	0.0186507
CAM112A_map5	0001.CSV	1801.26	0.0158999
CAM112A_map5	0001.CSV	1805.12	0.0138775
CAM112A_map5	0001.CSV	1808.98	0.0126464
CAM112A_map5	0001.CSV	1812.84	0.012116
CAM112A_map5	0001.CSV	1816.69	0.0116488
CAM112A_map5	0001.CSV	1820.55	0.011474
CAM112A_map5	0001.CSV	1824.41	0.0113363
CAM112A_map5	0001.CSV	1828.26	0.0114991
CAM112A_map5	0001.CSV	1832.12	0.0114715
CAM112A_map5	0001.CSV	1835.98	0.0113877
CAM112A_map5	0001.CSV	1839.84	0.0112125
CAM112A_map5	0001.CSV	1843.69	0.011424
CAM112A_map5	0001.CSV	1847.55	0.0115944
CAM112A_map5	0001.CSV	1851.41	0.0114955
CAM112A_map5	0001.CSV	1855.26	0.011341
CAM112A_map5	0001.CSV	1859.12	0.0114497
CAM112A_map5	0001.CSV	1862.98	0.0114017
CAM112A_map5	0001.CSV	1866.84	0.0115723
CAM112A_map5	0001.CSV	1870.69	0.0117887
CAM112A_map5	0001.CSV	1874.55	0.0116762
CAM112A_map5	0001.CSV	1878.41	0.0115067
CAM112A_map5	0001.CSV	1882.26	0.0115513
CAM112A_map5	0001.CSV	1886.12	0.0115199
CAM112A_map5	0001.CSV	1889.98	0.0116692
CAM112A_map5	0001.CSV	1893.83	0.0116934
CAM112A_map5	0001.CSV	1897.69	0.0117388
CAM112A_map5	0001.CSV	1901.55	0.0116683
CAM112A_map5	0001.CSV	1905.41	0.011695
CAM112A_map5	0001.CSV	1909.26	0.0117682
CAM112A_map5	0001.CSV	1913.12	0.0118611
CAM112A_map5	0001.CSV	1916.98	0.0118149
CAM112A_map5	0001.CSV	1920.83	0.0119544
CAM112A_map5	0001.CSV	1924.69	0.0120103
CAM112A_map5	0001.CSV	1928.55	0.0120777
CAM112A_map5	0001.CSV	1932.4	0.0120688
CAM112A_map5	0001.CSV	1936.26	0.0121563
CAM112A_map5	0001.CSV	1940.12	0.0121758
CAM112A_map5	0001.CSV	1943.98	0.0124618
CAM112A_map5	0001.CSV	1947.83	0.0125199
CAM112A_map5	0001.CSV	1951.69	0.0125228
CAM112A_map5	0001.CSV	1955.55	0.0124973
CAM112A_map5	0001.CSV	1959.4	0.0125598
CAM112A_map5	0001.CSV	1963.26	0.0125326
CAM112A_map5	0001.CSV	1967.12	0.012645
CAM112A_map5	0001.CSV	1970.98	0.0126778
CAM112A_map5	0001.CSV	1974.83	0.0127028
CAM112A_map5	0001.CSV	1978.69	0.0127228
CAM112A_map5	0001.CSV	1982.55	0.0128233
CAM112A_map5	0001.CSV	1986.4	0.0127635
CAM112A_map5	0001.CSV	1990.26	0.0128303
CAM112A_map5	0001.CSV	1994.12	0.0128929
CAM112A_map5	0001.CSV	1997.98	0.0129469
CAM112A_map5	0001.CSV	2001.83	0.0129419
CAM112A_map5	0001.CSV	2005.69	0.0130112
CAM112A_map5	0001.CSV	2009.55	0.0130487
CAM112A_map5	0001.CSV	2013.4	0.0131252
CAM112A_map5	0001.CSV	2017.26	0.0131779
CAM112A_map5	0001.CSV	2021.12	0.0132705
CAM112A_map5	0001.CSV	2024.97	0.0132189
CAM112A_map5	0001.CSV	2028.83	0.0132917
CAM112A_map5	0001.CSV	2032.69	0.013336
CAM112A_map5	0001.CSV	2036.55	0.0134073
CAM112A_map5	0001.CSV	2040.4	0.0134164
CAM112A_map5	0001.CSV	2044.26	0.0134837
CAM112A_map5	0001.CSV	2048.12	0.0134798
CAM112A_map5	0001.CSV	2051.97	0.0135122
CAM112A_map5	0001.CSV	2055.83	0.0134914
CAM112A_map5	0001.CSV	2059.69	0.0135786
CAM112A_map5	0001.CSV	2063.55	0.0136206
CAM112A_map5	0001.CSV	2067.4	0.0137378
CAM112A_map5	0001.CSV	2071.26	0.0137848
CAM112A_map5	0001.CSV	2075.12	0.013842
CAM112A_map5	0001.CSV	2078.97	0.0138467
CAM112A_map5	0001.CSV	2082.83	0.0139138
CAM112A_map5	0001.CSV	2086.69	0.0139008
CAM112A_map5	0001.CSV	2090.55	0.0139855
CAM112A_map5	0001.CSV	2094.4	0.0140051
CAM112A_map5	0001.CSV	2098.26	0.0140454
CAM112A_map5	0001.CSV	2102.12	0.014092
CAM112A_map5	0001.CSV	2105.97	0.0142073
CAM112A_map5	0001.CSV	2109.83	0.0142387
CAM112A_map5	0001.CSV	2113.69	0.0143304
CAM112A_map5	0001.CSV	2117.55	0.0143973
CAM112A_map5	0001.CSV	2121.4	0.0144964
CAM112A_map5	0001.CSV	2125.26	0.0145217
CAM112A_map5	0001.CSV	2129.12	0.014606
CAM112A_map5	0001.CSV	2132.97	0.0146306
CAM112A_map5	0001.CSV	2136.83	0.0146907
CAM112A_map5	0001.CSV	2140.69	0.0146937
CAM112A_map5	0001.CSV	2144.55	0.0147406
CAM112A_map5	0001.CSV	2148.4	0.014815
CAM112A_map5	0001.CSV	2152.26	0.0149266
CAM112A_map5	0001.CSV	2156.12	0.0148652
CAM112A_map5	0001.CSV	2159.97	0.0148395
CAM112A_map5	0001.CSV	2163.83	0.0148022
CAM112A_map5	0001.CSV	2167.69	0.0148297
CAM112A_map5	0001.CSV	2171.55	0.0148897
CAM112A_map5	0001.CSV	2175.4	0.0149898
CAM112A_map5	0001.CSV	2179.26	0.0150106
CAM112A_map5	0001.CSV	2183.12	0.0150685
CAM112A_map5	0001.CSV	2186.97	0.0150785
CAM112A_map5	0001.CSV	2190.83	0.0151618
CAM112A_map5	0001.CSV	2194.69	0.0151736
CAM112A_map5	0001.CSV	2198.55	0.0151756
CAM112A_map5	0001.CSV	2202.4	0.0152112
CAM112A_map5	0001.CSV	2206.26	0.0153033
CAM112A_map5	0001.CSV	2210.12	0.0153102
CAM112A_map5	0001.CSV	2213.97	0.0153363
CAM112A_map5	0001.CSV	2217.83	0.0153387
CAM112A_map5	0001.CSV	2221.69	0.0154036
CAM112A_map5	0001.CSV	2225.54	0.015398
CAM112A_map5	0001.CSV	2229.4	0.0154417
CAM112A_map5	0001.CSV	2233.26	0.0154423
CAM112A_map5	0001.CSV	2237.12	0.0154955
CAM112A_map5	0001.CSV	2240.97	0.0155346
CAM112A_map5	0001.CSV	2244.83	0.0155873
CAM112A_map5	0001.CSV	2248.69	0.0155862
CAM112A_map5	0001.CSV	2252.54	0.0156413
CAM112A_map5	0001.CSV	2256.4	0.0156548
CAM112A_map5	0001.CSV	2260.26	0.0156747
CAM112A_map5	0001.CSV	2264.11	0.0156529
CAM112A_map5	0001.CSV	2267.97	0.0156889
CAM112A_map5	0001.CSV	2271.83	0.0156844
CAM112A_map5	0001.CSV	2275.69	0.0157308
CAM112A_map5	0001.CSV	2279.54	0.0157188
CAM112A_map5	0001.CSV	2283.4	0.0156815
CAM112A_map5	0001.CSV	2287.26	0.0156447
CAM112A_map5	0001.CSV	2291.11	0.0157246
CAM112A_map5	0001.CSV	2294.97	0.0157609
CAM112A_map5	0001.CSV	2298.83	0.0157993
CAM112A_map5	0001.CSV	2302.69	0.0157251
CAM112A_map5	0001.CSV	2306.54	0.0156768
CAM112A_map5	0001.CSV	2310.4	0.0155707
CAM112A_map5	0001.CSV	2314.26	0.0154781
CAM112A_map5	0001.CSV	2318.11	0.0150455
CAM112A_map5	0001.CSV	2321.97	0.0145576
CAM112A_map5	0001.CSV	2325.83	0.0139953
CAM112A_map5	0001.CSV	2329.69	0.0135395
CAM112A_map5	0001.CSV	2333.54	0.0130026
CAM112A_map5	0001.CSV	2337.4	0.0128651
CAM112A_map5	0001.CSV	2341.26	0.0131273
CAM112A_map5	0001.CSV	2345.11	0.0145331
CAM112A_map5	0001.CSV	2348.97	0.0146374
CAM112A_map5	0001.CSV	2352.83	0.0132228
CAM112A_map5	0001.CSV	2356.69	0.0101631
CAM112A_map5	0001.CSV	2360.54	0.0081263
CAM112A_map5	0001.CSV	2364.4	0.00946688
CAM112A_map5	0001.CSV	2368.26	0.0126679
CAM112A_map5	0001.CSV	2372.11	0.0150207
CAM112A_map5	0001.CSV	2375.97	0.0162062
CAM112A_map5	0001.CSV	2379.83	0.0164785
CAM112A_map5	0001.CSV	2383.69	0.0164804
CAM112A_map5	0001.CSV	2387.54	0.0163394
CAM112A_map5	0001.CSV	2391.4	0.0162356
CAM112A_map5	0001.CSV	2395.26	0.0162036
CAM112A_map5	0001.CSV	2399.11	0.0162435
CAM112A_map5	0001.CSV	2402.97	0.016242
CAM112A_map5	0001.CSV	2406.83	0.0162785
CAM112A_map5	0001.CSV	2410.68	0.0163018
CAM112A_map5	0001.CSV	2414.54	0.0163435
CAM112A_map5	0001.CSV	2418.4	0.0164145
CAM112A_map5	0001.CSV	2422.26	0.0164817
CAM112A_map5	0001.CSV	2426.11	0.0164751
CAM112A_map5	0001.CSV	2429.97	0.0165398
CAM112A_map5	0001.CSV	2433.83	0.0166488
CAM112A_map5	0001.CSV	2437.68	0.0167445
CAM112A_map5	0001.CSV	2441.54	0.0167786
CAM112A_map5	0001.CSV	2445.4	0.016885
CAM112A_map5	0001.CSV	2449.26	0.0169902
CAM112A_map5	0001.CSV	2453.11	0.0170666
CAM112A_map5	0001.CSV	2456.97	0.0171905
CAM112A_map5	0001.CSV	2460.83	0.0173955
CAM112A_map5	0001.CSV	2464.68	0.0176121
CAM112A_map5	0001.CSV	2468.54	0.0178796
CAM112A_map5	0001.CSV	2472.4	0.0182246
CAM112A_map5	0001.CSV	2476.26	0.0187139
CAM112A_map5	0001.CSV	2480.11	0.0192644
CAM112A_map5	0001.CSV	2483.97	0.0199223
CAM112A_map5	0001.CSV	2487.83	0.0206003
CAM112A_map5	0001.CSV	2491.68	0.0211937
CAM112A_map5	0001.CSV	2495.54	0.0216593
CAM112A_map5	0001.CSV	2499.4	0.0220066
CAM112A_map5	0001.CSV	2503.26	0.022096
CAM112A_map5	0001.CSV	2507.11	0.0220654
CAM112A_map5	0001.CSV	2510.97	0.0221058
CAM112A_map5	0001.CSV	2514.83	0.0223806
CAM112A_map5	0001.CSV	2518.68	0.0228528
CAM112A_map5	0001.CSV	2522.54	0.023174
CAM112A_map5	0001.CSV	2526.4	0.0230792
CAM112A_map5	0001.CSV	2530.26	0.0226968
CAM112A_map5	0001.CSV	2534.11	0.0220859
CAM112A_map5	0001.CSV	2537.97	0.0214338
CAM112A_map5	0001.CSV	2541.83	0.0210034
CAM112A_map5	0001.CSV	2545.68	0.0209255
CAM112A_map5	0001.CSV	2549.54	0.0208389
CAM112A_map5	0001.CSV	2553.4	0.0205389
CAM112A_map5	0001.CSV	2557.26	0.0201175
CAM112A_map5	0001.CSV	2561.11	0.01976
CAM112A_map5	0001.CSV	2564.97	0.0194422
CAM112A_map5	0001.CSV	2568.83	0.0191736
CAM112A_map5	0001.CSV	2572.68	0.0189612
CAM112A_map5	0001.CSV	2576.54	0.0187649
CAM112A_map5	0001.CSV	2580.4	0.0185697
CAM112A_map5	0001.CSV	2584.25	0.0184408
CAM112A_map5	0001.CSV	2588.11	0.0183432
CAM112A_map5	0001.CSV	2591.97	0.0182912
CAM112A_map5	0001.CSV	2595.83	0.0182048
CAM112A_map5	0001.CSV	2599.68	0.0181724
CAM112A_map5	0001.CSV	2603.54	0.0181928
CAM112A_map5	0001.CSV	2607.4	0.0181849
CAM112A_map5	0001.CSV	2611.25	0.018162
CAM112A_map5	0001.CSV	2615.11	0.0181899
CAM112A_map5	0001.CSV	2618.97	0.0182398
CAM112A_map5	0001.CSV	2622.82	0.0183356
CAM112A_map5	0001.CSV	2626.68	0.0183936
CAM112A_map5	0001.CSV	2630.54	0.0183798
CAM112A_map5	0001.CSV	2634.4	0.0183743
CAM112A_map5	0001.CSV	2638.25	0.0183138
CAM112A_map5	0001.CSV	2642.11	0.0181057
CAM112A_map5	0001.CSV	2645.97	0.0179091
CAM112A_map5	0001.CSV	2649.82	0.0177555
CAM112A_map5	0001.CSV	2653.68	0.017586
CAM112A_map5	0001.CSV	2657.54	0.0174164
CAM112A_map5	0001.CSV	2661.4	0.017329
CAM112A_map5	0001.CSV	2665.25	0.0172458
CAM112A_map5	0001.CSV	2669.11	0.0172479
CAM112A_map5	0001.CSV	2672.97	0.0174379
CAM112A_map5	0001.CSV	2676.82	0.0177342
CAM112A_map5	0001.CSV	2680.68	0.0177267
CAM112A_map5	0001.CSV	2684.54	0.0173778
CAM112A_map5	0001.CSV	2688.4	0.0171886
CAM112A_map5	0001.CSV	2692.25	0.0171865
CAM112A_map5	0001.CSV	2696.11	0.0172618
CAM112A_map5	0001.CSV	2699.97	0.0173273
CAM112A_map5	0001.CSV	2703.82	0.0173234
CAM112A_map5	0001.CSV	2707.68	0.017445
CAM112A_map5	0001.CSV	2711.54	0.0175406
CAM112A_map5	0001.CSV	2715.4	0.0175751
CAM112A_map5	0001.CSV	2719.25	0.0177422
CAM112A_map5	0001.CSV	2723.11	0.0180839
CAM112A_map5	0001.CSV	2726.97	0.0181179
CAM112A_map5	0001.CSV	2730.82	0.0178759
CAM112A_map5	0001.CSV	2734.68	0.0179242
CAM112A_map5	0001.CSV	2738.54	0.0180174
CAM112A_map5	0001.CSV	2742.4	0.0180196
CAM112A_map5	0001.CSV	2746.25	0.018339
CAM112A_map5	0001.CSV	2750.11	0.018416
CAM112A_map5	0001.CSV	2753.97	0.0181818
CAM112A_map5	0001.CSV	2757.82	0.018114
CAM112A_map5	0001.CSV	2761.68	0.0180629
CAM112A_map5	0001.CSV	2765.54	0.0180771
CAM112A_map5	0001.CSV	2769.39	0.0183252
CAM112A_map5	0001.CSV	2773.25	0.0187798
CAM112A_map5	0001.CSV	2777.11	0.0187689
CAM112A_map5	0001.CSV	2780.97	0.0185214
CAM112A_map5	0001.CSV	2784.82	0.0187505
CAM112A_map5	0001.CSV	2788.68	0.019327
CAM112A_map5	0001.CSV	2792.54	0.0195982
CAM112A_map5	0001.CSV	2796.39	0.0196701
CAM112A_map5	0001.CSV	2800.25	0.0194829
CAM112A_map5	0001.CSV	2804.11	0.0192557
CAM112A_map5	0001.CSV	2807.97	0.019589
CAM112A_map5	0001.CSV	2811.82	0.0197016
CAM112A_map5	0001.CSV	2815.68	0.0195816
CAM112A_map5	0001.CSV	2819.54	0.0198331
CAM112A_map5	0001.CSV	2823.39	0.0201986
CAM112A_map5	0001.CSV	2827.25	0.0205105
CAM112A_map5	0001.CSV	2831.11	0.0214114
CAM112A_map5	0001.CSV	2834.97	0.0229328
CAM112A_map5	0001.CSV	2838.82	0.0247004
CAM112A_map5	0001.CSV	2842.68	0.0273689
CAM112A_map5	0001.CSV	2846.54	0.0320089
CAM112A_map5	0001.CSV	2850.39	0.0354623
CAM112A_map5	0001.CSV	2854.25	0.0351024
CAM112A_map5	0001.CSV	2858.11	0.0329346
CAM112A_map5	0001.CSV	2861.97	0.0304718
CAM112A_map5	0001.CSV	2865.82	0.0287037
CAM112A_map5	0001.CSV	2869.68	0.0283283
CAM112A_map5	0001.CSV	2873.54	0.0281247
CAM112A_map5	0001.CSV	2877.39	0.0269566
CAM112A_map5	0001.CSV	2881.25	0.0261605
CAM112A_map5	0001.CSV	2885.11	0.0264102
CAM112A_map5	0001.CSV	2888.97	0.0273793
CAM112A_map5	0001.CSV	2892.82	0.0289656
CAM112A_map5	0001.CSV	2896.68	0.0304502
CAM112A_map5	0001.CSV	2900.54	0.0316788
CAM112A_map5	0001.CSV	2904.39	0.0335535
CAM112A_map5	0001.CSV	2908.25	0.0367931
CAM112A_map5	0001.CSV	2912.11	0.0420947
CAM112A_map5	0001.CSV	2915.97	0.047547
CAM112A_map5	0001.CSV	2919.82	0.0498521
CAM112A_map5	0001.CSV	2923.68	0.0489651
CAM112A_map5	0001.CSV	2927.54	0.0467586
CAM112A_map5	0001.CSV	2931.39	0.0432575
CAM112A_map5	0001.CSV	2935.25	0.0390824
CAM112A_map5	0001.CSV	2939.11	0.0360577
CAM112A_map5	0001.CSV	2942.96	0.0344214
CAM112A_map5	0001.CSV	2946.82	0.0331569
CAM112A_map5	0001.CSV	2950.68	0.0322559
CAM112A_map5	0001.CSV	2954.54	0.0314917
CAM112A_map5	0001.CSV	2958.39	0.0304447
CAM112A_map5	0001.CSV	2962.25	0.0293213
CAM112A_map5	0001.CSV	2966.11	0.0276332
CAM112A_map5	0001.CSV	2969.96	0.0263639
CAM112A_map5	0001.CSV	2973.82	0.0259003
CAM112A_map5	0001.CSV	2977.68	0.0254309
CAM112A_map5	0001.CSV	2981.53	0.0244789
CAM112A_map5	0001.CSV	2985.39	0.0233034
CAM112A_map5	0001.CSV	2989.25	0.0229932
CAM112A_map5	0001.CSV	2993.11	0.0231281
CAM112A_map5	0001.CSV	2996.96	0.0227907
CAM112A_map5	0001.CSV	3000.82	0.0222202
CAM112A_map5	0001.CSV	3004.68	0.0217869
CAM112A_map5	0001.CSV	3008.53	0.0219251
CAM112A_map5	0001.CSV	3012.39	0.0223521
CAM112A_map5	0001.CSV	3016.25	0.0224053
CAM112A_map5	0001.CSV	3020.11	0.0222
CAM112A_map5	0001.CSV	3023.96	0.0220467
CAM112A_map5	0001.CSV	3027.82	0.02197
CAM112A_map5	0001.CSV	3031.68	0.0220788
CAM112A_map5	0001.CSV	3035.53	0.022014
CAM112A_map5	0001.CSV	3039.39	0.0219149
CAM112A_map5	0001.CSV	3043.25	0.0219631
CAM112A_map5	0001.CSV	3047.11	0.0218274
CAM112A_map5	0001.CSV	3050.96	0.0217546
CAM112A_map5	0001.CSV	3054.82	0.0217102
CAM112A_map5	0001.CSV	3058.68	0.0216165
CAM112A_map5	0001.CSV	3062.53	0.0217268
CAM112A_map5	0001.CSV	3066.39	0.0219786
CAM112A_map5	0001.CSV	3070.25	0.0218951
CAM112A_map5	0001.CSV	3074.11	0.0219128
CAM112A_map5	0001.CSV	3077.96	0.0221679
CAM112A_map5	0001.CSV	3081.82	0.0223174
CAM112A_map5	0001.CSV	3085.68	0.0223319
CAM112A_map5	0001.CSV	3089.53	0.0221113
CAM112A_map5	0001.CSV	3093.39	0.0217501
CAM112A_map5	0001.CSV	3097.25	0.0217597
CAM112A_map5	0001.CSV	3101.11	0.0218406
CAM112A_map5	0001.CSV	3104.96	0.0218149
CAM112A_map5	0001.CSV	3108.82	0.0220333
CAM112A_map5	0001.CSV	3112.68	0.0222252
CAM112A_map5	0001.CSV	3116.53	0.0224343
CAM112A_map5	0001.CSV	3120.39	0.0223747
CAM112A_map5	0001.CSV	3124.25	0.0220782
CAM112A_map5	0001.CSV	3128.11	0.0219919
CAM112A_map5	0001.CSV	3131.96	0.0219478
CAM112A_map5	0001.CSV	3135.82	0.0221096
CAM112A_map5	0001.CSV	3139.68	0.0222991
CAM112A_map5	0001.CSV	3143.53	0.0220811
CAM112A_map5	0001.CSV	3147.39	0.022128
CAM112A_map5	0001.CSV	3151.25	0.022504
CAM112A_map5	0001.CSV	3155.1	0.0224535
CAM112A_map5	0001.CSV	3158.96	0.0220999
CAM112A_map5	0001.CSV	3162.82	0.0220472
CAM112A_map5	0001.CSV	3166.68	0.0221807
CAM112A_map5	0001.CSV	3170.53	0.0222556
CAM112A_map5	0001.CSV	3174.39	0.0222759
CAM112A_map5	0001.CSV	3178.25	0.0224622
CAM112A_map5	0001.CSV	3182.1	0.0226111
CAM112A_map5	0001.CSV	3185.96	0.0226994
CAM112A_map5	0001.CSV	3189.82	0.0227552
CAM112A_map5	0001.CSV	3193.68	0.022729
CAM112A_map5	0001.CSV	3197.53	0.0227648
CAM112A_map5	0001.CSV	3201.39	0.0228927
CAM112A_map5	0001.CSV	3205.25	0.022894
CAM112A_map5	0001.CSV	3209.1	0.0228935
CAM112A_map5	0001.CSV	3212.96	0.0230479
CAM112A_map5	0001.CSV	3216.82	0.023202
CAM112A_map5	0001.CSV	3220.68	0.0231668
CAM112A_map5	0001.CSV	3224.53	0.0231322
CAM112A_map5	0001.CSV	3228.39	0.0233534
CAM112A_map5	0001.CSV	3232.25	0.0237062
CAM112A_map5	0001.CSV	3236.1	0.0236858
CAM112A_map5	0001.CSV	3239.96	0.0236011
CAM112A_map5	0001.CSV	3243.82	0.0238046
CAM112A_map5	0001.CSV	3247.68	0.0238954
CAM112A_map5	0001.CSV	3251.53	0.0237439
CAM112A_map5	0001.CSV	3255.39	0.0237883
CAM112A_map5	0001.CSV	3259.25	0.0236479
CAM112A_map5	0001.CSV	3263.1	0.0235523
CAM112A_map5	0001.CSV	3266.96	0.0238538
CAM112A_map5	0001.CSV	3270.82	0.0242343
CAM112A_map5	0001.CSV	3274.68	0.0242288
CAM112A_map5	0001.CSV	3278.53	0.0239843
CAM112A_map5	0001.CSV	3282.39	0.0238422
CAM112A_map5	0001.CSV	3286.25	0.0239067
CAM112A_map5	0001.CSV	3290.1	0.0242169
CAM112A_map5	0001.CSV	3293.96	0.0245078
CAM112A_map5	0001.CSV	3297.82	0.0244194
CAM112A_map5	0001.CSV	3301.67	0.0244176
CAM112A_map5	0001.CSV	3305.53	0.024623
CAM112A_map5	0001.CSV	3309.39	0.0245822
CAM112A_map5	0001.CSV	3313.25	0.0242629
CAM112A_map5	0001.CSV	3317.1	0.0239807
CAM112A_map5	0001.CSV	3320.96	0.0240552
CAM112A_map5	0001.CSV	3324.82	0.0243441
CAM112A_map5	0001.CSV	3328.67	0.0241926
CAM112A_map5	0001.CSV	3332.53	0.0241311
CAM112A_map5	0001.CSV	3336.39	0.0245202
CAM112A_map5	0001.CSV	3340.24	0.0247077
CAM112A_map5	0001.CSV	3344.1	0.0245737
CAM112A_map5	0001.CSV	3347.96	0.0245859
CAM112A_map5	0001.CSV	3351.82	0.0245023
CAM112A_map5	0001.CSV	3355.67	0.0241994
CAM112A_map5	0001.CSV	3359.53	0.0243091
CAM112A_map5	0001.CSV	3363.39	0.0245815
CAM112A_map5	0001.CSV	3367.24	0.0247795
CAM112A_map5	0001.CSV	3371.1	0.0246035
CAM112A_map5	0001.CSV	3374.96	0.024415
CAM112A_map5	0001.CSV	3378.82	0.0242401
CAM112A_map5	0001.CSV	3382.67	0.0238848
CAM112A_map5	0001.CSV	3386.53	0.0239369
CAM112A_map5	0001.CSV	3390.39	0.0242773
CAM112A_map5	0001.CSV	3394.24	0.0244298
CAM112A_map5	0001.CSV	3398.1	0.0244643
CAM112A_map5	0001.CSV	3401.96	0.0244492
CAM112A_map5	0001.CSV	3405.82	0.0241776
CAM112A_map5	0001.CSV	3409.67	0.0239683
CAM112A_map5	0001.CSV	3413.53	0.0236646
CAM112A_map5	0001.CSV	3417.39	0.0233604
CAM112A_map5	0001.CSV	3421.24	0.0233386
CAM112A_map5	0001.CSV	3425.1	0.0234113
CAM112A_map5	0001.CSV	3428.96	0.0235537
CAM112A_map5	0001.CSV	3432.82	0.0236106
CAM112A_map5	0001.CSV	3436.67	0.0233068
CAM112A_map5	0001.CSV	3440.53	0.0227344
CAM112A_map5	0001.CSV	3444.39	0.0224015
CAM112A_map5	0001.CSV	3448.24	0.0223628
CAM112A_map5	0001.CSV	3452.1	0.0221887
CAM112A_map5	0001.CSV	3455.96	0.0221825
CAM112A_map5	0001.CSV	3459.82	0.0223647
CAM112A_map5	0001.CSV	3463.67	0.0226193
CAM112A_map5	0001.CSV	3467.53	0.0227086
CAM112A_map5	0001.CSV	3471.39	0.0223015
CAM112A_map5	0001.CSV	3475.24	0.0220324
CAM112A_map5	0001.CSV	3479.1	0.0220639
CAM112A_map5	0001.CSV	3482.96	0.0218602
CAM112A_map5	0001.CSV	3486.82	0.0217977
CAM112A_map5	0001.CSV	3490.67	0.0217156
CAM112A_map5	0001.CSV	3494.53	0.0216432
CAM112A_map5	0001.CSV	3498.39	0.021473
CAM112A_map5	0001.CSV	3502.24	0.0212705
CAM112A_map5	0001.CSV	3506.1	0.020961
CAM112A_map5	0001.CSV	3509.96	0.0208282
CAM112A_map5	0001.CSV	3513.81	0.0209855
CAM112A_map5	0001.CSV	3517.67	0.0207555
CAM112A_map5	0001.CSV	3521.53	0.0206329
CAM112A_map5	0001.CSV	3525.39	0.0206334
CAM112A_map5	0001.CSV	3529.24	0.0203959
CAM112A_map5	0001.CSV	3533.1	0.0202313
CAM112A_map5	0001.CSV	3536.96	0.0201933
CAM112A_map5	0001.CSV	3540.81	0.0201825
CAM112A_map5	0001.CSV	3544.67	0.0203481
CAM112A_map5	0001.CSV	3548.53	0.0201639
CAM112A_map5	0001.CSV	3552.39	0.0197066
CAM112A_map5	0001.CSV	3556.24	0.0195238
CAM112A_map5	0001.CSV	3560.1	0.0192722
CAM112A_map5	0001.CSV	3563.96	0.0188597
CAM112A_map5	0001.CSV	3567.81	0.0191365
CAM112A_map5	0001.CSV	3571.67	0.0192203
CAM112A_map5	0001.CSV	3575.53	0.0188505
CAM112A_map5	0001.CSV	3579.39	0.018931
CAM112A_map5	0001.CSV	3583.24	0.0188641
CAM112A_map5	0001.CSV	3587.1	0.0187766
CAM112A_map5	0001.CSV	3590.96	0.0186538
CAM112A_map5	0001.CSV	3594.81	0.0184987
CAM112A_map5	0001.CSV	3598.67	0.0185876
CAM112A_map5	0001.CSV	3602.53	0.0183546
CAM112A_map5	0001.CSV	3606.39	0.0177023
CAM112A_map5	0001.CSV	3610.24	0.0175013
CAM112A_map5	0001.CSV	3614.1	0.0175778
CAM112A_map5	0001.CSV	3617.96	0.0176627
CAM112A_map5	0001.CSV	3621.81	0.0175715
CAM112A_map5	0001.CSV	3625.67	0.016877
CAM112A_map5	0001.CSV	3629.53	0.0169281
CAM112A_map5	0001.CSV	3633.39	0.0173859
CAM112A_map5	0001.CSV	3637.24	0.0170964
CAM112A_map5	0001.CSV	3641.1	0.0166994
CAM112A_map5	0001.CSV	3644.96	0.016152
CAM112A_map5	0001.CSV	3648.81	0.0167165
CAM112A_map5	0001.CSV	3652.67	0.0173007
CAM112A_map5	0001.CSV	3656.53	0.017122
CAM112A_map5	0001.CSV	3660.38	0.0169888
CAM112A_map5	0001.CSV	3664.24	0.0162337
CAM112A_map5	0001.CSV	3668.1	0.0155
CAM112A_map5	0001.CSV	3671.96	0.0156033
CAM112A_map5	0001.CSV	3675.81	0.0162307
CAM112A_map5	0001.CSV	3679.67	0.0164639
CAM112A_map5	0001.CSV	3683.53	0.0159024
CAM112A_map5	0001.CSV	3687.38	0.0155908
CAM112A_map5	0001.CSV	3691.24	0.0163652
CAM112A_map5	0001.CSV	3695.1	0.0163066
CAM112A_map5	0001.CSV	3698.95	0.0157639
CAM112A_map5	0001.CSV	3702.81	0.0155968
CAM112A_map5	0001.CSV	3706.67	0.0152129
CAM112A_map5	0001.CSV	3710.53	0.0152399
CAM112A_map5	0001.CSV	3714.38	0.0159543
CAM112A_map5	0001.CSV	3718.24	0.0155873
CAM112A_map5	0001.CSV	3722.1	0.0153419
CAM112A_map5	0001.CSV	3725.95	0.0154841
CAM112A_map5	0001.CSV	3729.81	0.0151602
CAM112A_map5	0001.CSV	3733.67	0.015414
CAM112A_map5	0001.CSV	3737.53	0.0165259
CAM112A_map5	0001.CSV	3741.38	0.015797
CAM112A_map5	0001.CSV	3745.24	0.014994
CAM112A_map5	0001.CSV	3749.1	0.0148627
CAM112A_map5	0001.CSV	3752.95	0.0155095
CAM112A_map5	0001.CSV	3756.81	0.0156461
CAM112A_map5	0001.CSV	3760.67	0.0156622
CAM112A_map5	0001.CSV	3764.53	0.0154369
CAM112A_map5	0001.CSV	3768.38	0.0155383
CAM112A_map5	0001.CSV	3772.24	0.0156561
CAM112A_map5	0001.CSV	3776.1	0.0153482
CAM112A_map5	0001.CSV	3779.95	0.0154406
CAM112A_map5	0001.CSV	3783.81	0.0156013
CAM112A_map5	0001.CSV	3787.67	0.0155769
CAM112A_map5	0001.CSV	3791.53	0.0152084
CAM112A_map5	0001.CSV	3795.38	0.0147292
CAM112A_map5	0001.CSV	3799.24	0.0147814
CAM112A_map5	0001.CSV	3803.1	0.0155268
CAM112A_map5	0001.CSV	3806.95	0.0159054
CAM112A_map5	0001.CSV	3810.81	0.0153081
CAM112A_map5	0001.CSV	3814.67	0.0147768
CAM112A_map5	0001.CSV	3818.53	0.015238
CAM112A_map5	0001.CSV	3822.38	0.0158085
CAM112A_map5	0001.CSV	3826.24	0.0157053
CAM112A_map5	0001.CSV	3830.1	0.0154643
CAM112A_map5	0001.CSV	3833.95	0.0151808
CAM112A_map5	0001.CSV	3837.81	0.0154114
CAM112A_map5	0001.CSV	3841.67	0.0160949
CAM112A_map5	0001.CSV	3845.53	0.0157889
CAM112A_map5	0001.CSV	3849.38	0.014962
CAM112A_map5	0001.CSV	3853.24	0.0153979
CAM112A_map5	0001.CSV	3857.1	0.0161059
CAM112A_map5	0001.CSV	3860.95	0.0155227
CAM112A_map5	0001.CSV	3864.81	0.0155904
CAM112A_map5	0001.CSV	3868.67	0.0157038
CAM112A_map5	0001.CSV	3872.52	0.0159994
CAM112A_map5	0001.CSV	3876.38	0.0157759
CAM112A_map5	0001.CSV	3880.24	0.0155092
CAM112A_map5	0001.CSV	3884.1	0.0159595
CAM112A_map5	0001.CSV	3887.95	0.0159764
CAM112A_map5	0001.CSV	3891.81	0.0158566
CAM112A_map5	0001.CSV	3895.67	0.0156463
CAM112A_map5	0001.CSV	3899.52	0.0153832
CAM112A_map5	0001.CSV	3903.38	0.0160266
CAM112A_map5	0001.CSV	3907.24	0.0161762
CAM112A_map5	0001.CSV	3911.1	0.0156462
CAM112A_map5	0001.CSV	3914.95	0.0153718
CAM112A_map5	0001.CSV	3918.81	0.0156485
CAM112A_map5	0001.CSV	3922.67	0.015717
CAM112A_map5	0001.CSV	3926.52	0.0156367
CAM112A_map5	0001.CSV	3930.38	0.0157014
CAM112A_map5	0001.CSV	3934.24	0.0158895
CAM112A_map5	0001.CSV	3938.09	0.0156499
CAM112A_map5	0001.CSV	3941.95	0.0155014
CAM112A_map5	0001.CSV	3945.81	0.0156038
CAM112A_map5	0001.CSV	3949.67	0.0157249
CAM112A_map5	0001.CSV	3953.52	0.0155678
CAM112A_map5	0001.CSV	3957.38	0.0153078
CAM112A_map5	0001.CSV	3961.24	0.0153942
CAM112A_map5	0001.CSV	3965.09	0.0154132
CAM112A_map5	0001.CSV	3968.95	0.0153289
CAM112A_map5	0001.CSV	3972.81	0.0153901
CAM112A_map5	0001.CSV	3976.67	0.0153961
CAM112A_map5	0001.CSV	3980.52	0.0153361
CAM112A_map5	0001.CSV	3984.38	0.015286
CAM112A_map5	0001.CSV	3988.24	0.0151333
CAM112A_map5	0001.CSV	3992.09	0.0151839
CAM112A_map5	0001.CSV	3995.95	0.0153132
CAM112A_map5	0001.CSV	3999.81	0.0152771
CAM112A_map5	0002.CSV	674.992	0.0399238
CAM112A_map5	0002.CSV	678.849	0.0426192
CAM112A_map5	0002.CSV	682.706	0.0443327
CAM112A_map5	0002.CSV	686.563	0.050014
CAM112A_map5	0002.CSV	690.42	0.0586351
CAM112A_map5	0002.CSV	694.277	0.0826819
CAM112A_map5	0002.CSV	698.134	0.112096
CAM112A_map5	0002.CSV	701.991	0.108679
CAM112A_map5	0002.CSV	705.849	0.0881149
CAM112A_map5	0002.CSV	709.706	0.104684
CAM112A_map5	0002.CSV	713.563	0.114065
CAM112A_map5	0002.CSV	717.42	0.0758664
CAM112A_map5	0002.CSV	721.277	0.0443275
CAM112A_map5	0002.CSV	725.134	0.0384479
CAM112A_map5	0002.CSV	728.991	0.038764
CAM112A_map5	0002.CSV	732.848	0.0430934
CAM112A_map5	0002.CSV	736.705	0.0482153
CAM112A_map5	0002.CSV	740.562	0.0538628
CAM112A_map5	0002.CSV	744.42	0.0555825
CAM112A_map5	0002.CSV	748.277	0.0553498
CAM112A_map5	0002.CSV	752.134	0.0528435
CAM112A_map5	0002.CSV	755.991	0.0521969
CAM112A_map5	0002.CSV	759.848	0.0512728
CAM112A_map5	0002.CSV	763.705	0.05172
CAM112A_map5	0002.CSV	767.562	0.0507687
CAM112A_map5	0002.CSV	771.419	0.0503815
CAM112A_map5	0002.CSV	775.276	0.0490314
CAM112A_map5	0002.CSV	779.133	0.048762
CAM112A_map5	0002.CSV	782.99	0.0476309
CAM112A_map5	0002.CSV	786.848	0.0480035
CAM112A_map5	0002.CSV	790.705	0.0479844
CAM112A_map5	0002.CSV	794.562	0.0491863
CAM112A_map5	0002.CSV	798.419	0.0496305
CAM112A_map5	0002.CSV	802.276	0.0509112
CAM112A_map5	0002.CSV	806.133	0.0514606
CAM112A_map5	0002.CSV	809.99	0.0535537
CAM112A_map5	0002.CSV	813.847	0.0554255
CAM112A_map5	0002.CSV	817.704	0.0594397
CAM112A_map5	0002.CSV	821.562	0.0637549
CAM112A_map5	0002.CSV	825.419	0.070541
CAM112A_map5	0002.CSV	829.276	0.0781751
CAM112A_map5	0002.CSV	833.133	0.0903821
CAM112A_map5	0002.CSV	836.99	0.110319
CAM112A_map5	0002.CSV	840.847	0.143321
CAM112A_map5	0002.CSV	844.704	0.17723
CAM112A_map5	0002.CSV	848.561	0.226676
CAM112A_map5	0002.CSV	852.418	0.282795
CAM112A_map5	0002.CSV	856.275	0.285337
CAM112A_map5	0002.CSV	860.132	0.231094
CAM112A_map5	0002.CSV	863.99	0.166383
CAM112A_map5	0002.CSV	867.847	0.112031
CAM112A_map5	0002.CSV	871.704	0.0772093
CAM112A_map5	0002.CSV	875.561	0.0593378
CAM112A_map5	0002.CSV	879.418	0.0501615
CAM112A_map5	0002.CSV	883.275	0.0429741
CAM112A_map5	0002.CSV	887.132	0.0387186
CAM112A_map5	0002.CSV	890.989	0.0366676
CAM112A_map5	0002.CSV	894.846	0.0365547
CAM112A_map5	0002.CSV	898.703	0.0365665
CAM112A_map5	0002.CSV	902.561	0.0376081
CAM112A_map5	0002.CSV	906.418	0.0388684
CAM112A_map5	0002.CSV	910.275	0.0396284
CAM112A_map5	0002.CSV	914.132	0.0388148
CAM112A_map5	0002.CSV	917.989	0.0391575
CAM112A_map5	0002.CSV	921.846	0.0393442
CAM112A_map5	0002.CSV	925.703	0.0399266
CAM112A_map5	0002.CSV	929.56	0.0402359
CAM112A_map5	0002.CSV	933.417	0.0411214
CAM112A_map5	0002.CSV	937.274	0.0415297
CAM112A_map5	0002.CSV	941.131	0.0422743
CAM112A_map5	0002.CSV	944.989	0.0423761
CAM112A_map5	0002.CSV	948.846	0.0428714
CAM112A_map5	0002.CSV	952.703	0.043423
CAM112A_map5	0002.CSV	956.56	0.044954
CAM112A_map5	0002.CSV	960.417	0.0459158
CAM112A_map5	0002.CSV	964.274	0.0468206
CAM112A_map5	0002.CSV	968.131	0.0471134
CAM112A_map5	0002.CSV	971.988	0.0479275
CAM112A_map5	0002.CSV	975.845	0.0486619
CAM112A_map5	0002.CSV	979.702	0.0500516
CAM112A_map5	0002.CSV	983.559	0.0510042
CAM112A_map5	0002.CSV	987.417	0.0522196
CAM112A_map5	0002.CSV	991.274	0.0527835
CAM112A_map5	0002.CSV	995.131	0.0536362
CAM112A_map5	0002.CSV	998.988	0.0542426
CAM112A_map5	0002.CSV	1002.85	0.055469
CAM112A_map5	0002.CSV	1006.7	0.0563567
CAM112A_map5	0002.CSV	1010.56	0.0579415
CAM112A_map5	0002.CSV	1014.42	0.0594496
CAM112A_map5	0002.CSV	1018.27	0.0616937
CAM112A_map5	0002.CSV	1022.13	0.0638249
CAM112A_map5	0002.CSV	1025.99	0.0666773
CAM112A_map5	0002.CSV	1029.85	0.068904
CAM112A_map5	0002.CSV	1033.7	0.0714836
CAM112A_map5	0002.CSV	1037.56	0.0734337
CAM112A_map5	0002.CSV	1041.42	0.0747888
CAM112A_map5	0002.CSV	1045.27	0.0748735
CAM112A_map5	0002.CSV	1049.13	0.0762898
CAM112A_map5	0002.CSV	1052.99	0.078913
CAM112A_map5	0002.CSV	1056.84	0.0836054
CAM112A_map5	0002.CSV	1060.7	0.0883997
CAM112A_map5	0002.CSV	1064.56	0.0924145
CAM112A_map5	0002.CSV	1068.42	0.0932461
CAM112A_map5	0002.CSV	1072.27	0.0925379
CAM112A_map5	0002.CSV	1076.13	0.0927225
CAM112A_map5	0002.CSV	1079.99	0.100955
CAM112A_map5	0002.CSV	1083.84	0.102473
CAM112A_map5	0002.CSV	1087.7	0.0856033
CAM112A_map5	0002.CSV	1091.56	0.0728131
CAM112A_map5	0002.CSV	1095.41	0.0708595
CAM112A_map5	0002.CSV	1099.27	0.0717332
CAM112A_map5	0002.CSV	1103.13	0.0740817
CAM112A_map5	0002.CSV	1106.99	0.0766777
CAM112A_map5	0002.CSV	1110.84	0.0799951
CAM112A_map5	0002.CSV	1114.7	0.0823273
CAM112A_map5	0002.CSV	1118.56	0.0836771
CAM112A_map5	0002.CSV	1122.41	0.0834762
CAM112A_map5	0002.CSV	1126.27	0.0829024
CAM112A_map5	0002.CSV	1130.13	0.0816391
CAM112A_map5	0002.CSV	1133.99	0.0810587
CAM112A_map5	0002.CSV	1137.84	0.0804404
CAM112A_map5	0002.CSV	1141.7	0.0798428
CAM112A_map5	0002.CSV	1145.56	0.0784191
CAM112A_map5	0002.CSV	1149.41	0.0778472
CAM112A_map5	0002.CSV	1153.27	0.0779966
CAM112A_map5	0002.CSV	1157.13	0.0789821
CAM112A_map5	0002.CSV	1160.99	0.0793882
CAM112A_map5	0002.CSV	1164.84	0.0796191
CAM112A_map5	0002.CSV	1168.7	0.0789047
CAM112A_map5	0002.CSV	1172.56	0.078381
CAM112A_map5	0002.CSV	1176.41	0.0776584
CAM112A_map5	0002.CSV	1180.27	0.0774248
CAM112A_map5	0002.CSV	1184.13	0.0768515
CAM112A_map5	0002.CSV	1187.99	0.0766243
CAM112A_map5	0002.CSV	1191.84	0.0761352
CAM112A_map5	0002.CSV	1195.7	0.0761819
CAM112A_map5	0002.CSV	1199.56	0.0761141
CAM112A_map5	0002.CSV	1203.41	0.0767213
CAM112A_map5	0002.CSV	1207.27	0.0773039
CAM112A_map5	0002.CSV	1211.13	0.0784678
CAM112A_map5	0002.CSV	1214.98	0.0793791
CAM112A_map5	0002.CSV	1218.84	0.0809028
CAM112A_map5	0002.CSV	1222.7	0.0824803
CAM112A_map5	0002.CSV	1226.56	0.0847533
CAM112A_map5	0002.CSV	1230.41	0.087116
CAM112A_map5	0002.CSV	1234.27	0.0904429
CAM112A_map5	0002.CSV	1238.13	0.09411
CAM112A_map5	0002.CSV	1241.98	0.0987139
CAM112A_map5	0002.CSV	1245.84	0.103196
CAM112A_map5	0002.CSV	1249.7	0.107741
CAM112A_map5	0002.CSV	1253.56	0.110983
CAM112A_map5	0002.CSV	1257.41	0.113517
CAM112A_map5	0002.CSV	1261.27	0.115109
CAM112A_map5	0002.CSV	1265.13	0.116889
CAM112A_map5	0002.CSV	1268.98	0.118327
CAM112A_map5	0002.CSV	1272.84	0.120143
CAM112A_map5	0002.CSV	1276.7	0.121337
CAM112A_map5	0002.CSV	1280.56	0.122573
CAM112A_map5	0002.CSV	1284.41	0.122732
CAM112A_map5	0002.CSV	1288.27	0.122176
CAM112A_map5	0002.CSV	1292.13	0.12011
CAM112A_map5	0002.CSV	1295.98	0.117892
CAM112A_map5	0002.CSV	1299.84	0.115591
CAM112A_map5	0002.CSV	1303.7	0.114549
CAM112A_map5	0002.CSV	1307.56	0.114088
CAM112A_map5	0002.CSV	1311.41	0.114857
CAM112A_map5	0002.CSV	1315.27	0.115796
CAM112A_map5	0002.CSV	1319.13	0.117227
CAM112A_map5	0002.CSV	1322.98	0.11794
CAM112A_map5	0002.CSV	1326.84	0.119255
CAM112A_map5	0002.CSV	1330.7	0.120971
CAM112A_map5	0002.CSV	1334.56	0.123878
CAM112A_map5	0002.CSV	1338.41	0.127765
CAM112A_map5	0002.CSV	1342.27	0.133437
CAM112A_map5	0002.CSV	1346.13	0.138182
CAM112A_map5	0002.CSV	1349.98	0.144054
CAM112A_map5	0002.CSV	1353.84	0.149918
CAM112A_map5	0002.CSV	1357.7	0.156153
CAM112A_map5	0002.CSV	1361.56	0.162983
CAM112A_map5	0002.CSV	1365.41	0.172145
CAM112A_map5	0002.CSV	1369.27	0.180069
CAM112A_map5	0002.CSV	1373.13	0.190856
CAM112A_map5	0002.CSV	1376.98	0.203162
CAM112A_map5	0002.CSV	1380.84	0.214019
CAM112A_map5	0002.CSV	1384.7	0.224007
CAM112A_map5	0002.CSV	1388.56	0.238053
CAM112A_map5	0002.CSV	1392.41	0.249886
CAM112A_map5	0002.CSV	1396.27	0.264953
CAM112A_map5	0002.CSV	1400.13	0.2807
CAM112A_map5	0002.CSV	1403.98	0.296013
CAM112A_map5	0002.CSV	1407.84	0.31147
CAM112A_map5	0002.CSV	1411.7	0.326204
CAM112A_map5	0002.CSV	1415.55	0.337047
CAM112A_map5	0002.CSV	1419.41	0.35151
CAM112A_map5	0002.CSV	1423.27	0.362954
CAM112A_map5	0002.CSV	1427.12	0.374877
CAM112A_map5	0002.CSV	1430.98	0.387115
CAM112A_map5	0002.CSV	1434.84	0.40283
CAM112A_map5	0002.CSV	1438.7	0.417208
CAM112A_map5	0002.CSV	1442.55	0.426665
CAM112A_map5	0002.CSV	1446.41	0.42753
CAM112A_map5	0002.CSV	1450.27	0.423609
CAM112A_map5	0002.CSV	1454.12	0.413196
CAM112A_map5	0002.CSV	1457.98	0.397663
CAM112A_map5	0002.CSV	1461.84	0.384605
CAM112A_map5	0002.CSV	1465.7	0.375263
CAM112A_map5	0002.CSV	1469.55	0.35895
CAM112A_map5	0002.CSV	1473.41	0.329206
CAM112A_map5	0002.CSV	1477.27	0.295843
CAM112A_map5	0002.CSV	1481.12	0.277137
CAM112A_map5	0002.CSV	1484.98	0.260178
CAM112A_map5	0002.CSV	1488.84	0.241611
CAM112A_map5	0002.CSV	1492.7	0.223682
CAM112A_map5	0002.CSV	1496.55	0.210912
CAM112A_map5	0002.CSV	1500.41	0.196726
CAM112A_map5	0002.CSV	1504.27	0.188796
CAM112A_map5	0002.CSV	1508.12	0.173432
CAM112A_map5	0002.CSV	1511.98	0.162713
CAM112A_map5	0002.CSV	1515.84	0.155115
CAM112A_map5	0002.CSV	1519.7	0.145367
CAM112A_map5	0002.CSV	1523.55	0.133293
CAM112A_map5	0002.CSV	1527.41	0.125472
CAM112A_map5	0002.CSV	1531.27	0.118867
CAM112A_map5	0002.CSV	1535.12	0.113583
CAM112A_map5	0002.CSV	1538.98	0.107968
CAM112A_map5	0002.CSV	1542.84	0.0987722
CAM112A_map5	0002.CSV	1546.7	0.0916172
CAM112A_map5	0002.CSV	1550.55	0.086465
CAM112A_map5	0002.CSV	1554.41	0.0807986
CAM112A_map5	0002.CSV	1558.27	0.0743024
CAM112A_map5	0002.CSV	1562.12	0.0682702
CAM112A_map5	0002.CSV	1565.98	0.0656525
CAM112A_map5	0002.CSV	1569.84	0.0619759
CAM112A_map5	0002.CSV	1573.69	0.0583845
CAM112A_map5	0002.CSV	1577.55	0.0531425
CAM112A_map5	0002.CSV	1581.41	0.0482123
CAM112A_map5	0002.CSV	1585.27	0.0435461
CAM112A_map5	0002.CSV	1589.12	0.0398556
CAM112A_map5	0002.CSV	1592.98	0.037494
CAM112A_map5	0002.CSV	1596.84	0.0363533
CAM112A_map5	0002.CSV	1600.69	0.0352917
CAM112A_map5	0002.CSV	1604.55	0.03427
CAM112A_map5	0002.CSV	1608.41	0.0331653
CAM112A_map5	0002.CSV	1612.27	0.0324773
CAM112A_map5	0002.CSV	1616.12	0.031599
CAM112A_map5	0002.CSV	1619.98	0.031008
CAM112A_map5	0002.CSV	1623.84	0.0301506
CAM112A_map5	0002.CSV	1627.69	0.0294399
CAM112A_map5	0002.CSV	1631.55	0.0284302
CAM112A_map5	0002.CSV	1635.41	0.0279106
CAM112A_map5	0002.CSV	1639.27	0.0273428
CAM112A_map5	0002.CSV	1643.12	0.0268396
CAM112A_map5	0002.CSV	1646.98	0.0263408
CAM112A_map5	0002.CSV	1650.84	0.0263027
CAM112A_map5	0002.CSV	1654.69	0.0259164
CAM112A_map5	0002.CSV	1658.55	0.0255586
CAM112A_map5	0002.CSV	1662.41	0.0250669
CAM112A_map5	0002.CSV	1666.27	0.0248778
CAM112A_map5	0002.CSV	1670.12	0.0245201
CAM112A_map5	0002.CSV	1673.98	0.0244764
CAM112A_map5	0002.CSV	1677.84	0.0240828
CAM112A_map5	0002.CSV	1681.69	0.0241082
CAM112A_map5	0002.CSV	1685.55	0.0244116
CAM112A_map5	0002.CSV	1689.41	0.0246608
CAM112A_map5	0002.CSV	1693.27	0.0244646
CAM112A_map5	0002.CSV	1697.12	0.0252244
CAM112A_map5	0002.CSV	1700.98	0.0268424
CAM112A_map5	0002.CSV	1704.84	0.0289208
CAM112A_map5	0002.CSV	1708.69	0.0311599
CAM112A_map5	0002.CSV	1712.55	0.0333088
CAM112A_map5	0002.CSV	1716.41	0.0375607
CAM112A_map5	0002.CSV	1720.27	0.0421575
CAM112A_map5	0002.CSV	1724.12	0.0432362
CAM112A_map5	0002.CSV	1727.98	0.0433855
CAM112A_map5	0002.CSV	1731.84	0.0425585
CAM112A_map5	0002.CSV	1735.69	0.040381
CAM112A_map5	0002.CSV	1739.55	0.0373754
CAM112A_map5	0002.CSV	1743.41	0.0334358
CAM112A_map5	0002.CSV	1747.27	0.0287728
CAM112A_map5	0002.CSV	1751.12	0.0237527
CAM112A_map5	0002.CSV	1754.98	0.0204571
CAM112A_map5	0002.CSV	1758.84	0.0183944
CAM112A_map5	0002.CSV	1762.69	0.0170332
CAM112A_map5	0002.CSV	1766.55	0.0163166
CAM112A_map5	0002.CSV	1770.41	0.0163612
CAM112A_map5	0002.CSV	1774.26	0.0182253
CAM112A_map5	0002.CSV	1778.12	0.020704
CAM112A_map5	0002.CSV	1781.98	0.0236841
CAM112A_map5	0002.CSV	1785.84	0.0252913
CAM112A_map5	0002.CSV	1789.69	0.0247476
CAM112A_map5	0002.CSV	1793.55	0.0216562
CAM112A_map5	0002.CSV	1797.41	0.0188016
CAM112A_map5	0002.CSV	1801.26	0.0164433
CAM112A_map5	0002.CSV	1805.12	0.0146791
CAM112A_map5	0002.CSV	1808.98	0.0135815
CAM112A_map5	0002.CSV	1812.84	0.013134
CAM112A_map5	0002.CSV	1816.69	0.0127218
CAM112A_map5	0002.CSV	1820.55	0.0124829
CAM112A_map5	0002.CSV	1824.41	0.0123272
CAM112A_map5	0002.CSV	1828.26	0.0124929
CAM112A_map5	0002.CSV	1832.12	0.0124598
CAM112A_map5	0002.CSV	1835.98	0.0123652
CAM112A_map5	0002.CSV	1839.84	0.0121977
CAM112A_map5	0002.CSV	1843.69	0.0123917
CAM112A_map5	0002.CSV	1847.55	0.0125145
CAM112A_map5	0002.CSV	1851.41	0.0123753
CAM112A_map5	0002.CSV	1855.26	0.0122381
CAM112A_map5	0002.CSV	1859.12	0.0122945
CAM112A_map5	0002.CSV	1862.98	0.0122161
CAM112A_map5	0002.CSV	1866.84	0.0123947
CAM112A_map5	0002.CSV	1870.69	0.0125943
CAM112A_map5	0002.CSV	1874.55	0.0124606
CAM112A_map5	0002.CSV	1878.41	0.0122848
CAM112A_map5	0002.CSV	1882.26	0.0122872
CAM112A_map5	0002.CSV	1886.12	0.0122688
CAM112A_map5	0002.CSV	1889.98	0.0124087
CAM112A_map5	0002.CSV	1893.83	0.0124119
CAM112A_map5	0002.CSV	1897.69	0.0124426
CAM112A_map5	0002.CSV	1901.55	0.0123771
CAM112A_map5	0002.CSV	1905.41	0.0123382
CAM112A_map5	0002.CSV	1909.26	0.0123607
CAM112A_map5	0002.CSV	1913.12	0.01245
CAM112A_map5	0002.CSV	1916.98	0.0124063
CAM112A_map5	0002.CSV	1920.83	0.0125362
CAM112A_map5	0002.CSV	1924.69	0.0125802
CAM112A_map5	0002.CSV	1928.55	0.012632
CAM112A_map5	0002.CSV	1932.4	0.0126024
CAM112A_map5	0002.CSV	1936.26	0.0126229
CAM112A_map5	0002.CSV	1940.12	0.0126349
CAM112A_map5	0002.CSV	1943.98	0.012928
CAM112A_map5	0002.CSV	1947.83	0.0129843
CAM112A_map5	0002.CSV	1951.69	0.0129877
CAM112A_map5	0002.CSV	1955.55	0.0129885
CAM112A_map5	0002.CSV	1959.4	0.013006
CAM112A_map5	0002.CSV	1963.26	0.0129514
CAM112A_map5	0002.CSV	1967.12	0.0130339
CAM112A_map5	0002.CSV	1970.98	0.0130302
CAM112A_map5	0002.CSV	1974.83	0.0130566
CAM112A_map5	0002.CSV	1978.69	0.0130602
CAM112A_map5	0002.CSV	1982.55	0.0131171
CAM112A_map5	0002.CSV	1986.4	0.0130399
CAM112A_map5	0002.CSV	1990.26	0.0130656
CAM112A_map5	0002.CSV	1994.12	0.0131143
CAM112A_map5	0002.CSV	1997.98	0.0131695
CAM112A_map5	0002.CSV	2001.83	0.0131676
CAM112A_map5	0002.CSV	2005.69	0.0132272
CAM112A_map5	0002.CSV	2009.55	0.0132232
CAM112A_map5	0002.CSV	2013.4	0.0132258
CAM112A_map5	0002.CSV	2017.26	0.013247
CAM112A_map5	0002.CSV	2021.12	0.0133317
CAM112A_map5	0002.CSV	2024.97	0.0133057
CAM112A_map5	0002.CSV	2028.83	0.0133586
CAM112A_map5	0002.CSV	2032.69	0.0133648
CAM112A_map5	0002.CSV	2036.55	0.0134015
CAM112A_map5	0002.CSV	2040.4	0.0133722
CAM112A_map5	0002.CSV	2044.26	0.0134441
CAM112A_map5	0002.CSV	2048.12	0.0134494
CAM112A_map5	0002.CSV	2051.97	0.0134657
CAM112A_map5	0002.CSV	2055.83	0.0134541
CAM112A_map5	0002.CSV	2059.69	0.0135371
CAM112A_map5	0002.CSV	2063.55	0.0135971
CAM112A_map5	0002.CSV	2067.4	0.0136917
CAM112A_map5	0002.CSV	2071.26	0.013665
CAM112A_map5	0002.CSV	2075.12	0.0136966
CAM112A_map5	0002.CSV	2078.97	0.0137247
CAM112A_map5	0002.CSV	2082.83	0.0137428
CAM112A_map5	0002.CSV	2086.69	0.013727
CAM112A_map5	0002.CSV	2090.55	0.0138066
CAM112A_map5	0002.CSV	2094.4	0.0137943
CAM112A_map5	0002.CSV	2098.26	0.0138292
CAM112A_map5	0002.CSV	2102.12	0.0138411
CAM112A_map5	0002.CSV	2105.97	0.0139121
CAM112A_map5	0002.CSV	2109.83	0.0139238
CAM112A_map5	0002.CSV	2113.69	0.0139923
CAM112A_map5	0002.CSV	2117.55	0.014049
CAM112A_map5	0002.CSV	2121.4	0.0141337
CAM112A_map5	0002.CSV	2125.26	0.0141425
CAM112A_map5	0002.CSV	2129.12	0.0141902
CAM112A_map5	0002.CSV	2132.97	0.0141899
CAM112A_map5	0002.CSV	2136.83	0.0142315
CAM112A_map5	0002.CSV	2140.69	0.0142396
CAM112A_map5	0002.CSV	2144.55	0.0143
CAM112A_map5	0002.CSV	2148.4	0.0143524
CAM112A_map5	0002.CSV	2152.26	0.0144527
CAM112A_map5	0002.CSV	2156.12	0.0143996
CAM112A_map5	0002.CSV	2159.97	0.0143709
CAM112A_map5	0002.CSV	2163.83	0.0143409
CAM112A_map5	0002.CSV	2167.69	0.0143458
CAM112A_map5	0002.CSV	2171.55	0.01438
CAM112A_map5	0002.CSV	2175.4	0.0144972
CAM112A_map5	0002.CSV	2179.26	0.0145046
CAM112A_map5	0002.CSV	2183.12	0.014513
CAM112A_map5	0002.CSV	2186.97	0.0145134
CAM112A_map5	0002.CSV	2190.83	0.0145899
CAM112A_map5	0002.CSV	2194.69	0.0146084
CAM112A_map5	0002.CSV	2198.55	0.0146348
CAM112A_map5	0002.CSV	2202.4	0.014637
CAM112A_map5	0002.CSV	2206.26	0.0147087
CAM112A_map5	0002.CSV	2210.12	0.0147063
CAM112A_map5	0002.CSV	2213.97	0.0147123
CAM112A_map5	0002.CSV	2217.83	0.0147105
CAM112A_map5	0002.CSV	2221.69	0.0147295
CAM112A_map5	0002.CSV	2225.54	0.0147104
CAM112A_map5	0002.CSV	2229.4	0.0147462
CAM112A_map5	0002.CSV	2233.26	0.0147483
CAM112A_map5	0002.CSV	2237.12	0.0147947
CAM112A_map5	0002.CSV	2240.97	0.0148298
CAM112A_map5	0002.CSV	2244.83	0.0148446
CAM112A_map5	0002.CSV	2248.69	0.0148183
CAM112A_map5	0002.CSV	2252.54	0.0148837
CAM112A_map5	0002.CSV	2256.4	0.0148989
CAM112A_map5	0002.CSV	2260.26	0.0149274
CAM112A_map5	0002.CSV	2264.11	0.0149134
CAM112A_map5	0002.CSV	2267.97	0.0149397
CAM112A_map5	0002.CSV	2271.83	0.0149398
CAM112A_map5	0002.CSV	2275.69	0.0149649
CAM112A_map5	0002.CSV	2279.54	0.0149462
CAM112A_map5	0002.CSV	2283.4	0.0149497
CAM112A_map5	0002.CSV	2287.26	0.0149558
CAM112A_map5	0002.CSV	2291.11	0.0150402
CAM112A_map5	0002.CSV	2294.97	0.0151133
CAM112A_map5	0002.CSV	2298.83	0.0151597
CAM112A_map5	0002.CSV	2302.69	0.015018
CAM112A_map5	0002.CSV	2306.54	0.0149202
CAM112A_map5	0002.CSV	2310.4	0.0148778
CAM112A_map5	0002.CSV	2314.26	0.0148547
CAM112A_map5	0002.CSV	2318.11	0.0144978
CAM112A_map5	0002.CSV	2321.97	0.0141043
CAM112A_map5	0002.CSV	2325.83	0.0135845
CAM112A_map5	0002.CSV	2329.69	0.0130021
CAM112A_map5	0002.CSV	2333.54	0.0123564
CAM112A_map5	0002.CSV	2337.4	0.0120864
CAM112A_map5	0002.CSV	2341.26	0.0124143
CAM112A_map5	0002.CSV	2345.11	0.0138639
CAM112A_map5	0002.CSV	2348.97	0.0140415
CAM112A_map5	0002.CSV	2352.83	0.0126835
CAM112A_map5	0002.CSV	2356.69	0.00986181
CAM112A_map5	0002.CSV	2360.54	0.00804258
CAM112A_map5	0002.CSV	2364.4	0.0090584
CAM112A_map5	0002.CSV	2368.26	0.0122529
CAM112A_map5	0002.CSV	2372.11	0.0144049
CAM112A_map5	0002.CSV	2375.97	0.0154424
CAM112A_map5	0002.CSV	2379.83	0.0156528
CAM112A_map5	0002.CSV	2383.69	0.015552
CAM112A_map5	0002.CSV	2387.54	0.0153638
CAM112A_map5	0002.CSV	2391.4	0.0152403
CAM112A_map5	0002.CSV	2395.26	0.0152008
CAM112A_map5	0002.CSV	2399.11	0.015243
CAM112A_map5	0002.CSV	2402.97	0.0152368
CAM112A_map5	0002.CSV	2406.83	0.0152148
CAM112A_map5	0002.CSV	2410.68	0.0152102
CAM112A_map5	0002.CSV	2414.54	0.0152535
CAM112A_map5	0002.CSV	2418.4	0.0152798
CAM112A_map5	0002.CSV	2422.26	0.015327
CAM112A_map5	0002.CSV	2426.11	0.0153349
CAM112A_map5	0002.CSV	2429.97	0.0153715
CAM112A_map5	0002.CSV	2433.83	0.0154153
CAM112A_map5	0002.CSV	2437.68	0.0154689
CAM112A_map5	0002.CSV	2441.54	0.0155173
CAM112A_map5	0002.CSV	2445.4	0.0155993
CAM112A_map5	0002.CSV	2449.26	0.0156439
CAM112A_map5	0002.CSV	2453.11	0.0156963
CAM112A_map5	0002.CSV	2456.97	0.015799
CAM112A_map5	0002.CSV	2460.83	0.0159582
CAM112A_map5	0002.CSV	2464.68	0.0161442
CAM112A_map5	0002.CSV	2468.54	0.0163905
CAM112A_map5	0002.CSV	2472.4	0.0166776
CAM112A_map5	0002.CSV	2476.26	0.0170724
CAM112A_map5	0002.CSV	2480.11	0.0175567
CAM112A_map5	0002.CSV	2483.97	0.018146
CAM112A_map5	0002.CSV	2487.83	0.0187383
CAM112A_map5	0002.CSV	2491.68	0.0192381
CAM112A_map5	0002.CSV	2495.54	0.0196051
CAM112A_map5	0002.CSV	2499.4	0.0198611
CAM112A_map5	0002.CSV	2503.26	0.0199187
CAM112A_map5	0002.CSV	2507.11	0.0198631
CAM112A_map5	0002.CSV	2510.97	0.0198888
CAM112A_map5	0002.CSV	2514.83	0.0202134
CAM112A_map5	0002.CSV	2518.68	0.0207365
CAM112A_map5	0002.CSV	2522.54	0.0210669
CAM112A_map5	0002.CSV	2526.4	0.0209538
CAM112A_map5	0002.CSV	2530.26	0.0205668
CAM112A_map5	0002.CSV	2534.11	0.0199681
CAM112A_map5	0002.CSV	2537.97	0.019378
CAM112A_map5	0002.CSV	2541.83	0.0190831
CAM112A_map5	0002.CSV	2545.68	0.0190526
CAM112A_map5	0002.CSV	2549.54	0.0189506
CAM112A_map5	0002.CSV	2553.4	0.0186908
CAM112A_map5	0002.CSV	2557.26	0.0183606
CAM112A_map5	0002.CSV	2561.11	0.0180722
CAM112A_map5	0002.CSV	2564.97	0.0177411
CAM112A_map5	0002.CSV	2568.83	0.0174724
CAM112A_map5	0002.CSV	2572.68	0.0173323
CAM112A_map5	0002.CSV	2576.54	0.0172271
CAM112A_map5	0002.CSV	2580.4	0.0170851
CAM112A_map5	0002.CSV	2584.25	0.0169623
CAM112A_map5	0002.CSV	2588.11	0.0168554
CAM112A_map5	0002.CSV	2591.97	0.0168142
CAM112A_map5	0002.CSV	2595.83	0.0167881
CAM112A_map5	0002.CSV	2599.68	0.0167941
CAM112A_map5	0002.CSV	2603.54	0.0167622
CAM112A_map5	0002.CSV	2607.4	0.0167627
CAM112A_map5	0002.CSV	2611.25	0.0167741
CAM112A_map5	0002.CSV	2615.11	0.0168141
CAM112A_map5	0002.CSV	2618.97	0.0168595
CAM112A_map5	0002.CSV	2622.82	0.0169334
CAM112A_map5	0002.CSV	2626.68	0.0169615
CAM112A_map5	0002.CSV	2630.54	0.0169756
CAM112A_map5	0002.CSV	2634.4	0.0170216
CAM112A_map5	0002.CSV	2638.25	0.0169985
CAM112A_map5	0002.CSV	2642.11	0.0167956
CAM112A_map5	0002.CSV	2645.97	0.0166097
CAM112A_map5	0002.CSV	2649.82	0.0164436
CAM112A_map5	0002.CSV	2653.68	0.0162895
CAM112A_map5	0002.CSV	2657.54	0.016189
CAM112A_map5	0002.CSV	2661.4	0.0161311
CAM112A_map5	0002.CSV	2665.25	0.0160652
CAM112A_map5	0002.CSV	2669.11	0.0160591
CAM112A_map5	0002.CSV	2672.97	0.0162141
CAM112A_map5	0002.CSV	2676.82	0.0164716
CAM112A_map5	0002.CSV	2680.68	0.0164449
CAM112A_map5	0002.CSV	2684.54	0.0160856
CAM112A_map5	0002.CSV	2688.4	0.0158879
CAM112A_map5	0002.CSV	2692.25	0.0159305
CAM112A_map5	0002.CSV	2696.11	0.0160244
CAM112A_map5	0002.CSV	2699.97	0.0160777
CAM112A_map5	0002.CSV	2703.82	0.0160818
CAM112A_map5	0002.CSV	2707.68	0.0161565
CAM112A_map5	0002.CSV	2711.54	0.0161858
CAM112A_map5	0002.CSV	2715.4	0.0162066
CAM112A_map5	0002.CSV	2719.25	0.0163765
CAM112A_map5	0002.CSV	2723.11	0.0166845
CAM112A_map5	0002.CSV	2726.97	0.0167281
CAM112A_map5	0002.CSV	2730.82	0.0165359
CAM112A_map5	0002.CSV	2734.68	0.0166068
CAM112A_map5	0002.CSV	2738.54	0.0166872
CAM112A_map5	0002.CSV	2742.4	0.0166279
CAM112A_map5	0002.CSV	2746.25	0.016864
CAM112A_map5	0002.CSV	2750.11	0.0169678
CAM112A_map5	0002.CSV	2753.97	0.016766
CAM112A_map5	0002.CSV	2757.82	0.0166618
CAM112A_map5	0002.CSV	2761.68	0.016594
CAM112A_map5	0002.CSV	2765.54	0.0166062
CAM112A_map5	0002.CSV	2769.39	0.0168579
CAM112A_map5	0002.CSV	2773.25	0.0172948
CAM112A_map5	0002.CSV	2777.11	0.0172338
CAM112A_map5	0002.CSV	2780.97	0.0169714
CAM112A_map5	0002.CSV	2784.82	0.0172301
CAM112A_map5	0002.CSV	2788.68	0.0178044
CAM112A_map5	0002.CSV	2792.54	0.0180271
CAM112A_map5	0002.CSV	2796.39	0.0180843
CAM112A_map5	0002.CSV	2800.25	0.0179343
CAM112A_map5	0002.CSV	2804.11	0.0176978
CAM112A_map5	0002.CSV	2807.97	0.0180346
CAM112A_map5	0002.CSV	2811.82	0.0181979
CAM112A_map5	0002.CSV	2815.68	0.0181108
CAM112A_map5	0002.CSV	2819.54	0.0183624
CAM112A_map5	0002.CSV	2823.39	0.0187433
CAM112A_map5	0002.CSV	2827.25	0.0190567
CAM112A_map5	0002.CSV	2831.11	0.0198864
CAM112A_map5	0002.CSV	2834.97	0.0213635
CAM112A_map5	0002.CSV	2838.82	0.0231765
CAM112A_map5	0002.CSV	2842.68	0.0258266
CAM112A_map5	0002.CSV	2846.54	0.0303422
CAM112A_map5	0002.CSV	2850.39	0.0338973
CAM112A_map5	0002.CSV	2854.25	0.0340263
CAM112A_map5	0002.CSV	2858.11	0.0321827
CAM112A_map5	0002.CSV	2861.97	0.0296924
CAM112A_map5	0002.CSV	2865.82	0.027911
CAM112A_map5	0002.CSV	2869.68	0.0275957
CAM112A_map5	0002.CSV	2873.54	0.0273555
CAM112A_map5	0002.CSV	2877.39	0.0260773
CAM112A_map5	0002.CSV	2881.25	0.0251953
CAM112A_map5	0002.CSV	2885.11	0.0253962
CAM112A_map5	0002.CSV	2888.97	0.0263785
CAM112A_map5	0002.CSV	2892.82	0.0280197
CAM112A_map5	0002.CSV	2896.68	0.0295348
CAM112A_map5	0002.CSV	2900.54	0.0308251
CAM112A_map5	0002.CSV	2904.39	0.0328372
CAM112A_map5	0002.CSV	2908.25	0.036097
CAM112A_map5	0002.CSV	2912.11	0.0411117
CAM112A_map5	0002.CSV	2915.97	0.0462242
CAM112A_map5	0002.CSV	2919.82	0.0487323
CAM112A_map5	0002.CSV	2923.68	0.0485066
CAM112A_map5	0002.CSV	2927.54	0.0468796
CAM112A_map5	0002.CSV	2931.39	0.043595
CAM112A_map5	0002.CSV	2935.25	0.0393295
CAM112A_map5	0002.CSV	2939.11	0.0360679
CAM112A_map5	0002.CSV	2942.96	0.034268
CAM112A_map5	0002.CSV	2946.82	0.0330826
CAM112A_map5	0002.CSV	2950.68	0.032385
CAM112A_map5	0002.CSV	2954.54	0.0317641
CAM112A_map5	0002.CSV	2958.39	0.0307279
CAM112A_map5	0002.CSV	2962.25	0.0294637
CAM112A_map5	0002.CSV	2966.11	0.0274981
CAM112A_map5	0002.CSV	2969.96	0.0259484
CAM112A_map5	0002.CSV	2973.82	0.0252871
CAM112A_map5	0002.CSV	2977.68	0.0247628
CAM112A_map5	0002.CSV	2981.53	0.0237886
CAM112A_map5	0002.CSV	2985.39	0.0225449
CAM112A_map5	0002.CSV	2989.25	0.0220992
CAM112A_map5	0002.CSV	2993.11	0.0220532
CAM112A_map5	0002.CSV	2996.96	0.0215554
CAM112A_map5	0002.CSV	3000.82	0.0208144
CAM112A_map5	0002.CSV	3004.68	0.0202362
CAM112A_map5	0002.CSV	3008.53	0.0203245
CAM112A_map5	0002.CSV	3012.39	0.0207093
CAM112A_map5	0002.CSV	3016.25	0.0206875
CAM112A_map5	0002.CSV	3020.11	0.0204923
CAM112A_map5	0002.CSV	3023.96	0.0204063
CAM112A_map5	0002.CSV	3027.82	0.020393
CAM112A_map5	0002.CSV	3031.68	0.0204863
CAM112A_map5	0002.CSV	3035.53	0.0203105
CAM112A_map5	0002.CSV	3039.39	0.0201651
CAM112A_map5	0002.CSV	3043.25	0.0201956
CAM112A_map5	0002.CSV	3047.11	0.0200611
CAM112A_map5	0002.CSV	3050.96	0.0200285
CAM112A_map5	0002.CSV	3054.82	0.020064
CAM112A_map5	0002.CSV	3058.68	0.019977
CAM112A_map5	0002.CSV	3062.53	0.020062
CAM112A_map5	0002.CSV	3066.39	0.0203622
CAM112A_map5	0002.CSV	3070.25	0.0202511
CAM112A_map5	0002.CSV	3074.11	0.0201969
CAM112A_map5	0002.CSV	3077.96	0.0204344
CAM112A_map5	0002.CSV	3081.82	0.0206211
CAM112A_map5	0002.CSV	3085.68	0.0205702
CAM112A_map5	0002.CSV	3089.53	0.0202328
CAM112A_map5	0002.CSV	3093.39	0.0197986
CAM112A_map5	0002.CSV	3097.25	0.019795
CAM112A_map5	0002.CSV	3101.11	0.0199178
CAM112A_map5	0002.CSV	3104.96	0.0200134
CAM112A_map5	0002.CSV	3108.82	0.020287
CAM112A_map5	0002.CSV	3112.68	0.0203732
CAM112A_map5	0002.CSV	3116.53	0.0204292
CAM112A_map5	0002.CSV	3120.39	0.0203803
CAM112A_map5	0002.CSV	3124.25	0.0201373
CAM112A_map5	0002.CSV	3128.11	0.0200346
CAM112A_map5	0002.CSV	3131.96	0.0200142
CAM112A_map5	0002.CSV	3135.82	0.0201466
CAM112A_map5	0002.CSV	3139.68	0.0202505
CAM112A_map5	0002.CSV	3143.53	0.0200434
CAM112A_map5	0002.CSV	3147.39	0.0201729
CAM112A_map5	0002.CSV	3151.25	0.0206217
CAM112A_map5	0002.CSV	3155.1	0.0205633
CAM112A_map5	0002.CSV	3158.96	0.0201752
CAM112A_map5	0002.CSV	3162.82	0.0200965
CAM112A_map5	0002.CSV	3166.68	0.0201665
CAM112A_map5	0002.CSV	3170.53	0.0202283
CAM112A_map5	0002.CSV	3174.39	0.0203161
CAM112A_map5	0002.CSV	3178.25	0.0204815
CAM112A_map5	0002.CSV	3182.1	0.0206061
CAM112A_map5	0002.CSV	3185.96	0.0206936
CAM112A_map5	0002.CSV	3189.82	0.0207912
CAM112A_map5	0002.CSV	3193.68	0.0207868
CAM112A_map5	0002.CSV	3197.53	0.0207785
CAM112A_map5	0002.CSV	3201.39	0.0209033
CAM112A_map5	0002.CSV	3205.25	0.0209936
CAM112A_map5	0002.CSV	3209.1	0.021025
CAM112A_map5	0002.CSV	3212.96	0.0211055
CAM112A_map5	0002.CSV	3216.82	0.0211777
CAM112A_map5	0002.CSV	3220.68	0.0211285
CAM112A_map5	0002.CSV	3224.53	0.0211298
CAM112A_map5	0002.CSV	3228.39	0.021412
CAM112A_map5	0002.CSV	3232.25	0.021804
CAM112A_map5	0002.CSV	3236.1	0.0217816
CAM112A_map5	0002.CSV	3239.96	0.0216382
CAM112A_map5	0002.CSV	3243.82	0.0218652
CAM112A_map5	0002.CSV	3247.68	0.0220017
CAM112A_map5	0002.CSV	3251.53	0.021863
CAM112A_map5	0002.CSV	3255.39	0.0219158
CAM112A_map5	0002.CSV	3259.25	0.0217723
CAM112A_map5	0002.CSV	3263.1	0.0216327
CAM112A_map5	0002.CSV	3266.96	0.0219216
CAM112A_map5	0002.CSV	3270.82	0.0223062
CAM112A_map5	0002.CSV	3274.68	0.0223263
CAM112A_map5	0002.CSV	3278.53	0.0221005
CAM112A_map5	0002.CSV	3282.39	0.021951
CAM112A_map5	0002.CSV	3286.25	0.0220363
CAM112A_map5	0002.CSV	3290.1	0.0222913
CAM112A_map5	0002.CSV	3293.96	0.0225585
CAM112A_map5	0002.CSV	3297.82	0.0225525
CAM112A_map5	0002.CSV	3301.67	0.0226261
CAM112A_map5	0002.CSV	3305.53	0.0227879
CAM112A_map5	0002.CSV	3309.39	0.0226643
CAM112A_map5	0002.CSV	3313.25	0.022248
CAM112A_map5	0002.CSV	3317.1	0.0219981
CAM112A_map5	0002.CSV	3320.96	0.0220716
CAM112A_map5	0002.CSV	3324.82	0.0223447
CAM112A_map5	0002.CSV	3328.67	0.0222764
CAM112A_map5	0002.CSV	3332.53	0.0222374
CAM112A_map5	0002.CSV	3336.39	0.0226409
CAM112A_map5	0002.CSV	3340.24	0.0228017
CAM112A_map5	0002.CSV	3344.1	0.0225474
CAM112A_map5	0002.CSV	3347.96	0.0225022
CAM112A_map5	0002.CSV	3351.82	0.0223987
CAM112A_map5	0002.CSV	3355.67	0.0221487
CAM112A_map5	0002.CSV	3359.53	0.0223437
CAM112A_map5	0002.CSV	3363.39	0.0226777
CAM112A_map5	0002.CSV	3367.24	0.0228739
CAM112A_map5	0002.CSV	3371.1	0.022634
CAM112A_map5	0002.CSV	3374.96	0.0223161
CAM112A_map5	0002.CSV	3378.82	0.0221344
CAM112A_map5	0002.CSV	3382.67	0.0218369
CAM112A_map5	0002.CSV	3386.53	0.0219419
CAM112A_map5	0002.CSV	3390.39	0.0222494
CAM112A_map5	0002.CSV	3394.24	0.0223246
CAM112A_map5	0002.CSV	3398.1	0.0224428
CAM112A_map5	0002.CSV	3401.96	0.0224668
CAM112A_map5	0002.CSV	3405.82	0.0221972
CAM112A_map5	0002.CSV	3409.67	0.0220573
CAM112A_map5	0002.CSV	3413.53	0.0217631
CAM112A_map5	0002.CSV	3417.39	0.021418
CAM112A_map5	0002.CSV	3421.24	0.0213195
CAM112A_map5	0002.CSV	3425.1	0.0213002
CAM112A_map5	0002.CSV	3428.96	0.0214446
CAM112A_map5	0002.CSV	3432.82	0.0216784
CAM112A_map5	0002.CSV	3436.67	0.0215271
CAM112A_map5	0002.CSV	3440.53	0.0208651
CAM112A_map5	0002.CSV	3444.39	0.0204145
CAM112A_map5	0002.CSV	3448.24	0.0202707
CAM112A_map5	0002.CSV	3452.1	0.0200178
CAM112A_map5	0002.CSV	3455.96	0.0201023
CAM112A_map5	0002.CSV	3459.82	0.0204123
CAM112A_map5	0002.CSV	3463.67	0.0206811
CAM112A_map5	0002.CSV	3467.53	0.0207559
CAM112A_map5	0002.CSV	3471.39	0.020251
CAM112A_map5	0002.CSV	3475.24	0.0199565
CAM112A_map5	0002.CSV	3479.1	0.0200417
CAM112A_map5	0002.CSV	3482.96	0.0198275
CAM112A_map5	0002.CSV	3486.82	0.0197709
CAM112A_map5	0002.CSV	3490.67	0.019809
CAM112A_map5	0002.CSV	3494.53	0.0198178
CAM112A_map5	0002.CSV	3498.39	0.0196362
CAM112A_map5	0002.CSV	3502.24	0.0194335
CAM112A_map5	0002.CSV	3506.1	0.019091
CAM112A_map5	0002.CSV	3509.96	0.0189587
CAM112A_map5	0002.CSV	3513.81	0.0190645
CAM112A_map5	0002.CSV	3517.67	0.0187618
CAM112A_map5	0002.CSV	3521.53	0.018678
CAM112A_map5	0002.CSV	3525.39	0.0187317
CAM112A_map5	0002.CSV	3529.24	0.0185429
CAM112A_map5	0002.CSV	3533.1	0.0184103
CAM112A_map5	0002.CSV	3536.96	0.0183327
CAM112A_map5	0002.CSV	3540.81	0.0182847
CAM112A_map5	0002.CSV	3544.67	0.0184436
CAM112A_map5	0002.CSV	3548.53	0.0182704
CAM112A_map5	0002.CSV	3552.39	0.0178129
CAM112A_map5	0002.CSV	3556.24	0.0176108
CAM112A_map5	0002.CSV	3560.1	0.0173702
CAM112A_map5	0002.CSV	3563.96	0.0168497
CAM112A_map5	0002.CSV	3567.81	0.0170145
CAM112A_map5	0002.CSV	3571.67	0.0171141
CAM112A_map5	0002.CSV	3575.53	0.016784
CAM112A_map5	0002.CSV	3579.39	0.01685
CAM112A_map5	0002.CSV	3583.24	0.0166775
CAM112A_map5	0002.CSV	3587.1	0.0165502
CAM112A_map5	0002.CSV	3590.96	0.0164617
CAM112A_map5	0002.CSV	3594.81	0.0162356
CAM112A_map5	0002.CSV	3598.67	0.0163533
CAM112A_map5	0002.CSV	3602.53	0.0162086
CAM112A_map5	0002.CSV	3606.39	0.0155603
CAM112A_map5	0002.CSV	3610.24	0.0153675
CAM112A_map5	0002.CSV	3614.1	0.0154211
CAM112A_map5	0002.CSV	3617.96	0.015532
CAM112A_map5	0002.CSV	3621.81	0.0156371
CAM112A_map5	0002.CSV	3625.67	0.0149479
CAM112A_map5	0002.CSV	3629.53	0.0149258
CAM112A_map5	0002.CSV	3633.39	0.0153913
CAM112A_map5	0002.CSV	3637.24	0.0150889
CAM112A_map5	0002.CSV	3641.1	0.0146345
CAM112A_map5	0002.CSV	3644.96	0.0140497
CAM112A_map5	0002.CSV	3648.81	0.0146374
CAM112A_map5	0002.CSV	3652.67	0.0151587
CAM112A_map5	0002.CSV	3656.53	0.0150378
CAM112A_map5	0002.CSV	3660.38	0.0149088
CAM112A_map5	0002.CSV	3664.24	0.0140532
CAM112A_map5	0002.CSV	3668.1	0.0132156
CAM112A_map5	0002.CSV	3671.96	0.0132486
CAM112A_map5	0002.CSV	3675.81	0.0139803
CAM112A_map5	0002.CSV	3679.67	0.0143077
CAM112A_map5	0002.CSV	3683.53	0.013761
CAM112A_map5	0002.CSV	3687.38	0.0135212
CAM112A_map5	0002.CSV	3691.24	0.0143448
CAM112A_map5	0002.CSV	3695.1	0.0141477
CAM112A_map5	0002.CSV	3698.95	0.0135606
CAM112A_map5	0002.CSV	3702.81	0.0134138
CAM112A_map5	0002.CSV	3706.67	0.0130148
CAM112A_map5	0002.CSV	3710.53	0.0130236
CAM112A_map5	0002.CSV	3714.38	0.0136595
CAM112A_map5	0002.CSV	3718.24	0.0133185
CAM112A_map5	0002.CSV	3722.1	0.0131334
CAM112A_map5	0002.CSV	3725.95	0.013311
CAM112A_map5	0002.CSV	3729.81	0.0129518
CAM112A_map5	0002.CSV	3733.67	0.0129918
CAM112A_map5	0002.CSV	3737.53	0.0141469
CAM112A_map5	0002.CSV	3741.38	0.0135985
CAM112A_map5	0002.CSV	3745.24	0.0127502
CAM112A_map5	0002.CSV	3749.1	0.012573
CAM112A_map5	0002.CSV	3752.95	0.0132294
CAM112A_map5	0002.CSV	3756.81	0.0132846
CAM112A_map5	0002.CSV	3760.67	0.0132305
CAM112A_map5	0002.CSV	3764.53	0.0130088
CAM112A_map5	0002.CSV	3768.38	0.0132166
CAM112A_map5	0002.CSV	3772.24	0.0135152
CAM112A_map5	0002.CSV	3776.1	0.0132424
CAM112A_map5	0002.CSV	3779.95	0.0132829
CAM112A_map5	0002.CSV	3783.81	0.0134694
CAM112A_map5	0002.CSV	3787.67	0.013476
CAM112A_map5	0002.CSV	3791.53	0.0130726
CAM112A_map5	0002.CSV	3795.38	0.012538
CAM112A_map5	0002.CSV	3799.24	0.0126476
CAM112A_map5	0002.CSV	3803.1	0.0133597
CAM112A_map5	0002.CSV	3806.95	0.0137309
CAM112A_map5	0002.CSV	3810.81	0.0132445
CAM112A_map5	0002.CSV	3814.67	0.0127349
CAM112A_map5	0002.CSV	3818.53	0.0131152
CAM112A_map5	0002.CSV	3822.38	0.0136479
CAM112A_map5	0002.CSV	3826.24	0.0134595
CAM112A_map5	0002.CSV	3830.1	0.0131134
CAM112A_map5	0002.CSV	3833.95	0.0128873
CAM112A_map5	0002.CSV	3837.81	0.013262
CAM112A_map5	0002.CSV	3841.67	0.0140382
CAM112A_map5	0002.CSV	3845.53	0.0136805
CAM112A_map5	0002.CSV	3849.38	0.0126927
CAM112A_map5	0002.CSV	3853.24	0.0128735
CAM112A_map5	0002.CSV	3857.1	0.01367
CAM112A_map5	0002.CSV	3860.95	0.0130784
CAM112A_map5	0002.CSV	3864.81	0.0131171
CAM112A_map5	0002.CSV	3868.67	0.0132937
CAM112A_map5	0002.CSV	3872.52	0.0136348
CAM112A_map5	0002.CSV	3876.38	0.0134577
CAM112A_map5	0002.CSV	3880.24	0.013241
CAM112A_map5	0002.CSV	3884.1	0.013703
CAM112A_map5	0002.CSV	3887.95	0.013707
CAM112A_map5	0002.CSV	3891.81	0.0135954
CAM112A_map5	0002.CSV	3895.67	0.0133608
CAM112A_map5	0002.CSV	3899.52	0.0130137
CAM112A_map5	0002.CSV	3903.38	0.013587
CAM112A_map5	0002.CSV	3907.24	0.0137079
CAM112A_map5	0002.CSV	3911.1	0.0132008
CAM112A_map5	0002.CSV	3914.95	0.0129484
CAM112A_map5	0002.CSV	3918.81	0.0132888
CAM112A_map5	0002.CSV	3922.67	0.0134685
CAM112A_map5	0002.CSV	3926.52	0.013343
CAM112A_map5	0002.CSV	3930.38	0.0134028
CAM112A_map5	0002.CSV	3934.24	0.0136431
CAM112A_map5	0002.CSV	3938.09	0.0133207
CAM112A_map5	0002.CSV	3941.95	0.0131746
CAM112A_map5	0002.CSV	3945.81	0.0133251
CAM112A_map5	0002.CSV	3949.67	0.0134351
CAM112A_map5	0002.CSV	3953.52	0.0133087
CAM112A_map5	0002.CSV	3957.38	0.0130978
CAM112A_map5	0002.CSV	3961.24	0.0131223
CAM112A_map5	0002.CSV	3965.09	0.0130761
CAM112A_map5	0002.CSV	3968.95	0.0129741
CAM112A_map5	0002.CSV	3972.81	0.0131143
CAM112A_map5	0002.CSV	3976.67	0.0131667
CAM112A_map5	0002.CSV	3980.52	0.0131016
CAM112A_map5	0002.CSV	3984.38	0.0130901
CAM112A_map5	0002.CSV	3988.24	0.0129656
CAM112A_map5	0002.CSV	3992.09	0.0129634
CAM112A_map5	0002.CSV	3995.95	0.0130507
CAM112A_map5	0002.CSV	3999.81	0.0129984
CAM112A_map5	0003.CSV	674.992	0.0379679
CAM112A_map5	0003.CSV	678.849	0.0404993
CAM112A_map5	0003.CSV	682.706	0.0420369
CAM112A_map5	0003.CSV	686.563	0.0472839
CAM112A_map5	0003.CSV	690.42	0.0544326
CAM112A_map5	0003.CSV	694.277	0.0736723
CAM112A_map5	0003.CSV	698.134	0.0950659
CAM112A_map5	0003.CSV	701.991	0.0897191
CAM112A_map5	0003.CSV	705.849	0.0748063
CAM112A_map5	0003.CSV	709.706	0.0915669
CAM112A_map5	0003.CSV	713.563	0.0971053
CAM112A_map5	0003.CSV	717.42	0.0627468
CAM112A_map5	0003.CSV	721.277	0.0376337
CAM112A_map5	0003.CSV	725.134	0.0340754
CAM112A_map5	0003.CSV	728.991	0.0348241
CAM112A_map5	0003.CSV	732.848	0.0384157
CAM112A_map5	0003.CSV	736.705	0.0419214
CAM112A_map5	0003.CSV	740.562	0.0462639
CAM112A_map5	0003.CSV	744.42	0.0479943
CAM112A_map5	0003.CSV	748.277	0.0485028
CAM112A_map5	0003.CSV	752.134	0.0468782
CAM112A_map5	0003.CSV	755.991	0.0467017
CAM112A_map5	0003.CSV	759.848	0.0459902
CAM112A_map5	0003.CSV	763.705	0.0462819
CAM112A_map5	0003.CSV	767.562	0.0455251
CAM112A_map5	0003.CSV	771.419	0.0454347
CAM112A_map5	0003.CSV	775.276	0.0442036
CAM112A_map5	0003.CSV	779.133	0.0438088
CAM112A_map5	0003.CSV	782.99	0.0430303
CAM112A_map5	0003.CSV	786.848	0.0434812
CAM112A_map5	0003.CSV	790.705	0.0434031
CAM112A_map5	0003.CSV	794.562	0.0445652
CAM112A_map5	0003.CSV	798.419	0.0451066
CAM112A_map5	0003.CSV	802.276	0.0464622
CAM112A_map5	0003.CSV	806.133	0.0471831
CAM112A_map5	0003.CSV	809.99	0.0493427
CAM112A_map5	0003.CSV	813.847	0.0511494
CAM112A_map5	0003.CSV	817.704	0.0545983
CAM112A_map5	0003.CSV	821.562	0.0581847
CAM112A_map5	0003.CSV	825.419	0.0639281
CAM112A_map5	0003.CSV	829.276	0.0701852
CAM112A_map5	0003.CSV	833.133	0.0799193
CAM112A_map5	0003.CSV	836.99	0.0956675
CAM112A_map5	0003.CSV	840.847	0.122754
CAM112A_map5	0003.CSV	844.704	0.15118
CAM112A_map5	0003.CSV	848.561	0.195941
CAM112A_map5	0003.CSV	852.418	0.252077
CAM112A_map5	0003.CSV	856.275	0.257914
CAM112A_map5	0003.CSV	860.132	0.207674
CAM112A_map5	0003.CSV	863.99	0.146577
CAM112A_map5	0003.CSV	867.847	0.0948258
CAM112A_map5	0003.CSV	871.704	0.062401
CAM112A_map5	0003.CSV	875.561	0.0474072
CAM112A_map5	0003.CSV	879.418	0.0413886
CAM112A_map5	0003.CSV	883.275	0.0367502
CAM112A_map5	0003.CSV	887.132	0.0342512
CAM112A_map5	0003.CSV	890.989	0.0333434
CAM112A_map5	0003.CSV	894.846	0.0338466
CAM112A_map5	0003.CSV	898.703	0.0342319
CAM112A_map5	0003.CSV	902.561	0.0355261
CAM112A_map5	0003.CSV	906.418	0.0368337
CAM112A_map5	0003.CSV	910.275	0.0374813
CAM112A_map5	0003.CSV	914.132	0.0368569
CAM112A_map5	0003.CSV	917.989	0.0373796
CAM112A_map5	0003.CSV	921.846	0.0377679
CAM112A_map5	0003.CSV	925.703	0.038611
CAM112A_map5	0003.CSV	929.56	0.0390498
CAM112A_map5	0003.CSV	933.417	0.0398842
CAM112A_map5	0003.CSV	937.274	0.0402382
CAM112A_map5	0003.CSV	941.131	0.0409538
CAM112A_map5	0003.CSV	944.989	0.0411994
CAM112A_map5	0003.CSV	948.846	0.0417616
CAM112A_map5	0003.CSV	952.703	0.0422255
CAM112A_map5	0003.CSV	956.56	0.043519
CAM112A_map5	0003.CSV	960.417	0.0442866
CAM112A_map5	0003.CSV	964.274	0.0451168
CAM112A_map5	0003.CSV	968.131	0.0454812
CAM112A_map5	0003.CSV	971.988	0.0462649
CAM112A_map5	0003.CSV	975.845	0.0468845
CAM112A_map5	0003.CSV	979.702	0.0481223
CAM112A_map5	0003.CSV	983.559	0.0490407
CAM112A_map5	0003.CSV	987.417	0.0502275
CAM112A_map5	0003.CSV	991.274	0.0509168
CAM112A_map5	0003.CSV	995.131	0.0520289
CAM112A_map5	0003.CSV	998.988	0.052872
CAM112A_map5	0003.CSV	1002.85	0.0543573
CAM112A_map5	0003.CSV	1006.7	0.05573
CAM112A_map5	0003.CSV	1010.56	0.0578079
CAM112A_map5	0003.CSV	1014.42	0.0598729
CAM112A_map5	0003.CSV	1018.27	0.0627476
CAM112A_map5	0003.CSV	1022.13	0.065491
CAM112A_map5	0003.CSV	1025.99	0.0686718
CAM112A_map5	0003.CSV	1029.85	0.0710173
CAM112A_map5	0003.CSV	1033.7	0.0733837
CAM112A_map5	0003.CSV	1037.56	0.0750546
CAM112A_map5	0003.CSV	1041.42	0.0763461
CAM112A_map5	0003.CSV	1045.27	0.076433
CAM112A_map5	0003.CSV	1049.13	0.0772374
CAM112A_map5	0003.CSV	1052.99	0.0784446
CAM112A_map5	0003.CSV	1056.84	0.0811078
CAM112A_map5	0003.CSV	1060.7	0.0837793
CAM112A_map5	0003.CSV	1064.56	0.0862784
CAM112A_map5	0003.CSV	1068.42	0.0868439
CAM112A_map5	0003.CSV	1072.27	0.086649
CAM112A_map5	0003.CSV	1076.13	0.0873844
CAM112A_map5	0003.CSV	1079.99	0.0946728
CAM112A_map5	0003.CSV	1083.84	0.0952907
CAM112A_map5	0003.CSV	1087.7	0.0809632
CAM112A_map5	0003.CSV	1091.56	0.0708556
CAM112A_map5	0003.CSV	1095.41	0.0692883
CAM112A_map5	0003.CSV	1099.27	0.0693523
CAM112A_map5	0003.CSV	1103.13	0.0702605
CAM112A_map5	0003.CSV	1106.99	0.0711163
CAM112A_map5	0003.CSV	1110.84	0.0724356
CAM112A_map5	0003.CSV	1114.7	0.0730983
CAM112A_map5	0003.CSV	1118.56	0.0733236
CAM112A_map5	0003.CSV	1122.41	0.0726193
CAM112A_map5	0003.CSV	1126.27	0.071968
CAM112A_map5	0003.CSV	1130.13	0.0708974
CAM112A_map5	0003.CSV	1133.99	0.070447
CAM112A_map5	0003.CSV	1137.84	0.0699348
CAM112A_map5	0003.CSV	1141.7	0.0695777
CAM112A_map5	0003.CSV	1145.56	0.0687415
CAM112A_map5	0003.CSV	1149.41	0.0685262
CAM112A_map5	0003.CSV	1153.27	0.0685442
CAM112A_map5	0003.CSV	1157.13	0.0691977
CAM112A_map5	0003.CSV	1160.99	0.0694078
CAM112A_map5	0003.CSV	1164.84	0.0695839
CAM112A_map5	0003.CSV	1168.7	0.0691033
CAM112A_map5	0003.CSV	1172.56	0.0688907
CAM112A_map5	0003.CSV	1176.41	0.0685513
CAM112A_map5	0003.CSV	1180.27	0.0684991
CAM112A_map5	0003.CSV	1184.13	0.0679939
CAM112A_map5	0003.CSV	1187.99	0.0677864
CAM112A_map5	0003.CSV	1191.84	0.0673978
CAM112A_map5	0003.CSV	1195.7	0.0674519
CAM112A_map5	0003.CSV	1199.56	0.067331
CAM112A_map5	0003.CSV	1203.41	0.0677986
CAM112A_map5	0003.CSV	1207.27	0.0682585
CAM112A_map5	0003.CSV	1211.13	0.0692054
CAM112A_map5	0003.CSV	1214.98	0.0699773
CAM112A_map5	0003.CSV	1218.84	0.071333
CAM112A_map5	0003.CSV	1222.7	0.0725871
CAM112A_map5	0003.CSV	1226.56	0.0742774
CAM112A_map5	0003.CSV	1230.41	0.0759895
CAM112A_map5	0003.CSV	1234.27	0.0784389
CAM112A_map5	0003.CSV	1238.13	0.0810387
CAM112A_map5	0003.CSV	1241.98	0.084368
CAM112A_map5	0003.CSV	1245.84	0.0875148
CAM112A_map5	0003.CSV	1249.7	0.090654
CAM112A_map5	0003.CSV	1253.56	0.0928254
CAM112A_map5	0003.CSV	1257.41	0.0945791
CAM112A_map5	0003.CSV	1261.27	0.0956597
CAM112A_map5	0003.CSV	1265.13	0.0970403
CAM112A_map5	0003.CSV	1268.98	0.0982099
CAM112A_map5	0003.CSV	1272.84	0.0997694
CAM112A_map5	0003.CSV	1276.7	0.100764
CAM112A_map5	0003.CSV	1280.56	0.101823
CAM112A_map5	0003.CSV	1284.41	0.102192
CAM112A_map5	0003.CSV	1288.27	0.102254
CAM112A_map5	0003.CSV	1292.13	0.10126
CAM112A_map5	0003.CSV	1295.98	0.100257
CAM112A_map5	0003.CSV	1299.84	0.0991057
CAM112A_map5	0003.CSV	1303.7	0.0987859
CAM112A_map5	0003.CSV	1307.56	0.0986782
CAM112A_map5	0003.CSV	1311.41	0.0994512
CAM112A_map5	0003.CSV	1315.27	0.100279
CAM112A_map5	0003.CSV	1319.13	0.101508
CAM112A_map5	0003.CSV	1322.98	0.102107
CAM112A_map5	0003.CSV	1326.84	0.1032
CAM112A_map5	0003.CSV	1330.7	0.104503
CAM112A_map5	0003.CSV	1334.56	0.106691
CAM112A_map5	0003.CSV	1338.41	0.109512
CAM112A_map5	0003.CSV	1342.27	0.113666
CAM112A_map5	0003.CSV	1346.13	0.117104
CAM112A_map5	0003.CSV	1349.98	0.121385
CAM112A_map5	0003.CSV	1353.84	0.125582
CAM112A_map5	0003.CSV	1357.7	0.130146
CAM112A_map5	0003.CSV	1361.56	0.135028
CAM112A_map5	0003.CSV	1365.41	0.141471
CAM112A_map5	0003.CSV	1369.27	0.146961
CAM112A_map5	0003.CSV	1373.13	0.1544
CAM112A_map5	0003.CSV	1376.98	0.162691
CAM112A_map5	0003.CSV	1380.84	0.170313
CAM112A_map5	0003.CSV	1384.7	0.177382
CAM112A_map5	0003.CSV	1388.56	0.187197
CAM112A_map5	0003.CSV	1392.41	0.195282
CAM112A_map5	0003.CSV	1396.27	0.205771
CAM112A_map5	0003.CSV	1400.13	0.216941
CAM112A_map5	0003.CSV	1403.98	0.228301
CAM112A_map5	0003.CSV	1407.84	0.240257
CAM112A_map5	0003.CSV	1411.7	0.252287
CAM112A_map5	0003.CSV	1415.55	0.261516
CAM112A_map5	0003.CSV	1419.41	0.273513
CAM112A_map5	0003.CSV	1423.27	0.283167
CAM112A_map5	0003.CSV	1427.12	0.293011
CAM112A_map5	0003.CSV	1430.98	0.303434
CAM112A_map5	0003.CSV	1434.84	0.31764
CAM112A_map5	0003.CSV	1438.7	0.333411
CAM112A_map5	0003.CSV	1442.55	0.346102
CAM112A_map5	0003.CSV	1446.41	0.352548
CAM112A_map5	0003.CSV	1450.27	0.354097
CAM112A_map5	0003.CSV	1454.12	0.348475
CAM112A_map5	0003.CSV	1457.98	0.339667
CAM112A_map5	0003.CSV	1461.84	0.332475
CAM112A_map5	0003.CSV	1465.7	0.328111
CAM112A_map5	0003.CSV	1469.55	0.317122
CAM112A_map5	0003.CSV	1473.41	0.293462
CAM112A_map5	0003.CSV	1477.27	0.26546
CAM112A_map5	0003.CSV	1481.12	0.24924
CAM112A_map5	0003.CSV	1484.98	0.234271
CAM112A_map5	0003.CSV	1488.84	0.217478
CAM112A_map5	0003.CSV	1492.7	0.201172
CAM112A_map5	0003.CSV	1496.55	0.190013
CAM112A_map5	0003.CSV	1500.41	0.177711
CAM112A_map5	0003.CSV	1504.27	0.170817
CAM112A_map5	0003.CSV	1508.12	0.156924
CAM112A_map5	0003.CSV	1511.98	0.146993
CAM112A_map5	0003.CSV	1515.84	0.139792
CAM112A_map5	0003.CSV	1519.7	0.13026
CAM112A_map5	0003.CSV	1523.55	0.118231
CAM112A_map5	0003.CSV	1527.41	0.110147
CAM112A_map5	0003.CSV	1531.27	0.103138
CAM112A_map5	0003.CSV	1535.12	0.0970802
CAM112A_map5	0003.CSV	1538.98	0.0910034
CAM112A_map5	0003.CSV	1542.84	0.0818557
CAM112A_map5	0003.CSV	1546.7	0.0754978
CAM112A_map5	0003.CSV	1550.55	0.0711398
CAM112A_map5	0003.CSV	1554.41	0.0665174
CAM112A_map5	0003.CSV	1558.27	0.061129
CAM112A_map5	0003.CSV	1562.12	0.0558784
CAM112A_map5	0003.CSV	1565.98	0.0534988
CAM112A_map5	0003.CSV	1569.84	0.0499197
CAM112A_map5	0003.CSV	1573.69	0.0463716
CAM112A_map5	0003.CSV	1577.55	0.0418306
CAM112A_map5	0003.CSV	1581.41	0.0381723
CAM112A_map5	0003.CSV	1585.27	0.0350863
CAM112A_map5	0003.CSV	1589.12	0.0326501
CAM112A_map5	0003.CSV	1592.98	0.0309474
CAM112A_map5	0003.CSV	1596.84	0.030052
CAM112A_map5	0003.CSV	1600.69	0.0292901
CAM112A_map5	0003.CSV	1604.55	0.0287668
CAM112A_map5	0003.CSV	1608.41	0.028123
CAM112A_map5	0003.CSV	1612.27	0.027568
CAM112A_map5	0003.CSV	1616.12	0.0267406
CAM112A_map5	0003.CSV	1619.98	0.0261765
CAM112A_map5	0003.CSV	1623.84	0.0253674
CAM112A_map5	0003.CSV	1627.69	0.0247127
CAM112A_map5	0003.CSV	1631.55	0.023865
CAM112A_map5	0003.CSV	1635.41	0.0235233
CAM112A_map5	0003.CSV	1639.27	0.0230665
CAM112A_map5	0003.CSV	1643.12	0.0225216
CAM112A_map5	0003.CSV	1646.98	0.0221045
CAM112A_map5	0003.CSV	1650.84	0.0222336
CAM112A_map5	0003.CSV	1654.69	0.0219945
CAM112A_map5	0003.CSV	1658.55	0.0215649
CAM112A_map5	0003.CSV	1662.41	0.0210159
CAM112A_map5	0003.CSV	1666.27	0.0207492
CAM112A_map5	0003.CSV	1670.12	0.0204011
CAM112A_map5	0003.CSV	1673.98	0.0202866
CAM112A_map5	0003.CSV	1677.84	0.0197054
CAM112A_map5	0003.CSV	1681.69	0.0194777
CAM112A_map5	0003.CSV	1685.55	0.0195733
CAM112A_map5	0003.CSV	1689.41	0.0196186
CAM112A_map5	0003.CSV	1693.27	0.0191831
CAM112A_map5	0003.CSV	1697.12	0.0195172
CAM112A_map5	0003.CSV	1700.98	0.0204967
CAM112A_map5	0003.CSV	1704.84	0.0217816
CAM112A_map5	0003.CSV	1708.69	0.0230118
CAM112A_map5	0003.CSV	1712.55	0.0242002
CAM112A_map5	0003.CSV	1716.41	0.0268991
CAM112A_map5	0003.CSV	1720.27	0.0299747
CAM112A_map5	0003.CSV	1724.12	0.0306422
[truncated: 171,464 more rows]

## Sheet: CAM112_map6
Map	Select spectrum number	Wavenumbers	Absorbance
CAM112A_map6	0001.CSV	674.992	0.0285361
CAM112A_map6	0001.CSV	678.849	0.030915
CAM112A_map6	0001.CSV	682.706	0.0316372
CAM112A_map6	0001.CSV	686.563	0.0350284
CAM112A_map6	0001.CSV	690.42	0.0391184
CAM112A_map6	0001.CSV	694.277	0.0493166
CAM112A_map6	0001.CSV	698.134	0.0602056
CAM112A_map6	0001.CSV	701.991	0.0700264
CAM112A_map6	0001.CSV	705.849	0.0881167
CAM112A_map6	0001.CSV	709.706	0.121942
CAM112A_map6	0001.CSV	713.563	0.116739
CAM112A_map6	0001.CSV	717.42	0.0690514
CAM112A_map6	0001.CSV	721.277	0.0376273
CAM112A_map6	0001.CSV	725.134	0.0305226
CAM112A_map6	0001.CSV	728.991	0.029282
CAM112A_map6	0001.CSV	732.848	0.0307857
CAM112A_map6	0001.CSV	736.705	0.0328226
CAM112A_map6	0001.CSV	740.562	0.0357034
CAM112A_map6	0001.CSV	744.42	0.0364778
CAM112A_map6	0001.CSV	748.277	0.0366591
CAM112A_map6	0001.CSV	752.134	0.035996
CAM112A_map6	0001.CSV	755.991	0.0364265
CAM112A_map6	0001.CSV	759.848	0.0363711
CAM112A_map6	0001.CSV	763.705	0.0373837
CAM112A_map6	0001.CSV	767.562	0.0377219
CAM112A_map6	0001.CSV	771.419	0.0381959
CAM112A_map6	0001.CSV	775.276	0.037525
CAM112A_map6	0001.CSV	779.133	0.0374008
CAM112A_map6	0001.CSV	782.99	0.0368189
CAM112A_map6	0001.CSV	786.848	0.0369872
CAM112A_map6	0001.CSV	790.705	0.0367119
CAM112A_map6	0001.CSV	794.562	0.0376472
CAM112A_map6	0001.CSV	798.419	0.038487
CAM112A_map6	0001.CSV	802.276	0.0395375
CAM112A_map6	0001.CSV	806.133	0.0396785
CAM112A_map6	0001.CSV	809.99	0.0410229
CAM112A_map6	0001.CSV	813.847	0.0422967
CAM112A_map6	0001.CSV	817.704	0.0448074
CAM112A_map6	0001.CSV	821.562	0.0472777
CAM112A_map6	0001.CSV	825.419	0.0507212
CAM112A_map6	0001.CSV	829.276	0.0540296
CAM112A_map6	0001.CSV	833.133	0.0586911
CAM112A_map6	0001.CSV	836.99	0.0638512
CAM112A_map6	0001.CSV	840.847	0.0726487
CAM112A_map6	0001.CSV	844.704	0.0864038
CAM112A_map6	0001.CSV	848.561	0.0958751
CAM112A_map6	0001.CSV	852.418	0.100693
CAM112A_map6	0001.CSV	856.275	0.121058
CAM112A_map6	0001.CSV	860.132	0.159866
CAM112A_map6	0001.CSV	863.99	0.217605
CAM112A_map6	0001.CSV	867.847	0.278442
CAM112A_map6	0001.CSV	871.704	0.30407
CAM112A_map6	0001.CSV	875.561	0.266948
CAM112A_map6	0001.CSV	879.418	0.202361
CAM112A_map6	0001.CSV	883.275	0.130396
CAM112A_map6	0001.CSV	887.132	0.0669393
CAM112A_map6	0001.CSV	890.989	0.0370398
CAM112A_map6	0001.CSV	894.846	0.032019
CAM112A_map6	0001.CSV	898.703	0.0314772
CAM112A_map6	0001.CSV	902.561	0.0320147
CAM112A_map6	0001.CSV	906.418	0.0324559
CAM112A_map6	0001.CSV	910.275	0.0331509
CAM112A_map6	0001.CSV	914.132	0.0333456
CAM112A_map6	0001.CSV	917.989	0.0342034
CAM112A_map6	0001.CSV	921.846	0.0346343
CAM112A_map6	0001.CSV	925.703	0.0354964
CAM112A_map6	0001.CSV	929.56	0.0360316
CAM112A_map6	0001.CSV	933.417	0.036945
CAM112A_map6	0001.CSV	937.274	0.0373344
CAM112A_map6	0001.CSV	941.131	0.037954
CAM112A_map6	0001.CSV	944.989	0.0379286
[truncated: 55,161 more rows]

## Sheet: CAM112_map7
Map	Select spectrum number	Wavenumbers	Absorbance
[truncated: 126,861 more rows]
