# Supplementary material for: Thermo-microstratigraphy of shells reveals invisible fire use and possible cooking in the archaeological record
Source: Frontiers journal article supplement (doi:10.3389/feart.2022.869487), 2022-09-01
Supplement: Table_6.XLSX [file Table_6.XLSX]

## Sheet: CAM112_map8
Map	Select spectrum number	Wavenumbers	Absorbance
CAM112A_map8	0001.CSV	674.992	0.0371777
CAM112A_map8	0001.CSV	678.849	0.0402166
CAM112A_map8	0001.CSV	682.706	0.0409642
CAM112A_map8	0001.CSV	686.563	0.0438375
CAM112A_map8	0001.CSV	690.42	0.0471169
CAM112A_map8	0001.CSV	694.277	0.0538041
CAM112A_map8	0001.CSV	698.134	0.0614745
CAM112A_map8	0001.CSV	701.991	0.0755756
CAM112A_map8	0001.CSV	705.849	0.10187
CAM112A_map8	0001.CSV	709.706	0.137212
CAM112A_map8	0001.CSV	713.563	0.133231
CAM112A_map8	0001.CSV	717.42	0.0897894
CAM112A_map8	0001.CSV	721.277	0.0550837
CAM112A_map8	0001.CSV	725.134	0.0423851
CAM112A_map8	0001.CSV	728.991	0.0378534
CAM112A_map8	0001.CSV	732.848	0.0374283
CAM112A_map8	0001.CSV	736.705	0.0365134
CAM112A_map8	0001.CSV	740.562	0.0364957
CAM112A_map8	0001.CSV	744.42	0.0365363
CAM112A_map8	0001.CSV	748.277	0.0379034
CAM112A_map8	0001.CSV	752.134	0.0384429
CAM112A_map8	0001.CSV	755.991	0.040178
CAM112A_map8	0001.CSV	759.848	0.041328
CAM112A_map8	0001.CSV	763.705	0.0432751
CAM112A_map8	0001.CSV	767.562	0.0442199
CAM112A_map8	0001.CSV	771.419	0.0457577
CAM112A_map8	0001.CSV	775.276	0.0463528
CAM112A_map8	0001.CSV	779.133	0.0471846
CAM112A_map8	0001.CSV	782.99	0.0470908
CAM112A_map8	0001.CSV	786.848	0.047623
CAM112A_map8	0001.CSV	790.705	0.0477032
CAM112A_map8	0001.CSV	794.562	0.0487648
CAM112A_map8	0001.CSV	798.419	0.0495936
CAM112A_map8	0001.CSV	802.276	0.0510763
CAM112A_map8	0001.CSV	806.133	0.0518173
CAM112A_map8	0001.CSV	809.99	0.0533544
CAM112A_map8	0001.CSV	813.847	0.0546255
CAM112A_map8	0001.CSV	817.704	0.0568925
CAM112A_map8	0001.CSV	821.562	0.0592166
CAM112A_map8	0001.CSV	825.419	0.0626992
CAM112A_map8	0001.CSV	829.276	0.0658788
CAM112A_map8	0001.CSV	833.133	0.0702046
CAM112A_map8	0001.CSV	836.99	0.0748532
CAM112A_map8	0001.CSV	840.847	0.0834516
CAM112A_map8	0001.CSV	844.704	0.0973891
CAM112A_map8	0001.CSV	848.561	0.107374
CAM112A_map8	0001.CSV	852.418	0.112348
CAM112A_map8	0001.CSV	856.275	0.132836
CAM112A_map8	0001.CSV	860.132	0.177139
CAM112A_map8	0001.CSV	863.99	0.261463
CAM112A_map8	0001.CSV	867.847	0.366688
CAM112A_map8	0001.CSV	871.704	0.390552
CAM112A_map8	0001.CSV	875.561	0.313552
CAM112A_map8	0001.CSV	879.418	0.222829
CAM112A_map8	0001.CSV	883.275	0.136586
CAM112A_map8	0001.CSV	887.132	0.0679439
CAM112A_map8	0001.CSV	890.989	0.0369877
CAM112A_map8	0001.CSV	894.846	0.0322676
CAM112A_map8	0001.CSV	898.703	0.0325519
CAM112A_map8	0001.CSV	902.561	0.0339976
CAM112A_map8	0001.CSV	906.418	0.0350413
CAM112A_map8	0001.CSV	910.275	0.0365662
CAM112A_map8	0001.CSV	914.132	0.0375699
CAM112A_map8	0001.CSV	917.989	0.0391161
CAM112A_map8	0001.CSV	921.846	0.0402115
CAM112A_map8	0001.CSV	925.703	0.0417402
CAM112A_map8	0001.CSV	929.56	0.0427439
CAM112A_map8	0001.CSV	933.417	0.0440953
CAM112A_map8	0001.CSV	937.274	0.0447196
CAM112A_map8	0001.CSV	941.131	0.0456139
CAM112A_map8	0001.CSV	944.989	0.0459916
CAM112A_map8	0001.CSV	948.846	0.046809
CAM112A_map8	0001.CSV	952.703	0.047225
CAM112A_map8	0001.CSV	956.56	0.048081
CAM112A_map8	0001.CSV	960.417	0.0484073
CAM112A_map8	0001.CSV	964.274	0.0491962
CAM112A_map8	0001.CSV	968.131	0.0497756
CAM112A_map8	0001.CSV	971.988	0.0509469
CAM112A_map8	0001.CSV	975.845	0.0516881
CAM112A_map8	0001.CSV	979.702	0.0527193
CAM112A_map8	0001.CSV	983.559	0.053412
CAM112A_map8	0001.CSV	987.417	0.0545982
CAM112A_map8	0001.CSV	991.274	0.0554264
CAM112A_map8	0001.CSV	995.131	0.05667
CAM112A_map8	0001.CSV	998.988	0.0574199
CAM112A_map8	0001.CSV	1002.85	0.0585223
CAM112A_map8	0001.CSV	1006.7	0.0592624
CAM112A_map8	0001.CSV	1010.56	0.060326
CAM112A_map8	0001.CSV	1014.42	0.060971
CAM112A_map8	0001.CSV	1018.27	0.0620776
CAM112A_map8	0001.CSV	1022.13	0.0627699
CAM112A_map8	0001.CSV	1025.99	0.0638152
CAM112A_map8	0001.CSV	1029.85	0.0642733
CAM112A_map8	0001.CSV	1033.7	0.065209
CAM112A_map8	0001.CSV	1037.56	0.0659228
CAM112A_map8	0001.CSV	1041.42	0.0672926
CAM112A_map8	0001.CSV	1045.27	0.0680507
CAM112A_map8	0001.CSV	1049.13	0.068996
CAM112A_map8	0001.CSV	1052.99	0.0697109
CAM112A_map8	0001.CSV	1056.84	0.0713782
CAM112A_map8	0001.CSV	1060.7	0.0730637
CAM112A_map8	0001.CSV	1064.56	0.0754329
CAM112A_map8	0001.CSV	1068.42	0.0773369
CAM112A_map8	0001.CSV	1072.27	0.0796958
CAM112A_map8	0001.CSV	1076.13	0.081694
CAM112A_map8	0001.CSV	1079.99	0.0846783
CAM112A_map8	0001.CSV	1083.84	0.0875237
CAM112A_map8	0001.CSV	1087.7	0.0897876
CAM112A_map8	0001.CSV	1091.56	0.088893
CAM112A_map8	0001.CSV	1095.41	0.0862755
CAM112A_map8	0001.CSV	1099.27	0.0838137
CAM112A_map8	0001.CSV	1103.13	0.0835526
CAM112A_map8	0001.CSV	1106.99	0.0839464
CAM112A_map8	0001.CSV	1110.84	0.0853014
CAM112A_map8	0001.CSV	1114.7	0.0861377
CAM112A_map8	0001.CSV	1118.56	0.0871334
CAM112A_map8	0001.CSV	1122.41	0.087659
CAM112A_map8	0001.CSV	1126.27	0.0886232
CAM112A_map8	0001.CSV	1130.13	0.0891348
CAM112A_map8	0001.CSV	1133.99	0.0900538
CAM112A_map8	0001.CSV	1137.84	0.0907051
CAM112A_map8	0001.CSV	1141.7	0.0919436
CAM112A_map8	0001.CSV	1145.56	0.0928487
CAM112A_map8	0001.CSV	1149.41	0.094272
CAM112A_map8	0001.CSV	1153.27	0.0955057
CAM112A_map8	0001.CSV	1157.13	0.0973498
CAM112A_map8	0001.CSV	1160.99	0.0987582
CAM112A_map8	0001.CSV	1164.84	0.100198
CAM112A_map8	0001.CSV	1168.7	0.100628
CAM112A_map8	0001.CSV	1172.56	0.101214
CAM112A_map8	0001.CSV	1176.41	0.101306
CAM112A_map8	0001.CSV	1180.27	0.101697
CAM112A_map8	0001.CSV	1184.13	0.101573
CAM112A_map8	0001.CSV	1187.99	0.101881
CAM112A_map8	0001.CSV	1191.84	0.10177
CAM112A_map8	0001.CSV	1195.7	0.102195
CAM112A_map8	0001.CSV	1199.56	0.10245
CAM112A_map8	0001.CSV	1203.41	0.103337
CAM112A_map8	0001.CSV	1207.27	0.104096
CAM112A_map8	0001.CSV	1211.13	0.105544
CAM112A_map8	0001.CSV	1214.98	0.106659
CAM112A_map8	0001.CSV	1218.84	0.108374
CAM112A_map8	0001.CSV	1222.7	0.109975
CAM112A_map8	0001.CSV	1226.56	0.112264
CAM112A_map8	0001.CSV	1230.41	0.114325
CAM112A_map8	0001.CSV	1234.27	0.116943
CAM112A_map8	0001.CSV	1238.13	0.119265
CAM112A_map8	0001.CSV	1241.98	0.122196
CAM112A_map8	0001.CSV	1245.84	0.124789
CAM112A_map8	0001.CSV	1249.7	0.127958
CAM112A_map8	0001.CSV	1253.56	0.130791
CAM112A_map8	0001.CSV	1257.41	0.134126
CAM112A_map8	0001.CSV	1261.27	0.137061
CAM112A_map8	0001.CSV	1265.13	0.140608
CAM112A_map8	0001.CSV	1268.98	0.143896
CAM112A_map8	0001.CSV	1272.84	0.148016
CAM112A_map8	0001.CSV	1276.7	0.151814
CAM112A_map8	0001.CSV	1280.56	0.156339
CAM112A_map8	0001.CSV	1284.41	0.160485
CAM112A_map8	0001.CSV	1288.27	0.16545
CAM112A_map8	0001.CSV	1292.13	0.170101
CAM112A_map8	0001.CSV	1295.98	0.175676
CAM112A_map8	0001.CSV	1299.84	0.181359
CAM112A_map8	0001.CSV	1303.7	0.188268
CAM112A_map8	0001.CSV	1307.56	0.195299
CAM112A_map8	0001.CSV	1311.41	0.203724
CAM112A_map8	0001.CSV	1315.27	0.212368
CAM112A_map8	0001.CSV	1319.13	0.222431
CAM112A_map8	0001.CSV	1322.98	0.23169
CAM112A_map8	0001.CSV	1326.84	0.242106
CAM112A_map8	0001.CSV	1330.7	0.253361
CAM112A_map8	0001.CSV	1334.56	0.266246
CAM112A_map8	0001.CSV	1338.41	0.282257
CAM112A_map8	0001.CSV	1342.27	0.30314
CAM112A_map8	0001.CSV	1346.13	0.321745
CAM112A_map8	0001.CSV	1349.98	0.344454
CAM112A_map8	0001.CSV	1353.84	0.369468
CAM112A_map8	0001.CSV	1357.7	0.396831
CAM112A_map8	0001.CSV	1361.56	0.428364
CAM112A_map8	0001.CSV	1365.41	0.46764
CAM112A_map8	0001.CSV	1369.27	0.500499
CAM112A_map8	0001.CSV	1373.13	0.538437
CAM112A_map8	0001.CSV	1376.98	0.576666
CAM112A_map8	0001.CSV	1380.84	0.607892
CAM112A_map8	0001.CSV	1384.7	0.631445
CAM112A_map8	0001.CSV	1388.56	0.655174
CAM112A_map8	0001.CSV	1392.41	0.663461
CAM112A_map8	0001.CSV	1396.27	0.657663
CAM112A_map8	0001.CSV	1400.13	0.635028
CAM112A_map8	0001.CSV	1403.98	0.609927
CAM112A_map8	0001.CSV	1407.84	0.570185
CAM112A_map8	0001.CSV	1411.7	0.527765
CAM112A_map8	0001.CSV	1415.55	0.487872
CAM112A_map8	0001.CSV	1419.41	0.448282
CAM112A_map8	0001.CSV	1423.27	0.418886
CAM112A_map8	0001.CSV	1427.12	0.402256
CAM112A_map8	0001.CSV	1430.98	0.384937
CAM112A_map8	0001.CSV	1434.84	0.368145
CAM112A_map8	0001.CSV	1438.7	0.347537
CAM112A_map8	0001.CSV	1442.55	0.332763
CAM112A_map8	0001.CSV	1446.41	0.316332
CAM112A_map8	0001.CSV	1450.27	0.299825
CAM112A_map8	0001.CSV	1454.12	0.286297
CAM112A_map8	0001.CSV	1457.98	0.266782
CAM112A_map8	0001.CSV	1461.84	0.251953
CAM112A_map8	0001.CSV	1465.7	0.241704
CAM112A_map8	0001.CSV	1469.55	0.230989
CAM112A_map8	0001.CSV	1473.41	0.218344
CAM112A_map8	0001.CSV	1477.27	0.204814
CAM112A_map8	0001.CSV	1481.12	0.197006
CAM112A_map8	0001.CSV	1484.98	0.189236
CAM112A_map8	0001.CSV	1488.84	0.179652
CAM112A_map8	0001.CSV	1492.7	0.169668
CAM112A_map8	0001.CSV	1496.55	0.162133
CAM112A_map8	0001.CSV	1500.41	0.153157
CAM112A_map8	0001.CSV	1504.27	0.147792
CAM112A_map8	0001.CSV	1508.12	0.137444
CAM112A_map8	0001.CSV	1511.98	0.130622
CAM112A_map8	0001.CSV	1515.84	0.126014
CAM112A_map8	0001.CSV	1519.7	0.12048
CAM112A_map8	0001.CSV	1523.55	0.11367
CAM112A_map8	0001.CSV	1527.41	0.109077
CAM112A_map8	0001.CSV	1531.27	0.10448
CAM112A_map8	0001.CSV	1535.12	0.100451
CAM112A_map8	0001.CSV	1538.98	0.0954637
CAM112A_map8	0001.CSV	1542.84	0.0848526
CAM112A_map8	0001.CSV	1546.7	0.0773546
CAM112A_map8	0001.CSV	1550.55	0.0719363
CAM112A_map8	0001.CSV	1554.41	0.0664135
CAM112A_map8	0001.CSV	1558.27	0.0604528
CAM112A_map8	0001.CSV	1562.12	0.0556661
CAM112A_map8	0001.CSV	1565.98	0.0538104
CAM112A_map8	0001.CSV	1569.84	0.052124
CAM112A_map8	0001.CSV	1573.69	0.0511431
CAM112A_map8	0001.CSV	1577.55	0.0495363
CAM112A_map8	0001.CSV	1581.41	0.0470386
CAM112A_map8	0001.CSV	1585.27	0.0440728
CAM112A_map8	0001.CSV	1589.12	0.0412095
CAM112A_map8	0001.CSV	1592.98	0.0384374
CAM112A_map8	0001.CSV	1596.84	0.0360383
CAM112A_map8	0001.CSV	1600.69	0.033957
CAM112A_map8	0001.CSV	1604.55	0.0324399
CAM112A_map8	0001.CSV	1608.41	0.0310524
CAM112A_map8	0001.CSV	1612.27	0.0299001
CAM112A_map8	0001.CSV	1616.12	0.0286789
CAM112A_map8	0001.CSV	1619.98	0.0277713
CAM112A_map8	0001.CSV	1623.84	0.0267699
CAM112A_map8	0001.CSV	1627.69	0.0257371
CAM112A_map8	0001.CSV	1631.55	0.0245403
CAM112A_map8	0001.CSV	1635.41	0.0237774
CAM112A_map8	0001.CSV	1639.27	0.0230648
CAM112A_map8	0001.CSV	1643.12	0.0223794
CAM112A_map8	0001.CSV	1646.98	0.0217855
CAM112A_map8	0001.CSV	1650.84	0.0216979
CAM112A_map8	0001.CSV	1654.69	0.0214387
CAM112A_map8	0001.CSV	1658.55	0.0210015
CAM112A_map8	0001.CSV	1662.41	0.0204958
CAM112A_map8	0001.CSV	1666.27	0.0201664
CAM112A_map8	0001.CSV	1670.12	0.0199121
CAM112A_map8	0001.CSV	1673.98	0.0198812
CAM112A_map8	0001.CSV	1677.84	0.0193575
CAM112A_map8	0001.CSV	1681.69	0.0191448
CAM112A_map8	0001.CSV	1685.55	0.0191649
CAM112A_map8	0001.CSV	1689.41	0.0189872
CAM112A_map8	0001.CSV	1693.27	0.0184045
CAM112A_map8	0001.CSV	1697.12	0.0183835
CAM112A_map8	0001.CSV	1700.98	0.0186363
CAM112A_map8	0001.CSV	1704.84	0.0188441
CAM112A_map8	0001.CSV	1708.69	0.0187913
CAM112A_map8	0001.CSV	1712.55	0.0187592
CAM112A_map8	0001.CSV	1716.41	0.019539
CAM112A_map8	0001.CSV	1720.27	0.0206256
CAM112A_map8	0001.CSV	1724.12	0.0206104
CAM112A_map8	0001.CSV	1727.98	0.0206301
CAM112A_map8	0001.CSV	1731.84	0.0207719
CAM112A_map8	0001.CSV	1735.69	0.0213576
CAM112A_map8	0001.CSV	1739.55	0.0210138
CAM112A_map8	0001.CSV	1743.41	0.0201435
CAM112A_map8	0001.CSV	1747.27	0.0189461
CAM112A_map8	0001.CSV	1751.12	0.0177466
CAM112A_map8	0001.CSV	1754.98	0.0167047
CAM112A_map8	0001.CSV	1758.84	0.0161782
CAM112A_map8	0001.CSV	1762.69	0.0158549
CAM112A_map8	0001.CSV	1766.55	0.01563
CAM112A_map8	0001.CSV	1770.41	0.0157572
CAM112A_map8	0001.CSV	1774.26	0.0164238
CAM112A_map8	0001.CSV	1778.12	0.01673
CAM112A_map8	0001.CSV	1781.98	0.0177192
CAM112A_map8	0001.CSV	1785.84	0.0195001
CAM112A_map8	0001.CSV	1789.69	0.0222525
CAM112A_map8	0001.CSV	1793.55	0.0260147
CAM112A_map8	0001.CSV	1797.41	0.0269386
CAM112A_map8	0001.CSV	1801.26	0.02443
CAM112A_map8	0001.CSV	1805.12	0.0211211
CAM112A_map8	0001.CSV	1808.98	0.018448
CAM112A_map8	0001.CSV	1812.84	0.0166559
CAM112A_map8	0001.CSV	1816.69	0.0154569
CAM112A_map8	0001.CSV	1820.55	0.0147617
CAM112A_map8	0001.CSV	1824.41	0.0142689
CAM112A_map8	0001.CSV	1828.26	0.0142037
CAM112A_map8	0001.CSV	1832.12	0.0139753
CAM112A_map8	0001.CSV	1835.98	0.0136862
CAM112A_map8	0001.CSV	1839.84	0.0133974
CAM112A_map8	0001.CSV	1843.69	0.0135665
CAM112A_map8	0001.CSV	1847.55	0.0137688
CAM112A_map8	0001.CSV	1851.41	0.0136044
CAM112A_map8	0001.CSV	1855.26	0.0134072
CAM112A_map8	0001.CSV	1859.12	0.013454
CAM112A_map8	0001.CSV	1862.98	0.0133514
CAM112A_map8	0001.CSV	1866.84	0.0134274
CAM112A_map8	0001.CSV	1870.69	0.0136895
CAM112A_map8	0001.CSV	1874.55	0.0136229
CAM112A_map8	0001.CSV	1878.41	0.0134776
CAM112A_map8	0001.CSV	1882.26	0.0135137
CAM112A_map8	0001.CSV	1886.12	0.0134582
CAM112A_map8	0001.CSV	1889.98	0.0135522
CAM112A_map8	0001.CSV	1893.83	0.0136254
CAM112A_map8	0001.CSV	1897.69	0.0136659
CAM112A_map8	0001.CSV	1901.55	0.0135757
CAM112A_map8	0001.CSV	1905.41	0.0136067
CAM112A_map8	0001.CSV	1909.26	0.0136743
CAM112A_map8	0001.CSV	1913.12	0.0136986
CAM112A_map8	0001.CSV	1916.98	0.013593
CAM112A_map8	0001.CSV	1920.83	0.0137368
CAM112A_map8	0001.CSV	1924.69	0.0138217
CAM112A_map8	0001.CSV	1928.55	0.0138254
CAM112A_map8	0001.CSV	1932.4	0.0137577
CAM112A_map8	0001.CSV	1936.26	0.0138117
CAM112A_map8	0001.CSV	1940.12	0.0138433
CAM112A_map8	0001.CSV	1943.98	0.0140681
CAM112A_map8	0001.CSV	1947.83	0.0141105
CAM112A_map8	0001.CSV	1951.69	0.0141295
CAM112A_map8	0001.CSV	1955.55	0.0141589
CAM112A_map8	0001.CSV	1959.4	0.0142826
CAM112A_map8	0001.CSV	1963.26	0.0142746
CAM112A_map8	0001.CSV	1967.12	0.0143282
CAM112A_map8	0001.CSV	1970.98	0.0143303
CAM112A_map8	0001.CSV	1974.83	0.0143623
CAM112A_map8	0001.CSV	1978.69	0.014373
CAM112A_map8	0001.CSV	1982.55	0.0144182
CAM112A_map8	0001.CSV	1986.4	0.0143908
CAM112A_map8	0001.CSV	1990.26	0.0144928
CAM112A_map8	0001.CSV	1994.12	0.0145459
CAM112A_map8	0001.CSV	1997.98	0.0145402
CAM112A_map8	0001.CSV	2001.83	0.0145241
CAM112A_map8	0001.CSV	2005.69	0.0146074
CAM112A_map8	0001.CSV	2009.55	0.0146402
CAM112A_map8	0001.CSV	2013.4	0.0147045
CAM112A_map8	0001.CSV	2017.26	0.0147735
CAM112A_map8	0001.CSV	2021.12	0.0148718
CAM112A_map8	0001.CSV	2024.97	0.0148455
CAM112A_map8	0001.CSV	2028.83	0.0148738
CAM112A_map8	0001.CSV	2032.69	0.0148569
CAM112A_map8	0001.CSV	2036.55	0.014906
CAM112A_map8	0001.CSV	2040.4	0.0149415
CAM112A_map8	0001.CSV	2044.26	0.0150427
CAM112A_map8	0001.CSV	2048.12	0.0150748
CAM112A_map8	0001.CSV	2051.97	0.0151905
CAM112A_map8	0001.CSV	2055.83	0.0152427
CAM112A_map8	0001.CSV	2059.69	0.0152969
CAM112A_map8	0001.CSV	2063.55	0.0153287
CAM112A_map8	0001.CSV	2067.4	0.0154252
CAM112A_map8	0001.CSV	2071.26	0.0154199
CAM112A_map8	0001.CSV	2075.12	0.0154705
CAM112A_map8	0001.CSV	2078.97	0.0154956
CAM112A_map8	0001.CSV	2082.83	0.015598
CAM112A_map8	0001.CSV	2086.69	0.0156603
CAM112A_map8	0001.CSV	2090.55	0.0157479
CAM112A_map8	0001.CSV	2094.4	0.0157553
CAM112A_map8	0001.CSV	2098.26	0.015785
CAM112A_map8	0001.CSV	2102.12	0.0158044
CAM112A_map8	0001.CSV	2105.97	0.0159351
CAM112A_map8	0001.CSV	2109.83	0.0159966
CAM112A_map8	0001.CSV	2113.69	0.0161025
CAM112A_map8	0001.CSV	2117.55	0.0161689
CAM112A_map8	0001.CSV	2121.4	0.0162887
CAM112A_map8	0001.CSV	2125.26	0.0164099
CAM112A_map8	0001.CSV	2129.12	0.0165777
CAM112A_map8	0001.CSV	2132.97	0.0166578
CAM112A_map8	0001.CSV	2136.83	0.0167487
CAM112A_map8	0001.CSV	2140.69	0.0167469
CAM112A_map8	0001.CSV	2144.55	0.0167676
CAM112A_map8	0001.CSV	2148.4	0.0168081
CAM112A_map8	0001.CSV	2152.26	0.016855
CAM112A_map8	0001.CSV	2156.12	0.0168136
CAM112A_map8	0001.CSV	2159.97	0.0168475
CAM112A_map8	0001.CSV	2163.83	0.0168606
CAM112A_map8	0001.CSV	2167.69	0.016896
CAM112A_map8	0001.CSV	2171.55	0.016904
CAM112A_map8	0001.CSV	2175.4	0.0169991
CAM112A_map8	0001.CSV	2179.26	0.0170461
CAM112A_map8	0001.CSV	2183.12	0.0170735
CAM112A_map8	0001.CSV	2186.97	0.0170423
CAM112A_map8	0001.CSV	2190.83	0.0170901
CAM112A_map8	0001.CSV	2194.69	0.017151
CAM112A_map8	0001.CSV	2198.55	0.0172087
CAM112A_map8	0001.CSV	2202.4	0.0171822
CAM112A_map8	0001.CSV	2206.26	0.0172165
CAM112A_map8	0001.CSV	2210.12	0.0172229
CAM112A_map8	0001.CSV	2213.97	0.017257
CAM112A_map8	0001.CSV	2217.83	0.0172725
CAM112A_map8	0001.CSV	2221.69	0.0173181
CAM112A_map8	0001.CSV	2225.54	0.017312
CAM112A_map8	0001.CSV	2229.4	0.0173397
CAM112A_map8	0001.CSV	2233.26	0.0173382
CAM112A_map8	0001.CSV	2237.12	0.0174186
CAM112A_map8	0001.CSV	2240.97	0.0174595
CAM112A_map8	0001.CSV	2244.83	0.0174915
CAM112A_map8	0001.CSV	2248.69	0.0175267
CAM112A_map8	0001.CSV	2252.54	0.0176024
CAM112A_map8	0001.CSV	2256.4	0.0175673
CAM112A_map8	0001.CSV	2260.26	0.0175771
CAM112A_map8	0001.CSV	2264.11	0.0175891
CAM112A_map8	0001.CSV	2267.97	0.0176186
CAM112A_map8	0001.CSV	2271.83	0.0176456
CAM112A_map8	0001.CSV	2275.69	0.0177015
CAM112A_map8	0001.CSV	2279.54	0.0176474
CAM112A_map8	0001.CSV	2283.4	0.0175967
CAM112A_map8	0001.CSV	2287.26	0.0176171
CAM112A_map8	0001.CSV	2291.11	0.0176955
CAM112A_map8	0001.CSV	2294.97	0.0176864
CAM112A_map8	0001.CSV	2298.83	0.0177024
CAM112A_map8	0001.CSV	2302.69	0.0176293
CAM112A_map8	0001.CSV	2306.54	0.017497
CAM112A_map8	0001.CSV	2310.4	0.0172496
CAM112A_map8	0001.CSV	2314.26	0.0170793
CAM112A_map8	0001.CSV	2318.11	0.0167205
CAM112A_map8	0001.CSV	2321.97	0.0159101
CAM112A_map8	0001.CSV	2325.83	0.0144993
CAM112A_map8	0001.CSV	2329.69	0.0133909
CAM112A_map8	0001.CSV	2333.54	0.0123062
CAM112A_map8	0001.CSV	2337.4	0.0113128
CAM112A_map8	0001.CSV	2341.26	0.0110894
CAM112A_map8	0001.CSV	2345.11	0.0139673
CAM112A_map8	0001.CSV	2348.97	0.0150136
CAM112A_map8	0001.CSV	2352.83	0.0129852
CAM112A_map8	0001.CSV	2356.69	0.00548414
CAM112A_map8	0001.CSV	2360.54	-0.00128618
CAM112A_map8	0001.CSV	2364.4	0.00243714
CAM112A_map8	0001.CSV	2368.26	0.0107649
CAM112A_map8	0001.CSV	2372.11	0.0157975
CAM112A_map8	0001.CSV	2375.97	0.0178971
CAM112A_map8	0001.CSV	2379.83	0.0184611
CAM112A_map8	0001.CSV	2383.69	0.0185493
CAM112A_map8	0001.CSV	2387.54	0.0184572
CAM112A_map8	0001.CSV	2391.4	0.0183781
CAM112A_map8	0001.CSV	2395.26	0.0183624
CAM112A_map8	0001.CSV	2399.11	0.0184013
CAM112A_map8	0001.CSV	2402.97	0.0184173
CAM112A_map8	0001.CSV	2406.83	0.0184849
CAM112A_map8	0001.CSV	2410.68	0.01851
CAM112A_map8	0001.CSV	2414.54	0.0185336
CAM112A_map8	0001.CSV	2418.4	0.018544
CAM112A_map8	0001.CSV	2422.26	0.0185794
CAM112A_map8	0001.CSV	2426.11	0.0186255
CAM112A_map8	0001.CSV	2429.97	0.0187196
CAM112A_map8	0001.CSV	2433.83	0.0188084
CAM112A_map8	0001.CSV	2437.68	0.0189465
CAM112A_map8	0001.CSV	2441.54	0.0190203
CAM112A_map8	0001.CSV	2445.4	0.0191322
CAM112A_map8	0001.CSV	2449.26	0.0192929
CAM112A_map8	0001.CSV	2453.11	0.0194655
CAM112A_map8	0001.CSV	2456.97	0.019602
CAM112A_map8	0001.CSV	2460.83	0.0197728
CAM112A_map8	0001.CSV	2464.68	0.0200019
CAM112A_map8	0001.CSV	2468.54	0.0202747
CAM112A_map8	0001.CSV	2472.4	0.0205764
CAM112A_map8	0001.CSV	2476.26	0.0209624
CAM112A_map8	0001.CSV	2480.11	0.0213938
CAM112A_map8	0001.CSV	2483.97	0.0219484
CAM112A_map8	0001.CSV	2487.83	0.0226358
CAM112A_map8	0001.CSV	2491.68	0.0234883
CAM112A_map8	0001.CSV	2495.54	0.0245584
CAM112A_map8	0001.CSV	2499.4	0.0257758
CAM112A_map8	0001.CSV	2503.26	0.0269266
CAM112A_map8	0001.CSV	2507.11	0.0278796
CAM112A_map8	0001.CSV	2510.97	0.0283868
CAM112A_map8	0001.CSV	2514.83	0.0284262
CAM112A_map8	0001.CSV	2518.68	0.0280564
CAM112A_map8	0001.CSV	2522.54	0.0273611
CAM112A_map8	0001.CSV	2526.4	0.0264426
CAM112A_map8	0001.CSV	2530.26	0.0254728
CAM112A_map8	0001.CSV	2534.11	0.0245546
CAM112A_map8	0001.CSV	2537.97	0.0237947
CAM112A_map8	0001.CSV	2541.83	0.0231768
CAM112A_map8	0001.CSV	2545.68	0.0227322
CAM112A_map8	0001.CSV	2549.54	0.0223997
CAM112A_map8	0001.CSV	2553.4	0.0221691
CAM112A_map8	0001.CSV	2557.26	0.0219988
CAM112A_map8	0001.CSV	2561.11	0.0219163
CAM112A_map8	0001.CSV	2564.97	0.0218075
CAM112A_map8	0001.CSV	2568.83	0.0217547
CAM112A_map8	0001.CSV	2572.68	0.0217693
CAM112A_map8	0001.CSV	2576.54	0.0217581
CAM112A_map8	0001.CSV	2580.4	0.021652
CAM112A_map8	0001.CSV	2584.25	0.0215542
CAM112A_map8	0001.CSV	2588.11	0.0215218
CAM112A_map8	0001.CSV	2591.97	0.0215031
CAM112A_map8	0001.CSV	2595.83	0.0213803
CAM112A_map8	0001.CSV	2599.68	0.0213069
CAM112A_map8	0001.CSV	2603.54	0.021195
CAM112A_map8	0001.CSV	2607.4	0.0210452
CAM112A_map8	0001.CSV	2611.25	0.0209206
CAM112A_map8	0001.CSV	2615.11	0.0208047
CAM112A_map8	0001.CSV	2618.97	0.020611
CAM112A_map8	0001.CSV	2622.82	0.0204458
CAM112A_map8	0001.CSV	2626.68	0.0202954
CAM112A_map8	0001.CSV	2630.54	0.0201287
CAM112A_map8	0001.CSV	2634.4	0.0200273
CAM112A_map8	0001.CSV	2638.25	0.0199547
CAM112A_map8	0001.CSV	2642.11	0.0197284
CAM112A_map8	0001.CSV	2645.97	0.0195182
CAM112A_map8	0001.CSV	2649.82	0.0194059
CAM112A_map8	0001.CSV	2653.68	0.019371
CAM112A_map8	0001.CSV	2657.54	0.0193552
CAM112A_map8	0001.CSV	2661.4	0.0193434
CAM112A_map8	0001.CSV	2665.25	0.0193235
CAM112A_map8	0001.CSV	2669.11	0.0194468
CAM112A_map8	0001.CSV	2672.97	0.0197076
CAM112A_map8	0001.CSV	2676.82	0.0200003
CAM112A_map8	0001.CSV	2680.68	0.0199279
CAM112A_map8	0001.CSV	2684.54	0.0195555
CAM112A_map8	0001.CSV	2688.4	0.0194096
CAM112A_map8	0001.CSV	2692.25	0.0194165
CAM112A_map8	0001.CSV	2696.11	0.0194576
CAM112A_map8	0001.CSV	2699.97	0.0195244
CAM112A_map8	0001.CSV	2703.82	0.0195203
CAM112A_map8	0001.CSV	2707.68	0.0195834
CAM112A_map8	0001.CSV	2711.54	0.0196439
CAM112A_map8	0001.CSV	2715.4	0.0196717
CAM112A_map8	0001.CSV	2719.25	0.0199335
CAM112A_map8	0001.CSV	2723.11	0.0203936
CAM112A_map8	0001.CSV	2726.97	0.0203666
CAM112A_map8	0001.CSV	2730.82	0.0199964
CAM112A_map8	0001.CSV	2734.68	0.0200227
CAM112A_map8	0001.CSV	2738.54	0.02011
CAM112A_map8	0001.CSV	2742.4	0.0201228
CAM112A_map8	0001.CSV	2746.25	0.0205034
CAM112A_map8	0001.CSV	2750.11	0.0205705
CAM112A_map8	0001.CSV	2753.97	0.020264
CAM112A_map8	0001.CSV	2757.82	0.0202028
CAM112A_map8	0001.CSV	2761.68	0.0201715
CAM112A_map8	0001.CSV	2765.54	0.0201404
CAM112A_map8	0001.CSV	2769.39	0.0203678
CAM112A_map8	0001.CSV	2773.25	0.0208801
CAM112A_map8	0001.CSV	2777.11	0.0208411
CAM112A_map8	0001.CSV	2780.97	0.0205623
CAM112A_map8	0001.CSV	2784.82	0.0208849
CAM112A_map8	0001.CSV	2788.68	0.021604
CAM112A_map8	0001.CSV	2792.54	0.02189
CAM112A_map8	0001.CSV	2796.39	0.0219276
CAM112A_map8	0001.CSV	2800.25	0.0217487
CAM112A_map8	0001.CSV	2804.11	0.021552
CAM112A_map8	0001.CSV	2807.97	0.0220154
CAM112A_map8	0001.CSV	2811.82	0.0222371
CAM112A_map8	0001.CSV	2815.68	0.0221954
CAM112A_map8	0001.CSV	2819.54	0.022503
CAM112A_map8	0001.CSV	2823.39	0.0229197
CAM112A_map8	0001.CSV	2827.25	0.0233531
CAM112A_map8	0001.CSV	2831.11	0.0243007
CAM112A_map8	0001.CSV	2834.97	0.0257845
CAM112A_map8	0001.CSV	2838.82	0.0275463
CAM112A_map8	0001.CSV	2842.68	0.0299705
CAM112A_map8	0001.CSV	2846.54	0.0339148
CAM112A_map8	0001.CSV	2850.39	0.0367377
CAM112A_map8	0001.CSV	2854.25	0.0365338
CAM112A_map8	0001.CSV	2858.11	0.0350103
CAM112A_map8	0001.CSV	2861.97	0.0331979
CAM112A_map8	0001.CSV	2865.82	0.0319873
CAM112A_map8	0001.CSV	2869.68	0.0319033
CAM112A_map8	0001.CSV	2873.54	0.0317854
CAM112A_map8	0001.CSV	2877.39	0.0307174
CAM112A_map8	0001.CSV	2881.25	0.0298347
CAM112A_map8	0001.CSV	2885.11	0.0296653
CAM112A_map8	0001.CSV	2888.97	0.030091
CAM112A_map8	0001.CSV	2892.82	0.0311218
CAM112A_map8	0001.CSV	2896.68	0.032181
CAM112A_map8	0001.CSV	2900.54	0.0330783
CAM112A_map8	0001.CSV	2904.39	0.034479
CAM112A_map8	0001.CSV	2908.25	0.0368519
CAM112A_map8	0001.CSV	2912.11	0.040731
CAM112A_map8	0001.CSV	2915.97	0.0447605
CAM112A_map8	0001.CSV	2919.82	0.04647
CAM112A_map8	0001.CSV	2923.68	0.0458136
CAM112A_map8	0001.CSV	2927.54	0.0442186
CAM112A_map8	0001.CSV	2931.39	0.0415305
CAM112A_map8	0001.CSV	2935.25	0.0382349
CAM112A_map8	0001.CSV	2939.11	0.0357447
CAM112A_map8	0001.CSV	2942.96	0.0344576
CAM112A_map8	0001.CSV	2946.82	0.0337134
CAM112A_map8	0001.CSV	2950.68	0.0332073
CAM112A_map8	0001.CSV	2954.54	0.0328018
CAM112A_map8	0001.CSV	2958.39	0.0320748
CAM112A_map8	0001.CSV	2962.25	0.0309735
CAM112A_map8	0001.CSV	2966.11	0.0294296
CAM112A_map8	0001.CSV	2969.96	0.0283183
CAM112A_map8	0001.CSV	2973.82	0.0277983
CAM112A_map8	0001.CSV	2977.68	0.0274092
CAM112A_map8	0001.CSV	2981.53	0.0266831
CAM112A_map8	0001.CSV	2985.39	0.0256342
CAM112A_map8	0001.CSV	2989.25	0.0251507
CAM112A_map8	0001.CSV	2993.11	0.0250031
CAM112A_map8	0001.CSV	2996.96	0.0245781
CAM112A_map8	0001.CSV	3000.82	0.0240218
CAM112A_map8	0001.CSV	3004.68	0.0236419
CAM112A_map8	0001.CSV	3008.53	0.0237332
CAM112A_map8	0001.CSV	3012.39	0.0239892
CAM112A_map8	0001.CSV	3016.25	0.0239199
CAM112A_map8	0001.CSV	3020.11	0.0236392
CAM112A_map8	0001.CSV	3023.96	0.023415
CAM112A_map8	0001.CSV	3027.82	0.0233698
CAM112A_map8	0001.CSV	3031.68	0.0235697
CAM112A_map8	0001.CSV	3035.53	0.0235863
CAM112A_map8	0001.CSV	3039.39	0.0235937
CAM112A_map8	0001.CSV	3043.25	0.0237166
CAM112A_map8	0001.CSV	3047.11	0.0236445
CAM112A_map8	0001.CSV	3050.96	0.0236462
CAM112A_map8	0001.CSV	3054.82	0.0235587
CAM112A_map8	0001.CSV	3058.68	0.023376
CAM112A_map8	0001.CSV	3062.53	0.0234719
CAM112A_map8	0001.CSV	3066.39	0.0237554
CAM112A_map8	0001.CSV	3070.25	0.0236614
CAM112A_map8	0001.CSV	3074.11	0.0236933
CAM112A_map8	0001.CSV	3077.96	0.0240218
CAM112A_map8	0001.CSV	3081.82	0.0241861
CAM112A_map8	0001.CSV	3085.68	0.0241132
CAM112A_map8	0001.CSV	3089.53	0.0238807
CAM112A_map8	0001.CSV	3093.39	0.0236225
CAM112A_map8	0001.CSV	3097.25	0.0236871
CAM112A_map8	0001.CSV	3101.11	0.0238445
CAM112A_map8	0001.CSV	3104.96	0.0239776
CAM112A_map8	0001.CSV	3108.82	0.024181
CAM112A_map8	0001.CSV	3112.68	0.0243345
CAM112A_map8	0001.CSV	3116.53	0.0244944
CAM112A_map8	0001.CSV	3120.39	0.0243638
CAM112A_map8	0001.CSV	3124.25	0.0240802
CAM112A_map8	0001.CSV	3128.11	0.0240998
CAM112A_map8	0001.CSV	3131.96	0.0241693
CAM112A_map8	0001.CSV	3135.82	0.0243317
CAM112A_map8	0001.CSV	3139.68	0.0244673
CAM112A_map8	0001.CSV	3143.53	0.0242419
CAM112A_map8	0001.CSV	3147.39	0.024313
CAM112A_map8	0001.CSV	3151.25	0.0246862
CAM112A_map8	0001.CSV	3155.1	0.0246763
CAM112A_map8	0001.CSV	3158.96	0.0243691
CAM112A_map8	0001.CSV	3162.82	0.024278
CAM112A_map8	0001.CSV	3166.68	0.0242884
CAM112A_map8	0001.CSV	3170.53	0.0243589
CAM112A_map8	0001.CSV	3174.39	0.024381
CAM112A_map8	0001.CSV	3178.25	0.0245084
CAM112A_map8	0001.CSV	3182.1	0.0246929
CAM112A_map8	0001.CSV	3185.96	0.0248961
CAM112A_map8	0001.CSV	3189.82	0.0250003
CAM112A_map8	0001.CSV	3193.68	0.024927
CAM112A_map8	0001.CSV	3197.53	0.0249352
CAM112A_map8	0001.CSV	3201.39	0.0251028
CAM112A_map8	0001.CSV	3205.25	0.0252213
CAM112A_map8	0001.CSV	3209.1	0.0252423
CAM112A_map8	0001.CSV	3212.96	0.0253861
CAM112A_map8	0001.CSV	3216.82	0.0255285
CAM112A_map8	0001.CSV	3220.68	0.0255183
CAM112A_map8	0001.CSV	3224.53	0.0255426
CAM112A_map8	0001.CSV	3228.39	0.0258184
CAM112A_map8	0001.CSV	3232.25	0.0262634
CAM112A_map8	0001.CSV	3236.1	0.0261841
CAM112A_map8	0001.CSV	3239.96	0.0259446
CAM112A_map8	0001.CSV	3243.82	0.0261423
CAM112A_map8	0001.CSV	3247.68	0.0262518
CAM112A_map8	0001.CSV	3251.53	0.0261561
CAM112A_map8	0001.CSV	3255.39	0.0262489
CAM112A_map8	0001.CSV	3259.25	0.026158
CAM112A_map8	0001.CSV	3263.1	0.0260773
CAM112A_map8	0001.CSV	3266.96	0.0263687
CAM112A_map8	0001.CSV	3270.82	0.0267669
CAM112A_map8	0001.CSV	3274.68	0.0267006
CAM112A_map8	0001.CSV	3278.53	0.026371
CAM112A_map8	0001.CSV	3282.39	0.0262742
CAM112A_map8	0001.CSV	3286.25	0.02643
CAM112A_map8	0001.CSV	3290.1	0.0268154
CAM112A_map8	0001.CSV	3293.96	0.0270742
CAM112A_map8	0001.CSV	3297.82	0.0269733
CAM112A_map8	0001.CSV	3301.67	0.026945
CAM112A_map8	0001.CSV	3305.53	0.0270272
CAM112A_map8	0001.CSV	3309.39	0.0269586
CAM112A_map8	0001.CSV	3313.25	0.0265322
CAM112A_map8	0001.CSV	3317.1	0.0262102
CAM112A_map8	0001.CSV	3320.96	0.0263346
CAM112A_map8	0001.CSV	3324.82	0.0266427
CAM112A_map8	0001.CSV	3328.67	0.0265274
CAM112A_map8	0001.CSV	3332.53	0.026377
CAM112A_map8	0001.CSV	3336.39	0.0267369
CAM112A_map8	0001.CSV	3340.24	0.0269465
CAM112A_map8	0001.CSV	3344.1	0.0268211
CAM112A_map8	0001.CSV	3347.96	0.0268459
CAM112A_map8	0001.CSV	3351.82	0.0267514
CAM112A_map8	0001.CSV	3355.67	0.0265072
CAM112A_map8	0001.CSV	3359.53	0.0266725
CAM112A_map8	0001.CSV	3363.39	0.0269728
CAM112A_map8	0001.CSV	3367.24	0.027144
CAM112A_map8	0001.CSV	3371.1	0.0269945
CAM112A_map8	0001.CSV	3374.96	0.026682
CAM112A_map8	0001.CSV	3378.82	0.0264973
CAM112A_map8	0001.CSV	3382.67	0.0263273
CAM112A_map8	0001.CSV	3386.53	0.0264756
CAM112A_map8	0001.CSV	3390.39	0.0267586
CAM112A_map8	0001.CSV	3394.24	0.0268287
CAM112A_map8	0001.CSV	3398.1	0.0267708
CAM112A_map8	0001.CSV	3401.96	0.0266257
CAM112A_map8	0001.CSV	3405.82	0.0264568
CAM112A_map8	0001.CSV	3409.67	0.0264933
CAM112A_map8	0001.CSV	3413.53	0.0262059
CAM112A_map8	0001.CSV	3417.39	0.0257844
CAM112A_map8	0001.CSV	3421.24	0.0256685
CAM112A_map8	0001.CSV	3425.1	0.0258352
CAM112A_map8	0001.CSV	3428.96	0.0260495
CAM112A_map8	0001.CSV	3432.82	0.0261757
CAM112A_map8	0001.CSV	3436.67	0.0260227
CAM112A_map8	0001.CSV	3440.53	0.025412
CAM112A_map8	0001.CSV	3444.39	0.0250445
CAM112A_map8	0001.CSV	3448.24	0.025054
CAM112A_map8	0001.CSV	3452.1	0.024893
CAM112A_map8	0001.CSV	3455.96	0.0248918
CAM112A_map8	0001.CSV	3459.82	0.0250129
CAM112A_map8	0001.CSV	3463.67	0.0250928
CAM112A_map8	0001.CSV	3467.53	0.0251159
CAM112A_map8	0001.CSV	3471.39	0.0247636
CAM112A_map8	0001.CSV	3475.24	0.0243858
CAM112A_map8	0001.CSV	3479.1	0.0243492
CAM112A_map8	0001.CSV	3482.96	0.0242046
CAM112A_map8	0001.CSV	3486.82	0.0241729
CAM112A_map8	0001.CSV	3490.67	0.0241616
CAM112A_map8	0001.CSV	3494.53	0.0242625
CAM112A_map8	0001.CSV	3498.39	0.0241565
CAM112A_map8	0001.CSV	3502.24	0.0237808
CAM112A_map8	0001.CSV	3506.1	0.0233864
CAM112A_map8	0001.CSV	3509.96	0.0233428
CAM112A_map8	0001.CSV	3513.81	0.0234524
CAM112A_map8	0001.CSV	3517.67	0.0230739
CAM112A_map8	0001.CSV	3521.53	0.0229554
CAM112A_map8	0001.CSV	3525.39	0.0230137
CAM112A_map8	0001.CSV	3529.24	0.0227968
CAM112A_map8	0001.CSV	3533.1	0.0227513
CAM112A_map8	0001.CSV	3536.96	0.0229083
CAM112A_map8	0001.CSV	3540.81	0.0228767
CAM112A_map8	0001.CSV	3544.67	0.0228061
CAM112A_map8	0001.CSV	3548.53	0.0226008
CAM112A_map8	0001.CSV	3552.39	0.0222665
CAM112A_map8	0001.CSV	3556.24	0.0221015
CAM112A_map8	0001.CSV	3560.1	0.0218924
CAM112A_map8	0001.CSV	3563.96	0.0214693
CAM112A_map8	0001.CSV	3567.81	0.0217007
CAM112A_map8	0001.CSV	3571.67	0.0216922
CAM112A_map8	0001.CSV	3575.53	0.0213017
CAM112A_map8	0001.CSV	3579.39	0.0213737
CAM112A_map8	0001.CSV	3583.24	0.0213323
CAM112A_map8	0001.CSV	3587.1	0.0213035
CAM112A_map8	0001.CSV	3590.96	0.0212113
CAM112A_map8	0001.CSV	3594.81	0.0209591
CAM112A_map8	0001.CSV	3598.67	0.0210967
CAM112A_map8	0001.CSV	3602.53	0.0209597
CAM112A_map8	0001.CSV	3606.39	0.0203018
CAM112A_map8	0001.CSV	3610.24	0.0199983
CAM112A_map8	0001.CSV	3614.1	0.0200682
CAM112A_map8	0001.CSV	3617.96	0.0203304
CAM112A_map8	0001.CSV	3621.81	0.0203934
CAM112A_map8	0001.CSV	3625.67	0.0196137
CAM112A_map8	0001.CSV	3629.53	0.0195679
CAM112A_map8	0001.CSV	3633.39	0.0201826
CAM112A_map8	0001.CSV	3637.24	0.0198894
CAM112A_map8	0001.CSV	3641.1	0.0194394
CAM112A_map8	0001.CSV	3644.96	0.0188087
CAM112A_map8	0001.CSV	3648.81	0.0194269
CAM112A_map8	0001.CSV	3652.67	0.0202382
CAM112A_map8	0001.CSV	3656.53	0.0201883
CAM112A_map8	0001.CSV	3660.38	0.0200324
CAM112A_map8	0001.CSV	3664.24	0.0191619
CAM112A_map8	0001.CSV	3668.1	0.0184491
CAM112A_map8	0001.CSV	3671.96	0.0187048
CAM112A_map8	0001.CSV	3675.81	0.0193966
CAM112A_map8	0001.CSV	3679.67	0.0196557
CAM112A_map8	0001.CSV	3683.53	0.019267
CAM112A_map8	0001.CSV	3687.38	0.0192176
CAM112A_map8	0001.CSV	3691.24	0.019845
CAM112A_map8	0001.CSV	3695.1	0.0195845
CAM112A_map8	0001.CSV	3698.95	0.0190672
CAM112A_map8	0001.CSV	3702.81	0.0189019
CAM112A_map8	0001.CSV	3706.67	0.0185514
CAM112A_map8	0001.CSV	3710.53	0.0185631
CAM112A_map8	0001.CSV	3714.38	0.019102
CAM112A_map8	0001.CSV	3718.24	0.0187137
CAM112A_map8	0001.CSV	3722.1	0.0185311
CAM112A_map8	0001.CSV	3725.95	0.0186209
CAM112A_map8	0001.CSV	3729.81	0.018294
CAM112A_map8	0001.CSV	3733.67	0.0184284
CAM112A_map8	0001.CSV	3737.53	0.0194883
CAM112A_map8	0001.CSV	3741.38	0.0189198
CAM112A_map8	0001.CSV	3745.24	0.0180771
CAM112A_map8	0001.CSV	3749.1	0.017945
CAM112A_map8	0001.CSV	3752.95	0.0188189
CAM112A_map8	0001.CSV	3756.81	0.0188765
CAM112A_map8	0001.CSV	3760.67	0.0188713
CAM112A_map8	0001.CSV	3764.53	0.0188058
CAM112A_map8	0001.CSV	3768.38	0.018954
CAM112A_map8	0001.CSV	3772.24	0.0190692
CAM112A_map8	0001.CSV	3776.1	0.0187641
CAM112A_map8	0001.CSV	3779.95	0.0187687
CAM112A_map8	0001.CSV	3783.81	0.0188368
CAM112A_map8	0001.CSV	3787.67	0.0188506
CAM112A_map8	0001.CSV	3791.53	0.0184861
CAM112A_map8	0001.CSV	3795.38	0.0179648
CAM112A_map8	0001.CSV	3799.24	0.0179292
CAM112A_map8	0001.CSV	3803.1	0.0184881
CAM112A_map8	0001.CSV	3806.95	0.0190488
CAM112A_map8	0001.CSV	3810.81	0.0188235
CAM112A_map8	0001.CSV	3814.67	0.0183544
CAM112A_map8	0001.CSV	3818.53	0.0185848
CAM112A_map8	0001.CSV	3822.38	0.0191335
CAM112A_map8	0001.CSV	3826.24	0.0191178
CAM112A_map8	0001.CSV	3830.1	0.0188004
CAM112A_map8	0001.CSV	3833.95	0.0186302
CAM112A_map8	0001.CSV	3837.81	0.0189207
CAM112A_map8	0001.CSV	3841.67	0.0194934
CAM112A_map8	0001.CSV	3845.53	0.0192138
CAM112A_map8	0001.CSV	3849.38	0.0184259
CAM112A_map8	0001.CSV	3853.24	0.018656
CAM112A_map8	0001.CSV	3857.1	0.0194154
CAM112A_map8	0001.CSV	3860.95	0.0189232
CAM112A_map8	0001.CSV	3864.81	0.0189254
CAM112A_map8	0001.CSV	3868.67	0.0190528
CAM112A_map8	0001.CSV	3872.52	0.0194826
CAM112A_map8	0001.CSV	3876.38	0.0192507
CAM112A_map8	0001.CSV	3880.24	0.01901
CAM112A_map8	0001.CSV	3884.1	0.0194502
CAM112A_map8	0001.CSV	3887.95	0.019429
CAM112A_map8	0001.CSV	3891.81	0.0192904
CAM112A_map8	0001.CSV	3895.67	0.0189113
CAM112A_map8	0001.CSV	3899.52	0.0185969
CAM112A_map8	0001.CSV	3903.38	0.0193895
CAM112A_map8	0001.CSV	3907.24	0.019602
CAM112A_map8	0001.CSV	3911.1	0.0190771
CAM112A_map8	0001.CSV	3914.95	0.0187882
CAM112A_map8	0001.CSV	3918.81	0.018992
CAM112A_map8	0001.CSV	3922.67	0.0191195
CAM112A_map8	0001.CSV	3926.52	0.0191932
CAM112A_map8	0001.CSV	3930.38	0.0193331
CAM112A_map8	0001.CSV	3934.24	0.0195048
CAM112A_map8	0001.CSV	3938.09	0.0191497
CAM112A_map8	0001.CSV	3941.95	0.0191026
CAM112A_map8	0001.CSV	3945.81	0.0192332
CAM112A_map8	0001.CSV	3949.67	0.019214
CAM112A_map8	0001.CSV	3953.52	0.0190863
CAM112A_map8	0001.CSV	3957.38	0.0189638
CAM112A_map8	0001.CSV	3961.24	0.0189925
CAM112A_map8	0001.CSV	3965.09	0.0189639
CAM112A_map8	0001.CSV	3968.95	0.0189773
CAM112A_map8	0001.CSV	3972.81	0.0190736
CAM112A_map8	0001.CSV	3976.67	0.0191076
CAM112A_map8	0001.CSV	3980.52	0.0191158
CAM112A_map8	0001.CSV	3984.38	0.0191326
CAM112A_map8	0001.CSV	3988.24	0.0189887
CAM112A_map8	0001.CSV	3992.09	0.018857
CAM112A_map8	0001.CSV	3995.95	0.0189165
CAM112A_map8	0001.CSV	3999.81	0.0189886
CAM112A_map8	0002.CSV	674.992	0.0359347
CAM112A_map8	0002.CSV	678.849	0.0382962
CAM112A_map8	0002.CSV	682.706	0.0397723
CAM112A_map8	0002.CSV	686.563	0.0434351
CAM112A_map8	0002.CSV	690.42	0.0468242
CAM112A_map8	0002.CSV	694.277	0.0532751
CAM112A_map8	0002.CSV	698.134	0.0607762
CAM112A_map8	0002.CSV	701.991	0.0727211
CAM112A_map8	0002.CSV	705.849	0.0943794
CAM112A_map8	0002.CSV	709.706	0.122883
CAM112A_map8	0002.CSV	713.563	0.116172
CAM112A_map8	0002.CSV	717.42	0.0769178
CAM112A_map8	0002.CSV	721.277	0.0476671
CAM112A_map8	0002.CSV	725.134	0.038026
CAM112A_map8	0002.CSV	728.991	0.0350054
CAM112A_map8	0002.CSV	732.848	0.0353326
CAM112A_map8	0002.CSV	736.705	0.0356027
CAM112A_map8	0002.CSV	740.562	0.0366231
CAM112A_map8	0002.CSV	744.42	0.0369534
CAM112A_map8	0002.CSV	748.277	0.038055
CAM112A_map8	0002.CSV	752.134	0.0385491
CAM112A_map8	0002.CSV	755.991	0.0398416
CAM112A_map8	0002.CSV	759.848	0.0404441
CAM112A_map8	0002.CSV	763.705	0.0420431
CAM112A_map8	0002.CSV	767.562	0.0429021
CAM112A_map8	0002.CSV	771.419	0.044114
CAM112A_map8	0002.CSV	775.276	0.0446587
CAM112A_map8	0002.CSV	779.133	0.0452477
CAM112A_map8	0002.CSV	782.99	0.04477
CAM112A_map8	0002.CSV	786.848	0.0451012
CAM112A_map8	0002.CSV	790.705	0.0451656
CAM112A_map8	0002.CSV	794.562	0.0459534
CAM112A_map8	0002.CSV	798.419	0.0465072
CAM112A_map8	0002.CSV	802.276	0.0475073
CAM112A_map8	0002.CSV	806.133	0.0476983
CAM112A_map8	0002.CSV	809.99	0.0486632
CAM112A_map8	0002.CSV	813.847	0.0496388
CAM112A_map8	0002.CSV	817.704	0.0514945
CAM112A_map8	0002.CSV	821.562	0.053006
CAM112A_map8	0002.CSV	825.419	0.0553863
CAM112A_map8	0002.CSV	829.276	0.0577915
CAM112A_map8	0002.CSV	833.133	0.0613869
CAM112A_map8	0002.CSV	836.99	0.0648177
CAM112A_map8	0002.CSV	840.847	0.0709254
CAM112A_map8	0002.CSV	844.704	0.081094
CAM112A_map8	0002.CSV	848.561	0.0883839
CAM112A_map8	0002.CSV	852.418	0.0919277
CAM112A_map8	0002.CSV	856.275	0.107402
CAM112A_map8	0002.CSV	860.132	0.141188
CAM112A_map8	0002.CSV	863.99	0.204352
CAM112A_map8	0002.CSV	867.847	0.282393
CAM112A_map8	0002.CSV	871.704	0.306832
CAM112A_map8	0002.CSV	875.561	0.257216
CAM112A_map8	0002.CSV	879.418	0.190088
CAM112A_map8	0002.CSV	883.275	0.120777
CAM112A_map8	0002.CSV	887.132	0.0638647
CAM112A_map8	0002.CSV	890.989	0.0395548
CAM112A_map8	0002.CSV	894.846	0.0372547
CAM112A_map8	0002.CSV	898.703	0.0383093
CAM112A_map8	0002.CSV	902.561	0.0398723
CAM112A_map8	0002.CSV	906.418	0.0408736
CAM112A_map8	0002.CSV	910.275	0.0422503
CAM112A_map8	0002.CSV	914.132	0.0430878
CAM112A_map8	0002.CSV	917.989	0.0442695
CAM112A_map8	0002.CSV	921.846	0.0451023
CAM112A_map8	0002.CSV	925.703	0.0463729
CAM112A_map8	0002.CSV	929.56	0.047116
CAM112A_map8	0002.CSV	933.417	0.0481443
CAM112A_map8	0002.CSV	937.274	0.0486045
CAM112A_map8	0002.CSV	941.131	0.0493548
CAM112A_map8	0002.CSV	944.989	0.049786
CAM112A_map8	0002.CSV	948.846	0.0505316
CAM112A_map8	0002.CSV	952.703	0.0509798
CAM112A_map8	0002.CSV	956.56	0.0518908
CAM112A_map8	0002.CSV	960.417	0.0522348
CAM112A_map8	0002.CSV	964.274	0.0528986
CAM112A_map8	0002.CSV	968.131	0.0534176
CAM112A_map8	0002.CSV	971.988	0.0544705
CAM112A_map8	0002.CSV	975.845	0.0552063
CAM112A_map8	0002.CSV	979.702	0.0562385
CAM112A_map8	0002.CSV	983.559	0.0569723
CAM112A_map8	0002.CSV	987.417	0.0581552
CAM112A_map8	0002.CSV	991.274	0.0590292
CAM112A_map8	0002.CSV	995.131	0.0602081
CAM112A_map8	0002.CSV	998.988	0.0611198
CAM112A_map8	0002.CSV	1002.85	0.0623619
CAM112A_map8	0002.CSV	1006.7	0.0632452
CAM112A_map8	0002.CSV	1010.56	0.064642
CAM112A_map8	0002.CSV	1014.42	0.0657695
CAM112A_map8	0002.CSV	1018.27	0.0671227
CAM112A_map8	0002.CSV	1022.13	0.0680576
CAM112A_map8	0002.CSV	1025.99	0.0693367
CAM112A_map8	0002.CSV	1029.85	0.0701179
CAM112A_map8	0002.CSV	1033.7	0.0713451
CAM112A_map8	0002.CSV	1037.56	0.0722638
CAM112A_map8	0002.CSV	1041.42	0.0735018
CAM112A_map8	0002.CSV	1045.27	0.074161
CAM112A_map8	0002.CSV	1049.13	0.0750834
CAM112A_map8	0002.CSV	1052.99	0.0759851
CAM112A_map8	0002.CSV	1056.84	0.0776732
CAM112A_map8	0002.CSV	1060.7	0.0791966
CAM112A_map8	0002.CSV	1064.56	0.0810783
CAM112A_map8	0002.CSV	1068.42	0.0822264
CAM112A_map8	0002.CSV	1072.27	0.0834584
CAM112A_map8	0002.CSV	1076.13	0.0841825
CAM112A_map8	0002.CSV	1079.99	0.0856176
CAM112A_map8	0002.CSV	1083.84	0.0868562
CAM112A_map8	0002.CSV	1087.7	0.087854
CAM112A_map8	0002.CSV	1091.56	0.0869398
CAM112A_map8	0002.CSV	1095.41	0.0854027
CAM112A_map8	0002.CSV	1099.27	0.0840684
CAM112A_map8	0002.CSV	1103.13	0.0841042
CAM112A_map8	0002.CSV	1106.99	0.084419
CAM112A_map8	0002.CSV	1110.84	0.0856797
CAM112A_map8	0002.CSV	1114.7	0.0865073
CAM112A_map8	0002.CSV	1118.56	0.087384
CAM112A_map8	0002.CSV	1122.41	0.0878104
CAM112A_map8	0002.CSV	1126.27	0.0885094
CAM112A_map8	0002.CSV	1130.13	0.0888347
CAM112A_map8	0002.CSV	1133.99	0.0896161
CAM112A_map8	0002.CSV	1137.84	0.090163
CAM112A_map8	0002.CSV	1141.7	0.0910134
CAM112A_map8	0002.CSV	1145.56	0.0915498
CAM112A_map8	0002.CSV	1149.41	0.0925769
CAM112A_map8	0002.CSV	1153.27	0.0934495
CAM112A_map8	0002.CSV	1157.13	0.0948103
CAM112A_map8	0002.CSV	1160.99	0.0957525
CAM112A_map8	0002.CSV	1164.84	0.0966681
CAM112A_map8	0002.CSV	1168.7	0.0967276
CAM112A_map8	0002.CSV	1172.56	0.0969824
CAM112A_map8	0002.CSV	1176.41	0.0969665
CAM112A_map8	0002.CSV	1180.27	0.0972152
CAM112A_map8	0002.CSV	1184.13	0.0970349
CAM112A_map8	0002.CSV	1187.99	0.0971894
CAM112A_map8	0002.CSV	1191.84	0.0970588
CAM112A_map8	0002.CSV	1195.7	0.0974965
CAM112A_map8	0002.CSV	1199.56	0.0977643
CAM112A_map8	0002.CSV	1203.41	0.0985361
CAM112A_map8	0002.CSV	1207.27	0.0992771
CAM112A_map8	0002.CSV	1211.13	0.100561
CAM112A_map8	0002.CSV	1214.98	0.101596
CAM112A_map8	0002.CSV	1218.84	0.103215
CAM112A_map8	0002.CSV	1222.7	0.104733
CAM112A_map8	0002.CSV	1226.56	0.106792
CAM112A_map8	0002.CSV	1230.41	0.108603
CAM112A_map8	0002.CSV	1234.27	0.110903
CAM112A_map8	0002.CSV	1238.13	0.113065
CAM112A_map8	0002.CSV	1241.98	0.11575
CAM112A_map8	0002.CSV	1245.84	0.118184
CAM112A_map8	0002.CSV	1249.7	0.121049
CAM112A_map8	0002.CSV	1253.56	0.123452
CAM112A_map8	0002.CSV	1257.41	0.126064
CAM112A_map8	0002.CSV	1261.27	0.12835
CAM112A_map8	0002.CSV	1265.13	0.131244
CAM112A_map8	0002.CSV	1268.98	0.133951
CAM112A_map8	0002.CSV	1272.84	0.137289
CAM112A_map8	0002.CSV	1276.7	0.140256
CAM112A_map8	0002.CSV	1280.56	0.143735
CAM112A_map8	0002.CSV	1284.41	0.146822
CAM112A_map8	0002.CSV	1288.27	0.150422
CAM112A_map8	0002.CSV	1292.13	0.1536
CAM112A_map8	0002.CSV	1295.98	0.157341
CAM112A_map8	0002.CSV	1299.84	0.161072
CAM112A_map8	0002.CSV	1303.7	0.165757
CAM112A_map8	0002.CSV	1307.56	0.170498
CAM112A_map8	0002.CSV	1311.41	0.176258
CAM112A_map8	0002.CSV	1315.27	0.182101
CAM112A_map8	0002.CSV	1319.13	0.18883
CAM112A_map8	0002.CSV	1322.98	0.194837
CAM112A_map8	0002.CSV	1326.84	0.201601
CAM112A_map8	0002.CSV	1330.7	0.20872
CAM112A_map8	0002.CSV	1334.56	0.2168
CAM112A_map8	0002.CSV	1338.41	0.226459
CAM112A_map8	0002.CSV	1342.27	0.23861
CAM112A_map8	0002.CSV	1346.13	0.248811
CAM112A_map8	0002.CSV	1349.98	0.261081
CAM112A_map8	0002.CSV	1353.84	0.274123
CAM112A_map8	0002.CSV	1357.7	0.28827
CAM112A_map8	0002.CSV	1361.56	0.304396
CAM112A_map8	0002.CSV	1365.41	0.324916
CAM112A_map8	0002.CSV	1369.27	0.342678
CAM112A_map8	0002.CSV	1373.13	0.364805
CAM112A_map8	0002.CSV	1376.98	0.388983
CAM112A_map8	0002.CSV	1380.84	0.410143
CAM112A_map8	0002.CSV	1384.7	0.427867
CAM112A_map8	0002.CSV	1388.56	0.446823
CAM112A_map8	0002.CSV	1392.41	0.45615
CAM112A_map8	0002.CSV	1396.27	0.457051
CAM112A_map8	0002.CSV	1400.13	0.447173
CAM112A_map8	0002.CSV	1403.98	0.434312
CAM112A_map8	0002.CSV	1407.84	0.412927
CAM112A_map8	0002.CSV	1411.7	0.3897
CAM112A_map8	0002.CSV	1415.55	0.367189
CAM112A_map8	0002.CSV	1419.41	0.344153
CAM112A_map8	0002.CSV	1423.27	0.325899
CAM112A_map8	0002.CSV	1427.12	0.314999
CAM112A_map8	0002.CSV	1430.98	0.303344
CAM112A_map8	0002.CSV	1434.84	0.291934
CAM112A_map8	0002.CSV	1438.7	0.277784
CAM112A_map8	0002.CSV	1442.55	0.267698
CAM112A_map8	0002.CSV	1446.41	0.256305
CAM112A_map8	0002.CSV	1450.27	0.244594
CAM112A_map8	0002.CSV	1454.12	0.234606
CAM112A_map8	0002.CSV	1457.98	0.220098
CAM112A_map8	0002.CSV	1461.84	0.208617
CAM112A_map8	0002.CSV	1465.7	0.200494
CAM112A_map8	0002.CSV	1469.55	0.191928
CAM112A_map8	0002.CSV	1473.41	0.181969
CAM112A_map8	0002.CSV	1477.27	0.171155
CAM112A_map8	0002.CSV	1481.12	0.164503
CAM112A_map8	0002.CSV	1484.98	0.157915
CAM112A_map8	0002.CSV	1488.84	0.14995
CAM112A_map8	0002.CSV	1492.7	0.141434
CAM112A_map8	0002.CSV	1496.55	0.134628
CAM112A_map8	0002.CSV	1500.41	0.126626
CAM112A_map8	0002.CSV	1504.27	0.121825
CAM112A_map8	0002.CSV	1508.12	0.112868
CAM112A_map8	0002.CSV	1511.98	0.106767
CAM112A_map8	0002.CSV	1515.84	0.102675
CAM112A_map8	0002.CSV	1519.7	0.0977331
CAM112A_map8	0002.CSV	1523.55	0.09184
CAM112A_map8	0002.CSV	1527.41	0.0877745
CAM112A_map8	0002.CSV	1531.27	0.0838173
CAM112A_map8	0002.CSV	1535.12	0.0804881
CAM112A_map8	0002.CSV	1538.98	0.0765804
CAM112A_map8	0002.CSV	1542.84	0.0689312
CAM112A_map8	0002.CSV	1546.7	0.0630303
CAM112A_map8	0002.CSV	1550.55	0.0584386
CAM112A_map8	0002.CSV	1554.41	0.0538166
CAM112A_map8	0002.CSV	1558.27	0.0490474
CAM112A_map8	0002.CSV	1562.12	0.0454378
CAM112A_map8	0002.CSV	1565.98	0.0440522
CAM112A_map8	0002.CSV	1569.84	0.0428403
CAM112A_map8	0002.CSV	1573.69	0.0422013
CAM112A_map8	0002.CSV	1577.55	0.0413111
CAM112A_map8	0002.CSV	1581.41	0.0395192
CAM112A_map8	0002.CSV	1585.27	0.037297
CAM112A_map8	0002.CSV	1589.12	0.0352641
CAM112A_map8	0002.CSV	1592.98	0.0332744
CAM112A_map8	0002.CSV	1596.84	0.0314858
CAM112A_map8	0002.CSV	1600.69	0.0298532
CAM112A_map8	0002.CSV	1604.55	0.0286937
CAM112A_map8	0002.CSV	1608.41	0.0276916
CAM112A_map8	0002.CSV	1612.27	0.0268487
CAM112A_map8	0002.CSV	1616.12	0.0259113
CAM112A_map8	0002.CSV	1619.98	0.0252438
CAM112A_map8	0002.CSV	1623.84	0.0244791
CAM112A_map8	0002.CSV	1627.69	0.0237087
CAM112A_map8	0002.CSV	1631.55	0.0227646
CAM112A_map8	0002.CSV	1635.41	0.0222243
CAM112A_map8	0002.CSV	1639.27	0.0218066
CAM112A_map8	0002.CSV	1643.12	0.0212325
CAM112A_map8	0002.CSV	1646.98	0.0207737
CAM112A_map8	0002.CSV	1650.84	0.0207535
CAM112A_map8	0002.CSV	1654.69	0.0204363
CAM112A_map8	0002.CSV	1658.55	0.0200055
CAM112A_map8	0002.CSV	1662.41	0.0196112
CAM112A_map8	0002.CSV	1666.27	0.0193471
CAM112A_map8	0002.CSV	1670.12	0.0192081
CAM112A_map8	0002.CSV	1673.98	0.0193409
CAM112A_map8	0002.CSV	1677.84	0.0188904
CAM112A_map8	0002.CSV	1681.69	0.0186091
CAM112A_map8	0002.CSV	1685.55	0.0187451
CAM112A_map8	0002.CSV	1689.41	0.0187112
CAM112A_map8	0002.CSV	1693.27	0.0182267
CAM112A_map8	0002.CSV	1697.12	0.0184107
CAM112A_map8	0002.CSV	1700.98	0.0189147
CAM112A_map8	0002.CSV	1704.84	0.0192186
CAM112A_map8	0002.CSV	1708.69	0.0193671
CAM112A_map8	0002.CSV	1712.55	0.019482
CAM112A_map8	0002.CSV	1716.41	0.0205314
CAM112A_map8	0002.CSV	1720.27	0.0218281
CAM112A_map8	0002.CSV	1724.12	0.0218843
CAM112A_map8	0002.CSV	1727.98	0.0218869
CAM112A_map8	0002.CSV	1731.84	0.0219308
CAM112A_map8	0002.CSV	1735.69	0.0222668
CAM112A_map8	0002.CSV	1739.55	0.0217637
CAM112A_map8	0002.CSV	1743.41	0.0207643
CAM112A_map8	0002.CSV	1747.27	0.0194969
CAM112A_map8	0002.CSV	1751.12	0.0182095
CAM112A_map8	0002.CSV	1754.98	0.0170882
CAM112A_map8	0002.CSV	1758.84	0.0164978
CAM112A_map8	0002.CSV	1762.69	0.0162169
CAM112A_map8	0002.CSV	1766.55	0.0160519
CAM112A_map8	0002.CSV	1770.41	0.0161381
CAM112A_map8	0002.CSV	1774.26	0.0166762
CAM112A_map8	0002.CSV	1778.12	0.0169326
CAM112A_map8	0002.CSV	1781.98	0.0177289
CAM112A_map8	0002.CSV	1785.84	0.0190975
CAM112A_map8	0002.CSV	1789.69	0.0212003
CAM112A_map8	0002.CSV	1793.55	0.0240356
CAM112A_map8	0002.CSV	1797.41	0.0246052
CAM112A_map8	0002.CSV	1801.26	0.0225727
CAM112A_map8	0002.CSV	1805.12	0.0199486
CAM112A_map8	0002.CSV	1808.98	0.0178983
CAM112A_map8	0002.CSV	1812.84	0.0166779
CAM112A_map8	0002.CSV	1816.69	0.0158667
CAM112A_map8	0002.CSV	1820.55	0.0154302
CAM112A_map8	0002.CSV	1824.41	0.0151205
CAM112A_map8	0002.CSV	1828.26	0.0151562
CAM112A_map8	0002.CSV	1832.12	0.0150277
CAM112A_map8	0002.CSV	1835.98	0.0147952
CAM112A_map8	0002.CSV	1839.84	0.0145515
CAM112A_map8	0002.CSV	1843.69	0.0147152
CAM112A_map8	0002.CSV	1847.55	0.0149449
CAM112A_map8	0002.CSV	1851.41	0.0148157
CAM112A_map8	0002.CSV	1855.26	0.0146361
CAM112A_map8	0002.CSV	1859.12	0.0146903
CAM112A_map8	0002.CSV	1862.98	0.0146297
CAM112A_map8	0002.CSV	1866.84	0.0147074
CAM112A_map8	0002.CSV	1870.69	0.0149107
CAM112A_map8	0002.CSV	1874.55	0.0148395
CAM112A_map8	0002.CSV	1878.41	0.0147174
CAM112A_map8	0002.CSV	1882.26	0.0147596
CAM112A_map8	0002.CSV	1886.12	0.0147416
CAM112A_map8	0002.CSV	1889.98	0.0148065
CAM112A_map8	0002.CSV	1893.83	0.0148249
CAM112A_map8	0002.CSV	1897.69	0.0148762
CAM112A_map8	0002.CSV	1901.55	0.0148118
CAM112A_map8	0002.CSV	1905.41	0.0148291
CAM112A_map8	0002.CSV	1909.26	0.0149192
CAM112A_map8	0002.CSV	1913.12	0.0149276
CAM112A_map8	0002.CSV	1916.98	0.0148318
CAM112A_map8	0002.CSV	1920.83	0.0149549
CAM112A_map8	0002.CSV	1924.69	0.0149995
CAM112A_map8	0002.CSV	1928.55	0.0149942
CAM112A_map8	0002.CSV	1932.4	0.01494
CAM112A_map8	0002.CSV	1936.26	0.0149852
CAM112A_map8	0002.CSV	1940.12	0.0149715
CAM112A_map8	0002.CSV	1943.98	0.0151726
CAM112A_map8	0002.CSV	1947.83	0.015235
CAM112A_map8	0002.CSV	1951.69	0.015204
CAM112A_map8	0002.CSV	1955.55	0.0151844
CAM112A_map8	0002.CSV	1959.4	0.0152693
CAM112A_map8	0002.CSV	1963.26	0.0152777
CAM112A_map8	0002.CSV	1967.12	0.0153659
CAM112A_map8	0002.CSV	1970.98	0.0153467
CAM112A_map8	0002.CSV	1974.83	0.0153258
CAM112A_map8	0002.CSV	1978.69	0.0153042
CAM112A_map8	0002.CSV	1982.55	0.015328
CAM112A_map8	0002.CSV	1986.4	0.0153047
CAM112A_map8	0002.CSV	1990.26	0.0154386
CAM112A_map8	0002.CSV	1994.12	0.015488
CAM112A_map8	0002.CSV	1997.98	0.0154388
CAM112A_map8	0002.CSV	2001.83	0.0154355
CAM112A_map8	0002.CSV	2005.69	0.0155071
CAM112A_map8	0002.CSV	2009.55	0.0155042
CAM112A_map8	0002.CSV	2013.4	0.0155274
CAM112A_map8	0002.CSV	2017.26	0.0155855
CAM112A_map8	0002.CSV	2021.12	0.0156698
CAM112A_map8	0002.CSV	2024.97	0.015647
CAM112A_map8	0002.CSV	2028.83	0.0156715
CAM112A_map8	0002.CSV	2032.69	0.0156627
CAM112A_map8	0002.CSV	2036.55	0.0157181
CAM112A_map8	0002.CSV	2040.4	0.0157763
CAM112A_map8	0002.CSV	2044.26	0.015879
CAM112A_map8	0002.CSV	2048.12	0.0158794
CAM112A_map8	0002.CSV	2051.97	0.0159452
CAM112A_map8	0002.CSV	2055.83	0.0159727
CAM112A_map8	0002.CSV	2059.69	0.0160564
CAM112A_map8	0002.CSV	2063.55	0.0161035
CAM112A_map8	0002.CSV	2067.4	0.0161489
CAM112A_map8	0002.CSV	2071.26	0.0161174
CAM112A_map8	0002.CSV	2075.12	0.0161965
CAM112A_map8	0002.CSV	2078.97	0.0162531
CAM112A_map8	0002.CSV	2082.83	0.016354
CAM112A_map8	0002.CSV	2086.69	0.0164175
CAM112A_map8	0002.CSV	2090.55	0.0164813
CAM112A_map8	0002.CSV	2094.4	0.0164626
CAM112A_map8	0002.CSV	2098.26	0.01648
CAM112A_map8	0002.CSV	2102.12	0.0165112
CAM112A_map8	0002.CSV	2105.97	0.0166222
CAM112A_map8	0002.CSV	2109.83	0.0166415
CAM112A_map8	0002.CSV	2113.69	0.01671
CAM112A_map8	0002.CSV	2117.55	0.016758
CAM112A_map8	0002.CSV	2121.4	0.0168574
CAM112A_map8	0002.CSV	2125.26	0.0169864
CAM112A_map8	0002.CSV	2129.12	0.0171255
CAM112A_map8	0002.CSV	2132.97	0.0171658
CAM112A_map8	0002.CSV	2136.83	0.0172282
CAM112A_map8	0002.CSV	2140.69	0.0172085
CAM112A_map8	0002.CSV	2144.55	0.0172514
CAM112A_map8	0002.CSV	2148.4	0.0173116
CAM112A_map8	0002.CSV	2152.26	0.0173659
CAM112A_map8	0002.CSV	2156.12	0.0173128
CAM112A_map8	0002.CSV	2159.97	0.0173151
CAM112A_map8	0002.CSV	2163.83	0.0173029
CAM112A_map8	0002.CSV	2167.69	0.0173342
CAM112A_map8	0002.CSV	2171.55	0.0173454
CAM112A_map8	0002.CSV	2175.4	0.0173886
CAM112A_map8	0002.CSV	2179.26	0.0174399
CAM112A_map8	0002.CSV	2183.12	0.0175104
CAM112A_map8	0002.CSV	2186.97	0.0174703
CAM112A_map8	0002.CSV	2190.83	0.0174977
CAM112A_map8	0002.CSV	2194.69	0.0175743
CAM112A_map8	0002.CSV	2198.55	0.0176133
CAM112A_map8	0002.CSV	2202.4	0.0175438
CAM112A_map8	0002.CSV	2206.26	0.0175792
CAM112A_map8	0002.CSV	2210.12	0.0176411
CAM112A_map8	0002.CSV	2213.97	0.0176749
CAM112A_map8	0002.CSV	2217.83	0.0176283
CAM112A_map8	0002.CSV	2221.69	0.0176148
CAM112A_map8	0002.CSV	2225.54	0.0176233
CAM112A_map8	0002.CSV	2229.4	0.0176897
CAM112A_map8	0002.CSV	2233.26	0.0177121
CAM112A_map8	0002.CSV	2237.12	0.0177418
CAM112A_map8	0002.CSV	2240.97	0.0177215
CAM112A_map8	0002.CSV	2244.83	0.0177157
CAM112A_map8	0002.CSV	2248.69	0.0177141
CAM112A_map8	0002.CSV	2252.54	0.0177465
CAM112A_map8	0002.CSV	2256.4	0.0177318
CAM112A_map8	0002.CSV	2260.26	0.0177799
CAM112A_map8	0002.CSV	2264.11	0.0177872
CAM112A_map8	0002.CSV	2267.97	0.0178036
CAM112A_map8	0002.CSV	2271.83	0.01782
CAM112A_map8	0002.CSV	2275.69	0.0178562
CAM112A_map8	0002.CSV	2279.54	0.017791
CAM112A_map8	0002.CSV	2283.4	0.0177159
CAM112A_map8	0002.CSV	2287.26	0.0176924
CAM112A_map8	0002.CSV	2291.11	0.0177732
CAM112A_map8	0002.CSV	2294.97	0.0178341
CAM112A_map8	0002.CSV	2298.83	0.0178503
CAM112A_map8	0002.CSV	2302.69	0.0177894
CAM112A_map8	0002.CSV	2306.54	0.0177142
CAM112A_map8	0002.CSV	2310.4	0.0174648
CAM112A_map8	0002.CSV	2314.26	0.0173058
CAM112A_map8	0002.CSV	2318.11	0.016813
CAM112A_map8	0002.CSV	2321.97	0.0157736
CAM112A_map8	0002.CSV	2325.83	0.0145034
CAM112A_map8	0002.CSV	2329.69	0.0136228
CAM112A_map8	0002.CSV	2333.54	0.0125035
CAM112A_map8	0002.CSV	2337.4	0.0114919
CAM112A_map8	0002.CSV	2341.26	0.0117882
CAM112A_map8	0002.CSV	2345.11	0.014537
CAM112A_map8	0002.CSV	2348.97	0.0154057
CAM112A_map8	0002.CSV	2352.83	0.0132987
CAM112A_map8	0002.CSV	2356.69	0.00534048
CAM112A_map8	0002.CSV	2360.54	-0.00103864
CAM112A_map8	0002.CSV	2364.4	0.00326094
CAM112A_map8	0002.CSV	2368.26	0.011201
CAM112A_map8	0002.CSV	2372.11	0.0158868
CAM112A_map8	0002.CSV	2375.97	0.0178866
CAM112A_map8	0002.CSV	2379.83	0.0184844
CAM112A_map8	0002.CSV	2383.69	0.0186026
CAM112A_map8	0002.CSV	2387.54	0.0185102
CAM112A_map8	0002.CSV	2391.4	0.0184047
CAM112A_map8	0002.CSV	2395.26	0.0183679
CAM112A_map8	0002.CSV	2399.11	0.0184205
CAM112A_map8	0002.CSV	2402.97	0.0184424
CAM112A_map8	0002.CSV	2406.83	0.018451
CAM112A_map8	0002.CSV	2410.68	0.0184611
CAM112A_map8	0002.CSV	2414.54	0.0185088
CAM112A_map8	0002.CSV	2418.4	0.0185522
CAM112A_map8	0002.CSV	2422.26	0.0185742
CAM112A_map8	0002.CSV	2426.11	0.0185749
CAM112A_map8	0002.CSV	2429.97	0.0186663
CAM112A_map8	0002.CSV	2433.83	0.0187509
CAM112A_map8	0002.CSV	2437.68	0.0188194
CAM112A_map8	0002.CSV	2441.54	0.0188588
CAM112A_map8	0002.CSV	2445.4	0.0189364
CAM112A_map8	0002.CSV	2449.26	0.0190541
CAM112A_map8	0002.CSV	2453.11	0.0191761
CAM112A_map8	0002.CSV	2456.97	0.0192824
CAM112A_map8	0002.CSV	2460.83	0.0194372
CAM112A_map8	0002.CSV	2464.68	0.0195989
CAM112A_map8	0002.CSV	2468.54	0.0198007
CAM112A_map8	0002.CSV	2472.4	0.0200072
CAM112A_map8	0002.CSV	2476.26	0.0202627
CAM112A_map8	0002.CSV	2480.11	0.0205896
CAM112A_map8	0002.CSV	2483.97	0.021013
CAM112A_map8	0002.CSV	2487.83	0.0215185
CAM112A_map8	0002.CSV	2491.68	0.0221372
CAM112A_map8	0002.CSV	2495.54	0.0228974
CAM112A_map8	0002.CSV	2499.4	0.0238032
CAM112A_map8	0002.CSV	2503.26	0.0246384
CAM112A_map8	0002.CSV	2507.11	0.0252822
CAM112A_map8	0002.CSV	2510.97	0.0256211
CAM112A_map8	0002.CSV	2514.83	0.0256131
CAM112A_map8	0002.CSV	2518.68	0.0252697
CAM112A_map8	0002.CSV	2522.54	0.024744
CAM112A_map8	0002.CSV	2526.4	0.0240157
CAM112A_map8	0002.CSV	2530.26	0.023216
CAM112A_map8	0002.CSV	2534.11	0.0225398
CAM112A_map8	0002.CSV	2537.97	0.0220017
CAM112A_map8	0002.CSV	2541.83	0.021557
CAM112A_map8	0002.CSV	2545.68	0.0212325
CAM112A_map8	0002.CSV	2549.54	0.0209781
CAM112A_map8	0002.CSV	2553.4	0.0208233
CAM112A_map8	0002.CSV	2557.26	0.0207399
CAM112A_map8	0002.CSV	2561.11	0.0206877
CAM112A_map8	0002.CSV	2564.97	0.0206002
CAM112A_map8	0002.CSV	2568.83	0.0205688
CAM112A_map8	0002.CSV	2572.68	0.0205961
CAM112A_map8	0002.CSV	2576.54	0.0206005
CAM112A_map8	0002.CSV	2580.4	0.020532
CAM112A_map8	0002.CSV	2584.25	0.020453
CAM112A_map8	0002.CSV	2588.11	0.0204233
CAM112A_map8	0002.CSV	2591.97	0.020432
CAM112A_map8	0002.CSV	2595.83	0.0203078
CAM112A_map8	0002.CSV	2599.68	0.0202148
CAM112A_map8	0002.CSV	2603.54	0.0201548
CAM112A_map8	0002.CSV	2607.4	0.0200774
CAM112A_map8	0002.CSV	2611.25	0.0199688
CAM112A_map8	0002.CSV	2615.11	0.0198513
CAM112A_map8	0002.CSV	2618.97	0.0196618
CAM112A_map8	0002.CSV	2622.82	0.0195807
CAM112A_map8	0002.CSV	2626.68	0.0195511
CAM112A_map8	0002.CSV	2630.54	0.0194336
CAM112A_map8	0002.CSV	2634.4	0.0193639
CAM112A_map8	0002.CSV	2638.25	0.0193277
CAM112A_map8	0002.CSV	2642.11	0.0191203
CAM112A_map8	0002.CSV	2645.97	0.0189371
CAM112A_map8	0002.CSV	2649.82	0.0188735
CAM112A_map8	0002.CSV	2653.68	0.0188777
CAM112A_map8	0002.CSV	2657.54	0.0188743
CAM112A_map8	0002.CSV	2661.4	0.0188734
CAM112A_map8	0002.CSV	2665.25	0.0188611
CAM112A_map8	0002.CSV	2669.11	0.0189575
CAM112A_map8	0002.CSV	2672.97	0.0192068
CAM112A_map8	0002.CSV	2676.82	0.0195147
CAM112A_map8	0002.CSV	2680.68	0.0194805
CAM112A_map8	0002.CSV	2684.54	0.0190913
CAM112A_map8	0002.CSV	2688.4	0.0189328
CAM112A_map8	0002.CSV	2692.25	0.0189849
CAM112A_map8	0002.CSV	2696.11	0.0190615
CAM112A_map8	0002.CSV	2699.97	0.0191038
CAM112A_map8	0002.CSV	2703.82	0.0190629
CAM112A_map8	0002.CSV	2707.68	0.0191326
CAM112A_map8	0002.CSV	2711.54	0.0191577
CAM112A_map8	0002.CSV	2715.4	0.0191358
CAM112A_map8	0002.CSV	2719.25	0.0193651
CAM112A_map8	0002.CSV	2723.11	0.0198349
CAM112A_map8	0002.CSV	2726.97	0.0198499
CAM112A_map8	0002.CSV	2730.82	0.0194712
CAM112A_map8	0002.CSV	2734.68	0.01949
CAM112A_map8	0002.CSV	2738.54	0.0195753
CAM112A_map8	0002.CSV	2742.4	0.019602
CAM112A_map8	0002.CSV	2746.25	0.0199371
CAM112A_map8	0002.CSV	2750.11	0.0199527
CAM112A_map8	0002.CSV	2753.97	0.0196499
CAM112A_map8	0002.CSV	2757.82	0.0195743
CAM112A_map8	0002.CSV	2761.68	0.0195055
CAM112A_map8	0002.CSV	2765.54	0.0194537
CAM112A_map8	0002.CSV	2769.39	0.0196606
CAM112A_map8	0002.CSV	2773.25	0.0201707
CAM112A_map8	0002.CSV	2777.11	0.0201188
CAM112A_map8	0002.CSV	2780.97	0.0197917
CAM112A_map8	0002.CSV	2784.82	0.0200672
CAM112A_map8	0002.CSV	2788.68	0.0207504
CAM112A_map8	0002.CSV	2792.54	0.0210148
CAM112A_map8	0002.CSV	2796.39	0.0210328
CAM112A_map8	0002.CSV	2800.25	0.0208215
CAM112A_map8	0002.CSV	2804.11	0.0205889
CAM112A_map8	0002.CSV	2807.97	0.0209592
CAM112A_map8	0002.CSV	2811.82	0.0211181
CAM112A_map8	0002.CSV	2815.68	0.0210468
CAM112A_map8	0002.CSV	2819.54	0.0213102
CAM112A_map8	0002.CSV	2823.39	0.0216603
CAM112A_map8	0002.CSV	2827.25	0.0219621
CAM112A_map8	0002.CSV	2831.11	0.0227132
CAM112A_map8	0002.CSV	2834.97	0.0239643
CAM112A_map8	0002.CSV	2838.82	0.025279
CAM112A_map8	0002.CSV	2842.68	0.0267362
CAM112A_map8	0002.CSV	2846.54	0.0292073
CAM112A_map8	0002.CSV	2850.39	0.0311368
CAM112A_map8	0002.CSV	2854.25	0.0312874
CAM112A_map8	0002.CSV	2858.11	0.0305328
CAM112A_map8	0002.CSV	2861.97	0.0293033
CAM112A_map8	0002.CSV	2865.82	0.0284124
CAM112A_map8	0002.CSV	2869.68	0.0284281
CAM112A_map8	0002.CSV	2873.54	0.0282907
CAM112A_map8	0002.CSV	2877.39	0.0272932
CAM112A_map8	0002.CSV	2881.25	0.0264822
CAM112A_map8	0002.CSV	2885.11	0.0263629
CAM112A_map8	0002.CSV	2888.97	0.0267502
CAM112A_map8	0002.CSV	2892.82	0.0276065
CAM112A_map8	0002.CSV	2896.68	0.0283516
CAM112A_map8	0002.CSV	2900.54	0.0288927
CAM112A_map8	0002.CSV	2904.39	0.0299442
CAM112A_map8	0002.CSV	2908.25	0.0317327
CAM112A_map8	0002.CSV	2912.11	0.0343873
CAM112A_map8	0002.CSV	2915.97	0.0370396
CAM112A_map8	0002.CSV	2919.82	0.0383086
CAM112A_map8	0002.CSV	2923.68	0.0381962
CAM112A_map8	0002.CSV	2927.54	0.0374599
CAM112A_map8	0002.CSV	2931.39	0.0355728
CAM112A_map8	0002.CSV	2935.25	0.0329065
CAM112A_map8	0002.CSV	2939.11	0.0309886
CAM112A_map8	0002.CSV	2942.96	0.030228
CAM112A_map8	0002.CSV	2946.82	0.0298021
CAM112A_map8	0002.CSV	2950.68	0.0294072
CAM112A_map8	0002.CSV	2954.54	0.0290018
CAM112A_map8	0002.CSV	2958.39	0.0283783
CAM112A_map8	0002.CSV	2962.25	0.0275745
CAM112A_map8	0002.CSV	2966.11	0.026322
CAM112A_map8	0002.CSV	2969.96	0.0254196
CAM112A_map8	0002.CSV	2973.82	0.0251255
CAM112A_map8	0002.CSV	2977.68	0.0249441
CAM112A_map8	0002.CSV	2981.53	0.0243222
CAM112A_map8	0002.CSV	2985.39	0.0233452
CAM112A_map8	0002.CSV	2989.25	0.0230054
CAM112A_map8	0002.CSV	2993.11	0.0230283
CAM112A_map8	0002.CSV	2996.96	0.0226961
CAM112A_map8	0002.CSV	3000.82	0.0222118
CAM112A_map8	0002.CSV	3004.68	0.0219355
CAM112A_map8	0002.CSV	3008.53	0.0220853
CAM112A_map8	0002.CSV	3012.39	0.0223467
CAM112A_map8	0002.CSV	3016.25	0.0222841
CAM112A_map8	0002.CSV	3020.11	0.0220443
CAM112A_map8	0002.CSV	3023.96	0.0219275
CAM112A_map8	0002.CSV	3027.82	0.0219442
CAM112A_map8	0002.CSV	3031.68	0.0221662
CAM112A_map8	0002.CSV	3035.53	0.0222351
CAM112A_map8	0002.CSV	3039.39	0.0222179
CAM112A_map8	0002.CSV	3043.25	0.0222878
CAM112A_map8	0002.CSV	3047.11	0.0221984
CAM112A_map8	0002.CSV	3050.96	0.0221661
CAM112A_map8	0002.CSV	3054.82	0.022113
CAM112A_map8	0002.CSV	3058.68	0.0219905
CAM112A_map8	0002.CSV	3062.53	0.0220766
CAM112A_map8	0002.CSV	3066.39	0.0222861
CAM112A_map8	0002.CSV	3070.25	0.022173
CAM112A_map8	0002.CSV	3074.11	0.0222069
CAM112A_map8	0002.CSV	3077.96	0.0225081
CAM112A_map8	0002.CSV	3081.82	0.0226968
CAM112A_map8	0002.CSV	3085.68	0.0226227
CAM112A_map8	0002.CSV	3089.53	0.0224126
CAM112A_map8	0002.CSV	3093.39	0.0221528
CAM112A_map8	0002.CSV	3097.25	0.0221409
CAM112A_map8	0002.CSV	3101.11	0.0222364
CAM112A_map8	0002.CSV	3104.96	0.0223113
CAM112A_map8	0002.CSV	3108.82	0.0224813
CAM112A_map8	0002.CSV	3112.68	0.0226164
CAM112A_map8	0002.CSV	3116.53	0.0228218
CAM112A_map8	0002.CSV	3120.39	0.0227907
CAM112A_map8	0002.CSV	3124.25	0.0225293
CAM112A_map8	0002.CSV	3128.11	0.0224013
CAM112A_map8	0002.CSV	3131.96	0.0223371
CAM112A_map8	0002.CSV	3135.82	0.0225001
CAM112A_map8	0002.CSV	3139.68	0.0226427
CAM112A_map8	0002.CSV	3143.53	0.0223953
CAM112A_map8	0002.CSV	3147.39	0.0224382
CAM112A_map8	0002.CSV	3151.25	0.0227833
CAM112A_map8	0002.CSV	3155.1	0.0227549
CAM112A_map8	0002.CSV	3158.96	0.0224077
CAM112A_map8	0002.CSV	3162.82	0.0222582
CAM112A_map8	0002.CSV	3166.68	0.0222605
CAM112A_map8	0002.CSV	3170.53	0.022341
CAM112A_map8	0002.CSV	3174.39	0.0224015
CAM112A_map8	0002.CSV	3178.25	0.0225157
CAM112A_map8	0002.CSV	3182.1	0.0226375
CAM112A_map8	0002.CSV	3185.96	0.022812
CAM112A_map8	0002.CSV	3189.82	0.0228798
CAM112A_map8	0002.CSV	3193.68	0.0227284
CAM112A_map8	0002.CSV	3197.53	0.022758
CAM112A_map8	0002.CSV	3201.39	0.0229689
CAM112A_map8	0002.CSV	3205.25	0.0229882
CAM112A_map8	0002.CSV	3209.1	0.0229212
CAM112A_map8	0002.CSV	3212.96	0.023094
CAM112A_map8	0002.CSV	3216.82	0.0232618
CAM112A_map8	0002.CSV	3220.68	0.0232426
CAM112A_map8	0002.CSV	3224.53	0.0232362
CAM112A_map8	0002.CSV	3228.39	0.0234347
CAM112A_map8	0002.CSV	3232.25	0.0238317
CAM112A_map8	0002.CSV	3236.1	0.0237546
CAM112A_map8	0002.CSV	3239.96	0.0234855
CAM112A_map8	0002.CSV	3243.82	0.0236648
CAM112A_map8	0002.CSV	3247.68	0.0237666
CAM112A_map8	0002.CSV	3251.53	0.0236512
CAM112A_map8	0002.CSV	3255.39	0.023788
CAM112A_map8	0002.CSV	3259.25	0.0237642
CAM112A_map8	0002.CSV	3263.1	0.0237369
CAM112A_map8	0002.CSV	3266.96	0.0239485
CAM112A_map8	0002.CSV	3270.82	0.0242509
CAM112A_map8	0002.CSV	3274.68	0.0242268
CAM112A_map8	0002.CSV	3278.53	0.0239139
CAM112A_map8	0002.CSV	3282.39	0.023766
CAM112A_map8	0002.CSV	3286.25	0.0238386
CAM112A_map8	0002.CSV	3290.1	0.0241887
CAM112A_map8	0002.CSV	3293.96	0.0244957
CAM112A_map8	0002.CSV	3297.82	0.0243782
CAM112A_map8	0002.CSV	3301.67	0.0243155
CAM112A_map8	0002.CSV	3305.53	0.0244818
CAM112A_map8	0002.CSV	3309.39	0.0244356
CAM112A_map8	0002.CSV	3313.25	0.0240081
CAM112A_map8	0002.CSV	3317.1	0.023684
CAM112A_map8	0002.CSV	3320.96	0.0238216
CAM112A_map8	0002.CSV	3324.82	0.0240684
CAM112A_map8	0002.CSV	3328.67	0.023903
CAM112A_map8	0002.CSV	3332.53	0.0238375
CAM112A_map8	0002.CSV	3336.39	0.0242207
CAM112A_map8	0002.CSV	3340.24	0.0244645
CAM112A_map8	0002.CSV	3344.1	0.0243331
CAM112A_map8	0002.CSV	3347.96	0.024293
CAM112A_map8	0002.CSV	3351.82	0.0242092
CAM112A_map8	0002.CSV	3355.67	0.023915
CAM112A_map8	0002.CSV	3359.53	0.024045
CAM112A_map8	0002.CSV	3363.39	0.0244159
CAM112A_map8	0002.CSV	3367.24	0.0246466
CAM112A_map8	0002.CSV	3371.1	0.0244894
CAM112A_map8	0002.CSV	3374.96	0.0242212
CAM112A_map8	0002.CSV	3378.82	0.024098
CAM112A_map8	0002.CSV	3382.67	0.0239409
CAM112A_map8	0002.CSV	3386.53	0.0240523
CAM112A_map8	0002.CSV	3390.39	0.0243362
CAM112A_map8	0002.CSV	3394.24	0.0244609
CAM112A_map8	0002.CSV	3398.1	0.0244014
CAM112A_map8	0002.CSV	3401.96	0.0242723
CAM112A_map8	0002.CSV	3405.82	0.0241297
CAM112A_map8	0002.CSV	3409.67	0.0240857
CAM112A_map8	0002.CSV	3413.53	0.0238048
CAM112A_map8	0002.CSV	3417.39	0.0234294
CAM112A_map8	0002.CSV	3421.24	0.023415
CAM112A_map8	0002.CSV	3425.1	0.0236041
CAM112A_map8	0002.CSV	3428.96	0.0237855
CAM112A_map8	0002.CSV	3432.82	0.0239507
CAM112A_map8	0002.CSV	3436.67	0.0238098
CAM112A_map8	0002.CSV	3440.53	0.0231893
CAM112A_map8	0002.CSV	3444.39	0.0228513
CAM112A_map8	0002.CSV	3448.24	0.0228937
CAM112A_map8	0002.CSV	3452.1	0.0227327
CAM112A_map8	0002.CSV	3455.96	0.0227019
CAM112A_map8	0002.CSV	3459.82	0.0228449
CAM112A_map8	0002.CSV	3463.67	0.0230444
CAM112A_map8	0002.CSV	3467.53	0.0232047
CAM112A_map8	0002.CSV	3471.39	0.0227743
CAM112A_map8	0002.CSV	3475.24	0.0223747
CAM112A_map8	0002.CSV	3479.1	0.0223865
CAM112A_map8	0002.CSV	3482.96	0.0222837
CAM112A_map8	0002.CSV	3486.82	0.022309
CAM112A_map8	0002.CSV	3490.67	0.0223307
CAM112A_map8	0002.CSV	3494.53	0.0224138
CAM112A_map8	0002.CSV	3498.39	0.0222819
CAM112A_map8	0002.CSV	3502.24	0.0219908
CAM112A_map8	0002.CSV	3506.1	0.021669
CAM112A_map8	0002.CSV	3509.96	0.0216315
CAM112A_map8	0002.CSV	3513.81	0.0217488
CAM112A_map8	0002.CSV	3517.67	0.0214631
CAM112A_map8	0002.CSV	3521.53	0.0214802
CAM112A_map8	0002.CSV	3525.39	0.021508
CAM112A_map8	0002.CSV	3529.24	0.0212539
CAM112A_map8	0002.CSV	3533.1	0.0212316
CAM112A_map8	0002.CSV	3536.96	0.0213569
CAM112A_map8	0002.CSV	3540.81	0.0213402
CAM112A_map8	0002.CSV	3544.67	0.0214195
CAM112A_map8	0002.CSV	3548.53	0.0212751
CAM112A_map8	0002.CSV	3552.39	0.0209497
CAM112A_map8	0002.CSV	3556.24	0.020824
CAM112A_map8	0002.CSV	3560.1	0.0206157
CAM112A_map8	0002.CSV	3563.96	0.0203107
CAM112A_map8	0002.CSV	3567.81	0.0206352
CAM112A_map8	0002.CSV	3571.67	0.020562
CAM112A_map8	0002.CSV	3575.53	0.0201943
CAM112A_map8	0002.CSV	3579.39	0.0203601
CAM112A_map8	0002.CSV	3583.24	0.0203025
CAM112A_map8	0002.CSV	3587.1	0.0202435
CAM112A_map8	0002.CSV	3590.96	0.0202204
CAM112A_map8	0002.CSV	3594.81	0.0200218
CAM112A_map8	0002.CSV	3598.67	0.0201256
CAM112A_map8	0002.CSV	3602.53	0.0199522
CAM112A_map8	0002.CSV	3606.39	0.0193577
CAM112A_map8	0002.CSV	3610.24	0.0191198
CAM112A_map8	0002.CSV	3614.1	0.0192073
CAM112A_map8	0002.CSV	3617.96	0.0194621
CAM112A_map8	0002.CSV	3621.81	0.0195631
CAM112A_map8	0002.CSV	3625.67	0.018881
CAM112A_map8	0002.CSV	3629.53	0.0188476
CAM112A_map8	0002.CSV	3633.39	0.0194758
CAM112A_map8	0002.CSV	3637.24	0.0192407
CAM112A_map8	0002.CSV	3641.1	0.0189679
CAM112A_map8	0002.CSV	3644.96	0.0184489
CAM112A_map8	0002.CSV	3648.81	0.0188496
CAM112A_map8	0002.CSV	3652.67	0.0196603
CAM112A_map8	0002.CSV	3656.53	0.0197614
CAM112A_map8	0002.CSV	3660.38	0.019668
CAM112A_map8	0002.CSV	3664.24	0.0188265
CAM112A_map8	0002.CSV	3668.1	0.0180769
CAM112A_map8	0002.CSV	3671.96	0.0181636
CAM112A_map8	0002.CSV	3675.81	0.0187602
CAM112A_map8	0002.CSV	3679.67	0.0190507
CAM112A_map8	0002.CSV	3683.53	0.0187267
CAM112A_map8	0002.CSV	3687.38	0.0187848
CAM112A_map8	0002.CSV	3691.24	0.0195424
CAM112A_map8	0002.CSV	3695.1	0.019206
CAM112A_map8	0002.CSV	3698.95	0.0186587
CAM112A_map8	0002.CSV	3702.81	0.0185544
CAM112A_map8	0002.CSV	3706.67	0.0181987
CAM112A_map8	0002.CSV	3710.53	0.0181662
CAM112A_map8	0002.CSV	3714.38	0.0187339
CAM112A_map8	0002.CSV	3718.24	0.0183458
CAM112A_map8	0002.CSV	3722.1	0.0181619
CAM112A_map8	0002.CSV	3725.95	0.0183444
CAM112A_map8	0002.CSV	3729.81	0.0180936
CAM112A_map8	0002.CSV	3733.67	0.0182455
CAM112A_map8	0002.CSV	3737.53	0.0192664
CAM112A_map8	0002.CSV	3741.38	0.0186342
CAM112A_map8	0002.CSV	3745.24	0.0177358
CAM112A_map8	0002.CSV	3749.1	0.0175349
CAM112A_map8	0002.CSV	3752.95	0.018408
CAM112A_map8	0002.CSV	3756.81	0.0185609
CAM112A_map8	0002.CSV	3760.67	0.0185212
CAM112A_map8	0002.CSV	3764.53	0.0183861
CAM112A_map8	0002.CSV	3768.38	0.0184514
CAM112A_map8	0002.CSV	3772.24	0.0185379
CAM112A_map8	0002.CSV	3776.1	0.0183678
CAM112A_map8	0002.CSV	3779.95	0.0185181
CAM112A_map8	0002.CSV	3783.81	0.0185567
CAM112A_map8	0002.CSV	3787.67	0.0184922
CAM112A_map8	0002.CSV	3791.53	0.0182189
CAM112A_map8	0002.CSV	3795.38	0.0177967
CAM112A_map8	0002.CSV	3799.24	0.0177925
CAM112A_map8	0002.CSV	3803.1	0.0183332
CAM112A_map8	0002.CSV	3806.95	0.0187583
CAM112A_map8	0002.CSV	3810.81	0.0184403
CAM112A_map8	0002.CSV	3814.67	0.0178973
CAM112A_map8	0002.CSV	3818.53	0.0180005
CAM112A_map8	0002.CSV	3822.38	0.0186328
CAM112A_map8	0002.CSV	3826.24	0.0185717
CAM112A_map8	0002.CSV	3830.1	0.0182992
CAM112A_map8	0002.CSV	3833.95	0.018267
CAM112A_map8	0002.CSV	3837.81	0.0186233
CAM112A_map8	0002.CSV	3841.67	0.0192423
CAM112A_map8	0002.CSV	3845.53	0.0188705
CAM112A_map8	0002.CSV	3849.38	0.0179185
CAM112A_map8	0002.CSV	3853.24	0.0180219
CAM112A_map8	0002.CSV	3857.1	0.0187277
CAM112A_map8	0002.CSV	3860.95	0.0182355
CAM112A_map8	0002.CSV	3864.81	0.0182752
CAM112A_map8	0002.CSV	3868.67	0.018496
CAM112A_map8	0002.CSV	3872.52	0.0189268
CAM112A_map8	0002.CSV	3876.38	0.0187714
CAM112A_map8	0002.CSV	3880.24	0.0185245
CAM112A_map8	0002.CSV	3884.1	0.0189456
CAM112A_map8	0002.CSV	3887.95	0.0189364
CAM112A_map8	0002.CSV	3891.81	0.0187935
CAM112A_map8	0002.CSV	3895.67	0.018461
CAM112A_map8	0002.CSV	3899.52	0.018185
CAM112A_map8	0002.CSV	3903.38	0.0189942
CAM112A_map8	0002.CSV	3907.24	0.0191513
CAM112A_map8	0002.CSV	3911.1	0.0185684
CAM112A_map8	0002.CSV	3914.95	0.0182745
CAM112A_map8	0002.CSV	3918.81	0.0185987
CAM112A_map8	0002.CSV	3922.67	0.0188116
CAM112A_map8	0002.CSV	3926.52	0.0187513
CAM112A_map8	0002.CSV	3930.38	0.0187486
CAM112A_map8	0002.CSV	3934.24	0.0189207
CAM112A_map8	0002.CSV	3938.09	0.0185732
CAM112A_map8	0002.CSV	3941.95	0.0185158
CAM112A_map8	0002.CSV	3945.81	0.0186528
CAM112A_map8	0002.CSV	3949.67	0.0187051
CAM112A_map8	0002.CSV	3953.52	0.0186487
CAM112A_map8	0002.CSV	3957.38	0.0185095
CAM112A_map8	0002.CSV	3961.24	0.0185574
CAM112A_map8	0002.CSV	3965.09	0.0185588
CAM112A_map8	0002.CSV	3968.95	0.018518
CAM112A_map8	0002.CSV	3972.81	0.0185539
CAM112A_map8	0002.CSV	3976.67	0.0186021
CAM112A_map8	0002.CSV	3980.52	0.0185632
CAM112A_map8	0002.CSV	3984.38	0.018546
CAM112A_map8	0002.CSV	3988.24	0.0184985
CAM112A_map8	0002.CSV	3992.09	0.0184255
CAM112A_map8	0002.CSV	3995.95	0.0184024
CAM112A_map8	0002.CSV	3999.81	0.0184176
CAM112A_map8	0003.CSV	674.992	0.0299824
CAM112A_map8	0003.CSV	678.849	0.0329348
CAM112A_map8	0003.CSV	682.706	0.0338785
CAM112A_map8	0003.CSV	686.563	0.0361594
CAM112A_map8	0003.CSV	690.42	0.0380586
CAM112A_map8	0003.CSV	694.277	0.0440465
CAM112A_map8	0003.CSV	698.134	0.0506181
CAM112A_map8	0003.CSV	701.991	0.0626292
CAM112A_map8	0003.CSV	705.849	0.0874976
CAM112A_map8	0003.CSV	709.706	0.123732
CAM112A_map8	0003.CSV	713.563	0.121091
CAM112A_map8	0003.CSV	717.42	0.0781595
CAM112A_map8	0003.CSV	721.277	0.0451012
CAM112A_map8	0003.CSV	725.134	0.0340432
CAM112A_map8	0003.CSV	728.991	0.0303438
CAM112A_map8	0003.CSV	732.848	0.0296624
CAM112A_map8	0003.CSV	736.705	0.0287093
CAM112A_map8	0003.CSV	740.562	0.0290519
CAM112A_map8	0003.CSV	744.42	0.0293799
CAM112A_map8	0003.CSV	748.277	0.0307817
CAM112A_map8	0003.CSV	752.134	0.0313002
CAM112A_map8	0003.CSV	755.991	0.0328909
CAM112A_map8	0003.CSV	759.848	0.0337257
CAM112A_map8	0003.CSV	763.705	0.0353316
CAM112A_map8	0003.CSV	767.562	0.0359916
CAM112A_map8	0003.CSV	771.419	0.0373459
CAM112A_map8	0003.CSV	775.276	0.0379572
CAM112A_map8	0003.CSV	779.133	0.038788
CAM112A_map8	0003.CSV	782.99	0.0387794
CAM112A_map8	0003.CSV	786.848	0.0393886
CAM112A_map8	0003.CSV	790.705	0.0393222
CAM112A_map8	0003.CSV	794.562	0.0403877
CAM112A_map8	0003.CSV	798.419	0.0413297
CAM112A_map8	0003.CSV	802.276	0.0427655
CAM112A_map8	0003.CSV	806.133	0.0434789
CAM112A_map8	0003.CSV	809.99	0.0450708
CAM112A_map8	0003.CSV	813.847	0.0465192
CAM112A_map8	0003.CSV	817.704	0.0487986
CAM112A_map8	0003.CSV	821.562	0.051025
CAM112A_map8	0003.CSV	825.419	0.0543571
CAM112A_map8	0003.CSV	829.276	0.0576269
CAM112A_map8	0003.CSV	833.133	0.0619346
CAM112A_map8	0003.CSV	836.99	0.0664454
CAM112A_map8	0003.CSV	840.847	0.0746158
CAM112A_map8	0003.CSV	844.704	0.087805
CAM112A_map8	0003.CSV	848.561	0.0972508
CAM112A_map8	0003.CSV	852.418	0.102056
CAM112A_map8	0003.CSV	856.275	0.121416
CAM112A_map8	0003.CSV	860.132	0.16198
CAM112A_map8	0003.CSV	863.99	0.237922
CAM112A_map8	0003.CSV	867.847	0.336218
CAM112A_map8	0003.CSV	871.704	0.364588
CAM112A_map8	0003.CSV	875.561	0.294665
CAM112A_map8	0003.CSV	879.418	0.209628
CAM112A_map8	0003.CSV	883.275	0.128248
CAM112A_map8	0003.CSV	887.132	0.0611673
CAM112A_map8	0003.CSV	890.989	0.0299523
CAM112A_map8	0003.CSV	894.846	0.0247489
CAM112A_map8	0003.CSV	898.703	0.0245087
CAM112A_map8	0003.CSV	902.561	0.0253954
CAM112A_map8	0003.CSV	906.418	0.0258807
CAM112A_map8	0003.CSV	910.275	0.0269503
CAM112A_map8	0003.CSV	914.132	0.0275301
CAM112A_map8	0003.CSV	917.989	0.0287364
CAM112A_map8	0003.CSV	921.846	0.0295901
CAM112A_map8	0003.CSV	925.703	0.0308572
CAM112A_map8	0003.CSV	929.56	0.0315866
CAM112A_map8	0003.CSV	933.417	0.0327507
CAM112A_map8	0003.CSV	937.274	0.0331944
CAM112A_map8	0003.CSV	941.131	0.0339121
CAM112A_map8	0003.CSV	944.989	0.0342018
CAM112A_map8	0003.CSV	948.846	0.0349411
CAM112A_map8	0003.CSV	952.703	0.0354321
CAM112A_map8	0003.CSV	956.56	0.0364587
CAM112A_map8	0003.CSV	960.417	0.0367885
CAM112A_map8	0003.CSV	964.274	0.0374351
CAM112A_map8	0003.CSV	968.131	0.0379086
CAM112A_map8	0003.CSV	971.988	0.0390008
CAM112A_map8	0003.CSV	975.845	0.0397145
CAM112A_map8	0003.CSV	979.702	0.0407119
CAM112A_map8	0003.CSV	983.559	0.0413613
CAM112A_map8	0003.CSV	987.417	0.0424784
CAM112A_map8	0003.CSV	991.274	0.0432297
CAM112A_map8	0003.CSV	995.131	0.0443761
CAM112A_map8	0003.CSV	998.988	0.0450734
CAM112A_map8	0003.CSV	1002.85	0.0461188
CAM112A_map8	0003.CSV	1006.7	0.0467425
CAM112A_map8	0003.CSV	1010.56	0.0477577
CAM112A_map8	0003.CSV	1014.42	0.0484217
CAM112A_map8	0003.CSV	1018.27	0.0494973
CAM112A_map8	0003.CSV	1022.13	0.0501207
CAM112A_map8	0003.CSV	1025.99	0.0510796
CAM112A_map8	0003.CSV	1029.85	0.051536
CAM112A_map8	0003.CSV	1033.7	0.0525171
CAM112A_map8	0003.CSV	1037.56	0.0532672
CAM112A_map8	0003.CSV	1041.42	0.0545397
CAM112A_map8	0003.CSV	1045.27	0.0552207
CAM112A_map8	0003.CSV	1049.13	0.0562304
CAM112A_map8	0003.CSV	1052.99	0.0570184
CAM112A_map8	0003.CSV	1056.84	0.0585894
CAM112A_map8	0003.CSV	1060.7	0.0601234
CAM112A_map8	0003.CSV	1064.56	0.0622637
CAM112A_map8	0003.CSV	1068.42	0.0639176
CAM112A_map8	0003.CSV	1072.27	0.0659711
CAM112A_map8	0003.CSV	1076.13	0.0677091
CAM112A_map8	0003.CSV	1079.99	0.0701769
CAM112A_map8	0003.CSV	1083.84	0.0721862
CAM112A_map8	0003.CSV	1087.7	0.0735589
CAM112A_map8	0003.CSV	1091.56	0.0725344
CAM112A_map8	0003.CSV	1095.41	0.0709588
CAM112A_map8	0003.CSV	1099.27	0.0697362
CAM112A_map8	0003.CSV	1103.13	0.0700504
CAM112A_map8	0003.CSV	1106.99	0.0707191
CAM112A_map8	0003.CSV	1110.84	0.0722057
CAM112A_map8	0003.CSV	1114.7	0.0729582
CAM112A_map8	0003.CSV	1118.56	0.073674
CAM112A_map8	0003.CSV	1122.41	0.0740305
CAM112A_map8	0003.CSV	1126.27	0.0749159
CAM112A_map8	0003.CSV	1130.13	0.0753089
CAM112A_map8	0003.CSV	1133.99	0.0761028
CAM112A_map8	0003.CSV	1137.84	0.0767614
CAM112A_map8	0003.CSV	1141.7	0.0779323
CAM112A_map8	0003.CSV	1145.56	0.0787298
CAM112A_map8	0003.CSV	1149.41	0.0800344
CAM112A_map8	0003.CSV	1153.27	0.0811777
CAM112A_map8	0003.CSV	1157.13	0.0828771
CAM112A_map8	0003.CSV	1160.99	0.0841601
CAM112A_map8	0003.CSV	1164.84	0.0855387
CAM112A_map8	0003.CSV	1168.7	0.0860112
CAM112A_map8	0003.CSV	1172.56	0.0865581
CAM112A_map8	0003.CSV	1176.41	0.0864604
CAM112A_map8	0003.CSV	1180.27	0.0866275
CAM112A_map8	0003.CSV	1184.13	0.0864
CAM112A_map8	0003.CSV	1187.99	0.0864904
CAM112A_map8	0003.CSV	1191.84	0.0861391
CAM112A_map8	0003.CSV	1195.7	0.0863554
CAM112A_map8	0003.CSV	1199.56	0.086526
CAM112A_map8	0003.CSV	1203.41	0.0873143
CAM112A_map8	0003.CSV	1207.27	0.0880048
CAM112A_map8	0003.CSV	1211.13	0.0893269
CAM112A_map8	0003.CSV	1214.98	0.090345
CAM112A_map8	0003.CSV	1218.84	0.0919206
CAM112A_map8	0003.CSV	1222.7	0.0933756
CAM112A_map8	0003.CSV	1226.56	0.0954398
CAM112A_map8	0003.CSV	1230.41	0.0972474
CAM112A_map8	0003.CSV	1234.27	0.0996337
CAM112A_map8	0003.CSV	1238.13	0.101729
CAM112A_map8	0003.CSV	1241.98	0.104288
CAM112A_map8	0003.CSV	1245.84	0.106579
CAM112A_map8	0003.CSV	1249.7	0.10947
CAM112A_map8	0003.CSV	1253.56	0.112102
CAM112A_map8	0003.CSV	1257.41	0.115161
CAM112A_map8	0003.CSV	1261.27	0.117769
CAM112A_map8	0003.CSV	1265.13	0.120848
CAM112A_map8	0003.CSV	1268.98	0.123695
CAM112A_map8	0003.CSV	1272.84	0.127412
CAM112A_map8	0003.CSV	1276.7	0.130831
CAM112A_map8	0003.CSV	1280.56	0.13487
CAM112A_map8	0003.CSV	1284.41	0.1386
CAM112A_map8	0003.CSV	1288.27	0.143082
CAM112A_map8	0003.CSV	1292.13	0.147174
CAM112A_map8	0003.CSV	1295.98	0.152085
CAM112A_map8	0003.CSV	1299.84	0.157081
CAM112A_map8	0003.CSV	1303.7	0.163013
CAM112A_map8	0003.CSV	1307.56	0.168974
CAM112A_map8	0003.CSV	1311.41	0.176273
CAM112A_map8	0003.CSV	1315.27	0.183753
CAM112A_map8	0003.CSV	1319.13	0.192323
CAM112A_map8	0003.CSV	1322.98	0.200058
CAM112A_map8	0003.CSV	1326.84	0.208784
CAM112A_map8	0003.CSV	1330.7	0.21823
CAM112A_map8	0003.CSV	1334.56	0.229055
CAM112A_map8	0003.CSV	1338.41	0.242455
CAM112A_map8	0003.CSV	1342.27	0.259918
CAM112A_map8	0003.CSV	1346.13	0.275262
CAM112A_map8	0003.CSV	1349.98	0.29391
CAM112A_map8	0003.CSV	1353.84	0.314352
CAM112A_map8	0003.CSV	1357.7	0.336829
CAM112A_map8	0003.CSV	1361.56	0.363046
CAM112A_map8	0003.CSV	1365.41	0.396301
CAM112A_map8	0003.CSV	1369.27	0.424994
CAM112A_map8	0003.CSV	1373.13	0.460176
CAM112A_map8	0003.CSV	1376.98	0.498981
CAM112A_map8	0003.CSV	1380.84	0.532951
CAM112A_map8	0003.CSV	1384.7	0.561625
CAM112A_map8	0003.CSV	1388.56	0.592123
CAM112A_map8	0003.CSV	1392.41	0.605912
CAM112A_map8	0003.CSV	1396.27	0.605469
CAM112A_map8	0003.CSV	1400.13	0.588563
CAM112A_map8	0003.CSV	1403.98	0.56793
CAM112A_map8	0003.CSV	1407.84	0.533652
CAM112A_map8	0003.CSV	1411.7	0.496239
CAM112A_map8	0003.CSV	1415.55	0.460399
CAM112A_map8	0003.CSV	1419.41	0.424281
CAM112A_map8	0003.CSV	1423.27	0.396341
CAM112A_map8	0003.CSV	1427.12	0.379654
CAM112A_map8	0003.CSV	1430.98	0.362296
CAM112A_map8	0003.CSV	1434.84	0.345919
CAM112A_map8	0003.CSV	1438.7	0.326499
CAM112A_map8	0003.CSV	1442.55	0.31243
CAM112A_map8	0003.CSV	1446.41	0.296792
CAM112A_map8	0003.CSV	1450.27	0.280947
CAM112A_map8	0003.CSV	1454.12	0.267829
CAM112A_map8	0003.CSV	1457.98	0.249306
CAM112A_map8	0003.CSV	1461.84	0.234967
CAM112A_map8	0003.CSV	1465.7	0.224888
CAM112A_map8	0003.CSV	1469.55	0.214404
CAM112A_map8	0003.CSV	1473.41	0.202069
CAM112A_map8	0003.CSV	1477.27	0.188821
CAM112A_map8	0003.CSV	1481.12	0.180927
CAM112A_map8	0003.CSV	1484.98	0.173229
CAM112A_map8	0003.CSV	1488.84	0.164067
CAM112A_map8	0003.CSV	1492.7	0.154521
CAM112A_map8	0003.CSV	1496.55	0.147197
CAM112A_map8	0003.CSV	1500.41	0.138641
CAM112A_map8	0003.CSV	1504.27	0.133445
CAM112A_map8	0003.CSV	1508.12	0.123673
CAM112A_map8	0003.CSV	1511.98	0.11697
CAM112A_map8	0003.CSV	1515.84	0.112268
CAM112A_map8	0003.CSV	1519.7	0.1064
CAM112A_map8	0003.CSV	1523.55	0.0991495
CAM112A_map8	0003.CSV	1527.41	0.094152
CAM112A_map8	0003.CSV	1531.27	0.0897541
CAM112A_map8	0003.CSV	1535.12	0.0862572
CAM112A_map8	0003.CSV	1538.98	0.082054
CAM112A_map8	0003.CSV	1542.84	0.0726109
CAM112A_map8	0003.CSV	1546.7	0.0651651
CAM112A_map8	0003.CSV	1550.55	0.0596956
CAM112A_map8	0003.CSV	1554.41	0.0545137
CAM112A_map8	0003.CSV	1558.27	0.0496963
CAM112A_map8	0003.CSV	1562.12	0.0465271
CAM112A_map8	0003.CSV	1565.98	0.0454594
CAM112A_map8	0003.CSV	1569.84	0.044964
CAM112A_map8	0003.CSV	1573.69	0.045082
CAM112A_map8	0003.CSV	1577.55	0.0443661
CAM112A_map8	0003.CSV	1581.41	0.0420439
CAM112A_map8	0003.CSV	1585.27	0.0389953
CAM112A_map8	0003.CSV	1589.12	0.036136
CAM112A_map8	0003.CSV	1592.98	0.0334916
CAM112A_map8	0003.CSV	1596.84	0.0313462
CAM112A_map8	0003.CSV	1600.69	0.0295259
CAM112A_map8	0003.CSV	1604.55	0.0282408
CAM112A_map8	0003.CSV	1608.41	0.0271423
CAM112A_map8	0003.CSV	1612.27	0.0261855
CAM112A_map8	0003.CSV	1616.12	0.0251701
CAM112A_map8	0003.CSV	1619.98	0.0244521
CAM112A_map8	0003.CSV	1623.84	0.0234703
CAM112A_map8	0003.CSV	1627.69	0.0224439
CAM112A_map8	0003.CSV	1631.55	0.0212219
CAM112A_map8	0003.CSV	1635.41	0.0204176
CAM112A_map8	0003.CSV	1639.27	0.0196539
CAM112A_map8	0003.CSV	1643.12	0.0188888
CAM112A_map8	0003.CSV	1646.98	0.018192
CAM112A_map8	0003.CSV	1650.84	0.0181121
CAM112A_map8	0003.CSV	1654.69	0.0180046
CAM112A_map8	0003.CSV	1658.55	0.0175546
CAM112A_map8	0003.CSV	1662.41	0.0170881
CAM112A_map8	0003.CSV	1666.27	0.0168356
CAM112A_map8	0003.CSV	1670.12	0.0166677
CAM112A_map8	0003.CSV	1673.98	0.0168085
CAM112A_map8	0003.CSV	1677.84	0.0163853
CAM112A_map8	0003.CSV	1681.69	0.0161294
CAM112A_map8	0003.CSV	1685.55	0.0161852
CAM112A_map8	0003.CSV	1689.41	0.0161179
CAM112A_map8	0003.CSV	1693.27	0.015632
CAM112A_map8	0003.CSV	1697.12	0.0157005
CAM112A_map8	0003.CSV	1700.98	0.016085
CAM112A_map8	0003.CSV	1704.84	0.0162971
CAM112A_map8	0003.CSV	1708.69	0.0162633
CAM112A_map8	0003.CSV	1712.55	0.0162625
CAM112A_map8	0003.CSV	1716.41	0.0170792
CAM112A_map8	0003.CSV	1720.27	0.0180988
CAM112A_map8	0003.CSV	1724.12	0.0180345
[truncated: 151,615 more rows]

## Sheet: CAM112_map9
Map	Select spectrum number	Wavenumbers	Absorbance
CAM112A_map9	0001.CSV	674.992	0.0354707
CAM112A_map9	0001.CSV	678.849	0.038016
CAM112A_map9	0001.CSV	682.706	0.0395318
CAM112A_map9	0001.CSV	686.563	0.0444829
CAM112A_map9	0001.CSV	690.42	0.0509879
CAM112A_map9	0001.CSV	694.277	0.0626317
CAM112A_map9	0001.CSV	698.134	0.073506
CAM112A_map9	0001.CSV	701.991	0.0824102
CAM112A_map9	0001.CSV	705.849	0.0973622
CAM112A_map9	0001.CSV	709.706	0.122714
CAM112A_map9	0001.CSV	713.563	0.114218
CAM112A_map9	0001.CSV	717.42	0.073399
CAM112A_map9	0001.CSV	721.277	0.0452167
CAM112A_map9	0001.CSV	725.134	0.0376443
CAM112A_map9	0001.CSV	728.991	0.0361232
CAM112A_map9	0001.CSV	732.848	0.0378204
CAM112A_map9	0001.CSV	736.705	0.0405103
CAM112A_map9	0001.CSV	740.562	0.0437961
CAM112A_map9	0001.CSV	744.42	0.045549
CAM112A_map9	0001.CSV	748.277	0.0473207
CAM112A_map9	0001.CSV	752.134	0.0495331
CAM112A_map9	0001.CSV	755.991	0.052379
CAM112A_map9	0001.CSV	759.848	0.0523734
CAM112A_map9	0001.CSV	763.705	0.0524302
CAM112A_map9	0001.CSV	767.562	0.0528198
CAM112A_map9	0001.CSV	771.419	0.0541081
CAM112A_map9	0001.CSV	775.276	0.0540824
CAM112A_map9	0001.CSV	779.133	0.0533635
CAM112A_map9	0001.CSV	782.99	0.05192
CAM112A_map9	0001.CSV	786.848	0.0520864
CAM112A_map9	0001.CSV	790.705	0.052891
CAM112A_map9	0001.CSV	794.562	0.0542955
CAM112A_map9	0001.CSV	798.419	0.0539883
CAM112A_map9	0001.CSV	802.276	0.0529306
CAM112A_map9	0001.CSV	806.133	0.0508765
CAM112A_map9	0001.CSV	809.99	0.050148
CAM112A_map9	0001.CSV	813.847	0.0502604
CAM112A_map9	0001.CSV	817.704	0.0518083
CAM112A_map9	0001.CSV	821.562	0.0530714
CAM112A_map9	0001.CSV	825.419	0.0550629
CAM112A_map9	0001.CSV	829.276	0.057905
CAM112A_map9	0001.CSV	833.133	0.0627104
CAM112A_map9	0001.CSV	836.99	0.0669682
CAM112A_map9	0001.CSV	840.847	0.0716019
CAM112A_map9	0001.CSV	844.704	0.0793691
CAM112A_map9	0001.CSV	848.561	0.085009
CAM112A_map9	0001.CSV	852.418	0.0873559
CAM112A_map9	0001.CSV	856.275	0.100706
CAM112A_map9	0001.CSV	860.132	0.130131
CAM112A_map9	0001.CSV	863.99	0.187705
CAM112A_map9	0001.CSV	867.847	0.266765
CAM112A_map9	0001.CSV	871.704	0.297196
CAM112A_map9	0001.CSV	875.561	0.246349
CAM112A_map9	0001.CSV	879.418	0.176842
CAM112A_map9	0001.CSV	883.275	0.110357
CAM112A_map9	0001.CSV	887.132	0.0559362
CAM112A_map9	0001.CSV	890.989	0.0308547
CAM112A_map9	0001.CSV	894.846	0.0275914
CAM112A_map9	0001.CSV	898.703	0.0284917
CAM112A_map9	0001.CSV	902.561	0.0302332
CAM112A_map9	0001.CSV	906.418	0.0315201
CAM112A_map9	0001.CSV	910.275	0.0332301
CAM112A_map9	0001.CSV	914.132	0.0344197
CAM112A_map9	0001.CSV	917.989	0.0358941
CAM112A_map9	0001.CSV	921.846	0.0368863
CAM112A_map9	0001.CSV	925.703	0.0384111
CAM112A_map9	0001.CSV	929.56	0.0395952
CAM112A_map9	0001.CSV	933.417	0.0410797
CAM112A_map9	0001.CSV	937.274	0.0419537
CAM112A_map9	0001.CSV	941.131	0.0430852
CAM112A_map9	0001.CSV	944.989	0.0437792
CAM112A_map9	0001.CSV	948.846	0.0449026
CAM112A_map9	0001.CSV	952.703	0.0459211
CAM112A_map9	0001.CSV	956.56	0.047447
CAM112A_map9	0001.CSV	960.417	0.0485174
CAM112A_map9	0001.CSV	964.274	0.0498606
CAM112A_map9	0001.CSV	968.131	0.050853
CAM112A_map9	0001.CSV	971.988	0.052479
CAM112A_map9	0001.CSV	975.845	0.0540227
CAM112A_map9	0001.CSV	979.702	0.055908
CAM112A_map9	0001.CSV	983.559	0.0573221
CAM112A_map9	0001.CSV	987.417	0.0590234
CAM112A_map9	0001.CSV	991.274	0.0602508
CAM112A_map9	0001.CSV	995.131	0.0617673
CAM112A_map9	0001.CSV	998.988	0.0628936
CAM112A_map9	0001.CSV	1002.85	0.0643938
CAM112A_map9	0001.CSV	1006.7	0.0655336
CAM112A_map9	0001.CSV	1010.56	0.0670511
CAM112A_map9	0001.CSV	1014.42	0.0682495
CAM112A_map9	0001.CSV	1018.27	0.0698487
CAM112A_map9	0001.CSV	1022.13	0.071154
CAM112A_map9	0001.CSV	1025.99	0.0727979
CAM112A_map9	0001.CSV	1029.85	0.0740182
CAM112A_map9	0001.CSV	1033.7	0.0757918
CAM112A_map9	0001.CSV	1037.56	0.0771917
CAM112A_map9	0001.CSV	1041.42	0.0781262
CAM112A_map9	0001.CSV	1045.27	0.0781728
CAM112A_map9	0001.CSV	1049.13	0.0791457
CAM112A_map9	0001.CSV	1052.99	0.0808478
CAM112A_map9	0001.CSV	1056.84	0.0839161
CAM112A_map9	0001.CSV	1060.7	0.0868301
CAM112A_map9	0001.CSV	1064.56	0.0894716
CAM112A_map9	0001.CSV	1068.42	0.0904955
CAM112A_map9	0001.CSV	1072.27	0.0909207
CAM112A_map9	0001.CSV	1076.13	0.0905818
CAM112A_map9	0001.CSV	1079.99	0.0907672
CAM112A_map9	0001.CSV	1083.84	0.0908096
CAM112A_map9	0001.CSV	1087.7	0.0905691
CAM112A_map9	0001.CSV	1091.56	0.0886238
CAM112A_map9	0001.CSV	1095.41	0.0870174
CAM112A_map9	0001.CSV	1099.27	0.0862516
CAM112A_map9	0001.CSV	1103.13	0.0869316
CAM112A_map9	0001.CSV	1106.99	0.0877885
CAM112A_map9	0001.CSV	1110.84	0.0894078
CAM112A_map9	0001.CSV	1114.7	0.090593
CAM112A_map9	0001.CSV	1118.56	0.0914585
CAM112A_map9	0001.CSV	1122.41	0.0913792
CAM112A_map9	0001.CSV	1126.27	0.091391
CAM112A_map9	0001.CSV	1130.13	0.0909089
CAM112A_map9	0001.CSV	1133.99	0.0910156
CAM112A_map9	0001.CSV	1137.84	0.0910906
CAM112A_map9	0001.CSV	1141.7	0.0914359
CAM112A_map9	0001.CSV	1145.56	0.091278
CAM112A_map9	0001.CSV	1149.41	0.0915687
CAM112A_map9	0001.CSV	1153.27	0.0920052
CAM112A_map9	0001.CSV	1157.13	0.0932177
CAM112A_map9	0001.CSV	1160.99	0.0937935
CAM112A_map9	0001.CSV	1164.84	0.0938491
CAM112A_map9	0001.CSV	1168.7	0.0928212
CAM112A_map9	0001.CSV	1172.56	0.0919547
CAM112A_map9	0001.CSV	1176.41	0.0908713
CAM112A_map9	0001.CSV	1180.27	0.0901811
CAM112A_map9	0001.CSV	1184.13	0.0891686
CAM112A_map9	0001.CSV	1187.99	0.0884858
CAM112A_map9	0001.CSV	1191.84	0.0876665
CAM112A_map9	0001.CSV	1195.7	0.0875611
CAM112A_map9	0001.CSV	1199.56	0.0873906
CAM112A_map9	0001.CSV	1203.41	0.0877664
CAM112A_map9	0001.CSV	1207.27	0.0880258
CAM112A_map9	0001.CSV	1211.13	0.088892
CAM112A_map9	0001.CSV	1214.98	0.0896644
CAM112A_map9	0001.CSV	1218.84	0.0910606
CAM112A_map9	0001.CSV	1222.7	0.0924492
CAM112A_map9	0001.CSV	1226.56	0.0944921
CAM112A_map9	0001.CSV	1230.41	0.0964898
CAM112A_map9	0001.CSV	1234.27	0.0991963
CAM112A_map9	0001.CSV	1238.13	0.101984
CAM112A_map9	0001.CSV	1241.98	0.105492
CAM112A_map9	0001.CSV	1245.84	0.108838
CAM112A_map9	0001.CSV	1249.7	0.112485
CAM112A_map9	0001.CSV	1253.56	0.115467
CAM112A_map9	0001.CSV	1257.41	0.118406
CAM112A_map9	0001.CSV	1261.27	0.120609
CAM112A_map9	0001.CSV	1265.13	0.122898
CAM112A_map9	0001.CSV	1268.98	0.12471
CAM112A_map9	0001.CSV	1272.84	0.127097
CAM112A_map9	0001.CSV	1276.7	0.12922
CAM112A_map9	0001.CSV	1280.56	0.131824
CAM112A_map9	0001.CSV	1284.41	0.133813
CAM112A_map9	0001.CSV	1288.27	0.135738
CAM112A_map9	0001.CSV	1292.13	0.136758
CAM112A_map9	0001.CSV	1295.98	0.137935
CAM112A_map9	0001.CSV	1299.84	0.138934
CAM112A_map9	0001.CSV	1303.7	0.141113
CAM112A_map9	0001.CSV	1307.56	0.143757
CAM112A_map9	0001.CSV	1311.41	0.14777
CAM112A_map9	0001.CSV	1315.27	0.152028
CAM112A_map9	0001.CSV	1319.13	0.157153
CAM112A_map9	0001.CSV	1322.98	0.161717
CAM112A_map9	0001.CSV	1326.84	0.167046
CAM112A_map9	0001.CSV	1330.7	0.172918
CAM112A_map9	0001.CSV	1334.56	0.180178
CAM112A_map9	0001.CSV	1338.41	0.189578
CAM112A_map9	0001.CSV	1342.27	0.202331
CAM112A_map9	0001.CSV	1346.13	0.213848
CAM112A_map9	0001.CSV	1349.98	0.228125
CAM112A_map9	0001.CSV	1353.84	0.243883
CAM112A_map9	0001.CSV	1357.7	0.260962
CAM112A_map9	0001.CSV	1361.56	0.280941
CAM112A_map9	0001.CSV	1365.41	0.305855
CAM112A_map9	0001.CSV	1369.27	0.325925
CAM112A_map9	0001.CSV	1373.13	0.349727
CAM112A_map9	0001.CSV	1376.98	0.376312
CAM112A_map9	0001.CSV	1380.84	0.399575
CAM112A_map9	0001.CSV	1384.7	0.419385
CAM112A_map9	0001.CSV	1388.56	0.441154
CAM112A_map9	0001.CSV	1392.41	0.452663
CAM112A_map9	0001.CSV	1396.27	0.456526
CAM112A_map9	0001.CSV	1400.13	0.451443
CAM112A_map9	0001.CSV	1403.98	0.443947
CAM112A_map9	0001.CSV	1407.84	0.426595
CAM112A_map9	0001.CSV	1411.7	0.404057
CAM112A_map9	0001.CSV	1415.55	0.379976
CAM112A_map9	0001.CSV	1419.41	0.354224
CAM112A_map9	0001.CSV	1423.27	0.332923
CAM112A_map9	0001.CSV	1427.12	0.319255
CAM112A_map9	0001.CSV	1430.98	0.304349
CAM112A_map9	0001.CSV	1434.84	0.289393
CAM112A_map9	0001.CSV	1438.7	0.272114
CAM112A_map9	0001.CSV	1442.55	0.261543
CAM112A_map9	0001.CSV	1446.41	0.250497
CAM112A_map9	0001.CSV	1450.27	0.238482
CAM112A_map9	0001.CSV	1454.12	0.227751
CAM112A_map9	0001.CSV	1457.98	0.21149
CAM112A_map9	0001.CSV	1461.84	0.198843
CAM112A_map9	0001.CSV	1465.7	0.189773
CAM112A_map9	0001.CSV	1469.55	0.180509
CAM112A_map9	0001.CSV	1473.41	0.169797
CAM112A_map9	0001.CSV	1477.27	0.158551
CAM112A_map9	0001.CSV	1481.12	0.152006
CAM112A_map9	0001.CSV	1484.98	0.145834
CAM112A_map9	0001.CSV	1488.84	0.138269
CAM112A_map9	0001.CSV	1492.7	0.129651
CAM112A_map9	0001.CSV	1496.55	0.121937
CAM112A_map9	0001.CSV	1500.41	0.112759
CAM112A_map9	0001.CSV	1504.27	0.107576
CAM112A_map9	0001.CSV	1508.12	0.0985815
CAM112A_map9	0001.CSV	1511.98	0.0926262
CAM112A_map9	0001.CSV	1515.84	0.0888521
CAM112A_map9	0001.CSV	1519.7	0.0844788
CAM112A_map9	0001.CSV	1523.55	0.0798871
CAM112A_map9	0001.CSV	1527.41	0.0775679
CAM112A_map9	0001.CSV	1531.27	0.0757983
CAM112A_map9	0001.CSV	1535.12	0.0746336
CAM112A_map9	0001.CSV	1538.98	0.0730566
CAM112A_map9	0001.CSV	1542.84	0.0691794
CAM112A_map9	0001.CSV	1546.7	0.0641326
CAM112A_map9	0001.CSV	1550.55	0.0596595
CAM112A_map9	0001.CSV	1554.41	0.0552134
CAM112A_map9	0001.CSV	1558.27	0.0506171
CAM112A_map9	0001.CSV	1562.12	0.046981
CAM112A_map9	0001.CSV	1565.98	0.0456858
CAM112A_map9	0001.CSV	1569.84	0.0445425
CAM112A_map9	0001.CSV	1573.69	0.0440753
CAM112A_map9	0001.CSV	1577.55	0.0432556
CAM112A_map9	0001.CSV	1581.41	0.0415332
CAM112A_map9	0001.CSV	1585.27	0.0395728
CAM112A_map9	0001.CSV	1589.12	0.0380798
CAM112A_map9	0001.CSV	1592.98	0.0364524
CAM112A_map9	0001.CSV	1596.84	0.034586
CAM112A_map9	0001.CSV	1600.69	0.0326515
CAM112A_map9	0001.CSV	1604.55	0.0308951
CAM112A_map9	0001.CSV	1608.41	0.0292836
CAM112A_map9	0001.CSV	1612.27	0.0282982
CAM112A_map9	0001.CSV	1616.12	0.0274956
CAM112A_map9	0001.CSV	1619.98	0.0270754
CAM112A_map9	0001.CSV	1623.84	0.0264874
CAM112A_map9	0001.CSV	1627.69	0.0256062
CAM112A_map9	0001.CSV	1631.55	0.0244134
CAM112A_map9	0001.CSV	1635.41	0.0234998
CAM112A_map9	0001.CSV	1639.27	0.0226469
CAM112A_map9	0001.CSV	1643.12	0.022228
CAM112A_map9	0001.CSV	1646.98	0.0216967
CAM112A_map9	0001.CSV	1650.84	0.0212868
CAM112A_map9	0001.CSV	1654.69	0.020597
CAM112A_map9	0001.CSV	1658.55	0.0201159
CAM112A_map9	0001.CSV	1662.41	0.019508
CAM112A_map9	0001.CSV	1666.27	0.0190779
CAM112A_map9	0001.CSV	1670.12	0.0186969
CAM112A_map9	0001.CSV	1673.98	0.0185387
CAM112A_map9	0001.CSV	1677.84	0.0181614
CAM112A_map9	0001.CSV	1681.69	0.0179698
CAM112A_map9	0001.CSV	1685.55	0.0180112
CAM112A_map9	0001.CSV	1689.41	0.0180664
CAM112A_map9	0001.CSV	1693.27	0.0178338
CAM112A_map9	0001.CSV	1697.12	0.0182775
CAM112A_map9	0001.CSV	1700.98	0.0195845
CAM112A_map9	0001.CSV	1704.84	0.0210366
CAM112A_map9	0001.CSV	1708.69	0.0223432
CAM112A_map9	0001.CSV	1712.55	0.0236437
CAM112A_map9	0001.CSV	1716.41	0.0264585
CAM112A_map9	0001.CSV	1720.27	0.0297704
CAM112A_map9	0001.CSV	1724.12	0.0308846
CAM112A_map9	0001.CSV	1727.98	0.0314259
CAM112A_map9	0001.CSV	1731.84	0.0313433
CAM112A_map9	0001.CSV	1735.69	0.0304571
CAM112A_map9	0001.CSV	1739.55	0.0287284
CAM112A_map9	0001.CSV	1743.41	0.0260501
CAM112A_map9	0001.CSV	1747.27	0.0226054
CAM112A_map9	0001.CSV	1751.12	0.018606
CAM112A_map9	0001.CSV	1754.98	0.0160131
CAM112A_map9	0001.CSV	1758.84	0.0143382
CAM112A_map9	0001.CSV	1762.69	0.0131421
CAM112A_map9	0001.CSV	1766.55	0.0125328
CAM112A_map9	0001.CSV	1770.41	0.0123353
CAM112A_map9	0001.CSV	1774.26	0.0124693
CAM112A_map9	0001.CSV	1778.12	0.0125543
CAM112A_map9	0001.CSV	1781.98	0.0131428
CAM112A_map9	0001.CSV	1785.84	0.0144372
CAM112A_map9	0001.CSV	1789.69	0.0165735
CAM112A_map9	0001.CSV	1793.55	0.0192614
CAM112A_map9	0001.CSV	1797.41	0.0194853
CAM112A_map9	0001.CSV	1801.26	0.0170108
CAM112A_map9	0001.CSV	1805.12	0.0141175
CAM112A_map9	0001.CSV	1808.98	0.0121379
CAM112A_map9	0001.CSV	1812.84	0.0110789
CAM112A_map9	0001.CSV	1816.69	0.0104737
CAM112A_map9	0001.CSV	1820.55	0.0101425
CAM112A_map9	0001.CSV	1824.41	0.00991364
CAM112A_map9	0001.CSV	1828.26	0.00990089
CAM112A_map9	0001.CSV	1832.12	0.00983209
CAM112A_map9	0001.CSV	1835.98	0.00980585
CAM112A_map9	0001.CSV	1839.84	0.00970599
CAM112A_map9	0001.CSV	1843.69	0.0097353
CAM112A_map9	0001.CSV	1847.55	0.00987259
CAM112A_map9	0001.CSV	1851.41	0.0099014
CAM112A_map9	0001.CSV	1855.26	0.00985669
CAM112A_map9	0001.CSV	1859.12	0.00992937
CAM112A_map9	0001.CSV	1862.98	0.00990222
CAM112A_map9	0001.CSV	1866.84	0.0100263
CAM112A_map9	0001.CSV	1870.69	0.0101806
CAM112A_map9	0001.CSV	1874.55	0.0101538
CAM112A_map9	0001.CSV	1878.41	0.0101063
CAM112A_map9	0001.CSV	1882.26	0.010143
CAM112A_map9	0001.CSV	1886.12	0.0101349
CAM112A_map9	0001.CSV	1889.98	0.0102022
CAM112A_map9	0001.CSV	1893.83	0.0101839
CAM112A_map9	0001.CSV	1897.69	0.010198
CAM112A_map9	0001.CSV	1901.55	0.0102041
CAM112A_map9	0001.CSV	1905.41	0.0102953
CAM112A_map9	0001.CSV	1909.26	0.0103255
CAM112A_map9	0001.CSV	1913.12	0.010365
CAM112A_map9	0001.CSV	1916.98	0.0103676
CAM112A_map9	0001.CSV	1920.83	0.0104885
CAM112A_map9	0001.CSV	1924.69	0.0105347
CAM112A_map9	0001.CSV	1928.55	0.0105609
CAM112A_map9	0001.CSV	1932.4	0.0105679
CAM112A_map9	0001.CSV	1936.26	0.0106697
CAM112A_map9	0001.CSV	1940.12	0.0107233
CAM112A_map9	0001.CSV	1943.98	0.0109079
CAM112A_map9	0001.CSV	1947.83	0.0109502
CAM112A_map9	0001.CSV	1951.69	0.010941
CAM112A_map9	0001.CSV	1955.55	0.0109283
CAM112A_map9	0001.CSV	1959.4	0.0110214
CAM112A_map9	0001.CSV	1963.26	0.010993
CAM112A_map9	0001.CSV	1967.12	0.0110205
CAM112A_map9	0001.CSV	1970.98	0.0110687
CAM112A_map9	0001.CSV	1974.83	0.0110991
CAM112A_map9	0001.CSV	1978.69	0.0110804
CAM112A_map9	0001.CSV	1982.55	0.0111238
CAM112A_map9	0001.CSV	1986.4	0.0111298
CAM112A_map9	0001.CSV	1990.26	0.0111603
CAM112A_map9	0001.CSV	1994.12	0.0111555
CAM112A_map9	0001.CSV	1997.98	0.0112149
CAM112A_map9	0001.CSV	2001.83	0.0112206
CAM112A_map9	0001.CSV	2005.69	0.0112445
CAM112A_map9	0001.CSV	2009.55	0.011265
CAM112A_map9	0001.CSV	2013.4	0.0113037
CAM112A_map9	0001.CSV	2017.26	0.0113106
CAM112A_map9	0001.CSV	2021.12	0.0113523
CAM112A_map9	0001.CSV	2024.97	0.0113456
CAM112A_map9	0001.CSV	2028.83	0.0114076
CAM112A_map9	0001.CSV	2032.69	0.0114111
CAM112A_map9	0001.CSV	2036.55	0.0114738
CAM112A_map9	0001.CSV	2040.4	0.0114918
CAM112A_map9	0001.CSV	2044.26	0.0115046
CAM112A_map9	0001.CSV	2048.12	0.0114888
CAM112A_map9	0001.CSV	2051.97	0.0115735
CAM112A_map9	0001.CSV	2055.83	0.0116125
CAM112A_map9	0001.CSV	2059.69	0.0116624
CAM112A_map9	0001.CSV	2063.55	0.0116997
CAM112A_map9	0001.CSV	2067.4	0.0117944
CAM112A_map9	0001.CSV	2071.26	0.0118084
CAM112A_map9	0001.CSV	2075.12	0.0118483
CAM112A_map9	0001.CSV	2078.97	0.0118683
CAM112A_map9	0001.CSV	2082.83	0.0119337
CAM112A_map9	0001.CSV	2086.69	0.0119493
CAM112A_map9	0001.CSV	2090.55	0.011991
CAM112A_map9	0001.CSV	2094.4	0.01199
CAM112A_map9	0001.CSV	2098.26	0.012064
CAM112A_map9	0001.CSV	2102.12	0.0120945
CAM112A_map9	0001.CSV	2105.97	0.0121268
CAM112A_map9	0001.CSV	2109.83	0.0121407
CAM112A_map9	0001.CSV	2113.69	0.0122001
CAM112A_map9	0001.CSV	2117.55	0.0122844
CAM112A_map9	0001.CSV	2121.4	0.012437
CAM112A_map9	0001.CSV	2125.26	0.0124988
CAM112A_map9	0001.CSV	2129.12	0.0125636
CAM112A_map9	0001.CSV	2132.97	0.0125833
CAM112A_map9	0001.CSV	2136.83	0.0126547
CAM112A_map9	0001.CSV	2140.69	0.0127033
CAM112A_map9	0001.CSV	2144.55	0.0127253
CAM112A_map9	0001.CSV	2148.4	0.012728
CAM112A_map9	0001.CSV	2152.26	0.0127542
CAM112A_map9	0001.CSV	2156.12	0.01267
CAM112A_map9	0001.CSV	2159.97	0.0126429
CAM112A_map9	0001.CSV	2163.83	0.0126675
CAM112A_map9	0001.CSV	2167.69	0.012716
CAM112A_map9	0001.CSV	2171.55	0.0127329
CAM112A_map9	0001.CSV	2175.4	0.0127601
CAM112A_map9	0001.CSV	2179.26	0.0127658
CAM112A_map9	0001.CSV	2183.12	0.0128158
CAM112A_map9	0001.CSV	2186.97	0.0128592
CAM112A_map9	0001.CSV	2190.83	0.0129266
CAM112A_map9	0001.CSV	2194.69	0.0129268
CAM112A_map9	0001.CSV	2198.55	0.0129286
CAM112A_map9	0001.CSV	2202.4	0.0129449
CAM112A_map9	0001.CSV	2206.26	0.0130274
CAM112A_map9	0001.CSV	2210.12	0.013057
CAM112A_map9	0001.CSV	2213.97	0.0130876
CAM112A_map9	0001.CSV	2217.83	0.0130645
CAM112A_map9	0001.CSV	2221.69	0.013085
CAM112A_map9	0001.CSV	2225.54	0.0130568
CAM112A_map9	0001.CSV	2229.4	0.0130566
CAM112A_map9	0001.CSV	2233.26	0.0130601
CAM112A_map9	0001.CSV	2237.12	0.0131011
CAM112A_map9	0001.CSV	2240.97	0.0130892
CAM112A_map9	0001.CSV	2244.83	0.0130768
CAM112A_map9	0001.CSV	2248.69	0.0131049
CAM112A_map9	0001.CSV	2252.54	0.013114
CAM112A_map9	0001.CSV	2256.4	0.0130514
CAM112A_map9	0001.CSV	2260.26	0.013069
CAM112A_map9	0001.CSV	2264.11	0.0130692
CAM112A_map9	0001.CSV	2267.97	0.0130743
CAM112A_map9	0001.CSV	2271.83	0.0130887
CAM112A_map9	0001.CSV	2275.69	0.0131541
CAM112A_map9	0001.CSV	2279.54	0.013152
CAM112A_map9	0001.CSV	2283.4	0.0131715
CAM112A_map9	0001.CSV	2287.26	0.0131365
CAM112A_map9	0001.CSV	2291.11	0.0130965
CAM112A_map9	0001.CSV	2294.97	0.0130427
CAM112A_map9	0001.CSV	2298.83	0.0130332
CAM112A_map9	0001.CSV	2302.69	0.0128995
CAM112A_map9	0001.CSV	2306.54	0.0127589
CAM112A_map9	0001.CSV	2310.4	0.0125559
CAM112A_map9	0001.CSV	2314.26	0.0121644
CAM112A_map9	0001.CSV	2318.11	0.0113376
CAM112A_map9	0001.CSV	2321.97	0.010046
CAM112A_map9	0001.CSV	2325.83	0.00794349
CAM112A_map9	0001.CSV	2329.69	0.0058086
CAM112A_map9	0001.CSV	2333.54	0.00415668
CAM112A_map9	0001.CSV	2337.4	0.00324007
CAM112A_map9	0001.CSV	2341.26	0.00283587
CAM112A_map9	0001.CSV	2345.11	0.00755087
CAM112A_map9	0001.CSV	2348.97	0.00930527
CAM112A_map9	0001.CSV	2352.83	0.00595322
CAM112A_map9	0001.CSV	2356.69	-0.00885575
CAM112A_map9	0001.CSV	2360.54	-0.026177
CAM112A_map9	0001.CSV	2364.4	-0.0151217
CAM112A_map9	0001.CSV	2368.26	0.00189203
CAM112A_map9	0001.CSV	2372.11	0.0100859
CAM112A_map9	0001.CSV	2375.97	0.012859
CAM112A_map9	0001.CSV	2379.83	0.0135082
CAM112A_map9	0001.CSV	2383.69	0.0136099
CAM112A_map9	0001.CSV	2387.54	0.0135613
CAM112A_map9	0001.CSV	2391.4	0.0135558
CAM112A_map9	0001.CSV	2395.26	0.0135836
CAM112A_map9	0001.CSV	2399.11	0.0136325
CAM112A_map9	0001.CSV	2402.97	0.0136398
CAM112A_map9	0001.CSV	2406.83	0.0136633
CAM112A_map9	0001.CSV	2410.68	0.0137167
CAM112A_map9	0001.CSV	2414.54	0.0137608
CAM112A_map9	0001.CSV	2418.4	0.013752
CAM112A_map9	0001.CSV	2422.26	0.0137908
CAM112A_map9	0001.CSV	2426.11	0.0138925
CAM112A_map9	0001.CSV	2429.97	0.0139707
CAM112A_map9	0001.CSV	2433.83	0.0139597
CAM112A_map9	0001.CSV	2437.68	0.0140247
CAM112A_map9	0001.CSV	2441.54	0.0141067
CAM112A_map9	0001.CSV	2445.4	0.0142088
CAM112A_map9	0001.CSV	2449.26	0.0143225
CAM112A_map9	0001.CSV	2453.11	0.0144146
CAM112A_map9	0001.CSV	2456.97	0.0145164
CAM112A_map9	0001.CSV	2460.83	0.0146631
CAM112A_map9	0001.CSV	2464.68	0.0148181
CAM112A_map9	0001.CSV	2468.54	0.0150238
CAM112A_map9	0001.CSV	2472.4	0.015204
CAM112A_map9	0001.CSV	2476.26	0.0154021
CAM112A_map9	0001.CSV	2480.11	0.0156591
CAM112A_map9	0001.CSV	2483.97	0.0160231
CAM112A_map9	0001.CSV	2487.83	0.0164672
CAM112A_map9	0001.CSV	2491.68	0.0170085
CAM112A_map9	0001.CSV	2495.54	0.017687
CAM112A_map9	0001.CSV	2499.4	0.0185401
CAM112A_map9	0001.CSV	2503.26	0.0193638
CAM112A_map9	0001.CSV	2507.11	0.0200386
CAM112A_map9	0001.CSV	2510.97	0.0203162
CAM112A_map9	0001.CSV	2514.83	0.0202041
CAM112A_map9	0001.CSV	2518.68	0.0198775
CAM112A_map9	0001.CSV	2522.54	0.0193491
CAM112A_map9	0001.CSV	2526.4	0.0186678
CAM112A_map9	0001.CSV	2530.26	0.0179487
CAM112A_map9	0001.CSV	2534.11	0.0172796
CAM112A_map9	0001.CSV	2537.97	0.0168093
CAM112A_map9	0001.CSV	2541.83	0.0164303
CAM112A_map9	0001.CSV	2545.68	0.0161139
CAM112A_map9	0001.CSV	2549.54	0.0158966
CAM112A_map9	0001.CSV	2553.4	0.0157737
CAM112A_map9	0001.CSV	2557.26	0.0156903
CAM112A_map9	0001.CSV	2561.11	0.0156796
CAM112A_map9	0001.CSV	2564.97	0.0156345
CAM112A_map9	0001.CSV	2568.83	0.0155966
CAM112A_map9	0001.CSV	2572.68	0.0155789
CAM112A_map9	0001.CSV	2576.54	0.0155841
CAM112A_map9	0001.CSV	2580.4	0.0155587
CAM112A_map9	0001.CSV	2584.25	0.0155163
CAM112A_map9	0001.CSV	2588.11	0.0154574
CAM112A_map9	0001.CSV	2591.97	0.0154217
CAM112A_map9	0001.CSV	2595.83	0.0153484
CAM112A_map9	0001.CSV	2599.68	0.0153167
CAM112A_map9	0001.CSV	2603.54	0.0152391
CAM112A_map9	0001.CSV	2607.4	0.0151664
CAM112A_map9	0001.CSV	2611.25	0.0151013
CAM112A_map9	0001.CSV	2615.11	0.0150195
CAM112A_map9	0001.CSV	2618.97	0.0148694
CAM112A_map9	0001.CSV	2622.82	0.0147692
CAM112A_map9	0001.CSV	2626.68	0.0147658
CAM112A_map9	0001.CSV	2630.54	0.0147241
CAM112A_map9	0001.CSV	2634.4	0.0147292
CAM112A_map9	0001.CSV	2638.25	0.0147118
CAM112A_map9	0001.CSV	2642.11	0.0145097
CAM112A_map9	0001.CSV	2645.97	0.0143906
CAM112A_map9	0001.CSV	2649.82	0.0143741
CAM112A_map9	0001.CSV	2653.68	0.0144009
CAM112A_map9	0001.CSV	2657.54	0.014408
CAM112A_map9	0001.CSV	2661.4	0.0144017
CAM112A_map9	0001.CSV	2665.25	0.0144001
CAM112A_map9	0001.CSV	2669.11	0.0144583
CAM112A_map9	0001.CSV	2672.97	0.0146839
CAM112A_map9	0001.CSV	2676.82	0.0150204
CAM112A_map9	0001.CSV	2680.68	0.0149908
CAM112A_map9	0001.CSV	2684.54	0.0146716
CAM112A_map9	0001.CSV	2688.4	0.0145328
CAM112A_map9	0001.CSV	2692.25	0.0145054
CAM112A_map9	0001.CSV	2696.11	0.0145636
CAM112A_map9	0001.CSV	2699.97	0.0146394
CAM112A_map9	0001.CSV	2703.82	0.0146174
CAM112A_map9	0001.CSV	2707.68	0.0147432
CAM112A_map9	0001.CSV	2711.54	0.0148128
CAM112A_map9	0001.CSV	2715.4	0.014794
CAM112A_map9	0001.CSV	2719.25	0.0149772
CAM112A_map9	0001.CSV	2723.11	0.0153624
CAM112A_map9	0001.CSV	2726.97	0.0153478
CAM112A_map9	0001.CSV	2730.82	0.0149724
CAM112A_map9	0001.CSV	2734.68	0.0149654
CAM112A_map9	0001.CSV	2738.54	0.015056
CAM112A_map9	0001.CSV	2742.4	0.015115
CAM112A_map9	0001.CSV	2746.25	0.0154971
CAM112A_map9	0001.CSV	2750.11	0.0155795
CAM112A_map9	0001.CSV	2753.97	0.0152485
CAM112A_map9	0001.CSV	2757.82	0.0150793
CAM112A_map9	0001.CSV	2761.68	0.0149355
CAM112A_map9	0001.CSV	2765.54	0.0148863
CAM112A_map9	0001.CSV	2769.39	0.0151494
CAM112A_map9	0001.CSV	2773.25	0.0156666
CAM112A_map9	0001.CSV	2777.11	0.0155977
CAM112A_map9	0001.CSV	2780.97	0.0152899
CAM112A_map9	0001.CSV	2784.82	0.0155753
CAM112A_map9	0001.CSV	2788.68	0.0162017
CAM112A_map9	0001.CSV	2792.54	0.0163916
CAM112A_map9	0001.CSV	2796.39	0.0164181
CAM112A_map9	0001.CSV	2800.25	0.0162502
CAM112A_map9	0001.CSV	2804.11	0.016054
CAM112A_map9	0001.CSV	2807.97	0.0164437
CAM112A_map9	0001.CSV	2811.82	0.0165567
CAM112A_map9	0001.CSV	2815.68	0.0164644
CAM112A_map9	0001.CSV	2819.54	0.0167371
CAM112A_map9	0001.CSV	2823.39	0.0171056
CAM112A_map9	0001.CSV	2827.25	0.0174754
CAM112A_map9	0001.CSV	2831.11	0.0183837
CAM112A_map9	0001.CSV	2834.97	0.0198058
CAM112A_map9	0001.CSV	2838.82	0.0212673
CAM112A_map9	0001.CSV	2842.68	0.0230186
CAM112A_map9	0001.CSV	2846.54	0.0258772
CAM112A_map9	0001.CSV	2850.39	0.0285482
CAM112A_map9	0001.CSV	2854.25	0.0296147
CAM112A_map9	0001.CSV	2858.11	0.0291016
CAM112A_map9	0001.CSV	2861.97	0.0274953
CAM112A_map9	0001.CSV	2865.82	0.0261815
CAM112A_map9	0001.CSV	2869.68	0.0260099
CAM112A_map9	0001.CSV	2873.54	0.0257646
CAM112A_map9	0001.CSV	2877.39	0.0245478
CAM112A_map9	0001.CSV	2881.25	0.0236102
CAM112A_map9	0001.CSV	2885.11	0.0235375
CAM112A_map9	0001.CSV	2888.97	0.0240961
CAM112A_map9	0001.CSV	2892.82	0.0252193
CAM112A_map9	0001.CSV	2896.68	0.026308
CAM112A_map9	0001.CSV	2900.54	0.0272014
CAM112A_map9	0001.CSV	2904.39	0.0284708
CAM112A_map9	0001.CSV	2908.25	0.0304472
CAM112A_map9	0001.CSV	2912.11	0.0332922
CAM112A_map9	0001.CSV	2915.97	0.0363713
CAM112A_map9	0001.CSV	2919.82	0.0388349
CAM112A_map9	0001.CSV	2923.68	0.0400965
CAM112A_map9	0001.CSV	2927.54	0.0398637
CAM112A_map9	0001.CSV	2931.39	0.0377349
CAM112A_map9	0001.CSV	2935.25	0.0344621
CAM112A_map9	0001.CSV	2939.11	0.0317984
CAM112A_map9	0001.CSV	2942.96	0.0302461
CAM112A_map9	0001.CSV	2946.82	0.0292753
CAM112A_map9	0001.CSV	2950.68	0.0288285
CAM112A_map9	0001.CSV	2954.54	0.0284655
CAM112A_map9	0001.CSV	2958.39	0.0276311
CAM112A_map9	0001.CSV	2962.25	0.0264343
CAM112A_map9	0001.CSV	2966.11	0.0247575
CAM112A_map9	0001.CSV	2969.96	0.0233946
CAM112A_map9	0001.CSV	2973.82	0.0226603
CAM112A_map9	0001.CSV	2977.68	0.022091
CAM112A_map9	0001.CSV	2981.53	0.0212423
CAM112A_map9	0001.CSV	2985.39	0.0202281
CAM112A_map9	0001.CSV	2989.25	0.0197675
CAM112A_map9	0001.CSV	2993.11	0.0196017
CAM112A_map9	0001.CSV	2996.96	0.0191668
CAM112A_map9	0001.CSV	3000.82	0.0185755
CAM112A_map9	0001.CSV	3004.68	0.0181624
CAM112A_map9	0001.CSV	3008.53	0.0181965
CAM112A_map9	0001.CSV	3012.39	0.0183893
CAM112A_map9	0001.CSV	3016.25	0.0184034
CAM112A_map9	0001.CSV	3020.11	0.0183174
CAM112A_map9	0001.CSV	3023.96	0.0182465
CAM112A_map9	0001.CSV	3027.82	0.0182214
CAM112A_map9	0001.CSV	3031.68	0.0184052
CAM112A_map9	0001.CSV	3035.53	0.0184731
CAM112A_map9	0001.CSV	3039.39	0.0184288
CAM112A_map9	0001.CSV	3043.25	0.0184901
CAM112A_map9	0001.CSV	3047.11	0.018426
CAM112A_map9	0001.CSV	3050.96	0.0184366
CAM112A_map9	0001.CSV	3054.82	0.0185848
CAM112A_map9	0001.CSV	3058.68	0.0186641
CAM112A_map9	0001.CSV	3062.53	0.0186917
CAM112A_map9	0001.CSV	3066.39	0.0188455
CAM112A_map9	0001.CSV	3070.25	0.0187932
CAM112A_map9	0001.CSV	3074.11	0.0187536
CAM112A_map9	0001.CSV	3077.96	0.0189017
CAM112A_map9	0001.CSV	3081.82	0.0189231
CAM112A_map9	0001.CSV	3085.68	0.0188328
CAM112A_map9	0001.CSV	3089.53	0.018715
CAM112A_map9	0001.CSV	3093.39	0.0185383
CAM112A_map9	0001.CSV	3097.25	0.0185848
CAM112A_map9	0001.CSV	3101.11	0.0186637
CAM112A_map9	0001.CSV	3104.96	0.0186714
CAM112A_map9	0001.CSV	3108.82	0.0188064
CAM112A_map9	0001.CSV	3112.68	0.0189636
CAM112A_map9	0001.CSV	3116.53	0.0191234
CAM112A_map9	0001.CSV	3120.39	0.0190494
CAM112A_map9	0001.CSV	3124.25	0.0188183
CAM112A_map9	0001.CSV	3128.11	0.0187666
CAM112A_map9	0001.CSV	3131.96	0.0187642
CAM112A_map9	0001.CSV	3135.82	0.0188869
CAM112A_map9	0001.CSV	3139.68	0.0191159
CAM112A_map9	0001.CSV	3143.53	0.019079
CAM112A_map9	0001.CSV	3147.39	0.0191522
CAM112A_map9	0001.CSV	3151.25	0.0194195
CAM112A_map9	0001.CSV	3155.1	0.0193988
CAM112A_map9	0001.CSV	3158.96	0.0191455
CAM112A_map9	0001.CSV	3162.82	0.0190889
CAM112A_map9	0001.CSV	3166.68	0.0191915
CAM112A_map9	0001.CSV	3170.53	0.0192543
CAM112A_map9	0001.CSV	3174.39	0.0192392
CAM112A_map9	0001.CSV	3178.25	0.0193063
CAM112A_map9	0001.CSV	3182.1	0.0193333
CAM112A_map9	0001.CSV	3185.96	0.0194812
CAM112A_map9	0001.CSV	3189.82	0.0196989
CAM112A_map9	0001.CSV	3193.68	0.0197175
CAM112A_map9	0001.CSV	3197.53	0.0197382
CAM112A_map9	0001.CSV	3201.39	0.0198582
CAM112A_map9	0001.CSV	3205.25	0.0199102
CAM112A_map9	0001.CSV	3209.1	0.0199706
CAM112A_map9	0001.CSV	3212.96	0.0202006
CAM112A_map9	0001.CSV	3216.82	0.0203192
CAM112A_map9	0001.CSV	3220.68	0.0202246
CAM112A_map9	0001.CSV	3224.53	0.020161
CAM112A_map9	0001.CSV	3228.39	0.0203534
CAM112A_map9	0001.CSV	3232.25	0.0207423
CAM112A_map9	0001.CSV	3236.1	0.0207941
CAM112A_map9	0001.CSV	3239.96	0.0206548
CAM112A_map9	0001.CSV	3243.82	0.0208161
CAM112A_map9	0001.CSV	3247.68	0.02099
CAM112A_map9	0001.CSV	3251.53	0.0208665
CAM112A_map9	0001.CSV	3255.39	0.0208433
CAM112A_map9	0001.CSV	3259.25	0.0208589
CAM112A_map9	0001.CSV	3263.1	0.0209219
CAM112A_map9	0001.CSV	3266.96	0.0211679
CAM112A_map9	0001.CSV	3270.82	0.0214445
CAM112A_map9	0001.CSV	3274.68	0.021432
CAM112A_map9	0001.CSV	3278.53	0.0212327
CAM112A_map9	0001.CSV	3282.39	0.0211281
CAM112A_map9	0001.CSV	3286.25	0.0212385
CAM112A_map9	0001.CSV	3290.1	0.021483
CAM112A_map9	0001.CSV	3293.96	0.0216962
CAM112A_map9	0001.CSV	3297.82	0.0216608
CAM112A_map9	0001.CSV	3301.67	0.0217011
CAM112A_map9	0001.CSV	3305.53	0.021801
CAM112A_map9	0001.CSV	3309.39	0.0216992
CAM112A_map9	0001.CSV	3313.25	0.021427
CAM112A_map9	0001.CSV	3317.1	0.0213103
CAM112A_map9	0001.CSV	3320.96	0.0214427
CAM112A_map9	0001.CSV	3324.82	0.0216785
CAM112A_map9	0001.CSV	3328.67	0.0215845
CAM112A_map9	0001.CSV	3332.53	0.0214959
CAM112A_map9	0001.CSV	3336.39	0.0217032
CAM112A_map9	0001.CSV	3340.24	0.0218375
CAM112A_map9	0001.CSV	3344.1	0.021795
CAM112A_map9	0001.CSV	3347.96	0.0218198
CAM112A_map9	0001.CSV	3351.82	0.021761
CAM112A_map9	0001.CSV	3355.67	0.021584
CAM112A_map9	0001.CSV	3359.53	0.0216358
CAM112A_map9	0001.CSV	3363.39	0.0217902
CAM112A_map9	0001.CSV	3367.24	0.0219113
CAM112A_map9	0001.CSV	3371.1	0.0218061
CAM112A_map9	0001.CSV	3374.96	0.0216068
CAM112A_map9	0001.CSV	3378.82	0.0214882
CAM112A_map9	0001.CSV	3382.67	0.0213074
CAM112A_map9	0001.CSV	3386.53	0.0213911
CAM112A_map9	0001.CSV	3390.39	0.021675
CAM112A_map9	0001.CSV	3394.24	0.0218232
CAM112A_map9	0001.CSV	3398.1	0.0218043
CAM112A_map9	0001.CSV	3401.96	0.0216529
CAM112A_map9	0001.CSV	3405.82	0.021472
CAM112A_map9	0001.CSV	3409.67	0.0214093
CAM112A_map9	0001.CSV	3413.53	0.0213055
CAM112A_map9	0001.CSV	3417.39	0.0211201
CAM112A_map9	0001.CSV	3421.24	0.0210366
CAM112A_map9	0001.CSV	3425.1	0.0210348
CAM112A_map9	0001.CSV	3428.96	0.0212327
CAM112A_map9	0001.CSV	3432.82	0.0213428
CAM112A_map9	0001.CSV	3436.67	0.0210455
CAM112A_map9	0001.CSV	3440.53	0.0205427
CAM112A_map9	0001.CSV	3444.39	0.020338
CAM112A_map9	0001.CSV	3448.24	0.0202338
CAM112A_map9	0001.CSV	3452.1	0.0200366
CAM112A_map9	0001.CSV	3455.96	0.0199034
CAM112A_map9	0001.CSV	3459.82	0.019953
CAM112A_map9	0001.CSV	3463.67	0.0201909
CAM112A_map9	0001.CSV	3467.53	0.0202588
CAM112A_map9	0001.CSV	3471.39	0.0198882
CAM112A_map9	0001.CSV	3475.24	0.0195032
CAM112A_map9	0001.CSV	3479.1	0.0194447
CAM112A_map9	0001.CSV	3482.96	0.0194162
CAM112A_map9	0001.CSV	3486.82	0.0194533
CAM112A_map9	0001.CSV	3490.67	0.0193712
CAM112A_map9	0001.CSV	3494.53	0.0192677
CAM112A_map9	0001.CSV	3498.39	0.0192205
CAM112A_map9	0001.CSV	3502.24	0.0190662
CAM112A_map9	0001.CSV	3506.1	0.0186545
CAM112A_map9	0001.CSV	3509.96	0.0184613
CAM112A_map9	0001.CSV	3513.81	0.0185118
CAM112A_map9	0001.CSV	3517.67	0.0182369
CAM112A_map9	0001.CSV	3521.53	0.0181004
CAM112A_map9	0001.CSV	3525.39	0.0181271
CAM112A_map9	0001.CSV	3529.24	0.0180374
CAM112A_map9	0001.CSV	3533.1	0.0179359
CAM112A_map9	0001.CSV	3536.96	0.0178004
CAM112A_map9	0001.CSV	3540.81	0.0176755
CAM112A_map9	0001.CSV	3544.67	0.0176711
CAM112A_map9	0001.CSV	3548.53	0.0174983
CAM112A_map9	0001.CSV	3552.39	0.0171717
CAM112A_map9	0001.CSV	3556.24	0.0169159
CAM112A_map9	0001.CSV	3560.1	0.0166418
CAM112A_map9	0001.CSV	3563.96	0.0162813
CAM112A_map9	0001.CSV	3567.81	0.0163886
CAM112A_map9	0001.CSV	3571.67	0.0162989
CAM112A_map9	0001.CSV	3575.53	0.0159292
CAM112A_map9	0001.CSV	3579.39	0.0159096
CAM112A_map9	0001.CSV	3583.24	0.0158396
CAM112A_map9	0001.CSV	3587.1	0.0156998
CAM112A_map9	0001.CSV	3590.96	0.0155584
CAM112A_map9	0001.CSV	3594.81	0.0153153
CAM112A_map9	0001.CSV	3598.67	0.0152366
CAM112A_map9	0001.CSV	3602.53	0.0152467
CAM112A_map9	0001.CSV	3606.39	0.0149492
CAM112A_map9	0001.CSV	3610.24	0.0146521
CAM112A_map9	0001.CSV	3614.1	0.0144662
CAM112A_map9	0001.CSV	3617.96	0.0145368
CAM112A_map9	0001.CSV	3621.81	0.014482
CAM112A_map9	0001.CSV	3625.67	0.0139741
CAM112A_map9	0001.CSV	3629.53	0.0140879
CAM112A_map9	0001.CSV	3633.39	0.0143914
CAM112A_map9	0001.CSV	3637.24	0.0140387
CAM112A_map9	0001.CSV	3641.1	0.0136697
CAM112A_map9	0001.CSV	3644.96	0.0132794
CAM112A_map9	0001.CSV	3648.81	0.0137576
CAM112A_map9	0001.CSV	3652.67	0.0142024
CAM112A_map9	0001.CSV	3656.53	0.0139116
CAM112A_map9	0001.CSV	3660.38	0.0137195
CAM112A_map9	0001.CSV	3664.24	0.0132007
CAM112A_map9	0001.CSV	3668.1	0.0127563
CAM112A_map9	0001.CSV	3671.96	0.0129816
CAM112A_map9	0001.CSV	3675.81	0.0135265
CAM112A_map9	0001.CSV	3679.67	0.0135962
CAM112A_map9	0001.CSV	3683.53	0.0132399
CAM112A_map9	0001.CSV	3687.38	0.0131521
CAM112A_map9	0001.CSV	3691.24	0.013612
CAM112A_map9	0001.CSV	3695.1	0.0134052
CAM112A_map9	0001.CSV	3698.95	0.0130526
CAM112A_map9	0001.CSV	3702.81	0.0130699
CAM112A_map9	0001.CSV	3706.67	0.0127964
CAM112A_map9	0001.CSV	3710.53	0.0125654
CAM112A_map9	0001.CSV	3714.38	0.012934
CAM112A_map9	0001.CSV	3718.24	0.0128174
CAM112A_map9	0001.CSV	3722.1	0.012738
CAM112A_map9	0001.CSV	3725.95	0.0128584
CAM112A_map9	0001.CSV	3729.81	0.0127043
CAM112A_map9	0001.CSV	3733.67	0.0128994
CAM112A_map9	0001.CSV	3737.53	0.0135412
CAM112A_map9	0001.CSV	3741.38	0.0131388
CAM112A_map9	0001.CSV	3745.24	0.0126841
CAM112A_map9	0001.CSV	3749.1	0.0127418
CAM112A_map9	0001.CSV	3752.95	0.0132979
CAM112A_map9	0001.CSV	3756.81	0.0131714
CAM112A_map9	0001.CSV	3760.67	0.0130583
CAM112A_map9	0001.CSV	3764.53	0.0128873
CAM112A_map9	0001.CSV	3768.38	0.0128769
CAM112A_map9	0001.CSV	3772.24	0.0129858
CAM112A_map9	0001.CSV	3776.1	0.0128619
CAM112A_map9	0001.CSV	3779.95	0.0129958
CAM112A_map9	0001.CSV	3783.81	0.0130318
CAM112A_map9	0001.CSV	3787.67	0.0129275
CAM112A_map9	0001.CSV	3791.53	0.0127923
CAM112A_map9	0001.CSV	3795.38	0.0126078
CAM112A_map9	0001.CSV	3799.24	0.0127393
CAM112A_map9	0001.CSV	3803.1	0.0130502
CAM112A_map9	0001.CSV	3806.95	0.0130853
CAM112A_map9	0001.CSV	3810.81	0.0128382
CAM112A_map9	0001.CSV	3814.67	0.0125872
CAM112A_map9	0001.CSV	3818.53	0.0128553
CAM112A_map9	0001.CSV	3822.38	0.0131773
CAM112A_map9	0001.CSV	3826.24	0.012863
CAM112A_map9	0001.CSV	3830.1	0.0126219
CAM112A_map9	0001.CSV	3833.95	0.012523
CAM112A_map9	0001.CSV	3837.81	0.012688
CAM112A_map9	0001.CSV	3841.67	0.0130648
CAM112A_map9	0001.CSV	3845.53	0.0129599
CAM112A_map9	0001.CSV	3849.38	0.0124953
CAM112A_map9	0001.CSV	3853.24	0.0126901
CAM112A_map9	0001.CSV	3857.1	0.0130373
CAM112A_map9	0001.CSV	3860.95	0.0125591
CAM112A_map9	0001.CSV	3864.81	0.0125269
CAM112A_map9	0001.CSV	3868.67	0.0127009
CAM112A_map9	0001.CSV	3872.52	0.012932
CAM112A_map9	0001.CSV	3876.38	0.0127606
CAM112A_map9	0001.CSV	3880.24	0.0127244
CAM112A_map9	0001.CSV	3884.1	0.0130842
CAM112A_map9	0001.CSV	3887.95	0.0129852
CAM112A_map9	0001.CSV	3891.81	0.0128202
CAM112A_map9	0001.CSV	3895.67	0.0125355
CAM112A_map9	0001.CSV	3899.52	0.0124019
CAM112A_map9	0001.CSV	3903.38	0.0130163
CAM112A_map9	0001.CSV	3907.24	0.0131227
CAM112A_map9	0001.CSV	3911.1	0.0126973
CAM112A_map9	0001.CSV	3914.95	0.0124432
CAM112A_map9	0001.CSV	3918.81	0.0126175
CAM112A_map9	0001.CSV	3922.67	0.0127006
CAM112A_map9	0001.CSV	3926.52	0.0124953
CAM112A_map9	0001.CSV	3930.38	0.0124748
CAM112A_map9	0001.CSV	3934.24	0.0126481
CAM112A_map9	0001.CSV	3938.09	0.0124124
CAM112A_map9	0001.CSV	3941.95	0.0123436
CAM112A_map9	0001.CSV	3945.81	0.0123917
CAM112A_map9	0001.CSV	3949.67	0.0124464
CAM112A_map9	0001.CSV	3953.52	0.0124758
CAM112A_map9	0001.CSV	3957.38	0.0124105
CAM112A_map9	0001.CSV	3961.24	0.0124131
CAM112A_map9	0001.CSV	3965.09	0.0124302
CAM112A_map9	0001.CSV	3968.95	0.0123833
CAM112A_map9	0001.CSV	3972.81	0.012368
CAM112A_map9	0001.CSV	3976.67	0.0124183
CAM112A_map9	0001.CSV	3980.52	0.0124963
CAM112A_map9	0001.CSV	3984.38	0.0124435
CAM112A_map9	0001.CSV	3988.24	0.0122731
CAM112A_map9	0001.CSV	3992.09	0.0121848
CAM112A_map9	0001.CSV	3995.95	0.0122141
CAM112A_map9	0001.CSV	3999.81	0.0122745
CAM112A_map9	0002.CSV	674.992	0.0314028
CAM112A_map9	0002.CSV	678.849	0.0340806
CAM112A_map9	0002.CSV	682.706	0.0345681
CAM112A_map9	0002.CSV	686.563	0.038104
CAM112A_map9	0002.CSV	690.42	0.0408396
CAM112A_map9	0002.CSV	694.277	0.0473071
CAM112A_map9	0002.CSV	698.134	0.0549636
CAM112A_map9	0002.CSV	701.991	0.067888
CAM112A_map9	0002.CSV	705.849	0.0928687
CAM112A_map9	0002.CSV	709.706	0.130059
CAM112A_map9	0002.CSV	713.563	0.125458
CAM112A_map9	0002.CSV	717.42	0.0778063
CAM112A_map9	0002.CSV	721.277	0.0427684
CAM112A_map9	0002.CSV	725.134	0.0326038
CAM112A_map9	0002.CSV	728.991	0.0297979
CAM112A_map9	0002.CSV	732.848	0.0303219
CAM112A_map9	0002.CSV	736.705	0.0308231
CAM112A_map9	0002.CSV	740.562	0.0321308
CAM112A_map9	0002.CSV	744.42	0.0327042
CAM112A_map9	0002.CSV	748.277	0.0337155
CAM112A_map9	0002.CSV	752.134	0.0338945
CAM112A_map9	0002.CSV	755.991	0.0354479
CAM112A_map9	0002.CSV	759.848	0.0362029
CAM112A_map9	0002.CSV	763.705	0.0375407
CAM112A_map9	0002.CSV	767.562	0.0381828
CAM112A_map9	0002.CSV	771.419	0.0393794
CAM112A_map9	0002.CSV	775.276	0.0395061
CAM112A_map9	0002.CSV	779.133	0.0400205
CAM112A_map9	0002.CSV	782.99	0.0397411
CAM112A_map9	0002.CSV	786.848	0.0401772
CAM112A_map9	0002.CSV	790.705	0.040276
CAM112A_map9	0002.CSV	794.562	0.041519
CAM112A_map9	0002.CSV	798.419	0.0423584
CAM112A_map9	0002.CSV	802.276	0.0436297
CAM112A_map9	0002.CSV	806.133	0.0440176
CAM112A_map9	0002.CSV	809.99	0.0452695
CAM112A_map9	0002.CSV	813.847	0.0462526
CAM112A_map9	0002.CSV	817.704	0.0482177
CAM112A_map9	0002.CSV	821.562	0.0501191
CAM112A_map9	0002.CSV	825.419	0.0531227
CAM112A_map9	0002.CSV	829.276	0.05593
CAM112A_map9	0002.CSV	833.133	0.0598003
CAM112A_map9	0002.CSV	836.99	0.0640317
CAM112A_map9	0002.CSV	840.847	0.0718021
CAM112A_map9	0002.CSV	844.704	0.084538
CAM112A_map9	0002.CSV	848.561	0.09336
CAM112A_map9	0002.CSV	852.418	0.0974861
CAM112A_map9	0002.CSV	856.275	0.117097
CAM112A_map9	0002.CSV	860.132	0.159672
CAM112A_map9	0002.CSV	863.99	0.236832
CAM112A_map9	0002.CSV	867.847	0.329438
CAM112A_map9	0002.CSV	871.704	0.353688
CAM112A_map9	0002.CSV	875.561	0.288724
CAM112A_map9	0002.CSV	879.418	0.208733
CAM112A_map9	0002.CSV	883.275	0.128852
CAM112A_map9	0002.CSV	887.132	0.0608916
CAM112A_map9	0002.CSV	890.989	0.0298046
CAM112A_map9	0002.CSV	894.846	0.0261251
CAM112A_map9	0002.CSV	898.703	0.0271837
CAM112A_map9	0002.CSV	902.561	0.0288623
CAM112A_map9	0002.CSV	906.418	0.0299472
CAM112A_map9	0002.CSV	910.275	0.0316142
CAM112A_map9	0002.CSV	914.132	0.0327948
CAM112A_map9	0002.CSV	917.989	0.0343281
CAM112A_map9	0002.CSV	921.846	0.0352163
CAM112A_map9	0002.CSV	925.703	0.0366723
CAM112A_map9	0002.CSV	929.56	0.0377395
CAM112A_map9	0002.CSV	933.417	0.0390641
CAM112A_map9	0002.CSV	937.274	0.0396149
CAM112A_map9	0002.CSV	941.131	0.0404931
CAM112A_map9	0002.CSV	944.989	0.0409805
CAM112A_map9	0002.CSV	948.846	0.0418855
CAM112A_map9	0002.CSV	952.703	0.0423524
CAM112A_map9	0002.CSV	956.56	0.0434178
CAM112A_map9	0002.CSV	960.417	0.0439958
CAM112A_map9	0002.CSV	964.274	0.0449092
CAM112A_map9	0002.CSV	968.131	0.0454983
CAM112A_map9	0002.CSV	971.988	0.0467215
CAM112A_map9	0002.CSV	975.845	0.047571
CAM112A_map9	0002.CSV	979.702	0.0487614
CAM112A_map9	0002.CSV	983.559	0.049514
CAM112A_map9	0002.CSV	987.417	0.0507781
CAM112A_map9	0002.CSV	991.274	0.0516021
CAM112A_map9	0002.CSV	995.131	0.052827
CAM112A_map9	0002.CSV	998.988	0.0536035
CAM112A_map9	0002.CSV	1002.85	0.0548297
CAM112A_map9	0002.CSV	1006.7	0.0557025
CAM112A_map9	0002.CSV	1010.56	0.0570241
CAM112A_map9	0002.CSV	1014.42	0.0578912
CAM112A_map9	0002.CSV	1018.27	0.0590697
CAM112A_map9	0002.CSV	1022.13	0.0597631
CAM112A_map9	0002.CSV	1025.99	0.0608484
CAM112A_map9	0002.CSV	1029.85	0.0614834
CAM112A_map9	0002.CSV	1033.7	0.0626582
CAM112A_map9	0002.CSV	1037.56	0.0635604
CAM112A_map9	0002.CSV	1041.42	0.0648636
CAM112A_map9	0002.CSV	1045.27	0.0655877
CAM112A_map9	0002.CSV	1049.13	0.0667311
CAM112A_map9	0002.CSV	1052.99	0.0675869
CAM112A_map9	0002.CSV	1056.84	0.0693305
CAM112A_map9	0002.CSV	1060.7	0.0711752
CAM112A_map9	0002.CSV	1064.56	0.0737227
CAM112A_map9	0002.CSV	1068.42	0.0754831
CAM112A_map9	0002.CSV	1072.27	0.0771685
CAM112A_map9	0002.CSV	1076.13	0.0781632
CAM112A_map9	0002.CSV	1079.99	0.0800163
CAM112A_map9	0002.CSV	1083.84	0.0820364
CAM112A_map9	0002.CSV	1087.7	0.0840315
CAM112A_map9	0002.CSV	1091.56	0.083464
CAM112A_map9	0002.CSV	1095.41	0.0818523
CAM112A_map9	0002.CSV	1099.27	0.0803859
CAM112A_map9	0002.CSV	1103.13	0.0807617
CAM112A_map9	0002.CSV	1106.99	0.0816241
CAM112A_map9	0002.CSV	1110.84	0.083438
CAM112A_map9	0002.CSV	1114.7	0.0847082
CAM112A_map9	0002.CSV	1118.56	0.0858968
CAM112A_map9	0002.CSV	1122.41	0.0863219
CAM112A_map9	0002.CSV	1126.27	0.0872069
CAM112A_map9	0002.CSV	1130.13	0.0876617
CAM112A_map9	0002.CSV	1133.99	0.0886093
CAM112A_map9	0002.CSV	1137.84	0.0893556
CAM112A_map9	0002.CSV	1141.7	0.0906005
CAM112A_map9	0002.CSV	1145.56	0.0913828
CAM112A_map9	0002.CSV	1149.41	0.0927773
CAM112A_map9	0002.CSV	1153.27	0.0939845
CAM112A_map9	0002.CSV	1157.13	0.0958156
CAM112A_map9	0002.CSV	1160.99	0.0972739
CAM112A_map9	0002.CSV	1164.84	0.0987235
CAM112A_map9	0002.CSV	1168.7	0.0990441
CAM112A_map9	0002.CSV	1172.56	0.0994689
CAM112A_map9	0002.CSV	1176.41	0.0995027
CAM112A_map9	0002.CSV	1180.27	0.0999514
CAM112A_map9	0002.CSV	1184.13	0.0998384
CAM112A_map9	0002.CSV	1187.99	0.100125
CAM112A_map9	0002.CSV	1191.84	0.100102
CAM112A_map9	0002.CSV	1195.7	0.100673
CAM112A_map9	0002.CSV	1199.56	0.101069
CAM112A_map9	0002.CSV	1203.41	0.102202
CAM112A_map9	0002.CSV	1207.27	0.103259
CAM112A_map9	0002.CSV	1211.13	0.104974
CAM112A_map9	0002.CSV	1214.98	0.106411
CAM112A_map9	0002.CSV	1218.84	0.108507
CAM112A_map9	0002.CSV	1222.7	0.110457
CAM112A_map9	0002.CSV	1226.56	0.113145
CAM112A_map9	0002.CSV	1230.41	0.115584
CAM112A_map9	0002.CSV	1234.27	0.11872
CAM112A_map9	0002.CSV	1238.13	0.1216
CAM112A_map9	0002.CSV	1241.98	0.125113
CAM112A_map9	0002.CSV	1245.84	0.128311
CAM112A_map9	0002.CSV	1249.7	0.132077
CAM112A_map9	0002.CSV	1253.56	0.135383
CAM112A_map9	0002.CSV	1257.41	0.139121
CAM112A_map9	0002.CSV	1261.27	0.142376
CAM112A_map9	0002.CSV	1265.13	0.146212
CAM112A_map9	0002.CSV	1268.98	0.149745
CAM112A_map9	0002.CSV	1272.84	0.154135
CAM112A_map9	0002.CSV	1276.7	0.158129
CAM112A_map9	0002.CSV	1280.56	0.1628
CAM112A_map9	0002.CSV	1284.41	0.167061
CAM112A_map9	0002.CSV	1288.27	0.17197
CAM112A_map9	0002.CSV	1292.13	0.176352
CAM112A_map9	0002.CSV	1295.98	0.181492
CAM112A_map9	0002.CSV	1299.84	0.186623
CAM112A_map9	0002.CSV	1303.7	0.192998
CAM112A_map9	0002.CSV	1307.56	0.199447
CAM112A_map9	0002.CSV	1311.41	0.207371
CAM112A_map9	0002.CSV	1315.27	0.215285
CAM112A_map9	0002.CSV	1319.13	0.224247
CAM112A_map9	0002.CSV	1322.98	0.232301
CAM112A_map9	0002.CSV	1326.84	0.241551
CAM112A_map9	0002.CSV	1330.7	0.251475
CAM112A_map9	0002.CSV	1334.56	0.262831
CAM112A_map9	0002.CSV	1338.41	0.276258
CAM112A_map9	0002.CSV	1342.27	0.293617
CAM112A_map9	0002.CSV	1346.13	0.308805
CAM112A_map9	0002.CSV	1349.98	0.327147
CAM112A_map9	0002.CSV	1353.84	0.346936
CAM112A_map9	0002.CSV	1357.7	0.368918
CAM112A_map9	0002.CSV	1361.56	0.394388
CAM112A_map9	0002.CSV	1365.41	0.427065
CAM112A_map9	0002.CSV	1369.27	0.455929
CAM112A_map9	0002.CSV	1373.13	0.492018
CAM112A_map9	0002.CSV	1376.98	0.532418
CAM112A_map9	0002.CSV	1380.84	0.569205
CAM112A_map9	0002.CSV	1384.7	0.60124
CAM112A_map9	0002.CSV	1388.56	0.637112
CAM112A_map9	0002.CSV	1392.41	0.656275
CAM112A_map9	0002.CSV	1396.27	0.659806
CAM112A_map9	0002.CSV	1400.13	0.642273
CAM112A_map9	0002.CSV	1403.98	0.617936
CAM112A_map9	0002.CSV	1407.84	0.575419
CAM112A_map9	0002.CSV	1411.7	0.528762
CAM112A_map9	0002.CSV	1415.55	0.485341
CAM112A_map9	0002.CSV	1419.41	0.442853
CAM112A_map9	0002.CSV	1423.27	0.41132
CAM112A_map9	0002.CSV	1427.12	0.393367
CAM112A_map9	0002.CSV	1430.98	0.375001
CAM112A_map9	0002.CSV	1434.84	0.357047
CAM112A_map9	0002.CSV	1438.7	0.334905
CAM112A_map9	0002.CSV	1442.55	0.319083
CAM112A_map9	0002.CSV	1446.41	0.301712
CAM112A_map9	0002.CSV	1450.27	0.284112
CAM112A_map9	0002.CSV	1454.12	0.269871
CAM112A_map9	0002.CSV	1457.98	0.249558
CAM112A_map9	0002.CSV	1461.84	0.234286
CAM112A_map9	0002.CSV	1465.7	0.223702
CAM112A_map9	0002.CSV	1469.55	0.212762
CAM112A_map9	0002.CSV	1473.41	0.199709
CAM112A_map9	0002.CSV	1477.27	0.185802
CAM112A_map9	0002.CSV	1481.12	0.177689
CAM112A_map9	0002.CSV	1484.98	0.169702
CAM112A_map9	0002.CSV	1488.84	0.159849
CAM112A_map9	0002.CSV	1492.7	0.149585
CAM112A_map9	0002.CSV	1496.55	0.141765
CAM112A_map9	0002.CSV	1500.41	0.132607
CAM112A_map9	0002.CSV	1504.27	0.127319
CAM112A_map9	0002.CSV	1508.12	0.117069
CAM112A_map9	0002.CSV	1511.98	0.110108
CAM112A_map9	0002.CSV	1515.84	0.105552
CAM112A_map9	0002.CSV	1519.7	0.0999827
CAM112A_map9	0002.CSV	1523.55	0.0932165
CAM112A_map9	0002.CSV	1527.41	0.0888942
CAM112A_map9	0002.CSV	1531.27	0.0850255
CAM112A_map9	0002.CSV	1535.12	0.0818752
CAM112A_map9	0002.CSV	1538.98	0.0777482
CAM112A_map9	0002.CSV	1542.84	0.0680851
CAM112A_map9	0002.CSV	1546.7	0.0608053
CAM112A_map9	0002.CSV	1550.55	0.0554484
CAM112A_map9	0002.CSV	1554.41	0.0502161
CAM112A_map9	0002.CSV	1558.27	0.0447307
CAM112A_map9	0002.CSV	1562.12	0.0407298
CAM112A_map9	0002.CSV	1565.98	0.039488
CAM112A_map9	0002.CSV	1569.84	0.0384862
CAM112A_map9	0002.CSV	1573.69	0.0380141
CAM112A_map9	0002.CSV	1577.55	0.0368276
CAM112A_map9	0002.CSV	1581.41	0.0346224
CAM112A_map9	0002.CSV	1585.27	0.0317251
CAM112A_map9	0002.CSV	1589.12	0.0288863
CAM112A_map9	0002.CSV	1592.98	0.0261825
CAM112A_map9	0002.CSV	1596.84	0.0239155
CAM112A_map9	0002.CSV	1600.69	0.0220597
CAM112A_map9	0002.CSV	1604.55	0.0207745
CAM112A_map9	0002.CSV	1608.41	0.0196947
CAM112A_map9	0002.CSV	1612.27	0.0188602
CAM112A_map9	0002.CSV	1616.12	0.0178187
CAM112A_map9	0002.CSV	1619.98	0.0170018
CAM112A_map9	0002.CSV	1623.84	0.0160555
CAM112A_map9	0002.CSV	1627.69	0.0150993
CAM112A_map9	0002.CSV	1631.55	0.0140487
CAM112A_map9	0002.CSV	1635.41	0.013132
CAM112A_map9	0002.CSV	1639.27	0.0121702
CAM112A_map9	0002.CSV	1643.12	0.0116509
CAM112A_map9	0002.CSV	1646.98	0.0109531
CAM112A_map9	0002.CSV	1650.84	0.0105793
CAM112A_map9	0002.CSV	1654.69	0.0101891
CAM112A_map9	0002.CSV	1658.55	0.00989503
CAM112A_map9	0002.CSV	1662.41	0.00947287
CAM112A_map9	0002.CSV	1666.27	0.0092261
CAM112A_map9	0002.CSV	1670.12	0.00896087
CAM112A_map9	0002.CSV	1673.98	0.00887621
CAM112A_map9	0002.CSV	1677.84	0.00858919
CAM112A_map9	0002.CSV	1681.69	0.008494
CAM112A_map9	0002.CSV	1685.55	0.00842936
CAM112A_map9	0002.CSV	1689.41	0.0083103
CAM112A_map9	0002.CSV	1693.27	0.00791103
CAM112A_map9	0002.CSV	1697.12	0.00792591
CAM112A_map9	0002.CSV	1700.98	0.00826882
CAM112A_map9	0002.CSV	1704.84	0.00875134
CAM112A_map9	0002.CSV	1708.69	0.0091215
CAM112A_map9	0002.CSV	1712.55	0.00957583
CAM112A_map9	0002.CSV	1716.41	0.0107139
CAM112A_map9	0002.CSV	1720.27	0.0122455
CAM112A_map9	0002.CSV	1724.12	0.0126816
CAM112A_map9	0002.CSV	1727.98	0.0129987
CAM112A_map9	0002.CSV	1731.84	0.0132191
CAM112A_map9	0002.CSV	1735.69	0.0134671
CAM112A_map9	0002.CSV	1739.55	0.0128837
CAM112A_map9	0002.CSV	1743.41	0.0116548
CAM112A_map9	0002.CSV	1747.27	0.00990303
CAM112A_map9	0002.CSV	1751.12	0.00811533
CAM112A_map9	0002.CSV	1754.98	0.00681869
CAM112A_map9	0002.CSV	1758.84	0.00592265
CAM112A_map9	0002.CSV	1762.69	0.0052576
CAM112A_map9	0002.CSV	1766.55	0.00497825
CAM112A_map9	0002.CSV	1770.41	0.00501271
CAM112A_map9	0002.CSV	1774.26	0.00539603
CAM112A_map9	0002.CSV	1778.12	0.00565691
CAM112A_map9	0002.CSV	1781.98	0.00650736
CAM112A_map9	0002.CSV	1785.84	0.00825045
CAM112A_map9	0002.CSV	1789.69	0.0112214
CAM112A_map9	0002.CSV	1793.55	0.0154742
CAM112A_map9	0002.CSV	1797.41	0.0166321
CAM112A_map9	0002.CSV	1801.26	0.01388
CAM112A_map9	0002.CSV	1805.12	0.0101109
CAM112A_map9	0002.CSV	1808.98	0.00717238
CAM112A_map9	0002.CSV	1812.84	0.00532337
CAM112A_map9	0002.CSV	1816.69	0.00423828
CAM112A_map9	0002.CSV	1820.55	0.00361341
CAM112A_map9	0002.CSV	1824.41	0.00314681
CAM112A_map9	0002.CSV	1828.26	0.00300042
CAM112A_map9	0002.CSV	1832.12	0.00284224
CAM112A_map9	0002.CSV	1835.98	0.00274787
CAM112A_map9	0002.CSV	1839.84	0.00254888
CAM112A_map9	0002.CSV	1843.69	0.00252715
CAM112A_map9	0002.CSV	1847.55	0.00258451
CAM112A_map9	0002.CSV	1851.41	0.00253918
CAM112A_map9	0002.CSV	1855.26	0.00244357
CAM112A_map9	0002.CSV	1859.12	0.00251972
CAM112A_map9	0002.CSV	1862.98	0.0024637
CAM112A_map9	0002.CSV	1866.84	0.00254188
CAM112A_map9	0002.CSV	1870.69	0.00262688
CAM112A_map9	0002.CSV	1874.55	0.00260211
CAM112A_map9	0002.CSV	1878.41	0.00252732
CAM112A_map9	0002.CSV	1882.26	0.00255348
CAM112A_map9	0002.CSV	1886.12	0.00252255
CAM112A_map9	0002.CSV	1889.98	0.00259221
CAM112A_map9	0002.CSV	1893.83	0.00260467
CAM112A_map9	0002.CSV	1897.69	0.00260891
CAM112A_map9	0002.CSV	1901.55	0.00256854
CAM112A_map9	0002.CSV	1905.41	0.00266958
CAM112A_map9	0002.CSV	1909.26	0.00267661
CAM112A_map9	0002.CSV	1913.12	0.00265908
CAM112A_map9	0002.CSV	1916.98	0.00258408
CAM112A_map9	0002.CSV	1920.83	0.00272166
CAM112A_map9	0002.CSV	1924.69	0.00277134
CAM112A_map9	0002.CSV	1928.55	0.00276024
CAM112A_map9	0002.CSV	1932.4	0.0027456
CAM112A_map9	0002.CSV	1936.26	0.00282683
CAM112A_map9	0002.CSV	1940.12	0.0028201
CAM112A_map9	0002.CSV	1943.98	0.00297954
CAM112A_map9	0002.CSV	1947.83	0.00301564
CAM112A_map9	0002.CSV	1951.69	0.00303355
CAM112A_map9	0002.CSV	1955.55	0.00306188
CAM112A_map9	0002.CSV	1959.4	0.00317835
CAM112A_map9	0002.CSV	1963.26	0.00316497
CAM112A_map9	0002.CSV	1967.12	0.0031603
CAM112A_map9	0002.CSV	1970.98	0.00314418
CAM112A_map9	0002.CSV	1974.83	0.0031907
CAM112A_map9	0002.CSV	1978.69	0.00318773
CAM112A_map9	0002.CSV	1982.55	0.00323583
CAM112A_map9	0002.CSV	1986.4	0.00320199
CAM112A_map9	0002.CSV	1990.26	0.00328992
CAM112A_map9	0002.CSV	1994.12	0.00333823
CAM112A_map9	0002.CSV	1997.98	0.00340157
CAM112A_map9	0002.CSV	2001.83	0.00341373
CAM112A_map9	0002.CSV	2005.69	0.00343417
CAM112A_map9	0002.CSV	2009.55	0.00344599
CAM112A_map9	0002.CSV	2013.4	0.00350955
CAM112A_map9	0002.CSV	2017.26	0.00351733
CAM112A_map9	0002.CSV	2021.12	0.00356925
CAM112A_map9	0002.CSV	2024.97	0.00353935
CAM112A_map9	0002.CSV	2028.83	0.00355495
CAM112A_map9	0002.CSV	2032.69	0.00354583
CAM112A_map9	0002.CSV	2036.55	0.00361712
CAM112A_map9	0002.CSV	2040.4	0.00364175
CAM112A_map9	0002.CSV	2044.26	0.00368669
CAM112A_map9	0002.CSV	2048.12	0.00366463
CAM112A_map9	0002.CSV	2051.97	0.00374517
CAM112A_map9	0002.CSV	2055.83	0.003769
CAM112A_map9	0002.CSV	2059.69	0.00381302
CAM112A_map9	0002.CSV	2063.55	0.00386484
CAM112A_map9	0002.CSV	2067.4	0.00400426
CAM112A_map9	0002.CSV	2071.26	0.00405459
CAM112A_map9	0002.CSV	2075.12	0.00406326
CAM112A_map9	0002.CSV	2078.97	0.00400473
CAM112A_map9	0002.CSV	2082.83	0.00405479
CAM112A_map9	0002.CSV	2086.69	0.00409042
CAM112A_map9	0002.CSV	2090.55	0.00417518
CAM112A_map9	0002.CSV	2094.4	0.00418803
CAM112A_map9	0002.CSV	2098.26	0.00425494
CAM112A_map9	0002.CSV	2102.12	0.00428589
CAM112A_map9	0002.CSV	2105.97	0.00432187
CAM112A_map9	0002.CSV	2109.83	0.00433736
CAM112A_map9	0002.CSV	2113.69	0.00439965
CAM112A_map9	0002.CSV	2117.55	0.00445515
CAM112A_map9	0002.CSV	2121.4	0.00462205
CAM112A_map9	0002.CSV	2125.26	0.00472719
CAM112A_map9	0002.CSV	2129.12	0.00481918
CAM112A_map9	0002.CSV	2132.97	0.00482565
CAM112A_map9	0002.CSV	2136.83	0.00489879
CAM112A_map9	0002.CSV	2140.69	0.00495167
CAM112A_map9	0002.CSV	2144.55	0.0049565
CAM112A_map9	0002.CSV	2148.4	0.00491451
CAM112A_map9	0002.CSV	2152.26	0.00493411
CAM112A_map9	0002.CSV	2156.12	0.00489249
CAM112A_map9	0002.CSV	2159.97	0.00487755
CAM112A_map9	0002.CSV	2163.83	0.0048425
CAM112A_map9	0002.CSV	2167.69	0.00488368
CAM112A_map9	0002.CSV	2171.55	0.00488777
CAM112A_map9	0002.CSV	2175.4	0.00489303
CAM112A_map9	0002.CSV	2179.26	0.00488556
CAM112A_map9	0002.CSV	2183.12	0.00492191
CAM112A_map9	0002.CSV	2186.97	0.00493495
CAM112A_map9	0002.CSV	2190.83	0.00498385
CAM112A_map9	0002.CSV	2194.69	0.00494551
CAM112A_map9	0002.CSV	2198.55	0.00491863
CAM112A_map9	0002.CSV	2202.4	0.00493897
CAM112A_map9	0002.CSV	2206.26	0.00500382
CAM112A_map9	0002.CSV	2210.12	0.0049864
CAM112A_map9	0002.CSV	2213.97	0.00502927
CAM112A_map9	0002.CSV	2217.83	0.00500879
CAM112A_map9	0002.CSV	2221.69	0.00503624
CAM112A_map9	0002.CSV	2225.54	0.00504539
CAM112A_map9	0002.CSV	2229.4	0.0050417
CAM112A_map9	0002.CSV	2233.26	0.00499082
CAM112A_map9	0002.CSV	2237.12	0.00503061
CAM112A_map9	0002.CSV	2240.97	0.00504981
CAM112A_map9	0002.CSV	2244.83	0.0050595
CAM112A_map9	0002.CSV	2248.69	0.00506755
CAM112A_map9	0002.CSV	2252.54	0.00506124
CAM112A_map9	0002.CSV	2256.4	0.00499534
CAM112A_map9	0002.CSV	2260.26	0.00504874
CAM112A_map9	0002.CSV	2264.11	0.00508669
CAM112A_map9	0002.CSV	2267.97	0.00509487
CAM112A_map9	0002.CSV	2271.83	0.0050703
CAM112A_map9	0002.CSV	2275.69	0.00509671
CAM112A_map9	0002.CSV	2279.54	0.00506383
CAM112A_map9	0002.CSV	2283.4	0.00509195
CAM112A_map9	0002.CSV	2287.26	0.00509805
CAM112A_map9	0002.CSV	2291.11	0.00509842
CAM112A_map9	0002.CSV	2294.97	0.00506574
CAM112A_map9	0002.CSV	2298.83	0.00508344
CAM112A_map9	0002.CSV	2302.69	0.00499129
CAM112A_map9	0002.CSV	2306.54	0.00485962
CAM112A_map9	0002.CSV	2310.4	0.00463662
CAM112A_map9	0002.CSV	2314.26	0.00424507
CAM112A_map9	0002.CSV	2318.11	0.00341163
CAM112A_map9	0002.CSV	2321.97	0.00206245
CAM112A_map9	0002.CSV	2325.83	-3.86326e-05
CAM112A_map9	0002.CSV	2329.69	-0.00220496
CAM112A_map9	0002.CSV	2333.54	-0.00449223
CAM112A_map9	0002.CSV	2337.4	-0.00608969
CAM112A_map9	0002.CSV	2341.26	-0.006745
CAM112A_map9	0002.CSV	2345.11	-0.00127657
CAM112A_map9	0002.CSV	2348.97	0.000832561
CAM112A_map9	0002.CSV	2352.83	-0.00289012
CAM112A_map9	0002.CSV	2356.69	-0.0195035
CAM112A_map9	0002.CSV	2360.54	-0.038574
CAM112A_map9	0002.CSV	2364.4	-0.0276148
CAM112A_map9	0002.CSV	2368.26	-0.00792618
CAM112A_map9	0002.CSV	2372.11	0.00155445
CAM112A_map9	0002.CSV	2375.97	0.00468344
CAM112A_map9	0002.CSV	2379.83	0.00544233
CAM112A_map9	0002.CSV	2383.69	0.00561361
CAM112A_map9	0002.CSV	2387.54	0.0055641
CAM112A_map9	0002.CSV	2391.4	0.00556071
CAM112A_map9	0002.CSV	2395.26	0.00562143
CAM112A_map9	0002.CSV	2399.11	0.00567554
CAM112A_map9	0002.CSV	2402.97	0.00568991
CAM112A_map9	0002.CSV	2406.83	0.00575044
CAM112A_map9	0002.CSV	2410.68	0.0057897
CAM112A_map9	0002.CSV	2414.54	0.00580981
CAM112A_map9	0002.CSV	2418.4	0.00578906
CAM112A_map9	0002.CSV	2422.26	0.00587187
CAM112A_map9	0002.CSV	2426.11	0.0059932
CAM112A_map9	0002.CSV	2429.97	0.00607729
CAM112A_map9	0002.CSV	2433.83	0.00609097
CAM112A_map9	0002.CSV	2437.68	0.00617108
CAM112A_map9	0002.CSV	2441.54	0.00629367
CAM112A_map9	0002.CSV	2445.4	0.00643001
CAM112A_map9	0002.CSV	2449.26	0.00653635
CAM112A_map9	0002.CSV	2453.11	0.00667388
CAM112A_map9	0002.CSV	2456.97	0.00679318
CAM112A_map9	0002.CSV	2460.83	0.00697301
CAM112A_map9	0002.CSV	2464.68	0.00717178
CAM112A_map9	0002.CSV	2468.54	0.00742085
CAM112A_map9	0002.CSV	2472.4	0.00771274
CAM112A_map9	0002.CSV	2476.26	0.00806817
CAM112A_map9	0002.CSV	2480.11	0.00851319
CAM112A_map9	0002.CSV	2483.97	0.0090634
CAM112A_map9	0002.CSV	2487.83	0.00972761
CAM112A_map9	0002.CSV	2491.68	0.0105875
CAM112A_map9	0002.CSV	2495.54	0.0116411
CAM112A_map9	0002.CSV	2499.4	0.0129604
CAM112A_map9	0002.CSV	2503.26	0.0142962
CAM112A_map9	0002.CSV	2507.11	0.0154431
CAM112A_map9	0002.CSV	2510.97	0.0160816
CAM112A_map9	0002.CSV	2514.83	0.0161211
CAM112A_map9	0002.CSV	2518.68	0.0156838
CAM112A_map9	0002.CSV	2522.54	0.0148856
CAM112A_map9	0002.CSV	2526.4	0.0138169
CAM112A_map9	0002.CSV	2530.26	0.0126919
CAM112A_map9	0002.CSV	2534.11	0.0115774
CAM112A_map9	0002.CSV	2537.97	0.0106713
CAM112A_map9	0002.CSV	2541.83	0.0100084
CAM112A_map9	0002.CSV	2545.68	0.00954904
CAM112A_map9	0002.CSV	2549.54	0.00919615
CAM112A_map9	0002.CSV	2553.4	0.00898549
CAM112A_map9	0002.CSV	2557.26	0.00882258
CAM112A_map9	0002.CSV	2561.11	0.00873667
CAM112A_map9	0002.CSV	2564.97	0.00865419
CAM112A_map9	0002.CSV	2568.83	0.00856537
CAM112A_map9	0002.CSV	2572.68	0.00850457
CAM112A_map9	0002.CSV	2576.54	0.00846389
CAM112A_map9	0002.CSV	2580.4	0.00839656
CAM112A_map9	0002.CSV	2584.25	0.00832364
CAM112A_map9	0002.CSV	2588.11	0.00824707
CAM112A_map9	0002.CSV	2591.97	0.00824214
CAM112A_map9	0002.CSV	2595.83	0.00814321
CAM112A_map9	0002.CSV	2599.68	0.00802776
CAM112A_map9	0002.CSV	2603.54	0.00790131
CAM112A_map9	0002.CSV	2607.4	0.00775237
CAM112A_map9	0002.CSV	2611.25	0.00758546
CAM112A_map9	0002.CSV	2615.11	0.00746046
CAM112A_map9	0002.CSV	2618.97	0.0072401
CAM112A_map9	0002.CSV	2622.82	0.00708006
CAM112A_map9	0002.CSV	2626.68	0.00697149
CAM112A_map9	0002.CSV	2630.54	0.00682071
CAM112A_map9	0002.CSV	2634.4	0.00676484
CAM112A_map9	0002.CSV	2638.25	0.00668304
CAM112A_map9	0002.CSV	2642.11	0.00641844
CAM112A_map9	0002.CSV	2645.97	0.00626362
CAM112A_map9	0002.CSV	2649.82	0.00620133
CAM112A_map9	0002.CSV	2653.68	0.00614326
CAM112A_map9	0002.CSV	2657.54	0.0060949
CAM112A_map9	0002.CSV	2661.4	0.0060997
CAM112A_map9	0002.CSV	2665.25	0.00612007
CAM112A_map9	0002.CSV	2669.11	0.00623397
CAM112A_map9	0002.CSV	2672.97	0.00646885
CAM112A_map9	0002.CSV	2676.82	0.00680031
CAM112A_map9	0002.CSV	2680.68	0.00677827
CAM112A_map9	0002.CSV	2684.54	0.00640136
CAM112A_map9	0002.CSV	2688.4	0.00619901
CAM112A_map9	0002.CSV	2692.25	0.00617179
CAM112A_map9	0002.CSV	2696.11	0.00625982
CAM112A_map9	0002.CSV	2699.97	0.00629095
CAM112A_map9	0002.CSV	2703.82	0.00624667
CAM112A_map9	0002.CSV	2707.68	0.00638831
CAM112A_map9	0002.CSV	2711.54	0.00643613
CAM112A_map9	0002.CSV	2715.4	0.006414
CAM112A_map9	0002.CSV	2719.25	0.00667509
CAM112A_map9	0002.CSV	2723.11	0.00710118
CAM112A_map9	0002.CSV	2726.97	0.00704308
CAM112A_map9	0002.CSV	2730.82	0.00665258
CAM112A_map9	0002.CSV	2734.68	0.00665588
CAM112A_map9	0002.CSV	2738.54	0.00672742
CAM112A_map9	0002.CSV	2742.4	0.00676965
CAM112A_map9	0002.CSV	2746.25	0.00718973
CAM112A_map9	0002.CSV	2750.11	0.00726968
CAM112A_map9	0002.CSV	2753.97	0.00691426
CAM112A_map9	0002.CSV	2757.82	0.00676016
CAM112A_map9	0002.CSV	2761.68	0.00661834
CAM112A_map9	0002.CSV	2765.54	0.00653642
CAM112A_map9	0002.CSV	2769.39	0.00682919
CAM112A_map9	0002.CSV	2773.25	0.0074164
CAM112A_map9	0002.CSV	2777.11	0.00731972
CAM112A_map9	0002.CSV	2780.97	0.00692978
CAM112A_map9	0002.CSV	2784.82	0.00726499
CAM112A_map9	0002.CSV	2788.68	0.00801278
CAM112A_map9	0002.CSV	2792.54	0.00820956
CAM112A_map9	0002.CSV	2796.39	0.00820861
CAM112A_map9	0002.CSV	2800.25	0.00799317
CAM112A_map9	0002.CSV	2804.11	0.00772636
CAM112A_map9	0002.CSV	2807.97	0.00817796
CAM112A_map9	0002.CSV	2811.82	0.00837123
CAM112A_map9	0002.CSV	2815.68	0.00828328
CAM112A_map9	0002.CSV	2819.54	0.00860186
CAM112A_map9	0002.CSV	2823.39	0.00904601
CAM112A_map9	0002.CSV	2827.25	0.00947003
CAM112A_map9	0002.CSV	2831.11	0.0104984
CAM112A_map9	0002.CSV	2834.97	0.0121773
CAM112A_map9	0002.CSV	2838.82	0.0140466
CAM112A_map9	0002.CSV	2842.68	0.0166901
CAM112A_map9	0002.CSV	2846.54	0.0212206
CAM112A_map9	0002.CSV	2850.39	0.0247149
CAM112A_map9	0002.CSV	2854.25	0.0247729
CAM112A_map9	0002.CSV	2858.11	0.0230424
CAM112A_map9	0002.CSV	2861.97	0.0208308
CAM112A_map9	0002.CSV	2865.82	0.0193264
CAM112A_map9	0002.CSV	2869.68	0.0192014
CAM112A_map9	0002.CSV	2873.54	0.0190967
CAM112A_map9	0002.CSV	2877.39	0.0178996
CAM112A_map9	0002.CSV	2881.25	0.0168491
CAM112A_map9	0002.CSV	2885.11	0.0166202
CAM112A_map9	0002.CSV	2888.97	0.0171052
CAM112A_map9	0002.CSV	2892.82	0.0182289
CAM112A_map9	0002.CSV	2896.68	0.0193179
CAM112A_map9	0002.CSV	2900.54	0.020284
CAM112A_map9	0002.CSV	2904.39	0.021886
CAM112A_map9	0002.CSV	2908.25	0.0247098
CAM112A_map9	0002.CSV	2912.11	0.0291685
CAM112A_map9	0002.CSV	2915.97	0.0338994
CAM112A_map9	0002.CSV	2919.82	0.036292
CAM112A_map9	0002.CSV	2923.68	0.0359503
CAM112A_map9	0002.CSV	2927.54	0.0342148
CAM112A_map9	0002.CSV	2931.39	0.0311764
CAM112A_map9	0002.CSV	2935.25	0.0274196
CAM112A_map9	0002.CSV	2939.11	0.0244821
CAM112A_map9	0002.CSV	2942.96	0.0227984
CAM112A_map9	0002.CSV	2946.82	0.0217129
CAM112A_map9	0002.CSV	2950.68	0.0211025
CAM112A_map9	0002.CSV	2954.54	0.0206155
CAM112A_map9	0002.CSV	2958.39	0.0197375
CAM112A_map9	0002.CSV	2962.25	0.0186485
CAM112A_map9	0002.CSV	2966.11	0.0171081
CAM112A_map9	0002.CSV	2969.96	0.0158155
CAM112A_map9	0002.CSV	2973.82	0.0151547
CAM112A_map9	0002.CSV	2977.68	0.0146628
CAM112A_map9	0002.CSV	2981.53	0.0138098
CAM112A_map9	0002.CSV	2985.39	0.0127124
CAM112A_map9	0002.CSV	2989.25	0.0122141
CAM112A_map9	0002.CSV	2993.11	0.0120008
CAM112A_map9	0002.CSV	2996.96	0.0114585
CAM112A_map9	0002.CSV	3000.82	0.0108267
CAM112A_map9	0002.CSV	3004.68	0.010394
CAM112A_map9	0002.CSV	3008.53	0.0103973
CAM112A_map9	0002.CSV	3012.39	0.0105807
CAM112A_map9	0002.CSV	3016.25	0.0105805
CAM112A_map9	0002.CSV	3020.11	0.0103919
CAM112A_map9	0002.CSV	3023.96	0.0101251
CAM112A_map9	0002.CSV	3027.82	0.00997249
CAM112A_map9	0002.CSV	3031.68	0.0101938
CAM112A_map9	0002.CSV	3035.53	0.0103135
CAM112A_map9	0002.CSV	3039.39	0.0102619
CAM112A_map9	0002.CSV	3043.25	0.0102977
CAM112A_map9	0002.CSV	3047.11	0.0102294
CAM112A_map9	0002.CSV	3050.96	0.0101811
CAM112A_map9	0002.CSV	3054.82	0.0101435
CAM112A_map9	0002.CSV	3058.68	0.0100947
CAM112A_map9	0002.CSV	3062.53	0.0101604
CAM112A_map9	0002.CSV	3066.39	0.0103544
CAM112A_map9	0002.CSV	3070.25	0.0103257
CAM112A_map9	0002.CSV	3074.11	0.0103748
CAM112A_map9	0002.CSV	3077.96	0.0106129
CAM112A_map9	0002.CSV	3081.82	0.0106669
CAM112A_map9	0002.CSV	3085.68	0.0106111
CAM112A_map9	0002.CSV	3089.53	0.0105518
CAM112A_map9	0002.CSV	3093.39	0.0103715
CAM112A_map9	0002.CSV	3097.25	0.0103423
CAM112A_map9	0002.CSV	3101.11	0.0104276
CAM112A_map9	0002.CSV	3104.96	0.0104916
CAM112A_map9	0002.CSV	3108.82	0.0106245
CAM112A_map9	0002.CSV	3112.68	0.0107692
CAM112A_map9	0002.CSV	3116.53	0.0109254
CAM112A_map9	0002.CSV	3120.39	0.0108656
CAM112A_map9	0002.CSV	3124.25	0.0106529
CAM112A_map9	0002.CSV	3128.11	0.010581
CAM112A_map9	0002.CSV	3131.96	0.0105474
CAM112A_map9	0002.CSV	3135.82	0.0106508
CAM112A_map9	0002.CSV	3139.68	0.0108429
CAM112A_map9	0002.CSV	3143.53	0.0107791
CAM112A_map9	0002.CSV	3147.39	0.0108596
CAM112A_map9	0002.CSV	3151.25	0.0111308
CAM112A_map9	0002.CSV	3155.1	0.011074
CAM112A_map9	0002.CSV	3158.96	0.010843
CAM112A_map9	0002.CSV	3162.82	0.010862
CAM112A_map9	0002.CSV	3166.68	0.0109231
CAM112A_map9	0002.CSV	3170.53	0.0109376
CAM112A_map9	0002.CSV	3174.39	0.0108835
CAM112A_map9	0002.CSV	3178.25	0.0109621
CAM112A_map9	0002.CSV	3182.1	0.0110747
CAM112A_map9	0002.CSV	3185.96	0.0111872
CAM112A_map9	0002.CSV	3189.82	0.0113
CAM112A_map9	0002.CSV	3193.68	0.0112787
CAM112A_map9	0002.CSV	3197.53	0.0112491
CAM112A_map9	0002.CSV	3201.39	0.0113583
CAM112A_map9	0002.CSV	3205.25	0.0114391
CAM112A_map9	0002.CSV	3209.1	0.0114655
CAM112A_map9	0002.CSV	3212.96	0.0115971
CAM112A_map9	0002.CSV	3216.82	0.0116783
CAM112A_map9	0002.CSV	3220.68	0.0116184
CAM112A_map9	0002.CSV	3224.53	0.0116136
CAM112A_map9	0002.CSV	3228.39	0.0118682
CAM112A_map9	0002.CSV	3232.25	0.0121975
CAM112A_map9	0002.CSV	3236.1	0.0122356
CAM112A_map9	0002.CSV	3239.96	0.012109
CAM112A_map9	0002.CSV	3243.82	0.0121751
CAM112A_map9	0002.CSV	3247.68	0.0122901
CAM112A_map9	0002.CSV	3251.53	0.012186
CAM112A_map9	0002.CSV	3255.39	0.0121457
CAM112A_map9	0002.CSV	3259.25	0.0121089
CAM112A_map9	0002.CSV	3263.1	0.012152
CAM112A_map9	0002.CSV	3266.96	0.0123693
CAM112A_map9	0002.CSV	3270.82	0.0125947
CAM112A_map9	0002.CSV	3274.68	0.0126105
CAM112A_map9	0002.CSV	3278.53	0.0124518
CAM112A_map9	0002.CSV	3282.39	0.0124142
CAM112A_map9	0002.CSV	3286.25	0.0125498
CAM112A_map9	0002.CSV	3290.1	0.0127653
CAM112A_map9	0002.CSV	3293.96	0.0128856
CAM112A_map9	0002.CSV	3297.82	0.0127785
CAM112A_map9	0002.CSV	3301.67	0.0128076
CAM112A_map9	0002.CSV	3305.53	0.0128936
CAM112A_map9	0002.CSV	3309.39	0.0128357
CAM112A_map9	0002.CSV	3313.25	0.0126191
CAM112A_map9	0002.CSV	3317.1	0.0125092
CAM112A_map9	0002.CSV	3320.96	0.012562
CAM112A_map9	0002.CSV	3324.82	0.012734
CAM112A_map9	0002.CSV	3328.67	0.0126722
CAM112A_map9	0002.CSV	3332.53	0.0126193
CAM112A_map9	0002.CSV	3336.39	0.0127842
CAM112A_map9	0002.CSV	3340.24	0.0128951
CAM112A_map9	0002.CSV	3344.1	0.0128237
CAM112A_map9	0002.CSV	3347.96	0.0128195
CAM112A_map9	0002.CSV	3351.82	0.0128645
CAM112A_map9	0002.CSV	3355.67	0.0128156
CAM112A_map9	0002.CSV	3359.53	0.0128672
CAM112A_map9	0002.CSV	3363.39	0.0128663
CAM112A_map9	0002.CSV	3367.24	0.0129237
CAM112A_map9	0002.CSV	3371.1	0.0129134
CAM112A_map9	0002.CSV	3374.96	0.0127847
CAM112A_map9	0002.CSV	3378.82	0.0126616
CAM112A_map9	0002.CSV	3382.67	0.0125192
CAM112A_map9	0002.CSV	3386.53	0.0126336
CAM112A_map9	0002.CSV	3390.39	0.0128947
CAM112A_map9	0002.CSV	3394.24	0.0129997
CAM112A_map9	0002.CSV	3398.1	0.0130006
CAM112A_map9	0002.CSV	3401.96	0.0128725
CAM112A_map9	0002.CSV	3405.82	0.0126963
CAM112A_map9	0002.CSV	3409.67	0.0125998
CAM112A_map9	0002.CSV	3413.53	0.0125288
CAM112A_map9	0002.CSV	3417.39	0.0124008
CAM112A_map9	0002.CSV	3421.24	0.0123295
CAM112A_map9	0002.CSV	3425.1	0.0122997
CAM112A_map9	0002.CSV	3428.96	0.0124587
CAM112A_map9	0002.CSV	3432.82	0.0125667
CAM112A_map9	0002.CSV	3436.67	0.0123105
CAM112A_map9	0002.CSV	3440.53	0.0118864
CAM112A_map9	0002.CSV	3444.39	0.0117141
CAM112A_map9	0002.CSV	3448.24	0.0116478
CAM112A_map9	0002.CSV	3452.1	0.0114622
CAM112A_map9	0002.CSV	3455.96	0.0113779
CAM112A_map9	0002.CSV	3459.82	0.0114963
CAM112A_map9	0002.CSV	3463.67	0.0117032
CAM112A_map9	0002.CSV	3467.53	0.0117425
CAM112A_map9	0002.CSV	3471.39	0.0114172
CAM112A_map9	0002.CSV	3475.24	0.0111059
CAM112A_map9	0002.CSV	3479.1	0.011139
CAM112A_map9	0002.CSV	3482.96	0.0111979
CAM112A_map9	0002.CSV	3486.82	0.0111608
CAM112A_map9	0002.CSV	3490.67	0.010925
CAM112A_map9	0002.CSV	3494.53	0.0108813
CAM112A_map9	0002.CSV	3498.39	0.0109997
CAM112A_map9	0002.CSV	3502.24	0.0108621
CAM112A_map9	0002.CSV	3506.1	0.0104853
CAM112A_map9	0002.CSV	3509.96	0.0103435
CAM112A_map9	0002.CSV	3513.81	0.0103412
CAM112A_map9	0002.CSV	3517.67	0.0100972
CAM112A_map9	0002.CSV	3521.53	0.0101146
CAM112A_map9	0002.CSV	3525.39	0.010239
CAM112A_map9	0002.CSV	3529.24	0.0100571
CAM112A_map9	0002.CSV	3533.1	0.00991666
CAM112A_map9	0002.CSV	3536.96	0.00982043
CAM112A_map9	0002.CSV	3540.81	0.00972879
CAM112A_map9	0002.CSV	3544.67	0.00982283
CAM112A_map9	0002.CSV	3548.53	0.00968702
CAM112A_map9	0002.CSV	3552.39	0.00931309
CAM112A_map9	0002.CSV	3556.24	0.0090359
CAM112A_map9	0002.CSV	3560.1	0.00879313
CAM112A_map9	0002.CSV	3563.96	0.0084694
CAM112A_map9	0002.CSV	3567.81	0.00853049
CAM112A_map9	0002.CSV	3571.67	0.00853198
CAM112A_map9	0002.CSV	3575.53	0.00822691
CAM112A_map9	0002.CSV	3579.39	0.00828446
CAM112A_map9	0002.CSV	3583.24	0.00832053
CAM112A_map9	0002.CSV	3587.1	0.00824191
CAM112A_map9	0002.CSV	3590.96	0.00810078
CAM112A_map9	0002.CSV	3594.81	0.00780701
CAM112A_map9	0002.CSV	3598.67	0.00758439
CAM112A_map9	0002.CSV	3602.53	0.00746265
CAM112A_map9	0002.CSV	3606.39	0.00718269
CAM112A_map9	0002.CSV	3610.24	0.00699267
CAM112A_map9	0002.CSV	3614.1	0.0068783
CAM112A_map9	0002.CSV	3617.96	0.00691823
CAM112A_map9	0002.CSV	3621.81	0.00694638
CAM112A_map9	0002.CSV	3625.67	0.00648957
CAM112A_map9	0002.CSV	3629.53	0.00640146
CAM112A_map9	0002.CSV	3633.39	0.00668196
CAM112A_map9	0002.CSV	3637.24	0.00647897
CAM112A_map9	0002.CSV	3641.1	0.00610558
CAM112A_map9	0002.CSV	3644.96	0.00560952
CAM112A_map9	0002.CSV	3648.81	0.00610787
CAM112A_map9	0002.CSV	3652.67	0.00664407
CAM112A_map9	0002.CSV	3656.53	0.00641087
CAM112A_map9	0002.CSV	3660.38	0.00631676
CAM112A_map9	0002.CSV	3664.24	0.00582109
CAM112A_map9	0002.CSV	3668.1	0.00539536
CAM112A_map9	0002.CSV	3671.96	0.00564036
CAM112A_map9	0002.CSV	3675.81	0.00612497
CAM112A_map9	0002.CSV	3679.67	0.00619323
CAM112A_map9	0002.CSV	3683.53	0.00591476
CAM112A_map9	0002.CSV	3687.38	0.00587892
CAM112A_map9	0002.CSV	3691.24	0.00633482
CAM112A_map9	0002.CSV	3695.1	0.00610098
CAM112A_map9	0002.CSV	3698.95	0.00575964
CAM112A_map9	0002.CSV	3702.81	0.00570579
CAM112A_map9	0002.CSV	3706.67	0.00544256
CAM112A_map9	0002.CSV	3710.53	0.00541096
CAM112A_map9	0002.CSV	3714.38	0.00577586
CAM112A_map9	0002.CSV	3718.24	0.00554729
CAM112A_map9	0002.CSV	3722.1	0.00550836
CAM112A_map9	0002.CSV	3725.95	0.00560015
CAM112A_map9	0002.CSV	3729.81	0.00533773
CAM112A_map9	0002.CSV	3733.67	0.00545561
CAM112A_map9	0002.CSV	3737.53	0.00620415
CAM112A_map9	0002.CSV	3741.38	0.00574551
CAM112A_map9	0002.CSV	3745.24	0.00520069
CAM112A_map9	0002.CSV	3749.1	0.00517919
CAM112A_map9	0002.CSV	3752.95	0.00577025
CAM112A_map9	0002.CSV	3756.81	0.00583624
CAM112A_map9	0002.CSV	3760.67	0.00583416
CAM112A_map9	0002.CSV	3764.53	0.00562428
CAM112A_map9	0002.CSV	3768.38	0.00549299
CAM112A_map9	0002.CSV	3772.24	0.00556088
CAM112A_map9	0002.CSV	3776.1	0.00555008
CAM112A_map9	0002.CSV	3779.95	0.00577418
CAM112A_map9	0002.CSV	3783.81	0.00575303
CAM112A_map9	0002.CSV	3787.67	0.00563096
CAM112A_map9	0002.CSV	3791.53	0.00553568
CAM112A_map9	0002.CSV	3795.38	0.00535547
CAM112A_map9	0002.CSV	3799.24	0.00535953
CAM112A_map9	0002.CSV	3803.1	0.00564708
CAM112A_map9	0002.CSV	3806.95	0.00586828
CAM112A_map9	0002.CSV	3810.81	0.0057159
CAM112A_map9	0002.CSV	3814.67	0.00554014
CAM112A_map9	0002.CSV	3818.53	0.00575293
CAM112A_map9	0002.CSV	3822.38	0.00591903
CAM112A_map9	0002.CSV	3826.24	0.00568206
CAM112A_map9	0002.CSV	3830.1	0.0054983
CAM112A_map9	0002.CSV	3833.95	0.00536876
CAM112A_map9	0002.CSV	3837.81	0.00551467
CAM112A_map9	0002.CSV	3841.67	0.00593461
CAM112A_map9	0002.CSV	3845.53	0.00571734
CAM112A_map9	0002.CSV	3849.38	0.0052031
CAM112A_map9	0002.CSV	3853.24	0.0054386
CAM112A_map9	0002.CSV	3857.1	0.00576948
CAM112A_map9	0002.CSV	3860.95	0.00521823
CAM112A_map9	0002.CSV	3864.81	0.00517148
CAM112A_map9	0002.CSV	3868.67	0.00537966
CAM112A_map9	0002.CSV	3872.52	0.00566077
CAM112A_map9	0002.CSV	3876.38	0.00553712
CAM112A_map9	0002.CSV	3880.24	0.00549877
CAM112A_map9	0002.CSV	3884.1	0.00577331
CAM112A_map9	0002.CSV	3887.95	0.00570777
CAM112A_map9	0002.CSV	3891.81	0.00557226
CAM112A_map9	0002.CSV	3895.67	0.00529023
CAM112A_map9	0002.CSV	3899.52	0.00516129
CAM112A_map9	0002.CSV	3903.38	0.00577579
CAM112A_map9	0002.CSV	3907.24	0.00582287
CAM112A_map9	0002.CSV	3911.1	0.00534598
CAM112A_map9	0002.CSV	3914.95	0.00509621
CAM112A_map9	0002.CSV	3918.81	0.00524026
CAM112A_map9	0002.CSV	3922.67	0.00529087
CAM112A_map9	0002.CSV	3926.52	0.00518898
CAM112A_map9	0002.CSV	3930.38	0.00521333
CAM112A_map9	0002.CSV	3934.24	0.0053919
CAM112A_map9	0002.CSV	3938.09	0.00524676
CAM112A_map9	0002.CSV	3941.95	0.00523872
CAM112A_map9	0002.CSV	3945.81	0.00530968
CAM112A_map9	0002.CSV	3949.67	0.00530167
CAM112A_map9	0002.CSV	3953.52	0.00531321
CAM112A_map9	0002.CSV	3957.38	0.00531622
CAM112A_map9	0002.CSV	3961.24	0.00525387
CAM112A_map9	0002.CSV	3965.09	0.00515056
CAM112A_map9	0002.CSV	3968.95	0.00510513
CAM112A_map9	0002.CSV	3972.81	0.0052087
CAM112A_map9	0002.CSV	3976.67	0.00520994
CAM112A_map9	0002.CSV	3980.52	0.00522654
CAM112A_map9	0002.CSV	3984.38	0.00522507
CAM112A_map9	0002.CSV	3988.24	0.00508682
CAM112A_map9	0002.CSV	3992.09	0.00500339
CAM112A_map9	0002.CSV	3995.95	0.00504586
CAM112A_map9	0002.CSV	3999.81	0.0051004
CAM112A_map9	0003.CSV	674.992	0.030654
CAM112A_map9	0003.CSV	678.849	0.0333262
CAM112A_map9	0003.CSV	682.706	0.0344707
CAM112A_map9	0003.CSV	686.563	0.0377665
CAM112A_map9	0003.CSV	690.42	0.0410681
CAM112A_map9	0003.CSV	694.277	0.0482438
CAM112A_map9	0003.CSV	698.134	0.0562968
CAM112A_map9	0003.CSV	701.991	0.0665274
CAM112A_map9	0003.CSV	705.849	0.0844633
CAM112A_map9	0003.CSV	709.706	0.111294
CAM112A_map9	0003.CSV	713.563	0.104341
CAM112A_map9	0003.CSV	717.42	0.0648024
CAM112A_map9	0003.CSV	721.277	0.0372867
CAM112A_map9	0003.CSV	725.134	0.030438
CAM112A_map9	0003.CSV	728.991	0.0293597
CAM112A_map9	0003.CSV	732.848	0.0308498
CAM112A_map9	0003.CSV	736.705	0.0324439
CAM112A_map9	0003.CSV	740.562	0.034724
CAM112A_map9	0003.CSV	744.42	0.0359613
CAM112A_map9	0003.CSV	748.277	0.0365697
CAM112A_map9	0003.CSV	752.134	0.0363466
CAM112A_map9	0003.CSV	755.991	0.0372965
CAM112A_map9	0003.CSV	759.848	0.0373996
CAM112A_map9	0003.CSV	763.705	0.0382327
CAM112A_map9	0003.CSV	767.562	0.0386706
CAM112A_map9	0003.CSV	771.419	0.0391709
CAM112A_map9	0003.CSV	775.276	0.0386553
CAM112A_map9	0003.CSV	779.133	0.0386122
CAM112A_map9	0003.CSV	782.99	0.0379164
CAM112A_map9	0003.CSV	786.848	0.0380407
CAM112A_map9	0003.CSV	790.705	0.0381044
CAM112A_map9	0003.CSV	794.562	0.0390646
CAM112A_map9	0003.CSV	798.419	0.0396382
CAM112A_map9	0003.CSV	802.276	0.0402948
CAM112A_map9	0003.CSV	806.133	0.0402551
CAM112A_map9	0003.CSV	809.99	0.0412858
CAM112A_map9	0003.CSV	813.847	0.0421642
CAM112A_map9	0003.CSV	817.704	0.0436447
CAM112A_map9	0003.CSV	821.562	0.0453104
CAM112A_map9	0003.CSV	825.419	0.0478539
CAM112A_map9	0003.CSV	829.276	0.050244
CAM112A_map9	0003.CSV	833.133	0.0534662
CAM112A_map9	0003.CSV	836.99	0.0568764
CAM112A_map9	0003.CSV	840.847	0.0627084
CAM112A_map9	0003.CSV	844.704	0.0719732
CAM112A_map9	0003.CSV	848.561	0.0783635
CAM112A_map9	0003.CSV	852.418	0.0809772
CAM112A_map9	0003.CSV	856.275	0.0944648
CAM112A_map9	0003.CSV	860.132	0.124045
CAM112A_map9	0003.CSV	863.99	0.182933
CAM112A_map9	0003.CSV	867.847	0.265441
CAM112A_map9	0003.CSV	871.704	0.296082
CAM112A_map9	0003.CSV	875.561	0.242538
CAM112A_map9	0003.CSV	879.418	0.174434
CAM112A_map9	0003.CSV	883.275	0.109344
CAM112A_map9	0003.CSV	887.132	0.053714
CAM112A_map9	0003.CSV	890.989	0.0277217
CAM112A_map9	0003.CSV	894.846	0.0245923
CAM112A_map9	0003.CSV	898.703	0.0254514
CAM112A_map9	0003.CSV	902.561	0.0268807
CAM112A_map9	0003.CSV	906.418	0.027827
CAM112A_map9	0003.CSV	910.275	0.0292623
CAM112A_map9	0003.CSV	914.132	0.0301821
CAM112A_map9	0003.CSV	917.989	0.0313917
CAM112A_map9	0003.CSV	921.846	0.0320443
CAM112A_map9	0003.CSV	925.703	0.0332894
CAM112A_map9	0003.CSV	929.56	0.0342191
CAM112A_map9	0003.CSV	933.417	0.0353341
CAM112A_map9	0003.CSV	937.274	0.0357299
CAM112A_map9	0003.CSV	941.131	0.0364261
CAM112A_map9	0003.CSV	944.989	0.0366984
CAM112A_map9	0003.CSV	948.846	0.0373549
CAM112A_map9	0003.CSV	952.703	0.0377128
CAM112A_map9	0003.CSV	956.56	0.0385587
CAM112A_map9	0003.CSV	960.417	0.0391432
CAM112A_map9	0003.CSV	964.274	0.0400225
CAM112A_map9	0003.CSV	968.131	0.0405437
CAM112A_map9	0003.CSV	971.988	0.0415452
CAM112A_map9	0003.CSV	975.845	0.0422193
CAM112A_map9	0003.CSV	979.702	0.0433124
CAM112A_map9	0003.CSV	983.559	0.0441342
CAM112A_map9	0003.CSV	987.417	0.0453186
CAM112A_map9	0003.CSV	991.274	0.0460046
CAM112A_map9	0003.CSV	995.131	0.0470125
CAM112A_map9	0003.CSV	998.988	0.047704
CAM112A_map9	0003.CSV	1002.85	0.0487576
CAM112A_map9	0003.CSV	1006.7	0.0494259
CAM112A_map9	0003.CSV	1010.56	0.0504706
CAM112A_map9	0003.CSV	1014.42	0.0512484
CAM112A_map9	0003.CSV	1018.27	0.0523985
CAM112A_map9	0003.CSV	1022.13	0.0531897
CAM112A_map9	0003.CSV	1025.99	0.0543953
CAM112A_map9	0003.CSV	1029.85	0.0550964
CAM112A_map9	0003.CSV	1033.7	0.0562168
CAM112A_map9	0003.CSV	1037.56	0.0570932
CAM112A_map9	0003.CSV	1041.42	0.0581842
CAM112A_map9	0003.CSV	1045.27	0.0585979
CAM112A_map9	0003.CSV	1049.13	0.0595513
CAM112A_map9	0003.CSV	1052.99	0.0607196
CAM112A_map9	0003.CSV	1056.84	0.0628958
CAM112A_map9	0003.CSV	1060.7	0.0651407
CAM112A_map9	0003.CSV	1064.56	0.0676049
CAM112A_map9	0003.CSV	1068.42	0.068885
CAM112A_map9	0003.CSV	1072.27	0.0696839
CAM112A_map9	0003.CSV	1076.13	0.0696103
CAM112A_map9	0003.CSV	1079.99	0.0701348
CAM112A_map9	0003.CSV	1083.84	0.0705232
CAM112A_map9	0003.CSV	1087.7	0.0708466
CAM112A_map9	0003.CSV	1091.56	0.0698201
CAM112A_map9	0003.CSV	1095.41	0.068881
CAM112A_map9	0003.CSV	1099.27	0.0683064
CAM112A_map9	0003.CSV	1103.13	0.0690481
CAM112A_map9	0003.CSV	1106.99	0.0700838
CAM112A_map9	0003.CSV	1110.84	0.0718064
CAM112A_map9	0003.CSV	1114.7	0.0729998
CAM112A_map9	0003.CSV	1118.56	0.0740253
CAM112A_map9	0003.CSV	1122.41	0.0742059
CAM112A_map9	0003.CSV	1126.27	0.0745147
CAM112A_map9	0003.CSV	1130.13	0.0744263
CAM112A_map9	0003.CSV	1133.99	0.0748117
CAM112A_map9	0003.CSV	1137.84	0.0750349
CAM112A_map9	0003.CSV	1141.7	0.0755852
CAM112A_map9	0003.CSV	1145.56	0.0756675
CAM112A_map9	0003.CSV	1149.41	0.0762076
CAM112A_map9	0003.CSV	1153.27	0.0767477
CAM112A_map9	0003.CSV	1157.13	0.077905
CAM112A_map9	0003.CSV	1160.99	0.0786778
CAM112A_map9	0003.CSV	1164.84	0.0794192
CAM112A_map9	0003.CSV	1168.7	0.0791836
CAM112A_map9	0003.CSV	1172.56	0.0789723
CAM112A_map9	0003.CSV	1176.41	0.0785172
CAM112A_map9	0003.CSV	1180.27	0.0784849
CAM112A_map9	0003.CSV	1184.13	0.0780826
CAM112A_map9	0003.CSV	1187.99	0.0780316
CAM112A_map9	0003.CSV	1191.84	0.0777696
CAM112A_map9	0003.CSV	1195.7	0.0779953
CAM112A_map9	0003.CSV	1199.56	0.0781354
CAM112A_map9	0003.CSV	1203.41	0.0788712
CAM112A_map9	0003.CSV	1207.27	0.0794807
CAM112A_map9	0003.CSV	1211.13	0.0806143
CAM112A_map9	0003.CSV	1214.98	0.0815531
CAM112A_map9	0003.CSV	1218.84	0.0830278
CAM112A_map9	0003.CSV	1222.7	0.0843812
CAM112A_map9	0003.CSV	1226.56	0.0864343
CAM112A_map9	0003.CSV	1230.41	0.0883981
CAM112A_map9	0003.CSV	1234.27	0.0908532
CAM112A_map9	0003.CSV	1238.13	0.0932236
CAM112A_map9	0003.CSV	1241.98	0.0961963
CAM112A_map9	0003.CSV	1245.84	0.0989302
CAM112A_map9	0003.CSV	1249.7	0.102111
CAM112A_map9	0003.CSV	1253.56	0.104822
CAM112A_map9	0003.CSV	1257.41	0.10761
CAM112A_map9	0003.CSV	1261.27	0.109844
CAM112A_map9	0003.CSV	1265.13	0.112401
CAM112A_map9	0003.CSV	1268.98	0.114606
CAM112A_map9	0003.CSV	1272.84	0.117427
CAM112A_map9	0003.CSV	1276.7	0.119956
CAM112A_map9	0003.CSV	1280.56	0.122894
CAM112A_map9	0003.CSV	1284.41	0.125315
CAM112A_map9	0003.CSV	1288.27	0.12803
CAM112A_map9	0003.CSV	1292.13	0.130183
CAM112A_map9	0003.CSV	1295.98	0.132707
CAM112A_map9	0003.CSV	1299.84	0.135131
CAM112A_map9	0003.CSV	1303.7	0.138623
CAM112A_map9	0003.CSV	1307.56	0.142364
CAM112A_map9	0003.CSV	1311.41	0.14731
CAM112A_map9	0003.CSV	1315.27	0.152306
CAM112A_map9	0003.CSV	1319.13	0.158062
CAM112A_map9	0003.CSV	1322.98	0.163142
CAM112A_map9	0003.CSV	1326.84	0.16904
CAM112A_map9	0003.CSV	1330.7	0.175561
CAM112A_map9	0003.CSV	1334.56	0.183337
CAM112A_map9	0003.CSV	1338.41	0.192865
CAM112A_map9	0003.CSV	1342.27	0.205321
CAM112A_map9	0003.CSV	1346.13	0.216302
CAM112A_map9	0003.CSV	1349.98	0.229678
CAM112A_map9	0003.CSV	1353.84	0.244151
CAM112A_map9	0003.CSV	1357.7	0.260076
CAM112A_map9	0003.CSV	1361.56	0.278637
CAM112A_map9	0003.CSV	1365.41	0.30206
CAM112A_map9	0003.CSV	1369.27	0.322375
CAM112A_map9	0003.CSV	1373.13	0.347575
CAM112A_map9	0003.CSV	1376.98	0.375566
CAM112A_map9	0003.CSV	1380.84	0.400217
CAM112A_map9	0003.CSV	1384.7	0.421299
CAM112A_map9	0003.CSV	1388.56	0.444032
CAM112A_map9	0003.CSV	1392.41	0.456223
CAM112A_map9	0003.CSV	1396.27	0.460135
CAM112A_map9	0003.CSV	1400.13	0.453125
CAM112A_map9	0003.CSV	1403.98	0.442518
CAM112A_map9	0003.CSV	1407.84	0.421927
CAM112A_map9	0003.CSV	1411.7	0.397774
CAM112A_map9	0003.CSV	1415.55	0.373287
CAM112A_map9	0003.CSV	1419.41	0.347321
CAM112A_map9	0003.CSV	1423.27	0.326321
CAM112A_map9	0003.CSV	1427.12	0.313574
CAM112A_map9	0003.CSV	1430.98	0.300071
CAM112A_map9	0003.CSV	1434.84	0.286967
CAM112A_map9	0003.CSV	1438.7	0.271219
CAM112A_map9	0003.CSV	1442.55	0.260082
CAM112A_map9	0003.CSV	1446.41	0.247649
CAM112A_map9	0003.CSV	1450.27	0.234816
CAM112A_map9	0003.CSV	1454.12	0.223934
CAM112A_map9	0003.CSV	1457.98	0.208142
CAM112A_map9	0003.CSV	1461.84	0.195937
CAM112A_map9	0003.CSV	1465.7	0.187235
CAM112A_map9	0003.CSV	1469.55	0.178189
CAM112A_map9	0003.CSV	1473.41	0.167481
CAM112A_map9	0003.CSV	1477.27	0.156037
CAM112A_map9	0003.CSV	1481.12	0.14918
CAM112A_map9	0003.CSV	1484.98	0.142422
CAM112A_map9	0003.CSV	1488.84	0.133999
CAM112A_map9	0003.CSV	1492.7	0.125035
CAM112A_map9	0003.CSV	1496.55	0.117977
CAM112A_map9	0003.CSV	1500.41	0.109765
CAM112A_map9	0003.CSV	1504.27	0.104937
CAM112A_map9	0003.CSV	1508.12	0.0958583
CAM112A_map9	0003.CSV	1511.98	0.0895211
CAM112A_map9	0003.CSV	1515.84	0.0852861
CAM112A_map9	0003.CSV	1519.7	0.0800586
CAM112A_map9	0003.CSV	1523.55	0.0738887
CAM112A_map9	0003.CSV	1527.41	0.0696839
CAM112A_map9	0003.CSV	1531.27	0.0660595
CAM112A_map9	0003.CSV	1535.12	0.0629707
CAM112A_map9	0003.CSV	1538.98	0.05956
CAM112A_map9	0003.CSV	1542.84	0.0527979
CAM112A_map9	0003.CSV	1546.7	0.047618
CAM112A_map9	0003.CSV	1550.55	0.043984
CAM112A_map9	0003.CSV	1554.41	0.0403928
CAM112A_map9	0003.CSV	1558.27	0.0368901
CAM112A_map9	0003.CSV	1562.12	0.0342823
CAM112A_map9	0003.CSV	1565.98	0.0331619
CAM112A_map9	0003.CSV	1569.84	0.0321548
CAM112A_map9	0003.CSV	1573.69	0.0316389
CAM112A_map9	0003.CSV	1577.55	0.0309401
CAM112A_map9	0003.CSV	1581.41	0.029592
CAM112A_map9	0003.CSV	1585.27	0.0277485
CAM112A_map9	0003.CSV	1589.12	0.025935
CAM112A_map9	0003.CSV	1592.98	0.0241453
CAM112A_map9	0003.CSV	1596.84	0.0226425
CAM112A_map9	0003.CSV	1600.69	0.0213175
CAM112A_map9	0003.CSV	1604.55	0.0203675
CAM112A_map9	0003.CSV	1608.41	0.0195721
CAM112A_map9	0003.CSV	1612.27	0.0189611
CAM112A_map9	0003.CSV	1616.12	0.0181711
CAM112A_map9	0003.CSV	1619.98	0.0176027
CAM112A_map9	0003.CSV	1623.84	0.0169481
CAM112A_map9	0003.CSV	1627.69	0.0162621
CAM112A_map9	0003.CSV	1631.55	0.0153875
CAM112A_map9	0003.CSV	1635.41	0.0147956
CAM112A_map9	0003.CSV	1639.27	0.0141971
CAM112A_map9	0003.CSV	1643.12	0.0137979
CAM112A_map9	0003.CSV	1646.98	0.0133862
CAM112A_map9	0003.CSV	1650.84	0.0131471
CAM112A_map9	0003.CSV	1654.69	0.0129395
CAM112A_map9	0003.CSV	1658.55	0.0127419
CAM112A_map9	0003.CSV	1662.41	0.0123513
CAM112A_map9	0003.CSV	1666.27	0.0120578
CAM112A_map9	0003.CSV	1670.12	0.0117882
CAM112A_map9	0003.CSV	1673.98	0.0118305
CAM112A_map9	0003.CSV	1677.84	0.0115912
CAM112A_map9	0003.CSV	1681.69	0.011481
CAM112A_map9	0003.CSV	1685.55	0.0115203
CAM112A_map9	0003.CSV	1689.41	0.0115002
CAM112A_map9	0003.CSV	1693.27	0.0112026
CAM112A_map9	0003.CSV	1697.12	0.0114278
CAM112A_map9	0003.CSV	1700.98	0.0120522
CAM112A_map9	0003.CSV	1704.84	0.0127852
CAM112A_map9	0003.CSV	1708.69	0.0134406
CAM112A_map9	0003.CSV	1712.55	0.0142048
CAM112A_map9	0003.CSV	1716.41	0.0160774
CAM112A_map9	0003.CSV	1720.27	0.0182149
CAM112A_map9	0003.CSV	1724.12	0.0188141
[truncated: 117,095 more rows]

## Sheet: CAM112_map10
Map	Select spectrum number	Wavenumbers	Absorbance
CAM112A_map10	0001.CSV	674.992	0.0351562
CAM112A_map10	0001.CSV	678.849	0.0368417
CAM112A_map10	0001.CSV	682.706	0.0374118
CAM112A_map10	0001.CSV	686.563	0.0400153
CAM112A_map10	0001.CSV	690.42	0.0420705
CAM112A_map10	0001.CSV	694.277	0.0477588
CAM112A_map10	0001.CSV	698.134	0.0545998
CAM112A_map10	0001.CSV	701.991	0.0674298
CAM112A_map10	0001.CSV	705.849	0.0930482
CAM112A_map10	0001.CSV	709.706	0.132823
CAM112A_map10	0001.CSV	713.563	0.134312
CAM112A_map10	0001.CSV	717.42	0.0893392
CAM112A_map10	0001.CSV	721.277	0.0527268
CAM112A_map10	0001.CSV	725.134	0.039738
CAM112A_map10	0001.CSV	728.991	0.0349662
CAM112A_map10	0001.CSV	732.848	0.0334933
CAM112A_map10	0001.CSV	736.705	0.0318713
CAM112A_map10	0001.CSV	740.562	0.0322619
CAM112A_map10	0001.CSV	744.42	0.0326985
CAM112A_map10	0001.CSV	748.277	0.0336826
CAM112A_map10	0001.CSV	752.134	0.0339431
CAM112A_map10	0001.CSV	755.991	0.035324
CAM112A_map10	0001.CSV	759.848	0.0359936
CAM112A_map10	0001.CSV	763.705	0.0374726
CAM112A_map10	0001.CSV	767.562	0.0381804
CAM112A_map10	0001.CSV	771.419	0.039372
CAM112A_map10	0001.CSV	775.276	0.0397347
CAM112A_map10	0001.CSV	779.133	0.0407629
CAM112A_map10	0001.CSV	782.99	0.0406502
CAM112A_map10	0001.CSV	786.848	0.0408932
CAM112A_map10	0001.CSV	790.705	0.0408293
CAM112A_map10	0001.CSV	794.562	0.0418335
CAM112A_map10	0001.CSV	798.419	0.0426125
CAM112A_map10	0001.CSV	802.276	0.0441298
CAM112A_map10	0001.CSV	806.133	0.0447298
CAM112A_map10	0001.CSV	809.99	0.045892
CAM112A_map10	0001.CSV	813.847	0.0468032
CAM112A_map10	0001.CSV	817.704	0.0487867
CAM112A_map10	0001.CSV	821.562	0.0506425
CAM112A_map10	0001.CSV	825.419	0.0537019
CAM112A_map10	0001.CSV	829.276	0.0568719
CAM112A_map10	0001.CSV	833.133	0.0611286
CAM112A_map10	0001.CSV	836.99	0.0655533
CAM112A_map10	0001.CSV	840.847	0.0735243
CAM112A_map10	0001.CSV	844.704	0.0868746
CAM112A_map10	0001.CSV	848.561	0.0965755
CAM112A_map10	0001.CSV	852.418	0.100561
CAM112A_map10	0001.CSV	856.275	0.119255
CAM112A_map10	0001.CSV	860.132	0.160531
CAM112A_map10	0001.CSV	863.99	0.239376
CAM112A_map10	0001.CSV	867.847	0.341927
CAM112A_map10	0001.CSV	871.704	0.375561
CAM112A_map10	0001.CSV	875.561	0.308335
CAM112A_map10	0001.CSV	879.418	0.221723
CAM112A_map10	0001.CSV	883.275	0.138295
CAM112A_map10	0001.CSV	887.132	0.0687779
CAM112A_map10	0001.CSV	890.989	0.0350004
CAM112A_map10	0001.CSV	894.846	0.0281948
CAM112A_map10	0001.CSV	898.703	0.0269348
CAM112A_map10	0001.CSV	902.561	0.0271216
CAM112A_map10	0001.CSV	906.418	0.0271581
CAM112A_map10	0001.CSV	910.275	0.0279961
CAM112A_map10	0001.CSV	914.132	0.0286006
CAM112A_map10	0001.CSV	917.989	0.029853
CAM112A_map10	0001.CSV	921.846	0.0305995
CAM112A_map10	0001.CSV	925.703	0.0318138
CAM112A_map10	0001.CSV	929.56	0.0326548
CAM112A_map10	0001.CSV	933.417	0.0338566
CAM112A_map10	0001.CSV	937.274	0.0343124
CAM112A_map10	0001.CSV	941.131	0.0349729
CAM112A_map10	0001.CSV	944.989	0.0351542
CAM112A_map10	0001.CSV	948.846	0.0358672
CAM112A_map10	0001.CSV	952.703	0.0363084
CAM112A_map10	0001.CSV	956.56	0.0372427
CAM112A_map10	0001.CSV	960.417	0.0375832
CAM112A_map10	0001.CSV	964.274	0.0382322
CAM112A_map10	0001.CSV	968.131	0.0387123
CAM112A_map10	0001.CSV	971.988	0.0397237
CAM112A_map10	0001.CSV	975.845	0.0403769
CAM112A_map10	0001.CSV	979.702	0.0415174
CAM112A_map10	0001.CSV	983.559	0.0423313
CAM112A_map10	0001.CSV	987.417	0.043633
CAM112A_map10	0001.CSV	991.274	0.0445641
CAM112A_map10	0001.CSV	995.131	0.0458364
CAM112A_map10	0001.CSV	998.988	0.0467875
CAM112A_map10	0001.CSV	1002.85	0.0481205
CAM112A_map10	0001.CSV	1006.7	0.049094
CAM112A_map10	0001.CSV	1010.56	0.0504759
CAM112A_map10	0001.CSV	1014.42	0.0513355
CAM112A_map10	0001.CSV	1018.27	0.0524076
CAM112A_map10	0001.CSV	1022.13	0.0530844
CAM112A_map10	0001.CSV	1025.99	0.0542295
CAM112A_map10	0001.CSV	1029.85	0.054901
CAM112A_map10	0001.CSV	1033.7	0.056082
CAM112A_map10	0001.CSV	1037.56	0.0570012
CAM112A_map10	0001.CSV	1041.42	0.0584045
CAM112A_map10	0001.CSV	1045.27	0.0592809
CAM112A_map10	0001.CSV	1049.13	0.0606128
CAM112A_map10	0001.CSV	1052.99	0.0618027
CAM112A_map10	0001.CSV	1056.84	0.0638731
CAM112A_map10	0001.CSV	1060.7	0.0659496
CAM112A_map10	0001.CSV	1064.56	0.0685604
CAM112A_map10	0001.CSV	1068.42	0.0704821
CAM112A_map10	0001.CSV	1072.27	0.0726709
CAM112A_map10	0001.CSV	1076.13	0.074406
CAM112A_map10	0001.CSV	1079.99	0.0767939
CAM112A_map10	0001.CSV	1083.84	0.0790448
CAM112A_map10	0001.CSV	1087.7	0.0810691
CAM112A_map10	0001.CSV	1091.56	0.0804752
CAM112A_map10	0001.CSV	1095.41	0.0787955
CAM112A_map10	0001.CSV	1099.27	0.0772943
CAM112A_map10	0001.CSV	1103.13	0.0774714
CAM112A_map10	0001.CSV	1106.99	0.0781995
CAM112A_map10	0001.CSV	1110.84	0.0798424
CAM112A_map10	0001.CSV	1114.7	0.0806305
CAM112A_map10	0001.CSV	1118.56	0.0811534
CAM112A_map10	0001.CSV	1122.41	0.0812593
CAM112A_map10	0001.CSV	1126.27	0.0819761
CAM112A_map10	0001.CSV	1130.13	0.0821901
CAM112A_map10	0001.CSV	1133.99	0.0826894
CAM112A_map10	0001.CSV	1137.84	0.0829235
CAM112A_map10	0001.CSV	1141.7	0.0836878
CAM112A_map10	0001.CSV	1145.56	0.0840505
CAM112A_map10	0001.CSV	1149.41	0.0849478
CAM112A_map10	0001.CSV	1153.27	0.0858072
CAM112A_map10	0001.CSV	1157.13	0.0875447
CAM112A_map10	0001.CSV	1160.99	0.0892044
CAM112A_map10	0001.CSV	1164.84	0.0908651
CAM112A_map10	0001.CSV	1168.7	0.0913959
CAM112A_map10	0001.CSV	1172.56	0.0917226
CAM112A_map10	0001.CSV	1176.41	0.0913165
CAM112A_map10	0001.CSV	1180.27	0.0910643
CAM112A_map10	0001.CSV	1184.13	0.0903662
CAM112A_map10	0001.CSV	1187.99	0.0901357
CAM112A_map10	0001.CSV	1191.84	0.0895097
CAM112A_map10	0001.CSV	1195.7	0.0893314
CAM112A_map10	0001.CSV	1199.56	0.0891145
CAM112A_map10	0001.CSV	1203.41	0.0897308
CAM112A_map10	0001.CSV	1207.27	0.0903818
CAM112A_map10	0001.CSV	1211.13	0.0917128
CAM112A_map10	0001.CSV	1214.98	0.0927153
CAM112A_map10	0001.CSV	1218.84	0.094245
CAM112A_map10	0001.CSV	1222.7	0.0957296
CAM112A_map10	0001.CSV	1226.56	0.0979594
CAM112A_map10	0001.CSV	1230.41	0.100145
CAM112A_map10	0001.CSV	1234.27	0.10288
CAM112A_map10	0001.CSV	1238.13	0.105214
CAM112A_map10	0001.CSV	1241.98	0.10802
CAM112A_map10	0001.CSV	1245.84	0.110594
CAM112A_map10	0001.CSV	1249.7	0.113838
CAM112A_map10	0001.CSV	1253.56	0.116873
CAM112A_map10	0001.CSV	1257.41	0.120361
CAM112A_map10	0001.CSV	1261.27	0.123362
CAM112A_map10	0001.CSV	1265.13	0.126755
CAM112A_map10	0001.CSV	1268.98	0.129889
CAM112A_map10	0001.CSV	1272.84	0.133899
CAM112A_map10	0001.CSV	1276.7	0.137739
CAM112A_map10	0001.CSV	1280.56	0.142257
CAM112A_map10	0001.CSV	1284.41	0.146371
CAM112A_map10	0001.CSV	1288.27	0.151093
CAM112A_map10	0001.CSV	1292.13	0.155312
CAM112A_map10	0001.CSV	1295.98	0.160208
CAM112A_map10	0001.CSV	1299.84	0.165105
CAM112A_map10	0001.CSV	1303.7	0.171014
CAM112A_map10	0001.CSV	1307.56	0.177241
CAM112A_map10	0001.CSV	1311.41	0.185108
CAM112A_map10	0001.CSV	1315.27	0.193398
CAM112A_map10	0001.CSV	1319.13	0.202876
CAM112A_map10	0001.CSV	1322.98	0.211094
CAM112A_map10	0001.CSV	1326.84	0.220145
CAM112A_map10	0001.CSV	1330.7	0.230294
CAM112A_map10	0001.CSV	1334.56	0.242235
CAM112A_map10	0001.CSV	1338.41	0.257124
CAM112A_map10	0001.CSV	1342.27	0.276484
CAM112A_map10	0001.CSV	1346.13	0.293982
CAM112A_map10	0001.CSV	1349.98	0.315128
CAM112A_map10	0001.CSV	1353.84	0.337901
CAM112A_map10	0001.CSV	1357.7	0.362567
CAM112A_map10	0001.CSV	1361.56	0.390969
CAM112A_map10	0001.CSV	1365.41	0.426186
CAM112A_map10	0001.CSV	1369.27	0.456439
CAM112A_map10	0001.CSV	1373.13	0.493515
CAM112A_map10	0001.CSV	1376.98	0.534562
CAM112A_map10	0001.CSV	1380.84	0.571339
CAM112A_map10	0001.CSV	1384.7	0.603527
CAM112A_map10	0001.CSV	1388.56	0.639898
CAM112A_map10	0001.CSV	1392.41	0.660574
CAM112A_map10	0001.CSV	1396.27	0.668471
CAM112A_map10	0001.CSV	1400.13	0.65681
CAM112A_map10	0001.CSV	1403.98	0.637819
CAM112A_map10	0001.CSV	1407.84	0.601972
CAM112A_map10	0001.CSV	1411.7	0.55977
CAM112A_map10	0001.CSV	1415.55	0.517044
CAM112A_map10	0001.CSV	1419.41	0.473281
CAM112A_map10	0001.CSV	1423.27	0.439557
CAM112A_map10	0001.CSV	1427.12	0.419549
CAM112A_map10	0001.CSV	1430.98	0.399178
CAM112A_map10	0001.CSV	1434.84	0.380015
CAM112A_map10	0001.CSV	1438.7	0.357609
CAM112A_map10	0001.CSV	1442.55	0.34158
CAM112A_map10	0001.CSV	1446.41	0.324058
CAM112A_map10	0001.CSV	1450.27	0.306421
CAM112A_map10	0001.CSV	1454.12	0.292083
CAM112A_map10	0001.CSV	1457.98	0.272436
CAM112A_map10	0001.CSV	1461.84	0.257454
CAM112A_map10	0001.CSV	1465.7	0.246767
CAM112A_map10	0001.CSV	1469.55	0.235343
CAM112A_map10	0001.CSV	1473.41	0.221558
CAM112A_map10	0001.CSV	1477.27	0.206782
CAM112A_map10	0001.CSV	1481.12	0.198054
CAM112A_map10	0001.CSV	1484.98	0.189748
CAM112A_map10	0001.CSV	1488.84	0.180178
CAM112A_map10	0001.CSV	1492.7	0.17033
CAM112A_map10	0001.CSV	1496.55	0.162737
CAM112A_map10	0001.CSV	1500.41	0.154079
CAM112A_map10	0001.CSV	1504.27	0.148942
CAM112A_map10	0001.CSV	1508.12	0.139099
CAM112A_map10	0001.CSV	1511.98	0.1321
CAM112A_map10	0001.CSV	1515.84	0.127336
CAM112A_map10	0001.CSV	1519.7	0.121724
CAM112A_map10	0001.CSV	1523.55	0.114892
CAM112A_map10	0001.CSV	1527.41	0.110265
CAM112A_map10	0001.CSV	1531.27	0.106458
CAM112A_map10	0001.CSV	1535.12	0.104157
CAM112A_map10	0001.CSV	1538.98	0.101386
CAM112A_map10	0001.CSV	1542.84	0.093121
CAM112A_map10	0001.CSV	1546.7	0.0844788
CAM112A_map10	0001.CSV	1550.55	0.0777075
CAM112A_map10	0001.CSV	1554.41	0.071569
CAM112A_map10	0001.CSV	1558.27	0.066218
CAM112A_map10	0001.CSV	1562.12	0.0627026
CAM112A_map10	0001.CSV	1565.98	0.0618216
CAM112A_map10	0001.CSV	1569.84	0.0620578
CAM112A_map10	0001.CSV	1573.69	0.0629583
CAM112A_map10	0001.CSV	1577.55	0.06223
CAM112A_map10	0001.CSV	1581.41	0.05881
CAM112A_map10	0001.CSV	1585.27	0.0539409
CAM112A_map10	0001.CSV	1589.12	0.0494384
CAM112A_map10	0001.CSV	1592.98	0.0457494
CAM112A_map10	0001.CSV	1596.84	0.0430551
CAM112A_map10	0001.CSV	1600.69	0.0409421
CAM112A_map10	0001.CSV	1604.55	0.0394709
CAM112A_map10	0001.CSV	1608.41	0.0382659
CAM112A_map10	0001.CSV	1612.27	0.0373898
CAM112A_map10	0001.CSV	1616.12	0.0363959
CAM112A_map10	0001.CSV	1619.98	0.0356095
CAM112A_map10	0001.CSV	1623.84	0.03454
CAM112A_map10	0001.CSV	1627.69	0.0335069
CAM112A_map10	0001.CSV	1631.55	0.0322846
CAM112A_map10	0001.CSV	1635.41	0.0314859
CAM112A_map10	0001.CSV	1639.27	0.0304966
CAM112A_map10	0001.CSV	1643.12	0.0296546
CAM112A_map10	0001.CSV	1646.98	0.0290695
CAM112A_map10	0001.CSV	1650.84	0.0290145
CAM112A_map10	0001.CSV	1654.69	0.0287616
CAM112A_map10	0001.CSV	1658.55	0.0282272
CAM112A_map10	0001.CSV	1662.41	0.027598
CAM112A_map10	0001.CSV	1666.27	0.0272431
CAM112A_map10	0001.CSV	1670.12	0.0270027
CAM112A_map10	0001.CSV	1673.98	0.0270055
CAM112A_map10	0001.CSV	1677.84	0.0264783
CAM112A_map10	0001.CSV	1681.69	0.0261305
CAM112A_map10	0001.CSV	1685.55	0.0259673
CAM112A_map10	0001.CSV	1689.41	0.0256483
CAM112A_map10	0001.CSV	1693.27	0.0249135
CAM112A_map10	0001.CSV	1697.12	0.0247714
CAM112A_map10	0001.CSV	1700.98	0.0248935
CAM112A_map10	0001.CSV	1704.84	0.0249823
CAM112A_map10	0001.CSV	1708.69	0.0249079
CAM112A_map10	0001.CSV	1712.55	0.0249447
CAM112A_map10	0001.CSV	1716.41	0.0258138
CAM112A_map10	0001.CSV	1720.27	0.0270284
CAM112A_map10	0001.CSV	1724.12	0.02712
CAM112A_map10	0001.CSV	1727.98	0.0272264
CAM112A_map10	0001.CSV	1731.84	0.027432
CAM112A_map10	0001.CSV	1735.69	0.0280976
CAM112A_map10	0001.CSV	1739.55	0.0276281
CAM112A_map10	0001.CSV	1743.41	0.0263124
CAM112A_map10	0001.CSV	1747.27	0.0245365
CAM112A_map10	0001.CSV	1751.12	0.0226795
CAM112A_map10	0001.CSV	1754.98	0.0211678
CAM112A_map10	0001.CSV	1758.84	0.0203216
CAM112A_map10	0001.CSV	1762.69	0.0197698
CAM112A_map10	0001.CSV	1766.55	0.0193424
CAM112A_map10	0001.CSV	1770.41	0.019264
CAM112A_map10	0001.CSV	1774.26	0.0197495
CAM112A_map10	0001.CSV	1778.12	0.0199837
CAM112A_map10	0001.CSV	1781.98	0.0209228
CAM112A_map10	0001.CSV	1785.84	0.0226534
CAM112A_map10	0001.CSV	1789.69	0.0255957
CAM112A_map10	0001.CSV	1793.55	0.0297567
CAM112A_map10	0001.CSV	1797.41	0.0308663
CAM112A_map10	0001.CSV	1801.26	0.0281782
CAM112A_map10	0001.CSV	1805.12	0.0243406
CAM112A_map10	0001.CSV	1808.98	0.0212857
CAM112A_map10	0001.CSV	1812.84	0.0193828
CAM112A_map10	0001.CSV	1816.69	0.0182115
CAM112A_map10	0001.CSV	1820.55	0.017628
CAM112A_map10	0001.CSV	1824.41	0.0172231
CAM112A_map10	0001.CSV	1828.26	0.0171519
CAM112A_map10	0001.CSV	1832.12	0.0169572
CAM112A_map10	0001.CSV	1835.98	0.016728
CAM112A_map10	0001.CSV	1839.84	0.0164409
CAM112A_map10	0001.CSV	1843.69	0.0165394
CAM112A_map10	0001.CSV	1847.55	0.0166833
CAM112A_map10	0001.CSV	1851.41	0.0165543
CAM112A_map10	0001.CSV	1855.26	0.0163376
CAM112A_map10	0001.CSV	1859.12	0.0163266
CAM112A_map10	0001.CSV	1862.98	0.0162089
CAM112A_map10	0001.CSV	1866.84	0.016333
CAM112A_map10	0001.CSV	1870.69	0.0165261
CAM112A_map10	0001.CSV	1874.55	0.0163493
CAM112A_map10	0001.CSV	1878.41	0.0161943
CAM112A_map10	0001.CSV	1882.26	0.0162091
CAM112A_map10	0001.CSV	1886.12	0.0161548
CAM112A_map10	0001.CSV	1889.98	0.0163021
CAM112A_map10	0001.CSV	1893.83	0.0163388
CAM112A_map10	0001.CSV	1897.69	0.016339
CAM112A_map10	0001.CSV	1901.55	0.0161856
CAM112A_map10	0001.CSV	1905.41	0.0161595
CAM112A_map10	0001.CSV	1909.26	0.0162151
CAM112A_map10	0001.CSV	1913.12	0.0162419
CAM112A_map10	0001.CSV	1916.98	0.0161626
CAM112A_map10	0001.CSV	1920.83	0.0163213
CAM112A_map10	0001.CSV	1924.69	0.0163701
CAM112A_map10	0001.CSV	1928.55	0.0163437
CAM112A_map10	0001.CSV	1932.4	0.0163055
CAM112A_map10	0001.CSV	1936.26	0.0163289
CAM112A_map10	0001.CSV	1940.12	0.0163325
CAM112A_map10	0001.CSV	1943.98	0.016548
CAM112A_map10	0001.CSV	1947.83	0.0165246
CAM112A_map10	0001.CSV	1951.69	0.0164708
CAM112A_map10	0001.CSV	1955.55	0.0164957
CAM112A_map10	0001.CSV	1959.4	0.0166496
CAM112A_map10	0001.CSV	1963.26	0.0166362
CAM112A_map10	0001.CSV	1967.12	0.0166785
CAM112A_map10	0001.CSV	1970.98	0.0166213
CAM112A_map10	0001.CSV	1974.83	0.0165981
CAM112A_map10	0001.CSV	1978.69	0.0165819
CAM112A_map10	0001.CSV	1982.55	0.016601
CAM112A_map10	0001.CSV	1986.4	0.0165505
CAM112A_map10	0001.CSV	1990.26	0.016646
CAM112A_map10	0001.CSV	1994.12	0.0167012
CAM112A_map10	0001.CSV	1997.98	0.0166787
CAM112A_map10	0001.CSV	2001.83	0.0166399
CAM112A_map10	0001.CSV	2005.69	0.016679
CAM112A_map10	0001.CSV	2009.55	0.0166802
CAM112A_map10	0001.CSV	2013.4	0.0167068
CAM112A_map10	0001.CSV	2017.26	0.0167722
CAM112A_map10	0001.CSV	2021.12	0.0168607
CAM112A_map10	0001.CSV	2024.97	0.0168318
CAM112A_map10	0001.CSV	2028.83	0.0168745
CAM112A_map10	0001.CSV	2032.69	0.016859
CAM112A_map10	0001.CSV	2036.55	0.0168767
CAM112A_map10	0001.CSV	2040.4	0.0168958
CAM112A_map10	0001.CSV	2044.26	0.0169701
CAM112A_map10	0001.CSV	2048.12	0.0169047
CAM112A_map10	0001.CSV	2051.97	0.0169109
CAM112A_map10	0001.CSV	2055.83	0.01695
CAM112A_map10	0001.CSV	2059.69	0.0170574
CAM112A_map10	0001.CSV	2063.55	0.0170875
CAM112A_map10	0001.CSV	2067.4	0.0171591
CAM112A_map10	0001.CSV	2071.26	0.0171406
CAM112A_map10	0001.CSV	2075.12	0.0171746
CAM112A_map10	0001.CSV	2078.97	0.0171832
CAM112A_map10	0001.CSV	2082.83	0.0172271
CAM112A_map10	0001.CSV	2086.69	0.017245
CAM112A_map10	0001.CSV	2090.55	0.0173304
CAM112A_map10	0001.CSV	2094.4	0.0173559
CAM112A_map10	0001.CSV	2098.26	0.017432
CAM112A_map10	0001.CSV	2102.12	0.0174597
CAM112A_map10	0001.CSV	2105.97	0.0175333
CAM112A_map10	0001.CSV	2109.83	0.0176141
CAM112A_map10	0001.CSV	2113.69	0.0176973
CAM112A_map10	0001.CSV	2117.55	0.0177153
CAM112A_map10	0001.CSV	2121.4	0.0178248
CAM112A_map10	0001.CSV	2125.26	0.0178893
CAM112A_map10	0001.CSV	2129.12	0.0179744
CAM112A_map10	0001.CSV	2132.97	0.0180439
CAM112A_map10	0001.CSV	2136.83	0.0181326
CAM112A_map10	0001.CSV	2140.69	0.0181757
CAM112A_map10	0001.CSV	2144.55	0.0182152
CAM112A_map10	0001.CSV	2148.4	0.0182028
CAM112A_map10	0001.CSV	2152.26	0.0182252
CAM112A_map10	0001.CSV	2156.12	0.0181956
CAM112A_map10	0001.CSV	2159.97	0.0181734
CAM112A_map10	0001.CSV	2163.83	0.0181252
CAM112A_map10	0001.CSV	2167.69	0.0181618
CAM112A_map10	0001.CSV	2171.55	0.0181689
CAM112A_map10	0001.CSV	2175.4	0.0182052
CAM112A_map10	0001.CSV	2179.26	0.018218
CAM112A_map10	0001.CSV	2183.12	0.0182678
CAM112A_map10	0001.CSV	2186.97	0.0182821
CAM112A_map10	0001.CSV	2190.83	0.0183103
CAM112A_map10	0001.CSV	2194.69	0.0183197
CAM112A_map10	0001.CSV	2198.55	0.0183651
CAM112A_map10	0001.CSV	2202.4	0.0183762
CAM112A_map10	0001.CSV	2206.26	0.0184387
CAM112A_map10	0001.CSV	2210.12	0.01847
CAM112A_map10	0001.CSV	2213.97	0.0184246
CAM112A_map10	0001.CSV	2217.83	0.0183347
CAM112A_map10	0001.CSV	2221.69	0.0183905
CAM112A_map10	0001.CSV	2225.54	0.0184594
CAM112A_map10	0001.CSV	2229.4	0.0184548
CAM112A_map10	0001.CSV	2233.26	0.0183785
CAM112A_map10	0001.CSV	2237.12	0.0183948
CAM112A_map10	0001.CSV	2240.97	0.0183907
CAM112A_map10	0001.CSV	2244.83	0.0184283
CAM112A_map10	0001.CSV	2248.69	0.0184127
CAM112A_map10	0001.CSV	2252.54	0.0184221
CAM112A_map10	0001.CSV	2256.4	0.0184064
CAM112A_map10	0001.CSV	2260.26	0.0184505
CAM112A_map10	0001.CSV	2264.11	0.0184225
CAM112A_map10	0001.CSV	2267.97	0.0183845
CAM112A_map10	0001.CSV	2271.83	0.0184049
CAM112A_map10	0001.CSV	2275.69	0.0184847
CAM112A_map10	0001.CSV	2279.54	0.0184559
CAM112A_map10	0001.CSV	2283.4	0.0184364
CAM112A_map10	0001.CSV	2287.26	0.018415
CAM112A_map10	0001.CSV	2291.11	0.0184399
CAM112A_map10	0001.CSV	2294.97	0.0184995
CAM112A_map10	0001.CSV	2298.83	0.0186164
CAM112A_map10	0001.CSV	2302.69	0.0186236
CAM112A_map10	0001.CSV	2306.54	0.0186117
CAM112A_map10	0001.CSV	2310.4	0.0186294
CAM112A_map10	0001.CSV	2314.26	0.0186435
CAM112A_map10	0001.CSV	2318.11	0.0184552
CAM112A_map10	0001.CSV	2321.97	0.0182413
CAM112A_map10	0001.CSV	2325.83	0.0179626
CAM112A_map10	0001.CSV	2329.69	0.0178238
CAM112A_map10	0001.CSV	2333.54	0.0177205
CAM112A_map10	0001.CSV	2337.4	0.0175674
CAM112A_map10	0001.CSV	2341.26	0.01742
CAM112A_map10	0001.CSV	2345.11	0.0181356
CAM112A_map10	0001.CSV	2348.97	0.018431
CAM112A_map10	0001.CSV	2352.83	0.0178712
CAM112A_map10	0001.CSV	2356.69	0.0162436
CAM112A_map10	0001.CSV	2360.54	0.0152137
CAM112A_map10	0001.CSV	2364.4	0.0160662
CAM112A_map10	0001.CSV	2368.26	0.0176609
CAM112A_map10	0001.CSV	2372.11	0.0185922
CAM112A_map10	0001.CSV	2375.97	0.0191336
CAM112A_map10	0001.CSV	2379.83	0.0192188
CAM112A_map10	0001.CSV	2383.69	0.0190919
CAM112A_map10	0001.CSV	2387.54	0.0189199
CAM112A_map10	0001.CSV	2391.4	0.0188615
CAM112A_map10	0001.CSV	2395.26	0.0188167
CAM112A_map10	0001.CSV	2399.11	0.0188369
CAM112A_map10	0001.CSV	2402.97	0.0188939
CAM112A_map10	0001.CSV	2406.83	0.0189676
CAM112A_map10	0001.CSV	2410.68	0.0189512
CAM112A_map10	0001.CSV	2414.54	0.0189749
CAM112A_map10	0001.CSV	2418.4	0.019038
CAM112A_map10	0001.CSV	2422.26	0.0190832
CAM112A_map10	0001.CSV	2426.11	0.0191155
CAM112A_map10	0001.CSV	2429.97	0.0192274
CAM112A_map10	0001.CSV	2433.83	0.0193172
CAM112A_map10	0001.CSV	2437.68	0.0193599
CAM112A_map10	0001.CSV	2441.54	0.0194
CAM112A_map10	0001.CSV	2445.4	0.0195477
CAM112A_map10	0001.CSV	2449.26	0.0196809
CAM112A_map10	0001.CSV	2453.11	0.0197689
CAM112A_map10	0001.CSV	2456.97	0.0198759
CAM112A_map10	0001.CSV	2460.83	0.0200624
CAM112A_map10	0001.CSV	2464.68	0.0202669
CAM112A_map10	0001.CSV	2468.54	0.0205025
CAM112A_map10	0001.CSV	2472.4	0.0207662
CAM112A_map10	0001.CSV	2476.26	0.0211485
CAM112A_map10	0001.CSV	2480.11	0.0215477
CAM112A_map10	0001.CSV	2483.97	0.022044
CAM112A_map10	0001.CSV	2487.83	0.0227064
CAM112A_map10	0001.CSV	2491.68	0.0236312
CAM112A_map10	0001.CSV	2495.54	0.0247856
CAM112A_map10	0001.CSV	2499.4	0.0261224
CAM112A_map10	0001.CSV	2503.26	0.0274278
CAM112A_map10	0001.CSV	2507.11	0.0285454
CAM112A_map10	0001.CSV	2510.97	0.0292145
CAM112A_map10	0001.CSV	2514.83	0.0293035
CAM112A_map10	0001.CSV	2518.68	0.028937
CAM112A_map10	0001.CSV	2522.54	0.0282358
CAM112A_map10	0001.CSV	2526.4	0.0272644
CAM112A_map10	0001.CSV	2530.26	0.0261806
CAM112A_map10	0001.CSV	2534.11	0.0250434
CAM112A_map10	0001.CSV	2537.97	0.0241067
CAM112A_map10	0001.CSV	2541.83	0.0234231
CAM112A_map10	0001.CSV	2545.68	0.0229682
CAM112A_map10	0001.CSV	2549.54	0.022616
CAM112A_map10	0001.CSV	2553.4	0.022455
CAM112A_map10	0001.CSV	2557.26	0.0223624
CAM112A_map10	0001.CSV	2561.11	0.0222528
CAM112A_map10	0001.CSV	2564.97	0.0221477
CAM112A_map10	0001.CSV	2568.83	0.0221141
CAM112A_map10	0001.CSV	2572.68	0.0220883
CAM112A_map10	0001.CSV	2576.54	0.0220661
CAM112A_map10	0001.CSV	2580.4	0.0219887
CAM112A_map10	0001.CSV	2584.25	0.02192
CAM112A_map10	0001.CSV	2588.11	0.0218511
CAM112A_map10	0001.CSV	2591.97	0.0218264
CAM112A_map10	0001.CSV	2595.83	0.0217466
CAM112A_map10	0001.CSV	2599.68	0.021649
CAM112A_map10	0001.CSV	2603.54	0.0215254
CAM112A_map10	0001.CSV	2607.4	0.0213954
CAM112A_map10	0001.CSV	2611.25	0.0212187
CAM112A_map10	0001.CSV	2615.11	0.0210483
CAM112A_map10	0001.CSV	2618.97	0.020884
CAM112A_map10	0001.CSV	2622.82	0.0208066
CAM112A_map10	0001.CSV	2626.68	0.0206819
CAM112A_map10	0001.CSV	2630.54	0.0204932
CAM112A_map10	0001.CSV	2634.4	0.0203911
CAM112A_map10	0001.CSV	2638.25	0.0202969
CAM112A_map10	0001.CSV	2642.11	0.0200184
CAM112A_map10	0001.CSV	2645.97	0.0198067
CAM112A_map10	0001.CSV	2649.82	0.0197381
CAM112A_map10	0001.CSV	2653.68	0.0197209
CAM112A_map10	0001.CSV	2657.54	0.0197217
CAM112A_map10	0001.CSV	2661.4	0.019778
CAM112A_map10	0001.CSV	2665.25	0.019745
CAM112A_map10	0001.CSV	2669.11	0.0198019
CAM112A_map10	0001.CSV	2672.97	0.0200915
CAM112A_map10	0001.CSV	2676.82	0.0204561
CAM112A_map10	0001.CSV	2680.68	0.020393
CAM112A_map10	0001.CSV	2684.54	0.0199094
CAM112A_map10	0001.CSV	2688.4	0.0196529
CAM112A_map10	0001.CSV	2692.25	0.0196904
CAM112A_map10	0001.CSV	2696.11	0.0197833
CAM112A_map10	0001.CSV	2699.97	0.0198032
CAM112A_map10	0001.CSV	2703.82	0.0197784
CAM112A_map10	0001.CSV	2707.68	0.0198904
CAM112A_map10	0001.CSV	2711.54	0.0199785
CAM112A_map10	0001.CSV	2715.4	0.0200187
CAM112A_map10	0001.CSV	2719.25	0.020265
CAM112A_map10	0001.CSV	2723.11	0.0207505
CAM112A_map10	0001.CSV	2726.97	0.0207344
CAM112A_map10	0001.CSV	2730.82	0.0202775
CAM112A_map10	0001.CSV	2734.68	0.0203026
CAM112A_map10	0001.CSV	2738.54	0.0204306
CAM112A_map10	0001.CSV	2742.4	0.0204147
CAM112A_map10	0001.CSV	2746.25	0.0207998
CAM112A_map10	0001.CSV	2750.11	0.0209267
CAM112A_map10	0001.CSV	2753.97	0.0206325
CAM112A_map10	0001.CSV	2757.82	0.0205135
CAM112A_map10	0001.CSV	2761.68	0.0204077
CAM112A_map10	0001.CSV	2765.54	0.0203906
CAM112A_map10	0001.CSV	2769.39	0.020715
CAM112A_map10	0001.CSV	2773.25	0.0213408
CAM112A_map10	0001.CSV	2777.11	0.021358
CAM112A_map10	0001.CSV	2780.97	0.0210233
CAM112A_map10	0001.CSV	2784.82	0.0213559
CAM112A_map10	0001.CSV	2788.68	0.0221403
CAM112A_map10	0001.CSV	2792.54	0.0224417
CAM112A_map10	0001.CSV	2796.39	0.0225387
CAM112A_map10	0001.CSV	2800.25	0.0223957
CAM112A_map10	0001.CSV	2804.11	0.0222353
CAM112A_map10	0001.CSV	2807.97	0.0227569
CAM112A_map10	0001.CSV	2811.82	0.022948
CAM112A_map10	0001.CSV	2815.68	0.0229488
CAM112A_map10	0001.CSV	2819.54	0.0234064
CAM112A_map10	0001.CSV	2823.39	0.0239834
CAM112A_map10	0001.CSV	2827.25	0.0245731
CAM112A_map10	0001.CSV	2831.11	0.0258762
CAM112A_map10	0001.CSV	2834.97	0.0281003
CAM112A_map10	0001.CSV	2838.82	0.0310207
CAM112A_map10	0001.CSV	2842.68	0.0357984
CAM112A_map10	0001.CSV	2846.54	0.0438516
CAM112A_map10	0001.CSV	2850.39	0.0496264
CAM112A_map10	0001.CSV	2854.25	0.048023
CAM112A_map10	0001.CSV	2858.11	0.0433071
CAM112A_map10	0001.CSV	2861.97	0.0392281
CAM112A_map10	0001.CSV	2865.82	0.0368389
CAM112A_map10	0001.CSV	2869.68	0.0363806
CAM112A_map10	0001.CSV	2873.54	0.036183
CAM112A_map10	0001.CSV	2877.39	0.0349483
CAM112A_map10	0001.CSV	2881.25	0.0340296
CAM112A_map10	0001.CSV	2885.11	0.0341492
CAM112A_map10	0001.CSV	2888.97	0.0350087
CAM112A_map10	0001.CSV	2892.82	0.0365979
CAM112A_map10	0001.CSV	2896.68	0.0383019
CAM112A_map10	0001.CSV	2900.54	0.0399441
CAM112A_map10	0001.CSV	2904.39	0.0424476
CAM112A_map10	0001.CSV	2908.25	0.0467985
CAM112A_map10	0001.CSV	2912.11	0.0542178
CAM112A_map10	0001.CSV	2915.97	0.0626438
CAM112A_map10	0001.CSV	2919.82	0.066347
CAM112A_map10	0001.CSV	2923.68	0.0639709
CAM112A_map10	0001.CSV	2927.54	0.0591899
CAM112A_map10	0001.CSV	2931.39	0.0534838
CAM112A_map10	0001.CSV	2935.25	0.0477229
CAM112A_map10	0001.CSV	2939.11	0.0434216
CAM112A_map10	0001.CSV	2942.96	0.0408275
CAM112A_map10	0001.CSV	2946.82	0.0391123
CAM112A_map10	0001.CSV	2950.68	0.0380402
CAM112A_map10	0001.CSV	2954.54	0.0372338
CAM112A_map10	0001.CSV	2958.39	0.036173
CAM112A_map10	0001.CSV	2962.25	0.0348502
CAM112A_map10	0001.CSV	2966.11	0.0329614
CAM112A_map10	0001.CSV	2969.96	0.0314321
CAM112A_map10	0001.CSV	2973.82	0.0306082
CAM112A_map10	0001.CSV	2977.68	0.029894
CAM112A_map10	0001.CSV	2981.53	0.0287954
CAM112A_map10	0001.CSV	2985.39	0.0274789
CAM112A_map10	0001.CSV	2989.25	0.0268994
CAM112A_map10	0001.CSV	2993.11	0.0266273
CAM112A_map10	0001.CSV	2996.96	0.0259417
CAM112A_map10	0001.CSV	3000.82	0.025199
CAM112A_map10	0001.CSV	3004.68	0.0247812
CAM112A_map10	0001.CSV	3008.53	0.0249319
CAM112A_map10	0001.CSV	3012.39	0.0252225
CAM112A_map10	0001.CSV	3016.25	0.0251185
CAM112A_map10	0001.CSV	3020.11	0.0247265
CAM112A_map10	0001.CSV	3023.96	0.0244225
CAM112A_map10	0001.CSV	3027.82	0.0243545
CAM112A_map10	0001.CSV	3031.68	0.0246557
CAM112A_map10	0001.CSV	3035.53	0.0247878
CAM112A_map10	0001.CSV	3039.39	0.0248361
CAM112A_map10	0001.CSV	3043.25	0.0249101
CAM112A_map10	0001.CSV	3047.11	0.024726
CAM112A_map10	0001.CSV	3050.96	0.0246865
CAM112A_map10	0001.CSV	3054.82	0.0246677
CAM112A_map10	0001.CSV	3058.68	0.0244797
CAM112A_map10	0001.CSV	3062.53	0.0246378
CAM112A_map10	0001.CSV	3066.39	0.02506
CAM112A_map10	0001.CSV	3070.25	0.0250048
CAM112A_map10	0001.CSV	3074.11	0.024976
CAM112A_map10	0001.CSV	3077.96	0.0252721
CAM112A_map10	0001.CSV	3081.82	0.025494
CAM112A_map10	0001.CSV	3085.68	0.025482
CAM112A_map10	0001.CSV	3089.53	0.0252918
CAM112A_map10	0001.CSV	3093.39	0.0249742
CAM112A_map10	0001.CSV	3097.25	0.024983
CAM112A_map10	0001.CSV	3101.11	0.0251433
CAM112A_map10	0001.CSV	3104.96	0.025227
CAM112A_map10	0001.CSV	3108.82	0.0253933
CAM112A_map10	0001.CSV	3112.68	0.0255672
CAM112A_map10	0001.CSV	3116.53	0.0257705
CAM112A_map10	0001.CSV	3120.39	0.0257697
CAM112A_map10	0001.CSV	3124.25	0.0255134
CAM112A_map10	0001.CSV	3128.11	0.0254121
CAM112A_map10	0001.CSV	3131.96	0.025423
CAM112A_map10	0001.CSV	3135.82	0.0256238
CAM112A_map10	0001.CSV	3139.68	0.0258022
CAM112A_map10	0001.CSV	3143.53	0.0255787
CAM112A_map10	0001.CSV	3147.39	0.0257069
CAM112A_map10	0001.CSV	3151.25	0.0261144
CAM112A_map10	0001.CSV	3155.1	0.0259956
CAM112A_map10	0001.CSV	3158.96	0.0256301
CAM112A_map10	0001.CSV	3162.82	0.0255901
CAM112A_map10	0001.CSV	3166.68	0.0256438
CAM112A_map10	0001.CSV	3170.53	0.025704
CAM112A_map10	0001.CSV	3174.39	0.0257136
CAM112A_map10	0001.CSV	3178.25	0.0258886
CAM112A_map10	0001.CSV	3182.1	0.0261626
CAM112A_map10	0001.CSV	3185.96	0.0263267
CAM112A_map10	0001.CSV	3189.82	0.0264394
CAM112A_map10	0001.CSV	3193.68	0.0263516
CAM112A_map10	0001.CSV	3197.53	0.0263076
CAM112A_map10	0001.CSV	3201.39	0.0265615
CAM112A_map10	0001.CSV	3205.25	0.0267485
CAM112A_map10	0001.CSV	3209.1	0.0267615
CAM112A_map10	0001.CSV	3212.96	0.026922
CAM112A_map10	0001.CSV	3216.82	0.0271279
CAM112A_map10	0001.CSV	3220.68	0.0270669
CAM112A_map10	0001.CSV	3224.53	0.027028
CAM112A_map10	0001.CSV	3228.39	0.0273547
CAM112A_map10	0001.CSV	3232.25	0.0277838
CAM112A_map10	0001.CSV	3236.1	0.0277307
CAM112A_map10	0001.CSV	3239.96	0.0274657
CAM112A_map10	0001.CSV	3243.82	0.027714
CAM112A_map10	0001.CSV	3247.68	0.0279169
CAM112A_map10	0001.CSV	3251.53	0.0277026
CAM112A_map10	0001.CSV	3255.39	0.0277463
CAM112A_map10	0001.CSV	3259.25	0.0276571
CAM112A_map10	0001.CSV	3263.1	0.0276737
CAM112A_map10	0001.CSV	3266.96	0.0280798
CAM112A_map10	0001.CSV	3270.82	0.0284395
CAM112A_map10	0001.CSV	3274.68	0.0284492
CAM112A_map10	0001.CSV	3278.53	0.028207
CAM112A_map10	0001.CSV	3282.39	0.0279918
CAM112A_map10	0001.CSV	3286.25	0.0279961
CAM112A_map10	0001.CSV	3290.1	0.0283893
CAM112A_map10	0001.CSV	3293.96	0.0287207
CAM112A_map10	0001.CSV	3297.82	0.0285696
CAM112A_map10	0001.CSV	3301.67	0.0285982
CAM112A_map10	0001.CSV	3305.53	0.0288514
CAM112A_map10	0001.CSV	3309.39	0.0287908
CAM112A_map10	0001.CSV	3313.25	0.0283409
CAM112A_map10	0001.CSV	3317.1	0.0280858
CAM112A_map10	0001.CSV	3320.96	0.0283414
CAM112A_map10	0001.CSV	3324.82	0.0286923
CAM112A_map10	0001.CSV	3328.67	0.0285592
CAM112A_map10	0001.CSV	3332.53	0.0283718
CAM112A_map10	0001.CSV	3336.39	0.0286969
CAM112A_map10	0001.CSV	3340.24	0.0290261
CAM112A_map10	0001.CSV	3344.1	0.0289465
CAM112A_map10	0001.CSV	3347.96	0.0289419
CAM112A_map10	0001.CSV	3351.82	0.0288448
CAM112A_map10	0001.CSV	3355.67	0.0286476
CAM112A_map10	0001.CSV	3359.53	0.0288078
CAM112A_map10	0001.CSV	3363.39	0.0290399
CAM112A_map10	0001.CSV	3367.24	0.0292573
CAM112A_map10	0001.CSV	3371.1	0.0291819
CAM112A_map10	0001.CSV	3374.96	0.0289324
CAM112A_map10	0001.CSV	3378.82	0.0287931
CAM112A_map10	0001.CSV	3382.67	0.0285056
CAM112A_map10	0001.CSV	3386.53	0.0285306
CAM112A_map10	0001.CSV	3390.39	0.0289305
CAM112A_map10	0001.CSV	3394.24	0.029047
CAM112A_map10	0001.CSV	3398.1	0.0290175
CAM112A_map10	0001.CSV	3401.96	0.0289559
CAM112A_map10	0001.CSV	3405.82	0.0286722
CAM112A_map10	0001.CSV	3409.67	0.0285747
CAM112A_map10	0001.CSV	3413.53	0.0283018
CAM112A_map10	0001.CSV	3417.39	0.0278682
CAM112A_map10	0001.CSV	3421.24	0.0278005
CAM112A_map10	0001.CSV	3425.1	0.0279814
CAM112A_map10	0001.CSV	3428.96	0.028156
CAM112A_map10	0001.CSV	3432.82	0.0282196
CAM112A_map10	0001.CSV	3436.67	0.0280111
CAM112A_map10	0001.CSV	3440.53	0.0274132
CAM112A_map10	0001.CSV	3444.39	0.0270042
CAM112A_map10	0001.CSV	3448.24	0.0270198
CAM112A_map10	0001.CSV	3452.1	0.0268401
CAM112A_map10	0001.CSV	3455.96	0.0267375
CAM112A_map10	0001.CSV	3459.82	0.026835
CAM112A_map10	0001.CSV	3463.67	0.0270027
CAM112A_map10	0001.CSV	3467.53	0.0270801
CAM112A_map10	0001.CSV	3471.39	0.0266748
CAM112A_map10	0001.CSV	3475.24	0.0263858
CAM112A_map10	0001.CSV	3479.1	0.0264927
CAM112A_map10	0001.CSV	3482.96	0.0264005
CAM112A_map10	0001.CSV	3486.82	0.0262532
CAM112A_map10	0001.CSV	3490.67	0.0260756
CAM112A_map10	0001.CSV	3494.53	0.0260902
CAM112A_map10	0001.CSV	3498.39	0.0260866
CAM112A_map10	0001.CSV	3502.24	0.0259361
CAM112A_map10	0001.CSV	3506.1	0.0253596
CAM112A_map10	0001.CSV	3509.96	0.0250133
CAM112A_map10	0001.CSV	3513.81	0.0250582
CAM112A_map10	0001.CSV	3517.67	0.0248098
CAM112A_map10	0001.CSV	3521.53	0.0247202
CAM112A_map10	0001.CSV	3525.39	0.0245435
CAM112A_map10	0001.CSV	3529.24	0.0242402
CAM112A_map10	0001.CSV	3533.1	0.0242592
CAM112A_map10	0001.CSV	3536.96	0.0243995
CAM112A_map10	0001.CSV	3540.81	0.0244439
CAM112A_map10	0001.CSV	3544.67	0.0245145
CAM112A_map10	0001.CSV	3548.53	0.0241523
CAM112A_map10	0001.CSV	3552.39	0.0237083
CAM112A_map10	0001.CSV	3556.24	0.0235297
CAM112A_map10	0001.CSV	3560.1	0.0232149
CAM112A_map10	0001.CSV	3563.96	0.0227648
CAM112A_map10	0001.CSV	3567.81	0.0229429
CAM112A_map10	0001.CSV	3571.67	0.022924
CAM112A_map10	0001.CSV	3575.53	0.0224793
CAM112A_map10	0001.CSV	3579.39	0.0224315
CAM112A_map10	0001.CSV	3583.24	0.0222921
CAM112A_map10	0001.CSV	3587.1	0.0222274
CAM112A_map10	0001.CSV	3590.96	0.0221305
CAM112A_map10	0001.CSV	3594.81	0.0218619
CAM112A_map10	0001.CSV	3598.67	0.0219584
CAM112A_map10	0001.CSV	3602.53	0.0217615
CAM112A_map10	0001.CSV	3606.39	0.021059
CAM112A_map10	0001.CSV	3610.24	0.0207485
CAM112A_map10	0001.CSV	3614.1	0.0206962
CAM112A_map10	0001.CSV	3617.96	0.0209722
CAM112A_map10	0001.CSV	3621.81	0.0211521
CAM112A_map10	0001.CSV	3625.67	0.0204204
CAM112A_map10	0001.CSV	3629.53	0.0203206
CAM112A_map10	0001.CSV	3633.39	0.0207854
CAM112A_map10	0001.CSV	3637.24	0.0204517
CAM112A_map10	0001.CSV	3641.1	0.0199572
CAM112A_map10	0001.CSV	3644.96	0.0193149
CAM112A_map10	0001.CSV	3648.81	0.0198982
CAM112A_map10	0001.CSV	3652.67	0.0206934
CAM112A_map10	0001.CSV	3656.53	0.0205583
CAM112A_map10	0001.CSV	3660.38	0.020317
CAM112A_map10	0001.CSV	3664.24	0.0194117
CAM112A_map10	0001.CSV	3668.1	0.018628
CAM112A_map10	0001.CSV	3671.96	0.0187026
CAM112A_map10	0001.CSV	3675.81	0.0194941
CAM112A_map10	0001.CSV	3679.67	0.0199203
CAM112A_map10	0001.CSV	3683.53	0.0194832
CAM112A_map10	0001.CSV	3687.38	0.019405
CAM112A_map10	0001.CSV	3691.24	0.0201804
CAM112A_map10	0001.CSV	3695.1	0.0199753
CAM112A_map10	0001.CSV	3698.95	0.0192902
CAM112A_map10	0001.CSV	3702.81	0.018982
CAM112A_map10	0001.CSV	3706.67	0.0186535
CAM112A_map10	0001.CSV	3710.53	0.0186374
CAM112A_map10	0001.CSV	3714.38	0.0191067
CAM112A_map10	0001.CSV	3718.24	0.0186138
CAM112A_map10	0001.CSV	3722.1	0.0183944
CAM112A_map10	0001.CSV	3725.95	0.0186605
CAM112A_map10	0001.CSV	3729.81	0.0185712
CAM112A_map10	0001.CSV	3733.67	0.018927
CAM112A_map10	0001.CSV	3737.53	0.0200295
CAM112A_map10	0001.CSV	3741.38	0.0190318
CAM112A_map10	0001.CSV	3745.24	0.0178054
CAM112A_map10	0001.CSV	3749.1	0.0176136
CAM112A_map10	0001.CSV	3752.95	0.0185572
CAM112A_map10	0001.CSV	3756.81	0.0187723
CAM112A_map10	0001.CSV	3760.67	0.018678
CAM112A_map10	0001.CSV	3764.53	0.0185029
CAM112A_map10	0001.CSV	3768.38	0.0187385
CAM112A_map10	0001.CSV	3772.24	0.0189035
CAM112A_map10	0001.CSV	3776.1	0.018626
CAM112A_map10	0001.CSV	3779.95	0.0186801
CAM112A_map10	0001.CSV	3783.81	0.0186438
CAM112A_map10	0001.CSV	3787.67	0.0186152
CAM112A_map10	0001.CSV	3791.53	0.0184311
CAM112A_map10	0001.CSV	3795.38	0.0180275
CAM112A_map10	0001.CSV	3799.24	0.0179935
CAM112A_map10	0001.CSV	3803.1	0.0185349
CAM112A_map10	0001.CSV	3806.95	0.0188631
CAM112A_map10	0001.CSV	3810.81	0.0185271
CAM112A_map10	0001.CSV	3814.67	0.0180887
CAM112A_map10	0001.CSV	3818.53	0.018359
CAM112A_map10	0001.CSV	3822.38	0.018902
CAM112A_map10	0001.CSV	3826.24	0.0187783
CAM112A_map10	0001.CSV	3830.1	0.018407
CAM112A_map10	0001.CSV	3833.95	0.0183165
CAM112A_map10	0001.CSV	3837.81	0.0187114
CAM112A_map10	0001.CSV	3841.67	0.0192676
CAM112A_map10	0001.CSV	3845.53	0.0189302
CAM112A_map10	0001.CSV	3849.38	0.0178935
CAM112A_map10	0001.CSV	3853.24	0.0179054
CAM112A_map10	0001.CSV	3857.1	0.0187632
CAM112A_map10	0001.CSV	3860.95	0.018325
CAM112A_map10	0001.CSV	3864.81	0.0183286
CAM112A_map10	0001.CSV	3868.67	0.0184971
CAM112A_map10	0001.CSV	3872.52	0.0188687
CAM112A_map10	0001.CSV	3876.38	0.0187623
CAM112A_map10	0001.CSV	3880.24	0.0186315
CAM112A_map10	0001.CSV	3884.1	0.019118
CAM112A_map10	0001.CSV	3887.95	0.0190868
CAM112A_map10	0001.CSV	3891.81	0.0189811
CAM112A_map10	0001.CSV	3895.67	0.0186485
CAM112A_map10	0001.CSV	3899.52	0.0182626
CAM112A_map10	0001.CSV	3903.38	0.0190634
CAM112A_map10	0001.CSV	3907.24	0.019374
CAM112A_map10	0001.CSV	3911.1	0.0188498
CAM112A_map10	0001.CSV	3914.95	0.0186041
CAM112A_map10	0001.CSV	3918.81	0.018842
CAM112A_map10	0001.CSV	3922.67	0.018895
CAM112A_map10	0001.CSV	3926.52	0.018837
CAM112A_map10	0001.CSV	3930.38	0.0190294
CAM112A_map10	0001.CSV	3934.24	0.0193605
CAM112A_map10	0001.CSV	3938.09	0.0190308
CAM112A_map10	0001.CSV	3941.95	0.018889
CAM112A_map10	0001.CSV	3945.81	0.0189489
CAM112A_map10	0001.CSV	3949.67	0.0189535
CAM112A_map10	0001.CSV	3953.52	0.0189617
CAM112A_map10	0001.CSV	3957.38	0.0189206
CAM112A_map10	0001.CSV	3961.24	0.0189473
CAM112A_map10	0001.CSV	3965.09	0.0189959
CAM112A_map10	0001.CSV	3968.95	0.0189523
CAM112A_map10	0001.CSV	3972.81	0.0189397
CAM112A_map10	0001.CSV	3976.67	0.0189226
CAM112A_map10	0001.CSV	3980.52	0.01892
CAM112A_map10	0001.CSV	3984.38	0.0190183
CAM112A_map10	0001.CSV	3988.24	0.0190267
CAM112A_map10	0001.CSV	3992.09	0.0189801
CAM112A_map10	0001.CSV	3995.95	0.0189506
CAM112A_map10	0001.CSV	3999.81	0.0189148
CAM112A_map10	0002.CSV	674.992	0.0327703
CAM112A_map10	0002.CSV	678.849	0.0348516
CAM112A_map10	0002.CSV	682.706	0.0360258
CAM112A_map10	0002.CSV	686.563	0.038264
CAM112A_map10	0002.CSV	690.42	0.0403575
CAM112A_map10	0002.CSV	694.277	0.0455392
CAM112A_map10	0002.CSV	698.134	0.0515008
CAM112A_map10	0002.CSV	701.991	0.0626131
CAM112A_map10	0002.CSV	705.849	0.0837779
CAM112A_map10	0002.CSV	709.706	0.113706
CAM112A_map10	0002.CSV	713.563	0.110478
CAM112A_map10	0002.CSV	717.42	0.0730894
CAM112A_map10	0002.CSV	721.277	0.0448371
CAM112A_map10	0002.CSV	725.134	0.0351419
CAM112A_map10	0002.CSV	728.991	0.0317193
CAM112A_map10	0002.CSV	732.848	0.0311046
CAM112A_map10	0002.CSV	736.705	0.0305011
CAM112A_map10	0002.CSV	740.562	0.0311166
CAM112A_map10	0002.CSV	744.42	0.0316338
CAM112A_map10	0002.CSV	748.277	0.032741
CAM112A_map10	0002.CSV	752.134	0.0331927
CAM112A_map10	0002.CSV	755.991	0.0342745
CAM112A_map10	0002.CSV	759.848	0.0347494
CAM112A_map10	0002.CSV	763.705	0.0359123
CAM112A_map10	0002.CSV	767.562	0.0364887
CAM112A_map10	0002.CSV	771.419	0.0375983
CAM112A_map10	0002.CSV	775.276	0.0381293
CAM112A_map10	0002.CSV	779.133	0.0390551
CAM112A_map10	0002.CSV	782.99	0.0393048
CAM112A_map10	0002.CSV	786.848	0.0397509
CAM112A_map10	0002.CSV	790.705	0.0396324
CAM112A_map10	0002.CSV	794.562	0.0405487
CAM112A_map10	0002.CSV	798.419	0.0415187
CAM112A_map10	0002.CSV	802.276	0.0428159
CAM112A_map10	0002.CSV	806.133	0.043359
CAM112A_map10	0002.CSV	809.99	0.0447482
CAM112A_map10	0002.CSV	813.847	0.0457873
CAM112A_map10	0002.CSV	817.704	0.0476791
CAM112A_map10	0002.CSV	821.562	0.0497014
CAM112A_map10	0002.CSV	825.419	0.0525359
CAM112A_map10	0002.CSV	829.276	0.0551967
CAM112A_map10	0002.CSV	833.133	0.0586467
CAM112A_map10	0002.CSV	836.99	0.0623448
CAM112A_map10	0002.CSV	840.847	0.0692256
CAM112A_map10	0002.CSV	844.704	0.0799862
CAM112A_map10	0002.CSV	848.561	0.0875065
CAM112A_map10	0002.CSV	852.418	0.0914792
CAM112A_map10	0002.CSV	856.275	0.107094
CAM112A_map10	0002.CSV	860.132	0.138975
CAM112A_map10	0002.CSV	863.99	0.195788
CAM112A_map10	0002.CSV	867.847	0.264824
CAM112A_map10	0002.CSV	871.704	0.287631
CAM112A_map10	0002.CSV	875.561	0.24393
CAM112A_map10	0002.CSV	879.418	0.182345
CAM112A_map10	0002.CSV	883.275	0.118336
CAM112A_map10	0002.CSV	887.132	0.0624283
CAM112A_map10	0002.CSV	890.989	0.0355104
CAM112A_map10	0002.CSV	894.846	0.0310722
CAM112A_map10	0002.CSV	898.703	0.0308918
CAM112A_map10	0002.CSV	902.561	0.0317364
CAM112A_map10	0002.CSV	906.418	0.0324218
CAM112A_map10	0002.CSV	910.275	0.0335291
CAM112A_map10	0002.CSV	914.132	0.0342059
CAM112A_map10	0002.CSV	917.989	0.0354659
CAM112A_map10	0002.CSV	921.846	0.0363226
CAM112A_map10	0002.CSV	925.703	0.0374633
CAM112A_map10	0002.CSV	929.56	0.0382463
CAM112A_map10	0002.CSV	933.417	0.0392001
CAM112A_map10	0002.CSV	937.274	0.0395897
CAM112A_map10	0002.CSV	941.131	0.0402634
CAM112A_map10	0002.CSV	944.989	0.0405183
CAM112A_map10	0002.CSV	948.846	0.0412168
CAM112A_map10	0002.CSV	952.703	0.0416432
CAM112A_map10	0002.CSV	956.56	0.0424751
CAM112A_map10	0002.CSV	960.417	0.042857
CAM112A_map10	0002.CSV	964.274	0.0434731
CAM112A_map10	0002.CSV	968.131	0.0439114
CAM112A_map10	0002.CSV	971.988	0.0447416
CAM112A_map10	0002.CSV	975.845	0.0453222
CAM112A_map10	0002.CSV	979.702	0.0463034
CAM112A_map10	0002.CSV	983.559	0.0469136
CAM112A_map10	0002.CSV	987.417	0.0479473
CAM112A_map10	0002.CSV	991.274	0.04881
CAM112A_map10	0002.CSV	995.131	0.0499105
CAM112A_map10	0002.CSV	998.988	0.0505192
CAM112A_map10	0002.CSV	1002.85	0.0514297
CAM112A_map10	0002.CSV	1006.7	0.0521001
CAM112A_map10	0002.CSV	1010.56	0.0530938
CAM112A_map10	0002.CSV	1014.42	0.0538014
CAM112A_map10	0002.CSV	1018.27	0.0548435
CAM112A_map10	0002.CSV	1022.13	0.0554129
CAM112A_map10	0002.CSV	1025.99	0.056254
CAM112A_map10	0002.CSV	1029.85	0.0568329
CAM112A_map10	0002.CSV	1033.7	0.0578477
CAM112A_map10	0002.CSV	1037.56	0.0585782
CAM112A_map10	0002.CSV	1041.42	0.0596513
CAM112A_map10	0002.CSV	1045.27	0.0603216
CAM112A_map10	0002.CSV	1049.13	0.0613122
CAM112A_map10	0002.CSV	1052.99	0.0621946
CAM112A_map10	0002.CSV	1056.84	0.063864
CAM112A_map10	0002.CSV	1060.7	0.0654451
CAM112A_map10	0002.CSV	1064.56	0.067322
CAM112A_map10	0002.CSV	1068.42	0.0686247
CAM112A_map10	0002.CSV	1072.27	0.0702012
CAM112A_map10	0002.CSV	1076.13	0.0714257
CAM112A_map10	0002.CSV	1079.99	0.0732345
CAM112A_map10	0002.CSV	1083.84	0.0748101
CAM112A_map10	0002.CSV	1087.7	0.0763042
CAM112A_map10	0002.CSV	1091.56	0.0759351
CAM112A_map10	0002.CSV	1095.41	0.0745746
CAM112A_map10	0002.CSV	1099.27	0.0732428
CAM112A_map10	0002.CSV	1103.13	0.0732702
CAM112A_map10	0002.CSV	1106.99	0.0737247
CAM112A_map10	0002.CSV	1110.84	0.0748994
CAM112A_map10	0002.CSV	1114.7	0.0755145
CAM112A_map10	0002.CSV	1118.56	0.076254
CAM112A_map10	0002.CSV	1122.41	0.0767152
CAM112A_map10	0002.CSV	1126.27	0.0774942
CAM112A_map10	0002.CSV	1130.13	0.0778059
CAM112A_map10	0002.CSV	1133.99	0.0784152
CAM112A_map10	0002.CSV	1137.84	0.07883
CAM112A_map10	0002.CSV	1141.7	0.0796581
CAM112A_map10	0002.CSV	1145.56	0.0800949
CAM112A_map10	0002.CSV	1149.41	0.0809219
CAM112A_map10	0002.CSV	1153.27	0.0816833
CAM112A_map10	0002.CSV	1157.13	0.0830259
CAM112A_map10	0002.CSV	1160.99	0.0841878
CAM112A_map10	0002.CSV	1164.84	0.0853286
CAM112A_map10	0002.CSV	1168.7	0.0856811
CAM112A_map10	0002.CSV	1172.56	0.0860892
CAM112A_map10	0002.CSV	1176.41	0.0859783
CAM112A_map10	0002.CSV	1180.27	0.0861212
CAM112A_map10	0002.CSV	1184.13	0.0859804
CAM112A_map10	0002.CSV	1187.99	0.0860864
CAM112A_map10	0002.CSV	1191.84	0.0859123
CAM112A_map10	0002.CSV	1195.7	0.086156
CAM112A_map10	0002.CSV	1199.56	0.0862831
CAM112A_map10	0002.CSV	1203.41	0.0870338
CAM112A_map10	0002.CSV	1207.27	0.0877428
CAM112A_map10	0002.CSV	1211.13	0.0889059
CAM112A_map10	0002.CSV	1214.98	0.0898158
CAM112A_map10	0002.CSV	1218.84	0.0911902
CAM112A_map10	0002.CSV	1222.7	0.0924823
CAM112A_map10	0002.CSV	1226.56	0.094308
CAM112A_map10	0002.CSV	1230.41	0.0959699
CAM112A_map10	0002.CSV	1234.27	0.0981348
CAM112A_map10	0002.CSV	1238.13	0.100105
CAM112A_map10	0002.CSV	1241.98	0.10248
CAM112A_map10	0002.CSV	1245.84	0.104598
CAM112A_map10	0002.CSV	1249.7	0.107174
CAM112A_map10	0002.CSV	1253.56	0.10956
CAM112A_map10	0002.CSV	1257.41	0.112412
CAM112A_map10	0002.CSV	1261.27	0.114944
CAM112A_map10	0002.CSV	1265.13	0.117712
CAM112A_map10	0002.CSV	1268.98	0.12022
CAM112A_map10	0002.CSV	1272.84	0.123408
CAM112A_map10	0002.CSV	1276.7	0.126379
CAM112A_map10	0002.CSV	1280.56	0.129888
CAM112A_map10	0002.CSV	1284.41	0.133119
CAM112A_map10	0002.CSV	1288.27	0.136873
CAM112A_map10	0002.CSV	1292.13	0.140247
CAM112A_map10	0002.CSV	1295.98	0.144163
CAM112A_map10	0002.CSV	1299.84	0.148104
CAM112A_map10	0002.CSV	1303.7	0.152916
CAM112A_map10	0002.CSV	1307.56	0.157814
CAM112A_map10	0002.CSV	1311.41	0.163748
CAM112A_map10	0002.CSV	1315.27	0.169831
CAM112A_map10	0002.CSV	1319.13	0.176706
CAM112A_map10	0002.CSV	1322.98	0.18268
CAM112A_map10	0002.CSV	1326.84	0.189242
CAM112A_map10	0002.CSV	1330.7	0.196261
CAM112A_map10	0002.CSV	1334.56	0.204261
CAM112A_map10	0002.CSV	1338.41	0.213818
CAM112A_map10	0002.CSV	1342.27	0.225829
CAM112A_map10	0002.CSV	1346.13	0.236113
CAM112A_map10	0002.CSV	1349.98	0.248359
CAM112A_map10	0002.CSV	1353.84	0.261205
CAM112A_map10	0002.CSV	1357.7	0.274853
CAM112A_map10	0002.CSV	1361.56	0.290029
CAM112A_map10	0002.CSV	1365.41	0.308733
CAM112A_map10	0002.CSV	1369.27	0.324257
CAM112A_map10	0002.CSV	1373.13	0.34317
CAM112A_map10	0002.CSV	1376.98	0.364036
CAM112A_map10	0002.CSV	1380.84	0.383074
CAM112A_map10	0002.CSV	1384.7	0.400309
CAM112A_map10	0002.CSV	1388.56	0.420224
CAM112A_map10	0002.CSV	1392.41	0.431468
CAM112A_map10	0002.CSV	1396.27	0.435621
CAM112A_map10	0002.CSV	1400.13	0.429334
CAM112A_map10	0002.CSV	1403.98	0.418574
CAM112A_map10	0002.CSV	1407.84	0.39936
CAM112A_map10	0002.CSV	1411.7	0.377399
CAM112A_map10	0002.CSV	1415.55	0.355226
CAM112A_map10	0002.CSV	1419.41	0.332581
CAM112A_map10	0002.CSV	1423.27	0.314917
CAM112A_map10	0002.CSV	1427.12	0.304622
CAM112A_map10	0002.CSV	1430.98	0.293813
CAM112A_map10	0002.CSV	1434.84	0.283291
CAM112A_map10	0002.CSV	1438.7	0.269935
CAM112A_map10	0002.CSV	1442.55	0.25971
CAM112A_map10	0002.CSV	1446.41	0.24813
CAM112A_map10	0002.CSV	1450.27	0.236154
CAM112A_map10	0002.CSV	1454.12	0.225825
CAM112A_map10	0002.CSV	1457.98	0.211597
CAM112A_map10	0002.CSV	1461.84	0.200373
CAM112A_map10	0002.CSV	1465.7	0.192203
CAM112A_map10	0002.CSV	1469.55	0.183586
CAM112A_map10	0002.CSV	1473.41	0.173623
CAM112A_map10	0002.CSV	1477.27	0.162779
CAM112A_map10	0002.CSV	1481.12	0.156138
CAM112A_map10	0002.CSV	1484.98	0.149683
CAM112A_map10	0002.CSV	1488.84	0.142201
CAM112A_map10	0002.CSV	1492.7	0.134389
CAM112A_map10	0002.CSV	1496.55	0.128271
CAM112A_map10	0002.CSV	1500.41	0.121255
CAM112A_map10	0002.CSV	1504.27	0.116848
CAM112A_map10	0002.CSV	1508.12	0.108973
CAM112A_map10	0002.CSV	1511.98	0.103518
CAM112A_map10	0002.CSV	1515.84	0.0996396
CAM112A_map10	0002.CSV	1519.7	0.095185
CAM112A_map10	0002.CSV	1523.55	0.0900069
CAM112A_map10	0002.CSV	1527.41	0.0864813
CAM112A_map10	0002.CSV	1531.27	0.0833709
CAM112A_map10	0002.CSV	1535.12	0.0811929
CAM112A_map10	0002.CSV	1538.98	0.0781448
CAM112A_map10	0002.CSV	1542.84	0.0700941
CAM112A_map10	0002.CSV	1546.7	0.0630694
CAM112A_map10	0002.CSV	1550.55	0.0578461
CAM112A_map10	0002.CSV	1554.41	0.0530144
CAM112A_map10	0002.CSV	1558.27	0.048347
CAM112A_map10	0002.CSV	1562.12	0.0449815
CAM112A_map10	0002.CSV	1565.98	0.0438011
CAM112A_map10	0002.CSV	1569.84	0.0432546
CAM112A_map10	0002.CSV	1573.69	0.0432214
CAM112A_map10	0002.CSV	1577.55	0.0422227
CAM112A_map10	0002.CSV	1581.41	0.0396791
CAM112A_map10	0002.CSV	1585.27	0.0365232
CAM112A_map10	0002.CSV	1589.12	0.0337583
CAM112A_map10	0002.CSV	1592.98	0.0315215
CAM112A_map10	0002.CSV	1596.84	0.0298886
CAM112A_map10	0002.CSV	1600.69	0.0285167
CAM112A_map10	0002.CSV	1604.55	0.0275112
CAM112A_map10	0002.CSV	1608.41	0.0266955
CAM112A_map10	0002.CSV	1612.27	0.0260961
CAM112A_map10	0002.CSV	1616.12	0.025466
CAM112A_map10	0002.CSV	1619.98	0.0249887
CAM112A_map10	0002.CSV	1623.84	0.0242751
CAM112A_map10	0002.CSV	1627.69	0.0235824
CAM112A_map10	0002.CSV	1631.55	0.022646
CAM112A_map10	0002.CSV	1635.41	0.0221307
CAM112A_map10	0002.CSV	1639.27	0.0216159
CAM112A_map10	0002.CSV	1643.12	0.0209496
CAM112A_map10	0002.CSV	1646.98	0.0205893
CAM112A_map10	0002.CSV	1650.84	0.0206097
CAM112A_map10	0002.CSV	1654.69	0.0205206
CAM112A_map10	0002.CSV	1658.55	0.0201355
CAM112A_map10	0002.CSV	1662.41	0.0196901
CAM112A_map10	0002.CSV	1666.27	0.019458
CAM112A_map10	0002.CSV	1670.12	0.019338
CAM112A_map10	0002.CSV	1673.98	0.0194582
CAM112A_map10	0002.CSV	1677.84	0.0190767
CAM112A_map10	0002.CSV	1681.69	0.018877
CAM112A_map10	0002.CSV	1685.55	0.0190322
CAM112A_map10	0002.CSV	1689.41	0.0188843
CAM112A_map10	0002.CSV	1693.27	0.0183273
CAM112A_map10	0002.CSV	1697.12	0.0183708
CAM112A_map10	0002.CSV	1700.98	0.0187221
CAM112A_map10	0002.CSV	1704.84	0.0188446
CAM112A_map10	0002.CSV	1708.69	0.0187944
CAM112A_map10	0002.CSV	1712.55	0.0187988
CAM112A_map10	0002.CSV	1716.41	0.0196226
CAM112A_map10	0002.CSV	1720.27	0.0206654
CAM112A_map10	0002.CSV	1724.12	0.0206261
CAM112A_map10	0002.CSV	1727.98	0.0206012
CAM112A_map10	0002.CSV	1731.84	0.0207501
CAM112A_map10	0002.CSV	1735.69	0.021254
CAM112A_map10	0002.CSV	1739.55	0.0208235
CAM112A_map10	0002.CSV	1743.41	0.0198777
CAM112A_map10	0002.CSV	1747.27	0.0187318
CAM112A_map10	0002.CSV	1751.12	0.0177506
CAM112A_map10	0002.CSV	1754.98	0.0168492
CAM112A_map10	0002.CSV	1758.84	0.0163518
CAM112A_map10	0002.CSV	1762.69	0.0160751
CAM112A_map10	0002.CSV	1766.55	0.0158388
CAM112A_map10	0002.CSV	1770.41	0.015916
CAM112A_map10	0002.CSV	1774.26	0.016497
CAM112A_map10	0002.CSV	1778.12	0.0166845
CAM112A_map10	0002.CSV	1781.98	0.0174206
CAM112A_map10	0002.CSV	1785.84	0.0187033
CAM112A_map10	0002.CSV	1789.69	0.0207932
CAM112A_map10	0002.CSV	1793.55	0.0237733
CAM112A_map10	0002.CSV	1797.41	0.0245377
CAM112A_map10	0002.CSV	1801.26	0.0226657
CAM112A_map10	0002.CSV	1805.12	0.020081
CAM112A_map10	0002.CSV	1808.98	0.017977
CAM112A_map10	0002.CSV	1812.84	0.0166728
CAM112A_map10	0002.CSV	1816.69	0.015762
CAM112A_map10	0002.CSV	1820.55	0.0152418
CAM112A_map10	0002.CSV	1824.41	0.014877
CAM112A_map10	0002.CSV	1828.26	0.0148349
CAM112A_map10	0002.CSV	1832.12	0.014738
CAM112A_map10	0002.CSV	1835.98	0.0145825
CAM112A_map10	0002.CSV	1839.84	0.0143588
CAM112A_map10	0002.CSV	1843.69	0.0145151
CAM112A_map10	0002.CSV	1847.55	0.014731
CAM112A_map10	0002.CSV	1851.41	0.0146067
CAM112A_map10	0002.CSV	1855.26	0.0144297
CAM112A_map10	0002.CSV	1859.12	0.0144476
CAM112A_map10	0002.CSV	1862.98	0.0143547
CAM112A_map10	0002.CSV	1866.84	0.0145035
CAM112A_map10	0002.CSV	1870.69	0.0147037
CAM112A_map10	0002.CSV	1874.55	0.0145604
CAM112A_map10	0002.CSV	1878.41	0.0144757
CAM112A_map10	0002.CSV	1882.26	0.0145268
CAM112A_map10	0002.CSV	1886.12	0.0144577
CAM112A_map10	0002.CSV	1889.98	0.0146066
CAM112A_map10	0002.CSV	1893.83	0.0147332
CAM112A_map10	0002.CSV	1897.69	0.0147576
CAM112A_map10	0002.CSV	1901.55	0.0146368
CAM112A_map10	0002.CSV	1905.41	0.0146404
CAM112A_map10	0002.CSV	1909.26	0.0147093
CAM112A_map10	0002.CSV	1913.12	0.0147034
CAM112A_map10	0002.CSV	1916.98	0.0146378
CAM112A_map10	0002.CSV	1920.83	0.0148208
CAM112A_map10	0002.CSV	1924.69	0.0148884
CAM112A_map10	0002.CSV	1928.55	0.0148681
CAM112A_map10	0002.CSV	1932.4	0.0148374
CAM112A_map10	0002.CSV	1936.26	0.0148785
CAM112A_map10	0002.CSV	1940.12	0.0148794
CAM112A_map10	0002.CSV	1943.98	0.0151176
CAM112A_map10	0002.CSV	1947.83	0.0151685
CAM112A_map10	0002.CSV	1951.69	0.0151482
CAM112A_map10	0002.CSV	1955.55	0.0151896
CAM112A_map10	0002.CSV	1959.4	0.0153394
CAM112A_map10	0002.CSV	1963.26	0.0153221
CAM112A_map10	0002.CSV	1967.12	0.0153959
CAM112A_map10	0002.CSV	1970.98	0.0154122
CAM112A_map10	0002.CSV	1974.83	0.0153929
CAM112A_map10	0002.CSV	1978.69	0.015425
CAM112A_map10	0002.CSV	1982.55	0.0154937
CAM112A_map10	0002.CSV	1986.4	0.0154161
CAM112A_map10	0002.CSV	1990.26	0.0154789
CAM112A_map10	0002.CSV	1994.12	0.0156185
CAM112A_map10	0002.CSV	1997.98	0.0156716
CAM112A_map10	0002.CSV	2001.83	0.0156269
CAM112A_map10	0002.CSV	2005.69	0.0156468
CAM112A_map10	0002.CSV	2009.55	0.0156744
CAM112A_map10	0002.CSV	2013.4	0.0157065
CAM112A_map10	0002.CSV	2017.26	0.0157607
CAM112A_map10	0002.CSV	2021.12	0.0158589
CAM112A_map10	0002.CSV	2024.97	0.0158688
CAM112A_map10	0002.CSV	2028.83	0.015956
CAM112A_map10	0002.CSV	2032.69	0.0159963
CAM112A_map10	0002.CSV	2036.55	0.0160345
CAM112A_map10	0002.CSV	2040.4	0.0160296
CAM112A_map10	0002.CSV	2044.26	0.0160593
CAM112A_map10	0002.CSV	2048.12	0.01602
CAM112A_map10	0002.CSV	2051.97	0.0160684
CAM112A_map10	0002.CSV	2055.83	0.0161495
CAM112A_map10	0002.CSV	2059.69	0.0162607
CAM112A_map10	0002.CSV	2063.55	0.0162954
CAM112A_map10	0002.CSV	2067.4	0.0163748
CAM112A_map10	0002.CSV	2071.26	0.016364
CAM112A_map10	0002.CSV	2075.12	0.0164449
CAM112A_map10	0002.CSV	2078.97	0.016492
CAM112A_map10	0002.CSV	2082.83	0.0165407
CAM112A_map10	0002.CSV	2086.69	0.0165631
CAM112A_map10	0002.CSV	2090.55	0.0166768
CAM112A_map10	0002.CSV	2094.4	0.0167398
CAM112A_map10	0002.CSV	2098.26	0.0167742
CAM112A_map10	0002.CSV	2102.12	0.0168189
CAM112A_map10	0002.CSV	2105.97	0.0169217
CAM112A_map10	0002.CSV	2109.83	0.0169534
CAM112A_map10	0002.CSV	2113.69	0.0170119
CAM112A_map10	0002.CSV	2117.55	0.0170379
CAM112A_map10	0002.CSV	2121.4	0.017159
CAM112A_map10	0002.CSV	2125.26	0.0172501
CAM112A_map10	0002.CSV	2129.12	0.0173314
CAM112A_map10	0002.CSV	2132.97	0.0173761
CAM112A_map10	0002.CSV	2136.83	0.0174413
CAM112A_map10	0002.CSV	2140.69	0.0175123
CAM112A_map10	0002.CSV	2144.55	0.0175459
CAM112A_map10	0002.CSV	2148.4	0.017499
CAM112A_map10	0002.CSV	2152.26	0.0175351
CAM112A_map10	0002.CSV	2156.12	0.0175511
CAM112A_map10	0002.CSV	2159.97	0.017561
CAM112A_map10	0002.CSV	2163.83	0.0175684
CAM112A_map10	0002.CSV	2167.69	0.0176076
CAM112A_map10	0002.CSV	2171.55	0.0176034
CAM112A_map10	0002.CSV	2175.4	0.0176542
CAM112A_map10	0002.CSV	2179.26	0.0176451
CAM112A_map10	0002.CSV	2183.12	0.017676
CAM112A_map10	0002.CSV	2186.97	0.0177046
CAM112A_map10	0002.CSV	2190.83	0.0177429
CAM112A_map10	0002.CSV	2194.69	0.0177874
CAM112A_map10	0002.CSV	2198.55	0.0178413
CAM112A_map10	0002.CSV	2202.4	0.0178383
CAM112A_map10	0002.CSV	2206.26	0.0179119
CAM112A_map10	0002.CSV	2210.12	0.0179528
CAM112A_map10	0002.CSV	2213.97	0.0179416
CAM112A_map10	0002.CSV	2217.83	0.0178784
CAM112A_map10	0002.CSV	2221.69	0.0179416
CAM112A_map10	0002.CSV	2225.54	0.0180069
CAM112A_map10	0002.CSV	2229.4	0.018008
CAM112A_map10	0002.CSV	2233.26	0.0179292
CAM112A_map10	0002.CSV	2237.12	0.0179317
CAM112A_map10	0002.CSV	2240.97	0.0179552
CAM112A_map10	0002.CSV	2244.83	0.0180151
CAM112A_map10	0002.CSV	2248.69	0.0179767
CAM112A_map10	0002.CSV	2252.54	0.0179767
CAM112A_map10	0002.CSV	2256.4	0.0180032
CAM112A_map10	0002.CSV	2260.26	0.0180309
CAM112A_map10	0002.CSV	2264.11	0.0180056
CAM112A_map10	0002.CSV	2267.97	0.0180212
CAM112A_map10	0002.CSV	2271.83	0.0180146
CAM112A_map10	0002.CSV	2275.69	0.0180326
CAM112A_map10	0002.CSV	2279.54	0.0180264
CAM112A_map10	0002.CSV	2283.4	0.0180172
CAM112A_map10	0002.CSV	2287.26	0.0180259
CAM112A_map10	0002.CSV	2291.11	0.0181186
CAM112A_map10	0002.CSV	2294.97	0.0181897
CAM112A_map10	0002.CSV	2298.83	0.0183114
CAM112A_map10	0002.CSV	2302.69	0.0183617
CAM112A_map10	0002.CSV	2306.54	0.0183864
CAM112A_map10	0002.CSV	2310.4	0.0184706
CAM112A_map10	0002.CSV	2314.26	0.0185396
CAM112A_map10	0002.CSV	2318.11	0.0184467
CAM112A_map10	0002.CSV	2321.97	0.0183408
CAM112A_map10	0002.CSV	2325.83	0.0180567
CAM112A_map10	0002.CSV	2329.69	0.0179522
CAM112A_map10	0002.CSV	2333.54	0.018017
CAM112A_map10	0002.CSV	2337.4	0.0180263
CAM112A_map10	0002.CSV	2341.26	0.0179871
CAM112A_map10	0002.CSV	2345.11	0.0186268
CAM112A_map10	0002.CSV	2348.97	0.0187643
CAM112A_map10	0002.CSV	2352.83	0.0183103
CAM112A_map10	0002.CSV	2356.69	0.0171609
CAM112A_map10	0002.CSV	2360.54	0.0164623
CAM112A_map10	0002.CSV	2364.4	0.0172148
CAM112A_map10	0002.CSV	2368.26	0.0183993
CAM112A_map10	0002.CSV	2372.11	0.0189853
CAM112A_map10	0002.CSV	2375.97	0.0192785
CAM112A_map10	0002.CSV	2379.83	0.0191988
CAM112A_map10	0002.CSV	2383.69	0.0189883
CAM112A_map10	0002.CSV	2387.54	0.0187802
CAM112A_map10	0002.CSV	2391.4	0.0187128
CAM112A_map10	0002.CSV	2395.26	0.0186872
CAM112A_map10	0002.CSV	2399.11	0.0187051
CAM112A_map10	0002.CSV	2402.97	0.0187542
CAM112A_map10	0002.CSV	2406.83	0.018829
CAM112A_map10	0002.CSV	2410.68	0.0188234
CAM112A_map10	0002.CSV	2414.54	0.0188446
CAM112A_map10	0002.CSV	2418.4	0.0189022
CAM112A_map10	0002.CSV	2422.26	0.0189336
CAM112A_map10	0002.CSV	2426.11	0.0189519
CAM112A_map10	0002.CSV	2429.97	0.0190488
CAM112A_map10	0002.CSV	2433.83	0.0191299
CAM112A_map10	0002.CSV	2437.68	0.0192053
CAM112A_map10	0002.CSV	2441.54	0.0192524
CAM112A_map10	0002.CSV	2445.4	0.0193237
CAM112A_map10	0002.CSV	2449.26	0.0194319
CAM112A_map10	0002.CSV	2453.11	0.0195324
CAM112A_map10	0002.CSV	2456.97	0.0196223
CAM112A_map10	0002.CSV	2460.83	0.0197921
CAM112A_map10	0002.CSV	2464.68	0.0199584
CAM112A_map10	0002.CSV	2468.54	0.0201324
CAM112A_map10	0002.CSV	2472.4	0.0203196
CAM112A_map10	0002.CSV	2476.26	0.0205889
CAM112A_map10	0002.CSV	2480.11	0.0208778
CAM112A_map10	0002.CSV	2483.97	0.0212507
CAM112A_map10	0002.CSV	2487.83	0.0217292
CAM112A_map10	0002.CSV	2491.68	0.0223831
CAM112A_map10	0002.CSV	2495.54	0.0231779
CAM112A_map10	0002.CSV	2499.4	0.0240354
CAM112A_map10	0002.CSV	2503.26	0.0248483
CAM112A_map10	0002.CSV	2507.11	0.0255701
CAM112A_map10	0002.CSV	2510.97	0.0259585
CAM112A_map10	0002.CSV	2514.83	0.025984
CAM112A_map10	0002.CSV	2518.68	0.025768
CAM112A_map10	0002.CSV	2522.54	0.0253141
CAM112A_map10	0002.CSV	2526.4	0.0246319
CAM112A_map10	0002.CSV	2530.26	0.0238901
CAM112A_map10	0002.CSV	2534.11	0.0231786
CAM112A_map10	0002.CSV	2537.97	0.022622
CAM112A_map10	0002.CSV	2541.83	0.0221745
CAM112A_map10	0002.CSV	2545.68	0.0218223
CAM112A_map10	0002.CSV	2549.54	0.0215192
CAM112A_map10	0002.CSV	2553.4	0.0213808
CAM112A_map10	0002.CSV	2557.26	0.0213446
CAM112A_map10	0002.CSV	2561.11	0.0212656
CAM112A_map10	0002.CSV	2564.97	0.0211465
CAM112A_map10	0002.CSV	2568.83	0.0211063
CAM112A_map10	0002.CSV	2572.68	0.0210673
CAM112A_map10	0002.CSV	2576.54	0.0210323
CAM112A_map10	0002.CSV	2580.4	0.0209482
CAM112A_map10	0002.CSV	2584.25	0.020876
CAM112A_map10	0002.CSV	2588.11	0.0208332
CAM112A_map10	0002.CSV	2591.97	0.0208205
CAM112A_map10	0002.CSV	2595.83	0.0207356
CAM112A_map10	0002.CSV	2599.68	0.0206677
CAM112A_map10	0002.CSV	2603.54	0.020596
CAM112A_map10	0002.CSV	2607.4	0.0204934
CAM112A_map10	0002.CSV	2611.25	0.0203734
CAM112A_map10	0002.CSV	2615.11	0.0202786
CAM112A_map10	0002.CSV	2618.97	0.0201747
CAM112A_map10	0002.CSV	2622.82	0.0201564
CAM112A_map10	0002.CSV	2626.68	0.0200866
CAM112A_map10	0002.CSV	2630.54	0.0199234
CAM112A_map10	0002.CSV	2634.4	0.0198737
CAM112A_map10	0002.CSV	2638.25	0.0198199
CAM112A_map10	0002.CSV	2642.11	0.0195846
CAM112A_map10	0002.CSV	2645.97	0.0193963
CAM112A_map10	0002.CSV	2649.82	0.0193216
CAM112A_map10	0002.CSV	2653.68	0.0192875
CAM112A_map10	0002.CSV	2657.54	0.0192711
CAM112A_map10	0002.CSV	2661.4	0.0193138
CAM112A_map10	0002.CSV	2665.25	0.0193355
CAM112A_map10	0002.CSV	2669.11	0.0194066
CAM112A_map10	0002.CSV	2672.97	0.0196387
CAM112A_map10	0002.CSV	2676.82	0.0199709
CAM112A_map10	0002.CSV	2680.68	0.0199416
CAM112A_map10	0002.CSV	2684.54	0.0195343
CAM112A_map10	0002.CSV	2688.4	0.0193382
CAM112A_map10	0002.CSV	2692.25	0.0193475
CAM112A_map10	0002.CSV	2696.11	0.0193933
CAM112A_map10	0002.CSV	2699.97	0.0193937
CAM112A_map10	0002.CSV	2703.82	0.0193635
CAM112A_map10	0002.CSV	2707.68	0.0194719
CAM112A_map10	0002.CSV	2711.54	0.0195596
CAM112A_map10	0002.CSV	2715.4	0.0195763
CAM112A_map10	0002.CSV	2719.25	0.0197774
CAM112A_map10	0002.CSV	2723.11	0.0201901
CAM112A_map10	0002.CSV	2726.97	0.0201611
CAM112A_map10	0002.CSV	2730.82	0.0197579
CAM112A_map10	0002.CSV	2734.68	0.0197826
CAM112A_map10	0002.CSV	2738.54	0.0198851
CAM112A_map10	0002.CSV	2742.4	0.0199033
CAM112A_map10	0002.CSV	2746.25	0.0202698
CAM112A_map10	0002.CSV	2750.11	0.0203505
CAM112A_map10	0002.CSV	2753.97	0.0200578
CAM112A_map10	0002.CSV	2757.82	0.0199379
CAM112A_map10	0002.CSV	2761.68	0.0198026
CAM112A_map10	0002.CSV	2765.54	0.0197391
CAM112A_map10	0002.CSV	2769.39	0.0199889
CAM112A_map10	0002.CSV	2773.25	0.0205061
CAM112A_map10	0002.CSV	2777.11	0.0204486
CAM112A_map10	0002.CSV	2780.97	0.0200935
CAM112A_map10	0002.CSV	2784.82	0.0203852
CAM112A_map10	0002.CSV	2788.68	0.021061
CAM112A_map10	0002.CSV	2792.54	0.0212805
CAM112A_map10	0002.CSV	2796.39	0.0212802
CAM112A_map10	0002.CSV	2800.25	0.0210294
CAM112A_map10	0002.CSV	2804.11	0.0207967
CAM112A_map10	0002.CSV	2807.97	0.0212043
CAM112A_map10	0002.CSV	2811.82	0.0213382
CAM112A_map10	0002.CSV	2815.68	0.0212202
CAM112A_map10	0002.CSV	2819.54	0.0214469
CAM112A_map10	0002.CSV	2823.39	0.0217909
CAM112A_map10	0002.CSV	2827.25	0.0221011
CAM112A_map10	0002.CSV	2831.11	0.0229102
CAM112A_map10	0002.CSV	2834.97	0.0242044
CAM112A_map10	0002.CSV	2838.82	0.0255124
CAM112A_map10	0002.CSV	2842.68	0.0272407
CAM112A_map10	0002.CSV	2846.54	0.0303595
CAM112A_map10	0002.CSV	2850.39	0.0324313
CAM112A_map10	0002.CSV	2854.25	0.0318476
CAM112A_map10	0002.CSV	2858.11	0.0304738
CAM112A_map10	0002.CSV	2861.97	0.0290794
CAM112A_map10	0002.CSV	2865.82	0.0281784
CAM112A_map10	0002.CSV	2869.68	0.0282554
CAM112A_map10	0002.CSV	2873.54	0.0282788
CAM112A_map10	0002.CSV	2877.39	0.027426
CAM112A_map10	0002.CSV	2881.25	0.0267372
CAM112A_map10	0002.CSV	2885.11	0.0266582
CAM112A_map10	0002.CSV	2888.97	0.0269767
CAM112A_map10	0002.CSV	2892.82	0.0277519
CAM112A_map10	0002.CSV	2896.68	0.0285028
CAM112A_map10	0002.CSV	2900.54	0.0290476
CAM112A_map10	0002.CSV	2904.39	0.0301246
CAM112A_map10	0002.CSV	2908.25	0.0321965
CAM112A_map10	0002.CSV	2912.11	0.0355441
CAM112A_map10	0002.CSV	2915.97	0.0386884
CAM112A_map10	0002.CSV	2919.82	0.0394459
CAM112A_map10	0002.CSV	2923.68	0.0382842
CAM112A_map10	0002.CSV	2927.54	0.0368993
CAM112A_map10	0002.CSV	2931.39	0.0349202
CAM112A_map10	0002.CSV	2935.25	0.0324677
CAM112A_map10	0002.CSV	2939.11	0.030791
CAM112A_map10	0002.CSV	2942.96	0.0301508
CAM112A_map10	0002.CSV	2946.82	0.0296189
CAM112A_map10	0002.CSV	2950.68	0.0290069
CAM112A_map10	0002.CSV	2954.54	0.0283902
CAM112A_map10	0002.CSV	2958.39	0.0277229
CAM112A_map10	0002.CSV	2962.25	0.0271221
CAM112A_map10	0002.CSV	2966.11	0.026155
CAM112A_map10	0002.CSV	2969.96	0.0255459
CAM112A_map10	0002.CSV	2973.82	0.0255094
CAM112A_map10	0002.CSV	2977.68	0.02541
CAM112A_map10	0002.CSV	2981.53	0.0248276
CAM112A_map10	0002.CSV	2985.39	0.0239825
CAM112A_map10	0002.CSV	2989.25	0.0237816
CAM112A_map10	0002.CSV	2993.11	0.0238021
CAM112A_map10	0002.CSV	2996.96	0.0234116
CAM112A_map10	0002.CSV	3000.82	0.0228817
CAM112A_map10	0002.CSV	3004.68	0.0225503
CAM112A_map10	0002.CSV	3008.53	0.0227823
CAM112A_map10	0002.CSV	3012.39	0.0231328
CAM112A_map10	0002.CSV	3016.25	0.0230954
CAM112A_map10	0002.CSV	3020.11	0.0227718
CAM112A_map10	0002.CSV	3023.96	0.0224997
CAM112A_map10	0002.CSV	3027.82	0.0224737
CAM112A_map10	0002.CSV	3031.68	0.0228045
CAM112A_map10	0002.CSV	3035.53	0.0229177
CAM112A_map10	0002.CSV	3039.39	0.0229369
CAM112A_map10	0002.CSV	3043.25	0.0230363
CAM112A_map10	0002.CSV	3047.11	0.0229479
CAM112A_map10	0002.CSV	3050.96	0.0229043
CAM112A_map10	0002.CSV	3054.82	0.0227747
CAM112A_map10	0002.CSV	3058.68	0.0225569
CAM112A_map10	0002.CSV	3062.53	0.0227556
CAM112A_map10	0002.CSV	3066.39	0.0231533
CAM112A_map10	0002.CSV	3070.25	0.0230372
CAM112A_map10	0002.CSV	3074.11	0.0230028
CAM112A_map10	0002.CSV	3077.96	0.0233444
CAM112A_map10	0002.CSV	3081.82	0.0234969
CAM112A_map10	0002.CSV	3085.68	0.0234302
CAM112A_map10	0002.CSV	3089.53	0.0233057
CAM112A_map10	0002.CSV	3093.39	0.0230198
CAM112A_map10	0002.CSV	3097.25	0.0229557
CAM112A_map10	0002.CSV	3101.11	0.0230432
CAM112A_map10	0002.CSV	3104.96	0.0231616
CAM112A_map10	0002.CSV	3108.82	0.0233486
CAM112A_map10	0002.CSV	3112.68	0.0234666
CAM112A_map10	0002.CSV	3116.53	0.0236326
CAM112A_map10	0002.CSV	3120.39	0.0236037
CAM112A_map10	0002.CSV	3124.25	0.0233477
CAM112A_map10	0002.CSV	3128.11	0.0232626
CAM112A_map10	0002.CSV	3131.96	0.023208
CAM112A_map10	0002.CSV	3135.82	0.0232835
CAM112A_map10	0002.CSV	3139.68	0.0234325
CAM112A_map10	0002.CSV	3143.53	0.023254
CAM112A_map10	0002.CSV	3147.39	0.023323
CAM112A_map10	0002.CSV	3151.25	0.0236568
CAM112A_map10	0002.CSV	3155.1	0.0235054
CAM112A_map10	0002.CSV	3158.96	0.0230908
CAM112A_map10	0002.CSV	3162.82	0.0229838
CAM112A_map10	0002.CSV	3166.68	0.0230199
CAM112A_map10	0002.CSV	3170.53	0.0231065
CAM112A_map10	0002.CSV	3174.39	0.0231034
CAM112A_map10	0002.CSV	3178.25	0.0231687
CAM112A_map10	0002.CSV	3182.1	0.0233444
CAM112A_map10	0002.CSV	3185.96	0.0235323
CAM112A_map10	0002.CSV	3189.82	0.0236302
CAM112A_map10	0002.CSV	3193.68	0.0234462
CAM112A_map10	0002.CSV	3197.53	0.0232759
CAM112A_map10	0002.CSV	3201.39	0.0234557
CAM112A_map10	0002.CSV	3205.25	0.0236078
CAM112A_map10	0002.CSV	3209.1	0.0236101
CAM112A_map10	0002.CSV	3212.96	0.0237003
CAM112A_map10	0002.CSV	3216.82	0.0238145
CAM112A_map10	0002.CSV	3220.68	0.0237544
CAM112A_map10	0002.CSV	3224.53	0.0236503
CAM112A_map10	0002.CSV	3228.39	0.023878
CAM112A_map10	0002.CSV	3232.25	0.0243729
CAM112A_map10	0002.CSV	3236.1	0.0243893
CAM112A_map10	0002.CSV	3239.96	0.024162
CAM112A_map10	0002.CSV	3243.82	0.0243824
CAM112A_map10	0002.CSV	3247.68	0.0245159
CAM112A_map10	0002.CSV	3251.53	0.0242718
CAM112A_map10	0002.CSV	3255.39	0.0242816
CAM112A_map10	0002.CSV	3259.25	0.024235
CAM112A_map10	0002.CSV	3263.1	0.0242568
CAM112A_map10	0002.CSV	3266.96	0.0246244
CAM112A_map10	0002.CSV	3270.82	0.0249566
CAM112A_map10	0002.CSV	3274.68	0.0249349
CAM112A_map10	0002.CSV	3278.53	0.0246757
CAM112A_map10	0002.CSV	3282.39	0.0244278
CAM112A_map10	0002.CSV	3286.25	0.0244113
CAM112A_map10	0002.CSV	3290.1	0.024759
CAM112A_map10	0002.CSV	3293.96	0.0250594
CAM112A_map10	0002.CSV	3297.82	0.0249042
CAM112A_map10	0002.CSV	3301.67	0.0249212
CAM112A_map10	0002.CSV	3305.53	0.0251853
CAM112A_map10	0002.CSV	3309.39	0.0251617
CAM112A_map10	0002.CSV	3313.25	0.0247211
CAM112A_map10	0002.CSV	3317.1	0.0243898
CAM112A_map10	0002.CSV	3320.96	0.0245711
CAM112A_map10	0002.CSV	3324.82	0.0248684
CAM112A_map10	0002.CSV	3328.67	0.0245922
CAM112A_map10	0002.CSV	3332.53	0.0243297
CAM112A_map10	0002.CSV	3336.39	0.0247295
CAM112A_map10	0002.CSV	3340.24	0.0250634
CAM112A_map10	0002.CSV	3344.1	0.0248947
CAM112A_map10	0002.CSV	3347.96	0.0249185
CAM112A_map10	0002.CSV	3351.82	0.024965
CAM112A_map10	0002.CSV	3355.67	0.024729
CAM112A_map10	0002.CSV	3359.53	0.0248622
CAM112A_map10	0002.CSV	3363.39	0.0251285
CAM112A_map10	0002.CSV	3367.24	0.0252849
CAM112A_map10	0002.CSV	3371.1	0.025107
CAM112A_map10	0002.CSV	3374.96	0.024847
CAM112A_map10	0002.CSV	3378.82	0.0247411
CAM112A_map10	0002.CSV	3382.67	0.0245506
CAM112A_map10	0002.CSV	3386.53	0.02464
CAM112A_map10	0002.CSV	3390.39	0.0250508
CAM112A_map10	0002.CSV	3394.24	0.0251519
CAM112A_map10	0002.CSV	3398.1	0.0251162
CAM112A_map10	0002.CSV	3401.96	0.0250998
CAM112A_map10	0002.CSV	3405.82	0.024833
CAM112A_map10	0002.CSV	3409.67	0.0247565
CAM112A_map10	0002.CSV	3413.53	0.0245615
CAM112A_map10	0002.CSV	3417.39	0.0241659
CAM112A_map10	0002.CSV	3421.24	0.0240912
CAM112A_map10	0002.CSV	3425.1	0.0242471
CAM112A_map10	0002.CSV	3428.96	0.024487
CAM112A_map10	0002.CSV	3432.82	0.0246388
CAM112A_map10	0002.CSV	3436.67	0.0244306
CAM112A_map10	0002.CSV	3440.53	0.0239129
CAM112A_map10	0002.CSV	3444.39	0.0235571
CAM112A_map10	0002.CSV	3448.24	0.0234029
CAM112A_map10	0002.CSV	3452.1	0.0231863
CAM112A_map10	0002.CSV	3455.96	0.0231943
CAM112A_map10	0002.CSV	3459.82	0.0234908
CAM112A_map10	0002.CSV	3463.67	0.0237453
CAM112A_map10	0002.CSV	3467.53	0.0238123
CAM112A_map10	0002.CSV	3471.39	0.0234515
CAM112A_map10	0002.CSV	3475.24	0.0231284
CAM112A_map10	0002.CSV	3479.1	0.0232651
CAM112A_map10	0002.CSV	3482.96	0.0233268
CAM112A_map10	0002.CSV	3486.82	0.0233071
CAM112A_map10	0002.CSV	3490.67	0.023165
CAM112A_map10	0002.CSV	3494.53	0.0232001
CAM112A_map10	0002.CSV	3498.39	0.0232926
CAM112A_map10	0002.CSV	3502.24	0.0232097
CAM112A_map10	0002.CSV	3506.1	0.0226698
CAM112A_map10	0002.CSV	3509.96	0.0223463
CAM112A_map10	0002.CSV	3513.81	0.022344
CAM112A_map10	0002.CSV	3517.67	0.02203
CAM112A_map10	0002.CSV	3521.53	0.0219853
CAM112A_map10	0002.CSV	3525.39	0.0219512
CAM112A_map10	0002.CSV	3529.24	0.0217262
CAM112A_map10	0002.CSV	3533.1	0.0217651
CAM112A_map10	0002.CSV	3536.96	0.0219806
CAM112A_map10	0002.CSV	3540.81	0.0220947
CAM112A_map10	0002.CSV	3544.67	0.0222767
CAM112A_map10	0002.CSV	3548.53	0.0220303
CAM112A_map10	0002.CSV	3552.39	0.0215984
CAM112A_map10	0002.CSV	3556.24	0.0214275
CAM112A_map10	0002.CSV	3560.1	0.0212169
CAM112A_map10	0002.CSV	3563.96	0.0208039
CAM112A_map10	0002.CSV	3567.81	0.0211214
CAM112A_map10	0002.CSV	3571.67	0.0211976
CAM112A_map10	0002.CSV	3575.53	0.020814
CAM112A_map10	0002.CSV	3579.39	0.0209191
CAM112A_map10	0002.CSV	3583.24	0.020923
CAM112A_map10	0002.CSV	3587.1	0.0209009
CAM112A_map10	0002.CSV	3590.96	0.0208688
CAM112A_map10	0002.CSV	3594.81	0.0207299
CAM112A_map10	0002.CSV	3598.67	0.020959
CAM112A_map10	0002.CSV	3602.53	0.0208041
CAM112A_map10	0002.CSV	3606.39	0.0201255
CAM112A_map10	0002.CSV	3610.24	0.019795
CAM112A_map10	0002.CSV	3614.1	0.019786
CAM112A_map10	0002.CSV	3617.96	0.0201904
CAM112A_map10	0002.CSV	3621.81	0.0204511
CAM112A_map10	0002.CSV	3625.67	0.0196569
CAM112A_map10	0002.CSV	3629.53	0.0196268
CAM112A_map10	0002.CSV	3633.39	0.020244
CAM112A_map10	0002.CSV	3637.24	0.0199598
CAM112A_map10	0002.CSV	3641.1	0.0195566
CAM112A_map10	0002.CSV	3644.96	0.018974
CAM112A_map10	0002.CSV	3648.81	0.0195228
CAM112A_map10	0002.CSV	3652.67	0.0202753
CAM112A_map10	0002.CSV	3656.53	0.020263
CAM112A_map10	0002.CSV	3660.38	0.0201631
CAM112A_map10	0002.CSV	3664.24	0.0193163
CAM112A_map10	0002.CSV	3668.1	0.0185189
CAM112A_map10	0002.CSV	3671.96	0.018559
CAM112A_map10	0002.CSV	3675.81	0.0193766
CAM112A_map10	0002.CSV	3679.67	0.0198639
CAM112A_map10	0002.CSV	3683.53	0.0194482
CAM112A_map10	0002.CSV	3687.38	0.0193439
CAM112A_map10	0002.CSV	3691.24	0.0201593
CAM112A_map10	0002.CSV	3695.1	0.0199004
CAM112A_map10	0002.CSV	3698.95	0.0191987
CAM112A_map10	0002.CSV	3702.81	0.0190237
CAM112A_map10	0002.CSV	3706.67	0.0188073
CAM112A_map10	0002.CSV	3710.53	0.0188022
CAM112A_map10	0002.CSV	3714.38	0.0192886
CAM112A_map10	0002.CSV	3718.24	0.0188466
CAM112A_map10	0002.CSV	3722.1	0.0186114
CAM112A_map10	0002.CSV	3725.95	0.0188425
CAM112A_map10	0002.CSV	3729.81	0.0187497
CAM112A_map10	0002.CSV	3733.67	0.0190776
CAM112A_map10	0002.CSV	3737.53	0.0201301
CAM112A_map10	0002.CSV	3741.38	0.0191942
CAM112A_map10	0002.CSV	3745.24	0.0179692
CAM112A_map10	0002.CSV	3749.1	0.0177336
CAM112A_map10	0002.CSV	3752.95	0.0187407
CAM112A_map10	0002.CSV	3756.81	0.0189226
CAM112A_map10	0002.CSV	3760.67	0.0188725
CAM112A_map10	0002.CSV	3764.53	0.018711
CAM112A_map10	0002.CSV	3768.38	0.0188866
CAM112A_map10	0002.CSV	3772.24	0.0190717
CAM112A_map10	0002.CSV	3776.1	0.0188085
CAM112A_map10	0002.CSV	3779.95	0.018818
CAM112A_map10	0002.CSV	3783.81	0.0188043
CAM112A_map10	0002.CSV	3787.67	0.0188111
CAM112A_map10	0002.CSV	3791.53	0.0184752
CAM112A_map10	0002.CSV	3795.38	0.0179215
CAM112A_map10	0002.CSV	3799.24	0.0179232
CAM112A_map10	0002.CSV	3803.1	0.0186482
CAM112A_map10	0002.CSV	3806.95	0.0189716
CAM112A_map10	0002.CSV	3810.81	0.0185889
CAM112A_map10	0002.CSV	3814.67	0.0181075
CAM112A_map10	0002.CSV	3818.53	0.0184055
CAM112A_map10	0002.CSV	3822.38	0.0188865
CAM112A_map10	0002.CSV	3826.24	0.0187154
CAM112A_map10	0002.CSV	3830.1	0.0183161
CAM112A_map10	0002.CSV	3833.95	0.0181713
CAM112A_map10	0002.CSV	3837.81	0.0185702
CAM112A_map10	0002.CSV	3841.67	0.0192018
CAM112A_map10	0002.CSV	3845.53	0.0188708
CAM112A_map10	0002.CSV	3849.38	0.0177894
CAM112A_map10	0002.CSV	3853.24	0.0177868
CAM112A_map10	0002.CSV	3857.1	0.0187831
CAM112A_map10	0002.CSV	3860.95	0.018313
CAM112A_map10	0002.CSV	3864.81	0.0182786
CAM112A_map10	0002.CSV	3868.67	0.0184702
CAM112A_map10	0002.CSV	3872.52	0.0189156
CAM112A_map10	0002.CSV	3876.38	0.0187562
CAM112A_map10	0002.CSV	3880.24	0.0184667
CAM112A_map10	0002.CSV	3884.1	0.018881
CAM112A_map10	0002.CSV	3887.95	0.0189647
CAM112A_map10	0002.CSV	3891.81	0.0189474
CAM112A_map10	0002.CSV	3895.67	0.0186507
CAM112A_map10	0002.CSV	3899.52	0.0182896
CAM112A_map10	0002.CSV	3903.38	0.0191234
CAM112A_map10	0002.CSV	3907.24	0.0194
CAM112A_map10	0002.CSV	3911.1	0.0187946
CAM112A_map10	0002.CSV	3914.95	0.01848
CAM112A_map10	0002.CSV	3918.81	0.0188015
CAM112A_map10	0002.CSV	3922.67	0.0188929
CAM112A_map10	0002.CSV	3926.52	0.018794
CAM112A_map10	0002.CSV	3930.38	0.0189947
CAM112A_map10	0002.CSV	3934.24	0.0193984
CAM112A_map10	0002.CSV	3938.09	0.0191141
CAM112A_map10	0002.CSV	3941.95	0.0188751
CAM112A_map10	0002.CSV	3945.81	0.0188238
CAM112A_map10	0002.CSV	3949.67	0.0189106
CAM112A_map10	0002.CSV	3953.52	0.0190047
CAM112A_map10	0002.CSV	3957.38	0.0188896
CAM112A_map10	0002.CSV	3961.24	0.0188686
CAM112A_map10	0002.CSV	3965.09	0.0188787
CAM112A_map10	0002.CSV	3968.95	0.0188579
CAM112A_map10	0002.CSV	3972.81	0.0188994
CAM112A_map10	0002.CSV	3976.67	0.0189012
CAM112A_map10	0002.CSV	3980.52	0.0189628
CAM112A_map10	0002.CSV	3984.38	0.0190485
CAM112A_map10	0002.CSV	3988.24	0.0189748
CAM112A_map10	0002.CSV	3992.09	0.0189116
CAM112A_map10	0002.CSV	3995.95	0.0189021
CAM112A_map10	0002.CSV	3999.81	0.0188118
CAM112A_map10	0003.CSV	674.992	0.0382575
CAM112A_map10	0003.CSV	678.849	0.0398624
CAM112A_map10	0003.CSV	682.706	0.0411355
CAM112A_map10	0003.CSV	686.563	0.0437935
CAM112A_map10	0003.CSV	690.42	0.0457348
CAM112A_map10	0003.CSV	694.277	0.0505831
CAM112A_map10	0003.CSV	698.134	0.056718
CAM112A_map10	0003.CSV	701.991	0.0673339
CAM112A_map10	0003.CSV	705.849	0.0866269
CAM112A_map10	0003.CSV	709.706	0.112839
CAM112A_map10	0003.CSV	713.563	0.106448
CAM112A_map10	0003.CSV	717.42	0.0698846
CAM112A_map10	0003.CSV	721.277	0.0447229
CAM112A_map10	0003.CSV	725.134	0.0374118
CAM112A_map10	0003.CSV	728.991	0.0354372
CAM112A_map10	0003.CSV	732.848	0.0355495
CAM112A_map10	0003.CSV	736.705	0.035135
CAM112A_map10	0003.CSV	740.562	0.0358817
CAM112A_map10	0003.CSV	744.42	0.0365538
CAM112A_map10	0003.CSV	748.277	0.0376829
CAM112A_map10	0003.CSV	752.134	0.0386479
CAM112A_map10	0003.CSV	755.991	0.0401787
CAM112A_map10	0003.CSV	759.848	0.0411562
CAM112A_map10	0003.CSV	763.705	0.0429026
CAM112A_map10	0003.CSV	767.562	0.0439087
CAM112A_map10	0003.CSV	771.419	0.045415
CAM112A_map10	0003.CSV	775.276	0.0465654
CAM112A_map10	0003.CSV	779.133	0.0476923
CAM112A_map10	0003.CSV	782.99	0.0475125
CAM112A_map10	0003.CSV	786.848	0.0478355
CAM112A_map10	0003.CSV	790.705	0.0477228
CAM112A_map10	0003.CSV	794.562	0.0483497
CAM112A_map10	0003.CSV	798.419	0.0490887
CAM112A_map10	0003.CSV	802.276	0.0502424
CAM112A_map10	0003.CSV	806.133	0.05066
CAM112A_map10	0003.CSV	809.99	0.0514195
CAM112A_map10	0003.CSV	813.847	0.0519656
CAM112A_map10	0003.CSV	817.704	0.0535351
CAM112A_map10	0003.CSV	821.562	0.0552273
CAM112A_map10	0003.CSV	825.419	0.0576736
CAM112A_map10	0003.CSV	829.276	0.0598091
CAM112A_map10	0003.CSV	833.133	0.0626146
CAM112A_map10	0003.CSV	836.99	0.0655271
CAM112A_map10	0003.CSV	840.847	0.070897
CAM112A_map10	0003.CSV	844.704	0.0791286
CAM112A_map10	0003.CSV	848.561	0.0850403
CAM112A_map10	0003.CSV	852.418	0.0882957
CAM112A_map10	0003.CSV	856.275	0.101085
CAM112A_map10	0003.CSV	860.132	0.127448
CAM112A_map10	0003.CSV	863.99	0.174894
CAM112A_map10	0003.CSV	867.847	0.235035
CAM112A_map10	0003.CSV	871.704	0.259244
CAM112A_map10	0003.CSV	875.561	0.222858
CAM112A_map10	0003.CSV	879.418	0.167326
CAM112A_map10	0003.CSV	883.275	0.109082
CAM112A_map10	0003.CSV	887.132	0.0589423
CAM112A_map10	0003.CSV	890.989	0.0362872
CAM112A_map10	0003.CSV	894.846	0.0342434
CAM112A_map10	0003.CSV	898.703	0.035632
CAM112A_map10	0003.CSV	902.561	0.0375112
CAM112A_map10	0003.CSV	906.418	0.0388475
CAM112A_map10	0003.CSV	910.275	0.0403263
CAM112A_map10	0003.CSV	914.132	0.041367
CAM112A_map10	0003.CSV	917.989	0.0428031
CAM112A_map10	0003.CSV	921.846	0.0437134
CAM112A_map10	0003.CSV	925.703	0.0449414
CAM112A_map10	0003.CSV	929.56	0.0458189
CAM112A_map10	0003.CSV	933.417	0.0468032
CAM112A_map10	0003.CSV	937.274	0.0472955
CAM112A_map10	0003.CSV	941.131	0.0480955
CAM112A_map10	0003.CSV	944.989	0.0485417
CAM112A_map10	0003.CSV	948.846	0.0492913
CAM112A_map10	0003.CSV	952.703	0.0496793
CAM112A_map10	0003.CSV	956.56	0.0503751
CAM112A_map10	0003.CSV	960.417	0.0506331
CAM112A_map10	0003.CSV	964.274	0.0511956
CAM112A_map10	0003.CSV	968.131	0.0516469
CAM112A_map10	0003.CSV	971.988	0.0525047
CAM112A_map10	0003.CSV	975.845	0.0530847
CAM112A_map10	0003.CSV	979.702	0.0540054
CAM112A_map10	0003.CSV	983.559	0.0546813
CAM112A_map10	0003.CSV	987.417	0.0557754
CAM112A_map10	0003.CSV	991.274	0.0566498
CAM112A_map10	0003.CSV	995.131	0.0576968
CAM112A_map10	0003.CSV	998.988	0.0583832
CAM112A_map10	0003.CSV	1002.85	0.0594238
CAM112A_map10	0003.CSV	1006.7	0.0601473
CAM112A_map10	0003.CSV	1010.56	0.061164
CAM112A_map10	0003.CSV	1014.42	0.0618643
CAM112A_map10	0003.CSV	1018.27	0.0628675
CAM112A_map10	0003.CSV	1022.13	0.0635325
CAM112A_map10	0003.CSV	1025.99	0.0644821
CAM112A_map10	0003.CSV	1029.85	0.0650824
CAM112A_map10	0003.CSV	1033.7	0.0660488
CAM112A_map10	0003.CSV	1037.56	0.0667856
CAM112A_map10	0003.CSV	1041.42	0.0678017
CAM112A_map10	0003.CSV	1045.27	0.068348
CAM112A_map10	0003.CSV	1049.13	0.0692278
CAM112A_map10	0003.CSV	1052.99	0.069868
CAM112A_map10	0003.CSV	1056.84	0.0710335
CAM112A_map10	0003.CSV	1060.7	0.0721063
CAM112A_map10	0003.CSV	1064.56	0.0735479
CAM112A_map10	0003.CSV	1068.42	0.0744826
CAM112A_map10	0003.CSV	1072.27	0.0756009
CAM112A_map10	0003.CSV	1076.13	0.0763374
CAM112A_map10	0003.CSV	1079.99	0.0775679
CAM112A_map10	0003.CSV	1083.84	0.0786454
CAM112A_map10	0003.CSV	1087.7	0.0796308
CAM112A_map10	0003.CSV	1091.56	0.0790451
CAM112A_map10	0003.CSV	1095.41	0.0780732
CAM112A_map10	0003.CSV	1099.27	0.0773095
CAM112A_map10	0003.CSV	1103.13	0.0777034
CAM112A_map10	0003.CSV	1106.99	0.0783248
CAM112A_map10	0003.CSV	1110.84	0.0795083
CAM112A_map10	0003.CSV	1114.7	0.0801252
CAM112A_map10	0003.CSV	1118.56	0.0807203
CAM112A_map10	0003.CSV	1122.41	0.0809903
CAM112A_map10	0003.CSV	1126.27	0.0816776
CAM112A_map10	0003.CSV	1130.13	0.081955
CAM112A_map10	0003.CSV	1133.99	0.0824672
CAM112A_map10	0003.CSV	1137.84	0.0827913
CAM112A_map10	0003.CSV	1141.7	0.0835278
CAM112A_map10	0003.CSV	1145.56	0.0839559
CAM112A_map10	0003.CSV	1149.41	0.084722
CAM112A_map10	0003.CSV	1153.27	0.085388
CAM112A_map10	0003.CSV	1157.13	0.0866085
CAM112A_map10	0003.CSV	1160.99	0.0874219
CAM112A_map10	0003.CSV	1164.84	0.0881717
CAM112A_map10	0003.CSV	1168.7	0.08828
CAM112A_map10	0003.CSV	1172.56	0.0885376
CAM112A_map10	0003.CSV	1176.41	0.0884433
CAM112A_map10	0003.CSV	1180.27	0.0886109
CAM112A_map10	0003.CSV	1184.13	0.0884629
CAM112A_map10	0003.CSV	1187.99	0.0885648
CAM112A_map10	0003.CSV	1191.84	0.0883695
CAM112A_map10	0003.CSV	1195.7	0.0885925
CAM112A_map10	0003.CSV	1199.56	0.0888201
CAM112A_map10	0003.CSV	1203.41	0.0896379
CAM112A_map10	0003.CSV	1207.27	0.090396
CAM112A_map10	0003.CSV	1211.13	0.0916229
CAM112A_map10	0003.CSV	1214.98	0.0925935
CAM112A_map10	0003.CSV	1218.84	0.093981
CAM112A_map10	0003.CSV	1222.7	0.0952709
CAM112A_map10	0003.CSV	1226.56	0.096986
CAM112A_map10	0003.CSV	1230.41	0.0985587
CAM112A_map10	0003.CSV	1234.27	0.100575
CAM112A_map10	0003.CSV	1238.13	0.102304
CAM112A_map10	0003.CSV	1241.98	0.104391
CAM112A_map10	0003.CSV	1245.84	0.106267
CAM112A_map10	0003.CSV	1249.7	0.10863
CAM112A_map10	0003.CSV	1253.56	0.11085
CAM112A_map10	0003.CSV	1257.41	0.113377
CAM112A_map10	0003.CSV	1261.27	0.115508
CAM112A_map10	0003.CSV	1265.13	0.117899
CAM112A_map10	0003.CSV	1268.98	0.120086
CAM112A_map10	0003.CSV	1272.84	0.122888
CAM112A_map10	0003.CSV	1276.7	0.125509
CAM112A_map10	0003.CSV	1280.56	0.128634
CAM112A_map10	0003.CSV	1284.41	0.131433
CAM112A_map10	0003.CSV	1288.27	0.134745
CAM112A_map10	0003.CSV	1292.13	0.137794
CAM112A_map10	0003.CSV	1295.98	0.141362
CAM112A_map10	0003.CSV	1299.84	0.144905
CAM112A_map10	0003.CSV	1303.7	0.149146
CAM112A_map10	0003.CSV	1307.56	0.153404
CAM112A_map10	0003.CSV	1311.41	0.158623
CAM112A_map10	0003.CSV	1315.27	0.163909
CAM112A_map10	0003.CSV	1319.13	0.1699
CAM112A_map10	0003.CSV	1322.98	0.175203
CAM112A_map10	0003.CSV	1326.84	0.181222
CAM112A_map10	0003.CSV	1330.7	0.187727
CAM112A_map10	0003.CSV	1334.56	0.195134
CAM112A_map10	0003.CSV	1338.41	0.203982
CAM112A_map10	0003.CSV	1342.27	0.215275
CAM112A_map10	0003.CSV	1346.13	0.225017
CAM112A_map10	0003.CSV	1349.98	0.236571
CAM112A_map10	0003.CSV	1353.84	0.248872
CAM112A_map10	0003.CSV	1357.7	0.26221
CAM112A_map10	0003.CSV	1361.56	0.277218
CAM112A_map10	0003.CSV	1365.41	0.295602
CAM112A_map10	0003.CSV	1369.27	0.311155
CAM112A_map10	0003.CSV	1373.13	0.329906
CAM112A_map10	0003.CSV	1376.98	0.34978
CAM112A_map10	0003.CSV	1380.84	0.36671
CAM112A_map10	0003.CSV	1384.7	0.380479
CAM112A_map10	0003.CSV	1388.56	0.394577
CAM112A_map10	0003.CSV	1392.41	0.400991
CAM112A_map10	0003.CSV	1396.27	0.400946
CAM112A_map10	0003.CSV	1400.13	0.393082
CAM112A_map10	0003.CSV	1403.98	0.383203
CAM112A_map10	0003.CSV	1407.84	0.365925
CAM112A_map10	0003.CSV	1411.7	0.3461
CAM112A_map10	0003.CSV	1415.55	0.326205
CAM112A_map10	0003.CSV	1419.41	0.305241
CAM112A_map10	0003.CSV	1423.27	0.288481
CAM112A_map10	0003.CSV	1427.12	0.2785
CAM112A_map10	0003.CSV	1430.98	0.267985
CAM112A_map10	0003.CSV	1434.84	0.257909
CAM112A_map10	0003.CSV	1438.7	0.246014
CAM112A_map10	0003.CSV	1442.55	0.237463
CAM112A_map10	0003.CSV	1446.41	0.227887
CAM112A_map10	0003.CSV	1450.27	0.218085
CAM112A_map10	0003.CSV	1454.12	0.209684
CAM112A_map10	0003.CSV	1457.98	0.197936
CAM112A_map10	0003.CSV	1461.84	0.188651
CAM112A_map10	0003.CSV	1465.7	0.18185
CAM112A_map10	0003.CSV	1469.55	0.174402
CAM112A_map10	0003.CSV	1473.41	0.165285
CAM112A_map10	0003.CSV	1477.27	0.155406
CAM112A_map10	0003.CSV	1481.12	0.149449
CAM112A_map10	0003.CSV	1484.98	0.143534
CAM112A_map10	0003.CSV	1488.84	0.136311
CAM112A_map10	0003.CSV	1492.7	0.12867
CAM112A_map10	0003.CSV	1496.55	0.122771
CAM112A_map10	0003.CSV	1500.41	0.115983
CAM112A_map10	0003.CSV	1504.27	0.111735
CAM112A_map10	0003.CSV	1508.12	0.104152
CAM112A_map10	0003.CSV	1511.98	0.0989649
CAM112A_map10	0003.CSV	1515.84	0.0952972
CAM112A_map10	0003.CSV	1519.7	0.0908669
CAM112A_map10	0003.CSV	1523.55	0.0856896
CAM112A_map10	0003.CSV	1527.41	0.0823419
CAM112A_map10	0003.CSV	1531.27	0.0796165
CAM112A_map10	0003.CSV	1535.12	0.0778593
CAM112A_map10	0003.CSV	1538.98	0.0752893
CAM112A_map10	0003.CSV	1542.84	0.0681981
CAM112A_map10	0003.CSV	1546.7	0.0620584
CAM112A_map10	0003.CSV	1550.55	0.0575332
CAM112A_map10	0003.CSV	1554.41	0.0533841
CAM112A_map10	0003.CSV	1558.27	0.0496019
CAM112A_map10	0003.CSV	1562.12	0.0470249
CAM112A_map10	0003.CSV	1565.98	0.0461838
CAM112A_map10	0003.CSV	1569.84	0.0460684
CAM112A_map10	0003.CSV	1573.69	0.0463194
CAM112A_map10	0003.CSV	1577.55	0.0454047
CAM112A_map10	0003.CSV	1581.41	0.0429122
CAM112A_map10	0003.CSV	1585.27	0.0396939
CAM112A_map10	0003.CSV	1589.12	0.0368257
CAM112A_map10	0003.CSV	1592.98	0.0345078
CAM112A_map10	0003.CSV	1596.84	0.03276
CAM112A_map10	0003.CSV	1600.69	0.0313559
CAM112A_map10	0003.CSV	1604.55	0.0303722
CAM112A_map10	0003.CSV	1608.41	0.0295307
CAM112A_map10	0003.CSV	1612.27	0.0288815
CAM112A_map10	0003.CSV	1616.12	0.0281824
CAM112A_map10	0003.CSV	1619.98	0.0276452
CAM112A_map10	0003.CSV	1623.84	0.0269046
CAM112A_map10	0003.CSV	1627.69	0.0262123
CAM112A_map10	0003.CSV	1631.55	0.0252325
CAM112A_map10	0003.CSV	1635.41	0.0246608
CAM112A_map10	0003.CSV	1639.27	0.0241928
CAM112A_map10	0003.CSV	1643.12	0.023595
CAM112A_map10	0003.CSV	1646.98	0.0232311
CAM112A_map10	0003.CSV	1650.84	0.0231942
CAM112A_map10	0003.CSV	1654.69	0.0231574
CAM112A_map10	0003.CSV	1658.55	0.0227606
CAM112A_map10	0003.CSV	1662.41	0.0222824
CAM112A_map10	0003.CSV	1666.27	0.0219811
CAM112A_map10	0003.CSV	1670.12	0.0217452
CAM112A_map10	0003.CSV	1673.98	0.0218268
CAM112A_map10	0003.CSV	1677.84	0.021449
CAM112A_map10	0003.CSV	1681.69	0.0212279
CAM112A_map10	0003.CSV	1685.55	0.0213201
CAM112A_map10	0003.CSV	1689.41	0.0210945
CAM112A_map10	0003.CSV	1693.27	0.0204368
CAM112A_map10	0003.CSV	1697.12	0.0203379
CAM112A_map10	0003.CSV	1700.98	0.0207303
CAM112A_map10	0003.CSV	1704.84	0.0209657
CAM112A_map10	0003.CSV	1708.69	0.0209121
CAM112A_map10	0003.CSV	1712.55	0.0208718
CAM112A_map10	0003.CSV	1716.41	0.0215612
CAM112A_map10	0003.CSV	1720.27	0.0224981
CAM112A_map10	0003.CSV	1724.12	0.0224569
[truncated: 88,616 more rows]

## Sheet: CAM112_map11
Map	Select spectrum number	Wavenumbers	Absorbance
CAM112A_map11	0001.CSV	674.992	0.0402776
CAM112A_map11	0001.CSV	678.849	0.0434491
CAM112A_map11	0001.CSV	682.706	0.0452211
CAM112A_map11	0001.CSV	686.563	0.0481294
CAM112A_map11	0001.CSV	690.42	0.0510915
CAM112A_map11	0001.CSV	694.277	0.0570128
CAM112A_map11	0001.CSV	698.134	0.0642142
CAM112A_map11	0001.CSV	701.991	0.0749052
CAM112A_map11	0001.CSV	705.849	0.0927356
CAM112A_map11	0001.CSV	709.706	0.11521
CAM112A_map11	0001.CSV	713.563	0.106256
CAM112A_map11	0001.CSV	717.42	0.0708856
CAM112A_map11	0001.CSV	721.277	0.0465049
CAM112A_map11	0001.CSV	725.134	0.0396643
CAM112A_map11	0001.CSV	728.991	0.0376463
CAM112A_map11	0001.CSV	732.848	0.0381494
CAM112A_map11	0001.CSV	736.705	0.0389136
CAM112A_map11	0001.CSV	740.562	0.0401677
CAM112A_map11	0001.CSV	744.42	0.0408993
CAM112A_map11	0001.CSV	748.277	0.0424875
CAM112A_map11	0001.CSV	752.134	0.0438685
CAM112A_map11	0001.CSV	755.991	0.0457722
CAM112A_map11	0001.CSV	759.848	0.0464946
CAM112A_map11	0001.CSV	763.705	0.0472932
CAM112A_map11	0001.CSV	767.562	0.0478408
CAM112A_map11	0001.CSV	771.419	0.0495301
CAM112A_map11	0001.CSV	775.276	0.050546
CAM112A_map11	0001.CSV	779.133	0.0509558
CAM112A_map11	0001.CSV	782.99	0.0502862
CAM112A_map11	0001.CSV	786.848	0.0506227
CAM112A_map11	0001.CSV	790.705	0.0510231
CAM112A_map11	0001.CSV	794.562	0.0524362
CAM112A_map11	0001.CSV	798.419	0.053473
CAM112A_map11	0001.CSV	802.276	0.0543365
CAM112A_map11	0001.CSV	806.133	0.054209
CAM112A_map11	0001.CSV	809.99	0.0550099
CAM112A_map11	0001.CSV	813.847	0.0559103
CAM112A_map11	0001.CSV	817.704	0.0578924
CAM112A_map11	0001.CSV	821.562	0.0592305
CAM112A_map11	0001.CSV	825.419	0.0613238
CAM112A_map11	0001.CSV	829.276	0.0639569
CAM112A_map11	0001.CSV	833.133	0.067779
CAM112A_map11	0001.CSV	836.99	0.0712254
CAM112A_map11	0001.CSV	840.847	0.0760719
CAM112A_map11	0001.CSV	844.704	0.0839744
CAM112A_map11	0001.CSV	848.561	0.0897759
CAM112A_map11	0001.CSV	852.418	0.0932766
CAM112A_map11	0001.CSV	856.275	0.107321
CAM112A_map11	0001.CSV	860.132	0.13792
CAM112A_map11	0001.CSV	863.99	0.195108
CAM112A_map11	0001.CSV	867.847	0.259078
CAM112A_map11	0001.CSV	871.704	0.266467
CAM112A_map11	0001.CSV	875.561	0.217995
CAM112A_map11	0001.CSV	879.418	0.164109
CAM112A_map11	0001.CSV	883.275	0.110015
CAM112A_map11	0001.CSV	887.132	0.0632641
CAM112A_map11	0001.CSV	890.989	0.0425756
CAM112A_map11	0001.CSV	894.846	0.0411987
CAM112A_map11	0001.CSV	898.703	0.0426898
CAM112A_map11	0001.CSV	902.561	0.0444819
CAM112A_map11	0001.CSV	906.418	0.0457266
CAM112A_map11	0001.CSV	910.275	0.0471378
CAM112A_map11	0001.CSV	914.132	0.0480217
CAM112A_map11	0001.CSV	917.989	0.0491758
CAM112A_map11	0001.CSV	921.846	0.0499451
CAM112A_map11	0001.CSV	925.703	0.0510724
CAM112A_map11	0001.CSV	929.56	0.0518123
CAM112A_map11	0001.CSV	933.417	0.0527941
CAM112A_map11	0001.CSV	937.274	0.0532494
CAM112A_map11	0001.CSV	941.131	0.053956
CAM112A_map11	0001.CSV	944.989	0.0544009
CAM112A_map11	0001.CSV	948.846	0.0551071
CAM112A_map11	0001.CSV	952.703	0.0554973
CAM112A_map11	0001.CSV	956.56	0.0563741
CAM112A_map11	0001.CSV	960.417	0.0567722
CAM112A_map11	0001.CSV	964.274	0.0573755
CAM112A_map11	0001.CSV	968.131	0.0578538
CAM112A_map11	0001.CSV	971.988	0.0588138
CAM112A_map11	0001.CSV	975.845	0.0594686
CAM112A_map11	0001.CSV	979.702	0.0604807
CAM112A_map11	0001.CSV	983.559	0.0612947
CAM112A_map11	0001.CSV	987.417	0.062418
CAM112A_map11	0001.CSV	991.274	0.0631781
CAM112A_map11	0001.CSV	995.131	0.0642256
CAM112A_map11	0001.CSV	998.988	0.0649667
CAM112A_map11	0001.CSV	1002.85	0.0660711
CAM112A_map11	0001.CSV	1006.7	0.0668912
CAM112A_map11	0001.CSV	1010.56	0.0679895
CAM112A_map11	0001.CSV	1014.42	0.0687681
CAM112A_map11	0001.CSV	1018.27	0.069823
CAM112A_map11	0001.CSV	1022.13	0.0705428
CAM112A_map11	0001.CSV	1025.99	0.0715805
CAM112A_map11	0001.CSV	1029.85	0.0723067
CAM112A_map11	0001.CSV	1033.7	0.0734509
CAM112A_map11	0001.CSV	1037.56	0.0743139
CAM112A_map11	0001.CSV	1041.42	0.0753097
CAM112A_map11	0001.CSV	1045.27	0.0758386
CAM112A_map11	0001.CSV	1049.13	0.0769251
CAM112A_map11	0001.CSV	1052.99	0.0781326
CAM112A_map11	0001.CSV	1056.84	0.0800656
CAM112A_map11	0001.CSV	1060.7	0.081923
CAM112A_map11	0001.CSV	1064.56	0.0841313
CAM112A_map11	0001.CSV	1068.42	0.0857417
CAM112A_map11	0001.CSV	1072.27	0.08729
CAM112A_map11	0001.CSV	1076.13	0.0881524
CAM112A_map11	0001.CSV	1079.99	0.0894354
CAM112A_map11	0001.CSV	1083.84	0.0906348
CAM112A_map11	0001.CSV	1087.7	0.091766
CAM112A_map11	0001.CSV	1091.56	0.0910036
CAM112A_map11	0001.CSV	1095.41	0.0891627
CAM112A_map11	0001.CSV	1099.27	0.0874517
CAM112A_map11	0001.CSV	1103.13	0.0873455
CAM112A_map11	0001.CSV	1106.99	0.0875564
CAM112A_map11	0001.CSV	1110.84	0.0881956
CAM112A_map11	0001.CSV	1114.7	0.0886279
CAM112A_map11	0001.CSV	1118.56	0.0894096
CAM112A_map11	0001.CSV	1122.41	0.0897258
CAM112A_map11	0001.CSV	1126.27	0.0902092
CAM112A_map11	0001.CSV	1130.13	0.0904335
CAM112A_map11	0001.CSV	1133.99	0.0910755
CAM112A_map11	0001.CSV	1137.84	0.091475
CAM112A_map11	0001.CSV	1141.7	0.0922211
CAM112A_map11	0001.CSV	1145.56	0.0926657
CAM112A_map11	0001.CSV	1149.41	0.0934469
CAM112A_map11	0001.CSV	1153.27	0.0941444
CAM112A_map11	0001.CSV	1157.13	0.0952933
CAM112A_map11	0001.CSV	1160.99	0.0959015
CAM112A_map11	0001.CSV	1164.84	0.0964789
CAM112A_map11	0001.CSV	1168.7	0.0965769
CAM112A_map11	0001.CSV	1172.56	0.0967649
CAM112A_map11	0001.CSV	1176.41	0.0964685
CAM112A_map11	0001.CSV	1180.27	0.0965301
CAM112A_map11	0001.CSV	1184.13	0.0963114
CAM112A_map11	0001.CSV	1187.99	0.0963151
CAM112A_map11	0001.CSV	1191.84	0.0960743
CAM112A_map11	0001.CSV	1195.7	0.0962363
CAM112A_map11	0001.CSV	1199.56	0.0962754
CAM112A_map11	0001.CSV	1203.41	0.0968257
CAM112A_map11	0001.CSV	1207.27	0.0972111
CAM112A_map11	0001.CSV	1211.13	0.098025
CAM112A_map11	0001.CSV	1214.98	0.0988114
CAM112A_map11	0001.CSV	1218.84	0.100084
CAM112A_map11	0001.CSV	1222.7	0.10118
CAM112A_map11	0001.CSV	1226.56	0.102685
CAM112A_map11	0001.CSV	1230.41	0.104071
CAM112A_map11	0001.CSV	1234.27	0.105976
CAM112A_map11	0001.CSV	1238.13	0.107706
CAM112A_map11	0001.CSV	1241.98	0.109886
CAM112A_map11	0001.CSV	1245.84	0.111816
CAM112A_map11	0001.CSV	1249.7	0.114063
CAM112A_map11	0001.CSV	1253.56	0.116035
CAM112A_map11	0001.CSV	1257.41	0.118297
CAM112A_map11	0001.CSV	1261.27	0.120225
CAM112A_map11	0001.CSV	1265.13	0.122359
CAM112A_map11	0001.CSV	1268.98	0.124158
CAM112A_map11	0001.CSV	1272.84	0.126536
CAM112A_map11	0001.CSV	1276.7	0.12875
CAM112A_map11	0001.CSV	1280.56	0.131439
CAM112A_map11	0001.CSV	1284.41	0.133784
CAM112A_map11	0001.CSV	1288.27	0.136507
CAM112A_map11	0001.CSV	1292.13	0.138856
CAM112A_map11	0001.CSV	1295.98	0.141549
CAM112A_map11	0001.CSV	1299.84	0.144138
CAM112A_map11	0001.CSV	1303.7	0.147567
CAM112A_map11	0001.CSV	1307.56	0.151108
CAM112A_map11	0001.CSV	1311.41	0.15546
CAM112A_map11	0001.CSV	1315.27	0.15974
CAM112A_map11	0001.CSV	1319.13	0.164662
CAM112A_map11	0001.CSV	1322.98	0.169108
CAM112A_map11	0001.CSV	1326.84	0.174235
CAM112A_map11	0001.CSV	1330.7	0.179686
CAM112A_map11	0001.CSV	1334.56	0.185926
CAM112A_map11	0001.CSV	1338.41	0.193343
CAM112A_map11	0001.CSV	1342.27	0.202804
CAM112A_map11	0001.CSV	1346.13	0.210868
CAM112A_map11	0001.CSV	1349.98	0.220471
CAM112A_map11	0001.CSV	1353.84	0.230649
CAM112A_map11	0001.CSV	1357.7	0.241642
CAM112A_map11	0001.CSV	1361.56	0.254074
CAM112A_map11	0001.CSV	1365.41	0.269589
CAM112A_map11	0001.CSV	1369.27	0.282433
CAM112A_map11	0001.CSV	1373.13	0.297937
CAM112A_map11	0001.CSV	1376.98	0.314918
CAM112A_map11	0001.CSV	1380.84	0.329995
CAM112A_map11	0001.CSV	1384.7	0.342863
CAM112A_map11	0001.CSV	1388.56	0.35731
CAM112A_map11	0001.CSV	1392.41	0.36576
CAM112A_map11	0001.CSV	1396.27	0.369529
CAM112A_map11	0001.CSV	1400.13	0.365721
CAM112A_map11	0001.CSV	1403.98	0.358399
CAM112A_map11	0001.CSV	1407.84	0.343728
CAM112A_map11	0001.CSV	1411.7	0.326053
CAM112A_map11	0001.CSV	1415.55	0.308163
CAM112A_map11	0001.CSV	1419.41	0.290136
CAM112A_map11	0001.CSV	1423.27	0.276018
CAM112A_map11	0001.CSV	1427.12	0.267696
CAM112A_map11	0001.CSV	1430.98	0.258577
CAM112A_map11	0001.CSV	1434.84	0.249329
CAM112A_map11	0001.CSV	1438.7	0.238293
CAM112A_map11	0001.CSV	1442.55	0.23118
CAM112A_map11	0001.CSV	1446.41	0.223207
CAM112A_map11	0001.CSV	1450.27	0.214623
CAM112A_map11	0001.CSV	1454.12	0.206712
CAM112A_map11	0001.CSV	1457.98	0.195021
CAM112A_map11	0001.CSV	1461.84	0.185501
CAM112A_map11	0001.CSV	1465.7	0.178411
CAM112A_map11	0001.CSV	1469.55	0.17094
CAM112A_map11	0001.CSV	1473.41	0.162284
CAM112A_map11	0001.CSV	1477.27	0.153101
CAM112A_map11	0001.CSV	1481.12	0.147489
CAM112A_map11	0001.CSV	1484.98	0.141733
CAM112A_map11	0001.CSV	1488.84	0.134661
CAM112A_map11	0001.CSV	1492.7	0.127113
CAM112A_map11	0001.CSV	1496.55	0.120908
CAM112A_map11	0001.CSV	1500.41	0.113538
CAM112A_map11	0001.CSV	1504.27	0.109081
CAM112A_map11	0001.CSV	1508.12	0.101502
CAM112A_map11	0001.CSV	1511.98	0.0964142
CAM112A_map11	0001.CSV	1515.84	0.0930928
CAM112A_map11	0001.CSV	1519.7	0.0893665
CAM112A_map11	0001.CSV	1523.55	0.0853073
CAM112A_map11	0001.CSV	1527.41	0.0827514
CAM112A_map11	0001.CSV	1531.27	0.0800624
CAM112A_map11	0001.CSV	1535.12	0.0775905
CAM112A_map11	0001.CSV	1538.98	0.0747873
CAM112A_map11	0001.CSV	1542.84	0.0702777
CAM112A_map11	0001.CSV	1546.7	0.0658433
CAM112A_map11	0001.CSV	1550.55	0.0616835
CAM112A_map11	0001.CSV	1554.41	0.0571213
CAM112A_map11	0001.CSV	1558.27	0.051991
CAM112A_map11	0001.CSV	1562.12	0.0479738
CAM112A_map11	0001.CSV	1565.98	0.0464687
CAM112A_map11	0001.CSV	1569.84	0.0451837
CAM112A_map11	0001.CSV	1573.69	0.0445578
CAM112A_map11	0001.CSV	1577.55	0.0437504
CAM112A_map11	0001.CSV	1581.41	0.0420608
CAM112A_map11	0001.CSV	1585.27	0.0400223
CAM112A_map11	0001.CSV	1589.12	0.0384931
CAM112A_map11	0001.CSV	1592.98	0.0371487
CAM112A_map11	0001.CSV	1596.84	0.0356294
CAM112A_map11	0001.CSV	1600.69	0.0339347
CAM112A_map11	0001.CSV	1604.55	0.0325115
CAM112A_map11	0001.CSV	1608.41	0.0312501
CAM112A_map11	0001.CSV	1612.27	0.0303172
CAM112A_map11	0001.CSV	1616.12	0.0295713
CAM112A_map11	0001.CSV	1619.98	0.0292229
CAM112A_map11	0001.CSV	1623.84	0.0287477
CAM112A_map11	0001.CSV	1627.69	0.0282815
CAM112A_map11	0001.CSV	1631.55	0.027617
CAM112A_map11	0001.CSV	1635.41	0.0273446
CAM112A_map11	0001.CSV	1639.27	0.0270353
CAM112A_map11	0001.CSV	1643.12	0.0264217
CAM112A_map11	0001.CSV	1646.98	0.0256764
CAM112A_map11	0001.CSV	1650.84	0.0254323
CAM112A_map11	0001.CSV	1654.69	0.0252435
CAM112A_map11	0001.CSV	1658.55	0.0247536
CAM112A_map11	0001.CSV	1662.41	0.0241627
CAM112A_map11	0001.CSV	1666.27	0.0237678
CAM112A_map11	0001.CSV	1670.12	0.0235303
CAM112A_map11	0001.CSV	1673.98	0.0235002
CAM112A_map11	0001.CSV	1677.84	0.023023
CAM112A_map11	0001.CSV	1681.69	0.0227322
CAM112A_map11	0001.CSV	1685.55	0.0227547
CAM112A_map11	0001.CSV	1689.41	0.0226756
CAM112A_map11	0001.CSV	1693.27	0.0221464
CAM112A_map11	0001.CSV	1697.12	0.0221248
CAM112A_map11	0001.CSV	1700.98	0.0225475
CAM112A_map11	0001.CSV	1704.84	0.0229668
CAM112A_map11	0001.CSV	1708.69	0.0232326
CAM112A_map11	0001.CSV	1712.55	0.0234093
CAM112A_map11	0001.CSV	1716.41	0.0243391
CAM112A_map11	0001.CSV	1720.27	0.0256657
CAM112A_map11	0001.CSV	1724.12	0.0258771
CAM112A_map11	0001.CSV	1727.98	0.0259669
CAM112A_map11	0001.CSV	1731.84	0.0259651
CAM112A_map11	0001.CSV	1735.69	0.0260768
CAM112A_map11	0001.CSV	1739.55	0.0254877
CAM112A_map11	0001.CSV	1743.41	0.0244745
CAM112A_map11	0001.CSV	1747.27	0.023184
CAM112A_map11	0001.CSV	1751.12	0.0218235
CAM112A_map11	0001.CSV	1754.98	0.0207291
CAM112A_map11	0001.CSV	1758.84	0.0201159
CAM112A_map11	0001.CSV	1762.69	0.0197998
CAM112A_map11	0001.CSV	1766.55	0.0195808
CAM112A_map11	0001.CSV	1770.41	0.019584
CAM112A_map11	0001.CSV	1774.26	0.020005
CAM112A_map11	0001.CSV	1778.12	0.0201494
CAM112A_map11	0001.CSV	1781.98	0.0208321
CAM112A_map11	0001.CSV	1785.84	0.0220606
CAM112A_map11	0001.CSV	1789.69	0.0239181
CAM112A_map11	0001.CSV	1793.55	0.026314
CAM112A_map11	0001.CSV	1797.41	0.0267047
CAM112A_map11	0001.CSV	1801.26	0.0249547
CAM112A_map11	0001.CSV	1805.12	0.0227496
CAM112A_map11	0001.CSV	1808.98	0.0209764
CAM112A_map11	0001.CSV	1812.84	0.0198811
CAM112A_map11	0001.CSV	1816.69	0.0191539
CAM112A_map11	0001.CSV	1820.55	0.0187042
CAM112A_map11	0001.CSV	1824.41	0.0183209
CAM112A_map11	0001.CSV	1828.26	0.0182452
CAM112A_map11	0001.CSV	1832.12	0.0182004
CAM112A_map11	0001.CSV	1835.98	0.0181523
CAM112A_map11	0001.CSV	1839.84	0.0179791
CAM112A_map11	0001.CSV	1843.69	0.0180751
CAM112A_map11	0001.CSV	1847.55	0.0182522
CAM112A_map11	0001.CSV	1851.41	0.0181754
CAM112A_map11	0001.CSV	1855.26	0.0180589
CAM112A_map11	0001.CSV	1859.12	0.0181035
CAM112A_map11	0001.CSV	1862.98	0.018006
CAM112A_map11	0001.CSV	1866.84	0.0180575
CAM112A_map11	0001.CSV	1870.69	0.0182839
CAM112A_map11	0001.CSV	1874.55	0.0182612
CAM112A_map11	0001.CSV	1878.41	0.0181485
CAM112A_map11	0001.CSV	1882.26	0.0181315
CAM112A_map11	0001.CSV	1886.12	0.0181062
CAM112A_map11	0001.CSV	1889.98	0.0182554
CAM112A_map11	0001.CSV	1893.83	0.0183346
CAM112A_map11	0001.CSV	1897.69	0.0183409
CAM112A_map11	0001.CSV	1901.55	0.0182752
CAM112A_map11	0001.CSV	1905.41	0.0182848
CAM112A_map11	0001.CSV	1909.26	0.0183164
CAM112A_map11	0001.CSV	1913.12	0.0183592
CAM112A_map11	0001.CSV	1916.98	0.0183342
CAM112A_map11	0001.CSV	1920.83	0.0185035
CAM112A_map11	0001.CSV	1924.69	0.0186121
CAM112A_map11	0001.CSV	1928.55	0.0186292
CAM112A_map11	0001.CSV	1932.4	0.0186215
CAM112A_map11	0001.CSV	1936.26	0.0186759
CAM112A_map11	0001.CSV	1940.12	0.0186453
CAM112A_map11	0001.CSV	1943.98	0.0188352
CAM112A_map11	0001.CSV	1947.83	0.0189239
CAM112A_map11	0001.CSV	1951.69	0.0189816
CAM112A_map11	0001.CSV	1955.55	0.0190465
CAM112A_map11	0001.CSV	1959.4	0.0191089
CAM112A_map11	0001.CSV	1963.26	0.019078
CAM112A_map11	0001.CSV	1967.12	0.019165
CAM112A_map11	0001.CSV	1970.98	0.0192082
CAM112A_map11	0001.CSV	1974.83	0.019256
CAM112A_map11	0001.CSV	1978.69	0.0192819
CAM112A_map11	0001.CSV	1982.55	0.0193431
CAM112A_map11	0001.CSV	1986.4	0.0193295
CAM112A_map11	0001.CSV	1990.26	0.0193946
CAM112A_map11	0001.CSV	1994.12	0.0194646
CAM112A_map11	0001.CSV	1997.98	0.0194983
CAM112A_map11	0001.CSV	2001.83	0.0194948
CAM112A_map11	0001.CSV	2005.69	0.0195867
CAM112A_map11	0001.CSV	2009.55	0.019633
CAM112A_map11	0001.CSV	2013.4	0.019677
CAM112A_map11	0001.CSV	2017.26	0.0197361
CAM112A_map11	0001.CSV	2021.12	0.0198466
CAM112A_map11	0001.CSV	2024.97	0.0198569
CAM112A_map11	0001.CSV	2028.83	0.0199254
CAM112A_map11	0001.CSV	2032.69	0.0199331
CAM112A_map11	0001.CSV	2036.55	0.0199344
CAM112A_map11	0001.CSV	2040.4	0.0199515
CAM112A_map11	0001.CSV	2044.26	0.0200501
CAM112A_map11	0001.CSV	2048.12	0.020084
CAM112A_map11	0001.CSV	2051.97	0.0201615
CAM112A_map11	0001.CSV	2055.83	0.0202085
CAM112A_map11	0001.CSV	2059.69	0.0202691
CAM112A_map11	0001.CSV	2063.55	0.0203015
CAM112A_map11	0001.CSV	2067.4	0.0203929
CAM112A_map11	0001.CSV	2071.26	0.0204119
CAM112A_map11	0001.CSV	2075.12	0.0204801
CAM112A_map11	0001.CSV	2078.97	0.0205212
CAM112A_map11	0001.CSV	2082.83	0.020587
CAM112A_map11	0001.CSV	2086.69	0.020606
CAM112A_map11	0001.CSV	2090.55	0.0206439
CAM112A_map11	0001.CSV	2094.4	0.0206509
CAM112A_map11	0001.CSV	2098.26	0.0207478
CAM112A_map11	0001.CSV	2102.12	0.0208087
CAM112A_map11	0001.CSV	2105.97	0.020868
CAM112A_map11	0001.CSV	2109.83	0.0208967
CAM112A_map11	0001.CSV	2113.69	0.020944
CAM112A_map11	0001.CSV	2117.55	0.0210085
CAM112A_map11	0001.CSV	2121.4	0.0211194
CAM112A_map11	0001.CSV	2125.26	0.0211646
CAM112A_map11	0001.CSV	2129.12	0.0212359
CAM112A_map11	0001.CSV	2132.97	0.0212527
CAM112A_map11	0001.CSV	2136.83	0.0212731
CAM112A_map11	0001.CSV	2140.69	0.0212961
CAM112A_map11	0001.CSV	2144.55	0.0213457
CAM112A_map11	0001.CSV	2148.4	0.0213187
CAM112A_map11	0001.CSV	2152.26	0.021315
CAM112A_map11	0001.CSV	2156.12	0.0213198
CAM112A_map11	0001.CSV	2159.97	0.0213773
CAM112A_map11	0001.CSV	2163.83	0.0213836
CAM112A_map11	0001.CSV	2167.69	0.0214238
CAM112A_map11	0001.CSV	2171.55	0.0214614
CAM112A_map11	0001.CSV	2175.4	0.021502
CAM112A_map11	0001.CSV	2179.26	0.0215207
CAM112A_map11	0001.CSV	2183.12	0.0215348
CAM112A_map11	0001.CSV	2186.97	0.0215064
CAM112A_map11	0001.CSV	2190.83	0.0215635
CAM112A_map11	0001.CSV	2194.69	0.0216109
CAM112A_map11	0001.CSV	2198.55	0.0216604
CAM112A_map11	0001.CSV	2202.4	0.0216836
CAM112A_map11	0001.CSV	2206.26	0.0217284
CAM112A_map11	0001.CSV	2210.12	0.0217535
CAM112A_map11	0001.CSV	2213.97	0.0218059
CAM112A_map11	0001.CSV	2217.83	0.0217616
CAM112A_map11	0001.CSV	2221.69	0.0217681
CAM112A_map11	0001.CSV	2225.54	0.0217712
CAM112A_map11	0001.CSV	2229.4	0.0217739
CAM112A_map11	0001.CSV	2233.26	0.0218016
CAM112A_map11	0001.CSV	2237.12	0.021868
CAM112A_map11	0001.CSV	2240.97	0.0218631
CAM112A_map11	0001.CSV	2244.83	0.02187
CAM112A_map11	0001.CSV	2248.69	0.0218431
CAM112A_map11	0001.CSV	2252.54	0.0218783
CAM112A_map11	0001.CSV	2256.4	0.0218825
CAM112A_map11	0001.CSV	2260.26	0.0218764
CAM112A_map11	0001.CSV	2264.11	0.0218856
CAM112A_map11	0001.CSV	2267.97	0.0219849
CAM112A_map11	0001.CSV	2271.83	0.0220167
CAM112A_map11	0001.CSV	2275.69	0.0220299
CAM112A_map11	0001.CSV	2279.54	0.0220384
CAM112A_map11	0001.CSV	2283.4	0.0220258
CAM112A_map11	0001.CSV	2287.26	0.0219755
CAM112A_map11	0001.CSV	2291.11	0.0220368
CAM112A_map11	0001.CSV	2294.97	0.0220795
CAM112A_map11	0001.CSV	2298.83	0.0220719
CAM112A_map11	0001.CSV	2302.69	0.0219748
CAM112A_map11	0001.CSV	2306.54	0.0218993
CAM112A_map11	0001.CSV	2310.4	0.021744
CAM112A_map11	0001.CSV	2314.26	0.0214877
CAM112A_map11	0001.CSV	2318.11	0.0209738
CAM112A_map11	0001.CSV	2321.97	0.020401
CAM112A_map11	0001.CSV	2325.83	0.0197876
CAM112A_map11	0001.CSV	2329.69	0.0190579
CAM112A_map11	0001.CSV	2333.54	0.0180981
CAM112A_map11	0001.CSV	2337.4	0.0178193
CAM112A_map11	0001.CSV	2341.26	0.0181265
CAM112A_map11	0001.CSV	2345.11	0.019929
CAM112A_map11	0001.CSV	2348.97	0.0202476
CAM112A_map11	0001.CSV	2352.83	0.0183122
CAM112A_map11	0001.CSV	2356.69	0.0130185
CAM112A_map11	0001.CSV	2360.54	0.00932041
CAM112A_map11	0001.CSV	2364.4	0.0121806
CAM112A_map11	0001.CSV	2368.26	0.0170758
CAM112A_map11	0001.CSV	2372.11	0.0204489
CAM112A_map11	0001.CSV	2375.97	0.0220828
CAM112A_map11	0001.CSV	2379.83	0.0225227
CAM112A_map11	0001.CSV	2383.69	0.0226218
CAM112A_map11	0001.CSV	2387.54	0.0225484
CAM112A_map11	0001.CSV	2391.4	0.0224877
CAM112A_map11	0001.CSV	2395.26	0.0224864
CAM112A_map11	0001.CSV	2399.11	0.0225107
CAM112A_map11	0001.CSV	2402.97	0.0225141
CAM112A_map11	0001.CSV	2406.83	0.0225337
CAM112A_map11	0001.CSV	2410.68	0.0225333
CAM112A_map11	0001.CSV	2414.54	0.022558
CAM112A_map11	0001.CSV	2418.4	0.0225798
CAM112A_map11	0001.CSV	2422.26	0.0226346
CAM112A_map11	0001.CSV	2426.11	0.0226711
CAM112A_map11	0001.CSV	2429.97	0.0227219
CAM112A_map11	0001.CSV	2433.83	0.0227564
CAM112A_map11	0001.CSV	2437.68	0.0228513
CAM112A_map11	0001.CSV	2441.54	0.0229496
CAM112A_map11	0001.CSV	2445.4	0.0230387
CAM112A_map11	0001.CSV	2449.26	0.0230932
CAM112A_map11	0001.CSV	2453.11	0.0231482
CAM112A_map11	0001.CSV	2456.97	0.0232313
CAM112A_map11	0001.CSV	2460.83	0.0233313
CAM112A_map11	0001.CSV	2464.68	0.0233949
CAM112A_map11	0001.CSV	2468.54	0.0235757
CAM112A_map11	0001.CSV	2472.4	0.0238164
CAM112A_map11	0001.CSV	2476.26	0.024042
CAM112A_map11	0001.CSV	2480.11	0.0243126
CAM112A_map11	0001.CSV	2483.97	0.0246676
CAM112A_map11	0001.CSV	2487.83	0.0250801
CAM112A_map11	0001.CSV	2491.68	0.0256243
CAM112A_map11	0001.CSV	2495.54	0.0262782
CAM112A_map11	0001.CSV	2499.4	0.0270019
CAM112A_map11	0001.CSV	2503.26	0.027633
CAM112A_map11	0001.CSV	2507.11	0.0281569
CAM112A_map11	0001.CSV	2510.97	0.0284378
CAM112A_map11	0001.CSV	2514.83	0.0284454
CAM112A_map11	0001.CSV	2518.68	0.0282255
CAM112A_map11	0001.CSV	2522.54	0.0278019
CAM112A_map11	0001.CSV	2526.4	0.0272263
CAM112A_map11	0001.CSV	2530.26	0.0266217
CAM112A_map11	0001.CSV	2534.11	0.0260219
CAM112A_map11	0001.CSV	2537.97	0.0255355
CAM112A_map11	0001.CSV	2541.83	0.0251838
CAM112A_map11	0001.CSV	2545.68	0.0248994
CAM112A_map11	0001.CSV	2549.54	0.0246821
CAM112A_map11	0001.CSV	2553.4	0.0245817
CAM112A_map11	0001.CSV	2557.26	0.0245064
CAM112A_map11	0001.CSV	2561.11	0.0244333
CAM112A_map11	0001.CSV	2564.97	0.0243503
CAM112A_map11	0001.CSV	2568.83	0.0243249
CAM112A_map11	0001.CSV	2572.68	0.024343
CAM112A_map11	0001.CSV	2576.54	0.0243708
CAM112A_map11	0001.CSV	2580.4	0.0242808
CAM112A_map11	0001.CSV	2584.25	0.0241789
CAM112A_map11	0001.CSV	2588.11	0.0241378
CAM112A_map11	0001.CSV	2591.97	0.0241571
CAM112A_map11	0001.CSV	2595.83	0.02413
CAM112A_map11	0001.CSV	2599.68	0.0241076
CAM112A_map11	0001.CSV	2603.54	0.0240376
CAM112A_map11	0001.CSV	2607.4	0.0238883
CAM112A_map11	0001.CSV	2611.25	0.0237519
CAM112A_map11	0001.CSV	2615.11	0.0237014
CAM112A_map11	0001.CSV	2618.97	0.0236405
CAM112A_map11	0001.CSV	2622.82	0.0236143
CAM112A_map11	0001.CSV	2626.68	0.0236003
CAM112A_map11	0001.CSV	2630.54	0.0235187
CAM112A_map11	0001.CSV	2634.4	0.0234576
CAM112A_map11	0001.CSV	2638.25	0.023413
CAM112A_map11	0001.CSV	2642.11	0.0232703
CAM112A_map11	0001.CSV	2645.97	0.0231547
CAM112A_map11	0001.CSV	2649.82	0.0230852
CAM112A_map11	0001.CSV	2653.68	0.0230286
CAM112A_map11	0001.CSV	2657.54	0.0230199
CAM112A_map11	0001.CSV	2661.4	0.0230088
CAM112A_map11	0001.CSV	2665.25	0.0229765
CAM112A_map11	0001.CSV	2669.11	0.0229853
CAM112A_map11	0001.CSV	2672.97	0.0231466
CAM112A_map11	0001.CSV	2676.82	0.0234481
CAM112A_map11	0001.CSV	2680.68	0.0235247
CAM112A_map11	0001.CSV	2684.54	0.0232481
CAM112A_map11	0001.CSV	2688.4	0.0230752
CAM112A_map11	0001.CSV	2692.25	0.0230972
CAM112A_map11	0001.CSV	2696.11	0.0231845
CAM112A_map11	0001.CSV	2699.97	0.0232496
CAM112A_map11	0001.CSV	2703.82	0.0232335
CAM112A_map11	0001.CSV	2707.68	0.0233137
CAM112A_map11	0001.CSV	2711.54	0.023394
CAM112A_map11	0001.CSV	2715.4	0.0233443
CAM112A_map11	0001.CSV	2719.25	0.0234913
CAM112A_map11	0001.CSV	2723.11	0.0238726
CAM112A_map11	0001.CSV	2726.97	0.0239131
CAM112A_map11	0001.CSV	2730.82	0.0236027
CAM112A_map11	0001.CSV	2734.68	0.0235562
CAM112A_map11	0001.CSV	2738.54	0.0236291
CAM112A_map11	0001.CSV	2742.4	0.0236547
CAM112A_map11	0001.CSV	2746.25	0.0240134
CAM112A_map11	0001.CSV	2750.11	0.0241013
CAM112A_map11	0001.CSV	2753.97	0.0238022
CAM112A_map11	0001.CSV	2757.82	0.0237148
CAM112A_map11	0001.CSV	2761.68	0.0236757
CAM112A_map11	0001.CSV	2765.54	0.0236394
CAM112A_map11	0001.CSV	2769.39	0.0238568
CAM112A_map11	0001.CSV	2773.25	0.0242919
CAM112A_map11	0001.CSV	2777.11	0.024243
CAM112A_map11	0001.CSV	2780.97	0.0239679
CAM112A_map11	0001.CSV	2784.82	0.0242099
CAM112A_map11	0001.CSV	2788.68	0.0247369
CAM112A_map11	0001.CSV	2792.54	0.024915
CAM112A_map11	0001.CSV	2796.39	0.0249794
CAM112A_map11	0001.CSV	2800.25	0.0248435
CAM112A_map11	0001.CSV	2804.11	0.0246067
CAM112A_map11	0001.CSV	2807.97	0.0249252
CAM112A_map11	0001.CSV	2811.82	0.0250577
CAM112A_map11	0001.CSV	2815.68	0.0249589
CAM112A_map11	0001.CSV	2819.54	0.0251642
CAM112A_map11	0001.CSV	2823.39	0.0254509
CAM112A_map11	0001.CSV	2827.25	0.0256113
CAM112A_map11	0001.CSV	2831.11	0.0262369
CAM112A_map11	0001.CSV	2834.97	0.027287
CAM112A_map11	0001.CSV	2838.82	0.0280641
CAM112A_map11	0001.CSV	2842.68	0.0288213
CAM112A_map11	0001.CSV	2846.54	0.0303935
CAM112A_map11	0001.CSV	2850.39	0.0318021
CAM112A_map11	0001.CSV	2854.25	0.0323436
CAM112A_map11	0001.CSV	2858.11	0.0322045
CAM112A_map11	0001.CSV	2861.97	0.0314267
CAM112A_map11	0001.CSV	2865.82	0.0307921
CAM112A_map11	0001.CSV	2869.68	0.0308511
CAM112A_map11	0001.CSV	2873.54	0.0308332
CAM112A_map11	0001.CSV	2877.39	0.0300518
CAM112A_map11	0001.CSV	2881.25	0.0293889
CAM112A_map11	0001.CSV	2885.11	0.0292218
CAM112A_map11	0001.CSV	2888.97	0.0294656
CAM112A_map11	0001.CSV	2892.82	0.0300827
CAM112A_map11	0001.CSV	2896.68	0.0305145
CAM112A_map11	0001.CSV	2900.54	0.0307778
CAM112A_map11	0001.CSV	2904.39	0.0314866
CAM112A_map11	0001.CSV	2908.25	0.0327163
CAM112A_map11	0001.CSV	2912.11	0.0344944
CAM112A_map11	0001.CSV	2915.97	0.0360626
CAM112A_map11	0001.CSV	2919.82	0.0369429
CAM112A_map11	0001.CSV	2923.68	0.037321
CAM112A_map11	0001.CSV	2927.54	0.0372896
CAM112A_map11	0001.CSV	2931.39	0.0362058
CAM112A_map11	0001.CSV	2935.25	0.0344195
CAM112A_map11	0001.CSV	2939.11	0.0331535
CAM112A_map11	0001.CSV	2942.96	0.0326309
CAM112A_map11	0001.CSV	2946.82	0.0321778
CAM112A_map11	0001.CSV	2950.68	0.0316772
CAM112A_map11	0001.CSV	2954.54	0.0311571
CAM112A_map11	0001.CSV	2958.39	0.0305537
CAM112A_map11	0001.CSV	2962.25	0.0300228
CAM112A_map11	0001.CSV	2966.11	0.0291757
CAM112A_map11	0001.CSV	2969.96	0.0286209
CAM112A_map11	0001.CSV	2973.82	0.0285238
CAM112A_map11	0001.CSV	2977.68	0.0283815
CAM112A_map11	0001.CSV	2981.53	0.0278476
CAM112A_map11	0001.CSV	2985.39	0.0270884
CAM112A_map11	0001.CSV	2989.25	0.0268885
CAM112A_map11	0001.CSV	2993.11	0.0269375
CAM112A_map11	0001.CSV	2996.96	0.0266355
CAM112A_map11	0001.CSV	3000.82	0.0261258
CAM112A_map11	0001.CSV	3004.68	0.0258399
CAM112A_map11	0001.CSV	3008.53	0.0260341
CAM112A_map11	0001.CSV	3012.39	0.0263816
CAM112A_map11	0001.CSV	3016.25	0.0264195
CAM112A_map11	0001.CSV	3020.11	0.0261558
CAM112A_map11	0001.CSV	3023.96	0.0259157
CAM112A_map11	0001.CSV	3027.82	0.0258896
CAM112A_map11	0001.CSV	3031.68	0.0261808
CAM112A_map11	0001.CSV	3035.53	0.0263333
CAM112A_map11	0001.CSV	3039.39	0.0263797
CAM112A_map11	0001.CSV	3043.25	0.0264786
CAM112A_map11	0001.CSV	3047.11	0.0263798
CAM112A_map11	0001.CSV	3050.96	0.026299
CAM112A_map11	0001.CSV	3054.82	0.0262855
CAM112A_map11	0001.CSV	3058.68	0.0261969
CAM112A_map11	0001.CSV	3062.53	0.0262657
CAM112A_map11	0001.CSV	3066.39	0.0265458
CAM112A_map11	0001.CSV	3070.25	0.0265215
CAM112A_map11	0001.CSV	3074.11	0.0264596
CAM112A_map11	0001.CSV	3077.96	0.026673
CAM112A_map11	0001.CSV	3081.82	0.0268168
CAM112A_map11	0001.CSV	3085.68	0.0267538
CAM112A_map11	0001.CSV	3089.53	0.0265857
CAM112A_map11	0001.CSV	3093.39	0.0263614
CAM112A_map11	0001.CSV	3097.25	0.0263946
CAM112A_map11	0001.CSV	3101.11	0.0264345
CAM112A_map11	0001.CSV	3104.96	0.0264321
CAM112A_map11	0001.CSV	3108.82	0.0266597
CAM112A_map11	0001.CSV	3112.68	0.0268808
CAM112A_map11	0001.CSV	3116.53	0.0270401
CAM112A_map11	0001.CSV	3120.39	0.0269706
CAM112A_map11	0001.CSV	3124.25	0.026694
CAM112A_map11	0001.CSV	3128.11	0.0265637
CAM112A_map11	0001.CSV	3131.96	0.0265364
CAM112A_map11	0001.CSV	3135.82	0.0266443
CAM112A_map11	0001.CSV	3139.68	0.0268131
CAM112A_map11	0001.CSV	3143.53	0.0266988
CAM112A_map11	0001.CSV	3147.39	0.0268143
CAM112A_map11	0001.CSV	3151.25	0.0271379
CAM112A_map11	0001.CSV	3155.1	0.0271112
CAM112A_map11	0001.CSV	3158.96	0.0268164
CAM112A_map11	0001.CSV	3162.82	0.0266103
CAM112A_map11	0001.CSV	3166.68	0.0265599
CAM112A_map11	0001.CSV	3170.53	0.0266561
CAM112A_map11	0001.CSV	3174.39	0.0267233
CAM112A_map11	0001.CSV	3178.25	0.0268276
CAM112A_map11	0001.CSV	3182.1	0.0269411
CAM112A_map11	0001.CSV	3185.96	0.0270661
CAM112A_map11	0001.CSV	3189.82	0.0271811
CAM112A_map11	0001.CSV	3193.68	0.0271354
CAM112A_map11	0001.CSV	3197.53	0.0270878
CAM112A_map11	0001.CSV	3201.39	0.0272575
CAM112A_map11	0001.CSV	3205.25	0.027343
CAM112A_map11	0001.CSV	3209.1	0.0273529
CAM112A_map11	0001.CSV	3212.96	0.0275051
CAM112A_map11	0001.CSV	3216.82	0.0276336
CAM112A_map11	0001.CSV	3220.68	0.0276349
CAM112A_map11	0001.CSV	3224.53	0.0276327
CAM112A_map11	0001.CSV	3228.39	0.0278467
CAM112A_map11	0001.CSV	3232.25	0.0281948
CAM112A_map11	0001.CSV	3236.1	0.028219
CAM112A_map11	0001.CSV	3239.96	0.0280569
CAM112A_map11	0001.CSV	3243.82	0.0281701
CAM112A_map11	0001.CSV	3247.68	0.0282578
CAM112A_map11	0001.CSV	3251.53	0.0281662
CAM112A_map11	0001.CSV	3255.39	0.0282108
CAM112A_map11	0001.CSV	3259.25	0.0280998
CAM112A_map11	0001.CSV	3263.1	0.0280814
CAM112A_map11	0001.CSV	3266.96	0.0283618
CAM112A_map11	0001.CSV	3270.82	0.0287627
CAM112A_map11	0001.CSV	3274.68	0.028762
CAM112A_map11	0001.CSV	3278.53	0.0284224
CAM112A_map11	0001.CSV	3282.39	0.0282576
CAM112A_map11	0001.CSV	3286.25	0.0283561
CAM112A_map11	0001.CSV	3290.1	0.0286901
CAM112A_map11	0001.CSV	3293.96	0.0289792
CAM112A_map11	0001.CSV	3297.82	0.0289474
CAM112A_map11	0001.CSV	3301.67	0.0289475
CAM112A_map11	0001.CSV	3305.53	0.0290326
CAM112A_map11	0001.CSV	3309.39	0.0289834
CAM112A_map11	0001.CSV	3313.25	0.0287533
CAM112A_map11	0001.CSV	3317.1	0.0285326
CAM112A_map11	0001.CSV	3320.96	0.0286203
CAM112A_map11	0001.CSV	3324.82	0.0288309
CAM112A_map11	0001.CSV	3328.67	0.028629
CAM112A_map11	0001.CSV	3332.53	0.0285183
CAM112A_map11	0001.CSV	3336.39	0.0288744
CAM112A_map11	0001.CSV	3340.24	0.029096
CAM112A_map11	0001.CSV	3344.1	0.0289139
CAM112A_map11	0001.CSV	3347.96	0.02892
CAM112A_map11	0001.CSV	3351.82	0.0289609
CAM112A_map11	0001.CSV	3355.67	0.0287871
CAM112A_map11	0001.CSV	3359.53	0.0289228
CAM112A_map11	0001.CSV	3363.39	0.0291072
CAM112A_map11	0001.CSV	3367.24	0.0292053
CAM112A_map11	0001.CSV	3371.1	0.0290895
CAM112A_map11	0001.CSV	3374.96	0.0288269
CAM112A_map11	0001.CSV	3378.82	0.0286303
CAM112A_map11	0001.CSV	3382.67	0.0284488
CAM112A_map11	0001.CSV	3386.53	0.0286094
CAM112A_map11	0001.CSV	3390.39	0.0289357
CAM112A_map11	0001.CSV	3394.24	0.0289539
CAM112A_map11	0001.CSV	3398.1	0.0289106
CAM112A_map11	0001.CSV	3401.96	0.028831
CAM112A_map11	0001.CSV	3405.82	0.028552
CAM112A_map11	0001.CSV	3409.67	0.0285491
CAM112A_map11	0001.CSV	3413.53	0.0284324
CAM112A_map11	0001.CSV	3417.39	0.0280812
CAM112A_map11	0001.CSV	3421.24	0.0279244
CAM112A_map11	0001.CSV	3425.1	0.0280243
CAM112A_map11	0001.CSV	3428.96	0.0283187
CAM112A_map11	0001.CSV	3432.82	0.0284903
CAM112A_map11	0001.CSV	3436.67	0.0282619
CAM112A_map11	0001.CSV	3440.53	0.0277333
CAM112A_map11	0001.CSV	3444.39	0.0274768
CAM112A_map11	0001.CSV	3448.24	0.0274187
CAM112A_map11	0001.CSV	3452.1	0.0271295
CAM112A_map11	0001.CSV	3455.96	0.0269752
CAM112A_map11	0001.CSV	3459.82	0.0270817
CAM112A_map11	0001.CSV	3463.67	0.0273016
CAM112A_map11	0001.CSV	3467.53	0.0274442
CAM112A_map11	0001.CSV	3471.39	0.0271007
CAM112A_map11	0001.CSV	3475.24	0.026727
CAM112A_map11	0001.CSV	3479.1	0.026672
CAM112A_map11	0001.CSV	3482.96	0.0265799
CAM112A_map11	0001.CSV	3486.82	0.0265483
CAM112A_map11	0001.CSV	3490.67	0.0264193
CAM112A_map11	0001.CSV	3494.53	0.0263658
CAM112A_map11	0001.CSV	3498.39	0.0263387
CAM112A_map11	0001.CSV	3502.24	0.0262212
CAM112A_map11	0001.CSV	3506.1	0.0257905
CAM112A_map11	0001.CSV	3509.96	0.0255859
CAM112A_map11	0001.CSV	3513.81	0.0257497
CAM112A_map11	0001.CSV	3517.67	0.0253788
CAM112A_map11	0001.CSV	3521.53	0.0251393
CAM112A_map11	0001.CSV	3525.39	0.0251813
CAM112A_map11	0001.CSV	3529.24	0.0250605
CAM112A_map11	0001.CSV	3533.1	0.0250819
CAM112A_map11	0001.CSV	3536.96	0.0251666
CAM112A_map11	0001.CSV	3540.81	0.0250949
CAM112A_map11	0001.CSV	3544.67	0.0251481
CAM112A_map11	0001.CSV	3548.53	0.0249331
CAM112A_map11	0001.CSV	3552.39	0.0246289
CAM112A_map11	0001.CSV	3556.24	0.0245061
CAM112A_map11	0001.CSV	3560.1	0.0243158
CAM112A_map11	0001.CSV	3563.96	0.0238836
CAM112A_map11	0001.CSV	3567.81	0.0240284
CAM112A_map11	0001.CSV	3571.67	0.0240902
CAM112A_map11	0001.CSV	3575.53	0.0238248
CAM112A_map11	0001.CSV	3579.39	0.0240286
CAM112A_map11	0001.CSV	3583.24	0.0240759
CAM112A_map11	0001.CSV	3587.1	0.024077
CAM112A_map11	0001.CSV	3590.96	0.0239692
CAM112A_map11	0001.CSV	3594.81	0.0237224
CAM112A_map11	0001.CSV	3598.67	0.0239055
CAM112A_map11	0001.CSV	3602.53	0.0238189
CAM112A_map11	0001.CSV	3606.39	0.0231992
CAM112A_map11	0001.CSV	3610.24	0.022915
CAM112A_map11	0001.CSV	3614.1	0.0229787
CAM112A_map11	0001.CSV	3617.96	0.0232928
CAM112A_map11	0001.CSV	3621.81	0.0234277
CAM112A_map11	0001.CSV	3625.67	0.0227932
CAM112A_map11	0001.CSV	3629.53	0.02279
CAM112A_map11	0001.CSV	3633.39	0.0232528
CAM112A_map11	0001.CSV	3637.24	0.023012
CAM112A_map11	0001.CSV	3641.1	0.0226578
CAM112A_map11	0001.CSV	3644.96	0.0221138
CAM112A_map11	0001.CSV	3648.81	0.0225046
CAM112A_map11	0001.CSV	3652.67	0.0231474
CAM112A_map11	0001.CSV	3656.53	0.0231886
CAM112A_map11	0001.CSV	3660.38	0.023162
CAM112A_map11	0001.CSV	3664.24	0.0224221
CAM112A_map11	0001.CSV	3668.1	0.0216658
CAM112A_map11	0001.CSV	3671.96	0.0215568
CAM112A_map11	0001.CSV	3675.81	0.0220761
CAM112A_map11	0001.CSV	3679.67	0.0225651
CAM112A_map11	0001.CSV	3683.53	0.0223914
CAM112A_map11	0001.CSV	3687.38	0.0224449
CAM112A_map11	0001.CSV	3691.24	0.0231624
CAM112A_map11	0001.CSV	3695.1	0.0228085
CAM112A_map11	0001.CSV	3698.95	0.0221583
CAM112A_map11	0001.CSV	3702.81	0.0219415
CAM112A_map11	0001.CSV	3706.67	0.0216618
CAM112A_map11	0001.CSV	3710.53	0.0216221
CAM112A_map11	0001.CSV	3714.38	0.0220863
CAM112A_map11	0001.CSV	3718.24	0.0216948
CAM112A_map11	0001.CSV	3722.1	0.0213457
CAM112A_map11	0001.CSV	3725.95	0.0215744
CAM112A_map11	0001.CSV	3729.81	0.0215649
CAM112A_map11	0001.CSV	3733.67	0.0218595
CAM112A_map11	0001.CSV	3737.53	0.0228088
CAM112A_map11	0001.CSV	3741.38	0.0219625
CAM112A_map11	0001.CSV	3745.24	0.0206894
CAM112A_map11	0001.CSV	3749.1	0.0203603
CAM112A_map11	0001.CSV	3752.95	0.0213953
CAM112A_map11	0001.CSV	3756.81	0.021674
CAM112A_map11	0001.CSV	3760.67	0.0216287
CAM112A_map11	0001.CSV	3764.53	0.0213548
CAM112A_map11	0001.CSV	3768.38	0.0214101
CAM112A_map11	0001.CSV	3772.24	0.0216364
CAM112A_map11	0001.CSV	3776.1	0.0215023
CAM112A_map11	0001.CSV	3779.95	0.0216244
CAM112A_map11	0001.CSV	3783.81	0.0216573
CAM112A_map11	0001.CSV	3787.67	0.0216086
CAM112A_map11	0001.CSV	3791.53	0.0213692
CAM112A_map11	0001.CSV	3795.38	0.0210594
CAM112A_map11	0001.CSV	3799.24	0.0211019
CAM112A_map11	0001.CSV	3803.1	0.0213779
CAM112A_map11	0001.CSV	3806.95	0.0217615
CAM112A_map11	0001.CSV	3810.81	0.0214725
CAM112A_map11	0001.CSV	3814.67	0.020879
CAM112A_map11	0001.CSV	3818.53	0.0210626
CAM112A_map11	0001.CSV	3822.38	0.0216226
CAM112A_map11	0001.CSV	3826.24	0.0215103
CAM112A_map11	0001.CSV	3830.1	0.02127
CAM112A_map11	0001.CSV	3833.95	0.0211901
CAM112A_map11	0001.CSV	3837.81	0.0214527
CAM112A_map11	0001.CSV	3841.67	0.0220376
CAM112A_map11	0001.CSV	3845.53	0.0218113
CAM112A_map11	0001.CSV	3849.38	0.0210442
CAM112A_map11	0001.CSV	3853.24	0.0212482
CAM112A_map11	0001.CSV	3857.1	0.0218181
CAM112A_map11	0001.CSV	3860.95	0.0212688
CAM112A_map11	0001.CSV	3864.81	0.0212605
CAM112A_map11	0001.CSV	3868.67	0.0214589
CAM112A_map11	0001.CSV	3872.52	0.0216517
CAM112A_map11	0001.CSV	3876.38	0.0214384
CAM112A_map11	0001.CSV	3880.24	0.0213169
CAM112A_map11	0001.CSV	3884.1	0.0216883
CAM112A_map11	0001.CSV	3887.95	0.021644
CAM112A_map11	0001.CSV	3891.81	0.021693
CAM112A_map11	0001.CSV	3895.67	0.021488
CAM112A_map11	0001.CSV	3899.52	0.0210554
CAM112A_map11	0001.CSV	3903.38	0.021674
CAM112A_map11	0001.CSV	3907.24	0.0219288
CAM112A_map11	0001.CSV	3911.1	0.0215103
CAM112A_map11	0001.CSV	3914.95	0.0213443
CAM112A_map11	0001.CSV	3918.81	0.0216402
CAM112A_map11	0001.CSV	3922.67	0.021702
CAM112A_map11	0001.CSV	3926.52	0.0215672
CAM112A_map11	0001.CSV	3930.38	0.0215959
CAM112A_map11	0001.CSV	3934.24	0.0218311
CAM112A_map11	0001.CSV	3938.09	0.0216292
CAM112A_map11	0001.CSV	3941.95	0.0214514
CAM112A_map11	0001.CSV	3945.81	0.0214974
CAM112A_map11	0001.CSV	3949.67	0.0216587
CAM112A_map11	0001.CSV	3953.52	0.0216715
CAM112A_map11	0001.CSV	3957.38	0.0213838
CAM112A_map11	0001.CSV	3961.24	0.0213116
CAM112A_map11	0001.CSV	3965.09	0.0213653
CAM112A_map11	0001.CSV	3968.95	0.0213568
CAM112A_map11	0001.CSV	3972.81	0.0214191
CAM112A_map11	0001.CSV	3976.67	0.0214616
CAM112A_map11	0001.CSV	3980.52	0.0214456
CAM112A_map11	0001.CSV	3984.38	0.0214295
CAM112A_map11	0001.CSV	3988.24	0.0213165
CAM112A_map11	0001.CSV	3992.09	0.0212605
CAM112A_map11	0001.CSV	3995.95	0.0212829
CAM112A_map11	0001.CSV	3999.81	0.0212191
CAM112A_map11	0002.CSV	674.992	0.0413976
CAM112A_map11	0002.CSV	678.849	0.0445226
CAM112A_map11	0002.CSV	682.706	0.046528
CAM112A_map11	0002.CSV	686.563	0.0497049
CAM112A_map11	0002.CSV	690.42	0.0525208
CAM112A_map11	0002.CSV	694.277	0.0586438
CAM112A_map11	0002.CSV	698.134	0.0662585
CAM112A_map11	0002.CSV	701.991	0.0782404
CAM112A_map11	0002.CSV	705.849	0.100046
CAM112A_map11	0002.CSV	709.706	0.128334
CAM112A_map11	0002.CSV	713.563	0.118013
CAM112A_map11	0002.CSV	717.42	0.0755734
CAM112A_map11	0002.CSV	721.277	0.0470224
CAM112A_map11	0002.CSV	725.134	0.0394869
CAM112A_map11	0002.CSV	728.991	0.0378487
CAM112A_map11	0002.CSV	732.848	0.0385133
CAM112A_map11	0002.CSV	736.705	0.0390783
CAM112A_map11	0002.CSV	740.562	0.0408104
CAM112A_map11	0002.CSV	744.42	0.0417678
CAM112A_map11	0002.CSV	748.277	0.0429032
CAM112A_map11	0002.CSV	752.134	0.0436402
CAM112A_map11	0002.CSV	755.991	0.0454348
CAM112A_map11	0002.CSV	759.848	0.046121
CAM112A_map11	0002.CSV	763.705	0.047172
CAM112A_map11	0002.CSV	767.562	0.0478501
CAM112A_map11	0002.CSV	771.419	0.0489194
CAM112A_map11	0002.CSV	775.276	0.0493352
CAM112A_map11	0002.CSV	779.133	0.0502581
CAM112A_map11	0002.CSV	782.99	0.0501685
CAM112A_map11	0002.CSV	786.848	0.0505469
CAM112A_map11	0002.CSV	790.705	0.050724
CAM112A_map11	0002.CSV	794.562	0.0520885
CAM112A_map11	0002.CSV	798.419	0.0530745
CAM112A_map11	0002.CSV	802.276	0.0539026
CAM112A_map11	0002.CSV	806.133	0.0537414
CAM112A_map11	0002.CSV	809.99	0.0545488
CAM112A_map11	0002.CSV	813.847	0.0554838
CAM112A_map11	0002.CSV	817.704	0.0572201
CAM112A_map11	0002.CSV	821.562	0.0586786
CAM112A_map11	0002.CSV	825.419	0.0611796
CAM112A_map11	0002.CSV	829.276	0.063767
CAM112A_map11	0002.CSV	833.133	0.0673305
CAM112A_map11	0002.CSV	836.99	0.0710303
CAM112A_map11	0002.CSV	840.847	0.0772727
CAM112A_map11	0002.CSV	844.704	0.0873251
CAM112A_map11	0002.CSV	848.561	0.0945844
CAM112A_map11	0002.CSV	852.418	0.0982224
CAM112A_map11	0002.CSV	856.275	0.1141
CAM112A_map11	0002.CSV	860.132	0.148632
CAM112A_map11	0002.CSV	863.99	0.213428
CAM112A_map11	0002.CSV	867.847	0.29299
CAM112A_map11	0002.CSV	871.704	0.313195
CAM112A_map11	0002.CSV	875.561	0.258192
CAM112A_map11	0002.CSV	879.418	0.190498
CAM112A_map11	0002.CSV	883.275	0.122878
CAM112A_map11	0002.CSV	887.132	0.0657723
CAM112A_map11	0002.CSV	890.989	0.0406478
CAM112A_map11	0002.CSV	894.846	0.0388057
CAM112A_map11	0002.CSV	898.703	0.0404988
CAM112A_map11	0002.CSV	902.561	0.04245
CAM112A_map11	0002.CSV	906.418	0.0437121
CAM112A_map11	0002.CSV	910.275	0.0452712
CAM112A_map11	0002.CSV	914.132	0.0462984
CAM112A_map11	0002.CSV	917.989	0.0477296
CAM112A_map11	0002.CSV	921.846	0.0486765
CAM112A_map11	0002.CSV	925.703	0.050056
CAM112A_map11	0002.CSV	929.56	0.0509904
CAM112A_map11	0002.CSV	933.417	0.052217
CAM112A_map11	0002.CSV	937.274	0.0528024
CAM112A_map11	0002.CSV	941.131	0.0534531
CAM112A_map11	0002.CSV	944.989	0.0537962
CAM112A_map11	0002.CSV	948.846	0.0546857
CAM112A_map11	0002.CSV	952.703	0.055239
CAM112A_map11	0002.CSV	956.56	0.0562498
CAM112A_map11	0002.CSV	960.417	0.0568011
CAM112A_map11	0002.CSV	964.274	0.057623
CAM112A_map11	0002.CSV	968.131	0.0581936
CAM112A_map11	0002.CSV	971.988	0.0592828
CAM112A_map11	0002.CSV	975.845	0.0600855
CAM112A_map11	0002.CSV	979.702	0.0612982
CAM112A_map11	0002.CSV	983.559	0.0621856
CAM112A_map11	0002.CSV	987.417	0.0634831
CAM112A_map11	0002.CSV	991.274	0.0644599
CAM112A_map11	0002.CSV	995.131	0.0657698
CAM112A_map11	0002.CSV	998.988	0.0667217
CAM112A_map11	0002.CSV	1002.85	0.0680838
CAM112A_map11	0002.CSV	1006.7	0.0690738
CAM112A_map11	0002.CSV	1010.56	0.0704207
CAM112A_map11	0002.CSV	1014.42	0.0714385
CAM112A_map11	0002.CSV	1018.27	0.072687
CAM112A_map11	0002.CSV	1022.13	0.073522
CAM112A_map11	0002.CSV	1025.99	0.0746866
CAM112A_map11	0002.CSV	1029.85	0.0754059
CAM112A_map11	0002.CSV	1033.7	0.0764896
CAM112A_map11	0002.CSV	1037.56	0.077295
CAM112A_map11	0002.CSV	1041.42	0.0784249
CAM112A_map11	0002.CSV	1045.27	0.0789682
CAM112A_map11	0002.CSV	1049.13	0.0800479
CAM112A_map11	0002.CSV	1052.99	0.0812128
CAM112A_map11	0002.CSV	1056.84	0.0832899
CAM112A_map11	0002.CSV	1060.7	0.0854135
CAM112A_map11	0002.CSV	1064.56	0.0880476
CAM112A_map11	0002.CSV	1068.42	0.0900949
CAM112A_map11	0002.CSV	1072.27	0.0923478
CAM112A_map11	0002.CSV	1076.13	0.093979
CAM112A_map11	0002.CSV	1079.99	0.0959688
CAM112A_map11	0002.CSV	1083.84	0.0973948
CAM112A_map11	0002.CSV	1087.7	0.0982081
CAM112A_map11	0002.CSV	1091.56	0.0970154
CAM112A_map11	0002.CSV	1095.41	0.0953343
CAM112A_map11	0002.CSV	1099.27	0.0939595
CAM112A_map11	0002.CSV	1103.13	0.0940082
CAM112A_map11	0002.CSV	1106.99	0.0942511
CAM112A_map11	0002.CSV	1110.84	0.0950774
CAM112A_map11	0002.CSV	1114.7	0.0953498
CAM112A_map11	0002.CSV	1118.56	0.0957815
CAM112A_map11	0002.CSV	1122.41	0.0957733
CAM112A_map11	0002.CSV	1126.27	0.0960719
CAM112A_map11	0002.CSV	1130.13	0.0959871
CAM112A_map11	0002.CSV	1133.99	0.0964257
CAM112A_map11	0002.CSV	1137.84	0.0967173
CAM112A_map11	0002.CSV	1141.7	0.0974227
CAM112A_map11	0002.CSV	1145.56	0.0977678
CAM112A_map11	0002.CSV	1149.41	0.0986267
CAM112A_map11	0002.CSV	1153.27	0.0993927
CAM112A_map11	0002.CSV	1157.13	0.100589
CAM112A_map11	0002.CSV	1160.99	0.101411
CAM112A_map11	0002.CSV	1164.84	0.102242
CAM112A_map11	0002.CSV	1168.7	0.102261
CAM112A_map11	0002.CSV	1172.56	0.102251
CAM112A_map11	0002.CSV	1176.41	0.101662
CAM112A_map11	0002.CSV	1180.27	0.101408
CAM112A_map11	0002.CSV	1184.13	0.10081
CAM112A_map11	0002.CSV	1187.99	0.10046
CAM112A_map11	0002.CSV	1191.84	0.0999182
CAM112A_map11	0002.CSV	1195.7	0.100025
CAM112A_map11	0002.CSV	1199.56	0.100033
CAM112A_map11	0002.CSV	1203.41	0.100675
CAM112A_map11	0002.CSV	1207.27	0.101244
CAM112A_map11	0002.CSV	1211.13	0.102296
CAM112A_map11	0002.CSV	1214.98	0.103164
CAM112A_map11	0002.CSV	1218.84	0.104583
CAM112A_map11	0002.CSV	1222.7	0.105885
CAM112A_map11	0002.CSV	1226.56	0.107713
CAM112A_map11	0002.CSV	1230.41	0.109365
CAM112A_map11	0002.CSV	1234.27	0.111588
CAM112A_map11	0002.CSV	1238.13	0.113611
CAM112A_map11	0002.CSV	1241.98	0.116071
CAM112A_map11	0002.CSV	1245.84	0.11824
CAM112A_map11	0002.CSV	1249.7	0.120871
CAM112A_map11	0002.CSV	1253.56	0.123082
CAM112A_map11	0002.CSV	1257.41	0.125469
CAM112A_map11	0002.CSV	1261.27	0.127354
CAM112A_map11	0002.CSV	1265.13	0.129645
CAM112A_map11	0002.CSV	1268.98	0.131759
CAM112A_map11	0002.CSV	1272.84	0.134596
CAM112A_map11	0002.CSV	1276.7	0.137157
CAM112A_map11	0002.CSV	1280.56	0.14012
CAM112A_map11	0002.CSV	1284.41	0.142614
CAM112A_map11	0002.CSV	1288.27	0.145536
CAM112A_map11	0002.CSV	1292.13	0.148
CAM112A_map11	0002.CSV	1295.98	0.150915
CAM112A_map11	0002.CSV	1299.84	0.153735
CAM112A_map11	0002.CSV	1303.7	0.15735
CAM112A_map11	0002.CSV	1307.56	0.161005
CAM112A_map11	0002.CSV	1311.41	0.165806
CAM112A_map11	0002.CSV	1315.27	0.1707
CAM112A_map11	0002.CSV	1319.13	0.176242
CAM112A_map11	0002.CSV	1322.98	0.181085
CAM112A_map11	0002.CSV	1326.84	0.186837
CAM112A_map11	0002.CSV	1330.7	0.193182
CAM112A_map11	0002.CSV	1334.56	0.20071
CAM112A_map11	0002.CSV	1338.41	0.209759
CAM112A_map11	0002.CSV	1342.27	0.221531
CAM112A_map11	0002.CSV	1346.13	0.232002
CAM112A_map11	0002.CSV	1349.98	0.244826
CAM112A_map11	0002.CSV	1353.84	0.258918
CAM112A_map11	0002.CSV	1357.7	0.274652
CAM112A_map11	0002.CSV	1361.56	0.293261
CAM112A_map11	0002.CSV	1365.41	0.317007
CAM112A_map11	0002.CSV	1369.27	0.337777
CAM112A_map11	0002.CSV	1373.13	0.36306
CAM112A_map11	0002.CSV	1376.98	0.390452
CAM112A_map11	0002.CSV	1380.84	0.414341
CAM112A_map11	0002.CSV	1384.7	0.434716
CAM112A_map11	0002.CSV	1388.56	0.456753
CAM112A_map11	0002.CSV	1392.41	0.468396
CAM112A_map11	0002.CSV	1396.27	0.471102
CAM112A_map11	0002.CSV	1400.13	0.46288
CAM112A_map11	0002.CSV	1403.98	0.451821
CAM112A_map11	0002.CSV	1407.84	0.431298
CAM112A_map11	0002.CSV	1411.7	0.407271
CAM112A_map11	0002.CSV	1415.55	0.382925
CAM112A_map11	0002.CSV	1419.41	0.357496
CAM112A_map11	0002.CSV	1423.27	0.337037
CAM112A_map11	0002.CSV	1427.12	0.324614
CAM112A_map11	0002.CSV	1430.98	0.311371
CAM112A_map11	0002.CSV	1434.84	0.298693
CAM112A_map11	0002.CSV	1438.7	0.283594
CAM112A_map11	0002.CSV	1442.55	0.273034
CAM112A_map11	0002.CSV	1446.41	0.261191
CAM112A_map11	0002.CSV	1450.27	0.248956
CAM112A_map11	0002.CSV	1454.12	0.238307
CAM112A_map11	0002.CSV	1457.98	0.222971
CAM112A_map11	0002.CSV	1461.84	0.211127
CAM112A_map11	0002.CSV	1465.7	0.202451
CAM112A_map11	0002.CSV	1469.55	0.193136
CAM112A_map11	0002.CSV	1473.41	0.181922
CAM112A_map11	0002.CSV	1477.27	0.170018
CAM112A_map11	0002.CSV	1481.12	0.163012
CAM112A_map11	0002.CSV	1484.98	0.156093
CAM112A_map11	0002.CSV	1488.84	0.147747
CAM112A_map11	0002.CSV	1492.7	0.139016
CAM112A_map11	0002.CSV	1496.55	0.132029
CAM112A_map11	0002.CSV	1500.41	0.123964
CAM112A_map11	0002.CSV	1504.27	0.119134
CAM112A_map11	0002.CSV	1508.12	0.110192
CAM112A_map11	0002.CSV	1511.98	0.104323
CAM112A_map11	0002.CSV	1515.84	0.100336
CAM112A_map11	0002.CSV	1519.7	0.0951453
CAM112A_map11	0002.CSV	1523.55	0.0888984
CAM112A_map11	0002.CSV	1527.41	0.0851131
CAM112A_map11	0002.CSV	1531.27	0.0817501
CAM112A_map11	0002.CSV	1535.12	0.0789302
CAM112A_map11	0002.CSV	1538.98	0.0753657
CAM112A_map11	0002.CSV	1542.84	0.0674373
CAM112A_map11	0002.CSV	1546.7	0.0609842
CAM112A_map11	0002.CSV	1550.55	0.0561162
CAM112A_map11	0002.CSV	1554.41	0.0516156
CAM112A_map11	0002.CSV	1558.27	0.0472282
CAM112A_map11	0002.CSV	1562.12	0.0437702
CAM112A_map11	0002.CSV	1565.98	0.0424526
CAM112A_map11	0002.CSV	1569.84	0.041472
CAM112A_map11	0002.CSV	1573.69	0.0410234
CAM112A_map11	0002.CSV	1577.55	0.0400258
CAM112A_map11	0002.CSV	1581.41	0.0379844
CAM112A_map11	0002.CSV	1585.27	0.0354057
CAM112A_map11	0002.CSV	1589.12	0.0331265
CAM112A_map11	0002.CSV	1592.98	0.0311459
CAM112A_map11	0002.CSV	1596.84	0.0295623
CAM112A_map11	0002.CSV	1600.69	0.0282432
CAM112A_map11	0002.CSV	1604.55	0.0272549
CAM112A_map11	0002.CSV	1608.41	0.0263853
CAM112A_map11	0002.CSV	1612.27	0.0257716
CAM112A_map11	0002.CSV	1616.12	0.0251713
CAM112A_map11	0002.CSV	1619.98	0.0248773
CAM112A_map11	0002.CSV	1623.84	0.0244023
CAM112A_map11	0002.CSV	1627.69	0.023882
CAM112A_map11	0002.CSV	1631.55	0.0230659
CAM112A_map11	0002.CSV	1635.41	0.0225822
CAM112A_map11	0002.CSV	1639.27	0.022216
CAM112A_map11	0002.CSV	1643.12	0.0217481
CAM112A_map11	0002.CSV	1646.98	0.0213665
CAM112A_map11	0002.CSV	1650.84	0.0212726
CAM112A_map11	0002.CSV	1654.69	0.021228
CAM112A_map11	0002.CSV	1658.55	0.0209114
CAM112A_map11	0002.CSV	1662.41	0.0203617
CAM112A_map11	0002.CSV	1666.27	0.0200218
CAM112A_map11	0002.CSV	1670.12	0.01973
CAM112A_map11	0002.CSV	1673.98	0.01967
CAM112A_map11	0002.CSV	1677.84	0.0191362
CAM112A_map11	0002.CSV	1681.69	0.0187843
CAM112A_map11	0002.CSV	1685.55	0.0187317
CAM112A_map11	0002.CSV	1689.41	0.0186256
CAM112A_map11	0002.CSV	1693.27	0.0180041
CAM112A_map11	0002.CSV	1697.12	0.0178758
CAM112A_map11	0002.CSV	1700.98	0.0184109
CAM112A_map11	0002.CSV	1704.84	0.0190097
CAM112A_map11	0002.CSV	1708.69	0.0192903
CAM112A_map11	0002.CSV	1712.55	0.0195585
CAM112A_map11	0002.CSV	1716.41	0.0208177
CAM112A_map11	0002.CSV	1720.27	0.0226253
CAM112A_map11	0002.CSV	1724.12	0.0231113
CAM112A_map11	0002.CSV	1727.98	0.023423
CAM112A_map11	0002.CSV	1731.84	0.0236554
CAM112A_map11	0002.CSV	1735.69	0.0239384
CAM112A_map11	0002.CSV	1739.55	0.0232614
CAM112A_map11	0002.CSV	1743.41	0.0219162
CAM112A_map11	0002.CSV	1747.27	0.0200548
CAM112A_map11	0002.CSV	1751.12	0.0181062
CAM112A_map11	0002.CSV	1754.98	0.0166797
CAM112A_map11	0002.CSV	1758.84	0.0158667
CAM112A_map11	0002.CSV	1762.69	0.0153963
CAM112A_map11	0002.CSV	1766.55	0.0150591
CAM112A_map11	0002.CSV	1770.41	0.0150021
CAM112A_map11	0002.CSV	1774.26	0.0154771
CAM112A_map11	0002.CSV	1778.12	0.0157026
CAM112A_map11	0002.CSV	1781.98	0.0165488
CAM112A_map11	0002.CSV	1785.84	0.0181419
CAM112A_map11	0002.CSV	1789.69	0.0205282
CAM112A_map11	0002.CSV	1793.55	0.0234573
CAM112A_map11	0002.CSV	1797.41	0.0238206
CAM112A_map11	0002.CSV	1801.26	0.0213397
CAM112A_map11	0002.CSV	1805.12	0.0183191
CAM112A_map11	0002.CSV	1808.98	0.0161543
CAM112A_map11	0002.CSV	1812.84	0.0149469
CAM112A_map11	0002.CSV	1816.69	0.0141667
CAM112A_map11	0002.CSV	1820.55	0.0137421
CAM112A_map11	0002.CSV	1824.41	0.0133747
CAM112A_map11	0002.CSV	1828.26	0.0132953
CAM112A_map11	0002.CSV	1832.12	0.0132974
CAM112A_map11	0002.CSV	1835.98	0.0132562
CAM112A_map11	0002.CSV	1839.84	0.0130389
CAM112A_map11	0002.CSV	1843.69	0.0131301
CAM112A_map11	0002.CSV	1847.55	0.0133297
CAM112A_map11	0002.CSV	1851.41	0.0132549
CAM112A_map11	0002.CSV	1855.26	0.0131117
CAM112A_map11	0002.CSV	1859.12	0.0131525
CAM112A_map11	0002.CSV	1862.98	0.0130995
CAM112A_map11	0002.CSV	1866.84	0.0131628
CAM112A_map11	0002.CSV	1870.69	0.0133672
CAM112A_map11	0002.CSV	1874.55	0.0133584
CAM112A_map11	0002.CSV	1878.41	0.0132955
CAM112A_map11	0002.CSV	1882.26	0.0133388
CAM112A_map11	0002.CSV	1886.12	0.0132949
CAM112A_map11	0002.CSV	1889.98	0.0134138
CAM112A_map11	0002.CSV	1893.83	0.0134724
CAM112A_map11	0002.CSV	1897.69	0.0135029
CAM112A_map11	0002.CSV	1901.55	0.0134594
CAM112A_map11	0002.CSV	1905.41	0.0134694
CAM112A_map11	0002.CSV	1909.26	0.0134777
CAM112A_map11	0002.CSV	1913.12	0.0135157
CAM112A_map11	0002.CSV	1916.98	0.0134819
CAM112A_map11	0002.CSV	1920.83	0.0136587
CAM112A_map11	0002.CSV	1924.69	0.0137418
CAM112A_map11	0002.CSV	1928.55	0.0137391
CAM112A_map11	0002.CSV	1932.4	0.0137769
CAM112A_map11	0002.CSV	1936.26	0.0138944
CAM112A_map11	0002.CSV	1940.12	0.0138668
CAM112A_map11	0002.CSV	1943.98	0.0140538
CAM112A_map11	0002.CSV	1947.83	0.0141318
CAM112A_map11	0002.CSV	1951.69	0.0141969
CAM112A_map11	0002.CSV	1955.55	0.0142807
CAM112A_map11	0002.CSV	1959.4	0.0143713
CAM112A_map11	0002.CSV	1963.26	0.0143345
CAM112A_map11	0002.CSV	1967.12	0.0144092
CAM112A_map11	0002.CSV	1970.98	0.0144403
CAM112A_map11	0002.CSV	1974.83	0.0144839
CAM112A_map11	0002.CSV	1978.69	0.0145163
CAM112A_map11	0002.CSV	1982.55	0.0145705
CAM112A_map11	0002.CSV	1986.4	0.0145103
CAM112A_map11	0002.CSV	1990.26	0.0145635
CAM112A_map11	0002.CSV	1994.12	0.0146299
CAM112A_map11	0002.CSV	1997.98	0.014695
CAM112A_map11	0002.CSV	2001.83	0.0147381
CAM112A_map11	0002.CSV	2005.69	0.0147894
CAM112A_map11	0002.CSV	2009.55	0.0148001
CAM112A_map11	0002.CSV	2013.4	0.0148447
CAM112A_map11	0002.CSV	2017.26	0.0148842
CAM112A_map11	0002.CSV	2021.12	0.0150208
CAM112A_map11	0002.CSV	2024.97	0.0150431
CAM112A_map11	0002.CSV	2028.83	0.0151042
CAM112A_map11	0002.CSV	2032.69	0.0151289
CAM112A_map11	0002.CSV	2036.55	0.0151587
CAM112A_map11	0002.CSV	2040.4	0.0151778
CAM112A_map11	0002.CSV	2044.26	0.015251
CAM112A_map11	0002.CSV	2048.12	0.0152594
CAM112A_map11	0002.CSV	2051.97	0.0153768
CAM112A_map11	0002.CSV	2055.83	0.0154439
CAM112A_map11	0002.CSV	2059.69	0.0154839
CAM112A_map11	0002.CSV	2063.55	0.0154632
CAM112A_map11	0002.CSV	2067.4	0.0155438
CAM112A_map11	0002.CSV	2071.26	0.0155888
CAM112A_map11	0002.CSV	2075.12	0.0156636
CAM112A_map11	0002.CSV	2078.97	0.0157157
CAM112A_map11	0002.CSV	2082.83	0.0157851
CAM112A_map11	0002.CSV	2086.69	0.015793
CAM112A_map11	0002.CSV	2090.55	0.0158816
CAM112A_map11	0002.CSV	2094.4	0.0159292
CAM112A_map11	0002.CSV	2098.26	0.0159975
CAM112A_map11	0002.CSV	2102.12	0.0160475
CAM112A_map11	0002.CSV	2105.97	0.0161238
CAM112A_map11	0002.CSV	2109.83	0.0161678
CAM112A_map11	0002.CSV	2113.69	0.0162575
CAM112A_map11	0002.CSV	2117.55	0.016343
CAM112A_map11	0002.CSV	2121.4	0.016457
CAM112A_map11	0002.CSV	2125.26	0.0165095
CAM112A_map11	0002.CSV	2129.12	0.0166141
CAM112A_map11	0002.CSV	2132.97	0.016653
CAM112A_map11	0002.CSV	2136.83	0.0166839
CAM112A_map11	0002.CSV	2140.69	0.0166912
CAM112A_map11	0002.CSV	2144.55	0.0167435
CAM112A_map11	0002.CSV	2148.4	0.0167522
CAM112A_map11	0002.CSV	2152.26	0.0167577
CAM112A_map11	0002.CSV	2156.12	0.0167254
CAM112A_map11	0002.CSV	2159.97	0.0167608
CAM112A_map11	0002.CSV	2163.83	0.0167667
CAM112A_map11	0002.CSV	2167.69	0.016806
CAM112A_map11	0002.CSV	2171.55	0.0168449
CAM112A_map11	0002.CSV	2175.4	0.0169322
CAM112A_map11	0002.CSV	2179.26	0.016962
CAM112A_map11	0002.CSV	2183.12	0.0170053
CAM112A_map11	0002.CSV	2186.97	0.0169937
CAM112A_map11	0002.CSV	2190.83	0.0170946
CAM112A_map11	0002.CSV	2194.69	0.017156
CAM112A_map11	0002.CSV	2198.55	0.017177
CAM112A_map11	0002.CSV	2202.4	0.0171887
CAM112A_map11	0002.CSV	2206.26	0.0172969
CAM112A_map11	0002.CSV	2210.12	0.0173599
CAM112A_map11	0002.CSV	2213.97	0.0174057
CAM112A_map11	0002.CSV	2217.83	0.0173759
CAM112A_map11	0002.CSV	2221.69	0.0173785
CAM112A_map11	0002.CSV	2225.54	0.0173652
CAM112A_map11	0002.CSV	2229.4	0.0173796
CAM112A_map11	0002.CSV	2233.26	0.0174005
CAM112A_map11	0002.CSV	2237.12	0.0174815
CAM112A_map11	0002.CSV	2240.97	0.0175045
CAM112A_map11	0002.CSV	2244.83	0.0175183
CAM112A_map11	0002.CSV	2248.69	0.0175089
CAM112A_map11	0002.CSV	2252.54	0.0175647
CAM112A_map11	0002.CSV	2256.4	0.0175823
CAM112A_map11	0002.CSV	2260.26	0.0175868
CAM112A_map11	0002.CSV	2264.11	0.0176068
CAM112A_map11	0002.CSV	2267.97	0.0176947
CAM112A_map11	0002.CSV	2271.83	0.0177066
CAM112A_map11	0002.CSV	2275.69	0.0177274
CAM112A_map11	0002.CSV	2279.54	0.0177269
CAM112A_map11	0002.CSV	2283.4	0.0177255
CAM112A_map11	0002.CSV	2287.26	0.0176925
CAM112A_map11	0002.CSV	2291.11	0.0177456
CAM112A_map11	0002.CSV	2294.97	0.0178254
CAM112A_map11	0002.CSV	2298.83	0.0178964
CAM112A_map11	0002.CSV	2302.69	0.0178448
CAM112A_map11	0002.CSV	2306.54	0.0177541
CAM112A_map11	0002.CSV	2310.4	0.0176245
CAM112A_map11	0002.CSV	2314.26	0.0174281
CAM112A_map11	0002.CSV	2318.11	0.0168759
CAM112A_map11	0002.CSV	2321.97	0.0162955
CAM112A_map11	0002.CSV	2325.83	0.0156874
CAM112A_map11	0002.CSV	2329.69	0.015013
CAM112A_map11	0002.CSV	2333.54	0.0143279
CAM112A_map11	0002.CSV	2337.4	0.0143436
CAM112A_map11	0002.CSV	2341.26	0.0144769
CAM112A_map11	0002.CSV	2345.11	0.0159827
CAM112A_map11	0002.CSV	2348.97	0.0163082
CAM112A_map11	0002.CSV	2352.83	0.0144843
CAM112A_map11	0002.CSV	2356.69	0.00902761
CAM112A_map11	0002.CSV	2360.54	0.0050949
CAM112A_map11	0002.CSV	2364.4	0.00870922
CAM112A_map11	0002.CSV	2368.26	0.013506
CAM112A_map11	0002.CSV	2372.11	0.0163561
CAM112A_map11	0002.CSV	2375.97	0.0178734
CAM112A_map11	0002.CSV	2379.83	0.0183703
CAM112A_map11	0002.CSV	2383.69	0.0185052
CAM112A_map11	0002.CSV	2387.54	0.0184107
CAM112A_map11	0002.CSV	2391.4	0.0183257
CAM112A_map11	0002.CSV	2395.26	0.0183107
CAM112A_map11	0002.CSV	2399.11	0.0183333
CAM112A_map11	0002.CSV	2402.97	0.0183939
CAM112A_map11	0002.CSV	2406.83	0.0184789
CAM112A_map11	0002.CSV	2410.68	0.0184759
CAM112A_map11	0002.CSV	2414.54	0.0184711
CAM112A_map11	0002.CSV	2418.4	0.0185102
CAM112A_map11	0002.CSV	2422.26	0.0186136
CAM112A_map11	0002.CSV	2426.11	0.0186589
CAM112A_map11	0002.CSV	2429.97	0.0187355
CAM112A_map11	0002.CSV	2433.83	0.0187918
CAM112A_map11	0002.CSV	2437.68	0.0188574
CAM112A_map11	0002.CSV	2441.54	0.0189787
CAM112A_map11	0002.CSV	2445.4	0.0191453
CAM112A_map11	0002.CSV	2449.26	0.0192408
CAM112A_map11	0002.CSV	2453.11	0.0193115
CAM112A_map11	0002.CSV	2456.97	0.0194097
CAM112A_map11	0002.CSV	2460.83	0.0195509
CAM112A_map11	0002.CSV	2464.68	0.0196712
CAM112A_map11	0002.CSV	2468.54	0.0198986
CAM112A_map11	0002.CSV	2472.4	0.0201937
CAM112A_map11	0002.CSV	2476.26	0.0204932
CAM112A_map11	0002.CSV	2480.11	0.0208058
CAM112A_map11	0002.CSV	2483.97	0.0212064
CAM112A_map11	0002.CSV	2487.83	0.0216822
CAM112A_map11	0002.CSV	2491.68	0.0223181
CAM112A_map11	0002.CSV	2495.54	0.0231507
CAM112A_map11	0002.CSV	2499.4	0.0240804
CAM112A_map11	0002.CSV	2503.26	0.024921
CAM112A_map11	0002.CSV	2507.11	0.0255734
CAM112A_map11	0002.CSV	2510.97	0.0258183
CAM112A_map11	0002.CSV	2514.83	0.0257093
CAM112A_map11	0002.CSV	2518.68	0.0253571
CAM112A_map11	0002.CSV	2522.54	0.0247709
CAM112A_map11	0002.CSV	2526.4	0.0240096
CAM112A_map11	0002.CSV	2530.26	0.0232242
CAM112A_map11	0002.CSV	2534.11	0.0224662
CAM112A_map11	0002.CSV	2537.97	0.0218627
CAM112A_map11	0002.CSV	2541.83	0.0214647
CAM112A_map11	0002.CSV	2545.68	0.0212103
CAM112A_map11	0002.CSV	2549.54	0.0210281
CAM112A_map11	0002.CSV	2553.4	0.0209361
CAM112A_map11	0002.CSV	2557.26	0.0208384
CAM112A_map11	0002.CSV	2561.11	0.0207943
CAM112A_map11	0002.CSV	2564.97	0.0207414
CAM112A_map11	0002.CSV	2568.83	0.020719
CAM112A_map11	0002.CSV	2572.68	0.0207085
CAM112A_map11	0002.CSV	2576.54	0.0207198
CAM112A_map11	0002.CSV	2580.4	0.0206593
CAM112A_map11	0002.CSV	2584.25	0.0205981
CAM112A_map11	0002.CSV	2588.11	0.0205451
CAM112A_map11	0002.CSV	2591.97	0.0205694
CAM112A_map11	0002.CSV	2595.83	0.0205545
CAM112A_map11	0002.CSV	2599.68	0.02047
CAM112A_map11	0002.CSV	2603.54	0.0203803
CAM112A_map11	0002.CSV	2607.4	0.0202638
CAM112A_map11	0002.CSV	2611.25	0.020096
CAM112A_map11	0002.CSV	2615.11	0.0199897
CAM112A_map11	0002.CSV	2618.97	0.0198874
CAM112A_map11	0002.CSV	2622.82	0.0198441
CAM112A_map11	0002.CSV	2626.68	0.0198402
CAM112A_map11	0002.CSV	2630.54	0.0197741
CAM112A_map11	0002.CSV	2634.4	0.0197261
CAM112A_map11	0002.CSV	2638.25	0.0197018
CAM112A_map11	0002.CSV	2642.11	0.0195624
CAM112A_map11	0002.CSV	2645.97	0.0194443
CAM112A_map11	0002.CSV	2649.82	0.019374
CAM112A_map11	0002.CSV	2653.68	0.0193149
CAM112A_map11	0002.CSV	2657.54	0.0193577
CAM112A_map11	0002.CSV	2661.4	0.0194309
CAM112A_map11	0002.CSV	2665.25	0.0194242
CAM112A_map11	0002.CSV	2669.11	0.0194752
CAM112A_map11	0002.CSV	2672.97	0.0196781
CAM112A_map11	0002.CSV	2676.82	0.019944
CAM112A_map11	0002.CSV	2680.68	0.0199548
CAM112A_map11	0002.CSV	2684.54	0.019705
CAM112A_map11	0002.CSV	2688.4	0.019596
CAM112A_map11	0002.CSV	2692.25	0.019603
CAM112A_map11	0002.CSV	2696.11	0.0196415
CAM112A_map11	0002.CSV	2699.97	0.0197017
CAM112A_map11	0002.CSV	2703.82	0.0197118
CAM112A_map11	0002.CSV	2707.68	0.019816
CAM112A_map11	0002.CSV	2711.54	0.0199022
CAM112A_map11	0002.CSV	2715.4	0.0198763
CAM112A_map11	0002.CSV	2719.25	0.0200454
CAM112A_map11	0002.CSV	2723.11	0.0204098
CAM112A_map11	0002.CSV	2726.97	0.0204035
CAM112A_map11	0002.CSV	2730.82	0.0201042
CAM112A_map11	0002.CSV	2734.68	0.0201205
CAM112A_map11	0002.CSV	2738.54	0.0201807
CAM112A_map11	0002.CSV	2742.4	0.0202088
CAM112A_map11	0002.CSV	2746.25	0.0205941
CAM112A_map11	0002.CSV	2750.11	0.0206772
CAM112A_map11	0002.CSV	2753.97	0.020391
CAM112A_map11	0002.CSV	2757.82	0.0203161
CAM112A_map11	0002.CSV	2761.68	0.020251
CAM112A_map11	0002.CSV	2765.54	0.0201971
CAM112A_map11	0002.CSV	2769.39	0.0204837
CAM112A_map11	0002.CSV	2773.25	0.021008
CAM112A_map11	0002.CSV	2777.11	0.020974
CAM112A_map11	0002.CSV	2780.97	0.0207094
CAM112A_map11	0002.CSV	2784.82	0.0209633
CAM112A_map11	0002.CSV	2788.68	0.0215841
CAM112A_map11	0002.CSV	2792.54	0.0218501
CAM112A_map11	0002.CSV	2796.39	0.0219504
CAM112A_map11	0002.CSV	2800.25	0.021798
CAM112A_map11	0002.CSV	2804.11	0.0215296
CAM112A_map11	0002.CSV	2807.97	0.0219222
CAM112A_map11	0002.CSV	2811.82	0.0221009
CAM112A_map11	0002.CSV	2815.68	0.0219775
CAM112A_map11	0002.CSV	2819.54	0.022275
CAM112A_map11	0002.CSV	2823.39	0.0227217
CAM112A_map11	0002.CSV	2827.25	0.0230298
CAM112A_map11	0002.CSV	2831.11	0.0238736
CAM112A_map11	0002.CSV	2834.97	0.0253428
CAM112A_map11	0002.CSV	2838.82	0.026862
CAM112A_map11	0002.CSV	2842.68	0.0289172
CAM112A_map11	0002.CSV	2846.54	0.03247
CAM112A_map11	0002.CSV	2850.39	0.0349836
CAM112A_map11	0002.CSV	2854.25	0.0346914
CAM112A_map11	0002.CSV	2858.11	0.0331692
CAM112A_map11	0002.CSV	2861.97	0.0313704
CAM112A_map11	0002.CSV	2865.82	0.0302295
CAM112A_map11	0002.CSV	2869.68	0.0302223
CAM112A_map11	0002.CSV	2873.54	0.0301339
CAM112A_map11	0002.CSV	2877.39	0.0290844
CAM112A_map11	0002.CSV	2881.25	0.0282453
CAM112A_map11	0002.CSV	2885.11	0.0281314
CAM112A_map11	0002.CSV	2888.97	0.0286231
CAM112A_map11	0002.CSV	2892.82	0.0296671
CAM112A_map11	0002.CSV	2896.68	0.0305619
CAM112A_map11	0002.CSV	2900.54	0.0313061
CAM112A_map11	0002.CSV	2904.39	0.0327123
CAM112A_map11	0002.CSV	2908.25	0.0350843
CAM112A_map11	0002.CSV	2912.11	0.0388068
CAM112A_map11	0002.CSV	2915.97	0.0424731
CAM112A_map11	0002.CSV	2919.82	0.0439142
CAM112A_map11	0002.CSV	2923.68	0.0431959
CAM112A_map11	0002.CSV	2927.54	0.0415671
CAM112A_map11	0002.CSV	2931.39	0.0388625
CAM112A_map11	0002.CSV	2935.25	0.0355921
CAM112A_map11	0002.CSV	2939.11	0.0332742
CAM112A_map11	0002.CSV	2942.96	0.0322275
CAM112A_map11	0002.CSV	2946.82	0.0315962
CAM112A_map11	0002.CSV	2950.68	0.0311864
CAM112A_map11	0002.CSV	2954.54	0.0308105
CAM112A_map11	0002.CSV	2958.39	0.0300853
CAM112A_map11	0002.CSV	2962.25	0.0291266
CAM112A_map11	0002.CSV	2966.11	0.0276807
CAM112A_map11	0002.CSV	2969.96	0.0266707
CAM112A_map11	0002.CSV	2973.82	0.0262874
CAM112A_map11	0002.CSV	2977.68	0.0258625
CAM112A_map11	0002.CSV	2981.53	0.0251033
CAM112A_map11	0002.CSV	2985.39	0.0241948
CAM112A_map11	0002.CSV	2989.25	0.0238825
CAM112A_map11	0002.CSV	2993.11	0.0238556
CAM112A_map11	0002.CSV	2996.96	0.0234834
CAM112A_map11	0002.CSV	3000.82	0.022983
CAM112A_map11	0002.CSV	3004.68	0.0227451
CAM112A_map11	0002.CSV	3008.53	0.0229533
CAM112A_map11	0002.CSV	3012.39	0.0232611
CAM112A_map11	0002.CSV	3016.25	0.0233
CAM112A_map11	0002.CSV	3020.11	0.0230556
CAM112A_map11	0002.CSV	3023.96	0.0228129
CAM112A_map11	0002.CSV	3027.82	0.0228209
CAM112A_map11	0002.CSV	3031.68	0.023141
CAM112A_map11	0002.CSV	3035.53	0.0232442
CAM112A_map11	0002.CSV	3039.39	0.0232694
CAM112A_map11	0002.CSV	3043.25	0.0234033
CAM112A_map11	0002.CSV	3047.11	0.0233211
CAM112A_map11	0002.CSV	3050.96	0.0232679
CAM112A_map11	0002.CSV	3054.82	0.0232863
CAM112A_map11	0002.CSV	3058.68	0.0231495
CAM112A_map11	0002.CSV	3062.53	0.0231907
CAM112A_map11	0002.CSV	3066.39	0.0235354
CAM112A_map11	0002.CSV	3070.25	0.0235026
CAM112A_map11	0002.CSV	3074.11	0.0234587
CAM112A_map11	0002.CSV	3077.96	0.0237091
CAM112A_map11	0002.CSV	3081.82	0.0238268
CAM112A_map11	0002.CSV	3085.68	0.0237412
CAM112A_map11	0002.CSV	3089.53	0.0235813
CAM112A_map11	0002.CSV	3093.39	0.0233127
CAM112A_map11	0002.CSV	3097.25	0.0232992
CAM112A_map11	0002.CSV	3101.11	0.0233832
CAM112A_map11	0002.CSV	3104.96	0.0234375
CAM112A_map11	0002.CSV	3108.82	0.0236163
CAM112A_map11	0002.CSV	3112.68	0.0237593
CAM112A_map11	0002.CSV	3116.53	0.0238995
CAM112A_map11	0002.CSV	3120.39	0.0238712
CAM112A_map11	0002.CSV	3124.25	0.0236552
CAM112A_map11	0002.CSV	3128.11	0.0235937
CAM112A_map11	0002.CSV	3131.96	0.0235507
CAM112A_map11	0002.CSV	3135.82	0.0236347
CAM112A_map11	0002.CSV	3139.68	0.0237983
CAM112A_map11	0002.CSV	3143.53	0.0236355
CAM112A_map11	0002.CSV	3147.39	0.0237503
CAM112A_map11	0002.CSV	3151.25	0.0241467
CAM112A_map11	0002.CSV	3155.1	0.0241178
CAM112A_map11	0002.CSV	3158.96	0.02381
CAM112A_map11	0002.CSV	3162.82	0.0236784
CAM112A_map11	0002.CSV	3166.68	0.0236915
CAM112A_map11	0002.CSV	3170.53	0.0237509
CAM112A_map11	0002.CSV	3174.39	0.0237954
CAM112A_map11	0002.CSV	3178.25	0.0239034
CAM112A_map11	0002.CSV	3182.1	0.023996
CAM112A_map11	0002.CSV	3185.96	0.0241271
CAM112A_map11	0002.CSV	3189.82	0.0242431
CAM112A_map11	0002.CSV	3193.68	0.0242248
CAM112A_map11	0002.CSV	3197.53	0.0242316
CAM112A_map11	0002.CSV	3201.39	0.0243614
CAM112A_map11	0002.CSV	3205.25	0.0244191
CAM112A_map11	0002.CSV	3209.1	0.0244539
CAM112A_map11	0002.CSV	3212.96	0.0245968
CAM112A_map11	0002.CSV	3216.82	0.0247024
CAM112A_map11	0002.CSV	3220.68	0.0246762
CAM112A_map11	0002.CSV	3224.53	0.0246878
CAM112A_map11	0002.CSV	3228.39	0.0249206
CAM112A_map11	0002.CSV	3232.25	0.0252518
CAM112A_map11	0002.CSV	3236.1	0.0252067
CAM112A_map11	0002.CSV	3239.96	0.025104
CAM112A_map11	0002.CSV	3243.82	0.0253166
CAM112A_map11	0002.CSV	3247.68	0.0254483
CAM112A_map11	0002.CSV	3251.53	0.0253988
CAM112A_map11	0002.CSV	3255.39	0.0254661
CAM112A_map11	0002.CSV	3259.25	0.0253293
CAM112A_map11	0002.CSV	3263.1	0.0252686
CAM112A_map11	0002.CSV	3266.96	0.0255772
CAM112A_map11	0002.CSV	3270.82	0.0260104
CAM112A_map11	0002.CSV	3274.68	0.0259784
CAM112A_map11	0002.CSV	3278.53	0.0256336
CAM112A_map11	0002.CSV	3282.39	0.0254598
CAM112A_map11	0002.CSV	3286.25	0.0255341
CAM112A_map11	0002.CSV	3290.1	0.0258826
CAM112A_map11	0002.CSV	3293.96	0.026174
CAM112A_map11	0002.CSV	3297.82	0.0260824
CAM112A_map11	0002.CSV	3301.67	0.026106
CAM112A_map11	0002.CSV	3305.53	0.0262918
CAM112A_map11	0002.CSV	3309.39	0.0262594
CAM112A_map11	0002.CSV	3313.25	0.0259175
CAM112A_map11	0002.CSV	3317.1	0.0256677
CAM112A_map11	0002.CSV	3320.96	0.0258211
CAM112A_map11	0002.CSV	3324.82	0.0260664
CAM112A_map11	0002.CSV	3328.67	0.0258605
CAM112A_map11	0002.CSV	3332.53	0.0257339
CAM112A_map11	0002.CSV	3336.39	0.026101
CAM112A_map11	0002.CSV	3340.24	0.0262648
CAM112A_map11	0002.CSV	3344.1	0.0260832
CAM112A_map11	0002.CSV	3347.96	0.0261029
CAM112A_map11	0002.CSV	3351.82	0.0260581
CAM112A_map11	0002.CSV	3355.67	0.0258764
CAM112A_map11	0002.CSV	3359.53	0.0259733
CAM112A_map11	0002.CSV	3363.39	0.026128
CAM112A_map11	0002.CSV	3367.24	0.0263268
CAM112A_map11	0002.CSV	3371.1	0.0262371
CAM112A_map11	0002.CSV	3374.96	0.0258822
CAM112A_map11	0002.CSV	3378.82	0.0256932
CAM112A_map11	0002.CSV	3382.67	0.0255029
CAM112A_map11	0002.CSV	3386.53	0.0256451
CAM112A_map11	0002.CSV	3390.39	0.026011
CAM112A_map11	0002.CSV	3394.24	0.0261524
CAM112A_map11	0002.CSV	3398.1	0.0261368
CAM112A_map11	0002.CSV	3401.96	0.0260509
CAM112A_map11	0002.CSV	3405.82	0.0257851
CAM112A_map11	0002.CSV	3409.67	0.0256524
CAM112A_map11	0002.CSV	3413.53	0.0254889
CAM112A_map11	0002.CSV	3417.39	0.0252332
CAM112A_map11	0002.CSV	3421.24	0.0250879
CAM112A_map11	0002.CSV	3425.1	0.0251239
CAM112A_map11	0002.CSV	3428.96	0.025344
CAM112A_map11	0002.CSV	3432.82	0.0254377
CAM112A_map11	0002.CSV	3436.67	0.0252083
CAM112A_map11	0002.CSV	3440.53	0.0247536
CAM112A_map11	0002.CSV	3444.39	0.0244522
CAM112A_map11	0002.CSV	3448.24	0.0243281
CAM112A_map11	0002.CSV	3452.1	0.0241884
CAM112A_map11	0002.CSV	3455.96	0.0242355
CAM112A_map11	0002.CSV	3459.82	0.024349
CAM112A_map11	0002.CSV	3463.67	0.0245007
CAM112A_map11	0002.CSV	3467.53	0.0245475
CAM112A_map11	0002.CSV	3471.39	0.0242098
CAM112A_map11	0002.CSV	3475.24	0.0239302
CAM112A_map11	0002.CSV	3479.1	0.0239077
CAM112A_map11	0002.CSV	3482.96	0.0238123
CAM112A_map11	0002.CSV	3486.82	0.0238091
CAM112A_map11	0002.CSV	3490.67	0.0236444
CAM112A_map11	0002.CSV	3494.53	0.0235625
CAM112A_map11	0002.CSV	3498.39	0.0235233
CAM112A_map11	0002.CSV	3502.24	0.0233538
CAM112A_map11	0002.CSV	3506.1	0.0229279
CAM112A_map11	0002.CSV	3509.96	0.0227262
CAM112A_map11	0002.CSV	3513.81	0.0229184
CAM112A_map11	0002.CSV	3517.67	0.0226365
CAM112A_map11	0002.CSV	3521.53	0.0225501
CAM112A_map11	0002.CSV	3525.39	0.0225906
CAM112A_map11	0002.CSV	3529.24	0.0224225
CAM112A_map11	0002.CSV	3533.1	0.0224381
CAM112A_map11	0002.CSV	3536.96	0.0224493
CAM112A_map11	0002.CSV	3540.81	0.0224616
CAM112A_map11	0002.CSV	3544.67	0.0225842
CAM112A_map11	0002.CSV	3548.53	0.0223898
CAM112A_map11	0002.CSV	3552.39	0.0221304
CAM112A_map11	0002.CSV	3556.24	0.0219687
CAM112A_map11	0002.CSV	3560.1	0.0216733
CAM112A_map11	0002.CSV	3563.96	0.0212185
CAM112A_map11	0002.CSV	3567.81	0.0214958
CAM112A_map11	0002.CSV	3571.67	0.021582
CAM112A_map11	0002.CSV	3575.53	0.0212702
CAM112A_map11	0002.CSV	3579.39	0.0213924
CAM112A_map11	0002.CSV	3583.24	0.0214081
CAM112A_map11	0002.CSV	3587.1	0.0214363
CAM112A_map11	0002.CSV	3590.96	0.0213116
CAM112A_map11	0002.CSV	3594.81	0.0210245
CAM112A_map11	0002.CSV	3598.67	0.0211512
CAM112A_map11	0002.CSV	3602.53	0.0210267
CAM112A_map11	0002.CSV	3606.39	0.0203649
CAM112A_map11	0002.CSV	3610.24	0.0201343
CAM112A_map11	0002.CSV	3614.1	0.0203063
CAM112A_map11	0002.CSV	3617.96	0.0205852
CAM112A_map11	0002.CSV	3621.81	0.0206945
CAM112A_map11	0002.CSV	3625.67	0.0200477
CAM112A_map11	0002.CSV	3629.53	0.0200361
CAM112A_map11	0002.CSV	3633.39	0.0205146
CAM112A_map11	0002.CSV	3637.24	0.020315
CAM112A_map11	0002.CSV	3641.1	0.0199283
CAM112A_map11	0002.CSV	3644.96	0.0193048
CAM112A_map11	0002.CSV	3648.81	0.0196323
CAM112A_map11	0002.CSV	3652.67	0.020243
CAM112A_map11	0002.CSV	3656.53	0.0203673
CAM112A_map11	0002.CSV	3660.38	0.0204144
CAM112A_map11	0002.CSV	3664.24	0.0196775
CAM112A_map11	0002.CSV	3668.1	0.0189635
CAM112A_map11	0002.CSV	3671.96	0.0190123
CAM112A_map11	0002.CSV	3675.81	0.0195679
CAM112A_map11	0002.CSV	3679.67	0.0198712
CAM112A_map11	0002.CSV	3683.53	0.0195575
CAM112A_map11	0002.CSV	3687.38	0.0194316
CAM112A_map11	0002.CSV	3691.24	0.0201665
CAM112A_map11	0002.CSV	3695.1	0.0200661
CAM112A_map11	0002.CSV	3698.95	0.0194205
CAM112A_map11	0002.CSV	3702.81	0.0191124
CAM112A_map11	0002.CSV	3706.67	0.0188396
CAM112A_map11	0002.CSV	3710.53	0.0188361
CAM112A_map11	0002.CSV	3714.38	0.0193963
CAM112A_map11	0002.CSV	3718.24	0.0191015
CAM112A_map11	0002.CSV	3722.1	0.0188312
CAM112A_map11	0002.CSV	3725.95	0.0189732
CAM112A_map11	0002.CSV	3729.81	0.018897
CAM112A_map11	0002.CSV	3733.67	0.0191809
CAM112A_map11	0002.CSV	3737.53	0.0201247
CAM112A_map11	0002.CSV	3741.38	0.0193014
CAM112A_map11	0002.CSV	3745.24	0.0183284
CAM112A_map11	0002.CSV	3749.1	0.0184383
CAM112A_map11	0002.CSV	3752.95	0.0191793
CAM112A_map11	0002.CSV	3756.81	0.0191987
CAM112A_map11	0002.CSV	3760.67	0.0190825
CAM112A_map11	0002.CSV	3764.53	0.0187963
CAM112A_map11	0002.CSV	3768.38	0.0188466
CAM112A_map11	0002.CSV	3772.24	0.0190287
CAM112A_map11	0002.CSV	3776.1	0.0188771
CAM112A_map11	0002.CSV	3779.95	0.0190108
CAM112A_map11	0002.CSV	3783.81	0.0190618
CAM112A_map11	0002.CSV	3787.67	0.0190378
CAM112A_map11	0002.CSV	3791.53	0.0187904
CAM112A_map11	0002.CSV	3795.38	0.0184186
CAM112A_map11	0002.CSV	3799.24	0.0183817
CAM112A_map11	0002.CSV	3803.1	0.0187414
CAM112A_map11	0002.CSV	3806.95	0.0190512
CAM112A_map11	0002.CSV	3810.81	0.0188739
CAM112A_map11	0002.CSV	3814.67	0.0185166
CAM112A_map11	0002.CSV	3818.53	0.0187882
CAM112A_map11	0002.CSV	3822.38	0.0192272
CAM112A_map11	0002.CSV	3826.24	0.0190172
CAM112A_map11	0002.CSV	3830.1	0.0187355
CAM112A_map11	0002.CSV	3833.95	0.0186377
CAM112A_map11	0002.CSV	3837.81	0.0189788
CAM112A_map11	0002.CSV	3841.67	0.0196278
CAM112A_map11	0002.CSV	3845.53	0.0193569
CAM112A_map11	0002.CSV	3849.38	0.0184638
CAM112A_map11	0002.CSV	3853.24	0.0186319
CAM112A_map11	0002.CSV	3857.1	0.0194263
CAM112A_map11	0002.CSV	3860.95	0.0188822
CAM112A_map11	0002.CSV	3864.81	0.0187868
CAM112A_map11	0002.CSV	3868.67	0.0189438
CAM112A_map11	0002.CSV	3872.52	0.0193038
CAM112A_map11	0002.CSV	3876.38	0.0190808
CAM112A_map11	0002.CSV	3880.24	0.0189637
CAM112A_map11	0002.CSV	3884.1	0.0194639
CAM112A_map11	0002.CSV	3887.95	0.0194364
CAM112A_map11	0002.CSV	3891.81	0.0193965
CAM112A_map11	0002.CSV	3895.67	0.0191112
CAM112A_map11	0002.CSV	3899.52	0.0187342
CAM112A_map11	0002.CSV	3903.38	0.0194018
CAM112A_map11	0002.CSV	3907.24	0.0196536
CAM112A_map11	0002.CSV	3911.1	0.0192069
CAM112A_map11	0002.CSV	3914.95	0.0189299
CAM112A_map11	0002.CSV	3918.81	0.0192289
CAM112A_map11	0002.CSV	3922.67	0.0193268
CAM112A_map11	0002.CSV	3926.52	0.0191248
CAM112A_map11	0002.CSV	3930.38	0.0191475
CAM112A_map11	0002.CSV	3934.24	0.0194328
CAM112A_map11	0002.CSV	3938.09	0.0191641
CAM112A_map11	0002.CSV	3941.95	0.0189591
CAM112A_map11	0002.CSV	3945.81	0.0191068
CAM112A_map11	0002.CSV	3949.67	0.019323
CAM112A_map11	0002.CSV	3953.52	0.0192675
CAM112A_map11	0002.CSV	3957.38	0.0190168
CAM112A_map11	0002.CSV	3961.24	0.0189914
CAM112A_map11	0002.CSV	3965.09	0.0190024
CAM112A_map11	0002.CSV	3968.95	0.0190072
CAM112A_map11	0002.CSV	3972.81	0.0191343
CAM112A_map11	0002.CSV	3976.67	0.0191739
CAM112A_map11	0002.CSV	3980.52	0.0190737
CAM112A_map11	0002.CSV	3984.38	0.0190107
CAM112A_map11	0002.CSV	3988.24	0.0189108
CAM112A_map11	0002.CSV	3992.09	0.0189334
CAM112A_map11	0002.CSV	3995.95	0.0190681
CAM112A_map11	0002.CSV	3999.81	0.0190275
CAM112A_map11	0003.CSV	674.992	0.049634
CAM112A_map11	0003.CSV	678.849	0.0526813
CAM112A_map11	0003.CSV	682.706	0.0551486
CAM112A_map11	0003.CSV	686.563	0.0598498
CAM112A_map11	0003.CSV	690.42	0.0677436
CAM112A_map11	0003.CSV	694.277	0.0834379
CAM112A_map11	0003.CSV	698.134	0.0996023
CAM112A_map11	0003.CSV	701.991	0.107115
CAM112A_map11	0003.CSV	705.849	0.113467
CAM112A_map11	0003.CSV	709.706	0.127891
CAM112A_map11	0003.CSV	713.563	0.112968
CAM112A_map11	0003.CSV	717.42	0.0737317
CAM112A_map11	0003.CSV	721.277	0.0505669
CAM112A_map11	0003.CSV	725.134	0.0465568
CAM112A_map11	0003.CSV	728.991	0.0476777
CAM112A_map11	0003.CSV	732.848	0.051958
CAM112A_map11	0003.CSV	736.705	0.0574794
CAM112A_map11	0003.CSV	740.562	0.0629305
CAM112A_map11	0003.CSV	744.42	0.0647155
CAM112A_map11	0003.CSV	748.277	0.0644019
CAM112A_map11	0003.CSV	752.134	0.064223
CAM112A_map11	0003.CSV	755.991	0.0651577
CAM112A_map11	0003.CSV	759.848	0.0631669
CAM112A_map11	0003.CSV	763.705	0.060745
CAM112A_map11	0003.CSV	767.562	0.0587681
CAM112A_map11	0003.CSV	771.419	0.0577208
CAM112A_map11	0003.CSV	775.276	0.0563792
CAM112A_map11	0003.CSV	779.133	0.0552579
CAM112A_map11	0003.CSV	782.99	0.0536841
CAM112A_map11	0003.CSV	786.848	0.0533042
CAM112A_map11	0003.CSV	790.705	0.0533921
CAM112A_map11	0003.CSV	794.562	0.0545857
CAM112A_map11	0003.CSV	798.419	0.0545322
CAM112A_map11	0003.CSV	802.276	0.0535388
CAM112A_map11	0003.CSV	806.133	0.0518713
CAM112A_map11	0003.CSV	809.99	0.0516973
CAM112A_map11	0003.CSV	813.847	0.0524378
CAM112A_map11	0003.CSV	817.704	0.0545125
CAM112A_map11	0003.CSV	821.562	0.0558172
CAM112A_map11	0003.CSV	825.419	0.0576626
CAM112A_map11	0003.CSV	829.276	0.0600099
CAM112A_map11	0003.CSV	833.133	0.0638945
CAM112A_map11	0003.CSV	836.99	0.0673957
CAM112A_map11	0003.CSV	840.847	0.0702497
CAM112A_map11	0003.CSV	844.704	0.0753429
CAM112A_map11	0003.CSV	848.561	0.0796456
CAM112A_map11	0003.CSV	852.418	0.0806659
CAM112A_map11	0003.CSV	856.275	0.0896131
CAM112A_map11	0003.CSV	860.132	0.111595
CAM112A_map11	0003.CSV	863.99	0.157479
CAM112A_map11	0003.CSV	867.847	0.223715
CAM112A_map11	0003.CSV	871.704	0.258379
CAM112A_map11	0003.CSV	875.561	0.227149
CAM112A_map11	0003.CSV	879.418	0.173486
CAM112A_map11	0003.CSV	883.275	0.11931
CAM112A_map11	0003.CSV	887.132	0.0739197
CAM112A_map11	0003.CSV	890.989	0.0532746
CAM112A_map11	0003.CSV	894.846	0.0510635
CAM112A_map11	0003.CSV	898.703	0.0523959
CAM112A_map11	0003.CSV	902.561	0.0545737
CAM112A_map11	0003.CSV	906.418	0.0564708
CAM112A_map11	0003.CSV	910.275	0.0584587
CAM112A_map11	0003.CSV	914.132	0.0595957
CAM112A_map11	0003.CSV	917.989	0.0607842
CAM112A_map11	0003.CSV	921.846	0.0615938
CAM112A_map11	0003.CSV	925.703	0.0627368
CAM112A_map11	0003.CSV	929.56	0.0636382
CAM112A_map11	0003.CSV	933.417	0.0649734
CAM112A_map11	0003.CSV	937.274	0.0659143
CAM112A_map11	0003.CSV	941.131	0.0668362
CAM112A_map11	0003.CSV	944.989	0.067242
CAM112A_map11	0003.CSV	948.846	0.0681543
CAM112A_map11	0003.CSV	952.703	0.0694609
CAM112A_map11	0003.CSV	956.56	0.0715048
CAM112A_map11	0003.CSV	960.417	0.0732157
CAM112A_map11	0003.CSV	964.274	0.0752588
CAM112A_map11	0003.CSV	968.131	0.0770675
CAM112A_map11	0003.CSV	971.988	0.0792989
CAM112A_map11	0003.CSV	975.845	0.0816816
CAM112A_map11	0003.CSV	979.702	0.0845198
CAM112A_map11	0003.CSV	983.559	0.086703
CAM112A_map11	0003.CSV	987.417	0.0886465
CAM112A_map11	0003.CSV	991.274	0.0898502
CAM112A_map11	0003.CSV	995.131	0.0910399
CAM112A_map11	0003.CSV	998.988	0.0918398
CAM112A_map11	0003.CSV	1002.85	0.0929746
CAM112A_map11	0003.CSV	1006.7	0.0938147
CAM112A_map11	0003.CSV	1010.56	0.0949426
CAM112A_map11	0003.CSV	1014.42	0.0957613
CAM112A_map11	0003.CSV	1018.27	0.0969257
CAM112A_map11	0003.CSV	1022.13	0.0979534
CAM112A_map11	0003.CSV	1025.99	0.0992609
CAM112A_map11	0003.CSV	1029.85	0.100124
CAM112A_map11	0003.CSV	1033.7	0.101438
CAM112A_map11	0003.CSV	1037.56	0.10206
CAM112A_map11	0003.CSV	1041.42	0.1015
CAM112A_map11	0003.CSV	1045.27	0.100167
CAM112A_map11	0003.CSV	1049.13	0.100687
CAM112A_map11	0003.CSV	1052.99	0.102924
CAM112A_map11	0003.CSV	1056.84	0.107011
CAM112A_map11	0003.CSV	1060.7	0.111113
CAM112A_map11	0003.CSV	1064.56	0.113994
CAM112A_map11	0003.CSV	1068.42	0.113759
CAM112A_map11	0003.CSV	1072.27	0.111549
CAM112A_map11	0003.CSV	1076.13	0.108113
CAM112A_map11	0003.CSV	1079.99	0.105308
CAM112A_map11	0003.CSV	1083.84	0.102683
CAM112A_map11	0003.CSV	1087.7	0.100339
CAM112A_map11	0003.CSV	1091.56	0.0974462
CAM112A_map11	0003.CSV	1095.41	0.0956165
CAM112A_map11	0003.CSV	1099.27	0.0952636
CAM112A_map11	0003.CSV	1103.13	0.0968411
CAM112A_map11	0003.CSV	1106.99	0.0990113
CAM112A_map11	0003.CSV	1110.84	0.101679
CAM112A_map11	0003.CSV	1114.7	0.103335
CAM112A_map11	0003.CSV	1118.56	0.104079
CAM112A_map11	0003.CSV	1122.41	0.103525
CAM112A_map11	0003.CSV	1126.27	0.102607
CAM112A_map11	0003.CSV	1130.13	0.101173
CAM112A_map11	0003.CSV	1133.99	0.100389
CAM112A_map11	0003.CSV	1137.84	0.0997731
CAM112A_map11	0003.CSV	1141.7	0.0992466
CAM112A_map11	0003.CSV	1145.56	0.0980364
CAM112A_map11	0003.CSV	1149.41	0.0974667
CAM112A_map11	0003.CSV	1153.27	0.0978054
CAM112A_map11	0003.CSV	1157.13	0.0988661
CAM112A_map11	0003.CSV	1160.99	0.0987324
CAM112A_map11	0003.CSV	1164.84	0.0979482
CAM112A_map11	0003.CSV	1168.7	0.0962404
CAM112A_map11	0003.CSV	1172.56	0.0946094
CAM112A_map11	0003.CSV	1176.41	0.092984
CAM112A_map11	0003.CSV	1180.27	0.0919848
CAM112A_map11	0003.CSV	1184.13	0.0908065
CAM112A_map11	0003.CSV	1187.99	0.0899271
CAM112A_map11	0003.CSV	1191.84	0.0890671
CAM112A_map11	0003.CSV	1195.7	0.0887812
CAM112A_map11	0003.CSV	1199.56	0.0886115
CAM112A_map11	0003.CSV	1203.41	0.0891528
CAM112A_map11	0003.CSV	1207.27	0.0896627
CAM112A_map11	0003.CSV	1211.13	0.0906261
CAM112A_map11	0003.CSV	1214.98	0.0915578
CAM112A_map11	0003.CSV	1218.84	0.0930985
CAM112A_map11	0003.CSV	1222.7	0.0948044
CAM112A_map11	0003.CSV	1226.56	0.0971512
CAM112A_map11	0003.CSV	1230.41	0.0996816
CAM112A_map11	0003.CSV	1234.27	0.103189
CAM112A_map11	0003.CSV	1238.13	0.107143
CAM112A_map11	0003.CSV	1241.98	0.111959
CAM112A_map11	0003.CSV	1245.84	0.116743
CAM112A_map11	0003.CSV	1249.7	0.121597
CAM112A_map11	0003.CSV	1253.56	0.12537
CAM112A_map11	0003.CSV	1257.41	0.128408
CAM112A_map11	0003.CSV	1261.27	0.130346
CAM112A_map11	0003.CSV	1265.13	0.132044
CAM112A_map11	0003.CSV	1268.98	0.133314
CAM112A_map11	0003.CSV	1272.84	0.135126
CAM112A_map11	0003.CSV	1276.7	0.136638
CAM112A_map11	0003.CSV	1280.56	0.138347
CAM112A_map11	0003.CSV	1284.41	0.139249
CAM112A_map11	0003.CSV	1288.27	0.139583
CAM112A_map11	0003.CSV	1292.13	0.138567
CAM112A_map11	0003.CSV	1295.98	0.137181
CAM112A_map11	0003.CSV	1299.84	0.135657
CAM112A_map11	0003.CSV	1303.7	0.135508
CAM112A_map11	0003.CSV	1307.56	0.136359
CAM112A_map11	0003.CSV	1311.41	0.138684
CAM112A_map11	0003.CSV	1315.27	0.141217
CAM112A_map11	0003.CSV	1319.13	0.144391
CAM112A_map11	0003.CSV	1322.98	0.147129
CAM112A_map11	0003.CSV	1326.84	0.150525
CAM112A_map11	0003.CSV	1330.7	0.154557
CAM112A_map11	0003.CSV	1334.56	0.15973
CAM112A_map11	0003.CSV	1338.41	0.166484
CAM112A_map11	0003.CSV	1342.27	0.175707
CAM112A_map11	0003.CSV	1346.13	0.184008
CAM112A_map11	0003.CSV	1349.98	0.194297
CAM112A_map11	0003.CSV	1353.84	0.205229
CAM112A_map11	0003.CSV	1357.7	0.216626
CAM112A_map11	0003.CSV	1361.56	0.229805
CAM112A_map11	0003.CSV	1365.41	0.246321
CAM112A_map11	0003.CSV	1369.27	0.259045
CAM112A_map11	0003.CSV	1373.13	0.274114
CAM112A_map11	0003.CSV	1376.98	0.291464
CAM112A_map11	0003.CSV	1380.84	0.307172
CAM112A_map11	0003.CSV	1384.7	0.321572
CAM112A_map11	0003.CSV	1388.56	0.339576
CAM112A_map11	0003.CSV	1392.41	0.3521
CAM112A_map11	0003.CSV	1396.27	0.360751
CAM112A_map11	0003.CSV	1400.13	0.36246
CAM112A_map11	0003.CSV	1403.98	0.361261
CAM112A_map11	0003.CSV	1407.84	0.353183
CAM112A_map11	0003.CSV	1411.7	0.339655
CAM112A_map11	0003.CSV	1415.55	0.323315
CAM112A_map11	0003.CSV	1419.41	0.305388
CAM112A_map11	0003.CSV	1423.27	0.29002
CAM112A_map11	0003.CSV	1427.12	0.280047
CAM112A_map11	0003.CSV	1430.98	0.268874
CAM112A_map11	0003.CSV	1434.84	0.257268
CAM112A_map11	0003.CSV	1438.7	0.243827
CAM112A_map11	0003.CSV	1442.55	0.23612
CAM112A_map11	0003.CSV	1446.41	0.22821
CAM112A_map11	0003.CSV	1450.27	0.219144
CAM112A_map11	0003.CSV	1454.12	0.209935
CAM112A_map11	0003.CSV	1457.98	0.194899
CAM112A_map11	0003.CSV	1461.84	0.183107
CAM112A_map11	0003.CSV	1465.7	0.174653
CAM112A_map11	0003.CSV	1469.55	0.165978
CAM112A_map11	0003.CSV	1473.41	0.156219
CAM112A_map11	0003.CSV	1477.27	0.146654
CAM112A_map11	0003.CSV	1481.12	0.141465
CAM112A_map11	0003.CSV	1484.98	0.136737
CAM112A_map11	0003.CSV	1488.84	0.131382
CAM112A_map11	0003.CSV	1492.7	0.124557
CAM112A_map11	0003.CSV	1496.55	0.116807
CAM112A_map11	0003.CSV	1500.41	0.107489
CAM112A_map11	0003.CSV	1504.27	0.102343
CAM112A_map11	0003.CSV	1508.12	0.0948153
CAM112A_map11	0003.CSV	1511.98	0.09016
CAM112A_map11	0003.CSV	1515.84	0.0871283
CAM112A_map11	0003.CSV	1519.7	0.0837893
CAM112A_map11	0003.CSV	1523.55	0.0809358
CAM112A_map11	0003.CSV	1527.41	0.0804691
CAM112A_map11	0003.CSV	1531.27	0.0795336
CAM112A_map11	0003.CSV	1535.12	0.0778073
CAM112A_map11	0003.CSV	1538.98	0.0746313
CAM112A_map11	0003.CSV	1542.84	0.0683032
CAM112A_map11	0003.CSV	1546.7	0.0632681
CAM112A_map11	0003.CSV	1550.55	0.0591112
CAM112A_map11	0003.CSV	1554.41	0.054969
CAM112A_map11	0003.CSV	1558.27	0.0512935
CAM112A_map11	0003.CSV	1562.12	0.0489407
CAM112A_map11	0003.CSV	1565.98	0.0479279
CAM112A_map11	0003.CSV	1569.84	0.04684
CAM112A_map11	0003.CSV	1573.69	0.0460351
CAM112A_map11	0003.CSV	1577.55	0.0454278
CAM112A_map11	0003.CSV	1581.41	0.0442251
CAM112A_map11	0003.CSV	1585.27	0.0426829
CAM112A_map11	0003.CSV	1589.12	0.0418436
CAM112A_map11	0003.CSV	1592.98	0.0417063
CAM112A_map11	0003.CSV	1596.84	0.0420252
CAM112A_map11	0003.CSV	1600.69	0.041406
CAM112A_map11	0003.CSV	1604.55	0.0390367
CAM112A_map11	0003.CSV	1608.41	0.0363497
CAM112A_map11	0003.CSV	1612.27	0.0351659
CAM112A_map11	0003.CSV	1616.12	0.0352826
CAM112A_map11	0003.CSV	1619.98	0.0364852
CAM112A_map11	0003.CSV	1623.84	0.0370854
CAM112A_map11	0003.CSV	1627.69	0.0366032
CAM112A_map11	0003.CSV	1631.55	0.0351047
CAM112A_map11	0003.CSV	1635.41	0.0338036
CAM112A_map11	0003.CSV	1639.27	0.032938
CAM112A_map11	0003.CSV	1643.12	0.0324907
CAM112A_map11	0003.CSV	1646.98	0.0318581
CAM112A_map11	0003.CSV	1650.84	0.0313777
CAM112A_map11	0003.CSV	1654.69	0.0307323
CAM112A_map11	0003.CSV	1658.55	0.0300892
CAM112A_map11	0003.CSV	1662.41	0.029326
CAM112A_map11	0003.CSV	1666.27	0.0288802
CAM112A_map11	0003.CSV	1670.12	0.028635
CAM112A_map11	0003.CSV	1673.98	0.0287174
CAM112A_map11	0003.CSV	1677.84	0.0283836
CAM112A_map11	0003.CSV	1681.69	0.0283292
CAM112A_map11	0003.CSV	1685.55	0.0289585
CAM112A_map11	0003.CSV	1689.41	0.0295392
CAM112A_map11	0003.CSV	1693.27	0.0295059
CAM112A_map11	0003.CSV	1697.12	0.0304251
CAM112A_map11	0003.CSV	1700.98	0.0328895
CAM112A_map11	0003.CSV	1704.84	0.0355415
CAM112A_map11	0003.CSV	1708.69	0.0383217
CAM112A_map11	0003.CSV	1712.55	0.0409553
CAM112A_map11	0003.CSV	1716.41	0.0460987
CAM112A_map11	0003.CSV	1720.27	0.0514367
CAM112A_map11	0003.CSV	1724.12	0.0529009
[truncated: 95,520 more rows]

## Sheet: CAM112_map12
Map	Select spectrum number	Wavenumbers	Absorbance
CAM112A_map12	0001.CSV	674.992	0.0413362
CAM112A_map12	0001.CSV	678.849	0.0436656
CAM112A_map12	0001.CSV	682.706	0.044768
CAM112A_map12	0001.CSV	686.563	0.0477622
CAM112A_map12	0001.CSV	690.42	0.0499208
CAM112A_map12	0001.CSV	694.277	0.0559329
CAM112A_map12	0001.CSV	698.134	0.0633421
CAM112A_map12	0001.CSV	701.991	0.0752795
CAM112A_map12	0001.CSV	705.849	0.0976847
CAM112A_map12	0001.CSV	709.706	0.127688
CAM112A_map12	0001.CSV	713.563	0.119349
CAM112A_map12	0001.CSV	717.42	0.0773913
CAM112A_map12	0001.CSV	721.277	0.0475507
CAM112A_map12	0001.CSV	725.134	0.0390166
CAM112A_map12	0001.CSV	728.991	0.0368124
CAM112A_map12	0001.CSV	732.848	0.0374415
CAM112A_map12	0001.CSV	736.705	0.0379323
CAM112A_map12	0001.CSV	740.562	0.0392274
CAM112A_map12	0001.CSV	744.42	0.0395516
CAM112A_map12	0001.CSV	748.277	0.0406012
CAM112A_map12	0001.CSV	752.134	0.0410277
CAM112A_map12	0001.CSV	755.991	0.0422731
CAM112A_map12	0001.CSV	759.848	0.0425957
CAM112A_map12	0001.CSV	763.705	0.0441312
CAM112A_map12	0001.CSV	767.562	0.0450029
CAM112A_map12	0001.CSV	771.419	0.0460012
CAM112A_map12	0001.CSV	775.276	0.0460771
CAM112A_map12	0001.CSV	779.133	0.0469139
CAM112A_map12	0001.CSV	782.99	0.0471211
CAM112A_map12	0001.CSV	786.848	0.0476381
CAM112A_map12	0001.CSV	790.705	0.047666
CAM112A_map12	0001.CSV	794.562	0.0487475
CAM112A_map12	0001.CSV	798.419	0.0495093
CAM112A_map12	0001.CSV	802.276	0.0508249
CAM112A_map12	0001.CSV	806.133	0.0512497
CAM112A_map12	0001.CSV	809.99	0.0521743
CAM112A_map12	0001.CSV	813.847	0.0526826
CAM112A_map12	0001.CSV	817.704	0.0542589
CAM112A_map12	0001.CSV	821.562	0.0556164
CAM112A_map12	0001.CSV	825.419	0.0579667
CAM112A_map12	0001.CSV	829.276	0.0602734
CAM112A_map12	0001.CSV	833.133	0.0634868
CAM112A_map12	0001.CSV	836.99	0.0667044
CAM112A_map12	0001.CSV	840.847	0.0728451
CAM112A_map12	0001.CSV	844.704	0.0830709
CAM112A_map12	0001.CSV	848.561	0.0905568
CAM112A_map12	0001.CSV	852.418	0.0937516
CAM112A_map12	0001.CSV	856.275	0.10899
CAM112A_map12	0001.CSV	860.132	0.143272
CAM112A_map12	0001.CSV	863.99	0.209306
CAM112A_map12	0001.CSV	867.847	0.29361
CAM112A_map12	0001.CSV	871.704	0.323054
CAM112A_map12	0001.CSV	875.561	0.27373
CAM112A_map12	0001.CSV	879.418	0.205326
CAM112A_map12	0001.CSV	883.275	0.132033
CAM112A_map12	0001.CSV	887.132	0.0687462
CAM112A_map12	0001.CSV	890.989	0.040599
CAM112A_map12	0001.CSV	894.846	0.0377662
CAM112A_map12	0001.CSV	898.703	0.0389388
CAM112A_map12	0001.CSV	902.561	0.0407231
CAM112A_map12	0001.CSV	906.418	0.041947
CAM112A_map12	0001.CSV	910.275	0.0435573
CAM112A_map12	0001.CSV	914.132	0.0447031
CAM112A_map12	0001.CSV	917.989	0.0462497
CAM112A_map12	0001.CSV	921.846	0.0471162
CAM112A_map12	0001.CSV	925.703	0.0483003
CAM112A_map12	0001.CSV	929.56	0.0491133
CAM112A_map12	0001.CSV	933.417	0.0502638
CAM112A_map12	0001.CSV	937.274	0.0508115
CAM112A_map12	0001.CSV	941.131	0.0515534
CAM112A_map12	0001.CSV	944.989	0.0517379
CAM112A_map12	0001.CSV	948.846	0.0523689
CAM112A_map12	0001.CSV	952.703	0.0527885
CAM112A_map12	0001.CSV	956.56	0.0536486
CAM112A_map12	0001.CSV	960.417	0.0539882
CAM112A_map12	0001.CSV	964.274	0.0547184
CAM112A_map12	0001.CSV	968.131	0.0551989
CAM112A_map12	0001.CSV	971.988	0.0562381
CAM112A_map12	0001.CSV	975.845	0.056961
CAM112A_map12	0001.CSV	979.702	0.0579808
CAM112A_map12	0001.CSV	983.559	0.0586852
CAM112A_map12	0001.CSV	987.417	0.0596905
CAM112A_map12	0001.CSV	991.274	0.0602991
CAM112A_map12	0001.CSV	995.131	0.0613109
CAM112A_map12	0001.CSV	998.988	0.0619034
CAM112A_map12	0001.CSV	1002.85	0.0628487
CAM112A_map12	0001.CSV	1006.7	0.0634732
CAM112A_map12	0001.CSV	1010.56	0.0645719
CAM112A_map12	0001.CSV	1014.42	0.0652738
CAM112A_map12	0001.CSV	1018.27	0.066271
CAM112A_map12	0001.CSV	1022.13	0.0668765
CAM112A_map12	0001.CSV	1025.99	0.067927
CAM112A_map12	0001.CSV	1029.85	0.068515
CAM112A_map12	0001.CSV	1033.7	0.0694104
CAM112A_map12	0001.CSV	1037.56	0.0699312
CAM112A_map12	0001.CSV	1041.42	0.0708788
CAM112A_map12	0001.CSV	1045.27	0.0714297
CAM112A_map12	0001.CSV	1049.13	0.0724542
CAM112A_map12	0001.CSV	1052.99	0.0733286
CAM112A_map12	0001.CSV	1056.84	0.0748758
CAM112A_map12	0001.CSV	1060.7	0.0763566
CAM112A_map12	0001.CSV	1064.56	0.0784102
CAM112A_map12	0001.CSV	1068.42	0.079774
CAM112A_map12	0001.CSV	1072.27	0.0812722
CAM112A_map12	0001.CSV	1076.13	0.0823877
CAM112A_map12	0001.CSV	1079.99	0.0842619
CAM112A_map12	0001.CSV	1083.84	0.0858678
CAM112A_map12	0001.CSV	1087.7	0.0871183
CAM112A_map12	0001.CSV	1091.56	0.0864154
CAM112A_map12	0001.CSV	1095.41	0.0852593
CAM112A_map12	0001.CSV	1099.27	0.0843254
CAM112A_map12	0001.CSV	1103.13	0.0847735
CAM112A_map12	0001.CSV	1106.99	0.0854311
CAM112A_map12	0001.CSV	1110.84	0.0868574
CAM112A_map12	0001.CSV	1114.7	0.0877526
CAM112A_map12	0001.CSV	1118.56	0.0886449
CAM112A_map12	0001.CSV	1122.41	0.0890733
CAM112A_map12	0001.CSV	1126.27	0.0898441
CAM112A_map12	0001.CSV	1130.13	0.0901556
CAM112A_map12	0001.CSV	1133.99	0.0909441
CAM112A_map12	0001.CSV	1137.84	0.091479
CAM112A_map12	0001.CSV	1141.7	0.0924673
CAM112A_map12	0001.CSV	1145.56	0.0931387
CAM112A_map12	0001.CSV	1149.41	0.0943032
CAM112A_map12	0001.CSV	1153.27	0.0952506
CAM112A_map12	0001.CSV	1157.13	0.0966912
CAM112A_map12	0001.CSV	1160.99	0.0977519
CAM112A_map12	0001.CSV	1164.84	0.0989653
CAM112A_map12	0001.CSV	1168.7	0.0993562
CAM112A_map12	0001.CSV	1172.56	0.0997251
CAM112A_map12	0001.CSV	1176.41	0.0996633
CAM112A_map12	0001.CSV	1180.27	0.100016
CAM112A_map12	0001.CSV	1184.13	0.0999736
CAM112A_map12	0001.CSV	1187.99	0.100275
CAM112A_map12	0001.CSV	1191.84	0.100269
CAM112A_map12	0001.CSV	1195.7	0.100785
CAM112A_map12	0001.CSV	1199.56	0.101215
CAM112A_map12	0001.CSV	1203.41	0.102244
CAM112A_map12	0001.CSV	1207.27	0.103117
CAM112A_map12	0001.CSV	1211.13	0.104579
CAM112A_map12	0001.CSV	1214.98	0.105836
CAM112A_map12	0001.CSV	1218.84	0.107663
CAM112A_map12	0001.CSV	1222.7	0.109288
CAM112A_map12	0001.CSV	1226.56	0.111493
CAM112A_map12	0001.CSV	1230.41	0.113512
CAM112A_map12	0001.CSV	1234.27	0.116048
CAM112A_map12	0001.CSV	1238.13	0.118244
CAM112A_map12	0001.CSV	1241.98	0.120886
CAM112A_map12	0001.CSV	1245.84	0.123309
CAM112A_map12	0001.CSV	1249.7	0.126288
CAM112A_map12	0001.CSV	1253.56	0.12891
CAM112A_map12	0001.CSV	1257.41	0.131877
CAM112A_map12	0001.CSV	1261.27	0.134348
CAM112A_map12	0001.CSV	1265.13	0.137325
CAM112A_map12	0001.CSV	1268.98	0.140124
CAM112A_map12	0001.CSV	1272.84	0.143702
CAM112A_map12	0001.CSV	1276.7	0.146946
CAM112A_map12	0001.CSV	1280.56	0.150758
CAM112A_map12	0001.CSV	1284.41	0.154229
CAM112A_map12	0001.CSV	1288.27	0.15822
CAM112A_map12	0001.CSV	1292.13	0.161807
CAM112A_map12	0001.CSV	1295.98	0.166142
CAM112A_map12	0001.CSV	1299.84	0.170395
CAM112A_map12	0001.CSV	1303.7	0.175485
CAM112A_map12	0001.CSV	1307.56	0.180633
CAM112A_map12	0001.CSV	1311.41	0.186852
CAM112A_map12	0001.CSV	1315.27	0.192956
CAM112A_map12	0001.CSV	1319.13	0.200013
CAM112A_map12	0001.CSV	1322.98	0.206423
CAM112A_map12	0001.CSV	1326.84	0.21371
CAM112A_map12	0001.CSV	1330.7	0.221372
CAM112A_map12	0001.CSV	1334.56	0.230021
CAM112A_map12	0001.CSV	1338.41	0.240189
CAM112A_map12	0001.CSV	1342.27	0.253308
CAM112A_map12	0001.CSV	1346.13	0.264782
CAM112A_map12	0001.CSV	1349.98	0.278571
CAM112A_map12	0001.CSV	1353.84	0.293293
CAM112A_map12	0001.CSV	1357.7	0.30955
CAM112A_map12	0001.CSV	1361.56	0.328308
CAM112A_map12	0001.CSV	1365.41	0.35205
CAM112A_map12	0001.CSV	1369.27	0.372877
CAM112A_map12	0001.CSV	1373.13	0.398998
CAM112A_map12	0001.CSV	1376.98	0.428009
CAM112A_map12	0001.CSV	1380.84	0.453856
CAM112A_map12	0001.CSV	1384.7	0.476029
CAM112A_map12	0001.CSV	1388.56	0.49982
CAM112A_map12	0001.CSV	1392.41	0.511605
CAM112A_map12	0001.CSV	1396.27	0.513336
CAM112A_map12	0001.CSV	1400.13	0.502217
CAM112A_map12	0001.CSV	1403.98	0.487258
CAM112A_map12	0001.CSV	1407.84	0.461952
CAM112A_map12	0001.CSV	1411.7	0.434196
CAM112A_map12	0001.CSV	1415.55	0.407241
CAM112A_map12	0001.CSV	1419.41	0.379775
CAM112A_map12	0001.CSV	1423.27	0.357841
CAM112A_map12	0001.CSV	1427.12	0.344699
CAM112A_map12	0001.CSV	1430.98	0.330894
CAM112A_map12	0001.CSV	1434.84	0.317456
CAM112A_map12	0001.CSV	1438.7	0.300874
CAM112A_map12	0001.CSV	1442.55	0.288898
CAM112A_map12	0001.CSV	1446.41	0.275462
CAM112A_map12	0001.CSV	1450.27	0.261747
CAM112A_map12	0001.CSV	1454.12	0.250184
CAM112A_map12	0001.CSV	1457.98	0.233854
CAM112A_map12	0001.CSV	1461.84	0.221134
CAM112A_map12	0001.CSV	1465.7	0.212009
CAM112A_map12	0001.CSV	1469.55	0.202485
CAM112A_map12	0001.CSV	1473.41	0.191195
CAM112A_map12	0001.CSV	1477.27	0.178849
CAM112A_map12	0001.CSV	1481.12	0.17139
CAM112A_map12	0001.CSV	1484.98	0.164082
CAM112A_map12	0001.CSV	1488.84	0.155304
CAM112A_map12	0001.CSV	1492.7	0.14614
CAM112A_map12	0001.CSV	1496.55	0.13903
CAM112A_map12	0001.CSV	1500.41	0.130757
CAM112A_map12	0001.CSV	1504.27	0.125703
CAM112A_map12	0001.CSV	1508.12	0.116238
CAM112A_map12	0001.CSV	1511.98	0.109804
CAM112A_map12	0001.CSV	1515.84	0.105476
CAM112A_map12	0001.CSV	1519.7	0.100191
CAM112A_map12	0001.CSV	1523.55	0.0935026
CAM112A_map12	0001.CSV	1527.41	0.0889149
CAM112A_map12	0001.CSV	1531.27	0.0850102
CAM112A_map12	0001.CSV	1535.12	0.0819975
CAM112A_map12	0001.CSV	1538.98	0.0783169
CAM112A_map12	0001.CSV	1542.84	0.0698233
CAM112A_map12	0001.CSV	1546.7	0.062701
CAM112A_map12	0001.CSV	1550.55	0.0574695
CAM112A_map12	0001.CSV	1554.41	0.0526327
CAM112A_map12	0001.CSV	1558.27	0.0479453
CAM112A_map12	0001.CSV	1562.12	0.0443782
CAM112A_map12	0001.CSV	1565.98	0.0431257
CAM112A_map12	0001.CSV	1569.84	0.0422956
CAM112A_map12	0001.CSV	1573.69	0.0419978
CAM112A_map12	0001.CSV	1577.55	0.0409744
CAM112A_map12	0001.CSV	1581.41	0.0386649
CAM112A_map12	0001.CSV	1585.27	0.0357229
CAM112A_map12	0001.CSV	1589.12	0.033075
CAM112A_map12	0001.CSV	1592.98	0.0308044
CAM112A_map12	0001.CSV	1596.84	0.0290083
CAM112A_map12	0001.CSV	1600.69	0.0275553
CAM112A_map12	0001.CSV	1604.55	0.0266449
CAM112A_map12	0001.CSV	1608.41	0.0259009
CAM112A_map12	0001.CSV	1612.27	0.0252784
CAM112A_map12	0001.CSV	1616.12	0.0245386
CAM112A_map12	0001.CSV	1619.98	0.0240054
CAM112A_map12	0001.CSV	1623.84	0.0232402
CAM112A_map12	0001.CSV	1627.69	0.0225644
CAM112A_map12	0001.CSV	1631.55	0.0217353
CAM112A_map12	0001.CSV	1635.41	0.0212413
CAM112A_map12	0001.CSV	1639.27	0.0207015
CAM112A_map12	0001.CSV	1643.12	0.0201693
CAM112A_map12	0001.CSV	1646.98	0.0198507
CAM112A_map12	0001.CSV	1650.84	0.0198027
CAM112A_map12	0001.CSV	1654.69	0.0196624
CAM112A_map12	0001.CSV	1658.55	0.019369
CAM112A_map12	0001.CSV	1662.41	0.0189254
CAM112A_map12	0001.CSV	1666.27	0.0186117
CAM112A_map12	0001.CSV	1670.12	0.0182593
CAM112A_map12	0001.CSV	1673.98	0.0181836
CAM112A_map12	0001.CSV	1677.84	0.0177776
CAM112A_map12	0001.CSV	1681.69	0.0175773
CAM112A_map12	0001.CSV	1685.55	0.0176376
CAM112A_map12	0001.CSV	1689.41	0.0174711
CAM112A_map12	0001.CSV	1693.27	0.016954
CAM112A_map12	0001.CSV	1697.12	0.0170572
CAM112A_map12	0001.CSV	1700.98	0.0173342
CAM112A_map12	0001.CSV	1704.84	0.0174545
CAM112A_map12	0001.CSV	1708.69	0.0174291
CAM112A_map12	0001.CSV	1712.55	0.0175127
CAM112A_map12	0001.CSV	1716.41	0.0183038
CAM112A_map12	0001.CSV	1720.27	0.019388
CAM112A_map12	0001.CSV	1724.12	0.0194445
CAM112A_map12	0001.CSV	1727.98	0.0195364
CAM112A_map12	0001.CSV	1731.84	0.0197451
CAM112A_map12	0001.CSV	1735.69	0.0201717
CAM112A_map12	0001.CSV	1739.55	0.0196935
CAM112A_map12	0001.CSV	1743.41	0.018728
CAM112A_map12	0001.CSV	1747.27	0.0175335
CAM112A_map12	0001.CSV	1751.12	0.0164076
CAM112A_map12	0001.CSV	1754.98	0.0154478
CAM112A_map12	0001.CSV	1758.84	0.014924
CAM112A_map12	0001.CSV	1762.69	0.0146537
CAM112A_map12	0001.CSV	1766.55	0.0144683
CAM112A_map12	0001.CSV	1770.41	0.0145163
CAM112A_map12	0001.CSV	1774.26	0.014963
CAM112A_map12	0001.CSV	1778.12	0.0151635
CAM112A_map12	0001.CSV	1781.98	0.016002
CAM112A_map12	0001.CSV	1785.84	0.0175021
CAM112A_map12	0001.CSV	1789.69	0.0198655
CAM112A_map12	0001.CSV	1793.55	0.0230018
CAM112A_map12	0001.CSV	1797.41	0.023667
CAM112A_map12	0001.CSV	1801.26	0.021432
CAM112A_map12	0001.CSV	1805.12	0.0184009
CAM112A_map12	0001.CSV	1808.98	0.0160274
CAM112A_map12	0001.CSV	1812.84	0.0145918
CAM112A_map12	0001.CSV	1816.69	0.013706
CAM112A_map12	0001.CSV	1820.55	0.0132574
CAM112A_map12	0001.CSV	1824.41	0.0129388
CAM112A_map12	0001.CSV	1828.26	0.0129096
CAM112A_map12	0001.CSV	1832.12	0.0127689
CAM112A_map12	0001.CSV	1835.98	0.0126089
CAM112A_map12	0001.CSV	1839.84	0.0124106
CAM112A_map12	0001.CSV	1843.69	0.0124915
CAM112A_map12	0001.CSV	1847.55	0.0126012
CAM112A_map12	0001.CSV	1851.41	0.0125536
CAM112A_map12	0001.CSV	1855.26	0.0124227
CAM112A_map12	0001.CSV	1859.12	0.0124259
CAM112A_map12	0001.CSV	1862.98	0.0123503
CAM112A_map12	0001.CSV	1866.84	0.0124525
CAM112A_map12	0001.CSV	1870.69	0.0126719
CAM112A_map12	0001.CSV	1874.55	0.0126095
CAM112A_map12	0001.CSV	1878.41	0.0124751
CAM112A_map12	0001.CSV	1882.26	0.0124785
CAM112A_map12	0001.CSV	1886.12	0.0124597
CAM112A_map12	0001.CSV	1889.98	0.0125829
CAM112A_map12	0001.CSV	1893.83	0.012606
CAM112A_map12	0001.CSV	1897.69	0.0126623
CAM112A_map12	0001.CSV	1901.55	0.0126427
CAM112A_map12	0001.CSV	1905.41	0.0127141
CAM112A_map12	0001.CSV	1909.26	0.0127677
CAM112A_map12	0001.CSV	1913.12	0.0127295
CAM112A_map12	0001.CSV	1916.98	0.0126633
CAM112A_map12	0001.CSV	1920.83	0.0128309
CAM112A_map12	0001.CSV	1924.69	0.0128741
CAM112A_map12	0001.CSV	1928.55	0.0128893
CAM112A_map12	0001.CSV	1932.4	0.0129109
CAM112A_map12	0001.CSV	1936.26	0.0129775
CAM112A_map12	0001.CSV	1940.12	0.0129785
CAM112A_map12	0001.CSV	1943.98	0.0132047
CAM112A_map12	0001.CSV	1947.83	0.0132762
CAM112A_map12	0001.CSV	1951.69	0.0133134
CAM112A_map12	0001.CSV	1955.55	0.0133339
CAM112A_map12	0001.CSV	1959.4	0.0134335
CAM112A_map12	0001.CSV	1963.26	0.0134557
CAM112A_map12	0001.CSV	1967.12	0.0135322
CAM112A_map12	0001.CSV	1970.98	0.0135435
CAM112A_map12	0001.CSV	1974.83	0.0135664
CAM112A_map12	0001.CSV	1978.69	0.0135501
CAM112A_map12	0001.CSV	1982.55	0.0135616
CAM112A_map12	0001.CSV	1986.4	0.0135054
CAM112A_map12	0001.CSV	1990.26	0.0135962
CAM112A_map12	0001.CSV	1994.12	0.0137137
CAM112A_map12	0001.CSV	1997.98	0.0137635
CAM112A_map12	0001.CSV	2001.83	0.0137644
CAM112A_map12	0001.CSV	2005.69	0.0138786
CAM112A_map12	0001.CSV	2009.55	0.013907
CAM112A_map12	0001.CSV	2013.4	0.0139252
CAM112A_map12	0001.CSV	2017.26	0.0139358
CAM112A_map12	0001.CSV	2021.12	0.013998
CAM112A_map12	0001.CSV	2024.97	0.0139928
CAM112A_map12	0001.CSV	2028.83	0.0140248
CAM112A_map12	0001.CSV	2032.69	0.014026
CAM112A_map12	0001.CSV	2036.55	0.0140622
CAM112A_map12	0001.CSV	2040.4	0.0140875
CAM112A_map12	0001.CSV	2044.26	0.0141717
CAM112A_map12	0001.CSV	2048.12	0.0141217
CAM112A_map12	0001.CSV	2051.97	0.0141389
CAM112A_map12	0001.CSV	2055.83	0.0141693
CAM112A_map12	0001.CSV	2059.69	0.0142447
CAM112A_map12	0001.CSV	2063.55	0.0142495
CAM112A_map12	0001.CSV	2067.4	0.0143094
CAM112A_map12	0001.CSV	2071.26	0.014346
CAM112A_map12	0001.CSV	2075.12	0.0143856
CAM112A_map12	0001.CSV	2078.97	0.0144084
CAM112A_map12	0001.CSV	2082.83	0.0144915
CAM112A_map12	0001.CSV	2086.69	0.0144803
CAM112A_map12	0001.CSV	2090.55	0.0145164
CAM112A_map12	0001.CSV	2094.4	0.0145284
CAM112A_map12	0001.CSV	2098.26	0.0146101
CAM112A_map12	0001.CSV	2102.12	0.0146334
CAM112A_map12	0001.CSV	2105.97	0.0146527
CAM112A_map12	0001.CSV	2109.83	0.0146548
CAM112A_map12	0001.CSV	2113.69	0.0147132
CAM112A_map12	0001.CSV	2117.55	0.014775
CAM112A_map12	0001.CSV	2121.4	0.0148845
CAM112A_map12	0001.CSV	2125.26	0.0149418
CAM112A_map12	0001.CSV	2129.12	0.0149894
CAM112A_map12	0001.CSV	2132.97	0.0150134
CAM112A_map12	0001.CSV	2136.83	0.0151025
CAM112A_map12	0001.CSV	2140.69	0.0151325
CAM112A_map12	0001.CSV	2144.55	0.0151373
CAM112A_map12	0001.CSV	2148.4	0.0150941
CAM112A_map12	0001.CSV	2152.26	0.015104
CAM112A_map12	0001.CSV	2156.12	0.0150691
CAM112A_map12	0001.CSV	2159.97	0.0150737
CAM112A_map12	0001.CSV	2163.83	0.0150392
CAM112A_map12	0001.CSV	2167.69	0.0150563
CAM112A_map12	0001.CSV	2171.55	0.0150835
CAM112A_map12	0001.CSV	2175.4	0.0151484
CAM112A_map12	0001.CSV	2179.26	0.0151422
CAM112A_map12	0001.CSV	2183.12	0.0151707
CAM112A_map12	0001.CSV	2186.97	0.0152187
CAM112A_map12	0001.CSV	2190.83	0.0152728
CAM112A_map12	0001.CSV	2194.69	0.0152491
CAM112A_map12	0001.CSV	2198.55	0.0152714
CAM112A_map12	0001.CSV	2202.4	0.0152972
CAM112A_map12	0001.CSV	2206.26	0.0153602
CAM112A_map12	0001.CSV	2210.12	0.0153525
CAM112A_map12	0001.CSV	2213.97	0.0153641
CAM112A_map12	0001.CSV	2217.83	0.0153284
CAM112A_map12	0001.CSV	2221.69	0.0153456
CAM112A_map12	0001.CSV	2225.54	0.0153916
CAM112A_map12	0001.CSV	2229.4	0.0154284
CAM112A_map12	0001.CSV	2233.26	0.0153963
CAM112A_map12	0001.CSV	2237.12	0.0154258
CAM112A_map12	0001.CSV	2240.97	0.0154241
CAM112A_map12	0001.CSV	2244.83	0.0154735
CAM112A_map12	0001.CSV	2248.69	0.0154868
CAM112A_map12	0001.CSV	2252.54	0.0155074
CAM112A_map12	0001.CSV	2256.4	0.0154931
CAM112A_map12	0001.CSV	2260.26	0.0154921
CAM112A_map12	0001.CSV	2264.11	0.0154497
CAM112A_map12	0001.CSV	2267.97	0.0154894
CAM112A_map12	0001.CSV	2271.83	0.0155568
CAM112A_map12	0001.CSV	2275.69	0.0156101
CAM112A_map12	0001.CSV	2279.54	0.015561
CAM112A_map12	0001.CSV	2283.4	0.0155078
CAM112A_map12	0001.CSV	2287.26	0.01543
CAM112A_map12	0001.CSV	2291.11	0.0154313
CAM112A_map12	0001.CSV	2294.97	0.0154234
CAM112A_map12	0001.CSV	2298.83	0.0153693
CAM112A_map12	0001.CSV	2302.69	0.0152193
CAM112A_map12	0001.CSV	2306.54	0.0151026
CAM112A_map12	0001.CSV	2310.4	0.0148406
CAM112A_map12	0001.CSV	2314.26	0.0144913
CAM112A_map12	0001.CSV	2318.11	0.013679
CAM112A_map12	0001.CSV	2321.97	0.0124865
CAM112A_map12	0001.CSV	2325.83	0.0108749
CAM112A_map12	0001.CSV	2329.69	0.00940867
CAM112A_map12	0001.CSV	2333.54	0.00793715
CAM112A_map12	0001.CSV	2337.4	0.0073457
CAM112A_map12	0001.CSV	2341.26	0.00788309
CAM112A_map12	0001.CSV	2345.11	0.0110908
CAM112A_map12	0001.CSV	2348.97	0.0118173
CAM112A_map12	0001.CSV	2352.83	0.00860078
CAM112A_map12	0001.CSV	2356.69	-0.00190233
CAM112A_map12	0001.CSV	2360.54	-0.01075
CAM112A_map12	0001.CSV	2364.4	-0.00450439
CAM112A_map12	0001.CSV	2368.26	0.00643778
CAM112A_map12	0001.CSV	2372.11	0.0127196
CAM112A_map12	0001.CSV	2375.97	0.0151884
CAM112A_map12	0001.CSV	2379.83	0.0159815
CAM112A_map12	0001.CSV	2383.69	0.0160869
CAM112A_map12	0001.CSV	2387.54	0.0159287
CAM112A_map12	0001.CSV	2391.4	0.0158643
CAM112A_map12	0001.CSV	2395.26	0.0158377
CAM112A_map12	0001.CSV	2399.11	0.0158202
CAM112A_map12	0001.CSV	2402.97	0.0158554
CAM112A_map12	0001.CSV	2406.83	0.0159262
CAM112A_map12	0001.CSV	2410.68	0.0159518
CAM112A_map12	0001.CSV	2414.54	0.0159851
CAM112A_map12	0001.CSV	2418.4	0.0160187
CAM112A_map12	0001.CSV	2422.26	0.0160799
CAM112A_map12	0001.CSV	2426.11	0.0160801
CAM112A_map12	0001.CSV	2429.97	0.0161423
CAM112A_map12	0001.CSV	2433.83	0.0162518
CAM112A_map12	0001.CSV	2437.68	0.0163802
CAM112A_map12	0001.CSV	2441.54	0.0164265
CAM112A_map12	0001.CSV	2445.4	0.0165117
CAM112A_map12	0001.CSV	2449.26	0.016621
CAM112A_map12	0001.CSV	2453.11	0.0167389
CAM112A_map12	0001.CSV	2456.97	0.016852
CAM112A_map12	0001.CSV	2460.83	0.0170106
CAM112A_map12	0001.CSV	2464.68	0.0171925
CAM112A_map12	0001.CSV	2468.54	0.0174458
CAM112A_map12	0001.CSV	2472.4	0.0176888
CAM112A_map12	0001.CSV	2476.26	0.0179921
CAM112A_map12	0001.CSV	2480.11	0.0183378
CAM112A_map12	0001.CSV	2483.97	0.0188017
CAM112A_map12	0001.CSV	2487.83	0.0193404
CAM112A_map12	0001.CSV	2491.68	0.0199863
CAM112A_map12	0001.CSV	2495.54	0.0208532
CAM112A_map12	0001.CSV	2499.4	0.0218956
CAM112A_map12	0001.CSV	2503.26	0.022853
CAM112A_map12	0001.CSV	2507.11	0.0235413
CAM112A_map12	0001.CSV	2510.97	0.0238096
CAM112A_map12	0001.CSV	2514.83	0.0237649
CAM112A_map12	0001.CSV	2518.68	0.0234254
CAM112A_map12	0001.CSV	2522.54	0.0227732
CAM112A_map12	0001.CSV	2526.4	0.0219562
CAM112A_map12	0001.CSV	2530.26	0.0211336
CAM112A_map12	0001.CSV	2534.11	0.0202857
CAM112A_map12	0001.CSV	2537.97	0.019636
CAM112A_map12	0001.CSV	2541.83	0.0191969
CAM112A_map12	0001.CSV	2545.68	0.0188612
CAM112A_map12	0001.CSV	2549.54	0.0185721
CAM112A_map12	0001.CSV	2553.4	0.0183661
CAM112A_map12	0001.CSV	2557.26	0.0182815
CAM112A_map12	0001.CSV	2561.11	0.018264
CAM112A_map12	0001.CSV	2564.97	0.0181867
CAM112A_map12	0001.CSV	2568.83	0.0181256
CAM112A_map12	0001.CSV	2572.68	0.0180904
CAM112A_map12	0001.CSV	2576.54	0.0180524
CAM112A_map12	0001.CSV	2580.4	0.0179597
CAM112A_map12	0001.CSV	2584.25	0.0179117
CAM112A_map12	0001.CSV	2588.11	0.0178523
CAM112A_map12	0001.CSV	2591.97	0.0177926
CAM112A_map12	0001.CSV	2595.83	0.0176783
CAM112A_map12	0001.CSV	2599.68	0.0175876
CAM112A_map12	0001.CSV	2603.54	0.0174907
CAM112A_map12	0001.CSV	2607.4	0.017377
CAM112A_map12	0001.CSV	2611.25	0.017197
CAM112A_map12	0001.CSV	2615.11	0.0170596
CAM112A_map12	0001.CSV	2618.97	0.0169232
CAM112A_map12	0001.CSV	2622.82	0.0168443
CAM112A_map12	0001.CSV	2626.68	0.0167463
CAM112A_map12	0001.CSV	2630.54	0.0165849
CAM112A_map12	0001.CSV	2634.4	0.0165362
CAM112A_map12	0001.CSV	2638.25	0.0165288
CAM112A_map12	0001.CSV	2642.11	0.0163274
CAM112A_map12	0001.CSV	2645.97	0.0161371
CAM112A_map12	0001.CSV	2649.82	0.0160449
CAM112A_map12	0001.CSV	2653.68	0.0160109
CAM112A_map12	0001.CSV	2657.54	0.0160133
CAM112A_map12	0001.CSV	2661.4	0.0160041
CAM112A_map12	0001.CSV	2665.25	0.0160097
CAM112A_map12	0001.CSV	2669.11	0.0160772
CAM112A_map12	0001.CSV	2672.97	0.0162998
CAM112A_map12	0001.CSV	2676.82	0.0166463
CAM112A_map12	0001.CSV	2680.68	0.0165811
CAM112A_map12	0001.CSV	2684.54	0.0161022
CAM112A_map12	0001.CSV	2688.4	0.015899
CAM112A_map12	0001.CSV	2692.25	0.0159299
CAM112A_map12	0001.CSV	2696.11	0.0160302
CAM112A_map12	0001.CSV	2699.97	0.0161006
CAM112A_map12	0001.CSV	2703.82	0.0160694
CAM112A_map12	0001.CSV	2707.68	0.0161533
CAM112A_map12	0001.CSV	2711.54	0.0161907
CAM112A_map12	0001.CSV	2715.4	0.0161744
CAM112A_map12	0001.CSV	2719.25	0.016447
CAM112A_map12	0001.CSV	2723.11	0.0169653
CAM112A_map12	0001.CSV	2726.97	0.0169181
CAM112A_map12	0001.CSV	2730.82	0.0164472
CAM112A_map12	0001.CSV	2734.68	0.0164419
CAM112A_map12	0001.CSV	2738.54	0.0165272
CAM112A_map12	0001.CSV	2742.4	0.0165753
CAM112A_map12	0001.CSV	2746.25	0.0170054
CAM112A_map12	0001.CSV	2750.11	0.0170407
CAM112A_map12	0001.CSV	2753.97	0.0166796
CAM112A_map12	0001.CSV	2757.82	0.0165912
CAM112A_map12	0001.CSV	2761.68	0.0164597
CAM112A_map12	0001.CSV	2765.54	0.0163818
CAM112A_map12	0001.CSV	2769.39	0.0167039
CAM112A_map12	0001.CSV	2773.25	0.0172961
CAM112A_map12	0001.CSV	2777.11	0.0171948
CAM112A_map12	0001.CSV	2780.97	0.0168444
CAM112A_map12	0001.CSV	2784.82	0.0171466
CAM112A_map12	0001.CSV	2788.68	0.0178577
CAM112A_map12	0001.CSV	2792.54	0.018115
CAM112A_map12	0001.CSV	2796.39	0.0181859
CAM112A_map12	0001.CSV	2800.25	0.0179367
CAM112A_map12	0001.CSV	2804.11	0.017594
CAM112A_map12	0001.CSV	2807.97	0.018041
CAM112A_map12	0001.CSV	2811.82	0.0182163
CAM112A_map12	0001.CSV	2815.68	0.0180293
CAM112A_map12	0001.CSV	2819.54	0.018285
CAM112A_map12	0001.CSV	2823.39	0.0186723
CAM112A_map12	0001.CSV	2827.25	0.0189835
CAM112A_map12	0001.CSV	2831.11	0.0198618
CAM112A_map12	0001.CSV	2834.97	0.0212699
CAM112A_map12	0001.CSV	2838.82	0.0226601
CAM112A_map12	0001.CSV	2842.68	0.024481
CAM112A_map12	0001.CSV	2846.54	0.0277598
CAM112A_map12	0001.CSV	2850.39	0.0299449
CAM112A_map12	0001.CSV	2854.25	0.02944
CAM112A_map12	0001.CSV	2858.11	0.0280524
CAM112A_map12	0001.CSV	2861.97	0.0265335
CAM112A_map12	0001.CSV	2865.82	0.025467
CAM112A_map12	0001.CSV	2869.68	0.0254156
CAM112A_map12	0001.CSV	2873.54	0.0254365
CAM112A_map12	0001.CSV	2877.39	0.0245325
CAM112A_map12	0001.CSV	2881.25	0.0237095
CAM112A_map12	0001.CSV	2885.11	0.0235141
CAM112A_map12	0001.CSV	2888.97	0.0238626
CAM112A_map12	0001.CSV	2892.82	0.0247995
CAM112A_map12	0001.CSV	2896.68	0.0256259
CAM112A_map12	0001.CSV	2900.54	0.0262227
CAM112A_map12	0001.CSV	2904.39	0.0274148
CAM112A_map12	0001.CSV	2908.25	0.0296013
CAM112A_map12	0001.CSV	2912.11	0.0330945
CAM112A_map12	0001.CSV	2915.97	0.0365188
CAM112A_map12	0001.CSV	2919.82	0.037599
CAM112A_map12	0001.CSV	2923.68	0.0365719
CAM112A_map12	0001.CSV	2927.54	0.0350169
CAM112A_map12	0001.CSV	2931.39	0.0325684
CAM112A_map12	0001.CSV	2935.25	0.0296719
CAM112A_map12	0001.CSV	2939.11	0.0277738
CAM112A_map12	0001.CSV	2942.96	0.0269879
CAM112A_map12	0001.CSV	2946.82	0.0264057
CAM112A_map12	0001.CSV	2950.68	0.0258977
CAM112A_map12	0001.CSV	2954.54	0.0254458
CAM112A_map12	0001.CSV	2958.39	0.0247897
CAM112A_map12	0001.CSV	2962.25	0.0240604
CAM112A_map12	0001.CSV	2966.11	0.0229717
CAM112A_map12	0001.CSV	2969.96	0.0222372
CAM112A_map12	0001.CSV	2973.82	0.0220401
CAM112A_map12	0001.CSV	2977.68	0.0218315
CAM112A_map12	0001.CSV	2981.53	0.0212465
CAM112A_map12	0001.CSV	2985.39	0.0203411
CAM112A_map12	0001.CSV	2989.25	0.020036
CAM112A_map12	0001.CSV	2993.11	0.0200393
CAM112A_map12	0001.CSV	2996.96	0.0196533
CAM112A_map12	0001.CSV	3000.82	0.0191885
CAM112A_map12	0001.CSV	3004.68	0.0189208
CAM112A_map12	0001.CSV	3008.53	0.019134
CAM112A_map12	0001.CSV	3012.39	0.0195418
CAM112A_map12	0001.CSV	3016.25	0.0195339
CAM112A_map12	0001.CSV	3020.11	0.0191738
CAM112A_map12	0001.CSV	3023.96	0.0189296
CAM112A_map12	0001.CSV	3027.82	0.0189233
CAM112A_map12	0001.CSV	3031.68	0.0191692
CAM112A_map12	0001.CSV	3035.53	0.0192332
CAM112A_map12	0001.CSV	3039.39	0.0192467
CAM112A_map12	0001.CSV	3043.25	0.019432
CAM112A_map12	0001.CSV	3047.11	0.0194251
CAM112A_map12	0001.CSV	3050.96	0.0193461
CAM112A_map12	0001.CSV	3054.82	0.0192812
CAM112A_map12	0001.CSV	3058.68	0.0191462
CAM112A_map12	0001.CSV	3062.53	0.0192193
CAM112A_map12	0001.CSV	3066.39	0.0195267
CAM112A_map12	0001.CSV	3070.25	0.0194825
CAM112A_map12	0001.CSV	3074.11	0.019523
CAM112A_map12	0001.CSV	3077.96	0.0198285
CAM112A_map12	0001.CSV	3081.82	0.0199418
CAM112A_map12	0001.CSV	3085.68	0.019867
CAM112A_map12	0001.CSV	3089.53	0.0196878
CAM112A_map12	0001.CSV	3093.39	0.0194393
CAM112A_map12	0001.CSV	3097.25	0.0195342
CAM112A_map12	0001.CSV	3101.11	0.0196773
CAM112A_map12	0001.CSV	3104.96	0.019682
CAM112A_map12	0001.CSV	3108.82	0.0198598
CAM112A_map12	0001.CSV	3112.68	0.0200299
CAM112A_map12	0001.CSV	3116.53	0.0201413
CAM112A_map12	0001.CSV	3120.39	0.0200337
CAM112A_map12	0001.CSV	3124.25	0.0198144
CAM112A_map12	0001.CSV	3128.11	0.0197711
CAM112A_map12	0001.CSV	3131.96	0.0197525
CAM112A_map12	0001.CSV	3135.82	0.0198277
CAM112A_map12	0001.CSV	3139.68	0.019967
CAM112A_map12	0001.CSV	3143.53	0.019851
CAM112A_map12	0001.CSV	3147.39	0.019873
CAM112A_map12	0001.CSV	3151.25	0.0201313
CAM112A_map12	0001.CSV	3155.1	0.0201108
CAM112A_map12	0001.CSV	3158.96	0.0197652
CAM112A_map12	0001.CSV	3162.82	0.019558
CAM112A_map12	0001.CSV	3166.68	0.0194915
CAM112A_map12	0001.CSV	3170.53	0.0195446
CAM112A_map12	0001.CSV	3174.39	0.0196072
CAM112A_map12	0001.CSV	3178.25	0.0197417
CAM112A_map12	0001.CSV	3182.1	0.0198397
CAM112A_map12	0001.CSV	3185.96	0.0199263
CAM112A_map12	0001.CSV	3189.82	0.020002
CAM112A_map12	0001.CSV	3193.68	0.0199635
CAM112A_map12	0001.CSV	3197.53	0.020034
CAM112A_map12	0001.CSV	3201.39	0.0202062
CAM112A_map12	0001.CSV	3205.25	0.0202098
CAM112A_map12	0001.CSV	3209.1	0.0201592
CAM112A_map12	0001.CSV	3212.96	0.0203402
CAM112A_map12	0001.CSV	3216.82	0.0205386
CAM112A_map12	0001.CSV	3220.68	0.0204644
CAM112A_map12	0001.CSV	3224.53	0.0203929
CAM112A_map12	0001.CSV	3228.39	0.0205644
CAM112A_map12	0001.CSV	3232.25	0.0208985
CAM112A_map12	0001.CSV	3236.1	0.0208683
CAM112A_map12	0001.CSV	3239.96	0.0207183
CAM112A_map12	0001.CSV	3243.82	0.0208927
CAM112A_map12	0001.CSV	3247.68	0.0210092
CAM112A_map12	0001.CSV	3251.53	0.0208929
CAM112A_map12	0001.CSV	3255.39	0.0209153
CAM112A_map12	0001.CSV	3259.25	0.0208124
CAM112A_map12	0001.CSV	3263.1	0.0207643
CAM112A_map12	0001.CSV	3266.96	0.0210244
CAM112A_map12	0001.CSV	3270.82	0.021301
CAM112A_map12	0001.CSV	3274.68	0.0212646
CAM112A_map12	0001.CSV	3278.53	0.0210826
CAM112A_map12	0001.CSV	3282.39	0.0209707
CAM112A_map12	0001.CSV	3286.25	0.0210079
CAM112A_map12	0001.CSV	3290.1	0.021291
CAM112A_map12	0001.CSV	3293.96	0.0215956
CAM112A_map12	0001.CSV	3297.82	0.0214773
CAM112A_map12	0001.CSV	3301.67	0.0214719
CAM112A_map12	0001.CSV	3305.53	0.0216913
CAM112A_map12	0001.CSV	3309.39	0.0215423
CAM112A_map12	0001.CSV	3313.25	0.0211053
CAM112A_map12	0001.CSV	3317.1	0.0209067
CAM112A_map12	0001.CSV	3320.96	0.0210725
CAM112A_map12	0001.CSV	3324.82	0.0213578
CAM112A_map12	0001.CSV	3328.67	0.0212039
CAM112A_map12	0001.CSV	3332.53	0.0210599
CAM112A_map12	0001.CSV	3336.39	0.0214112
CAM112A_map12	0001.CSV	3340.24	0.0216982
CAM112A_map12	0001.CSV	3344.1	0.0215369
CAM112A_map12	0001.CSV	3347.96	0.0215028
CAM112A_map12	0001.CSV	3351.82	0.0214147
CAM112A_map12	0001.CSV	3355.67	0.0211209
CAM112A_map12	0001.CSV	3359.53	0.0211854
CAM112A_map12	0001.CSV	3363.39	0.0214568
CAM112A_map12	0001.CSV	3367.24	0.0217364
CAM112A_map12	0001.CSV	3371.1	0.0216263
CAM112A_map12	0001.CSV	3374.96	0.0213329
CAM112A_map12	0001.CSV	3378.82	0.0211365
CAM112A_map12	0001.CSV	3382.67	0.0208572
CAM112A_map12	0001.CSV	3386.53	0.0208959
CAM112A_map12	0001.CSV	3390.39	0.0213202
CAM112A_map12	0001.CSV	3394.24	0.0214832
CAM112A_map12	0001.CSV	3398.1	0.0214685
CAM112A_map12	0001.CSV	3401.96	0.0213764
CAM112A_map12	0001.CSV	3405.82	0.021075
CAM112A_map12	0001.CSV	3409.67	0.0209703
CAM112A_map12	0001.CSV	3413.53	0.0207057
CAM112A_map12	0001.CSV	3417.39	0.0204293
CAM112A_map12	0001.CSV	3421.24	0.0203918
CAM112A_map12	0001.CSV	3425.1	0.0203789
CAM112A_map12	0001.CSV	3428.96	0.0205254
CAM112A_map12	0001.CSV	3432.82	0.0206458
CAM112A_map12	0001.CSV	3436.67	0.0203576
CAM112A_map12	0001.CSV	3440.53	0.0198116
CAM112A_map12	0001.CSV	3444.39	0.0195819
CAM112A_map12	0001.CSV	3448.24	0.0195177
CAM112A_map12	0001.CSV	3452.1	0.0192622
CAM112A_map12	0001.CSV	3455.96	0.0192748
CAM112A_map12	0001.CSV	3459.82	0.0195302
CAM112A_map12	0001.CSV	3463.67	0.0197737
CAM112A_map12	0001.CSV	3467.53	0.0198394
CAM112A_map12	0001.CSV	3471.39	0.0194838
CAM112A_map12	0001.CSV	3475.24	0.0191276
CAM112A_map12	0001.CSV	3479.1	0.0191092
CAM112A_map12	0001.CSV	3482.96	0.0189857
CAM112A_map12	0001.CSV	3486.82	0.018881
CAM112A_map12	0001.CSV	3490.67	0.0187944
CAM112A_map12	0001.CSV	3494.53	0.0188528
CAM112A_map12	0001.CSV	3498.39	0.0188277
CAM112A_map12	0001.CSV	3502.24	0.0186667
CAM112A_map12	0001.CSV	3506.1	0.0182837
CAM112A_map12	0001.CSV	3509.96	0.0180537
CAM112A_map12	0001.CSV	3513.81	0.0180232
CAM112A_map12	0001.CSV	3517.67	0.0177389
CAM112A_map12	0001.CSV	3521.53	0.0176935
CAM112A_map12	0001.CSV	3525.39	0.0176019
CAM112A_map12	0001.CSV	3529.24	0.0174893
CAM112A_map12	0001.CSV	3533.1	0.0175737
CAM112A_map12	0001.CSV	3536.96	0.017707
CAM112A_map12	0001.CSV	3540.81	0.0177161
CAM112A_map12	0001.CSV	3544.67	0.0178223
CAM112A_map12	0001.CSV	3548.53	0.0177066
CAM112A_map12	0001.CSV	3552.39	0.0172697
CAM112A_map12	0001.CSV	3556.24	0.0169985
CAM112A_map12	0001.CSV	3560.1	0.0166935
CAM112A_map12	0001.CSV	3563.96	0.0163379
CAM112A_map12	0001.CSV	3567.81	0.0167444
CAM112A_map12	0001.CSV	3571.67	0.0167866
CAM112A_map12	0001.CSV	3575.53	0.0163753
CAM112A_map12	0001.CSV	3579.39	0.0164228
CAM112A_map12	0001.CSV	3583.24	0.0164517
CAM112A_map12	0001.CSV	3587.1	0.0164484
CAM112A_map12	0001.CSV	3590.96	0.0162731
CAM112A_map12	0001.CSV	3594.81	0.0159451
CAM112A_map12	0001.CSV	3598.67	0.0160387
CAM112A_map12	0001.CSV	3602.53	0.0159885
CAM112A_map12	0001.CSV	3606.39	0.0155099
CAM112A_map12	0001.CSV	3610.24	0.0152415
CAM112A_map12	0001.CSV	3614.1	0.0151626
CAM112A_map12	0001.CSV	3617.96	0.0153487
CAM112A_map12	0001.CSV	3621.81	0.0156022
CAM112A_map12	0001.CSV	3625.67	0.0149449
CAM112A_map12	0001.CSV	3629.53	0.0147767
CAM112A_map12	0001.CSV	3633.39	0.015264
CAM112A_map12	0001.CSV	3637.24	0.0151284
CAM112A_map12	0001.CSV	3641.1	0.014842
CAM112A_map12	0001.CSV	3644.96	0.0142962
CAM112A_map12	0001.CSV	3648.81	0.0148708
CAM112A_map12	0001.CSV	3652.67	0.0155328
CAM112A_map12	0001.CSV	3656.53	0.0152731
CAM112A_map12	0001.CSV	3660.38	0.0151475
CAM112A_map12	0001.CSV	3664.24	0.0144185
CAM112A_map12	0001.CSV	3668.1	0.0136877
CAM112A_map12	0001.CSV	3671.96	0.0136795
CAM112A_map12	0001.CSV	3675.81	0.0143324
CAM112A_map12	0001.CSV	3679.67	0.014699
CAM112A_map12	0001.CSV	3683.53	0.0143211
CAM112A_map12	0001.CSV	3687.38	0.0142459
CAM112A_map12	0001.CSV	3691.24	0.014885
CAM112A_map12	0001.CSV	3695.1	0.0145686
CAM112A_map12	0001.CSV	3698.95	0.0140593
CAM112A_map12	0001.CSV	3702.81	0.0139404
CAM112A_map12	0001.CSV	3706.67	0.0135149
CAM112A_map12	0001.CSV	3710.53	0.0134718
CAM112A_map12	0001.CSV	3714.38	0.0139782
CAM112A_map12	0001.CSV	3718.24	0.0135701
CAM112A_map12	0001.CSV	3722.1	0.013328
CAM112A_map12	0001.CSV	3725.95	0.0133694
CAM112A_map12	0001.CSV	3729.81	0.0131771
CAM112A_map12	0001.CSV	3733.67	0.013467
CAM112A_map12	0001.CSV	3737.53	0.0144845
CAM112A_map12	0001.CSV	3741.38	0.0138621
CAM112A_map12	0001.CSV	3745.24	0.0131136
CAM112A_map12	0001.CSV	3749.1	0.0130853
CAM112A_map12	0001.CSV	3752.95	0.0138346
CAM112A_map12	0001.CSV	3756.81	0.0137973
CAM112A_map12	0001.CSV	3760.67	0.0136833
CAM112A_map12	0001.CSV	3764.53	0.0134366
CAM112A_map12	0001.CSV	3768.38	0.0133814
CAM112A_map12	0001.CSV	3772.24	0.0134605
CAM112A_map12	0001.CSV	3776.1	0.0133045
CAM112A_map12	0001.CSV	3779.95	0.013474
CAM112A_map12	0001.CSV	3783.81	0.0135571
CAM112A_map12	0001.CSV	3787.67	0.0135444
CAM112A_map12	0001.CSV	3791.53	0.0132673
CAM112A_map12	0001.CSV	3795.38	0.0127274
CAM112A_map12	0001.CSV	3799.24	0.0126601
CAM112A_map12	0001.CSV	3803.1	0.0133041
CAM112A_map12	0001.CSV	3806.95	0.0136996
CAM112A_map12	0001.CSV	3810.81	0.0133836
CAM112A_map12	0001.CSV	3814.67	0.0128927
CAM112A_map12	0001.CSV	3818.53	0.0129303
CAM112A_map12	0001.CSV	3822.38	0.0134327
CAM112A_map12	0001.CSV	3826.24	0.0133782
CAM112A_map12	0001.CSV	3830.1	0.0130164
CAM112A_map12	0001.CSV	3833.95	0.0129724
CAM112A_map12	0001.CSV	3837.81	0.0133594
CAM112A_map12	0001.CSV	3841.67	0.0138615
CAM112A_map12	0001.CSV	3845.53	0.0135642
CAM112A_map12	0001.CSV	3849.38	0.0127468
CAM112A_map12	0001.CSV	3853.24	0.0130053
CAM112A_map12	0001.CSV	3857.1	0.0136383
CAM112A_map12	0001.CSV	3860.95	0.0130314
CAM112A_map12	0001.CSV	3864.81	0.0131033
CAM112A_map12	0001.CSV	3868.67	0.0133219
CAM112A_map12	0001.CSV	3872.52	0.0136817
CAM112A_map12	0001.CSV	3876.38	0.0135496
CAM112A_map12	0001.CSV	3880.24	0.0133318
CAM112A_map12	0001.CSV	3884.1	0.013653
CAM112A_map12	0001.CSV	3887.95	0.0136314
CAM112A_map12	0001.CSV	3891.81	0.0136213
CAM112A_map12	0001.CSV	3895.67	0.013474
CAM112A_map12	0001.CSV	3899.52	0.0132686
CAM112A_map12	0001.CSV	3903.38	0.0138905
CAM112A_map12	0001.CSV	3907.24	0.0139643
CAM112A_map12	0001.CSV	3911.1	0.0134046
CAM112A_map12	0001.CSV	3914.95	0.013097
CAM112A_map12	0001.CSV	3918.81	0.0134116
CAM112A_map12	0001.CSV	3922.67	0.0134612
CAM112A_map12	0001.CSV	3926.52	0.0133318
CAM112A_map12	0001.CSV	3930.38	0.0134154
CAM112A_map12	0001.CSV	3934.24	0.0136337
CAM112A_map12	0001.CSV	3938.09	0.013309
CAM112A_map12	0001.CSV	3941.95	0.0131678
CAM112A_map12	0001.CSV	3945.81	0.0131412
CAM112A_map12	0001.CSV	3949.67	0.013234
CAM112A_map12	0001.CSV	3953.52	0.0133886
CAM112A_map12	0001.CSV	3957.38	0.0133688
CAM112A_map12	0001.CSV	3961.24	0.0132968
CAM112A_map12	0001.CSV	3965.09	0.0131584
CAM112A_map12	0001.CSV	3968.95	0.0130801
CAM112A_map12	0001.CSV	3972.81	0.013108
CAM112A_map12	0001.CSV	3976.67	0.0131775
CAM112A_map12	0001.CSV	3980.52	0.0132252
CAM112A_map12	0001.CSV	3984.38	0.013119
CAM112A_map12	0001.CSV	3988.24	0.0129297
CAM112A_map12	0001.CSV	3992.09	0.012963
CAM112A_map12	0001.CSV	3995.95	0.0130426
CAM112A_map12	0001.CSV	3999.81	0.0129856
CAM112A_map12	0002.CSV	674.992	0.0366389
CAM112A_map12	0002.CSV	678.849	0.038845
CAM112A_map12	0002.CSV	682.706	0.0396503
CAM112A_map12	0002.CSV	686.563	0.0421923
CAM112A_map12	0002.CSV	690.42	0.0440673
CAM112A_map12	0002.CSV	694.277	0.0485249
CAM112A_map12	0002.CSV	698.134	0.054397
CAM112A_map12	0002.CSV	701.991	0.0645014
CAM112A_map12	0002.CSV	705.849	0.0832775
CAM112A_map12	0002.CSV	709.706	0.108508
CAM112A_map12	0002.CSV	713.563	0.101432
CAM112A_map12	0002.CSV	717.42	0.0655239
CAM112A_map12	0002.CSV	721.277	0.0409456
CAM112A_map12	0002.CSV	725.134	0.0342693
CAM112A_map12	0002.CSV	728.991	0.0325542
CAM112A_map12	0002.CSV	732.848	0.0331646
CAM112A_map12	0002.CSV	736.705	0.0334557
CAM112A_map12	0002.CSV	740.562	0.034314
CAM112A_map12	0002.CSV	744.42	0.0346197
CAM112A_map12	0002.CSV	748.277	0.0353494
CAM112A_map12	0002.CSV	752.134	0.035519
CAM112A_map12	0002.CSV	755.991	0.0364732
CAM112A_map12	0002.CSV	759.848	0.036913
CAM112A_map12	0002.CSV	763.705	0.03801
CAM112A_map12	0002.CSV	767.562	0.0385416
CAM112A_map12	0002.CSV	771.419	0.0392376
CAM112A_map12	0002.CSV	775.276	0.0392402
CAM112A_map12	0002.CSV	779.133	0.0398947
CAM112A_map12	0002.CSV	782.99	0.0398405
CAM112A_map12	0002.CSV	786.848	0.0398438
CAM112A_map12	0002.CSV	790.705	0.0397596
CAM112A_map12	0002.CSV	794.562	0.0405511
CAM112A_map12	0002.CSV	798.419	0.0410997
CAM112A_map12	0002.CSV	802.276	0.0421903
CAM112A_map12	0002.CSV	806.133	0.0428269
CAM112A_map12	0002.CSV	809.99	0.043845
CAM112A_map12	0002.CSV	813.847	0.0441964
CAM112A_map12	0002.CSV	817.704	0.0452957
CAM112A_map12	0002.CSV	821.562	0.046396
CAM112A_map12	0002.CSV	825.419	0.0483122
CAM112A_map12	0002.CSV	829.276	0.0501792
CAM112A_map12	0002.CSV	833.133	0.0527764
CAM112A_map12	0002.CSV	836.99	0.0554492
CAM112A_map12	0002.CSV	840.847	0.0605037
CAM112A_map12	0002.CSV	844.704	0.0685747
CAM112A_map12	0002.CSV	848.561	0.0740994
CAM112A_map12	0002.CSV	852.418	0.0766018
CAM112A_map12	0002.CSV	856.275	0.0889714
CAM112A_map12	0002.CSV	860.132	0.116734
CAM112A_map12	0002.CSV	863.99	0.169014
CAM112A_map12	0002.CSV	867.847	0.231336
CAM112A_map12	0002.CSV	871.704	0.249577
CAM112A_map12	0002.CSV	875.561	0.212432
CAM112A_map12	0002.CSV	879.418	0.162091
CAM112A_map12	0002.CSV	883.275	0.107414
CAM112A_map12	0002.CSV	887.132	0.0581649
CAM112A_map12	0002.CSV	890.989	0.0353918
CAM112A_map12	0002.CSV	894.846	0.0330392
CAM112A_map12	0002.CSV	898.703	0.033946
CAM112A_map12	0002.CSV	902.561	0.0352556
CAM112A_map12	0002.CSV	906.418	0.0361566
CAM112A_map12	0002.CSV	910.275	0.037331
CAM112A_map12	0002.CSV	914.132	0.0380915
CAM112A_map12	0002.CSV	917.989	0.0392662
CAM112A_map12	0002.CSV	921.846	0.0400009
CAM112A_map12	0002.CSV	925.703	0.040935
CAM112A_map12	0002.CSV	929.56	0.0415473
CAM112A_map12	0002.CSV	933.417	0.0424506
CAM112A_map12	0002.CSV	937.274	0.0428888
CAM112A_map12	0002.CSV	941.131	0.0435001
CAM112A_map12	0002.CSV	944.989	0.0436481
CAM112A_map12	0002.CSV	948.846	0.0441679
CAM112A_map12	0002.CSV	952.703	0.0445178
CAM112A_map12	0002.CSV	956.56	0.0450999
CAM112A_map12	0002.CSV	960.417	0.0452525
CAM112A_map12	0002.CSV	964.274	0.0457241
CAM112A_map12	0002.CSV	968.131	0.0460863
CAM112A_map12	0002.CSV	971.988	0.0468951
CAM112A_map12	0002.CSV	975.845	0.0475107
CAM112A_map12	0002.CSV	979.702	0.0483399
CAM112A_map12	0002.CSV	983.559	0.0488219
CAM112A_map12	0002.CSV	987.417	0.0496468
CAM112A_map12	0002.CSV	991.274	0.050155
CAM112A_map12	0002.CSV	995.131	0.0509089
CAM112A_map12	0002.CSV	998.988	0.0512842
CAM112A_map12	0002.CSV	1002.85	0.0519822
CAM112A_map12	0002.CSV	1006.7	0.0524719
CAM112A_map12	0002.CSV	1010.56	0.0532633
CAM112A_map12	0002.CSV	1014.42	0.0538404
CAM112A_map12	0002.CSV	1018.27	0.0546225
CAM112A_map12	0002.CSV	1022.13	0.0549944
CAM112A_map12	0002.CSV	1025.99	0.0556557
CAM112A_map12	0002.CSV	1029.85	0.0560174
CAM112A_map12	0002.CSV	1033.7	0.0566688
CAM112A_map12	0002.CSV	1037.56	0.0570751
CAM112A_map12	0002.CSV	1041.42	0.0578693
CAM112A_map12	0002.CSV	1045.27	0.0582587
CAM112A_map12	0002.CSV	1049.13	0.0589963
CAM112A_map12	0002.CSV	1052.99	0.0596635
CAM112A_map12	0002.CSV	1056.84	0.0609258
CAM112A_map12	0002.CSV	1060.7	0.0621455
CAM112A_map12	0002.CSV	1064.56	0.0637174
CAM112A_map12	0002.CSV	1068.42	0.0646736
CAM112A_map12	0002.CSV	1072.27	0.0657149
CAM112A_map12	0002.CSV	1076.13	0.0664078
CAM112A_map12	0002.CSV	1079.99	0.0676833
CAM112A_map12	0002.CSV	1083.84	0.0687946
CAM112A_map12	0002.CSV	1087.7	0.0696878
CAM112A_map12	0002.CSV	1091.56	0.0690887
CAM112A_map12	0002.CSV	1095.41	0.0680965
CAM112A_map12	0002.CSV	1099.27	0.0672544
CAM112A_map12	0002.CSV	1103.13	0.0675464
CAM112A_map12	0002.CSV	1106.99	0.0681122
CAM112A_map12	0002.CSV	1110.84	0.0692315
CAM112A_map12	0002.CSV	1114.7	0.0699641
CAM112A_map12	0002.CSV	1118.56	0.0706233
CAM112A_map12	0002.CSV	1122.41	0.0708042
CAM112A_map12	0002.CSV	1126.27	0.0713235
CAM112A_map12	0002.CSV	1130.13	0.0715051
CAM112A_map12	0002.CSV	1133.99	0.0720256
CAM112A_map12	0002.CSV	1137.84	0.0724686
CAM112A_map12	0002.CSV	1141.7	0.0732694
CAM112A_map12	0002.CSV	1145.56	0.0737531
CAM112A_map12	0002.CSV	1149.41	0.0746683
CAM112A_map12	0002.CSV	1153.27	0.0755004
CAM112A_map12	0002.CSV	1157.13	0.0767377
CAM112A_map12	0002.CSV	1160.99	0.0776187
CAM112A_map12	0002.CSV	1164.84	0.0785477
CAM112A_map12	0002.CSV	1168.7	0.0788461
CAM112A_map12	0002.CSV	1172.56	0.0792334
CAM112A_map12	0002.CSV	1176.41	0.0792349
CAM112A_map12	0002.CSV	1180.27	0.0794505
CAM112A_map12	0002.CSV	1184.13	0.0793852
CAM112A_map12	0002.CSV	1187.99	0.0795543
CAM112A_map12	0002.CSV	1191.84	0.0793838
CAM112A_map12	0002.CSV	1195.7	0.0796339
CAM112A_map12	0002.CSV	1199.56	0.0798457
CAM112A_map12	0002.CSV	1203.41	0.080555
CAM112A_map12	0002.CSV	1207.27	0.0812288
CAM112A_map12	0002.CSV	1211.13	0.0823197
CAM112A_map12	0002.CSV	1214.98	0.0831815
CAM112A_map12	0002.CSV	1218.84	0.0844523
CAM112A_map12	0002.CSV	1222.7	0.0855968
CAM112A_map12	0002.CSV	1226.56	0.0872128
CAM112A_map12	0002.CSV	1230.41	0.0887276
CAM112A_map12	0002.CSV	1234.27	0.0906575
CAM112A_map12	0002.CSV	1238.13	0.0922799
CAM112A_map12	0002.CSV	1241.98	0.0942386
CAM112A_map12	0002.CSV	1245.84	0.096008
CAM112A_map12	0002.CSV	1249.7	0.0981388
CAM112A_map12	0002.CSV	1253.56	0.0999557
CAM112A_map12	0002.CSV	1257.41	0.10207
CAM112A_map12	0002.CSV	1261.27	0.103845
CAM112A_map12	0002.CSV	1265.13	0.105991
CAM112A_map12	0002.CSV	1268.98	0.108062
CAM112A_map12	0002.CSV	1272.84	0.110688
CAM112A_map12	0002.CSV	1276.7	0.11302
CAM112A_map12	0002.CSV	1280.56	0.115758
CAM112A_map12	0002.CSV	1284.41	0.118297
CAM112A_map12	0002.CSV	1288.27	0.121222
CAM112A_map12	0002.CSV	1292.13	0.123736
CAM112A_map12	0002.CSV	1295.98	0.126758
CAM112A_map12	0002.CSV	1299.84	0.129727
CAM112A_map12	0002.CSV	1303.7	0.1333
CAM112A_map12	0002.CSV	1307.56	0.136859
CAM112A_map12	0002.CSV	1311.41	0.141228
CAM112A_map12	0002.CSV	1315.27	0.145623
CAM112A_map12	0002.CSV	1319.13	0.150641
CAM112A_map12	0002.CSV	1322.98	0.155086
CAM112A_map12	0002.CSV	1326.84	0.1602
CAM112A_map12	0002.CSV	1330.7	0.16562
CAM112A_map12	0002.CSV	1334.56	0.171689
CAM112A_map12	0002.CSV	1338.41	0.17886
CAM112A_map12	0002.CSV	1342.27	0.188022
CAM112A_map12	0002.CSV	1346.13	0.195801
CAM112A_map12	0002.CSV	1349.98	0.205049
CAM112A_map12	0002.CSV	1353.84	0.214825
CAM112A_map12	0002.CSV	1357.7	0.225515
CAM112A_map12	0002.CSV	1361.56	0.237776
CAM112A_map12	0002.CSV	1365.41	0.253418
CAM112A_map12	0002.CSV	1369.27	0.267085
CAM112A_map12	0002.CSV	1373.13	0.283903
CAM112A_map12	0002.CSV	1376.98	0.302194
CAM112A_map12	0002.CSV	1380.84	0.318122
CAM112A_map12	0002.CSV	1384.7	0.331898
CAM112A_map12	0002.CSV	1388.56	0.346915
CAM112A_map12	0002.CSV	1392.41	0.354467
CAM112A_map12	0002.CSV	1396.27	0.35574
CAM112A_map12	0002.CSV	1400.13	0.349367
CAM112A_map12	0002.CSV	1403.98	0.340563
CAM112A_map12	0002.CSV	1407.84	0.325665
CAM112A_map12	0002.CSV	1411.7	0.30926
CAM112A_map12	0002.CSV	1415.55	0.293039
CAM112A_map12	0002.CSV	1419.41	0.276142
CAM112A_map12	0002.CSV	1423.27	0.262356
CAM112A_map12	0002.CSV	1427.12	0.254046
CAM112A_map12	0002.CSV	1430.98	0.245316
CAM112A_map12	0002.CSV	1434.84	0.236831
CAM112A_map12	0002.CSV	1438.7	0.226161
CAM112A_map12	0002.CSV	1442.55	0.218223
CAM112A_map12	0002.CSV	1446.41	0.209144
CAM112A_map12	0002.CSV	1450.27	0.199772
CAM112A_map12	0002.CSV	1454.12	0.191711
CAM112A_map12	0002.CSV	1457.98	0.180383
CAM112A_map12	0002.CSV	1461.84	0.171238
CAM112A_map12	0002.CSV	1465.7	0.164631
CAM112A_map12	0002.CSV	1469.55	0.157564
CAM112A_map12	0002.CSV	1473.41	0.149004
CAM112A_map12	0002.CSV	1477.27	0.139451
CAM112A_map12	0002.CSV	1481.12	0.133473
CAM112A_map12	0002.CSV	1484.98	0.127631
CAM112A_map12	0002.CSV	1488.84	0.120697
CAM112A_map12	0002.CSV	1492.7	0.113438
CAM112A_map12	0002.CSV	1496.55	0.107757
CAM112A_map12	0002.CSV	1500.41	0.101173
CAM112A_map12	0002.CSV	1504.27	0.0970792
CAM112A_map12	0002.CSV	1508.12	0.0897523
CAM112A_map12	0002.CSV	1511.98	0.0847195
CAM112A_map12	0002.CSV	1515.84	0.0813234
CAM112A_map12	0002.CSV	1519.7	0.0771798
CAM112A_map12	0002.CSV	1523.55	0.0722617
CAM112A_map12	0002.CSV	1527.41	0.0689999
CAM112A_map12	0002.CSV	1531.27	0.0664883
CAM112A_map12	0002.CSV	1535.12	0.0651616
CAM112A_map12	0002.CSV	1538.98	0.0631844
CAM112A_map12	0002.CSV	1542.84	0.0561851
CAM112A_map12	0002.CSV	1546.7	0.0498237
CAM112A_map12	0002.CSV	1550.55	0.045385
CAM112A_map12	0002.CSV	1554.41	0.0414842
CAM112A_map12	0002.CSV	1558.27	0.0381176
CAM112A_map12	0002.CSV	1562.12	0.0359252
CAM112A_map12	0002.CSV	1565.98	0.0352798
CAM112A_map12	0002.CSV	1569.84	0.0354748
CAM112A_map12	0002.CSV	1573.69	0.0359347
CAM112A_map12	0002.CSV	1577.55	0.0352201
CAM112A_map12	0002.CSV	1581.41	0.0329341
CAM112A_map12	0002.CSV	1585.27	0.0300471
CAM112A_map12	0002.CSV	1589.12	0.0275781
CAM112A_map12	0002.CSV	1592.98	0.025671
CAM112A_map12	0002.CSV	1596.84	0.0242451
CAM112A_map12	0002.CSV	1600.69	0.0231085
CAM112A_map12	0002.CSV	1604.55	0.022408
CAM112A_map12	0002.CSV	1608.41	0.0218908
CAM112A_map12	0002.CSV	1612.27	0.021515
CAM112A_map12	0002.CSV	1616.12	0.0210188
CAM112A_map12	0002.CSV	1619.98	0.0206476
CAM112A_map12	0002.CSV	1623.84	0.0200393
CAM112A_map12	0002.CSV	1627.69	0.0194469
CAM112A_map12	0002.CSV	1631.55	0.0186975
CAM112A_map12	0002.CSV	1635.41	0.0182955
CAM112A_map12	0002.CSV	1639.27	0.0178811
CAM112A_map12	0002.CSV	1643.12	0.0173702
CAM112A_map12	0002.CSV	1646.98	0.0171608
CAM112A_map12	0002.CSV	1650.84	0.0171938
CAM112A_map12	0002.CSV	1654.69	0.0170107
CAM112A_map12	0002.CSV	1658.55	0.0167197
CAM112A_map12	0002.CSV	1662.41	0.0164157
CAM112A_map12	0002.CSV	1666.27	0.0162141
CAM112A_map12	0002.CSV	1670.12	0.0159929
CAM112A_map12	0002.CSV	1673.98	0.0160826
CAM112A_map12	0002.CSV	1677.84	0.0157661
CAM112A_map12	0002.CSV	1681.69	0.0156168
CAM112A_map12	0002.CSV	1685.55	0.0158519
CAM112A_map12	0002.CSV	1689.41	0.015754
CAM112A_map12	0002.CSV	1693.27	0.015292
CAM112A_map12	0002.CSV	1697.12	0.0154112
CAM112A_map12	0002.CSV	1700.98	0.0157281
CAM112A_map12	0002.CSV	1704.84	0.0158364
CAM112A_map12	0002.CSV	1708.69	0.0158201
CAM112A_map12	0002.CSV	1712.55	0.0158773
CAM112A_map12	0002.CSV	1716.41	0.0165915
CAM112A_map12	0002.CSV	1720.27	0.017497
CAM112A_map12	0002.CSV	1724.12	0.0174845
CAM112A_map12	0002.CSV	1727.98	0.0174916
CAM112A_map12	0002.CSV	1731.84	0.0176712
CAM112A_map12	0002.CSV	1735.69	0.0181654
CAM112A_map12	0002.CSV	1739.55	0.0178452
CAM112A_map12	0002.CSV	1743.41	0.0170825
CAM112A_map12	0002.CSV	1747.27	0.0160794
CAM112A_map12	0002.CSV	1751.12	0.0151054
CAM112A_map12	0002.CSV	1754.98	0.0142451
CAM112A_map12	0002.CSV	1758.84	0.0138173
CAM112A_map12	0002.CSV	1762.69	0.0135956
CAM112A_map12	0002.CSV	1766.55	0.0133754
CAM112A_map12	0002.CSV	1770.41	0.0134251
CAM112A_map12	0002.CSV	1774.26	0.0138322
CAM112A_map12	0002.CSV	1778.12	0.0139326
CAM112A_map12	0002.CSV	1781.98	0.0145608
CAM112A_map12	0002.CSV	1785.84	0.0156674
CAM112A_map12	0002.CSV	1789.69	0.0174604
CAM112A_map12	0002.CSV	1793.55	0.0199333
CAM112A_map12	0002.CSV	1797.41	0.0204014
CAM112A_map12	0002.CSV	1801.26	0.0186113
CAM112A_map12	0002.CSV	1805.12	0.0162743
CAM112A_map12	0002.CSV	1808.98	0.0144959
CAM112A_map12	0002.CSV	1812.84	0.0134888
CAM112A_map12	0002.CSV	1816.69	0.0128075
CAM112A_map12	0002.CSV	1820.55	0.0124622
CAM112A_map12	0002.CSV	1824.41	0.0122652
CAM112A_map12	0002.CSV	1828.26	0.0123015
CAM112A_map12	0002.CSV	1832.12	0.0121701
CAM112A_map12	0002.CSV	1835.98	0.0119759
CAM112A_map12	0002.CSV	1839.84	0.0117793
CAM112A_map12	0002.CSV	1843.69	0.0118823
CAM112A_map12	0002.CSV	1847.55	0.0119938
CAM112A_map12	0002.CSV	1851.41	0.0118813
CAM112A_map12	0002.CSV	1855.26	0.01174
CAM112A_map12	0002.CSV	1859.12	0.0117756
CAM112A_map12	0002.CSV	1862.98	0.0117006
CAM112A_map12	0002.CSV	1866.84	0.0117919
CAM112A_map12	0002.CSV	1870.69	0.0120165
CAM112A_map12	0002.CSV	1874.55	0.0119675
CAM112A_map12	0002.CSV	1878.41	0.011841
CAM112A_map12	0002.CSV	1882.26	0.0117981
CAM112A_map12	0002.CSV	1886.12	0.0117712
CAM112A_map12	0002.CSV	1889.98	0.0118854
CAM112A_map12	0002.CSV	1893.83	0.0118933
CAM112A_map12	0002.CSV	1897.69	0.0119232
CAM112A_map12	0002.CSV	1901.55	0.011884
CAM112A_map12	0002.CSV	1905.41	0.0119153
CAM112A_map12	0002.CSV	1909.26	0.0119585
CAM112A_map12	0002.CSV	1913.12	0.0119381
CAM112A_map12	0002.CSV	1916.98	0.0118796
CAM112A_map12	0002.CSV	1920.83	0.0119976
CAM112A_map12	0002.CSV	1924.69	0.012021
CAM112A_map12	0002.CSV	1928.55	0.0120143
CAM112A_map12	0002.CSV	1932.4	0.0119973
CAM112A_map12	0002.CSV	1936.26	0.0120422
CAM112A_map12	0002.CSV	1940.12	0.0120375
CAM112A_map12	0002.CSV	1943.98	0.0122534
CAM112A_map12	0002.CSV	1947.83	0.0123421
CAM112A_map12	0002.CSV	1951.69	0.0123335
CAM112A_map12	0002.CSV	1955.55	0.0123243
CAM112A_map12	0002.CSV	1959.4	0.0123981
CAM112A_map12	0002.CSV	1963.26	0.0124014
CAM112A_map12	0002.CSV	1967.12	0.0124809
CAM112A_map12	0002.CSV	1970.98	0.0124802
CAM112A_map12	0002.CSV	1974.83	0.012474
CAM112A_map12	0002.CSV	1978.69	0.012457
CAM112A_map12	0002.CSV	1982.55	0.0124426
CAM112A_map12	0002.CSV	1986.4	0.0123986
CAM112A_map12	0002.CSV	1990.26	0.0125043
CAM112A_map12	0002.CSV	1994.12	0.0126064
CAM112A_map12	0002.CSV	1997.98	0.012606
CAM112A_map12	0002.CSV	2001.83	0.0125797
CAM112A_map12	0002.CSV	2005.69	0.0126685
CAM112A_map12	0002.CSV	2009.55	0.0126877
CAM112A_map12	0002.CSV	2013.4	0.0126976
CAM112A_map12	0002.CSV	2017.26	0.012722
CAM112A_map12	0002.CSV	2021.12	0.0127594
CAM112A_map12	0002.CSV	2024.97	0.0127312
CAM112A_map12	0002.CSV	2028.83	0.0127902
CAM112A_map12	0002.CSV	2032.69	0.0128086
CAM112A_map12	0002.CSV	2036.55	0.0128395
CAM112A_map12	0002.CSV	2040.4	0.012867
CAM112A_map12	0002.CSV	2044.26	0.0129189
CAM112A_map12	0002.CSV	2048.12	0.0129004
CAM112A_map12	0002.CSV	2051.97	0.0129075
CAM112A_map12	0002.CSV	2055.83	0.0129038
CAM112A_map12	0002.CSV	2059.69	0.0129399
CAM112A_map12	0002.CSV	2063.55	0.0129213
CAM112A_map12	0002.CSV	2067.4	0.0129839
CAM112A_map12	0002.CSV	2071.26	0.0130095
CAM112A_map12	0002.CSV	2075.12	0.0130343
CAM112A_map12	0002.CSV	2078.97	0.0130856
CAM112A_map12	0002.CSV	2082.83	0.0131674
CAM112A_map12	0002.CSV	2086.69	0.0131484
CAM112A_map12	0002.CSV	2090.55	0.0131744
CAM112A_map12	0002.CSV	2094.4	0.0131763
CAM112A_map12	0002.CSV	2098.26	0.0132344
CAM112A_map12	0002.CSV	2102.12	0.013256
CAM112A_map12	0002.CSV	2105.97	0.0132612
CAM112A_map12	0002.CSV	2109.83	0.0132267
CAM112A_map12	0002.CSV	2113.69	0.0132874
CAM112A_map12	0002.CSV	2117.55	0.0133608
CAM112A_map12	0002.CSV	2121.4	0.0134661
CAM112A_map12	0002.CSV	2125.26	0.0135109
CAM112A_map12	0002.CSV	2129.12	0.0135435
CAM112A_map12	0002.CSV	2132.97	0.0135774
CAM112A_map12	0002.CSV	2136.83	0.0136336
CAM112A_map12	0002.CSV	2140.69	0.0136356
CAM112A_map12	0002.CSV	2144.55	0.0136637
CAM112A_map12	0002.CSV	2148.4	0.0136727
CAM112A_map12	0002.CSV	2152.26	0.013691
CAM112A_map12	0002.CSV	2156.12	0.0136521
CAM112A_map12	0002.CSV	2159.97	0.0136674
CAM112A_map12	0002.CSV	2163.83	0.0136325
CAM112A_map12	0002.CSV	2167.69	0.013612
CAM112A_map12	0002.CSV	2171.55	0.0136198
CAM112A_map12	0002.CSV	2175.4	0.0136952
CAM112A_map12	0002.CSV	2179.26	0.013698
CAM112A_map12	0002.CSV	2183.12	0.0137093
CAM112A_map12	0002.CSV	2186.97	0.0137606
CAM112A_map12	0002.CSV	2190.83	0.0138198
CAM112A_map12	0002.CSV	2194.69	0.0138048
CAM112A_map12	0002.CSV	2198.55	0.0138146
CAM112A_map12	0002.CSV	2202.4	0.0138185
CAM112A_map12	0002.CSV	2206.26	0.0138688
CAM112A_map12	0002.CSV	2210.12	0.0138712
CAM112A_map12	0002.CSV	2213.97	0.0138733
CAM112A_map12	0002.CSV	2217.83	0.0138701
CAM112A_map12	0002.CSV	2221.69	0.0139257
CAM112A_map12	0002.CSV	2225.54	0.0139658
CAM112A_map12	0002.CSV	2229.4	0.0139781
CAM112A_map12	0002.CSV	2233.26	0.0139192
CAM112A_map12	0002.CSV	2237.12	0.0139049
CAM112A_map12	0002.CSV	2240.97	0.0138861
CAM112A_map12	0002.CSV	2244.83	0.0139253
CAM112A_map12	0002.CSV	2248.69	0.0139574
CAM112A_map12	0002.CSV	2252.54	0.0139871
CAM112A_map12	0002.CSV	2256.4	0.0139381
CAM112A_map12	0002.CSV	2260.26	0.0139291
CAM112A_map12	0002.CSV	2264.11	0.0139302
CAM112A_map12	0002.CSV	2267.97	0.0139509
CAM112A_map12	0002.CSV	2271.83	0.0139829
CAM112A_map12	0002.CSV	2275.69	0.014009
CAM112A_map12	0002.CSV	2279.54	0.013965
CAM112A_map12	0002.CSV	2283.4	0.0139286
CAM112A_map12	0002.CSV	2287.26	0.0138823
CAM112A_map12	0002.CSV	2291.11	0.0138855
CAM112A_map12	0002.CSV	2294.97	0.013854
CAM112A_map12	0002.CSV	2298.83	0.0138279
CAM112A_map12	0002.CSV	2302.69	0.0137275
CAM112A_map12	0002.CSV	2306.54	0.0136333
CAM112A_map12	0002.CSV	2310.4	0.0134205
CAM112A_map12	0002.CSV	2314.26	0.0131339
CAM112A_map12	0002.CSV	2318.11	0.0123754
CAM112A_map12	0002.CSV	2321.97	0.0112759
CAM112A_map12	0002.CSV	2325.83	0.00990893
CAM112A_map12	0002.CSV	2329.69	0.00845204
CAM112A_map12	0002.CSV	2333.54	0.00684811
CAM112A_map12	0002.CSV	2337.4	0.00580497
CAM112A_map12	0002.CSV	2341.26	0.00614772
CAM112A_map12	0002.CSV	2345.11	0.00985761
CAM112A_map12	0002.CSV	2348.97	0.0109079
CAM112A_map12	0002.CSV	2352.83	0.00780357
CAM112A_map12	0002.CSV	2356.69	-0.00230827
CAM112A_map12	0002.CSV	2360.54	-0.0102587
CAM112A_map12	0002.CSV	2364.4	-0.00368647
CAM112A_map12	0002.CSV	2368.26	0.00618009
CAM112A_map12	0002.CSV	2372.11	0.0114159
CAM112A_map12	0002.CSV	2375.97	0.0134824
CAM112A_map12	0002.CSV	2379.83	0.0141235
CAM112A_map12	0002.CSV	2383.69	0.0142181
CAM112A_map12	0002.CSV	2387.54	0.0140822
CAM112A_map12	0002.CSV	2391.4	0.014008
CAM112A_map12	0002.CSV	2395.26	0.0140144
CAM112A_map12	0002.CSV	2399.11	0.0140558
CAM112A_map12	0002.CSV	2402.97	0.0140582
CAM112A_map12	0002.CSV	2406.83	0.0140654
CAM112A_map12	0002.CSV	2410.68	0.0140534
CAM112A_map12	0002.CSV	2414.54	0.0140651
CAM112A_map12	0002.CSV	2418.4	0.0141239
CAM112A_map12	0002.CSV	2422.26	0.0141808
CAM112A_map12	0002.CSV	2426.11	0.0141638
CAM112A_map12	0002.CSV	2429.97	0.0141919
CAM112A_map12	0002.CSV	2433.83	0.0142596
CAM112A_map12	0002.CSV	2437.68	0.0143538
CAM112A_map12	0002.CSV	2441.54	0.014388
CAM112A_map12	0002.CSV	2445.4	0.0144387
CAM112A_map12	0002.CSV	2449.26	0.0145093
CAM112A_map12	0002.CSV	2453.11	0.014576
CAM112A_map12	0002.CSV	2456.97	0.0146621
CAM112A_map12	0002.CSV	2460.83	0.0148033
CAM112A_map12	0002.CSV	2464.68	0.0149503
CAM112A_map12	0002.CSV	2468.54	0.0151323
CAM112A_map12	0002.CSV	2472.4	0.0152713
CAM112A_map12	0002.CSV	2476.26	0.0154698
CAM112A_map12	0002.CSV	2480.11	0.0157476
CAM112A_map12	0002.CSV	2483.97	0.0160986
CAM112A_map12	0002.CSV	2487.83	0.0165101
CAM112A_map12	0002.CSV	2491.68	0.0170128
CAM112A_map12	0002.CSV	2495.54	0.0176579
CAM112A_map12	0002.CSV	2499.4	0.0184598
CAM112A_map12	0002.CSV	2503.26	0.019156
CAM112A_map12	0002.CSV	2507.11	0.0196623
CAM112A_map12	0002.CSV	2510.97	0.0198901
CAM112A_map12	0002.CSV	2514.83	0.0198022
CAM112A_map12	0002.CSV	2518.68	0.0194934
CAM112A_map12	0002.CSV	2522.54	0.0190166
CAM112A_map12	0002.CSV	2526.4	0.0184005
CAM112A_map12	0002.CSV	2530.26	0.0178144
CAM112A_map12	0002.CSV	2534.11	0.0171912
CAM112A_map12	0002.CSV	2537.97	0.0166759
CAM112A_map12	0002.CSV	2541.83	0.0163512
CAM112A_map12	0002.CSV	2545.68	0.0160941
CAM112A_map12	0002.CSV	2549.54	0.0158369
CAM112A_map12	0002.CSV	2553.4	0.0156692
CAM112A_map12	0002.CSV	2557.26	0.0155905
CAM112A_map12	0002.CSV	2561.11	0.0155768
CAM112A_map12	0002.CSV	2564.97	0.0155048
CAM112A_map12	0002.CSV	2568.83	0.015403
CAM112A_map12	0002.CSV	2572.68	0.0153813
CAM112A_map12	0002.CSV	2576.54	0.0153782
CAM112A_map12	0002.CSV	2580.4	0.0153085
CAM112A_map12	0002.CSV	2584.25	0.0152757
CAM112A_map12	0002.CSV	2588.11	0.0152107
CAM112A_map12	0002.CSV	2591.97	0.0151558
CAM112A_map12	0002.CSV	2595.83	0.0150961
CAM112A_map12	0002.CSV	2599.68	0.0150472
CAM112A_map12	0002.CSV	2603.54	0.014938
CAM112A_map12	0002.CSV	2607.4	0.0148215
CAM112A_map12	0002.CSV	2611.25	0.0147099
CAM112A_map12	0002.CSV	2615.11	0.0145987
CAM112A_map12	0002.CSV	2618.97	0.0144876
CAM112A_map12	0002.CSV	2622.82	0.0144757
CAM112A_map12	0002.CSV	2626.68	0.0144569
CAM112A_map12	0002.CSV	2630.54	0.0143609
CAM112A_map12	0002.CSV	2634.4	0.0143075
CAM112A_map12	0002.CSV	2638.25	0.0142452
CAM112A_map12	0002.CSV	2642.11	0.0140617
CAM112A_map12	0002.CSV	2645.97	0.0139286
CAM112A_map12	0002.CSV	2649.82	0.0138232
CAM112A_map12	0002.CSV	2653.68	0.013748
CAM112A_map12	0002.CSV	2657.54	0.0137838
CAM112A_map12	0002.CSV	2661.4	0.0138346
CAM112A_map12	0002.CSV	2665.25	0.0138166
CAM112A_map12	0002.CSV	2669.11	0.0138727
CAM112A_map12	0002.CSV	2672.97	0.0141063
CAM112A_map12	0002.CSV	2676.82	0.0144547
CAM112A_map12	0002.CSV	2680.68	0.0144115
CAM112A_map12	0002.CSV	2684.54	0.0139347
CAM112A_map12	0002.CSV	2688.4	0.0137259
CAM112A_map12	0002.CSV	2692.25	0.0137825
CAM112A_map12	0002.CSV	2696.11	0.0138528
CAM112A_map12	0002.CSV	2699.97	0.0138775
CAM112A_map12	0002.CSV	2703.82	0.0138417
CAM112A_map12	0002.CSV	2707.68	0.0139211
CAM112A_map12	0002.CSV	2711.54	0.0139828
CAM112A_map12	0002.CSV	2715.4	0.0139952
CAM112A_map12	0002.CSV	2719.25	0.014211
CAM112A_map12	0002.CSV	2723.11	0.014652
CAM112A_map12	0002.CSV	2726.97	0.0146452
CAM112A_map12	0002.CSV	2730.82	0.0142132
CAM112A_map12	0002.CSV	2734.68	0.0141568
CAM112A_map12	0002.CSV	2738.54	0.0142035
CAM112A_map12	0002.CSV	2742.4	0.0142594
CAM112A_map12	0002.CSV	2746.25	0.0146882
CAM112A_map12	0002.CSV	2750.11	0.0147131
CAM112A_map12	0002.CSV	2753.97	0.0143437
CAM112A_map12	0002.CSV	2757.82	0.0142436
CAM112A_map12	0002.CSV	2761.68	0.014099
CAM112A_map12	0002.CSV	2765.54	0.014028
CAM112A_map12	0002.CSV	2769.39	0.0142988
CAM112A_map12	0002.CSV	2773.25	0.014843
CAM112A_map12	0002.CSV	2777.11	0.0147912
CAM112A_map12	0002.CSV	2780.97	0.0144449
CAM112A_map12	0002.CSV	2784.82	0.0146661
CAM112A_map12	0002.CSV	2788.68	0.0152958
CAM112A_map12	0002.CSV	2792.54	0.015544
CAM112A_map12	0002.CSV	2796.39	0.0156369
CAM112A_map12	0002.CSV	2800.25	0.0153926
CAM112A_map12	0002.CSV	2804.11	0.0150373
CAM112A_map12	0002.CSV	2807.97	0.0154278
CAM112A_map12	0002.CSV	2811.82	0.0155251
CAM112A_map12	0002.CSV	2815.68	0.0152947
CAM112A_map12	0002.CSV	2819.54	0.0155125
CAM112A_map12	0002.CSV	2823.39	0.0158268
CAM112A_map12	0002.CSV	2827.25	0.0161073
CAM112A_map12	0002.CSV	2831.11	0.0169779
CAM112A_map12	0002.CSV	2834.97	0.018349
CAM112A_map12	0002.CSV	2838.82	0.0197301
CAM112A_map12	0002.CSV	2842.68	0.0216124
CAM112A_map12	0002.CSV	2846.54	0.0249824
CAM112A_map12	0002.CSV	2850.39	0.0270513
CAM112A_map12	0002.CSV	2854.25	0.026176
CAM112A_map12	0002.CSV	2858.11	0.0245629
CAM112A_map12	0002.CSV	2861.97	0.0230282
CAM112A_map12	0002.CSV	2865.82	0.022029
CAM112A_map12	0002.CSV	2869.68	0.0220428
CAM112A_map12	0002.CSV	2873.54	0.0220088
CAM112A_map12	0002.CSV	2877.39	0.0210467
CAM112A_map12	0002.CSV	2881.25	0.0203066
CAM112A_map12	0002.CSV	2885.11	0.0202301
CAM112A_map12	0002.CSV	2888.97	0.0206726
CAM112A_map12	0002.CSV	2892.82	0.0216094
CAM112A_map12	0002.CSV	2896.68	0.022386
CAM112A_map12	0002.CSV	2900.54	0.0229658
CAM112A_map12	0002.CSV	2904.39	0.0242015
CAM112A_map12	0002.CSV	2908.25	0.0264641
CAM112A_map12	0002.CSV	2912.11	0.0301183
CAM112A_map12	0002.CSV	2915.97	0.0336479
CAM112A_map12	0002.CSV	2919.82	0.0344943
CAM112A_map12	0002.CSV	2923.68	0.0330507
CAM112A_map12	0002.CSV	2927.54	0.0312431
CAM112A_map12	0002.CSV	2931.39	0.0287319
CAM112A_map12	0002.CSV	2935.25	0.0259099
CAM112A_map12	0002.CSV	2939.11	0.0241876
CAM112A_map12	0002.CSV	2942.96	0.0235508
CAM112A_map12	0002.CSV	2946.82	0.02302
CAM112A_map12	0002.CSV	2950.68	0.0226214
CAM112A_map12	0002.CSV	2954.54	0.0222862
CAM112A_map12	0002.CSV	2958.39	0.02166
CAM112A_map12	0002.CSV	2962.25	0.0208983
CAM112A_map12	0002.CSV	2966.11	0.019731
CAM112A_map12	0002.CSV	2969.96	0.018933
CAM112A_map12	0002.CSV	2973.82	0.0187862
CAM112A_map12	0002.CSV	2977.68	0.0186487
CAM112A_map12	0002.CSV	2981.53	0.0180158
CAM112A_map12	0002.CSV	2985.39	0.0170917
CAM112A_map12	0002.CSV	2989.25	0.0168316
CAM112A_map12	0002.CSV	2993.11	0.0169737
CAM112A_map12	0002.CSV	2996.96	0.0167323
CAM112A_map12	0002.CSV	3000.82	0.0162659
CAM112A_map12	0002.CSV	3004.68	0.0159875
CAM112A_map12	0002.CSV	3008.53	0.016183
CAM112A_map12	0002.CSV	3012.39	0.0165792
CAM112A_map12	0002.CSV	3016.25	0.016597
CAM112A_map12	0002.CSV	3020.11	0.0162844
CAM112A_map12	0002.CSV	3023.96	0.0160432
CAM112A_map12	0002.CSV	3027.82	0.0160205
CAM112A_map12	0002.CSV	3031.68	0.0162788
CAM112A_map12	0002.CSV	3035.53	0.0163313
CAM112A_map12	0002.CSV	3039.39	0.0163859
CAM112A_map12	0002.CSV	3043.25	0.0165988
CAM112A_map12	0002.CSV	3047.11	0.0165619
CAM112A_map12	0002.CSV	3050.96	0.0164244
CAM112A_map12	0002.CSV	3054.82	0.0163152
CAM112A_map12	0002.CSV	3058.68	0.0161481
CAM112A_map12	0002.CSV	3062.53	0.0162136
CAM112A_map12	0002.CSV	3066.39	0.0165248
CAM112A_map12	0002.CSV	3070.25	0.0164734
CAM112A_map12	0002.CSV	3074.11	0.0164589
CAM112A_map12	0002.CSV	3077.96	0.0167594
CAM112A_map12	0002.CSV	3081.82	0.0168957
CAM112A_map12	0002.CSV	3085.68	0.0168083
CAM112A_map12	0002.CSV	3089.53	0.016617
CAM112A_map12	0002.CSV	3093.39	0.0163487
CAM112A_map12	0002.CSV	3097.25	0.0164018
CAM112A_map12	0002.CSV	3101.11	0.0165171
CAM112A_map12	0002.CSV	3104.96	0.0164968
CAM112A_map12	0002.CSV	3108.82	0.0166357
CAM112A_map12	0002.CSV	3112.68	0.0167344
CAM112A_map12	0002.CSV	3116.53	0.0168297
CAM112A_map12	0002.CSV	3120.39	0.0167786
CAM112A_map12	0002.CSV	3124.25	0.0165397
CAM112A_map12	0002.CSV	3128.11	0.0164547
CAM112A_map12	0002.CSV	3131.96	0.0164098
CAM112A_map12	0002.CSV	3135.82	0.0165049
CAM112A_map12	0002.CSV	3139.68	0.0166882
CAM112A_map12	0002.CSV	3143.53	0.0165002
CAM112A_map12	0002.CSV	3147.39	0.0165123
CAM112A_map12	0002.CSV	3151.25	0.0168049
CAM112A_map12	0002.CSV	3155.1	0.0167532
CAM112A_map12	0002.CSV	3158.96	0.0164015
CAM112A_map12	0002.CSV	3162.82	0.016179
CAM112A_map12	0002.CSV	3166.68	0.0161196
CAM112A_map12	0002.CSV	3170.53	0.0161586
CAM112A_map12	0002.CSV	3174.39	0.0162023
CAM112A_map12	0002.CSV	3178.25	0.0163798
CAM112A_map12	0002.CSV	3182.1	0.0164962
CAM112A_map12	0002.CSV	3185.96	0.0165508
CAM112A_map12	0002.CSV	3189.82	0.0165931
CAM112A_map12	0002.CSV	3193.68	0.0165064
CAM112A_map12	0002.CSV	3197.53	0.0164865
CAM112A_map12	0002.CSV	3201.39	0.016634
CAM112A_map12	0002.CSV	3205.25	0.016688
CAM112A_map12	0002.CSV	3209.1	0.0165783
CAM112A_map12	0002.CSV	3212.96	0.01669
CAM112A_map12	0002.CSV	3216.82	0.01692
CAM112A_map12	0002.CSV	3220.68	0.0168655
CAM112A_map12	0002.CSV	3224.53	0.0167371
CAM112A_map12	0002.CSV	3228.39	0.0169011
CAM112A_map12	0002.CSV	3232.25	0.0172405
CAM112A_map12	0002.CSV	3236.1	0.0171962
CAM112A_map12	0002.CSV	3239.96	0.0170792
CAM112A_map12	0002.CSV	3243.82	0.0172999
CAM112A_map12	0002.CSV	3247.68	0.0173554
CAM112A_map12	0002.CSV	3251.53	0.0171353
CAM112A_map12	0002.CSV	3255.39	0.0171557
CAM112A_map12	0002.CSV	3259.25	0.0170866
CAM112A_map12	0002.CSV	3263.1	0.017014
CAM112A_map12	0002.CSV	3266.96	0.0172521
CAM112A_map12	0002.CSV	3270.82	0.017479
CAM112A_map12	0002.CSV	3274.68	0.0174436
CAM112A_map12	0002.CSV	3278.53	0.0173295
CAM112A_map12	0002.CSV	3282.39	0.0172255
CAM112A_map12	0002.CSV	3286.25	0.0172209
CAM112A_map12	0002.CSV	3290.1	0.0175274
CAM112A_map12	0002.CSV	3293.96	0.0178361
CAM112A_map12	0002.CSV	3297.82	0.0176976
CAM112A_map12	0002.CSV	3301.67	0.0176675
CAM112A_map12	0002.CSV	3305.53	0.0178106
CAM112A_map12	0002.CSV	3309.39	0.0177384
CAM112A_map12	0002.CSV	3313.25	0.0174145
CAM112A_map12	0002.CSV	3317.1	0.0171364
CAM112A_map12	0002.CSV	3320.96	0.0172785
CAM112A_map12	0002.CSV	3324.82	0.0176548
CAM112A_map12	0002.CSV	3328.67	0.0175429
CAM112A_map12	0002.CSV	3332.53	0.0173538
CAM112A_map12	0002.CSV	3336.39	0.0176677
CAM112A_map12	0002.CSV	3340.24	0.0179259
CAM112A_map12	0002.CSV	3344.1	0.0177841
CAM112A_map12	0002.CSV	3347.96	0.0177518
CAM112A_map12	0002.CSV	3351.82	0.0176379
CAM112A_map12	0002.CSV	3355.67	0.0173789
CAM112A_map12	0002.CSV	3359.53	0.0175269
CAM112A_map12	0002.CSV	3363.39	0.0178908
CAM112A_map12	0002.CSV	3367.24	0.0181057
CAM112A_map12	0002.CSV	3371.1	0.0178595
CAM112A_map12	0002.CSV	3374.96	0.0175675
CAM112A_map12	0002.CSV	3378.82	0.0174931
CAM112A_map12	0002.CSV	3382.67	0.0173246
CAM112A_map12	0002.CSV	3386.53	0.0173889
CAM112A_map12	0002.CSV	3390.39	0.017722
CAM112A_map12	0002.CSV	3394.24	0.0177606
CAM112A_map12	0002.CSV	3398.1	0.017725
CAM112A_map12	0002.CSV	3401.96	0.017655
CAM112A_map12	0002.CSV	3405.82	0.0173745
CAM112A_map12	0002.CSV	3409.67	0.0172917
CAM112A_map12	0002.CSV	3413.53	0.0170552
CAM112A_map12	0002.CSV	3417.39	0.0168027
CAM112A_map12	0002.CSV	3421.24	0.0167713
CAM112A_map12	0002.CSV	3425.1	0.0167631
CAM112A_map12	0002.CSV	3428.96	0.0169535
CAM112A_map12	0002.CSV	3432.82	0.0170815
CAM112A_map12	0002.CSV	3436.67	0.0168655
CAM112A_map12	0002.CSV	3440.53	0.0164326
CAM112A_map12	0002.CSV	3444.39	0.0161244
CAM112A_map12	0002.CSV	3448.24	0.016093
CAM112A_map12	0002.CSV	3452.1	0.0159834
CAM112A_map12	0002.CSV	3455.96	0.0160082
CAM112A_map12	0002.CSV	3459.82	0.0162405
CAM112A_map12	0002.CSV	3463.67	0.0164086
CAM112A_map12	0002.CSV	3467.53	0.0164645
CAM112A_map12	0002.CSV	3471.39	0.0161606
CAM112A_map12	0002.CSV	3475.24	0.0158754
CAM112A_map12	0002.CSV	3479.1	0.0158763
CAM112A_map12	0002.CSV	3482.96	0.0157709
CAM112A_map12	0002.CSV	3486.82	0.015695
CAM112A_map12	0002.CSV	3490.67	0.015611
CAM112A_map12	0002.CSV	3494.53	0.0157419
CAM112A_map12	0002.CSV	3498.39	0.0157893
CAM112A_map12	0002.CSV	3502.24	0.0156163
CAM112A_map12	0002.CSV	3506.1	0.0152227
CAM112A_map12	0002.CSV	3509.96	0.0150089
CAM112A_map12	0002.CSV	3513.81	0.0150607
CAM112A_map12	0002.CSV	3517.67	0.0147691
CAM112A_map12	0002.CSV	3521.53	0.0146919
CAM112A_map12	0002.CSV	3525.39	0.0146812
CAM112A_map12	0002.CSV	3529.24	0.0145763
CAM112A_map12	0002.CSV	3533.1	0.0146228
CAM112A_map12	0002.CSV	3536.96	0.0148071
CAM112A_map12	0002.CSV	3540.81	0.0149166
CAM112A_map12	0002.CSV	3544.67	0.0150833
CAM112A_map12	0002.CSV	3548.53	0.0149795
CAM112A_map12	0002.CSV	3552.39	0.0145802
CAM112A_map12	0002.CSV	3556.24	0.0143859
CAM112A_map12	0002.CSV	3560.1	0.0140871
CAM112A_map12	0002.CSV	3563.96	0.0136663
CAM112A_map12	0002.CSV	3567.81	0.0139821
CAM112A_map12	0002.CSV	3571.67	0.0140844
CAM112A_map12	0002.CSV	3575.53	0.0138564
CAM112A_map12	0002.CSV	3579.39	0.0139669
CAM112A_map12	0002.CSV	3583.24	0.0139618
CAM112A_map12	0002.CSV	3587.1	0.0140237
CAM112A_map12	0002.CSV	3590.96	0.0139133
CAM112A_map12	0002.CSV	3594.81	0.013584
CAM112A_map12	0002.CSV	3598.67	0.0137497
CAM112A_map12	0002.CSV	3602.53	0.013697
CAM112A_map12	0002.CSV	3606.39	0.0131857
CAM112A_map12	0002.CSV	3610.24	0.012992
CAM112A_map12	0002.CSV	3614.1	0.0129593
CAM112A_map12	0002.CSV	3617.96	0.0130609
CAM112A_map12	0002.CSV	3621.81	0.0132709
CAM112A_map12	0002.CSV	3625.67	0.0127526
CAM112A_map12	0002.CSV	3629.53	0.0126514
CAM112A_map12	0002.CSV	3633.39	0.0130943
CAM112A_map12	0002.CSV	3637.24	0.0129638
CAM112A_map12	0002.CSV	3641.1	0.0126417
CAM112A_map12	0002.CSV	3644.96	0.0120704
CAM112A_map12	0002.CSV	3648.81	0.0127073
CAM112A_map12	0002.CSV	3652.67	0.0133253
CAM112A_map12	0002.CSV	3656.53	0.0131161
CAM112A_map12	0002.CSV	3660.38	0.0130628
CAM112A_map12	0002.CSV	3664.24	0.0123925
CAM112A_map12	0002.CSV	3668.1	0.011688
CAM112A_map12	0002.CSV	3671.96	0.0115403
CAM112A_map12	0002.CSV	3675.81	0.012063
CAM112A_map12	0002.CSV	3679.67	0.0126489
CAM112A_map12	0002.CSV	3683.53	0.0123128
CAM112A_map12	0002.CSV	3687.38	0.0121485
CAM112A_map12	0002.CSV	3691.24	0.0127785
CAM112A_map12	0002.CSV	3695.1	0.0125118
CAM112A_map12	0002.CSV	3698.95	0.0120435
CAM112A_map12	0002.CSV	3702.81	0.0119889
CAM112A_map12	0002.CSV	3706.67	0.0116375
CAM112A_map12	0002.CSV	3710.53	0.0115186
CAM112A_map12	0002.CSV	3714.38	0.0118979
CAM112A_map12	0002.CSV	3718.24	0.0114724
CAM112A_map12	0002.CSV	3722.1	0.0112492
CAM112A_map12	0002.CSV	3725.95	0.0114599
CAM112A_map12	0002.CSV	3729.81	0.011294
CAM112A_map12	0002.CSV	3733.67	0.0114121
CAM112A_map12	0002.CSV	3737.53	0.0122911
CAM112A_map12	0002.CSV	3741.38	0.011556
CAM112A_map12	0002.CSV	3745.24	0.01077
CAM112A_map12	0002.CSV	3749.1	0.010892
CAM112A_map12	0002.CSV	3752.95	0.0116166
CAM112A_map12	0002.CSV	3756.81	0.0115259
CAM112A_map12	0002.CSV	3760.67	0.0115254
CAM112A_map12	0002.CSV	3764.53	0.0114095
CAM112A_map12	0002.CSV	3768.38	0.0114734
CAM112A_map12	0002.CSV	3772.24	0.0115977
CAM112A_map12	0002.CSV	3776.1	0.0113885
CAM112A_map12	0002.CSV	3779.95	0.0115323
CAM112A_map12	0002.CSV	3783.81	0.0115882
CAM112A_map12	0002.CSV	3787.67	0.0115548
CAM112A_map12	0002.CSV	3791.53	0.0113032
CAM112A_map12	0002.CSV	3795.38	0.0108909
CAM112A_map12	0002.CSV	3799.24	0.0108613
CAM112A_map12	0002.CSV	3803.1	0.0111833
CAM112A_map12	0002.CSV	3806.95	0.0115077
CAM112A_map12	0002.CSV	3810.81	0.0112441
CAM112A_map12	0002.CSV	3814.67	0.0107287
CAM112A_map12	0002.CSV	3818.53	0.0108223
CAM112A_map12	0002.CSV	3822.38	0.011389
CAM112A_map12	0002.CSV	3826.24	0.011434
CAM112A_map12	0002.CSV	3830.1	0.0111675
CAM112A_map12	0002.CSV	3833.95	0.0111513
CAM112A_map12	0002.CSV	3837.81	0.0114763
CAM112A_map12	0002.CSV	3841.67	0.0118631
CAM112A_map12	0002.CSV	3845.53	0.0115653
CAM112A_map12	0002.CSV	3849.38	0.0107296
CAM112A_map12	0002.CSV	3853.24	0.0110532
CAM112A_map12	0002.CSV	3857.1	0.0117591
CAM112A_map12	0002.CSV	3860.95	0.0111649
CAM112A_map12	0002.CSV	3864.81	0.0112473
CAM112A_map12	0002.CSV	3868.67	0.0114414
CAM112A_map12	0002.CSV	3872.52	0.0116709
CAM112A_map12	0002.CSV	3876.38	0.0115297
CAM112A_map12	0002.CSV	3880.24	0.0112769
CAM112A_map12	0002.CSV	3884.1	0.0115087
CAM112A_map12	0002.CSV	3887.95	0.0115285
CAM112A_map12	0002.CSV	3891.81	0.0114938
CAM112A_map12	0002.CSV	3895.67	0.011278
CAM112A_map12	0002.CSV	3899.52	0.0109835
CAM112A_map12	0002.CSV	3903.38	0.0116165
CAM112A_map12	0002.CSV	3907.24	0.0118579
CAM112A_map12	0002.CSV	3911.1	0.0114054
CAM112A_map12	0002.CSV	3914.95	0.0111277
CAM112A_map12	0002.CSV	3918.81	0.0113414
CAM112A_map12	0002.CSV	3922.67	0.011348
CAM112A_map12	0002.CSV	3926.52	0.0112371
CAM112A_map12	0002.CSV	3930.38	0.0113363
CAM112A_map12	0002.CSV	3934.24	0.011503
CAM112A_map12	0002.CSV	3938.09	0.0111454
CAM112A_map12	0002.CSV	3941.95	0.0110467
CAM112A_map12	0002.CSV	3945.81	0.0111343
CAM112A_map12	0002.CSV	3949.67	0.0112595
CAM112A_map12	0002.CSV	3953.52	0.0113511
CAM112A_map12	0002.CSV	3957.38	0.0112486
CAM112A_map12	0002.CSV	3961.24	0.011121
CAM112A_map12	0002.CSV	3965.09	0.0110413
CAM112A_map12	0002.CSV	3968.95	0.0110445
CAM112A_map12	0002.CSV	3972.81	0.0110844
CAM112A_map12	0002.CSV	3976.67	0.0110829
CAM112A_map12	0002.CSV	3980.52	0.0110718
CAM112A_map12	0002.CSV	3984.38	0.011024
CAM112A_map12	0002.CSV	3988.24	0.0109022
CAM112A_map12	0002.CSV	3992.09	0.0108764
CAM112A_map12	0002.CSV	3995.95	0.0108633
CAM112A_map12	0002.CSV	3999.81	0.0107806
CAM112A_map12	0003.CSV	674.992	0.0411596
CAM112A_map12	0003.CSV	678.849	0.0438608
CAM112A_map12	0003.CSV	682.706	0.045042
CAM112A_map12	0003.CSV	686.563	0.0485243
CAM112A_map12	0003.CSV	690.42	0.0512791
CAM112A_map12	0003.CSV	694.277	0.0574418
CAM112A_map12	0003.CSV	698.134	0.0651216
CAM112A_map12	0003.CSV	701.991	0.0782796
CAM112A_map12	0003.CSV	705.849	0.101646
CAM112A_map12	0003.CSV	709.706	0.132502
CAM112A_map12	0003.CSV	713.563	0.126315
CAM112A_map12	0003.CSV	717.42	0.0845258
CAM112A_map12	0003.CSV	721.277	0.0518749
CAM112A_map12	0003.CSV	725.134	0.0412465
CAM112A_map12	0003.CSV	728.991	0.0378897
CAM112A_map12	0003.CSV	732.848	0.0383231
CAM112A_map12	0003.CSV	736.705	0.038555
CAM112A_map12	0003.CSV	740.562	0.0395571
CAM112A_map12	0003.CSV	744.42	0.0399897
CAM112A_map12	0003.CSV	748.277	0.041183
CAM112A_map12	0003.CSV	752.134	0.041404
CAM112A_map12	0003.CSV	755.991	0.0427512
CAM112A_map12	0003.CSV	759.848	0.0434233
CAM112A_map12	0003.CSV	763.705	0.0449852
CAM112A_map12	0003.CSV	767.562	0.0458344
CAM112A_map12	0003.CSV	771.419	0.0469842
CAM112A_map12	0003.CSV	775.276	0.0470646
CAM112A_map12	0003.CSV	779.133	0.04779
CAM112A_map12	0003.CSV	782.99	0.0475299
CAM112A_map12	0003.CSV	786.848	0.0479626
CAM112A_map12	0003.CSV	790.705	0.0479708
CAM112A_map12	0003.CSV	794.562	0.049061
CAM112A_map12	0003.CSV	798.419	0.0498309
CAM112A_map12	0003.CSV	802.276	0.0511218
CAM112A_map12	0003.CSV	806.133	0.0516832
CAM112A_map12	0003.CSV	809.99	0.0530314
CAM112A_map12	0003.CSV	813.847	0.0540173
CAM112A_map12	0003.CSV	817.704	0.056103
CAM112A_map12	0003.CSV	821.562	0.0577975
CAM112A_map12	0003.CSV	825.419	0.0604544
CAM112A_map12	0003.CSV	829.276	0.0629503
CAM112A_map12	0003.CSV	833.133	0.0663906
CAM112A_map12	0003.CSV	836.99	0.069985
CAM112A_map12	0003.CSV	840.847	0.0769314
CAM112A_map12	0003.CSV	844.704	0.0887112
CAM112A_map12	0003.CSV	848.561	0.0973693
CAM112A_map12	0003.CSV	852.418	0.101177
CAM112A_map12	0003.CSV	856.275	0.119243
CAM112A_map12	0003.CSV	860.132	0.160539
CAM112A_map12	0003.CSV	863.99	0.239309
CAM112A_map12	0003.CSV	867.847	0.336272
CAM112A_map12	0003.CSV	871.704	0.359892
CAM112A_map12	0003.CSV	875.561	0.292494
CAM112A_map12	0003.CSV	879.418	0.21312
CAM112A_map12	0003.CSV	883.275	0.134652
CAM112A_map12	0003.CSV	887.132	0.0686947
CAM112A_map12	0003.CSV	890.989	0.0392075
CAM112A_map12	0003.CSV	894.846	0.0362622
CAM112A_map12	0003.CSV	898.703	0.0377922
CAM112A_map12	0003.CSV	902.561	0.039981
CAM112A_map12	0003.CSV	906.418	0.0413893
CAM112A_map12	0003.CSV	910.275	0.043165
CAM112A_map12	0003.CSV	914.132	0.0443983
CAM112A_map12	0003.CSV	917.989	0.0460469
CAM112A_map12	0003.CSV	921.846	0.0470077
CAM112A_map12	0003.CSV	925.703	0.0484037
CAM112A_map12	0003.CSV	929.56	0.0493888
CAM112A_map12	0003.CSV	933.417	0.0505969
CAM112A_map12	0003.CSV	937.274	0.0510954
CAM112A_map12	0003.CSV	941.131	0.0520351
CAM112A_map12	0003.CSV	944.989	0.0524802
CAM112A_map12	0003.CSV	948.846	0.0532937
CAM112A_map12	0003.CSV	952.703	0.053763
CAM112A_map12	0003.CSV	956.56	0.0546878
CAM112A_map12	0003.CSV	960.417	0.0550102
CAM112A_map12	0003.CSV	964.274	0.055775
CAM112A_map12	0003.CSV	968.131	0.0562854
CAM112A_map12	0003.CSV	971.988	0.0573788
CAM112A_map12	0003.CSV	975.845	0.0580854
CAM112A_map12	0003.CSV	979.702	0.0592043
CAM112A_map12	0003.CSV	983.559	0.0599324
CAM112A_map12	0003.CSV	987.417	0.0610903
CAM112A_map12	0003.CSV	991.274	0.0618173
CAM112A_map12	0003.CSV	995.131	0.0628907
CAM112A_map12	0003.CSV	998.988	0.0635492
CAM112A_map12	0003.CSV	1002.85	0.0646465
CAM112A_map12	0003.CSV	1006.7	0.0653288
CAM112A_map12	0003.CSV	1010.56	0.0664548
CAM112A_map12	0003.CSV	1014.42	0.0672057
CAM112A_map12	0003.CSV	1018.27	0.06838
CAM112A_map12	0003.CSV	1022.13	0.0691026
CAM112A_map12	0003.CSV	1025.99	0.0701611
CAM112A_map12	0003.CSV	1029.85	0.0706047
CAM112A_map12	0003.CSV	1033.7	0.0715628
CAM112A_map12	0003.CSV	1037.56	0.0723222
CAM112A_map12	0003.CSV	1041.42	0.0735026
CAM112A_map12	0003.CSV	1045.27	0.0741083
[truncated: 133,668 more rows]

## Sheet: CAM112_map13
Map	Select spectrum number	Wavenumbers	Absorbance
[truncated: 123,409 more rows]

[truncated: 2 more sheets: CAM112_map14, CAM112_map15]
