# Supplementary material for: Thermo-microstratigraphy of shells reveals invisible fire use and possible cooking in the archaeological record
Source: Frontiers journal article supplement (doi:10.3389/feart.2022.869487), 2022-09-01
Supplement: Table_7.XLSX [file Table_7.XLSX]

## Sheet: CAM112_map16
Map	Select spectrum number	Wavenumbers	Absorbance
CAM112A_map16	0001.CSV	674.992	0.0378418
CAM112A_map16	0001.CSV	678.849	0.0393379
CAM112A_map16	0001.CSV	682.706	0.039928
CAM112A_map16	0001.CSV	686.563	0.0426107
CAM112A_map16	0001.CSV	690.42	0.0458626
CAM112A_map16	0001.CSV	694.277	0.0525073
CAM112A_map16	0001.CSV	698.134	0.0592086
CAM112A_map16	0001.CSV	701.991	0.0678658
CAM112A_map16	0001.CSV	705.849	0.0853019
CAM112A_map16	0001.CSV	709.706	0.111872
CAM112A_map16	0001.CSV	713.563	0.102447
CAM112A_map16	0001.CSV	717.42	0.062052
CAM112A_map16	0001.CSV	721.277	0.0380633
CAM112A_map16	0001.CSV	725.134	0.0334003
CAM112A_map16	0001.CSV	728.991	0.0326864
CAM112A_map16	0001.CSV	732.848	0.033969
CAM112A_map16	0001.CSV	736.705	0.0352794
CAM112A_map16	0001.CSV	740.562	0.0367192
CAM112A_map16	0001.CSV	744.42	0.0377449
CAM112A_map16	0001.CSV	748.277	0.0387577
CAM112A_map16	0001.CSV	752.134	0.0389643
CAM112A_map16	0001.CSV	755.991	0.039534
CAM112A_map16	0001.CSV	759.848	0.0395573
CAM112A_map16	0001.CSV	763.705	0.040301
CAM112A_map16	0001.CSV	767.562	0.0407666
CAM112A_map16	0001.CSV	771.419	0.0414838
CAM112A_map16	0001.CSV	775.276	0.0413989
CAM112A_map16	0001.CSV	779.133	0.0412212
CAM112A_map16	0001.CSV	782.99	0.0408758
CAM112A_map16	0001.CSV	786.848	0.0411536
CAM112A_map16	0001.CSV	790.705	0.0410999
CAM112A_map16	0001.CSV	794.562	0.0416325
CAM112A_map16	0001.CSV	798.419	0.0419346
CAM112A_map16	0001.CSV	802.276	0.0425831
CAM112A_map16	0001.CSV	806.133	0.042922
CAM112A_map16	0001.CSV	809.99	0.0438925
CAM112A_map16	0001.CSV	813.847	0.0446189
CAM112A_map16	0001.CSV	817.704	0.0459111
CAM112A_map16	0001.CSV	821.562	0.0472916
CAM112A_map16	0001.CSV	825.419	0.0493813
CAM112A_map16	0001.CSV	829.276	0.0513311
CAM112A_map16	0001.CSV	833.133	0.0538648
CAM112A_map16	0001.CSV	836.99	0.0563488
CAM112A_map16	0001.CSV	840.847	0.0607651
CAM112A_map16	0001.CSV	844.704	0.0681884
CAM112A_map16	0001.CSV	848.561	0.0736273
CAM112A_map16	0001.CSV	852.418	0.0759408
CAM112A_map16	0001.CSV	856.275	0.086601
CAM112A_map16	0001.CSV	860.132	0.110175
CAM112A_map16	0001.CSV	863.99	0.156062
CAM112A_map16	0001.CSV	867.847	0.216652
CAM112A_map16	0001.CSV	871.704	0.240256
CAM112A_map16	0001.CSV	875.561	0.206346
CAM112A_map16	0001.CSV	879.418	0.157345
CAM112A_map16	0001.CSV	883.275	0.105128
CAM112A_map16	0001.CSV	887.132	0.0581396
CAM112A_map16	0001.CSV	890.989	0.0361975
CAM112A_map16	0001.CSV	894.846	0.0334586
CAM112A_map16	0001.CSV	898.703	0.0341409
CAM112A_map16	0001.CSV	902.561	0.0355774
CAM112A_map16	0001.CSV	906.418	0.0366861
CAM112A_map16	0001.CSV	910.275	0.0380325
CAM112A_map16	0001.CSV	914.132	0.0388786
CAM112A_map16	0001.CSV	917.989	0.0398127
CAM112A_map16	0001.CSV	921.846	0.0404003
CAM112A_map16	0001.CSV	925.703	0.041508
CAM112A_map16	0001.CSV	929.56	0.0422546
CAM112A_map16	0001.CSV	933.417	0.0430488
CAM112A_map16	0001.CSV	937.274	0.0433967
CAM112A_map16	0001.CSV	941.131	0.0438815
CAM112A_map16	0001.CSV	944.989	0.044124
CAM112A_map16	0001.CSV	948.846	0.0447931
CAM112A_map16	0001.CSV	952.703	0.045303
CAM112A_map16	0001.CSV	956.56	0.0461348
CAM112A_map16	0001.CSV	960.417	0.046535
CAM112A_map16	0001.CSV	964.274	0.0470243
CAM112A_map16	0001.CSV	968.131	0.0474871
CAM112A_map16	0001.CSV	971.988	0.0484804
CAM112A_map16	0001.CSV	975.845	0.049254
CAM112A_map16	0001.CSV	979.702	0.0502352
CAM112A_map16	0001.CSV	983.559	0.0510882
CAM112A_map16	0001.CSV	987.417	0.0522948
CAM112A_map16	0001.CSV	991.274	0.0531062
CAM112A_map16	0001.CSV	995.131	0.0539933
CAM112A_map16	0001.CSV	998.988	0.0546252
CAM112A_map16	0001.CSV	1002.85	0.0555814
CAM112A_map16	0001.CSV	1006.7	0.0563552
CAM112A_map16	0001.CSV	1010.56	0.0574742
CAM112A_map16	0001.CSV	1014.42	0.0582514
CAM112A_map16	0001.CSV	1018.27	0.0592353
CAM112A_map16	0001.CSV	1022.13	0.0599537
CAM112A_map16	0001.CSV	1025.99	0.0609086
CAM112A_map16	0001.CSV	1029.85	0.0615762
CAM112A_map16	0001.CSV	1033.7	0.0625324
CAM112A_map16	0001.CSV	1037.56	0.0632478
CAM112A_map16	0001.CSV	1041.42	0.0639749
CAM112A_map16	0001.CSV	1045.27	0.0642292
CAM112A_map16	0001.CSV	1049.13	0.0649197
CAM112A_map16	0001.CSV	1052.99	0.0656874
CAM112A_map16	0001.CSV	1056.84	0.067283
CAM112A_map16	0001.CSV	1060.7	0.0689415
CAM112A_map16	0001.CSV	1064.56	0.07053
CAM112A_map16	0001.CSV	1068.42	0.0711156
CAM112A_map16	0001.CSV	1072.27	0.0714396
CAM112A_map16	0001.CSV	1076.13	0.0712354
CAM112A_map16	0001.CSV	1079.99	0.0714389
CAM112A_map16	0001.CSV	1083.84	0.0716348
CAM112A_map16	0001.CSV	1087.7	0.072054
CAM112A_map16	0001.CSV	1091.56	0.071629
CAM112A_map16	0001.CSV	1095.41	0.071202
CAM112A_map16	0001.CSV	1099.27	0.0709897
CAM112A_map16	0001.CSV	1103.13	0.0717669
CAM112A_map16	0001.CSV	1106.99	0.0727148
CAM112A_map16	0001.CSV	1110.84	0.0741211
CAM112A_map16	0001.CSV	1114.7	0.0749577
CAM112A_map16	0001.CSV	1118.56	0.0755836
CAM112A_map16	0001.CSV	1122.41	0.0757088
CAM112A_map16	0001.CSV	1126.27	0.0759835
CAM112A_map16	0001.CSV	1130.13	0.0758772
CAM112A_map16	0001.CSV	1133.99	0.0761196
CAM112A_map16	0001.CSV	1137.84	0.0763193
CAM112A_map16	0001.CSV	1141.7	0.0767813
CAM112A_map16	0001.CSV	1145.56	0.0769739
CAM112A_map16	0001.CSV	1149.41	0.0777002
CAM112A_map16	0001.CSV	1153.27	0.0785382
CAM112A_map16	0001.CSV	1157.13	0.0797542
CAM112A_map16	0001.CSV	1160.99	0.0805461
CAM112A_map16	0001.CSV	1164.84	0.0811842
CAM112A_map16	0001.CSV	1168.7	0.0812577
CAM112A_map16	0001.CSV	1172.56	0.0814667
CAM112A_map16	0001.CSV	1176.41	0.0814886
CAM112A_map16	0001.CSV	1180.27	0.0817676
CAM112A_map16	0001.CSV	1184.13	0.0817213
CAM112A_map16	0001.CSV	1187.99	0.0819153
CAM112A_map16	0001.CSV	1191.84	0.0818799
CAM112A_map16	0001.CSV	1195.7	0.0822364
CAM112A_map16	0001.CSV	1199.56	0.0825463
CAM112A_map16	0001.CSV	1203.41	0.0833442
CAM112A_map16	0001.CSV	1207.27	0.0841866
CAM112A_map16	0001.CSV	1211.13	0.0854159
CAM112A_map16	0001.CSV	1214.98	0.0864477
CAM112A_map16	0001.CSV	1218.84	0.0879256
CAM112A_map16	0001.CSV	1222.7	0.0893685
CAM112A_map16	0001.CSV	1226.56	0.0912752
CAM112A_map16	0001.CSV	1230.41	0.0930415
CAM112A_map16	0001.CSV	1234.27	0.0952183
CAM112A_map16	0001.CSV	1238.13	0.0972689
CAM112A_map16	0001.CSV	1241.98	0.0997067
CAM112A_map16	0001.CSV	1245.84	0.102062
CAM112A_map16	0001.CSV	1249.7	0.104708
CAM112A_map16	0001.CSV	1253.56	0.106936
CAM112A_map16	0001.CSV	1257.41	0.109309
CAM112A_map16	0001.CSV	1261.27	0.111263
CAM112A_map16	0001.CSV	1265.13	0.113344
CAM112A_map16	0001.CSV	1268.98	0.115227
CAM112A_map16	0001.CSV	1272.84	0.117677
CAM112A_map16	0001.CSV	1276.7	0.119878
CAM112A_map16	0001.CSV	1280.56	0.122457
CAM112A_map16	0001.CSV	1284.41	0.124744
CAM112A_map16	0001.CSV	1288.27	0.127272
CAM112A_map16	0001.CSV	1292.13	0.129371
CAM112A_map16	0001.CSV	1295.98	0.131851
CAM112A_map16	0001.CSV	1299.84	0.134372
CAM112A_map16	0001.CSV	1303.7	0.137583
CAM112A_map16	0001.CSV	1307.56	0.140878
CAM112A_map16	0001.CSV	1311.41	0.145104
CAM112A_map16	0001.CSV	1315.27	0.14938
CAM112A_map16	0001.CSV	1319.13	0.154184
CAM112A_map16	0001.CSV	1322.98	0.158445
CAM112A_map16	0001.CSV	1326.84	0.163227
CAM112A_map16	0001.CSV	1330.7	0.168371
CAM112A_map16	0001.CSV	1334.56	0.174217
CAM112A_map16	0001.CSV	1338.41	0.18121
CAM112A_map16	0001.CSV	1342.27	0.189883
CAM112A_map16	0001.CSV	1346.13	0.197022
CAM112A_map16	0001.CSV	1349.98	0.205509
CAM112A_map16	0001.CSV	1353.84	0.214445
CAM112A_map16	0001.CSV	1357.7	0.224004
CAM112A_map16	0001.CSV	1361.56	0.234592
CAM112A_map16	0001.CSV	1365.41	0.247378
CAM112A_map16	0001.CSV	1369.27	0.257592
CAM112A_map16	0001.CSV	1373.13	0.269755
CAM112A_map16	0001.CSV	1376.98	0.282309
CAM112A_map16	0001.CSV	1380.84	0.292775
CAM112A_map16	0001.CSV	1384.7	0.301498
CAM112A_map16	0001.CSV	1388.56	0.3113
CAM112A_map16	0001.CSV	1392.41	0.315874
CAM112A_map16	0001.CSV	1396.27	0.316584
CAM112A_map16	0001.CSV	1400.13	0.312392
CAM112A_map16	0001.CSV	1403.98	0.307009
CAM112A_map16	0001.CSV	1407.84	0.297009
CAM112A_map16	0001.CSV	1411.7	0.285272
CAM112A_map16	0001.CSV	1415.55	0.273062
CAM112A_map16	0001.CSV	1419.41	0.260241
CAM112A_map16	0001.CSV	1423.27	0.249098
CAM112A_map16	0001.CSV	1427.12	0.24205
CAM112A_map16	0001.CSV	1430.98	0.234435
CAM112A_map16	0001.CSV	1434.84	0.226806
CAM112A_map16	0001.CSV	1438.7	0.217296
CAM112A_map16	0001.CSV	1442.55	0.210288
CAM112A_map16	0001.CSV	1446.41	0.202508
CAM112A_map16	0001.CSV	1450.27	0.194555
CAM112A_map16	0001.CSV	1454.12	0.187362
CAM112A_map16	0001.CSV	1457.98	0.177238
CAM112A_map16	0001.CSV	1461.84	0.168735
CAM112A_map16	0001.CSV	1465.7	0.162393
CAM112A_map16	0001.CSV	1469.55	0.155623
CAM112A_map16	0001.CSV	1473.41	0.147596
CAM112A_map16	0001.CSV	1477.27	0.138464
CAM112A_map16	0001.CSV	1481.12	0.13258
CAM112A_map16	0001.CSV	1484.98	0.126989
CAM112A_map16	0001.CSV	1488.84	0.120465
CAM112A_map16	0001.CSV	1492.7	0.11347
CAM112A_map16	0001.CSV	1496.55	0.107744
CAM112A_map16	0001.CSV	1500.41	0.101359
CAM112A_map16	0001.CSV	1504.27	0.097368
CAM112A_map16	0001.CSV	1508.12	0.0909792
CAM112A_map16	0001.CSV	1511.98	0.0862677
CAM112A_map16	0001.CSV	1515.84	0.0828688
CAM112A_map16	0001.CSV	1519.7	0.0789774
CAM112A_map16	0001.CSV	1523.55	0.0747124
CAM112A_map16	0001.CSV	1527.41	0.0718501
CAM112A_map16	0001.CSV	1531.27	0.0697662
CAM112A_map16	0001.CSV	1535.12	0.0689283
CAM112A_map16	0001.CSV	1538.98	0.0676788
CAM112A_map16	0001.CSV	1542.84	0.0631493
CAM112A_map16	0001.CSV	1546.7	0.0578422
CAM112A_map16	0001.CSV	1550.55	0.0534864
CAM112A_map16	0001.CSV	1554.41	0.0497271
CAM112A_map16	0001.CSV	1558.27	0.0469637
CAM112A_map16	0001.CSV	1562.12	0.0453225
CAM112A_map16	0001.CSV	1565.98	0.0447553
CAM112A_map16	0001.CSV	1569.84	0.0449798
CAM112A_map16	0001.CSV	1573.69	0.0457051
CAM112A_map16	0001.CSV	1577.55	0.0456992
CAM112A_map16	0001.CSV	1581.41	0.0436248
CAM112A_map16	0001.CSV	1585.27	0.0407064
CAM112A_map16	0001.CSV	1589.12	0.0381901
CAM112A_map16	0001.CSV	1592.98	0.0361877
CAM112A_map16	0001.CSV	1596.84	0.0346438
CAM112A_map16	0001.CSV	1600.69	0.0333783
CAM112A_map16	0001.CSV	1604.55	0.0326408
CAM112A_map16	0001.CSV	1608.41	0.0319642
CAM112A_map16	0001.CSV	1612.27	0.0312245
CAM112A_map16	0001.CSV	1616.12	0.0305905
CAM112A_map16	0001.CSV	1619.98	0.0302264
CAM112A_map16	0001.CSV	1623.84	0.02975
CAM112A_map16	0001.CSV	1627.69	0.0294066
CAM112A_map16	0001.CSV	1631.55	0.028752
CAM112A_map16	0001.CSV	1635.41	0.0286645
CAM112A_map16	0001.CSV	1639.27	0.0286854
CAM112A_map16	0001.CSV	1643.12	0.0281913
CAM112A_map16	0001.CSV	1646.98	0.0279679
CAM112A_map16	0001.CSV	1650.84	0.0282389
CAM112A_map16	0001.CSV	1654.69	0.0283424
CAM112A_map16	0001.CSV	1658.55	0.0277263
CAM112A_map16	0001.CSV	1662.41	0.0269934
CAM112A_map16	0001.CSV	1666.27	0.0264834
CAM112A_map16	0001.CSV	1670.12	0.0261227
CAM112A_map16	0001.CSV	1673.98	0.0260356
CAM112A_map16	0001.CSV	1677.84	0.025439
CAM112A_map16	0001.CSV	1681.69	0.0250317
CAM112A_map16	0001.CSV	1685.55	0.0249178
CAM112A_map16	0001.CSV	1689.41	0.0245211
CAM112A_map16	0001.CSV	1693.27	0.0238083
CAM112A_map16	0001.CSV	1697.12	0.0238215
CAM112A_map16	0001.CSV	1700.98	0.0241698
CAM112A_map16	0001.CSV	1704.84	0.024238
CAM112A_map16	0001.CSV	1708.69	0.0242768
CAM112A_map16	0001.CSV	1712.55	0.0244139
CAM112A_map16	0001.CSV	1716.41	0.0257534
CAM112A_map16	0001.CSV	1720.27	0.0273226
CAM112A_map16	0001.CSV	1724.12	0.0273594
CAM112A_map16	0001.CSV	1727.98	0.0273219
CAM112A_map16	0001.CSV	1731.84	0.027359
CAM112A_map16	0001.CSV	1735.69	0.0274589
CAM112A_map16	0001.CSV	1739.55	0.0266431
CAM112A_map16	0001.CSV	1743.41	0.0254061
CAM112A_map16	0001.CSV	1747.27	0.0240021
CAM112A_map16	0001.CSV	1751.12	0.0226129
CAM112A_map16	0001.CSV	1754.98	0.0214626
CAM112A_map16	0001.CSV	1758.84	0.0208263
CAM112A_map16	0001.CSV	1762.69	0.0205325
CAM112A_map16	0001.CSV	1766.55	0.0202976
CAM112A_map16	0001.CSV	1770.41	0.0203069
CAM112A_map16	0001.CSV	1774.26	0.0207358
CAM112A_map16	0001.CSV	1778.12	0.0207993
CAM112A_map16	0001.CSV	1781.98	0.0213278
CAM112A_map16	0001.CSV	1785.84	0.0223971
CAM112A_map16	0001.CSV	1789.69	0.0242444
CAM112A_map16	0001.CSV	1793.55	0.0268658
CAM112A_map16	0001.CSV	1797.41	0.0272094
CAM112A_map16	0001.CSV	1801.26	0.0251116
CAM112A_map16	0001.CSV	1805.12	0.0226569
CAM112A_map16	0001.CSV	1808.98	0.021068
CAM112A_map16	0001.CSV	1812.84	0.0204033
CAM112A_map16	0001.CSV	1816.69	0.0199198
CAM112A_map16	0001.CSV	1820.55	0.0196664
CAM112A_map16	0001.CSV	1824.41	0.0195534
CAM112A_map16	0001.CSV	1828.26	0.0196944
CAM112A_map16	0001.CSV	1832.12	0.019678
CAM112A_map16	0001.CSV	1835.98	0.0194917
CAM112A_map16	0001.CSV	1839.84	0.0192548
CAM112A_map16	0001.CSV	1843.69	0.0194455
CAM112A_map16	0001.CSV	1847.55	0.0197339
CAM112A_map16	0001.CSV	1851.41	0.0196321
CAM112A_map16	0001.CSV	1855.26	0.0195053
CAM112A_map16	0001.CSV	1859.12	0.0195621
CAM112A_map16	0001.CSV	1862.98	0.0195058
CAM112A_map16	0001.CSV	1866.84	0.0196502
CAM112A_map16	0001.CSV	1870.69	0.0199679
CAM112A_map16	0001.CSV	1874.55	0.0198414
CAM112A_map16	0001.CSV	1878.41	0.0197168
CAM112A_map16	0001.CSV	1882.26	0.0197391
CAM112A_map16	0001.CSV	1886.12	0.0197093
CAM112A_map16	0001.CSV	1889.98	0.0198868
CAM112A_map16	0001.CSV	1893.83	0.0199846
CAM112A_map16	0001.CSV	1897.69	0.0199996
CAM112A_map16	0001.CSV	1901.55	0.0199156
CAM112A_map16	0001.CSV	1905.41	0.0199401
CAM112A_map16	0001.CSV	1909.26	0.0200735
CAM112A_map16	0001.CSV	1913.12	0.0201075
CAM112A_map16	0001.CSV	1916.98	0.0200074
CAM112A_map16	0001.CSV	1920.83	0.0201322
CAM112A_map16	0001.CSV	1924.69	0.0202273
CAM112A_map16	0001.CSV	1928.55	0.0202366
CAM112A_map16	0001.CSV	1932.4	0.0202126
CAM112A_map16	0001.CSV	1936.26	0.0202721
CAM112A_map16	0001.CSV	1940.12	0.0203086
CAM112A_map16	0001.CSV	1943.98	0.0205622
CAM112A_map16	0001.CSV	1947.83	0.0206216
CAM112A_map16	0001.CSV	1951.69	0.0205795
CAM112A_map16	0001.CSV	1955.55	0.020582
CAM112A_map16	0001.CSV	1959.4	0.0206637
CAM112A_map16	0001.CSV	1963.26	0.0206098
CAM112A_map16	0001.CSV	1967.12	0.0206817
CAM112A_map16	0001.CSV	1970.98	0.0207131
CAM112A_map16	0001.CSV	1974.83	0.0206866
CAM112A_map16	0001.CSV	1978.69	0.0206595
CAM112A_map16	0001.CSV	1982.55	0.0206669
CAM112A_map16	0001.CSV	1986.4	0.0206765
CAM112A_map16	0001.CSV	1990.26	0.0207605
CAM112A_map16	0001.CSV	1994.12	0.0208418
CAM112A_map16	0001.CSV	1997.98	0.0208502
CAM112A_map16	0001.CSV	2001.83	0.0207832
CAM112A_map16	0001.CSV	2005.69	0.0208194
CAM112A_map16	0001.CSV	2009.55	0.0208642
CAM112A_map16	0001.CSV	2013.4	0.0208619
CAM112A_map16	0001.CSV	2017.26	0.0208832
CAM112A_map16	0001.CSV	2021.12	0.0209516
CAM112A_map16	0001.CSV	2024.97	0.0209506
CAM112A_map16	0001.CSV	2028.83	0.0209846
CAM112A_map16	0001.CSV	2032.69	0.0209497
CAM112A_map16	0001.CSV	2036.55	0.0209422
CAM112A_map16	0001.CSV	2040.4	0.0209648
CAM112A_map16	0001.CSV	2044.26	0.0210548
CAM112A_map16	0001.CSV	2048.12	0.0210262
CAM112A_map16	0001.CSV	2051.97	0.0210333
CAM112A_map16	0001.CSV	2055.83	0.021059
CAM112A_map16	0001.CSV	2059.69	0.0211152
CAM112A_map16	0001.CSV	2063.55	0.021158
CAM112A_map16	0001.CSV	2067.4	0.0212333
CAM112A_map16	0001.CSV	2071.26	0.0212429
CAM112A_map16	0001.CSV	2075.12	0.0213206
CAM112A_map16	0001.CSV	2078.97	0.0213368
CAM112A_map16	0001.CSV	2082.83	0.0213867
CAM112A_map16	0001.CSV	2086.69	0.0214207
CAM112A_map16	0001.CSV	2090.55	0.0214817
CAM112A_map16	0001.CSV	2094.4	0.021478
CAM112A_map16	0001.CSV	2098.26	0.0215209
CAM112A_map16	0001.CSV	2102.12	0.0215549
CAM112A_map16	0001.CSV	2105.97	0.0216165
CAM112A_map16	0001.CSV	2109.83	0.0216435
CAM112A_map16	0001.CSV	2113.69	0.0217164
CAM112A_map16	0001.CSV	2117.55	0.0217779
CAM112A_map16	0001.CSV	2121.4	0.0218825
CAM112A_map16	0001.CSV	2125.26	0.0219517
CAM112A_map16	0001.CSV	2129.12	0.0220387
CAM112A_map16	0001.CSV	2132.97	0.0220989
CAM112A_map16	0001.CSV	2136.83	0.0221914
CAM112A_map16	0001.CSV	2140.69	0.0221932
CAM112A_map16	0001.CSV	2144.55	0.0222146
CAM112A_map16	0001.CSV	2148.4	0.0222912
CAM112A_map16	0001.CSV	2152.26	0.0223772
CAM112A_map16	0001.CSV	2156.12	0.0223373
CAM112A_map16	0001.CSV	2159.97	0.0223014
CAM112A_map16	0001.CSV	2163.83	0.0223158
CAM112A_map16	0001.CSV	2167.69	0.022442
CAM112A_map16	0001.CSV	2171.55	0.0225252
CAM112A_map16	0001.CSV	2175.4	0.0225839
CAM112A_map16	0001.CSV	2179.26	0.0225981
CAM112A_map16	0001.CSV	2183.12	0.0226416
CAM112A_map16	0001.CSV	2186.97	0.0226717
CAM112A_map16	0001.CSV	2190.83	0.022695
CAM112A_map16	0001.CSV	2194.69	0.0227139
CAM112A_map16	0001.CSV	2198.55	0.0227899
CAM112A_map16	0001.CSV	2202.4	0.0228151
CAM112A_map16	0001.CSV	2206.26	0.0228471
CAM112A_map16	0001.CSV	2210.12	0.0228805
CAM112A_map16	0001.CSV	2213.97	0.0229447
CAM112A_map16	0001.CSV	2217.83	0.022961
CAM112A_map16	0001.CSV	2221.69	0.0229568
CAM112A_map16	0001.CSV	2225.54	0.0229282
CAM112A_map16	0001.CSV	2229.4	0.0229496
CAM112A_map16	0001.CSV	2233.26	0.0229637
CAM112A_map16	0001.CSV	2237.12	0.0229956
CAM112A_map16	0001.CSV	2240.97	0.0229559
CAM112A_map16	0001.CSV	2244.83	0.0229984
CAM112A_map16	0001.CSV	2248.69	0.0230592
CAM112A_map16	0001.CSV	2252.54	0.0230745
CAM112A_map16	0001.CSV	2256.4	0.0230347
CAM112A_map16	0001.CSV	2260.26	0.022982
CAM112A_map16	0001.CSV	2264.11	0.0229247
CAM112A_map16	0001.CSV	2267.97	0.0229457
CAM112A_map16	0001.CSV	2271.83	0.0229784
CAM112A_map16	0001.CSV	2275.69	0.0230681
CAM112A_map16	0001.CSV	2279.54	0.0230844
CAM112A_map16	0001.CSV	2283.4	0.0230192
CAM112A_map16	0001.CSV	2287.26	0.022929
CAM112A_map16	0001.CSV	2291.11	0.0228554
CAM112A_map16	0001.CSV	2294.97	0.0227853
CAM112A_map16	0001.CSV	2298.83	0.0227566
CAM112A_map16	0001.CSV	2302.69	0.0225576
CAM112A_map16	0001.CSV	2306.54	0.0221562
CAM112A_map16	0001.CSV	2310.4	0.0216392
CAM112A_map16	0001.CSV	2314.26	0.020989
CAM112A_map16	0001.CSV	2318.11	0.0195453
CAM112A_map16	0001.CSV	2321.97	0.017477
CAM112A_map16	0001.CSV	2325.83	0.0140541
CAM112A_map16	0001.CSV	2329.69	0.00934041
CAM112A_map16	0001.CSV	2333.54	0.00473637
CAM112A_map16	0001.CSV	2337.4	0.0010393
CAM112A_map16	0001.CSV	2341.26	0.000561587
CAM112A_map16	0001.CSV	2345.11	0.0112096
CAM112A_map16	0001.CSV	2348.97	0.0149859
CAM112A_map16	0001.CSV	2352.83	0.00915936
CAM112A_map16	0001.CSV	2356.69	-0.0218228
CAM112A_map16	0001.CSV	2360.54	-0.0708378
CAM112A_map16	0001.CSV	2364.4	-0.0400153
CAM112A_map16	0001.CSV	2368.26	0.00193822
CAM112A_map16	0001.CSV	2372.11	0.0171716
CAM112A_map16	0001.CSV	2375.97	0.0219428
CAM112A_map16	0001.CSV	2379.83	0.0232833
CAM112A_map16	0001.CSV	2383.69	0.0235432
CAM112A_map16	0001.CSV	2387.54	0.0233781
CAM112A_map16	0001.CSV	2391.4	0.0231827
CAM112A_map16	0001.CSV	2395.26	0.0231195
CAM112A_map16	0001.CSV	2399.11	0.0231208
CAM112A_map16	0001.CSV	2402.97	0.0231054
CAM112A_map16	0001.CSV	2406.83	0.0231431
CAM112A_map16	0001.CSV	2410.68	0.0231623
CAM112A_map16	0001.CSV	2414.54	0.0231725
CAM112A_map16	0001.CSV	2418.4	0.0231909
CAM112A_map16	0001.CSV	2422.26	0.0232589
CAM112A_map16	0001.CSV	2426.11	0.0232637
CAM112A_map16	0001.CSV	2429.97	0.0232445
CAM112A_map16	0001.CSV	2433.83	0.0233083
CAM112A_map16	0001.CSV	2437.68	0.0234163
CAM112A_map16	0001.CSV	2441.54	0.0234817
CAM112A_map16	0001.CSV	2445.4	0.0235452
CAM112A_map16	0001.CSV	2449.26	0.0236094
CAM112A_map16	0001.CSV	2453.11	0.023677
CAM112A_map16	0001.CSV	2456.97	0.0237726
CAM112A_map16	0001.CSV	2460.83	0.0238734
CAM112A_map16	0001.CSV	2464.68	0.0239338
CAM112A_map16	0001.CSV	2468.54	0.0240802
CAM112A_map16	0001.CSV	2472.4	0.024241
CAM112A_map16	0001.CSV	2476.26	0.0243936
CAM112A_map16	0001.CSV	2480.11	0.0245966
CAM112A_map16	0001.CSV	2483.97	0.0248908
CAM112A_map16	0001.CSV	2487.83	0.0252211
CAM112A_map16	0001.CSV	2491.68	0.0256155
CAM112A_map16	0001.CSV	2495.54	0.0261686
CAM112A_map16	0001.CSV	2499.4	0.0268503
CAM112A_map16	0001.CSV	2503.26	0.0274895
CAM112A_map16	0001.CSV	2507.11	0.0280065
CAM112A_map16	0001.CSV	2510.97	0.0282489
CAM112A_map16	0001.CSV	2514.83	0.0282048
CAM112A_map16	0001.CSV	2518.68	0.0279406
CAM112A_map16	0001.CSV	2522.54	0.0274808
CAM112A_map16	0001.CSV	2526.4	0.0268795
CAM112A_map16	0001.CSV	2530.26	0.0262846
CAM112A_map16	0001.CSV	2534.11	0.0257267
CAM112A_map16	0001.CSV	2537.97	0.0253475
CAM112A_map16	0001.CSV	2541.83	0.0251119
CAM112A_map16	0001.CSV	2545.68	0.024937
CAM112A_map16	0001.CSV	2549.54	0.0248029
CAM112A_map16	0001.CSV	2553.4	0.0247351
CAM112A_map16	0001.CSV	2557.26	0.0246754
CAM112A_map16	0001.CSV	2561.11	0.0246188
CAM112A_map16	0001.CSV	2564.97	0.0245918
CAM112A_map16	0001.CSV	2568.83	0.0245736
CAM112A_map16	0001.CSV	2572.68	0.0245933
CAM112A_map16	0001.CSV	2576.54	0.0246461
CAM112A_map16	0001.CSV	2580.4	0.0246237
CAM112A_map16	0001.CSV	2584.25	0.024609
CAM112A_map16	0001.CSV	2588.11	0.0245787
CAM112A_map16	0001.CSV	2591.97	0.024591
CAM112A_map16	0001.CSV	2595.83	0.0245571
CAM112A_map16	0001.CSV	2599.68	0.0244854
CAM112A_map16	0001.CSV	2603.54	0.0243587
CAM112A_map16	0001.CSV	2607.4	0.0243035
CAM112A_map16	0001.CSV	2611.25	0.0242937
CAM112A_map16	0001.CSV	2615.11	0.0242039
CAM112A_map16	0001.CSV	2618.97	0.0240733
CAM112A_map16	0001.CSV	2622.82	0.0241039
CAM112A_map16	0001.CSV	2626.68	0.0241258
CAM112A_map16	0001.CSV	2630.54	0.024013
CAM112A_map16	0001.CSV	2634.4	0.0239746
CAM112A_map16	0001.CSV	2638.25	0.0239673
CAM112A_map16	0001.CSV	2642.11	0.0237802
CAM112A_map16	0001.CSV	2645.97	0.023612
CAM112A_map16	0001.CSV	2649.82	0.0235616
CAM112A_map16	0001.CSV	2653.68	0.0235491
CAM112A_map16	0001.CSV	2657.54	0.023541
CAM112A_map16	0001.CSV	2661.4	0.0235193
CAM112A_map16	0001.CSV	2665.25	0.0235112
CAM112A_map16	0001.CSV	2669.11	0.0236288
CAM112A_map16	0001.CSV	2672.97	0.0238634
CAM112A_map16	0001.CSV	2676.82	0.0241702
CAM112A_map16	0001.CSV	2680.68	0.0241243
CAM112A_map16	0001.CSV	2684.54	0.0237286
CAM112A_map16	0001.CSV	2688.4	0.0235269
CAM112A_map16	0001.CSV	2692.25	0.0235295
CAM112A_map16	0001.CSV	2696.11	0.0236545
CAM112A_map16	0001.CSV	2699.97	0.0237386
CAM112A_map16	0001.CSV	2703.82	0.0236868
CAM112A_map16	0001.CSV	2707.68	0.0237407
CAM112A_map16	0001.CSV	2711.54	0.0237751
CAM112A_map16	0001.CSV	2715.4	0.0237669
CAM112A_map16	0001.CSV	2719.25	0.0239697
CAM112A_map16	0001.CSV	2723.11	0.0243787
CAM112A_map16	0001.CSV	2726.97	0.0243941
CAM112A_map16	0001.CSV	2730.82	0.0239935
CAM112A_map16	0001.CSV	2734.68	0.0239715
CAM112A_map16	0001.CSV	2738.54	0.0240894
CAM112A_map16	0001.CSV	2742.4	0.0241636
CAM112A_map16	0001.CSV	2746.25	0.0245251
CAM112A_map16	0001.CSV	2750.11	0.0245128
CAM112A_map16	0001.CSV	2753.97	0.024136
CAM112A_map16	0001.CSV	2757.82	0.0240304
CAM112A_map16	0001.CSV	2761.68	0.0239445
CAM112A_map16	0001.CSV	2765.54	0.0239121
CAM112A_map16	0001.CSV	2769.39	0.0241906
CAM112A_map16	0001.CSV	2773.25	0.0246954
CAM112A_map16	0001.CSV	2777.11	0.0246192
CAM112A_map16	0001.CSV	2780.97	0.0243145
CAM112A_map16	0001.CSV	2784.82	0.0245895
CAM112A_map16	0001.CSV	2788.68	0.0251818
CAM112A_map16	0001.CSV	2792.54	0.0253576
CAM112A_map16	0001.CSV	2796.39	0.0254148
CAM112A_map16	0001.CSV	2800.25	0.0252237
CAM112A_map16	0001.CSV	2804.11	0.0249509
CAM112A_map16	0001.CSV	2807.97	0.0253152
CAM112A_map16	0001.CSV	2811.82	0.025452
CAM112A_map16	0001.CSV	2815.68	0.0253207
CAM112A_map16	0001.CSV	2819.54	0.0255034
CAM112A_map16	0001.CSV	2823.39	0.0258135
CAM112A_map16	0001.CSV	2827.25	0.0260831
CAM112A_map16	0001.CSV	2831.11	0.0268377
CAM112A_map16	0001.CSV	2834.97	0.0280788
CAM112A_map16	0001.CSV	2838.82	0.029336
CAM112A_map16	0001.CSV	2842.68	0.031085
CAM112A_map16	0001.CSV	2846.54	0.034229
CAM112A_map16	0001.CSV	2850.39	0.0360788
CAM112A_map16	0001.CSV	2854.25	0.0351906
CAM112A_map16	0001.CSV	2858.11	0.0336132
CAM112A_map16	0001.CSV	2861.97	0.0321808
CAM112A_map16	0001.CSV	2865.82	0.0313527
CAM112A_map16	0001.CSV	2869.68	0.0314426
CAM112A_map16	0001.CSV	2873.54	0.0315309
CAM112A_map16	0001.CSV	2877.39	0.0307283
CAM112A_map16	0001.CSV	2881.25	0.0300553
CAM112A_map16	0001.CSV	2885.11	0.0299887
CAM112A_map16	0001.CSV	2888.97	0.0303443
CAM112A_map16	0001.CSV	2892.82	0.0311367
CAM112A_map16	0001.CSV	2896.68	0.0319024
CAM112A_map16	0001.CSV	2900.54	0.032516
CAM112A_map16	0001.CSV	2904.39	0.0336314
CAM112A_map16	0001.CSV	2908.25	0.0357213
CAM112A_map16	0001.CSV	2912.11	0.0393126
CAM112A_map16	0001.CSV	2915.97	0.0426467
CAM112A_map16	0001.CSV	2919.82	0.0431996
CAM112A_map16	0001.CSV	2923.68	0.041679
CAM112A_map16	0001.CSV	2927.54	0.0399706
CAM112A_map16	0001.CSV	2931.39	0.0378
CAM112A_map16	0001.CSV	2935.25	0.0353241
CAM112A_map16	0001.CSV	2939.11	0.0337411
CAM112A_map16	0001.CSV	2942.96	0.0332453
CAM112A_map16	0001.CSV	2946.82	0.0328398
CAM112A_map16	0001.CSV	2950.68	0.0323757
CAM112A_map16	0001.CSV	2954.54	0.0318696
CAM112A_map16	0001.CSV	2958.39	0.0312122
CAM112A_map16	0001.CSV	2962.25	0.0305274
CAM112A_map16	0001.CSV	2966.11	0.0294898
CAM112A_map16	0001.CSV	2969.96	0.0288565
CAM112A_map16	0001.CSV	2973.82	0.0288004
CAM112A_map16	0001.CSV	2977.68	0.0287418
CAM112A_map16	0001.CSV	2981.53	0.0281975
CAM112A_map16	0001.CSV	2985.39	0.0272874
CAM112A_map16	0001.CSV	2989.25	0.0269537
CAM112A_map16	0001.CSV	2993.11	0.0269304
CAM112A_map16	0001.CSV	2996.96	0.0265887
CAM112A_map16	0001.CSV	3000.82	0.0261041
CAM112A_map16	0001.CSV	3004.68	0.0258149
CAM112A_map16	0001.CSV	3008.53	0.0260365
CAM112A_map16	0001.CSV	3012.39	0.0264843
CAM112A_map16	0001.CSV	3016.25	0.026586
CAM112A_map16	0001.CSV	3020.11	0.0263541
CAM112A_map16	0001.CSV	3023.96	0.0261144
CAM112A_map16	0001.CSV	3027.82	0.026016
CAM112A_map16	0001.CSV	3031.68	0.0263017
CAM112A_map16	0001.CSV	3035.53	0.0263995
CAM112A_map16	0001.CSV	3039.39	0.0263758
CAM112A_map16	0001.CSV	3043.25	0.0264834
CAM112A_map16	0001.CSV	3047.11	0.0264186
CAM112A_map16	0001.CSV	3050.96	0.0264186
CAM112A_map16	0001.CSV	3054.82	0.0263736
CAM112A_map16	0001.CSV	3058.68	0.0262133
CAM112A_map16	0001.CSV	3062.53	0.0262738
CAM112A_map16	0001.CSV	3066.39	0.0266352
CAM112A_map16	0001.CSV	3070.25	0.0266014
CAM112A_map16	0001.CSV	3074.11	0.0265034
CAM112A_map16	0001.CSV	3077.96	0.0267621
CAM112A_map16	0001.CSV	3081.82	0.0269975
CAM112A_map16	0001.CSV	3085.68	0.0270225
CAM112A_map16	0001.CSV	3089.53	0.0268183
CAM112A_map16	0001.CSV	3093.39	0.0264746
CAM112A_map16	0001.CSV	3097.25	0.0264913
CAM112A_map16	0001.CSV	3101.11	0.0265419
CAM112A_map16	0001.CSV	3104.96	0.0265203
CAM112A_map16	0001.CSV	3108.82	0.0266917
CAM112A_map16	0001.CSV	3112.68	0.0268946
CAM112A_map16	0001.CSV	3116.53	0.0271009
CAM112A_map16	0001.CSV	3120.39	0.027018
CAM112A_map16	0001.CSV	3124.25	0.0267761
CAM112A_map16	0001.CSV	3128.11	0.0266988
CAM112A_map16	0001.CSV	3131.96	0.0266498
CAM112A_map16	0001.CSV	3135.82	0.0267822
CAM112A_map16	0001.CSV	3139.68	0.0269449
CAM112A_map16	0001.CSV	3143.53	0.0267675
CAM112A_map16	0001.CSV	3147.39	0.0268615
CAM112A_map16	0001.CSV	3151.25	0.0272092
CAM112A_map16	0001.CSV	3155.1	0.027101
CAM112A_map16	0001.CSV	3158.96	0.0267056
CAM112A_map16	0001.CSV	3162.82	0.0265396
CAM112A_map16	0001.CSV	3166.68	0.0264825
CAM112A_map16	0001.CSV	3170.53	0.0265009
CAM112A_map16	0001.CSV	3174.39	0.0266177
CAM112A_map16	0001.CSV	3178.25	0.0268676
CAM112A_map16	0001.CSV	3182.1	0.0269175
CAM112A_map16	0001.CSV	3185.96	0.0269366
CAM112A_map16	0001.CSV	3189.82	0.0270142
CAM112A_map16	0001.CSV	3193.68	0.0269114
CAM112A_map16	0001.CSV	3197.53	0.0269384
CAM112A_map16	0001.CSV	3201.39	0.0271444
CAM112A_map16	0001.CSV	3205.25	0.027246
CAM112A_map16	0001.CSV	3209.1	0.0272807
CAM112A_map16	0001.CSV	3212.96	0.0274334
CAM112A_map16	0001.CSV	3216.82	0.0275977
CAM112A_map16	0001.CSV	3220.68	0.0275618
CAM112A_map16	0001.CSV	3224.53	0.0274844
CAM112A_map16	0001.CSV	3228.39	0.0278194
CAM112A_map16	0001.CSV	3232.25	0.0283012
CAM112A_map16	0001.CSV	3236.1	0.0281341
CAM112A_map16	0001.CSV	3239.96	0.0278678
CAM112A_map16	0001.CSV	3243.82	0.0282012
CAM112A_map16	0001.CSV	3247.68	0.0284299
CAM112A_map16	0001.CSV	3251.53	0.0281945
CAM112A_map16	0001.CSV	3255.39	0.0281859
CAM112A_map16	0001.CSV	3259.25	0.0280785
CAM112A_map16	0001.CSV	3263.1	0.0279948
CAM112A_map16	0001.CSV	3266.96	0.0283663
CAM112A_map16	0001.CSV	3270.82	0.0288594
CAM112A_map16	0001.CSV	3274.68	0.0289391
CAM112A_map16	0001.CSV	3278.53	0.0286681
CAM112A_map16	0001.CSV	3282.39	0.0283405
CAM112A_map16	0001.CSV	3286.25	0.0283346
CAM112A_map16	0001.CSV	3290.1	0.0288531
CAM112A_map16	0001.CSV	3293.96	0.0292385
CAM112A_map16	0001.CSV	3297.82	0.0290137
CAM112A_map16	0001.CSV	3301.67	0.0290158
CAM112A_map16	0001.CSV	3305.53	0.0293
CAM112A_map16	0001.CSV	3309.39	0.0290834
CAM112A_map16	0001.CSV	3313.25	0.0284501
CAM112A_map16	0001.CSV	3317.1	0.0282078
CAM112A_map16	0001.CSV	3320.96	0.0284202
CAM112A_map16	0001.CSV	3324.82	0.0287304
CAM112A_map16	0001.CSV	3328.67	0.0285179
CAM112A_map16	0001.CSV	3332.53	0.0283556
CAM112A_map16	0001.CSV	3336.39	0.0288209
CAM112A_map16	0001.CSV	3340.24	0.0291004
CAM112A_map16	0001.CSV	3344.1	0.0288711
CAM112A_map16	0001.CSV	3347.96	0.0288503
CAM112A_map16	0001.CSV	3351.82	0.028767
CAM112A_map16	0001.CSV	3355.67	0.0285131
CAM112A_map16	0001.CSV	3359.53	0.0286389
CAM112A_map16	0001.CSV	3363.39	0.0288514
CAM112A_map16	0001.CSV	3367.24	0.0291218
CAM112A_map16	0001.CSV	3371.1	0.0289261
CAM112A_map16	0001.CSV	3374.96	0.0285552
CAM112A_map16	0001.CSV	3378.82	0.0284535
CAM112A_map16	0001.CSV	3382.67	0.0282212
CAM112A_map16	0001.CSV	3386.53	0.028287
CAM112A_map16	0001.CSV	3390.39	0.0286581
CAM112A_map16	0001.CSV	3394.24	0.0287981
CAM112A_map16	0001.CSV	3398.1	0.0286694
CAM112A_map16	0001.CSV	3401.96	0.0284381
CAM112A_map16	0001.CSV	3405.82	0.0281906
CAM112A_map16	0001.CSV	3409.67	0.0281803
CAM112A_map16	0001.CSV	3413.53	0.0279092
CAM112A_map16	0001.CSV	3417.39	0.0274869
CAM112A_map16	0001.CSV	3421.24	0.0274186
CAM112A_map16	0001.CSV	3425.1	0.0275663
CAM112A_map16	0001.CSV	3428.96	0.02786
CAM112A_map16	0001.CSV	3432.82	0.0279986
CAM112A_map16	0001.CSV	3436.67	0.0277103
CAM112A_map16	0001.CSV	3440.53	0.0270867
CAM112A_map16	0001.CSV	3444.39	0.0267977
CAM112A_map16	0001.CSV	3448.24	0.026686
CAM112A_map16	0001.CSV	3452.1	0.0264071
CAM112A_map16	0001.CSV	3455.96	0.026496
CAM112A_map16	0001.CSV	3459.82	0.0267944
CAM112A_map16	0001.CSV	3463.67	0.027118
CAM112A_map16	0001.CSV	3467.53	0.0273624
CAM112A_map16	0001.CSV	3471.39	0.026905
CAM112A_map16	0001.CSV	3475.24	0.0263753
CAM112A_map16	0001.CSV	3479.1	0.0263204
CAM112A_map16	0001.CSV	3482.96	0.0262541
CAM112A_map16	0001.CSV	3486.82	0.0262405
CAM112A_map16	0001.CSV	3490.67	0.0261578
CAM112A_map16	0001.CSV	3494.53	0.0262236
CAM112A_map16	0001.CSV	3498.39	0.0262097
CAM112A_map16	0001.CSV	3502.24	0.0259958
CAM112A_map16	0001.CSV	3506.1	0.0254065
CAM112A_map16	0001.CSV	3509.96	0.0252036
CAM112A_map16	0001.CSV	3513.81	0.0253397
CAM112A_map16	0001.CSV	3517.67	0.0250092
CAM112A_map16	0001.CSV	3521.53	0.0250054
CAM112A_map16	0001.CSV	3525.39	0.0250537
CAM112A_map16	0001.CSV	3529.24	0.0249236
CAM112A_map16	0001.CSV	3533.1	0.0249193
CAM112A_map16	0001.CSV	3536.96	0.0250038
CAM112A_map16	0001.CSV	3540.81	0.025012
CAM112A_map16	0001.CSV	3544.67	0.0252774
CAM112A_map16	0001.CSV	3548.53	0.025031
CAM112A_map16	0001.CSV	3552.39	0.0244385
CAM112A_map16	0001.CSV	3556.24	0.0242735
CAM112A_map16	0001.CSV	3560.1	0.0239781
CAM112A_map16	0001.CSV	3563.96	0.023432
CAM112A_map16	0001.CSV	3567.81	0.0240031
CAM112A_map16	0001.CSV	3571.67	0.0241783
CAM112A_map16	0001.CSV	3575.53	0.023646
CAM112A_map16	0001.CSV	3579.39	0.023763
CAM112A_map16	0001.CSV	3583.24	0.0238183
CAM112A_map16	0001.CSV	3587.1	0.0238673
CAM112A_map16	0001.CSV	3590.96	0.0238603
CAM112A_map16	0001.CSV	3594.81	0.0235673
CAM112A_map16	0001.CSV	3598.67	0.0236891
CAM112A_map16	0001.CSV	3602.53	0.023587
CAM112A_map16	0001.CSV	3606.39	0.0229624
CAM112A_map16	0001.CSV	3610.24	0.0227942
CAM112A_map16	0001.CSV	3614.1	0.022687
CAM112A_map16	0001.CSV	3617.96	0.0229365
CAM112A_map16	0001.CSV	3621.81	0.0231221
CAM112A_map16	0001.CSV	3625.67	0.0222149
CAM112A_map16	0001.CSV	3629.53	0.0222526
CAM112A_map16	0001.CSV	3633.39	0.0231294
CAM112A_map16	0001.CSV	3637.24	0.0228844
CAM112A_map16	0001.CSV	3641.1	0.0224991
CAM112A_map16	0001.CSV	3644.96	0.0217155
CAM112A_map16	0001.CSV	3648.81	0.022157
CAM112A_map16	0001.CSV	3652.67	0.023287
CAM112A_map16	0001.CSV	3656.53	0.0233191
CAM112A_map16	0001.CSV	3660.38	0.0232399
CAM112A_map16	0001.CSV	3664.24	0.0223507
CAM112A_map16	0001.CSV	3668.1	0.0214674
CAM112A_map16	0001.CSV	3671.96	0.0213693
CAM112A_map16	0001.CSV	3675.81	0.0221035
CAM112A_map16	0001.CSV	3679.67	0.0227412
CAM112A_map16	0001.CSV	3683.53	0.0224584
CAM112A_map16	0001.CSV	3687.38	0.0224067
CAM112A_map16	0001.CSV	3691.24	0.0233044
CAM112A_map16	0001.CSV	3695.1	0.0230489
CAM112A_map16	0001.CSV	3698.95	0.0223029
CAM112A_map16	0001.CSV	3702.81	0.0219368
CAM112A_map16	0001.CSV	3706.67	0.0213522
CAM112A_map16	0001.CSV	3710.53	0.021317
CAM112A_map16	0001.CSV	3714.38	0.0222473
CAM112A_map16	0001.CSV	3718.24	0.0219095
CAM112A_map16	0001.CSV	3722.1	0.0215009
CAM112A_map16	0001.CSV	3725.95	0.0215302
CAM112A_map16	0001.CSV	3729.81	0.0212423
CAM112A_map16	0001.CSV	3733.67	0.0213667
CAM112A_map16	0001.CSV	3737.53	0.0227595
CAM112A_map16	0001.CSV	3741.38	0.0220644
CAM112A_map16	0001.CSV	3745.24	0.0210087
CAM112A_map16	0001.CSV	3749.1	0.0209766
CAM112A_map16	0001.CSV	3752.95	0.0220605
CAM112A_map16	0001.CSV	3756.81	0.0222714
CAM112A_map16	0001.CSV	3760.67	0.0221854
CAM112A_map16	0001.CSV	3764.53	0.0218166
CAM112A_map16	0001.CSV	3768.38	0.0218798
CAM112A_map16	0001.CSV	3772.24	0.0221778
CAM112A_map16	0001.CSV	3776.1	0.0219067
CAM112A_map16	0001.CSV	3779.95	0.0219204
CAM112A_map16	0001.CSV	3783.81	0.021924
CAM112A_map16	0001.CSV	3787.67	0.0219575
CAM112A_map16	0001.CSV	3791.53	0.0216898
CAM112A_map16	0001.CSV	3795.38	0.0210982
CAM112A_map16	0001.CSV	3799.24	0.0209069
CAM112A_map16	0001.CSV	3803.1	0.0215882
CAM112A_map16	0001.CSV	3806.95	0.0221133
CAM112A_map16	0001.CSV	3810.81	0.0216842
CAM112A_map16	0001.CSV	3814.67	0.0209935
CAM112A_map16	0001.CSV	3818.53	0.0211446
CAM112A_map16	0001.CSV	3822.38	0.0218417
CAM112A_map16	0001.CSV	3826.24	0.0217195
CAM112A_map16	0001.CSV	3830.1	0.0211737
CAM112A_map16	0001.CSV	3833.95	0.0209371
CAM112A_map16	0001.CSV	3837.81	0.0214167
CAM112A_map16	0001.CSV	3841.67	0.0222731
CAM112A_map16	0001.CSV	3845.53	0.0219527
CAM112A_map16	0001.CSV	3849.38	0.0207517
CAM112A_map16	0001.CSV	3853.24	0.0206711
CAM112A_map16	0001.CSV	3857.1	0.0216192
CAM112A_map16	0001.CSV	3860.95	0.0210619
CAM112A_map16	0001.CSV	3864.81	0.0210596
CAM112A_map16	0001.CSV	3868.67	0.0213504
CAM112A_map16	0001.CSV	3872.52	0.0218158
CAM112A_map16	0001.CSV	3876.38	0.0215411
CAM112A_map16	0001.CSV	3880.24	0.0212252
CAM112A_map16	0001.CSV	3884.1	0.021798
CAM112A_map16	0001.CSV	3887.95	0.0218225
CAM112A_map16	0001.CSV	3891.81	0.0217601
CAM112A_map16	0001.CSV	3895.67	0.0214238
CAM112A_map16	0001.CSV	3899.52	0.0208109
CAM112A_map16	0001.CSV	3903.38	0.0217146
CAM112A_map16	0001.CSV	3907.24	0.0222411
CAM112A_map16	0001.CSV	3911.1	0.0217237
CAM112A_map16	0001.CSV	3914.95	0.0213657
CAM112A_map16	0001.CSV	3918.81	0.0215066
CAM112A_map16	0001.CSV	3922.67	0.0215368
CAM112A_map16	0001.CSV	3926.52	0.0215376
CAM112A_map16	0001.CSV	3930.38	0.0216866
CAM112A_map16	0001.CSV	3934.24	0.0220163
CAM112A_map16	0001.CSV	3938.09	0.0216403
CAM112A_map16	0001.CSV	3941.95	0.0214442
CAM112A_map16	0001.CSV	3945.81	0.0215876
CAM112A_map16	0001.CSV	3949.67	0.0217723
CAM112A_map16	0001.CSV	3953.52	0.0218325
CAM112A_map16	0001.CSV	3957.38	0.0217342
CAM112A_map16	0001.CSV	3961.24	0.021771
CAM112A_map16	0001.CSV	3965.09	0.0218188
CAM112A_map16	0001.CSV	3968.95	0.0218127
CAM112A_map16	0001.CSV	3972.81	0.0219012
CAM112A_map16	0001.CSV	3976.67	0.0219677
CAM112A_map16	0001.CSV	3980.52	0.0219699
CAM112A_map16	0001.CSV	3984.38	0.0219787
CAM112A_map16	0001.CSV	3988.24	0.0218124
CAM112A_map16	0001.CSV	3992.09	0.0217519
CAM112A_map16	0001.CSV	3995.95	0.0218408
CAM112A_map16	0001.CSV	3999.81	0.0218265
CAM112A_map16	0002.CSV	674.992	0.0479506
CAM112A_map16	0002.CSV	678.849	0.0493973
CAM112A_map16	0002.CSV	682.706	0.0500533
CAM112A_map16	0002.CSV	686.563	0.0522034
CAM112A_map16	0002.CSV	690.42	0.0544763
CAM112A_map16	0002.CSV	694.277	0.0603285
CAM112A_map16	0002.CSV	698.134	0.0671123
CAM112A_map16	0002.CSV	701.991	0.0771501
CAM112A_map16	0002.CSV	705.849	0.0977643
CAM112A_map16	0002.CSV	709.706	0.13329
CAM112A_map16	0002.CSV	713.563	0.128246
CAM112A_map16	0002.CSV	717.42	0.0796498
CAM112A_map16	0002.CSV	721.277	0.0496517
CAM112A_map16	0002.CSV	725.134	0.043385
CAM112A_map16	0002.CSV	728.991	0.0421138
CAM112A_map16	0002.CSV	732.848	0.0425852
CAM112A_map16	0002.CSV	736.705	0.0432207
CAM112A_map16	0002.CSV	740.562	0.0441115
CAM112A_map16	0002.CSV	744.42	0.0445632
CAM112A_map16	0002.CSV	748.277	0.0455178
CAM112A_map16	0002.CSV	752.134	0.0458659
CAM112A_map16	0002.CSV	755.991	0.046666
CAM112A_map16	0002.CSV	759.848	0.0469562
CAM112A_map16	0002.CSV	763.705	0.0476638
CAM112A_map16	0002.CSV	767.562	0.048154
CAM112A_map16	0002.CSV	771.419	0.048995
CAM112A_map16	0002.CSV	775.276	0.0490576
CAM112A_map16	0002.CSV	779.133	0.0493691
CAM112A_map16	0002.CSV	782.99	0.0492096
CAM112A_map16	0002.CSV	786.848	0.0491481
CAM112A_map16	0002.CSV	790.705	0.0490592
CAM112A_map16	0002.CSV	794.562	0.0499741
CAM112A_map16	0002.CSV	798.419	0.050657
CAM112A_map16	0002.CSV	802.276	0.0516308
CAM112A_map16	0002.CSV	806.133	0.0524934
CAM112A_map16	0002.CSV	809.99	0.0541095
CAM112A_map16	0002.CSV	813.847	0.0555555
CAM112A_map16	0002.CSV	817.704	0.0576297
CAM112A_map16	0002.CSV	821.562	0.0596515
CAM112A_map16	0002.CSV	825.419	0.0623636
CAM112A_map16	0002.CSV	829.276	0.0654186
CAM112A_map16	0002.CSV	833.133	0.0693105
CAM112A_map16	0002.CSV	836.99	0.0737426
CAM112A_map16	0002.CSV	840.847	0.0810369
CAM112A_map16	0002.CSV	844.704	0.0919731
CAM112A_map16	0002.CSV	848.561	0.0990773
CAM112A_map16	0002.CSV	852.418	0.103805
CAM112A_map16	0002.CSV	856.275	0.121757
CAM112A_map16	0002.CSV	860.132	0.154355
CAM112A_map16	0002.CSV	863.99	0.198737
CAM112A_map16	0002.CSV	867.847	0.237243
CAM112A_map16	0002.CSV	871.704	0.244827
CAM112A_map16	0002.CSV	875.561	0.214668
CAM112A_map16	0002.CSV	879.418	0.169589
CAM112A_map16	0002.CSV	883.275	0.11812
CAM112A_map16	0002.CSV	887.132	0.0682816
CAM112A_map16	0002.CSV	890.989	0.0427936
CAM112A_map16	0002.CSV	894.846	0.0380999
CAM112A_map16	0002.CSV	898.703	0.0376777
CAM112A_map16	0002.CSV	902.561	0.0381747
CAM112A_map16	0002.CSV	906.418	0.0386622
CAM112A_map16	0002.CSV	910.275	0.0395217
CAM112A_map16	0002.CSV	914.132	0.0399468
CAM112A_map16	0002.CSV	917.989	0.0407251
CAM112A_map16	0002.CSV	921.846	0.0413599
CAM112A_map16	0002.CSV	925.703	0.0424868
CAM112A_map16	0002.CSV	929.56	0.0432782
CAM112A_map16	0002.CSV	933.417	0.0441033
CAM112A_map16	0002.CSV	937.274	0.0444626
CAM112A_map16	0002.CSV	941.131	0.045074
CAM112A_map16	0002.CSV	944.989	0.0454693
CAM112A_map16	0002.CSV	948.846	0.0461251
CAM112A_map16	0002.CSV	952.703	0.04668
CAM112A_map16	0002.CSV	956.56	0.0476218
CAM112A_map16	0002.CSV	960.417	0.0480875
CAM112A_map16	0002.CSV	964.274	0.0486787
CAM112A_map16	0002.CSV	968.131	0.0493263
CAM112A_map16	0002.CSV	971.988	0.0504374
CAM112A_map16	0002.CSV	975.845	0.0513195
CAM112A_map16	0002.CSV	979.702	0.0525166
CAM112A_map16	0002.CSV	983.559	0.0535591
CAM112A_map16	0002.CSV	987.417	0.0549222
CAM112A_map16	0002.CSV	991.274	0.0560642
CAM112A_map16	0002.CSV	995.131	0.0573204
CAM112A_map16	0002.CSV	998.988	0.0583013
CAM112A_map16	0002.CSV	1002.85	0.0596078
CAM112A_map16	0002.CSV	1006.7	0.0607944
CAM112A_map16	0002.CSV	1010.56	0.0623452
CAM112A_map16	0002.CSV	1014.42	0.0636805
CAM112A_map16	0002.CSV	1018.27	0.0653811
CAM112A_map16	0002.CSV	1022.13	0.0667631
CAM112A_map16	0002.CSV	1025.99	0.068225
CAM112A_map16	0002.CSV	1029.85	0.0692038
CAM112A_map16	0002.CSV	1033.7	0.0703512
CAM112A_map16	0002.CSV	1037.56	0.0714034
CAM112A_map16	0002.CSV	1041.42	0.0726642
CAM112A_map16	0002.CSV	1045.27	0.0734746
CAM112A_map16	0002.CSV	1049.13	0.0744389
CAM112A_map16	0002.CSV	1052.99	0.0752479
CAM112A_map16	0002.CSV	1056.84	0.0767947
CAM112A_map16	0002.CSV	1060.7	0.0785472
CAM112A_map16	0002.CSV	1064.56	0.08053
CAM112A_map16	0002.CSV	1068.42	0.0817631
CAM112A_map16	0002.CSV	1072.27	0.082688
CAM112A_map16	0002.CSV	1076.13	0.0831555
CAM112A_map16	0002.CSV	1079.99	0.0839131
CAM112A_map16	0002.CSV	1083.84	0.0844448
CAM112A_map16	0002.CSV	1087.7	0.0850644
CAM112A_map16	0002.CSV	1091.56	0.0847346
CAM112A_map16	0002.CSV	1095.41	0.0842919
CAM112A_map16	0002.CSV	1099.27	0.0840048
CAM112A_map16	0002.CSV	1103.13	0.0847644
CAM112A_map16	0002.CSV	1106.99	0.0858784
CAM112A_map16	0002.CSV	1110.84	0.0875049
CAM112A_map16	0002.CSV	1114.7	0.0884873
CAM112A_map16	0002.CSV	1118.56	0.0891574
CAM112A_map16	0002.CSV	1122.41	0.0894495
CAM112A_map16	0002.CSV	1126.27	0.0899848
CAM112A_map16	0002.CSV	1130.13	0.0901866
CAM112A_map16	0002.CSV	1133.99	0.0907018
CAM112A_map16	0002.CSV	1137.84	0.091202
CAM112A_map16	0002.CSV	1141.7	0.092083
CAM112A_map16	0002.CSV	1145.56	0.092822
CAM112A_map16	0002.CSV	1149.41	0.0940873
CAM112A_map16	0002.CSV	1153.27	0.0954775
CAM112A_map16	0002.CSV	1157.13	0.0972489
CAM112A_map16	0002.CSV	1160.99	0.0986476
CAM112A_map16	0002.CSV	1164.84	0.0999534
CAM112A_map16	0002.CSV	1168.7	0.100629
CAM112A_map16	0002.CSV	1172.56	0.101197
CAM112A_map16	0002.CSV	1176.41	0.101253
CAM112A_map16	0002.CSV	1180.27	0.1014
CAM112A_map16	0002.CSV	1184.13	0.101262
CAM112A_map16	0002.CSV	1187.99	0.101477
CAM112A_map16	0002.CSV	1191.84	0.101604
CAM112A_map16	0002.CSV	1195.7	0.102223
CAM112A_map16	0002.CSV	1199.56	0.102935
CAM112A_map16	0002.CSV	1203.41	0.104277
CAM112A_map16	0002.CSV	1207.27	0.105764
CAM112A_map16	0002.CSV	1211.13	0.107648
CAM112A_map16	0002.CSV	1214.98	0.109452
CAM112A_map16	0002.CSV	1218.84	0.111779
CAM112A_map16	0002.CSV	1222.7	0.114244
CAM112A_map16	0002.CSV	1226.56	0.11725
CAM112A_map16	0002.CSV	1230.41	0.120148
CAM112A_map16	0002.CSV	1234.27	0.12332
CAM112A_map16	0002.CSV	1238.13	0.126123
CAM112A_map16	0002.CSV	1241.98	0.129126
CAM112A_map16	0002.CSV	1245.84	0.131838
CAM112A_map16	0002.CSV	1249.7	0.134754
CAM112A_map16	0002.CSV	1253.56	0.137326
CAM112A_map16	0002.CSV	1257.41	0.140034
CAM112A_map16	0002.CSV	1261.27	0.142289
CAM112A_map16	0002.CSV	1265.13	0.144681
CAM112A_map16	0002.CSV	1268.98	0.1469
CAM112A_map16	0002.CSV	1272.84	0.14983
CAM112A_map16	0002.CSV	1276.7	0.152646
CAM112A_map16	0002.CSV	1280.56	0.155797
CAM112A_map16	0002.CSV	1284.41	0.158822
CAM112A_map16	0002.CSV	1288.27	0.162351
CAM112A_map16	0002.CSV	1292.13	0.165526
CAM112A_map16	0002.CSV	1295.98	0.169042
CAM112A_map16	0002.CSV	1299.84	0.172437
CAM112A_map16	0002.CSV	1303.7	0.176378
CAM112A_map16	0002.CSV	1307.56	0.180275
CAM112A_map16	0002.CSV	1311.41	0.184844
CAM112A_map16	0002.CSV	1315.27	0.189377
CAM112A_map16	0002.CSV	1319.13	0.194201
CAM112A_map16	0002.CSV	1322.98	0.197997
CAM112A_map16	0002.CSV	1326.84	0.20225
CAM112A_map16	0002.CSV	1330.7	0.206987
CAM112A_map16	0002.CSV	1334.56	0.212454
CAM112A_map16	0002.CSV	1338.41	0.218851
CAM112A_map16	0002.CSV	1342.27	0.226757
CAM112A_map16	0002.CSV	1346.13	0.233336
CAM112A_map16	0002.CSV	1349.98	0.241278
CAM112A_map16	0002.CSV	1353.84	0.249702
CAM112A_map16	0002.CSV	1357.7	0.259118
CAM112A_map16	0002.CSV	1361.56	0.270229
CAM112A_map16	0002.CSV	1365.41	0.284251
CAM112A_map16	0002.CSV	1369.27	0.295988
CAM112A_map16	0002.CSV	1373.13	0.309905
CAM112A_map16	0002.CSV	1376.98	0.324302
CAM112A_map16	0002.CSV	1380.84	0.336096
CAM112A_map16	0002.CSV	1384.7	0.345566
CAM112A_map16	0002.CSV	1388.56	0.355809
CAM112A_map16	0002.CSV	1392.41	0.360771
CAM112A_map16	0002.CSV	1396.27	0.361479
CAM112A_map16	0002.CSV	1400.13	0.357049
CAM112A_map16	0002.CSV	1403.98	0.351607
CAM112A_map16	0002.CSV	1407.84	0.340719
CAM112A_map16	0002.CSV	1411.7	0.327112
CAM112A_map16	0002.CSV	1415.55	0.312314
CAM112A_map16	0002.CSV	1419.41	0.295205
CAM112A_map16	0002.CSV	1423.27	0.280065
CAM112A_map16	0002.CSV	1427.12	0.270293
CAM112A_map16	0002.CSV	1430.98	0.260699
CAM112A_map16	0002.CSV	1434.84	0.251425
CAM112A_map16	0002.CSV	1438.7	0.239712
CAM112A_map16	0002.CSV	1442.55	0.230765
CAM112A_map16	0002.CSV	1446.41	0.220992
CAM112A_map16	0002.CSV	1450.27	0.211006
CAM112A_map16	0002.CSV	1454.12	0.202682
CAM112A_map16	0002.CSV	1457.98	0.191047
CAM112A_map16	0002.CSV	1461.84	0.182269
CAM112A_map16	0002.CSV	1465.7	0.175971
CAM112A_map16	0002.CSV	1469.55	0.168953
CAM112A_map16	0002.CSV	1473.41	0.159759
CAM112A_map16	0002.CSV	1477.27	0.149589
CAM112A_map16	0002.CSV	1481.12	0.14369
CAM112A_map16	0002.CSV	1484.98	0.138752
CAM112A_map16	0002.CSV	1488.84	0.133772
CAM112A_map16	0002.CSV	1492.7	0.128981
CAM112A_map16	0002.CSV	1496.55	0.125391
CAM112A_map16	0002.CSV	1500.41	0.121575
CAM112A_map16	0002.CSV	1504.27	0.119371
CAM112A_map16	0002.CSV	1508.12	0.117211
CAM112A_map16	0002.CSV	1511.98	0.11616
CAM112A_map16	0002.CSV	1515.84	0.114835
CAM112A_map16	0002.CSV	1519.7	0.113322
CAM112A_map16	0002.CSV	1523.55	0.11166
CAM112A_map16	0002.CSV	1527.41	0.111167
CAM112A_map16	0002.CSV	1531.27	0.111164
CAM112A_map16	0002.CSV	1535.12	0.112635
CAM112A_map16	0002.CSV	1538.98	0.112648
CAM112A_map16	0002.CSV	1542.84	0.105903
CAM112A_map16	0002.CSV	1546.7	0.0972899
CAM112A_map16	0002.CSV	1550.55	0.0894994
CAM112A_map16	0002.CSV	1554.41	0.082365
CAM112A_map16	0002.CSV	1558.27	0.0755197
CAM112A_map16	0002.CSV	1562.12	0.07095
CAM112A_map16	0002.CSV	1565.98	0.0692903
CAM112A_map16	0002.CSV	1569.84	0.0686869
CAM112A_map16	0002.CSV	1573.69	0.0685276
CAM112A_map16	0002.CSV	1577.55	0.0669999
CAM112A_map16	0002.CSV	1581.41	0.0631239
CAM112A_map16	0002.CSV	1585.27	0.0585627
CAM112A_map16	0002.CSV	1589.12	0.0544302
CAM112A_map16	0002.CSV	1592.98	0.0513421
CAM112A_map16	0002.CSV	1596.84	0.0492263
CAM112A_map16	0002.CSV	1600.69	0.0481077
CAM112A_map16	0002.CSV	1604.55	0.047843
CAM112A_map16	0002.CSV	1608.41	0.0482515
CAM112A_map16	0002.CSV	1612.27	0.048745
CAM112A_map16	0002.CSV	1616.12	0.0499185
CAM112A_map16	0002.CSV	1619.98	0.051676
CAM112A_map16	0002.CSV	1623.84	0.0538093
CAM112A_map16	0002.CSV	1627.69	0.0565874
CAM112A_map16	0002.CSV	1631.55	0.0585924
CAM112A_map16	0002.CSV	1635.41	0.0620792
CAM112A_map16	0002.CSV	1639.27	0.0667286
CAM112A_map16	0002.CSV	1643.12	0.0687112
CAM112A_map16	0002.CSV	1646.98	0.0716972
CAM112A_map16	0002.CSV	1650.84	0.0740655
CAM112A_map16	0002.CSV	1654.69	0.0726225
CAM112A_map16	0002.CSV	1658.55	0.0699527
CAM112A_map16	0002.CSV	1662.41	0.0664208
CAM112A_map16	0002.CSV	1666.27	0.0629489
CAM112A_map16	0002.CSV	1670.12	0.0596614
CAM112A_map16	0002.CSV	1673.98	0.0564806
CAM112A_map16	0002.CSV	1677.84	0.0535443
CAM112A_map16	0002.CSV	1681.69	0.0510391
CAM112A_map16	0002.CSV	1685.55	0.0470577
CAM112A_map16	0002.CSV	1689.41	0.0438364
CAM112A_map16	0002.CSV	1693.27	0.0410093
CAM112A_map16	0002.CSV	1697.12	0.0381677
CAM112A_map16	0002.CSV	1700.98	0.0346948
CAM112A_map16	0002.CSV	1704.84	0.0326091
CAM112A_map16	0002.CSV	1708.69	0.0308452
CAM112A_map16	0002.CSV	1712.55	0.0298651
CAM112A_map16	0002.CSV	1716.41	0.0297249
CAM112A_map16	0002.CSV	1720.27	0.0302356
CAM112A_map16	0002.CSV	1724.12	0.0297702
CAM112A_map16	0002.CSV	1727.98	0.0294637
CAM112A_map16	0002.CSV	1731.84	0.0292886
CAM112A_map16	0002.CSV	1735.69	0.029563
CAM112A_map16	0002.CSV	1739.55	0.0286406
CAM112A_map16	0002.CSV	1743.41	0.0270903
CAM112A_map16	0002.CSV	1747.27	0.0252267
CAM112A_map16	0002.CSV	1751.12	0.023531
CAM112A_map16	0002.CSV	1754.98	0.0220859
CAM112A_map16	0002.CSV	1758.84	0.0212743
CAM112A_map16	0002.CSV	1762.69	0.0207732
CAM112A_map16	0002.CSV	1766.55	0.0203777
CAM112A_map16	0002.CSV	1770.41	0.0201307
CAM112A_map16	0002.CSV	1774.26	0.020421
CAM112A_map16	0002.CSV	1778.12	0.020326
CAM112A_map16	0002.CSV	1781.98	0.0206413
CAM112A_map16	0002.CSV	1785.84	0.0214283
CAM112A_map16	0002.CSV	1789.69	0.0233027
CAM112A_map16	0002.CSV	1793.55	0.0265484
CAM112A_map16	0002.CSV	1797.41	0.0273732
CAM112A_map16	0002.CSV	1801.26	0.0251086
CAM112A_map16	0002.CSV	1805.12	0.0222048
CAM112A_map16	0002.CSV	1808.98	0.0202301
CAM112A_map16	0002.CSV	1812.84	0.0193399
CAM112A_map16	0002.CSV	1816.69	0.0187489
CAM112A_map16	0002.CSV	1820.55	0.0184494
CAM112A_map16	0002.CSV	1824.41	0.0182635
CAM112A_map16	0002.CSV	1828.26	0.0184218
CAM112A_map16	0002.CSV	1832.12	0.018386
CAM112A_map16	0002.CSV	1835.98	0.018155
CAM112A_map16	0002.CSV	1839.84	0.0178375
CAM112A_map16	0002.CSV	1843.69	0.0179896
CAM112A_map16	0002.CSV	1847.55	0.0182675
CAM112A_map16	0002.CSV	1851.41	0.0181497
CAM112A_map16	0002.CSV	1855.26	0.0179396
CAM112A_map16	0002.CSV	1859.12	0.0179333
CAM112A_map16	0002.CSV	1862.98	0.0178526
CAM112A_map16	0002.CSV	1866.84	0.0180356
CAM112A_map16	0002.CSV	1870.69	0.0183312
CAM112A_map16	0002.CSV	1874.55	0.0181862
CAM112A_map16	0002.CSV	1878.41	0.0180539
CAM112A_map16	0002.CSV	1882.26	0.0180735
CAM112A_map16	0002.CSV	1886.12	0.0180321
CAM112A_map16	0002.CSV	1889.98	0.0181651
CAM112A_map16	0002.CSV	1893.83	0.018227
CAM112A_map16	0002.CSV	1897.69	0.0182504
CAM112A_map16	0002.CSV	1901.55	0.0181787
CAM112A_map16	0002.CSV	1905.41	0.0182053
CAM112A_map16	0002.CSV	1909.26	0.0183364
CAM112A_map16	0002.CSV	1913.12	0.0183781
CAM112A_map16	0002.CSV	1916.98	0.0182688
CAM112A_map16	0002.CSV	1920.83	0.0184111
CAM112A_map16	0002.CSV	1924.69	0.0184613
CAM112A_map16	0002.CSV	1928.55	0.0184308
CAM112A_map16	0002.CSV	1932.4	0.0184162
CAM112A_map16	0002.CSV	1936.26	0.0184791
CAM112A_map16	0002.CSV	1940.12	0.018503
CAM112A_map16	0002.CSV	1943.98	0.0187955
CAM112A_map16	0002.CSV	1947.83	0.0188406
CAM112A_map16	0002.CSV	1951.69	0.018769
CAM112A_map16	0002.CSV	1955.55	0.0187928
CAM112A_map16	0002.CSV	1959.4	0.0188804
CAM112A_map16	0002.CSV	1963.26	0.0188371
CAM112A_map16	0002.CSV	1967.12	0.0189156
CAM112A_map16	0002.CSV	1970.98	0.018914
CAM112A_map16	0002.CSV	1974.83	0.0188746
CAM112A_map16	0002.CSV	1978.69	0.018859
CAM112A_map16	0002.CSV	1982.55	0.0188696
CAM112A_map16	0002.CSV	1986.4	0.0188689
CAM112A_map16	0002.CSV	1990.26	0.0189754
CAM112A_map16	0002.CSV	1994.12	0.0190622
CAM112A_map16	0002.CSV	1997.98	0.0190411
CAM112A_map16	0002.CSV	2001.83	0.0189892
CAM112A_map16	0002.CSV	2005.69	0.0190335
CAM112A_map16	0002.CSV	2009.55	0.0190541
CAM112A_map16	0002.CSV	2013.4	0.0190504
CAM112A_map16	0002.CSV	2017.26	0.0190894
CAM112A_map16	0002.CSV	2021.12	0.0191749
CAM112A_map16	0002.CSV	2024.97	0.019166
CAM112A_map16	0002.CSV	2028.83	0.0191849
CAM112A_map16	0002.CSV	2032.69	0.0191608
CAM112A_map16	0002.CSV	2036.55	0.0191396
CAM112A_map16	0002.CSV	2040.4	0.0191317
CAM112A_map16	0002.CSV	2044.26	0.0192158
CAM112A_map16	0002.CSV	2048.12	0.0192056
CAM112A_map16	0002.CSV	2051.97	0.0192351
CAM112A_map16	0002.CSV	2055.83	0.0192627
CAM112A_map16	0002.CSV	2059.69	0.0193009
CAM112A_map16	0002.CSV	2063.55	0.0193291
CAM112A_map16	0002.CSV	2067.4	0.0193913
CAM112A_map16	0002.CSV	2071.26	0.0193934
CAM112A_map16	0002.CSV	2075.12	0.0194568
CAM112A_map16	0002.CSV	2078.97	0.0195055
CAM112A_map16	0002.CSV	2082.83	0.0195779
CAM112A_map16	0002.CSV	2086.69	0.019612
CAM112A_map16	0002.CSV	2090.55	0.0196659
CAM112A_map16	0002.CSV	2094.4	0.0196716
CAM112A_map16	0002.CSV	2098.26	0.019713
CAM112A_map16	0002.CSV	2102.12	0.0197624
CAM112A_map16	0002.CSV	2105.97	0.0198344
CAM112A_map16	0002.CSV	2109.83	0.0198796
CAM112A_map16	0002.CSV	2113.69	0.0199596
CAM112A_map16	0002.CSV	2117.55	0.0200299
CAM112A_map16	0002.CSV	2121.4	0.0200984
CAM112A_map16	0002.CSV	2125.26	0.0201405
CAM112A_map16	0002.CSV	2129.12	0.0202449
CAM112A_map16	0002.CSV	2132.97	0.0203233
CAM112A_map16	0002.CSV	2136.83	0.0204197
CAM112A_map16	0002.CSV	2140.69	0.0204591
CAM112A_map16	0002.CSV	2144.55	0.0205028
CAM112A_map16	0002.CSV	2148.4	0.0205517
CAM112A_map16	0002.CSV	2152.26	0.0206258
CAM112A_map16	0002.CSV	2156.12	0.0206193
CAM112A_map16	0002.CSV	2159.97	0.0205777
CAM112A_map16	0002.CSV	2163.83	0.0205705
CAM112A_map16	0002.CSV	2167.69	0.0206342
CAM112A_map16	0002.CSV	2171.55	0.0206961
CAM112A_map16	0002.CSV	2175.4	0.0207861
CAM112A_map16	0002.CSV	2179.26	0.0208264
CAM112A_map16	0002.CSV	2183.12	0.0208579
CAM112A_map16	0002.CSV	2186.97	0.0208791
CAM112A_map16	0002.CSV	2190.83	0.0209238
CAM112A_map16	0002.CSV	2194.69	0.0209517
CAM112A_map16	0002.CSV	2198.55	0.020968
CAM112A_map16	0002.CSV	2202.4	0.0209439
CAM112A_map16	0002.CSV	2206.26	0.020974
CAM112A_map16	0002.CSV	2210.12	0.0210402
CAM112A_map16	0002.CSV	2213.97	0.0211073
CAM112A_map16	0002.CSV	2217.83	0.0211079
CAM112A_map16	0002.CSV	2221.69	0.0210932
CAM112A_map16	0002.CSV	2225.54	0.0210928
CAM112A_map16	0002.CSV	2229.4	0.0211169
CAM112A_map16	0002.CSV	2233.26	0.0211037
CAM112A_map16	0002.CSV	2237.12	0.0211101
CAM112A_map16	0002.CSV	2240.97	0.0211002
CAM112A_map16	0002.CSV	2244.83	0.0211202
CAM112A_map16	0002.CSV	2248.69	0.0211248
CAM112A_map16	0002.CSV	2252.54	0.0211062
CAM112A_map16	0002.CSV	2256.4	0.0210752
CAM112A_map16	0002.CSV	2260.26	0.0210598
CAM112A_map16	0002.CSV	2264.11	0.0210467
CAM112A_map16	0002.CSV	2267.97	0.0210609
CAM112A_map16	0002.CSV	2271.83	0.0210558
CAM112A_map16	0002.CSV	2275.69	0.0210949
CAM112A_map16	0002.CSV	2279.54	0.0211056
CAM112A_map16	0002.CSV	2283.4	0.0210421
CAM112A_map16	0002.CSV	2287.26	0.020931
CAM112A_map16	0002.CSV	2291.11	0.0208389
CAM112A_map16	0002.CSV	2294.97	0.0207151
CAM112A_map16	0002.CSV	2298.83	0.0205979
CAM112A_map16	0002.CSV	2302.69	0.0204025
CAM112A_map16	0002.CSV	2306.54	0.0200531
CAM112A_map16	0002.CSV	2310.4	0.01952
CAM112A_map16	0002.CSV	2314.26	0.0187929
CAM112A_map16	0002.CSV	2318.11	0.0174056
CAM112A_map16	0002.CSV	2321.97	0.0150603
CAM112A_map16	0002.CSV	2325.83	0.0110729
CAM112A_map16	0002.CSV	2329.69	0.00654177
CAM112A_map16	0002.CSV	2333.54	0.00219504
CAM112A_map16	0002.CSV	2337.4	-0.00200913
CAM112A_map16	0002.CSV	2341.26	-0.00209887
CAM112A_map16	0002.CSV	2345.11	0.00901191
CAM112A_map16	0002.CSV	2348.97	0.0127646
CAM112A_map16	0002.CSV	2352.83	0.00645547
CAM112A_map16	0002.CSV	2356.69	-0.0261845
CAM112A_map16	0002.CSV	2360.54	-0.0746152
CAM112A_map16	0002.CSV	2364.4	-0.0417476
CAM112A_map16	0002.CSV	2368.26	-0.000627701
CAM112A_map16	0002.CSV	2372.11	0.0146728
CAM112A_map16	0002.CSV	2375.97	0.019762
CAM112A_map16	0002.CSV	2379.83	0.0213841
CAM112A_map16	0002.CSV	2383.69	0.0217218
CAM112A_map16	0002.CSV	2387.54	0.0216201
CAM112A_map16	0002.CSV	2391.4	0.0214644
CAM112A_map16	0002.CSV	2395.26	0.0213845
CAM112A_map16	0002.CSV	2399.11	0.0213736
CAM112A_map16	0002.CSV	2402.97	0.0213745
CAM112A_map16	0002.CSV	2406.83	0.0214383
CAM112A_map16	0002.CSV	2410.68	0.0214936
CAM112A_map16	0002.CSV	2414.54	0.0215191
CAM112A_map16	0002.CSV	2418.4	0.0215687
CAM112A_map16	0002.CSV	2422.26	0.0216419
CAM112A_map16	0002.CSV	2426.11	0.0216561
CAM112A_map16	0002.CSV	2429.97	0.0216708
CAM112A_map16	0002.CSV	2433.83	0.0217692
CAM112A_map16	0002.CSV	2437.68	0.0218474
CAM112A_map16	0002.CSV	2441.54	0.0218733
CAM112A_map16	0002.CSV	2445.4	0.0219625
CAM112A_map16	0002.CSV	2449.26	0.0220853
CAM112A_map16	0002.CSV	2453.11	0.0221711
CAM112A_map16	0002.CSV	2456.97	0.0222622
CAM112A_map16	0002.CSV	2460.83	0.0223614
CAM112A_map16	0002.CSV	2464.68	0.0224353
CAM112A_map16	0002.CSV	2468.54	0.0225784
CAM112A_map16	0002.CSV	2472.4	0.0227383
CAM112A_map16	0002.CSV	2476.26	0.0229417
CAM112A_map16	0002.CSV	2480.11	0.0232142
CAM112A_map16	0002.CSV	2483.97	0.0235047
CAM112A_map16	0002.CSV	2487.83	0.0238293
CAM112A_map16	0002.CSV	2491.68	0.0242971
CAM112A_map16	0002.CSV	2495.54	0.0249457
CAM112A_map16	0002.CSV	2499.4	0.0257157
CAM112A_map16	0002.CSV	2503.26	0.0264947
CAM112A_map16	0002.CSV	2507.11	0.0271797
CAM112A_map16	0002.CSV	2510.97	0.0275391
CAM112A_map16	0002.CSV	2514.83	0.0275423
CAM112A_map16	0002.CSV	2518.68	0.027272
CAM112A_map16	0002.CSV	2522.54	0.0267504
CAM112A_map16	0002.CSV	2526.4	0.0260865
CAM112A_map16	0002.CSV	2530.26	0.0254172
CAM112A_map16	0002.CSV	2534.11	0.0247689
CAM112A_map16	0002.CSV	2537.97	0.0242564
CAM112A_map16	0002.CSV	2541.83	0.0239582
CAM112A_map16	0002.CSV	2545.68	0.023789
CAM112A_map16	0002.CSV	2549.54	0.0236586
CAM112A_map16	0002.CSV	2553.4	0.0235745
CAM112A_map16	0002.CSV	2557.26	0.0235256
CAM112A_map16	0002.CSV	2561.11	0.0235023
CAM112A_map16	0002.CSV	2564.97	0.0235349
CAM112A_map16	0002.CSV	2568.83	0.0235811
CAM112A_map16	0002.CSV	2572.68	0.0236097
CAM112A_map16	0002.CSV	2576.54	0.0236586
CAM112A_map16	0002.CSV	2580.4	0.0236541
CAM112A_map16	0002.CSV	2584.25	0.023621
CAM112A_map16	0002.CSV	2588.11	0.0235922
CAM112A_map16	0002.CSV	2591.97	0.0236699
CAM112A_map16	0002.CSV	2595.83	0.0236682
CAM112A_map16	0002.CSV	2599.68	0.0235919
CAM112A_map16	0002.CSV	2603.54	0.0235151
CAM112A_map16	0002.CSV	2607.4	0.0234728
CAM112A_map16	0002.CSV	2611.25	0.0234421
CAM112A_map16	0002.CSV	2615.11	0.023397
CAM112A_map16	0002.CSV	2618.97	0.0232967
CAM112A_map16	0002.CSV	2622.82	0.023299
CAM112A_map16	0002.CSV	2626.68	0.0233298
CAM112A_map16	0002.CSV	2630.54	0.0232548
CAM112A_map16	0002.CSV	2634.4	0.023256
CAM112A_map16	0002.CSV	2638.25	0.0232754
CAM112A_map16	0002.CSV	2642.11	0.0231356
CAM112A_map16	0002.CSV	2645.97	0.022978
CAM112A_map16	0002.CSV	2649.82	0.02292
CAM112A_map16	0002.CSV	2653.68	0.0229509
CAM112A_map16	0002.CSV	2657.54	0.0230097
CAM112A_map16	0002.CSV	2661.4	0.0230316
CAM112A_map16	0002.CSV	2665.25	0.0230288
CAM112A_map16	0002.CSV	2669.11	0.0231456
CAM112A_map16	0002.CSV	2672.97	0.0234308
CAM112A_map16	0002.CSV	2676.82	0.0237581
CAM112A_map16	0002.CSV	2680.68	0.023715
CAM112A_map16	0002.CSV	2684.54	0.0233555
CAM112A_map16	0002.CSV	2688.4	0.0231814
CAM112A_map16	0002.CSV	2692.25	0.0232162
CAM112A_map16	0002.CSV	2696.11	0.0233628
CAM112A_map16	0002.CSV	2699.97	0.0234656
CAM112A_map16	0002.CSV	2703.82	0.0234641
CAM112A_map16	0002.CSV	2707.68	0.0236047
CAM112A_map16	0002.CSV	2711.54	0.0236971
CAM112A_map16	0002.CSV	2715.4	0.0236937
CAM112A_map16	0002.CSV	2719.25	0.0239216
CAM112A_map16	0002.CSV	2723.11	0.0244099
CAM112A_map16	0002.CSV	2726.97	0.0244983
CAM112A_map16	0002.CSV	2730.82	0.0241659
CAM112A_map16	0002.CSV	2734.68	0.024211
CAM112A_map16	0002.CSV	2738.54	0.0243832
CAM112A_map16	0002.CSV	2742.4	0.0244776
CAM112A_map16	0002.CSV	2746.25	0.0248589
CAM112A_map16	0002.CSV	2750.11	0.0249493
CAM112A_map16	0002.CSV	2753.97	0.0246812
CAM112A_map16	0002.CSV	2757.82	0.0246102
CAM112A_map16	0002.CSV	2761.68	0.0245773
CAM112A_map16	0002.CSV	2765.54	0.0246191
CAM112A_map16	0002.CSV	2769.39	0.0249286
CAM112A_map16	0002.CSV	2773.25	0.025473
CAM112A_map16	0002.CSV	2777.11	0.0254798
CAM112A_map16	0002.CSV	2780.97	0.0252489
CAM112A_map16	0002.CSV	2784.82	0.025592
CAM112A_map16	0002.CSV	2788.68	0.026318
CAM112A_map16	0002.CSV	2792.54	0.0265839
CAM112A_map16	0002.CSV	2796.39	0.0266966
CAM112A_map16	0002.CSV	2800.25	0.0266738
CAM112A_map16	0002.CSV	2804.11	0.0265963
CAM112A_map16	0002.CSV	2807.97	0.0270173
CAM112A_map16	0002.CSV	2811.82	0.0271998
CAM112A_map16	0002.CSV	2815.68	0.0272227
CAM112A_map16	0002.CSV	2819.54	0.0276195
CAM112A_map16	0002.CSV	2823.39	0.0281059
CAM112A_map16	0002.CSV	2827.25	0.0285485
CAM112A_map16	0002.CSV	2831.11	0.0295277
CAM112A_map16	0002.CSV	2834.97	0.0312163
CAM112A_map16	0002.CSV	2838.82	0.0334423
CAM112A_map16	0002.CSV	2842.68	0.0372082
CAM112A_map16	0002.CSV	2846.54	0.0436302
CAM112A_map16	0002.CSV	2850.39	0.0478091
CAM112A_map16	0002.CSV	2854.25	0.0461663
CAM112A_map16	0002.CSV	2858.11	0.0426158
CAM112A_map16	0002.CSV	2861.97	0.03983
CAM112A_map16	0002.CSV	2865.82	0.0383559
CAM112A_map16	0002.CSV	2869.68	0.0383016
CAM112A_map16	0002.CSV	2873.54	0.0383506
CAM112A_map16	0002.CSV	2877.39	0.0373322
CAM112A_map16	0002.CSV	2881.25	0.0365229
CAM112A_map16	0002.CSV	2885.11	0.0365591
CAM112A_map16	0002.CSV	2888.97	0.0372551
CAM112A_map16	0002.CSV	2892.82	0.0386288
CAM112A_map16	0002.CSV	2896.68	0.0400793
CAM112A_map16	0002.CSV	2900.54	0.041495
CAM112A_map16	0002.CSV	2904.39	0.0437127
CAM112A_map16	0002.CSV	2908.25	0.0476248
CAM112A_map16	0002.CSV	2912.11	0.0542585
CAM112A_map16	0002.CSV	2915.97	0.0611267
CAM112A_map16	0002.CSV	2919.82	0.0632591
CAM112A_map16	0002.CSV	2923.68	0.0607214
CAM112A_map16	0002.CSV	2927.54	0.0569808
CAM112A_map16	0002.CSV	2931.39	0.0528293
CAM112A_map16	0002.CSV	2935.25	0.0486699
CAM112A_map16	0002.CSV	2939.11	0.0456131
CAM112A_map16	0002.CSV	2942.96	0.0438984
CAM112A_map16	0002.CSV	2946.82	0.0428172
CAM112A_map16	0002.CSV	2950.68	0.0422422
CAM112A_map16	0002.CSV	2954.54	0.0418814
CAM112A_map16	0002.CSV	2958.39	0.0411347
CAM112A_map16	0002.CSV	2962.25	0.039995
CAM112A_map16	0002.CSV	2966.11	0.0382534
CAM112A_map16	0002.CSV	2969.96	0.0367486
CAM112A_map16	0002.CSV	2973.82	0.035916
CAM112A_map16	0002.CSV	2977.68	0.035211
CAM112A_map16	0002.CSV	2981.53	0.0340881
CAM112A_map16	0002.CSV	2985.39	0.0327527
CAM112A_map16	0002.CSV	2989.25	0.0321338
CAM112A_map16	0002.CSV	2993.11	0.0319127
CAM112A_map16	0002.CSV	2996.96	0.0313654
CAM112A_map16	0002.CSV	3000.82	0.0307242
CAM112A_map16	0002.CSV	3004.68	0.0303991
CAM112A_map16	0002.CSV	3008.53	0.0306576
CAM112A_map16	0002.CSV	3012.39	0.0311366
CAM112A_map16	0002.CSV	3016.25	0.0312788
CAM112A_map16	0002.CSV	3020.11	0.0311769
CAM112A_map16	0002.CSV	3023.96	0.0311203
CAM112A_map16	0002.CSV	3027.82	0.0311832
CAM112A_map16	0002.CSV	3031.68	0.0316867
CAM112A_map16	0002.CSV	3035.53	0.0320705
CAM112A_map16	0002.CSV	3039.39	0.0322941
CAM112A_map16	0002.CSV	3043.25	0.0325855
CAM112A_map16	0002.CSV	3047.11	0.0326457
CAM112A_map16	0002.CSV	3050.96	0.0327682
CAM112A_map16	0002.CSV	3054.82	0.0328799
CAM112A_map16	0002.CSV	3058.68	0.0328652
CAM112A_map16	0002.CSV	3062.53	0.033086
CAM112A_map16	0002.CSV	3066.39	0.0335234
CAM112A_map16	0002.CSV	3070.25	0.0334794
CAM112A_map16	0002.CSV	3074.11	0.0334152
CAM112A_map16	0002.CSV	3077.96	0.0337533
CAM112A_map16	0002.CSV	3081.82	0.034055
CAM112A_map16	0002.CSV	3085.68	0.0340188
CAM112A_map16	0002.CSV	3089.53	0.0337282
CAM112A_map16	0002.CSV	3093.39	0.0333059
CAM112A_map16	0002.CSV	3097.25	0.0332959
CAM112A_map16	0002.CSV	3101.11	0.0333785
CAM112A_map16	0002.CSV	3104.96	0.0334001
CAM112A_map16	0002.CSV	3108.82	0.0335714
CAM112A_map16	0002.CSV	3112.68	0.0337589
CAM112A_map16	0002.CSV	3116.53	0.0340701
CAM112A_map16	0002.CSV	3120.39	0.0340713
CAM112A_map16	0002.CSV	3124.25	0.0338478
CAM112A_map16	0002.CSV	3128.11	0.0338311
CAM112A_map16	0002.CSV	3131.96	0.033934
CAM112A_map16	0002.CSV	3135.82	0.0342823
CAM112A_map16	0002.CSV	3139.68	0.0346178
CAM112A_map16	0002.CSV	3143.53	0.0346223
CAM112A_map16	0002.CSV	3147.39	0.0349913
CAM112A_map16	0002.CSV	3151.25	0.0356255
CAM112A_map16	0002.CSV	3155.1	0.0357284
CAM112A_map16	0002.CSV	3158.96	0.0354987
CAM112A_map16	0002.CSV	3162.82	0.0356028
CAM112A_map16	0002.CSV	3166.68	0.0358835
CAM112A_map16	0002.CSV	3170.53	0.0362527
CAM112A_map16	0002.CSV	3174.39	0.0366483
CAM112A_map16	0002.CSV	3178.25	0.0371992
CAM112A_map16	0002.CSV	3182.1	0.0376528
CAM112A_map16	0002.CSV	3185.96	0.0380287
CAM112A_map16	0002.CSV	3189.82	0.038446
CAM112A_map16	0002.CSV	3193.68	0.038657
CAM112A_map16	0002.CSV	3197.53	0.0389149
CAM112A_map16	0002.CSV	3201.39	0.0393722
CAM112A_map16	0002.CSV	3205.25	0.0396923
CAM112A_map16	0002.CSV	3209.1	0.0399284
CAM112A_map16	0002.CSV	3212.96	0.0403516
CAM112A_map16	0002.CSV	3216.82	0.0407743
CAM112A_map16	0002.CSV	3220.68	0.0409337
CAM112A_map16	0002.CSV	3224.53	0.0410965
CAM112A_map16	0002.CSV	3228.39	0.041698
CAM112A_map16	0002.CSV	3232.25	0.0425379
CAM112A_map16	0002.CSV	3236.1	0.0427129
CAM112A_map16	0002.CSV	3239.96	0.0427395
CAM112A_map16	0002.CSV	3243.82	0.0433549
CAM112A_map16	0002.CSV	3247.68	0.0438914
CAM112A_map16	0002.CSV	3251.53	0.0440809
CAM112A_map16	0002.CSV	3255.39	0.0445479
CAM112A_map16	0002.CSV	3259.25	0.0448054
CAM112A_map16	0002.CSV	3263.1	0.0451373
CAM112A_map16	0002.CSV	3266.96	0.0459271
CAM112A_map16	0002.CSV	3270.82	0.0467497
CAM112A_map16	0002.CSV	3274.68	0.0470208
CAM112A_map16	0002.CSV	3278.53	0.0468595
CAM112A_map16	0002.CSV	3282.39	0.0466509
CAM112A_map16	0002.CSV	3286.25	0.0467994
CAM112A_map16	0002.CSV	3290.1	0.0474681
CAM112A_map16	0002.CSV	3293.96	0.0479232
CAM112A_map16	0002.CSV	3297.82	0.0475899
CAM112A_map16	0002.CSV	3301.67	0.0474433
CAM112A_map16	0002.CSV	3305.53	0.0475948
CAM112A_map16	0002.CSV	3309.39	0.0472185
CAM112A_map16	0002.CSV	3313.25	0.0463824
CAM112A_map16	0002.CSV	3317.1	0.0457947
CAM112A_map16	0002.CSV	3320.96	0.0457459
CAM112A_map16	0002.CSV	3324.82	0.0458834
CAM112A_map16	0002.CSV	3328.67	0.0454444
CAM112A_map16	0002.CSV	3332.53	0.0451457
CAM112A_map16	0002.CSV	3336.39	0.0454586
CAM112A_map16	0002.CSV	3340.24	0.0454308
CAM112A_map16	0002.CSV	3344.1	0.0448925
CAM112A_map16	0002.CSV	3347.96	0.0447
CAM112A_map16	0002.CSV	3351.82	0.0444194
CAM112A_map16	0002.CSV	3355.67	0.0438608
CAM112A_map16	0002.CSV	3359.53	0.0438176
CAM112A_map16	0002.CSV	3363.39	0.0438945
CAM112A_map16	0002.CSV	3367.24	0.0439358
CAM112A_map16	0002.CSV	3371.1	0.0434185
CAM112A_map16	0002.CSV	3374.96	0.0428012
CAM112A_map16	0002.CSV	3378.82	0.0424948
CAM112A_map16	0002.CSV	3382.67	0.0420131
CAM112A_map16	0002.CSV	3386.53	0.041886
CAM112A_map16	0002.CSV	3390.39	0.0421596
CAM112A_map16	0002.CSV	3394.24	0.042216
CAM112A_map16	0002.CSV	3398.1	0.0419062
CAM112A_map16	0002.CSV	3401.96	0.0414293
CAM112A_map16	0002.CSV	3405.82	0.0409023
CAM112A_map16	0002.CSV	3409.67	0.0407321
CAM112A_map16	0002.CSV	3413.53	0.0402563
CAM112A_map16	0002.CSV	3417.39	0.0395434
CAM112A_map16	0002.CSV	3421.24	0.0391454
CAM112A_map16	0002.CSV	3425.1	0.0390352
CAM112A_map16	0002.CSV	3428.96	0.0391538
CAM112A_map16	0002.CSV	3432.82	0.0391235
CAM112A_map16	0002.CSV	3436.67	0.0386895
CAM112A_map16	0002.CSV	3440.53	0.037856
CAM112A_map16	0002.CSV	3444.39	0.0372743
CAM112A_map16	0002.CSV	3448.24	0.0370034
CAM112A_map16	0002.CSV	3452.1	0.0365645
CAM112A_map16	0002.CSV	3455.96	0.0363593
CAM112A_map16	0002.CSV	3459.82	0.036408
CAM112A_map16	0002.CSV	3463.67	0.0365964
CAM112A_map16	0002.CSV	3467.53	0.036649
CAM112A_map16	0002.CSV	3471.39	0.0359655
CAM112A_map16	0002.CSV	3475.24	0.0352527
CAM112A_map16	0002.CSV	3479.1	0.0350098
CAM112A_map16	0002.CSV	3482.96	0.0347297
CAM112A_map16	0002.CSV	3486.82	0.0345112
CAM112A_map16	0002.CSV	3490.67	0.0341887
CAM112A_map16	0002.CSV	3494.53	0.0340985
CAM112A_map16	0002.CSV	3498.39	0.0339405
CAM112A_map16	0002.CSV	3502.24	0.0335162
CAM112A_map16	0002.CSV	3506.1	0.0327817
CAM112A_map16	0002.CSV	3509.96	0.0324393
CAM112A_map16	0002.CSV	3513.81	0.0324006
CAM112A_map16	0002.CSV	3517.67	0.0319088
CAM112A_map16	0002.CSV	3521.53	0.0316275
CAM112A_map16	0002.CSV	3525.39	0.031391
CAM112A_map16	0002.CSV	3529.24	0.0310568
CAM112A_map16	0002.CSV	3533.1	0.0309109
CAM112A_map16	0002.CSV	3536.96	0.0307503
CAM112A_map16	0002.CSV	3540.81	0.030518
CAM112A_map16	0002.CSV	3544.67	0.0305613
CAM112A_map16	0002.CSV	3548.53	0.030169
CAM112A_map16	0002.CSV	3552.39	0.0294492
CAM112A_map16	0002.CSV	3556.24	0.0289618
CAM112A_map16	0002.CSV	3560.1	0.0284397
CAM112A_map16	0002.CSV	3563.96	0.0277848
CAM112A_map16	0002.CSV	3567.81	0.0280382
CAM112A_map16	0002.CSV	3571.67	0.0279279
CAM112A_map16	0002.CSV	3575.53	0.0273007
CAM112A_map16	0002.CSV	3579.39	0.0272659
CAM112A_map16	0002.CSV	3583.24	0.0270404
CAM112A_map16	0002.CSV	3587.1	0.0267863
CAM112A_map16	0002.CSV	3590.96	0.0264665
CAM112A_map16	0002.CSV	3594.81	0.0259109
CAM112A_map16	0002.CSV	3598.67	0.0258723
CAM112A_map16	0002.CSV	3602.53	0.0256111
CAM112A_map16	0002.CSV	3606.39	0.0247902
CAM112A_map16	0002.CSV	3610.24	0.024327
CAM112A_map16	0002.CSV	3614.1	0.024093
CAM112A_map16	0002.CSV	3617.96	0.0243656
CAM112A_map16	0002.CSV	3621.81	0.0245261
CAM112A_map16	0002.CSV	3625.67	0.0235954
CAM112A_map16	0002.CSV	3629.53	0.0233248
CAM112A_map16	0002.CSV	3633.39	0.0238033
CAM112A_map16	0002.CSV	3637.24	0.0234568
CAM112A_map16	0002.CSV	3641.1	0.0230159
CAM112A_map16	0002.CSV	3644.96	0.0222764
CAM112A_map16	0002.CSV	3648.81	0.0226411
CAM112A_map16	0002.CSV	3652.67	0.0233514
CAM112A_map16	0002.CSV	3656.53	0.0232557
CAM112A_map16	0002.CSV	3660.38	0.0230602
CAM112A_map16	0002.CSV	3664.24	0.0220066
CAM112A_map16	0002.CSV	3668.1	0.0210614
CAM112A_map16	0002.CSV	3671.96	0.0209965
CAM112A_map16	0002.CSV	3675.81	0.0215946
CAM112A_map16	0002.CSV	3679.67	0.0220631
CAM112A_map16	0002.CSV	3683.53	0.0216722
CAM112A_map16	0002.CSV	3687.38	0.0215432
CAM112A_map16	0002.CSV	3691.24	0.0223569
CAM112A_map16	0002.CSV	3695.1	0.0220952
CAM112A_map16	0002.CSV	3698.95	0.021377
CAM112A_map16	0002.CSV	3702.81	0.021021
CAM112A_map16	0002.CSV	3706.67	0.0204577
CAM112A_map16	0002.CSV	3710.53	0.0204789
CAM112A_map16	0002.CSV	3714.38	0.0213675
CAM112A_map16	0002.CSV	3718.24	0.0209087
CAM112A_map16	0002.CSV	3722.1	0.0204941
CAM112A_map16	0002.CSV	3725.95	0.0206075
CAM112A_map16	0002.CSV	3729.81	0.0203732
CAM112A_map16	0002.CSV	3733.67	0.0205449
CAM112A_map16	0002.CSV	3737.53	0.0218208
CAM112A_map16	0002.CSV	3741.38	0.0209332
CAM112A_map16	0002.CSV	3745.24	0.0198842
CAM112A_map16	0002.CSV	3749.1	0.020002
CAM112A_map16	0002.CSV	3752.95	0.0210559
CAM112A_map16	0002.CSV	3756.81	0.0212181
CAM112A_map16	0002.CSV	3760.67	0.0210822
CAM112A_map16	0002.CSV	3764.53	0.0207056
CAM112A_map16	0002.CSV	3768.38	0.020812
CAM112A_map16	0002.CSV	3772.24	0.0211017
CAM112A_map16	0002.CSV	3776.1	0.0208229
CAM112A_map16	0002.CSV	3779.95	0.0208546
CAM112A_map16	0002.CSV	3783.81	0.0209151
CAM112A_map16	0002.CSV	3787.67	0.0209706
CAM112A_map16	0002.CSV	3791.53	0.0206604
CAM112A_map16	0002.CSV	3795.38	0.0200463
CAM112A_map16	0002.CSV	3799.24	0.0199456
CAM112A_map16	0002.CSV	3803.1	0.0206857
CAM112A_map16	0002.CSV	3806.95	0.0211236
CAM112A_map16	0002.CSV	3810.81	0.0206496
CAM112A_map16	0002.CSV	3814.67	0.0200266
CAM112A_map16	0002.CSV	3818.53	0.0202202
CAM112A_map16	0002.CSV	3822.38	0.0208857
CAM112A_map16	0002.CSV	3826.24	0.0207874
CAM112A_map16	0002.CSV	3830.1	0.0202807
CAM112A_map16	0002.CSV	3833.95	0.0199983
CAM112A_map16	0002.CSV	3837.81	0.0203028
CAM112A_map16	0002.CSV	3841.67	0.0212137
CAM112A_map16	0002.CSV	3845.53	0.020947
CAM112A_map16	0002.CSV	3849.38	0.0197978
CAM112A_map16	0002.CSV	3853.24	0.0199176
CAM112A_map16	0002.CSV	3857.1	0.0208264
CAM112A_map16	0002.CSV	3860.95	0.0201679
CAM112A_map16	0002.CSV	3864.81	0.0201447
CAM112A_map16	0002.CSV	3868.67	0.0204245
CAM112A_map16	0002.CSV	3872.52	0.0209488
CAM112A_map16	0002.CSV	3876.38	0.0207098
CAM112A_map16	0002.CSV	3880.24	0.0204315
CAM112A_map16	0002.CSV	3884.1	0.0209312
CAM112A_map16	0002.CSV	3887.95	0.02092
CAM112A_map16	0002.CSV	3891.81	0.0209054
CAM112A_map16	0002.CSV	3895.67	0.0205683
CAM112A_map16	0002.CSV	3899.52	0.0201262
CAM112A_map16	0002.CSV	3903.38	0.0210915
CAM112A_map16	0002.CSV	3907.24	0.0214641
CAM112A_map16	0002.CSV	3911.1	0.0208615
CAM112A_map16	0002.CSV	3914.95	0.0204626
CAM112A_map16	0002.CSV	3918.81	0.0206612
CAM112A_map16	0002.CSV	3922.67	0.0207913
CAM112A_map16	0002.CSV	3926.52	0.0208417
CAM112A_map16	0002.CSV	3930.38	0.0209554
CAM112A_map16	0002.CSV	3934.24	0.0212264
CAM112A_map16	0002.CSV	3938.09	0.0209296
CAM112A_map16	0002.CSV	3941.95	0.0207899
CAM112A_map16	0002.CSV	3945.81	0.020911
CAM112A_map16	0002.CSV	3949.67	0.0210204
CAM112A_map16	0002.CSV	3953.52	0.0210333
CAM112A_map16	0002.CSV	3957.38	0.0209458
CAM112A_map16	0002.CSV	3961.24	0.0210301
CAM112A_map16	0002.CSV	3965.09	0.0210904
CAM112A_map16	0002.CSV	3968.95	0.0210237
CAM112A_map16	0002.CSV	3972.81	0.0210835
CAM112A_map16	0002.CSV	3976.67	0.0211857
CAM112A_map16	0002.CSV	3980.52	0.0211668
CAM112A_map16	0002.CSV	3984.38	0.0211808
CAM112A_map16	0002.CSV	3988.24	0.0211013
CAM112A_map16	0002.CSV	3992.09	0.0210633
CAM112A_map16	0002.CSV	3995.95	0.0210526
CAM112A_map16	0002.CSV	3999.81	0.0210775
CAM112A_map16	0003.CSV	674.992	0.0326289
CAM112A_map16	0003.CSV	678.849	0.0332617
CAM112A_map16	0003.CSV	682.706	0.03363
CAM112A_map16	0003.CSV	686.563	0.0356892
CAM112A_map16	0003.CSV	690.42	0.0379068
CAM112A_map16	0003.CSV	694.277	0.0422662
CAM112A_map16	0003.CSV	698.134	0.0471079
CAM112A_map16	0003.CSV	701.991	0.053196
CAM112A_map16	0003.CSV	705.849	0.0652052
CAM112A_map16	0003.CSV	709.706	0.0836948
CAM112A_map16	0003.CSV	713.563	0.0768283
CAM112A_map16	0003.CSV	717.42	0.0480603
CAM112A_map16	0003.CSV	721.277	0.0311942
CAM112A_map16	0003.CSV	725.134	0.0285061
CAM112A_map16	0003.CSV	728.991	0.028446
CAM112A_map16	0003.CSV	732.848	0.0294041
CAM112A_map16	0003.CSV	736.705	0.0304051
CAM112A_map16	0003.CSV	740.562	0.031508
CAM112A_map16	0003.CSV	744.42	0.0320331
CAM112A_map16	0003.CSV	748.277	0.0326828
CAM112A_map16	0003.CSV	752.134	0.0328976
CAM112A_map16	0003.CSV	755.991	0.0334293
CAM112A_map16	0003.CSV	759.848	0.033684
CAM112A_map16	0003.CSV	763.705	0.0340427
CAM112A_map16	0003.CSV	767.562	0.0342566
CAM112A_map16	0003.CSV	771.419	0.0347773
CAM112A_map16	0003.CSV	775.276	0.0347022
CAM112A_map16	0003.CSV	779.133	0.0350583
CAM112A_map16	0003.CSV	782.99	0.0351443
CAM112A_map16	0003.CSV	786.848	0.0352914
CAM112A_map16	0003.CSV	790.705	0.035406
CAM112A_map16	0003.CSV	794.562	0.0358874
CAM112A_map16	0003.CSV	798.419	0.0362285
CAM112A_map16	0003.CSV	802.276	0.0369383
CAM112A_map16	0003.CSV	806.133	0.0374272
CAM112A_map16	0003.CSV	809.99	0.0382596
CAM112A_map16	0003.CSV	813.847	0.0390243
CAM112A_map16	0003.CSV	817.704	0.0403198
CAM112A_map16	0003.CSV	821.562	0.0417425
CAM112A_map16	0003.CSV	825.419	0.0432013
CAM112A_map16	0003.CSV	829.276	0.0441913
CAM112A_map16	0003.CSV	833.133	0.0459184
CAM112A_map16	0003.CSV	836.99	0.0479077
CAM112A_map16	0003.CSV	840.847	0.0511804
CAM112A_map16	0003.CSV	844.704	0.0563468
CAM112A_map16	0003.CSV	848.561	0.0598611
CAM112A_map16	0003.CSV	852.418	0.0619905
CAM112A_map16	0003.CSV	856.275	0.069959
CAM112A_map16	0003.CSV	860.132	0.0857446
CAM112A_map16	0003.CSV	863.99	0.114238
CAM112A_map16	0003.CSV	867.847	0.150713
CAM112A_map16	0003.CSV	871.704	0.165719
CAM112A_map16	0003.CSV	875.561	0.145979
CAM112A_map16	0003.CSV	879.418	0.114724
CAM112A_map16	0003.CSV	883.275	0.0795716
CAM112A_map16	0003.CSV	887.132	0.0474513
CAM112A_map16	0003.CSV	890.989	0.0329212
CAM112A_map16	0003.CSV	894.846	0.0314531
CAM112A_map16	0003.CSV	898.703	0.0319397
CAM112A_map16	0003.CSV	902.561	0.0326979
CAM112A_map16	0003.CSV	906.418	0.0332671
CAM112A_map16	0003.CSV	910.275	0.0340278
CAM112A_map16	0003.CSV	914.132	0.0344437
CAM112A_map16	0003.CSV	917.989	0.0349701
CAM112A_map16	0003.CSV	921.846	0.0352491
CAM112A_map16	0003.CSV	925.703	0.0359236
CAM112A_map16	0003.CSV	929.56	0.0363814
CAM112A_map16	0003.CSV	933.417	0.036868
CAM112A_map16	0003.CSV	937.274	0.037058
CAM112A_map16	0003.CSV	941.131	0.0373916
CAM112A_map16	0003.CSV	944.989	0.0375723
CAM112A_map16	0003.CSV	948.846	0.0379501
CAM112A_map16	0003.CSV	952.703	0.0381719
CAM112A_map16	0003.CSV	956.56	0.0386393
CAM112A_map16	0003.CSV	960.417	0.0388238
CAM112A_map16	0003.CSV	964.274	0.039104
CAM112A_map16	0003.CSV	968.131	0.0393825
CAM112A_map16	0003.CSV	971.988	0.0399689
CAM112A_map16	0003.CSV	975.845	0.0404131
CAM112A_map16	0003.CSV	979.702	0.0410713
CAM112A_map16	0003.CSV	983.559	0.0415944
CAM112A_map16	0003.CSV	987.417	0.0422796
CAM112A_map16	0003.CSV	991.274	0.042803
CAM112A_map16	0003.CSV	995.131	0.0434073
CAM112A_map16	0003.CSV	998.988	0.0437631
CAM112A_map16	0003.CSV	1002.85	0.0443694
CAM112A_map16	0003.CSV	1006.7	0.0448449
CAM112A_map16	0003.CSV	1010.56	0.0454768
CAM112A_map16	0003.CSV	1014.42	0.0459056
CAM112A_map16	0003.CSV	1018.27	0.0465352
CAM112A_map16	0003.CSV	1022.13	0.0469916
CAM112A_map16	0003.CSV	1025.99	0.0475111
CAM112A_map16	0003.CSV	1029.85	0.0477962
CAM112A_map16	0003.CSV	1033.7	0.0483037
CAM112A_map16	0003.CSV	1037.56	0.0486889
CAM112A_map16	0003.CSV	1041.42	0.049202
CAM112A_map16	0003.CSV	1045.27	0.0493846
CAM112A_map16	0003.CSV	1049.13	0.0498526
CAM112A_map16	0003.CSV	1052.99	0.0504113
CAM112A_map16	0003.CSV	1056.84	0.0513833
CAM112A_map16	0003.CSV	1060.7	0.0522066
CAM112A_map16	0003.CSV	1064.56	0.0530693
CAM112A_map16	0003.CSV	1068.42	0.053415
CAM112A_map16	0003.CSV	1072.27	0.0535971
CAM112A_map16	0003.CSV	1076.13	0.0535526
CAM112A_map16	0003.CSV	1079.99	0.0538019
CAM112A_map16	0003.CSV	1083.84	0.0540289
CAM112A_map16	0003.CSV	1087.7	0.054302
CAM112A_map16	0003.CSV	1091.56	0.0539881
CAM112A_map16	0003.CSV	1095.41	0.0538048
CAM112A_map16	0003.CSV	1099.27	0.0537443
CAM112A_map16	0003.CSV	1103.13	0.0542135
CAM112A_map16	0003.CSV	1106.99	0.0548689
CAM112A_map16	0003.CSV	1110.84	0.0558424
CAM112A_map16	0003.CSV	1114.7	0.0564035
CAM112A_map16	0003.CSV	1118.56	0.0569127
CAM112A_map16	0003.CSV	1122.41	0.057095
CAM112A_map16	0003.CSV	1126.27	0.0573142
CAM112A_map16	0003.CSV	1130.13	0.0573042
CAM112A_map16	0003.CSV	1133.99	0.0575332
CAM112A_map16	0003.CSV	1137.84	0.0577335
CAM112A_map16	0003.CSV	1141.7	0.0581974
CAM112A_map16	0003.CSV	1145.56	0.0584419
CAM112A_map16	0003.CSV	1149.41	0.0589582
CAM112A_map16	0003.CSV	1153.27	0.0594701
CAM112A_map16	0003.CSV	1157.13	0.0601952
CAM112A_map16	0003.CSV	1160.99	0.0606386
CAM112A_map16	0003.CSV	1164.84	0.060939
CAM112A_map16	0003.CSV	1168.7	0.0609093
CAM112A_map16	0003.CSV	1172.56	0.0610202
CAM112A_map16	0003.CSV	1176.41	0.060996
CAM112A_map16	0003.CSV	1180.27	0.0611914
CAM112A_map16	0003.CSV	1184.13	0.0611815
CAM112A_map16	0003.CSV	1187.99	0.0612807
CAM112A_map16	0003.CSV	1191.84	0.0611986
CAM112A_map16	0003.CSV	1195.7	0.0614005
CAM112A_map16	0003.CSV	1199.56	0.061619
CAM112A_map16	0003.CSV	1203.41	0.0621582
CAM112A_map16	0003.CSV	1207.27	0.0626852
CAM112A_map16	0003.CSV	1211.13	0.0633966
CAM112A_map16	0003.CSV	1214.98	0.0639931
CAM112A_map16	0003.CSV	1218.84	0.0648801
CAM112A_map16	0003.CSV	1222.7	0.0657163
CAM112A_map16	0003.CSV	1226.56	0.0667998
CAM112A_map16	0003.CSV	1230.41	0.0678054
CAM112A_map16	0003.CSV	1234.27	0.06905
CAM112A_map16	0003.CSV	1238.13	0.0701705
CAM112A_map16	0003.CSV	1241.98	0.0714826
CAM112A_map16	0003.CSV	1245.84	0.0727248
CAM112A_map16	0003.CSV	1249.7	0.0741452
CAM112A_map16	0003.CSV	1253.56	0.0752447
CAM112A_map16	0003.CSV	1257.41	0.0764074
CAM112A_map16	0003.CSV	1261.27	0.0773315
CAM112A_map16	0003.CSV	1265.13	0.0784947
CAM112A_map16	0003.CSV	1268.98	0.0796545
CAM112A_map16	0003.CSV	1272.84	0.0811634
CAM112A_map16	0003.CSV	1276.7	0.082403
CAM112A_map16	0003.CSV	1280.56	0.0837777
CAM112A_map16	0003.CSV	1284.41	0.0850257
CAM112A_map16	0003.CSV	1288.27	0.0865804
CAM112A_map16	0003.CSV	1292.13	0.0878902
CAM112A_map16	0003.CSV	1295.98	0.0894023
CAM112A_map16	0003.CSV	1299.84	0.0909737
CAM112A_map16	0003.CSV	1303.7	0.0929608
CAM112A_map16	0003.CSV	1307.56	0.0948825
CAM112A_map16	0003.CSV	1311.41	0.0972274
CAM112A_map16	0003.CSV	1315.27	0.0995841
CAM112A_map16	0003.CSV	1319.13	0.102318
CAM112A_map16	0003.CSV	1322.98	0.104763
CAM112A_map16	0003.CSV	1326.84	0.107583
CAM112A_map16	0003.CSV	1330.7	0.110551
CAM112A_map16	0003.CSV	1334.56	0.113783
CAM112A_map16	0003.CSV	1338.41	0.11765
CAM112A_map16	0003.CSV	1342.27	0.122496
CAM112A_map16	0003.CSV	1346.13	0.12633
CAM112A_map16	0003.CSV	1349.98	0.13083
CAM112A_map16	0003.CSV	1353.84	0.13557
CAM112A_map16	0003.CSV	1357.7	0.14059
CAM112A_map16	0003.CSV	1361.56	0.146167
CAM112A_map16	0003.CSV	1365.41	0.152891
CAM112A_map16	0003.CSV	1369.27	0.158159
CAM112A_map16	0003.CSV	1373.13	0.164614
CAM112A_map16	0003.CSV	1376.98	0.171328
CAM112A_map16	0003.CSV	1380.84	0.176968
CAM112A_map16	0003.CSV	1384.7	0.181954
CAM112A_map16	0003.CSV	1388.56	0.188089
CAM112A_map16	0003.CSV	1392.41	0.191631
CAM112A_map16	0003.CSV	1396.27	0.193357
CAM112A_map16	0003.CSV	1400.13	0.192271
CAM112A_map16	0003.CSV	1403.98	0.190203
CAM112A_map16	0003.CSV	1407.84	0.185771
CAM112A_map16	0003.CSV	1411.7	0.180194
CAM112A_map16	0003.CSV	1415.55	0.17398
CAM112A_map16	0003.CSV	1419.41	0.16715
CAM112A_map16	0003.CSV	1423.27	0.160848
CAM112A_map16	0003.CSV	1427.12	0.1566
CAM112A_map16	0003.CSV	1430.98	0.152052
CAM112A_map16	0003.CSV	1434.84	0.14756
CAM112A_map16	0003.CSV	1438.7	0.141948
CAM112A_map16	0003.CSV	1442.55	0.137656
CAM112A_map16	0003.CSV	1446.41	0.132817
CAM112A_map16	0003.CSV	1450.27	0.127835
CAM112A_map16	0003.CSV	1454.12	0.12331
CAM112A_map16	0003.CSV	1457.98	0.117285
CAM112A_map16	0003.CSV	1461.84	0.112091
CAM112A_map16	0003.CSV	1465.7	0.108093
CAM112A_map16	0003.CSV	1469.55	0.103836
CAM112A_map16	0003.CSV	1473.41	0.0990333
CAM112A_map16	0003.CSV	1477.27	0.0934848
CAM112A_map16	0003.CSV	1481.12	0.0896846
CAM112A_map16	0003.CSV	1484.98	0.0861073
CAM112A_map16	0003.CSV	1488.84	0.0820244
CAM112A_map16	0003.CSV	1492.7	0.077621
CAM112A_map16	0003.CSV	1496.55	0.0739779
CAM112A_map16	0003.CSV	1500.41	0.0700058
CAM112A_map16	0003.CSV	1504.27	0.0673683
CAM112A_map16	0003.CSV	1508.12	0.0633222
CAM112A_map16	0003.CSV	1511.98	0.0602446
CAM112A_map16	0003.CSV	1515.84	0.0578728
CAM112A_map16	0003.CSV	1519.7	0.0552374
CAM112A_map16	0003.CSV	1523.55	0.0524833
CAM112A_map16	0003.CSV	1527.41	0.0504163
CAM112A_map16	0003.CSV	1531.27	0.0484908
CAM112A_map16	0003.CSV	1535.12	0.0470523
CAM112A_map16	0003.CSV	1538.98	0.0455037
CAM112A_map16	0003.CSV	1542.84	0.0423293
CAM112A_map16	0003.CSV	1546.7	0.0388574
CAM112A_map16	0003.CSV	1550.55	0.035901
CAM112A_map16	0003.CSV	1554.41	0.0333871
CAM112A_map16	0003.CSV	1558.27	0.0316553
CAM112A_map16	0003.CSV	1562.12	0.0306394
CAM112A_map16	0003.CSV	1565.98	0.0300847
CAM112A_map16	0003.CSV	1569.84	0.0298192
CAM112A_map16	0003.CSV	1573.69	0.0297658
CAM112A_map16	0003.CSV	1577.55	0.0297829
CAM112A_map16	0003.CSV	1581.41	0.0289273
CAM112A_map16	0003.CSV	1585.27	0.0276456
CAM112A_map16	0003.CSV	1589.12	0.0264566
CAM112A_map16	0003.CSV	1592.98	0.0255
CAM112A_map16	0003.CSV	1596.84	0.0248117
CAM112A_map16	0003.CSV	1600.69	0.0243159
CAM112A_map16	0003.CSV	1604.55	0.0241516
CAM112A_map16	0003.CSV	1608.41	0.0240188
CAM112A_map16	0003.CSV	1612.27	0.0236993
CAM112A_map16	0003.CSV	1616.12	0.0235231
CAM112A_map16	0003.CSV	1619.98	0.0235999
CAM112A_map16	0003.CSV	1623.84	0.0235648
CAM112A_map16	0003.CSV	1627.69	0.0235338
CAM112A_map16	0003.CSV	1631.55	0.0230691
CAM112A_map16	0003.CSV	1635.41	0.0231898
CAM112A_map16	0003.CSV	1639.27	0.0236231
CAM112A_map16	0003.CSV	1643.12	0.0233254
CAM112A_map16	0003.CSV	1646.98	0.0233323
CAM112A_map16	0003.CSV	1650.84	0.0237541
CAM112A_map16	0003.CSV	1654.69	0.0240861
CAM112A_map16	0003.CSV	1658.55	0.0234753
CAM112A_map16	0003.CSV	1662.41	0.0228386
CAM112A_map16	0003.CSV	1666.27	0.0224653
CAM112A_map16	0003.CSV	1670.12	0.0222579
CAM112A_map16	0003.CSV	1673.98	0.0222748
CAM112A_map16	0003.CSV	1677.84	0.0217836
CAM112A_map16	0003.CSV	1681.69	0.0214907
CAM112A_map16	0003.CSV	1685.55	0.0216438
CAM112A_map16	0003.CSV	1689.41	0.0213645
CAM112A_map16	0003.CSV	1693.27	0.0207133
CAM112A_map16	0003.CSV	1697.12	0.0206127
CAM112A_map16	0003.CSV	1700.98	0.0209033
CAM112A_map16	0003.CSV	1704.84	0.0208522
CAM112A_map16	0003.CSV	1708.69	0.0206315
CAM112A_map16	0003.CSV	1712.55	0.0204493
CAM112A_map16	0003.CSV	1716.41	0.0213057
CAM112A_map16	0003.CSV	1720.27	0.0224106
CAM112A_map16	0003.CSV	1724.12	0.0222533
[truncated: 96,383 more rows]

## Sheet: CAM112_map17
Map	Select spectrum number	Wavenumbers	Absorbance
CAM112A_map17	0001.CSV	674.992	0.0358487
CAM112A_map17	0001.CSV	678.849	0.0386999
CAM112A_map17	0001.CSV	682.706	0.0404197
CAM112A_map17	0001.CSV	686.563	0.0429639
CAM112A_map17	0001.CSV	690.42	0.0450647
CAM112A_map17	0001.CSV	694.277	0.0505524
CAM112A_map17	0001.CSV	698.134	0.0574883
CAM112A_map17	0001.CSV	701.991	0.0683308
CAM112A_map17	0001.CSV	705.849	0.0882837
CAM112A_map17	0001.CSV	709.706	0.115623
CAM112A_map17	0001.CSV	713.563	0.108205
CAM112A_map17	0001.CSV	717.42	0.0697553
CAM112A_map17	0001.CSV	721.277	0.0432909
CAM112A_map17	0001.CSV	725.134	0.0356257
CAM112A_map17	0001.CSV	728.991	0.0335406
CAM112A_map17	0001.CSV	732.848	0.0340157
CAM112A_map17	0001.CSV	736.705	0.0344081
CAM112A_map17	0001.CSV	740.562	0.0356168
CAM112A_map17	0001.CSV	744.42	0.0359304
CAM112A_map17	0001.CSV	748.277	0.0368201
CAM112A_map17	0001.CSV	752.134	0.0370119
CAM112A_map17	0001.CSV	755.991	0.0380412
CAM112A_map17	0001.CSV	759.848	0.0385438
CAM112A_map17	0001.CSV	763.705	0.0401324
CAM112A_map17	0001.CSV	767.562	0.0412088
CAM112A_map17	0001.CSV	771.419	0.0427427
CAM112A_map17	0001.CSV	775.276	0.0432092
CAM112A_map17	0001.CSV	779.133	0.0437437
CAM112A_map17	0001.CSV	782.99	0.0433798
CAM112A_map17	0001.CSV	786.848	0.0436202
CAM112A_map17	0001.CSV	790.705	0.0437472
CAM112A_map17	0001.CSV	794.562	0.0448687
CAM112A_map17	0001.CSV	798.419	0.0456365
CAM112A_map17	0001.CSV	802.276	0.0466663
CAM112A_map17	0001.CSV	806.133	0.0468998
CAM112A_map17	0001.CSV	809.99	0.0478277
CAM112A_map17	0001.CSV	813.847	0.0485858
CAM112A_map17	0001.CSV	817.704	0.0503154
CAM112A_map17	0001.CSV	821.562	0.0519887
CAM112A_map17	0001.CSV	825.419	0.0541544
CAM112A_map17	0001.CSV	829.276	0.0560726
CAM112A_map17	0001.CSV	833.133	0.0592075
CAM112A_map17	0001.CSV	836.99	0.0625654
CAM112A_map17	0001.CSV	840.847	0.0687852
CAM112A_map17	0001.CSV	844.704	0.0789249
CAM112A_map17	0001.CSV	848.561	0.0859036
CAM112A_map17	0001.CSV	852.418	0.0892812
CAM112A_map17	0001.CSV	856.275	0.104482
CAM112A_map17	0001.CSV	860.132	0.137445
CAM112A_map17	0001.CSV	863.99	0.198819
CAM112A_map17	0001.CSV	867.847	0.273762
CAM112A_map17	0001.CSV	871.704	0.294983
CAM112A_map17	0001.CSV	875.561	0.244571
CAM112A_map17	0001.CSV	879.418	0.178732
CAM112A_map17	0001.CSV	883.275	0.1122
CAM112A_map17	0001.CSV	887.132	0.0566249
CAM112A_map17	0001.CSV	890.989	0.0319322
CAM112A_map17	0001.CSV	894.846	0.029354
CAM112A_map17	0001.CSV	898.703	0.030456
CAM112A_map17	0001.CSV	902.561	0.0321185
CAM112A_map17	0001.CSV	906.418	0.0333526
CAM112A_map17	0001.CSV	910.275	0.0348913
CAM112A_map17	0001.CSV	914.132	0.0357507
CAM112A_map17	0001.CSV	917.989	0.0369977
CAM112A_map17	0001.CSV	921.846	0.0378828
CAM112A_map17	0001.CSV	925.703	0.0390935
CAM112A_map17	0001.CSV	929.56	0.0399323
CAM112A_map17	0001.CSV	933.417	0.0410709
CAM112A_map17	0001.CSV	937.274	0.0416401
CAM112A_map17	0001.CSV	941.131	0.0426165
CAM112A_map17	0001.CSV	944.989	0.0429779
CAM112A_map17	0001.CSV	948.846	0.0434711
CAM112A_map17	0001.CSV	952.703	0.0439015
CAM112A_map17	0001.CSV	956.56	0.0448327
CAM112A_map17	0001.CSV	960.417	0.0452893
CAM112A_map17	0001.CSV	964.274	0.0461334
CAM112A_map17	0001.CSV	968.131	0.0467716
CAM112A_map17	0001.CSV	971.988	0.0478958
CAM112A_map17	0001.CSV	975.845	0.0487686
CAM112A_map17	0001.CSV	979.702	0.0499222
CAM112A_map17	0001.CSV	983.559	0.0507336
CAM112A_map17	0001.CSV	987.417	0.0519712
CAM112A_map17	0001.CSV	991.274	0.052867
CAM112A_map17	0001.CSV	995.131	0.0539126
CAM112A_map17	0001.CSV	998.988	0.0546355
CAM112A_map17	0001.CSV	1002.85	0.0557578
CAM112A_map17	0001.CSV	1006.7	0.0565098
CAM112A_map17	0001.CSV	1010.56	0.0576301
CAM112A_map17	0001.CSV	1014.42	0.0584071
CAM112A_map17	0001.CSV	1018.27	0.0595349
CAM112A_map17	0001.CSV	1022.13	0.060291
CAM112A_map17	0001.CSV	1025.99	0.0613064
CAM112A_map17	0001.CSV	1029.85	0.0618835
CAM112A_map17	0001.CSV	1033.7	0.0629663
CAM112A_map17	0001.CSV	1037.56	0.0639192
CAM112A_map17	0001.CSV	1041.42	0.0651442
CAM112A_map17	0001.CSV	1045.27	0.0659178
CAM112A_map17	0001.CSV	1049.13	0.0671996
CAM112A_map17	0001.CSV	1052.99	0.0685035
CAM112A_map17	0001.CSV	1056.84	0.0707219
CAM112A_map17	0001.CSV	1060.7	0.0727922
CAM112A_map17	0001.CSV	1064.56	0.0748641
CAM112A_map17	0001.CSV	1068.42	0.0760622
CAM112A_map17	0001.CSV	1072.27	0.0772549
CAM112A_map17	0001.CSV	1076.13	0.0781779
CAM112A_map17	0001.CSV	1079.99	0.0798871
CAM112A_map17	0001.CSV	1083.84	0.0813675
CAM112A_map17	0001.CSV	1087.7	0.0826482
CAM112A_map17	0001.CSV	1091.56	0.0819089
CAM112A_map17	0001.CSV	1095.41	0.0805644
CAM112A_map17	0001.CSV	1099.27	0.0794966
CAM112A_map17	0001.CSV	1103.13	0.0798714
CAM112A_map17	0001.CSV	1106.99	0.080473
CAM112A_map17	0001.CSV	1110.84	0.0815643
CAM112A_map17	0001.CSV	1114.7	0.0821846
CAM112A_map17	0001.CSV	1118.56	0.0829844
CAM112A_map17	0001.CSV	1122.41	0.0833711
CAM112A_map17	0001.CSV	1126.27	0.0840867
CAM112A_map17	0001.CSV	1130.13	0.0841348
CAM112A_map17	0001.CSV	1133.99	0.0843529
CAM112A_map17	0001.CSV	1137.84	0.084499
CAM112A_map17	0001.CSV	1141.7	0.0852282
CAM112A_map17	0001.CSV	1145.56	0.0856439
CAM112A_map17	0001.CSV	1149.41	0.0864489
CAM112A_map17	0001.CSV	1153.27	0.0871283
CAM112A_map17	0001.CSV	1157.13	0.0884286
CAM112A_map17	0001.CSV	1160.99	0.0895021
CAM112A_map17	0001.CSV	1164.84	0.0905604
CAM112A_map17	0001.CSV	1168.7	0.0907994
CAM112A_map17	0001.CSV	1172.56	0.0910679
CAM112A_map17	0001.CSV	1176.41	0.0910221
CAM112A_map17	0001.CSV	1180.27	0.0912788
CAM112A_map17	0001.CSV	1184.13	0.090908
CAM112A_map17	0001.CSV	1187.99	0.0906682
CAM112A_map17	0001.CSV	1191.84	0.0902386
CAM112A_map17	0001.CSV	1195.7	0.0905488
CAM112A_map17	0001.CSV	1199.56	0.0908417
CAM112A_map17	0001.CSV	1203.41	0.091713
CAM112A_map17	0001.CSV	1207.27	0.0924591
CAM112A_map17	0001.CSV	1211.13	0.0935017
CAM112A_map17	0001.CSV	1214.98	0.093984
CAM112A_map17	0001.CSV	1218.84	0.0945952
CAM112A_map17	0001.CSV	1222.7	0.094981
CAM112A_map17	0001.CSV	1226.56	0.0960134
CAM112A_map17	0001.CSV	1230.41	0.0970742
CAM112A_map17	0001.CSV	1234.27	0.0989572
CAM112A_map17	0001.CSV	1238.13	0.100825
CAM112A_map17	0001.CSV	1241.98	0.10314
CAM112A_map17	0001.CSV	1245.84	0.10534
CAM112A_map17	0001.CSV	1249.7	0.108186
CAM112A_map17	0001.CSV	1253.56	0.11062
CAM112A_map17	0001.CSV	1257.41	0.113082
CAM112A_map17	0001.CSV	1261.27	0.114842
CAM112A_map17	0001.CSV	1265.13	0.116878
CAM112A_map17	0001.CSV	1268.98	0.118823
CAM112A_map17	0001.CSV	1272.84	0.121582
CAM112A_map17	0001.CSV	1276.7	0.124253
CAM112A_map17	0001.CSV	1280.56	0.127409
CAM112A_map17	0001.CSV	1284.41	0.130155
CAM112A_map17	0001.CSV	1288.27	0.133246
CAM112A_map17	0001.CSV	1292.13	0.135778
CAM112A_map17	0001.CSV	1295.98	0.138819
CAM112A_map17	0001.CSV	1299.84	0.141891
CAM112A_map17	0001.CSV	1303.7	0.145883
CAM112A_map17	0001.CSV	1307.56	0.150106
CAM112A_map17	0001.CSV	1311.41	0.155435
CAM112A_map17	0001.CSV	1315.27	0.160693
CAM112A_map17	0001.CSV	1319.13	0.166543
CAM112A_map17	0001.CSV	1322.98	0.171725
CAM112A_map17	0001.CSV	1326.84	0.177769
CAM112A_map17	0001.CSV	1330.7	0.184338
CAM112A_map17	0001.CSV	1334.56	0.191994
CAM112A_map17	0001.CSV	1338.41	0.201475
CAM112A_map17	0001.CSV	1342.27	0.213686
CAM112A_map17	0001.CSV	1346.13	0.224166
CAM112A_map17	0001.CSV	1349.98	0.236832
CAM112A_map17	0001.CSV	1353.84	0.250635
CAM112A_map17	0001.CSV	1357.7	0.265781
CAM112A_map17	0001.CSV	1361.56	0.283359
CAM112A_map17	0001.CSV	1365.41	0.305268
CAM112A_map17	0001.CSV	1369.27	0.323675
CAM112A_map17	0001.CSV	1373.13	0.34643
CAM112A_map17	0001.CSV	1376.98	0.371003
CAM112A_map17	0001.CSV	1380.84	0.39124
CAM112A_map17	0001.CSV	1384.7	0.408051
CAM112A_map17	0001.CSV	1388.56	0.426087
CAM112A_map17	0001.CSV	1392.41	0.434391
CAM112A_map17	0001.CSV	1396.27	0.434895
CAM112A_map17	0001.CSV	1400.13	0.426499
CAM112A_map17	0001.CSV	1403.98	0.415857
CAM112A_map17	0001.CSV	1407.84	0.397435
CAM112A_map17	0001.CSV	1411.7	0.376375
CAM112A_map17	0001.CSV	1415.55	0.355081
CAM112A_map17	0001.CSV	1419.41	0.332932
CAM112A_map17	0001.CSV	1423.27	0.314903
CAM112A_map17	0001.CSV	1427.12	0.303809
CAM112A_map17	0001.CSV	1430.98	0.292161
CAM112A_map17	0001.CSV	1434.84	0.281135
CAM112A_map17	0001.CSV	1438.7	0.267766
CAM112A_map17	0001.CSV	1442.55	0.257775
CAM112A_map17	0001.CSV	1446.41	0.246527
CAM112A_map17	0001.CSV	1450.27	0.235074
CAM112A_map17	0001.CSV	1454.12	0.22523
CAM112A_map17	0001.CSV	1457.98	0.211272
CAM112A_map17	0001.CSV	1461.84	0.200142
CAM112A_map17	0001.CSV	1465.7	0.191962
CAM112A_map17	0001.CSV	1469.55	0.183412
CAM112A_map17	0001.CSV	1473.41	0.173389
CAM112A_map17	0001.CSV	1477.27	0.16257
CAM112A_map17	0001.CSV	1481.12	0.156101
CAM112A_map17	0001.CSV	1484.98	0.14971
CAM112A_map17	0001.CSV	1488.84	0.141879
CAM112A_map17	0001.CSV	1492.7	0.133632
CAM112A_map17	0001.CSV	1496.55	0.127096
CAM112A_map17	0001.CSV	1500.41	0.119502
CAM112A_map17	0001.CSV	1504.27	0.114919
CAM112A_map17	0001.CSV	1508.12	0.106407
CAM112A_map17	0001.CSV	1511.98	0.100321
CAM112A_map17	0001.CSV	1515.84	0.0961685
CAM112A_map17	0001.CSV	1519.7	0.0912623
CAM112A_map17	0001.CSV	1523.55	0.0852914
CAM112A_map17	0001.CSV	1527.41	0.0811345
CAM112A_map17	0001.CSV	1531.27	0.0773955
CAM112A_map17	0001.CSV	1535.12	0.0742863
CAM112A_map17	0001.CSV	1538.98	0.0705425
CAM112A_map17	0001.CSV	1542.84	0.0624233
CAM112A_map17	0001.CSV	1546.7	0.0562646
CAM112A_map17	0001.CSV	1550.55	0.0517752
CAM112A_map17	0001.CSV	1554.41	0.0476031
CAM112A_map17	0001.CSV	1558.27	0.0436997
CAM112A_map17	0001.CSV	1562.12	0.0406825
CAM112A_map17	0001.CSV	1565.98	0.0394205
CAM112A_map17	0001.CSV	1569.84	0.0385298
CAM112A_map17	0001.CSV	1573.69	0.0381494
CAM112A_map17	0001.CSV	1577.55	0.0374078
CAM112A_map17	0001.CSV	1581.41	0.0357556
CAM112A_map17	0001.CSV	1585.27	0.0334636
CAM112A_map17	0001.CSV	1589.12	0.0312877
CAM112A_map17	0001.CSV	1592.98	0.0293899
CAM112A_map17	0001.CSV	1596.84	0.0278944
CAM112A_map17	0001.CSV	1600.69	0.0267202
CAM112A_map17	0001.CSV	1604.55	0.025956
CAM112A_map17	0001.CSV	1608.41	0.0252959
CAM112A_map17	0001.CSV	1612.27	0.0247658
CAM112A_map17	0001.CSV	1616.12	0.0241784
CAM112A_map17	0001.CSV	1619.98	0.0238857
CAM112A_map17	0001.CSV	1623.84	0.0233725
CAM112A_map17	0001.CSV	1627.69	0.0227507
CAM112A_map17	0001.CSV	1631.55	0.0219328
CAM112A_map17	0001.CSV	1635.41	0.0213996
CAM112A_map17	0001.CSV	1639.27	0.0209813
CAM112A_map17	0001.CSV	1643.12	0.0206102
CAM112A_map17	0001.CSV	1646.98	0.020786
CAM112A_map17	0001.CSV	1650.84	0.0213743
CAM112A_map17	0001.CSV	1654.69	0.0215603
CAM112A_map17	0001.CSV	1658.55	0.0212096
CAM112A_map17	0001.CSV	1662.41	0.0206258
CAM112A_map17	0001.CSV	1666.27	0.0202037
CAM112A_map17	0001.CSV	1670.12	0.0199283
CAM112A_map17	0001.CSV	1673.98	0.0200404
CAM112A_map17	0001.CSV	1677.84	0.0196279
CAM112A_map17	0001.CSV	1681.69	0.0193384
CAM112A_map17	0001.CSV	1685.55	0.019322
CAM112A_map17	0001.CSV	1689.41	0.0191262
CAM112A_map17	0001.CSV	1693.27	0.018582
CAM112A_map17	0001.CSV	1697.12	0.0185517
CAM112A_map17	0001.CSV	1700.98	0.0188443
CAM112A_map17	0001.CSV	1704.84	0.0191919
CAM112A_map17	0001.CSV	1708.69	0.0194114
CAM112A_map17	0001.CSV	1712.55	0.0196082
CAM112A_map17	0001.CSV	1716.41	0.0205645
CAM112A_map17	0001.CSV	1720.27	0.0219527
CAM112A_map17	0001.CSV	1724.12	0.0222528
CAM112A_map17	0001.CSV	1727.98	0.0224512
CAM112A_map17	0001.CSV	1731.84	0.0226171
CAM112A_map17	0001.CSV	1735.69	0.0228775
CAM112A_map17	0001.CSV	1739.55	0.022311
CAM112A_map17	0001.CSV	1743.41	0.0212115
CAM112A_map17	0001.CSV	1747.27	0.0197497
CAM112A_map17	0001.CSV	1751.12	0.0182378
CAM112A_map17	0001.CSV	1754.98	0.0170895
CAM112A_map17	0001.CSV	1758.84	0.0163561
CAM112A_map17	0001.CSV	1762.69	0.0159325
CAM112A_map17	0001.CSV	1766.55	0.0156734
CAM112A_map17	0001.CSV	1770.41	0.0156695
CAM112A_map17	0001.CSV	1774.26	0.0161171
CAM112A_map17	0001.CSV	1778.12	0.0163014
CAM112A_map17	0001.CSV	1781.98	0.0170303
CAM112A_map17	0001.CSV	1785.84	0.0183508
CAM112A_map17	0001.CSV	1789.69	0.020456
CAM112A_map17	0001.CSV	1793.55	0.0232858
CAM112A_map17	0001.CSV	1797.41	0.023727
CAM112A_map17	0001.CSV	1801.26	0.0215403
CAM112A_map17	0001.CSV	1805.12	0.0188089
CAM112A_map17	0001.CSV	1808.98	0.0167838
CAM112A_map17	0001.CSV	1812.84	0.0155791
CAM112A_map17	0001.CSV	1816.69	0.0147937
CAM112A_map17	0001.CSV	1820.55	0.0143629
CAM112A_map17	0001.CSV	1824.41	0.0140567
CAM112A_map17	0001.CSV	1828.26	0.014064
CAM112A_map17	0001.CSV	1832.12	0.0139974
CAM112A_map17	0001.CSV	1835.98	0.0138711
CAM112A_map17	0001.CSV	1839.84	0.0136312
CAM112A_map17	0001.CSV	1843.69	0.0137041
CAM112A_map17	0001.CSV	1847.55	0.0138014
CAM112A_map17	0001.CSV	1851.41	0.0136551
CAM112A_map17	0001.CSV	1855.26	0.0135501
CAM112A_map17	0001.CSV	1859.12	0.0135889
CAM112A_map17	0001.CSV	1862.98	0.0135045
CAM112A_map17	0001.CSV	1866.84	0.01362
CAM112A_map17	0001.CSV	1870.69	0.0138058
CAM112A_map17	0001.CSV	1874.55	0.0136781
CAM112A_map17	0001.CSV	1878.41	0.0135588
CAM112A_map17	0001.CSV	1882.26	0.0135948
CAM112A_map17	0001.CSV	1886.12	0.0135366
CAM112A_map17	0001.CSV	1889.98	0.0136349
CAM112A_map17	0001.CSV	1893.83	0.0136807
CAM112A_map17	0001.CSV	1897.69	0.0137083
CAM112A_map17	0001.CSV	1901.55	0.0136587
CAM112A_map17	0001.CSV	1905.41	0.0136632
CAM112A_map17	0001.CSV	1909.26	0.0136946
CAM112A_map17	0001.CSV	1913.12	0.0137178
CAM112A_map17	0001.CSV	1916.98	0.0136558
CAM112A_map17	0001.CSV	1920.83	0.0137982
CAM112A_map17	0001.CSV	1924.69	0.0138318
CAM112A_map17	0001.CSV	1928.55	0.0137788
CAM112A_map17	0001.CSV	1932.4	0.013727
CAM112A_map17	0001.CSV	1936.26	0.013788
CAM112A_map17	0001.CSV	1940.12	0.0138209
CAM112A_map17	0001.CSV	1943.98	0.0140646
CAM112A_map17	0001.CSV	1947.83	0.014081
CAM112A_map17	0001.CSV	1951.69	0.0140572
CAM112A_map17	0001.CSV	1955.55	0.0140681
CAM112A_map17	0001.CSV	1959.4	0.0141629
CAM112A_map17	0001.CSV	1963.26	0.014154
CAM112A_map17	0001.CSV	1967.12	0.0141851
CAM112A_map17	0001.CSV	1970.98	0.014223
CAM112A_map17	0001.CSV	1974.83	0.0142688
CAM112A_map17	0001.CSV	1978.69	0.0142551
CAM112A_map17	0001.CSV	1982.55	0.0142882
CAM112A_map17	0001.CSV	1986.4	0.0142866
CAM112A_map17	0001.CSV	1990.26	0.0143881
CAM112A_map17	0001.CSV	1994.12	0.0144769
CAM112A_map17	0001.CSV	1997.98	0.0144947
CAM112A_map17	0001.CSV	2001.83	0.0144961
CAM112A_map17	0001.CSV	2005.69	0.0145931
CAM112A_map17	0001.CSV	2009.55	0.0146068
CAM112A_map17	0001.CSV	2013.4	0.0146026
CAM112A_map17	0001.CSV	2017.26	0.0146627
CAM112A_map17	0001.CSV	2021.12	0.014769
CAM112A_map17	0001.CSV	2024.97	0.0147758
CAM112A_map17	0001.CSV	2028.83	0.0148635
CAM112A_map17	0001.CSV	2032.69	0.0148832
CAM112A_map17	0001.CSV	2036.55	0.0149162
CAM112A_map17	0001.CSV	2040.4	0.0149334
CAM112A_map17	0001.CSV	2044.26	0.0150136
CAM112A_map17	0001.CSV	2048.12	0.0150246
CAM112A_map17	0001.CSV	2051.97	0.0150437
CAM112A_map17	0001.CSV	2055.83	0.0150276
CAM112A_map17	0001.CSV	2059.69	0.0151023
CAM112A_map17	0001.CSV	2063.55	0.0151729
CAM112A_map17	0001.CSV	2067.4	0.0152584
CAM112A_map17	0001.CSV	2071.26	0.0152837
CAM112A_map17	0001.CSV	2075.12	0.0153049
CAM112A_map17	0001.CSV	2078.97	0.0152873
CAM112A_map17	0001.CSV	2082.83	0.0153442
CAM112A_map17	0001.CSV	2086.69	0.0153782
CAM112A_map17	0001.CSV	2090.55	0.015416
CAM112A_map17	0001.CSV	2094.4	0.0153692
CAM112A_map17	0001.CSV	2098.26	0.0153762
CAM112A_map17	0001.CSV	2102.12	0.0153891
CAM112A_map17	0001.CSV	2105.97	0.0154676
CAM112A_map17	0001.CSV	2109.83	0.015548
CAM112A_map17	0001.CSV	2113.69	0.0156314
CAM112A_map17	0001.CSV	2117.55	0.0156363
CAM112A_map17	0001.CSV	2121.4	0.0157024
CAM112A_map17	0001.CSV	2125.26	0.0157473
CAM112A_map17	0001.CSV	2129.12	0.0158231
CAM112A_map17	0001.CSV	2132.97	0.0158461
CAM112A_map17	0001.CSV	2136.83	0.0159014
CAM112A_map17	0001.CSV	2140.69	0.0159332
CAM112A_map17	0001.CSV	2144.55	0.015963
CAM112A_map17	0001.CSV	2148.4	0.0159351
CAM112A_map17	0001.CSV	2152.26	0.0159472
CAM112A_map17	0001.CSV	2156.12	0.0159187
CAM112A_map17	0001.CSV	2159.97	0.0158948
CAM112A_map17	0001.CSV	2163.83	0.0158865
CAM112A_map17	0001.CSV	2167.69	0.0159398
CAM112A_map17	0001.CSV	2171.55	0.0159635
CAM112A_map17	0001.CSV	2175.4	0.0160237
CAM112A_map17	0001.CSV	2179.26	0.0160335
CAM112A_map17	0001.CSV	2183.12	0.0160562
CAM112A_map17	0001.CSV	2186.97	0.0160294
CAM112A_map17	0001.CSV	2190.83	0.0160671
CAM112A_map17	0001.CSV	2194.69	0.0160367
CAM112A_map17	0001.CSV	2198.55	0.0160198
CAM112A_map17	0001.CSV	2202.4	0.0160262
CAM112A_map17	0001.CSV	2206.26	0.0160749
CAM112A_map17	0001.CSV	2210.12	0.0160677
CAM112A_map17	0001.CSV	2213.97	0.016093
CAM112A_map17	0001.CSV	2217.83	0.0160699
CAM112A_map17	0001.CSV	2221.69	0.0160909
CAM112A_map17	0001.CSV	2225.54	0.0160938
CAM112A_map17	0001.CSV	2229.4	0.0160826
CAM112A_map17	0001.CSV	2233.26	0.016059
CAM112A_map17	0001.CSV	2237.12	0.0160681
CAM112A_map17	0001.CSV	2240.97	0.0160901
CAM112A_map17	0001.CSV	2244.83	0.0161484
CAM112A_map17	0001.CSV	2248.69	0.0161313
CAM112A_map17	0001.CSV	2252.54	0.0161434
CAM112A_map17	0001.CSV	2256.4	0.0161066
CAM112A_map17	0001.CSV	2260.26	0.0160949
CAM112A_map17	0001.CSV	2264.11	0.016059
CAM112A_map17	0001.CSV	2267.97	0.016093
CAM112A_map17	0001.CSV	2271.83	0.0161549
CAM112A_map17	0001.CSV	2275.69	0.016232
CAM112A_map17	0001.CSV	2279.54	0.0162281
CAM112A_map17	0001.CSV	2283.4	0.0162151
CAM112A_map17	0001.CSV	2287.26	0.0162043
CAM112A_map17	0001.CSV	2291.11	0.0162382
CAM112A_map17	0001.CSV	2294.97	0.0163035
CAM112A_map17	0001.CSV	2298.83	0.0164139
CAM112A_map17	0001.CSV	2302.69	0.0164252
CAM112A_map17	0001.CSV	2306.54	0.0164241
CAM112A_map17	0001.CSV	2310.4	0.0163202
CAM112A_map17	0001.CSV	2314.26	0.0162538
CAM112A_map17	0001.CSV	2318.11	0.0160734
CAM112A_map17	0001.CSV	2321.97	0.0158795
CAM112A_map17	0001.CSV	2325.83	0.0155917
CAM112A_map17	0001.CSV	2329.69	0.0154749
CAM112A_map17	0001.CSV	2333.54	0.0151513
CAM112A_map17	0001.CSV	2337.4	0.0149818
CAM112A_map17	0001.CSV	2341.26	0.0150264
CAM112A_map17	0001.CSV	2345.11	0.015751
CAM112A_map17	0001.CSV	2348.97	0.0158996
CAM112A_map17	0001.CSV	2352.83	0.0149732
CAM112A_map17	0001.CSV	2356.69	0.0123671
CAM112A_map17	0001.CSV	2360.54	0.0105287
CAM112A_map17	0001.CSV	2364.4	0.0120193
CAM112A_map17	0001.CSV	2368.26	0.0147183
CAM112A_map17	0001.CSV	2372.11	0.0164233
CAM112A_map17	0001.CSV	2375.97	0.0172161
CAM112A_map17	0001.CSV	2379.83	0.0173254
CAM112A_map17	0001.CSV	2383.69	0.0172426
CAM112A_map17	0001.CSV	2387.54	0.0170386
CAM112A_map17	0001.CSV	2391.4	0.0169606
CAM112A_map17	0001.CSV	2395.26	0.0170007
CAM112A_map17	0001.CSV	2399.11	0.0170157
CAM112A_map17	0001.CSV	2402.97	0.0169954
CAM112A_map17	0001.CSV	2406.83	0.0170603
CAM112A_map17	0001.CSV	2410.68	0.0171096
CAM112A_map17	0001.CSV	2414.54	0.0171257
CAM112A_map17	0001.CSV	2418.4	0.017164
CAM112A_map17	0001.CSV	2422.26	0.0172458
CAM112A_map17	0001.CSV	2426.11	0.0172914
CAM112A_map17	0001.CSV	2429.97	0.0173176
CAM112A_map17	0001.CSV	2433.83	0.0173445
CAM112A_map17	0001.CSV	2437.68	0.0173966
CAM112A_map17	0001.CSV	2441.54	0.0174026
CAM112A_map17	0001.CSV	2445.4	0.017448
CAM112A_map17	0001.CSV	2449.26	0.0175119
CAM112A_map17	0001.CSV	2453.11	0.0175859
CAM112A_map17	0001.CSV	2456.97	0.0176428
CAM112A_map17	0001.CSV	2460.83	0.0177009
CAM112A_map17	0001.CSV	2464.68	0.0177994
CAM112A_map17	0001.CSV	2468.54	0.017952
CAM112A_map17	0001.CSV	2472.4	0.0181711
CAM112A_map17	0001.CSV	2476.26	0.0184306
CAM112A_map17	0001.CSV	2480.11	0.0186719
CAM112A_map17	0001.CSV	2483.97	0.0190059
CAM112A_map17	0001.CSV	2487.83	0.0194178
CAM112A_map17	0001.CSV	2491.68	0.0200162
CAM112A_map17	0001.CSV	2495.54	0.020767
CAM112A_map17	0001.CSV	2499.4	0.021573
CAM112A_map17	0001.CSV	2503.26	0.0223386
CAM112A_map17	0001.CSV	2507.11	0.0229749
CAM112A_map17	0001.CSV	2510.97	0.0233109
CAM112A_map17	0001.CSV	2514.83	0.0232613
CAM112A_map17	0001.CSV	2518.68	0.0228878
CAM112A_map17	0001.CSV	2522.54	0.0223157
CAM112A_map17	0001.CSV	2526.4	0.0216064
CAM112A_map17	0001.CSV	2530.26	0.0209297
CAM112A_map17	0001.CSV	2534.11	0.0203102
CAM112A_map17	0001.CSV	2537.97	0.0198199
CAM112A_map17	0001.CSV	2541.83	0.0194217
CAM112A_map17	0001.CSV	2545.68	0.0191198
CAM112A_map17	0001.CSV	2549.54	0.0189202
CAM112A_map17	0001.CSV	2553.4	0.0188152
CAM112A_map17	0001.CSV	2557.26	0.0187827
CAM112A_map17	0001.CSV	2561.11	0.018757
CAM112A_map17	0001.CSV	2564.97	0.0186981
CAM112A_map17	0001.CSV	2568.83	0.0186824
CAM112A_map17	0001.CSV	2572.68	0.0186835
CAM112A_map17	0001.CSV	2576.54	0.0187014
CAM112A_map17	0001.CSV	2580.4	0.0186379
CAM112A_map17	0001.CSV	2584.25	0.0186097
CAM112A_map17	0001.CSV	2588.11	0.0186056
CAM112A_map17	0001.CSV	2591.97	0.0186172
CAM112A_map17	0001.CSV	2595.83	0.0185472
CAM112A_map17	0001.CSV	2599.68	0.0184666
CAM112A_map17	0001.CSV	2603.54	0.0184004
CAM112A_map17	0001.CSV	2607.4	0.0183177
CAM112A_map17	0001.CSV	2611.25	0.0182148
CAM112A_map17	0001.CSV	2615.11	0.0181055
CAM112A_map17	0001.CSV	2618.97	0.0179847
CAM112A_map17	0001.CSV	2622.82	0.0179652
CAM112A_map17	0001.CSV	2626.68	0.0179815
CAM112A_map17	0001.CSV	2630.54	0.0179337
CAM112A_map17	0001.CSV	2634.4	0.0178739
CAM112A_map17	0001.CSV	2638.25	0.0177794
CAM112A_map17	0001.CSV	2642.11	0.0175974
CAM112A_map17	0001.CSV	2645.97	0.0174947
CAM112A_map17	0001.CSV	2649.82	0.0174954
CAM112A_map17	0001.CSV	2653.68	0.017472
CAM112A_map17	0001.CSV	2657.54	0.017461
CAM112A_map17	0001.CSV	2661.4	0.0175002
CAM112A_map17	0001.CSV	2665.25	0.0174924
CAM112A_map17	0001.CSV	2669.11	0.0175252
CAM112A_map17	0001.CSV	2672.97	0.0176967
CAM112A_map17	0001.CSV	2676.82	0.0179807
CAM112A_map17	0001.CSV	2680.68	0.017959
CAM112A_map17	0001.CSV	2684.54	0.0176508
CAM112A_map17	0001.CSV	2688.4	0.0175123
CAM112A_map17	0001.CSV	2692.25	0.0175228
CAM112A_map17	0001.CSV	2696.11	0.0175732
CAM112A_map17	0001.CSV	2699.97	0.0176304
CAM112A_map17	0001.CSV	2703.82	0.0176437
CAM112A_map17	0001.CSV	2707.68	0.0176578
CAM112A_map17	0001.CSV	2711.54	0.0176043
CAM112A_map17	0001.CSV	2715.4	0.0175781
CAM112A_map17	0001.CSV	2719.25	0.0177264
CAM112A_map17	0001.CSV	2723.11	0.0180859
CAM112A_map17	0001.CSV	2726.97	0.0181353
CAM112A_map17	0001.CSV	2730.82	0.0177796
CAM112A_map17	0001.CSV	2734.68	0.0177021
CAM112A_map17	0001.CSV	2738.54	0.0177862
CAM112A_map17	0001.CSV	2742.4	0.0178192
CAM112A_map17	0001.CSV	2746.25	0.018124
CAM112A_map17	0001.CSV	2750.11	0.0181118
CAM112A_map17	0001.CSV	2753.97	0.0178039
CAM112A_map17	0001.CSV	2757.82	0.0177586
CAM112A_map17	0001.CSV	2761.68	0.0177188
CAM112A_map17	0001.CSV	2765.54	0.0176873
CAM112A_map17	0001.CSV	2769.39	0.0178789
CAM112A_map17	0001.CSV	2773.25	0.0182605
CAM112A_map17	0001.CSV	2777.11	0.0182005
CAM112A_map17	0001.CSV	2780.97	0.0179524
CAM112A_map17	0001.CSV	2784.82	0.0182324
CAM112A_map17	0001.CSV	2788.68	0.0188278
CAM112A_map17	0001.CSV	2792.54	0.0190495
CAM112A_map17	0001.CSV	2796.39	0.0191061
CAM112A_map17	0001.CSV	2800.25	0.018892
CAM112A_map17	0001.CSV	2804.11	0.0186489
CAM112A_map17	0001.CSV	2807.97	0.0189998
CAM112A_map17	0001.CSV	2811.82	0.0191099
CAM112A_map17	0001.CSV	2815.68	0.0190077
CAM112A_map17	0001.CSV	2819.54	0.0192344
CAM112A_map17	0001.CSV	2823.39	0.0195176
CAM112A_map17	0001.CSV	2827.25	0.0197813
CAM112A_map17	0001.CSV	2831.11	0.0205056
CAM112A_map17	0001.CSV	2834.97	0.0216781
CAM112A_map17	0001.CSV	2838.82	0.0229033
CAM112A_map17	0001.CSV	2842.68	0.0244771
CAM112A_map17	0001.CSV	2846.54	0.0271323
CAM112A_map17	0001.CSV	2850.39	0.0289274
CAM112A_map17	0001.CSV	2854.25	0.0285673
CAM112A_map17	0001.CSV	2858.11	0.0274367
CAM112A_map17	0001.CSV	2861.97	0.0262336
CAM112A_map17	0001.CSV	2865.82	0.0254606
CAM112A_map17	0001.CSV	2869.68	0.025513
CAM112A_map17	0001.CSV	2873.54	0.0255443
CAM112A_map17	0001.CSV	2877.39	0.0247778
CAM112A_map17	0001.CSV	2881.25	0.0240966
CAM112A_map17	0001.CSV	2885.11	0.0240147
CAM112A_map17	0001.CSV	2888.97	0.0243703
CAM112A_map17	0001.CSV	2892.82	0.0251084
CAM112A_map17	0001.CSV	2896.68	0.0257542
CAM112A_map17	0001.CSV	2900.54	0.0263133
CAM112A_map17	0001.CSV	2904.39	0.0273988
CAM112A_map17	0001.CSV	2908.25	0.0292407
CAM112A_map17	0001.CSV	2912.11	0.0322583
CAM112A_map17	0001.CSV	2915.97	0.0351581
CAM112A_map17	0001.CSV	2919.82	0.0359181
CAM112A_map17	0001.CSV	2923.68	0.0349373
CAM112A_map17	0001.CSV	2927.54	0.0336395
CAM112A_map17	0001.CSV	2931.39	0.0318451
CAM112A_map17	0001.CSV	2935.25	0.0297344
CAM112A_map17	0001.CSV	2939.11	0.0282636
CAM112A_map17	0001.CSV	2942.96	0.0276159
CAM112A_map17	0001.CSV	2946.82	0.0270757
CAM112A_map17	0001.CSV	2950.68	0.0265496
CAM112A_map17	0001.CSV	2954.54	0.0260498
CAM112A_map17	0001.CSV	2958.39	0.0253653
CAM112A_map17	0001.CSV	2962.25	0.0247207
CAM112A_map17	0001.CSV	2966.11	0.0238647
CAM112A_map17	0001.CSV	2969.96	0.0232815
CAM112A_map17	0001.CSV	2973.82	0.0231393
CAM112A_map17	0001.CSV	2977.68	0.0229775
CAM112A_map17	0001.CSV	2981.53	0.0224739
CAM112A_map17	0001.CSV	2985.39	0.0217412
CAM112A_map17	0001.CSV	2989.25	0.0215311
CAM112A_map17	0001.CSV	2993.11	0.0215406
CAM112A_map17	0001.CSV	2996.96	0.0211697
CAM112A_map17	0001.CSV	3000.82	0.0206628
CAM112A_map17	0001.CSV	3004.68	0.0203206
CAM112A_map17	0001.CSV	3008.53	0.0204476
CAM112A_map17	0001.CSV	3012.39	0.0207663
CAM112A_map17	0001.CSV	3016.25	0.0207745
CAM112A_map17	0001.CSV	3020.11	0.0205494
CAM112A_map17	0001.CSV	3023.96	0.0203916
CAM112A_map17	0001.CSV	3027.82	0.0203309
CAM112A_map17	0001.CSV	3031.68	0.0205537
CAM112A_map17	0001.CSV	3035.53	0.0206707
CAM112A_map17	0001.CSV	3039.39	0.0206549
CAM112A_map17	0001.CSV	3043.25	0.0206793
CAM112A_map17	0001.CSV	3047.11	0.0205847
CAM112A_map17	0001.CSV	3050.96	0.0205856
CAM112A_map17	0001.CSV	3054.82	0.0205846
CAM112A_map17	0001.CSV	3058.68	0.0204645
CAM112A_map17	0001.CSV	3062.53	0.0205212
CAM112A_map17	0001.CSV	3066.39	0.0207529
CAM112A_map17	0001.CSV	3070.25	0.020723
CAM112A_map17	0001.CSV	3074.11	0.0207324
CAM112A_map17	0001.CSV	3077.96	0.0209305
CAM112A_map17	0001.CSV	3081.82	0.0210377
CAM112A_map17	0001.CSV	3085.68	0.0210349
CAM112A_map17	0001.CSV	3089.53	0.0209505
CAM112A_map17	0001.CSV	3093.39	0.0207088
CAM112A_map17	0001.CSV	3097.25	0.0207292
CAM112A_map17	0001.CSV	3101.11	0.0208956
CAM112A_map17	0001.CSV	3104.96	0.0209836
CAM112A_map17	0001.CSV	3108.82	0.0211049
CAM112A_map17	0001.CSV	3112.68	0.0212069
CAM112A_map17	0001.CSV	3116.53	0.0213854
CAM112A_map17	0001.CSV	3120.39	0.0213607
CAM112A_map17	0001.CSV	3124.25	0.0211508
CAM112A_map17	0001.CSV	3128.11	0.0211062
CAM112A_map17	0001.CSV	3131.96	0.0210804
CAM112A_map17	0001.CSV	3135.82	0.0211994
CAM112A_map17	0001.CSV	3139.68	0.0213403
CAM112A_map17	0001.CSV	3143.53	0.0212256
CAM112A_map17	0001.CSV	3147.39	0.0213205
CAM112A_map17	0001.CSV	3151.25	0.0216435
CAM112A_map17	0001.CSV	3155.1	0.0216593
CAM112A_map17	0001.CSV	3158.96	0.0214114
CAM112A_map17	0001.CSV	3162.82	0.0213196
CAM112A_map17	0001.CSV	3166.68	0.021262
CAM112A_map17	0001.CSV	3170.53	0.0212731
CAM112A_map17	0001.CSV	3174.39	0.0213688
CAM112A_map17	0001.CSV	3178.25	0.0215381
CAM112A_map17	0001.CSV	3182.1	0.0216899
CAM112A_map17	0001.CSV	3185.96	0.0218732
CAM112A_map17	0001.CSV	3189.82	0.0220254
CAM112A_map17	0001.CSV	3193.68	0.022033
CAM112A_map17	0001.CSV	3197.53	0.0220372
CAM112A_map17	0001.CSV	3201.39	0.0221648
CAM112A_map17	0001.CSV	3205.25	0.0222645
CAM112A_map17	0001.CSV	3209.1	0.022283
CAM112A_map17	0001.CSV	3212.96	0.0223837
CAM112A_map17	0001.CSV	3216.82	0.0225075
CAM112A_map17	0001.CSV	3220.68	0.0225062
CAM112A_map17	0001.CSV	3224.53	0.0225589
CAM112A_map17	0001.CSV	3228.39	0.0228641
CAM112A_map17	0001.CSV	3232.25	0.0232385
CAM112A_map17	0001.CSV	3236.1	0.0232003
CAM112A_map17	0001.CSV	3239.96	0.0230971
CAM112A_map17	0001.CSV	3243.82	0.0233058
CAM112A_map17	0001.CSV	3247.68	0.0234509
CAM112A_map17	0001.CSV	3251.53	0.023343
CAM112A_map17	0001.CSV	3255.39	0.0233357
CAM112A_map17	0001.CSV	3259.25	0.0232679
CAM112A_map17	0001.CSV	3263.1	0.0232471
CAM112A_map17	0001.CSV	3266.96	0.0235067
CAM112A_map17	0001.CSV	3270.82	0.0238122
CAM112A_map17	0001.CSV	3274.68	0.0237771
CAM112A_map17	0001.CSV	3278.53	0.023588
CAM112A_map17	0001.CSV	3282.39	0.0235169
CAM112A_map17	0001.CSV	3286.25	0.023582
CAM112A_map17	0001.CSV	3290.1	0.023806
CAM112A_map17	0001.CSV	3293.96	0.0239997
CAM112A_map17	0001.CSV	3297.82	0.0239163
CAM112A_map17	0001.CSV	3301.67	0.023968
CAM112A_map17	0001.CSV	3305.53	0.0241108
CAM112A_map17	0001.CSV	3309.39	0.0240005
CAM112A_map17	0001.CSV	3313.25	0.023666
CAM112A_map17	0001.CSV	3317.1	0.0235637
CAM112A_map17	0001.CSV	3320.96	0.0237512
CAM112A_map17	0001.CSV	3324.82	0.0239568
CAM112A_map17	0001.CSV	3328.67	0.0238691
CAM112A_map17	0001.CSV	3332.53	0.0239028
CAM112A_map17	0001.CSV	3336.39	0.0242543
CAM112A_map17	0001.CSV	3340.24	0.0243765
CAM112A_map17	0001.CSV	3344.1	0.0242491
CAM112A_map17	0001.CSV	3347.96	0.024323
CAM112A_map17	0001.CSV	3351.82	0.024326
CAM112A_map17	0001.CSV	3355.67	0.024197
CAM112A_map17	0001.CSV	3359.53	0.0242787
CAM112A_map17	0001.CSV	3363.39	0.0244106
CAM112A_map17	0001.CSV	3367.24	0.0245853
CAM112A_map17	0001.CSV	3371.1	0.0245828
CAM112A_map17	0001.CSV	3374.96	0.0243794
CAM112A_map17	0001.CSV	3378.82	0.0241184
CAM112A_map17	0001.CSV	3382.67	0.0238312
CAM112A_map17	0001.CSV	3386.53	0.0238458
CAM112A_map17	0001.CSV	3390.39	0.0240556
CAM112A_map17	0001.CSV	3394.24	0.0241061
CAM112A_map17	0001.CSV	3398.1	0.0241664
CAM112A_map17	0001.CSV	3401.96	0.0241091
CAM112A_map17	0001.CSV	3405.82	0.0238976
CAM112A_map17	0001.CSV	3409.67	0.0237858
CAM112A_map17	0001.CSV	3413.53	0.0234074
CAM112A_map17	0001.CSV	3417.39	0.0230151
CAM112A_map17	0001.CSV	3421.24	0.023118
CAM112A_map17	0001.CSV	3425.1	0.0232996
CAM112A_map17	0001.CSV	3428.96	0.023321
CAM112A_map17	0001.CSV	3432.82	0.023287
CAM112A_map17	0001.CSV	3436.67	0.0230479
CAM112A_map17	0001.CSV	3440.53	0.0225567
CAM112A_map17	0001.CSV	3444.39	0.0222578
CAM112A_map17	0001.CSV	3448.24	0.0221587
CAM112A_map17	0001.CSV	3452.1	0.0219687
CAM112A_map17	0001.CSV	3455.96	0.0220172
CAM112A_map17	0001.CSV	3459.82	0.0222115
CAM112A_map17	0001.CSV	3463.67	0.0222957
CAM112A_map17	0001.CSV	3467.53	0.0222056
CAM112A_map17	0001.CSV	3471.39	0.0219198
CAM112A_map17	0001.CSV	3475.24	0.0217311
CAM112A_map17	0001.CSV	3479.1	0.0216739
CAM112A_map17	0001.CSV	3482.96	0.0215204
CAM112A_map17	0001.CSV	3486.82	0.021542
CAM112A_map17	0001.CSV	3490.67	0.0216523
CAM112A_map17	0001.CSV	3494.53	0.0216399
CAM112A_map17	0001.CSV	3498.39	0.0214712
CAM112A_map17	0001.CSV	3502.24	0.0212325
CAM112A_map17	0001.CSV	3506.1	0.0207829
CAM112A_map17	0001.CSV	3509.96	0.0205336
CAM112A_map17	0001.CSV	3513.81	0.0205892
CAM112A_map17	0001.CSV	3517.67	0.0203384
CAM112A_map17	0001.CSV	3521.53	0.0201294
CAM112A_map17	0001.CSV	3525.39	0.0200184
CAM112A_map17	0001.CSV	3529.24	0.019994
CAM112A_map17	0001.CSV	3533.1	0.02005
CAM112A_map17	0001.CSV	3536.96	0.0200777
CAM112A_map17	0001.CSV	3540.81	0.0199593
CAM112A_map17	0001.CSV	3544.67	0.0199656
CAM112A_map17	0001.CSV	3548.53	0.0198192
CAM112A_map17	0001.CSV	3552.39	0.0194432
CAM112A_map17	0001.CSV	3556.24	0.0192668
CAM112A_map17	0001.CSV	3560.1	0.0190212
CAM112A_map17	0001.CSV	3563.96	0.0186649
CAM112A_map17	0001.CSV	3567.81	0.0190936
CAM112A_map17	0001.CSV	3571.67	0.0190478
CAM112A_map17	0001.CSV	3575.53	0.0184731
CAM112A_map17	0001.CSV	3579.39	0.0184182
CAM112A_map17	0001.CSV	3583.24	0.0184266
CAM112A_map17	0001.CSV	3587.1	0.018504
CAM112A_map17	0001.CSV	3590.96	0.0183881
CAM112A_map17	0001.CSV	3594.81	0.0180116
CAM112A_map17	0001.CSV	3598.67	0.0180611
CAM112A_map17	0001.CSV	3602.53	0.018024
CAM112A_map17	0001.CSV	3606.39	0.0175312
CAM112A_map17	0001.CSV	3610.24	0.0171836
CAM112A_map17	0001.CSV	3614.1	0.0171521
CAM112A_map17	0001.CSV	3617.96	0.0174353
CAM112A_map17	0001.CSV	3621.81	0.0174365
CAM112A_map17	0001.CSV	3625.67	0.0167171
CAM112A_map17	0001.CSV	3629.53	0.0167751
CAM112A_map17	0001.CSV	3633.39	0.0172476
CAM112A_map17	0001.CSV	3637.24	0.0168933
CAM112A_map17	0001.CSV	3641.1	0.0164675
CAM112A_map17	0001.CSV	3644.96	0.0159355
CAM112A_map17	0001.CSV	3648.81	0.0164455
CAM112A_map17	0001.CSV	3652.67	0.0171451
CAM112A_map17	0001.CSV	3656.53	0.0170476
CAM112A_map17	0001.CSV	3660.38	0.0170137
CAM112A_map17	0001.CSV	3664.24	0.0164571
CAM112A_map17	0001.CSV	3668.1	0.0158308
CAM112A_map17	0001.CSV	3671.96	0.0156364
CAM112A_map17	0001.CSV	3675.81	0.0161808
CAM112A_map17	0001.CSV	3679.67	0.0166559
CAM112A_map17	0001.CSV	3683.53	0.0163596
CAM112A_map17	0001.CSV	3687.38	0.0163351
CAM112A_map17	0001.CSV	3691.24	0.0171088
CAM112A_map17	0001.CSV	3695.1	0.0169412
CAM112A_map17	0001.CSV	3698.95	0.0163868
CAM112A_map17	0001.CSV	3702.81	0.0162042
CAM112A_map17	0001.CSV	3706.67	0.0157891
CAM112A_map17	0001.CSV	3710.53	0.0158959
CAM112A_map17	0001.CSV	3714.38	0.0167073
CAM112A_map17	0001.CSV	3718.24	0.0163182
CAM112A_map17	0001.CSV	3722.1	0.016081
CAM112A_map17	0001.CSV	3725.95	0.016202
CAM112A_map17	0001.CSV	3729.81	0.0158821
CAM112A_map17	0001.CSV	3733.67	0.0159746
CAM112A_map17	0001.CSV	3737.53	0.0168569
CAM112A_map17	0001.CSV	3741.38	0.0161706
CAM112A_map17	0001.CSV	3745.24	0.0154239
CAM112A_map17	0001.CSV	3749.1	0.0153676
CAM112A_map17	0001.CSV	3752.95	0.0160644
CAM112A_map17	0001.CSV	3756.81	0.0162565
CAM112A_map17	0001.CSV	3760.67	0.0164155
CAM112A_map17	0001.CSV	3764.53	0.0162568
CAM112A_map17	0001.CSV	3768.38	0.0162496
CAM112A_map17	0001.CSV	3772.24	0.0163862
CAM112A_map17	0001.CSV	3776.1	0.0162034
CAM112A_map17	0001.CSV	3779.95	0.0163312
CAM112A_map17	0001.CSV	3783.81	0.0164308
CAM112A_map17	0001.CSV	3787.67	0.0164731
CAM112A_map17	0001.CSV	3791.53	0.016271
CAM112A_map17	0001.CSV	3795.38	0.0158686
CAM112A_map17	0001.CSV	3799.24	0.0158069
CAM112A_map17	0001.CSV	3803.1	0.0162828
CAM112A_map17	0001.CSV	3806.95	0.0166464
CAM112A_map17	0001.CSV	3810.81	0.0163287
CAM112A_map17	0001.CSV	3814.67	0.0159052
CAM112A_map17	0001.CSV	3818.53	0.0162365
CAM112A_map17	0001.CSV	3822.38	0.0167422
CAM112A_map17	0001.CSV	3826.24	0.0164941
CAM112A_map17	0001.CSV	3830.1	0.0161269
CAM112A_map17	0001.CSV	3833.95	0.0157434
CAM112A_map17	0001.CSV	3837.81	0.0157578
CAM112A_map17	0001.CSV	3841.67	0.0164984
CAM112A_map17	0001.CSV	3845.53	0.0163838
CAM112A_map17	0001.CSV	3849.38	0.015543
CAM112A_map17	0001.CSV	3853.24	0.0156972
CAM112A_map17	0001.CSV	3857.1	0.016449
CAM112A_map17	0001.CSV	3860.95	0.0157789
CAM112A_map17	0001.CSV	3864.81	0.0155016
CAM112A_map17	0001.CSV	3868.67	0.0155697
CAM112A_map17	0001.CSV	3872.52	0.0160646
CAM112A_map17	0001.CSV	3876.38	0.016047
CAM112A_map17	0001.CSV	3880.24	0.0157853
CAM112A_map17	0001.CSV	3884.1	0.0160158
CAM112A_map17	0001.CSV	3887.95	0.0159598
CAM112A_map17	0001.CSV	3891.81	0.0158423
CAM112A_map17	0001.CSV	3895.67	0.015547
CAM112A_map17	0001.CSV	3899.52	0.0151869
CAM112A_map17	0001.CSV	3903.38	0.0159267
CAM112A_map17	0001.CSV	3907.24	0.0162433
CAM112A_map17	0001.CSV	3911.1	0.0157527
CAM112A_map17	0001.CSV	3914.95	0.015494
CAM112A_map17	0001.CSV	3918.81	0.0157075
CAM112A_map17	0001.CSV	3922.67	0.0157002
CAM112A_map17	0001.CSV	3926.52	0.0156468
CAM112A_map17	0001.CSV	3930.38	0.0157299
CAM112A_map17	0001.CSV	3934.24	0.0159427
CAM112A_map17	0001.CSV	3938.09	0.0156639
CAM112A_map17	0001.CSV	3941.95	0.0154491
CAM112A_map17	0001.CSV	3945.81	0.0155325
CAM112A_map17	0001.CSV	3949.67	0.0157271
CAM112A_map17	0001.CSV	3953.52	0.0157335
CAM112A_map17	0001.CSV	3957.38	0.0156101
CAM112A_map17	0001.CSV	3961.24	0.0156062
CAM112A_map17	0001.CSV	3965.09	0.015556
CAM112A_map17	0001.CSV	3968.95	0.0154468
CAM112A_map17	0001.CSV	3972.81	0.015483
CAM112A_map17	0001.CSV	3976.67	0.0155195
CAM112A_map17	0001.CSV	3980.52	0.0155416
CAM112A_map17	0001.CSV	3984.38	0.0156245
CAM112A_map17	0001.CSV	3988.24	0.0155675
CAM112A_map17	0001.CSV	3992.09	0.0154933
CAM112A_map17	0001.CSV	3995.95	0.015494
CAM112A_map17	0001.CSV	3999.81	0.0155184
CAM112A_map17	0002.CSV	674.992	0.030469
CAM112A_map17	0002.CSV	678.849	0.0331521
CAM112A_map17	0002.CSV	682.706	0.0344455
CAM112A_map17	0002.CSV	686.563	0.0378763
CAM112A_map17	0002.CSV	690.42	0.0415087
CAM112A_map17	0002.CSV	694.277	0.0491283
CAM112A_map17	0002.CSV	698.134	0.0575731
CAM112A_map17	0002.CSV	701.991	0.0682432
CAM112A_map17	0002.CSV	705.849	0.087365
CAM112A_map17	0002.CSV	709.706	0.116332
CAM112A_map17	0002.CSV	713.563	0.110866
CAM112A_map17	0002.CSV	717.42	0.0706409
CAM112A_map17	0002.CSV	721.277	0.0413452
CAM112A_map17	0002.CSV	725.134	0.0322472
CAM112A_map17	0002.CSV	728.991	0.0300316
CAM112A_map17	0002.CSV	732.848	0.0312841
CAM112A_map17	0002.CSV	736.705	0.032479
CAM112A_map17	0002.CSV	740.562	0.0340934
CAM112A_map17	0002.CSV	744.42	0.0345534
CAM112A_map17	0002.CSV	748.277	0.0353987
CAM112A_map17	0002.CSV	752.134	0.0353506
CAM112A_map17	0002.CSV	755.991	0.0360391
CAM112A_map17	0002.CSV	759.848	0.0363875
CAM112A_map17	0002.CSV	763.705	0.0377269
CAM112A_map17	0002.CSV	767.562	0.0380391
CAM112A_map17	0002.CSV	771.419	0.0391371
CAM112A_map17	0002.CSV	775.276	0.0396158
CAM112A_map17	0002.CSV	779.133	0.0402287
CAM112A_map17	0002.CSV	782.99	0.0399597
CAM112A_map17	0002.CSV	786.848	0.0403013
CAM112A_map17	0002.CSV	790.705	0.040435
CAM112A_map17	0002.CSV	794.562	0.0417528
CAM112A_map17	0002.CSV	798.419	0.0429133
CAM112A_map17	0002.CSV	802.276	0.0439916
CAM112A_map17	0002.CSV	806.133	0.0438454
CAM112A_map17	0002.CSV	809.99	0.0446292
CAM112A_map17	0002.CSV	813.847	0.0454691
CAM112A_map17	0002.CSV	817.704	0.0473275
CAM112A_map17	0002.CSV	821.562	0.0489058
CAM112A_map17	0002.CSV	825.419	0.0513279
CAM112A_map17	0002.CSV	829.276	0.0536564
CAM112A_map17	0002.CSV	833.133	0.0572998
CAM112A_map17	0002.CSV	836.99	0.0615068
CAM112A_map17	0002.CSV	840.847	0.0686501
CAM112A_map17	0002.CSV	844.704	0.0795866
CAM112A_map17	0002.CSV	848.561	0.0870361
CAM112A_map17	0002.CSV	852.418	0.0907589
CAM112A_map17	0002.CSV	856.275	0.10723
CAM112A_map17	0002.CSV	860.132	0.142127
CAM112A_map17	0002.CSV	863.99	0.205459
CAM112A_map17	0002.CSV	867.847	0.281808
CAM112A_map17	0002.CSV	871.704	0.302658
CAM112A_map17	0002.CSV	875.561	0.250225
CAM112A_map17	0002.CSV	879.418	0.18348
CAM112A_map17	0002.CSV	883.275	0.11588
CAM112A_map17	0002.CSV	887.132	0.0579182
CAM112A_map17	0002.CSV	890.989	0.0308071
CAM112A_map17	0002.CSV	894.846	0.0266416
CAM112A_map17	0002.CSV	898.703	0.0267775
CAM112A_map17	0002.CSV	902.561	0.0278474
CAM112A_map17	0002.CSV	906.418	0.0286579
CAM112A_map17	0002.CSV	910.275	0.0300069
CAM112A_map17	0002.CSV	914.132	0.0308203
CAM112A_map17	0002.CSV	917.989	0.0320887
CAM112A_map17	0002.CSV	921.846	0.0329278
CAM112A_map17	0002.CSV	925.703	0.0341647
CAM112A_map17	0002.CSV	929.56	0.0350622
CAM112A_map17	0002.CSV	933.417	0.0362773
CAM112A_map17	0002.CSV	937.274	0.0368833
CAM112A_map17	0002.CSV	941.131	0.0379386
CAM112A_map17	0002.CSV	944.989	0.0384237
CAM112A_map17	0002.CSV	948.846	0.0390996
CAM112A_map17	0002.CSV	952.703	0.039697
CAM112A_map17	0002.CSV	956.56	0.0409329
CAM112A_map17	0002.CSV	960.417	0.0417067
CAM112A_map17	0002.CSV	964.274	0.0426921
CAM112A_map17	0002.CSV	968.131	0.0433032
CAM112A_map17	0002.CSV	971.988	0.0445272
CAM112A_map17	0002.CSV	975.845	0.0455016
CAM112A_map17	0002.CSV	979.702	0.0468113
CAM112A_map17	0002.CSV	983.559	0.0478156
CAM112A_map17	0002.CSV	987.417	0.0492251
CAM112A_map17	0002.CSV	991.274	0.0502299
CAM112A_map17	0002.CSV	995.131	0.0515649
CAM112A_map17	0002.CSV	998.988	0.0526068
CAM112A_map17	0002.CSV	1002.85	0.0539605
CAM112A_map17	0002.CSV	1006.7	0.0549084
CAM112A_map17	0002.CSV	1010.56	0.056236
CAM112A_map17	0002.CSV	1014.42	0.0572325
CAM112A_map17	0002.CSV	1018.27	0.0586902
CAM112A_map17	0002.CSV	1022.13	0.0599452
CAM112A_map17	0002.CSV	1025.99	0.0615628
CAM112A_map17	0002.CSV	1029.85	0.0626575
CAM112A_map17	0002.CSV	1033.7	0.0640923
CAM112A_map17	0002.CSV	1037.56	0.0652571
CAM112A_map17	0002.CSV	1041.42	0.0667001
CAM112A_map17	0002.CSV	1045.27	0.0675375
CAM112A_map17	0002.CSV	1049.13	0.0688701
CAM112A_map17	0002.CSV	1052.99	0.0702717
CAM112A_map17	0002.CSV	1056.84	0.0729026
CAM112A_map17	0002.CSV	1060.7	0.0755876
CAM112A_map17	0002.CSV	1064.56	0.0781841
CAM112A_map17	0002.CSV	1068.42	0.0792691
CAM112A_map17	0002.CSV	1072.27	0.0798243
CAM112A_map17	0002.CSV	1076.13	0.0797983
CAM112A_map17	0002.CSV	1079.99	0.0805484
CAM112A_map17	0002.CSV	1083.84	0.0814702
CAM112A_map17	0002.CSV	1087.7	0.0825501
CAM112A_map17	0002.CSV	1091.56	0.08156
CAM112A_map17	0002.CSV	1095.41	0.0798077
CAM112A_map17	0002.CSV	1099.27	0.0783572
CAM112A_map17	0002.CSV	1103.13	0.0786023
CAM112A_map17	0002.CSV	1106.99	0.0791282
CAM112A_map17	0002.CSV	1110.84	0.0802502
CAM112A_map17	0002.CSV	1114.7	0.0809677
CAM112A_map17	0002.CSV	1118.56	0.08174
CAM112A_map17	0002.CSV	1122.41	0.0817427
CAM112A_map17	0002.CSV	1126.27	0.0819531
CAM112A_map17	0002.CSV	1130.13	0.0819024
CAM112A_map17	0002.CSV	1133.99	0.0822908
CAM112A_map17	0002.CSV	1137.84	0.0824868
CAM112A_map17	0002.CSV	1141.7	0.0831032
CAM112A_map17	0002.CSV	1145.56	0.083297
CAM112A_map17	0002.CSV	1149.41	0.0840225
CAM112A_map17	0002.CSV	1153.27	0.0847282
CAM112A_map17	0002.CSV	1157.13	0.0859778
CAM112A_map17	0002.CSV	1160.99	0.0868987
CAM112A_map17	0002.CSV	1164.84	0.0877511
CAM112A_map17	0002.CSV	1168.7	0.0876722
CAM112A_map17	0002.CSV	1172.56	0.0878033
CAM112A_map17	0002.CSV	1176.41	0.0877166
CAM112A_map17	0002.CSV	1180.27	0.0879605
CAM112A_map17	0002.CSV	1184.13	0.087549
CAM112A_map17	0002.CSV	1187.99	0.0872621
CAM112A_map17	0002.CSV	1191.84	0.0867591
CAM112A_map17	0002.CSV	1195.7	0.0868766
CAM112A_map17	0002.CSV	1199.56	0.0868633
CAM112A_map17	0002.CSV	1203.41	0.0874933
CAM112A_map17	0002.CSV	1207.27	0.0880169
CAM112A_map17	0002.CSV	1211.13	0.0889645
CAM112A_map17	0002.CSV	1214.98	0.0896325
CAM112A_map17	0002.CSV	1218.84	0.090844
CAM112A_map17	0002.CSV	1222.7	0.0920162
CAM112A_map17	0002.CSV	1226.56	0.0939433
CAM112A_map17	0002.CSV	1230.41	0.0958271
CAM112A_map17	0002.CSV	1234.27	0.0983589
CAM112A_map17	0002.CSV	1238.13	0.100756
CAM112A_map17	0002.CSV	1241.98	0.103656
CAM112A_map17	0002.CSV	1245.84	0.106273
CAM112A_map17	0002.CSV	1249.7	0.10929
CAM112A_map17	0002.CSV	1253.56	0.111737
CAM112A_map17	0002.CSV	1257.41	0.114346
CAM112A_map17	0002.CSV	1261.27	0.116526
CAM112A_map17	0002.CSV	1265.13	0.119178
CAM112A_map17	0002.CSV	1268.98	0.121578
CAM112A_map17	0002.CSV	1272.84	0.124597
CAM112A_map17	0002.CSV	1276.7	0.127321
CAM112A_map17	0002.CSV	1280.56	0.130539
CAM112A_map17	0002.CSV	1284.41	0.133304
CAM112A_map17	0002.CSV	1288.27	0.136351
CAM112A_map17	0002.CSV	1292.13	0.138761
CAM112A_map17	0002.CSV	1295.98	0.141726
CAM112A_map17	0002.CSV	1299.84	0.14473
CAM112A_map17	0002.CSV	1303.7	0.148796
CAM112A_map17	0002.CSV	1307.56	0.153114
CAM112A_map17	0002.CSV	1311.41	0.158658
CAM112A_map17	0002.CSV	1315.27	0.164373
CAM112A_map17	0002.CSV	1319.13	0.170986
CAM112A_map17	0002.CSV	1322.98	0.177039
CAM112A_map17	0002.CSV	1326.84	0.183972
CAM112A_map17	0002.CSV	1330.7	0.191379
CAM112A_map17	0002.CSV	1334.56	0.199913
CAM112A_map17	0002.CSV	1338.41	0.210432
CAM112A_map17	0002.CSV	1342.27	0.223996
CAM112A_map17	0002.CSV	1346.13	0.23576
CAM112A_map17	0002.CSV	1349.98	0.249905
CAM112A_map17	0002.CSV	1353.84	0.265258
CAM112A_map17	0002.CSV	1357.7	0.282194
CAM112A_map17	0002.CSV	1361.56	0.301688
CAM112A_map17	0002.CSV	1365.41	0.325838
CAM112A_map17	0002.CSV	1369.27	0.346596
CAM112A_map17	0002.CSV	1373.13	0.371825
CAM112A_map17	0002.CSV	1376.98	0.399085
CAM112A_map17	0002.CSV	1380.84	0.422883
CAM112A_map17	0002.CSV	1384.7	0.443135
CAM112A_map17	0002.CSV	1388.56	0.465099
CAM112A_map17	0002.CSV	1392.41	0.476794
CAM112A_map17	0002.CSV	1396.27	0.479979
CAM112A_map17	0002.CSV	1400.13	0.471919
CAM112A_map17	0002.CSV	1403.98	0.460175
CAM112A_map17	0002.CSV	1407.84	0.438341
CAM112A_map17	0002.CSV	1411.7	0.413126
CAM112A_map17	0002.CSV	1415.55	0.387767
CAM112A_map17	0002.CSV	1419.41	0.361461
CAM112A_map17	0002.CSV	1423.27	0.340726
CAM112A_map17	0002.CSV	1427.12	0.328362
CAM112A_map17	0002.CSV	1430.98	0.31542
CAM112A_map17	0002.CSV	1434.84	0.303105
CAM112A_map17	0002.CSV	1438.7	0.287951
CAM112A_map17	0002.CSV	1442.55	0.276855
CAM112A_map17	0002.CSV	1446.41	0.264279
CAM112A_map17	0002.CSV	1450.27	0.251443
CAM112A_map17	0002.CSV	1454.12	0.24064
CAM112A_map17	0002.CSV	1457.98	0.224988
CAM112A_map17	0002.CSV	1461.84	0.21282
CAM112A_map17	0002.CSV	1465.7	0.204124
CAM112A_map17	0002.CSV	1469.55	0.19501
CAM112A_map17	0002.CSV	1473.41	0.184606
CAM112A_map17	0002.CSV	1477.27	0.173432
CAM112A_map17	0002.CSV	1481.12	0.166851
CAM112A_map17	0002.CSV	1484.98	0.160314
CAM112A_map17	0002.CSV	1488.84	0.152049
CAM112A_map17	0002.CSV	1492.7	0.143134
CAM112A_map17	0002.CSV	1496.55	0.136043
CAM112A_map17	0002.CSV	1500.41	0.127696
CAM112A_map17	0002.CSV	1504.27	0.122803
CAM112A_map17	0002.CSV	1508.12	0.113362
CAM112A_map17	0002.CSV	1511.98	0.106792
CAM112A_map17	0002.CSV	1515.84	0.102435
CAM112A_map17	0002.CSV	1519.7	0.0970667
CAM112A_map17	0002.CSV	1523.55	0.0903154
CAM112A_map17	0002.CSV	1527.41	0.0854718
CAM112A_map17	0002.CSV	1531.27	0.080518
CAM112A_map17	0002.CSV	1535.12	0.0754963
CAM112A_map17	0002.CSV	1538.98	0.0700349
CAM112A_map17	0002.CSV	1542.84	0.0610173
CAM112A_map17	0002.CSV	1546.7	0.0552663
CAM112A_map17	0002.CSV	1550.55	0.0511525
CAM112A_map17	0002.CSV	1554.41	0.0470418
CAM112A_map17	0002.CSV	1558.27	0.0428576
CAM112A_map17	0002.CSV	1562.12	0.0392612
CAM112A_map17	0002.CSV	1565.98	0.0375539
CAM112A_map17	0002.CSV	1569.84	0.0355963
CAM112A_map17	0002.CSV	1573.69	0.0341937
CAM112A_map17	0002.CSV	1577.55	0.0331884
CAM112A_map17	0002.CSV	1581.41	0.0322882
CAM112A_map17	0002.CSV	1585.27	0.0311568
CAM112A_map17	0002.CSV	1589.12	0.0298732
CAM112A_map17	0002.CSV	1592.98	0.0284079
CAM112A_map17	0002.CSV	1596.84	0.02715
CAM112A_map17	0002.CSV	1600.69	0.025996
CAM112A_map17	0002.CSV	1604.55	0.0250707
CAM112A_map17	0002.CSV	1608.41	0.0241112
CAM112A_map17	0002.CSV	1612.27	0.0233439
CAM112A_map17	0002.CSV	1616.12	0.0225388
CAM112A_map17	0002.CSV	1619.98	0.0219556
CAM112A_map17	0002.CSV	1623.84	0.0212405
CAM112A_map17	0002.CSV	1627.69	0.0204124
CAM112A_map17	0002.CSV	1631.55	0.0193303
CAM112A_map17	0002.CSV	1635.41	0.0183208
CAM112A_map17	0002.CSV	1639.27	0.0171929
CAM112A_map17	0002.CSV	1643.12	0.0164331
CAM112A_map17	0002.CSV	1646.98	0.0165323
CAM112A_map17	0002.CSV	1650.84	0.017427
CAM112A_map17	0002.CSV	1654.69	0.0184185
CAM112A_map17	0002.CSV	1658.55	0.0185266
CAM112A_map17	0002.CSV	1662.41	0.0182435
CAM112A_map17	0002.CSV	1666.27	0.0181224
CAM112A_map17	0002.CSV	1670.12	0.0181469
CAM112A_map17	0002.CSV	1673.98	0.0185684
CAM112A_map17	0002.CSV	1677.84	0.0183766
CAM112A_map17	0002.CSV	1681.69	0.0181999
CAM112A_map17	0002.CSV	1685.55	0.0183979
CAM112A_map17	0002.CSV	1689.41	0.0184003
CAM112A_map17	0002.CSV	1693.27	0.0178898
CAM112A_map17	0002.CSV	1697.12	0.018044
CAM112A_map17	0002.CSV	1700.98	0.0187952
CAM112A_map17	0002.CSV	1704.84	0.0193488
CAM112A_map17	0002.CSV	1708.69	0.019833
CAM112A_map17	0002.CSV	1712.55	0.0203079
CAM112A_map17	0002.CSV	1716.41	0.0217973
CAM112A_map17	0002.CSV	1720.27	0.0238205
CAM112A_map17	0002.CSV	1724.12	0.0243646
CAM112A_map17	0002.CSV	1727.98	0.024654
CAM112A_map17	0002.CSV	1731.84	0.0246955
CAM112A_map17	0002.CSV	1735.69	0.0245264
CAM112A_map17	0002.CSV	1739.55	0.0236037
CAM112A_map17	0002.CSV	1743.41	0.0222161
CAM112A_map17	0002.CSV	1747.27	0.0204579
CAM112A_map17	0002.CSV	1751.12	0.0185445
CAM112A_map17	0002.CSV	1754.98	0.0171406
CAM112A_map17	0002.CSV	1758.84	0.0163106
CAM112A_map17	0002.CSV	1762.69	0.015852
CAM112A_map17	0002.CSV	1766.55	0.0154826
CAM112A_map17	0002.CSV	1770.41	0.0153726
CAM112A_map17	0002.CSV	1774.26	0.0157968
CAM112A_map17	0002.CSV	1778.12	0.0160021
CAM112A_map17	0002.CSV	1781.98	0.0167728
CAM112A_map17	0002.CSV	1785.84	0.0182374
CAM112A_map17	0002.CSV	1789.69	0.0205924
CAM112A_map17	0002.CSV	1793.55	0.0237543
CAM112A_map17	0002.CSV	1797.41	0.0242736
CAM112A_map17	0002.CSV	1801.26	0.0219006
CAM112A_map17	0002.CSV	1805.12	0.0189181
CAM112A_map17	0002.CSV	1808.98	0.0166629
CAM112A_map17	0002.CSV	1812.84	0.0153077
CAM112A_map17	0002.CSV	1816.69	0.0144119
CAM112A_map17	0002.CSV	1820.55	0.0139226
CAM112A_map17	0002.CSV	1824.41	0.0136184
CAM112A_map17	0002.CSV	1828.26	0.0136263
CAM112A_map17	0002.CSV	1832.12	0.0135168
CAM112A_map17	0002.CSV	1835.98	0.0133599
CAM112A_map17	0002.CSV	1839.84	0.0130944
CAM112A_map17	0002.CSV	1843.69	0.0131459
CAM112A_map17	0002.CSV	1847.55	0.0132754
CAM112A_map17	0002.CSV	1851.41	0.0131579
CAM112A_map17	0002.CSV	1855.26	0.0130139
CAM112A_map17	0002.CSV	1859.12	0.0130248
CAM112A_map17	0002.CSV	1862.98	0.0129339
CAM112A_map17	0002.CSV	1866.84	0.0130463
CAM112A_map17	0002.CSV	1870.69	0.0132739
CAM112A_map17	0002.CSV	1874.55	0.0131389
CAM112A_map17	0002.CSV	1878.41	0.0130015
CAM112A_map17	0002.CSV	1882.26	0.0129995
CAM112A_map17	0002.CSV	1886.12	0.0129236
CAM112A_map17	0002.CSV	1889.98	0.0129973
CAM112A_map17	0002.CSV	1893.83	0.0130036
CAM112A_map17	0002.CSV	1897.69	0.0130129
CAM112A_map17	0002.CSV	1901.55	0.012973
CAM112A_map17	0002.CSV	1905.41	0.0130081
CAM112A_map17	0002.CSV	1909.26	0.0130448
CAM112A_map17	0002.CSV	1913.12	0.0130364
CAM112A_map17	0002.CSV	1916.98	0.0129658
CAM112A_map17	0002.CSV	1920.83	0.0131201
CAM112A_map17	0002.CSV	1924.69	0.0131523
CAM112A_map17	0002.CSV	1928.55	0.0131486
CAM112A_map17	0002.CSV	1932.4	0.0131356
CAM112A_map17	0002.CSV	1936.26	0.0131838
CAM112A_map17	0002.CSV	1940.12	0.0131601
CAM112A_map17	0002.CSV	1943.98	0.0133652
CAM112A_map17	0002.CSV	1947.83	0.0134186
CAM112A_map17	0002.CSV	1951.69	0.0134313
CAM112A_map17	0002.CSV	1955.55	0.013459
CAM112A_map17	0002.CSV	1959.4	0.0135174
CAM112A_map17	0002.CSV	1963.26	0.0134754
CAM112A_map17	0002.CSV	1967.12	0.0135572
CAM112A_map17	0002.CSV	1970.98	0.0135965
CAM112A_map17	0002.CSV	1974.83	0.0136158
CAM112A_map17	0002.CSV	1978.69	0.0136387
CAM112A_map17	0002.CSV	1982.55	0.013701
CAM112A_map17	0002.CSV	1986.4	0.0136637
CAM112A_map17	0002.CSV	1990.26	0.0137193
CAM112A_map17	0002.CSV	1994.12	0.0137867
CAM112A_map17	0002.CSV	1997.98	0.0138023
CAM112A_map17	0002.CSV	2001.83	0.0137663
CAM112A_map17	0002.CSV	2005.69	0.0138462
CAM112A_map17	0002.CSV	2009.55	0.0138857
CAM112A_map17	0002.CSV	2013.4	0.0139417
CAM112A_map17	0002.CSV	2017.26	0.0140093
CAM112A_map17	0002.CSV	2021.12	0.0140627
CAM112A_map17	0002.CSV	2024.97	0.0140286
CAM112A_map17	0002.CSV	2028.83	0.0140931
CAM112A_map17	0002.CSV	2032.69	0.014112
CAM112A_map17	0002.CSV	2036.55	0.0141624
CAM112A_map17	0002.CSV	2040.4	0.0141767
CAM112A_map17	0002.CSV	2044.26	0.0142086
CAM112A_map17	0002.CSV	2048.12	0.0142074
CAM112A_map17	0002.CSV	2051.97	0.0142858
CAM112A_map17	0002.CSV	2055.83	0.0143073
CAM112A_map17	0002.CSV	2059.69	0.0143698
CAM112A_map17	0002.CSV	2063.55	0.0144162
CAM112A_map17	0002.CSV	2067.4	0.0144847
CAM112A_map17	0002.CSV	2071.26	0.0144575
CAM112A_map17	0002.CSV	2075.12	0.0144896
CAM112A_map17	0002.CSV	2078.97	0.0145051
CAM112A_map17	0002.CSV	2082.83	0.0145366
CAM112A_map17	0002.CSV	2086.69	0.0145247
CAM112A_map17	0002.CSV	2090.55	0.0145992
CAM112A_map17	0002.CSV	2094.4	0.0146064
CAM112A_map17	0002.CSV	2098.26	0.0146351
CAM112A_map17	0002.CSV	2102.12	0.0146442
CAM112A_map17	0002.CSV	2105.97	0.0147258
CAM112A_map17	0002.CSV	2109.83	0.0147779
CAM112A_map17	0002.CSV	2113.69	0.0148099
CAM112A_map17	0002.CSV	2117.55	0.014831
CAM112A_map17	0002.CSV	2121.4	0.0149343
CAM112A_map17	0002.CSV	2125.26	0.0149816
CAM112A_map17	0002.CSV	2129.12	0.0150473
CAM112A_map17	0002.CSV	2132.97	0.0150913
CAM112A_map17	0002.CSV	2136.83	0.0151793
CAM112A_map17	0002.CSV	2140.69	0.0151693
CAM112A_map17	0002.CSV	2144.55	0.0151877
CAM112A_map17	0002.CSV	2148.4	0.0152063
CAM112A_map17	0002.CSV	2152.26	0.0152254
CAM112A_map17	0002.CSV	2156.12	0.015183
CAM112A_map17	0002.CSV	2159.97	0.0151973
CAM112A_map17	0002.CSV	2163.83	0.015217
CAM112A_map17	0002.CSV	2167.69	0.0152703
CAM112A_map17	0002.CSV	2171.55	0.0152478
CAM112A_map17	0002.CSV	2175.4	0.0152744
CAM112A_map17	0002.CSV	2179.26	0.0153069
CAM112A_map17	0002.CSV	2183.12	0.0153683
CAM112A_map17	0002.CSV	2186.97	0.0153339
CAM112A_map17	0002.CSV	2190.83	0.01532
CAM112A_map17	0002.CSV	2194.69	0.0152952
CAM112A_map17	0002.CSV	2198.55	0.0153359
CAM112A_map17	0002.CSV	2202.4	0.0153562
CAM112A_map17	0002.CSV	2206.26	0.0153957
CAM112A_map17	0002.CSV	2210.12	0.0153792
CAM112A_map17	0002.CSV	2213.97	0.0154246
CAM112A_map17	0002.CSV	2217.83	0.015432
CAM112A_map17	0002.CSV	2221.69	0.0154286
CAM112A_map17	0002.CSV	2225.54	0.0153887
CAM112A_map17	0002.CSV	2229.4	0.0153847
CAM112A_map17	0002.CSV	2233.26	0.0153852
CAM112A_map17	0002.CSV	2237.12	0.015414
CAM112A_map17	0002.CSV	2240.97	0.0154246
CAM112A_map17	0002.CSV	2244.83	0.0154797
CAM112A_map17	0002.CSV	2248.69	0.0155056
CAM112A_map17	0002.CSV	2252.54	0.0155233
CAM112A_map17	0002.CSV	2256.4	0.0154904
CAM112A_map17	0002.CSV	2260.26	0.0155015
CAM112A_map17	0002.CSV	2264.11	0.0154992
CAM112A_map17	0002.CSV	2267.97	0.0155736
CAM112A_map17	0002.CSV	2271.83	0.0156209
CAM112A_map17	0002.CSV	2275.69	0.0156742
CAM112A_map17	0002.CSV	2279.54	0.015658
CAM112A_map17	0002.CSV	2283.4	0.0156428
CAM112A_map17	0002.CSV	2287.26	0.0156871
CAM112A_map17	0002.CSV	2291.11	0.0158162
CAM112A_map17	0002.CSV	2294.97	0.0159382
CAM112A_map17	0002.CSV	2298.83	0.0160557
CAM112A_map17	0002.CSV	2302.69	0.0160791
CAM112A_map17	0002.CSV	2306.54	0.0161019
CAM112A_map17	0002.CSV	2310.4	0.0160576
CAM112A_map17	0002.CSV	2314.26	0.0160823
CAM112A_map17	0002.CSV	2318.11	0.0159551
CAM112A_map17	0002.CSV	2321.97	0.0157066
CAM112A_map17	0002.CSV	2325.83	0.0154124
CAM112A_map17	0002.CSV	2329.69	0.0153282
CAM112A_map17	0002.CSV	2333.54	0.0150901
CAM112A_map17	0002.CSV	2337.4	0.0149822
CAM112A_map17	0002.CSV	2341.26	0.0151514
CAM112A_map17	0002.CSV	2345.11	0.0159931
CAM112A_map17	0002.CSV	2348.97	0.0160401
CAM112A_map17	0002.CSV	2352.83	0.0151118
CAM112A_map17	0002.CSV	2356.69	0.0125274
CAM112A_map17	0002.CSV	2360.54	0.0106303
CAM112A_map17	0002.CSV	2364.4	0.0119397
CAM112A_map17	0002.CSV	2368.26	0.0145327
CAM112A_map17	0002.CSV	2372.11	0.0161664
CAM112A_map17	0002.CSV	2375.97	0.0168054
CAM112A_map17	0002.CSV	2379.83	0.0167866
CAM112A_map17	0002.CSV	2383.69	0.0166393
CAM112A_map17	0002.CSV	2387.54	0.0164225
CAM112A_map17	0002.CSV	2391.4	0.0163356
CAM112A_map17	0002.CSV	2395.26	0.01633
CAM112A_map17	0002.CSV	2399.11	0.0163471
CAM112A_map17	0002.CSV	2402.97	0.0163299
CAM112A_map17	0002.CSV	2406.83	0.0163543
CAM112A_map17	0002.CSV	2410.68	0.0163701
CAM112A_map17	0002.CSV	2414.54	0.0163868
CAM112A_map17	0002.CSV	2418.4	0.0164183
CAM112A_map17	0002.CSV	2422.26	0.0164847
CAM112A_map17	0002.CSV	2426.11	0.0165264
CAM112A_map17	0002.CSV	2429.97	0.016551
CAM112A_map17	0002.CSV	2433.83	0.0165777
CAM112A_map17	0002.CSV	2437.68	0.0166737
CAM112A_map17	0002.CSV	2441.54	0.0166863
CAM112A_map17	0002.CSV	2445.4	0.0167073
CAM112A_map17	0002.CSV	2449.26	0.0167601
CAM112A_map17	0002.CSV	2453.11	0.0168157
CAM112A_map17	0002.CSV	2456.97	0.0168919
CAM112A_map17	0002.CSV	2460.83	0.0170044
CAM112A_map17	0002.CSV	2464.68	0.017079
CAM112A_map17	0002.CSV	2468.54	0.0171767
CAM112A_map17	0002.CSV	2472.4	0.0173576
CAM112A_map17	0002.CSV	2476.26	0.0176236
CAM112A_map17	0002.CSV	2480.11	0.0179122
CAM112A_map17	0002.CSV	2483.97	0.018302
CAM112A_map17	0002.CSV	2487.83	0.0187843
CAM112A_map17	0002.CSV	2491.68	0.019418
CAM112A_map17	0002.CSV	2495.54	0.0201993
CAM112A_map17	0002.CSV	2499.4	0.0210843
CAM112A_map17	0002.CSV	2503.26	0.0219279
CAM112A_map17	0002.CSV	2507.11	0.0226802
CAM112A_map17	0002.CSV	2510.97	0.02313
CAM112A_map17	0002.CSV	2514.83	0.0231075
CAM112A_map17	0002.CSV	2518.68	0.0227283
CAM112A_map17	0002.CSV	2522.54	0.0221737
CAM112A_map17	0002.CSV	2526.4	0.0214577
CAM112A_map17	0002.CSV	2530.26	0.0207015
CAM112A_map17	0002.CSV	2534.11	0.0199534
CAM112A_map17	0002.CSV	2537.97	0.0193472
CAM112A_map17	0002.CSV	2541.83	0.0188889
CAM112A_map17	0002.CSV	2545.68	0.0185791
CAM112A_map17	0002.CSV	2549.54	0.0183608
CAM112A_map17	0002.CSV	2553.4	0.0182249
CAM112A_map17	0002.CSV	2557.26	0.0181316
CAM112A_map17	0002.CSV	2561.11	0.0180861
CAM112A_map17	0002.CSV	2564.97	0.0180582
CAM112A_map17	0002.CSV	2568.83	0.0180507
CAM112A_map17	0002.CSV	2572.68	0.018046
CAM112A_map17	0002.CSV	2576.54	0.0180877
CAM112A_map17	0002.CSV	2580.4	0.0180217
CAM112A_map17	0002.CSV	2584.25	0.0179574
CAM112A_map17	0002.CSV	2588.11	0.0179532
CAM112A_map17	0002.CSV	2591.97	0.0179882
CAM112A_map17	0002.CSV	2595.83	0.0179349
CAM112A_map17	0002.CSV	2599.68	0.0178386
CAM112A_map17	0002.CSV	2603.54	0.0177198
CAM112A_map17	0002.CSV	2607.4	0.0176131
CAM112A_map17	0002.CSV	2611.25	0.0174839
CAM112A_map17	0002.CSV	2615.11	0.0173592
CAM112A_map17	0002.CSV	2618.97	0.0172645
CAM112A_map17	0002.CSV	2622.82	0.017272
CAM112A_map17	0002.CSV	2626.68	0.0172142
CAM112A_map17	0002.CSV	2630.54	0.0170957
CAM112A_map17	0002.CSV	2634.4	0.0170316
CAM112A_map17	0002.CSV	2638.25	0.0169873
CAM112A_map17	0002.CSV	2642.11	0.0168123
CAM112A_map17	0002.CSV	2645.97	0.0166762
CAM112A_map17	0002.CSV	2649.82	0.0166495
CAM112A_map17	0002.CSV	2653.68	0.0166786
CAM112A_map17	0002.CSV	2657.54	0.0166837
CAM112A_map17	0002.CSV	2661.4	0.0166597
CAM112A_map17	0002.CSV	2665.25	0.0166581
CAM112A_map17	0002.CSV	2669.11	0.0166944
CAM112A_map17	0002.CSV	2672.97	0.016871
CAM112A_map17	0002.CSV	2676.82	0.0172006
CAM112A_map17	0002.CSV	2680.68	0.0171918
CAM112A_map17	0002.CSV	2684.54	0.0168535
CAM112A_map17	0002.CSV	2688.4	0.0166902
CAM112A_map17	0002.CSV	2692.25	0.0166836
CAM112A_map17	0002.CSV	2696.11	0.0167447
CAM112A_map17	0002.CSV	2699.97	0.0168112
CAM112A_map17	0002.CSV	2703.82	0.0168251
CAM112A_map17	0002.CSV	2707.68	0.0168458
CAM112A_map17	0002.CSV	2711.54	0.0168048
CAM112A_map17	0002.CSV	2715.4	0.0167906
CAM112A_map17	0002.CSV	2719.25	0.01697
CAM112A_map17	0002.CSV	2723.11	0.0173418
CAM112A_map17	0002.CSV	2726.97	0.0173186
CAM112A_map17	0002.CSV	2730.82	0.0168989
CAM112A_map17	0002.CSV	2734.68	0.0168417
CAM112A_map17	0002.CSV	2738.54	0.0169947
CAM112A_map17	0002.CSV	2742.4	0.0171037
CAM112A_map17	0002.CSV	2746.25	0.0174175
CAM112A_map17	0002.CSV	2750.11	0.0174011
CAM112A_map17	0002.CSV	2753.97	0.0170858
CAM112A_map17	0002.CSV	2757.82	0.0169937
CAM112A_map17	0002.CSV	2761.68	0.0169172
CAM112A_map17	0002.CSV	2765.54	0.0168713
CAM112A_map17	0002.CSV	2769.39	0.0170742
CAM112A_map17	0002.CSV	2773.25	0.0175217
CAM112A_map17	0002.CSV	2777.11	0.0174278
CAM112A_map17	0002.CSV	2780.97	0.0171033
CAM112A_map17	0002.CSV	2784.82	0.0173816
CAM112A_map17	0002.CSV	2788.68	0.0180122
CAM112A_map17	0002.CSV	2792.54	0.0182583
CAM112A_map17	0002.CSV	2796.39	0.0183186
CAM112A_map17	0002.CSV	2800.25	0.0180917
CAM112A_map17	0002.CSV	2804.11	0.017811
CAM112A_map17	0002.CSV	2807.97	0.018128
CAM112A_map17	0002.CSV	2811.82	0.0182265
CAM112A_map17	0002.CSV	2815.68	0.0181097
CAM112A_map17	0002.CSV	2819.54	0.018317
CAM112A_map17	0002.CSV	2823.39	0.0185651
CAM112A_map17	0002.CSV	2827.25	0.0187161
CAM112A_map17	0002.CSV	2831.11	0.0193105
CAM112A_map17	0002.CSV	2834.97	0.0202972
CAM112A_map17	0002.CSV	2838.82	0.0210636
CAM112A_map17	0002.CSV	2842.68	0.0214779
CAM112A_map17	0002.CSV	2846.54	0.0223275
CAM112A_map17	0002.CSV	2850.39	0.023271
CAM112A_map17	0002.CSV	2854.25	0.0239918
CAM112A_map17	0002.CSV	2858.11	0.0243439
CAM112A_map17	0002.CSV	2861.97	0.0240373
CAM112A_map17	0002.CSV	2865.82	0.0236972
CAM112A_map17	0002.CSV	2869.68	0.0239078
CAM112A_map17	0002.CSV	2873.54	0.0240321
CAM112A_map17	0002.CSV	2877.39	0.0233026
CAM112A_map17	0002.CSV	2881.25	0.0225403
CAM112A_map17	0002.CSV	2885.11	0.0222852
CAM112A_map17	0002.CSV	2888.97	0.0223478
CAM112A_map17	0002.CSV	2892.82	0.0227761
CAM112A_map17	0002.CSV	2896.68	0.0232241
CAM112A_map17	0002.CSV	2900.54	0.0234891
CAM112A_map17	0002.CSV	2904.39	0.0240037
CAM112A_map17	0002.CSV	2908.25	0.0249036
CAM112A_map17	0002.CSV	2912.11	0.026125
CAM112A_map17	0002.CSV	2915.97	0.0270592
CAM112A_map17	0002.CSV	2919.82	0.027567
CAM112A_map17	0002.CSV	2923.68	0.0280161
CAM112A_map17	0002.CSV	2927.54	0.0284622
CAM112A_map17	0002.CSV	2931.39	0.0279799
CAM112A_map17	0002.CSV	2935.25	0.0267639
CAM112A_map17	0002.CSV	2939.11	0.0259303
CAM112A_map17	0002.CSV	2942.96	0.0257815
CAM112A_map17	0002.CSV	2946.82	0.0255346
CAM112A_map17	0002.CSV	2950.68	0.0250517
CAM112A_map17	0002.CSV	2954.54	0.0244622
CAM112A_map17	0002.CSV	2958.39	0.0238152
CAM112A_map17	0002.CSV	2962.25	0.0233747
CAM112A_map17	0002.CSV	2966.11	0.0227308
CAM112A_map17	0002.CSV	2969.96	0.0223937
CAM112A_map17	0002.CSV	2973.82	0.0224581
CAM112A_map17	0002.CSV	2977.68	0.0224098
CAM112A_map17	0002.CSV	2981.53	0.0219463
CAM112A_map17	0002.CSV	2985.39	0.0212569
CAM112A_map17	0002.CSV	2989.25	0.0210424
CAM112A_map17	0002.CSV	2993.11	0.0210121
CAM112A_map17	0002.CSV	2996.96	0.0206423
CAM112A_map17	0002.CSV	3000.82	0.0201247
CAM112A_map17	0002.CSV	3004.68	0.0197923
CAM112A_map17	0002.CSV	3008.53	0.0199383
CAM112A_map17	0002.CSV	3012.39	0.0202282
CAM112A_map17	0002.CSV	3016.25	0.020242
CAM112A_map17	0002.CSV	3020.11	0.0200686
CAM112A_map17	0002.CSV	3023.96	0.0199392
CAM112A_map17	0002.CSV	3027.82	0.0198879
CAM112A_map17	0002.CSV	3031.68	0.0200927
CAM112A_map17	0002.CSV	3035.53	0.020181
CAM112A_map17	0002.CSV	3039.39	0.0201606
CAM112A_map17	0002.CSV	3043.25	0.0201897
CAM112A_map17	0002.CSV	3047.11	0.0200564
CAM112A_map17	0002.CSV	3050.96	0.0200021
CAM112A_map17	0002.CSV	3054.82	0.0199883
CAM112A_map17	0002.CSV	3058.68	0.0198675
CAM112A_map17	0002.CSV	3062.53	0.0199337
CAM112A_map17	0002.CSV	3066.39	0.0201621
CAM112A_map17	0002.CSV	3070.25	0.0201104
CAM112A_map17	0002.CSV	3074.11	0.02009
CAM112A_map17	0002.CSV	3077.96	0.0202689
CAM112A_map17	0002.CSV	3081.82	0.0203671
CAM112A_map17	0002.CSV	3085.68	0.0203369
CAM112A_map17	0002.CSV	3089.53	0.0201881
CAM112A_map17	0002.CSV	3093.39	0.0199464
CAM112A_map17	0002.CSV	3097.25	0.0199583
CAM112A_map17	0002.CSV	3101.11	0.0200696
CAM112A_map17	0002.CSV	3104.96	0.0201268
CAM112A_map17	0002.CSV	3108.82	0.0202423
CAM112A_map17	0002.CSV	3112.68	0.0203075
CAM112A_map17	0002.CSV	3116.53	0.0205086
CAM112A_map17	0002.CSV	3120.39	0.0205165
CAM112A_map17	0002.CSV	3124.25	0.0202753
CAM112A_map17	0002.CSV	3128.11	0.0201969
CAM112A_map17	0002.CSV	3131.96	0.0201447
CAM112A_map17	0002.CSV	3135.82	0.0201976
CAM112A_map17	0002.CSV	3139.68	0.0203024
CAM112A_map17	0002.CSV	3143.53	0.0201964
CAM112A_map17	0002.CSV	3147.39	0.0202558
CAM112A_map17	0002.CSV	3151.25	0.0205446
CAM112A_map17	0002.CSV	3155.1	0.0205425
CAM112A_map17	0002.CSV	3158.96	0.0202573
CAM112A_map17	0002.CSV	3162.82	0.0201231
CAM112A_map17	0002.CSV	3166.68	0.0200421
CAM112A_map17	0002.CSV	3170.53	0.0200159
CAM112A_map17	0002.CSV	3174.39	0.0200883
CAM112A_map17	0002.CSV	3178.25	0.0201579
CAM112A_map17	0002.CSV	3182.1	0.0202042
CAM112A_map17	0002.CSV	3185.96	0.020345
CAM112A_map17	0002.CSV	3189.82	0.020512
CAM112A_map17	0002.CSV	3193.68	0.0204844
CAM112A_map17	0002.CSV	3197.53	0.020449
CAM112A_map17	0002.CSV	3201.39	0.0205116
CAM112A_map17	0002.CSV	3205.25	0.0205984
CAM112A_map17	0002.CSV	3209.1	0.0206701
CAM112A_map17	0002.CSV	3212.96	0.0208037
CAM112A_map17	0002.CSV	3216.82	0.0208659
CAM112A_map17	0002.CSV	3220.68	0.020689
CAM112A_map17	0002.CSV	3224.53	0.0206229
CAM112A_map17	0002.CSV	3228.39	0.0208735
CAM112A_map17	0002.CSV	3232.25	0.0212376
CAM112A_map17	0002.CSV	3236.1	0.0211793
CAM112A_map17	0002.CSV	3239.96	0.0209735
CAM112A_map17	0002.CSV	3243.82	0.021101
CAM112A_map17	0002.CSV	3247.68	0.0211634
CAM112A_map17	0002.CSV	3251.53	0.0210308
CAM112A_map17	0002.CSV	3255.39	0.0210566
CAM112A_map17	0002.CSV	3259.25	0.0209059
CAM112A_map17	0002.CSV	3263.1	0.0207576
CAM112A_map17	0002.CSV	3266.96	0.0209524
CAM112A_map17	0002.CSV	3270.82	0.0212561
CAM112A_map17	0002.CSV	3274.68	0.0212193
CAM112A_map17	0002.CSV	3278.53	0.0209626
CAM112A_map17	0002.CSV	3282.39	0.0209178
CAM112A_map17	0002.CSV	3286.25	0.0211019
CAM112A_map17	0002.CSV	3290.1	0.0213909
CAM112A_map17	0002.CSV	3293.96	0.0216362
CAM112A_map17	0002.CSV	3297.82	0.0216001
CAM112A_map17	0002.CSV	3301.67	0.021645
CAM112A_map17	0002.CSV	3305.53	0.0218463
CAM112A_map17	0002.CSV	3309.39	0.0218833
CAM112A_map17	0002.CSV	3313.25	0.0215767
CAM112A_map17	0002.CSV	3317.1	0.0212892
CAM112A_map17	0002.CSV	3320.96	0.0213751
CAM112A_map17	0002.CSV	3324.82	0.0216244
CAM112A_map17	0002.CSV	3328.67	0.0214206
CAM112A_map17	0002.CSV	3332.53	0.0213353
CAM112A_map17	0002.CSV	3336.39	0.021658
CAM112A_map17	0002.CSV	3340.24	0.0217644
CAM112A_map17	0002.CSV	3344.1	0.0216496
CAM112A_map17	0002.CSV	3347.96	0.0216768
CAM112A_map17	0002.CSV	3351.82	0.0214857
CAM112A_map17	0002.CSV	3355.67	0.0212438
CAM112A_map17	0002.CSV	3359.53	0.0213779
CAM112A_map17	0002.CSV	3363.39	0.021454
CAM112A_map17	0002.CSV	3367.24	0.0215819
CAM112A_map17	0002.CSV	3371.1	0.0214952
CAM112A_map17	0002.CSV	3374.96	0.0212239
CAM112A_map17	0002.CSV	3378.82	0.021074
CAM112A_map17	0002.CSV	3382.67	0.0208817
CAM112A_map17	0002.CSV	3386.53	0.0209511
CAM112A_map17	0002.CSV	3390.39	0.021274
CAM112A_map17	0002.CSV	3394.24	0.0215217
CAM112A_map17	0002.CSV	3398.1	0.0216641
CAM112A_map17	0002.CSV	3401.96	0.0216691
CAM112A_map17	0002.CSV	3405.82	0.0214928
CAM112A_map17	0002.CSV	3409.67	0.0214552
CAM112A_map17	0002.CSV	3413.53	0.0213088
CAM112A_map17	0002.CSV	3417.39	0.0210158
CAM112A_map17	0002.CSV	3421.24	0.0210578
CAM112A_map17	0002.CSV	3425.1	0.0212225
CAM112A_map17	0002.CSV	3428.96	0.0213273
CAM112A_map17	0002.CSV	3432.82	0.0213855
CAM112A_map17	0002.CSV	3436.67	0.0211425
CAM112A_map17	0002.CSV	3440.53	0.0206411
CAM112A_map17	0002.CSV	3444.39	0.0203515
CAM112A_map17	0002.CSV	3448.24	0.0203346
CAM112A_map17	0002.CSV	3452.1	0.0201998
CAM112A_map17	0002.CSV	3455.96	0.0202807
CAM112A_map17	0002.CSV	3459.82	0.0205621
CAM112A_map17	0002.CSV	3463.67	0.0207296
CAM112A_map17	0002.CSV	3467.53	0.0206988
CAM112A_map17	0002.CSV	3471.39	0.0203161
CAM112A_map17	0002.CSV	3475.24	0.0201121
CAM112A_map17	0002.CSV	3479.1	0.020204
CAM112A_map17	0002.CSV	3482.96	0.0201401
CAM112A_map17	0002.CSV	3486.82	0.0200736
CAM112A_map17	0002.CSV	3490.67	0.0200815
CAM112A_map17	0002.CSV	3494.53	0.0201415
CAM112A_map17	0002.CSV	3498.39	0.0199903
CAM112A_map17	0002.CSV	3502.24	0.0196948
CAM112A_map17	0002.CSV	3506.1	0.0193912
CAM112A_map17	0002.CSV	3509.96	0.0192753
CAM112A_map17	0002.CSV	3513.81	0.0193203
CAM112A_map17	0002.CSV	3517.67	0.0190956
CAM112A_map17	0002.CSV	3521.53	0.018887
CAM112A_map17	0002.CSV	3525.39	0.0187179
CAM112A_map17	0002.CSV	3529.24	0.0186592
CAM112A_map17	0002.CSV	3533.1	0.0187012
CAM112A_map17	0002.CSV	3536.96	0.0187438
CAM112A_map17	0002.CSV	3540.81	0.0186404
CAM112A_map17	0002.CSV	3544.67	0.0187547
CAM112A_map17	0002.CSV	3548.53	0.0187547
CAM112A_map17	0002.CSV	3552.39	0.0184603
CAM112A_map17	0002.CSV	3556.24	0.0182919
CAM112A_map17	0002.CSV	3560.1	0.0179156
CAM112A_map17	0002.CSV	3563.96	0.0174071
CAM112A_map17	0002.CSV	3567.81	0.0178585
CAM112A_map17	0002.CSV	3571.67	0.0179731
CAM112A_map17	0002.CSV	3575.53	0.0174569
CAM112A_map17	0002.CSV	3579.39	0.0173994
CAM112A_map17	0002.CSV	3583.24	0.0173426
CAM112A_map17	0002.CSV	3587.1	0.0174293
CAM112A_map17	0002.CSV	3590.96	0.0174481
CAM112A_map17	0002.CSV	3594.81	0.0171292
CAM112A_map17	0002.CSV	3598.67	0.0170959
CAM112A_map17	0002.CSV	3602.53	0.0169473
CAM112A_map17	0002.CSV	3606.39	0.0164582
CAM112A_map17	0002.CSV	3610.24	0.0162232
CAM112A_map17	0002.CSV	3614.1	0.0162306
CAM112A_map17	0002.CSV	3617.96	0.0164659
CAM112A_map17	0002.CSV	3621.81	0.0165532
CAM112A_map17	0002.CSV	3625.67	0.0159258
CAM112A_map17	0002.CSV	3629.53	0.015964
CAM112A_map17	0002.CSV	3633.39	0.0164847
CAM112A_map17	0002.CSV	3637.24	0.0161066
CAM112A_map17	0002.CSV	3641.1	0.0156297
CAM112A_map17	0002.CSV	3644.96	0.0151081
CAM112A_map17	0002.CSV	3648.81	0.0156463
CAM112A_map17	0002.CSV	3652.67	0.0164972
CAM112A_map17	0002.CSV	3656.53	0.0164913
CAM112A_map17	0002.CSV	3660.38	0.0164565
CAM112A_map17	0002.CSV	3664.24	0.0157865
CAM112A_map17	0002.CSV	3668.1	0.0151033
CAM112A_map17	0002.CSV	3671.96	0.0150849
CAM112A_map17	0002.CSV	3675.81	0.0157769
CAM112A_map17	0002.CSV	3679.67	0.016207
CAM112A_map17	0002.CSV	3683.53	0.0158035
CAM112A_map17	0002.CSV	3687.38	0.0156878
CAM112A_map17	0002.CSV	3691.24	0.0164782
CAM112A_map17	0002.CSV	3695.1	0.0163373
CAM112A_map17	0002.CSV	3698.95	0.0158252
CAM112A_map17	0002.CSV	3702.81	0.0157201
CAM112A_map17	0002.CSV	3706.67	0.015339
CAM112A_map17	0002.CSV	3710.53	0.0154188
CAM112A_map17	0002.CSV	3714.38	0.0161835
CAM112A_map17	0002.CSV	3718.24	0.0157196
CAM112A_map17	0002.CSV	3722.1	0.0154438
CAM112A_map17	0002.CSV	3725.95	0.015545
CAM112A_map17	0002.CSV	3729.81	0.0151829
CAM112A_map17	0002.CSV	3733.67	0.0153811
CAM112A_map17	0002.CSV	3737.53	0.0166196
CAM112A_map17	0002.CSV	3741.38	0.0160552
CAM112A_map17	0002.CSV	3745.24	0.0151987
CAM112A_map17	0002.CSV	3749.1	0.0148313
CAM112A_map17	0002.CSV	3752.95	0.0155594
CAM112A_map17	0002.CSV	3756.81	0.0157863
CAM112A_map17	0002.CSV	3760.67	0.015862
CAM112A_map17	0002.CSV	3764.53	0.0156961
CAM112A_map17	0002.CSV	3768.38	0.0157563
CAM112A_map17	0002.CSV	3772.24	0.0159934
CAM112A_map17	0002.CSV	3776.1	0.0157973
CAM112A_map17	0002.CSV	3779.95	0.0158662
CAM112A_map17	0002.CSV	3783.81	0.0159712
CAM112A_map17	0002.CSV	3787.67	0.016032
CAM112A_map17	0002.CSV	3791.53	0.0158392
CAM112A_map17	0002.CSV	3795.38	0.0153825
CAM112A_map17	0002.CSV	3799.24	0.0152641
CAM112A_map17	0002.CSV	3803.1	0.0157974
CAM112A_map17	0002.CSV	3806.95	0.0162092
CAM112A_map17	0002.CSV	3810.81	0.0158403
CAM112A_map17	0002.CSV	3814.67	0.0152308
CAM112A_map17	0002.CSV	3818.53	0.0153363
CAM112A_map17	0002.CSV	3822.38	0.0158971
CAM112A_map17	0002.CSV	3826.24	0.0158351
CAM112A_map17	0002.CSV	3830.1	0.0156091
CAM112A_map17	0002.CSV	3833.95	0.0153001
CAM112A_map17	0002.CSV	3837.81	0.015361
CAM112A_map17	0002.CSV	3841.67	0.0160962
CAM112A_map17	0002.CSV	3845.53	0.015928
CAM112A_map17	0002.CSV	3849.38	0.0150917
CAM112A_map17	0002.CSV	3853.24	0.0154093
CAM112A_map17	0002.CSV	3857.1	0.0160786
CAM112A_map17	0002.CSV	3860.95	0.0152987
CAM112A_map17	0002.CSV	3864.81	0.0151475
CAM112A_map17	0002.CSV	3868.67	0.0153443
CAM112A_map17	0002.CSV	3872.52	0.0156545
CAM112A_map17	0002.CSV	3876.38	0.015487
CAM112A_map17	0002.CSV	3880.24	0.0152091
CAM112A_map17	0002.CSV	3884.1	0.0154717
CAM112A_map17	0002.CSV	3887.95	0.0155074
CAM112A_map17	0002.CSV	3891.81	0.0155094
CAM112A_map17	0002.CSV	3895.67	0.0151786
CAM112A_map17	0002.CSV	3899.52	0.0147406
CAM112A_map17	0002.CSV	3903.38	0.0154821
CAM112A_map17	0002.CSV	3907.24	0.0158276
CAM112A_map17	0002.CSV	3911.1	0.0153097
CAM112A_map17	0002.CSV	3914.95	0.0149387
CAM112A_map17	0002.CSV	3918.81	0.0151323
CAM112A_map17	0002.CSV	3922.67	0.0152449
CAM112A_map17	0002.CSV	3926.52	0.0151754
CAM112A_map17	0002.CSV	3930.38	0.0152391
CAM112A_map17	0002.CSV	3934.24	0.0155469
CAM112A_map17	0002.CSV	3938.09	0.0152838
CAM112A_map17	0002.CSV	3941.95	0.0150066
CAM112A_map17	0002.CSV	3945.81	0.0150814
CAM112A_map17	0002.CSV	3949.67	0.0153019
CAM112A_map17	0002.CSV	3953.52	0.0153315
CAM112A_map17	0002.CSV	3957.38	0.0151786
CAM112A_map17	0002.CSV	3961.24	0.015116
CAM112A_map17	0002.CSV	3965.09	0.0150656
CAM112A_map17	0002.CSV	3968.95	0.0149143
CAM112A_map17	0002.CSV	3972.81	0.0148927
CAM112A_map17	0002.CSV	3976.67	0.0149772
CAM112A_map17	0002.CSV	3980.52	0.0150328
CAM112A_map17	0002.CSV	3984.38	0.0150476
CAM112A_map17	0002.CSV	3988.24	0.014955
CAM112A_map17	0002.CSV	3992.09	0.0149541
CAM112A_map17	0002.CSV	3995.95	0.0149918
CAM112A_map17	0002.CSV	3999.81	0.014938
CAM112A_map17	0003.CSV	674.992	0.0378252
CAM112A_map17	0003.CSV	678.849	0.0404923
CAM112A_map17	0003.CSV	682.706	0.0417612
CAM112A_map17	0003.CSV	686.563	0.0442845
CAM112A_map17	0003.CSV	690.42	0.0467536
CAM112A_map17	0003.CSV	694.277	0.0524334
CAM112A_map17	0003.CSV	698.134	0.0593168
CAM112A_map17	0003.CSV	701.991	0.0685075
CAM112A_map17	0003.CSV	705.849	0.0850412
CAM112A_map17	0003.CSV	709.706	0.107938
CAM112A_map17	0003.CSV	713.563	0.0993597
CAM112A_map17	0003.CSV	717.42	0.0648516
CAM112A_map17	0003.CSV	721.277	0.0427133
CAM112A_map17	0003.CSV	725.134	0.036846
CAM112A_map17	0003.CSV	728.991	0.0353057
CAM112A_map17	0003.CSV	732.848	0.0359385
CAM112A_map17	0003.CSV	736.705	0.0365748
CAM112A_map17	0003.CSV	740.562	0.0380936
CAM112A_map17	0003.CSV	744.42	0.0387933
CAM112A_map17	0003.CSV	748.277	0.0395436
CAM112A_map17	0003.CSV	752.134	0.039568
CAM112A_map17	0003.CSV	755.991	0.0404423
CAM112A_map17	0003.CSV	759.848	0.0409
CAM112A_map17	0003.CSV	763.705	0.0421784
CAM112A_map17	0003.CSV	767.562	0.0425647
CAM112A_map17	0003.CSV	771.419	0.0430695
CAM112A_map17	0003.CSV	775.276	0.0429895
CAM112A_map17	0003.CSV	779.133	0.0435546
CAM112A_map17	0003.CSV	782.99	0.0434696
CAM112A_map17	0003.CSV	786.848	0.04361
CAM112A_map17	0003.CSV	790.705	0.0434771
CAM112A_map17	0003.CSV	794.562	0.0442094
CAM112A_map17	0003.CSV	798.419	0.0446962
CAM112A_map17	0003.CSV	802.276	0.0455377
CAM112A_map17	0003.CSV	806.133	0.0458132
CAM112A_map17	0003.CSV	809.99	0.0467437
CAM112A_map17	0003.CSV	813.847	0.0476963
CAM112A_map17	0003.CSV	817.704	0.049589
CAM112A_map17	0003.CSV	821.562	0.0513304
CAM112A_map17	0003.CSV	825.419	0.053549
CAM112A_map17	0003.CSV	829.276	0.0555901
CAM112A_map17	0003.CSV	833.133	0.05875
CAM112A_map17	0003.CSV	836.99	0.0621722
CAM112A_map17	0003.CSV	840.847	0.0678737
CAM112A_map17	0003.CSV	844.704	0.0765688
CAM112A_map17	0003.CSV	848.561	0.0824819
CAM112A_map17	0003.CSV	852.418	0.0853292
CAM112A_map17	0003.CSV	856.275	0.0985141
CAM112A_map17	0003.CSV	860.132	0.12724
CAM112A_map17	0003.CSV	863.99	0.180747
CAM112A_map17	0003.CSV	867.847	0.244674
CAM112A_map17	0003.CSV	871.704	0.260476
CAM112A_map17	0003.CSV	875.561	0.215319
CAM112A_map17	0003.CSV	879.418	0.157239
CAM112A_map17	0003.CSV	883.275	0.0993298
CAM112A_map17	0003.CSV	887.132	0.0510335
CAM112A_map17	0003.CSV	890.989	0.0295831
CAM112A_map17	0003.CSV	894.846	0.0276754
CAM112A_map17	0003.CSV	898.703	0.0289927
CAM112A_map17	0003.CSV	902.561	0.0307613
CAM112A_map17	0003.CSV	906.418	0.0321721
CAM112A_map17	0003.CSV	910.275	0.0339127
CAM112A_map17	0003.CSV	914.132	0.0349159
CAM112A_map17	0003.CSV	917.989	0.0361346
CAM112A_map17	0003.CSV	921.846	0.0369613
CAM112A_map17	0003.CSV	925.703	0.0381371
CAM112A_map17	0003.CSV	929.56	0.0388976
CAM112A_map17	0003.CSV	933.417	0.0398099
CAM112A_map17	0003.CSV	937.274	0.040223
CAM112A_map17	0003.CSV	941.131	0.0409447
CAM112A_map17	0003.CSV	944.989	0.0413021
CAM112A_map17	0003.CSV	948.846	0.0420209
CAM112A_map17	0003.CSV	952.703	0.042558
CAM112A_map17	0003.CSV	956.56	0.04344
CAM112A_map17	0003.CSV	960.417	0.0439088
CAM112A_map17	0003.CSV	964.274	0.0445857
CAM112A_map17	0003.CSV	968.131	0.045093
CAM112A_map17	0003.CSV	971.988	0.0461158
CAM112A_map17	0003.CSV	975.845	0.0469265
CAM112A_map17	0003.CSV	979.702	0.0480474
CAM112A_map17	0003.CSV	983.559	0.0487508
CAM112A_map17	0003.CSV	987.417	0.0497392
CAM112A_map17	0003.CSV	991.274	0.0505141
CAM112A_map17	0003.CSV	995.131	0.0516054
CAM112A_map17	0003.CSV	998.988	0.0525402
CAM112A_map17	0003.CSV	1002.85	0.0538743
CAM112A_map17	0003.CSV	1006.7	0.054715
CAM112A_map17	0003.CSV	1010.56	0.0555381
CAM112A_map17	0003.CSV	1014.42	0.0559115
CAM112A_map17	0003.CSV	1018.27	0.0567672
CAM112A_map17	0003.CSV	1022.13	0.0575707
CAM112A_map17	0003.CSV	1025.99	0.058664
CAM112A_map17	0003.CSV	1029.85	0.0590903
CAM112A_map17	0003.CSV	1033.7	0.0596678
CAM112A_map17	0003.CSV	1037.56	0.059989
CAM112A_map17	0003.CSV	1041.42	0.0606237
CAM112A_map17	0003.CSV	1045.27	0.0609794
CAM112A_map17	0003.CSV	1049.13	0.0617224
CAM112A_map17	0003.CSV	1052.99	0.0622671
CAM112A_map17	0003.CSV	1056.84	0.0636466
CAM112A_map17	0003.CSV	1060.7	0.0651243
CAM112A_map17	0003.CSV	1064.56	0.0669336
CAM112A_map17	0003.CSV	1068.42	0.0677534
CAM112A_map17	0003.CSV	1072.27	0.0681745
CAM112A_map17	0003.CSV	1076.13	0.068185
CAM112A_map17	0003.CSV	1079.99	0.0689055
CAM112A_map17	0003.CSV	1083.84	0.0694812
CAM112A_map17	0003.CSV	1087.7	0.0700857
CAM112A_map17	0003.CSV	1091.56	0.0694378
CAM112A_map17	0003.CSV	1095.41	0.068639
CAM112A_map17	0003.CSV	1099.27	0.068213
CAM112A_map17	0003.CSV	1103.13	0.0691133
CAM112A_map17	0003.CSV	1106.99	0.0702264
CAM112A_map17	0003.CSV	1110.84	0.0716397
CAM112A_map17	0003.CSV	1114.7	0.0721523
CAM112A_map17	0003.CSV	1118.56	0.0723738
CAM112A_map17	0003.CSV	1122.41	0.0720554
CAM112A_map17	0003.CSV	1126.27	0.0721516
CAM112A_map17	0003.CSV	1130.13	0.0722508
CAM112A_map17	0003.CSV	1133.99	0.0728601
CAM112A_map17	0003.CSV	1137.84	0.0732712
CAM112A_map17	0003.CSV	1141.7	0.0741363
CAM112A_map17	0003.CSV	1145.56	0.0747431
CAM112A_map17	0003.CSV	1149.41	0.0757436
CAM112A_map17	0003.CSV	1153.27	0.076603
CAM112A_map17	0003.CSV	1157.13	0.0778393
CAM112A_map17	0003.CSV	1160.99	0.0787262
CAM112A_map17	0003.CSV	1164.84	0.0796154
CAM112A_map17	0003.CSV	1168.7	0.0797656
CAM112A_map17	0003.CSV	1172.56	0.0798871
CAM112A_map17	0003.CSV	1176.41	0.0797649
CAM112A_map17	0003.CSV	1180.27	0.0799472
CAM112A_map17	0003.CSV	1184.13	0.0796141
CAM112A_map17	0003.CSV	1187.99	0.0795608
CAM112A_map17	0003.CSV	1191.84	0.079269
CAM112A_map17	0003.CSV	1195.7	0.0793454
CAM112A_map17	0003.CSV	1199.56	0.0793424
CAM112A_map17	0003.CSV	1203.41	0.0798569
CAM112A_map17	0003.CSV	1207.27	0.0803124
CAM112A_map17	0003.CSV	1211.13	0.0812195
CAM112A_map17	0003.CSV	1214.98	0.0819275
CAM112A_map17	0003.CSV	1218.84	0.0831599
CAM112A_map17	0003.CSV	1222.7	0.0843628
CAM112A_map17	0003.CSV	1226.56	0.0861027
CAM112A_map17	0003.CSV	1230.41	0.087773
CAM112A_map17	0003.CSV	1234.27	0.0898908
CAM112A_map17	0003.CSV	1238.13	0.0917085
CAM112A_map17	0003.CSV	1241.98	0.0938416
CAM112A_map17	0003.CSV	1245.84	0.0957025
CAM112A_map17	0003.CSV	1249.7	0.0978811
CAM112A_map17	0003.CSV	1253.56	0.0996355
CAM112A_map17	0003.CSV	1257.41	0.101714
CAM112A_map17	0003.CSV	1261.27	0.103625
CAM112A_map17	0003.CSV	1265.13	0.105963
CAM112A_map17	0003.CSV	1268.98	0.108033
CAM112A_map17	0003.CSV	1272.84	0.11054
CAM112A_map17	0003.CSV	1276.7	0.112735
CAM112A_map17	0003.CSV	1280.56	0.115264
CAM112A_map17	0003.CSV	1284.41	0.117471
CAM112A_map17	0003.CSV	1288.27	0.120043
CAM112A_map17	0003.CSV	1292.13	0.122182
CAM112A_map17	0003.CSV	1295.98	0.124772
CAM112A_map17	0003.CSV	1299.84	0.127332
CAM112A_map17	0003.CSV	1303.7	0.130587
CAM112A_map17	0003.CSV	1307.56	0.133865
CAM112A_map17	0003.CSV	1311.41	0.138001
CAM112A_map17	0003.CSV	1315.27	0.142409
CAM112A_map17	0003.CSV	1319.13	0.147593
CAM112A_map17	0003.CSV	1322.98	0.152103
CAM112A_map17	0003.CSV	1326.84	0.157297
CAM112A_map17	0003.CSV	1330.7	0.162894
CAM112A_map17	0003.CSV	1334.56	0.169333
CAM112A_map17	0003.CSV	1338.41	0.17714
CAM112A_map17	0003.CSV	1342.27	0.187149
CAM112A_map17	0003.CSV	1346.13	0.195692
CAM112A_map17	0003.CSV	1349.98	0.205943
CAM112A_map17	0003.CSV	1353.84	0.216835
CAM112A_map17	0003.CSV	1357.7	0.228565
CAM112A_map17	0003.CSV	1361.56	0.241759
CAM112A_map17	0003.CSV	1365.41	0.258094
CAM112A_map17	0003.CSV	1369.27	0.272201
CAM112A_map17	0003.CSV	1373.13	0.289296
CAM112A_map17	0003.CSV	1376.98	0.307185
CAM112A_map17	0003.CSV	1380.84	0.322174
CAM112A_map17	0003.CSV	1384.7	0.334631
CAM112A_map17	0003.CSV	1388.56	0.34824
CAM112A_map17	0003.CSV	1392.41	0.355399
CAM112A_map17	0003.CSV	1396.27	0.357886
CAM112A_map17	0003.CSV	1400.13	0.353949
CAM112A_map17	0003.CSV	1403.98	0.348078
CAM112A_map17	0003.CSV	1407.84	0.336391
CAM112A_map17	0003.CSV	1411.7	0.322229
CAM112A_map17	0003.CSV	1415.55	0.306985
CAM112A_map17	0003.CSV	1419.41	0.290266
CAM112A_map17	0003.CSV	1423.27	0.275969
CAM112A_map17	0003.CSV	1427.12	0.266955
CAM112A_map17	0003.CSV	1430.98	0.25738
CAM112A_map17	0003.CSV	1434.84	0.248281
CAM112A_map17	0003.CSV	1438.7	0.236983
CAM112A_map17	0003.CSV	1442.55	0.228608
CAM112A_map17	0003.CSV	1446.41	0.219113
CAM112A_map17	0003.CSV	1450.27	0.20934
CAM112A_map17	0003.CSV	1454.12	0.200837
CAM112A_map17	0003.CSV	1457.98	0.188604
CAM112A_map17	0003.CSV	1461.84	0.178925
CAM112A_map17	0003.CSV	1465.7	0.171729
CAM112A_map17	0003.CSV	1469.55	0.163882
CAM112A_map17	0003.CSV	1473.41	0.154135
CAM112A_map17	0003.CSV	1477.27	0.143458
CAM112A_map17	0003.CSV	1481.12	0.137328
CAM112A_map17	0003.CSV	1484.98	0.131482
CAM112A_map17	0003.CSV	1488.84	0.12426
CAM112A_map17	0003.CSV	1492.7	0.116732
CAM112A_map17	0003.CSV	1496.55	0.110875
CAM112A_map17	0003.CSV	1500.41	0.104043
CAM112A_map17	0003.CSV	1504.27	0.0999082
CAM112A_map17	0003.CSV	1508.12	0.0925746
CAM112A_map17	0003.CSV	1511.98	0.0874597
CAM112A_map17	0003.CSV	1515.84	0.0838779
CAM112A_map17	0003.CSV	1519.7	0.0794611
CAM112A_map17	0003.CSV	1523.55	0.0743464
CAM112A_map17	0003.CSV	1527.41	0.0710141
CAM112A_map17	0003.CSV	1531.27	0.0683435
CAM112A_map17	0003.CSV	1535.12	0.0668435
CAM112A_map17	0003.CSV	1538.98	0.0645836
CAM112A_map17	0003.CSV	1542.84	0.0570366
CAM112A_map17	0003.CSV	1546.7	0.0506037
CAM112A_map17	0003.CSV	1550.55	0.0460366
CAM112A_map17	0003.CSV	1554.41	0.0421492
CAM112A_map17	0003.CSV	1558.27	0.0390029
CAM112A_map17	0003.CSV	1562.12	0.0367982
CAM112A_map17	0003.CSV	1565.98	0.0361205
CAM112A_map17	0003.CSV	1569.84	0.0364033
CAM112A_map17	0003.CSV	1573.69	0.0370964
CAM112A_map17	0003.CSV	1577.55	0.0366521
CAM112A_map17	0003.CSV	1581.41	0.0343635
CAM112A_map17	0003.CSV	1585.27	0.0312521
CAM112A_map17	0003.CSV	1589.12	0.0285317
CAM112A_map17	0003.CSV	1592.98	0.0264309
CAM112A_map17	0003.CSV	1596.84	0.0248613
CAM112A_map17	0003.CSV	1600.69	0.0235386
CAM112A_map17	0003.CSV	1604.55	0.0226893
CAM112A_map17	0003.CSV	1608.41	0.0219933
CAM112A_map17	0003.CSV	1612.27	0.0214331
CAM112A_map17	0003.CSV	1616.12	0.020769
CAM112A_map17	0003.CSV	1619.98	0.0202165
CAM112A_map17	0003.CSV	1623.84	0.0194295
CAM112A_map17	0003.CSV	1627.69	0.0184517
CAM112A_map17	0003.CSV	1631.55	0.0171414
CAM112A_map17	0003.CSV	1635.41	0.0157233
CAM112A_map17	0003.CSV	1639.27	0.0138993
CAM112A_map17	0003.CSV	1643.12	0.0127577
CAM112A_map17	0003.CSV	1646.98	0.0126906
CAM112A_map17	0003.CSV	1650.84	0.0136875
CAM112A_map17	0003.CSV	1654.69	0.0149251
CAM112A_map17	0003.CSV	1658.55	0.0151042
CAM112A_map17	0003.CSV	1662.41	0.0150494
CAM112A_map17	0003.CSV	1666.27	0.0151562
CAM112A_map17	0003.CSV	1670.12	0.0153993
CAM112A_map17	0003.CSV	1673.98	0.0160775
CAM112A_map17	0003.CSV	1677.84	0.0161415
CAM112A_map17	0003.CSV	1681.69	0.0161391
CAM112A_map17	0003.CSV	1685.55	0.0165047
CAM112A_map17	0003.CSV	1689.41	0.0165704
CAM112A_map17	0003.CSV	1693.27	0.0161786
CAM112A_map17	0003.CSV	1697.12	0.0163265
CAM112A_map17	0003.CSV	1700.98	0.0170468
CAM112A_map17	0003.CSV	1704.84	0.0176164
CAM112A_map17	0003.CSV	1708.69	0.0179909
CAM112A_map17	0003.CSV	1712.55	0.0183298
CAM112A_map17	0003.CSV	1716.41	0.0194594
CAM112A_map17	0003.CSV	1720.27	0.0209605
CAM112A_map17	0003.CSV	1724.12	0.0213681
[truncated: 119,684 more rows]

## Sheet: CAM112_map18
Map	Select spectrum number	Wavenumbers	Absorbance
CAM112A_map18	0001.CSV	674.992	0.0731811
CAM112A_map18	0001.CSV	678.849	0.07536
CAM112A_map18	0001.CSV	682.706	0.0778026
CAM112A_map18	0001.CSV	686.563	0.0832579
CAM112A_map18	0001.CSV	690.42	0.0935213
CAM112A_map18	0001.CSV	694.277	0.11395
CAM112A_map18	0001.CSV	698.134	0.131725
CAM112A_map18	0001.CSV	701.991	0.131966
CAM112A_map18	0001.CSV	705.849	0.125289
CAM112A_map18	0001.CSV	709.706	0.129022
CAM112A_map18	0001.CSV	713.563	0.116481
CAM112A_map18	0001.CSV	717.42	0.0850269
CAM112A_map18	0001.CSV	721.277	0.0667077
CAM112A_map18	0001.CSV	725.134	0.0650233
CAM112A_map18	0001.CSV	728.991	0.0683715
CAM112A_map18	0001.CSV	732.848	0.0751442
CAM112A_map18	0001.CSV	736.705	0.0834308
CAM112A_map18	0001.CSV	740.562	0.0902171
CAM112A_map18	0001.CSV	744.42	0.0912906
CAM112A_map18	0001.CSV	748.277	0.0884566
CAM112A_map18	0001.CSV	752.134	0.0841556
CAM112A_map18	0001.CSV	755.991	0.0814276
CAM112A_map18	0001.CSV	759.848	0.0796091
CAM112A_map18	0001.CSV	763.705	0.078955
CAM112A_map18	0001.CSV	767.562	0.0777585
CAM112A_map18	0001.CSV	771.419	0.0762096
CAM112A_map18	0001.CSV	775.276	0.073711
CAM112A_map18	0001.CSV	779.133	0.0709721
CAM112A_map18	0001.CSV	782.99	0.0681072
CAM112A_map18	0001.CSV	786.848	0.0669291
CAM112A_map18	0001.CSV	790.705	0.0665298
CAM112A_map18	0001.CSV	794.562	0.0667653
CAM112A_map18	0001.CSV	798.419	0.0660437
CAM112A_map18	0001.CSV	802.276	0.0646956
CAM112A_map18	0001.CSV	806.133	0.0625746
CAM112A_map18	0001.CSV	809.99	0.0618663
CAM112A_map18	0001.CSV	813.847	0.062047
CAM112A_map18	0001.CSV	817.704	0.0633976
CAM112A_map18	0001.CSV	821.562	0.0649143
CAM112A_map18	0001.CSV	825.419	0.0671407
CAM112A_map18	0001.CSV	829.276	0.0688741
CAM112A_map18	0001.CSV	833.133	0.0710396
CAM112A_map18	0001.CSV	836.99	0.0734835
CAM112A_map18	0001.CSV	840.847	0.0771756
CAM112A_map18	0001.CSV	844.704	0.082722
CAM112A_map18	0001.CSV	848.561	0.0864334
CAM112A_map18	0001.CSV	852.418	0.0867902
CAM112A_map18	0001.CSV	856.275	0.092611
CAM112A_map18	0001.CSV	860.132	0.107433
CAM112A_map18	0001.CSV	863.99	0.139751
CAM112A_map18	0001.CSV	867.847	0.191396
CAM112A_map18	0001.CSV	871.704	0.224295
CAM112A_map18	0001.CSV	875.561	0.204684
CAM112A_map18	0001.CSV	879.418	0.164592
CAM112A_map18	0001.CSV	883.275	0.122454
CAM112A_map18	0001.CSV	887.132	0.0850572
CAM112A_map18	0001.CSV	890.989	0.0675235
CAM112A_map18	0001.CSV	894.846	0.0655716
CAM112A_map18	0001.CSV	898.703	0.066469
CAM112A_map18	0001.CSV	902.561	0.0684182
CAM112A_map18	0001.CSV	906.418	0.0702987
CAM112A_map18	0001.CSV	910.275	0.0720653
CAM112A_map18	0001.CSV	914.132	0.0728984
CAM112A_map18	0001.CSV	917.989	0.0738096
CAM112A_map18	0001.CSV	921.846	0.0744894
CAM112A_map18	0001.CSV	925.703	0.0754006
CAM112A_map18	0001.CSV	929.56	0.0763584
CAM112A_map18	0001.CSV	933.417	0.0779079
CAM112A_map18	0001.CSV	937.274	0.0791277
CAM112A_map18	0001.CSV	941.131	0.080446
CAM112A_map18	0001.CSV	944.989	0.0814015
CAM112A_map18	0001.CSV	948.846	0.0828005
CAM112A_map18	0001.CSV	952.703	0.0844386
CAM112A_map18	0001.CSV	956.56	0.0867647
CAM112A_map18	0001.CSV	960.417	0.0887817
CAM112A_map18	0001.CSV	964.274	0.0906169
CAM112A_map18	0001.CSV	968.131	0.0919471
CAM112A_map18	0001.CSV	971.988	0.0935052
CAM112A_map18	0001.CSV	975.845	0.0951173
CAM112A_map18	0001.CSV	979.702	0.0972967
CAM112A_map18	0001.CSV	983.559	0.0992696
CAM112A_map18	0001.CSV	987.417	0.101207
CAM112A_map18	0001.CSV	991.274	0.102556
CAM112A_map18	0001.CSV	995.131	0.103838
CAM112A_map18	0001.CSV	998.988	0.105086
CAM112A_map18	0001.CSV	1002.85	0.106985
CAM112A_map18	0001.CSV	1006.7	0.108689
CAM112A_map18	0001.CSV	1010.56	0.110544
CAM112A_map18	0001.CSV	1014.42	0.112272
CAM112A_map18	0001.CSV	1018.27	0.114294
CAM112A_map18	0001.CSV	1022.13	0.116195
CAM112A_map18	0001.CSV	1025.99	0.118495
CAM112A_map18	0001.CSV	1029.85	0.1203
CAM112A_map18	0001.CSV	1033.7	0.12206
CAM112A_map18	0001.CSV	1037.56	0.123409
CAM112A_map18	0001.CSV	1041.42	0.123665
CAM112A_map18	0001.CSV	1045.27	0.122858
CAM112A_map18	0001.CSV	1049.13	0.123882
CAM112A_map18	0001.CSV	1052.99	0.127228
CAM112A_map18	0001.CSV	1056.84	0.133076
CAM112A_map18	0001.CSV	1060.7	0.139117
CAM112A_map18	0001.CSV	1064.56	0.142561
CAM112A_map18	0001.CSV	1068.42	0.140841
CAM112A_map18	0001.CSV	1072.27	0.135625
CAM112A_map18	0001.CSV	1076.13	0.128952
CAM112A_map18	0001.CSV	1079.99	0.122889
CAM112A_map18	0001.CSV	1083.84	0.117515
CAM112A_map18	0001.CSV	1087.7	0.113476
CAM112A_map18	0001.CSV	1091.56	0.110327
CAM112A_map18	0001.CSV	1095.41	0.109217
CAM112A_map18	0001.CSV	1099.27	0.110089
CAM112A_map18	0001.CSV	1103.13	0.113037
CAM112A_map18	0001.CSV	1106.99	0.11693
CAM112A_map18	0001.CSV	1110.84	0.121543
CAM112A_map18	0001.CSV	1114.7	0.124864
CAM112A_map18	0001.CSV	1118.56	0.126101
CAM112A_map18	0001.CSV	1122.41	0.12502
CAM112A_map18	0001.CSV	1126.27	0.122931
CAM112A_map18	0001.CSV	1130.13	0.120181
CAM112A_map18	0001.CSV	1133.99	0.118121
CAM112A_map18	0001.CSV	1137.84	0.11614
CAM112A_map18	0001.CSV	1141.7	0.113739
CAM112A_map18	0001.CSV	1145.56	0.110461
CAM112A_map18	0001.CSV	1149.41	0.108162
CAM112A_map18	0001.CSV	1153.27	0.107118
CAM112A_map18	0001.CSV	1157.13	0.107135
CAM112A_map18	0001.CSV	1160.99	0.106902
CAM112A_map18	0001.CSV	1164.84	0.105972
CAM112A_map18	0001.CSV	1168.7	0.103718
CAM112A_map18	0001.CSV	1172.56	0.101525
CAM112A_map18	0001.CSV	1176.41	0.0996179
CAM112A_map18	0001.CSV	1180.27	0.0983637
CAM112A_map18	0001.CSV	1184.13	0.096932
CAM112A_map18	0001.CSV	1187.99	0.0957694
CAM112A_map18	0001.CSV	1191.84	0.0946393
CAM112A_map18	0001.CSV	1195.7	0.0941269
CAM112A_map18	0001.CSV	1199.56	0.0939083
CAM112A_map18	0001.CSV	1203.41	0.0942732
CAM112A_map18	0001.CSV	1207.27	0.0947176
CAM112A_map18	0001.CSV	1211.13	0.0957087
CAM112A_map18	0001.CSV	1214.98	0.0967424
CAM112A_map18	0001.CSV	1218.84	0.0983714
CAM112A_map18	0001.CSV	1222.7	0.100272
CAM112A_map18	0001.CSV	1226.56	0.102864
CAM112A_map18	0001.CSV	1230.41	0.1059
CAM112A_map18	0001.CSV	1234.27	0.110145
CAM112A_map18	0001.CSV	1238.13	0.115161
CAM112A_map18	0001.CSV	1241.98	0.121246
CAM112A_map18	0001.CSV	1245.84	0.127516
CAM112A_map18	0001.CSV	1249.7	0.133588
CAM112A_map18	0001.CSV	1253.56	0.138213
CAM112A_map18	0001.CSV	1257.41	0.141535
CAM112A_map18	0001.CSV	1261.27	0.143312
CAM112A_map18	0001.CSV	1265.13	0.144667
CAM112A_map18	0001.CSV	1268.98	0.145628
CAM112A_map18	0001.CSV	1272.84	0.146877
CAM112A_map18	0001.CSV	1276.7	0.147759
CAM112A_map18	0001.CSV	1280.56	0.148576
CAM112A_map18	0001.CSV	1284.41	0.14834
CAM112A_map18	0001.CSV	1288.27	0.146926
CAM112A_map18	0001.CSV	1292.13	0.143539
CAM112A_map18	0001.CSV	1295.98	0.139549
CAM112A_map18	0001.CSV	1299.84	0.135794
CAM112A_map18	0001.CSV	1303.7	0.133758
CAM112A_map18	0001.CSV	1307.56	0.133034
CAM112A_map18	0001.CSV	1311.41	0.133878
CAM112A_map18	0001.CSV	1315.27	0.135146
CAM112A_map18	0001.CSV	1319.13	0.136854
CAM112A_map18	0001.CSV	1322.98	0.13797
CAM112A_map18	0001.CSV	1326.84	0.139565
CAM112A_map18	0001.CSV	1330.7	0.14178
CAM112A_map18	0001.CSV	1334.56	0.145218
CAM112A_map18	0001.CSV	1338.41	0.150316
CAM112A_map18	0001.CSV	1342.27	0.157321
CAM112A_map18	0001.CSV	1346.13	0.163491
CAM112A_map18	0001.CSV	1349.98	0.171146
CAM112A_map18	0001.CSV	1353.84	0.179159
CAM112A_map18	0001.CSV	1357.7	0.187485
CAM112A_map18	0001.CSV	1361.56	0.196936
CAM112A_map18	0001.CSV	1365.41	0.209106
CAM112A_map18	0001.CSV	1369.27	0.219752
CAM112A_map18	0001.CSV	1373.13	0.233179
CAM112A_map18	0001.CSV	1376.98	0.248086
CAM112A_map18	0001.CSV	1380.84	0.260882
CAM112A_map18	0001.CSV	1384.7	0.272755
CAM112A_map18	0001.CSV	1388.56	0.288337
CAM112A_map18	0001.CSV	1392.41	0.299517
CAM112A_map18	0001.CSV	1396.27	0.30717
CAM112A_map18	0001.CSV	1400.13	0.308673
CAM112A_map18	0001.CSV	1403.98	0.307839
CAM112A_map18	0001.CSV	1407.84	0.302583
CAM112A_map18	0001.CSV	1411.7	0.293558
CAM112A_map18	0001.CSV	1415.55	0.282107
CAM112A_map18	0001.CSV	1419.41	0.268969
CAM112A_map18	0001.CSV	1423.27	0.257293
CAM112A_map18	0001.CSV	1427.12	0.249843
CAM112A_map18	0001.CSV	1430.98	0.242066
CAM112A_map18	0001.CSV	1434.84	0.23492
CAM112A_map18	0001.CSV	1438.7	0.226497
CAM112A_map18	0001.CSV	1442.55	0.220586
CAM112A_map18	0001.CSV	1446.41	0.213922
CAM112A_map18	0001.CSV	1450.27	0.206459
CAM112A_map18	0001.CSV	1454.12	0.198334
CAM112A_map18	0001.CSV	1457.98	0.18292
CAM112A_map18	0001.CSV	1461.84	0.171049
CAM112A_map18	0001.CSV	1465.7	0.163375
CAM112A_map18	0001.CSV	1469.55	0.156009
CAM112A_map18	0001.CSV	1473.41	0.14811
CAM112A_map18	0001.CSV	1477.27	0.140118
CAM112A_map18	0001.CSV	1481.12	0.135516
CAM112A_map18	0001.CSV	1484.98	0.131613
CAM112A_map18	0001.CSV	1488.84	0.128166
CAM112A_map18	0001.CSV	1492.7	0.123692
CAM112A_map18	0001.CSV	1496.55	0.116437
CAM112A_map18	0001.CSV	1500.41	0.107096
CAM112A_map18	0001.CSV	1504.27	0.102308
CAM112A_map18	0001.CSV	1508.12	0.0964104
CAM112A_map18	0001.CSV	1511.98	0.0922178
CAM112A_map18	0001.CSV	1515.84	0.0893062
CAM112A_map18	0001.CSV	1519.7	0.0860395
CAM112A_map18	0001.CSV	1523.55	0.0824004
CAM112A_map18	0001.CSV	1527.41	0.079681
CAM112A_map18	0001.CSV	1531.27	0.0771132
CAM112A_map18	0001.CSV	1535.12	0.0748531
CAM112A_map18	0001.CSV	1538.98	0.0725139
CAM112A_map18	0001.CSV	1542.84	0.0694644
CAM112A_map18	0001.CSV	1546.7	0.066808
CAM112A_map18	0001.CSV	1550.55	0.064681
CAM112A_map18	0001.CSV	1554.41	0.0626632
CAM112A_map18	0001.CSV	1558.27	0.0609557
CAM112A_map18	0001.CSV	1562.12	0.0594261
CAM112A_map18	0001.CSV	1565.98	0.0583425
CAM112A_map18	0001.CSV	1569.84	0.0574696
CAM112A_map18	0001.CSV	1573.69	0.0573853
CAM112A_map18	0001.CSV	1577.55	0.0583636
CAM112A_map18	0001.CSV	1581.41	0.0581941
CAM112A_map18	0001.CSV	1585.27	0.056563
CAM112A_map18	0001.CSV	1589.12	0.0549347
CAM112A_map18	0001.CSV	1592.98	0.0543701
CAM112A_map18	0001.CSV	1596.84	0.0548469
CAM112A_map18	0001.CSV	1600.69	0.0546587
CAM112A_map18	0001.CSV	1604.55	0.0531466
CAM112A_map18	0001.CSV	1608.41	0.051301
CAM112A_map18	0001.CSV	1612.27	0.050171
CAM112A_map18	0001.CSV	1616.12	0.0496912
CAM112A_map18	0001.CSV	1619.98	0.0497406
CAM112A_map18	0001.CSV	1623.84	0.0497048
CAM112A_map18	0001.CSV	1627.69	0.0496067
CAM112A_map18	0001.CSV	1631.55	0.0489961
CAM112A_map18	0001.CSV	1635.41	0.0492316
CAM112A_map18	0001.CSV	1639.27	0.0497535
CAM112A_map18	0001.CSV	1643.12	0.0494471
CAM112A_map18	0001.CSV	1646.98	0.0496113
CAM112A_map18	0001.CSV	1650.84	0.0502359
CAM112A_map18	0001.CSV	1654.69	0.0505509
CAM112A_map18	0001.CSV	1658.55	0.0501256
CAM112A_map18	0001.CSV	1662.41	0.049584
CAM112A_map18	0001.CSV	1666.27	0.0493207
CAM112A_map18	0001.CSV	1670.12	0.0492816
CAM112A_map18	0001.CSV	1673.98	0.0496959
CAM112A_map18	0001.CSV	1677.84	0.0495168
CAM112A_map18	0001.CSV	1681.69	0.0498514
CAM112A_map18	0001.CSV	1685.55	0.0513435
CAM112A_map18	0001.CSV	1689.41	0.0522134
CAM112A_map18	0001.CSV	1693.27	0.0524801
CAM112A_map18	0001.CSV	1697.12	0.0544277
CAM112A_map18	0001.CSV	1700.98	0.0585578
CAM112A_map18	0001.CSV	1704.84	0.0625989
CAM112A_map18	0001.CSV	1708.69	0.0672056
CAM112A_map18	0001.CSV	1712.55	0.0715906
CAM112A_map18	0001.CSV	1716.41	0.0801916
CAM112A_map18	0001.CSV	1720.27	0.0885629
CAM112A_map18	0001.CSV	1724.12	0.0904483
CAM112A_map18	0001.CSV	1727.98	0.0900928
CAM112A_map18	0001.CSV	1731.84	0.0875313
CAM112A_map18	0001.CSV	1735.69	0.0813854
CAM112A_map18	0001.CSV	1739.55	0.0748683
CAM112A_map18	0001.CSV	1743.41	0.0670798
CAM112A_map18	0001.CSV	1747.27	0.0587474
CAM112A_map18	0001.CSV	1751.12	0.0494185
CAM112A_map18	0001.CSV	1754.98	0.0433317
CAM112A_map18	0001.CSV	1758.84	0.0392896
CAM112A_map18	0001.CSV	1762.69	0.0365162
CAM112A_map18	0001.CSV	1766.55	0.0348477
CAM112A_map18	0001.CSV	1770.41	0.0341074
CAM112A_map18	0001.CSV	1774.26	0.0338946
CAM112A_map18	0001.CSV	1778.12	0.0334822
CAM112A_map18	0001.CSV	1781.98	0.0335478
CAM112A_map18	0001.CSV	1785.84	0.0342388
CAM112A_map18	0001.CSV	1789.69	0.0356516
CAM112A_map18	0001.CSV	1793.55	0.0382084
CAM112A_map18	0001.CSV	1797.41	0.0386437
CAM112A_map18	0001.CSV	1801.26	0.0367304
CAM112A_map18	0001.CSV	1805.12	0.0342944
CAM112A_map18	0001.CSV	1808.98	0.0327223
CAM112A_map18	0001.CSV	1812.84	0.0319733
CAM112A_map18	0001.CSV	1816.69	0.031397
CAM112A_map18	0001.CSV	1820.55	0.0310481
CAM112A_map18	0001.CSV	1824.41	0.030852
CAM112A_map18	0001.CSV	1828.26	0.0309662
CAM112A_map18	0001.CSV	1832.12	0.0310004
CAM112A_map18	0001.CSV	1835.98	0.0307722
CAM112A_map18	0001.CSV	1839.84	0.0305193
CAM112A_map18	0001.CSV	1843.69	0.0307258
CAM112A_map18	0001.CSV	1847.55	0.0310562
CAM112A_map18	0001.CSV	1851.41	0.0308906
CAM112A_map18	0001.CSV	1855.26	0.0307539
CAM112A_map18	0001.CSV	1859.12	0.0307693
CAM112A_map18	0001.CSV	1862.98	0.0306765
CAM112A_map18	0001.CSV	1866.84	0.0309056
CAM112A_map18	0001.CSV	1870.69	0.0313653
CAM112A_map18	0001.CSV	1874.55	0.0311765
CAM112A_map18	0001.CSV	1878.41	0.0310213
CAM112A_map18	0001.CSV	1882.26	0.0310465
CAM112A_map18	0001.CSV	1886.12	0.0310395
CAM112A_map18	0001.CSV	1889.98	0.0311263
CAM112A_map18	0001.CSV	1893.83	0.031196
CAM112A_map18	0001.CSV	1897.69	0.0312099
CAM112A_map18	0001.CSV	1901.55	0.0310822
CAM112A_map18	0001.CSV	1905.41	0.0310452
CAM112A_map18	0001.CSV	1909.26	0.0311528
CAM112A_map18	0001.CSV	1913.12	0.0311453
CAM112A_map18	0001.CSV	1916.98	0.0311128
CAM112A_map18	0001.CSV	1920.83	0.0312993
CAM112A_map18	0001.CSV	1924.69	0.0313835
CAM112A_map18	0001.CSV	1928.55	0.0313508
CAM112A_map18	0001.CSV	1932.4	0.0313865
CAM112A_map18	0001.CSV	1936.26	0.0314927
CAM112A_map18	0001.CSV	1940.12	0.0315811
CAM112A_map18	0001.CSV	1943.98	0.0319635
CAM112A_map18	0001.CSV	1947.83	0.0321067
CAM112A_map18	0001.CSV	1951.69	0.032043
CAM112A_map18	0001.CSV	1955.55	0.0320017
CAM112A_map18	0001.CSV	1959.4	0.0320503
CAM112A_map18	0001.CSV	1963.26	0.0320217
CAM112A_map18	0001.CSV	1967.12	0.0320785
CAM112A_map18	0001.CSV	1970.98	0.0320659
CAM112A_map18	0001.CSV	1974.83	0.032021
CAM112A_map18	0001.CSV	1978.69	0.0319969
CAM112A_map18	0001.CSV	1982.55	0.0320258
CAM112A_map18	0001.CSV	1986.4	0.0320236
CAM112A_map18	0001.CSV	1990.26	0.0320987
CAM112A_map18	0001.CSV	1994.12	0.0322234
CAM112A_map18	0001.CSV	1997.98	0.0322428
CAM112A_map18	0001.CSV	2001.83	0.0322409
CAM112A_map18	0001.CSV	2005.69	0.0322797
CAM112A_map18	0001.CSV	2009.55	0.0323242
CAM112A_map18	0001.CSV	2013.4	0.0323299
CAM112A_map18	0001.CSV	2017.26	0.0323845
CAM112A_map18	0001.CSV	2021.12	0.0325063
CAM112A_map18	0001.CSV	2024.97	0.0325186
CAM112A_map18	0001.CSV	2028.83	0.032525
CAM112A_map18	0001.CSV	2032.69	0.0325353
CAM112A_map18	0001.CSV	2036.55	0.0326091
CAM112A_map18	0001.CSV	2040.4	0.0326702
CAM112A_map18	0001.CSV	2044.26	0.0327654
CAM112A_map18	0001.CSV	2048.12	0.032805
CAM112A_map18	0001.CSV	2051.97	0.0328881
CAM112A_map18	0001.CSV	2055.83	0.0329022
CAM112A_map18	0001.CSV	2059.69	0.0329017
CAM112A_map18	0001.CSV	2063.55	0.0329517
CAM112A_map18	0001.CSV	2067.4	0.0330396
CAM112A_map18	0001.CSV	2071.26	0.0330405
CAM112A_map18	0001.CSV	2075.12	0.0330819
CAM112A_map18	0001.CSV	2078.97	0.0331454
CAM112A_map18	0001.CSV	2082.83	0.0332369
CAM112A_map18	0001.CSV	2086.69	0.0332707
CAM112A_map18	0001.CSV	2090.55	0.0333102
CAM112A_map18	0001.CSV	2094.4	0.0332959
CAM112A_map18	0001.CSV	2098.26	0.0333193
CAM112A_map18	0001.CSV	2102.12	0.0333558
CAM112A_map18	0001.CSV	2105.97	0.0334224
CAM112A_map18	0001.CSV	2109.83	0.0334405
CAM112A_map18	0001.CSV	2113.69	0.0334494
CAM112A_map18	0001.CSV	2117.55	0.03348
CAM112A_map18	0001.CSV	2121.4	0.0335712
CAM112A_map18	0001.CSV	2125.26	0.0336038
CAM112A_map18	0001.CSV	2129.12	0.0336354
CAM112A_map18	0001.CSV	2132.97	0.0336819
CAM112A_map18	0001.CSV	2136.83	0.033766
CAM112A_map18	0001.CSV	2140.69	0.0338083
CAM112A_map18	0001.CSV	2144.55	0.0338671
CAM112A_map18	0001.CSV	2148.4	0.0338552
CAM112A_map18	0001.CSV	2152.26	0.0338223
CAM112A_map18	0001.CSV	2156.12	0.0338089
CAM112A_map18	0001.CSV	2159.97	0.0338005
CAM112A_map18	0001.CSV	2163.83	0.0338179
CAM112A_map18	0001.CSV	2167.69	0.0338745
CAM112A_map18	0001.CSV	2171.55	0.0339145
CAM112A_map18	0001.CSV	2175.4	0.0339737
CAM112A_map18	0001.CSV	2179.26	0.0339898
CAM112A_map18	0001.CSV	2183.12	0.034008
CAM112A_map18	0001.CSV	2186.97	0.033993
CAM112A_map18	0001.CSV	2190.83	0.0339845
CAM112A_map18	0001.CSV	2194.69	0.03402
CAM112A_map18	0001.CSV	2198.55	0.0340714
CAM112A_map18	0001.CSV	2202.4	0.0340605
CAM112A_map18	0001.CSV	2206.26	0.0340816
CAM112A_map18	0001.CSV	2210.12	0.0340936
CAM112A_map18	0001.CSV	2213.97	0.034115
CAM112A_map18	0001.CSV	2217.83	0.0340995
CAM112A_map18	0001.CSV	2221.69	0.0340905
CAM112A_map18	0001.CSV	2225.54	0.0340727
CAM112A_map18	0001.CSV	2229.4	0.0341018
CAM112A_map18	0001.CSV	2233.26	0.0341337
CAM112A_map18	0001.CSV	2237.12	0.0341428
CAM112A_map18	0001.CSV	2240.97	0.0341153
CAM112A_map18	0001.CSV	2244.83	0.0341297
CAM112A_map18	0001.CSV	2248.69	0.0341581
CAM112A_map18	0001.CSV	2252.54	0.0341692
CAM112A_map18	0001.CSV	2256.4	0.0341732
CAM112A_map18	0001.CSV	2260.26	0.034231
CAM112A_map18	0001.CSV	2264.11	0.0342865
CAM112A_map18	0001.CSV	2267.97	0.0343602
CAM112A_map18	0001.CSV	2271.83	0.0344127
CAM112A_map18	0001.CSV	2275.69	0.0344518
CAM112A_map18	0001.CSV	2279.54	0.0345155
CAM112A_map18	0001.CSV	2283.4	0.0345169
CAM112A_map18	0001.CSV	2287.26	0.0345129
CAM112A_map18	0001.CSV	2291.11	0.0345716
CAM112A_map18	0001.CSV	2294.97	0.0346284
CAM112A_map18	0001.CSV	2298.83	0.0347452
CAM112A_map18	0001.CSV	2302.69	0.0347131
CAM112A_map18	0001.CSV	2306.54	0.0345486
CAM112A_map18	0001.CSV	2310.4	0.0343814
CAM112A_map18	0001.CSV	2314.26	0.0342821
CAM112A_map18	0001.CSV	2318.11	0.0338253
CAM112A_map18	0001.CSV	2321.97	0.0328343
CAM112A_map18	0001.CSV	2325.83	0.0317208
CAM112A_map18	0001.CSV	2329.69	0.0309365
CAM112A_map18	0001.CSV	2333.54	0.0300425
CAM112A_map18	0001.CSV	2337.4	0.0293216
CAM112A_map18	0001.CSV	2341.26	0.0293796
CAM112A_map18	0001.CSV	2345.11	0.0321827
CAM112A_map18	0001.CSV	2348.97	0.0329597
CAM112A_map18	0001.CSV	2352.83	0.0306476
CAM112A_map18	0001.CSV	2356.69	0.0240769
CAM112A_map18	0001.CSV	2360.54	0.0188391
CAM112A_map18	0001.CSV	2364.4	0.0220695
CAM112A_map18	0001.CSV	2368.26	0.029243
CAM112A_map18	0001.CSV	2372.11	0.0338093
CAM112A_map18	0001.CSV	2375.97	0.0357272
CAM112A_map18	0001.CSV	2379.83	0.036234
CAM112A_map18	0001.CSV	2383.69	0.0361604
CAM112A_map18	0001.CSV	2387.54	0.0358906
CAM112A_map18	0001.CSV	2391.4	0.0357318
CAM112A_map18	0001.CSV	2395.26	0.0357165
CAM112A_map18	0001.CSV	2399.11	0.0357617
CAM112A_map18	0001.CSV	2402.97	0.0358288
CAM112A_map18	0001.CSV	2406.83	0.035881
CAM112A_map18	0001.CSV	2410.68	0.035869
CAM112A_map18	0001.CSV	2414.54	0.0358682
CAM112A_map18	0001.CSV	2418.4	0.0359239
CAM112A_map18	0001.CSV	2422.26	0.0360175
CAM112A_map18	0001.CSV	2426.11	0.0360351
CAM112A_map18	0001.CSV	2429.97	0.0360627
CAM112A_map18	0001.CSV	2433.83	0.0360994
CAM112A_map18	0001.CSV	2437.68	0.0361529
CAM112A_map18	0001.CSV	2441.54	0.0362022
CAM112A_map18	0001.CSV	2445.4	0.0362193
CAM112A_map18	0001.CSV	2449.26	0.036218
CAM112A_map18	0001.CSV	2453.11	0.0362347
CAM112A_map18	0001.CSV	2456.97	0.0362853
CAM112A_map18	0001.CSV	2460.83	0.036363
CAM112A_map18	0001.CSV	2464.68	0.0364293
CAM112A_map18	0001.CSV	2468.54	0.0365119
CAM112A_map18	0001.CSV	2472.4	0.0366102
CAM112A_map18	0001.CSV	2476.26	0.0367799
CAM112A_map18	0001.CSV	2480.11	0.0369817
CAM112A_map18	0001.CSV	2483.97	0.0372009
CAM112A_map18	0001.CSV	2487.83	0.0374817
CAM112A_map18	0001.CSV	2491.68	0.0378959
CAM112A_map18	0001.CSV	2495.54	0.038457
CAM112A_map18	0001.CSV	2499.4	0.0391151
CAM112A_map18	0001.CSV	2503.26	0.0397723
CAM112A_map18	0001.CSV	2507.11	0.0402935
CAM112A_map18	0001.CSV	2510.97	0.0405586
CAM112A_map18	0001.CSV	2514.83	0.0405681
CAM112A_map18	0001.CSV	2518.68	0.0403351
CAM112A_map18	0001.CSV	2522.54	0.0399072
CAM112A_map18	0001.CSV	2526.4	0.0393516
CAM112A_map18	0001.CSV	2530.26	0.0387813
CAM112A_map18	0001.CSV	2534.11	0.038246
CAM112A_map18	0001.CSV	2537.97	0.0378173
CAM112A_map18	0001.CSV	2541.83	0.0375367
CAM112A_map18	0001.CSV	2545.68	0.03736
CAM112A_map18	0001.CSV	2549.54	0.037198
CAM112A_map18	0001.CSV	2553.4	0.0371084
CAM112A_map18	0001.CSV	2557.26	0.0370725
CAM112A_map18	0001.CSV	2561.11	0.0370643
CAM112A_map18	0001.CSV	2564.97	0.0370348
CAM112A_map18	0001.CSV	2568.83	0.0370402
CAM112A_map18	0001.CSV	2572.68	0.0370985
CAM112A_map18	0001.CSV	2576.54	0.0371212
CAM112A_map18	0001.CSV	2580.4	0.037047
CAM112A_map18	0001.CSV	2584.25	0.0369982
CAM112A_map18	0001.CSV	2588.11	0.0369843
CAM112A_map18	0001.CSV	2591.97	0.037006
CAM112A_map18	0001.CSV	2595.83	0.036977
CAM112A_map18	0001.CSV	2599.68	0.0369286
CAM112A_map18	0001.CSV	2603.54	0.0368633
CAM112A_map18	0001.CSV	2607.4	0.0367858
CAM112A_map18	0001.CSV	2611.25	0.0367574
CAM112A_map18	0001.CSV	2615.11	0.0367424
CAM112A_map18	0001.CSV	2618.97	0.036635
CAM112A_map18	0001.CSV	2622.82	0.0366018
CAM112A_map18	0001.CSV	2626.68	0.0366327
CAM112A_map18	0001.CSV	2630.54	0.0366015
CAM112A_map18	0001.CSV	2634.4	0.0366146
CAM112A_map18	0001.CSV	2638.25	0.036656
CAM112A_map18	0001.CSV	2642.11	0.0365445
CAM112A_map18	0001.CSV	2645.97	0.0363765
CAM112A_map18	0001.CSV	2649.82	0.0363333
CAM112A_map18	0001.CSV	2653.68	0.0363928
CAM112A_map18	0001.CSV	2657.54	0.0364671
CAM112A_map18	0001.CSV	2661.4	0.0365269
CAM112A_map18	0001.CSV	2665.25	0.0365518
CAM112A_map18	0001.CSV	2669.11	0.036679
CAM112A_map18	0001.CSV	2672.97	0.0369351
CAM112A_map18	0001.CSV	2676.82	0.0371891
CAM112A_map18	0001.CSV	2680.68	0.0371601
CAM112A_map18	0001.CSV	2684.54	0.036867
CAM112A_map18	0001.CSV	2688.4	0.0367668
CAM112A_map18	0001.CSV	2692.25	0.0368073
CAM112A_map18	0001.CSV	2696.11	0.0369291
CAM112A_map18	0001.CSV	2699.97	0.036986
CAM112A_map18	0001.CSV	2703.82	0.0369514
CAM112A_map18	0001.CSV	2707.68	0.0370552
CAM112A_map18	0001.CSV	2711.54	0.037138
CAM112A_map18	0001.CSV	2715.4	0.0371879
CAM112A_map18	0001.CSV	2719.25	0.0373845
CAM112A_map18	0001.CSV	2723.11	0.037694
CAM112A_map18	0001.CSV	2726.97	0.0376886
CAM112A_map18	0001.CSV	2730.82	0.0373807
CAM112A_map18	0001.CSV	2734.68	0.0374262
CAM112A_map18	0001.CSV	2738.54	0.0375371
CAM112A_map18	0001.CSV	2742.4	0.0376144
CAM112A_map18	0001.CSV	2746.25	0.0379684
CAM112A_map18	0001.CSV	2750.11	0.0380301
CAM112A_map18	0001.CSV	2753.97	0.0377881
CAM112A_map18	0001.CSV	2757.82	0.0377441
CAM112A_map18	0001.CSV	2761.68	0.0377198
CAM112A_map18	0001.CSV	2765.54	0.0377085
CAM112A_map18	0001.CSV	2769.39	0.0379348
CAM112A_map18	0001.CSV	2773.25	0.0383831
CAM112A_map18	0001.CSV	2777.11	0.0383817
CAM112A_map18	0001.CSV	2780.97	0.0381809
CAM112A_map18	0001.CSV	2784.82	0.0384229
CAM112A_map18	0001.CSV	2788.68	0.0389372
CAM112A_map18	0001.CSV	2792.54	0.0391426
CAM112A_map18	0001.CSV	2796.39	0.0392048
CAM112A_map18	0001.CSV	2800.25	0.039088
CAM112A_map18	0001.CSV	2804.11	0.0389428
CAM112A_map18	0001.CSV	2807.97	0.0392733
CAM112A_map18	0001.CSV	2811.82	0.0394304
CAM112A_map18	0001.CSV	2815.68	0.0393829
CAM112A_map18	0001.CSV	2819.54	0.0396058
CAM112A_map18	0001.CSV	2823.39	0.0399139
CAM112A_map18	0001.CSV	2827.25	0.040166
CAM112A_map18	0001.CSV	2831.11	0.0408133
CAM112A_map18	0001.CSV	2834.97	0.0419217
CAM112A_map18	0001.CSV	2838.82	0.0430072
CAM112A_map18	0001.CSV	2842.68	0.0441485
CAM112A_map18	0001.CSV	2846.54	0.0459128
CAM112A_map18	0001.CSV	2850.39	0.0472844
CAM112A_map18	0001.CSV	2854.25	0.0477519
CAM112A_map18	0001.CSV	2858.11	0.0476632
CAM112A_map18	0001.CSV	2861.97	0.0470128
CAM112A_map18	0001.CSV	2865.82	0.0464613
CAM112A_map18	0001.CSV	2869.68	0.0466218
CAM112A_map18	0001.CSV	2873.54	0.046757
CAM112A_map18	0001.CSV	2877.39	0.0461373
CAM112A_map18	0001.CSV	2881.25	0.045543
CAM112A_map18	0001.CSV	2885.11	0.0453625
CAM112A_map18	0001.CSV	2888.97	0.0456336
CAM112A_map18	0001.CSV	2892.82	0.0464409
CAM112A_map18	0001.CSV	2896.68	0.0471863
CAM112A_map18	0001.CSV	2900.54	0.0477569
CAM112A_map18	0001.CSV	2904.39	0.048718
CAM112A_map18	0001.CSV	2908.25	0.0501928
CAM112A_map18	0001.CSV	2912.11	0.0522364
CAM112A_map18	0001.CSV	2915.97	0.0541326
CAM112A_map18	0001.CSV	2919.82	0.0552145
CAM112A_map18	0001.CSV	2923.68	0.0557042
CAM112A_map18	0001.CSV	2927.54	0.055879
CAM112A_map18	0001.CSV	2931.39	0.0550053
CAM112A_map18	0001.CSV	2935.25	0.053287
CAM112A_map18	0001.CSV	2939.11	0.0518633
CAM112A_map18	0001.CSV	2942.96	0.0511203
CAM112A_map18	0001.CSV	2946.82	0.0504292
CAM112A_map18	0001.CSV	2950.68	0.0495953
CAM112A_map18	0001.CSV	2954.54	0.0487755
CAM112A_map18	0001.CSV	2958.39	0.0479491
CAM112A_map18	0001.CSV	2962.25	0.0472526
CAM112A_map18	0001.CSV	2966.11	0.0462891
CAM112A_map18	0001.CSV	2969.96	0.0456737
CAM112A_map18	0001.CSV	2973.82	0.0456346
CAM112A_map18	0001.CSV	2977.68	0.0456498
CAM112A_map18	0001.CSV	2981.53	0.0451787
CAM112A_map18	0001.CSV	2985.39	0.0442626
CAM112A_map18	0001.CSV	2989.25	0.0438062
CAM112A_map18	0001.CSV	2993.11	0.0436757
CAM112A_map18	0001.CSV	2996.96	0.0432881
CAM112A_map18	0001.CSV	3000.82	0.0427044
CAM112A_map18	0001.CSV	3004.68	0.0422042
CAM112A_map18	0001.CSV	3008.53	0.0421921
CAM112A_map18	0001.CSV	3012.39	0.0424705
CAM112A_map18	0001.CSV	3016.25	0.042673
CAM112A_map18	0001.CSV	3020.11	0.0429899
CAM112A_map18	0001.CSV	3023.96	0.0434004
CAM112A_map18	0001.CSV	3027.82	0.0435468
CAM112A_map18	0001.CSV	3031.68	0.0435041
CAM112A_map18	0001.CSV	3035.53	0.0430565
CAM112A_map18	0001.CSV	3039.39	0.0426711
CAM112A_map18	0001.CSV	3043.25	0.0426114
CAM112A_map18	0001.CSV	3047.11	0.0425613
CAM112A_map18	0001.CSV	3050.96	0.0427427
CAM112A_map18	0001.CSV	3054.82	0.0429523
CAM112A_map18	0001.CSV	3058.68	0.0430287
CAM112A_map18	0001.CSV	3062.53	0.0431805
CAM112A_map18	0001.CSV	3066.39	0.0433856
CAM112A_map18	0001.CSV	3070.25	0.0431689
CAM112A_map18	0001.CSV	3074.11	0.043025
CAM112A_map18	0001.CSV	3077.96	0.0432992
CAM112A_map18	0001.CSV	3081.82	0.0435521
CAM112A_map18	0001.CSV	3085.68	0.0434175
CAM112A_map18	0001.CSV	3089.53	0.0430032
CAM112A_map18	0001.CSV	3093.39	0.0425198
CAM112A_map18	0001.CSV	3097.25	0.0424283
CAM112A_map18	0001.CSV	3101.11	0.0424962
CAM112A_map18	0001.CSV	3104.96	0.0425206
CAM112A_map18	0001.CSV	3108.82	0.0426322
CAM112A_map18	0001.CSV	3112.68	0.0426971
CAM112A_map18	0001.CSV	3116.53	0.0428778
CAM112A_map18	0001.CSV	3120.39	0.0428105
CAM112A_map18	0001.CSV	3124.25	0.0424653
CAM112A_map18	0001.CSV	3128.11	0.042407
CAM112A_map18	0001.CSV	3131.96	0.0424948
CAM112A_map18	0001.CSV	3135.82	0.0427196
CAM112A_map18	0001.CSV	3139.68	0.0428692
CAM112A_map18	0001.CSV	3143.53	0.0426574
CAM112A_map18	0001.CSV	3147.39	0.0427741
CAM112A_map18	0001.CSV	3151.25	0.0432405
CAM112A_map18	0001.CSV	3155.1	0.0432084
CAM112A_map18	0001.CSV	3158.96	0.0427869
CAM112A_map18	0001.CSV	3162.82	0.0426506
CAM112A_map18	0001.CSV	3166.68	0.0426997
CAM112A_map18	0001.CSV	3170.53	0.0428237
CAM112A_map18	0001.CSV	3174.39	0.042954
CAM112A_map18	0001.CSV	3178.25	0.0431019
CAM112A_map18	0001.CSV	3182.1	0.0432095
CAM112A_map18	0001.CSV	3185.96	0.0433232
CAM112A_map18	0001.CSV	3189.82	0.0434714
CAM112A_map18	0001.CSV	3193.68	0.0434363
CAM112A_map18	0001.CSV	3197.53	0.0434583
CAM112A_map18	0001.CSV	3201.39	0.0436783
CAM112A_map18	0001.CSV	3205.25	0.0437398
CAM112A_map18	0001.CSV	3209.1	0.0437321
CAM112A_map18	0001.CSV	3212.96	0.0439139
CAM112A_map18	0001.CSV	3216.82	0.0441582
CAM112A_map18	0001.CSV	3220.68	0.0441911
CAM112A_map18	0001.CSV	3224.53	0.0441145
CAM112A_map18	0001.CSV	3228.39	0.0443642
CAM112A_map18	0001.CSV	3232.25	0.0448317
CAM112A_map18	0001.CSV	3236.1	0.044798
CAM112A_map18	0001.CSV	3239.96	0.0446206
CAM112A_map18	0001.CSV	3243.82	0.0448891
CAM112A_map18	0001.CSV	3247.68	0.045037
CAM112A_map18	0001.CSV	3251.53	0.0449053
CAM112A_map18	0001.CSV	3255.39	0.0449542
CAM112A_map18	0001.CSV	3259.25	0.0447734
CAM112A_map18	0001.CSV	3263.1	0.044745
CAM112A_map18	0001.CSV	3266.96	0.0452417
CAM112A_map18	0001.CSV	3270.82	0.0458144
CAM112A_map18	0001.CSV	3274.68	0.0457896
CAM112A_map18	0001.CSV	3278.53	0.0454315
CAM112A_map18	0001.CSV	3282.39	0.0452447
CAM112A_map18	0001.CSV	3286.25	0.0453893
CAM112A_map18	0001.CSV	3290.1	0.0458059
CAM112A_map18	0001.CSV	3293.96	0.0460378
CAM112A_map18	0001.CSV	3297.82	0.0457805
CAM112A_map18	0001.CSV	3301.67	0.0457805
CAM112A_map18	0001.CSV	3305.53	0.0460708
CAM112A_map18	0001.CSV	3309.39	0.0458888
CAM112A_map18	0001.CSV	3313.25	0.045243
CAM112A_map18	0001.CSV	3317.1	0.0449292
CAM112A_map18	0001.CSV	3320.96	0.0451682
CAM112A_map18	0001.CSV	3324.82	0.0455453
CAM112A_map18	0001.CSV	3328.67	0.0452762
CAM112A_map18	0001.CSV	3332.53	0.0451006
CAM112A_map18	0001.CSV	3336.39	0.045664
CAM112A_map18	0001.CSV	3340.24	0.0459109
CAM112A_map18	0001.CSV	3344.1	0.045608
CAM112A_map18	0001.CSV	3347.96	0.0454805
CAM112A_map18	0001.CSV	3351.82	0.0453152
CAM112A_map18	0001.CSV	3355.67	0.0449935
CAM112A_map18	0001.CSV	3359.53	0.0450574
CAM112A_map18	0001.CSV	3363.39	0.0453928
CAM112A_map18	0001.CSV	3367.24	0.0457372
CAM112A_map18	0001.CSV	3371.1	0.0455208
CAM112A_map18	0001.CSV	3374.96	0.0451353
CAM112A_map18	0001.CSV	3378.82	0.0449383
CAM112A_map18	0001.CSV	3382.67	0.0446691
CAM112A_map18	0001.CSV	3386.53	0.0447198
CAM112A_map18	0001.CSV	3390.39	0.0450449
CAM112A_map18	0001.CSV	3394.24	0.0452286
CAM112A_map18	0001.CSV	3398.1	0.0452911
CAM112A_map18	0001.CSV	3401.96	0.0451237
CAM112A_map18	0001.CSV	3405.82	0.0447638
CAM112A_map18	0001.CSV	3409.67	0.0447524
CAM112A_map18	0001.CSV	3413.53	0.044416
CAM112A_map18	0001.CSV	3417.39	0.0438332
CAM112A_map18	0001.CSV	3421.24	0.0437754
CAM112A_map18	0001.CSV	3425.1	0.0440072
CAM112A_map18	0001.CSV	3428.96	0.0443544
CAM112A_map18	0001.CSV	3432.82	0.0445612
CAM112A_map18	0001.CSV	3436.67	0.0441611
CAM112A_map18	0001.CSV	3440.53	0.0433386
CAM112A_map18	0001.CSV	3444.39	0.042949
CAM112A_map18	0001.CSV	3448.24	0.0428849
CAM112A_map18	0001.CSV	3452.1	0.0424917
CAM112A_map18	0001.CSV	3455.96	0.0424907
CAM112A_map18	0001.CSV	3459.82	0.0428671
CAM112A_map18	0001.CSV	3463.67	0.0431972
CAM112A_map18	0001.CSV	3467.53	0.0433686
CAM112A_map18	0001.CSV	3471.39	0.0428386
CAM112A_map18	0001.CSV	3475.24	0.0423755
CAM112A_map18	0001.CSV	3479.1	0.0423099
CAM112A_map18	0001.CSV	3482.96	0.042168
CAM112A_map18	0001.CSV	3486.82	0.0421607
CAM112A_map18	0001.CSV	3490.67	0.0419426
CAM112A_map18	0001.CSV	3494.53	0.0418253
CAM112A_map18	0001.CSV	3498.39	0.0418072
CAM112A_map18	0001.CSV	3502.24	0.0416476
CAM112A_map18	0001.CSV	3506.1	0.0410568
CAM112A_map18	0001.CSV	3509.96	0.0406884
CAM112A_map18	0001.CSV	3513.81	0.0406417
CAM112A_map18	0001.CSV	3517.67	0.0401571
CAM112A_map18	0001.CSV	3521.53	0.0401114
CAM112A_map18	0001.CSV	3525.39	0.0402255
CAM112A_map18	0001.CSV	3529.24	0.0398417
CAM112A_map18	0001.CSV	3533.1	0.0396789
CAM112A_map18	0001.CSV	3536.96	0.039845
CAM112A_map18	0001.CSV	3540.81	0.0398555
CAM112A_map18	0001.CSV	3544.67	0.0398963
CAM112A_map18	0001.CSV	3548.53	0.039612
CAM112A_map18	0001.CSV	3552.39	0.0389874
CAM112A_map18	0001.CSV	3556.24	0.0386021
CAM112A_map18	0001.CSV	3560.1	0.038151
CAM112A_map18	0001.CSV	3563.96	0.0375221
CAM112A_map18	0001.CSV	3567.81	0.0379104
CAM112A_map18	0001.CSV	3571.67	0.0377951
CAM112A_map18	0001.CSV	3575.53	0.0371169
CAM112A_map18	0001.CSV	3579.39	0.0371584
CAM112A_map18	0001.CSV	3583.24	0.0372214
CAM112A_map18	0001.CSV	3587.1	0.0372921
CAM112A_map18	0001.CSV	3590.96	0.0369507
CAM112A_map18	0001.CSV	3594.81	0.0363878
CAM112A_map18	0001.CSV	3598.67	0.0365101
CAM112A_map18	0001.CSV	3602.53	0.0364129
CAM112A_map18	0001.CSV	3606.39	0.035611
CAM112A_map18	0001.CSV	3610.24	0.0352093
CAM112A_map18	0001.CSV	3614.1	0.0350684
CAM112A_map18	0001.CSV	3617.96	0.0353614
CAM112A_map18	0001.CSV	3621.81	0.0356088
CAM112A_map18	0001.CSV	3625.67	0.034708
CAM112A_map18	0001.CSV	3629.53	0.0347911
CAM112A_map18	0001.CSV	3633.39	0.0352271
CAM112A_map18	0001.CSV	3637.24	0.0346361
CAM112A_map18	0001.CSV	3641.1	0.033994
CAM112A_map18	0001.CSV	3644.96	0.0330338
CAM112A_map18	0001.CSV	3648.81	0.0336689
CAM112A_map18	0001.CSV	3652.67	0.0346325
CAM112A_map18	0001.CSV	3656.53	0.0345707
CAM112A_map18	0001.CSV	3660.38	0.0343634
CAM112A_map18	0001.CSV	3664.24	0.0331981
CAM112A_map18	0001.CSV	3668.1	0.0321167
CAM112A_map18	0001.CSV	3671.96	0.0320425
CAM112A_map18	0001.CSV	3675.81	0.032844
CAM112A_map18	0001.CSV	3679.67	0.0333704
CAM112A_map18	0001.CSV	3683.53	0.0327436
CAM112A_map18	0001.CSV	3687.38	0.0323592
CAM112A_map18	0001.CSV	3691.24	0.0334715
CAM112A_map18	0001.CSV	3695.1	0.0333367
CAM112A_map18	0001.CSV	3698.95	0.0325242
CAM112A_map18	0001.CSV	3702.81	0.0322982
CAM112A_map18	0001.CSV	3706.67	0.0318074
CAM112A_map18	0001.CSV	3710.53	0.0317675
CAM112A_map18	0001.CSV	3714.38	0.0324921
CAM112A_map18	0001.CSV	3718.24	0.0319335
CAM112A_map18	0001.CSV	3722.1	0.0317609
CAM112A_map18	0001.CSV	3725.95	0.0318966
CAM112A_map18	0001.CSV	3729.81	0.0312827
CAM112A_map18	0001.CSV	3733.67	0.0315181
CAM112A_map18	0001.CSV	3737.53	0.033233
CAM112A_map18	0001.CSV	3741.38	0.0322121
CAM112A_map18	0001.CSV	3745.24	0.0308512
CAM112A_map18	0001.CSV	3749.1	0.0308824
CAM112A_map18	0001.CSV	3752.95	0.0321097
CAM112A_map18	0001.CSV	3756.81	0.032164
CAM112A_map18	0001.CSV	3760.67	0.0320972
CAM112A_map18	0001.CSV	3764.53	0.0317526
CAM112A_map18	0001.CSV	3768.38	0.0318864
CAM112A_map18	0001.CSV	3772.24	0.0322148
CAM112A_map18	0001.CSV	3776.1	0.0319689
CAM112A_map18	0001.CSV	3779.95	0.0321028
CAM112A_map18	0001.CSV	3783.81	0.0322031
CAM112A_map18	0001.CSV	3787.67	0.0323116
CAM112A_map18	0001.CSV	3791.53	0.0319962
CAM112A_map18	0001.CSV	3795.38	0.0312698
CAM112A_map18	0001.CSV	3799.24	0.0312425
CAM112A_map18	0001.CSV	3803.1	0.0321571
CAM112A_map18	0001.CSV	3806.95	0.0327273
CAM112A_map18	0001.CSV	3810.81	0.0322491
CAM112A_map18	0001.CSV	3814.67	0.0314399
CAM112A_map18	0001.CSV	3818.53	0.0316959
CAM112A_map18	0001.CSV	3822.38	0.0325104
CAM112A_map18	0001.CSV	3826.24	0.0323503
CAM112A_map18	0001.CSV	3830.1	0.0318968
CAM112A_map18	0001.CSV	3833.95	0.0317151
CAM112A_map18	0001.CSV	3837.81	0.0322858
CAM112A_map18	0001.CSV	3841.67	0.0332139
CAM112A_map18	0001.CSV	3845.53	0.0326735
CAM112A_map18	0001.CSV	3849.38	0.0313734
CAM112A_map18	0001.CSV	3853.24	0.0317883
CAM112A_map18	0001.CSV	3857.1	0.0329507
CAM112A_map18	0001.CSV	3860.95	0.0321978
CAM112A_map18	0001.CSV	3864.81	0.0321375
CAM112A_map18	0001.CSV	3868.67	0.0323499
CAM112A_map18	0001.CSV	3872.52	0.0327662
CAM112A_map18	0001.CSV	3876.38	0.0324709
CAM112A_map18	0001.CSV	3880.24	0.0322254
CAM112A_map18	0001.CSV	3884.1	0.032818
CAM112A_map18	0001.CSV	3887.95	0.0327725
CAM112A_map18	0001.CSV	3891.81	0.0327143
CAM112A_map18	0001.CSV	3895.67	0.0323356
CAM112A_map18	0001.CSV	3899.52	0.0318382
CAM112A_map18	0001.CSV	3903.38	0.0329731
CAM112A_map18	0001.CSV	3907.24	0.0332612
CAM112A_map18	0001.CSV	3911.1	0.032498
CAM112A_map18	0001.CSV	3914.95	0.03211
CAM112A_map18	0001.CSV	3918.81	0.032518
CAM112A_map18	0001.CSV	3922.67	0.0326955
CAM112A_map18	0001.CSV	3926.52	0.0325561
CAM112A_map18	0001.CSV	3930.38	0.0326476
CAM112A_map18	0001.CSV	3934.24	0.0330102
CAM112A_map18	0001.CSV	3938.09	0.0325651
CAM112A_map18	0001.CSV	3941.95	0.0323367
CAM112A_map18	0001.CSV	3945.81	0.0324771
CAM112A_map18	0001.CSV	3949.67	0.0326537
CAM112A_map18	0001.CSV	3953.52	0.03262
CAM112A_map18	0001.CSV	3957.38	0.0323854
CAM112A_map18	0001.CSV	3961.24	0.032287
CAM112A_map18	0001.CSV	3965.09	0.0323219
CAM112A_map18	0001.CSV	3968.95	0.0323673
CAM112A_map18	0001.CSV	3972.81	0.0324581
CAM112A_map18	0001.CSV	3976.67	0.0323864
CAM112A_map18	0001.CSV	3980.52	0.032286
CAM112A_map18	0001.CSV	3984.38	0.0323612
CAM112A_map18	0001.CSV	3988.24	0.0322824
CAM112A_map18	0001.CSV	3992.09	0.0321452
CAM112A_map18	0001.CSV	3995.95	0.0321651
CAM112A_map18	0001.CSV	3999.81	0.0321451
CAM112A_map18	0002.CSV	674.992	0.0402177
CAM112A_map18	0002.CSV	678.849	0.0422608
CAM112A_map18	0002.CSV	682.706	0.0436106
CAM112A_map18	0002.CSV	686.563	0.0466689
CAM112A_map18	0002.CSV	690.42	0.0498905
CAM112A_map18	0002.CSV	694.277	0.0578204
CAM112A_map18	0002.CSV	698.134	0.06617
CAM112A_map18	0002.CSV	701.991	0.0748247
CAM112A_map18	0002.CSV	705.849	0.0913175
CAM112A_map18	0002.CSV	709.706	0.118402
CAM112A_map18	0002.CSV	713.563	0.109016
CAM112A_map18	0002.CSV	717.42	0.0660131
CAM112A_map18	0002.CSV	721.277	0.0398808
CAM112A_map18	0002.CSV	725.134	0.0351213
CAM112A_map18	0002.CSV	728.991	0.0353837
CAM112A_map18	0002.CSV	732.848	0.0375281
CAM112A_map18	0002.CSV	736.705	0.0395234
CAM112A_map18	0002.CSV	740.562	0.0418128
CAM112A_map18	0002.CSV	744.42	0.043032
CAM112A_map18	0002.CSV	748.277	0.0438854
CAM112A_map18	0002.CSV	752.134	0.0436396
CAM112A_map18	0002.CSV	755.991	0.0440689
CAM112A_map18	0002.CSV	759.848	0.044038
CAM112A_map18	0002.CSV	763.705	0.044966
CAM112A_map18	0002.CSV	767.562	0.0456478
CAM112A_map18	0002.CSV	771.419	0.046424
CAM112A_map18	0002.CSV	775.276	0.0464362
CAM112A_map18	0002.CSV	779.133	0.0469153
CAM112A_map18	0002.CSV	782.99	0.0466777
CAM112A_map18	0002.CSV	786.848	0.0468654
CAM112A_map18	0002.CSV	790.705	0.0469323
CAM112A_map18	0002.CSV	794.562	0.047663
CAM112A_map18	0002.CSV	798.419	0.0480063
CAM112A_map18	0002.CSV	802.276	0.0483153
CAM112A_map18	0002.CSV	806.133	0.0479028
CAM112A_map18	0002.CSV	809.99	0.0485133
CAM112A_map18	0002.CSV	813.847	0.0491548
CAM112A_map18	0002.CSV	817.704	0.0506339
CAM112A_map18	0002.CSV	821.562	0.0521281
CAM112A_map18	0002.CSV	825.419	0.0542628
CAM112A_map18	0002.CSV	829.276	0.0562496
CAM112A_map18	0002.CSV	833.133	0.0589471
CAM112A_map18	0002.CSV	836.99	0.0619339
CAM112A_map18	0002.CSV	840.847	0.0671107
CAM112A_map18	0002.CSV	844.704	0.0750236
CAM112A_map18	0002.CSV	848.561	0.0805481
CAM112A_map18	0002.CSV	852.418	0.0834405
CAM112A_map18	0002.CSV	856.275	0.0959828
CAM112A_map18	0002.CSV	860.132	0.12249
CAM112A_map18	0002.CSV	863.99	0.172325
CAM112A_map18	0002.CSV	867.847	0.236805
CAM112A_map18	0002.CSV	871.704	0.258309
CAM112A_map18	0002.CSV	875.561	0.21677
CAM112A_map18	0002.CSV	879.418	0.165469
CAM112A_map18	0002.CSV	883.275	0.114328
CAM112A_map18	0002.CSV	887.132	0.0666658
CAM112A_map18	0002.CSV	890.989	0.0436225
CAM112A_map18	0002.CSV	894.846	0.0407937
CAM112A_map18	0002.CSV	898.703	0.0413343
CAM112A_map18	0002.CSV	902.561	0.0425878
CAM112A_map18	0002.CSV	906.418	0.0435275
CAM112A_map18	0002.CSV	910.275	0.044727
CAM112A_map18	0002.CSV	914.132	0.0454772
CAM112A_map18	0002.CSV	917.989	0.0464925
CAM112A_map18	0002.CSV	921.846	0.0471599
CAM112A_map18	0002.CSV	925.703	0.0482083
CAM112A_map18	0002.CSV	929.56	0.0489844
CAM112A_map18	0002.CSV	933.417	0.0500639
CAM112A_map18	0002.CSV	937.274	0.0504846
CAM112A_map18	0002.CSV	941.131	0.0511711
CAM112A_map18	0002.CSV	944.989	0.0516116
CAM112A_map18	0002.CSV	948.846	0.0524745
CAM112A_map18	0002.CSV	952.703	0.0531367
CAM112A_map18	0002.CSV	956.56	0.0541309
CAM112A_map18	0002.CSV	960.417	0.0546317
CAM112A_map18	0002.CSV	964.274	0.0553768
CAM112A_map18	0002.CSV	968.131	0.0560663
CAM112A_map18	0002.CSV	971.988	0.0572489
CAM112A_map18	0002.CSV	975.845	0.0581621
CAM112A_map18	0002.CSV	979.702	0.0594159
CAM112A_map18	0002.CSV	983.559	0.0603949
CAM112A_map18	0002.CSV	987.417	0.0616107
CAM112A_map18	0002.CSV	991.274	0.0625145
CAM112A_map18	0002.CSV	995.131	0.0636556
CAM112A_map18	0002.CSV	998.988	0.0644561
CAM112A_map18	0002.CSV	1002.85	0.0656129
CAM112A_map18	0002.CSV	1006.7	0.0664753
CAM112A_map18	0002.CSV	1010.56	0.0676009
CAM112A_map18	0002.CSV	1014.42	0.0684759
CAM112A_map18	0002.CSV	1018.27	0.0697331
CAM112A_map18	0002.CSV	1022.13	0.0706992
CAM112A_map18	0002.CSV	1025.99	0.0719421
CAM112A_map18	0002.CSV	1029.85	0.0728475
CAM112A_map18	0002.CSV	1033.7	0.0741493
CAM112A_map18	0002.CSV	1037.56	0.0753175
CAM112A_map18	0002.CSV	1041.42	0.0767092
CAM112A_map18	0002.CSV	1045.27	0.0776837
CAM112A_map18	0002.CSV	1049.13	0.0793854
CAM112A_map18	0002.CSV	1052.99	0.081314
CAM112A_map18	0002.CSV	1056.84	0.0838587
CAM112A_map18	0002.CSV	1060.7	0.0860099
CAM112A_map18	0002.CSV	1064.56	0.088002
CAM112A_map18	0002.CSV	1068.42	0.0886355
CAM112A_map18	0002.CSV	1072.27	0.0886846
CAM112A_map18	0002.CSV	1076.13	0.0881689
CAM112A_map18	0002.CSV	1079.99	0.0881384
CAM112A_map18	0002.CSV	1083.84	0.0878927
CAM112A_map18	0002.CSV	1087.7	0.0877545
CAM112A_map18	0002.CSV	1091.56	0.0867905
CAM112A_map18	0002.CSV	1095.41	0.0860925
CAM112A_map18	0002.CSV	1099.27	0.0858142
CAM112A_map18	0002.CSV	1103.13	0.0865674
CAM112A_map18	0002.CSV	1106.99	0.0874319
CAM112A_map18	0002.CSV	1110.84	0.0888532
CAM112A_map18	0002.CSV	1114.7	0.0898313
CAM112A_map18	0002.CSV	1118.56	0.0907672
CAM112A_map18	0002.CSV	1122.41	0.09105
CAM112A_map18	0002.CSV	1126.27	0.0913522
CAM112A_map18	0002.CSV	1130.13	0.0912389
CAM112A_map18	0002.CSV	1133.99	0.0915072
CAM112A_map18	0002.CSV	1137.84	0.0916372
CAM112A_map18	0002.CSV	1141.7	0.0920934
CAM112A_map18	0002.CSV	1145.56	0.092253
CAM112A_map18	0002.CSV	1149.41	0.0929269
CAM112A_map18	0002.CSV	1153.27	0.0936071
CAM112A_map18	0002.CSV	1157.13	0.094765
CAM112A_map18	0002.CSV	1160.99	0.095555
CAM112A_map18	0002.CSV	1164.84	0.0961454
CAM112A_map18	0002.CSV	1168.7	0.0959715
CAM112A_map18	0002.CSV	1172.56	0.096059
CAM112A_map18	0002.CSV	1176.41	0.0959774
CAM112A_map18	0002.CSV	1180.27	0.0962703
CAM112A_map18	0002.CSV	1184.13	0.0962505
CAM112A_map18	0002.CSV	1187.99	0.0964621
CAM112A_map18	0002.CSV	1191.84	0.0964246
CAM112A_map18	0002.CSV	1195.7	0.0968106
CAM112A_map18	0002.CSV	1199.56	0.0971377
CAM112A_map18	0002.CSV	1203.41	0.0979696
CAM112A_map18	0002.CSV	1207.27	0.0986884
CAM112A_map18	0002.CSV	1211.13	0.0998875
CAM112A_map18	0002.CSV	1214.98	0.10097
CAM112A_map18	0002.CSV	1218.84	0.102451
CAM112A_map18	0002.CSV	1222.7	0.10379
CAM112A_map18	0002.CSV	1226.56	0.105632
CAM112A_map18	0002.CSV	1230.41	0.107384
CAM112A_map18	0002.CSV	1234.27	0.109661
CAM112A_map18	0002.CSV	1238.13	0.111788
CAM112A_map18	0002.CSV	1241.98	0.114376
CAM112A_map18	0002.CSV	1245.84	0.116781
CAM112A_map18	0002.CSV	1249.7	0.119495
CAM112A_map18	0002.CSV	1253.56	0.121785
CAM112A_map18	0002.CSV	1257.41	0.124098
CAM112A_map18	0002.CSV	1261.27	0.125858
CAM112A_map18	0002.CSV	1265.13	0.127967
CAM112A_map18	0002.CSV	1268.98	0.129817
CAM112A_map18	0002.CSV	1272.84	0.132123
CAM112A_map18	0002.CSV	1276.7	0.134201
CAM112A_map18	0002.CSV	1280.56	0.136677
CAM112A_map18	0002.CSV	1284.41	0.138702
CAM112A_map18	0002.CSV	1288.27	0.140886
CAM112A_map18	0002.CSV	1292.13	0.142449
CAM112A_map18	0002.CSV	1295.98	0.144364
CAM112A_map18	0002.CSV	1299.84	0.146348
CAM112A_map18	0002.CSV	1303.7	0.149211
CAM112A_map18	0002.CSV	1307.56	0.152163
CAM112A_map18	0002.CSV	1311.41	0.155911
CAM112A_map18	0002.CSV	1315.27	0.159652
CAM112A_map18	0002.CSV	1319.13	0.164028
CAM112A_map18	0002.CSV	1322.98	0.167898
CAM112A_map18	0002.CSV	1326.84	0.172289
CAM112A_map18	0002.CSV	1330.7	0.176952
CAM112A_map18	0002.CSV	1334.56	0.182385
CAM112A_map18	0002.CSV	1338.41	0.188815
CAM112A_map18	0002.CSV	1342.27	0.196788
CAM112A_map18	0002.CSV	1346.13	0.2032
CAM112A_map18	0002.CSV	1349.98	0.210893
CAM112A_map18	0002.CSV	1353.84	0.218871
CAM112A_map18	0002.CSV	1357.7	0.2275
CAM112A_map18	0002.CSV	1361.56	0.23723
CAM112A_map18	0002.CSV	1365.41	0.249543
CAM112A_map18	0002.CSV	1369.27	0.260002
CAM112A_map18	0002.CSV	1373.13	0.2735
CAM112A_map18	0002.CSV	1376.98	0.28902
CAM112A_map18	0002.CSV	1380.84	0.303778
CAM112A_map18	0002.CSV	1384.7	0.318095
CAM112A_map18	0002.CSV	1388.56	0.336485
CAM112A_map18	0002.CSV	1392.41	0.350009
CAM112A_map18	0002.CSV	1396.27	0.359728
CAM112A_map18	0002.CSV	1400.13	0.361004
CAM112A_map18	0002.CSV	1403.98	0.358065
CAM112A_map18	0002.CSV	1407.84	0.348299
CAM112A_map18	0002.CSV	1411.7	0.334856
CAM112A_map18	0002.CSV	1415.55	0.320069
CAM112A_map18	0002.CSV	1419.41	0.304127
CAM112A_map18	0002.CSV	1423.27	0.290416
CAM112A_map18	0002.CSV	1427.12	0.281941
CAM112A_map18	0002.CSV	1430.98	0.272904
CAM112A_map18	0002.CSV	1434.84	0.26427
CAM112A_map18	0002.CSV	1438.7	0.253121
CAM112A_map18	0002.CSV	1442.55	0.244833
CAM112A_map18	0002.CSV	1446.41	0.235265
CAM112A_map18	0002.CSV	1450.27	0.225414
CAM112A_map18	0002.CSV	1454.12	0.216838
CAM112A_map18	0002.CSV	1457.98	0.20433
CAM112A_map18	0002.CSV	1461.84	0.194059
CAM112A_map18	0002.CSV	1465.7	0.186465
CAM112A_map18	0002.CSV	1469.55	0.178617
CAM112A_map18	0002.CSV	1473.41	0.169657
CAM112A_map18	0002.CSV	1477.27	0.159621
CAM112A_map18	0002.CSV	1481.12	0.153229
CAM112A_map18	0002.CSV	1484.98	0.146862
CAM112A_map18	0002.CSV	1488.84	0.139012
CAM112A_map18	0002.CSV	1492.7	0.130527
CAM112A_map18	0002.CSV	1496.55	0.123616
CAM112A_map18	0002.CSV	1500.41	0.115642
CAM112A_map18	0002.CSV	1504.27	0.110939
CAM112A_map18	0002.CSV	1508.12	0.102596
CAM112A_map18	0002.CSV	1511.98	0.0964404
CAM112A_map18	0002.CSV	1515.84	0.0923745
CAM112A_map18	0002.CSV	1519.7	0.087544
CAM112A_map18	0002.CSV	1523.55	0.0819362
CAM112A_map18	0002.CSV	1527.41	0.0777712
CAM112A_map18	0002.CSV	1531.27	0.0738062
CAM112A_map18	0002.CSV	1535.12	0.0701556
CAM112A_map18	0002.CSV	1538.98	0.0664036
CAM112A_map18	0002.CSV	1542.84	0.0601974
CAM112A_map18	0002.CSV	1546.7	0.0555385
CAM112A_map18	0002.CSV	1550.55	0.0521891
CAM112A_map18	0002.CSV	1554.41	0.0491729
CAM112A_map18	0002.CSV	1558.27	0.0467137
CAM112A_map18	0002.CSV	1562.12	0.0444887
CAM112A_map18	0002.CSV	1565.98	0.0431204
CAM112A_map18	0002.CSV	1569.84	0.0418776
CAM112A_map18	0002.CSV	1573.69	0.0410717
CAM112A_map18	0002.CSV	1577.55	0.0406426
CAM112A_map18	0002.CSV	1581.41	0.0398432
CAM112A_map18	0002.CSV	1585.27	0.0387243
CAM112A_map18	0002.CSV	1589.12	0.0376227
CAM112A_map18	0002.CSV	1592.98	0.036563
CAM112A_map18	0002.CSV	1596.84	0.0357636
CAM112A_map18	0002.CSV	1600.69	0.0350417
CAM112A_map18	0002.CSV	1604.55	0.0344849
CAM112A_map18	0002.CSV	1608.41	0.0340274
CAM112A_map18	0002.CSV	1612.27	0.0335927
CAM112A_map18	0002.CSV	1616.12	0.0332351
CAM112A_map18	0002.CSV	1619.98	0.0331565
CAM112A_map18	0002.CSV	1623.84	0.0328871
CAM112A_map18	0002.CSV	1627.69	0.0326089
CAM112A_map18	0002.CSV	1631.55	0.0319046
CAM112A_map18	0002.CSV	1635.41	0.0319288
CAM112A_map18	0002.CSV	1639.27	0.0321734
CAM112A_map18	0002.CSV	1643.12	0.0316626
CAM112A_map18	0002.CSV	1646.98	0.0315839
CAM112A_map18	0002.CSV	1650.84	0.0319973
CAM112A_map18	0002.CSV	1654.69	0.0321902
CAM112A_map18	0002.CSV	1658.55	0.031663
CAM112A_map18	0002.CSV	1662.41	0.0311021
CAM112A_map18	0002.CSV	1666.27	0.0308225
CAM112A_map18	0002.CSV	1670.12	0.0308148
CAM112A_map18	0002.CSV	1673.98	0.0311309
CAM112A_map18	0002.CSV	1677.84	0.0306885
CAM112A_map18	0002.CSV	1681.69	0.030512
CAM112A_map18	0002.CSV	1685.55	0.0309648
CAM112A_map18	0002.CSV	1689.41	0.0308607
CAM112A_map18	0002.CSV	1693.27	0.0302291
CAM112A_map18	0002.CSV	1697.12	0.0305023
CAM112A_map18	0002.CSV	1700.98	0.0313955
CAM112A_map18	0002.CSV	1704.84	0.0319424
CAM112A_map18	0002.CSV	1708.69	0.0323025
CAM112A_map18	0002.CSV	1712.55	0.0326041
CAM112A_map18	0002.CSV	1716.41	0.0344123
CAM112A_map18	0002.CSV	1720.27	0.0365173
CAM112A_map18	0002.CSV	1724.12	0.0367619
CAM112A_map18	0002.CSV	1727.98	0.0368164
CAM112A_map18	0002.CSV	1731.84	0.0368148
CAM112A_map18	0002.CSV	1735.69	0.0367352
CAM112A_map18	0002.CSV	1739.55	0.0356461
CAM112A_map18	0002.CSV	1743.41	0.0341033
CAM112A_map18	0002.CSV	1747.27	0.0326048
CAM112A_map18	0002.CSV	1751.12	0.0311064
CAM112A_map18	0002.CSV	1754.98	0.0296503
CAM112A_map18	0002.CSV	1758.84	0.0288529
CAM112A_map18	0002.CSV	1762.69	0.0284558
CAM112A_map18	0002.CSV	1766.55	0.028063
CAM112A_map18	0002.CSV	1770.41	0.0280894
CAM112A_map18	0002.CSV	1774.26	0.0286851
CAM112A_map18	0002.CSV	1778.12	0.0286701
CAM112A_map18	0002.CSV	1781.98	0.029201
CAM112A_map18	0002.CSV	1785.84	0.0303777
CAM112A_map18	0002.CSV	1789.69	0.0324759
CAM112A_map18	0002.CSV	1793.55	0.0355565
CAM112A_map18	0002.CSV	1797.41	0.0359498
CAM112A_map18	0002.CSV	1801.26	0.0335183
CAM112A_map18	0002.CSV	1805.12	0.0306429
CAM112A_map18	0002.CSV	1808.98	0.0287642
CAM112A_map18	0002.CSV	1812.84	0.027919
CAM112A_map18	0002.CSV	1816.69	0.0272949
CAM112A_map18	0002.CSV	1820.55	0.0269377
CAM112A_map18	0002.CSV	1824.41	0.0267248
CAM112A_map18	0002.CSV	1828.26	0.0268605
CAM112A_map18	0002.CSV	1832.12	0.0268433
CAM112A_map18	0002.CSV	1835.98	0.0266267
CAM112A_map18	0002.CSV	1839.84	0.0263719
CAM112A_map18	0002.CSV	1843.69	0.0265795
CAM112A_map18	0002.CSV	1847.55	0.0268798
CAM112A_map18	0002.CSV	1851.41	0.0267528
CAM112A_map18	0002.CSV	1855.26	0.0266147
CAM112A_map18	0002.CSV	1859.12	0.0266414
CAM112A_map18	0002.CSV	1862.98	0.0264706
CAM112A_map18	0002.CSV	1866.84	0.0266341
CAM112A_map18	0002.CSV	1870.69	0.0270383
CAM112A_map18	0002.CSV	1874.55	0.026881
CAM112A_map18	0002.CSV	1878.41	0.0267569
CAM112A_map18	0002.CSV	1882.26	0.0268058
CAM112A_map18	0002.CSV	1886.12	0.0267961
CAM112A_map18	0002.CSV	1889.98	0.0269538
CAM112A_map18	0002.CSV	1893.83	0.0270083
CAM112A_map18	0002.CSV	1897.69	0.0270266
CAM112A_map18	0002.CSV	1901.55	0.0269658
CAM112A_map18	0002.CSV	1905.41	0.027022
CAM112A_map18	0002.CSV	1909.26	0.0271289
CAM112A_map18	0002.CSV	1913.12	0.0271292
CAM112A_map18	0002.CSV	1916.98	0.0270839
CAM112A_map18	0002.CSV	1920.83	0.0273031
CAM112A_map18	0002.CSV	1924.69	0.0273545
CAM112A_map18	0002.CSV	1928.55	0.0273032
CAM112A_map18	0002.CSV	1932.4	0.0272884
CAM112A_map18	0002.CSV	1936.26	0.0273594
CAM112A_map18	0002.CSV	1940.12	0.0273564
CAM112A_map18	0002.CSV	1943.98	0.0276601
CAM112A_map18	0002.CSV	1947.83	0.0277722
CAM112A_map18	0002.CSV	1951.69	0.0277256
CAM112A_map18	0002.CSV	1955.55	0.0277309
CAM112A_map18	0002.CSV	1959.4	0.0278485
CAM112A_map18	0002.CSV	1963.26	0.0278645
CAM112A_map18	0002.CSV	1967.12	0.0279885
CAM112A_map18	0002.CSV	1970.98	0.0280085
CAM112A_map18	0002.CSV	1974.83	0.027989
CAM112A_map18	0002.CSV	1978.69	0.0280199
CAM112A_map18	0002.CSV	1982.55	0.0281125
CAM112A_map18	0002.CSV	1986.4	0.0281205
CAM112A_map18	0002.CSV	1990.26	0.0282535
CAM112A_map18	0002.CSV	1994.12	0.028403
CAM112A_map18	0002.CSV	1997.98	0.0284151
CAM112A_map18	0002.CSV	2001.83	0.0284274
CAM112A_map18	0002.CSV	2005.69	0.0285433
CAM112A_map18	0002.CSV	2009.55	0.0286141
CAM112A_map18	0002.CSV	2013.4	0.0286491
CAM112A_map18	0002.CSV	2017.26	0.0287335
CAM112A_map18	0002.CSV	2021.12	0.0288741
CAM112A_map18	0002.CSV	2024.97	0.0288771
CAM112A_map18	0002.CSV	2028.83	0.0288993
CAM112A_map18	0002.CSV	2032.69	0.0289265
CAM112A_map18	0002.CSV	2036.55	0.0290231
CAM112A_map18	0002.CSV	2040.4	0.0290859
CAM112A_map18	0002.CSV	2044.26	0.0292068
CAM112A_map18	0002.CSV	2048.12	0.0292373
CAM112A_map18	0002.CSV	2051.97	0.029312
CAM112A_map18	0002.CSV	2055.83	0.0293123
CAM112A_map18	0002.CSV	2059.69	0.0293149
CAM112A_map18	0002.CSV	2063.55	0.0293626
CAM112A_map18	0002.CSV	2067.4	0.029542
CAM112A_map18	0002.CSV	2071.26	0.0295774
CAM112A_map18	0002.CSV	2075.12	0.0295862
CAM112A_map18	0002.CSV	2078.97	0.029625
CAM112A_map18	0002.CSV	2082.83	0.0297276
CAM112A_map18	0002.CSV	2086.69	0.0297812
CAM112A_map18	0002.CSV	2090.55	0.0298531
CAM112A_map18	0002.CSV	2094.4	0.0298629
CAM112A_map18	0002.CSV	2098.26	0.0298991
CAM112A_map18	0002.CSV	2102.12	0.0299262
CAM112A_map18	0002.CSV	2105.97	0.0300153
CAM112A_map18	0002.CSV	2109.83	0.0300515
CAM112A_map18	0002.CSV	2113.69	0.0301055
CAM112A_map18	0002.CSV	2117.55	0.0301536
CAM112A_map18	0002.CSV	2121.4	0.0302769
CAM112A_map18	0002.CSV	2125.26	0.0303256
CAM112A_map18	0002.CSV	2129.12	0.0303797
CAM112A_map18	0002.CSV	2132.97	0.0304838
CAM112A_map18	0002.CSV	2136.83	0.0306234
CAM112A_map18	0002.CSV	2140.69	0.0306102
CAM112A_map18	0002.CSV	2144.55	0.0306273
CAM112A_map18	0002.CSV	2148.4	0.030645
CAM112A_map18	0002.CSV	2152.26	0.0306647
CAM112A_map18	0002.CSV	2156.12	0.0306895
CAM112A_map18	0002.CSV	2159.97	0.0307456
CAM112A_map18	0002.CSV	2163.83	0.0307512
CAM112A_map18	0002.CSV	2167.69	0.0307854
CAM112A_map18	0002.CSV	2171.55	0.0308416
CAM112A_map18	0002.CSV	2175.4	0.0309344
CAM112A_map18	0002.CSV	2179.26	0.0309398
CAM112A_map18	0002.CSV	2183.12	0.0309847
CAM112A_map18	0002.CSV	2186.97	0.0310025
CAM112A_map18	0002.CSV	2190.83	0.0310262
CAM112A_map18	0002.CSV	2194.69	0.0310285
CAM112A_map18	0002.CSV	2198.55	0.031089
CAM112A_map18	0002.CSV	2202.4	0.0310992
CAM112A_map18	0002.CSV	2206.26	0.0311399
CAM112A_map18	0002.CSV	2210.12	0.0311805
CAM112A_map18	0002.CSV	2213.97	0.0312246
CAM112A_map18	0002.CSV	2217.83	0.0312186
CAM112A_map18	0002.CSV	2221.69	0.0312459
CAM112A_map18	0002.CSV	2225.54	0.0312589
CAM112A_map18	0002.CSV	2229.4	0.0313233
CAM112A_map18	0002.CSV	2233.26	0.0313358
CAM112A_map18	0002.CSV	2237.12	0.0313347
CAM112A_map18	0002.CSV	2240.97	0.0313251
CAM112A_map18	0002.CSV	2244.83	0.0313727
CAM112A_map18	0002.CSV	2248.69	0.0313869
CAM112A_map18	0002.CSV	2252.54	0.0314027
CAM112A_map18	0002.CSV	2256.4	0.0314276
CAM112A_map18	0002.CSV	2260.26	0.0314977
CAM112A_map18	0002.CSV	2264.11	0.0315111
CAM112A_map18	0002.CSV	2267.97	0.0316035
CAM112A_map18	0002.CSV	2271.83	0.0317201
CAM112A_map18	0002.CSV	2275.69	0.0318232
CAM112A_map18	0002.CSV	2279.54	0.0318403
CAM112A_map18	0002.CSV	2283.4	0.0318074
CAM112A_map18	0002.CSV	2287.26	0.0317718
CAM112A_map18	0002.CSV	2291.11	0.0318525
CAM112A_map18	0002.CSV	2294.97	0.0319554
CAM112A_map18	0002.CSV	2298.83	0.0320809
CAM112A_map18	0002.CSV	2302.69	0.0320739
CAM112A_map18	0002.CSV	2306.54	0.0320002
CAM112A_map18	0002.CSV	2310.4	0.0318588
CAM112A_map18	0002.CSV	2314.26	0.0318287
CAM112A_map18	0002.CSV	2318.11	0.0313707
CAM112A_map18	0002.CSV	2321.97	0.0304728
CAM112A_map18	0002.CSV	2325.83	0.0296201
CAM112A_map18	0002.CSV	2329.69	0.0292491
CAM112A_map18	0002.CSV	2333.54	0.0285684
CAM112A_map18	0002.CSV	2337.4	0.0277356
CAM112A_map18	0002.CSV	2341.26	0.0274308
CAM112A_map18	0002.CSV	2345.11	0.0300783
CAM112A_map18	0002.CSV	2348.97	0.0307808
CAM112A_map18	0002.CSV	2352.83	0.0285459
CAM112A_map18	0002.CSV	2356.69	0.0217582
CAM112A_map18	0002.CSV	2360.54	0.0157159
CAM112A_map18	0002.CSV	2364.4	0.0189814
CAM112A_map18	0002.CSV	2368.26	0.0266378
CAM112A_map18	0002.CSV	2372.11	0.0313224
CAM112A_map18	0002.CSV	2375.97	0.0332607
CAM112A_map18	0002.CSV	2379.83	0.0337124
CAM112A_map18	0002.CSV	2383.69	0.0335949
CAM112A_map18	0002.CSV	2387.54	0.0332831
CAM112A_map18	0002.CSV	2391.4	0.0330966
CAM112A_map18	0002.CSV	2395.26	0.0330776
CAM112A_map18	0002.CSV	2399.11	0.0331646
CAM112A_map18	0002.CSV	2402.97	0.033211
CAM112A_map18	0002.CSV	2406.83	0.0332611
CAM112A_map18	0002.CSV	2410.68	0.0332751
CAM112A_map18	0002.CSV	2414.54	0.0332815
CAM112A_map18	0002.CSV	2418.4	0.0333068
CAM112A_map18	0002.CSV	2422.26	0.0334161
CAM112A_map18	0002.CSV	2426.11	0.0334581
CAM112A_map18	0002.CSV	2429.97	0.0335177
CAM112A_map18	0002.CSV	2433.83	0.0335911
CAM112A_map18	0002.CSV	2437.68	0.0336843
CAM112A_map18	0002.CSV	2441.54	0.0337475
CAM112A_map18	0002.CSV	2445.4	0.0337797
CAM112A_map18	0002.CSV	2449.26	0.0337744
CAM112A_map18	0002.CSV	2453.11	0.033815
CAM112A_map18	0002.CSV	2456.97	0.0338623
CAM112A_map18	0002.CSV	2460.83	0.0339582
CAM112A_map18	0002.CSV	2464.68	0.0340838
CAM112A_map18	0002.CSV	2468.54	0.0341993
CAM112A_map18	0002.CSV	2472.4	0.0343147
CAM112A_map18	0002.CSV	2476.26	0.0345415
CAM112A_map18	0002.CSV	2480.11	0.0347857
CAM112A_map18	0002.CSV	2483.97	0.0350449
CAM112A_map18	0002.CSV	2487.83	0.0353682
CAM112A_map18	0002.CSV	2491.68	0.0358444
CAM112A_map18	0002.CSV	2495.54	0.0364847
CAM112A_map18	0002.CSV	2499.4	0.0372844
CAM112A_map18	0002.CSV	2503.26	0.0380209
CAM112A_map18	0002.CSV	2507.11	0.0385481
CAM112A_map18	0002.CSV	2510.97	0.0387493
CAM112A_map18	0002.CSV	2514.83	0.038663
CAM112A_map18	0002.CSV	2518.68	0.0383416
CAM112A_map18	0002.CSV	2522.54	0.0377888
CAM112A_map18	0002.CSV	2526.4	0.0371008
CAM112A_map18	0002.CSV	2530.26	0.0364335
CAM112A_map18	0002.CSV	2534.11	0.0358134
CAM112A_map18	0002.CSV	2537.97	0.0353489
CAM112A_map18	0002.CSV	2541.83	0.0350366
CAM112A_map18	0002.CSV	2545.68	0.0348169
CAM112A_map18	0002.CSV	2549.54	0.0346463
CAM112A_map18	0002.CSV	2553.4	0.0345854
CAM112A_map18	0002.CSV	2557.26	0.0345333
CAM112A_map18	0002.CSV	2561.11	0.0344766
CAM112A_map18	0002.CSV	2564.97	0.034437
CAM112A_map18	0002.CSV	2568.83	0.034479
CAM112A_map18	0002.CSV	2572.68	0.0345435
CAM112A_map18	0002.CSV	2576.54	0.0345795
CAM112A_map18	0002.CSV	2580.4	0.0344955
CAM112A_map18	0002.CSV	2584.25	0.0344008
CAM112A_map18	0002.CSV	2588.11	0.0343585
CAM112A_map18	0002.CSV	2591.97	0.0343678
CAM112A_map18	0002.CSV	2595.83	0.0343253
CAM112A_map18	0002.CSV	2599.68	0.0342335
CAM112A_map18	0002.CSV	2603.54	0.034121
CAM112A_map18	0002.CSV	2607.4	0.034043
CAM112A_map18	0002.CSV	2611.25	0.0339991
CAM112A_map18	0002.CSV	2615.11	0.0339527
CAM112A_map18	0002.CSV	2618.97	0.0338494
CAM112A_map18	0002.CSV	2622.82	0.0338385
CAM112A_map18	0002.CSV	2626.68	0.0338478
CAM112A_map18	0002.CSV	2630.54	0.0338063
CAM112A_map18	0002.CSV	2634.4	0.0338262
CAM112A_map18	0002.CSV	2638.25	0.0338174
CAM112A_map18	0002.CSV	2642.11	0.0336917
CAM112A_map18	0002.CSV	2645.97	0.0335947
CAM112A_map18	0002.CSV	2649.82	0.0335612
CAM112A_map18	0002.CSV	2653.68	0.0336032
CAM112A_map18	0002.CSV	2657.54	0.0336944
CAM112A_map18	0002.CSV	2661.4	0.0337598
CAM112A_map18	0002.CSV	2665.25	0.0337309
CAM112A_map18	0002.CSV	2669.11	0.0338081
CAM112A_map18	0002.CSV	2672.97	0.0340755
CAM112A_map18	0002.CSV	2676.82	0.0343728
CAM112A_map18	0002.CSV	2680.68	0.034381
CAM112A_map18	0002.CSV	2684.54	0.034131
CAM112A_map18	0002.CSV	2688.4	0.0339956
CAM112A_map18	0002.CSV	2692.25	0.0339887
CAM112A_map18	0002.CSV	2696.11	0.0340944
CAM112A_map18	0002.CSV	2699.97	0.0341762
CAM112A_map18	0002.CSV	2703.82	0.0341776
CAM112A_map18	0002.CSV	2707.68	0.0342685
CAM112A_map18	0002.CSV	2711.54	0.034319
CAM112A_map18	0002.CSV	2715.4	0.034358
CAM112A_map18	0002.CSV	2719.25	0.0345744
CAM112A_map18	0002.CSV	2723.11	0.0348975
CAM112A_map18	0002.CSV	2726.97	0.0348871
CAM112A_map18	0002.CSV	2730.82	0.0345795
CAM112A_map18	0002.CSV	2734.68	0.0345908
CAM112A_map18	0002.CSV	2738.54	0.0346595
CAM112A_map18	0002.CSV	2742.4	0.0347191
CAM112A_map18	0002.CSV	2746.25	0.0350946
CAM112A_map18	0002.CSV	2750.11	0.0351582
CAM112A_map18	0002.CSV	2753.97	0.0349035
CAM112A_map18	0002.CSV	2757.82	0.0348068
CAM112A_map18	0002.CSV	2761.68	0.0347209
CAM112A_map18	0002.CSV	2765.54	0.0346893
CAM112A_map18	0002.CSV	2769.39	0.0349004
CAM112A_map18	0002.CSV	2773.25	0.0353037
CAM112A_map18	0002.CSV	2777.11	0.0352744
CAM112A_map18	0002.CSV	2780.97	0.0350285
CAM112A_map18	0002.CSV	2784.82	0.0352355
CAM112A_map18	0002.CSV	2788.68	0.0357524
CAM112A_map18	0002.CSV	2792.54	0.0359386
CAM112A_map18	0002.CSV	2796.39	0.0359594
CAM112A_map18	0002.CSV	2800.25	0.03577
CAM112A_map18	0002.CSV	2804.11	0.0355312
CAM112A_map18	0002.CSV	2807.97	0.0358054
CAM112A_map18	0002.CSV	2811.82	0.0359174
CAM112A_map18	0002.CSV	2815.68	0.0357718
CAM112A_map18	0002.CSV	2819.54	0.0359167
CAM112A_map18	0002.CSV	2823.39	0.0361209
CAM112A_map18	0002.CSV	2827.25	0.0361874
CAM112A_map18	0002.CSV	2831.11	0.0366881
CAM112A_map18	0002.CSV	2834.97	0.0376118
CAM112A_map18	0002.CSV	2838.82	0.0383041
CAM112A_map18	0002.CSV	2842.68	0.0387508
CAM112A_map18	0002.CSV	2846.54	0.039744
CAM112A_map18	0002.CSV	2850.39	0.0404158
CAM112A_map18	0002.CSV	2854.25	0.0404529
CAM112A_map18	0002.CSV	2858.11	0.0403934
CAM112A_map18	0002.CSV	2861.97	0.040029
CAM112A_map18	0002.CSV	2865.82	0.0397359
CAM112A_map18	0002.CSV	2869.68	0.0399634
CAM112A_map18	0002.CSV	2873.54	0.0400596
CAM112A_map18	0002.CSV	2877.39	0.0393311
CAM112A_map18	0002.CSV	2881.25	0.0386363
CAM112A_map18	0002.CSV	2885.11	0.0383337
CAM112A_map18	0002.CSV	2888.97	0.0383874
CAM112A_map18	0002.CSV	2892.82	0.0389448
CAM112A_map18	0002.CSV	2896.68	0.0393328
CAM112A_map18	0002.CSV	2900.54	0.0394132
CAM112A_map18	0002.CSV	2904.39	0.0398564
CAM112A_map18	0002.CSV	2908.25	0.0407746
CAM112A_map18	0002.CSV	2912.11	0.0421757
CAM112A_map18	0002.CSV	2915.97	0.0432272
CAM112A_map18	0002.CSV	2919.82	0.0432676
CAM112A_map18	0002.CSV	2923.68	0.0429071
CAM112A_map18	0002.CSV	2927.54	0.0428868
CAM112A_map18	0002.CSV	2931.39	0.0423241
CAM112A_map18	0002.CSV	2935.25	0.0411705
CAM112A_map18	0002.CSV	2939.11	0.040512
CAM112A_map18	0002.CSV	2942.96	0.0405287
CAM112A_map18	0002.CSV	2946.82	0.0404244
CAM112A_map18	0002.CSV	2950.68	0.0400095
CAM112A_map18	0002.CSV	2954.54	0.0395197
CAM112A_map18	0002.CSV	2958.39	0.0390569
CAM112A_map18	0002.CSV	2962.25	0.0387558
CAM112A_map18	0002.CSV	2966.11	0.0382067
CAM112A_map18	0002.CSV	2969.96	0.0379575
CAM112A_map18	0002.CSV	2973.82	0.0381638
CAM112A_map18	0002.CSV	2977.68	0.0383002
CAM112A_map18	0002.CSV	2981.53	0.0379592
CAM112A_map18	0002.CSV	2985.39	0.0372253
CAM112A_map18	0002.CSV	2989.25	0.0370294
CAM112A_map18	0002.CSV	2993.11	0.0371443
CAM112A_map18	0002.CSV	2996.96	0.0368809
CAM112A_map18	0002.CSV	3000.82	0.0363838
CAM112A_map18	0002.CSV	3004.68	0.0360744
CAM112A_map18	0002.CSV	3008.53	0.036272
CAM112A_map18	0002.CSV	3012.39	0.0366636
CAM112A_map18	0002.CSV	3016.25	0.0367343
CAM112A_map18	0002.CSV	3020.11	0.036548
CAM112A_map18	0002.CSV	3023.96	0.0364087
CAM112A_map18	0002.CSV	3027.82	0.0364387
CAM112A_map18	0002.CSV	3031.68	0.036741
CAM112A_map18	0002.CSV	3035.53	0.0367689
CAM112A_map18	0002.CSV	3039.39	0.0366663
CAM112A_map18	0002.CSV	3043.25	0.0367699
CAM112A_map18	0002.CSV	3047.11	0.0367843
CAM112A_map18	0002.CSV	3050.96	0.0367793
CAM112A_map18	0002.CSV	3054.82	0.0367289
CAM112A_map18	0002.CSV	3058.68	0.0366097
CAM112A_map18	0002.CSV	3062.53	0.0366834
CAM112A_map18	0002.CSV	3066.39	0.0369923
CAM112A_map18	0002.CSV	3070.25	0.0369418
CAM112A_map18	0002.CSV	3074.11	0.0368531
CAM112A_map18	0002.CSV	3077.96	0.0370829
CAM112A_map18	0002.CSV	3081.82	0.0372779
CAM112A_map18	0002.CSV	3085.68	0.037234
CAM112A_map18	0002.CSV	3089.53	0.0370426
CAM112A_map18	0002.CSV	3093.39	0.0367696
CAM112A_map18	0002.CSV	3097.25	0.036761
CAM112A_map18	0002.CSV	3101.11	0.0368451
CAM112A_map18	0002.CSV	3104.96	0.0368767
CAM112A_map18	0002.CSV	3108.82	0.03702
CAM112A_map18	0002.CSV	3112.68	0.0371611
CAM112A_map18	0002.CSV	3116.53	0.0373397
CAM112A_map18	0002.CSV	3120.39	0.0372141
CAM112A_map18	0002.CSV	3124.25	0.0368841
CAM112A_map18	0002.CSV	3128.11	0.036794
CAM112A_map18	0002.CSV	3131.96	0.0367988
CAM112A_map18	0002.CSV	3135.82	0.0370027
CAM112A_map18	0002.CSV	3139.68	0.0371556
CAM112A_map18	0002.CSV	3143.53	0.036925
CAM112A_map18	0002.CSV	3147.39	0.0369535
CAM112A_map18	0002.CSV	3151.25	0.0373529
CAM112A_map18	0002.CSV	3155.1	0.0372697
CAM112A_map18	0002.CSV	3158.96	0.0368159
CAM112A_map18	0002.CSV	3162.82	0.0366421
CAM112A_map18	0002.CSV	3166.68	0.0366475
CAM112A_map18	0002.CSV	3170.53	0.036705
CAM112A_map18	0002.CSV	3174.39	0.0368132
CAM112A_map18	0002.CSV	3178.25	0.0369153
CAM112A_map18	0002.CSV	3182.1	0.0369209
CAM112A_map18	0002.CSV	3185.96	0.0369912
CAM112A_map18	0002.CSV	3189.82	0.0370601
CAM112A_map18	0002.CSV	3193.68	0.0370091
CAM112A_map18	0002.CSV	3197.53	0.0370944
CAM112A_map18	0002.CSV	3201.39	0.0372647
CAM112A_map18	0002.CSV	3205.25	0.0372712
CAM112A_map18	0002.CSV	3209.1	0.0372567
CAM112A_map18	0002.CSV	3212.96	0.0374039
CAM112A_map18	0002.CSV	3216.82	0.0375798
CAM112A_map18	0002.CSV	3220.68	0.0376034
CAM112A_map18	0002.CSV	3224.53	0.0375006
CAM112A_map18	0002.CSV	3228.39	0.0376726
CAM112A_map18	0002.CSV	3232.25	0.0380858
CAM112A_map18	0002.CSV	3236.1	0.0380206
CAM112A_map18	0002.CSV	3239.96	0.0378308
CAM112A_map18	0002.CSV	3243.82	0.0380577
CAM112A_map18	0002.CSV	3247.68	0.038156
CAM112A_map18	0002.CSV	3251.53	0.0380404
CAM112A_map18	0002.CSV	3255.39	0.0380234
CAM112A_map18	0002.CSV	3259.25	0.0377596
CAM112A_map18	0002.CSV	3263.1	0.0377229
CAM112A_map18	0002.CSV	3266.96	0.0381711
CAM112A_map18	0002.CSV	3270.82	0.0385996
CAM112A_map18	0002.CSV	3274.68	0.0385294
CAM112A_map18	0002.CSV	3278.53	0.0382209
CAM112A_map18	0002.CSV	3282.39	0.0379832
CAM112A_map18	0002.CSV	3286.25	0.0380812
CAM112A_map18	0002.CSV	3290.1	0.0384696
CAM112A_map18	0002.CSV	3293.96	0.0386721
CAM112A_map18	0002.CSV	3297.82	0.0384486
CAM112A_map18	0002.CSV	3301.67	0.0384793
CAM112A_map18	0002.CSV	3305.53	0.0387392
CAM112A_map18	0002.CSV	3309.39	0.0386273
CAM112A_map18	0002.CSV	3313.25	0.0381438
CAM112A_map18	0002.CSV	3317.1	0.0378462
CAM112A_map18	0002.CSV	3320.96	0.0380137
CAM112A_map18	0002.CSV	3324.82	0.0382781
CAM112A_map18	0002.CSV	3328.67	0.0379991
CAM112A_map18	0002.CSV	3332.53	0.037936
CAM112A_map18	0002.CSV	3336.39	0.0385446
CAM112A_map18	0002.CSV	3340.24	0.0387647
CAM112A_map18	0002.CSV	3344.1	0.0383923
CAM112A_map18	0002.CSV	3347.96	0.0383236
CAM112A_map18	0002.CSV	3351.82	0.0382182
CAM112A_map18	0002.CSV	3355.67	0.0379279
CAM112A_map18	0002.CSV	3359.53	0.0380393
CAM112A_map18	0002.CSV	3363.39	0.0384124
CAM112A_map18	0002.CSV	3367.24	0.0388339
CAM112A_map18	0002.CSV	3371.1	0.0386917
CAM112A_map18	0002.CSV	3374.96	0.0383747
CAM112A_map18	0002.CSV	3378.82	0.0382375
CAM112A_map18	0002.CSV	3382.67	0.0379384
CAM112A_map18	0002.CSV	3386.53	0.0379499
CAM112A_map18	0002.CSV	3390.39	0.0383231
CAM112A_map18	0002.CSV	3394.24	0.0384756
CAM112A_map18	0002.CSV	3398.1	0.0385199
CAM112A_map18	0002.CSV	3401.96	0.0384028
CAM112A_map18	0002.CSV	3405.82	0.0380517
CAM112A_map18	0002.CSV	3409.67	0.0380131
CAM112A_map18	0002.CSV	3413.53	0.0378185
CAM112A_map18	0002.CSV	3417.39	0.0374507
CAM112A_map18	0002.CSV	3421.24	0.0374353
CAM112A_map18	0002.CSV	3425.1	0.037623
CAM112A_map18	0002.CSV	3428.96	0.0380574
CAM112A_map18	0002.CSV	3432.82	0.0383477
CAM112A_map18	0002.CSV	3436.67	0.0380018
CAM112A_map18	0002.CSV	3440.53	0.0372393
CAM112A_map18	0002.CSV	3444.39	0.0369124
CAM112A_map18	0002.CSV	3448.24	0.0370598
CAM112A_map18	0002.CSV	3452.1	0.0368347
CAM112A_map18	0002.CSV	3455.96	0.0367924
CAM112A_map18	0002.CSV	3459.82	0.0371492
CAM112A_map18	0002.CSV	3463.67	0.0376216
CAM112A_map18	0002.CSV	3467.53	0.0378881
CAM112A_map18	0002.CSV	3471.39	0.0374117
CAM112A_map18	0002.CSV	3475.24	0.0369774
CAM112A_map18	0002.CSV	3479.1	0.0369392
CAM112A_map18	0002.CSV	3482.96	0.0368537
CAM112A_map18	0002.CSV	3486.82	0.0369458
CAM112A_map18	0002.CSV	3490.67	0.0369442
CAM112A_map18	0002.CSV	3494.53	0.0369557
CAM112A_map18	0002.CSV	3498.39	0.0368966
CAM112A_map18	0002.CSV	3502.24	0.036824
CAM112A_map18	0002.CSV	3506.1	0.0363784
CAM112A_map18	0002.CSV	3509.96	0.0361107
CAM112A_map18	0002.CSV	3513.81	0.0362483
CAM112A_map18	0002.CSV	3517.67	0.0358628
CAM112A_map18	0002.CSV	3521.53	0.0358502
CAM112A_map18	0002.CSV	3525.39	0.0360472
CAM112A_map18	0002.CSV	3529.24	0.0358634
CAM112A_map18	0002.CSV	3533.1	0.0358161
CAM112A_map18	0002.CSV	3536.96	0.036048
CAM112A_map18	0002.CSV	3540.81	0.0361658
CAM112A_map18	0002.CSV	3544.67	0.0364352
CAM112A_map18	0002.CSV	3548.53	0.0363492
CAM112A_map18	0002.CSV	3552.39	0.0358307
CAM112A_map18	0002.CSV	3556.24	0.035518
CAM112A_map18	0002.CSV	3560.1	0.0351116
CAM112A_map18	0002.CSV	3563.96	0.0345298
CAM112A_map18	0002.CSV	3567.81	0.0350729
CAM112A_map18	0002.CSV	3571.67	0.0352847
CAM112A_map18	0002.CSV	3575.53	0.0348458
CAM112A_map18	0002.CSV	3579.39	0.0349819
CAM112A_map18	0002.CSV	3583.24	0.0350943
CAM112A_map18	0002.CSV	3587.1	0.0352547
CAM112A_map18	0002.CSV	3590.96	0.0349737
CAM112A_map18	0002.CSV	3594.81	0.0345251
CAM112A_map18	0002.CSV	3598.67	0.0349138
CAM112A_map18	0002.CSV	3602.53	0.0349167
CAM112A_map18	0002.CSV	3606.39	0.0341762
CAM112A_map18	0002.CSV	3610.24	0.0339213
CAM112A_map18	0002.CSV	3614.1	0.033855
CAM112A_map18	0002.CSV	3617.96	0.0341135
CAM112A_map18	0002.CSV	3621.81	0.0345114
CAM112A_map18	0002.CSV	3625.67	0.0338503
CAM112A_map18	0002.CSV	3629.53	0.0340905
CAM112A_map18	0002.CSV	3633.39	0.0346783
CAM112A_map18	0002.CSV	3637.24	0.0342437
CAM112A_map18	0002.CSV	3641.1	0.0337332
CAM112A_map18	0002.CSV	3644.96	0.0329753
CAM112A_map18	0002.CSV	3648.81	0.0338044
CAM112A_map18	0002.CSV	3652.67	0.0347314
CAM112A_map18	0002.CSV	3656.53	0.0346686
CAM112A_map18	0002.CSV	3660.38	0.0345954
CAM112A_map18	0002.CSV	3664.24	0.0336089
CAM112A_map18	0002.CSV	3668.1	0.0326361
CAM112A_map18	0002.CSV	3671.96	0.032521
CAM112A_map18	0002.CSV	3675.81	0.0333073
CAM112A_map18	0002.CSV	3679.67	0.0339464
CAM112A_map18	0002.CSV	3683.53	0.033479
CAM112A_map18	0002.CSV	3687.38	0.0333912
CAM112A_map18	0002.CSV	3691.24	0.0345756
CAM112A_map18	0002.CSV	3695.1	0.0343131
CAM112A_map18	0002.CSV	3698.95	0.0335159
CAM112A_map18	0002.CSV	3702.81	0.0332484
CAM112A_map18	0002.CSV	3706.67	0.0328457
CAM112A_map18	0002.CSV	3710.53	0.0329141
CAM112A_map18	0002.CSV	3714.38	0.0336149
CAM112A_map18	0002.CSV	3718.24	0.0330487
CAM112A_map18	0002.CSV	3722.1	0.0328134
CAM112A_map18	0002.CSV	3725.95	0.0330126
CAM112A_map18	0002.CSV	3729.81	0.0325772
CAM112A_map18	0002.CSV	3733.67	0.0329082
CAM112A_map18	0002.CSV	3737.53	0.0343745
CAM112A_map18	0002.CSV	3741.38	0.0332545
CAM112A_map18	0002.CSV	3745.24	0.0321584
CAM112A_map18	0002.CSV	3749.1	0.0322862
CAM112A_map18	0002.CSV	3752.95	0.0332707
CAM112A_map18	0002.CSV	3756.81	0.0332983
CAM112A_map18	0002.CSV	3760.67	0.0332628
CAM112A_map18	0002.CSV	3764.53	0.0329452
CAM112A_map18	0002.CSV	3768.38	0.033151
CAM112A_map18	0002.CSV	3772.24	0.0334161
CAM112A_map18	0002.CSV	3776.1	0.0331295
CAM112A_map18	0002.CSV	3779.95	0.0332734
CAM112A_map18	0002.CSV	3783.81	0.0333678
CAM112A_map18	0002.CSV	3787.67	0.0334527
CAM112A_map18	0002.CSV	3791.53	0.0331631
CAM112A_map18	0002.CSV	3795.38	0.0325108
CAM112A_map18	0002.CSV	3799.24	0.0325777
CAM112A_map18	0002.CSV	3803.1	0.0334084
CAM112A_map18	0002.CSV	3806.95	0.0338386
CAM112A_map18	0002.CSV	3810.81	0.0333123
CAM112A_map18	0002.CSV	3814.67	0.0325314
CAM112A_map18	0002.CSV	3818.53	0.0329084
CAM112A_map18	0002.CSV	3822.38	0.0337582
CAM112A_map18	0002.CSV	3826.24	0.033563
CAM112A_map18	0002.CSV	3830.1	0.033123
CAM112A_map18	0002.CSV	3833.95	0.0329135
CAM112A_map18	0002.CSV	3837.81	0.0333778
CAM112A_map18	0002.CSV	3841.67	0.0343401
CAM112A_map18	0002.CSV	3845.53	0.0339322
CAM112A_map18	0002.CSV	3849.38	0.0325937
CAM112A_map18	0002.CSV	3853.24	0.0328972
CAM112A_map18	0002.CSV	3857.1	0.0340785
CAM112A_map18	0002.CSV	3860.95	0.0333236
CAM112A_map18	0002.CSV	3864.81	0.0333047
CAM112A_map18	0002.CSV	3868.67	0.0335883
CAM112A_map18	0002.CSV	3872.52	0.0340596
CAM112A_map18	0002.CSV	3876.38	0.0337191
CAM112A_map18	0002.CSV	3880.24	0.0333828
CAM112A_map18	0002.CSV	3884.1	0.0339177
CAM112A_map18	0002.CSV	3887.95	0.0338277
CAM112A_map18	0002.CSV	3891.81	0.0337997
CAM112A_map18	0002.CSV	3895.67	0.0335054
CAM112A_map18	0002.CSV	3899.52	0.0331052
CAM112A_map18	0002.CSV	3903.38	0.0343369
CAM112A_map18	0002.CSV	3907.24	0.034652
CAM112A_map18	0002.CSV	3911.1	0.033854
CAM112A_map18	0002.CSV	3914.95	0.0333562
CAM112A_map18	0002.CSV	3918.81	0.0336129
CAM112A_map18	0002.CSV	3922.67	0.0337424
CAM112A_map18	0002.CSV	3926.52	0.0336461
CAM112A_map18	0002.CSV	3930.38	0.0338123
CAM112A_map18	0002.CSV	3934.24	0.0343031
CAM112A_map18	0002.CSV	3938.09	0.033839
CAM112A_map18	0002.CSV	3941.95	0.0335408
CAM112A_map18	0002.CSV	3945.81	0.0336977
CAM112A_map18	0002.CSV	3949.67	0.0338621
CAM112A_map18	0002.CSV	3953.52	0.0337889
CAM112A_map18	0002.CSV	3957.38	0.0335668
CAM112A_map18	0002.CSV	3961.24	0.0335003
CAM112A_map18	0002.CSV	3965.09	0.0334776
CAM112A_map18	0002.CSV	3968.95	0.0334577
CAM112A_map18	0002.CSV	3972.81	0.033534
CAM112A_map18	0002.CSV	3976.67	0.0335152
CAM112A_map18	0002.CSV	3980.52	0.0334676
CAM112A_map18	0002.CSV	3984.38	0.0335369
CAM112A_map18	0002.CSV	3988.24	0.0333886
CAM112A_map18	0002.CSV	3992.09	0.0331989
CAM112A_map18	0002.CSV	3995.95	0.0332848
CAM112A_map18	0002.CSV	3999.81	0.0333208
CAM112A_map18	0003.CSV	674.992	0.0495449
CAM112A_map18	0003.CSV	678.849	0.0511019
CAM112A_map18	0003.CSV	682.706	0.0523469
CAM112A_map18	0003.CSV	686.563	0.0549252
CAM112A_map18	0003.CSV	690.42	0.0584589
CAM112A_map18	0003.CSV	694.277	0.0663571
CAM112A_map18	0003.CSV	698.134	0.0748798
CAM112A_map18	0003.CSV	701.991	0.0844881
CAM112A_map18	0003.CSV	705.849	0.101698
CAM112A_map18	0003.CSV	709.706	0.127539
CAM112A_map18	0003.CSV	713.563	0.116735
CAM112A_map18	0003.CSV	717.42	0.0752227
CAM112A_map18	0003.CSV	721.277	0.0501085
CAM112A_map18	0003.CSV	725.134	0.0448006
CAM112A_map18	0003.CSV	728.991	0.0441456
CAM112A_map18	0003.CSV	732.848	0.0456197
CAM112A_map18	0003.CSV	736.705	0.0470808
CAM112A_map18	0003.CSV	740.562	0.0487697
CAM112A_map18	0003.CSV	744.42	0.0499224
CAM112A_map18	0003.CSV	748.277	0.051672
CAM112A_map18	0003.CSV	752.134	0.0530242
CAM112A_map18	0003.CSV	755.991	0.0544628
CAM112A_map18	0003.CSV	759.848	0.053955
CAM112A_map18	0003.CSV	763.705	0.0537264
CAM112A_map18	0003.CSV	767.562	0.0535348
CAM112A_map18	0003.CSV	771.419	0.0537971
CAM112A_map18	0003.CSV	775.276	0.0535948
CAM112A_map18	0003.CSV	779.133	0.0537748
CAM112A_map18	0003.CSV	782.99	0.0534911
CAM112A_map18	0003.CSV	786.848	0.0538847
CAM112A_map18	0003.CSV	790.705	0.0541208
CAM112A_map18	0003.CSV	794.562	0.0548527
CAM112A_map18	0003.CSV	798.419	0.0546535
CAM112A_map18	0003.CSV	802.276	0.0549031
CAM112A_map18	0003.CSV	806.133	0.0547227
CAM112A_map18	0003.CSV	809.99	0.0554222
CAM112A_map18	0003.CSV	813.847	0.0563922
CAM112A_map18	0003.CSV	817.704	0.0582896
CAM112A_map18	0003.CSV	821.562	0.059819
CAM112A_map18	0003.CSV	825.419	0.0619513
CAM112A_map18	0003.CSV	829.276	0.0640898
CAM112A_map18	0003.CSV	833.133	0.0672652
CAM112A_map18	0003.CSV	836.99	0.0702276
CAM112A_map18	0003.CSV	840.847	0.0739456
CAM112A_map18	0003.CSV	844.704	0.0800496
CAM112A_map18	0003.CSV	848.561	0.0846
CAM112A_map18	0003.CSV	852.418	0.0865921
CAM112A_map18	0003.CSV	856.275	0.0979763
CAM112A_map18	0003.CSV	860.132	0.124133
CAM112A_map18	0003.CSV	863.99	0.173286
CAM112A_map18	0003.CSV	867.847	0.231109
CAM112A_map18	0003.CSV	871.704	0.24602
CAM112A_map18	0003.CSV	875.561	0.208689
CAM112A_map18	0003.CSV	879.418	0.162169
CAM112A_map18	0003.CSV	883.275	0.11349
CAM112A_map18	0003.CSV	887.132	0.070049
CAM112A_map18	0003.CSV	890.989	0.0505867
CAM112A_map18	0003.CSV	894.846	0.0486922
CAM112A_map18	0003.CSV	898.703	0.0494009
CAM112A_map18	0003.CSV	902.561	0.0506491
CAM112A_map18	0003.CSV	906.418	0.0515237
CAM112A_map18	0003.CSV	910.275	0.052631
CAM112A_map18	0003.CSV	914.132	0.0533958
CAM112A_map18	0003.CSV	917.989	0.0544718
CAM112A_map18	0003.CSV	921.846	0.0551471
CAM112A_map18	0003.CSV	925.703	0.0561205
CAM112A_map18	0003.CSV	929.56	0.0568813
CAM112A_map18	0003.CSV	933.417	0.0578922
CAM112A_map18	0003.CSV	937.274	0.0583419
CAM112A_map18	0003.CSV	941.131	0.0590846
CAM112A_map18	0003.CSV	944.989	0.0595066
CAM112A_map18	0003.CSV	948.846	0.0603018
CAM112A_map18	0003.CSV	952.703	0.0609855
CAM112A_map18	0003.CSV	956.56	0.0618032
CAM112A_map18	0003.CSV	960.417	0.0619537
CAM112A_map18	0003.CSV	964.274	0.0624596
CAM112A_map18	0003.CSV	968.131	0.0629944
CAM112A_map18	0003.CSV	971.988	0.0641073
CAM112A_map18	0003.CSV	975.845	0.0649765
CAM112A_map18	0003.CSV	979.702	0.0660191
CAM112A_map18	0003.CSV	983.559	0.0668608
CAM112A_map18	0003.CSV	987.417	0.0680433
CAM112A_map18	0003.CSV	991.274	0.0689272
CAM112A_map18	0003.CSV	995.131	0.07003
CAM112A_map18	0003.CSV	998.988	0.0707441
CAM112A_map18	0003.CSV	1002.85	0.0717889
CAM112A_map18	0003.CSV	1006.7	0.0726474
CAM112A_map18	0003.CSV	1010.56	0.0736971
CAM112A_map18	0003.CSV	1014.42	0.0744248
CAM112A_map18	0003.CSV	1018.27	0.0755563
CAM112A_map18	0003.CSV	1022.13	0.0764516
CAM112A_map18	0003.CSV	1025.99	0.0775988
CAM112A_map18	0003.CSV	1029.85	0.0783929
CAM112A_map18	0003.CSV	1033.7	0.0796584
CAM112A_map18	0003.CSV	1037.56	0.0806518
CAM112A_map18	0003.CSV	1041.42	0.0815701
CAM112A_map18	0003.CSV	1045.27	0.0821472
CAM112A_map18	0003.CSV	1049.13	0.0834088
CAM112A_map18	0003.CSV	1052.99	0.0846392
CAM112A_map18	0003.CSV	1056.84	0.0864271
CAM112A_map18	0003.CSV	1060.7	0.0879346
CAM112A_map18	0003.CSV	1064.56	0.0895217
CAM112A_map18	0003.CSV	1068.42	0.0902073
CAM112A_map18	0003.CSV	1072.27	0.0906834
CAM112A_map18	0003.CSV	1076.13	0.0908029
CAM112A_map18	0003.CSV	1079.99	0.0915217
CAM112A_map18	0003.CSV	1083.84	0.0923261
CAM112A_map18	0003.CSV	1087.7	0.093274
CAM112A_map18	0003.CSV	1091.56	0.0928249
CAM112A_map18	0003.CSV	1095.41	0.0918371
CAM112A_map18	0003.CSV	1099.27	0.0909428
CAM112A_map18	0003.CSV	1103.13	0.0913037
CAM112A_map18	0003.CSV	1106.99	0.0919958
CAM112A_map18	0003.CSV	1110.84	0.0932345
CAM112A_map18	0003.CSV	1114.7	0.094082
CAM112A_map18	0003.CSV	1118.56	0.0950166
CAM112A_map18	0003.CSV	1122.41	0.0954495
CAM112A_map18	0003.CSV	1126.27	0.0959327
CAM112A_map18	0003.CSV	1130.13	0.0960505
CAM112A_map18	0003.CSV	1133.99	0.0966234
CAM112A_map18	0003.CSV	1137.84	0.097098
CAM112A_map18	0003.CSV	1141.7	0.0979313
CAM112A_map18	0003.CSV	1145.56	0.0985603
CAM112A_map18	0003.CSV	1149.41	0.0995277
CAM112A_map18	0003.CSV	1153.27	0.100393
CAM112A_map18	0003.CSV	1157.13	0.101571
CAM112A_map18	0003.CSV	1160.99	0.102115
CAM112A_map18	0003.CSV	1164.84	0.102552
CAM112A_map18	0003.CSV	1168.7	0.102386
CAM112A_map18	0003.CSV	1172.56	0.102415
CAM112A_map18	0003.CSV	1176.41	0.102168
CAM112A_map18	0003.CSV	1180.27	0.102218
CAM112A_map18	0003.CSV	1184.13	0.101956
CAM112A_map18	0003.CSV	1187.99	0.10199
CAM112A_map18	0003.CSV	1191.84	0.10187
CAM112A_map18	0003.CSV	1195.7	0.102208
CAM112A_map18	0003.CSV	1199.56	0.102485
CAM112A_map18	0003.CSV	1203.41	0.1032
CAM112A_map18	0003.CSV	1207.27	0.103836
CAM112A_map18	0003.CSV	1211.13	0.104979
CAM112A_map18	0003.CSV	1214.98	0.106012
CAM112A_map18	0003.CSV	1218.84	0.107489
CAM112A_map18	0003.CSV	1222.7	0.108877
CAM112A_map18	0003.CSV	1226.56	0.110771
CAM112A_map18	0003.CSV	1230.41	0.112532
CAM112A_map18	0003.CSV	1234.27	0.11478
CAM112A_map18	0003.CSV	1238.13	0.116951
CAM112A_map18	0003.CSV	1241.98	0.119526
CAM112A_map18	0003.CSV	1245.84	0.121836
CAM112A_map18	0003.CSV	1249.7	0.124495
CAM112A_map18	0003.CSV	1253.56	0.126833
CAM112A_map18	0003.CSV	1257.41	0.129351
CAM112A_map18	0003.CSV	1261.27	0.131502
CAM112A_map18	0003.CSV	1265.13	0.133951
CAM112A_map18	0003.CSV	1268.98	0.136063
CAM112A_map18	0003.CSV	1272.84	0.138723
CAM112A_map18	0003.CSV	1276.7	0.141184
CAM112A_map18	0003.CSV	1280.56	0.144047
CAM112A_map18	0003.CSV	1284.41	0.146617
CAM112A_map18	0003.CSV	1288.27	0.149568
CAM112A_map18	0003.CSV	1292.13	0.152097
CAM112A_map18	0003.CSV	1295.98	0.154965
CAM112A_map18	0003.CSV	1299.84	0.157784
CAM112A_map18	0003.CSV	1303.7	0.16142
CAM112A_map18	0003.CSV	1307.56	0.165201
CAM112A_map18	0003.CSV	1311.41	0.169913
CAM112A_map18	0003.CSV	1315.27	0.174657
CAM112A_map18	0003.CSV	1319.13	0.179994
CAM112A_map18	0003.CSV	1322.98	0.184645
CAM112A_map18	0003.CSV	1326.84	0.189715
CAM112A_map18	0003.CSV	1330.7	0.194936
CAM112A_map18	0003.CSV	1334.56	0.200826
CAM112A_map18	0003.CSV	1338.41	0.207921
CAM112A_map18	0003.CSV	1342.27	0.216614
CAM112A_map18	0003.CSV	1346.13	0.223571
CAM112A_map18	0003.CSV	1349.98	0.231874
CAM112A_map18	0003.CSV	1353.84	0.240464
CAM112A_map18	0003.CSV	1357.7	0.249495
CAM112A_map18	0003.CSV	1361.56	0.259465
CAM112A_map18	0003.CSV	1365.41	0.271628
CAM112A_map18	0003.CSV	1369.27	0.280781
CAM112A_map18	0003.CSV	1373.13	0.292359
CAM112A_map18	0003.CSV	1376.98	0.305447
CAM112A_map18	0003.CSV	1380.84	0.317146
CAM112A_map18	0003.CSV	1384.7	0.327938
CAM112A_map18	0003.CSV	1388.56	0.341812
CAM112A_map18	0003.CSV	1392.41	0.350794
CAM112A_map18	0003.CSV	1396.27	0.356007
CAM112A_map18	0003.CSV	1400.13	0.35419
CAM112A_map18	0003.CSV	1403.98	0.348907
CAM112A_map18	0003.CSV	1407.84	0.337246
CAM112A_map18	0003.CSV	1411.7	0.322389
CAM112A_map18	0003.CSV	1415.55	0.306755
CAM112A_map18	0003.CSV	1419.41	0.290649
CAM112A_map18	0003.CSV	1423.27	0.277547
CAM112A_map18	0003.CSV	1427.12	0.269526
CAM112A_map18	0003.CSV	1430.98	0.260712
CAM112A_map18	0003.CSV	1434.84	0.251703
CAM112A_map18	0003.CSV	1438.7	0.240474
CAM112A_map18	0003.CSV	1442.55	0.232462
CAM112A_map18	0003.CSV	1446.41	0.223485
CAM112A_map18	0003.CSV	1450.27	0.213826
CAM112A_map18	0003.CSV	1454.12	0.20519
CAM112A_map18	0003.CSV	1457.98	0.193083
CAM112A_map18	0003.CSV	1461.84	0.18331
CAM112A_map18	0003.CSV	1465.7	0.176128
CAM112A_map18	0003.CSV	1469.55	0.168766
CAM112A_map18	0003.CSV	1473.41	0.160454
CAM112A_map18	0003.CSV	1477.27	0.151465
CAM112A_map18	0003.CSV	1481.12	0.145835
CAM112A_map18	0003.CSV	1484.98	0.140441
CAM112A_map18	0003.CSV	1488.84	0.13404
CAM112A_map18	0003.CSV	1492.7	0.126723
CAM112A_map18	0003.CSV	1496.55	0.120508
CAM112A_map18	0003.CSV	1500.41	0.113433
CAM112A_map18	0003.CSV	1504.27	0.109067
CAM112A_map18	0003.CSV	1508.12	0.102274
CAM112A_map18	0003.CSV	1511.98	0.0976312
CAM112A_map18	0003.CSV	1515.84	0.0944502
CAM112A_map18	0003.CSV	1519.7	0.091248
CAM112A_map18	0003.CSV	1523.55	0.0882336
CAM112A_map18	0003.CSV	1527.41	0.0862915
CAM112A_map18	0003.CSV	1531.27	0.0842034
CAM112A_map18	0003.CSV	1535.12	0.0823785
CAM112A_map18	0003.CSV	1538.98	0.0797466
CAM112A_map18	0003.CSV	1542.84	0.0744497
CAM112A_map18	0003.CSV	1546.7	0.0696093
CAM112A_map18	0003.CSV	1550.55	0.0656987
CAM112A_map18	0003.CSV	1554.41	0.0620988
CAM112A_map18	0003.CSV	1558.27	0.0587662
CAM112A_map18	0003.CSV	1562.12	0.0558468
CAM112A_map18	0003.CSV	1565.98	0.0542248
CAM112A_map18	0003.CSV	1569.84	0.0527257
CAM112A_map18	0003.CSV	1573.69	0.0515835
CAM112A_map18	0003.CSV	1577.55	0.050526
CAM112A_map18	0003.CSV	1581.41	0.0491277
CAM112A_map18	0003.CSV	1585.27	0.0475944
CAM112A_map18	0003.CSV	1589.12	0.0462789
CAM112A_map18	0003.CSV	1592.98	0.045086
CAM112A_map18	0003.CSV	1596.84	0.0440222
CAM112A_map18	0003.CSV	1600.69	0.0428961
CAM112A_map18	0003.CSV	1604.55	0.0418079
CAM112A_map18	0003.CSV	1608.41	0.0408813
CAM112A_map18	0003.CSV	1612.27	0.0402917
CAM112A_map18	0003.CSV	1616.12	0.040079
CAM112A_map18	0003.CSV	1619.98	0.0402279
CAM112A_map18	0003.CSV	1623.84	0.0399876
CAM112A_map18	0003.CSV	1627.69	0.0394627
CAM112A_map18	0003.CSV	1631.55	0.0384094
CAM112A_map18	0003.CSV	1635.41	0.0379752
CAM112A_map18	0003.CSV	1639.27	0.0377356
CAM112A_map18	0003.CSV	1643.12	0.0370877
CAM112A_map18	0003.CSV	1646.98	0.0368371
CAM112A_map18	0003.CSV	1650.84	0.0369236
CAM112A_map18	0003.CSV	1654.69	0.0369155
CAM112A_map18	0003.CSV	1658.55	0.0362379
CAM112A_map18	0003.CSV	1662.41	0.0355123
CAM112A_map18	0003.CSV	1666.27	0.0351199
CAM112A_map18	0003.CSV	1670.12	0.0350443
CAM112A_map18	0003.CSV	1673.98	0.0351875
CAM112A_map18	0003.CSV	1677.84	0.0346133
CAM112A_map18	0003.CSV	1681.69	0.0344264
CAM112A_map18	0003.CSV	1685.55	0.0348624
CAM112A_map18	0003.CSV	1689.41	0.0346895
CAM112A_map18	0003.CSV	1693.27	0.0340986
CAM112A_map18	0003.CSV	1697.12	0.0344583
CAM112A_map18	0003.CSV	1700.98	0.0353257
CAM112A_map18	0003.CSV	1704.84	0.0357539
CAM112A_map18	0003.CSV	1708.69	0.0359906
CAM112A_map18	0003.CSV	1712.55	0.0361979
CAM112A_map18	0003.CSV	1716.41	0.0377362
CAM112A_map18	0003.CSV	1720.27	0.0394481
CAM112A_map18	0003.CSV	1724.12	0.0395638
[truncated: 85,164 more rows]

## Sheet: CAM112_map19
Map	Select spectrum number	Wavenumbers	Absorbance
CAM112A_map19	0001.CSV	674.992	0.0405312
CAM112A_map19	0001.CSV	678.849	0.0437047
CAM112A_map19	0001.CSV	682.706	0.0451273
CAM112A_map19	0001.CSV	686.563	0.0473241
CAM112A_map19	0001.CSV	690.42	0.0495053
CAM112A_map19	0001.CSV	694.277	0.0558417
CAM112A_map19	0001.CSV	698.134	0.062508
CAM112A_map19	0001.CSV	701.991	0.0723214
CAM112A_map19	0001.CSV	705.849	0.0927248
CAM112A_map19	0001.CSV	709.706	0.123415
CAM112A_map19	0001.CSV	713.563	0.113616
CAM112A_map19	0001.CSV	717.42	0.068933
CAM112A_map19	0001.CSV	721.277	0.0417135
CAM112A_map19	0001.CSV	725.134	0.0362664
CAM112A_map19	0001.CSV	728.991	0.0358926
CAM112A_map19	0001.CSV	732.848	0.037101
CAM112A_map19	0001.CSV	736.705	0.0380563
CAM112A_map19	0001.CSV	740.562	0.0395597
CAM112A_map19	0001.CSV	744.42	0.0401543
CAM112A_map19	0001.CSV	748.277	0.0412036
CAM112A_map19	0001.CSV	752.134	0.0415041
CAM112A_map19	0001.CSV	755.991	0.0423955
CAM112A_map19	0001.CSV	759.848	0.0427051
CAM112A_map19	0001.CSV	763.705	0.0436771
CAM112A_map19	0001.CSV	767.562	0.0441296
CAM112A_map19	0001.CSV	771.419	0.044984
CAM112A_map19	0001.CSV	775.276	0.0451119
CAM112A_map19	0001.CSV	779.133	0.0456062
CAM112A_map19	0001.CSV	782.99	0.0454627
CAM112A_map19	0001.CSV	786.848	0.0460152
CAM112A_map19	0001.CSV	790.705	0.0459329
CAM112A_map19	0001.CSV	794.562	0.0465123
CAM112A_map19	0001.CSV	798.419	0.0469246
CAM112A_map19	0001.CSV	802.276	0.0477839
CAM112A_map19	0001.CSV	806.133	0.047747
CAM112A_map19	0001.CSV	809.99	0.0484379
CAM112A_map19	0001.CSV	813.847	0.0492647
CAM112A_map19	0001.CSV	817.704	0.0509097
CAM112A_map19	0001.CSV	821.562	0.0522973
CAM112A_map19	0001.CSV	825.419	0.0545478
CAM112A_map19	0001.CSV	829.276	0.0566788
CAM112A_map19	0001.CSV	833.133	0.0593388
CAM112A_map19	0001.CSV	836.99	0.0621098
CAM112A_map19	0001.CSV	840.847	0.0672064
CAM112A_map19	0001.CSV	844.704	0.0752315
CAM112A_map19	0001.CSV	848.561	0.081005
CAM112A_map19	0001.CSV	852.418	0.0833382
CAM112A_map19	0001.CSV	856.275	0.0954224
CAM112A_map19	0001.CSV	860.132	0.123351
CAM112A_map19	0001.CSV	863.99	0.179994
CAM112A_map19	0001.CSV	867.847	0.256099
CAM112A_map19	0001.CSV	871.704	0.282275
CAM112A_map19	0001.CSV	875.561	0.233062
CAM112A_map19	0001.CSV	879.418	0.171139
CAM112A_map19	0001.CSV	883.275	0.112541
CAM112A_map19	0001.CSV	887.132	0.0625795
CAM112A_map19	0001.CSV	890.989	0.0398584
CAM112A_map19	0001.CSV	894.846	0.037775
CAM112A_map19	0001.CSV	898.703	0.0389079
CAM112A_map19	0001.CSV	902.561	0.0404664
CAM112A_map19	0001.CSV	906.418	0.0414351
CAM112A_map19	0001.CSV	910.275	0.0426304
CAM112A_map19	0001.CSV	914.132	0.0433003
CAM112A_map19	0001.CSV	917.989	0.044401
CAM112A_map19	0001.CSV	921.846	0.0451585
CAM112A_map19	0001.CSV	925.703	0.0462342
CAM112A_map19	0001.CSV	929.56	0.0468229
CAM112A_map19	0001.CSV	933.417	0.0477822
CAM112A_map19	0001.CSV	937.274	0.0481939
CAM112A_map19	0001.CSV	941.131	0.0488119
CAM112A_map19	0001.CSV	944.989	0.0491003
CAM112A_map19	0001.CSV	948.846	0.0498053
CAM112A_map19	0001.CSV	952.703	0.0501886
CAM112A_map19	0001.CSV	956.56	0.050887
CAM112A_map19	0001.CSV	960.417	0.051169
CAM112A_map19	0001.CSV	964.274	0.0518472
CAM112A_map19	0001.CSV	968.131	0.0524182
CAM112A_map19	0001.CSV	971.988	0.0535234
CAM112A_map19	0001.CSV	975.845	0.0542886
CAM112A_map19	0001.CSV	979.702	0.0553888
CAM112A_map19	0001.CSV	983.559	0.0561353
CAM112A_map19	0001.CSV	987.417	0.0571048
CAM112A_map19	0001.CSV	991.274	0.0577941
CAM112A_map19	0001.CSV	995.131	0.0588376
CAM112A_map19	0001.CSV	998.988	0.0594997
CAM112A_map19	0001.CSV	1002.85	0.0605316
CAM112A_map19	0001.CSV	1006.7	0.0613253
CAM112A_map19	0001.CSV	1010.56	0.0623601
CAM112A_map19	0001.CSV	1014.42	0.0629853
CAM112A_map19	0001.CSV	1018.27	0.0639695
CAM112A_map19	0001.CSV	1022.13	0.0646248
CAM112A_map19	0001.CSV	1025.99	0.0655787
CAM112A_map19	0001.CSV	1029.85	0.0660533
CAM112A_map19	0001.CSV	1033.7	0.066863
CAM112A_map19	0001.CSV	1037.56	0.0674826
CAM112A_map19	0001.CSV	1041.42	0.0684025
CAM112A_map19	0001.CSV	1045.27	0.0687844
CAM112A_map19	0001.CSV	1049.13	0.0696522
CAM112A_map19	0001.CSV	1052.99	0.0704505
CAM112A_map19	0001.CSV	1056.84	0.0719434
CAM112A_map19	0001.CSV	1060.7	0.073403
CAM112A_map19	0001.CSV	1064.56	0.0752122
CAM112A_map19	0001.CSV	1068.42	0.0761787
CAM112A_map19	0001.CSV	1072.27	0.077031
CAM112A_map19	0001.CSV	1076.13	0.0774434
CAM112A_map19	0001.CSV	1079.99	0.0782874
CAM112A_map19	0001.CSV	1083.84	0.0789193
CAM112A_map19	0001.CSV	1087.7	0.0796075
CAM112A_map19	0001.CSV	1091.56	0.0791532
CAM112A_map19	0001.CSV	1095.41	0.0785883
CAM112A_map19	0001.CSV	1099.27	0.0780969
CAM112A_map19	0001.CSV	1103.13	0.0786618
CAM112A_map19	0001.CSV	1106.99	0.0791792
CAM112A_map19	0001.CSV	1110.84	0.0802105
CAM112A_map19	0001.CSV	1114.7	0.080823
CAM112A_map19	0001.CSV	1118.56	0.0815554
CAM112A_map19	0001.CSV	1122.41	0.0817234
CAM112A_map19	0001.CSV	1126.27	0.08214
CAM112A_map19	0001.CSV	1130.13	0.0822155
CAM112A_map19	0001.CSV	1133.99	0.0826605
CAM112A_map19	0001.CSV	1137.84	0.0829492
CAM112A_map19	0001.CSV	1141.7	0.0835936
CAM112A_map19	0001.CSV	1145.56	0.0840125
CAM112A_map19	0001.CSV	1149.41	0.0850272
CAM112A_map19	0001.CSV	1153.27	0.085863
CAM112A_map19	0001.CSV	1157.13	0.0870785
CAM112A_map19	0001.CSV	1160.99	0.0878816
CAM112A_map19	0001.CSV	1164.84	0.0885877
CAM112A_map19	0001.CSV	1168.7	0.0886592
CAM112A_map19	0001.CSV	1172.56	0.0889911
CAM112A_map19	0001.CSV	1176.41	0.0890497
CAM112A_map19	0001.CSV	1180.27	0.0893841
CAM112A_map19	0001.CSV	1184.13	0.0892413
CAM112A_map19	0001.CSV	1187.99	0.0893341
CAM112A_map19	0001.CSV	1191.84	0.0891779
CAM112A_map19	0001.CSV	1195.7	0.0895062
CAM112A_map19	0001.CSV	1199.56	0.0897742
CAM112A_map19	0001.CSV	1203.41	0.0905443
CAM112A_map19	0001.CSV	1207.27	0.091103
CAM112A_map19	0001.CSV	1211.13	0.0921478
CAM112A_map19	0001.CSV	1214.98	0.0930027
CAM112A_map19	0001.CSV	1218.84	0.0943195
CAM112A_map19	0001.CSV	1222.7	0.0955625
CAM112A_map19	0001.CSV	1226.56	0.0973859
CAM112A_map19	0001.CSV	1230.41	0.0990099
CAM112A_map19	0001.CSV	1234.27	0.101036
CAM112A_map19	0001.CSV	1238.13	0.102843
CAM112A_map19	0001.CSV	1241.98	0.105102
CAM112A_map19	0001.CSV	1245.84	0.107107
CAM112A_map19	0001.CSV	1249.7	0.109476
CAM112A_map19	0001.CSV	1253.56	0.111482
CAM112A_map19	0001.CSV	1257.41	0.113675
CAM112A_map19	0001.CSV	1261.27	0.115406
CAM112A_map19	0001.CSV	1265.13	0.117461
CAM112A_map19	0001.CSV	1268.98	0.119332
CAM112A_map19	0001.CSV	1272.84	0.121875
CAM112A_map19	0001.CSV	1276.7	0.124182
CAM112A_map19	0001.CSV	1280.56	0.126859
CAM112A_map19	0001.CSV	1284.41	0.1291
CAM112A_map19	0001.CSV	1288.27	0.131759
CAM112A_map19	0001.CSV	1292.13	0.134047
CAM112A_map19	0001.CSV	1295.98	0.136762
CAM112A_map19	0001.CSV	1299.84	0.139377
CAM112A_map19	0001.CSV	1303.7	0.142775
CAM112A_map19	0001.CSV	1307.56	0.146354
CAM112A_map19	0001.CSV	1311.41	0.150865
CAM112A_map19	0001.CSV	1315.27	0.155238
CAM112A_map19	0001.CSV	1319.13	0.160281
CAM112A_map19	0001.CSV	1322.98	0.164694
CAM112A_map19	0001.CSV	1326.84	0.169733
CAM112A_map19	0001.CSV	1330.7	0.175086
CAM112A_map19	0001.CSV	1334.56	0.181254
CAM112A_map19	0001.CSV	1338.41	0.188663
CAM112A_map19	0001.CSV	1342.27	0.198112
CAM112A_map19	0001.CSV	1346.13	0.20594
CAM112A_map19	0001.CSV	1349.98	0.215406
CAM112A_map19	0001.CSV	1353.84	0.225509
CAM112A_map19	0001.CSV	1357.7	0.236716
CAM112A_map19	0001.CSV	1361.56	0.249755
CAM112A_map19	0001.CSV	1365.41	0.266488
CAM112A_map19	0001.CSV	1369.27	0.280969
CAM112A_map19	0001.CSV	1373.13	0.299349
CAM112A_map19	0001.CSV	1376.98	0.320227
CAM112A_map19	0001.CSV	1380.84	0.33961
CAM112A_map19	0001.CSV	1384.7	0.358316
CAM112A_map19	0001.CSV	1388.56	0.381636
CAM112A_map19	0001.CSV	1392.41	0.397281
CAM112A_map19	0001.CSV	1396.27	0.407017
CAM112A_map19	0001.CSV	1400.13	0.406832
CAM112A_map19	0001.CSV	1403.98	0.401944
CAM112A_map19	0001.CSV	1407.84	0.388804
CAM112A_map19	0001.CSV	1411.7	0.371904
CAM112A_map19	0001.CSV	1415.55	0.353575
CAM112A_map19	0001.CSV	1419.41	0.333464
CAM112A_map19	0001.CSV	1423.27	0.316271
CAM112A_map19	0001.CSV	1427.12	0.305719
CAM112A_map19	0001.CSV	1430.98	0.294462
CAM112A_map19	0001.CSV	1434.84	0.283771
CAM112A_map19	0001.CSV	1438.7	0.270602
CAM112A_map19	0001.CSV	1442.55	0.261016
CAM112A_map19	0001.CSV	1446.41	0.250031
CAM112A_map19	0001.CSV	1450.27	0.238707
CAM112A_map19	0001.CSV	1454.12	0.229002
CAM112A_map19	0001.CSV	1457.98	0.214785
CAM112A_map19	0001.CSV	1461.84	0.20328
CAM112A_map19	0001.CSV	1465.7	0.194931
CAM112A_map19	0001.CSV	1469.55	0.186129
CAM112A_map19	0001.CSV	1473.41	0.175834
CAM112A_map19	0001.CSV	1477.27	0.164696
CAM112A_map19	0001.CSV	1481.12	0.157768
CAM112A_map19	0001.CSV	1484.98	0.150756
CAM112A_map19	0001.CSV	1488.84	0.14218
CAM112A_map19	0001.CSV	1492.7	0.13322
CAM112A_map19	0001.CSV	1496.55	0.126142
CAM112A_map19	0001.CSV	1500.41	0.117802
CAM112A_map19	0001.CSV	1504.27	0.11266
CAM112A_map19	0001.CSV	1508.12	0.103742
CAM112A_map19	0001.CSV	1511.98	0.0975584
CAM112A_map19	0001.CSV	1515.84	0.0932644
CAM112A_map19	0001.CSV	1519.7	0.0879644
CAM112A_map19	0001.CSV	1523.55	0.081828
CAM112A_map19	0001.CSV	1527.41	0.0775594
CAM112A_map19	0001.CSV	1531.27	0.0737249
CAM112A_map19	0001.CSV	1535.12	0.070565
CAM112A_map19	0001.CSV	1538.98	0.0672342
CAM112A_map19	0001.CSV	1542.84	0.0600724
CAM112A_map19	0001.CSV	1546.7	0.0545079
CAM112A_map19	0001.CSV	1550.55	0.0506159
CAM112A_map19	0001.CSV	1554.41	0.0470807
CAM112A_map19	0001.CSV	1558.27	0.0440735
CAM112A_map19	0001.CSV	1562.12	0.0417475
CAM112A_map19	0001.CSV	1565.98	0.0405612
CAM112A_map19	0001.CSV	1569.84	0.0397458
CAM112A_map19	0001.CSV	1573.69	0.0393718
CAM112A_map19	0001.CSV	1577.55	0.0388301
CAM112A_map19	0001.CSV	1581.41	0.0374156
CAM112A_map19	0001.CSV	1585.27	0.0355452
CAM112A_map19	0001.CSV	1589.12	0.0337755
CAM112A_map19	0001.CSV	1592.98	0.0322148
CAM112A_map19	0001.CSV	1596.84	0.0310605
CAM112A_map19	0001.CSV	1600.69	0.0301526
CAM112A_map19	0001.CSV	1604.55	0.0296128
CAM112A_map19	0001.CSV	1608.41	0.0292366
CAM112A_map19	0001.CSV	1612.27	0.0288766
CAM112A_map19	0001.CSV	1616.12	0.0285132
CAM112A_map19	0001.CSV	1619.98	0.0283798
CAM112A_map19	0001.CSV	1623.84	0.0281224
CAM112A_map19	0001.CSV	1627.69	0.0278384
CAM112A_map19	0001.CSV	1631.55	0.0271349
CAM112A_map19	0001.CSV	1635.41	0.0270864
CAM112A_map19	0001.CSV	1639.27	0.0271553
CAM112A_map19	0001.CSV	1643.12	0.026753
CAM112A_map19	0001.CSV	1646.98	0.0267391
CAM112A_map19	0001.CSV	1650.84	0.0270885
CAM112A_map19	0001.CSV	1654.69	0.0272018
CAM112A_map19	0001.CSV	1658.55	0.0266695
CAM112A_map19	0001.CSV	1662.41	0.0260563
CAM112A_map19	0001.CSV	1666.27	0.0256744
CAM112A_map19	0001.CSV	1670.12	0.0254462
CAM112A_map19	0001.CSV	1673.98	0.0254949
CAM112A_map19	0001.CSV	1677.84	0.0249569
CAM112A_map19	0001.CSV	1681.69	0.024673
CAM112A_map19	0001.CSV	1685.55	0.0247144
CAM112A_map19	0001.CSV	1689.41	0.0244041
CAM112A_map19	0001.CSV	1693.27	0.0237809
CAM112A_map19	0001.CSV	1697.12	0.0238272
CAM112A_map19	0001.CSV	1700.98	0.0242085
CAM112A_map19	0001.CSV	1704.84	0.0244347
CAM112A_map19	0001.CSV	1708.69	0.0245035
CAM112A_map19	0001.CSV	1712.55	0.0245987
CAM112A_map19	0001.CSV	1716.41	0.0257361
CAM112A_map19	0001.CSV	1720.27	0.027207
CAM112A_map19	0001.CSV	1724.12	0.0272547
CAM112A_map19	0001.CSV	1727.98	0.0273016
CAM112A_map19	0001.CSV	1731.84	0.0275742
CAM112A_map19	0001.CSV	1735.69	0.0279344
CAM112A_map19	0001.CSV	1739.55	0.0271441
CAM112A_map19	0001.CSV	1743.41	0.0258933
CAM112A_map19	0001.CSV	1747.27	0.0246367
CAM112A_map19	0001.CSV	1751.12	0.0235073
CAM112A_map19	0001.CSV	1754.98	0.0223466
CAM112A_map19	0001.CSV	1758.84	0.0216959
CAM112A_map19	0001.CSV	1762.69	0.0213657
CAM112A_map19	0001.CSV	1766.55	0.0210145
CAM112A_map19	0001.CSV	1770.41	0.0210409
CAM112A_map19	0001.CSV	1774.26	0.0216349
CAM112A_map19	0001.CSV	1778.12	0.0216567
CAM112A_map19	0001.CSV	1781.98	0.0223226
CAM112A_map19	0001.CSV	1785.84	0.0236254
CAM112A_map19	0001.CSV	1789.69	0.0257747
CAM112A_map19	0001.CSV	1793.55	0.0287238
CAM112A_map19	0001.CSV	1797.41	0.0290016
CAM112A_map19	0001.CSV	1801.26	0.0265098
CAM112A_map19	0001.CSV	1805.12	0.02369
CAM112A_map19	0001.CSV	1808.98	0.0218895
CAM112A_map19	0001.CSV	1812.84	0.0210355
CAM112A_map19	0001.CSV	1816.69	0.0204453
CAM112A_map19	0001.CSV	1820.55	0.0201269
CAM112A_map19	0001.CSV	1824.41	0.0199124
CAM112A_map19	0001.CSV	1828.26	0.0200958
CAM112A_map19	0001.CSV	1832.12	0.020139
CAM112A_map19	0001.CSV	1835.98	0.0199577
CAM112A_map19	0001.CSV	1839.84	0.0197129
CAM112A_map19	0001.CSV	1843.69	0.0199095
CAM112A_map19	0001.CSV	1847.55	0.0201718
CAM112A_map19	0001.CSV	1851.41	0.0200036
CAM112A_map19	0001.CSV	1855.26	0.0198357
CAM112A_map19	0001.CSV	1859.12	0.0199141
CAM112A_map19	0001.CSV	1862.98	0.0198552
CAM112A_map19	0001.CSV	1866.84	0.0200151
CAM112A_map19	0001.CSV	1870.69	0.0203226
CAM112A_map19	0001.CSV	1874.55	0.020232
CAM112A_map19	0001.CSV	1878.41	0.0201156
CAM112A_map19	0001.CSV	1882.26	0.0201393
CAM112A_map19	0001.CSV	1886.12	0.0201518
CAM112A_map19	0001.CSV	1889.98	0.0202898
CAM112A_map19	0001.CSV	1893.83	0.0203387
CAM112A_map19	0001.CSV	1897.69	0.0203989
CAM112A_map19	0001.CSV	1901.55	0.020337
CAM112A_map19	0001.CSV	1905.41	0.020383
CAM112A_map19	0001.CSV	1909.26	0.0204995
CAM112A_map19	0001.CSV	1913.12	0.020518
CAM112A_map19	0001.CSV	1916.98	0.020482
CAM112A_map19	0001.CSV	1920.83	0.0206694
CAM112A_map19	0001.CSV	1924.69	0.020697
CAM112A_map19	0001.CSV	1928.55	0.0206802
CAM112A_map19	0001.CSV	1932.4	0.0206885
CAM112A_map19	0001.CSV	1936.26	0.0207613
CAM112A_map19	0001.CSV	1940.12	0.0207591
CAM112A_map19	0001.CSV	1943.98	0.0210255
CAM112A_map19	0001.CSV	1947.83	0.0210842
CAM112A_map19	0001.CSV	1951.69	0.0210741
CAM112A_map19	0001.CSV	1955.55	0.0211198
CAM112A_map19	0001.CSV	1959.4	0.0212198
CAM112A_map19	0001.CSV	1963.26	0.0212351
CAM112A_map19	0001.CSV	1967.12	0.0213596
CAM112A_map19	0001.CSV	1970.98	0.0213886
CAM112A_map19	0001.CSV	1974.83	0.0213885
CAM112A_map19	0001.CSV	1978.69	0.0213801
CAM112A_map19	0001.CSV	1982.55	0.0214129
CAM112A_map19	0001.CSV	1986.4	0.0213906
CAM112A_map19	0001.CSV	1990.26	0.021524
CAM112A_map19	0001.CSV	1994.12	0.0216825
CAM112A_map19	0001.CSV	1997.98	0.0217227
CAM112A_map19	0001.CSV	2001.83	0.0217145
CAM112A_map19	0001.CSV	2005.69	0.021786
CAM112A_map19	0001.CSV	2009.55	0.0218042
CAM112A_map19	0001.CSV	2013.4	0.021826
CAM112A_map19	0001.CSV	2017.26	0.0218976
CAM112A_map19	0001.CSV	2021.12	0.0220049
CAM112A_map19	0001.CSV	2024.97	0.0219841
CAM112A_map19	0001.CSV	2028.83	0.0220328
CAM112A_map19	0001.CSV	2032.69	0.0220602
CAM112A_map19	0001.CSV	2036.55	0.022135
CAM112A_map19	0001.CSV	2040.4	0.0221735
CAM112A_map19	0001.CSV	2044.26	0.0222308
CAM112A_map19	0001.CSV	2048.12	0.0222124
CAM112A_map19	0001.CSV	2051.97	0.0222359
CAM112A_map19	0001.CSV	2055.83	0.0222175
CAM112A_map19	0001.CSV	2059.69	0.0222815
CAM112A_map19	0001.CSV	2063.55	0.0223705
CAM112A_map19	0001.CSV	2067.4	0.0224636
CAM112A_map19	0001.CSV	2071.26	0.0224416
CAM112A_map19	0001.CSV	2075.12	0.0225191
CAM112A_map19	0001.CSV	2078.97	0.0225576
CAM112A_map19	0001.CSV	2082.83	0.022558
CAM112A_map19	0001.CSV	2086.69	0.0225415
CAM112A_map19	0001.CSV	2090.55	0.0226015
CAM112A_map19	0001.CSV	2094.4	0.0226425
CAM112A_map19	0001.CSV	2098.26	0.0227232
CAM112A_map19	0001.CSV	2102.12	0.0227157
CAM112A_map19	0001.CSV	2105.97	0.0227592
CAM112A_map19	0001.CSV	2109.83	0.0227756
CAM112A_map19	0001.CSV	2113.69	0.0228205
CAM112A_map19	0001.CSV	2117.55	0.0228597
CAM112A_map19	0001.CSV	2121.4	0.0229491
CAM112A_map19	0001.CSV	2125.26	0.0230401
CAM112A_map19	0001.CSV	2129.12	0.0231342
CAM112A_map19	0001.CSV	2132.97	0.0231142
CAM112A_map19	0001.CSV	2136.83	0.0231759
CAM112A_map19	0001.CSV	2140.69	0.0231979
CAM112A_map19	0001.CSV	2144.55	0.0232296
CAM112A_map19	0001.CSV	2148.4	0.0232498
CAM112A_map19	0001.CSV	2152.26	0.0233037
CAM112A_map19	0001.CSV	2156.12	0.0232948
CAM112A_map19	0001.CSV	2159.97	0.0232983
CAM112A_map19	0001.CSV	2163.83	0.0232875
CAM112A_map19	0001.CSV	2167.69	0.0233343
CAM112A_map19	0001.CSV	2171.55	0.0233729
CAM112A_map19	0001.CSV	2175.4	0.0234296
CAM112A_map19	0001.CSV	2179.26	0.0233989
CAM112A_map19	0001.CSV	2183.12	0.0234574
CAM112A_map19	0001.CSV	2186.97	0.0235208
CAM112A_map19	0001.CSV	2190.83	0.0235535
CAM112A_map19	0001.CSV	2194.69	0.023501
CAM112A_map19	0001.CSV	2198.55	0.0235065
CAM112A_map19	0001.CSV	2202.4	0.0235638
CAM112A_map19	0001.CSV	2206.26	0.0236165
CAM112A_map19	0001.CSV	2210.12	0.023607
CAM112A_map19	0001.CSV	2213.97	0.0236516
CAM112A_map19	0001.CSV	2217.83	0.0236752
CAM112A_map19	0001.CSV	2221.69	0.0236887
CAM112A_map19	0001.CSV	2225.54	0.0236482
CAM112A_map19	0001.CSV	2229.4	0.023661
CAM112A_map19	0001.CSV	2233.26	0.0236655
CAM112A_map19	0001.CSV	2237.12	0.0236945
CAM112A_map19	0001.CSV	2240.97	0.0237066
CAM112A_map19	0001.CSV	2244.83	0.0237229
CAM112A_map19	0001.CSV	2248.69	0.0236901
CAM112A_map19	0001.CSV	2252.54	0.023702
CAM112A_map19	0001.CSV	2256.4	0.0237444
CAM112A_map19	0001.CSV	2260.26	0.0237934
CAM112A_map19	0001.CSV	2264.11	0.0237887
CAM112A_map19	0001.CSV	2267.97	0.0238565
CAM112A_map19	0001.CSV	2271.83	0.0238824
CAM112A_map19	0001.CSV	2275.69	0.0239664
CAM112A_map19	0001.CSV	2279.54	0.0240014
CAM112A_map19	0001.CSV	2283.4	0.0239548
CAM112A_map19	0001.CSV	2287.26	0.0238806
CAM112A_map19	0001.CSV	2291.11	0.0239057
CAM112A_map19	0001.CSV	2294.97	0.023945
CAM112A_map19	0001.CSV	2298.83	0.0240173
CAM112A_map19	0001.CSV	2302.69	0.0239846
CAM112A_map19	0001.CSV	2306.54	0.0238327
CAM112A_map19	0001.CSV	2310.4	0.0235404
CAM112A_map19	0001.CSV	2314.26	0.0233037
CAM112A_map19	0001.CSV	2318.11	0.022703
CAM112A_map19	0001.CSV	2321.97	0.0217827
CAM112A_map19	0001.CSV	2325.83	0.0207958
CAM112A_map19	0001.CSV	2329.69	0.0199155
CAM112A_map19	0001.CSV	2333.54	0.0187771
CAM112A_map19	0001.CSV	2337.4	0.01805
CAM112A_map19	0001.CSV	2341.26	0.0181812
CAM112A_map19	0001.CSV	2345.11	0.0209028
CAM112A_map19	0001.CSV	2348.97	0.0216448
CAM112A_map19	0001.CSV	2352.83	0.0191549
CAM112A_map19	0001.CSV	2356.69	0.0103979
CAM112A_map19	0001.CSV	2360.54	0.00232843
CAM112A_map19	0001.CSV	2364.4	0.00752343
CAM112A_map19	0001.CSV	2368.26	0.0170832
CAM112A_map19	0001.CSV	2372.11	0.0223979
CAM112A_map19	0001.CSV	2375.97	0.0245445
CAM112A_map19	0001.CSV	2379.83	0.0251594
CAM112A_map19	0001.CSV	2383.69	0.0252463
CAM112A_map19	0001.CSV	2387.54	0.0250999
CAM112A_map19	0001.CSV	2391.4	0.0250237
CAM112A_map19	0001.CSV	2395.26	0.025002
CAM112A_map19	0001.CSV	2399.11	0.025019
CAM112A_map19	0001.CSV	2402.97	0.025088
CAM112A_map19	0001.CSV	2406.83	0.0251635
CAM112A_map19	0001.CSV	2410.68	0.025179
CAM112A_map19	0001.CSV	2414.54	0.0252353
CAM112A_map19	0001.CSV	2418.4	0.0252402
CAM112A_map19	0001.CSV	2422.26	0.0252424
CAM112A_map19	0001.CSV	2426.11	0.0252698
CAM112A_map19	0001.CSV	2429.97	0.0252977
CAM112A_map19	0001.CSV	2433.83	0.0252986
CAM112A_map19	0001.CSV	2437.68	0.0253769
CAM112A_map19	0001.CSV	2441.54	0.0254409
CAM112A_map19	0001.CSV	2445.4	0.0254845
CAM112A_map19	0001.CSV	2449.26	0.0255311
CAM112A_map19	0001.CSV	2453.11	0.0256041
CAM112A_map19	0001.CSV	2456.97	0.0256778
CAM112A_map19	0001.CSV	2460.83	0.0257746
CAM112A_map19	0001.CSV	2464.68	0.0258415
CAM112A_map19	0001.CSV	2468.54	0.0259651
CAM112A_map19	0001.CSV	2472.4	0.0261012
CAM112A_map19	0001.CSV	2476.26	0.0262794
CAM112A_map19	0001.CSV	2480.11	0.0265138
CAM112A_map19	0001.CSV	2483.97	0.0268248
CAM112A_map19	0001.CSV	2487.83	0.0271623
CAM112A_map19	0001.CSV	2491.68	0.0276423
CAM112A_map19	0001.CSV	2495.54	0.0282756
CAM112A_map19	0001.CSV	2499.4	0.0290085
CAM112A_map19	0001.CSV	2503.26	0.0297059
CAM112A_map19	0001.CSV	2507.11	0.0303051
CAM112A_map19	0001.CSV	2510.97	0.0305595
CAM112A_map19	0001.CSV	2514.83	0.0304706
CAM112A_map19	0001.CSV	2518.68	0.0301668
CAM112A_map19	0001.CSV	2522.54	0.0296325
CAM112A_map19	0001.CSV	2526.4	0.0289438
CAM112A_map19	0001.CSV	2530.26	0.0282774
CAM112A_map19	0001.CSV	2534.11	0.0276022
CAM112A_map19	0001.CSV	2537.97	0.027134
CAM112A_map19	0001.CSV	2541.83	0.026872
CAM112A_map19	0001.CSV	2545.68	0.0266516
CAM112A_map19	0001.CSV	2549.54	0.0264785
CAM112A_map19	0001.CSV	2553.4	0.0264244
CAM112A_map19	0001.CSV	2557.26	0.0264013
CAM112A_map19	0001.CSV	2561.11	0.0263444
CAM112A_map19	0001.CSV	2564.97	0.026257
CAM112A_map19	0001.CSV	2568.83	0.026293
CAM112A_map19	0001.CSV	2572.68	0.0263563
CAM112A_map19	0001.CSV	2576.54	0.0263802
CAM112A_map19	0001.CSV	2580.4	0.026328
CAM112A_map19	0001.CSV	2584.25	0.0263258
CAM112A_map19	0001.CSV	2588.11	0.0263482
CAM112A_map19	0001.CSV	2591.97	0.0263462
CAM112A_map19	0001.CSV	2595.83	0.0262676
CAM112A_map19	0001.CSV	2599.68	0.0262108
CAM112A_map19	0001.CSV	2603.54	0.0261663
CAM112A_map19	0001.CSV	2607.4	0.0261013
CAM112A_map19	0001.CSV	2611.25	0.0260371
CAM112A_map19	0001.CSV	2615.11	0.0260012
CAM112A_map19	0001.CSV	2618.97	0.0258927
CAM112A_map19	0001.CSV	2622.82	0.0258673
CAM112A_map19	0001.CSV	2626.68	0.0258857
CAM112A_map19	0001.CSV	2630.54	0.0258046
CAM112A_map19	0001.CSV	2634.4	0.0257869
CAM112A_map19	0001.CSV	2638.25	0.0257857
CAM112A_map19	0001.CSV	2642.11	0.0256676
CAM112A_map19	0001.CSV	2645.97	0.0255708
CAM112A_map19	0001.CSV	2649.82	0.025528
CAM112A_map19	0001.CSV	2653.68	0.0255617
CAM112A_map19	0001.CSV	2657.54	0.0255891
CAM112A_map19	0001.CSV	2661.4	0.025651
CAM112A_map19	0001.CSV	2665.25	0.025698
CAM112A_map19	0001.CSV	2669.11	0.0257491
CAM112A_map19	0001.CSV	2672.97	0.0259457
CAM112A_map19	0001.CSV	2676.82	0.0262846
CAM112A_map19	0001.CSV	2680.68	0.0262668
CAM112A_map19	0001.CSV	2684.54	0.0259427
CAM112A_map19	0001.CSV	2688.4	0.0258125
CAM112A_map19	0001.CSV	2692.25	0.0258491
CAM112A_map19	0001.CSV	2696.11	0.025941
CAM112A_map19	0001.CSV	2699.97	0.0260114
CAM112A_map19	0001.CSV	2703.82	0.0260078
CAM112A_map19	0001.CSV	2707.68	0.0260789
CAM112A_map19	0001.CSV	2711.54	0.0260942
CAM112A_map19	0001.CSV	2715.4	0.0260722
CAM112A_map19	0001.CSV	2719.25	0.026315
CAM112A_map19	0001.CSV	2723.11	0.0267401
CAM112A_map19	0001.CSV	2726.97	0.0267046
CAM112A_map19	0001.CSV	2730.82	0.026323
CAM112A_map19	0001.CSV	2734.68	0.0262948
CAM112A_map19	0001.CSV	2738.54	0.0263301
CAM112A_map19	0001.CSV	2742.4	0.0263549
CAM112A_map19	0001.CSV	2746.25	0.0267409
CAM112A_map19	0001.CSV	2750.11	0.0267979
CAM112A_map19	0001.CSV	2753.97	0.0265086
CAM112A_map19	0001.CSV	2757.82	0.0264194
CAM112A_map19	0001.CSV	2761.68	0.0263571
CAM112A_map19	0001.CSV	2765.54	0.0263592
CAM112A_map19	0001.CSV	2769.39	0.0265656
CAM112A_map19	0001.CSV	2773.25	0.0269559
CAM112A_map19	0001.CSV	2777.11	0.0268986
CAM112A_map19	0001.CSV	2780.97	0.0266546
CAM112A_map19	0001.CSV	2784.82	0.0268937
CAM112A_map19	0001.CSV	2788.68	0.0274488
CAM112A_map19	0001.CSV	2792.54	0.0276519
CAM112A_map19	0001.CSV	2796.39	0.027724
CAM112A_map19	0001.CSV	2800.25	0.0275121
CAM112A_map19	0001.CSV	2804.11	0.0272275
CAM112A_map19	0001.CSV	2807.97	0.0275367
CAM112A_map19	0001.CSV	2811.82	0.0276096
CAM112A_map19	0001.CSV	2815.68	0.0274981
CAM112A_map19	0001.CSV	2819.54	0.0277719
CAM112A_map19	0001.CSV	2823.39	0.0281315
CAM112A_map19	0001.CSV	2827.25	0.0283365
CAM112A_map19	0001.CSV	2831.11	0.0289402
CAM112A_map19	0001.CSV	2834.97	0.030008
CAM112A_map19	0001.CSV	2838.82	0.031003
CAM112A_map19	0001.CSV	2842.68	0.0321731
CAM112A_map19	0001.CSV	2846.54	0.0343429
CAM112A_map19	0001.CSV	2850.39	0.0355882
CAM112A_map19	0001.CSV	2854.25	0.0349575
CAM112A_map19	0001.CSV	2858.11	0.0340895
CAM112A_map19	0001.CSV	2861.97	0.0332968
CAM112A_map19	0001.CSV	2865.82	0.0327742
CAM112A_map19	0001.CSV	2869.68	0.0329164
CAM112A_map19	0001.CSV	2873.54	0.0329804
CAM112A_map19	0001.CSV	2877.39	0.0322254
CAM112A_map19	0001.CSV	2881.25	0.0315497
CAM112A_map19	0001.CSV	2885.11	0.0313728
CAM112A_map19	0001.CSV	2888.97	0.031601
CAM112A_map19	0001.CSV	2892.82	0.0323057
CAM112A_map19	0001.CSV	2896.68	0.0329361
CAM112A_map19	0001.CSV	2900.54	0.0333347
CAM112A_map19	0001.CSV	2904.39	0.0341448
CAM112A_map19	0001.CSV	2908.25	0.0356789
CAM112A_map19	0001.CSV	2912.11	0.0381904
CAM112A_map19	0001.CSV	2915.97	0.0403536
CAM112A_map19	0001.CSV	2919.82	0.0405588
CAM112A_map19	0001.CSV	2923.68	0.0395141
CAM112A_map19	0001.CSV	2927.54	0.0385439
CAM112A_map19	0001.CSV	2931.39	0.0370769
CAM112A_map19	0001.CSV	2935.25	0.0352655
CAM112A_map19	0001.CSV	2939.11	0.0342588
CAM112A_map19	0001.CSV	2942.96	0.0340938
CAM112A_map19	0001.CSV	2946.82	0.0338656
CAM112A_map19	0001.CSV	2950.68	0.0334931
CAM112A_map19	0001.CSV	2954.54	0.0329826
CAM112A_map19	0001.CSV	2958.39	0.0323836
CAM112A_map19	0001.CSV	2962.25	0.0318378
CAM112A_map19	0001.CSV	2966.11	0.0310739
CAM112A_map19	0001.CSV	2969.96	0.0307631
CAM112A_map19	0001.CSV	2973.82	0.0309018
CAM112A_map19	0001.CSV	2977.68	0.0309042
CAM112A_map19	0001.CSV	2981.53	0.0304308
CAM112A_map19	0001.CSV	2985.39	0.0296362
CAM112A_map19	0001.CSV	2989.25	0.0294404
CAM112A_map19	0001.CSV	2993.11	0.0295128
CAM112A_map19	0001.CSV	2996.96	0.0292498
CAM112A_map19	0001.CSV	3000.82	0.02884
CAM112A_map19	0001.CSV	3004.68	0.0285766
CAM112A_map19	0001.CSV	3008.53	0.0287679
CAM112A_map19	0001.CSV	3012.39	0.0291205
CAM112A_map19	0001.CSV	3016.25	0.0292206
CAM112A_map19	0001.CSV	3020.11	0.0290208
CAM112A_map19	0001.CSV	3023.96	0.0287946
CAM112A_map19	0001.CSV	3027.82	0.0287797
CAM112A_map19	0001.CSV	3031.68	0.0290131
CAM112A_map19	0001.CSV	3035.53	0.0290155
CAM112A_map19	0001.CSV	3039.39	0.0289814
CAM112A_map19	0001.CSV	3043.25	0.0290977
CAM112A_map19	0001.CSV	3047.11	0.0291027
CAM112A_map19	0001.CSV	3050.96	0.0291215
CAM112A_map19	0001.CSV	3054.82	0.0290885
CAM112A_map19	0001.CSV	3058.68	0.0289004
CAM112A_map19	0001.CSV	3062.53	0.0289031
CAM112A_map19	0001.CSV	3066.39	0.0292598
CAM112A_map19	0001.CSV	3070.25	0.0292906
CAM112A_map19	0001.CSV	3074.11	0.0292676
CAM112A_map19	0001.CSV	3077.96	0.0295022
CAM112A_map19	0001.CSV	3081.82	0.0296159
CAM112A_map19	0001.CSV	3085.68	0.0294844
CAM112A_map19	0001.CSV	3089.53	0.0293676
CAM112A_map19	0001.CSV	3093.39	0.0291948
CAM112A_map19	0001.CSV	3097.25	0.029218
CAM112A_map19	0001.CSV	3101.11	0.0293896
CAM112A_map19	0001.CSV	3104.96	0.0294745
CAM112A_map19	0001.CSV	3108.82	0.0296015
CAM112A_map19	0001.CSV	3112.68	0.0296987
CAM112A_map19	0001.CSV	3116.53	0.029846
CAM112A_map19	0001.CSV	3120.39	0.0298237
CAM112A_map19	0001.CSV	3124.25	0.0296168
CAM112A_map19	0001.CSV	3128.11	0.0295288
CAM112A_map19	0001.CSV	3131.96	0.0294633
CAM112A_map19	0001.CSV	3135.82	0.029529
CAM112A_map19	0001.CSV	3139.68	0.0296213
CAM112A_map19	0001.CSV	3143.53	0.0295134
CAM112A_map19	0001.CSV	3147.39	0.0296303
CAM112A_map19	0001.CSV	3151.25	0.0299635
CAM112A_map19	0001.CSV	3155.1	0.029894
CAM112A_map19	0001.CSV	3158.96	0.0295631
CAM112A_map19	0001.CSV	3162.82	0.0295426
CAM112A_map19	0001.CSV	3166.68	0.0296243
CAM112A_map19	0001.CSV	3170.53	0.0296382
CAM112A_map19	0001.CSV	3174.39	0.0296674
CAM112A_map19	0001.CSV	3178.25	0.0297867
CAM112A_map19	0001.CSV	3182.1	0.029829
CAM112A_map19	0001.CSV	3185.96	0.0299568
CAM112A_map19	0001.CSV	3189.82	0.0300968
CAM112A_map19	0001.CSV	3193.68	0.0300029
CAM112A_map19	0001.CSV	3197.53	0.0300034
CAM112A_map19	0001.CSV	3201.39	0.0302201
CAM112A_map19	0001.CSV	3205.25	0.0303021
CAM112A_map19	0001.CSV	3209.1	0.030262
CAM112A_map19	0001.CSV	3212.96	0.0304308
CAM112A_map19	0001.CSV	3216.82	0.0306384
CAM112A_map19	0001.CSV	3220.68	0.0305524
CAM112A_map19	0001.CSV	3224.53	0.0305097
CAM112A_map19	0001.CSV	3228.39	0.0307989
CAM112A_map19	0001.CSV	3232.25	0.0311269
CAM112A_map19	0001.CSV	3236.1	0.0310293
CAM112A_map19	0001.CSV	3239.96	0.0308668
CAM112A_map19	0001.CSV	3243.82	0.0310865
CAM112A_map19	0001.CSV	3247.68	0.0312037
CAM112A_map19	0001.CSV	3251.53	0.0310829
CAM112A_map19	0001.CSV	3255.39	0.0311439
CAM112A_map19	0001.CSV	3259.25	0.0309938
CAM112A_map19	0001.CSV	3263.1	0.0309249
CAM112A_map19	0001.CSV	3266.96	0.031227
CAM112A_map19	0001.CSV	3270.82	0.0316153
CAM112A_map19	0001.CSV	3274.68	0.0317004
CAM112A_map19	0001.CSV	3278.53	0.031485
CAM112A_map19	0001.CSV	3282.39	0.0312205
CAM112A_map19	0001.CSV	3286.25	0.0312684
CAM112A_map19	0001.CSV	3290.1	0.0317491
CAM112A_map19	0001.CSV	3293.96	0.0320324
CAM112A_map19	0001.CSV	3297.82	0.0317836
CAM112A_map19	0001.CSV	3301.67	0.0317557
CAM112A_map19	0001.CSV	3305.53	0.031965
CAM112A_map19	0001.CSV	3309.39	0.0318303
CAM112A_map19	0001.CSV	3313.25	0.0313673
CAM112A_map19	0001.CSV	3317.1	0.0311291
CAM112A_map19	0001.CSV	3320.96	0.0313546
CAM112A_map19	0001.CSV	3324.82	0.0315658
CAM112A_map19	0001.CSV	3328.67	0.031247
CAM112A_map19	0001.CSV	3332.53	0.0311694
CAM112A_map19	0001.CSV	3336.39	0.0317106
CAM112A_map19	0001.CSV	3340.24	0.0319484
CAM112A_map19	0001.CSV	3344.1	0.0317281
CAM112A_map19	0001.CSV	3347.96	0.0316394
CAM112A_map19	0001.CSV	3351.82	0.0314959
CAM112A_map19	0001.CSV	3355.67	0.0312186
CAM112A_map19	0001.CSV	3359.53	0.0313353
CAM112A_map19	0001.CSV	3363.39	0.0316644
CAM112A_map19	0001.CSV	3367.24	0.0320101
CAM112A_map19	0001.CSV	3371.1	0.0319424
CAM112A_map19	0001.CSV	3374.96	0.0316353
CAM112A_map19	0001.CSV	3378.82	0.0313979
CAM112A_map19	0001.CSV	3382.67	0.0312014
CAM112A_map19	0001.CSV	3386.53	0.0313834
CAM112A_map19	0001.CSV	3390.39	0.0317729
CAM112A_map19	0001.CSV	3394.24	0.0318855
CAM112A_map19	0001.CSV	3398.1	0.0317829
CAM112A_map19	0001.CSV	3401.96	0.0316788
CAM112A_map19	0001.CSV	3405.82	0.0315272
CAM112A_map19	0001.CSV	3409.67	0.0315013
CAM112A_map19	0001.CSV	3413.53	0.0312591
CAM112A_map19	0001.CSV	3417.39	0.0308262
CAM112A_map19	0001.CSV	3421.24	0.0306805
CAM112A_map19	0001.CSV	3425.1	0.0309531
CAM112A_map19	0001.CSV	3428.96	0.0313161
CAM112A_map19	0001.CSV	3432.82	0.0314099
CAM112A_map19	0001.CSV	3436.67	0.0311061
CAM112A_map19	0001.CSV	3440.53	0.0305866
CAM112A_map19	0001.CSV	3444.39	0.0303503
CAM112A_map19	0001.CSV	3448.24	0.0302853
CAM112A_map19	0001.CSV	3452.1	0.0300722
CAM112A_map19	0001.CSV	3455.96	0.0301381
CAM112A_map19	0001.CSV	3459.82	0.0305084
CAM112A_map19	0001.CSV	3463.67	0.0308273
CAM112A_map19	0001.CSV	3467.53	0.0309353
CAM112A_map19	0001.CSV	3471.39	0.030536
CAM112A_map19	0001.CSV	3475.24	0.030179
CAM112A_map19	0001.CSV	3479.1	0.0301622
CAM112A_map19	0001.CSV	3482.96	0.0301397
CAM112A_map19	0001.CSV	3486.82	0.0302196
CAM112A_map19	0001.CSV	3490.67	0.030192
CAM112A_map19	0001.CSV	3494.53	0.0302166
CAM112A_map19	0001.CSV	3498.39	0.0301624
CAM112A_map19	0001.CSV	3502.24	0.0300147
CAM112A_map19	0001.CSV	3506.1	0.0296009
CAM112A_map19	0001.CSV	3509.96	0.0294077
CAM112A_map19	0001.CSV	3513.81	0.0294687
CAM112A_map19	0001.CSV	3517.67	0.0290859
CAM112A_map19	0001.CSV	3521.53	0.0291009
CAM112A_map19	0001.CSV	3525.39	0.0292614
CAM112A_map19	0001.CSV	3529.24	0.029057
CAM112A_map19	0001.CSV	3533.1	0.029096
CAM112A_map19	0001.CSV	3536.96	0.0292706
CAM112A_map19	0001.CSV	3540.81	0.0292618
CAM112A_map19	0001.CSV	3544.67	0.0294444
CAM112A_map19	0001.CSV	3548.53	0.0293208
CAM112A_map19	0001.CSV	3552.39	0.0288798
CAM112A_map19	0001.CSV	3556.24	0.0287361
CAM112A_map19	0001.CSV	3560.1	0.0284612
CAM112A_map19	0001.CSV	3563.96	0.027977
CAM112A_map19	0001.CSV	3567.81	0.0284569
CAM112A_map19	0001.CSV	3571.67	0.0285627
CAM112A_map19	0001.CSV	3575.53	0.028207
CAM112A_map19	0001.CSV	3579.39	0.0283384
CAM112A_map19	0001.CSV	3583.24	0.0282421
CAM112A_map19	0001.CSV	3587.1	0.0282903
CAM112A_map19	0001.CSV	3590.96	0.0282764
CAM112A_map19	0001.CSV	3594.81	0.0279535
CAM112A_map19	0001.CSV	3598.67	0.0281165
CAM112A_map19	0001.CSV	3602.53	0.0279913
CAM112A_map19	0001.CSV	3606.39	0.0272931
CAM112A_map19	0001.CSV	3610.24	0.0268837
CAM112A_map19	0001.CSV	3614.1	0.0268246
CAM112A_map19	0001.CSV	3617.96	0.0273136
CAM112A_map19	0001.CSV	3621.81	0.0276096
CAM112A_map19	0001.CSV	3625.67	0.0268745
CAM112A_map19	0001.CSV	3629.53	0.0269331
CAM112A_map19	0001.CSV	3633.39	0.0274795
CAM112A_map19	0001.CSV	3637.24	0.02712
CAM112A_map19	0001.CSV	3641.1	0.0266426
CAM112A_map19	0001.CSV	3644.96	0.0260199
CAM112A_map19	0001.CSV	3648.81	0.0268546
CAM112A_map19	0001.CSV	3652.67	0.0275932
CAM112A_map19	0001.CSV	3656.53	0.0274112
CAM112A_map19	0001.CSV	3660.38	0.0273057
CAM112A_map19	0001.CSV	3664.24	0.0264366
CAM112A_map19	0001.CSV	3668.1	0.0255987
CAM112A_map19	0001.CSV	3671.96	0.0258334
CAM112A_map19	0001.CSV	3675.81	0.0268327
CAM112A_map19	0001.CSV	3679.67	0.0272094
CAM112A_map19	0001.CSV	3683.53	0.0266496
CAM112A_map19	0001.CSV	3687.38	0.0264629
CAM112A_map19	0001.CSV	3691.24	0.0272426
CAM112A_map19	0001.CSV	3695.1	0.0270286
CAM112A_map19	0001.CSV	3698.95	0.0265024
CAM112A_map19	0001.CSV	3702.81	0.0262949
CAM112A_map19	0001.CSV	3706.67	0.0257898
CAM112A_map19	0001.CSV	3710.53	0.0259043
CAM112A_map19	0001.CSV	3714.38	0.0268554
CAM112A_map19	0001.CSV	3718.24	0.0264646
CAM112A_map19	0001.CSV	3722.1	0.0261909
CAM112A_map19	0001.CSV	3725.95	0.0263535
CAM112A_map19	0001.CSV	3729.81	0.0261343
CAM112A_map19	0001.CSV	3733.67	0.0263719
CAM112A_map19	0001.CSV	3737.53	0.0274741
CAM112A_map19	0001.CSV	3741.38	0.0266335
CAM112A_map19	0001.CSV	3745.24	0.0254685
CAM112A_map19	0001.CSV	3749.1	0.0254543
CAM112A_map19	0001.CSV	3752.95	0.0267921
CAM112A_map19	0001.CSV	3756.81	0.0269771
CAM112A_map19	0001.CSV	3760.67	0.0268963
CAM112A_map19	0001.CSV	3764.53	0.026652
CAM112A_map19	0001.CSV	3768.38	0.0268615
CAM112A_map19	0001.CSV	3772.24	0.0271612
CAM112A_map19	0001.CSV	3776.1	0.0269491
CAM112A_map19	0001.CSV	3779.95	0.0270163
CAM112A_map19	0001.CSV	3783.81	0.0270402
CAM112A_map19	0001.CSV	3787.67	0.0270864
CAM112A_map19	0001.CSV	3791.53	0.0268117
CAM112A_map19	0001.CSV	3795.38	0.0262236
CAM112A_map19	0001.CSV	3799.24	0.0262373
CAM112A_map19	0001.CSV	3803.1	0.0268671
CAM112A_map19	0001.CSV	3806.95	0.027334
CAM112A_map19	0001.CSV	3810.81	0.0270937
CAM112A_map19	0001.CSV	3814.67	0.0265416
CAM112A_map19	0001.CSV	3818.53	0.0268418
CAM112A_map19	0001.CSV	3822.38	0.0275176
CAM112A_map19	0001.CSV	3826.24	0.0272997
CAM112A_map19	0001.CSV	3830.1	0.0268337
CAM112A_map19	0001.CSV	3833.95	0.0265599
CAM112A_map19	0001.CSV	3837.81	0.0269728
CAM112A_map19	0001.CSV	3841.67	0.0278409
CAM112A_map19	0001.CSV	3845.53	0.0274807
CAM112A_map19	0001.CSV	3849.38	0.0264058
CAM112A_map19	0001.CSV	3853.24	0.0266876
CAM112A_map19	0001.CSV	3857.1	0.0275287
CAM112A_map19	0001.CSV	3860.95	0.0268006
CAM112A_map19	0001.CSV	3864.81	0.0267032
CAM112A_map19	0001.CSV	3868.67	0.027013
CAM112A_map19	0001.CSV	3872.52	0.0274554
CAM112A_map19	0001.CSV	3876.38	0.0272171
CAM112A_map19	0001.CSV	3880.24	0.0270672
CAM112A_map19	0001.CSV	3884.1	0.0274654
CAM112A_map19	0001.CSV	3887.95	0.0273323
CAM112A_map19	0001.CSV	3891.81	0.0272391
CAM112A_map19	0001.CSV	3895.67	0.026874
CAM112A_map19	0001.CSV	3899.52	0.0265138
CAM112A_map19	0001.CSV	3903.38	0.0276084
CAM112A_map19	0001.CSV	3907.24	0.0278124
CAM112A_map19	0001.CSV	3911.1	0.0270178
CAM112A_map19	0001.CSV	3914.95	0.0265568
CAM112A_map19	0001.CSV	3918.81	0.02686
CAM112A_map19	0001.CSV	3922.67	0.0271087
CAM112A_map19	0001.CSV	3926.52	0.0272223
CAM112A_map19	0001.CSV	3930.38	0.0273093
CAM112A_map19	0001.CSV	3934.24	0.0274398
CAM112A_map19	0001.CSV	3938.09	0.0270324
CAM112A_map19	0001.CSV	3941.95	0.0267789
CAM112A_map19	0001.CSV	3945.81	0.0269398
CAM112A_map19	0001.CSV	3949.67	0.0271374
CAM112A_map19	0001.CSV	3953.52	0.0270944
CAM112A_map19	0001.CSV	3957.38	0.0268573
CAM112A_map19	0001.CSV	3961.24	0.0268057
CAM112A_map19	0001.CSV	3965.09	0.0269294
CAM112A_map19	0001.CSV	3968.95	0.0269175
CAM112A_map19	0001.CSV	3972.81	0.026879
CAM112A_map19	0001.CSV	3976.67	0.026868
CAM112A_map19	0001.CSV	3980.52	0.0268692
CAM112A_map19	0001.CSV	3984.38	0.0269817
CAM112A_map19	0001.CSV	3988.24	0.0269241
CAM112A_map19	0001.CSV	3992.09	0.0268362
CAM112A_map19	0001.CSV	3995.95	0.0268275
CAM112A_map19	0001.CSV	3999.81	0.0267573
CAM112A_map19	0002.CSV	674.992	0.0420568
CAM112A_map19	0002.CSV	678.849	0.044649
CAM112A_map19	0002.CSV	682.706	0.0455781
CAM112A_map19	0002.CSV	686.563	0.0475417
CAM112A_map19	0002.CSV	690.42	0.0505975
CAM112A_map19	0002.CSV	694.277	0.0582147
CAM112A_map19	0002.CSV	698.134	0.0656832
CAM112A_map19	0002.CSV	701.991	0.0732947
CAM112A_map19	0002.CSV	705.849	0.0871442
CAM112A_map19	0002.CSV	709.706	0.108856
CAM112A_map19	0002.CSV	713.563	0.0986781
CAM112A_map19	0002.CSV	717.42	0.0605467
CAM112A_map19	0002.CSV	721.277	0.0385401
CAM112A_map19	0002.CSV	725.134	0.0351655
CAM112A_map19	0002.CSV	728.991	0.0359921
CAM112A_map19	0002.CSV	732.848	0.0384149
CAM112A_map19	0002.CSV	736.705	0.0406889
CAM112A_map19	0002.CSV	740.562	0.0430726
CAM112A_map19	0002.CSV	744.42	0.0437872
CAM112A_map19	0002.CSV	748.277	0.0441294
CAM112A_map19	0002.CSV	752.134	0.0438816
CAM112A_map19	0002.CSV	755.991	0.0441217
CAM112A_map19	0002.CSV	759.848	0.0438922
CAM112A_map19	0002.CSV	763.705	0.0443462
CAM112A_map19	0002.CSV	767.562	0.0443701
CAM112A_map19	0002.CSV	771.419	0.0445461
CAM112A_map19	0002.CSV	775.276	0.0442505
CAM112A_map19	0002.CSV	779.133	0.0444283
CAM112A_map19	0002.CSV	782.99	0.044142
CAM112A_map19	0002.CSV	786.848	0.0443416
CAM112A_map19	0002.CSV	790.705	0.0442523
CAM112A_map19	0002.CSV	794.562	0.0448524
CAM112A_map19	0002.CSV	798.419	0.0450894
CAM112A_map19	0002.CSV	802.276	0.0453911
CAM112A_map19	0002.CSV	806.133	0.0454133
CAM112A_map19	0002.CSV	809.99	0.0463513
CAM112A_map19	0002.CSV	813.847	0.0472352
CAM112A_map19	0002.CSV	817.704	0.0484492
CAM112A_map19	0002.CSV	821.562	0.0497848
CAM112A_map19	0002.CSV	825.419	0.0518618
CAM112A_map19	0002.CSV	829.276	0.0535631
CAM112A_map19	0002.CSV	833.133	0.0558218
CAM112A_map19	0002.CSV	836.99	0.0585015
CAM112A_map19	0002.CSV	840.847	0.0632289
CAM112A_map19	0002.CSV	844.704	0.0700058
CAM112A_map19	0002.CSV	848.561	0.0743837
CAM112A_map19	0002.CSV	852.418	0.0765853
CAM112A_map19	0002.CSV	856.275	0.0868586
CAM112A_map19	0002.CSV	860.132	0.109141
CAM112A_map19	0002.CSV	863.99	0.150193
CAM112A_map19	0002.CSV	867.847	0.197475
CAM112A_map19	0002.CSV	871.704	0.207421
CAM112A_map19	0002.CSV	875.561	0.17468
CAM112A_map19	0002.CSV	879.418	0.135806
CAM112A_map19	0002.CSV	883.275	0.0946503
CAM112A_map19	0002.CSV	887.132	0.0559956
CAM112A_map19	0002.CSV	890.989	0.0383739
CAM112A_map19	0002.CSV	894.846	0.0375364
CAM112A_map19	0002.CSV	898.703	0.0390904
CAM112A_map19	0002.CSV	902.561	0.0407211
CAM112A_map19	0002.CSV	906.418	0.0418492
CAM112A_map19	0002.CSV	910.275	0.0430926
CAM112A_map19	0002.CSV	914.132	0.0437786
CAM112A_map19	0002.CSV	917.989	0.0446429
CAM112A_map19	0002.CSV	921.846	0.0452166
CAM112A_map19	0002.CSV	925.703	0.0459832
CAM112A_map19	0002.CSV	929.56	0.046398
CAM112A_map19	0002.CSV	933.417	0.0472011
CAM112A_map19	0002.CSV	937.274	0.0474971
CAM112A_map19	0002.CSV	941.131	0.0478354
CAM112A_map19	0002.CSV	944.989	0.0480094
CAM112A_map19	0002.CSV	948.846	0.0485781
CAM112A_map19	0002.CSV	952.703	0.0490254
CAM112A_map19	0002.CSV	956.56	0.0497562
CAM112A_map19	0002.CSV	960.417	0.0501298
CAM112A_map19	0002.CSV	964.274	0.0507531
CAM112A_map19	0002.CSV	968.131	0.0512133
CAM112A_map19	0002.CSV	971.988	0.0521456
CAM112A_map19	0002.CSV	975.845	0.0529647
CAM112A_map19	0002.CSV	979.702	0.0539553
CAM112A_map19	0002.CSV	983.559	0.0547208
CAM112A_map19	0002.CSV	987.417	0.0556615
CAM112A_map19	0002.CSV	991.274	0.0561812
CAM112A_map19	0002.CSV	995.131	0.0569161
CAM112A_map19	0002.CSV	998.988	0.0574261
CAM112A_map19	0002.CSV	1002.85	0.0583019
CAM112A_map19	0002.CSV	1006.7	0.0590349
CAM112A_map19	0002.CSV	1010.56	0.0599429
CAM112A_map19	0002.CSV	1014.42	0.0605781
CAM112A_map19	0002.CSV	1018.27	0.0615947
CAM112A_map19	0002.CSV	1022.13	0.0623046
CAM112A_map19	0002.CSV	1025.99	0.0632036
CAM112A_map19	0002.CSV	1029.85	0.0637118
CAM112A_map19	0002.CSV	1033.7	0.0645304
CAM112A_map19	0002.CSV	1037.56	0.0652469
CAM112A_map19	0002.CSV	1041.42	0.0659526
CAM112A_map19	0002.CSV	1045.27	0.0661382
CAM112A_map19	0002.CSV	1049.13	0.0668857
CAM112A_map19	0002.CSV	1052.99	0.0679003
CAM112A_map19	0002.CSV	1056.84	0.069848
CAM112A_map19	0002.CSV	1060.7	0.0717439
CAM112A_map19	0002.CSV	1064.56	0.0734003
CAM112A_map19	0002.CSV	1068.42	0.0737344
CAM112A_map19	0002.CSV	1072.27	0.0734808
CAM112A_map19	0002.CSV	1076.13	0.0727148
CAM112A_map19	0002.CSV	1079.99	0.0724092
CAM112A_map19	0002.CSV	1083.84	0.0721439
CAM112A_map19	0002.CSV	1087.7	0.0722124
CAM112A_map19	0002.CSV	1091.56	0.071715
CAM112A_map19	0002.CSV	1095.41	0.0713944
CAM112A_map19	0002.CSV	1099.27	0.0713874
CAM112A_map19	0002.CSV	1103.13	0.0723301
CAM112A_map19	0002.CSV	1106.99	0.0733656
CAM112A_map19	0002.CSV	1110.84	0.0749408
CAM112A_map19	0002.CSV	1114.7	0.0760071
CAM112A_map19	0002.CSV	1118.56	0.0767116
CAM112A_map19	0002.CSV	1122.41	0.0766429
CAM112A_map19	0002.CSV	1126.27	0.0766497
CAM112A_map19	0002.CSV	1130.13	0.0763886
CAM112A_map19	0002.CSV	1133.99	0.0764736
CAM112A_map19	0002.CSV	1137.84	0.0764983
CAM112A_map19	0002.CSV	1141.7	0.0766751
CAM112A_map19	0002.CSV	1145.56	0.0765355
CAM112A_map19	0002.CSV	1149.41	0.0768977
CAM112A_map19	0002.CSV	1153.27	0.0773509
CAM112A_map19	0002.CSV	1157.13	0.078199
CAM112A_map19	0002.CSV	1160.99	0.0786194
CAM112A_map19	0002.CSV	1164.84	0.078866
CAM112A_map19	0002.CSV	1168.7	0.0785224
CAM112A_map19	0002.CSV	1172.56	0.078392
CAM112A_map19	0002.CSV	1176.41	0.0781744
CAM112A_map19	0002.CSV	1180.27	0.0782518
CAM112A_map19	0002.CSV	1184.13	0.0780379
CAM112A_map19	0002.CSV	1187.99	0.0780305
CAM112A_map19	0002.CSV	1191.84	0.0778497
CAM112A_map19	0002.CSV	1195.7	0.0780475
CAM112A_map19	0002.CSV	1199.56	0.0782936
CAM112A_map19	0002.CSV	1203.41	0.0790012
CAM112A_map19	0002.CSV	1207.27	0.0795593
CAM112A_map19	0002.CSV	1211.13	0.080433
CAM112A_map19	0002.CSV	1214.98	0.0811819
CAM112A_map19	0002.CSV	1218.84	0.0822698
CAM112A_map19	0002.CSV	1222.7	0.0832981
CAM112A_map19	0002.CSV	1226.56	0.0847974
CAM112A_map19	0002.CSV	1230.41	0.0861998
CAM112A_map19	0002.CSV	1234.27	0.0880856
CAM112A_map19	0002.CSV	1238.13	0.0898882
CAM112A_map19	0002.CSV	1241.98	0.09206
CAM112A_map19	0002.CSV	1245.84	0.0940899
CAM112A_map19	0002.CSV	1249.7	0.0963202
CAM112A_map19	0002.CSV	1253.56	0.0980696
CAM112A_map19	0002.CSV	1257.41	0.0997816
CAM112A_map19	0002.CSV	1261.27	0.101054
CAM112A_map19	0002.CSV	1265.13	0.10261
CAM112A_map19	0002.CSV	1268.98	0.103991
CAM112A_map19	0002.CSV	1272.84	0.105724
CAM112A_map19	0002.CSV	1276.7	0.107213
CAM112A_map19	0002.CSV	1280.56	0.10894
CAM112A_map19	0002.CSV	1284.41	0.110301
CAM112A_map19	0002.CSV	1288.27	0.111746
CAM112A_map19	0002.CSV	1292.13	0.112675
CAM112A_map19	0002.CSV	1295.98	0.113772
CAM112A_map19	0002.CSV	1299.84	0.114869
CAM112A_map19	0002.CSV	1303.7	0.116645
CAM112A_map19	0002.CSV	1307.56	0.118602
CAM112A_map19	0002.CSV	1311.41	0.121336
CAM112A_map19	0002.CSV	1315.27	0.124039
CAM112A_map19	0002.CSV	1319.13	0.127106
CAM112A_map19	0002.CSV	1322.98	0.129668
CAM112A_map19	0002.CSV	1326.84	0.132648
CAM112A_map19	0002.CSV	1330.7	0.135834
CAM112A_map19	0002.CSV	1334.56	0.139613
CAM112A_map19	0002.CSV	1338.41	0.144224
CAM112A_map19	0002.CSV	1342.27	0.150105
CAM112A_map19	0002.CSV	1346.13	0.154779
CAM112A_map19	0002.CSV	1349.98	0.160445
CAM112A_map19	0002.CSV	1353.84	0.166371
CAM112A_map19	0002.CSV	1357.7	0.172795
CAM112A_map19	0002.CSV	1361.56	0.180179
CAM112A_map19	0002.CSV	1365.41	0.189696
CAM112A_map19	0002.CSV	1369.27	0.197749
CAM112A_map19	0002.CSV	1373.13	0.208025
CAM112A_map19	0002.CSV	1376.98	0.219578
CAM112A_map19	0002.CSV	1380.84	0.230092
CAM112A_map19	0002.CSV	1384.7	0.240283
CAM112A_map19	0002.CSV	1388.56	0.253434
CAM112A_map19	0002.CSV	1392.41	0.26235
CAM112A_map19	0002.CSV	1396.27	0.267976
CAM112A_map19	0002.CSV	1400.13	0.268095
CAM112A_map19	0002.CSV	1403.98	0.265641
CAM112A_map19	0002.CSV	1407.84	0.259107
CAM112A_map19	0002.CSV	1411.7	0.250787
CAM112A_map19	0002.CSV	1415.55	0.241557
CAM112A_map19	0002.CSV	1419.41	0.231849
CAM112A_map19	0002.CSV	1423.27	0.223386
CAM112A_map19	0002.CSV	1427.12	0.21814
CAM112A_map19	0002.CSV	1430.98	0.212252
CAM112A_map19	0002.CSV	1434.84	0.206614
CAM112A_map19	0002.CSV	1438.7	0.199247
CAM112A_map19	0002.CSV	1442.55	0.193599
CAM112A_map19	0002.CSV	1446.41	0.186964
CAM112A_map19	0002.CSV	1450.27	0.180072
CAM112A_map19	0002.CSV	1454.12	0.173641
CAM112A_map19	0002.CSV	1457.98	0.164127
CAM112A_map19	0002.CSV	1461.84	0.156174
CAM112A_map19	0002.CSV	1465.7	0.150147
CAM112A_map19	0002.CSV	1469.55	0.143703
CAM112A_map19	0002.CSV	1473.41	0.136413
CAM112A_map19	0002.CSV	1477.27	0.128398
CAM112A_map19	0002.CSV	1481.12	0.123092
CAM112A_map19	0002.CSV	1484.98	0.117775
CAM112A_map19	0002.CSV	1488.84	0.111543
CAM112A_map19	0002.CSV	1492.7	0.104726
CAM112A_map19	0002.CSV	1496.55	0.0987967
CAM112A_map19	0002.CSV	1500.41	0.0918806
CAM112A_map19	0002.CSV	1504.27	0.0876065
CAM112A_map19	0002.CSV	1508.12	0.080804
CAM112A_map19	0002.CSV	1511.98	0.0761562
CAM112A_map19	0002.CSV	1515.84	0.0729012
CAM112A_map19	0002.CSV	1519.7	0.0690768
CAM112A_map19	0002.CSV	1523.55	0.0648811
CAM112A_map19	0002.CSV	1527.41	0.0618226
CAM112A_map19	0002.CSV	1531.27	0.0590683
CAM112A_map19	0002.CSV	1535.12	0.0569283
CAM112A_map19	0002.CSV	1538.98	0.0544636
CAM112A_map19	0002.CSV	1542.84	0.0493475
CAM112A_map19	0002.CSV	1546.7	0.0451184
CAM112A_map19	0002.CSV	1550.55	0.0420192
CAM112A_map19	0002.CSV	1554.41	0.0392976
CAM112A_map19	0002.CSV	1558.27	0.0371206
CAM112A_map19	0002.CSV	1562.12	0.0354329
CAM112A_map19	0002.CSV	1565.98	0.0344345
CAM112A_map19	0002.CSV	1569.84	0.0337836
CAM112A_map19	0002.CSV	1573.69	0.0335566
CAM112A_map19	0002.CSV	1577.55	0.0333607
CAM112A_map19	0002.CSV	1581.41	0.0322454
CAM112A_map19	0002.CSV	1585.27	0.0306849
CAM112A_map19	0002.CSV	1589.12	0.0292778
CAM112A_map19	0002.CSV	1592.98	0.028151
CAM112A_map19	0002.CSV	1596.84	0.027392
CAM112A_map19	0002.CSV	1600.69	0.0267303
CAM112A_map19	0002.CSV	1604.55	0.0262125
CAM112A_map19	0002.CSV	1608.41	0.0258215
CAM112A_map19	0002.CSV	1612.27	0.0255109
CAM112A_map19	0002.CSV	1616.12	0.0253205
CAM112A_map19	0002.CSV	1619.98	0.0253331
CAM112A_map19	0002.CSV	1623.84	0.025149
CAM112A_map19	0002.CSV	1627.69	0.0249377
CAM112A_map19	0002.CSV	1631.55	0.0242739
CAM112A_map19	0002.CSV	1635.41	0.0242535
CAM112A_map19	0002.CSV	1639.27	0.0244153
CAM112A_map19	0002.CSV	1643.12	0.0239849
CAM112A_map19	0002.CSV	1646.98	0.0239652
CAM112A_map19	0002.CSV	1650.84	0.0242983
CAM112A_map19	0002.CSV	1654.69	0.0245107
CAM112A_map19	0002.CSV	1658.55	0.0240865
CAM112A_map19	0002.CSV	1662.41	0.0236782
CAM112A_map19	0002.CSV	1666.27	0.0234108
CAM112A_map19	0002.CSV	1670.12	0.0232747
CAM112A_map19	0002.CSV	1673.98	0.023556
CAM112A_map19	0002.CSV	1677.84	0.0232603
CAM112A_map19	0002.CSV	1681.69	0.0230639
CAM112A_map19	0002.CSV	1685.55	0.0233348
CAM112A_map19	0002.CSV	1689.41	0.0233065
CAM112A_map19	0002.CSV	1693.27	0.022878
CAM112A_map19	0002.CSV	1697.12	0.0231662
CAM112A_map19	0002.CSV	1700.98	0.024069
CAM112A_map19	0002.CSV	1704.84	0.024657
CAM112A_map19	0002.CSV	1708.69	0.025094
CAM112A_map19	0002.CSV	1712.55	0.0254825
CAM112A_map19	0002.CSV	1716.41	0.0272373
CAM112A_map19	0002.CSV	1720.27	0.029185
CAM112A_map19	0002.CSV	1724.12	0.0293904
CAM112A_map19	0002.CSV	1727.98	0.0294301
CAM112A_map19	0002.CSV	1731.84	0.0294218
CAM112A_map19	0002.CSV	1735.69	0.0291454
CAM112A_map19	0002.CSV	1739.55	0.0279981
CAM112A_map19	0002.CSV	1743.41	0.0264918
CAM112A_map19	0002.CSV	1747.27	0.024973
CAM112A_map19	0002.CSV	1751.12	0.0234697
CAM112A_map19	0002.CSV	1754.98	0.022073
CAM112A_map19	0002.CSV	1758.84	0.0212595
CAM112A_map19	0002.CSV	1762.69	0.0208834
CAM112A_map19	0002.CSV	1766.55	0.0205353
CAM112A_map19	0002.CSV	1770.41	0.0205591
CAM112A_map19	0002.CSV	1774.26	0.021087
CAM112A_map19	0002.CSV	1778.12	0.0210682
CAM112A_map19	0002.CSV	1781.98	0.0215214
CAM112A_map19	0002.CSV	1785.84	0.0224339
CAM112A_map19	0002.CSV	1789.69	0.0239806
CAM112A_map19	0002.CSV	1793.55	0.0263036
CAM112A_map19	0002.CSV	1797.41	0.0265503
CAM112A_map19	0002.CSV	1801.26	0.0246462
CAM112A_map19	0002.CSV	1805.12	0.0224967
CAM112A_map19	0002.CSV	1808.98	0.0211235
CAM112A_map19	0002.CSV	1812.84	0.0204987
CAM112A_map19	0002.CSV	1816.69	0.0200402
CAM112A_map19	0002.CSV	1820.55	0.0197717
CAM112A_map19	0002.CSV	1824.41	0.0195902
CAM112A_map19	0002.CSV	1828.26	0.0197878
CAM112A_map19	0002.CSV	1832.12	0.0199024
CAM112A_map19	0002.CSV	1835.98	0.0197532
CAM112A_map19	0002.CSV	1839.84	0.0195158
CAM112A_map19	0002.CSV	1843.69	0.0197053
CAM112A_map19	0002.CSV	1847.55	0.0199973
CAM112A_map19	0002.CSV	1851.41	0.0198741
CAM112A_map19	0002.CSV	1855.26	0.0197574
CAM112A_map19	0002.CSV	1859.12	0.0198298
CAM112A_map19	0002.CSV	1862.98	0.0197466
CAM112A_map19	0002.CSV	1866.84	0.0198679
CAM112A_map19	0002.CSV	1870.69	0.0202304
CAM112A_map19	0002.CSV	1874.55	0.0201383
CAM112A_map19	0002.CSV	1878.41	0.0200035
CAM112A_map19	0002.CSV	1882.26	0.0200575
CAM112A_map19	0002.CSV	1886.12	0.0200818
CAM112A_map19	0002.CSV	1889.98	0.0201781
CAM112A_map19	0002.CSV	1893.83	0.020261
CAM112A_map19	0002.CSV	1897.69	0.0203453
CAM112A_map19	0002.CSV	1901.55	0.0203318
CAM112A_map19	0002.CSV	1905.41	0.0203588
CAM112A_map19	0002.CSV	1909.26	0.0204452
CAM112A_map19	0002.CSV	1913.12	0.020449
CAM112A_map19	0002.CSV	1916.98	0.0204195
CAM112A_map19	0002.CSV	1920.83	0.020655
CAM112A_map19	0002.CSV	1924.69	0.0207311
CAM112A_map19	0002.CSV	1928.55	0.0206856
CAM112A_map19	0002.CSV	1932.4	0.0206662
CAM112A_map19	0002.CSV	1936.26	0.0207183
CAM112A_map19	0002.CSV	1940.12	0.0207303
CAM112A_map19	0002.CSV	1943.98	0.0210005
CAM112A_map19	0002.CSV	1947.83	0.0210962
CAM112A_map19	0002.CSV	1951.69	0.0210856
CAM112A_map19	0002.CSV	1955.55	0.0211056
CAM112A_map19	0002.CSV	1959.4	0.0211856
CAM112A_map19	0002.CSV	1963.26	0.0212136
CAM112A_map19	0002.CSV	1967.12	0.0213026
CAM112A_map19	0002.CSV	1970.98	0.0213091
CAM112A_map19	0002.CSV	1974.83	0.0213577
CAM112A_map19	0002.CSV	1978.69	0.0213972
CAM112A_map19	0002.CSV	1982.55	0.0214208
CAM112A_map19	0002.CSV	1986.4	0.0213947
CAM112A_map19	0002.CSV	1990.26	0.021505
CAM112A_map19	0002.CSV	1994.12	0.0216003
CAM112A_map19	0002.CSV	1997.98	0.0216277
CAM112A_map19	0002.CSV	2001.83	0.0216782
CAM112A_map19	0002.CSV	2005.69	0.0217532
CAM112A_map19	0002.CSV	2009.55	0.0217577
CAM112A_map19	0002.CSV	2013.4	0.0217625
CAM112A_map19	0002.CSV	2017.26	0.0218589
CAM112A_map19	0002.CSV	2021.12	0.021976
CAM112A_map19	0002.CSV	2024.97	0.0219438
CAM112A_map19	0002.CSV	2028.83	0.0219784
CAM112A_map19	0002.CSV	2032.69	0.0219738
CAM112A_map19	0002.CSV	2036.55	0.0220025
CAM112A_map19	0002.CSV	2040.4	0.0220709
CAM112A_map19	0002.CSV	2044.26	0.0221814
CAM112A_map19	0002.CSV	2048.12	0.0221915
CAM112A_map19	0002.CSV	2051.97	0.0221896
CAM112A_map19	0002.CSV	2055.83	0.0221627
CAM112A_map19	0002.CSV	2059.69	0.0222034
CAM112A_map19	0002.CSV	2063.55	0.0222562
CAM112A_map19	0002.CSV	2067.4	0.0223304
CAM112A_map19	0002.CSV	2071.26	0.0223246
CAM112A_map19	0002.CSV	2075.12	0.0224131
CAM112A_map19	0002.CSV	2078.97	0.0224644
CAM112A_map19	0002.CSV	2082.83	0.0224898
CAM112A_map19	0002.CSV	2086.69	0.0224681
CAM112A_map19	0002.CSV	2090.55	0.0224792
CAM112A_map19	0002.CSV	2094.4	0.0224732
CAM112A_map19	0002.CSV	2098.26	0.0225487
CAM112A_map19	0002.CSV	2102.12	0.0225901
CAM112A_map19	0002.CSV	2105.97	0.0226266
CAM112A_map19	0002.CSV	2109.83	0.0226323
CAM112A_map19	0002.CSV	2113.69	0.0226619
CAM112A_map19	0002.CSV	2117.55	0.0226771
CAM112A_map19	0002.CSV	2121.4	0.0227294
CAM112A_map19	0002.CSV	2125.26	0.0228084
CAM112A_map19	0002.CSV	2129.12	0.0228937
CAM112A_map19	0002.CSV	2132.97	0.0228777
CAM112A_map19	0002.CSV	2136.83	0.0229402
CAM112A_map19	0002.CSV	2140.69	0.0229467
CAM112A_map19	0002.CSV	2144.55	0.0229772
CAM112A_map19	0002.CSV	2148.4	0.0230527
CAM112A_map19	0002.CSV	2152.26	0.0231159
CAM112A_map19	0002.CSV	2156.12	0.0231065
CAM112A_map19	0002.CSV	2159.97	0.0231196
CAM112A_map19	0002.CSV	2163.83	0.0231251
CAM112A_map19	0002.CSV	2167.69	0.0231667
CAM112A_map19	0002.CSV	2171.55	0.0232137
CAM112A_map19	0002.CSV	2175.4	0.0232929
CAM112A_map19	0002.CSV	2179.26	0.0232845
CAM112A_map19	0002.CSV	2183.12	0.0233204
CAM112A_map19	0002.CSV	2186.97	0.0233588
CAM112A_map19	0002.CSV	2190.83	0.0233757
CAM112A_map19	0002.CSV	2194.69	0.0233422
CAM112A_map19	0002.CSV	2198.55	0.0233445
CAM112A_map19	0002.CSV	2202.4	0.0233899
CAM112A_map19	0002.CSV	2206.26	0.0234614
CAM112A_map19	0002.CSV	2210.12	0.02344
CAM112A_map19	0002.CSV	2213.97	0.0234268
CAM112A_map19	0002.CSV	2217.83	0.0234317
CAM112A_map19	0002.CSV	2221.69	0.0234796
CAM112A_map19	0002.CSV	2225.54	0.023492
CAM112A_map19	0002.CSV	2229.4	0.0235057
CAM112A_map19	0002.CSV	2233.26	0.0234752
CAM112A_map19	0002.CSV	2237.12	0.0234893
CAM112A_map19	0002.CSV	2240.97	0.0235121
CAM112A_map19	0002.CSV	2244.83	0.0235238
CAM112A_map19	0002.CSV	2248.69	0.0234931
CAM112A_map19	0002.CSV	2252.54	0.0235414
CAM112A_map19	0002.CSV	2256.4	0.0235964
CAM112A_map19	0002.CSV	2260.26	0.0236278
CAM112A_map19	0002.CSV	2264.11	0.0236077
CAM112A_map19	0002.CSV	2267.97	0.0236364
CAM112A_map19	0002.CSV	2271.83	0.0236384
CAM112A_map19	0002.CSV	2275.69	0.0237644
CAM112A_map19	0002.CSV	2279.54	0.0238331
CAM112A_map19	0002.CSV	2283.4	0.023769
CAM112A_map19	0002.CSV	2287.26	0.0237082
CAM112A_map19	0002.CSV	2291.11	0.0237682
CAM112A_map19	0002.CSV	2294.97	0.0237915
CAM112A_map19	0002.CSV	2298.83	0.0237966
CAM112A_map19	0002.CSV	2302.69	0.023762
CAM112A_map19	0002.CSV	2306.54	0.0237248
CAM112A_map19	0002.CSV	2310.4	0.0236591
CAM112A_map19	0002.CSV	2314.26	0.0234342
CAM112A_map19	0002.CSV	2318.11	0.0228667
CAM112A_map19	0002.CSV	2321.97	0.022122
CAM112A_map19	0002.CSV	2325.83	0.0210346
CAM112A_map19	0002.CSV	2329.69	0.0199928
CAM112A_map19	0002.CSV	2333.54	0.0189712
CAM112A_map19	0002.CSV	2337.4	0.018868
CAM112A_map19	0002.CSV	2341.26	0.0191013
CAM112A_map19	0002.CSV	2345.11	0.0212932
CAM112A_map19	0002.CSV	2348.97	0.0220252
CAM112A_map19	0002.CSV	2352.83	0.0197669
CAM112A_map19	0002.CSV	2356.69	0.0121287
CAM112A_map19	0002.CSV	2360.54	0.00582183
CAM112A_map19	0002.CSV	2364.4	0.00997429
CAM112A_map19	0002.CSV	2368.26	0.0177604
CAM112A_map19	0002.CSV	2372.11	0.0226463
CAM112A_map19	0002.CSV	2375.97	0.0246401
CAM112A_map19	0002.CSV	2379.83	0.0251087
CAM112A_map19	0002.CSV	2383.69	0.0251167
CAM112A_map19	0002.CSV	2387.54	0.024877
CAM112A_map19	0002.CSV	2391.4	0.0246918
CAM112A_map19	0002.CSV	2395.26	0.0246807
CAM112A_map19	0002.CSV	2399.11	0.0246769
CAM112A_map19	0002.CSV	2402.97	0.0247083
CAM112A_map19	0002.CSV	2406.83	0.0247958
CAM112A_map19	0002.CSV	2410.68	0.0248149
CAM112A_map19	0002.CSV	2414.54	0.0248587
CAM112A_map19	0002.CSV	2418.4	0.024858
CAM112A_map19	0002.CSV	2422.26	0.0248514
CAM112A_map19	0002.CSV	2426.11	0.0248485
CAM112A_map19	0002.CSV	2429.97	0.0248572
CAM112A_map19	0002.CSV	2433.83	0.0248912
CAM112A_map19	0002.CSV	2437.68	0.0249539
CAM112A_map19	0002.CSV	2441.54	0.0249974
CAM112A_map19	0002.CSV	2445.4	0.0250386
CAM112A_map19	0002.CSV	2449.26	0.0250718
CAM112A_map19	0002.CSV	2453.11	0.0251356
CAM112A_map19	0002.CSV	2456.97	0.0252212
CAM112A_map19	0002.CSV	2460.83	0.025282
CAM112A_map19	0002.CSV	2464.68	0.0252796
CAM112A_map19	0002.CSV	2468.54	0.0253467
CAM112A_map19	0002.CSV	2472.4	0.025463
CAM112A_map19	0002.CSV	2476.26	0.0256177
CAM112A_map19	0002.CSV	2480.11	0.0257921
CAM112A_map19	0002.CSV	2483.97	0.0259768
CAM112A_map19	0002.CSV	2487.83	0.026211
CAM112A_map19	0002.CSV	2491.68	0.0265226
CAM112A_map19	0002.CSV	2495.54	0.0269617
CAM112A_map19	0002.CSV	2499.4	0.0275162
CAM112A_map19	0002.CSV	2503.26	0.0280226
CAM112A_map19	0002.CSV	2507.11	0.0284224
CAM112A_map19	0002.CSV	2510.97	0.0285915
CAM112A_map19	0002.CSV	2514.83	0.0284953
CAM112A_map19	0002.CSV	2518.68	0.0282441
CAM112A_map19	0002.CSV	2522.54	0.027865
CAM112A_map19	0002.CSV	2526.4	0.0273807
CAM112A_map19	0002.CSV	2530.26	0.0269088
CAM112A_map19	0002.CSV	2534.11	0.0264246
CAM112A_map19	0002.CSV	2537.97	0.0260485
CAM112A_map19	0002.CSV	2541.83	0.025844
CAM112A_map19	0002.CSV	2545.68	0.0257016
CAM112A_map19	0002.CSV	2549.54	0.0255875
CAM112A_map19	0002.CSV	2553.4	0.0255368
CAM112A_map19	0002.CSV	2557.26	0.0254942
CAM112A_map19	0002.CSV	2561.11	0.0254614
CAM112A_map19	0002.CSV	2564.97	0.0254184
CAM112A_map19	0002.CSV	2568.83	0.0254729
CAM112A_map19	0002.CSV	2572.68	0.0255338
CAM112A_map19	0002.CSV	2576.54	0.0255497
CAM112A_map19	0002.CSV	2580.4	0.0254868
CAM112A_map19	0002.CSV	2584.25	0.0254923
CAM112A_map19	0002.CSV	2588.11	0.0255119
CAM112A_map19	0002.CSV	2591.97	0.0255136
CAM112A_map19	0002.CSV	2595.83	0.0254815
CAM112A_map19	0002.CSV	2599.68	0.0254651
CAM112A_map19	0002.CSV	2603.54	0.0254343
CAM112A_map19	0002.CSV	2607.4	0.0253644
CAM112A_map19	0002.CSV	2611.25	0.0253211
CAM112A_map19	0002.CSV	2615.11	0.0252947
CAM112A_map19	0002.CSV	2618.97	0.0252191
CAM112A_map19	0002.CSV	2622.82	0.0252319
CAM112A_map19	0002.CSV	2626.68	0.0252529
CAM112A_map19	0002.CSV	2630.54	0.0251695
CAM112A_map19	0002.CSV	2634.4	0.0251459
CAM112A_map19	0002.CSV	2638.25	0.0251696
CAM112A_map19	0002.CSV	2642.11	0.0250671
CAM112A_map19	0002.CSV	2645.97	0.0249743
CAM112A_map19	0002.CSV	2649.82	0.0249875
CAM112A_map19	0002.CSV	2653.68	0.0250346
CAM112A_map19	0002.CSV	2657.54	0.0250836
CAM112A_map19	0002.CSV	2661.4	0.0251348
CAM112A_map19	0002.CSV	2665.25	0.0251488
CAM112A_map19	0002.CSV	2669.11	0.0252366
CAM112A_map19	0002.CSV	2672.97	0.0254179
CAM112A_map19	0002.CSV	2676.82	0.025672
CAM112A_map19	0002.CSV	2680.68	0.0256745
CAM112A_map19	0002.CSV	2684.54	0.0253796
CAM112A_map19	0002.CSV	2688.4	0.0252332
CAM112A_map19	0002.CSV	2692.25	0.0252951
CAM112A_map19	0002.CSV	2696.11	0.0253794
CAM112A_map19	0002.CSV	2699.97	0.0254055
CAM112A_map19	0002.CSV	2703.82	0.0254207
CAM112A_map19	0002.CSV	2707.68	0.0255209
CAM112A_map19	0002.CSV	2711.54	0.0255389
CAM112A_map19	0002.CSV	2715.4	0.0255182
CAM112A_map19	0002.CSV	2719.25	0.0257228
CAM112A_map19	0002.CSV	2723.11	0.0260533
CAM112A_map19	0002.CSV	2726.97	0.0259975
CAM112A_map19	0002.CSV	2730.82	0.0256947
CAM112A_map19	0002.CSV	2734.68	0.0256705
CAM112A_map19	0002.CSV	2738.54	0.0257313
CAM112A_map19	0002.CSV	2742.4	0.0257263
CAM112A_map19	0002.CSV	2746.25	0.026011
CAM112A_map19	0002.CSV	2750.11	0.0260933
CAM112A_map19	0002.CSV	2753.97	0.0258929
CAM112A_map19	0002.CSV	2757.82	0.0258217
CAM112A_map19	0002.CSV	2761.68	0.0257437
CAM112A_map19	0002.CSV	2765.54	0.0256937
CAM112A_map19	0002.CSV	2769.39	0.0258536
CAM112A_map19	0002.CSV	2773.25	0.0262114
CAM112A_map19	0002.CSV	2777.11	0.0261684
CAM112A_map19	0002.CSV	2780.97	0.0259593
CAM112A_map19	0002.CSV	2784.82	0.0261454
CAM112A_map19	0002.CSV	2788.68	0.0265967
CAM112A_map19	0002.CSV	2792.54	0.0267425
CAM112A_map19	0002.CSV	2796.39	0.0267592
CAM112A_map19	0002.CSV	2800.25	0.0265986
CAM112A_map19	0002.CSV	2804.11	0.0263946
CAM112A_map19	0002.CSV	2807.97	0.0266559
CAM112A_map19	0002.CSV	2811.82	0.0267287
CAM112A_map19	0002.CSV	2815.68	0.0266045
CAM112A_map19	0002.CSV	2819.54	0.0267551
CAM112A_map19	0002.CSV	2823.39	0.0269876
CAM112A_map19	0002.CSV	2827.25	0.0271964
CAM112A_map19	0002.CSV	2831.11	0.0277318
CAM112A_map19	0002.CSV	2834.97	0.0285208
CAM112A_map19	0002.CSV	2838.82	0.0291812
CAM112A_map19	0002.CSV	2842.68	0.0299388
CAM112A_map19	0002.CSV	2846.54	0.0314125
CAM112A_map19	0002.CSV	2850.39	0.0322482
CAM112A_map19	0002.CSV	2854.25	0.0318937
CAM112A_map19	0002.CSV	2858.11	0.0314008
CAM112A_map19	0002.CSV	2861.97	0.0307919
CAM112A_map19	0002.CSV	2865.82	0.0303706
CAM112A_map19	0002.CSV	2869.68	0.0305315
CAM112A_map19	0002.CSV	2873.54	0.0306133
CAM112A_map19	0002.CSV	2877.39	0.0300141
CAM112A_map19	0002.CSV	2881.25	0.0294676
CAM112A_map19	0002.CSV	2885.11	0.0293247
CAM112A_map19	0002.CSV	2888.97	0.0295
CAM112A_map19	0002.CSV	2892.82	0.030049
CAM112A_map19	0002.CSV	2896.68	0.0305367
CAM112A_map19	0002.CSV	2900.54	0.030791
CAM112A_map19	0002.CSV	2904.39	0.0313609
CAM112A_map19	0002.CSV	2908.25	0.0324909
CAM112A_map19	0002.CSV	2912.11	0.0343108
CAM112A_map19	0002.CSV	2915.97	0.035827
CAM112A_map19	0002.CSV	2919.82	0.0359592
CAM112A_map19	0002.CSV	2923.68	0.0352858
CAM112A_map19	0002.CSV	2927.54	0.0347407
CAM112A_map19	0002.CSV	2931.39	0.0337308
CAM112A_map19	0002.CSV	2935.25	0.0323374
CAM112A_map19	0002.CSV	2939.11	0.0316033
CAM112A_map19	0002.CSV	2942.96	0.0316129
CAM112A_map19	0002.CSV	2946.82	0.0314902
CAM112A_map19	0002.CSV	2950.68	0.0311306
CAM112A_map19	0002.CSV	2954.54	0.0306032
CAM112A_map19	0002.CSV	2958.39	0.0300865
CAM112A_map19	0002.CSV	2962.25	0.0298191
CAM112A_map19	0002.CSV	2966.11	0.0292457
CAM112A_map19	0002.CSV	2969.96	0.028972
CAM112A_map19	0002.CSV	2973.82	0.0291706
CAM112A_map19	0002.CSV	2977.68	0.0292187
CAM112A_map19	0002.CSV	2981.53	0.0288639
CAM112A_map19	0002.CSV	2985.39	0.0281927
CAM112A_map19	0002.CSV	2989.25	0.0280289
CAM112A_map19	0002.CSV	2993.11	0.028154
CAM112A_map19	0002.CSV	2996.96	0.0279437
CAM112A_map19	0002.CSV	3000.82	0.0275355
CAM112A_map19	0002.CSV	3004.68	0.0273203
CAM112A_map19	0002.CSV	3008.53	0.0275242
CAM112A_map19	0002.CSV	3012.39	0.0278549
CAM112A_map19	0002.CSV	3016.25	0.0279284
CAM112A_map19	0002.CSV	3020.11	0.0277168
CAM112A_map19	0002.CSV	3023.96	0.0275439
CAM112A_map19	0002.CSV	3027.82	0.0275716
CAM112A_map19	0002.CSV	3031.68	0.0277819
CAM112A_map19	0002.CSV	3035.53	0.027768
CAM112A_map19	0002.CSV	3039.39	0.0277332
CAM112A_map19	0002.CSV	3043.25	0.0278478
CAM112A_map19	0002.CSV	3047.11	0.027833
CAM112A_map19	0002.CSV	3050.96	0.0278308
CAM112A_map19	0002.CSV	3054.82	0.0278372
CAM112A_map19	0002.CSV	3058.68	0.0276995
CAM112A_map19	0002.CSV	3062.53	0.0276622
CAM112A_map19	0002.CSV	3066.39	0.0279123
CAM112A_map19	0002.CSV	3070.25	0.0279001
CAM112A_map19	0002.CSV	3074.11	0.0278551
CAM112A_map19	0002.CSV	3077.96	0.0280963
CAM112A_map19	0002.CSV	3081.82	0.0282544
CAM112A_map19	0002.CSV	3085.68	0.0281804
CAM112A_map19	0002.CSV	3089.53	0.028047
CAM112A_map19	0002.CSV	3093.39	0.0278131
CAM112A_map19	0002.CSV	3097.25	0.0278328
CAM112A_map19	0002.CSV	3101.11	0.0279741
CAM112A_map19	0002.CSV	3104.96	0.0279956
CAM112A_map19	0002.CSV	3108.82	0.0280597
CAM112A_map19	0002.CSV	3112.68	0.0281649
CAM112A_map19	0002.CSV	3116.53	0.0283935
CAM112A_map19	0002.CSV	3120.39	0.0284052
CAM112A_map19	0002.CSV	3124.25	0.0281799
CAM112A_map19	0002.CSV	3128.11	0.0280883
CAM112A_map19	0002.CSV	3131.96	0.0280209
CAM112A_map19	0002.CSV	3135.82	0.0280563
CAM112A_map19	0002.CSV	3139.68	0.0281352
CAM112A_map19	0002.CSV	3143.53	0.0280342
CAM112A_map19	0002.CSV	3147.39	0.0281754
CAM112A_map19	0002.CSV	3151.25	0.0284881
CAM112A_map19	0002.CSV	3155.1	0.0283622
CAM112A_map19	0002.CSV	3158.96	0.0280114
CAM112A_map19	0002.CSV	3162.82	0.0279292
CAM112A_map19	0002.CSV	3166.68	0.0279502
CAM112A_map19	0002.CSV	3170.53	0.0279872
CAM112A_map19	0002.CSV	3174.39	0.0280362
CAM112A_map19	0002.CSV	3178.25	0.0281577
CAM112A_map19	0002.CSV	3182.1	0.0282034
CAM112A_map19	0002.CSV	3185.96	0.0282106
CAM112A_map19	0002.CSV	3189.82	0.0282438
CAM112A_map19	0002.CSV	3193.68	0.0281891
CAM112A_map19	0002.CSV	3197.53	0.0281932
CAM112A_map19	0002.CSV	3201.39	0.0283636
CAM112A_map19	0002.CSV	3205.25	0.0284191
CAM112A_map19	0002.CSV	3209.1	0.0283845
CAM112A_map19	0002.CSV	3212.96	0.0285681
CAM112A_map19	0002.CSV	3216.82	0.0287117
CAM112A_map19	0002.CSV	3220.68	0.028623
CAM112A_map19	0002.CSV	3224.53	0.028578
CAM112A_map19	0002.CSV	3228.39	0.028868
CAM112A_map19	0002.CSV	3232.25	0.029231
CAM112A_map19	0002.CSV	3236.1	0.0290947
CAM112A_map19	0002.CSV	3239.96	0.028928
CAM112A_map19	0002.CSV	3243.82	0.0291604
CAM112A_map19	0002.CSV	3247.68	0.0291912
CAM112A_map19	0002.CSV	3251.53	0.0290195
CAM112A_map19	0002.CSV	3255.39	0.0290977
CAM112A_map19	0002.CSV	3259.25	0.0288918
CAM112A_map19	0002.CSV	3263.1	0.0288065
CAM112A_map19	0002.CSV	3266.96	0.029175
CAM112A_map19	0002.CSV	3270.82	0.0295638
CAM112A_map19	0002.CSV	3274.68	0.0295474
CAM112A_map19	0002.CSV	3278.53	0.0292743
CAM112A_map19	0002.CSV	3282.39	0.0290859
CAM112A_map19	0002.CSV	3286.25	0.0291426
CAM112A_map19	0002.CSV	3290.1	0.029552
CAM112A_map19	0002.CSV	3293.96	0.0298347
CAM112A_map19	0002.CSV	3297.82	0.0296805
CAM112A_map19	0002.CSV	3301.67	0.0296399
CAM112A_map19	0002.CSV	3305.53	0.0297457
CAM112A_map19	0002.CSV	3309.39	0.0295989
CAM112A_map19	0002.CSV	3313.25	0.0291703
CAM112A_map19	0002.CSV	3317.1	0.0289593
CAM112A_map19	0002.CSV	3320.96	0.0291064
CAM112A_map19	0002.CSV	3324.82	0.0293171
CAM112A_map19	0002.CSV	3328.67	0.0291049
CAM112A_map19	0002.CSV	3332.53	0.0289832
CAM112A_map19	0002.CSV	3336.39	0.029452
CAM112A_map19	0002.CSV	3340.24	0.0297342
CAM112A_map19	0002.CSV	3344.1	0.0295847
CAM112A_map19	0002.CSV	3347.96	0.0295872
CAM112A_map19	0002.CSV	3351.82	0.0295296
CAM112A_map19	0002.CSV	3355.67	0.0292371
CAM112A_map19	0002.CSV	3359.53	0.0293073
CAM112A_map19	0002.CSV	3363.39	0.0296146
CAM112A_map19	0002.CSV	3367.24	0.0299023
CAM112A_map19	0002.CSV	3371.1	0.0298156
CAM112A_map19	0002.CSV	3374.96	0.0295474
CAM112A_map19	0002.CSV	3378.82	0.0293642
CAM112A_map19	0002.CSV	3382.67	0.0291341
CAM112A_map19	0002.CSV	3386.53	0.0292389
CAM112A_map19	0002.CSV	3390.39	0.029708
CAM112A_map19	0002.CSV	3394.24	0.0299451
CAM112A_map19	0002.CSV	3398.1	0.0298151
CAM112A_map19	0002.CSV	3401.96	0.0296555
CAM112A_map19	0002.CSV	3405.82	0.029566
CAM112A_map19	0002.CSV	3409.67	0.0295903
CAM112A_map19	0002.CSV	3413.53	0.0293463
CAM112A_map19	0002.CSV	3417.39	0.028963
CAM112A_map19	0002.CSV	3421.24	0.0288597
CAM112A_map19	0002.CSV	3425.1	0.0290479
CAM112A_map19	0002.CSV	3428.96	0.0293248
CAM112A_map19	0002.CSV	3432.82	0.0294297
CAM112A_map19	0002.CSV	3436.67	0.0291529
CAM112A_map19	0002.CSV	3440.53	0.0286
CAM112A_map19	0002.CSV	3444.39	0.0283956
CAM112A_map19	0002.CSV	3448.24	0.0284201
CAM112A_map19	0002.CSV	3452.1	0.0282444
CAM112A_map19	0002.CSV	3455.96	0.028272
CAM112A_map19	0002.CSV	3459.82	0.0286529
CAM112A_map19	0002.CSV	3463.67	0.0289803
CAM112A_map19	0002.CSV	3467.53	0.0291049
CAM112A_map19	0002.CSV	3471.39	0.0287628
CAM112A_map19	0002.CSV	3475.24	0.0284288
CAM112A_map19	0002.CSV	3479.1	0.0283936
CAM112A_map19	0002.CSV	3482.96	0.0283724
CAM112A_map19	0002.CSV	3486.82	0.0284241
CAM112A_map19	0002.CSV	3490.67	0.0283711
CAM112A_map19	0002.CSV	3494.53	0.0284478
CAM112A_map19	0002.CSV	3498.39	0.0284459
CAM112A_map19	0002.CSV	3502.24	0.0283133
CAM112A_map19	0002.CSV	3506.1	0.0279421
CAM112A_map19	0002.CSV	3509.96	0.0277875
CAM112A_map19	0002.CSV	3513.81	0.0278613
CAM112A_map19	0002.CSV	3517.67	0.0274372
CAM112A_map19	0002.CSV	3521.53	0.0274017
CAM112A_map19	0002.CSV	3525.39	0.0276067
CAM112A_map19	0002.CSV	3529.24	0.0275017
CAM112A_map19	0002.CSV	3533.1	0.0274758
CAM112A_map19	0002.CSV	3536.96	0.0275287
CAM112A_map19	0002.CSV	3540.81	0.0275058
CAM112A_map19	0002.CSV	3544.67	0.0277995
CAM112A_map19	0002.CSV	3548.53	0.0277468
CAM112A_map19	0002.CSV	3552.39	0.0273279
CAM112A_map19	0002.CSV	3556.24	0.0271487
CAM112A_map19	0002.CSV	3560.1	0.0268511
CAM112A_map19	0002.CSV	3563.96	0.0264166
CAM112A_map19	0002.CSV	3567.81	0.0269331
CAM112A_map19	0002.CSV	3571.67	0.0269663
CAM112A_map19	0002.CSV	3575.53	0.0265226
CAM112A_map19	0002.CSV	3579.39	0.0267
CAM112A_map19	0002.CSV	3583.24	0.0267228
CAM112A_map19	0002.CSV	3587.1	0.0268154
CAM112A_map19	0002.CSV	3590.96	0.0267698
CAM112A_map19	0002.CSV	3594.81	0.0264251
CAM112A_map19	0002.CSV	3598.67	0.0265092
CAM112A_map19	0002.CSV	3602.53	0.0263716
CAM112A_map19	0002.CSV	3606.39	0.0257207
CAM112A_map19	0002.CSV	3610.24	0.0253123
CAM112A_map19	0002.CSV	3614.1	0.0253715
CAM112A_map19	0002.CSV	3617.96	0.0258922
CAM112A_map19	0002.CSV	3621.81	0.0260981
CAM112A_map19	0002.CSV	3625.67	0.025288
CAM112A_map19	0002.CSV	3629.53	0.0253393
CAM112A_map19	0002.CSV	3633.39	0.0260312
CAM112A_map19	0002.CSV	3637.24	0.0257423
CAM112A_map19	0002.CSV	3641.1	0.0252787
CAM112A_map19	0002.CSV	3644.96	0.0245905
CAM112A_map19	0002.CSV	3648.81	0.0253337
CAM112A_map19	0002.CSV	3652.67	0.0261077
CAM112A_map19	0002.CSV	3656.53	0.0259769
CAM112A_map19	0002.CSV	3660.38	0.0259166
CAM112A_map19	0002.CSV	3664.24	0.0250276
CAM112A_map19	0002.CSV	3668.1	0.0241623
CAM112A_map19	0002.CSV	3671.96	0.024463
CAM112A_map19	0002.CSV	3675.81	0.0254487
CAM112A_map19	0002.CSV	3679.67	0.0258104
CAM112A_map19	0002.CSV	3683.53	0.0251887
CAM112A_map19	0002.CSV	3687.38	0.0249521
CAM112A_map19	0002.CSV	3691.24	0.0259541
CAM112A_map19	0002.CSV	3695.1	0.0257048
CAM112A_map19	0002.CSV	3698.95	0.02503
CAM112A_map19	0002.CSV	3702.81	0.0248988
CAM112A_map19	0002.CSV	3706.67	0.024472
CAM112A_map19	0002.CSV	3710.53	0.0245068
CAM112A_map19	0002.CSV	3714.38	0.0253856
CAM112A_map19	0002.CSV	3718.24	0.0250073
CAM112A_map19	0002.CSV	3722.1	0.0246983
CAM112A_map19	0002.CSV	3725.95	0.024848
CAM112A_map19	0002.CSV	3729.81	0.0247081
CAM112A_map19	0002.CSV	3733.67	0.0250447
CAM112A_map19	0002.CSV	3737.53	0.0262497
CAM112A_map19	0002.CSV	3741.38	0.0252614
CAM112A_map19	0002.CSV	3745.24	0.0240045
CAM112A_map19	0002.CSV	3749.1	0.023935
CAM112A_map19	0002.CSV	3752.95	0.0252343
CAM112A_map19	0002.CSV	3756.81	0.0255184
CAM112A_map19	0002.CSV	3760.67	0.0254306
CAM112A_map19	0002.CSV	3764.53	0.0251153
CAM112A_map19	0002.CSV	3768.38	0.0253623
CAM112A_map19	0002.CSV	3772.24	0.025696
CAM112A_map19	0002.CSV	3776.1	0.0254215
CAM112A_map19	0002.CSV	3779.95	0.0255719
CAM112A_map19	0002.CSV	3783.81	0.0256703
CAM112A_map19	0002.CSV	3787.67	0.0256517
CAM112A_map19	0002.CSV	3791.53	0.0252632
CAM112A_map19	0002.CSV	3795.38	0.024706
CAM112A_map19	0002.CSV	3799.24	0.0248559
CAM112A_map19	0002.CSV	3803.1	0.0254835
CAM112A_map19	0002.CSV	3806.95	0.0258928
CAM112A_map19	0002.CSV	3810.81	0.0255283
CAM112A_map19	0002.CSV	3814.67	0.0249115
CAM112A_map19	0002.CSV	3818.53	0.0253332
CAM112A_map19	0002.CSV	3822.38	0.0260005
CAM112A_map19	0002.CSV	3826.24	0.0257136
CAM112A_map19	0002.CSV	3830.1	0.0252944
CAM112A_map19	0002.CSV	3833.95	0.0249726
CAM112A_map19	0002.CSV	3837.81	0.025402
CAM112A_map19	0002.CSV	3841.67	0.0263007
CAM112A_map19	0002.CSV	3845.53	0.0259631
CAM112A_map19	0002.CSV	3849.38	0.0248744
CAM112A_map19	0002.CSV	3853.24	0.0251516
CAM112A_map19	0002.CSV	3857.1	0.0260543
CAM112A_map19	0002.CSV	3860.95	0.0253677
CAM112A_map19	0002.CSV	3864.81	0.0254092
CAM112A_map19	0002.CSV	3868.67	0.0256597
CAM112A_map19	0002.CSV	3872.52	0.0259796
CAM112A_map19	0002.CSV	3876.38	0.0256151
CAM112A_map19	0002.CSV	3880.24	0.025363
CAM112A_map19	0002.CSV	3884.1	0.0258795
CAM112A_map19	0002.CSV	3887.95	0.0258347
CAM112A_map19	0002.CSV	3891.81	0.025767
CAM112A_map19	0002.CSV	3895.67	0.0254433
CAM112A_map19	0002.CSV	3899.52	0.0250167
CAM112A_map19	0002.CSV	3903.38	0.0260918
CAM112A_map19	0002.CSV	3907.24	0.026349
CAM112A_map19	0002.CSV	3911.1	0.0255371
CAM112A_map19	0002.CSV	3914.95	0.025036
CAM112A_map19	0002.CSV	3918.81	0.0253355
CAM112A_map19	0002.CSV	3922.67	0.0255053
CAM112A_map19	0002.CSV	3926.52	0.0255316
CAM112A_map19	0002.CSV	3930.38	0.0256735
CAM112A_map19	0002.CSV	3934.24	0.0259172
CAM112A_map19	0002.CSV	3938.09	0.0254844
CAM112A_map19	0002.CSV	3941.95	0.0252777
CAM112A_map19	0002.CSV	3945.81	0.0254034
CAM112A_map19	0002.CSV	3949.67	0.0254767
CAM112A_map19	0002.CSV	3953.52	0.0254505
CAM112A_map19	0002.CSV	3957.38	0.0252548
CAM112A_map19	0002.CSV	3961.24	0.0252046
CAM112A_map19	0002.CSV	3965.09	0.0253553
CAM112A_map19	0002.CSV	3968.95	0.0253846
CAM112A_map19	0002.CSV	3972.81	0.0254052
CAM112A_map19	0002.CSV	3976.67	0.0253752
CAM112A_map19	0002.CSV	3980.52	0.0253293
CAM112A_map19	0002.CSV	3984.38	0.0253948
CAM112A_map19	0002.CSV	3988.24	0.0253768
CAM112A_map19	0002.CSV	3992.09	0.0253666
CAM112A_map19	0002.CSV	3995.95	0.0253846
CAM112A_map19	0002.CSV	3999.81	0.0252854
CAM112A_map19	0003.CSV	674.992	0.0448691
CAM112A_map19	0003.CSV	678.849	0.0471838
CAM112A_map19	0003.CSV	682.706	0.0482263
CAM112A_map19	0003.CSV	686.563	0.0498855
CAM112A_map19	0003.CSV	690.42	0.0517022
CAM112A_map19	0003.CSV	694.277	0.0569853
CAM112A_map19	0003.CSV	698.134	0.062394
CAM112A_map19	0003.CSV	701.991	0.0705472
CAM112A_map19	0003.CSV	705.849	0.0878828
CAM112A_map19	0003.CSV	709.706	0.110949
CAM112A_map19	0003.CSV	713.563	0.10011
CAM112A_map19	0003.CSV	717.42	0.0633157
CAM112A_map19	0003.CSV	721.277	0.0425015
CAM112A_map19	0003.CSV	725.134	0.0390431
CAM112A_map19	0003.CSV	728.991	0.0390436
CAM112A_map19	0003.CSV	732.848	0.0400228
CAM112A_map19	0003.CSV	736.705	0.0409704
CAM112A_map19	0003.CSV	740.562	0.0422682
CAM112A_map19	0003.CSV	744.42	0.0428718
CAM112A_map19	0003.CSV	748.277	0.043861
CAM112A_map19	0003.CSV	752.134	0.0440761
CAM112A_map19	0003.CSV	755.991	0.0445551
CAM112A_map19	0003.CSV	759.848	0.0451411
CAM112A_map19	0003.CSV	763.705	0.046339
CAM112A_map19	0003.CSV	767.562	0.0467273
CAM112A_map19	0003.CSV	771.419	0.0473773
CAM112A_map19	0003.CSV	775.276	0.0475662
CAM112A_map19	0003.CSV	779.133	0.0480264
CAM112A_map19	0003.CSV	782.99	0.0479686
CAM112A_map19	0003.CSV	786.848	0.0481542
CAM112A_map19	0003.CSV	790.705	0.0479937
CAM112A_map19	0003.CSV	794.562	0.048695
CAM112A_map19	0003.CSV	798.419	0.0493261
CAM112A_map19	0003.CSV	802.276	0.0501413
CAM112A_map19	0003.CSV	806.133	0.0502649
CAM112A_map19	0003.CSV	809.99	0.0510067
CAM112A_map19	0003.CSV	813.847	0.051905
CAM112A_map19	0003.CSV	817.704	0.0533101
CAM112A_map19	0003.CSV	821.562	0.0546152
CAM112A_map19	0003.CSV	825.419	0.0566724
CAM112A_map19	0003.CSV	829.276	0.0586153
CAM112A_map19	0003.CSV	833.133	0.0608329
CAM112A_map19	0003.CSV	836.99	0.0635491
CAM112A_map19	0003.CSV	840.847	0.0682902
CAM112A_map19	0003.CSV	844.704	0.0752412
CAM112A_map19	0003.CSV	848.561	0.0799669
CAM112A_map19	0003.CSV	852.418	0.082485
CAM112A_map19	0003.CSV	856.275	0.0933275
CAM112A_map19	0003.CSV	860.132	0.116287
CAM112A_map19	0003.CSV	863.99	0.15808
CAM112A_map19	0003.CSV	867.847	0.205223
CAM112A_map19	0003.CSV	871.704	0.210997
CAM112A_map19	0003.CSV	875.561	0.17385
CAM112A_map19	0003.CSV	879.418	0.133578
CAM112A_map19	0003.CSV	883.275	0.0933494
CAM112A_map19	0003.CSV	887.132	0.0576098
CAM112A_map19	0003.CSV	890.989	0.0420942
CAM112A_map19	0003.CSV	894.846	0.0416605
CAM112A_map19	0003.CSV	898.703	0.0432491
CAM112A_map19	0003.CSV	902.561	0.0448003
CAM112A_map19	0003.CSV	906.418	0.0456482
CAM112A_map19	0003.CSV	910.275	0.0467028
CAM112A_map19	0003.CSV	914.132	0.0473845
CAM112A_map19	0003.CSV	917.989	0.0483949
CAM112A_map19	0003.CSV	921.846	0.0490536
CAM112A_map19	0003.CSV	925.703	0.0499402
CAM112A_map19	0003.CSV	929.56	0.0505583
CAM112A_map19	0003.CSV	933.417	0.051398
CAM112A_map19	0003.CSV	937.274	0.0517295
CAM112A_map19	0003.CSV	941.131	0.0522099
CAM112A_map19	0003.CSV	944.989	0.0525433
CAM112A_map19	0003.CSV	948.846	0.05319
CAM112A_map19	0003.CSV	952.703	0.0536636
CAM112A_map19	0003.CSV	956.56	0.0543102
CAM112A_map19	0003.CSV	960.417	0.0546139
CAM112A_map19	0003.CSV	964.274	0.0552265
CAM112A_map19	0003.CSV	968.131	0.0557279
CAM112A_map19	0003.CSV	971.988	0.0566696
CAM112A_map19	0003.CSV	975.845	0.0574389
CAM112A_map19	0003.CSV	979.702	0.0583751
CAM112A_map19	0003.CSV	983.559	0.0590878
CAM112A_map19	0003.CSV	987.417	0.0599769
CAM112A_map19	0003.CSV	991.274	0.0605943
CAM112A_map19	0003.CSV	995.131	0.0614554
CAM112A_map19	0003.CSV	998.988	0.0620768
CAM112A_map19	0003.CSV	1002.85	0.0629882
CAM112A_map19	0003.CSV	1006.7	0.0635529
CAM112A_map19	0003.CSV	1010.56	0.0643102
CAM112A_map19	0003.CSV	1014.42	0.0648848
CAM112A_map19	0003.CSV	1018.27	0.065679
CAM112A_map19	0003.CSV	1022.13	0.0661578
CAM112A_map19	0003.CSV	1025.99	0.0668398
CAM112A_map19	0003.CSV	1029.85	0.0672001
CAM112A_map19	0003.CSV	1033.7	0.0678182
CAM112A_map19	0003.CSV	1037.56	0.0683666
CAM112A_map19	0003.CSV	1041.42	0.0691415
CAM112A_map19	0003.CSV	1045.27	0.0694417
CAM112A_map19	0003.CSV	1049.13	0.0701408
CAM112A_map19	0003.CSV	1052.99	0.0708307
CAM112A_map19	0003.CSV	1056.84	0.0719798
CAM112A_map19	0003.CSV	1060.7	0.0729578
CAM112A_map19	0003.CSV	1064.56	0.0742108
CAM112A_map19	0003.CSV	1068.42	0.0748987
CAM112A_map19	0003.CSV	1072.27	0.0754762
CAM112A_map19	0003.CSV	1076.13	0.075664
CAM112A_map19	0003.CSV	1079.99	0.0762003
CAM112A_map19	0003.CSV	1083.84	0.0766208
CAM112A_map19	0003.CSV	1087.7	0.0770481
CAM112A_map19	0003.CSV	1091.56	0.0766301
CAM112A_map19	0003.CSV	1095.41	0.0761359
CAM112A_map19	0003.CSV	1099.27	0.0757966
CAM112A_map19	0003.CSV	1103.13	0.0762907
CAM112A_map19	0003.CSV	1106.99	0.0768392
CAM112A_map19	0003.CSV	1110.84	0.0778583
CAM112A_map19	0003.CSV	1114.7	0.078372
CAM112A_map19	0003.CSV	1118.56	0.0787186
CAM112A_map19	0003.CSV	1122.41	0.0787237
CAM112A_map19	0003.CSV	1126.27	0.0790154
CAM112A_map19	0003.CSV	1130.13	0.0791127
CAM112A_map19	0003.CSV	1133.99	0.0795093
CAM112A_map19	0003.CSV	1137.84	0.0796704
CAM112A_map19	0003.CSV	1141.7	0.08012
CAM112A_map19	0003.CSV	1145.56	0.0804616
CAM112A_map19	0003.CSV	1149.41	0.0811218
CAM112A_map19	0003.CSV	1153.27	0.0815618
CAM112A_map19	0003.CSV	1157.13	0.0823621
CAM112A_map19	0003.CSV	1160.99	0.0829062
CAM112A_map19	0003.CSV	1164.84	0.0834391
CAM112A_map19	0003.CSV	1168.7	0.0834881
CAM112A_map19	0003.CSV	1172.56	0.0836794
CAM112A_map19	0003.CSV	1176.41	0.0835826
CAM112A_map19	0003.CSV	1180.27	0.0836653
CAM112A_map19	0003.CSV	1184.13	0.0834411
CAM112A_map19	0003.CSV	1187.99	0.0833564
CAM112A_map19	0003.CSV	1191.84	0.0830741
CAM112A_map19	0003.CSV	1195.7	0.0832182
CAM112A_map19	0003.CSV	1199.56	0.0834242
CAM112A_map19	0003.CSV	1203.41	0.084031
CAM112A_map19	0003.CSV	1207.27	0.084491
CAM112A_map19	0003.CSV	1211.13	0.0852989
CAM112A_map19	0003.CSV	1214.98	0.0859405
CAM112A_map19	0003.CSV	1218.84	0.0869482
CAM112A_map19	0003.CSV	1222.7	0.0879415
CAM112A_map19	0003.CSV	1226.56	0.0892904
CAM112A_map19	0003.CSV	1230.41	0.0904164
CAM112A_map19	0003.CSV	1234.27	0.0918487
CAM112A_map19	0003.CSV	1238.13	0.0930992
CAM112A_map19	0003.CSV	1241.98	0.0946252
CAM112A_map19	0003.CSV	1245.84	0.0960096
CAM112A_map19	0003.CSV	1249.7	0.097695
CAM112A_map19	0003.CSV	1253.56	0.0989827
CAM112A_map19	0003.CSV	1257.41	0.100249
CAM112A_map19	0003.CSV	1261.27	0.101273
CAM112A_map19	0003.CSV	1265.13	0.1028
CAM112A_map19	0003.CSV	1268.98	0.104279
CAM112A_map19	0003.CSV	1272.84	0.106202
CAM112A_map19	0003.CSV	1276.7	0.107868
CAM112A_map19	0003.CSV	1280.56	0.109728
CAM112A_map19	0003.CSV	1284.41	0.11127
CAM112A_map19	0003.CSV	1288.27	0.113092
CAM112A_map19	0003.CSV	1292.13	0.114647
CAM112A_map19	0003.CSV	1295.98	0.116511
CAM112A_map19	0003.CSV	1299.84	0.118261
CAM112A_map19	0003.CSV	1303.7	0.120451
CAM112A_map19	0003.CSV	1307.56	0.122638
CAM112A_map19	0003.CSV	1311.41	0.125411
CAM112A_map19	0003.CSV	1315.27	0.128125
CAM112A_map19	0003.CSV	1319.13	0.131174
CAM112A_map19	0003.CSV	1322.98	0.133665
CAM112A_map19	0003.CSV	1326.84	0.136562
CAM112A_map19	0003.CSV	1330.7	0.139635
CAM112A_map19	0003.CSV	1334.56	0.143227
CAM112A_map19	0003.CSV	1338.41	0.147472
CAM112A_map19	0003.CSV	1342.27	0.152886
CAM112A_map19	0003.CSV	1346.13	0.157219
CAM112A_map19	0003.CSV	1349.98	0.162447
CAM112A_map19	0003.CSV	1353.84	0.167852
CAM112A_map19	0003.CSV	1357.7	0.173855
CAM112A_map19	0003.CSV	1361.56	0.18076
CAM112A_map19	0003.CSV	1365.41	0.18961
CAM112A_map19	0003.CSV	1369.27	0.197042
CAM112A_map19	0003.CSV	1373.13	0.20663
CAM112A_map19	0003.CSV	1376.98	0.21758
CAM112A_map19	0003.CSV	1380.84	0.227736
CAM112A_map19	0003.CSV	1384.7	0.237493
CAM112A_map19	0003.CSV	1388.56	0.249832
CAM112A_map19	0003.CSV	1392.41	0.258171
CAM112A_map19	0003.CSV	1396.27	0.263646
CAM112A_map19	0003.CSV	1400.13	0.263823
CAM112A_map19	0003.CSV	1403.98	0.26142
CAM112A_map19	0003.CSV	1407.84	0.255225
CAM112A_map19	0003.CSV	1411.7	0.247642
CAM112A_map19	0003.CSV	1415.55	0.239275
CAM112A_map19	0003.CSV	1419.41	0.229999
CAM112A_map19	0003.CSV	1423.27	0.221423
CAM112A_map19	0003.CSV	1427.12	0.215852
CAM112A_map19	0003.CSV	1430.98	0.209645
CAM112A_map19	0003.CSV	1434.84	0.203586
CAM112A_map19	0003.CSV	1438.7	0.195751
CAM112A_map19	0003.CSV	1442.55	0.189919
CAM112A_map19	0003.CSV	1446.41	0.183227
CAM112A_map19	0003.CSV	1450.27	0.176309
CAM112A_map19	0003.CSV	1454.12	0.170088
CAM112A_map19	0003.CSV	1457.98	0.16089
CAM112A_map19	0003.CSV	1461.84	0.153078
CAM112A_map19	0003.CSV	1465.7	0.147124
CAM112A_map19	0003.CSV	1469.55	0.140669
CAM112A_map19	0003.CSV	1473.41	0.132874
CAM112A_map19	0003.CSV	1477.27	0.124193
CAM112A_map19	0003.CSV	1481.12	0.118527
CAM112A_map19	0003.CSV	1484.98	0.112976
CAM112A_map19	0003.CSV	1488.84	0.106419
CAM112A_map19	0003.CSV	1492.7	0.0995775
CAM112A_map19	0003.CSV	1496.55	0.0941859
CAM112A_map19	0003.CSV	1500.41	0.0880355
CAM112A_map19	0003.CSV	1504.27	0.0841708
CAM112A_map19	0003.CSV	1508.12	0.0781114
CAM112A_map19	0003.CSV	1511.98	0.0738485
CAM112A_map19	0003.CSV	1515.84	0.0708187
CAM112A_map19	0003.CSV	1519.7	0.0671385
CAM112A_map19	0003.CSV	1523.55	0.0632038
CAM112A_map19	0003.CSV	1527.41	0.0606279
CAM112A_map19	0003.CSV	1531.27	0.0586659
CAM112A_map19	0003.CSV	1535.12	0.0579268
CAM112A_map19	0003.CSV	1538.98	0.0568744
CAM112A_map19	0003.CSV	1542.84	0.0516703
CAM112A_map19	0003.CSV	1546.7	0.0466081
CAM112A_map19	0003.CSV	1550.55	0.0429271
CAM112A_map19	0003.CSV	1554.41	0.0398243
CAM112A_map19	0003.CSV	1558.27	0.0377887
CAM112A_map19	0003.CSV	1562.12	0.0366823
CAM112A_map19	0003.CSV	1565.98	0.0361942
CAM112A_map19	0003.CSV	1569.84	0.0366714
CAM112A_map19	0003.CSV	1573.69	0.0373103
CAM112A_map19	0003.CSV	1577.55	0.0371025
CAM112A_map19	0003.CSV	1581.41	0.0353006
CAM112A_map19	0003.CSV	1585.27	0.0329896
CAM112A_map19	0003.CSV	1589.12	0.0309991
CAM112A_map19	0003.CSV	1592.98	0.0294975
CAM112A_map19	0003.CSV	1596.84	0.0284903
CAM112A_map19	0003.CSV	1600.69	0.0277803
CAM112A_map19	0003.CSV	1604.55	0.0274674
CAM112A_map19	0003.CSV	1608.41	0.0273069
CAM112A_map19	0003.CSV	1612.27	0.0271335
CAM112A_map19	0003.CSV	1616.12	0.0269773
CAM112A_map19	0003.CSV	1619.98	0.0270035
CAM112A_map19	0003.CSV	1623.84	0.0268462
CAM112A_map19	0003.CSV	1627.69	0.0265776
CAM112A_map19	0003.CSV	1631.55	0.0258735
CAM112A_map19	0003.CSV	1635.41	0.0257332
CAM112A_map19	0003.CSV	1639.27	0.0257246
CAM112A_map19	0003.CSV	1643.12	0.025257
CAM112A_map19	0003.CSV	1646.98	0.0251708
CAM112A_map19	0003.CSV	1650.84	0.0254711
CAM112A_map19	0003.CSV	1654.69	0.0256465
CAM112A_map19	0003.CSV	1658.55	0.0252108
CAM112A_map19	0003.CSV	1662.41	0.0247842
CAM112A_map19	0003.CSV	1666.27	0.024559
CAM112A_map19	0003.CSV	1670.12	0.0245397
CAM112A_map19	0003.CSV	1673.98	0.024768
CAM112A_map19	0003.CSV	1677.84	0.0243788
CAM112A_map19	0003.CSV	1681.69	0.0241484
CAM112A_map19	0003.CSV	1685.55	0.0243534
CAM112A_map19	0003.CSV	1689.41	0.024206
CAM112A_map19	0003.CSV	1693.27	0.0236927
CAM112A_map19	0003.CSV	1697.12	0.0237875
CAM112A_map19	0003.CSV	1700.98	0.0242953
CAM112A_map19	0003.CSV	1704.84	0.0245411
CAM112A_map19	0003.CSV	1708.69	0.0245868
CAM112A_map19	0003.CSV	1712.55	0.0245824
CAM112A_map19	0003.CSV	1716.41	0.0255474
CAM112A_map19	0003.CSV	1720.27	0.0267718
CAM112A_map19	0003.CSV	1724.12	0.0267617
[truncated: 128,314 more rows]

## Sheet: CAM112_map20
Map	Select spectrum number	Wavenumbers	Absorbance
CAM112A_map20	0001.CSV	674.992	0.0341571
CAM112A_map20	0001.CSV	678.849	0.0366563
CAM112A_map20	0001.CSV	682.706	0.0382664
CAM112A_map20	0001.CSV	686.563	0.0407308
CAM112A_map20	0001.CSV	690.42	0.042642
CAM112A_map20	0001.CSV	694.277	0.0467992
CAM112A_map20	0001.CSV	698.134	0.0520771
CAM112A_map20	0001.CSV	701.991	0.0607872
CAM112A_map20	0001.CSV	705.849	0.0774345
CAM112A_map20	0001.CSV	709.706	0.0991414
CAM112A_map20	0001.CSV	713.563	0.0895286
CAM112A_map20	0001.CSV	717.42	0.0557252
CAM112A_map20	0001.CSV	721.277	0.0355438
CAM112A_map20	0001.CSV	725.134	0.0315873
CAM112A_map20	0001.CSV	728.991	0.03121
CAM112A_map20	0001.CSV	732.848	0.0319826
CAM112A_map20	0001.CSV	736.705	0.03217
CAM112A_map20	0001.CSV	740.562	0.0329337
CAM112A_map20	0001.CSV	744.42	0.0334572
CAM112A_map20	0001.CSV	748.277	0.0342375
CAM112A_map20	0001.CSV	752.134	0.034399
CAM112A_map20	0001.CSV	755.991	0.0354547
CAM112A_map20	0001.CSV	759.848	0.0361652
CAM112A_map20	0001.CSV	763.705	0.0371495
CAM112A_map20	0001.CSV	767.562	0.0375957
CAM112A_map20	0001.CSV	771.419	0.038236
CAM112A_map20	0001.CSV	775.276	0.0382106
CAM112A_map20	0001.CSV	779.133	0.0386841
CAM112A_map20	0001.CSV	782.99	0.0387846
CAM112A_map20	0001.CSV	786.848	0.039062
CAM112A_map20	0001.CSV	790.705	0.0390605
CAM112A_map20	0001.CSV	794.562	0.039677
CAM112A_map20	0001.CSV	798.419	0.0399549
CAM112A_map20	0001.CSV	802.276	0.0408232
CAM112A_map20	0001.CSV	806.133	0.041413
CAM112A_map20	0001.CSV	809.99	0.042313
CAM112A_map20	0001.CSV	813.847	0.0429251
CAM112A_map20	0001.CSV	817.704	0.0441982
CAM112A_map20	0001.CSV	821.562	0.0454575
CAM112A_map20	0001.CSV	825.419	0.047365
CAM112A_map20	0001.CSV	829.276	0.0489807
CAM112A_map20	0001.CSV	833.133	0.0513108
CAM112A_map20	0001.CSV	836.99	0.0540092
CAM112A_map20	0001.CSV	840.847	0.058404
CAM112A_map20	0001.CSV	844.704	0.0651029
CAM112A_map20	0001.CSV	848.561	0.0699799
CAM112A_map20	0001.CSV	852.418	0.0726826
CAM112A_map20	0001.CSV	856.275	0.0838895
CAM112A_map20	0001.CSV	860.132	0.107771
CAM112A_map20	0001.CSV	863.99	0.150093
CAM112A_map20	0001.CSV	867.847	0.195361
CAM112A_map20	0001.CSV	871.704	0.203963
CAM112A_map20	0001.CSV	875.561	0.175325
CAM112A_map20	0001.CSV	879.418	0.138095
CAM112A_map20	0001.CSV	883.275	0.0937187
CAM112A_map20	0001.CSV	887.132	0.0517883
CAM112A_map20	0001.CSV	890.989	0.0324187
CAM112A_map20	0001.CSV	894.846	0.0307604
CAM112A_map20	0001.CSV	898.703	0.0319748
CAM112A_map20	0001.CSV	902.561	0.0334858
CAM112A_map20	0001.CSV	906.418	0.0345488
CAM112A_map20	0001.CSV	910.275	0.0357358
CAM112A_map20	0001.CSV	914.132	0.0366073
CAM112A_map20	0001.CSV	917.989	0.0376646
CAM112A_map20	0001.CSV	921.846	0.038364
CAM112A_map20	0001.CSV	925.703	0.0393309
CAM112A_map20	0001.CSV	929.56	0.0400273
CAM112A_map20	0001.CSV	933.417	0.0408768
CAM112A_map20	0001.CSV	937.274	0.0412327
CAM112A_map20	0001.CSV	941.131	0.0416819
CAM112A_map20	0001.CSV	944.989	0.0419284
CAM112A_map20	0001.CSV	948.846	0.04251
CAM112A_map20	0001.CSV	952.703	0.0429441
CAM112A_map20	0001.CSV	956.56	0.043594
CAM112A_map20	0001.CSV	960.417	0.043914
CAM112A_map20	0001.CSV	964.274	0.0444999
CAM112A_map20	0001.CSV	968.131	0.0448449
CAM112A_map20	0001.CSV	971.988	0.0455429
CAM112A_map20	0001.CSV	975.845	0.0460842
CAM112A_map20	0001.CSV	979.702	0.0468335
CAM112A_map20	0001.CSV	983.559	0.0473739
CAM112A_map20	0001.CSV	987.417	0.048242
CAM112A_map20	0001.CSV	991.274	0.0488073
CAM112A_map20	0001.CSV	995.131	0.0494686
CAM112A_map20	0001.CSV	998.988	0.0499164
CAM112A_map20	0001.CSV	1002.85	0.0505891
CAM112A_map20	0001.CSV	1006.7	0.0510995
CAM112A_map20	0001.CSV	1010.56	0.0518593
CAM112A_map20	0001.CSV	1014.42	0.0522939
CAM112A_map20	0001.CSV	1018.27	0.0528861
CAM112A_map20	0001.CSV	1022.13	0.0532562
CAM112A_map20	0001.CSV	1025.99	0.05389
CAM112A_map20	0001.CSV	1029.85	0.0542197
CAM112A_map20	0001.CSV	1033.7	0.0548931
CAM112A_map20	0001.CSV	1037.56	0.0554184
CAM112A_map20	0001.CSV	1041.42	0.0560886
CAM112A_map20	0001.CSV	1045.27	0.056354
CAM112A_map20	0001.CSV	1049.13	0.0570763
CAM112A_map20	0001.CSV	1052.99	0.0577028
CAM112A_map20	0001.CSV	1056.84	0.0585623
CAM112A_map20	0001.CSV	1060.7	0.0593776
CAM112A_map20	0001.CSV	1064.56	0.060471
CAM112A_map20	0001.CSV	1068.42	0.0610723
CAM112A_map20	0001.CSV	1072.27	0.06173
CAM112A_map20	0001.CSV	1076.13	0.0621292
CAM112A_map20	0001.CSV	1079.99	0.0629602
CAM112A_map20	0001.CSV	1083.84	0.0636727
CAM112A_map20	0001.CSV	1087.7	0.0642271
CAM112A_map20	0001.CSV	1091.56	0.063804
CAM112A_map20	0001.CSV	1095.41	0.0632123
CAM112A_map20	0001.CSV	1099.27	0.0626465
CAM112A_map20	0001.CSV	1103.13	0.0629072
CAM112A_map20	0001.CSV	1106.99	0.0634024
CAM112A_map20	0001.CSV	1110.84	0.0644075
CAM112A_map20	0001.CSV	1114.7	0.0648806
CAM112A_map20	0001.CSV	1118.56	0.0652321
CAM112A_map20	0001.CSV	1122.41	0.0654021
CAM112A_map20	0001.CSV	1126.27	0.065844
CAM112A_map20	0001.CSV	1130.13	0.0659475
CAM112A_map20	0001.CSV	1133.99	0.0663569
CAM112A_map20	0001.CSV	1137.84	0.0666074
CAM112A_map20	0001.CSV	1141.7	0.0671175
CAM112A_map20	0001.CSV	1145.56	0.0674555
CAM112A_map20	0001.CSV	1149.41	0.0682253
CAM112A_map20	0001.CSV	1153.27	0.0688487
CAM112A_map20	0001.CSV	1157.13	0.0697004
CAM112A_map20	0001.CSV	1160.99	0.070314
CAM112A_map20	0001.CSV	1164.84	0.0709235
CAM112A_map20	0001.CSV	1168.7	0.0710361
CAM112A_map20	0001.CSV	1172.56	0.0712996
CAM112A_map20	0001.CSV	1176.41	0.0713808
CAM112A_map20	0001.CSV	1180.27	0.071542
CAM112A_map20	0001.CSV	1184.13	0.071384
CAM112A_map20	0001.CSV	1187.99	0.0715885
CAM112A_map20	0001.CSV	1191.84	0.0715882
CAM112A_map20	0001.CSV	1195.7	0.0718315
CAM112A_map20	0001.CSV	1199.56	0.0720029
CAM112A_map20	0001.CSV	1203.41	0.0725565
CAM112A_map20	0001.CSV	1207.27	0.0730808
CAM112A_map20	0001.CSV	1211.13	0.0739438
CAM112A_map20	0001.CSV	1214.98	0.0746286
CAM112A_map20	0001.CSV	1218.84	0.075584
CAM112A_map20	0001.CSV	1222.7	0.0764381
CAM112A_map20	0001.CSV	1226.56	0.0776483
CAM112A_map20	0001.CSV	1230.41	0.0787355
CAM112A_map20	0001.CSV	1234.27	0.0801538
CAM112A_map20	0001.CSV	1238.13	0.081324
CAM112A_map20	0001.CSV	1241.98	0.0827483
CAM112A_map20	0001.CSV	1245.84	0.0840522
CAM112A_map20	0001.CSV	1249.7	0.0856845
CAM112A_map20	0001.CSV	1253.56	0.0869775
CAM112A_map20	0001.CSV	1257.41	0.0882599
CAM112A_map20	0001.CSV	1261.27	0.0893677
CAM112A_map20	0001.CSV	1265.13	0.0910238
CAM112A_map20	0001.CSV	1268.98	0.0926162
CAM112A_map20	0001.CSV	1272.84	0.0946248
CAM112A_map20	0001.CSV	1276.7	0.0964267
CAM112A_map20	0001.CSV	1280.56	0.0984657
CAM112A_map20	0001.CSV	1284.41	0.100258
CAM112A_map20	0001.CSV	1288.27	0.102384
CAM112A_map20	0001.CSV	1292.13	0.104242
CAM112A_map20	0001.CSV	1295.98	0.10646
CAM112A_map20	0001.CSV	1299.84	0.108644
CAM112A_map20	0001.CSV	1303.7	0.111276
CAM112A_map20	0001.CSV	1307.56	0.113878
CAM112A_map20	0001.CSV	1311.41	0.117112
CAM112A_map20	0001.CSV	1315.27	0.120329
CAM112A_map20	0001.CSV	1319.13	0.124023
CAM112A_map20	0001.CSV	1322.98	0.127208
CAM112A_map20	0001.CSV	1326.84	0.130846
CAM112A_map20	0001.CSV	1330.7	0.134749
CAM112A_map20	0001.CSV	1334.56	0.139172
CAM112A_map20	0001.CSV	1338.41	0.144407
CAM112A_map20	0001.CSV	1342.27	0.151012
CAM112A_map20	0001.CSV	1346.13	0.15644
CAM112A_map20	0001.CSV	1349.98	0.162893
CAM112A_map20	0001.CSV	1353.84	0.169585
CAM112A_map20	0001.CSV	1357.7	0.176767
CAM112A_map20	0001.CSV	1361.56	0.184805
CAM112A_map20	0001.CSV	1365.41	0.194756
CAM112A_map20	0001.CSV	1369.27	0.203028
CAM112A_map20	0001.CSV	1373.13	0.21318
CAM112A_map20	0001.CSV	1376.98	0.223896
CAM112A_map20	0001.CSV	1380.84	0.232738
CAM112A_map20	0001.CSV	1384.7	0.239721
CAM112A_map20	0001.CSV	1388.56	0.246625
CAM112A_map20	0001.CSV	1392.41	0.24896
CAM112A_map20	0001.CSV	1396.27	0.247847
CAM112A_map20	0001.CSV	1400.13	0.243103
CAM112A_map20	0001.CSV	1403.98	0.238099
CAM112A_map20	0001.CSV	1407.84	0.230505
CAM112A_map20	0001.CSV	1411.7	0.222751
CAM112A_map20	0001.CSV	1415.55	0.215074
CAM112A_map20	0001.CSV	1419.41	0.206847
CAM112A_map20	0001.CSV	1423.27	0.199529
CAM112A_map20	0001.CSV	1427.12	0.195015
CAM112A_map20	0001.CSV	1430.98	0.190017
CAM112A_map20	0001.CSV	1434.84	0.18503
CAM112A_map20	0001.CSV	1438.7	0.178501
CAM112A_map20	0001.CSV	1442.55	0.173812
CAM112A_map20	0001.CSV	1446.41	0.168387
CAM112A_map20	0001.CSV	1450.27	0.16272
CAM112A_map20	0001.CSV	1454.12	0.157593
CAM112A_map20	0001.CSV	1457.98	0.15007
CAM112A_map20	0001.CSV	1461.84	0.14382
CAM112A_map20	0001.CSV	1465.7	0.139122
CAM112A_map20	0001.CSV	1469.55	0.133856
CAM112A_map20	0001.CSV	1473.41	0.127139
CAM112A_map20	0001.CSV	1477.27	0.119429
CAM112A_map20	0001.CSV	1481.12	0.114691
CAM112A_map20	0001.CSV	1484.98	0.110055
CAM112A_map20	0001.CSV	1488.84	0.104435
CAM112A_map20	0001.CSV	1492.7	0.0984233
CAM112A_map20	0001.CSV	1496.55	0.0936506
CAM112A_map20	0001.CSV	1500.41	0.0881023
CAM112A_map20	0001.CSV	1504.27	0.0847008
CAM112A_map20	0001.CSV	1508.12	0.0786689
CAM112A_map20	0001.CSV	1511.98	0.0745033
CAM112A_map20	0001.CSV	1515.84	0.0717118
CAM112A_map20	0001.CSV	1519.7	0.0683057
CAM112A_map20	0001.CSV	1523.55	0.0643782
CAM112A_map20	0001.CSV	1527.41	0.0618931
CAM112A_map20	0001.CSV	1531.27	0.0600292
CAM112A_map20	0001.CSV	1535.12	0.0593161
CAM112A_map20	0001.CSV	1538.98	0.0580239
CAM112A_map20	0001.CSV	1542.84	0.0523341
CAM112A_map20	0001.CSV	1546.7	0.0467927
CAM112A_map20	0001.CSV	1550.55	0.0427222
CAM112A_map20	0001.CSV	1554.41	0.039247
CAM112A_map20	0001.CSV	1558.27	0.0365879
CAM112A_map20	0001.CSV	1562.12	0.0349256
CAM112A_map20	0001.CSV	1565.98	0.0343755
CAM112A_map20	0001.CSV	1569.84	0.0347589
CAM112A_map20	0001.CSV	1573.69	0.0353243
CAM112A_map20	0001.CSV	1577.55	0.0347689
CAM112A_map20	0001.CSV	1581.41	0.0325639
CAM112A_map20	0001.CSV	1585.27	0.0298131
CAM112A_map20	0001.CSV	1589.12	0.0275146
CAM112A_map20	0001.CSV	1592.98	0.0258013
CAM112A_map20	0001.CSV	1596.84	0.0245998
CAM112A_map20	0001.CSV	1600.69	0.0236429
CAM112A_map20	0001.CSV	1604.55	0.0231147
CAM112A_map20	0001.CSV	1608.41	0.0228022
CAM112A_map20	0001.CSV	1612.27	0.0225083
CAM112A_map20	0001.CSV	1616.12	0.0221561
CAM112A_map20	0001.CSV	1619.98	0.0219881
CAM112A_map20	0001.CSV	1623.84	0.0216957
CAM112A_map20	0001.CSV	1627.69	0.0213251
CAM112A_map20	0001.CSV	1631.55	0.0206178
CAM112A_map20	0001.CSV	1635.41	0.0203526
CAM112A_map20	0001.CSV	1639.27	0.0202434
CAM112A_map20	0001.CSV	1643.12	0.0197785
CAM112A_map20	0001.CSV	1646.98	0.0195381
CAM112A_map20	0001.CSV	1650.84	0.0195629
CAM112A_map20	0001.CSV	1654.69	0.0196479
CAM112A_map20	0001.CSV	1658.55	0.0193075
CAM112A_map20	0001.CSV	1662.41	0.0189293
CAM112A_map20	0001.CSV	1666.27	0.0187282
CAM112A_map20	0001.CSV	1670.12	0.018645
CAM112A_map20	0001.CSV	1673.98	0.0188023
CAM112A_map20	0001.CSV	1677.84	0.0184619
CAM112A_map20	0001.CSV	1681.69	0.0182984
CAM112A_map20	0001.CSV	1685.55	0.018622
CAM112A_map20	0001.CSV	1689.41	0.0184811
CAM112A_map20	0001.CSV	1693.27	0.0179257
CAM112A_map20	0001.CSV	1697.12	0.0179741
CAM112A_map20	0001.CSV	1700.98	0.0184393
CAM112A_map20	0001.CSV	1704.84	0.018703
CAM112A_map20	0001.CSV	1708.69	0.0187139
CAM112A_map20	0001.CSV	1712.55	0.0186474
CAM112A_map20	0001.CSV	1716.41	0.0193149
CAM112A_map20	0001.CSV	1720.27	0.0201896
CAM112A_map20	0001.CSV	1724.12	0.0201217
CAM112A_map20	0001.CSV	1727.98	0.0200221
CAM112A_map20	0001.CSV	1731.84	0.0200639
CAM112A_map20	0001.CSV	1735.69	0.0205115
CAM112A_map20	0001.CSV	1739.55	0.0201774
CAM112A_map20	0001.CSV	1743.41	0.0195157
CAM112A_map20	0001.CSV	1747.27	0.0187875
CAM112A_map20	0001.CSV	1751.12	0.0181824
CAM112A_map20	0001.CSV	1754.98	0.017527
CAM112A_map20	0001.CSV	1758.84	0.0171789
CAM112A_map20	0001.CSV	1762.69	0.0170264
CAM112A_map20	0001.CSV	1766.55	0.0168641
CAM112A_map20	0001.CSV	1770.41	0.0169643
CAM112A_map20	0001.CSV	1774.26	0.0173804
CAM112A_map20	0001.CSV	1778.12	0.0173938
CAM112A_map20	0001.CSV	1781.98	0.0178986
CAM112A_map20	0001.CSV	1785.84	0.0187625
CAM112A_map20	0001.CSV	1789.69	0.0200696
CAM112A_map20	0001.CSV	1793.55	0.0219786
CAM112A_map20	0001.CSV	1797.41	0.0221807
CAM112A_map20	0001.CSV	1801.26	0.0206536
CAM112A_map20	0001.CSV	1805.12	0.0188185
CAM112A_map20	0001.CSV	1808.98	0.017493
CAM112A_map20	0001.CSV	1812.84	0.0168879
CAM112A_map20	0001.CSV	1816.69	0.0164612
CAM112A_map20	0001.CSV	1820.55	0.0162316
CAM112A_map20	0001.CSV	1824.41	0.0160519
CAM112A_map20	0001.CSV	1828.26	0.0160895
CAM112A_map20	0001.CSV	1832.12	0.016066
CAM112A_map20	0001.CSV	1835.98	0.0159526
CAM112A_map20	0001.CSV	1839.84	0.0157328
CAM112A_map20	0001.CSV	1843.69	0.015838
CAM112A_map20	0001.CSV	1847.55	0.0159872
CAM112A_map20	0001.CSV	1851.41	0.0158034
CAM112A_map20	0001.CSV	1855.26	0.0156651
CAM112A_map20	0001.CSV	1859.12	0.0156852
CAM112A_map20	0001.CSV	1862.98	0.0155436
CAM112A_map20	0001.CSV	1866.84	0.0155525
CAM112A_map20	0001.CSV	1870.69	0.0157791
CAM112A_map20	0001.CSV	1874.55	0.0156632
CAM112A_map20	0001.CSV	1878.41	0.0155291
CAM112A_map20	0001.CSV	1882.26	0.0155445
CAM112A_map20	0001.CSV	1886.12	0.0154783
CAM112A_map20	0001.CSV	1889.98	0.0155108
CAM112A_map20	0001.CSV	1893.83	0.0155421
CAM112A_map20	0001.CSV	1897.69	0.0155897
CAM112A_map20	0001.CSV	1901.55	0.0155234
CAM112A_map20	0001.CSV	1905.41	0.0155043
CAM112A_map20	0001.CSV	1909.26	0.0155323
CAM112A_map20	0001.CSV	1913.12	0.0155367
CAM112A_map20	0001.CSV	1916.98	0.0154787
CAM112A_map20	0001.CSV	1920.83	0.0156133
CAM112A_map20	0001.CSV	1924.69	0.0156193
CAM112A_map20	0001.CSV	1928.55	0.0155582
CAM112A_map20	0001.CSV	1932.4	0.015534
CAM112A_map20	0001.CSV	1936.26	0.015559
CAM112A_map20	0001.CSV	1940.12	0.015516
CAM112A_map20	0001.CSV	1943.98	0.0157102
CAM112A_map20	0001.CSV	1947.83	0.0157295
CAM112A_map20	0001.CSV	1951.69	0.0156834
CAM112A_map20	0001.CSV	1955.55	0.0157089
CAM112A_map20	0001.CSV	1959.4	0.0157853
CAM112A_map20	0001.CSV	1963.26	0.0157666
CAM112A_map20	0001.CSV	1967.12	0.015855
CAM112A_map20	0001.CSV	1970.98	0.0158497
CAM112A_map20	0001.CSV	1974.83	0.0158248
CAM112A_map20	0001.CSV	1978.69	0.0158188
CAM112A_map20	0001.CSV	1982.55	0.0158163
CAM112A_map20	0001.CSV	1986.4	0.0158212
CAM112A_map20	0001.CSV	1990.26	0.0159588
CAM112A_map20	0001.CSV	1994.12	0.0159961
CAM112A_map20	0001.CSV	1997.98	0.0159583
CAM112A_map20	0001.CSV	2001.83	0.0159786
CAM112A_map20	0001.CSV	2005.69	0.0160843
CAM112A_map20	0001.CSV	2009.55	0.0161075
CAM112A_map20	0001.CSV	2013.4	0.0160527
CAM112A_map20	0001.CSV	2017.26	0.0161018
CAM112A_map20	0001.CSV	2021.12	0.0161998
CAM112A_map20	0001.CSV	2024.97	0.0161641
CAM112A_map20	0001.CSV	2028.83	0.0162029
CAM112A_map20	0001.CSV	2032.69	0.0162268
CAM112A_map20	0001.CSV	2036.55	0.0162406
CAM112A_map20	0001.CSV	2040.4	0.0162089
CAM112A_map20	0001.CSV	2044.26	0.0162781
CAM112A_map20	0001.CSV	2048.12	0.0163023
CAM112A_map20	0001.CSV	2051.97	0.0163363
CAM112A_map20	0001.CSV	2055.83	0.016389
CAM112A_map20	0001.CSV	2059.69	0.0164685
CAM112A_map20	0001.CSV	2063.55	0.0164682
CAM112A_map20	0001.CSV	2067.4	0.0165203
CAM112A_map20	0001.CSV	2071.26	0.0165014
CAM112A_map20	0001.CSV	2075.12	0.0165138
CAM112A_map20	0001.CSV	2078.97	0.0165388
CAM112A_map20	0001.CSV	2082.83	0.0165989
CAM112A_map20	0001.CSV	2086.69	0.0165911
CAM112A_map20	0001.CSV	2090.55	0.0165873
CAM112A_map20	0001.CSV	2094.4	0.0165178
CAM112A_map20	0001.CSV	2098.26	0.0165724
CAM112A_map20	0001.CSV	2102.12	0.0166521
CAM112A_map20	0001.CSV	2105.97	0.0166646
CAM112A_map20	0001.CSV	2109.83	0.0166312
CAM112A_map20	0001.CSV	2113.69	0.0166851
CAM112A_map20	0001.CSV	2117.55	0.0167191
CAM112A_map20	0001.CSV	2121.4	0.0167854
CAM112A_map20	0001.CSV	2125.26	0.0168052
CAM112A_map20	0001.CSV	2129.12	0.0168405
CAM112A_map20	0001.CSV	2132.97	0.0168852
CAM112A_map20	0001.CSV	2136.83	0.0169404
CAM112A_map20	0001.CSV	2140.69	0.0169471
CAM112A_map20	0001.CSV	2144.55	0.0169629
CAM112A_map20	0001.CSV	2148.4	0.0169361
CAM112A_map20	0001.CSV	2152.26	0.0169531
CAM112A_map20	0001.CSV	2156.12	0.0169545
CAM112A_map20	0001.CSV	2159.97	0.0169473
CAM112A_map20	0001.CSV	2163.83	0.0169117
CAM112A_map20	0001.CSV	2167.69	0.0169628
CAM112A_map20	0001.CSV	2171.55	0.0170032
CAM112A_map20	0001.CSV	2175.4	0.0170275
CAM112A_map20	0001.CSV	2179.26	0.0170171
CAM112A_map20	0001.CSV	2183.12	0.0170292
CAM112A_map20	0001.CSV	2186.97	0.0170094
CAM112A_map20	0001.CSV	2190.83	0.0169834
CAM112A_map20	0001.CSV	2194.69	0.0169447
CAM112A_map20	0001.CSV	2198.55	0.0169694
CAM112A_map20	0001.CSV	2202.4	0.0169687
CAM112A_map20	0001.CSV	2206.26	0.0170163
CAM112A_map20	0001.CSV	2210.12	0.0170348
CAM112A_map20	0001.CSV	2213.97	0.017034
CAM112A_map20	0001.CSV	2217.83	0.0170299
CAM112A_map20	0001.CSV	2221.69	0.0170293
CAM112A_map20	0001.CSV	2225.54	0.016993
CAM112A_map20	0001.CSV	2229.4	0.0169765
CAM112A_map20	0001.CSV	2233.26	0.0169606
CAM112A_map20	0001.CSV	2237.12	0.0169828
CAM112A_map20	0001.CSV	2240.97	0.0169826
CAM112A_map20	0001.CSV	2244.83	0.016994
CAM112A_map20	0001.CSV	2248.69	0.0169505
CAM112A_map20	0001.CSV	2252.54	0.0169408
CAM112A_map20	0001.CSV	2256.4	0.0169539
CAM112A_map20	0001.CSV	2260.26	0.0169754
CAM112A_map20	0001.CSV	2264.11	0.0169553
CAM112A_map20	0001.CSV	2267.97	0.017034
CAM112A_map20	0001.CSV	2271.83	0.0170938
CAM112A_map20	0001.CSV	2275.69	0.0170889
CAM112A_map20	0001.CSV	2279.54	0.0170775
CAM112A_map20	0001.CSV	2283.4	0.0170826
CAM112A_map20	0001.CSV	2287.26	0.0170377
CAM112A_map20	0001.CSV	2291.11	0.0170677
CAM112A_map20	0001.CSV	2294.97	0.0171157
CAM112A_map20	0001.CSV	2298.83	0.0171693
CAM112A_map20	0001.CSV	2302.69	0.0170486
CAM112A_map20	0001.CSV	2306.54	0.0168137
CAM112A_map20	0001.CSV	2310.4	0.0166186
CAM112A_map20	0001.CSV	2314.26	0.0164875
CAM112A_map20	0001.CSV	2318.11	0.0160142
CAM112A_map20	0001.CSV	2321.97	0.0152526
CAM112A_map20	0001.CSV	2325.83	0.014242
CAM112A_map20	0001.CSV	2329.69	0.0135683
CAM112A_map20	0001.CSV	2333.54	0.0127344
CAM112A_map20	0001.CSV	2337.4	0.0120295
CAM112A_map20	0001.CSV	2341.26	0.0121478
CAM112A_map20	0001.CSV	2345.11	0.0146317
CAM112A_map20	0001.CSV	2348.97	0.0151036
CAM112A_map20	0001.CSV	2352.83	0.0133817
CAM112A_map20	0001.CSV	2356.69	0.00730388
CAM112A_map20	0001.CSV	2360.54	-0.000898725
CAM112A_map20	0001.CSV	2364.4	0.00237633
CAM112A_map20	0001.CSV	2368.26	0.0106676
CAM112A_map20	0001.CSV	2372.11	0.0154009
CAM112A_map20	0001.CSV	2375.97	0.0173907
CAM112A_map20	0001.CSV	2379.83	0.0179866
CAM112A_map20	0001.CSV	2383.69	0.0180901
CAM112A_map20	0001.CSV	2387.54	0.0179686
CAM112A_map20	0001.CSV	2391.4	0.0178715
CAM112A_map20	0001.CSV	2395.26	0.0178483
CAM112A_map20	0001.CSV	2399.11	0.017855
CAM112A_map20	0001.CSV	2402.97	0.0178283
CAM112A_map20	0001.CSV	2406.83	0.0178743
CAM112A_map20	0001.CSV	2410.68	0.0179446
CAM112A_map20	0001.CSV	2414.54	0.0179339
CAM112A_map20	0001.CSV	2418.4	0.0178905
CAM112A_map20	0001.CSV	2422.26	0.0179218
CAM112A_map20	0001.CSV	2426.11	0.0179613
CAM112A_map20	0001.CSV	2429.97	0.0180206
CAM112A_map20	0001.CSV	2433.83	0.018043
CAM112A_map20	0001.CSV	2437.68	0.0180527
CAM112A_map20	0001.CSV	2441.54	0.0180961
CAM112A_map20	0001.CSV	2445.4	0.0181601
CAM112A_map20	0001.CSV	2449.26	0.0181616
CAM112A_map20	0001.CSV	2453.11	0.0181484
CAM112A_map20	0001.CSV	2456.97	0.0181416
CAM112A_map20	0001.CSV	2460.83	0.018198
CAM112A_map20	0001.CSV	2464.68	0.0182848
CAM112A_map20	0001.CSV	2468.54	0.0183751
CAM112A_map20	0001.CSV	2472.4	0.0184896
CAM112A_map20	0001.CSV	2476.26	0.0186032
CAM112A_map20	0001.CSV	2480.11	0.018714
CAM112A_map20	0001.CSV	2483.97	0.0189015
CAM112A_map20	0001.CSV	2487.83	0.0191688
CAM112A_map20	0001.CSV	2491.68	0.0194998
CAM112A_map20	0001.CSV	2495.54	0.0199437
CAM112A_map20	0001.CSV	2499.4	0.0204562
CAM112A_map20	0001.CSV	2503.26	0.0208776
CAM112A_map20	0001.CSV	2507.11	0.0212126
CAM112A_map20	0001.CSV	2510.97	0.0213712
CAM112A_map20	0001.CSV	2514.83	0.0212906
CAM112A_map20	0001.CSV	2518.68	0.021004
CAM112A_map20	0001.CSV	2522.54	0.0206183
CAM112A_map20	0001.CSV	2526.4	0.0201641
CAM112A_map20	0001.CSV	2530.26	0.0197111
CAM112A_map20	0001.CSV	2534.11	0.0192535
CAM112A_map20	0001.CSV	2537.97	0.0189297
CAM112A_map20	0001.CSV	2541.83	0.018744
CAM112A_map20	0001.CSV	2545.68	0.0186268
CAM112A_map20	0001.CSV	2549.54	0.0185252
CAM112A_map20	0001.CSV	2553.4	0.0184784
CAM112A_map20	0001.CSV	2557.26	0.0184448
CAM112A_map20	0001.CSV	2561.11	0.0184276
CAM112A_map20	0001.CSV	2564.97	0.0183802
CAM112A_map20	0001.CSV	2568.83	0.0183462
CAM112A_map20	0001.CSV	2572.68	0.0183659
CAM112A_map20	0001.CSV	2576.54	0.0184006
CAM112A_map20	0001.CSV	2580.4	0.0183683
CAM112A_map20	0001.CSV	2584.25	0.018359
CAM112A_map20	0001.CSV	2588.11	0.0184053
CAM112A_map20	0001.CSV	2591.97	0.0184389
CAM112A_map20	0001.CSV	2595.83	0.0183939
CAM112A_map20	0001.CSV	2599.68	0.0183548
CAM112A_map20	0001.CSV	2603.54	0.0183096
CAM112A_map20	0001.CSV	2607.4	0.018251
CAM112A_map20	0001.CSV	2611.25	0.0181857
CAM112A_map20	0001.CSV	2615.11	0.0181458
CAM112A_map20	0001.CSV	2618.97	0.0181094
CAM112A_map20	0001.CSV	2622.82	0.0181673
CAM112A_map20	0001.CSV	2626.68	0.0182086
CAM112A_map20	0001.CSV	2630.54	0.0181293
CAM112A_map20	0001.CSV	2634.4	0.0181135
CAM112A_map20	0001.CSV	2638.25	0.018142
CAM112A_map20	0001.CSV	2642.11	0.0180451
CAM112A_map20	0001.CSV	2645.97	0.0179422
CAM112A_map20	0001.CSV	2649.82	0.0179127
CAM112A_map20	0001.CSV	2653.68	0.0179466
CAM112A_map20	0001.CSV	2657.54	0.0179457
CAM112A_map20	0001.CSV	2661.4	0.017953
CAM112A_map20	0001.CSV	2665.25	0.0179536
CAM112A_map20	0001.CSV	2669.11	0.0180126
CAM112A_map20	0001.CSV	2672.97	0.0182008
CAM112A_map20	0001.CSV	2676.82	0.0184648
CAM112A_map20	0001.CSV	2680.68	0.0184604
CAM112A_map20	0001.CSV	2684.54	0.018189
CAM112A_map20	0001.CSV	2688.4	0.0180846
CAM112A_map20	0001.CSV	2692.25	0.0181081
CAM112A_map20	0001.CSV	2696.11	0.0181759
CAM112A_map20	0001.CSV	2699.97	0.0182262
CAM112A_map20	0001.CSV	2703.82	0.018223
CAM112A_map20	0001.CSV	2707.68	0.0182599
CAM112A_map20	0001.CSV	2711.54	0.0182104
CAM112A_map20	0001.CSV	2715.4	0.0181899
CAM112A_map20	0001.CSV	2719.25	0.0183905
CAM112A_map20	0001.CSV	2723.11	0.0186918
CAM112A_map20	0001.CSV	2726.97	0.0186243
CAM112A_map20	0001.CSV	2730.82	0.0182912
CAM112A_map20	0001.CSV	2734.68	0.0182428
CAM112A_map20	0001.CSV	2738.54	0.0183314
CAM112A_map20	0001.CSV	2742.4	0.0183891
CAM112A_map20	0001.CSV	2746.25	0.0186528
CAM112A_map20	0001.CSV	2750.11	0.0187389
CAM112A_map20	0001.CSV	2753.97	0.018529
CAM112A_map20	0001.CSV	2757.82	0.0183969
CAM112A_map20	0001.CSV	2761.68	0.018293
CAM112A_map20	0001.CSV	2765.54	0.0182681
CAM112A_map20	0001.CSV	2769.39	0.0184213
CAM112A_map20	0001.CSV	2773.25	0.0188057
CAM112A_map20	0001.CSV	2777.11	0.018787
CAM112A_map20	0001.CSV	2780.97	0.018555
CAM112A_map20	0001.CSV	2784.82	0.0187636
CAM112A_map20	0001.CSV	2788.68	0.0192115
CAM112A_map20	0001.CSV	2792.54	0.019367
CAM112A_map20	0001.CSV	2796.39	0.0193878
CAM112A_map20	0001.CSV	2800.25	0.0191915
CAM112A_map20	0001.CSV	2804.11	0.0189574
CAM112A_map20	0001.CSV	2807.97	0.019233
CAM112A_map20	0001.CSV	2811.82	0.0193422
CAM112A_map20	0001.CSV	2815.68	0.0192608
CAM112A_map20	0001.CSV	2819.54	0.0193933
CAM112A_map20	0001.CSV	2823.39	0.0195689
CAM112A_map20	0001.CSV	2827.25	0.0197244
CAM112A_map20	0001.CSV	2831.11	0.0202779
CAM112A_map20	0001.CSV	2834.97	0.0211638
CAM112A_map20	0001.CSV	2838.82	0.0221188
CAM112A_map20	0001.CSV	2842.68	0.0235669
CAM112A_map20	0001.CSV	2846.54	0.025994
CAM112A_map20	0001.CSV	2850.39	0.027207
CAM112A_map20	0001.CSV	2854.25	0.0261963
CAM112A_map20	0001.CSV	2858.11	0.0248821
CAM112A_map20	0001.CSV	2861.97	0.0238299
CAM112A_map20	0001.CSV	2865.82	0.0231785
CAM112A_map20	0001.CSV	2869.68	0.0232395
CAM112A_map20	0001.CSV	2873.54	0.0233372
CAM112A_map20	0001.CSV	2877.39	0.0227658
CAM112A_map20	0001.CSV	2881.25	0.0222544
CAM112A_map20	0001.CSV	2885.11	0.02217
CAM112A_map20	0001.CSV	2888.97	0.0224295
CAM112A_map20	0001.CSV	2892.82	0.0230932
CAM112A_map20	0001.CSV	2896.68	0.0236787
CAM112A_map20	0001.CSV	2900.54	0.0240491
CAM112A_map20	0001.CSV	2904.39	0.0248979
CAM112A_map20	0001.CSV	2908.25	0.02655
CAM112A_map20	0001.CSV	2912.11	0.0293238
CAM112A_map20	0001.CSV	2915.97	0.0318979
CAM112A_map20	0001.CSV	2919.82	0.0320463
CAM112A_map20	0001.CSV	2923.68	0.030368
CAM112A_map20	0001.CSV	2927.54	0.0287974
CAM112A_map20	0001.CSV	2931.39	0.0271847
CAM112A_map20	0001.CSV	2935.25	0.0254907
CAM112A_map20	0001.CSV	2939.11	0.0244592
CAM112A_map20	0001.CSV	2942.96	0.0241786
CAM112A_map20	0001.CSV	2946.82	0.0239104
CAM112A_map20	0001.CSV	2950.68	0.0235875
CAM112A_map20	0001.CSV	2954.54	0.0232488
CAM112A_map20	0001.CSV	2958.39	0.0228331
CAM112A_map20	0001.CSV	2962.25	0.0224595
CAM112A_map20	0001.CSV	2966.11	0.0218575
CAM112A_map20	0001.CSV	2969.96	0.0214793
CAM112A_map20	0001.CSV	2973.82	0.0214494
CAM112A_map20	0001.CSV	2977.68	0.0214259
CAM112A_map20	0001.CSV	2981.53	0.0210485
CAM112A_map20	0001.CSV	2985.39	0.0204217
CAM112A_map20	0001.CSV	2989.25	0.0202531
CAM112A_map20	0001.CSV	2993.11	0.0203364
CAM112A_map20	0001.CSV	2996.96	0.0201123
CAM112A_map20	0001.CSV	3000.82	0.0197912
CAM112A_map20	0001.CSV	3004.68	0.0196467
CAM112A_map20	0001.CSV	3008.53	0.0198128
CAM112A_map20	0001.CSV	3012.39	0.0200931
CAM112A_map20	0001.CSV	3016.25	0.0200407
CAM112A_map20	0001.CSV	3020.11	0.0198423
CAM112A_map20	0001.CSV	3023.96	0.019764
CAM112A_map20	0001.CSV	3027.82	0.0197615
CAM112A_map20	0001.CSV	3031.68	0.0198932
CAM112A_map20	0001.CSV	3035.53	0.0199415
CAM112A_map20	0001.CSV	3039.39	0.0199608
CAM112A_map20	0001.CSV	3043.25	0.0200296
CAM112A_map20	0001.CSV	3047.11	0.0199479
CAM112A_map20	0001.CSV	3050.96	0.0198782
CAM112A_map20	0001.CSV	3054.82	0.0198437
CAM112A_map20	0001.CSV	3058.68	0.0197512
CAM112A_map20	0001.CSV	3062.53	0.0197639
CAM112A_map20	0001.CSV	3066.39	0.0199751
CAM112A_map20	0001.CSV	3070.25	0.0199436
CAM112A_map20	0001.CSV	3074.11	0.0198952
CAM112A_map20	0001.CSV	3077.96	0.0200902
CAM112A_map20	0001.CSV	3081.82	0.0202485
CAM112A_map20	0001.CSV	3085.68	0.0202217
CAM112A_map20	0001.CSV	3089.53	0.020114
CAM112A_map20	0001.CSV	3093.39	0.019921
CAM112A_map20	0001.CSV	3097.25	0.0198775
CAM112A_map20	0001.CSV	3101.11	0.0199003
CAM112A_map20	0001.CSV	3104.96	0.0199493
CAM112A_map20	0001.CSV	3108.82	0.0201465
CAM112A_map20	0001.CSV	3112.68	0.0202363
CAM112A_map20	0001.CSV	3116.53	0.0202768
CAM112A_map20	0001.CSV	3120.39	0.020262
CAM112A_map20	0001.CSV	3124.25	0.0200995
CAM112A_map20	0001.CSV	3128.11	0.0200122
CAM112A_map20	0001.CSV	3131.96	0.0199266
CAM112A_map20	0001.CSV	3135.82	0.0200419
CAM112A_map20	0001.CSV	3139.68	0.0201528
CAM112A_map20	0001.CSV	3143.53	0.0199862
CAM112A_map20	0001.CSV	3147.39	0.0201205
CAM112A_map20	0001.CSV	3151.25	0.0204071
CAM112A_map20	0001.CSV	3155.1	0.0203363
CAM112A_map20	0001.CSV	3158.96	0.0200802
CAM112A_map20	0001.CSV	3162.82	0.0199661
CAM112A_map20	0001.CSV	3166.68	0.0199624
CAM112A_map20	0001.CSV	3170.53	0.0200115
CAM112A_map20	0001.CSV	3174.39	0.0200385
CAM112A_map20	0001.CSV	3178.25	0.0201238
CAM112A_map20	0001.CSV	3182.1	0.0202623
CAM112A_map20	0001.CSV	3185.96	0.020359
CAM112A_map20	0001.CSV	3189.82	0.0203823
CAM112A_map20	0001.CSV	3193.68	0.0202972
CAM112A_map20	0001.CSV	3197.53	0.0202751
CAM112A_map20	0001.CSV	3201.39	0.0203952
CAM112A_map20	0001.CSV	3205.25	0.0204203
CAM112A_map20	0001.CSV	3209.1	0.0203697
CAM112A_map20	0001.CSV	3212.96	0.020486
CAM112A_map20	0001.CSV	3216.82	0.0206519
CAM112A_map20	0001.CSV	3220.68	0.0206138
CAM112A_map20	0001.CSV	3224.53	0.0205449
CAM112A_map20	0001.CSV	3228.39	0.0207336
CAM112A_map20	0001.CSV	3232.25	0.0210422
CAM112A_map20	0001.CSV	3236.1	0.0210211
CAM112A_map20	0001.CSV	3239.96	0.0208301
CAM112A_map20	0001.CSV	3243.82	0.02095
CAM112A_map20	0001.CSV	3247.68	0.0210457
CAM112A_map20	0001.CSV	3251.53	0.0209763
CAM112A_map20	0001.CSV	3255.39	0.0210089
CAM112A_map20	0001.CSV	3259.25	0.0208613
CAM112A_map20	0001.CSV	3263.1	0.0208404
CAM112A_map20	0001.CSV	3266.96	0.0211242
CAM112A_map20	0001.CSV	3270.82	0.0213021
CAM112A_map20	0001.CSV	3274.68	0.0211828
CAM112A_map20	0001.CSV	3278.53	0.0209882
CAM112A_map20	0001.CSV	3282.39	0.0208692
CAM112A_map20	0001.CSV	3286.25	0.0208895
CAM112A_map20	0001.CSV	3290.1	0.0211985
CAM112A_map20	0001.CSV	3293.96	0.0214472
CAM112A_map20	0001.CSV	3297.82	0.0213304
CAM112A_map20	0001.CSV	3301.67	0.0213042
CAM112A_map20	0001.CSV	3305.53	0.0214045
CAM112A_map20	0001.CSV	3309.39	0.0213227
CAM112A_map20	0001.CSV	3313.25	0.0209978
CAM112A_map20	0001.CSV	3317.1	0.0207888
CAM112A_map20	0001.CSV	3320.96	0.0209177
CAM112A_map20	0001.CSV	3324.82	0.0211797
CAM112A_map20	0001.CSV	3328.67	0.0210665
CAM112A_map20	0001.CSV	3332.53	0.0209656
CAM112A_map20	0001.CSV	3336.39	0.0212641
CAM112A_map20	0001.CSV	3340.24	0.0214228
CAM112A_map20	0001.CSV	3344.1	0.0212091
CAM112A_map20	0001.CSV	3347.96	0.0211547
CAM112A_map20	0001.CSV	3351.82	0.0210941
CAM112A_map20	0001.CSV	3355.67	0.0208812
CAM112A_map20	0001.CSV	3359.53	0.0210107
CAM112A_map20	0001.CSV	3363.39	0.021226
CAM112A_map20	0001.CSV	3367.24	0.0213773
CAM112A_map20	0001.CSV	3371.1	0.0212688
CAM112A_map20	0001.CSV	3374.96	0.021074
CAM112A_map20	0001.CSV	3378.82	0.0209731
CAM112A_map20	0001.CSV	3382.67	0.0207627
CAM112A_map20	0001.CSV	3386.53	0.0208204
CAM112A_map20	0001.CSV	3390.39	0.0210739
CAM112A_map20	0001.CSV	3394.24	0.0212565
CAM112A_map20	0001.CSV	3398.1	0.0213549
CAM112A_map20	0001.CSV	3401.96	0.0212303
CAM112A_map20	0001.CSV	3405.82	0.0210034
CAM112A_map20	0001.CSV	3409.67	0.0209744
CAM112A_map20	0001.CSV	3413.53	0.0207853
CAM112A_map20	0001.CSV	3417.39	0.0205713
CAM112A_map20	0001.CSV	3421.24	0.0206385
CAM112A_map20	0001.CSV	3425.1	0.0207829
CAM112A_map20	0001.CSV	3428.96	0.0209615
CAM112A_map20	0001.CSV	3432.82	0.0209595
CAM112A_map20	0001.CSV	3436.67	0.0207018
CAM112A_map20	0001.CSV	3440.53	0.0202834
CAM112A_map20	0001.CSV	3444.39	0.0200143
CAM112A_map20	0001.CSV	3448.24	0.020071
CAM112A_map20	0001.CSV	3452.1	0.0199861
CAM112A_map20	0001.CSV	3455.96	0.0200119
CAM112A_map20	0001.CSV	3459.82	0.0201937
CAM112A_map20	0001.CSV	3463.67	0.0203155
CAM112A_map20	0001.CSV	3467.53	0.0203902
CAM112A_map20	0001.CSV	3471.39	0.0201732
CAM112A_map20	0001.CSV	3475.24	0.0200364
CAM112A_map20	0001.CSV	3479.1	0.0201136
CAM112A_map20	0001.CSV	3482.96	0.0200417
CAM112A_map20	0001.CSV	3486.82	0.0199821
CAM112A_map20	0001.CSV	3490.67	0.0200094
CAM112A_map20	0001.CSV	3494.53	0.0200756
CAM112A_map20	0001.CSV	3498.39	0.0199382
CAM112A_map20	0001.CSV	3502.24	0.0198378
CAM112A_map20	0001.CSV	3506.1	0.0196586
CAM112A_map20	0001.CSV	3509.96	0.0195393
CAM112A_map20	0001.CSV	3513.81	0.019566
CAM112A_map20	0001.CSV	3517.67	0.0192934
CAM112A_map20	0001.CSV	3521.53	0.0192945
CAM112A_map20	0001.CSV	3525.39	0.0192614
CAM112A_map20	0001.CSV	3529.24	0.0191034
CAM112A_map20	0001.CSV	3533.1	0.0191328
CAM112A_map20	0001.CSV	3536.96	0.0192214
CAM112A_map20	0001.CSV	3540.81	0.0192185
CAM112A_map20	0001.CSV	3544.67	0.0193909
CAM112A_map20	0001.CSV	3548.53	0.019366
CAM112A_map20	0001.CSV	3552.39	0.0189399
CAM112A_map20	0001.CSV	3556.24	0.0187234
CAM112A_map20	0001.CSV	3560.1	0.0185558
CAM112A_map20	0001.CSV	3563.96	0.0182931
CAM112A_map20	0001.CSV	3567.81	0.0186562
CAM112A_map20	0001.CSV	3571.67	0.0186049
CAM112A_map20	0001.CSV	3575.53	0.0181545
CAM112A_map20	0001.CSV	3579.39	0.0182106
CAM112A_map20	0001.CSV	3583.24	0.0181303
CAM112A_map20	0001.CSV	3587.1	0.0182153
CAM112A_map20	0001.CSV	3590.96	0.0181636
CAM112A_map20	0001.CSV	3594.81	0.0178171
CAM112A_map20	0001.CSV	3598.67	0.0178793
CAM112A_map20	0001.CSV	3602.53	0.0177864
CAM112A_map20	0001.CSV	3606.39	0.0173494
CAM112A_map20	0001.CSV	3610.24	0.0171752
CAM112A_map20	0001.CSV	3614.1	0.0171732
CAM112A_map20	0001.CSV	3617.96	0.0173499
CAM112A_map20	0001.CSV	3621.81	0.0174648
CAM112A_map20	0001.CSV	3625.67	0.0168778
CAM112A_map20	0001.CSV	3629.53	0.0170879
CAM112A_map20	0001.CSV	3633.39	0.0174086
CAM112A_map20	0001.CSV	3637.24	0.0170241
CAM112A_map20	0001.CSV	3641.1	0.0167258
CAM112A_map20	0001.CSV	3644.96	0.0162168
CAM112A_map20	0001.CSV	3648.81	0.0170075
CAM112A_map20	0001.CSV	3652.67	0.0176643
CAM112A_map20	0001.CSV	3656.53	0.0173731
CAM112A_map20	0001.CSV	3660.38	0.0173092
CAM112A_map20	0001.CSV	3664.24	0.0165495
CAM112A_map20	0001.CSV	3668.1	0.0158426
CAM112A_map20	0001.CSV	3671.96	0.0160457
CAM112A_map20	0001.CSV	3675.81	0.0167694
CAM112A_map20	0001.CSV	3679.67	0.0171422
CAM112A_map20	0001.CSV	3683.53	0.0166341
CAM112A_map20	0001.CSV	3687.38	0.0165216
CAM112A_map20	0001.CSV	3691.24	0.0175763
CAM112A_map20	0001.CSV	3695.1	0.0173479
CAM112A_map20	0001.CSV	3698.95	0.0167398
CAM112A_map20	0001.CSV	3702.81	0.0166083
CAM112A_map20	0001.CSV	3706.67	0.0162416
CAM112A_map20	0001.CSV	3710.53	0.0164506
CAM112A_map20	0001.CSV	3714.38	0.0171711
CAM112A_map20	0001.CSV	3718.24	0.0166051
CAM112A_map20	0001.CSV	3722.1	0.016326
CAM112A_map20	0001.CSV	3725.95	0.016665
CAM112A_map20	0001.CSV	3729.81	0.0163531
CAM112A_map20	0001.CSV	3733.67	0.0164343
CAM112A_map20	0001.CSV	3737.53	0.0176397
CAM112A_map20	0001.CSV	3741.38	0.0169978
CAM112A_map20	0001.CSV	3745.24	0.0161495
CAM112A_map20	0001.CSV	3749.1	0.0161919
CAM112A_map20	0001.CSV	3752.95	0.017166
CAM112A_map20	0001.CSV	3756.81	0.0172422
CAM112A_map20	0001.CSV	3760.67	0.0171055
CAM112A_map20	0001.CSV	3764.53	0.0167567
CAM112A_map20	0001.CSV	3768.38	0.0168917
CAM112A_map20	0001.CSV	3772.24	0.0170504
CAM112A_map20	0001.CSV	3776.1	0.0167904
CAM112A_map20	0001.CSV	3779.95	0.0169706
CAM112A_map20	0001.CSV	3783.81	0.0170873
CAM112A_map20	0001.CSV	3787.67	0.0170891
CAM112A_map20	0001.CSV	3791.53	0.016856
CAM112A_map20	0001.CSV	3795.38	0.0164527
CAM112A_map20	0001.CSV	3799.24	0.016436
CAM112A_map20	0001.CSV	3803.1	0.0170017
CAM112A_map20	0001.CSV	3806.95	0.0173639
CAM112A_map20	0001.CSV	3810.81	0.0169719
CAM112A_map20	0001.CSV	3814.67	0.0163629
CAM112A_map20	0001.CSV	3818.53	0.0166574
CAM112A_map20	0001.CSV	3822.38	0.0171976
CAM112A_map20	0001.CSV	3826.24	0.0169906
CAM112A_map20	0001.CSV	3830.1	0.016703
CAM112A_map20	0001.CSV	3833.95	0.0165203
CAM112A_map20	0001.CSV	3837.81	0.0168155
CAM112A_map20	0001.CSV	3841.67	0.0175462
CAM112A_map20	0001.CSV	3845.53	0.0171602
CAM112A_map20	0001.CSV	3849.38	0.0161593
CAM112A_map20	0001.CSV	3853.24	0.016443
CAM112A_map20	0001.CSV	3857.1	0.0170493
CAM112A_map20	0001.CSV	3860.95	0.0163041
CAM112A_map20	0001.CSV	3864.81	0.0163308
CAM112A_map20	0001.CSV	3868.67	0.0167165
CAM112A_map20	0001.CSV	3872.52	0.0171748
CAM112A_map20	0001.CSV	3876.38	0.0167873
CAM112A_map20	0001.CSV	3880.24	0.0163517
CAM112A_map20	0001.CSV	3884.1	0.0167768
CAM112A_map20	0001.CSV	3887.95	0.0167048
CAM112A_map20	0001.CSV	3891.81	0.0166012
CAM112A_map20	0001.CSV	3895.67	0.0163324
CAM112A_map20	0001.CSV	3899.52	0.0160319
CAM112A_map20	0001.CSV	3903.38	0.0169385
CAM112A_map20	0001.CSV	3907.24	0.0170597
CAM112A_map20	0001.CSV	3911.1	0.0163507
CAM112A_map20	0001.CSV	3914.95	0.0159684
CAM112A_map20	0001.CSV	3918.81	0.0161884
CAM112A_map20	0001.CSV	3922.67	0.0163278
CAM112A_map20	0001.CSV	3926.52	0.0162735
CAM112A_map20	0001.CSV	3930.38	0.0162857
CAM112A_map20	0001.CSV	3934.24	0.0165516
CAM112A_map20	0001.CSV	3938.09	0.016294
CAM112A_map20	0001.CSV	3941.95	0.0161064
CAM112A_map20	0001.CSV	3945.81	0.016086
CAM112A_map20	0001.CSV	3949.67	0.0162525
CAM112A_map20	0001.CSV	3953.52	0.0163294
CAM112A_map20	0001.CSV	3957.38	0.0160903
CAM112A_map20	0001.CSV	3961.24	0.0160314
CAM112A_map20	0001.CSV	3965.09	0.0161246
CAM112A_map20	0001.CSV	3968.95	0.0162104
CAM112A_map20	0001.CSV	3972.81	0.0162077
CAM112A_map20	0001.CSV	3976.67	0.0161934
CAM112A_map20	0001.CSV	3980.52	0.0161879
CAM112A_map20	0001.CSV	3984.38	0.0161364
CAM112A_map20	0001.CSV	3988.24	0.016033
CAM112A_map20	0001.CSV	3992.09	0.0160141
CAM112A_map20	0001.CSV	3995.95	0.0160541
CAM112A_map20	0001.CSV	3999.81	0.0160181
CAM112A_map20	0002.CSV	674.992	0.0380496
CAM112A_map20	0002.CSV	678.849	0.0405426
CAM112A_map20	0002.CSV	682.706	0.0416538
CAM112A_map20	0002.CSV	686.563	0.0440494
CAM112A_map20	0002.CSV	690.42	0.046854
CAM112A_map20	0002.CSV	694.277	0.0525768
CAM112A_map20	0002.CSV	698.134	0.0587756
CAM112A_map20	0002.CSV	701.991	0.0681977
CAM112A_map20	0002.CSV	705.849	0.086132
CAM112A_map20	0002.CSV	709.706	0.110979
CAM112A_map20	0002.CSV	713.563	0.101418
CAM112A_map20	0002.CSV	717.42	0.0633707
CAM112A_map20	0002.CSV	721.277	0.0394229
CAM112A_map20	0002.CSV	725.134	0.0340997
CAM112A_map20	0002.CSV	728.991	0.0333553
CAM112A_map20	0002.CSV	732.848	0.0344774
CAM112A_map20	0002.CSV	736.705	0.0355319
CAM112A_map20	0002.CSV	740.562	0.0371454
CAM112A_map20	0002.CSV	744.42	0.0377998
CAM112A_map20	0002.CSV	748.277	0.0386268
CAM112A_map20	0002.CSV	752.134	0.0388023
CAM112A_map20	0002.CSV	755.991	0.0398246
CAM112A_map20	0002.CSV	759.848	0.040306
CAM112A_map20	0002.CSV	763.705	0.0412312
CAM112A_map20	0002.CSV	767.562	0.0416031
CAM112A_map20	0002.CSV	771.419	0.0422814
CAM112A_map20	0002.CSV	775.276	0.0421047
CAM112A_map20	0002.CSV	779.133	0.0422631
CAM112A_map20	0002.CSV	782.99	0.0420452
CAM112A_map20	0002.CSV	786.848	0.042412
CAM112A_map20	0002.CSV	790.705	0.0424142
CAM112A_map20	0002.CSV	794.562	0.0432767
CAM112A_map20	0002.CSV	798.419	0.0437721
CAM112A_map20	0002.CSV	802.276	0.0444955
CAM112A_map20	0002.CSV	806.133	0.044889
CAM112A_map20	0002.CSV	809.99	0.0457065
CAM112A_map20	0002.CSV	813.847	0.0461569
CAM112A_map20	0002.CSV	817.704	0.0474952
CAM112A_map20	0002.CSV	821.562	0.0489177
CAM112A_map20	0002.CSV	825.419	0.0510124
CAM112A_map20	0002.CSV	829.276	0.052765
CAM112A_map20	0002.CSV	833.133	0.0552053
CAM112A_map20	0002.CSV	836.99	0.0579799
CAM112A_map20	0002.CSV	840.847	0.0627014
CAM112A_map20	0002.CSV	844.704	0.0701513
CAM112A_map20	0002.CSV	848.561	0.0755207
CAM112A_map20	0002.CSV	852.418	0.0778747
CAM112A_map20	0002.CSV	856.275	0.0891541
CAM112A_map20	0002.CSV	860.132	0.114118
CAM112A_map20	0002.CSV	863.99	0.163163
CAM112A_map20	0002.CSV	867.847	0.22843
CAM112A_map20	0002.CSV	871.704	0.252634
CAM112A_map20	0002.CSV	875.561	0.213693
CAM112A_map20	0002.CSV	879.418	0.160568
CAM112A_map20	0002.CSV	883.275	0.106084
CAM112A_map20	0002.CSV	887.132	0.0578494
CAM112A_map20	0002.CSV	890.989	0.0360948
CAM112A_map20	0002.CSV	894.846	0.0343425
CAM112A_map20	0002.CSV	898.703	0.0354599
CAM112A_map20	0002.CSV	902.561	0.0369968
CAM112A_map20	0002.CSV	906.418	0.0380825
CAM112A_map20	0002.CSV	910.275	0.0393028
CAM112A_map20	0002.CSV	914.132	0.0401794
CAM112A_map20	0002.CSV	917.989	0.0413287
CAM112A_map20	0002.CSV	921.846	0.0420632
CAM112A_map20	0002.CSV	925.703	0.0431897
CAM112A_map20	0002.CSV	929.56	0.0438746
CAM112A_map20	0002.CSV	933.417	0.0448032
CAM112A_map20	0002.CSV	937.274	0.0452032
CAM112A_map20	0002.CSV	941.131	0.0458454
CAM112A_map20	0002.CSV	944.989	0.0461756
CAM112A_map20	0002.CSV	948.846	0.0468516
CAM112A_map20	0002.CSV	952.703	0.0473281
CAM112A_map20	0002.CSV	956.56	0.0481294
CAM112A_map20	0002.CSV	960.417	0.0485472
CAM112A_map20	0002.CSV	964.274	0.0493367
CAM112A_map20	0002.CSV	968.131	0.0499141
CAM112A_map20	0002.CSV	971.988	0.0507484
CAM112A_map20	0002.CSV	975.845	0.0514278
CAM112A_map20	0002.CSV	979.702	0.0525413
CAM112A_map20	0002.CSV	983.559	0.0533931
CAM112A_map20	0002.CSV	987.417	0.054533
CAM112A_map20	0002.CSV	991.274	0.0553053
CAM112A_map20	0002.CSV	995.131	0.0562433
CAM112A_map20	0002.CSV	998.988	0.056905
CAM112A_map20	0002.CSV	1002.85	0.0579192
CAM112A_map20	0002.CSV	1006.7	0.0587328
CAM112A_map20	0002.CSV	1010.56	0.0598608
CAM112A_map20	0002.CSV	1014.42	0.0606335
CAM112A_map20	0002.CSV	1018.27	0.0616913
CAM112A_map20	0002.CSV	1022.13	0.0624144
CAM112A_map20	0002.CSV	1025.99	0.0633422
CAM112A_map20	0002.CSV	1029.85	0.0639417
CAM112A_map20	0002.CSV	1033.7	0.0649133
CAM112A_map20	0002.CSV	1037.56	0.0656876
CAM112A_map20	0002.CSV	1041.42	0.0666377
CAM112A_map20	0002.CSV	1045.27	0.0670026
CAM112A_map20	0002.CSV	1049.13	0.0677913
CAM112A_map20	0002.CSV	1052.99	0.0686275
CAM112A_map20	0002.CSV	1056.84	0.070074
CAM112A_map20	0002.CSV	1060.7	0.0715278
CAM112A_map20	0002.CSV	1064.56	0.0733541
CAM112A_map20	0002.CSV	1068.42	0.0743676
CAM112A_map20	0002.CSV	1072.27	0.0750961
CAM112A_map20	0002.CSV	1076.13	0.0752775
CAM112A_map20	0002.CSV	1079.99	0.0758282
CAM112A_map20	0002.CSV	1083.84	0.0760532
CAM112A_map20	0002.CSV	1087.7	0.0762754
CAM112A_map20	0002.CSV	1091.56	0.0755519
CAM112A_map20	0002.CSV	1095.41	0.0748445
CAM112A_map20	0002.CSV	1099.27	0.0743647
CAM112A_map20	0002.CSV	1103.13	0.0747663
CAM112A_map20	0002.CSV	1106.99	0.0752388
CAM112A_map20	0002.CSV	1110.84	0.0763667
CAM112A_map20	0002.CSV	1114.7	0.0770982
CAM112A_map20	0002.CSV	1118.56	0.0776895
CAM112A_map20	0002.CSV	1122.41	0.0777722
CAM112A_map20	0002.CSV	1126.27	0.0781042
CAM112A_map20	0002.CSV	1130.13	0.0780412
CAM112A_map20	0002.CSV	1133.99	0.0783086
CAM112A_map20	0002.CSV	1137.84	0.0785431
CAM112A_map20	0002.CSV	1141.7	0.0791302
CAM112A_map20	0002.CSV	1145.56	0.0793958
CAM112A_map20	0002.CSV	1149.41	0.080112
CAM112A_map20	0002.CSV	1153.27	0.0807419
CAM112A_map20	0002.CSV	1157.13	0.0817085
CAM112A_map20	0002.CSV	1160.99	0.0822883
CAM112A_map20	0002.CSV	1164.84	0.0827281
CAM112A_map20	0002.CSV	1168.7	0.0824873
CAM112A_map20	0002.CSV	1172.56	0.0824963
CAM112A_map20	0002.CSV	1176.41	0.0822948
CAM112A_map20	0002.CSV	1180.27	0.0822901
CAM112A_map20	0002.CSV	1184.13	0.0819375
CAM112A_map20	0002.CSV	1187.99	0.0819326
CAM112A_map20	0002.CSV	1191.84	0.0816863
CAM112A_map20	0002.CSV	1195.7	0.081788
CAM112A_map20	0002.CSV	1199.56	0.081803
CAM112A_map20	0002.CSV	1203.41	0.0823118
CAM112A_map20	0002.CSV	1207.27	0.0827755
CAM112A_map20	0002.CSV	1211.13	0.0837366
CAM112A_map20	0002.CSV	1214.98	0.0845487
CAM112A_map20	0002.CSV	1218.84	0.0856874
CAM112A_map20	0002.CSV	1222.7	0.0867378
CAM112A_map20	0002.CSV	1226.56	0.0882577
CAM112A_map20	0002.CSV	1230.41	0.0896377
CAM112A_map20	0002.CSV	1234.27	0.0914306
CAM112A_map20	0002.CSV	1238.13	0.0929998
CAM112A_map20	0002.CSV	1241.98	0.0950156
CAM112A_map20	0002.CSV	1245.84	0.0968996
CAM112A_map20	0002.CSV	1249.7	0.0990776
CAM112A_map20	0002.CSV	1253.56	0.100724
CAM112A_map20	0002.CSV	1257.41	0.102385
CAM112A_map20	0002.CSV	1261.27	0.103741
CAM112A_map20	0002.CSV	1265.13	0.105565
CAM112A_map20	0002.CSV	1268.98	0.107312
CAM112A_map20	0002.CSV	1272.84	0.109535
CAM112A_map20	0002.CSV	1276.7	0.111469
CAM112A_map20	0002.CSV	1280.56	0.113727
CAM112A_map20	0002.CSV	1284.41	0.115585
CAM112A_map20	0002.CSV	1288.27	0.117752
CAM112A_map20	0002.CSV	1292.13	0.119518
CAM112A_map20	0002.CSV	1295.98	0.121604
CAM112A_map20	0002.CSV	1299.84	0.123646
CAM112A_map20	0002.CSV	1303.7	0.126409
CAM112A_map20	0002.CSV	1307.56	0.129268
CAM112A_map20	0002.CSV	1311.41	0.132984
CAM112A_map20	0002.CSV	1315.27	0.136721
CAM112A_map20	0002.CSV	1319.13	0.141036
CAM112A_map20	0002.CSV	1322.98	0.144652
CAM112A_map20	0002.CSV	1326.84	0.148833
CAM112A_map20	0002.CSV	1330.7	0.153483
CAM112A_map20	0002.CSV	1334.56	0.158962
CAM112A_map20	0002.CSV	1338.41	0.165528
CAM112A_map20	0002.CSV	1342.27	0.173912
CAM112A_map20	0002.CSV	1346.13	0.181053
CAM112A_map20	0002.CSV	1349.98	0.189719
CAM112A_map20	0002.CSV	1353.84	0.198886
CAM112A_map20	0002.CSV	1357.7	0.208965
CAM112A_map20	0002.CSV	1361.56	0.220723
CAM112A_map20	0002.CSV	1365.41	0.235504
CAM112A_map20	0002.CSV	1369.27	0.248136
CAM112A_map20	0002.CSV	1373.13	0.263958
CAM112A_map20	0002.CSV	1376.98	0.281417
CAM112A_map20	0002.CSV	1380.84	0.29648
CAM112A_map20	0002.CSV	1384.7	0.309416
CAM112A_map20	0002.CSV	1388.56	0.323743
CAM112A_map20	0002.CSV	1392.41	0.331594
CAM112A_map20	0002.CSV	1396.27	0.334557
CAM112A_map20	0002.CSV	1400.13	0.331115
CAM112A_map20	0002.CSV	1403.98	0.325774
CAM112A_map20	0002.CSV	1407.84	0.31524
CAM112A_map20	0002.CSV	1411.7	0.302838
CAM112A_map20	0002.CSV	1415.55	0.289781
CAM112A_map20	0002.CSV	1419.41	0.275512
CAM112A_map20	0002.CSV	1423.27	0.263257
CAM112A_map20	0002.CSV	1427.12	0.255723
CAM112A_map20	0002.CSV	1430.98	0.247493
CAM112A_map20	0002.CSV	1434.84	0.23945
CAM112A_map20	0002.CSV	1438.7	0.229169
CAM112A_map20	0002.CSV	1442.55	0.221792
CAM112A_map20	0002.CSV	1446.41	0.213404
CAM112A_map20	0002.CSV	1450.27	0.204524
CAM112A_map20	0002.CSV	1454.12	0.196641
CAM112A_map20	0002.CSV	1457.98	0.185054
CAM112A_map20	0002.CSV	1461.84	0.175813
CAM112A_map20	0002.CSV	1465.7	0.169127
CAM112A_map20	0002.CSV	1469.55	0.162025
CAM112A_map20	0002.CSV	1473.41	0.153421
CAM112A_map20	0002.CSV	1477.27	0.143792
CAM112A_map20	0002.CSV	1481.12	0.137809
CAM112A_map20	0002.CSV	1484.98	0.131893
CAM112A_map20	0002.CSV	1488.84	0.124623
CAM112A_map20	0002.CSV	1492.7	0.116903
CAM112A_map20	0002.CSV	1496.55	0.110819
CAM112A_map20	0002.CSV	1500.41	0.103696
CAM112A_map20	0002.CSV	1504.27	0.0993792
CAM112A_map20	0002.CSV	1508.12	0.0918787
CAM112A_map20	0002.CSV	1511.98	0.0866238
CAM112A_map20	0002.CSV	1515.84	0.0830293
CAM112A_map20	0002.CSV	1519.7	0.0785791
CAM112A_map20	0002.CSV	1523.55	0.073229
CAM112A_map20	0002.CSV	1527.41	0.0696174
CAM112A_map20	0002.CSV	1531.27	0.0664748
CAM112A_map20	0002.CSV	1535.12	0.0640036
CAM112A_map20	0002.CSV	1538.98	0.0613163
CAM112A_map20	0002.CSV	1542.84	0.0554831
CAM112A_map20	0002.CSV	1546.7	0.0507194
CAM112A_map20	0002.CSV	1550.55	0.047295
CAM112A_map20	0002.CSV	1554.41	0.0441431
CAM112A_map20	0002.CSV	1558.27	0.0412383
CAM112A_map20	0002.CSV	1562.12	0.0391961
CAM112A_map20	0002.CSV	1565.98	0.0383071
CAM112A_map20	0002.CSV	1569.84	0.0376338
CAM112A_map20	0002.CSV	1573.69	0.0372621
CAM112A_map20	0002.CSV	1577.55	0.036767
CAM112A_map20	0002.CSV	1581.41	0.0354872
CAM112A_map20	0002.CSV	1585.27	0.0336993
CAM112A_map20	0002.CSV	1589.12	0.0319636
CAM112A_map20	0002.CSV	1592.98	0.0304613
CAM112A_map20	0002.CSV	1596.84	0.0293445
CAM112A_map20	0002.CSV	1600.69	0.0284391
CAM112A_map20	0002.CSV	1604.55	0.0278946
CAM112A_map20	0002.CSV	1608.41	0.0274919
CAM112A_map20	0002.CSV	1612.27	0.0271468
CAM112A_map20	0002.CSV	1616.12	0.0267634
CAM112A_map20	0002.CSV	1619.98	0.0265252
CAM112A_map20	0002.CSV	1623.84	0.0262263
CAM112A_map20	0002.CSV	1627.69	0.025892
CAM112A_map20	0002.CSV	1631.55	0.0251963
CAM112A_map20	0002.CSV	1635.41	0.0249916
CAM112A_map20	0002.CSV	1639.27	0.0249781
CAM112A_map20	0002.CSV	1643.12	0.0246219
CAM112A_map20	0002.CSV	1646.98	0.0245908
CAM112A_map20	0002.CSV	1650.84	0.0248151
CAM112A_map20	0002.CSV	1654.69	0.024855
CAM112A_map20	0002.CSV	1658.55	0.0244531
CAM112A_map20	0002.CSV	1662.41	0.023929
CAM112A_map20	0002.CSV	1666.27	0.0235775
CAM112A_map20	0002.CSV	1670.12	0.0233514
CAM112A_map20	0002.CSV	1673.98	0.0233243
CAM112A_map20	0002.CSV	1677.84	0.0228543
CAM112A_map20	0002.CSV	1681.69	0.0226062
CAM112A_map20	0002.CSV	1685.55	0.0227191
CAM112A_map20	0002.CSV	1689.41	0.0225723
CAM112A_map20	0002.CSV	1693.27	0.0220069
CAM112A_map20	0002.CSV	1697.12	0.0220472
CAM112A_map20	0002.CSV	1700.98	0.0225167
CAM112A_map20	0002.CSV	1704.84	0.0228753
CAM112A_map20	0002.CSV	1708.69	0.0232009
CAM112A_map20	0002.CSV	1712.55	0.0234704
CAM112A_map20	0002.CSV	1716.41	0.0246889
CAM112A_map20	0002.CSV	1720.27	0.0263189
CAM112A_map20	0002.CSV	1724.12	0.0265823
CAM112A_map20	0002.CSV	1727.98	0.0266414
CAM112A_map20	0002.CSV	1731.84	0.0266597
CAM112A_map20	0002.CSV	1735.69	0.0268061
CAM112A_map20	0002.CSV	1739.55	0.0260854
CAM112A_map20	0002.CSV	1743.41	0.0248728
CAM112A_map20	0002.CSV	1747.27	0.0234716
CAM112A_map20	0002.CSV	1751.12	0.0221421
CAM112A_map20	0002.CSV	1754.98	0.0210267
CAM112A_map20	0002.CSV	1758.84	0.0203644
CAM112A_map20	0002.CSV	1762.69	0.0199792
CAM112A_map20	0002.CSV	1766.55	0.0196808
CAM112A_map20	0002.CSV	1770.41	0.0196746
CAM112A_map20	0002.CSV	1774.26	0.0201038
CAM112A_map20	0002.CSV	1778.12	0.0201414
CAM112A_map20	0002.CSV	1781.98	0.0207585
CAM112A_map20	0002.CSV	1785.84	0.0219633
CAM112A_map20	0002.CSV	1789.69	0.0237619
CAM112A_map20	0002.CSV	1793.55	0.0261472
CAM112A_map20	0002.CSV	1797.41	0.0262945
CAM112A_map20	0002.CSV	1801.26	0.024175
CAM112A_map20	0002.CSV	1805.12	0.0217971
CAM112A_map20	0002.CSV	1808.98	0.0202247
CAM112A_map20	0002.CSV	1812.84	0.0194941
CAM112A_map20	0002.CSV	1816.69	0.018958
CAM112A_map20	0002.CSV	1820.55	0.0186457
CAM112A_map20	0002.CSV	1824.41	0.0184295
CAM112A_map20	0002.CSV	1828.26	0.0184969
CAM112A_map20	0002.CSV	1832.12	0.0184802
CAM112A_map20	0002.CSV	1835.98	0.0183669
CAM112A_map20	0002.CSV	1839.84	0.0181611
CAM112A_map20	0002.CSV	1843.69	0.0182899
CAM112A_map20	0002.CSV	1847.55	0.0184767
CAM112A_map20	0002.CSV	1851.41	0.0183269
CAM112A_map20	0002.CSV	1855.26	0.0181765
CAM112A_map20	0002.CSV	1859.12	0.0181621
CAM112A_map20	0002.CSV	1862.98	0.0180227
CAM112A_map20	0002.CSV	1866.84	0.0180793
CAM112A_map20	0002.CSV	1870.69	0.0183469
CAM112A_map20	0002.CSV	1874.55	0.018266
CAM112A_map20	0002.CSV	1878.41	0.0181114
CAM112A_map20	0002.CSV	1882.26	0.0181146
CAM112A_map20	0002.CSV	1886.12	0.0181115
CAM112A_map20	0002.CSV	1889.98	0.0182093
CAM112A_map20	0002.CSV	1893.83	0.0182494
CAM112A_map20	0002.CSV	1897.69	0.0182552
CAM112A_map20	0002.CSV	1901.55	0.0181587
CAM112A_map20	0002.CSV	1905.41	0.0181853
CAM112A_map20	0002.CSV	1909.26	0.0182519
CAM112A_map20	0002.CSV	1913.12	0.0182577
CAM112A_map20	0002.CSV	1916.98	0.0182314
CAM112A_map20	0002.CSV	1920.83	0.0184115
CAM112A_map20	0002.CSV	1924.69	0.0183992
CAM112A_map20	0002.CSV	1928.55	0.0183336
CAM112A_map20	0002.CSV	1932.4	0.0183271
CAM112A_map20	0002.CSV	1936.26	0.0183797
CAM112A_map20	0002.CSV	1940.12	0.018335
CAM112A_map20	0002.CSV	1943.98	0.0185521
CAM112A_map20	0002.CSV	1947.83	0.0186271
CAM112A_map20	0002.CSV	1951.69	0.0186315
CAM112A_map20	0002.CSV	1955.55	0.0186773
CAM112A_map20	0002.CSV	1959.4	0.0187511
CAM112A_map20	0002.CSV	1963.26	0.0186994
CAM112A_map20	0002.CSV	1967.12	0.0187901
CAM112A_map20	0002.CSV	1970.98	0.0188412
CAM112A_map20	0002.CSV	1974.83	0.018855
CAM112A_map20	0002.CSV	1978.69	0.0188427
CAM112A_map20	0002.CSV	1982.55	0.0188588
CAM112A_map20	0002.CSV	1986.4	0.0188912
CAM112A_map20	0002.CSV	1990.26	0.0190195
CAM112A_map20	0002.CSV	1994.12	0.0190789
CAM112A_map20	0002.CSV	1997.98	0.0190914
CAM112A_map20	0002.CSV	2001.83	0.0191089
CAM112A_map20	0002.CSV	2005.69	0.0191408
CAM112A_map20	0002.CSV	2009.55	0.0191328
CAM112A_map20	0002.CSV	2013.4	0.0191696
CAM112A_map20	0002.CSV	2017.26	0.0192573
CAM112A_map20	0002.CSV	2021.12	0.0193781
CAM112A_map20	0002.CSV	2024.97	0.01935
CAM112A_map20	0002.CSV	2028.83	0.019423
CAM112A_map20	0002.CSV	2032.69	0.0194838
CAM112A_map20	0002.CSV	2036.55	0.0194996
CAM112A_map20	0002.CSV	2040.4	0.0195146
CAM112A_map20	0002.CSV	2044.26	0.0196013
CAM112A_map20	0002.CSV	2048.12	0.0195834
CAM112A_map20	0002.CSV	2051.97	0.019623
CAM112A_map20	0002.CSV	2055.83	0.0196924
CAM112A_map20	0002.CSV	2059.69	0.0197848
CAM112A_map20	0002.CSV	2063.55	0.0197837
CAM112A_map20	0002.CSV	2067.4	0.0198297
CAM112A_map20	0002.CSV	2071.26	0.019848
CAM112A_map20	0002.CSV	2075.12	0.0199107
CAM112A_map20	0002.CSV	2078.97	0.0199419
CAM112A_map20	0002.CSV	2082.83	0.0199973
CAM112A_map20	0002.CSV	2086.69	0.0199931
CAM112A_map20	0002.CSV	2090.55	0.0200338
CAM112A_map20	0002.CSV	2094.4	0.0200239
CAM112A_map20	0002.CSV	2098.26	0.0201047
CAM112A_map20	0002.CSV	2102.12	0.020171
CAM112A_map20	0002.CSV	2105.97	0.0201709
CAM112A_map20	0002.CSV	2109.83	0.0201456
CAM112A_map20	0002.CSV	2113.69	0.0202571
CAM112A_map20	0002.CSV	2117.55	0.0203558
CAM112A_map20	0002.CSV	2121.4	0.0204411
CAM112A_map20	0002.CSV	2125.26	0.0204598
CAM112A_map20	0002.CSV	2129.12	0.0205246
CAM112A_map20	0002.CSV	2132.97	0.0205717
CAM112A_map20	0002.CSV	2136.83	0.0206325
CAM112A_map20	0002.CSV	2140.69	0.0206384
CAM112A_map20	0002.CSV	2144.55	0.0206587
CAM112A_map20	0002.CSV	2148.4	0.0206551
CAM112A_map20	0002.CSV	2152.26	0.0206824
CAM112A_map20	0002.CSV	2156.12	0.0206649
CAM112A_map20	0002.CSV	2159.97	0.0206473
CAM112A_map20	0002.CSV	2163.83	0.0206275
CAM112A_map20	0002.CSV	2167.69	0.0206703
CAM112A_map20	0002.CSV	2171.55	0.0206967
CAM112A_map20	0002.CSV	2175.4	0.0207745
CAM112A_map20	0002.CSV	2179.26	0.0207914
CAM112A_map20	0002.CSV	2183.12	0.020815
CAM112A_map20	0002.CSV	2186.97	0.0207975
CAM112A_map20	0002.CSV	2190.83	0.0207792
CAM112A_map20	0002.CSV	2194.69	0.0207657
CAM112A_map20	0002.CSV	2198.55	0.0208161
CAM112A_map20	0002.CSV	2202.4	0.0208086
CAM112A_map20	0002.CSV	2206.26	0.0208229
CAM112A_map20	0002.CSV	2210.12	0.0208452
CAM112A_map20	0002.CSV	2213.97	0.0208636
CAM112A_map20	0002.CSV	2217.83	0.0208409
CAM112A_map20	0002.CSV	2221.69	0.0208668
CAM112A_map20	0002.CSV	2225.54	0.0208674
CAM112A_map20	0002.CSV	2229.4	0.0208769
CAM112A_map20	0002.CSV	2233.26	0.020842
CAM112A_map20	0002.CSV	2237.12	0.0208416
CAM112A_map20	0002.CSV	2240.97	0.0208363
CAM112A_map20	0002.CSV	2244.83	0.020863
CAM112A_map20	0002.CSV	2248.69	0.0208483
CAM112A_map20	0002.CSV	2252.54	0.0208633
CAM112A_map20	0002.CSV	2256.4	0.0208894
CAM112A_map20	0002.CSV	2260.26	0.0209124
CAM112A_map20	0002.CSV	2264.11	0.0208889
CAM112A_map20	0002.CSV	2267.97	0.0209586
CAM112A_map20	0002.CSV	2271.83	0.0209897
CAM112A_map20	0002.CSV	2275.69	0.0210225
CAM112A_map20	0002.CSV	2279.54	0.0210573
CAM112A_map20	0002.CSV	2283.4	0.0210467
CAM112A_map20	0002.CSV	2287.26	0.0210021
CAM112A_map20	0002.CSV	2291.11	0.0210164
CAM112A_map20	0002.CSV	2294.97	0.0210144
CAM112A_map20	0002.CSV	2298.83	0.0211183
CAM112A_map20	0002.CSV	2302.69	0.0211199
CAM112A_map20	0002.CSV	2306.54	0.0210023
CAM112A_map20	0002.CSV	2310.4	0.0208564
CAM112A_map20	0002.CSV	2314.26	0.0206298
CAM112A_map20	0002.CSV	2318.11	0.0200562
CAM112A_map20	0002.CSV	2321.97	0.0191724
CAM112A_map20	0002.CSV	2325.83	0.0179917
CAM112A_map20	0002.CSV	2329.69	0.0175956
CAM112A_map20	0002.CSV	2333.54	0.0171928
CAM112A_map20	0002.CSV	2337.4	0.0160954
CAM112A_map20	0002.CSV	2341.26	0.0156254
CAM112A_map20	0002.CSV	2345.11	0.0183928
CAM112A_map20	0002.CSV	2348.97	0.0190161
CAM112A_map20	0002.CSV	2352.83	0.0168526
CAM112A_map20	0002.CSV	2356.69	0.00965486
CAM112A_map20	0002.CSV	2360.54	0.00160802
CAM112A_map20	0002.CSV	2364.4	0.00504143
CAM112A_map20	0002.CSV	2368.26	0.0143726
CAM112A_map20	0002.CSV	2372.11	0.0195036
CAM112A_map20	0002.CSV	2375.97	0.0214512
CAM112A_map20	0002.CSV	2379.83	0.022097
CAM112A_map20	0002.CSV	2383.69	0.0222128
CAM112A_map20	0002.CSV	2387.54	0.022061
CAM112A_map20	0002.CSV	2391.4	0.0219734
CAM112A_map20	0002.CSV	2395.26	0.0219731
CAM112A_map20	0002.CSV	2399.11	0.0220045
CAM112A_map20	0002.CSV	2402.97	0.0220184
CAM112A_map20	0002.CSV	2406.83	0.0220756
CAM112A_map20	0002.CSV	2410.68	0.02209
CAM112A_map20	0002.CSV	2414.54	0.0220583
CAM112A_map20	0002.CSV	2418.4	0.0220647
CAM112A_map20	0002.CSV	2422.26	0.0221493
CAM112A_map20	0002.CSV	2426.11	0.0222151
CAM112A_map20	0002.CSV	2429.97	0.0222811
CAM112A_map20	0002.CSV	2433.83	0.0222844
CAM112A_map20	0002.CSV	2437.68	0.0222973
CAM112A_map20	0002.CSV	2441.54	0.0223426
CAM112A_map20	0002.CSV	2445.4	0.0223775
CAM112A_map20	0002.CSV	2449.26	0.0223757
CAM112A_map20	0002.CSV	2453.11	0.0224028
CAM112A_map20	0002.CSV	2456.97	0.0224333
CAM112A_map20	0002.CSV	2460.83	0.0225247
CAM112A_map20	0002.CSV	2464.68	0.0226364
CAM112A_map20	0002.CSV	2468.54	0.0227245
CAM112A_map20	0002.CSV	2472.4	0.0228357
CAM112A_map20	0002.CSV	2476.26	0.0230171
CAM112A_map20	0002.CSV	2480.11	0.0231762
CAM112A_map20	0002.CSV	2483.97	0.0233861
CAM112A_map20	0002.CSV	2487.83	0.0236825
CAM112A_map20	0002.CSV	2491.68	0.0241321
CAM112A_map20	0002.CSV	2495.54	0.0247372
CAM112A_map20	0002.CSV	2499.4	0.0253688
CAM112A_map20	0002.CSV	2503.26	0.0259197
CAM112A_map20	0002.CSV	2507.11	0.0263718
CAM112A_map20	0002.CSV	2510.97	0.0265576
CAM112A_map20	0002.CSV	2514.83	0.0264511
CAM112A_map20	0002.CSV	2518.68	0.0261263
CAM112A_map20	0002.CSV	2522.54	0.0256741
CAM112A_map20	0002.CSV	2526.4	0.0251183
CAM112A_map20	0002.CSV	2530.26	0.0245704
CAM112A_map20	0002.CSV	2534.11	0.0240303
CAM112A_map20	0002.CSV	2537.97	0.0236314
CAM112A_map20	0002.CSV	2541.83	0.0234006
CAM112A_map20	0002.CSV	2545.68	0.0232625
CAM112A_map20	0002.CSV	2549.54	0.0231338
CAM112A_map20	0002.CSV	2553.4	0.0230289
CAM112A_map20	0002.CSV	2557.26	0.0229558
CAM112A_map20	0002.CSV	2561.11	0.0229429
CAM112A_map20	0002.CSV	2564.97	0.0229144
CAM112A_map20	0002.CSV	2568.83	0.0228905
CAM112A_map20	0002.CSV	2572.68	0.0229088
CAM112A_map20	0002.CSV	2576.54	0.0229312
CAM112A_map20	0002.CSV	2580.4	0.0229061
CAM112A_map20	0002.CSV	2584.25	0.0228872
CAM112A_map20	0002.CSV	2588.11	0.0228724
CAM112A_map20	0002.CSV	2591.97	0.0228762
CAM112A_map20	0002.CSV	2595.83	0.0228292
CAM112A_map20	0002.CSV	2599.68	0.0227922
CAM112A_map20	0002.CSV	2603.54	0.0227484
CAM112A_map20	0002.CSV	2607.4	0.0227075
CAM112A_map20	0002.CSV	2611.25	0.0226331
CAM112A_map20	0002.CSV	2615.11	0.0225317
CAM112A_map20	0002.CSV	2618.97	0.0224603
CAM112A_map20	0002.CSV	2622.82	0.0224829
CAM112A_map20	0002.CSV	2626.68	0.0225413
CAM112A_map20	0002.CSV	2630.54	0.0224709
CAM112A_map20	0002.CSV	2634.4	0.0224103
CAM112A_map20	0002.CSV	2638.25	0.0224198
CAM112A_map20	0002.CSV	2642.11	0.0223159
CAM112A_map20	0002.CSV	2645.97	0.0222363
CAM112A_map20	0002.CSV	2649.82	0.0221912
CAM112A_map20	0002.CSV	2653.68	0.022206
CAM112A_map20	0002.CSV	2657.54	0.0222368
CAM112A_map20	0002.CSV	2661.4	0.0222605
CAM112A_map20	0002.CSV	2665.25	0.0222772
CAM112A_map20	0002.CSV	2669.11	0.0223593
CAM112A_map20	0002.CSV	2672.97	0.0225359
CAM112A_map20	0002.CSV	2676.82	0.0228105
CAM112A_map20	0002.CSV	2680.68	0.0227795
CAM112A_map20	0002.CSV	2684.54	0.0224639
CAM112A_map20	0002.CSV	2688.4	0.0223524
CAM112A_map20	0002.CSV	2692.25	0.0223815
CAM112A_map20	0002.CSV	2696.11	0.0224526
CAM112A_map20	0002.CSV	2699.97	0.0225134
CAM112A_map20	0002.CSV	2703.82	0.022481
CAM112A_map20	0002.CSV	2707.68	0.0225301
CAM112A_map20	0002.CSV	2711.54	0.0225453
CAM112A_map20	0002.CSV	2715.4	0.022529
CAM112A_map20	0002.CSV	2719.25	0.0227385
CAM112A_map20	0002.CSV	2723.11	0.0230716
CAM112A_map20	0002.CSV	2726.97	0.0230115
CAM112A_map20	0002.CSV	2730.82	0.0226601
CAM112A_map20	0002.CSV	2734.68	0.0226141
CAM112A_map20	0002.CSV	2738.54	0.0226947
CAM112A_map20	0002.CSV	2742.4	0.0227208
CAM112A_map20	0002.CSV	2746.25	0.0230043
CAM112A_map20	0002.CSV	2750.11	0.0230656
CAM112A_map20	0002.CSV	2753.97	0.0228174
CAM112A_map20	0002.CSV	2757.82	0.0227183
CAM112A_map20	0002.CSV	2761.68	0.0226115
CAM112A_map20	0002.CSV	2765.54	0.0225414
CAM112A_map20	0002.CSV	2769.39	0.0227301
CAM112A_map20	0002.CSV	2773.25	0.0231777
CAM112A_map20	0002.CSV	2777.11	0.0231527
CAM112A_map20	0002.CSV	2780.97	0.0228991
CAM112A_map20	0002.CSV	2784.82	0.0231099
CAM112A_map20	0002.CSV	2788.68	0.0236049
CAM112A_map20	0002.CSV	2792.54	0.0237991
CAM112A_map20	0002.CSV	2796.39	0.0238414
CAM112A_map20	0002.CSV	2800.25	0.0236297
CAM112A_map20	0002.CSV	2804.11	0.0233672
CAM112A_map20	0002.CSV	2807.97	0.0236319
CAM112A_map20	0002.CSV	2811.82	0.0236968
CAM112A_map20	0002.CSV	2815.68	0.0235885
CAM112A_map20	0002.CSV	2819.54	0.0238183
CAM112A_map20	0002.CSV	2823.39	0.0240705
CAM112A_map20	0002.CSV	2827.25	0.0242323
CAM112A_map20	0002.CSV	2831.11	0.0248503
CAM112A_map20	0002.CSV	2834.97	0.0258123
CAM112A_map20	0002.CSV	2838.82	0.0267119
CAM112A_map20	0002.CSV	2842.68	0.0278458
CAM112A_map20	0002.CSV	2846.54	0.0298748
CAM112A_map20	0002.CSV	2850.39	0.0311754
CAM112A_map20	0002.CSV	2854.25	0.030818
CAM112A_map20	0002.CSV	2858.11	0.0299895
CAM112A_map20	0002.CSV	2861.97	0.0291206
CAM112A_map20	0002.CSV	2865.82	0.0285488
CAM112A_map20	0002.CSV	2869.68	0.0286438
CAM112A_map20	0002.CSV	2873.54	0.0287149
CAM112A_map20	0002.CSV	2877.39	0.0280253
CAM112A_map20	0002.CSV	2881.25	0.0274062
CAM112A_map20	0002.CSV	2885.11	0.0272867
CAM112A_map20	0002.CSV	2888.97	0.0274791
CAM112A_map20	0002.CSV	2892.82	0.0280958
CAM112A_map20	0002.CSV	2896.68	0.0286583
CAM112A_map20	0002.CSV	2900.54	0.0289988
CAM112A_map20	0002.CSV	2904.39	0.029816
CAM112A_map20	0002.CSV	2908.25	0.031304
CAM112A_map20	0002.CSV	2912.11	0.0336276
CAM112A_map20	0002.CSV	2915.97	0.0358228
CAM112A_map20	0002.CSV	2919.82	0.0363147
CAM112A_map20	0002.CSV	2923.68	0.0354703
CAM112A_map20	0002.CSV	2927.54	0.0345287
CAM112A_map20	0002.CSV	2931.39	0.033176
CAM112A_map20	0002.CSV	2935.25	0.0314633
CAM112A_map20	0002.CSV	2939.11	0.0303325
CAM112A_map20	0002.CSV	2942.96	0.0299815
CAM112A_map20	0002.CSV	2946.82	0.0297125
CAM112A_map20	0002.CSV	2950.68	0.0293562
CAM112A_map20	0002.CSV	2954.54	0.0289443
CAM112A_map20	0002.CSV	2958.39	0.0284302
CAM112A_map20	0002.CSV	2962.25	0.0280252
CAM112A_map20	0002.CSV	2966.11	0.0273587
CAM112A_map20	0002.CSV	2969.96	0.0268733
CAM112A_map20	0002.CSV	2973.82	0.0267654
CAM112A_map20	0002.CSV	2977.68	0.0267125
CAM112A_map20	0002.CSV	2981.53	0.0262788
CAM112A_map20	0002.CSV	2985.39	0.0255471
CAM112A_map20	0002.CSV	2989.25	0.025308
CAM112A_map20	0002.CSV	2993.11	0.0253116
CAM112A_map20	0002.CSV	2996.96	0.025058
CAM112A_map20	0002.CSV	3000.82	0.0246886
CAM112A_map20	0002.CSV	3004.68	0.0244387
CAM112A_map20	0002.CSV	3008.53	0.0245623
CAM112A_map20	0002.CSV	3012.39	0.0248718
CAM112A_map20	0002.CSV	3016.25	0.0248619
CAM112A_map20	0002.CSV	3020.11	0.0246485
CAM112A_map20	0002.CSV	3023.96	0.0245363
CAM112A_map20	0002.CSV	3027.82	0.0245326
CAM112A_map20	0002.CSV	3031.68	0.0247029
CAM112A_map20	0002.CSV	3035.53	0.0247458
CAM112A_map20	0002.CSV	3039.39	0.0247538
CAM112A_map20	0002.CSV	3043.25	0.0248301
CAM112A_map20	0002.CSV	3047.11	0.0247859
CAM112A_map20	0002.CSV	3050.96	0.0247756
CAM112A_map20	0002.CSV	3054.82	0.0247248
CAM112A_map20	0002.CSV	3058.68	0.0246498
CAM112A_map20	0002.CSV	3062.53	0.0247439
CAM112A_map20	0002.CSV	3066.39	0.0249334
CAM112A_map20	0002.CSV	3070.25	0.0248562
CAM112A_map20	0002.CSV	3074.11	0.0248503
CAM112A_map20	0002.CSV	3077.96	0.0250804
CAM112A_map20	0002.CSV	3081.82	0.0252097
CAM112A_map20	0002.CSV	3085.68	0.0251995
CAM112A_map20	0002.CSV	3089.53	0.0250601
CAM112A_map20	0002.CSV	3093.39	0.0247977
CAM112A_map20	0002.CSV	3097.25	0.0247925
CAM112A_map20	0002.CSV	3101.11	0.0249317
CAM112A_map20	0002.CSV	3104.96	0.0249934
CAM112A_map20	0002.CSV	3108.82	0.0251043
CAM112A_map20	0002.CSV	3112.68	0.0251621
CAM112A_map20	0002.CSV	3116.53	0.0252441
CAM112A_map20	0002.CSV	3120.39	0.0252489
CAM112A_map20	0002.CSV	3124.25	0.0251059
CAM112A_map20	0002.CSV	3128.11	0.0250342
CAM112A_map20	0002.CSV	3131.96	0.0250179
CAM112A_map20	0002.CSV	3135.82	0.0251877
CAM112A_map20	0002.CSV	3139.68	0.0252996
CAM112A_map20	0002.CSV	3143.53	0.0251057
CAM112A_map20	0002.CSV	3147.39	0.0251345
CAM112A_map20	0002.CSV	3151.25	0.0253934
CAM112A_map20	0002.CSV	3155.1	0.02537
CAM112A_map20	0002.CSV	3158.96	0.0251512
CAM112A_map20	0002.CSV	3162.82	0.0250949
CAM112A_map20	0002.CSV	3166.68	0.0251016
CAM112A_map20	0002.CSV	3170.53	0.0250857
CAM112A_map20	0002.CSV	3174.39	0.0251248
CAM112A_map20	0002.CSV	3178.25	0.0252246
CAM112A_map20	0002.CSV	3182.1	0.0253666
CAM112A_map20	0002.CSV	3185.96	0.0255659
CAM112A_map20	0002.CSV	3189.82	0.025644
CAM112A_map20	0002.CSV	3193.68	0.0255135
CAM112A_map20	0002.CSV	3197.53	0.0255071
CAM112A_map20	0002.CSV	3201.39	0.0256838
CAM112A_map20	0002.CSV	3205.25	0.0257083
CAM112A_map20	0002.CSV	3209.1	0.0256934
CAM112A_map20	0002.CSV	3212.96	0.0258924
CAM112A_map20	0002.CSV	3216.82	0.0260438
CAM112A_map20	0002.CSV	3220.68	0.0259791
CAM112A_map20	0002.CSV	3224.53	0.0259334
CAM112A_map20	0002.CSV	3228.39	0.0261124
CAM112A_map20	0002.CSV	3232.25	0.0264018
CAM112A_map20	0002.CSV	3236.1	0.0264071
CAM112A_map20	0002.CSV	3239.96	0.0262505
CAM112A_map20	0002.CSV	3243.82	0.0263993
CAM112A_map20	0002.CSV	3247.68	0.0264998
CAM112A_map20	0002.CSV	3251.53	0.0264333
CAM112A_map20	0002.CSV	3255.39	0.0264803
CAM112A_map20	0002.CSV	3259.25	0.0264012
CAM112A_map20	0002.CSV	3263.1	0.0263909
CAM112A_map20	0002.CSV	3266.96	0.0266653
CAM112A_map20	0002.CSV	3270.82	0.0268726
CAM112A_map20	0002.CSV	3274.68	0.0268481
CAM112A_map20	0002.CSV	3278.53	0.0266665
CAM112A_map20	0002.CSV	3282.39	0.0265323
CAM112A_map20	0002.CSV	3286.25	0.026545
CAM112A_map20	0002.CSV	3290.1	0.0268305
CAM112A_map20	0002.CSV	3293.96	0.0271027
CAM112A_map20	0002.CSV	3297.82	0.0269754
CAM112A_map20	0002.CSV	3301.67	0.0269593
CAM112A_map20	0002.CSV	3305.53	0.027119
CAM112A_map20	0002.CSV	3309.39	0.0270765
CAM112A_map20	0002.CSV	3313.25	0.0267839
CAM112A_map20	0002.CSV	3317.1	0.0265043
CAM112A_map20	0002.CSV	3320.96	0.0266121
CAM112A_map20	0002.CSV	3324.82	0.0268855
CAM112A_map20	0002.CSV	3328.67	0.026656
CAM112A_map20	0002.CSV	3332.53	0.0265084
CAM112A_map20	0002.CSV	3336.39	0.0268307
CAM112A_map20	0002.CSV	3340.24	0.0269801
CAM112A_map20	0002.CSV	3344.1	0.0267479
CAM112A_map20	0002.CSV	3347.96	0.0267132
CAM112A_map20	0002.CSV	3351.82	0.0267333
CAM112A_map20	0002.CSV	3355.67	0.0265484
CAM112A_map20	0002.CSV	3359.53	0.0265981
CAM112A_map20	0002.CSV	3363.39	0.0268105
CAM112A_map20	0002.CSV	3367.24	0.0269746
CAM112A_map20	0002.CSV	3371.1	0.0267953
CAM112A_map20	0002.CSV	3374.96	0.0265485
CAM112A_map20	0002.CSV	3378.82	0.0264548
CAM112A_map20	0002.CSV	3382.67	0.0261476
CAM112A_map20	0002.CSV	3386.53	0.0262022
CAM112A_map20	0002.CSV	3390.39	0.0266083
CAM112A_map20	0002.CSV	3394.24	0.0267627
CAM112A_map20	0002.CSV	3398.1	0.0267856
CAM112A_map20	0002.CSV	3401.96	0.0266901
CAM112A_map20	0002.CSV	3405.82	0.0264774
CAM112A_map20	0002.CSV	3409.67	0.0264701
CAM112A_map20	0002.CSV	3413.53	0.0262534
CAM112A_map20	0002.CSV	3417.39	0.0259369
CAM112A_map20	0002.CSV	3421.24	0.025909
CAM112A_map20	0002.CSV	3425.1	0.0259506
CAM112A_map20	0002.CSV	3428.96	0.0260956
CAM112A_map20	0002.CSV	3432.82	0.0261949
CAM112A_map20	0002.CSV	3436.67	0.0260246
CAM112A_map20	0002.CSV	3440.53	0.025574
CAM112A_map20	0002.CSV	3444.39	0.0252098
CAM112A_map20	0002.CSV	3448.24	0.0251336
CAM112A_map20	0002.CSV	3452.1	0.0249888
CAM112A_map20	0002.CSV	3455.96	0.0249521
CAM112A_map20	0002.CSV	3459.82	0.0251035
CAM112A_map20	0002.CSV	3463.67	0.0253666
CAM112A_map20	0002.CSV	3467.53	0.0255407
CAM112A_map20	0002.CSV	3471.39	0.0252393
CAM112A_map20	0002.CSV	3475.24	0.0249663
CAM112A_map20	0002.CSV	3479.1	0.0249364
CAM112A_map20	0002.CSV	3482.96	0.0248389
CAM112A_map20	0002.CSV	3486.82	0.0247967
CAM112A_map20	0002.CSV	3490.67	0.0246765
CAM112A_map20	0002.CSV	3494.53	0.0246942
CAM112A_map20	0002.CSV	3498.39	0.0246999
CAM112A_map20	0002.CSV	3502.24	0.0246526
CAM112A_map20	0002.CSV	3506.1	0.0243673
CAM112A_map20	0002.CSV	3509.96	0.0241089
CAM112A_map20	0002.CSV	3513.81	0.0240778
CAM112A_map20	0002.CSV	3517.67	0.0238334
CAM112A_map20	0002.CSV	3521.53	0.0237904
CAM112A_map20	0002.CSV	3525.39	0.0237561
CAM112A_map20	0002.CSV	3529.24	0.0236138
CAM112A_map20	0002.CSV	3533.1	0.0235907
CAM112A_map20	0002.CSV	3536.96	0.0236503
CAM112A_map20	0002.CSV	3540.81	0.0235914
CAM112A_map20	0002.CSV	3544.67	0.0236725
CAM112A_map20	0002.CSV	3548.53	0.023532
CAM112A_map20	0002.CSV	3552.39	0.0230815
CAM112A_map20	0002.CSV	3556.24	0.022889
CAM112A_map20	0002.CSV	3560.1	0.0227094
CAM112A_map20	0002.CSV	3563.96	0.0224456
CAM112A_map20	0002.CSV	3567.81	0.0228042
CAM112A_map20	0002.CSV	3571.67	0.02269
CAM112A_map20	0002.CSV	3575.53	0.0222517
CAM112A_map20	0002.CSV	3579.39	0.0222604
CAM112A_map20	0002.CSV	3583.24	0.0221258
CAM112A_map20	0002.CSV	3587.1	0.0222179
CAM112A_map20	0002.CSV	3590.96	0.0222293
CAM112A_map20	0002.CSV	3594.81	0.0219295
CAM112A_map20	0002.CSV	3598.67	0.0219017
CAM112A_map20	0002.CSV	3602.53	0.0217221
CAM112A_map20	0002.CSV	3606.39	0.0212853
CAM112A_map20	0002.CSV	3610.24	0.0210288
CAM112A_map20	0002.CSV	3614.1	0.0209074
CAM112A_map20	0002.CSV	3617.96	0.0211218
CAM112A_map20	0002.CSV	3621.81	0.0212577
CAM112A_map20	0002.CSV	3625.67	0.0206383
CAM112A_map20	0002.CSV	3629.53	0.0207646
CAM112A_map20	0002.CSV	3633.39	0.0211588
CAM112A_map20	0002.CSV	3637.24	0.0208086
CAM112A_map20	0002.CSV	3641.1	0.0204305
CAM112A_map20	0002.CSV	3644.96	0.0198921
CAM112A_map20	0002.CSV	3648.81	0.0205534
CAM112A_map20	0002.CSV	3652.67	0.0211549
CAM112A_map20	0002.CSV	3656.53	0.0210354
CAM112A_map20	0002.CSV	3660.38	0.0210421
CAM112A_map20	0002.CSV	3664.24	0.0202693
CAM112A_map20	0002.CSV	3668.1	0.0195396
CAM112A_map20	0002.CSV	3671.96	0.0195808
CAM112A_map20	0002.CSV	3675.81	0.020404
CAM112A_map20	0002.CSV	3679.67	0.020848
CAM112A_map20	0002.CSV	3683.53	0.0202648
CAM112A_map20	0002.CSV	3687.38	0.0201126
CAM112A_map20	0002.CSV	3691.24	0.0210949
CAM112A_map20	0002.CSV	3695.1	0.0208609
CAM112A_map20	0002.CSV	3698.95	0.0202527
CAM112A_map20	0002.CSV	3702.81	0.0201383
CAM112A_map20	0002.CSV	3706.67	0.0197401
CAM112A_map20	0002.CSV	3710.53	0.0198608
CAM112A_map20	0002.CSV	3714.38	0.0205916
CAM112A_map20	0002.CSV	3718.24	0.0200467
CAM112A_map20	0002.CSV	3722.1	0.0198217
CAM112A_map20	0002.CSV	3725.95	0.0201718
CAM112A_map20	0002.CSV	3729.81	0.0198427
CAM112A_map20	0002.CSV	3733.67	0.020007
CAM112A_map20	0002.CSV	3737.53	0.0212093
CAM112A_map20	0002.CSV	3741.38	0.0204881
CAM112A_map20	0002.CSV	3745.24	0.0197295
CAM112A_map20	0002.CSV	3749.1	0.0198055
CAM112A_map20	0002.CSV	3752.95	0.0206312
CAM112A_map20	0002.CSV	3756.81	0.0207532
CAM112A_map20	0002.CSV	3760.67	0.0206639
CAM112A_map20	0002.CSV	3764.53	0.0203226
CAM112A_map20	0002.CSV	3768.38	0.0204125
CAM112A_map20	0002.CSV	3772.24	0.0206139
CAM112A_map20	0002.CSV	3776.1	0.0203891
CAM112A_map20	0002.CSV	3779.95	0.0204974
CAM112A_map20	0002.CSV	3783.81	0.0205639
CAM112A_map20	0002.CSV	3787.67	0.0205565
CAM112A_map20	0002.CSV	3791.53	0.0203121
CAM112A_map20	0002.CSV	3795.38	0.0199616
CAM112A_map20	0002.CSV	3799.24	0.0201211
CAM112A_map20	0002.CSV	3803.1	0.0206402
CAM112A_map20	0002.CSV	3806.95	0.0209097
CAM112A_map20	0002.CSV	3810.81	0.0204528
CAM112A_map20	0002.CSV	3814.67	0.0198207
CAM112A_map20	0002.CSV	3818.53	0.020184
CAM112A_map20	0002.CSV	3822.38	0.0207681
CAM112A_map20	0002.CSV	3826.24	0.0205802
CAM112A_map20	0002.CSV	3830.1	0.0203674
CAM112A_map20	0002.CSV	3833.95	0.0202654
CAM112A_map20	0002.CSV	3837.81	0.0205507
CAM112A_map20	0002.CSV	3841.67	0.0210757
CAM112A_map20	0002.CSV	3845.53	0.020626
CAM112A_map20	0002.CSV	3849.38	0.0196038
CAM112A_map20	0002.CSV	3853.24	0.0199061
CAM112A_map20	0002.CSV	3857.1	0.0206238
CAM112A_map20	0002.CSV	3860.95	0.0198821
CAM112A_map20	0002.CSV	3864.81	0.0198825
CAM112A_map20	0002.CSV	3868.67	0.0202482
CAM112A_map20	0002.CSV	3872.52	0.0206583
CAM112A_map20	0002.CSV	3876.38	0.0203111
CAM112A_map20	0002.CSV	3880.24	0.019953
CAM112A_map20	0002.CSV	3884.1	0.0203511
CAM112A_map20	0002.CSV	3887.95	0.0203555
CAM112A_map20	0002.CSV	3891.81	0.0202247
CAM112A_map20	0002.CSV	3895.67	0.0198711
CAM112A_map20	0002.CSV	3899.52	0.019509
CAM112A_map20	0002.CSV	3903.38	0.0203211
CAM112A_map20	0002.CSV	3907.24	0.0205133
CAM112A_map20	0002.CSV	3911.1	0.019939
CAM112A_map20	0002.CSV	3914.95	0.0195993
CAM112A_map20	0002.CSV	3918.81	0.019761
CAM112A_map20	0002.CSV	3922.67	0.019864
CAM112A_map20	0002.CSV	3926.52	0.0198205
CAM112A_map20	0002.CSV	3930.38	0.0197789
CAM112A_map20	0002.CSV	3934.24	0.0200318
CAM112A_map20	0002.CSV	3938.09	0.0197625
CAM112A_map20	0002.CSV	3941.95	0.0195019
CAM112A_map20	0002.CSV	3945.81	0.0195308
CAM112A_map20	0002.CSV	3949.67	0.0197046
CAM112A_map20	0002.CSV	3953.52	0.0197303
CAM112A_map20	0002.CSV	3957.38	0.0195055
CAM112A_map20	0002.CSV	3961.24	0.0195379
CAM112A_map20	0002.CSV	3965.09	0.0196491
CAM112A_map20	0002.CSV	3968.95	0.0196213
CAM112A_map20	0002.CSV	3972.81	0.0196085
CAM112A_map20	0002.CSV	3976.67	0.019608
CAM112A_map20	0002.CSV	3980.52	0.0195741
CAM112A_map20	0002.CSV	3984.38	0.0195245
CAM112A_map20	0002.CSV	3988.24	0.0194431
CAM112A_map20	0002.CSV	3992.09	0.0194544
CAM112A_map20	0002.CSV	3995.95	0.0194754
CAM112A_map20	0002.CSV	3999.81	0.019391
CAM112A_map20	0003.CSV	674.992	0.0390694
CAM112A_map20	0003.CSV	678.849	0.0416146
CAM112A_map20	0003.CSV	682.706	0.0437785
CAM112A_map20	0003.CSV	686.563	0.0477612
CAM112A_map20	0003.CSV	690.42	0.0529257
CAM112A_map20	0003.CSV	694.277	0.0638076
[truncated: 81,116 more rows]

## Sheet: CAM112_map21
Map	Select spectrum number	Wavenumbers	Absorbance
[truncated: 112,190 more rows]

[truncated: 4 more sheets: CAM112_map22, CAM112_map23, CAM112_map24, CAM112_map25]
