# Supplementary material for: Thermo-microstratigraphy of shells reveals invisible fire use and possible cooking in the archaeological record
Source: Frontiers journal article supplement (doi:10.3389/feart.2022.869487), 2022-09-01
Supplement: Table_8.XLSX [file Table_8.XLSX]

## Sheet: CAM206_map1
Map	Select spectrum number	Wavenumbers	Absorbance
CAM206_map1	0001.CSV	674.992	0.0200661
CAM206_map1	0001.CSV	678.849	0.0205512
CAM206_map1	0001.CSV	682.706	0.0208476
CAM206_map1	0001.CSV	686.563	0.0219394
CAM206_map1	0001.CSV	690.42	0.0229454
CAM206_map1	0001.CSV	694.277	0.0265047
CAM206_map1	0001.CSV	698.134	0.0303853
CAM206_map1	0001.CSV	701.991	0.0284541
CAM206_map1	0001.CSV	705.849	0.0269685
CAM206_map1	0001.CSV	709.706	0.0331688
CAM206_map1	0001.CSV	713.563	0.0333389
CAM206_map1	0001.CSV	717.42	0.0240985
CAM206_map1	0001.CSV	721.277	0.0187792
CAM206_map1	0001.CSV	725.134	0.0182689
CAM206_map1	0001.CSV	728.991	0.0177843
CAM206_map1	0001.CSV	732.848	0.0176438
CAM206_map1	0001.CSV	736.705	0.0177655
CAM206_map1	0001.CSV	740.562	0.0181591
CAM206_map1	0001.CSV	744.42	0.0182776
CAM206_map1	0001.CSV	748.277	0.0185239
CAM206_map1	0001.CSV	752.134	0.0184578
CAM206_map1	0001.CSV	755.991	0.0188557
CAM206_map1	0001.CSV	759.848	0.0193036
CAM206_map1	0001.CSV	763.705	0.0196053
CAM206_map1	0001.CSV	767.562	0.0195196
CAM206_map1	0001.CSV	771.419	0.0198883
CAM206_map1	0001.CSV	775.276	0.0204163
CAM206_map1	0001.CSV	779.133	0.0209953
CAM206_map1	0001.CSV	782.99	0.0210428
CAM206_map1	0001.CSV	786.848	0.0213304
CAM206_map1	0001.CSV	790.705	0.0218195
CAM206_map1	0001.CSV	794.562	0.022644
CAM206_map1	0001.CSV	798.419	0.0230579
CAM206_map1	0001.CSV	802.276	0.0232179
CAM206_map1	0001.CSV	806.133	0.0233401
CAM206_map1	0001.CSV	809.99	0.0239201
CAM206_map1	0001.CSV	813.847	0.0244277
CAM206_map1	0001.CSV	817.704	0.0255262
CAM206_map1	0001.CSV	821.562	0.0270141
CAM206_map1	0001.CSV	825.419	0.0289516
CAM206_map1	0001.CSV	829.276	0.031055
CAM206_map1	0001.CSV	833.133	0.0336163
CAM206_map1	0001.CSV	836.99	0.0370776
CAM206_map1	0001.CSV	840.847	0.0420701
CAM206_map1	0001.CSV	844.704	0.0470403
CAM206_map1	0001.CSV	848.561	0.054823
CAM206_map1	0001.CSV	852.418	0.063102
CAM206_map1	0001.CSV	856.275	0.0634264
CAM206_map1	0001.CSV	860.132	0.056008
CAM206_map1	0001.CSV	863.99	0.045764
CAM206_map1	0001.CSV	867.847	0.0353964
CAM206_map1	0001.CSV	871.704	0.0275846
CAM206_map1	0001.CSV	875.561	0.0232064
CAM206_map1	0001.CSV	879.418	0.021134
CAM206_map1	0001.CSV	883.275	0.0198582
CAM206_map1	0001.CSV	887.132	0.0193174
CAM206_map1	0001.CSV	890.989	0.0192907
CAM206_map1	0001.CSV	894.846	0.0195235
CAM206_map1	0001.CSV	898.703	0.0197332
CAM206_map1	0001.CSV	902.561	0.0201356
CAM206_map1	0001.CSV	906.418	0.0204532
CAM206_map1	0001.CSV	910.275	0.0207078
CAM206_map1	0001.CSV	914.132	0.0208476
CAM206_map1	0001.CSV	917.989	0.0210792
CAM206_map1	0001.CSV	921.846	0.0213169
CAM206_map1	0001.CSV	925.703	0.0216825
CAM206_map1	0001.CSV	929.56	0.0217987
CAM206_map1	0001.CSV	933.417	0.021983
CAM206_map1	0001.CSV	937.274	0.022128
CAM206_map1	0001.CSV	941.131	0.0222762
CAM206_map1	0001.CSV	944.989	0.0224534
CAM206_map1	0001.CSV	948.846	0.0228593
CAM206_map1	0001.CSV	952.703	0.0231688
CAM206_map1	0001.CSV	956.56	0.0234031
CAM206_map1	0001.CSV	960.417	0.0234816
CAM206_map1	0001.CSV	964.274	0.0235685
CAM206_map1	0001.CSV	968.131	0.0237386
CAM206_map1	0001.CSV	971.988	0.0240554
CAM206_map1	0001.CSV	975.845	0.0243335
CAM206_map1	0001.CSV	979.702	0.0247015
CAM206_map1	0001.CSV	983.559	0.0249674
CAM206_map1	0001.CSV	987.417	0.0253507
CAM206_map1	0001.CSV	991.274	0.0257082
CAM206_map1	0001.CSV	995.131	0.0261589
CAM206_map1	0001.CSV	998.988	0.0264408
CAM206_map1	0001.CSV	1002.85	0.0267485
CAM206_map1	0001.CSV	1006.7	0.0271072
CAM206_map1	0001.CSV	1010.56	0.027468
CAM206_map1	0001.CSV	1014.42	0.0276526
CAM206_map1	0001.CSV	1018.27	0.0278861
CAM206_map1	0001.CSV	1022.13	0.0280225
CAM206_map1	0001.CSV	1025.99	0.0282906
CAM206_map1	0001.CSV	1029.85	0.0285457
CAM206_map1	0001.CSV	1033.7	0.028858
CAM206_map1	0001.CSV	1037.56	0.0290504
CAM206_map1	0001.CSV	1041.42	0.0293177
CAM206_map1	0001.CSV	1045.27	0.0295244
CAM206_map1	0001.CSV	1049.13	0.029894
CAM206_map1	0001.CSV	1052.99	0.0303206
CAM206_map1	0001.CSV	1056.84	0.0309386
CAM206_map1	0001.CSV	1060.7	0.0315284
CAM206_map1	0001.CSV	1064.56	0.0322334
CAM206_map1	0001.CSV	1068.42	0.0327841
CAM206_map1	0001.CSV	1072.27	0.0335591
CAM206_map1	0001.CSV	1076.13	0.0346491
CAM206_map1	0001.CSV	1079.99	0.0361435
CAM206_map1	0001.CSV	1083.84	0.0354816
CAM206_map1	0001.CSV	1087.7	0.0330617
CAM206_map1	0001.CSV	1091.56	0.0319893
CAM206_map1	0001.CSV	1095.41	0.0319358
CAM206_map1	0001.CSV	1099.27	0.0318245
CAM206_map1	0001.CSV	1103.13	0.0317079
CAM206_map1	0001.CSV	1106.99	0.031738
CAM206_map1	0001.CSV	1110.84	0.0319433
CAM206_map1	0001.CSV	1114.7	0.0318823
CAM206_map1	0001.CSV	1118.56	0.0317343
CAM206_map1	0001.CSV	1122.41	0.0316353
CAM206_map1	0001.CSV	1126.27	0.0316208
CAM206_map1	0001.CSV	1130.13	0.0315279
CAM206_map1	0001.CSV	1133.99	0.0315544
CAM206_map1	0001.CSV	1137.84	0.031525
CAM206_map1	0001.CSV	1141.7	0.0315366
CAM206_map1	0001.CSV	1145.56	0.0315549
CAM206_map1	0001.CSV	1149.41	0.0316486
CAM206_map1	0001.CSV	1153.27	0.0316594
CAM206_map1	0001.CSV	1157.13	0.0317576
CAM206_map1	0001.CSV	1160.99	0.0319112
CAM206_map1	0001.CSV	1164.84	0.0321013
CAM206_map1	0001.CSV	1168.7	0.0321048
CAM206_map1	0001.CSV	1172.56	0.0321242
CAM206_map1	0001.CSV	1176.41	0.0321012
CAM206_map1	0001.CSV	1180.27	0.0320874
CAM206_map1	0001.CSV	1184.13	0.0318842
CAM206_map1	0001.CSV	1187.99	0.0316281
CAM206_map1	0001.CSV	1191.84	0.0313301
CAM206_map1	0001.CSV	1195.7	0.0311584
CAM206_map1	0001.CSV	1199.56	0.0309552
CAM206_map1	0001.CSV	1203.41	0.0309234
CAM206_map1	0001.CSV	1207.27	0.0309913
CAM206_map1	0001.CSV	1211.13	0.031134
CAM206_map1	0001.CSV	1214.98	0.0312085
CAM206_map1	0001.CSV	1218.84	0.0313669
CAM206_map1	0001.CSV	1222.7	0.0315272
CAM206_map1	0001.CSV	1226.56	0.0317762
CAM206_map1	0001.CSV	1230.41	0.0319829
CAM206_map1	0001.CSV	1234.27	0.0322083
CAM206_map1	0001.CSV	1238.13	0.0323623
CAM206_map1	0001.CSV	1241.98	0.0326129
CAM206_map1	0001.CSV	1245.84	0.0328033
CAM206_map1	0001.CSV	1249.7	0.0329901
CAM206_map1	0001.CSV	1253.56	0.0331157
CAM206_map1	0001.CSV	1257.41	0.0332938
CAM206_map1	0001.CSV	1261.27	0.03335
CAM206_map1	0001.CSV	1265.13	0.0333954
CAM206_map1	0001.CSV	1268.98	0.0334948
CAM206_map1	0001.CSV	1272.84	0.0337795
CAM206_map1	0001.CSV	1276.7	0.0339971
CAM206_map1	0001.CSV	1280.56	0.0342801
CAM206_map1	0001.CSV	1284.41	0.0345071
CAM206_map1	0001.CSV	1288.27	0.0348291
CAM206_map1	0001.CSV	1292.13	0.0351136
CAM206_map1	0001.CSV	1295.98	0.0353894
CAM206_map1	0001.CSV	1299.84	0.0355859
CAM206_map1	0001.CSV	1303.7	0.0358243
CAM206_map1	0001.CSV	1307.56	0.036025
CAM206_map1	0001.CSV	1311.41	0.0363388
CAM206_map1	0001.CSV	1315.27	0.03665
CAM206_map1	0001.CSV	1319.13	0.0370359
CAM206_map1	0001.CSV	1322.98	0.037393
CAM206_map1	0001.CSV	1326.84	0.0378112
CAM206_map1	0001.CSV	1330.7	0.0382137
CAM206_map1	0001.CSV	1334.56	0.0386847
CAM206_map1	0001.CSV	1338.41	0.0393844
CAM206_map1	0001.CSV	1342.27	0.0401181
CAM206_map1	0001.CSV	1346.13	0.0404708
CAM206_map1	0001.CSV	1349.98	0.041091
CAM206_map1	0001.CSV	1353.84	0.0417325
CAM206_map1	0001.CSV	1357.7	0.0424013
CAM206_map1	0001.CSV	1361.56	0.0431984
CAM206_map1	0001.CSV	1365.41	0.0442467
CAM206_map1	0001.CSV	1369.27	0.0449092
CAM206_map1	0001.CSV	1373.13	0.0459917
CAM206_map1	0001.CSV	1376.98	0.0472919
CAM206_map1	0001.CSV	1380.84	0.0482462
CAM206_map1	0001.CSV	1384.7	0.0490341
CAM206_map1	0001.CSV	1388.56	0.0503154
CAM206_map1	0001.CSV	1392.41	0.0512208
CAM206_map1	0001.CSV	1396.27	0.052574
CAM206_map1	0001.CSV	1400.13	0.0538313
CAM206_map1	0001.CSV	1403.98	0.0548912
CAM206_map1	0001.CSV	1407.84	0.0559665
CAM206_map1	0001.CSV	1411.7	0.0567694
CAM206_map1	0001.CSV	1415.55	0.0571391
CAM206_map1	0001.CSV	1419.41	0.0580017
CAM206_map1	0001.CSV	1423.27	0.0586037
CAM206_map1	0001.CSV	1427.12	0.0591388
CAM206_map1	0001.CSV	1430.98	0.0598868
CAM206_map1	0001.CSV	1434.84	0.0610177
CAM206_map1	0001.CSV	1438.7	0.0620744
CAM206_map1	0001.CSV	1442.55	0.0624942
CAM206_map1	0001.CSV	1446.41	0.0625247
CAM206_map1	0001.CSV	1450.27	0.0623753
CAM206_map1	0001.CSV	1454.12	0.0615925
CAM206_map1	0001.CSV	1457.98	0.0616094
CAM206_map1	0001.CSV	1461.84	0.0611284
CAM206_map1	0001.CSV	1465.7	0.0604727
CAM206_map1	0001.CSV	1469.55	0.059252
CAM206_map1	0001.CSV	1473.41	0.0574764
CAM206_map1	0001.CSV	1477.27	0.0551296
CAM206_map1	0001.CSV	1481.12	0.0532162
CAM206_map1	0001.CSV	1484.98	0.0514445
CAM206_map1	0001.CSV	1488.84	0.0499661
CAM206_map1	0001.CSV	1492.7	0.0482708
CAM206_map1	0001.CSV	1496.55	0.0468246
CAM206_map1	0001.CSV	1500.41	0.04532
CAM206_map1	0001.CSV	1504.27	0.0439932
CAM206_map1	0001.CSV	1508.12	0.0425984
CAM206_map1	0001.CSV	1511.98	0.0411014
CAM206_map1	0001.CSV	1515.84	0.0395669
CAM206_map1	0001.CSV	1519.7	0.03808
CAM206_map1	0001.CSV	1523.55	0.0363899
CAM206_map1	0001.CSV	1527.41	0.0350199
CAM206_map1	0001.CSV	1531.27	0.0339864
CAM206_map1	0001.CSV	1535.12	0.0335417
CAM206_map1	0001.CSV	1538.98	0.0330637
CAM206_map1	0001.CSV	1542.84	0.0321115
CAM206_map1	0001.CSV	1546.7	0.0304382
CAM206_map1	0001.CSV	1550.55	0.0290471
CAM206_map1	0001.CSV	1554.41	0.027926
CAM206_map1	0001.CSV	1558.27	0.0273664
CAM206_map1	0001.CSV	1562.12	0.0267301
CAM206_map1	0001.CSV	1565.98	0.0260553
CAM206_map1	0001.CSV	1569.84	0.0258599
CAM206_map1	0001.CSV	1573.69	0.0257944
CAM206_map1	0001.CSV	1577.55	0.0252429
CAM206_map1	0001.CSV	1581.41	0.0238649
CAM206_map1	0001.CSV	1585.27	0.0224117
CAM206_map1	0001.CSV	1589.12	0.0214246
CAM206_map1	0001.CSV	1592.98	0.0209666
CAM206_map1	0001.CSV	1596.84	0.0207828
CAM206_map1	0001.CSV	1600.69	0.0206523
CAM206_map1	0001.CSV	1604.55	0.0207009
CAM206_map1	0001.CSV	1608.41	0.020783
CAM206_map1	0001.CSV	1612.27	0.0206258
CAM206_map1	0001.CSV	1616.12	0.0205936
CAM206_map1	0001.CSV	1619.98	0.0207127
CAM206_map1	0001.CSV	1623.84	0.020548
CAM206_map1	0001.CSV	1627.69	0.0204377
CAM206_map1	0001.CSV	1631.55	0.0199851
CAM206_map1	0001.CSV	1635.41	0.0201625
CAM206_map1	0001.CSV	1639.27	0.0205038
CAM206_map1	0001.CSV	1643.12	0.020029
CAM206_map1	0001.CSV	1646.98	0.0200944
CAM206_map1	0001.CSV	1650.84	0.0204517
CAM206_map1	0001.CSV	1654.69	0.0207352
CAM206_map1	0001.CSV	1658.55	0.020253
CAM206_map1	0001.CSV	1662.41	0.0198366
CAM206_map1	0001.CSV	1666.27	0.0196228
CAM206_map1	0001.CSV	1670.12	0.0196707
CAM206_map1	0001.CSV	1673.98	0.0199473
CAM206_map1	0001.CSV	1677.84	0.0195157
CAM206_map1	0001.CSV	1681.69	0.0192038
CAM206_map1	0001.CSV	1685.55	0.019654
CAM206_map1	0001.CSV	1689.41	0.0195294
CAM206_map1	0001.CSV	1693.27	0.0189081
CAM206_map1	0001.CSV	1697.12	0.0189075
CAM206_map1	0001.CSV	1700.98	0.0193379
CAM206_map1	0001.CSV	1704.84	0.0192347
CAM206_map1	0001.CSV	1708.69	0.0189304
CAM206_map1	0001.CSV	1712.55	0.0186555
CAM206_map1	0001.CSV	1716.41	0.0191606
CAM206_map1	0001.CSV	1720.27	0.0195682
CAM206_map1	0001.CSV	1724.12	0.0191922
CAM206_map1	0001.CSV	1727.98	0.0188724
CAM206_map1	0001.CSV	1731.84	0.0188853
CAM206_map1	0001.CSV	1735.69	0.01939
CAM206_map1	0001.CSV	1739.55	0.0191055
CAM206_map1	0001.CSV	1743.41	0.0186232
CAM206_map1	0001.CSV	1747.27	0.018332
CAM206_map1	0001.CSV	1751.12	0.0182572
CAM206_map1	0001.CSV	1754.98	0.0177601
CAM206_map1	0001.CSV	1758.84	0.0175354
CAM206_map1	0001.CSV	1762.69	0.0175328
CAM206_map1	0001.CSV	1766.55	0.0173495
CAM206_map1	0001.CSV	1770.41	0.0175148
CAM206_map1	0001.CSV	1774.26	0.0182588
CAM206_map1	0001.CSV	1778.12	0.0184381
CAM206_map1	0001.CSV	1781.98	0.0187223
CAM206_map1	0001.CSV	1785.84	0.0186829
CAM206_map1	0001.CSV	1789.69	0.0183964
CAM206_map1	0001.CSV	1793.55	0.0182666
CAM206_map1	0001.CSV	1797.41	0.0179388
CAM206_map1	0001.CSV	1801.26	0.0176514
CAM206_map1	0001.CSV	1805.12	0.0173791
CAM206_map1	0001.CSV	1808.98	0.0172398
CAM206_map1	0001.CSV	1812.84	0.0173474
CAM206_map1	0001.CSV	1816.69	0.0172018
CAM206_map1	0001.CSV	1820.55	0.017093
CAM206_map1	0001.CSV	1824.41	0.0171264
CAM206_map1	0001.CSV	1828.26	0.0174449
CAM206_map1	0001.CSV	1832.12	0.0175593
CAM206_map1	0001.CSV	1835.98	0.0174428
CAM206_map1	0001.CSV	1839.84	0.0172547
CAM206_map1	0001.CSV	1843.69	0.0174931
CAM206_map1	0001.CSV	1847.55	0.017829
CAM206_map1	0001.CSV	1851.41	0.0175993
CAM206_map1	0001.CSV	1855.26	0.017452
CAM206_map1	0001.CSV	1859.12	0.0175108
CAM206_map1	0001.CSV	1862.98	0.0174369
CAM206_map1	0001.CSV	1866.84	0.0176008
CAM206_map1	0001.CSV	1870.69	0.0180023
CAM206_map1	0001.CSV	1874.55	0.0177901
CAM206_map1	0001.CSV	1878.41	0.0175958
CAM206_map1	0001.CSV	1882.26	0.0175753
CAM206_map1	0001.CSV	1886.12	0.0175871
CAM206_map1	0001.CSV	1889.98	0.0177199
CAM206_map1	0001.CSV	1893.83	0.0177683
CAM206_map1	0001.CSV	1897.69	0.0177591
CAM206_map1	0001.CSV	1901.55	0.017695
CAM206_map1	0001.CSV	1905.41	0.0176799
CAM206_map1	0001.CSV	1909.26	0.0178036
CAM206_map1	0001.CSV	1913.12	0.0177629
CAM206_map1	0001.CSV	1916.98	0.0176661
CAM206_map1	0001.CSV	1920.83	0.0178513
CAM206_map1	0001.CSV	1924.69	0.017949
CAM206_map1	0001.CSV	1928.55	0.0178637
CAM206_map1	0001.CSV	1932.4	0.0177973
CAM206_map1	0001.CSV	1936.26	0.0178195
CAM206_map1	0001.CSV	1940.12	0.017858
CAM206_map1	0001.CSV	1943.98	0.0180779
CAM206_map1	0001.CSV	1947.83	0.0181117
CAM206_map1	0001.CSV	1951.69	0.0180416
CAM206_map1	0001.CSV	1955.55	0.0179947
CAM206_map1	0001.CSV	1959.4	0.0180043
CAM206_map1	0001.CSV	1963.26	0.0180133
CAM206_map1	0001.CSV	1967.12	0.0181522
CAM206_map1	0001.CSV	1970.98	0.0181333
CAM206_map1	0001.CSV	1974.83	0.0180664
CAM206_map1	0001.CSV	1978.69	0.0180772
CAM206_map1	0001.CSV	1982.55	0.0180586
CAM206_map1	0001.CSV	1986.4	0.0179943
CAM206_map1	0001.CSV	1990.26	0.0180854
CAM206_map1	0001.CSV	1994.12	0.0182343
CAM206_map1	0001.CSV	1997.98	0.0182112
CAM206_map1	0001.CSV	2001.83	0.0181364
CAM206_map1	0001.CSV	2005.69	0.0181002
CAM206_map1	0001.CSV	2009.55	0.0180996
CAM206_map1	0001.CSV	2013.4	0.018063
CAM206_map1	0001.CSV	2017.26	0.018119
CAM206_map1	0001.CSV	2021.12	0.0181669
CAM206_map1	0001.CSV	2024.97	0.0180702
CAM206_map1	0001.CSV	2028.83	0.0180653
CAM206_map1	0001.CSV	2032.69	0.0180758
CAM206_map1	0001.CSV	2036.55	0.018061
CAM206_map1	0001.CSV	2040.4	0.018094
CAM206_map1	0001.CSV	2044.26	0.018169
CAM206_map1	0001.CSV	2048.12	0.0181447
CAM206_map1	0001.CSV	2051.97	0.0180999
CAM206_map1	0001.CSV	2055.83	0.018088
CAM206_map1	0001.CSV	2059.69	0.0181166
CAM206_map1	0001.CSV	2063.55	0.0181512
CAM206_map1	0001.CSV	2067.4	0.018204
CAM206_map1	0001.CSV	2071.26	0.0181422
CAM206_map1	0001.CSV	2075.12	0.0181362
CAM206_map1	0001.CSV	2078.97	0.0181607
CAM206_map1	0001.CSV	2082.83	0.0181827
CAM206_map1	0001.CSV	2086.69	0.0181995
CAM206_map1	0001.CSV	2090.55	0.0182692
CAM206_map1	0001.CSV	2094.4	0.0182663
CAM206_map1	0001.CSV	2098.26	0.0182564
CAM206_map1	0001.CSV	2102.12	0.0182562
CAM206_map1	0001.CSV	2105.97	0.0183026
CAM206_map1	0001.CSV	2109.83	0.0183145
CAM206_map1	0001.CSV	2113.69	0.018327
CAM206_map1	0001.CSV	2117.55	0.0183334
CAM206_map1	0001.CSV	2121.4	0.0183514
CAM206_map1	0001.CSV	2125.26	0.0183722
CAM206_map1	0001.CSV	2129.12	0.0183827
CAM206_map1	0001.CSV	2132.97	0.0183705
CAM206_map1	0001.CSV	2136.83	0.0184096
CAM206_map1	0001.CSV	2140.69	0.0184539
CAM206_map1	0001.CSV	2144.55	0.0185362
CAM206_map1	0001.CSV	2148.4	0.0185484
CAM206_map1	0001.CSV	2152.26	0.0185493
CAM206_map1	0001.CSV	2156.12	0.0185722
CAM206_map1	0001.CSV	2159.97	0.0186168
CAM206_map1	0001.CSV	2163.83	0.0186287
CAM206_map1	0001.CSV	2167.69	0.018645
CAM206_map1	0001.CSV	2171.55	0.0186845
CAM206_map1	0001.CSV	2175.4	0.0187262
CAM206_map1	0001.CSV	2179.26	0.0187188
CAM206_map1	0001.CSV	2183.12	0.0187372
CAM206_map1	0001.CSV	2186.97	0.018774
CAM206_map1	0001.CSV	2190.83	0.0188343
CAM206_map1	0001.CSV	2194.69	0.0188771
CAM206_map1	0001.CSV	2198.55	0.0189076
CAM206_map1	0001.CSV	2202.4	0.0188847
CAM206_map1	0001.CSV	2206.26	0.0188538
CAM206_map1	0001.CSV	2210.12	0.0188447
CAM206_map1	0001.CSV	2213.97	0.0188753
CAM206_map1	0001.CSV	2217.83	0.0189271
CAM206_map1	0001.CSV	2221.69	0.0189661
CAM206_map1	0001.CSV	2225.54	0.0189672
CAM206_map1	0001.CSV	2229.4	0.018981
CAM206_map1	0001.CSV	2233.26	0.0189559
CAM206_map1	0001.CSV	2237.12	0.0189593
CAM206_map1	0001.CSV	2240.97	0.0189611
CAM206_map1	0001.CSV	2244.83	0.0189195
CAM206_map1	0001.CSV	2248.69	0.0188854
CAM206_map1	0001.CSV	2252.54	0.0188729
CAM206_map1	0001.CSV	2256.4	0.018832
CAM206_map1	0001.CSV	2260.26	0.0188328
CAM206_map1	0001.CSV	2264.11	0.0188281
CAM206_map1	0001.CSV	2267.97	0.0188039
CAM206_map1	0001.CSV	2271.83	0.0187991
CAM206_map1	0001.CSV	2275.69	0.0188253
CAM206_map1	0001.CSV	2279.54	0.0187927
CAM206_map1	0001.CSV	2283.4	0.0187326
CAM206_map1	0001.CSV	2287.26	0.01868
CAM206_map1	0001.CSV	2291.11	0.018626
CAM206_map1	0001.CSV	2294.97	0.018491
CAM206_map1	0001.CSV	2298.83	0.0183832
CAM206_map1	0001.CSV	2302.69	0.0182822
CAM206_map1	0001.CSV	2306.54	0.018102
CAM206_map1	0001.CSV	2310.4	0.0179664
CAM206_map1	0001.CSV	2314.26	0.017724
CAM206_map1	0001.CSV	2318.11	0.01718
CAM206_map1	0001.CSV	2321.97	0.0164517
CAM206_map1	0001.CSV	2325.83	0.0156548
CAM206_map1	0001.CSV	2329.69	0.0149737
CAM206_map1	0001.CSV	2333.54	0.0140709
CAM206_map1	0001.CSV	2337.4	0.0131371
CAM206_map1	0001.CSV	2341.26	0.0133527
CAM206_map1	0001.CSV	2345.11	0.0156915
CAM206_map1	0001.CSV	2348.97	0.0161116
CAM206_map1	0001.CSV	2352.83	0.0139667
CAM206_map1	0001.CSV	2356.69	0.00820926
CAM206_map1	0001.CSV	2360.54	0.00417113
CAM206_map1	0001.CSV	2364.4	0.00801275
CAM206_map1	0001.CSV	2368.26	0.0133645
CAM206_map1	0001.CSV	2372.11	0.016661
CAM206_map1	0001.CSV	2375.97	0.0183383
CAM206_map1	0001.CSV	2379.83	0.0189133
CAM206_map1	0001.CSV	2383.69	0.0188999
CAM206_map1	0001.CSV	2387.54	0.0186814
CAM206_map1	0001.CSV	2391.4	0.018535
CAM206_map1	0001.CSV	2395.26	0.0185179
CAM206_map1	0001.CSV	2399.11	0.0185119
CAM206_map1	0001.CSV	2402.97	0.0185094
CAM206_map1	0001.CSV	2406.83	0.0184956
CAM206_map1	0001.CSV	2410.68	0.018412
CAM206_map1	0001.CSV	2414.54	0.0183611
CAM206_map1	0001.CSV	2418.4	0.0183656
CAM206_map1	0001.CSV	2422.26	0.018389
CAM206_map1	0001.CSV	2426.11	0.0184
CAM206_map1	0001.CSV	2429.97	0.0183717
CAM206_map1	0001.CSV	2433.83	0.0183897
CAM206_map1	0001.CSV	2437.68	0.0184594
CAM206_map1	0001.CSV	2441.54	0.0184679
CAM206_map1	0001.CSV	2445.4	0.0184086
CAM206_map1	0001.CSV	2449.26	0.0183501
CAM206_map1	0001.CSV	2453.11	0.0183301
CAM206_map1	0001.CSV	2456.97	0.0183544
CAM206_map1	0001.CSV	2460.83	0.0183621
CAM206_map1	0001.CSV	2464.68	0.0183739
CAM206_map1	0001.CSV	2468.54	0.0184218
CAM206_map1	0001.CSV	2472.4	0.0184244
CAM206_map1	0001.CSV	2476.26	0.0184089
CAM206_map1	0001.CSV	2480.11	0.0184297
CAM206_map1	0001.CSV	2483.97	0.0184394
CAM206_map1	0001.CSV	2487.83	0.0184596
CAM206_map1	0001.CSV	2491.68	0.0185182
CAM206_map1	0001.CSV	2495.54	0.0185927
CAM206_map1	0001.CSV	2499.4	0.0186133
CAM206_map1	0001.CSV	2503.26	0.0185697
CAM206_map1	0001.CSV	2507.11	0.018537
CAM206_map1	0001.CSV	2510.97	0.0185326
CAM206_map1	0001.CSV	2514.83	0.0185669
CAM206_map1	0001.CSV	2518.68	0.0185917
CAM206_map1	0001.CSV	2522.54	0.0185752
CAM206_map1	0001.CSV	2526.4	0.0185397
CAM206_map1	0001.CSV	2530.26	0.0184911
CAM206_map1	0001.CSV	2534.11	0.0184451
CAM206_map1	0001.CSV	2537.97	0.0184287
CAM206_map1	0001.CSV	2541.83	0.0183641
CAM206_map1	0001.CSV	2545.68	0.0183432
CAM206_map1	0001.CSV	2549.54	0.0183503
CAM206_map1	0001.CSV	2553.4	0.0183077
CAM206_map1	0001.CSV	2557.26	0.0182605
CAM206_map1	0001.CSV	2561.11	0.0182404
CAM206_map1	0001.CSV	2564.97	0.0182323
CAM206_map1	0001.CSV	2568.83	0.0182349
CAM206_map1	0001.CSV	2572.68	0.0182788
CAM206_map1	0001.CSV	2576.54	0.0183324
CAM206_map1	0001.CSV	2580.4	0.018308
CAM206_map1	0001.CSV	2584.25	0.0182859
CAM206_map1	0001.CSV	2588.11	0.0182713
CAM206_map1	0001.CSV	2591.97	0.0182974
CAM206_map1	0001.CSV	2595.83	0.0183103
CAM206_map1	0001.CSV	2599.68	0.0183033
CAM206_map1	0001.CSV	2603.54	0.018295
CAM206_map1	0001.CSV	2607.4	0.0183107
CAM206_map1	0001.CSV	2611.25	0.0183606
CAM206_map1	0001.CSV	2615.11	0.0184118
CAM206_map1	0001.CSV	2618.97	0.0184298
CAM206_map1	0001.CSV	2622.82	0.0185176
CAM206_map1	0001.CSV	2626.68	0.0185706
CAM206_map1	0001.CSV	2630.54	0.0185458
CAM206_map1	0001.CSV	2634.4	0.0186262
CAM206_map1	0001.CSV	2638.25	0.0186443
CAM206_map1	0001.CSV	2642.11	0.0184663
CAM206_map1	0001.CSV	2645.97	0.0183386
CAM206_map1	0001.CSV	2649.82	0.0183438
CAM206_map1	0001.CSV	2653.68	0.0183442
CAM206_map1	0001.CSV	2657.54	0.0183252
CAM206_map1	0001.CSV	2661.4	0.018336
CAM206_map1	0001.CSV	2665.25	0.0183192
CAM206_map1	0001.CSV	2669.11	0.0183542
CAM206_map1	0001.CSV	2672.97	0.0185229
CAM206_map1	0001.CSV	2676.82	0.018707
CAM206_map1	0001.CSV	2680.68	0.0186477
CAM206_map1	0001.CSV	2684.54	0.0183748
CAM206_map1	0001.CSV	2688.4	0.0182424
CAM206_map1	0001.CSV	2692.25	0.0182347
CAM206_map1	0001.CSV	2696.11	0.0182827
CAM206_map1	0001.CSV	2699.97	0.018288
CAM206_map1	0001.CSV	2703.82	0.0182842
CAM206_map1	0001.CSV	2707.68	0.0183844
CAM206_map1	0001.CSV	2711.54	0.0183826
CAM206_map1	0001.CSV	2715.4	0.0183088
CAM206_map1	0001.CSV	2719.25	0.0184114
CAM206_map1	0001.CSV	2723.11	0.0186987
CAM206_map1	0001.CSV	2726.97	0.0186898
CAM206_map1	0001.CSV	2730.82	0.0184278
CAM206_map1	0001.CSV	2734.68	0.0184019
CAM206_map1	0001.CSV	2738.54	0.0184253
CAM206_map1	0001.CSV	2742.4	0.0184522
CAM206_map1	0001.CSV	2746.25	0.0187124
CAM206_map1	0001.CSV	2750.11	0.0187653
CAM206_map1	0001.CSV	2753.97	0.0185398
CAM206_map1	0001.CSV	2757.82	0.0184016
CAM206_map1	0001.CSV	2761.68	0.0183147
CAM206_map1	0001.CSV	2765.54	0.0183271
CAM206_map1	0001.CSV	2769.39	0.0184892
CAM206_map1	0001.CSV	2773.25	0.0188072
CAM206_map1	0001.CSV	2777.11	0.0187776
CAM206_map1	0001.CSV	2780.97	0.0185712
CAM206_map1	0001.CSV	2784.82	0.0186592
CAM206_map1	0001.CSV	2788.68	0.018982
CAM206_map1	0001.CSV	2792.54	0.0191088
CAM206_map1	0001.CSV	2796.39	0.0191274
CAM206_map1	0001.CSV	2800.25	0.0189914
CAM206_map1	0001.CSV	2804.11	0.0188201
CAM206_map1	0001.CSV	2807.97	0.0190047
CAM206_map1	0001.CSV	2811.82	0.0190309
CAM206_map1	0001.CSV	2815.68	0.0188956
CAM206_map1	0001.CSV	2819.54	0.0189976
CAM206_map1	0001.CSV	2823.39	0.0191425
CAM206_map1	0001.CSV	2827.25	0.01924
CAM206_map1	0001.CSV	2831.11	0.0195593
CAM206_map1	0001.CSV	2834.97	0.0200799
CAM206_map1	0001.CSV	2838.82	0.0204556
CAM206_map1	0001.CSV	2842.68	0.0209144
CAM206_map1	0001.CSV	2846.54	0.0219571
CAM206_map1	0001.CSV	2850.39	0.0223762
CAM206_map1	0001.CSV	2854.25	0.0217913
CAM206_map1	0001.CSV	2858.11	0.0212544
CAM206_map1	0001.CSV	2861.97	0.02084
CAM206_map1	0001.CSV	2865.82	0.0206132
CAM206_map1	0001.CSV	2869.68	0.02074
CAM206_map1	0001.CSV	2873.54	0.020886
CAM206_map1	0001.CSV	2877.39	0.020554
CAM206_map1	0001.CSV	2881.25	0.0201917
CAM206_map1	0001.CSV	2885.11	0.020141
CAM206_map1	0001.CSV	2888.97	0.0203567
CAM206_map1	0001.CSV	2892.82	0.0207814
CAM206_map1	0001.CSV	2896.68	0.0210913
CAM206_map1	0001.CSV	2900.54	0.0212134
CAM206_map1	0001.CSV	2904.39	0.0216215
CAM206_map1	0001.CSV	2908.25	0.0225257
CAM206_map1	0001.CSV	2912.11	0.0240207
CAM206_map1	0001.CSV	2915.97	0.0250564
CAM206_map1	0001.CSV	2919.82	0.0246679
CAM206_map1	0001.CSV	2923.68	0.0236712
CAM206_map1	0001.CSV	2927.54	0.0230835
CAM206_map1	0001.CSV	2931.39	0.0223851
CAM206_map1	0001.CSV	2935.25	0.0214395
CAM206_map1	0001.CSV	2939.11	0.0209906
CAM206_map1	0001.CSV	2942.96	0.0211427
CAM206_map1	0001.CSV	2946.82	0.0211997
CAM206_map1	0001.CSV	2950.68	0.021027
CAM206_map1	0001.CSV	2954.54	0.0206578
CAM206_map1	0001.CSV	2958.39	0.0202371
CAM206_map1	0001.CSV	2962.25	0.0200333
CAM206_map1	0001.CSV	2966.11	0.0197136
CAM206_map1	0001.CSV	2969.96	0.0195382
CAM206_map1	0001.CSV	2973.82	0.0196676
CAM206_map1	0001.CSV	2977.68	0.0197405
CAM206_map1	0001.CSV	2981.53	0.0194366
CAM206_map1	0001.CSV	2985.39	0.018924
CAM206_map1	0001.CSV	2989.25	0.0189406
CAM206_map1	0001.CSV	2993.11	0.0191933
CAM206_map1	0001.CSV	2996.96	0.0190517
CAM206_map1	0001.CSV	3000.82	0.0186929
CAM206_map1	0001.CSV	3004.68	0.0185586
CAM206_map1	0001.CSV	3008.53	0.0188426
CAM206_map1	0001.CSV	3012.39	0.0191787
CAM206_map1	0001.CSV	3016.25	0.0192201
CAM206_map1	0001.CSV	3020.11	0.0189683
CAM206_map1	0001.CSV	3023.96	0.0187229
CAM206_map1	0001.CSV	3027.82	0.0187222
CAM206_map1	0001.CSV	3031.68	0.0190168
CAM206_map1	0001.CSV	3035.53	0.0190831
CAM206_map1	0001.CSV	3039.39	0.0190851
CAM206_map1	0001.CSV	3043.25	0.0192326
CAM206_map1	0001.CSV	3047.11	0.0191954
CAM206_map1	0001.CSV	3050.96	0.019093
CAM206_map1	0001.CSV	3054.82	0.0189399
CAM206_map1	0001.CSV	3058.68	0.0187322
CAM206_map1	0001.CSV	3062.53	0.0188357
CAM206_map1	0001.CSV	3066.39	0.0192078
CAM206_map1	0001.CSV	3070.25	0.0191315
CAM206_map1	0001.CSV	3074.11	0.0189912
CAM206_map1	0001.CSV	3077.96	0.0192127
CAM206_map1	0001.CSV	3081.82	0.0194215
CAM206_map1	0001.CSV	3085.68	0.0193831
CAM206_map1	0001.CSV	3089.53	0.0192474
CAM206_map1	0001.CSV	3093.39	0.0189632
CAM206_map1	0001.CSV	3097.25	0.0190101
CAM206_map1	0001.CSV	3101.11	0.0190812
CAM206_map1	0001.CSV	3104.96	0.0191101
CAM206_map1	0001.CSV	3108.82	0.0192764
CAM206_map1	0001.CSV	3112.68	0.0193973
CAM206_map1	0001.CSV	3116.53	0.0195826
CAM206_map1	0001.CSV	3120.39	0.0195431
CAM206_map1	0001.CSV	3124.25	0.0192429
CAM206_map1	0001.CSV	3128.11	0.0191241
CAM206_map1	0001.CSV	3131.96	0.0190401
CAM206_map1	0001.CSV	3135.82	0.0191315
CAM206_map1	0001.CSV	3139.68	0.0193252
CAM206_map1	0001.CSV	3143.53	0.0191356
CAM206_map1	0001.CSV	3147.39	0.0191046
CAM206_map1	0001.CSV	3151.25	0.019388
CAM206_map1	0001.CSV	3155.1	0.0193559
CAM206_map1	0001.CSV	3158.96	0.0189667
CAM206_map1	0001.CSV	3162.82	0.0187596
CAM206_map1	0001.CSV	3166.68	0.0187398
CAM206_map1	0001.CSV	3170.53	0.0187215
CAM206_map1	0001.CSV	3174.39	0.0186934
CAM206_map1	0001.CSV	3178.25	0.0187678
CAM206_map1	0001.CSV	3182.1	0.0188723
CAM206_map1	0001.CSV	3185.96	0.0189908
CAM206_map1	0001.CSV	3189.82	0.0190642
CAM206_map1	0001.CSV	3193.68	0.0189898
CAM206_map1	0001.CSV	3197.53	0.0189865
CAM206_map1	0001.CSV	3201.39	0.0191273
CAM206_map1	0001.CSV	3205.25	0.0191912
CAM206_map1	0001.CSV	3209.1	0.0191727
CAM206_map1	0001.CSV	3212.96	0.0192725
CAM206_map1	0001.CSV	3216.82	0.0194097
CAM206_map1	0001.CSV	3220.68	0.0193536
CAM206_map1	0001.CSV	3224.53	0.0192198
CAM206_map1	0001.CSV	3228.39	0.0194883
CAM206_map1	0001.CSV	3232.25	0.0199521
CAM206_map1	0001.CSV	3236.1	0.0198431
CAM206_map1	0001.CSV	3239.96	0.0195389
CAM206_map1	0001.CSV	3243.82	0.0197561
CAM206_map1	0001.CSV	3247.68	0.0199517
CAM206_map1	0001.CSV	3251.53	0.019722
CAM206_map1	0001.CSV	3255.39	0.0196711
CAM206_map1	0001.CSV	3259.25	0.0195083
CAM206_map1	0001.CSV	3263.1	0.0195115
CAM206_map1	0001.CSV	3266.96	0.0198776
CAM206_map1	0001.CSV	3270.82	0.0202875
CAM206_map1	0001.CSV	3274.68	0.0203099
CAM206_map1	0001.CSV	3278.53	0.0199396
CAM206_map1	0001.CSV	3282.39	0.0196876
CAM206_map1	0001.CSV	3286.25	0.0197665
CAM206_map1	0001.CSV	3290.1	0.0202165
CAM206_map1	0001.CSV	3293.96	0.0205482
CAM206_map1	0001.CSV	3297.82	0.0203424
CAM206_map1	0001.CSV	3301.67	0.0203211
CAM206_map1	0001.CSV	3305.53	0.0206041
CAM206_map1	0001.CSV	3309.39	0.0205037
CAM206_map1	0001.CSV	3313.25	0.0199409
CAM206_map1	0001.CSV	3317.1	0.0195617
CAM206_map1	0001.CSV	3320.96	0.0197424
CAM206_map1	0001.CSV	3324.82	0.0200428
CAM206_map1	0001.CSV	3328.67	0.0197644
CAM206_map1	0001.CSV	3332.53	0.0196424
CAM206_map1	0001.CSV	3336.39	0.0201645
CAM206_map1	0001.CSV	3340.24	0.0204135
CAM206_map1	0001.CSV	3344.1	0.0201508
CAM206_map1	0001.CSV	3347.96	0.0200927
CAM206_map1	0001.CSV	3351.82	0.0199866
CAM206_map1	0001.CSV	3355.67	0.0197339
CAM206_map1	0001.CSV	3359.53	0.0199805
CAM206_map1	0001.CSV	3363.39	0.0203224
CAM206_map1	0001.CSV	3367.24	0.0205484
CAM206_map1	0001.CSV	3371.1	0.020345
CAM206_map1	0001.CSV	3374.96	0.0200558
CAM206_map1	0001.CSV	3378.82	0.0199114
CAM206_map1	0001.CSV	3382.67	0.0195185
CAM206_map1	0001.CSV	3386.53	0.0195341
CAM206_map1	0001.CSV	3390.39	0.0200926
CAM206_map1	0001.CSV	3394.24	0.0203505
CAM206_map1	0001.CSV	3398.1	0.0203012
CAM206_map1	0001.CSV	3401.96	0.0201784
CAM206_map1	0001.CSV	3405.82	0.0198791
CAM206_map1	0001.CSV	3409.67	0.0198158
CAM206_map1	0001.CSV	3413.53	0.0195388
CAM206_map1	0001.CSV	3417.39	0.0190727
CAM206_map1	0001.CSV	3421.24	0.0189184
CAM206_map1	0001.CSV	3425.1	0.0190508
CAM206_map1	0001.CSV	3428.96	0.0195217
CAM206_map1	0001.CSV	3432.82	0.0198183
CAM206_map1	0001.CSV	3436.67	0.0195612
CAM206_map1	0001.CSV	3440.53	0.0189198
CAM206_map1	0001.CSV	3444.39	0.0185817
CAM206_map1	0001.CSV	3448.24	0.0185199
CAM206_map1	0001.CSV	3452.1	0.0182692
CAM206_map1	0001.CSV	3455.96	0.0183233
CAM206_map1	0001.CSV	3459.82	0.0187034
CAM206_map1	0001.CSV	3463.67	0.0191039
CAM206_map1	0001.CSV	3467.53	0.0193032
CAM206_map1	0001.CSV	3471.39	0.0189119
CAM206_map1	0001.CSV	3475.24	0.018473
CAM206_map1	0001.CSV	3479.1	0.0184622
CAM206_map1	0001.CSV	3482.96	0.018475
CAM206_map1	0001.CSV	3486.82	0.0185085
CAM206_map1	0001.CSV	3490.67	0.0185407
CAM206_map1	0001.CSV	3494.53	0.0186322
CAM206_map1	0001.CSV	3498.39	0.0184995
CAM206_map1	0001.CSV	3502.24	0.0183269
CAM206_map1	0001.CSV	3506.1	0.0179018
CAM206_map1	0001.CSV	3509.96	0.0177069
CAM206_map1	0001.CSV	3513.81	0.0179406
CAM206_map1	0001.CSV	3517.67	0.0176109
CAM206_map1	0001.CSV	3521.53	0.0175688
CAM206_map1	0001.CSV	3525.39	0.0175854
CAM206_map1	0001.CSV	3529.24	0.0173936
CAM206_map1	0001.CSV	3533.1	0.0174802
CAM206_map1	0001.CSV	3536.96	0.0176788
CAM206_map1	0001.CSV	3540.81	0.0177393
CAM206_map1	0001.CSV	3544.67	0.0180182
CAM206_map1	0001.CSV	3548.53	0.0178934
CAM206_map1	0001.CSV	3552.39	0.0174121
CAM206_map1	0001.CSV	3556.24	0.0171796
CAM206_map1	0001.CSV	3560.1	0.0169121
CAM206_map1	0001.CSV	3563.96	0.0164716
CAM206_map1	0001.CSV	3567.81	0.0171895
CAM206_map1	0001.CSV	3571.67	0.0173743
CAM206_map1	0001.CSV	3575.53	0.0168551
CAM206_map1	0001.CSV	3579.39	0.0170977
CAM206_map1	0001.CSV	3583.24	0.0172288
CAM206_map1	0001.CSV	3587.1	0.0173357
CAM206_map1	0001.CSV	3590.96	0.0172215
CAM206_map1	0001.CSV	3594.81	0.0168409
CAM206_map1	0001.CSV	3598.67	0.0170991
CAM206_map1	0001.CSV	3602.53	0.0170294
CAM206_map1	0001.CSV	3606.39	0.0162107
CAM206_map1	0001.CSV	3610.24	0.0158852
CAM206_map1	0001.CSV	3614.1	0.0159767
CAM206_map1	0001.CSV	3617.96	0.0165236
CAM206_map1	0001.CSV	3621.81	0.0168974
CAM206_map1	0001.CSV	3625.67	0.0159388
CAM206_map1	0001.CSV	3629.53	0.0159357
CAM206_map1	0001.CSV	3633.39	0.0168012
CAM206_map1	0001.CSV	3637.24	0.0166441
CAM206_map1	0001.CSV	3641.1	0.0162631
CAM206_map1	0001.CSV	3644.96	0.0154191
CAM206_map1	0001.CSV	3648.81	0.0160006
CAM206_map1	0001.CSV	3652.67	0.0172595
CAM206_map1	0001.CSV	3656.53	0.0174538
CAM206_map1	0001.CSV	3660.38	0.0173884
CAM206_map1	0001.CSV	3664.24	0.0163138
CAM206_map1	0001.CSV	3668.1	0.0153157
CAM206_map1	0001.CSV	3671.96	0.015346
CAM206_map1	0001.CSV	3675.81	0.0163193
CAM206_map1	0001.CSV	3679.67	0.0170671
CAM206_map1	0001.CSV	3683.53	0.0166298
CAM206_map1	0001.CSV	3687.38	0.0165968
CAM206_map1	0001.CSV	3691.24	0.0176649
CAM206_map1	0001.CSV	3695.1	0.0172026
CAM206_map1	0001.CSV	3698.95	0.0162324
CAM206_map1	0001.CSV	3702.81	0.0159538
CAM206_map1	0001.CSV	3706.67	0.0154953
CAM206_map1	0001.CSV	3710.53	0.0155707
CAM206_map1	0001.CSV	3714.38	0.0164966
CAM206_map1	0001.CSV	3718.24	0.0159647
CAM206_map1	0001.CSV	3722.1	0.0156623
CAM206_map1	0001.CSV	3725.95	0.0157082
CAM206_map1	0001.CSV	3729.81	0.015241
CAM206_map1	0001.CSV	3733.67	0.0154458
CAM206_map1	0001.CSV	3737.53	0.0168952
CAM206_map1	0001.CSV	3741.38	0.0158938
CAM206_map1	0001.CSV	3745.24	0.0146508
CAM206_map1	0001.CSV	3749.1	0.014817
CAM206_map1	0001.CSV	3752.95	0.0160634
CAM206_map1	0001.CSV	3756.81	0.0161225
CAM206_map1	0001.CSV	3760.67	0.0160783
CAM206_map1	0001.CSV	3764.53	0.0158789
CAM206_map1	0001.CSV	3768.38	0.0161638
CAM206_map1	0001.CSV	3772.24	0.0164558
CAM206_map1	0001.CSV	3776.1	0.016113
CAM206_map1	0001.CSV	3779.95	0.0162396
CAM206_map1	0001.CSV	3783.81	0.0163165
CAM206_map1	0001.CSV	3787.67	0.0163504
CAM206_map1	0001.CSV	3791.53	0.0159601
CAM206_map1	0001.CSV	3795.38	0.015234
CAM206_map1	0001.CSV	3799.24	0.0150654
CAM206_map1	0001.CSV	3803.1	0.015787
CAM206_map1	0001.CSV	3806.95	0.01637
CAM206_map1	0001.CSV	3810.81	0.01592
CAM206_map1	0001.CSV	3814.67	0.0152355
CAM206_map1	0001.CSV	3818.53	0.015651
CAM206_map1	0001.CSV	3822.38	0.016305
CAM206_map1	0001.CSV	3826.24	0.0159963
CAM206_map1	0001.CSV	3830.1	0.0155845
CAM206_map1	0001.CSV	3833.95	0.0152699
CAM206_map1	0001.CSV	3837.81	0.0153603
CAM206_map1	0001.CSV	3841.67	0.0164649
CAM206_map1	0001.CSV	3845.53	0.0162538
CAM206_map1	0001.CSV	3849.38	0.0147789
CAM206_map1	0001.CSV	3853.24	0.014782
CAM206_map1	0001.CSV	3857.1	0.016053
CAM206_map1	0001.CSV	3860.95	0.0152479
CAM206_map1	0001.CSV	3864.81	0.0150756
CAM206_map1	0001.CSV	3868.67	0.0152027
CAM206_map1	0001.CSV	3872.52	0.0156807
CAM206_map1	0001.CSV	3876.38	0.0155342
CAM206_map1	0001.CSV	3880.24	0.0153531
CAM206_map1	0001.CSV	3884.1	0.0162008
CAM206_map1	0001.CSV	3887.95	0.0161963
CAM206_map1	0001.CSV	3891.81	0.01598
CAM206_map1	0001.CSV	3895.67	0.0155545
CAM206_map1	0001.CSV	3899.52	0.0148929
CAM206_map1	0001.CSV	3903.38	0.0159685
CAM206_map1	0001.CSV	3907.24	0.0165333
CAM206_map1	0001.CSV	3911.1	0.0158911
CAM206_map1	0001.CSV	3914.95	0.0154764
CAM206_map1	0001.CSV	3918.81	0.0156411
CAM206_map1	0001.CSV	3922.67	0.0157526
CAM206_map1	0001.CSV	3926.52	0.0158086
CAM206_map1	0001.CSV	3930.38	0.0159427
CAM206_map1	0001.CSV	3934.24	0.016222
CAM206_map1	0001.CSV	3938.09	0.0158276
CAM206_map1	0001.CSV	3941.95	0.0156576
CAM206_map1	0001.CSV	3945.81	0.0158474
CAM206_map1	0001.CSV	3949.67	0.0159804
CAM206_map1	0001.CSV	3953.52	0.0160003
CAM206_map1	0001.CSV	3957.38	0.0158882
CAM206_map1	0001.CSV	3961.24	0.0159597
CAM206_map1	0001.CSV	3965.09	0.01598
CAM206_map1	0001.CSV	3968.95	0.0158696
CAM206_map1	0001.CSV	3972.81	0.0159775
CAM206_map1	0001.CSV	3976.67	0.0161274
CAM206_map1	0001.CSV	3980.52	0.0160815
CAM206_map1	0001.CSV	3984.38	0.0159798
CAM206_map1	0001.CSV	3988.24	0.0159465
CAM206_map1	0001.CSV	3992.09	0.0159856
CAM206_map1	0001.CSV	3995.95	0.016001
CAM206_map1	0001.CSV	3999.81	0.0159648
CAM206_map1	0002.CSV	674.992	0.0120238
CAM206_map1	0002.CSV	678.849	0.0127581
CAM206_map1	0002.CSV	682.706	0.0134737
CAM206_map1	0002.CSV	686.563	0.0139753
CAM206_map1	0002.CSV	690.42	0.014331
CAM206_map1	0002.CSV	694.277	0.0161854
CAM206_map1	0002.CSV	698.134	0.0182133
CAM206_map1	0002.CSV	701.991	0.0172283
CAM206_map1	0002.CSV	705.849	0.0164437
CAM206_map1	0002.CSV	709.706	0.0202021
CAM206_map1	0002.CSV	713.563	0.0207378
CAM206_map1	0002.CSV	717.42	0.0156791
CAM206_map1	0002.CSV	721.277	0.0125276
CAM206_map1	0002.CSV	725.134	0.0117625
CAM206_map1	0002.CSV	728.991	0.0112849
CAM206_map1	0002.CSV	732.848	0.011225
CAM206_map1	0002.CSV	736.705	0.0114031
CAM206_map1	0002.CSV	740.562	0.0115986
CAM206_map1	0002.CSV	744.42	0.0115089
CAM206_map1	0002.CSV	748.277	0.0115535
CAM206_map1	0002.CSV	752.134	0.0114562
CAM206_map1	0002.CSV	755.991	0.0117098
CAM206_map1	0002.CSV	759.848	0.0118011
CAM206_map1	0002.CSV	763.705	0.011834
CAM206_map1	0002.CSV	767.562	0.0116181
CAM206_map1	0002.CSV	771.419	0.0116115
CAM206_map1	0002.CSV	775.276	0.0119451
CAM206_map1	0002.CSV	779.133	0.0122982
CAM206_map1	0002.CSV	782.99	0.0123475
CAM206_map1	0002.CSV	786.848	0.0125184
CAM206_map1	0002.CSV	790.705	0.0126386
CAM206_map1	0002.CSV	794.562	0.012866
CAM206_map1	0002.CSV	798.419	0.0130772
CAM206_map1	0002.CSV	802.276	0.0133551
CAM206_map1	0002.CSV	806.133	0.0135224
CAM206_map1	0002.CSV	809.99	0.0137691
CAM206_map1	0002.CSV	813.847	0.0139491
CAM206_map1	0002.CSV	817.704	0.0144247
CAM206_map1	0002.CSV	821.562	0.0150951
CAM206_map1	0002.CSV	825.419	0.0161516
CAM206_map1	0002.CSV	829.276	0.0172951
CAM206_map1	0002.CSV	833.133	0.0186416
CAM206_map1	0002.CSV	836.99	0.0204227
CAM206_map1	0002.CSV	840.847	0.0229516
CAM206_map1	0002.CSV	844.704	0.0254166
CAM206_map1	0002.CSV	848.561	0.029484
CAM206_map1	0002.CSV	852.418	0.0346065
CAM206_map1	0002.CSV	856.275	0.036581
CAM206_map1	0002.CSV	860.132	0.034562
CAM206_map1	0002.CSV	863.99	0.0300653
CAM206_map1	0002.CSV	867.847	0.0243431
CAM206_map1	0002.CSV	871.704	0.0193742
CAM206_map1	0002.CSV	875.561	0.0162606
CAM206_map1	0002.CSV	879.418	0.0145985
CAM206_map1	0002.CSV	883.275	0.0136099
CAM206_map1	0002.CSV	887.132	0.0130989
CAM206_map1	0002.CSV	890.989	0.0129144
CAM206_map1	0002.CSV	894.846	0.0129922
CAM206_map1	0002.CSV	898.703	0.0130579
CAM206_map1	0002.CSV	902.561	0.0132724
CAM206_map1	0002.CSV	906.418	0.013482
CAM206_map1	0002.CSV	910.275	0.0136188
CAM206_map1	0002.CSV	914.132	0.0136814
CAM206_map1	0002.CSV	917.989	0.0138592
CAM206_map1	0002.CSV	921.846	0.0140267
CAM206_map1	0002.CSV	925.703	0.0141751
CAM206_map1	0002.CSV	929.56	0.0141876
CAM206_map1	0002.CSV	933.417	0.014243
CAM206_map1	0002.CSV	937.274	0.0142408
CAM206_map1	0002.CSV	941.131	0.01424
CAM206_map1	0002.CSV	944.989	0.0143279
CAM206_map1	0002.CSV	948.846	0.0145987
CAM206_map1	0002.CSV	952.703	0.0148558
CAM206_map1	0002.CSV	956.56	0.0149502
CAM206_map1	0002.CSV	960.417	0.014862
CAM206_map1	0002.CSV	964.274	0.0148811
CAM206_map1	0002.CSV	968.131	0.014988
CAM206_map1	0002.CSV	971.988	0.0151426
CAM206_map1	0002.CSV	975.845	0.0152953
CAM206_map1	0002.CSV	979.702	0.0155026
CAM206_map1	0002.CSV	983.559	0.015628
CAM206_map1	0002.CSV	987.417	0.0158588
CAM206_map1	0002.CSV	991.274	0.0160645
CAM206_map1	0002.CSV	995.131	0.0162645
CAM206_map1	0002.CSV	998.988	0.0164085
CAM206_map1	0002.CSV	1002.85	0.0166455
CAM206_map1	0002.CSV	1006.7	0.016864
CAM206_map1	0002.CSV	1010.56	0.0170269
CAM206_map1	0002.CSV	1014.42	0.017079
CAM206_map1	0002.CSV	1018.27	0.0171866
CAM206_map1	0002.CSV	1022.13	0.0172622
CAM206_map1	0002.CSV	1025.99	0.0174158
CAM206_map1	0002.CSV	1029.85	0.017584
CAM206_map1	0002.CSV	1033.7	0.0177782
CAM206_map1	0002.CSV	1037.56	0.0178139
CAM206_map1	0002.CSV	1041.42	0.0178615
CAM206_map1	0002.CSV	1045.27	0.0178975
CAM206_map1	0002.CSV	1049.13	0.0180063
CAM206_map1	0002.CSV	1052.99	0.0181089
CAM206_map1	0002.CSV	1056.84	0.0182799
CAM206_map1	0002.CSV	1060.7	0.0184189
CAM206_map1	0002.CSV	1064.56	0.0187118
CAM206_map1	0002.CSV	1068.42	0.0190205
CAM206_map1	0002.CSV	1072.27	0.0195248
CAM206_map1	0002.CSV	1076.13	0.0202666
CAM206_map1	0002.CSV	1079.99	0.0212332
CAM206_map1	0002.CSV	1083.84	0.0211837
CAM206_map1	0002.CSV	1087.7	0.0201587
CAM206_map1	0002.CSV	1091.56	0.0196276
CAM206_map1	0002.CSV	1095.41	0.0195845
CAM206_map1	0002.CSV	1099.27	0.0195479
CAM206_map1	0002.CSV	1103.13	0.019567
CAM206_map1	0002.CSV	1106.99	0.01972
CAM206_map1	0002.CSV	1110.84	0.0198162
CAM206_map1	0002.CSV	1114.7	0.0197495
CAM206_map1	0002.CSV	1118.56	0.0197317
CAM206_map1	0002.CSV	1122.41	0.0197246
CAM206_map1	0002.CSV	1126.27	0.0196996
CAM206_map1	0002.CSV	1130.13	0.0195977
CAM206_map1	0002.CSV	1133.99	0.0196141
CAM206_map1	0002.CSV	1137.84	0.0195899
CAM206_map1	0002.CSV	1141.7	0.0195646
CAM206_map1	0002.CSV	1145.56	0.0195094
CAM206_map1	0002.CSV	1149.41	0.0195668
CAM206_map1	0002.CSV	1153.27	0.0196215
CAM206_map1	0002.CSV	1157.13	0.0196669
CAM206_map1	0002.CSV	1160.99	0.0197477
CAM206_map1	0002.CSV	1164.84	0.0198346
CAM206_map1	0002.CSV	1168.7	0.0198674
CAM206_map1	0002.CSV	1172.56	0.0199513
CAM206_map1	0002.CSV	1176.41	0.0200671
CAM206_map1	0002.CSV	1180.27	0.0201607
CAM206_map1	0002.CSV	1184.13	0.0201019
CAM206_map1	0002.CSV	1187.99	0.0199435
CAM206_map1	0002.CSV	1191.84	0.0196775
CAM206_map1	0002.CSV	1195.7	0.0195219
CAM206_map1	0002.CSV	1199.56	0.0194071
CAM206_map1	0002.CSV	1203.41	0.019336
CAM206_map1	0002.CSV	1207.27	0.019298
CAM206_map1	0002.CSV	1211.13	0.0193822
CAM206_map1	0002.CSV	1214.98	0.0194611
CAM206_map1	0002.CSV	1218.84	0.0195095
CAM206_map1	0002.CSV	1222.7	0.019543
CAM206_map1	0002.CSV	1226.56	0.0196742
CAM206_map1	0002.CSV	1230.41	0.0197954
CAM206_map1	0002.CSV	1234.27	0.019904
CAM206_map1	0002.CSV	1238.13	0.0199443
CAM206_map1	0002.CSV	1241.98	0.0200401
CAM206_map1	0002.CSV	1245.84	0.0201658
CAM206_map1	0002.CSV	1249.7	0.0202728
CAM206_map1	0002.CSV	1253.56	0.020298
CAM206_map1	0002.CSV	1257.41	0.020324
CAM206_map1	0002.CSV	1261.27	0.0202889
CAM206_map1	0002.CSV	1265.13	0.0202656
CAM206_map1	0002.CSV	1268.98	0.0202845
CAM206_map1	0002.CSV	1272.84	0.0204239
CAM206_map1	0002.CSV	1276.7	0.0205311
CAM206_map1	0002.CSV	1280.56	0.0206895
CAM206_map1	0002.CSV	1284.41	0.0208509
CAM206_map1	0002.CSV	1288.27	0.0210518
CAM206_map1	0002.CSV	1292.13	0.0212203
CAM206_map1	0002.CSV	1295.98	0.0213468
CAM206_map1	0002.CSV	1299.84	0.0213898
CAM206_map1	0002.CSV	1303.7	0.0214365
CAM206_map1	0002.CSV	1307.56	0.0214662
CAM206_map1	0002.CSV	1311.41	0.021556
CAM206_map1	0002.CSV	1315.27	0.0217195
CAM206_map1	0002.CSV	1319.13	0.0219709
CAM206_map1	0002.CSV	1322.98	0.0221256
CAM206_map1	0002.CSV	1326.84	0.0222112
CAM206_map1	0002.CSV	1330.7	0.0223119
CAM206_map1	0002.CSV	1334.56	0.0224548
CAM206_map1	0002.CSV	1338.41	0.0228854
CAM206_map1	0002.CSV	1342.27	0.0233485
CAM206_map1	0002.CSV	1346.13	0.0233961
CAM206_map1	0002.CSV	1349.98	0.023591
CAM206_map1	0002.CSV	1353.84	0.0238747
CAM206_map1	0002.CSV	1357.7	0.0241876
CAM206_map1	0002.CSV	1361.56	0.0246445
CAM206_map1	0002.CSV	1365.41	0.0252329
CAM206_map1	0002.CSV	1369.27	0.0254769
CAM206_map1	0002.CSV	1373.13	0.0260496
CAM206_map1	0002.CSV	1376.98	0.0267941
CAM206_map1	0002.CSV	1380.84	0.0271842
CAM206_map1	0002.CSV	1384.7	0.0274941
CAM206_map1	0002.CSV	1388.56	0.0282746
CAM206_map1	0002.CSV	1392.41	0.0287752
CAM206_map1	0002.CSV	1396.27	0.0296584
CAM206_map1	0002.CSV	1400.13	0.0305217
CAM206_map1	0002.CSV	1403.98	0.0311076
CAM206_map1	0002.CSV	1407.84	0.0317851
CAM206_map1	0002.CSV	1411.7	0.0322901
CAM206_map1	0002.CSV	1415.55	0.0325538
CAM206_map1	0002.CSV	1419.41	0.0332746
CAM206_map1	0002.CSV	1423.27	0.0337357
CAM206_map1	0002.CSV	1427.12	0.0340291
CAM206_map1	0002.CSV	1430.98	0.034473
CAM206_map1	0002.CSV	1434.84	0.0352384
CAM206_map1	0002.CSV	1438.7	0.0362028
CAM206_map1	0002.CSV	1442.55	0.0365502
CAM206_map1	0002.CSV	1446.41	0.036831
CAM206_map1	0002.CSV	1450.27	0.0371978
CAM206_map1	0002.CSV	1454.12	0.0370069
CAM206_map1	0002.CSV	1457.98	0.0377612
CAM206_map1	0002.CSV	1461.84	0.0377499
CAM206_map1	0002.CSV	1465.7	0.0375192
CAM206_map1	0002.CSV	1469.55	0.0370619
CAM206_map1	0002.CSV	1473.41	0.0366652
CAM206_map1	0002.CSV	1477.27	0.0358413
CAM206_map1	0002.CSV	1481.12	0.034775
CAM206_map1	0002.CSV	1484.98	0.0338119
CAM206_map1	0002.CSV	1488.84	0.0332806
CAM206_map1	0002.CSV	1492.7	0.0325876
CAM206_map1	0002.CSV	1496.55	0.031861
CAM206_map1	0002.CSV	1500.41	0.0312649
CAM206_map1	0002.CSV	1504.27	0.0304516
CAM206_map1	0002.CSV	1508.12	0.030343
CAM206_map1	0002.CSV	1511.98	0.029615
CAM206_map1	0002.CSV	1515.84	0.0285373
CAM206_map1	0002.CSV	1519.7	0.0277363
CAM206_map1	0002.CSV	1523.55	0.0269445
CAM206_map1	0002.CSV	1527.41	0.0259657
CAM206_map1	0002.CSV	1531.27	0.0251181
CAM206_map1	0002.CSV	1535.12	0.0248228
CAM206_map1	0002.CSV	1538.98	0.0246386
CAM206_map1	0002.CSV	1542.84	0.0245908
CAM206_map1	0002.CSV	1546.7	0.0235619
CAM206_map1	0002.CSV	1550.55	0.0225979
CAM206_map1	0002.CSV	1554.41	0.0218725
CAM206_map1	0002.CSV	1558.27	0.0217694
CAM206_map1	0002.CSV	1562.12	0.0216215
CAM206_map1	0002.CSV	1565.98	0.0211365
CAM206_map1	0002.CSV	1569.84	0.0211185
CAM206_map1	0002.CSV	1573.69	0.0211596
CAM206_map1	0002.CSV	1577.55	0.0210969
CAM206_map1	0002.CSV	1581.41	0.0203674
CAM206_map1	0002.CSV	1585.27	0.0195244
CAM206_map1	0002.CSV	1589.12	0.0190022
CAM206_map1	0002.CSV	1592.98	0.0187693
CAM206_map1	0002.CSV	1596.84	0.0186738
CAM206_map1	0002.CSV	1600.69	0.0186185
CAM206_map1	0002.CSV	1604.55	0.0186999
CAM206_map1	0002.CSV	1608.41	0.0187896
CAM206_map1	0002.CSV	1612.27	0.0186127
CAM206_map1	0002.CSV	1616.12	0.0186372
CAM206_map1	0002.CSV	1619.98	0.018892
CAM206_map1	0002.CSV	1623.84	0.0188693
CAM206_map1	0002.CSV	1627.69	0.0187641
CAM206_map1	0002.CSV	1631.55	0.0183101
CAM206_map1	0002.CSV	1635.41	0.0185599
CAM206_map1	0002.CSV	1639.27	0.0189466
CAM206_map1	0002.CSV	1643.12	0.0184339
CAM206_map1	0002.CSV	1646.98	0.0184914
CAM206_map1	0002.CSV	1650.84	0.0188385
CAM206_map1	0002.CSV	1654.69	0.0191753
CAM206_map1	0002.CSV	1658.55	0.0187125
CAM206_map1	0002.CSV	1662.41	0.0183388
CAM206_map1	0002.CSV	1666.27	0.018111
CAM206_map1	0002.CSV	1670.12	0.0181125
CAM206_map1	0002.CSV	1673.98	0.0183679
CAM206_map1	0002.CSV	1677.84	0.0180068
CAM206_map1	0002.CSV	1681.69	0.0177264
CAM206_map1	0002.CSV	1685.55	0.0181475
CAM206_map1	0002.CSV	1689.41	0.0179813
CAM206_map1	0002.CSV	1693.27	0.0173217
CAM206_map1	0002.CSV	1697.12	0.0172846
CAM206_map1	0002.CSV	1700.98	0.0178144
CAM206_map1	0002.CSV	1704.84	0.0176223
CAM206_map1	0002.CSV	1708.69	0.0171919
CAM206_map1	0002.CSV	1712.55	0.0168252
CAM206_map1	0002.CSV	1716.41	0.0172681
CAM206_map1	0002.CSV	1720.27	0.0176514
CAM206_map1	0002.CSV	1724.12	0.0172407
CAM206_map1	0002.CSV	1727.98	0.0168832
CAM206_map1	0002.CSV	1731.84	0.0169234
CAM206_map1	0002.CSV	1735.69	0.0173921
CAM206_map1	0002.CSV	1739.55	0.0171014
CAM206_map1	0002.CSV	1743.41	0.0167856
CAM206_map1	0002.CSV	1747.27	0.0166577
CAM206_map1	0002.CSV	1751.12	0.0166754
CAM206_map1	0002.CSV	1754.98	0.0162362
CAM206_map1	0002.CSV	1758.84	0.0160086
CAM206_map1	0002.CSV	1762.69	0.0159856
CAM206_map1	0002.CSV	1766.55	0.0157517
CAM206_map1	0002.CSV	1770.41	0.0158653
CAM206_map1	0002.CSV	1774.26	0.0164144
CAM206_map1	0002.CSV	1778.12	0.0163296
CAM206_map1	0002.CSV	1781.98	0.0163736
CAM206_map1	0002.CSV	1785.84	0.0162772
CAM206_map1	0002.CSV	1789.69	0.0160948
CAM206_map1	0002.CSV	1793.55	0.016238
CAM206_map1	0002.CSV	1797.41	0.0161204
CAM206_map1	0002.CSV	1801.26	0.015967
CAM206_map1	0002.CSV	1805.12	0.0157896
CAM206_map1	0002.CSV	1808.98	0.015687
CAM206_map1	0002.CSV	1812.84	0.0158137
CAM206_map1	0002.CSV	1816.69	0.0156743
CAM206_map1	0002.CSV	1820.55	0.0155382
CAM206_map1	0002.CSV	1824.41	0.0155404
CAM206_map1	0002.CSV	1828.26	0.0158411
CAM206_map1	0002.CSV	1832.12	0.0159554
CAM206_map1	0002.CSV	1835.98	0.0157999
CAM206_map1	0002.CSV	1839.84	0.0155983
CAM206_map1	0002.CSV	1843.69	0.0158076
CAM206_map1	0002.CSV	1847.55	0.0161316
CAM206_map1	0002.CSV	1851.41	0.0158875
CAM206_map1	0002.CSV	1855.26	0.0156793
CAM206_map1	0002.CSV	1859.12	0.0157005
CAM206_map1	0002.CSV	1862.98	0.0156384
CAM206_map1	0002.CSV	1866.84	0.0157808
CAM206_map1	0002.CSV	1870.69	0.0161643
CAM206_map1	0002.CSV	1874.55	0.0159246
CAM206_map1	0002.CSV	1878.41	0.0157146
CAM206_map1	0002.CSV	1882.26	0.0156547
CAM206_map1	0002.CSV	1886.12	0.0156486
CAM206_map1	0002.CSV	1889.98	0.0158054
CAM206_map1	0002.CSV	1893.83	0.0159011
CAM206_map1	0002.CSV	1897.69	0.015878
CAM206_map1	0002.CSV	1901.55	0.0157597
CAM206_map1	0002.CSV	1905.41	0.0157047
CAM206_map1	0002.CSV	1909.26	0.0158243
CAM206_map1	0002.CSV	1913.12	0.0158002
CAM206_map1	0002.CSV	1916.98	0.0157211
CAM206_map1	0002.CSV	1920.83	0.0158692
CAM206_map1	0002.CSV	1924.69	0.0159215
CAM206_map1	0002.CSV	1928.55	0.0158224
CAM206_map1	0002.CSV	1932.4	0.0157854
CAM206_map1	0002.CSV	1936.26	0.0158007
CAM206_map1	0002.CSV	1940.12	0.0157868
CAM206_map1	0002.CSV	1943.98	0.0159877
CAM206_map1	0002.CSV	1947.83	0.0159861
CAM206_map1	0002.CSV	1951.69	0.0158859
CAM206_map1	0002.CSV	1955.55	0.0158748
CAM206_map1	0002.CSV	1959.4	0.0158854
CAM206_map1	0002.CSV	1963.26	0.0158859
CAM206_map1	0002.CSV	1967.12	0.0160331
CAM206_map1	0002.CSV	1970.98	0.0160089
CAM206_map1	0002.CSV	1974.83	0.0159142
CAM206_map1	0002.CSV	1978.69	0.015953
CAM206_map1	0002.CSV	1982.55	0.0159335
CAM206_map1	0002.CSV	1986.4	0.0158467
CAM206_map1	0002.CSV	1990.26	0.0159128
CAM206_map1	0002.CSV	1994.12	0.0160648
CAM206_map1	0002.CSV	1997.98	0.0160127
CAM206_map1	0002.CSV	2001.83	0.0159484
CAM206_map1	0002.CSV	2005.69	0.0159235
CAM206_map1	0002.CSV	2009.55	0.0159102
CAM206_map1	0002.CSV	2013.4	0.0158709
CAM206_map1	0002.CSV	2017.26	0.0159258
CAM206_map1	0002.CSV	2021.12	0.0159928
CAM206_map1	0002.CSV	2024.97	0.0159188
CAM206_map1	0002.CSV	2028.83	0.0158775
CAM206_map1	0002.CSV	2032.69	0.0158625
CAM206_map1	0002.CSV	2036.55	0.0158366
CAM206_map1	0002.CSV	2040.4	0.0158437
CAM206_map1	0002.CSV	2044.26	0.0159021
CAM206_map1	0002.CSV	2048.12	0.0159039
CAM206_map1	0002.CSV	2051.97	0.0158789
CAM206_map1	0002.CSV	2055.83	0.015858
CAM206_map1	0002.CSV	2059.69	0.0158723
CAM206_map1	0002.CSV	2063.55	0.0159122
CAM206_map1	0002.CSV	2067.4	0.0159383
CAM206_map1	0002.CSV	2071.26	0.015887
CAM206_map1	0002.CSV	2075.12	0.0159256
CAM206_map1	0002.CSV	2078.97	0.0159668
CAM206_map1	0002.CSV	2082.83	0.0159383
CAM206_map1	0002.CSV	2086.69	0.0159309
CAM206_map1	0002.CSV	2090.55	0.0159992
CAM206_map1	0002.CSV	2094.4	0.0159695
CAM206_map1	0002.CSV	2098.26	0.0159444
CAM206_map1	0002.CSV	2102.12	0.0159574
CAM206_map1	0002.CSV	2105.97	0.0159745
CAM206_map1	0002.CSV	2109.83	0.0159896
CAM206_map1	0002.CSV	2113.69	0.0160009
CAM206_map1	0002.CSV	2117.55	0.0159897
CAM206_map1	0002.CSV	2121.4	0.0160044
CAM206_map1	0002.CSV	2125.26	0.0160276
CAM206_map1	0002.CSV	2129.12	0.0160545
CAM206_map1	0002.CSV	2132.97	0.0160489
CAM206_map1	0002.CSV	2136.83	0.0160552
CAM206_map1	0002.CSV	2140.69	0.0160971
CAM206_map1	0002.CSV	2144.55	0.016155
CAM206_map1	0002.CSV	2148.4	0.0161516
CAM206_map1	0002.CSV	2152.26	0.0161717
CAM206_map1	0002.CSV	2156.12	0.0162217
CAM206_map1	0002.CSV	2159.97	0.0162442
CAM206_map1	0002.CSV	2163.83	0.0162354
CAM206_map1	0002.CSV	2167.69	0.0162675
CAM206_map1	0002.CSV	2171.55	0.0163036
CAM206_map1	0002.CSV	2175.4	0.0163325
CAM206_map1	0002.CSV	2179.26	0.016344
CAM206_map1	0002.CSV	2183.12	0.0163651
CAM206_map1	0002.CSV	2186.97	0.0163767
CAM206_map1	0002.CSV	2190.83	0.0163725
CAM206_map1	0002.CSV	2194.69	0.0163893
CAM206_map1	0002.CSV	2198.55	0.0164508
CAM206_map1	0002.CSV	2202.4	0.0164634
CAM206_map1	0002.CSV	2206.26	0.0164612
CAM206_map1	0002.CSV	2210.12	0.0165025
CAM206_map1	0002.CSV	2213.97	0.0165307
CAM206_map1	0002.CSV	2217.83	0.0165143
CAM206_map1	0002.CSV	2221.69	0.0165174
CAM206_map1	0002.CSV	2225.54	0.0165169
CAM206_map1	0002.CSV	2229.4	0.0165151
CAM206_map1	0002.CSV	2233.26	0.0164801
CAM206_map1	0002.CSV	2237.12	0.0164675
CAM206_map1	0002.CSV	2240.97	0.0164793
CAM206_map1	0002.CSV	2244.83	0.0164767
CAM206_map1	0002.CSV	2248.69	0.0164451
CAM206_map1	0002.CSV	2252.54	0.0164294
CAM206_map1	0002.CSV	2256.4	0.0163931
CAM206_map1	0002.CSV	2260.26	0.0163462
CAM206_map1	0002.CSV	2264.11	0.0163326
CAM206_map1	0002.CSV	2267.97	0.0163137
CAM206_map1	0002.CSV	2271.83	0.0162989
CAM206_map1	0002.CSV	2275.69	0.0163217
CAM206_map1	0002.CSV	2279.54	0.0162898
CAM206_map1	0002.CSV	2283.4	0.016172
CAM206_map1	0002.CSV	2287.26	0.016061
CAM206_map1	0002.CSV	2291.11	0.0159865
CAM206_map1	0002.CSV	2294.97	0.0158906
CAM206_map1	0002.CSV	2298.83	0.015803
CAM206_map1	0002.CSV	2302.69	0.0156538
CAM206_map1	0002.CSV	2306.54	0.0153597
CAM206_map1	0002.CSV	2310.4	0.0150208
CAM206_map1	0002.CSV	2314.26	0.0147237
CAM206_map1	0002.CSV	2318.11	0.0141871
CAM206_map1	0002.CSV	2321.97	0.0133766
CAM206_map1	0002.CSV	2325.83	0.0125053
CAM206_map1	0002.CSV	2329.69	0.0115904
CAM206_map1	0002.CSV	2333.54	0.0105283
CAM206_map1	0002.CSV	2337.4	0.010032
CAM206_map1	0002.CSV	2341.26	0.0105399
CAM206_map1	0002.CSV	2345.11	0.0125956
CAM206_map1	0002.CSV	2348.97	0.0130406
CAM206_map1	0002.CSV	2352.83	0.0110556
CAM206_map1	0002.CSV	2356.69	0.00535638
CAM206_map1	0002.CSV	2360.54	0.0011234
CAM206_map1	0002.CSV	2364.4	0.00470927
CAM206_map1	0002.CSV	2368.26	0.0100651
CAM206_map1	0002.CSV	2372.11	0.013827
CAM206_map1	0002.CSV	2375.97	0.0156158
CAM206_map1	0002.CSV	2379.83	0.0162525
CAM206_map1	0002.CSV	2383.69	0.0163505
CAM206_map1	0002.CSV	2387.54	0.0161781
CAM206_map1	0002.CSV	2391.4	0.0160044
CAM206_map1	0002.CSV	2395.26	0.0159643
CAM206_map1	0002.CSV	2399.11	0.0159674
CAM206_map1	0002.CSV	2402.97	0.015952
CAM206_map1	0002.CSV	2406.83	0.01595
CAM206_map1	0002.CSV	2410.68	0.0159363
CAM206_map1	0002.CSV	2414.54	0.0158807
CAM206_map1	0002.CSV	2418.4	0.0158216
CAM206_map1	0002.CSV	2422.26	0.0158178
CAM206_map1	0002.CSV	2426.11	0.0158439
CAM206_map1	0002.CSV	2429.97	0.0158567
CAM206_map1	0002.CSV	2433.83	0.0159039
CAM206_map1	0002.CSV	2437.68	0.0159653
CAM206_map1	0002.CSV	2441.54	0.015945
CAM206_map1	0002.CSV	2445.4	0.0158752
CAM206_map1	0002.CSV	2449.26	0.0158427
CAM206_map1	0002.CSV	2453.11	0.0158255
CAM206_map1	0002.CSV	2456.97	0.0158109
CAM206_map1	0002.CSV	2460.83	0.0158353
CAM206_map1	0002.CSV	2464.68	0.015868
CAM206_map1	0002.CSV	2468.54	0.0158621
CAM206_map1	0002.CSV	2472.4	0.0158029
CAM206_map1	0002.CSV	2476.26	0.0158005
CAM206_map1	0002.CSV	2480.11	0.0158565
CAM206_map1	0002.CSV	2483.97	0.0158742
CAM206_map1	0002.CSV	2487.83	0.0158645
CAM206_map1	0002.CSV	2491.68	0.015873
CAM206_map1	0002.CSV	2495.54	0.0159107
CAM206_map1	0002.CSV	2499.4	0.0159619
CAM206_map1	0002.CSV	2503.26	0.015975
CAM206_map1	0002.CSV	2507.11	0.0159695
CAM206_map1	0002.CSV	2510.97	0.0159382
CAM206_map1	0002.CSV	2514.83	0.0159475
CAM206_map1	0002.CSV	2518.68	0.0160034
CAM206_map1	0002.CSV	2522.54	0.0160323
CAM206_map1	0002.CSV	2526.4	0.0159941
CAM206_map1	0002.CSV	2530.26	0.015948
CAM206_map1	0002.CSV	2534.11	0.015949
CAM206_map1	0002.CSV	2537.97	0.0159578
CAM206_map1	0002.CSV	2541.83	0.0159356
CAM206_map1	0002.CSV	2545.68	0.0158973
CAM206_map1	0002.CSV	2549.54	0.0158809
CAM206_map1	0002.CSV	2553.4	0.0158643
CAM206_map1	0002.CSV	2557.26	0.0158484
CAM206_map1	0002.CSV	2561.11	0.0158577
CAM206_map1	0002.CSV	2564.97	0.0158464
CAM206_map1	0002.CSV	2568.83	0.015851
CAM206_map1	0002.CSV	2572.68	0.015913
CAM206_map1	0002.CSV	2576.54	0.0159791
CAM206_map1	0002.CSV	2580.4	0.0159511
CAM206_map1	0002.CSV	2584.25	0.0158952
CAM206_map1	0002.CSV	2588.11	0.0158987
CAM206_map1	0002.CSV	2591.97	0.0159726
CAM206_map1	0002.CSV	2595.83	0.0159747
CAM206_map1	0002.CSV	2599.68	0.0159355
CAM206_map1	0002.CSV	2603.54	0.0159322
CAM206_map1	0002.CSV	2607.4	0.0159723
CAM206_map1	0002.CSV	2611.25	0.016021
CAM206_map1	0002.CSV	2615.11	0.0160592
CAM206_map1	0002.CSV	2618.97	0.0160837
CAM206_map1	0002.CSV	2622.82	0.0161631
CAM206_map1	0002.CSV	2626.68	0.0161925
CAM206_map1	0002.CSV	2630.54	0.0161695
CAM206_map1	0002.CSV	2634.4	0.0162427
CAM206_map1	0002.CSV	2638.25	0.0162577
CAM206_map1	0002.CSV	2642.11	0.0161277
CAM206_map1	0002.CSV	2645.97	0.0160358
CAM206_map1	0002.CSV	2649.82	0.0160192
CAM206_map1	0002.CSV	2653.68	0.0160295
CAM206_map1	0002.CSV	2657.54	0.0160081
CAM206_map1	0002.CSV	2661.4	0.0159657
CAM206_map1	0002.CSV	2665.25	0.0159232
CAM206_map1	0002.CSV	2669.11	0.0159906
CAM206_map1	0002.CSV	2672.97	0.0162132
CAM206_map1	0002.CSV	2676.82	0.0163933
CAM206_map1	0002.CSV	2680.68	0.0163183
CAM206_map1	0002.CSV	2684.54	0.0160248
CAM206_map1	0002.CSV	2688.4	0.0158708
CAM206_map1	0002.CSV	2692.25	0.0158742
CAM206_map1	0002.CSV	2696.11	0.0159241
CAM206_map1	0002.CSV	2699.97	0.0159455
CAM206_map1	0002.CSV	2703.82	0.0159336
CAM206_map1	0002.CSV	2707.68	0.0159651
CAM206_map1	0002.CSV	2711.54	0.0159361
CAM206_map1	0002.CSV	2715.4	0.0158875
CAM206_map1	0002.CSV	2719.25	0.0160095
CAM206_map1	0002.CSV	2723.11	0.0163098
CAM206_map1	0002.CSV	2726.97	0.0163313
CAM206_map1	0002.CSV	2730.82	0.0160574
CAM206_map1	0002.CSV	2734.68	0.0159937
CAM206_map1	0002.CSV	2738.54	0.0160058
CAM206_map1	0002.CSV	2742.4	0.0160514
CAM206_map1	0002.CSV	2746.25	0.0163192
CAM206_map1	0002.CSV	2750.11	0.0163323
CAM206_map1	0002.CSV	2753.97	0.0160757
CAM206_map1	0002.CSV	2757.82	0.0159832
CAM206_map1	0002.CSV	2761.68	0.0159234
CAM206_map1	0002.CSV	2765.54	0.015943
CAM206_map1	0002.CSV	2769.39	0.0160671
CAM206_map1	0002.CSV	2773.25	0.0163237
CAM206_map1	0002.CSV	2777.11	0.0163018
CAM206_map1	0002.CSV	2780.97	0.0161163
CAM206_map1	0002.CSV	2784.82	0.0162239
CAM206_map1	0002.CSV	2788.68	0.0165555
CAM206_map1	0002.CSV	2792.54	0.0167031
CAM206_map1	0002.CSV	2796.39	0.0167123
CAM206_map1	0002.CSV	2800.25	0.0165353
CAM206_map1	0002.CSV	2804.11	0.0163429
CAM206_map1	0002.CSV	2807.97	0.0164825
CAM206_map1	0002.CSV	2811.82	0.0164941
CAM206_map1	0002.CSV	2815.68	0.0163641
CAM206_map1	0002.CSV	2819.54	0.0164105
CAM206_map1	0002.CSV	2823.39	0.0165068
CAM206_map1	0002.CSV	2827.25	0.0165051
CAM206_map1	0002.CSV	2831.11	0.0167382
CAM206_map1	0002.CSV	2834.97	0.0172734
CAM206_map1	0002.CSV	2838.82	0.0175843
CAM206_map1	0002.CSV	2842.68	0.0177835
CAM206_map1	0002.CSV	2846.54	0.0185323
CAM206_map1	0002.CSV	2850.39	0.0188996
CAM206_map1	0002.CSV	2854.25	0.0185172
CAM206_map1	0002.CSV	2858.11	0.0181883
CAM206_map1	0002.CSV	2861.97	0.0178768
CAM206_map1	0002.CSV	2865.82	0.0176476
CAM206_map1	0002.CSV	2869.68	0.0178024
CAM206_map1	0002.CSV	2873.54	0.0180038
CAM206_map1	0002.CSV	2877.39	0.0176753
CAM206_map1	0002.CSV	2881.25	0.0173023
CAM206_map1	0002.CSV	2885.11	0.0172037
CAM206_map1	0002.CSV	2888.97	0.0173179
CAM206_map1	0002.CSV	2892.82	0.0177015
CAM206_map1	0002.CSV	2896.68	0.0179722
CAM206_map1	0002.CSV	2900.54	0.0180171
CAM206_map1	0002.CSV	2904.39	0.0183128
CAM206_map1	0002.CSV	2908.25	0.0189983
CAM206_map1	0002.CSV	2912.11	0.0201778
CAM206_map1	0002.CSV	2915.97	0.0210214
CAM206_map1	0002.CSV	2919.82	0.0207861
CAM206_map1	0002.CSV	2923.68	0.0200966
CAM206_map1	0002.CSV	2927.54	0.0197277
CAM206_map1	0002.CSV	2931.39	0.0191856
CAM206_map1	0002.CSV	2935.25	0.0184176
CAM206_map1	0002.CSV	2939.11	0.0181516
CAM206_map1	0002.CSV	2942.96	0.0184142
CAM206_map1	0002.CSV	2946.82	0.0184661
CAM206_map1	0002.CSV	2950.68	0.0182346
CAM206_map1	0002.CSV	2954.54	0.0178352
CAM206_map1	0002.CSV	2958.39	0.0174392
CAM206_map1	0002.CSV	2962.25	0.0173304
CAM206_map1	0002.CSV	2966.11	0.0171192
CAM206_map1	0002.CSV	2969.96	0.0170511
CAM206_map1	0002.CSV	2973.82	0.0172673
CAM206_map1	0002.CSV	2977.68	0.0173919
CAM206_map1	0002.CSV	2981.53	0.0171482
CAM206_map1	0002.CSV	2985.39	0.0166122
CAM206_map1	0002.CSV	2989.25	0.0166138
CAM206_map1	0002.CSV	2993.11	0.0169234
CAM206_map1	0002.CSV	2996.96	0.0168297
CAM206_map1	0002.CSV	3000.82	0.016508
CAM206_map1	0002.CSV	3004.68	0.0163615
CAM206_map1	0002.CSV	3008.53	0.0166293
CAM206_map1	0002.CSV	3012.39	0.0170201
CAM206_map1	0002.CSV	3016.25	0.0170586
CAM206_map1	0002.CSV	3020.11	0.0168056
CAM206_map1	0002.CSV	3023.96	0.0165665
CAM206_map1	0002.CSV	3027.82	0.0165128
CAM206_map1	0002.CSV	3031.68	0.0167988
CAM206_map1	0002.CSV	3035.53	0.0169149
CAM206_map1	0002.CSV	3039.39	0.0168933
CAM206_map1	0002.CSV	3043.25	0.0170143
CAM206_map1	0002.CSV	3047.11	0.0169987
CAM206_map1	0002.CSV	3050.96	0.0169341
CAM206_map1	0002.CSV	3054.82	0.0168101
CAM206_map1	0002.CSV	3058.68	0.0165965
CAM206_map1	0002.CSV	3062.53	0.016627
CAM206_map1	0002.CSV	3066.39	0.0169752
CAM206_map1	0002.CSV	3070.25	0.0169375
CAM206_map1	0002.CSV	3074.11	0.0168122
CAM206_map1	0002.CSV	3077.96	0.0170225
CAM206_map1	0002.CSV	3081.82	0.0172458
CAM206_map1	0002.CSV	3085.68	0.0172392
CAM206_map1	0002.CSV	3089.53	0.0171034
CAM206_map1	0002.CSV	3093.39	0.0168158
CAM206_map1	0002.CSV	3097.25	0.0168323
CAM206_map1	0002.CSV	3101.11	0.0169044
CAM206_map1	0002.CSV	3104.96	0.0169141
CAM206_map1	0002.CSV	3108.82	0.0170635
CAM206_map1	0002.CSV	3112.68	0.0171938
CAM206_map1	0002.CSV	3116.53	0.0173973
CAM206_map1	0002.CSV	3120.39	0.017368
CAM206_map1	0002.CSV	3124.25	0.0170433
CAM206_map1	0002.CSV	3128.11	0.0168959
CAM206_map1	0002.CSV	3131.96	0.0168301
CAM206_map1	0002.CSV	3135.82	0.0169467
CAM206_map1	0002.CSV	3139.68	0.0170735
CAM206_map1	0002.CSV	3143.53	0.0168203
CAM206_map1	0002.CSV	3147.39	0.0168411
CAM206_map1	0002.CSV	3151.25	0.0172531
CAM206_map1	0002.CSV	3155.1	0.0172238
CAM206_map1	0002.CSV	3158.96	0.0167853
CAM206_map1	0002.CSV	3162.82	0.0165499
CAM206_map1	0002.CSV	3166.68	0.0165224
CAM206_map1	0002.CSV	3170.53	0.0165339
CAM206_map1	0002.CSV	3174.39	0.0165206
CAM206_map1	0002.CSV	3178.25	0.0166029
CAM206_map1	0002.CSV	3182.1	0.0166666
CAM206_map1	0002.CSV	3185.96	0.0167484
CAM206_map1	0002.CSV	3189.82	0.0168688
CAM206_map1	0002.CSV	3193.68	0.0167826
CAM206_map1	0002.CSV	3197.53	0.0166865
CAM206_map1	0002.CSV	3201.39	0.0168026
CAM206_map1	0002.CSV	3205.25	0.016881
CAM206_map1	0002.CSV	3209.1	0.0169038
CAM206_map1	0002.CSV	3212.96	0.0170456
CAM206_map1	0002.CSV	3216.82	0.0171808
CAM206_map1	0002.CSV	3220.68	0.0170789
CAM206_map1	0002.CSV	3224.53	0.0169105
CAM206_map1	0002.CSV	3228.39	0.0171869
CAM206_map1	0002.CSV	3232.25	0.017664
CAM206_map1	0002.CSV	3236.1	0.0175567
CAM206_map1	0002.CSV	3239.96	0.0172984
CAM206_map1	0002.CSV	3243.82	0.0175342
CAM206_map1	0002.CSV	3247.68	0.0176754
CAM206_map1	0002.CSV	3251.53	0.0174667
CAM206_map1	0002.CSV	3255.39	0.0174759
CAM206_map1	0002.CSV	3259.25	0.0172838
CAM206_map1	0002.CSV	3263.1	0.017178
CAM206_map1	0002.CSV	3266.96	0.0175659
CAM206_map1	0002.CSV	3270.82	0.0179806
CAM206_map1	0002.CSV	3274.68	0.0179976
CAM206_map1	0002.CSV	3278.53	0.0176931
CAM206_map1	0002.CSV	3282.39	0.0173871
CAM206_map1	0002.CSV	3286.25	0.0174551
CAM206_map1	0002.CSV	3290.1	0.0179101
CAM206_map1	0002.CSV	3293.96	0.0182129
CAM206_map1	0002.CSV	3297.82	0.0180702
CAM206_map1	0002.CSV	3301.67	0.0180995
CAM206_map1	0002.CSV	3305.53	0.0183109
CAM206_map1	0002.CSV	3309.39	0.0181957
CAM206_map1	0002.CSV	3313.25	0.0177615
CAM206_map1	0002.CSV	3317.1	0.0174316
CAM206_map1	0002.CSV	3320.96	0.0175603
CAM206_map1	0002.CSV	3324.82	0.0179135
CAM206_map1	0002.CSV	3328.67	0.0176403
CAM206_map1	0002.CSV	3332.53	0.0173942
CAM206_map1	0002.CSV	3336.39	0.0178726
CAM206_map1	0002.CSV	3340.24	0.0181549
CAM206_map1	0002.CSV	3344.1	0.0178915
CAM206_map1	0002.CSV	3347.96	0.0178331
CAM206_map1	0002.CSV	3351.82	0.0177248
CAM206_map1	0002.CSV	3355.67	0.0174153
CAM206_map1	0002.CSV	3359.53	0.0176732
CAM206_map1	0002.CSV	3363.39	0.0180567
CAM206_map1	0002.CSV	3367.24	0.0183077
CAM206_map1	0002.CSV	3371.1	0.0181148
CAM206_map1	0002.CSV	3374.96	0.01783
CAM206_map1	0002.CSV	3378.82	0.0176946
CAM206_map1	0002.CSV	3382.67	0.0173817
CAM206_map1	0002.CSV	3386.53	0.0174791
CAM206_map1	0002.CSV	3390.39	0.0179929
CAM206_map1	0002.CSV	3394.24	0.0181866
CAM206_map1	0002.CSV	3398.1	0.0181697
CAM206_map1	0002.CSV	3401.96	0.0180427
CAM206_map1	0002.CSV	3405.82	0.0177848
CAM206_map1	0002.CSV	3409.67	0.0177348
CAM206_map1	0002.CSV	3413.53	0.0174553
CAM206_map1	0002.CSV	3417.39	0.0170185
CAM206_map1	0002.CSV	3421.24	0.0168858
CAM206_map1	0002.CSV	3425.1	0.0169902
CAM206_map1	0002.CSV	3428.96	0.0174075
CAM206_map1	0002.CSV	3432.82	0.0176792
CAM206_map1	0002.CSV	3436.67	0.0174242
CAM206_map1	0002.CSV	3440.53	0.016721
CAM206_map1	0002.CSV	3444.39	0.0163856
CAM206_map1	0002.CSV	3448.24	0.0164319
CAM206_map1	0002.CSV	3452.1	0.0162032
CAM206_map1	0002.CSV	3455.96	0.0162468
CAM206_map1	0002.CSV	3459.82	0.016654
CAM206_map1	0002.CSV	3463.67	0.0170808
CAM206_map1	0002.CSV	3467.53	0.0172925
CAM206_map1	0002.CSV	3471.39	0.0168596
CAM206_map1	0002.CSV	3475.24	0.0164459
CAM206_map1	0002.CSV	3479.1	0.0165363
CAM206_map1	0002.CSV	3482.96	0.0166669
CAM206_map1	0002.CSV	3486.82	0.0166479
CAM206_map1	0002.CSV	3490.67	0.0165492
CAM206_map1	0002.CSV	3494.53	0.0166499
CAM206_map1	0002.CSV	3498.39	0.0166094
CAM206_map1	0002.CSV	3502.24	0.0163957
CAM206_map1	0002.CSV	3506.1	0.0159701
CAM206_map1	0002.CSV	3509.96	0.015871
CAM206_map1	0002.CSV	3513.81	0.0160792
CAM206_map1	0002.CSV	3517.67	0.0156628
CAM206_map1	0002.CSV	3521.53	0.015603
CAM206_map1	0002.CSV	3525.39	0.0156393
CAM206_map1	0002.CSV	3529.24	0.0154951
CAM206_map1	0002.CSV	3533.1	0.0156406
CAM206_map1	0002.CSV	3536.96	0.0158791
CAM206_map1	0002.CSV	3540.81	0.0159719
CAM206_map1	0002.CSV	3544.67	0.0162602
CAM206_map1	0002.CSV	3548.53	0.0161092
CAM206_map1	0002.CSV	3552.39	0.0155858
CAM206_map1	0002.CSV	3556.24	0.0153328
CAM206_map1	0002.CSV	3560.1	0.0150828
CAM206_map1	0002.CSV	3563.96	0.0147282
CAM206_map1	0002.CSV	3567.81	0.0155608
CAM206_map1	0002.CSV	3571.67	0.0156687
CAM206_map1	0002.CSV	3575.53	0.0151124
CAM206_map1	0002.CSV	3579.39	0.0154309
CAM206_map1	0002.CSV	3583.24	0.0155821
CAM206_map1	0002.CSV	3587.1	0.0156116
CAM206_map1	0002.CSV	3590.96	0.0154586
CAM206_map1	0002.CSV	3594.81	0.0150874
CAM206_map1	0002.CSV	3598.67	0.0153455
CAM206_map1	0002.CSV	3602.53	0.0153241
CAM206_map1	0002.CSV	3606.39	0.0145932
CAM206_map1	0002.CSV	3610.24	0.0143785
CAM206_map1	0002.CSV	3614.1	0.0144327
CAM206_map1	0002.CSV	3617.96	0.014874
CAM206_map1	0002.CSV	3621.81	0.015182
CAM206_map1	0002.CSV	3625.67	0.0141154
CAM206_map1	0002.CSV	3629.53	0.0141481
CAM206_map1	0002.CSV	3633.39	0.0151312
CAM206_map1	0002.CSV	3637.24	0.0149604
CAM206_map1	0002.CSV	3641.1	0.0145689
CAM206_map1	0002.CSV	3644.96	0.013722
CAM206_map1	0002.CSV	3648.81	0.0143501
CAM206_map1	0002.CSV	3652.67	0.0157324
CAM206_map1	0002.CSV	3656.53	0.0159037
CAM206_map1	0002.CSV	3660.38	0.0158614
CAM206_map1	0002.CSV	3664.24	0.0147467
CAM206_map1	0002.CSV	3668.1	0.0135622
CAM206_map1	0002.CSV	3671.96	0.0134587
CAM206_map1	0002.CSV	3675.81	0.0146005
CAM206_map1	0002.CSV	3679.67	0.0154653
CAM206_map1	0002.CSV	3683.53	0.0150332
CAM206_map1	0002.CSV	3687.38	0.0149623
CAM206_map1	0002.CSV	3691.24	0.0159677
CAM206_map1	0002.CSV	3695.1	0.0155551
CAM206_map1	0002.CSV	3698.95	0.0147
CAM206_map1	0002.CSV	3702.81	0.0144865
CAM206_map1	0002.CSV	3706.67	0.0140065
CAM206_map1	0002.CSV	3710.53	0.0140711
CAM206_map1	0002.CSV	3714.38	0.0149979
CAM206_map1	0002.CSV	3718.24	0.014418
CAM206_map1	0002.CSV	3722.1	0.0140342
CAM206_map1	0002.CSV	3725.95	0.0141501
CAM206_map1	0002.CSV	3729.81	0.0137713
CAM206_map1	0002.CSV	3733.67	0.013982
CAM206_map1	0002.CSV	3737.53	0.0155451
CAM206_map1	0002.CSV	3741.38	0.0144968
CAM206_map1	0002.CSV	3745.24	0.0131465
CAM206_map1	0002.CSV	3749.1	0.0132943
CAM206_map1	0002.CSV	3752.95	0.0145901
CAM206_map1	0002.CSV	3756.81	0.0147325
CAM206_map1	0002.CSV	3760.67	0.0147788
CAM206_map1	0002.CSV	3764.53	0.0144996
CAM206_map1	0002.CSV	3768.38	0.0146892
CAM206_map1	0002.CSV	3772.24	0.0150916
CAM206_map1	0002.CSV	3776.1	0.0148005
CAM206_map1	0002.CSV	3779.95	0.0148854
CAM206_map1	0002.CSV	3783.81	0.0148873
CAM206_map1	0002.CSV	3787.67	0.0148446
CAM206_map1	0002.CSV	3791.53	0.0143874
CAM206_map1	0002.CSV	3795.38	0.0135817
CAM206_map1	0002.CSV	3799.24	0.0134611
CAM206_map1	0002.CSV	3803.1	0.0142521
CAM206_map1	0002.CSV	3806.95	0.0148762
CAM206_map1	0002.CSV	3810.81	0.0144277
CAM206_map1	0002.CSV	3814.67	0.0137206
CAM206_map1	0002.CSV	3818.53	0.0141582
CAM206_map1	0002.CSV	3822.38	0.0148447
CAM206_map1	0002.CSV	3826.24	0.0145564
CAM206_map1	0002.CSV	3830.1	0.014128
CAM206_map1	0002.CSV	3833.95	0.0137563
CAM206_map1	0002.CSV	3837.81	0.0139011
CAM206_map1	0002.CSV	3841.67	0.0150414
CAM206_map1	0002.CSV	3845.53	0.0147695
CAM206_map1	0002.CSV	3849.38	0.0132151
CAM206_map1	0002.CSV	3853.24	0.0130761
CAM206_map1	0002.CSV	3857.1	0.0144406
CAM206_map1	0002.CSV	3860.95	0.0137451
CAM206_map1	0002.CSV	3864.81	0.0135832
CAM206_map1	0002.CSV	3868.67	0.0136706
CAM206_map1	0002.CSV	3872.52	0.0141512
CAM206_map1	0002.CSV	3876.38	0.014046
CAM206_map1	0002.CSV	3880.24	0.0138698
CAM206_map1	0002.CSV	3884.1	0.0145876
CAM206_map1	0002.CSV	3887.95	0.0145661
CAM206_map1	0002.CSV	3891.81	0.0144309
CAM206_map1	0002.CSV	3895.67	0.014043
CAM206_map1	0002.CSV	3899.52	0.0133463
CAM206_map1	0002.CSV	3903.38	0.0145348
CAM206_map1	0002.CSV	3907.24	0.015172
CAM206_map1	0002.CSV	3911.1	0.0144904
CAM206_map1	0002.CSV	3914.95	0.0140122
CAM206_map1	0002.CSV	3918.81	0.0141606
CAM206_map1	0002.CSV	3922.67	0.0143037
CAM206_map1	0002.CSV	3926.52	0.0143717
CAM206_map1	0002.CSV	3930.38	0.014528
CAM206_map1	0002.CSV	3934.24	0.0148747
CAM206_map1	0002.CSV	3938.09	0.0144329
CAM206_map1	0002.CSV	3941.95	0.0141099
CAM206_map1	0002.CSV	3945.81	0.0142651
CAM206_map1	0002.CSV	3949.67	0.014534
CAM206_map1	0002.CSV	3953.52	0.0145658
CAM206_map1	0002.CSV	3957.38	0.0143779
CAM206_map1	0002.CSV	3961.24	0.0144603
CAM206_map1	0002.CSV	3965.09	0.0145326
CAM206_map1	0002.CSV	3968.95	0.0144533
CAM206_map1	0002.CSV	3972.81	0.0145282
CAM206_map1	0002.CSV	3976.67	0.0146844
CAM206_map1	0002.CSV	3980.52	0.0146883
CAM206_map1	0002.CSV	3984.38	0.0146547
CAM206_map1	0002.CSV	3988.24	0.0145144
CAM206_map1	0002.CSV	3992.09	0.0144241
CAM206_map1	0002.CSV	3995.95	0.0145103
CAM206_map1	0002.CSV	3999.81	0.0145316
CAM206_map1	0003.CSV	674.992	0.0270047
CAM206_map1	0003.CSV	678.849	0.027984
CAM206_map1	0003.CSV	682.706	0.0283165
CAM206_map1	0003.CSV	686.563	0.0297976
CAM206_map1	0003.CSV	690.42	0.0314484
CAM206_map1	0003.CSV	694.277	0.0369187
CAM206_map1	0003.CSV	698.134	0.0429627
CAM206_map1	0003.CSV	701.991	0.0408347
CAM206_map1	0003.CSV	705.849	0.0383911
CAM206_map1	0003.CSV	709.706	0.0491814
CAM206_map1	0003.CSV	713.563	0.0507717
CAM206_map1	0003.CSV	717.42	0.0354192
CAM206_map1	0003.CSV	721.277	0.0255345
CAM206_map1	0003.CSV	725.134	0.0240215
CAM206_map1	0003.CSV	728.991	0.0230671
CAM206_map1	0003.CSV	732.848	0.0227392
CAM206_map1	0003.CSV	736.705	0.0228234
CAM206_map1	0003.CSV	740.562	0.0234275
CAM206_map1	0003.CSV	744.42	0.0230902
CAM206_map1	0003.CSV	748.277	0.023198
CAM206_map1	0003.CSV	752.134	0.0232469
CAM206_map1	0003.CSV	755.991	0.023944
CAM206_map1	0003.CSV	759.848	0.0242145
CAM206_map1	0003.CSV	763.705	0.0248354
CAM206_map1	0003.CSV	767.562	0.0250093
CAM206_map1	0003.CSV	771.419	0.025438
CAM206_map1	0003.CSV	775.276	0.0255202
CAM206_map1	0003.CSV	779.133	0.0260111
CAM206_map1	0003.CSV	782.99	0.0261775
CAM206_map1	0003.CSV	786.848	0.0266891
CAM206_map1	0003.CSV	790.705	0.0269024
CAM206_map1	0003.CSV	794.562	0.0277636
CAM206_map1	0003.CSV	798.419	0.0284253
CAM206_map1	0003.CSV	802.276	0.0293051
CAM206_map1	0003.CSV	806.133	0.0296566
CAM206_map1	0003.CSV	809.99	0.0302151
CAM206_map1	0003.CSV	813.847	0.0307292
CAM206_map1	0003.CSV	817.704	0.0324276
CAM206_map1	0003.CSV	821.562	0.0346113
CAM206_map1	0003.CSV	825.419	0.0378228
CAM206_map1	0003.CSV	829.276	0.0411939
CAM206_map1	0003.CSV	833.133	0.0458487
CAM206_map1	0003.CSV	836.99	0.0527969
CAM206_map1	0003.CSV	840.847	0.0635548
CAM206_map1	0003.CSV	844.704	0.0745676
CAM206_map1	0003.CSV	848.561	0.0919545
CAM206_map1	0003.CSV	852.418	0.11089
CAM206_map1	0003.CSV	856.275	0.112133
CAM206_map1	0003.CSV	860.132	0.0966805
CAM206_map1	0003.CSV	863.99	0.076136
CAM206_map1	0003.CSV	867.847	0.0556763
CAM206_map1	0003.CSV	871.704	0.0402454
CAM206_map1	0003.CSV	875.561	0.0315057
CAM206_map1	0003.CSV	879.418	0.0270882
CAM206_map1	0003.CSV	883.275	0.0239268
CAM206_map1	0003.CSV	887.132	0.0221602
CAM206_map1	0003.CSV	890.989	0.0214841
CAM206_map1	0003.CSV	894.846	0.0216353
CAM206_map1	0003.CSV	898.703	0.0217771
CAM206_map1	0003.CSV	902.561	0.0222726
CAM206_map1	0003.CSV	906.418	0.0226401
CAM206_map1	0003.CSV	910.275	0.0229062
CAM206_map1	0003.CSV	914.132	0.0228989
CAM206_map1	0003.CSV	917.989	0.0233022
CAM206_map1	0003.CSV	921.846	0.0236236
CAM206_map1	0003.CSV	925.703	0.0240443
CAM206_map1	0003.CSV	929.56	0.0241811
CAM206_map1	0003.CSV	933.417	0.0243911
CAM206_map1	0003.CSV	937.274	0.0244412
CAM206_map1	0003.CSV	941.131	0.0246884
CAM206_map1	0003.CSV	944.989	0.0248185
CAM206_map1	0003.CSV	948.846	0.025258
CAM206_map1	0003.CSV	952.703	0.0256022
CAM206_map1	0003.CSV	956.56	0.0260624
CAM206_map1	0003.CSV	960.417	0.0261098
CAM206_map1	0003.CSV	964.274	0.026236
CAM206_map1	0003.CSV	968.131	0.026442
CAM206_map1	0003.CSV	971.988	0.0269406
CAM206_map1	0003.CSV	975.845	0.0272811
CAM206_map1	0003.CSV	979.702	0.0277922
CAM206_map1	0003.CSV	983.559	0.0281878
CAM206_map1	0003.CSV	987.417	0.0287389
CAM206_map1	0003.CSV	991.274	0.0291173
CAM206_map1	0003.CSV	995.131	0.0296529
CAM206_map1	0003.CSV	998.988	0.0300546
CAM206_map1	0003.CSV	1002.85	0.0306301
CAM206_map1	0003.CSV	1006.7	0.031055
CAM206_map1	0003.CSV	1010.56	0.0316543
CAM206_map1	0003.CSV	1014.42	0.0319784
CAM206_map1	0003.CSV	1018.27	0.0324005
CAM206_map1	0003.CSV	1022.13	0.0326935
CAM206_map1	0003.CSV	1025.99	0.033175
CAM206_map1	0003.CSV	1029.85	0.0335373
CAM206_map1	0003.CSV	1033.7	0.0340889
CAM206_map1	0003.CSV	1037.56	0.0343061
CAM206_map1	0003.CSV	1041.42	0.0346813
CAM206_map1	0003.CSV	1045.27	0.0349764
CAM206_map1	0003.CSV	1049.13	0.0354449
CAM206_map1	0003.CSV	1052.99	0.0357277
CAM206_map1	0003.CSV	1056.84	0.0362574
CAM206_map1	0003.CSV	1060.7	0.0367932
CAM206_map1	0003.CSV	1064.56	0.0377264
CAM206_map1	0003.CSV	1068.42	0.0386544
CAM206_map1	0003.CSV	1072.27	0.0402209
CAM206_map1	0003.CSV	1076.13	0.0427223
CAM206_map1	0003.CSV	1079.99	0.0469586
CAM206_map1	0003.CSV	1083.84	0.0467635
CAM206_map1	0003.CSV	1087.7	0.0416014
CAM206_map1	0003.CSV	1091.56	0.0389539
CAM206_map1	0003.CSV	1095.41	0.038912
CAM206_map1	0003.CSV	1099.27	0.0389293
CAM206_map1	0003.CSV	1103.13	0.0389741
CAM206_map1	0003.CSV	1106.99	0.0391205
CAM206_map1	0003.CSV	1110.84	0.0394482
CAM206_map1	0003.CSV	1114.7	0.0393369
CAM206_map1	0003.CSV	1118.56	0.0391139
CAM206_map1	0003.CSV	1122.41	0.0388609
CAM206_map1	0003.CSV	1126.27	0.0388284
CAM206_map1	0003.CSV	1130.13	0.0386935
CAM206_map1	0003.CSV	1133.99	0.0387942
CAM206_map1	0003.CSV	1137.84	0.0388397
CAM206_map1	0003.CSV	1141.7	0.0389902
CAM206_map1	0003.CSV	1145.56	0.0391213
CAM206_map1	0003.CSV	1149.41	0.0393896
CAM206_map1	0003.CSV	1153.27	0.0394934
CAM206_map1	0003.CSV	1157.13	0.0397656
CAM206_map1	0003.CSV	1160.99	0.0399958
CAM206_map1	0003.CSV	1164.84	0.0403626
CAM206_map1	0003.CSV	1168.7	0.0405607
CAM206_map1	0003.CSV	1172.56	0.0407932
CAM206_map1	0003.CSV	1176.41	0.0408467
CAM206_map1	0003.CSV	1180.27	0.0408867
CAM206_map1	0003.CSV	1184.13	0.0406534
CAM206_map1	0003.CSV	1187.99	0.0404287
CAM206_map1	0003.CSV	1191.84	0.0400747
CAM206_map1	0003.CSV	1195.7	0.0399332
CAM206_map1	0003.CSV	1199.56	0.0396959
CAM206_map1	0003.CSV	1203.41	0.039698
CAM206_map1	0003.CSV	1207.27	0.0397494
CAM206_map1	0003.CSV	1211.13	0.039989
CAM206_map1	0003.CSV	1214.98	0.0401767
CAM206_map1	0003.CSV	1218.84	0.0405024
CAM206_map1	0003.CSV	1222.7	0.0407207
CAM206_map1	0003.CSV	1226.56	0.0411374
CAM206_map1	0003.CSV	1230.41	0.0415186
CAM206_map1	0003.CSV	1234.27	0.0419951
CAM206_map1	0003.CSV	1238.13	0.042296
CAM206_map1	0003.CSV	1241.98	0.0427482
CAM206_map1	0003.CSV	1245.84	0.0431022
CAM206_map1	0003.CSV	1249.7	0.0435276
CAM206_map1	0003.CSV	1253.56	0.0437993
CAM206_map1	0003.CSV	1257.41	0.0441986
CAM206_map1	0003.CSV	1261.27	0.0443877
CAM206_map1	0003.CSV	1265.13	0.0446569
CAM206_map1	0003.CSV	1268.98	0.0450105
CAM206_map1	0003.CSV	1272.84	0.0456038
CAM206_map1	0003.CSV	1276.7	0.0460498
CAM206_map1	0003.CSV	1280.56	0.0466227
CAM206_map1	0003.CSV	1284.41	0.0470551
CAM206_map1	0003.CSV	1288.27	0.0476754
CAM206_map1	0003.CSV	1292.13	0.0482098
CAM206_map1	0003.CSV	1295.98	0.0488525
CAM206_map1	0003.CSV	1299.84	0.0493676
CAM206_map1	0003.CSV	1303.7	0.0499603
CAM206_map1	0003.CSV	1307.56	0.0504596
CAM206_map1	0003.CSV	1311.41	0.0512328
CAM206_map1	0003.CSV	1315.27	0.0519896
CAM206_map1	0003.CSV	1319.13	0.0528617
CAM206_map1	0003.CSV	1322.98	0.0535223
CAM206_map1	0003.CSV	1326.84	0.0543551
CAM206_map1	0003.CSV	1330.7	0.055217
CAM206_map1	0003.CSV	1334.56	0.0562445
CAM206_map1	0003.CSV	1338.41	0.0576193
CAM206_map1	0003.CSV	1342.27	0.0593229
CAM206_map1	0003.CSV	1346.13	0.0604556
CAM206_map1	0003.CSV	1349.98	0.0619856
CAM206_map1	0003.CSV	1353.84	0.0634825
CAM206_map1	0003.CSV	1357.7	0.0651803
CAM206_map1	0003.CSV	1361.56	0.0671696
CAM206_map1	0003.CSV	1365.41	0.0695617
CAM206_map1	0003.CSV	1369.27	0.0712878
CAM206_map1	0003.CSV	1373.13	0.0739001
CAM206_map1	0003.CSV	1376.98	0.0769963
CAM206_map1	0003.CSV	1380.84	0.0796209
CAM206_map1	0003.CSV	1384.7	0.0821187
CAM206_map1	0003.CSV	1388.56	0.0858394
CAM206_map1	0003.CSV	1392.41	0.0887524
CAM206_map1	0003.CSV	1396.27	0.0925757
CAM206_map1	0003.CSV	1400.13	0.0962467
CAM206_map1	0003.CSV	1403.98	0.0994641
CAM206_map1	0003.CSV	1407.84	0.102639
CAM206_map1	0003.CSV	1411.7	0.105337
CAM206_map1	0003.CSV	1415.55	0.106936
CAM206_map1	0003.CSV	1419.41	0.10917
CAM206_map1	0003.CSV	1423.27	0.110791
CAM206_map1	0003.CSV	1427.12	0.112726
CAM206_map1	0003.CSV	1430.98	0.115043
CAM206_map1	0003.CSV	1434.84	0.118385
CAM206_map1	0003.CSV	1438.7	0.122044
CAM206_map1	0003.CSV	1442.55	0.124605
CAM206_map1	0003.CSV	1446.41	0.125955
CAM206_map1	0003.CSV	1450.27	0.12643
CAM206_map1	0003.CSV	1454.12	0.125165
CAM206_map1	0003.CSV	1457.98	0.124307
CAM206_map1	0003.CSV	1461.84	0.123007
CAM206_map1	0003.CSV	1465.7	0.122065
CAM206_map1	0003.CSV	1469.55	0.119693
CAM206_map1	0003.CSV	1473.41	0.114871
CAM206_map1	0003.CSV	1477.27	0.108232
CAM206_map1	0003.CSV	1481.12	0.103814
CAM206_map1	0003.CSV	1484.98	0.0997346
CAM206_map1	0003.CSV	1488.84	0.0954393
CAM206_map1	0003.CSV	1492.7	0.0906921
CAM206_map1	0003.CSV	1496.55	0.0871497
CAM206_map1	0003.CSV	1500.41	0.0831957
CAM206_map1	0003.CSV	1504.27	0.080557
CAM206_map1	0003.CSV	1508.12	0.0762184
CAM206_map1	0003.CSV	1511.98	0.0725387
CAM206_map1	0003.CSV	1515.84	0.0694503
CAM206_map1	0003.CSV	1519.7	0.0658456
CAM206_map1	0003.CSV	1523.55	0.0615054
CAM206_map1	0003.CSV	1527.41	0.0585392
CAM206_map1	0003.CSV	1531.27	0.0563181
CAM206_map1	0003.CSV	1535.12	0.0552132
CAM206_map1	0003.CSV	1538.98	0.0540122
CAM206_map1	0003.CSV	1542.84	0.0509296
CAM206_map1	0003.CSV	1546.7	0.0471692
CAM206_map1	0003.CSV	1550.55	0.0443264
CAM206_map1	0003.CSV	1554.41	0.0418156
CAM206_map1	0003.CSV	1558.27	0.0397672
CAM206_map1	0003.CSV	1562.12	0.0378709
CAM206_map1	0003.CSV	1565.98	0.0368701
CAM206_map1	0003.CSV	1569.84	0.0362962
CAM206_map1	0003.CSV	1573.69	0.035785
CAM206_map1	0003.CSV	1577.55	0.0342536
CAM206_map1	0003.CSV	1581.41	0.0317373
CAM206_map1	0003.CSV	1585.27	0.0291449
CAM206_map1	0003.CSV	1589.12	0.0272569
CAM206_map1	0003.CSV	1592.98	0.0261567
CAM206_map1	0003.CSV	1596.84	0.0255639
CAM206_map1	0003.CSV	1600.69	0.0250763
CAM206_map1	0003.CSV	1604.55	0.0249273
CAM206_map1	0003.CSV	1608.41	0.0248566
CAM206_map1	0003.CSV	1612.27	0.0245852
CAM206_map1	0003.CSV	1616.12	0.0243137
CAM206_map1	0003.CSV	1619.98	0.0242986
CAM206_map1	0003.CSV	1623.84	0.0239921
CAM206_map1	0003.CSV	1627.69	0.0237625
CAM206_map1	0003.CSV	1631.55	0.0231623
CAM206_map1	0003.CSV	1635.41	0.0232081
CAM206_map1	0003.CSV	1639.27	0.0234103
CAM206_map1	0003.CSV	1643.12	0.022929
CAM206_map1	0003.CSV	1646.98	0.0228805
CAM206_map1	0003.CSV	1650.84	0.023181
CAM206_map1	0003.CSV	1654.69	0.023337
CAM206_map1	0003.CSV	1658.55	0.022867
CAM206_map1	0003.CSV	1662.41	0.0223551
CAM206_map1	0003.CSV	1666.27	0.0220528
CAM206_map1	0003.CSV	1670.12	0.0219349
CAM206_map1	0003.CSV	1673.98	0.0219764
CAM206_map1	0003.CSV	1677.84	0.021425
CAM206_map1	0003.CSV	1681.69	0.0211438
CAM206_map1	0003.CSV	1685.55	0.0213259
CAM206_map1	0003.CSV	1689.41	0.0209268
CAM206_map1	0003.CSV	1693.27	0.0201157
CAM206_map1	0003.CSV	1697.12	0.019986
CAM206_map1	0003.CSV	1700.98	0.0203485
CAM206_map1	0003.CSV	1704.84	0.0202276
CAM206_map1	0003.CSV	1708.69	0.019794
CAM206_map1	0003.CSV	1712.55	0.0194554
CAM206_map1	0003.CSV	1716.41	0.0198645
CAM206_map1	0003.CSV	1720.27	0.0203054
CAM206_map1	0003.CSV	1724.12	0.0199422
[truncated: 36,836 more rows]

## Sheet: CAM206_map2
Map	Select spectrum number	Wavenumbers	Absorbance
CAM206_map2	0001.CSV	674.992	0.0263773
CAM206_map2	0001.CSV	678.849	0.0277669
CAM206_map2	0001.CSV	682.706	0.0280877
CAM206_map2	0001.CSV	686.563	0.0293119
CAM206_map2	0001.CSV	690.42	0.0304089
CAM206_map2	0001.CSV	694.277	0.035653
CAM206_map2	0001.CSV	698.134	0.0423117
CAM206_map2	0001.CSV	701.991	0.0405102
CAM206_map2	0001.CSV	705.849	0.0390108
CAM206_map2	0001.CSV	709.706	0.0513268
CAM206_map2	0001.CSV	713.563	0.0521119
CAM206_map2	0001.CSV	717.42	0.0348084
CAM206_map2	0001.CSV	721.277	0.0246821
CAM206_map2	0001.CSV	725.134	0.0234859
CAM206_map2	0001.CSV	728.991	0.0230914
CAM206_map2	0001.CSV	732.848	0.023193
CAM206_map2	0001.CSV	736.705	0.0232782
CAM206_map2	0001.CSV	740.562	0.0237084
CAM206_map2	0001.CSV	744.42	0.0238595
CAM206_map2	0001.CSV	748.277	0.0245752
CAM206_map2	0001.CSV	752.134	0.0248139
CAM206_map2	0001.CSV	755.991	0.0252876
CAM206_map2	0001.CSV	759.848	0.0255852
CAM206_map2	0001.CSV	763.705	0.0262001
CAM206_map2	0001.CSV	767.562	0.0266639
CAM206_map2	0001.CSV	771.419	0.0274232
CAM206_map2	0001.CSV	775.276	0.0278306
CAM206_map2	0001.CSV	779.133	0.0287807
CAM206_map2	0001.CSV	782.99	0.0292821
CAM206_map2	0001.CSV	786.848	0.0300458
CAM206_map2	0001.CSV	790.705	0.0306113
CAM206_map2	0001.CSV	794.562	0.0317273
CAM206_map2	0001.CSV	798.419	0.032532
CAM206_map2	0001.CSV	802.276	0.0337142
CAM206_map2	0001.CSV	806.133	0.0348814
CAM206_map2	0001.CSV	809.99	0.0363133
CAM206_map2	0001.CSV	813.847	0.0376371
CAM206_map2	0001.CSV	817.704	0.039988
CAM206_map2	0001.CSV	821.562	0.0426036
CAM206_map2	0001.CSV	825.419	0.0464331
CAM206_map2	0001.CSV	829.276	0.051141
CAM206_map2	0001.CSV	833.133	0.0574796
CAM206_map2	0001.CSV	836.99	0.0657605
CAM206_map2	0001.CSV	840.847	0.0757148
CAM206_map2	0001.CSV	844.704	0.08366
CAM206_map2	0001.CSV	848.561	0.094044
CAM206_map2	0001.CSV	852.418	0.105347
CAM206_map2	0001.CSV	856.275	0.109748
CAM206_map2	0001.CSV	860.132	0.102347
CAM206_map2	0001.CSV	863.99	0.0857401
CAM206_map2	0001.CSV	867.847	0.0657247
CAM206_map2	0001.CSV	871.704	0.0489701
CAM206_map2	0001.CSV	875.561	0.0375145
CAM206_map2	0001.CSV	879.418	0.0310953
CAM206_map2	0001.CSV	883.275	0.0272649
CAM206_map2	0001.CSV	887.132	0.0251286
CAM206_map2	0001.CSV	890.989	0.0243336
CAM206_map2	0001.CSV	894.846	0.0244118
CAM206_map2	0001.CSV	898.703	0.0244659
CAM206_map2	0001.CSV	902.561	0.0249454
CAM206_map2	0001.CSV	906.418	0.025271
CAM206_map2	0001.CSV	910.275	0.0253421
CAM206_map2	0001.CSV	914.132	0.0251077
CAM206_map2	0001.CSV	917.989	0.025358
CAM206_map2	0001.CSV	921.846	0.0255463
CAM206_map2	0001.CSV	925.703	0.0258469
CAM206_map2	0001.CSV	929.56	0.0259967
CAM206_map2	0001.CSV	933.417	0.0263169
CAM206_map2	0001.CSV	937.274	0.0264045
CAM206_map2	0001.CSV	941.131	0.0266581
CAM206_map2	0001.CSV	944.989	0.0267644
CAM206_map2	0001.CSV	948.846	0.0270803
CAM206_map2	0001.CSV	952.703	0.0274277
CAM206_map2	0001.CSV	956.56	0.0278541
CAM206_map2	0001.CSV	960.417	0.027883
CAM206_map2	0001.CSV	964.274	0.0281284
CAM206_map2	0001.CSV	968.131	0.0283408
CAM206_map2	0001.CSV	971.988	0.028812
CAM206_map2	0001.CSV	975.845	0.0291723
CAM206_map2	0001.CSV	979.702	0.0295898
CAM206_map2	0001.CSV	983.559	0.0297987
CAM206_map2	0001.CSV	987.417	0.0302352
CAM206_map2	0001.CSV	991.274	0.0305746
CAM206_map2	0001.CSV	995.131	0.0310697
CAM206_map2	0001.CSV	998.988	0.0313318
CAM206_map2	0001.CSV	1002.85	0.031733
CAM206_map2	0001.CSV	1006.7	0.0320473
CAM206_map2	0001.CSV	1010.56	0.0325242
CAM206_map2	0001.CSV	1014.42	0.0327272
CAM206_map2	0001.CSV	1018.27	0.0329102
CAM206_map2	0001.CSV	1022.13	0.0329881
CAM206_map2	0001.CSV	1025.99	0.0334019
CAM206_map2	0001.CSV	1029.85	0.0337172
CAM206_map2	0001.CSV	1033.7	0.034168
CAM206_map2	0001.CSV	1037.56	0.0343348
CAM206_map2	0001.CSV	1041.42	0.0346202
CAM206_map2	0001.CSV	1045.27	0.0346987
CAM206_map2	0001.CSV	1049.13	0.0349523
CAM206_map2	0001.CSV	1052.99	0.0350357
CAM206_map2	0001.CSV	1056.84	0.035413
CAM206_map2	0001.CSV	1060.7	0.0357607
CAM206_map2	0001.CSV	1064.56	0.0365903
CAM206_map2	0001.CSV	1068.42	0.0374513
CAM206_map2	0001.CSV	1072.27	0.0387526
CAM206_map2	0001.CSV	1076.13	0.0411668
CAM206_map2	0001.CSV	1079.99	0.0461483
CAM206_map2	0001.CSV	1083.84	0.0464381
CAM206_map2	0001.CSV	1087.7	0.0405508
CAM206_map2	0001.CSV	1091.56	0.0375259
CAM206_map2	0001.CSV	1095.41	0.0375265
CAM206_map2	0001.CSV	1099.27	0.0377253
CAM206_map2	0001.CSV	1103.13	0.0380228
CAM206_map2	0001.CSV	1106.99	0.0382726
CAM206_map2	0001.CSV	1110.84	0.0386239
CAM206_map2	0001.CSV	1114.7	0.0386995
CAM206_map2	0001.CSV	1118.56	0.038764
CAM206_map2	0001.CSV	1122.41	0.0388034
CAM206_map2	0001.CSV	1126.27	0.0390455
CAM206_map2	0001.CSV	1130.13	0.0392125
CAM206_map2	0001.CSV	1133.99	0.0395944
CAM206_map2	0001.CSV	1137.84	0.0400315
CAM206_map2	0001.CSV	1141.7	0.040607
CAM206_map2	0001.CSV	1145.56	0.0409938
CAM206_map2	0001.CSV	1149.41	0.0413981
CAM206_map2	0001.CSV	1153.27	0.0415999
CAM206_map2	0001.CSV	1157.13	0.0417563
CAM206_map2	0001.CSV	1160.99	0.0417964
CAM206_map2	0001.CSV	1164.84	0.0420547
CAM206_map2	0001.CSV	1168.7	0.0421825
CAM206_map2	0001.CSV	1172.56	0.0422243
CAM206_map2	0001.CSV	1176.41	0.0420638
CAM206_map2	0001.CSV	1180.27	0.0419545
CAM206_map2	0001.CSV	1184.13	0.0415984
CAM206_map2	0001.CSV	1187.99	0.0413309
CAM206_map2	0001.CSV	1191.84	0.0409223
CAM206_map2	0001.CSV	1195.7	0.040625
CAM206_map2	0001.CSV	1199.56	0.0403976
CAM206_map2	0001.CSV	1203.41	0.0404789
CAM206_map2	0001.CSV	1207.27	0.0406039
CAM206_map2	0001.CSV	1211.13	0.0408798
CAM206_map2	0001.CSV	1214.98	0.0410481
CAM206_map2	0001.CSV	1218.84	0.0414516
CAM206_map2	0001.CSV	1222.7	0.0417695
CAM206_map2	0001.CSV	1226.56	0.0421546
CAM206_map2	0001.CSV	1230.41	0.0424553
CAM206_map2	0001.CSV	1234.27	0.0429097
CAM206_map2	0001.CSV	1238.13	0.0432497
CAM206_map2	0001.CSV	1241.98	0.0437059
CAM206_map2	0001.CSV	1245.84	0.0440486
CAM206_map2	0001.CSV	1249.7	0.0444754
CAM206_map2	0001.CSV	1253.56	0.0447053
CAM206_map2	0001.CSV	1257.41	0.0449961
CAM206_map2	0001.CSV	1261.27	0.0451413
CAM206_map2	0001.CSV	1265.13	0.0453988
CAM206_map2	0001.CSV	1268.98	0.0457056
CAM206_map2	0001.CSV	1272.84	0.0462868
CAM206_map2	0001.CSV	1276.7	0.0467414
CAM206_map2	0001.CSV	1280.56	0.0472713
CAM206_map2	0001.CSV	1284.41	0.0476577
CAM206_map2	0001.CSV	1288.27	0.0482503
CAM206_map2	0001.CSV	1292.13	0.0487489
CAM206_map2	0001.CSV	1295.98	0.0493828
CAM206_map2	0001.CSV	1299.84	0.0499298
CAM206_map2	0001.CSV	1303.7	0.0505776
CAM206_map2	0001.CSV	1307.56	0.0511853
CAM206_map2	0001.CSV	1311.41	0.0520188
CAM206_map2	0001.CSV	1315.27	0.0528177
CAM206_map2	0001.CSV	1319.13	0.0538213
CAM206_map2	0001.CSV	1322.98	0.054604
CAM206_map2	0001.CSV	1326.84	0.0555474
CAM206_map2	0001.CSV	1330.7	0.0564908
CAM206_map2	0001.CSV	1334.56	0.0575399
CAM206_map2	0001.CSV	1338.41	0.0589647
CAM206_map2	0001.CSV	1342.27	0.0608025
CAM206_map2	0001.CSV	1346.13	0.0620538
CAM206_map2	0001.CSV	1349.98	0.0637156
CAM206_map2	0001.CSV	1353.84	0.0653763
CAM206_map2	0001.CSV	1357.7	0.0671785
CAM206_map2	0001.CSV	1361.56	0.0692788
CAM206_map2	0001.CSV	1365.41	0.0719308
CAM206_map2	0001.CSV	1369.27	0.0739018
CAM206_map2	0001.CSV	1373.13	0.0766316
CAM206_map2	0001.CSV	1376.98	0.0797566
CAM206_map2	0001.CSV	1380.84	0.0823859
CAM206_map2	0001.CSV	1384.7	0.0847686
CAM206_map2	0001.CSV	1388.56	0.0881452
CAM206_map2	0001.CSV	1392.41	0.0907669
CAM206_map2	0001.CSV	1396.27	0.0940801
CAM206_map2	0001.CSV	1400.13	0.0969953
CAM206_map2	0001.CSV	1403.98	0.0993415
CAM206_map2	0001.CSV	1407.84	0.101371
CAM206_map2	0001.CSV	1411.7	0.103013
CAM206_map2	0001.CSV	1415.55	0.103921
CAM206_map2	0001.CSV	1419.41	0.105741
CAM206_map2	0001.CSV	1423.27	0.107233
CAM206_map2	0001.CSV	1427.12	0.10901
CAM206_map2	0001.CSV	1430.98	0.111081
CAM206_map2	0001.CSV	1434.84	0.113818
CAM206_map2	0001.CSV	1438.7	0.116336
CAM206_map2	0001.CSV	1442.55	0.117864
CAM206_map2	0001.CSV	1446.41	0.118155
CAM206_map2	0001.CSV	1450.27	0.117849
CAM206_map2	0001.CSV	1454.12	0.116428
CAM206_map2	0001.CSV	1457.98	0.115356
CAM206_map2	0001.CSV	1461.84	0.114061
CAM206_map2	0001.CSV	1465.7	0.113166
CAM206_map2	0001.CSV	1469.55	0.111049
CAM206_map2	0001.CSV	1473.41	0.107052
CAM206_map2	0001.CSV	1477.27	0.101435
CAM206_map2	0001.CSV	1481.12	0.0975516
CAM206_map2	0001.CSV	1484.98	0.0937971
CAM206_map2	0001.CSV	1488.84	0.0896946
CAM206_map2	0001.CSV	1492.7	0.085259
CAM206_map2	0001.CSV	1496.55	0.0819048
CAM206_map2	0001.CSV	1500.41	0.0781091
CAM206_map2	0001.CSV	1504.27	0.0756594
CAM206_map2	0001.CSV	1508.12	0.0715076
CAM206_map2	0001.CSV	1511.98	0.0682247
CAM206_map2	0001.CSV	1515.84	0.0654198
CAM206_map2	0001.CSV	1519.7	0.0622221
CAM206_map2	0001.CSV	1523.55	0.0585804
CAM206_map2	0001.CSV	1527.41	0.0560126
CAM206_map2	0001.CSV	1531.27	0.0538365
CAM206_map2	0001.CSV	1535.12	0.0525042
CAM206_map2	0001.CSV	1538.98	0.0511698
CAM206_map2	0001.CSV	1542.84	0.0486114
CAM206_map2	0001.CSV	1546.7	0.0454345
CAM206_map2	0001.CSV	1550.55	0.0429661
CAM206_map2	0001.CSV	1554.41	0.0405689
CAM206_map2	0001.CSV	1558.27	0.0380468
CAM206_map2	0001.CSV	1562.12	0.0355083
CAM206_map2	0001.CSV	1565.98	0.0341281
CAM206_map2	0001.CSV	1569.84	0.0328108
CAM206_map2	0001.CSV	1573.69	0.0317006
CAM206_map2	0001.CSV	1577.55	0.0300911
CAM206_map2	0001.CSV	1581.41	0.0280062
CAM206_map2	0001.CSV	1585.27	0.0259725
CAM206_map2	0001.CSV	1589.12	0.0245299
CAM206_map2	0001.CSV	1592.98	0.0236718
CAM206_map2	0001.CSV	1596.84	0.023192
CAM206_map2	0001.CSV	1600.69	0.0228334
CAM206_map2	0001.CSV	1604.55	0.0227584
CAM206_map2	0001.CSV	1608.41	0.0226768
CAM206_map2	0001.CSV	1612.27	0.0224653
CAM206_map2	0001.CSV	1616.12	0.0222649
CAM206_map2	0001.CSV	1619.98	0.022204
CAM206_map2	0001.CSV	1623.84	0.0219926
CAM206_map2	0001.CSV	1627.69	0.0218534
CAM206_map2	0001.CSV	1631.55	0.0212999
CAM206_map2	0001.CSV	1635.41	0.0214222
CAM206_map2	0001.CSV	1639.27	0.0216823
CAM206_map2	0001.CSV	1643.12	0.0212017
CAM206_map2	0001.CSV	1646.98	0.0211567
CAM206_map2	0001.CSV	1650.84	0.0213308
CAM206_map2	0001.CSV	1654.69	0.0214789
CAM206_map2	0001.CSV	1658.55	0.0211643
CAM206_map2	0001.CSV	1662.41	0.0207538
CAM206_map2	0001.CSV	1666.27	0.0204538
CAM206_map2	0001.CSV	1670.12	0.0203726
CAM206_map2	0001.CSV	1673.98	0.0205529
CAM206_map2	0001.CSV	1677.84	0.020035
CAM206_map2	0001.CSV	1681.69	0.0197155
CAM206_map2	0001.CSV	1685.55	0.0200319
CAM206_map2	0001.CSV	1689.41	0.0198767
CAM206_map2	0001.CSV	1693.27	0.0192037
CAM206_map2	0001.CSV	1697.12	0.0191296
CAM206_map2	0001.CSV	1700.98	0.0195026
CAM206_map2	0001.CSV	1704.84	0.0195076
CAM206_map2	0001.CSV	1708.69	0.0192357
CAM206_map2	0001.CSV	1712.55	0.0189869
CAM206_map2	0001.CSV	1716.41	0.0196117
CAM206_map2	0001.CSV	1720.27	0.020316
CAM206_map2	0001.CSV	1724.12	0.0200788
CAM206_map2	0001.CSV	1727.98	0.0200183
CAM206_map2	0001.CSV	1731.84	0.0203431
CAM206_map2	0001.CSV	1735.69	0.0210141
CAM206_map2	0001.CSV	1739.55	0.0205741
CAM206_map2	0001.CSV	1743.41	0.0198771
CAM206_map2	0001.CSV	1747.27	0.0191564
CAM206_map2	0001.CSV	1751.12	0.0184159
CAM206_map2	0001.CSV	1754.98	0.0175
CAM206_map2	0001.CSV	1758.84	0.0169883
CAM206_map2	0001.CSV	1762.69	0.0167341
CAM206_map2	0001.CSV	1766.55	0.01649
CAM206_map2	0001.CSV	1770.41	0.0166611
CAM206_map2	0001.CSV	1774.26	0.0175976
CAM206_map2	0001.CSV	1778.12	0.0181444
CAM206_map2	0001.CSV	1781.98	0.0188071
CAM206_map2	0001.CSV	1785.84	0.0189535
CAM206_map2	0001.CSV	1789.69	0.0185449
CAM206_map2	0001.CSV	1793.55	0.0179152
CAM206_map2	0001.CSV	1797.41	0.0172266
CAM206_map2	0001.CSV	1801.26	0.0165606
CAM206_map2	0001.CSV	1805.12	0.0160969
CAM206_map2	0001.CSV	1808.98	0.01584
CAM206_map2	0001.CSV	1812.84	0.0158617
CAM206_map2	0001.CSV	1816.69	0.015649
CAM206_map2	0001.CSV	1820.55	0.0154883
CAM206_map2	0001.CSV	1824.41	0.0154223
CAM206_map2	0001.CSV	1828.26	0.0156825
CAM206_map2	0001.CSV	1832.12	0.0158206
CAM206_map2	0001.CSV	1835.98	0.0157107
CAM206_map2	0001.CSV	1839.84	0.0155199
CAM206_map2	0001.CSV	1843.69	0.0157019
CAM206_map2	0001.CSV	1847.55	0.0159629
CAM206_map2	0001.CSV	1851.41	0.0157901
CAM206_map2	0001.CSV	1855.26	0.0156481
CAM206_map2	0001.CSV	1859.12	0.0156871
CAM206_map2	0001.CSV	1862.98	0.0155844
CAM206_map2	0001.CSV	1866.84	0.0157533
CAM206_map2	0001.CSV	1870.69	0.016113
CAM206_map2	0001.CSV	1874.55	0.0158642
CAM206_map2	0001.CSV	1878.41	0.0156702
CAM206_map2	0001.CSV	1882.26	0.0156639
CAM206_map2	0001.CSV	1886.12	0.0156026
CAM206_map2	0001.CSV	1889.98	0.0157144
CAM206_map2	0001.CSV	1893.83	0.0158128
CAM206_map2	0001.CSV	1897.69	0.0158442
CAM206_map2	0001.CSV	1901.55	0.0157773
CAM206_map2	0001.CSV	1905.41	0.0157529
CAM206_map2	0001.CSV	1909.26	0.0157984
CAM206_map2	0001.CSV	1913.12	0.0157807
CAM206_map2	0001.CSV	1916.98	0.0157262
CAM206_map2	0001.CSV	1920.83	0.015873
CAM206_map2	0001.CSV	1924.69	0.0159291
CAM206_map2	0001.CSV	1928.55	0.0158987
CAM206_map2	0001.CSV	1932.4	0.0158427
CAM206_map2	0001.CSV	1936.26	0.0158171
CAM206_map2	0001.CSV	1940.12	0.0157986
CAM206_map2	0001.CSV	1943.98	0.0160359
CAM206_map2	0001.CSV	1947.83	0.0160455
CAM206_map2	0001.CSV	1951.69	0.0159973
CAM206_map2	0001.CSV	1955.55	0.0160458
CAM206_map2	0001.CSV	1959.4	0.0160763
CAM206_map2	0001.CSV	1963.26	0.0160188
CAM206_map2	0001.CSV	1967.12	0.0161172
CAM206_map2	0001.CSV	1970.98	0.0161221
CAM206_map2	0001.CSV	1974.83	0.0160674
CAM206_map2	0001.CSV	1978.69	0.0160511
CAM206_map2	0001.CSV	1982.55	0.0160583
CAM206_map2	0001.CSV	1986.4	0.0159873
CAM206_map2	0001.CSV	1990.26	0.0160261
CAM206_map2	0001.CSV	1994.12	0.0161084
CAM206_map2	0001.CSV	1997.98	0.0160833
CAM206_map2	0001.CSV	2001.83	0.0160455
CAM206_map2	0001.CSV	2005.69	0.0160748
CAM206_map2	0001.CSV	2009.55	0.0161313
CAM206_map2	0001.CSV	2013.4	0.0161105
CAM206_map2	0001.CSV	2017.26	0.0161096
CAM206_map2	0001.CSV	2021.12	0.0161462
CAM206_map2	0001.CSV	2024.97	0.0160735
CAM206_map2	0001.CSV	2028.83	0.0160812
CAM206_map2	0001.CSV	2032.69	0.0160926
CAM206_map2	0001.CSV	2036.55	0.0160606
CAM206_map2	0001.CSV	2040.4	0.01603
CAM206_map2	0001.CSV	2044.26	0.0160922
CAM206_map2	0001.CSV	2048.12	0.0160709
CAM206_map2	0001.CSV	2051.97	0.0160658
CAM206_map2	0001.CSV	2055.83	0.0160532
CAM206_map2	0001.CSV	2059.69	0.0160371
CAM206_map2	0001.CSV	2063.55	0.0160355
CAM206_map2	0001.CSV	2067.4	0.016086
CAM206_map2	0001.CSV	2071.26	0.0160532
CAM206_map2	0001.CSV	2075.12	0.0160543
CAM206_map2	0001.CSV	2078.97	0.0160673
CAM206_map2	0001.CSV	2082.83	0.0161532
CAM206_map2	0001.CSV	2086.69	0.0161867
CAM206_map2	0001.CSV	2090.55	0.0161788
CAM206_map2	0001.CSV	2094.4	0.0161223
CAM206_map2	0001.CSV	2098.26	0.0161308
CAM206_map2	0001.CSV	2102.12	0.0161623
CAM206_map2	0001.CSV	2105.97	0.0162018
CAM206_map2	0001.CSV	2109.83	0.0162247
CAM206_map2	0001.CSV	2113.69	0.0162316
CAM206_map2	0001.CSV	2117.55	0.0161957
CAM206_map2	0001.CSV	2121.4	0.0162027
CAM206_map2	0001.CSV	2125.26	0.0161757
CAM206_map2	0001.CSV	2129.12	0.0161859
CAM206_map2	0001.CSV	2132.97	0.0161933
CAM206_map2	0001.CSV	2136.83	0.0162377
CAM206_map2	0001.CSV	2140.69	0.0162712
CAM206_map2	0001.CSV	2144.55	0.0163206
CAM206_map2	0001.CSV	2148.4	0.0163637
CAM206_map2	0001.CSV	2152.26	0.0163919
CAM206_map2	0001.CSV	2156.12	0.0163331
CAM206_map2	0001.CSV	2159.97	0.0162816
CAM206_map2	0001.CSV	2163.83	0.0162619
CAM206_map2	0001.CSV	2167.69	0.0163379
CAM206_map2	0001.CSV	2171.55	0.016375
CAM206_map2	0001.CSV	2175.4	0.0163688
CAM206_map2	0001.CSV	2179.26	0.0163934
CAM206_map2	0001.CSV	2183.12	0.0164368
CAM206_map2	0001.CSV	2186.97	0.0164516
CAM206_map2	0001.CSV	2190.83	0.0164829
CAM206_map2	0001.CSV	2194.69	0.0164812
CAM206_map2	0001.CSV	2198.55	0.0165295
CAM206_map2	0001.CSV	2202.4	0.0165422
CAM206_map2	0001.CSV	2206.26	0.0165176
CAM206_map2	0001.CSV	2210.12	0.0164872
CAM206_map2	0001.CSV	2213.97	0.0165252
CAM206_map2	0001.CSV	2217.83	0.0165681
CAM206_map2	0001.CSV	2221.69	0.016547
CAM206_map2	0001.CSV	2225.54	0.0165216
CAM206_map2	0001.CSV	2229.4	0.0165484
CAM206_map2	0001.CSV	2233.26	0.0165316
CAM206_map2	0001.CSV	2237.12	0.0165387
CAM206_map2	0001.CSV	2240.97	0.0165165
CAM206_map2	0001.CSV	2244.83	0.0164651
CAM206_map2	0001.CSV	2248.69	0.0164571
CAM206_map2	0001.CSV	2252.54	0.0164529
CAM206_map2	0001.CSV	2256.4	0.0164158
CAM206_map2	0001.CSV	2260.26	0.0164248
CAM206_map2	0001.CSV	2264.11	0.0164162
CAM206_map2	0001.CSV	2267.97	0.0164137
CAM206_map2	0001.CSV	2271.83	0.0163968
CAM206_map2	0001.CSV	2275.69	0.0163945
CAM206_map2	0001.CSV	2279.54	0.0163555
CAM206_map2	0001.CSV	2283.4	0.0162821
CAM206_map2	0001.CSV	2287.26	0.0162135
CAM206_map2	0001.CSV	2291.11	0.0162223
CAM206_map2	0001.CSV	2294.97	0.0161766
CAM206_map2	0001.CSV	2298.83	0.0161427
CAM206_map2	0001.CSV	2302.69	0.0160338
CAM206_map2	0001.CSV	2306.54	0.0158098
CAM206_map2	0001.CSV	2310.4	0.015628
CAM206_map2	0001.CSV	2314.26	0.0154398
CAM206_map2	0001.CSV	2318.11	0.0149058
CAM206_map2	0001.CSV	2321.97	0.0143034
CAM206_map2	0001.CSV	2325.83	0.0137776
CAM206_map2	0001.CSV	2329.69	0.0131918
CAM206_map2	0001.CSV	2333.54	0.0127032
CAM206_map2	0001.CSV	2337.4	0.0123873
CAM206_map2	0001.CSV	2341.26	0.0123301
CAM206_map2	0001.CSV	2345.11	0.0136878
CAM206_map2	0001.CSV	2348.97	0.014045
CAM206_map2	0001.CSV	2352.83	0.0125072
CAM206_map2	0001.CSV	2356.69	0.00882741
CAM206_map2	0001.CSV	2360.54	0.00659842
CAM206_map2	0001.CSV	2364.4	0.00884564
CAM206_map2	0001.CSV	2368.26	0.0125982
CAM206_map2	0001.CSV	2372.11	0.0149857
CAM206_map2	0001.CSV	2375.97	0.0161019
CAM206_map2	0001.CSV	2379.83	0.0164912
CAM206_map2	0001.CSV	2383.69	0.0164959
CAM206_map2	0001.CSV	2387.54	0.0163265
CAM206_map2	0001.CSV	2391.4	0.0161717
CAM206_map2	0001.CSV	2395.26	0.0161082
CAM206_map2	0001.CSV	2399.11	0.016095
CAM206_map2	0001.CSV	2402.97	0.0160845
CAM206_map2	0001.CSV	2406.83	0.0160981
CAM206_map2	0001.CSV	2410.68	0.0160603
CAM206_map2	0001.CSV	2414.54	0.0160216
CAM206_map2	0001.CSV	2418.4	0.0160091
CAM206_map2	0001.CSV	2422.26	0.01604
CAM206_map2	0001.CSV	2426.11	0.0160326
CAM206_map2	0001.CSV	2429.97	0.0159881
CAM206_map2	0001.CSV	2433.83	0.0159763
CAM206_map2	0001.CSV	2437.68	0.0160151
CAM206_map2	0001.CSV	2441.54	0.016008
CAM206_map2	0001.CSV	2445.4	0.0159838
CAM206_map2	0001.CSV	2449.26	0.0159772
CAM206_map2	0001.CSV	2453.11	0.0159673
CAM206_map2	0001.CSV	2456.97	0.0159552
CAM206_map2	0001.CSV	2460.83	0.0159907
CAM206_map2	0001.CSV	2464.68	0.0160632
CAM206_map2	0001.CSV	2468.54	0.0161252
CAM206_map2	0001.CSV	2472.4	0.0161327
CAM206_map2	0001.CSV	2476.26	0.0162003
CAM206_map2	0001.CSV	2480.11	0.0163148
CAM206_map2	0001.CSV	2483.97	0.0164651
CAM206_map2	0001.CSV	2487.83	0.0165662
CAM206_map2	0001.CSV	2491.68	0.0166127
CAM206_map2	0001.CSV	2495.54	0.016626
CAM206_map2	0001.CSV	2499.4	0.0166389
CAM206_map2	0001.CSV	2503.26	0.0166161
CAM206_map2	0001.CSV	2507.11	0.0165973
CAM206_map2	0001.CSV	2510.97	0.0166238
CAM206_map2	0001.CSV	2514.83	0.0167039
CAM206_map2	0001.CSV	2518.68	0.0168527
CAM206_map2	0001.CSV	2522.54	0.0169123
CAM206_map2	0001.CSV	2526.4	0.0168065
CAM206_map2	0001.CSV	2530.26	0.0166998
CAM206_map2	0001.CSV	2534.11	0.0165361
CAM206_map2	0001.CSV	2537.97	0.0164109
CAM206_map2	0001.CSV	2541.83	0.0163988
CAM206_map2	0001.CSV	2545.68	0.0163916
CAM206_map2	0001.CSV	2549.54	0.0163152
CAM206_map2	0001.CSV	2553.4	0.016263
CAM206_map2	0001.CSV	2557.26	0.0162663
CAM206_map2	0001.CSV	2561.11	0.0162655
CAM206_map2	0001.CSV	2564.97	0.0162001
CAM206_map2	0001.CSV	2568.83	0.0161416
CAM206_map2	0001.CSV	2572.68	0.0161649
CAM206_map2	0001.CSV	2576.54	0.0161643
CAM206_map2	0001.CSV	2580.4	0.0160817
CAM206_map2	0001.CSV	2584.25	0.0160504
CAM206_map2	0001.CSV	2588.11	0.0160785
CAM206_map2	0001.CSV	2591.97	0.0161023
CAM206_map2	0001.CSV	2595.83	0.0160563
CAM206_map2	0001.CSV	2599.68	0.0160369
CAM206_map2	0001.CSV	2603.54	0.0160641
CAM206_map2	0001.CSV	2607.4	0.0161006
CAM206_map2	0001.CSV	2611.25	0.016133
CAM206_map2	0001.CSV	2615.11	0.0161414
CAM206_map2	0001.CSV	2618.97	0.0161473
CAM206_map2	0001.CSV	2622.82	0.0162565
CAM206_map2	0001.CSV	2626.68	0.0163035
CAM206_map2	0001.CSV	2630.54	0.0162129
CAM206_map2	0001.CSV	2634.4	0.0162187
CAM206_map2	0001.CSV	2638.25	0.0162434
CAM206_map2	0001.CSV	2642.11	0.0161226
CAM206_map2	0001.CSV	2645.97	0.0159964
CAM206_map2	0001.CSV	2649.82	0.0159099
CAM206_map2	0001.CSV	2653.68	0.0158853
CAM206_map2	0001.CSV	2657.54	0.0158596
CAM206_map2	0001.CSV	2661.4	0.0158113
CAM206_map2	0001.CSV	2665.25	0.0158
CAM206_map2	0001.CSV	2669.11	0.0158937
CAM206_map2	0001.CSV	2672.97	0.016082
CAM206_map2	0001.CSV	2676.82	0.0163004
CAM206_map2	0001.CSV	2680.68	0.0162643
CAM206_map2	0001.CSV	2684.54	0.0159457
CAM206_map2	0001.CSV	2688.4	0.0157853
CAM206_map2	0001.CSV	2692.25	0.0157992
CAM206_map2	0001.CSV	2696.11	0.0158125
CAM206_map2	0001.CSV	2699.97	0.0157558
CAM206_map2	0001.CSV	2703.82	0.0157039
CAM206_map2	0001.CSV	2707.68	0.0157796
CAM206_map2	0001.CSV	2711.54	0.0158505
CAM206_map2	0001.CSV	2715.4	0.0159
CAM206_map2	0001.CSV	2719.25	0.016053
CAM206_map2	0001.CSV	2723.11	0.0163242
CAM206_map2	0001.CSV	2726.97	0.0162641
CAM206_map2	0001.CSV	2730.82	0.0159596
CAM206_map2	0001.CSV	2734.68	0.0159563
CAM206_map2	0001.CSV	2738.54	0.016014
CAM206_map2	0001.CSV	2742.4	0.0160067
CAM206_map2	0001.CSV	2746.25	0.0162005
CAM206_map2	0001.CSV	2750.11	0.0162259
CAM206_map2	0001.CSV	2753.97	0.0160064
CAM206_map2	0001.CSV	2757.82	0.0159191
CAM206_map2	0001.CSV	2761.68	0.0158745
CAM206_map2	0001.CSV	2765.54	0.0158589
CAM206_map2	0001.CSV	2769.39	0.0160363
CAM206_map2	0001.CSV	2773.25	0.0163536
CAM206_map2	0001.CSV	2777.11	0.016314
CAM206_map2	0001.CSV	2780.97	0.0161804
CAM206_map2	0001.CSV	2784.82	0.0163346
CAM206_map2	0001.CSV	2788.68	0.016639
CAM206_map2	0001.CSV	2792.54	0.0167643
CAM206_map2	0001.CSV	2796.39	0.0168431
CAM206_map2	0001.CSV	2800.25	0.0167344
CAM206_map2	0001.CSV	2804.11	0.0165202
CAM206_map2	0001.CSV	2807.97	0.0166575
CAM206_map2	0001.CSV	2811.82	0.016695
CAM206_map2	0001.CSV	2815.68	0.0166137
CAM206_map2	0001.CSV	2819.54	0.0167243
CAM206_map2	0001.CSV	2823.39	0.0168256
CAM206_map2	0001.CSV	2827.25	0.0169195
CAM206_map2	0001.CSV	2831.11	0.0173905
CAM206_map2	0001.CSV	2834.97	0.0180738
CAM206_map2	0001.CSV	2838.82	0.0186803
CAM206_map2	0001.CSV	2842.68	0.0195008
CAM206_map2	0001.CSV	2846.54	0.0211852
CAM206_map2	0001.CSV	2850.39	0.0221215
CAM206_map2	0001.CSV	2854.25	0.0214864
CAM206_map2	0001.CSV	2858.11	0.0206576
CAM206_map2	0001.CSV	2861.97	0.0198398
CAM206_map2	0001.CSV	2865.82	0.0193281
CAM206_map2	0001.CSV	2869.68	0.0194906
CAM206_map2	0001.CSV	2873.54	0.0196114
CAM206_map2	0001.CSV	2877.39	0.0190552
CAM206_map2	0001.CSV	2881.25	0.0186632
CAM206_map2	0001.CSV	2885.11	0.018698
CAM206_map2	0001.CSV	2888.97	0.0190172
CAM206_map2	0001.CSV	2892.82	0.0196004
CAM206_map2	0001.CSV	2896.68	0.0200595
CAM206_map2	0001.CSV	2900.54	0.0203059
CAM206_map2	0001.CSV	2904.39	0.0209299
CAM206_map2	0001.CSV	2908.25	0.0222098
CAM206_map2	0001.CSV	2912.11	0.0243486
CAM206_map2	0001.CSV	2915.97	0.0262531
CAM206_map2	0001.CSV	2919.82	0.0263299
CAM206_map2	0001.CSV	2923.68	0.0251533
CAM206_map2	0001.CSV	2927.54	0.0241552
CAM206_map2	0001.CSV	2931.39	0.0229621
CAM206_map2	0001.CSV	2935.25	0.0215531
CAM206_map2	0001.CSV	2939.11	0.0207942
CAM206_map2	0001.CSV	2942.96	0.0207468
CAM206_map2	0001.CSV	2946.82	0.0206261
CAM206_map2	0001.CSV	2950.68	0.0203256
CAM206_map2	0001.CSV	2954.54	0.0199128
CAM206_map2	0001.CSV	2958.39	0.0194043
CAM206_map2	0001.CSV	2962.25	0.019036
CAM206_map2	0001.CSV	2966.11	0.0184577
CAM206_map2	0001.CSV	2969.96	0.0181818
CAM206_map2	0001.CSV	2973.82	0.0183043
CAM206_map2	0001.CSV	2977.68	0.0182992
CAM206_map2	0001.CSV	2981.53	0.0178232
CAM206_map2	0001.CSV	2985.39	0.0170821
CAM206_map2	0001.CSV	2989.25	0.0169157
CAM206_map2	0001.CSV	2993.11	0.0171513
CAM206_map2	0001.CSV	2996.96	0.0170645
CAM206_map2	0001.CSV	3000.82	0.0167369
CAM206_map2	0001.CSV	3004.68	0.0165746
CAM206_map2	0001.CSV	3008.53	0.0167997
CAM206_map2	0001.CSV	3012.39	0.0171311
CAM206_map2	0001.CSV	3016.25	0.0171471
CAM206_map2	0001.CSV	3020.11	0.0168978
CAM206_map2	0001.CSV	3023.96	0.0166443
CAM206_map2	0001.CSV	3027.82	0.0165765
CAM206_map2	0001.CSV	3031.68	0.0168346
CAM206_map2	0001.CSV	3035.53	0.0169311
CAM206_map2	0001.CSV	3039.39	0.0169601
CAM206_map2	0001.CSV	3043.25	0.0170813
CAM206_map2	0001.CSV	3047.11	0.0170181
CAM206_map2	0001.CSV	3050.96	0.0169998
CAM206_map2	0001.CSV	3054.82	0.0168838
CAM206_map2	0001.CSV	3058.68	0.0166794
CAM206_map2	0001.CSV	3062.53	0.016779
CAM206_map2	0001.CSV	3066.39	0.0171476
CAM206_map2	0001.CSV	3070.25	0.0170329
CAM206_map2	0001.CSV	3074.11	0.0169193
CAM206_map2	0001.CSV	3077.96	0.017216
CAM206_map2	0001.CSV	3081.82	0.0174271
CAM206_map2	0001.CSV	3085.68	0.0173334
CAM206_map2	0001.CSV	3089.53	0.0171108
CAM206_map2	0001.CSV	3093.39	0.0168104
CAM206_map2	0001.CSV	3097.25	0.0168366
CAM206_map2	0001.CSV	3101.11	0.0169394
CAM206_map2	0001.CSV	3104.96	0.016926
CAM206_map2	0001.CSV	3108.82	0.0170969
CAM206_map2	0001.CSV	3112.68	0.0172325
CAM206_map2	0001.CSV	3116.53	0.0174004
CAM206_map2	0001.CSV	3120.39	0.0173611
CAM206_map2	0001.CSV	3124.25	0.0171479
CAM206_map2	0001.CSV	3128.11	0.017077
CAM206_map2	0001.CSV	3131.96	0.0170377
CAM206_map2	0001.CSV	3135.82	0.0171425
CAM206_map2	0001.CSV	3139.68	0.0171792
CAM206_map2	0001.CSV	3143.53	0.0169091
CAM206_map2	0001.CSV	3147.39	0.01703
CAM206_map2	0001.CSV	3151.25	0.0174219
CAM206_map2	0001.CSV	3155.1	0.0173157
CAM206_map2	0001.CSV	3158.96	0.0169102
CAM206_map2	0001.CSV	3162.82	0.0167125
CAM206_map2	0001.CSV	3166.68	0.0166725
CAM206_map2	0001.CSV	3170.53	0.0166768
CAM206_map2	0001.CSV	3174.39	0.0166307
CAM206_map2	0001.CSV	3178.25	0.0167807
CAM206_map2	0001.CSV	3182.1	0.0169024
CAM206_map2	0001.CSV	3185.96	0.0169563
CAM206_map2	0001.CSV	3189.82	0.0170111
CAM206_map2	0001.CSV	3193.68	0.0169219
CAM206_map2	0001.CSV	3197.53	0.0169537
CAM206_map2	0001.CSV	3201.39	0.0171168
CAM206_map2	0001.CSV	3205.25	0.017139
CAM206_map2	0001.CSV	3209.1	0.0171157
CAM206_map2	0001.CSV	3212.96	0.0173247
CAM206_map2	0001.CSV	3216.82	0.0175186
CAM206_map2	0001.CSV	3220.68	0.0174147
CAM206_map2	0001.CSV	3224.53	0.0173304
CAM206_map2	0001.CSV	3228.39	0.0176001
CAM206_map2	0001.CSV	3232.25	0.017962
CAM206_map2	0001.CSV	3236.1	0.0178407
CAM206_map2	0001.CSV	3239.96	0.017653
CAM206_map2	0001.CSV	3243.82	0.0178933
CAM206_map2	0001.CSV	3247.68	0.0180502
CAM206_map2	0001.CSV	3251.53	0.0178822
CAM206_map2	0001.CSV	3255.39	0.0179246
CAM206_map2	0001.CSV	3259.25	0.0177688
CAM206_map2	0001.CSV	3263.1	0.01769
CAM206_map2	0001.CSV	3266.96	0.018014
CAM206_map2	0001.CSV	3270.82	0.0184132
CAM206_map2	0001.CSV	3274.68	0.0183648
CAM206_map2	0001.CSV	3278.53	0.0179983
CAM206_map2	0001.CSV	3282.39	0.0178076
CAM206_map2	0001.CSV	3286.25	0.0179291
CAM206_map2	0001.CSV	3290.1	0.0183295
CAM206_map2	0001.CSV	3293.96	0.0185774
CAM206_map2	0001.CSV	3297.82	0.0183987
CAM206_map2	0001.CSV	3301.67	0.0184532
CAM206_map2	0001.CSV	3305.53	0.0186774
CAM206_map2	0001.CSV	3309.39	0.0185227
CAM206_map2	0001.CSV	3313.25	0.0179904
CAM206_map2	0001.CSV	3317.1	0.0176544
CAM206_map2	0001.CSV	3320.96	0.0178068
CAM206_map2	0001.CSV	3324.82	0.018082
CAM206_map2	0001.CSV	3328.67	0.0178221
CAM206_map2	0001.CSV	3332.53	0.0177235
CAM206_map2	0001.CSV	3336.39	0.0182519
CAM206_map2	0001.CSV	3340.24	0.0185297
CAM206_map2	0001.CSV	3344.1	0.0182515
CAM206_map2	0001.CSV	3347.96	0.0181257
CAM206_map2	0001.CSV	3351.82	0.0180798
CAM206_map2	0001.CSV	3355.67	0.0178327
CAM206_map2	0001.CSV	3359.53	0.01792
CAM206_map2	0001.CSV	3363.39	0.0181844
CAM206_map2	0001.CSV	3367.24	0.01851
CAM206_map2	0001.CSV	3371.1	0.0183131
CAM206_map2	0001.CSV	3374.96	0.0180126
CAM206_map2	0001.CSV	3378.82	0.0178806
CAM206_map2	0001.CSV	3382.67	0.017503
CAM206_map2	0001.CSV	3386.53	0.0175929
CAM206_map2	0001.CSV	3390.39	0.018138
CAM206_map2	0001.CSV	3394.24	0.0184367
CAM206_map2	0001.CSV	3398.1	0.0184156
CAM206_map2	0001.CSV	3401.96	0.0182213
CAM206_map2	0001.CSV	3405.82	0.0178995
CAM206_map2	0001.CSV	3409.67	0.0178492
CAM206_map2	0001.CSV	3413.53	0.0175649
CAM206_map2	0001.CSV	3417.39	0.0171054
CAM206_map2	0001.CSV	3421.24	0.0170738
CAM206_map2	0001.CSV	3425.1	0.0172476
CAM206_map2	0001.CSV	3428.96	0.0175224
CAM206_map2	0001.CSV	3432.82	0.0177874
CAM206_map2	0001.CSV	3436.67	0.0176669
CAM206_map2	0001.CSV	3440.53	0.0169295
CAM206_map2	0001.CSV	3444.39	0.0163422
CAM206_map2	0001.CSV	3448.24	0.0163026
CAM206_map2	0001.CSV	3452.1	0.0161074
CAM206_map2	0001.CSV	3455.96	0.0161539
CAM206_map2	0001.CSV	3459.82	0.0165268
CAM206_map2	0001.CSV	3463.67	0.0169088
CAM206_map2	0001.CSV	3467.53	0.0171791
CAM206_map2	0001.CSV	3471.39	0.0167679
CAM206_map2	0001.CSV	3475.24	0.0164311
CAM206_map2	0001.CSV	3479.1	0.0164811
CAM206_map2	0001.CSV	3482.96	0.0163377
CAM206_map2	0001.CSV	3486.82	0.0162552
CAM206_map2	0001.CSV	3490.67	0.0162432
CAM206_map2	0001.CSV	3494.53	0.0164226
CAM206_map2	0001.CSV	3498.39	0.0164059
CAM206_map2	0001.CSV	3502.24	0.0161807
CAM206_map2	0001.CSV	3506.1	0.0156887
CAM206_map2	0001.CSV	3509.96	0.0155578
CAM206_map2	0001.CSV	3513.81	0.0156744
CAM206_map2	0001.CSV	3517.67	0.0152205
CAM206_map2	0001.CSV	3521.53	0.0151653
CAM206_map2	0001.CSV	3525.39	0.0151887
CAM206_map2	0001.CSV	3529.24	0.014994
CAM206_map2	0001.CSV	3533.1	0.0151494
CAM206_map2	0001.CSV	3536.96	0.0153858
CAM206_map2	0001.CSV	3540.81	0.0154521
CAM206_map2	0001.CSV	3544.67	0.0156269
CAM206_map2	0001.CSV	3548.53	0.0154646
CAM206_map2	0001.CSV	3552.39	0.015025
CAM206_map2	0001.CSV	3556.24	0.0147904
CAM206_map2	0001.CSV	3560.1	0.0145041
CAM206_map2	0001.CSV	3563.96	0.0139171
CAM206_map2	0001.CSV	3567.81	0.0144557
CAM206_map2	0001.CSV	3571.67	0.0146859
CAM206_map2	0001.CSV	3575.53	0.0142642
CAM206_map2	0001.CSV	3579.39	0.0145007
CAM206_map2	0001.CSV	3583.24	0.0145707
CAM206_map2	0001.CSV	3587.1	0.0146812
CAM206_map2	0001.CSV	3590.96	0.0147466
CAM206_map2	0001.CSV	3594.81	0.0143787
CAM206_map2	0001.CSV	3598.67	0.0144576
CAM206_map2	0001.CSV	3602.53	0.0142808
CAM206_map2	0001.CSV	3606.39	0.0134741
CAM206_map2	0001.CSV	3610.24	0.0131454
CAM206_map2	0001.CSV	3614.1	0.0132927
CAM206_map2	0001.CSV	3617.96	0.0138363
CAM206_map2	0001.CSV	3621.81	0.0142053
CAM206_map2	0001.CSV	3625.67	0.0132037
CAM206_map2	0001.CSV	3629.53	0.0132867
CAM206_map2	0001.CSV	3633.39	0.0141308
CAM206_map2	0001.CSV	3637.24	0.0137709
CAM206_map2	0001.CSV	3641.1	0.013282
CAM206_map2	0001.CSV	3644.96	0.0124032
CAM206_map2	0001.CSV	3648.81	0.0130292
CAM206_map2	0001.CSV	3652.67	0.0143428
CAM206_map2	0001.CSV	3656.53	0.0144712
CAM206_map2	0001.CSV	3660.38	0.0144633
CAM206_map2	0001.CSV	3664.24	0.0133608
CAM206_map2	0001.CSV	3668.1	0.0122622
CAM206_map2	0001.CSV	3671.96	0.0122176
CAM206_map2	0001.CSV	3675.81	0.0132283
CAM206_map2	0001.CSV	3679.67	0.0139734
CAM206_map2	0001.CSV	3683.53	0.0134711
CAM206_map2	0001.CSV	3687.38	0.0133764
CAM206_map2	0001.CSV	3691.24	0.0144658
CAM206_map2	0001.CSV	3695.1	0.0140518
CAM206_map2	0001.CSV	3698.95	0.0132415
CAM206_map2	0001.CSV	3702.81	0.0130337
CAM206_map2	0001.CSV	3706.67	0.0124818
CAM206_map2	0001.CSV	3710.53	0.0123693
CAM206_map2	0001.CSV	3714.38	0.0133612
CAM206_map2	0001.CSV	3718.24	0.0128155
CAM206_map2	0001.CSV	3722.1	0.0123467
CAM206_map2	0001.CSV	3725.95	0.0125901
CAM206_map2	0001.CSV	3729.81	0.012233
CAM206_map2	0001.CSV	3733.67	0.0124363
CAM206_map2	0001.CSV	3737.53	0.0140579
CAM206_map2	0001.CSV	3741.38	0.0131736
CAM206_map2	0001.CSV	3745.24	0.0118762
CAM206_map2	0001.CSV	3749.1	0.0118079
CAM206_map2	0001.CSV	3752.95	0.0130555
CAM206_map2	0001.CSV	3756.81	0.0132837
CAM206_map2	0001.CSV	3760.67	0.0131774
CAM206_map2	0001.CSV	3764.53	0.012701
CAM206_map2	0001.CSV	3768.38	0.0128154
CAM206_map2	0001.CSV	3772.24	0.013269
CAM206_map2	0001.CSV	3776.1	0.0130377
CAM206_map2	0001.CSV	3779.95	0.0131278
CAM206_map2	0001.CSV	3783.81	0.0131635
CAM206_map2	0001.CSV	3787.67	0.013126
CAM206_map2	0001.CSV	3791.53	0.0126504
CAM206_map2	0001.CSV	3795.38	0.0118928
CAM206_map2	0001.CSV	3799.24	0.0118895
CAM206_map2	0001.CSV	3803.1	0.0126767
CAM206_map2	0001.CSV	3806.95	0.013186
CAM206_map2	0001.CSV	3810.81	0.0127206
CAM206_map2	0001.CSV	3814.67	0.0119229
CAM206_map2	0001.CSV	3818.53	0.0121072
CAM206_map2	0001.CSV	3822.38	0.0128303
CAM206_map2	0001.CSV	3826.24	0.012773
CAM206_map2	0001.CSV	3830.1	0.0123238
CAM206_map2	0001.CSV	3833.95	0.0119595
CAM206_map2	0001.CSV	3837.81	0.0121557
CAM206_map2	0001.CSV	3841.67	0.013166
CAM206_map2	0001.CSV	3845.53	0.0129016
CAM206_map2	0001.CSV	3849.38	0.0114045
CAM206_map2	0001.CSV	3853.24	0.0113333
CAM206_map2	0001.CSV	3857.1	0.012842
CAM206_map2	0001.CSV	3860.95	0.012209
CAM206_map2	0001.CSV	3864.81	0.0120602
CAM206_map2	0001.CSV	3868.67	0.0122455
CAM206_map2	0001.CSV	3872.52	0.0127954
CAM206_map2	0001.CSV	3876.38	0.0126581
CAM206_map2	0001.CSV	3880.24	0.0123845
CAM206_map2	0001.CSV	3884.1	0.0128877
CAM206_map2	0001.CSV	3887.95	0.0128439
CAM206_map2	0001.CSV	3891.81	0.0127852
CAM206_map2	0001.CSV	3895.67	0.0123479
CAM206_map2	0001.CSV	3899.52	0.0116503
CAM206_map2	0001.CSV	3903.38	0.0127233
CAM206_map2	0001.CSV	3907.24	0.0133134
CAM206_map2	0001.CSV	3911.1	0.0126568
CAM206_map2	0001.CSV	3914.95	0.0122224
CAM206_map2	0001.CSV	3918.81	0.0125345
CAM206_map2	0001.CSV	3922.67	0.01259
CAM206_map2	0001.CSV	3926.52	0.012521
CAM206_map2	0001.CSV	3930.38	0.0126854
CAM206_map2	0001.CSV	3934.24	0.0129597
CAM206_map2	0001.CSV	3938.09	0.0125142
CAM206_map2	0001.CSV	3941.95	0.012284
CAM206_map2	0001.CSV	3945.81	0.0124709
CAM206_map2	0001.CSV	3949.67	0.0126452
CAM206_map2	0001.CSV	3953.52	0.0126961
CAM206_map2	0001.CSV	3957.38	0.012477
CAM206_map2	0001.CSV	3961.24	0.0124339
CAM206_map2	0001.CSV	3965.09	0.0125478
CAM206_map2	0001.CSV	3968.95	0.012528
CAM206_map2	0001.CSV	3972.81	0.0125632
CAM206_map2	0001.CSV	3976.67	0.0127457
CAM206_map2	0001.CSV	3980.52	0.0127902
CAM206_map2	0001.CSV	3984.38	0.0127892
CAM206_map2	0001.CSV	3988.24	0.0126321
CAM206_map2	0001.CSV	3992.09	0.0125613
CAM206_map2	0001.CSV	3995.95	0.0125799
CAM206_map2	0001.CSV	3999.81	0.0124642
CAM206_map2	0002.CSV	674.992	0.0333361
CAM206_map2	0002.CSV	678.849	0.0350784
CAM206_map2	0002.CSV	682.706	0.0357127
CAM206_map2	0002.CSV	686.563	0.0370539
CAM206_map2	0002.CSV	690.42	0.0385115
CAM206_map2	0002.CSV	694.277	0.0447838
CAM206_map2	0002.CSV	698.134	0.0527744
CAM206_map2	0002.CSV	701.991	0.0508402
CAM206_map2	0002.CSV	705.849	0.0486361
CAM206_map2	0002.CSV	709.706	0.0619893
CAM206_map2	0002.CSV	713.563	0.0630238
CAM206_map2	0002.CSV	717.42	0.0433404
CAM206_map2	0002.CSV	721.277	0.0309446
CAM206_map2	0002.CSV	725.134	0.0293079
CAM206_map2	0002.CSV	728.991	0.0286486
CAM206_map2	0002.CSV	732.848	0.0285155
CAM206_map2	0002.CSV	736.705	0.0285738
CAM206_map2	0002.CSV	740.562	0.0292011
CAM206_map2	0002.CSV	744.42	0.0293969
CAM206_map2	0002.CSV	748.277	0.0303255
CAM206_map2	0002.CSV	752.134	0.0308817
CAM206_map2	0002.CSV	755.991	0.0316495
CAM206_map2	0002.CSV	759.848	0.0319259
CAM206_map2	0002.CSV	763.705	0.0327005
CAM206_map2	0002.CSV	767.562	0.0333989
CAM206_map2	0002.CSV	771.419	0.0344318
CAM206_map2	0002.CSV	775.276	0.0348163
CAM206_map2	0002.CSV	779.133	0.0359165
CAM206_map2	0002.CSV	782.99	0.0364297
CAM206_map2	0002.CSV	786.848	0.0371483
CAM206_map2	0002.CSV	790.705	0.0377734
CAM206_map2	0002.CSV	794.562	0.0391931
CAM206_map2	0002.CSV	798.419	0.040404
CAM206_map2	0002.CSV	802.276	0.0416123
CAM206_map2	0002.CSV	806.133	0.04242
CAM206_map2	0002.CSV	809.99	0.0438073
CAM206_map2	0002.CSV	813.847	0.0452997
CAM206_map2	0002.CSV	817.704	0.0478268
CAM206_map2	0002.CSV	821.562	0.0506056
CAM206_map2	0002.CSV	825.419	0.054501
CAM206_map2	0002.CSV	829.276	0.0591507
CAM206_map2	0002.CSV	833.133	0.0655806
CAM206_map2	0002.CSV	836.99	0.0740191
CAM206_map2	0002.CSV	840.847	0.0848802
CAM206_map2	0002.CSV	844.704	0.0951059
CAM206_map2	0002.CSV	848.561	0.110517
CAM206_map2	0002.CSV	852.418	0.12715
CAM206_map2	0002.CSV	856.275	0.128813
CAM206_map2	0002.CSV	860.132	0.113212
CAM206_map2	0002.CSV	863.99	0.0908566
CAM206_map2	0002.CSV	867.847	0.0685886
CAM206_map2	0002.CSV	871.704	0.0518567
CAM206_map2	0002.CSV	875.561	0.0412488
CAM206_map2	0002.CSV	879.418	0.0353056
CAM206_map2	0002.CSV	883.275	0.0311737
CAM206_map2	0002.CSV	887.132	0.0288378
CAM206_map2	0002.CSV	890.989	0.0281827
CAM206_map2	0002.CSV	894.846	0.0284875
CAM206_map2	0002.CSV	898.703	0.0286518
CAM206_map2	0002.CSV	902.561	0.029247
CAM206_map2	0002.CSV	906.418	0.0297637
CAM206_map2	0002.CSV	910.275	0.0299988
CAM206_map2	0002.CSV	914.132	0.0298709
CAM206_map2	0002.CSV	917.989	0.0303102
CAM206_map2	0002.CSV	921.846	0.0306189
CAM206_map2	0002.CSV	925.703	0.0311512
CAM206_map2	0002.CSV	929.56	0.0314976
CAM206_map2	0002.CSV	933.417	0.0320106
CAM206_map2	0002.CSV	937.274	0.0321633
CAM206_map2	0002.CSV	941.131	0.0324661
CAM206_map2	0002.CSV	944.989	0.0326142
CAM206_map2	0002.CSV	948.846	0.0330538
CAM206_map2	0002.CSV	952.703	0.0335238
CAM206_map2	0002.CSV	956.56	0.0340267
CAM206_map2	0002.CSV	960.417	0.0341391
CAM206_map2	0002.CSV	964.274	0.0344796
CAM206_map2	0002.CSV	968.131	0.0347868
CAM206_map2	0002.CSV	971.988	0.0354059
CAM206_map2	0002.CSV	975.845	0.0358271
CAM206_map2	0002.CSV	979.702	0.0363619
CAM206_map2	0002.CSV	983.559	0.0366807
CAM206_map2	0002.CSV	987.417	0.0371925
CAM206_map2	0002.CSV	991.274	0.0376622
CAM206_map2	0002.CSV	995.131	0.0383976
CAM206_map2	0002.CSV	998.988	0.0388849
CAM206_map2	0002.CSV	1002.85	0.0394333
CAM206_map2	0002.CSV	1006.7	0.0398351
CAM206_map2	0002.CSV	1010.56	0.0405186
CAM206_map2	0002.CSV	1014.42	0.041038
CAM206_map2	0002.CSV	1018.27	0.0416255
CAM206_map2	0002.CSV	1022.13	0.0419375
CAM206_map2	0002.CSV	1025.99	0.0423902
CAM206_map2	0002.CSV	1029.85	0.0427771
CAM206_map2	0002.CSV	1033.7	0.0433746
CAM206_map2	0002.CSV	1037.56	0.0437718
CAM206_map2	0002.CSV	1041.42	0.044373
CAM206_map2	0002.CSV	1045.27	0.0447025
CAM206_map2	0002.CSV	1049.13	0.0451971
CAM206_map2	0002.CSV	1052.99	0.0455871
CAM206_map2	0002.CSV	1056.84	0.0463798
CAM206_map2	0002.CSV	1060.7	0.0471114
CAM206_map2	0002.CSV	1064.56	0.0483056
CAM206_map2	0002.CSV	1068.42	0.0496388
CAM206_map2	0002.CSV	1072.27	0.0516724
CAM206_map2	0002.CSV	1076.13	0.0547235
CAM206_map2	0002.CSV	1079.99	0.0597832
CAM206_map2	0002.CSV	1083.84	0.0598641
CAM206_map2	0002.CSV	1087.7	0.0537395
CAM206_map2	0002.CSV	1091.56	0.0501395
CAM206_map2	0002.CSV	1095.41	0.0497359
CAM206_map2	0002.CSV	1099.27	0.0495735
CAM206_map2	0002.CSV	1103.13	0.0496236
CAM206_map2	0002.CSV	1106.99	0.0497223
CAM206_map2	0002.CSV	1110.84	0.0500056
CAM206_map2	0002.CSV	1114.7	0.049906
CAM206_map2	0002.CSV	1118.56	0.0497044
CAM206_map2	0002.CSV	1122.41	0.0494751
CAM206_map2	0002.CSV	1126.27	0.0495413
CAM206_map2	0002.CSV	1130.13	0.0494438
CAM206_map2	0002.CSV	1133.99	0.0494452
CAM206_map2	0002.CSV	1137.84	0.0494897
CAM206_map2	0002.CSV	1141.7	0.0497781
CAM206_map2	0002.CSV	1145.56	0.0499441
CAM206_map2	0002.CSV	1149.41	0.0503241
CAM206_map2	0002.CSV	1153.27	0.0505227
CAM206_map2	0002.CSV	1157.13	0.0508116
CAM206_map2	0002.CSV	1160.99	0.0510565
CAM206_map2	0002.CSV	1164.84	0.0514611
CAM206_map2	0002.CSV	1168.7	0.0516983
CAM206_map2	0002.CSV	1172.56	0.0519725
CAM206_map2	0002.CSV	1176.41	0.0520319
CAM206_map2	0002.CSV	1180.27	0.0521216
CAM206_map2	0002.CSV	1184.13	0.0518998
CAM206_map2	0002.CSV	1187.99	0.0517998
CAM206_map2	0002.CSV	1191.84	0.0515609
CAM206_map2	0002.CSV	1195.7	0.0514351
CAM206_map2	0002.CSV	1199.56	0.0512766
CAM206_map2	0002.CSV	1203.41	0.0513897
CAM206_map2	0002.CSV	1207.27	0.0515481
CAM206_map2	0002.CSV	1211.13	0.0519806
CAM206_map2	0002.CSV	1214.98	0.0522579
CAM206_map2	0002.CSV	1218.84	0.052704
CAM206_map2	0002.CSV	1222.7	0.0531139
CAM206_map2	0002.CSV	1226.56	0.0537597
CAM206_map2	0002.CSV	1230.41	0.0543065
CAM206_map2	0002.CSV	1234.27	0.0549333
CAM206_map2	0002.CSV	1238.13	0.0553848
CAM206_map2	0002.CSV	1241.98	0.0559698
CAM206_map2	0002.CSV	1245.84	0.0564076
CAM206_map2	0002.CSV	1249.7	0.0569687
CAM206_map2	0002.CSV	1253.56	0.0573466
CAM206_map2	0002.CSV	1257.41	0.0578699
CAM206_map2	0002.CSV	1261.27	0.0582638
CAM206_map2	0002.CSV	1265.13	0.0588167
CAM206_map2	0002.CSV	1268.98	0.059371
CAM206_map2	0002.CSV	1272.84	0.0601915
CAM206_map2	0002.CSV	1276.7	0.0608587
CAM206_map2	0002.CSV	1280.56	0.061644
CAM206_map2	0002.CSV	1284.41	0.0622901
CAM206_map2	0002.CSV	1288.27	0.0632114
CAM206_map2	0002.CSV	1292.13	0.0639905
CAM206_map2	0002.CSV	1295.98	0.0648747
CAM206_map2	0002.CSV	1299.84	0.0656936
CAM206_map2	0002.CSV	1303.7	0.0666368
CAM206_map2	0002.CSV	1307.56	0.0674258
CAM206_map2	0002.CSV	1311.41	0.0685032
CAM206_map2	0002.CSV	1315.27	0.0695799
CAM206_map2	0002.CSV	1319.13	0.0708863
CAM206_map2	0002.CSV	1322.98	0.0718889
CAM206_map2	0002.CSV	1326.84	0.0730843
CAM206_map2	0002.CSV	1330.7	0.0742684
CAM206_map2	0002.CSV	1334.56	0.0756511
CAM206_map2	0002.CSV	1338.41	0.0774387
CAM206_map2	0002.CSV	1342.27	0.0797239
CAM206_map2	0002.CSV	1346.13	0.0813862
CAM206_map2	0002.CSV	1349.98	0.0835054
CAM206_map2	0002.CSV	1353.84	0.0855937
CAM206_map2	0002.CSV	1357.7	0.0878734
CAM206_map2	0002.CSV	1361.56	0.0904675
CAM206_map2	0002.CSV	1365.41	0.0936473
CAM206_map2	0002.CSV	1369.27	0.0959839
CAM206_map2	0002.CSV	1373.13	0.099277
CAM206_map2	0002.CSV	1376.98	0.103011
CAM206_map2	0002.CSV	1380.84	0.10614
CAM206_map2	0002.CSV	1384.7	0.108909
CAM206_map2	0002.CSV	1388.56	0.112694
CAM206_map2	0002.CSV	1392.41	0.115463
CAM206_map2	0002.CSV	1396.27	0.118817
CAM206_map2	0002.CSV	1400.13	0.121798
CAM206_map2	0002.CSV	1403.98	0.124409
CAM206_map2	0002.CSV	1407.84	0.126571
CAM206_map2	0002.CSV	1411.7	0.128421
CAM206_map2	0002.CSV	1415.55	0.129428
CAM206_map2	0002.CSV	1419.41	0.131116
CAM206_map2	0002.CSV	1423.27	0.132317
CAM206_map2	0002.CSV	1427.12	0.13412
CAM206_map2	0002.CSV	1430.98	0.136148
CAM206_map2	0002.CSV	1434.84	0.138842
CAM206_map2	0002.CSV	1438.7	0.141202
CAM206_map2	0002.CSV	1442.55	0.142593
CAM206_map2	0002.CSV	1446.41	0.142526
CAM206_map2	0002.CSV	1450.27	0.141694
CAM206_map2	0002.CSV	1454.12	0.139662
CAM206_map2	0002.CSV	1457.98	0.13778
CAM206_map2	0002.CSV	1461.84	0.135959
CAM206_map2	0002.CSV	1465.7	0.134747
CAM206_map2	0002.CSV	1469.55	0.131923
CAM206_map2	0002.CSV	1473.41	0.126161
CAM206_map2	0002.CSV	1477.27	0.118501
CAM206_map2	0002.CSV	1481.12	0.113637
CAM206_map2	0002.CSV	1484.98	0.109144
CAM206_map2	0002.CSV	1488.84	0.104347
CAM206_map2	0002.CSV	1492.7	0.0992536
CAM206_map2	0002.CSV	1496.55	0.0954161
CAM206_map2	0002.CSV	1500.41	0.0909984
CAM206_map2	0002.CSV	1504.27	0.0881664
CAM206_map2	0002.CSV	1508.12	0.0830571
CAM206_map2	0002.CSV	1511.98	0.0790588
CAM206_map2	0002.CSV	1515.84	0.0758664
CAM206_map2	0002.CSV	1519.7	0.072022
CAM206_map2	0002.CSV	1523.55	0.0673709
CAM206_map2	0002.CSV	1527.41	0.0644339
CAM206_map2	0002.CSV	1531.27	0.0623331
CAM206_map2	0002.CSV	1535.12	0.0615247
CAM206_map2	0002.CSV	1538.98	0.060508
CAM206_map2	0002.CSV	1542.84	0.057011
CAM206_map2	0002.CSV	1546.7	0.0529165
CAM206_map2	0002.CSV	1550.55	0.0499301
CAM206_map2	0002.CSV	1554.41	0.0471528
CAM206_map2	0002.CSV	1558.27	0.044491
CAM206_map2	0002.CSV	1562.12	0.0420987
CAM206_map2	0002.CSV	1565.98	0.0409606
CAM206_map2	0002.CSV	1569.84	0.0400667
CAM206_map2	0002.CSV	1573.69	0.0392629
CAM206_map2	0002.CSV	1577.55	0.0372465
CAM206_map2	0002.CSV	1581.41	0.0342259
CAM206_map2	0002.CSV	1585.27	0.0312169
CAM206_map2	0002.CSV	1589.12	0.0290361
CAM206_map2	0002.CSV	1592.98	0.0276697
CAM206_map2	0002.CSV	1596.84	0.0268625
CAM206_map2	0002.CSV	1600.69	0.026317
CAM206_map2	0002.CSV	1604.55	0.0261293
CAM206_map2	0002.CSV	1608.41	0.0259563
CAM206_map2	0002.CSV	1612.27	0.0256945
CAM206_map2	0002.CSV	1616.12	0.025484
CAM206_map2	0002.CSV	1619.98	0.0254204
CAM206_map2	0002.CSV	1623.84	0.0250563
CAM206_map2	0002.CSV	1627.69	0.024881
CAM206_map2	0002.CSV	1631.55	0.024293
CAM206_map2	0002.CSV	1635.41	0.0243484
CAM206_map2	0002.CSV	1639.27	0.0245632
CAM206_map2	0002.CSV	1643.12	0.0240656
CAM206_map2	0002.CSV	1646.98	0.0240631
CAM206_map2	0002.CSV	1650.84	0.0243572
CAM206_map2	0002.CSV	1654.69	0.0244656
CAM206_map2	0002.CSV	1658.55	0.0240268
CAM206_map2	0002.CSV	1662.41	0.0234863
CAM206_map2	0002.CSV	1666.27	0.0231198
CAM206_map2	0002.CSV	1670.12	0.0228968
CAM206_map2	0002.CSV	1673.98	0.0228754
CAM206_map2	0002.CSV	1677.84	0.0222976
CAM206_map2	0002.CSV	1681.69	0.0219497
CAM206_map2	0002.CSV	1685.55	0.0220937
CAM206_map2	0002.CSV	1689.41	0.021796
CAM206_map2	0002.CSV	1693.27	0.0209665
CAM206_map2	0002.CSV	1697.12	0.0207551
CAM206_map2	0002.CSV	1700.98	0.0210179
CAM206_map2	0002.CSV	1704.84	0.0209018
CAM206_map2	0002.CSV	1708.69	0.0204475
CAM206_map2	0002.CSV	1712.55	0.0200548
CAM206_map2	0002.CSV	1716.41	0.020445
CAM206_map2	0002.CSV	1720.27	0.0208969
CAM206_map2	0002.CSV	1724.12	0.0205052
CAM206_map2	0002.CSV	1727.98	0.0202715
CAM206_map2	0002.CSV	1731.84	0.0204285
CAM206_map2	0002.CSV	1735.69	0.0210743
CAM206_map2	0002.CSV	1739.55	0.0207853
CAM206_map2	0002.CSV	1743.41	0.0203039
CAM206_map2	0002.CSV	1747.27	0.0198374
CAM206_map2	0002.CSV	1751.12	0.0195329
CAM206_map2	0002.CSV	1754.98	0.0188664
CAM206_map2	0002.CSV	1758.84	0.0185746
CAM206_map2	0002.CSV	1762.69	0.0185081
CAM206_map2	0002.CSV	1766.55	0.0183645
CAM206_map2	0002.CSV	1770.41	0.0186893
CAM206_map2	0002.CSV	1774.26	0.0198548
CAM206_map2	0002.CSV	1778.12	0.0205263
CAM206_map2	0002.CSV	1781.98	0.0213986
CAM206_map2	0002.CSV	1785.84	0.021707
CAM206_map2	0002.CSV	1789.69	0.0213728
CAM206_map2	0002.CSV	1793.55	0.0206175
CAM206_map2	0002.CSV	1797.41	0.0197316
CAM206_map2	0002.CSV	1801.26	0.018899
CAM206_map2	0002.CSV	1805.12	0.0183063
CAM206_map2	0002.CSV	1808.98	0.0179612
CAM206_map2	0002.CSV	1812.84	0.0179229
CAM206_map2	0002.CSV	1816.69	0.0176566
CAM206_map2	0002.CSV	1820.55	0.0175034
CAM206_map2	0002.CSV	1824.41	0.0174545
CAM206_map2	0002.CSV	1828.26	0.017716
CAM206_map2	0002.CSV	1832.12	0.0178593
CAM206_map2	0002.CSV	1835.98	0.017797
CAM206_map2	0002.CSV	1839.84	0.0176076
CAM206_map2	0002.CSV	1843.69	0.0178424
CAM206_map2	0002.CSV	1847.55	0.0181386
CAM206_map2	0002.CSV	1851.41	0.0179473
CAM206_map2	0002.CSV	1855.26	0.0177892
CAM206_map2	0002.CSV	1859.12	0.0178387
CAM206_map2	0002.CSV	1862.98	0.017775
CAM206_map2	0002.CSV	1866.84	0.0179922
CAM206_map2	0002.CSV	1870.69	0.0183405
CAM206_map2	0002.CSV	1874.55	0.0181043
CAM206_map2	0002.CSV	1878.41	0.0179496
CAM206_map2	0002.CSV	1882.26	0.017979
CAM206_map2	0002.CSV	1886.12	0.017948
CAM206_map2	0002.CSV	1889.98	0.0180881
CAM206_map2	0002.CSV	1893.83	0.0181756
CAM206_map2	0002.CSV	1897.69	0.0181907
CAM206_map2	0002.CSV	1901.55	0.0181406
CAM206_map2	0002.CSV	1905.41	0.0181572
CAM206_map2	0002.CSV	1909.26	0.0182408
CAM206_map2	0002.CSV	1913.12	0.0182088
CAM206_map2	0002.CSV	1916.98	0.0181173
CAM206_map2	0002.CSV	1920.83	0.0182839
CAM206_map2	0002.CSV	1924.69	0.0183655
CAM206_map2	0002.CSV	1928.55	0.0183372
CAM206_map2	0002.CSV	1932.4	0.0183198
CAM206_map2	0002.CSV	1936.26	0.0183365
CAM206_map2	0002.CSV	1940.12	0.0183217
CAM206_map2	0002.CSV	1943.98	0.0185884
CAM206_map2	0002.CSV	1947.83	0.0186228
CAM206_map2	0002.CSV	1951.69	0.0185615
CAM206_map2	0002.CSV	1955.55	0.0186111
CAM206_map2	0002.CSV	1959.4	0.018684
CAM206_map2	0002.CSV	1963.26	0.0186311
CAM206_map2	0002.CSV	1967.12	0.0187492
CAM206_map2	0002.CSV	1970.98	0.0187709
CAM206_map2	0002.CSV	1974.83	0.0187219
CAM206_map2	0002.CSV	1978.69	0.0186968
CAM206_map2	0002.CSV	1982.55	0.0186893
CAM206_map2	0002.CSV	1986.4	0.0186426
CAM206_map2	0002.CSV	1990.26	0.0187389
CAM206_map2	0002.CSV	1994.12	0.0188424
CAM206_map2	0002.CSV	1997.98	0.0188178
CAM206_map2	0002.CSV	2001.83	0.0187807
CAM206_map2	0002.CSV	2005.69	0.0188043
CAM206_map2	0002.CSV	2009.55	0.01884
CAM206_map2	0002.CSV	2013.4	0.0188381
CAM206_map2	0002.CSV	2017.26	0.0188902
CAM206_map2	0002.CSV	2021.12	0.0189506
CAM206_map2	0002.CSV	2024.97	0.0188728
CAM206_map2	0002.CSV	2028.83	0.0188781
CAM206_map2	0002.CSV	2032.69	0.0188722
CAM206_map2	0002.CSV	2036.55	0.0188871
CAM206_map2	0002.CSV	2040.4	0.0188843
CAM206_map2	0002.CSV	2044.26	0.0189135
CAM206_map2	0002.CSV	2048.12	0.018887
CAM206_map2	0002.CSV	2051.97	0.0189209
CAM206_map2	0002.CSV	2055.83	0.0189027
CAM206_map2	0002.CSV	2059.69	0.0188752
CAM206_map2	0002.CSV	2063.55	0.0188946
CAM206_map2	0002.CSV	2067.4	0.0189954
CAM206_map2	0002.CSV	2071.26	0.0189698
CAM206_map2	0002.CSV	2075.12	0.0189493
CAM206_map2	0002.CSV	2078.97	0.0189292
CAM206_map2	0002.CSV	2082.83	0.0189886
CAM206_map2	0002.CSV	2086.69	0.0190129
CAM206_map2	0002.CSV	2090.55	0.0190495
CAM206_map2	0002.CSV	2094.4	0.019022
CAM206_map2	0002.CSV	2098.26	0.0190287
CAM206_map2	0002.CSV	2102.12	0.0190832
CAM206_map2	0002.CSV	2105.97	0.0191266
CAM206_map2	0002.CSV	2109.83	0.0190924
CAM206_map2	0002.CSV	2113.69	0.0190971
CAM206_map2	0002.CSV	2117.55	0.0190888
CAM206_map2	0002.CSV	2121.4	0.0190868
CAM206_map2	0002.CSV	2125.26	0.0190919
CAM206_map2	0002.CSV	2129.12	0.0191611
CAM206_map2	0002.CSV	2132.97	0.0191884
CAM206_map2	0002.CSV	2136.83	0.0192279
CAM206_map2	0002.CSV	2140.69	0.0192311
CAM206_map2	0002.CSV	2144.55	0.0192691
CAM206_map2	0002.CSV	2148.4	0.0193024
CAM206_map2	0002.CSV	2152.26	0.0193304
CAM206_map2	0002.CSV	2156.12	0.0193174
CAM206_map2	0002.CSV	2159.97	0.0193088
CAM206_map2	0002.CSV	2163.83	0.0192794
CAM206_map2	0002.CSV	2167.69	0.019321
CAM206_map2	0002.CSV	2171.55	0.0193703
CAM206_map2	0002.CSV	2175.4	0.0193784
CAM206_map2	0002.CSV	2179.26	0.0193966
CAM206_map2	0002.CSV	2183.12	0.0194627
CAM206_map2	0002.CSV	2186.97	0.0194884
CAM206_map2	0002.CSV	2190.83	0.0195106
CAM206_map2	0002.CSV	2194.69	0.0195092
CAM206_map2	0002.CSV	2198.55	0.0195607
CAM206_map2	0002.CSV	2202.4	0.0196046
CAM206_map2	0002.CSV	2206.26	0.0196048
CAM206_map2	0002.CSV	2210.12	0.0195667
CAM206_map2	0002.CSV	2213.97	0.0196137
CAM206_map2	0002.CSV	2217.83	0.0196393
CAM206_map2	0002.CSV	2221.69	0.0196323
CAM206_map2	0002.CSV	2225.54	0.0196398
CAM206_map2	0002.CSV	2229.4	0.0196715
CAM206_map2	0002.CSV	2233.26	0.0196521
CAM206_map2	0002.CSV	2237.12	0.0196666
CAM206_map2	0002.CSV	2240.97	0.0196235
CAM206_map2	0002.CSV	2244.83	0.019569
CAM206_map2	0002.CSV	2248.69	0.019564
CAM206_map2	0002.CSV	2252.54	0.0195936
CAM206_map2	0002.CSV	2256.4	0.0195796
CAM206_map2	0002.CSV	2260.26	0.0195746
CAM206_map2	0002.CSV	2264.11	0.0195432
CAM206_map2	0002.CSV	2267.97	0.0195281
CAM206_map2	0002.CSV	2271.83	0.019522
CAM206_map2	0002.CSV	2275.69	0.0195365
CAM206_map2	0002.CSV	2279.54	0.019521
CAM206_map2	0002.CSV	2283.4	0.019466
CAM206_map2	0002.CSV	2287.26	0.0193753
CAM206_map2	0002.CSV	2291.11	0.0193389
CAM206_map2	0002.CSV	2294.97	0.0192551
CAM206_map2	0002.CSV	2298.83	0.0192249
CAM206_map2	0002.CSV	2302.69	0.0191258
CAM206_map2	0002.CSV	2306.54	0.0188528
CAM206_map2	0002.CSV	2310.4	0.0185917
CAM206_map2	0002.CSV	2314.26	0.0184115
CAM206_map2	0002.CSV	2318.11	0.0178978
CAM206_map2	0002.CSV	2321.97	0.0172402
CAM206_map2	0002.CSV	2325.83	0.0165168
CAM206_map2	0002.CSV	2329.69	0.0159167
CAM206_map2	0002.CSV	2333.54	0.0152365
CAM206_map2	0002.CSV	2337.4	0.0148179
CAM206_map2	0002.CSV	2341.26	0.0147733
CAM206_map2	0002.CSV	2345.11	0.0162308
CAM206_map2	0002.CSV	2348.97	0.0167072
CAM206_map2	0002.CSV	2352.83	0.0150249
CAM206_map2	0002.CSV	2356.69	0.0107206
CAM206_map2	0002.CSV	2360.54	0.00865672
CAM206_map2	0002.CSV	2364.4	0.0115953
CAM206_map2	0002.CSV	2368.26	0.0153831
CAM206_map2	0002.CSV	2372.11	0.0179491
CAM206_map2	0002.CSV	2375.97	0.0192772
CAM206_map2	0002.CSV	2379.83	0.0196737
CAM206_map2	0002.CSV	2383.69	0.0196417
CAM206_map2	0002.CSV	2387.54	0.019473
CAM206_map2	0002.CSV	2391.4	0.0193886
CAM206_map2	0002.CSV	2395.26	0.0193354
CAM206_map2	0002.CSV	2399.11	0.019286
CAM206_map2	0002.CSV	2402.97	0.0192965
CAM206_map2	0002.CSV	2406.83	0.0192828
CAM206_map2	0002.CSV	2410.68	0.0192203
CAM206_map2	0002.CSV	2414.54	0.0192187
CAM206_map2	0002.CSV	2418.4	0.0192334
CAM206_map2	0002.CSV	2422.26	0.0192793
CAM206_map2	0002.CSV	2426.11	0.0192853
CAM206_map2	0002.CSV	2429.97	0.0192323
CAM206_map2	0002.CSV	2433.83	0.0192021
CAM206_map2	0002.CSV	2437.68	0.0192244
CAM206_map2	0002.CSV	2441.54	0.0192265
CAM206_map2	0002.CSV	2445.4	0.0192193
CAM206_map2	0002.CSV	2449.26	0.0192196
CAM206_map2	0002.CSV	2453.11	0.0191948
CAM206_map2	0002.CSV	2456.97	0.0191784
CAM206_map2	0002.CSV	2460.83	0.0192303
CAM206_map2	0002.CSV	2464.68	0.0193086
CAM206_map2	0002.CSV	2468.54	0.0194181
CAM206_map2	0002.CSV	2472.4	0.0195164
CAM206_map2	0002.CSV	2476.26	0.0196146
CAM206_map2	0002.CSV	2480.11	0.0197362
CAM206_map2	0002.CSV	2483.97	0.0199262
CAM206_map2	0002.CSV	2487.83	0.0200685
CAM206_map2	0002.CSV	2491.68	0.0201437
CAM206_map2	0002.CSV	2495.54	0.0201924
CAM206_map2	0002.CSV	2499.4	0.0202423
CAM206_map2	0002.CSV	2503.26	0.0202438
CAM206_map2	0002.CSV	2507.11	0.0202237
CAM206_map2	0002.CSV	2510.97	0.0202347
CAM206_map2	0002.CSV	2514.83	0.0203015
CAM206_map2	0002.CSV	2518.68	0.0204427
CAM206_map2	0002.CSV	2522.54	0.0205176
CAM206_map2	0002.CSV	2526.4	0.0204264
CAM206_map2	0002.CSV	2530.26	0.0203178
CAM206_map2	0002.CSV	2534.11	0.020142
CAM206_map2	0002.CSV	2537.97	0.020015
CAM206_map2	0002.CSV	2541.83	0.0199962
CAM206_map2	0002.CSV	2545.68	0.0199384
CAM206_map2	0002.CSV	2549.54	0.0198363
CAM206_map2	0002.CSV	2553.4	0.0197743
CAM206_map2	0002.CSV	2557.26	0.0197302
CAM206_map2	0002.CSV	2561.11	0.0196792
CAM206_map2	0002.CSV	2564.97	0.0196049
CAM206_map2	0002.CSV	2568.83	0.0195806
CAM206_map2	0002.CSV	2572.68	0.0195842
CAM206_map2	0002.CSV	2576.54	0.0195681
CAM206_map2	0002.CSV	2580.4	0.0195001
CAM206_map2	0002.CSV	2584.25	0.0194725
CAM206_map2	0002.CSV	2588.11	0.0194807
CAM206_map2	0002.CSV	2591.97	0.0194907
CAM206_map2	0002.CSV	2595.83	0.0194241
CAM206_map2	0002.CSV	2599.68	0.0193892
CAM206_map2	0002.CSV	2603.54	0.0194309
CAM206_map2	0002.CSV	2607.4	0.01949
CAM206_map2	0002.CSV	2611.25	0.0195585
CAM206_map2	0002.CSV	2615.11	0.0195951
CAM206_map2	0002.CSV	2618.97	0.0195508
CAM206_map2	0002.CSV	2622.82	0.0196118
CAM206_map2	0002.CSV	2626.68	0.0196835
CAM206_map2	0002.CSV	2630.54	0.0196184
CAM206_map2	0002.CSV	2634.4	0.0196345
CAM206_map2	0002.CSV	2638.25	0.0196453
CAM206_map2	0002.CSV	2642.11	0.01948
CAM206_map2	0002.CSV	2645.97	0.0193238
CAM206_map2	0002.CSV	2649.82	0.0192428
CAM206_map2	0002.CSV	2653.68	0.0192319
CAM206_map2	0002.CSV	2657.54	0.0192298
CAM206_map2	0002.CSV	2661.4	0.019184
CAM206_map2	0002.CSV	2665.25	0.0191135
CAM206_map2	0002.CSV	2669.11	0.0192042
CAM206_map2	0002.CSV	2672.97	0.0194477
CAM206_map2	0002.CSV	2676.82	0.0196575
CAM206_map2	0002.CSV	2680.68	0.0195486
CAM206_map2	0002.CSV	2684.54	0.0192008
CAM206_map2	0002.CSV	2688.4	0.0190398
CAM206_map2	0002.CSV	2692.25	0.0190055
CAM206_map2	0002.CSV	2696.11	0.0190207
CAM206_map2	0002.CSV	2699.97	0.0190035
CAM206_map2	0002.CSV	2703.82	0.0189749
CAM206_map2	0002.CSV	2707.68	0.0190604
CAM206_map2	0002.CSV	2711.54	0.0191182
CAM206_map2	0002.CSV	2715.4	0.0191435
CAM206_map2	0002.CSV	2719.25	0.0193026
CAM206_map2	0002.CSV	2723.11	0.0195775
CAM206_map2	0002.CSV	2726.97	0.0195158
CAM206_map2	0002.CSV	2730.82	0.019216
CAM206_map2	0002.CSV	2734.68	0.019235
CAM206_map2	0002.CSV	2738.54	0.0193339
CAM206_map2	0002.CSV	2742.4	0.0193698
CAM206_map2	0002.CSV	2746.25	0.0196133
CAM206_map2	0002.CSV	2750.11	0.019665
CAM206_map2	0002.CSV	2753.97	0.0194303
CAM206_map2	0002.CSV	2757.82	0.0193189
CAM206_map2	0002.CSV	2761.68	0.0192464
CAM206_map2	0002.CSV	2765.54	0.0192381
CAM206_map2	0002.CSV	2769.39	0.0194424
CAM206_map2	0002.CSV	2773.25	0.0197557
CAM206_map2	0002.CSV	2777.11	0.0196782
CAM206_map2	0002.CSV	2780.97	0.0195398
CAM206_map2	0002.CSV	2784.82	0.0197522
CAM206_map2	0002.CSV	2788.68	0.020122
CAM206_map2	0002.CSV	2792.54	0.0202613
CAM206_map2	0002.CSV	2796.39	0.0203402
CAM206_map2	0002.CSV	2800.25	0.0202125
CAM206_map2	0002.CSV	2804.11	0.0199767
CAM206_map2	0002.CSV	2807.97	0.020182
CAM206_map2	0002.CSV	2811.82	0.0202685
CAM206_map2	0002.CSV	2815.68	0.0201751
CAM206_map2	0002.CSV	2819.54	0.020306
CAM206_map2	0002.CSV	2823.39	0.0205084
CAM206_map2	0002.CSV	2827.25	0.0207249
CAM206_map2	0002.CSV	2831.11	0.0213078
CAM206_map2	0002.CSV	2834.97	0.0221858
CAM206_map2	0002.CSV	2838.82	0.0230494
CAM206_map2	0002.CSV	2842.68	0.0243352
CAM206_map2	0002.CSV	2846.54	0.026792
CAM206_map2	0002.CSV	2850.39	0.0281162
CAM206_map2	0002.CSV	2854.25	0.0270626
CAM206_map2	0002.CSV	2858.11	0.0256834
CAM206_map2	0002.CSV	2861.97	0.0245606
CAM206_map2	0002.CSV	2865.82	0.0237992
CAM206_map2	0002.CSV	2869.68	0.0238075
CAM206_map2	0002.CSV	2873.54	0.0239047
CAM206_map2	0002.CSV	2877.39	0.0233582
CAM206_map2	0002.CSV	2881.25	0.0229735
CAM206_map2	0002.CSV	2885.11	0.0230583
CAM206_map2	0002.CSV	2888.97	0.0234751
CAM206_map2	0002.CSV	2892.82	0.024245
CAM206_map2	0002.CSV	2896.68	0.0249316
CAM206_map2	0002.CSV	2900.54	0.0253938
CAM206_map2	0002.CSV	2904.39	0.0262842
CAM206_map2	0002.CSV	2908.25	0.0280502
CAM206_map2	0002.CSV	2912.11	0.0309778
CAM206_map2	0002.CSV	2915.97	0.0335892
CAM206_map2	0002.CSV	2919.82	0.0337537
CAM206_map2	0002.CSV	2923.68	0.0320518
CAM206_map2	0002.CSV	2927.54	0.0304225
CAM206_map2	0002.CSV	2931.39	0.028668
CAM206_map2	0002.CSV	2935.25	0.0267416
CAM206_map2	0002.CSV	2939.11	0.0256619
CAM206_map2	0002.CSV	2942.96	0.0254194
CAM206_map2	0002.CSV	2946.82	0.0251455
CAM206_map2	0002.CSV	2950.68	0.0247199
CAM206_map2	0002.CSV	2954.54	0.0242039
CAM206_map2	0002.CSV	2958.39	0.0235957
CAM206_map2	0002.CSV	2962.25	0.0230757
CAM206_map2	0002.CSV	2966.11	0.0223724
CAM206_map2	0002.CSV	2969.96	0.0220373
CAM206_map2	0002.CSV	2973.82	0.0221273
CAM206_map2	0002.CSV	2977.68	0.0220371
CAM206_map2	0002.CSV	2981.53	0.0214593
CAM206_map2	0002.CSV	2985.39	0.0206716
CAM206_map2	0002.CSV	2989.25	0.0205419
CAM206_map2	0002.CSV	2993.11	0.0208154
CAM206_map2	0002.CSV	2996.96	0.020687
CAM206_map2	0002.CSV	3000.82	0.0202731
CAM206_map2	0002.CSV	3004.68	0.0200855
CAM206_map2	0002.CSV	3008.53	0.0203655
CAM206_map2	0002.CSV	3012.39	0.02076
CAM206_map2	0002.CSV	3016.25	0.0207623
CAM206_map2	0002.CSV	3020.11	0.020467
CAM206_map2	0002.CSV	3023.96	0.0201829
CAM206_map2	0002.CSV	3027.82	0.0201286
CAM206_map2	0002.CSV	3031.68	0.0204531
CAM206_map2	0002.CSV	3035.53	0.0206118
CAM206_map2	0002.CSV	3039.39	0.020651
CAM206_map2	0002.CSV	3043.25	0.0207544
CAM206_map2	0002.CSV	3047.11	0.0206502
CAM206_map2	0002.CSV	3050.96	0.0206134
CAM206_map2	0002.CSV	3054.82	0.0205433
CAM206_map2	0002.CSV	3058.68	0.0203635
CAM206_map2	0002.CSV	3062.53	0.0204252
CAM206_map2	0002.CSV	3066.39	0.0207869
CAM206_map2	0002.CSV	3070.25	0.0206847
CAM206_map2	0002.CSV	3074.11	0.0206221
CAM206_map2	0002.CSV	3077.96	0.0209514
CAM206_map2	0002.CSV	3081.82	0.0211565
CAM206_map2	0002.CSV	3085.68	0.021112
CAM206_map2	0002.CSV	3089.53	0.0209199
CAM206_map2	0002.CSV	3093.39	0.0205609
CAM206_map2	0002.CSV	3097.25	0.0205804
CAM206_map2	0002.CSV	3101.11	0.0207668
CAM206_map2	0002.CSV	3104.96	0.0207946
CAM206_map2	0002.CSV	3108.82	0.0209582
CAM206_map2	0002.CSV	3112.68	0.0211266
CAM206_map2	0002.CSV	3116.53	0.0213268
CAM206_map2	0002.CSV	3120.39	0.0212753
CAM206_map2	0002.CSV	3124.25	0.021033
CAM206_map2	0002.CSV	3128.11	0.0209877
CAM206_map2	0002.CSV	3131.96	0.0209235
CAM206_map2	0002.CSV	3135.82	0.0210083
CAM206_map2	0002.CSV	3139.68	0.021111
CAM206_map2	0002.CSV	3143.53	0.0208977
CAM206_map2	0002.CSV	3147.39	0.0210617
CAM206_map2	0002.CSV	3151.25	0.0215187
CAM206_map2	0002.CSV	3155.1	0.0214292
CAM206_map2	0002.CSV	3158.96	0.0210167
CAM206_map2	0002.CSV	3162.82	0.0208487
CAM206_map2	0002.CSV	3166.68	0.020795
CAM206_map2	0002.CSV	3170.53	0.0207918
CAM206_map2	0002.CSV	3174.39	0.0207965
CAM206_map2	0002.CSV	3178.25	0.0209749
CAM206_map2	0002.CSV	3182.1	0.021058
CAM206_map2	0002.CSV	3185.96	0.021116
CAM206_map2	0002.CSV	3189.82	0.0212776
CAM206_map2	0002.CSV	3193.68	0.0212298
CAM206_map2	0002.CSV	3197.53	0.0212092
CAM206_map2	0002.CSV	3201.39	0.0214264
CAM206_map2	0002.CSV	3205.25	0.021454
CAM206_map2	0002.CSV	3209.1	0.0213956
CAM206_map2	0002.CSV	3212.96	0.0216055
CAM206_map2	0002.CSV	3216.82	0.0217875
CAM206_map2	0002.CSV	3220.68	0.0217183
CAM206_map2	0002.CSV	3224.53	0.0216919
CAM206_map2	0002.CSV	3228.39	0.0219693
CAM206_map2	0002.CSV	3232.25	0.0223926
CAM206_map2	0002.CSV	3236.1	0.0222899
CAM206_map2	0002.CSV	3239.96	0.0220087
CAM206_map2	0002.CSV	3243.82	0.0223051
CAM206_map2	0002.CSV	3247.68	0.022538
CAM206_map2	0002.CSV	3251.53	0.0223572
CAM206_map2	0002.CSV	3255.39	0.0223608
CAM206_map2	0002.CSV	3259.25	0.0221427
CAM206_map2	0002.CSV	3263.1	0.0220395
CAM206_map2	0002.CSV	3266.96	0.0224503
CAM206_map2	0002.CSV	3270.82	0.0228984
CAM206_map2	0002.CSV	3274.68	0.0228729
CAM206_map2	0002.CSV	3278.53	0.0225059
CAM206_map2	0002.CSV	3282.39	0.0223026
CAM206_map2	0002.CSV	3286.25	0.0224176
CAM206_map2	0002.CSV	3290.1	0.0228014
CAM206_map2	0002.CSV	3293.96	0.0231086
CAM206_map2	0002.CSV	3297.82	0.022961
CAM206_map2	0002.CSV	3301.67	0.023037
CAM206_map2	0002.CSV	3305.53	0.0232685
CAM206_map2	0002.CSV	3309.39	0.0230704
CAM206_map2	0002.CSV	3313.25	0.0224351
CAM206_map2	0002.CSV	3317.1	0.0220906
CAM206_map2	0002.CSV	3320.96	0.0223682
CAM206_map2	0002.CSV	3324.82	0.0227638
CAM206_map2	0002.CSV	3328.67	0.0224883
CAM206_map2	0002.CSV	3332.53	0.0222737
CAM206_map2	0002.CSV	3336.39	0.0227345
CAM206_map2	0002.CSV	3340.24	0.0230164
CAM206_map2	0002.CSV	3344.1	0.0227793
CAM206_map2	0002.CSV	3347.96	0.0227568
CAM206_map2	0002.CSV	3351.82	0.0226882
CAM206_map2	0002.CSV	3355.67	0.0223694
CAM206_map2	0002.CSV	3359.53	0.0224444
CAM206_map2	0002.CSV	3363.39	0.0227095
CAM206_map2	0002.CSV	3367.24	0.0230112
CAM206_map2	0002.CSV	3371.1	0.022806
CAM206_map2	0002.CSV	3374.96	0.0225335
CAM206_map2	0002.CSV	3378.82	0.0224744
CAM206_map2	0002.CSV	3382.67	0.0221406
CAM206_map2	0002.CSV	3386.53	0.022166
CAM206_map2	0002.CSV	3390.39	0.0225968
CAM206_map2	0002.CSV	3394.24	0.0228742
CAM206_map2	0002.CSV	3398.1	0.0228196
CAM206_map2	0002.CSV	3401.96	0.0225924
CAM206_map2	0002.CSV	3405.82	0.0223414
CAM206_map2	0002.CSV	3409.67	0.0223124
CAM206_map2	0002.CSV	3413.53	0.0219029
CAM206_map2	0002.CSV	3417.39	0.0213976
CAM206_map2	0002.CSV	3421.24	0.0213931
CAM206_map2	0002.CSV	3425.1	0.02159
CAM206_map2	0002.CSV	3428.96	0.021852
CAM206_map2	0002.CSV	3432.82	0.0220486
CAM206_map2	0002.CSV	3436.67	0.0218743
CAM206_map2	0002.CSV	3440.53	0.0211185
CAM206_map2	0002.CSV	3444.39	0.0205264
CAM206_map2	0002.CSV	3448.24	0.0204916
CAM206_map2	0002.CSV	3452.1	0.0203726
CAM206_map2	0002.CSV	3455.96	0.0203939
CAM206_map2	0002.CSV	3459.82	0.0206273
CAM206_map2	0002.CSV	3463.67	0.0209503
CAM206_map2	0002.CSV	3467.53	0.02121
CAM206_map2	0002.CSV	3471.39	0.0207642
CAM206_map2	0002.CSV	3475.24	0.0204054
CAM206_map2	0002.CSV	3479.1	0.0204618
CAM206_map2	0002.CSV	3482.96	0.0204061
CAM206_map2	0002.CSV	3486.82	0.0203337
CAM206_map2	0002.CSV	3490.67	0.0202071
CAM206_map2	0002.CSV	3494.53	0.0202544
CAM206_map2	0002.CSV	3498.39	0.0201949
CAM206_map2	0002.CSV	3502.24	0.0200163
CAM206_map2	0002.CSV	3506.1	0.0194968
CAM206_map2	0002.CSV	3509.96	0.0192592
CAM206_map2	0002.CSV	3513.81	0.0194084
CAM206_map2	0002.CSV	3517.67	0.0189766
CAM206_map2	0002.CSV	3521.53	0.018916
CAM206_map2	0002.CSV	3525.39	0.0189779
CAM206_map2	0002.CSV	3529.24	0.0187385
CAM206_map2	0002.CSV	3533.1	0.0186967
CAM206_map2	0002.CSV	3536.96	0.0188133
CAM206_map2	0002.CSV	3540.81	0.0187958
CAM206_map2	0002.CSV	3544.67	0.0189138
CAM206_map2	0002.CSV	3548.53	0.0188103
CAM206_map2	0002.CSV	3552.39	0.0183996
CAM206_map2	0002.CSV	3556.24	0.0180639
CAM206_map2	0002.CSV	3560.1	0.0177166
CAM206_map2	0002.CSV	3563.96	0.0171673
CAM206_map2	0002.CSV	3567.81	0.0177492
CAM206_map2	0002.CSV	3571.67	0.017944
CAM206_map2	0002.CSV	3575.53	0.0174122
CAM206_map2	0002.CSV	3579.39	0.0175735
CAM206_map2	0002.CSV	3583.24	0.0175859
CAM206_map2	0002.CSV	3587.1	0.0176863
CAM206_map2	0002.CSV	3590.96	0.0177445
CAM206_map2	0002.CSV	3594.81	0.0173804
CAM206_map2	0002.CSV	3598.67	0.0174496
CAM206_map2	0002.CSV	3602.53	0.0173089
CAM206_map2	0002.CSV	3606.39	0.016591
CAM206_map2	0002.CSV	3610.24	0.0162948
CAM206_map2	0002.CSV	3614.1	0.0162996
CAM206_map2	0002.CSV	3617.96	0.0167693
CAM206_map2	0002.CSV	3621.81	0.017
CAM206_map2	0002.CSV	3625.67	0.0159336
CAM206_map2	0002.CSV	3629.53	0.0161203
CAM206_map2	0002.CSV	3633.39	0.016952
CAM206_map2	0002.CSV	3637.24	0.0166014
CAM206_map2	0002.CSV	3641.1	0.0161797
CAM206_map2	0002.CSV	3644.96	0.0152712
CAM206_map2	0002.CSV	3648.81	0.0158255
CAM206_map2	0002.CSV	3652.67	0.0170861
CAM206_map2	0002.CSV	3656.53	0.0172107
CAM206_map2	0002.CSV	3660.38	0.0172158
CAM206_map2	0002.CSV	3664.24	0.0160686
CAM206_map2	0002.CSV	3668.1	0.0148943
CAM206_map2	0002.CSV	3671.96	0.0148815
CAM206_map2	0002.CSV	3675.81	0.0159958
CAM206_map2	0002.CSV	3679.67	0.0167007
CAM206_map2	0002.CSV	3683.53	0.0161152
CAM206_map2	0002.CSV	3687.38	0.0159902
CAM206_map2	0002.CSV	3691.24	0.0171541
CAM206_map2	0002.CSV	3695.1	0.0167965
CAM206_map2	0002.CSV	3698.95	0.0159556
CAM206_map2	0002.CSV	3702.81	0.0156912
CAM206_map2	0002.CSV	3706.67	0.0151082
CAM206_map2	0002.CSV	3710.53	0.0150531
CAM206_map2	0002.CSV	3714.38	0.0160534
CAM206_map2	0002.CSV	3718.24	0.0154844
CAM206_map2	0002.CSV	3722.1	0.0150287
CAM206_map2	0002.CSV	3725.95	0.0152649
CAM206_map2	0002.CSV	3729.81	0.0148662
CAM206_map2	0002.CSV	3733.67	0.0150257
CAM206_map2	0002.CSV	3737.53	0.0166155
CAM206_map2	0002.CSV	3741.38	0.0157806
CAM206_map2	0002.CSV	3745.24	0.0145289
CAM206_map2	0002.CSV	3749.1	0.0144413
CAM206_map2	0002.CSV	3752.95	0.0156614
CAM206_map2	0002.CSV	3756.81	0.0159563
CAM206_map2	0002.CSV	3760.67	0.0159303
CAM206_map2	0002.CSV	3764.53	0.0154612
CAM206_map2	0002.CSV	3768.38	0.0155655
CAM206_map2	0002.CSV	3772.24	0.0160171
CAM206_map2	0002.CSV	3776.1	0.0157304
CAM206_map2	0002.CSV	3779.95	0.0158198
CAM206_map2	0002.CSV	3783.81	0.0158766
CAM206_map2	0002.CSV	3787.67	0.015837
CAM206_map2	0002.CSV	3791.53	0.0153561
CAM206_map2	0002.CSV	3795.38	0.0146002
CAM206_map2	0002.CSV	3799.24	0.0146156
CAM206_map2	0002.CSV	3803.1	0.0154889
CAM206_map2	0002.CSV	3806.95	0.0159831
CAM206_map2	0002.CSV	3810.81	0.0153754
CAM206_map2	0002.CSV	3814.67	0.014533
CAM206_map2	0002.CSV	3818.53	0.0148911
CAM206_map2	0002.CSV	3822.38	0.0157596
CAM206_map2	0002.CSV	3826.24	0.0155699
CAM206_map2	0002.CSV	3830.1	0.0150142
CAM206_map2	0002.CSV	3833.95	0.0145953
CAM206_map2	0002.CSV	3837.81	0.0147169
CAM206_map2	0002.CSV	3841.67	0.0157885
CAM206_map2	0002.CSV	3845.53	0.0155585
CAM206_map2	0002.CSV	3849.38	0.0139969
CAM206_map2	0002.CSV	3853.24	0.0138552
CAM206_map2	0002.CSV	3857.1	0.0153932
CAM206_map2	0002.CSV	3860.95	0.0147989
CAM206_map2	0002.CSV	3864.81	0.0146735
CAM206_map2	0002.CSV	3868.67	0.0148981
CAM206_map2	0002.CSV	3872.52	0.0154477
CAM206_map2	0002.CSV	3876.38	0.0152865
CAM206_map2	0002.CSV	3880.24	0.0150255
CAM206_map2	0002.CSV	3884.1	0.0155204
CAM206_map2	0002.CSV	3887.95	0.0154599
CAM206_map2	0002.CSV	3891.81	0.0153709
CAM206_map2	0002.CSV	3895.67	0.014954
CAM206_map2	0002.CSV	3899.52	0.0144406
CAM206_map2	0002.CSV	3903.38	0.0156529
CAM206_map2	0002.CSV	3907.24	0.0160714
CAM206_map2	0002.CSV	3911.1	0.0153278
CAM206_map2	0002.CSV	3914.95	0.0148438
CAM206_map2	0002.CSV	3918.81	0.0151036
CAM206_map2	0002.CSV	3922.67	0.0152097
CAM206_map2	0002.CSV	3926.52	0.0152531
CAM206_map2	0002.CSV	3930.38	0.0154211
CAM206_map2	0002.CSV	3934.24	0.0156413
CAM206_map2	0002.CSV	3938.09	0.0151693
CAM206_map2	0002.CSV	3941.95	0.0149274
CAM206_map2	0002.CSV	3945.81	0.0150797
CAM206_map2	0002.CSV	3949.67	0.0152388
CAM206_map2	0002.CSV	3953.52	0.0152928
CAM206_map2	0002.CSV	3957.38	0.0151693
CAM206_map2	0002.CSV	3961.24	0.0151771
CAM206_map2	0002.CSV	3965.09	0.015201
CAM206_map2	0002.CSV	3968.95	0.0151366
CAM206_map2	0002.CSV	3972.81	0.0151813
CAM206_map2	0002.CSV	3976.67	0.0153273
CAM206_map2	0002.CSV	3980.52	0.0153382
CAM206_map2	0002.CSV	3984.38	0.015383
CAM206_map2	0002.CSV	3988.24	0.0152485
CAM206_map2	0002.CSV	3992.09	0.0151836
CAM206_map2	0002.CSV	3995.95	0.0152681
CAM206_map2	0002.CSV	3999.81	0.0151862
CAM206_map2	0003.CSV	674.992	0.0233051
CAM206_map2	0003.CSV	678.849	0.024568
CAM206_map2	0003.CSV	682.706	0.0249392
CAM206_map2	0003.CSV	686.563	0.025619
CAM206_map2	0003.CSV	690.42	0.0261236
CAM206_map2	0003.CSV	694.277	0.0297228
CAM206_map2	0003.CSV	698.134	0.0344349
CAM206_map2	0003.CSV	701.991	0.0330578
CAM206_map2	0003.CSV	705.849	0.0318041
CAM206_map2	0003.CSV	709.706	0.0398142
CAM206_map2	0003.CSV	713.563	0.0398786
CAM206_map2	0003.CSV	717.42	0.0281387
CAM206_map2	0003.CSV	721.277	0.0212907
CAM206_map2	0003.CSV	725.134	0.0206929
CAM206_map2	0003.CSV	728.991	0.0205267
CAM206_map2	0003.CSV	732.848	0.0206131
CAM206_map2	0003.CSV	736.705	0.0206989
CAM206_map2	0003.CSV	740.562	0.0208177
CAM206_map2	0003.CSV	744.42	0.0209603
CAM206_map2	0003.CSV	748.277	0.0214967
CAM206_map2	0003.CSV	752.134	0.0215625
CAM206_map2	0003.CSV	755.991	0.0217304
CAM206_map2	0003.CSV	759.848	0.0218812
CAM206_map2	0003.CSV	763.705	0.0223435
CAM206_map2	0003.CSV	767.562	0.0226359
CAM206_map2	0003.CSV	771.419	0.02316
CAM206_map2	0003.CSV	775.276	0.0234651
CAM206_map2	0003.CSV	779.133	0.024005
CAM206_map2	0003.CSV	782.99	0.0240965
CAM206_map2	0003.CSV	786.848	0.0243406
CAM206_map2	0003.CSV	790.705	0.0246409
CAM206_map2	0003.CSV	794.562	0.0253761
CAM206_map2	0003.CSV	798.419	0.0258058
CAM206_map2	0003.CSV	802.276	0.0264707
CAM206_map2	0003.CSV	806.133	0.0270549
CAM206_map2	0003.CSV	809.99	0.0277556
CAM206_map2	0003.CSV	813.847	0.0282542
CAM206_map2	0003.CSV	817.704	0.0294181
CAM206_map2	0003.CSV	821.562	0.0308724
CAM206_map2	0003.CSV	825.419	0.0331182
CAM206_map2	0003.CSV	829.276	0.0357454
CAM206_map2	0003.CSV	833.133	0.0392432
CAM206_map2	0003.CSV	836.99	0.0440507
CAM206_map2	0003.CSV	840.847	0.0504311
CAM206_map2	0003.CSV	844.704	0.0565317
CAM206_map2	0003.CSV	848.561	0.0660973
CAM206_map2	0003.CSV	852.418	0.0771297
CAM206_map2	0003.CSV	856.275	0.0799842
CAM206_map2	0003.CSV	860.132	0.0727205
CAM206_map2	0003.CSV	863.99	0.0604126
CAM206_map2	0003.CSV	867.847	0.0467654
CAM206_map2	0003.CSV	871.704	0.0355805
CAM206_map2	0003.CSV	875.561	0.0281974
CAM206_map2	0003.CSV	879.418	0.0241625
CAM206_map2	0003.CSV	883.275	0.0216246
CAM206_map2	0003.CSV	887.132	0.0202616
CAM206_map2	0003.CSV	890.989	0.0198616
CAM206_map2	0003.CSV	894.846	0.0200642
CAM206_map2	0003.CSV	898.703	0.0202277
CAM206_map2	0003.CSV	902.561	0.0206419
CAM206_map2	0003.CSV	906.418	0.0209688
CAM206_map2	0003.CSV	910.275	0.0211346
CAM206_map2	0003.CSV	914.132	0.0210701
CAM206_map2	0003.CSV	917.989	0.0213575
CAM206_map2	0003.CSV	921.846	0.0215481
CAM206_map2	0003.CSV	925.703	0.0217769
CAM206_map2	0003.CSV	929.56	0.021982
CAM206_map2	0003.CSV	933.417	0.0222795
CAM206_map2	0003.CSV	937.274	0.0223476
CAM206_map2	0003.CSV	941.131	0.0225208
CAM206_map2	0003.CSV	944.989	0.0225569
CAM206_map2	0003.CSV	948.846	0.0227611
CAM206_map2	0003.CSV	952.703	0.0230251
CAM206_map2	0003.CSV	956.56	0.0232746
CAM206_map2	0003.CSV	960.417	0.0233051
CAM206_map2	0003.CSV	964.274	0.0235194
CAM206_map2	0003.CSV	968.131	0.0236822
CAM206_map2	0003.CSV	971.988	0.0239931
CAM206_map2	0003.CSV	975.845	0.0242465
CAM206_map2	0003.CSV	979.702	0.0245207
CAM206_map2	0003.CSV	983.559	0.0246584
CAM206_map2	0003.CSV	987.417	0.0249641
CAM206_map2	0003.CSV	991.274	0.0252345
CAM206_map2	0003.CSV	995.131	0.0256141
CAM206_map2	0003.CSV	998.988	0.02579
CAM206_map2	0003.CSV	1002.85	0.0260394
CAM206_map2	0003.CSV	1006.7	0.026299
CAM206_map2	0003.CSV	1010.56	0.0266681
CAM206_map2	0003.CSV	1014.42	0.0268884
CAM206_map2	0003.CSV	1018.27	0.0271815
CAM206_map2	0003.CSV	1022.13	0.027344
CAM206_map2	0003.CSV	1025.99	0.0276195
CAM206_map2	0003.CSV	1029.85	0.02777
CAM206_map2	0003.CSV	1033.7	0.0280738
CAM206_map2	0003.CSV	1037.56	0.0282912
CAM206_map2	0003.CSV	1041.42	0.0285509
CAM206_map2	0003.CSV	1045.27	0.0286917
CAM206_map2	0003.CSV	1049.13	0.0289053
CAM206_map2	0003.CSV	1052.99	0.028989
CAM206_map2	0003.CSV	1056.84	0.0293359
CAM206_map2	0003.CSV	1060.7	0.0297344
CAM206_map2	0003.CSV	1064.56	0.0303921
CAM206_map2	0003.CSV	1068.42	0.0310701
CAM206_map2	0003.CSV	1072.27	0.0320863
CAM206_map2	0003.CSV	1076.13	0.0336388
CAM206_map2	0003.CSV	1079.99	0.0365342
CAM206_map2	0003.CSV	1083.84	0.0365815
CAM206_map2	0003.CSV	1087.7	0.0330166
CAM206_map2	0003.CSV	1091.56	0.0310597
CAM206_map2	0003.CSV	1095.41	0.0309197
CAM206_map2	0003.CSV	1099.27	0.0309344
CAM206_map2	0003.CSV	1103.13	0.0310515
CAM206_map2	0003.CSV	1106.99	0.0311127
CAM206_map2	0003.CSV	1110.84	0.0312787
CAM206_map2	0003.CSV	1114.7	0.0312842
CAM206_map2	0003.CSV	1118.56	0.0313224
CAM206_map2	0003.CSV	1122.41	0.0313445
CAM206_map2	0003.CSV	1126.27	0.0314099
CAM206_map2	0003.CSV	1130.13	0.0313063
CAM206_map2	0003.CSV	1133.99	0.0312456
CAM206_map2	0003.CSV	1137.84	0.0311524
CAM206_map2	0003.CSV	1141.7	0.0312263
CAM206_map2	0003.CSV	1145.56	0.0312934
CAM206_map2	0003.CSV	1149.41	0.0314587
CAM206_map2	0003.CSV	1153.27	0.0315505
CAM206_map2	0003.CSV	1157.13	0.0317053
CAM206_map2	0003.CSV	1160.99	0.0318641
CAM206_map2	0003.CSV	1164.84	0.0320615
CAM206_map2	0003.CSV	1168.7	0.0321712
CAM206_map2	0003.CSV	1172.56	0.0323286
CAM206_map2	0003.CSV	1176.41	0.0324252
CAM206_map2	0003.CSV	1180.27	0.0325568
CAM206_map2	0003.CSV	1184.13	0.032411
CAM206_map2	0003.CSV	1187.99	0.0322583
CAM206_map2	0003.CSV	1191.84	0.0320042
CAM206_map2	0003.CSV	1195.7	0.0318873
CAM206_map2	0003.CSV	1199.56	0.0317968
CAM206_map2	0003.CSV	1203.41	0.0318494
CAM206_map2	0003.CSV	1207.27	0.0319395
CAM206_map2	0003.CSV	1211.13	0.0321607
CAM206_map2	0003.CSV	1214.98	0.0323168
CAM206_map2	0003.CSV	1218.84	0.0326068
CAM206_map2	0003.CSV	1222.7	0.0328151
CAM206_map2	0003.CSV	1226.56	0.0331137
CAM206_map2	0003.CSV	1230.41	0.0333681
CAM206_map2	0003.CSV	1234.27	0.0336754
CAM206_map2	0003.CSV	1238.13	0.0339303
CAM206_map2	0003.CSV	1241.98	0.0342957
CAM206_map2	0003.CSV	1245.84	0.0345804
CAM206_map2	0003.CSV	1249.7	0.0348995
CAM206_map2	0003.CSV	1253.56	0.0350526
CAM206_map2	0003.CSV	1257.41	0.0353128
CAM206_map2	0003.CSV	1261.27	0.0354757
CAM206_map2	0003.CSV	1265.13	0.0356949
CAM206_map2	0003.CSV	1268.98	0.0359922
CAM206_map2	0003.CSV	1272.84	0.0364621
CAM206_map2	0003.CSV	1276.7	0.0367982
CAM206_map2	0003.CSV	1280.56	0.0372176
CAM206_map2	0003.CSV	1284.41	0.0375764
CAM206_map2	0003.CSV	1288.27	0.0380873
CAM206_map2	0003.CSV	1292.13	0.0384495
CAM206_map2	0003.CSV	1295.98	0.0388899
CAM206_map2	0003.CSV	1299.84	0.0394118
CAM206_map2	0003.CSV	1303.7	0.0399544
CAM206_map2	0003.CSV	1307.56	0.0403372
CAM206_map2	0003.CSV	1311.41	0.0409339
CAM206_map2	0003.CSV	1315.27	0.0415464
CAM206_map2	0003.CSV	1319.13	0.0422477
CAM206_map2	0003.CSV	1322.98	0.0428008
CAM206_map2	0003.CSV	1326.84	0.0434418
CAM206_map2	0003.CSV	1330.7	0.0440669
CAM206_map2	0003.CSV	1334.56	0.0448031
CAM206_map2	0003.CSV	1338.41	0.0458669
CAM206_map2	0003.CSV	1342.27	0.0471747
CAM206_map2	0003.CSV	1346.13	0.0480007
CAM206_map2	0003.CSV	1349.98	0.0491161
CAM206_map2	0003.CSV	1353.84	0.0502507
CAM206_map2	0003.CSV	1357.7	0.0514932
CAM206_map2	0003.CSV	1361.56	0.0529357
CAM206_map2	0003.CSV	1365.41	0.0547074
CAM206_map2	0003.CSV	1369.27	0.0559216
CAM206_map2	0003.CSV	1373.13	0.0577516
CAM206_map2	0003.CSV	1376.98	0.0598678
CAM206_map2	0003.CSV	1380.84	0.0615754
CAM206_map2	0003.CSV	1384.7	0.0631294
CAM206_map2	0003.CSV	1388.56	0.0653942
CAM206_map2	0003.CSV	1392.41	0.0670413
CAM206_map2	0003.CSV	1396.27	0.0692685
CAM206_map2	0003.CSV	1400.13	0.0713222
CAM206_map2	0003.CSV	1403.98	0.0729019
CAM206_map2	0003.CSV	1407.84	0.0743456
CAM206_map2	0003.CSV	1411.7	0.0755542
CAM206_map2	0003.CSV	1415.55	0.0762242
CAM206_map2	0003.CSV	1419.41	0.0775869
CAM206_map2	0003.CSV	1423.27	0.0785899
CAM206_map2	0003.CSV	1427.12	0.0796785
CAM206_map2	0003.CSV	1430.98	0.0810322
CAM206_map2	0003.CSV	1434.84	0.0829099
CAM206_map2	0003.CSV	1438.7	0.0846705
CAM206_map2	0003.CSV	1442.55	0.0854285
CAM206_map2	0003.CSV	1446.41	0.0853515
CAM206_map2	0003.CSV	1450.27	0.0849464
CAM206_map2	0003.CSV	1454.12	0.0838464
CAM206_map2	0003.CSV	1457.98	0.083368
CAM206_map2	0003.CSV	1461.84	0.0824123
CAM206_map2	0003.CSV	1465.7	0.0816502
CAM206_map2	0003.CSV	1469.55	0.080044
CAM206_map2	0003.CSV	1473.41	0.0772775
CAM206_map2	0003.CSV	1477.27	0.0734195
CAM206_map2	0003.CSV	1481.12	0.070596
CAM206_map2	0003.CSV	1484.98	0.0679474
CAM206_map2	0003.CSV	1488.84	0.0653633
CAM206_map2	0003.CSV	1492.7	0.0625133
CAM206_map2	0003.CSV	1496.55	0.0603026
CAM206_map2	0003.CSV	1500.41	0.0578478
CAM206_map2	0003.CSV	1504.27	0.0559948
CAM206_map2	0003.CSV	1508.12	0.0535061
CAM206_map2	0003.CSV	1511.98	0.0514484
CAM206_map2	0003.CSV	1515.84	0.0493713
CAM206_map2	0003.CSV	1519.7	0.0469997
CAM206_map2	0003.CSV	1523.55	0.0443211
CAM206_map2	0003.CSV	1527.41	0.0423113
CAM206_map2	0003.CSV	1531.27	0.0406773
CAM206_map2	0003.CSV	1535.12	0.0396384
CAM206_map2	0003.CSV	1538.98	0.038632
CAM206_map2	0003.CSV	1542.84	0.0372943
CAM206_map2	0003.CSV	1546.7	0.0352268
CAM206_map2	0003.CSV	1550.55	0.0334779
CAM206_map2	0003.CSV	1554.41	0.031839
CAM206_map2	0003.CSV	1558.27	0.0305862
CAM206_map2	0003.CSV	1562.12	0.0293284
CAM206_map2	0003.CSV	1565.98	0.02842
CAM206_map2	0003.CSV	1569.84	0.0277318
CAM206_map2	0003.CSV	1573.69	0.0271392
CAM206_map2	0003.CSV	1577.55	0.0262883
CAM206_map2	0003.CSV	1581.41	0.024911
CAM206_map2	0003.CSV	1585.27	0.0234466
CAM206_map2	0003.CSV	1589.12	0.0223749
CAM206_map2	0003.CSV	1592.98	0.0217427
CAM206_map2	0003.CSV	1596.84	0.0214073
CAM206_map2	0003.CSV	1600.69	0.0211481
CAM206_map2	0003.CSV	1604.55	0.0210713
CAM206_map2	0003.CSV	1608.41	0.020989
CAM206_map2	0003.CSV	1612.27	0.0207349
CAM206_map2	0003.CSV	1616.12	0.0205644
CAM206_map2	0003.CSV	1619.98	0.0205903
CAM206_map2	0003.CSV	1623.84	0.0203825
CAM206_map2	0003.CSV	1627.69	0.020217
CAM206_map2	0003.CSV	1631.55	0.0196913
CAM206_map2	0003.CSV	1635.41	0.0198415
CAM206_map2	0003.CSV	1639.27	0.020118
CAM206_map2	0003.CSV	1643.12	0.0196093
CAM206_map2	0003.CSV	1646.98	0.0195844
CAM206_map2	0003.CSV	1650.84	0.0198287
CAM206_map2	0003.CSV	1654.69	0.0200213
CAM206_map2	0003.CSV	1658.55	0.0196184
CAM206_map2	0003.CSV	1662.41	0.0191802
CAM206_map2	0003.CSV	1666.27	0.0189012
CAM206_map2	0003.CSV	1670.12	0.018874
CAM206_map2	0003.CSV	1673.98	0.0190067
CAM206_map2	0003.CSV	1677.84	0.0185167
CAM206_map2	0003.CSV	1681.69	0.01824
CAM206_map2	0003.CSV	1685.55	0.0185557
CAM206_map2	0003.CSV	1689.41	0.018248
CAM206_map2	0003.CSV	1693.27	0.0175021
CAM206_map2	0003.CSV	1697.12	0.0173199
CAM206_map2	0003.CSV	1700.98	0.0174656
CAM206_map2	0003.CSV	1704.84	0.0173846
CAM206_map2	0003.CSV	1708.69	0.0170314
CAM206_map2	0003.CSV	1712.55	0.0166443
CAM206_map2	0003.CSV	1716.41	0.0170156
CAM206_map2	0003.CSV	1720.27	0.0173772
CAM206_map2	0003.CSV	1724.12	0.0169456
[truncated: 59,274 more rows]

## Sheet: CAM206_map3
Map	Select spectrum number	Wavenumbers	Absorbance
CAM206_map3	0001.CSV	674.992	0.0259648
CAM206_map3	0001.CSV	678.849	0.0272699
CAM206_map3	0001.CSV	682.706	0.0278506
CAM206_map3	0001.CSV	686.563	0.0287016
CAM206_map3	0001.CSV	690.42	0.0306845
CAM206_map3	0001.CSV	694.277	0.0359976
CAM206_map3	0001.CSV	698.134	0.0418632
CAM206_map3	0001.CSV	701.991	0.0401126
CAM206_map3	0001.CSV	705.849	0.0374104
CAM206_map3	0001.CSV	709.706	0.0470581
CAM206_map3	0001.CSV	713.563	0.0497111
CAM206_map3	0001.CSV	717.42	0.0357539
CAM206_map3	0001.CSV	721.277	0.0252911
CAM206_map3	0001.CSV	725.134	0.0234896
CAM206_map3	0001.CSV	728.991	0.0231326
CAM206_map3	0001.CSV	732.848	0.0234257
CAM206_map3	0001.CSV	736.705	0.0235897
CAM206_map3	0001.CSV	740.562	0.0240175
CAM206_map3	0001.CSV	744.42	0.0240366
CAM206_map3	0001.CSV	748.277	0.0244538
CAM206_map3	0001.CSV	752.134	0.0246173
CAM206_map3	0001.CSV	755.991	0.0252905
CAM206_map3	0001.CSV	759.848	0.0257218
CAM206_map3	0001.CSV	763.705	0.0262311
CAM206_map3	0001.CSV	767.562	0.0262646
CAM206_map3	0001.CSV	771.419	0.0269254
CAM206_map3	0001.CSV	775.276	0.0272197
CAM206_map3	0001.CSV	779.133	0.0278678
CAM206_map3	0001.CSV	782.99	0.0281706
CAM206_map3	0001.CSV	786.848	0.0286567
CAM206_map3	0001.CSV	790.705	0.0290382
CAM206_map3	0001.CSV	794.562	0.0296716
CAM206_map3	0001.CSV	798.419	0.0301067
CAM206_map3	0001.CSV	802.276	0.0310511
CAM206_map3	0001.CSV	806.133	0.031787
CAM206_map3	0001.CSV	809.99	0.0329606
CAM206_map3	0001.CSV	813.847	0.0340836
CAM206_map3	0001.CSV	817.704	0.0360043
CAM206_map3	0001.CSV	821.562	0.0384227
CAM206_map3	0001.CSV	825.419	0.041894
CAM206_map3	0001.CSV	829.276	0.0458694
CAM206_map3	0001.CSV	833.133	0.0515296
CAM206_map3	0001.CSV	836.99	0.0595458
CAM206_map3	0001.CSV	840.847	0.0703499
CAM206_map3	0001.CSV	844.704	0.0806647
CAM206_map3	0001.CSV	848.561	0.0937338
CAM206_map3	0001.CSV	852.418	0.103586
CAM206_map3	0001.CSV	856.275	0.0995744
CAM206_map3	0001.CSV	860.132	0.0847212
CAM206_map3	0001.CSV	863.99	0.0674115
CAM206_map3	0001.CSV	867.847	0.0505098
CAM206_map3	0001.CSV	871.704	0.0368569
CAM206_map3	0001.CSV	875.561	0.0283371
CAM206_map3	0001.CSV	879.418	0.024673
CAM206_map3	0001.CSV	883.275	0.0228636
CAM206_map3	0001.CSV	887.132	0.0221685
CAM206_map3	0001.CSV	890.989	0.0220086
CAM206_map3	0001.CSV	894.846	0.0223365
CAM206_map3	0001.CSV	898.703	0.022547
CAM206_map3	0001.CSV	902.561	0.0230236
CAM206_map3	0001.CSV	906.418	0.0235062
CAM206_map3	0001.CSV	910.275	0.0238471
CAM206_map3	0001.CSV	914.132	0.0238348
CAM206_map3	0001.CSV	917.989	0.0241543
CAM206_map3	0001.CSV	921.846	0.0243765
CAM206_map3	0001.CSV	925.703	0.0248654
CAM206_map3	0001.CSV	929.56	0.0251509
CAM206_map3	0001.CSV	933.417	0.0253878
CAM206_map3	0001.CSV	937.274	0.025464
CAM206_map3	0001.CSV	941.131	0.0257711
CAM206_map3	0001.CSV	944.989	0.0259616
CAM206_map3	0001.CSV	948.846	0.0262816
CAM206_map3	0001.CSV	952.703	0.0265422
CAM206_map3	0001.CSV	956.56	0.02692
CAM206_map3	0001.CSV	960.417	0.0270443
CAM206_map3	0001.CSV	964.274	0.0272764
CAM206_map3	0001.CSV	968.131	0.0274969
CAM206_map3	0001.CSV	971.988	0.0280159
CAM206_map3	0001.CSV	975.845	0.0284242
CAM206_map3	0001.CSV	979.702	0.0288651
CAM206_map3	0001.CSV	983.559	0.029057
CAM206_map3	0001.CSV	987.417	0.0294238
CAM206_map3	0001.CSV	991.274	0.0297468
CAM206_map3	0001.CSV	995.131	0.0301959
CAM206_map3	0001.CSV	998.988	0.0304558
CAM206_map3	0001.CSV	1002.85	0.030866
CAM206_map3	0001.CSV	1006.7	0.0311623
CAM206_map3	0001.CSV	1010.56	0.0316625
CAM206_map3	0001.CSV	1014.42	0.0319276
CAM206_map3	0001.CSV	1018.27	0.0321631
CAM206_map3	0001.CSV	1022.13	0.0322843
CAM206_map3	0001.CSV	1025.99	0.0327012
CAM206_map3	0001.CSV	1029.85	0.0329658
CAM206_map3	0001.CSV	1033.7	0.0333428
CAM206_map3	0001.CSV	1037.56	0.0335199
CAM206_map3	0001.CSV	1041.42	0.0338331
CAM206_map3	0001.CSV	1045.27	0.0340058
CAM206_map3	0001.CSV	1049.13	0.0343745
CAM206_map3	0001.CSV	1052.99	0.0346302
CAM206_map3	0001.CSV	1056.84	0.0351821
CAM206_map3	0001.CSV	1060.7	0.035709
CAM206_map3	0001.CSV	1064.56	0.0365872
CAM206_map3	0001.CSV	1068.42	0.0373551
CAM206_map3	0001.CSV	1072.27	0.0384545
CAM206_map3	0001.CSV	1076.13	0.0403789
CAM206_map3	0001.CSV	1079.99	0.0442031
CAM206_map3	0001.CSV	1083.84	0.0446705
CAM206_map3	0001.CSV	1087.7	0.0400429
CAM206_map3	0001.CSV	1091.56	0.0369859
CAM206_map3	0001.CSV	1095.41	0.0367199
CAM206_map3	0001.CSV	1099.27	0.0368589
CAM206_map3	0001.CSV	1103.13	0.037138
CAM206_map3	0001.CSV	1106.99	0.0373181
CAM206_map3	0001.CSV	1110.84	0.037639
CAM206_map3	0001.CSV	1114.7	0.0377614
CAM206_map3	0001.CSV	1118.56	0.0378217
CAM206_map3	0001.CSV	1122.41	0.0377807
CAM206_map3	0001.CSV	1126.27	0.0380348
CAM206_map3	0001.CSV	1130.13	0.0380994
CAM206_map3	0001.CSV	1133.99	0.0382924
CAM206_map3	0001.CSV	1137.84	0.0384668
CAM206_map3	0001.CSV	1141.7	0.03874
CAM206_map3	0001.CSV	1145.56	0.038901
CAM206_map3	0001.CSV	1149.41	0.0392151
CAM206_map3	0001.CSV	1153.27	0.0394079
CAM206_map3	0001.CSV	1157.13	0.0396741
CAM206_map3	0001.CSV	1160.99	0.0397967
CAM206_map3	0001.CSV	1164.84	0.0400851
CAM206_map3	0001.CSV	1168.7	0.0402655
CAM206_map3	0001.CSV	1172.56	0.0405248
CAM206_map3	0001.CSV	1176.41	0.0406661
CAM206_map3	0001.CSV	1180.27	0.0408309
CAM206_map3	0001.CSV	1184.13	0.0407046
CAM206_map3	0001.CSV	1187.99	0.0405064
CAM206_map3	0001.CSV	1191.84	0.0401233
CAM206_map3	0001.CSV	1195.7	0.0399695
CAM206_map3	0001.CSV	1199.56	0.0398448
CAM206_map3	0001.CSV	1203.41	0.0399533
CAM206_map3	0001.CSV	1207.27	0.0400276
CAM206_map3	0001.CSV	1211.13	0.040285
CAM206_map3	0001.CSV	1214.98	0.0404627
CAM206_map3	0001.CSV	1218.84	0.0407691
CAM206_map3	0001.CSV	1222.7	0.0410563
CAM206_map3	0001.CSV	1226.56	0.0414711
CAM206_map3	0001.CSV	1230.41	0.041805
CAM206_map3	0001.CSV	1234.27	0.042317
CAM206_map3	0001.CSV	1238.13	0.0426821
CAM206_map3	0001.CSV	1241.98	0.0430801
CAM206_map3	0001.CSV	1245.84	0.0433835
CAM206_map3	0001.CSV	1249.7	0.0437684
CAM206_map3	0001.CSV	1253.56	0.0439103
CAM206_map3	0001.CSV	1257.41	0.0440805
CAM206_map3	0001.CSV	1261.27	0.0441479
CAM206_map3	0001.CSV	1265.13	0.0444721
CAM206_map3	0001.CSV	1268.98	0.044907
CAM206_map3	0001.CSV	1272.84	0.0455787
CAM206_map3	0001.CSV	1276.7	0.0460957
CAM206_map3	0001.CSV	1280.56	0.0466863
CAM206_map3	0001.CSV	1284.41	0.0470831
CAM206_map3	0001.CSV	1288.27	0.0476639
CAM206_map3	0001.CSV	1292.13	0.0481554
CAM206_map3	0001.CSV	1295.98	0.0487394
CAM206_map3	0001.CSV	1299.84	0.0492824
CAM206_map3	0001.CSV	1303.7	0.0499508
CAM206_map3	0001.CSV	1307.56	0.0504765
CAM206_map3	0001.CSV	1311.41	0.0511642
CAM206_map3	0001.CSV	1315.27	0.0518845
CAM206_map3	0001.CSV	1319.13	0.0528431
CAM206_map3	0001.CSV	1322.98	0.0535098
CAM206_map3	0001.CSV	1326.84	0.0543366
CAM206_map3	0001.CSV	1330.7	0.0552246
CAM206_map3	0001.CSV	1334.56	0.0562561
CAM206_map3	0001.CSV	1338.41	0.0576239
CAM206_map3	0001.CSV	1342.27	0.0593477
CAM206_map3	0001.CSV	1346.13	0.0604866
CAM206_map3	0001.CSV	1349.98	0.0619995
CAM206_map3	0001.CSV	1353.84	0.063567
CAM206_map3	0001.CSV	1357.7	0.0653179
CAM206_map3	0001.CSV	1361.56	0.0672228
CAM206_map3	0001.CSV	1365.41	0.0695886
CAM206_map3	0001.CSV	1369.27	0.0712591
CAM206_map3	0001.CSV	1373.13	0.0735444
CAM206_map3	0001.CSV	1376.98	0.0761679
CAM206_map3	0001.CSV	1380.84	0.0783662
CAM206_map3	0001.CSV	1384.7	0.0802858
CAM206_map3	0001.CSV	1388.56	0.0829869
CAM206_map3	0001.CSV	1392.41	0.0849532
CAM206_map3	0001.CSV	1396.27	0.0877394
CAM206_map3	0001.CSV	1400.13	0.0904042
CAM206_map3	0001.CSV	1403.98	0.0926814
CAM206_map3	0001.CSV	1407.84	0.0949742
CAM206_map3	0001.CSV	1411.7	0.0972094
CAM206_map3	0001.CSV	1415.55	0.0987375
CAM206_map3	0001.CSV	1419.41	0.100977
CAM206_map3	0001.CSV	1423.27	0.10268
CAM206_map3	0001.CSV	1427.12	0.104508
CAM206_map3	0001.CSV	1430.98	0.10651
CAM206_map3	0001.CSV	1434.84	0.109319
CAM206_map3	0001.CSV	1438.7	0.112238
CAM206_map3	0001.CSV	1442.55	0.114139
CAM206_map3	0001.CSV	1446.41	0.114842
CAM206_map3	0001.CSV	1450.27	0.114861
CAM206_map3	0001.CSV	1454.12	0.113505
CAM206_map3	0001.CSV	1457.98	0.112068
CAM206_map3	0001.CSV	1461.84	0.110467
CAM206_map3	0001.CSV	1465.7	0.109506
CAM206_map3	0001.CSV	1469.55	0.107356
CAM206_map3	0001.CSV	1473.41	0.102923
CAM206_map3	0001.CSV	1477.27	0.0969607
CAM206_map3	0001.CSV	1481.12	0.0930071
CAM206_map3	0001.CSV	1484.98	0.0891744
CAM206_map3	0001.CSV	1488.84	0.0850326
CAM206_map3	0001.CSV	1492.7	0.0808129
CAM206_map3	0001.CSV	1496.55	0.0778001
CAM206_map3	0001.CSV	1500.41	0.0743508
CAM206_map3	0001.CSV	1504.27	0.0719439
CAM206_map3	0001.CSV	1508.12	0.0677611
CAM206_map3	0001.CSV	1511.98	0.0646469
CAM206_map3	0001.CSV	1515.84	0.0619343
CAM206_map3	0001.CSV	1519.7	0.0586947
CAM206_map3	0001.CSV	1523.55	0.0549227
CAM206_map3	0001.CSV	1527.41	0.0522657
CAM206_map3	0001.CSV	1531.27	0.0499764
CAM206_map3	0001.CSV	1535.12	0.0484289
CAM206_map3	0001.CSV	1538.98	0.046804
CAM206_map3	0001.CSV	1542.84	0.0440883
CAM206_map3	0001.CSV	1546.7	0.0414492
CAM206_map3	0001.CSV	1550.55	0.0393645
CAM206_map3	0001.CSV	1554.41	0.0372553
CAM206_map3	0001.CSV	1558.27	0.0354008
CAM206_map3	0001.CSV	1562.12	0.0336576
CAM206_map3	0001.CSV	1565.98	0.0324112
CAM206_map3	0001.CSV	1569.84	0.0310612
CAM206_map3	0001.CSV	1573.69	0.0298364
CAM206_map3	0001.CSV	1577.55	0.0279758
CAM206_map3	0001.CSV	1581.41	0.025854
CAM206_map3	0001.CSV	1585.27	0.0239233
CAM206_map3	0001.CSV	1589.12	0.0225106
CAM206_map3	0001.CSV	1592.98	0.0215652
CAM206_map3	0001.CSV	1596.84	0.0208858
CAM206_map3	0001.CSV	1600.69	0.0204223
CAM206_map3	0001.CSV	1604.55	0.0203161
CAM206_map3	0001.CSV	1608.41	0.0201228
CAM206_map3	0001.CSV	1612.27	0.0197846
CAM206_map3	0001.CSV	1616.12	0.0195151
CAM206_map3	0001.CSV	1619.98	0.0194271
CAM206_map3	0001.CSV	1623.84	0.0191059
CAM206_map3	0001.CSV	1627.69	0.0188804
CAM206_map3	0001.CSV	1631.55	0.0182678
CAM206_map3	0001.CSV	1635.41	0.0182532
CAM206_map3	0001.CSV	1639.27	0.0184546
CAM206_map3	0001.CSV	1643.12	0.0180171
CAM206_map3	0001.CSV	1646.98	0.0178808
CAM206_map3	0001.CSV	1650.84	0.0180199
CAM206_map3	0001.CSV	1654.69	0.0182083
CAM206_map3	0001.CSV	1658.55	0.0178455
CAM206_map3	0001.CSV	1662.41	0.0174475
CAM206_map3	0001.CSV	1666.27	0.017205
CAM206_map3	0001.CSV	1670.12	0.0170918
CAM206_map3	0001.CSV	1673.98	0.0172113
CAM206_map3	0001.CSV	1677.84	0.0167085
CAM206_map3	0001.CSV	1681.69	0.0163923
CAM206_map3	0001.CSV	1685.55	0.0166953
CAM206_map3	0001.CSV	1689.41	0.01655
CAM206_map3	0001.CSV	1693.27	0.0159389
CAM206_map3	0001.CSV	1697.12	0.0159542
CAM206_map3	0001.CSV	1700.98	0.0162335
CAM206_map3	0001.CSV	1704.84	0.0161954
CAM206_map3	0001.CSV	1708.69	0.0158506
CAM206_map3	0001.CSV	1712.55	0.0154219
CAM206_map3	0001.CSV	1716.41	0.0158373
CAM206_map3	0001.CSV	1720.27	0.0164149
CAM206_map3	0001.CSV	1724.12	0.0160592
CAM206_map3	0001.CSV	1727.98	0.0158249
CAM206_map3	0001.CSV	1731.84	0.0158809
CAM206_map3	0001.CSV	1735.69	0.0162953
CAM206_map3	0001.CSV	1739.55	0.0158883
CAM206_map3	0001.CSV	1743.41	0.0153603
CAM206_map3	0001.CSV	1747.27	0.0149611
CAM206_map3	0001.CSV	1751.12	0.0147944
CAM206_map3	0001.CSV	1754.98	0.0142677
CAM206_map3	0001.CSV	1758.84	0.0139939
CAM206_map3	0001.CSV	1762.69	0.013864
CAM206_map3	0001.CSV	1766.55	0.0136461
CAM206_map3	0001.CSV	1770.41	0.0138762
CAM206_map3	0001.CSV	1774.26	0.0149312
CAM206_map3	0001.CSV	1778.12	0.0155073
CAM206_map3	0001.CSV	1781.98	0.0162831
CAM206_map3	0001.CSV	1785.84	0.0165942
CAM206_map3	0001.CSV	1789.69	0.0162858
CAM206_map3	0001.CSV	1793.55	0.0156445
CAM206_map3	0001.CSV	1797.41	0.0149142
CAM206_map3	0001.CSV	1801.26	0.0141741
CAM206_map3	0001.CSV	1805.12	0.0135847
CAM206_map3	0001.CSV	1808.98	0.013246
CAM206_map3	0001.CSV	1812.84	0.0132225
CAM206_map3	0001.CSV	1816.69	0.0130142
CAM206_map3	0001.CSV	1820.55	0.0128856
CAM206_map3	0001.CSV	1824.41	0.0128221
CAM206_map3	0001.CSV	1828.26	0.0130968
CAM206_map3	0001.CSV	1832.12	0.0132238
CAM206_map3	0001.CSV	1835.98	0.0130925
CAM206_map3	0001.CSV	1839.84	0.0128393
CAM206_map3	0001.CSV	1843.69	0.0129938
CAM206_map3	0001.CSV	1847.55	0.0132843
CAM206_map3	0001.CSV	1851.41	0.0131646
CAM206_map3	0001.CSV	1855.26	0.0130203
CAM206_map3	0001.CSV	1859.12	0.01307
CAM206_map3	0001.CSV	1862.98	0.0129976
CAM206_map3	0001.CSV	1866.84	0.0130871
CAM206_map3	0001.CSV	1870.69	0.0134194
CAM206_map3	0001.CSV	1874.55	0.0132425
CAM206_map3	0001.CSV	1878.41	0.0130434
CAM206_map3	0001.CSV	1882.26	0.0130608
CAM206_map3	0001.CSV	1886.12	0.0130678
CAM206_map3	0001.CSV	1889.98	0.0131565
CAM206_map3	0001.CSV	1893.83	0.0132106
CAM206_map3	0001.CSV	1897.69	0.0131856
CAM206_map3	0001.CSV	1901.55	0.0130521
CAM206_map3	0001.CSV	1905.41	0.0130299
CAM206_map3	0001.CSV	1909.26	0.0131149
CAM206_map3	0001.CSV	1913.12	0.0131229
CAM206_map3	0001.CSV	1916.98	0.0130411
CAM206_map3	0001.CSV	1920.83	0.0131685
CAM206_map3	0001.CSV	1924.69	0.0132493
CAM206_map3	0001.CSV	1928.55	0.0132031
CAM206_map3	0001.CSV	1932.4	0.0131541
CAM206_map3	0001.CSV	1936.26	0.0131783
CAM206_map3	0001.CSV	1940.12	0.0131625
CAM206_map3	0001.CSV	1943.98	0.0133898
CAM206_map3	0001.CSV	1947.83	0.0134269
CAM206_map3	0001.CSV	1951.69	0.0133485
CAM206_map3	0001.CSV	1955.55	0.013328
CAM206_map3	0001.CSV	1959.4	0.0133752
CAM206_map3	0001.CSV	1963.26	0.0133553
CAM206_map3	0001.CSV	1967.12	0.0134744
CAM206_map3	0001.CSV	1970.98	0.0134794
CAM206_map3	0001.CSV	1974.83	0.0134086
CAM206_map3	0001.CSV	1978.69	0.0134102
CAM206_map3	0001.CSV	1982.55	0.0134582
CAM206_map3	0001.CSV	1986.4	0.0134203
CAM206_map3	0001.CSV	1990.26	0.0135012
CAM206_map3	0001.CSV	1994.12	0.0135606
CAM206_map3	0001.CSV	1997.98	0.0134858
CAM206_map3	0001.CSV	2001.83	0.0134872
CAM206_map3	0001.CSV	2005.69	0.0135788
CAM206_map3	0001.CSV	2009.55	0.01358
CAM206_map3	0001.CSV	2013.4	0.0135372
CAM206_map3	0001.CSV	2017.26	0.0135836
CAM206_map3	0001.CSV	2021.12	0.0136743
CAM206_map3	0001.CSV	2024.97	0.0136286
CAM206_map3	0001.CSV	2028.83	0.013616
CAM206_map3	0001.CSV	2032.69	0.0135774
CAM206_map3	0001.CSV	2036.55	0.0135732
CAM206_map3	0001.CSV	2040.4	0.0136077
CAM206_map3	0001.CSV	2044.26	0.0136716
CAM206_map3	0001.CSV	2048.12	0.0136487
CAM206_map3	0001.CSV	2051.97	0.0136484
CAM206_map3	0001.CSV	2055.83	0.0136622
CAM206_map3	0001.CSV	2059.69	0.0137137
CAM206_map3	0001.CSV	2063.55	0.0137248
CAM206_map3	0001.CSV	2067.4	0.0137826
CAM206_map3	0001.CSV	2071.26	0.0137801
CAM206_map3	0001.CSV	2075.12	0.0137858
CAM206_map3	0001.CSV	2078.97	0.0137866
CAM206_map3	0001.CSV	2082.83	0.0138348
CAM206_map3	0001.CSV	2086.69	0.013879
CAM206_map3	0001.CSV	2090.55	0.0139548
CAM206_map3	0001.CSV	2094.4	0.0139482
CAM206_map3	0001.CSV	2098.26	0.0139322
CAM206_map3	0001.CSV	2102.12	0.0139371
CAM206_map3	0001.CSV	2105.97	0.0140055
CAM206_map3	0001.CSV	2109.83	0.0140005
CAM206_map3	0001.CSV	2113.69	0.0140067
CAM206_map3	0001.CSV	2117.55	0.0140202
CAM206_map3	0001.CSV	2121.4	0.0140542
CAM206_map3	0001.CSV	2125.26	0.0140331
CAM206_map3	0001.CSV	2129.12	0.0140463
CAM206_map3	0001.CSV	2132.97	0.0140605
CAM206_map3	0001.CSV	2136.83	0.0141082
CAM206_map3	0001.CSV	2140.69	0.014116
CAM206_map3	0001.CSV	2144.55	0.0141101
CAM206_map3	0001.CSV	2148.4	0.0141273
CAM206_map3	0001.CSV	2152.26	0.0141643
CAM206_map3	0001.CSV	2156.12	0.0141344
CAM206_map3	0001.CSV	2159.97	0.0141031
CAM206_map3	0001.CSV	2163.83	0.0140527
CAM206_map3	0001.CSV	2167.69	0.0140844
CAM206_map3	0001.CSV	2171.55	0.0141616
CAM206_map3	0001.CSV	2175.4	0.0142078
CAM206_map3	0001.CSV	2179.26	0.0141959
CAM206_map3	0001.CSV	2183.12	0.0142328
CAM206_map3	0001.CSV	2186.97	0.0142633
CAM206_map3	0001.CSV	2190.83	0.0142723
CAM206_map3	0001.CSV	2194.69	0.0142691
CAM206_map3	0001.CSV	2198.55	0.0142344
CAM206_map3	0001.CSV	2202.4	0.0141778
CAM206_map3	0001.CSV	2206.26	0.0141756
CAM206_map3	0001.CSV	2210.12	0.0141665
CAM206_map3	0001.CSV	2213.97	0.0141715
CAM206_map3	0001.CSV	2217.83	0.0141619
CAM206_map3	0001.CSV	2221.69	0.0141799
CAM206_map3	0001.CSV	2225.54	0.0142038
CAM206_map3	0001.CSV	2229.4	0.0142264
CAM206_map3	0001.CSV	2233.26	0.0142028
CAM206_map3	0001.CSV	2237.12	0.0141686
CAM206_map3	0001.CSV	2240.97	0.0141605
CAM206_map3	0001.CSV	2244.83	0.0141612
CAM206_map3	0001.CSV	2248.69	0.014138
CAM206_map3	0001.CSV	2252.54	0.0141532
CAM206_map3	0001.CSV	2256.4	0.0141382
CAM206_map3	0001.CSV	2260.26	0.0141314
CAM206_map3	0001.CSV	2264.11	0.0141286
CAM206_map3	0001.CSV	2267.97	0.0141261
CAM206_map3	0001.CSV	2271.83	0.0140809
CAM206_map3	0001.CSV	2275.69	0.0140576
CAM206_map3	0001.CSV	2279.54	0.0140473
CAM206_map3	0001.CSV	2283.4	0.0139808
CAM206_map3	0001.CSV	2287.26	0.0138793
CAM206_map3	0001.CSV	2291.11	0.0138954
CAM206_map3	0001.CSV	2294.97	0.0139118
CAM206_map3	0001.CSV	2298.83	0.0138745
CAM206_map3	0001.CSV	2302.69	0.0137778
CAM206_map3	0001.CSV	2306.54	0.0136842
CAM206_map3	0001.CSV	2310.4	0.0135968
CAM206_map3	0001.CSV	2314.26	0.013376
CAM206_map3	0001.CSV	2318.11	0.0128674
CAM206_map3	0001.CSV	2321.97	0.0122713
CAM206_map3	0001.CSV	2325.83	0.0115667
CAM206_map3	0001.CSV	2329.69	0.0112127
CAM206_map3	0001.CSV	2333.54	0.0110569
CAM206_map3	0001.CSV	2337.4	0.0107732
CAM206_map3	0001.CSV	2341.26	0.0111448
CAM206_map3	0001.CSV	2345.11	0.0123326
CAM206_map3	0001.CSV	2348.97	0.0122468
CAM206_map3	0001.CSV	2352.83	0.010885
CAM206_map3	0001.CSV	2356.69	0.00841163
CAM206_map3	0001.CSV	2360.54	0.00735432
CAM206_map3	0001.CSV	2364.4	0.00874488
CAM206_map3	0001.CSV	2368.26	0.0111278
CAM206_map3	0001.CSV	2372.11	0.0130656
CAM206_map3	0001.CSV	2375.97	0.0139591
CAM206_map3	0001.CSV	2379.83	0.0141906
CAM206_map3	0001.CSV	2383.69	0.0141693
CAM206_map3	0001.CSV	2387.54	0.0140004
CAM206_map3	0001.CSV	2391.4	0.013871
CAM206_map3	0001.CSV	2395.26	0.0138418
CAM206_map3	0001.CSV	2399.11	0.013814
CAM206_map3	0001.CSV	2402.97	0.0137917
CAM206_map3	0001.CSV	2406.83	0.0138055
CAM206_map3	0001.CSV	2410.68	0.0137905
CAM206_map3	0001.CSV	2414.54	0.0138141
CAM206_map3	0001.CSV	2418.4	0.013835
CAM206_map3	0001.CSV	2422.26	0.0138136
CAM206_map3	0001.CSV	2426.11	0.0138049
CAM206_map3	0001.CSV	2429.97	0.0138335
CAM206_map3	0001.CSV	2433.83	0.0138317
CAM206_map3	0001.CSV	2437.68	0.013823
CAM206_map3	0001.CSV	2441.54	0.0138425
CAM206_map3	0001.CSV	2445.4	0.0138548
CAM206_map3	0001.CSV	2449.26	0.0138395
CAM206_map3	0001.CSV	2453.11	0.0138413
CAM206_map3	0001.CSV	2456.97	0.0138511
CAM206_map3	0001.CSV	2460.83	0.0138679
CAM206_map3	0001.CSV	2464.68	0.0139182
CAM206_map3	0001.CSV	2468.54	0.0139758
CAM206_map3	0001.CSV	2472.4	0.0140175
CAM206_map3	0001.CSV	2476.26	0.0141117
CAM206_map3	0001.CSV	2480.11	0.0142245
CAM206_map3	0001.CSV	2483.97	0.0143478
CAM206_map3	0001.CSV	2487.83	0.0144672
CAM206_map3	0001.CSV	2491.68	0.0145667
CAM206_map3	0001.CSV	2495.54	0.0146625
CAM206_map3	0001.CSV	2499.4	0.0146855
CAM206_map3	0001.CSV	2503.26	0.014656
CAM206_map3	0001.CSV	2507.11	0.0146655
CAM206_map3	0001.CSV	2510.97	0.014687
CAM206_map3	0001.CSV	2514.83	0.014745
CAM206_map3	0001.CSV	2518.68	0.0148967
CAM206_map3	0001.CSV	2522.54	0.0149521
CAM206_map3	0001.CSV	2526.4	0.0148719
CAM206_map3	0001.CSV	2530.26	0.0147281
CAM206_map3	0001.CSV	2534.11	0.0145206
CAM206_map3	0001.CSV	2537.97	0.0144135
CAM206_map3	0001.CSV	2541.83	0.0144456
CAM206_map3	0001.CSV	2545.68	0.0144402
CAM206_map3	0001.CSV	2549.54	0.0143504
CAM206_map3	0001.CSV	2553.4	0.014282
CAM206_map3	0001.CSV	2557.26	0.0142116
CAM206_map3	0001.CSV	2561.11	0.0141315
CAM206_map3	0001.CSV	2564.97	0.0140056
CAM206_map3	0001.CSV	2568.83	0.0139496
CAM206_map3	0001.CSV	2572.68	0.0139728
CAM206_map3	0001.CSV	2576.54	0.0139723
CAM206_map3	0001.CSV	2580.4	0.0139121
CAM206_map3	0001.CSV	2584.25	0.013877
CAM206_map3	0001.CSV	2588.11	0.0138432
CAM206_map3	0001.CSV	2591.97	0.0137919
CAM206_map3	0001.CSV	2595.83	0.0137439
CAM206_map3	0001.CSV	2599.68	0.013752
CAM206_map3	0001.CSV	2603.54	0.0137653
CAM206_map3	0001.CSV	2607.4	0.0137886
CAM206_map3	0001.CSV	2611.25	0.0137623
CAM206_map3	0001.CSV	2615.11	0.0137377
CAM206_map3	0001.CSV	2618.97	0.0137252
CAM206_map3	0001.CSV	2622.82	0.0138312
CAM206_map3	0001.CSV	2626.68	0.0139302
CAM206_map3	0001.CSV	2630.54	0.0139181
CAM206_map3	0001.CSV	2634.4	0.0139808
CAM206_map3	0001.CSV	2638.25	0.0139898
CAM206_map3	0001.CSV	2642.11	0.0138236
CAM206_map3	0001.CSV	2645.97	0.0136567
CAM206_map3	0001.CSV	2649.82	0.0135256
CAM206_map3	0001.CSV	2653.68	0.0134937
CAM206_map3	0001.CSV	2657.54	0.0135305
CAM206_map3	0001.CSV	2661.4	0.0135014
CAM206_map3	0001.CSV	2665.25	0.013427
CAM206_map3	0001.CSV	2669.11	0.0134517
CAM206_map3	0001.CSV	2672.97	0.0136176
CAM206_map3	0001.CSV	2676.82	0.0138978
CAM206_map3	0001.CSV	2680.68	0.0138822
CAM206_map3	0001.CSV	2684.54	0.0134973
CAM206_map3	0001.CSV	2688.4	0.0133079
CAM206_map3	0001.CSV	2692.25	0.0133301
CAM206_map3	0001.CSV	2696.11	0.0133963
CAM206_map3	0001.CSV	2699.97	0.0134183
CAM206_map3	0001.CSV	2703.82	0.0133845
CAM206_map3	0001.CSV	2707.68	0.0134164
CAM206_map3	0001.CSV	2711.54	0.0134576
CAM206_map3	0001.CSV	2715.4	0.0134902
CAM206_map3	0001.CSV	2719.25	0.013637
CAM206_map3	0001.CSV	2723.11	0.0139304
CAM206_map3	0001.CSV	2726.97	0.0139095
CAM206_map3	0001.CSV	2730.82	0.0136043
CAM206_map3	0001.CSV	2734.68	0.0136192
CAM206_map3	0001.CSV	2738.54	0.0136652
CAM206_map3	0001.CSV	2742.4	0.0136723
CAM206_map3	0001.CSV	2746.25	0.0139384
CAM206_map3	0001.CSV	2750.11	0.0140025
CAM206_map3	0001.CSV	2753.97	0.0137934
CAM206_map3	0001.CSV	2757.82	0.0136994
CAM206_map3	0001.CSV	2761.68	0.0136285
CAM206_map3	0001.CSV	2765.54	0.0135864
CAM206_map3	0001.CSV	2769.39	0.0137199
CAM206_map3	0001.CSV	2773.25	0.014066
CAM206_map3	0001.CSV	2777.11	0.0140342
CAM206_map3	0001.CSV	2780.97	0.0138116
CAM206_map3	0001.CSV	2784.82	0.0139744
CAM206_map3	0001.CSV	2788.68	0.0143483
CAM206_map3	0001.CSV	2792.54	0.0144684
CAM206_map3	0001.CSV	2796.39	0.0144741
CAM206_map3	0001.CSV	2800.25	0.0143086
CAM206_map3	0001.CSV	2804.11	0.0141345
CAM206_map3	0001.CSV	2807.97	0.0143326
CAM206_map3	0001.CSV	2811.82	0.0143728
CAM206_map3	0001.CSV	2815.68	0.0142545
CAM206_map3	0001.CSV	2819.54	0.0143215
CAM206_map3	0001.CSV	2823.39	0.0144223
CAM206_map3	0001.CSV	2827.25	0.0144709
CAM206_map3	0001.CSV	2831.11	0.0148724
CAM206_map3	0001.CSV	2834.97	0.0155727
CAM206_map3	0001.CSV	2838.82	0.016064
CAM206_map3	0001.CSV	2842.68	0.0166891
CAM206_map3	0001.CSV	2846.54	0.0181148
CAM206_map3	0001.CSV	2850.39	0.0189212
CAM206_map3	0001.CSV	2854.25	0.0184154
CAM206_map3	0001.CSV	2858.11	0.0177646
CAM206_map3	0001.CSV	2861.97	0.0171334
CAM206_map3	0001.CSV	2865.82	0.0167155
CAM206_map3	0001.CSV	2869.68	0.016863
CAM206_map3	0001.CSV	2873.54	0.0169571
CAM206_map3	0001.CSV	2877.39	0.0164392
CAM206_map3	0001.CSV	2881.25	0.0160598
CAM206_map3	0001.CSV	2885.11	0.0160237
CAM206_map3	0001.CSV	2888.97	0.0162509
CAM206_map3	0001.CSV	2892.82	0.0168221
CAM206_map3	0001.CSV	2896.68	0.0172411
CAM206_map3	0001.CSV	2900.54	0.0174704
CAM206_map3	0001.CSV	2904.39	0.018067
CAM206_map3	0001.CSV	2908.25	0.0192037
CAM206_map3	0001.CSV	2912.11	0.0210924
CAM206_map3	0001.CSV	2915.97	0.0226848
CAM206_map3	0001.CSV	2919.82	0.0227396
CAM206_map3	0001.CSV	2923.68	0.021804
CAM206_map3	0001.CSV	2927.54	0.0210535
CAM206_map3	0001.CSV	2931.39	0.0200596
CAM206_map3	0001.CSV	2935.25	0.0187956
CAM206_map3	0001.CSV	2939.11	0.0181985
CAM206_map3	0001.CSV	2942.96	0.0182808
CAM206_map3	0001.CSV	2946.82	0.0181704
CAM206_map3	0001.CSV	2950.68	0.0177616
CAM206_map3	0001.CSV	2954.54	0.0172607
CAM206_map3	0001.CSV	2958.39	0.01681
CAM206_map3	0001.CSV	2962.25	0.016557
CAM206_map3	0001.CSV	2966.11	0.0160561
CAM206_map3	0001.CSV	2969.96	0.0158671
CAM206_map3	0001.CSV	2973.82	0.0160887
CAM206_map3	0001.CSV	2977.68	0.0161391
CAM206_map3	0001.CSV	2981.53	0.0156973
CAM206_map3	0001.CSV	2985.39	0.0149894
CAM206_map3	0001.CSV	2989.25	0.0149312
CAM206_map3	0001.CSV	2993.11	0.0152215
CAM206_map3	0001.CSV	2996.96	0.0150712
CAM206_map3	0001.CSV	3000.82	0.0146587
CAM206_map3	0001.CSV	3004.68	0.0144638
CAM206_map3	0001.CSV	3008.53	0.0147238
CAM206_map3	0001.CSV	3012.39	0.0151046
CAM206_map3	0001.CSV	3016.25	0.0151344
CAM206_map3	0001.CSV	3020.11	0.0148606
CAM206_map3	0001.CSV	3023.96	0.0146036
CAM206_map3	0001.CSV	3027.82	0.0145718
CAM206_map3	0001.CSV	3031.68	0.0148518
CAM206_map3	0001.CSV	3035.53	0.0149349
CAM206_map3	0001.CSV	3039.39	0.0150042
CAM206_map3	0001.CSV	3043.25	0.0151435
CAM206_map3	0001.CSV	3047.11	0.015045
CAM206_map3	0001.CSV	3050.96	0.0150067
CAM206_map3	0001.CSV	3054.82	0.0148932
CAM206_map3	0001.CSV	3058.68	0.0146526
CAM206_map3	0001.CSV	3062.53	0.014702
CAM206_map3	0001.CSV	3066.39	0.0150367
CAM206_map3	0001.CSV	3070.25	0.0149696
CAM206_map3	0001.CSV	3074.11	0.0149559
CAM206_map3	0001.CSV	3077.96	0.0152312
CAM206_map3	0001.CSV	3081.82	0.0154085
CAM206_map3	0001.CSV	3085.68	0.0153922
CAM206_map3	0001.CSV	3089.53	0.0152363
CAM206_map3	0001.CSV	3093.39	0.0149729
CAM206_map3	0001.CSV	3097.25	0.0149867
CAM206_map3	0001.CSV	3101.11	0.0150613
CAM206_map3	0001.CSV	3104.96	0.0151171
CAM206_map3	0001.CSV	3108.82	0.0153823
CAM206_map3	0001.CSV	3112.68	0.0155322
CAM206_map3	0001.CSV	3116.53	0.015645
CAM206_map3	0001.CSV	3120.39	0.0155681
CAM206_map3	0001.CSV	3124.25	0.0152428
CAM206_map3	0001.CSV	3128.11	0.015147
CAM206_map3	0001.CSV	3131.96	0.0151651
CAM206_map3	0001.CSV	3135.82	0.0153018
CAM206_map3	0001.CSV	3139.68	0.0154022
CAM206_map3	0001.CSV	3143.53	0.015178
CAM206_map3	0001.CSV	3147.39	0.0152259
CAM206_map3	0001.CSV	3151.25	0.0155822
CAM206_map3	0001.CSV	3155.1	0.0155758
CAM206_map3	0001.CSV	3158.96	0.0152501
CAM206_map3	0001.CSV	3162.82	0.0150577
CAM206_map3	0001.CSV	3166.68	0.0149591
CAM206_map3	0001.CSV	3170.53	0.0149096
CAM206_map3	0001.CSV	3174.39	0.0148896
CAM206_map3	0001.CSV	3178.25	0.0150583
CAM206_map3	0001.CSV	3182.1	0.0151842
CAM206_map3	0001.CSV	3185.96	0.0152575
CAM206_map3	0001.CSV	3189.82	0.0153106
CAM206_map3	0001.CSV	3193.68	0.0152061
CAM206_map3	0001.CSV	3197.53	0.0151898
CAM206_map3	0001.CSV	3201.39	0.015344
CAM206_map3	0001.CSV	3205.25	0.0154841
CAM206_map3	0001.CSV	3209.1	0.015474
CAM206_map3	0001.CSV	3212.96	0.0154974
CAM206_map3	0001.CSV	3216.82	0.0156367
CAM206_map3	0001.CSV	3220.68	0.0156541
CAM206_map3	0001.CSV	3224.53	0.0156607
CAM206_map3	0001.CSV	3228.39	0.0159396
CAM206_map3	0001.CSV	3232.25	0.0162856
CAM206_map3	0001.CSV	3236.1	0.0161641
CAM206_map3	0001.CSV	3239.96	0.0159998
CAM206_map3	0001.CSV	3243.82	0.0163025
CAM206_map3	0001.CSV	3247.68	0.0164627
CAM206_map3	0001.CSV	3251.53	0.0161964
CAM206_map3	0001.CSV	3255.39	0.0161658
CAM206_map3	0001.CSV	3259.25	0.0159837
CAM206_map3	0001.CSV	3263.1	0.0159477
CAM206_map3	0001.CSV	3266.96	0.0163693
CAM206_map3	0001.CSV	3270.82	0.0167647
CAM206_map3	0001.CSV	3274.68	0.01663
CAM206_map3	0001.CSV	3278.53	0.0163391
CAM206_map3	0001.CSV	3282.39	0.016164
CAM206_map3	0001.CSV	3286.25	0.0162033
CAM206_map3	0001.CSV	3290.1	0.0166569
CAM206_map3	0001.CSV	3293.96	0.0170041
CAM206_map3	0001.CSV	3297.82	0.0167832
CAM206_map3	0001.CSV	3301.67	0.0167257
CAM206_map3	0001.CSV	3305.53	0.0169318
CAM206_map3	0001.CSV	3309.39	0.0168644
CAM206_map3	0001.CSV	3313.25	0.0164077
CAM206_map3	0001.CSV	3317.1	0.0160426
CAM206_map3	0001.CSV	3320.96	0.0161551
CAM206_map3	0001.CSV	3324.82	0.0164604
CAM206_map3	0001.CSV	3328.67	0.0162682
CAM206_map3	0001.CSV	3332.53	0.0161367
CAM206_map3	0001.CSV	3336.39	0.0166125
CAM206_map3	0001.CSV	3340.24	0.0169135
CAM206_map3	0001.CSV	3344.1	0.0166831
CAM206_map3	0001.CSV	3347.96	0.0165467
CAM206_map3	0001.CSV	3351.82	0.0164134
CAM206_map3	0001.CSV	3355.67	0.0162599
CAM206_map3	0001.CSV	3359.53	0.0164937
CAM206_map3	0001.CSV	3363.39	0.0167804
CAM206_map3	0001.CSV	3367.24	0.0169997
CAM206_map3	0001.CSV	3371.1	0.0168607
CAM206_map3	0001.CSV	3374.96	0.0165022
CAM206_map3	0001.CSV	3378.82	0.0162445
CAM206_map3	0001.CSV	3382.67	0.0159395
CAM206_map3	0001.CSV	3386.53	0.0160607
CAM206_map3	0001.CSV	3390.39	0.0165213
CAM206_map3	0001.CSV	3394.24	0.0167731
CAM206_map3	0001.CSV	3398.1	0.0167935
CAM206_map3	0001.CSV	3401.96	0.0166433
CAM206_map3	0001.CSV	3405.82	0.0163471
CAM206_map3	0001.CSV	3409.67	0.0162294
CAM206_map3	0001.CSV	3413.53	0.0159999
CAM206_map3	0001.CSV	3417.39	0.0155892
CAM206_map3	0001.CSV	3421.24	0.015418
CAM206_map3	0001.CSV	3425.1	0.0156199
CAM206_map3	0001.CSV	3428.96	0.0160159
CAM206_map3	0001.CSV	3432.82	0.0162303
CAM206_map3	0001.CSV	3436.67	0.0159019
CAM206_map3	0001.CSV	3440.53	0.0152076
CAM206_map3	0001.CSV	3444.39	0.0148455
CAM206_map3	0001.CSV	3448.24	0.0147663
CAM206_map3	0001.CSV	3452.1	0.0145295
CAM206_map3	0001.CSV	3455.96	0.0145275
CAM206_map3	0001.CSV	3459.82	0.0149287
CAM206_map3	0001.CSV	3463.67	0.015327
CAM206_map3	0001.CSV	3467.53	0.0154977
CAM206_map3	0001.CSV	3471.39	0.0150992
CAM206_map3	0001.CSV	3475.24	0.0147574
CAM206_map3	0001.CSV	3479.1	0.0147432
CAM206_map3	0001.CSV	3482.96	0.0145996
CAM206_map3	0001.CSV	3486.82	0.0146464
CAM206_map3	0001.CSV	3490.67	0.0146075
CAM206_map3	0001.CSV	3494.53	0.014561
CAM206_map3	0001.CSV	3498.39	0.0144638
CAM206_map3	0001.CSV	3502.24	0.014292
CAM206_map3	0001.CSV	3506.1	0.0138968
CAM206_map3	0001.CSV	3509.96	0.0136911
CAM206_map3	0001.CSV	3513.81	0.0138186
CAM206_map3	0001.CSV	3517.67	0.0134152
CAM206_map3	0001.CSV	3521.53	0.0134185
CAM206_map3	0001.CSV	3525.39	0.0135446
CAM206_map3	0001.CSV	3529.24	0.0132644
CAM206_map3	0001.CSV	3533.1	0.0132595
CAM206_map3	0001.CSV	3536.96	0.0134676
CAM206_map3	0001.CSV	3540.81	0.0135312
CAM206_map3	0001.CSV	3544.67	0.0137339
CAM206_map3	0001.CSV	3548.53	0.01358
CAM206_map3	0001.CSV	3552.39	0.0129928
CAM206_map3	0001.CSV	3556.24	0.0127018
CAM206_map3	0001.CSV	3560.1	0.012553
CAM206_map3	0001.CSV	3563.96	0.0120709
CAM206_map3	0001.CSV	3567.81	0.0125062
CAM206_map3	0001.CSV	3571.67	0.012631
CAM206_map3	0001.CSV	3575.53	0.0120921
CAM206_map3	0001.CSV	3579.39	0.0123252
CAM206_map3	0001.CSV	3583.24	0.0124209
CAM206_map3	0001.CSV	3587.1	0.0124883
CAM206_map3	0001.CSV	3590.96	0.0124531
CAM206_map3	0001.CSV	3594.81	0.0120504
CAM206_map3	0001.CSV	3598.67	0.0122264
CAM206_map3	0001.CSV	3602.53	0.0120556
CAM206_map3	0001.CSV	3606.39	0.0112664
CAM206_map3	0001.CSV	3610.24	0.0109932
CAM206_map3	0001.CSV	3614.1	0.0111478
CAM206_map3	0001.CSV	3617.96	0.011558
CAM206_map3	0001.CSV	3621.81	0.0117631
CAM206_map3	0001.CSV	3625.67	0.0108098
CAM206_map3	0001.CSV	3629.53	0.0108488
CAM206_map3	0001.CSV	3633.39	0.0117061
CAM206_map3	0001.CSV	3637.24	0.0114217
CAM206_map3	0001.CSV	3641.1	0.0109501
CAM206_map3	0001.CSV	3644.96	0.0101324
CAM206_map3	0001.CSV	3648.81	0.01072
CAM206_map3	0001.CSV	3652.67	0.0119178
CAM206_map3	0001.CSV	3656.53	0.0119937
CAM206_map3	0001.CSV	3660.38	0.0118974
CAM206_map3	0001.CSV	3664.24	0.0108248
CAM206_map3	0001.CSV	3668.1	0.00981985
CAM206_map3	0001.CSV	3671.96	0.00989259
CAM206_map3	0001.CSV	3675.81	0.0106396
CAM206_map3	0001.CSV	3679.67	0.0113231
CAM206_map3	0001.CSV	3683.53	0.0109666
CAM206_map3	0001.CSV	3687.38	0.0108327
CAM206_map3	0001.CSV	3691.24	0.0119081
CAM206_map3	0001.CSV	3695.1	0.0116981
CAM206_map3	0001.CSV	3698.95	0.0110205
CAM206_map3	0001.CSV	3702.81	0.0108127
CAM206_map3	0001.CSV	3706.67	0.0101528
CAM206_map3	0001.CSV	3710.53	0.0100716
CAM206_map3	0001.CSV	3714.38	0.0110824
CAM206_map3	0001.CSV	3718.24	0.0105235
CAM206_map3	0001.CSV	3722.1	0.0100401
CAM206_map3	0001.CSV	3725.95	0.0100504
CAM206_map3	0001.CSV	3729.81	0.00965263
CAM206_map3	0001.CSV	3733.67	0.00987395
CAM206_map3	0001.CSV	3737.53	0.0114658
CAM206_map3	0001.CSV	3741.38	0.0106119
CAM206_map3	0001.CSV	3745.24	0.00922475
CAM206_map3	0001.CSV	3749.1	0.00907389
CAM206_map3	0001.CSV	3752.95	0.0102919
CAM206_map3	0001.CSV	3756.81	0.0105324
CAM206_map3	0001.CSV	3760.67	0.0106158
CAM206_map3	0001.CSV	3764.53	0.0103023
CAM206_map3	0001.CSV	3768.38	0.0103264
CAM206_map3	0001.CSV	3772.24	0.0107043
CAM206_map3	0001.CSV	3776.1	0.0105264
CAM206_map3	0001.CSV	3779.95	0.0106195
CAM206_map3	0001.CSV	3783.81	0.0106495
CAM206_map3	0001.CSV	3787.67	0.0106145
CAM206_map3	0001.CSV	3791.53	0.0102477
CAM206_map3	0001.CSV	3795.38	0.0095253
CAM206_map3	0001.CSV	3799.24	0.00925636
CAM206_map3	0001.CSV	3803.1	0.00997249
CAM206_map3	0001.CSV	3806.95	0.010605
CAM206_map3	0001.CSV	3810.81	0.0101773
CAM206_map3	0001.CSV	3814.67	0.00947531
CAM206_map3	0001.CSV	3818.53	0.00977515
CAM206_map3	0001.CSV	3822.38	0.010377
CAM206_map3	0001.CSV	3826.24	0.0101395
CAM206_map3	0001.CSV	3830.1	0.00972385
CAM206_map3	0001.CSV	3833.95	0.00945387
CAM206_map3	0001.CSV	3837.81	0.0095677
CAM206_map3	0001.CSV	3841.67	0.0106569
CAM206_map3	0001.CSV	3845.53	0.0105094
CAM206_map3	0001.CSV	3849.38	0.00909101
CAM206_map3	0001.CSV	3853.24	0.00892349
CAM206_map3	0001.CSV	3857.1	0.010269
CAM206_map3	0001.CSV	3860.95	0.00966635
CAM206_map3	0001.CSV	3864.81	0.00960889
CAM206_map3	0001.CSV	3868.67	0.00986178
CAM206_map3	0001.CSV	3872.52	0.0102762
CAM206_map3	0001.CSV	3876.38	0.010076
CAM206_map3	0001.CSV	3880.24	0.00976864
CAM206_map3	0001.CSV	3884.1	0.0103858
CAM206_map3	0001.CSV	3887.95	0.010417
CAM206_map3	0001.CSV	3891.81	0.0102782
CAM206_map3	0001.CSV	3895.67	0.0099254
CAM206_map3	0001.CSV	3899.52	0.00926401
CAM206_map3	0001.CSV	3903.38	0.0101882
CAM206_map3	0001.CSV	3907.24	0.010808
CAM206_map3	0001.CSV	3911.1	0.0101602
CAM206_map3	0001.CSV	3914.95	0.00966455
CAM206_map3	0001.CSV	3918.81	0.00994476
CAM206_map3	0001.CSV	3922.67	0.0102176
CAM206_map3	0001.CSV	3926.52	0.010223
CAM206_map3	0001.CSV	3930.38	0.0103377
CAM206_map3	0001.CSV	3934.24	0.010743
CAM206_map3	0001.CSV	3938.09	0.0104121
CAM206_map3	0001.CSV	3941.95	0.0101946
CAM206_map3	0001.CSV	3945.81	0.010231
CAM206_map3	0001.CSV	3949.67	0.0102895
CAM206_map3	0001.CSV	3953.52	0.0103124
CAM206_map3	0001.CSV	3957.38	0.0102498
CAM206_map3	0001.CSV	3961.24	0.0102794
CAM206_map3	0001.CSV	3965.09	0.0102162
CAM206_map3	0001.CSV	3968.95	0.0101435
CAM206_map3	0001.CSV	3972.81	0.0103151
CAM206_map3	0001.CSV	3976.67	0.0104217
CAM206_map3	0001.CSV	3980.52	0.0103743
CAM206_map3	0001.CSV	3984.38	0.0103698
CAM206_map3	0001.CSV	3988.24	0.0101989
CAM206_map3	0001.CSV	3992.09	0.0102384
CAM206_map3	0001.CSV	3995.95	0.0103532
CAM206_map3	0001.CSV	3999.81	0.0102593
CAM206_map3	0002.CSV	674.992	0.0192612
CAM206_map3	0002.CSV	678.849	0.0197212
CAM206_map3	0002.CSV	682.706	0.019876
CAM206_map3	0002.CSV	686.563	0.0207011
CAM206_map3	0002.CSV	690.42	0.0220897
CAM206_map3	0002.CSV	694.277	0.0261387
CAM206_map3	0002.CSV	698.134	0.0309067
CAM206_map3	0002.CSV	701.991	0.029335
CAM206_map3	0002.CSV	705.849	0.0274005
CAM206_map3	0002.CSV	709.706	0.0348576
CAM206_map3	0002.CSV	713.563	0.0359959
CAM206_map3	0002.CSV	717.42	0.0248649
CAM206_map3	0002.CSV	721.277	0.0175031
CAM206_map3	0002.CSV	725.134	0.0164304
CAM206_map3	0002.CSV	728.991	0.0162276
CAM206_map3	0002.CSV	732.848	0.0162772
CAM206_map3	0002.CSV	736.705	0.0164754
CAM206_map3	0002.CSV	740.562	0.0170433
CAM206_map3	0002.CSV	744.42	0.0172975
CAM206_map3	0002.CSV	748.277	0.0177142
CAM206_map3	0002.CSV	752.134	0.0178108
CAM206_map3	0002.CSV	755.991	0.018007
CAM206_map3	0002.CSV	759.848	0.0183578
CAM206_map3	0002.CSV	763.705	0.0187066
CAM206_map3	0002.CSV	767.562	0.0187255
CAM206_map3	0002.CSV	771.419	0.0191346
CAM206_map3	0002.CSV	775.276	0.0193598
CAM206_map3	0002.CSV	779.133	0.0197447
CAM206_map3	0002.CSV	782.99	0.0199544
CAM206_map3	0002.CSV	786.848	0.0206658
CAM206_map3	0002.CSV	790.705	0.0211251
CAM206_map3	0002.CSV	794.562	0.0215006
CAM206_map3	0002.CSV	798.419	0.0217929
CAM206_map3	0002.CSV	802.276	0.0223509
CAM206_map3	0002.CSV	806.133	0.0229017
CAM206_map3	0002.CSV	809.99	0.0237535
CAM206_map3	0002.CSV	813.847	0.0244037
CAM206_map3	0002.CSV	817.704	0.0256339
CAM206_map3	0002.CSV	821.562	0.0271012
CAM206_map3	0002.CSV	825.419	0.0293511
CAM206_map3	0002.CSV	829.276	0.031779
CAM206_map3	0002.CSV	833.133	0.0348719
CAM206_map3	0002.CSV	836.99	0.0392214
CAM206_map3	0002.CSV	840.847	0.0451988
CAM206_map3	0002.CSV	844.704	0.0510403
CAM206_map3	0002.CSV	848.561	0.0597294
CAM206_map3	0002.CSV	852.418	0.0685361
CAM206_map3	0002.CSV	856.275	0.069626
CAM206_map3	0002.CSV	860.132	0.0629752
CAM206_map3	0002.CSV	863.99	0.0527887
CAM206_map3	0002.CSV	867.847	0.0410099
CAM206_map3	0002.CSV	871.704	0.030251
CAM206_map3	0002.CSV	875.561	0.0229283
CAM206_map3	0002.CSV	879.418	0.0196574
CAM206_map3	0002.CSV	883.275	0.0182923
CAM206_map3	0002.CSV	887.132	0.0177978
CAM206_map3	0002.CSV	890.989	0.0176517
CAM206_map3	0002.CSV	894.846	0.0177838
CAM206_map3	0002.CSV	898.703	0.0179113
CAM206_map3	0002.CSV	902.561	0.0182127
CAM206_map3	0002.CSV	906.418	0.0184699
CAM206_map3	0002.CSV	910.275	0.0186765
CAM206_map3	0002.CSV	914.132	0.0187293
CAM206_map3	0002.CSV	917.989	0.0189126
CAM206_map3	0002.CSV	921.846	0.0190854
CAM206_map3	0002.CSV	925.703	0.0194673
CAM206_map3	0002.CSV	929.56	0.0196372
CAM206_map3	0002.CSV	933.417	0.0197706
CAM206_map3	0002.CSV	937.274	0.0198446
CAM206_map3	0002.CSV	941.131	0.0200342
CAM206_map3	0002.CSV	944.989	0.0201893
CAM206_map3	0002.CSV	948.846	0.0204488
CAM206_map3	0002.CSV	952.703	0.0205563
CAM206_map3	0002.CSV	956.56	0.020769
CAM206_map3	0002.CSV	960.417	0.0209043
CAM206_map3	0002.CSV	964.274	0.0210648
CAM206_map3	0002.CSV	968.131	0.0212101
CAM206_map3	0002.CSV	971.988	0.0215319
CAM206_map3	0002.CSV	975.845	0.0217773
CAM206_map3	0002.CSV	979.702	0.0221898
CAM206_map3	0002.CSV	983.559	0.0224453
CAM206_map3	0002.CSV	987.417	0.0227028
CAM206_map3	0002.CSV	991.274	0.022888
CAM206_map3	0002.CSV	995.131	0.0231408
CAM206_map3	0002.CSV	998.988	0.0233235
CAM206_map3	0002.CSV	1002.85	0.023627
CAM206_map3	0002.CSV	1006.7	0.0238938
CAM206_map3	0002.CSV	1010.56	0.0242316
CAM206_map3	0002.CSV	1014.42	0.0243901
CAM206_map3	0002.CSV	1018.27	0.0245743
CAM206_map3	0002.CSV	1022.13	0.0246674
CAM206_map3	0002.CSV	1025.99	0.0249333
CAM206_map3	0002.CSV	1029.85	0.0251426
CAM206_map3	0002.CSV	1033.7	0.0254494
CAM206_map3	0002.CSV	1037.56	0.0256055
CAM206_map3	0002.CSV	1041.42	0.0258272
CAM206_map3	0002.CSV	1045.27	0.0258592
CAM206_map3	0002.CSV	1049.13	0.0260161
CAM206_map3	0002.CSV	1052.99	0.0261699
CAM206_map3	0002.CSV	1056.84	0.026532
CAM206_map3	0002.CSV	1060.7	0.0267883
CAM206_map3	0002.CSV	1064.56	0.0272022
CAM206_map3	0002.CSV	1068.42	0.0276042
CAM206_map3	0002.CSV	1072.27	0.028228
CAM206_map3	0002.CSV	1076.13	0.0293531
CAM206_map3	0002.CSV	1079.99	0.0315156
CAM206_map3	0002.CSV	1083.84	0.0314302
CAM206_map3	0002.CSV	1087.7	0.0286314
CAM206_map3	0002.CSV	1091.56	0.0271354
CAM206_map3	0002.CSV	1095.41	0.0271782
CAM206_map3	0002.CSV	1099.27	0.0273273
CAM206_map3	0002.CSV	1103.13	0.027481
CAM206_map3	0002.CSV	1106.99	0.0276037
CAM206_map3	0002.CSV	1110.84	0.0278823
CAM206_map3	0002.CSV	1114.7	0.0280006
CAM206_map3	0002.CSV	1118.56	0.0280361
CAM206_map3	0002.CSV	1122.41	0.0280267
CAM206_map3	0002.CSV	1126.27	0.0281782
CAM206_map3	0002.CSV	1130.13	0.0282349
CAM206_map3	0002.CSV	1133.99	0.0283848
CAM206_map3	0002.CSV	1137.84	0.0284915
CAM206_map3	0002.CSV	1141.7	0.0286481
CAM206_map3	0002.CSV	1145.56	0.0287639
CAM206_map3	0002.CSV	1149.41	0.0289215
CAM206_map3	0002.CSV	1153.27	0.0289909
CAM206_map3	0002.CSV	1157.13	0.0291684
CAM206_map3	0002.CSV	1160.99	0.0292884
CAM206_map3	0002.CSV	1164.84	0.0294342
CAM206_map3	0002.CSV	1168.7	0.0295067
CAM206_map3	0002.CSV	1172.56	0.0296307
CAM206_map3	0002.CSV	1176.41	0.0296954
CAM206_map3	0002.CSV	1180.27	0.029794
CAM206_map3	0002.CSV	1184.13	0.0297065
CAM206_map3	0002.CSV	1187.99	0.029615
CAM206_map3	0002.CSV	1191.84	0.0294617
CAM206_map3	0002.CSV	1195.7	0.02936
CAM206_map3	0002.CSV	1199.56	0.0292477
CAM206_map3	0002.CSV	1203.41	0.0293307
CAM206_map3	0002.CSV	1207.27	0.0294028
CAM206_map3	0002.CSV	1211.13	0.0295627
CAM206_map3	0002.CSV	1214.98	0.0296949
CAM206_map3	0002.CSV	1218.84	0.0298464
CAM206_map3	0002.CSV	1222.7	0.0299597
CAM206_map3	0002.CSV	1226.56	0.0301613
CAM206_map3	0002.CSV	1230.41	0.0303313
CAM206_map3	0002.CSV	1234.27	0.0306381
CAM206_map3	0002.CSV	1238.13	0.0308214
CAM206_map3	0002.CSV	1241.98	0.0309905
CAM206_map3	0002.CSV	1245.84	0.03116
CAM206_map3	0002.CSV	1249.7	0.031392
CAM206_map3	0002.CSV	1253.56	0.0314448
CAM206_map3	0002.CSV	1257.41	0.0315359
CAM206_map3	0002.CSV	1261.27	0.0316302
CAM206_map3	0002.CSV	1265.13	0.0318808
CAM206_map3	0002.CSV	1268.98	0.0321073
CAM206_map3	0002.CSV	1272.84	0.0324436
CAM206_map3	0002.CSV	1276.7	0.0327257
CAM206_map3	0002.CSV	1280.56	0.0330485
CAM206_map3	0002.CSV	1284.41	0.0332697
CAM206_map3	0002.CSV	1288.27	0.0336487
CAM206_map3	0002.CSV	1292.13	0.0340046
CAM206_map3	0002.CSV	1295.98	0.0343578
CAM206_map3	0002.CSV	1299.84	0.0346579
CAM206_map3	0002.CSV	1303.7	0.0350487
CAM206_map3	0002.CSV	1307.56	0.0353942
CAM206_map3	0002.CSV	1311.41	0.0358224
CAM206_map3	0002.CSV	1315.27	0.0362828
CAM206_map3	0002.CSV	1319.13	0.036912
CAM206_map3	0002.CSV	1322.98	0.0373653
CAM206_map3	0002.CSV	1326.84	0.0378802
CAM206_map3	0002.CSV	1330.7	0.0384349
CAM206_map3	0002.CSV	1334.56	0.0390399
CAM206_map3	0002.CSV	1338.41	0.0399226
CAM206_map3	0002.CSV	1342.27	0.0410561
CAM206_map3	0002.CSV	1346.13	0.0417338
CAM206_map3	0002.CSV	1349.98	0.0426576
CAM206_map3	0002.CSV	1353.84	0.0436688
CAM206_map3	0002.CSV	1357.7	0.0447748
CAM206_map3	0002.CSV	1361.56	0.0459851
CAM206_map3	0002.CSV	1365.41	0.0475086
CAM206_map3	0002.CSV	1369.27	0.0485379
CAM206_map3	0002.CSV	1373.13	0.0500091
CAM206_map3	0002.CSV	1376.98	0.0517955
CAM206_map3	0002.CSV	1380.84	0.0531877
CAM206_map3	0002.CSV	1384.7	0.0543584
CAM206_map3	0002.CSV	1388.56	0.0561076
CAM206_map3	0002.CSV	1392.41	0.0573209
CAM206_map3	0002.CSV	1396.27	0.0590495
CAM206_map3	0002.CSV	1400.13	0.0608334
CAM206_map3	0002.CSV	1403.98	0.0622307
CAM206_map3	0002.CSV	1407.84	0.0634801
CAM206_map3	0002.CSV	1411.7	0.06455
CAM206_map3	0002.CSV	1415.55	0.0652262
CAM206_map3	0002.CSV	1419.41	0.0664368
CAM206_map3	0002.CSV	1423.27	0.0672088
CAM206_map3	0002.CSV	1427.12	0.0678942
CAM206_map3	0002.CSV	1430.98	0.0686088
CAM206_map3	0002.CSV	1434.84	0.0696299
CAM206_map3	0002.CSV	1438.7	0.0705265
CAM206_map3	0002.CSV	1442.55	0.0706414
CAM206_map3	0002.CSV	1446.41	0.0700373
CAM206_map3	0002.CSV	1450.27	0.0692342
CAM206_map3	0002.CSV	1454.12	0.0680474
CAM206_map3	0002.CSV	1457.98	0.0674902
CAM206_map3	0002.CSV	1461.84	0.0666971
CAM206_map3	0002.CSV	1465.7	0.066111
CAM206_map3	0002.CSV	1469.55	0.0649864
CAM206_map3	0002.CSV	1473.41	0.0633072
CAM206_map3	0002.CSV	1477.27	0.0609025
CAM206_map3	0002.CSV	1481.12	0.0590223
CAM206_map3	0002.CSV	1484.98	0.0572052
CAM206_map3	0002.CSV	1488.84	0.0554977
CAM206_map3	0002.CSV	1492.7	0.0535885
CAM206_map3	0002.CSV	1496.55	0.0520639
CAM206_map3	0002.CSV	1500.41	0.0503446
CAM206_map3	0002.CSV	1504.27	0.0489379
CAM206_map3	0002.CSV	1508.12	0.0469637
CAM206_map3	0002.CSV	1511.98	0.0452898
CAM206_map3	0002.CSV	1515.84	0.0435295
CAM206_map3	0002.CSV	1519.7	0.0415214
CAM206_map3	0002.CSV	1523.55	0.0394207
CAM206_map3	0002.CSV	1527.41	0.0376844
CAM206_map3	0002.CSV	1531.27	0.0359626
CAM206_map3	0002.CSV	1535.12	0.0347869
CAM206_map3	0002.CSV	1538.98	0.0337433
CAM206_map3	0002.CSV	1542.84	0.0324445
CAM206_map3	0002.CSV	1546.7	0.0308242
CAM206_map3	0002.CSV	1550.55	0.0294141
CAM206_map3	0002.CSV	1554.41	0.0279961
CAM206_map3	0002.CSV	1558.27	0.0270005
CAM206_map3	0002.CSV	1562.12	0.0260311
CAM206_map3	0002.CSV	1565.98	0.025115
CAM206_map3	0002.CSV	1569.84	0.0243117
CAM206_map3	0002.CSV	1573.69	0.0235758
CAM206_map3	0002.CSV	1577.55	0.0225786
CAM206_map3	0002.CSV	1581.41	0.0212808
CAM206_map3	0002.CSV	1585.27	0.0200154
CAM206_map3	0002.CSV	1589.12	0.0191511
CAM206_map3	0002.CSV	1592.98	0.018658
CAM206_map3	0002.CSV	1596.84	0.0183325
CAM206_map3	0002.CSV	1600.69	0.0180717
CAM206_map3	0002.CSV	1604.55	0.018088
CAM206_map3	0002.CSV	1608.41	0.0180778
CAM206_map3	0002.CSV	1612.27	0.0178826
CAM206_map3	0002.CSV	1616.12	0.0177792
CAM206_map3	0002.CSV	1619.98	0.0177438
CAM206_map3	0002.CSV	1623.84	0.0175695
CAM206_map3	0002.CSV	1627.69	0.0174953
CAM206_map3	0002.CSV	1631.55	0.0170241
CAM206_map3	0002.CSV	1635.41	0.0171225
CAM206_map3	0002.CSV	1639.27	0.0174451
CAM206_map3	0002.CSV	1643.12	0.0170408
CAM206_map3	0002.CSV	1646.98	0.0169722
CAM206_map3	0002.CSV	1650.84	0.0171738
CAM206_map3	0002.CSV	1654.69	0.0175384
CAM206_map3	0002.CSV	1658.55	0.0172031
CAM206_map3	0002.CSV	1662.41	0.0168714
CAM206_map3	0002.CSV	1666.27	0.016662
CAM206_map3	0002.CSV	1670.12	0.0165322
CAM206_map3	0002.CSV	1673.98	0.0166832
CAM206_map3	0002.CSV	1677.84	0.0163417
CAM206_map3	0002.CSV	1681.69	0.0161305
CAM206_map3	0002.CSV	1685.55	0.0164743
CAM206_map3	0002.CSV	1689.41	0.0163162
CAM206_map3	0002.CSV	1693.27	0.0157522
CAM206_map3	0002.CSV	1697.12	0.0157228
CAM206_map3	0002.CSV	1700.98	0.01606
CAM206_map3	0002.CSV	1704.84	0.0160636
CAM206_map3	0002.CSV	1708.69	0.015785
CAM206_map3	0002.CSV	1712.55	0.0153794
CAM206_map3	0002.CSV	1716.41	0.0157744
CAM206_map3	0002.CSV	1720.27	0.01627
CAM206_map3	0002.CSV	1724.12	0.0159091
CAM206_map3	0002.CSV	1727.98	0.0156666
CAM206_map3	0002.CSV	1731.84	0.0157247
CAM206_map3	0002.CSV	1735.69	0.016086
CAM206_map3	0002.CSV	1739.55	0.0157321
CAM206_map3	0002.CSV	1743.41	0.0153107
CAM206_map3	0002.CSV	1747.27	0.0151194
CAM206_map3	0002.CSV	1751.12	0.0151597
CAM206_map3	0002.CSV	1754.98	0.0147183
CAM206_map3	0002.CSV	1758.84	0.0144699
CAM206_map3	0002.CSV	1762.69	0.0144278
CAM206_map3	0002.CSV	1766.55	0.0142328
CAM206_map3	0002.CSV	1770.41	0.0143656
CAM206_map3	0002.CSV	1774.26	0.0151078
CAM206_map3	0002.CSV	1778.12	0.0153238
CAM206_map3	0002.CSV	1781.98	0.0156305
CAM206_map3	0002.CSV	1785.84	0.0156779
CAM206_map3	0002.CSV	1789.69	0.0154273
CAM206_map3	0002.CSV	1793.55	0.015236
CAM206_map3	0002.CSV	1797.41	0.0148698
CAM206_map3	0002.CSV	1801.26	0.014499
CAM206_map3	0002.CSV	1805.12	0.0142169
CAM206_map3	0002.CSV	1808.98	0.014041
CAM206_map3	0002.CSV	1812.84	0.0141415
CAM206_map3	0002.CSV	1816.69	0.0140047
CAM206_map3	0002.CSV	1820.55	0.0138631
CAM206_map3	0002.CSV	1824.41	0.0138045
CAM206_map3	0002.CSV	1828.26	0.0140852
CAM206_map3	0002.CSV	1832.12	0.0141969
CAM206_map3	0002.CSV	1835.98	0.0140741
CAM206_map3	0002.CSV	1839.84	0.013897
CAM206_map3	0002.CSV	1843.69	0.0140516
CAM206_map3	0002.CSV	1847.55	0.0142584
CAM206_map3	0002.CSV	1851.41	0.0140949
CAM206_map3	0002.CSV	1855.26	0.0139712
CAM206_map3	0002.CSV	1859.12	0.0139815
CAM206_map3	0002.CSV	1862.98	0.0138706
CAM206_map3	0002.CSV	1866.84	0.0139565
CAM206_map3	0002.CSV	1870.69	0.0143537
CAM206_map3	0002.CSV	1874.55	0.0141914
CAM206_map3	0002.CSV	1878.41	0.0139827
CAM206_map3	0002.CSV	1882.26	0.013974
CAM206_map3	0002.CSV	1886.12	0.0139769
CAM206_map3	0002.CSV	1889.98	0.0140987
CAM206_map3	0002.CSV	1893.83	0.0141504
CAM206_map3	0002.CSV	1897.69	0.0140813
CAM206_map3	0002.CSV	1901.55	0.013935
CAM206_map3	0002.CSV	1905.41	0.0139006
CAM206_map3	0002.CSV	1909.26	0.0139925
CAM206_map3	0002.CSV	1913.12	0.013983
CAM206_map3	0002.CSV	1916.98	0.0139231
CAM206_map3	0002.CSV	1920.83	0.0140767
CAM206_map3	0002.CSV	1924.69	0.0141549
CAM206_map3	0002.CSV	1928.55	0.0140752
CAM206_map3	0002.CSV	1932.4	0.0140114
CAM206_map3	0002.CSV	1936.26	0.0140207
CAM206_map3	0002.CSV	1940.12	0.0140121
CAM206_map3	0002.CSV	1943.98	0.0142101
CAM206_map3	0002.CSV	1947.83	0.0142308
CAM206_map3	0002.CSV	1951.69	0.0141301
CAM206_map3	0002.CSV	1955.55	0.0141195
CAM206_map3	0002.CSV	1959.4	0.0141771
CAM206_map3	0002.CSV	1963.26	0.0141779
CAM206_map3	0002.CSV	1967.12	0.0142675
CAM206_map3	0002.CSV	1970.98	0.0142554
CAM206_map3	0002.CSV	1974.83	0.0141912
CAM206_map3	0002.CSV	1978.69	0.0141729
CAM206_map3	0002.CSV	1982.55	0.0141802
CAM206_map3	0002.CSV	1986.4	0.0141475
CAM206_map3	0002.CSV	1990.26	0.014244
CAM206_map3	0002.CSV	1994.12	0.0142901
CAM206_map3	0002.CSV	1997.98	0.0141758
CAM206_map3	0002.CSV	2001.83	0.0141587
CAM206_map3	0002.CSV	2005.69	0.0142348
CAM206_map3	0002.CSV	2009.55	0.0142462
CAM206_map3	0002.CSV	2013.4	0.014196
CAM206_map3	0002.CSV	2017.26	0.0142393
CAM206_map3	0002.CSV	2021.12	0.0142973
CAM206_map3	0002.CSV	2024.97	0.0142282
CAM206_map3	0002.CSV	2028.83	0.0142138
CAM206_map3	0002.CSV	2032.69	0.0141948
CAM206_map3	0002.CSV	2036.55	0.0141679
CAM206_map3	0002.CSV	2040.4	0.0141845
CAM206_map3	0002.CSV	2044.26	0.0142426
CAM206_map3	0002.CSV	2048.12	0.014208
CAM206_map3	0002.CSV	2051.97	0.0141931
CAM206_map3	0002.CSV	2055.83	0.0142244
CAM206_map3	0002.CSV	2059.69	0.0142714
CAM206_map3	0002.CSV	2063.55	0.0142805
CAM206_map3	0002.CSV	2067.4	0.0143012
CAM206_map3	0002.CSV	2071.26	0.0142604
CAM206_map3	0002.CSV	2075.12	0.0142874
CAM206_map3	0002.CSV	2078.97	0.014295
CAM206_map3	0002.CSV	2082.83	0.0143038
CAM206_map3	0002.CSV	2086.69	0.0143496
CAM206_map3	0002.CSV	2090.55	0.01443
CAM206_map3	0002.CSV	2094.4	0.0144158
CAM206_map3	0002.CSV	2098.26	0.0143554
CAM206_map3	0002.CSV	2102.12	0.0143286
CAM206_map3	0002.CSV	2105.97	0.0143837
CAM206_map3	0002.CSV	2109.83	0.0144009
CAM206_map3	0002.CSV	2113.69	0.0143912
CAM206_map3	0002.CSV	2117.55	0.0143877
CAM206_map3	0002.CSV	2121.4	0.0144166
CAM206_map3	0002.CSV	2125.26	0.0144247
CAM206_map3	0002.CSV	2129.12	0.0144519
CAM206_map3	0002.CSV	2132.97	0.014475
CAM206_map3	0002.CSV	2136.83	0.0145018
CAM206_map3	0002.CSV	2140.69	0.0144864
CAM206_map3	0002.CSV	2144.55	0.0144497
CAM206_map3	0002.CSV	2148.4	0.0144577
CAM206_map3	0002.CSV	2152.26	0.014502
CAM206_map3	0002.CSV	2156.12	0.0144786
CAM206_map3	0002.CSV	2159.97	0.0144581
CAM206_map3	0002.CSV	2163.83	0.0144744
CAM206_map3	0002.CSV	2167.69	0.0145226
CAM206_map3	0002.CSV	2171.55	0.0145451
CAM206_map3	0002.CSV	2175.4	0.0145522
CAM206_map3	0002.CSV	2179.26	0.0145595
CAM206_map3	0002.CSV	2183.12	0.0145957
CAM206_map3	0002.CSV	2186.97	0.014583
CAM206_map3	0002.CSV	2190.83	0.0145766
CAM206_map3	0002.CSV	2194.69	0.0145826
CAM206_map3	0002.CSV	2198.55	0.0145452
CAM206_map3	0002.CSV	2202.4	0.0145137
CAM206_map3	0002.CSV	2206.26	0.0145066
CAM206_map3	0002.CSV	2210.12	0.0144787
CAM206_map3	0002.CSV	2213.97	0.0144714
CAM206_map3	0002.CSV	2217.83	0.0144809
CAM206_map3	0002.CSV	2221.69	0.0145009
CAM206_map3	0002.CSV	2225.54	0.0145118
CAM206_map3	0002.CSV	2229.4	0.0145097
CAM206_map3	0002.CSV	2233.26	0.0144884
CAM206_map3	0002.CSV	2237.12	0.0144758
CAM206_map3	0002.CSV	2240.97	0.0144442
CAM206_map3	0002.CSV	2244.83	0.0144183
CAM206_map3	0002.CSV	2248.69	0.0143955
CAM206_map3	0002.CSV	2252.54	0.0144011
CAM206_map3	0002.CSV	2256.4	0.0144126
CAM206_map3	0002.CSV	2260.26	0.0143967
CAM206_map3	0002.CSV	2264.11	0.0143736
CAM206_map3	0002.CSV	2267.97	0.0143943
CAM206_map3	0002.CSV	2271.83	0.0143245
CAM206_map3	0002.CSV	2275.69	0.0142583
CAM206_map3	0002.CSV	2279.54	0.014247
CAM206_map3	0002.CSV	2283.4	0.0142177
CAM206_map3	0002.CSV	2287.26	0.0141573
CAM206_map3	0002.CSV	2291.11	0.0140986
CAM206_map3	0002.CSV	2294.97	0.0140209
CAM206_map3	0002.CSV	2298.83	0.0139658
CAM206_map3	0002.CSV	2302.69	0.0138588
CAM206_map3	0002.CSV	2306.54	0.0137004
CAM206_map3	0002.CSV	2310.4	0.0135071
CAM206_map3	0002.CSV	2314.26	0.0133401
CAM206_map3	0002.CSV	2318.11	0.0129941
CAM206_map3	0002.CSV	2321.97	0.0123714
CAM206_map3	0002.CSV	2325.83	0.0115829
CAM206_map3	0002.CSV	2329.69	0.0112282
CAM206_map3	0002.CSV	2333.54	0.0110557
CAM206_map3	0002.CSV	2337.4	0.0107328
CAM206_map3	0002.CSV	2341.26	0.0110065
CAM206_map3	0002.CSV	2345.11	0.0121751
CAM206_map3	0002.CSV	2348.97	0.0121654
CAM206_map3	0002.CSV	2352.83	0.0108413
CAM206_map3	0002.CSV	2356.69	0.00869654
CAM206_map3	0002.CSV	2360.54	0.00791312
CAM206_map3	0002.CSV	2364.4	0.00923896
CAM206_map3	0002.CSV	2368.26	0.0114293
CAM206_map3	0002.CSV	2372.11	0.0130645
CAM206_map3	0002.CSV	2375.97	0.0139284
CAM206_map3	0002.CSV	2379.83	0.014243
CAM206_map3	0002.CSV	2383.69	0.0141708
CAM206_map3	0002.CSV	2387.54	0.0139983
CAM206_map3	0002.CSV	2391.4	0.013912
CAM206_map3	0002.CSV	2395.26	0.0138857
CAM206_map3	0002.CSV	2399.11	0.0138514
CAM206_map3	0002.CSV	2402.97	0.0138508
CAM206_map3	0002.CSV	2406.83	0.0138594
CAM206_map3	0002.CSV	2410.68	0.0138253
CAM206_map3	0002.CSV	2414.54	0.0138037
CAM206_map3	0002.CSV	2418.4	0.013804
CAM206_map3	0002.CSV	2422.26	0.0137842
CAM206_map3	0002.CSV	2426.11	0.0137659
CAM206_map3	0002.CSV	2429.97	0.0137787
CAM206_map3	0002.CSV	2433.83	0.0137553
CAM206_map3	0002.CSV	2437.68	0.0137619
CAM206_map3	0002.CSV	2441.54	0.0137945
CAM206_map3	0002.CSV	2445.4	0.0137559
CAM206_map3	0002.CSV	2449.26	0.0136916
CAM206_map3	0002.CSV	2453.11	0.0136534
CAM206_map3	0002.CSV	2456.97	0.0136653
CAM206_map3	0002.CSV	2460.83	0.0136966
CAM206_map3	0002.CSV	2464.68	0.013719
CAM206_map3	0002.CSV	2468.54	0.0137186
CAM206_map3	0002.CSV	2472.4	0.0137321
CAM206_map3	0002.CSV	2476.26	0.0138091
CAM206_map3	0002.CSV	2480.11	0.0138294
CAM206_map3	0002.CSV	2483.97	0.0138028
CAM206_map3	0002.CSV	2487.83	0.0138464
CAM206_map3	0002.CSV	2491.68	0.0139063
CAM206_map3	0002.CSV	2495.54	0.01396
CAM206_map3	0002.CSV	2499.4	0.0139824
CAM206_map3	0002.CSV	2503.26	0.013927
CAM206_map3	0002.CSV	2507.11	0.0139177
CAM206_map3	0002.CSV	2510.97	0.0139341
CAM206_map3	0002.CSV	2514.83	0.0139722
CAM206_map3	0002.CSV	2518.68	0.014077
CAM206_map3	0002.CSV	2522.54	0.0141018
CAM206_map3	0002.CSV	2526.4	0.0140328
CAM206_map3	0002.CSV	2530.26	0.0139684
CAM206_map3	0002.CSV	2534.11	0.0138715
CAM206_map3	0002.CSV	2537.97	0.013791
CAM206_map3	0002.CSV	2541.83	0.0137838
CAM206_map3	0002.CSV	2545.68	0.0137598
CAM206_map3	0002.CSV	2549.54	0.0136978
CAM206_map3	0002.CSV	2553.4	0.0136654
CAM206_map3	0002.CSV	2557.26	0.0136457
CAM206_map3	0002.CSV	2561.11	0.0136069
CAM206_map3	0002.CSV	2564.97	0.0135566
CAM206_map3	0002.CSV	2568.83	0.0135196
CAM206_map3	0002.CSV	2572.68	0.0135411
CAM206_map3	0002.CSV	2576.54	0.0135913
CAM206_map3	0002.CSV	2580.4	0.0135642
CAM206_map3	0002.CSV	2584.25	0.0135258
CAM206_map3	0002.CSV	2588.11	0.0134916
CAM206_map3	0002.CSV	2591.97	0.0134411
CAM206_map3	0002.CSV	2595.83	0.0133951
CAM206_map3	0002.CSV	2599.68	0.0133759
CAM206_map3	0002.CSV	2603.54	0.0133563
CAM206_map3	0002.CSV	2607.4	0.0133759
CAM206_map3	0002.CSV	2611.25	0.013392
CAM206_map3	0002.CSV	2615.11	0.0134069
CAM206_map3	0002.CSV	2618.97	0.0133924
CAM206_map3	0002.CSV	2622.82	0.0134606
CAM206_map3	0002.CSV	2626.68	0.0135502
CAM206_map3	0002.CSV	2630.54	0.0135443
CAM206_map3	0002.CSV	2634.4	0.0136005
CAM206_map3	0002.CSV	2638.25	0.0136017
CAM206_map3	0002.CSV	2642.11	0.0134556
CAM206_map3	0002.CSV	2645.97	0.0133206
CAM206_map3	0002.CSV	2649.82	0.0132213
CAM206_map3	0002.CSV	2653.68	0.0131845
CAM206_map3	0002.CSV	2657.54	0.0131957
CAM206_map3	0002.CSV	2661.4	0.0131754
CAM206_map3	0002.CSV	2665.25	0.0131481
CAM206_map3	0002.CSV	2669.11	0.0131756
CAM206_map3	0002.CSV	2672.97	0.0133329
CAM206_map3	0002.CSV	2676.82	0.0135855
CAM206_map3	0002.CSV	2680.68	0.013556
CAM206_map3	0002.CSV	2684.54	0.0132166
CAM206_map3	0002.CSV	2688.4	0.0130702
CAM206_map3	0002.CSV	2692.25	0.0131047
CAM206_map3	0002.CSV	2696.11	0.013174
CAM206_map3	0002.CSV	2699.97	0.0131548
CAM206_map3	0002.CSV	2703.82	0.013092
CAM206_map3	0002.CSV	2707.68	0.0131298
CAM206_map3	0002.CSV	2711.54	0.0131653
CAM206_map3	0002.CSV	2715.4	0.0131869
CAM206_map3	0002.CSV	2719.25	0.0132985
CAM206_map3	0002.CSV	2723.11	0.0135617
CAM206_map3	0002.CSV	2726.97	0.0135868
CAM206_map3	0002.CSV	2730.82	0.0133199
CAM206_map3	0002.CSV	2734.68	0.0133319
CAM206_map3	0002.CSV	2738.54	0.0133866
CAM206_map3	0002.CSV	2742.4	0.0133365
CAM206_map3	0002.CSV	2746.25	0.0135646
CAM206_map3	0002.CSV	2750.11	0.0136504
CAM206_map3	0002.CSV	2753.97	0.0134509
CAM206_map3	0002.CSV	2757.82	0.0133677
CAM206_map3	0002.CSV	2761.68	0.0133126
CAM206_map3	0002.CSV	2765.54	0.0133153
CAM206_map3	0002.CSV	2769.39	0.0134553
CAM206_map3	0002.CSV	2773.25	0.0136711
CAM206_map3	0002.CSV	2777.11	0.0136274
CAM206_map3	0002.CSV	2780.97	0.0134746
CAM206_map3	0002.CSV	2784.82	0.0136279
CAM206_map3	0002.CSV	2788.68	0.0139493
CAM206_map3	0002.CSV	2792.54	0.014006
CAM206_map3	0002.CSV	2796.39	0.0139579
CAM206_map3	0002.CSV	2800.25	0.0138089
CAM206_map3	0002.CSV	2804.11	0.0136687
CAM206_map3	0002.CSV	2807.97	0.0138393
CAM206_map3	0002.CSV	2811.82	0.0138762
CAM206_map3	0002.CSV	2815.68	0.0137755
CAM206_map3	0002.CSV	2819.54	0.0138204
CAM206_map3	0002.CSV	2823.39	0.0138228
CAM206_map3	0002.CSV	2827.25	0.0137957
CAM206_map3	0002.CSV	2831.11	0.0140909
CAM206_map3	0002.CSV	2834.97	0.0146077
CAM206_map3	0002.CSV	2838.82	0.014906
CAM206_map3	0002.CSV	2842.68	0.0151204
CAM206_map3	0002.CSV	2846.54	0.0157865
CAM206_map3	0002.CSV	2850.39	0.0161195
CAM206_map3	0002.CSV	2854.25	0.0158504
CAM206_map3	0002.CSV	2858.11	0.015644
CAM206_map3	0002.CSV	2861.97	0.0153734
CAM206_map3	0002.CSV	2865.82	0.0151829
CAM206_map3	0002.CSV	2869.68	0.0153233
CAM206_map3	0002.CSV	2873.54	0.0153965
CAM206_map3	0002.CSV	2877.39	0.0150014
CAM206_map3	0002.CSV	2881.25	0.0146791
CAM206_map3	0002.CSV	2885.11	0.0146029
CAM206_map3	0002.CSV	2888.97	0.0147587
CAM206_map3	0002.CSV	2892.82	0.015188
CAM206_map3	0002.CSV	2896.68	0.015436
CAM206_map3	0002.CSV	2900.54	0.0154348
CAM206_map3	0002.CSV	2904.39	0.0157465
CAM206_map3	0002.CSV	2908.25	0.0164365
CAM206_map3	0002.CSV	2912.11	0.0174529
CAM206_map3	0002.CSV	2915.97	0.0182218
CAM206_map3	0002.CSV	2919.82	0.0180824
CAM206_map3	0002.CSV	2923.68	0.0175169
CAM206_map3	0002.CSV	2927.54	0.0173095
CAM206_map3	0002.CSV	2931.39	0.01687
CAM206_map3	0002.CSV	2935.25	0.0161395
CAM206_map3	0002.CSV	2939.11	0.0159028
CAM206_map3	0002.CSV	2942.96	0.0161324
CAM206_map3	0002.CSV	2946.82	0.0160895
CAM206_map3	0002.CSV	2950.68	0.0157139
CAM206_map3	0002.CSV	2954.54	0.0153181
CAM206_map3	0002.CSV	2958.39	0.0150527
CAM206_map3	0002.CSV	2962.25	0.0149351
CAM206_map3	0002.CSV	2966.11	0.0145602
CAM206_map3	0002.CSV	2969.96	0.0144301
CAM206_map3	0002.CSV	2973.82	0.0147118
CAM206_map3	0002.CSV	2977.68	0.0149049
CAM206_map3	0002.CSV	2981.53	0.014603
CAM206_map3	0002.CSV	2985.39	0.0139887
CAM206_map3	0002.CSV	2989.25	0.0139268
CAM206_map3	0002.CSV	2993.11	0.0141908
CAM206_map3	0002.CSV	2996.96	0.0141064
CAM206_map3	0002.CSV	3000.82	0.0137796
CAM206_map3	0002.CSV	3004.68	0.0136329
CAM206_map3	0002.CSV	3008.53	0.0138669
CAM206_map3	0002.CSV	3012.39	0.0141892
CAM206_map3	0002.CSV	3016.25	0.0142304
CAM206_map3	0002.CSV	3020.11	0.0140339
CAM206_map3	0002.CSV	3023.96	0.0138423
CAM206_map3	0002.CSV	3027.82	0.0137612
CAM206_map3	0002.CSV	3031.68	0.0139742
CAM206_map3	0002.CSV	3035.53	0.0140675
CAM206_map3	0002.CSV	3039.39	0.0140843
CAM206_map3	0002.CSV	3043.25	0.0141934
CAM206_map3	0002.CSV	3047.11	0.0141507
CAM206_map3	0002.CSV	3050.96	0.0141303
CAM206_map3	0002.CSV	3054.82	0.0140393
CAM206_map3	0002.CSV	3058.68	0.0138463
CAM206_map3	0002.CSV	3062.53	0.0139021
CAM206_map3	0002.CSV	3066.39	0.0142016
CAM206_map3	0002.CSV	3070.25	0.0140939
CAM206_map3	0002.CSV	3074.11	0.0140371
CAM206_map3	0002.CSV	3077.96	0.0143175
CAM206_map3	0002.CSV	3081.82	0.0145347
CAM206_map3	0002.CSV	3085.68	0.0145115
CAM206_map3	0002.CSV	3089.53	0.0143383
CAM206_map3	0002.CSV	3093.39	0.0140506
CAM206_map3	0002.CSV	3097.25	0.0140952
CAM206_map3	0002.CSV	3101.11	0.0141848
CAM206_map3	0002.CSV	3104.96	0.0141818
CAM206_map3	0002.CSV	3108.82	0.0143502
CAM206_map3	0002.CSV	3112.68	0.0144886
CAM206_map3	0002.CSV	3116.53	0.0146709
CAM206_map3	0002.CSV	3120.39	0.0146318
CAM206_map3	0002.CSV	3124.25	0.0143111
CAM206_map3	0002.CSV	3128.11	0.0141871
CAM206_map3	0002.CSV	3131.96	0.0141855
CAM206_map3	0002.CSV	3135.82	0.0142856
CAM206_map3	0002.CSV	3139.68	0.0143889
CAM206_map3	0002.CSV	3143.53	0.0141598
CAM206_map3	0002.CSV	3147.39	0.0141627
CAM206_map3	0002.CSV	3151.25	0.0144904
CAM206_map3	0002.CSV	3155.1	0.0144519
CAM206_map3	0002.CSV	3158.96	0.0141624
CAM206_map3	0002.CSV	3162.82	0.0140024
CAM206_map3	0002.CSV	3166.68	0.0139121
CAM206_map3	0002.CSV	3170.53	0.0138482
CAM206_map3	0002.CSV	3174.39	0.0138503
CAM206_map3	0002.CSV	3178.25	0.0140418
CAM206_map3	0002.CSV	3182.1	0.0141269
CAM206_map3	0002.CSV	3185.96	0.0140943
CAM206_map3	0002.CSV	3189.82	0.0141296
CAM206_map3	0002.CSV	3193.68	0.014099
CAM206_map3	0002.CSV	3197.53	0.0140441
CAM206_map3	0002.CSV	3201.39	0.0141679
CAM206_map3	0002.CSV	3205.25	0.0142796
CAM206_map3	0002.CSV	3209.1	0.0142958
CAM206_map3	0002.CSV	3212.96	0.0144312
CAM206_map3	0002.CSV	3216.82	0.014535
CAM206_map3	0002.CSV	3220.68	0.0143985
CAM206_map3	0002.CSV	3224.53	0.0142866
CAM206_map3	0002.CSV	3228.39	0.0145684
CAM206_map3	0002.CSV	3232.25	0.0150092
CAM206_map3	0002.CSV	3236.1	0.0149283
CAM206_map3	0002.CSV	3239.96	0.0147162
CAM206_map3	0002.CSV	3243.82	0.0149293
CAM206_map3	0002.CSV	3247.68	0.0151047
CAM206_map3	0002.CSV	3251.53	0.0149127
CAM206_map3	0002.CSV	3255.39	0.0148831
CAM206_map3	0002.CSV	3259.25	0.0146975
CAM206_map3	0002.CSV	3263.1	0.0146986
CAM206_map3	0002.CSV	3266.96	0.015134
CAM206_map3	0002.CSV	3270.82	0.0154701
CAM206_map3	0002.CSV	3274.68	0.0153192
CAM206_map3	0002.CSV	3278.53	0.0149872
CAM206_map3	0002.CSV	3282.39	0.0148187
CAM206_map3	0002.CSV	3286.25	0.0148965
CAM206_map3	0002.CSV	3290.1	0.0152825
CAM206_map3	0002.CSV	3293.96	0.0155599
CAM206_map3	0002.CSV	3297.82	0.0153514
CAM206_map3	0002.CSV	3301.67	0.0153736
CAM206_map3	0002.CSV	3305.53	0.0155804
CAM206_map3	0002.CSV	3309.39	0.0154575
CAM206_map3	0002.CSV	3313.25	0.014975
CAM206_map3	0002.CSV	3317.1	0.0145924
CAM206_map3	0002.CSV	3320.96	0.0147663
CAM206_map3	0002.CSV	3324.82	0.0150982
CAM206_map3	0002.CSV	3328.67	0.0148129
CAM206_map3	0002.CSV	3332.53	0.0146392
CAM206_map3	0002.CSV	3336.39	0.0151646
CAM206_map3	0002.CSV	3340.24	0.0154765
CAM206_map3	0002.CSV	3344.1	0.0152449
CAM206_map3	0002.CSV	3347.96	0.0151653
CAM206_map3	0002.CSV	3351.82	0.0151196
CAM206_map3	0002.CSV	3355.67	0.0148862
CAM206_map3	0002.CSV	3359.53	0.0149913
CAM206_map3	0002.CSV	3363.39	0.0153382
CAM206_map3	0002.CSV	3367.24	0.0157076
CAM206_map3	0002.CSV	3371.1	0.0155237
CAM206_map3	0002.CSV	3374.96	0.0150764
CAM206_map3	0002.CSV	3378.82	0.0148477
CAM206_map3	0002.CSV	3382.67	0.0146052
CAM206_map3	0002.CSV	3386.53	0.0146645
CAM206_map3	0002.CSV	3390.39	0.0151166
CAM206_map3	0002.CSV	3394.24	0.0153441
CAM206_map3	0002.CSV	3398.1	0.0153509
CAM206_map3	0002.CSV	3401.96	0.0152843
CAM206_map3	0002.CSV	3405.82	0.0150599
CAM206_map3	0002.CSV	3409.67	0.0149764
CAM206_map3	0002.CSV	3413.53	0.0147215
CAM206_map3	0002.CSV	3417.39	0.0142464
CAM206_map3	0002.CSV	3421.24	0.0140787
CAM206_map3	0002.CSV	3425.1	0.0142784
CAM206_map3	0002.CSV	3428.96	0.0147121
CAM206_map3	0002.CSV	3432.82	0.0150138
CAM206_map3	0002.CSV	3436.67	0.0147741
CAM206_map3	0002.CSV	3440.53	0.0139883
CAM206_map3	0002.CSV	3444.39	0.0134967
CAM206_map3	0002.CSV	3448.24	0.013547
CAM206_map3	0002.CSV	3452.1	0.0134492
CAM206_map3	0002.CSV	3455.96	0.0133765
CAM206_map3	0002.CSV	3459.82	0.0137105
CAM206_map3	0002.CSV	3463.67	0.0141707
CAM206_map3	0002.CSV	3467.53	0.014386
CAM206_map3	0002.CSV	3471.39	0.0139335
CAM206_map3	0002.CSV	3475.24	0.0135989
CAM206_map3	0002.CSV	3479.1	0.0137403
CAM206_map3	0002.CSV	3482.96	0.0136737
CAM206_map3	0002.CSV	3486.82	0.0136045
CAM206_map3	0002.CSV	3490.67	0.0136275
CAM206_map3	0002.CSV	3494.53	0.01375
CAM206_map3	0002.CSV	3498.39	0.0136865
CAM206_map3	0002.CSV	3502.24	0.0135022
CAM206_map3	0002.CSV	3506.1	0.0130002
CAM206_map3	0002.CSV	3509.96	0.0127851
CAM206_map3	0002.CSV	3513.81	0.0129264
CAM206_map3	0002.CSV	3517.67	0.0125679
CAM206_map3	0002.CSV	3521.53	0.0126366
CAM206_map3	0002.CSV	3525.39	0.0127321
CAM206_map3	0002.CSV	3529.24	0.0125316
CAM206_map3	0002.CSV	3533.1	0.0126034
CAM206_map3	0002.CSV	3536.96	0.0127683
CAM206_map3	0002.CSV	3540.81	0.012784
CAM206_map3	0002.CSV	3544.67	0.01301
CAM206_map3	0002.CSV	3548.53	0.0128836
CAM206_map3	0002.CSV	3552.39	0.012338
CAM206_map3	0002.CSV	3556.24	0.0121567
CAM206_map3	0002.CSV	3560.1	0.011972
CAM206_map3	0002.CSV	3563.96	0.0114853
CAM206_map3	0002.CSV	3567.81	0.0120037
CAM206_map3	0002.CSV	3571.67	0.0121599
CAM206_map3	0002.CSV	3575.53	0.0116747
CAM206_map3	0002.CSV	3579.39	0.0119684
CAM206_map3	0002.CSV	3583.24	0.0120716
CAM206_map3	0002.CSV	3587.1	0.012076
CAM206_map3	0002.CSV	3590.96	0.0120281
CAM206_map3	0002.CSV	3594.81	0.0117164
CAM206_map3	0002.CSV	3598.67	0.0119278
CAM206_map3	0002.CSV	3602.53	0.0117182
CAM206_map3	0002.CSV	3606.39	0.010905
CAM206_map3	0002.CSV	3610.24	0.0106814
CAM206_map3	0002.CSV	3614.1	0.0109224
CAM206_map3	0002.CSV	3617.96	0.0113817
CAM206_map3	0002.CSV	3621.81	0.0115641
CAM206_map3	0002.CSV	3625.67	0.0104441
CAM206_map3	0002.CSV	3629.53	0.0104283
CAM206_map3	0002.CSV	3633.39	0.0115289
CAM206_map3	0002.CSV	3637.24	0.0113196
CAM206_map3	0002.CSV	3641.1	0.0108238
CAM206_map3	0002.CSV	3644.96	0.00992852
CAM206_map3	0002.CSV	3648.81	0.0105518
CAM206_map3	0002.CSV	3652.67	0.0118086
CAM206_map3	0002.CSV	3656.53	0.0119075
CAM206_map3	0002.CSV	3660.38	0.0118363
CAM206_map3	0002.CSV	3664.24	0.010776
CAM206_map3	0002.CSV	3668.1	0.00980396
CAM206_map3	0002.CSV	3671.96	0.00999341
CAM206_map3	0002.CSV	3675.81	0.0108518
CAM206_map3	0002.CSV	3679.67	0.0113819
CAM206_map3	0002.CSV	3683.53	0.0109369
CAM206_map3	0002.CSV	3687.38	0.0107931
CAM206_map3	0002.CSV	3691.24	0.011825
CAM206_map3	0002.CSV	3695.1	0.011599
CAM206_map3	0002.CSV	3698.95	0.010921
CAM206_map3	0002.CSV	3702.81	0.0106764
CAM206_map3	0002.CSV	3706.67	0.0100373
CAM206_map3	0002.CSV	3710.53	0.0099449
CAM206_map3	0002.CSV	3714.38	0.0110335
CAM206_map3	0002.CSV	3718.24	0.0104828
CAM206_map3	0002.CSV	3722.1	0.00990245
CAM206_map3	0002.CSV	3725.95	0.00996758
CAM206_map3	0002.CSV	3729.81	0.00961062
CAM206_map3	0002.CSV	3733.67	0.00970541
CAM206_map3	0002.CSV	3737.53	0.0112292
CAM206_map3	0002.CSV	3741.38	0.0104159
CAM206_map3	0002.CSV	3745.24	0.00897392
CAM206_map3	0002.CSV	3749.1	0.0087819
CAM206_map3	0002.CSV	3752.95	0.0101814
CAM206_map3	0002.CSV	3756.81	0.0105207
CAM206_map3	0002.CSV	3760.67	0.0106248
CAM206_map3	0002.CSV	3764.53	0.0103438
CAM206_map3	0002.CSV	3768.38	0.0104585
CAM206_map3	0002.CSV	3772.24	0.0108154
CAM206_map3	0002.CSV	3776.1	0.0105064
CAM206_map3	0002.CSV	3779.95	0.0105759
CAM206_map3	0002.CSV	3783.81	0.0107328
CAM206_map3	0002.CSV	3787.67	0.0107311
CAM206_map3	0002.CSV	3791.53	0.0102977
CAM206_map3	0002.CSV	3795.38	0.00955341
CAM206_map3	0002.CSV	3799.24	0.00929211
CAM206_map3	0002.CSV	3803.1	0.0100796
CAM206_map3	0002.CSV	3806.95	0.0108125
CAM206_map3	0002.CSV	3810.81	0.0103565
CAM206_map3	0002.CSV	3814.67	0.00960381
CAM206_map3	0002.CSV	3818.53	0.00985354
CAM206_map3	0002.CSV	3822.38	0.0103635
CAM206_map3	0002.CSV	3826.24	0.0101554
CAM206_map3	0002.CSV	3830.1	0.00977827
CAM206_map3	0002.CSV	3833.95	0.00948008
CAM206_map3	0002.CSV	3837.81	0.00966279
CAM206_map3	0002.CSV	3841.67	0.0107506
CAM206_map3	0002.CSV	3845.53	0.0105886
CAM206_map3	0002.CSV	3849.38	0.00928886
CAM206_map3	0002.CSV	3853.24	0.00923389
CAM206_map3	0002.CSV	3857.1	0.0104862
CAM206_map3	0002.CSV	3860.95	0.00980152
CAM206_map3	0002.CSV	3864.81	0.00952865
CAM206_map3	0002.CSV	3868.67	0.00966913
CAM206_map3	0002.CSV	3872.52	0.0101865
CAM206_map3	0002.CSV	3876.38	0.0100512
CAM206_map3	0002.CSV	3880.24	0.00988405
CAM206_map3	0002.CSV	3884.1	0.0105401
CAM206_map3	0002.CSV	3887.95	0.0104873
CAM206_map3	0002.CSV	3891.81	0.0103481
CAM206_map3	0002.CSV	3895.67	0.00998636
CAM206_map3	0002.CSV	3899.52	0.00934089
CAM206_map3	0002.CSV	3903.38	0.0103009
CAM206_map3	0002.CSV	3907.24	0.010886
CAM206_map3	0002.CSV	3911.1	0.0102762
CAM206_map3	0002.CSV	3914.95	0.00979942
CAM206_map3	0002.CSV	3918.81	0.0100166
CAM206_map3	0002.CSV	3922.67	0.0102676
CAM206_map3	0002.CSV	3926.52	0.0102547
CAM206_map3	0002.CSV	3930.38	0.0103121
CAM206_map3	0002.CSV	3934.24	0.0106777
CAM206_map3	0002.CSV	3938.09	0.0102865
CAM206_map3	0002.CSV	3941.95	0.0100271
CAM206_map3	0002.CSV	3945.81	0.0102036
CAM206_map3	0002.CSV	3949.67	0.0104537
CAM206_map3	0002.CSV	3953.52	0.0104625
CAM206_map3	0002.CSV	3957.38	0.0102808
CAM206_map3	0002.CSV	3961.24	0.0103119
CAM206_map3	0002.CSV	3965.09	0.0102957
CAM206_map3	0002.CSV	3968.95	0.0102299
CAM206_map3	0002.CSV	3972.81	0.0103924
CAM206_map3	0002.CSV	3976.67	0.0104992
CAM206_map3	0002.CSV	3980.52	0.0104733
CAM206_map3	0002.CSV	3984.38	0.0104053
CAM206_map3	0002.CSV	3988.24	0.0102394
CAM206_map3	0002.CSV	3992.09	0.0103579
CAM206_map3	0002.CSV	3995.95	0.0104921
CAM206_map3	0002.CSV	3999.81	0.0103463
CAM206_map3	0003.CSV	674.992	0.0298036
CAM206_map3	0003.CSV	678.849	0.0307738
CAM206_map3	0003.CSV	682.706	0.0312258
CAM206_map3	0003.CSV	686.563	0.0325076
CAM206_map3	0003.CSV	690.42	0.0345143
CAM206_map3	0003.CSV	694.277	0.0402718
CAM206_map3	0003.CSV	698.134	0.047252
CAM206_map3	0003.CSV	701.991	0.0452266
CAM206_map3	0003.CSV	705.849	0.0422624
CAM206_map3	0003.CSV	709.706	0.0532119
CAM206_map3	0003.CSV	713.563	0.0552578
CAM206_map3	0003.CSV	717.42	0.039007
CAM206_map3	0003.CSV	721.277	0.027807
CAM206_map3	0003.CSV	725.134	0.0260976
CAM206_map3	0003.CSV	728.991	0.0257909
CAM206_map3	0003.CSV	732.848	0.0262294
CAM206_map3	0003.CSV	736.705	0.0265679
CAM206_map3	0003.CSV	740.562	0.0271435
CAM206_map3	0003.CSV	744.42	0.0272794
CAM206_map3	0003.CSV	748.277	0.0277845
CAM206_map3	0003.CSV	752.134	0.0280357
CAM206_map3	0003.CSV	755.991	0.0288457
CAM206_map3	0003.CSV	759.848	0.0295095
CAM206_map3	0003.CSV	763.705	0.0300447
CAM206_map3	0003.CSV	767.562	0.0300651
CAM206_map3	0003.CSV	771.419	0.0307801
CAM206_map3	0003.CSV	775.276	0.0313579
CAM206_map3	0003.CSV	779.133	0.0321553
CAM206_map3	0003.CSV	782.99	0.0325877
CAM206_map3	0003.CSV	786.848	0.0335027
CAM206_map3	0003.CSV	790.705	0.0340498
CAM206_map3	0003.CSV	794.562	0.034875
CAM206_map3	0003.CSV	798.419	0.0356036
CAM206_map3	0003.CSV	802.276	0.0367203
CAM206_map3	0003.CSV	806.133	0.0376282
CAM206_map3	0003.CSV	809.99	0.038939
CAM206_map3	0003.CSV	813.847	0.0400978
CAM206_map3	0003.CSV	817.704	0.0422079
CAM206_map3	0003.CSV	821.562	0.0448882
CAM206_map3	0003.CSV	825.419	0.048647
CAM206_map3	0003.CSV	829.276	0.0527056
CAM206_map3	0003.CSV	833.133	0.0581854
CAM206_map3	0003.CSV	836.99	0.0660657
CAM206_map3	0003.CSV	840.847	0.0771227
CAM206_map3	0003.CSV	844.704	0.0879512
CAM206_map3	0003.CSV	848.561	0.102726
CAM206_map3	0003.CSV	852.418	0.114263
CAM206_map3	0003.CSV	856.275	0.110318
CAM206_map3	0003.CSV	860.132	0.0948415
CAM206_map3	0003.CSV	863.99	0.0764837
CAM206_map3	0003.CSV	867.847	0.0583546
CAM206_map3	0003.CSV	871.704	0.0429722
CAM206_map3	0003.CSV	875.561	0.0325592
CAM206_map3	0003.CSV	879.418	0.0279131
CAM206_map3	0003.CSV	883.275	0.0261475
CAM206_map3	0003.CSV	887.132	0.0257103
CAM206_map3	0003.CSV	890.989	0.0256132
CAM206_map3	0003.CSV	894.846	0.0260713
CAM206_map3	0003.CSV	898.703	0.0264431
CAM206_map3	0003.CSV	902.561	0.0270281
CAM206_map3	0003.CSV	906.418	0.027704
CAM206_map3	0003.CSV	910.275	0.0281552
CAM206_map3	0003.CSV	914.132	0.028156
CAM206_map3	0003.CSV	917.989	0.028581
CAM206_map3	0003.CSV	921.846	0.028948
CAM206_map3	0003.CSV	925.703	0.0294328
CAM206_map3	0003.CSV	929.56	0.0297014
CAM206_map3	0003.CSV	933.417	0.0300384
CAM206_map3	0003.CSV	937.274	0.0301578
CAM206_map3	0003.CSV	941.131	0.0304238
CAM206_map3	0003.CSV	944.989	0.0305977
CAM206_map3	0003.CSV	948.846	0.0310195
CAM206_map3	0003.CSV	952.703	0.0313154
CAM206_map3	0003.CSV	956.56	0.0317699
CAM206_map3	0003.CSV	960.417	0.0319646
CAM206_map3	0003.CSV	964.274	0.0321854
CAM206_map3	0003.CSV	968.131	0.0324185
CAM206_map3	0003.CSV	971.988	0.0330223
CAM206_map3	0003.CSV	975.845	0.0334959
CAM206_map3	0003.CSV	979.702	0.0340985
CAM206_map3	0003.CSV	983.559	0.0344918
CAM206_map3	0003.CSV	987.417	0.0349908
CAM206_map3	0003.CSV	991.274	0.0353943
CAM206_map3	0003.CSV	995.131	0.0359317
CAM206_map3	0003.CSV	998.988	0.0363203
CAM206_map3	0003.CSV	1002.85	0.036928
CAM206_map3	0003.CSV	1006.7	0.0375423
CAM206_map3	0003.CSV	1010.56	0.0382065
CAM206_map3	0003.CSV	1014.42	0.0384705
CAM206_map3	0003.CSV	1018.27	0.0389002
CAM206_map3	0003.CSV	1022.13	0.0392516
CAM206_map3	0003.CSV	1025.99	0.0397941
CAM206_map3	0003.CSV	1029.85	0.0401523
CAM206_map3	0003.CSV	1033.7	0.0406144
CAM206_map3	0003.CSV	1037.56	0.0408779
CAM206_map3	0003.CSV	1041.42	0.0413649
CAM206_map3	0003.CSV	1045.27	0.0415777
CAM206_map3	0003.CSV	1049.13	0.0418832
CAM206_map3	0003.CSV	1052.99	0.0420027
CAM206_map3	0003.CSV	1056.84	0.0425527
CAM206_map3	0003.CSV	1060.7	0.0431292
CAM206_map3	0003.CSV	1064.56	0.0439526
CAM206_map3	0003.CSV	1068.42	0.0446445
CAM206_map3	0003.CSV	1072.27	0.0457921
CAM206_map3	0003.CSV	1076.13	0.0479064
CAM206_map3	0003.CSV	1079.99	0.0520758
CAM206_map3	0003.CSV	1083.84	0.051957
CAM206_map3	0003.CSV	1087.7	0.0466102
CAM206_map3	0003.CSV	1091.56	0.0439341
CAM206_map3	0003.CSV	1095.41	0.0441375
CAM206_map3	0003.CSV	1099.27	0.0444311
CAM206_map3	0003.CSV	1103.13	0.0447604
CAM206_map3	0003.CSV	1106.99	0.0449823
CAM206_map3	0003.CSV	1110.84	0.0452746
CAM206_map3	0003.CSV	1114.7	0.0453214
CAM206_map3	0003.CSV	1118.56	0.0452801
CAM206_map3	0003.CSV	1122.41	0.0451702
CAM206_map3	0003.CSV	1126.27	0.0453489
CAM206_map3	0003.CSV	1130.13	0.04543
CAM206_map3	0003.CSV	1133.99	0.0456678
CAM206_map3	0003.CSV	1137.84	0.0458477
CAM206_map3	0003.CSV	1141.7	0.0461778
CAM206_map3	0003.CSV	1145.56	0.0463992
CAM206_map3	0003.CSV	1149.41	0.046774
CAM206_map3	0003.CSV	1153.27	0.0470655
CAM206_map3	0003.CSV	1157.13	0.0473882
CAM206_map3	0003.CSV	1160.99	0.0475593
CAM206_map3	0003.CSV	1164.84	0.0477994
CAM206_map3	0003.CSV	1168.7	0.0478677
CAM206_map3	0003.CSV	1172.56	0.0480326
CAM206_map3	0003.CSV	1176.41	0.0481273
CAM206_map3	0003.CSV	1180.27	0.0482871
CAM206_map3	0003.CSV	1184.13	0.0481608
CAM206_map3	0003.CSV	1187.99	0.0480964
CAM206_map3	0003.CSV	1191.84	0.0478961
CAM206_map3	0003.CSV	1195.7	0.0478168
CAM206_map3	0003.CSV	1199.56	0.0477585
CAM206_map3	0003.CSV	1203.41	0.0479113
CAM206_map3	0003.CSV	1207.27	0.0479518
CAM206_map3	0003.CSV	1211.13	0.0482241
CAM206_map3	0003.CSV	1214.98	0.0484236
CAM206_map3	0003.CSV	1218.84	0.0487173
CAM206_map3	0003.CSV	1222.7	0.0490298
CAM206_map3	0003.CSV	1226.56	0.049535
CAM206_map3	0003.CSV	1230.41	0.0499206
CAM206_map3	0003.CSV	1234.27	0.050496
CAM206_map3	0003.CSV	1238.13	0.0509347
CAM206_map3	0003.CSV	1241.98	0.0513949
CAM206_map3	0003.CSV	1245.84	0.0517103
CAM206_map3	0003.CSV	1249.7	0.0521227
CAM206_map3	0003.CSV	1253.56	0.0523451
CAM206_map3	0003.CSV	1257.41	0.052638
CAM206_map3	0003.CSV	1261.27	0.0527786
CAM206_map3	0003.CSV	1265.13	0.0531389
CAM206_map3	0003.CSV	1268.98	0.0535182
CAM206_map3	0003.CSV	1272.84	0.0541086
CAM206_map3	0003.CSV	1276.7	0.0545627
CAM206_map3	0003.CSV	1280.56	0.0550862
CAM206_map3	0003.CSV	1284.41	0.0554878
CAM206_map3	0003.CSV	1288.27	0.0561278
CAM206_map3	0003.CSV	1292.13	0.0566677
CAM206_map3	0003.CSV	1295.98	0.0573095
CAM206_map3	0003.CSV	1299.84	0.057853
CAM206_map3	0003.CSV	1303.7	0.0585383
CAM206_map3	0003.CSV	1307.56	0.0591284
CAM206_map3	0003.CSV	1311.41	0.0598715
CAM206_map3	0003.CSV	1315.27	0.0605506
CAM206_map3	0003.CSV	1319.13	0.0614934
CAM206_map3	0003.CSV	1322.98	0.0622518
CAM206_map3	0003.CSV	1326.84	0.0631367
CAM206_map3	0003.CSV	1330.7	0.0640363
CAM206_map3	0003.CSV	1334.56	0.0650459
CAM206_map3	0003.CSV	1338.41	0.0663652
CAM206_map3	0003.CSV	1342.27	0.0680752
CAM206_map3	0003.CSV	1346.13	0.0691461
CAM206_map3	0003.CSV	1349.98	0.0706216
CAM206_map3	0003.CSV	1353.84	0.0721941
CAM206_map3	0003.CSV	1357.7	0.0738987
CAM206_map3	0003.CSV	1361.56	0.0757602
CAM206_map3	0003.CSV	1365.41	0.078128
CAM206_map3	0003.CSV	1369.27	0.0797945
CAM206_map3	0003.CSV	1373.13	0.0821212
CAM206_map3	0003.CSV	1376.98	0.0848462
CAM206_map3	0003.CSV	1380.84	0.0872099
CAM206_map3	0003.CSV	1384.7	0.0892954
CAM206_map3	0003.CSV	1388.56	0.0921818
CAM206_map3	0003.CSV	1392.41	0.0943133
CAM206_map3	0003.CSV	1396.27	0.0973975
CAM206_map3	0003.CSV	1400.13	0.100526
CAM206_map3	0003.CSV	1403.98	0.103277
CAM206_map3	0003.CSV	1407.84	0.105898
CAM206_map3	0003.CSV	1411.7	0.10831
CAM206_map3	0003.CSV	1415.55	0.109947
CAM206_map3	0003.CSV	1419.41	0.112365
CAM206_map3	0003.CSV	1423.27	0.114148
CAM206_map3	0003.CSV	1427.12	0.115962
CAM206_map3	0003.CSV	1430.98	0.117738
CAM206_map3	0003.CSV	1434.84	0.120079
CAM206_map3	0003.CSV	1438.7	0.122216
CAM206_map3	0003.CSV	1442.55	0.123254
CAM206_map3	0003.CSV	1446.41	0.122874
CAM206_map3	0003.CSV	1450.27	0.121956
CAM206_map3	0003.CSV	1454.12	0.120055
CAM206_map3	0003.CSV	1457.98	0.118191
CAM206_map3	0003.CSV	1461.84	0.116389
CAM206_map3	0003.CSV	1465.7	0.11503
CAM206_map3	0003.CSV	1469.55	0.112334
CAM206_map3	0003.CSV	1473.41	0.107438
CAM206_map3	0003.CSV	1477.27	0.10107
CAM206_map3	0003.CSV	1481.12	0.0968999
CAM206_map3	0003.CSV	1484.98	0.0928603
CAM206_map3	0003.CSV	1488.84	0.0884399
CAM206_map3	0003.CSV	1492.7	0.0840028
CAM206_map3	0003.CSV	1496.55	0.0807844
CAM206_map3	0003.CSV	1500.41	0.0771663
CAM206_map3	0003.CSV	1504.27	0.0746872
CAM206_map3	0003.CSV	1508.12	0.0705201
CAM206_map3	0003.CSV	1511.98	0.0673877
CAM206_map3	0003.CSV	1515.84	0.0646591
CAM206_map3	0003.CSV	1519.7	0.0613218
CAM206_map3	0003.CSV	1523.55	0.0576455
CAM206_map3	0003.CSV	1527.41	0.0552557
CAM206_map3	0003.CSV	1531.27	0.0531189
CAM206_map3	0003.CSV	1535.12	0.0516131
CAM206_map3	0003.CSV	1538.98	0.0500053
CAM206_map3	0003.CSV	1542.84	0.0474155
CAM206_map3	0003.CSV	1546.7	0.0446733
CAM206_map3	0003.CSV	1550.55	0.0424759
CAM206_map3	0003.CSV	1554.41	0.0402996
CAM206_map3	0003.CSV	1558.27	0.0384252
CAM206_map3	0003.CSV	1562.12	0.0365599
CAM206_map3	0003.CSV	1565.98	0.0352137
CAM206_map3	0003.CSV	1569.84	0.0338148
CAM206_map3	0003.CSV	1573.69	0.0324952
CAM206_map3	0003.CSV	1577.55	0.0304892
CAM206_map3	0003.CSV	1581.41	0.0282039
CAM206_map3	0003.CSV	1585.27	0.0260778
CAM206_map3	0003.CSV	1589.12	0.024494
CAM206_map3	0003.CSV	1592.98	0.023516
CAM206_map3	0003.CSV	1596.84	0.0229556
CAM206_map3	0003.CSV	1600.69	0.0225533
CAM206_map3	0003.CSV	1604.55	0.0224725
CAM206_map3	0003.CSV	1608.41	0.0223732
CAM206_map3	0003.CSV	1612.27	0.0221244
CAM206_map3	0003.CSV	1616.12	0.0218972
CAM206_map3	0003.CSV	1619.98	0.0218819
CAM206_map3	0003.CSV	1623.84	0.0216781
CAM206_map3	0003.CSV	1627.69	0.0215183
CAM206_map3	0003.CSV	1631.55	0.0210201
CAM206_map3	0003.CSV	1635.41	0.0211462
CAM206_map3	0003.CSV	1639.27	0.0214115
CAM206_map3	0003.CSV	1643.12	0.0209481
CAM206_map3	0003.CSV	1646.98	0.0208008
CAM206_map3	0003.CSV	1650.84	0.0210342
CAM206_map3	0003.CSV	1654.69	0.0213707
CAM206_map3	0003.CSV	1658.55	0.021035
CAM206_map3	0003.CSV	1662.41	0.0205965
CAM206_map3	0003.CSV	1666.27	0.0202873
CAM206_map3	0003.CSV	1670.12	0.0199997
CAM206_map3	0003.CSV	1673.98	0.020015
CAM206_map3	0003.CSV	1677.84	0.0195772
CAM206_map3	0003.CSV	1681.69	0.0193223
CAM206_map3	0003.CSV	1685.55	0.0195524
CAM206_map3	0003.CSV	1689.41	0.0192659
CAM206_map3	0003.CSV	1693.27	0.0185144
CAM206_map3	0003.CSV	1697.12	0.0183622
CAM206_map3	0003.CSV	1700.98	0.0187268
CAM206_map3	0003.CSV	1704.84	0.0187641
CAM206_map3	0003.CSV	1708.69	0.0185272
CAM206_map3	0003.CSV	1712.55	0.0182117
CAM206_map3	0003.CSV	1716.41	0.0186289
CAM206_map3	0003.CSV	1720.27	0.0192665
CAM206_map3	0003.CSV	1724.12	0.0189811
[truncated: 50,644 more rows]

## Sheet: CAM206_map4
Map	Select spectrum number	Wavenumbers	Absorbance
CAM206_map4	0001.CSV	674.992	0.0523471
CAM206_map4	0001.CSV	678.849	0.0546532
CAM206_map4	0001.CSV	682.706	0.0549924
CAM206_map4	0001.CSV	686.563	0.057942
CAM206_map4	0001.CSV	690.42	0.060952
CAM206_map4	0001.CSV	694.277	0.0728298
CAM206_map4	0001.CSV	698.134	0.0874434
CAM206_map4	0001.CSV	701.991	0.0831281
CAM206_map4	0001.CSV	705.849	0.0749465
CAM206_map4	0001.CSV	709.706	0.0969944
CAM206_map4	0001.CSV	713.563	0.104472
CAM206_map4	0001.CSV	717.42	0.0732938
CAM206_map4	0001.CSV	721.277	0.0502211
CAM206_map4	0001.CSV	725.134	0.0463976
CAM206_map4	0001.CSV	728.991	0.0447206
CAM206_map4	0001.CSV	732.848	0.0440632
CAM206_map4	0001.CSV	736.705	0.0429512
CAM206_map4	0001.CSV	740.562	0.0436468
CAM206_map4	0001.CSV	744.42	0.0434193
CAM206_map4	0001.CSV	748.277	0.0444789
CAM206_map4	0001.CSV	752.134	0.0448946
CAM206_map4	0001.CSV	755.991	0.0462869
CAM206_map4	0001.CSV	759.848	0.0466301
CAM206_map4	0001.CSV	763.705	0.0480746
CAM206_map4	0001.CSV	767.562	0.0487337
CAM206_map4	0001.CSV	771.419	0.0506206
CAM206_map4	0001.CSV	775.276	0.0517476
CAM206_map4	0001.CSV	779.133	0.0539034
CAM206_map4	0001.CSV	782.99	0.0541706
CAM206_map4	0001.CSV	786.848	0.0546719
CAM206_map4	0001.CSV	790.705	0.0553914
CAM206_map4	0001.CSV	794.562	0.057822
CAM206_map4	0001.CSV	798.419	0.0591422
CAM206_map4	0001.CSV	802.276	0.0604161
CAM206_map4	0001.CSV	806.133	0.0599053
CAM206_map4	0001.CSV	809.99	0.0606785
CAM206_map4	0001.CSV	813.847	0.0614437
CAM206_map4	0001.CSV	817.704	0.0640559
CAM206_map4	0001.CSV	821.562	0.0667114
CAM206_map4	0001.CSV	825.419	0.071647
CAM206_map4	0001.CSV	829.276	0.077398
CAM206_map4	0001.CSV	833.133	0.0867693
CAM206_map4	0001.CSV	836.99	0.101844
CAM206_map4	0001.CSV	840.847	0.127706
CAM206_map4	0001.CSV	844.704	0.156137
CAM206_map4	0001.CSV	848.561	0.205489
CAM206_map4	0001.CSV	852.418	0.271851
CAM206_map4	0001.CSV	856.275	0.283963
CAM206_map4	0001.CSV	860.132	0.232935
CAM206_map4	0001.CSV	863.99	0.171505
CAM206_map4	0001.CSV	867.847	0.118621
CAM206_map4	0001.CSV	871.704	0.0807765
CAM206_map4	0001.CSV	875.561	0.0572708
CAM206_map4	0001.CSV	879.418	0.0449021
CAM206_map4	0001.CSV	883.275	0.0375602
CAM206_map4	0001.CSV	887.132	0.0344972
CAM206_map4	0001.CSV	890.989	0.0337382
CAM206_map4	0001.CSV	894.846	0.0347173
CAM206_map4	0001.CSV	898.703	0.0354324
CAM206_map4	0001.CSV	902.561	0.0367449
CAM206_map4	0001.CSV	906.418	0.0377895
CAM206_map4	0001.CSV	910.275	0.0386347
CAM206_map4	0001.CSV	914.132	0.0384781
CAM206_map4	0001.CSV	917.989	0.0391835
CAM206_map4	0001.CSV	921.846	0.0397151
CAM206_map4	0001.CSV	925.703	0.0408049
CAM206_map4	0001.CSV	929.56	0.0414063
CAM206_map4	0001.CSV	933.417	0.0425239
CAM206_map4	0001.CSV	937.274	0.0430058
CAM206_map4	0001.CSV	941.131	0.0437247
CAM206_map4	0001.CSV	944.989	0.0440965
CAM206_map4	0001.CSV	948.846	0.0451722
CAM206_map4	0001.CSV	952.703	0.0458425
CAM206_map4	0001.CSV	956.56	0.0468667
CAM206_map4	0001.CSV	960.417	0.0472612
CAM206_map4	0001.CSV	964.274	0.0480084
CAM206_map4	0001.CSV	968.131	0.0485601
CAM206_map4	0001.CSV	971.988	0.0498193
CAM206_map4	0001.CSV	975.845	0.0507537
CAM206_map4	0001.CSV	979.702	0.0520565
CAM206_map4	0001.CSV	983.559	0.0528827
CAM206_map4	0001.CSV	987.417	0.0542398
CAM206_map4	0001.CSV	991.274	0.0552955
CAM206_map4	0001.CSV	995.131	0.0568774
CAM206_map4	0001.CSV	998.988	0.0580972
CAM206_map4	0001.CSV	1002.85	0.0597904
CAM206_map4	0001.CSV	1006.7	0.0610644
CAM206_map4	0001.CSV	1010.56	0.0625405
CAM206_map4	0001.CSV	1014.42	0.063289
CAM206_map4	0001.CSV	1018.27	0.0644457
CAM206_map4	0001.CSV	1022.13	0.0653554
CAM206_map4	0001.CSV	1025.99	0.066915
CAM206_map4	0001.CSV	1029.85	0.0681452
CAM206_map4	0001.CSV	1033.7	0.0696704
CAM206_map4	0001.CSV	1037.56	0.0705845
CAM206_map4	0001.CSV	1041.42	0.0719569
CAM206_map4	0001.CSV	1045.27	0.0729482
CAM206_map4	0001.CSV	1049.13	0.0746856
CAM206_map4	0001.CSV	1052.99	0.0763969
CAM206_map4	0001.CSV	1056.84	0.0792449
CAM206_map4	0001.CSV	1060.7	0.0821753
CAM206_map4	0001.CSV	1064.56	0.0861655
CAM206_map4	0001.CSV	1068.42	0.0902481
CAM206_map4	0001.CSV	1072.27	0.0953351
CAM206_map4	0001.CSV	1076.13	0.101665
CAM206_map4	0001.CSV	1079.99	0.112438
CAM206_map4	0001.CSV	1083.84	0.114105
CAM206_map4	0001.CSV	1087.7	0.101457
CAM206_map4	0001.CSV	1091.56	0.0927393
CAM206_map4	0001.CSV	1095.41	0.0911734
CAM206_map4	0001.CSV	1099.27	0.0901493
CAM206_map4	0001.CSV	1103.13	0.089379
CAM206_map4	0001.CSV	1106.99	0.0883386
CAM206_map4	0001.CSV	1110.84	0.0878861
CAM206_map4	0001.CSV	1114.7	0.0866298
CAM206_map4	0001.CSV	1118.56	0.0854407
CAM206_map4	0001.CSV	1122.41	0.0841716
CAM206_map4	0001.CSV	1126.27	0.0836902
CAM206_map4	0001.CSV	1130.13	0.083105
CAM206_map4	0001.CSV	1133.99	0.0831936
CAM206_map4	0001.CSV	1137.84	0.0831306
CAM206_map4	0001.CSV	1141.7	0.0835337
CAM206_map4	0001.CSV	1145.56	0.0835239
CAM206_map4	0001.CSV	1149.41	0.0838001
CAM206_map4	0001.CSV	1153.27	0.0836867
CAM206_map4	0001.CSV	1157.13	0.0842598
CAM206_map4	0001.CSV	1160.99	0.0850772
CAM206_map4	0001.CSV	1164.84	0.0863886
CAM206_map4	0001.CSV	1168.7	0.0869676
CAM206_map4	0001.CSV	1172.56	0.0873436
CAM206_map4	0001.CSV	1176.41	0.0868244
CAM206_map4	0001.CSV	1180.27	0.0863446
CAM206_map4	0001.CSV	1184.13	0.0853549
CAM206_map4	0001.CSV	1187.99	0.0846165
CAM206_map4	0001.CSV	1191.84	0.0835255
CAM206_map4	0001.CSV	1195.7	0.0828545
CAM206_map4	0001.CSV	1199.56	0.0820557
CAM206_map4	0001.CSV	1203.41	0.081911
CAM206_map4	0001.CSV	1207.27	0.0817193
CAM206_map4	0001.CSV	1211.13	0.082251
CAM206_map4	0001.CSV	1214.98	0.0826794
CAM206_map4	0001.CSV	1218.84	0.0836022
CAM206_map4	0001.CSV	1222.7	0.08437
CAM206_map4	0001.CSV	1226.56	0.0856167
CAM206_map4	0001.CSV	1230.41	0.0865922
CAM206_map4	0001.CSV	1234.27	0.0879549
CAM206_map4	0001.CSV	1238.13	0.0889389
CAM206_map4	0001.CSV	1241.98	0.0902958
CAM206_map4	0001.CSV	1245.84	0.091294
CAM206_map4	0001.CSV	1249.7	0.0926086
CAM206_map4	0001.CSV	1253.56	0.093604
CAM206_map4	0001.CSV	1257.41	0.0950392
CAM206_map4	0001.CSV	1261.27	0.096077
CAM206_map4	0001.CSV	1265.13	0.0974172
CAM206_map4	0001.CSV	1268.98	0.0985705
CAM206_map4	0001.CSV	1272.84	0.100407
CAM206_map4	0001.CSV	1276.7	0.101941
CAM206_map4	0001.CSV	1280.56	0.10379
CAM206_map4	0001.CSV	1284.41	0.10526
CAM206_map4	0001.CSV	1288.27	0.107198
CAM206_map4	0001.CSV	1292.13	0.108833
CAM206_map4	0001.CSV	1295.98	0.110985
CAM206_map4	0001.CSV	1299.84	0.112885
CAM206_map4	0001.CSV	1303.7	0.115181
CAM206_map4	0001.CSV	1307.56	0.117152
CAM206_map4	0001.CSV	1311.41	0.119778
CAM206_map4	0001.CSV	1315.27	0.122264
CAM206_map4	0001.CSV	1319.13	0.125343
CAM206_map4	0001.CSV	1322.98	0.127878
CAM206_map4	0001.CSV	1326.84	0.131041
CAM206_map4	0001.CSV	1330.7	0.134452
CAM206_map4	0001.CSV	1334.56	0.138497
CAM206_map4	0001.CSV	1338.41	0.143079
CAM206_map4	0001.CSV	1342.27	0.149187
CAM206_map4	0001.CSV	1346.13	0.154091
CAM206_map4	0001.CSV	1349.98	0.160164
CAM206_map4	0001.CSV	1353.84	0.166345
CAM206_map4	0001.CSV	1357.7	0.173034
CAM206_map4	0001.CSV	1361.56	0.180308
CAM206_map4	0001.CSV	1365.41	0.189499
CAM206_map4	0001.CSV	1369.27	0.196828
CAM206_map4	0001.CSV	1373.13	0.206509
CAM206_map4	0001.CSV	1376.98	0.217417
CAM206_map4	0001.CSV	1380.84	0.227372
CAM206_map4	0001.CSV	1384.7	0.236789
CAM206_map4	0001.CSV	1388.56	0.249797
CAM206_map4	0001.CSV	1392.41	0.260181
CAM206_map4	0001.CSV	1396.27	0.273324
CAM206_map4	0001.CSV	1400.13	0.286232
CAM206_map4	0001.CSV	1403.98	0.298106
CAM206_map4	0001.CSV	1407.84	0.309288
CAM206_map4	0001.CSV	1411.7	0.319605
CAM206_map4	0001.CSV	1415.55	0.326192
CAM206_map4	0001.CSV	1419.41	0.33457
CAM206_map4	0001.CSV	1423.27	0.340684
CAM206_map4	0001.CSV	1427.12	0.348611
CAM206_map4	0001.CSV	1430.98	0.357156
CAM206_map4	0001.CSV	1434.84	0.369356
CAM206_map4	0001.CSV	1438.7	0.381779
CAM206_map4	0001.CSV	1442.55	0.390824
CAM206_map4	0001.CSV	1446.41	0.392536
CAM206_map4	0001.CSV	1450.27	0.389459
CAM206_map4	0001.CSV	1454.12	0.380947
CAM206_map4	0001.CSV	1457.98	0.369563
CAM206_map4	0001.CSV	1461.84	0.360045
CAM206_map4	0001.CSV	1465.7	0.353612
CAM206_map4	0001.CSV	1469.55	0.340818
CAM206_map4	0001.CSV	1473.41	0.315084
CAM206_map4	0001.CSV	1477.27	0.28478
CAM206_map4	0001.CSV	1481.12	0.267884
CAM206_map4	0001.CSV	1484.98	0.252378
CAM206_map4	0001.CSV	1488.84	0.234771
CAM206_map4	0001.CSV	1492.7	0.217721
CAM206_map4	0001.CSV	1496.55	0.206066
CAM206_map4	0001.CSV	1500.41	0.192666
CAM206_map4	0001.CSV	1504.27	0.185034
CAM206_map4	0001.CSV	1508.12	0.169831
CAM206_map4	0001.CSV	1511.98	0.159408
CAM206_map4	0001.CSV	1515.84	0.152003
CAM206_map4	0001.CSV	1519.7	0.142433
CAM206_map4	0001.CSV	1523.55	0.130748
CAM206_map4	0001.CSV	1527.41	0.123786
CAM206_map4	0001.CSV	1531.27	0.118759
CAM206_map4	0001.CSV	1535.12	0.115934
CAM206_map4	0001.CSV	1538.98	0.112165
CAM206_map4	0001.CSV	1542.84	0.101834
CAM206_map4	0001.CSV	1546.7	0.0930971
CAM206_map4	0001.CSV	1550.55	0.0870385
CAM206_map4	0001.CSV	1554.41	0.0811018
CAM206_map4	0001.CSV	1558.27	0.0752314
CAM206_map4	0001.CSV	1562.12	0.0705778
CAM206_map4	0001.CSV	1565.98	0.0689777
CAM206_map4	0001.CSV	1569.84	0.0672844
CAM206_map4	0001.CSV	1573.69	0.0654384
CAM206_map4	0001.CSV	1577.55	0.0601406
CAM206_map4	0001.CSV	1581.41	0.0536717
CAM206_map4	0001.CSV	1585.27	0.0474779
CAM206_map4	0001.CSV	1589.12	0.0426745
CAM206_map4	0001.CSV	1592.98	0.0394657
CAM206_map4	0001.CSV	1596.84	0.0375095
CAM206_map4	0001.CSV	1600.69	0.0360552
CAM206_map4	0001.CSV	1604.55	0.0352782
CAM206_map4	0001.CSV	1608.41	0.0344251
CAM206_map4	0001.CSV	1612.27	0.033738
CAM206_map4	0001.CSV	1616.12	0.0327994
CAM206_map4	0001.CSV	1619.98	0.032102
CAM206_map4	0001.CSV	1623.84	0.0310988
CAM206_map4	0001.CSV	1627.69	0.0302609
CAM206_map4	0001.CSV	1631.55	0.0291523
CAM206_map4	0001.CSV	1635.41	0.0284497
CAM206_map4	0001.CSV	1639.27	0.0277036
CAM206_map4	0001.CSV	1643.12	0.0270072
CAM206_map4	0001.CSV	1646.98	0.0262847
CAM206_map4	0001.CSV	1650.84	0.026114
CAM206_map4	0001.CSV	1654.69	0.0258903
CAM206_map4	0001.CSV	1658.55	0.0255145
CAM206_map4	0001.CSV	1662.41	0.0248718
CAM206_map4	0001.CSV	1666.27	0.0244446
CAM206_map4	0001.CSV	1670.12	0.0240036
CAM206_map4	0001.CSV	1673.98	0.0239395
CAM206_map4	0001.CSV	1677.84	0.0232751
CAM206_map4	0001.CSV	1681.69	0.0228012
CAM206_map4	0001.CSV	1685.55	0.0225945
CAM206_map4	0001.CSV	1689.41	0.0224571
CAM206_map4	0001.CSV	1693.27	0.0217399
CAM206_map4	0001.CSV	1697.12	0.0215146
CAM206_map4	0001.CSV	1700.98	0.0216613
CAM206_map4	0001.CSV	1704.84	0.0218025
CAM206_map4	0001.CSV	1708.69	0.0215339
CAM206_map4	0001.CSV	1712.55	0.0213227
CAM206_map4	0001.CSV	1716.41	0.0216428
CAM206_map4	0001.CSV	1720.27	0.0224869
CAM206_map4	0001.CSV	1724.12	0.0223499
CAM206_map4	0001.CSV	1727.98	0.0223489
CAM206_map4	0001.CSV	1731.84	0.0225387
CAM206_map4	0001.CSV	1735.69	0.0232403
CAM206_map4	0001.CSV	1739.55	0.0227893
CAM206_map4	0001.CSV	1743.41	0.0217737
CAM206_map4	0001.CSV	1747.27	0.0204497
CAM206_map4	0001.CSV	1751.12	0.0194747
CAM206_map4	0001.CSV	1754.98	0.0186268
CAM206_map4	0001.CSV	1758.84	0.0181846
CAM206_map4	0001.CSV	1762.69	0.0180078
CAM206_map4	0001.CSV	1766.55	0.0179489
CAM206_map4	0001.CSV	1770.41	0.0183876
CAM206_map4	0001.CSV	1774.26	0.0207099
CAM206_map4	0001.CSV	1778.12	0.0230178
CAM206_map4	0001.CSV	1781.98	0.0256239
CAM206_map4	0001.CSV	1785.84	0.0268189
CAM206_map4	0001.CSV	1789.69	0.0260417
CAM206_map4	0001.CSV	1793.55	0.0232224
CAM206_map4	0001.CSV	1797.41	0.020802
CAM206_map4	0001.CSV	1801.26	0.0188012
CAM206_map4	0001.CSV	1805.12	0.0173744
CAM206_map4	0001.CSV	1808.98	0.0165337
CAM206_map4	0001.CSV	1812.84	0.0162961
CAM206_map4	0001.CSV	1816.69	0.0159985
CAM206_map4	0001.CSV	1820.55	0.0158597
CAM206_map4	0001.CSV	1824.41	0.0156768
CAM206_map4	0001.CSV	1828.26	0.0158747
CAM206_map4	0001.CSV	1832.12	0.0160127
CAM206_map4	0001.CSV	1835.98	0.016019
CAM206_map4	0001.CSV	1839.84	0.015833
CAM206_map4	0001.CSV	1843.69	0.0159904
CAM206_map4	0001.CSV	1847.55	0.0161957
CAM206_map4	0001.CSV	1851.41	0.0161296
CAM206_map4	0001.CSV	1855.26	0.0160467
CAM206_map4	0001.CSV	1859.12	0.0162211
CAM206_map4	0001.CSV	1862.98	0.0161662
CAM206_map4	0001.CSV	1866.84	0.0162823
CAM206_map4	0001.CSV	1870.69	0.0166139
CAM206_map4	0001.CSV	1874.55	0.0166573
CAM206_map4	0001.CSV	1878.41	0.0165702
CAM206_map4	0001.CSV	1882.26	0.0166523
CAM206_map4	0001.CSV	1886.12	0.0166514
CAM206_map4	0001.CSV	1889.98	0.0168171
CAM206_map4	0001.CSV	1893.83	0.0169327
CAM206_map4	0001.CSV	1897.69	0.0170129
CAM206_map4	0001.CSV	1901.55	0.0169532
CAM206_map4	0001.CSV	1905.41	0.0169911
CAM206_map4	0001.CSV	1909.26	0.0171242
CAM206_map4	0001.CSV	1913.12	0.0172442
CAM206_map4	0001.CSV	1916.98	0.0171926
CAM206_map4	0001.CSV	1920.83	0.0173935
CAM206_map4	0001.CSV	1924.69	0.0174814
CAM206_map4	0001.CSV	1928.55	0.0175438
CAM206_map4	0001.CSV	1932.4	0.0175685
CAM206_map4	0001.CSV	1936.26	0.0176414
CAM206_map4	0001.CSV	1940.12	0.0176329
CAM206_map4	0001.CSV	1943.98	0.0179038
CAM206_map4	0001.CSV	1947.83	0.0179961
CAM206_map4	0001.CSV	1951.69	0.0180533
CAM206_map4	0001.CSV	1955.55	0.0181064
CAM206_map4	0001.CSV	1959.4	0.0182223
CAM206_map4	0001.CSV	1963.26	0.0182222
CAM206_map4	0001.CSV	1967.12	0.0184024
CAM206_map4	0001.CSV	1970.98	0.0185153
CAM206_map4	0001.CSV	1974.83	0.0185702
CAM206_map4	0001.CSV	1978.69	0.0185871
CAM206_map4	0001.CSV	1982.55	0.0186567
CAM206_map4	0001.CSV	1986.4	0.0186071
CAM206_map4	0001.CSV	1990.26	0.0186998
CAM206_map4	0001.CSV	1994.12	0.0188411
CAM206_map4	0001.CSV	1997.98	0.0189117
CAM206_map4	0001.CSV	2001.83	0.0189123
CAM206_map4	0001.CSV	2005.69	0.01903
CAM206_map4	0001.CSV	2009.55	0.0190812
CAM206_map4	0001.CSV	2013.4	0.0191214
CAM206_map4	0001.CSV	2017.26	0.0191999
CAM206_map4	0001.CSV	2021.12	0.019341
CAM206_map4	0001.CSV	2024.97	0.0192999
CAM206_map4	0001.CSV	2028.83	0.0193512
CAM206_map4	0001.CSV	2032.69	0.0193513
CAM206_map4	0001.CSV	2036.55	0.0193958
CAM206_map4	0001.CSV	2040.4	0.0194395
CAM206_map4	0001.CSV	2044.26	0.0195557
CAM206_map4	0001.CSV	2048.12	0.0195774
CAM206_map4	0001.CSV	2051.97	0.0196608
CAM206_map4	0001.CSV	2055.83	0.0196646
CAM206_map4	0001.CSV	2059.69	0.0197281
CAM206_map4	0001.CSV	2063.55	0.0197977
CAM206_map4	0001.CSV	2067.4	0.0199218
CAM206_map4	0001.CSV	2071.26	0.0199449
CAM206_map4	0001.CSV	2075.12	0.0200108
CAM206_map4	0001.CSV	2078.97	0.0200434
CAM206_map4	0001.CSV	2082.83	0.0201151
CAM206_map4	0001.CSV	2086.69	0.0201041
CAM206_map4	0001.CSV	2090.55	0.0201818
CAM206_map4	0001.CSV	2094.4	0.0202161
CAM206_map4	0001.CSV	2098.26	0.0202903
CAM206_map4	0001.CSV	2102.12	0.020335
CAM206_map4	0001.CSV	2105.97	0.0204284
CAM206_map4	0001.CSV	2109.83	0.0204888
CAM206_map4	0001.CSV	2113.69	0.0205969
CAM206_map4	0001.CSV	2117.55	0.0206565
CAM206_map4	0001.CSV	2121.4	0.0207573
CAM206_map4	0001.CSV	2125.26	0.0208007
CAM206_map4	0001.CSV	2129.12	0.0208754
CAM206_map4	0001.CSV	2132.97	0.0208661
CAM206_map4	0001.CSV	2136.83	0.0209182
CAM206_map4	0001.CSV	2140.69	0.0209438
CAM206_map4	0001.CSV	2144.55	0.0209978
CAM206_map4	0001.CSV	2148.4	0.021016
CAM206_map4	0001.CSV	2152.26	0.0210877
CAM206_map4	0001.CSV	2156.12	0.0211075
CAM206_map4	0001.CSV	2159.97	0.0211257
CAM206_map4	0001.CSV	2163.83	0.0210682
CAM206_map4	0001.CSV	2167.69	0.021086
CAM206_map4	0001.CSV	2171.55	0.0211641
CAM206_map4	0001.CSV	2175.4	0.0212522
CAM206_map4	0001.CSV	2179.26	0.021234
CAM206_map4	0001.CSV	2183.12	0.0212447
CAM206_map4	0001.CSV	2186.97	0.0212475
CAM206_map4	0001.CSV	2190.83	0.0212896
CAM206_map4	0001.CSV	2194.69	0.0212751
CAM206_map4	0001.CSV	2198.55	0.0213283
CAM206_map4	0001.CSV	2202.4	0.0213566
CAM206_map4	0001.CSV	2206.26	0.021422
CAM206_map4	0001.CSV	2210.12	0.021456
CAM206_map4	0001.CSV	2213.97	0.0215118
CAM206_map4	0001.CSV	2217.83	0.0214998
CAM206_map4	0001.CSV	2221.69	0.0215432
CAM206_map4	0001.CSV	2225.54	0.0215656
CAM206_map4	0001.CSV	2229.4	0.0215987
CAM206_map4	0001.CSV	2233.26	0.0215894
CAM206_map4	0001.CSV	2237.12	0.021641
CAM206_map4	0001.CSV	2240.97	0.0216361
CAM206_map4	0001.CSV	2244.83	0.0216675
CAM206_map4	0001.CSV	2248.69	0.0216741
CAM206_map4	0001.CSV	2252.54	0.0217179
CAM206_map4	0001.CSV	2256.4	0.0216941
CAM206_map4	0001.CSV	2260.26	0.0216977
CAM206_map4	0001.CSV	2264.11	0.0216676
CAM206_map4	0001.CSV	2267.97	0.02169
CAM206_map4	0001.CSV	2271.83	0.0216943
CAM206_map4	0001.CSV	2275.69	0.0217437
CAM206_map4	0001.CSV	2279.54	0.0217146
CAM206_map4	0001.CSV	2283.4	0.0216577
CAM206_map4	0001.CSV	2287.26	0.021592
CAM206_map4	0001.CSV	2291.11	0.0215909
CAM206_map4	0001.CSV	2294.97	0.0215138
CAM206_map4	0001.CSV	2298.83	0.0214774
CAM206_map4	0001.CSV	2302.69	0.0213814
CAM206_map4	0001.CSV	2306.54	0.0212452
CAM206_map4	0001.CSV	2310.4	0.0210481
CAM206_map4	0001.CSV	2314.26	0.0208603
CAM206_map4	0001.CSV	2318.11	0.0204382
CAM206_map4	0001.CSV	2321.97	0.0199252
CAM206_map4	0001.CSV	2325.83	0.0192347
CAM206_map4	0001.CSV	2329.69	0.0186057
CAM206_map4	0001.CSV	2333.54	0.0179998
CAM206_map4	0001.CSV	2337.4	0.0177629
CAM206_map4	0001.CSV	2341.26	0.017809
CAM206_map4	0001.CSV	2345.11	0.0193165
CAM206_map4	0001.CSV	2348.97	0.019656
CAM206_map4	0001.CSV	2352.83	0.0181356
CAM206_map4	0001.CSV	2356.69	0.0144923
CAM206_map4	0001.CSV	2360.54	0.0127907
CAM206_map4	0001.CSV	2364.4	0.0147039
CAM206_map4	0001.CSV	2368.26	0.01791
CAM206_map4	0001.CSV	2372.11	0.0201269
CAM206_map4	0001.CSV	2375.97	0.0213272
CAM206_map4	0001.CSV	2379.83	0.0218172
CAM206_map4	0001.CSV	2383.69	0.0219256
CAM206_map4	0001.CSV	2387.54	0.0217936
CAM206_map4	0001.CSV	2391.4	0.0216953
CAM206_map4	0001.CSV	2395.26	0.0216716
CAM206_map4	0001.CSV	2399.11	0.021701
CAM206_map4	0001.CSV	2402.97	0.0216944
CAM206_map4	0001.CSV	2406.83	0.0217036
CAM206_map4	0001.CSV	2410.68	0.0216965
CAM206_map4	0001.CSV	2414.54	0.0217483
CAM206_map4	0001.CSV	2418.4	0.021779
CAM206_map4	0001.CSV	2422.26	0.0218353
CAM206_map4	0001.CSV	2426.11	0.0218729
CAM206_map4	0001.CSV	2429.97	0.0219246
CAM206_map4	0001.CSV	2433.83	0.0219877
CAM206_map4	0001.CSV	2437.68	0.0220412
CAM206_map4	0001.CSV	2441.54	0.0220945
CAM206_map4	0001.CSV	2445.4	0.0221692
CAM206_map4	0001.CSV	2449.26	0.022262
CAM206_map4	0001.CSV	2453.11	0.0224112
CAM206_map4	0001.CSV	2456.97	0.022509
CAM206_map4	0001.CSV	2460.83	0.0226272
CAM206_map4	0001.CSV	2464.68	0.0228176
CAM206_map4	0001.CSV	2468.54	0.0231137
CAM206_map4	0001.CSV	2472.4	0.0233653
CAM206_map4	0001.CSV	2476.26	0.0236961
CAM206_map4	0001.CSV	2480.11	0.0241122
CAM206_map4	0001.CSV	2483.97	0.0245489
CAM206_map4	0001.CSV	2487.83	0.0249521
CAM206_map4	0001.CSV	2491.68	0.0253002
CAM206_map4	0001.CSV	2495.54	0.0255892
CAM206_map4	0001.CSV	2499.4	0.0257688
CAM206_map4	0001.CSV	2503.26	0.0257531
CAM206_map4	0001.CSV	2507.11	0.0256732
CAM206_map4	0001.CSV	2510.97	0.0257052
CAM206_map4	0001.CSV	2514.83	0.0259849
CAM206_map4	0001.CSV	2518.68	0.0263215
CAM206_map4	0001.CSV	2522.54	0.0264679
CAM206_map4	0001.CSV	2526.4	0.026284
CAM206_map4	0001.CSV	2530.26	0.0258995
CAM206_map4	0001.CSV	2534.11	0.0254044
CAM206_map4	0001.CSV	2537.97	0.0250504
CAM206_map4	0001.CSV	2541.83	0.0248886
CAM206_map4	0001.CSV	2545.68	0.0248369
CAM206_map4	0001.CSV	2549.54	0.0247368
CAM206_map4	0001.CSV	2553.4	0.0245
CAM206_map4	0001.CSV	2557.26	0.0241736
CAM206_map4	0001.CSV	2561.11	0.0239166
CAM206_map4	0001.CSV	2564.97	0.0237188
CAM206_map4	0001.CSV	2568.83	0.0235977
CAM206_map4	0001.CSV	2572.68	0.023504
CAM206_map4	0001.CSV	2576.54	0.0234097
CAM206_map4	0001.CSV	2580.4	0.0232662
CAM206_map4	0001.CSV	2584.25	0.0231757
CAM206_map4	0001.CSV	2588.11	0.0231082
CAM206_map4	0001.CSV	2591.97	0.0230924
CAM206_map4	0001.CSV	2595.83	0.0230267
CAM206_map4	0001.CSV	2599.68	0.0229885
CAM206_map4	0001.CSV	2603.54	0.0229916
CAM206_map4	0001.CSV	2607.4	0.0230196
CAM206_map4	0001.CSV	2611.25	0.023044
CAM206_map4	0001.CSV	2615.11	0.0230854
CAM206_map4	0001.CSV	2618.97	0.0230552
CAM206_map4	0001.CSV	2622.82	0.0230954
CAM206_map4	0001.CSV	2626.68	0.0231854
CAM206_map4	0001.CSV	2630.54	0.0231661
CAM206_map4	0001.CSV	2634.4	0.0231703
CAM206_map4	0001.CSV	2638.25	0.0231723
CAM206_map4	0001.CSV	2642.11	0.022996
CAM206_map4	0001.CSV	2645.97	0.0227711
CAM206_map4	0001.CSV	2649.82	0.0226159
CAM206_map4	0001.CSV	2653.68	0.0226137
CAM206_map4	0001.CSV	2657.54	0.0226137
CAM206_map4	0001.CSV	2661.4	0.0225455
CAM206_map4	0001.CSV	2665.25	0.0224792
CAM206_map4	0001.CSV	2669.11	0.0225195
CAM206_map4	0001.CSV	2672.97	0.022686
CAM206_map4	0001.CSV	2676.82	0.0229568
CAM206_map4	0001.CSV	2680.68	0.0229674
CAM206_map4	0001.CSV	2684.54	0.0226769
CAM206_map4	0001.CSV	2688.4	0.022502
CAM206_map4	0001.CSV	2692.25	0.0224838
CAM206_map4	0001.CSV	2696.11	0.0225746
CAM206_map4	0001.CSV	2699.97	0.0226865
CAM206_map4	0001.CSV	2703.82	0.0227406
CAM206_map4	0001.CSV	2707.68	0.0228524
CAM206_map4	0001.CSV	2711.54	0.0228607
CAM206_map4	0001.CSV	2715.4	0.0228888
CAM206_map4	0001.CSV	2719.25	0.0231277
CAM206_map4	0001.CSV	2723.11	0.0235196
CAM206_map4	0001.CSV	2726.97	0.023531
CAM206_map4	0001.CSV	2730.82	0.023231
CAM206_map4	0001.CSV	2734.68	0.0232984
CAM206_map4	0001.CSV	2738.54	0.0233705
CAM206_map4	0001.CSV	2742.4	0.0233937
CAM206_map4	0001.CSV	2746.25	0.0237783
CAM206_map4	0001.CSV	2750.11	0.0238799
CAM206_map4	0001.CSV	2753.97	0.0236386
CAM206_map4	0001.CSV	2757.82	0.0235628
CAM206_map4	0001.CSV	2761.68	0.0234972
CAM206_map4	0001.CSV	2765.54	0.0234682
CAM206_map4	0001.CSV	2769.39	0.0237382
CAM206_map4	0001.CSV	2773.25	0.0242523
CAM206_map4	0001.CSV	2777.11	0.0242568
CAM206_map4	0001.CSV	2780.97	0.0240085
CAM206_map4	0001.CSV	2784.82	0.0242737
CAM206_map4	0001.CSV	2788.68	0.0248946
CAM206_map4	0001.CSV	2792.54	0.0251952
CAM206_map4	0001.CSV	2796.39	0.0252719
CAM206_map4	0001.CSV	2800.25	0.0250916
CAM206_map4	0001.CSV	2804.11	0.0248982
CAM206_map4	0001.CSV	2807.97	0.0253125
CAM206_map4	0001.CSV	2811.82	0.025486
CAM206_map4	0001.CSV	2815.68	0.0254416
CAM206_map4	0001.CSV	2819.54	0.0257844
CAM206_map4	0001.CSV	2823.39	0.0262811
CAM206_map4	0001.CSV	2827.25	0.0267698
CAM206_map4	0001.CSV	2831.11	0.0278195
CAM206_map4	0001.CSV	2834.97	0.0295079
CAM206_map4	0001.CSV	2838.82	0.0317098
CAM206_map4	0001.CSV	2842.68	0.0354398
CAM206_map4	0001.CSV	2846.54	0.0415353
CAM206_map4	0001.CSV	2850.39	0.04482
CAM206_map4	0001.CSV	2854.25	0.0422426
CAM206_map4	0001.CSV	2858.11	0.0382737
CAM206_map4	0001.CSV	2861.97	0.0352353
CAM206_map4	0001.CSV	2865.82	0.0335046
CAM206_map4	0001.CSV	2869.68	0.0333139
CAM206_map4	0001.CSV	2873.54	0.033244
CAM206_map4	0001.CSV	2877.39	0.0322404
CAM206_map4	0001.CSV	2881.25	0.0316548
CAM206_map4	0001.CSV	2885.11	0.032051
CAM206_map4	0001.CSV	2888.97	0.0331413
CAM206_map4	0001.CSV	2892.82	0.034841
CAM206_map4	0001.CSV	2896.68	0.0364086
CAM206_map4	0001.CSV	2900.54	0.0377384
CAM206_map4	0001.CSV	2904.39	0.0399921
CAM206_map4	0001.CSV	2908.25	0.0440902
CAM206_map4	0001.CSV	2912.11	0.0508493
CAM206_map4	0001.CSV	2915.97	0.0572315
CAM206_map4	0001.CSV	2919.82	0.058207
CAM206_map4	0001.CSV	2923.68	0.0545281
CAM206_map4	0001.CSV	2927.54	0.0500711
CAM206_map4	0001.CSV	2931.39	0.0454931
CAM206_map4	0001.CSV	2935.25	0.0410309
CAM206_map4	0001.CSV	2939.11	0.0380796
CAM206_map4	0001.CSV	2942.96	0.0366468
CAM206_map4	0001.CSV	2946.82	0.0356561
CAM206_map4	0001.CSV	2950.68	0.0349875
CAM206_map4	0001.CSV	2954.54	0.0344643
CAM206_map4	0001.CSV	2958.39	0.0335037
CAM206_map4	0001.CSV	2962.25	0.0322934
CAM206_map4	0001.CSV	2966.11	0.0306291
CAM206_map4	0001.CSV	2969.96	0.0294442
CAM206_map4	0001.CSV	2973.82	0.028967
CAM206_map4	0001.CSV	2977.68	0.0285019
CAM206_map4	0001.CSV	2981.53	0.027608
CAM206_map4	0001.CSV	2985.39	0.0265043
CAM206_map4	0001.CSV	2989.25	0.0261645
CAM206_map4	0001.CSV	2993.11	0.026263
CAM206_map4	0001.CSV	2996.96	0.025973
CAM206_map4	0001.CSV	3000.82	0.0254603
CAM206_map4	0001.CSV	3004.68	0.0252037
CAM206_map4	0001.CSV	3008.53	0.0254899
CAM206_map4	0001.CSV	3012.39	0.0258877
CAM206_map4	0001.CSV	3016.25	0.0258489
CAM206_map4	0001.CSV	3020.11	0.0254955
CAM206_map4	0001.CSV	3023.96	0.0251819
CAM206_map4	0001.CSV	3027.82	0.0251555
CAM206_map4	0001.CSV	3031.68	0.0255481
CAM206_map4	0001.CSV	3035.53	0.0257285
CAM206_map4	0001.CSV	3039.39	0.0257761
CAM206_map4	0001.CSV	3043.25	0.0259028
CAM206_map4	0001.CSV	3047.11	0.0258235
CAM206_map4	0001.CSV	3050.96	0.025761
CAM206_map4	0001.CSV	3054.82	0.0257376
CAM206_map4	0001.CSV	3058.68	0.0256036
CAM206_map4	0001.CSV	3062.53	0.0256794
CAM206_map4	0001.CSV	3066.39	0.0260621
CAM206_map4	0001.CSV	3070.25	0.0261034
CAM206_map4	0001.CSV	3074.11	0.0261304
CAM206_map4	0001.CSV	3077.96	0.0264225
CAM206_map4	0001.CSV	3081.82	0.0266388
CAM206_map4	0001.CSV	3085.68	0.0266896
CAM206_map4	0001.CSV	3089.53	0.0265494
CAM206_map4	0001.CSV	3093.39	0.026246
CAM206_map4	0001.CSV	3097.25	0.0263253
CAM206_map4	0001.CSV	3101.11	0.0265378
CAM206_map4	0001.CSV	3104.96	0.0266435
CAM206_map4	0001.CSV	3108.82	0.0268153
CAM206_map4	0001.CSV	3112.68	0.0269641
CAM206_map4	0001.CSV	3116.53	0.0272012
CAM206_map4	0001.CSV	3120.39	0.0272215
CAM206_map4	0001.CSV	3124.25	0.0269897
CAM206_map4	0001.CSV	3128.11	0.0269032
CAM206_map4	0001.CSV	3131.96	0.0269159
CAM206_map4	0001.CSV	3135.82	0.0271244
CAM206_map4	0001.CSV	3139.68	0.0273646
CAM206_map4	0001.CSV	3143.53	0.0272114
CAM206_map4	0001.CSV	3147.39	0.0273401
CAM206_map4	0001.CSV	3151.25	0.0277108
CAM206_map4	0001.CSV	3155.1	0.0276227
CAM206_map4	0001.CSV	3158.96	0.0272647
CAM206_map4	0001.CSV	3162.82	0.0271857
CAM206_map4	0001.CSV	3166.68	0.0272465
CAM206_map4	0001.CSV	3170.53	0.0273397
CAM206_map4	0001.CSV	3174.39	0.0273902
CAM206_map4	0001.CSV	3178.25	0.0275415
CAM206_map4	0001.CSV	3182.1	0.0276782
CAM206_map4	0001.CSV	3185.96	0.0277673
CAM206_map4	0001.CSV	3189.82	0.0278834
CAM206_map4	0001.CSV	3193.68	0.0279126
CAM206_map4	0001.CSV	3197.53	0.0278776
CAM206_map4	0001.CSV	3201.39	0.0279832
CAM206_map4	0001.CSV	3205.25	0.0281332
CAM206_map4	0001.CSV	3209.1	0.0282083
CAM206_map4	0001.CSV	3212.96	0.028297
CAM206_map4	0001.CSV	3216.82	0.0284455
CAM206_map4	0001.CSV	3220.68	0.0284168
CAM206_map4	0001.CSV	3224.53	0.028328
CAM206_map4	0001.CSV	3228.39	0.028531
CAM206_map4	0001.CSV	3232.25	0.0289983
CAM206_map4	0001.CSV	3236.1	0.0290189
CAM206_map4	0001.CSV	3239.96	0.028784
CAM206_map4	0001.CSV	3243.82	0.02889
CAM206_map4	0001.CSV	3247.68	0.0290296
CAM206_map4	0001.CSV	3251.53	0.0288969
CAM206_map4	0001.CSV	3255.39	0.0288981
CAM206_map4	0001.CSV	3259.25	0.028721
CAM206_map4	0001.CSV	3263.1	0.0286511
CAM206_map4	0001.CSV	3266.96	0.0289607
CAM206_map4	0001.CSV	3270.82	0.0293804
CAM206_map4	0001.CSV	3274.68	0.0294537
CAM206_map4	0001.CSV	3278.53	0.0292164
CAM206_map4	0001.CSV	3282.39	0.0290316
CAM206_map4	0001.CSV	3286.25	0.0290199
CAM206_map4	0001.CSV	3290.1	0.0292756
CAM206_map4	0001.CSV	3293.96	0.0295703
CAM206_map4	0001.CSV	3297.82	0.0294825
CAM206_map4	0001.CSV	3301.67	0.0294803
CAM206_map4	0001.CSV	3305.53	0.0296173
CAM206_map4	0001.CSV	3309.39	0.0294843
CAM206_map4	0001.CSV	3313.25	0.0290289
CAM206_map4	0001.CSV	3317.1	0.0287535
CAM206_map4	0001.CSV	3320.96	0.0288905
CAM206_map4	0001.CSV	3324.82	0.0291356
CAM206_map4	0001.CSV	3328.67	0.0289632
CAM206_map4	0001.CSV	3332.53	0.0288519
CAM206_map4	0001.CSV	3336.39	0.0292925
CAM206_map4	0001.CSV	3340.24	0.029523
CAM206_map4	0001.CSV	3344.1	0.0292195
CAM206_map4	0001.CSV	3347.96	0.0291177
CAM206_map4	0001.CSV	3351.82	0.0290273
CAM206_map4	0001.CSV	3355.67	0.0288375
CAM206_map4	0001.CSV	3359.53	0.0290145
CAM206_map4	0001.CSV	3363.39	0.0291933
CAM206_map4	0001.CSV	3367.24	0.0292868
CAM206_map4	0001.CSV	3371.1	0.0291028
CAM206_map4	0001.CSV	3374.96	0.0288489
CAM206_map4	0001.CSV	3378.82	0.0287715
CAM206_map4	0001.CSV	3382.67	0.0285239
CAM206_map4	0001.CSV	3386.53	0.0285237
CAM206_map4	0001.CSV	3390.39	0.0287569
CAM206_map4	0001.CSV	3394.24	0.0288438
CAM206_map4	0001.CSV	3398.1	0.0288434
CAM206_map4	0001.CSV	3401.96	0.0287331
CAM206_map4	0001.CSV	3405.82	0.0284427
CAM206_map4	0001.CSV	3409.67	0.0283063
CAM206_map4	0001.CSV	3413.53	0.0279893
CAM206_map4	0001.CSV	3417.39	0.0274721
CAM206_map4	0001.CSV	3421.24	0.0273723
CAM206_map4	0001.CSV	3425.1	0.0275391
CAM206_map4	0001.CSV	3428.96	0.0277312
CAM206_map4	0001.CSV	3432.82	0.0278285
CAM206_map4	0001.CSV	3436.67	0.0275657
CAM206_map4	0001.CSV	3440.53	0.0269554
CAM206_map4	0001.CSV	3444.39	0.0265415
CAM206_map4	0001.CSV	3448.24	0.0265444
CAM206_map4	0001.CSV	3452.1	0.026314
CAM206_map4	0001.CSV	3455.96	0.0262085
CAM206_map4	0001.CSV	3459.82	0.0263881
CAM206_map4	0001.CSV	3463.67	0.0266391
CAM206_map4	0001.CSV	3467.53	0.0267298
CAM206_map4	0001.CSV	3471.39	0.0262854
CAM206_map4	0001.CSV	3475.24	0.0258898
CAM206_map4	0001.CSV	3479.1	0.0258419
CAM206_map4	0001.CSV	3482.96	0.0256849
CAM206_map4	0001.CSV	3486.82	0.0255889
CAM206_map4	0001.CSV	3490.67	0.0254668
CAM206_map4	0001.CSV	3494.53	0.0254886
CAM206_map4	0001.CSV	3498.39	0.0253805
CAM206_map4	0001.CSV	3502.24	0.0251201
CAM206_map4	0001.CSV	3506.1	0.0246066
CAM206_map4	0001.CSV	3509.96	0.024327
CAM206_map4	0001.CSV	3513.81	0.0243153
CAM206_map4	0001.CSV	3517.67	0.0238911
CAM206_map4	0001.CSV	3521.53	0.0237869
CAM206_map4	0001.CSV	3525.39	0.0237684
CAM206_map4	0001.CSV	3529.24	0.0235247
CAM206_map4	0001.CSV	3533.1	0.0233955
CAM206_map4	0001.CSV	3536.96	0.0233543
CAM206_map4	0001.CSV	3540.81	0.0232568
CAM206_map4	0001.CSV	3544.67	0.0233766
CAM206_map4	0001.CSV	3548.53	0.0233144
CAM206_map4	0001.CSV	3552.39	0.022782
CAM206_map4	0001.CSV	3556.24	0.0223586
CAM206_map4	0001.CSV	3560.1	0.0218994
CAM206_map4	0001.CSV	3563.96	0.0213169
CAM206_map4	0001.CSV	3567.81	0.0216747
CAM206_map4	0001.CSV	3571.67	0.0217278
CAM206_map4	0001.CSV	3575.53	0.0211636
CAM206_map4	0001.CSV	3579.39	0.0211183
CAM206_map4	0001.CSV	3583.24	0.0210488
CAM206_map4	0001.CSV	3587.1	0.0211284
CAM206_map4	0001.CSV	3590.96	0.0209006
CAM206_map4	0001.CSV	3594.81	0.0203369
CAM206_map4	0001.CSV	3598.67	0.0203599
CAM206_map4	0001.CSV	3602.53	0.0202046
CAM206_map4	0001.CSV	3606.39	0.019464
CAM206_map4	0001.CSV	3610.24	0.0191376
CAM206_map4	0001.CSV	3614.1	0.0191538
CAM206_map4	0001.CSV	3617.96	0.0192964
CAM206_map4	0001.CSV	3621.81	0.019325
CAM206_map4	0001.CSV	3625.67	0.0184581
CAM206_map4	0001.CSV	3629.53	0.0184878
CAM206_map4	0001.CSV	3633.39	0.0190544
CAM206_map4	0001.CSV	3637.24	0.0186379
CAM206_map4	0001.CSV	3641.1	0.0181641
CAM206_map4	0001.CSV	3644.96	0.0174416
CAM206_map4	0001.CSV	3648.81	0.0180718
CAM206_map4	0001.CSV	3652.67	0.0190632
CAM206_map4	0001.CSV	3656.53	0.0189378
CAM206_map4	0001.CSV	3660.38	0.0187256
CAM206_map4	0001.CSV	3664.24	0.0177516
CAM206_map4	0001.CSV	3668.1	0.0168801
CAM206_map4	0001.CSV	3671.96	0.0169657
CAM206_map4	0001.CSV	3675.81	0.0175343
CAM206_map4	0001.CSV	3679.67	0.0180169
CAM206_map4	0001.CSV	3683.53	0.017678
CAM206_map4	0001.CSV	3687.38	0.0176507
CAM206_map4	0001.CSV	3691.24	0.0185144
CAM206_map4	0001.CSV	3695.1	0.0181542
CAM206_map4	0001.CSV	3698.95	0.017403
CAM206_map4	0001.CSV	3702.81	0.0171118
CAM206_map4	0001.CSV	3706.67	0.0165473
CAM206_map4	0001.CSV	3710.53	0.0163151
CAM206_map4	0001.CSV	3714.38	0.0170256
CAM206_map4	0001.CSV	3718.24	0.0165246
CAM206_map4	0001.CSV	3722.1	0.0160673
CAM206_map4	0001.CSV	3725.95	0.0162759
CAM206_map4	0001.CSV	3729.81	0.0159925
CAM206_map4	0001.CSV	3733.67	0.0159511
CAM206_map4	0001.CSV	3737.53	0.0173196
CAM206_map4	0001.CSV	3741.38	0.0166201
CAM206_map4	0001.CSV	3745.24	0.0153989
CAM206_map4	0001.CSV	3749.1	0.0153508
CAM206_map4	0001.CSV	3752.95	0.0165761
CAM206_map4	0001.CSV	3756.81	0.0167233
CAM206_map4	0001.CSV	3760.67	0.0167175
CAM206_map4	0001.CSV	3764.53	0.0165349
CAM206_map4	0001.CSV	3768.38	0.0166579
CAM206_map4	0001.CSV	3772.24	0.0169386
CAM206_map4	0001.CSV	3776.1	0.0167106
CAM206_map4	0001.CSV	3779.95	0.0167305
CAM206_map4	0001.CSV	3783.81	0.0167491
CAM206_map4	0001.CSV	3787.67	0.0168174
CAM206_map4	0001.CSV	3791.53	0.0165673
CAM206_map4	0001.CSV	3795.38	0.0160221
CAM206_map4	0001.CSV	3799.24	0.0158976
CAM206_map4	0001.CSV	3803.1	0.0164161
CAM206_map4	0001.CSV	3806.95	0.0169615
CAM206_map4	0001.CSV	3810.81	0.0167014
CAM206_map4	0001.CSV	3814.67	0.0160888
CAM206_map4	0001.CSV	3818.53	0.0161566
CAM206_map4	0001.CSV	3822.38	0.0166004
CAM206_map4	0001.CSV	3826.24	0.016505
CAM206_map4	0001.CSV	3830.1	0.0161857
CAM206_map4	0001.CSV	3833.95	0.0159236
CAM206_map4	0001.CSV	3837.81	0.0160908
CAM206_map4	0001.CSV	3841.67	0.0168866
CAM206_map4	0001.CSV	3845.53	0.0167272
CAM206_map4	0001.CSV	3849.38	0.015545
CAM206_map4	0001.CSV	3853.24	0.0154327
CAM206_map4	0001.CSV	3857.1	0.0165301
CAM206_map4	0001.CSV	3860.95	0.0160651
CAM206_map4	0001.CSV	3864.81	0.016088
CAM206_map4	0001.CSV	3868.67	0.0162307
CAM206_map4	0001.CSV	3872.52	0.0164671
CAM206_map4	0001.CSV	3876.38	0.0162664
CAM206_map4	0001.CSV	3880.24	0.016067
CAM206_map4	0001.CSV	3884.1	0.0166353
CAM206_map4	0001.CSV	3887.95	0.0166411
CAM206_map4	0001.CSV	3891.81	0.0165372
CAM206_map4	0001.CSV	3895.67	0.0161527
CAM206_map4	0001.CSV	3899.52	0.0157478
CAM206_map4	0001.CSV	3903.38	0.0166466
CAM206_map4	0001.CSV	3907.24	0.0169585
CAM206_map4	0001.CSV	3911.1	0.0164012
CAM206_map4	0001.CSV	3914.95	0.0160233
CAM206_map4	0001.CSV	3918.81	0.0161735
CAM206_map4	0001.CSV	3922.67	0.0162613
CAM206_map4	0001.CSV	3926.52	0.016246
CAM206_map4	0001.CSV	3930.38	0.0163063
CAM206_map4	0001.CSV	3934.24	0.0165332
CAM206_map4	0001.CSV	3938.09	0.0162488
CAM206_map4	0001.CSV	3941.95	0.0160809
CAM206_map4	0001.CSV	3945.81	0.0161453
CAM206_map4	0001.CSV	3949.67	0.0162503
CAM206_map4	0001.CSV	3953.52	0.0163238
CAM206_map4	0001.CSV	3957.38	0.0162691
CAM206_map4	0001.CSV	3961.24	0.0162927
CAM206_map4	0001.CSV	3965.09	0.0162725
CAM206_map4	0001.CSV	3968.95	0.0161965
CAM206_map4	0001.CSV	3972.81	0.0161722
CAM206_map4	0001.CSV	3976.67	0.0162163
CAM206_map4	0001.CSV	3980.52	0.0161943
CAM206_map4	0001.CSV	3984.38	0.0161417
CAM206_map4	0001.CSV	3988.24	0.0160629
CAM206_map4	0001.CSV	3992.09	0.0160449
CAM206_map4	0001.CSV	3995.95	0.0160232
CAM206_map4	0001.CSV	3999.81	0.0159179
CAM206_map4	0002.CSV	674.992	0.0331192
CAM206_map4	0002.CSV	678.849	0.0351377
CAM206_map4	0002.CSV	682.706	0.0359175
CAM206_map4	0002.CSV	686.563	0.0383365
CAM206_map4	0002.CSV	690.42	0.0410585
CAM206_map4	0002.CSV	694.277	0.0501849
CAM206_map4	0002.CSV	698.134	0.0613897
CAM206_map4	0002.CSV	701.991	0.0581418
CAM206_map4	0002.CSV	705.849	0.0522245
CAM206_map4	0002.CSV	709.706	0.069016
CAM206_map4	0002.CSV	713.563	0.0743424
CAM206_map4	0002.CSV	717.42	0.0508864
CAM206_map4	0002.CSV	721.277	0.0336492
CAM206_map4	0002.CSV	725.134	0.0305248
CAM206_map4	0002.CSV	728.991	0.0289824
CAM206_map4	0002.CSV	732.848	0.0284541
CAM206_map4	0002.CSV	736.705	0.0279027
CAM206_map4	0002.CSV	740.562	0.0285451
CAM206_map4	0002.CSV	744.42	0.028419
CAM206_map4	0002.CSV	748.277	0.0291212
CAM206_map4	0002.CSV	752.134	0.0296433
CAM206_map4	0002.CSV	755.991	0.0307835
CAM206_map4	0002.CSV	759.848	0.030981
CAM206_map4	0002.CSV	763.705	0.0321905
CAM206_map4	0002.CSV	767.562	0.0329446
CAM206_map4	0002.CSV	771.419	0.0342128
CAM206_map4	0002.CSV	775.276	0.0350098
CAM206_map4	0002.CSV	779.133	0.0365534
CAM206_map4	0002.CSV	782.99	0.0370495
CAM206_map4	0002.CSV	786.848	0.0377605
CAM206_map4	0002.CSV	790.705	0.0382653
CAM206_map4	0002.CSV	794.562	0.0399158
CAM206_map4	0002.CSV	798.419	0.040899
CAM206_map4	0002.CSV	802.276	0.0419137
CAM206_map4	0002.CSV	806.133	0.0421076
CAM206_map4	0002.CSV	809.99	0.043352
CAM206_map4	0002.CSV	813.847	0.0445856
CAM206_map4	0002.CSV	817.704	0.0471727
CAM206_map4	0002.CSV	821.562	0.0499519
CAM206_map4	0002.CSV	825.419	0.054422
CAM206_map4	0002.CSV	829.276	0.0597028
CAM206_map4	0002.CSV	833.133	0.0677121
CAM206_map4	0002.CSV	836.99	0.0795342
CAM206_map4	0002.CSV	840.847	0.0972706
CAM206_map4	0002.CSV	844.704	0.1159
CAM206_map4	0002.CSV	848.561	0.146272
CAM206_map4	0002.CSV	852.418	0.181836
CAM206_map4	0002.CSV	856.275	0.18591
CAM206_map4	0002.CSV	860.132	0.15639
CAM206_map4	0002.CSV	863.99	0.11879
CAM206_map4	0002.CSV	867.847	0.0838613
CAM206_map4	0002.CSV	871.704	0.0582024
CAM206_map4	0002.CSV	875.561	0.04285
CAM206_map4	0002.CSV	879.418	0.0349489
CAM206_map4	0002.CSV	883.275	0.0299259
CAM206_map4	0002.CSV	887.132	0.027626
CAM206_map4	0002.CSV	890.989	0.0271113
CAM206_map4	0002.CSV	894.846	0.0277433
CAM206_map4	0002.CSV	898.703	0.0282235
CAM206_map4	0002.CSV	902.561	0.0291675
CAM206_map4	0002.CSV	906.418	0.0297751
CAM206_map4	0002.CSV	910.275	0.0301486
CAM206_map4	0002.CSV	914.132	0.0300478
CAM206_map4	0002.CSV	917.989	0.0306421
CAM206_map4	0002.CSV	921.846	0.031044
CAM206_map4	0002.CSV	925.703	0.0318348
CAM206_map4	0002.CSV	929.56	0.0323531
CAM206_map4	0002.CSV	933.417	0.0331153
CAM206_map4	0002.CSV	937.274	0.0334187
CAM206_map4	0002.CSV	941.131	0.0339633
CAM206_map4	0002.CSV	944.989	0.0342249
CAM206_map4	0002.CSV	948.846	0.0349802
CAM206_map4	0002.CSV	952.703	0.0355286
CAM206_map4	0002.CSV	956.56	0.0362037
CAM206_map4	0002.CSV	960.417	0.0364662
CAM206_map4	0002.CSV	964.274	0.0370478
CAM206_map4	0002.CSV	968.131	0.0373983
CAM206_map4	0002.CSV	971.988	0.0381234
CAM206_map4	0002.CSV	975.845	0.0386888
CAM206_map4	0002.CSV	979.702	0.0395217
CAM206_map4	0002.CSV	983.559	0.0400343
CAM206_map4	0002.CSV	987.417	0.0409019
CAM206_map4	0002.CSV	991.274	0.0415102
CAM206_map4	0002.CSV	995.131	0.0424616
CAM206_map4	0002.CSV	998.988	0.0432005
CAM206_map4	0002.CSV	1002.85	0.0440891
CAM206_map4	0002.CSV	1006.7	0.0447422
CAM206_map4	0002.CSV	1010.56	0.0457566
CAM206_map4	0002.CSV	1014.42	0.0463756
CAM206_map4	0002.CSV	1018.27	0.047169
CAM206_map4	0002.CSV	1022.13	0.0476626
CAM206_map4	0002.CSV	1025.99	0.0484774
CAM206_map4	0002.CSV	1029.85	0.0490436
CAM206_map4	0002.CSV	1033.7	0.0499658
CAM206_map4	0002.CSV	1037.56	0.0506342
CAM206_map4	0002.CSV	1041.42	0.0516635
CAM206_map4	0002.CSV	1045.27	0.0523288
CAM206_map4	0002.CSV	1049.13	0.0532832
CAM206_map4	0002.CSV	1052.99	0.0540957
CAM206_map4	0002.CSV	1056.84	0.0555844
CAM206_map4	0002.CSV	1060.7	0.0570785
CAM206_map4	0002.CSV	1064.56	0.059242
CAM206_map4	0002.CSV	1068.42	0.0614585
CAM206_map4	0002.CSV	1072.27	0.0644176
CAM206_map4	0002.CSV	1076.13	0.0685659
CAM206_map4	0002.CSV	1079.99	0.075791
CAM206_map4	0002.CSV	1083.84	0.0769191
CAM206_map4	0002.CSV	1087.7	0.0689371
CAM206_map4	0002.CSV	1091.56	0.0633781
CAM206_map4	0002.CSV	1095.41	0.062313
CAM206_map4	0002.CSV	1099.27	0.0617283
CAM206_map4	0002.CSV	1103.13	0.0614826
CAM206_map4	0002.CSV	1106.99	0.0611809
CAM206_map4	0002.CSV	1110.84	0.0612895
CAM206_map4	0002.CSV	1114.7	0.060892
CAM206_map4	0002.CSV	1118.56	0.0604883
CAM206_map4	0002.CSV	1122.41	0.0599532
CAM206_map4	0002.CSV	1126.27	0.0598815
CAM206_map4	0002.CSV	1130.13	0.0597289
CAM206_map4	0002.CSV	1133.99	0.0599097
CAM206_map4	0002.CSV	1137.84	0.0599704
CAM206_map4	0002.CSV	1141.7	0.0603308
CAM206_map4	0002.CSV	1145.56	0.0604545
CAM206_map4	0002.CSV	1149.41	0.0608104
CAM206_map4	0002.CSV	1153.27	0.0608756
CAM206_map4	0002.CSV	1157.13	0.0613331
CAM206_map4	0002.CSV	1160.99	0.0619004
CAM206_map4	0002.CSV	1164.84	0.062703
CAM206_map4	0002.CSV	1168.7	0.0630873
CAM206_map4	0002.CSV	1172.56	0.0634837
CAM206_map4	0002.CSV	1176.41	0.0633985
CAM206_map4	0002.CSV	1180.27	0.0633276
CAM206_map4	0002.CSV	1184.13	0.0628271
CAM206_map4	0002.CSV	1187.99	0.0625284
CAM206_map4	0002.CSV	1191.84	0.0620694
CAM206_map4	0002.CSV	1195.7	0.0618865
CAM206_map4	0002.CSV	1199.56	0.0615893
CAM206_map4	0002.CSV	1203.41	0.0616991
CAM206_map4	0002.CSV	1207.27	0.0618002
CAM206_map4	0002.CSV	1211.13	0.0623311
CAM206_map4	0002.CSV	1214.98	0.062747
CAM206_map4	0002.CSV	1218.84	0.0634868
CAM206_map4	0002.CSV	1222.7	0.0640656
CAM206_map4	0002.CSV	1226.56	0.0649383
CAM206_map4	0002.CSV	1230.41	0.0656564
CAM206_map4	0002.CSV	1234.27	0.0666377
CAM206_map4	0002.CSV	1238.13	0.0673198
CAM206_map4	0002.CSV	1241.98	0.0682327
CAM206_map4	0002.CSV	1245.84	0.0689903
CAM206_map4	0002.CSV	1249.7	0.0699245
CAM206_map4	0002.CSV	1253.56	0.0705261
CAM206_map4	0002.CSV	1257.41	0.0713316
CAM206_map4	0002.CSV	1261.27	0.0719543
CAM206_map4	0002.CSV	1265.13	0.0728991
CAM206_map4	0002.CSV	1268.98	0.0737884
CAM206_map4	0002.CSV	1272.84	0.0750858
CAM206_map4	0002.CSV	1276.7	0.0761306
CAM206_map4	0002.CSV	1280.56	0.0774099
CAM206_map4	0002.CSV	1284.41	0.078418
CAM206_map4	0002.CSV	1288.27	0.0796966
CAM206_map4	0002.CSV	1292.13	0.080791
CAM206_map4	0002.CSV	1295.98	0.0822336
CAM206_map4	0002.CSV	1299.84	0.0834654
CAM206_map4	0002.CSV	1303.7	0.0849753
CAM206_map4	0002.CSV	1307.56	0.0863234
CAM206_map4	0002.CSV	1311.41	0.0880052
CAM206_map4	0002.CSV	1315.27	0.0895755
CAM206_map4	0002.CSV	1319.13	0.0915441
CAM206_map4	0002.CSV	1322.98	0.0931799
CAM206_map4	0002.CSV	1326.84	0.0952482
CAM206_map4	0002.CSV	1330.7	0.0973975
CAM206_map4	0002.CSV	1334.56	0.0998242
CAM206_map4	0002.CSV	1338.41	0.10259
CAM206_map4	0002.CSV	1342.27	0.10635
CAM206_map4	0002.CSV	1346.13	0.109271
CAM206_map4	0002.CSV	1349.98	0.112827
CAM206_map4	0002.CSV	1353.84	0.116414
CAM206_map4	0002.CSV	1357.7	0.120263
CAM206_map4	0002.CSV	1361.56	0.124405
CAM206_map4	0002.CSV	1365.41	0.129662
CAM206_map4	0002.CSV	1369.27	0.13377
CAM206_map4	0002.CSV	1373.13	0.139149
CAM206_map4	0002.CSV	1376.98	0.145091
CAM206_map4	0002.CSV	1380.84	0.150438
CAM206_map4	0002.CSV	1384.7	0.155256
CAM206_map4	0002.CSV	1388.56	0.161792
CAM206_map4	0002.CSV	1392.41	0.166849
CAM206_map4	0002.CSV	1396.27	0.173111
CAM206_map4	0002.CSV	1400.13	0.179085
CAM206_map4	0002.CSV	1403.98	0.184486
CAM206_map4	0002.CSV	1407.84	0.189331
CAM206_map4	0002.CSV	1411.7	0.193777
CAM206_map4	0002.CSV	1415.55	0.196559
CAM206_map4	0002.CSV	1419.41	0.200425
CAM206_map4	0002.CSV	1423.27	0.203397
CAM206_map4	0002.CSV	1427.12	0.207312
CAM206_map4	0002.CSV	1430.98	0.21156
CAM206_map4	0002.CSV	1434.84	0.217687
CAM206_map4	0002.CSV	1438.7	0.224085
CAM206_map4	0002.CSV	1442.55	0.228649
CAM206_map4	0002.CSV	1446.41	0.229716
CAM206_map4	0002.CSV	1450.27	0.22853
CAM206_map4	0002.CSV	1454.12	0.224718
CAM206_map4	0002.CSV	1457.98	0.219803
CAM206_map4	0002.CSV	1461.84	0.215645
CAM206_map4	0002.CSV	1465.7	0.213022
CAM206_map4	0002.CSV	1469.55	0.207418
CAM206_map4	0002.CSV	1473.41	0.195694
CAM206_map4	0002.CSV	1477.27	0.180968
CAM206_map4	0002.CSV	1481.12	0.172265
CAM206_map4	0002.CSV	1484.98	0.164015
CAM206_map4	0002.CSV	1488.84	0.154549
CAM206_map4	0002.CSV	1492.7	0.145092
CAM206_map4	0002.CSV	1496.55	0.138462
CAM206_map4	0002.CSV	1500.41	0.130715
CAM206_map4	0002.CSV	1504.27	0.126124
CAM206_map4	0002.CSV	1508.12	0.117047
CAM206_map4	0002.CSV	1511.98	0.110659
CAM206_map4	0002.CSV	1515.84	0.105877
CAM206_map4	0002.CSV	1519.7	0.0996661
CAM206_map4	0002.CSV	1523.55	0.0922724
CAM206_map4	0002.CSV	1527.41	0.087873
CAM206_map4	0002.CSV	1531.27	0.0842965
CAM206_map4	0002.CSV	1535.12	0.0819048
CAM206_map4	0002.CSV	1538.98	0.0790656
CAM206_map4	0002.CSV	1542.84	0.0728682
CAM206_map4	0002.CSV	1546.7	0.067469
CAM206_map4	0002.CSV	1550.55	0.0634184
CAM206_map4	0002.CSV	1554.41	0.0592081
CAM206_map4	0002.CSV	1558.27	0.0548705
CAM206_map4	0002.CSV	1562.12	0.0513083
CAM206_map4	0002.CSV	1565.98	0.0498814
CAM206_map4	0002.CSV	1569.84	0.0483504
CAM206_map4	0002.CSV	1573.69	0.0467042
CAM206_map4	0002.CSV	1577.55	0.042947
CAM206_map4	0002.CSV	1581.41	0.0386149
CAM206_map4	0002.CSV	1585.27	0.0345506
CAM206_map4	0002.CSV	1589.12	0.0314529
CAM206_map4	0002.CSV	1592.98	0.0293709
CAM206_map4	0002.CSV	1596.84	0.0280718
CAM206_map4	0002.CSV	1600.69	0.0270669
CAM206_map4	0002.CSV	1604.55	0.0265269
CAM206_map4	0002.CSV	1608.41	0.0259937
CAM206_map4	0002.CSV	1612.27	0.0255528
CAM206_map4	0002.CSV	1616.12	0.0248635
CAM206_map4	0002.CSV	1619.98	0.0243544
CAM206_map4	0002.CSV	1623.84	0.0236577
CAM206_map4	0002.CSV	1627.69	0.0231671
CAM206_map4	0002.CSV	1631.55	0.0224578
CAM206_map4	0002.CSV	1635.41	0.0220445
CAM206_map4	0002.CSV	1639.27	0.0216798
CAM206_map4	0002.CSV	1643.12	0.0211269
CAM206_map4	0002.CSV	1646.98	0.0206113
CAM206_map4	0002.CSV	1650.84	0.0206526
CAM206_map4	0002.CSV	1654.69	0.020663
CAM206_map4	0002.CSV	1658.55	0.0203339
CAM206_map4	0002.CSV	1662.41	0.0198092
CAM206_map4	0002.CSV	1666.27	0.0194548
CAM206_map4	0002.CSV	1670.12	0.0191497
CAM206_map4	0002.CSV	1673.98	0.0191966
CAM206_map4	0002.CSV	1677.84	0.0186522
CAM206_map4	0002.CSV	1681.69	0.018214
CAM206_map4	0002.CSV	1685.55	0.0181958
CAM206_map4	0002.CSV	1689.41	0.0181649
CAM206_map4	0002.CSV	1693.27	0.0175386
CAM206_map4	0002.CSV	1697.12	0.0173023
CAM206_map4	0002.CSV	1700.98	0.0174773
CAM206_map4	0002.CSV	1704.84	0.017567
CAM206_map4	0002.CSV	1708.69	0.017285
CAM206_map4	0002.CSV	1712.55	0.0169574
CAM206_map4	0002.CSV	1716.41	0.0171068
CAM206_map4	0002.CSV	1720.27	0.0177153
CAM206_map4	0002.CSV	1724.12	0.0175188
CAM206_map4	0002.CSV	1727.98	0.017397
CAM206_map4	0002.CSV	1731.84	0.0174753
CAM206_map4	0002.CSV	1735.69	0.0180221
CAM206_map4	0002.CSV	1739.55	0.0176904
CAM206_map4	0002.CSV	1743.41	0.0171007
CAM206_map4	0002.CSV	1747.27	0.0164385
CAM206_map4	0002.CSV	1751.12	0.0160896
CAM206_map4	0002.CSV	1754.98	0.0156115
CAM206_map4	0002.CSV	1758.84	0.015412
CAM206_map4	0002.CSV	1762.69	0.0153999
CAM206_map4	0002.CSV	1766.55	0.0153854
CAM206_map4	0002.CSV	1770.41	0.0157791
CAM206_map4	0002.CSV	1774.26	0.0174263
CAM206_map4	0002.CSV	1778.12	0.0188378
CAM206_map4	0002.CSV	1781.98	0.020564
CAM206_map4	0002.CSV	1785.84	0.021367
CAM206_map4	0002.CSV	1789.69	0.0207808
CAM206_map4	0002.CSV	1793.55	0.0190459
CAM206_map4	0002.CSV	1797.41	0.0174935
CAM206_map4	0002.CSV	1801.26	0.0161209
CAM206_map4	0002.CSV	1805.12	0.0151902
CAM206_map4	0002.CSV	1808.98	0.0146477
CAM206_map4	0002.CSV	1812.84	0.0145077
CAM206_map4	0002.CSV	1816.69	0.0142766
CAM206_map4	0002.CSV	1820.55	0.0141656
CAM206_map4	0002.CSV	1824.41	0.0140569
CAM206_map4	0002.CSV	1828.26	0.0142497
CAM206_map4	0002.CSV	1832.12	0.0143709
CAM206_map4	0002.CSV	1835.98	0.014367
CAM206_map4	0002.CSV	1839.84	0.0142099
CAM206_map4	0002.CSV	1843.69	0.0143779
CAM206_map4	0002.CSV	1847.55	0.0146733
CAM206_map4	0002.CSV	1851.41	0.014642
CAM206_map4	0002.CSV	1855.26	0.0145683
CAM206_map4	0002.CSV	1859.12	0.0147004
CAM206_map4	0002.CSV	1862.98	0.0146389
CAM206_map4	0002.CSV	1866.84	0.0147426
CAM206_map4	0002.CSV	1870.69	0.0150552
CAM206_map4	0002.CSV	1874.55	0.0150098
CAM206_map4	0002.CSV	1878.41	0.0149304
CAM206_map4	0002.CSV	1882.26	0.0150331
CAM206_map4	0002.CSV	1886.12	0.0150758
CAM206_map4	0002.CSV	1889.98	0.0151912
CAM206_map4	0002.CSV	1893.83	0.0152394
CAM206_map4	0002.CSV	1897.69	0.0152943
CAM206_map4	0002.CSV	1901.55	0.0152665
CAM206_map4	0002.CSV	1905.41	0.0153079
CAM206_map4	0002.CSV	1909.26	0.0154349
CAM206_map4	0002.CSV	1913.12	0.0155097
CAM206_map4	0002.CSV	1916.98	0.0154629
CAM206_map4	0002.CSV	1920.83	0.0156362
CAM206_map4	0002.CSV	1924.69	0.0156738
CAM206_map4	0002.CSV	1928.55	0.0156781
CAM206_map4	0002.CSV	1932.4	0.0156916
CAM206_map4	0002.CSV	1936.26	0.0157748
CAM206_map4	0002.CSV	1940.12	0.0157432
CAM206_map4	0002.CSV	1943.98	0.0159263
CAM206_map4	0002.CSV	1947.83	0.0160308
CAM206_map4	0002.CSV	1951.69	0.016043
CAM206_map4	0002.CSV	1955.55	0.0160808
CAM206_map4	0002.CSV	1959.4	0.016179
CAM206_map4	0002.CSV	1963.26	0.0161661
CAM206_map4	0002.CSV	1967.12	0.0163006
CAM206_map4	0002.CSV	1970.98	0.0163515
CAM206_map4	0002.CSV	1974.83	0.0163595
CAM206_map4	0002.CSV	1978.69	0.0163834
CAM206_map4	0002.CSV	1982.55	0.0164156
CAM206_map4	0002.CSV	1986.4	0.0163361
CAM206_map4	0002.CSV	1990.26	0.0164311
CAM206_map4	0002.CSV	1994.12	0.0165481
CAM206_map4	0002.CSV	1997.98	0.0165663
CAM206_map4	0002.CSV	2001.83	0.0165602
CAM206_map4	0002.CSV	2005.69	0.0166296
CAM206_map4	0002.CSV	2009.55	0.0166512
CAM206_map4	0002.CSV	2013.4	0.0166758
CAM206_map4	0002.CSV	2017.26	0.0167252
CAM206_map4	0002.CSV	2021.12	0.016811
CAM206_map4	0002.CSV	2024.97	0.0167571
CAM206_map4	0002.CSV	2028.83	0.0167719
CAM206_map4	0002.CSV	2032.69	0.0167637
CAM206_map4	0002.CSV	2036.55	0.016783
CAM206_map4	0002.CSV	2040.4	0.0168058
CAM206_map4	0002.CSV	2044.26	0.016906
CAM206_map4	0002.CSV	2048.12	0.016929
CAM206_map4	0002.CSV	2051.97	0.0169827
CAM206_map4	0002.CSV	2055.83	0.0169695
CAM206_map4	0002.CSV	2059.69	0.0169941
CAM206_map4	0002.CSV	2063.55	0.017057
CAM206_map4	0002.CSV	2067.4	0.0171854
CAM206_map4	0002.CSV	2071.26	0.0172149
CAM206_map4	0002.CSV	2075.12	0.017255
CAM206_map4	0002.CSV	2078.97	0.0172686
CAM206_map4	0002.CSV	2082.83	0.0173112
CAM206_map4	0002.CSV	2086.69	0.0173214
CAM206_map4	0002.CSV	2090.55	0.0173671
CAM206_map4	0002.CSV	2094.4	0.0173901
CAM206_map4	0002.CSV	2098.26	0.0174488
CAM206_map4	0002.CSV	2102.12	0.0174737
CAM206_map4	0002.CSV	2105.97	0.0175219
CAM206_map4	0002.CSV	2109.83	0.0175338
CAM206_map4	0002.CSV	2113.69	0.0176143
CAM206_map4	0002.CSV	2117.55	0.0176738
CAM206_map4	0002.CSV	2121.4	0.0177472
CAM206_map4	0002.CSV	2125.26	0.0177348
CAM206_map4	0002.CSV	2129.12	0.0177464
CAM206_map4	0002.CSV	2132.97	0.0177618
CAM206_map4	0002.CSV	2136.83	0.0177951
CAM206_map4	0002.CSV	2140.69	0.0178086
CAM206_map4	0002.CSV	2144.55	0.0178889
CAM206_map4	0002.CSV	2148.4	0.0179308
CAM206_map4	0002.CSV	2152.26	0.0179758
CAM206_map4	0002.CSV	2156.12	0.0179531
CAM206_map4	0002.CSV	2159.97	0.0179297
CAM206_map4	0002.CSV	2163.83	0.0179081
CAM206_map4	0002.CSV	2167.69	0.0179492
CAM206_map4	0002.CSV	2171.55	0.0179692
CAM206_map4	0002.CSV	2175.4	0.0179789
CAM206_map4	0002.CSV	2179.26	0.0179932
CAM206_map4	0002.CSV	2183.12	0.0180385
CAM206_map4	0002.CSV	2186.97	0.0180546
CAM206_map4	0002.CSV	2190.83	0.018104
CAM206_map4	0002.CSV	2194.69	0.0180944
CAM206_map4	0002.CSV	2198.55	0.0181134
CAM206_map4	0002.CSV	2202.4	0.0181215
CAM206_map4	0002.CSV	2206.26	0.0181865
CAM206_map4	0002.CSV	2210.12	0.0182523
CAM206_map4	0002.CSV	2213.97	0.0182872
CAM206_map4	0002.CSV	2217.83	0.0182574
CAM206_map4	0002.CSV	2221.69	0.0182643
CAM206_map4	0002.CSV	2225.54	0.0182775
CAM206_map4	0002.CSV	2229.4	0.018351
CAM206_map4	0002.CSV	2233.26	0.0183368
CAM206_map4	0002.CSV	2237.12	0.0183296
CAM206_map4	0002.CSV	2240.97	0.0183102
CAM206_map4	0002.CSV	2244.83	0.0183446
CAM206_map4	0002.CSV	2248.69	0.0183294
CAM206_map4	0002.CSV	2252.54	0.0183257
CAM206_map4	0002.CSV	2256.4	0.0183222
CAM206_map4	0002.CSV	2260.26	0.0183316
CAM206_map4	0002.CSV	2264.11	0.0182959
CAM206_map4	0002.CSV	2267.97	0.0182961
CAM206_map4	0002.CSV	2271.83	0.0182916
CAM206_map4	0002.CSV	2275.69	0.0183714
CAM206_map4	0002.CSV	2279.54	0.0183601
CAM206_map4	0002.CSV	2283.4	0.0182602
CAM206_map4	0002.CSV	2287.26	0.0181927
CAM206_map4	0002.CSV	2291.11	0.018189
CAM206_map4	0002.CSV	2294.97	0.018112
CAM206_map4	0002.CSV	2298.83	0.0180855
CAM206_map4	0002.CSV	2302.69	0.0180225
CAM206_map4	0002.CSV	2306.54	0.0179233
CAM206_map4	0002.CSV	2310.4	0.0177245
CAM206_map4	0002.CSV	2314.26	0.0175596
CAM206_map4	0002.CSV	2318.11	0.0173003
CAM206_map4	0002.CSV	2321.97	0.0169237
CAM206_map4	0002.CSV	2325.83	0.016478
CAM206_map4	0002.CSV	2329.69	0.0159854
CAM206_map4	0002.CSV	2333.54	0.0153971
CAM206_map4	0002.CSV	2337.4	0.0151965
CAM206_map4	0002.CSV	2341.26	0.0153613
CAM206_map4	0002.CSV	2345.11	0.0165386
CAM206_map4	0002.CSV	2348.97	0.0167594
CAM206_map4	0002.CSV	2352.83	0.0154431
CAM206_map4	0002.CSV	2356.69	0.0124283
CAM206_map4	0002.CSV	2360.54	0.0106301
CAM206_map4	0002.CSV	2364.4	0.0119896
CAM206_map4	0002.CSV	2368.26	0.014793
CAM206_map4	0002.CSV	2372.11	0.0167093
CAM206_map4	0002.CSV	2375.97	0.0176966
CAM206_map4	0002.CSV	2379.83	0.0181293
CAM206_map4	0002.CSV	2383.69	0.0181802
CAM206_map4	0002.CSV	2387.54	0.0180114
CAM206_map4	0002.CSV	2391.4	0.0179185
CAM206_map4	0002.CSV	2395.26	0.0178781
CAM206_map4	0002.CSV	2399.11	0.0178614
CAM206_map4	0002.CSV	2402.97	0.0178172
CAM206_map4	0002.CSV	2406.83	0.0178129
CAM206_map4	0002.CSV	2410.68	0.0178071
CAM206_map4	0002.CSV	2414.54	0.0178326
CAM206_map4	0002.CSV	2418.4	0.0178488
CAM206_map4	0002.CSV	2422.26	0.0179107
CAM206_map4	0002.CSV	2426.11	0.0179584
CAM206_map4	0002.CSV	2429.97	0.0179897
CAM206_map4	0002.CSV	2433.83	0.0180367
CAM206_map4	0002.CSV	2437.68	0.0180948
CAM206_map4	0002.CSV	2441.54	0.0181394
CAM206_map4	0002.CSV	2445.4	0.0181599
CAM206_map4	0002.CSV	2449.26	0.0181883
CAM206_map4	0002.CSV	2453.11	0.0182793
CAM206_map4	0002.CSV	2456.97	0.0183342
CAM206_map4	0002.CSV	2460.83	0.0183945
CAM206_map4	0002.CSV	2464.68	0.0185221
CAM206_map4	0002.CSV	2468.54	0.0187188
CAM206_map4	0002.CSV	2472.4	0.0188836
CAM206_map4	0002.CSV	2476.26	0.0191096
CAM206_map4	0002.CSV	2480.11	0.0193859
CAM206_map4	0002.CSV	2483.97	0.0196628
CAM206_map4	0002.CSV	2487.83	0.0198925
CAM206_map4	0002.CSV	2491.68	0.0201013
CAM206_map4	0002.CSV	2495.54	0.020285
CAM206_map4	0002.CSV	2499.4	0.0204081
CAM206_map4	0002.CSV	2503.26	0.0203933
CAM206_map4	0002.CSV	2507.11	0.0203459
CAM206_map4	0002.CSV	2510.97	0.0203707
CAM206_map4	0002.CSV	2514.83	0.0205451
CAM206_map4	0002.CSV	2518.68	0.0207512
CAM206_map4	0002.CSV	2522.54	0.0208494
CAM206_map4	0002.CSV	2526.4	0.0207176
CAM206_map4	0002.CSV	2530.26	0.0204713
CAM206_map4	0002.CSV	2534.11	0.0201861
CAM206_map4	0002.CSV	2537.97	0.0199669
CAM206_map4	0002.CSV	2541.83	0.0198572
CAM206_map4	0002.CSV	2545.68	0.0197745
CAM206_map4	0002.CSV	2549.54	0.0195908
CAM206_map4	0002.CSV	2553.4	0.0194165
CAM206_map4	0002.CSV	2557.26	0.0192515
CAM206_map4	0002.CSV	2561.11	0.0191032
CAM206_map4	0002.CSV	2564.97	0.0189629
CAM206_map4	0002.CSV	2568.83	0.0188485
CAM206_map4	0002.CSV	2572.68	0.0187793
CAM206_map4	0002.CSV	2576.54	0.0187499
CAM206_map4	0002.CSV	2580.4	0.0186452
CAM206_map4	0002.CSV	2584.25	0.0185766
CAM206_map4	0002.CSV	2588.11	0.0185218
CAM206_map4	0002.CSV	2591.97	0.0184605
CAM206_map4	0002.CSV	2595.83	0.0184042
CAM206_map4	0002.CSV	2599.68	0.018388
CAM206_map4	0002.CSV	2603.54	0.018361
CAM206_map4	0002.CSV	2607.4	0.0183507
CAM206_map4	0002.CSV	2611.25	0.0183834
CAM206_map4	0002.CSV	2615.11	0.0183797
CAM206_map4	0002.CSV	2618.97	0.0183255
CAM206_map4	0002.CSV	2622.82	0.0183967
CAM206_map4	0002.CSV	2626.68	0.0184526
CAM206_map4	0002.CSV	2630.54	0.0184003
CAM206_map4	0002.CSV	2634.4	0.0184014
CAM206_map4	0002.CSV	2638.25	0.0184093
CAM206_map4	0002.CSV	2642.11	0.0182654
CAM206_map4	0002.CSV	2645.97	0.018097
CAM206_map4	0002.CSV	2649.82	0.0179676
CAM206_map4	0002.CSV	2653.68	0.0179374
CAM206_map4	0002.CSV	2657.54	0.0179178
CAM206_map4	0002.CSV	2661.4	0.0178752
CAM206_map4	0002.CSV	2665.25	0.0178249
CAM206_map4	0002.CSV	2669.11	0.0178348
CAM206_map4	0002.CSV	2672.97	0.017996
CAM206_map4	0002.CSV	2676.82	0.0182471
CAM206_map4	0002.CSV	2680.68	0.0182436
CAM206_map4	0002.CSV	2684.54	0.0179549
CAM206_map4	0002.CSV	2688.4	0.0177788
CAM206_map4	0002.CSV	2692.25	0.0177793
CAM206_map4	0002.CSV	2696.11	0.0178864
CAM206_map4	0002.CSV	2699.97	0.0179684
CAM206_map4	0002.CSV	2703.82	0.0179964
CAM206_map4	0002.CSV	2707.68	0.0180506
CAM206_map4	0002.CSV	2711.54	0.0180413
CAM206_map4	0002.CSV	2715.4	0.018056
CAM206_map4	0002.CSV	2719.25	0.0182396
CAM206_map4	0002.CSV	2723.11	0.0185563
CAM206_map4	0002.CSV	2726.97	0.0185601
CAM206_map4	0002.CSV	2730.82	0.0183125
CAM206_map4	0002.CSV	2734.68	0.0183662
CAM206_map4	0002.CSV	2738.54	0.018479
CAM206_map4	0002.CSV	2742.4	0.018524
CAM206_map4	0002.CSV	2746.25	0.0188153
CAM206_map4	0002.CSV	2750.11	0.0188885
CAM206_map4	0002.CSV	2753.97	0.0187259
CAM206_map4	0002.CSV	2757.82	0.0186886
CAM206_map4	0002.CSV	2761.68	0.0186109
CAM206_map4	0002.CSV	2765.54	0.0185766
CAM206_map4	0002.CSV	2769.39	0.0187608
CAM206_map4	0002.CSV	2773.25	0.0191153
CAM206_map4	0002.CSV	2777.11	0.0191052
CAM206_map4	0002.CSV	2780.97	0.0189253
CAM206_map4	0002.CSV	2784.82	0.0191272
CAM206_map4	0002.CSV	2788.68	0.0195962
CAM206_map4	0002.CSV	2792.54	0.0197659
CAM206_map4	0002.CSV	2796.39	0.0197676
CAM206_map4	0002.CSV	2800.25	0.0196019
CAM206_map4	0002.CSV	2804.11	0.019443
CAM206_map4	0002.CSV	2807.97	0.019754
CAM206_map4	0002.CSV	2811.82	0.0198583
CAM206_map4	0002.CSV	2815.68	0.0197945
CAM206_map4	0002.CSV	2819.54	0.0199833
CAM206_map4	0002.CSV	2823.39	0.0202754
CAM206_map4	0002.CSV	2827.25	0.0205719
CAM206_map4	0002.CSV	2831.11	0.0212039
CAM206_map4	0002.CSV	2834.97	0.02221
CAM206_map4	0002.CSV	2838.82	0.0233698
CAM206_map4	0002.CSV	2842.68	0.0251207
CAM206_map4	0002.CSV	2846.54	0.0280824
CAM206_map4	0002.CSV	2850.39	0.0296763
CAM206_map4	0002.CSV	2854.25	0.0284437
CAM206_map4	0002.CSV	2858.11	0.0265877
CAM206_map4	0002.CSV	2861.97	0.0250834
CAM206_map4	0002.CSV	2865.82	0.0241877
CAM206_map4	0002.CSV	2869.68	0.0241324
CAM206_map4	0002.CSV	2873.54	0.0241383
CAM206_map4	0002.CSV	2877.39	0.0235047
CAM206_map4	0002.CSV	2881.25	0.0231029
CAM206_map4	0002.CSV	2885.11	0.0232492
CAM206_map4	0002.CSV	2888.97	0.0238071
CAM206_map4	0002.CSV	2892.82	0.0248061
CAM206_map4	0002.CSV	2896.68	0.0256926
CAM206_map4	0002.CSV	2900.54	0.0262974
CAM206_map4	0002.CSV	2904.39	0.0274198
CAM206_map4	0002.CSV	2908.25	0.0295764
CAM206_map4	0002.CSV	2912.11	0.0331079
CAM206_map4	0002.CSV	2915.97	0.0363062
CAM206_map4	0002.CSV	2919.82	0.0366179
CAM206_map4	0002.CSV	2923.68	0.0346646
CAM206_map4	0002.CSV	2927.54	0.0326036
CAM206_map4	0002.CSV	2931.39	0.0303813
CAM206_map4	0002.CSV	2935.25	0.0279901
CAM206_map4	0002.CSV	2939.11	0.0264921
CAM206_map4	0002.CSV	2942.96	0.0259964
CAM206_map4	0002.CSV	2946.82	0.0255674
CAM206_map4	0002.CSV	2950.68	0.025022
CAM206_map4	0002.CSV	2954.54	0.0244822
CAM206_map4	0002.CSV	2958.39	0.0238197
CAM206_map4	0002.CSV	2962.25	0.0231844
CAM206_map4	0002.CSV	2966.11	0.0222779
CAM206_map4	0002.CSV	2969.96	0.0216744
CAM206_map4	0002.CSV	2973.82	0.0215872
CAM206_map4	0002.CSV	2977.68	0.0214759
CAM206_map4	0002.CSV	2981.53	0.0209413
CAM206_map4	0002.CSV	2985.39	0.020185
CAM206_map4	0002.CSV	2989.25	0.0200201
CAM206_map4	0002.CSV	2993.11	0.0201803
CAM206_map4	0002.CSV	2996.96	0.0199693
CAM206_map4	0002.CSV	3000.82	0.0196062
CAM206_map4	0002.CSV	3004.68	0.0194577
CAM206_map4	0002.CSV	3008.53	0.0197201
CAM206_map4	0002.CSV	3012.39	0.0200728
CAM206_map4	0002.CSV	3016.25	0.0200332
CAM206_map4	0002.CSV	3020.11	0.0197449
CAM206_map4	0002.CSV	3023.96	0.0194726
CAM206_map4	0002.CSV	3027.82	0.0194151
CAM206_map4	0002.CSV	3031.68	0.0197314
CAM206_map4	0002.CSV	3035.53	0.0199064
CAM206_map4	0002.CSV	3039.39	0.0199748
CAM206_map4	0002.CSV	3043.25	0.0200716
CAM206_map4	0002.CSV	3047.11	0.0199861
CAM206_map4	0002.CSV	3050.96	0.0199124
CAM206_map4	0002.CSV	3054.82	0.01985
CAM206_map4	0002.CSV	3058.68	0.0196916
CAM206_map4	0002.CSV	3062.53	0.0197585
CAM206_map4	0002.CSV	3066.39	0.0201129
CAM206_map4	0002.CSV	3070.25	0.0200997
CAM206_map4	0002.CSV	3074.11	0.0200869
CAM206_map4	0002.CSV	3077.96	0.0203808
CAM206_map4	0002.CSV	3081.82	0.0205582
CAM206_map4	0002.CSV	3085.68	0.0205224
CAM206_map4	0002.CSV	3089.53	0.0203785
CAM206_map4	0002.CSV	3093.39	0.0201179
CAM206_map4	0002.CSV	3097.25	0.0201716
CAM206_map4	0002.CSV	3101.11	0.020356
CAM206_map4	0002.CSV	3104.96	0.0204123
CAM206_map4	0002.CSV	3108.82	0.0206008
CAM206_map4	0002.CSV	3112.68	0.0207644
CAM206_map4	0002.CSV	3116.53	0.0209227
CAM206_map4	0002.CSV	3120.39	0.0208703
CAM206_map4	0002.CSV	3124.25	0.0206497
CAM206_map4	0002.CSV	3128.11	0.0205573
CAM206_map4	0002.CSV	3131.96	0.0205857
CAM206_map4	0002.CSV	3135.82	0.020751
CAM206_map4	0002.CSV	3139.68	0.0209135
CAM206_map4	0002.CSV	3143.53	0.0207673
CAM206_map4	0002.CSV	3147.39	0.0208374
CAM206_map4	0002.CSV	3151.25	0.0211053
CAM206_map4	0002.CSV	3155.1	0.0210106
CAM206_map4	0002.CSV	3158.96	0.0207521
CAM206_map4	0002.CSV	3162.82	0.0207089
CAM206_map4	0002.CSV	3166.68	0.0206686
CAM206_map4	0002.CSV	3170.53	0.0206704
CAM206_map4	0002.CSV	3174.39	0.0207169
CAM206_map4	0002.CSV	3178.25	0.0208449
CAM206_map4	0002.CSV	3182.1	0.0209464
CAM206_map4	0002.CSV	3185.96	0.0210169
CAM206_map4	0002.CSV	3189.82	0.0211343
CAM206_map4	0002.CSV	3193.68	0.0211176
CAM206_map4	0002.CSV	3197.53	0.0210618
CAM206_map4	0002.CSV	3201.39	0.0211147
CAM206_map4	0002.CSV	3205.25	0.0211306
CAM206_map4	0002.CSV	3209.1	0.0211382
CAM206_map4	0002.CSV	3212.96	0.0213254
CAM206_map4	0002.CSV	3216.82	0.0215589
CAM206_map4	0002.CSV	3220.68	0.0215149
CAM206_map4	0002.CSV	3224.53	0.0213534
CAM206_map4	0002.CSV	3228.39	0.0215331
CAM206_map4	0002.CSV	3232.25	0.0219326
CAM206_map4	0002.CSV	3236.1	0.0219108
CAM206_map4	0002.CSV	3239.96	0.0216742
CAM206_map4	0002.CSV	3243.82	0.0218129
CAM206_map4	0002.CSV	3247.68	0.021941
CAM206_map4	0002.CSV	3251.53	0.0217677
CAM206_map4	0002.CSV	3255.39	0.0218172
CAM206_map4	0002.CSV	3259.25	0.0216536
CAM206_map4	0002.CSV	3263.1	0.0215133
CAM206_map4	0002.CSV	3266.96	0.0218088
CAM206_map4	0002.CSV	3270.82	0.0222187
CAM206_map4	0002.CSV	3274.68	0.0221761
CAM206_map4	0002.CSV	3278.53	0.0218769
CAM206_map4	0002.CSV	3282.39	0.0217921
CAM206_map4	0002.CSV	3286.25	0.021842
CAM206_map4	0002.CSV	3290.1	0.0220672
CAM206_map4	0002.CSV	3293.96	0.0222518
CAM206_map4	0002.CSV	3297.82	0.0220502
CAM206_map4	0002.CSV	3301.67	0.0220092
CAM206_map4	0002.CSV	3305.53	0.0222231
CAM206_map4	0002.CSV	3309.39	0.0221752
CAM206_map4	0002.CSV	3313.25	0.0217425
CAM206_map4	0002.CSV	3317.1	0.0214011
CAM206_map4	0002.CSV	3320.96	0.0215426
CAM206_map4	0002.CSV	3324.82	0.0218609
CAM206_map4	0002.CSV	3328.67	0.0216596
CAM206_map4	0002.CSV	3332.53	0.0214865
CAM206_map4	0002.CSV	3336.39	0.0218778
CAM206_map4	0002.CSV	3340.24	0.0220497
CAM206_map4	0002.CSV	3344.1	0.0217556
CAM206_map4	0002.CSV	3347.96	0.0216804
CAM206_map4	0002.CSV	3351.82	0.0216352
CAM206_map4	0002.CSV	3355.67	0.0214354
CAM206_map4	0002.CSV	3359.53	0.0215716
CAM206_map4	0002.CSV	3363.39	0.0218699
CAM206_map4	0002.CSV	3367.24	0.022086
CAM206_map4	0002.CSV	3371.1	0.021939
CAM206_map4	0002.CSV	3374.96	0.0216047
CAM206_map4	0002.CSV	3378.82	0.0213868
CAM206_map4	0002.CSV	3382.67	0.0211568
CAM206_map4	0002.CSV	3386.53	0.0212511
CAM206_map4	0002.CSV	3390.39	0.0215311
CAM206_map4	0002.CSV	3394.24	0.0216518
CAM206_map4	0002.CSV	3398.1	0.0216571
CAM206_map4	0002.CSV	3401.96	0.0215237
CAM206_map4	0002.CSV	3405.82	0.0212839
CAM206_map4	0002.CSV	3409.67	0.0212464
CAM206_map4	0002.CSV	3413.53	0.0210192
CAM206_map4	0002.CSV	3417.39	0.0206217
CAM206_map4	0002.CSV	3421.24	0.0204905
CAM206_map4	0002.CSV	3425.1	0.0205978
CAM206_map4	0002.CSV	3428.96	0.0208307
CAM206_map4	0002.CSV	3432.82	0.0209901
CAM206_map4	0002.CSV	3436.67	0.0207751
CAM206_map4	0002.CSV	3440.53	0.0202307
CAM206_map4	0002.CSV	3444.39	0.0199133
CAM206_map4	0002.CSV	3448.24	0.0199107
CAM206_map4	0002.CSV	3452.1	0.0196639
CAM206_map4	0002.CSV	3455.96	0.01957
CAM206_map4	0002.CSV	3459.82	0.0198596
CAM206_map4	0002.CSV	3463.67	0.0201552
CAM206_map4	0002.CSV	3467.53	0.0202591
CAM206_map4	0002.CSV	3471.39	0.0199995
CAM206_map4	0002.CSV	3475.24	0.0196786
CAM206_map4	0002.CSV	3479.1	0.0195744
CAM206_map4	0002.CSV	3482.96	0.0194543
CAM206_map4	0002.CSV	3486.82	0.0194825
CAM206_map4	0002.CSV	3490.67	0.019385
CAM206_map4	0002.CSV	3494.53	0.0193999
CAM206_map4	0002.CSV	3498.39	0.019325
CAM206_map4	0002.CSV	3502.24	0.0191647
CAM206_map4	0002.CSV	3506.1	0.0187721
CAM206_map4	0002.CSV	3509.96	0.0184746
CAM206_map4	0002.CSV	3513.81	0.018496
CAM206_map4	0002.CSV	3517.67	0.0181743
CAM206_map4	0002.CSV	3521.53	0.0181282
CAM206_map4	0002.CSV	3525.39	0.0181531
CAM206_map4	0002.CSV	3529.24	0.0178824
CAM206_map4	0002.CSV	3533.1	0.0177939
CAM206_map4	0002.CSV	3536.96	0.0178361
CAM206_map4	0002.CSV	3540.81	0.0177555
CAM206_map4	0002.CSV	3544.67	0.0178827
CAM206_map4	0002.CSV	3548.53	0.0178318
CAM206_map4	0002.CSV	3552.39	0.0173991
CAM206_map4	0002.CSV	3556.24	0.0170806
CAM206_map4	0002.CSV	3560.1	0.0167582
CAM206_map4	0002.CSV	3563.96	0.016309
CAM206_map4	0002.CSV	3567.81	0.0166508
CAM206_map4	0002.CSV	3571.67	0.0166716
CAM206_map4	0002.CSV	3575.53	0.0162384
CAM206_map4	0002.CSV	3579.39	0.0163363
CAM206_map4	0002.CSV	3583.24	0.0163537
CAM206_map4	0002.CSV	3587.1	0.0163943
CAM206_map4	0002.CSV	3590.96	0.0162337
CAM206_map4	0002.CSV	3594.81	0.0158498
CAM206_map4	0002.CSV	3598.67	0.0160166
CAM206_map4	0002.CSV	3602.53	0.0159654
CAM206_map4	0002.CSV	3606.39	0.0152356
CAM206_map4	0002.CSV	3610.24	0.0147429
CAM206_map4	0002.CSV	3614.1	0.0147046
CAM206_map4	0002.CSV	3617.96	0.0150922
CAM206_map4	0002.CSV	3621.81	0.0153601
CAM206_map4	0002.CSV	3625.67	0.0145729
CAM206_map4	0002.CSV	3629.53	0.0144
CAM206_map4	0002.CSV	3633.39	0.0150057
CAM206_map4	0002.CSV	3637.24	0.0148046
CAM206_map4	0002.CSV	3641.1	0.0143468
CAM206_map4	0002.CSV	3644.96	0.0134853
CAM206_map4	0002.CSV	3648.81	0.0140071
CAM206_map4	0002.CSV	3652.67	0.0150824
CAM206_map4	0002.CSV	3656.53	0.0149784
CAM206_map4	0002.CSV	3660.38	0.0148971
CAM206_map4	0002.CSV	3664.24	0.0140821
CAM206_map4	0002.CSV	3668.1	0.0132296
CAM206_map4	0002.CSV	3671.96	0.0132752
CAM206_map4	0002.CSV	3675.81	0.0140997
CAM206_map4	0002.CSV	3679.67	0.0146816
CAM206_map4	0002.CSV	3683.53	0.0142332
CAM206_map4	0002.CSV	3687.38	0.0140328
CAM206_map4	0002.CSV	3691.24	0.0147139
CAM206_map4	0002.CSV	3695.1	0.0144646
CAM206_map4	0002.CSV	3698.95	0.0138297
CAM206_map4	0002.CSV	3702.81	0.0135879
CAM206_map4	0002.CSV	3706.67	0.0131468
CAM206_map4	0002.CSV	3710.53	0.0130974
CAM206_map4	0002.CSV	3714.38	0.0138853
CAM206_map4	0002.CSV	3718.24	0.013392
CAM206_map4	0002.CSV	3722.1	0.0130393
CAM206_map4	0002.CSV	3725.95	0.0132575
CAM206_map4	0002.CSV	3729.81	0.0128994
CAM206_map4	0002.CSV	3733.67	0.0128177
CAM206_map4	0002.CSV	3737.53	0.0141745
CAM206_map4	0002.CSV	3741.38	0.0135227
CAM206_map4	0002.CSV	3745.24	0.0122839
CAM206_map4	0002.CSV	3749.1	0.0120486
CAM206_map4	0002.CSV	3752.95	0.0133004
CAM206_map4	0002.CSV	3756.81	0.0135896
CAM206_map4	0002.CSV	3760.67	0.0135892
CAM206_map4	0002.CSV	3764.53	0.0134223
CAM206_map4	0002.CSV	3768.38	0.0135759
CAM206_map4	0002.CSV	3772.24	0.0138946
CAM206_map4	0002.CSV	3776.1	0.0136336
CAM206_map4	0002.CSV	3779.95	0.0136446
CAM206_map4	0002.CSV	3783.81	0.013735
CAM206_map4	0002.CSV	3787.67	0.0138083
CAM206_map4	0002.CSV	3791.53	0.0135265
CAM206_map4	0002.CSV	3795.38	0.0129554
CAM206_map4	0002.CSV	3799.24	0.0128632
CAM206_map4	0002.CSV	3803.1	0.0133238
CAM206_map4	0002.CSV	3806.95	0.0138334
CAM206_map4	0002.CSV	3810.81	0.0135993
CAM206_map4	0002.CSV	3814.67	0.0129988
CAM206_map4	0002.CSV	3818.53	0.0131895
CAM206_map4	0002.CSV	3822.38	0.0137466
CAM206_map4	0002.CSV	3826.24	0.0137548
CAM206_map4	0002.CSV	3830.1	0.0134706
CAM206_map4	0002.CSV	3833.95	0.0132063
CAM206_map4	0002.CSV	3837.81	0.0133755
CAM206_map4	0002.CSV	3841.67	0.0140471
CAM206_map4	0002.CSV	3845.53	0.0138387
CAM206_map4	0002.CSV	3849.38	0.0126886
CAM206_map4	0002.CSV	3853.24	0.0125527
CAM206_map4	0002.CSV	3857.1	0.0137052
CAM206_map4	0002.CSV	3860.95	0.013118
CAM206_map4	0002.CSV	3864.81	0.0130277
CAM206_map4	0002.CSV	3868.67	0.0132726
CAM206_map4	0002.CSV	3872.52	0.0135413
CAM206_map4	0002.CSV	3876.38	0.0134466
CAM206_map4	0002.CSV	3880.24	0.0133127
CAM206_map4	0002.CSV	3884.1	0.0138748
CAM206_map4	0002.CSV	3887.95	0.0138061
CAM206_map4	0002.CSV	3891.81	0.0135943
CAM206_map4	0002.CSV	3895.67	0.0132811
CAM206_map4	0002.CSV	3899.52	0.0129145
CAM206_map4	0002.CSV	3903.38	0.0138119
CAM206_map4	0002.CSV	3907.24	0.0141715
CAM206_map4	0002.CSV	3911.1	0.0136158
CAM206_map4	0002.CSV	3914.95	0.0132283
CAM206_map4	0002.CSV	3918.81	0.0133274
CAM206_map4	0002.CSV	3922.67	0.0134022
CAM206_map4	0002.CSV	3926.52	0.0134224
CAM206_map4	0002.CSV	3930.38	0.0135067
CAM206_map4	0002.CSV	3934.24	0.0137358
CAM206_map4	0002.CSV	3938.09	0.0134956
CAM206_map4	0002.CSV	3941.95	0.0133807
CAM206_map4	0002.CSV	3945.81	0.0134314
CAM206_map4	0002.CSV	3949.67	0.0135012
CAM206_map4	0002.CSV	3953.52	0.0135964
CAM206_map4	0002.CSV	3957.38	0.013551
CAM206_map4	0002.CSV	3961.24	0.013576
CAM206_map4	0002.CSV	3965.09	0.0135318
CAM206_map4	0002.CSV	3968.95	0.013431
CAM206_map4	0002.CSV	3972.81	0.0134036
CAM206_map4	0002.CSV	3976.67	0.0134314
CAM206_map4	0002.CSV	3980.52	0.0134368
CAM206_map4	0002.CSV	3984.38	0.0133673
CAM206_map4	0002.CSV	3988.24	0.0132319
CAM206_map4	0002.CSV	3992.09	0.0132185
CAM206_map4	0002.CSV	3995.95	0.0132566
CAM206_map4	0002.CSV	3999.81	0.0132173
CAM206_map4	0003.CSV	674.992	0.0389947
CAM206_map4	0003.CSV	678.849	0.0406577
CAM206_map4	0003.CSV	682.706	0.0412398
CAM206_map4	0003.CSV	686.563	0.0435208
CAM206_map4	0003.CSV	690.42	0.0461202
CAM206_map4	0003.CSV	694.277	0.0545387
CAM206_map4	0003.CSV	698.134	0.0643926
CAM206_map4	0003.CSV	701.991	0.0613603
CAM206_map4	0003.CSV	705.849	0.0568945
CAM206_map4	0003.CSV	709.706	0.07211
CAM206_map4	0003.CSV	713.563	0.0745243
CAM206_map4	0003.CSV	717.42	0.0514188
CAM206_map4	0003.CSV	721.277	0.0357698
CAM206_map4	0003.CSV	725.134	0.0334243
CAM206_map4	0003.CSV	728.991	0.0327035
CAM206_map4	0003.CSV	732.848	0.0323371
CAM206_map4	0003.CSV	736.705	0.0317114
CAM206_map4	0003.CSV	740.562	0.0323261
CAM206_map4	0003.CSV	744.42	0.0323929
CAM206_map4	0003.CSV	748.277	0.033094
CAM206_map4	0003.CSV	752.134	0.0335695
CAM206_map4	0003.CSV	755.991	0.0346001
CAM206_map4	0003.CSV	759.848	0.0348043
CAM206_map4	0003.CSV	763.705	0.0360079
CAM206_map4	0003.CSV	767.562	0.0368548
CAM206_map4	0003.CSV	771.419	0.0379784
CAM206_map4	0003.CSV	775.276	0.0388148
CAM206_map4	0003.CSV	779.133	0.0401387
CAM206_map4	0003.CSV	782.99	0.0402451
CAM206_map4	0003.CSV	786.848	0.0405929
CAM206_map4	0003.CSV	790.705	0.0410107
CAM206_map4	0003.CSV	794.562	0.0425415
CAM206_map4	0003.CSV	798.419	0.0434578
CAM206_map4	0003.CSV	802.276	0.0440999
CAM206_map4	0003.CSV	806.133	0.0437317
CAM206_map4	0003.CSV	809.99	0.0444104
CAM206_map4	0003.CSV	813.847	0.0451715
CAM206_map4	0003.CSV	817.704	0.0468071
CAM206_map4	0003.CSV	821.562	0.0486916
CAM206_map4	0003.CSV	825.419	0.0520596
CAM206_map4	0003.CSV	829.276	0.0558477
CAM206_map4	0003.CSV	833.133	0.0616928
CAM206_map4	0003.CSV	836.99	0.0704012
CAM206_map4	0003.CSV	840.847	0.0845588
CAM206_map4	0003.CSV	844.704	0.0999716
CAM206_map4	0003.CSV	848.561	0.126478
CAM206_map4	0003.CSV	852.418	0.160709
CAM206_map4	0003.CSV	856.275	0.167645
CAM206_map4	0003.CSV	860.132	0.142913
CAM206_map4	0003.CSV	863.99	0.109982
CAM206_map4	0003.CSV	867.847	0.0785392
CAM206_map4	0003.CSV	871.704	0.0547957
CAM206_map4	0003.CSV	875.561	0.0407043
CAM206_map4	0003.CSV	879.418	0.0335209
CAM206_map4	0003.CSV	883.275	0.0287651
CAM206_map4	0003.CSV	887.132	0.0265228
CAM206_map4	0003.CSV	890.989	0.025997
CAM206_map4	0003.CSV	894.846	0.0265903
CAM206_map4	0003.CSV	898.703	0.0270194
CAM206_map4	0003.CSV	902.561	0.0277917
CAM206_map4	0003.CSV	906.418	0.0283895
CAM206_map4	0003.CSV	910.275	0.0288566
CAM206_map4	0003.CSV	914.132	0.0286665
CAM206_map4	0003.CSV	917.989	0.0291249
CAM206_map4	0003.CSV	921.846	0.0295067
CAM206_map4	0003.CSV	925.703	0.030168
CAM206_map4	0003.CSV	929.56	0.0304951
CAM206_map4	0003.CSV	933.417	0.0310867
CAM206_map4	0003.CSV	937.274	0.0312723
CAM206_map4	0003.CSV	941.131	0.0316263
CAM206_map4	0003.CSV	944.989	0.0318993
CAM206_map4	0003.CSV	948.846	0.0325855
CAM206_map4	0003.CSV	952.703	0.0329771
CAM206_map4	0003.CSV	956.56	0.0335589
CAM206_map4	0003.CSV	960.417	0.033739
CAM206_map4	0003.CSV	964.274	0.034219
CAM206_map4	0003.CSV	968.131	0.034543
CAM206_map4	0003.CSV	971.988	0.0352289
CAM206_map4	0003.CSV	975.845	0.0357851
CAM206_map4	0003.CSV	979.702	0.0364864
CAM206_map4	0003.CSV	983.559	0.0368939
CAM206_map4	0003.CSV	987.417	0.0376235
CAM206_map4	0003.CSV	991.274	0.0381557
CAM206_map4	0003.CSV	995.131	0.0390872
CAM206_map4	0003.CSV	998.988	0.0397342
CAM206_map4	0003.CSV	1002.85	0.0405193
CAM206_map4	0003.CSV	1006.7	0.0410881
CAM206_map4	0003.CSV	1010.56	0.0418336
CAM206_map4	0003.CSV	1014.42	0.0422666
CAM206_map4	0003.CSV	1018.27	0.0429242
CAM206_map4	0003.CSV	1022.13	0.0433814
CAM206_map4	0003.CSV	1025.99	0.0441842
CAM206_map4	0003.CSV	1029.85	0.0447025
CAM206_map4	0003.CSV	1033.7	0.0454139
CAM206_map4	0003.CSV	1037.56	0.0458675
CAM206_map4	0003.CSV	1041.42	0.0466697
CAM206_map4	0003.CSV	1045.27	0.0473123
CAM206_map4	0003.CSV	1049.13	0.0483235
CAM206_map4	0003.CSV	1052.99	0.0491857
CAM206_map4	0003.CSV	1056.84	0.0506402
CAM206_map4	0003.CSV	1060.7	0.052293
CAM206_map4	0003.CSV	1064.56	0.0547062
CAM206_map4	0003.CSV	1068.42	0.0573564
CAM206_map4	0003.CSV	1072.27	0.0607188
CAM206_map4	0003.CSV	1076.13	0.0648645
CAM206_map4	0003.CSV	1079.99	0.0709357
CAM206_map4	0003.CSV	1083.84	0.071114
CAM206_map4	0003.CSV	1087.7	0.0638844
CAM206_map4	0003.CSV	1091.56	0.0591041
CAM206_map4	0003.CSV	1095.41	0.058203
CAM206_map4	0003.CSV	1099.27	0.0576735
CAM206_map4	0003.CSV	1103.13	0.0572349
CAM206_map4	0003.CSV	1106.99	0.0566388
CAM206_map4	0003.CSV	1110.84	0.0563574
CAM206_map4	0003.CSV	1114.7	0.0556563
CAM206_map4	0003.CSV	1118.56	0.0549931
CAM206_map4	0003.CSV	1122.41	0.0542564
CAM206_map4	0003.CSV	1126.27	0.053959
CAM206_map4	0003.CSV	1130.13	0.0535655
CAM206_map4	0003.CSV	1133.99	0.0535206
CAM206_map4	0003.CSV	1137.84	0.0534427
CAM206_map4	0003.CSV	1141.7	0.0536644
CAM206_map4	0003.CSV	1145.56	0.0536002
CAM206_map4	0003.CSV	1149.41	0.0536893
CAM206_map4	0003.CSV	1153.27	0.0536016
CAM206_map4	0003.CSV	1157.13	0.0539075
CAM206_map4	0003.CSV	1160.99	0.05431
CAM206_map4	0003.CSV	1164.84	0.0550294
CAM206_map4	0003.CSV	1168.7	0.0554026
CAM206_map4	0003.CSV	1172.56	0.0556651
CAM206_map4	0003.CSV	1176.41	0.0553866
CAM206_map4	0003.CSV	1180.27	0.0550551
CAM206_map4	0003.CSV	1184.13	0.0543937
CAM206_map4	0003.CSV	1187.99	0.0539445
CAM206_map4	0003.CSV	1191.84	0.0533353
CAM206_map4	0003.CSV	1195.7	0.0529927
CAM206_map4	0003.CSV	1199.56	0.0525705
CAM206_map4	0003.CSV	1203.41	0.0524691
CAM206_map4	0003.CSV	1207.27	0.0523476
CAM206_map4	0003.CSV	1211.13	0.0526712
CAM206_map4	0003.CSV	1214.98	0.0529498
CAM206_map4	0003.CSV	1218.84	0.0534884
CAM206_map4	0003.CSV	1222.7	0.0538809
CAM206_map4	0003.CSV	1226.56	0.0545346
CAM206_map4	0003.CSV	1230.41	0.0550331
CAM206_map4	0003.CSV	1234.27	0.055821
CAM206_map4	0003.CSV	1238.13	0.056402
CAM206_map4	0003.CSV	1241.98	0.0571292
CAM206_map4	0003.CSV	1245.84	0.0576951
CAM206_map4	0003.CSV	1249.7	0.0584736
CAM206_map4	0003.CSV	1253.56	0.0589946
CAM206_map4	0003.CSV	1257.41	0.0596931
CAM206_map4	0003.CSV	1261.27	0.0601917
CAM206_map4	0003.CSV	1265.13	0.0609921
CAM206_map4	0003.CSV	1268.98	0.0618241
CAM206_map4	0003.CSV	1272.84	0.0630224
CAM206_map4	0003.CSV	1276.7	0.0639579
CAM206_map4	0003.CSV	1280.56	0.0650369
CAM206_map4	0003.CSV	1284.41	0.0658801
CAM206_map4	0003.CSV	1288.27	0.0669895
CAM206_map4	0003.CSV	1292.13	0.0679295
CAM206_map4	0003.CSV	1295.98	0.0691381
CAM206_map4	0003.CSV	1299.84	0.0701857
CAM206_map4	0003.CSV	1303.7	0.071493
CAM206_map4	0003.CSV	1307.56	0.0726429
CAM206_map4	0003.CSV	1311.41	0.0741114
CAM206_map4	0003.CSV	1315.27	0.0754795
CAM206_map4	0003.CSV	1319.13	0.0772013
CAM206_map4	0003.CSV	1322.98	0.0786206
CAM206_map4	0003.CSV	1326.84	0.0804374
CAM206_map4	0003.CSV	1330.7	0.0823491
CAM206_map4	0003.CSV	1334.56	0.0845507
CAM206_map4	0003.CSV	1338.41	0.0871142
CAM206_map4	0003.CSV	1342.27	0.0905329
CAM206_map4	0003.CSV	1346.13	0.093195
CAM206_map4	0003.CSV	1349.98	0.0964953
CAM206_map4	0003.CSV	1353.84	0.0998474
CAM206_map4	0003.CSV	1357.7	0.103376
CAM206_map4	0003.CSV	1361.56	0.107238
CAM206_map4	0003.CSV	1365.41	0.112163
CAM206_map4	0003.CSV	1369.27	0.11602
CAM206_map4	0003.CSV	1373.13	0.12112
CAM206_map4	0003.CSV	1376.98	0.126815
CAM206_map4	0003.CSV	1380.84	0.131832
CAM206_map4	0003.CSV	1384.7	0.136368
CAM206_map4	0003.CSV	1388.56	0.142463
CAM206_map4	0003.CSV	1392.41	0.147108
CAM206_map4	0003.CSV	1396.27	0.152687
CAM206_map4	0003.CSV	1400.13	0.157875
CAM206_map4	0003.CSV	1403.98	0.162542
CAM206_map4	0003.CSV	1407.84	0.166749
CAM206_map4	0003.CSV	1411.7	0.170523
CAM206_map4	0003.CSV	1415.55	0.172799
CAM206_map4	0003.CSV	1419.41	0.175951
CAM206_map4	0003.CSV	1423.27	0.178247
CAM206_map4	0003.CSV	1427.12	0.181322
CAM206_map4	0003.CSV	1430.98	0.184582
CAM206_map4	0003.CSV	1434.84	0.189197
CAM206_map4	0003.CSV	1438.7	0.193766
CAM206_map4	0003.CSV	1442.55	0.196867
CAM206_map4	0003.CSV	1446.41	0.19711
CAM206_map4	0003.CSV	1450.27	0.195548
CAM206_map4	0003.CSV	1454.12	0.192046
CAM206_map4	0003.CSV	1457.98	0.187823
CAM206_map4	0003.CSV	1461.84	0.184268
CAM206_map4	0003.CSV	1465.7	0.181897
CAM206_map4	0003.CSV	1469.55	0.176898
CAM206_map4	0003.CSV	1473.41	0.166759
CAM206_map4	0003.CSV	1477.27	0.154232
CAM206_map4	0003.CSV	1481.12	0.146845
CAM206_map4	0003.CSV	1484.98	0.139945
CAM206_map4	0003.CSV	1488.84	0.132185
CAM206_map4	0003.CSV	1492.7	0.124432
CAM206_map4	0003.CSV	1496.55	0.11891
CAM206_map4	0003.CSV	1500.41	0.112431
CAM206_map4	0003.CSV	1504.27	0.108453
CAM206_map4	0003.CSV	1508.12	0.100707
CAM206_map4	0003.CSV	1511.98	0.0953642
CAM206_map4	0003.CSV	1515.84	0.0912365
CAM206_map4	0003.CSV	1519.7	0.0858909
CAM206_map4	0003.CSV	1523.55	0.079625
CAM206_map4	0003.CSV	1527.41	0.0757929
CAM206_map4	0003.CSV	1531.27	0.0726649
CAM206_map4	0003.CSV	1535.12	0.0707872
CAM206_map4	0003.CSV	1538.98	0.0685051
CAM206_map4	0003.CSV	1542.84	0.0626835
CAM206_map4	0003.CSV	1546.7	0.0575294
CAM206_map4	0003.CSV	1550.55	0.0537924
CAM206_map4	0003.CSV	1554.41	0.050016
CAM206_map4	0003.CSV	1558.27	0.0461019
CAM206_map4	0003.CSV	1562.12	0.0430439
CAM206_map4	0003.CSV	1565.98	0.0418609
CAM206_map4	0003.CSV	1569.84	0.0406115
CAM206_map4	0003.CSV	1573.69	0.0392605
CAM206_map4	0003.CSV	1577.55	0.0361065
CAM206_map4	0003.CSV	1581.41	0.0323995
CAM206_map4	0003.CSV	1585.27	0.028898
CAM206_map4	0003.CSV	1589.12	0.0262676
CAM206_map4	0003.CSV	1592.98	0.0245869
CAM206_map4	0003.CSV	1596.84	0.0235858
CAM206_map4	0003.CSV	1600.69	0.0228357
CAM206_map4	0003.CSV	1604.55	0.0224929
CAM206_map4	0003.CSV	1608.41	0.0221071
CAM206_map4	0003.CSV	1612.27	0.0217321
CAM206_map4	0003.CSV	1616.12	0.0211828
CAM206_map4	0003.CSV	1619.98	0.0208094
CAM206_map4	0003.CSV	1623.84	0.020241
CAM206_map4	0003.CSV	1627.69	0.0198124
CAM206_map4	0003.CSV	1631.55	0.0191408
CAM206_map4	0003.CSV	1635.41	0.0188119
CAM206_map4	0003.CSV	1639.27	0.0185465
CAM206_map4	0003.CSV	1643.12	0.0180017
CAM206_map4	0003.CSV	1646.98	0.0175982
CAM206_map4	0003.CSV	1650.84	0.017632
CAM206_map4	0003.CSV	1654.69	0.0175543
CAM206_map4	0003.CSV	1658.55	0.0173158
CAM206_map4	0003.CSV	1662.41	0.016844
CAM206_map4	0003.CSV	1666.27	0.0163959
CAM206_map4	0003.CSV	1670.12	0.0160242
CAM206_map4	0003.CSV	1673.98	0.016128
CAM206_map4	0003.CSV	1677.84	0.0156486
CAM206_map4	0003.CSV	1681.69	0.0151841
CAM206_map4	0003.CSV	1685.55	0.0151334
CAM206_map4	0003.CSV	1689.41	0.0150369
CAM206_map4	0003.CSV	1693.27	0.0143501
CAM206_map4	0003.CSV	1697.12	0.0139769
CAM206_map4	0003.CSV	1700.98	0.0140575
CAM206_map4	0003.CSV	1704.84	0.0141061
CAM206_map4	0003.CSV	1708.69	0.0138162
CAM206_map4	0003.CSV	1712.55	0.0134728
CAM206_map4	0003.CSV	1716.41	0.0136044
CAM206_map4	0003.CSV	1720.27	0.0141683
CAM206_map4	0003.CSV	1724.12	0.013958
[truncated: 67,904 more rows]

## Sheet: CAM206_map6
Map	Select spectrum number	Wavenumbers	Absorbance
CAM206_map6	0001.CSV	674.992	0.0483105
CAM206_map6	0001.CSV	678.849	0.0505814
CAM206_map6	0001.CSV	682.706	0.0513043
CAM206_map6	0001.CSV	686.563	0.0527912
CAM206_map6	0001.CSV	690.42	0.0543556
CAM206_map6	0001.CSV	694.277	0.0620008
CAM206_map6	0001.CSV	698.134	0.0703766
CAM206_map6	0001.CSV	701.991	0.0668834
CAM206_map6	0001.CSV	705.849	0.0641433
CAM206_map6	0001.CSV	709.706	0.0788917
CAM206_map6	0001.CSV	713.563	0.0792616
CAM206_map6	0001.CSV	717.42	0.057302
CAM206_map6	0001.CSV	721.277	0.0440312
CAM206_map6	0001.CSV	725.134	0.042805
CAM206_map6	0001.CSV	728.991	0.042346
CAM206_map6	0001.CSV	732.848	0.0420827
CAM206_map6	0001.CSV	736.705	0.0418686
CAM206_map6	0001.CSV	740.562	0.0426577
CAM206_map6	0001.CSV	744.42	0.0428704
CAM206_map6	0001.CSV	748.277	0.0436296
CAM206_map6	0001.CSV	752.134	0.0439323
CAM206_map6	0001.CSV	755.991	0.044874
CAM206_map6	0001.CSV	759.848	0.045529
CAM206_map6	0001.CSV	763.705	0.0467732
CAM206_map6	0001.CSV	767.562	0.0474331
CAM206_map6	0001.CSV	771.419	0.0489811
CAM206_map6	0001.CSV	775.276	0.0501303
CAM206_map6	0001.CSV	779.133	0.051437
CAM206_map6	0001.CSV	782.99	0.051584
CAM206_map6	0001.CSV	786.848	0.0523475
CAM206_map6	0001.CSV	790.705	0.0531332
CAM206_map6	0001.CSV	794.562	0.054895
CAM206_map6	0001.CSV	798.419	0.0564526
CAM206_map6	0001.CSV	802.276	0.0578065
CAM206_map6	0001.CSV	806.133	0.0580327
CAM206_map6	0001.CSV	809.99	0.059036
CAM206_map6	0001.CSV	813.847	0.060414
CAM206_map6	0001.CSV	817.704	0.0631211
CAM206_map6	0001.CSV	821.562	0.0663188
CAM206_map6	0001.CSV	825.419	0.0710345
CAM206_map6	0001.CSV	829.276	0.0765321
CAM206_map6	0001.CSV	833.133	0.0845848
CAM206_map6	0001.CSV	836.99	0.0958359
CAM206_map6	0001.CSV	840.847	0.110438
CAM206_map6	0001.CSV	844.704	0.124293
CAM206_map6	0001.CSV	848.561	0.144055
CAM206_map6	0001.CSV	852.418	0.161957
CAM206_map6	0001.CSV	856.275	0.159484
CAM206_map6	0001.CSV	860.132	0.137386
CAM206_map6	0001.CSV	863.99	0.108522
CAM206_map6	0001.CSV	867.847	0.0802989
CAM206_map6	0001.CSV	871.704	0.0594392
CAM206_map6	0001.CSV	875.561	0.0469792
CAM206_map6	0001.CSV	879.418	0.0406744
CAM206_map6	0001.CSV	883.275	0.036688
CAM206_map6	0001.CSV	887.132	0.0347787
CAM206_map6	0001.CSV	890.989	0.0342432
CAM206_map6	0001.CSV	894.846	0.0345997
CAM206_map6	0001.CSV	898.703	0.0348167
CAM206_map6	0001.CSV	902.561	0.0356173
CAM206_map6	0001.CSV	906.418	0.0362863
CAM206_map6	0001.CSV	910.275	0.0367998
CAM206_map6	0001.CSV	914.132	0.0367892
CAM206_map6	0001.CSV	917.989	0.0372502
CAM206_map6	0001.CSV	921.846	0.0375632
CAM206_map6	0001.CSV	925.703	0.0381858
CAM206_map6	0001.CSV	929.56	0.0385795
CAM206_map6	0001.CSV	933.417	0.0392242
CAM206_map6	0001.CSV	937.274	0.0395259
CAM206_map6	0001.CSV	941.131	0.0399739
CAM206_map6	0001.CSV	944.989	0.0402131
CAM206_map6	0001.CSV	948.846	0.0408075
CAM206_map6	0001.CSV	952.703	0.041411
CAM206_map6	0001.CSV	956.56	0.0422462
CAM206_map6	0001.CSV	960.417	0.042665
CAM206_map6	0001.CSV	964.274	0.0432976
CAM206_map6	0001.CSV	968.131	0.0438014
CAM206_map6	0001.CSV	971.988	0.0447006
CAM206_map6	0001.CSV	975.845	0.0454487
CAM206_map6	0001.CSV	979.702	0.0464602
CAM206_map6	0001.CSV	983.559	0.0472696
CAM206_map6	0001.CSV	987.417	0.048275
CAM206_map6	0001.CSV	991.274	0.0490536
CAM206_map6	0001.CSV	995.131	0.0501183
CAM206_map6	0001.CSV	998.988	0.0510058
CAM206_map6	0001.CSV	1002.85	0.0520579
CAM206_map6	0001.CSV	1006.7	0.0528926
CAM206_map6	0001.CSV	1010.56	0.0539576
CAM206_map6	0001.CSV	1014.42	0.0546186
CAM206_map6	0001.CSV	1018.27	0.0553616
CAM206_map6	0001.CSV	1022.13	0.0558244
CAM206_map6	0001.CSV	1025.99	0.0567577
CAM206_map6	0001.CSV	1029.85	0.0574588
CAM206_map6	0001.CSV	1033.7	0.0582089
CAM206_map6	0001.CSV	1037.56	0.0586541
CAM206_map6	0001.CSV	1041.42	0.0593648
CAM206_map6	0001.CSV	1045.27	0.0598401
CAM206_map6	0001.CSV	1049.13	0.0607603
CAM206_map6	0001.CSV	1052.99	0.0616596
CAM206_map6	0001.CSV	1056.84	0.0630418
CAM206_map6	0001.CSV	1060.7	0.0644666
CAM206_map6	0001.CSV	1064.56	0.0665638
CAM206_map6	0001.CSV	1068.42	0.0688573
CAM206_map6	0001.CSV	1072.27	0.0719062
CAM206_map6	0001.CSV	1076.13	0.0761496
CAM206_map6	0001.CSV	1079.99	0.0824352
CAM206_map6	0001.CSV	1083.84	0.0819173
CAM206_map6	0001.CSV	1087.7	0.074454
CAM206_map6	0001.CSV	1091.56	0.0704244
CAM206_map6	0001.CSV	1095.41	0.0698811
CAM206_map6	0001.CSV	1099.27	0.0692726
CAM206_map6	0001.CSV	1103.13	0.0688511
CAM206_map6	0001.CSV	1106.99	0.0683798
CAM206_map6	0001.CSV	1110.84	0.0681159
CAM206_map6	0001.CSV	1114.7	0.0674733
CAM206_map6	0001.CSV	1118.56	0.0668975
CAM206_map6	0001.CSV	1122.41	0.0662522
CAM206_map6	0001.CSV	1126.27	0.0659457
CAM206_map6	0001.CSV	1130.13	0.0655632
CAM206_map6	0001.CSV	1133.99	0.0654864
CAM206_map6	0001.CSV	1137.84	0.0654148
CAM206_map6	0001.CSV	1141.7	0.0656513
CAM206_map6	0001.CSV	1145.56	0.0657028
CAM206_map6	0001.CSV	1149.41	0.0659021
CAM206_map6	0001.CSV	1153.27	0.0658351
CAM206_map6	0001.CSV	1157.13	0.0659668
CAM206_map6	0001.CSV	1160.99	0.0661869
CAM206_map6	0001.CSV	1164.84	0.0668067
CAM206_map6	0001.CSV	1168.7	0.06705
CAM206_map6	0001.CSV	1172.56	0.0672122
CAM206_map6	0001.CSV	1176.41	0.0670215
CAM206_map6	0001.CSV	1180.27	0.0668194
CAM206_map6	0001.CSV	1184.13	0.0662527
CAM206_map6	0001.CSV	1187.99	0.0657503
CAM206_map6	0001.CSV	1191.84	0.0649597
CAM206_map6	0001.CSV	1195.7	0.0643843
CAM206_map6	0001.CSV	1199.56	0.0638779
CAM206_map6	0001.CSV	1203.41	0.0637995
CAM206_map6	0001.CSV	1207.27	0.0636845
CAM206_map6	0001.CSV	1211.13	0.063898
CAM206_map6	0001.CSV	1214.98	0.0640639
CAM206_map6	0001.CSV	1218.84	0.0645292
CAM206_map6	0001.CSV	1222.7	0.0649578
CAM206_map6	0001.CSV	1226.56	0.0656085
CAM206_map6	0001.CSV	1230.41	0.0660442
CAM206_map6	0001.CSV	1234.27	0.0667304
CAM206_map6	0001.CSV	1238.13	0.0672389
CAM206_map6	0001.CSV	1241.98	0.0679258
CAM206_map6	0001.CSV	1245.84	0.0684118
CAM206_map6	0001.CSV	1249.7	0.0690311
CAM206_map6	0001.CSV	1253.56	0.069407
CAM206_map6	0001.CSV	1257.41	0.0699615
CAM206_map6	0001.CSV	1261.27	0.0703721
CAM206_map6	0001.CSV	1265.13	0.0710966
CAM206_map6	0001.CSV	1268.98	0.0718254
CAM206_map6	0001.CSV	1272.84	0.0728371
CAM206_map6	0001.CSV	1276.7	0.0736341
CAM206_map6	0001.CSV	1280.56	0.0745781
CAM206_map6	0001.CSV	1284.41	0.0753004
CAM206_map6	0001.CSV	1288.27	0.0763058
CAM206_map6	0001.CSV	1292.13	0.0771761
CAM206_map6	0001.CSV	1295.98	0.0782942
CAM206_map6	0001.CSV	1299.84	0.079245
CAM206_map6	0001.CSV	1303.7	0.0804175
CAM206_map6	0001.CSV	1307.56	0.0814472
CAM206_map6	0001.CSV	1311.41	0.0827369
CAM206_map6	0001.CSV	1315.27	0.0839969
CAM206_map6	0001.CSV	1319.13	0.0855807
CAM206_map6	0001.CSV	1322.98	0.0868762
CAM206_map6	0001.CSV	1326.84	0.0884345
CAM206_map6	0001.CSV	1330.7	0.0900109
CAM206_map6	0001.CSV	1334.56	0.0918764
CAM206_map6	0001.CSV	1338.41	0.0940898
CAM206_map6	0001.CSV	1342.27	0.0969714
CAM206_map6	0001.CSV	1346.13	0.0991956
CAM206_map6	0001.CSV	1349.98	0.101913
CAM206_map6	0001.CSV	1353.84	0.104594
CAM206_map6	0001.CSV	1357.7	0.107553
CAM206_map6	0001.CSV	1361.56	0.11083
CAM206_map6	0001.CSV	1365.41	0.114925
CAM206_map6	0001.CSV	1369.27	0.118029
CAM206_map6	0001.CSV	1373.13	0.122229
CAM206_map6	0001.CSV	1376.98	0.126931
CAM206_map6	0001.CSV	1380.84	0.131029
CAM206_map6	0001.CSV	1384.7	0.134684
CAM206_map6	0001.CSV	1388.56	0.139656
CAM206_map6	0001.CSV	1392.41	0.143448
CAM206_map6	0001.CSV	1396.27	0.14826
CAM206_map6	0001.CSV	1400.13	0.152713
CAM206_map6	0001.CSV	1403.98	0.156778
CAM206_map6	0001.CSV	1407.84	0.160553
CAM206_map6	0001.CSV	1411.7	0.163915
CAM206_map6	0001.CSV	1415.55	0.16601
CAM206_map6	0001.CSV	1419.41	0.169187
CAM206_map6	0001.CSV	1423.27	0.171664
CAM206_map6	0001.CSV	1427.12	0.174722
CAM206_map6	0001.CSV	1430.98	0.17808
CAM206_map6	0001.CSV	1434.84	0.18278
CAM206_map6	0001.CSV	1438.7	0.187719
CAM206_map6	0001.CSV	1442.55	0.191219
CAM206_map6	0001.CSV	1446.41	0.192222
CAM206_map6	0001.CSV	1450.27	0.19169
CAM206_map6	0001.CSV	1454.12	0.189139
CAM206_map6	0001.CSV	1457.98	0.186159
CAM206_map6	0001.CSV	1461.84	0.183181
CAM206_map6	0001.CSV	1465.7	0.18107
CAM206_map6	0001.CSV	1469.55	0.176648
CAM206_map6	0001.CSV	1473.41	0.167993
CAM206_map6	0001.CSV	1477.27	0.157001
CAM206_map6	0001.CSV	1481.12	0.150147
CAM206_map6	0001.CSV	1484.98	0.143643
CAM206_map6	0001.CSV	1488.84	0.136313
CAM206_map6	0001.CSV	1492.7	0.128818
CAM206_map6	0001.CSV	1496.55	0.123273
CAM206_map6	0001.CSV	1500.41	0.11685
CAM206_map6	0001.CSV	1504.27	0.112808
CAM206_map6	0001.CSV	1508.12	0.105363
CAM206_map6	0001.CSV	1511.98	0.0999025
CAM206_map6	0001.CSV	1515.84	0.0958387
CAM206_map6	0001.CSV	1519.7	0.0907686
CAM206_map6	0001.CSV	1523.55	0.0846756
CAM206_map6	0001.CSV	1527.41	0.0809469
CAM206_map6	0001.CSV	1531.27	0.0779881
CAM206_map6	0001.CSV	1535.12	0.0760337
CAM206_map6	0001.CSV	1538.98	0.0737487
CAM206_map6	0001.CSV	1542.84	0.0689652
CAM206_map6	0001.CSV	1546.7	0.0641731
CAM206_map6	0001.CSV	1550.55	0.0605526
CAM206_map6	0001.CSV	1554.41	0.0569751
CAM206_map6	0001.CSV	1558.27	0.0533584
CAM206_map6	0001.CSV	1562.12	0.050212
CAM206_map6	0001.CSV	1565.98	0.0487521
CAM206_map6	0001.CSV	1569.84	0.0473768
CAM206_map6	0001.CSV	1573.69	0.0460124
CAM206_map6	0001.CSV	1577.55	0.043144
CAM206_map6	0001.CSV	1581.41	0.0395913
CAM206_map6	0001.CSV	1585.27	0.0362641
CAM206_map6	0001.CSV	1589.12	0.0337892
CAM206_map6	0001.CSV	1592.98	0.0323113
CAM206_map6	0001.CSV	1596.84	0.0315623
CAM206_map6	0001.CSV	1600.69	0.0309539
CAM206_map6	0001.CSV	1604.55	0.0307052
CAM206_map6	0001.CSV	1608.41	0.0304893
CAM206_map6	0001.CSV	1612.27	0.030166
CAM206_map6	0001.CSV	1616.12	0.0298228
CAM206_map6	0001.CSV	1619.98	0.0297672
CAM206_map6	0001.CSV	1623.84	0.0293904
CAM206_map6	0001.CSV	1627.69	0.0290293
CAM206_map6	0001.CSV	1631.55	0.028339
CAM206_map6	0001.CSV	1635.41	0.0283656
CAM206_map6	0001.CSV	1639.27	0.028481
CAM206_map6	0001.CSV	1643.12	0.0279171
CAM206_map6	0001.CSV	1646.98	0.0276126
CAM206_map6	0001.CSV	1650.84	0.0277744
CAM206_map6	0001.CSV	1654.69	0.0282026
CAM206_map6	0001.CSV	1658.55	0.0278884
CAM206_map6	0001.CSV	1662.41	0.0273463
CAM206_map6	0001.CSV	1666.27	0.027056
CAM206_map6	0001.CSV	1670.12	0.0269302
CAM206_map6	0001.CSV	1673.98	0.027067
CAM206_map6	0001.CSV	1677.84	0.026565
CAM206_map6	0001.CSV	1681.69	0.0262319
CAM206_map6	0001.CSV	1685.55	0.0264637
CAM206_map6	0001.CSV	1689.41	0.0263748
CAM206_map6	0001.CSV	1693.27	0.0256973
CAM206_map6	0001.CSV	1697.12	0.0255797
CAM206_map6	0001.CSV	1700.98	0.0259535
CAM206_map6	0001.CSV	1704.84	0.0260415
CAM206_map6	0001.CSV	1708.69	0.0258345
CAM206_map6	0001.CSV	1712.55	0.0255801
CAM206_map6	0001.CSV	1716.41	0.0260645
CAM206_map6	0001.CSV	1720.27	0.0267008
CAM206_map6	0001.CSV	1724.12	0.0264103
CAM206_map6	0001.CSV	1727.98	0.0263116
CAM206_map6	0001.CSV	1731.84	0.0265193
CAM206_map6	0001.CSV	1735.69	0.0270496
CAM206_map6	0001.CSV	1739.55	0.0265809
CAM206_map6	0001.CSV	1743.41	0.0258704
CAM206_map6	0001.CSV	1747.27	0.0251873
CAM206_map6	0001.CSV	1751.12	0.0247277
CAM206_map6	0001.CSV	1754.98	0.0240314
CAM206_map6	0001.CSV	1758.84	0.0237689
CAM206_map6	0001.CSV	1762.69	0.0237922
CAM206_map6	0001.CSV	1766.55	0.023652
CAM206_map6	0001.CSV	1770.41	0.0239774
CAM206_map6	0001.CSV	1774.26	0.0255819
CAM206_map6	0001.CSV	1778.12	0.0266755
CAM206_map6	0001.CSV	1781.98	0.027771
CAM206_map6	0001.CSV	1785.84	0.0280054
CAM206_map6	0001.CSV	1789.69	0.0273234
CAM206_map6	0001.CSV	1793.55	0.0260645
CAM206_map6	0001.CSV	1797.41	0.0249425
CAM206_map6	0001.CSV	1801.26	0.024019
CAM206_map6	0001.CSV	1805.12	0.0233358
CAM206_map6	0001.CSV	1808.98	0.0229153
CAM206_map6	0001.CSV	1812.84	0.0229508
CAM206_map6	0001.CSV	1816.69	0.0227604
CAM206_map6	0001.CSV	1820.55	0.0226236
CAM206_map6	0001.CSV	1824.41	0.0225607
CAM206_map6	0001.CSV	1828.26	0.0228693
CAM206_map6	0001.CSV	1832.12	0.0229687
CAM206_map6	0001.CSV	1835.98	0.0228257
CAM206_map6	0001.CSV	1839.84	0.0225879
CAM206_map6	0001.CSV	1843.69	0.0227805
CAM206_map6	0001.CSV	1847.55	0.0230867
CAM206_map6	0001.CSV	1851.41	0.0230021
CAM206_map6	0001.CSV	1855.26	0.022876
CAM206_map6	0001.CSV	1859.12	0.022936
CAM206_map6	0001.CSV	1862.98	0.0228293
CAM206_map6	0001.CSV	1866.84	0.0229768
CAM206_map6	0001.CSV	1870.69	0.0234112
CAM206_map6	0001.CSV	1874.55	0.0232705
CAM206_map6	0001.CSV	1878.41	0.0230908
CAM206_map6	0001.CSV	1882.26	0.0230995
CAM206_map6	0001.CSV	1886.12	0.0230808
CAM206_map6	0001.CSV	1889.98	0.0232328
CAM206_map6	0001.CSV	1893.83	0.0233227
CAM206_map6	0001.CSV	1897.69	0.0233191
CAM206_map6	0001.CSV	1901.55	0.023203
CAM206_map6	0001.CSV	1905.41	0.0231779
CAM206_map6	0001.CSV	1909.26	0.0232683
CAM206_map6	0001.CSV	1913.12	0.0233411
CAM206_map6	0001.CSV	1916.98	0.023302
CAM206_map6	0001.CSV	1920.83	0.023501
CAM206_map6	0001.CSV	1924.69	0.0235705
CAM206_map6	0001.CSV	1928.55	0.0234613
CAM206_map6	0001.CSV	1932.4	0.0234161
CAM206_map6	0001.CSV	1936.26	0.0234673
CAM206_map6	0001.CSV	1940.12	0.0234209
CAM206_map6	0001.CSV	1943.98	0.0236535
CAM206_map6	0001.CSV	1947.83	0.0237527
CAM206_map6	0001.CSV	1951.69	0.0237667
CAM206_map6	0001.CSV	1955.55	0.0237604
CAM206_map6	0001.CSV	1959.4	0.0237739
CAM206_map6	0001.CSV	1963.26	0.0237768
CAM206_map6	0001.CSV	1967.12	0.0239403
CAM206_map6	0001.CSV	1970.98	0.0239651
CAM206_map6	0001.CSV	1974.83	0.0239609
CAM206_map6	0001.CSV	1978.69	0.0240029
CAM206_map6	0001.CSV	1982.55	0.0240521
CAM206_map6	0001.CSV	1986.4	0.0240628
CAM206_map6	0001.CSV	1990.26	0.0241816
CAM206_map6	0001.CSV	1994.12	0.0242836
CAM206_map6	0001.CSV	1997.98	0.0243266
CAM206_map6	0001.CSV	2001.83	0.0243028
CAM206_map6	0001.CSV	2005.69	0.0243401
CAM206_map6	0001.CSV	2009.55	0.0243954
CAM206_map6	0001.CSV	2013.4	0.0244415
CAM206_map6	0001.CSV	2017.26	0.0245417
CAM206_map6	0001.CSV	2021.12	0.0246533
CAM206_map6	0001.CSV	2024.97	0.0246172
CAM206_map6	0001.CSV	2028.83	0.0246624
CAM206_map6	0001.CSV	2032.69	0.0246777
CAM206_map6	0001.CSV	2036.55	0.0247084
CAM206_map6	0001.CSV	2040.4	0.0248035
CAM206_map6	0001.CSV	2044.26	0.0249101
CAM206_map6	0001.CSV	2048.12	0.0248798
CAM206_map6	0001.CSV	2051.97	0.0248868
CAM206_map6	0001.CSV	2055.83	0.0248943
CAM206_map6	0001.CSV	2059.69	0.0249821
CAM206_map6	0001.CSV	2063.55	0.0250263
CAM206_map6	0001.CSV	2067.4	0.0250938
CAM206_map6	0001.CSV	2071.26	0.0250871
CAM206_map6	0001.CSV	2075.12	0.0251091
CAM206_map6	0001.CSV	2078.97	0.02509
CAM206_map6	0001.CSV	2082.83	0.0250988
CAM206_map6	0001.CSV	2086.69	0.025092
CAM206_map6	0001.CSV	2090.55	0.025149
CAM206_map6	0001.CSV	2094.4	0.0251625
CAM206_map6	0001.CSV	2098.26	0.0251931
CAM206_map6	0001.CSV	2102.12	0.0252184
CAM206_map6	0001.CSV	2105.97	0.0252598
CAM206_map6	0001.CSV	2109.83	0.0252324
CAM206_map6	0001.CSV	2113.69	0.0252802
CAM206_map6	0001.CSV	2117.55	0.0252521
CAM206_map6	0001.CSV	2121.4	0.0252571
CAM206_map6	0001.CSV	2125.26	0.0252752
CAM206_map6	0001.CSV	2129.12	0.0253065
CAM206_map6	0001.CSV	2132.97	0.0253011
CAM206_map6	0001.CSV	2136.83	0.0252929
CAM206_map6	0001.CSV	2140.69	0.0252831
CAM206_map6	0001.CSV	2144.55	0.025316
CAM206_map6	0001.CSV	2148.4	0.0253139
CAM206_map6	0001.CSV	2152.26	0.025355
CAM206_map6	0001.CSV	2156.12	0.0253221
CAM206_map6	0001.CSV	2159.97	0.0253049
CAM206_map6	0001.CSV	2163.83	0.0253394
CAM206_map6	0001.CSV	2167.69	0.0253763
CAM206_map6	0001.CSV	2171.55	0.0253654
CAM206_map6	0001.CSV	2175.4	0.0253865
CAM206_map6	0001.CSV	2179.26	0.0253865
CAM206_map6	0001.CSV	2183.12	0.0254034
CAM206_map6	0001.CSV	2186.97	0.0253772
CAM206_map6	0001.CSV	2190.83	0.025418
CAM206_map6	0001.CSV	2194.69	0.0254147
CAM206_map6	0001.CSV	2198.55	0.0253946
CAM206_map6	0001.CSV	2202.4	0.0253635
CAM206_map6	0001.CSV	2206.26	0.0254059
CAM206_map6	0001.CSV	2210.12	0.025464
CAM206_map6	0001.CSV	2213.97	0.0254787
CAM206_map6	0001.CSV	2217.83	0.0254112
CAM206_map6	0001.CSV	2221.69	0.0253974
CAM206_map6	0001.CSV	2225.54	0.025372
CAM206_map6	0001.CSV	2229.4	0.0254114
CAM206_map6	0001.CSV	2233.26	0.0254405
CAM206_map6	0001.CSV	2237.12	0.0254618
CAM206_map6	0001.CSV	2240.97	0.0254328
CAM206_map6	0001.CSV	2244.83	0.0254304
CAM206_map6	0001.CSV	2248.69	0.0254354
CAM206_map6	0001.CSV	2252.54	0.0254574
CAM206_map6	0001.CSV	2256.4	0.0254161
CAM206_map6	0001.CSV	2260.26	0.0254451
CAM206_map6	0001.CSV	2264.11	0.025478
CAM206_map6	0001.CSV	2267.97	0.0254972
CAM206_map6	0001.CSV	2271.83	0.0255087
CAM206_map6	0001.CSV	2275.69	0.025584
CAM206_map6	0001.CSV	2279.54	0.025609
CAM206_map6	0001.CSV	2283.4	0.0255652
CAM206_map6	0001.CSV	2287.26	0.0255185
CAM206_map6	0001.CSV	2291.11	0.0255408
CAM206_map6	0001.CSV	2294.97	0.0255658
CAM206_map6	0001.CSV	2298.83	0.0255848
CAM206_map6	0001.CSV	2302.69	0.025454
CAM206_map6	0001.CSV	2306.54	0.0253164
CAM206_map6	0001.CSV	2310.4	0.0252856
CAM206_map6	0001.CSV	2314.26	0.0252357
CAM206_map6	0001.CSV	2318.11	0.0249213
CAM206_map6	0001.CSV	2321.97	0.0245412
CAM206_map6	0001.CSV	2325.83	0.0239955
CAM206_map6	0001.CSV	2329.69	0.0236207
CAM206_map6	0001.CSV	2333.54	0.0234699
CAM206_map6	0001.CSV	2337.4	0.0233015
CAM206_map6	0001.CSV	2341.26	0.0233433
CAM206_map6	0001.CSV	2345.11	0.0247166
CAM206_map6	0001.CSV	2348.97	0.0249203
CAM206_map6	0001.CSV	2352.83	0.0235753
CAM206_map6	0001.CSV	2356.69	0.020864
CAM206_map6	0001.CSV	2360.54	0.0195535
CAM206_map6	0001.CSV	2364.4	0.0212149
CAM206_map6	0001.CSV	2368.26	0.023768
CAM206_map6	0001.CSV	2372.11	0.0255992
CAM206_map6	0001.CSV	2375.97	0.0265194
CAM206_map6	0001.CSV	2379.83	0.0267345
CAM206_map6	0001.CSV	2383.69	0.0266671
CAM206_map6	0001.CSV	2387.54	0.0264813
CAM206_map6	0001.CSV	2391.4	0.0263452
CAM206_map6	0001.CSV	2395.26	0.0262989
CAM206_map6	0001.CSV	2399.11	0.0263094
CAM206_map6	0001.CSV	2402.97	0.0263562
CAM206_map6	0001.CSV	2406.83	0.0264026
CAM206_map6	0001.CSV	2410.68	0.0263697
CAM206_map6	0001.CSV	2414.54	0.026353
CAM206_map6	0001.CSV	2418.4	0.0263436
CAM206_map6	0001.CSV	2422.26	0.0263675
CAM206_map6	0001.CSV	2426.11	0.0263796
CAM206_map6	0001.CSV	2429.97	0.0263807
CAM206_map6	0001.CSV	2433.83	0.0263874
CAM206_map6	0001.CSV	2437.68	0.0264342
CAM206_map6	0001.CSV	2441.54	0.0264294
CAM206_map6	0001.CSV	2445.4	0.0263908
CAM206_map6	0001.CSV	2449.26	0.0263629
CAM206_map6	0001.CSV	2453.11	0.0263924
CAM206_map6	0001.CSV	2456.97	0.0264038
CAM206_map6	0001.CSV	2460.83	0.0264453
CAM206_map6	0001.CSV	2464.68	0.0264789
CAM206_map6	0001.CSV	2468.54	0.02653
CAM206_map6	0001.CSV	2472.4	0.0266357
CAM206_map6	0001.CSV	2476.26	0.0267712
CAM206_map6	0001.CSV	2480.11	0.0269382
CAM206_map6	0001.CSV	2483.97	0.0271022
CAM206_map6	0001.CSV	2487.83	0.0271755
CAM206_map6	0001.CSV	2491.68	0.0272434
CAM206_map6	0001.CSV	2495.54	0.0272926
CAM206_map6	0001.CSV	2499.4	0.0273141
CAM206_map6	0001.CSV	2503.26	0.0272953
CAM206_map6	0001.CSV	2507.11	0.0272692
CAM206_map6	0001.CSV	2510.97	0.0272472
CAM206_map6	0001.CSV	2514.83	0.0272502
CAM206_map6	0001.CSV	2518.68	0.0272768
CAM206_map6	0001.CSV	2522.54	0.0272731
CAM206_map6	0001.CSV	2526.4	0.0271707
CAM206_map6	0001.CSV	2530.26	0.0269798
CAM206_map6	0001.CSV	2534.11	0.0267064
CAM206_map6	0001.CSV	2537.97	0.026563
CAM206_map6	0001.CSV	2541.83	0.0265498
CAM206_map6	0001.CSV	2545.68	0.0264961
CAM206_map6	0001.CSV	2549.54	0.0263165
CAM206_map6	0001.CSV	2553.4	0.0261426
CAM206_map6	0001.CSV	2557.26	0.026016
CAM206_map6	0001.CSV	2561.11	0.0259211
CAM206_map6	0001.CSV	2564.97	0.0258232
CAM206_map6	0001.CSV	2568.83	0.0257236
CAM206_map6	0001.CSV	2572.68	0.0256435
CAM206_map6	0001.CSV	2576.54	0.025601
CAM206_map6	0001.CSV	2580.4	0.0255629
CAM206_map6	0001.CSV	2584.25	0.0255312
CAM206_map6	0001.CSV	2588.11	0.0254879
CAM206_map6	0001.CSV	2591.97	0.025461
CAM206_map6	0001.CSV	2595.83	0.0254303
CAM206_map6	0001.CSV	2599.68	0.025459
CAM206_map6	0001.CSV	2603.54	0.0255019
CAM206_map6	0001.CSV	2607.4	0.0255044
CAM206_map6	0001.CSV	2611.25	0.0254571
CAM206_map6	0001.CSV	2615.11	0.0254498
CAM206_map6	0001.CSV	2618.97	0.0254991
CAM206_map6	0001.CSV	2622.82	0.0255937
CAM206_map6	0001.CSV	2626.68	0.0256927
CAM206_map6	0001.CSV	2630.54	0.0257339
CAM206_map6	0001.CSV	2634.4	0.0257258
CAM206_map6	0001.CSV	2638.25	0.0256947
CAM206_map6	0001.CSV	2642.11	0.0255626
CAM206_map6	0001.CSV	2645.97	0.0254523
CAM206_map6	0001.CSV	2649.82	0.0254421
CAM206_map6	0001.CSV	2653.68	0.0254791
CAM206_map6	0001.CSV	2657.54	0.0255007
CAM206_map6	0001.CSV	2661.4	0.0255166
CAM206_map6	0001.CSV	2665.25	0.025537
CAM206_map6	0001.CSV	2669.11	0.0256038
CAM206_map6	0001.CSV	2672.97	0.0257864
CAM206_map6	0001.CSV	2676.82	0.0260442
CAM206_map6	0001.CSV	2680.68	0.0260497
CAM206_map6	0001.CSV	2684.54	0.0257866
CAM206_map6	0001.CSV	2688.4	0.0256703
CAM206_map6	0001.CSV	2692.25	0.0257224
CAM206_map6	0001.CSV	2696.11	0.025852
CAM206_map6	0001.CSV	2699.97	0.0258965
CAM206_map6	0001.CSV	2703.82	0.0258584
CAM206_map6	0001.CSV	2707.68	0.0259876
CAM206_map6	0001.CSV	2711.54	0.0261126
CAM206_map6	0001.CSV	2715.4	0.0261341
CAM206_map6	0001.CSV	2719.25	0.0262204
CAM206_map6	0001.CSV	2723.11	0.0264856
CAM206_map6	0001.CSV	2726.97	0.0265505
CAM206_map6	0001.CSV	2730.82	0.0263461
CAM206_map6	0001.CSV	2734.68	0.026336
CAM206_map6	0001.CSV	2738.54	0.0263777
CAM206_map6	0001.CSV	2742.4	0.026359
CAM206_map6	0001.CSV	2746.25	0.0265927
CAM206_map6	0001.CSV	2750.11	0.0266646
CAM206_map6	0001.CSV	2753.97	0.0265291
CAM206_map6	0001.CSV	2757.82	0.0264872
CAM206_map6	0001.CSV	2761.68	0.0264392
CAM206_map6	0001.CSV	2765.54	0.0263958
CAM206_map6	0001.CSV	2769.39	0.0265192
CAM206_map6	0001.CSV	2773.25	0.0267944
CAM206_map6	0001.CSV	2777.11	0.0267806
CAM206_map6	0001.CSV	2780.97	0.0266843
CAM206_map6	0001.CSV	2784.82	0.0268931
CAM206_map6	0001.CSV	2788.68	0.0272173
CAM206_map6	0001.CSV	2792.54	0.0273528
CAM206_map6	0001.CSV	2796.39	0.027368
CAM206_map6	0001.CSV	2800.25	0.0272235
CAM206_map6	0001.CSV	2804.11	0.0270912
CAM206_map6	0001.CSV	2807.97	0.027351
CAM206_map6	0001.CSV	2811.82	0.0274557
CAM206_map6	0001.CSV	2815.68	0.027381
CAM206_map6	0001.CSV	2819.54	0.0274933
CAM206_map6	0001.CSV	2823.39	0.0277207
CAM206_map6	0001.CSV	2827.25	0.0278968
CAM206_map6	0001.CSV	2831.11	0.0283326
CAM206_map6	0001.CSV	2834.97	0.0291195
CAM206_map6	0001.CSV	2838.82	0.0300183
CAM206_map6	0001.CSV	2842.68	0.0313845
CAM206_map6	0001.CSV	2846.54	0.0337185
CAM206_map6	0001.CSV	2850.39	0.0347854
CAM206_map6	0001.CSV	2854.25	0.0335052
CAM206_map6	0001.CSV	2858.11	0.0319985
CAM206_map6	0001.CSV	2861.97	0.0308946
CAM206_map6	0001.CSV	2865.82	0.0302578
CAM206_map6	0001.CSV	2869.68	0.0303314
CAM206_map6	0001.CSV	2873.54	0.0303881
CAM206_map6	0001.CSV	2877.39	0.0299141
CAM206_map6	0001.CSV	2881.25	0.0296146
CAM206_map6	0001.CSV	2885.11	0.029753
CAM206_map6	0001.CSV	2888.97	0.030186
CAM206_map6	0001.CSV	2892.82	0.0308863
CAM206_map6	0001.CSV	2896.68	0.0315107
CAM206_map6	0001.CSV	2900.54	0.0319623
CAM206_map6	0001.CSV	2904.39	0.032838
CAM206_map6	0001.CSV	2908.25	0.0345462
CAM206_map6	0001.CSV	2912.11	0.0373507
CAM206_map6	0001.CSV	2915.97	0.0398291
CAM206_map6	0001.CSV	2919.82	0.0398287
CAM206_map6	0001.CSV	2923.68	0.0378928
CAM206_map6	0001.CSV	2927.54	0.036025
CAM206_map6	0001.CSV	2931.39	0.0341958
CAM206_map6	0001.CSV	2935.25	0.032375
CAM206_map6	0001.CSV	2939.11	0.031353
CAM206_map6	0001.CSV	2942.96	0.0310945
CAM206_map6	0001.CSV	2946.82	0.0308452
CAM206_map6	0001.CSV	2950.68	0.0305826
CAM206_map6	0001.CSV	2954.54	0.0303064
CAM206_map6	0001.CSV	2958.39	0.0298376
CAM206_map6	0001.CSV	2962.25	0.0293824
CAM206_map6	0001.CSV	2966.11	0.0286147
CAM206_map6	0001.CSV	2969.96	0.0281438
CAM206_map6	0001.CSV	2973.82	0.0282038
CAM206_map6	0001.CSV	2977.68	0.0281553
CAM206_map6	0001.CSV	2981.53	0.027699
CAM206_map6	0001.CSV	2985.39	0.0270949
CAM206_map6	0001.CSV	2989.25	0.0269728
CAM206_map6	0001.CSV	2993.11	0.0271179
CAM206_map6	0001.CSV	2996.96	0.0269796
CAM206_map6	0001.CSV	3000.82	0.0266735
CAM206_map6	0001.CSV	3004.68	0.0265424
CAM206_map6	0001.CSV	3008.53	0.0267648
CAM206_map6	0001.CSV	3012.39	0.0270994
CAM206_map6	0001.CSV	3016.25	0.0271697
CAM206_map6	0001.CSV	3020.11	0.0269196
CAM206_map6	0001.CSV	3023.96	0.0266394
CAM206_map6	0001.CSV	3027.82	0.0266188
CAM206_map6	0001.CSV	3031.68	0.0269355
CAM206_map6	0001.CSV	3035.53	0.0271094
CAM206_map6	0001.CSV	3039.39	0.0271534
CAM206_map6	0001.CSV	3043.25	0.0272171
CAM206_map6	0001.CSV	3047.11	0.0271182
CAM206_map6	0001.CSV	3050.96	0.0270957
CAM206_map6	0001.CSV	3054.82	0.027042
CAM206_map6	0001.CSV	3058.68	0.0268697
CAM206_map6	0001.CSV	3062.53	0.0269082
CAM206_map6	0001.CSV	3066.39	0.0272096
CAM206_map6	0001.CSV	3070.25	0.0271969
CAM206_map6	0001.CSV	3074.11	0.0271724
CAM206_map6	0001.CSV	3077.96	0.0274091
CAM206_map6	0001.CSV	3081.82	0.0275523
CAM206_map6	0001.CSV	3085.68	0.0274997
CAM206_map6	0001.CSV	3089.53	0.0273701
CAM206_map6	0001.CSV	3093.39	0.0271107
CAM206_map6	0001.CSV	3097.25	0.0271459
CAM206_map6	0001.CSV	3101.11	0.0273073
CAM206_map6	0001.CSV	3104.96	0.0273335
CAM206_map6	0001.CSV	3108.82	0.027469
CAM206_map6	0001.CSV	3112.68	0.027616
CAM206_map6	0001.CSV	3116.53	0.0277835
CAM206_map6	0001.CSV	3120.39	0.0276991
CAM206_map6	0001.CSV	3124.25	0.0274193
CAM206_map6	0001.CSV	3128.11	0.027321
CAM206_map6	0001.CSV	3131.96	0.0272646
CAM206_map6	0001.CSV	3135.82	0.027463
CAM206_map6	0001.CSV	3139.68	0.0276753
CAM206_map6	0001.CSV	3143.53	0.0275074
CAM206_map6	0001.CSV	3147.39	0.0275587
CAM206_map6	0001.CSV	3151.25	0.0278645
CAM206_map6	0001.CSV	3155.1	0.0277976
CAM206_map6	0001.CSV	3158.96	0.0274477
CAM206_map6	0001.CSV	3162.82	0.0272847
CAM206_map6	0001.CSV	3166.68	0.0272812
CAM206_map6	0001.CSV	3170.53	0.0273188
CAM206_map6	0001.CSV	3174.39	0.0273292
CAM206_map6	0001.CSV	3178.25	0.0274781
CAM206_map6	0001.CSV	3182.1	0.0275695
CAM206_map6	0001.CSV	3185.96	0.0275668
CAM206_map6	0001.CSV	3189.82	0.0276043
CAM206_map6	0001.CSV	3193.68	0.0275359
CAM206_map6	0001.CSV	3197.53	0.0275049
CAM206_map6	0001.CSV	3201.39	0.0277089
CAM206_map6	0001.CSV	3205.25	0.0278248
CAM206_map6	0001.CSV	3209.1	0.027759
CAM206_map6	0001.CSV	3212.96	0.0278177
CAM206_map6	0001.CSV	3216.82	0.0279462
CAM206_map6	0001.CSV	3220.68	0.0279559
CAM206_map6	0001.CSV	3224.53	0.0278859
CAM206_map6	0001.CSV	3228.39	0.0280952
CAM206_map6	0001.CSV	3232.25	0.0285018
CAM206_map6	0001.CSV	3236.1	0.0283687
CAM206_map6	0001.CSV	3239.96	0.028053
CAM206_map6	0001.CSV	3243.82	0.0282725
CAM206_map6	0001.CSV	3247.68	0.0284759
CAM206_map6	0001.CSV	3251.53	0.0282751
CAM206_map6	0001.CSV	3255.39	0.0282705
CAM206_map6	0001.CSV	3259.25	0.0281419
CAM206_map6	0001.CSV	3263.1	0.0281227
CAM206_map6	0001.CSV	3266.96	0.0284904
CAM206_map6	0001.CSV	3270.82	0.0288085
CAM206_map6	0001.CSV	3274.68	0.0287037
CAM206_map6	0001.CSV	3278.53	0.028377
CAM206_map6	0001.CSV	3282.39	0.0281511
CAM206_map6	0001.CSV	3286.25	0.0282338
CAM206_map6	0001.CSV	3290.1	0.0286606
CAM206_map6	0001.CSV	3293.96	0.028981
CAM206_map6	0001.CSV	3297.82	0.0287778
CAM206_map6	0001.CSV	3301.67	0.0287552
CAM206_map6	0001.CSV	3305.53	0.029009
CAM206_map6	0001.CSV	3309.39	0.0288635
CAM206_map6	0001.CSV	3313.25	0.0283771
CAM206_map6	0001.CSV	3317.1	0.0281019
CAM206_map6	0001.CSV	3320.96	0.0282522
CAM206_map6	0001.CSV	3324.82	0.0285508
CAM206_map6	0001.CSV	3328.67	0.0283003
CAM206_map6	0001.CSV	3332.53	0.0281915
CAM206_map6	0001.CSV	3336.39	0.0287252
CAM206_map6	0001.CSV	3340.24	0.0290089
CAM206_map6	0001.CSV	3344.1	0.0287648
CAM206_map6	0001.CSV	3347.96	0.0286068
CAM206_map6	0001.CSV	3351.82	0.0285088
CAM206_map6	0001.CSV	3355.67	0.0283308
CAM206_map6	0001.CSV	3359.53	0.0284815
CAM206_map6	0001.CSV	3363.39	0.028629
CAM206_map6	0001.CSV	3367.24	0.0288504
CAM206_map6	0001.CSV	3371.1	0.0288018
CAM206_map6	0001.CSV	3374.96	0.0285805
CAM206_map6	0001.CSV	3378.82	0.0284715
CAM206_map6	0001.CSV	3382.67	0.0281358
CAM206_map6	0001.CSV	3386.53	0.0281078
CAM206_map6	0001.CSV	3390.39	0.0284787
CAM206_map6	0001.CSV	3394.24	0.0287207
CAM206_map6	0001.CSV	3398.1	0.0288217
CAM206_map6	0001.CSV	3401.96	0.0287234
CAM206_map6	0001.CSV	3405.82	0.0284162
CAM206_map6	0001.CSV	3409.67	0.0283778
CAM206_map6	0001.CSV	3413.53	0.0280683
CAM206_map6	0001.CSV	3417.39	0.0276369
CAM206_map6	0001.CSV	3421.24	0.0276123
CAM206_map6	0001.CSV	3425.1	0.0277613
CAM206_map6	0001.CSV	3428.96	0.0280865
CAM206_map6	0001.CSV	3432.82	0.0283658
CAM206_map6	0001.CSV	3436.67	0.0281758
CAM206_map6	0001.CSV	3440.53	0.0275898
CAM206_map6	0001.CSV	3444.39	0.027257
CAM206_map6	0001.CSV	3448.24	0.0272341
CAM206_map6	0001.CSV	3452.1	0.0270565
CAM206_map6	0001.CSV	3455.96	0.0269849
CAM206_map6	0001.CSV	3459.82	0.0272318
CAM206_map6	0001.CSV	3463.67	0.0276148
CAM206_map6	0001.CSV	3467.53	0.0277821
CAM206_map6	0001.CSV	3471.39	0.0273328
CAM206_map6	0001.CSV	3475.24	0.026989
CAM206_map6	0001.CSV	3479.1	0.0270137
CAM206_map6	0001.CSV	3482.96	0.0268554
CAM206_map6	0001.CSV	3486.82	0.0268443
CAM206_map6	0001.CSV	3490.67	0.0268501
CAM206_map6	0001.CSV	3494.53	0.0268836
CAM206_map6	0001.CSV	3498.39	0.0267888
CAM206_map6	0001.CSV	3502.24	0.0265993
CAM206_map6	0001.CSV	3506.1	0.0262272
CAM206_map6	0001.CSV	3509.96	0.0260722
CAM206_map6	0001.CSV	3513.81	0.0261378
CAM206_map6	0001.CSV	3517.67	0.025747
CAM206_map6	0001.CSV	3521.53	0.0257579
CAM206_map6	0001.CSV	3525.39	0.0257512
CAM206_map6	0001.CSV	3529.24	0.0254316
CAM206_map6	0001.CSV	3533.1	0.0254588
CAM206_map6	0001.CSV	3536.96	0.0256305
CAM206_map6	0001.CSV	3540.81	0.0256284
CAM206_map6	0001.CSV	3544.67	0.0257793
CAM206_map6	0001.CSV	3548.53	0.02564
CAM206_map6	0001.CSV	3552.39	0.0251723
CAM206_map6	0001.CSV	3556.24	0.0248812
CAM206_map6	0001.CSV	3560.1	0.0245338
CAM206_map6	0001.CSV	3563.96	0.0239752
CAM206_map6	0001.CSV	3567.81	0.0244938
CAM206_map6	0001.CSV	3571.67	0.0246814
CAM206_map6	0001.CSV	3575.53	0.0242203
CAM206_map6	0001.CSV	3579.39	0.0242851
CAM206_map6	0001.CSV	3583.24	0.0242128
CAM206_map6	0001.CSV	3587.1	0.0243641
CAM206_map6	0001.CSV	3590.96	0.0243561
CAM206_map6	0001.CSV	3594.81	0.0240015
CAM206_map6	0001.CSV	3598.67	0.0242487
CAM206_map6	0001.CSV	3602.53	0.024013
CAM206_map6	0001.CSV	3606.39	0.0231731
CAM206_map6	0001.CSV	3610.24	0.0229343
CAM206_map6	0001.CSV	3614.1	0.0229686
CAM206_map6	0001.CSV	3617.96	0.0233378
CAM206_map6	0001.CSV	3621.81	0.0235941
CAM206_map6	0001.CSV	3625.67	0.0226854
CAM206_map6	0001.CSV	3629.53	0.0227346
CAM206_map6	0001.CSV	3633.39	0.0235113
CAM206_map6	0001.CSV	3637.24	0.0232268
CAM206_map6	0001.CSV	3641.1	0.022637
CAM206_map6	0001.CSV	3644.96	0.0216617
CAM206_map6	0001.CSV	3648.81	0.0223543
CAM206_map6	0001.CSV	3652.67	0.0236398
CAM206_map6	0001.CSV	3656.53	0.0236344
CAM206_map6	0001.CSV	3660.38	0.0235631
CAM206_map6	0001.CSV	3664.24	0.0225197
CAM206_map6	0001.CSV	3668.1	0.0214538
CAM206_map6	0001.CSV	3671.96	0.0215259
CAM206_map6	0001.CSV	3675.81	0.0225011
CAM206_map6	0001.CSV	3679.67	0.0230606
CAM206_map6	0001.CSV	3683.53	0.0224959
CAM206_map6	0001.CSV	3687.38	0.0223213
CAM206_map6	0001.CSV	3691.24	0.023629
CAM206_map6	0001.CSV	3695.1	0.023326
CAM206_map6	0001.CSV	3698.95	0.0224631
CAM206_map6	0001.CSV	3702.81	0.0222146
CAM206_map6	0001.CSV	3706.67	0.0217705
CAM206_map6	0001.CSV	3710.53	0.0218964
CAM206_map6	0001.CSV	3714.38	0.0227634
CAM206_map6	0001.CSV	3718.24	0.0221591
CAM206_map6	0001.CSV	3722.1	0.021655
CAM206_map6	0001.CSV	3725.95	0.0216953
CAM206_map6	0001.CSV	3729.81	0.0213534
CAM206_map6	0001.CSV	3733.67	0.0216622
CAM206_map6	0001.CSV	3737.53	0.0232772
CAM206_map6	0001.CSV	3741.38	0.0223996
CAM206_map6	0001.CSV	3745.24	0.0212432
CAM206_map6	0001.CSV	3749.1	0.0214745
CAM206_map6	0001.CSV	3752.95	0.022744
CAM206_map6	0001.CSV	3756.81	0.0226925
CAM206_map6	0001.CSV	3760.67	0.0226221
CAM206_map6	0001.CSV	3764.53	0.0224033
CAM206_map6	0001.CSV	3768.38	0.0225551
CAM206_map6	0001.CSV	3772.24	0.0229478
CAM206_map6	0001.CSV	3776.1	0.0227463
CAM206_map6	0001.CSV	3779.95	0.0228431
CAM206_map6	0001.CSV	3783.81	0.0228626
CAM206_map6	0001.CSV	3787.67	0.0228068
CAM206_map6	0001.CSV	3791.53	0.0224357
CAM206_map6	0001.CSV	3795.38	0.0218614
CAM206_map6	0001.CSV	3799.24	0.021885
CAM206_map6	0001.CSV	3803.1	0.0225888
CAM206_map6	0001.CSV	3806.95	0.0231091
CAM206_map6	0001.CSV	3810.81	0.0227264
CAM206_map6	0001.CSV	3814.67	0.0220397
CAM206_map6	0001.CSV	3818.53	0.0224347
CAM206_map6	0001.CSV	3822.38	0.023315
CAM206_map6	0001.CSV	3826.24	0.0230597
CAM206_map6	0001.CSV	3830.1	0.0225303
CAM206_map6	0001.CSV	3833.95	0.0221551
CAM206_map6	0001.CSV	3837.81	0.0224452
CAM206_map6	0001.CSV	3841.67	0.0235135
CAM206_map6	0001.CSV	3845.53	0.023189
CAM206_map6	0001.CSV	3849.38	0.0217625
CAM206_map6	0001.CSV	3853.24	0.0218756
CAM206_map6	0001.CSV	3857.1	0.0232545
CAM206_map6	0001.CSV	3860.95	0.0225617
CAM206_map6	0001.CSV	3864.81	0.0224977
CAM206_map6	0001.CSV	3868.67	0.0226778
CAM206_map6	0001.CSV	3872.52	0.0230702
CAM206_map6	0001.CSV	3876.38	0.022755
CAM206_map6	0001.CSV	3880.24	0.0224786
CAM206_map6	0001.CSV	3884.1	0.0230591
CAM206_map6	0001.CSV	3887.95	0.0229461
CAM206_map6	0001.CSV	3891.81	0.022902
CAM206_map6	0001.CSV	3895.67	0.022519
CAM206_map6	0001.CSV	3899.52	0.0218952
CAM206_map6	0001.CSV	3903.38	0.0230958
CAM206_map6	0001.CSV	3907.24	0.0237253
CAM206_map6	0001.CSV	3911.1	0.0229807
CAM206_map6	0001.CSV	3914.95	0.0224511
CAM206_map6	0001.CSV	3918.81	0.0226812
CAM206_map6	0001.CSV	3922.67	0.0228261
CAM206_map6	0001.CSV	3926.52	0.0228291
CAM206_map6	0001.CSV	3930.38	0.0228714
CAM206_map6	0001.CSV	3934.24	0.023184
CAM206_map6	0001.CSV	3938.09	0.0229118
CAM206_map6	0001.CSV	3941.95	0.02271
CAM206_map6	0001.CSV	3945.81	0.0228584
CAM206_map6	0001.CSV	3949.67	0.0230597
CAM206_map6	0001.CSV	3953.52	0.0229749
CAM206_map6	0001.CSV	3957.38	0.0227911
CAM206_map6	0001.CSV	3961.24	0.0228817
CAM206_map6	0001.CSV	3965.09	0.0229192
CAM206_map6	0001.CSV	3968.95	0.0227743
CAM206_map6	0001.CSV	3972.81	0.0227421
CAM206_map6	0001.CSV	3976.67	0.0227815
CAM206_map6	0001.CSV	3980.52	0.0227854
CAM206_map6	0001.CSV	3984.38	0.0227382
CAM206_map6	0001.CSV	3988.24	0.0226148
CAM206_map6	0001.CSV	3992.09	0.0226426
CAM206_map6	0001.CSV	3995.95	0.0227548
CAM206_map6	0001.CSV	3999.81	0.022655
CAM206_map6	0002.CSV	674.992	0.036186
CAM206_map6	0002.CSV	678.849	0.0377514
CAM206_map6	0002.CSV	682.706	0.0383363
CAM206_map6	0002.CSV	686.563	0.0393273
CAM206_map6	0002.CSV	690.42	0.0406283
CAM206_map6	0002.CSV	694.277	0.0463759
CAM206_map6	0002.CSV	698.134	0.0531667
CAM206_map6	0002.CSV	701.991	0.0511227
CAM206_map6	0002.CSV	705.849	0.0478107
CAM206_map6	0002.CSV	709.706	0.0580177
CAM206_map6	0002.CSV	713.563	0.0608496
CAM206_map6	0002.CSV	717.42	0.0461666
CAM206_map6	0002.CSV	721.277	0.0349109
CAM206_map6	0002.CSV	725.134	0.0326542
CAM206_map6	0002.CSV	728.991	0.0319087
CAM206_map6	0002.CSV	732.848	0.0317206
CAM206_map6	0002.CSV	736.705	0.0310982
CAM206_map6	0002.CSV	740.562	0.0312502
CAM206_map6	0002.CSV	744.42	0.0313357
CAM206_map6	0002.CSV	748.277	0.0319433
CAM206_map6	0002.CSV	752.134	0.0320242
CAM206_map6	0002.CSV	755.991	0.0325001
CAM206_map6	0002.CSV	759.848	0.0328959
CAM206_map6	0002.CSV	763.705	0.0336165
CAM206_map6	0002.CSV	767.562	0.0336829
CAM206_map6	0002.CSV	771.419	0.0345712
CAM206_map6	0002.CSV	775.276	0.0354595
CAM206_map6	0002.CSV	779.133	0.0364404
CAM206_map6	0002.CSV	782.99	0.0363852
CAM206_map6	0002.CSV	786.848	0.036664
CAM206_map6	0002.CSV	790.705	0.0370495
CAM206_map6	0002.CSV	794.562	0.0383352
CAM206_map6	0002.CSV	798.419	0.0391929
CAM206_map6	0002.CSV	802.276	0.0397697
CAM206_map6	0002.CSV	806.133	0.039637
CAM206_map6	0002.CSV	809.99	0.039835
CAM206_map6	0002.CSV	813.847	0.040148
CAM206_map6	0002.CSV	817.704	0.0416563
CAM206_map6	0002.CSV	821.562	0.0436712
CAM206_map6	0002.CSV	825.419	0.0468201
CAM206_map6	0002.CSV	829.276	0.0505799
CAM206_map6	0002.CSV	833.133	0.0562265
CAM206_map6	0002.CSV	836.99	0.0647214
CAM206_map6	0002.CSV	840.847	0.0764917
CAM206_map6	0002.CSV	844.704	0.0875362
CAM206_map6	0002.CSV	848.561	0.102376
CAM206_map6	0002.CSV	852.418	0.117147
CAM206_map6	0002.CSV	856.275	0.118809
CAM206_map6	0002.CSV	860.132	0.105224
CAM206_map6	0002.CSV	863.99	0.0845011
CAM206_map6	0002.CSV	867.847	0.0626728
CAM206_map6	0002.CSV	871.704	0.0460279
CAM206_map6	0002.CSV	875.561	0.0362983
CAM206_map6	0002.CSV	879.418	0.0314411
CAM206_map6	0002.CSV	883.275	0.0282038
CAM206_map6	0002.CSV	887.132	0.0263973
CAM206_map6	0002.CSV	890.989	0.0256765
CAM206_map6	0002.CSV	894.846	0.0257685
CAM206_map6	0002.CSV	898.703	0.0256656
CAM206_map6	0002.CSV	902.561	0.0259836
CAM206_map6	0002.CSV	906.418	0.0262699
CAM206_map6	0002.CSV	910.275	0.0264966
CAM206_map6	0002.CSV	914.132	0.026281
CAM206_map6	0002.CSV	917.989	0.0263938
CAM206_map6	0002.CSV	921.846	0.0264921
CAM206_map6	0002.CSV	925.703	0.0268159
CAM206_map6	0002.CSV	929.56	0.0269335
CAM206_map6	0002.CSV	933.417	0.0272151
CAM206_map6	0002.CSV	937.274	0.027291
CAM206_map6	0002.CSV	941.131	0.0275793
CAM206_map6	0002.CSV	944.989	0.0276541
CAM206_map6	0002.CSV	948.846	0.0280116
CAM206_map6	0002.CSV	952.703	0.0284287
CAM206_map6	0002.CSV	956.56	0.0290221
CAM206_map6	0002.CSV	960.417	0.0292535
CAM206_map6	0002.CSV	964.274	0.0295924
CAM206_map6	0002.CSV	968.131	0.0298848
CAM206_map6	0002.CSV	971.988	0.0306323
CAM206_map6	0002.CSV	975.845	0.031244
CAM206_map6	0002.CSV	979.702	0.0319045
CAM206_map6	0002.CSV	983.559	0.0324091
CAM206_map6	0002.CSV	987.417	0.0331875
CAM206_map6	0002.CSV	991.274	0.0337825
CAM206_map6	0002.CSV	995.131	0.0344631
CAM206_map6	0002.CSV	998.988	0.03501
CAM206_map6	0002.CSV	1002.85	0.0357236
CAM206_map6	0002.CSV	1006.7	0.0362779
CAM206_map6	0002.CSV	1010.56	0.0369365
CAM206_map6	0002.CSV	1014.42	0.0373182
CAM206_map6	0002.CSV	1018.27	0.0377978
CAM206_map6	0002.CSV	1022.13	0.0380949
CAM206_map6	0002.CSV	1025.99	0.0386617
CAM206_map6	0002.CSV	1029.85	0.0390892
CAM206_map6	0002.CSV	1033.7	0.0396804
CAM206_map6	0002.CSV	1037.56	0.0401205
CAM206_map6	0002.CSV	1041.42	0.0407331
CAM206_map6	0002.CSV	1045.27	0.0411181
CAM206_map6	0002.CSV	1049.13	0.0418007
CAM206_map6	0002.CSV	1052.99	0.0425191
CAM206_map6	0002.CSV	1056.84	0.0436458
CAM206_map6	0002.CSV	1060.7	0.0448751
CAM206_map6	0002.CSV	1064.56	0.0467131
CAM206_map6	0002.CSV	1068.42	0.0487277
CAM206_map6	0002.CSV	1072.27	0.0512212
CAM206_map6	0002.CSV	1076.13	0.054348
CAM206_map6	0002.CSV	1079.99	0.0590608
CAM206_map6	0002.CSV	1083.84	0.0598764
CAM206_map6	0002.CSV	1087.7	0.055066
CAM206_map6	0002.CSV	1091.56	0.051329
CAM206_map6	0002.CSV	1095.41	0.0502545
CAM206_map6	0002.CSV	1099.27	0.0495472
CAM206_map6	0002.CSV	1103.13	0.0491026
CAM206_map6	0002.CSV	1106.99	0.0485155
CAM206_map6	0002.CSV	1110.84	0.0480027
CAM206_map6	0002.CSV	1114.7	0.0472973
CAM206_map6	0002.CSV	1118.56	0.0467205
CAM206_map6	0002.CSV	1122.41	0.0460939
CAM206_map6	0002.CSV	1126.27	0.0456842
CAM206_map6	0002.CSV	1130.13	0.0452269
CAM206_map6	0002.CSV	1133.99	0.0449907
CAM206_map6	0002.CSV	1137.84	0.0447353
CAM206_map6	0002.CSV	1141.7	0.0447383
CAM206_map6	0002.CSV	1145.56	0.0446019
CAM206_map6	0002.CSV	1149.41	0.0445686
CAM206_map6	0002.CSV	1153.27	0.0443893
CAM206_map6	0002.CSV	1157.13	0.0444876
CAM206_map6	0002.CSV	1160.99	0.0446751
CAM206_map6	0002.CSV	1164.84	0.0450593
CAM206_map6	0002.CSV	1168.7	0.0451281
CAM206_map6	0002.CSV	1172.56	0.0451444
CAM206_map6	0002.CSV	1176.41	0.0449336
CAM206_map6	0002.CSV	1180.27	0.0446816
CAM206_map6	0002.CSV	1184.13	0.0441201
CAM206_map6	0002.CSV	1187.99	0.0436028
CAM206_map6	0002.CSV	1191.84	0.0428444
CAM206_map6	0002.CSV	1195.7	0.0422092
CAM206_map6	0002.CSV	1199.56	0.0416161
CAM206_map6	0002.CSV	1203.41	0.0413683
CAM206_map6	0002.CSV	1207.27	0.0410395
CAM206_map6	0002.CSV	1211.13	0.0409518
CAM206_map6	0002.CSV	1214.98	0.0409088
CAM206_map6	0002.CSV	1218.84	0.0411639
CAM206_map6	0002.CSV	1222.7	0.0414156
CAM206_map6	0002.CSV	1226.56	0.0417893
CAM206_map6	0002.CSV	1230.41	0.0420218
CAM206_map6	0002.CSV	1234.27	0.0424445
CAM206_map6	0002.CSV	1238.13	0.0427298
CAM206_map6	0002.CSV	1241.98	0.0431637
CAM206_map6	0002.CSV	1245.84	0.0434453
CAM206_map6	0002.CSV	1249.7	0.0438071
CAM206_map6	0002.CSV	1253.56	0.0440229
CAM206_map6	0002.CSV	1257.41	0.0443803
CAM206_map6	0002.CSV	1261.27	0.0446089
CAM206_map6	0002.CSV	1265.13	0.0450004
CAM206_map6	0002.CSV	1268.98	0.045423
CAM206_map6	0002.CSV	1272.84	0.0460919
CAM206_map6	0002.CSV	1276.7	0.0466151
CAM206_map6	0002.CSV	1280.56	0.0472126
CAM206_map6	0002.CSV	1284.41	0.0476575
CAM206_map6	0002.CSV	1288.27	0.0483528
CAM206_map6	0002.CSV	1292.13	0.0489105
CAM206_map6	0002.CSV	1295.98	0.0495671
CAM206_map6	0002.CSV	1299.84	0.050162
CAM206_map6	0002.CSV	1303.7	0.0509231
CAM206_map6	0002.CSV	1307.56	0.051609
CAM206_map6	0002.CSV	1311.41	0.0524757
CAM206_map6	0002.CSV	1315.27	0.0533256
CAM206_map6	0002.CSV	1319.13	0.0544646
CAM206_map6	0002.CSV	1322.98	0.0553514
CAM206_map6	0002.CSV	1326.84	0.0563367
CAM206_map6	0002.CSV	1330.7	0.0573475
CAM206_map6	0002.CSV	1334.56	0.0586362
CAM206_map6	0002.CSV	1338.41	0.0603016
CAM206_map6	0002.CSV	1342.27	0.0624136
CAM206_map6	0002.CSV	1346.13	0.0639551
CAM206_map6	0002.CSV	1349.98	0.0659372
CAM206_map6	0002.CSV	1353.84	0.0678998
CAM206_map6	0002.CSV	1357.7	0.0699984
CAM206_map6	0002.CSV	1361.56	0.0724359
CAM206_map6	0002.CSV	1365.41	0.0755356
CAM206_map6	0002.CSV	1369.27	0.0778012
CAM206_map6	0002.CSV	1373.13	0.080942
CAM206_map6	0002.CSV	1376.98	0.0845844
CAM206_map6	0002.CSV	1380.84	0.0876664
CAM206_map6	0002.CSV	1384.7	0.0904972
CAM206_map6	0002.CSV	1388.56	0.0944858
CAM206_map6	0002.CSV	1392.41	0.097454
CAM206_map6	0002.CSV	1396.27	0.101315
CAM206_map6	0002.CSV	1400.13	0.104932
CAM206_map6	0002.CSV	1403.98	0.108012
CAM206_map6	0002.CSV	1407.84	0.110938
CAM206_map6	0002.CSV	1411.7	0.113504
CAM206_map6	0002.CSV	1415.55	0.11521
CAM206_map6	0002.CSV	1419.41	0.118086
CAM206_map6	0002.CSV	1423.27	0.120399
CAM206_map6	0002.CSV	1427.12	0.122763
CAM206_map6	0002.CSV	1430.98	0.125294
CAM206_map6	0002.CSV	1434.84	0.129072
CAM206_map6	0002.CSV	1438.7	0.133536
CAM206_map6	0002.CSV	1442.55	0.1368
CAM206_map6	0002.CSV	1446.41	0.138754
CAM206_map6	0002.CSV	1450.27	0.139788
CAM206_map6	0002.CSV	1454.12	0.138619
CAM206_map6	0002.CSV	1457.98	0.137586
CAM206_map6	0002.CSV	1461.84	0.136015
CAM206_map6	0002.CSV	1465.7	0.135027
CAM206_map6	0002.CSV	1469.55	0.132641
CAM206_map6	0002.CSV	1473.41	0.128123
CAM206_map6	0002.CSV	1477.27	0.121539
CAM206_map6	0002.CSV	1481.12	0.116741
CAM206_map6	0002.CSV	1484.98	0.112122
CAM206_map6	0002.CSV	1488.84	0.107163
CAM206_map6	0002.CSV	1492.7	0.10194
CAM206_map6	0002.CSV	1496.55	0.0980331
CAM206_map6	0002.CSV	1500.41	0.0935679
CAM206_map6	0002.CSV	1504.27	0.0905784
CAM206_map6	0002.CSV	1508.12	0.0855985
CAM206_map6	0002.CSV	1511.98	0.0815625
CAM206_map6	0002.CSV	1515.84	0.0782512
CAM206_map6	0002.CSV	1519.7	0.0745641
CAM206_map6	0002.CSV	1523.55	0.0701925
CAM206_map6	0002.CSV	1527.41	0.0670494
CAM206_map6	0002.CSV	1531.27	0.0642207
CAM206_map6	0002.CSV	1535.12	0.0620634
CAM206_map6	0002.CSV	1538.98	0.0598426
CAM206_map6	0002.CSV	1542.84	0.056577
CAM206_map6	0002.CSV	1546.7	0.0532179
CAM206_map6	0002.CSV	1550.55	0.0504779
CAM206_map6	0002.CSV	1554.41	0.0477385
CAM206_map6	0002.CSV	1558.27	0.0451546
CAM206_map6	0002.CSV	1562.12	0.0426197
CAM206_map6	0002.CSV	1565.98	0.0411322
CAM206_map6	0002.CSV	1569.84	0.0395839
CAM206_map6	0002.CSV	1573.69	0.0381594
CAM206_map6	0002.CSV	1577.55	0.0360426
CAM206_map6	0002.CSV	1581.41	0.0335323
CAM206_map6	0002.CSV	1585.27	0.031154
CAM206_map6	0002.CSV	1589.12	0.0294123
CAM206_map6	0002.CSV	1592.98	0.0283178
CAM206_map6	0002.CSV	1596.84	0.0276647
CAM206_map6	0002.CSV	1600.69	0.027088
CAM206_map6	0002.CSV	1604.55	0.026798
CAM206_map6	0002.CSV	1608.41	0.0265534
CAM206_map6	0002.CSV	1612.27	0.0262194
CAM206_map6	0002.CSV	1616.12	0.025902
CAM206_map6	0002.CSV	1619.98	0.0257535
CAM206_map6	0002.CSV	1623.84	0.0253464
CAM206_map6	0002.CSV	1627.69	0.0249892
CAM206_map6	0002.CSV	1631.55	0.0242597
CAM206_map6	0002.CSV	1635.41	0.0242612
CAM206_map6	0002.CSV	1639.27	0.0244338
CAM206_map6	0002.CSV	1643.12	0.0238863
CAM206_map6	0002.CSV	1646.98	0.0236238
CAM206_map6	0002.CSV	1650.84	0.0238283
CAM206_map6	0002.CSV	1654.69	0.0241941
CAM206_map6	0002.CSV	1658.55	0.0237765
CAM206_map6	0002.CSV	1662.41	0.0232364
CAM206_map6	0002.CSV	1666.27	0.0229017
CAM206_map6	0002.CSV	1670.12	0.0227612
CAM206_map6	0002.CSV	1673.98	0.0229597
CAM206_map6	0002.CSV	1677.84	0.0224756
CAM206_map6	0002.CSV	1681.69	0.0221317
CAM206_map6	0002.CSV	1685.55	0.022443
CAM206_map6	0002.CSV	1689.41	0.0222202
CAM206_map6	0002.CSV	1693.27	0.0214256
CAM206_map6	0002.CSV	1697.12	0.0213635
CAM206_map6	0002.CSV	1700.98	0.0217355
CAM206_map6	0002.CSV	1704.84	0.0216181
CAM206_map6	0002.CSV	1708.69	0.0213547
CAM206_map6	0002.CSV	1712.55	0.0210721
CAM206_map6	0002.CSV	1716.41	0.0214936
CAM206_map6	0002.CSV	1720.27	0.0219686
CAM206_map6	0002.CSV	1724.12	0.0215625
CAM206_map6	0002.CSV	1727.98	0.0213013
CAM206_map6	0002.CSV	1731.84	0.0213372
CAM206_map6	0002.CSV	1735.69	0.0217814
CAM206_map6	0002.CSV	1739.55	0.0213638
CAM206_map6	0002.CSV	1743.41	0.0207505
CAM206_map6	0002.CSV	1747.27	0.0202621
CAM206_map6	0002.CSV	1751.12	0.0199897
CAM206_map6	0002.CSV	1754.98	0.019328
CAM206_map6	0002.CSV	1758.84	0.0190025
CAM206_map6	0002.CSV	1762.69	0.0188797
CAM206_map6	0002.CSV	1766.55	0.0186659
CAM206_map6	0002.CSV	1770.41	0.0188809
CAM206_map6	0002.CSV	1774.26	0.0200324
CAM206_map6	0002.CSV	1778.12	0.0207063
CAM206_map6	0002.CSV	1781.98	0.0215501
CAM206_map6	0002.CSV	1785.84	0.0218186
CAM206_map6	0002.CSV	1789.69	0.0213874
CAM206_map6	0002.CSV	1793.55	0.0206401
CAM206_map6	0002.CSV	1797.41	0.0197796
CAM206_map6	0002.CSV	1801.26	0.0189448
CAM206_map6	0002.CSV	1805.12	0.0183283
CAM206_map6	0002.CSV	1808.98	0.0179391
CAM206_map6	0002.CSV	1812.84	0.0179336
CAM206_map6	0002.CSV	1816.69	0.0176863
CAM206_map6	0002.CSV	1820.55	0.0174948
CAM206_map6	0002.CSV	1824.41	0.0173748
CAM206_map6	0002.CSV	1828.26	0.0176271
CAM206_map6	0002.CSV	1832.12	0.0176795
CAM206_map6	0002.CSV	1835.98	0.0174877
CAM206_map6	0002.CSV	1839.84	0.0172438
CAM206_map6	0002.CSV	1843.69	0.0174158
CAM206_map6	0002.CSV	1847.55	0.017679
CAM206_map6	0002.CSV	1851.41	0.0175063
CAM206_map6	0002.CSV	1855.26	0.0173094
CAM206_map6	0002.CSV	1859.12	0.017335
CAM206_map6	0002.CSV	1862.98	0.0172231
CAM206_map6	0002.CSV	1866.84	0.0173297
CAM206_map6	0002.CSV	1870.69	0.0177363
CAM206_map6	0002.CSV	1874.55	0.017569
CAM206_map6	0002.CSV	1878.41	0.0173839
CAM206_map6	0002.CSV	1882.26	0.0173774
CAM206_map6	0002.CSV	1886.12	0.0173292
CAM206_map6	0002.CSV	1889.98	0.0174683
CAM206_map6	0002.CSV	1893.83	0.01753
CAM206_map6	0002.CSV	1897.69	0.0175083
CAM206_map6	0002.CSV	1901.55	0.0174177
CAM206_map6	0002.CSV	1905.41	0.0173888
CAM206_map6	0002.CSV	1909.26	0.0174467
CAM206_map6	0002.CSV	1913.12	0.0174612
CAM206_map6	0002.CSV	1916.98	0.0173862
CAM206_map6	0002.CSV	1920.83	0.0175423
CAM206_map6	0002.CSV	1924.69	0.0176129
CAM206_map6	0002.CSV	1928.55	0.0175309
CAM206_map6	0002.CSV	1932.4	0.0174697
CAM206_map6	0002.CSV	1936.26	0.0174681
CAM206_map6	0002.CSV	1940.12	0.0174432
CAM206_map6	0002.CSV	1943.98	0.0177105
CAM206_map6	0002.CSV	1947.83	0.017775
CAM206_map6	0002.CSV	1951.69	0.0177678
CAM206_map6	0002.CSV	1955.55	0.0177979
CAM206_map6	0002.CSV	1959.4	0.0178055
CAM206_map6	0002.CSV	1963.26	0.0177521
CAM206_map6	0002.CSV	1967.12	0.0178877
CAM206_map6	0002.CSV	1970.98	0.0179266
CAM206_map6	0002.CSV	1974.83	0.0179377
CAM206_map6	0002.CSV	1978.69	0.0180015
CAM206_map6	0002.CSV	1982.55	0.0180341
CAM206_map6	0002.CSV	1986.4	0.0180311
CAM206_map6	0002.CSV	1990.26	0.0181616
CAM206_map6	0002.CSV	1994.12	0.0182809
CAM206_map6	0002.CSV	1997.98	0.0182901
CAM206_map6	0002.CSV	2001.83	0.0182537
CAM206_map6	0002.CSV	2005.69	0.0183084
CAM206_map6	0002.CSV	2009.55	0.0183559
CAM206_map6	0002.CSV	2013.4	0.0183755
CAM206_map6	0002.CSV	2017.26	0.01847
CAM206_map6	0002.CSV	2021.12	0.0185547
CAM206_map6	0002.CSV	2024.97	0.0185487
CAM206_map6	0002.CSV	2028.83	0.018614
CAM206_map6	0002.CSV	2032.69	0.0186515
CAM206_map6	0002.CSV	2036.55	0.0186764
CAM206_map6	0002.CSV	2040.4	0.0187502
CAM206_map6	0002.CSV	2044.26	0.0188501
CAM206_map6	0002.CSV	2048.12	0.0188555
CAM206_map6	0002.CSV	2051.97	0.0188864
CAM206_map6	0002.CSV	2055.83	0.0188834
CAM206_map6	0002.CSV	2059.69	0.0189171
CAM206_map6	0002.CSV	2063.55	0.0189451
CAM206_map6	0002.CSV	2067.4	0.0190215
CAM206_map6	0002.CSV	2071.26	0.0190252
CAM206_map6	0002.CSV	2075.12	0.0190338
CAM206_map6	0002.CSV	2078.97	0.019015
CAM206_map6	0002.CSV	2082.83	0.0189996
CAM206_map6	0002.CSV	2086.69	0.0189802
CAM206_map6	0002.CSV	2090.55	0.0190225
CAM206_map6	0002.CSV	2094.4	0.0190419
CAM206_map6	0002.CSV	2098.26	0.0190836
CAM206_map6	0002.CSV	2102.12	0.0190427
CAM206_map6	0002.CSV	2105.97	0.0190458
CAM206_map6	0002.CSV	2109.83	0.019051
CAM206_map6	0002.CSV	2113.69	0.0191043
CAM206_map6	0002.CSV	2117.55	0.0190981
CAM206_map6	0002.CSV	2121.4	0.0190722
CAM206_map6	0002.CSV	2125.26	0.0190256
CAM206_map6	0002.CSV	2129.12	0.0190089
CAM206_map6	0002.CSV	2132.97	0.0190075
CAM206_map6	0002.CSV	2136.83	0.0190156
CAM206_map6	0002.CSV	2140.69	0.0189854
CAM206_map6	0002.CSV	2144.55	0.0190203
CAM206_map6	0002.CSV	2148.4	0.0190272
CAM206_map6	0002.CSV	2152.26	0.0190319
CAM206_map6	0002.CSV	2156.12	0.0189986
CAM206_map6	0002.CSV	2159.97	0.0189794
CAM206_map6	0002.CSV	2163.83	0.018947
CAM206_map6	0002.CSV	2167.69	0.0189313
CAM206_map6	0002.CSV	2171.55	0.0189393
CAM206_map6	0002.CSV	2175.4	0.0189923
CAM206_map6	0002.CSV	2179.26	0.0190057
CAM206_map6	0002.CSV	2183.12	0.018999
CAM206_map6	0002.CSV	2186.97	0.0189235
CAM206_map6	0002.CSV	2190.83	0.0189294
CAM206_map6	0002.CSV	2194.69	0.0189534
CAM206_map6	0002.CSV	2198.55	0.018931
CAM206_map6	0002.CSV	2202.4	0.0188748
CAM206_map6	0002.CSV	2206.26	0.0188956
CAM206_map6	0002.CSV	2210.12	0.0189286
CAM206_map6	0002.CSV	2213.97	0.0189348
CAM206_map6	0002.CSV	2217.83	0.0188828
CAM206_map6	0002.CSV	2221.69	0.0188766
CAM206_map6	0002.CSV	2225.54	0.0188632
CAM206_map6	0002.CSV	2229.4	0.0188757
CAM206_map6	0002.CSV	2233.26	0.0188714
CAM206_map6	0002.CSV	2237.12	0.0188524
CAM206_map6	0002.CSV	2240.97	0.0188371
CAM206_map6	0002.CSV	2244.83	0.0188512
CAM206_map6	0002.CSV	2248.69	0.0188416
CAM206_map6	0002.CSV	2252.54	0.0188344
CAM206_map6	0002.CSV	2256.4	0.0188119
CAM206_map6	0002.CSV	2260.26	0.0188477
CAM206_map6	0002.CSV	2264.11	0.0188554
CAM206_map6	0002.CSV	2267.97	0.0188613
CAM206_map6	0002.CSV	2271.83	0.0189038
CAM206_map6	0002.CSV	2275.69	0.0189622
CAM206_map6	0002.CSV	2279.54	0.018957
CAM206_map6	0002.CSV	2283.4	0.0188992
CAM206_map6	0002.CSV	2287.26	0.0188629
CAM206_map6	0002.CSV	2291.11	0.0189401
CAM206_map6	0002.CSV	2294.97	0.0190052
CAM206_map6	0002.CSV	2298.83	0.0190904
CAM206_map6	0002.CSV	2302.69	0.0191188
CAM206_map6	0002.CSV	2306.54	0.0191337
CAM206_map6	0002.CSV	2310.4	0.0192287
CAM206_map6	0002.CSV	2314.26	0.0192894
CAM206_map6	0002.CSV	2318.11	0.0190617
CAM206_map6	0002.CSV	2321.97	0.0188854
CAM206_map6	0002.CSV	2325.83	0.0186447
CAM206_map6	0002.CSV	2329.69	0.0185506
CAM206_map6	0002.CSV	2333.54	0.0182744
CAM206_map6	0002.CSV	2337.4	0.0178547
CAM206_map6	0002.CSV	2341.26	0.0180239
CAM206_map6	0002.CSV	2345.11	0.0193023
CAM206_map6	0002.CSV	2348.97	0.0193562
CAM206_map6	0002.CSV	2352.83	0.0181289
CAM206_map6	0002.CSV	2356.69	0.0157853
CAM206_map6	0002.CSV	2360.54	0.0149927
CAM206_map6	0002.CSV	2364.4	0.0167357
CAM206_map6	0002.CSV	2368.26	0.0187755
CAM206_map6	0002.CSV	2372.11	0.0201432
CAM206_map6	0002.CSV	2375.97	0.0205827
CAM206_map6	0002.CSV	2379.83	0.0204328
CAM206_map6	0002.CSV	2383.69	0.020059
CAM206_map6	0002.CSV	2387.54	0.0196748
CAM206_map6	0002.CSV	2391.4	0.0194938
CAM206_map6	0002.CSV	2395.26	0.0194793
CAM206_map6	0002.CSV	2399.11	0.0194981
CAM206_map6	0002.CSV	2402.97	0.0195582
CAM206_map6	0002.CSV	2406.83	0.0195832
CAM206_map6	0002.CSV	2410.68	0.0195471
CAM206_map6	0002.CSV	2414.54	0.0195494
CAM206_map6	0002.CSV	2418.4	0.0195366
CAM206_map6	0002.CSV	2422.26	0.0195245
CAM206_map6	0002.CSV	2426.11	0.0195284
CAM206_map6	0002.CSV	2429.97	0.0195399
CAM206_map6	0002.CSV	2433.83	0.0195505
CAM206_map6	0002.CSV	2437.68	0.0195992
CAM206_map6	0002.CSV	2441.54	0.0195963
CAM206_map6	0002.CSV	2445.4	0.0195314
CAM206_map6	0002.CSV	2449.26	0.0194904
CAM206_map6	0002.CSV	2453.11	0.019487
CAM206_map6	0002.CSV	2456.97	0.0194902
CAM206_map6	0002.CSV	2460.83	0.0195368
CAM206_map6	0002.CSV	2464.68	0.019552
CAM206_map6	0002.CSV	2468.54	0.0195683
CAM206_map6	0002.CSV	2472.4	0.0196387
CAM206_map6	0002.CSV	2476.26	0.0197291
CAM206_map6	0002.CSV	2480.11	0.019872
CAM206_map6	0002.CSV	2483.97	0.0199944
CAM206_map6	0002.CSV	2487.83	0.0200488
CAM206_map6	0002.CSV	2491.68	0.0201026
CAM206_map6	0002.CSV	2495.54	0.0201876
CAM206_map6	0002.CSV	2499.4	0.0202495
CAM206_map6	0002.CSV	2503.26	0.0202324
CAM206_map6	0002.CSV	2507.11	0.0202084
CAM206_map6	0002.CSV	2510.97	0.020212
CAM206_map6	0002.CSV	2514.83	0.0202512
CAM206_map6	0002.CSV	2518.68	0.0202776
CAM206_map6	0002.CSV	2522.54	0.0202547
CAM206_map6	0002.CSV	2526.4	0.0202117
CAM206_map6	0002.CSV	2530.26	0.0201083
CAM206_map6	0002.CSV	2534.11	0.0199247
CAM206_map6	0002.CSV	2537.97	0.0197801
CAM206_map6	0002.CSV	2541.83	0.0197382
CAM206_map6	0002.CSV	2545.68	0.019706
CAM206_map6	0002.CSV	2549.54	0.0195812
CAM206_map6	0002.CSV	2553.4	0.0194919
CAM206_map6	0002.CSV	2557.26	0.0194371
CAM206_map6	0002.CSV	2561.11	0.0193519
CAM206_map6	0002.CSV	2564.97	0.0192561
CAM206_map6	0002.CSV	2568.83	0.0191982
CAM206_map6	0002.CSV	2572.68	0.0191372
CAM206_map6	0002.CSV	2576.54	0.0191016
CAM206_map6	0002.CSV	2580.4	0.019082
CAM206_map6	0002.CSV	2584.25	0.0190567
CAM206_map6	0002.CSV	2588.11	0.0190092
CAM206_map6	0002.CSV	2591.97	0.0189872
CAM206_map6	0002.CSV	2595.83	0.0189672
CAM206_map6	0002.CSV	2599.68	0.0189588
CAM206_map6	0002.CSV	2603.54	0.0189453
CAM206_map6	0002.CSV	2607.4	0.0189407
CAM206_map6	0002.CSV	2611.25	0.0188928
CAM206_map6	0002.CSV	2615.11	0.0188921
CAM206_map6	0002.CSV	2618.97	0.0189656
CAM206_map6	0002.CSV	2622.82	0.0190673
CAM206_map6	0002.CSV	2626.68	0.0191334
CAM206_map6	0002.CSV	2630.54	0.0191445
CAM206_map6	0002.CSV	2634.4	0.0191921
CAM206_map6	0002.CSV	2638.25	0.0191904
CAM206_map6	0002.CSV	2642.11	0.019027
CAM206_map6	0002.CSV	2645.97	0.018937
CAM206_map6	0002.CSV	2649.82	0.0189465
CAM206_map6	0002.CSV	2653.68	0.0189717
CAM206_map6	0002.CSV	2657.54	0.0190153
CAM206_map6	0002.CSV	2661.4	0.0190464
CAM206_map6	0002.CSV	2665.25	0.0190783
CAM206_map6	0002.CSV	2669.11	0.0191196
CAM206_map6	0002.CSV	2672.97	0.0192506
CAM206_map6	0002.CSV	2676.82	0.0194715
CAM206_map6	0002.CSV	2680.68	0.0194742
CAM206_map6	0002.CSV	2684.54	0.0192456
CAM206_map6	0002.CSV	2688.4	0.0191457
CAM206_map6	0002.CSV	2692.25	0.0191774
CAM206_map6	0002.CSV	2696.11	0.0192643
CAM206_map6	0002.CSV	2699.97	0.0192843
CAM206_map6	0002.CSV	2703.82	0.0192363
CAM206_map6	0002.CSV	2707.68	0.0192932
CAM206_map6	0002.CSV	2711.54	0.0193735
CAM206_map6	0002.CSV	2715.4	0.0194141
CAM206_map6	0002.CSV	2719.25	0.0195376
CAM206_map6	0002.CSV	2723.11	0.0197874
CAM206_map6	0002.CSV	2726.97	0.0198025
CAM206_map6	0002.CSV	2730.82	0.0195408
CAM206_map6	0002.CSV	2734.68	0.0195214
CAM206_map6	0002.CSV	2738.54	0.019607
CAM206_map6	0002.CSV	2742.4	0.0196433
CAM206_map6	0002.CSV	2746.25	0.0198755
CAM206_map6	0002.CSV	2750.11	0.0198951
CAM206_map6	0002.CSV	2753.97	0.0197036
CAM206_map6	0002.CSV	2757.82	0.0196278
CAM206_map6	0002.CSV	2761.68	0.0195611
CAM206_map6	0002.CSV	2765.54	0.0194803
CAM206_map6	0002.CSV	2769.39	0.0195985
CAM206_map6	0002.CSV	2773.25	0.0199263
CAM206_map6	0002.CSV	2777.11	0.0198754
CAM206_map6	0002.CSV	2780.97	0.0197401
CAM206_map6	0002.CSV	2784.82	0.0199457
CAM206_map6	0002.CSV	2788.68	0.0202529
CAM206_map6	0002.CSV	2792.54	0.0203318
CAM206_map6	0002.CSV	2796.39	0.0203296
CAM206_map6	0002.CSV	2800.25	0.0201381
CAM206_map6	0002.CSV	2804.11	0.0199739
CAM206_map6	0002.CSV	2807.97	0.020222
CAM206_map6	0002.CSV	2811.82	0.0202652
CAM206_map6	0002.CSV	2815.68	0.0200898
CAM206_map6	0002.CSV	2819.54	0.0201566
CAM206_map6	0002.CSV	2823.39	0.0203235
CAM206_map6	0002.CSV	2827.25	0.0204128
CAM206_map6	0002.CSV	2831.11	0.0207942
CAM206_map6	0002.CSV	2834.97	0.021461
CAM206_map6	0002.CSV	2838.82	0.0219749
CAM206_map6	0002.CSV	2842.68	0.0225618
CAM206_map6	0002.CSV	2846.54	0.0238672
CAM206_map6	0002.CSV	2850.39	0.0247042
CAM206_map6	0002.CSV	2854.25	0.0243687
CAM206_map6	0002.CSV	2858.11	0.0237635
CAM206_map6	0002.CSV	2861.97	0.0230692
CAM206_map6	0002.CSV	2865.82	0.0225227
CAM206_map6	0002.CSV	2869.68	0.0225224
CAM206_map6	0002.CSV	2873.54	0.0225914
CAM206_map6	0002.CSV	2877.39	0.0221218
CAM206_map6	0002.CSV	2881.25	0.0217301
CAM206_map6	0002.CSV	2885.11	0.0217585
CAM206_map6	0002.CSV	2888.97	0.0220628
CAM206_map6	0002.CSV	2892.82	0.0226198
CAM206_map6	0002.CSV	2896.68	0.0230634
CAM206_map6	0002.CSV	2900.54	0.0232686
CAM206_map6	0002.CSV	2904.39	0.0237977
CAM206_map6	0002.CSV	2908.25	0.0249163
CAM206_map6	0002.CSV	2912.11	0.0267022
CAM206_map6	0002.CSV	2915.97	0.0281902
CAM206_map6	0002.CSV	2919.82	0.0283614
CAM206_map6	0002.CSV	2923.68	0.0276639
CAM206_map6	0002.CSV	2927.54	0.0270412
CAM206_map6	0002.CSV	2931.39	0.026038
CAM206_map6	0002.CSV	2935.25	0.0246946
CAM206_map6	0002.CSV	2939.11	0.0239721
CAM206_map6	0002.CSV	2942.96	0.0239222
CAM206_map6	0002.CSV	2946.82	0.0237456
CAM206_map6	0002.CSV	2950.68	0.0233507
CAM206_map6	0002.CSV	2954.54	0.0228883
CAM206_map6	0002.CSV	2958.39	0.0223957
CAM206_map6	0002.CSV	2962.25	0.0220776
CAM206_map6	0002.CSV	2966.11	0.0215795
CAM206_map6	0002.CSV	2969.96	0.0213916
CAM206_map6	0002.CSV	2973.82	0.0215809
CAM206_map6	0002.CSV	2977.68	0.0216207
CAM206_map6	0002.CSV	2981.53	0.0211872
CAM206_map6	0002.CSV	2985.39	0.0205274
CAM206_map6	0002.CSV	2989.25	0.0205037
CAM206_map6	0002.CSV	2993.11	0.020755
CAM206_map6	0002.CSV	2996.96	0.0206027
CAM206_map6	0002.CSV	3000.82	0.0202502
CAM206_map6	0002.CSV	3004.68	0.0200733
CAM206_map6	0002.CSV	3008.53	0.0202948
CAM206_map6	0002.CSV	3012.39	0.0206734
CAM206_map6	0002.CSV	3016.25	0.0207493
CAM206_map6	0002.CSV	3020.11	0.0204974
CAM206_map6	0002.CSV	3023.96	0.0202445
CAM206_map6	0002.CSV	3027.82	0.0201811
CAM206_map6	0002.CSV	3031.68	0.0204828
CAM206_map6	0002.CSV	3035.53	0.0206669
CAM206_map6	0002.CSV	3039.39	0.0207018
CAM206_map6	0002.CSV	3043.25	0.0207664
CAM206_map6	0002.CSV	3047.11	0.0206664
CAM206_map6	0002.CSV	3050.96	0.0206336
CAM206_map6	0002.CSV	3054.82	0.0205398
CAM206_map6	0002.CSV	3058.68	0.0203004
CAM206_map6	0002.CSV	3062.53	0.0203353
CAM206_map6	0002.CSV	3066.39	0.0206692
CAM206_map6	0002.CSV	3070.25	0.0206278
CAM206_map6	0002.CSV	3074.11	0.0206145
CAM206_map6	0002.CSV	3077.96	0.0209371
CAM206_map6	0002.CSV	3081.82	0.0211482
CAM206_map6	0002.CSV	3085.68	0.0210993
CAM206_map6	0002.CSV	3089.53	0.020903
CAM206_map6	0002.CSV	3093.39	0.0206322
CAM206_map6	0002.CSV	3097.25	0.0206969
CAM206_map6	0002.CSV	3101.11	0.0208094
CAM206_map6	0002.CSV	3104.96	0.0207945
CAM206_map6	0002.CSV	3108.82	0.0209712
CAM206_map6	0002.CSV	3112.68	0.0211887
CAM206_map6	0002.CSV	3116.53	0.0213578
CAM206_map6	0002.CSV	3120.39	0.0212855
CAM206_map6	0002.CSV	3124.25	0.0210329
CAM206_map6	0002.CSV	3128.11	0.0208953
CAM206_map6	0002.CSV	3131.96	0.0208009
CAM206_map6	0002.CSV	3135.82	0.0209639
CAM206_map6	0002.CSV	3139.68	0.0211728
CAM206_map6	0002.CSV	3143.53	0.0210126
CAM206_map6	0002.CSV	3147.39	0.0210845
CAM206_map6	0002.CSV	3151.25	0.0214209
CAM206_map6	0002.CSV	3155.1	0.021319
CAM206_map6	0002.CSV	3158.96	0.0209198
CAM206_map6	0002.CSV	3162.82	0.0207583
CAM206_map6	0002.CSV	3166.68	0.0207022
CAM206_map6	0002.CSV	3170.53	0.0207564
CAM206_map6	0002.CSV	3174.39	0.0208536
CAM206_map6	0002.CSV	3178.25	0.0209877
CAM206_map6	0002.CSV	3182.1	0.0210162
CAM206_map6	0002.CSV	3185.96	0.0210128
CAM206_map6	0002.CSV	3189.82	0.0210857
CAM206_map6	0002.CSV	3193.68	0.0210594
CAM206_map6	0002.CSV	3197.53	0.0210219
CAM206_map6	0002.CSV	3201.39	0.0211699
CAM206_map6	0002.CSV	3205.25	0.0212157
CAM206_map6	0002.CSV	3209.1	0.0211188
CAM206_map6	0002.CSV	3212.96	0.0212001
CAM206_map6	0002.CSV	3216.82	0.0213522
CAM206_map6	0002.CSV	3220.68	0.021371
CAM206_map6	0002.CSV	3224.53	0.0213306
CAM206_map6	0002.CSV	3228.39	0.021543
CAM206_map6	0002.CSV	3232.25	0.0219006
CAM206_map6	0002.CSV	3236.1	0.0217463
CAM206_map6	0002.CSV	3239.96	0.0214498
CAM206_map6	0002.CSV	3243.82	0.0216915
CAM206_map6	0002.CSV	3247.68	0.021917
CAM206_map6	0002.CSV	3251.53	0.021707
CAM206_map6	0002.CSV	3255.39	0.0216647
CAM206_map6	0002.CSV	3259.25	0.0215092
CAM206_map6	0002.CSV	3263.1	0.0215193
CAM206_map6	0002.CSV	3266.96	0.0218806
CAM206_map6	0002.CSV	3270.82	0.0221654
CAM206_map6	0002.CSV	3274.68	0.0220339
CAM206_map6	0002.CSV	3278.53	0.0216667
CAM206_map6	0002.CSV	3282.39	0.0214428
CAM206_map6	0002.CSV	3286.25	0.0216243
CAM206_map6	0002.CSV	3290.1	0.0221344
CAM206_map6	0002.CSV	3293.96	0.0224659
CAM206_map6	0002.CSV	3297.82	0.0221901
CAM206_map6	0002.CSV	3301.67	0.0221406
CAM206_map6	0002.CSV	3305.53	0.0224011
CAM206_map6	0002.CSV	3309.39	0.0221999
CAM206_map6	0002.CSV	3313.25	0.0217081
CAM206_map6	0002.CSV	3317.1	0.0214036
CAM206_map6	0002.CSV	3320.96	0.0215622
CAM206_map6	0002.CSV	3324.82	0.0219389
CAM206_map6	0002.CSV	3328.67	0.0216731
CAM206_map6	0002.CSV	3332.53	0.0214112
CAM206_map6	0002.CSV	3336.39	0.0218727
CAM206_map6	0002.CSV	3340.24	0.022219
CAM206_map6	0002.CSV	3344.1	0.0220738
CAM206_map6	0002.CSV	3347.96	0.0220112
CAM206_map6	0002.CSV	3351.82	0.0218894
CAM206_map6	0002.CSV	3355.67	0.0216154
CAM206_map6	0002.CSV	3359.53	0.0218372
CAM206_map6	0002.CSV	3363.39	0.0221143
CAM206_map6	0002.CSV	3367.24	0.022407
CAM206_map6	0002.CSV	3371.1	0.0223568
CAM206_map6	0002.CSV	3374.96	0.0220509
CAM206_map6	0002.CSV	3378.82	0.0218041
CAM206_map6	0002.CSV	3382.67	0.0215173
CAM206_map6	0002.CSV	3386.53	0.0215665
CAM206_map6	0002.CSV	3390.39	0.0219016
CAM206_map6	0002.CSV	3394.24	0.0222257
CAM206_map6	0002.CSV	3398.1	0.0223914
CAM206_map6	0002.CSV	3401.96	0.0222316
CAM206_map6	0002.CSV	3405.82	0.0219527
CAM206_map6	0002.CSV	3409.67	0.0220182
CAM206_map6	0002.CSV	3413.53	0.0217364
CAM206_map6	0002.CSV	3417.39	0.0212505
CAM206_map6	0002.CSV	3421.24	0.0212299
CAM206_map6	0002.CSV	3425.1	0.0214561
CAM206_map6	0002.CSV	3428.96	0.021785
CAM206_map6	0002.CSV	3432.82	0.0220192
CAM206_map6	0002.CSV	3436.67	0.0217784
CAM206_map6	0002.CSV	3440.53	0.0211898
CAM206_map6	0002.CSV	3444.39	0.020911
CAM206_map6	0002.CSV	3448.24	0.0209804
CAM206_map6	0002.CSV	3452.1	0.0208841
CAM206_map6	0002.CSV	3455.96	0.0208229
CAM206_map6	0002.CSV	3459.82	0.0209888
CAM206_map6	0002.CSV	3463.67	0.0214053
CAM206_map6	0002.CSV	3467.53	0.0217208
CAM206_map6	0002.CSV	3471.39	0.021305
CAM206_map6	0002.CSV	3475.24	0.0209133
CAM206_map6	0002.CSV	3479.1	0.0208905
CAM206_map6	0002.CSV	3482.96	0.0207502
CAM206_map6	0002.CSV	3486.82	0.0207087
CAM206_map6	0002.CSV	3490.67	0.0207219
CAM206_map6	0002.CSV	3494.53	0.0208109
CAM206_map6	0002.CSV	3498.39	0.0207389
CAM206_map6	0002.CSV	3502.24	0.0205841
CAM206_map6	0002.CSV	3506.1	0.0202523
CAM206_map6	0002.CSV	3509.96	0.0200378
CAM206_map6	0002.CSV	3513.81	0.0201441
CAM206_map6	0002.CSV	3517.67	0.0198425
CAM206_map6	0002.CSV	3521.53	0.0197863
CAM206_map6	0002.CSV	3525.39	0.0197266
CAM206_map6	0002.CSV	3529.24	0.0195091
CAM206_map6	0002.CSV	3533.1	0.0195915
CAM206_map6	0002.CSV	3536.96	0.0197568
CAM206_map6	0002.CSV	3540.81	0.0196969
CAM206_map6	0002.CSV	3544.67	0.0198506
CAM206_map6	0002.CSV	3548.53	0.0197661
CAM206_map6	0002.CSV	3552.39	0.0193282
CAM206_map6	0002.CSV	3556.24	0.0191164
CAM206_map6	0002.CSV	3560.1	0.0188495
CAM206_map6	0002.CSV	3563.96	0.0182761
CAM206_map6	0002.CSV	3567.81	0.0187639
CAM206_map6	0002.CSV	3571.67	0.0189529
CAM206_map6	0002.CSV	3575.53	0.0186089
CAM206_map6	0002.CSV	3579.39	0.0187964
CAM206_map6	0002.CSV	3583.24	0.0186736
CAM206_map6	0002.CSV	3587.1	0.0188299
CAM206_map6	0002.CSV	3590.96	0.0189356
CAM206_map6	0002.CSV	3594.81	0.0186119
CAM206_map6	0002.CSV	3598.67	0.0188814
CAM206_map6	0002.CSV	3602.53	0.0186986
CAM206_map6	0002.CSV	3606.39	0.0178416
CAM206_map6	0002.CSV	3610.24	0.0176118
CAM206_map6	0002.CSV	3614.1	0.0176402
CAM206_map6	0002.CSV	3617.96	0.0180423
CAM206_map6	0002.CSV	3621.81	0.0182986
CAM206_map6	0002.CSV	3625.67	0.0173625
CAM206_map6	0002.CSV	3629.53	0.0176462
CAM206_map6	0002.CSV	3633.39	0.0184408
CAM206_map6	0002.CSV	3637.24	0.0179852
CAM206_map6	0002.CSV	3641.1	0.0174163
CAM206_map6	0002.CSV	3644.96	0.016505
CAM206_map6	0002.CSV	3648.81	0.0172673
CAM206_map6	0002.CSV	3652.67	0.0186505
CAM206_map6	0002.CSV	3656.53	0.0185909
CAM206_map6	0002.CSV	3660.38	0.0184037
CAM206_map6	0002.CSV	3664.24	0.0172867
CAM206_map6	0002.CSV	3668.1	0.0161557
CAM206_map6	0002.CSV	3671.96	0.0161474
CAM206_map6	0002.CSV	3675.81	0.0172001
CAM206_map6	0002.CSV	3679.67	0.0180335
CAM206_map6	0002.CSV	3683.53	0.0175651
CAM206_map6	0002.CSV	3687.38	0.0173712
CAM206_map6	0002.CSV	3691.24	0.0185938
CAM206_map6	0002.CSV	3695.1	0.0182245
CAM206_map6	0002.CSV	3698.95	0.0173554
CAM206_map6	0002.CSV	3702.81	0.0171291
CAM206_map6	0002.CSV	3706.67	0.0167037
CAM206_map6	0002.CSV	3710.53	0.0168775
CAM206_map6	0002.CSV	3714.38	0.0176932
CAM206_map6	0002.CSV	3718.24	0.0170722
CAM206_map6	0002.CSV	3722.1	0.0167154
CAM206_map6	0002.CSV	3725.95	0.016897
CAM206_map6	0002.CSV	3729.81	0.0165233
CAM206_map6	0002.CSV	3733.67	0.0168281
CAM206_map6	0002.CSV	3737.53	0.0183998
CAM206_map6	0002.CSV	3741.38	0.017385
CAM206_map6	0002.CSV	3745.24	0.0159992
CAM206_map6	0002.CSV	3749.1	0.0160225
CAM206_map6	0002.CSV	3752.95	0.0173094
CAM206_map6	0002.CSV	3756.81	0.0174693
CAM206_map6	0002.CSV	3760.67	0.0175642
CAM206_map6	0002.CSV	3764.53	0.0172944
CAM206_map6	0002.CSV	3768.38	0.0173418
CAM206_map6	0002.CSV	3772.24	0.017728
CAM206_map6	0002.CSV	3776.1	0.0175397
CAM206_map6	0002.CSV	3779.95	0.0176488
CAM206_map6	0002.CSV	3783.81	0.0177123
CAM206_map6	0002.CSV	3787.67	0.0177227
CAM206_map6	0002.CSV	3791.53	0.0173927
CAM206_map6	0002.CSV	3795.38	0.0167212
CAM206_map6	0002.CSV	3799.24	0.0166562
CAM206_map6	0002.CSV	3803.1	0.017451
CAM206_map6	0002.CSV	3806.95	0.0180331
CAM206_map6	0002.CSV	3810.81	0.0175667
CAM206_map6	0002.CSV	3814.67	0.0167653
CAM206_map6	0002.CSV	3818.53	0.0170626
CAM206_map6	0002.CSV	3822.38	0.0180681
CAM206_map6	0002.CSV	3826.24	0.0178678
CAM206_map6	0002.CSV	3830.1	0.0172702
CAM206_map6	0002.CSV	3833.95	0.0169001
CAM206_map6	0002.CSV	3837.81	0.0171766
CAM206_map6	0002.CSV	3841.67	0.0183986
CAM206_map6	0002.CSV	3845.53	0.0180881
CAM206_map6	0002.CSV	3849.38	0.016572
CAM206_map6	0002.CSV	3853.24	0.0166048
CAM206_map6	0002.CSV	3857.1	0.0180277
CAM206_map6	0002.CSV	3860.95	0.0173433
CAM206_map6	0002.CSV	3864.81	0.0172875
CAM206_map6	0002.CSV	3868.67	0.0174761
CAM206_map6	0002.CSV	3872.52	0.017965
CAM206_map6	0002.CSV	3876.38	0.0177061
CAM206_map6	0002.CSV	3880.24	0.0173278
CAM206_map6	0002.CSV	3884.1	0.0179411
CAM206_map6	0002.CSV	3887.95	0.0179187
CAM206_map6	0002.CSV	3891.81	0.0177311
CAM206_map6	0002.CSV	3895.67	0.0172417
CAM206_map6	0002.CSV	3899.52	0.016655
CAM206_map6	0002.CSV	3903.38	0.0180014
CAM206_map6	0002.CSV	3907.24	0.0186539
CAM206_map6	0002.CSV	3911.1	0.0178921
CAM206_map6	0002.CSV	3914.95	0.01736
CAM206_map6	0002.CSV	3918.81	0.0176251
CAM206_map6	0002.CSV	3922.67	0.0178632
CAM206_map6	0002.CSV	3926.52	0.0177867
CAM206_map6	0002.CSV	3930.38	0.0177247
CAM206_map6	0002.CSV	3934.24	0.0180733
CAM206_map6	0002.CSV	3938.09	0.0177569
CAM206_map6	0002.CSV	3941.95	0.0175346
CAM206_map6	0002.CSV	3945.81	0.0177651
CAM206_map6	0002.CSV	3949.67	0.0180679
CAM206_map6	0002.CSV	3953.52	0.0180849
CAM206_map6	0002.CSV	3957.38	0.0179057
CAM206_map6	0002.CSV	3961.24	0.0179269
CAM206_map6	0002.CSV	3965.09	0.0179504
CAM206_map6	0002.CSV	3968.95	0.0178622
CAM206_map6	0002.CSV	3972.81	0.0178291
CAM206_map6	0002.CSV	3976.67	0.0178327
CAM206_map6	0002.CSV	3980.52	0.017873
CAM206_map6	0002.CSV	3984.38	0.0179135
CAM206_map6	0002.CSV	3988.24	0.017836
CAM206_map6	0002.CSV	3992.09	0.0178113
CAM206_map6	0002.CSV	3995.95	0.0178657
CAM206_map6	0002.CSV	3999.81	0.0178502
CAM206_map6	0003.CSV	674.992	0.0472789
CAM206_map6	0003.CSV	678.849	0.0492923
CAM206_map6	0003.CSV	682.706	0.0499291
CAM206_map6	0003.CSV	686.563	0.0513381
CAM206_map6	0003.CSV	690.42	0.052861
CAM206_map6	0003.CSV	694.277	0.0609145
CAM206_map6	0003.CSV	698.134	0.0699194
CAM206_map6	0003.CSV	701.991	0.0663019
CAM206_map6	0003.CSV	705.849	0.06269
CAM206_map6	0003.CSV	709.706	0.0774227
CAM206_map6	0003.CSV	713.563	0.079098
CAM206_map6	0003.CSV	717.42	0.057753
CAM206_map6	0003.CSV	721.277	0.0434023
CAM206_map6	0003.CSV	725.134	0.0408261
CAM206_map6	0003.CSV	728.991	0.0398123
CAM206_map6	0003.CSV	732.848	0.0396441
CAM206_map6	0003.CSV	736.705	0.0392537
CAM206_map6	0003.CSV	740.562	0.039925
CAM206_map6	0003.CSV	744.42	0.0400692
CAM206_map6	0003.CSV	748.277	0.0407107
CAM206_map6	0003.CSV	752.134	0.040781
CAM206_map6	0003.CSV	755.991	0.0415858
CAM206_map6	0003.CSV	759.848	0.042164
CAM206_map6	0003.CSV	763.705	0.0434321
CAM206_map6	0003.CSV	767.562	0.0439987
CAM206_map6	0003.CSV	771.419	0.0455345
CAM206_map6	0003.CSV	775.276	0.0471408
CAM206_map6	0003.CSV	779.133	0.0487576
CAM206_map6	0003.CSV	782.99	0.0487144
CAM206_map6	0003.CSV	786.848	0.048972
CAM206_map6	0003.CSV	790.705	0.049494
CAM206_map6	0003.CSV	794.562	0.051382
CAM206_map6	0003.CSV	798.419	0.0530501
CAM206_map6	0003.CSV	802.276	0.0541285
CAM206_map6	0003.CSV	806.133	0.0538798
CAM206_map6	0003.CSV	809.99	0.0544394
CAM206_map6	0003.CSV	813.847	0.0552936
CAM206_map6	0003.CSV	817.704	0.0577264
CAM206_map6	0003.CSV	821.562	0.0609445
CAM206_map6	0003.CSV	825.419	0.0656982
CAM206_map6	0003.CSV	829.276	0.0710047
CAM206_map6	0003.CSV	833.133	0.0789174
CAM206_map6	0003.CSV	836.99	0.0901946
CAM206_map6	0003.CSV	840.847	0.105183
CAM206_map6	0003.CSV	844.704	0.119349
CAM206_map6	0003.CSV	848.561	0.140464
CAM206_map6	0003.CSV	852.418	0.162266
CAM206_map6	0003.CSV	856.275	0.161897
CAM206_map6	0003.CSV	860.132	0.138577
CAM206_map6	0003.CSV	863.99	0.108261
CAM206_map6	0003.CSV	867.847	0.0799526
CAM206_map6	0003.CSV	871.704	0.0605359
CAM206_map6	0003.CSV	875.561	0.0493232
CAM206_map6	0003.CSV	879.418	0.0428223
CAM206_map6	0003.CSV	883.275	0.038127
CAM206_map6	0003.CSV	887.132	0.0356672
CAM206_map6	0003.CSV	890.989	0.0349427
CAM206_map6	0003.CSV	894.846	0.035302
CAM206_map6	0003.CSV	898.703	0.0355067
CAM206_map6	0003.CSV	902.561	0.0362197
CAM206_map6	0003.CSV	906.418	0.0368052
CAM206_map6	0003.CSV	910.275	0.0372711
CAM206_map6	0003.CSV	914.132	0.0372197
CAM206_map6	0003.CSV	917.989	0.0375596
CAM206_map6	0003.CSV	921.846	0.0378346
CAM206_map6	0003.CSV	925.703	0.038455
CAM206_map6	0003.CSV	929.56	0.0387742
CAM206_map6	0003.CSV	933.417	0.0393601
CAM206_map6	0003.CSV	937.274	0.0396109
CAM206_map6	0003.CSV	941.131	0.0400867
CAM206_map6	0003.CSV	944.989	0.0403439
CAM206_map6	0003.CSV	948.846	0.040961
CAM206_map6	0003.CSV	952.703	0.0415398
CAM206_map6	0003.CSV	956.56	0.0423701
CAM206_map6	0003.CSV	960.417	0.0427549
CAM206_map6	0003.CSV	964.274	0.0433187
CAM206_map6	0003.CSV	968.131	0.0438675
CAM206_map6	0003.CSV	971.988	0.0448964
CAM206_map6	0003.CSV	975.845	0.045716
CAM206_map6	0003.CSV	979.702	0.0467649
CAM206_map6	0003.CSV	983.559	0.0475661
CAM206_map6	0003.CSV	987.417	0.0485478
CAM206_map6	0003.CSV	991.274	0.0494105
CAM206_map6	0003.CSV	995.131	0.0506087
CAM206_map6	0003.CSV	998.988	0.0515249
CAM206_map6	0003.CSV	1002.85	0.0525367
CAM206_map6	0003.CSV	1006.7	0.0533597
CAM206_map6	0003.CSV	1010.56	0.0544347
CAM206_map6	0003.CSV	1014.42	0.0551193
CAM206_map6	0003.CSV	1018.27	0.0559455
CAM206_map6	0003.CSV	1022.13	0.0565786
CAM206_map6	0003.CSV	1025.99	0.0576474
CAM206_map6	0003.CSV	1029.85	0.0586094
CAM206_map6	0003.CSV	1033.7	0.059635
CAM206_map6	0003.CSV	1037.56	0.0603527
CAM206_map6	0003.CSV	1041.42	0.0613971
CAM206_map6	0003.CSV	1045.27	0.0622442
CAM206_map6	0003.CSV	1049.13	0.0635384
CAM206_map6	0003.CSV	1052.99	0.0647835
CAM206_map6	0003.CSV	1056.84	0.0665314
CAM206_map6	0003.CSV	1060.7	0.0682398
CAM206_map6	0003.CSV	1064.56	0.0705842
CAM206_map6	0003.CSV	1068.42	0.0730518
CAM206_map6	0003.CSV	1072.27	0.0761653
CAM206_map6	0003.CSV	1076.13	0.0803018
CAM206_map6	0003.CSV	1079.99	0.0864514
CAM206_map6	0003.CSV	1083.84	0.0864782
CAM206_map6	0003.CSV	1087.7	0.0795935
CAM206_map6	0003.CSV	1091.56	0.0752078
CAM206_map6	0003.CSV	1095.41	0.0738992
CAM206_map6	0003.CSV	1099.27	0.0726492
CAM206_map6	0003.CSV	1103.13	0.0717141
CAM206_map6	0003.CSV	1106.99	0.070769
CAM206_map6	0003.CSV	1110.84	0.0701692
CAM206_map6	0003.CSV	1114.7	0.0693214
CAM206_map6	0003.CSV	1118.56	0.0685322
CAM206_map6	0003.CSV	1122.41	0.0676939
CAM206_map6	0003.CSV	1126.27	0.0672047
CAM206_map6	0003.CSV	1130.13	0.066666
CAM206_map6	0003.CSV	1133.99	0.0664476
CAM206_map6	0003.CSV	1137.84	0.0661681
CAM206_map6	0003.CSV	1141.7	0.0661718
CAM206_map6	0003.CSV	1145.56	0.0660199
CAM206_map6	0003.CSV	1149.41	0.0660161
CAM206_map6	0003.CSV	1153.27	0.0658154
CAM206_map6	0003.CSV	1157.13	0.065915
CAM206_map6	0003.CSV	1160.99	0.0661608
CAM206_map6	0003.CSV	1164.84	0.0667203
CAM206_map6	0003.CSV	1168.7	0.0667804
CAM206_map6	0003.CSV	1172.56	0.0666319
CAM206_map6	0003.CSV	1176.41	0.0661258
CAM206_map6	0003.CSV	1180.27	0.0657401
CAM206_map6	0003.CSV	1184.13	0.0650377
CAM206_map6	0003.CSV	1187.99	0.0642964
CAM206_map6	0003.CSV	1191.84	0.0633222
CAM206_map6	0003.CSV	1195.7	0.0626461
CAM206_map6	0003.CSV	1199.56	0.0620455
CAM206_map6	0003.CSV	1203.41	0.0618918
CAM206_map6	0003.CSV	1207.27	0.0616942
CAM206_map6	0003.CSV	1211.13	0.061833
CAM206_map6	0003.CSV	1214.98	0.0619685
CAM206_map6	0003.CSV	1218.84	0.0624681
CAM206_map6	0003.CSV	1222.7	0.0628985
CAM206_map6	0003.CSV	1226.56	0.0635776
CAM206_map6	0003.CSV	1230.41	0.0640584
CAM206_map6	0003.CSV	1234.27	0.064711
CAM206_map6	0003.CSV	1238.13	0.0651589
CAM206_map6	0003.CSV	1241.98	0.0658138
CAM206_map6	0003.CSV	1245.84	0.0662953
CAM206_map6	0003.CSV	1249.7	0.0669128
CAM206_map6	0003.CSV	1253.56	0.0673115
CAM206_map6	0003.CSV	1257.41	0.0678636
CAM206_map6	0003.CSV	1261.27	0.0681988
CAM206_map6	0003.CSV	1265.13	0.0687947
CAM206_map6	0003.CSV	1268.98	0.0694289
CAM206_map6	0003.CSV	1272.84	0.0704029
CAM206_map6	0003.CSV	1276.7	0.0712097
CAM206_map6	0003.CSV	1280.56	0.0721203
CAM206_map6	0003.CSV	1284.41	0.0727973
CAM206_map6	0003.CSV	1288.27	0.0737897
CAM206_map6	0003.CSV	1292.13	0.0746432
CAM206_map6	0003.CSV	1295.98	0.0756727
CAM206_map6	0003.CSV	1299.84	0.0765416
CAM206_map6	0003.CSV	1303.7	0.0776282
CAM206_map6	0003.CSV	1307.56	0.07859
CAM206_map6	0003.CSV	1311.41	0.0798162
CAM206_map6	0003.CSV	1315.27	0.0809702
CAM206_map6	0003.CSV	1319.13	0.0824405
CAM206_map6	0003.CSV	1322.98	0.0836138
CAM206_map6	0003.CSV	1326.84	0.08503
CAM206_map6	0003.CSV	1330.7	0.0865206
CAM206_map6	0003.CSV	1334.56	0.0882982
CAM206_map6	0003.CSV	1338.41	0.0903603
CAM206_map6	0003.CSV	1342.27	0.092983
CAM206_map6	0003.CSV	1346.13	0.0949729
CAM206_map6	0003.CSV	1349.98	0.0974539
CAM206_map6	0003.CSV	1353.84	0.0999132
CAM206_map6	0003.CSV	1357.7	0.102652
CAM206_map6	0003.CSV	1361.56	0.105752
CAM206_map6	0003.CSV	1365.41	0.109636
CAM206_map6	0003.CSV	1369.27	0.112498
CAM206_map6	0003.CSV	1373.13	0.116425
CAM206_map6	0003.CSV	1376.98	0.120892
CAM206_map6	0003.CSV	1380.84	0.12488
CAM206_map6	0003.CSV	1384.7	0.128603
CAM206_map6	0003.CSV	1388.56	0.133741
CAM206_map6	0003.CSV	1392.41	0.137722
CAM206_map6	0003.CSV	1396.27	0.14275
CAM206_map6	0003.CSV	1400.13	0.147408
CAM206_map6	0003.CSV	1403.98	0.151557
CAM206_map6	0003.CSV	1407.84	0.155432
CAM206_map6	0003.CSV	1411.7	0.158815
CAM206_map6	0003.CSV	1415.55	0.16068
CAM206_map6	0003.CSV	1419.41	0.163277
CAM206_map6	0003.CSV	1423.27	0.165314
CAM206_map6	0003.CSV	1427.12	0.168137
CAM206_map6	0003.CSV	1430.98	0.171312
CAM206_map6	0003.CSV	1434.84	0.175987
CAM206_map6	0003.CSV	1438.7	0.181392
CAM206_map6	0003.CSV	1442.55	0.185548
CAM206_map6	0003.CSV	1446.41	0.187461
CAM206_map6	0003.CSV	1450.27	0.187858
CAM206_map6	0003.CSV	1454.12	0.185747
CAM206_map6	0003.CSV	1457.98	0.18324
CAM206_map6	0003.CSV	1461.84	0.180902
CAM206_map6	0003.CSV	1465.7	0.179389
CAM206_map6	0003.CSV	1469.55	0.175701
CAM206_map6	0003.CSV	1473.41	0.168045
CAM206_map6	0003.CSV	1477.27	0.157888
CAM206_map6	0003.CSV	1481.12	0.151368
CAM206_map6	0003.CSV	1484.98	0.145084
CAM206_map6	0003.CSV	1488.84	0.13796
CAM206_map6	0003.CSV	1492.7	0.130642
CAM206_map6	0003.CSV	1496.55	0.125307
CAM206_map6	0003.CSV	1500.41	0.119115
CAM206_map6	0003.CSV	1504.27	0.115214
CAM206_map6	0003.CSV	1508.12	0.107799
CAM206_map6	0003.CSV	1511.98	0.102325
CAM206_map6	0003.CSV	1515.84	0.0980791
CAM206_map6	0003.CSV	1519.7	0.0928349
CAM206_map6	0003.CSV	1523.55	0.0864676
CAM206_map6	0003.CSV	1527.41	0.082402
CAM206_map6	0003.CSV	1531.27	0.0792595
CAM206_map6	0003.CSV	1535.12	0.077293
CAM206_map6	0003.CSV	1538.98	0.0750587
CAM206_map6	0003.CSV	1542.84	0.0703027
CAM206_map6	0003.CSV	1546.7	0.0655042
CAM206_map6	0003.CSV	1550.55	0.0618244
CAM206_map6	0003.CSV	1554.41	0.0582777
CAM206_map6	0003.CSV	1558.27	0.0549501
CAM206_map6	0003.CSV	1562.12	0.0519863
CAM206_map6	0003.CSV	1565.98	0.0506171
CAM206_map6	0003.CSV	1569.84	0.0493861
CAM206_map6	0003.CSV	1573.69	0.0481754
CAM206_map6	0003.CSV	1577.55	0.0454491
CAM206_map6	0003.CSV	1581.41	0.0418519
CAM206_map6	0003.CSV	1585.27	0.0383536
CAM206_map6	0003.CSV	1589.12	0.0357568
CAM206_map6	0003.CSV	1592.98	0.0341522
CAM206_map6	0003.CSV	1596.84	0.0332871
CAM206_map6	0003.CSV	1600.69	0.0326315
CAM206_map6	0003.CSV	1604.55	0.032344
CAM206_map6	0003.CSV	1608.41	0.0320611
CAM206_map6	0003.CSV	1612.27	0.0316714
CAM206_map6	0003.CSV	1616.12	0.0312685
CAM206_map6	0003.CSV	1619.98	0.0311441
CAM206_map6	0003.CSV	1623.84	0.0307688
CAM206_map6	0003.CSV	1627.69	0.0304065
CAM206_map6	0003.CSV	1631.55	0.0296043
CAM206_map6	0003.CSV	1635.41	0.0294736
CAM206_map6	0003.CSV	1639.27	0.0295461
CAM206_map6	0003.CSV	1643.12	0.0289936
CAM206_map6	0003.CSV	1646.98	0.0286884
CAM206_map6	0003.CSV	1650.84	0.0287973
CAM206_map6	0003.CSV	1654.69	0.0291571
CAM206_map6	0003.CSV	1658.55	0.0288179
CAM206_map6	0003.CSV	1662.41	0.0282481
CAM206_map6	0003.CSV	1666.27	0.0279067
CAM206_map6	0003.CSV	1670.12	0.0277357
CAM206_map6	0003.CSV	1673.98	0.0279089
CAM206_map6	0003.CSV	1677.84	0.0273854
CAM206_map6	0003.CSV	1681.69	0.027028
CAM206_map6	0003.CSV	1685.55	0.0272816
CAM206_map6	0003.CSV	1689.41	0.0270896
CAM206_map6	0003.CSV	1693.27	0.026265
CAM206_map6	0003.CSV	1697.12	0.0261117
CAM206_map6	0003.CSV	1700.98	0.026587
CAM206_map6	0003.CSV	1704.84	0.0266332
CAM206_map6	0003.CSV	1708.69	0.0263715
CAM206_map6	0003.CSV	1712.55	0.0261105
CAM206_map6	0003.CSV	1716.41	0.0265438
CAM206_map6	0003.CSV	1720.27	0.0270953
CAM206_map6	0003.CSV	1724.12	0.0268198
[truncated: 28,206 more rows]

## Sheet: CAM206_map7
Map	Select spectrum number	Wavenumbers	Absorbance
CAM206_map7	0001.CSV	674.992	0.0407912
CAM206_map7	0001.CSV	678.849	0.0398369
CAM206_map7	0001.CSV	682.706	0.0408338
CAM206_map7	0001.CSV	686.563	0.0418363
CAM206_map7	0001.CSV	690.42	0.0445969
CAM206_map7	0001.CSV	694.277	0.0508689
CAM206_map7	0001.CSV	698.134	0.0594689
CAM206_map7	0001.CSV	701.991	0.0547658
CAM206_map7	0001.CSV	705.849	0.051845
CAM206_map7	0001.CSV	709.706	0.0658083
CAM206_map7	0001.CSV	713.563	0.0684092
CAM206_map7	0001.CSV	717.42	0.0484157
CAM206_map7	0001.CSV	721.277	0.0367638
CAM206_map7	0001.CSV	725.134	0.0346321
CAM206_map7	0001.CSV	728.991	0.0344695
CAM206_map7	0001.CSV	732.848	0.0335802
CAM206_map7	0001.CSV	736.705	0.0337428
CAM206_map7	0001.CSV	740.562	0.0337447
CAM206_map7	0001.CSV	744.42	0.0346543
CAM206_map7	0001.CSV	748.277	0.0349779
CAM206_map7	0001.CSV	752.134	0.0358817
CAM206_map7	0001.CSV	755.991	0.0364102
CAM206_map7	0001.CSV	759.848	0.0373369
CAM206_map7	0001.CSV	763.705	0.0377507
CAM206_map7	0001.CSV	767.562	0.0387786
CAM206_map7	0001.CSV	771.419	0.0390559
CAM206_map7	0001.CSV	775.276	0.0400346
CAM206_map7	0001.CSV	779.133	0.0405407
CAM206_map7	0001.CSV	782.99	0.0412232
CAM206_map7	0001.CSV	786.848	0.0414064
CAM206_map7	0001.CSV	790.705	0.042412
CAM206_map7	0001.CSV	794.562	0.0433276
CAM206_map7	0001.CSV	798.419	0.0447071
CAM206_map7	0001.CSV	802.276	0.0451343
CAM206_map7	0001.CSV	806.133	0.0459207
CAM206_map7	0001.CSV	809.99	0.0465283
CAM206_map7	0001.CSV	813.847	0.047788
CAM206_map7	0001.CSV	817.704	0.0496538
CAM206_map7	0001.CSV	821.562	0.0529232
CAM206_map7	0001.CSV	825.419	0.0563657
CAM206_map7	0001.CSV	829.276	0.061019
CAM206_map7	0001.CSV	833.133	0.066654
CAM206_map7	0001.CSV	836.99	0.0756859
CAM206_map7	0001.CSV	840.847	0.0881059
CAM206_map7	0001.CSV	844.704	0.10148
CAM206_map7	0001.CSV	848.561	0.122905
CAM206_map7	0001.CSV	852.418	0.15021
CAM206_map7	0001.CSV	856.275	0.155508
CAM206_map7	0001.CSV	860.132	0.136056
CAM206_map7	0001.CSV	863.99	0.107448
CAM206_map7	0001.CSV	867.847	0.0796067
CAM206_map7	0001.CSV	871.704	0.0582033
CAM206_map7	0001.CSV	875.561	0.0453686
CAM206_map7	0001.CSV	879.418	0.0381465
CAM206_map7	0001.CSV	883.275	0.0339349
CAM206_map7	0001.CSV	887.132	0.0316502
CAM206_map7	0001.CSV	890.989	0.0310016
CAM206_map7	0001.CSV	894.846	0.031086
CAM206_map7	0001.CSV	898.703	0.031683
CAM206_map7	0001.CSV	902.561	0.0322986
CAM206_map7	0001.CSV	906.418	0.0328714
CAM206_map7	0001.CSV	910.275	0.033069
CAM206_map7	0001.CSV	914.132	0.0330808
CAM206_map7	0001.CSV	917.989	0.033424
CAM206_map7	0001.CSV	921.846	0.0338098
CAM206_map7	0001.CSV	925.703	0.0342844
CAM206_map7	0001.CSV	929.56	0.0347259
CAM206_map7	0001.CSV	933.417	0.0351657
CAM206_map7	0001.CSV	937.274	0.0353256
CAM206_map7	0001.CSV	941.131	0.0355682
CAM206_map7	0001.CSV	944.989	0.035849
CAM206_map7	0001.CSV	948.846	0.0364716
CAM206_map7	0001.CSV	952.703	0.0370688
CAM206_map7	0001.CSV	956.56	0.037626
CAM206_map7	0001.CSV	960.417	0.0377773
CAM206_map7	0001.CSV	964.274	0.038238
CAM206_map7	0001.CSV	968.131	0.0387869
CAM206_map7	0001.CSV	971.988	0.0395991
CAM206_map7	0001.CSV	975.845	0.0401042
CAM206_map7	0001.CSV	979.702	0.0408758
CAM206_map7	0001.CSV	983.559	0.0414552
CAM206_map7	0001.CSV	987.417	0.0422482
CAM206_map7	0001.CSV	991.274	0.0427974
CAM206_map7	0001.CSV	995.131	0.0436926
CAM206_map7	0001.CSV	998.988	0.0442666
CAM206_map7	0001.CSV	1002.85	0.045162
CAM206_map7	0001.CSV	1006.7	0.0457741
CAM206_map7	0001.CSV	1010.56	0.0466721
CAM206_map7	0001.CSV	1014.42	0.0470871
CAM206_map7	0001.CSV	1018.27	0.0478752
CAM206_map7	0001.CSV	1022.13	0.0483114
CAM206_map7	0001.CSV	1025.99	0.0491305
CAM206_map7	0001.CSV	1029.85	0.0495318
CAM206_map7	0001.CSV	1033.7	0.0504001
CAM206_map7	0001.CSV	1037.56	0.0507856
CAM206_map7	0001.CSV	1041.42	0.0516039
CAM206_map7	0001.CSV	1045.27	0.0518244
CAM206_map7	0001.CSV	1049.13	0.0526176
CAM206_map7	0001.CSV	1052.99	0.0530388
CAM206_map7	0001.CSV	1056.84	0.0542845
CAM206_map7	0001.CSV	1060.7	0.0551589
CAM206_map7	0001.CSV	1064.56	0.056984
CAM206_map7	0001.CSV	1068.42	0.0588103
CAM206_map7	0001.CSV	1072.27	0.0618823
CAM206_map7	0001.CSV	1076.13	0.0658522
CAM206_map7	0001.CSV	1079.99	0.0726595
CAM206_map7	0001.CSV	1083.84	0.0724989
CAM206_map7	0001.CSV	1087.7	0.0650672
CAM206_map7	0001.CSV	1091.56	0.0606287
CAM206_map7	0001.CSV	1095.41	0.0602957
CAM206_map7	0001.CSV	1099.27	0.059806
CAM206_map7	0001.CSV	1103.13	0.060099
CAM206_map7	0001.CSV	1106.99	0.059863
CAM206_map7	0001.CSV	1110.84	0.0601217
CAM206_map7	0001.CSV	1114.7	0.0594614
CAM206_map7	0001.CSV	1118.56	0.0592472
CAM206_map7	0001.CSV	1122.41	0.0585369
CAM206_map7	0001.CSV	1126.27	0.0586539
CAM206_map7	0001.CSV	1130.13	0.0582353
CAM206_map7	0001.CSV	1133.99	0.0585896
CAM206_map7	0001.CSV	1137.84	0.0584104
CAM206_map7	0001.CSV	1141.7	0.0589427
CAM206_map7	0001.CSV	1145.56	0.058873
CAM206_map7	0001.CSV	1149.41	0.0594308
CAM206_map7	0001.CSV	1153.27	0.0592758
CAM206_map7	0001.CSV	1157.13	0.0598002
CAM206_map7	0001.CSV	1160.99	0.0598164
CAM206_map7	0001.CSV	1164.84	0.0606103
CAM206_map7	0001.CSV	1168.7	0.0605428
CAM206_map7	0001.CSV	1172.56	0.0609584
CAM206_map7	0001.CSV	1176.41	0.0606567
CAM206_map7	0001.CSV	1180.27	0.0609323
CAM206_map7	0001.CSV	1184.13	0.0603354
CAM206_map7	0001.CSV	1187.99	0.0603012
CAM206_map7	0001.CSV	1191.84	0.0595332
CAM206_map7	0001.CSV	1195.7	0.0595069
CAM206_map7	0001.CSV	1199.56	0.0589122
CAM206_map7	0001.CSV	1203.41	0.0591639
CAM206_map7	0001.CSV	1207.27	0.0588833
CAM206_map7	0001.CSV	1211.13	0.0594949
CAM206_map7	0001.CSV	1214.98	0.0595612
CAM206_map7	0001.CSV	1218.84	0.0603888
CAM206_map7	0001.CSV	1222.7	0.0605287
CAM206_map7	0001.CSV	1226.56	0.0614916
CAM206_map7	0001.CSV	1230.41	0.0618735
CAM206_map7	0001.CSV	1234.27	0.0629407
CAM206_map7	0001.CSV	1238.13	0.0631889
CAM206_map7	0001.CSV	1241.98	0.064123
CAM206_map7	0001.CSV	1245.84	0.0644209
CAM206_map7	0001.CSV	1249.7	0.0653926
CAM206_map7	0001.CSV	1253.56	0.0655657
CAM206_map7	0001.CSV	1257.41	0.0664115
CAM206_map7	0001.CSV	1261.27	0.0665118
CAM206_map7	0001.CSV	1265.13	0.0675044
CAM206_map7	0001.CSV	1268.98	0.0679857
CAM206_map7	0001.CSV	1272.84	0.0693133
CAM206_map7	0001.CSV	1276.7	0.0698751
CAM206_map7	0001.CSV	1280.56	0.0710678
CAM206_map7	0001.CSV	1284.41	0.0715643
CAM206_map7	0001.CSV	1288.27	0.0728742
CAM206_map7	0001.CSV	1292.13	0.073494
CAM206_map7	0001.CSV	1295.98	0.0748995
CAM206_map7	0001.CSV	1299.84	0.0756847
CAM206_map7	0001.CSV	1303.7	0.0771176
CAM206_map7	0001.CSV	1307.56	0.0778736
CAM206_map7	0001.CSV	1311.41	0.0794732
CAM206_map7	0001.CSV	1315.27	0.080531
CAM206_map7	0001.CSV	1319.13	0.0825195
CAM206_map7	0001.CSV	1322.98	0.0836152
CAM206_map7	0001.CSV	1326.84	0.0854931
CAM206_map7	0001.CSV	1330.7	0.0869518
CAM206_map7	0001.CSV	1334.56	0.0891982
CAM206_map7	0001.CSV	1338.41	0.0912926
CAM206_map7	0001.CSV	1342.27	0.0946827
CAM206_map7	0001.CSV	1346.13	0.0967518
CAM206_map7	0001.CSV	1349.98	0.099884
CAM206_map7	0001.CSV	1353.84	0.102498
CAM206_map7	0001.CSV	1357.7	0.105969
CAM206_map7	0001.CSV	1361.56	0.109262
CAM206_map7	0001.CSV	1365.41	0.113986
CAM206_map7	0001.CSV	1369.27	0.117145
CAM206_map7	0001.CSV	1373.13	0.122099
CAM206_map7	0001.CSV	1376.98	0.127138
CAM206_map7	0001.CSV	1380.84	0.132233
CAM206_map7	0001.CSV	1384.7	0.13648
CAM206_map7	0001.CSV	1388.56	0.142814
CAM206_map7	0001.CSV	1392.41	0.147181
CAM206_map7	0001.CSV	1396.27	0.153519
CAM206_map7	0001.CSV	1400.13	0.159211
CAM206_map7	0001.CSV	1403.98	0.1649
CAM206_map7	0001.CSV	1407.84	0.169756
CAM206_map7	0001.CSV	1411.7	0.174817
CAM206_map7	0001.CSV	1415.55	0.177714
CAM206_map7	0001.CSV	1419.41	0.182218
CAM206_map7	0001.CSV	1423.27	0.185036
CAM206_map7	0001.CSV	1427.12	0.18907
CAM206_map7	0001.CSV	1430.98	0.192598
CAM206_map7	0001.CSV	1434.84	0.197682
CAM206_map7	0001.CSV	1438.7	0.201854
CAM206_map7	0001.CSV	1442.55	0.20518
CAM206_map7	0001.CSV	1446.41	0.205089
CAM206_map7	0001.CSV	1450.27	0.20399
CAM206_map7	0001.CSV	1454.12	0.200307
CAM206_map7	0001.CSV	1457.98	0.196669
CAM206_map7	0001.CSV	1461.84	0.19272
CAM206_map7	0001.CSV	1465.7	0.190255
CAM206_map7	0001.CSV	1469.55	0.184686
CAM206_map7	0001.CSV	1473.41	0.174993
CAM206_map7	0001.CSV	1477.27	0.162504
CAM206_map7	0001.CSV	1481.12	0.155501
CAM206_map7	0001.CSV	1484.98	0.148426
CAM206_map7	0001.CSV	1488.84	0.140887
CAM206_map7	0001.CSV	1492.7	0.132629
CAM206_map7	0001.CSV	1496.55	0.12712
CAM206_map7	0001.CSV	1500.41	0.120179
CAM206_map7	0001.CSV	1504.27	0.116306
[truncated: 81,769 more rows]

## Sheet: CAM206_map8
Map	Select spectrum number	Wavenumbers	Absorbance
[truncated: 52,643 more rows]
