# Supplementary material for: Thermo-microstratigraphy of shells reveals invisible fire use and possible cooking in the archaeological record
Source: Frontiers journal article supplement (doi:10.3389/feart.2022.869487), 2022-09-01
Supplement: Table_9.XLSX [file Table_9.XLSX]

## Sheet: CAM210_map1
Map	Select spectrum number	Wavenumbers	Absorbance
CAM210_map1	0001.CSV	674.992	0.0367768
CAM210_map1	0001.CSV	678.849	0.0362944
CAM210_map1	0001.CSV	682.706	0.0362129
CAM210_map1	0001.CSV	686.563	0.036824
CAM210_map1	0001.CSV	690.42	0.0398842
CAM210_map1	0001.CSV	694.277	0.0469065
CAM210_map1	0001.CSV	698.134	0.0533647
CAM210_map1	0001.CSV	701.991	0.0541835
CAM210_map1	0001.CSV	705.849	0.0567822
CAM210_map1	0001.CSV	709.706	0.0663409
CAM210_map1	0001.CSV	713.563	0.068704
CAM210_map1	0001.CSV	717.42	0.0568461
CAM210_map1	0001.CSV	721.277	0.0438067
CAM210_map1	0001.CSV	725.134	0.0367398
CAM210_map1	0001.CSV	728.991	0.032004
CAM210_map1	0001.CSV	732.848	0.0280428
CAM210_map1	0001.CSV	736.705	0.0257956
CAM210_map1	0001.CSV	740.562	0.025199
CAM210_map1	0001.CSV	744.42	0.025337
CAM210_map1	0001.CSV	748.277	0.025965
CAM210_map1	0001.CSV	752.134	0.0269073
CAM210_map1	0001.CSV	755.991	0.0279263
CAM210_map1	0001.CSV	759.848	0.0290099
CAM210_map1	0001.CSV	763.705	0.0301977
CAM210_map1	0001.CSV	767.562	0.0312337
CAM210_map1	0001.CSV	771.419	0.0321178
CAM210_map1	0001.CSV	775.276	0.0330803
CAM210_map1	0001.CSV	779.133	0.03414
CAM210_map1	0001.CSV	782.99	0.0348827
CAM210_map1	0001.CSV	786.848	0.0353627
CAM210_map1	0001.CSV	790.705	0.0362263
CAM210_map1	0001.CSV	794.562	0.0377941
CAM210_map1	0001.CSV	798.419	0.0396689
CAM210_map1	0001.CSV	802.276	0.0414321
CAM210_map1	0001.CSV	806.133	0.043232
CAM210_map1	0001.CSV	809.99	0.0456109
CAM210_map1	0001.CSV	813.847	0.0488622
CAM210_map1	0001.CSV	817.704	0.0530426
CAM210_map1	0001.CSV	821.562	0.058333
CAM210_map1	0001.CSV	825.419	0.0650026
CAM210_map1	0001.CSV	829.276	0.07343
CAM210_map1	0001.CSV	833.133	0.0844348
CAM210_map1	0001.CSV	836.99	0.0985627
CAM210_map1	0001.CSV	840.847	0.11443
CAM210_map1	0001.CSV	844.704	0.131339
CAM210_map1	0001.CSV	848.561	0.151096
CAM210_map1	0001.CSV	852.418	0.169374
CAM210_map1	0001.CSV	856.275	0.173407
CAM210_map1	0001.CSV	860.132	0.156333
CAM210_map1	0001.CSV	863.99	0.124882
CAM210_map1	0001.CSV	867.847	0.0914784
CAM210_map1	0001.CSV	871.704	0.0651537
CAM210_map1	0001.CSV	875.561	0.0482221
CAM210_map1	0001.CSV	879.418	0.0380397
CAM210_map1	0001.CSV	883.275	0.0313336
CAM210_map1	0001.CSV	887.132	0.0268165
CAM210_map1	0001.CSV	890.989	0.0243911
CAM210_map1	0001.CSV	894.846	0.0235681
CAM210_map1	0001.CSV	898.703	0.0236388
CAM210_map1	0001.CSV	902.561	0.0241333
CAM210_map1	0001.CSV	906.418	0.0246492
CAM210_map1	0001.CSV	910.275	0.0248863
CAM210_map1	0001.CSV	914.132	0.0250029
CAM210_map1	0001.CSV	917.989	0.0253102
CAM210_map1	0001.CSV	921.846	0.0258762
CAM210_map1	0001.CSV	925.703	0.0266738
CAM210_map1	0001.CSV	929.56	0.027587
CAM210_map1	0001.CSV	933.417	0.028339
CAM210_map1	0001.CSV	937.274	0.0287323
CAM210_map1	0001.CSV	941.131	0.0288489
CAM210_map1	0001.CSV	944.989	0.0290399
CAM210_map1	0001.CSV	948.846	0.0296674
CAM210_map1	0001.CSV	952.703	0.03068
CAM210_map1	0001.CSV	956.56	0.0315645
CAM210_map1	0001.CSV	960.417	0.0319025
CAM210_map1	0001.CSV	964.274	0.0319178
CAM210_map1	0001.CSV	968.131	0.0320964
CAM210_map1	0001.CSV	971.988	0.0325829
CAM210_map1	0001.CSV	975.845	0.0332113
CAM210_map1	0001.CSV	979.702	0.0338679
CAM210_map1	0001.CSV	983.559	0.0345283
CAM210_map1	0001.CSV	987.417	0.0352149
CAM210_map1	0001.CSV	991.274	0.0359702
CAM210_map1	0001.CSV	995.131	0.0368171
CAM210_map1	0001.CSV	998.988	0.0377119
CAM210_map1	0001.CSV	1002.85	0.0386349
CAM210_map1	0001.CSV	1006.7	0.0395639
CAM210_map1	0001.CSV	1010.56	0.040431
CAM210_map1	0001.CSV	1014.42	0.0411163
CAM210_map1	0001.CSV	1018.27	0.0416599
CAM210_map1	0001.CSV	1022.13	0.042203
CAM210_map1	0001.CSV	1025.99	0.0428354
CAM210_map1	0001.CSV	1029.85	0.0435897
CAM210_map1	0001.CSV	1033.7	0.0444554
CAM210_map1	0001.CSV	1037.56	0.0453344
CAM210_map1	0001.CSV	1041.42	0.0461906
CAM210_map1	0001.CSV	1045.27	0.0470542
CAM210_map1	0001.CSV	1049.13	0.0479796
CAM210_map1	0001.CSV	1052.99	0.0490373
CAM210_map1	0001.CSV	1056.84	0.0503222
CAM210_map1	0001.CSV	1060.7	0.0518458
CAM210_map1	0001.CSV	1064.56	0.0536399
CAM210_map1	0001.CSV	1068.42	0.0559176
CAM210_map1	0001.CSV	1072.27	0.059366
CAM210_map1	0001.CSV	1076.13	0.0651512
CAM210_map1	0001.CSV	1079.99	0.0716035
CAM210_map1	0001.CSV	1083.84	0.0724842
CAM210_map1	0001.CSV	1087.7	0.0665753
CAM210_map1	0001.CSV	1091.56	0.0607502
CAM210_map1	0001.CSV	1095.41	0.0586369
CAM210_map1	0001.CSV	1099.27	0.0584844
CAM210_map1	0001.CSV	1103.13	0.0591346
CAM210_map1	0001.CSV	1106.99	0.0606803
CAM210_map1	0001.CSV	1110.84	0.0621004
CAM210_map1	0001.CSV	1114.7	0.0615956
CAM210_map1	0001.CSV	1118.56	0.0593052
CAM210_map1	0001.CSV	1122.41	0.0571369
CAM210_map1	0001.CSV	1126.27	0.0560674
CAM210_map1	0001.CSV	1130.13	0.0557147
CAM210_map1	0001.CSV	1133.99	0.0556447
CAM210_map1	0001.CSV	1137.84	0.055773
CAM210_map1	0001.CSV	1141.7	0.0560349
CAM210_map1	0001.CSV	1145.56	0.0563022
CAM210_map1	0001.CSV	1149.41	0.0565421
CAM210_map1	0001.CSV	1153.27	0.0568663
CAM210_map1	0001.CSV	1157.13	0.057376
CAM210_map1	0001.CSV	1160.99	0.0580537
CAM210_map1	0001.CSV	1164.84	0.058738
CAM210_map1	0001.CSV	1168.7	0.0592222
CAM210_map1	0001.CSV	1172.56	0.0594077
CAM210_map1	0001.CSV	1176.41	0.0593303
CAM210_map1	0001.CSV	1180.27	0.0591186
CAM210_map1	0001.CSV	1184.13	0.0589831
CAM210_map1	0001.CSV	1187.99	0.0589608
CAM210_map1	0001.CSV	1191.84	0.0587963
CAM210_map1	0001.CSV	1195.7	0.0583813
CAM210_map1	0001.CSV	1199.56	0.0580123
CAM210_map1	0001.CSV	1203.41	0.0580218
CAM210_map1	0001.CSV	1207.27	0.0584965
CAM210_map1	0001.CSV	1211.13	0.0592103
CAM210_map1	0001.CSV	1214.98	0.0598139
CAM210_map1	0001.CSV	1218.84	0.0602541
CAM210_map1	0001.CSV	1222.7	0.0607909
CAM210_map1	0001.CSV	1226.56	0.0616525
CAM210_map1	0001.CSV	1230.41	0.0628239
CAM210_map1	0001.CSV	1234.27	0.0640011
CAM210_map1	0001.CSV	1238.13	0.0648991
CAM210_map1	0001.CSV	1241.98	0.065593
CAM210_map1	0001.CSV	1245.84	0.0663052
CAM210_map1	0001.CSV	1249.7	0.0671454
CAM210_map1	0001.CSV	1253.56	0.0681212
CAM210_map1	0001.CSV	1257.41	0.0691014
CAM210_map1	0001.CSV	1261.27	0.0699646
CAM210_map1	0001.CSV	1265.13	0.0708952
CAM210_map1	0001.CSV	1268.98	0.0722201
CAM210_map1	0001.CSV	1272.84	0.0739465
CAM210_map1	0001.CSV	1276.7	0.0756915
CAM210_map1	0001.CSV	1280.56	0.0772322
CAM210_map1	0001.CSV	1284.41	0.078803
CAM210_map1	0001.CSV	1288.27	0.0806084
CAM210_map1	0001.CSV	1292.13	0.0824053
CAM210_map1	0001.CSV	1295.98	0.083907
CAM210_map1	0001.CSV	1299.84	0.0850748
CAM210_map1	0001.CSV	1303.7	0.0860797
CAM210_map1	0001.CSV	1307.56	0.0872675
CAM210_map1	0001.CSV	1311.41	0.0889388
CAM210_map1	0001.CSV	1315.27	0.0910627
CAM210_map1	0001.CSV	1319.13	0.0931118
CAM210_map1	0001.CSV	1322.98	0.0947374
CAM210_map1	0001.CSV	1326.84	0.0964545
CAM210_map1	0001.CSV	1330.7	0.0986382
CAM210_map1	0001.CSV	1334.56	0.101118
CAM210_map1	0001.CSV	1338.41	0.103999
CAM210_map1	0001.CSV	1342.27	0.107277
CAM210_map1	0001.CSV	1346.13	0.110639
CAM210_map1	0001.CSV	1349.98	0.114238
CAM210_map1	0001.CSV	1353.84	0.118049
CAM210_map1	0001.CSV	1357.7	0.122154
CAM210_map1	0001.CSV	1361.56	0.127299
CAM210_map1	0001.CSV	1365.41	0.133257
CAM210_map1	0001.CSV	1369.27	0.139264
CAM210_map1	0001.CSV	1373.13	0.146373
CAM210_map1	0001.CSV	1376.98	0.154122
CAM210_map1	0001.CSV	1380.84	0.160257
CAM210_map1	0001.CSV	1384.7	0.165804
CAM210_map1	0001.CSV	1388.56	0.172443
CAM210_map1	0001.CSV	1392.41	0.179925
CAM210_map1	0001.CSV	1396.27	0.188867
CAM210_map1	0001.CSV	1400.13	0.199016
CAM210_map1	0001.CSV	1403.98	0.209039
CAM210_map1	0001.CSV	1407.84	0.219209
CAM210_map1	0001.CSV	1411.7	0.228517
CAM210_map1	0001.CSV	1415.55	0.235967
CAM210_map1	0001.CSV	1419.41	0.240875
CAM210_map1	0001.CSV	1423.27	0.243149
CAM210_map1	0001.CSV	1427.12	0.245814
CAM210_map1	0001.CSV	1430.98	0.25029
CAM210_map1	0001.CSV	1434.84	0.254625
CAM210_map1	0001.CSV	1438.7	0.257207
CAM210_map1	0001.CSV	1442.55	0.259399
CAM210_map1	0001.CSV	1446.41	0.262312
CAM210_map1	0001.CSV	1450.27	0.265431
CAM210_map1	0001.CSV	1454.12	0.268616
CAM210_map1	0001.CSV	1457.98	0.273636
CAM210_map1	0001.CSV	1461.84	0.27869
CAM210_map1	0001.CSV	1465.7	0.279775
CAM210_map1	0001.CSV	1469.55	0.271986
CAM210_map1	0001.CSV	1473.41	0.246565
CAM210_map1	0001.CSV	1477.27	0.215665
CAM210_map1	0001.CSV	1481.12	0.195772
CAM210_map1	0001.CSV	1484.98	0.181207
CAM210_map1	0001.CSV	1488.84	0.166925
CAM210_map1	0001.CSV	1492.7	0.155133
CAM210_map1	0001.CSV	1496.55	0.14713
CAM210_map1	0001.CSV	1500.41	0.140939
CAM210_map1	0001.CSV	1504.27	0.135408
CAM210_map1	0001.CSV	1508.12	0.127982
CAM210_map1	0001.CSV	1511.98	0.121785
CAM210_map1	0001.CSV	1515.84	0.118216
CAM210_map1	0001.CSV	1519.7	0.11468
CAM210_map1	0001.CSV	1523.55	0.113789
CAM210_map1	0001.CSV	1527.41	0.1189
CAM210_map1	0001.CSV	1531.27	0.129728
CAM210_map1	0001.CSV	1535.12	0.144234
CAM210_map1	0001.CSV	1538.98	0.151194
CAM210_map1	0001.CSV	1542.84	0.132515
CAM210_map1	0001.CSV	1546.7	0.111257
CAM210_map1	0001.CSV	1550.55	0.0987134
CAM210_map1	0001.CSV	1554.41	0.089299
CAM210_map1	0001.CSV	1558.27	0.083167
CAM210_map1	0001.CSV	1562.12	0.0843054
CAM210_map1	0001.CSV	1565.98	0.0913959
CAM210_map1	0001.CSV	1569.84	0.102659
CAM210_map1	0001.CSV	1573.69	0.110391
CAM210_map1	0001.CSV	1577.55	0.103163
CAM210_map1	0001.CSV	1581.41	0.0852602
CAM210_map1	0001.CSV	1585.27	0.0667976
CAM210_map1	0001.CSV	1589.12	0.0517408
CAM210_map1	0001.CSV	1592.98	0.04166
CAM210_map1	0001.CSV	1596.84	0.0358657
CAM210_map1	0001.CSV	1600.69	0.0327363
CAM210_map1	0001.CSV	1604.55	0.0311498
CAM210_map1	0001.CSV	1608.41	0.0305959
CAM210_map1	0001.CSV	1612.27	0.0306154
CAM210_map1	0001.CSV	1616.12	0.0307584
CAM210_map1	0001.CSV	1619.98	0.030634
CAM210_map1	0001.CSV	1623.84	0.0299777
CAM210_map1	0001.CSV	1627.69	0.0289197
CAM210_map1	0001.CSV	1631.55	0.0275748
CAM210_map1	0001.CSV	1635.41	0.0257466
CAM210_map1	0001.CSV	1639.27	0.0239862
CAM210_map1	0001.CSV	1643.12	0.0228118
CAM210_map1	0001.CSV	1646.98	0.0218123
CAM210_map1	0001.CSV	1650.84	0.0209622
CAM210_map1	0001.CSV	1654.69	0.0204671
CAM210_map1	0001.CSV	1658.55	0.0200255
CAM210_map1	0001.CSV	1662.41	0.0195002
CAM210_map1	0001.CSV	1666.27	0.0189573
CAM210_map1	0001.CSV	1670.12	0.018458
CAM210_map1	0001.CSV	1673.98	0.0180045
CAM210_map1	0001.CSV	1677.84	0.0174922
CAM210_map1	0001.CSV	1681.69	0.0169828
CAM210_map1	0001.CSV	1685.55	0.0166718
CAM210_map1	0001.CSV	1689.41	0.0163266
CAM210_map1	0001.CSV	1693.27	0.0157896
CAM210_map1	0001.CSV	1697.12	0.0153167
CAM210_map1	0001.CSV	1700.98	0.0151275
CAM210_map1	0001.CSV	1704.84	0.0149045
CAM210_map1	0001.CSV	1708.69	0.0145447
CAM210_map1	0001.CSV	1712.55	0.0142084
CAM210_map1	0001.CSV	1716.41	0.014218
CAM210_map1	0001.CSV	1720.27	0.0143587
CAM210_map1	0001.CSV	1724.12	0.014147
CAM210_map1	0001.CSV	1727.98	0.0138653
CAM210_map1	0001.CSV	1731.84	0.0139489
CAM210_map1	0001.CSV	1735.69	0.0144265
CAM210_map1	0001.CSV	1739.55	0.0144427
CAM210_map1	0001.CSV	1743.41	0.0138145
CAM210_map1	0001.CSV	1747.27	0.0128814
CAM210_map1	0001.CSV	1751.12	0.011933
CAM210_map1	0001.CSV	1754.98	0.0111672
CAM210_map1	0001.CSV	1758.84	0.0106447
CAM210_map1	0001.CSV	1762.69	0.0103895
CAM210_map1	0001.CSV	1766.55	0.0103193
CAM210_map1	0001.CSV	1770.41	0.0108325
CAM210_map1	0001.CSV	1774.26	0.0122258
CAM210_map1	0001.CSV	1778.12	0.0137077
CAM210_map1	0001.CSV	1781.98	0.0148816
CAM210_map1	0001.CSV	1785.84	0.0153968
CAM210_map1	0001.CSV	1789.69	0.0148999
CAM210_map1	0001.CSV	1793.55	0.013585
CAM210_map1	0001.CSV	1797.41	0.0120693
CAM210_map1	0001.CSV	1801.26	0.0107712
CAM210_map1	0001.CSV	1805.12	0.00981226
CAM210_map1	0001.CSV	1808.98	0.00924898
CAM210_map1	0001.CSV	1812.84	0.00896858
CAM210_map1	0001.CSV	1816.69	0.00877534
CAM210_map1	0001.CSV	1820.55	0.00860879
CAM210_map1	0001.CSV	1824.41	0.0085559
CAM210_map1	0001.CSV	1828.26	0.0086624
CAM210_map1	0001.CSV	1832.12	0.00876652
CAM210_map1	0001.CSV	1835.98	0.0087032
CAM210_map1	0001.CSV	1839.84	0.00860386
CAM210_map1	0001.CSV	1843.69	0.00867937
CAM210_map1	0001.CSV	1847.55	0.00886705
CAM210_map1	0001.CSV	1851.41	0.00890185
CAM210_map1	0001.CSV	1855.26	0.00885964
CAM210_map1	0001.CSV	1859.12	0.00884334
CAM210_map1	0001.CSV	1862.98	0.00884084
CAM210_map1	0001.CSV	1866.84	0.00894944
CAM210_map1	0001.CSV	1870.69	0.0091683
CAM210_map1	0001.CSV	1874.55	0.00924025
CAM210_map1	0001.CSV	1878.41	0.00920948
CAM210_map1	0001.CSV	1882.26	0.00920579
CAM210_map1	0001.CSV	1886.12	0.00925054
CAM210_map1	0001.CSV	1889.98	0.00935118
CAM210_map1	0001.CSV	1893.83	0.00944788
CAM210_map1	0001.CSV	1897.69	0.00948926
CAM210_map1	0001.CSV	1901.55	0.00949976
CAM210_map1	0001.CSV	1905.41	0.00953187
CAM210_map1	0001.CSV	1909.26	0.00961204
CAM210_map1	0001.CSV	1913.12	0.00968014
CAM210_map1	0001.CSV	1916.98	0.00970979
CAM210_map1	0001.CSV	1920.83	0.00976465
CAM210_map1	0001.CSV	1924.69	0.00983398
CAM210_map1	0001.CSV	1928.55	0.00986863
CAM210_map1	0001.CSV	1932.4	0.00989015
CAM210_map1	0001.CSV	1936.26	0.00991978
CAM210_map1	0001.CSV	1940.12	0.00997453
CAM210_map1	0001.CSV	1943.98	0.0100733
CAM210_map1	0001.CSV	1947.83	0.0101416
CAM210_map1	0001.CSV	1951.69	0.0101632
CAM210_map1	0001.CSV	1955.55	0.0102063
CAM210_map1	0001.CSV	1959.4	0.010253
CAM210_map1	0001.CSV	1963.26	0.0102806
CAM210_map1	0001.CSV	1967.12	0.0103333
CAM210_map1	0001.CSV	1970.98	0.0103967
CAM210_map1	0001.CSV	1974.83	0.0104249
CAM210_map1	0001.CSV	1978.69	0.0104436
CAM210_map1	0001.CSV	1982.55	0.010473
CAM210_map1	0001.CSV	1986.4	0.0104928
CAM210_map1	0001.CSV	1990.26	0.0105119
CAM210_map1	0001.CSV	1994.12	0.0105432
CAM210_map1	0001.CSV	1997.98	0.0105748
CAM210_map1	0001.CSV	2001.83	0.0106297
CAM210_map1	0001.CSV	2005.69	0.0107094
CAM210_map1	0001.CSV	2009.55	0.0107712
CAM210_map1	0001.CSV	2013.4	0.0108139
CAM210_map1	0001.CSV	2017.26	0.0108736
CAM210_map1	0001.CSV	2021.12	0.0109341
CAM210_map1	0001.CSV	2024.97	0.0109421
CAM210_map1	0001.CSV	2028.83	0.0109023
CAM210_map1	0001.CSV	2032.69	0.01087
CAM210_map1	0001.CSV	2036.55	0.0108785
CAM210_map1	0001.CSV	2040.4	0.0109063
CAM210_map1	0001.CSV	2044.26	0.0109325
CAM210_map1	0001.CSV	2048.12	0.0109539
CAM210_map1	0001.CSV	2051.97	0.0109618
CAM210_map1	0001.CSV	2055.83	0.0109599
CAM210_map1	0001.CSV	2059.69	0.0109632
CAM210_map1	0001.CSV	2063.55	0.0109805
CAM210_map1	0001.CSV	2067.4	0.0109982
CAM210_map1	0001.CSV	2071.26	0.0110115
CAM210_map1	0001.CSV	2075.12	0.0110355
CAM210_map1	0001.CSV	2078.97	0.011062
CAM210_map1	0001.CSV	2082.83	0.0110742
CAM210_map1	0001.CSV	2086.69	0.0110825
CAM210_map1	0001.CSV	2090.55	0.011101
CAM210_map1	0001.CSV	2094.4	0.0111261
CAM210_map1	0001.CSV	2098.26	0.0111589
CAM210_map1	0001.CSV	2102.12	0.0111938
CAM210_map1	0001.CSV	2105.97	0.0112049
CAM210_map1	0001.CSV	2109.83	0.011206
CAM210_map1	0001.CSV	2113.69	0.0112332
CAM210_map1	0001.CSV	2117.55	0.0112716
CAM210_map1	0001.CSV	2121.4	0.01129
CAM210_map1	0001.CSV	2125.26	0.0113016
CAM210_map1	0001.CSV	2129.12	0.0113196
CAM210_map1	0001.CSV	2132.97	0.0113303
CAM210_map1	0001.CSV	2136.83	0.0113343
CAM210_map1	0001.CSV	2140.69	0.0113327
CAM210_map1	0001.CSV	2144.55	0.0113208
CAM210_map1	0001.CSV	2148.4	0.0113121
CAM210_map1	0001.CSV	2152.26	0.0113116
CAM210_map1	0001.CSV	2156.12	0.0112971
CAM210_map1	0001.CSV	2159.97	0.0112535
CAM210_map1	0001.CSV	2163.83	0.0111931
CAM210_map1	0001.CSV	2167.69	0.0111626
CAM210_map1	0001.CSV	2171.55	0.0111713
CAM210_map1	0001.CSV	2175.4	0.0111833
CAM210_map1	0001.CSV	2179.26	0.0111731
CAM210_map1	0001.CSV	2183.12	0.0111526
CAM210_map1	0001.CSV	2186.97	0.0111471
CAM210_map1	0001.CSV	2190.83	0.0111558
CAM210_map1	0001.CSV	2194.69	0.011142
CAM210_map1	0001.CSV	2198.55	0.0110964
CAM210_map1	0001.CSV	2202.4	0.0110455
CAM210_map1	0001.CSV	2206.26	0.0110068
CAM210_map1	0001.CSV	2210.12	0.010973
CAM210_map1	0001.CSV	2213.97	0.0109274
CAM210_map1	0001.CSV	2217.83	0.0108702
CAM210_map1	0001.CSV	2221.69	0.0108088
CAM210_map1	0001.CSV	2225.54	0.0107583
CAM210_map1	0001.CSV	2229.4	0.0107371
CAM210_map1	0001.CSV	2233.26	0.0107615
CAM210_map1	0001.CSV	2237.12	0.0107906
CAM210_map1	0001.CSV	2240.97	0.0107974
CAM210_map1	0001.CSV	2244.83	0.0107678
CAM210_map1	0001.CSV	2248.69	0.0107173
CAM210_map1	0001.CSV	2252.54	0.0106627
CAM210_map1	0001.CSV	2256.4	0.0106579
CAM210_map1	0001.CSV	2260.26	0.0106673
CAM210_map1	0001.CSV	2264.11	0.0106586
CAM210_map1	0001.CSV	2267.97	0.0106339
CAM210_map1	0001.CSV	2271.83	0.0106527
CAM210_map1	0001.CSV	2275.69	0.0106851
CAM210_map1	0001.CSV	2279.54	0.0107073
CAM210_map1	0001.CSV	2283.4	0.0107124
CAM210_map1	0001.CSV	2287.26	0.0107504
CAM210_map1	0001.CSV	2291.11	0.0107848
CAM210_map1	0001.CSV	2294.97	0.0108266
CAM210_map1	0001.CSV	2298.83	0.010896
CAM210_map1	0001.CSV	2302.69	0.0109994
CAM210_map1	0001.CSV	2306.54	0.0110827
CAM210_map1	0001.CSV	2310.4	0.0111484
CAM210_map1	0001.CSV	2314.26	0.0111697
CAM210_map1	0001.CSV	2318.11	0.0111244
CAM210_map1	0001.CSV	2321.97	0.0110086
CAM210_map1	0001.CSV	2325.83	0.0108513
CAM210_map1	0001.CSV	2329.69	0.0107115
CAM210_map1	0001.CSV	2333.54	0.0106465
CAM210_map1	0001.CSV	2337.4	0.0105929
CAM210_map1	0001.CSV	2341.26	0.0106107
CAM210_map1	0001.CSV	2345.11	0.0107624
CAM210_map1	0001.CSV	2348.97	0.0107079
CAM210_map1	0001.CSV	2352.83	0.010217
CAM210_map1	0001.CSV	2356.69	0.00931221
CAM210_map1	0001.CSV	2360.54	0.0086479
CAM210_map1	0001.CSV	2364.4	0.00907054
CAM210_map1	0001.CSV	2368.26	0.0100094
CAM210_map1	0001.CSV	2372.11	0.0107045
CAM210_map1	0001.CSV	2375.97	0.0110497
CAM210_map1	0001.CSV	2379.83	0.0111519
CAM210_map1	0001.CSV	2383.69	0.0110837
CAM210_map1	0001.CSV	2387.54	0.0109363
CAM210_map1	0001.CSV	2391.4	0.0107965
CAM210_map1	0001.CSV	2395.26	0.0107365
CAM210_map1	0001.CSV	2399.11	0.0107222
CAM210_map1	0001.CSV	2402.97	0.0107133
CAM210_map1	0001.CSV	2406.83	0.0106913
CAM210_map1	0001.CSV	2410.68	0.0106905
CAM210_map1	0001.CSV	2414.54	0.0106743
CAM210_map1	0001.CSV	2418.4	0.0106413
CAM210_map1	0001.CSV	2422.26	0.0106192
CAM210_map1	0001.CSV	2426.11	0.0106432
CAM210_map1	0001.CSV	2429.97	0.0106609
CAM210_map1	0001.CSV	2433.83	0.0106697
CAM210_map1	0001.CSV	2437.68	0.0106885
CAM210_map1	0001.CSV	2441.54	0.0107426
CAM210_map1	0001.CSV	2445.4	0.010804
CAM210_map1	0001.CSV	2449.26	0.010875
CAM210_map1	0001.CSV	2453.11	0.0109721
CAM210_map1	0001.CSV	2456.97	0.0111058
CAM210_map1	0001.CSV	2460.83	0.0112394
CAM210_map1	0001.CSV	2464.68	0.011392
CAM210_map1	0001.CSV	2468.54	0.0115961
CAM210_map1	0001.CSV	2472.4	0.0118405
CAM210_map1	0001.CSV	2476.26	0.0121198
CAM210_map1	0001.CSV	2480.11	0.0124575
CAM210_map1	0001.CSV	2483.97	0.0128176
CAM210_map1	0001.CSV	2487.83	0.0131297
CAM210_map1	0001.CSV	2491.68	0.0133743
CAM210_map1	0001.CSV	2495.54	0.0135759
CAM210_map1	0001.CSV	2499.4	0.0137316
CAM210_map1	0001.CSV	2503.26	0.0138258
CAM210_map1	0001.CSV	2507.11	0.013892
CAM210_map1	0001.CSV	2510.97	0.0139933
CAM210_map1	0001.CSV	2514.83	0.0141525
CAM210_map1	0001.CSV	2518.68	0.0143024
CAM210_map1	0001.CSV	2522.54	0.0143492
CAM210_map1	0001.CSV	2526.4	0.0142465
CAM210_map1	0001.CSV	2530.26	0.0140202
CAM210_map1	0001.CSV	2534.11	0.0137572
CAM210_map1	0001.CSV	2537.97	0.0135555
CAM210_map1	0001.CSV	2541.83	0.0134325
CAM210_map1	0001.CSV	2545.68	0.0133437
CAM210_map1	0001.CSV	2549.54	0.0132567
CAM210_map1	0001.CSV	2553.4	0.0131356
CAM210_map1	0001.CSV	2557.26	0.0129568
CAM210_map1	0001.CSV	2561.11	0.0127659
CAM210_map1	0001.CSV	2564.97	0.0126148
CAM210_map1	0001.CSV	2568.83	0.0125214
CAM210_map1	0001.CSV	2572.68	0.0124703
CAM210_map1	0001.CSV	2576.54	0.0124068
CAM210_map1	0001.CSV	2580.4	0.0123163
CAM210_map1	0001.CSV	2584.25	0.0122421
CAM210_map1	0001.CSV	2588.11	0.0121977
CAM210_map1	0001.CSV	2591.97	0.0121622
CAM210_map1	0001.CSV	2595.83	0.0121292
CAM210_map1	0001.CSV	2599.68	0.0121203
CAM210_map1	0001.CSV	2603.54	0.012149
CAM210_map1	0001.CSV	2607.4	0.0121899
CAM210_map1	0001.CSV	2611.25	0.0122188
CAM210_map1	0001.CSV	2615.11	0.0122423
CAM210_map1	0001.CSV	2618.97	0.0122723
CAM210_map1	0001.CSV	2622.82	0.0123166
CAM210_map1	0001.CSV	2626.68	0.0123655
CAM210_map1	0001.CSV	2630.54	0.0123898
CAM210_map1	0001.CSV	2634.4	0.0123839
CAM210_map1	0001.CSV	2638.25	0.0123348
CAM210_map1	0001.CSV	2642.11	0.012222
CAM210_map1	0001.CSV	2645.97	0.0120888
CAM210_map1	0001.CSV	2649.82	0.0119961
CAM210_map1	0001.CSV	2653.68	0.0119376
CAM210_map1	0001.CSV	2657.54	0.0118753
CAM210_map1	0001.CSV	2661.4	0.0118082
CAM210_map1	0001.CSV	2665.25	0.0117775
CAM210_map1	0001.CSV	2669.11	0.0118288
CAM210_map1	0001.CSV	2672.97	0.0119615
CAM210_map1	0001.CSV	2676.82	0.012067
CAM210_map1	0001.CSV	2680.68	0.0120028
CAM210_map1	0001.CSV	2684.54	0.0118192
CAM210_map1	0001.CSV	2688.4	0.011685
CAM210_map1	0001.CSV	2692.25	0.0116528
CAM210_map1	0001.CSV	2696.11	0.0116831
CAM210_map1	0001.CSV	2699.97	0.0117257
CAM210_map1	0001.CSV	2703.82	0.0117726
CAM210_map1	0001.CSV	2707.68	0.0118521
CAM210_map1	0001.CSV	2711.54	0.0119378
CAM210_map1	0001.CSV	2715.4	0.0120253
CAM210_map1	0001.CSV	2719.25	0.0121935
CAM210_map1	0001.CSV	2723.11	0.0124123
CAM210_map1	0001.CSV	2726.97	0.0124947
CAM210_map1	0001.CSV	2730.82	0.0124279
CAM210_map1	0001.CSV	2734.68	0.0123877
CAM210_map1	0001.CSV	2738.54	0.0124073
CAM210_map1	0001.CSV	2742.4	0.0124775
CAM210_map1	0001.CSV	2746.25	0.0126107
CAM210_map1	0001.CSV	2750.11	0.012668
CAM210_map1	0001.CSV	2753.97	0.0126139
CAM210_map1	0001.CSV	2757.82	0.0125782
CAM210_map1	0001.CSV	2761.68	0.0125915
CAM210_map1	0001.CSV	2765.54	0.0126732
CAM210_map1	0001.CSV	2769.39	0.0129016
CAM210_map1	0001.CSV	2773.25	0.0131948
CAM210_map1	0001.CSV	2777.11	0.013349
CAM210_map1	0001.CSV	2780.97	0.0134345
CAM210_map1	0001.CSV	2784.82	0.0137097
CAM210_map1	0001.CSV	2788.68	0.014141
CAM210_map1	0001.CSV	2792.54	0.0145154
CAM210_map1	0001.CSV	2796.39	0.0147731
CAM210_map1	0001.CSV	2800.25	0.0149422
CAM210_map1	0001.CSV	2804.11	0.015182
CAM210_map1	0001.CSV	2807.97	0.0156327
CAM210_map1	0001.CSV	2811.82	0.0161395
CAM210_map1	0001.CSV	2815.68	0.0166478
CAM210_map1	0001.CSV	2819.54	0.0173491
CAM210_map1	0001.CSV	2823.39	0.0183605
CAM210_map1	0001.CSV	2827.25	0.0198825
CAM210_map1	0001.CSV	2831.11	0.0224487
CAM210_map1	0001.CSV	2834.97	0.0270436
CAM210_map1	0001.CSV	2838.82	0.0356696
CAM210_map1	0001.CSV	2842.68	0.0505229
CAM210_map1	0001.CSV	2846.54	0.0678639
CAM210_map1	0001.CSV	2850.39	0.0754166
CAM210_map1	0001.CSV	2854.25	0.0675173
CAM210_map1	0001.CSV	2858.11	0.0537222
CAM210_map1	0001.CSV	2861.97	0.0432916
CAM210_map1	0001.CSV	2865.82	0.0378571
CAM210_map1	0001.CSV	2869.68	0.0359407
CAM210_map1	0001.CSV	2873.54	0.0352141
CAM210_map1	0001.CSV	2877.39	0.0342872
CAM210_map1	0001.CSV	2881.25	0.0338815
CAM210_map1	0001.CSV	2885.11	0.0350846
CAM210_map1	0001.CSV	2888.97	0.0379434
CAM210_map1	0001.CSV	2892.82	0.0419127
CAM210_map1	0001.CSV	2896.68	0.0465392
CAM210_map1	0001.CSV	2900.54	0.0521612
CAM210_map1	0001.CSV	2904.39	0.0605994
CAM210_map1	0001.CSV	2908.25	0.0748023
CAM210_map1	0001.CSV	2912.11	0.0946722
CAM210_map1	0001.CSV	2915.97	0.111332
CAM210_map1	0001.CSV	2919.82	0.112955
CAM210_map1	0001.CSV	2923.68	0.0996453
CAM210_map1	0001.CSV	2927.54	0.0816229
CAM210_map1	0001.CSV	2931.39	0.0659104
CAM210_map1	0001.CSV	2935.25	0.0540158
CAM210_map1	0001.CSV	2939.11	0.0457851
CAM210_map1	0001.CSV	2942.96	0.0406851
CAM210_map1	0001.CSV	2946.82	0.038104
CAM210_map1	0001.CSV	2950.68	0.0375181
CAM210_map1	0001.CSV	2954.54	0.0374616
CAM210_map1	0001.CSV	2958.39	0.0359428
CAM210_map1	0001.CSV	2962.25	0.0325283
CAM210_map1	0001.CSV	2966.11	0.028387
CAM210_map1	0001.CSV	2969.96	0.0247826
CAM210_map1	0001.CSV	2973.82	0.022135
CAM210_map1	0001.CSV	2977.68	0.020076
CAM210_map1	0001.CSV	2981.53	0.0182087
CAM210_map1	0001.CSV	2985.39	0.0166422
CAM210_map1	0001.CSV	2989.25	0.0156976
CAM210_map1	0001.CSV	2993.11	0.0152492
CAM210_map1	0001.CSV	2996.96	0.014901
CAM210_map1	0001.CSV	3000.82	0.0145728
CAM210_map1	0001.CSV	3004.68	0.014415
CAM210_map1	0001.CSV	3008.53	0.014477
CAM210_map1	0001.CSV	3012.39	0.0145481
CAM210_map1	0001.CSV	3016.25	0.0143845
CAM210_map1	0001.CSV	3020.11	0.0140314
CAM210_map1	0001.CSV	3023.96	0.013677
CAM210_map1	0001.CSV	3027.82	0.0134635
CAM210_map1	0001.CSV	3031.68	0.0134418
CAM210_map1	0001.CSV	3035.53	0.013498
CAM210_map1	0001.CSV	3039.39	0.0135359
CAM210_map1	0001.CSV	3043.25	0.0135395
CAM210_map1	0001.CSV	3047.11	0.0134803
CAM210_map1	0001.CSV	3050.96	0.0133875
CAM210_map1	0001.CSV	3054.82	0.0132918
CAM210_map1	0001.CSV	3058.68	0.0132174
CAM210_map1	0001.CSV	3062.53	0.0132503
CAM210_map1	0001.CSV	3066.39	0.013323
CAM210_map1	0001.CSV	3070.25	0.0132951
CAM210_map1	0001.CSV	3074.11	0.0133004
CAM210_map1	0001.CSV	3077.96	0.0134556
CAM210_map1	0001.CSV	3081.82	0.0135787
CAM210_map1	0001.CSV	3085.68	0.0135395
CAM210_map1	0001.CSV	3089.53	0.0134041
CAM210_map1	0001.CSV	3093.39	0.0132853
CAM210_map1	0001.CSV	3097.25	0.0132778
CAM210_map1	0001.CSV	3101.11	0.013346
CAM210_map1	0001.CSV	3104.96	0.0134246
CAM210_map1	0001.CSV	3108.82	0.0135385
CAM210_map1	0001.CSV	3112.68	0.0136933
CAM210_map1	0001.CSV	3116.53	0.013828
CAM210_map1	0001.CSV	3120.39	0.0138363
CAM210_map1	0001.CSV	3124.25	0.0137472
CAM210_map1	0001.CSV	3128.11	0.0136949
CAM210_map1	0001.CSV	3131.96	0.0136956
CAM210_map1	0001.CSV	3135.82	0.013754
CAM210_map1	0001.CSV	3139.68	0.0138297
CAM210_map1	0001.CSV	3143.53	0.0138523
CAM210_map1	0001.CSV	3147.39	0.0139354
CAM210_map1	0001.CSV	3151.25	0.0140892
CAM210_map1	0001.CSV	3155.1	0.0141004
CAM210_map1	0001.CSV	3158.96	0.013977
CAM210_map1	0001.CSV	3162.82	0.013931
CAM210_map1	0001.CSV	3166.68	0.0140046
CAM210_map1	0001.CSV	3170.53	0.0141309
CAM210_map1	0001.CSV	3174.39	0.0142934
CAM210_map1	0001.CSV	3178.25	0.0144721
CAM210_map1	0001.CSV	3182.1	0.0146264
CAM210_map1	0001.CSV	3185.96	0.0147519
CAM210_map1	0001.CSV	3189.82	0.0148562
CAM210_map1	0001.CSV	3193.68	0.0149414
CAM210_map1	0001.CSV	3197.53	0.0150291
CAM210_map1	0001.CSV	3201.39	0.0151446
CAM210_map1	0001.CSV	3205.25	0.0152763
CAM210_map1	0001.CSV	3209.1	0.015382
CAM210_map1	0001.CSV	3212.96	0.015476
CAM210_map1	0001.CSV	3216.82	0.0155639
CAM210_map1	0001.CSV	3220.68	0.0155815
CAM210_map1	0001.CSV	3224.53	0.0155946
CAM210_map1	0001.CSV	3228.39	0.0157502
CAM210_map1	0001.CSV	3232.25	0.0159597
CAM210_map1	0001.CSV	3236.1	0.0160162
CAM210_map1	0001.CSV	3239.96	0.0160151
CAM210_map1	0001.CSV	3243.82	0.0161484
CAM210_map1	0001.CSV	3247.68	0.0163034
CAM210_map1	0001.CSV	3251.53	0.016359
CAM210_map1	0001.CSV	3255.39	0.0163831
CAM210_map1	0001.CSV	3259.25	0.0163838
CAM210_map1	0001.CSV	3263.1	0.0164201
CAM210_map1	0001.CSV	3266.96	0.0166122
CAM210_map1	0001.CSV	3270.82	0.0168712
CAM210_map1	0001.CSV	3274.68	0.0169712
CAM210_map1	0001.CSV	3278.53	0.0168646
CAM210_map1	0001.CSV	3282.39	0.0167752
CAM210_map1	0001.CSV	3286.25	0.0168825
CAM210_map1	0001.CSV	3290.1	0.0171176
CAM210_map1	0001.CSV	3293.96	0.0173
CAM210_map1	0001.CSV	3297.82	0.0173502
CAM210_map1	0001.CSV	3301.67	0.017382
CAM210_map1	0001.CSV	3305.53	0.0174741
CAM210_map1	0001.CSV	3309.39	0.017524
CAM210_map1	0001.CSV	3313.25	0.0174668
CAM210_map1	0001.CSV	3317.1	0.0174411
CAM210_map1	0001.CSV	3320.96	0.0175843
CAM210_map1	0001.CSV	3324.82	0.0177896
CAM210_map1	0001.CSV	3328.67	0.0178809
CAM210_map1	0001.CSV	3332.53	0.0179506
CAM210_map1	0001.CSV	3336.39	0.0181542
CAM210_map1	0001.CSV	3340.24	0.0183673
CAM210_map1	0001.CSV	3344.1	0.0184431
CAM210_map1	0001.CSV	3347.96	0.0184413
CAM210_map1	0001.CSV	3351.82	0.0184195
CAM210_map1	0001.CSV	3355.67	0.0184068
CAM210_map1	0001.CSV	3359.53	0.0184696
CAM210_map1	0001.CSV	3363.39	0.0185894
CAM210_map1	0001.CSV	3367.24	0.0186568
CAM210_map1	0001.CSV	3371.1	0.0186215
CAM210_map1	0001.CSV	3374.96	0.0185627
CAM210_map1	0001.CSV	3378.82	0.0185379
CAM210_map1	0001.CSV	3382.67	0.018518
CAM210_map1	0001.CSV	3386.53	0.0185311
CAM210_map1	0001.CSV	3390.39	0.0185643
CAM210_map1	0001.CSV	3394.24	0.0185217
CAM210_map1	0001.CSV	3398.1	0.0184135
CAM210_map1	0001.CSV	3401.96	0.0183356
CAM210_map1	0001.CSV	3405.82	0.0183098
CAM210_map1	0001.CSV	3409.67	0.0182606
CAM210_map1	0001.CSV	3413.53	0.0181086
CAM210_map1	0001.CSV	3417.39	0.017897
CAM210_map1	0001.CSV	3421.24	0.0177489
CAM210_map1	0001.CSV	3425.1	0.0177258
CAM210_map1	0001.CSV	3428.96	0.0177859
CAM210_map1	0001.CSV	3432.82	0.0178027
CAM210_map1	0001.CSV	3436.67	0.0176684
CAM210_map1	0001.CSV	3440.53	0.0174272
CAM210_map1	0001.CSV	3444.39	0.0171997
CAM210_map1	0001.CSV	3448.24	0.0170171
CAM210_map1	0001.CSV	3452.1	0.0168629
CAM210_map1	0001.CSV	3455.96	0.0167728
CAM210_map1	0001.CSV	3459.82	0.0167514
CAM210_map1	0001.CSV	3463.67	0.0167607
CAM210_map1	0001.CSV	3467.53	0.016733
CAM210_map1	0001.CSV	3471.39	0.0165875
CAM210_map1	0001.CSV	3475.24	0.0163862
CAM210_map1	0001.CSV	3479.1	0.0162278
CAM210_map1	0001.CSV	3482.96	0.0161092
CAM210_map1	0001.CSV	3486.82	0.01605
CAM210_map1	0001.CSV	3490.67	0.0160241
CAM210_map1	0001.CSV	3494.53	0.0159646
CAM210_map1	0001.CSV	3498.39	0.0158727
CAM210_map1	0001.CSV	3502.24	0.0157677
CAM210_map1	0001.CSV	3506.1	0.0156082
CAM210_map1	0001.CSV	3509.96	0.0154033
CAM210_map1	0001.CSV	3513.81	0.0152307
CAM210_map1	0001.CSV	3517.67	0.0150823
CAM210_map1	0001.CSV	3521.53	0.0149899
CAM210_map1	0001.CSV	3525.39	0.0149393
CAM210_map1	0001.CSV	3529.24	0.0148283
CAM210_map1	0001.CSV	3533.1	0.0147144
CAM210_map1	0001.CSV	3536.96	0.0146395
CAM210_map1	0001.CSV	3540.81	0.0145948
CAM210_map1	0001.CSV	3544.67	0.0145606
CAM210_map1	0001.CSV	3548.53	0.0144233
CAM210_map1	0001.CSV	3552.39	0.0141671
CAM210_map1	0001.CSV	3556.24	0.0139011
CAM210_map1	0001.CSV	3560.1	0.0136236
CAM210_map1	0001.CSV	3563.96	0.0133004
CAM210_map1	0001.CSV	3567.81	0.0130899
CAM210_map1	0001.CSV	3571.67	0.0130016
CAM210_map1	0001.CSV	3575.53	0.0128427
CAM210_map1	0001.CSV	3579.39	0.012659
CAM210_map1	0001.CSV	3583.24	0.0124892
CAM210_map1	0001.CSV	3587.1	0.0122836
CAM210_map1	0001.CSV	3590.96	0.0120387
CAM210_map1	0001.CSV	3594.81	0.0117756
CAM210_map1	0001.CSV	3598.67	0.0115052
CAM210_map1	0001.CSV	3602.53	0.0111556
CAM210_map1	0001.CSV	3606.39	0.010655
CAM210_map1	0001.CSV	3610.24	0.0101465
CAM210_map1	0001.CSV	3614.1	0.00987476
CAM210_map1	0001.CSV	3617.96	0.00978349
CAM210_map1	0001.CSV	3621.81	0.00965883
CAM210_map1	0001.CSV	3625.67	0.00943091
CAM210_map1	0001.CSV	3629.53	0.00920613
CAM210_map1	0001.CSV	3633.39	0.00907538
CAM210_map1	0001.CSV	3637.24	0.00890925
CAM210_map1	0001.CSV	3641.1	0.00868653
CAM210_map1	0001.CSV	3644.96	0.00849315
CAM210_map1	0001.CSV	3648.81	0.00848606
CAM210_map1	0001.CSV	3652.67	0.00856229
CAM210_map1	0001.CSV	3656.53	0.00849369
CAM210_map1	0001.CSV	3660.38	0.00833789
CAM210_map1	0001.CSV	3664.24	0.00805264
CAM210_map1	0001.CSV	3668.1	0.00771722
CAM210_map1	0001.CSV	3671.96	0.00765122
CAM210_map1	0001.CSV	3675.81	0.00789956
CAM210_map1	0001.CSV	3679.67	0.00793047
CAM210_map1	0001.CSV	3683.53	0.00781811
CAM210_map1	0001.CSV	3687.38	0.00783687
CAM210_map1	0001.CSV	3691.24	0.00797565
CAM210_map1	0001.CSV	3695.1	0.00790594
CAM210_map1	0001.CSV	3698.95	0.0077209
CAM210_map1	0001.CSV	3702.81	0.00754052
CAM210_map1	0001.CSV	3706.67	0.00733397
CAM210_map1	0001.CSV	3710.53	0.00725772
CAM210_map1	0001.CSV	3714.38	0.00740124
CAM210_map1	0001.CSV	3718.24	0.00741954
CAM210_map1	0001.CSV	3722.1	0.00730256
CAM210_map1	0001.CSV	3725.95	0.00719202
CAM210_map1	0001.CSV	3729.81	0.00713007
CAM210_map1	0001.CSV	3733.67	0.00723167
CAM210_map1	0001.CSV	3737.53	0.00738974
CAM210_map1	0001.CSV	3741.38	0.00716457
CAM210_map1	0001.CSV	3745.24	0.00674512
CAM210_map1	0001.CSV	3749.1	0.00670992
CAM210_map1	0001.CSV	3752.95	0.00704894
CAM210_map1	0001.CSV	3756.81	0.00721102
CAM210_map1	0001.CSV	3760.67	0.00718737
CAM210_map1	0001.CSV	3764.53	0.00711256
CAM210_map1	0001.CSV	3768.38	0.00710202
CAM210_map1	0001.CSV	3772.24	0.00710872
CAM210_map1	0001.CSV	3776.1	0.00704241
CAM210_map1	0001.CSV	3779.95	0.00701075
CAM210_map1	0001.CSV	3783.81	0.00706181
CAM210_map1	0001.CSV	3787.67	0.00706746
CAM210_map1	0001.CSV	3791.53	0.00694564
CAM210_map1	0001.CSV	3795.38	0.00673119
CAM210_map1	0001.CSV	3799.24	0.00661174
CAM210_map1	0001.CSV	3803.1	0.00680257
CAM210_map1	0001.CSV	3806.95	0.00700244
CAM210_map1	0001.CSV	3810.81	0.00690813
CAM210_map1	0001.CSV	3814.67	0.00667795
CAM210_map1	0001.CSV	3818.53	0.00663317
CAM210_map1	0001.CSV	3822.38	0.00681664
CAM210_map1	0001.CSV	3826.24	0.0068542
CAM210_map1	0001.CSV	3830.1	0.0067812
CAM210_map1	0001.CSV	3833.95	0.00676386
CAM210_map1	0001.CSV	3837.81	0.00691362
CAM210_map1	0001.CSV	3841.67	0.00707289
CAM210_map1	0001.CSV	3845.53	0.0069248
CAM210_map1	0001.CSV	3849.38	0.00656999
CAM210_map1	0001.CSV	3853.24	0.00642399
CAM210_map1	0001.CSV	3857.1	0.00654984
CAM210_map1	0001.CSV	3860.95	0.00645755
CAM210_map1	0001.CSV	3864.81	0.00635768
CAM210_map1	0001.CSV	3868.67	0.00648079
CAM210_map1	0001.CSV	3872.52	0.00662641
CAM210_map1	0001.CSV	3876.38	0.0065924
CAM210_map1	0001.CSV	3880.24	0.00657544
CAM210_map1	0001.CSV	3884.1	0.00674657
CAM210_map1	0001.CSV	3887.95	0.00681761
CAM210_map1	0001.CSV	3891.81	0.00666904
CAM210_map1	0001.CSV	3895.67	0.00642631
CAM210_map1	0001.CSV	3899.52	0.00625787
CAM210_map1	0001.CSV	3903.38	0.0064817
CAM210_map1	0001.CSV	3907.24	0.00674717
CAM210_map1	0001.CSV	3911.1	0.00665894
CAM210_map1	0001.CSV	3914.95	0.00647262
CAM210_map1	0001.CSV	3918.81	0.00643482
CAM210_map1	0001.CSV	3922.67	0.006534
CAM210_map1	0001.CSV	3926.52	0.00664538
CAM210_map1	0001.CSV	3930.38	0.00680536
CAM210_map1	0001.CSV	3934.24	0.00693102
CAM210_map1	0001.CSV	3938.09	0.00686437
CAM210_map1	0001.CSV	3941.95	0.00670618
CAM210_map1	0001.CSV	3945.81	0.00662866
CAM210_map1	0001.CSV	3949.67	0.00665693
CAM210_map1	0001.CSV	3953.52	0.0067045
CAM210_map1	0001.CSV	3957.38	0.0067145
CAM210_map1	0001.CSV	3961.24	0.00673462
CAM210_map1	0001.CSV	3965.09	0.00675542
CAM210_map1	0001.CSV	3968.95	0.00672829
CAM210_map1	0001.CSV	3972.81	0.00670777
CAM210_map1	0001.CSV	3976.67	0.00673936
CAM210_map1	0001.CSV	3980.52	0.00677941
CAM210_map1	0001.CSV	3984.38	0.00678416
CAM210_map1	0001.CSV	3988.24	0.00673358
CAM210_map1	0001.CSV	3992.09	0.00670915
CAM210_map1	0001.CSV	3995.95	0.00674142
CAM210_map1	0001.CSV	3999.81	0.00671901
CAM210_map1	0002.CSV	674.992	0.0432018
CAM210_map1	0002.CSV	678.849	0.0427012
CAM210_map1	0002.CSV	682.706	0.0425781
CAM210_map1	0002.CSV	686.563	0.043146
CAM210_map1	0002.CSV	690.42	0.0465273
CAM210_map1	0002.CSV	694.277	0.0545463
CAM210_map1	0002.CSV	698.134	0.0618973
CAM210_map1	0002.CSV	701.991	0.0625334
CAM210_map1	0002.CSV	705.849	0.0650513
CAM210_map1	0002.CSV	709.706	0.0758671
CAM210_map1	0002.CSV	713.563	0.0787905
CAM210_map1	0002.CSV	717.42	0.0649712
CAM210_map1	0002.CSV	721.277	0.049418
CAM210_map1	0002.CSV	725.134	0.0411999
CAM210_map1	0002.CSV	728.991	0.0363748
CAM210_map1	0002.CSV	732.848	0.0324967
CAM210_map1	0002.CSV	736.705	0.0301948
CAM210_map1	0002.CSV	740.562	0.029608
CAM210_map1	0002.CSV	744.42	0.0299813
CAM210_map1	0002.CSV	748.277	0.0308759
CAM210_map1	0002.CSV	752.134	0.0318949
CAM210_map1	0002.CSV	755.991	0.0329291
CAM210_map1	0002.CSV	759.848	0.0341892
CAM210_map1	0002.CSV	763.705	0.0356703
CAM210_map1	0002.CSV	767.562	0.0369514
CAM210_map1	0002.CSV	771.419	0.0380066
CAM210_map1	0002.CSV	775.276	0.0391781
CAM210_map1	0002.CSV	779.133	0.040555
CAM210_map1	0002.CSV	782.99	0.041639
CAM210_map1	0002.CSV	786.848	0.0423744
CAM210_map1	0002.CSV	790.705	0.0434595
CAM210_map1	0002.CSV	794.562	0.045381
CAM210_map1	0002.CSV	798.419	0.0477143
CAM210_map1	0002.CSV	802.276	0.0498644
CAM210_map1	0002.CSV	806.133	0.0520263
CAM210_map1	0002.CSV	809.99	0.054837
CAM210_map1	0002.CSV	813.847	0.0585352
CAM210_map1	0002.CSV	817.704	0.0632338
CAM210_map1	0002.CSV	821.562	0.0692474
CAM210_map1	0002.CSV	825.419	0.0768869
CAM210_map1	0002.CSV	829.276	0.0864883
CAM210_map1	0002.CSV	833.133	0.0986832
CAM210_map1	0002.CSV	836.99	0.113694
CAM210_map1	0002.CSV	840.847	0.129766
CAM210_map1	0002.CSV	844.704	0.145881
CAM210_map1	0002.CSV	848.561	0.163561
CAM210_map1	0002.CSV	852.418	0.178721
CAM210_map1	0002.CSV	856.275	0.179948
CAM210_map1	0002.CSV	860.132	0.161503
CAM210_map1	0002.CSV	863.99	0.129948
CAM210_map1	0002.CSV	867.847	0.0970114
CAM210_map1	0002.CSV	871.704	0.0709369
CAM210_map1	0002.CSV	875.561	0.0536177
CAM210_map1	0002.CSV	879.418	0.0426553
CAM210_map1	0002.CSV	883.275	0.0351614
CAM210_map1	0002.CSV	887.132	0.0300484
CAM210_map1	0002.CSV	890.989	0.0272609
CAM210_map1	0002.CSV	894.846	0.0262425
CAM210_map1	0002.CSV	898.703	0.0262443
CAM210_map1	0002.CSV	902.561	0.0267755
CAM210_map1	0002.CSV	906.418	0.0273486
CAM210_map1	0002.CSV	910.275	0.0275466
CAM210_map1	0002.CSV	914.132	0.0275405
CAM210_map1	0002.CSV	917.989	0.0277551
CAM210_map1	0002.CSV	921.846	0.0283071
CAM210_map1	0002.CSV	925.703	0.0291542
CAM210_map1	0002.CSV	929.56	0.0301471
CAM210_map1	0002.CSV	933.417	0.0309674
CAM210_map1	0002.CSV	937.274	0.0314086
CAM210_map1	0002.CSV	941.131	0.0315832
CAM210_map1	0002.CSV	944.989	0.0318351
CAM210_map1	0002.CSV	948.846	0.0325192
CAM210_map1	0002.CSV	952.703	0.0336278
CAM210_map1	0002.CSV	956.56	0.0346407
CAM210_map1	0002.CSV	960.417	0.0350828
CAM210_map1	0002.CSV	964.274	0.0351639
CAM210_map1	0002.CSV	968.131	0.0354067
CAM210_map1	0002.CSV	971.988	0.0359981
CAM210_map1	0002.CSV	975.845	0.0367389
CAM210_map1	0002.CSV	979.702	0.037459
CAM210_map1	0002.CSV	983.559	0.0381788
CAM210_map1	0002.CSV	987.417	0.0389723
CAM210_map1	0002.CSV	991.274	0.0398355
CAM210_map1	0002.CSV	995.131	0.0407494
CAM210_map1	0002.CSV	998.988	0.0416985
CAM210_map1	0002.CSV	1002.85	0.0427068
CAM210_map1	0002.CSV	1006.7	0.0437478
CAM210_map1	0002.CSV	1010.56	0.0447271
CAM210_map1	0002.CSV	1014.42	0.0455219
CAM210_map1	0002.CSV	1018.27	0.0461827
CAM210_map1	0002.CSV	1022.13	0.0468806
CAM210_map1	0002.CSV	1025.99	0.0477099
CAM210_map1	0002.CSV	1029.85	0.0486541
CAM210_map1	0002.CSV	1033.7	0.0496647
CAM210_map1	0002.CSV	1037.56	0.0506743
CAM210_map1	0002.CSV	1041.42	0.0517058
CAM210_map1	0002.CSV	1045.27	0.0528029
CAM210_map1	0002.CSV	1049.13	0.0539947
CAM210_map1	0002.CSV	1052.99	0.0553217
CAM210_map1	0002.CSV	1056.84	0.0568944
CAM210_map1	0002.CSV	1060.7	0.058824
CAM210_map1	0002.CSV	1064.56	0.0612052
CAM210_map1	0002.CSV	1068.42	0.0641766
CAM210_map1	0002.CSV	1072.27	0.0684196
CAM210_map1	0002.CSV	1076.13	0.0753318
CAM210_map1	0002.CSV	1079.99	0.0830569
CAM210_map1	0002.CSV	1083.84	0.0841631
CAM210_map1	0002.CSV	1087.7	0.0771383
CAM210_map1	0002.CSV	1091.56	0.070263
CAM210_map1	0002.CSV	1095.41	0.0678153
CAM210_map1	0002.CSV	1099.27	0.0676108
CAM210_map1	0002.CSV	1103.13	0.0682216
CAM210_map1	0002.CSV	1106.99	0.0697304
CAM210_map1	0002.CSV	1110.84	0.0711211
CAM210_map1	0002.CSV	1114.7	0.07054
CAM210_map1	0002.CSV	1118.56	0.0680733
CAM210_map1	0002.CSV	1122.41	0.06568
CAM210_map1	0002.CSV	1126.27	0.0644414
CAM210_map1	0002.CSV	1130.13	0.0640208
CAM210_map1	0002.CSV	1133.99	0.0639788
CAM210_map1	0002.CSV	1137.84	0.0642423
CAM210_map1	0002.CSV	1141.7	0.0647348
CAM210_map1	0002.CSV	1145.56	0.0652816
CAM210_map1	0002.CSV	1149.41	0.0657907
CAM210_map1	0002.CSV	1153.27	0.066302
CAM210_map1	0002.CSV	1157.13	0.0669299
CAM210_map1	0002.CSV	1160.99	0.0677864
CAM210_map1	0002.CSV	1164.84	0.068764
CAM210_map1	0002.CSV	1168.7	0.0695365
CAM210_map1	0002.CSV	1172.56	0.0698718
CAM210_map1	0002.CSV	1176.41	0.0697828
CAM210_map1	0002.CSV	1180.27	0.0694636
CAM210_map1	0002.CSV	1184.13	0.0692021
CAM210_map1	0002.CSV	1187.99	0.0690601
CAM210_map1	0002.CSV	1191.84	0.068776
CAM210_map1	0002.CSV	1195.7	0.0682562
CAM210_map1	0002.CSV	1199.56	0.067829
CAM210_map1	0002.CSV	1203.41	0.0678383
CAM210_map1	0002.CSV	1207.27	0.0683561
CAM210_map1	0002.CSV	1211.13	0.0691526
CAM210_map1	0002.CSV	1214.98	0.0698673
CAM210_map1	0002.CSV	1218.84	0.0704097
CAM210_map1	0002.CSV	1222.7	0.0710257
CAM210_map1	0002.CSV	1226.56	0.0719573
CAM210_map1	0002.CSV	1230.41	0.0732108
CAM210_map1	0002.CSV	1234.27	0.0744938
CAM210_map1	0002.CSV	1238.13	0.0754972
CAM210_map1	0002.CSV	1241.98	0.0762686
CAM210_map1	0002.CSV	1245.84	0.0770477
CAM210_map1	0002.CSV	1249.7	0.0779951
CAM210_map1	0002.CSV	1253.56	0.0791192
CAM210_map1	0002.CSV	1257.41	0.080256
CAM210_map1	0002.CSV	1261.27	0.081283
CAM210_map1	0002.CSV	1265.13	0.0823581
CAM210_map1	0002.CSV	1268.98	0.0837726
CAM210_map1	0002.CSV	1272.84	0.0855665
CAM210_map1	0002.CSV	1276.7	0.087405
CAM210_map1	0002.CSV	1280.56	0.0890735
CAM210_map1	0002.CSV	1284.41	0.0908011
CAM210_map1	0002.CSV	1288.27	0.0927884
CAM210_map1	0002.CSV	1292.13	0.0947757
CAM210_map1	0002.CSV	1295.98	0.096441
CAM210_map1	0002.CSV	1299.84	0.0977169
CAM210_map1	0002.CSV	1303.7	0.0987827
CAM210_map1	0002.CSV	1307.56	0.100042
CAM210_map1	0002.CSV	1311.41	0.101857
CAM210_map1	0002.CSV	1315.27	0.104173
CAM210_map1	0002.CSV	1319.13	0.106373
CAM210_map1	0002.CSV	1322.98	0.108075
CAM210_map1	0002.CSV	1326.84	0.109847
CAM210_map1	0002.CSV	1330.7	0.1121
CAM210_map1	0002.CSV	1334.56	0.114642
CAM210_map1	0002.CSV	1338.41	0.117563
CAM210_map1	0002.CSV	1342.27	0.120856
CAM210_map1	0002.CSV	1346.13	0.124223
CAM210_map1	0002.CSV	1349.98	0.127823
CAM210_map1	0002.CSV	1353.84	0.131619
CAM210_map1	0002.CSV	1357.7	0.135695
CAM210_map1	0002.CSV	1361.56	0.140786
CAM210_map1	0002.CSV	1365.41	0.146616
CAM210_map1	0002.CSV	1369.27	0.152428
CAM210_map1	0002.CSV	1373.13	0.159298
CAM210_map1	0002.CSV	1376.98	0.166766
CAM210_map1	0002.CSV	1380.84	0.17257
CAM210_map1	0002.CSV	1384.7	0.177724
CAM210_map1	0002.CSV	1388.56	0.18399
CAM210_map1	0002.CSV	1392.41	0.191196
CAM210_map1	0002.CSV	1396.27	0.199833
CAM210_map1	0002.CSV	1400.13	0.209605
CAM210_map1	0002.CSV	1403.98	0.219262
CAM210_map1	0002.CSV	1407.84	0.229041
CAM210_map1	0002.CSV	1411.7	0.237899
CAM210_map1	0002.CSV	1415.55	0.24471
CAM210_map1	0002.CSV	1419.41	0.248434
CAM210_map1	0002.CSV	1423.27	0.249018
CAM210_map1	0002.CSV	1427.12	0.249806
CAM210_map1	0002.CSV	1430.98	0.252035
CAM210_map1	0002.CSV	1434.84	0.253412
CAM210_map1	0002.CSV	1438.7	0.252811
CAM210_map1	0002.CSV	1442.55	0.252709
CAM210_map1	0002.CSV	1446.41	0.25424
CAM210_map1	0002.CSV	1450.27	0.256732
CAM210_map1	0002.CSV	1454.12	0.260002
CAM210_map1	0002.CSV	1457.98	0.265607
CAM210_map1	0002.CSV	1461.84	0.27104
CAM210_map1	0002.CSV	1465.7	0.272075
CAM210_map1	0002.CSV	1469.55	0.264139
CAM210_map1	0002.CSV	1473.41	0.238757
CAM210_map1	0002.CSV	1477.27	0.208154
CAM210_map1	0002.CSV	1481.12	0.188652
CAM210_map1	0002.CSV	1484.98	0.174618
CAM210_map1	0002.CSV	1488.84	0.161186
CAM210_map1	0002.CSV	1492.7	0.150334
CAM210_map1	0002.CSV	1496.55	0.143112
CAM210_map1	0002.CSV	1500.41	0.137633
CAM210_map1	0002.CSV	1504.27	0.132878
CAM210_map1	0002.CSV	1508.12	0.126632
CAM210_map1	0002.CSV	1511.98	0.121449
CAM210_map1	0002.CSV	1515.84	0.118517
CAM210_map1	0002.CSV	1519.7	0.115906
CAM210_map1	0002.CSV	1523.55	0.116268
CAM210_map1	0002.CSV	1527.41	0.122401
CAM210_map1	0002.CSV	1531.27	0.134312
CAM210_map1	0002.CSV	1535.12	0.150558
CAM210_map1	0002.CSV	1538.98	0.160807
CAM210_map1	0002.CSV	1542.84	0.145575
CAM210_map1	0002.CSV	1546.7	0.124331
CAM210_map1	0002.CSV	1550.55	0.110525
CAM210_map1	0002.CSV	1554.41	0.0996989
CAM210_map1	0002.CSV	1558.27	0.0921598
CAM210_map1	0002.CSV	1562.12	0.0926919
CAM210_map1	0002.CSV	1565.98	0.100046
CAM210_map1	0002.CSV	1569.84	0.112278
CAM210_map1	0002.CSV	1573.69	0.121507
CAM210_map1	0002.CSV	1577.55	0.11495
CAM210_map1	0002.CSV	1581.41	0.0958896
CAM210_map1	0002.CSV	1585.27	0.0753516
CAM210_map1	0002.CSV	1589.12	0.0583037
CAM210_map1	0002.CSV	1592.98	0.0467993
CAM210_map1	0002.CSV	1596.84	0.0401637
CAM210_map1	0002.CSV	1600.69	0.0365828
CAM210_map1	0002.CSV	1604.55	0.0347427
CAM210_map1	0002.CSV	1608.41	0.034034
CAM210_map1	0002.CSV	1612.27	0.0339805
CAM210_map1	0002.CSV	1616.12	0.0341358
CAM210_map1	0002.CSV	1619.98	0.0340576
CAM210_map1	0002.CSV	1623.84	0.033392
CAM210_map1	0002.CSV	1627.69	0.0322586
CAM210_map1	0002.CSV	1631.55	0.0307978
CAM210_map1	0002.CSV	1635.41	0.0288128
CAM210_map1	0002.CSV	1639.27	0.0269243
CAM210_map1	0002.CSV	1643.12	0.0257011
CAM210_map1	0002.CSV	1646.98	0.024714
CAM210_map1	0002.CSV	1650.84	0.0238751
CAM210_map1	0002.CSV	1654.69	0.0232621
CAM210_map1	0002.CSV	1658.55	0.022683
CAM210_map1	0002.CSV	1662.41	0.0220563
CAM210_map1	0002.CSV	1666.27	0.0214248
CAM210_map1	0002.CSV	1670.12	0.0208382
CAM210_map1	0002.CSV	1673.98	0.0203064
CAM210_map1	0002.CSV	1677.84	0.0197381
CAM210_map1	0002.CSV	1681.69	0.0191857
CAM210_map1	0002.CSV	1685.55	0.0188298
CAM210_map1	0002.CSV	1689.41	0.0184356
CAM210_map1	0002.CSV	1693.27	0.0178492
CAM210_map1	0002.CSV	1697.12	0.0173273
CAM210_map1	0002.CSV	1700.98	0.0171197
CAM210_map1	0002.CSV	1704.84	0.0169024
CAM210_map1	0002.CSV	1708.69	0.0165402
CAM210_map1	0002.CSV	1712.55	0.0162077
CAM210_map1	0002.CSV	1716.41	0.0162771
CAM210_map1	0002.CSV	1720.27	0.0165028
CAM210_map1	0002.CSV	1724.12	0.0163108
CAM210_map1	0002.CSV	1727.98	0.0160135
CAM210_map1	0002.CSV	1731.84	0.0160782
CAM210_map1	0002.CSV	1735.69	0.0165255
CAM210_map1	0002.CSV	1739.55	0.0164412
CAM210_map1	0002.CSV	1743.41	0.0156112
CAM210_map1	0002.CSV	1747.27	0.0143895
CAM210_map1	0002.CSV	1751.12	0.0131867
CAM210_map1	0002.CSV	1754.98	0.0123105
CAM210_map1	0002.CSV	1758.84	0.0117608
CAM210_map1	0002.CSV	1762.69	0.0114845
CAM210_map1	0002.CSV	1766.55	0.0113869
CAM210_map1	0002.CSV	1770.41	0.0119294
CAM210_map1	0002.CSV	1774.26	0.0134637
CAM210_map1	0002.CSV	1778.12	0.0151379
CAM210_map1	0002.CSV	1781.98	0.0164988
CAM210_map1	0002.CSV	1785.84	0.0171398
CAM210_map1	0002.CSV	1789.69	0.0166199
CAM210_map1	0002.CSV	1793.55	0.0150903
CAM210_map1	0002.CSV	1797.41	0.0133289
CAM210_map1	0002.CSV	1801.26	0.011874
CAM210_map1	0002.CSV	1805.12	0.0108091
CAM210_map1	0002.CSV	1808.98	0.01018
CAM210_map1	0002.CSV	1812.84	0.00986283
CAM210_map1	0002.CSV	1816.69	0.00965154
CAM210_map1	0002.CSV	1820.55	0.0095
CAM210_map1	0002.CSV	1824.41	0.00948371
CAM210_map1	0002.CSV	1828.26	0.00961096
CAM210_map1	0002.CSV	1832.12	0.00971944
CAM210_map1	0002.CSV	1835.98	0.00966855
CAM210_map1	0002.CSV	1839.84	0.00958674
CAM210_map1	0002.CSV	1843.69	0.00967519
CAM210_map1	0002.CSV	1847.55	0.00987635
CAM210_map1	0002.CSV	1851.41	0.00992486
CAM210_map1	0002.CSV	1855.26	0.00988832
CAM210_map1	0002.CSV	1859.12	0.00988544
CAM210_map1	0002.CSV	1862.98	0.00991117
CAM210_map1	0002.CSV	1866.84	0.0100457
CAM210_map1	0002.CSV	1870.69	0.0102887
CAM210_map1	0002.CSV	1874.55	0.0103741
CAM210_map1	0002.CSV	1878.41	0.010341
CAM210_map1	0002.CSV	1882.26	0.0103382
CAM210_map1	0002.CSV	1886.12	0.0103934
CAM210_map1	0002.CSV	1889.98	0.0105148
CAM210_map1	0002.CSV	1893.83	0.0106535
CAM210_map1	0002.CSV	1897.69	0.0107447
CAM210_map1	0002.CSV	1901.55	0.0107785
CAM210_map1	0002.CSV	1905.41	0.0107978
CAM210_map1	0002.CSV	1909.26	0.0108466
CAM210_map1	0002.CSV	1913.12	0.010898
CAM210_map1	0002.CSV	1916.98	0.0109557
CAM210_map1	0002.CSV	1920.83	0.0110733
CAM210_map1	0002.CSV	1924.69	0.0111959
CAM210_map1	0002.CSV	1928.55	0.0112563
CAM210_map1	0002.CSV	1932.4	0.0112854
CAM210_map1	0002.CSV	1936.26	0.0113162
CAM210_map1	0002.CSV	1940.12	0.0113673
CAM210_map1	0002.CSV	1943.98	0.0114647
CAM210_map1	0002.CSV	1947.83	0.0115556
CAM210_map1	0002.CSV	1951.69	0.0116157
CAM210_map1	0002.CSV	1955.55	0.0116816
CAM210_map1	0002.CSV	1959.4	0.0117249
CAM210_map1	0002.CSV	1963.26	0.0117451
CAM210_map1	0002.CSV	1967.12	0.0118138
CAM210_map1	0002.CSV	1970.98	0.0119064
CAM210_map1	0002.CSV	1974.83	0.0119588
CAM210_map1	0002.CSV	1978.69	0.0120053
CAM210_map1	0002.CSV	1982.55	0.0120655
CAM210_map1	0002.CSV	1986.4	0.0121195
CAM210_map1	0002.CSV	1990.26	0.0121878
CAM210_map1	0002.CSV	1994.12	0.012264
CAM210_map1	0002.CSV	1997.98	0.0123032
CAM210_map1	0002.CSV	2001.83	0.0123332
CAM210_map1	0002.CSV	2005.69	0.0123873
CAM210_map1	0002.CSV	2009.55	0.0124563
CAM210_map1	0002.CSV	2013.4	0.0125422
CAM210_map1	0002.CSV	2017.26	0.0126494
CAM210_map1	0002.CSV	2021.12	0.0127363
CAM210_map1	0002.CSV	2024.97	0.0127591
CAM210_map1	0002.CSV	2028.83	0.0127361
CAM210_map1	0002.CSV	2032.69	0.0127131
CAM210_map1	0002.CSV	2036.55	0.0127161
CAM210_map1	0002.CSV	2040.4	0.0127441
CAM210_map1	0002.CSV	2044.26	0.0127867
CAM210_map1	0002.CSV	2048.12	0.0128264
CAM210_map1	0002.CSV	2051.97	0.0128458
CAM210_map1	0002.CSV	2055.83	0.0128556
CAM210_map1	0002.CSV	2059.69	0.012878
CAM210_map1	0002.CSV	2063.55	0.0129239
CAM210_map1	0002.CSV	2067.4	0.0129751
CAM210_map1	0002.CSV	2071.26	0.0130105
CAM210_map1	0002.CSV	2075.12	0.0130454
CAM210_map1	0002.CSV	2078.97	0.013092
CAM210_map1	0002.CSV	2082.83	0.0131342
CAM210_map1	0002.CSV	2086.69	0.0131646
CAM210_map1	0002.CSV	2090.55	0.0132006
CAM210_map1	0002.CSV	2094.4	0.0132518
CAM210_map1	0002.CSV	2098.26	0.0133037
CAM210_map1	0002.CSV	2102.12	0.0133535
CAM210_map1	0002.CSV	2105.97	0.0133968
CAM210_map1	0002.CSV	2109.83	0.0134289
CAM210_map1	0002.CSV	2113.69	0.0134683
CAM210_map1	0002.CSV	2117.55	0.0135098
CAM210_map1	0002.CSV	2121.4	0.0135312
CAM210_map1	0002.CSV	2125.26	0.0135492
CAM210_map1	0002.CSV	2129.12	0.0135821
CAM210_map1	0002.CSV	2132.97	0.0136133
CAM210_map1	0002.CSV	2136.83	0.0136352
CAM210_map1	0002.CSV	2140.69	0.0136551
CAM210_map1	0002.CSV	2144.55	0.0136714
CAM210_map1	0002.CSV	2148.4	0.0136842
CAM210_map1	0002.CSV	2152.26	0.0136908
CAM210_map1	0002.CSV	2156.12	0.0136673
CAM210_map1	0002.CSV	2159.97	0.0136172
CAM210_map1	0002.CSV	2163.83	0.0135766
CAM210_map1	0002.CSV	2167.69	0.0135777
CAM210_map1	0002.CSV	2171.55	0.0136147
CAM210_map1	0002.CSV	2175.4	0.0136491
CAM210_map1	0002.CSV	2179.26	0.0136501
CAM210_map1	0002.CSV	2183.12	0.0136399
CAM210_map1	0002.CSV	2186.97	0.0136411
CAM210_map1	0002.CSV	2190.83	0.0136326
CAM210_map1	0002.CSV	2194.69	0.0135959
CAM210_map1	0002.CSV	2198.55	0.0135568
CAM210_map1	0002.CSV	2202.4	0.013537
CAM210_map1	0002.CSV	2206.26	0.0135264
CAM210_map1	0002.CSV	2210.12	0.013507
CAM210_map1	0002.CSV	2213.97	0.0134786
CAM210_map1	0002.CSV	2217.83	0.0134517
CAM210_map1	0002.CSV	2221.69	0.0134221
CAM210_map1	0002.CSV	2225.54	0.0133962
CAM210_map1	0002.CSV	2229.4	0.0133734
CAM210_map1	0002.CSV	2233.26	0.0133674
CAM210_map1	0002.CSV	2237.12	0.0133859
CAM210_map1	0002.CSV	2240.97	0.013422
CAM210_map1	0002.CSV	2244.83	0.0134269
CAM210_map1	0002.CSV	2248.69	0.0134012
CAM210_map1	0002.CSV	2252.54	0.0133711
CAM210_map1	0002.CSV	2256.4	0.0133914
CAM210_map1	0002.CSV	2260.26	0.0134179
CAM210_map1	0002.CSV	2264.11	0.0134249
CAM210_map1	0002.CSV	2267.97	0.0134265
CAM210_map1	0002.CSV	2271.83	0.0134578
CAM210_map1	0002.CSV	2275.69	0.0134839
CAM210_map1	0002.CSV	2279.54	0.0135265
CAM210_map1	0002.CSV	2283.4	0.0135783
CAM210_map1	0002.CSV	2287.26	0.0136521
CAM210_map1	0002.CSV	2291.11	0.0137187
CAM210_map1	0002.CSV	2294.97	0.0138001
CAM210_map1	0002.CSV	2298.83	0.0138998
CAM210_map1	0002.CSV	2302.69	0.0140219
CAM210_map1	0002.CSV	2306.54	0.0141228
CAM210_map1	0002.CSV	2310.4	0.0142134
CAM210_map1	0002.CSV	2314.26	0.0142626
CAM210_map1	0002.CSV	2318.11	0.0142464
CAM210_map1	0002.CSV	2321.97	0.0141713
CAM210_map1	0002.CSV	2325.83	0.0140496
CAM210_map1	0002.CSV	2329.69	0.0139538
CAM210_map1	0002.CSV	2333.54	0.0139716
CAM210_map1	0002.CSV	2337.4	0.0140007
CAM210_map1	0002.CSV	2341.26	0.0140681
CAM210_map1	0002.CSV	2345.11	0.0142437
CAM210_map1	0002.CSV	2348.97	0.0141871
CAM210_map1	0002.CSV	2352.83	0.0136497
CAM210_map1	0002.CSV	2356.69	0.0126812
CAM210_map1	0002.CSV	2360.54	0.0119824
CAM210_map1	0002.CSV	2364.4	0.0123817
CAM210_map1	0002.CSV	2368.26	0.0133426
CAM210_map1	0002.CSV	2372.11	0.0140387
CAM210_map1	0002.CSV	2375.97	0.0143384
CAM210_map1	0002.CSV	2379.83	0.0144091
CAM210_map1	0002.CSV	2383.69	0.0143342
CAM210_map1	0002.CSV	2387.54	0.0141878
CAM210_map1	0002.CSV	2391.4	0.0140487
CAM210_map1	0002.CSV	2395.26	0.0139857
CAM210_map1	0002.CSV	2399.11	0.0139707
CAM210_map1	0002.CSV	2402.97	0.0139731
CAM210_map1	0002.CSV	2406.83	0.0139726
CAM210_map1	0002.CSV	2410.68	0.0139925
CAM210_map1	0002.CSV	2414.54	0.0139889
CAM210_map1	0002.CSV	2418.4	0.0139674
CAM210_map1	0002.CSV	2422.26	0.0139691
CAM210_map1	0002.CSV	2426.11	0.014025
CAM210_map1	0002.CSV	2429.97	0.0140735
CAM210_map1	0002.CSV	2433.83	0.0141106
CAM210_map1	0002.CSV	2437.68	0.0141522
CAM210_map1	0002.CSV	2441.54	0.0142134
CAM210_map1	0002.CSV	2445.4	0.0142624
CAM210_map1	0002.CSV	2449.26	0.014319
CAM210_map1	0002.CSV	2453.11	0.0144134
CAM210_map1	0002.CSV	2456.97	0.0145645
CAM210_map1	0002.CSV	2460.83	0.0147396
CAM210_map1	0002.CSV	2464.68	0.0149275
CAM210_map1	0002.CSV	2468.54	0.0151468
CAM210_map1	0002.CSV	2472.4	0.01541
CAM210_map1	0002.CSV	2476.26	0.0157154
CAM210_map1	0002.CSV	2480.11	0.01607
CAM210_map1	0002.CSV	2483.97	0.0164321
CAM210_map1	0002.CSV	2487.83	0.0167436
CAM210_map1	0002.CSV	2491.68	0.0169925
CAM210_map1	0002.CSV	2495.54	0.0171929
CAM210_map1	0002.CSV	2499.4	0.01734
CAM210_map1	0002.CSV	2503.26	0.017413
CAM210_map1	0002.CSV	2507.11	0.0174564
CAM210_map1	0002.CSV	2510.97	0.0175676
CAM210_map1	0002.CSV	2514.83	0.0177652
CAM210_map1	0002.CSV	2518.68	0.0179436
CAM210_map1	0002.CSV	2522.54	0.0179832
CAM210_map1	0002.CSV	2526.4	0.0178353
CAM210_map1	0002.CSV	2530.26	0.0175514
CAM210_map1	0002.CSV	2534.11	0.0172402
CAM210_map1	0002.CSV	2537.97	0.0170016
CAM210_map1	0002.CSV	2541.83	0.0168721
CAM210_map1	0002.CSV	2545.68	0.0168069
CAM210_map1	0002.CSV	2549.54	0.0167285
CAM210_map1	0002.CSV	2553.4	0.0165929
CAM210_map1	0002.CSV	2557.26	0.0164087
CAM210_map1	0002.CSV	2561.11	0.0162275
CAM210_map1	0002.CSV	2564.97	0.0160848
CAM210_map1	0002.CSV	2568.83	0.0159803
CAM210_map1	0002.CSV	2572.68	0.0159028
CAM210_map1	0002.CSV	2576.54	0.0158383
CAM210_map1	0002.CSV	2580.4	0.015782
CAM210_map1	0002.CSV	2584.25	0.0157397
CAM210_map1	0002.CSV	2588.11	0.0157128
CAM210_map1	0002.CSV	2591.97	0.015691
CAM210_map1	0002.CSV	2595.83	0.0156634
CAM210_map1	0002.CSV	2599.68	0.0156495
CAM210_map1	0002.CSV	2603.54	0.0156759
CAM210_map1	0002.CSV	2607.4	0.015727
CAM210_map1	0002.CSV	2611.25	0.0157763
CAM210_map1	0002.CSV	2615.11	0.0158185
CAM210_map1	0002.CSV	2618.97	0.0158646
CAM210_map1	0002.CSV	2622.82	0.0159362
CAM210_map1	0002.CSV	2626.68	0.0160187
CAM210_map1	0002.CSV	2630.54	0.0160657
CAM210_map1	0002.CSV	2634.4	0.0160608
CAM210_map1	0002.CSV	2638.25	0.0160034
CAM210_map1	0002.CSV	2642.11	0.0158936
CAM210_map1	0002.CSV	2645.97	0.0157678
CAM210_map1	0002.CSV	2649.82	0.0156731
CAM210_map1	0002.CSV	2653.68	0.0156143
CAM210_map1	0002.CSV	2657.54	0.0155687
CAM210_map1	0002.CSV	2661.4	0.0155318
CAM210_map1	0002.CSV	2665.25	0.0155272
CAM210_map1	0002.CSV	2669.11	0.0155875
CAM210_map1	0002.CSV	2672.97	0.0157149
CAM210_map1	0002.CSV	2676.82	0.0158177
CAM210_map1	0002.CSV	2680.68	0.0157584
CAM210_map1	0002.CSV	2684.54	0.0155802
CAM210_map1	0002.CSV	2688.4	0.0154631
CAM210_map1	0002.CSV	2692.25	0.0154596
CAM210_map1	0002.CSV	2696.11	0.0155019
CAM210_map1	0002.CSV	2699.97	0.0155429
CAM210_map1	0002.CSV	2703.82	0.0156027
CAM210_map1	0002.CSV	2707.68	0.0156964
CAM210_map1	0002.CSV	2711.54	0.0157804
CAM210_map1	0002.CSV	2715.4	0.0158787
CAM210_map1	0002.CSV	2719.25	0.0160857
CAM210_map1	0002.CSV	2723.11	0.0163409
CAM210_map1	0002.CSV	2726.97	0.016446
CAM210_map1	0002.CSV	2730.82	0.0163978
CAM210_map1	0002.CSV	2734.68	0.0163645
CAM210_map1	0002.CSV	2738.54	0.0163849
CAM210_map1	0002.CSV	2742.4	0.0164645
CAM210_map1	0002.CSV	2746.25	0.0166062
CAM210_map1	0002.CSV	2750.11	0.0166615
CAM210_map1	0002.CSV	2753.97	0.0166038
CAM210_map1	0002.CSV	2757.82	0.0165772
CAM210_map1	0002.CSV	2761.68	0.0166138
CAM210_map1	0002.CSV	2765.54	0.0167221
CAM210_map1	0002.CSV	2769.39	0.016964
CAM210_map1	0002.CSV	2773.25	0.017253
CAM210_map1	0002.CSV	2777.11	0.0174062
CAM210_map1	0002.CSV	2780.97	0.0175105
CAM210_map1	0002.CSV	2784.82	0.017817
CAM210_map1	0002.CSV	2788.68	0.0182706
CAM210_map1	0002.CSV	2792.54	0.018652
CAM210_map1	0002.CSV	2796.39	0.0189264
CAM210_map1	0002.CSV	2800.25	0.0191458
CAM210_map1	0002.CSV	2804.11	0.0194437
CAM210_map1	0002.CSV	2807.97	0.0199326
CAM210_map1	0002.CSV	2811.82	0.0204752
CAM210_map1	0002.CSV	2815.68	0.0210351
CAM210_map1	0002.CSV	2819.54	0.0218099
CAM210_map1	0002.CSV	2823.39	0.0229114
CAM210_map1	0002.CSV	2827.25	0.0245402
CAM210_map1	0002.CSV	2831.11	0.027285
CAM210_map1	0002.CSV	2834.97	0.0322758
CAM210_map1	0002.CSV	2838.82	0.041814
CAM210_map1	0002.CSV	2842.68	0.0585515
CAM210_map1	0002.CSV	2846.54	0.0785911
CAM210_map1	0002.CSV	2850.39	0.0878706
CAM210_map1	0002.CSV	2854.25	0.0792473
CAM210_map1	0002.CSV	2858.11	0.0634868
CAM210_map1	0002.CSV	2861.97	0.0514748
CAM210_map1	0002.CSV	2865.82	0.0451891
CAM210_map1	0002.CSV	2869.68	0.0429157
CAM210_map1	0002.CSV	2873.54	0.042058
CAM210_map1	0002.CSV	2877.39	0.0410977
CAM210_map1	0002.CSV	2881.25	0.0407523
CAM210_map1	0002.CSV	2885.11	0.0421183
CAM210_map1	0002.CSV	2888.97	0.0452483
CAM210_map1	0002.CSV	2892.82	0.049598
CAM210_map1	0002.CSV	2896.68	0.0547198
CAM210_map1	0002.CSV	2900.54	0.0609847
CAM210_map1	0002.CSV	2904.39	0.0703517
CAM210_map1	0002.CSV	2908.25	0.0861606
CAM210_map1	0002.CSV	2912.11	0.108713
CAM210_map1	0002.CSV	2915.97	0.128398
CAM210_map1	0002.CSV	2919.82	0.131222
CAM210_map1	0002.CSV	2923.68	0.116357
CAM210_map1	0002.CSV	2927.54	0.095511
CAM210_map1	0002.CSV	2931.39	0.0772467
CAM210_map1	0002.CSV	2935.25	0.063545
CAM210_map1	0002.CSV	2939.11	0.0541422
CAM210_map1	0002.CSV	2942.96	0.0483044
CAM210_map1	0002.CSV	2946.82	0.0453008
CAM210_map1	0002.CSV	2950.68	0.0445363
CAM210_map1	0002.CSV	2954.54	0.0444384
CAM210_map1	0002.CSV	2958.39	0.0428591
CAM210_map1	0002.CSV	2962.25	0.0392583
CAM210_map1	0002.CSV	2966.11	0.0348005
CAM210_map1	0002.CSV	2969.96	0.0307962
CAM210_map1	0002.CSV	2973.82	0.0277433
CAM210_map1	0002.CSV	2977.68	0.0253687
CAM210_map1	0002.CSV	2981.53	0.0233093
CAM210_map1	0002.CSV	2985.39	0.021605
CAM210_map1	0002.CSV	2989.25	0.0205073
CAM210_map1	0002.CSV	2993.11	0.0199098
CAM210_map1	0002.CSV	2996.96	0.019475
CAM210_map1	0002.CSV	3000.82	0.019136
CAM210_map1	0002.CSV	3004.68	0.0190024
CAM210_map1	0002.CSV	3008.53	0.0190822
CAM210_map1	0002.CSV	3012.39	0.0191432
CAM210_map1	0002.CSV	3016.25	0.0189259
CAM210_map1	0002.CSV	3020.11	0.0185087
CAM210_map1	0002.CSV	3023.96	0.0181371
CAM210_map1	0002.CSV	3027.82	0.0179446
CAM210_map1	0002.CSV	3031.68	0.0179375
CAM210_map1	0002.CSV	3035.53	0.0179936
CAM210_map1	0002.CSV	3039.39	0.0180404
CAM210_map1	0002.CSV	3043.25	0.0180605
CAM210_map1	0002.CSV	3047.11	0.0180061
CAM210_map1	0002.CSV	3050.96	0.017907
CAM210_map1	0002.CSV	3054.82	0.0177934
CAM210_map1	0002.CSV	3058.68	0.0176951
CAM210_map1	0002.CSV	3062.53	0.0177204
CAM210_map1	0002.CSV	3066.39	0.0178092
CAM210_map1	0002.CSV	3070.25	0.0178007
CAM210_map1	0002.CSV	3074.11	0.0178121
CAM210_map1	0002.CSV	3077.96	0.0179811
CAM210_map1	0002.CSV	3081.82	0.0181401
CAM210_map1	0002.CSV	3085.68	0.0181215
CAM210_map1	0002.CSV	3089.53	0.0179703
CAM210_map1	0002.CSV	3093.39	0.0178307
CAM210_map1	0002.CSV	3097.25	0.0178162
CAM210_map1	0002.CSV	3101.11	0.017892
CAM210_map1	0002.CSV	3104.96	0.0179931
CAM210_map1	0002.CSV	3108.82	0.0181247
CAM210_map1	0002.CSV	3112.68	0.0182619
CAM210_map1	0002.CSV	3116.53	0.0183503
CAM210_map1	0002.CSV	3120.39	0.018334
CAM210_map1	0002.CSV	3124.25	0.0182614
CAM210_map1	0002.CSV	3128.11	0.0182193
CAM210_map1	0002.CSV	3131.96	0.0182104
CAM210_map1	0002.CSV	3135.82	0.0182797
CAM210_map1	0002.CSV	3139.68	0.0183664
CAM210_map1	0002.CSV	3143.53	0.0183723
CAM210_map1	0002.CSV	3147.39	0.0184589
CAM210_map1	0002.CSV	3151.25	0.0186549
CAM210_map1	0002.CSV	3155.1	0.0187018
CAM210_map1	0002.CSV	3158.96	0.0185942
CAM210_map1	0002.CSV	3162.82	0.0185655
CAM210_map1	0002.CSV	3166.68	0.018656
CAM210_map1	0002.CSV	3170.53	0.0187799
CAM210_map1	0002.CSV	3174.39	0.0189155
CAM210_map1	0002.CSV	3178.25	0.0190629
CAM210_map1	0002.CSV	3182.1	0.0192187
CAM210_map1	0002.CSV	3185.96	0.019399
CAM210_map1	0002.CSV	3189.82	0.0195663
CAM210_map1	0002.CSV	3193.68	0.0196707
CAM210_map1	0002.CSV	3197.53	0.0197595
CAM210_map1	0002.CSV	3201.39	0.0198841
CAM210_map1	0002.CSV	3205.25	0.0200269
CAM210_map1	0002.CSV	3209.1	0.0201421
CAM210_map1	0002.CSV	3212.96	0.0202208
CAM210_map1	0002.CSV	3216.82	0.020293
CAM210_map1	0002.CSV	3220.68	0.0203586
CAM210_map1	0002.CSV	3224.53	0.0204405
CAM210_map1	0002.CSV	3228.39	0.0206144
CAM210_map1	0002.CSV	3232.25	0.0208169
CAM210_map1	0002.CSV	3236.1	0.0208769
CAM210_map1	0002.CSV	3239.96	0.0208799
CAM210_map1	0002.CSV	3243.82	0.0210069
CAM210_map1	0002.CSV	3247.68	0.0211664
CAM210_map1	0002.CSV	3251.53	0.0212619
CAM210_map1	0002.CSV	3255.39	0.0213244
CAM210_map1	0002.CSV	3259.25	0.0213213
CAM210_map1	0002.CSV	3263.1	0.0213249
CAM210_map1	0002.CSV	3266.96	0.0214736
CAM210_map1	0002.CSV	3270.82	0.0217086
CAM210_map1	0002.CSV	3274.68	0.0218505
CAM210_map1	0002.CSV	3278.53	0.0218295
CAM210_map1	0002.CSV	3282.39	0.0217792
CAM210_map1	0002.CSV	3286.25	0.0218736
CAM210_map1	0002.CSV	3290.1	0.0221016
CAM210_map1	0002.CSV	3293.96	0.022268
CAM210_map1	0002.CSV	3297.82	0.0222947
CAM210_map1	0002.CSV	3301.67	0.0223444
CAM210_map1	0002.CSV	3305.53	0.0224727
CAM210_map1	0002.CSV	3309.39	0.0225357
CAM210_map1	0002.CSV	3313.25	0.0224887
CAM210_map1	0002.CSV	3317.1	0.0224734
CAM210_map1	0002.CSV	3320.96	0.0225995
CAM210_map1	0002.CSV	3324.82	0.0227947
CAM210_map1	0002.CSV	3328.67	0.0229027
CAM210_map1	0002.CSV	3332.53	0.022951
CAM210_map1	0002.CSV	3336.39	0.0230898
CAM210_map1	0002.CSV	3340.24	0.0232725
CAM210_map1	0002.CSV	3344.1	0.0233781
CAM210_map1	0002.CSV	3347.96	0.0234163
CAM210_map1	0002.CSV	3351.82	0.0234027
CAM210_map1	0002.CSV	3355.67	0.0233848
CAM210_map1	0002.CSV	3359.53	0.0234482
CAM210_map1	0002.CSV	3363.39	0.0235633
CAM210_map1	0002.CSV	3367.24	0.023628
CAM210_map1	0002.CSV	3371.1	0.0235943
CAM210_map1	0002.CSV	3374.96	0.0235001
CAM210_map1	0002.CSV	3378.82	0.0234135
CAM210_map1	0002.CSV	3382.67	0.0233607
CAM210_map1	0002.CSV	3386.53	0.0233593
CAM210_map1	0002.CSV	3390.39	0.0233899
CAM210_map1	0002.CSV	3394.24	0.0233987
CAM210_map1	0002.CSV	3398.1	0.0233843
CAM210_map1	0002.CSV	3401.96	0.0233528
CAM210_map1	0002.CSV	3405.82	0.0232815
CAM210_map1	0002.CSV	3409.67	0.0231802
CAM210_map1	0002.CSV	3413.53	0.0230037
CAM210_map1	0002.CSV	3417.39	0.0227297
CAM210_map1	0002.CSV	3421.24	0.0224928
CAM210_map1	0002.CSV	3425.1	0.0223993
CAM210_map1	0002.CSV	3428.96	0.0224366
CAM210_map1	0002.CSV	3432.82	0.0225082
CAM210_map1	0002.CSV	3436.67	0.0224628
CAM210_map1	0002.CSV	3440.53	0.0222794
CAM210_map1	0002.CSV	3444.39	0.0220719
CAM210_map1	0002.CSV	3448.24	0.0218724
CAM210_map1	0002.CSV	3452.1	0.0216687
CAM210_map1	0002.CSV	3455.96	0.0215289
CAM210_map1	0002.CSV	3459.82	0.021472
CAM210_map1	0002.CSV	3463.67	0.0214529
CAM210_map1	0002.CSV	3467.53	0.0214112
CAM210_map1	0002.CSV	3471.39	0.0212679
CAM210_map1	0002.CSV	3475.24	0.0210773
CAM210_map1	0002.CSV	3479.1	0.0209288
CAM210_map1	0002.CSV	3482.96	0.0207822
CAM210_map1	0002.CSV	3486.82	0.0206605
CAM210_map1	0002.CSV	3490.67	0.0206086
CAM210_map1	0002.CSV	3494.53	0.0205788
CAM210_map1	0002.CSV	3498.39	0.0205245
CAM210_map1	0002.CSV	3502.24	0.0204243
CAM210_map1	0002.CSV	3506.1	0.0202741
CAM210_map1	0002.CSV	3509.96	0.0201414
CAM210_map1	0002.CSV	3513.81	0.0200559
CAM210_map1	0002.CSV	3517.67	0.0199381
CAM210_map1	0002.CSV	3521.53	0.0198192
CAM210_map1	0002.CSV	3525.39	0.0197231
CAM210_map1	0002.CSV	3529.24	0.0195629
CAM210_map1	0002.CSV	3533.1	0.0193986
CAM210_map1	0002.CSV	3536.96	0.0193042
CAM210_map1	0002.CSV	3540.81	0.0192677
CAM210_map1	0002.CSV	3544.67	0.0192372
CAM210_map1	0002.CSV	3548.53	0.0190957
CAM210_map1	0002.CSV	3552.39	0.01883
CAM210_map1	0002.CSV	3556.24	0.0185875
CAM210_map1	0002.CSV	3560.1	0.0183896
CAM210_map1	0002.CSV	3563.96	0.0181197
CAM210_map1	0002.CSV	3567.81	0.0178551
CAM210_map1	0002.CSV	3571.67	0.0176951
CAM210_map1	0002.CSV	3575.53	0.0174959
CAM210_map1	0002.CSV	3579.39	0.0172871
CAM210_map1	0002.CSV	3583.24	0.0171153
CAM210_map1	0002.CSV	3587.1	0.0168782
CAM210_map1	0002.CSV	3590.96	0.0165277
CAM210_map1	0002.CSV	3594.81	0.0161862
CAM210_map1	0002.CSV	3598.67	0.0159407
CAM210_map1	0002.CSV	3602.53	0.015668
CAM210_map1	0002.CSV	3606.39	0.0151972
CAM210_map1	0002.CSV	3610.24	0.0146291
CAM210_map1	0002.CSV	3614.1	0.0142813
CAM210_map1	0002.CSV	3617.96	0.0141843
CAM210_map1	0002.CSV	3621.81	0.0140689
CAM210_map1	0002.CSV	3625.67	0.013797
CAM210_map1	0002.CSV	3629.53	0.0134793
CAM210_map1	0002.CSV	3633.39	0.0132816
CAM210_map1	0002.CSV	3637.24	0.0130822
CAM210_map1	0002.CSV	3641.1	0.0128273
CAM210_map1	0002.CSV	3644.96	0.0126087
CAM210_map1	0002.CSV	3648.81	0.0125829
CAM210_map1	0002.CSV	3652.67	0.0126655
CAM210_map1	0002.CSV	3656.53	0.0126345
CAM210_map1	0002.CSV	3660.38	0.012496
CAM210_map1	0002.CSV	3664.24	0.0122046
CAM210_map1	0002.CSV	3668.1	0.0118574
CAM210_map1	0002.CSV	3671.96	0.0117174
CAM210_map1	0002.CSV	3675.81	0.0119033
CAM210_map1	0002.CSV	3679.67	0.0120134
CAM210_map1	0002.CSV	3683.53	0.0119513
CAM210_map1	0002.CSV	3687.38	0.0119697
CAM210_map1	0002.CSV	3691.24	0.0121622
CAM210_map1	0002.CSV	3695.1	0.0121428
CAM210_map1	0002.CSV	3698.95	0.0119276
CAM210_map1	0002.CSV	3702.81	0.0117052
CAM210_map1	0002.CSV	3706.67	0.0115007
CAM210_map1	0002.CSV	3710.53	0.0114102
CAM210_map1	0002.CSV	3714.38	0.011475
CAM210_map1	0002.CSV	3718.24	0.0114492
CAM210_map1	0002.CSV	3722.1	0.0113493
CAM210_map1	0002.CSV	3725.95	0.0112506
CAM210_map1	0002.CSV	3729.81	0.0111229
CAM210_map1	0002.CSV	3733.67	0.011104
CAM210_map1	0002.CSV	3737.53	0.0112639
CAM210_map1	0002.CSV	3741.38	0.0111826
CAM210_map1	0002.CSV	3745.24	0.0108818
CAM210_map1	0002.CSV	3749.1	0.0108607
CAM210_map1	0002.CSV	3752.95	0.0111119
CAM210_map1	0002.CSV	3756.81	0.0111693
CAM210_map1	0002.CSV	3760.67	0.0111151
CAM210_map1	0002.CSV	3764.53	0.0110802
CAM210_map1	0002.CSV	3768.38	0.0110846
CAM210_map1	0002.CSV	3772.24	0.0110728
CAM210_map1	0002.CSV	3776.1	0.01102
CAM210_map1	0002.CSV	3779.95	0.011026
CAM210_map1	0002.CSV	3783.81	0.0110965
CAM210_map1	0002.CSV	3787.67	0.0111009
CAM210_map1	0002.CSV	3791.53	0.010989
CAM210_map1	0002.CSV	3795.38	0.0108243
CAM210_map1	0002.CSV	3799.24	0.010765
CAM210_map1	0002.CSV	3803.1	0.0108958
CAM210_map1	0002.CSV	3806.95	0.0109681
CAM210_map1	0002.CSV	3810.81	0.0108196
CAM210_map1	0002.CSV	3814.67	0.0105954
CAM210_map1	0002.CSV	3818.53	0.0105918
CAM210_map1	0002.CSV	3822.38	0.0108099
CAM210_map1	0002.CSV	3826.24	0.0108434
CAM210_map1	0002.CSV	3830.1	0.0107522
CAM210_map1	0002.CSV	3833.95	0.0107086
CAM210_map1	0002.CSV	3837.81	0.010842
CAM210_map1	0002.CSV	3841.67	0.01103
CAM210_map1	0002.CSV	3845.53	0.0109093
CAM210_map1	0002.CSV	3849.38	0.010575
CAM210_map1	0002.CSV	3853.24	0.0104811
CAM210_map1	0002.CSV	3857.1	0.010635
CAM210_map1	0002.CSV	3860.95	0.0105195
CAM210_map1	0002.CSV	3864.81	0.0103879
CAM210_map1	0002.CSV	3868.67	0.0104811
CAM210_map1	0002.CSV	3872.52	0.0106286
CAM210_map1	0002.CSV	3876.38	0.0106227
CAM210_map1	0002.CSV	3880.24	0.0106236
CAM210_map1	0002.CSV	3884.1	0.0107902
CAM210_map1	0002.CSV	3887.95	0.0108404
CAM210_map1	0002.CSV	3891.81	0.0106763
CAM210_map1	0002.CSV	3895.67	0.0104285
CAM210_map1	0002.CSV	3899.52	0.010268
CAM210_map1	0002.CSV	3903.38	0.0105266
CAM210_map1	0002.CSV	3907.24	0.0108127
CAM210_map1	0002.CSV	3911.1	0.0107169
CAM210_map1	0002.CSV	3914.95	0.0105137
CAM210_map1	0002.CSV	3918.81	0.010458
CAM210_map1	0002.CSV	3922.67	0.0105368
CAM210_map1	0002.CSV	3926.52	0.0106285
CAM210_map1	0002.CSV	3930.38	0.0107845
CAM210_map1	0002.CSV	3934.24	0.0108908
CAM210_map1	0002.CSV	3938.09	0.0108075
CAM210_map1	0002.CSV	3941.95	0.0106891
CAM210_map1	0002.CSV	3945.81	0.0106515
CAM210_map1	0002.CSV	3949.67	0.0106431
CAM210_map1	0002.CSV	3953.52	0.0106324
CAM210_map1	0002.CSV	3957.38	0.0106232
CAM210_map1	0002.CSV	3961.24	0.0106411
CAM210_map1	0002.CSV	3965.09	0.0106729
CAM210_map1	0002.CSV	3968.95	0.0106767
CAM210_map1	0002.CSV	3972.81	0.0106551
CAM210_map1	0002.CSV	3976.67	0.0106429
CAM210_map1	0002.CSV	3980.52	0.010665
CAM210_map1	0002.CSV	3984.38	0.0107119
CAM210_map1	0002.CSV	3988.24	0.0107186
CAM210_map1	0002.CSV	3992.09	0.0106868
CAM210_map1	0002.CSV	3995.95	0.0106746
CAM210_map1	0002.CSV	3999.81	0.0106684
CAM210_map1	0003.CSV	674.992	0.0414695
CAM210_map1	0003.CSV	678.849	0.0405149
CAM210_map1	0003.CSV	682.706	0.0397156
CAM210_map1	0003.CSV	686.563	0.0394496
CAM210_map1	0003.CSV	690.42	0.0412095
CAM210_map1	0003.CSV	694.277	0.0459066
CAM210_map1	0003.CSV	698.134	0.0498851
CAM210_map1	0003.CSV	701.991	0.0498603
CAM210_map1	0003.CSV	705.849	0.0517245
CAM210_map1	0003.CSV	709.706	0.0587173
CAM210_map1	0003.CSV	713.563	0.0603324
CAM210_map1	0003.CSV	717.42	0.0525343
CAM210_map1	0003.CSV	721.277	0.0444112
CAM210_map1	0003.CSV	725.134	0.0395486
CAM210_map1	0003.CSV	728.991	0.034972
CAM210_map1	0003.CSV	732.848	0.0306228
CAM210_map1	0003.CSV	736.705	0.0281317
CAM210_map1	0003.CSV	740.562	0.0275159
CAM210_map1	0003.CSV	744.42	0.0276346
CAM210_map1	0003.CSV	748.277	0.0281265
CAM210_map1	0003.CSV	752.134	0.0288755
CAM210_map1	0003.CSV	755.991	0.0296783
CAM210_map1	0003.CSV	759.848	0.0305424
CAM210_map1	0003.CSV	763.705	0.0315898
CAM210_map1	0003.CSV	767.562	0.0325477
CAM210_map1	0003.CSV	771.419	0.0332577
CAM210_map1	0003.CSV	775.276	0.0339136
CAM210_map1	0003.CSV	779.133	0.0346686
CAM210_map1	0003.CSV	782.99	0.0351808
CAM210_map1	0003.CSV	786.848	0.0354473
CAM210_map1	0003.CSV	790.705	0.0360502
CAM210_map1	0003.CSV	794.562	0.0372735
CAM210_map1	0003.CSV	798.419	0.0386625
CAM210_map1	0003.CSV	802.276	0.0398321
CAM210_map1	0003.CSV	806.133	0.0410383
CAM210_map1	0003.CSV	809.99	0.0427027
CAM210_map1	0003.CSV	813.847	0.0448675
CAM210_map1	0003.CSV	817.704	0.0475162
CAM210_map1	0003.CSV	821.562	0.0508244
CAM210_map1	0003.CSV	825.419	0.0549799
CAM210_map1	0003.CSV	829.276	0.0601437
CAM210_map1	0003.CSV	833.133	0.0666696
CAM210_map1	0003.CSV	836.99	0.0750498
CAM210_map1	0003.CSV	840.847	0.0849515
CAM210_map1	0003.CSV	844.704	0.096541
CAM210_map1	0003.CSV	848.561	0.111476
CAM210_map1	0003.CSV	852.418	0.126252
CAM210_map1	0003.CSV	856.275	0.130482
CAM210_map1	0003.CSV	860.132	0.118779
CAM210_map1	0003.CSV	863.99	0.0962301
CAM210_map1	0003.CSV	867.847	0.0718149
CAM210_map1	0003.CSV	871.704	0.0522905
CAM210_map1	0003.CSV	875.561	0.0396159
CAM210_map1	0003.CSV	879.418	0.0318215
CAM210_map1	0003.CSV	883.275	0.0266151
CAM210_map1	0003.CSV	887.132	0.0233648
CAM210_map1	0003.CSV	890.989	0.0219347
CAM210_map1	0003.CSV	894.846	0.0216684
CAM210_map1	0003.CSV	898.703	0.0220172
CAM210_map1	0003.CSV	902.561	0.0226568
CAM210_map1	0003.CSV	906.418	0.0232614
CAM210_map1	0003.CSV	910.275	0.0236728
CAM210_map1	0003.CSV	914.132	0.0240234
CAM210_map1	0003.CSV	917.989	0.0244815
CAM210_map1	0003.CSV	921.846	0.0251323
CAM210_map1	0003.CSV	925.703	0.0260323
CAM210_map1	0003.CSV	929.56	0.0270815
CAM210_map1	0003.CSV	933.417	0.0279377
CAM210_map1	0003.CSV	937.274	0.0283484
CAM210_map1	0003.CSV	941.131	0.0284654
CAM210_map1	0003.CSV	944.989	0.0287221
CAM210_map1	0003.CSV	948.846	0.0294726
CAM210_map1	0003.CSV	952.703	0.0305977
CAM210_map1	0003.CSV	956.56	0.0315205
CAM210_map1	0003.CSV	960.417	0.0318572
CAM210_map1	0003.CSV	964.274	0.031932
CAM210_map1	0003.CSV	968.131	0.0322609
CAM210_map1	0003.CSV	971.988	0.0329236
CAM210_map1	0003.CSV	975.845	0.0337088
CAM210_map1	0003.CSV	979.702	0.0345155
CAM210_map1	0003.CSV	983.559	0.0353151
CAM210_map1	0003.CSV	987.417	0.0361065
CAM210_map1	0003.CSV	991.274	0.0369366
CAM210_map1	0003.CSV	995.131	0.0378634
CAM210_map1	0003.CSV	998.988	0.038861
CAM210_map1	0003.CSV	1002.85	0.0398788
CAM210_map1	0003.CSV	1006.7	0.0408496
CAM210_map1	0003.CSV	1010.56	0.0416967
CAM210_map1	0003.CSV	1014.42	0.0423557
CAM210_map1	0003.CSV	1018.27	0.0429224
CAM210_map1	0003.CSV	1022.13	0.0435168
CAM210_map1	0003.CSV	1025.99	0.0441719
CAM210_map1	0003.CSV	1029.85	0.0448897
CAM210_map1	0003.CSV	1033.7	0.0456523
CAM210_map1	0003.CSV	1037.56	0.0463673
CAM210_map1	0003.CSV	1041.42	0.0470043
CAM210_map1	0003.CSV	1045.27	0.0476325
CAM210_map1	0003.CSV	1049.13	0.0483161
CAM210_map1	0003.CSV	1052.99	0.0490603
CAM210_map1	0003.CSV	1056.84	0.0499774
CAM210_map1	0003.CSV	1060.7	0.0511536
CAM210_map1	0003.CSV	1064.56	0.052587
CAM210_map1	0003.CSV	1068.42	0.0544049
CAM210_map1	0003.CSV	1072.27	0.0570798
CAM210_map1	0003.CSV	1076.13	0.0611804
CAM210_map1	0003.CSV	1079.99	0.0652127
CAM210_map1	0003.CSV	1083.84	0.0652132
CAM210_map1	0003.CSV	1087.7	0.0611245
CAM210_map1	0003.CSV	1091.56	0.0575884
CAM210_map1	0003.CSV	1095.41	0.0564709
CAM210_map1	0003.CSV	1099.27	0.0564483
CAM210_map1	0003.CSV	1103.13	0.0570931
CAM210_map1	0003.CSV	1106.99	0.0586694
CAM210_map1	0003.CSV	1110.84	0.0600143
CAM210_map1	0003.CSV	1114.7	0.0592
CAM210_map1	0003.CSV	1118.56	0.0564341
CAM210_map1	0003.CSV	1122.41	0.0537989
CAM210_map1	0003.CSV	1126.27	0.0523571
CAM210_map1	0003.CSV	1130.13	0.0517043
CAM210_map1	0003.CSV	1133.99	0.0513783
CAM210_map1	0003.CSV	1137.84	0.0513108
CAM210_map1	0003.CSV	1141.7	0.0514655
CAM210_map1	0003.CSV	1145.56	0.051716
CAM210_map1	0003.CSV	1149.41	0.0519663
CAM210_map1	0003.CSV	1153.27	0.0522305
CAM210_map1	0003.CSV	1157.13	0.0525968
CAM210_map1	0003.CSV	1160.99	0.0531143
CAM210_map1	0003.CSV	1164.84	0.0536672
CAM210_map1	0003.CSV	1168.7	0.0540537
CAM210_map1	0003.CSV	1172.56	0.0541429
CAM210_map1	0003.CSV	1176.41	0.0539594
CAM210_map1	0003.CSV	1180.27	0.0536677
CAM210_map1	0003.CSV	1184.13	0.0534853
CAM210_map1	0003.CSV	1187.99	0.0534106
CAM210_map1	0003.CSV	1191.84	0.0531618
CAM210_map1	0003.CSV	1195.7	0.0526479
CAM210_map1	0003.CSV	1199.56	0.0521966
CAM210_map1	0003.CSV	1203.41	0.0521252
CAM210_map1	0003.CSV	1207.27	0.0524769
CAM210_map1	0003.CSV	1211.13	0.0530128
CAM210_map1	0003.CSV	1214.98	0.0533988
CAM210_map1	0003.CSV	1218.84	0.0536046
CAM210_map1	0003.CSV	1222.7	0.0538981
CAM210_map1	0003.CSV	1226.56	0.0545012
CAM210_map1	0003.CSV	1230.41	0.0553985
CAM210_map1	0003.CSV	1234.27	0.0562798
CAM210_map1	0003.CSV	1238.13	0.056861
CAM210_map1	0003.CSV	1241.98	0.0572444
CAM210_map1	0003.CSV	1245.84	0.0576702
CAM210_map1	0003.CSV	1249.7	0.0582352
CAM210_map1	0003.CSV	1253.56	0.0589204
CAM210_map1	0003.CSV	1257.41	0.0595656
CAM210_map1	0003.CSV	1261.27	0.06004
CAM210_map1	0003.CSV	1265.13	0.0605453
CAM210_map1	0003.CSV	1268.98	0.0613985
CAM210_map1	0003.CSV	1272.84	0.0626008
CAM210_map1	0003.CSV	1276.7	0.0638238
CAM210_map1	0003.CSV	1280.56	0.0648791
CAM210_map1	0003.CSV	1284.41	0.0659879
CAM210_map1	0003.CSV	1288.27	0.0673206
CAM210_map1	0003.CSV	1292.13	0.0685976
CAM210_map1	0003.CSV	1295.98	0.0695189
CAM210_map1	0003.CSV	1299.84	0.0700784
CAM210_map1	0003.CSV	1303.7	0.0704892
CAM210_map1	0003.CSV	1307.56	0.0710804
CAM210_map1	0003.CSV	1311.41	0.0721036
CAM210_map1	0003.CSV	1315.27	0.0734859
CAM210_map1	0003.CSV	1319.13	0.074717
CAM210_map1	0003.CSV	1322.98	0.0755355
CAM210_map1	0003.CSV	1326.84	0.0764247
CAM210_map1	0003.CSV	1330.7	0.0776806
CAM210_map1	0003.CSV	1334.56	0.0791194
CAM210_map1	0003.CSV	1338.41	0.0807059
CAM210_map1	0003.CSV	1342.27	0.0824562
CAM210_map1	0003.CSV	1346.13	0.0843086
CAM210_map1	0003.CSV	1349.98	0.0863447
CAM210_map1	0003.CSV	1353.84	0.0884657
CAM210_map1	0003.CSV	1357.7	0.09075
CAM210_map1	0003.CSV	1361.56	0.0936999
CAM210_map1	0003.CSV	1365.41	0.0971367
CAM210_map1	0003.CSV	1369.27	0.100644
CAM210_map1	0003.CSV	1373.13	0.104975
CAM210_map1	0003.CSV	1376.98	0.109673
CAM210_map1	0003.CSV	1380.84	0.113076
CAM210_map1	0003.CSV	1384.7	0.115946
CAM210_map1	0003.CSV	1388.56	0.119627
CAM210_map1	0003.CSV	1392.41	0.124135
CAM210_map1	0003.CSV	1396.27	0.12985
CAM210_map1	0003.CSV	1400.13	0.13666
CAM210_map1	0003.CSV	1403.98	0.143839
CAM210_map1	0003.CSV	1407.84	0.151565
CAM210_map1	0003.CSV	1411.7	0.158853
CAM210_map1	0003.CSV	1415.55	0.164499
CAM210_map1	0003.CSV	1419.41	0.167223
CAM210_map1	0003.CSV	1423.27	0.167031
CAM210_map1	0003.CSV	1427.12	0.167283
CAM210_map1	0003.CSV	1430.98	0.169106
CAM210_map1	0003.CSV	1434.84	0.170214
CAM210_map1	0003.CSV	1438.7	0.169538
CAM210_map1	0003.CSV	1442.55	0.169667
CAM210_map1	0003.CSV	1446.41	0.171938
CAM210_map1	0003.CSV	1450.27	0.175686
CAM210_map1	0003.CSV	1454.12	0.180867
CAM210_map1	0003.CSV	1457.98	0.189646
CAM210_map1	0003.CSV	1461.84	0.198394
CAM210_map1	0003.CSV	1465.7	0.202594
CAM210_map1	0003.CSV	1469.55	0.199204
CAM210_map1	0003.CSV	1473.41	0.180864
CAM210_map1	0003.CSV	1477.27	0.156147
CAM210_map1	0003.CSV	1481.12	0.139358
CAM210_map1	0003.CSV	1484.98	0.127235
CAM210_map1	0003.CSV	1488.84	0.116339
CAM210_map1	0003.CSV	1492.7	0.108241
CAM210_map1	0003.CSV	1496.55	0.103364
CAM210_map1	0003.CSV	1500.41	0.0999134
CAM210_map1	0003.CSV	1504.27	0.0970394
CAM210_map1	0003.CSV	1508.12	0.093477
CAM210_map1	0003.CSV	1511.98	0.090638
CAM210_map1	0003.CSV	1515.84	0.0891282
CAM210_map1	0003.CSV	1519.7	0.0885238
CAM210_map1	0003.CSV	1523.55	0.0918596
CAM210_map1	0003.CSV	1527.41	0.100681
CAM210_map1	0003.CSV	1531.27	0.114942
CAM210_map1	0003.CSV	1535.12	0.133042
CAM210_map1	0003.CSV	1538.98	0.142323
CAM210_map1	0003.CSV	1542.84	0.122578
CAM210_map1	0003.CSV	1546.7	0.100094
CAM210_map1	0003.CSV	1550.55	0.0874963
CAM210_map1	0003.CSV	1554.41	0.0789119
CAM210_map1	0003.CSV	1558.27	0.0754203
CAM210_map1	0003.CSV	1562.12	0.0798483
CAM210_map1	0003.CSV	1565.98	0.0898042
CAM210_map1	0003.CSV	1569.84	0.104464
CAM210_map1	0003.CSV	1573.69	0.114972
CAM210_map1	0003.CSV	1577.55	0.107946
CAM210_map1	0003.CSV	1581.41	0.0886772
CAM210_map1	0003.CSV	1585.27	0.0689797
CAM210_map1	0003.CSV	1589.12	0.0532257
CAM210_map1	0003.CSV	1592.98	0.0429245
CAM210_map1	0003.CSV	1596.84	0.0372024
CAM210_map1	0003.CSV	1600.69	0.0342901
CAM210_map1	0003.CSV	1604.55	0.0329871
CAM210_map1	0003.CSV	1608.41	0.0327413
CAM210_map1	0003.CSV	1612.27	0.0330684
CAM210_map1	0003.CSV	1616.12	0.0335016
CAM210_map1	0003.CSV	1619.98	0.0335748
CAM210_map1	0003.CSV	1623.84	0.0329845
CAM210_map1	0003.CSV	1627.69	0.0319016
CAM210_map1	0003.CSV	1631.55	0.0304609
CAM210_map1	0003.CSV	1635.41	0.0284805
CAM210_map1	0003.CSV	1639.27	0.0266081
CAM210_map1	0003.CSV	1643.12	0.0254064
CAM210_map1	0003.CSV	1646.98	0.0244262
CAM210_map1	0003.CSV	1650.84	0.0236357
CAM210_map1	0003.CSV	1654.69	0.0231668
CAM210_map1	0003.CSV	1658.55	0.0227195
CAM210_map1	0003.CSV	1662.41	0.0222196
CAM210_map1	0003.CSV	1666.27	0.0217535
CAM210_map1	0003.CSV	1670.12	0.0213644
CAM210_map1	0003.CSV	1673.98	0.0210001
CAM210_map1	0003.CSV	1677.84	0.0205414
CAM210_map1	0003.CSV	1681.69	0.020111
CAM210_map1	0003.CSV	1685.55	0.0199264
CAM210_map1	0003.CSV	1689.41	0.0196707
CAM210_map1	0003.CSV	1693.27	0.0192015
CAM210_map1	0003.CSV	1697.12	0.0188394
CAM210_map1	0003.CSV	1700.98	0.0187929
CAM210_map1	0003.CSV	1704.84	0.0186692
CAM210_map1	0003.CSV	1708.69	0.0183882
CAM210_map1	0003.CSV	1712.55	0.0181405
CAM210_map1	0003.CSV	1716.41	0.0182961
CAM210_map1	0003.CSV	1720.27	0.0185901
CAM210_map1	0003.CSV	1724.12	0.0184534
[truncated: 73,945 more rows]

## Sheet: CAM210_map2
Map	Select spectrum number	Wavenumbers	Absorbance
CAM210_map2	0001.CSV	674.992	0.0362849
CAM210_map2	0001.CSV	678.849	0.0360415
CAM210_map2	0001.CSV	682.706	0.036132
CAM210_map2	0001.CSV	686.563	0.0364853
CAM210_map2	0001.CSV	690.42	0.0379748
CAM210_map2	0001.CSV	694.277	0.0411608
CAM210_map2	0001.CSV	698.134	0.0465971
CAM210_map2	0001.CSV	701.991	0.0564982
CAM210_map2	0001.CSV	705.849	0.0720647
CAM210_map2	0001.CSV	709.706	0.0847692
CAM210_map2	0001.CSV	713.563	0.0797906
CAM210_map2	0001.CSV	717.42	0.0594722
CAM210_map2	0001.CSV	721.277	0.0409083
CAM210_map2	0001.CSV	725.134	0.0319343
CAM210_map2	0001.CSV	728.991	0.0288304
CAM210_map2	0001.CSV	732.848	0.0277692
CAM210_map2	0001.CSV	736.705	0.0273122
CAM210_map2	0001.CSV	740.562	0.0273071
CAM210_map2	0001.CSV	744.42	0.0278217
CAM210_map2	0001.CSV	748.277	0.0287141
CAM210_map2	0001.CSV	752.134	0.0297033
CAM210_map2	0001.CSV	755.991	0.0307659
CAM210_map2	0001.CSV	759.848	0.0318447
CAM210_map2	0001.CSV	763.705	0.033001
CAM210_map2	0001.CSV	767.562	0.034187
CAM210_map2	0001.CSV	771.419	0.0352921
CAM210_map2	0001.CSV	775.276	0.0362926
CAM210_map2	0001.CSV	779.133	0.0372261
CAM210_map2	0001.CSV	782.99	0.0378041
CAM210_map2	0001.CSV	786.848	0.0380314
CAM210_map2	0001.CSV	790.705	0.0384806
CAM210_map2	0001.CSV	794.562	0.0395793
CAM210_map2	0001.CSV	798.419	0.0410106
CAM210_map2	0001.CSV	802.276	0.0421256
CAM210_map2	0001.CSV	806.133	0.0426652
CAM210_map2	0001.CSV	809.99	0.0431127
CAM210_map2	0001.CSV	813.847	0.0440056
CAM210_map2	0001.CSV	817.704	0.045476
CAM210_map2	0001.CSV	821.562	0.0476104
CAM210_map2	0001.CSV	825.419	0.0504215
CAM210_map2	0001.CSV	829.276	0.0534051
CAM210_map2	0001.CSV	833.133	0.0560901
CAM210_map2	0001.CSV	836.99	0.0592787
CAM210_map2	0001.CSV	840.847	0.0645048
CAM210_map2	0001.CSV	844.704	0.0714511
CAM210_map2	0001.CSV	848.561	0.078374
CAM210_map2	0001.CSV	852.418	0.0875782
CAM210_map2	0001.CSV	856.275	0.10437
CAM210_map2	0001.CSV	860.132	0.131849
CAM210_map2	0001.CSV	863.99	0.17014
CAM210_map2	0001.CSV	867.847	0.207771
CAM210_map2	0001.CSV	871.704	0.218119
CAM210_map2	0001.CSV	875.561	0.190712
CAM210_map2	0001.CSV	879.418	0.14337
CAM210_map2	0001.CSV	883.275	0.0939295
CAM210_map2	0001.CSV	887.132	0.0550512
CAM210_map2	0001.CSV	890.989	0.0348677
CAM210_map2	0001.CSV	894.846	0.0297635
CAM210_map2	0001.CSV	898.703	0.03051
CAM210_map2	0001.CSV	902.561	0.0321256
CAM210_map2	0001.CSV	906.418	0.0336484
CAM210_map2	0001.CSV	910.275	0.0350216
CAM210_map2	0001.CSV	914.132	0.0363024
CAM210_map2	0001.CSV	917.989	0.03754
CAM210_map2	0001.CSV	921.846	0.0387125
CAM210_map2	0001.CSV	925.703	0.0398155
CAM210_map2	0001.CSV	929.56	0.0408622
CAM210_map2	0001.CSV	933.417	0.0417739
CAM210_map2	0001.CSV	937.274	0.0424658
CAM210_map2	0001.CSV	941.131	0.0429946
CAM210_map2	0001.CSV	944.989	0.0435488
CAM210_map2	0001.CSV	948.846	0.0442845
CAM210_map2	0001.CSV	952.703	0.0451476
CAM210_map2	0001.CSV	956.56	0.0459068
CAM210_map2	0001.CSV	960.417	0.0464166
CAM210_map2	0001.CSV	964.274	0.0468819
CAM210_map2	0001.CSV	968.131	0.0476145
CAM210_map2	0001.CSV	971.988	0.0486207
CAM210_map2	0001.CSV	975.845	0.0496619
CAM210_map2	0001.CSV	979.702	0.0506581
CAM210_map2	0001.CSV	983.559	0.0516787
CAM210_map2	0001.CSV	987.417	0.0527598
CAM210_map2	0001.CSV	991.274	0.0538946
CAM210_map2	0001.CSV	995.131	0.0550917
CAM210_map2	0001.CSV	998.988	0.0563012
CAM210_map2	0001.CSV	1002.85	0.0575067
CAM210_map2	0001.CSV	1006.7	0.0587232
CAM210_map2	0001.CSV	1010.56	0.059827
CAM210_map2	0001.CSV	1014.42	0.0605621
CAM210_map2	0001.CSV	1018.27	0.0609365
CAM210_map2	0001.CSV	1022.13	0.061212
CAM210_map2	0001.CSV	1025.99	0.0616116
CAM210_map2	0001.CSV	1029.85	0.0621659
CAM210_map2	0001.CSV	1033.7	0.0628186
CAM210_map2	0001.CSV	1037.56	0.0635246
CAM210_map2	0001.CSV	1041.42	0.064287
CAM210_map2	0001.CSV	1045.27	0.0650802
CAM210_map2	0001.CSV	1049.13	0.0659382
CAM210_map2	0001.CSV	1052.99	0.0669858
CAM210_map2	0001.CSV	1056.84	0.0683704
CAM210_map2	0001.CSV	1060.7	0.0701573
CAM210_map2	0001.CSV	1064.56	0.0723417
CAM210_map2	0001.CSV	1068.42	0.0747725
CAM210_map2	0001.CSV	1072.27	0.0772533
CAM210_map2	0001.CSV	1076.13	0.079657
CAM210_map2	0001.CSV	1079.99	0.0818454
CAM210_map2	0001.CSV	1083.84	0.0833818
CAM210_map2	0001.CSV	1087.7	0.083742
CAM210_map2	0001.CSV	1091.56	0.082945
CAM210_map2	0001.CSV	1095.41	0.0816504
CAM210_map2	0001.CSV	1099.27	0.0806234
CAM210_map2	0001.CSV	1103.13	0.0802821
CAM210_map2	0001.CSV	1106.99	0.0805095
CAM210_map2	0001.CSV	1110.84	0.0807323
CAM210_map2	0001.CSV	1114.7	0.0803971
CAM210_map2	0001.CSV	1118.56	0.0796143
CAM210_map2	0001.CSV	1122.41	0.0789764
CAM210_map2	0001.CSV	1126.27	0.0787844
CAM210_map2	0001.CSV	1130.13	0.0789353
CAM210_map2	0001.CSV	1133.99	0.0793026
CAM210_map2	0001.CSV	1137.84	0.0798476
CAM210_map2	0001.CSV	1141.7	0.0805314
CAM210_map2	0001.CSV	1145.56	0.0812584
CAM210_map2	0001.CSV	1149.41	0.0819159
CAM210_map2	0001.CSV	1153.27	0.0825148
CAM210_map2	0001.CSV	1157.13	0.0831981
CAM210_map2	0001.CSV	1160.99	0.084032
CAM210_map2	0001.CSV	1164.84	0.0848387
CAM210_map2	0001.CSV	1168.7	0.0854103
CAM210_map2	0001.CSV	1172.56	0.0857265
CAM210_map2	0001.CSV	1176.41	0.0858764
CAM210_map2	0001.CSV	1180.27	0.0859143
CAM210_map2	0001.CSV	1184.13	0.0858304
CAM210_map2	0001.CSV	1187.99	0.0855897
CAM210_map2	0001.CSV	1191.84	0.0852519
CAM210_map2	0001.CSV	1195.7	0.0849868
CAM210_map2	0001.CSV	1199.56	0.084992
CAM210_map2	0001.CSV	1203.41	0.0853775
CAM210_map2	0001.CSV	1207.27	0.0861111
CAM210_map2	0001.CSV	1211.13	0.0870527
CAM210_map2	0001.CSV	1214.98	0.0880678
CAM210_map2	0001.CSV	1218.84	0.0891612
CAM210_map2	0001.CSV	1222.7	0.0904285
CAM210_map2	0001.CSV	1226.56	0.0918858
CAM210_map2	0001.CSV	1230.41	0.0934515
CAM210_map2	0001.CSV	1234.27	0.0950185
CAM210_map2	0001.CSV	1238.13	0.0965184
CAM210_map2	0001.CSV	1241.98	0.0979715
CAM210_map2	0001.CSV	1245.84	0.0994583
CAM210_map2	0001.CSV	1249.7	0.101041
CAM210_map2	0001.CSV	1253.56	0.102702
CAM210_map2	0001.CSV	1257.41	0.104363
CAM210_map2	0001.CSV	1261.27	0.10601
CAM210_map2	0001.CSV	1265.13	0.107772
CAM210_map2	0001.CSV	1268.98	0.109838
CAM210_map2	0001.CSV	1272.84	0.11224
CAM210_map2	0001.CSV	1276.7	0.114772
CAM210_map2	0001.CSV	1280.56	0.117297
CAM210_map2	0001.CSV	1284.41	0.119949
CAM210_map2	0001.CSV	1288.27	0.122914
CAM210_map2	0001.CSV	1292.13	0.126113
CAM210_map2	0001.CSV	1295.98	0.129399
CAM210_map2	0001.CSV	1299.84	0.132762
CAM210_map2	0001.CSV	1303.7	0.13624
CAM210_map2	0001.CSV	1307.56	0.139915
CAM210_map2	0001.CSV	1311.41	0.143904
CAM210_map2	0001.CSV	1315.27	0.14829
CAM210_map2	0001.CSV	1319.13	0.152932
CAM210_map2	0001.CSV	1322.98	0.157557
CAM210_map2	0001.CSV	1326.84	0.162353
CAM210_map2	0001.CSV	1330.7	0.167578
CAM210_map2	0001.CSV	1334.56	0.173432
CAM210_map2	0001.CSV	1338.41	0.180783
CAM210_map2	0001.CSV	1342.27	0.189193
CAM210_map2	0001.CSV	1346.13	0.197309
CAM210_map2	0001.CSV	1349.98	0.205932
CAM210_map2	0001.CSV	1353.84	0.215605
CAM210_map2	0001.CSV	1357.7	0.226304
CAM210_map2	0001.CSV	1361.56	0.239095
CAM210_map2	0001.CSV	1365.41	0.25305
CAM210_map2	0001.CSV	1369.27	0.266066
CAM210_map2	0001.CSV	1373.13	0.28005
CAM210_map2	0001.CSV	1376.98	0.295192
CAM210_map2	0001.CSV	1380.84	0.308165
CAM210_map2	0001.CSV	1384.7	0.31922
CAM210_map2	0001.CSV	1388.56	0.32876
CAM210_map2	0001.CSV	1392.41	0.334307
CAM210_map2	0001.CSV	1396.27	0.334395
CAM210_map2	0001.CSV	1400.13	0.330181
CAM210_map2	0001.CSV	1403.98	0.323579
CAM210_map2	0001.CSV	1407.84	0.314373
CAM210_map2	0001.CSV	1411.7	0.30297
CAM210_map2	0001.CSV	1415.55	0.28929
CAM210_map2	0001.CSV	1419.41	0.27242
CAM210_map2	0001.CSV	1423.27	0.257703
CAM210_map2	0001.CSV	1427.12	0.247845
CAM210_map2	0001.CSV	1430.98	0.23927
CAM210_map2	0001.CSV	1434.84	0.229583
CAM210_map2	0001.CSV	1438.7	0.219809
CAM210_map2	0001.CSV	1442.55	0.212052
CAM210_map2	0001.CSV	1446.41	0.204878
CAM210_map2	0001.CSV	1450.27	0.197605
CAM210_map2	0001.CSV	1454.12	0.189946
CAM210_map2	0001.CSV	1457.98	0.180173
CAM210_map2	0001.CSV	1461.84	0.172153
CAM210_map2	0001.CSV	1465.7	0.166604
CAM210_map2	0001.CSV	1469.55	0.160035
CAM210_map2	0001.CSV	1473.41	0.149457
CAM210_map2	0001.CSV	1477.27	0.138545
CAM210_map2	0001.CSV	1481.12	0.131633
CAM210_map2	0001.CSV	1484.98	0.125904
CAM210_map2	0001.CSV	1488.84	0.118872
CAM210_map2	0001.CSV	1492.7	0.111741
CAM210_map2	0001.CSV	1496.55	0.105936
CAM210_map2	0001.CSV	1500.41	0.101022
CAM210_map2	0001.CSV	1504.27	0.0965488
CAM210_map2	0001.CSV	1508.12	0.0906027
CAM210_map2	0001.CSV	1511.98	0.0855738
CAM210_map2	0001.CSV	1515.84	0.0825143
CAM210_map2	0001.CSV	1519.7	0.0788928
CAM210_map2	0001.CSV	1523.55	0.0751619
CAM210_map2	0001.CSV	1527.41	0.0735688
CAM210_map2	0001.CSV	1531.27	0.0738629
CAM210_map2	0001.CSV	1535.12	0.0751679
CAM210_map2	0001.CSV	1538.98	0.0747495
CAM210_map2	0001.CSV	1542.84	0.0677706
CAM210_map2	0001.CSV	1546.7	0.0600998
CAM210_map2	0001.CSV	1550.55	0.0547513
CAM210_map2	0001.CSV	1554.41	0.0499506
CAM210_map2	0001.CSV	1558.27	0.0454618
CAM210_map2	0001.CSV	1562.12	0.0436096
CAM210_map2	0001.CSV	1565.98	0.0443046
CAM210_map2	0001.CSV	1569.84	0.0464861
CAM210_map2	0001.CSV	1573.69	0.0484933
CAM210_map2	0001.CSV	1577.55	0.0472106
CAM210_map2	0001.CSV	1581.41	0.0424909
CAM210_map2	0001.CSV	1585.27	0.0367131
CAM210_map2	0001.CSV	1589.12	0.0314036
CAM210_map2	0001.CSV	1592.98	0.0273756
CAM210_map2	0001.CSV	1596.84	0.024657
CAM210_map2	0001.CSV	1600.69	0.0228555
CAM210_map2	0001.CSV	1604.55	0.0216192
CAM210_map2	0001.CSV	1608.41	0.0207538
CAM210_map2	0001.CSV	1612.27	0.0201236
CAM210_map2	0001.CSV	1616.12	0.0196583
CAM210_map2	0001.CSV	1619.98	0.0192711
CAM210_map2	0001.CSV	1623.84	0.0187794
CAM210_map2	0001.CSV	1627.69	0.0181256
CAM210_map2	0001.CSV	1631.55	0.017394
CAM210_map2	0001.CSV	1635.41	0.0167225
CAM210_map2	0001.CSV	1639.27	0.0161063
CAM210_map2	0001.CSV	1643.12	0.0154349
CAM210_map2	0001.CSV	1646.98	0.014919
CAM210_map2	0001.CSV	1650.84	0.0148261
CAM210_map2	0001.CSV	1654.69	0.0147382
CAM210_map2	0001.CSV	1658.55	0.0143341
CAM210_map2	0001.CSV	1662.41	0.0138722
CAM210_map2	0001.CSV	1666.27	0.0135584
CAM210_map2	0001.CSV	1670.12	0.0135126
CAM210_map2	0001.CSV	1673.98	0.0136156
CAM210_map2	0001.CSV	1677.84	0.0135802
CAM210_map2	0001.CSV	1681.69	0.0137533
CAM210_map2	0001.CSV	1685.55	0.0142632
CAM210_map2	0001.CSV	1689.41	0.0140327
CAM210_map2	0001.CSV	1693.27	0.0131672
CAM210_map2	0001.CSV	1697.12	0.0124374
CAM210_map2	0001.CSV	1700.98	0.0122817
CAM210_map2	0001.CSV	1704.84	0.0121166
CAM210_map2	0001.CSV	1708.69	0.0116828
CAM210_map2	0001.CSV	1712.55	0.0112884
CAM210_map2	0001.CSV	1716.41	0.0115006
CAM210_map2	0001.CSV	1720.27	0.0119468
CAM210_map2	0001.CSV	1724.12	0.0118098
CAM210_map2	0001.CSV	1727.98	0.0115274
CAM210_map2	0001.CSV	1731.84	0.0116096
CAM210_map2	0001.CSV	1735.69	0.0119367
CAM210_map2	0001.CSV	1739.55	0.0116334
CAM210_map2	0001.CSV	1743.41	0.0107777
CAM210_map2	0001.CSV	1747.27	0.00986886
CAM210_map2	0001.CSV	1751.12	0.00907135
CAM210_map2	0001.CSV	1754.98	0.00836177
CAM210_map2	0001.CSV	1758.84	0.00785431
CAM210_map2	0001.CSV	1762.69	0.00758112
CAM210_map2	0001.CSV	1766.55	0.00736228
CAM210_map2	0001.CSV	1770.41	0.00746093
CAM210_map2	0001.CSV	1774.26	0.00796755
CAM210_map2	0001.CSV	1778.12	0.0083946
CAM210_map2	0001.CSV	1781.98	0.00898894
CAM210_map2	0001.CSV	1785.84	0.0100048
CAM210_map2	0001.CSV	1789.69	0.0115371
CAM210_map2	0001.CSV	1793.55	0.0133301
CAM210_map2	0001.CSV	1797.41	0.0137485
CAM210_map2	0001.CSV	1801.26	0.0123483
CAM210_map2	0001.CSV	1805.12	0.0103377
CAM210_map2	0001.CSV	1808.98	0.00867636
CAM210_map2	0001.CSV	1812.84	0.00758324
CAM210_map2	0001.CSV	1816.69	0.00689678
CAM210_map2	0001.CSV	1820.55	0.00644837
CAM210_map2	0001.CSV	1824.41	0.0062578
CAM210_map2	0001.CSV	1828.26	0.00632537
CAM210_map2	0001.CSV	1832.12	0.00636915
CAM210_map2	0001.CSV	1835.98	0.00618731
CAM210_map2	0001.CSV	1839.84	0.00600405
CAM210_map2	0001.CSV	1843.69	0.00610343
CAM210_map2	0001.CSV	1847.55	0.00632692
CAM210_map2	0001.CSV	1851.41	0.00629982
CAM210_map2	0001.CSV	1855.26	0.00618651
CAM210_map2	0001.CSV	1859.12	0.00613445
CAM210_map2	0001.CSV	1862.98	0.00610367
CAM210_map2	0001.CSV	1866.84	0.0062417
CAM210_map2	0001.CSV	1870.69	0.00651715
CAM210_map2	0001.CSV	1874.55	0.00653504
CAM210_map2	0001.CSV	1878.41	0.0064252
CAM210_map2	0001.CSV	1882.26	0.00640126
CAM210_map2	0001.CSV	1886.12	0.00643778
CAM210_map2	0001.CSV	1889.98	0.00651728
CAM210_map2	0001.CSV	1893.83	0.00660296
CAM210_map2	0001.CSV	1897.69	0.0066253
CAM210_map2	0001.CSV	1901.55	0.00658493
CAM210_map2	0001.CSV	1905.41	0.00657107
CAM210_map2	0001.CSV	1909.26	0.00662402
CAM210_map2	0001.CSV	1913.12	0.00663909
CAM210_map2	0001.CSV	1916.98	0.00664088
CAM210_map2	0001.CSV	1920.83	0.00673775
CAM210_map2	0001.CSV	1924.69	0.00680943
CAM210_map2	0001.CSV	1928.55	0.00678672
CAM210_map2	0001.CSV	1932.4	0.00676336
CAM210_map2	0001.CSV	1936.26	0.00675367
CAM210_map2	0001.CSV	1940.12	0.00676652
CAM210_map2	0001.CSV	1943.98	0.006851
CAM210_map2	0001.CSV	1947.83	0.00691429
CAM210_map2	0001.CSV	1951.69	0.00691486
CAM210_map2	0001.CSV	1955.55	0.00693557
CAM210_map2	0001.CSV	1959.4	0.0069656
CAM210_map2	0001.CSV	1963.26	0.00697631
CAM210_map2	0001.CSV	1967.12	0.00700823
CAM210_map2	0001.CSV	1970.98	0.00702796
CAM210_map2	0001.CSV	1974.83	0.00698233
CAM210_map2	0001.CSV	1978.69	0.0069187
CAM210_map2	0001.CSV	1982.55	0.00688022
CAM210_map2	0001.CSV	1986.4	0.00687258
CAM210_map2	0001.CSV	1990.26	0.00692395
CAM210_map2	0001.CSV	1994.12	0.00699974
CAM210_map2	0001.CSV	1997.98	0.00699422
CAM210_map2	0001.CSV	2001.83	0.00693072
CAM210_map2	0001.CSV	2005.69	0.00690116
CAM210_map2	0001.CSV	2009.55	0.00690264
CAM210_map2	0001.CSV	2013.4	0.00690288
CAM210_map2	0001.CSV	2017.26	0.0069185
CAM210_map2	0001.CSV	2021.12	0.00692496
CAM210_map2	0001.CSV	2024.97	0.00688918
CAM210_map2	0001.CSV	2028.83	0.00684165
CAM210_map2	0001.CSV	2032.69	0.00679816
CAM210_map2	0001.CSV	2036.55	0.00676218
CAM210_map2	0001.CSV	2040.4	0.0067606
CAM210_map2	0001.CSV	2044.26	0.00677584
CAM210_map2	0001.CSV	2048.12	0.00675178
CAM210_map2	0001.CSV	2051.97	0.00670232
CAM210_map2	0001.CSV	2055.83	0.00667348
CAM210_map2	0001.CSV	2059.69	0.00666335
CAM210_map2	0001.CSV	2063.55	0.0066651
CAM210_map2	0001.CSV	2067.4	0.006665
CAM210_map2	0001.CSV	2071.26	0.00664195
CAM210_map2	0001.CSV	2075.12	0.0066251
CAM210_map2	0001.CSV	2078.97	0.00663828
CAM210_map2	0001.CSV	2082.83	0.00665793
CAM210_map2	0001.CSV	2086.69	0.00668071
CAM210_map2	0001.CSV	2090.55	0.00670427
CAM210_map2	0001.CSV	2094.4	0.00669293
CAM210_map2	0001.CSV	2098.26	0.00664182
CAM210_map2	0001.CSV	2102.12	0.00659643
CAM210_map2	0001.CSV	2105.97	0.00659277
CAM210_map2	0001.CSV	2109.83	0.00662113
CAM210_map2	0001.CSV	2113.69	0.00664703
CAM210_map2	0001.CSV	2117.55	0.00666416
CAM210_map2	0001.CSV	2121.4	0.00670565
CAM210_map2	0001.CSV	2125.26	0.0067646
CAM210_map2	0001.CSV	2129.12	0.00679409
CAM210_map2	0001.CSV	2132.97	0.00678951
CAM210_map2	0001.CSV	2136.83	0.00678113
CAM210_map2	0001.CSV	2140.69	0.00678059
CAM210_map2	0001.CSV	2144.55	0.00678419
CAM210_map2	0001.CSV	2148.4	0.00677709
CAM210_map2	0001.CSV	2152.26	0.00676386
CAM210_map2	0001.CSV	2156.12	0.00674721
CAM210_map2	0001.CSV	2159.97	0.00671345
CAM210_map2	0001.CSV	2163.83	0.00666833
CAM210_map2	0001.CSV	2167.69	0.00664071
CAM210_map2	0001.CSV	2171.55	0.00662355
CAM210_map2	0001.CSV	2175.4	0.00661245
CAM210_map2	0001.CSV	2179.26	0.0065965
CAM210_map2	0001.CSV	2183.12	0.006556
CAM210_map2	0001.CSV	2186.97	0.00649344
CAM210_map2	0001.CSV	2190.83	0.00643334
CAM210_map2	0001.CSV	2194.69	0.00637654
CAM210_map2	0001.CSV	2198.55	0.00631683
CAM210_map2	0001.CSV	2202.4	0.00625071
CAM210_map2	0001.CSV	2206.26	0.00618079
CAM210_map2	0001.CSV	2210.12	0.00612827
CAM210_map2	0001.CSV	2213.97	0.00609305
CAM210_map2	0001.CSV	2217.83	0.00604033
CAM210_map2	0001.CSV	2221.69	0.00594405
CAM210_map2	0001.CSV	2225.54	0.00583009
CAM210_map2	0001.CSV	2229.4	0.00572405
CAM210_map2	0001.CSV	2233.26	0.00564802
CAM210_map2	0001.CSV	2237.12	0.00558736
CAM210_map2	0001.CSV	2240.97	0.00553206
CAM210_map2	0001.CSV	2244.83	0.00545102
CAM210_map2	0001.CSV	2248.69	0.00537617
CAM210_map2	0001.CSV	2252.54	0.00531455
CAM210_map2	0001.CSV	2256.4	0.00528701
CAM210_map2	0001.CSV	2260.26	0.0052574
CAM210_map2	0001.CSV	2264.11	0.00524686
CAM210_map2	0001.CSV	2267.97	0.00524717
CAM210_map2	0001.CSV	2271.83	0.00529358
CAM210_map2	0001.CSV	2275.69	0.00533065
CAM210_map2	0001.CSV	2279.54	0.00536037
CAM210_map2	0001.CSV	2283.4	0.00538398
CAM210_map2	0001.CSV	2287.26	0.00547705
CAM210_map2	0001.CSV	2291.11	0.00559069
CAM210_map2	0001.CSV	2294.97	0.00570307
CAM210_map2	0001.CSV	2298.83	0.00577129
CAM210_map2	0001.CSV	2302.69	0.00581387
CAM210_map2	0001.CSV	2306.54	0.00580283
CAM210_map2	0001.CSV	2310.4	0.00576817
CAM210_map2	0001.CSV	2314.26	0.00567994
CAM210_map2	0001.CSV	2318.11	0.00548283
CAM210_map2	0001.CSV	2321.97	0.00511438
CAM210_map2	0001.CSV	2325.83	0.00455924
CAM210_map2	0001.CSV	2329.69	0.00381927
CAM210_map2	0001.CSV	2333.54	0.00300576
CAM210_map2	0001.CSV	2337.4	0.00243288
CAM210_map2	0001.CSV	2341.26	0.0028334
CAM210_map2	0001.CSV	2345.11	0.00389884
CAM210_map2	0001.CSV	2348.97	0.00392495
CAM210_map2	0001.CSV	2352.83	0.00211725
CAM210_map2	0001.CSV	2356.69	-0.0019363
CAM210_map2	0001.CSV	2360.54	-0.00559709
CAM210_map2	0001.CSV	2364.4	-0.00347054
CAM210_map2	0001.CSV	2368.26	0.00114174
CAM210_map2	0001.CSV	2372.11	0.0042871
CAM210_map2	0001.CSV	2375.97	0.00571022
CAM210_map2	0001.CSV	2379.83	0.00614551
CAM210_map2	0001.CSV	2383.69	0.00609392
CAM210_map2	0001.CSV	2387.54	0.00585995
CAM210_map2	0001.CSV	2391.4	0.00562583
CAM210_map2	0001.CSV	2395.26	0.00549048
CAM210_map2	0001.CSV	2399.11	0.00538767
CAM210_map2	0001.CSV	2402.97	0.0053012
CAM210_map2	0001.CSV	2406.83	0.00523291
CAM210_map2	0001.CSV	2410.68	0.00521745
CAM210_map2	0001.CSV	2414.54	0.00519267
CAM210_map2	0001.CSV	2418.4	0.00516689
CAM210_map2	0001.CSV	2422.26	0.00514882
CAM210_map2	0001.CSV	2426.11	0.00517701
CAM210_map2	0001.CSV	2429.97	0.00519995
CAM210_map2	0001.CSV	2433.83	0.00521554
CAM210_map2	0001.CSV	2437.68	0.00524502
CAM210_map2	0001.CSV	2441.54	0.005334
CAM210_map2	0001.CSV	2445.4	0.00544696
CAM210_map2	0001.CSV	2449.26	0.00557068
CAM210_map2	0001.CSV	2453.11	0.00567927
CAM210_map2	0001.CSV	2456.97	0.00577898
CAM210_map2	0001.CSV	2460.83	0.00588913
CAM210_map2	0001.CSV	2464.68	0.00604379
CAM210_map2	0001.CSV	2468.54	0.00624062
CAM210_map2	0001.CSV	2472.4	0.00647803
CAM210_map2	0001.CSV	2476.26	0.00673236
CAM210_map2	0001.CSV	2480.11	0.00700729
CAM210_map2	0001.CSV	2483.97	0.00734785
CAM210_map2	0001.CSV	2487.83	0.00777648
CAM210_map2	0001.CSV	2491.68	0.0082905
CAM210_map2	0001.CSV	2495.54	0.00890043
CAM210_map2	0001.CSV	2499.4	0.00957485
CAM210_map2	0001.CSV	2503.26	0.0101951
CAM210_map2	0001.CSV	2507.11	0.0106383
CAM210_map2	0001.CSV	2510.97	0.0108519
CAM210_map2	0001.CSV	2514.83	0.0108466
CAM210_map2	0001.CSV	2518.68	0.0106317
CAM210_map2	0001.CSV	2522.54	0.010201
CAM210_map2	0001.CSV	2526.4	0.0096028
CAM210_map2	0001.CSV	2530.26	0.00896124
CAM210_map2	0001.CSV	2534.11	0.00837312
CAM210_map2	0001.CSV	2537.97	0.0078919
CAM210_map2	0001.CSV	2541.83	0.00752717
CAM210_map2	0001.CSV	2545.68	0.00725199
CAM210_map2	0001.CSV	2549.54	0.00705039
CAM210_map2	0001.CSV	2553.4	0.00691857
CAM210_map2	0001.CSV	2557.26	0.00684528
CAM210_map2	0001.CSV	2561.11	0.00680789
CAM210_map2	0001.CSV	2564.97	0.00677298
CAM210_map2	0001.CSV	2568.83	0.00674223
CAM210_map2	0001.CSV	2572.68	0.00673169
CAM210_map2	0001.CSV	2576.54	0.00671352
CAM210_map2	0001.CSV	2580.4	0.00665719
CAM210_map2	0001.CSV	2584.25	0.0065854
CAM210_map2	0001.CSV	2588.11	0.00654012
CAM210_map2	0001.CSV	2591.97	0.00651732
CAM210_map2	0001.CSV	2595.83	0.00648237
CAM210_map2	0001.CSV	2599.68	0.00641989
CAM210_map2	0001.CSV	2603.54	0.00632924
CAM210_map2	0001.CSV	2607.4	0.00622113
CAM210_map2	0001.CSV	2611.25	0.00611993
CAM210_map2	0001.CSV	2615.11	0.00603079
CAM210_map2	0001.CSV	2618.97	0.00596085
CAM210_map2	0001.CSV	2622.82	0.00592188
CAM210_map2	0001.CSV	2626.68	0.00586139
CAM210_map2	0001.CSV	2630.54	0.00575689
CAM210_map2	0001.CSV	2634.4	0.00568487
CAM210_map2	0001.CSV	2638.25	0.0056177
CAM210_map2	0001.CSV	2642.11	0.00547098
CAM210_map2	0001.CSV	2645.97	0.00530683
CAM210_map2	0001.CSV	2649.82	0.00520763
CAM210_map2	0001.CSV	2653.68	0.00516186
CAM210_map2	0001.CSV	2657.54	0.00512333
CAM210_map2	0001.CSV	2661.4	0.00508585
CAM210_map2	0001.CSV	2665.25	0.00509222
CAM210_map2	0001.CSV	2669.11	0.00519432
CAM210_map2	0001.CSV	2672.97	0.00541321
CAM210_map2	0001.CSV	2676.82	0.00560851
CAM210_map2	0001.CSV	2680.68	0.00552313
CAM210_map2	0001.CSV	2684.54	0.00519116
CAM210_map2	0001.CSV	2688.4	0.0049251
CAM210_map2	0001.CSV	2692.25	0.00485724
CAM210_map2	0001.CSV	2696.11	0.00487477
CAM210_map2	0001.CSV	2699.97	0.00485614
CAM210_map2	0001.CSV	2703.82	0.0048351
CAM210_map2	0001.CSV	2707.68	0.00488857
CAM210_map2	0001.CSV	2711.54	0.00495787
CAM210_map2	0001.CSV	2715.4	0.00503523
CAM210_map2	0001.CSV	2719.25	0.00523342
CAM210_map2	0001.CSV	2723.11	0.005474
CAM210_map2	0001.CSV	2726.97	0.00548427
CAM210_map2	0001.CSV	2730.82	0.00529848
CAM210_map2	0001.CSV	2734.68	0.00520267
CAM210_map2	0001.CSV	2738.54	0.0052195
CAM210_map2	0001.CSV	2742.4	0.00531247
CAM210_map2	0001.CSV	2746.25	0.00549138
CAM210_map2	0001.CSV	2750.11	0.0055237
CAM210_map2	0001.CSV	2753.97	0.0053438
CAM210_map2	0001.CSV	2757.82	0.00519328
CAM210_map2	0001.CSV	2761.68	0.00515076
CAM210_map2	0001.CSV	2765.54	0.00521585
CAM210_map2	0001.CSV	2769.39	0.00548075
CAM210_map2	0001.CSV	2773.25	0.00579289
CAM210_map2	0001.CSV	2777.11	0.0058442
CAM210_map2	0001.CSV	2780.97	0.00579087
CAM210_map2	0001.CSV	2784.82	0.00603301
CAM210_map2	0001.CSV	2788.68	0.00648476
CAM210_map2	0001.CSV	2792.54	0.00678732
CAM210_map2	0001.CSV	2796.39	0.00686043
CAM210_map2	0001.CSV	2800.25	0.00679695
CAM210_map2	0001.CSV	2804.11	0.00681172
CAM210_map2	0001.CSV	2807.97	0.0070518
CAM210_map2	0001.CSV	2811.82	0.00729343
CAM210_map2	0001.CSV	2815.68	0.00746353
CAM210_map2	0001.CSV	2819.54	0.00777149
CAM210_map2	0001.CSV	2823.39	0.00824218
CAM210_map2	0001.CSV	2827.25	0.00894964
CAM210_map2	0001.CSV	2831.11	0.0102393
CAM210_map2	0001.CSV	2834.97	0.0124192
CAM210_map2	0001.CSV	2838.82	0.0159905
CAM210_map2	0001.CSV	2842.68	0.0219399
CAM210_map2	0001.CSV	2846.54	0.0293065
CAM210_map2	0001.CSV	2850.39	0.0333314
CAM210_map2	0001.CSV	2854.25	0.0311225
CAM210_map2	0001.CSV	2858.11	0.0258826
CAM210_map2	0001.CSV	2861.97	0.0214696
CAM210_map2	0001.CSV	2865.82	0.0190093
CAM210_map2	0001.CSV	2869.68	0.0181419
CAM210_map2	0001.CSV	2873.54	0.0177334
CAM210_map2	0001.CSV	2877.39	0.0170188
CAM210_map2	0001.CSV	2881.25	0.0164537
CAM210_map2	0001.CSV	2885.11	0.0166776
CAM210_map2	0001.CSV	2888.97	0.0177566
CAM210_map2	0001.CSV	2892.82	0.0194166
CAM210_map2	0001.CSV	2896.68	0.0212807
CAM210_map2	0001.CSV	2900.54	0.0234008
CAM210_map2	0001.CSV	2904.39	0.0266716
CAM210_map2	0001.CSV	2908.25	0.0324811
CAM210_map2	0001.CSV	2912.11	0.0409419
CAM210_map2	0001.CSV	2915.97	0.0485878
CAM210_map2	0001.CSV	2919.82	0.050583
CAM210_map2	0001.CSV	2923.68	0.0464176
CAM210_map2	0001.CSV	2927.54	0.0396135
CAM210_map2	0001.CSV	2931.39	0.032873
CAM210_map2	0001.CSV	2935.25	0.0271981
CAM210_map2	0001.CSV	2939.11	0.0231359
CAM210_map2	0001.CSV	2942.96	0.0206458
CAM210_map2	0001.CSV	2946.82	0.0192108
CAM210_map2	0001.CSV	2950.68	0.0184366
CAM210_map2	0001.CSV	2954.54	0.0178574
CAM210_map2	0001.CSV	2958.39	0.0169163
CAM210_map2	0001.CSV	2962.25	0.015418
CAM210_map2	0001.CSV	2966.11	0.0136351
CAM210_map2	0001.CSV	2969.96	0.0121364
CAM210_map2	0001.CSV	2973.82	0.0111528
CAM210_map2	0001.CSV	2977.68	0.0103378
CAM210_map2	0001.CSV	2981.53	0.00934322
CAM210_map2	0001.CSV	2985.39	0.00832286
CAM210_map2	0001.CSV	2989.25	0.00770734
CAM210_map2	0001.CSV	2993.11	0.0074459
CAM210_map2	0001.CSV	2996.96	0.00713792
CAM210_map2	0001.CSV	3000.82	0.00675464
CAM210_map2	0001.CSV	3004.68	0.0065603
CAM210_map2	0001.CSV	3008.53	0.00666349
CAM210_map2	0001.CSV	3012.39	0.0068505
CAM210_map2	0001.CSV	3016.25	0.00682337
CAM210_map2	0001.CSV	3020.11	0.00654503
CAM210_map2	0001.CSV	3023.96	0.00623558
CAM210_map2	0001.CSV	3027.82	0.00614689
CAM210_map2	0001.CSV	3031.68	0.00629579
CAM210_map2	0001.CSV	3035.53	0.00642863
CAM210_map2	0001.CSV	3039.39	0.00646734
CAM210_map2	0001.CSV	3043.25	0.00649007
CAM210_map2	0001.CSV	3047.11	0.00646206
CAM210_map2	0001.CSV	3050.96	0.00637903
CAM210_map2	0001.CSV	3054.82	0.00625118
CAM210_map2	0001.CSV	3058.68	0.00611899
CAM210_map2	0001.CSV	3062.53	0.00613805
CAM210_map2	0001.CSV	3066.39	0.00625679
CAM210_map2	0001.CSV	3070.25	0.00628157
CAM210_map2	0001.CSV	3074.11	0.00633415
CAM210_map2	0001.CSV	3077.96	0.00655156
CAM210_map2	0001.CSV	3081.82	0.00674381
CAM210_map2	0001.CSV	3085.68	0.00674404
CAM210_map2	0001.CSV	3089.53	0.00657786
CAM210_map2	0001.CSV	3093.39	0.00636911
CAM210_map2	0001.CSV	3097.25	0.00628745
CAM210_map2	0001.CSV	3101.11	0.00632964
CAM210_map2	0001.CSV	3104.96	0.00640933
CAM210_map2	0001.CSV	3108.82	0.00653582
CAM210_map2	0001.CSV	3112.68	0.00667758
CAM210_map2	0001.CSV	3116.53	0.00676255
CAM210_map2	0001.CSV	3120.39	0.00670225
CAM210_map2	0001.CSV	3124.25	0.0065226
CAM210_map2	0001.CSV	3128.11	0.00637103
CAM210_map2	0001.CSV	3131.96	0.00633095
CAM210_map2	0001.CSV	3135.82	0.00643095
CAM210_map2	0001.CSV	3139.68	0.00648493
CAM210_map2	0001.CSV	3143.53	0.00636652
CAM210_map2	0001.CSV	3147.39	0.0063749
CAM210_map2	0001.CSV	3151.25	0.0065564
CAM210_map2	0001.CSV	3155.1	0.00650706
CAM210_map2	0001.CSV	3158.96	0.00617918
CAM210_map2	0001.CSV	3162.82	0.00591627
CAM210_map2	0001.CSV	3166.68	0.00585058
CAM210_map2	0001.CSV	3170.53	0.00588016
CAM210_map2	0001.CSV	3174.39	0.00594637
CAM210_map2	0001.CSV	3178.25	0.00605014
CAM210_map2	0001.CSV	3182.1	0.0061769
CAM210_map2	0001.CSV	3185.96	0.00630318
CAM210_map2	0001.CSV	3189.82	0.00634511
CAM210_map2	0001.CSV	3193.68	0.00626126
CAM210_map2	0001.CSV	3197.53	0.00620809
CAM210_map2	0001.CSV	3201.39	0.00628829
CAM210_map2	0001.CSV	3205.25	0.00638613
CAM210_map2	0001.CSV	3209.1	0.00643529
CAM210_map2	0001.CSV	3212.96	0.00652747
CAM210_map2	0001.CSV	3216.82	0.00665703
CAM210_map2	0001.CSV	3220.68	0.0067006
CAM210_map2	0001.CSV	3224.53	0.00673519
CAM210_map2	0001.CSV	3228.39	0.00695961
CAM210_map2	0001.CSV	3232.25	0.00724016
CAM210_map2	0001.CSV	3236.1	0.00726944
CAM210_map2	0001.CSV	3239.96	0.00719162
CAM210_map2	0001.CSV	3243.82	0.00727204
CAM210_map2	0001.CSV	3247.68	0.00732666
CAM210_map2	0001.CSV	3251.53	0.00723184
CAM210_map2	0001.CSV	3255.39	0.00714405
CAM210_map2	0001.CSV	3259.25	0.00709791
CAM210_map2	0001.CSV	3263.1	0.00717393
CAM210_map2	0001.CSV	3266.96	0.00748146
CAM210_map2	0001.CSV	3270.82	0.00780462
CAM210_map2	0001.CSV	3274.68	0.00781818
CAM210_map2	0001.CSV	3278.53	0.00757343
CAM210_map2	0001.CSV	3282.39	0.00740535
CAM210_map2	0001.CSV	3286.25	0.00751203
CAM210_map2	0001.CSV	3290.1	0.00786966
CAM210_map2	0001.CSV	3293.96	0.00820125
CAM210_map2	0001.CSV	3297.82	0.00827159
CAM210_map2	0001.CSV	3301.67	0.00825423
CAM210_map2	0001.CSV	3305.53	0.008293
CAM210_map2	0001.CSV	3309.39	0.00820466
CAM210_map2	0001.CSV	3313.25	0.00789379
CAM210_map2	0001.CSV	3317.1	0.00761969
CAM210_map2	0001.CSV	3320.96	0.0076638
CAM210_map2	0001.CSV	3324.82	0.00784203
CAM210_map2	0001.CSV	3328.67	0.00781204
CAM210_map2	0001.CSV	3332.53	0.00782776
CAM210_map2	0001.CSV	3336.39	0.00818599
CAM210_map2	0001.CSV	3340.24	0.00848018
CAM210_map2	0001.CSV	3344.1	0.00841997
CAM210_map2	0001.CSV	3347.96	0.00827818
CAM210_map2	0001.CSV	3351.82	0.00817208
CAM210_map2	0001.CSV	3355.67	0.00808778
CAM210_map2	0001.CSV	3359.53	0.00817508
CAM210_map2	0001.CSV	3363.39	0.00842555
CAM210_map2	0001.CSV	3367.24	0.00861011
CAM210_map2	0001.CSV	3371.1	0.00850991
CAM210_map2	0001.CSV	3374.96	0.0082076
CAM210_map2	0001.CSV	3378.82	0.00795817
CAM210_map2	0001.CSV	3382.67	0.00785033
CAM210_map2	0001.CSV	3386.53	0.00795699
CAM210_map2	0001.CSV	3390.39	0.00823444
CAM210_map2	0001.CSV	3394.24	0.00843018
CAM210_map2	0001.CSV	3398.1	0.00844258
CAM210_map2	0001.CSV	3401.96	0.00832387
CAM210_map2	0001.CSV	3405.82	0.00815098
CAM210_map2	0001.CSV	3409.67	0.00799084
CAM210_map2	0001.CSV	3413.53	0.00773881
CAM210_map2	0001.CSV	3417.39	0.0074103
CAM210_map2	0001.CSV	3421.24	0.00725357
CAM210_map2	0001.CSV	3425.1	0.00736811
CAM210_map2	0001.CSV	3428.96	0.00761635
CAM210_map2	0001.CSV	3432.82	0.00773307
CAM210_map2	0001.CSV	3436.67	0.00745432
CAM210_map2	0001.CSV	3440.53	0.00688736
CAM210_map2	0001.CSV	3444.39	0.00645328
CAM210_map2	0001.CSV	3448.24	0.0062297
CAM210_map2	0001.CSV	3452.1	0.00607249
CAM210_map2	0001.CSV	3455.96	0.00613196
CAM210_map2	0001.CSV	3459.82	0.00642382
CAM210_map2	0001.CSV	3463.67	0.00668297
CAM210_map2	0001.CSV	3467.53	0.00666712
CAM210_map2	0001.CSV	3471.39	0.00635829
CAM210_map2	0001.CSV	3475.24	0.00607265
CAM210_map2	0001.CSV	3479.1	0.00598043
CAM210_map2	0001.CSV	3482.96	0.00592286
CAM210_map2	0001.CSV	3486.82	0.00585041
CAM210_map2	0001.CSV	3490.67	0.00579309
CAM210_map2	0001.CSV	3494.53	0.00575115
CAM210_map2	0001.CSV	3498.39	0.00567571
CAM210_map2	0001.CSV	3502.24	0.0054481
CAM210_map2	0001.CSV	3506.1	0.00506932
CAM210_map2	0001.CSV	3509.96	0.00479211
CAM210_map2	0001.CSV	3513.81	0.00467336
CAM210_map2	0001.CSV	3517.67	0.00451551
CAM210_map2	0001.CSV	3521.53	0.00438415
CAM210_map2	0001.CSV	3525.39	0.00430246
CAM210_map2	0001.CSV	3529.24	0.00415966
CAM210_map2	0001.CSV	3533.1	0.00411905
CAM210_map2	0001.CSV	3536.96	0.00418441
CAM210_map2	0001.CSV	3540.81	0.00426133
CAM210_map2	0001.CSV	3544.67	0.00434657
CAM210_map2	0001.CSV	3548.53	0.00423446
CAM210_map2	0001.CSV	3552.39	0.00383936
CAM210_map2	0001.CSV	3556.24	0.00342455
CAM210_map2	0001.CSV	3560.1	0.00307617
CAM210_map2	0001.CSV	3563.96	0.00278021
CAM210_map2	0001.CSV	3567.81	0.00270889
CAM210_map2	0001.CSV	3571.67	0.00266118
CAM210_map2	0001.CSV	3575.53	0.00250652
CAM210_map2	0001.CSV	3579.39	0.00249029
CAM210_map2	0001.CSV	3583.24	0.00256158
CAM210_map2	0001.CSV	3587.1	0.00252355
CAM210_map2	0001.CSV	3590.96	0.00233249
CAM210_map2	0001.CSV	3594.81	0.00208369
CAM210_map2	0001.CSV	3598.67	0.00191802
CAM210_map2	0001.CSV	3602.53	0.00165315
CAM210_map2	0001.CSV	3606.39	0.00111789
CAM210_map2	0001.CSV	3610.24	0.000639394
CAM210_map2	0001.CSV	3614.1	0.000623599
CAM210_map2	0001.CSV	3617.96	0.000959528
CAM210_map2	0001.CSV	3621.81	0.00102997
CAM210_map2	0001.CSV	3625.67	0.000604189
CAM210_map2	0001.CSV	3629.53	0.000368076
CAM210_map2	0001.CSV	3633.39	0.000649847
CAM210_map2	0001.CSV	3637.24	0.000704271
CAM210_map2	0001.CSV	3641.1	0.000377395
CAM210_map2	0001.CSV	3644.96	-5.23486e-05
CAM210_map2	0001.CSV	3648.81	9.50057e-05
CAM210_map2	0001.CSV	3652.67	0.000854605
CAM210_map2	0001.CSV	3656.53	0.00116383
CAM210_map2	0001.CSV	3660.38	0.000924794
CAM210_map2	0001.CSV	3664.24	0.00022832
CAM210_map2	0001.CSV	3668.1	-0.000580088
CAM210_map2	0001.CSV	3671.96	-0.000823858
CAM210_map2	0001.CSV	3675.81	-0.000185511
CAM210_map2	0001.CSV	3679.67	0.000297646
CAM210_map2	0001.CSV	3683.53	0.000317374
CAM210_map2	0001.CSV	3687.38	0.000401173
CAM210_map2	0001.CSV	3691.24	0.000794021
CAM210_map2	0001.CSV	3695.1	0.000780477
CAM210_map2	0001.CSV	3698.95	0.00033213
CAM210_map2	0001.CSV	3702.81	-0.000147024
CAM210_map2	0001.CSV	3706.67	-0.000521482
CAM210_map2	0001.CSV	3710.53	-0.000559439
CAM210_map2	0001.CSV	3714.38	-0.000296051
CAM210_map2	0001.CSV	3718.24	-0.000367732
CAM210_map2	0001.CSV	3722.1	-0.000634517
CAM210_map2	0001.CSV	3725.95	-0.000720796
CAM210_map2	0001.CSV	3729.81	-0.000692115
CAM210_map2	0001.CSV	3733.67	-0.000401763
CAM210_map2	0001.CSV	3737.53	3.21743e-05
CAM210_map2	0001.CSV	3741.38	-0.000376273
CAM210_map2	0001.CSV	3745.24	-0.00140493
CAM210_map2	0001.CSV	3749.1	-0.00177622
CAM210_map2	0001.CSV	3752.95	-0.00103483
CAM210_map2	0001.CSV	3756.81	-0.000461345
CAM210_map2	0001.CSV	3760.67	-0.000349722
CAM210_map2	0001.CSV	3764.53	-0.000381172
CAM210_map2	0001.CSV	3768.38	-0.000264462
CAM210_map2	0001.CSV	3772.24	-0.000135199
CAM210_map2	0001.CSV	3776.1	-0.000167129
CAM210_map2	0001.CSV	3779.95	-0.000193691
CAM210_map2	0001.CSV	3783.81	-0.000152456
CAM210_map2	0001.CSV	3787.67	-0.00021194
CAM210_map2	0001.CSV	3791.53	-0.000564965
CAM210_map2	0001.CSV	3795.38	-0.00109519
CAM210_map2	0001.CSV	3799.24	-0.0012804
CAM210_map2	0001.CSV	3803.1	-0.000822072
CAM210_map2	0001.CSV	3806.95	-0.000511553
CAM210_map2	0001.CSV	3810.81	-0.000747424
CAM210_map2	0001.CSV	3814.67	-0.00111548
CAM210_map2	0001.CSV	3818.53	-0.00110831
CAM210_map2	0001.CSV	3822.38	-0.0008688
CAM210_map2	0001.CSV	3826.24	-0.00101427
CAM210_map2	0001.CSV	3830.1	-0.00133794
CAM210_map2	0001.CSV	3833.95	-0.00151149
CAM210_map2	0001.CSV	3837.81	-0.00121568
CAM210_map2	0001.CSV	3841.67	-0.000706274
CAM210_map2	0001.CSV	3845.53	-0.000898758
CAM210_map2	0001.CSV	3849.38	-0.00167078
CAM210_map2	0001.CSV	3853.24	-0.00203918
CAM210_map2	0001.CSV	3857.1	-0.00165101
CAM210_map2	0001.CSV	3860.95	-0.00166639
CAM210_map2	0001.CSV	3864.81	-0.0018726
CAM210_map2	0001.CSV	3868.67	-0.00178665
CAM210_map2	0001.CSV	3872.52	-0.00152929
CAM210_map2	0001.CSV	3876.38	-0.00150657
CAM210_map2	0001.CSV	3880.24	-0.00158614
CAM210_map2	0001.CSV	3884.1	-0.00143168
CAM210_map2	0001.CSV	3887.95	-0.00127055
CAM210_map2	0001.CSV	3891.81	-0.00134026
CAM210_map2	0001.CSV	3895.67	-0.00165474
CAM210_map2	0001.CSV	3899.52	-0.00190639
CAM210_map2	0001.CSV	3903.38	-0.00144195
CAM210_map2	0001.CSV	3907.24	-0.00094346
CAM210_map2	0001.CSV	3911.1	-0.0010622
CAM210_map2	0001.CSV	3914.95	-0.00131089
CAM210_map2	0001.CSV	3918.81	-0.00135287
CAM210_map2	0001.CSV	3922.67	-0.00129731
CAM210_map2	0001.CSV	3926.52	-0.00127941
CAM210_map2	0001.CSV	3930.38	-0.00114483
CAM210_map2	0001.CSV	3934.24	-0.000975827
CAM210_map2	0001.CSV	3938.09	-0.00103923
CAM210_map2	0001.CSV	3941.95	-0.0011754
CAM210_map2	0001.CSV	3945.81	-0.00112503
CAM210_map2	0001.CSV	3949.67	-0.000991233
CAM210_map2	0001.CSV	3953.52	-0.000977083
CAM210_map2	0001.CSV	3957.38	-0.00104892
CAM210_map2	0001.CSV	3961.24	-0.00106184
CAM210_map2	0001.CSV	3965.09	-0.00101824
CAM210_map2	0001.CSV	3968.95	-0.000976753
CAM210_map2	0001.CSV	3972.81	-0.000890194
CAM210_map2	0001.CSV	3976.67	-0.000747258
CAM210_map2	0001.CSV	3980.52	-0.000654666
CAM210_map2	0001.CSV	3984.38	-0.000672266
CAM210_map2	0001.CSV	3988.24	-0.000752253
CAM210_map2	0001.CSV	3992.09	-0.000790455
CAM210_map2	0001.CSV	3995.95	-0.000787412
CAM210_map2	0001.CSV	3999.81	-0.000807554
CAM210_map2	0002.CSV	674.992	0.0417852
CAM210_map2	0002.CSV	678.849	0.0414061
CAM210_map2	0002.CSV	682.706	0.0416721
CAM210_map2	0002.CSV	686.563	0.0422572
CAM210_map2	0002.CSV	690.42	0.0437252
CAM210_map2	0002.CSV	694.277	0.0466826
CAM210_map2	0002.CSV	698.134	0.0515235
CAM210_map2	0002.CSV	701.991	0.0602776
CAM210_map2	0002.CSV	705.849	0.0742726
CAM210_map2	0002.CSV	709.706	0.0854413
CAM210_map2	0002.CSV	713.563	0.0801495
CAM210_map2	0002.CSV	717.42	0.0613177
CAM210_map2	0002.CSV	721.277	0.0448259
CAM210_map2	0002.CSV	725.134	0.0372415
CAM210_map2	0002.CSV	728.991	0.0347509
CAM210_map2	0002.CSV	732.848	0.0340208
CAM210_map2	0002.CSV	736.705	0.0339209
CAM210_map2	0002.CSV	740.562	0.0341983
CAM210_map2	0002.CSV	744.42	0.0347971
CAM210_map2	0002.CSV	748.277	0.0356857
CAM210_map2	0002.CSV	752.134	0.0366987
CAM210_map2	0002.CSV	755.991	0.0378281
CAM210_map2	0002.CSV	759.848	0.0389942
CAM210_map2	0002.CSV	763.705	0.0401857
CAM210_map2	0002.CSV	767.562	0.0413238
CAM210_map2	0002.CSV	771.419	0.0424238
CAM210_map2	0002.CSV	775.276	0.0435211
CAM210_map2	0002.CSV	779.133	0.0445119
CAM210_map2	0002.CSV	782.99	0.0450267
CAM210_map2	0002.CSV	786.848	0.0452032
CAM210_map2	0002.CSV	790.705	0.0457232
CAM210_map2	0002.CSV	794.562	0.0468909
CAM210_map2	0002.CSV	798.419	0.0482107
CAM210_map2	0002.CSV	802.276	0.0490963
CAM210_map2	0002.CSV	806.133	0.049505
CAM210_map2	0002.CSV	809.99	0.0499859
CAM210_map2	0002.CSV	813.847	0.0509674
CAM210_map2	0002.CSV	817.704	0.0524477
CAM210_map2	0002.CSV	821.562	0.0544276
CAM210_map2	0002.CSV	825.419	0.0569518
CAM210_map2	0002.CSV	829.276	0.0597724
CAM210_map2	0002.CSV	833.133	0.0625702
CAM210_map2	0002.CSV	836.99	0.0658228
CAM210_map2	0002.CSV	840.847	0.070707
CAM210_map2	0002.CSV	844.704	0.0771401
CAM210_map2	0002.CSV	848.561	0.0837842
CAM210_map2	0002.CSV	852.418	0.0922883
CAM210_map2	0002.CSV	856.275	0.106646
CAM210_map2	0002.CSV	860.132	0.129914
CAM210_map2	0002.CSV	863.99	0.164623
CAM210_map2	0002.CSV	867.847	0.202751
CAM210_map2	0002.CSV	871.704	0.217183
CAM210_map2	0002.CSV	875.561	0.192435
CAM210_map2	0002.CSV	879.418	0.145463
CAM210_map2	0002.CSV	883.275	0.0967359
CAM210_map2	0002.CSV	887.132	0.0591236
CAM210_map2	0002.CSV	890.989	0.0395986
CAM210_map2	0002.CSV	894.846	0.0344513
CAM210_map2	0002.CSV	898.703	0.0349768
CAM210_map2	0002.CSV	902.561	0.0364355
CAM210_map2	0002.CSV	906.418	0.0378667
CAM210_map2	0002.CSV	910.275	0.0391275
CAM210_map2	0002.CSV	914.132	0.0402423
CAM210_map2	0002.CSV	917.989	0.0413669
CAM210_map2	0002.CSV	921.846	0.0425213
CAM210_map2	0002.CSV	925.703	0.0436245
CAM210_map2	0002.CSV	929.56	0.0446562
CAM210_map2	0002.CSV	933.417	0.0455383
CAM210_map2	0002.CSV	937.274	0.0462019
CAM210_map2	0002.CSV	941.131	0.0467399
CAM210_map2	0002.CSV	944.989	0.0473161
CAM210_map2	0002.CSV	948.846	0.0480141
CAM210_map2	0002.CSV	952.703	0.0487845
CAM210_map2	0002.CSV	956.56	0.0494931
CAM210_map2	0002.CSV	960.417	0.0500409
CAM210_map2	0002.CSV	964.274	0.0505525
CAM210_map2	0002.CSV	968.131	0.0512573
CAM210_map2	0002.CSV	971.988	0.0521766
CAM210_map2	0002.CSV	975.845	0.0531201
CAM210_map2	0002.CSV	979.702	0.0540248
CAM210_map2	0002.CSV	983.559	0.0549539
CAM210_map2	0002.CSV	987.417	0.0559438
CAM210_map2	0002.CSV	991.274	0.0569665
CAM210_map2	0002.CSV	995.131	0.0580019
CAM210_map2	0002.CSV	998.988	0.0590249
CAM210_map2	0002.CSV	1002.85	0.0600528
CAM210_map2	0002.CSV	1006.7	0.0611029
CAM210_map2	0002.CSV	1010.56	0.0620472
CAM210_map2	0002.CSV	1014.42	0.0626463
CAM210_map2	0002.CSV	1018.27	0.0629603
CAM210_map2	0002.CSV	1022.13	0.0632445
CAM210_map2	0002.CSV	1025.99	0.0636448
CAM210_map2	0002.CSV	1029.85	0.0641644
CAM210_map2	0002.CSV	1033.7	0.0647562
CAM210_map2	0002.CSV	1037.56	0.0653684
CAM210_map2	0002.CSV	1041.42	0.0660226
CAM210_map2	0002.CSV	1045.27	0.0667215
CAM210_map2	0002.CSV	1049.13	0.0674705
CAM210_map2	0002.CSV	1052.99	0.068327
CAM210_map2	0002.CSV	1056.84	0.0694361
CAM210_map2	0002.CSV	1060.7	0.0709257
CAM210_map2	0002.CSV	1064.56	0.0728268
CAM210_map2	0002.CSV	1068.42	0.0750666
CAM210_map2	0002.CSV	1072.27	0.0775971
CAM210_map2	0002.CSV	1076.13	0.0802992
CAM210_map2	0002.CSV	1079.99	0.08269
CAM210_map2	0002.CSV	1083.84	0.0839185
CAM210_map2	0002.CSV	1087.7	0.0835973
CAM210_map2	0002.CSV	1091.56	0.0822638
CAM210_map2	0002.CSV	1095.41	0.0807291
CAM210_map2	0002.CSV	1099.27	0.0795309
CAM210_map2	0002.CSV	1103.13	0.0789603
CAM210_map2	0002.CSV	1106.99	0.0789953
CAM210_map2	0002.CSV	1110.84	0.0791579
CAM210_map2	0002.CSV	1114.7	0.0788614
CAM210_map2	0002.CSV	1118.56	0.078157
CAM210_map2	0002.CSV	1122.41	0.0775966
CAM210_map2	0002.CSV	1126.27	0.0774193
CAM210_map2	0002.CSV	1130.13	0.0775007
CAM210_map2	0002.CSV	1133.99	0.0777686
CAM210_map2	0002.CSV	1137.84	0.0782341
CAM210_map2	0002.CSV	1141.7	0.0788459
CAM210_map2	0002.CSV	1145.56	0.0794974
CAM210_map2	0002.CSV	1149.41	0.0801009
CAM210_map2	0002.CSV	1153.27	0.080663
CAM210_map2	0002.CSV	1157.13	0.0812927
CAM210_map2	0002.CSV	1160.99	0.0820419
CAM210_map2	0002.CSV	1164.84	0.0827403
CAM210_map2	0002.CSV	1168.7	0.0831791
CAM210_map2	0002.CSV	1172.56	0.083328
CAM210_map2	0002.CSV	1176.41	0.083276
CAM210_map2	0002.CSV	1180.27	0.0830919
CAM210_map2	0002.CSV	1184.13	0.082809
CAM210_map2	0002.CSV	1187.99	0.0824359
CAM210_map2	0002.CSV	1191.84	0.0820175
CAM210_map2	0002.CSV	1195.7	0.0816802
CAM210_map2	0002.CSV	1199.56	0.0815876
CAM210_map2	0002.CSV	1203.41	0.0818159
CAM210_map2	0002.CSV	1207.27	0.0823499
CAM210_map2	0002.CSV	1211.13	0.0831006
CAM210_map2	0002.CSV	1214.98	0.0839367
CAM210_map2	0002.CSV	1218.84	0.0848358
CAM210_map2	0002.CSV	1222.7	0.0858747
CAM210_map2	0002.CSV	1226.56	0.087087
CAM210_map2	0002.CSV	1230.41	0.0884224
CAM210_map2	0002.CSV	1234.27	0.0897687
CAM210_map2	0002.CSV	1238.13	0.0910588
CAM210_map2	0002.CSV	1241.98	0.0923294
CAM210_map2	0002.CSV	1245.84	0.0936515
CAM210_map2	0002.CSV	1249.7	0.0950709
CAM210_map2	0002.CSV	1253.56	0.0965848
CAM210_map2	0002.CSV	1257.41	0.0981522
CAM210_map2	0002.CSV	1261.27	0.0997264
CAM210_map2	0002.CSV	1265.13	0.101348
CAM210_map2	0002.CSV	1268.98	0.103188
CAM210_map2	0002.CSV	1272.84	0.105316
CAM210_map2	0002.CSV	1276.7	0.10757
CAM210_map2	0002.CSV	1280.56	0.109877
CAM210_map2	0002.CSV	1284.41	0.112383
CAM210_map2	0002.CSV	1288.27	0.115201
CAM210_map2	0002.CSV	1292.13	0.118186
CAM210_map2	0002.CSV	1295.98	0.12123
CAM210_map2	0002.CSV	1299.84	0.124406
CAM210_map2	0002.CSV	1303.7	0.127764
CAM210_map2	0002.CSV	1307.56	0.13139
CAM210_map2	0002.CSV	1311.41	0.135415
CAM210_map2	0002.CSV	1315.27	0.139888
CAM210_map2	0002.CSV	1319.13	0.144611
CAM210_map2	0002.CSV	1322.98	0.149299
CAM210_map2	0002.CSV	1326.84	0.154168
CAM210_map2	0002.CSV	1330.7	0.1595
CAM210_map2	0002.CSV	1334.56	0.165547
CAM210_map2	0002.CSV	1338.41	0.173288
CAM210_map2	0002.CSV	1342.27	0.182234
CAM210_map2	0002.CSV	1346.13	0.19085
CAM210_map2	0002.CSV	1349.98	0.199956
CAM210_map2	0002.CSV	1353.84	0.210076
CAM210_map2	0002.CSV	1357.7	0.221103
CAM210_map2	0002.CSV	1361.56	0.23411
CAM210_map2	0002.CSV	1365.41	0.24807
CAM210_map2	0002.CSV	1369.27	0.260789
CAM210_map2	0002.CSV	1373.13	0.274246
CAM210_map2	0002.CSV	1376.98	0.288788
CAM210_map2	0002.CSV	1380.84	0.301354
CAM210_map2	0002.CSV	1384.7	0.312384
CAM210_map2	0002.CSV	1388.56	0.322282
CAM210_map2	0002.CSV	1392.41	0.328441
CAM210_map2	0002.CSV	1396.27	0.329509
CAM210_map2	0002.CSV	1400.13	0.326546
CAM210_map2	0002.CSV	1403.98	0.321016
CAM210_map2	0002.CSV	1407.84	0.312517
CAM210_map2	0002.CSV	1411.7	0.301386
CAM210_map2	0002.CSV	1415.55	0.287733
CAM210_map2	0002.CSV	1419.41	0.270861
CAM210_map2	0002.CSV	1423.27	0.256074
CAM210_map2	0002.CSV	1427.12	0.246081
CAM210_map2	0002.CSV	1430.98	0.237478
CAM210_map2	0002.CSV	1434.84	0.228036
CAM210_map2	0002.CSV	1438.7	0.218693
CAM210_map2	0002.CSV	1442.55	0.211328
CAM210_map2	0002.CSV	1446.41	0.204512
CAM210_map2	0002.CSV	1450.27	0.197563
CAM210_map2	0002.CSV	1454.12	0.190212
CAM210_map2	0002.CSV	1457.98	0.18073
CAM210_map2	0002.CSV	1461.84	0.172778
CAM210_map2	0002.CSV	1465.7	0.1672
CAM210_map2	0002.CSV	1469.55	0.160705
CAM210_map2	0002.CSV	1473.41	0.15049
CAM210_map2	0002.CSV	1477.27	0.140067
CAM210_map2	0002.CSV	1481.12	0.133455
CAM210_map2	0002.CSV	1484.98	0.127974
CAM210_map2	0002.CSV	1488.84	0.121285
CAM210_map2	0002.CSV	1492.7	0.114472
CAM210_map2	0002.CSV	1496.55	0.108832
CAM210_map2	0002.CSV	1500.41	0.103949
CAM210_map2	0002.CSV	1504.27	0.0993743
CAM210_map2	0002.CSV	1508.12	0.0932649
CAM210_map2	0002.CSV	1511.98	0.0881051
CAM210_map2	0002.CSV	1515.84	0.0848758
CAM210_map2	0002.CSV	1519.7	0.0809373
CAM210_map2	0002.CSV	1523.55	0.0766584
CAM210_map2	0002.CSV	1527.41	0.0744289
CAM210_map2	0002.CSV	1531.27	0.0740593
CAM210_map2	0002.CSV	1535.12	0.0745644
CAM210_map2	0002.CSV	1538.98	0.0730457
CAM210_map2	0002.CSV	1542.84	0.0651996
CAM210_map2	0002.CSV	1546.7	0.057726
CAM210_map2	0002.CSV	1550.55	0.0529403
CAM210_map2	0002.CSV	1554.41	0.0488343
CAM210_map2	0002.CSV	1558.27	0.0452287
CAM210_map2	0002.CSV	1562.12	0.0438887
CAM210_map2	0002.CSV	1565.98	0.0445745
CAM210_map2	0002.CSV	1569.84	0.0464955
CAM210_map2	0002.CSV	1573.69	0.0481685
CAM210_map2	0002.CSV	1577.55	0.0468127
CAM210_map2	0002.CSV	1581.41	0.0424962
CAM210_map2	0002.CSV	1585.27	0.0374437
CAM210_map2	0002.CSV	1589.12	0.032953
CAM210_map2	0002.CSV	1592.98	0.0296465
CAM210_map2	0002.CSV	1596.84	0.0274661
CAM210_map2	0002.CSV	1600.69	0.0260268
CAM210_map2	0002.CSV	1604.55	0.0250495
CAM210_map2	0002.CSV	1608.41	0.024397
CAM210_map2	0002.CSV	1612.27	0.0239092
CAM210_map2	0002.CSV	1616.12	0.0235049
CAM210_map2	0002.CSV	1619.98	0.0231412
CAM210_map2	0002.CSV	1623.84	0.0226806
CAM210_map2	0002.CSV	1627.69	0.0220843
CAM210_map2	0002.CSV	1631.55	0.0214259
CAM210_map2	0002.CSV	1635.41	0.0208866
CAM210_map2	0002.CSV	1639.27	0.0204459
CAM210_map2	0002.CSV	1643.12	0.0198845
CAM210_map2	0002.CSV	1646.98	0.0194495
CAM210_map2	0002.CSV	1650.84	0.0194743
CAM210_map2	0002.CSV	1654.69	0.0194926
CAM210_map2	0002.CSV	1658.55	0.0191289
CAM210_map2	0002.CSV	1662.41	0.0186582
CAM210_map2	0002.CSV	1666.27	0.0183015
CAM210_map2	0002.CSV	1670.12	0.0182092
CAM210_map2	0002.CSV	1673.98	0.0182668
CAM210_map2	0002.CSV	1677.84	0.0181516
CAM210_map2	0002.CSV	1681.69	0.0181951
CAM210_map2	0002.CSV	1685.55	0.0185678
CAM210_map2	0002.CSV	1689.41	0.0182775
CAM210_map2	0002.CSV	1693.27	0.0173965
CAM210_map2	0002.CSV	1697.12	0.0166882
CAM210_map2	0002.CSV	1700.98	0.0166534
CAM210_map2	0002.CSV	1704.84	0.0166242
CAM210_map2	0002.CSV	1708.69	0.0162584
CAM210_map2	0002.CSV	1712.55	0.0158963
CAM210_map2	0002.CSV	1716.41	0.016117
CAM210_map2	0002.CSV	1720.27	0.0165193
CAM210_map2	0002.CSV	1724.12	0.0163065
CAM210_map2	0002.CSV	1727.98	0.0159386
CAM210_map2	0002.CSV	1731.84	0.0159355
CAM210_map2	0002.CSV	1735.69	0.0161972
CAM210_map2	0002.CSV	1739.55	0.0158721
CAM210_map2	0002.CSV	1743.41	0.0150578
CAM210_map2	0002.CSV	1747.27	0.0142748
CAM210_map2	0002.CSV	1751.12	0.0136503
CAM210_map2	0002.CSV	1754.98	0.0130602
CAM210_map2	0002.CSV	1758.84	0.012593
CAM210_map2	0002.CSV	1762.69	0.0123198
CAM210_map2	0002.CSV	1766.55	0.0121231
CAM210_map2	0002.CSV	1770.41	0.0122766
CAM210_map2	0002.CSV	1774.26	0.0128206
CAM210_map2	0002.CSV	1778.12	0.0132468
CAM210_map2	0002.CSV	1781.98	0.0137932
CAM210_map2	0002.CSV	1785.84	0.0146847
CAM210_map2	0002.CSV	1789.69	0.0159555
CAM210_map2	0002.CSV	1793.55	0.0173232
CAM210_map2	0002.CSV	1797.41	0.0174229
CAM210_map2	0002.CSV	1801.26	0.0160272
CAM210_map2	0002.CSV	1805.12	0.0142492
CAM210_map2	0002.CSV	1808.98	0.0128877
CAM210_map2	0002.CSV	1812.84	0.0120465
CAM210_map2	0002.CSV	1816.69	0.0115185
CAM210_map2	0002.CSV	1820.55	0.0111771
CAM210_map2	0002.CSV	1824.41	0.011074
CAM210_map2	0002.CSV	1828.26	0.0111917
CAM210_map2	0002.CSV	1832.12	0.0112342
CAM210_map2	0002.CSV	1835.98	0.0110328
CAM210_map2	0002.CSV	1839.84	0.0108457
CAM210_map2	0002.CSV	1843.69	0.0109697
CAM210_map2	0002.CSV	1847.55	0.0112253
CAM210_map2	0002.CSV	1851.41	0.0112055
CAM210_map2	0002.CSV	1855.26	0.011074
CAM210_map2	0002.CSV	1859.12	0.0109937
CAM210_map2	0002.CSV	1862.98	0.0109336
CAM210_map2	0002.CSV	1866.84	0.0110421
CAM210_map2	0002.CSV	1870.69	0.0112935
CAM210_map2	0002.CSV	1874.55	0.011292
CAM210_map2	0002.CSV	1878.41	0.0111637
CAM210_map2	0002.CSV	1882.26	0.0111134
CAM210_map2	0002.CSV	1886.12	0.0111171
CAM210_map2	0002.CSV	1889.98	0.0111857
CAM210_map2	0002.CSV	1893.83	0.0112743
CAM210_map2	0002.CSV	1897.69	0.0112783
CAM210_map2	0002.CSV	1901.55	0.0112103
CAM210_map2	0002.CSV	1905.41	0.0111762
CAM210_map2	0002.CSV	1909.26	0.0112114
CAM210_map2	0002.CSV	1913.12	0.0112189
CAM210_map2	0002.CSV	1916.98	0.0112199
CAM210_map2	0002.CSV	1920.83	0.0113041
CAM210_map2	0002.CSV	1924.69	0.011356
CAM210_map2	0002.CSV	1928.55	0.0113173
CAM210_map2	0002.CSV	1932.4	0.0112859
CAM210_map2	0002.CSV	1936.26	0.0112758
CAM210_map2	0002.CSV	1940.12	0.0112858
CAM210_map2	0002.CSV	1943.98	0.0113577
CAM210_map2	0002.CSV	1947.83	0.0114003
CAM210_map2	0002.CSV	1951.69	0.0113749
CAM210_map2	0002.CSV	1955.55	0.0113589
CAM210_map2	0002.CSV	1959.4	0.0113402
CAM210_map2	0002.CSV	1963.26	0.011309
CAM210_map2	0002.CSV	1967.12	0.0113306
CAM210_map2	0002.CSV	1970.98	0.0113642
CAM210_map2	0002.CSV	1974.83	0.0113179
CAM210_map2	0002.CSV	1978.69	0.0112332
CAM210_map2	0002.CSV	1982.55	0.011185
CAM210_map2	0002.CSV	1986.4	0.011181
CAM210_map2	0002.CSV	1990.26	0.0112048
CAM210_map2	0002.CSV	1994.12	0.0112088
CAM210_map2	0002.CSV	1997.98	0.0111506
CAM210_map2	0002.CSV	2001.83	0.0110882
CAM210_map2	0002.CSV	2005.69	0.0110635
CAM210_map2	0002.CSV	2009.55	0.0110313
CAM210_map2	0002.CSV	2013.4	0.0109893
CAM210_map2	0002.CSV	2017.26	0.0109892
CAM210_map2	0002.CSV	2021.12	0.0109947
CAM210_map2	0002.CSV	2024.97	0.0109469
CAM210_map2	0002.CSV	2028.83	0.0108626
CAM210_map2	0002.CSV	2032.69	0.0107726
CAM210_map2	0002.CSV	2036.55	0.0107205
CAM210_map2	0002.CSV	2040.4	0.0107311
CAM210_map2	0002.CSV	2044.26	0.0107445
CAM210_map2	0002.CSV	2048.12	0.0106981
CAM210_map2	0002.CSV	2051.97	0.0106217
CAM210_map2	0002.CSV	2055.83	0.0105623
CAM210_map2	0002.CSV	2059.69	0.0105293
CAM210_map2	0002.CSV	2063.55	0.0105184
CAM210_map2	0002.CSV	2067.4	0.0104973
CAM210_map2	0002.CSV	2071.26	0.0104542
CAM210_map2	0002.CSV	2075.12	0.0104349
CAM210_map2	0002.CSV	2078.97	0.010441
CAM210_map2	0002.CSV	2082.83	0.0104298
CAM210_map2	0002.CSV	2086.69	0.0104084
CAM210_map2	0002.CSV	2090.55	0.0103903
CAM210_map2	0002.CSV	2094.4	0.0103575
CAM210_map2	0002.CSV	2098.26	0.010314
CAM210_map2	0002.CSV	2102.12	0.0102789
CAM210_map2	0002.CSV	2105.97	0.0102516
CAM210_map2	0002.CSV	2109.83	0.0102316
CAM210_map2	0002.CSV	2113.69	0.0102194
CAM210_map2	0002.CSV	2117.55	0.010208
CAM210_map2	0002.CSV	2121.4	0.0102098
CAM210_map2	0002.CSV	2125.26	0.0102248
CAM210_map2	0002.CSV	2129.12	0.0102261
CAM210_map2	0002.CSV	2132.97	0.0102055
CAM210_map2	0002.CSV	2136.83	0.010178
CAM210_map2	0002.CSV	2140.69	0.0101467
CAM210_map2	0002.CSV	2144.55	0.010107
CAM210_map2	0002.CSV	2148.4	0.0100592
CAM210_map2	0002.CSV	2152.26	0.0100254
CAM210_map2	0002.CSV	2156.12	0.0100051
CAM210_map2	0002.CSV	2159.97	0.00997182
CAM210_map2	0002.CSV	2163.83	0.00991859
CAM210_map2	0002.CSV	2167.69	0.00987246
CAM210_map2	0002.CSV	2171.55	0.00983839
CAM210_map2	0002.CSV	2175.4	0.00980338
CAM210_map2	0002.CSV	2179.26	0.00974686
CAM210_map2	0002.CSV	2183.12	0.00967235
CAM210_map2	0002.CSV	2186.97	0.00959473
CAM210_map2	0002.CSV	2190.83	0.00951778
CAM210_map2	0002.CSV	2194.69	0.00943423
CAM210_map2	0002.CSV	2198.55	0.00934884
CAM210_map2	0002.CSV	2202.4	0.00925169
CAM210_map2	0002.CSV	2206.26	0.00914535
CAM210_map2	0002.CSV	2210.12	0.00906936
CAM210_map2	0002.CSV	2213.97	0.00902034
CAM210_map2	0002.CSV	2217.83	0.0089471
CAM210_map2	0002.CSV	2221.69	0.0088284
CAM210_map2	0002.CSV	2225.54	0.00869651
CAM210_map2	0002.CSV	2229.4	0.00856783
CAM210_map2	0002.CSV	2233.26	0.00846737
CAM210_map2	0002.CSV	2237.12	0.00839514
CAM210_map2	0002.CSV	2240.97	0.00833303
CAM210_map2	0002.CSV	2244.83	0.00822209
CAM210_map2	0002.CSV	2248.69	0.00810479
CAM210_map2	0002.CSV	2252.54	0.00802317
CAM210_map2	0002.CSV	2256.4	0.00799273
CAM210_map2	0002.CSV	2260.26	0.007952
CAM210_map2	0002.CSV	2264.11	0.00791916
CAM210_map2	0002.CSV	2267.97	0.00788758
CAM210_map2	0002.CSV	2271.83	0.00788407
CAM210_map2	0002.CSV	2275.69	0.00786143
CAM210_map2	0002.CSV	2279.54	0.00784453
CAM210_map2	0002.CSV	2283.4	0.00785104
CAM210_map2	0002.CSV	2287.26	0.00796472
CAM210_map2	0002.CSV	2291.11	0.00811587
CAM210_map2	0002.CSV	2294.97	0.00823056
CAM210_map2	0002.CSV	2298.83	0.00826612
CAM210_map2	0002.CSV	2302.69	0.00828882
CAM210_map2	0002.CSV	2306.54	0.00827048
CAM210_map2	0002.CSV	2310.4	0.00823384
CAM210_map2	0002.CSV	2314.26	0.00817583
CAM210_map2	0002.CSV	2318.11	0.00802405
CAM210_map2	0002.CSV	2321.97	0.00766259
CAM210_map2	0002.CSV	2325.83	0.00706403
CAM210_map2	0002.CSV	2329.69	0.00628805
CAM210_map2	0002.CSV	2333.54	0.00551877
CAM210_map2	0002.CSV	2337.4	0.00502973
CAM210_map2	0002.CSV	2341.26	0.00544773
CAM210_map2	0002.CSV	2345.11	0.00646219
CAM210_map2	0002.CSV	2348.97	0.00650911
CAM210_map2	0002.CSV	2352.83	0.00492543
CAM210_map2	0002.CSV	2356.69	0.0013463
CAM210_map2	0002.CSV	2360.54	-0.00201787
CAM210_map2	0002.CSV	2364.4	-0.000140432
CAM210_map2	0002.CSV	2368.26	0.00406827
CAM210_map2	0002.CSV	2372.11	0.0067956
CAM210_map2	0002.CSV	2375.97	0.00791545
CAM210_map2	0002.CSV	2379.83	0.00817556
CAM210_map2	0002.CSV	2383.69	0.00801467
CAM210_map2	0002.CSV	2387.54	0.00769348
CAM210_map2	0002.CSV	2391.4	0.00738779
CAM210_map2	0002.CSV	2395.26	0.00720469
CAM210_map2	0002.CSV	2399.11	0.00706783
CAM210_map2	0002.CSV	2402.97	0.00694866
CAM210_map2	0002.CSV	2406.83	0.00684262
CAM210_map2	0002.CSV	2410.68	0.00678211
CAM210_map2	0002.CSV	2414.54	0.00670938
CAM210_map2	0002.CSV	2418.4	0.00663943
CAM210_map2	0002.CSV	2422.26	0.00659095
CAM210_map2	0002.CSV	2426.11	0.00659912
CAM210_map2	0002.CSV	2429.97	0.0065998
CAM210_map2	0002.CSV	2433.83	0.00658328
CAM210_map2	0002.CSV	2437.68	0.00656878
CAM210_map2	0002.CSV	2441.54	0.00661884
CAM210_map2	0002.CSV	2445.4	0.00670194
CAM210_map2	0002.CSV	2449.26	0.00679092
CAM210_map2	0002.CSV	2453.11	0.00687719
CAM210_map2	0002.CSV	2456.97	0.00697772
CAM210_map2	0002.CSV	2460.83	0.00706794
CAM210_map2	0002.CSV	2464.68	0.00715537
CAM210_map2	0002.CSV	2468.54	0.00727628
CAM210_map2	0002.CSV	2472.4	0.00745284
CAM210_map2	0002.CSV	2476.26	0.00764495
CAM210_map2	0002.CSV	2480.11	0.00785192
CAM210_map2	0002.CSV	2483.97	0.0081158
CAM210_map2	0002.CSV	2487.83	0.00844609
CAM210_map2	0002.CSV	2491.68	0.00883769
CAM210_map2	0002.CSV	2495.54	0.0093093
CAM210_map2	0002.CSV	2499.4	0.00983581
CAM210_map2	0002.CSV	2503.26	0.0103136
CAM210_map2	0002.CSV	2507.11	0.0106386
CAM210_map2	0002.CSV	2510.97	0.0107647
CAM210_map2	0002.CSV	2514.83	0.010718
CAM210_map2	0002.CSV	2518.68	0.0105261
CAM210_map2	0002.CSV	2522.54	0.0101867
CAM210_map2	0002.CSV	2526.4	0.00972324
CAM210_map2	0002.CSV	2530.26	0.00921375
CAM210_map2	0002.CSV	2534.11	0.00874458
CAM210_map2	0002.CSV	2537.97	0.00837886
CAM210_map2	0002.CSV	2541.83	0.00809966
CAM210_map2	0002.CSV	2545.68	0.00785789
CAM210_map2	0002.CSV	2549.54	0.0076585
CAM210_map2	0002.CSV	2553.4	0.00752259
CAM210_map2	0002.CSV	2557.26	0.00743919
CAM210_map2	0002.CSV	2561.11	0.00738776
CAM210_map2	0002.CSV	2564.97	0.0073555
CAM210_map2	0002.CSV	2568.83	0.00734277
CAM210_map2	0002.CSV	2572.68	0.00734192
CAM210_map2	0002.CSV	2576.54	0.00731941
CAM210_map2	0002.CSV	2580.4	0.00725243
CAM210_map2	0002.CSV	2584.25	0.00717006
CAM210_map2	0002.CSV	2588.11	0.00711441
CAM210_map2	0002.CSV	2591.97	0.00707878
CAM210_map2	0002.CSV	2595.83	0.00702379
CAM210_map2	0002.CSV	2599.68	0.00693867
CAM210_map2	0002.CSV	2603.54	0.00684225
CAM210_map2	0002.CSV	2607.4	0.00675559
CAM210_map2	0002.CSV	2611.25	0.00668933
CAM210_map2	0002.CSV	2615.11	0.00661887
CAM210_map2	0002.CSV	2618.97	0.006541
CAM210_map2	0002.CSV	2622.82	0.00649391
CAM210_map2	0002.CSV	2626.68	0.00645321
CAM210_map2	0002.CSV	2630.54	0.00639359
CAM210_map2	0002.CSV	2634.4	0.00635593
CAM210_map2	0002.CSV	2638.25	0.00628318
CAM210_map2	0002.CSV	2642.11	0.00609994
CAM210_map2	0002.CSV	2645.97	0.00590388
CAM210_map2	0002.CSV	2649.82	0.00578936
CAM210_map2	0002.CSV	2653.68	0.0057304
CAM210_map2	0002.CSV	2657.54	0.00569414
CAM210_map2	0002.CSV	2661.4	0.00566493
CAM210_map2	0002.CSV	2665.25	0.00564332
CAM210_map2	0002.CSV	2669.11	0.00569139
CAM210_map2	0002.CSV	2672.97	0.00587059
CAM210_map2	0002.CSV	2676.82	0.0060406
CAM210_map2	0002.CSV	2680.68	0.00592685
CAM210_map2	0002.CSV	2684.54	0.00556971
CAM210_map2	0002.CSV	2688.4	0.00529281
CAM210_map2	0002.CSV	2692.25	0.00522245
CAM210_map2	0002.CSV	2696.11	0.00523691
CAM210_map2	0002.CSV	2699.97	0.00521387
CAM210_map2	0002.CSV	2703.82	0.00517229
CAM210_map2	0002.CSV	2707.68	0.00517111
CAM210_map2	0002.CSV	2711.54	0.00517175
CAM210_map2	0002.CSV	2715.4	0.00519921
CAM210_map2	0002.CSV	2719.25	0.00537942
CAM210_map2	0002.CSV	2723.11	0.00562472
CAM210_map2	0002.CSV	2726.97	0.00562485
CAM210_map2	0002.CSV	2730.82	0.00539197
CAM210_map2	0002.CSV	2734.68	0.00523244
CAM210_map2	0002.CSV	2738.54	0.00519948
CAM210_map2	0002.CSV	2742.4	0.00527779
CAM210_map2	0002.CSV	2746.25	0.00546437
CAM210_map2	0002.CSV	2750.11	0.00549169
CAM210_map2	0002.CSV	2753.97	0.00529265
CAM210_map2	0002.CSV	2757.82	0.00511891
CAM210_map2	0002.CSV	2761.68	0.0050406
CAM210_map2	0002.CSV	2765.54	0.00505555
CAM210_map2	0002.CSV	2769.39	0.00527665
CAM210_map2	0002.CSV	2773.25	0.00556729
CAM210_map2	0002.CSV	2777.11	0.00559908
CAM210_map2	0002.CSV	2780.97	0.00551252
CAM210_map2	0002.CSV	2784.82	0.00572043
CAM210_map2	0002.CSV	2788.68	0.00614567
CAM210_map2	0002.CSV	2792.54	0.00642947
CAM210_map2	0002.CSV	2796.39	0.00647823
CAM210_map2	0002.CSV	2800.25	0.00635782
CAM210_map2	0002.CSV	2804.11	0.00629068
CAM210_map2	0002.CSV	2807.97	0.00645722
CAM210_map2	0002.CSV	2811.82	0.00661827
CAM210_map2	0002.CSV	2815.68	0.00667264
CAM210_map2	0002.CSV	2819.54	0.00686932
CAM210_map2	0002.CSV	2823.39	0.00726819
CAM210_map2	0002.CSV	2827.25	0.00789602
CAM210_map2	0002.CSV	2831.11	0.00902372
CAM210_map2	0002.CSV	2834.97	0.0108701
CAM210_map2	0002.CSV	2838.82	0.0137429
CAM210_map2	0002.CSV	2842.68	0.0183276
CAM210_map2	0002.CSV	2846.54	0.0237462
CAM210_map2	0002.CSV	2850.39	0.0262878
CAM210_map2	0002.CSV	2854.25	0.0241321
CAM210_map2	0002.CSV	2858.11	0.0200857
CAM210_map2	0002.CSV	2861.97	0.016918
CAM210_map2	0002.CSV	2865.82	0.0152633
CAM210_map2	0002.CSV	2869.68	0.0148078
CAM210_map2	0002.CSV	2873.54	0.0145937
CAM210_map2	0002.CSV	2877.39	0.0139688
CAM210_map2	0002.CSV	2881.25	0.0134006
CAM210_map2	0002.CSV	2885.11	0.0135079
CAM210_map2	0002.CSV	2888.97	0.014359
CAM210_map2	0002.CSV	2892.82	0.0157129
CAM210_map2	0002.CSV	2896.68	0.0172323
CAM210_map2	0002.CSV	2900.54	0.0189625
CAM210_map2	0002.CSV	2904.39	0.0216568
CAM210_map2	0002.CSV	2908.25	0.026401
CAM210_map2	0002.CSV	2912.11	0.0331235
CAM210_map2	0002.CSV	2915.97	0.0387919
CAM210_map2	0002.CSV	2919.82	0.0395687
CAM210_map2	0002.CSV	2923.68	0.0355422
CAM210_map2	0002.CSV	2927.54	0.0298936
CAM210_map2	0002.CSV	2931.39	0.024649
CAM210_map2	0002.CSV	2935.25	0.0203883
CAM210_map2	0002.CSV	2939.11	0.0175427
CAM210_map2	0002.CSV	2942.96	0.0160453
CAM210_map2	0002.CSV	2946.82	0.0153107
CAM210_map2	0002.CSV	2950.68	0.0149178
CAM210_map2	0002.CSV	2954.54	0.0144825
CAM210_map2	0002.CSV	2958.39	0.0136087
CAM210_map2	0002.CSV	2962.25	0.0122579
CAM210_map2	0002.CSV	2966.11	0.0107448
CAM210_map2	0002.CSV	2969.96	0.0095572
CAM210_map2	0002.CSV	2973.82	0.00885504
CAM210_map2	0002.CSV	2977.68	0.00828338
CAM210_map2	0002.CSV	2981.53	0.00747023
CAM210_map2	0002.CSV	2985.39	0.00658271
CAM210_map2	0002.CSV	2989.25	0.00611909
CAM210_map2	0002.CSV	2993.11	0.00601715
CAM210_map2	0002.CSV	2996.96	0.00580796
CAM210_map2	0002.CSV	3000.82	0.00544854
CAM210_map2	0002.CSV	3004.68	0.00525431
CAM210_map2	0002.CSV	3008.53	0.00539955
CAM210_map2	0002.CSV	3012.39	0.00565634
CAM210_map2	0002.CSV	3016.25	0.00565577
CAM210_map2	0002.CSV	3020.11	0.00535571
CAM210_map2	0002.CSV	3023.96	0.00501934
CAM210_map2	0002.CSV	3027.82	0.00492513
CAM210_map2	0002.CSV	3031.68	0.00509601
CAM210_map2	0002.CSV	3035.53	0.00526601
CAM210_map2	0002.CSV	3039.39	0.00533417
CAM210_map2	0002.CSV	3043.25	0.00535128
CAM210_map2	0002.CSV	3047.11	0.00528701
CAM210_map2	0002.CSV	3050.96	0.00517165
CAM210_map2	0002.CSV	3054.82	0.00503969
CAM210_map2	0002.CSV	3058.68	0.00493006
CAM210_map2	0002.CSV	3062.53	0.00496672
CAM210_map2	0002.CSV	3066.39	0.00507995
CAM210_map2	0002.CSV	3070.25	0.00511579
CAM210_map2	0002.CSV	3074.11	0.00520863
CAM210_map2	0002.CSV	3077.96	0.00543679
CAM210_map2	0002.CSV	3081.82	0.00560982
CAM210_map2	0002.CSV	3085.68	0.00559888
CAM210_map2	0002.CSV	3089.53	0.00539895
CAM210_map2	0002.CSV	3093.39	0.0051296
CAM210_map2	0002.CSV	3097.25	0.00500463
CAM210_map2	0002.CSV	3101.11	0.00504341
CAM210_map2	0002.CSV	3104.96	0.00513996
CAM210_map2	0002.CSV	3108.82	0.00526518
CAM210_map2	0002.CSV	3112.68	0.00540143
CAM210_map2	0002.CSV	3116.53	0.00550991
CAM210_map2	0002.CSV	3120.39	0.00548279
CAM210_map2	0002.CSV	3124.25	0.00529375
CAM210_map2	0002.CSV	3128.11	0.00509464
CAM210_map2	0002.CSV	3131.96	0.00502541
CAM210_map2	0002.CSV	3135.82	0.00511515
CAM210_map2	0002.CSV	3139.68	0.00517681
CAM210_map2	0002.CSV	3143.53	0.00509202
CAM210_map2	0002.CSV	3147.39	0.00511492
CAM210_map2	0002.CSV	3151.25	0.00527051
CAM210_map2	0002.CSV	3155.1	0.00518858
CAM210_map2	0002.CSV	3158.96	0.00485707
CAM210_map2	0002.CSV	3162.82	0.00461941
CAM210_map2	0002.CSV	3166.68	0.00456777
CAM210_map2	0002.CSV	3170.53	0.00457481
CAM210_map2	0002.CSV	3174.39	0.00461462
CAM210_map2	0002.CSV	3178.25	0.00470796
CAM210_map2	0002.CSV	3182.1	0.00481064
CAM210_map2	0002.CSV	3185.96	0.00490472
CAM210_map2	0002.CSV	3189.82	0.00495107
CAM210_map2	0002.CSV	3193.68	0.00490978
CAM210_map2	0002.CSV	3197.53	0.00488268
CAM210_map2	0002.CSV	3201.39	0.00493609
CAM210_map2	0002.CSV	3205.25	0.00498646
CAM210_map2	0002.CSV	3209.1	0.00503423
CAM210_map2	0002.CSV	3212.96	0.00516001
CAM210_map2	0002.CSV	3216.82	0.00527658
CAM210_map2	0002.CSV	3220.68	0.00527319
CAM210_map2	0002.CSV	3224.53	0.00529758
CAM210_map2	0002.CSV	3228.39	0.00554706
CAM210_map2	0002.CSV	3232.25	0.00587093
CAM210_map2	0002.CSV	3236.1	0.00594721
CAM210_map2	0002.CSV	3239.96	0.00588752
CAM210_map2	0002.CSV	3243.82	0.00595426
CAM210_map2	0002.CSV	3247.68	0.00598843
CAM210_map2	0002.CSV	3251.53	0.00589286
CAM210_map2	0002.CSV	3255.39	0.00581035
CAM210_map2	0002.CSV	3259.25	0.00573137
CAM210_map2	0002.CSV	3263.1	0.00576428
CAM210_map2	0002.CSV	3266.96	0.00607927
CAM210_map2	0002.CSV	3270.82	0.00644642
CAM210_map2	0002.CSV	3274.68	0.00649946
CAM210_map2	0002.CSV	3278.53	0.00626197
CAM210_map2	0002.CSV	3282.39	0.00606472
CAM210_map2	0002.CSV	3286.25	0.00614218
CAM210_map2	0002.CSV	3290.1	0.00647242
CAM210_map2	0002.CSV	3293.96	0.00676578
CAM210_map2	0002.CSV	3297.82	0.00682468
CAM210_map2	0002.CSV	3301.67	0.00685067
CAM210_map2	0002.CSV	3305.53	0.00692789
CAM210_map2	0002.CSV	3309.39	0.00680691
CAM210_map2	0002.CSV	3313.25	0.00643879
CAM210_map2	0002.CSV	3317.1	0.00615384
CAM210_map2	0002.CSV	3320.96	0.00621303
CAM210_map2	0002.CSV	3324.82	0.00638952
CAM210_map2	0002.CSV	3328.67	0.00635983
CAM210_map2	0002.CSV	3332.53	0.00638613
CAM210_map2	0002.CSV	3336.39	0.00671154
CAM210_map2	0002.CSV	3340.24	0.006952
CAM210_map2	0002.CSV	3344.1	0.00688325
CAM210_map2	0002.CSV	3347.96	0.00675182
CAM210_map2	0002.CSV	3351.82	0.00664794
CAM210_map2	0002.CSV	3355.67	0.00657628
CAM210_map2	0002.CSV	3359.53	0.00668273
CAM210_map2	0002.CSV	3363.39	0.00695893
CAM210_map2	0002.CSV	3367.24	0.00717706
CAM210_map2	0002.CSV	3371.1	0.0071095
CAM210_map2	0002.CSV	3374.96	0.00684239
CAM210_map2	0002.CSV	3378.82	0.00659529
CAM210_map2	0002.CSV	3382.67	0.00642903
CAM210_map2	0002.CSV	3386.53	0.00648308
CAM210_map2	0002.CSV	3390.39	0.00676989
CAM210_map2	0002.CSV	3394.24	0.00699197
CAM210_map2	0002.CSV	3398.1	0.00701877
CAM210_map2	0002.CSV	3401.96	0.00691628
CAM210_map2	0002.CSV	3405.82	0.0067187
CAM210_map2	0002.CSV	3409.67	0.00647548
CAM210_map2	0002.CSV	3413.53	0.00615381
CAM210_map2	0002.CSV	3417.39	0.00580286
CAM210_map2	0002.CSV	3421.24	0.0056463
CAM210_map2	0002.CSV	3425.1	0.00579812
CAM210_map2	0002.CSV	3428.96	0.00609984
CAM210_map2	0002.CSV	3432.82	0.00620832
CAM210_map2	0002.CSV	3436.67	0.0058674
CAM210_map2	0002.CSV	3440.53	0.00526102
CAM210_map2	0002.CSV	3444.39	0.00483161
CAM210_map2	0002.CSV	3448.24	0.00462758
CAM210_map2	0002.CSV	3452.1	0.00447476
CAM210_map2	0002.CSV	3455.96	0.00451109
CAM210_map2	0002.CSV	3459.82	0.00477754
CAM210_map2	0002.CSV	3463.67	0.00505615
CAM210_map2	0002.CSV	3467.53	0.00510556
CAM210_map2	0002.CSV	3471.39	0.00483211
CAM210_map2	0002.CSV	3475.24	0.00449241
CAM210_map2	0002.CSV	3479.1	0.00429647
CAM210_map2	0002.CSV	3482.96	0.00415645
CAM210_map2	0002.CSV	3486.82	0.0040569
CAM210_map2	0002.CSV	3490.67	0.00401246
CAM210_map2	0002.CSV	3494.53	0.00400801
CAM210_map2	0002.CSV	3498.39	0.0039742
CAM210_map2	0002.CSV	3502.24	0.00373297
CAM210_map2	0002.CSV	3506.1	0.00329272
CAM210_map2	0002.CSV	3509.96	0.00298111
CAM210_map2	0002.CSV	3513.81	0.00283961
CAM210_map2	0002.CSV	3517.67	0.00261958
CAM210_map2	0002.CSV	3521.53	0.00241388
CAM210_map2	0002.CSV	3525.39	0.00233376
CAM210_map2	0002.CSV	3529.24	0.00225625
CAM210_map2	0002.CSV	3533.1	0.00223094
CAM210_map2	0002.CSV	3536.96	0.00228746
CAM210_map2	0002.CSV	3540.81	0.00239476
CAM210_map2	0002.CSV	3544.67	0.00251455
CAM210_map2	0002.CSV	3548.53	0.00239129
CAM210_map2	0002.CSV	3552.39	0.00194141
CAM210_map2	0002.CSV	3556.24	0.00144379
CAM210_map2	0002.CSV	3560.1	0.00100695
CAM210_map2	0002.CSV	3563.96	0.000692523
CAM210_map2	0002.CSV	3567.81	0.000741012
CAM210_map2	0002.CSV	3571.67	0.000808527
CAM210_map2	0002.CSV	3575.53	0.000692656
CAM210_map2	0002.CSV	3579.39	0.000698331
CAM210_map2	0002.CSV	3583.24	0.000783199
CAM210_map2	0002.CSV	3587.1	0.000730391
CAM210_map2	0002.CSV	3590.96	0.000494907
CAM210_map2	0002.CSV	3594.81	0.000233591
CAM210_map2	0002.CSV	3598.67	0.00012268
CAM210_map2	0002.CSV	3602.53	-0.000114662
CAM210_map2	0002.CSV	3606.39	-0.000711997
CAM210_map2	0002.CSV	3610.24	-0.001288
CAM210_map2	0002.CSV	3614.1	-0.00134191
CAM210_map2	0002.CSV	3617.96	-0.000987398
CAM210_map2	0002.CSV	3621.81	-0.000905106
CAM210_map2	0002.CSV	3625.67	-0.00128634
CAM210_map2	0002.CSV	3629.53	-0.00146034
CAM210_map2	0002.CSV	3633.39	-0.00124554
CAM210_map2	0002.CSV	3637.24	-0.00132153
CAM210_map2	0002.CSV	3641.1	-0.00171956
CAM210_map2	0002.CSV	3644.96	-0.00214536
CAM210_map2	0002.CSV	3648.81	-0.00195587
CAM210_map2	0002.CSV	3652.67	-0.00117787
CAM210_map2	0002.CSV	3656.53	-0.000849686
CAM210_map2	0002.CSV	3660.38	-0.00105754
CAM210_map2	0002.CSV	3664.24	-0.00174781
CAM210_map2	0002.CSV	3668.1	-0.00257726
CAM210_map2	0002.CSV	3671.96	-0.00282972
CAM210_map2	0002.CSV	3675.81	-0.0021961
CAM210_map2	0002.CSV	3679.67	-0.00174982
CAM210_map2	0002.CSV	3683.53	-0.00174623
CAM210_map2	0002.CSV	3687.38	-0.00162803
CAM210_map2	0002.CSV	3691.24	-0.00118881
CAM210_map2	0002.CSV	3695.1	-0.00121356
CAM210_map2	0002.CSV	3698.95	-0.00168236
CAM210_map2	0002.CSV	3702.81	-0.00215103
CAM210_map2	0002.CSV	3706.67	-0.00249968
CAM210_map2	0002.CSV	3710.53	-0.00251451
CAM210_map2	0002.CSV	3714.38	-0.00225919
CAM210_map2	0002.CSV	3718.24	-0.00236884
CAM210_map2	0002.CSV	3722.1	-0.00268294
CAM210_map2	0002.CSV	3725.95	-0.00282202
CAM210_map2	0002.CSV	3729.81	-0.00281425
CAM210_map2	0002.CSV	3733.67	-0.00250587
CAM210_map2	0002.CSV	3737.53	-0.00210599
CAM210_map2	0002.CSV	3741.38	-0.00260278
CAM210_map2	0002.CSV	3745.24	-0.00367133
CAM210_map2	0002.CSV	3749.1	-0.00396896
CAM210_map2	0002.CSV	3752.95	-0.00314076
CAM210_map2	0002.CSV	3756.81	-0.00254705
CAM210_map2	0002.CSV	3760.67	-0.00241217
CAM210_map2	0002.CSV	3764.53	-0.00241913
CAM210_map2	0002.CSV	3768.38	-0.0023145
CAM210_map2	0002.CSV	3772.24	-0.00223127
CAM210_map2	0002.CSV	3776.1	-0.00229798
CAM210_map2	0002.CSV	3779.95	-0.00230856
CAM210_map2	0002.CSV	3783.81	-0.00223556
CAM210_map2	0002.CSV	3787.67	-0.00229627
CAM210_map2	0002.CSV	3791.53	-0.00268311
CAM210_map2	0002.CSV	3795.38	-0.00329599
CAM210_map2	0002.CSV	3799.24	-0.00359112
CAM210_map2	0002.CSV	3803.1	-0.00314188
CAM210_map2	0002.CSV	3806.95	-0.00274784
CAM210_map2	0002.CSV	3810.81	-0.00296628
CAM210_map2	0002.CSV	3814.67	-0.00341528
CAM210_map2	0002.CSV	3818.53	-0.00349269
CAM210_map2	0002.CSV	3822.38	-0.00319447
CAM210_map2	0002.CSV	3826.24	-0.00325752
CAM210_map2	0002.CSV	3830.1	-0.00356963
CAM210_map2	0002.CSV	3833.95	-0.00375438
CAM210_map2	0002.CSV	3837.81	-0.0034231
CAM210_map2	0002.CSV	3841.67	-0.00282448
CAM210_map2	0002.CSV	3845.53	-0.00299968
CAM210_map2	0002.CSV	3849.38	-0.00382993
CAM210_map2	0002.CSV	3853.24	-0.00426087
CAM210_map2	0002.CSV	3857.1	-0.00388694
CAM210_map2	0002.CSV	3860.95	-0.00391002
CAM210_map2	0002.CSV	3864.81	-0.00414822
CAM210_map2	0002.CSV	3868.67	-0.00409771
CAM210_map2	0002.CSV	3872.52	-0.00381554
CAM210_map2	0002.CSV	3876.38	-0.00373083
CAM210_map2	0002.CSV	3880.24	-0.00373894
CAM210_map2	0002.CSV	3884.1	-0.00350281
CAM210_map2	0002.CSV	3887.95	-0.00331368
CAM210_map2	0002.CSV	3891.81	-0.00344266
CAM210_map2	0002.CSV	3895.67	-0.00386549
CAM210_map2	0002.CSV	3899.52	-0.00418521
CAM210_map2	0002.CSV	3903.38	-0.0036529
CAM210_map2	0002.CSV	3907.24	-0.00308447
CAM210_map2	0002.CSV	3911.1	-0.00321953
CAM210_map2	0002.CSV	3914.95	-0.00348704
CAM210_map2	0002.CSV	3918.81	-0.00349828
CAM210_map2	0002.CSV	3922.67	-0.00338457
CAM210_map2	0002.CSV	3926.52	-0.00332667
CAM210_map2	0002.CSV	3930.38	-0.00316967
CAM210_map2	0002.CSV	3934.24	-0.00299583
CAM210_map2	0002.CSV	3938.09	-0.00308026
CAM210_map2	0002.CSV	3941.95	-0.00324456
CAM210_map2	0002.CSV	3945.81	-0.00322384
CAM210_map2	0002.CSV	3949.67	-0.00313125
CAM210_map2	0002.CSV	3953.52	-0.00313191
CAM210_map2	0002.CSV	3957.38	-0.00315674
CAM210_map2	0002.CSV	3961.24	-0.00309773
CAM210_map2	0002.CSV	3965.09	-0.003029
CAM210_map2	0002.CSV	3968.95	-0.00302353
CAM210_map2	0002.CSV	3972.81	-0.00299004
CAM210_map2	0002.CSV	3976.67	-0.00288769
CAM210_map2	0002.CSV	3980.52	-0.00281517
CAM210_map2	0002.CSV	3984.38	-0.00283775
CAM210_map2	0002.CSV	3988.24	-0.00290141
CAM210_map2	0002.CSV	3992.09	-0.00288081
CAM210_map2	0002.CSV	3995.95	-0.00280895
CAM210_map2	0002.CSV	3999.81	-0.00280618
CAM210_map2	0003.CSV	674.992	0.0364654
CAM210_map2	0003.CSV	678.849	0.0364712
CAM210_map2	0003.CSV	682.706	0.0368114
CAM210_map2	0003.CSV	686.563	0.0373563
CAM210_map2	0003.CSV	690.42	0.0393356
CAM210_map2	0003.CSV	694.277	0.0434296
CAM210_map2	0003.CSV	698.134	0.0486881
CAM210_map2	0003.CSV	701.991	0.0556247
CAM210_map2	0003.CSV	705.849	0.0668372
CAM210_map2	0003.CSV	709.706	0.0772965
CAM210_map2	0003.CSV	713.563	0.0735612
CAM210_map2	0003.CSV	717.42	0.0559873
CAM210_map2	0003.CSV	721.277	0.0396212
CAM210_map2	0003.CSV	725.134	0.0319549
CAM210_map2	0003.CSV	728.991	0.0297186
CAM210_map2	0003.CSV	732.848	0.0294369
CAM210_map2	0003.CSV	736.705	0.0295267
CAM210_map2	0003.CSV	740.562	0.0295701
CAM210_map2	0003.CSV	744.42	0.0298516
CAM210_map2	0003.CSV	748.277	0.03061
CAM210_map2	0003.CSV	752.134	0.0315979
CAM210_map2	0003.CSV	755.991	0.0326622
CAM210_map2	0003.CSV	759.848	0.0336875
CAM210_map2	0003.CSV	763.705	0.0346841
CAM210_map2	0003.CSV	767.562	0.0356403
CAM210_map2	0003.CSV	771.419	0.0366044
CAM210_map2	0003.CSV	775.276	0.0375913
CAM210_map2	0003.CSV	779.133	0.0385112
CAM210_map2	0003.CSV	782.99	0.0390827
CAM210_map2	0003.CSV	786.848	0.0394422
CAM210_map2	0003.CSV	790.705	0.0400695
CAM210_map2	0003.CSV	794.562	0.0411585
CAM210_map2	0003.CSV	798.419	0.0423521
CAM210_map2	0003.CSV	802.276	0.0432949
CAM210_map2	0003.CSV	806.133	0.0440324
CAM210_map2	0003.CSV	809.99	0.0448643
CAM210_map2	0003.CSV	813.847	0.0460056
CAM210_map2	0003.CSV	817.704	0.0476691
CAM210_map2	0003.CSV	821.562	0.0500785
CAM210_map2	0003.CSV	825.419	0.0533139
CAM210_map2	0003.CSV	829.276	0.0572476
CAM210_map2	0003.CSV	833.133	0.0618255
CAM210_map2	0003.CSV	836.99	0.0677624
CAM210_map2	0003.CSV	840.847	0.0758435
CAM210_map2	0003.CSV	844.704	0.0855941
CAM210_map2	0003.CSV	848.561	0.0959226
CAM210_map2	0003.CSV	852.418	0.106632
CAM210_map2	0003.CSV	856.275	0.117685
CAM210_map2	0003.CSV	860.132	0.12973
CAM210_map2	0003.CSV	863.99	0.145638
CAM210_map2	0003.CSV	867.847	0.163008
CAM210_map2	0003.CSV	871.704	0.167884
CAM210_map2	0003.CSV	875.561	0.150505
CAM210_map2	0003.CSV	879.418	0.117571
CAM210_map2	0003.CSV	883.275	0.0806888
CAM210_map2	0003.CSV	887.132	0.0505068
CAM210_map2	0003.CSV	890.989	0.034179
CAM210_map2	0003.CSV	894.846	0.0295422
CAM210_map2	0003.CSV	898.703	0.0297376
CAM210_map2	0003.CSV	902.561	0.0308522
CAM210_map2	0003.CSV	906.418	0.0319442
CAM210_map2	0003.CSV	910.275	0.0328328
CAM210_map2	0003.CSV	914.132	0.0336056
CAM210_map2	0003.CSV	917.989	0.034408
CAM210_map2	0003.CSV	921.846	0.0352357
CAM210_map2	0003.CSV	925.703	0.0360172
CAM210_map2	0003.CSV	929.56	0.0367068
CAM210_map2	0003.CSV	933.417	0.0372816
CAM210_map2	0003.CSV	937.274	0.0377684
CAM210_map2	0003.CSV	941.131	0.0382099
CAM210_map2	0003.CSV	944.989	0.0386633
CAM210_map2	0003.CSV	948.846	0.0392183
CAM210_map2	0003.CSV	952.703	0.0398544
CAM210_map2	0003.CSV	956.56	0.040419
CAM210_map2	0003.CSV	960.417	0.0408295
CAM210_map2	0003.CSV	964.274	0.0412379
CAM210_map2	0003.CSV	968.131	0.0418613
CAM210_map2	0003.CSV	971.988	0.0427162
CAM210_map2	0003.CSV	975.845	0.0436049
CAM210_map2	0003.CSV	979.702	0.0444214
CAM210_map2	0003.CSV	983.559	0.0452177
CAM210_map2	0003.CSV	987.417	0.0460729
CAM210_map2	0003.CSV	991.274	0.0469922
CAM210_map2	0003.CSV	995.131	0.0479198
CAM210_map2	0003.CSV	998.988	0.0487877
CAM210_map2	0003.CSV	1002.85	0.0496401
CAM210_map2	0003.CSV	1006.7	0.0504957
CAM210_map2	0003.CSV	1010.56	0.0512598
CAM210_map2	0003.CSV	1014.42	0.0518173
CAM210_map2	0003.CSV	1018.27	0.0522058
CAM210_map2	0003.CSV	1022.13	0.0525592
CAM210_map2	0003.CSV	1025.99	0.0529861
CAM210_map2	0003.CSV	1029.85	0.053472
CAM210_map2	0003.CSV	1033.7	0.0540013
CAM210_map2	0003.CSV	1037.56	0.0546033
CAM210_map2	0003.CSV	1041.42	0.05528
CAM210_map2	0003.CSV	1045.27	0.0559707
CAM210_map2	0003.CSV	1049.13	0.0567119
CAM210_map2	0003.CSV	1052.99	0.0575986
CAM210_map2	0003.CSV	1056.84	0.0587196
CAM210_map2	0003.CSV	1060.7	0.0601228
CAM210_map2	0003.CSV	1064.56	0.0618273
CAM210_map2	0003.CSV	1068.42	0.0637798
CAM210_map2	0003.CSV	1072.27	0.0660313
CAM210_map2	0003.CSV	1076.13	0.068796
CAM210_map2	0003.CSV	1079.99	0.0716291
CAM210_map2	0003.CSV	1083.84	0.0728158
CAM210_map2	0003.CSV	1087.7	0.0715233
CAM210_map2	0003.CSV	1091.56	0.069167
CAM210_map2	0003.CSV	1095.41	0.0672083
CAM210_map2	0003.CSV	1099.27	0.0659771
CAM210_map2	0003.CSV	1103.13	0.0654446
CAM210_map2	0003.CSV	1106.99	0.0654351
CAM210_map2	0003.CSV	1110.84	0.0655445
CAM210_map2	0003.CSV	1114.7	0.0653817
CAM210_map2	0003.CSV	1118.56	0.0649986
CAM210_map2	0003.CSV	1122.41	0.0647516
CAM210_map2	0003.CSV	1126.27	0.0647725
CAM210_map2	0003.CSV	1130.13	0.0649886
CAM210_map2	0003.CSV	1133.99	0.0653795
CAM210_map2	0003.CSV	1137.84	0.065944
CAM210_map2	0003.CSV	1141.7	0.0666253
CAM210_map2	0003.CSV	1145.56	0.0673306
CAM210_map2	0003.CSV	1149.41	0.0679893
CAM210_map2	0003.CSV	1153.27	0.0686479
CAM210_map2	0003.CSV	1157.13	0.0693855
CAM210_map2	0003.CSV	1160.99	0.070142
CAM210_map2	0003.CSV	1164.84	0.0707422
CAM210_map2	0003.CSV	1168.7	0.071091
CAM210_map2	0003.CSV	1172.56	0.0712324
CAM210_map2	0003.CSV	1176.41	0.0712581
CAM210_map2	0003.CSV	1180.27	0.0712136
CAM210_map2	0003.CSV	1184.13	0.0711039
CAM210_map2	0003.CSV	1187.99	0.0709332
CAM210_map2	0003.CSV	1191.84	0.0707311
CAM210_map2	0003.CSV	1195.7	0.0705773
CAM210_map2	0003.CSV	1199.56	0.0706187
CAM210_map2	0003.CSV	1203.41	0.0709339
CAM210_map2	0003.CSV	1207.27	0.0714943
CAM210_map2	0003.CSV	1211.13	0.0722258
CAM210_map2	0003.CSV	1214.98	0.0730398
CAM210_map2	0003.CSV	1218.84	0.0739169
CAM210_map2	0003.CSV	1222.7	0.0749178
CAM210_map2	0003.CSV	1226.56	0.0760598
CAM210_map2	0003.CSV	1230.41	0.07729
CAM210_map2	0003.CSV	1234.27	0.0785426
CAM210_map2	0003.CSV	1238.13	0.0797743
CAM210_map2	0003.CSV	1241.98	0.0809766
CAM210_map2	0003.CSV	1245.84	0.0821948
CAM210_map2	0003.CSV	1249.7	0.0834822
CAM210_map2	0003.CSV	1253.56	0.0848202
CAM210_map2	0003.CSV	1257.41	0.0861953
CAM210_map2	0003.CSV	1261.27	0.087649
CAM210_map2	0003.CSV	1265.13	0.0892186
CAM210_map2	0003.CSV	1268.98	0.0909756
CAM210_map2	0003.CSV	1272.84	0.0929494
CAM210_map2	0003.CSV	1276.7	0.0950136
CAM210_map2	0003.CSV	1280.56	0.0970939
CAM210_map2	0003.CSV	1284.41	0.0992862
CAM210_map2	0003.CSV	1288.27	0.10171
CAM210_map2	0003.CSV	1292.13	0.104311
CAM210_map2	0003.CSV	1295.98	0.107009
CAM210_map2	0003.CSV	1299.84	0.109824
CAM210_map2	0003.CSV	1303.7	0.112784
CAM210_map2	0003.CSV	1307.56	0.115945
CAM210_map2	0003.CSV	1311.41	0.119396
CAM210_map2	0003.CSV	1315.27	0.12321
CAM210_map2	0003.CSV	1319.13	0.127292
CAM210_map2	0003.CSV	1322.98	0.131377
CAM210_map2	0003.CSV	1326.84	0.135551
CAM210_map2	0003.CSV	1330.7	0.140029
CAM210_map2	0003.CSV	1334.56	0.145037
CAM210_map2	0003.CSV	1338.41	0.15131
CAM210_map2	0003.CSV	1342.27	0.158358
CAM210_map2	0003.CSV	1346.13	0.164998
CAM210_map2	0003.CSV	1349.98	0.171954
CAM210_map2	0003.CSV	1353.84	0.179639
CAM210_map2	0003.CSV	1357.7	0.187933
CAM210_map2	0003.CSV	1361.56	0.197638
CAM210_map2	0003.CSV	1365.41	0.20805
CAM210_map2	0003.CSV	1369.27	0.217553
CAM210_map2	0003.CSV	1373.13	0.227504
CAM210_map2	0003.CSV	1376.98	0.237947
CAM210_map2	0003.CSV	1380.84	0.246555
CAM210_map2	0003.CSV	1384.7	0.253791
CAM210_map2	0003.CSV	1388.56	0.26028
CAM210_map2	0003.CSV	1392.41	0.264588
CAM210_map2	0003.CSV	1396.27	0.265827
CAM210_map2	0003.CSV	1400.13	0.264418
CAM210_map2	0003.CSV	1403.98	0.261324
CAM210_map2	0003.CSV	1407.84	0.256522
CAM210_map2	0003.CSV	1411.7	0.250132
CAM210_map2	0003.CSV	1415.55	0.242099
CAM210_map2	0003.CSV	1419.41	0.232005
CAM210_map2	0003.CSV	1423.27	0.223211
CAM210_map2	0003.CSV	1427.12	0.217529
CAM210_map2	0003.CSV	1430.98	0.212893
CAM210_map2	0003.CSV	1434.84	0.207875
CAM210_map2	0003.CSV	1438.7	0.202867
CAM210_map2	0003.CSV	1442.55	0.198722
CAM210_map2	0003.CSV	1446.41	0.194439
CAM210_map2	0003.CSV	1450.27	0.189637
CAM210_map2	0003.CSV	1454.12	0.184084
CAM210_map2	0003.CSV	1457.98	0.17647
CAM210_map2	0003.CSV	1461.84	0.169989
CAM210_map2	0003.CSV	1465.7	0.165412
CAM210_map2	0003.CSV	1469.55	0.159834
CAM210_map2	0003.CSV	1473.41	0.150523
CAM210_map2	0003.CSV	1477.27	0.140692
CAM210_map2	0003.CSV	1481.12	0.134301
CAM210_map2	0003.CSV	1484.98	0.128889
CAM210_map2	0003.CSV	1488.84	0.122158
CAM210_map2	0003.CSV	1492.7	0.115203
CAM210_map2	0003.CSV	1496.55	0.109389
CAM210_map2	0003.CSV	1500.41	0.104356
CAM210_map2	0003.CSV	1504.27	0.0996043
CAM210_map2	0003.CSV	1508.12	0.093071
CAM210_map2	0003.CSV	1511.98	0.0874927
CAM210_map2	0003.CSV	1515.84	0.0840159
CAM210_map2	0003.CSV	1519.7	0.0796585
CAM210_map2	0003.CSV	1523.55	0.0746982
CAM210_map2	0003.CSV	1527.41	0.0717493
CAM210_map2	0003.CSV	1531.27	0.0704272
CAM210_map2	0003.CSV	1535.12	0.0696887
CAM210_map2	0003.CSV	1538.98	0.0672182
CAM210_map2	0003.CSV	1542.84	0.0598917
CAM210_map2	0003.CSV	1546.7	0.0535381
CAM210_map2	0003.CSV	1550.55	0.0494921
CAM210_map2	0003.CSV	1554.41	0.0456959
CAM210_map2	0003.CSV	1558.27	0.0415413
CAM210_map2	0003.CSV	1562.12	0.0391111
CAM210_map2	0003.CSV	1565.98	0.038608
CAM210_map2	0003.CSV	1569.84	0.0388771
CAM210_map2	0003.CSV	1573.69	0.0388495
CAM210_map2	0003.CSV	1577.55	0.0368523
CAM210_map2	0003.CSV	1581.41	0.0331475
CAM210_map2	0003.CSV	1585.27	0.0291271
CAM210_map2	0003.CSV	1589.12	0.0255144
CAM210_map2	0003.CSV	1592.98	0.0227325
CAM210_map2	0003.CSV	1596.84	0.0207766
CAM210_map2	0003.CSV	1600.69	0.0193884
CAM210_map2	0003.CSV	1604.55	0.018358
CAM210_map2	0003.CSV	1608.41	0.0175715
CAM210_map2	0003.CSV	1612.27	0.01692
CAM210_map2	0003.CSV	1616.12	0.0163708
CAM210_map2	0003.CSV	1619.98	0.0159378
CAM210_map2	0003.CSV	1623.84	0.0155035
CAM210_map2	0003.CSV	1627.69	0.0149665
CAM210_map2	0003.CSV	1631.55	0.0143703
CAM210_map2	0003.CSV	1635.41	0.0138954
CAM210_map2	0003.CSV	1639.27	0.0134916
CAM210_map2	0003.CSV	1643.12	0.0129482
CAM210_map2	0003.CSV	1646.98	0.0125388
CAM210_map2	0003.CSV	1650.84	0.0125854
CAM210_map2	0003.CSV	1654.69	0.0125976
CAM210_map2	0003.CSV	1658.55	0.0122101
CAM210_map2	0003.CSV	1662.41	0.0117211
CAM210_map2	0003.CSV	1666.27	0.0113572
CAM210_map2	0003.CSV	1670.12	0.0112352
CAM210_map2	0003.CSV	1673.98	0.0112227
CAM210_map2	0003.CSV	1677.84	0.0110303
CAM210_map2	0003.CSV	1681.69	0.0109581
CAM210_map2	0003.CSV	1685.55	0.0112006
CAM210_map2	0003.CSV	1689.41	0.010911
CAM210_map2	0003.CSV	1693.27	0.0101057
CAM210_map2	0003.CSV	1697.12	0.00945783
CAM210_map2	0003.CSV	1700.98	0.00938161
CAM210_map2	0003.CSV	1704.84	0.00924184
CAM210_map2	0003.CSV	1708.69	0.00879205
CAM210_map2	0003.CSV	1712.55	0.00836788
CAM210_map2	0003.CSV	1716.41	0.00850383
CAM210_map2	0003.CSV	1720.27	0.00880277
CAM210_map2	0003.CSV	1724.12	0.00853147
[truncated: 65,315 more rows]

## Sheet: CAM210_map3
Map	Select spectrum number	Wavenumbers	Absorbance
CAM210_map3	0001.CSV	674.992	0.045622
CAM210_map3	0001.CSV	678.849	0.0463143
CAM210_map3	0001.CSV	682.706	0.047095
CAM210_map3	0001.CSV	686.563	0.0481387
CAM210_map3	0001.CSV	690.42	0.0498742
CAM210_map3	0001.CSV	694.277	0.0529439
CAM210_map3	0001.CSV	698.134	0.0584022
CAM210_map3	0001.CSV	701.991	0.0688578
CAM210_map3	0001.CSV	705.849	0.0863167
CAM210_map3	0001.CSV	709.706	0.101219
CAM210_map3	0001.CSV	713.563	0.0961441
CAM210_map3	0001.CSV	717.42	0.0740723
CAM210_map3	0001.CSV	721.277	0.0546664
CAM210_map3	0001.CSV	725.134	0.0455219
CAM210_map3	0001.CSV	728.991	0.0417842
CAM210_map3	0001.CSV	732.848	0.0395973
CAM210_map3	0001.CSV	736.705	0.0381898
CAM210_map3	0001.CSV	740.562	0.0376184
CAM210_map3	0001.CSV	744.42	0.0378373
CAM210_map3	0001.CSV	748.277	0.0386345
CAM210_map3	0001.CSV	752.134	0.0396297
CAM210_map3	0001.CSV	755.991	0.0404722
CAM210_map3	0001.CSV	759.848	0.0412654
CAM210_map3	0001.CSV	763.705	0.0422223
CAM210_map3	0001.CSV	767.562	0.0431744
CAM210_map3	0001.CSV	771.419	0.0439158
CAM210_map3	0001.CSV	775.276	0.0444545
CAM210_map3	0001.CSV	779.133	0.0448333
CAM210_map3	0001.CSV	782.99	0.0449807
CAM210_map3	0001.CSV	786.848	0.0449709
CAM210_map3	0001.CSV	790.705	0.045157
CAM210_map3	0001.CSV	794.562	0.0457566
CAM210_map3	0001.CSV	798.419	0.0465399
CAM210_map3	0001.CSV	802.276	0.047156
CAM210_map3	0001.CSV	806.133	0.0476398
CAM210_map3	0001.CSV	809.99	0.0482477
CAM210_map3	0001.CSV	813.847	0.0490611
CAM210_map3	0001.CSV	817.704	0.0501296
CAM210_map3	0001.CSV	821.562	0.0515999
CAM210_map3	0001.CSV	825.419	0.0534992
CAM210_map3	0001.CSV	829.276	0.0557156
CAM210_map3	0001.CSV	833.133	0.0583324
CAM210_map3	0001.CSV	836.99	0.0619312
CAM210_map3	0001.CSV	840.847	0.0674346
CAM210_map3	0001.CSV	844.704	0.0741925
CAM210_map3	0001.CSV	848.561	0.0801037
CAM210_map3	0001.CSV	852.418	0.0873353
CAM210_map3	0001.CSV	856.275	0.102603
CAM210_map3	0001.CSV	860.132	0.131418
CAM210_map3	0001.CSV	863.99	0.174306
CAM210_map3	0001.CSV	867.847	0.217641
CAM210_map3	0001.CSV	871.704	0.231899
CAM210_map3	0001.CSV	875.561	0.204746
CAM210_map3	0001.CSV	879.418	0.155408
CAM210_map3	0001.CSV	883.275	0.103063
CAM210_map3	0001.CSV	887.132	0.0603418
CAM210_map3	0001.CSV	890.989	0.0363966
CAM210_map3	0001.CSV	894.846	0.0288361
CAM210_map3	0001.CSV	898.703	0.0283115
CAM210_map3	0001.CSV	902.561	0.0292092
CAM210_map3	0001.CSV	906.418	0.0302653
CAM210_map3	0001.CSV	910.275	0.0313099
CAM210_map3	0001.CSV	914.132	0.0323237
CAM210_map3	0001.CSV	917.989	0.0334014
CAM210_map3	0001.CSV	921.846	0.0345661
CAM210_map3	0001.CSV	925.703	0.0357582
CAM210_map3	0001.CSV	929.56	0.0369223
CAM210_map3	0001.CSV	933.417	0.0379033
CAM210_map3	0001.CSV	937.274	0.0385526
CAM210_map3	0001.CSV	941.131	0.039003
CAM210_map3	0001.CSV	944.989	0.0395356
CAM210_map3	0001.CSV	948.846	0.0403246
CAM210_map3	0001.CSV	952.703	0.0413403
CAM210_map3	0001.CSV	956.56	0.0422906
CAM210_map3	0001.CSV	960.417	0.0428902
CAM210_map3	0001.CSV	964.274	0.0432837
CAM210_map3	0001.CSV	968.131	0.0438377
CAM210_map3	0001.CSV	971.988	0.0446701
CAM210_map3	0001.CSV	975.845	0.045622
CAM210_map3	0001.CSV	979.702	0.0465791
CAM210_map3	0001.CSV	983.559	0.0475949
CAM210_map3	0001.CSV	987.417	0.0486915
CAM210_map3	0001.CSV	991.274	0.0498068
CAM210_map3	0001.CSV	995.131	0.0508934
CAM210_map3	0001.CSV	998.988	0.0519279
CAM210_map3	0001.CSV	1002.85	0.0529255
CAM210_map3	0001.CSV	1006.7	0.0539199
CAM210_map3	0001.CSV	1010.56	0.0549024
CAM210_map3	0001.CSV	1014.42	0.0558277
CAM210_map3	0001.CSV	1018.27	0.0567122
CAM210_map3	0001.CSV	1022.13	0.0575954
CAM210_map3	0001.CSV	1025.99	0.0584379
CAM210_map3	0001.CSV	1029.85	0.0592119
CAM210_map3	0001.CSV	1033.7	0.0599581
CAM210_map3	0001.CSV	1037.56	0.0606924
CAM210_map3	0001.CSV	1041.42	0.0614525
CAM210_map3	0001.CSV	1045.27	0.0622797
CAM210_map3	0001.CSV	1049.13	0.0631237
CAM210_map3	0001.CSV	1052.99	0.0639374
CAM210_map3	0001.CSV	1056.84	0.0648345
CAM210_map3	0001.CSV	1060.7	0.0659915
CAM210_map3	0001.CSV	1064.56	0.0674136
CAM210_map3	0001.CSV	1068.42	0.0689457
CAM210_map3	0001.CSV	1072.27	0.0705113
CAM210_map3	0001.CSV	1076.13	0.0721302
CAM210_map3	0001.CSV	1079.99	0.0737621
CAM210_map3	0001.CSV	1083.84	0.075147
CAM210_map3	0001.CSV	1087.7	0.0757937
CAM210_map3	0001.CSV	1091.56	0.0754662
CAM210_map3	0001.CSV	1095.41	0.0745724
CAM210_map3	0001.CSV	1099.27	0.0737906
CAM210_map3	0001.CSV	1103.13	0.0736732
CAM210_map3	0001.CSV	1106.99	0.0743647
CAM210_map3	0001.CSV	1110.84	0.0751066
CAM210_map3	0001.CSV	1114.7	0.0747891
CAM210_map3	0001.CSV	1118.56	0.0734839
CAM210_map3	0001.CSV	1122.41	0.07227
CAM210_map3	0001.CSV	1126.27	0.0717207
CAM210_map3	0001.CSV	1130.13	0.0716584
CAM210_map3	0001.CSV	1133.99	0.0718707
CAM210_map3	0001.CSV	1137.84	0.0723172
CAM210_map3	0001.CSV	1141.7	0.0729819
CAM210_map3	0001.CSV	1145.56	0.0738035
CAM210_map3	0001.CSV	1149.41	0.0746621
CAM210_map3	0001.CSV	1153.27	0.0754593
CAM210_map3	0001.CSV	1157.13	0.0762163
CAM210_map3	0001.CSV	1160.99	0.076956
CAM210_map3	0001.CSV	1164.84	0.0775847
CAM210_map3	0001.CSV	1168.7	0.0780041
CAM210_map3	0001.CSV	1172.56	0.0782299
CAM210_map3	0001.CSV	1176.41	0.0783071
CAM210_map3	0001.CSV	1180.27	0.078283
CAM210_map3	0001.CSV	1184.13	0.0782509
CAM210_map3	0001.CSV	1187.99	0.0782405
CAM210_map3	0001.CSV	1191.84	0.0781701
CAM210_map3	0001.CSV	1195.7	0.0780753
CAM210_map3	0001.CSV	1199.56	0.0781564
CAM210_map3	0001.CSV	1203.41	0.0785467
CAM210_map3	0001.CSV	1207.27	0.0792589
CAM210_map3	0001.CSV	1211.13	0.0802192
CAM210_map3	0001.CSV	1214.98	0.0812612
CAM210_map3	0001.CSV	1218.84	0.0823106
CAM210_map3	0001.CSV	1222.7	0.0834501
CAM210_map3	0001.CSV	1226.56	0.0847914
CAM210_map3	0001.CSV	1230.41	0.086355
CAM210_map3	0001.CSV	1234.27	0.0879794
CAM210_map3	0001.CSV	1238.13	0.0894968
CAM210_map3	0001.CSV	1241.98	0.0909319
CAM210_map3	0001.CSV	1245.84	0.0923886
CAM210_map3	0001.CSV	1249.7	0.0939876
CAM210_map3	0001.CSV	1253.56	0.0957926
CAM210_map3	0001.CSV	1257.41	0.0977048
CAM210_map3	0001.CSV	1261.27	0.0996059
CAM210_map3	0001.CSV	1265.13	0.101562
CAM210_map3	0001.CSV	1268.98	0.103781
CAM210_map3	0001.CSV	1272.84	0.106326
CAM210_map3	0001.CSV	1276.7	0.109039
CAM210_map3	0001.CSV	1280.56	0.111859
CAM210_map3	0001.CSV	1284.41	0.114939
CAM210_map3	0001.CSV	1288.27	0.118374
CAM210_map3	0001.CSV	1292.13	0.121967
CAM210_map3	0001.CSV	1295.98	0.125541
CAM210_map3	0001.CSV	1299.84	0.129156
CAM210_map3	0001.CSV	1303.7	0.132936
CAM210_map3	0001.CSV	1307.56	0.137037
CAM210_map3	0001.CSV	1311.41	0.141607
CAM210_map3	0001.CSV	1315.27	0.146647
CAM210_map3	0001.CSV	1319.13	0.151806
CAM210_map3	0001.CSV	1322.98	0.156781
CAM210_map3	0001.CSV	1326.84	0.16199
CAM210_map3	0001.CSV	1330.7	0.167767
CAM210_map3	0001.CSV	1334.56	0.174252
CAM210_map3	0001.CSV	1338.41	0.18238
CAM210_map3	0001.CSV	1342.27	0.191637
CAM210_map3	0001.CSV	1346.13	0.200543
CAM210_map3	0001.CSV	1349.98	0.210023
CAM210_map3	0001.CSV	1353.84	0.22066
CAM210_map3	0001.CSV	1357.7	0.232511
CAM210_map3	0001.CSV	1361.56	0.247017
CAM210_map3	0001.CSV	1365.41	0.263307
CAM210_map3	0001.CSV	1369.27	0.279086
CAM210_map3	0001.CSV	1373.13	0.296762
CAM210_map3	0001.CSV	1376.98	0.316271
CAM210_map3	0001.CSV	1380.84	0.333324
CAM210_map3	0001.CSV	1384.7	0.349185
CAM210_map3	0001.CSV	1388.56	0.365161
CAM210_map3	0001.CSV	1392.41	0.377515
CAM210_map3	0001.CSV	1396.27	0.383975
CAM210_map3	0001.CSV	1400.13	0.384515
CAM210_map3	0001.CSV	1403.98	0.380073
CAM210_map3	0001.CSV	1407.84	0.370896
CAM210_map3	0001.CSV	1411.7	0.357877
CAM210_map3	0001.CSV	1415.55	0.341323
CAM210_map3	0001.CSV	1419.41	0.320417
CAM210_map3	0001.CSV	1423.27	0.301874
CAM210_map3	0001.CSV	1427.12	0.289368
CAM210_map3	0001.CSV	1430.98	0.278576
CAM210_map3	0001.CSV	1434.84	0.2663
CAM210_map3	0001.CSV	1438.7	0.253686
CAM210_map3	0001.CSV	1442.55	0.243733
CAM210_map3	0001.CSV	1446.41	0.234986
CAM210_map3	0001.CSV	1450.27	0.226531
CAM210_map3	0001.CSV	1454.12	0.218057
CAM210_map3	0001.CSV	1457.98	0.207775
CAM210_map3	0001.CSV	1461.84	0.199391
CAM210_map3	0001.CSV	1465.7	0.193395
CAM210_map3	0001.CSV	1469.55	0.185642
CAM210_map3	0001.CSV	1473.41	0.17215
CAM210_map3	0001.CSV	1477.27	0.157634
CAM210_map3	0001.CSV	1481.12	0.148171
CAM210_map3	0001.CSV	1484.98	0.140516
CAM210_map3	0001.CSV	1488.84	0.131723
CAM210_map3	0001.CSV	1492.7	0.123096
CAM210_map3	0001.CSV	1496.55	0.116187
CAM210_map3	0001.CSV	1500.41	0.110404
CAM210_map3	0001.CSV	1504.27	0.105298
CAM210_map3	0001.CSV	1508.12	0.0989447
CAM210_map3	0001.CSV	1511.98	0.0935931
CAM210_map3	0001.CSV	1515.84	0.0903451
CAM210_map3	0001.CSV	1519.7	0.0869921
CAM210_map3	0001.CSV	1523.55	0.0843834
CAM210_map3	0001.CSV	1527.41	0.0846842
CAM210_map3	0001.CSV	1531.27	0.0879235
CAM210_map3	0001.CSV	1535.12	0.0930509
CAM210_map3	0001.CSV	1538.98	0.0947831
CAM210_map3	0001.CSV	1542.84	0.083933
CAM210_map3	0001.CSV	1546.7	0.0714824
CAM210_map3	0001.CSV	1550.55	0.0635051
CAM210_map3	0001.CSV	1554.41	0.0572493
CAM210_map3	0001.CSV	1558.27	0.0528413
CAM210_map3	0001.CSV	1562.12	0.0526087
CAM210_map3	0001.CSV	1565.98	0.0558753
CAM210_map3	0001.CSV	1569.84	0.0617494
CAM210_map3	0001.CSV	1573.69	0.0667934
CAM210_map3	0001.CSV	1577.55	0.064975
CAM210_map3	0001.CSV	1581.41	0.0568667
CAM210_map3	0001.CSV	1585.27	0.0473518
CAM210_map3	0001.CSV	1589.12	0.0390068
CAM210_map3	0001.CSV	1592.98	0.0330052
CAM210_map3	0001.CSV	1596.84	0.0292704
CAM210_map3	0001.CSV	1600.69	0.0270747
CAM210_map3	0001.CSV	1604.55	0.0257731
CAM210_map3	0001.CSV	1608.41	0.0250418
CAM210_map3	0001.CSV	1612.27	0.0246533
CAM210_map3	0001.CSV	1616.12	0.0243715
CAM210_map3	0001.CSV	1619.98	0.0239629
CAM210_map3	0001.CSV	1623.84	0.0232946
CAM210_map3	0001.CSV	1627.69	0.0224342
CAM210_map3	0001.CSV	1631.55	0.0214997
CAM210_map3	0001.CSV	1635.41	0.0204185
CAM210_map3	0001.CSV	1639.27	0.0193291
CAM210_map3	0001.CSV	1643.12	0.0184992
CAM210_map3	0001.CSV	1646.98	0.0178792
CAM210_map3	0001.CSV	1650.84	0.0174744
CAM210_map3	0001.CSV	1654.69	0.0170887
CAM210_map3	0001.CSV	1658.55	0.0166027
CAM210_map3	0001.CSV	1662.41	0.016098
CAM210_map3	0001.CSV	1666.27	0.0156465
CAM210_map3	0001.CSV	1670.12	0.0153598
CAM210_map3	0001.CSV	1673.98	0.0151728
CAM210_map3	0001.CSV	1677.84	0.0149057
CAM210_map3	0001.CSV	1681.69	0.014656
CAM210_map3	0001.CSV	1685.55	0.0145129
CAM210_map3	0001.CSV	1689.41	0.014249
CAM210_map3	0001.CSV	1693.27	0.0139009
CAM210_map3	0001.CSV	1697.12	0.0137682
CAM210_map3	0001.CSV	1700.98	0.0139453
CAM210_map3	0001.CSV	1704.84	0.013926
CAM210_map3	0001.CSV	1708.69	0.0136997
CAM210_map3	0001.CSV	1712.55	0.0135742
CAM210_map3	0001.CSV	1716.41	0.0138619
CAM210_map3	0001.CSV	1720.27	0.0141963
CAM210_map3	0001.CSV	1724.12	0.0141375
CAM210_map3	0001.CSV	1727.98	0.0140089
CAM210_map3	0001.CSV	1731.84	0.014082
CAM210_map3	0001.CSV	1735.69	0.01426
CAM210_map3	0001.CSV	1739.55	0.0140652
CAM210_map3	0001.CSV	1743.41	0.0135357
CAM210_map3	0001.CSV	1747.27	0.0128706
CAM210_map3	0001.CSV	1751.12	0.0121722
CAM210_map3	0001.CSV	1754.98	0.011574
CAM210_map3	0001.CSV	1758.84	0.0111376
CAM210_map3	0001.CSV	1762.69	0.0108323
CAM210_map3	0001.CSV	1766.55	0.0106381
CAM210_map3	0001.CSV	1770.41	0.0106754
CAM210_map3	0001.CSV	1774.26	0.0109342
CAM210_map3	0001.CSV	1778.12	0.0112564
CAM210_map3	0001.CSV	1781.98	0.0118972
CAM210_map3	0001.CSV	1785.84	0.0130507
CAM210_map3	0001.CSV	1789.69	0.0147822
CAM210_map3	0001.CSV	1793.55	0.0165817
CAM210_map3	0001.CSV	1797.41	0.0167667
CAM210_map3	0001.CSV	1801.26	0.0150624
CAM210_map3	0001.CSV	1805.12	0.0128637
CAM210_map3	0001.CSV	1808.98	0.0111828
CAM210_map3	0001.CSV	1812.84	0.0101402
CAM210_map3	0001.CSV	1816.69	0.009513
CAM210_map3	0001.CSV	1820.55	0.00910252
CAM210_map3	0001.CSV	1824.41	0.00887652
CAM210_map3	0001.CSV	1828.26	0.00882603
CAM210_map3	0001.CSV	1832.12	0.00877551
CAM210_map3	0001.CSV	1835.98	0.00862316
CAM210_map3	0001.CSV	1839.84	0.00848744
CAM210_map3	0001.CSV	1843.69	0.00848714
CAM210_map3	0001.CSV	1847.55	0.00851387
CAM210_map3	0001.CSV	1851.41	0.00842031
CAM210_map3	0001.CSV	1855.26	0.00830347
CAM210_map3	0001.CSV	1859.12	0.00821347
CAM210_map3	0001.CSV	1862.98	0.00814085
CAM210_map3	0001.CSV	1866.84	0.00818943
CAM210_map3	0001.CSV	1870.69	0.00830574
CAM210_map3	0001.CSV	1874.55	0.00825396
CAM210_map3	0001.CSV	1878.41	0.00813045
CAM210_map3	0001.CSV	1882.26	0.00807036
CAM210_map3	0001.CSV	1886.12	0.00807786
CAM210_map3	0001.CSV	1889.98	0.0081261
CAM210_map3	0001.CSV	1893.83	0.00814831
CAM210_map3	0001.CSV	1897.69	0.00810669
CAM210_map3	0001.CSV	1901.55	0.00804224
CAM210_map3	0001.CSV	1905.41	0.00800728
CAM210_map3	0001.CSV	1909.26	0.00800026
CAM210_map3	0001.CSV	1913.12	0.00798436
CAM210_map3	0001.CSV	1916.98	0.00799631
CAM210_map3	0001.CSV	1920.83	0.00807465
CAM210_map3	0001.CSV	1924.69	0.0081266
CAM210_map3	0001.CSV	1928.55	0.00810128
CAM210_map3	0001.CSV	1932.4	0.0080626
CAM210_map3	0001.CSV	1936.26	0.00803195
CAM210_map3	0001.CSV	1940.12	0.00804042
CAM210_map3	0001.CSV	1943.98	0.00812603
CAM210_map3	0001.CSV	1947.83	0.00817036
CAM210_map3	0001.CSV	1951.69	0.00813224
CAM210_map3	0001.CSV	1955.55	0.00811104
CAM210_map3	0001.CSV	1959.4	0.00811867
CAM210_map3	0001.CSV	1963.26	0.00813427
CAM210_map3	0001.CSV	1967.12	0.00816918
CAM210_map3	0001.CSV	1970.98	0.00818349
CAM210_map3	0001.CSV	1974.83	0.00816121
CAM210_map3	0001.CSV	1978.69	0.00814328
CAM210_map3	0001.CSV	1982.55	0.00812714
CAM210_map3	0001.CSV	1986.4	0.00810344
CAM210_map3	0001.CSV	1990.26	0.00811502
CAM210_map3	0001.CSV	1994.12	0.00816013
CAM210_map3	0001.CSV	1997.98	0.00817951
CAM210_map3	0001.CSV	2001.83	0.00817471
CAM210_map3	0001.CSV	2005.69	0.00817046
CAM210_map3	0001.CSV	2009.55	0.00816502
CAM210_map3	0001.CSV	2013.4	0.00816438
CAM210_map3	0001.CSV	2017.26	0.00817488
CAM210_map3	0001.CSV	2021.12	0.00816647
CAM210_map3	0001.CSV	2024.97	0.0081367
CAM210_map3	0001.CSV	2028.83	0.00811394
CAM210_map3	0001.CSV	2032.69	0.00808657
CAM210_map3	0001.CSV	2036.55	0.00805102
CAM210_map3	0001.CSV	2040.4	0.00802763
CAM210_map3	0001.CSV	2044.26	0.00800704
CAM210_map3	0001.CSV	2048.12	0.0079709
CAM210_map3	0001.CSV	2051.97	0.0079362
CAM210_map3	0001.CSV	2055.83	0.00791616
CAM210_map3	0001.CSV	2059.69	0.00790341
CAM210_map3	0001.CSV	2063.55	0.00789936
CAM210_map3	0001.CSV	2067.4	0.00789315
CAM210_map3	0001.CSV	2071.26	0.00787938
CAM210_map3	0001.CSV	2075.12	0.00788313
CAM210_map3	0001.CSV	2078.97	0.00788947
CAM210_map3	0001.CSV	2082.83	0.00787506
CAM210_map3	0001.CSV	2086.69	0.0078674
CAM210_map3	0001.CSV	2090.55	0.00787044
CAM210_map3	0001.CSV	2094.4	0.00785745
CAM210_map3	0001.CSV	2098.26	0.00783454
CAM210_map3	0001.CSV	2102.12	0.00781352
CAM210_map3	0001.CSV	2105.97	0.0077972
CAM210_map3	0001.CSV	2109.83	0.00780071
CAM210_map3	0001.CSV	2113.69	0.00782274
CAM210_map3	0001.CSV	2117.55	0.00784213
CAM210_map3	0001.CSV	2121.4	0.00786481
CAM210_map3	0001.CSV	2125.26	0.00791218
CAM210_map3	0001.CSV	2129.12	0.00796627
CAM210_map3	0001.CSV	2132.97	0.00799327
CAM210_map3	0001.CSV	2136.83	0.00799817
CAM210_map3	0001.CSV	2140.69	0.00799884
CAM210_map3	0001.CSV	2144.55	0.00798669
CAM210_map3	0001.CSV	2148.4	0.00795257
CAM210_map3	0001.CSV	2152.26	0.00790914
CAM210_map3	0001.CSV	2156.12	0.00786555
CAM210_map3	0001.CSV	2159.97	0.00782304
CAM210_map3	0001.CSV	2163.83	0.00779544
CAM210_map3	0001.CSV	2167.69	0.00778559
CAM210_map3	0001.CSV	2171.55	0.00777615
CAM210_map3	0001.CSV	2175.4	0.00776505
CAM210_map3	0001.CSV	2179.26	0.00775348
CAM210_map3	0001.CSV	2183.12	0.00773449
CAM210_map3	0001.CSV	2186.97	0.0077152
CAM210_map3	0001.CSV	2190.83	0.00769958
CAM210_map3	0001.CSV	2194.69	0.00768613
CAM210_map3	0001.CSV	2198.55	0.00768788
CAM210_map3	0001.CSV	2202.4	0.00770016
CAM210_map3	0001.CSV	2206.26	0.00770241
CAM210_map3	0001.CSV	2210.12	0.00768592
CAM210_map3	0001.CSV	2213.97	0.00764893
CAM210_map3	0001.CSV	2217.83	0.00760927
CAM210_map3	0001.CSV	2221.69	0.00758631
CAM210_map3	0001.CSV	2225.54	0.00756837
CAM210_map3	0001.CSV	2229.4	0.00753887
CAM210_map3	0001.CSV	2233.26	0.00749959
CAM210_map3	0001.CSV	2237.12	0.00745341
CAM210_map3	0001.CSV	2240.97	0.007404
CAM210_map3	0001.CSV	2244.83	0.00736248
CAM210_map3	0001.CSV	2248.69	0.00732113
CAM210_map3	0001.CSV	2252.54	0.00726129
CAM210_map3	0001.CSV	2256.4	0.00719371
CAM210_map3	0001.CSV	2260.26	0.00714985
CAM210_map3	0001.CSV	2264.11	0.00713334
CAM210_map3	0001.CSV	2267.97	0.00712853
CAM210_map3	0001.CSV	2271.83	0.00712041
CAM210_map3	0001.CSV	2275.69	0.00708821
CAM210_map3	0001.CSV	2279.54	0.00702847
CAM210_map3	0001.CSV	2283.4	0.00696223
CAM210_map3	0001.CSV	2287.26	0.0069086
CAM210_map3	0001.CSV	2291.11	0.00686911
CAM210_map3	0001.CSV	2294.97	0.00681997
CAM210_map3	0001.CSV	2298.83	0.0067292
CAM210_map3	0001.CSV	2302.69	0.00658745
CAM210_map3	0001.CSV	2306.54	0.00639645
CAM210_map3	0001.CSV	2310.4	0.00614463
CAM210_map3	0001.CSV	2314.26	0.00580138
CAM210_map3	0001.CSV	2318.11	0.00526374
CAM210_map3	0001.CSV	2321.97	0.00443526
CAM210_map3	0001.CSV	2325.83	0.00340725
CAM210_map3	0001.CSV	2329.69	0.00242645
CAM210_map3	0001.CSV	2333.54	0.00160932
CAM210_map3	0001.CSV	2337.4	0.000914534
CAM210_map3	0001.CSV	2341.26	0.00114015
CAM210_map3	0001.CSV	2345.11	0.00242671
CAM210_map3	0001.CSV	2348.97	0.00283227
CAM210_map3	0001.CSV	2352.83	0.00114918
CAM210_map3	0001.CSV	2356.69	-0.00355869
CAM210_map3	0001.CSV	2360.54	-0.00790341
CAM210_map3	0001.CSV	2364.4	-0.00442942
CAM210_map3	0001.CSV	2368.26	0.000973276
CAM210_map3	0001.CSV	2372.11	0.00419221
CAM210_map3	0001.CSV	2375.97	0.0057123
CAM210_map3	0001.CSV	2379.83	0.00627377
CAM210_map3	0001.CSV	2383.69	0.0063524
CAM210_map3	0001.CSV	2387.54	0.00623558
CAM210_map3	0001.CSV	2391.4	0.00608882
CAM210_map3	0001.CSV	2395.26	0.00598715
CAM210_map3	0001.CSV	2399.11	0.00592715
CAM210_map3	0001.CSV	2402.97	0.00588655
CAM210_map3	0001.CSV	2406.83	0.00586865
CAM210_map3	0001.CSV	2410.68	0.0058621
CAM210_map3	0001.CSV	2414.54	0.00584104
CAM210_map3	0001.CSV	2418.4	0.0058088
CAM210_map3	0001.CSV	2422.26	0.0057811
CAM210_map3	0001.CSV	2426.11	0.00575958
CAM210_map3	0001.CSV	2429.97	0.00574427
CAM210_map3	0001.CSV	2433.83	0.00572943
CAM210_map3	0001.CSV	2437.68	0.0056974
CAM210_map3	0001.CSV	2441.54	0.00566477
CAM210_map3	0001.CSV	2445.4	0.00568102
CAM210_map3	0001.CSV	2449.26	0.00572879
CAM210_map3	0001.CSV	2453.11	0.00575659
CAM210_map3	0001.CSV	2456.97	0.00578201
CAM210_map3	0001.CSV	2460.83	0.00583587
CAM210_map3	0001.CSV	2464.68	0.00591073
CAM210_map3	0001.CSV	2468.54	0.00600264
CAM210_map3	0001.CSV	2472.4	0.00612349
CAM210_map3	0001.CSV	2476.26	0.00628429
CAM210_map3	0001.CSV	2480.11	0.00648792
CAM210_map3	0001.CSV	2483.97	0.00674542
CAM210_map3	0001.CSV	2487.83	0.00707534
CAM210_map3	0001.CSV	2491.68	0.00750698
CAM210_map3	0001.CSV	2495.54	0.00806449
CAM210_map3	0001.CSV	2499.4	0.00869813
CAM210_map3	0001.CSV	2503.26	0.00928899
CAM210_map3	0001.CSV	2507.11	0.00971978
CAM210_map3	0001.CSV	2510.97	0.00991012
CAM210_map3	0001.CSV	2514.83	0.00983155
CAM210_map3	0001.CSV	2518.68	0.00951233
CAM210_map3	0001.CSV	2522.54	0.0090091
CAM210_map3	0001.CSV	2526.4	0.00838616
CAM210_map3	0001.CSV	2530.26	0.00771918
CAM210_map3	0001.CSV	2534.11	0.00709515
CAM210_map3	0001.CSV	2537.97	0.0065962
CAM210_map3	0001.CSV	2541.83	0.00624862
CAM210_map3	0001.CSV	2545.68	0.00600993
CAM210_map3	0001.CSV	2549.54	0.0058444
CAM210_map3	0001.CSV	2553.4	0.00574991
CAM210_map3	0001.CSV	2557.26	0.00569706
CAM210_map3	0001.CSV	2561.11	0.00563482
CAM210_map3	0001.CSV	2564.97	0.00555988
CAM210_map3	0001.CSV	2568.83	0.00550514
CAM210_map3	0001.CSV	2572.68	0.00547984
CAM210_map3	0001.CSV	2576.54	0.00546316
CAM210_map3	0001.CSV	2580.4	0.00542458
CAM210_map3	0001.CSV	2584.25	0.00535389
CAM210_map3	0001.CSV	2588.11	0.00528959
CAM210_map3	0001.CSV	2591.97	0.00525471
CAM210_map3	0001.CSV	2595.83	0.00521538
CAM210_map3	0001.CSV	2599.68	0.00515566
CAM210_map3	0001.CSV	2603.54	0.00507838
CAM210_map3	0001.CSV	2607.4	0.00498368
CAM210_map3	0001.CSV	2611.25	0.00489889
CAM210_map3	0001.CSV	2615.11	0.00481941
CAM210_map3	0001.CSV	2618.97	0.00474082
CAM210_map3	0001.CSV	2622.82	0.00471366
CAM210_map3	0001.CSV	2626.68	0.00470666
CAM210_map3	0001.CSV	2630.54	0.0046593
CAM210_map3	0001.CSV	2634.4	0.0046094
CAM210_map3	0001.CSV	2638.25	0.00452723
CAM210_map3	0001.CSV	2642.11	0.0043388
CAM210_map3	0001.CSV	2645.97	0.00412908
CAM210_map3	0001.CSV	2649.82	0.00400704
CAM210_map3	0001.CSV	2653.68	0.00395842
CAM210_map3	0001.CSV	2657.54	0.00393164
CAM210_map3	0001.CSV	2661.4	0.00389218
CAM210_map3	0001.CSV	2665.25	0.00386179
CAM210_map3	0001.CSV	2669.11	0.00394986
CAM210_map3	0001.CSV	2672.97	0.00419589
CAM210_map3	0001.CSV	2676.82	0.00440169
CAM210_map3	0001.CSV	2680.68	0.00431012
CAM210_map3	0001.CSV	2684.54	0.00398072
CAM210_map3	0001.CSV	2688.4	0.00371269
CAM210_map3	0001.CSV	2692.25	0.00362574
CAM210_map3	0001.CSV	2696.11	0.0036213
CAM210_map3	0001.CSV	2699.97	0.00359327
CAM210_map3	0001.CSV	2703.82	0.00356223
CAM210_map3	0001.CSV	2707.68	0.00357593
CAM210_map3	0001.CSV	2711.54	0.0035766
CAM210_map3	0001.CSV	2715.4	0.00359731
CAM210_map3	0001.CSV	2719.25	0.00379487
CAM210_map3	0001.CSV	2723.11	0.00406898
CAM210_map3	0001.CSV	2726.97	0.00407245
CAM210_map3	0001.CSV	2730.82	0.00383993
CAM210_map3	0001.CSV	2734.68	0.00371566
CAM210_map3	0001.CSV	2738.54	0.00372699
CAM210_map3	0001.CSV	2742.4	0.00383074
CAM210_map3	0001.CSV	2746.25	0.00401603
CAM210_map3	0001.CSV	2750.11	0.0040253
CAM210_map3	0001.CSV	2753.97	0.0038175
CAM210_map3	0001.CSV	2757.82	0.00363339
CAM210_map3	0001.CSV	2761.68	0.00353
CAM210_map3	0001.CSV	2765.54	0.00354907
CAM210_map3	0001.CSV	2769.39	0.00382245
CAM210_map3	0001.CSV	2773.25	0.0041634
CAM210_map3	0001.CSV	2777.11	0.00421121
CAM210_map3	0001.CSV	2780.97	0.00414782
CAM210_map3	0001.CSV	2784.82	0.00443248
CAM210_map3	0001.CSV	2788.68	0.00495087
CAM210_map3	0001.CSV	2792.54	0.00529707
CAM210_map3	0001.CSV	2796.39	0.00538492
CAM210_map3	0001.CSV	2800.25	0.00530204
CAM210_map3	0001.CSV	2804.11	0.00530318
CAM210_map3	0001.CSV	2807.97	0.00556065
CAM210_map3	0001.CSV	2811.82	0.00582173
CAM210_map3	0001.CSV	2815.68	0.00604907
CAM210_map3	0001.CSV	2819.54	0.00648365
CAM210_map3	0001.CSV	2823.39	0.00712027
CAM210_map3	0001.CSV	2827.25	0.00806824
CAM210_map3	0001.CSV	2831.11	0.00974841
CAM210_map3	0001.CSV	2834.97	0.0125762
CAM210_map3	0001.CSV	2838.82	0.017372
CAM210_map3	0001.CSV	2842.68	0.0253764
CAM210_map3	0001.CSV	2846.54	0.0348571
CAM210_map3	0001.CSV	2850.39	0.039284
CAM210_map3	0001.CSV	2854.25	0.0354149
CAM210_map3	0001.CSV	2858.11	0.0281683
CAM210_map3	0001.CSV	2861.97	0.022534
CAM210_map3	0001.CSV	2865.82	0.0195658
CAM210_map3	0001.CSV	2869.68	0.018613
CAM210_map3	0001.CSV	2873.54	0.0182318
CAM210_map3	0001.CSV	2877.39	0.0174623
CAM210_map3	0001.CSV	2881.25	0.0168528
CAM210_map3	0001.CSV	2885.11	0.0172109
CAM210_map3	0001.CSV	2888.97	0.0186289
CAM210_map3	0001.CSV	2892.82	0.0207682
CAM210_map3	0001.CSV	2896.68	0.0232227
CAM210_map3	0001.CSV	2900.54	0.0261533
CAM210_map3	0001.CSV	2904.39	0.030723
CAM210_map3	0001.CSV	2908.25	0.0386165
CAM210_map3	0001.CSV	2912.11	0.0497565
CAM210_map3	0001.CSV	2915.97	0.0593457
CAM210_map3	0001.CSV	2919.82	0.0609024
CAM210_map3	0001.CSV	2923.68	0.054129
CAM210_map3	0001.CSV	2927.54	0.0443301
CAM210_map3	0001.CSV	2931.39	0.0353867
CAM210_map3	0001.CSV	2935.25	0.0284285
CAM210_map3	0001.CSV	2939.11	0.0237258
CAM210_map3	0001.CSV	2942.96	0.0209237
CAM210_map3	0001.CSV	2946.82	0.0194019
CAM210_map3	0001.CSV	2950.68	0.0188417
CAM210_map3	0001.CSV	2954.54	0.0185616
CAM210_map3	0001.CSV	2958.39	0.017574
CAM210_map3	0001.CSV	2962.25	0.0156296
CAM210_map3	0001.CSV	2966.11	0.0132974
CAM210_map3	0001.CSV	2969.96	0.0113706
CAM210_map3	0001.CSV	2973.82	0.0101151
CAM210_map3	0001.CSV	2977.68	0.00909348
CAM210_map3	0001.CSV	2981.53	0.00787506
CAM210_map3	0001.CSV	2985.39	0.00667994
CAM210_map3	0001.CSV	2989.25	0.00601265
CAM210_map3	0001.CSV	2993.11	0.00575229
CAM210_map3	0001.CSV	2996.96	0.00544246
CAM210_map3	0001.CSV	3000.82	0.00506094
CAM210_map3	0001.CSV	3004.68	0.00488495
CAM210_map3	0001.CSV	3008.53	0.00504485
CAM210_map3	0001.CSV	3012.39	0.00528302
CAM210_map3	0001.CSV	3016.25	0.0052202
CAM210_map3	0001.CSV	3020.11	0.00485399
CAM210_map3	0001.CSV	3023.96	0.00448139
CAM210_map3	0001.CSV	3027.82	0.00436772
CAM210_map3	0001.CSV	3031.68	0.00451598
CAM210_map3	0001.CSV	3035.53	0.00465752
CAM210_map3	0001.CSV	3039.39	0.00469034
CAM210_map3	0001.CSV	3043.25	0.00469473
CAM210_map3	0001.CSV	3047.11	0.00466676
CAM210_map3	0001.CSV	3050.96	0.00460943
CAM210_map3	0001.CSV	3054.82	0.00449827
CAM210_map3	0001.CSV	3058.68	0.00434583
CAM210_map3	0001.CSV	3062.53	0.00434024
CAM210_map3	0001.CSV	3066.39	0.00447152
CAM210_map3	0001.CSV	3070.25	0.00452354
CAM210_map3	0001.CSV	3074.11	0.00459071
CAM210_map3	0001.CSV	3077.96	0.00480899
CAM210_map3	0001.CSV	3081.82	0.00499286
CAM210_map3	0001.CSV	3085.68	0.00497661
CAM210_map3	0001.CSV	3089.53	0.00478658
CAM210_map3	0001.CSV	3093.39	0.00456798
CAM210_map3	0001.CSV	3097.25	0.00451437
CAM210_map3	0001.CSV	3101.11	0.00462125
CAM210_map3	0001.CSV	3104.96	0.00478903
CAM210_map3	0001.CSV	3108.82	0.00500795
CAM210_map3	0001.CSV	3112.68	0.00521434
CAM210_map3	0001.CSV	3116.53	0.00528668
CAM210_map3	0001.CSV	3120.39	0.00513939
CAM210_map3	0001.CSV	3124.25	0.0048868
CAM210_map3	0001.CSV	3128.11	0.00474585
CAM210_map3	0001.CSV	3131.96	0.00477951
CAM210_map3	0001.CSV	3135.82	0.00492486
CAM210_map3	0001.CSV	3139.68	0.00497172
CAM210_map3	0001.CSV	3143.53	0.00486786
CAM210_map3	0001.CSV	3147.39	0.00492744
CAM210_map3	0001.CSV	3151.25	0.0051583
CAM210_map3	0001.CSV	3155.1	0.0051462
CAM210_map3	0001.CSV	3158.96	0.0048363
CAM210_map3	0001.CSV	3162.82	0.00455927
CAM210_map3	0001.CSV	3166.68	0.00446308
CAM210_map3	0001.CSV	3170.53	0.00447657
CAM210_map3	0001.CSV	3174.39	0.00456031
CAM210_map3	0001.CSV	3178.25	0.00471007
CAM210_map3	0001.CSV	3182.1	0.00485533
CAM210_map3	0001.CSV	3185.96	0.00497627
CAM210_map3	0001.CSV	3189.82	0.00506708
CAM210_map3	0001.CSV	3193.68	0.00506453
CAM210_map3	0001.CSV	3197.53	0.00505132
CAM210_map3	0001.CSV	3201.39	0.00513688
CAM210_map3	0001.CSV	3205.25	0.00526323
CAM210_map3	0001.CSV	3209.1	0.00537765
CAM210_map3	0001.CSV	3212.96	0.00549595
CAM210_map3	0001.CSV	3216.82	0.00558199
CAM210_map3	0001.CSV	3220.68	0.0055981
CAM210_map3	0001.CSV	3224.53	0.00566638
CAM210_map3	0001.CSV	3228.39	0.00594781
CAM210_map3	0001.CSV	3232.25	0.00625363
CAM210_map3	0001.CSV	3236.1	0.00627968
CAM210_map3	0001.CSV	3239.96	0.00621128
CAM210_map3	0001.CSV	3243.82	0.00631159
CAM210_map3	0001.CSV	3247.68	0.00639941
CAM210_map3	0001.CSV	3251.53	0.00636743
CAM210_map3	0001.CSV	3255.39	0.00633337
CAM210_map3	0001.CSV	3259.25	0.00629407
CAM210_map3	0001.CSV	3263.1	0.00635146
CAM210_map3	0001.CSV	3266.96	0.00665302
CAM210_map3	0001.CSV	3270.82	0.00698031
CAM210_map3	0001.CSV	3274.68	0.00699516
CAM210_map3	0001.CSV	3278.53	0.00673526
CAM210_map3	0001.CSV	3282.39	0.00652892
CAM210_map3	0001.CSV	3286.25	0.00662062
CAM210_map3	0001.CSV	3290.1	0.00697486
CAM210_map3	0001.CSV	3293.96	0.00724667
CAM210_map3	0001.CSV	3297.82	0.00729566
CAM210_map3	0001.CSV	3301.67	0.00739416
CAM210_map3	0001.CSV	3305.53	0.00755293
CAM210_map3	0001.CSV	3309.39	0.00748176
CAM210_map3	0001.CSV	3313.25	0.0071678
CAM210_map3	0001.CSV	3317.1	0.00693375
CAM210_map3	0001.CSV	3320.96	0.00701096
CAM210_map3	0001.CSV	3324.82	0.00717228
CAM210_map3	0001.CSV	3328.67	0.00716288
CAM210_map3	0001.CSV	3332.53	0.00727851
CAM210_map3	0001.CSV	3336.39	0.00769891
CAM210_map3	0001.CSV	3340.24	0.00801275
CAM210_map3	0001.CSV	3344.1	0.00803505
CAM210_map3	0001.CSV	3347.96	0.00801048
CAM210_map3	0001.CSV	3351.82	0.00797815
CAM210_map3	0001.CSV	3355.67	0.00791899
CAM210_map3	0001.CSV	3359.53	0.00803006
CAM210_map3	0001.CSV	3363.39	0.00830675
CAM210_map3	0001.CSV	3367.24	0.00849684
CAM210_map3	0001.CSV	3371.1	0.0084548
CAM210_map3	0001.CSV	3374.96	0.0082515
CAM210_map3	0001.CSV	3378.82	0.0080011
CAM210_map3	0001.CSV	3382.67	0.00783144
CAM210_map3	0001.CSV	3386.53	0.00796641
CAM210_map3	0001.CSV	3390.39	0.00835363
CAM210_map3	0001.CSV	3394.24	0.00862157
CAM210_map3	0001.CSV	3398.1	0.00860835
CAM210_map3	0001.CSV	3401.96	0.00841812
CAM210_map3	0001.CSV	3405.82	0.00821628
CAM210_map3	0001.CSV	3409.67	0.00806327
CAM210_map3	0001.CSV	3413.53	0.00778886
CAM210_map3	0001.CSV	3417.39	0.00740595
CAM210_map3	0001.CSV	3421.24	0.00724495
CAM210_map3	0001.CSV	3425.1	0.00742173
CAM210_map3	0001.CSV	3428.96	0.0077039
CAM210_map3	0001.CSV	3432.82	0.00778627
CAM210_map3	0001.CSV	3436.67	0.00749093
CAM210_map3	0001.CSV	3440.53	0.00697671
CAM210_map3	0001.CSV	3444.39	0.00657191
CAM210_map3	0001.CSV	3448.24	0.00631149
CAM210_map3	0001.CSV	3452.1	0.00610542
CAM210_map3	0001.CSV	3455.96	0.00612071
CAM210_map3	0001.CSV	3459.82	0.00640022
CAM210_map3	0001.CSV	3463.67	0.00669313
CAM210_map3	0001.CSV	3467.53	0.00671113
CAM210_map3	0001.CSV	3471.39	0.00640745
CAM210_map3	0001.CSV	3475.24	0.00609308
CAM210_map3	0001.CSV	3479.1	0.00594724
CAM210_map3	0001.CSV	3482.96	0.00586149
CAM210_map3	0001.CSV	3486.82	0.00579869
CAM210_map3	0001.CSV	3490.67	0.0057396
CAM210_map3	0001.CSV	3494.53	0.00564439
CAM210_map3	0001.CSV	3498.39	0.00549373
CAM210_map3	0001.CSV	3502.24	0.00521722
CAM210_map3	0001.CSV	3506.1	0.00481188
CAM210_map3	0001.CSV	3509.96	0.00452582
CAM210_map3	0001.CSV	3513.81	0.00439412
CAM210_map3	0001.CSV	3517.67	0.00423714
CAM210_map3	0001.CSV	3521.53	0.00411179
CAM210_map3	0001.CSV	3525.39	0.00402299
CAM210_map3	0001.CSV	3529.24	0.00391622
CAM210_map3	0001.CSV	3533.1	0.00390007
CAM210_map3	0001.CSV	3536.96	0.0039307
CAM210_map3	0001.CSV	3540.81	0.00394508
CAM210_map3	0001.CSV	3544.67	0.00391482
CAM210_map3	0001.CSV	3548.53	0.00364141
CAM210_map3	0001.CSV	3552.39	0.00318703
CAM210_map3	0001.CSV	3556.24	0.00284041
CAM210_map3	0001.CSV	3560.1	0.00254141
CAM210_map3	0001.CSV	3563.96	0.00224163
CAM210_map3	0001.CSV	3567.81	0.00220136
CAM210_map3	0001.CSV	3571.67	0.0021638
CAM210_map3	0001.CSV	3575.53	0.00193942
CAM210_map3	0001.CSV	3579.39	0.00178046
CAM210_map3	0001.CSV	3583.24	0.00170754
CAM210_map3	0001.CSV	3587.1	0.00164919
CAM210_map3	0001.CSV	3590.96	0.00148671
CAM210_map3	0001.CSV	3594.81	0.00120925
CAM210_map3	0001.CSV	3598.67	0.000979884
CAM210_map3	0001.CSV	3602.53	0.000596059
CAM210_map3	0001.CSV	3606.39	-6.32151e-05
CAM210_map3	0001.CSV	3610.24	-0.000671174
CAM210_map3	0001.CSV	3614.1	-0.00087495
CAM210_map3	0001.CSV	3617.96	-0.00064967
CAM210_map3	0001.CSV	3621.81	-0.000581577
CAM210_map3	0001.CSV	3625.67	-0.00098948
CAM210_map3	0001.CSV	3629.53	-0.00119367
CAM210_map3	0001.CSV	3633.39	-0.000980323
CAM210_map3	0001.CSV	3637.24	-0.00104878
CAM210_map3	0001.CSV	3641.1	-0.00142996
CAM210_map3	0001.CSV	3644.96	-0.00182123
CAM210_map3	0001.CSV	3648.81	-0.00159007
CAM210_map3	0001.CSV	3652.67	-0.000840228
CAM210_map3	0001.CSV	3656.53	-0.000587665
CAM210_map3	0001.CSV	3660.38	-0.000876868
CAM210_map3	0001.CSV	3664.24	-0.00158958
CAM210_map3	0001.CSV	3668.1	-0.00236963
CAM210_map3	0001.CSV	3671.96	-0.0025905
CAM210_map3	0001.CSV	3675.81	-0.00197473
CAM210_map3	0001.CSV	3679.67	-0.00155204
CAM210_map3	0001.CSV	3683.53	-0.0015801
CAM210_map3	0001.CSV	3687.38	-0.00150763
CAM210_map3	0001.CSV	3691.24	-0.00115996
CAM210_map3	0001.CSV	3695.1	-0.00123223
CAM210_map3	0001.CSV	3698.95	-0.001662
CAM210_map3	0001.CSV	3702.81	-0.00209016
CAM210_map3	0001.CSV	3706.67	-0.0024272
CAM210_map3	0001.CSV	3710.53	-0.00240354
CAM210_map3	0001.CSV	3714.38	-0.00212686
CAM210_map3	0001.CSV	3718.24	-0.00219666
CAM210_map3	0001.CSV	3722.1	-0.00240871
CAM210_map3	0001.CSV	3725.95	-0.00248815
CAM210_map3	0001.CSV	3729.81	-0.00246048
CAM210_map3	0001.CSV	3733.67	-0.00207308
CAM210_map3	0001.CSV	3737.53	-0.00166705
CAM210_map3	0001.CSV	3741.38	-0.00217539
CAM210_map3	0001.CSV	3745.24	-0.00306502
CAM210_map3	0001.CSV	3749.1	-0.00313878
CAM210_map3	0001.CSV	3752.95	-0.00241053
CAM210_map3	0001.CSV	3756.81	-0.00205369
CAM210_map3	0001.CSV	3760.67	-0.00209728
CAM210_map3	0001.CSV	3764.53	-0.00224581
CAM210_map3	0001.CSV	3768.38	-0.00222751
CAM210_map3	0001.CSV	3772.24	-0.00215986
CAM210_map3	0001.CSV	3776.1	-0.00224482
CAM210_map3	0001.CSV	3779.95	-0.00228282
CAM210_map3	0001.CSV	3783.81	-0.00219649
CAM210_map3	0001.CSV	3787.67	-0.00221934
CAM210_map3	0001.CSV	3791.53	-0.00253197
CAM210_map3	0001.CSV	3795.38	-0.00300735
CAM210_map3	0001.CSV	3799.24	-0.00318908
CAM210_map3	0001.CSV	3803.1	-0.0027809
CAM210_map3	0001.CSV	3806.95	-0.00246726
CAM210_map3	0001.CSV	3810.81	-0.00263552
CAM210_map3	0001.CSV	3814.67	-0.00292142
CAM210_map3	0001.CSV	3818.53	-0.00286096
CAM210_map3	0001.CSV	3822.38	-0.0025628
CAM210_map3	0001.CSV	3826.24	-0.00262778
CAM210_map3	0001.CSV	3830.1	-0.00292817
CAM210_map3	0001.CSV	3833.95	-0.00313233
CAM210_map3	0001.CSV	3837.81	-0.00285796
CAM210_map3	0001.CSV	3841.67	-0.00244924
CAM210_map3	0001.CSV	3845.53	-0.00274787
CAM210_map3	0001.CSV	3849.38	-0.00337241
CAM210_map3	0001.CSV	3853.24	-0.00341699
CAM210_map3	0001.CSV	3857.1	-0.00303676
CAM210_map3	0001.CSV	3860.95	-0.00319743
CAM210_map3	0001.CSV	3864.81	-0.00342392
CAM210_map3	0001.CSV	3868.67	-0.00330895
CAM210_map3	0001.CSV	3872.52	-0.00311401
CAM210_map3	0001.CSV	3876.38	-0.00316546
CAM210_map3	0001.CSV	3880.24	-0.0031626
CAM210_map3	0001.CSV	3884.1	-0.00290075
CAM210_map3	0001.CSV	3887.95	-0.00278205
CAM210_map3	0001.CSV	3891.81	-0.00294689
CAM210_map3	0001.CSV	3895.67	-0.00327791
CAM210_map3	0001.CSV	3899.52	-0.00348112
CAM210_map3	0001.CSV	3903.38	-0.00309509
CAM210_map3	0001.CSV	3907.24	-0.00282323
CAM210_map3	0001.CSV	3911.1	-0.00306335
CAM210_map3	0001.CSV	3914.95	-0.00330477
CAM210_map3	0001.CSV	3918.81	-0.00329307
CAM210_map3	0001.CSV	3922.67	-0.00319128
CAM210_map3	0001.CSV	3926.52	-0.00311108
CAM210_map3	0001.CSV	3930.38	-0.00295038
CAM210_map3	0001.CSV	3934.24	-0.00284114
CAM210_map3	0001.CSV	3938.09	-0.0029491
CAM210_map3	0001.CSV	3941.95	-0.00306325
CAM210_map3	0001.CSV	3945.81	-0.00300185
CAM210_map3	0001.CSV	3949.67	-0.00287771
CAM210_map3	0001.CSV	3953.52	-0.00285513
CAM210_map3	0001.CSV	3957.38	-0.00289967
CAM210_map3	0001.CSV	3961.24	-0.00291188
CAM210_map3	0001.CSV	3965.09	-0.00292948
CAM210_map3	0001.CSV	3968.95	-0.002928
CAM210_map3	0001.CSV	3972.81	-0.00284608
CAM210_map3	0001.CSV	3976.67	-0.00277102
CAM210_map3	0001.CSV	3980.52	-0.00271623
CAM210_map3	0001.CSV	3984.38	-0.00264945
CAM210_map3	0001.CSV	3988.24	-0.00264642
CAM210_map3	0001.CSV	3992.09	-0.00268574
CAM210_map3	0001.CSV	3995.95	-0.00269928
CAM210_map3	0001.CSV	3999.81	-0.00271264
CAM210_map3	0002.CSV	674.992	0.0231365
CAM210_map3	0002.CSV	678.849	0.0237838
CAM210_map3	0002.CSV	682.706	0.0242919
CAM210_map3	0002.CSV	686.563	0.0249125
CAM210_map3	0002.CSV	690.42	0.0257892
CAM210_map3	0002.CSV	694.277	0.0269522
CAM210_map3	0002.CSV	698.134	0.0288858
CAM210_map3	0002.CSV	701.991	0.0330305
CAM210_map3	0002.CSV	705.849	0.040174
CAM210_map3	0002.CSV	709.706	0.0458171
CAM210_map3	0002.CSV	713.563	0.0428587
CAM210_map3	0002.CSV	717.42	0.0330541
CAM210_map3	0002.CSV	721.277	0.0249565
CAM210_map3	0002.CSV	725.134	0.0217357
CAM210_map3	0002.CSV	728.991	0.0208533
CAM210_map3	0002.CSV	732.848	0.0204134
CAM210_map3	0002.CSV	736.705	0.0200985
CAM210_map3	0002.CSV	740.562	0.0199803
CAM210_map3	0002.CSV	744.42	0.0201016
CAM210_map3	0002.CSV	748.277	0.0204469
CAM210_map3	0002.CSV	752.134	0.0208499
CAM210_map3	0002.CSV	755.991	0.0211551
CAM210_map3	0002.CSV	759.848	0.0215106
CAM210_map3	0002.CSV	763.705	0.0219963
CAM210_map3	0002.CSV	767.562	0.0224316
CAM210_map3	0002.CSV	771.419	0.0227759
CAM210_map3	0002.CSV	775.276	0.0231043
CAM210_map3	0002.CSV	779.133	0.0233848
CAM210_map3	0002.CSV	782.99	0.0235522
CAM210_map3	0002.CSV	786.848	0.0236391
CAM210_map3	0002.CSV	790.705	0.0237791
CAM210_map3	0002.CSV	794.562	0.0241217
CAM210_map3	0002.CSV	798.419	0.0246202
CAM210_map3	0002.CSV	802.276	0.025118
CAM210_map3	0002.CSV	806.133	0.0256391
CAM210_map3	0002.CSV	809.99	0.0262355
CAM210_map3	0002.CSV	813.847	0.0268744
CAM210_map3	0002.CSV	817.704	0.0275969
CAM210_map3	0002.CSV	821.562	0.0285164
CAM210_map3	0002.CSV	825.419	0.0296884
CAM210_map3	0002.CSV	829.276	0.0310224
CAM210_map3	0002.CSV	833.133	0.0323959
CAM210_map3	0002.CSV	836.99	0.0339815
CAM210_map3	0002.CSV	840.847	0.0361428
CAM210_map3	0002.CSV	844.704	0.0385652
CAM210_map3	0002.CSV	848.561	0.0405912
CAM210_map3	0002.CSV	852.418	0.0430254
CAM210_map3	0002.CSV	856.275	0.0476946
CAM210_map3	0002.CSV	860.132	0.0560398
CAM210_map3	0002.CSV	863.99	0.0690131
CAM210_map3	0002.CSV	867.847	0.0840237
CAM210_map3	0002.CSV	871.704	0.0923441
CAM210_map3	0002.CSV	875.561	0.087096
CAM210_map3	0002.CSV	879.418	0.0709185
CAM210_map3	0002.CSV	883.275	0.0505835
CAM210_map3	0002.CSV	887.132	0.0328317
CAM210_map3	0002.CSV	890.989	0.0227922
CAM210_map3	0002.CSV	894.846	0.0198706
CAM210_map3	0002.CSV	898.703	0.0199076
CAM210_map3	0002.CSV	902.561	0.020458
CAM210_map3	0002.CSV	906.418	0.0210474
CAM210_map3	0002.CSV	910.275	0.0215542
CAM210_map3	0002.CSV	914.132	0.0219401
CAM210_map3	0002.CSV	917.989	0.0222979
CAM210_map3	0002.CSV	921.846	0.0226544
CAM210_map3	0002.CSV	925.703	0.02299
CAM210_map3	0002.CSV	929.56	0.02333
CAM210_map3	0002.CSV	933.417	0.0236563
CAM210_map3	0002.CSV	937.274	0.0238958
CAM210_map3	0002.CSV	941.131	0.0240407
CAM210_map3	0002.CSV	944.989	0.0241706
CAM210_map3	0002.CSV	948.846	0.0243706
CAM210_map3	0002.CSV	952.703	0.0246411
CAM210_map3	0002.CSV	956.56	0.0248819
CAM210_map3	0002.CSV	960.417	0.0250178
CAM210_map3	0002.CSV	964.274	0.0251241
CAM210_map3	0002.CSV	968.131	0.0253162
CAM210_map3	0002.CSV	971.988	0.0255932
CAM210_map3	0002.CSV	975.845	0.02589
CAM210_map3	0002.CSV	979.702	0.0261954
CAM210_map3	0002.CSV	983.559	0.0265197
CAM210_map3	0002.CSV	987.417	0.0268659
CAM210_map3	0002.CSV	991.274	0.0272527
CAM210_map3	0002.CSV	995.131	0.027651
CAM210_map3	0002.CSV	998.988	0.0280061
CAM210_map3	0002.CSV	1002.85	0.0283477
CAM210_map3	0002.CSV	1006.7	0.0287127
CAM210_map3	0002.CSV	1010.56	0.0290414
CAM210_map3	0002.CSV	1014.42	0.0292741
CAM210_map3	0002.CSV	1018.27	0.0294538
CAM210_map3	0002.CSV	1022.13	0.0296445
CAM210_map3	0002.CSV	1025.99	0.0298509
CAM210_map3	0002.CSV	1029.85	0.0300605
CAM210_map3	0002.CSV	1033.7	0.0302786
CAM210_map3	0002.CSV	1037.56	0.0305019
CAM210_map3	0002.CSV	1041.42	0.0307349
CAM210_map3	0002.CSV	1045.27	0.0309728
CAM210_map3	0002.CSV	1049.13	0.0311818
CAM210_map3	0002.CSV	1052.99	0.0313531
CAM210_map3	0002.CSV	1056.84	0.0315295
CAM210_map3	0002.CSV	1060.7	0.0317856
CAM210_map3	0002.CSV	1064.56	0.0321613
CAM210_map3	0002.CSV	1068.42	0.0326118
CAM210_map3	0002.CSV	1072.27	0.0331164
CAM210_map3	0002.CSV	1076.13	0.0336725
CAM210_map3	0002.CSV	1079.99	0.0341654
CAM210_map3	0002.CSV	1083.84	0.0344614
CAM210_map3	0002.CSV	1087.7	0.0345108
CAM210_map3	0002.CSV	1091.56	0.0343821
CAM210_map3	0002.CSV	1095.41	0.0342448
CAM210_map3	0002.CSV	1099.27	0.0342154
CAM210_map3	0002.CSV	1103.13	0.0343385
CAM210_map3	0002.CSV	1106.99	0.0346045
CAM210_map3	0002.CSV	1110.84	0.0348634
CAM210_map3	0002.CSV	1114.7	0.0349129
CAM210_map3	0002.CSV	1118.56	0.0347478
CAM210_map3	0002.CSV	1122.41	0.034557
CAM210_map3	0002.CSV	1126.27	0.0344868
CAM210_map3	0002.CSV	1130.13	0.034539
CAM210_map3	0002.CSV	1133.99	0.0346677
CAM210_map3	0002.CSV	1137.84	0.0348433
CAM210_map3	0002.CSV	1141.7	0.0350507
CAM210_map3	0002.CSV	1145.56	0.035288
CAM210_map3	0002.CSV	1149.41	0.0355188
CAM210_map3	0002.CSV	1153.27	0.0357058
CAM210_map3	0002.CSV	1157.13	0.035872
CAM210_map3	0002.CSV	1160.99	0.0360334
CAM210_map3	0002.CSV	1164.84	0.0361804
CAM210_map3	0002.CSV	1168.7	0.0363024
CAM210_map3	0002.CSV	1172.56	0.0363959
CAM210_map3	0002.CSV	1176.41	0.0364761
CAM210_map3	0002.CSV	1180.27	0.0365324
CAM210_map3	0002.CSV	1184.13	0.0365085
CAM210_map3	0002.CSV	1187.99	0.036378
CAM210_map3	0002.CSV	1191.84	0.036194
CAM210_map3	0002.CSV	1195.7	0.0360556
CAM210_map3	0002.CSV	1199.56	0.036029
CAM210_map3	0002.CSV	1203.41	0.0361055
CAM210_map3	0002.CSV	1207.27	0.0362673
CAM210_map3	0002.CSV	1211.13	0.0365088
CAM210_map3	0002.CSV	1214.98	0.0367975
CAM210_map3	0002.CSV	1218.84	0.0371189
CAM210_map3	0002.CSV	1222.7	0.0374756
CAM210_map3	0002.CSV	1226.56	0.0378682
CAM210_map3	0002.CSV	1230.41	0.0382927
CAM210_map3	0002.CSV	1234.27	0.0387153
CAM210_map3	0002.CSV	1238.13	0.0391197
CAM210_map3	0002.CSV	1241.98	0.0395334
CAM210_map3	0002.CSV	1245.84	0.0399602
CAM210_map3	0002.CSV	1249.7	0.0403769
CAM210_map3	0002.CSV	1253.56	0.0407718
CAM210_map3	0002.CSV	1257.41	0.0411538
CAM210_map3	0002.CSV	1261.27	0.0415456
CAM210_map3	0002.CSV	1265.13	0.0419968
CAM210_map3	0002.CSV	1268.98	0.042568
CAM210_map3	0002.CSV	1272.84	0.0432394
CAM210_map3	0002.CSV	1276.7	0.0439479
CAM210_map3	0002.CSV	1280.56	0.0446921
CAM210_map3	0002.CSV	1284.41	0.0454866
CAM210_map3	0002.CSV	1288.27	0.0463353
CAM210_map3	0002.CSV	1292.13	0.0472225
CAM210_map3	0002.CSV	1295.98	0.0481339
CAM210_map3	0002.CSV	1299.84	0.0490723
CAM210_map3	0002.CSV	1303.7	0.0500376
CAM210_map3	0002.CSV	1307.56	0.051049
CAM210_map3	0002.CSV	1311.41	0.0521515
CAM210_map3	0002.CSV	1315.27	0.0533667
CAM210_map3	0002.CSV	1319.13	0.0546236
CAM210_map3	0002.CSV	1322.98	0.0558434
CAM210_map3	0002.CSV	1326.84	0.0571006
CAM210_map3	0002.CSV	1330.7	0.0584693
CAM210_map3	0002.CSV	1334.56	0.060011
CAM210_map3	0002.CSV	1338.41	0.0619545
CAM210_map3	0002.CSV	1342.27	0.0640687
CAM210_map3	0002.CSV	1346.13	0.0659611
CAM210_map3	0002.CSV	1349.98	0.067941
CAM210_map3	0002.CSV	1353.84	0.070153
CAM210_map3	0002.CSV	1357.7	0.0725193
CAM210_map3	0002.CSV	1361.56	0.0752861
CAM210_map3	0002.CSV	1365.41	0.078262
CAM210_map3	0002.CSV	1369.27	0.0810212
CAM210_map3	0002.CSV	1373.13	0.0840875
CAM210_map3	0002.CSV	1376.98	0.0874893
CAM210_map3	0002.CSV	1380.84	0.0904448
CAM210_map3	0002.CSV	1384.7	0.0931626
CAM210_map3	0002.CSV	1388.56	0.0958037
CAM210_map3	0002.CSV	1392.41	0.0976815
CAM210_map3	0002.CSV	1396.27	0.0984939
CAM210_map3	0002.CSV	1400.13	0.0983437
CAM210_map3	0002.CSV	1403.98	0.097458
CAM210_map3	0002.CSV	1407.84	0.0959461
CAM210_map3	0002.CSV	1411.7	0.0939539
CAM210_map3	0002.CSV	1415.55	0.0915075
CAM210_map3	0002.CSV	1419.41	0.0884046
CAM210_map3	0002.CSV	1423.27	0.0854598
CAM210_map3	0002.CSV	1427.12	0.0832571
CAM210_map3	0002.CSV	1430.98	0.081264
CAM210_map3	0002.CSV	1434.84	0.079043
CAM210_map3	0002.CSV	1438.7	0.0766813
CAM210_map3	0002.CSV	1442.55	0.0745721
CAM210_map3	0002.CSV	1446.41	0.072541
CAM210_map3	0002.CSV	1450.27	0.0705106
CAM210_map3	0002.CSV	1454.12	0.068402
CAM210_map3	0002.CSV	1457.98	0.065752
CAM210_map3	0002.CSV	1461.84	0.0633524
CAM210_map3	0002.CSV	1465.7	0.0614374
CAM210_map3	0002.CSV	1469.55	0.0592654
CAM210_map3	0002.CSV	1473.41	0.0561567
CAM210_map3	0002.CSV	1477.27	0.0529278
CAM210_map3	0002.CSV	1481.12	0.0506267
CAM210_map3	0002.CSV	1484.98	0.0486185
CAM210_map3	0002.CSV	1488.84	0.0462984
CAM210_map3	0002.CSV	1492.7	0.0439248
CAM210_map3	0002.CSV	1496.55	0.0418763
CAM210_map3	0002.CSV	1500.41	0.040077
CAM210_map3	0002.CSV	1504.27	0.0384579
CAM210_map3	0002.CSV	1508.12	0.0365234
CAM210_map3	0002.CSV	1511.98	0.0347774
CAM210_map3	0002.CSV	1515.84	0.0334879
CAM210_map3	0002.CSV	1519.7	0.0320523
CAM210_map3	0002.CSV	1523.55	0.0305559
CAM210_map3	0002.CSV	1527.41	0.0296263
CAM210_map3	0002.CSV	1531.27	0.0293916
CAM210_map3	0002.CSV	1535.12	0.0296709
CAM210_map3	0002.CSV	1538.98	0.0295631
CAM210_map3	0002.CSV	1542.84	0.0272705
CAM210_map3	0002.CSV	1546.7	0.0244948
CAM210_map3	0002.CSV	1550.55	0.0225274
CAM210_map3	0002.CSV	1554.41	0.0209996
CAM210_map3	0002.CSV	1558.27	0.0199781
CAM210_map3	0002.CSV	1562.12	0.0197358
CAM210_map3	0002.CSV	1565.98	0.0201402
CAM210_map3	0002.CSV	1569.84	0.0211501
CAM210_map3	0002.CSV	1573.69	0.0222287
CAM210_map3	0002.CSV	1577.55	0.0221986
CAM210_map3	0002.CSV	1581.41	0.0208698
CAM210_map3	0002.CSV	1585.27	0.0191141
CAM210_map3	0002.CSV	1589.12	0.0175342
CAM210_map3	0002.CSV	1592.98	0.0164154
CAM210_map3	0002.CSV	1596.84	0.0157702
CAM210_map3	0002.CSV	1600.69	0.0154562
CAM210_map3	0002.CSV	1604.55	0.0153342
CAM210_map3	0002.CSV	1608.41	0.0152883
CAM210_map3	0002.CSV	1612.27	0.0152434
CAM210_map3	0002.CSV	1616.12	0.0152144
CAM210_map3	0002.CSV	1619.98	0.0151563
CAM210_map3	0002.CSV	1623.84	0.0149932
CAM210_map3	0002.CSV	1627.69	0.0147274
CAM210_map3	0002.CSV	1631.55	0.0144452
CAM210_map3	0002.CSV	1635.41	0.0143288
CAM210_map3	0002.CSV	1639.27	0.0142487
CAM210_map3	0002.CSV	1643.12	0.0139904
CAM210_map3	0002.CSV	1646.98	0.0137471
CAM210_map3	0002.CSV	1650.84	0.013762
CAM210_map3	0002.CSV	1654.69	0.0138615
CAM210_map3	0002.CSV	1658.55	0.0137474
CAM210_map3	0002.CSV	1662.41	0.0135388
CAM210_map3	0002.CSV	1666.27	0.0133845
CAM210_map3	0002.CSV	1670.12	0.0133788
CAM210_map3	0002.CSV	1673.98	0.0134001
CAM210_map3	0002.CSV	1677.84	0.0132604
CAM210_map3	0002.CSV	1681.69	0.0131547
CAM210_map3	0002.CSV	1685.55	0.0132531
CAM210_map3	0002.CSV	1689.41	0.0131841
CAM210_map3	0002.CSV	1693.27	0.0129399
CAM210_map3	0002.CSV	1697.12	0.0128903
CAM210_map3	0002.CSV	1700.98	0.0131315
CAM210_map3	0002.CSV	1704.84	0.0131335
CAM210_map3	0002.CSV	1708.69	0.0129017
CAM210_map3	0002.CSV	1712.55	0.0127506
CAM210_map3	0002.CSV	1716.41	0.0129656
CAM210_map3	0002.CSV	1720.27	0.0131746
CAM210_map3	0002.CSV	1724.12	0.013
CAM210_map3	0002.CSV	1727.98	0.0127688
CAM210_map3	0002.CSV	1731.84	0.0127354
CAM210_map3	0002.CSV	1735.69	0.0128455
CAM210_map3	0002.CSV	1739.55	0.0127268
CAM210_map3	0002.CSV	1743.41	0.0124487
CAM210_map3	0002.CSV	1747.27	0.0122293
CAM210_map3	0002.CSV	1751.12	0.0120405
CAM210_map3	0002.CSV	1754.98	0.0118039
CAM210_map3	0002.CSV	1758.84	0.0116126
CAM210_map3	0002.CSV	1762.69	0.0114607
CAM210_map3	0002.CSV	1766.55	0.0113318
CAM210_map3	0002.CSV	1770.41	0.0114032
CAM210_map3	0002.CSV	1774.26	0.0116073
CAM210_map3	0002.CSV	1778.12	0.0116663
CAM210_map3	0002.CSV	1781.98	0.0117491
CAM210_map3	0002.CSV	1785.84	0.0119667
CAM210_map3	0002.CSV	1789.69	0.0123363
CAM210_map3	0002.CSV	1793.55	0.01275
CAM210_map3	0002.CSV	1797.41	0.0127326
CAM210_map3	0002.CSV	1801.26	0.0122305
CAM210_map3	0002.CSV	1805.12	0.0116456
CAM210_map3	0002.CSV	1808.98	0.0112546
CAM210_map3	0002.CSV	1812.84	0.0110492
CAM210_map3	0002.CSV	1816.69	0.0108769
CAM210_map3	0002.CSV	1820.55	0.010718
CAM210_map3	0002.CSV	1824.41	0.0106796
CAM210_map3	0002.CSV	1828.26	0.0107976
CAM210_map3	0002.CSV	1832.12	0.010877
CAM210_map3	0002.CSV	1835.98	0.010798
CAM210_map3	0002.CSV	1839.84	0.0107032
CAM210_map3	0002.CSV	1843.69	0.0107515
CAM210_map3	0002.CSV	1847.55	0.0108251
CAM210_map3	0002.CSV	1851.41	0.0107364
CAM210_map3	0002.CSV	1855.26	0.0106093
CAM210_map3	0002.CSV	1859.12	0.0105229
CAM210_map3	0002.CSV	1862.98	0.010459
CAM210_map3	0002.CSV	1866.84	0.0105214
CAM210_map3	0002.CSV	1870.69	0.0106664
CAM210_map3	0002.CSV	1874.55	0.0106389
CAM210_map3	0002.CSV	1878.41	0.010525
CAM210_map3	0002.CSV	1882.26	0.010462
CAM210_map3	0002.CSV	1886.12	0.010461
CAM210_map3	0002.CSV	1889.98	0.0105122
CAM210_map3	0002.CSV	1893.83	0.0105556
CAM210_map3	0002.CSV	1897.69	0.0105372
CAM210_map3	0002.CSV	1901.55	0.0104826
CAM210_map3	0002.CSV	1905.41	0.0104475
CAM210_map3	0002.CSV	1909.26	0.010437
CAM210_map3	0002.CSV	1913.12	0.0104037
CAM210_map3	0002.CSV	1916.98	0.0103847
CAM210_map3	0002.CSV	1920.83	0.0104411
CAM210_map3	0002.CSV	1924.69	0.0104844
CAM210_map3	0002.CSV	1928.55	0.010451
CAM210_map3	0002.CSV	1932.4	0.0104098
CAM210_map3	0002.CSV	1936.26	0.0103812
CAM210_map3	0002.CSV	1940.12	0.0103754
CAM210_map3	0002.CSV	1943.98	0.0104249
CAM210_map3	0002.CSV	1947.83	0.0104416
CAM210_map3	0002.CSV	1951.69	0.0103956
CAM210_map3	0002.CSV	1955.55	0.0103559
CAM210_map3	0002.CSV	1959.4	0.0103257
CAM210_map3	0002.CSV	1963.26	0.0103141
CAM210_map3	0002.CSV	1967.12	0.0103395
CAM210_map3	0002.CSV	1970.98	0.0103426
CAM210_map3	0002.CSV	1974.83	0.0103044
CAM210_map3	0002.CSV	1978.69	0.0102644
CAM210_map3	0002.CSV	1982.55	0.0102151
CAM210_map3	0002.CSV	1986.4	0.010171
CAM210_map3	0002.CSV	1990.26	0.0101869
CAM210_map3	0002.CSV	1994.12	0.0102244
CAM210_map3	0002.CSV	1997.98	0.0102064
CAM210_map3	0002.CSV	2001.83	0.0101583
CAM210_map3	0002.CSV	2005.69	0.0101228
CAM210_map3	0002.CSV	2009.55	0.0100879
CAM210_map3	0002.CSV	2013.4	0.0100409
CAM210_map3	0002.CSV	2017.26	0.0100007
CAM210_map3	0002.CSV	2021.12	0.00995683
CAM210_map3	0002.CSV	2024.97	0.00990384
CAM210_map3	0002.CSV	2028.83	0.00987246
CAM210_map3	0002.CSV	2032.69	0.00984873
CAM210_map3	0002.CSV	2036.55	0.00980064
CAM210_map3	0002.CSV	2040.4	0.00974577
CAM210_map3	0002.CSV	2044.26	0.00970298
CAM210_map3	0002.CSV	2048.12	0.00965524
CAM210_map3	0002.CSV	2051.97	0.00960876
CAM210_map3	0002.CSV	2055.83	0.00957719
CAM210_map3	0002.CSV	2059.69	0.00954609
CAM210_map3	0002.CSV	2063.55	0.00951402
CAM210_map3	0002.CSV	2067.4	0.00947734
CAM210_map3	0002.CSV	2071.26	0.00943091
CAM210_map3	0002.CSV	2075.12	0.00940329
CAM210_map3	0002.CSV	2078.97	0.00939313
CAM210_map3	0002.CSV	2082.83	0.009374
CAM210_map3	0002.CSV	2086.69	0.0093526
CAM210_map3	0002.CSV	2090.55	0.00933022
CAM210_map3	0002.CSV	2094.4	0.00929458
CAM210_map3	0002.CSV	2098.26	0.00925013
CAM210_map3	0002.CSV	2102.12	0.00919842
CAM210_map3	0002.CSV	2105.97	0.00915104
CAM210_map3	0002.CSV	2109.83	0.00913043
CAM210_map3	0002.CSV	2113.69	0.00912837
CAM210_map3	0002.CSV	2117.55	0.00912113
CAM210_map3	0002.CSV	2121.4	0.00910553
CAM210_map3	0002.CSV	2125.26	0.00909832
CAM210_map3	0002.CSV	2129.12	0.00910106
CAM210_map3	0002.CSV	2132.97	0.00909453
CAM210_map3	0002.CSV	2136.83	0.00907924
CAM210_map3	0002.CSV	2140.69	0.00907156
CAM210_map3	0002.CSV	2144.55	0.00906009
CAM210_map3	0002.CSV	2148.4	0.00901628
CAM210_map3	0002.CSV	2152.26	0.00895752
CAM210_map3	0002.CSV	2156.12	0.00892623
CAM210_map3	0002.CSV	2159.97	0.00891375
CAM210_map3	0002.CSV	2163.83	0.00889928
CAM210_map3	0002.CSV	2167.69	0.00888903
CAM210_map3	0002.CSV	2171.55	0.00888352
CAM210_map3	0002.CSV	2175.4	0.00887757
CAM210_map3	0002.CSV	2179.26	0.00886718
CAM210_map3	0002.CSV	2183.12	0.00885071
CAM210_map3	0002.CSV	2186.97	0.00883303
CAM210_map3	0002.CSV	2190.83	0.00881967
CAM210_map3	0002.CSV	2194.69	0.00881233
CAM210_map3	0002.CSV	2198.55	0.00881311
CAM210_map3	0002.CSV	2202.4	0.00881233
CAM210_map3	0002.CSV	2206.26	0.00880101
CAM210_map3	0002.CSV	2210.12	0.00878687
CAM210_map3	0002.CSV	2213.97	0.00875726
CAM210_map3	0002.CSV	2217.83	0.00870296
CAM210_map3	0002.CSV	2221.69	0.00866733
CAM210_map3	0002.CSV	2225.54	0.00867264
CAM210_map3	0002.CSV	2229.4	0.00867054
CAM210_map3	0002.CSV	2233.26	0.00862235
CAM210_map3	0002.CSV	2237.12	0.00854404
CAM210_map3	0002.CSV	2240.97	0.00847052
CAM210_map3	0002.CSV	2244.83	0.00842741
CAM210_map3	0002.CSV	2248.69	0.00839967
CAM210_map3	0002.CSV	2252.54	0.00834745
CAM210_map3	0002.CSV	2256.4	0.00827629
CAM210_map3	0002.CSV	2260.26	0.00822742
CAM210_map3	0002.CSV	2264.11	0.00820287
CAM210_map3	0002.CSV	2267.97	0.00817812
CAM210_map3	0002.CSV	2271.83	0.0081471
CAM210_map3	0002.CSV	2275.69	0.00810014
CAM210_map3	0002.CSV	2279.54	0.00803522
CAM210_map3	0002.CSV	2283.4	0.00797511
CAM210_map3	0002.CSV	2287.26	0.00792949
CAM210_map3	0002.CSV	2291.11	0.00789456
CAM210_map3	0002.CSV	2294.97	0.00786535
CAM210_map3	0002.CSV	2298.83	0.0078201
CAM210_map3	0002.CSV	2302.69	0.00772511
CAM210_map3	0002.CSV	2306.54	0.00757393
CAM210_map3	0002.CSV	2310.4	0.00740006
CAM210_map3	0002.CSV	2314.26	0.00720219
CAM210_map3	0002.CSV	2318.11	0.00687965
CAM210_map3	0002.CSV	2321.97	0.00636599
CAM210_map3	0002.CSV	2325.83	0.00574547
CAM210_map3	0002.CSV	2329.69	0.00513423
CAM210_map3	0002.CSV	2333.54	0.0045523
CAM210_map3	0002.CSV	2337.4	0.00401383
CAM210_map3	0002.CSV	2341.26	0.00412487
CAM210_map3	0002.CSV	2345.11	0.00498931
CAM210_map3	0002.CSV	2348.97	0.00520682
CAM210_map3	0002.CSV	2352.83	0.00389185
CAM210_map3	0002.CSV	2356.69	0.000371359
CAM210_map3	0002.CSV	2360.54	-0.00280556
CAM210_map3	0002.CSV	2364.4	-0.00021449
CAM210_map3	0002.CSV	2368.26	0.00376446
CAM210_map3	0002.CSV	2372.11	0.00609288
CAM210_map3	0002.CSV	2375.97	0.00707716
CAM210_map3	0002.CSV	2379.83	0.00730277
CAM210_map3	0002.CSV	2383.69	0.00717892
CAM210_map3	0002.CSV	2387.54	0.00694459
CAM210_map3	0002.CSV	2391.4	0.00673566
CAM210_map3	0002.CSV	2395.26	0.00660599
CAM210_map3	0002.CSV	2399.11	0.00653723
CAM210_map3	0002.CSV	2402.97	0.00649889
CAM210_map3	0002.CSV	2406.83	0.00647561
CAM210_map3	0002.CSV	2410.68	0.00645822
CAM210_map3	0002.CSV	2414.54	0.006433
CAM210_map3	0002.CSV	2418.4	0.00638495
CAM210_map3	0002.CSV	2422.26	0.00632702
CAM210_map3	0002.CSV	2426.11	0.00628553
CAM210_map3	0002.CSV	2429.97	0.00626523
CAM210_map3	0002.CSV	2433.83	0.00624704
CAM210_map3	0002.CSV	2437.68	0.0062019
CAM210_map3	0002.CSV	2441.54	0.00613186
CAM210_map3	0002.CSV	2445.4	0.00608509
CAM210_map3	0002.CSV	2449.26	0.00607333
CAM210_map3	0002.CSV	2453.11	0.00605945
CAM210_map3	0002.CSV	2456.97	0.00603969
CAM210_map3	0002.CSV	2460.83	0.00601762
CAM210_map3	0002.CSV	2464.68	0.00597677
CAM210_map3	0002.CSV	2468.54	0.00592605
CAM210_map3	0002.CSV	2472.4	0.0058852
CAM210_map3	0002.CSV	2476.26	0.00586868
CAM210_map3	0002.CSV	2480.11	0.0058888
CAM210_map3	0002.CSV	2483.97	0.00593673
CAM210_map3	0002.CSV	2487.83	0.00598261
CAM210_map3	0002.CSV	2491.68	0.00601654
CAM210_map3	0002.CSV	2495.54	0.00606634
CAM210_map3	0002.CSV	2499.4	0.00613966
CAM210_map3	0002.CSV	2503.26	0.00619851
CAM210_map3	0002.CSV	2507.11	0.0062143
CAM210_map3	0002.CSV	2510.97	0.00618795
CAM210_map3	0002.CSV	2514.83	0.0061277
CAM210_map3	0002.CSV	2518.68	0.00603287
CAM210_map3	0002.CSV	2522.54	0.00589615
CAM210_map3	0002.CSV	2526.4	0.00572855
CAM210_map3	0002.CSV	2530.26	0.00557223
CAM210_map3	0002.CSV	2534.11	0.00545756
CAM210_map3	0002.CSV	2537.97	0.00536554
CAM210_map3	0002.CSV	2541.83	0.00527101
CAM210_map3	0002.CSV	2545.68	0.00517792
CAM210_map3	0002.CSV	2549.54	0.00510335
CAM210_map3	0002.CSV	2553.4	0.00505893
CAM210_map3	0002.CSV	2557.26	0.00502575
CAM210_map3	0002.CSV	2561.11	0.0049811
CAM210_map3	0002.CSV	2564.97	0.00494149
CAM210_map3	0002.CSV	2568.83	0.00493368
CAM210_map3	0002.CSV	2572.68	0.00494564
CAM210_map3	0002.CSV	2576.54	0.00494192
CAM210_map3	0002.CSV	2580.4	0.00490952
CAM210_map3	0002.CSV	2584.25	0.00485496
CAM210_map3	0002.CSV	2588.11	0.00480806
CAM210_map3	0002.CSV	2591.97	0.00479395
CAM210_map3	0002.CSV	2595.83	0.00478273
CAM210_map3	0002.CSV	2599.68	0.00475519
CAM210_map3	0002.CSV	2603.54	0.00472143
CAM210_map3	0002.CSV	2607.4	0.00468381
CAM210_map3	0002.CSV	2611.25	0.00466248
CAM210_map3	0002.CSV	2615.11	0.00464992
CAM210_map3	0002.CSV	2618.97	0.00463019
CAM210_map3	0002.CSV	2622.82	0.00464058
CAM210_map3	0002.CSV	2626.68	0.00466563
CAM210_map3	0002.CSV	2630.54	0.00465732
CAM210_map3	0002.CSV	2634.4	0.00463361
CAM210_map3	0002.CSV	2638.25	0.00458529
CAM210_map3	0002.CSV	2642.11	0.00447209
CAM210_map3	0002.CSV	2645.97	0.00433284
CAM210_map3	0002.CSV	2649.82	0.00423821
CAM210_map3	0002.CSV	2653.68	0.00420338
CAM210_map3	0002.CSV	2657.54	0.00418545
CAM210_map3	0002.CSV	2661.4	0.00414323
CAM210_map3	0002.CSV	2665.25	0.00411008
CAM210_map3	0002.CSV	2669.11	0.00417458
CAM210_map3	0002.CSV	2672.97	0.00435299
CAM210_map3	0002.CSV	2676.82	0.004484
CAM210_map3	0002.CSV	2680.68	0.00438974
CAM210_map3	0002.CSV	2684.54	0.00415056
CAM210_map3	0002.CSV	2688.4	0.00398032
CAM210_map3	0002.CSV	2692.25	0.00392809
CAM210_map3	0002.CSV	2696.11	0.0039105
CAM210_map3	0002.CSV	2699.97	0.00386457
CAM210_map3	0002.CSV	2703.82	0.00381917
CAM210_map3	0002.CSV	2707.68	0.00381393
CAM210_map3	0002.CSV	2711.54	0.00381068
CAM210_map3	0002.CSV	2715.4	0.00381957
CAM210_map3	0002.CSV	2719.25	0.00391629
CAM210_map3	0002.CSV	2723.11	0.004037
CAM210_map3	0002.CSV	2726.97	0.00399747
CAM210_map3	0002.CSV	2730.82	0.00384281
CAM210_map3	0002.CSV	2734.68	0.0037817
CAM210_map3	0002.CSV	2738.54	0.00380955
CAM210_map3	0002.CSV	2742.4	0.00388142
CAM210_map3	0002.CSV	2746.25	0.00398694
CAM210_map3	0002.CSV	2750.11	0.0039752
CAM210_map3	0002.CSV	2753.97	0.00382509
CAM210_map3	0002.CSV	2757.82	0.00368231
CAM210_map3	0002.CSV	2761.68	0.00358849
CAM210_map3	0002.CSV	2765.54	0.00357369
CAM210_map3	0002.CSV	2769.39	0.00372047
CAM210_map3	0002.CSV	2773.25	0.00391325
CAM210_map3	0002.CSV	2777.11	0.0039203
CAM210_map3	0002.CSV	2780.97	0.00383375
CAM210_map3	0002.CSV	2784.82	0.00392234
CAM210_map3	0002.CSV	2788.68	0.00414276
CAM210_map3	0002.CSV	2792.54	0.00426906
CAM210_map3	0002.CSV	2796.39	0.00424882
CAM210_map3	0002.CSV	2800.25	0.00414604
CAM210_map3	0002.CSV	2804.11	0.00408954
CAM210_map3	0002.CSV	2807.97	0.00414169
CAM210_map3	0002.CSV	2811.82	0.00414838
CAM210_map3	0002.CSV	2815.68	0.00410155
CAM210_map3	0002.CSV	2819.54	0.00414782
CAM210_map3	0002.CSV	2823.39	0.00424848
CAM210_map3	0002.CSV	2827.25	0.00440095
CAM210_map3	0002.CSV	2831.11	0.00476273
CAM210_map3	0002.CSV	2834.97	0.00533199
CAM210_map3	0002.CSV	2838.82	0.00600096
CAM210_map3	0002.CSV	2842.68	0.0068878
CAM210_map3	0002.CSV	2846.54	0.0078978
CAM210_map3	0002.CSV	2850.39	0.00831377
CAM210_map3	0002.CSV	2854.25	0.00784912
CAM210_map3	0002.CSV	2858.11	0.00708508
CAM210_map3	0002.CSV	2861.97	0.00646276
CAM210_map3	0002.CSV	2865.82	0.00613065
CAM210_map3	0002.CSV	2869.68	0.00610945
CAM210_map3	0002.CSV	2873.54	0.00607
CAM210_map3	0002.CSV	2877.39	0.00576505
CAM210_map3	0002.CSV	2881.25	0.00544223
CAM210_map3	0002.CSV	2885.11	0.00537587
CAM210_map3	0002.CSV	2888.97	0.00558109
CAM210_map3	0002.CSV	2892.82	0.00594791
CAM210_map3	0002.CSV	2896.68	0.00629175
CAM210_map3	0002.CSV	2900.54	0.00661914
CAM210_map3	0002.CSV	2904.39	0.00722494
CAM210_map3	0002.CSV	2908.25	0.00838646
CAM210_map3	0002.CSV	2912.11	0.00996042
CAM210_map3	0002.CSV	2915.97	0.011106
CAM210_map3	0002.CSV	2919.82	0.0110317
CAM210_map3	0002.CSV	2923.68	0.010026
CAM210_map3	0002.CSV	2927.54	0.00884094
CAM210_map3	0002.CSV	2931.39	0.00769014
CAM210_map3	0002.CSV	2935.25	0.00668428
CAM210_map3	0002.CSV	2939.11	0.0061568
CAM210_map3	0002.CSV	2942.96	0.00604618
CAM210_map3	0002.CSV	2946.82	0.00594217
CAM210_map3	0002.CSV	2950.68	0.00569139
CAM210_map3	0002.CSV	2954.54	0.00535191
CAM210_map3	0002.CSV	2958.39	0.00500895
CAM210_map3	0002.CSV	2962.25	0.00469296
CAM210_map3	0002.CSV	2966.11	0.00438489
CAM210_map3	0002.CSV	2969.96	0.00425257
CAM210_map3	0002.CSV	2973.82	0.00435202
CAM210_map3	0002.CSV	2977.68	0.00437585
CAM210_map3	0002.CSV	2981.53	0.00408306
CAM210_map3	0002.CSV	2985.39	0.00368091
CAM210_map3	0002.CSV	2989.25	0.0035502
CAM210_map3	0002.CSV	2993.11	0.00361919
CAM210_map3	0002.CSV	2996.96	0.00357165
CAM210_map3	0002.CSV	3000.82	0.00341289
CAM210_map3	0002.CSV	3004.68	0.00335209
CAM210_map3	0002.CSV	3008.53	0.00349562
CAM210_map3	0002.CSV	3012.39	0.00370868
CAM210_map3	0002.CSV	3016.25	0.00374938
CAM210_map3	0002.CSV	3020.11	0.00358946
CAM210_map3	0002.CSV	3023.96	0.00339643
CAM210_map3	0002.CSV	3027.82	0.00334287
CAM210_map3	0002.CSV	3031.68	0.00346343
CAM210_map3	0002.CSV	3035.53	0.00358461
CAM210_map3	0002.CSV	3039.39	0.0036197
CAM210_map3	0002.CSV	3043.25	0.00362872
CAM210_map3	0002.CSV	3047.11	0.00360479
CAM210_map3	0002.CSV	3050.96	0.0035478
CAM210_map3	0002.CSV	3054.82	0.00344552
CAM210_map3	0002.CSV	3058.68	0.00330868
CAM210_map3	0002.CSV	3062.53	0.00330197
CAM210_map3	0002.CSV	3066.39	0.00341787
CAM210_map3	0002.CSV	3070.25	0.00345968
CAM210_map3	0002.CSV	3074.11	0.00350474
CAM210_map3	0002.CSV	3077.96	0.00365956
CAM210_map3	0002.CSV	3081.82	0.00377786
CAM210_map3	0002.CSV	3085.68	0.00374146
CAM210_map3	0002.CSV	3089.53	0.00356323
CAM210_map3	0002.CSV	3093.39	0.00336621
CAM210_map3	0002.CSV	3097.25	0.00332684
CAM210_map3	0002.CSV	3101.11	0.00344161
CAM210_map3	0002.CSV	3104.96	0.00359718
CAM210_map3	0002.CSV	3108.82	0.00375349
CAM210_map3	0002.CSV	3112.68	0.00389716
CAM210_map3	0002.CSV	3116.53	0.00396835
CAM210_map3	0002.CSV	3120.39	0.00385437
CAM210_map3	0002.CSV	3124.25	0.00360733
CAM210_map3	0002.CSV	3128.11	0.00343083
CAM210_map3	0002.CSV	3131.96	0.00340912
CAM210_map3	0002.CSV	3135.82	0.00349519
CAM210_map3	0002.CSV	3139.68	0.00350067
CAM210_map3	0002.CSV	3143.53	0.00336768
CAM210_map3	0002.CSV	3147.39	0.00335289
CAM210_map3	0002.CSV	3151.25	0.00347121
CAM210_map3	0002.CSV	3155.1	0.00340027
CAM210_map3	0002.CSV	3158.96	0.00308901
CAM210_map3	0002.CSV	3162.82	0.00279788
CAM210_map3	0002.CSV	3166.68	0.00267035
CAM210_map3	0002.CSV	3170.53	0.00264718
CAM210_map3	0002.CSV	3174.39	0.00268445
CAM210_map3	0002.CSV	3178.25	0.00278241
CAM210_map3	0002.CSV	3182.1	0.00286048
CAM210_map3	0002.CSV	3185.96	0.00287182
CAM210_map3	0002.CSV	3189.82	0.00285024
CAM210_map3	0002.CSV	3193.68	0.00280989
CAM210_map3	0002.CSV	3197.53	0.00281173
CAM210_map3	0002.CSV	3201.39	0.0028887
CAM210_map3	0002.CSV	3205.25	0.00295738
CAM210_map3	0002.CSV	3209.1	0.00300549
CAM210_map3	0002.CSV	3212.96	0.00310189
CAM210_map3	0002.CSV	3216.82	0.0031844
CAM210_map3	0002.CSV	3220.68	0.00314628
CAM210_map3	0002.CSV	3224.53	0.00311521
CAM210_map3	0002.CSV	3228.39	0.0033016
CAM210_map3	0002.CSV	3232.25	0.003548
CAM210_map3	0002.CSV	3236.1	0.0035476
CAM210_map3	0002.CSV	3239.96	0.00345294
CAM210_map3	0002.CSV	3243.82	0.00353531
CAM210_map3	0002.CSV	3247.68	0.00363406
CAM210_map3	0002.CSV	3251.53	0.00361385
CAM210_map3	0002.CSV	3255.39	0.00356196
CAM210_map3	0002.CSV	3259.25	0.00346783
CAM210_map3	0002.CSV	3263.1	0.00345387
CAM210_map3	0002.CSV	3266.96	0.00368071
CAM210_map3	0002.CSV	3270.82	0.00393391
CAM210_map3	0002.CSV	3274.68	0.00392508
CAM210_map3	0002.CSV	3278.53	0.00369444
CAM210_map3	0002.CSV	3282.39	0.00349171
CAM210_map3	0002.CSV	3286.25	0.00355071
CAM210_map3	0002.CSV	3290.1	0.00388974
CAM210_map3	0002.CSV	3293.96	0.00416879
CAM210_map3	0002.CSV	3297.82	0.00417575
CAM210_map3	0002.CSV	3301.67	0.0041423
CAM210_map3	0002.CSV	3305.53	0.00419378
CAM210_map3	0002.CSV	3309.39	0.0041356
CAM210_map3	0002.CSV	3313.25	0.00385665
CAM210_map3	0002.CSV	3317.1	0.00358679
CAM210_map3	0002.CSV	3320.96	0.00360362
CAM210_map3	0002.CSV	3324.82	0.00371225
CAM210_map3	0002.CSV	3328.67	0.00360306
CAM210_map3	0002.CSV	3332.53	0.00356617
CAM210_map3	0002.CSV	3336.39	0.0038872
CAM210_map3	0002.CSV	3340.24	0.00420201
CAM210_map3	0002.CSV	3344.1	0.00423155
CAM210_map3	0002.CSV	3347.96	0.00413387
CAM210_map3	0002.CSV	3351.82	0.00398804
CAM210_map3	0002.CSV	3355.67	0.00387199
CAM210_map3	0002.CSV	3359.53	0.0039938
CAM210_map3	0002.CSV	3363.39	0.00430319
CAM210_map3	0002.CSV	3367.24	0.00453265
CAM210_map3	0002.CSV	3371.1	0.00450469
CAM210_map3	0002.CSV	3374.96	0.00426421
CAM210_map3	0002.CSV	3378.82	0.00395003
CAM210_map3	0002.CSV	3382.67	0.00373946
CAM210_map3	0002.CSV	3386.53	0.00387904
CAM210_map3	0002.CSV	3390.39	0.00430028
CAM210_map3	0002.CSV	3394.24	0.00463344
CAM210_map3	0002.CSV	3398.1	0.0046804
CAM210_map3	0002.CSV	3401.96	0.00449485
CAM210_map3	0002.CSV	3405.82	0.00427448
CAM210_map3	0002.CSV	3409.67	0.00410604
CAM210_map3	0002.CSV	3413.53	0.00384043
CAM210_map3	0002.CSV	3417.39	0.00352776
CAM210_map3	0002.CSV	3421.24	0.00346596
CAM210_map3	0002.CSV	3425.1	0.00372559
CAM210_map3	0002.CSV	3428.96	0.00409537
CAM210_map3	0002.CSV	3432.82	0.004269
CAM210_map3	0002.CSV	3436.67	0.00400891
CAM210_map3	0002.CSV	3440.53	0.00346296
CAM210_map3	0002.CSV	3444.39	0.00303943
CAM210_map3	0002.CSV	3448.24	0.00282443
CAM210_map3	0002.CSV	3452.1	0.00270669
CAM210_map3	0002.CSV	3455.96	0.00282183
CAM210_map3	0002.CSV	3459.82	0.00317885
CAM210_map3	0002.CSV	3463.67	0.00353457
CAM210_map3	0002.CSV	3467.53	0.0036222
CAM210_map3	0002.CSV	3471.39	0.00337202
CAM210_map3	0002.CSV	3475.24	0.00310944
CAM210_map3	0002.CSV	3479.1	0.00306118
CAM210_map3	0002.CSV	3482.96	0.00309168
CAM210_map3	0002.CSV	3486.82	0.00311344
CAM210_map3	0002.CSV	3490.67	0.00313396
CAM210_map3	0002.CSV	3494.53	0.00313373
CAM210_map3	0002.CSV	3498.39	0.00305501
CAM210_map3	0002.CSV	3502.24	0.00281253
CAM210_map3	0002.CSV	3506.1	0.0024459
CAM210_map3	0002.CSV	3509.96	0.00224076
CAM210_map3	0002.CSV	3513.81	0.00219923
CAM210_map3	0002.CSV	3517.67	0.00209704
CAM210_map3	0002.CSV	3521.53	0.00200649
CAM210_map3	0002.CSV	3525.39	0.0019494
CAM210_map3	0002.CSV	3529.24	0.00187738
CAM210_map3	0002.CSV	3533.1	0.00192288
CAM210_map3	0002.CSV	3536.96	0.00206784
CAM210_map3	0002.CSV	3540.81	0.00223999
CAM210_map3	0002.CSV	3544.67	0.00233559
CAM210_map3	0002.CSV	3548.53	0.00209021
CAM210_map3	0002.CSV	3552.39	0.0016161
CAM210_map3	0002.CSV	3556.24	0.00126856
CAM210_map3	0002.CSV	3560.1	0.00098812
CAM210_map3	0002.CSV	3563.96	0.000747185
CAM210_map3	0002.CSV	3567.81	0.000858689
CAM210_map3	0002.CSV	3571.67	0.000994031
CAM210_map3	0002.CSV	3575.53	0.000938607
CAM210_map3	0002.CSV	3579.39	0.000969922
CAM210_map3	0002.CSV	3583.24	0.00108015
CAM210_map3	0002.CSV	3587.1	0.00117699
CAM210_map3	0002.CSV	3590.96	0.00112417
CAM210_map3	0002.CSV	3594.81	0.000990279
CAM210_map3	0002.CSV	3598.67	0.000977227
CAM210_map3	0002.CSV	3602.53	0.000759599
CAM210_map3	0002.CSV	3606.39	0.000196728
CAM210_map3	0002.CSV	3610.24	-0.000290853
CAM210_map3	0002.CSV	3614.1	-0.000333399
CAM210_map3	0002.CSV	3617.96	3.33341e-05
CAM210_map3	0002.CSV	3621.81	0.000201104
CAM210_map3	0002.CSV	3625.67	-0.000108202
CAM210_map3	0002.CSV	3629.53	-0.000181934
CAM210_map3	0002.CSV	3633.39	0.000127618
CAM210_map3	0002.CSV	3637.24	9.92146e-05
CAM210_map3	0002.CSV	3641.1	-0.000256448
CAM210_map3	0002.CSV	3644.96	-0.00059822
CAM210_map3	0002.CSV	3648.81	-0.000252309
CAM210_map3	0002.CSV	3652.67	0.000574195
CAM210_map3	0002.CSV	3656.53	0.000857095
CAM210_map3	0002.CSV	3660.38	0.000643376
CAM210_map3	0002.CSV	3664.24	1.92513e-05
CAM210_map3	0002.CSV	3668.1	-0.000713452
CAM210_map3	0002.CSV	3671.96	-0.000961214
CAM210_map3	0002.CSV	3675.81	-0.000367268
CAM210_map3	0002.CSV	3679.67	7.41935e-05
CAM210_map3	0002.CSV	3683.53	3.11803e-05
CAM210_map3	0002.CSV	3687.38	0.000116349
CAM210_map3	0002.CSV	3691.24	0.000601003
CAM210_map3	0002.CSV	3695.1	0.000663486
CAM210_map3	0002.CSV	3698.95	0.000271386
CAM210_map3	0002.CSV	3702.81	-0.000190744
CAM210_map3	0002.CSV	3706.67	-0.000587632
CAM210_map3	0002.CSV	3710.53	-0.000553813
CAM210_map3	0002.CSV	3714.38	-0.000201607
CAM210_map3	0002.CSV	3718.24	-0.000268038
CAM210_map3	0002.CSV	3722.1	-0.00052724
CAM210_map3	0002.CSV	3725.95	-0.000624194
CAM210_map3	0002.CSV	3729.81	-0.000567679
CAM210_map3	0002.CSV	3733.67	-0.000107109
CAM210_map3	0002.CSV	3737.53	0.000306167
CAM210_map3	0002.CSV	3741.38	-0.000331611
CAM210_map3	0002.CSV	3745.24	-0.00140959
CAM210_map3	0002.CSV	3749.1	-0.00161823
CAM210_map3	0002.CSV	3752.95	-0.00080848
CAM210_map3	0002.CSV	3756.81	-0.000299561
CAM210_map3	0002.CSV	3760.67	-0.000223332
CAM210_map3	0002.CSV	3764.53	-0.000273071
CAM210_map3	0002.CSV	3768.38	-0.000191737
CAM210_map3	0002.CSV	3772.24	-0.000111813
CAM210_map3	0002.CSV	3776.1	-0.000182961
CAM210_map3	0002.CSV	3779.95	-0.000186637
CAM210_map3	0002.CSV	3783.81	-7.80236e-05
CAM210_map3	0002.CSV	3787.67	-8.60737e-05
CAM210_map3	0002.CSV	3791.53	-0.000380411
CAM210_map3	0002.CSV	3795.38	-0.000850083
CAM210_map3	0002.CSV	3799.24	-0.00106296
CAM210_map3	0002.CSV	3803.1	-0.00067971
CAM210_map3	0002.CSV	3806.95	-0.000316878
CAM210_map3	0002.CSV	3810.81	-0.000449496
CAM210_map3	0002.CSV	3814.67	-0.000774281
CAM210_map3	0002.CSV	3818.53	-0.00082323
CAM210_map3	0002.CSV	3822.38	-0.000595838
CAM210_map3	0002.CSV	3826.24	-0.00061933
CAM210_map3	0002.CSV	3830.1	-0.000810828
CAM210_map3	0002.CSV	3833.95	-0.000907851
CAM210_map3	0002.CSV	3837.81	-0.000656684
CAM210_map3	0002.CSV	3841.67	-0.000315421
CAM210_map3	0002.CSV	3845.53	-0.00059693
CAM210_map3	0002.CSV	3849.38	-0.00120989
CAM210_map3	0002.CSV	3853.24	-0.00126461
CAM210_map3	0002.CSV	3857.1	-0.000889929
CAM210_map3	0002.CSV	3860.95	-0.0010591
CAM210_map3	0002.CSV	3864.81	-0.0012916
CAM210_map3	0002.CSV	3868.67	-0.00117493
CAM210_map3	0002.CSV	3872.52	-0.00100016
CAM210_map3	0002.CSV	3876.38	-0.00110097
CAM210_map3	0002.CSV	3880.24	-0.00113273
CAM210_map3	0002.CSV	3884.1	-0.000869659
CAM210_map3	0002.CSV	3887.95	-0.000726882
CAM210_map3	0002.CSV	3891.81	-0.000836656
CAM210_map3	0002.CSV	3895.67	-0.00107913
CAM210_map3	0002.CSV	3899.52	-0.00119066
CAM210_map3	0002.CSV	3903.38	-0.000761051
CAM210_map3	0002.CSV	3907.24	-0.000526115
CAM210_map3	0002.CSV	3911.1	-0.000839335
CAM210_map3	0002.CSV	3914.95	-0.00112989
CAM210_map3	0002.CSV	3918.81	-0.00108835
CAM210_map3	0002.CSV	3922.67	-0.000951098
CAM210_map3	0002.CSV	3926.52	-0.000915456
CAM210_map3	0002.CSV	3930.38	-0.000789926
CAM210_map3	0002.CSV	3934.24	-0.000635708
CAM210_map3	0002.CSV	3938.09	-0.000697938
CAM210_map3	0002.CSV	3941.95	-0.000822965
CAM210_map3	0002.CSV	3945.81	-0.000778515
CAM210_map3	0002.CSV	3949.67	-0.000627172
CAM210_map3	0002.CSV	3953.52	-0.000569598
CAM210_map3	0002.CSV	3957.38	-0.000633855
CAM210_map3	0002.CSV	3961.24	-0.000709053
CAM210_map3	0002.CSV	3965.09	-0.000748813
CAM210_map3	0002.CSV	3968.95	-0.000720961
CAM210_map3	0002.CSV	3972.81	-0.000608875
CAM210_map3	0002.CSV	3976.67	-0.000525155
CAM210_map3	0002.CSV	3980.52	-0.000512811
CAM210_map3	0002.CSV	3984.38	-0.000503246
CAM210_map3	0002.CSV	3988.24	-0.000493582
CAM210_map3	0002.CSV	3992.09	-0.000466111
CAM210_map3	0002.CSV	3995.95	-0.000437712
CAM210_map3	0002.CSV	3999.81	-0.00045168
CAM210_map3	0003.CSV	674.992	0.0290433
CAM210_map3	0003.CSV	678.849	0.0296221
CAM210_map3	0003.CSV	682.706	0.0302086
CAM210_map3	0003.CSV	686.563	0.0311244
CAM210_map3	0003.CSV	690.42	0.0324552
CAM210_map3	0003.CSV	694.277	0.0345649
CAM210_map3	0003.CSV	698.134	0.038219
CAM210_map3	0003.CSV	701.991	0.0455804
CAM210_map3	0003.CSV	705.849	0.0588623
CAM210_map3	0003.CSV	709.706	0.0711809
CAM210_map3	0003.CSV	713.563	0.0682122
CAM210_map3	0003.CSV	717.42	0.0511083
CAM210_map3	0003.CSV	721.277	0.0358132
CAM210_map3	0003.CSV	725.134	0.0291441
CAM210_map3	0003.CSV	728.991	0.0269807
CAM210_map3	0003.CSV	732.848	0.0259209
CAM210_map3	0003.CSV	736.705	0.0252658
CAM210_map3	0003.CSV	740.562	0.0250011
CAM210_map3	0003.CSV	744.42	0.0251781
CAM210_map3	0003.CSV	748.277	0.0257477
CAM210_map3	0003.CSV	752.134	0.0264185
CAM210_map3	0003.CSV	755.991	0.0269378
CAM210_map3	0003.CSV	759.848	0.0274402
CAM210_map3	0003.CSV	763.705	0.0281573
CAM210_map3	0003.CSV	767.562	0.0289545
CAM210_map3	0003.CSV	771.419	0.0295829
CAM210_map3	0003.CSV	775.276	0.0300174
CAM210_map3	0003.CSV	779.133	0.0302835
CAM210_map3	0003.CSV	782.99	0.0304105
CAM210_map3	0003.CSV	786.848	0.0305702
CAM210_map3	0003.CSV	790.705	0.0309092
CAM210_map3	0003.CSV	794.562	0.0314391
CAM210_map3	0003.CSV	798.419	0.032093
CAM210_map3	0003.CSV	802.276	0.0327817
CAM210_map3	0003.CSV	806.133	0.0335186
CAM210_map3	0003.CSV	809.99	0.0343663
CAM210_map3	0003.CSV	813.847	0.0353369
CAM210_map3	0003.CSV	817.704	0.0365099
CAM210_map3	0003.CSV	821.562	0.0379828
CAM210_map3	0003.CSV	825.419	0.0397541
CAM210_map3	0003.CSV	829.276	0.0417759
CAM210_map3	0003.CSV	833.133	0.0441267
CAM210_map3	0003.CSV	836.99	0.0473087
CAM210_map3	0003.CSV	840.847	0.0521057
CAM210_map3	0003.CSV	844.704	0.0578518
CAM210_map3	0003.CSV	848.561	0.0627622
CAM210_map3	0003.CSV	852.418	0.0684816
CAM210_map3	0003.CSV	856.275	0.0794253
CAM210_map3	0003.CSV	860.132	0.0978816
CAM210_map3	0003.CSV	863.99	0.122978
CAM210_map3	0003.CSV	867.847	0.148069
CAM210_map3	0003.CSV	871.704	0.15874
CAM210_map3	0003.CSV	875.561	0.145717
CAM210_map3	0003.CSV	879.418	0.115511
CAM210_map3	0003.CSV	883.275	0.0794065
CAM210_map3	0003.CSV	887.132	0.0480387
CAM210_map3	0003.CSV	890.989	0.0299182
CAM210_map3	0003.CSV	894.846	0.0241114
CAM210_map3	0003.CSV	898.703	0.0236107
CAM210_map3	0003.CSV	902.561	0.0241044
CAM210_map3	0003.CSV	906.418	0.0246466
CAM210_map3	0003.CSV	910.275	0.0251609
CAM210_map3	0003.CSV	914.132	0.0256697
CAM210_map3	0003.CSV	917.989	0.0261783
CAM210_map3	0003.CSV	921.846	0.0266835
CAM210_map3	0003.CSV	925.703	0.0272371
CAM210_map3	0003.CSV	929.56	0.0278385
CAM210_map3	0003.CSV	933.417	0.0283931
CAM210_map3	0003.CSV	937.274	0.028807
CAM210_map3	0003.CSV	941.131	0.0290927
CAM210_map3	0003.CSV	944.989	0.0293849
CAM210_map3	0003.CSV	948.846	0.0298089
CAM210_map3	0003.CSV	952.703	0.0303481
CAM210_map3	0003.CSV	956.56	0.0308294
CAM210_map3	0003.CSV	960.417	0.0311337
CAM210_map3	0003.CSV	964.274	0.0314006
CAM210_map3	0003.CSV	968.131	0.0318106
CAM210_map3	0003.CSV	971.988	0.032362
CAM210_map3	0003.CSV	975.845	0.0329562
CAM210_map3	0003.CSV	979.702	0.0335537
CAM210_map3	0003.CSV	983.559	0.0341944
CAM210_map3	0003.CSV	987.417	0.0349062
CAM210_map3	0003.CSV	991.274	0.0356732
CAM210_map3	0003.CSV	995.131	0.0364391
CAM210_map3	0003.CSV	998.988	0.0371362
CAM210_map3	0003.CSV	1002.85	0.0377786
CAM210_map3	0003.CSV	1006.7	0.038423
CAM210_map3	0003.CSV	1010.56	0.0390696
CAM210_map3	0003.CSV	1014.42	0.0396771
CAM210_map3	0003.CSV	1018.27	0.0402345
CAM210_map3	0003.CSV	1022.13	0.0407631
CAM210_map3	0003.CSV	1025.99	0.0412674
CAM210_map3	0003.CSV	1029.85	0.0417477
CAM210_map3	0003.CSV	1033.7	0.0422294
CAM210_map3	0003.CSV	1037.56	0.0427061
CAM210_map3	0003.CSV	1041.42	0.0431707
CAM210_map3	0003.CSV	1045.27	0.0436443
CAM210_map3	0003.CSV	1049.13	0.0441107
CAM210_map3	0003.CSV	1052.99	0.0445384
CAM210_map3	0003.CSV	1056.84	0.0449967
CAM210_map3	0003.CSV	1060.7	0.0456132
CAM210_map3	0003.CSV	1064.56	0.046385
CAM210_map3	0003.CSV	1068.42	0.0472096
CAM210_map3	0003.CSV	1072.27	0.0480788
CAM210_map3	0003.CSV	1076.13	0.0490036
CAM210_map3	0003.CSV	1079.99	0.0499074
CAM210_map3	0003.CSV	1083.84	0.050682
CAM210_map3	0003.CSV	1087.7	0.0511177
CAM210_map3	0003.CSV	1091.56	0.0510193
CAM210_map3	0003.CSV	1095.41	0.0505565
CAM210_map3	0003.CSV	1099.27	0.0501635
CAM210_map3	0003.CSV	1103.13	0.0501585
CAM210_map3	0003.CSV	1106.99	0.0505541
CAM210_map3	0003.CSV	1110.84	0.0510065
CAM210_map3	0003.CSV	1114.7	0.0510576
CAM210_map3	0003.CSV	1118.56	0.0506914
CAM210_map3	0003.CSV	1122.41	0.050337
CAM210_map3	0003.CSV	1126.27	0.0502812
CAM210_map3	0003.CSV	1130.13	0.050459
CAM210_map3	0003.CSV	1133.99	0.0507427
CAM210_map3	0003.CSV	1137.84	0.051109
CAM210_map3	0003.CSV	1141.7	0.0515928
CAM210_map3	0003.CSV	1145.56	0.0521801
CAM210_map3	0003.CSV	1149.41	0.0527809
CAM210_map3	0003.CSV	1153.27	0.0533503
CAM210_map3	0003.CSV	1157.13	0.0538937
CAM210_map3	0003.CSV	1160.99	0.0543812
CAM210_map3	0003.CSV	1164.84	0.0547889
CAM210_map3	0003.CSV	1168.7	0.0551173
CAM210_map3	0003.CSV	1172.56	0.0553894
CAM210_map3	0003.CSV	1176.41	0.0556254
CAM210_map3	0003.CSV	1180.27	0.0557918
CAM210_map3	0003.CSV	1184.13	0.0558517
CAM210_map3	0003.CSV	1187.99	0.0558246
CAM210_map3	0003.CSV	1191.84	0.0557462
CAM210_map3	0003.CSV	1195.7	0.0557019
CAM210_map3	0003.CSV	1199.56	0.0558201
CAM210_map3	0003.CSV	1203.41	0.0561518
CAM210_map3	0003.CSV	1207.27	0.0566706
CAM210_map3	0003.CSV	1211.13	0.0573323
CAM210_map3	0003.CSV	1214.98	0.0580679
CAM210_map3	0003.CSV	1218.84	0.0588351
CAM210_map3	0003.CSV	1222.7	0.0596554
CAM210_map3	0003.CSV	1226.56	0.0605769
CAM210_map3	0003.CSV	1230.41	0.0615984
CAM210_map3	0003.CSV	1234.27	0.0626382
CAM210_map3	0003.CSV	1238.13	0.0636411
CAM210_map3	0003.CSV	1241.98	0.0646466
CAM210_map3	0003.CSV	1245.84	0.0656865
CAM210_map3	0003.CSV	1249.7	0.0667525
CAM210_map3	0003.CSV	1253.56	0.0678381
CAM210_map3	0003.CSV	1257.41	0.0689475
CAM210_map3	0003.CSV	1261.27	0.0701152
CAM210_map3	0003.CSV	1265.13	0.0714244
CAM210_map3	0003.CSV	1268.98	0.0729531
CAM210_map3	0003.CSV	1272.84	0.0746448
CAM210_map3	0003.CSV	1276.7	0.0763716
CAM210_map3	0003.CSV	1280.56	0.0781387
CAM210_map3	0003.CSV	1284.41	0.080045
CAM210_map3	0003.CSV	1288.27	0.0821676
CAM210_map3	0003.CSV	1292.13	0.0844559
CAM210_map3	0003.CSV	1295.98	0.0867957
CAM210_map3	0003.CSV	1299.84	0.0891199
CAM210_map3	0003.CSV	1303.7	0.0914354
CAM210_map3	0003.CSV	1307.56	0.0938632
CAM210_map3	0003.CSV	1311.41	0.0965426
CAM210_map3	0003.CSV	1315.27	0.0994952
CAM210_map3	0003.CSV	1319.13	0.102532
CAM210_map3	0003.CSV	1322.98	0.105461
CAM210_map3	0003.CSV	1326.84	0.108473
CAM210_map3	0003.CSV	1330.7	0.111768
CAM210_map3	0003.CSV	1334.56	0.115453
CAM210_map3	0003.CSV	1338.41	0.12004
CAM210_map3	0003.CSV	1342.27	0.125165
CAM210_map3	0003.CSV	1346.13	0.129998
CAM210_map3	0003.CSV	1349.98	0.135116
CAM210_map3	0003.CSV	1353.84	0.140871
CAM210_map3	0003.CSV	1357.7	0.147273
CAM210_map3	0003.CSV	1361.56	0.155056
CAM210_map3	0003.CSV	1365.41	0.163713
CAM210_map3	0003.CSV	1369.27	0.172006
CAM210_map3	0003.CSV	1373.13	0.181166
CAM210_map3	0003.CSV	1376.98	0.191078
CAM210_map3	0003.CSV	1380.84	0.199517
CAM210_map3	0003.CSV	1384.7	0.207122
CAM210_map3	0003.CSV	1388.56	0.214598
CAM210_map3	0003.CSV	1392.41	0.220282
CAM210_map3	0003.CSV	1396.27	0.223154
CAM210_map3	0003.CSV	1400.13	0.223182
CAM210_map3	0003.CSV	1403.98	0.220916
CAM210_map3	0003.CSV	1407.84	0.216579
CAM210_map3	0003.CSV	1411.7	0.21054
CAM210_map3	0003.CSV	1415.55	0.202885
CAM210_map3	0003.CSV	1419.41	0.193168
CAM210_map3	0003.CSV	1423.27	0.184361
CAM210_map3	0003.CSV	1427.12	0.178236
CAM210_map3	0003.CSV	1430.98	0.172873
CAM210_map3	0003.CSV	1434.84	0.166761
CAM210_map3	0003.CSV	1438.7	0.160324
CAM210_map3	0003.CSV	1442.55	0.15493
CAM210_map3	0003.CSV	1446.41	0.149859
CAM210_map3	0003.CSV	1450.27	0.144731
CAM210_map3	0003.CSV	1454.12	0.13932
CAM210_map3	0003.CSV	1457.98	0.132277
CAM210_map3	0003.CSV	1461.84	0.126114
CAM210_map3	0003.CSV	1465.7	0.121678
CAM210_map3	0003.CSV	1469.55	0.116762
CAM210_map3	0003.CSV	1473.41	0.109423
CAM210_map3	0003.CSV	1477.27	0.101838
CAM210_map3	0003.CSV	1481.12	0.0967895
CAM210_map3	0003.CSV	1484.98	0.0925367
CAM210_map3	0003.CSV	1488.84	0.0873903
CAM210_map3	0003.CSV	1492.7	0.0820208
CAM210_map3	0003.CSV	1496.55	0.0774843
CAM210_map3	0003.CSV	1500.41	0.0736064
CAM210_map3	0003.CSV	1504.27	0.0701724
CAM210_map3	0003.CSV	1508.12	0.0658619
CAM210_map3	0003.CSV	1511.98	0.0620596
CAM210_map3	0003.CSV	1515.84	0.0595181
CAM210_map3	0003.CSV	1519.7	0.0566149
CAM210_map3	0003.CSV	1523.55	0.0536593
CAM210_map3	0003.CSV	1527.41	0.0521931
CAM210_map3	0003.CSV	1531.27	0.0521401
CAM210_map3	0003.CSV	1535.12	0.0529076
CAM210_map3	0003.CSV	1538.98	0.0523322
CAM210_map3	0003.CSV	1542.84	0.0465741
CAM210_map3	0003.CSV	1546.7	0.0403425
CAM210_map3	0003.CSV	1550.55	0.0360922
CAM210_map3	0003.CSV	1554.41	0.0325277
CAM210_map3	0003.CSV	1558.27	0.0296257
CAM210_map3	0003.CSV	1562.12	0.0286961
CAM210_map3	0003.CSV	1565.98	0.0294875
CAM210_map3	0003.CSV	1569.84	0.0314232
CAM210_map3	0003.CSV	1573.69	0.0332765
CAM210_map3	0003.CSV	1577.55	0.0327323
CAM210_map3	0003.CSV	1581.41	0.029682
CAM210_map3	0003.CSV	1585.27	0.0259238
CAM210_map3	0003.CSV	1589.12	0.0225595
CAM210_map3	0003.CSV	1592.98	0.0200938
CAM210_map3	0003.CSV	1596.84	0.0185247
CAM210_map3	0003.CSV	1600.69	0.0176054
CAM210_map3	0003.CSV	1604.55	0.017083
CAM210_map3	0003.CSV	1608.41	0.0167664
CAM210_map3	0003.CSV	1612.27	0.0165402
CAM210_map3	0003.CSV	1616.12	0.0163832
CAM210_map3	0003.CSV	1619.98	0.0162092
CAM210_map3	0003.CSV	1623.84	0.0158866
CAM210_map3	0003.CSV	1627.69	0.0154417
CAM210_map3	0003.CSV	1631.55	0.015003
CAM210_map3	0003.CSV	1635.41	0.0146752
CAM210_map3	0003.CSV	1639.27	0.0143721
CAM210_map3	0003.CSV	1643.12	0.0140082
CAM210_map3	0003.CSV	1646.98	0.0137192
CAM210_map3	0003.CSV	1650.84	0.0136407
CAM210_map3	0003.CSV	1654.69	0.0135747
CAM210_map3	0003.CSV	1658.55	0.0133387
CAM210_map3	0003.CSV	1662.41	0.0130484
CAM210_map3	0003.CSV	1666.27	0.0128194
CAM210_map3	0003.CSV	1670.12	0.0127445
CAM210_map3	0003.CSV	1673.98	0.0127056
CAM210_map3	0003.CSV	1677.84	0.0125176
CAM210_map3	0003.CSV	1681.69	0.0123847
CAM210_map3	0003.CSV	1685.55	0.0124719
CAM210_map3	0003.CSV	1689.41	0.0123719
CAM210_map3	0003.CSV	1693.27	0.0120712
CAM210_map3	0003.CSV	1697.12	0.0119754
CAM210_map3	0003.CSV	1700.98	0.0122705
CAM210_map3	0003.CSV	1704.84	0.0123522
CAM210_map3	0003.CSV	1708.69	0.0121295
CAM210_map3	0003.CSV	1712.55	0.0119654
CAM210_map3	0003.CSV	1716.41	0.012198
CAM210_map3	0003.CSV	1720.27	0.0124714
CAM210_map3	0003.CSV	1724.12	0.0123644
[truncated: 54,096 more rows]

## Sheet: CAM210_map4
Map	Select spectrum number	Wavenumbers	Absorbance
CAM210_map4	0001.CSV	674.992	0.089737
CAM210_map4	0001.CSV	678.849	0.0888184
CAM210_map4	0001.CSV	682.706	0.0882784
CAM210_map4	0001.CSV	686.563	0.0883884
CAM210_map4	0001.CSV	690.42	0.0889835
CAM210_map4	0001.CSV	694.277	0.0890057
CAM210_map4	0001.CSV	698.134	0.0875604
CAM210_map4	0001.CSV	701.991	0.0851612
CAM210_map4	0001.CSV	705.849	0.0829335
CAM210_map4	0001.CSV	709.706	0.08149
CAM210_map4	0001.CSV	713.563	0.0809835
CAM210_map4	0001.CSV	717.42	0.0813667
CAM210_map4	0001.CSV	721.277	0.0821235
CAM210_map4	0001.CSV	725.134	0.0823189
CAM210_map4	0001.CSV	728.991	0.0815611
CAM210_map4	0001.CSV	732.848	0.0803954
CAM210_map4	0001.CSV	736.705	0.0793358
CAM210_map4	0001.CSV	740.562	0.0783868
CAM210_map4	0001.CSV	744.42	0.0778616
CAM210_map4	0001.CSV	748.277	0.0780853
CAM210_map4	0001.CSV	752.134	0.0786635
CAM210_map4	0001.CSV	755.991	0.0790498
CAM210_map4	0001.CSV	759.848	0.0793401
CAM210_map4	0001.CSV	763.705	0.0800667
CAM210_map4	0001.CSV	767.562	0.0815081
CAM210_map4	0001.CSV	771.419	0.0836734
CAM210_map4	0001.CSV	775.276	0.0860357
CAM210_map4	0001.CSV	779.133	0.0868945
CAM210_map4	0001.CSV	782.99	0.0854228
CAM210_map4	0001.CSV	786.848	0.0839799
CAM210_map4	0001.CSV	790.705	0.0856199
CAM210_map4	0001.CSV	794.562	0.0904281
CAM210_map4	0001.CSV	798.419	0.0949785
CAM210_map4	0001.CSV	802.276	0.0953803
CAM210_map4	0001.CSV	806.133	0.0916624
CAM210_map4	0001.CSV	809.99	0.0875186
CAM210_map4	0001.CSV	813.847	0.0866217
CAM210_map4	0001.CSV	817.704	0.0911574
CAM210_map4	0001.CSV	821.562	0.100654
CAM210_map4	0001.CSV	825.419	0.109623
CAM210_map4	0001.CSV	829.276	0.110559
CAM210_map4	0001.CSV	833.133	0.101984
CAM210_map4	0001.CSV	836.99	0.0890931
CAM210_map4	0001.CSV	840.847	0.0771037
CAM210_map4	0001.CSV	844.704	0.0681146
CAM210_map4	0001.CSV	848.561	0.0622808
CAM210_map4	0001.CSV	852.418	0.0592215
CAM210_map4	0001.CSV	856.275	0.05836
CAM210_map4	0001.CSV	860.132	0.0587217
CAM210_map4	0001.CSV	863.99	0.0592665
CAM210_map4	0001.CSV	867.847	0.0597792
CAM210_map4	0001.CSV	871.704	0.0606119
CAM210_map4	0001.CSV	875.561	0.061348
CAM210_map4	0001.CSV	879.418	0.0610525
CAM210_map4	0001.CSV	883.275	0.0598001
CAM210_map4	0001.CSV	887.132	0.0585135
CAM210_map4	0001.CSV	890.989	0.0577677
CAM210_map4	0001.CSV	894.846	0.0576328
CAM210_map4	0001.CSV	898.703	0.0580863
CAM210_map4	0001.CSV	902.561	0.0591396
CAM210_map4	0001.CSV	906.418	0.0607036
CAM210_map4	0001.CSV	910.275	0.062525
CAM210_map4	0001.CSV	914.132	0.0642451
CAM210_map4	0001.CSV	917.989	0.0656364
CAM210_map4	0001.CSV	921.846	0.0668143
CAM210_map4	0001.CSV	925.703	0.068026
CAM210_map4	0001.CSV	929.56	0.069328
CAM210_map4	0001.CSV	933.417	0.0705514
CAM210_map4	0001.CSV	937.274	0.0715203
CAM210_map4	0001.CSV	941.131	0.0722725
CAM210_map4	0001.CSV	944.989	0.0730089
CAM210_map4	0001.CSV	948.846	0.0738927
CAM210_map4	0001.CSV	952.703	0.0748769
CAM210_map4	0001.CSV	956.56	0.0757054
CAM210_map4	0001.CSV	960.417	0.076221
CAM210_map4	0001.CSV	964.274	0.0766208
CAM210_map4	0001.CSV	968.131	0.0772385
CAM210_map4	0001.CSV	971.988	0.0782208
CAM210_map4	0001.CSV	975.845	0.0796279
CAM210_map4	0001.CSV	979.702	0.081586
CAM210_map4	0001.CSV	983.559	0.0842032
CAM210_map4	0001.CSV	987.417	0.0875168
CAM210_map4	0001.CSV	991.274	0.0915469
CAM210_map4	0001.CSV	995.131	0.0964033
CAM210_map4	0001.CSV	998.988	0.102364
CAM210_map4	0001.CSV	1002.85	0.109736
CAM210_map4	0001.CSV	1006.7	0.118003
CAM210_map4	0001.CSV	1010.56	0.125178
CAM210_map4	0001.CSV	1014.42	0.129903
CAM210_map4	0001.CSV	1018.27	0.133644
CAM210_map4	0001.CSV	1022.13	0.138434
CAM210_map4	0001.CSV	1025.99	0.144198
CAM210_map4	0001.CSV	1029.85	0.149538
CAM210_map4	0001.CSV	1033.7	0.153234
CAM210_map4	0001.CSV	1037.56	0.154619
CAM210_map4	0001.CSV	1041.42	0.153711
CAM210_map4	0001.CSV	1045.27	0.151581
CAM210_map4	0001.CSV	1049.13	0.150138
CAM210_map4	0001.CSV	1052.99	0.151036
CAM210_map4	0001.CSV	1056.84	0.154694
CAM210_map4	0001.CSV	1060.7	0.160344
CAM210_map4	0001.CSV	1064.56	0.166975
CAM210_map4	0001.CSV	1068.42	0.1739
CAM210_map4	0001.CSV	1072.27	0.180356
CAM210_map4	0001.CSV	1076.13	0.185147
CAM210_map4	0001.CSV	1079.99	0.18714
CAM210_map4	0001.CSV	1083.84	0.185933
CAM210_map4	0001.CSV	1087.7	0.182136
CAM210_map4	0001.CSV	1091.56	0.177154
CAM210_map4	0001.CSV	1095.41	0.172204
CAM210_map4	0001.CSV	1099.27	0.167621
CAM210_map4	0001.CSV	1103.13	0.163114
CAM210_map4	0001.CSV	1106.99	0.158229
CAM210_map4	0001.CSV	1110.84	0.152715
CAM210_map4	0001.CSV	1114.7	0.146586
CAM210_map4	0001.CSV	1118.56	0.139979
CAM210_map4	0001.CSV	1122.41	0.133132
CAM210_map4	0001.CSV	1126.27	0.126332
CAM210_map4	0001.CSV	1130.13	0.119843
CAM210_map4	0001.CSV	1133.99	0.113984
CAM210_map4	0001.CSV	1137.84	0.109121
CAM210_map4	0001.CSV	1141.7	0.105429
CAM210_map4	0001.CSV	1145.56	0.102629
CAM210_map4	0001.CSV	1149.41	0.100096
CAM210_map4	0001.CSV	1153.27	0.0975696
CAM210_map4	0001.CSV	1157.13	0.0956803
CAM210_map4	0001.CSV	1160.99	0.0951218
CAM210_map4	0001.CSV	1164.84	0.0957711
CAM210_map4	0001.CSV	1168.7	0.0975822
CAM210_map4	0001.CSV	1172.56	0.101303
CAM210_map4	0001.CSV	1176.41	0.10647
CAM210_map4	0001.CSV	1180.27	0.10919
CAM210_map4	0001.CSV	1184.13	0.105157
CAM210_map4	0001.CSV	1187.99	0.0951995
CAM210_map4	0001.CSV	1191.84	0.0843494
CAM210_map4	0001.CSV	1195.7	0.0765854
CAM210_map4	0001.CSV	1199.56	0.0728777
CAM210_map4	0001.CSV	1203.41	0.072446
CAM210_map4	0001.CSV	1207.27	0.0742844
CAM210_map4	0001.CSV	1211.13	0.07765
CAM210_map4	0001.CSV	1214.98	0.0818663
CAM210_map4	0001.CSV	1218.84	0.0864117
CAM210_map4	0001.CSV	1222.7	0.0910524
CAM210_map4	0001.CSV	1226.56	0.0955525
CAM210_map4	0001.CSV	1230.41	0.0994528
CAM210_map4	0001.CSV	1234.27	0.102306
CAM210_map4	0001.CSV	1238.13	0.104016
CAM210_map4	0001.CSV	1241.98	0.104718
CAM210_map4	0001.CSV	1245.84	0.103957
CAM210_map4	0001.CSV	1249.7	0.100394
CAM210_map4	0001.CSV	1253.56	0.0931161
CAM210_map4	0001.CSV	1257.41	0.0830376
CAM210_map4	0001.CSV	1261.27	0.0728069
CAM210_map4	0001.CSV	1265.13	0.0650831
CAM210_map4	0001.CSV	1268.98	0.0606064
CAM210_map4	0001.CSV	1272.84	0.0586228
CAM210_map4	0001.CSV	1276.7	0.0582642
CAM210_map4	0001.CSV	1280.56	0.0590848
CAM210_map4	0001.CSV	1284.41	0.0608343
CAM210_map4	0001.CSV	1288.27	0.062967
CAM210_map4	0001.CSV	1292.13	0.064598
CAM210_map4	0001.CSV	1295.98	0.0650068
CAM210_map4	0001.CSV	1299.84	0.0639779
CAM210_map4	0001.CSV	1303.7	0.0618905
CAM210_map4	0001.CSV	1307.56	0.0595129
CAM210_map4	0001.CSV	1311.41	0.0574007
CAM210_map4	0001.CSV	1315.27	0.0557476
CAM210_map4	0001.CSV	1319.13	0.0546677
CAM210_map4	0001.CSV	1322.98	0.0541234
CAM210_map4	0001.CSV	1326.84	0.05389
CAM210_map4	0001.CSV	1330.7	0.0537902
CAM210_map4	0001.CSV	1334.56	0.0537522
CAM210_map4	0001.CSV	1338.41	0.0537727
CAM210_map4	0001.CSV	1342.27	0.0538144
CAM210_map4	0001.CSV	1346.13	0.0539511
CAM210_map4	0001.CSV	1349.98	0.0545564
CAM210_map4	0001.CSV	1353.84	0.0560528
CAM210_map4	0001.CSV	1357.7	0.0583051
CAM210_map4	0001.CSV	1361.56	0.0601706
CAM210_map4	0001.CSV	1365.41	0.0603156
CAM210_map4	0001.CSV	1369.27	0.0594715
CAM210_map4	0001.CSV	1373.13	0.0593117
CAM210_map4	0001.CSV	1376.98	0.0602074
CAM210_map4	0001.CSV	1380.84	0.0609887
CAM210_map4	0001.CSV	1384.7	0.0607428
CAM210_map4	0001.CSV	1388.56	0.0595837
CAM210_map4	0001.CSV	1392.41	0.0585209
CAM210_map4	0001.CSV	1396.27	0.0584364
CAM210_map4	0001.CSV	1400.13	0.0594191
CAM210_map4	0001.CSV	1403.98	0.061171
CAM210_map4	0001.CSV	1407.84	0.0634674
CAM210_map4	0001.CSV	1411.7	0.0656403
CAM210_map4	0001.CSV	1415.55	0.0671806
CAM210_map4	0001.CSV	1419.41	0.0680326
CAM210_map4	0001.CSV	1423.27	0.0683009
CAM210_map4	0001.CSV	1427.12	0.0686097
CAM210_map4	0001.CSV	1430.98	0.069454
CAM210_map4	0001.CSV	1434.84	0.070786
CAM210_map4	0001.CSV	1438.7	0.0721372
CAM210_map4	0001.CSV	1442.55	0.0734356
CAM210_map4	0001.CSV	1446.41	0.075311
CAM210_map4	0001.CSV	1450.27	0.0777883
CAM210_map4	0001.CSV	1454.12	0.0806595
CAM210_map4	0001.CSV	1457.98	0.0842674
CAM210_map4	0001.CSV	1461.84	0.0865618
CAM210_map4	0001.CSV	1465.7	0.0867326
CAM210_map4	0001.CSV	1469.55	0.0849807
CAM210_map4	0001.CSV	1473.41	0.0796091
CAM210_map4	0001.CSV	1477.27	0.0720627
CAM210_map4	0001.CSV	1481.12	0.0661284
CAM210_map4	0001.CSV	1484.98	0.0616921
CAM210_map4	0001.CSV	1488.84	0.0589344
CAM210_map4	0001.CSV	1492.7	0.0595118
CAM210_map4	0001.CSV	1496.55	0.0643539
CAM210_map4	0001.CSV	1500.41	0.0721061
CAM210_map4	0001.CSV	1504.27	0.0811682
CAM210_map4	0001.CSV	1508.12	0.090141
CAM210_map4	0001.CSV	1511.98	0.089091
CAM210_map4	0001.CSV	1515.84	0.07828
CAM210_map4	0001.CSV	1519.7	0.063212
CAM210_map4	0001.CSV	1523.55	0.0523295
CAM210_map4	0001.CSV	1527.41	0.0503279
CAM210_map4	0001.CSV	1531.27	0.052351
CAM210_map4	0001.CSV	1535.12	0.056026
CAM210_map4	0001.CSV	1538.98	0.0602602
CAM210_map4	0001.CSV	1542.84	0.0620137
CAM210_map4	0001.CSV	1546.7	0.0601337
CAM210_map4	0001.CSV	1550.55	0.0578086
CAM210_map4	0001.CSV	1554.41	0.0560872
CAM210_map4	0001.CSV	1558.27	0.0560089
CAM210_map4	0001.CSV	1562.12	0.0576013
CAM210_map4	0001.CSV	1565.98	0.0599342
CAM210_map4	0001.CSV	1569.84	0.063555
CAM210_map4	0001.CSV	1573.69	0.0675284
CAM210_map4	0001.CSV	1577.55	0.0687452
CAM210_map4	0001.CSV	1581.41	0.0658399
CAM210_map4	0001.CSV	1585.27	0.0609735
CAM210_map4	0001.CSV	1589.12	0.056662
CAM210_map4	0001.CSV	1592.98	0.0546834
CAM210_map4	0001.CSV	1596.84	0.0551964
CAM210_map4	0001.CSV	1600.69	0.0572141
CAM210_map4	0001.CSV	1604.55	0.0593612
CAM210_map4	0001.CSV	1608.41	0.0598711
CAM210_map4	0001.CSV	1612.27	0.0579516
CAM210_map4	0001.CSV	1616.12	0.054313
CAM210_map4	0001.CSV	1619.98	0.0507661
CAM210_map4	0001.CSV	1623.84	0.0487943
CAM210_map4	0001.CSV	1627.69	0.0479632
CAM210_map4	0001.CSV	1631.55	0.0476029
CAM210_map4	0001.CSV	1635.41	0.0476439
CAM210_map4	0001.CSV	1639.27	0.0478815
CAM210_map4	0001.CSV	1643.12	0.0479474
CAM210_map4	0001.CSV	1646.98	0.0480642
CAM210_map4	0001.CSV	1650.84	0.0483639
CAM210_map4	0001.CSV	1654.69	0.0482802
CAM210_map4	0001.CSV	1658.55	0.0476515
CAM210_map4	0001.CSV	1662.41	0.0466963
CAM210_map4	0001.CSV	1666.27	0.045503
CAM210_map4	0001.CSV	1670.12	0.0441335
CAM210_map4	0001.CSV	1673.98	0.0427611
CAM210_map4	0001.CSV	1677.84	0.0416053
CAM210_map4	0001.CSV	1681.69	0.0405254
CAM210_map4	0001.CSV	1685.55	0.0394798
CAM210_map4	0001.CSV	1689.41	0.0387519
CAM210_map4	0001.CSV	1693.27	0.0382778
CAM210_map4	0001.CSV	1697.12	0.0381226
CAM210_map4	0001.CSV	1700.98	0.0385723
CAM210_map4	0001.CSV	1704.84	0.0391915
CAM210_map4	0001.CSV	1708.69	0.0396203
CAM210_map4	0001.CSV	1712.55	0.0400948
CAM210_map4	0001.CSV	1716.41	0.0411717
CAM210_map4	0001.CSV	1720.27	0.0423572
CAM210_map4	0001.CSV	1724.12	0.0428323
CAM210_map4	0001.CSV	1727.98	0.0429767
CAM210_map4	0001.CSV	1731.84	0.0428226
CAM210_map4	0001.CSV	1735.69	0.0418282
CAM210_map4	0001.CSV	1739.55	0.0399498
CAM210_map4	0001.CSV	1743.41	0.037638
CAM210_map4	0001.CSV	1747.27	0.0349763
CAM210_map4	0001.CSV	1751.12	0.0324203
CAM210_map4	0001.CSV	1754.98	0.0307193
CAM210_map4	0001.CSV	1758.84	0.0296793
CAM210_map4	0001.CSV	1762.69	0.02896
CAM210_map4	0001.CSV	1766.55	0.0284609
CAM210_map4	0001.CSV	1770.41	0.0281493
CAM210_map4	0001.CSV	1774.26	0.0279467
CAM210_map4	0001.CSV	1778.12	0.0277132
CAM210_map4	0001.CSV	1781.98	0.027458
CAM210_map4	0001.CSV	1785.84	0.0271979
CAM210_map4	0001.CSV	1789.69	0.0269906
CAM210_map4	0001.CSV	1793.55	0.0269203
CAM210_map4	0001.CSV	1797.41	0.0268806
CAM210_map4	0001.CSV	1801.26	0.0267666
CAM210_map4	0001.CSV	1805.12	0.0266146
CAM210_map4	0001.CSV	1808.98	0.0264966
CAM210_map4	0001.CSV	1812.84	0.026422
CAM210_map4	0001.CSV	1816.69	0.0263296
CAM210_map4	0001.CSV	1820.55	0.0262381
CAM210_map4	0001.CSV	1824.41	0.0262233
CAM210_map4	0001.CSV	1828.26	0.0263186
CAM210_map4	0001.CSV	1832.12	0.0263858
CAM210_map4	0001.CSV	1835.98	0.0263193
CAM210_map4	0001.CSV	1839.84	0.0262493
CAM210_map4	0001.CSV	1843.69	0.026356
CAM210_map4	0001.CSV	1847.55	0.0265488
CAM210_map4	0001.CSV	1851.41	0.0265978
CAM210_map4	0001.CSV	1855.26	0.0265927
CAM210_map4	0001.CSV	1859.12	0.0266198
CAM210_map4	0001.CSV	1862.98	0.0266589
CAM210_map4	0001.CSV	1866.84	0.0268123
CAM210_map4	0001.CSV	1870.69	0.0270392
CAM210_map4	0001.CSV	1874.55	0.0270869
CAM210_map4	0001.CSV	1878.41	0.027038
CAM210_map4	0001.CSV	1882.26	0.027011
CAM210_map4	0001.CSV	1886.12	0.0270046
CAM210_map4	0001.CSV	1889.98	0.0270104
CAM210_map4	0001.CSV	1893.83	0.0269863
CAM210_map4	0001.CSV	1897.69	0.0269037
CAM210_map4	0001.CSV	1901.55	0.0267921
CAM210_map4	0001.CSV	1905.41	0.0267047
CAM210_map4	0001.CSV	1909.26	0.0266499
CAM210_map4	0001.CSV	1913.12	0.0265823
CAM210_map4	0001.CSV	1916.98	0.0265375
CAM210_map4	0001.CSV	1920.83	0.0265689
CAM210_map4	0001.CSV	1924.69	0.0266031
CAM210_map4	0001.CSV	1928.55	0.026587
CAM210_map4	0001.CSV	1932.4	0.0265606
CAM210_map4	0001.CSV	1936.26	0.0265549
CAM210_map4	0001.CSV	1940.12	0.0265967
CAM210_map4	0001.CSV	1943.98	0.0266732
CAM210_map4	0001.CSV	1947.83	0.0266921
CAM210_map4	0001.CSV	1951.69	0.0266678
CAM210_map4	0001.CSV	1955.55	0.0266741
CAM210_map4	0001.CSV	1959.4	0.0266964
CAM210_map4	0001.CSV	1963.26	0.0267172
CAM210_map4	0001.CSV	1967.12	0.0267539
CAM210_map4	0001.CSV	1970.98	0.0267841
CAM210_map4	0001.CSV	1974.83	0.0267991
CAM210_map4	0001.CSV	1978.69	0.0268154
CAM210_map4	0001.CSV	1982.55	0.0268088
CAM210_map4	0001.CSV	1986.4	0.0267896
CAM210_map4	0001.CSV	1990.26	0.0268248
CAM210_map4	0001.CSV	1994.12	0.0268968
CAM210_map4	0001.CSV	1997.98	0.0269207
CAM210_map4	0001.CSV	2001.83	0.0268969
CAM210_map4	0001.CSV	2005.69	0.0268743
CAM210_map4	0001.CSV	2009.55	0.026855
CAM210_map4	0001.CSV	2013.4	0.0268357
CAM210_map4	0001.CSV	2017.26	0.0268543
CAM210_map4	0001.CSV	2021.12	0.0268859
CAM210_map4	0001.CSV	2024.97	0.0268771
CAM210_map4	0001.CSV	2028.83	0.0268417
CAM210_map4	0001.CSV	2032.69	0.0267853
CAM210_map4	0001.CSV	2036.55	0.0267223
CAM210_map4	0001.CSV	2040.4	0.0266942
CAM210_map4	0001.CSV	2044.26	0.0266969
CAM210_map4	0001.CSV	2048.12	0.0266907
CAM210_map4	0001.CSV	2051.97	0.0266726
CAM210_map4	0001.CSV	2055.83	0.0266684
CAM210_map4	0001.CSV	2059.69	0.0266672
CAM210_map4	0001.CSV	2063.55	0.0266371
CAM210_map4	0001.CSV	2067.4	0.0265914
CAM210_map4	0001.CSV	2071.26	0.0265688
CAM210_map4	0001.CSV	2075.12	0.0265594
CAM210_map4	0001.CSV	2078.97	0.0265257
CAM210_map4	0001.CSV	2082.83	0.0264706
CAM210_map4	0001.CSV	2086.69	0.0264188
CAM210_map4	0001.CSV	2090.55	0.0263701
CAM210_map4	0001.CSV	2094.4	0.0263103
CAM210_map4	0001.CSV	2098.26	0.0262509
CAM210_map4	0001.CSV	2102.12	0.0262123
CAM210_map4	0001.CSV	2105.97	0.0261899
CAM210_map4	0001.CSV	2109.83	0.0261584
CAM210_map4	0001.CSV	2113.69	0.0261001
CAM210_map4	0001.CSV	2117.55	0.0260285
CAM210_map4	0001.CSV	2121.4	0.0259739
CAM210_map4	0001.CSV	2125.26	0.025953
CAM210_map4	0001.CSV	2129.12	0.0259448
CAM210_map4	0001.CSV	2132.97	0.025925
CAM210_map4	0001.CSV	2136.83	0.0259043
CAM210_map4	0001.CSV	2140.69	0.0258927
CAM210_map4	0001.CSV	2144.55	0.0258798
CAM210_map4	0001.CSV	2148.4	0.0258601
CAM210_map4	0001.CSV	2152.26	0.0258411
CAM210_map4	0001.CSV	2156.12	0.0258204
CAM210_map4	0001.CSV	2159.97	0.0257868
CAM210_map4	0001.CSV	2163.83	0.0257433
CAM210_map4	0001.CSV	2167.69	0.0257088
CAM210_map4	0001.CSV	2171.55	0.0257061
CAM210_map4	0001.CSV	2175.4	0.0257196
CAM210_map4	0001.CSV	2179.26	0.0257092
CAM210_map4	0001.CSV	2183.12	0.0256771
CAM210_map4	0001.CSV	2186.97	0.025652
CAM210_map4	0001.CSV	2190.83	0.0256417
CAM210_map4	0001.CSV	2194.69	0.0256341
CAM210_map4	0001.CSV	2198.55	0.025617
CAM210_map4	0001.CSV	2202.4	0.0255988
CAM210_map4	0001.CSV	2206.26	0.0255926
CAM210_map4	0001.CSV	2210.12	0.0255957
CAM210_map4	0001.CSV	2213.97	0.0256021
CAM210_map4	0001.CSV	2217.83	0.0256089
CAM210_map4	0001.CSV	2221.69	0.0256037
CAM210_map4	0001.CSV	2225.54	0.025565
CAM210_map4	0001.CSV	2229.4	0.0255039
CAM210_map4	0001.CSV	2233.26	0.0254552
CAM210_map4	0001.CSV	2237.12	0.0254234
CAM210_map4	0001.CSV	2240.97	0.0253944
CAM210_map4	0001.CSV	2244.83	0.0253713
CAM210_map4	0001.CSV	2248.69	0.025359
CAM210_map4	0001.CSV	2252.54	0.0253491
CAM210_map4	0001.CSV	2256.4	0.0253257
CAM210_map4	0001.CSV	2260.26	0.0252828
CAM210_map4	0001.CSV	2264.11	0.0252429
CAM210_map4	0001.CSV	2267.97	0.0252228
CAM210_map4	0001.CSV	2271.83	0.025221
CAM210_map4	0001.CSV	2275.69	0.0252355
CAM210_map4	0001.CSV	2279.54	0.0252279
CAM210_map4	0001.CSV	2283.4	0.0251729
CAM210_map4	0001.CSV	2287.26	0.0251123
CAM210_map4	0001.CSV	2291.11	0.0250667
CAM210_map4	0001.CSV	2294.97	0.025006
CAM210_map4	0001.CSV	2298.83	0.0249048
CAM210_map4	0001.CSV	2302.69	0.0247459
CAM210_map4	0001.CSV	2306.54	0.0245177
CAM210_map4	0001.CSV	2310.4	0.0242044
CAM210_map4	0001.CSV	2314.26	0.0237618
CAM210_map4	0001.CSV	2318.11	0.02313
CAM210_map4	0001.CSV	2321.97	0.0221859
CAM210_map4	0001.CSV	2325.83	0.0208231
CAM210_map4	0001.CSV	2329.69	0.0193011
CAM210_map4	0001.CSV	2333.54	0.0180632
CAM210_map4	0001.CSV	2337.4	0.0173808
CAM210_map4	0001.CSV	2341.26	0.0180673
CAM210_map4	0001.CSV	2345.11	0.0195544
CAM210_map4	0001.CSV	2348.97	0.0196231
CAM210_map4	0001.CSV	2352.83	0.0171893
CAM210_map4	0001.CSV	2356.69	0.0107404
CAM210_map4	0001.CSV	2360.54	0.00362434
CAM210_map4	0001.CSV	2364.4	0.00799489
CAM210_map4	0001.CSV	2368.26	0.0164632
CAM210_map4	0001.CSV	2372.11	0.0216075
CAM210_map4	0001.CSV	2375.97	0.0238443
CAM210_map4	0001.CSV	2379.83	0.024604
CAM210_map4	0001.CSV	2383.69	0.0247512
CAM210_map4	0001.CSV	2387.54	0.024686
CAM210_map4	0001.CSV	2391.4	0.0245875
CAM210_map4	0001.CSV	2395.26	0.0245148
CAM210_map4	0001.CSV	2399.11	0.0244589
CAM210_map4	0001.CSV	2402.97	0.0244115
CAM210_map4	0001.CSV	2406.83	0.0243885
CAM210_map4	0001.CSV	2410.68	0.0243941
CAM210_map4	0001.CSV	2414.54	0.0243941
CAM210_map4	0001.CSV	2418.4	0.0243663
CAM210_map4	0001.CSV	2422.26	0.024325
CAM210_map4	0001.CSV	2426.11	0.0242831
CAM210_map4	0001.CSV	2429.97	0.0242481
CAM210_map4	0001.CSV	2433.83	0.0242245
CAM210_map4	0001.CSV	2437.68	0.0241905
CAM210_map4	0001.CSV	2441.54	0.0241254
CAM210_map4	0001.CSV	2445.4	0.0240515
CAM210_map4	0001.CSV	2449.26	0.0239981
CAM210_map4	0001.CSV	2453.11	0.0239659
CAM210_map4	0001.CSV	2456.97	0.02394
CAM210_map4	0001.CSV	2460.83	0.0239055
CAM210_map4	0001.CSV	2464.68	0.023866
CAM210_map4	0001.CSV	2468.54	0.0238377
CAM210_map4	0001.CSV	2472.4	0.0238227
CAM210_map4	0001.CSV	2476.26	0.0237999
CAM210_map4	0001.CSV	2480.11	0.0237557
CAM210_map4	0001.CSV	2483.97	0.023717
CAM210_map4	0001.CSV	2487.83	0.0236939
CAM210_map4	0001.CSV	2491.68	0.0236631
CAM210_map4	0001.CSV	2495.54	0.0236351
CAM210_map4	0001.CSV	2499.4	0.0236257
CAM210_map4	0001.CSV	2503.26	0.0236236
CAM210_map4	0001.CSV	2507.11	0.0236403
CAM210_map4	0001.CSV	2510.97	0.0236933
CAM210_map4	0001.CSV	2514.83	0.0237657
CAM210_map4	0001.CSV	2518.68	0.0238203
CAM210_map4	0001.CSV	2522.54	0.0238349
CAM210_map4	0001.CSV	2526.4	0.0238239
CAM210_map4	0001.CSV	2530.26	0.0238164
CAM210_map4	0001.CSV	2534.11	0.0238193
CAM210_map4	0001.CSV	2537.97	0.0238254
CAM210_map4	0001.CSV	2541.83	0.0238222
CAM210_map4	0001.CSV	2545.68	0.0237941
CAM210_map4	0001.CSV	2549.54	0.0237564
CAM210_map4	0001.CSV	2553.4	0.0237395
CAM210_map4	0001.CSV	2557.26	0.0237416
CAM210_map4	0001.CSV	2561.11	0.0237363
CAM210_map4	0001.CSV	2564.97	0.0237169
CAM210_map4	0001.CSV	2568.83	0.0237072
CAM210_map4	0001.CSV	2572.68	0.0237156
CAM210_map4	0001.CSV	2576.54	0.0237216
CAM210_map4	0001.CSV	2580.4	0.0237175
CAM210_map4	0001.CSV	2584.25	0.02372
CAM210_map4	0001.CSV	2588.11	0.0237348
CAM210_map4	0001.CSV	2591.97	0.0237538
CAM210_map4	0001.CSV	2595.83	0.0237771
CAM210_map4	0001.CSV	2599.68	0.0238016
CAM210_map4	0001.CSV	2603.54	0.0238121
CAM210_map4	0001.CSV	2607.4	0.0238187
CAM210_map4	0001.CSV	2611.25	0.0238469
CAM210_map4	0001.CSV	2615.11	0.0238875
CAM210_map4	0001.CSV	2618.97	0.0239347
CAM210_map4	0001.CSV	2622.82	0.0240059
CAM210_map4	0001.CSV	2626.68	0.0240818
CAM210_map4	0001.CSV	2630.54	0.0241465
CAM210_map4	0001.CSV	2634.4	0.0242049
CAM210_map4	0001.CSV	2638.25	0.0242197
CAM210_map4	0001.CSV	2642.11	0.0241766
CAM210_map4	0001.CSV	2645.97	0.024128
CAM210_map4	0001.CSV	2649.82	0.0241125
CAM210_map4	0001.CSV	2653.68	0.0241356
CAM210_map4	0001.CSV	2657.54	0.0241886
CAM210_map4	0001.CSV	2661.4	0.0242452
CAM210_map4	0001.CSV	2665.25	0.024305
CAM210_map4	0001.CSV	2669.11	0.0244157
CAM210_map4	0001.CSV	2672.97	0.024595
CAM210_map4	0001.CSV	2676.82	0.0247476
CAM210_map4	0001.CSV	2680.68	0.0247383
CAM210_map4	0001.CSV	2684.54	0.0246102
CAM210_map4	0001.CSV	2688.4	0.024542
CAM210_map4	0001.CSV	2692.25	0.0245727
CAM210_map4	0001.CSV	2696.11	0.0246247
CAM210_map4	0001.CSV	2699.97	0.0246563
CAM210_map4	0001.CSV	2703.82	0.0246979
CAM210_map4	0001.CSV	2707.68	0.0247972
CAM210_map4	0001.CSV	2711.54	0.0249233
CAM210_map4	0001.CSV	2715.4	0.0250479
CAM210_map4	0001.CSV	2719.25	0.0252457
CAM210_map4	0001.CSV	2723.11	0.0255012
CAM210_map4	0001.CSV	2726.97	0.0256155
CAM210_map4	0001.CSV	2730.82	0.0255646
CAM210_map4	0001.CSV	2734.68	0.0255416
CAM210_map4	0001.CSV	2738.54	0.0255958
CAM210_map4	0001.CSV	2742.4	0.0257045
CAM210_map4	0001.CSV	2746.25	0.0258702
CAM210_map4	0001.CSV	2750.11	0.0259694
CAM210_map4	0001.CSV	2753.97	0.025954
CAM210_map4	0001.CSV	2757.82	0.0259411
CAM210_map4	0001.CSV	2761.68	0.0259946
CAM210_map4	0001.CSV	2765.54	0.0261582
CAM210_map4	0001.CSV	2769.39	0.0264766
CAM210_map4	0001.CSV	2773.25	0.0268455
CAM210_map4	0001.CSV	2777.11	0.0271112
CAM210_map4	0001.CSV	2780.97	0.0273562
CAM210_map4	0001.CSV	2784.82	0.0277893
CAM210_map4	0001.CSV	2788.68	0.0283923
CAM210_map4	0001.CSV	2792.54	0.0289778
CAM210_map4	0001.CSV	2796.39	0.0294517
CAM210_map4	0001.CSV	2800.25	0.0298249
CAM210_map4	0001.CSV	2804.11	0.0302182
CAM210_map4	0001.CSV	2807.97	0.0307307
CAM210_map4	0001.CSV	2811.82	0.0312289
CAM210_map4	0001.CSV	2815.68	0.0316492
CAM210_map4	0001.CSV	2819.54	0.0321482
CAM210_map4	0001.CSV	2823.39	0.0327906
CAM210_map4	0001.CSV	2827.25	0.0336324
CAM210_map4	0001.CSV	2831.11	0.0349291
CAM210_map4	0001.CSV	2834.97	0.0369373
CAM210_map4	0001.CSV	2838.82	0.0400626
CAM210_map4	0001.CSV	2842.68	0.0449855
CAM210_map4	0001.CSV	2846.54	0.0508419
CAM210_map4	0001.CSV	2850.39	0.0541559
CAM210_map4	0001.CSV	2854.25	0.0530941
CAM210_map4	0001.CSV	2858.11	0.0501191
CAM210_map4	0001.CSV	2861.97	0.0478522
CAM210_map4	0001.CSV	2865.82	0.0467591
CAM210_map4	0001.CSV	2869.68	0.0462569
CAM210_map4	0001.CSV	2873.54	0.045539
CAM210_map4	0001.CSV	2877.39	0.0444238
CAM210_map4	0001.CSV	2881.25	0.0435599
CAM210_map4	0001.CSV	2885.11	0.0434988
CAM210_map4	0001.CSV	2888.97	0.0442339
CAM210_map4	0001.CSV	2892.82	0.0454918
CAM210_map4	0001.CSV	2896.68	0.047021
CAM210_map4	0001.CSV	2900.54	0.0489206
CAM210_map4	0001.CSV	2904.39	0.0517904
CAM210_map4	0001.CSV	2908.25	0.0565032
CAM210_map4	0001.CSV	2912.11	0.063082
CAM210_map4	0001.CSV	2915.97	0.0689566
CAM210_map4	0001.CSV	2919.82	0.0704948
CAM210_map4	0001.CSV	2923.68	0.0673762
CAM210_map4	0001.CSV	2927.54	0.0623286
CAM210_map4	0001.CSV	2931.39	0.057314
CAM210_map4	0001.CSV	2935.25	0.0529864
CAM210_map4	0001.CSV	2939.11	0.0497873
CAM210_map4	0001.CSV	2942.96	0.0477947
CAM210_map4	0001.CSV	2946.82	0.0466801
CAM210_map4	0001.CSV	2950.68	0.046094
CAM210_map4	0001.CSV	2954.54	0.0455408
CAM210_map4	0001.CSV	2958.39	0.0444297
CAM210_map4	0001.CSV	2962.25	0.0424917
CAM210_map4	0001.CSV	2966.11	0.0398957
CAM210_map4	0001.CSV	2969.96	0.037104
CAM210_map4	0001.CSV	2973.82	0.0344431
CAM210_map4	0001.CSV	2977.68	0.0319129
CAM210_map4	0001.CSV	2981.53	0.0295057
CAM210_map4	0001.CSV	2985.39	0.027455
CAM210_map4	0001.CSV	2989.25	0.0260415
CAM210_map4	0001.CSV	2993.11	0.0251525
CAM210_map4	0001.CSV	2996.96	0.0244356
CAM210_map4	0001.CSV	3000.82	0.0237897
CAM210_map4	0001.CSV	3004.68	0.023393
CAM210_map4	0001.CSV	3008.53	0.0233736
CAM210_map4	0001.CSV	3012.39	0.0235313
CAM210_map4	0001.CSV	3016.25	0.0235482
CAM210_map4	0001.CSV	3020.11	0.0234151
CAM210_map4	0001.CSV	3023.96	0.0233917
CAM210_map4	0001.CSV	3027.82	0.0236769
CAM210_map4	0001.CSV	3031.68	0.024176
CAM210_map4	0001.CSV	3035.53	0.0245653
CAM210_map4	0001.CSV	3039.39	0.024711
CAM210_map4	0001.CSV	3043.25	0.0247304
CAM210_map4	0001.CSV	3047.11	0.0247288
CAM210_map4	0001.CSV	3050.96	0.0247461
CAM210_map4	0001.CSV	3054.82	0.0247311
CAM210_map4	0001.CSV	3058.68	0.0246751
CAM210_map4	0001.CSV	3062.53	0.0247312
CAM210_map4	0001.CSV	3066.39	0.0248718
CAM210_map4	0001.CSV	3070.25	0.0248938
CAM210_map4	0001.CSV	3074.11	0.0248679
CAM210_map4	0001.CSV	3077.96	0.0249469
CAM210_map4	0001.CSV	3081.82	0.0250606
CAM210_map4	0001.CSV	3085.68	0.0250956
CAM210_map4	0001.CSV	3089.53	0.0250213
CAM210_map4	0001.CSV	3093.39	0.0249411
CAM210_map4	0001.CSV	3097.25	0.0250079
CAM210_map4	0001.CSV	3101.11	0.0251715
CAM210_map4	0001.CSV	3104.96	0.0253468
CAM210_map4	0001.CSV	3108.82	0.025554
CAM210_map4	0001.CSV	3112.68	0.0257668
CAM210_map4	0001.CSV	3116.53	0.025916
CAM210_map4	0001.CSV	3120.39	0.025915
CAM210_map4	0001.CSV	3124.25	0.0258106
CAM210_map4	0001.CSV	3128.11	0.0257594
CAM210_map4	0001.CSV	3131.96	0.0258428
CAM210_map4	0001.CSV	3135.82	0.0260641
CAM210_map4	0001.CSV	3139.68	0.0262283
CAM210_map4	0001.CSV	3143.53	0.0262362
CAM210_map4	0001.CSV	3147.39	0.0263461
CAM210_map4	0001.CSV	3151.25	0.0265708
CAM210_map4	0001.CSV	3155.1	0.0266109
CAM210_map4	0001.CSV	3158.96	0.0265069
CAM210_map4	0001.CSV	3162.82	0.0265186
CAM210_map4	0001.CSV	3166.68	0.0266398
CAM210_map4	0001.CSV	3170.53	0.0267663
CAM210_map4	0001.CSV	3174.39	0.0269429
CAM210_map4	0001.CSV	3178.25	0.0271834
CAM210_map4	0001.CSV	3182.1	0.0274101
CAM210_map4	0001.CSV	3185.96	0.0276204
CAM210_map4	0001.CSV	3189.82	0.0277881
CAM210_map4	0001.CSV	3193.68	0.0278555
CAM210_map4	0001.CSV	3197.53	0.0279608
CAM210_map4	0001.CSV	3201.39	0.0282191
CAM210_map4	0001.CSV	3205.25	0.028468
CAM210_map4	0001.CSV	3209.1	0.0286034
CAM210_map4	0001.CSV	3212.96	0.0287523
CAM210_map4	0001.CSV	3216.82	0.0289392
CAM210_map4	0001.CSV	3220.68	0.0290609
CAM210_map4	0001.CSV	3224.53	0.0292255
CAM210_map4	0001.CSV	3228.39	0.0296189
CAM210_map4	0001.CSV	3232.25	0.0300545
CAM210_map4	0001.CSV	3236.1	0.0302185
CAM210_map4	0001.CSV	3239.96	0.0302731
CAM210_map4	0001.CSV	3243.82	0.0304929
CAM210_map4	0001.CSV	3247.68	0.0307091
CAM210_map4	0001.CSV	3251.53	0.0307766
CAM210_map4	0001.CSV	3255.39	0.0308032
CAM210_map4	0001.CSV	3259.25	0.0307958
CAM210_map4	0001.CSV	3263.1	0.0308693
CAM210_map4	0001.CSV	3266.96	0.0311989
CAM210_map4	0001.CSV	3270.82	0.0315781
CAM210_map4	0001.CSV	3274.68	0.0317139
CAM210_map4	0001.CSV	3278.53	0.0316307
CAM210_map4	0001.CSV	3282.39	0.0315506
CAM210_map4	0001.CSV	3286.25	0.0316805
CAM210_map4	0001.CSV	3290.1	0.032031
CAM210_map4	0001.CSV	3293.96	0.0323193
CAM210_map4	0001.CSV	3297.82	0.0323867
CAM210_map4	0001.CSV	3301.67	0.0324516
CAM210_map4	0001.CSV	3305.53	0.032586
CAM210_map4	0001.CSV	3309.39	0.03255
CAM210_map4	0001.CSV	3313.25	0.0322893
CAM210_map4	0001.CSV	3317.1	0.032094
CAM210_map4	0001.CSV	3320.96	0.0321873
CAM210_map4	0001.CSV	3324.82	0.0323694
CAM210_map4	0001.CSV	3328.67	0.0323896
CAM210_map4	0001.CSV	3332.53	0.0324603
CAM210_map4	0001.CSV	3336.39	0.0327365
CAM210_map4	0001.CSV	3340.24	0.0328956
CAM210_map4	0001.CSV	3344.1	0.0327918
CAM210_map4	0001.CSV	3347.96	0.0326253
CAM210_map4	0001.CSV	3351.82	0.0324631
CAM210_map4	0001.CSV	3355.67	0.0323457
CAM210_map4	0001.CSV	3359.53	0.0324082
CAM210_map4	0001.CSV	3363.39	0.0325948
CAM210_map4	0001.CSV	3367.24	0.0326696
CAM210_map4	0001.CSV	3371.1	0.032495
CAM210_map4	0001.CSV	3374.96	0.0321953
CAM210_map4	0001.CSV	3378.82	0.0318936
CAM210_map4	0001.CSV	3382.67	0.0316198
CAM210_map4	0001.CSV	3386.53	0.0315286
CAM210_map4	0001.CSV	3390.39	0.0316309
CAM210_map4	0001.CSV	3394.24	0.0317038
CAM210_map4	0001.CSV	3398.1	0.0316193
CAM210_map4	0001.CSV	3401.96	0.0313725
CAM210_map4	0001.CSV	3405.82	0.0310495
CAM210_map4	0001.CSV	3409.67	0.0307168
CAM210_map4	0001.CSV	3413.53	0.0302946
CAM210_map4	0001.CSV	3417.39	0.0298214
CAM210_map4	0001.CSV	3421.24	0.0295046
CAM210_map4	0001.CSV	3425.1	0.0294448
CAM210_map4	0001.CSV	3428.96	0.029517
CAM210_map4	0001.CSV	3432.82	0.0294326
CAM210_map4	0001.CSV	3436.67	0.0289831
CAM210_map4	0001.CSV	3440.53	0.0282875
CAM210_map4	0001.CSV	3444.39	0.027637
CAM210_map4	0001.CSV	3448.24	0.0271228
CAM210_map4	0001.CSV	3452.1	0.0267137
CAM210_map4	0001.CSV	3455.96	0.0265131
CAM210_map4	0001.CSV	3459.82	0.0265635
CAM210_map4	0001.CSV	3463.67	0.026675
CAM210_map4	0001.CSV	3467.53	0.0265093
CAM210_map4	0001.CSV	3471.39	0.0259657
CAM210_map4	0001.CSV	3475.24	0.0253909
CAM210_map4	0001.CSV	3479.1	0.0250103
CAM210_map4	0001.CSV	3482.96	0.0246951
CAM210_map4	0001.CSV	3486.82	0.0243884
CAM210_map4	0001.CSV	3490.67	0.0241436
CAM210_map4	0001.CSV	3494.53	0.0239533
CAM210_map4	0001.CSV	3498.39	0.0236897
CAM210_map4	0001.CSV	3502.24	0.0231939
CAM210_map4	0001.CSV	3506.1	0.0225323
CAM210_map4	0001.CSV	3509.96	0.022004
CAM210_map4	0001.CSV	3513.81	0.0215947
CAM210_map4	0001.CSV	3517.67	0.0211372
CAM210_map4	0001.CSV	3521.53	0.0207158
CAM210_map4	0001.CSV	3525.39	0.0203381
CAM210_map4	0001.CSV	3529.24	0.0200265
CAM210_map4	0001.CSV	3533.1	0.0198883
CAM210_map4	0001.CSV	3536.96	0.0198109
CAM210_map4	0001.CSV	3540.81	0.0196931
CAM210_map4	0001.CSV	3544.67	0.0194555
CAM210_map4	0001.CSV	3548.53	0.0189591
CAM210_map4	0001.CSV	3552.39	0.0183557
CAM210_map4	0001.CSV	3556.24	0.0178646
CAM210_map4	0001.CSV	3560.1	0.0173886
CAM210_map4	0001.CSV	3563.96	0.0169353
CAM210_map4	0001.CSV	3567.81	0.016769
CAM210_map4	0001.CSV	3571.67	0.0166256
CAM210_map4	0001.CSV	3575.53	0.0163495
CAM210_map4	0001.CSV	3579.39	0.0161642
CAM210_map4	0001.CSV	3583.24	0.0160193
CAM210_map4	0001.CSV	3587.1	0.0157836
CAM210_map4	0001.CSV	3590.96	0.015423
CAM210_map4	0001.CSV	3594.81	0.0150182
CAM210_map4	0001.CSV	3598.67	0.014667
CAM210_map4	0001.CSV	3602.53	0.014186
CAM210_map4	0001.CSV	3606.39	0.0134892
CAM210_map4	0001.CSV	3610.24	0.0128898
CAM210_map4	0001.CSV	3614.1	0.0127675
CAM210_map4	0001.CSV	3617.96	0.0130436
CAM210_map4	0001.CSV	3621.81	0.0130136
CAM210_map4	0001.CSV	3625.67	0.0124543
CAM210_map4	0001.CSV	3629.53	0.012054
CAM210_map4	0001.CSV	3633.39	0.0121058
CAM210_map4	0001.CSV	3637.24	0.0120128
CAM210_map4	0001.CSV	3641.1	0.0116766
CAM210_map4	0001.CSV	3644.96	0.0113825
CAM210_map4	0001.CSV	3648.81	0.0116543
CAM210_map4	0001.CSV	3652.67	0.0121887
CAM210_map4	0001.CSV	3656.53	0.0122528
CAM210_map4	0001.CSV	3660.38	0.0119323
CAM210_map4	0001.CSV	3664.24	0.0112752
CAM210_map4	0001.CSV	3668.1	0.0105696
CAM210_map4	0001.CSV	3671.96	0.0103527
CAM210_map4	0001.CSV	3675.81	0.0108635
CAM210_map4	0001.CSV	3679.67	0.0112794
CAM210_map4	0001.CSV	3683.53	0.0113469
CAM210_map4	0001.CSV	3687.38	0.0115142
CAM210_map4	0001.CSV	3691.24	0.0118479
CAM210_map4	0001.CSV	3695.1	0.0116047
CAM210_map4	0001.CSV	3698.95	0.0109274
CAM210_map4	0001.CSV	3702.81	0.0102397
CAM210_map4	0001.CSV	3706.67	0.00968282
CAM210_map4	0001.CSV	3710.53	0.00953515
CAM210_map4	0001.CSV	3714.38	0.00971561
CAM210_map4	0001.CSV	3718.24	0.00959849
CAM210_map4	0001.CSV	3722.1	0.00933757
CAM210_map4	0001.CSV	3725.95	0.00918106
CAM210_map4	0001.CSV	3729.81	0.00910844
CAM210_map4	0001.CSV	3733.67	0.00944984
CAM210_map4	0001.CSV	3737.53	0.0099013
CAM210_map4	0001.CSV	3741.38	0.00943508
CAM210_map4	0001.CSV	3745.24	0.00851728
CAM210_map4	0001.CSV	3749.1	0.00829375
CAM210_map4	0001.CSV	3752.95	0.00888382
CAM210_map4	0001.CSV	3756.81	0.00924543
CAM210_map4	0001.CSV	3760.67	0.00931306
CAM210_map4	0001.CSV	3764.53	0.00932809
CAM210_map4	0001.CSV	3768.38	0.0094281
CAM210_map4	0001.CSV	3772.24	0.00944561
CAM210_map4	0001.CSV	3776.1	0.00932247
CAM210_map4	0001.CSV	3779.95	0.00930768
CAM210_map4	0001.CSV	3783.81	0.00941216
CAM210_map4	0001.CSV	3787.67	0.00936255
CAM210_map4	0001.CSV	3791.53	0.0090248
CAM210_map4	0001.CSV	3795.38	0.00856969
CAM210_map4	0001.CSV	3799.24	0.00843318
CAM210_map4	0001.CSV	3803.1	0.00881981
CAM210_map4	0001.CSV	3806.95	0.00904618
CAM210_map4	0001.CSV	3810.81	0.00880554
CAM210_map4	0001.CSV	3814.67	0.0084293
CAM210_map4	0001.CSV	3818.53	0.00837697
CAM210_map4	0001.CSV	3822.38	0.00866088
CAM210_map4	0001.CSV	3826.24	0.00863931
CAM210_map4	0001.CSV	3830.1	0.0083867
CAM210_map4	0001.CSV	3833.95	0.00822867
CAM210_map4	0001.CSV	3837.81	0.00845312
CAM210_map4	0001.CSV	3841.67	0.00884476
CAM210_map4	0001.CSV	3845.53	0.00868187
CAM210_map4	0001.CSV	3849.38	0.00817704
CAM210_map4	0001.CSV	3853.24	0.0080973
CAM210_map4	0001.CSV	3857.1	0.00836603
CAM210_map4	0001.CSV	3860.95	0.00822705
CAM210_map4	0001.CSV	3864.81	0.00809099
CAM210_map4	0001.CSV	3868.67	0.00822894
CAM210_map4	0001.CSV	3872.52	0.0083842
CAM210_map4	0001.CSV	3876.38	0.00828182
CAM210_map4	0001.CSV	3880.24	0.00819295
CAM210_map4	0001.CSV	3884.1	0.00836515
CAM210_map4	0001.CSV	3887.95	0.00844551
CAM210_map4	0001.CSV	3891.81	0.00827193
CAM210_map4	0001.CSV	3895.67	0.00797869
CAM210_map4	0001.CSV	3899.52	0.00786069
CAM210_map4	0001.CSV	3903.38	0.00828466
CAM210_map4	0001.CSV	3907.24	0.0085189
CAM210_map4	0001.CSV	3911.1	0.00824285
CAM210_map4	0001.CSV	3914.95	0.00797771
CAM210_map4	0001.CSV	3918.81	0.00798446
CAM210_map4	0001.CSV	3922.67	0.0080843
CAM210_map4	0001.CSV	3926.52	0.00816144
CAM210_map4	0001.CSV	3930.38	0.00830938
CAM210_map4	0001.CSV	3934.24	0.00832607
CAM210_map4	0001.CSV	3938.09	0.00810118
CAM210_map4	0001.CSV	3941.95	0.00795146
CAM210_map4	0001.CSV	3945.81	0.00801295
CAM210_map4	0001.CSV	3949.67	0.00811263
CAM210_map4	0001.CSV	3953.52	0.00813021
CAM210_map4	0001.CSV	3957.38	0.00811236
CAM210_map4	0001.CSV	3961.24	0.00814419
CAM210_map4	0001.CSV	3965.09	0.00816701
CAM210_map4	0001.CSV	3968.95	0.00815145
CAM210_map4	0001.CSV	3972.81	0.00816219
CAM210_map4	0001.CSV	3976.67	0.00817927
CAM210_map4	0001.CSV	3980.52	0.00819413
CAM210_map4	0001.CSV	3984.38	0.0082286
CAM210_map4	0001.CSV	3988.24	0.00823262
CAM210_map4	0001.CSV	3992.09	0.00820426
CAM210_map4	0001.CSV	3995.95	0.00817701
CAM210_map4	0001.CSV	3999.81	0.00814267
CAM210_map4	0002.CSV	674.992	0.0422481
CAM210_map4	0002.CSV	678.849	0.0429502
CAM210_map4	0002.CSV	682.706	0.0439952
CAM210_map4	0002.CSV	686.563	0.0453855
CAM210_map4	0002.CSV	690.42	0.0473119
CAM210_map4	0002.CSV	694.277	0.0504117
CAM210_map4	0002.CSV	698.134	0.0555389
CAM210_map4	0002.CSV	701.991	0.0641301
CAM210_map4	0002.CSV	705.849	0.0769187
CAM210_map4	0002.CSV	709.706	0.0870492
CAM210_map4	0002.CSV	713.563	0.0827769
CAM210_map4	0002.CSV	717.42	0.0657713
CAM210_map4	0002.CSV	721.277	0.0498352
CAM210_map4	0002.CSV	725.134	0.041708
CAM210_map4	0002.CSV	728.991	0.0384882
CAM210_map4	0002.CSV	732.848	0.0370485
CAM210_map4	0002.CSV	736.705	0.0363026
CAM210_map4	0002.CSV	740.562	0.0359149
CAM210_map4	0002.CSV	744.42	0.0358833
CAM210_map4	0002.CSV	748.277	0.0361979
CAM210_map4	0002.CSV	752.134	0.0367741
CAM210_map4	0002.CSV	755.991	0.0375434
CAM210_map4	0002.CSV	759.848	0.0383542
CAM210_map4	0002.CSV	763.705	0.0390918
CAM210_map4	0002.CSV	767.562	0.0397787
CAM210_map4	0002.CSV	771.419	0.0404142
CAM210_map4	0002.CSV	775.276	0.0409407
CAM210_map4	0002.CSV	779.133	0.0413031
CAM210_map4	0002.CSV	782.99	0.0415057
CAM210_map4	0002.CSV	786.848	0.041722
CAM210_map4	0002.CSV	790.705	0.0421299
CAM210_map4	0002.CSV	794.562	0.0427348
CAM210_map4	0002.CSV	798.419	0.0434016
CAM210_map4	0002.CSV	802.276	0.0440135
CAM210_map4	0002.CSV	806.133	0.0445971
CAM210_map4	0002.CSV	809.99	0.045263
CAM210_map4	0002.CSV	813.847	0.0460741
CAM210_map4	0002.CSV	817.704	0.0471211
CAM210_map4	0002.CSV	821.562	0.048479
CAM210_map4	0002.CSV	825.419	0.0500402
CAM210_map4	0002.CSV	829.276	0.0517564
CAM210_map4	0002.CSV	833.133	0.0538815
CAM210_map4	0002.CSV	836.99	0.0569445
CAM210_map4	0002.CSV	840.847	0.0616295
CAM210_map4	0002.CSV	844.704	0.0676771
CAM210_map4	0002.CSV	848.561	0.0740742
CAM210_map4	0002.CSV	852.418	0.0823079
CAM210_map4	0002.CSV	856.275	0.0963828
CAM210_map4	0002.CSV	860.132	0.120043
CAM210_map4	0002.CSV	863.99	0.154349
CAM210_map4	0002.CSV	867.847	0.18923
CAM210_map4	0002.CSV	871.704	0.201222
CAM210_map4	0002.CSV	875.561	0.178991
CAM210_map4	0002.CSV	879.418	0.136539
CAM210_map4	0002.CSV	883.275	0.0908519
CAM210_map4	0002.CSV	887.132	0.0543374
CAM210_map4	0002.CSV	890.989	0.034694
CAM210_map4	0002.CSV	894.846	0.0290548
CAM210_map4	0002.CSV	898.703	0.0291725
CAM210_map4	0002.CSV	902.561	0.0303563
CAM210_map4	0002.CSV	906.418	0.0315823
CAM210_map4	0002.CSV	910.275	0.032717
CAM210_map4	0002.CSV	914.132	0.0337045
CAM210_map4	0002.CSV	917.989	0.0345931
CAM210_map4	0002.CSV	921.846	0.0354795
CAM210_map4	0002.CSV	925.703	0.0364049
CAM210_map4	0002.CSV	929.56	0.0373288
CAM210_map4	0002.CSV	933.417	0.0381128
CAM210_map4	0002.CSV	937.274	0.0386451
CAM210_map4	0002.CSV	941.131	0.0390163
CAM210_map4	0002.CSV	944.989	0.0394379
CAM210_map4	0002.CSV	948.846	0.0400457
CAM210_map4	0002.CSV	952.703	0.0408024
CAM210_map4	0002.CSV	956.56	0.0415181
CAM210_map4	0002.CSV	960.417	0.0420306
CAM210_map4	0002.CSV	964.274	0.0424468
CAM210_map4	0002.CSV	968.131	0.043025
CAM210_map4	0002.CSV	971.988	0.0438285
CAM210_map4	0002.CSV	975.845	0.0447144
CAM210_map4	0002.CSV	979.702	0.0455634
CAM210_map4	0002.CSV	983.559	0.0463859
CAM210_map4	0002.CSV	987.417	0.0472583
CAM210_map4	0002.CSV	991.274	0.048199
CAM210_map4	0002.CSV	995.131	0.049154
CAM210_map4	0002.CSV	998.988	0.0500614
CAM210_map4	0002.CSV	1002.85	0.0509654
CAM210_map4	0002.CSV	1006.7	0.0519247
CAM210_map4	0002.CSV	1010.56	0.0528272
CAM210_map4	0002.CSV	1014.42	0.0535574
CAM210_map4	0002.CSV	1018.27	0.0542067
CAM210_map4	0002.CSV	1022.13	0.0548955
CAM210_map4	0002.CSV	1025.99	0.0556019
CAM210_map4	0002.CSV	1029.85	0.0562562
CAM210_map4	0002.CSV	1033.7	0.0568399
CAM210_map4	0002.CSV	1037.56	0.0573905
CAM210_map4	0002.CSV	1041.42	0.0579715
CAM210_map4	0002.CSV	1045.27	0.0585993
CAM210_map4	0002.CSV	1049.13	0.059266
CAM210_map4	0002.CSV	1052.99	0.0600161
CAM210_map4	0002.CSV	1056.84	0.0609093
CAM210_map4	0002.CSV	1060.7	0.0619758
CAM210_map4	0002.CSV	1064.56	0.0632689
CAM210_map4	0002.CSV	1068.42	0.0648208
CAM210_map4	0002.CSV	1072.27	0.0666018
CAM210_map4	0002.CSV	1076.13	0.0686031
CAM210_map4	0002.CSV	1079.99	0.0707279
CAM210_map4	0002.CSV	1083.84	0.0724329
CAM210_map4	0002.CSV	1087.7	0.0729977
CAM210_map4	0002.CSV	1091.56	0.0722959
CAM210_map4	0002.CSV	1095.41	0.0709388
CAM210_map4	0002.CSV	1099.27	0.0697555
CAM210_map4	0002.CSV	1103.13	0.0692532
CAM210_map4	0002.CSV	1106.99	0.0693753
CAM210_map4	0002.CSV	1110.84	0.0695846
CAM210_map4	0002.CSV	1114.7	0.0693443
CAM210_map4	0002.CSV	1118.56	0.0687538
CAM210_map4	0002.CSV	1122.41	0.0683449
CAM210_map4	0002.CSV	1126.27	0.0683353
CAM210_map4	0002.CSV	1130.13	0.0685668
CAM210_map4	0002.CSV	1133.99	0.0689384
CAM210_map4	0002.CSV	1137.84	0.069455
CAM210_map4	0002.CSV	1141.7	0.0700971
CAM210_map4	0002.CSV	1145.56	0.0708298
CAM210_map4	0002.CSV	1149.41	0.0715971
CAM210_map4	0002.CSV	1153.27	0.0723464
CAM210_map4	0002.CSV	1157.13	0.0730989
CAM210_map4	0002.CSV	1160.99	0.0738522
CAM210_map4	0002.CSV	1164.84	0.0744907
CAM210_map4	0002.CSV	1168.7	0.0749119
CAM210_map4	0002.CSV	1172.56	0.0751558
CAM210_map4	0002.CSV	1176.41	0.0753009
CAM210_map4	0002.CSV	1180.27	0.0753594
CAM210_map4	0002.CSV	1184.13	0.0753458
CAM210_map4	0002.CSV	1187.99	0.0752897
CAM210_map4	0002.CSV	1191.84	0.0751856
CAM210_map4	0002.CSV	1195.7	0.0751233
CAM210_map4	0002.CSV	1199.56	0.0752841
CAM210_map4	0002.CSV	1203.41	0.0757476
CAM210_map4	0002.CSV	1207.27	0.0764757
CAM210_map4	0002.CSV	1211.13	0.0773677
CAM210_map4	0002.CSV	1214.98	0.0783163
CAM210_map4	0002.CSV	1218.84	0.0793166
CAM210_map4	0002.CSV	1222.7	0.0804418
CAM210_map4	0002.CSV	1226.56	0.0817597
CAM210_map4	0002.CSV	1230.41	0.0832521
CAM210_map4	0002.CSV	1234.27	0.0847894
CAM210_map4	0002.CSV	1238.13	0.0862541
CAM210_map4	0002.CSV	1241.98	0.0876669
CAM210_map4	0002.CSV	1245.84	0.0891238
CAM210_map4	0002.CSV	1249.7	0.090712
CAM210_map4	0002.CSV	1253.56	0.0924421
CAM210_map4	0002.CSV	1257.41	0.0942226
CAM210_map4	0002.CSV	1261.27	0.0959528
CAM210_map4	0002.CSV	1265.13	0.0976798
CAM210_map4	0002.CSV	1268.98	0.0996217
CAM210_map4	0002.CSV	1272.84	0.101867
CAM210_map4	0002.CSV	1276.7	0.104259
CAM210_map4	0002.CSV	1280.56	0.106742
CAM210_map4	0002.CSV	1284.41	0.109452
CAM210_map4	0002.CSV	1288.27	0.112482
CAM210_map4	0002.CSV	1292.13	0.115736
CAM210_map4	0002.CSV	1295.98	0.119123
CAM210_map4	0002.CSV	1299.84	0.122658
CAM210_map4	0002.CSV	1303.7	0.126394
CAM210_map4	0002.CSV	1307.56	0.130436
CAM210_map4	0002.CSV	1311.41	0.134908
CAM210_map4	0002.CSV	1315.27	0.139893
CAM210_map4	0002.CSV	1319.13	0.145191
CAM210_map4	0002.CSV	1322.98	0.150467
CAM210_map4	0002.CSV	1326.84	0.155941
CAM210_map4	0002.CSV	1330.7	0.161922
CAM210_map4	0002.CSV	1334.56	0.168711
CAM210_map4	0002.CSV	1338.41	0.177429
CAM210_map4	0002.CSV	1342.27	0.187421
CAM210_map4	0002.CSV	1346.13	0.196894
CAM210_map4	0002.CSV	1349.98	0.206805
CAM210_map4	0002.CSV	1353.84	0.217703
CAM210_map4	0002.CSV	1357.7	0.22938
CAM210_map4	0002.CSV	1361.56	0.242968
CAM210_map4	0002.CSV	1365.41	0.257495
CAM210_map4	0002.CSV	1369.27	0.270744
CAM210_map4	0002.CSV	1373.13	0.284621
CAM210_map4	0002.CSV	1376.98	0.299066
CAM210_map4	0002.CSV	1380.84	0.310905
CAM210_map4	0002.CSV	1384.7	0.321015
CAM210_map4	0002.CSV	1388.56	0.330271
CAM210_map4	0002.CSV	1392.41	0.33644
CAM210_map4	0002.CSV	1396.27	0.338098
CAM210_map4	0002.CSV	1400.13	0.33537
CAM210_map4	0002.CSV	1403.98	0.329149
CAM210_map4	0002.CSV	1407.84	0.319414
CAM210_map4	0002.CSV	1411.7	0.307001
CAM210_map4	0002.CSV	1415.55	0.292382
CAM210_map4	0002.CSV	1419.41	0.275169
CAM210_map4	0002.CSV	1423.27	0.260568
CAM210_map4	0002.CSV	1427.12	0.250891
CAM210_map4	0002.CSV	1430.98	0.242673
CAM210_map4	0002.CSV	1434.84	0.23376
CAM210_map4	0002.CSV	1438.7	0.224765
CAM210_map4	0002.CSV	1442.55	0.21728
CAM210_map4	0002.CSV	1446.41	0.210117
CAM210_map4	0002.CSV	1450.27	0.202748
CAM210_map4	0002.CSV	1454.12	0.194971
CAM210_map4	0002.CSV	1457.98	0.185239
CAM210_map4	0002.CSV	1461.84	0.177063
CAM210_map4	0002.CSV	1465.7	0.171233
CAM210_map4	0002.CSV	1469.55	0.164644
CAM210_map4	0002.CSV	1473.41	0.154748
CAM210_map4	0002.CSV	1477.27	0.144695
CAM210_map4	0002.CSV	1481.12	0.138165
CAM210_map4	0002.CSV	1484.98	0.132714
CAM210_map4	0002.CSV	1488.84	0.126164
CAM210_map4	0002.CSV	1492.7	0.119446
CAM210_map4	0002.CSV	1496.55	0.113821
CAM210_map4	0002.CSV	1500.41	0.108936
CAM210_map4	0002.CSV	1504.27	0.104419
CAM210_map4	0002.CSV	1508.12	0.0985757
CAM210_map4	0002.CSV	1511.98	0.0935255
CAM210_map4	0002.CSV	1515.84	0.0902477
CAM210_map4	0002.CSV	1519.7	0.0864062
CAM210_map4	0002.CSV	1523.55	0.0823251
CAM210_map4	0002.CSV	1527.41	0.0800825
CAM210_map4	0002.CSV	1531.27	0.0794159
CAM210_map4	0002.CSV	1535.12	0.07942
CAM210_map4	0002.CSV	1538.98	0.0775462
CAM210_map4	0002.CSV	1542.84	0.0699975
CAM210_map4	0002.CSV	1546.7	0.0628441
CAM210_map4	0002.CSV	1550.55	0.0581292
CAM210_map4	0002.CSV	1554.41	0.0539062
CAM210_map4	0002.CSV	1558.27	0.0498177
CAM210_map4	0002.CSV	1562.12	0.0479228
CAM210_map4	0002.CSV	1565.98	0.0481987
CAM210_map4	0002.CSV	1569.84	0.0495464
CAM210_map4	0002.CSV	1573.69	0.0505126
CAM210_map4	0002.CSV	1577.55	0.048752
CAM210_map4	0002.CSV	1581.41	0.0445022
CAM210_map4	0002.CSV	1585.27	0.039665
CAM210_map4	0002.CSV	1589.12	0.035256
CAM210_map4	0002.CSV	1592.98	0.0318259
CAM210_map4	0002.CSV	1596.84	0.0294109
CAM210_map4	0002.CSV	1600.69	0.0277595
CAM210_map4	0002.CSV	1604.55	0.0265878
CAM210_map4	0002.CSV	1608.41	0.0257176
CAM210_map4	0002.CSV	1612.27	0.0250643
CAM210_map4	0002.CSV	1616.12	0.0245194
CAM210_map4	0002.CSV	1619.98	0.023974
CAM210_map4	0002.CSV	1623.84	0.0234031
CAM210_map4	0002.CSV	1627.69	0.0227945
CAM210_map4	0002.CSV	1631.55	0.0221727
CAM210_map4	0002.CSV	1635.41	0.0215605
CAM210_map4	0002.CSV	1639.27	0.0209569
CAM210_map4	0002.CSV	1643.12	0.0203924
CAM210_map4	0002.CSV	1646.98	0.0199642
CAM210_map4	0002.CSV	1650.84	0.0198222
CAM210_map4	0002.CSV	1654.69	0.019679
CAM210_map4	0002.CSV	1658.55	0.0193299
CAM210_map4	0002.CSV	1662.41	0.0189309
CAM210_map4	0002.CSV	1666.27	0.0185457
CAM210_map4	0002.CSV	1670.12	0.0182506
CAM210_map4	0002.CSV	1673.98	0.0180544
CAM210_map4	0002.CSV	1677.84	0.0178169
CAM210_map4	0002.CSV	1681.69	0.0175971
CAM210_map4	0002.CSV	1685.55	0.0174859
CAM210_map4	0002.CSV	1689.41	0.0172426
CAM210_map4	0002.CSV	1693.27	0.0168523
CAM210_map4	0002.CSV	1697.12	0.0165633
CAM210_map4	0002.CSV	1700.98	0.0166032
CAM210_map4	0002.CSV	1704.84	0.0166523
CAM210_map4	0002.CSV	1708.69	0.0165094
CAM210_map4	0002.CSV	1712.55	0.016362
CAM210_map4	0002.CSV	1716.41	0.0165255
CAM210_map4	0002.CSV	1720.27	0.0168186
CAM210_map4	0002.CSV	1724.12	0.0168201
CAM210_map4	0002.CSV	1727.98	0.0167402
CAM210_map4	0002.CSV	1731.84	0.016834
CAM210_map4	0002.CSV	1735.69	0.0170075
CAM210_map4	0002.CSV	1739.55	0.016775
CAM210_map4	0002.CSV	1743.41	0.0162004
CAM210_map4	0002.CSV	1747.27	0.0154947
CAM210_map4	0002.CSV	1751.12	0.0147323
CAM210_map4	0002.CSV	1754.98	0.0140703
CAM210_map4	0002.CSV	1758.84	0.0136083
CAM210_map4	0002.CSV	1762.69	0.0133124
CAM210_map4	0002.CSV	1766.55	0.0131296
CAM210_map4	0002.CSV	1770.41	0.0131902
CAM210_map4	0002.CSV	1774.26	0.0135165
CAM210_map4	0002.CSV	1778.12	0.0138725
CAM210_map4	0002.CSV	1781.98	0.0144485
CAM210_map4	0002.CSV	1785.84	0.0154123
CAM210_map4	0002.CSV	1789.69	0.0167953
CAM210_map4	0002.CSV	1793.55	0.018214
CAM210_map4	0002.CSV	1797.41	0.018371
CAM210_map4	0002.CSV	1801.26	0.017021
CAM210_map4	0002.CSV	1805.12	0.0151867
CAM210_map4	0002.CSV	1808.98	0.0136536
CAM210_map4	0002.CSV	1812.84	0.0126012
CAM210_map4	0002.CSV	1816.69	0.0119297
CAM210_map4	0002.CSV	1820.55	0.0114764
CAM210_map4	0002.CSV	1824.41	0.0111801
CAM210_map4	0002.CSV	1828.26	0.0110263
CAM210_map4	0002.CSV	1832.12	0.0109049
CAM210_map4	0002.CSV	1835.98	0.0107182
CAM210_map4	0002.CSV	1839.84	0.010544
CAM210_map4	0002.CSV	1843.69	0.010523
CAM210_map4	0002.CSV	1847.55	0.0105758
CAM210_map4	0002.CSV	1851.41	0.0105084
CAM210_map4	0002.CSV	1855.26	0.0104019
CAM210_map4	0002.CSV	1859.12	0.0103299
CAM210_map4	0002.CSV	1862.98	0.0102698
CAM210_map4	0002.CSV	1866.84	0.0103083
CAM210_map4	0002.CSV	1870.69	0.0104188
CAM210_map4	0002.CSV	1874.55	0.0103821
CAM210_map4	0002.CSV	1878.41	0.0102629
CAM210_map4	0002.CSV	1882.26	0.0101751
CAM210_map4	0002.CSV	1886.12	0.0101472
CAM210_map4	0002.CSV	1889.98	0.0101999
CAM210_map4	0002.CSV	1893.83	0.0102721
CAM210_map4	0002.CSV	1897.69	0.0102751
CAM210_map4	0002.CSV	1901.55	0.0102196
CAM210_map4	0002.CSV	1905.41	0.0101812
CAM210_map4	0002.CSV	1909.26	0.0101779
CAM210_map4	0002.CSV	1913.12	0.0101543
CAM210_map4	0002.CSV	1916.98	0.0101448
CAM210_map4	0002.CSV	1920.83	0.0102095
CAM210_map4	0002.CSV	1924.69	0.0102623
CAM210_map4	0002.CSV	1928.55	0.0102476
CAM210_map4	0002.CSV	1932.4	0.01022
CAM210_map4	0002.CSV	1936.26	0.0102005
CAM210_map4	0002.CSV	1940.12	0.0102234
CAM210_map4	0002.CSV	1943.98	0.010303
CAM210_map4	0002.CSV	1947.83	0.0103344
CAM210_map4	0002.CSV	1951.69	0.0103238
CAM210_map4	0002.CSV	1955.55	0.0103491
CAM210_map4	0002.CSV	1959.4	0.0103782
CAM210_map4	0002.CSV	1963.26	0.0103902
CAM210_map4	0002.CSV	1967.12	0.0104169
CAM210_map4	0002.CSV	1970.98	0.0104349
CAM210_map4	0002.CSV	1974.83	0.0104332
CAM210_map4	0002.CSV	1978.69	0.0104368
CAM210_map4	0002.CSV	1982.55	0.0104265
CAM210_map4	0002.CSV	1986.4	0.0104014
CAM210_map4	0002.CSV	1990.26	0.0104225
CAM210_map4	0002.CSV	1994.12	0.0104852
CAM210_map4	0002.CSV	1997.98	0.0105104
CAM210_map4	0002.CSV	2001.83	0.0104963
CAM210_map4	0002.CSV	2005.69	0.0104781
CAM210_map4	0002.CSV	2009.55	0.0104536
CAM210_map4	0002.CSV	2013.4	0.0104383
CAM210_map4	0002.CSV	2017.26	0.010464
CAM210_map4	0002.CSV	2021.12	0.0104918
CAM210_map4	0002.CSV	2024.97	0.0104867
CAM210_map4	0002.CSV	2028.83	0.0104762
CAM210_map4	0002.CSV	2032.69	0.0104615
CAM210_map4	0002.CSV	2036.55	0.0104345
CAM210_map4	0002.CSV	2040.4	0.0104093
CAM210_map4	0002.CSV	2044.26	0.0103844
CAM210_map4	0002.CSV	2048.12	0.0103501
CAM210_map4	0002.CSV	2051.97	0.0103257
CAM210_map4	0002.CSV	2055.83	0.0103205
CAM210_map4	0002.CSV	2059.69	0.0103033
CAM210_map4	0002.CSV	2063.55	0.0102653
CAM210_map4	0002.CSV	2067.4	0.0102399
CAM210_map4	0002.CSV	2071.26	0.0102468
CAM210_map4	0002.CSV	2075.12	0.0102707
CAM210_map4	0002.CSV	2078.97	0.0102804
CAM210_map4	0002.CSV	2082.83	0.0102683
CAM210_map4	0002.CSV	2086.69	0.0102668
CAM210_map4	0002.CSV	2090.55	0.0102766
CAM210_map4	0002.CSV	2094.4	0.0102589
CAM210_map4	0002.CSV	2098.26	0.010233
CAM210_map4	0002.CSV	2102.12	0.0102405
CAM210_map4	0002.CSV	2105.97	0.0102671
CAM210_map4	0002.CSV	2109.83	0.0102814
CAM210_map4	0002.CSV	2113.69	0.0102887
CAM210_map4	0002.CSV	2117.55	0.010298
CAM210_map4	0002.CSV	2121.4	0.0103002
CAM210_map4	0002.CSV	2125.26	0.0103124
CAM210_map4	0002.CSV	2129.12	0.0103498
CAM210_map4	0002.CSV	2132.97	0.0103882
CAM210_map4	0002.CSV	2136.83	0.010413
CAM210_map4	0002.CSV	2140.69	0.0104312
CAM210_map4	0002.CSV	2144.55	0.0104437
CAM210_map4	0002.CSV	2148.4	0.0104485
CAM210_map4	0002.CSV	2152.26	0.0104495
CAM210_map4	0002.CSV	2156.12	0.0104339
CAM210_map4	0002.CSV	2159.97	0.0103896
CAM210_map4	0002.CSV	2163.83	0.0103342
CAM210_map4	0002.CSV	2167.69	0.0102928
CAM210_map4	0002.CSV	2171.55	0.0102837
CAM210_map4	0002.CSV	2175.4	0.0103049
CAM210_map4	0002.CSV	2179.26	0.0103323
CAM210_map4	0002.CSV	2183.12	0.0103456
CAM210_map4	0002.CSV	2186.97	0.0103478
CAM210_map4	0002.CSV	2190.83	0.0103493
CAM210_map4	0002.CSV	2194.69	0.0103402
CAM210_map4	0002.CSV	2198.55	0.0103143
CAM210_map4	0002.CSV	2202.4	0.0102962
CAM210_map4	0002.CSV	2206.26	0.0102943
CAM210_map4	0002.CSV	2210.12	0.0102866
CAM210_map4	0002.CSV	2213.97	0.0102663
CAM210_map4	0002.CSV	2217.83	0.0102391
CAM210_map4	0002.CSV	2221.69	0.0102076
CAM210_map4	0002.CSV	2225.54	0.0101697
CAM210_map4	0002.CSV	2229.4	0.0101211
CAM210_map4	0002.CSV	2233.26	0.0100695
CAM210_map4	0002.CSV	2237.12	0.0100251
CAM210_map4	0002.CSV	2240.97	0.00998178
CAM210_map4	0002.CSV	2244.83	0.00993835
CAM210_map4	0002.CSV	2248.69	0.00991022
CAM210_map4	0002.CSV	2252.54	0.00989744
CAM210_map4	0002.CSV	2256.4	0.00987476
CAM210_map4	0002.CSV	2260.26	0.00982558
CAM210_map4	0002.CSV	2264.11	0.00977013
CAM210_map4	0002.CSV	2267.97	0.00973449
CAM210_map4	0002.CSV	2271.83	0.00972578
CAM210_map4	0002.CSV	2275.69	0.00973483
CAM210_map4	0002.CSV	2279.54	0.00970843
CAM210_map4	0002.CSV	2283.4	0.00961638
CAM210_map4	0002.CSV	2287.26	0.00950958
CAM210_map4	0002.CSV	2291.11	0.00942343
CAM210_map4	0002.CSV	2294.97	0.0093419
CAM210_map4	0002.CSV	2298.83	0.00924827
CAM210_map4	0002.CSV	2302.69	0.0091057
CAM210_map4	0002.CSV	2306.54	0.00885802
CAM210_map4	0002.CSV	2310.4	0.00849765
CAM210_map4	0002.CSV	2314.26	0.00803678
CAM210_map4	0002.CSV	2318.11	0.00739675
CAM210_map4	0002.CSV	2321.97	0.00642641
CAM210_map4	0002.CSV	2325.83	0.00509319
CAM210_map4	0002.CSV	2329.69	0.00366975
CAM210_map4	0002.CSV	2333.54	0.00245907
CAM210_map4	0002.CSV	2337.4	0.00175181
CAM210_map4	0002.CSV	2341.26	0.00256938
CAM210_map4	0002.CSV	2345.11	0.00425052
CAM210_map4	0002.CSV	2348.97	0.00443848
CAM210_map4	0002.CSV	2352.83	0.00225572
CAM210_map4	0002.CSV	2356.69	-0.00351797
CAM210_map4	0002.CSV	2360.54	-0.0100853
CAM210_map4	0002.CSV	2364.4	-0.00639024
CAM210_map4	0002.CSV	2368.26	0.00142338
CAM210_map4	0002.CSV	2372.11	0.00623793
CAM210_map4	0002.CSV	2375.97	0.00830195
CAM210_map4	0002.CSV	2379.83	0.00898952
CAM210_map4	0002.CSV	2383.69	0.0091196
CAM210_map4	0002.CSV	2387.54	0.00905552
CAM210_map4	0002.CSV	2391.4	0.00895244
CAM210_map4	0002.CSV	2395.26	0.00886874
CAM210_map4	0002.CSV	2399.11	0.00881095
CAM210_map4	0002.CSV	2402.97	0.00877703
CAM210_map4	0002.CSV	2406.83	0.00876828
CAM210_map4	0002.CSV	2410.68	0.00877156
CAM210_map4	0002.CSV	2414.54	0.00877007
CAM210_map4	0002.CSV	2418.4	0.00876307
CAM210_map4	0002.CSV	2422.26	0.008751
CAM210_map4	0002.CSV	2426.11	0.00872821
CAM210_map4	0002.CSV	2429.97	0.00871081
CAM210_map4	0002.CSV	2433.83	0.00871882
CAM210_map4	0002.CSV	2437.68	0.00873761
CAM210_map4	0002.CSV	2441.54	0.00875394
CAM210_map4	0002.CSV	2445.4	0.00878146
CAM210_map4	0002.CSV	2449.26	0.00882353
CAM210_map4	0002.CSV	2453.11	0.00886597
CAM210_map4	0002.CSV	2456.97	0.00890733
CAM210_map4	0002.CSV	2460.83	0.0089609
CAM210_map4	0002.CSV	2464.68	0.00903742
CAM210_map4	0002.CSV	2468.54	0.0091373
CAM210_map4	0002.CSV	2472.4	0.00926465
CAM210_map4	0002.CSV	2476.26	0.00943305
CAM210_map4	0002.CSV	2480.11	0.00964185
CAM210_map4	0002.CSV	2483.97	0.00989923
CAM210_map4	0002.CSV	2487.83	0.0102376
CAM210_map4	0002.CSV	2491.68	0.0106685
CAM210_map4	0002.CSV	2495.54	0.0111781
CAM210_map4	0002.CSV	2499.4	0.0117371
CAM210_map4	0002.CSV	2503.26	0.0122731
CAM210_map4	0002.CSV	2507.11	0.0126715
CAM210_map4	0002.CSV	2510.97	0.0128564
CAM210_map4	0002.CSV	2514.83	0.012829
CAM210_map4	0002.CSV	2518.68	0.0126017
CAM210_map4	0002.CSV	2522.54	0.0121835
CAM210_map4	0002.CSV	2526.4	0.0116328
CAM210_map4	0002.CSV	2530.26	0.0110512
CAM210_map4	0002.CSV	2534.11	0.0105215
CAM210_map4	0002.CSV	2537.97	0.0100859
CAM210_map4	0002.CSV	2541.83	0.00975123
CAM210_map4	0002.CSV	2545.68	0.00949427
CAM210_map4	0002.CSV	2549.54	0.00929275
CAM210_map4	0002.CSV	2553.4	0.00914749
CAM210_map4	0002.CSV	2557.26	0.00907098
CAM210_map4	0002.CSV	2561.11	0.00902737
CAM210_map4	0002.CSV	2564.97	0.00896374
CAM210_map4	0002.CSV	2568.83	0.00890739
CAM210_map4	0002.CSV	2572.68	0.00889755
CAM210_map4	0002.CSV	2576.54	0.00889728
CAM210_map4	0002.CSV	2580.4	0.00885954
CAM210_map4	0002.CSV	2584.25	0.0087934
CAM210_map4	0002.CSV	2588.11	0.00873312
CAM210_map4	0002.CSV	2591.97	0.00867967
CAM210_map4	0002.CSV	2595.83	0.00861217
CAM210_map4	0002.CSV	2599.68	0.00853681
CAM210_map4	0002.CSV	2603.54	0.00846119
CAM210_map4	0002.CSV	2607.4	0.00838241
CAM210_map4	0002.CSV	2611.25	0.00830611
CAM210_map4	0002.CSV	2615.11	0.00821908
CAM210_map4	0002.CSV	2618.97	0.00812984
CAM210_map4	0002.CSV	2622.82	0.00807691
CAM210_map4	0002.CSV	2626.68	0.00803121
CAM210_map4	0002.CSV	2630.54	0.00796928
CAM210_map4	0002.CSV	2634.4	0.00792618
CAM210_map4	0002.CSV	2638.25	0.00784945
CAM210_map4	0002.CSV	2642.11	0.0076726
CAM210_map4	0002.CSV	2645.97	0.00746265
CAM210_map4	0002.CSV	2649.82	0.00731469
CAM210_map4	0002.CSV	2653.68	0.00725044
CAM210_map4	0002.CSV	2657.54	0.00723083
CAM210_map4	0002.CSV	2661.4	0.0072056
CAM210_map4	0002.CSV	2665.25	0.00719637
CAM210_map4	0002.CSV	2669.11	0.007284
CAM210_map4	0002.CSV	2672.97	0.00747913
CAM210_map4	0002.CSV	2676.82	0.00762772
CAM210_map4	0002.CSV	2680.68	0.00751106
CAM210_map4	0002.CSV	2684.54	0.00718774
CAM210_map4	0002.CSV	2688.4	0.00695133
CAM210_map4	0002.CSV	2692.25	0.00687588
CAM210_map4	0002.CSV	2696.11	0.00685201
CAM210_map4	0002.CSV	2699.97	0.00682697
CAM210_map4	0002.CSV	2703.82	0.00681856
CAM210_map4	0002.CSV	2707.68	0.00685272
CAM210_map4	0002.CSV	2711.54	0.00688396
CAM210_map4	0002.CSV	2715.4	0.00693728
CAM210_map4	0002.CSV	2719.25	0.00714553
CAM210_map4	0002.CSV	2723.11	0.00741843
CAM210_map4	0002.CSV	2726.97	0.00742999
CAM210_map4	0002.CSV	2730.82	0.00719269
CAM210_map4	0002.CSV	2734.68	0.0070346
CAM210_map4	0002.CSV	2738.54	0.00702224
CAM210_map4	0002.CSV	2742.4	0.00713732
CAM210_map4	0002.CSV	2746.25	0.00735517
CAM210_map4	0002.CSV	2750.11	0.00739665
CAM210_map4	0002.CSV	2753.97	0.00720873
CAM210_map4	0002.CSV	2757.82	0.00703035
CAM210_map4	0002.CSV	2761.68	0.00693284
CAM210_map4	0002.CSV	2765.54	0.00697533
CAM210_map4	0002.CSV	2769.39	0.00726196
CAM210_map4	0002.CSV	2773.25	0.00758192
CAM210_map4	0002.CSV	2777.11	0.007606
CAM210_map4	0002.CSV	2780.97	0.00752576
CAM210_map4	0002.CSV	2784.82	0.00778384
CAM210_map4	0002.CSV	2788.68	0.00828074
CAM210_map4	0002.CSV	2792.54	0.00861055
CAM210_map4	0002.CSV	2796.39	0.00866919
CAM210_map4	0002.CSV	2800.25	0.00854059
CAM210_map4	0002.CSV	2804.11	0.00848423
CAM210_map4	0002.CSV	2807.97	0.00870144
CAM210_map4	0002.CSV	2811.82	0.00892129
CAM210_map4	0002.CSV	2815.68	0.00903373
CAM210_map4	0002.CSV	2819.54	0.00929451
CAM210_map4	0002.CSV	2823.39	0.0097498
CAM210_map4	0002.CSV	2827.25	0.0104382
CAM210_map4	0002.CSV	2831.11	0.0116254
CAM210_map4	0002.CSV	2834.97	0.01345
CAM210_map4	0002.CSV	2838.82	0.0161406
CAM210_map4	0002.CSV	2842.68	0.0203735
CAM210_map4	0002.CSV	2846.54	0.0254915
CAM210_map4	0002.CSV	2850.39	0.0282041
CAM210_map4	0002.CSV	2854.25	0.0266363
CAM210_map4	0002.CSV	2858.11	0.0230365
CAM210_map4	0002.CSV	2861.97	0.0199994
CAM210_map4	0002.CSV	2865.82	0.0183506
CAM210_map4	0002.CSV	2869.68	0.0178857
CAM210_map4	0002.CSV	2873.54	0.0176667
CAM210_map4	0002.CSV	2877.39	0.0170456
CAM210_map4	0002.CSV	2881.25	0.0164579
CAM210_map4	0002.CSV	2885.11	0.0165126
CAM210_map4	0002.CSV	2888.97	0.017309
CAM210_map4	0002.CSV	2892.82	0.0185996
CAM210_map4	0002.CSV	2896.68	0.020015
CAM210_map4	0002.CSV	2900.54	0.0216227
CAM210_map4	0002.CSV	2904.39	0.024167
CAM210_map4	0002.CSV	2908.25	0.0285776
CAM210_map4	0002.CSV	2912.11	0.0347503
CAM210_map4	0002.CSV	2915.97	0.0401463
CAM210_map4	0002.CSV	2919.82	0.0414245
CAM210_map4	0002.CSV	2923.68	0.0383412
CAM210_map4	0002.CSV	2927.54	0.0334107
CAM210_map4	0002.CSV	2931.39	0.0284808
CAM210_map4	0002.CSV	2935.25	0.0243066
CAM210_map4	0002.CSV	2939.11	0.0214237
CAM210_map4	0002.CSV	2942.96	0.0197832
CAM210_map4	0002.CSV	2946.82	0.0188523
CAM210_map4	0002.CSV	2950.68	0.0182766
CAM210_map4	0002.CSV	2954.54	0.017771
CAM210_map4	0002.CSV	2958.39	0.0169847
CAM210_map4	0002.CSV	2962.25	0.0157684
CAM210_map4	0002.CSV	2966.11	0.0143473
CAM210_map4	0002.CSV	2969.96	0.0132362
CAM210_map4	0002.CSV	2973.82	0.012582
CAM210_map4	0002.CSV	2977.68	0.0119661
CAM210_map4	0002.CSV	2981.53	0.0110811
CAM210_map4	0002.CSV	2985.39	0.0101936
CAM210_map4	0002.CSV	2989.25	0.00973909
CAM210_map4	0002.CSV	2993.11	0.00956567
CAM210_map4	0002.CSV	2996.96	0.00924925
CAM210_map4	0002.CSV	3000.82	0.00882877
CAM210_map4	0002.CSV	3004.68	0.00864526
CAM210_map4	0002.CSV	3008.53	0.00882637
CAM210_map4	0002.CSV	3012.39	0.00908905
CAM210_map4	0002.CSV	3016.25	0.00907761
CAM210_map4	0002.CSV	3020.11	0.00879621
CAM210_map4	0002.CSV	3023.96	0.00850957
CAM210_map4	0002.CSV	3027.82	0.00845626
CAM210_map4	0002.CSV	3031.68	0.00864334
CAM210_map4	0002.CSV	3035.53	0.00882853
CAM210_map4	0002.CSV	3039.39	0.00889089
CAM210_map4	0002.CSV	3043.25	0.00888382
CAM210_map4	0002.CSV	3047.11	0.0088285
CAM210_map4	0002.CSV	3050.96	0.00875293
CAM210_map4	0002.CSV	3054.82	0.0086432
CAM210_map4	0002.CSV	3058.68	0.00854249
CAM210_map4	0002.CSV	3062.53	0.00863242
CAM210_map4	0002.CSV	3066.39	0.00882714
CAM210_map4	0002.CSV	3070.25	0.0088778
CAM210_map4	0002.CSV	3074.11	0.00889326
CAM210_map4	0002.CSV	3077.96	0.00901726
CAM210_map4	0002.CSV	3081.82	0.00912884
CAM210_map4	0002.CSV	3085.68	0.00913053
CAM210_map4	0002.CSV	3089.53	0.00901201
CAM210_map4	0002.CSV	3093.39	0.00885126
CAM210_map4	0002.CSV	3097.25	0.00881534
CAM210_map4	0002.CSV	3101.11	0.00890983
CAM210_map4	0002.CSV	3104.96	0.00905359
CAM210_map4	0002.CSV	3108.82	0.00923605
CAM210_map4	0002.CSV	3112.68	0.00941778
CAM210_map4	0002.CSV	3116.53	0.00951588
CAM210_map4	0002.CSV	3120.39	0.00943132
CAM210_map4	0002.CSV	3124.25	0.00922444
CAM210_map4	0002.CSV	3128.11	0.0090856
CAM210_map4	0002.CSV	3131.96	0.00909206
CAM210_map4	0002.CSV	3135.82	0.00921091
CAM210_map4	0002.CSV	3139.68	0.00926184
CAM210_map4	0002.CSV	3143.53	0.00917354
CAM210_map4	0002.CSV	3147.39	0.00920305
CAM210_map4	0002.CSV	3151.25	0.00936357
CAM210_map4	0002.CSV	3155.1	0.00930903
CAM210_map4	0002.CSV	3158.96	0.00905271
CAM210_map4	0002.CSV	3162.82	0.00890668
CAM210_map4	0002.CSV	3166.68	0.00889752
CAM210_map4	0002.CSV	3170.53	0.00890963
CAM210_map4	0002.CSV	3174.39	0.00896296
CAM210_map4	0002.CSV	3178.25	0.00906543
CAM210_map4	0002.CSV	3182.1	0.00915439
CAM210_map4	0002.CSV	3185.96	0.00923064
CAM210_map4	0002.CSV	3189.82	0.00927078
CAM210_map4	0002.CSV	3193.68	0.00923209
CAM210_map4	0002.CSV	3197.53	0.00924418
CAM210_map4	0002.CSV	3201.39	0.00938453
CAM210_map4	0002.CSV	3205.25	0.00949942
CAM210_map4	0002.CSV	3209.1	0.00951659
CAM210_map4	0002.CSV	3212.96	0.00955273
CAM210_map4	0002.CSV	3216.82	0.00963714
CAM210_map4	0002.CSV	3220.68	0.00967279
CAM210_map4	0002.CSV	3224.53	0.00972493
CAM210_map4	0002.CSV	3228.39	0.00997938
CAM210_map4	0002.CSV	3232.25	0.0102875
CAM210_map4	0002.CSV	3236.1	0.0103261
CAM210_map4	0002.CSV	3239.96	0.0102579
CAM210_map4	0002.CSV	3243.82	0.0103701
CAM210_map4	0002.CSV	3247.68	0.0104757
CAM210_map4	0002.CSV	3251.53	0.0104245
CAM210_map4	0002.CSV	3255.39	0.0103383
CAM210_map4	0002.CSV	3259.25	0.010238
CAM210_map4	0002.CSV	3263.1	0.0102192
CAM210_map4	0002.CSV	3266.96	0.0104244
CAM210_map4	0002.CSV	3270.82	0.0106757
CAM210_map4	0002.CSV	3274.68	0.0107276
CAM210_map4	0002.CSV	3278.53	0.0106036
CAM210_map4	0002.CSV	3282.39	0.0104902
CAM210_map4	0002.CSV	3286.25	0.0105745
CAM210_map4	0002.CSV	3290.1	0.0108653
CAM210_map4	0002.CSV	3293.96	0.0110883
CAM210_map4	0002.CSV	3297.82	0.0111146
CAM210_map4	0002.CSV	3301.67	0.0111614
CAM210_map4	0002.CSV	3305.53	0.0112649
CAM210_map4	0002.CSV	3309.39	0.0111983
CAM210_map4	0002.CSV	3313.25	0.0109337
CAM210_map4	0002.CSV	3317.1	0.0107355
CAM210_map4	0002.CSV	3320.96	0.0108206
CAM210_map4	0002.CSV	3324.82	0.0110129
CAM210_map4	0002.CSV	3328.67	0.011033
CAM210_map4	0002.CSV	3332.53	0.0110725
CAM210_map4	0002.CSV	3336.39	0.0113219
CAM210_map4	0002.CSV	3340.24	0.0114748
CAM210_map4	0002.CSV	3344.1	0.0113735
CAM210_map4	0002.CSV	3347.96	0.0112229
CAM210_map4	0002.CSV	3351.82	0.0111024
CAM210_map4	0002.CSV	3355.67	0.0110503
CAM210_map4	0002.CSV	3359.53	0.0111668
CAM210_map4	0002.CSV	3363.39	0.0113852
CAM210_map4	0002.CSV	3367.24	0.0115307
CAM210_map4	0002.CSV	3371.1	0.0114939
CAM210_map4	0002.CSV	3374.96	0.011337
CAM210_map4	0002.CSV	3378.82	0.0111204
CAM210_map4	0002.CSV	3382.67	0.0109107
CAM210_map4	0002.CSV	3386.53	0.0109455
CAM210_map4	0002.CSV	3390.39	0.0112231
CAM210_map4	0002.CSV	3394.24	0.0114604
CAM210_map4	0002.CSV	3398.1	0.0115294
CAM210_map4	0002.CSV	3401.96	0.0114413
CAM210_map4	0002.CSV	3405.82	0.0112738
CAM210_map4	0002.CSV	3409.67	0.0110929
CAM210_map4	0002.CSV	3413.53	0.0108417
CAM210_map4	0002.CSV	3417.39	0.0105691
CAM210_map4	0002.CSV	3421.24	0.0104477
CAM210_map4	0002.CSV	3425.1	0.0105399
CAM210_map4	0002.CSV	3428.96	0.0107407
CAM210_map4	0002.CSV	3432.82	0.0108094
CAM210_map4	0002.CSV	3436.67	0.010537
CAM210_map4	0002.CSV	3440.53	0.0100446
CAM210_map4	0002.CSV	3444.39	0.00965747
CAM210_map4	0002.CSV	3448.24	0.00943061
CAM210_map4	0002.CSV	3452.1	0.00927681
CAM210_map4	0002.CSV	3455.96	0.00932413
CAM210_map4	0002.CSV	3459.82	0.00960581
CAM210_map4	0002.CSV	3463.67	0.00988798
CAM210_map4	0002.CSV	3467.53	0.00990117
CAM210_map4	0002.CSV	3471.39	0.00961326
CAM210_map4	0002.CSV	3475.24	0.00930111
CAM210_map4	0002.CSV	3479.1	0.00916799
CAM210_map4	0002.CSV	3482.96	0.00914018
CAM210_map4	0002.CSV	3486.82	0.00911771
CAM210_map4	0002.CSV	3490.67	0.00907399
CAM210_map4	0002.CSV	3494.53	0.00901333
CAM210_map4	0002.CSV	3498.39	0.00888781
CAM210_map4	0002.CSV	3502.24	0.00859223
CAM210_map4	0002.CSV	3506.1	0.00816955
CAM210_map4	0002.CSV	3509.96	0.0078973
CAM210_map4	0002.CSV	3513.81	0.00776768
CAM210_map4	0002.CSV	3517.67	0.00757602
CAM210_map4	0002.CSV	3521.53	0.00738354
CAM210_map4	0002.CSV	3525.39	0.00721621
CAM210_map4	0002.CSV	3529.24	0.00709922
CAM210_map4	0002.CSV	3533.1	0.00715662
CAM210_map4	0002.CSV	3536.96	0.00726533
CAM210_map4	0002.CSV	3540.81	0.00729485
CAM210_map4	0002.CSV	3544.67	0.00723888
CAM210_map4	0002.CSV	3548.53	0.00699941
CAM210_map4	0002.CSV	3552.39	0.00657662
CAM210_map4	0002.CSV	3556.24	0.00614305
CAM210_map4	0002.CSV	3560.1	0.00572442
CAM210_map4	0002.CSV	3563.96	0.0054064
CAM210_map4	0002.CSV	3567.81	0.00543035
CAM210_map4	0002.CSV	3571.67	0.00542723
CAM210_map4	0002.CSV	3575.53	0.00526487
CAM210_map4	0002.CSV	3579.39	0.00523063
CAM210_map4	0002.CSV	3583.24	0.0052413
CAM210_map4	0002.CSV	3587.1	0.00512833
CAM210_map4	0002.CSV	3590.96	0.00489025
CAM210_map4	0002.CSV	3594.81	0.00468297
CAM210_map4	0002.CSV	3598.67	0.00458937
CAM210_map4	0002.CSV	3602.53	0.00428201
CAM210_map4	0002.CSV	3606.39	0.00366734
CAM210_map4	0002.CSV	3610.24	0.00313306
CAM210_map4	0002.CSV	3614.1	0.00301227
CAM210_map4	0002.CSV	3617.96	0.00328097
CAM210_map4	0002.CSV	3621.81	0.00338835
CAM210_map4	0002.CSV	3625.67	0.00307753
CAM210_map4	0002.CSV	3629.53	0.00294171
CAM210_map4	0002.CSV	3633.39	0.00312152
CAM210_map4	0002.CSV	3637.24	0.00304627
CAM210_map4	0002.CSV	3641.1	0.00270629
CAM210_map4	0002.CSV	3644.96	0.00240859
CAM210_map4	0002.CSV	3648.81	0.00273516
CAM210_map4	0002.CSV	3652.67	0.0034139
CAM210_map4	0002.CSV	3656.53	0.0036077
CAM210_map4	0002.CSV	3660.38	0.00335489
CAM210_map4	0002.CSV	3664.24	0.00270179
CAM210_map4	0002.CSV	3668.1	0.00196581
CAM210_map4	0002.CSV	3671.96	0.00174975
CAM210_map4	0002.CSV	3675.81	0.00234285
CAM210_map4	0002.CSV	3679.67	0.00274203
CAM210_map4	0002.CSV	3683.53	0.00267265
CAM210_map4	0002.CSV	3687.38	0.00271612
CAM210_map4	0002.CSV	3691.24	0.00310733
CAM210_map4	0002.CSV	3695.1	0.0030809
CAM210_map4	0002.CSV	3698.95	0.00265448
CAM210_map4	0002.CSV	3702.81	0.00224642
CAM210_map4	0002.CSV	3706.67	0.00194022
CAM210_map4	0002.CSV	3710.53	0.00195593
CAM210_map4	0002.CSV	3714.38	0.00218594
CAM210_map4	0002.CSV	3718.24	0.0020476
CAM210_map4	0002.CSV	3722.1	0.00178106
CAM210_map4	0002.CSV	3725.95	0.0017085
CAM210_map4	0002.CSV	3729.81	0.00173335
CAM210_map4	0002.CSV	3733.67	0.00208136
CAM210_map4	0002.CSV	3737.53	0.00251082
CAM210_map4	0002.CSV	3741.38	0.00208991
CAM210_map4	0002.CSV	3745.24	0.00129349
CAM210_map4	0002.CSV	3749.1	0.00118699
CAM210_map4	0002.CSV	3752.95	0.00173465
CAM210_map4	0002.CSV	3756.81	0.00201121
CAM210_map4	0002.CSV	3760.67	0.00200429
CAM210_map4	0002.CSV	3764.53	0.00192694
CAM210_map4	0002.CSV	3768.38	0.00199297
CAM210_map4	0002.CSV	3772.24	0.00207979
CAM210_map4	0002.CSV	3776.1	0.0020219
CAM210_map4	0002.CSV	3779.95	0.00201654
CAM210_map4	0002.CSV	3783.81	0.00212334
CAM210_map4	0002.CSV	3787.67	0.00211751
CAM210_map4	0002.CSV	3791.53	0.001831
CAM210_map4	0002.CSV	3795.38	0.00139131
CAM210_map4	0002.CSV	3799.24	0.00124683
CAM210_map4	0002.CSV	3803.1	0.00167823
CAM210_map4	0002.CSV	3806.95	0.00197769
CAM210_map4	0002.CSV	3810.81	0.0017569
CAM210_map4	0002.CSV	3814.67	0.00138146
CAM210_map4	0002.CSV	3818.53	0.00133337
CAM210_map4	0002.CSV	3822.38	0.00159342
CAM210_map4	0002.CSV	3826.24	0.00156555
CAM210_map4	0002.CSV	3830.1	0.00134264
CAM210_map4	0002.CSV	3833.95	0.00121719
CAM210_map4	0002.CSV	3837.81	0.00144665
CAM210_map4	0002.CSV	3841.67	0.00180245
CAM210_map4	0002.CSV	3845.53	0.00161457
CAM210_map4	0002.CSV	3849.38	0.00107351
CAM210_map4	0002.CSV	3853.24	0.000893483
CAM210_map4	0002.CSV	3857.1	0.00112619
CAM210_map4	0002.CSV	3860.95	0.00103511
CAM210_map4	0002.CSV	3864.81	0.000895907
CAM210_map4	0002.CSV	3868.67	0.00098025
CAM210_map4	0002.CSV	3872.52	0.00112988
CAM210_map4	0002.CSV	3876.38	0.00107985
CAM210_map4	0002.CSV	3880.24	0.00104505
CAM210_map4	0002.CSV	3884.1	0.00123278
CAM210_map4	0002.CSV	3887.95	0.0013008
CAM210_map4	0002.CSV	3891.81	0.00111879
CAM210_map4	0002.CSV	3895.67	0.000822801
CAM210_map4	0002.CSV	3899.52	0.000708519
CAM210_map4	0002.CSV	3903.38	0.00114091
CAM210_map4	0002.CSV	3907.24	0.0013931
CAM210_map4	0002.CSV	3911.1	0.0011455
CAM210_map4	0002.CSV	3914.95	0.00089428
CAM210_map4	0002.CSV	3918.81	0.000893616
CAM210_map4	0002.CSV	3922.67	0.00100081
CAM210_map4	0002.CSV	3926.52	0.00108301
CAM210_map4	0002.CSV	3930.38	0.00122161
CAM210_map4	0002.CSV	3934.24	0.00128448
CAM210_map4	0002.CSV	3938.09	0.00113154
CAM210_map4	0002.CSV	3941.95	0.00098978
CAM210_map4	0002.CSV	3945.81	0.0010026
CAM210_map4	0002.CSV	3949.67	0.00107859
CAM210_map4	0002.CSV	3953.52	0.0011327
CAM210_map4	0002.CSV	3957.38	0.00115892
CAM210_map4	0002.CSV	3961.24	0.00121802
CAM210_map4	0002.CSV	3965.09	0.00126631
CAM210_map4	0002.CSV	3968.95	0.00125178
CAM210_map4	0002.CSV	3972.81	0.00124753
CAM210_map4	0002.CSV	3976.67	0.00127072
CAM210_map4	0002.CSV	3980.52	0.00127647
CAM210_map4	0002.CSV	3984.38	0.00125783
CAM210_map4	0002.CSV	3988.24	0.00123617
CAM210_map4	0002.CSV	3992.09	0.00125188
CAM210_map4	0002.CSV	3995.95	0.00128152
CAM210_map4	0002.CSV	3999.81	0.00126298
CAM210_map4	0003.CSV	674.992	0.0462319
CAM210_map4	0003.CSV	678.849	0.0465584
CAM210_map4	0003.CSV	682.706	0.0474111
CAM210_map4	0003.CSV	686.563	0.0491252
CAM210_map4	0003.CSV	690.42	0.0517539
CAM210_map4	0003.CSV	694.277	0.0556343
CAM210_map4	0003.CSV	698.134	0.0610245
CAM210_map4	0003.CSV	701.991	0.0690386
CAM210_map4	0003.CSV	705.849	0.0813447
CAM210_map4	0003.CSV	709.706	0.0909927
CAM210_map4	0003.CSV	713.563	0.0845739
CAM210_map4	0003.CSV	717.42	0.0648725
CAM210_map4	0003.CSV	721.277	0.0482461
CAM210_map4	0003.CSV	725.134	0.0410676
CAM210_map4	0003.CSV	728.991	0.0389222
CAM210_map4	0003.CSV	732.848	0.0382981
CAM210_map4	0003.CSV	736.705	0.0382102
CAM210_map4	0003.CSV	740.562	0.0383178
CAM210_map4	0003.CSV	744.42	0.0386154
CAM210_map4	0003.CSV	748.277	0.0391994
CAM210_map4	0003.CSV	752.134	0.039983
CAM210_map4	0003.CSV	755.991	0.0408492
CAM210_map4	0003.CSV	759.848	0.0417397
CAM210_map4	0003.CSV	763.705	0.0425392
CAM210_map4	0003.CSV	767.562	0.0432203
CAM210_map4	0003.CSV	771.419	0.0439896
CAM210_map4	0003.CSV	775.276	0.0449214
CAM210_map4	0003.CSV	779.133	0.045728
CAM210_map4	0003.CSV	782.99	0.0461702
CAM210_map4	0003.CSV	786.848	0.0464448
CAM210_map4	0003.CSV	790.705	0.0468979
CAM210_map4	0003.CSV	794.562	0.047641
CAM210_map4	0003.CSV	798.419	0.0485118
CAM210_map4	0003.CSV	802.276	0.049262
CAM210_map4	0003.CSV	806.133	0.0498518
CAM210_map4	0003.CSV	809.99	0.0504616
CAM210_map4	0003.CSV	813.847	0.0512068
CAM210_map4	0003.CSV	817.704	0.0522063
CAM210_map4	0003.CSV	821.562	0.0535763
CAM210_map4	0003.CSV	825.419	0.055246
CAM210_map4	0003.CSV	829.276	0.0572186
CAM210_map4	0003.CSV	833.133	0.0597655
CAM210_map4	0003.CSV	836.99	0.0633388
CAM210_map4	0003.CSV	840.847	0.0685115
CAM210_map4	0003.CSV	844.704	0.0752866
CAM210_map4	0003.CSV	848.561	0.0833044
CAM210_map4	0003.CSV	852.418	0.0935226
CAM210_map4	0003.CSV	856.275	0.107125
CAM210_map4	0003.CSV	860.132	0.124757
CAM210_map4	0003.CSV	863.99	0.147765
CAM210_map4	0003.CSV	867.847	0.17145
CAM210_map4	0003.CSV	871.704	0.179666
CAM210_map4	0003.CSV	875.561	0.162116
CAM210_map4	0003.CSV	879.418	0.127302
CAM210_map4	0003.CSV	883.275	0.0886068
CAM210_map4	0003.CSV	887.132	0.0573929
CAM210_map4	0003.CSV	890.989	0.0409281
CAM210_map4	0003.CSV	894.846	0.0366668
CAM210_map4	0003.CSV	898.703	0.0371842
CAM210_map4	0003.CSV	902.561	0.0384176
CAM210_map4	0003.CSV	906.418	0.0395629
CAM210_map4	0003.CSV	910.275	0.0405638
CAM210_map4	0003.CSV	914.132	0.0414648
CAM210_map4	0003.CSV	917.989	0.0423401
CAM210_map4	0003.CSV	921.846	0.0432667
CAM210_map4	0003.CSV	925.703	0.0442394
CAM210_map4	0003.CSV	929.56	0.045155
CAM210_map4	0003.CSV	933.417	0.0459315
CAM210_map4	0003.CSV	937.274	0.0465475
CAM210_map4	0003.CSV	941.131	0.047062
CAM210_map4	0003.CSV	944.989	0.0475972
CAM210_map4	0003.CSV	948.846	0.0482592
CAM210_map4	0003.CSV	952.703	0.0490334
CAM210_map4	0003.CSV	956.56	0.0497525
CAM210_map4	0003.CSV	960.417	0.0502963
CAM210_map4	0003.CSV	964.274	0.0507957
CAM210_map4	0003.CSV	968.131	0.0514712
CAM210_map4	0003.CSV	971.988	0.0523409
CAM210_map4	0003.CSV	975.845	0.0532529
CAM210_map4	0003.CSV	979.702	0.0541231
CAM210_map4	0003.CSV	983.559	0.0550018
CAM210_map4	0003.CSV	987.417	0.0559581
CAM210_map4	0003.CSV	991.274	0.0569821
CAM210_map4	0003.CSV	995.131	0.0580202
CAM210_map4	0003.CSV	998.988	0.0590187
CAM210_map4	0003.CSV	1002.85	0.0600084
CAM210_map4	0003.CSV	1006.7	0.0610568
CAM210_map4	0003.CSV	1010.56	0.0620962
CAM210_map4	0003.CSV	1014.42	0.0629951
CAM210_map4	0003.CSV	1018.27	0.0637524
CAM210_map4	0003.CSV	1022.13	0.0644839
CAM210_map4	0003.CSV	1025.99	0.0652589
CAM210_map4	0003.CSV	1029.85	0.0660251
CAM210_map4	0003.CSV	1033.7	0.066726
CAM210_map4	0003.CSV	1037.56	0.0673878
CAM210_map4	0003.CSV	1041.42	0.068077
CAM210_map4	0003.CSV	1045.27	0.0688318
CAM210_map4	0003.CSV	1049.13	0.0696429
CAM210_map4	0003.CSV	1052.99	0.0705696
CAM210_map4	0003.CSV	1056.84	0.0717309
CAM210_map4	0003.CSV	1060.7	0.0731343
CAM210_map4	0003.CSV	1064.56	0.0747224
CAM210_map4	0003.CSV	1068.42	0.0764316
CAM210_map4	0003.CSV	1072.27	0.0782374
CAM210_map4	0003.CSV	1076.13	0.0802627
CAM210_map4	0003.CSV	1079.99	0.0822869
CAM210_map4	0003.CSV	1083.84	0.0833361
CAM210_map4	0003.CSV	1087.7	0.0829407
CAM210_map4	0003.CSV	1091.56	0.081786
CAM210_map4	0003.CSV	1095.41	0.0805593
CAM210_map4	0003.CSV	1099.27	0.0795819
CAM210_map4	0003.CSV	1103.13	0.0790984
CAM210_map4	0003.CSV	1106.99	0.0791174
CAM210_map4	0003.CSV	1110.84	0.0792375
CAM210_map4	0003.CSV	1114.7	0.0789752
CAM210_map4	0003.CSV	1118.56	0.0783873
CAM210_map4	0003.CSV	1122.41	0.0779336
CAM210_map4	0003.CSV	1126.27	0.0778106
CAM210_map4	0003.CSV	1130.13	0.0778872
CAM210_map4	0003.CSV	1133.99	0.0781198
CAM210_map4	0003.CSV	1137.84	0.0785561
CAM210_map4	0003.CSV	1141.7	0.0791259
CAM210_map4	0003.CSV	1145.56	0.0797083
CAM210_map4	0003.CSV	1149.41	0.0802398
CAM210_map4	0003.CSV	1153.27	0.0807329
CAM210_map4	0003.CSV	1157.13	0.0812728
CAM210_map4	0003.CSV	1160.99	0.0818759
CAM210_map4	0003.CSV	1164.84	0.0823867
CAM210_map4	0003.CSV	1168.7	0.0826675
CAM210_map4	0003.CSV	1172.56	0.0827822
CAM210_map4	0003.CSV	1176.41	0.0828229
CAM210_map4	0003.CSV	1180.27	0.0827657
CAM210_map4	0003.CSV	1184.13	0.0825922
CAM210_map4	0003.CSV	1187.99	0.0823613
CAM210_map4	0003.CSV	1191.84	0.0821318
CAM210_map4	0003.CSV	1195.7	0.0819771
CAM210_map4	0003.CSV	1199.56	0.0820178
CAM210_map4	0003.CSV	1203.41	0.082334
CAM210_map4	0003.CSV	1207.27	0.0829076
CAM210_map4	0003.CSV	1211.13	0.0836462
CAM210_map4	0003.CSV	1214.98	0.0844689
CAM210_map4	0003.CSV	1218.84	0.0853886
CAM210_map4	0003.CSV	1222.7	0.0864383
CAM210_map4	0003.CSV	1226.56	0.0876142
CAM210_map4	0003.CSV	1230.41	0.0888776
CAM210_map4	0003.CSV	1234.27	0.0901615
CAM210_map4	0003.CSV	1238.13	0.0914278
CAM210_map4	0003.CSV	1241.98	0.0927009
CAM210_map4	0003.CSV	1245.84	0.0940177
CAM210_map4	0003.CSV	1249.7	0.0954094
CAM210_map4	0003.CSV	1253.56	0.0968891
CAM210_map4	0003.CSV	1257.41	0.0984175
CAM210_map4	0003.CSV	1261.27	0.0999377
CAM210_map4	0003.CSV	1265.13	0.101482
CAM210_map4	0003.CSV	1268.98	0.103189
CAM210_map4	0003.CSV	1272.84	0.105097
CAM210_map4	0003.CSV	1276.7	0.107109
CAM210_map4	0003.CSV	1280.56	0.10922
CAM210_map4	0003.CSV	1284.41	0.111516
CAM210_map4	0003.CSV	1288.27	0.114041
CAM210_map4	0003.CSV	1292.13	0.116712
CAM210_map4	0003.CSV	1295.98	0.119453
CAM210_map4	0003.CSV	1299.84	0.122276
CAM210_map4	0003.CSV	1303.7	0.125225
CAM210_map4	0003.CSV	1307.56	0.128376
CAM210_map4	0003.CSV	1311.41	0.131788
CAM210_map4	0003.CSV	1315.27	0.135487
CAM210_map4	0003.CSV	1319.13	0.13934
CAM210_map4	0003.CSV	1322.98	0.143119
CAM210_map4	0003.CSV	1326.84	0.146959
CAM210_map4	0003.CSV	1330.7	0.151064
CAM210_map4	0003.CSV	1334.56	0.155614
CAM210_map4	0003.CSV	1338.41	0.161316
CAM210_map4	0003.CSV	1342.27	0.167729
CAM210_map4	0003.CSV	1346.13	0.173696
CAM210_map4	0003.CSV	1349.98	0.179843
CAM210_map4	0003.CSV	1353.84	0.186573
CAM210_map4	0003.CSV	1357.7	0.193834
CAM210_map4	0003.CSV	1361.56	0.202404
CAM210_map4	0003.CSV	1365.41	0.211673
CAM210_map4	0003.CSV	1369.27	0.220275
CAM210_map4	0003.CSV	1373.13	0.229619
CAM210_map4	0003.CSV	1376.98	0.239729
CAM210_map4	0003.CSV	1380.84	0.248303
CAM210_map4	0003.CSV	1384.7	0.255827
CAM210_map4	0003.CSV	1388.56	0.262839
CAM210_map4	0003.CSV	1392.41	0.267639
CAM210_map4	0003.CSV	1396.27	0.269187
CAM210_map4	0003.CSV	1400.13	0.267507
CAM210_map4	0003.CSV	1403.98	0.263155
CAM210_map4	0003.CSV	1407.84	0.256229
CAM210_map4	0003.CSV	1411.7	0.247486
CAM210_map4	0003.CSV	1415.55	0.23735
CAM210_map4	0003.CSV	1419.41	0.225562
CAM210_map4	0003.CSV	1423.27	0.215661
CAM210_map4	0003.CSV	1427.12	0.209276
CAM210_map4	0003.CSV	1430.98	0.20405
CAM210_map4	0003.CSV	1434.84	0.198431
CAM210_map4	0003.CSV	1438.7	0.192698
CAM210_map4	0003.CSV	1442.55	0.187843
CAM210_map4	0003.CSV	1446.41	0.18307
CAM210_map4	0003.CSV	1450.27	0.177994
CAM210_map4	0003.CSV	1454.12	0.172366
CAM210_map4	0003.CSV	1457.98	0.165031
CAM210_map4	0003.CSV	1461.84	0.158784
CAM210_map4	0003.CSV	1465.7	0.154268
CAM210_map4	0003.CSV	1469.55	0.148949
CAM210_map4	0003.CSV	1473.41	0.140643
CAM210_map4	0003.CSV	1477.27	0.132034
CAM210_map4	0003.CSV	1481.12	0.126351
CAM210_map4	0003.CSV	1484.98	0.121577
CAM210_map4	0003.CSV	1488.84	0.115834
CAM210_map4	0003.CSV	1492.7	0.109848
CAM210_map4	0003.CSV	1496.55	0.104709
CAM210_map4	0003.CSV	1500.41	0.100218
CAM210_map4	0003.CSV	1504.27	0.0960386
CAM210_map4	0003.CSV	1508.12	0.0904673
CAM210_map4	0003.CSV	1511.98	0.0855545
CAM210_map4	0003.CSV	1515.84	0.0823398
CAM210_map4	0003.CSV	1519.7	0.0785184
CAM210_map4	0003.CSV	1523.55	0.074361
CAM210_map4	0003.CSV	1527.41	0.0719873
CAM210_map4	0003.CSV	1531.27	0.0711704
CAM210_map4	0003.CSV	1535.12	0.0710282
CAM210_map4	0003.CSV	1538.98	0.0692882
CAM210_map4	0003.CSV	1542.84	0.0626794
CAM210_map4	0003.CSV	1546.7	0.0564638
CAM210_map4	0003.CSV	1550.55	0.0523339
CAM210_map4	0003.CSV	1554.41	0.0486083
CAM210_map4	0003.CSV	1558.27	0.0449667
CAM210_map4	0003.CSV	1562.12	0.0432195
CAM210_map4	0003.CSV	1565.98	0.0434015
CAM210_map4	0003.CSV	1569.84	0.0445385
CAM210_map4	0003.CSV	1573.69	0.0454216
CAM210_map4	0003.CSV	1577.55	0.0440766
CAM210_map4	0003.CSV	1581.41	0.0405977
CAM210_map4	0003.CSV	1585.27	0.0365888
CAM210_map4	0003.CSV	1589.12	0.0329733
CAM210_map4	0003.CSV	1592.98	0.0302353
CAM210_map4	0003.CSV	1596.84	0.0283853
CAM210_map4	0003.CSV	1600.69	0.0271648
CAM210_map4	0003.CSV	1604.55	0.0263136
CAM210_map4	0003.CSV	1608.41	0.0256977
CAM210_map4	0003.CSV	1612.27	0.0252479
CAM210_map4	0003.CSV	1616.12	0.0248758
CAM210_map4	0003.CSV	1619.98	0.0244909
CAM210_map4	0003.CSV	1623.84	0.0240793
CAM210_map4	0003.CSV	1627.69	0.023624
CAM210_map4	0003.CSV	1631.55	0.0231161
CAM210_map4	0003.CSV	1635.41	0.0226129
CAM210_map4	0003.CSV	1639.27	0.0221364
CAM210_map4	0003.CSV	1643.12	0.0216787
CAM210_map4	0003.CSV	1646.98	0.021347
CAM210_map4	0003.CSV	1650.84	0.0212924
CAM210_map4	0003.CSV	1654.69	0.021206
CAM210_map4	0003.CSV	1658.55	0.0208944
CAM210_map4	0003.CSV	1662.41	0.0205401
CAM210_map4	0003.CSV	1666.27	0.0202299
CAM210_map4	0003.CSV	1670.12	0.0200437
CAM210_map4	0003.CSV	1673.98	0.0199486
CAM210_map4	0003.CSV	1677.84	0.0197607
CAM210_map4	0003.CSV	1681.69	0.019566
CAM210_map4	0003.CSV	1685.55	0.0195241
CAM210_map4	0003.CSV	1689.41	0.0193886
CAM210_map4	0003.CSV	1693.27	0.0191177
CAM210_map4	0003.CSV	1697.12	0.0190145
CAM210_map4	0003.CSV	1700.98	0.0192691
CAM210_map4	0003.CSV	1704.84	0.0194475
CAM210_map4	0003.CSV	1708.69	0.0194017
CAM210_map4	0003.CSV	1712.55	0.0193493
CAM210_map4	0003.CSV	1716.41	0.0196238
CAM210_map4	0003.CSV	1720.27	0.0200067
CAM210_map4	0003.CSV	1724.12	0.0200598
[truncated: 100,698 more rows]

## Sheet: CAM210_map5
Map	Select spectrum number	Wavenumbers	Absorbance
CAM210_map5	0001.CSV	674.992	0.0301188
CAM210_map5	0001.CSV	678.849	0.0305372
CAM210_map5	0001.CSV	682.706	0.0312613
CAM210_map5	0001.CSV	686.563	0.0329788
CAM210_map5	0001.CSV	690.42	0.0371843
CAM210_map5	0001.CSV	694.277	0.0450148
CAM210_map5	0001.CSV	698.134	0.0515893
CAM210_map5	0001.CSV	701.991	0.0519255
CAM210_map5	0001.CSV	705.849	0.0538184
CAM210_map5	0001.CSV	709.706	0.0617623
CAM210_map5	0001.CSV	713.563	0.0614716
CAM210_map5	0001.CSV	717.42	0.0467363
CAM210_map5	0001.CSV	721.277	0.032068
CAM210_map5	0001.CSV	725.134	0.0259437
CAM210_map5	0001.CSV	728.991	0.0241556
CAM210_map5	0001.CSV	732.848	0.0233458
CAM210_map5	0001.CSV	736.705	0.0231547
CAM210_map5	0001.CSV	740.562	0.0233819
CAM210_map5	0001.CSV	744.42	0.0237718
CAM210_map5	0001.CSV	748.277	0.0242475
CAM210_map5	0001.CSV	752.134	0.0247584
CAM210_map5	0001.CSV	755.991	0.0252727
CAM210_map5	0001.CSV	759.848	0.0258109
CAM210_map5	0001.CSV	763.705	0.0264306
CAM210_map5	0001.CSV	767.562	0.027099
CAM210_map5	0001.CSV	771.419	0.0277673
CAM210_map5	0001.CSV	775.276	0.028434
CAM210_map5	0001.CSV	779.133	0.0290112
CAM210_map5	0001.CSV	782.99	0.0293991
CAM210_map5	0001.CSV	786.848	0.0297416
CAM210_map5	0001.CSV	790.705	0.0303077
CAM210_map5	0001.CSV	794.562	0.0311995
CAM210_map5	0001.CSV	798.419	0.0322189
CAM210_map5	0001.CSV	802.276	0.0331339
CAM210_map5	0001.CSV	806.133	0.0340323
CAM210_map5	0001.CSV	809.99	0.0351925
CAM210_map5	0001.CSV	813.847	0.0368226
CAM210_map5	0001.CSV	817.704	0.0389943
CAM210_map5	0001.CSV	821.562	0.0418013
CAM210_map5	0001.CSV	825.419	0.0454942
CAM210_map5	0001.CSV	829.276	0.0504892
CAM210_map5	0001.CSV	833.133	0.0577458
CAM210_map5	0001.CSV	836.99	0.0687062
CAM210_map5	0001.CSV	840.847	0.0837019
CAM210_map5	0001.CSV	844.704	0.10281
CAM210_map5	0001.CSV	848.561	0.126413
CAM210_map5	0001.CSV	852.418	0.146548
CAM210_map5	0001.CSV	856.275	0.148763
CAM210_map5	0001.CSV	860.132	0.130805
CAM210_map5	0001.CSV	863.99	0.103144
CAM210_map5	0001.CSV	867.847	0.0756563
CAM210_map5	0001.CSV	871.704	0.0540584
CAM210_map5	0001.CSV	875.561	0.0403036
CAM210_map5	0001.CSV	879.418	0.0327319
CAM210_map5	0001.CSV	883.275	0.028497
CAM210_map5	0001.CSV	887.132	0.0260634
CAM210_map5	0001.CSV	890.989	0.0249468
CAM210_map5	0001.CSV	894.846	0.0246486
CAM210_map5	0001.CSV	898.703	0.0247598
CAM210_map5	0001.CSV	902.561	0.025193
CAM210_map5	0001.CSV	906.418	0.0257299
CAM210_map5	0001.CSV	910.275	0.0259659
CAM210_map5	0001.CSV	914.132	0.0259658
CAM210_map5	0001.CSV	917.989	0.0261401
CAM210_map5	0001.CSV	921.846	0.0265353
CAM210_map5	0001.CSV	925.703	0.0269675
CAM210_map5	0001.CSV	929.56	0.0273613
CAM210_map5	0001.CSV	933.417	0.0277158
CAM210_map5	0001.CSV	937.274	0.0280242
CAM210_map5	0001.CSV	941.131	0.0282738
CAM210_map5	0001.CSV	944.989	0.0285394
CAM210_map5	0001.CSV	948.846	0.0289906
CAM210_map5	0001.CSV	952.703	0.0296004
CAM210_map5	0001.CSV	956.56	0.0301145
CAM210_map5	0001.CSV	960.417	0.0304333
CAM210_map5	0001.CSV	964.274	0.0307292
CAM210_map5	0001.CSV	968.131	0.03119
CAM210_map5	0001.CSV	971.988	0.0318269
CAM210_map5	0001.CSV	975.845	0.0325348
CAM210_map5	0001.CSV	979.702	0.0332556
CAM210_map5	0001.CSV	983.559	0.0339683
CAM210_map5	0001.CSV	987.417	0.0346696
CAM210_map5	0001.CSV	991.274	0.035384
CAM210_map5	0001.CSV	995.131	0.0361284
CAM210_map5	0001.CSV	998.988	0.0369445
CAM210_map5	0001.CSV	1002.85	0.0378633
CAM210_map5	0001.CSV	1006.7	0.0387576
CAM210_map5	0001.CSV	1010.56	0.0394247
CAM210_map5	0001.CSV	1014.42	0.0398918
CAM210_map5	0001.CSV	1018.27	0.0403903
CAM210_map5	0001.CSV	1022.13	0.0410252
CAM210_map5	0001.CSV	1025.99	0.0417172
CAM210_map5	0001.CSV	1029.85	0.042351
CAM210_map5	0001.CSV	1033.7	0.04288
CAM210_map5	0001.CSV	1037.56	0.0433269
CAM210_map5	0001.CSV	1041.42	0.0437645
CAM210_map5	0001.CSV	1045.27	0.0442791
CAM210_map5	0001.CSV	1049.13	0.0448988
CAM210_map5	0001.CSV	1052.99	0.0456149
CAM210_map5	0001.CSV	1056.84	0.0464475
CAM210_map5	0001.CSV	1060.7	0.0474633
CAM210_map5	0001.CSV	1064.56	0.0487599
CAM210_map5	0001.CSV	1068.42	0.0504026
CAM210_map5	0001.CSV	1072.27	0.0527621
CAM210_map5	0001.CSV	1076.13	0.056726
CAM210_map5	0001.CSV	1079.99	0.0610298
CAM210_map5	0001.CSV	1083.84	0.0610857
CAM210_map5	0001.CSV	1087.7	0.0563763
CAM210_map5	0001.CSV	1091.56	0.0521383
CAM210_map5	0001.CSV	1095.41	0.0506932
CAM210_map5	0001.CSV	1099.27	0.0504489
CAM210_map5	0001.CSV	1103.13	0.0504214
CAM210_map5	0001.CSV	1106.99	0.0506542
CAM210_map5	0001.CSV	1110.84	0.0509443
CAM210_map5	0001.CSV	1114.7	0.0508408
CAM210_map5	0001.CSV	1118.56	0.0503709
CAM210_map5	0001.CSV	1122.41	0.0499626
CAM210_map5	0001.CSV	1126.27	0.0498284
CAM210_map5	0001.CSV	1130.13	0.0498651
CAM210_map5	0001.CSV	1133.99	0.0499642
CAM210_map5	0001.CSV	1137.84	0.0501398
CAM210_map5	0001.CSV	1141.7	0.0504243
CAM210_map5	0001.CSV	1145.56	0.0508009
CAM210_map5	0001.CSV	1149.41	0.0512311
CAM210_map5	0001.CSV	1153.27	0.0516776
CAM210_map5	0001.CSV	1157.13	0.0521513
CAM210_map5	0001.CSV	1160.99	0.0526513
CAM210_map5	0001.CSV	1164.84	0.0531249
CAM210_map5	0001.CSV	1168.7	0.0535405
CAM210_map5	0001.CSV	1172.56	0.0539008
CAM210_map5	0001.CSV	1176.41	0.05421
CAM210_map5	0001.CSV	1180.27	0.0544294
CAM210_map5	0001.CSV	1184.13	0.0544967
CAM210_map5	0001.CSV	1187.99	0.0544353
CAM210_map5	0001.CSV	1191.84	0.0543329
CAM210_map5	0001.CSV	1195.7	0.0542677
CAM210_map5	0001.CSV	1199.56	0.0543112
CAM210_map5	0001.CSV	1203.41	0.0545102
CAM210_map5	0001.CSV	1207.27	0.0548531
CAM210_map5	0001.CSV	1211.13	0.0553001
CAM210_map5	0001.CSV	1214.98	0.0558107
CAM210_map5	0001.CSV	1218.84	0.0563934
CAM210_map5	0001.CSV	1222.7	0.0570782
CAM210_map5	0001.CSV	1226.56	0.0578405
CAM210_map5	0001.CSV	1230.41	0.0586342
CAM210_map5	0001.CSV	1234.27	0.0594216
CAM210_map5	0001.CSV	1238.13	0.0601619
CAM210_map5	0001.CSV	1241.98	0.0608618
CAM210_map5	0001.CSV	1245.84	0.06156
CAM210_map5	0001.CSV	1249.7	0.0622774
CAM210_map5	0001.CSV	1253.56	0.0630286
CAM210_map5	0001.CSV	1257.41	0.0638262
CAM210_map5	0001.CSV	1261.27	0.0646508
CAM210_map5	0001.CSV	1265.13	0.0655099
CAM210_map5	0001.CSV	1268.98	0.0665069
CAM210_map5	0001.CSV	1272.84	0.0676551
CAM210_map5	0001.CSV	1276.7	0.0687954
CAM210_map5	0001.CSV	1280.56	0.069844
CAM210_map5	0001.CSV	1284.41	0.0708827
CAM210_map5	0001.CSV	1288.27	0.0720143
CAM210_map5	0001.CSV	1292.13	0.0732269
CAM210_map5	0001.CSV	1295.98	0.0744741
CAM210_map5	0001.CSV	1299.84	0.0757273
CAM210_map5	0001.CSV	1303.7	0.0769677
CAM210_map5	0001.CSV	1307.56	0.0782636
CAM210_map5	0001.CSV	1311.41	0.0797224
CAM210_map5	0001.CSV	1315.27	0.0813832
CAM210_map5	0001.CSV	1319.13	0.0831474
CAM210_map5	0001.CSV	1322.98	0.084868
CAM210_map5	0001.CSV	1326.84	0.0866158
CAM210_map5	0001.CSV	1330.7	0.0884868
CAM210_map5	0001.CSV	1334.56	0.0905572
CAM210_map5	0001.CSV	1338.41	0.0931795
CAM210_map5	0001.CSV	1342.27	0.0961345
CAM210_map5	0001.CSV	1346.13	0.0988569
CAM210_map5	0001.CSV	1349.98	0.101639
CAM210_map5	0001.CSV	1353.84	0.10464
CAM210_map5	0001.CSV	1357.7	0.107847
CAM210_map5	0001.CSV	1361.56	0.111677
CAM210_map5	0001.CSV	1365.41	0.115873
CAM210_map5	0001.CSV	1369.27	0.119858
CAM210_map5	0001.CSV	1373.13	0.12444
CAM210_map5	0001.CSV	1376.98	0.129649
CAM210_map5	0001.CSV	1380.84	0.13427
CAM210_map5	0001.CSV	1384.7	0.138759
CAM210_map5	0001.CSV	1388.56	0.143739
CAM210_map5	0001.CSV	1392.41	0.148801
CAM210_map5	0001.CSV	1396.27	0.1545
CAM210_map5	0001.CSV	1400.13	0.160545
CAM210_map5	0001.CSV	1403.98	0.165828
CAM210_map5	0001.CSV	1407.84	0.170613
CAM210_map5	0001.CSV	1411.7	0.174727
CAM210_map5	0001.CSV	1415.55	0.17837
CAM210_map5	0001.CSV	1419.41	0.182345
CAM210_map5	0001.CSV	1423.27	0.186098
CAM210_map5	0001.CSV	1427.12	0.189328
CAM210_map5	0001.CSV	1430.98	0.19279
CAM210_map5	0001.CSV	1434.84	0.196648
CAM210_map5	0001.CSV	1438.7	0.199859
CAM210_map5	0001.CSV	1442.55	0.201298
CAM210_map5	0001.CSV	1446.41	0.20112
CAM210_map5	0001.CSV	1450.27	0.199668
CAM210_map5	0001.CSV	1454.12	0.197104
CAM210_map5	0001.CSV	1457.98	0.193414
CAM210_map5	0001.CSV	1461.84	0.189924
CAM210_map5	0001.CSV	1465.7	0.186363
CAM210_map5	0001.CSV	1469.55	0.180302
CAM210_map5	0001.CSV	1473.41	0.168803
CAM210_map5	0001.CSV	1477.27	0.156369
CAM210_map5	0001.CSV	1481.12	0.148314
CAM210_map5	0001.CSV	1484.98	0.141819
CAM210_map5	0001.CSV	1488.84	0.134387
CAM210_map5	0001.CSV	1492.7	0.127095
CAM210_map5	0001.CSV	1496.55	0.12122
CAM210_map5	0001.CSV	1500.41	0.116221
CAM210_map5	0001.CSV	1504.27	0.111543
CAM210_map5	0001.CSV	1508.12	0.105246
CAM210_map5	0001.CSV	1511.98	0.0996144
CAM210_map5	0001.CSV	1515.84	0.0958091
CAM210_map5	0001.CSV	1519.7	0.0911804
CAM210_map5	0001.CSV	1523.55	0.0859412
CAM210_map5	0001.CSV	1527.41	0.0825763
CAM210_map5	0001.CSV	1531.27	0.0808126
CAM210_map5	0001.CSV	1535.12	0.0796897
CAM210_map5	0001.CSV	1538.98	0.0773335
CAM210_map5	0001.CSV	1542.84	0.0711164
CAM210_map5	0001.CSV	1546.7	0.0655166
CAM210_map5	0001.CSV	1550.55	0.0617841
CAM210_map5	0001.CSV	1554.41	0.0582401
CAM210_map5	0001.CSV	1558.27	0.0540765
CAM210_map5	0001.CSV	1562.12	0.0512341
CAM210_map5	0001.CSV	1565.98	0.0502678
CAM210_map5	0001.CSV	1569.84	0.0498279
CAM210_map5	0001.CSV	1573.69	0.0486173
CAM210_map5	0001.CSV	1577.55	0.0452197
CAM210_map5	0001.CSV	1581.41	0.0405187
CAM210_map5	0001.CSV	1585.27	0.0360187
CAM210_map5	0001.CSV	1589.12	0.0322943
CAM210_map5	0001.CSV	1592.98	0.0296793
CAM210_map5	0001.CSV	1596.84	0.0280343
CAM210_map5	0001.CSV	1600.69	0.0270266
CAM210_map5	0001.CSV	1604.55	0.0264114
CAM210_map5	0001.CSV	1608.41	0.0259962
CAM210_map5	0001.CSV	1612.27	0.0256262
CAM210_map5	0001.CSV	1616.12	0.0252416
CAM210_map5	0001.CSV	1619.98	0.0248406
CAM210_map5	0001.CSV	1623.84	0.0244205
CAM210_map5	0001.CSV	1627.69	0.0239424
CAM210_map5	0001.CSV	1631.55	0.0234467
CAM210_map5	0001.CSV	1635.41	0.0230477
CAM210_map5	0001.CSV	1639.27	0.0226855
CAM210_map5	0001.CSV	1643.12	0.022273
CAM210_map5	0001.CSV	1646.98	0.0219761
CAM210_map5	0001.CSV	1650.84	0.0219446
CAM210_map5	0001.CSV	1654.69	0.0218065
CAM210_map5	0001.CSV	1658.55	0.0213948
CAM210_map5	0001.CSV	1662.41	0.0209309
CAM210_map5	0001.CSV	1666.27	0.020499
CAM210_map5	0001.CSV	1670.12	0.0201353
CAM210_map5	0001.CSV	1673.98	0.0197906
CAM210_map5	0001.CSV	1677.84	0.0193783
CAM210_map5	0001.CSV	1681.69	0.0190314
CAM210_map5	0001.CSV	1685.55	0.0188665
CAM210_map5	0001.CSV	1689.41	0.0185977
CAM210_map5	0001.CSV	1693.27	0.0181846
CAM210_map5	0001.CSV	1697.12	0.0178587
CAM210_map5	0001.CSV	1700.98	0.0177235
CAM210_map5	0001.CSV	1704.84	0.0175305
CAM210_map5	0001.CSV	1708.69	0.0172385
CAM210_map5	0001.CSV	1712.55	0.0170287
CAM210_map5	0001.CSV	1716.41	0.0171279
CAM210_map5	0001.CSV	1720.27	0.0172137
CAM210_map5	0001.CSV	1724.12	0.0169727
CAM210_map5	0001.CSV	1727.98	0.0167047
CAM210_map5	0001.CSV	1731.84	0.0166454
CAM210_map5	0001.CSV	1735.69	0.0167099
CAM210_map5	0001.CSV	1739.55	0.016501
CAM210_map5	0001.CSV	1743.41	0.0160871
CAM210_map5	0001.CSV	1747.27	0.0156338
CAM210_map5	0001.CSV	1751.12	0.0151419
CAM210_map5	0001.CSV	1754.98	0.0147113
CAM210_map5	0001.CSV	1758.84	0.0144583
CAM210_map5	0001.CSV	1762.69	0.0143331
CAM210_map5	0001.CSV	1766.55	0.0143294
CAM210_map5	0001.CSV	1770.41	0.0148977
CAM210_map5	0001.CSV	1774.26	0.0163234
CAM210_map5	0001.CSV	1778.12	0.0178482
CAM210_map5	0001.CSV	1781.98	0.0190345
CAM210_map5	0001.CSV	1785.84	0.0195225
CAM210_map5	0001.CSV	1789.69	0.0190054
CAM210_map5	0001.CSV	1793.55	0.0176369
CAM210_map5	0001.CSV	1797.41	0.0161197
CAM210_map5	0001.CSV	1801.26	0.0148867
CAM210_map5	0001.CSV	1805.12	0.0139832
CAM210_map5	0001.CSV	1808.98	0.0134291
CAM210_map5	0001.CSV	1812.84	0.0131121
CAM210_map5	0001.CSV	1816.69	0.0128802
CAM210_map5	0001.CSV	1820.55	0.0127108
CAM210_map5	0001.CSV	1824.41	0.0126825
CAM210_map5	0001.CSV	1828.26	0.0127949
CAM210_map5	0001.CSV	1832.12	0.0128254
CAM210_map5	0001.CSV	1835.98	0.0126958
CAM210_map5	0001.CSV	1839.84	0.0126162
CAM210_map5	0001.CSV	1843.69	0.0127563
CAM210_map5	0001.CSV	1847.55	0.0129086
CAM210_map5	0001.CSV	1851.41	0.0128372
CAM210_map5	0001.CSV	1855.26	0.012724
CAM210_map5	0001.CSV	1859.12	0.0126689
CAM210_map5	0001.CSV	1862.98	0.0126374
CAM210_map5	0001.CSV	1866.84	0.0127364
CAM210_map5	0001.CSV	1870.69	0.0129093
CAM210_map5	0001.CSV	1874.55	0.0128896
CAM210_map5	0001.CSV	1878.41	0.0127852
CAM210_map5	0001.CSV	1882.26	0.012739
CAM210_map5	0001.CSV	1886.12	0.0127618
CAM210_map5	0001.CSV	1889.98	0.0128521
CAM210_map5	0001.CSV	1893.83	0.01294
CAM210_map5	0001.CSV	1897.69	0.0129504
CAM210_map5	0001.CSV	1901.55	0.0129051
CAM210_map5	0001.CSV	1905.41	0.0128795
CAM210_map5	0001.CSV	1909.26	0.0128994
CAM210_map5	0001.CSV	1913.12	0.0129046
CAM210_map5	0001.CSV	1916.98	0.012914
CAM210_map5	0001.CSV	1920.83	0.0129982
CAM210_map5	0001.CSV	1924.69	0.0130857
CAM210_map5	0001.CSV	1928.55	0.0131135
CAM210_map5	0001.CSV	1932.4	0.0131144
CAM210_map5	0001.CSV	1936.26	0.013093
CAM210_map5	0001.CSV	1940.12	0.0131034
CAM210_map5	0001.CSV	1943.98	0.0131955
CAM210_map5	0001.CSV	1947.83	0.013253
CAM210_map5	0001.CSV	1951.69	0.0132413
CAM210_map5	0001.CSV	1955.55	0.0132374
CAM210_map5	0001.CSV	1959.4	0.0132463
CAM210_map5	0001.CSV	1963.26	0.0132672
CAM210_map5	0001.CSV	1967.12	0.0133172
CAM210_map5	0001.CSV	1970.98	0.0133513
CAM210_map5	0001.CSV	1974.83	0.0133488
CAM210_map5	0001.CSV	1978.69	0.0133455
CAM210_map5	0001.CSV	1982.55	0.0133443
CAM210_map5	0001.CSV	1986.4	0.0133398
CAM210_map5	0001.CSV	1990.26	0.0133654
CAM210_map5	0001.CSV	1994.12	0.0134099
CAM210_map5	0001.CSV	1997.98	0.0134191
CAM210_map5	0001.CSV	2001.83	0.0134102
CAM210_map5	0001.CSV	2005.69	0.0134113
CAM210_map5	0001.CSV	2009.55	0.0134059
CAM210_map5	0001.CSV	2013.4	0.0133978
CAM210_map5	0001.CSV	2017.26	0.0134148
CAM210_map5	0001.CSV	2021.12	0.0134265
CAM210_map5	0001.CSV	2024.97	0.0134035
CAM210_map5	0001.CSV	2028.83	0.013382
CAM210_map5	0001.CSV	2032.69	0.0133722
CAM210_map5	0001.CSV	2036.55	0.0133606
CAM210_map5	0001.CSV	2040.4	0.013363
CAM210_map5	0001.CSV	2044.26	0.0133731
CAM210_map5	0001.CSV	2048.12	0.0133574
CAM210_map5	0001.CSV	2051.97	0.0133247
CAM210_map5	0001.CSV	2055.83	0.0133
CAM210_map5	0001.CSV	2059.69	0.0132922
CAM210_map5	0001.CSV	2063.55	0.0133168
CAM210_map5	0001.CSV	2067.4	0.0133533
CAM210_map5	0001.CSV	2071.26	0.013347
CAM210_map5	0001.CSV	2075.12	0.0133047
CAM210_map5	0001.CSV	2078.97	0.0132696
CAM210_map5	0001.CSV	2082.83	0.0132586
CAM210_map5	0001.CSV	2086.69	0.013274
CAM210_map5	0001.CSV	2090.55	0.0133001
CAM210_map5	0001.CSV	2094.4	0.0133029
CAM210_map5	0001.CSV	2098.26	0.013288
CAM210_map5	0001.CSV	2102.12	0.013276
CAM210_map5	0001.CSV	2105.97	0.0132592
CAM210_map5	0001.CSV	2109.83	0.0132461
CAM210_map5	0001.CSV	2113.69	0.0132605
CAM210_map5	0001.CSV	2117.55	0.0132841
CAM210_map5	0001.CSV	2121.4	0.0132973
CAM210_map5	0001.CSV	2125.26	0.0133188
CAM210_map5	0001.CSV	2129.12	0.013349
CAM210_map5	0001.CSV	2132.97	0.0133685
CAM210_map5	0001.CSV	2136.83	0.0133733
CAM210_map5	0001.CSV	2140.69	0.0133633
CAM210_map5	0001.CSV	2144.55	0.0133532
CAM210_map5	0001.CSV	2148.4	0.0133679
CAM210_map5	0001.CSV	2152.26	0.0133991
CAM210_map5	0001.CSV	2156.12	0.0134073
CAM210_map5	0001.CSV	2159.97	0.0133904
CAM210_map5	0001.CSV	2163.83	0.0133886
CAM210_map5	0001.CSV	2167.69	0.0134129
CAM210_map5	0001.CSV	2171.55	0.0134443
CAM210_map5	0001.CSV	2175.4	0.0134735
CAM210_map5	0001.CSV	2179.26	0.0134898
CAM210_map5	0001.CSV	2183.12	0.0134856
CAM210_map5	0001.CSV	2186.97	0.0134784
CAM210_map5	0001.CSV	2190.83	0.0134792
CAM210_map5	0001.CSV	2194.69	0.0134692
CAM210_map5	0001.CSV	2198.55	0.0134458
CAM210_map5	0001.CSV	2202.4	0.0134308
CAM210_map5	0001.CSV	2206.26	0.0134297
CAM210_map5	0001.CSV	2210.12	0.0134303
CAM210_map5	0001.CSV	2213.97	0.0134313
CAM210_map5	0001.CSV	2217.83	0.0134307
CAM210_map5	0001.CSV	2221.69	0.0134228
CAM210_map5	0001.CSV	2225.54	0.0134133
CAM210_map5	0001.CSV	2229.4	0.0134014
CAM210_map5	0001.CSV	2233.26	0.0133818
CAM210_map5	0001.CSV	2237.12	0.0133633
CAM210_map5	0001.CSV	2240.97	0.013346
CAM210_map5	0001.CSV	2244.83	0.0133113
CAM210_map5	0001.CSV	2248.69	0.0132611
CAM210_map5	0001.CSV	2252.54	0.0132243
CAM210_map5	0001.CSV	2256.4	0.0132076
CAM210_map5	0001.CSV	2260.26	0.0131938
CAM210_map5	0001.CSV	2264.11	0.0131746
CAM210_map5	0001.CSV	2267.97	0.0131554
CAM210_map5	0001.CSV	2271.83	0.0131378
CAM210_map5	0001.CSV	2275.69	0.0131156
CAM210_map5	0001.CSV	2279.54	0.0130712
CAM210_map5	0001.CSV	2283.4	0.0130042
CAM210_map5	0001.CSV	2287.26	0.0129445
CAM210_map5	0001.CSV	2291.11	0.0128896
CAM210_map5	0001.CSV	2294.97	0.0128099
CAM210_map5	0001.CSV	2298.83	0.0126959
CAM210_map5	0001.CSV	2302.69	0.0125228
CAM210_map5	0001.CSV	2306.54	0.0122651
CAM210_map5	0001.CSV	2310.4	0.0119374
CAM210_map5	0001.CSV	2314.26	0.0115084
CAM210_map5	0001.CSV	2318.11	0.0107922
CAM210_map5	0001.CSV	2321.97	0.00962939
CAM210_map5	0001.CSV	2325.83	0.00820584
CAM210_map5	0001.CSV	2329.69	0.0068883
CAM210_map5	0001.CSV	2333.54	0.00574796
CAM210_map5	0001.CSV	2337.4	0.0049133
CAM210_map5	0001.CSV	2341.26	0.00557511
CAM210_map5	0001.CSV	2345.11	0.00740788
CAM210_map5	0001.CSV	2348.97	0.00787142
CAM210_map5	0001.CSV	2352.83	0.00591322
CAM210_map5	0001.CSV	2356.69	0.000312334
CAM210_map5	0001.CSV	2360.54	-0.00607296
CAM210_map5	0001.CSV	2364.4	-0.00229643
CAM210_map5	0001.CSV	2368.26	0.00514918
CAM210_map5	0001.CSV	2372.11	0.0095865
CAM210_map5	0001.CSV	2375.97	0.0115781
CAM210_map5	0001.CSV	2379.83	0.0123467
CAM210_map5	0001.CSV	2383.69	0.0125328
CAM210_map5	0001.CSV	2387.54	0.0124809
CAM210_map5	0001.CSV	2391.4	0.0124014
CAM210_map5	0001.CSV	2395.26	0.012365
CAM210_map5	0001.CSV	2399.11	0.0123418
CAM210_map5	0001.CSV	2402.97	0.012308
CAM210_map5	0001.CSV	2406.83	0.012272
CAM210_map5	0001.CSV	2410.68	0.0122393
CAM210_map5	0001.CSV	2414.54	0.0122051
CAM210_map5	0001.CSV	2418.4	0.0121679
CAM210_map5	0001.CSV	2422.26	0.0121381
CAM210_map5	0001.CSV	2426.11	0.012128
CAM210_map5	0001.CSV	2429.97	0.0121253
CAM210_map5	0001.CSV	2433.83	0.0121016
CAM210_map5	0001.CSV	2437.68	0.0120717
CAM210_map5	0001.CSV	2441.54	0.0120731
CAM210_map5	0001.CSV	2445.4	0.0121012
CAM210_map5	0001.CSV	2449.26	0.0121227
CAM210_map5	0001.CSV	2453.11	0.0121269
CAM210_map5	0001.CSV	2456.97	0.012132
CAM210_map5	0001.CSV	2460.83	0.0121584
CAM210_map5	0001.CSV	2464.68	0.0122256
CAM210_map5	0001.CSV	2468.54	0.0123259
CAM210_map5	0001.CSV	2472.4	0.0124357
CAM210_map5	0001.CSV	2476.26	0.0125727
CAM210_map5	0001.CSV	2480.11	0.0127676
CAM210_map5	0001.CSV	2483.97	0.0130015
CAM210_map5	0001.CSV	2487.83	0.0132134
CAM210_map5	0001.CSV	2491.68	0.013365
CAM210_map5	0001.CSV	2495.54	0.013468
CAM210_map5	0001.CSV	2499.4	0.0135327
CAM210_map5	0001.CSV	2503.26	0.0135373
CAM210_map5	0001.CSV	2507.11	0.0134945
CAM210_map5	0001.CSV	2510.97	0.0135007
CAM210_map5	0001.CSV	2514.83	0.0136193
CAM210_map5	0001.CSV	2518.68	0.0137671
CAM210_map5	0001.CSV	2522.54	0.0138064
CAM210_map5	0001.CSV	2526.4	0.0137039
CAM210_map5	0001.CSV	2530.26	0.0135164
CAM210_map5	0001.CSV	2534.11	0.0132922
CAM210_map5	0001.CSV	2537.97	0.0130875
CAM210_map5	0001.CSV	2541.83	0.0129504
CAM210_map5	0001.CSV	2545.68	0.0128545
CAM210_map5	0001.CSV	2549.54	0.0127407
CAM210_map5	0001.CSV	2553.4	0.0125927
CAM210_map5	0001.CSV	2557.26	0.0124228
CAM210_map5	0001.CSV	2561.11	0.0122369
CAM210_map5	0001.CSV	2564.97	0.0120684
CAM210_map5	0001.CSV	2568.83	0.011976
CAM210_map5	0001.CSV	2572.68	0.0119451
CAM210_map5	0001.CSV	2576.54	0.0118911
CAM210_map5	0001.CSV	2580.4	0.011796
CAM210_map5	0001.CSV	2584.25	0.0117135
CAM210_map5	0001.CSV	2588.11	0.0116572
CAM210_map5	0001.CSV	2591.97	0.0116167
CAM210_map5	0001.CSV	2595.83	0.0115941
CAM210_map5	0001.CSV	2599.68	0.0115772
CAM210_map5	0001.CSV	2603.54	0.0115506
CAM210_map5	0001.CSV	2607.4	0.0115169
CAM210_map5	0001.CSV	2611.25	0.0114909
CAM210_map5	0001.CSV	2615.11	0.0114799
CAM210_map5	0001.CSV	2618.97	0.0114926
CAM210_map5	0001.CSV	2622.82	0.0115406
CAM210_map5	0001.CSV	2626.68	0.011578
CAM210_map5	0001.CSV	2630.54	0.0115762
CAM210_map5	0001.CSV	2634.4	0.0115633
CAM210_map5	0001.CSV	2638.25	0.0114895
CAM210_map5	0001.CSV	2642.11	0.0113134
CAM210_map5	0001.CSV	2645.97	0.0111219
CAM210_map5	0001.CSV	2649.82	0.0109843
CAM210_map5	0001.CSV	2653.68	0.010888
CAM210_map5	0001.CSV	2657.54	0.0108088
CAM210_map5	0001.CSV	2661.4	0.0107236
CAM210_map5	0001.CSV	2665.25	0.0106613
CAM210_map5	0001.CSV	2669.11	0.0107141
CAM210_map5	0001.CSV	2672.97	0.0109076
CAM210_map5	0001.CSV	2676.82	0.0110762
CAM210_map5	0001.CSV	2680.68	0.01099
CAM210_map5	0001.CSV	2684.54	0.0107061
CAM210_map5	0001.CSV	2688.4	0.010499
CAM210_map5	0001.CSV	2692.25	0.0104466
CAM210_map5	0001.CSV	2696.11	0.0104495
CAM210_map5	0001.CSV	2699.97	0.010437
CAM210_map5	0001.CSV	2703.82	0.0104244
CAM210_map5	0001.CSV	2707.68	0.010456
CAM210_map5	0001.CSV	2711.54	0.0104935
CAM210_map5	0001.CSV	2715.4	0.0105322
CAM210_map5	0001.CSV	2719.25	0.0106681
CAM210_map5	0001.CSV	2723.11	0.0108316
CAM210_map5	0001.CSV	2726.97	0.0107921
CAM210_map5	0001.CSV	2730.82	0.0106133
CAM210_map5	0001.CSV	2734.68	0.0105468
CAM210_map5	0001.CSV	2738.54	0.0105696
CAM210_map5	0001.CSV	2742.4	0.0106523
CAM210_map5	0001.CSV	2746.25	0.010827
CAM210_map5	0001.CSV	2750.11	0.0108725
CAM210_map5	0001.CSV	2753.97	0.0107279
CAM210_map5	0001.CSV	2757.82	0.0106123
CAM210_map5	0001.CSV	2761.68	0.01058
CAM210_map5	0001.CSV	2765.54	0.0106128
CAM210_map5	0001.CSV	2769.39	0.0107825
CAM210_map5	0001.CSV	2773.25	0.0109876
CAM210_map5	0001.CSV	2777.11	0.0110034
CAM210_map5	0001.CSV	2780.97	0.0109511
CAM210_map5	0001.CSV	2784.82	0.0111313
CAM210_map5	0001.CSV	2788.68	0.0114632
CAM210_map5	0001.CSV	2792.54	0.0116721
CAM210_map5	0001.CSV	2796.39	0.0117004
CAM210_map5	0001.CSV	2800.25	0.0116045
CAM210_map5	0001.CSV	2804.11	0.011544
CAM210_map5	0001.CSV	2807.97	0.0116516
CAM210_map5	0001.CSV	2811.82	0.0117664
CAM210_map5	0001.CSV	2815.68	0.0118318
CAM210_map5	0001.CSV	2819.54	0.0120003
CAM210_map5	0001.CSV	2823.39	0.0122749
CAM210_map5	0001.CSV	2827.25	0.0126922
CAM210_map5	0001.CSV	2831.11	0.0134599
CAM210_map5	0001.CSV	2834.97	0.0146576
CAM210_map5	0001.CSV	2838.82	0.0163647
CAM210_map5	0001.CSV	2842.68	0.0189899
CAM210_map5	0001.CSV	2846.54	0.022117
CAM210_map5	0001.CSV	2850.39	0.0236296
CAM210_map5	0001.CSV	2854.25	0.0224452
CAM210_map5	0001.CSV	2858.11	0.0201147
CAM210_map5	0001.CSV	2861.97	0.0182065
CAM210_map5	0001.CSV	2865.82	0.0171861
CAM210_map5	0001.CSV	2869.68	0.0169427
CAM210_map5	0001.CSV	2873.54	0.0168044
CAM210_map5	0001.CSV	2877.39	0.0163375
CAM210_map5	0001.CSV	2881.25	0.0159551
CAM210_map5	0001.CSV	2885.11	0.0161112
CAM210_map5	0001.CSV	2888.97	0.016806
CAM210_map5	0001.CSV	2892.82	0.0178013
CAM210_map5	0001.CSV	2896.68	0.0187878
CAM210_map5	0001.CSV	2900.54	0.0198181
CAM210_map5	0001.CSV	2904.39	0.0215016
CAM210_map5	0001.CSV	2908.25	0.024542
CAM210_map5	0001.CSV	2912.11	0.0287432
CAM210_map5	0001.CSV	2915.97	0.0321467
CAM210_map5	0001.CSV	2919.82	0.0325459
CAM210_map5	0001.CSV	2923.68	0.0301879
CAM210_map5	0001.CSV	2927.54	0.0269459
CAM210_map5	0001.CSV	2931.39	0.0238267
CAM210_map5	0001.CSV	2935.25	0.0211813
CAM210_map5	0001.CSV	2939.11	0.0194585
CAM210_map5	0001.CSV	2942.96	0.0186142
CAM210_map5	0001.CSV	2946.82	0.0181124
CAM210_map5	0001.CSV	2950.68	0.0176648
CAM210_map5	0001.CSV	2954.54	0.0171885
CAM210_map5	0001.CSV	2958.39	0.0165656
CAM210_map5	0001.CSV	2962.25	0.0157435
CAM210_map5	0001.CSV	2966.11	0.0148558
CAM210_map5	0001.CSV	2969.96	0.0142424
CAM210_map5	0001.CSV	2973.82	0.013959
CAM210_map5	0001.CSV	2977.68	0.0136336
CAM210_map5	0001.CSV	2981.53	0.0130145
CAM210_map5	0001.CSV	2985.39	0.0123576
CAM210_map5	0001.CSV	2989.25	0.0120966
CAM210_map5	0001.CSV	2993.11	0.0121188
CAM210_map5	0001.CSV	2996.96	0.011995
CAM210_map5	0001.CSV	3000.82	0.0117057
CAM210_map5	0001.CSV	3004.68	0.0115739
CAM210_map5	0001.CSV	3008.53	0.0117594
CAM210_map5	0001.CSV	3012.39	0.012026
CAM210_map5	0001.CSV	3016.25	0.0120612
CAM210_map5	0001.CSV	3020.11	0.0118374
CAM210_map5	0001.CSV	3023.96	0.0115507
CAM210_map5	0001.CSV	3027.82	0.0114557
CAM210_map5	0001.CSV	3031.68	0.0116042
CAM210_map5	0001.CSV	3035.53	0.0117768
CAM210_map5	0001.CSV	3039.39	0.0118697
CAM210_map5	0001.CSV	3043.25	0.0119053
CAM210_map5	0001.CSV	3047.11	0.0118713
CAM210_map5	0001.CSV	3050.96	0.0117952
CAM210_map5	0001.CSV	3054.82	0.0116707
CAM210_map5	0001.CSV	3058.68	0.0115459
CAM210_map5	0001.CSV	3062.53	0.0115984
CAM210_map5	0001.CSV	3066.39	0.0117727
CAM210_map5	0001.CSV	3070.25	0.011836
CAM210_map5	0001.CSV	3074.11	0.0118824
CAM210_map5	0001.CSV	3077.96	0.012078
CAM210_map5	0001.CSV	3081.82	0.0122731
CAM210_map5	0001.CSV	3085.68	0.0122749
CAM210_map5	0001.CSV	3089.53	0.0120775
CAM210_map5	0001.CSV	3093.39	0.0118567
CAM210_map5	0001.CSV	3097.25	0.0118146
CAM210_map5	0001.CSV	3101.11	0.0119113
CAM210_map5	0001.CSV	3104.96	0.0120231
CAM210_map5	0001.CSV	3108.82	0.0121397
CAM210_map5	0001.CSV	3112.68	0.0122765
CAM210_map5	0001.CSV	3116.53	0.0123929
CAM210_map5	0001.CSV	3120.39	0.0123461
CAM210_map5	0001.CSV	3124.25	0.0121321
CAM210_map5	0001.CSV	3128.11	0.0119388
CAM210_map5	0001.CSV	3131.96	0.0118955
CAM210_map5	0001.CSV	3135.82	0.0120045
CAM210_map5	0001.CSV	3139.68	0.0120667
CAM210_map5	0001.CSV	3143.53	0.0119963
CAM210_map5	0001.CSV	3147.39	0.0120494
CAM210_map5	0001.CSV	3151.25	0.0122235
CAM210_map5	0001.CSV	3155.1	0.012171
CAM210_map5	0001.CSV	3158.96	0.0118886
CAM210_map5	0001.CSV	3162.82	0.0116963
CAM210_map5	0001.CSV	3166.68	0.0116725
CAM210_map5	0001.CSV	3170.53	0.0116843
CAM210_map5	0001.CSV	3174.39	0.0117298
CAM210_map5	0001.CSV	3178.25	0.0118722
CAM210_map5	0001.CSV	3182.1	0.0120359
CAM210_map5	0001.CSV	3185.96	0.0121444
CAM210_map5	0001.CSV	3189.82	0.0121895
CAM210_map5	0001.CSV	3193.68	0.0121376
CAM210_map5	0001.CSV	3197.53	0.0120601
CAM210_map5	0001.CSV	3201.39	0.0120935
CAM210_map5	0001.CSV	3205.25	0.0121968
CAM210_map5	0001.CSV	3209.1	0.0123006
CAM210_map5	0001.CSV	3212.96	0.0124319
CAM210_map5	0001.CSV	3216.82	0.0125219
CAM210_map5	0001.CSV	3220.68	0.0125128
CAM210_map5	0001.CSV	3224.53	0.0125549
CAM210_map5	0001.CSV	3228.39	0.0128135
CAM210_map5	0001.CSV	3232.25	0.0131318
CAM210_map5	0001.CSV	3236.1	0.0132026
CAM210_map5	0001.CSV	3239.96	0.0131482
CAM210_map5	0001.CSV	3243.82	0.0132268
CAM210_map5	0001.CSV	3247.68	0.0132778
CAM210_map5	0001.CSV	3251.53	0.0131965
CAM210_map5	0001.CSV	3255.39	0.013108
CAM210_map5	0001.CSV	3259.25	0.0130378
CAM210_map5	0001.CSV	3263.1	0.0130935
CAM210_map5	0001.CSV	3266.96	0.0133709
CAM210_map5	0001.CSV	3270.82	0.0136485
CAM210_map5	0001.CSV	3274.68	0.0136452
CAM210_map5	0001.CSV	3278.53	0.013422
CAM210_map5	0001.CSV	3282.39	0.0132631
CAM210_map5	0001.CSV	3286.25	0.0133529
CAM210_map5	0001.CSV	3290.1	0.0136611
CAM210_map5	0001.CSV	3293.96	0.0138933
CAM210_map5	0001.CSV	3297.82	0.0139236
CAM210_map5	0001.CSV	3301.67	0.0140071
CAM210_map5	0001.CSV	3305.53	0.0141362
CAM210_map5	0001.CSV	3309.39	0.0139957
CAM210_map5	0001.CSV	3313.25	0.0136021
CAM210_map5	0001.CSV	3317.1	0.0133434
CAM210_map5	0001.CSV	3320.96	0.0134265
CAM210_map5	0001.CSV	3324.82	0.0135588
CAM210_map5	0001.CSV	3328.67	0.0134646
CAM210_map5	0001.CSV	3332.53	0.0134677
CAM210_map5	0001.CSV	3336.39	0.0137985
CAM210_map5	0001.CSV	3340.24	0.0140492
CAM210_map5	0001.CSV	3344.1	0.0140043
CAM210_map5	0001.CSV	3347.96	0.0138964
CAM210_map5	0001.CSV	3351.82	0.0137833
CAM210_map5	0001.CSV	3355.67	0.0136818
CAM210_map5	0001.CSV	3359.53	0.0137898
CAM210_map5	0001.CSV	3363.39	0.0141074
CAM210_map5	0001.CSV	3367.24	0.0143269
CAM210_map5	0001.CSV	3371.1	0.0142016
CAM210_map5	0001.CSV	3374.96	0.013902
CAM210_map5	0001.CSV	3378.82	0.0136565
CAM210_map5	0001.CSV	3382.67	0.0135048
CAM210_map5	0001.CSV	3386.53	0.0135905
CAM210_map5	0001.CSV	3390.39	0.0138987
CAM210_map5	0001.CSV	3394.24	0.0141491
CAM210_map5	0001.CSV	3398.1	0.0142017
CAM210_map5	0001.CSV	3401.96	0.0140516
CAM210_map5	0001.CSV	3405.82	0.013824
CAM210_map5	0001.CSV	3409.67	0.0136527
CAM210_map5	0001.CSV	3413.53	0.013397
CAM210_map5	0001.CSV	3417.39	0.0130873
CAM210_map5	0001.CSV	3421.24	0.0130162
CAM210_map5	0001.CSV	3425.1	0.0132253
CAM210_map5	0001.CSV	3428.96	0.0135138
CAM210_map5	0001.CSV	3432.82	0.013592
CAM210_map5	0001.CSV	3436.67	0.0132571
CAM210_map5	0001.CSV	3440.53	0.0126854
CAM210_map5	0001.CSV	3444.39	0.012264
CAM210_map5	0001.CSV	3448.24	0.0120742
CAM210_map5	0001.CSV	3452.1	0.011946
CAM210_map5	0001.CSV	3455.96	0.0119553
CAM210_map5	0001.CSV	3459.82	0.0121818
CAM210_map5	0001.CSV	3463.67	0.012459
CAM210_map5	0001.CSV	3467.53	0.0125093
CAM210_map5	0001.CSV	3471.39	0.0122495
CAM210_map5	0001.CSV	3475.24	0.0119892
CAM210_map5	0001.CSV	3479.1	0.0118994
CAM210_map5	0001.CSV	3482.96	0.011827
CAM210_map5	0001.CSV	3486.82	0.0117258
CAM210_map5	0001.CSV	3490.67	0.0116906
CAM210_map5	0001.CSV	3494.53	0.0117312
CAM210_map5	0001.CSV	3498.39	0.0116823
CAM210_map5	0001.CSV	3502.24	0.0114056
CAM210_map5	0001.CSV	3506.1	0.0109869
CAM210_map5	0001.CSV	3509.96	0.0107133
CAM210_map5	0001.CSV	3513.81	0.0105675
CAM210_map5	0001.CSV	3517.67	0.0103311
CAM210_map5	0001.CSV	3521.53	0.0101078
CAM210_map5	0001.CSV	3525.39	0.00997178
CAM210_map5	0001.CSV	3529.24	0.00991818
CAM210_map5	0001.CSV	3533.1	0.0100243
CAM210_map5	0001.CSV	3536.96	0.0101703
CAM210_map5	0001.CSV	3540.81	0.0102442
CAM210_map5	0001.CSV	3544.67	0.0101942
CAM210_map5	0001.CSV	3548.53	0.00989005
CAM210_map5	0001.CSV	3552.39	0.00948557
CAM210_map5	0001.CSV	3556.24	0.00918183
CAM210_map5	0001.CSV	3560.1	0.00878414
CAM210_map5	0001.CSV	3563.96	0.00835201
CAM210_map5	0001.CSV	3567.81	0.00839106
CAM210_map5	0001.CSV	3571.67	0.00852218
CAM210_map5	0001.CSV	3575.53	0.00842318
CAM210_map5	0001.CSV	3579.39	0.0083767
CAM210_map5	0001.CSV	3583.24	0.00835285
CAM210_map5	0001.CSV	3587.1	0.00827517
CAM210_map5	0001.CSV	3590.96	0.00815017
CAM210_map5	0001.CSV	3594.81	0.00806351
CAM210_map5	0001.CSV	3598.67	0.00809608
CAM210_map5	0001.CSV	3602.53	0.00788053
CAM210_map5	0001.CSV	3606.39	0.00728019
CAM210_map5	0001.CSV	3610.24	0.00675518
CAM210_map5	0001.CSV	3614.1	0.00670272
CAM210_map5	0001.CSV	3617.96	0.00699173
CAM210_map5	0001.CSV	3621.81	0.00697671
CAM210_map5	0001.CSV	3625.67	0.00650215
CAM210_map5	0001.CSV	3629.53	0.00640274
CAM210_map5	0001.CSV	3633.39	0.00678039
CAM210_map5	0001.CSV	3637.24	0.00677558
CAM210_map5	0001.CSV	3641.1	0.00638303
CAM210_map5	0001.CSV	3644.96	0.00597086
CAM210_map5	0001.CSV	3648.81	0.00629844
CAM210_map5	0001.CSV	3652.67	0.00721439
CAM210_map5	0001.CSV	3656.53	0.00755728
CAM210_map5	0001.CSV	3660.38	0.00730688
CAM210_map5	0001.CSV	3664.24	0.00656592
CAM210_map5	0001.CSV	3668.1	0.00572274
CAM210_map5	0001.CSV	3671.96	0.00552249
CAM210_map5	0001.CSV	3675.81	0.00629538
CAM210_map5	0001.CSV	3679.67	0.00684585
CAM210_map5	0001.CSV	3683.53	0.00687325
CAM210_map5	0001.CSV	3687.38	0.00701022
CAM210_map5	0001.CSV	3691.24	0.0073949
CAM210_map5	0001.CSV	3695.1	0.00719761
CAM210_map5	0001.CSV	3698.95	0.00657971
CAM210_map5	0001.CSV	3702.81	0.00601251
CAM210_map5	0001.CSV	3706.67	0.00559884
CAM210_map5	0001.CSV	3710.53	0.00564546
CAM210_map5	0001.CSV	3714.38	0.00599286
CAM210_map5	0001.CSV	3718.24	0.00590028
CAM210_map5	0001.CSV	3722.1	0.00564379
CAM210_map5	0001.CSV	3725.95	0.00553383
CAM210_map5	0001.CSV	3729.81	0.00546276
CAM210_map5	0001.CSV	3733.67	0.00577163
CAM210_map5	0001.CSV	3737.53	0.00620123
CAM210_map5	0001.CSV	3741.38	0.0056746
CAM210_map5	0001.CSV	3745.24	0.00476876
CAM210_map5	0001.CSV	3749.1	0.00480799
CAM210_map5	0001.CSV	3752.95	0.00560653
CAM210_map5	0001.CSV	3756.81	0.00592349
CAM210_map5	0001.CSV	3760.67	0.00587661
CAM210_map5	0001.CSV	3764.53	0.00581119
CAM210_map5	0001.CSV	3768.38	0.00595026
CAM210_map5	0001.CSV	3772.24	0.0061117
CAM210_map5	0001.CSV	3776.1	0.00606617
CAM210_map5	0001.CSV	3779.95	0.00601681
CAM210_map5	0001.CSV	3783.81	0.00609715
CAM210_map5	0001.CSV	3787.67	0.00611782
CAM210_map5	0001.CSV	3791.53	0.00583802
CAM210_map5	0001.CSV	3795.38	0.00537721
CAM210_map5	0001.CSV	3799.24	0.00523969
CAM210_map5	0001.CSV	3803.1	0.00566655
CAM210_map5	0001.CSV	3806.95	0.00592645
CAM210_map5	0001.CSV	3810.81	0.00567494
CAM210_map5	0001.CSV	3814.67	0.00529389
CAM210_map5	0001.CSV	3818.53	0.0053235
CAM210_map5	0001.CSV	3822.38	0.00571831
CAM210_map5	0001.CSV	3826.24	0.00568192
CAM210_map5	0001.CSV	3830.1	0.00530717
CAM210_map5	0001.CSV	3833.95	0.00503624
CAM210_map5	0001.CSV	3837.81	0.00527121
CAM210_map5	0001.CSV	3841.67	0.00572254
CAM210_map5	0001.CSV	3845.53	0.00549004
CAM210_map5	0001.CSV	3849.38	0.00484109
CAM210_map5	0001.CSV	3853.24	0.00474491
CAM210_map5	0001.CSV	3857.1	0.00515703
CAM210_map5	0001.CSV	3860.95	0.00506688
CAM210_map5	0001.CSV	3864.81	0.00490302
CAM210_map5	0001.CSV	3868.67	0.0050289
CAM210_map5	0001.CSV	3872.52	0.00522527
CAM210_map5	0001.CSV	3876.38	0.00520501
CAM210_map5	0001.CSV	3880.24	0.00519693
CAM210_map5	0001.CSV	3884.1	0.00536191
CAM210_map5	0001.CSV	3887.95	0.00537701
CAM210_map5	0001.CSV	3891.81	0.00520062
CAM210_map5	0001.CSV	3895.67	0.00496615
CAM210_map5	0001.CSV	3899.52	0.00492473
CAM210_map5	0001.CSV	3903.38	0.00540925
CAM210_map5	0001.CSV	3907.24	0.00565627
CAM210_map5	0001.CSV	3911.1	0.00535483
CAM210_map5	0001.CSV	3914.95	0.00505283
CAM210_map5	0001.CSV	3918.81	0.00503084
CAM210_map5	0001.CSV	3922.67	0.00510751
CAM210_map5	0001.CSV	3926.52	0.00514348
CAM210_map5	0001.CSV	3930.38	0.00527326
CAM210_map5	0001.CSV	3934.24	0.00538724
CAM210_map5	0001.CSV	3938.09	0.00529831
CAM210_map5	0001.CSV	3941.95	0.00521631
CAM210_map5	0001.CSV	3945.81	0.00531636
CAM210_map5	0001.CSV	3949.67	0.00547424
CAM210_map5	0001.CSV	3953.52	0.0055388
CAM210_map5	0001.CSV	3957.38	0.00552377
CAM210_map5	0001.CSV	3961.24	0.00553256
CAM210_map5	0001.CSV	3965.09	0.00554347
CAM210_map5	0001.CSV	3968.95	0.00551826
CAM210_map5	0001.CSV	3972.81	0.00552185
CAM210_map5	0001.CSV	3976.67	0.00555796
CAM210_map5	0001.CSV	3980.52	0.00557968
CAM210_map5	0001.CSV	3984.38	0.0055635
CAM210_map5	0001.CSV	3988.24	0.00551202
CAM210_map5	0001.CSV	3992.09	0.00549843
CAM210_map5	0001.CSV	3995.95	0.00553256
CAM210_map5	0001.CSV	3999.81	0.00555451
CAM210_map5	0002.CSV	674.992	0.039856
CAM210_map5	0002.CSV	678.849	0.0407032
CAM210_map5	0002.CSV	682.706	0.0419053
CAM210_map5	0002.CSV	686.563	0.0437512
CAM210_map5	0002.CSV	690.42	0.0481878
CAM210_map5	0002.CSV	694.277	0.0569043
CAM210_map5	0002.CSV	698.134	0.0644392
CAM210_map5	0002.CSV	701.991	0.0651191
CAM210_map5	0002.CSV	705.849	0.0674522
CAM210_map5	0002.CSV	709.706	0.0760973
CAM210_map5	0002.CSV	713.563	0.0751435
CAM210_map5	0002.CSV	717.42	0.0583707
CAM210_map5	0002.CSV	721.277	0.0422336
CAM210_map5	0002.CSV	725.134	0.0356276
CAM210_map5	0002.CSV	728.991	0.0335669
CAM210_map5	0002.CSV	732.848	0.0323039
CAM210_map5	0002.CSV	736.705	0.0316621
CAM210_map5	0002.CSV	740.562	0.0317426
CAM210_map5	0002.CSV	744.42	0.0321921
CAM210_map5	0002.CSV	748.277	0.0327207
CAM210_map5	0002.CSV	752.134	0.0332617
CAM210_map5	0002.CSV	755.991	0.0338206
CAM210_map5	0002.CSV	759.848	0.0344415
CAM210_map5	0002.CSV	763.705	0.0351897
CAM210_map5	0002.CSV	767.562	0.0360193
CAM210_map5	0002.CSV	771.419	0.0368373
CAM210_map5	0002.CSV	775.276	0.0376703
CAM210_map5	0002.CSV	779.133	0.038498
CAM210_map5	0002.CSV	782.99	0.039066
CAM210_map5	0002.CSV	786.848	0.0393748
CAM210_map5	0002.CSV	790.705	0.0398325
CAM210_map5	0002.CSV	794.562	0.0407078
CAM210_map5	0002.CSV	798.419	0.0418727
CAM210_map5	0002.CSV	802.276	0.0431019
CAM210_map5	0002.CSV	806.133	0.0444147
CAM210_map5	0002.CSV	809.99	0.0460145
CAM210_map5	0002.CSV	813.847	0.0480933
CAM210_map5	0002.CSV	817.704	0.0507403
CAM210_map5	0002.CSV	821.562	0.0540859
CAM210_map5	0002.CSV	825.419	0.0585578
CAM210_map5	0002.CSV	829.276	0.0646646
CAM210_map5	0002.CSV	833.133	0.073193
CAM210_map5	0002.CSV	836.99	0.0854882
CAM210_map5	0002.CSV	840.847	0.101815
CAM210_map5	0002.CSV	844.704	0.122592
CAM210_map5	0002.CSV	848.561	0.149771
CAM210_map5	0002.CSV	852.418	0.175344
CAM210_map5	0002.CSV	856.275	0.180348
CAM210_map5	0002.CSV	860.132	0.159469
CAM210_map5	0002.CSV	863.99	0.125873
CAM210_map5	0002.CSV	867.847	0.092861
CAM210_map5	0002.CSV	871.704	0.0672047
CAM210_map5	0002.CSV	875.561	0.0504114
CAM210_map5	0002.CSV	879.418	0.0403901
CAM210_map5	0002.CSV	883.275	0.0343518
CAM210_map5	0002.CSV	887.132	0.0309
CAM210_map5	0002.CSV	890.989	0.0294507
CAM210_map5	0002.CSV	894.846	0.0292459
CAM210_map5	0002.CSV	898.703	0.0296168
CAM210_map5	0002.CSV	902.561	0.0302892
CAM210_map5	0002.CSV	906.418	0.0309695
CAM210_map5	0002.CSV	910.275	0.0312606
CAM210_map5	0002.CSV	914.132	0.0312964
CAM210_map5	0002.CSV	917.989	0.0315581
CAM210_map5	0002.CSV	921.846	0.0321101
CAM210_map5	0002.CSV	925.703	0.0327521
CAM210_map5	0002.CSV	929.56	0.0333624
CAM210_map5	0002.CSV	933.417	0.033852
CAM210_map5	0002.CSV	937.274	0.034152
CAM210_map5	0002.CSV	941.131	0.0343498
CAM210_map5	0002.CSV	944.989	0.03466
CAM210_map5	0002.CSV	948.846	0.0352292
CAM210_map5	0002.CSV	952.703	0.0359652
CAM210_map5	0002.CSV	956.56	0.0365733
CAM210_map5	0002.CSV	960.417	0.0369171
CAM210_map5	0002.CSV	964.274	0.037207
CAM210_map5	0002.CSV	968.131	0.0376735
CAM210_map5	0002.CSV	971.988	0.0383139
CAM210_map5	0002.CSV	975.845	0.0390071
CAM210_map5	0002.CSV	979.702	0.0397096
CAM210_map5	0002.CSV	983.559	0.0404342
CAM210_map5	0002.CSV	987.417	0.0411644
CAM210_map5	0002.CSV	991.274	0.0418745
CAM210_map5	0002.CSV	995.131	0.0425745
CAM210_map5	0002.CSV	998.988	0.0432919
CAM210_map5	0002.CSV	1002.85	0.0440238
CAM210_map5	0002.CSV	1006.7	0.0447517
CAM210_map5	0002.CSV	1010.56	0.0454491
CAM210_map5	0002.CSV	1014.42	0.0460975
CAM210_map5	0002.CSV	1018.27	0.0467477
CAM210_map5	0002.CSV	1022.13	0.0474232
CAM210_map5	0002.CSV	1025.99	0.0480877
CAM210_map5	0002.CSV	1029.85	0.0487518
CAM210_map5	0002.CSV	1033.7	0.0494398
CAM210_map5	0002.CSV	1037.56	0.0501139
CAM210_map5	0002.CSV	1041.42	0.0507631
CAM210_map5	0002.CSV	1045.27	0.0514564
CAM210_map5	0002.CSV	1049.13	0.0522451
CAM210_map5	0002.CSV	1052.99	0.0531512
CAM210_map5	0002.CSV	1056.84	0.0542359
CAM210_map5	0002.CSV	1060.7	0.0555593
CAM210_map5	0002.CSV	1064.56	0.0572227
CAM210_map5	0002.CSV	1068.42	0.0593905
CAM210_map5	0002.CSV	1072.27	0.0624666
CAM210_map5	0002.CSV	1076.13	0.0672833
CAM210_map5	0002.CSV	1079.99	0.072345
CAM210_map5	0002.CSV	1083.84	0.0724135
CAM210_map5	0002.CSV	1087.7	0.0667728
CAM210_map5	0002.CSV	1091.56	0.0614761
CAM210_map5	0002.CSV	1095.41	0.0594933
CAM210_map5	0002.CSV	1099.27	0.0591626
CAM210_map5	0002.CSV	1103.13	0.0592404
CAM210_map5	0002.CSV	1106.99	0.0596163
CAM210_map5	0002.CSV	1110.84	0.0599898
CAM210_map5	0002.CSV	1114.7	0.0598216
CAM210_map5	0002.CSV	1118.56	0.0591672
CAM210_map5	0002.CSV	1122.41	0.0585944
CAM210_map5	0002.CSV	1126.27	0.0583745
CAM210_map5	0002.CSV	1130.13	0.0583583
CAM210_map5	0002.CSV	1133.99	0.0584315
CAM210_map5	0002.CSV	1137.84	0.0586269
CAM210_map5	0002.CSV	1141.7	0.0589614
CAM210_map5	0002.CSV	1145.56	0.059394
CAM210_map5	0002.CSV	1149.41	0.0598393
CAM210_map5	0002.CSV	1153.27	0.0602403
CAM210_map5	0002.CSV	1157.13	0.0606717
CAM210_map5	0002.CSV	1160.99	0.0612231
CAM210_map5	0002.CSV	1164.84	0.0618487
CAM210_map5	0002.CSV	1168.7	0.0623992
CAM210_map5	0002.CSV	1172.56	0.062757
CAM210_map5	0002.CSV	1176.41	0.0629174
CAM210_map5	0002.CSV	1180.27	0.0629281
CAM210_map5	0002.CSV	1184.13	0.0628085
CAM210_map5	0002.CSV	1187.99	0.0625862
CAM210_map5	0002.CSV	1191.84	0.0623018
CAM210_map5	0002.CSV	1195.7	0.0620168
CAM210_map5	0002.CSV	1199.56	0.0618479
CAM210_map5	0002.CSV	1203.41	0.0619211
CAM210_map5	0002.CSV	1207.27	0.0622791
CAM210_map5	0002.CSV	1211.13	0.0628549
CAM210_map5	0002.CSV	1214.98	0.0635068
CAM210_map5	0002.CSV	1218.84	0.0641683
CAM210_map5	0002.CSV	1222.7	0.0648886
CAM210_map5	0002.CSV	1226.56	0.0657095
CAM210_map5	0002.CSV	1230.41	0.0666056
CAM210_map5	0002.CSV	1234.27	0.0674952
CAM210_map5	0002.CSV	1238.13	0.0682961
CAM210_map5	0002.CSV	1241.98	0.0690169
CAM210_map5	0002.CSV	1245.84	0.0697248
CAM210_map5	0002.CSV	1249.7	0.0704775
CAM210_map5	0002.CSV	1253.56	0.0712957
CAM210_map5	0002.CSV	1257.41	0.0721452
CAM210_map5	0002.CSV	1261.27	0.0729856
CAM210_map5	0002.CSV	1265.13	0.0738769
CAM210_map5	0002.CSV	1268.98	0.0749605
CAM210_map5	0002.CSV	1272.84	0.0762378
CAM210_map5	0002.CSV	1276.7	0.077527
CAM210_map5	0002.CSV	1280.56	0.0787385
CAM210_map5	0002.CSV	1284.41	0.0799564
CAM210_map5	0002.CSV	1288.27	0.081275
CAM210_map5	0002.CSV	1292.13	0.0826791
CAM210_map5	0002.CSV	1295.98	0.0841346
CAM210_map5	0002.CSV	1299.84	0.0856018
CAM210_map5	0002.CSV	1303.7	0.0870442
CAM210_map5	0002.CSV	1307.56	0.0885523
CAM210_map5	0002.CSV	1311.41	0.0902746
CAM210_map5	0002.CSV	1315.27	0.0922502
CAM210_map5	0002.CSV	1319.13	0.0943088
CAM210_map5	0002.CSV	1322.98	0.0962847
CAM210_map5	0002.CSV	1326.84	0.0983523
CAM210_map5	0002.CSV	1330.7	0.100646
CAM210_map5	0002.CSV	1334.56	0.10323
CAM210_map5	0002.CSV	1338.41	0.10652
CAM210_map5	0002.CSV	1342.27	0.110204
CAM210_map5	0002.CSV	1346.13	0.113601
CAM210_map5	0002.CSV	1349.98	0.117135
CAM210_map5	0002.CSV	1353.84	0.120995
CAM210_map5	0002.CSV	1357.7	0.125135
CAM210_map5	0002.CSV	1361.56	0.130085
CAM210_map5	0002.CSV	1365.41	0.135536
CAM210_map5	0002.CSV	1369.27	0.140772
CAM210_map5	0002.CSV	1373.13	0.146821
CAM210_map5	0002.CSV	1376.98	0.153666
CAM210_map5	0002.CSV	1380.84	0.159748
CAM210_map5	0002.CSV	1384.7	0.165735
CAM210_map5	0002.CSV	1388.56	0.172449
CAM210_map5	0002.CSV	1392.41	0.179262
CAM210_map5	0002.CSV	1396.27	0.186837
CAM210_map5	0002.CSV	1400.13	0.194771
CAM210_map5	0002.CSV	1403.98	0.201635
CAM210_map5	0002.CSV	1407.84	0.207809
CAM210_map5	0002.CSV	1411.7	0.213034
CAM210_map5	0002.CSV	1415.55	0.217424
CAM210_map5	0002.CSV	1419.41	0.221821
CAM210_map5	0002.CSV	1423.27	0.225832
CAM210_map5	0002.CSV	1427.12	0.22959
CAM210_map5	0002.CSV	1430.98	0.2341
CAM210_map5	0002.CSV	1434.84	0.239557
CAM210_map5	0002.CSV	1438.7	0.244564
CAM210_map5	0002.CSV	1442.55	0.247337
CAM210_map5	0002.CSV	1446.41	0.247885
CAM210_map5	0002.CSV	1450.27	0.246506
CAM210_map5	0002.CSV	1454.12	0.243385
CAM210_map5	0002.CSV	1457.98	0.238759
CAM210_map5	0002.CSV	1461.84	0.234523
CAM210_map5	0002.CSV	1465.7	0.230219
CAM210_map5	0002.CSV	1469.55	0.222503
CAM210_map5	0002.CSV	1473.41	0.207275
CAM210_map5	0002.CSV	1477.27	0.190584
CAM210_map5	0002.CSV	1481.12	0.179738
CAM210_map5	0002.CSV	1484.98	0.171007
CAM210_map5	0002.CSV	1488.84	0.160978
CAM210_map5	0002.CSV	1492.7	0.151089
CAM210_map5	0002.CSV	1496.55	0.14312
CAM210_map5	0002.CSV	1500.41	0.136423
CAM210_map5	0002.CSV	1504.27	0.130288
CAM210_map5	0002.CSV	1508.12	0.122091
CAM210_map5	0002.CSV	1511.98	0.114799
CAM210_map5	0002.CSV	1515.84	0.109951
CAM210_map5	0002.CSV	1519.7	0.104033
CAM210_map5	0002.CSV	1523.55	0.0973195
CAM210_map5	0002.CSV	1527.41	0.0932116
CAM210_map5	0002.CSV	1531.27	0.0913965
CAM210_map5	0002.CSV	1535.12	0.0905531
CAM210_map5	0002.CSV	1538.98	0.0880289
CAM210_map5	0002.CSV	1542.84	0.0800512
CAM210_map5	0002.CSV	1546.7	0.0726646
CAM210_map5	0002.CSV	1550.55	0.0677562
CAM210_map5	0002.CSV	1554.41	0.063181
CAM210_map5	0002.CSV	1558.27	0.0580887
CAM210_map5	0002.CSV	1562.12	0.0549103
CAM210_map5	0002.CSV	1565.98	0.054144
CAM210_map5	0002.CSV	1569.84	0.0541721
CAM210_map5	0002.CSV	1573.69	0.0532456
CAM210_map5	0002.CSV	1577.55	0.0493068
CAM210_map5	0002.CSV	1581.41	0.0434615
CAM210_map5	0002.CSV	1585.27	0.0377866
CAM210_map5	0002.CSV	1589.12	0.0330969
CAM210_map5	0002.CSV	1592.98	0.0298442
CAM210_map5	0002.CSV	1596.84	0.0278631
CAM210_map5	0002.CSV	1600.69	0.0266991
CAM210_map5	0002.CSV	1604.55	0.0260057
CAM210_map5	0002.CSV	1608.41	0.0255512
CAM210_map5	0002.CSV	1612.27	0.0251686
CAM210_map5	0002.CSV	1616.12	0.0247953
CAM210_map5	0002.CSV	1619.98	0.0243935
CAM210_map5	0002.CSV	1623.84	0.0239109
CAM210_map5	0002.CSV	1627.69	0.0233292
CAM210_map5	0002.CSV	1631.55	0.0227104
CAM210_map5	0002.CSV	1635.41	0.0221201
CAM210_map5	0002.CSV	1639.27	0.021551
CAM210_map5	0002.CSV	1643.12	0.0210126
CAM210_map5	0002.CSV	1646.98	0.0206116
CAM210_map5	0002.CSV	1650.84	0.0204688
CAM210_map5	0002.CSV	1654.69	0.0202535
CAM210_map5	0002.CSV	1658.55	0.0197883
CAM210_map5	0002.CSV	1662.41	0.0192922
CAM210_map5	0002.CSV	1666.27	0.0188716
CAM210_map5	0002.CSV	1670.12	0.0185242
CAM210_map5	0002.CSV	1673.98	0.018155
CAM210_map5	0002.CSV	1677.84	0.0177293
CAM210_map5	0002.CSV	1681.69	0.0173822
CAM210_map5	0002.CSV	1685.55	0.0171921
CAM210_map5	0002.CSV	1689.41	0.0168961
CAM210_map5	0002.CSV	1693.27	0.0164357
CAM210_map5	0002.CSV	1697.12	0.0160116
CAM210_map5	0002.CSV	1700.98	0.0158409
CAM210_map5	0002.CSV	1704.84	0.0157147
CAM210_map5	0002.CSV	1708.69	0.0154676
CAM210_map5	0002.CSV	1712.55	0.0152611
CAM210_map5	0002.CSV	1716.41	0.0153316
CAM210_map5	0002.CSV	1720.27	0.0154289
CAM210_map5	0002.CSV	1724.12	0.0152384
CAM210_map5	0002.CSV	1727.98	0.0150091
CAM210_map5	0002.CSV	1731.84	0.0149895
CAM210_map5	0002.CSV	1735.69	0.0150821
CAM210_map5	0002.CSV	1739.55	0.0147979
CAM210_map5	0002.CSV	1743.41	0.0142187
CAM210_map5	0002.CSV	1747.27	0.0135863
CAM210_map5	0002.CSV	1751.12	0.0129826
CAM210_map5	0002.CSV	1754.98	0.012511
CAM210_map5	0002.CSV	1758.84	0.0122295
CAM210_map5	0002.CSV	1762.69	0.0120787
CAM210_map5	0002.CSV	1766.55	0.0120693
CAM210_map5	0002.CSV	1770.41	0.0126592
CAM210_map5	0002.CSV	1774.26	0.0141456
CAM210_map5	0002.CSV	1778.12	0.0157723
CAM210_map5	0002.CSV	1781.98	0.0170778
CAM210_map5	0002.CSV	1785.84	0.0176489
CAM210_map5	0002.CSV	1789.69	0.0171075
CAM210_map5	0002.CSV	1793.55	0.0155678
CAM210_map5	0002.CSV	1797.41	0.0138421
CAM210_map5	0002.CSV	1801.26	0.0124629
CAM210_map5	0002.CSV	1805.12	0.011471
CAM210_map5	0002.CSV	1808.98	0.0108714
CAM210_map5	0002.CSV	1812.84	0.0105204
CAM210_map5	0002.CSV	1816.69	0.0102496
CAM210_map5	0002.CSV	1820.55	0.0100398
CAM210_map5	0002.CSV	1824.41	0.00996673
CAM210_map5	0002.CSV	1828.26	0.0100422
CAM210_map5	0002.CSV	1832.12	0.0100604
CAM210_map5	0002.CSV	1835.98	0.00992534
CAM210_map5	0002.CSV	1839.84	0.00981562
CAM210_map5	0002.CSV	1843.69	0.00989754
CAM210_map5	0002.CSV	1847.55	0.0100258
CAM210_map5	0002.CSV	1851.41	0.00997595
CAM210_map5	0002.CSV	1855.26	0.00987001
CAM210_map5	0002.CSV	1859.12	0.00980311
CAM210_map5	0002.CSV	1862.98	0.00975956
CAM210_map5	0002.CSV	1866.84	0.00982927
CAM210_map5	0002.CSV	1870.69	0.00996656
CAM210_map5	0002.CSV	1874.55	0.00993808
CAM210_map5	0002.CSV	1878.41	0.00983727
CAM210_map5	0002.CSV	1882.26	0.00979681
CAM210_map5	0002.CSV	1886.12	0.00981765
CAM210_map5	0002.CSV	1889.98	0.00988137
CAM210_map5	0002.CSV	1893.83	0.00993628
CAM210_map5	0002.CSV	1897.69	0.009937
CAM210_map5	0002.CSV	1901.55	0.00989306
CAM210_map5	0002.CSV	1905.41	0.00985381
CAM210_map5	0002.CSV	1909.26	0.00984009
CAM210_map5	0002.CSV	1913.12	0.00981572
CAM210_map5	0002.CSV	1916.98	0.00981178
CAM210_map5	0002.CSV	1920.83	0.00988106
CAM210_map5	0002.CSV	1924.69	0.00995168
CAM210_map5	0002.CSV	1928.55	0.00996602
CAM210_map5	0002.CSV	1932.4	0.00995673
CAM210_map5	0002.CSV	1936.26	0.00993907
CAM210_map5	0002.CSV	1940.12	0.0099512
CAM210_map5	0002.CSV	1943.98	0.0100215
CAM210_map5	0002.CSV	1947.83	0.0100548
CAM210_map5	0002.CSV	1951.69	0.0100416
CAM210_map5	0002.CSV	1955.55	0.0100536
CAM210_map5	0002.CSV	1959.4	0.0100704
CAM210_map5	0002.CSV	1963.26	0.0100817
CAM210_map5	0002.CSV	1967.12	0.0101171
CAM210_map5	0002.CSV	1970.98	0.0101367
CAM210_map5	0002.CSV	1974.83	0.0101143
CAM210_map5	0002.CSV	1978.69	0.0100821
CAM210_map5	0002.CSV	1982.55	0.0100533
CAM210_map5	0002.CSV	1986.4	0.010045
CAM210_map5	0002.CSV	1990.26	0.0100822
CAM210_map5	0002.CSV	1994.12	0.0101237
CAM210_map5	0002.CSV	1997.98	0.0101193
CAM210_map5	0002.CSV	2001.83	0.0100931
CAM210_map5	0002.CSV	2005.69	0.0100725
CAM210_map5	0002.CSV	2009.55	0.0100496
CAM210_map5	0002.CSV	2013.4	0.0100351
CAM210_map5	0002.CSV	2017.26	0.0100666
CAM210_map5	0002.CSV	2021.12	0.0101014
CAM210_map5	0002.CSV	2024.97	0.0100695
CAM210_map5	0002.CSV	2028.83	0.0100108
CAM210_map5	0002.CSV	2032.69	0.0099768
CAM210_map5	0002.CSV	2036.55	0.00995402
CAM210_map5	0002.CSV	2040.4	0.00994015
CAM210_map5	0002.CSV	2044.26	0.009947
CAM210_map5	0002.CSV	2048.12	0.00994283
CAM210_map5	0002.CSV	2051.97	0.00991323
CAM210_map5	0002.CSV	2055.83	0.00988106
CAM210_map5	0002.CSV	2059.69	0.0098588
CAM210_map5	0002.CSV	2063.55	0.00985398
CAM210_map5	0002.CSV	2067.4	0.00985479
CAM210_map5	0002.CSV	2071.26	0.00983775
CAM210_map5	0002.CSV	2075.12	0.0098108
CAM210_map5	0002.CSV	2078.97	0.00977878
CAM210_map5	0002.CSV	2082.83	0.00973472
CAM210_map5	0002.CSV	2086.69	0.00969945
CAM210_map5	0002.CSV	2090.55	0.0096942
CAM210_map5	0002.CSV	2094.4	0.00969434
CAM210_map5	0002.CSV	2098.26	0.00968769
CAM210_map5	0002.CSV	2102.12	0.00968566
CAM210_map5	0002.CSV	2105.97	0.00967553
CAM210_map5	0002.CSV	2109.83	0.00966177
CAM210_map5	0002.CSV	2113.69	0.0096676
CAM210_map5	0002.CSV	2117.55	0.00967814
CAM210_map5	0002.CSV	2121.4	0.00968397
CAM210_map5	0002.CSV	2125.26	0.0097067
CAM210_map5	0002.CSV	2129.12	0.00973449
CAM210_map5	0002.CSV	2132.97	0.00973418
CAM210_map5	0002.CSV	2136.83	0.00971348
CAM210_map5	0002.CSV	2140.69	0.00970691
CAM210_map5	0002.CSV	2144.55	0.00972791
CAM210_map5	0002.CSV	2148.4	0.00975604
CAM210_map5	0002.CSV	2152.26	0.00976055
CAM210_map5	0002.CSV	2156.12	0.00972663
CAM210_map5	0002.CSV	2159.97	0.0096759
CAM210_map5	0002.CSV	2163.83	0.00965822
CAM210_map5	0002.CSV	2167.69	0.00967567
CAM210_map5	0002.CSV	2171.55	0.00968641
CAM210_map5	0002.CSV	2175.4	0.00969735
CAM210_map5	0002.CSV	2179.26	0.00972588
CAM210_map5	0002.CSV	2183.12	0.0097457
CAM210_map5	0002.CSV	2186.97	0.00974049
CAM210_map5	0002.CSV	2190.83	0.00972425
CAM210_map5	0002.CSV	2194.69	0.00970965
CAM210_map5	0002.CSV	2198.55	0.0096982
CAM210_map5	0002.CSV	2202.4	0.00969007
CAM210_map5	0002.CSV	2206.26	0.00968766
CAM210_map5	0002.CSV	2210.12	0.00968292
CAM210_map5	0002.CSV	2213.97	0.00966205
CAM210_map5	0002.CSV	2217.83	0.00963308
CAM210_map5	0002.CSV	2221.69	0.00961557
CAM210_map5	0002.CSV	2225.54	0.00960134
CAM210_map5	0002.CSV	2229.4	0.00957878
CAM210_map5	0002.CSV	2233.26	0.00955622
CAM210_map5	0002.CSV	2237.12	0.00952868
CAM210_map5	0002.CSV	2240.97	0.00948164
CAM210_map5	0002.CSV	2244.83	0.0094215
CAM210_map5	0002.CSV	2248.69	0.0093699
CAM210_map5	0002.CSV	2252.54	0.00933638
CAM210_map5	0002.CSV	2256.4	0.00930724
CAM210_map5	0002.CSV	2260.26	0.0092698
CAM210_map5	0002.CSV	2264.11	0.00922106
CAM210_map5	0002.CSV	2267.97	0.00917594
CAM210_map5	0002.CSV	2271.83	0.0091532
CAM210_map5	0002.CSV	2275.69	0.00913771
CAM210_map5	0002.CSV	2279.54	0.00908996
CAM210_map5	0002.CSV	2283.4	0.00900204
CAM210_map5	0002.CSV	2287.26	0.00890645
CAM210_map5	0002.CSV	2291.11	0.00881271
CAM210_map5	0002.CSV	2294.97	0.00870046
CAM210_map5	0002.CSV	2298.83	0.00856935
CAM210_map5	0002.CSV	2302.69	0.00840349
CAM210_map5	0002.CSV	2306.54	0.00816468
CAM210_map5	0002.CSV	2310.4	0.00782857
CAM210_map5	0002.CSV	2314.26	0.0073372
CAM210_map5	0002.CSV	2318.11	0.00654931
CAM210_map5	0002.CSV	2321.97	0.0052909
CAM210_map5	0002.CSV	2325.83	0.00357142
CAM210_map5	0002.CSV	2329.69	0.00180954
CAM210_map5	0002.CSV	2333.54	0.000430492
CAM210_map5	0002.CSV	2337.4	-0.000508674
CAM210_map5	0002.CSV	2341.26	0.000162785
CAM210_map5	0002.CSV	2345.11	0.00227204
CAM210_map5	0002.CSV	2348.97	0.0028348
CAM210_map5	0002.CSV	2352.83	0.000516369
CAM210_map5	0002.CSV	2356.69	-0.00604038
CAM210_map5	0002.CSV	2360.54	-0.0133192
CAM210_map5	0002.CSV	2364.4	-0.00885098
CAM210_map5	0002.CSV	2368.26	-0.000279826
CAM210_map5	0002.CSV	2372.11	0.00476149
CAM210_map5	0002.CSV	2375.97	0.00700974
CAM210_map5	0002.CSV	2379.83	0.00792217
CAM210_map5	0002.CSV	2383.69	0.00819345
CAM210_map5	0002.CSV	2387.54	0.00816843
CAM210_map5	0002.CSV	2391.4	0.00807799
CAM210_map5	0002.CSV	2395.26	0.00801899
CAM210_map5	0002.CSV	2399.11	0.00797407
CAM210_map5	0002.CSV	2402.97	0.00792504
CAM210_map5	0002.CSV	2406.83	0.00788498
CAM210_map5	0002.CSV	2410.68	0.00786555
CAM210_map5	0002.CSV	2414.54	0.00786035
CAM210_map5	0002.CSV	2418.4	0.00784554
CAM210_map5	0002.CSV	2422.26	0.00781069
CAM210_map5	0002.CSV	2426.11	0.0077754
CAM210_map5	0002.CSV	2429.97	0.00775746
CAM210_map5	0002.CSV	2433.83	0.00774825
CAM210_map5	0002.CSV	2437.68	0.00774751
CAM210_map5	0002.CSV	2441.54	0.00775945
CAM210_map5	0002.CSV	2445.4	0.00776927
CAM210_map5	0002.CSV	2449.26	0.00776782
CAM210_map5	0002.CSV	2453.11	0.00776249
CAM210_map5	0002.CSV	2456.97	0.00777443
CAM210_map5	0002.CSV	2460.83	0.00781535
CAM210_map5	0002.CSV	2464.68	0.00788829
CAM210_map5	0002.CSV	2468.54	0.00800471
CAM210_map5	0002.CSV	2472.4	0.00815705
CAM210_map5	0002.CSV	2476.26	0.00833191
CAM210_map5	0002.CSV	2480.11	0.00854637
CAM210_map5	0002.CSV	2483.97	0.00880314
CAM210_map5	0002.CSV	2487.83	0.00904476
CAM210_map5	0002.CSV	2491.68	0.00922075
CAM210_map5	0002.CSV	2495.54	0.00934316
CAM210_map5	0002.CSV	2499.4	0.00941676
CAM210_map5	0002.CSV	2503.26	0.00941906
CAM210_map5	0002.CSV	2507.11	0.00937786
CAM210_map5	0002.CSV	2510.97	0.00938564
CAM210_map5	0002.CSV	2514.83	0.00949959
CAM210_map5	0002.CSV	2518.68	0.0096366
CAM210_map5	0002.CSV	2522.54	0.00964443
CAM210_map5	0002.CSV	2526.4	0.00948709
CAM210_map5	0002.CSV	2530.26	0.00923835
CAM210_map5	0002.CSV	2534.11	0.00897047
CAM210_map5	0002.CSV	2537.97	0.00875232
CAM210_map5	0002.CSV	2541.83	0.00862228
CAM210_map5	0002.CSV	2545.68	0.00853275
CAM210_map5	0002.CSV	2549.54	0.00841072
CAM210_map5	0002.CSV	2553.4	0.00823539
CAM210_map5	0002.CSV	2557.26	0.00802135
CAM210_map5	0002.CSV	2561.11	0.00781336
CAM210_map5	0002.CSV	2564.97	0.0076635
CAM210_map5	0002.CSV	2568.83	0.00757309
CAM210_map5	0002.CSV	2572.68	0.00751271
CAM210_map5	0002.CSV	2576.54	0.007449
CAM210_map5	0002.CSV	2580.4	0.00736184
CAM210_map5	0002.CSV	2584.25	0.00727446
CAM210_map5	0002.CSV	2588.11	0.00721961
CAM210_map5	0002.CSV	2591.97	0.00718879
CAM210_map5	0002.CSV	2595.83	0.0071518
CAM210_map5	0002.CSV	2599.68	0.00711195
CAM210_map5	0002.CSV	2603.54	0.00708946
CAM210_map5	0002.CSV	2607.4	0.0070812
CAM210_map5	0002.CSV	2611.25	0.00707002
CAM210_map5	0002.CSV	2615.11	0.00705137
CAM210_map5	0002.CSV	2618.97	0.00705729
CAM210_map5	0002.CSV	2622.82	0.00711492
CAM210_map5	0002.CSV	2626.68	0.00716302
CAM210_map5	0002.CSV	2630.54	0.0071518
CAM210_map5	0002.CSV	2634.4	0.00711781
CAM210_map5	0002.CSV	2638.25	0.00702288
CAM210_map5	0002.CSV	2642.11	0.00680802
CAM210_map5	0002.CSV	2645.97	0.00657124
CAM210_map5	0002.CSV	2649.82	0.00640943
CAM210_map5	0002.CSV	2653.68	0.0062975
CAM210_map5	0002.CSV	2657.54	0.00621545
CAM210_map5	0002.CSV	2661.4	0.00616302
CAM210_map5	0002.CSV	2665.25	0.00613687
CAM210_map5	0002.CSV	2669.11	0.00620506
CAM210_map5	0002.CSV	2672.97	0.00641289
CAM210_map5	0002.CSV	2676.82	0.00658876
CAM210_map5	0002.CSV	2680.68	0.0064822
CAM210_map5	0002.CSV	2684.54	0.00614967
CAM210_map5	0002.CSV	2688.4	0.00587603
CAM210_map5	0002.CSV	2692.25	0.00577432
CAM210_map5	0002.CSV	2696.11	0.00577233
CAM210_map5	0002.CSV	2699.97	0.00578671
CAM210_map5	0002.CSV	2703.82	0.00580974
CAM210_map5	0002.CSV	2707.68	0.00585064
CAM210_map5	0002.CSV	2711.54	0.00585363
CAM210_map5	0002.CSV	2715.4	0.00587009
CAM210_map5	0002.CSV	2719.25	0.00605643
CAM210_map5	0002.CSV	2723.11	0.00630117
CAM210_map5	0002.CSV	2726.97	0.00628385
CAM210_map5	0002.CSV	2730.82	0.00606026
CAM210_map5	0002.CSV	2734.68	0.00594516
CAM210_map5	0002.CSV	2738.54	0.00594183
CAM210_map5	0002.CSV	2742.4	0.00602461
CAM210_map5	0002.CSV	2746.25	0.00623171
CAM210_map5	0002.CSV	2750.11	0.00629152
CAM210_map5	0002.CSV	2753.97	0.00609796
CAM210_map5	0002.CSV	2757.82	0.00590183
CAM210_map5	0002.CSV	2761.68	0.00580978
CAM210_map5	0002.CSV	2765.54	0.00584185
CAM210_map5	0002.CSV	2769.39	0.00606805
CAM210_map5	0002.CSV	2773.25	0.00631333
CAM210_map5	0002.CSV	2777.11	0.00628967
CAM210_map5	0002.CSV	2780.97	0.00618342
CAM210_map5	0002.CSV	2784.82	0.00640018
CAM210_map5	0002.CSV	2788.68	0.00683724
CAM210_map5	0002.CSV	2792.54	0.00712179
CAM210_map5	0002.CSV	2796.39	0.00714439
CAM210_map5	0002.CSV	2800.25	0.00697846
CAM210_map5	0002.CSV	2804.11	0.00688312
CAM210_map5	0002.CSV	2807.97	0.00703311
CAM210_map5	0002.CSV	2811.82	0.0071672
CAM210_map5	0002.CSV	2815.68	0.00721887
CAM210_map5	0002.CSV	2819.54	0.00742422
CAM210_map5	0002.CSV	2823.39	0.00776802
CAM210_map5	0002.CSV	2827.25	0.00827001
CAM210_map5	0002.CSV	2831.11	0.00922465
CAM210_map5	0002.CSV	2834.97	0.0107754
CAM210_map5	0002.CSV	2838.82	0.0130558
CAM210_map5	0002.CSV	2842.68	0.0166331
CAM210_map5	0002.CSV	2846.54	0.0209328
CAM210_map5	0002.CSV	2850.39	0.0230154
CAM210_map5	0002.CSV	2854.25	0.0213639
CAM210_map5	0002.CSV	2858.11	0.0181411
CAM210_map5	0002.CSV	2861.97	0.0155125
CAM210_map5	0002.CSV	2865.82	0.0140812
CAM210_map5	0002.CSV	2869.68	0.013677
CAM210_map5	0002.CSV	2873.54	0.0134264
CAM210_map5	0002.CSV	2877.39	0.0127918
CAM210_map5	0002.CSV	2881.25	0.0123071
CAM210_map5	0002.CSV	2885.11	0.0125236
CAM210_map5	0002.CSV	2888.97	0.0134405
CAM210_map5	0002.CSV	2892.82	0.0147771
CAM210_map5	0002.CSV	2896.68	0.0161275
CAM210_map5	0002.CSV	2900.54	0.0175346
CAM210_map5	0002.CSV	2904.39	0.0197858
CAM210_map5	0002.CSV	2908.25	0.0238361
CAM210_map5	0002.CSV	2912.11	0.0294672
CAM210_map5	0002.CSV	2915.97	0.0340458
CAM210_map5	0002.CSV	2919.82	0.0345543
CAM210_map5	0002.CSV	2923.68	0.031332
CAM210_map5	0002.CSV	2927.54	0.0269386
CAM210_map5	0002.CSV	2931.39	0.022731
CAM210_map5	0002.CSV	2935.25	0.0191921
CAM210_map5	0002.CSV	2939.11	0.0169148
CAM210_map5	0002.CSV	2942.96	0.0158033
CAM210_map5	0002.CSV	2946.82	0.0151458
CAM210_map5	0002.CSV	2950.68	0.0145679
CAM210_map5	0002.CSV	2954.54	0.0139468
CAM210_map5	0002.CSV	2958.39	0.0131409
CAM210_map5	0002.CSV	2962.25	0.0120983
CAM210_map5	0002.CSV	2966.11	0.0109591
CAM210_map5	0002.CSV	2969.96	0.0101315
CAM210_map5	0002.CSV	2973.82	0.00972835
CAM210_map5	0002.CSV	2977.68	0.00933175
CAM210_map5	0002.CSV	2981.53	0.00860619
CAM210_map5	0002.CSV	2985.39	0.007828
CAM210_map5	0002.CSV	2989.25	0.00753152
CAM210_map5	0002.CSV	2993.11	0.00757592
CAM210_map5	0002.CSV	2996.96	0.00743491
CAM210_map5	0002.CSV	3000.82	0.00709845
CAM210_map5	0002.CSV	3004.68	0.00694577
CAM210_map5	0002.CSV	3008.53	0.00715793
CAM210_map5	0002.CSV	3012.39	0.00747293
CAM210_map5	0002.CSV	3016.25	0.00751453
CAM210_map5	0002.CSV	3020.11	0.00723322
CAM210_map5	0002.CSV	3023.96	0.00688884
CAM210_map5	0002.CSV	3027.82	0.00679032
CAM210_map5	0002.CSV	3031.68	0.00696398
CAM210_map5	0002.CSV	3035.53	0.00714361
CAM210_map5	0002.CSV	3039.39	0.0072339
CAM210_map5	0002.CSV	3043.25	0.00727055
CAM210_map5	0002.CSV	3047.11	0.00723471
CAM210_map5	0002.CSV	3050.96	0.00715648
CAM210_map5	0002.CSV	3054.82	0.00701991
CAM210_map5	0002.CSV	3058.68	0.00688167
CAM210_map5	0002.CSV	3062.53	0.00694833
CAM210_map5	0002.CSV	3066.39	0.00714321
CAM210_map5	0002.CSV	3070.25	0.00721789
CAM210_map5	0002.CSV	3074.11	0.00729967
CAM210_map5	0002.CSV	3077.96	0.00752815
CAM210_map5	0002.CSV	3081.82	0.00770521
CAM210_map5	0002.CSV	3085.68	0.00767928
CAM210_map5	0002.CSV	3089.53	0.00746835
CAM210_map5	0002.CSV	3093.39	0.00721954
CAM210_map5	0002.CSV	3097.25	0.00713839
CAM210_map5	0002.CSV	3101.11	0.0072119
CAM210_map5	0002.CSV	3104.96	0.00733694
CAM210_map5	0002.CSV	3108.82	0.0074855
CAM210_map5	0002.CSV	3112.68	0.00764205
CAM210_map5	0002.CSV	3116.53	0.00775179
CAM210_map5	0002.CSV	3120.39	0.00766896
CAM210_map5	0002.CSV	3124.25	0.00742554
CAM210_map5	0002.CSV	3128.11	0.00723582
CAM210_map5	0002.CSV	3131.96	0.00719246
CAM210_map5	0002.CSV	3135.82	0.00728356
CAM210_map5	0002.CSV	3139.68	0.00733013
CAM210_map5	0002.CSV	3143.53	0.00725431
CAM210_map5	0002.CSV	3147.39	0.00732888
CAM210_map5	0002.CSV	3151.25	0.0075265
CAM210_map5	0002.CSV	3155.1	0.00745422
CAM210_map5	0002.CSV	3158.96	0.00713381
CAM210_map5	0002.CSV	3162.82	0.0069186
CAM210_map5	0002.CSV	3166.68	0.00688379
CAM210_map5	0002.CSV	3170.53	0.00690066
CAM210_map5	0002.CSV	3174.39	0.00696331
CAM210_map5	0002.CSV	3178.25	0.00710438
CAM210_map5	0002.CSV	3182.1	0.0072435
CAM210_map5	0002.CSV	3185.96	0.00734047
CAM210_map5	0002.CSV	3189.82	0.00739692
CAM210_map5	0002.CSV	3193.68	0.00737242
CAM210_map5	0002.CSV	3197.53	0.00734482
CAM210_map5	0002.CSV	3201.39	0.0074039
CAM210_map5	0002.CSV	3205.25	0.00746474
CAM210_map5	0002.CSV	3209.1	0.00750381
CAM210_map5	0002.CSV	3212.96	0.0076176
CAM210_map5	0002.CSV	3216.82	0.00774636
CAM210_map5	0002.CSV	3220.68	0.00777959
CAM210_map5	0002.CSV	3224.53	0.0078312
CAM210_map5	0002.CSV	3228.39	0.00806165
CAM210_map5	0002.CSV	3232.25	0.00832043
CAM210_map5	0002.CSV	3236.1	0.0083589
CAM210_map5	0002.CSV	3239.96	0.00833597
CAM210_map5	0002.CSV	3243.82	0.00845153
CAM210_map5	0002.CSV	3247.68	0.00848866
CAM210_map5	0002.CSV	3251.53	0.00835947
CAM210_map5	0002.CSV	3255.39	0.00824586
CAM210_map5	0002.CSV	3259.25	0.00818775
CAM210_map5	0002.CSV	3263.1	0.00825616
CAM210_map5	0002.CSV	3266.96	0.00852975
CAM210_map5	0002.CSV	3270.82	0.00878397
CAM210_map5	0002.CSV	3274.68	0.00874508
CAM210_map5	0002.CSV	3278.53	0.00849032
CAM210_map5	0002.CSV	3282.39	0.0083207
CAM210_map5	0002.CSV	3286.25	0.00842382
CAM210_map5	0002.CSV	3290.1	0.00875956
CAM210_map5	0002.CSV	3293.96	0.00902964
CAM210_map5	0002.CSV	3297.82	0.0090767
CAM210_map5	0002.CSV	3301.67	0.0091352
CAM210_map5	0002.CSV	3305.53	0.00923341
CAM210_map5	0002.CSV	3309.39	0.00908499
CAM210_map5	0002.CSV	3313.25	0.00869296
CAM210_map5	0002.CSV	3317.1	0.008412
CAM210_map5	0002.CSV	3320.96	0.00845619
CAM210_map5	0002.CSV	3324.82	0.00856634
CAM210_map5	0002.CSV	3328.67	0.00846585
CAM210_map5	0002.CSV	3332.53	0.00848069
CAM210_map5	0002.CSV	3336.39	0.0088544
CAM210_map5	0002.CSV	3340.24	0.00913385
CAM210_map5	0002.CSV	3344.1	0.0090585
CAM210_map5	0002.CSV	3347.96	0.00890124
CAM210_map5	0002.CSV	3351.82	0.00878326
CAM210_map5	0002.CSV	3355.67	0.00872991
CAM210_map5	0002.CSV	3359.53	0.00887148
CAM210_map5	0002.CSV	3363.39	0.00914261
CAM210_map5	0002.CSV	3367.24	0.00929647
CAM210_map5	0002.CSV	3371.1	0.00917655
CAM210_map5	0002.CSV	3374.96	0.00890743
CAM210_map5	0002.CSV	3378.82	0.00864462
CAM210_map5	0002.CSV	3382.67	0.0084616
CAM210_map5	0002.CSV	3386.53	0.00853755
CAM210_map5	0002.CSV	3390.39	0.00882214
CAM210_map5	0002.CSV	3394.24	0.00902602
CAM210_map5	0002.CSV	3398.1	0.00905542
CAM210_map5	0002.CSV	3401.96	0.00895918
CAM210_map5	0002.CSV	3405.82	0.00882275
CAM210_map5	0002.CSV	3409.67	0.00868322
CAM210_map5	0002.CSV	3413.53	0.00839011
CAM210_map5	0002.CSV	3417.39	0.00797397
CAM210_map5	0002.CSV	3421.24	0.00777675
CAM210_map5	0002.CSV	3425.1	0.00796482
CAM210_map5	0002.CSV	3428.96	0.00832394
CAM210_map5	0002.CSV	3432.82	0.00846058
CAM210_map5	0002.CSV	3436.67	0.00812191
CAM210_map5	0002.CSV	3440.53	0.00754851
CAM210_map5	0002.CSV	3444.39	0.00718603
CAM210_map5	0002.CSV	3448.24	0.0070155
CAM210_map5	0002.CSV	3452.1	0.00684357
CAM210_map5	0002.CSV	3455.96	0.00685057
CAM210_map5	0002.CSV	3459.82	0.00711532
CAM210_map5	0002.CSV	3463.67	0.00741856
CAM210_map5	0002.CSV	3467.53	0.00747829
CAM210_map5	0002.CSV	3471.39	0.00720075
CAM210_map5	0002.CSV	3475.24	0.00686854
CAM210_map5	0002.CSV	3479.1	0.00669417
CAM210_map5	0002.CSV	3482.96	0.00661238
CAM210_map5	0002.CSV	3486.82	0.00656992
CAM210_map5	0002.CSV	3490.67	0.00656939
CAM210_map5	0002.CSV	3494.53	0.0065928
CAM210_map5	0002.CSV	3498.39	0.00650245
CAM210_map5	0002.CSV	3502.24	0.00617972
CAM210_map5	0002.CSV	3506.1	0.0057494
CAM210_map5	0002.CSV	3509.96	0.00550645
CAM210_map5	0002.CSV	3513.81	0.00539452
CAM210_map5	0002.CSV	3517.67	0.00518717
CAM210_map5	0002.CSV	3521.53	0.0049752
CAM210_map5	0002.CSV	3525.39	0.0048229
CAM210_map5	0002.CSV	3529.24	0.00474571
CAM210_map5	0002.CSV	3533.1	0.00485259
CAM210_map5	0002.CSV	3536.96	0.0050292
CAM210_map5	0002.CSV	3540.81	0.00512022
CAM210_map5	0002.CSV	3544.67	0.00506611
CAM210_map5	0002.CSV	3548.53	0.00475218
CAM210_map5	0002.CSV	3552.39	0.00428998
CAM210_map5	0002.CSV	3556.24	0.00389372
CAM210_map5	0002.CSV	3560.1	0.00343273
CAM210_map5	0002.CSV	3563.96	0.00298214
CAM210_map5	0002.CSV	3567.81	0.00303542
CAM210_map5	0002.CSV	3571.67	0.00320786
CAM210_map5	0002.CSV	3575.53	0.0031644
CAM210_map5	0002.CSV	3579.39	0.00316347
CAM210_map5	0002.CSV	3583.24	0.00314094
CAM210_map5	0002.CSV	3587.1	0.00302508
CAM210_map5	0002.CSV	3590.96	0.00285338
CAM210_map5	0002.CSV	3594.81	0.00268382
CAM210_map5	0002.CSV	3598.67	0.00260804
CAM210_map5	0002.CSV	3602.53	0.0023213
CAM210_map5	0002.CSV	3606.39	0.00169919
CAM210_map5	0002.CSV	3610.24	0.00119214
CAM210_map5	0002.CSV	3614.1	0.00115025
CAM210_map5	0002.CSV	3617.96	0.0014031
CAM210_map5	0002.CSV	3621.81	0.00140437
CAM210_map5	0002.CSV	3625.67	0.00105222
CAM210_map5	0002.CSV	3629.53	0.00105853
CAM210_map5	0002.CSV	3633.39	0.00137661
CAM210_map5	0002.CSV	3637.24	0.00126082
CAM210_map5	0002.CSV	3641.1	0.000804543
CAM210_map5	0002.CSV	3644.96	0.000353187
CAM210_map5	0002.CSV	3648.81	0.000599245
CAM210_map5	0002.CSV	3652.67	0.00144941
CAM210_map5	0002.CSV	3656.53	0.00180109
CAM210_map5	0002.CSV	3660.38	0.00159146
CAM210_map5	0002.CSV	3664.24	0.000928745
CAM210_map5	0002.CSV	3668.1	0.000165039
CAM210_map5	0002.CSV	3671.96	-7.5274e-05
CAM210_map5	0002.CSV	3675.81	0.000510365
CAM210_map5	0002.CSV	3679.67	0.000909919
CAM210_map5	0002.CSV	3683.53	0.00084677
CAM210_map5	0002.CSV	3687.38	0.000923964
CAM210_map5	0002.CSV	3691.24	0.00132795
CAM210_map5	0002.CSV	3695.1	0.00124201
CAM210_map5	0002.CSV	3698.95	0.000758305
CAM210_map5	0002.CSV	3702.81	0.00031943
CAM210_map5	0002.CSV	3706.67	4.40705e-05
CAM210_map5	0002.CSV	3710.53	0.000214065
CAM210_map5	0002.CSV	3714.38	0.000558701
CAM210_map5	0002.CSV	3718.24	0.000398686
CAM210_map5	0002.CSV	3722.1	8.37378e-05
CAM210_map5	0002.CSV	3725.95	-6.32483e-05
CAM210_map5	0002.CSV	3729.81	-0.000150469
CAM210_map5	0002.CSV	3733.67	0.00015251
CAM210_map5	0002.CSV	3737.53	0.000626022
CAM210_map5	0002.CSV	3741.38	0.000150256
CAM210_map5	0002.CSV	3745.24	-0.000773752
CAM210_map5	0002.CSV	3749.1	-0.000781657
CAM210_map5	0002.CSV	3752.95	4.48989e-05
CAM210_map5	0002.CSV	3756.81	0.000421305
CAM210_map5	0002.CSV	3760.67	0.000430923
CAM210_map5	0002.CSV	3764.53	0.000401206
CAM210_map5	0002.CSV	3768.38	0.000507413
CAM210_map5	0002.CSV	3772.24	0.000582921
CAM210_map5	0002.CSV	3776.1	0.000476032
CAM210_map5	0002.CSV	3779.95	0.000411322
CAM210_map5	0002.CSV	3783.81	0.000476862
CAM210_map5	0002.CSV	3787.67	0.000451255
CAM210_map5	0002.CSV	3791.53	0.000129607
CAM210_map5	0002.CSV	3795.38	-0.000362203
CAM210_map5	0002.CSV	3799.24	-0.000538161
CAM210_map5	0002.CSV	3803.1	-0.000124897
CAM210_map5	0002.CSV	3806.95	0.000155592
CAM210_map5	0002.CSV	3810.81	-6.69256e-05
CAM210_map5	0002.CSV	3814.67	-0.000391534
CAM210_map5	0002.CSV	3818.53	-0.000283965
CAM210_map5	0002.CSV	3822.38	0.0001191
CAM210_map5	0002.CSV	3826.24	7.3133e-05
CAM210_map5	0002.CSV	3830.1	-0.000266117
CAM210_map5	0002.CSV	3833.95	-0.000549743
CAM210_map5	0002.CSV	3837.81	-0.000448536
CAM210_map5	0002.CSV	3841.67	-0.000106016
CAM210_map5	0002.CSV	3845.53	-0.000314461
CAM210_map5	0002.CSV	3849.38	-0.000902693
CAM210_map5	0002.CSV	3853.24	-0.000999861
CAM210_map5	0002.CSV	3857.1	-0.000643053
CAM210_map5	0002.CSV	3860.95	-0.000746828
CAM210_map5	0002.CSV	3864.81	-0.000905007
CAM210_map5	0002.CSV	3868.67	-0.00076932
CAM210_map5	0002.CSV	3872.52	-0.000576878
CAM210_map5	0002.CSV	3876.38	-0.000643913
CAM210_map5	0002.CSV	3880.24	-0.000690958
CAM210_map5	0002.CSV	3884.1	-0.000454063
CAM210_map5	0002.CSV	3887.95	-0.000302872
CAM210_map5	0002.CSV	3891.81	-0.000429801
CAM210_map5	0002.CSV	3895.67	-0.000715305
CAM210_map5	0002.CSV	3899.52	-0.000847206
CAM210_map5	0002.CSV	3903.38	-0.00043331
CAM210_map5	0002.CSV	3907.24	-0.000229757
CAM210_map5	0002.CSV	3911.1	-0.000554707
CAM210_map5	0002.CSV	3914.95	-0.000825611
CAM210_map5	0002.CSV	3918.81	-0.000796243
CAM210_map5	0002.CSV	3922.67	-0.000732208
CAM210_map5	0002.CSV	3926.52	-0.000729099
CAM210_map5	0002.CSV	3930.38	-0.00059961
CAM210_map5	0002.CSV	3934.24	-0.000475611
CAM210_map5	0002.CSV	3938.09	-0.000545441
CAM210_map5	0002.CSV	3941.95	-0.000606923
CAM210_map5	0002.CSV	3945.81	-0.000510693
CAM210_map5	0002.CSV	3949.67	-0.000381536
CAM210_map5	0002.CSV	3953.52	-0.000359289
CAM210_map5	0002.CSV	3957.38	-0.000400538
CAM210_map5	0002.CSV	3961.24	-0.00039064
CAM210_map5	0002.CSV	3965.09	-0.000382232
CAM210_map5	0002.CSV	3968.95	-0.000399347
CAM210_map5	0002.CSV	3972.81	-0.000339127
CAM210_map5	0002.CSV	3976.67	-0.000239162
CAM210_map5	0002.CSV	3980.52	-0.000211013
CAM210_map5	0002.CSV	3984.38	-0.000261945
CAM210_map5	0002.CSV	3988.24	-0.00033426
CAM210_map5	0002.CSV	3992.09	-0.00035098
CAM210_map5	0002.CSV	3995.95	-0.000319526
CAM210_map5	0002.CSV	3999.81	-0.000309693
CAM210_map5	0003.CSV	674.992	0.0547669
CAM210_map5	0003.CSV	678.849	0.0559135
CAM210_map5	0003.CSV	682.706	0.0573847
CAM210_map5	0003.CSV	686.563	0.0601451
CAM210_map5	0003.CSV	690.42	0.066537
CAM210_map5	0003.CSV	694.277	0.0781796
CAM210_map5	0003.CSV	698.134	0.0876313
CAM210_map5	0003.CSV	701.991	0.0875655
CAM210_map5	0003.CSV	705.849	0.0896822
CAM210_map5	0003.CSV	709.706	0.100444
CAM210_map5	0003.CSV	713.563	0.0989492
CAM210_map5	0003.CSV	717.42	0.0768582
CAM210_map5	0003.CSV	721.277	0.0557091
CAM210_map5	0003.CSV	725.134	0.0470798
CAM210_map5	0003.CSV	728.991	0.0445259
CAM210_map5	0003.CSV	732.848	0.0430639
CAM210_map5	0003.CSV	736.705	0.042488
CAM210_map5	0003.CSV	740.562	0.0429166
CAM210_map5	0003.CSV	744.42	0.0437219
CAM210_map5	0003.CSV	748.277	0.0445473
CAM210_map5	0003.CSV	752.134	0.045411
CAM210_map5	0003.CSV	755.991	0.0462845
CAM210_map5	0003.CSV	759.848	0.0472028
CAM210_map5	0003.CSV	763.705	0.0482671
CAM210_map5	0003.CSV	767.562	0.0494327
CAM210_map5	0003.CSV	771.419	0.0505392
CAM210_map5	0003.CSV	775.276	0.0514987
CAM210_map5	0003.CSV	779.133	0.0523274
CAM210_map5	0003.CSV	782.99	0.0529741
CAM210_map5	0003.CSV	786.848	0.0535421
CAM210_map5	0003.CSV	790.705	0.0543181
CAM210_map5	0003.CSV	794.562	0.0554592
CAM210_map5	0003.CSV	798.419	0.0568827
CAM210_map5	0003.CSV	802.276	0.0584403
CAM210_map5	0003.CSV	806.133	0.0601725
CAM210_map5	0003.CSV	809.99	0.0622453
CAM210_map5	0003.CSV	813.847	0.0648336
CAM210_map5	0003.CSV	817.704	0.0681995
CAM210_map5	0003.CSV	821.562	0.0726673
CAM210_map5	0003.CSV	825.419	0.0786705
CAM210_map5	0003.CSV	829.276	0.0868238
CAM210_map5	0003.CSV	833.133	0.0984805
CAM210_map5	0003.CSV	836.99	0.115833
CAM210_map5	0003.CSV	840.847	0.139244
CAM210_map5	0003.CSV	844.704	0.168577
CAM210_map5	0003.CSV	848.561	0.204537
CAM210_map5	0003.CSV	852.418	0.233095
CAM210_map5	0003.CSV	856.275	0.229772
CAM210_map5	0003.CSV	860.132	0.195883
CAM210_map5	0003.CSV	863.99	0.152613
CAM210_map5	0003.CSV	867.847	0.113888
CAM210_map5	0003.CSV	871.704	0.0850662
CAM210_map5	0003.CSV	875.561	0.0668109
CAM210_map5	0003.CSV	879.418	0.056427
CAM210_map5	0003.CSV	883.275	0.050552
CAM210_map5	0003.CSV	887.132	0.0474085
CAM210_map5	0003.CSV	890.989	0.0463017
CAM210_map5	0003.CSV	894.846	0.0464118
CAM210_map5	0003.CSV	898.703	0.0470244
CAM210_map5	0003.CSV	902.561	0.0479047
CAM210_map5	0003.CSV	906.418	0.0487352
CAM210_map5	0003.CSV	910.275	0.049052
CAM210_map5	0003.CSV	914.132	0.049064
CAM210_map5	0003.CSV	917.989	0.04933
CAM210_map5	0003.CSV	921.846	0.0498974
CAM210_map5	0003.CSV	925.703	0.0506013
CAM210_map5	0003.CSV	929.56	0.0513509
CAM210_map5	0003.CSV	933.417	0.0520171
CAM210_map5	0003.CSV	937.274	0.0524792
CAM210_map5	0003.CSV	941.131	0.0527543
CAM210_map5	0003.CSV	944.989	0.0530294
CAM210_map5	0003.CSV	948.846	0.0535595
CAM210_map5	0003.CSV	952.703	0.0543561
CAM210_map5	0003.CSV	956.56	0.0550634
CAM210_map5	0003.CSV	960.417	0.0554421
CAM210_map5	0003.CSV	964.274	0.0557343
CAM210_map5	0003.CSV	968.131	0.0562483
CAM210_map5	0003.CSV	971.988	0.0569658
CAM210_map5	0003.CSV	975.845	0.0577221
CAM210_map5	0003.CSV	979.702	0.0584757
CAM210_map5	0003.CSV	983.559	0.0592434
CAM210_map5	0003.CSV	987.417	0.0600123
CAM210_map5	0003.CSV	991.274	0.0607729
CAM210_map5	0003.CSV	995.131	0.0615231
CAM210_map5	0003.CSV	998.988	0.0622832
CAM210_map5	0003.CSV	1002.85	0.0631002
CAM210_map5	0003.CSV	1006.7	0.0639675
CAM210_map5	0003.CSV	1010.56	0.0648039
CAM210_map5	0003.CSV	1014.42	0.0655627
CAM210_map5	0003.CSV	1018.27	0.0662993
CAM210_map5	0003.CSV	1022.13	0.067036
CAM210_map5	0003.CSV	1025.99	0.0677281
CAM210_map5	0003.CSV	1029.85	0.0683988
CAM210_map5	0003.CSV	1033.7	0.0691046
CAM210_map5	0003.CSV	1037.56	0.0697955
CAM210_map5	0003.CSV	1041.42	0.0704366
CAM210_map5	0003.CSV	1045.27	0.0711341
CAM210_map5	0003.CSV	1049.13	0.0719933
CAM210_map5	0003.CSV	1052.99	0.0729884
CAM210_map5	0003.CSV	1056.84	0.0740708
CAM210_map5	0003.CSV	1060.7	0.0753213
CAM210_map5	0003.CSV	1064.56	0.0769529
CAM210_map5	0003.CSV	1068.42	0.0791734
CAM210_map5	0003.CSV	1072.27	0.082616
CAM210_map5	0003.CSV	1076.13	0.0887269
CAM210_map5	0003.CSV	1079.99	0.0958256
CAM210_map5	0003.CSV	1083.84	0.0966114
CAM210_map5	0003.CSV	1087.7	0.0894819
CAM210_map5	0003.CSV	1091.56	0.0825316
CAM210_map5	0003.CSV	1095.41	0.0800519
CAM210_map5	0003.CSV	1099.27	0.079918
CAM210_map5	0003.CSV	1103.13	0.0804141
CAM210_map5	0003.CSV	1106.99	0.0813155
CAM210_map5	0003.CSV	1110.84	0.0821289
CAM210_map5	0003.CSV	1114.7	0.0820695
CAM210_map5	0003.CSV	1118.56	0.0812532
CAM210_map5	0003.CSV	1122.41	0.080549
CAM210_map5	0003.CSV	1126.27	0.0803851
CAM210_map5	0003.CSV	1130.13	0.0805679
CAM210_map5	0003.CSV	1133.99	0.0808718
CAM210_map5	0003.CSV	1137.84	0.0812665
CAM210_map5	0003.CSV	1141.7	0.0818109
CAM210_map5	0003.CSV	1145.56	0.0825029
CAM210_map5	0003.CSV	1149.41	0.08324
CAM210_map5	0003.CSV	1153.27	0.0839401
CAM210_map5	0003.CSV	1157.13	0.0846534
CAM210_map5	0003.CSV	1160.99	0.0854679
CAM210_map5	0003.CSV	1164.84	0.086375
CAM210_map5	0003.CSV	1168.7	0.0872372
CAM210_map5	0003.CSV	1172.56	0.0879049
CAM210_map5	0003.CSV	1176.41	0.0883441
CAM210_map5	0003.CSV	1180.27	0.0886139
CAM210_map5	0003.CSV	1184.13	0.0887889
CAM210_map5	0003.CSV	1187.99	0.08891
CAM210_map5	0003.CSV	1191.84	0.0889485
CAM210_map5	0003.CSV	1195.7	0.0889453
CAM210_map5	0003.CSV	1199.56	0.0890527
CAM210_map5	0003.CSV	1203.41	0.0894023
CAM210_map5	0003.CSV	1207.27	0.0900554
CAM210_map5	0003.CSV	1211.13	0.0909436
CAM210_map5	0003.CSV	1214.98	0.0918739
CAM210_map5	0003.CSV	1218.84	0.0928057
CAM210_map5	0003.CSV	1222.7	0.0938656
CAM210_map5	0003.CSV	1226.56	0.0951042
CAM210_map5	0003.CSV	1230.41	0.0964526
CAM210_map5	0003.CSV	1234.27	0.0977653
CAM210_map5	0003.CSV	1238.13	0.0989358
CAM210_map5	0003.CSV	1241.98	0.100047
CAM210_map5	0003.CSV	1245.84	0.101214
CAM210_map5	0003.CSV	1249.7	0.102454
CAM210_map5	0003.CSV	1253.56	0.103785
CAM210_map5	0003.CSV	1257.41	0.105216
CAM210_map5	0003.CSV	1261.27	0.106692
CAM210_map5	0003.CSV	1265.13	0.108228
CAM210_map5	0003.CSV	1268.98	0.109968
CAM210_map5	0003.CSV	1272.84	0.111937
CAM210_map5	0003.CSV	1276.7	0.113913
CAM210_map5	0003.CSV	1280.56	0.11576
CAM210_map5	0003.CSV	1284.41	0.117594
CAM210_map5	0003.CSV	1288.27	0.11956
CAM210_map5	0003.CSV	1292.13	0.121633
CAM210_map5	0003.CSV	1295.98	0.12375
CAM210_map5	0003.CSV	1299.84	0.125856
CAM210_map5	0003.CSV	1303.7	0.127934
CAM210_map5	0003.CSV	1307.56	0.130138
CAM210_map5	0003.CSV	1311.41	0.132665
CAM210_map5	0003.CSV	1315.27	0.135536
CAM210_map5	0003.CSV	1319.13	0.138485
CAM210_map5	0003.CSV	1322.98	0.141301
CAM210_map5	0003.CSV	1326.84	0.144274
CAM210_map5	0003.CSV	1330.7	0.147598
CAM210_map5	0003.CSV	1334.56	0.15129
CAM210_map5	0003.CSV	1338.41	0.155853
CAM210_map5	0003.CSV	1342.27	0.160969
CAM210_map5	0003.CSV	1346.13	0.165764
CAM210_map5	0003.CSV	1349.98	0.170681
CAM210_map5	0003.CSV	1353.84	0.17594
CAM210_map5	0003.CSV	1357.7	0.181552
CAM210_map5	0003.CSV	1361.56	0.188286
CAM210_map5	0003.CSV	1365.41	0.19574
CAM210_map5	0003.CSV	1369.27	0.202924
CAM210_map5	0003.CSV	1373.13	0.211137
CAM210_map5	0003.CSV	1376.98	0.220279
CAM210_map5	0003.CSV	1380.84	0.228187
CAM210_map5	0003.CSV	1384.7	0.235702
CAM210_map5	0003.CSV	1388.56	0.244053
CAM210_map5	0003.CSV	1392.41	0.252609
CAM210_map5	0003.CSV	1396.27	0.262194
CAM210_map5	0003.CSV	1400.13	0.272388
CAM210_map5	0003.CSV	1403.98	0.281459
CAM210_map5	0003.CSV	1407.84	0.289785
CAM210_map5	0003.CSV	1411.7	0.29692
CAM210_map5	0003.CSV	1415.55	0.302773
CAM210_map5	0003.CSV	1419.41	0.308128
CAM210_map5	0003.CSV	1423.27	0.312802
CAM210_map5	0003.CSV	1427.12	0.317495
CAM210_map5	0003.CSV	1430.98	0.323405
CAM210_map5	0003.CSV	1434.84	0.330491
CAM210_map5	0003.CSV	1438.7	0.337037
CAM210_map5	0003.CSV	1442.55	0.341098
CAM210_map5	0003.CSV	1446.41	0.342579
CAM210_map5	0003.CSV	1450.27	0.34152
CAM210_map5	0003.CSV	1454.12	0.337822
CAM210_map5	0003.CSV	1457.98	0.331571
CAM210_map5	0003.CSV	1461.84	0.325349
CAM210_map5	0003.CSV	1465.7	0.318432
CAM210_map5	0003.CSV	1469.55	0.305383
CAM210_map5	0003.CSV	1473.41	0.279595
CAM210_map5	0003.CSV	1477.27	0.252345
CAM210_map5	0003.CSV	1481.12	0.235615
CAM210_map5	0003.CSV	1484.98	0.222732
CAM210_map5	0003.CSV	1488.84	0.208178
CAM210_map5	0003.CSV	1492.7	0.193989
CAM210_map5	0003.CSV	1496.55	0.182598
CAM210_map5	0003.CSV	1500.41	0.173006
CAM210_map5	0003.CSV	1504.27	0.164252
CAM210_map5	0003.CSV	1508.12	0.152693
CAM210_map5	0003.CSV	1511.98	0.142708
CAM210_map5	0003.CSV	1515.84	0.136346
CAM210_map5	0003.CSV	1519.7	0.12875
CAM210_map5	0003.CSV	1523.55	0.120669
CAM210_map5	0003.CSV	1527.41	0.116641
CAM210_map5	0003.CSV	1531.27	0.116134
CAM210_map5	0003.CSV	1535.12	0.11729
CAM210_map5	0003.CSV	1538.98	0.115685
CAM210_map5	0003.CSV	1542.84	0.104629
CAM210_map5	0003.CSV	1546.7	0.0935302
CAM210_map5	0003.CSV	1550.55	0.0861969
CAM210_map5	0003.CSV	1554.41	0.0795476
CAM210_map5	0003.CSV	1558.27	0.0725531
CAM210_map5	0003.CSV	1562.12	0.0688398
CAM210_map5	0003.CSV	1565.98	0.0688922
CAM210_map5	0003.CSV	1569.84	0.0704274
CAM210_map5	0003.CSV	1573.69	0.0703329
CAM210_map5	0003.CSV	1577.55	0.0647236
CAM210_map5	0003.CSV	1581.41	0.0555181
CAM210_map5	0003.CSV	1585.27	0.0464817
CAM210_map5	0003.CSV	1589.12	0.0390575
CAM210_map5	0003.CSV	1592.98	0.0339659
CAM210_map5	0003.CSV	1596.84	0.0309304
CAM210_map5	0003.CSV	1600.69	0.0291858
CAM210_map5	0003.CSV	1604.55	0.0281527
CAM210_map5	0003.CSV	1608.41	0.02753
CAM210_map5	0003.CSV	1612.27	0.0271068
CAM210_map5	0003.CSV	1616.12	0.0267171
CAM210_map5	0003.CSV	1619.98	0.0262332
CAM210_map5	0003.CSV	1623.84	0.0255777
CAM210_map5	0003.CSV	1627.69	0.0247508
CAM210_map5	0003.CSV	1631.55	0.0238396
CAM210_map5	0003.CSV	1635.41	0.0228874
CAM210_map5	0003.CSV	1639.27	0.0220052
CAM210_map5	0003.CSV	1643.12	0.0212699
CAM210_map5	0003.CSV	1646.98	0.0206545
CAM210_map5	0003.CSV	1650.84	0.0202774
CAM210_map5	0003.CSV	1654.69	0.0199947
CAM210_map5	0003.CSV	1658.55	0.0195708
CAM210_map5	0003.CSV	1662.41	0.0190781
CAM210_map5	0003.CSV	1666.27	0.0185944
CAM210_map5	0003.CSV	1670.12	0.0181783
CAM210_map5	0003.CSV	1673.98	0.0177766
CAM210_map5	0003.CSV	1677.84	0.0173081
CAM210_map5	0003.CSV	1681.69	0.0169044
CAM210_map5	0003.CSV	1685.55	0.0166918
CAM210_map5	0003.CSV	1689.41	0.0163754
CAM210_map5	0003.CSV	1693.27	0.0158591
CAM210_map5	0003.CSV	1697.12	0.0153665
CAM210_map5	0003.CSV	1700.98	0.0151492
CAM210_map5	0003.CSV	1704.84	0.0149812
CAM210_map5	0003.CSV	1708.69	0.014663
CAM210_map5	0003.CSV	1712.55	0.0143596
CAM210_map5	0003.CSV	1716.41	0.0143482
CAM210_map5	0003.CSV	1720.27	0.0144272
CAM210_map5	0003.CSV	1724.12	0.0142197
[truncated: 41,151 more rows]

## Sheet: CAM210_map6
Map	Select spectrum number	Wavenumbers	Absorbance
CAM210_map6	0001.CSV	674.992	0.0266171
CAM210_map6	0001.CSV	678.849	0.0256026
CAM210_map6	0001.CSV	682.706	0.0251936
CAM210_map6	0001.CSV	686.563	0.0248812
CAM210_map6	0001.CSV	690.42	0.0251198
CAM210_map6	0001.CSV	694.277	0.0264382
CAM210_map6	0001.CSV	698.134	0.0293402
CAM210_map6	0001.CSV	701.991	0.0358705
CAM210_map6	0001.CSV	705.849	0.0478644
CAM210_map6	0001.CSV	709.706	0.0589104
CAM210_map6	0001.CSV	713.563	0.0562005
CAM210_map6	0001.CSV	717.42	0.0411542
CAM210_map6	0001.CSV	721.277	0.0277689
CAM210_map6	0001.CSV	725.134	0.0216937
CAM210_map6	0001.CSV	728.991	0.0193069
CAM210_map6	0001.CSV	732.848	0.0180365
CAM210_map6	0001.CSV	736.705	0.0174231
CAM210_map6	0001.CSV	740.562	0.0174567
CAM210_map6	0001.CSV	744.42	0.0178033
CAM210_map6	0001.CSV	748.277	0.0182908
CAM210_map6	0001.CSV	752.134	0.0188655
CAM210_map6	0001.CSV	755.991	0.0194684
CAM210_map6	0001.CSV	759.848	0.0199862
CAM210_map6	0001.CSV	763.705	0.0205197
CAM210_map6	0001.CSV	767.562	0.021089
CAM210_map6	0001.CSV	771.419	0.0216101
CAM210_map6	0001.CSV	775.276	0.0219927
CAM210_map6	0001.CSV	779.133	0.0221944
CAM210_map6	0001.CSV	782.99	0.0221284
CAM210_map6	0001.CSV	786.848	0.0220977
CAM210_map6	0001.CSV	790.705	0.0224275
CAM210_map6	0001.CSV	794.562	0.0230043
CAM210_map6	0001.CSV	798.419	0.0234827
CAM210_map6	0001.CSV	802.276	0.0237292
CAM210_map6	0001.CSV	806.133	0.0238632
CAM210_map6	0001.CSV	809.99	0.0241373
CAM210_map6	0001.CSV	813.847	0.02465
CAM210_map6	0001.CSV	817.704	0.025419
CAM210_map6	0001.CSV	821.562	0.0264969
CAM210_map6	0001.CSV	825.419	0.0278533
CAM210_map6	0001.CSV	829.276	0.0293338
CAM210_map6	0001.CSV	833.133	0.0309627
CAM210_map6	0001.CSV	836.99	0.033101
CAM210_map6	0001.CSV	840.847	0.0362575
CAM210_map6	0001.CSV	844.704	0.0401185
CAM210_map6	0001.CSV	848.561	0.0434643
CAM210_map6	0001.CSV	852.418	0.0472793
CAM210_map6	0001.CSV	856.275	0.0551779
CAM210_map6	0001.CSV	860.132	0.0707857
CAM210_map6	0001.CSV	863.99	0.0964159
CAM210_map6	0001.CSV	867.847	0.12674
CAM210_map6	0001.CSV	871.704	0.14363
CAM210_map6	0001.CSV	875.561	0.133749
CAM210_map6	0001.CSV	879.418	0.105077
CAM210_map6	0001.CSV	883.275	0.0717662
CAM210_map6	0001.CSV	887.132	0.0439652
CAM210_map6	0001.CSV	890.989	0.028159
CAM210_map6	0001.CSV	894.846	0.0229926
CAM210_map6	0001.CSV	898.703	0.0224599
CAM210_map6	0001.CSV	902.561	0.0229194
CAM210_map6	0001.CSV	906.418	0.0234761
CAM210_map6	0001.CSV	910.275	0.0239849
CAM210_map6	0001.CSV	914.132	0.024477
CAM210_map6	0001.CSV	917.989	0.0249755
CAM210_map6	0001.CSV	921.846	0.0254567
CAM210_map6	0001.CSV	925.703	0.0259556
CAM210_map6	0001.CSV	929.56	0.0264947
CAM210_map6	0001.CSV	933.417	0.0269619
CAM210_map6	0001.CSV	937.274	0.0272554
CAM210_map6	0001.CSV	941.131	0.0274647
CAM210_map6	0001.CSV	944.989	0.0277852
CAM210_map6	0001.CSV	948.846	0.0283437
CAM210_map6	0001.CSV	952.703	0.0290553
CAM210_map6	0001.CSV	956.56	0.0296712
CAM210_map6	0001.CSV	960.417	0.0300836
CAM210_map6	0001.CSV	964.274	0.0304927
CAM210_map6	0001.CSV	968.131	0.0311049
CAM210_map6	0001.CSV	971.988	0.0319346
CAM210_map6	0001.CSV	975.845	0.0328698
CAM210_map6	0001.CSV	979.702	0.0338442
CAM210_map6	0001.CSV	983.559	0.0348386
CAM210_map6	0001.CSV	987.417	0.035852
CAM210_map6	0001.CSV	991.274	0.0368705
CAM210_map6	0001.CSV	995.131	0.0378832
CAM210_map6	0001.CSV	998.988	0.0388423
CAM210_map6	0001.CSV	1002.85	0.0397095
CAM210_map6	0001.CSV	1006.7	0.0404316
CAM210_map6	0001.CSV	1010.56	0.0409599
CAM210_map6	0001.CSV	1014.42	0.0413001
CAM210_map6	0001.CSV	1018.27	0.0415775
CAM210_map6	0001.CSV	1022.13	0.0419011
CAM210_map6	0001.CSV	1025.99	0.0423076
CAM210_map6	0001.CSV	1029.85	0.0427418
CAM210_map6	0001.CSV	1033.7	0.0431399
CAM210_map6	0001.CSV	1037.56	0.0434774
CAM210_map6	0001.CSV	1041.42	0.0437572
CAM210_map6	0001.CSV	1045.27	0.0439195
CAM210_map6	0001.CSV	1049.13	0.0439496
CAM210_map6	0001.CSV	1052.99	0.0439619
CAM210_map6	0001.CSV	1056.84	0.0441799
CAM210_map6	0001.CSV	1060.7	0.0447465
CAM210_map6	0001.CSV	1064.56	0.0456319
CAM210_map6	0001.CSV	1068.42	0.0467011
CAM210_map6	0001.CSV	1072.27	0.0479118
CAM210_map6	0001.CSV	1076.13	0.0492262
CAM210_map6	0001.CSV	1079.99	0.0504911
CAM210_map6	0001.CSV	1083.84	0.0514955
CAM210_map6	0001.CSV	1087.7	0.0520489
CAM210_map6	0001.CSV	1091.56	0.0520978
CAM210_map6	0001.CSV	1095.41	0.0518703
CAM210_map6	0001.CSV	1099.27	0.0516637
CAM210_map6	0001.CSV	1103.13	0.0516942
CAM210_map6	0001.CSV	1106.99	0.0520293
CAM210_map6	0001.CSV	1110.84	0.052353
CAM210_map6	0001.CSV	1114.7	0.0522344
CAM210_map6	0001.CSV	1118.56	0.0518025
CAM210_map6	0001.CSV	1122.41	0.0515546
CAM210_map6	0001.CSV	1126.27	0.0517405
CAM210_map6	0001.CSV	1130.13	0.052327
CAM210_map6	0001.CSV	1133.99	0.0532548
CAM210_map6	0001.CSV	1137.84	0.0544474
CAM210_map6	0001.CSV	1141.7	0.0557097
CAM210_map6	0001.CSV	1145.56	0.0567907
CAM210_map6	0001.CSV	1149.41	0.0575436
CAM210_map6	0001.CSV	1153.27	0.0579966
CAM210_map6	0001.CSV	1157.13	0.0582762
[truncated: 40,435 more rows]

## Sheet: CAM210_map7
Map	Select spectrum number	Wavenumbers	Absorbance
[truncated: 59,547 more rows]

[truncated: 4 more sheets: CAM210_map8, CAM210_map9, CAM210_map10, CAM210_map11]
