# Supplementary material for: Thermo-microstratigraphy of shells reveals invisible fire use and possible cooking in the archaeological record
Source: Frontiers journal article supplement (doi:10.3389/feart.2022.869487), 2022-09-01
Supplement: Table_11.XLSX [file Table_11.XLSX]

## Sheet: PSB107_map5
Map	Select spectrum number	Wavenumbers	Absorbance
PSB107_map5	0001.CSV	674.992	0.0118986
PSB107_map5	0001.CSV	678.849	0.0147679
PSB107_map5	0001.CSV	682.706	0.0161021
PSB107_map5	0001.CSV	686.563	0.0180831
PSB107_map5	0001.CSV	690.42	0.0201987
PSB107_map5	0001.CSV	694.277	0.0262089
PSB107_map5	0001.CSV	698.134	0.0333945
PSB107_map5	0001.CSV	701.991	0.0426132
PSB107_map5	0001.CSV	705.849	0.058549
PSB107_map5	0001.CSV	709.706	0.0812404
PSB107_map5	0001.CSV	713.563	0.0716636
PSB107_map5	0001.CSV	717.42	0.0335642
PSB107_map5	0001.CSV	721.277	0.00978033
PSB107_map5	0001.CSV	725.134	0.00472659
PSB107_map5	0001.CSV	728.991	0.00467189
PSB107_map5	0001.CSV	732.848	0.00757124
PSB107_map5	0001.CSV	736.705	0.00882184
PSB107_map5	0001.CSV	740.562	0.00841849
PSB107_map5	0001.CSV	744.42	0.00758934
PSB107_map5	0001.CSV	748.277	0.00780597
PSB107_map5	0001.CSV	752.134	0.00748938
PSB107_map5	0001.CSV	755.991	0.00794181
PSB107_map5	0001.CSV	759.848	0.00788839
PSB107_map5	0001.CSV	763.705	0.00821618
PSB107_map5	0001.CSV	767.562	0.00833738
PSB107_map5	0001.CSV	771.419	0.00895011
PSB107_map5	0001.CSV	775.276	0.00871429
PSB107_map5	0001.CSV	779.133	0.00903278
PSB107_map5	0001.CSV	782.99	0.00902243
PSB107_map5	0001.CSV	786.848	0.0095129
PSB107_map5	0001.CSV	790.705	0.00963166
PSB107_map5	0001.CSV	794.562	0.010304
PSB107_map5	0001.CSV	798.419	0.0105806
PSB107_map5	0001.CSV	802.276	0.0115956
PSB107_map5	0001.CSV	806.133	0.0124301
PSB107_map5	0001.CSV	809.99	0.0142316
PSB107_map5	0001.CSV	813.847	0.0155515
PSB107_map5	0001.CSV	817.704	0.0168313
PSB107_map5	0001.CSV	821.562	0.0179502
PSB107_map5	0001.CSV	825.419	0.0202241
PSB107_map5	0001.CSV	829.276	0.0224271
PSB107_map5	0001.CSV	833.133	0.0253077
PSB107_map5	0001.CSV	836.99	0.0289215
PSB107_map5	0001.CSV	840.847	0.0352361
PSB107_map5	0001.CSV	844.704	0.0437616
PSB107_map5	0001.CSV	848.561	0.0506763
PSB107_map5	0001.CSV	852.418	0.0581361
PSB107_map5	0001.CSV	856.275	0.0783035
PSB107_map5	0001.CSV	860.132	0.114295
PSB107_map5	0001.CSV	863.99	0.161829
PSB107_map5	0001.CSV	867.847	0.198574
PSB107_map5	0001.CSV	871.704	0.198803
PSB107_map5	0001.CSV	875.561	0.161585
PSB107_map5	0001.CSV	879.418	0.113088
PSB107_map5	0001.CSV	883.275	0.0613356
PSB107_map5	0001.CSV	887.132	0.0181237
PSB107_map5	0001.CSV	890.989	-0.00058975
PSB107_map5	0001.CSV	894.846	-0.00225846
PSB107_map5	0001.CSV	898.703	-0.00144188
PSB107_map5	0001.CSV	902.561	-0.000121817
PSB107_map5	0001.CSV	906.418	0.000861809
PSB107_map5	0001.CSV	910.275	0.00197254
PSB107_map5	0001.CSV	914.132	0.0027481
PSB107_map5	0001.CSV	917.989	0.00379781
PSB107_map5	0001.CSV	921.846	0.00441625
PSB107_map5	0001.CSV	925.703	0.0054117
PSB107_map5	0001.CSV	929.56	0.00622899
PSB107_map5	0001.CSV	933.417	0.00737107
PSB107_map5	0001.CSV	937.274	0.00786767
PSB107_map5	0001.CSV	941.131	0.00847177
PSB107_map5	0001.CSV	944.989	0.00883323
PSB107_map5	0001.CSV	948.846	0.00958
PSB107_map5	0001.CSV	952.703	0.0101097
PSB107_map5	0001.CSV	956.56	0.0109915
PSB107_map5	0001.CSV	960.417	0.0114222
PSB107_map5	0001.CSV	964.274	0.0121665
PSB107_map5	0001.CSV	968.131	0.0128633
PSB107_map5	0001.CSV	971.988	0.0140267
PSB107_map5	0001.CSV	975.845	0.014792
PSB107_map5	0001.CSV	979.702	0.0158575
PSB107_map5	0001.CSV	983.559	0.0167825
PSB107_map5	0001.CSV	987.417	0.0180943
PSB107_map5	0001.CSV	991.274	0.019024
PSB107_map5	0001.CSV	995.131	0.0201634
PSB107_map5	0001.CSV	998.988	0.0209088
PSB107_map5	0001.CSV	1002.85	0.0218865
PSB107_map5	0001.CSV	1006.7	0.0226722
PSB107_map5	0001.CSV	1010.56	0.0238779
PSB107_map5	0001.CSV	1014.42	0.0246809
PSB107_map5	0001.CSV	1018.27	0.0258311
PSB107_map5	0001.CSV	1022.13	0.0268782
PSB107_map5	0001.CSV	1025.99	0.0282334
PSB107_map5	0001.CSV	1029.85	0.0290375
PSB107_map5	0001.CSV	1033.7	0.0300584
PSB107_map5	0001.CSV	1037.56	0.0308094
PSB107_map5	0001.CSV	1041.42	0.03186
PSB107_map5	0001.CSV	1045.27	0.0325362
PSB107_map5	0001.CSV	1049.13	0.0336772
PSB107_map5	0001.CSV	1052.99	0.0346826
PSB107_map5	0001.CSV	1056.84	0.0362409
PSB107_map5	0001.CSV	1060.7	0.0375993
PSB107_map5	0001.CSV	1064.56	0.0391126
PSB107_map5	0001.CSV	1068.42	0.0397407
PSB107_map5	0001.CSV	1072.27	0.0401734
PSB107_map5	0001.CSV	1076.13	0.0402045
PSB107_map5	0001.CSV	1079.99	0.0412716
PSB107_map5	0001.CSV	1083.84	0.0431992
PSB107_map5	0001.CSV	1087.7	0.0452059
PSB107_map5	0001.CSV	1091.56	0.0444094
PSB107_map5	0001.CSV	1095.41	0.041636
PSB107_map5	0001.CSV	1099.27	0.0387878
PSB107_map5	0001.CSV	1103.13	0.0381614
PSB107_map5	0001.CSV	1106.99	0.0384033
PSB107_map5	0001.CSV	1110.84	0.0392527
PSB107_map5	0001.CSV	1114.7	0.039783
PSB107_map5	0001.CSV	1118.56	0.0405386
PSB107_map5	0001.CSV	1122.41	0.0407707
PSB107_map5	0001.CSV	1126.27	0.0410824
PSB107_map5	0001.CSV	1130.13	0.041005
PSB107_map5	0001.CSV	1133.99	0.0413409
PSB107_map5	0001.CSV	1137.84	0.0415343
PSB107_map5	0001.CSV	1141.7	0.0421203
PSB107_map5	0001.CSV	1145.56	0.0424964
PSB107_map5	0001.CSV	1149.41	0.0434189
PSB107_map5	0001.CSV	1153.27	0.0442432
PSB107_map5	0001.CSV	1157.13	0.0453792
PSB107_map5	0001.CSV	1160.99	0.0460232
PSB107_map5	0001.CSV	1164.84	0.0466533
PSB107_map5	0001.CSV	1168.7	0.0466219
PSB107_map5	0001.CSV	1172.56	0.0469267
PSB107_map5	0001.CSV	1176.41	0.0473984
PSB107_map5	0001.CSV	1180.27	0.0483379
PSB107_map5	0001.CSV	1184.13	0.0486781
PSB107_map5	0001.CSV	1187.99	0.049251
PSB107_map5	0001.CSV	1191.84	0.0495427
PSB107_map5	0001.CSV	1195.7	0.0502924
PSB107_map5	0001.CSV	1199.56	0.0509718
PSB107_map5	0001.CSV	1203.41	0.0520877
PSB107_map5	0001.CSV	1207.27	0.0530406
PSB107_map5	0001.CSV	1211.13	0.0545056
PSB107_map5	0001.CSV	1214.98	0.0558324
PSB107_map5	0001.CSV	1218.84	0.057593
PSB107_map5	0001.CSV	1222.7	0.0591607
PSB107_map5	0001.CSV	1226.56	0.0612376
PSB107_map5	0001.CSV	1230.41	0.063139
PSB107_map5	0001.CSV	1234.27	0.0655255
PSB107_map5	0001.CSV	1238.13	0.0676763
PSB107_map5	0001.CSV	1241.98	0.0701792
PSB107_map5	0001.CSV	1245.84	0.0724276
PSB107_map5	0001.CSV	1249.7	0.0750663
PSB107_map5	0001.CSV	1253.56	0.0771784
PSB107_map5	0001.CSV	1257.41	0.0794864
PSB107_map5	0001.CSV	1261.27	0.0816374
PSB107_map5	0001.CSV	1265.13	0.0842911
PSB107_map5	0001.CSV	1268.98	0.0867263
PSB107_map5	0001.CSV	1272.84	0.0896889
PSB107_map5	0001.CSV	1276.7	0.0923438
PSB107_map5	0001.CSV	1280.56	0.0955743
PSB107_map5	0001.CSV	1284.41	0.0985515
PSB107_map5	0001.CSV	1288.27	0.102061
PSB107_map5	0001.CSV	1292.13	0.105263
PSB107_map5	0001.CSV	1295.98	0.109004
PSB107_map5	0001.CSV	1299.84	0.112658
PSB107_map5	0001.CSV	1303.7	0.117117
PSB107_map5	0001.CSV	1307.56	0.121553
PSB107_map5	0001.CSV	1311.41	0.126736
PSB107_map5	0001.CSV	1315.27	0.131911
PSB107_map5	0001.CSV	1319.13	0.138021
PSB107_map5	0001.CSV	1322.98	0.143675
PSB107_map5	0001.CSV	1326.84	0.149935
PSB107_map5	0001.CSV	1330.7	0.15636
PSB107_map5	0001.CSV	1334.56	0.163408
PSB107_map5	0001.CSV	1338.41	0.171745
PSB107_map5	0001.CSV	1342.27	0.181901
PSB107_map5	0001.CSV	1346.13	0.189983
PSB107_map5	0001.CSV	1349.98	0.199875
PSB107_map5	0001.CSV	1353.84	0.210438
PSB107_map5	0001.CSV	1357.7	0.222003
PSB107_map5	0001.CSV	1361.56	0.235188
PSB107_map5	0001.CSV	1365.41	0.251513
PSB107_map5	0001.CSV	1369.27	0.264806
PSB107_map5	0001.CSV	1373.13	0.280911
PSB107_map5	0001.CSV	1376.98	0.297639
PSB107_map5	0001.CSV	1380.84	0.311313
PSB107_map5	0001.CSV	1384.7	0.322306
PSB107_map5	0001.CSV	1388.56	0.334987
PSB107_map5	0001.CSV	1392.41	0.341828
PSB107_map5	0001.CSV	1396.27	0.343917
PSB107_map5	0001.CSV	1400.13	0.338166
PSB107_map5	0001.CSV	1403.98	0.331167
PSB107_map5	0001.CSV	1407.84	0.31875
PSB107_map5	0001.CSV	1411.7	0.303609
PSB107_map5	0001.CSV	1415.55	0.287018
PSB107_map5	0001.CSV	1419.41	0.268374
PSB107_map5	0001.CSV	1423.27	0.252767
PSB107_map5	0001.CSV	1427.12	0.243782
PSB107_map5	0001.CSV	1430.98	0.234474
PSB107_map5	0001.CSV	1434.84	0.225789
PSB107_map5	0001.CSV	1438.7	0.214997
PSB107_map5	0001.CSV	1442.55	0.20714
PSB107_map5	0001.CSV	1446.41	0.198078
PSB107_map5	0001.CSV	1450.27	0.188891
PSB107_map5	0001.CSV	1454.12	0.1811
PSB107_map5	0001.CSV	1457.98	0.16966
PSB107_map5	0001.CSV	1461.84	0.160516
PSB107_map5	0001.CSV	1465.7	0.154384
PSB107_map5	0001.CSV	1469.55	0.147919
PSB107_map5	0001.CSV	1473.41	0.140847
PSB107_map5	0001.CSV	1477.27	0.13264
PSB107_map5	0001.CSV	1481.12	0.127513
PSB107_map5	0001.CSV	1484.98	0.122133
PSB107_map5	0001.CSV	1488.84	0.115343
PSB107_map5	0001.CSV	1492.7	0.107719
PSB107_map5	0001.CSV	1496.55	0.10163
PSB107_map5	0001.CSV	1500.41	0.0938773
PSB107_map5	0001.CSV	1504.27	0.0893911
PSB107_map5	0001.CSV	1508.12	0.0810752
PSB107_map5	0001.CSV	1511.98	0.0753031
PSB107_map5	0001.CSV	1515.84	0.071235
PSB107_map5	0001.CSV	1519.7	0.0665819
PSB107_map5	0001.CSV	1523.55	0.0604754
PSB107_map5	0001.CSV	1527.41	0.055916
PSB107_map5	0001.CSV	1531.27	0.0511746
PSB107_map5	0001.CSV	1535.12	0.0464986
PSB107_map5	0001.CSV	1538.98	0.0416586
PSB107_map5	0001.CSV	1542.84	0.0335194
PSB107_map5	0001.CSV	1546.7	0.0279107
PSB107_map5	0001.CSV	1550.55	0.024013
PSB107_map5	0001.CSV	1554.41	0.0199659
PSB107_map5	0001.CSV	1558.27	0.0154293
PSB107_map5	0001.CSV	1562.12	0.0114293
PSB107_map5	0001.CSV	1565.98	0.00926414
PSB107_map5	0001.CSV	1569.84	0.00660693
PSB107_map5	0001.CSV	1573.69	0.00459362
PSB107_map5	0001.CSV	1577.55	0.00262408
PSB107_map5	0001.CSV	1581.41	0.000666804
PSB107_map5	0001.CSV	1585.27	-0.00142197
PSB107_map5	0001.CSV	1589.12	-0.00357045
PSB107_map5	0001.CSV	1592.98	-0.00576879
PSB107_map5	0001.CSV	1596.84	-0.00768441
PSB107_map5	0001.CSV	1600.69	-0.00948379
PSB107_map5	0001.CSV	1604.55	-0.011003
PSB107_map5	0001.CSV	1608.41	-0.0124579
PSB107_map5	0001.CSV	1612.27	-0.0137691
PSB107_map5	0001.CSV	1616.12	-0.0148999
PSB107_map5	0001.CSV	1619.98	-0.0154708
PSB107_map5	0001.CSV	1623.84	-0.016067
PSB107_map5	0001.CSV	1627.69	-0.0164973
PSB107_map5	0001.CSV	1631.55	-0.0172407
PSB107_map5	0001.CSV	1635.41	-0.0172664
PSB107_map5	0001.CSV	1639.27	-0.0172124
PSB107_map5	0001.CSV	1643.12	-0.0179287
PSB107_map5	0001.CSV	1646.98	-0.0183572
PSB107_map5	0001.CSV	1650.84	-0.0181529
PSB107_map5	0001.CSV	1654.69	-0.0180187
PSB107_map5	0001.CSV	1658.55	-0.0184912
PSB107_map5	0001.CSV	1662.41	-0.0189282
PSB107_map5	0001.CSV	1666.27	-0.0192709
PSB107_map5	0001.CSV	1670.12	-0.0196776
PSB107_map5	0001.CSV	1673.98	-0.0197484
PSB107_map5	0001.CSV	1677.84	-0.0202663
PSB107_map5	0001.CSV	1681.69	-0.0204938
PSB107_map5	0001.CSV	1685.55	-0.0200579
PSB107_map5	0001.CSV	1689.41	-0.0202508
PSB107_map5	0001.CSV	1693.27	-0.021125
PSB107_map5	0001.CSV	1697.12	-0.0211638
PSB107_map5	0001.CSV	1700.98	-0.0203585
PSB107_map5	0001.CSV	1704.84	-0.0201866
PSB107_map5	0001.CSV	1708.69	-0.020406
PSB107_map5	0001.CSV	1712.55	-0.02063
PSB107_map5	0001.CSV	1716.41	-0.019705
PSB107_map5	0001.CSV	1720.27	-0.0184973
PSB107_map5	0001.CSV	1724.12	-0.0186398
PSB107_map5	0001.CSV	1727.98	-0.0188161
PSB107_map5	0001.CSV	1731.84	-0.018948
PSB107_map5	0001.CSV	1735.69	-0.0186843
PSB107_map5	0001.CSV	1739.55	-0.0191128
PSB107_map5	0001.CSV	1743.41	-0.0197013
PSB107_map5	0001.CSV	1747.27	-0.0203843
PSB107_map5	0001.CSV	1751.12	-0.0208112
PSB107_map5	0001.CSV	1754.98	-0.0216187
PSB107_map5	0001.CSV	1758.84	-0.0220979
PSB107_map5	0001.CSV	1762.69	-0.0222783
PSB107_map5	0001.CSV	1766.55	-0.0225331
PSB107_map5	0001.CSV	1770.41	-0.0223735
PSB107_map5	0001.CSV	1774.26	-0.0215368
PSB107_map5	0001.CSV	1778.12	-0.021595
PSB107_map5	0001.CSV	1781.98	-0.0211076
PSB107_map5	0001.CSV	1785.84	-0.0201362
PSB107_map5	0001.CSV	1789.69	-0.0184556
PSB107_map5	0001.CSV	1793.55	-0.0154795
PSB107_map5	0001.CSV	1797.41	-0.0148835
PSB107_map5	0001.CSV	1801.26	-0.0169275
PSB107_map5	0001.CSV	1805.12	-0.0193658
PSB107_map5	0001.CSV	1808.98	-0.0210488
PSB107_map5	0001.CSV	1812.84	-0.0218915
PSB107_map5	0001.CSV	1816.69	-0.0226615
PSB107_map5	0001.CSV	1820.55	-0.0231601
PSB107_map5	0001.CSV	1824.41	-0.0234966
PSB107_map5	0001.CSV	1828.26	-0.02345
PSB107_map5	0001.CSV	1832.12	-0.0237172
PSB107_map5	0001.CSV	1835.98	-0.0241248
PSB107_map5	0001.CSV	1839.84	-0.0245541
PSB107_map5	0001.CSV	1843.69	-0.0244539
PSB107_map5	0001.CSV	1847.55	-0.0242451
PSB107_map5	0001.CSV	1851.41	-0.0244453
PSB107_map5	0001.CSV	1855.26	-0.0247074
PSB107_map5	0001.CSV	1859.12	-0.0247437
PSB107_map5	0001.CSV	1862.98	-0.0248814
PSB107_map5	0001.CSV	1866.84	-0.0247651
PSB107_map5	0001.CSV	1870.69	-0.0244321
PSB107_map5	0001.CSV	1874.55	-0.024652
PSB107_map5	0001.CSV	1878.41	-0.0248509
PSB107_map5	0001.CSV	1882.26	-0.0248803
PSB107_map5	0001.CSV	1886.12	-0.0249396
PSB107_map5	0001.CSV	1889.98	-0.0248545
PSB107_map5	0001.CSV	1893.83	-0.0248685
PSB107_map5	0001.CSV	1897.69	-0.0248881
PSB107_map5	0001.CSV	1901.55	-0.0249898
PSB107_map5	0001.CSV	1905.41	-0.0249981
PSB107_map5	0001.CSV	1909.26	-0.024952
PSB107_map5	0001.CSV	1913.12	-0.024992
PSB107_map5	0001.CSV	1916.98	-0.025061
PSB107_map5	0001.CSV	1920.83	-0.0248662
PSB107_map5	0001.CSV	1924.69	-0.0248879
PSB107_map5	0001.CSV	1928.55	-0.0249883
PSB107_map5	0001.CSV	1932.4	-0.0250618
PSB107_map5	0001.CSV	1936.26	-0.0250751
PSB107_map5	0001.CSV	1940.12	-0.0251597
PSB107_map5	0001.CSV	1943.98	-0.0249658
PSB107_map5	0001.CSV	1947.83	-0.0249864
PSB107_map5	0001.CSV	1951.69	-0.0250844
PSB107_map5	0001.CSV	1955.55	-0.0251049
PSB107_map5	0001.CSV	1959.4	-0.0250538
PSB107_map5	0001.CSV	1963.26	-0.0251456
PSB107_map5	0001.CSV	1967.12	-0.0250495
PSB107_map5	0001.CSV	1970.98	-0.0249696
PSB107_map5	0001.CSV	1974.83	-0.0249953
PSB107_map5	0001.CSV	1978.69	-0.0250446
PSB107_map5	0001.CSV	1982.55	-0.0250083
PSB107_map5	0001.CSV	1986.4	-0.0250637
PSB107_map5	0001.CSV	1990.26	-0.0249361
PSB107_map5	0001.CSV	1994.12	-0.0247907
PSB107_map5	0001.CSV	1997.98	-0.0247831
PSB107_map5	0001.CSV	2001.83	-0.0248467
PSB107_map5	0001.CSV	2005.69	-0.0248267
PSB107_map5	0001.CSV	2009.55	-0.0248062
PSB107_map5	0001.CSV	2013.4	-0.024753
PSB107_map5	0001.CSV	2017.26	-0.0246591
PSB107_map5	0001.CSV	2021.12	-0.024559
PSB107_map5	0001.CSV	2024.97	-0.024564
PSB107_map5	0001.CSV	2028.83	-0.0244669
PSB107_map5	0001.CSV	2032.69	-0.0243947
PSB107_map5	0001.CSV	2036.55	-0.0243267
PSB107_map5	0001.CSV	2040.4	-0.0242729
PSB107_map5	0001.CSV	2044.26	-0.0241738
PSB107_map5	0001.CSV	2048.12	-0.0242003
PSB107_map5	0001.CSV	2051.97	-0.0241784
PSB107_map5	0001.CSV	2055.83	-0.0241742
PSB107_map5	0001.CSV	2059.69	-0.0240888
PSB107_map5	0001.CSV	2063.55	-0.0240135
PSB107_map5	0001.CSV	2067.4	-0.0239242
PSB107_map5	0001.CSV	2071.26	-0.0239316
PSB107_map5	0001.CSV	2075.12	-0.023919
PSB107_map5	0001.CSV	2078.97	-0.0239478
PSB107_map5	0001.CSV	2082.83	-0.0239193
PSB107_map5	0001.CSV	2086.69	-0.0239086
PSB107_map5	0001.CSV	2090.55	-0.0237989
PSB107_map5	0001.CSV	2094.4	-0.0237587
PSB107_map5	0001.CSV	2098.26	-0.0237644
PSB107_map5	0001.CSV	2102.12	-0.0238041
PSB107_map5	0001.CSV	2105.97	-0.0237179
PSB107_map5	0001.CSV	2109.83	-0.0236047
PSB107_map5	0001.CSV	2113.69	-0.0234919
PSB107_map5	0001.CSV	2117.55	-0.0234941
PSB107_map5	0001.CSV	2121.4	-0.0234738
PSB107_map5	0001.CSV	2125.26	-0.0234791
PSB107_map5	0001.CSV	2129.12	-0.0234191
PSB107_map5	0001.CSV	2132.97	-0.0233608
PSB107_map5	0001.CSV	2136.83	-0.0232778
PSB107_map5	0001.CSV	2140.69	-0.0232943
PSB107_map5	0001.CSV	2144.55	-0.0232748
PSB107_map5	0001.CSV	2148.4	-0.0232896
PSB107_map5	0001.CSV	2152.26	-0.023245
PSB107_map5	0001.CSV	2156.12	-0.0232185
PSB107_map5	0001.CSV	2159.97	-0.0231337
PSB107_map5	0001.CSV	2163.83	-0.0230914
PSB107_map5	0001.CSV	2167.69	-0.023077
PSB107_map5	0001.CSV	2171.55	-0.0230788
PSB107_map5	0001.CSV	2175.4	-0.0230269
PSB107_map5	0001.CSV	2179.26	-0.0230508
PSB107_map5	0001.CSV	2183.12	-0.0230278
PSB107_map5	0001.CSV	2186.97	-0.0230086
PSB107_map5	0001.CSV	2190.83	-0.0229801
PSB107_map5	0001.CSV	2194.69	-0.0229586
PSB107_map5	0001.CSV	2198.55	-0.0228876
PSB107_map5	0001.CSV	2202.4	-0.0229087
PSB107_map5	0001.CSV	2206.26	-0.0229102
PSB107_map5	0001.CSV	2210.12	-0.0229445
PSB107_map5	0001.CSV	2213.97	-0.0229628
PSB107_map5	0001.CSV	2217.83	-0.0229519
PSB107_map5	0001.CSV	2221.69	-0.0229183
PSB107_map5	0001.CSV	2225.54	-0.0229409
PSB107_map5	0001.CSV	2229.4	-0.0229068
PSB107_map5	0001.CSV	2233.26	-0.0229695
PSB107_map5	0001.CSV	2237.12	-0.0230084
PSB107_map5	0001.CSV	2240.97	-0.0230721
PSB107_map5	0001.CSV	2244.83	-0.0231668
PSB107_map5	0001.CSV	2248.69	-0.0231906
PSB107_map5	0001.CSV	2252.54	-0.0231256
PSB107_map5	0001.CSV	2256.4	-0.0231632
PSB107_map5	0001.CSV	2260.26	-0.0231713
PSB107_map5	0001.CSV	2264.11	-0.0231638
PSB107_map5	0001.CSV	2267.97	-0.0231332
PSB107_map5	0001.CSV	2271.83	-0.0231829
PSB107_map5	0001.CSV	2275.69	-0.0232022
PSB107_map5	0001.CSV	2279.54	-0.0232315
PSB107_map5	0001.CSV	2283.4	-0.0232563
PSB107_map5	0001.CSV	2287.26	-0.0233483
PSB107_map5	0001.CSV	2291.11	-0.0233991
PSB107_map5	0001.CSV	2294.97	-0.0234342
PSB107_map5	0001.CSV	2298.83	-0.023527
PSB107_map5	0001.CSV	2302.69	-0.0238064
PSB107_map5	0001.CSV	2306.54	-0.0240616
PSB107_map5	0001.CSV	2310.4	-0.0244006
PSB107_map5	0001.CSV	2314.26	-0.0248059
PSB107_map5	0001.CSV	2318.11	-0.0255561
PSB107_map5	0001.CSV	2321.97	-0.026549
PSB107_map5	0001.CSV	2325.83	-0.0280335
PSB107_map5	0001.CSV	2329.69	-0.0292136
PSB107_map5	0001.CSV	2333.54	-0.0304909
PSB107_map5	0001.CSV	2337.4	-0.0316752
PSB107_map5	0001.CSV	2341.26	-0.031798
PSB107_map5	0001.CSV	2345.11	-0.028656
PSB107_map5	0001.CSV	2348.97	-0.0280489
PSB107_map5	0001.CSV	2352.83	-0.0310206
PSB107_map5	0001.CSV	2356.69	-0.0397536
PSB107_map5	0001.CSV	2360.54	-0.0487737
PSB107_map5	0001.CSV	2364.4	-0.0453874
PSB107_map5	0001.CSV	2368.26	-0.0341898
PSB107_map5	0001.CSV	2372.11	-0.0274797
PSB107_map5	0001.CSV	2375.97	-0.0246752
PSB107_map5	0001.CSV	2379.83	-0.023627
PSB107_map5	0001.CSV	2383.69	-0.0233046
PSB107_map5	0001.CSV	2387.54	-0.023362
PSB107_map5	0001.CSV	2391.4	-0.023447
PSB107_map5	0001.CSV	2395.26	-0.023511
PSB107_map5	0001.CSV	2399.11	-0.0235194
PSB107_map5	0001.CSV	2402.97	-0.0234768
PSB107_map5	0001.CSV	2406.83	-0.0234199
PSB107_map5	0001.CSV	2410.68	-0.0234091
PSB107_map5	0001.CSV	2414.54	-0.0233992
PSB107_map5	0001.CSV	2418.4	-0.0233801
PSB107_map5	0001.CSV	2422.26	-0.0232776
PSB107_map5	0001.CSV	2426.11	-0.023214
PSB107_map5	0001.CSV	2429.97	-0.0231925
PSB107_map5	0001.CSV	2433.83	-0.0231494
PSB107_map5	0001.CSV	2437.68	-0.0230754
PSB107_map5	0001.CSV	2441.54	-0.0230498
PSB107_map5	0001.CSV	2445.4	-0.0230184
PSB107_map5	0001.CSV	2449.26	-0.0229566
PSB107_map5	0001.CSV	2453.11	-0.0228616
PSB107_map5	0001.CSV	2456.97	-0.0227508
PSB107_map5	0001.CSV	2460.83	-0.0225763
PSB107_map5	0001.CSV	2464.68	-0.0223726
PSB107_map5	0001.CSV	2468.54	-0.0221811
PSB107_map5	0001.CSV	2472.4	-0.0220612
PSB107_map5	0001.CSV	2476.26	-0.0218243
PSB107_map5	0001.CSV	2480.11	-0.0215335
PSB107_map5	0001.CSV	2483.97	-0.0212384
PSB107_map5	0001.CSV	2487.83	-0.0208308
PSB107_map5	0001.CSV	2491.68	-0.0203453
PSB107_map5	0001.CSV	2495.54	-0.0198095
PSB107_map5	0001.CSV	2499.4	-0.0191263
PSB107_map5	0001.CSV	2503.26	-0.0184575
PSB107_map5	0001.CSV	2507.11	-0.0179218
PSB107_map5	0001.CSV	2510.97	-0.0176497
PSB107_map5	0001.CSV	2514.83	-0.017663
PSB107_map5	0001.CSV	2518.68	-0.0179578
PSB107_map5	0001.CSV	2522.54	-0.0184388
PSB107_map5	0001.CSV	2526.4	-0.0190702
PSB107_map5	0001.CSV	2530.26	-0.0197088
PSB107_map5	0001.CSV	2534.11	-0.0202334
PSB107_map5	0001.CSV	2537.97	-0.0206431
PSB107_map5	0001.CSV	2541.83	-0.0210314
PSB107_map5	0001.CSV	2545.68	-0.0212898
PSB107_map5	0001.CSV	2549.54	-0.0214084
PSB107_map5	0001.CSV	2553.4	-0.0214926
PSB107_map5	0001.CSV	2557.26	-0.021591
PSB107_map5	0001.CSV	2561.11	-0.0216361
PSB107_map5	0001.CSV	2564.97	-0.0217145
PSB107_map5	0001.CSV	2568.83	-0.0217873
PSB107_map5	0001.CSV	2572.68	-0.0217504
PSB107_map5	0001.CSV	2576.54	-0.0217139
PSB107_map5	0001.CSV	2580.4	-0.0217698
PSB107_map5	0001.CSV	2584.25	-0.021798
PSB107_map5	0001.CSV	2588.11	-0.0218696
PSB107_map5	0001.CSV	2591.97	-0.0218699
PSB107_map5	0001.CSV	2595.83	-0.021826
PSB107_map5	0001.CSV	2599.68	-0.0218427
PSB107_map5	0001.CSV	2603.54	-0.0219757
PSB107_map5	0001.CSV	2607.4	-0.022074
PSB107_map5	0001.CSV	2611.25	-0.0221948
PSB107_map5	0001.CSV	2615.11	-0.0223454
PSB107_map5	0001.CSV	2618.97	-0.0224785
PSB107_map5	0001.CSV	2622.82	-0.0225106
PSB107_map5	0001.CSV	2626.68	-0.0225948
PSB107_map5	0001.CSV	2630.54	-0.0227251
PSB107_map5	0001.CSV	2634.4	-0.0227212
PSB107_map5	0001.CSV	2638.25	-0.0227548
PSB107_map5	0001.CSV	2642.11	-0.0230018
PSB107_map5	0001.CSV	2645.97	-0.0232257
PSB107_map5	0001.CSV	2649.82	-0.0233513
PSB107_map5	0001.CSV	2653.68	-0.0233763
PSB107_map5	0001.CSV	2657.54	-0.0233585
PSB107_map5	0001.CSV	2661.4	-0.0233661
PSB107_map5	0001.CSV	2665.25	-0.0234033
PSB107_map5	0001.CSV	2669.11	-0.0233416
PSB107_map5	0001.CSV	2672.97	-0.0230921
PSB107_map5	0001.CSV	2676.82	-0.0227587
PSB107_map5	0001.CSV	2680.68	-0.0228733
PSB107_map5	0001.CSV	2684.54	-0.0233227
PSB107_map5	0001.CSV	2688.4	-0.0234779
PSB107_map5	0001.CSV	2692.25	-0.0235063
PSB107_map5	0001.CSV	2696.11	-0.0234928
PSB107_map5	0001.CSV	2699.97	-0.0234833
PSB107_map5	0001.CSV	2703.82	-0.0235267
PSB107_map5	0001.CSV	2707.68	-0.0233792
PSB107_map5	0001.CSV	2711.54	-0.0233223
PSB107_map5	0001.CSV	2715.4	-0.0233654
PSB107_map5	0001.CSV	2719.25	-0.0232508
PSB107_map5	0001.CSV	2723.11	-0.0229307
PSB107_map5	0001.CSV	2726.97	-0.0229567
PSB107_map5	0001.CSV	2730.82	-0.0233091
PSB107_map5	0001.CSV	2734.68	-0.0233091
PSB107_map5	0001.CSV	2738.54	-0.023181
PSB107_map5	0001.CSV	2742.4	-0.0231146
PSB107_map5	0001.CSV	2746.25	-0.0227595
PSB107_map5	0001.CSV	2750.11	-0.0225474
PSB107_map5	0001.CSV	2753.97	-0.0227106
PSB107_map5	0001.CSV	2757.82	-0.0228413
PSB107_map5	0001.CSV	2761.68	-0.0229677
PSB107_map5	0001.CSV	2765.54	-0.022988
PSB107_map5	0001.CSV	2769.39	-0.0227314
PSB107_map5	0001.CSV	2773.25	-0.0223172
PSB107_map5	0001.CSV	2777.11	-0.0223058
PSB107_map5	0001.CSV	2780.97	-0.0224518
PSB107_map5	0001.CSV	2784.82	-0.0221881
PSB107_map5	0001.CSV	2788.68	-0.0216103
PSB107_map5	0001.CSV	2792.54	-0.0213984
PSB107_map5	0001.CSV	2796.39	-0.0214083
PSB107_map5	0001.CSV	2800.25	-0.0216098
PSB107_map5	0001.CSV	2804.11	-0.0217869
PSB107_map5	0001.CSV	2807.97	-0.021429
PSB107_map5	0001.CSV	2811.82	-0.0213503
PSB107_map5	0001.CSV	2815.68	-0.0215412
PSB107_map5	0001.CSV	2819.54	-0.0213609
PSB107_map5	0001.CSV	2823.39	-0.0211157
PSB107_map5	0001.CSV	2827.25	-0.0210212
PSB107_map5	0001.CSV	2831.11	-0.0205952
PSB107_map5	0001.CSV	2834.97	-0.0199242
PSB107_map5	0001.CSV	2838.82	-0.0194417
PSB107_map5	0001.CSV	2842.68	-0.0192603
PSB107_map5	0001.CSV	2846.54	-0.0188222
PSB107_map5	0001.CSV	2850.39	-0.0184927
PSB107_map5	0001.CSV	2854.25	-0.0182804
PSB107_map5	0001.CSV	2858.11	-0.0179168
PSB107_map5	0001.CSV	2861.97	-0.0177892
PSB107_map5	0001.CSV	2865.82	-0.0177988
PSB107_map5	0001.CSV	2869.68	-0.0175001
PSB107_map5	0001.CSV	2873.54	-0.0172501
PSB107_map5	0001.CSV	2877.39	-0.017647
PSB107_map5	0001.CSV	2881.25	-0.0181877
PSB107_map5	0001.CSV	2885.11	-0.0184443
PSB107_map5	0001.CSV	2888.97	-0.0183894
PSB107_map5	0001.CSV	2892.82	-0.0180001
PSB107_map5	0001.CSV	2896.68	-0.017771
PSB107_map5	0001.CSV	2900.54	-0.0178251
PSB107_map5	0001.CSV	2904.39	-0.0175125
PSB107_map5	0001.CSV	2908.25	-0.016869
PSB107_map5	0001.CSV	2912.11	-0.0161037
PSB107_map5	0001.CSV	2915.97	-0.0157449
PSB107_map5	0001.CSV	2919.82	-0.0159638
PSB107_map5	0001.CSV	2923.68	-0.0162532
PSB107_map5	0001.CSV	2927.54	-0.0161102
PSB107_map5	0001.CSV	2931.39	-0.0163248
PSB107_map5	0001.CSV	2935.25	-0.0169493
PSB107_map5	0001.CSV	2939.11	-0.0171016
PSB107_map5	0001.CSV	2942.96	-0.0168047
PSB107_map5	0001.CSV	2946.82	-0.0168222
PSB107_map5	0001.CSV	2950.68	-0.0171435
PSB107_map5	0001.CSV	2954.54	-0.0176273
PSB107_map5	0001.CSV	2958.39	-0.0180443
PSB107_map5	0001.CSV	2962.25	-0.0181622
PSB107_map5	0001.CSV	2966.11	-0.0184783
PSB107_map5	0001.CSV	2969.96	-0.0185194
PSB107_map5	0001.CSV	2973.82	-0.0181484
PSB107_map5	0001.CSV	2977.68	-0.0178862
PSB107_map5	0001.CSV	2981.53	-0.0181774
PSB107_map5	0001.CSV	2985.39	-0.0187974
PSB107_map5	0001.CSV	2989.25	-0.0188283
PSB107_map5	0001.CSV	2993.11	-0.0186542
PSB107_map5	0001.CSV	2996.96	-0.0189712
PSB107_map5	0001.CSV	3000.82	-0.0194256
PSB107_map5	0001.CSV	3004.68	-0.0196985
PSB107_map5	0001.CSV	3008.53	-0.0195194
PSB107_map5	0001.CSV	3012.39	-0.0191956
PSB107_map5	0001.CSV	3016.25	-0.0191588
PSB107_map5	0001.CSV	3020.11	-0.0193972
PSB107_map5	0001.CSV	3023.96	-0.0195683
PSB107_map5	0001.CSV	3027.82	-0.0196607
PSB107_map5	0001.CSV	3031.68	-0.019418
PSB107_map5	0001.CSV	3035.53	-0.0192726
PSB107_map5	0001.CSV	3039.39	-0.0193641
PSB107_map5	0001.CSV	3043.25	-0.0193644
PSB107_map5	0001.CSV	3047.11	-0.0194216
PSB107_map5	0001.CSV	3050.96	-0.0194129
PSB107_map5	0001.CSV	3054.82	-0.0194458
PSB107_map5	0001.CSV	3058.68	-0.0195366
PSB107_map5	0001.CSV	3062.53	-0.0194597
PSB107_map5	0001.CSV	3066.39	-0.0192431
PSB107_map5	0001.CSV	3070.25	-0.0193163
PSB107_map5	0001.CSV	3074.11	-0.0192897
PSB107_map5	0001.CSV	3077.96	-0.0189399
PSB107_map5	0001.CSV	3081.82	-0.0187095
PSB107_map5	0001.CSV	3085.68	-0.0188091
PSB107_map5	0001.CSV	3089.53	-0.0190413
PSB107_map5	0001.CSV	3093.39	-0.0192274
PSB107_map5	0001.CSV	3097.25	-0.0190964
PSB107_map5	0001.CSV	3101.11	-0.0190475
PSB107_map5	0001.CSV	3104.96	-0.0190071
PSB107_map5	0001.CSV	3108.82	-0.0186934
PSB107_map5	0001.CSV	3112.68	-0.0184643
PSB107_map5	0001.CSV	3116.53	-0.018261
PSB107_map5	0001.CSV	3120.39	-0.0183478
PSB107_map5	0001.CSV	3124.25	-0.0187069
PSB107_map5	0001.CSV	3128.11	-0.0188551
PSB107_map5	0001.CSV	3131.96	-0.0187975
PSB107_map5	0001.CSV	3135.82	-0.0185555
PSB107_map5	0001.CSV	3139.68	-0.0184667
PSB107_map5	0001.CSV	3143.53	-0.0186969
PSB107_map5	0001.CSV	3147.39	-0.0185352
PSB107_map5	0001.CSV	3151.25	-0.0181539
PSB107_map5	0001.CSV	3155.1	-0.0182735
PSB107_map5	0001.CSV	3158.96	-0.0187668
PSB107_map5	0001.CSV	3162.82	-0.0189552
PSB107_map5	0001.CSV	3166.68	-0.0189288
PSB107_map5	0001.CSV	3170.53	-0.0188154
PSB107_map5	0001.CSV	3174.39	-0.0187504
PSB107_map5	0001.CSV	3178.25	-0.0186203
PSB107_map5	0001.CSV	3182.1	-0.0185268
PSB107_map5	0001.CSV	3185.96	-0.0184326
PSB107_map5	0001.CSV	3189.82	-0.0183161
PSB107_map5	0001.CSV	3193.68	-0.0183628
PSB107_map5	0001.CSV	3197.53	-0.0182702
PSB107_map5	0001.CSV	3201.39	-0.0180588
PSB107_map5	0001.CSV	3205.25	-0.0179956
PSB107_map5	0001.CSV	3209.1	-0.0180568
PSB107_map5	0001.CSV	3212.96	-0.017938
PSB107_map5	0001.CSV	3216.82	-0.0177615
PSB107_map5	0001.CSV	3220.68	-0.0177185
PSB107_map5	0001.CSV	3224.53	-0.0178216
PSB107_map5	0001.CSV	3228.39	-0.017612
PSB107_map5	0001.CSV	3232.25	-0.0171041
PSB107_map5	0001.CSV	3236.1	-0.017028
PSB107_map5	0001.CSV	3239.96	-0.0171077
PSB107_map5	0001.CSV	3243.82	-0.0167917
PSB107_map5	0001.CSV	3247.68	-0.0166221
PSB107_map5	0001.CSV	3251.53	-0.0167732
PSB107_map5	0001.CSV	3255.39	-0.0167964
PSB107_map5	0001.CSV	3259.25	-0.0170065
PSB107_map5	0001.CSV	3263.1	-0.0170618
PSB107_map5	0001.CSV	3266.96	-0.0166949
PSB107_map5	0001.CSV	3270.82	-0.016268
PSB107_map5	0001.CSV	3274.68	-0.0162524
PSB107_map5	0001.CSV	3278.53	-0.0165417
PSB107_map5	0001.CSV	3282.39	-0.0167114
PSB107_map5	0001.CSV	3286.25	-0.0166262
PSB107_map5	0001.CSV	3290.1	-0.0162735
PSB107_map5	0001.CSV	3293.96	-0.0158904
PSB107_map5	0001.CSV	3297.82	-0.0158814
PSB107_map5	0001.CSV	3301.67	-0.0157253
PSB107_map5	0001.CSV	3305.53	-0.0154129
PSB107_map5	0001.CSV	3309.39	-0.0155104
PSB107_map5	0001.CSV	3313.25	-0.0160345
PSB107_map5	0001.CSV	3317.1	-0.016384
PSB107_map5	0001.CSV	3320.96	-0.0161899
PSB107_map5	0001.CSV	3324.82	-0.0158226
PSB107_map5	0001.CSV	3328.67	-0.0160356
PSB107_map5	0001.CSV	3332.53	-0.0161193
PSB107_map5	0001.CSV	3336.39	-0.0155967
PSB107_map5	0001.CSV	3340.24	-0.01529
PSB107_map5	0001.CSV	3344.1	-0.0154527
PSB107_map5	0001.CSV	3347.96	-0.0155138
PSB107_map5	0001.CSV	3351.82	-0.0156693
PSB107_map5	0001.CSV	3355.67	-0.0159374
PSB107_map5	0001.CSV	3359.53	-0.0156064
PSB107_map5	0001.CSV	3363.39	-0.0152131
PSB107_map5	0001.CSV	3367.24	-0.0149497
PSB107_map5	0001.CSV	3371.1	-0.0150756
PSB107_map5	0001.CSV	3374.96	-0.0152672
PSB107_map5	0001.CSV	3378.82	-0.0153944
PSB107_map5	0001.CSV	3382.67	-0.0157358
PSB107_map5	0001.CSV	3386.53	-0.015621
PSB107_map5	0001.CSV	3390.39	-0.0152194
PSB107_map5	0001.CSV	3394.24	-0.015064
PSB107_map5	0001.CSV	3398.1	-0.0149372
PSB107_map5	0001.CSV	3401.96	-0.0148093
PSB107_map5	0001.CSV	3405.82	-0.0150499
PSB107_map5	0001.CSV	3409.67	-0.0151704
PSB107_map5	0001.CSV	3413.53	-0.0154359
PSB107_map5	0001.CSV	3417.39	-0.0158275
PSB107_map5	0001.CSV	3421.24	-0.0158689
PSB107_map5	0001.CSV	3425.1	-0.0157
PSB107_map5	0001.CSV	3428.96	-0.0152783
PSB107_map5	0001.CSV	3432.82	-0.0150073
PSB107_map5	0001.CSV	3436.67	-0.0153179
PSB107_map5	0001.CSV	3440.53	-0.0160661
PSB107_map5	0001.CSV	3444.39	-0.0163674
PSB107_map5	0001.CSV	3448.24	-0.0162733
PSB107_map5	0001.CSV	3452.1	-0.0164841
PSB107_map5	0001.CSV	3455.96	-0.0164396
PSB107_map5	0001.CSV	3459.82	-0.0160123
PSB107_map5	0001.CSV	3463.67	-0.0155773
PSB107_map5	0001.CSV	3467.53	-0.0153024
PSB107_map5	0001.CSV	3471.39	-0.0157615
PSB107_map5	0001.CSV	3475.24	-0.0162025
PSB107_map5	0001.CSV	3479.1	-0.0161948
PSB107_map5	0001.CSV	3482.96	-0.0161846
PSB107_map5	0001.CSV	3486.82	-0.0160727
PSB107_map5	0001.CSV	3490.67	-0.0160346
PSB107_map5	0001.CSV	3494.53	-0.0160401
PSB107_map5	0001.CSV	3498.39	-0.0161669
PSB107_map5	0001.CSV	3502.24	-0.0163216
PSB107_map5	0001.CSV	3506.1	-0.0168916
PSB107_map5	0001.CSV	3509.96	-0.0172241
PSB107_map5	0001.CSV	3513.81	-0.017031
PSB107_map5	0001.CSV	3517.67	-0.0174362
PSB107_map5	0001.CSV	3521.53	-0.0174132
PSB107_map5	0001.CSV	3525.39	-0.0173566
PSB107_map5	0001.CSV	3529.24	-0.0175794
PSB107_map5	0001.CSV	3533.1	-0.0176134
PSB107_map5	0001.CSV	3536.96	-0.0176323
PSB107_map5	0001.CSV	3540.81	-0.0177015
PSB107_map5	0001.CSV	3544.67	-0.0175204
PSB107_map5	0001.CSV	3548.53	-0.0176311
PSB107_map5	0001.CSV	3552.39	-0.0181653
PSB107_map5	0001.CSV	3556.24	-0.0184756
PSB107_map5	0001.CSV	3560.1	-0.0189082
PSB107_map5	0001.CSV	3563.96	-0.0193489
PSB107_map5	0001.CSV	3567.81	-0.0185339
PSB107_map5	0001.CSV	3571.67	-0.0185423
PSB107_map5	0001.CSV	3575.53	-0.0191326
PSB107_map5	0001.CSV	3579.39	-0.0189469
PSB107_map5	0001.CSV	3583.24	-0.0189586
PSB107_map5	0001.CSV	3587.1	-0.0189126
PSB107_map5	0001.CSV	3590.96	-0.0189245
PSB107_map5	0001.CSV	3594.81	-0.0192525
PSB107_map5	0001.CSV	3598.67	-0.0189726
PSB107_map5	0001.CSV	3602.53	-0.0190711
PSB107_map5	0001.CSV	3606.39	-0.0199331
PSB107_map5	0001.CSV	3610.24	-0.0203951
PSB107_map5	0001.CSV	3614.1	-0.0204254
PSB107_map5	0001.CSV	3617.96	-0.0197399
PSB107_map5	0001.CSV	3621.81	-0.0195427
PSB107_map5	0001.CSV	3625.67	-0.0208653
PSB107_map5	0001.CSV	3629.53	-0.0208346
PSB107_map5	0001.CSV	3633.39	-0.0196945
PSB107_map5	0001.CSV	3637.24	-0.0199687
PSB107_map5	0001.CSV	3641.1	-0.0205599
PSB107_map5	0001.CSV	3644.96	-0.0215932
PSB107_map5	0001.CSV	3648.81	-0.0209746
PSB107_map5	0001.CSV	3652.67	-0.0194642
PSB107_map5	0001.CSV	3656.53	-0.0194044
PSB107_map5	0001.CSV	3660.38	-0.0195437
PSB107_map5	0001.CSV	3664.24	-0.0205905
PSB107_map5	0001.CSV	3668.1	-0.0215696
PSB107_map5	0001.CSV	3671.96	-0.0213545
PSB107_map5	0001.CSV	3675.81	-0.0202713
PSB107_map5	0001.CSV	3679.67	-0.0196516
PSB107_map5	0001.CSV	3683.53	-0.0202742
PSB107_map5	0001.CSV	3687.38	-0.0206296
PSB107_map5	0001.CSV	3691.24	-0.0194369
PSB107_map5	0001.CSV	3695.1	-0.0194639
PSB107_map5	0001.CSV	3698.95	-0.0201081
PSB107_map5	0001.CSV	3702.81	-0.0203853
PSB107_map5	0001.CSV	3706.67	-0.0210406
PSB107_map5	0001.CSV	3710.53	-0.0210608
PSB107_map5	0001.CSV	3714.38	-0.0200517
PSB107_map5	0001.CSV	3718.24	-0.0204099
PSB107_map5	0001.CSV	3722.1	-0.0206187
PSB107_map5	0001.CSV	3725.95	-0.0206167
PSB107_map5	0001.CSV	3729.81	-0.0211262
PSB107_map5	0001.CSV	3733.67	-0.0208295
PSB107_map5	0001.CSV	3737.53	-0.0192205
PSB107_map5	0001.CSV	3741.38	-0.0202053
PSB107_map5	0001.CSV	3745.24	-0.0215731
PSB107_map5	0001.CSV	3749.1	-0.0213576
PSB107_map5	0001.CSV	3752.95	-0.0199056
PSB107_map5	0001.CSV	3756.81	-0.019892
PSB107_map5	0001.CSV	3760.67	-0.0200173
PSB107_map5	0001.CSV	3764.53	-0.0202188
PSB107_map5	0001.CSV	3768.38	-0.0197895
PSB107_map5	0001.CSV	3772.24	-0.0194712
PSB107_map5	0001.CSV	3776.1	-0.0200041
PSB107_map5	0001.CSV	3779.95	-0.0200117
PSB107_map5	0001.CSV	3783.81	-0.0197083
PSB107_map5	0001.CSV	3787.67	-0.0195148
PSB107_map5	0001.CSV	3791.53	-0.0199057
PSB107_map5	0001.CSV	3795.38	-0.0207147
PSB107_map5	0001.CSV	3799.24	-0.0209553
PSB107_map5	0001.CSV	3803.1	-0.0199935
PSB107_map5	0001.CSV	3806.95	-0.0191571
PSB107_map5	0001.CSV	3810.81	-0.0196138
PSB107_map5	0001.CSV	3814.67	-0.0203656
PSB107_map5	0001.CSV	3818.53	-0.0201825
PSB107_map5	0001.CSV	3822.38	-0.0193503
PSB107_map5	0001.CSV	3826.24	-0.0194366
PSB107_map5	0001.CSV	3830.1	-0.0198906
PSB107_map5	0001.CSV	3833.95	-0.0203243
PSB107_map5	0001.CSV	3837.81	-0.0201425
PSB107_map5	0001.CSV	3841.67	-0.0190029
PSB107_map5	0001.CSV	3845.53	-0.0192876
PSB107_map5	0001.CSV	3849.38	-0.0206016
PSB107_map5	0001.CSV	3853.24	-0.0200384
PSB107_map5	0001.CSV	3857.1	-0.0188001
PSB107_map5	0001.CSV	3860.95	-0.0197363
PSB107_map5	0001.CSV	3864.81	-0.0197731
PSB107_map5	0001.CSV	3868.67	-0.0193961
PSB107_map5	0001.CSV	3872.52	-0.0190877
PSB107_map5	0001.CSV	3876.38	-0.0195477
PSB107_map5	0001.CSV	3880.24	-0.0196076
PSB107_map5	0001.CSV	3884.1	-0.0189064
PSB107_map5	0001.CSV	3887.95	-0.0191346
PSB107_map5	0001.CSV	3891.81	-0.0192425
PSB107_map5	0001.CSV	3895.67	-0.0197673
PSB107_map5	0001.CSV	3899.52	-0.0203554
PSB107_map5	0001.CSV	3903.38	-0.0187694
PSB107_map5	0001.CSV	3907.24	-0.0183299
PSB107_map5	0001.CSV	3911.1	-0.0192312
PSB107_map5	0001.CSV	3914.95	-0.019671
PSB107_map5	0001.CSV	3918.81	-0.0193756
PSB107_map5	0001.CSV	3922.67	-0.0192767
PSB107_map5	0001.CSV	3926.52	-0.019324
PSB107_map5	0001.CSV	3930.38	-0.0192956
PSB107_map5	0001.CSV	3934.24	-0.0190039
PSB107_map5	0001.CSV	3938.09	-0.0194579
PSB107_map5	0001.CSV	3941.95	-0.0196717
PSB107_map5	0001.CSV	3945.81	-0.0195211
PSB107_map5	0001.CSV	3949.67	-0.0193463
PSB107_map5	0001.CSV	3953.52	-0.0192986
PSB107_map5	0001.CSV	3957.38	-0.0194271
PSB107_map5	0001.CSV	3961.24	-0.0194572
PSB107_map5	0001.CSV	3965.09	-0.0195536
PSB107_map5	0001.CSV	3968.95	-0.0197418
PSB107_map5	0001.CSV	3972.81	-0.0195727
PSB107_map5	0001.CSV	3976.67	-0.0193372
PSB107_map5	0001.CSV	3980.52	-0.0193267
PSB107_map5	0001.CSV	3984.38	-0.0192837
PSB107_map5	0001.CSV	3988.24	-0.0193357
PSB107_map5	0001.CSV	3992.09	-0.019417
PSB107_map5	0001.CSV	3995.95	-0.0193615
PSB107_map5	0001.CSV	3999.81	-0.019378
PSB107_map5	0002.CSV	674.992	0.000982275
PSB107_map5	0002.CSV	678.849	0.0020722
PSB107_map5	0002.CSV	682.706	0.0027407
PSB107_map5	0002.CSV	686.563	0.00440768
PSB107_map5	0002.CSV	690.42	0.00602626
PSB107_map5	0002.CSV	694.277	0.00997382
PSB107_map5	0002.CSV	698.134	0.0145624
PSB107_map5	0002.CSV	701.991	0.0203982
PSB107_map5	0002.CSV	705.849	0.032182
PSB107_map5	0002.CSV	709.706	0.0513893
PSB107_map5	0002.CSV	713.563	0.0449917
PSB107_map5	0002.CSV	717.42	0.0139857
PSB107_map5	0002.CSV	721.277	-0.00472572
PSB107_map5	0002.CSV	725.134	-0.00798081
PSB107_map5	0002.CSV	728.991	-0.00774997
PSB107_map5	0002.CSV	732.848	-0.00601381
PSB107_map5	0002.CSV	736.705	-0.00520496
PSB107_map5	0002.CSV	740.562	-0.00474237
PSB107_map5	0002.CSV	744.42	-0.00481371
PSB107_map5	0002.CSV	748.277	-0.0047523
PSB107_map5	0002.CSV	752.134	-0.00493281
PSB107_map5	0002.CSV	755.991	-0.00468419
PSB107_map5	0002.CSV	759.848	-0.0047347
PSB107_map5	0002.CSV	763.705	-0.00460351
PSB107_map5	0002.CSV	767.562	-0.00491174
PSB107_map5	0002.CSV	771.419	-0.0048333
PSB107_map5	0002.CSV	775.276	-0.00515431
PSB107_map5	0002.CSV	779.133	-0.00500812
PSB107_map5	0002.CSV	782.99	-0.00514121
PSB107_map5	0002.CSV	786.848	-0.00501477
PSB107_map5	0002.CSV	790.705	-0.00509484
PSB107_map5	0002.CSV	794.562	-0.00468261
PSB107_map5	0002.CSV	798.419	-0.00464587
PSB107_map5	0002.CSV	802.276	-0.0042129
PSB107_map5	0002.CSV	806.133	-0.00398052
PSB107_map5	0002.CSV	809.99	-0.00297335
PSB107_map5	0002.CSV	813.847	-0.00199465
PSB107_map5	0002.CSV	817.704	-0.000936385
PSB107_map5	0002.CSV	821.562	-0.000248633
PSB107_map5	0002.CSV	825.419	0.000724417
PSB107_map5	0002.CSV	829.276	0.00159365
PSB107_map5	0002.CSV	833.133	0.00316557
PSB107_map5	0002.CSV	836.99	0.00522735
PSB107_map5	0002.CSV	840.847	0.00894761
PSB107_map5	0002.CSV	844.704	0.0144585
PSB107_map5	0002.CSV	848.561	0.018686
PSB107_map5	0002.CSV	852.418	0.0220611
PSB107_map5	0002.CSV	856.275	0.0332972
PSB107_map5	0002.CSV	860.132	0.0555503
PSB107_map5	0002.CSV	863.99	0.0882483
PSB107_map5	0002.CSV	867.847	0.118096
PSB107_map5	0002.CSV	871.704	0.124986
PSB107_map5	0002.CSV	875.561	0.103122
PSB107_map5	0002.CSV	879.418	0.0712796
PSB107_map5	0002.CSV	883.275	0.0358384
PSB107_map5	0002.CSV	887.132	0.00345548
PSB107_map5	0002.CSV	890.989	-0.0116844
PSB107_map5	0002.CSV	894.846	-0.0132668
PSB107_map5	0002.CSV	898.703	-0.0127141
PSB107_map5	0002.CSV	902.561	-0.0118986
PSB107_map5	0002.CSV	906.418	-0.0113886
PSB107_map5	0002.CSV	910.275	-0.0107263
PSB107_map5	0002.CSV	914.132	-0.0101996
PSB107_map5	0002.CSV	917.989	-0.0094599
PSB107_map5	0002.CSV	921.846	-0.00900338
PSB107_map5	0002.CSV	925.703	-0.0082901
PSB107_map5	0002.CSV	929.56	-0.00782248
PSB107_map5	0002.CSV	933.417	-0.00713558
PSB107_map5	0002.CSV	937.274	-0.00688
PSB107_map5	0002.CSV	941.131	-0.00640431
PSB107_map5	0002.CSV	944.989	-0.0060924
PSB107_map5	0002.CSV	948.846	-0.00560599
PSB107_map5	0002.CSV	952.703	-0.00522699
PSB107_map5	0002.CSV	956.56	-0.00463046
PSB107_map5	0002.CSV	960.417	-0.00433771
PSB107_map5	0002.CSV	964.274	-0.00377744
PSB107_map5	0002.CSV	968.131	-0.00324006
PSB107_map5	0002.CSV	971.988	-0.00237846
PSB107_map5	0002.CSV	975.845	-0.0016551
PSB107_map5	0002.CSV	979.702	-0.000677063
PSB107_map5	0002.CSV	983.559	0.000204386
PSB107_map5	0002.CSV	987.417	0.00137429
PSB107_map5	0002.CSV	991.274	0.00227224
PSB107_map5	0002.CSV	995.131	0.00327476
PSB107_map5	0002.CSV	998.988	0.00399099
PSB107_map5	0002.CSV	1002.85	0.00479288
PSB107_map5	0002.CSV	1006.7	0.00538177
PSB107_map5	0002.CSV	1010.56	0.00628533
PSB107_map5	0002.CSV	1014.42	0.00700234
PSB107_map5	0002.CSV	1018.27	0.0079877
PSB107_map5	0002.CSV	1022.13	0.00883083
PSB107_map5	0002.CSV	1025.99	0.00990161
PSB107_map5	0002.CSV	1029.85	0.010554
PSB107_map5	0002.CSV	1033.7	0.011235
PSB107_map5	0002.CSV	1037.56	0.0117318
PSB107_map5	0002.CSV	1041.42	0.0124719
PSB107_map5	0002.CSV	1045.27	0.0130287
PSB107_map5	0002.CSV	1049.13	0.013904
PSB107_map5	0002.CSV	1052.99	0.0146404
PSB107_map5	0002.CSV	1056.84	0.0156316
PSB107_map5	0002.CSV	1060.7	0.0163913
PSB107_map5	0002.CSV	1064.56	0.0171725
PSB107_map5	0002.CSV	1068.42	0.017344
PSB107_map5	0002.CSV	1072.27	0.0173683
PSB107_map5	0002.CSV	1076.13	0.0169913
PSB107_map5	0002.CSV	1079.99	0.0171027
PSB107_map5	0002.CSV	1083.84	0.0176074
PSB107_map5	0002.CSV	1087.7	0.0184394
PSB107_map5	0002.CSV	1091.56	0.0180295
PSB107_map5	0002.CSV	1095.41	0.0168734
PSB107_map5	0002.CSV	1099.27	0.0156546
PSB107_map5	0002.CSV	1103.13	0.0155601
PSB107_map5	0002.CSV	1106.99	0.0158669
PSB107_map5	0002.CSV	1110.84	0.0164991
PSB107_map5	0002.CSV	1114.7	0.0167692
PSB107_map5	0002.CSV	1118.56	0.0170869
PSB107_map5	0002.CSV	1122.41	0.0170013
PSB107_map5	0002.CSV	1126.27	0.0169514
PSB107_map5	0002.CSV	1130.13	0.0166266
PSB107_map5	0002.CSV	1133.99	0.0166666
PSB107_map5	0002.CSV	1137.84	0.0167177
PSB107_map5	0002.CSV	1141.7	0.0171185
PSB107_map5	0002.CSV	1145.56	0.0173791
PSB107_map5	0002.CSV	1149.41	0.0180961
PSB107_map5	0002.CSV	1153.27	0.0188407
PSB107_map5	0002.CSV	1157.13	0.0198071
PSB107_map5	0002.CSV	1160.99	0.0203101
PSB107_map5	0002.CSV	1164.84	0.0205808
PSB107_map5	0002.CSV	1168.7	0.020306
PSB107_map5	0002.CSV	1172.56	0.0203165
PSB107_map5	0002.CSV	1176.41	0.0204052
PSB107_map5	0002.CSV	1180.27	0.0208776
PSB107_map5	0002.CSV	1184.13	0.0210725
PSB107_map5	0002.CSV	1187.99	0.0214864
PSB107_map5	0002.CSV	1191.84	0.021851
PSB107_map5	0002.CSV	1195.7	0.0225345
PSB107_map5	0002.CSV	1199.56	0.0230214
PSB107_map5	0002.CSV	1203.41	0.0237215
PSB107_map5	0002.CSV	1207.27	0.0243476
PSB107_map5	0002.CSV	1211.13	0.0252816
PSB107_map5	0002.CSV	1214.98	0.0261197
PSB107_map5	0002.CSV	1218.84	0.0273457
PSB107_map5	0002.CSV	1222.7	0.0284356
PSB107_map5	0002.CSV	1226.56	0.0298701
PSB107_map5	0002.CSV	1230.41	0.0311958
PSB107_map5	0002.CSV	1234.27	0.0328136
PSB107_map5	0002.CSV	1238.13	0.0342683
PSB107_map5	0002.CSV	1241.98	0.0359307
PSB107_map5	0002.CSV	1245.84	0.0373777
PSB107_map5	0002.CSV	1249.7	0.0390795
PSB107_map5	0002.CSV	1253.56	0.0404436
PSB107_map5	0002.CSV	1257.41	0.0418976
PSB107_map5	0002.CSV	1261.27	0.0432346
PSB107_map5	0002.CSV	1265.13	0.0449172
PSB107_map5	0002.CSV	1268.98	0.0464515
PSB107_map5	0002.CSV	1272.84	0.0483073
PSB107_map5	0002.CSV	1276.7	0.0499298
PSB107_map5	0002.CSV	1280.56	0.0518466
PSB107_map5	0002.CSV	1284.41	0.0535171
PSB107_map5	0002.CSV	1288.27	0.0555655
PSB107_map5	0002.CSV	1292.13	0.0573851
PSB107_map5	0002.CSV	1295.98	0.0595574
PSB107_map5	0002.CSV	1299.84	0.0617079
PSB107_map5	0002.CSV	1303.7	0.0642865
PSB107_map5	0002.CSV	1307.56	0.0668369
PSB107_map5	0002.CSV	1311.41	0.0698413
PSB107_map5	0002.CSV	1315.27	0.0726874
PSB107_map5	0002.CSV	1319.13	0.0760021
PSB107_map5	0002.CSV	1322.98	0.0789473
PSB107_map5	0002.CSV	1326.84	0.0822956
PSB107_map5	0002.CSV	1330.7	0.0858056
PSB107_map5	0002.CSV	1334.56	0.0896307
PSB107_map5	0002.CSV	1338.41	0.0942683
PSB107_map5	0002.CSV	1342.27	0.100119
PSB107_map5	0002.CSV	1346.13	0.104865
PSB107_map5	0002.CSV	1349.98	0.110849
PSB107_map5	0002.CSV	1353.84	0.117205
PSB107_map5	0002.CSV	1357.7	0.124105
PSB107_map5	0002.CSV	1361.56	0.132119
PSB107_map5	0002.CSV	1365.41	0.142122
PSB107_map5	0002.CSV	1369.27	0.150227
PSB107_map5	0002.CSV	1373.13	0.160155
PSB107_map5	0002.CSV	1376.98	0.170538
PSB107_map5	0002.CSV	1380.84	0.178886
PSB107_map5	0002.CSV	1384.7	0.185975
PSB107_map5	0002.CSV	1388.56	0.194981
PSB107_map5	0002.CSV	1392.41	0.200541
PSB107_map5	0002.CSV	1396.27	0.20378
PSB107_map5	0002.CSV	1400.13	0.202446
PSB107_map5	0002.CSV	1403.98	0.199824
PSB107_map5	0002.CSV	1407.84	0.194394
PSB107_map5	0002.CSV	1411.7	0.187167
PSB107_map5	0002.CSV	1415.55	0.17864
PSB107_map5	0002.CSV	1419.41	0.168839
PSB107_map5	0002.CSV	1423.27	0.160064
PSB107_map5	0002.CSV	1427.12	0.154609
PSB107_map5	0002.CSV	1430.98	0.148544
PSB107_map5	0002.CSV	1434.84	0.14274
PSB107_map5	0002.CSV	1438.7	0.135538
PSB107_map5	0002.CSV	1442.55	0.130053
PSB107_map5	0002.CSV	1446.41	0.123821
PSB107_map5	0002.CSV	1450.27	0.117522
PSB107_map5	0002.CSV	1454.12	0.111993
PSB107_map5	0002.CSV	1457.98	0.104
PSB107_map5	0002.CSV	1461.84	0.097426
PSB107_map5	0002.CSV	1465.7	0.0927979
PSB107_map5	0002.CSV	1469.55	0.0879422
PSB107_map5	0002.CSV	1473.41	0.0827199
PSB107_map5	0002.CSV	1477.27	0.0765219
PSB107_map5	0002.CSV	1481.12	0.072444
PSB107_map5	0002.CSV	1484.98	0.0683548
PSB107_map5	0002.CSV	1488.84	0.0632939
PSB107_map5	0002.CSV	1492.7	0.0574845
PSB107_map5	0002.CSV	1496.55	0.0528803
PSB107_map5	0002.CSV	1500.41	0.0475581
PSB107_map5	0002.CSV	1504.27	0.0443165
PSB107_map5	0002.CSV	1508.12	0.0390916
PSB107_map5	0002.CSV	1511.98	0.0351759
PSB107_map5	0002.CSV	1515.84	0.0323614
PSB107_map5	0002.CSV	1519.7	0.0293619
PSB107_map5	0002.CSV	1523.55	0.0254436
PSB107_map5	0002.CSV	1527.41	0.0222568
PSB107_map5	0002.CSV	1531.27	0.0191861
PSB107_map5	0002.CSV	1535.12	0.0162475
PSB107_map5	0002.CSV	1538.98	0.0131121
PSB107_map5	0002.CSV	1542.84	0.00773979
PSB107_map5	0002.CSV	1546.7	0.00373063
PSB107_map5	0002.CSV	1550.55	0.00076647
PSB107_map5	0002.CSV	1554.41	-0.00209774
PSB107_map5	0002.CSV	1558.27	-0.00451469
PSB107_map5	0002.CSV	1562.12	-0.00663905
PSB107_map5	0002.CSV	1565.98	-0.00806551
PSB107_map5	0002.CSV	1569.84	-0.00940517
PSB107_map5	0002.CSV	1573.69	-0.0103799
PSB107_map5	0002.CSV	1577.55	-0.0111804
PSB107_map5	0002.CSV	1581.41	-0.0122907
PSB107_map5	0002.CSV	1585.27	-0.0136032
PSB107_map5	0002.CSV	1589.12	-0.0148778
PSB107_map5	0002.CSV	1592.98	-0.0161083
PSB107_map5	0002.CSV	1596.84	-0.0171509
PSB107_map5	0002.CSV	1600.69	-0.0181511
PSB107_map5	0002.CSV	1604.55	-0.0189681
PSB107_map5	0002.CSV	1608.41	-0.0196816
PSB107_map5	0002.CSV	1612.27	-0.0203929
PSB107_map5	0002.CSV	1616.12	-0.0208723
PSB107_map5	0002.CSV	1619.98	-0.0209914
PSB107_map5	0002.CSV	1623.84	-0.0212986
PSB107_map5	0002.CSV	1627.69	-0.0215486
PSB107_map5	0002.CSV	1631.55	-0.0222089
PSB107_map5	0002.CSV	1635.41	-0.0221374
PSB107_map5	0002.CSV	1639.27	-0.0218825
PSB107_map5	0002.CSV	1643.12	-0.022537
PSB107_map5	0002.CSV	1646.98	-0.0228067
PSB107_map5	0002.CSV	1650.84	-0.0224068
PSB107_map5	0002.CSV	1654.69	-0.0221373
PSB107_map5	0002.CSV	1658.55	-0.0227707
PSB107_map5	0002.CSV	1662.41	-0.0232394
PSB107_map5	0002.CSV	1666.27	-0.0235602
PSB107_map5	0002.CSV	1670.12	-0.0237991
PSB107_map5	0002.CSV	1673.98	-0.0236888
PSB107_map5	0002.CSV	1677.84	-0.0241145
PSB107_map5	0002.CSV	1681.69	-0.0242876
PSB107_map5	0002.CSV	1685.55	-0.0238594
PSB107_map5	0002.CSV	1689.41	-0.0240404
PSB107_map5	0002.CSV	1693.27	-0.0248027
PSB107_map5	0002.CSV	1697.12	-0.0247972
PSB107_map5	0002.CSV	1700.98	-0.0239767
PSB107_map5	0002.CSV	1704.84	-0.0238579
PSB107_map5	0002.CSV	1708.69	-0.0241186
PSB107_map5	0002.CSV	1712.55	-0.024387
PSB107_map5	0002.CSV	1716.41	-0.0234445
PSB107_map5	0002.CSV	1720.27	-0.0225096
PSB107_map5	0002.CSV	1724.12	-0.0228527
PSB107_map5	0002.CSV	1727.98	-0.0231159
PSB107_map5	0002.CSV	1731.84	-0.0231195
PSB107_map5	0002.CSV	1735.69	-0.0227923
PSB107_map5	0002.CSV	1739.55	-0.023203
PSB107_map5	0002.CSV	1743.41	-0.0236872
PSB107_map5	0002.CSV	1747.27	-0.0241635
PSB107_map5	0002.CSV	1751.12	-0.0243531
PSB107_map5	0002.CSV	1754.98	-0.0249544
PSB107_map5	0002.CSV	1758.84	-0.0253041
PSB107_map5	0002.CSV	1762.69	-0.0254001
PSB107_map5	0002.CSV	1766.55	-0.0256137
PSB107_map5	0002.CSV	1770.41	-0.0254414
PSB107_map5	0002.CSV	1774.26	-0.0246626
PSB107_map5	0002.CSV	1778.12	-0.0247982
PSB107_map5	0002.CSV	1781.98	-0.0244321
PSB107_map5	0002.CSV	1785.84	-0.0236004
PSB107_map5	0002.CSV	1789.69	-0.0221691
PSB107_map5	0002.CSV	1793.55	-0.0196608
PSB107_map5	0002.CSV	1797.41	-0.019357
PSB107_map5	0002.CSV	1801.26	-0.021212
PSB107_map5	0002.CSV	1805.12	-0.0233026
PSB107_map5	0002.CSV	1808.98	-0.0245611
PSB107_map5	0002.CSV	1812.84	-0.0250674
PSB107_map5	0002.CSV	1816.69	-0.0256316
PSB107_map5	0002.CSV	1820.55	-0.0259727
PSB107_map5	0002.CSV	1824.41	-0.0261341
PSB107_map5	0002.CSV	1828.26	-0.0259645
PSB107_map5	0002.CSV	1832.12	-0.0260385
PSB107_map5	0002.CSV	1835.98	-0.026286
PSB107_map5	0002.CSV	1839.84	-0.0265719
PSB107_map5	0002.CSV	1843.69	-0.026338
PSB107_map5	0002.CSV	1847.55	-0.0260361
PSB107_map5	0002.CSV	1851.41	-0.0262545
PSB107_map5	0002.CSV	1855.26	-0.0264811
PSB107_map5	0002.CSV	1859.12	-0.0264737
PSB107_map5	0002.CSV	1862.98	-0.0265924
PSB107_map5	0002.CSV	1866.84	-0.0264661
PSB107_map5	0002.CSV	1870.69	-0.0260854
PSB107_map5	0002.CSV	1874.55	-0.0263258
PSB107_map5	0002.CSV	1878.41	-0.0265111
PSB107_map5	0002.CSV	1882.26	-0.026507
PSB107_map5	0002.CSV	1886.12	-0.026539
PSB107_map5	0002.CSV	1889.98	-0.0263979
PSB107_map5	0002.CSV	1893.83	-0.0263479
PSB107_map5	0002.CSV	1897.69	-0.0263564
PSB107_map5	0002.CSV	1901.55	-0.0264433
PSB107_map5	0002.CSV	1905.41	-0.0264276
PSB107_map5	0002.CSV	1909.26	-0.0262949
PSB107_map5	0002.CSV	1913.12	-0.026326
PSB107_map5	0002.CSV	1916.98	-0.0264151
PSB107_map5	0002.CSV	1920.83	-0.0262016
PSB107_map5	0002.CSV	1924.69	-0.0261709
PSB107_map5	0002.CSV	1928.55	-0.0262817
PSB107_map5	0002.CSV	1932.4	-0.0263298
PSB107_map5	0002.CSV	1936.26	-0.0263043
PSB107_map5	0002.CSV	1940.12	-0.026347
PSB107_map5	0002.CSV	1943.98	-0.0260813
PSB107_map5	0002.CSV	1947.83	-0.0260379
PSB107_map5	0002.CSV	1951.69	-0.0260924
PSB107_map5	0002.CSV	1955.55	-0.0261115
PSB107_map5	0002.CSV	1959.4	-0.0261089
PSB107_map5	0002.CSV	1963.26	-0.0261718
PSB107_map5	0002.CSV	1967.12	-0.0260227
PSB107_map5	0002.CSV	1970.98	-0.0259568
PSB107_map5	0002.CSV	1974.83	-0.0260036
PSB107_map5	0002.CSV	1978.69	-0.0260183
PSB107_map5	0002.CSV	1982.55	-0.0259489
PSB107_map5	0002.CSV	1986.4	-0.0259598
PSB107_map5	0002.CSV	1990.26	-0.0258501
PSB107_map5	0002.CSV	1994.12	-0.0257016
PSB107_map5	0002.CSV	1997.98	-0.0256598
PSB107_map5	0002.CSV	2001.83	-0.0256494
PSB107_map5	0002.CSV	2005.69	-0.0256375
PSB107_map5	0002.CSV	2009.55	-0.0256146
PSB107_map5	0002.CSV	2013.4	-0.0255699
PSB107_map5	0002.CSV	2017.26	-0.0254434
PSB107_map5	0002.CSV	2021.12	-0.0253213
PSB107_map5	0002.CSV	2024.97	-0.0253122
PSB107_map5	0002.CSV	2028.83	-0.025226
PSB107_map5	0002.CSV	2032.69	-0.0251494
PSB107_map5	0002.CSV	2036.55	-0.0250523
PSB107_map5	0002.CSV	2040.4	-0.025004
PSB107_map5	0002.CSV	2044.26	-0.0249233
PSB107_map5	0002.CSV	2048.12	-0.0248853
PSB107_map5	0002.CSV	2051.97	-0.0248377
PSB107_map5	0002.CSV	2055.83	-0.0248441
PSB107_map5	0002.CSV	2059.69	-0.0247953
PSB107_map5	0002.CSV	2063.55	-0.0247285
PSB107_map5	0002.CSV	2067.4	-0.0246286
PSB107_map5	0002.CSV	2071.26	-0.0246545
PSB107_map5	0002.CSV	2075.12	-0.0246365
PSB107_map5	0002.CSV	2078.97	-0.0246065
PSB107_map5	0002.CSV	2082.83	-0.0245585
PSB107_map5	0002.CSV	2086.69	-0.0245088
PSB107_map5	0002.CSV	2090.55	-0.024371
PSB107_map5	0002.CSV	2094.4	-0.024342
PSB107_map5	0002.CSV	2098.26	-0.024372
PSB107_map5	0002.CSV	2102.12	-0.0243896
PSB107_map5	0002.CSV	2105.97	-0.0243115
PSB107_map5	0002.CSV	2109.83	-0.0242026
PSB107_map5	0002.CSV	2113.69	-0.0240657
PSB107_map5	0002.CSV	2117.55	-0.0240591
PSB107_map5	0002.CSV	2121.4	-0.0240741
PSB107_map5	0002.CSV	2125.26	-0.0240819
PSB107_map5	0002.CSV	2129.12	-0.0240081
PSB107_map5	0002.CSV	2132.97	-0.0239307
PSB107_map5	0002.CSV	2136.83	-0.0238416
PSB107_map5	0002.CSV	2140.69	-0.0238476
PSB107_map5	0002.CSV	2144.55	-0.023811
PSB107_map5	0002.CSV	2148.4	-0.0237552
PSB107_map5	0002.CSV	2152.26	-0.0237005
PSB107_map5	0002.CSV	2156.12	-0.0237512
PSB107_map5	0002.CSV	2159.97	-0.0237343
PSB107_map5	0002.CSV	2163.83	-0.0236656
PSB107_map5	0002.CSV	2167.69	-0.023618
PSB107_map5	0002.CSV	2171.55	-0.0235692
PSB107_map5	0002.CSV	2175.4	-0.0234927
PSB107_map5	0002.CSV	2179.26	-0.0235191
PSB107_map5	0002.CSV	2183.12	-0.023551
PSB107_map5	0002.CSV	2186.97	-0.0235268
PSB107_map5	0002.CSV	2190.83	-0.0234466
PSB107_map5	0002.CSV	2194.69	-0.0234122
PSB107_map5	0002.CSV	2198.55	-0.0233689
PSB107_map5	0002.CSV	2202.4	-0.0233689
PSB107_map5	0002.CSV	2206.26	-0.0233232
PSB107_map5	0002.CSV	2210.12	-0.0233393
PSB107_map5	0002.CSV	2213.97	-0.0233656
PSB107_map5	0002.CSV	2217.83	-0.0233882
PSB107_map5	0002.CSV	2221.69	-0.0233888
PSB107_map5	0002.CSV	2225.54	-0.0234049
PSB107_map5	0002.CSV	2229.4	-0.0234055
PSB107_map5	0002.CSV	2233.26	-0.0234667
PSB107_map5	0002.CSV	2237.12	-0.0234753
PSB107_map5	0002.CSV	2240.97	-0.0234707
PSB107_map5	0002.CSV	2244.83	-0.0235205
PSB107_map5	0002.CSV	2248.69	-0.0235535
PSB107_map5	0002.CSV	2252.54	-0.0235361
PSB107_map5	0002.CSV	2256.4	-0.0235924
PSB107_map5	0002.CSV	2260.26	-0.0236267
PSB107_map5	0002.CSV	2264.11	-0.0237018
PSB107_map5	0002.CSV	2267.97	-0.0237365
PSB107_map5	0002.CSV	2271.83	-0.0237972
PSB107_map5	0002.CSV	2275.69	-0.0238091
PSB107_map5	0002.CSV	2279.54	-0.0238386
PSB107_map5	0002.CSV	2283.4	-0.023902
PSB107_map5	0002.CSV	2287.26	-0.0240226
PSB107_map5	0002.CSV	2291.11	-0.0241299
PSB107_map5	0002.CSV	2294.97	-0.0242153
PSB107_map5	0002.CSV	2298.83	-0.0243683
PSB107_map5	0002.CSV	2302.69	-0.0247042
PSB107_map5	0002.CSV	2306.54	-0.025063
PSB107_map5	0002.CSV	2310.4	-0.0254678
PSB107_map5	0002.CSV	2314.26	-0.0258479
PSB107_map5	0002.CSV	2318.11	-0.0265976
PSB107_map5	0002.CSV	2321.97	-0.0276889
PSB107_map5	0002.CSV	2325.83	-0.0289384
PSB107_map5	0002.CSV	2329.69	-0.0297566
PSB107_map5	0002.CSV	2333.54	-0.0309515
PSB107_map5	0002.CSV	2337.4	-0.0321295
PSB107_map5	0002.CSV	2341.26	-0.0323345
PSB107_map5	0002.CSV	2345.11	-0.0293445
PSB107_map5	0002.CSV	2348.97	-0.0287087
PSB107_map5	0002.CSV	2352.83	-0.0316112
PSB107_map5	0002.CSV	2356.69	-0.0396234
PSB107_map5	0002.CSV	2360.54	-0.0468638
PSB107_map5	0002.CSV	2364.4	-0.0433432
PSB107_map5	0002.CSV	2368.26	-0.034114
PSB107_map5	0002.CSV	2372.11	-0.0283657
PSB107_map5	0002.CSV	2375.97	-0.0256829
PSB107_map5	0002.CSV	2379.83	-0.0246792
PSB107_map5	0002.CSV	2383.69	-0.0244389
PSB107_map5	0002.CSV	2387.54	-0.0245153
PSB107_map5	0002.CSV	2391.4	-0.0245994
PSB107_map5	0002.CSV	2395.26	-0.0246142
PSB107_map5	0002.CSV	2399.11	-0.0245985
PSB107_map5	0002.CSV	2402.97	-0.024622
PSB107_map5	0002.CSV	2406.83	-0.0245929
PSB107_map5	0002.CSV	2410.68	-0.0245911
PSB107_map5	0002.CSV	2414.54	-0.0245733
PSB107_map5	0002.CSV	2418.4	-0.0245534
PSB107_map5	0002.CSV	2422.26	-0.0244764
PSB107_map5	0002.CSV	2426.11	-0.0244074
PSB107_map5	0002.CSV	2429.97	-0.0243815
PSB107_map5	0002.CSV	2433.83	-0.0243586
PSB107_map5	0002.CSV	2437.68	-0.0243271
PSB107_map5	0002.CSV	2441.54	-0.0243268
PSB107_map5	0002.CSV	2445.4	-0.0243106
PSB107_map5	0002.CSV	2449.26	-0.0242692
PSB107_map5	0002.CSV	2453.11	-0.0242507
PSB107_map5	0002.CSV	2456.97	-0.0242438
PSB107_map5	0002.CSV	2460.83	-0.0241398
PSB107_map5	0002.CSV	2464.68	-0.0239943
PSB107_map5	0002.CSV	2468.54	-0.0238783
PSB107_map5	0002.CSV	2472.4	-0.0238059
PSB107_map5	0002.CSV	2476.26	-0.0236976
PSB107_map5	0002.CSV	2480.11	-0.0234911
PSB107_map5	0002.CSV	2483.97	-0.0232596
PSB107_map5	0002.CSV	2487.83	-0.0230301
PSB107_map5	0002.CSV	2491.68	-0.0227259
PSB107_map5	0002.CSV	2495.54	-0.0223536
PSB107_map5	0002.CSV	2499.4	-0.021877
PSB107_map5	0002.CSV	2503.26	-0.0213842
PSB107_map5	0002.CSV	2507.11	-0.020982
PSB107_map5	0002.CSV	2510.97	-0.0208194
PSB107_map5	0002.CSV	2514.83	-0.0208499
PSB107_map5	0002.CSV	2518.68	-0.0210398
PSB107_map5	0002.CSV	2522.54	-0.021401
PSB107_map5	0002.CSV	2526.4	-0.021881
PSB107_map5	0002.CSV	2530.26	-0.0223405
PSB107_map5	0002.CSV	2534.11	-0.0227196
PSB107_map5	0002.CSV	2537.97	-0.0230043
PSB107_map5	0002.CSV	2541.83	-0.0232377
PSB107_map5	0002.CSV	2545.68	-0.023397
PSB107_map5	0002.CSV	2549.54	-0.0235154
PSB107_map5	0002.CSV	2553.4	-0.0235572
PSB107_map5	0002.CSV	2557.26	-0.0235803
PSB107_map5	0002.CSV	2561.11	-0.0236033
PSB107_map5	0002.CSV	2564.97	-0.0236486
PSB107_map5	0002.CSV	2568.83	-0.0236845
PSB107_map5	0002.CSV	2572.68	-0.0236585
PSB107_map5	0002.CSV	2576.54	-0.0236043
PSB107_map5	0002.CSV	2580.4	-0.0236534
PSB107_map5	0002.CSV	2584.25	-0.0236927
PSB107_map5	0002.CSV	2588.11	-0.0237188
PSB107_map5	0002.CSV	2591.97	-0.0237181
PSB107_map5	0002.CSV	2595.83	-0.0237358
PSB107_map5	0002.CSV	2599.68	-0.023767
PSB107_map5	0002.CSV	2603.54	-0.0238258
PSB107_map5	0002.CSV	2607.4	-0.0238603
PSB107_map5	0002.CSV	2611.25	-0.0239131
PSB107_map5	0002.CSV	2615.11	-0.0239848
PSB107_map5	0002.CSV	2618.97	-0.0240627
PSB107_map5	0002.CSV	2622.82	-0.0240654
PSB107_map5	0002.CSV	2626.68	-0.024079
PSB107_map5	0002.CSV	2630.54	-0.0241586
PSB107_map5	0002.CSV	2634.4	-0.0241554
PSB107_map5	0002.CSV	2638.25	-0.0241415
PSB107_map5	0002.CSV	2642.11	-0.0242771
PSB107_map5	0002.CSV	2645.97	-0.0243871
PSB107_map5	0002.CSV	2649.82	-0.0244441
PSB107_map5	0002.CSV	2653.68	-0.0244552
PSB107_map5	0002.CSV	2657.54	-0.024444
PSB107_map5	0002.CSV	2661.4	-0.0244533
PSB107_map5	0002.CSV	2665.25	-0.0244522
PSB107_map5	0002.CSV	2669.11	-0.0243413
PSB107_map5	0002.CSV	2672.97	-0.0240659
PSB107_map5	0002.CSV	2676.82	-0.023729
PSB107_map5	0002.CSV	2680.68	-0.023774
PSB107_map5	0002.CSV	2684.54	-0.0240933
PSB107_map5	0002.CSV	2688.4	-0.0242252
PSB107_map5	0002.CSV	2692.25	-0.0242829
PSB107_map5	0002.CSV	2696.11	-0.0242467
PSB107_map5	0002.CSV	2699.97	-0.0241903
PSB107_map5	0002.CSV	2703.82	-0.0242065
PSB107_map5	0002.CSV	2707.68	-0.0241138
PSB107_map5	0002.CSV	2711.54	-0.0240278
PSB107_map5	0002.CSV	2715.4	-0.0240221
PSB107_map5	0002.CSV	2719.25	-0.0239091
PSB107_map5	0002.CSV	2723.11	-0.0235896
PSB107_map5	0002.CSV	2726.97	-0.0235932
PSB107_map5	0002.CSV	2730.82	-0.0238766
PSB107_map5	0002.CSV	2734.68	-0.0238553
PSB107_map5	0002.CSV	2738.54	-0.0237234
PSB107_map5	0002.CSV	2742.4	-0.0236161
PSB107_map5	0002.CSV	2746.25	-0.0232025
PSB107_map5	0002.CSV	2750.11	-0.0230518
PSB107_map5	0002.CSV	2753.97	-0.0232331
PSB107_map5	0002.CSV	2757.82	-0.02331
PSB107_map5	0002.CSV	2761.68	-0.0234519
PSB107_map5	0002.CSV	2765.54	-0.0235219
PSB107_map5	0002.CSV	2769.39	-0.0232634
PSB107_map5	0002.CSV	2773.25	-0.0227743
PSB107_map5	0002.CSV	2777.11	-0.0227602
PSB107_map5	0002.CSV	2780.97	-0.0229455
PSB107_map5	0002.CSV	2784.82	-0.0226992
PSB107_map5	0002.CSV	2788.68	-0.0221213
PSB107_map5	0002.CSV	2792.54	-0.0219078
PSB107_map5	0002.CSV	2796.39	-0.0218833
PSB107_map5	0002.CSV	2800.25	-0.0220732
PSB107_map5	0002.CSV	2804.11	-0.0223142
PSB107_map5	0002.CSV	2807.97	-0.0220074
PSB107_map5	0002.CSV	2811.82	-0.0219148
PSB107_map5	0002.CSV	2815.68	-0.0220715
PSB107_map5	0002.CSV	2819.54	-0.021919
PSB107_map5	0002.CSV	2823.39	-0.0216697
PSB107_map5	0002.CSV	2827.25	-0.0215459
PSB107_map5	0002.CSV	2831.11	-0.0211639
PSB107_map5	0002.CSV	2834.97	-0.0205549
PSB107_map5	0002.CSV	2838.82	-0.0201735
PSB107_map5	0002.CSV	2842.68	-0.0201111
PSB107_map5	0002.CSV	2846.54	-0.0196749
PSB107_map5	0002.CSV	2850.39	-0.0194142
PSB107_map5	0002.CSV	2854.25	-0.0194398
PSB107_map5	0002.CSV	2858.11	-0.0192349
PSB107_map5	0002.CSV	2861.97	-0.0191148
PSB107_map5	0002.CSV	2865.82	-0.0191234
PSB107_map5	0002.CSV	2869.68	-0.0188244
PSB107_map5	0002.CSV	2873.54	-0.0185625
PSB107_map5	0002.CSV	2877.39	-0.0190122
PSB107_map5	0002.CSV	2881.25	-0.0196121
PSB107_map5	0002.CSV	2885.11	-0.0198205
PSB107_map5	0002.CSV	2888.97	-0.0196596
PSB107_map5	0002.CSV	2892.82	-0.0192817
PSB107_map5	0002.CSV	2896.68	-0.01913
PSB107_map5	0002.CSV	2900.54	-0.0192621
PSB107_map5	0002.CSV	2904.39	-0.0190522
PSB107_map5	0002.CSV	2908.25	-0.0184346
PSB107_map5	0002.CSV	2912.11	-0.017632
PSB107_map5	0002.CSV	2915.97	-0.0172733
PSB107_map5	0002.CSV	2919.82	-0.0176644
PSB107_map5	0002.CSV	2923.68	-0.0182062
PSB107_map5	0002.CSV	2927.54	-0.0182404
PSB107_map5	0002.CSV	2931.39	-0.018448
PSB107_map5	0002.CSV	2935.25	-0.0189453
PSB107_map5	0002.CSV	2939.11	-0.0189892
PSB107_map5	0002.CSV	2942.96	-0.0185726
PSB107_map5	0002.CSV	2946.82	-0.0185246
PSB107_map5	0002.CSV	2950.68	-0.0188886
PSB107_map5	0002.CSV	2954.54	-0.0194162
PSB107_map5	0002.CSV	2958.39	-0.0198014
PSB107_map5	0002.CSV	2962.25	-0.0199102
PSB107_map5	0002.CSV	2966.11	-0.0201885
PSB107_map5	0002.CSV	2969.96	-0.020107
PSB107_map5	0002.CSV	2973.82	-0.0196658
PSB107_map5	0002.CSV	2977.68	-0.0193964
PSB107_map5	0002.CSV	2981.53	-0.0195834
PSB107_map5	0002.CSV	2985.39	-0.0200992
PSB107_map5	0002.CSV	2989.25	-0.0201506
PSB107_map5	0002.CSV	2993.11	-0.0199946
PSB107_map5	0002.CSV	2996.96	-0.0202234
PSB107_map5	0002.CSV	3000.82	-0.0205496
PSB107_map5	0002.CSV	3004.68	-0.0207137
PSB107_map5	0002.CSV	3008.53	-0.0205474
PSB107_map5	0002.CSV	3012.39	-0.0202643
PSB107_map5	0002.CSV	3016.25	-0.0201864
PSB107_map5	0002.CSV	3020.11	-0.0204052
PSB107_map5	0002.CSV	3023.96	-0.0205878
PSB107_map5	0002.CSV	3027.82	-0.0206155
PSB107_map5	0002.CSV	3031.68	-0.0203049
PSB107_map5	0002.CSV	3035.53	-0.020177
PSB107_map5	0002.CSV	3039.39	-0.0202564
PSB107_map5	0002.CSV	3043.25	-0.0202186
PSB107_map5	0002.CSV	3047.11	-0.0203623
PSB107_map5	0002.CSV	3050.96	-0.0204491
PSB107_map5	0002.CSV	3054.82	-0.0204773
PSB107_map5	0002.CSV	3058.68	-0.0205652
PSB107_map5	0002.CSV	3062.53	-0.020451
PSB107_map5	0002.CSV	3066.39	-0.0201808
PSB107_map5	0002.CSV	3070.25	-0.0202479
PSB107_map5	0002.CSV	3074.11	-0.0203043
PSB107_map5	0002.CSV	3077.96	-0.0200578
PSB107_map5	0002.CSV	3081.82	-0.0198337
PSB107_map5	0002.CSV	3085.68	-0.019869
PSB107_map5	0002.CSV	3089.53	-0.0200582
PSB107_map5	0002.CSV	3093.39	-0.0202869
PSB107_map5	0002.CSV	3097.25	-0.0202747
PSB107_map5	0002.CSV	3101.11	-0.0202348
PSB107_map5	0002.CSV	3104.96	-0.0200985
PSB107_map5	0002.CSV	3108.82	-0.0197795
PSB107_map5	0002.CSV	3112.68	-0.0196309
PSB107_map5	0002.CSV	3116.53	-0.0195721
PSB107_map5	0002.CSV	3120.39	-0.0197007
PSB107_map5	0002.CSV	3124.25	-0.0199989
PSB107_map5	0002.CSV	3128.11	-0.0200473
PSB107_map5	0002.CSV	3131.96	-0.0200051
PSB107_map5	0002.CSV	3135.82	-0.0199182
PSB107_map5	0002.CSV	3139.68	-0.0198723
PSB107_map5	0002.CSV	3143.53	-0.0201167
PSB107_map5	0002.CSV	3147.39	-0.0199965
PSB107_map5	0002.CSV	3151.25	-0.0196246
PSB107_map5	0002.CSV	3155.1	-0.0197469
PSB107_map5	0002.CSV	3158.96	-0.0201423
PSB107_map5	0002.CSV	3162.82	-0.0202249
PSB107_map5	0002.CSV	3166.68	-0.0202972
PSB107_map5	0002.CSV	3170.53	-0.0203059
PSB107_map5	0002.CSV	3174.39	-0.0202348
PSB107_map5	0002.CSV	3178.25	-0.0200603
PSB107_map5	0002.CSV	3182.1	-0.0199237
PSB107_map5	0002.CSV	3185.96	-0.019855
PSB107_map5	0002.CSV	3189.82	-0.0197985
PSB107_map5	0002.CSV	3193.68	-0.0198438
PSB107_map5	0002.CSV	3197.53	-0.0197949
PSB107_map5	0002.CSV	3201.39	-0.0196027
PSB107_map5	0002.CSV	3205.25	-0.0195297
PSB107_map5	0002.CSV	3209.1	-0.0196728
PSB107_map5	0002.CSV	3212.96	-0.0195573
PSB107_map5	0002.CSV	3216.82	-0.019363
PSB107_map5	0002.CSV	3220.68	-0.0194276
PSB107_map5	0002.CSV	3224.53	-0.0194685
PSB107_map5	0002.CSV	3228.39	-0.0191908
PSB107_map5	0002.CSV	3232.25	-0.0187385
PSB107_map5	0002.CSV	3236.1	-0.0187864
PSB107_map5	0002.CSV	3239.96	-0.0189699
PSB107_map5	0002.CSV	3243.82	-0.0186765
PSB107_map5	0002.CSV	3247.68	-0.0184981
PSB107_map5	0002.CSV	3251.53	-0.0186304
PSB107_map5	0002.CSV	3255.39	-0.0186139
PSB107_map5	0002.CSV	3259.25	-0.0188033
PSB107_map5	0002.CSV	3263.1	-0.018765
PSB107_map5	0002.CSV	3266.96	-0.0183241
PSB107_map5	0002.CSV	3270.82	-0.0178666
PSB107_map5	0002.CSV	3274.68	-0.0178808
PSB107_map5	0002.CSV	3278.53	-0.0182663
PSB107_map5	0002.CSV	3282.39	-0.0184293
PSB107_map5	0002.CSV	3286.25	-0.0182888
PSB107_map5	0002.CSV	3290.1	-0.0179138
PSB107_map5	0002.CSV	3293.96	-0.0175763
PSB107_map5	0002.CSV	3297.82	-0.0175651
PSB107_map5	0002.CSV	3301.67	-0.0174329
PSB107_map5	0002.CSV	3305.53	-0.0172102
PSB107_map5	0002.CSV	3309.39	-0.0173306
PSB107_map5	0002.CSV	3313.25	-0.0177916
PSB107_map5	0002.CSV	3317.1	-0.018191
PSB107_map5	0002.CSV	3320.96	-0.0179898
PSB107_map5	0002.CSV	3324.82	-0.0175398
PSB107_map5	0002.CSV	3328.67	-0.0176809
PSB107_map5	0002.CSV	3332.53	-0.0177042
PSB107_map5	0002.CSV	3336.39	-0.0171856
PSB107_map5	0002.CSV	3340.24	-0.0169163
PSB107_map5	0002.CSV	3344.1	-0.0170827
PSB107_map5	0002.CSV	3347.96	-0.0171344
PSB107_map5	0002.CSV	3351.82	-0.0171759
PSB107_map5	0002.CSV	3355.67	-0.0173335
PSB107_map5	0002.CSV	3359.53	-0.0170728
PSB107_map5	0002.CSV	3363.39	-0.016729
PSB107_map5	0002.CSV	3367.24	-0.0164783
PSB107_map5	0002.CSV	3371.1	-0.0166064
PSB107_map5	0002.CSV	3374.96	-0.0167673
PSB107_map5	0002.CSV	3378.82	-0.016892
PSB107_map5	0002.CSV	3382.67	-0.0172544
PSB107_map5	0002.CSV	3386.53	-0.0171597
PSB107_map5	0002.CSV	3390.39	-0.0167722
PSB107_map5	0002.CSV	3394.24	-0.016565
PSB107_map5	0002.CSV	3398.1	-0.0164107
PSB107_map5	0002.CSV	3401.96	-0.0163442
PSB107_map5	0002.CSV	3405.82	-0.0165333
PSB107_map5	0002.CSV	3409.67	-0.016591
PSB107_map5	0002.CSV	3413.53	-0.0168439
PSB107_map5	0002.CSV	3417.39	-0.0172596
PSB107_map5	0002.CSV	3421.24	-0.017269
PSB107_map5	0002.CSV	3425.1	-0.0169356
PSB107_map5	0002.CSV	3428.96	-0.0165353
PSB107_map5	0002.CSV	3432.82	-0.0163646
PSB107_map5	0002.CSV	3436.67	-0.01675
PSB107_map5	0002.CSV	3440.53	-0.0174492
PSB107_map5	0002.CSV	3444.39	-0.0176604
PSB107_map5	0002.CSV	3448.24	-0.0175094
PSB107_map5	0002.CSV	3452.1	-0.0176127
PSB107_map5	0002.CSV	3455.96	-0.017538
PSB107_map5	0002.CSV	3459.82	-0.0170642
PSB107_map5	0002.CSV	3463.67	-0.0166464
PSB107_map5	0002.CSV	3467.53	-0.0165382
PSB107_map5	0002.CSV	3471.39	-0.0170991
PSB107_map5	0002.CSV	3475.24	-0.0173921
PSB107_map5	0002.CSV	3479.1	-0.0172292
PSB107_map5	0002.CSV	3482.96	-0.0172367
PSB107_map5	0002.CSV	3486.82	-0.017124
PSB107_map5	0002.CSV	3490.67	-0.0171559
PSB107_map5	0002.CSV	3494.53	-0.0172311
PSB107_map5	0002.CSV	3498.39	-0.0172762
PSB107_map5	0002.CSV	3502.24	-0.017486
PSB107_map5	0002.CSV	3506.1	-0.0180721
PSB107_map5	0002.CSV	3509.96	-0.0182452
PSB107_map5	0002.CSV	3513.81	-0.01804
PSB107_map5	0002.CSV	3517.67	-0.0185218
PSB107_map5	0002.CSV	3521.53	-0.0185851
PSB107_map5	0002.CSV	3525.39	-0.0185002
PSB107_map5	0002.CSV	3529.24	-0.01857
PSB107_map5	0002.CSV	3533.1	-0.0185959
PSB107_map5	0002.CSV	3536.96	-0.0185586
PSB107_map5	0002.CSV	3540.81	-0.0185851
PSB107_map5	0002.CSV	3544.67	-0.0183664
PSB107_map5	0002.CSV	3548.53	-0.0184308
PSB107_map5	0002.CSV	3552.39	-0.0189512
PSB107_map5	0002.CSV	3556.24	-0.0191448
PSB107_map5	0002.CSV	3560.1	-0.01946
PSB107_map5	0002.CSV	3563.96	-0.0199042
PSB107_map5	0002.CSV	3567.81	-0.0190619
PSB107_map5	0002.CSV	3571.67	-0.0191876
PSB107_map5	0002.CSV	3575.53	-0.0199213
PSB107_map5	0002.CSV	3579.39	-0.0197921
PSB107_map5	0002.CSV	3583.24	-0.0198069
PSB107_map5	0002.CSV	3587.1	-0.0196684
PSB107_map5	0002.CSV	3590.96	-0.0194033
PSB107_map5	0002.CSV	3594.81	-0.0197189
PSB107_map5	0002.CSV	3598.67	-0.0196492
PSB107_map5	0002.CSV	3602.53	-0.0197971
PSB107_map5	0002.CSV	3606.39	-0.0205537
PSB107_map5	0002.CSV	3610.24	-0.0208308
PSB107_map5	0002.CSV	3614.1	-0.0208379
PSB107_map5	0002.CSV	3617.96	-0.0203297
PSB107_map5	0002.CSV	3621.81	-0.0201525
PSB107_map5	0002.CSV	3625.67	-0.021289
PSB107_map5	0002.CSV	3629.53	-0.0211196
PSB107_map5	0002.CSV	3633.39	-0.0201726
PSB107_map5	0002.CSV	3637.24	-0.0205336
PSB107_map5	0002.CSV	3641.1	-0.0209992
PSB107_map5	0002.CSV	3644.96	-0.0218859
PSB107_map5	0002.CSV	3648.81	-0.0213367
PSB107_map5	0002.CSV	3652.67	-0.0198688
PSB107_map5	0002.CSV	3656.53	-0.0197455
PSB107_map5	0002.CSV	3660.38	-0.0198639
PSB107_map5	0002.CSV	3664.24	-0.020945
PSB107_map5	0002.CSV	3668.1	-0.022007
PSB107_map5	0002.CSV	3671.96	-0.0218565
PSB107_map5	0002.CSV	3675.81	-0.020773
PSB107_map5	0002.CSV	3679.67	-0.020211
PSB107_map5	0002.CSV	3683.53	-0.020846
PSB107_map5	0002.CSV	3687.38	-0.0211368
PSB107_map5	0002.CSV	3691.24	-0.0199178
PSB107_map5	0002.CSV	3695.1	-0.0200255
PSB107_map5	0002.CSV	3698.95	-0.0206658
PSB107_map5	0002.CSV	3702.81	-0.0209168
PSB107_map5	0002.CSV	3706.67	-0.021626
PSB107_map5	0002.CSV	3710.53	-0.0218013
PSB107_map5	0002.CSV	3714.38	-0.0205999
PSB107_map5	0002.CSV	3718.24	-0.0209391
PSB107_map5	0002.CSV	3722.1	-0.0214269
PSB107_map5	0002.CSV	3725.95	-0.0213475
PSB107_map5	0002.CSV	3729.81	-0.0216507
PSB107_map5	0002.CSV	3733.67	-0.0212477
PSB107_map5	0002.CSV	3737.53	-0.0196386
PSB107_map5	0002.CSV	3741.38	-0.0207692
PSB107_map5	0002.CSV	3745.24	-0.0223541
PSB107_map5	0002.CSV	3749.1	-0.0223283
PSB107_map5	0002.CSV	3752.95	-0.0207114
PSB107_map5	0002.CSV	3756.81	-0.020651
PSB107_map5	0002.CSV	3760.67	-0.020796
PSB107_map5	0002.CSV	3764.53	-0.0209473
PSB107_map5	0002.CSV	3768.38	-0.020418
PSB107_map5	0002.CSV	3772.24	-0.0201197
PSB107_map5	0002.CSV	3776.1	-0.0206458
PSB107_map5	0002.CSV	3779.95	-0.0205597
PSB107_map5	0002.CSV	3783.81	-0.0202303
PSB107_map5	0002.CSV	3787.67	-0.0201556
PSB107_map5	0002.CSV	3791.53	-0.0206942
PSB107_map5	0002.CSV	3795.38	-0.021549
PSB107_map5	0002.CSV	3799.24	-0.0217447
PSB107_map5	0002.CSV	3803.1	-0.0209023
PSB107_map5	0002.CSV	3806.95	-0.0201097
PSB107_map5	0002.CSV	3810.81	-0.0206055
PSB107_map5	0002.CSV	3814.67	-0.0214777
PSB107_map5	0002.CSV	3818.53	-0.0212142
PSB107_map5	0002.CSV	3822.38	-0.0202994
PSB107_map5	0002.CSV	3826.24	-0.0202107
PSB107_map5	0002.CSV	3830.1	-0.0206863
PSB107_map5	0002.CSV	3833.95	-0.021326
PSB107_map5	0002.CSV	3837.81	-0.0213383
PSB107_map5	0002.CSV	3841.67	-0.0201902
PSB107_map5	0002.CSV	3845.53	-0.02038
PSB107_map5	0002.CSV	3849.38	-0.0216965
PSB107_map5	0002.CSV	3853.24	-0.0213136
PSB107_map5	0002.CSV	3857.1	-0.0200788
PSB107_map5	0002.CSV	3860.95	-0.0209705
PSB107_map5	0002.CSV	3864.81	-0.0209744
PSB107_map5	0002.CSV	3868.67	-0.020674
PSB107_map5	0002.CSV	3872.52	-0.020341
PSB107_map5	0002.CSV	3876.38	-0.0207341
PSB107_map5	0002.CSV	3880.24	-0.0208936
PSB107_map5	0002.CSV	3884.1	-0.0201972
PSB107_map5	0002.CSV	3887.95	-0.020299
PSB107_map5	0002.CSV	3891.81	-0.0204425
PSB107_map5	0002.CSV	3895.67	-0.0210055
PSB107_map5	0002.CSV	3899.52	-0.0216307
PSB107_map5	0002.CSV	3903.38	-0.0200028
PSB107_map5	0002.CSV	3907.24	-0.0193773
PSB107_map5	0002.CSV	3911.1	-0.0202704
PSB107_map5	0002.CSV	3914.95	-0.0208486
PSB107_map5	0002.CSV	3918.81	-0.0205958
PSB107_map5	0002.CSV	3922.67	-0.0203049
PSB107_map5	0002.CSV	3926.52	-0.0202445
PSB107_map5	0002.CSV	3930.38	-0.0202169
PSB107_map5	0002.CSV	3934.24	-0.0200075
PSB107_map5	0002.CSV	3938.09	-0.0205157
PSB107_map5	0002.CSV	3941.95	-0.0206705
PSB107_map5	0002.CSV	3945.81	-0.0205076
PSB107_map5	0002.CSV	3949.67	-0.0203487
PSB107_map5	0002.CSV	3953.52	-0.0203183
PSB107_map5	0002.CSV	3957.38	-0.0205539
PSB107_map5	0002.CSV	3961.24	-0.020614
PSB107_map5	0002.CSV	3965.09	-0.0206212
PSB107_map5	0002.CSV	3968.95	-0.0207145
PSB107_map5	0002.CSV	3972.81	-0.0205633
PSB107_map5	0002.CSV	3976.67	-0.0203419
PSB107_map5	0002.CSV	3980.52	-0.0202001
PSB107_map5	0002.CSV	3984.38	-0.0201691
PSB107_map5	0002.CSV	3988.24	-0.0203356
PSB107_map5	0002.CSV	3992.09	-0.0203614
PSB107_map5	0002.CSV	3995.95	-0.0203081
PSB107_map5	0002.CSV	3999.81	-0.0203613
PSB107_map5	0003.CSV	674.992	0.00718835
PSB107_map5	0003.CSV	678.849	0.0107032
PSB107_map5	0003.CSV	682.706	0.0120754
PSB107_map5	0003.CSV	686.563	0.0133793
PSB107_map5	0003.CSV	690.42	0.014586
PSB107_map5	0003.CSV	694.277	0.019991
PSB107_map5	0003.CSV	698.134	0.0275254
PSB107_map5	0003.CSV	701.991	0.0390469
PSB107_map5	0003.CSV	705.849	0.0567216
PSB107_map5	0003.CSV	709.706	0.0798463
PSB107_map5	0003.CSV	713.563	0.0732318
PSB107_map5	0003.CSV	717.42	0.0383582
PSB107_map5	0003.CSV	721.277	0.0134883
PSB107_map5	0003.CSV	725.134	0.00582673
PSB107_map5	0003.CSV	728.991	0.00410185
PSB107_map5	0003.CSV	732.848	0.00711027
PSB107_map5	0003.CSV	736.705	0.0076412
PSB107_map5	0003.CSV	740.562	0.00495285
PSB107_map5	0003.CSV	744.42	0.00171991
PSB107_map5	0003.CSV	748.277	0.00111991
PSB107_map5	0003.CSV	752.134	0.00102711
PSB107_map5	0003.CSV	755.991	0.00165605
PSB107_map5	0003.CSV	759.848	0.00174696
PSB107_map5	0003.CSV	763.705	0.00248512
PSB107_map5	0003.CSV	767.562	0.00262264
PSB107_map5	0003.CSV	771.419	0.00339506
PSB107_map5	0003.CSV	775.276	0.00341623
PSB107_map5	0003.CSV	779.133	0.00393749
PSB107_map5	0003.CSV	782.99	0.0040262
PSB107_map5	0003.CSV	786.848	0.00473245
PSB107_map5	0003.CSV	790.705	0.00503057
PSB107_map5	0003.CSV	794.562	0.0058317
PSB107_map5	0003.CSV	798.419	0.00616567
PSB107_map5	0003.CSV	802.276	0.00732369
PSB107_map5	0003.CSV	806.133	0.00793651
PSB107_map5	0003.CSV	809.99	0.00944033
PSB107_map5	0003.CSV	813.847	0.0109471
PSB107_map5	0003.CSV	817.704	0.0130564
PSB107_map5	0003.CSV	821.562	0.0150468
PSB107_map5	0003.CSV	825.419	0.0176184
PSB107_map5	0003.CSV	829.276	0.0196844
PSB107_map5	0003.CSV	833.133	0.0229303
PSB107_map5	0003.CSV	836.99	0.0277085
PSB107_map5	0003.CSV	840.847	0.0360179
PSB107_map5	0003.CSV	844.704	0.0466607
PSB107_map5	0003.CSV	848.561	0.0555887
PSB107_map5	0003.CSV	852.418	0.0654529
PSB107_map5	0003.CSV	856.275	0.0925833
PSB107_map5	0003.CSV	860.132	0.143034
PSB107_map5	0003.CSV	863.99	0.205164
PSB107_map5	0003.CSV	867.847	0.243822
PSB107_map5	0003.CSV	871.704	0.235691
PSB107_map5	0003.CSV	875.561	0.18956
PSB107_map5	0003.CSV	879.418	0.134233
PSB107_map5	0003.CSV	883.275	0.0741181
PSB107_map5	0003.CSV	887.132	0.0213994
PSB107_map5	0003.CSV	890.989	-0.00345607
PSB107_map5	0003.CSV	894.846	-0.00676313
PSB107_map5	0003.CSV	898.703	-0.00597159
PSB107_map5	0003.CSV	902.561	-0.00450734
PSB107_map5	0003.CSV	906.418	-0.00357959
PSB107_map5	0003.CSV	910.275	-0.00241178
PSB107_map5	0003.CSV	914.132	-0.00157175
PSB107_map5	0003.CSV	917.989	-0.000360382
PSB107_map5	0003.CSV	921.846	0.000449099
PSB107_map5	0003.CSV	925.703	0.00163536
PSB107_map5	0003.CSV	929.56	0.00248849
PSB107_map5	0003.CSV	933.417	0.003663
PSB107_map5	0003.CSV	937.274	0.00416648
PSB107_map5	0003.CSV	941.131	0.00496005
PSB107_map5	0003.CSV	944.989	0.00536577
PSB107_map5	0003.CSV	948.846	0.00619299
PSB107_map5	0003.CSV	952.703	0.00677904
PSB107_map5	0003.CSV	956.56	0.00768795
PSB107_map5	0003.CSV	960.417	0.00807921
PSB107_map5	0003.CSV	964.274	0.00893087
PSB107_map5	0003.CSV	968.131	0.00970934
PSB107_map5	0003.CSV	971.988	0.010963
PSB107_map5	0003.CSV	975.845	0.0118778
PSB107_map5	0003.CSV	979.702	0.0130873
PSB107_map5	0003.CSV	983.559	0.0141125
PSB107_map5	0003.CSV	987.417	0.0156736
PSB107_map5	0003.CSV	991.274	0.0168716
PSB107_map5	0003.CSV	995.131	0.0182467
PSB107_map5	0003.CSV	998.988	0.0191315
PSB107_map5	0003.CSV	1002.85	0.020279
PSB107_map5	0003.CSV	1006.7	0.0211767
PSB107_map5	0003.CSV	1010.56	0.0225578
PSB107_map5	0003.CSV	1014.42	0.0236675
PSB107_map5	0003.CSV	1018.27	0.0252538
PSB107_map5	0003.CSV	1022.13	0.0265771
PSB107_map5	0003.CSV	1025.99	0.028089
PSB107_map5	0003.CSV	1029.85	0.0289718
PSB107_map5	0003.CSV	1033.7	0.0301203
PSB107_map5	0003.CSV	1037.56	0.0309502
PSB107_map5	0003.CSV	1041.42	0.0321965
PSB107_map5	0003.CSV	1045.27	0.0330272
PSB107_map5	0003.CSV	1049.13	0.0343317
PSB107_map5	0003.CSV	1052.99	0.0354066
PSB107_map5	0003.CSV	1056.84	0.0368712
PSB107_map5	0003.CSV	1060.7	0.038006
PSB107_map5	0003.CSV	1064.56	0.0396152
PSB107_map5	0003.CSV	1068.42	0.0406653
PSB107_map5	0003.CSV	1072.27	0.0417817
PSB107_map5	0003.CSV	1076.13	0.0425803
PSB107_map5	0003.CSV	1079.99	0.0449645
PSB107_map5	0003.CSV	1083.84	0.0489891
PSB107_map5	0003.CSV	1087.7	0.053023
PSB107_map5	0003.CSV	1091.56	0.0524377
PSB107_map5	0003.CSV	1095.41	0.0475274
PSB107_map5	0003.CSV	1099.27	0.041704
PSB107_map5	0003.CSV	1103.13	0.0392907
PSB107_map5	0003.CSV	1106.99	0.0387992
PSB107_map5	0003.CSV	1110.84	0.0393783
PSB107_map5	0003.CSV	1114.7	0.0397456
PSB107_map5	0003.CSV	1118.56	0.040429
PSB107_map5	0003.CSV	1122.41	0.0405945
PSB107_map5	0003.CSV	1126.27	0.0410551
PSB107_map5	0003.CSV	1130.13	0.0411431
PSB107_map5	0003.CSV	1133.99	0.0416237
PSB107_map5	0003.CSV	1137.84	0.0419772
PSB107_map5	0003.CSV	1141.7	0.0428456
PSB107_map5	0003.CSV	1145.56	0.043488
PSB107_map5	0003.CSV	1149.41	0.0447383
PSB107_map5	0003.CSV	1153.27	0.0459138
PSB107_map5	0003.CSV	1157.13	0.0474666
PSB107_map5	0003.CSV	1160.99	0.0483464
PSB107_map5	0003.CSV	1164.84	0.0491539
PSB107_map5	0003.CSV	1168.7	0.0493219
PSB107_map5	0003.CSV	1172.56	0.0498823
PSB107_map5	0003.CSV	1176.41	0.0503406
PSB107_map5	0003.CSV	1180.27	0.051291
PSB107_map5	0003.CSV	1184.13	0.0518767
PSB107_map5	0003.CSV	1187.99	0.0528696
PSB107_map5	0003.CSV	1191.84	0.0535873
PSB107_map5	0003.CSV	1195.7	0.0547732
PSB107_map5	0003.CSV	1199.56	0.0556512
PSB107_map5	0003.CSV	1203.41	0.0570009
PSB107_map5	0003.CSV	1207.27	0.0581667
PSB107_map5	0003.CSV	1211.13	0.0598108
PSB107_map5	0003.CSV	1214.98	0.0613115
PSB107_map5	0003.CSV	1218.84	0.0634406
PSB107_map5	0003.CSV	1222.7	0.0653378
PSB107_map5	0003.CSV	1226.56	0.0677711
PSB107_map5	0003.CSV	1230.41	0.0700228
PSB107_map5	0003.CSV	1234.27	0.0728028
PSB107_map5	0003.CSV	1238.13	0.0753332
PSB107_map5	0003.CSV	1241.98	0.0782732
PSB107_map5	0003.CSV	1245.84	0.0808953
PSB107_map5	0003.CSV	1249.7	0.0840098
PSB107_map5	0003.CSV	1253.56	0.0866977
PSB107_map5	0003.CSV	1257.41	0.0898507
PSB107_map5	0003.CSV	1261.27	0.0929102
PSB107_map5	0003.CSV	1265.13	0.0964133
PSB107_map5	0003.CSV	1268.98	0.099581
PSB107_map5	0003.CSV	1272.84	0.103477
PSB107_map5	0003.CSV	1276.7	0.107098
PSB107_map5	0003.CSV	1280.56	0.111372
PSB107_map5	0003.CSV	1284.41	0.115425
PSB107_map5	0003.CSV	1288.27	0.120362
PSB107_map5	0003.CSV	1292.13	0.125046
PSB107_map5	0003.CSV	1295.98	0.130421
PSB107_map5	0003.CSV	1299.84	0.135791
PSB107_map5	0003.CSV	1303.7	0.142114
PSB107_map5	0003.CSV	1307.56	0.148379
PSB107_map5	0003.CSV	1311.41	0.155503
PSB107_map5	0003.CSV	1315.27	0.162622
PSB107_map5	0003.CSV	1319.13	0.171126
PSB107_map5	0003.CSV	1322.98	0.179117
PSB107_map5	0003.CSV	1326.84	0.187788
PSB107_map5	0003.CSV	1330.7	0.196889
PSB107_map5	0003.CSV	1334.56	0.206919
PSB107_map5	0003.CSV	1338.41	0.219024
PSB107_map5	0003.CSV	1342.27	0.233946
PSB107_map5	0003.CSV	1346.13	0.246047
PSB107_map5	0003.CSV	1349.98	0.260768
PSB107_map5	0003.CSV	1353.84	0.276659
PSB107_map5	0003.CSV	1357.7	0.293807
PSB107_map5	0003.CSV	1361.56	0.313124
PSB107_map5	0003.CSV	1365.41	0.336474
PSB107_map5	0003.CSV	1369.27	0.354778
PSB107_map5	0003.CSV	1373.13	0.375375
PSB107_map5	0003.CSV	1376.98	0.394409
PSB107_map5	0003.CSV	1380.84	0.408406
PSB107_map5	0003.CSV	1384.7	0.41819
PSB107_map5	0003.CSV	1388.56	0.428848
PSB107_map5	0003.CSV	1392.41	0.432202
PSB107_map5	0003.CSV	1396.27	0.428148
PSB107_map5	0003.CSV	1400.13	0.413652
PSB107_map5	0003.CSV	1403.98	0.399075
PSB107_map5	0003.CSV	1407.84	0.377647
PSB107_map5	0003.CSV	1411.7	0.354482
PSB107_map5	0003.CSV	1415.55	0.331822
PSB107_map5	0003.CSV	1419.41	0.307857
PSB107_map5	0003.CSV	1423.27	0.288833
PSB107_map5	0003.CSV	1427.12	0.27851
PSB107_map5	0003.CSV	1430.98	0.268386
PSB107_map5	0003.CSV	1434.84	0.259172
PSB107_map5	0003.CSV	1438.7	0.24759
PSB107_map5	0003.CSV	1442.55	0.239017
PSB107_map5	0003.CSV	1446.41	0.22909
PSB107_map5	0003.CSV	1450.27	0.219029
PSB107_map5	0003.CSV	1454.12	0.210448
PSB107_map5	0003.CSV	1457.98	0.198082
PSB107_map5	0003.CSV	1461.84	0.188346
PSB107_map5	0003.CSV	1465.7	0.182093
PSB107_map5	0003.CSV	1469.55	0.175521
PSB107_map5	0003.CSV	1473.41	0.168868
PSB107_map5	0003.CSV	1477.27	0.161259
PSB107_map5	0003.CSV	1481.12	0.156581
PSB107_map5	0003.CSV	1484.98	0.151545
PSB107_map5	0003.CSV	1488.84	0.145059
PSB107_map5	0003.CSV	1492.7	0.137023
PSB107_map5	0003.CSV	1496.55	0.130601
PSB107_map5	0003.CSV	1500.41	0.122404
PSB107_map5	0003.CSV	1504.27	0.117752
PSB107_map5	0003.CSV	1508.12	0.108874
PSB107_map5	0003.CSV	1511.98	0.102642
PSB107_map5	0003.CSV	1515.84	0.0982649
PSB107_map5	0003.CSV	1519.7	0.0932552
PSB107_map5	0003.CSV	1523.55	0.0860156
PSB107_map5	0003.CSV	1527.41	0.0807343
PSB107_map5	0003.CSV	1531.27	0.0751762
PSB107_map5	0003.CSV	1535.12	0.0696551
PSB107_map5	0003.CSV	1538.98	0.0637106
PSB107_map5	0003.CSV	1542.84	0.0536126
PSB107_map5	0003.CSV	1546.7	0.0468701
PSB107_map5	0003.CSV	1550.55	0.0423505
PSB107_map5	0003.CSV	1554.41	0.0374724
PSB107_map5	0003.CSV	1558.27	0.0318232
PSB107_map5	0003.CSV	1562.12	0.02649
PSB107_map5	0003.CSV	1565.98	0.0236692
PSB107_map5	0003.CSV	1569.84	0.0200703
PSB107_map5	0003.CSV	1573.69	0.0170964
PSB107_map5	0003.CSV	1577.55	0.0140282
PSB107_map5	0003.CSV	1581.41	0.0112376
PSB107_map5	0003.CSV	1585.27	0.00836647
PSB107_map5	0003.CSV	1589.12	0.00540069
PSB107_map5	0003.CSV	1592.98	0.0023218
PSB107_map5	0003.CSV	1596.84	-0.000492225
PSB107_map5	0003.CSV	1600.69	-0.00315395
PSB107_map5	0003.CSV	1604.55	-0.00540364
PSB107_map5	0003.CSV	1608.41	-0.0075955
PSB107_map5	0003.CSV	1612.27	-0.00941927
PSB107_map5	0003.CSV	1616.12	-0.0109496
PSB107_map5	0003.CSV	1619.98	-0.0119131
PSB107_map5	0003.CSV	1623.84	-0.012911
PSB107_map5	0003.CSV	1627.69	-0.0137082
PSB107_map5	0003.CSV	1631.55	-0.0147467
PSB107_map5	0003.CSV	1635.41	-0.0150929
PSB107_map5	0003.CSV	1639.27	-0.015217
PSB107_map5	0003.CSV	1643.12	-0.0158966
PSB107_map5	0003.CSV	1646.98	-0.016347
PSB107_map5	0003.CSV	1650.84	-0.0162639
PSB107_map5	0003.CSV	1654.69	-0.0163341
PSB107_map5	0003.CSV	1658.55	-0.0169252
PSB107_map5	0003.CSV	1662.41	-0.0174877
PSB107_map5	0003.CSV	1666.27	-0.0179462
PSB107_map5	0003.CSV	1670.12	-0.0184087
PSB107_map5	0003.CSV	1673.98	-0.0184788
PSB107_map5	0003.CSV	1677.84	-0.0191185
PSB107_map5	0003.CSV	1681.69	-0.019571
PSB107_map5	0003.CSV	1685.55	-0.0195465
PSB107_map5	0003.CSV	1689.41	-0.0198072
PSB107_map5	0003.CSV	1693.27	-0.0207075
PSB107_map5	0003.CSV	1697.12	-0.0208987
PSB107_map5	0003.CSV	1700.98	-0.0205269
PSB107_map5	0003.CSV	1704.84	-0.0206385
PSB107_map5	0003.CSV	1708.69	-0.0210793
PSB107_map5	0003.CSV	1712.55	-0.0215051
PSB107_map5	0003.CSV	1716.41	-0.0211009
PSB107_map5	0003.CSV	1720.27	-0.020527
PSB107_map5	0003.CSV	1724.12	-0.0210452
[truncated: 128,314 more rows]

## Sheet: PSB107_map6
Map	Select spectrum number	Wavenumbers	Absorbance
PSB107_map6	0001.CSV	674.992	0.00392552
PSB107_map6	0001.CSV	678.849	0.0041431
PSB107_map6	0001.CSV	682.706	0.00555847
PSB107_map6	0001.CSV	686.563	0.00538261
PSB107_map6	0001.CSV	690.42	0.00710104
PSB107_map6	0001.CSV	694.277	0.00965354
PSB107_map6	0001.CSV	698.134	0.0136438
PSB107_map6	0001.CSV	701.991	0.0172434
PSB107_map6	0001.CSV	705.849	0.0256032
PSB107_map6	0001.CSV	709.706	0.0366624
PSB107_map6	0001.CSV	713.563	0.0313337
PSB107_map6	0001.CSV	717.42	0.00993639
PSB107_map6	0001.CSV	721.277	-0.00130517
PSB107_map6	0001.CSV	725.134	-0.00343172
PSB107_map6	0001.CSV	728.991	-0.00254468
PSB107_map6	0001.CSV	732.848	-0.00132133
PSB107_map6	0001.CSV	736.705	0.000326294
PSB107_map6	0001.CSV	740.562	0.00018632
PSB107_map6	0001.CSV	744.42	0.00043361
PSB107_map6	0001.CSV	748.277	-0.000225551
PSB107_map6	0001.CSV	752.134	0.000237106
PSB107_map6	0001.CSV	755.991	6.09046e-05
PSB107_map6	0001.CSV	759.848	0.000525426
PSB107_map6	0001.CSV	763.705	0.000120426
PSB107_map6	0001.CSV	767.562	0.000413644
PSB107_map6	0001.CSV	771.419	0.000221193
PSB107_map6	0001.CSV	775.276	0.00061119
PSB107_map6	0001.CSV	779.133	0.00027006
PSB107_map6	0001.CSV	782.99	0.000747683
PSB107_map6	0001.CSV	786.848	0.000480245
PSB107_map6	0001.CSV	790.705	0.00070228
PSB107_map6	0001.CSV	794.562	0.000487277
PSB107_map6	0001.CSV	798.419	0.000863768
PSB107_map6	0001.CSV	802.276	0.000629904
PSB107_map6	0001.CSV	806.133	0.00101931
PSB107_map6	0001.CSV	809.99	0.0011333
PSB107_map6	0001.CSV	813.847	0.00221622
PSB107_map6	0001.CSV	817.704	0.00298638
PSB107_map6	0001.CSV	821.562	0.00437762
PSB107_map6	0001.CSV	825.419	0.00527638
PSB107_map6	0001.CSV	829.276	0.00674149
PSB107_map6	0001.CSV	833.133	0.00795628
PSB107_map6	0001.CSV	836.99	0.0104568
PSB107_map6	0001.CSV	840.847	0.0133828
PSB107_map6	0001.CSV	844.704	0.0176968
PSB107_map6	0001.CSV	848.561	0.0203848
PSB107_map6	0001.CSV	852.418	0.0239946
PSB107_map6	0001.CSV	856.275	0.0329296
PSB107_map6	0001.CSV	860.132	0.0494364
PSB107_map6	0001.CSV	863.99	0.0703064
PSB107_map6	0001.CSV	867.847	0.0862004
PSB107_map6	0001.CSV	871.704	0.0848446
PSB107_map6	0001.CSV	875.561	0.0677426
PSB107_map6	0001.CSV	879.418	0.0461737
PSB107_map6	0001.CSV	883.275	0.023635
PSB107_map6	0001.CSV	887.132	0.00230431
PSB107_map6	0001.CSV	890.989	-0.00736196
PSB107_map6	0001.CSV	894.846	-0.00797606
PSB107_map6	0001.CSV	898.703	-0.0068864
PSB107_map6	0001.CSV	902.561	-0.00597483
PSB107_map6	0001.CSV	906.418	-0.0051989
PSB107_map6	0001.CSV	910.275	-0.00460836
PSB107_map6	0001.CSV	914.132	-0.00403987
PSB107_map6	0001.CSV	917.989	-0.00353151
PSB107_map6	0001.CSV	921.846	-0.00294031
PSB107_map6	0001.CSV	925.703	-0.00235058
PSB107_map6	0001.CSV	929.56	-0.00177078
PSB107_map6	0001.CSV	933.417	-0.00135443
PSB107_map6	0001.CSV	937.274	-0.00106581
PSB107_map6	0001.CSV	941.131	-0.000738195
PSB107_map6	0001.CSV	944.989	-0.000328069
PSB107_map6	0001.CSV	948.846	0.000133418
PSB107_map6	0001.CSV	952.703	0.000535013
PSB107_map6	0001.CSV	956.56	0.00104016
PSB107_map6	0001.CSV	960.417	0.00141943
PSB107_map6	0001.CSV	964.274	0.00183416
PSB107_map6	0001.CSV	968.131	0.00230654
PSB107_map6	0001.CSV	971.988	0.00302545
PSB107_map6	0001.CSV	975.845	0.0037045
PSB107_map6	0001.CSV	979.702	0.00449689
PSB107_map6	0001.CSV	983.559	0.00502994
PSB107_map6	0001.CSV	987.417	0.0057852
PSB107_map6	0001.CSV	991.274	0.00647343
PSB107_map6	0001.CSV	995.131	0.00712964
PSB107_map6	0001.CSV	998.988	0.00745746
PSB107_map6	0001.CSV	1002.85	0.00808677
PSB107_map6	0001.CSV	1006.7	0.00854844
PSB107_map6	0001.CSV	1010.56	0.00916664
PSB107_map6	0001.CSV	1014.42	0.009534
PSB107_map6	0001.CSV	1018.27	0.0103148
PSB107_map6	0001.CSV	1022.13	0.0108566
PSB107_map6	0001.CSV	1025.99	0.0116038
PSB107_map6	0001.CSV	1029.85	0.0120735
PSB107_map6	0001.CSV	1033.7	0.0127644
PSB107_map6	0001.CSV	1037.56	0.0131247
PSB107_map6	0001.CSV	1041.42	0.0137023
PSB107_map6	0001.CSV	1045.27	0.0137993
PSB107_map6	0001.CSV	1049.13	0.0145916
PSB107_map6	0001.CSV	1052.99	0.0151797
PSB107_map6	0001.CSV	1056.84	0.0163282
PSB107_map6	0001.CSV	1060.7	0.0170091
PSB107_map6	0001.CSV	1064.56	0.0176876
PSB107_map6	0001.CSV	1068.42	0.0176317
PSB107_map6	0001.CSV	1072.27	0.0177302
PSB107_map6	0001.CSV	1076.13	0.0172214
PSB107_map6	0001.CSV	1079.99	0.0174297
PSB107_map6	0001.CSV	1083.84	0.0175247
PSB107_map6	0001.CSV	1087.7	0.0181431
PSB107_map6	0001.CSV	1091.56	0.0174929
PSB107_map6	0001.CSV	1095.41	0.0166338
PSB107_map6	0001.CSV	1099.27	0.0154243
PSB107_map6	0001.CSV	1103.13	0.0154594
PSB107_map6	0001.CSV	1106.99	0.0155491
PSB107_map6	0001.CSV	1110.84	0.0163867
PSB107_map6	0001.CSV	1114.7	0.0165185
PSB107_map6	0001.CSV	1118.56	0.0169063
PSB107_map6	0001.CSV	1122.41	0.0166074
PSB107_map6	0001.CSV	1126.27	0.0167464
PSB107_map6	0001.CSV	1130.13	0.0163588
PSB107_map6	0001.CSV	1133.99	0.0165739
PSB107_map6	0001.CSV	1137.84	0.016216
PSB107_map6	0001.CSV	1141.7	0.0165243
PSB107_map6	0001.CSV	1145.56	0.0163742
PSB107_map6	0001.CSV	1149.41	0.0168941
PSB107_map6	0001.CSV	1153.27	0.0169448
PSB107_map6	0001.CSV	1157.13	0.0177108
PSB107_map6	0001.CSV	1160.99	0.0177979
PSB107_map6	0001.CSV	1164.84	0.0180891
PSB107_map6	0001.CSV	1168.7	0.0176211
PSB107_map6	0001.CSV	1172.56	0.0178875
PSB107_map6	0001.CSV	1176.41	0.0177991
PSB107_map6	0001.CSV	1180.27	0.0183622
PSB107_map6	0001.CSV	1184.13	0.0182412
PSB107_map6	0001.CSV	1187.99	0.0187205
PSB107_map6	0001.CSV	1191.84	0.0185972
PSB107_map6	0001.CSV	1195.7	0.0191953
PSB107_map6	0001.CSV	1199.56	0.0193013
PSB107_map6	0001.CSV	1203.41	0.0200347
PSB107_map6	0001.CSV	1207.27	0.0202396
PSB107_map6	0001.CSV	1211.13	0.0211892
PSB107_map6	0001.CSV	1214.98	0.0215804
PSB107_map6	0001.CSV	1218.84	0.0226876
PSB107_map6	0001.CSV	1222.7	0.023285
PSB107_map6	0001.CSV	1226.56	0.0245609
PSB107_map6	0001.CSV	1230.41	0.0252388
PSB107_map6	0001.CSV	1234.27	0.0266537
PSB107_map6	0001.CSV	1238.13	0.027449
PSB107_map6	0001.CSV	1241.98	0.0289511
PSB107_map6	0001.CSV	1245.84	0.0299513
PSB107_map6	0001.CSV	1249.7	0.0315101
PSB107_map6	0001.CSV	1253.56	0.0322481
PSB107_map6	0001.CSV	1257.41	0.0334887
PSB107_map6	0001.CSV	1261.27	0.0341044
PSB107_map6	0001.CSV	1265.13	0.0355035
PSB107_map6	0001.CSV	1268.98	0.0363313
PSB107_map6	0001.CSV	1272.84	0.0379013
PSB107_map6	0001.CSV	1276.7	0.0387662
PSB107_map6	0001.CSV	1280.56	0.0402953
PSB107_map6	0001.CSV	1284.41	0.0412007
PSB107_map6	0001.CSV	1288.27	0.0428108
PSB107_map6	0001.CSV	1292.13	0.0436487
PSB107_map6	0001.CSV	1295.98	0.0451712
PSB107_map6	0001.CSV	1299.84	0.0462537
PSB107_map6	0001.CSV	1303.7	0.0481659
PSB107_map6	0001.CSV	1307.56	0.0495818
PSB107_map6	0001.CSV	1311.41	0.0518064
PSB107_map6	0001.CSV	1315.27	0.0534995
PSB107_map6	0001.CSV	1319.13	0.0560467
PSB107_map6	0001.CSV	1322.98	0.0578202
PSB107_map6	0001.CSV	1326.84	0.0603659
PSB107_map6	0001.CSV	1330.7	0.0625935
PSB107_map6	0001.CSV	1334.56	0.0656312
PSB107_map6	0001.CSV	1338.41	0.068704
PSB107_map6	0001.CSV	1342.27	0.0729693
PSB107_map6	0001.CSV	1346.13	0.0758101
PSB107_map6	0001.CSV	1349.98	0.0798321
PSB107_map6	0001.CSV	1353.84	0.0834677
PSB107_map6	0001.CSV	1357.7	0.0877512
PSB107_map6	0001.CSV	1361.56	0.091862
PSB107_map6	0001.CSV	1365.41	0.0972593
PSB107_map6	0001.CSV	1369.27	0.100744
PSB107_map6	0001.CSV	1373.13	0.105497
PSB107_map6	0001.CSV	1376.98	0.109521
PSB107_map6	0001.CSV	1380.84	0.112966
PSB107_map6	0001.CSV	1384.7	0.114809
PSB107_map6	0001.CSV	1388.56	0.11741
PSB107_map6	0001.CSV	1392.41	0.117793
PSB107_map6	0001.CSV	1396.27	0.117271
PSB107_map6	0001.CSV	1400.13	0.113997
PSB107_map6	0001.CSV	1403.98	0.11163
PSB107_map6	0001.CSV	1407.84	0.107348
PSB107_map6	0001.CSV	1411.7	0.103202
PSB107_map6	0001.CSV	1415.55	0.0982989
PSB107_map6	0001.CSV	1419.41	0.0936781
PSB107_map6	0001.CSV	1423.27	0.0891213
PSB107_map6	0001.CSV	1427.12	0.0870461
PSB107_map6	0001.CSV	1430.98	0.0841717
PSB107_map6	0001.CSV	1434.84	0.0822605
PSB107_map6	0001.CSV	1438.7	0.0789282
PSB107_map6	0001.CSV	1442.55	0.076837
PSB107_map6	0001.CSV	1446.41	0.0736671
PSB107_map6	0001.CSV	1450.27	0.0710216
PSB107_map6	0001.CSV	1454.12	0.0676905
PSB107_map6	0001.CSV	1457.98	0.0637794
PSB107_map6	0001.CSV	1461.84	0.0598461
PSB107_map6	0001.CSV	1465.7	0.0575266
PSB107_map6	0001.CSV	1469.55	0.0543525
PSB107_map6	0001.CSV	1473.41	0.0515524
PSB107_map6	0001.CSV	1477.27	0.0475415
PSB107_map6	0001.CSV	1481.12	0.045396
PSB107_map6	0001.CSV	1484.98	0.0426492
PSB107_map6	0001.CSV	1488.84	0.0397777
PSB107_map6	0001.CSV	1492.7	0.0357637
PSB107_map6	0001.CSV	1496.55	0.032997
PSB107_map6	0001.CSV	1500.41	0.0290737
PSB107_map6	0001.CSV	1504.27	0.0272371
PSB107_map6	0001.CSV	1508.12	0.0231206
PSB107_map6	0001.CSV	1511.98	0.0208327
PSB107_map6	0001.CSV	1515.84	0.0183412
PSB107_map6	0001.CSV	1519.7	0.0165398
PSB107_map6	0001.CSV	1523.55	0.0135474
PSB107_map6	0001.CSV	1527.41	0.0119741
PSB107_map6	0001.CSV	1531.27	0.00952401
PSB107_map6	0001.CSV	1535.12	0.00777014
PSB107_map6	0001.CSV	1538.98	0.00501482
PSB107_map6	0001.CSV	1542.84	0.00181616
PSB107_map6	0001.CSV	1546.7	-0.00139674
PSB107_map6	0001.CSV	1550.55	-0.00344266
PSB107_map6	0001.CSV	1554.41	-0.00577506
PSB107_map6	0001.CSV	1558.27	-0.00694757
PSB107_map6	0001.CSV	1562.12	-0.0086879
PSB107_map6	0001.CSV	1565.98	-0.00975948
PSB107_map6	0001.CSV	1569.84	-0.0108778
PSB107_map6	0001.CSV	1573.69	-0.0112708
PSB107_map6	0001.CSV	1577.55	-0.01178
PSB107_map6	0001.CSV	1581.41	-0.0124765
PSB107_map6	0001.CSV	1585.27	-0.0136533
PSB107_map6	0001.CSV	1589.12	-0.0145409
PSB107_map6	0001.CSV	1592.98	-0.0154286
PSB107_map6	0001.CSV	1596.84	-0.0159634
PSB107_map6	0001.CSV	1600.69	-0.0166581
PSB107_map6	0001.CSV	1604.55	-0.0171576
PSB107_map6	0001.CSV	1608.41	-0.0177222
PSB107_map6	0001.CSV	1612.27	-0.0181147
PSB107_map6	0001.CSV	1616.12	-0.0185393
PSB107_map6	0001.CSV	1619.98	-0.0186398
PSB107_map6	0001.CSV	1623.84	-0.0189757
PSB107_map6	0001.CSV	1627.69	-0.0190237
PSB107_map6	0001.CSV	1631.55	-0.0195244
PSB107_map6	0001.CSV	1635.41	-0.0194556
PSB107_map6	0001.CSV	1639.27	-0.0191934
PSB107_map6	0001.CSV	1643.12	-0.0196725
PSB107_map6	0001.CSV	1646.98	-0.0198822
PSB107_map6	0001.CSV	1650.84	-0.0196916
PSB107_map6	0001.CSV	1654.69	-0.0193654
PSB107_map6	0001.CSV	1658.55	-0.0196948
PSB107_map6	0001.CSV	1662.41	-0.0201484
PSB107_map6	0001.CSV	1666.27	-0.0203832
PSB107_map6	0001.CSV	1670.12	-0.0204405
PSB107_map6	0001.CSV	1673.98	-0.0201769
PSB107_map6	0001.CSV	1677.84	-0.0205042
PSB107_map6	0001.CSV	1681.69	-0.0208394
PSB107_map6	0001.CSV	1685.55	-0.0203393
PSB107_map6	0001.CSV	1689.41	-0.0204794
PSB107_map6	0001.CSV	1693.27	-0.0211623
PSB107_map6	0001.CSV	1697.12	-0.0213777
PSB107_map6	0001.CSV	1700.98	-0.02029
PSB107_map6	0001.CSV	1704.84	-0.020071
PSB107_map6	0001.CSV	1708.69	-0.0200554
PSB107_map6	0001.CSV	1712.55	-0.0203647
PSB107_map6	0001.CSV	1716.41	-0.0191937
PSB107_map6	0001.CSV	1720.27	-0.0181068
PSB107_map6	0001.CSV	1724.12	-0.0183436
PSB107_map6	0001.CSV	1727.98	-0.0187982
PSB107_map6	0001.CSV	1731.84	-0.018693
PSB107_map6	0001.CSV	1735.69	-0.0185342
PSB107_map6	0001.CSV	1739.55	-0.0189445
PSB107_map6	0001.CSV	1743.41	-0.0196951
PSB107_map6	0001.CSV	1747.27	-0.0199713
PSB107_map6	0001.CSV	1751.12	-0.0204519
PSB107_map6	0001.CSV	1754.98	-0.0210999
PSB107_map6	0001.CSV	1758.84	-0.0217282
PSB107_map6	0001.CSV	1762.69	-0.0216929
PSB107_map6	0001.CSV	1766.55	-0.0221352
PSB107_map6	0001.CSV	1770.41	-0.0219299
PSB107_map6	0001.CSV	1774.26	-0.0214138
PSB107_map6	0001.CSV	1778.12	-0.0213005
PSB107_map6	0001.CSV	1781.98	-0.0212248
PSB107_map6	0001.CSV	1785.84	-0.020716
PSB107_map6	0001.CSV	1789.69	-0.0201114
PSB107_map6	0001.CSV	1793.55	-0.0181684
PSB107_map6	0001.CSV	1797.41	-0.0178869
PSB107_map6	0001.CSV	1801.26	-0.0186964
PSB107_map6	0001.CSV	1805.12	-0.0201087
PSB107_map6	0001.CSV	1808.98	-0.0208095
PSB107_map6	0001.CSV	1812.84	-0.021234
PSB107_map6	0001.CSV	1816.69	-0.0215229
PSB107_map6	0001.CSV	1820.55	-0.0219146
PSB107_map6	0001.CSV	1824.41	-0.0219377
PSB107_map6	0001.CSV	1828.26	-0.0219193
PSB107_map6	0001.CSV	1832.12	-0.0217316
PSB107_map6	0001.CSV	1835.98	-0.0221578
PSB107_map6	0001.CSV	1839.84	-0.0223116
PSB107_map6	0001.CSV	1843.69	-0.0223094
PSB107_map6	0001.CSV	1847.55	-0.0218686
PSB107_map6	0001.CSV	1851.41	-0.0222741
PSB107_map6	0001.CSV	1855.26	-0.0223989
PSB107_map6	0001.CSV	1859.12	-0.0225342
PSB107_map6	0001.CSV	1862.98	-0.0225322
PSB107_map6	0001.CSV	1866.84	-0.02266
PSB107_map6	0001.CSV	1870.69	-0.0221465
PSB107_map6	0001.CSV	1874.55	-0.022426
PSB107_map6	0001.CSV	1878.41	-0.0225167
PSB107_map6	0001.CSV	1882.26	-0.0227359
PSB107_map6	0001.CSV	1886.12	-0.0226916
PSB107_map6	0001.CSV	1889.98	-0.0227708
PSB107_map6	0001.CSV	1893.83	-0.0226496
PSB107_map6	0001.CSV	1897.69	-0.0228074
PSB107_map6	0001.CSV	1901.55	-0.0227603
PSB107_map6	0001.CSV	1905.41	-0.0229155
PSB107_map6	0001.CSV	1909.26	-0.022783
PSB107_map6	0001.CSV	1913.12	-0.0230748
PSB107_map6	0001.CSV	1916.98	-0.0231196
PSB107_map6	0001.CSV	1920.83	-0.0230467
PSB107_map6	0001.CSV	1924.69	-0.0228459
PSB107_map6	0001.CSV	1928.55	-0.0230786
PSB107_map6	0001.CSV	1932.4	-0.0230371
PSB107_map6	0001.CSV	1936.26	-0.0232132
PSB107_map6	0001.CSV	1940.12	-0.0231936
PSB107_map6	0001.CSV	1943.98	-0.0231082
PSB107_map6	0001.CSV	1947.83	-0.0229585
PSB107_map6	0001.CSV	1951.69	-0.0232002
PSB107_map6	0001.CSV	1955.55	-0.0231938
PSB107_map6	0001.CSV	1959.4	-0.0233097
PSB107_map6	0001.CSV	1963.26	-0.0232524
PSB107_map6	0001.CSV	1967.12	-0.0233519
PSB107_map6	0001.CSV	1970.98	-0.0232578
PSB107_map6	0001.CSV	1974.83	-0.0233905
PSB107_map6	0001.CSV	1978.69	-0.0233177
PSB107_map6	0001.CSV	1982.55	-0.0233624
PSB107_map6	0001.CSV	1986.4	-0.0232782
PSB107_map6	0001.CSV	1990.26	-0.023352
PSB107_map6	0001.CSV	1994.12	-0.0231777
PSB107_map6	0001.CSV	1997.98	-0.0232755
PSB107_map6	0001.CSV	2001.83	-0.0232149
PSB107_map6	0001.CSV	2005.69	-0.0232903
PSB107_map6	0001.CSV	2009.55	-0.0232005
PSB107_map6	0001.CSV	2013.4	-0.0233025
PSB107_map6	0001.CSV	2017.26	-0.0231997
PSB107_map6	0001.CSV	2021.12	-0.0231413
PSB107_map6	0001.CSV	2024.97	-0.0230426
PSB107_map6	0001.CSV	2028.83	-0.0231012
PSB107_map6	0001.CSV	2032.69	-0.0229924
PSB107_map6	0001.CSV	2036.55	-0.0230104
PSB107_map6	0001.CSV	2040.4	-0.0228832
PSB107_map6	0001.CSV	2044.26	-0.0228462
PSB107_map6	0001.CSV	2048.12	-0.0228303
PSB107_map6	0001.CSV	2051.97	-0.0228958
PSB107_map6	0001.CSV	2055.83	-0.0228326
PSB107_map6	0001.CSV	2059.69	-0.0227994
PSB107_map6	0001.CSV	2063.55	-0.022659
PSB107_map6	0001.CSV	2067.4	-0.022638
PSB107_map6	0001.CSV	2071.26	-0.0225885
PSB107_map6	0001.CSV	2075.12	-0.0225557
PSB107_map6	0001.CSV	2078.97	-0.0224479
PSB107_map6	0001.CSV	2082.83	-0.0224555
PSB107_map6	0001.CSV	2086.69	-0.0224245
PSB107_map6	0001.CSV	2090.55	-0.0223422
PSB107_map6	0001.CSV	2094.4	-0.0222195
PSB107_map6	0001.CSV	2098.26	-0.0221895
PSB107_map6	0001.CSV	2102.12	-0.0221723
PSB107_map6	0001.CSV	2105.97	-0.0221975
PSB107_map6	0001.CSV	2109.83	-0.0221763
PSB107_map6	0001.CSV	2113.69	-0.0221239
PSB107_map6	0001.CSV	2117.55	-0.0220272
PSB107_map6	0001.CSV	2121.4	-0.0219407
PSB107_map6	0001.CSV	2125.26	-0.0218969
PSB107_map6	0001.CSV	2129.12	-0.0217623
PSB107_map6	0001.CSV	2132.97	-0.0216578
PSB107_map6	0001.CSV	2136.83	-0.0216033
PSB107_map6	0001.CSV	2140.69	-0.0216225
PSB107_map6	0001.CSV	2144.55	-0.021576
PSB107_map6	0001.CSV	2148.4	-0.0215493
PSB107_map6	0001.CSV	2152.26	-0.0214932
PSB107_map6	0001.CSV	2156.12	-0.0214954
PSB107_map6	0001.CSV	2159.97	-0.0214162
PSB107_map6	0001.CSV	2163.83	-0.0213402
PSB107_map6	0001.CSV	2167.69	-0.0212092
PSB107_map6	0001.CSV	2171.55	-0.0212319
PSB107_map6	0001.CSV	2175.4	-0.0211371
PSB107_map6	0001.CSV	2179.26	-0.0211666
PSB107_map6	0001.CSV	2183.12	-0.0211394
PSB107_map6	0001.CSV	2186.97	-0.0211738
PSB107_map6	0001.CSV	2190.83	-0.021077
PSB107_map6	0001.CSV	2194.69	-0.0211201
PSB107_map6	0001.CSV	2198.55	-0.0210836
PSB107_map6	0001.CSV	2202.4	-0.0211794
PSB107_map6	0001.CSV	2206.26	-0.0211262
PSB107_map6	0001.CSV	2210.12	-0.0212069
PSB107_map6	0001.CSV	2213.97	-0.0211648
PSB107_map6	0001.CSV	2217.83	-0.0212899
PSB107_map6	0001.CSV	2221.69	-0.0213013
PSB107_map6	0001.CSV	2225.54	-0.0214596
PSB107_map6	0001.CSV	2229.4	-0.021469
PSB107_map6	0001.CSV	2233.26	-0.0216289
PSB107_map6	0001.CSV	2237.12	-0.0216724
PSB107_map6	0001.CSV	2240.97	-0.0218735
PSB107_map6	0001.CSV	2244.83	-0.0219231
PSB107_map6	0001.CSV	2248.69	-0.0221818
PSB107_map6	0001.CSV	2252.54	-0.0221718
PSB107_map6	0001.CSV	2256.4	-0.0223158
PSB107_map6	0001.CSV	2260.26	-0.0223484
PSB107_map6	0001.CSV	2264.11	-0.0225715
PSB107_map6	0001.CSV	2267.97	-0.0226212
PSB107_map6	0001.CSV	2271.83	-0.0228123
PSB107_map6	0001.CSV	2275.69	-0.0227973
PSB107_map6	0001.CSV	2279.54	-0.0230269
PSB107_map6	0001.CSV	2283.4	-0.023087
PSB107_map6	0001.CSV	2287.26	-0.0232548
PSB107_map6	0001.CSV	2291.11	-0.0230498
PSB107_map6	0001.CSV	2294.97	-0.0230035
PSB107_map6	0001.CSV	2298.83	-0.0228217
PSB107_map6	0001.CSV	2302.69	-0.0229262
PSB107_map6	0001.CSV	2306.54	-0.0227164
PSB107_map6	0001.CSV	2310.4	-0.0229294
PSB107_map6	0001.CSV	2314.26	-0.0225944
PSB107_map6	0001.CSV	2318.11	-0.0229611
PSB107_map6	0001.CSV	2321.97	-0.0229654
PSB107_map6	0001.CSV	2325.83	-0.0239485
PSB107_map6	0001.CSV	2329.69	-0.0236975
PSB107_map6	0001.CSV	2333.54	-0.0252852
PSB107_map6	0001.CSV	2337.4	-0.025045
PSB107_map6	0001.CSV	2341.26	-0.0262562
PSB107_map6	0001.CSV	2345.11	-0.0238884
PSB107_map6	0001.CSV	2348.97	-0.0242888
PSB107_map6	0001.CSV	2352.83	-0.0259178
PSB107_map6	0001.CSV	2356.69	-0.032586
PSB107_map6	0001.CSV	2360.54	-0.0345888
PSB107_map6	0001.CSV	2364.4	-0.0341496
PSB107_map6	0001.CSV	2368.26	-0.0274121
PSB107_map6	0001.CSV	2372.11	-0.024938
PSB107_map6	0001.CSV	2375.97	-0.0229838
PSB107_map6	0001.CSV	2379.83	-0.0228071
PSB107_map6	0001.CSV	2383.69	-0.02263
PSB107_map6	0001.CSV	2387.54	-0.0230445
PSB107_map6	0001.CSV	2391.4	-0.0231698
PSB107_map6	0001.CSV	2395.26	-0.0233095
PSB107_map6	0001.CSV	2399.11	-0.0231418
PSB107_map6	0001.CSV	2402.97	-0.0232674
PSB107_map6	0001.CSV	2406.83	-0.0231381
PSB107_map6	0001.CSV	2410.68	-0.0231638
PSB107_map6	0001.CSV	2414.54	-0.0229201
PSB107_map6	0001.CSV	2418.4	-0.0228986
PSB107_map6	0001.CSV	2422.26	-0.0225803
PSB107_map6	0001.CSV	2426.11	-0.0225694
PSB107_map6	0001.CSV	2429.97	-0.0223426
PSB107_map6	0001.CSV	2433.83	-0.0222987
PSB107_map6	0001.CSV	2437.68	-0.0220129
PSB107_map6	0001.CSV	2441.54	-0.0219979
PSB107_map6	0001.CSV	2445.4	-0.0217276
PSB107_map6	0001.CSV	2449.26	-0.0217127
PSB107_map6	0001.CSV	2453.11	-0.0214566
PSB107_map6	0001.CSV	2456.97	-0.0214918
PSB107_map6	0001.CSV	2460.83	-0.0212446
PSB107_map6	0001.CSV	2464.68	-0.0212285
PSB107_map6	0001.CSV	2468.54	-0.0209923
PSB107_map6	0001.CSV	2472.4	-0.0209628
PSB107_map6	0001.CSV	2476.26	-0.0206519
PSB107_map6	0001.CSV	2480.11	-0.0206111
PSB107_map6	0001.CSV	2483.97	-0.0202958
PSB107_map6	0001.CSV	2487.83	-0.0202162
PSB107_map6	0001.CSV	2491.68	-0.0198983
PSB107_map6	0001.CSV	2495.54	-0.0197201
PSB107_map6	0001.CSV	2499.4	-0.0193572
PSB107_map6	0001.CSV	2503.26	-0.0192108
PSB107_map6	0001.CSV	2507.11	-0.0188238
PSB107_map6	0001.CSV	2510.97	-0.0187997
PSB107_map6	0001.CSV	2514.83	-0.0186835
PSB107_map6	0001.CSV	2518.68	-0.018899
PSB107_map6	0001.CSV	2522.54	-0.0190129
PSB107_map6	0001.CSV	2526.4	-0.0193944
PSB107_map6	0001.CSV	2530.26	-0.0195531
PSB107_map6	0001.CSV	2534.11	-0.0198916
PSB107_map6	0001.CSV	2537.97	-0.0199776
PSB107_map6	0001.CSV	2541.83	-0.0202411
PSB107_map6	0001.CSV	2545.68	-0.0202483
PSB107_map6	0001.CSV	2549.54	-0.0204515
PSB107_map6	0001.CSV	2553.4	-0.0204133
PSB107_map6	0001.CSV	2557.26	-0.0205127
PSB107_map6	0001.CSV	2561.11	-0.0204543
PSB107_map6	0001.CSV	2564.97	-0.0205895
PSB107_map6	0001.CSV	2568.83	-0.0205146
PSB107_map6	0001.CSV	2572.68	-0.0206394
PSB107_map6	0001.CSV	2576.54	-0.0205625
PSB107_map6	0001.CSV	2580.4	-0.0206597
PSB107_map6	0001.CSV	2584.25	-0.020584
PSB107_map6	0001.CSV	2588.11	-0.0206782
PSB107_map6	0001.CSV	2591.97	-0.0206381
PSB107_map6	0001.CSV	2595.83	-0.0208202
PSB107_map6	0001.CSV	2599.68	-0.0208426
PSB107_map6	0001.CSV	2603.54	-0.0209642
PSB107_map6	0001.CSV	2607.4	-0.0209799
PSB107_map6	0001.CSV	2611.25	-0.0211075
PSB107_map6	0001.CSV	2615.11	-0.0210815
PSB107_map6	0001.CSV	2618.97	-0.0212275
PSB107_map6	0001.CSV	2622.82	-0.0211144
PSB107_map6	0001.CSV	2626.68	-0.0211716
PSB107_map6	0001.CSV	2630.54	-0.0212211
PSB107_map6	0001.CSV	2634.4	-0.021315
PSB107_map6	0001.CSV	2638.25	-0.0213645
PSB107_map6	0001.CSV	2642.11	-0.0215803
PSB107_map6	0001.CSV	2645.97	-0.0216596
PSB107_map6	0001.CSV	2649.82	-0.021798
PSB107_map6	0001.CSV	2653.68	-0.021743
PSB107_map6	0001.CSV	2657.54	-0.0217845
PSB107_map6	0001.CSV	2661.4	-0.0217685
PSB107_map6	0001.CSV	2665.25	-0.0218323
PSB107_map6	0001.CSV	2669.11	-0.0217083
PSB107_map6	0001.CSV	2672.97	-0.0215507
PSB107_map6	0001.CSV	2676.82	-0.0213259
PSB107_map6	0001.CSV	2680.68	-0.0214166
PSB107_map6	0001.CSV	2684.54	-0.021705
PSB107_map6	0001.CSV	2688.4	-0.0218931
PSB107_map6	0001.CSV	2692.25	-0.0218656
PSB107_map6	0001.CSV	2696.11	-0.0218508
PSB107_map6	0001.CSV	2699.97	-0.0217665
PSB107_map6	0001.CSV	2703.82	-0.0217844
PSB107_map6	0001.CSV	2707.68	-0.0217151
PSB107_map6	0001.CSV	2711.54	-0.021677
PSB107_map6	0001.CSV	2715.4	-0.021621
PSB107_map6	0001.CSV	2719.25	-0.0214922
PSB107_map6	0001.CSV	2723.11	-0.0212303
PSB107_map6	0001.CSV	2726.97	-0.0212774
PSB107_map6	0001.CSV	2730.82	-0.0215152
PSB107_map6	0001.CSV	2734.68	-0.0215055
PSB107_map6	0001.CSV	2738.54	-0.0213825
PSB107_map6	0001.CSV	2742.4	-0.0213546
PSB107_map6	0001.CSV	2746.25	-0.0211222
PSB107_map6	0001.CSV	2750.11	-0.0210579
PSB107_map6	0001.CSV	2753.97	-0.0212175
PSB107_map6	0001.CSV	2757.82	-0.0212083
PSB107_map6	0001.CSV	2761.68	-0.0212199
PSB107_map6	0001.CSV	2765.54	-0.0212892
PSB107_map6	0001.CSV	2769.39	-0.0211301
PSB107_map6	0001.CSV	2773.25	-0.0207663
PSB107_map6	0001.CSV	2777.11	-0.0207778
PSB107_map6	0001.CSV	2780.97	-0.0209338
PSB107_map6	0001.CSV	2784.82	-0.0207541
PSB107_map6	0001.CSV	2788.68	-0.0203774
PSB107_map6	0001.CSV	2792.54	-0.020261
PSB107_map6	0001.CSV	2796.39	-0.0202166
PSB107_map6	0001.CSV	2800.25	-0.0203355
PSB107_map6	0001.CSV	2804.11	-0.0204538
PSB107_map6	0001.CSV	2807.97	-0.0202363
PSB107_map6	0001.CSV	2811.82	-0.0201309
PSB107_map6	0001.CSV	2815.68	-0.020238
PSB107_map6	0001.CSV	2819.54	-0.0201116
PSB107_map6	0001.CSV	2823.39	-0.0200197
PSB107_map6	0001.CSV	2827.25	-0.0199636
PSB107_map6	0001.CSV	2831.11	-0.0196759
PSB107_map6	0001.CSV	2834.97	-0.0191609
PSB107_map6	0001.CSV	2838.82	-0.018907
PSB107_map6	0001.CSV	2842.68	-0.0188928
PSB107_map6	0001.CSV	2846.54	-0.0186605
PSB107_map6	0001.CSV	2850.39	-0.0184408
PSB107_map6	0001.CSV	2854.25	-0.0184804
PSB107_map6	0001.CSV	2858.11	-0.0183588
PSB107_map6	0001.CSV	2861.97	-0.0183654
PSB107_map6	0001.CSV	2865.82	-0.0183368
PSB107_map6	0001.CSV	2869.68	-0.0180707
PSB107_map6	0001.CSV	2873.54	-0.0178437
PSB107_map6	0001.CSV	2877.39	-0.0182062
PSB107_map6	0001.CSV	2881.25	-0.0184951
PSB107_map6	0001.CSV	2885.11	-0.0185794
PSB107_map6	0001.CSV	2888.97	-0.0185144
PSB107_map6	0001.CSV	2892.82	-0.0183728
PSB107_map6	0001.CSV	2896.68	-0.0182262
PSB107_map6	0001.CSV	2900.54	-0.0183012
PSB107_map6	0001.CSV	2904.39	-0.0181057
PSB107_map6	0001.CSV	2908.25	-0.0177459
PSB107_map6	0001.CSV	2912.11	-0.0171181
PSB107_map6	0001.CSV	2915.97	-0.0168069
PSB107_map6	0001.CSV	2919.82	-0.0170607
PSB107_map6	0001.CSV	2923.68	-0.0174638
PSB107_map6	0001.CSV	2927.54	-0.0173844
PSB107_map6	0001.CSV	2931.39	-0.0175665
PSB107_map6	0001.CSV	2935.25	-0.0180903
PSB107_map6	0001.CSV	2939.11	-0.0182833
PSB107_map6	0001.CSV	2942.96	-0.0179404
PSB107_map6	0001.CSV	2946.82	-0.0179375
PSB107_map6	0001.CSV	2950.68	-0.0181859
PSB107_map6	0001.CSV	2954.54	-0.0186304
PSB107_map6	0001.CSV	2958.39	-0.0189704
PSB107_map6	0001.CSV	2962.25	-0.0190954
PSB107_map6	0001.CSV	2966.11	-0.0191739
PSB107_map6	0001.CSV	2969.96	-0.0190322
PSB107_map6	0001.CSV	2973.82	-0.0186791
PSB107_map6	0001.CSV	2977.68	-0.0184914
PSB107_map6	0001.CSV	2981.53	-0.018618
PSB107_map6	0001.CSV	2985.39	-0.0189677
PSB107_map6	0001.CSV	2989.25	-0.0189214
PSB107_map6	0001.CSV	2993.11	-0.0187075
PSB107_map6	0001.CSV	2996.96	-0.0188008
PSB107_map6	0001.CSV	3000.82	-0.0191297
PSB107_map6	0001.CSV	3004.68	-0.0193157
PSB107_map6	0001.CSV	3008.53	-0.0192045
PSB107_map6	0001.CSV	3012.39	-0.0189385
PSB107_map6	0001.CSV	3016.25	-0.0189039
PSB107_map6	0001.CSV	3020.11	-0.0190593
PSB107_map6	0001.CSV	3023.96	-0.0191574
PSB107_map6	0001.CSV	3027.82	-0.0191347
PSB107_map6	0001.CSV	3031.68	-0.0189197
PSB107_map6	0001.CSV	3035.53	-0.018742
PSB107_map6	0001.CSV	3039.39	-0.0187653
PSB107_map6	0001.CSV	3043.25	-0.0187622
PSB107_map6	0001.CSV	3047.11	-0.0188684
PSB107_map6	0001.CSV	3050.96	-0.0189434
PSB107_map6	0001.CSV	3054.82	-0.0189376
PSB107_map6	0001.CSV	3058.68	-0.0190338
PSB107_map6	0001.CSV	3062.53	-0.0189851
PSB107_map6	0001.CSV	3066.39	-0.0188034
PSB107_map6	0001.CSV	3070.25	-0.0189073
PSB107_map6	0001.CSV	3074.11	-0.0189536
PSB107_map6	0001.CSV	3077.96	-0.0186987
PSB107_map6	0001.CSV	3081.82	-0.0184889
PSB107_map6	0001.CSV	3085.68	-0.0184939
PSB107_map6	0001.CSV	3089.53	-0.0186508
PSB107_map6	0001.CSV	3093.39	-0.0188736
PSB107_map6	0001.CSV	3097.25	-0.0188528
PSB107_map6	0001.CSV	3101.11	-0.0186927
PSB107_map6	0001.CSV	3104.96	-0.0186957
PSB107_map6	0001.CSV	3108.82	-0.0185642
PSB107_map6	0001.CSV	3112.68	-0.0184456
PSB107_map6	0001.CSV	3116.53	-0.0183623
PSB107_map6	0001.CSV	3120.39	-0.0184207
PSB107_map6	0001.CSV	3124.25	-0.0185277
PSB107_map6	0001.CSV	3128.11	-0.0186591
PSB107_map6	0001.CSV	3131.96	-0.0186887
PSB107_map6	0001.CSV	3135.82	-0.0185748
PSB107_map6	0001.CSV	3139.68	-0.0184217
PSB107_map6	0001.CSV	3143.53	-0.0186169
PSB107_map6	0001.CSV	3147.39	-0.0185971
PSB107_map6	0001.CSV	3151.25	-0.0183018
PSB107_map6	0001.CSV	3155.1	-0.0182096
PSB107_map6	0001.CSV	3158.96	-0.0185465
PSB107_map6	0001.CSV	3162.82	-0.0186678
PSB107_map6	0001.CSV	3166.68	-0.0187859
PSB107_map6	0001.CSV	3170.53	-0.0187406
PSB107_map6	0001.CSV	3174.39	-0.018672
PSB107_map6	0001.CSV	3178.25	-0.0184859
PSB107_map6	0001.CSV	3182.1	-0.0185376
PSB107_map6	0001.CSV	3185.96	-0.0185244
PSB107_map6	0001.CSV	3189.82	-0.0186125
PSB107_map6	0001.CSV	3193.68	-0.0187023
PSB107_map6	0001.CSV	3197.53	-0.0187238
PSB107_map6	0001.CSV	3201.39	-0.0185063
PSB107_map6	0001.CSV	3205.25	-0.0184811
PSB107_map6	0001.CSV	3209.1	-0.0184207
PSB107_map6	0001.CSV	3212.96	-0.0183087
PSB107_map6	0001.CSV	3216.82	-0.0180507
PSB107_map6	0001.CSV	3220.68	-0.0182318
PSB107_map6	0001.CSV	3224.53	-0.0182608
PSB107_map6	0001.CSV	3228.39	-0.0180083
PSB107_map6	0001.CSV	3232.25	-0.0176005
PSB107_map6	0001.CSV	3236.1	-0.0177057
PSB107_map6	0001.CSV	3239.96	-0.0178388
PSB107_map6	0001.CSV	3243.82	-0.0178019
PSB107_map6	0001.CSV	3247.68	-0.0176528
PSB107_map6	0001.CSV	3251.53	-0.0178794
PSB107_map6	0001.CSV	3255.39	-0.0179354
PSB107_map6	0001.CSV	3259.25	-0.0181156
PSB107_map6	0001.CSV	3263.1	-0.0180036
PSB107_map6	0001.CSV	3266.96	-0.0177378
PSB107_map6	0001.CSV	3270.82	-0.0173767
PSB107_map6	0001.CSV	3274.68	-0.0174974
PSB107_map6	0001.CSV	3278.53	-0.0176794
PSB107_map6	0001.CSV	3282.39	-0.0178233
PSB107_map6	0001.CSV	3286.25	-0.017539
PSB107_map6	0001.CSV	3290.1	-0.0172945
PSB107_map6	0001.CSV	3293.96	-0.0170818
PSB107_map6	0001.CSV	3297.82	-0.0172938
PSB107_map6	0001.CSV	3301.67	-0.0172304
PSB107_map6	0001.CSV	3305.53	-0.0171446
PSB107_map6	0001.CSV	3309.39	-0.0171142
PSB107_map6	0001.CSV	3313.25	-0.0175105
PSB107_map6	0001.CSV	3317.1	-0.0176652
PSB107_map6	0001.CSV	3320.96	-0.0175139
PSB107_map6	0001.CSV	3324.82	-0.0172058
PSB107_map6	0001.CSV	3328.67	-0.0174563
PSB107_map6	0001.CSV	3332.53	-0.0175246
PSB107_map6	0001.CSV	3336.39	-0.0172529
PSB107_map6	0001.CSV	3340.24	-0.0170086
PSB107_map6	0001.CSV	3344.1	-0.0170484
PSB107_map6	0001.CSV	3347.96	-0.0169412
PSB107_map6	0001.CSV	3351.82	-0.0172077
PSB107_map6	0001.CSV	3355.67	-0.0174086
PSB107_map6	0001.CSV	3359.53	-0.0171534
PSB107_map6	0001.CSV	3363.39	-0.0167548
PSB107_map6	0001.CSV	3367.24	-0.016636
PSB107_map6	0001.CSV	3371.1	-0.0166779
PSB107_map6	0001.CSV	3374.96	-0.0168609
PSB107_map6	0001.CSV	3378.82	-0.0169116
PSB107_map6	0001.CSV	3382.67	-0.0172004
PSB107_map6	0001.CSV	3386.53	-0.0171944
PSB107_map6	0001.CSV	3390.39	-0.016994
PSB107_map6	0001.CSV	3394.24	-0.0165982
PSB107_map6	0001.CSV	3398.1	-0.0163456
PSB107_map6	0001.CSV	3401.96	-0.0163879
PSB107_map6	0001.CSV	3405.82	-0.0167439
PSB107_map6	0001.CSV	3409.67	-0.0167392
PSB107_map6	0001.CSV	3413.53	-0.016941
PSB107_map6	0001.CSV	3417.39	-0.0172919
PSB107_map6	0001.CSV	3421.24	-0.0173313
PSB107_map6	0001.CSV	3425.1	-0.0171068
PSB107_map6	0001.CSV	3428.96	-0.0168284
PSB107_map6	0001.CSV	3432.82	-0.0164997
PSB107_map6	0001.CSV	3436.67	-0.0167029
PSB107_map6	0001.CSV	3440.53	-0.0172643
PSB107_map6	0001.CSV	3444.39	-0.0175907
PSB107_map6	0001.CSV	3448.24	-0.0174366
PSB107_map6	0001.CSV	3452.1	-0.0176007
PSB107_map6	0001.CSV	3455.96	-0.0175378
PSB107_map6	0001.CSV	3459.82	-0.0173366
PSB107_map6	0001.CSV	3463.67	-0.0172434
PSB107_map6	0001.CSV	3467.53	-0.0171968
PSB107_map6	0001.CSV	3471.39	-0.0173993
PSB107_map6	0001.CSV	3475.24	-0.0174514
PSB107_map6	0001.CSV	3479.1	-0.0174019
PSB107_map6	0001.CSV	3482.96	-0.017489
PSB107_map6	0001.CSV	3486.82	-0.0174098
PSB107_map6	0001.CSV	3490.67	-0.0174797
PSB107_map6	0001.CSV	3494.53	-0.0175424
PSB107_map6	0001.CSV	3498.39	-0.017552
PSB107_map6	0001.CSV	3502.24	-0.0177144
PSB107_map6	0001.CSV	3506.1	-0.0182145
PSB107_map6	0001.CSV	3509.96	-0.0184355
PSB107_map6	0001.CSV	3513.81	-0.0182647
PSB107_map6	0001.CSV	3517.67	-0.0186441
PSB107_map6	0001.CSV	3521.53	-0.018557
PSB107_map6	0001.CSV	3525.39	-0.0185046
PSB107_map6	0001.CSV	3529.24	-0.0187302
PSB107_map6	0001.CSV	3533.1	-0.0187181
PSB107_map6	0001.CSV	3536.96	-0.0186042
PSB107_map6	0001.CSV	3540.81	-0.0187021
PSB107_map6	0001.CSV	3544.67	-0.018522
PSB107_map6	0001.CSV	3548.53	-0.0185883
PSB107_map6	0001.CSV	3552.39	-0.0188222
PSB107_map6	0001.CSV	3556.24	-0.0190725
PSB107_map6	0001.CSV	3560.1	-0.019281
PSB107_map6	0001.CSV	3563.96	-0.0195258
PSB107_map6	0001.CSV	3567.81	-0.018976
PSB107_map6	0001.CSV	3571.67	-0.019167
PSB107_map6	0001.CSV	3575.53	-0.019635
PSB107_map6	0001.CSV	3579.39	-0.019534
PSB107_map6	0001.CSV	3583.24	-0.0193089
PSB107_map6	0001.CSV	3587.1	-0.0191761
PSB107_map6	0001.CSV	3590.96	-0.019005
PSB107_map6	0001.CSV	3594.81	-0.0194185
PSB107_map6	0001.CSV	3598.67	-0.0192377
PSB107_map6	0001.CSV	3602.53	-0.0192747
PSB107_map6	0001.CSV	3606.39	-0.019867
PSB107_map6	0001.CSV	3610.24	-0.0206221
PSB107_map6	0001.CSV	3614.1	-0.0204774
PSB107_map6	0001.CSV	3617.96	-0.0199775
PSB107_map6	0001.CSV	3621.81	-0.0195933
PSB107_map6	0001.CSV	3625.67	-0.0206722
PSB107_map6	0001.CSV	3629.53	-0.0206754
PSB107_map6	0001.CSV	3633.39	-0.0198895
PSB107_map6	0001.CSV	3637.24	-0.0200225
PSB107_map6	0001.CSV	3641.1	-0.0203485
PSB107_map6	0001.CSV	3644.96	-0.0207735
PSB107_map6	0001.CSV	3648.81	-0.0205251
PSB107_map6	0001.CSV	3652.67	-0.0193897
PSB107_map6	0001.CSV	3656.53	-0.0192715
PSB107_map6	0001.CSV	3660.38	-0.0189473
PSB107_map6	0001.CSV	3664.24	-0.0198174
PSB107_map6	0001.CSV	3668.1	-0.0206622
PSB107_map6	0001.CSV	3671.96	-0.0208051
PSB107_map6	0001.CSV	3675.81	-0.0196759
PSB107_map6	0001.CSV	3679.67	-0.0193071
PSB107_map6	0001.CSV	3683.53	-0.0196647
PSB107_map6	0001.CSV	3687.38	-0.0202173
PSB107_map6	0001.CSV	3691.24	-0.0194746
PSB107_map6	0001.CSV	3695.1	-0.0195159
PSB107_map6	0001.CSV	3698.95	-0.0197398
PSB107_map6	0001.CSV	3702.81	-0.019923
PSB107_map6	0001.CSV	3706.67	-0.0202193
PSB107_map6	0001.CSV	3710.53	-0.0201506
PSB107_map6	0001.CSV	3714.38	-0.0190076
PSB107_map6	0001.CSV	3718.24	-0.019727
PSB107_map6	0001.CSV	3722.1	-0.0201003
PSB107_map6	0001.CSV	3725.95	-0.0201619
PSB107_map6	0001.CSV	3729.81	-0.0201787
PSB107_map6	0001.CSV	3733.67	-0.0202604
PSB107_map6	0001.CSV	3737.53	-0.0185193
PSB107_map6	0001.CSV	3741.38	-0.0196298
PSB107_map6	0001.CSV	3745.24	-0.0210779
PSB107_map6	0001.CSV	3749.1	-0.0217335
PSB107_map6	0001.CSV	3752.95	-0.0197395
PSB107_map6	0001.CSV	3756.81	-0.0194414
PSB107_map6	0001.CSV	3760.67	-0.019326
PSB107_map6	0001.CSV	3764.53	-0.0195539
PSB107_map6	0001.CSV	3768.38	-0.0191658
PSB107_map6	0001.CSV	3772.24	-0.0190803
PSB107_map6	0001.CSV	3776.1	-0.0192756
PSB107_map6	0001.CSV	3779.95	-0.019115
PSB107_map6	0001.CSV	3783.81	-0.0188714
PSB107_map6	0001.CSV	3787.67	-0.0189721
PSB107_map6	0001.CSV	3791.53	-0.0192689
PSB107_map6	0001.CSV	3795.38	-0.0201017
PSB107_map6	0001.CSV	3799.24	-0.0201022
PSB107_map6	0001.CSV	3803.1	-0.0195941
PSB107_map6	0001.CSV	3806.95	-0.0187848
PSB107_map6	0001.CSV	3810.81	-0.0191517
PSB107_map6	0001.CSV	3814.67	-0.0197688
PSB107_map6	0001.CSV	3818.53	-0.0198863
PSB107_map6	0001.CSV	3822.38	-0.0188614
PSB107_map6	0001.CSV	3826.24	-0.019025
PSB107_map6	0001.CSV	3830.1	-0.01928
PSB107_map6	0001.CSV	3833.95	-0.0195447
PSB107_map6	0001.CSV	3837.81	-0.0190882
PSB107_map6	0001.CSV	3841.67	-0.0185171
PSB107_map6	0001.CSV	3845.53	-0.0188356
PSB107_map6	0001.CSV	3849.38	-0.0202139
PSB107_map6	0001.CSV	3853.24	-0.0201939
PSB107_map6	0001.CSV	3857.1	-0.0192973
PSB107_map6	0001.CSV	3860.95	-0.019976
PSB107_map6	0001.CSV	3864.81	-0.0204626
PSB107_map6	0001.CSV	3868.67	-0.0203419
PSB107_map6	0001.CSV	3872.52	-0.0197519
PSB107_map6	0001.CSV	3876.38	-0.0193313
PSB107_map6	0001.CSV	3880.24	-0.0196789
PSB107_map6	0001.CSV	3884.1	-0.0192059
PSB107_map6	0001.CSV	3887.95	-0.0191776
PSB107_map6	0001.CSV	3891.81	-0.0191406
PSB107_map6	0001.CSV	3895.67	-0.0197475
PSB107_map6	0001.CSV	3899.52	-0.0204563
PSB107_map6	0001.CSV	3903.38	-0.0194972
PSB107_map6	0001.CSV	3907.24	-0.0186257
PSB107_map6	0001.CSV	3911.1	-0.0192859
PSB107_map6	0001.CSV	3914.95	-0.0197531
PSB107_map6	0001.CSV	3918.81	-0.0196024
PSB107_map6	0001.CSV	3922.67	-0.0194115
PSB107_map6	0001.CSV	3926.52	-0.0194476
PSB107_map6	0001.CSV	3930.38	-0.0193748
PSB107_map6	0001.CSV	3934.24	-0.0190409
PSB107_map6	0001.CSV	3938.09	-0.0192053
PSB107_map6	0001.CSV	3941.95	-0.0193982
PSB107_map6	0001.CSV	3945.81	-0.0191867
PSB107_map6	0001.CSV	3949.67	-0.0188902
PSB107_map6	0001.CSV	3953.52	-0.0186474
PSB107_map6	0001.CSV	3957.38	-0.018924
PSB107_map6	0001.CSV	3961.24	-0.0190537
PSB107_map6	0001.CSV	3965.09	-0.0190505
PSB107_map6	0001.CSV	3968.95	-0.0189514
PSB107_map6	0001.CSV	3972.81	-0.0187735
PSB107_map6	0001.CSV	3976.67	-0.0187158
PSB107_map6	0001.CSV	3980.52	-0.0188816
PSB107_map6	0001.CSV	3984.38	-0.0187866
PSB107_map6	0001.CSV	3988.24	-0.0187536
PSB107_map6	0001.CSV	3992.09	-0.0186026
PSB107_map6	0001.CSV	3995.95	-0.0185673
PSB107_map6	0001.CSV	3999.81	-0.0185854
PSB107_map6	0002.CSV	674.992	0.00416916
PSB107_map6	0002.CSV	678.849	0.00367115
PSB107_map6	0002.CSV	682.706	0.00489176
PSB107_map6	0002.CSV	686.563	0.00491277
PSB107_map6	0002.CSV	690.42	0.00679681
PSB107_map6	0002.CSV	694.277	0.00902791
PSB107_map6	0002.CSV	698.134	0.0129195
PSB107_map6	0002.CSV	701.991	0.0163593
PSB107_map6	0002.CSV	705.849	0.0258583
PSB107_map6	0002.CSV	709.706	0.0392068
PSB107_map6	0002.CSV	713.563	0.0320337
PSB107_map6	0002.CSV	717.42	0.00658735
PSB107_map6	0002.CSV	721.277	-0.00490073
PSB107_map6	0002.CSV	725.134	-0.00607913
PSB107_map6	0002.CSV	728.991	-0.00463774
PSB107_map6	0002.CSV	732.848	-0.00355471
PSB107_map6	0002.CSV	736.705	-0.00147322
PSB107_map6	0002.CSV	740.562	-0.000960189
PSB107_map6	0002.CSV	744.42	-0.000217802
PSB107_map6	0002.CSV	748.277	-0.000645005
PSB107_map6	0002.CSV	752.134	-0.000269296
PSB107_map6	0002.CSV	755.991	-0.000506854
PSB107_map6	0002.CSV	759.848	7.61487e-05
PSB107_map6	0002.CSV	763.705	-0.000532502
PSB107_map6	0002.CSV	767.562	-0.000300124
PSB107_map6	0002.CSV	771.419	-0.000612548
PSB107_map6	0002.CSV	775.276	-0.000415832
PSB107_map6	0002.CSV	779.133	-0.00108689
PSB107_map6	0002.CSV	782.99	-0.000627536
PSB107_map6	0002.CSV	786.848	-0.000850513
PSB107_map6	0002.CSV	790.705	-0.000569532
PSB107_map6	0002.CSV	794.562	-0.00101775
PSB107_map6	0002.CSV	798.419	-0.00080246
PSB107_map6	0002.CSV	802.276	-0.0011635
PSB107_map6	0002.CSV	806.133	-0.000774281
PSB107_map6	0002.CSV	809.99	-0.00104934
PSB107_map6	0002.CSV	813.847	-0.00029572
PSB107_map6	0002.CSV	817.704	0.000219535
PSB107_map6	0002.CSV	821.562	0.00144868
PSB107_map6	0002.CSV	825.419	0.00187076
PSB107_map6	0002.CSV	829.276	0.00306292
PSB107_map6	0002.CSV	833.133	0.00373455
PSB107_map6	0002.CSV	836.99	0.00532622
PSB107_map6	0002.CSV	840.847	0.00685474
PSB107_map6	0002.CSV	844.704	0.00989991
PSB107_map6	0002.CSV	848.561	0.0118029
PSB107_map6	0002.CSV	852.418	0.0135571
PSB107_map6	0002.CSV	856.275	0.0177877
PSB107_map6	0002.CSV	860.132	0.0268438
PSB107_map6	0002.CSV	863.99	0.0417889
PSB107_map6	0002.CSV	867.847	0.062013
PSB107_map6	0002.CSV	871.704	0.071916
PSB107_map6	0002.CSV	875.561	0.0616567
PSB107_map6	0002.CSV	879.418	0.0425655
PSB107_map6	0002.CSV	883.275	0.0222762
PSB107_map6	0002.CSV	887.132	0.00296426
PSB107_map6	0002.CSV	890.989	-0.00567114
PSB107_map6	0002.CSV	894.846	-0.00628111
PSB107_map6	0002.CSV	898.703	-0.00537762
PSB107_map6	0002.CSV	902.561	-0.00468809
PSB107_map6	0002.CSV	906.418	-0.00395773
PSB107_map6	0002.CSV	910.275	-0.00345325
PSB107_map6	0002.CSV	914.132	-0.00298474
PSB107_map6	0002.CSV	917.989	-0.00260697
PSB107_map6	0002.CSV	921.846	-0.00206045
PSB107_map6	0002.CSV	925.703	-0.00155151
PSB107_map6	0002.CSV	929.56	-0.00107096
PSB107_map6	0002.CSV	933.417	-0.00076416
PSB107_map6	0002.CSV	937.274	-0.000481105
PSB107_map6	0002.CSV	941.131	-0.00026625
PSB107_map6	0002.CSV	944.989	4.2248e-05
PSB107_map6	0002.CSV	948.846	0.000463826
PSB107_map6	0002.CSV	952.703	0.000818154
PSB107_map6	0002.CSV	956.56	0.00111118
PSB107_map6	0002.CSV	960.417	0.00130279
PSB107_map6	0002.CSV	964.274	0.00152681
PSB107_map6	0002.CSV	968.131	0.00185981
PSB107_map6	0002.CSV	971.988	0.00239949
PSB107_map6	0002.CSV	975.845	0.00288186
PSB107_map6	0002.CSV	979.702	0.00343039
PSB107_map6	0002.CSV	983.559	0.00398416
PSB107_map6	0002.CSV	987.417	0.00470625
PSB107_map6	0002.CSV	991.274	0.00527577
PSB107_map6	0002.CSV	995.131	0.00582173
PSB107_map6	0002.CSV	998.988	0.00615263
PSB107_map6	0002.CSV	1002.85	0.00662537
PSB107_map6	0002.CSV	1006.7	0.00690591
PSB107_map6	0002.CSV	1010.56	0.00740231
PSB107_map6	0002.CSV	1014.42	0.00789264
PSB107_map6	0002.CSV	1018.27	0.00874681
PSB107_map6	0002.CSV	1022.13	0.00921899
PSB107_map6	0002.CSV	1025.99	0.0098649
PSB107_map6	0002.CSV	1029.85	0.0103084
PSB107_map6	0002.CSV	1033.7	0.0109004
PSB107_map6	0002.CSV	1037.56	0.0112092
PSB107_map6	0002.CSV	1041.42	0.0117192
PSB107_map6	0002.CSV	1045.27	0.0118217
PSB107_map6	0002.CSV	1049.13	0.0124268
PSB107_map6	0002.CSV	1052.99	0.0128706
PSB107_map6	0002.CSV	1056.84	0.0138634
PSB107_map6	0002.CSV	1060.7	0.0143786
PSB107_map6	0002.CSV	1064.56	0.0148669
PSB107_map6	0002.CSV	1068.42	0.0147013
PSB107_map6	0002.CSV	1072.27	0.0146415
PSB107_map6	0002.CSV	1076.13	0.0139979
PSB107_map6	0002.CSV	1079.99	0.0138646
PSB107_map6	0002.CSV	1083.84	0.0133956
PSB107_map6	0002.CSV	1087.7	0.0134837
PSB107_map6	0002.CSV	1091.56	0.0131549
PSB107_map6	0002.CSV	1095.41	0.0133627
PSB107_map6	0002.CSV	1099.27	0.0132208
PSB107_map6	0002.CSV	1103.13	0.0137003
PSB107_map6	0002.CSV	1106.99	0.0138889
PSB107_map6	0002.CSV	1110.84	0.0145917
PSB107_map6	0002.CSV	1114.7	0.014604
PSB107_map6	0002.CSV	1118.56	0.0148799
PSB107_map6	0002.CSV	1122.41	0.0145367
PSB107_map6	0002.CSV	1126.27	0.014674
PSB107_map6	0002.CSV	1130.13	0.0143138
PSB107_map6	0002.CSV	1133.99	0.0144734
PSB107_map6	0002.CSV	1137.84	0.014137
PSB107_map6	0002.CSV	1141.7	0.014407
PSB107_map6	0002.CSV	1145.56	0.014298
PSB107_map6	0002.CSV	1149.41	0.0148374
PSB107_map6	0002.CSV	1153.27	0.0148983
PSB107_map6	0002.CSV	1157.13	0.0156338
PSB107_map6	0002.CSV	1160.99	0.0156771
PSB107_map6	0002.CSV	1164.84	0.0158677
PSB107_map6	0002.CSV	1168.7	0.015351
PSB107_map6	0002.CSV	1172.56	0.0155805
PSB107_map6	0002.CSV	1176.41	0.0155263
PSB107_map6	0002.CSV	1180.27	0.0160786
PSB107_map6	0002.CSV	1184.13	0.0159827
PSB107_map6	0002.CSV	1187.99	0.0163831
PSB107_map6	0002.CSV	1191.84	0.0162427
PSB107_map6	0002.CSV	1195.7	0.0167901
PSB107_map6	0002.CSV	1199.56	0.0168775
PSB107_map6	0002.CSV	1203.41	0.0175493
PSB107_map6	0002.CSV	1207.27	0.0176706
PSB107_map6	0002.CSV	1211.13	0.0184896
PSB107_map6	0002.CSV	1214.98	0.0187498
PSB107_map6	0002.CSV	1218.84	0.0196856
PSB107_map6	0002.CSV	1222.7	0.0201691
PSB107_map6	0002.CSV	1226.56	0.0213045
PSB107_map6	0002.CSV	1230.41	0.0218708
PSB107_map6	0002.CSV	1234.27	0.0231041
PSB107_map6	0002.CSV	1238.13	0.0237624
PSB107_map6	0002.CSV	1241.98	0.0250015
PSB107_map6	0002.CSV	1245.84	0.0256249
PSB107_map6	0002.CSV	1249.7	0.0268773
PSB107_map6	0002.CSV	1253.56	0.0274247
PSB107_map6	0002.CSV	1257.41	0.0283973
PSB107_map6	0002.CSV	1261.27	0.0287504
PSB107_map6	0002.CSV	1265.13	0.0298202
PSB107_map6	0002.CSV	1268.98	0.0303065
PSB107_map6	0002.CSV	1272.84	0.0314933
PSB107_map6	0002.CSV	1276.7	0.0321082
PSB107_map6	0002.CSV	1280.56	0.0332818
PSB107_map6	0002.CSV	1284.41	0.0338514
PSB107_map6	0002.CSV	1288.27	0.0351488
PSB107_map6	0002.CSV	1292.13	0.0358042
PSB107_map6	0002.CSV	1295.98	0.0370053
PSB107_map6	0002.CSV	1299.84	0.0376878
PSB107_map6	0002.CSV	1303.7	0.0391405
PSB107_map6	0002.CSV	1307.56	0.0400852
PSB107_map6	0002.CSV	1311.41	0.0417396
PSB107_map6	0002.CSV	1315.27	0.0428443
PSB107_map6	0002.CSV	1319.13	0.0447076
PSB107_map6	0002.CSV	1322.98	0.0459058
PSB107_map6	0002.CSV	1326.84	0.0477795
PSB107_map6	0002.CSV	1330.7	0.04923
PSB107_map6	0002.CSV	1334.56	0.0513281
PSB107_map6	0002.CSV	1338.41	0.0533744
PSB107_map6	0002.CSV	1342.27	0.0564645
PSB107_map6	0002.CSV	1346.13	0.0581838
PSB107_map6	0002.CSV	1349.98	0.060866
PSB107_map6	0002.CSV	1353.84	0.0632673
PSB107_map6	0002.CSV	1357.7	0.0663354
PSB107_map6	0002.CSV	1361.56	0.0690127
PSB107_map6	0002.CSV	1365.41	0.0726427
PSB107_map6	0002.CSV	1369.27	0.0747205
PSB107_map6	0002.CSV	1373.13	0.0777894
PSB107_map6	0002.CSV	1376.98	0.0800822
PSB107_map6	0002.CSV	1380.84	0.0822978
PSB107_map6	0002.CSV	1384.7	0.0833551
PSB107_map6	0002.CSV	1388.56	0.085071
PSB107_map6	0002.CSV	1392.41	0.0847993
PSB107_map6	0002.CSV	1396.27	0.0837526
PSB107_map6	0002.CSV	1400.13	0.0806832
PSB107_map6	0002.CSV	1403.98	0.078531
PSB107_map6	0002.CSV	1407.84	0.0744244
PSB107_map6	0002.CSV	1411.7	0.0705248
PSB107_map6	0002.CSV	1415.55	0.066411
PSB107_map6	0002.CSV	1419.41	0.0629872
PSB107_map6	0002.CSV	1423.27	0.0593248
PSB107_map6	0002.CSV	1427.12	0.057548
PSB107_map6	0002.CSV	1430.98	0.054912
PSB107_map6	0002.CSV	1434.84	0.0529872
PSB107_map6	0002.CSV	1438.7	0.0498846
PSB107_map6	0002.CSV	1442.55	0.0480261
PSB107_map6	0002.CSV	1446.41	0.0453167
PSB107_map6	0002.CSV	1450.27	0.0430312
PSB107_map6	0002.CSV	1454.12	0.0401352
PSB107_map6	0002.CSV	1457.98	0.0369558
PSB107_map6	0002.CSV	1461.84	0.0336878
PSB107_map6	0002.CSV	1465.7	0.0318074
PSB107_map6	0002.CSV	1469.55	0.0291852
PSB107_map6	0002.CSV	1473.41	0.0269679
PSB107_map6	0002.CSV	1477.27	0.0238508
PSB107_map6	0002.CSV	1481.12	0.0222447
PSB107_map6	0002.CSV	1484.98	0.02007
PSB107_map6	0002.CSV	1488.84	0.0181824
PSB107_map6	0002.CSV	1492.7	0.0155839
PSB107_map6	0002.CSV	1496.55	0.013928
PSB107_map6	0002.CSV	1500.41	0.0113537
PSB107_map6	0002.CSV	1504.27	0.010133
PSB107_map6	0002.CSV	1508.12	0.00731759
PSB107_map6	0002.CSV	1511.98	0.00596619
PSB107_map6	0002.CSV	1515.84	0.00421593
PSB107_map6	0002.CSV	1519.7	0.00303712
PSB107_map6	0002.CSV	1523.55	0.000628278
PSB107_map6	0002.CSV	1527.41	-0.00039832
PSB107_map6	0002.CSV	1531.27	-0.0022815
PSB107_map6	0002.CSV	1535.12	-0.00348145
PSB107_map6	0002.CSV	1538.98	-0.00538783
PSB107_map6	0002.CSV	1542.84	-0.00735134
PSB107_map6	0002.CSV	1546.7	-0.00973609
PSB107_map6	0002.CSV	1550.55	-0.0112214
PSB107_map6	0002.CSV	1554.41	-0.0129023
PSB107_map6	0002.CSV	1558.27	-0.0132037
PSB107_map6	0002.CSV	1562.12	-0.01406
PSB107_map6	0002.CSV	1565.98	-0.0146648
PSB107_map6	0002.CSV	1569.84	-0.015125
PSB107_map6	0002.CSV	1573.69	-0.0151067
PSB107_map6	0002.CSV	1577.55	-0.0150941
PSB107_map6	0002.CSV	1581.41	-0.0152776
PSB107_map6	0002.CSV	1585.27	-0.0160155
PSB107_map6	0002.CSV	1589.12	-0.0164304
PSB107_map6	0002.CSV	1592.98	-0.0168289
PSB107_map6	0002.CSV	1596.84	-0.0169217
PSB107_map6	0002.CSV	1600.69	-0.0171109
PSB107_map6	0002.CSV	1604.55	-0.0171678
PSB107_map6	0002.CSV	1608.41	-0.0173421
PSB107_map6	0002.CSV	1612.27	-0.0174841
PSB107_map6	0002.CSV	1616.12	-0.0175582
PSB107_map6	0002.CSV	1619.98	-0.0173674
PSB107_map6	0002.CSV	1623.84	-0.017532
PSB107_map6	0002.CSV	1627.69	-0.0174458
PSB107_map6	0002.CSV	1631.55	-0.017796
PSB107_map6	0002.CSV	1635.41	-0.0176814
PSB107_map6	0002.CSV	1639.27	-0.0173218
PSB107_map6	0002.CSV	1643.12	-0.0176987
PSB107_map6	0002.CSV	1646.98	-0.0177659
PSB107_map6	0002.CSV	1650.84	-0.0174942
PSB107_map6	0002.CSV	1654.69	-0.0170948
PSB107_map6	0002.CSV	1658.55	-0.0172932
PSB107_map6	0002.CSV	1662.41	-0.0175757
PSB107_map6	0002.CSV	1666.27	-0.0177211
PSB107_map6	0002.CSV	1670.12	-0.017698
PSB107_map6	0002.CSV	1673.98	-0.0175261
PSB107_map6	0002.CSV	1677.84	-0.017848
PSB107_map6	0002.CSV	1681.69	-0.0181263
PSB107_map6	0002.CSV	1685.55	-0.0175268
PSB107_map6	0002.CSV	1689.41	-0.0176801
PSB107_map6	0002.CSV	1693.27	-0.0183075
PSB107_map6	0002.CSV	1697.12	-0.018405
PSB107_map6	0002.CSV	1700.98	-0.0173166
PSB107_map6	0002.CSV	1704.84	-0.0172088
PSB107_map6	0002.CSV	1708.69	-0.0172272
PSB107_map6	0002.CSV	1712.55	-0.0175808
PSB107_map6	0002.CSV	1716.41	-0.0165714
PSB107_map6	0002.CSV	1720.27	-0.0157082
PSB107_map6	0002.CSV	1724.12	-0.0160004
PSB107_map6	0002.CSV	1727.98	-0.0165306
PSB107_map6	0002.CSV	1731.84	-0.0164767
PSB107_map6	0002.CSV	1735.69	-0.0163555
PSB107_map6	0002.CSV	1739.55	-0.0166545
PSB107_map6	0002.CSV	1743.41	-0.0173559
PSB107_map6	0002.CSV	1747.27	-0.0175751
PSB107_map6	0002.CSV	1751.12	-0.0177859
PSB107_map6	0002.CSV	1754.98	-0.018144
PSB107_map6	0002.CSV	1758.84	-0.0185881
PSB107_map6	0002.CSV	1762.69	-0.0184505
PSB107_map6	0002.CSV	1766.55	-0.0188497
PSB107_map6	0002.CSV	1770.41	-0.0185892
PSB107_map6	0002.CSV	1774.26	-0.0180649
PSB107_map6	0002.CSV	1778.12	-0.0179229
PSB107_map6	0002.CSV	1781.98	-0.0177957
PSB107_map6	0002.CSV	1785.84	-0.0172152
PSB107_map6	0002.CSV	1789.69	-0.0166482
PSB107_map6	0002.CSV	1793.55	-0.0150448
PSB107_map6	0002.CSV	1797.41	-0.0151237
PSB107_map6	0002.CSV	1801.26	-0.0159975
PSB107_map6	0002.CSV	1805.12	-0.0172229
PSB107_map6	0002.CSV	1808.98	-0.0176682
PSB107_map6	0002.CSV	1812.84	-0.0178273
PSB107_map6	0002.CSV	1816.69	-0.0179359
PSB107_map6	0002.CSV	1820.55	-0.018198
PSB107_map6	0002.CSV	1824.41	-0.0180717
PSB107_map6	0002.CSV	1828.26	-0.0179692
PSB107_map6	0002.CSV	1832.12	-0.0176428
PSB107_map6	0002.CSV	1835.98	-0.0179396
PSB107_map6	0002.CSV	1839.84	-0.0180208
PSB107_map6	0002.CSV	1843.69	-0.0179609
PSB107_map6	0002.CSV	1847.55	-0.0175059
PSB107_map6	0002.CSV	1851.41	-0.0178679
PSB107_map6	0002.CSV	1855.26	-0.0179131
PSB107_map6	0002.CSV	1859.12	-0.0180368
PSB107_map6	0002.CSV	1862.98	-0.0180065
PSB107_map6	0002.CSV	1866.84	-0.0180933
PSB107_map6	0002.CSV	1870.69	-0.0175554
PSB107_map6	0002.CSV	1874.55	-0.0178193
PSB107_map6	0002.CSV	1878.41	-0.0178658
PSB107_map6	0002.CSV	1882.26	-0.0180226
PSB107_map6	0002.CSV	1886.12	-0.0179386
PSB107_map6	0002.CSV	1889.98	-0.0179848
PSB107_map6	0002.CSV	1893.83	-0.0178064
PSB107_map6	0002.CSV	1897.69	-0.0179473
PSB107_map6	0002.CSV	1901.55	-0.0179162
PSB107_map6	0002.CSV	1905.41	-0.0181005
PSB107_map6	0002.CSV	1909.26	-0.0179313
PSB107_map6	0002.CSV	1913.12	-0.0181708
PSB107_map6	0002.CSV	1916.98	-0.0181987
PSB107_map6	0002.CSV	1920.83	-0.0181785
PSB107_map6	0002.CSV	1924.69	-0.0179693
PSB107_map6	0002.CSV	1928.55	-0.0181609
PSB107_map6	0002.CSV	1932.4	-0.0181077
PSB107_map6	0002.CSV	1936.26	-0.0182844
PSB107_map6	0002.CSV	1940.12	-0.0182236
PSB107_map6	0002.CSV	1943.98	-0.0181437
PSB107_map6	0002.CSV	1947.83	-0.0180023
PSB107_map6	0002.CSV	1951.69	-0.0182326
PSB107_map6	0002.CSV	1955.55	-0.0181794
PSB107_map6	0002.CSV	1959.4	-0.018287
PSB107_map6	0002.CSV	1963.26	-0.0182136
PSB107_map6	0002.CSV	1967.12	-0.0182822
PSB107_map6	0002.CSV	1970.98	-0.0182133
PSB107_map6	0002.CSV	1974.83	-0.018361
PSB107_map6	0002.CSV	1978.69	-0.0182662
PSB107_map6	0002.CSV	1982.55	-0.0183255
PSB107_map6	0002.CSV	1986.4	-0.0182349
PSB107_map6	0002.CSV	1990.26	-0.0182759
PSB107_map6	0002.CSV	1994.12	-0.0180971
PSB107_map6	0002.CSV	1997.98	-0.0181974
PSB107_map6	0002.CSV	2001.83	-0.0181569
PSB107_map6	0002.CSV	2005.69	-0.0182709
PSB107_map6	0002.CSV	2009.55	-0.0181632
PSB107_map6	0002.CSV	2013.4	-0.0182663
PSB107_map6	0002.CSV	2017.26	-0.0181485
PSB107_map6	0002.CSV	2021.12	-0.0180814
PSB107_map6	0002.CSV	2024.97	-0.0179738
PSB107_map6	0002.CSV	2028.83	-0.0180215
PSB107_map6	0002.CSV	2032.69	-0.0179195
PSB107_map6	0002.CSV	2036.55	-0.0179327
PSB107_map6	0002.CSV	2040.4	-0.0178384
PSB107_map6	0002.CSV	2044.26	-0.0178411
PSB107_map6	0002.CSV	2048.12	-0.0178303
PSB107_map6	0002.CSV	2051.97	-0.0179004
PSB107_map6	0002.CSV	2055.83	-0.0178238
PSB107_map6	0002.CSV	2059.69	-0.0177784
PSB107_map6	0002.CSV	2063.55	-0.0175781
PSB107_map6	0002.CSV	2067.4	-0.0175114
PSB107_map6	0002.CSV	2071.26	-0.0174967
PSB107_map6	0002.CSV	2075.12	-0.0174998
PSB107_map6	0002.CSV	2078.97	-0.0173661
PSB107_map6	0002.CSV	2082.83	-0.0173448
PSB107_map6	0002.CSV	2086.69	-0.0173423
PSB107_map6	0002.CSV	2090.55	-0.0172918
PSB107_map6	0002.CSV	2094.4	-0.0171295
PSB107_map6	0002.CSV	2098.26	-0.0170733
PSB107_map6	0002.CSV	2102.12	-0.0170346
PSB107_map6	0002.CSV	2105.97	-0.0170202
PSB107_map6	0002.CSV	2109.83	-0.0169974
PSB107_map6	0002.CSV	2113.69	-0.0169482
PSB107_map6	0002.CSV	2117.55	-0.0168234
PSB107_map6	0002.CSV	2121.4	-0.016735
PSB107_map6	0002.CSV	2125.26	-0.0167019
PSB107_map6	0002.CSV	2129.12	-0.0166174
PSB107_map6	0002.CSV	2132.97	-0.0165371
PSB107_map6	0002.CSV	2136.83	-0.0164819
PSB107_map6	0002.CSV	2140.69	-0.0164485
PSB107_map6	0002.CSV	2144.55	-0.0163568
PSB107_map6	0002.CSV	2148.4	-0.0163264
PSB107_map6	0002.CSV	2152.26	-0.0162598
PSB107_map6	0002.CSV	2156.12	-0.0162509
PSB107_map6	0002.CSV	2159.97	-0.0161741
PSB107_map6	0002.CSV	2163.83	-0.0161026
PSB107_map6	0002.CSV	2167.69	-0.0160139
PSB107_map6	0002.CSV	2171.55	-0.0160078
PSB107_map6	0002.CSV	2175.4	-0.0158834
PSB107_map6	0002.CSV	2179.26	-0.0159009
PSB107_map6	0002.CSV	2183.12	-0.0159108
PSB107_map6	0002.CSV	2186.97	-0.0159335
PSB107_map6	0002.CSV	2190.83	-0.0158233
PSB107_map6	0002.CSV	2194.69	-0.0159216
PSB107_map6	0002.CSV	2198.55	-0.0159293
PSB107_map6	0002.CSV	2202.4	-0.016022
PSB107_map6	0002.CSV	2206.26	-0.0159643
PSB107_map6	0002.CSV	2210.12	-0.0160728
PSB107_map6	0002.CSV	2213.97	-0.0160385
PSB107_map6	0002.CSV	2217.83	-0.0161139
PSB107_map6	0002.CSV	2221.69	-0.0160781
PSB107_map6	0002.CSV	2225.54	-0.0162334
PSB107_map6	0002.CSV	2229.4	-0.0162461
PSB107_map6	0002.CSV	2233.26	-0.0163985
PSB107_map6	0002.CSV	2237.12	-0.0164917
PSB107_map6	0002.CSV	2240.97	-0.016734
PSB107_map6	0002.CSV	2244.83	-0.0167481
PSB107_map6	0002.CSV	2248.69	-0.0169599
PSB107_map6	0002.CSV	2252.54	-0.0169987
PSB107_map6	0002.CSV	2256.4	-0.0171286
PSB107_map6	0002.CSV	2260.26	-0.0170897
PSB107_map6	0002.CSV	2264.11	-0.0173106
PSB107_map6	0002.CSV	2267.97	-0.0173916
PSB107_map6	0002.CSV	2271.83	-0.0176049
PSB107_map6	0002.CSV	2275.69	-0.017569
PSB107_map6	0002.CSV	2279.54	-0.0177965
PSB107_map6	0002.CSV	2283.4	-0.017843
PSB107_map6	0002.CSV	2287.26	-0.0179846
PSB107_map6	0002.CSV	2291.11	-0.017826
PSB107_map6	0002.CSV	2294.97	-0.0178366
PSB107_map6	0002.CSV	2298.83	-0.0176328
PSB107_map6	0002.CSV	2302.69	-0.0176602
PSB107_map6	0002.CSV	2306.54	-0.017364
PSB107_map6	0002.CSV	2310.4	-0.0174911
PSB107_map6	0002.CSV	2314.26	-0.0171669
PSB107_map6	0002.CSV	2318.11	-0.0175273
PSB107_map6	0002.CSV	2321.97	-0.0174699
PSB107_map6	0002.CSV	2325.83	-0.0184525
PSB107_map6	0002.CSV	2329.69	-0.0179977
PSB107_map6	0002.CSV	2333.54	-0.0191208
PSB107_map6	0002.CSV	2337.4	-0.0188756
PSB107_map6	0002.CSV	2341.26	-0.0199981
PSB107_map6	0002.CSV	2345.11	-0.0178267
PSB107_map6	0002.CSV	2348.97	-0.0184558
PSB107_map6	0002.CSV	2352.83	-0.0198158
PSB107_map6	0002.CSV	2356.69	-0.0255403
PSB107_map6	0002.CSV	2360.54	-0.0274282
PSB107_map6	0002.CSV	2364.4	-0.027934
PSB107_map6	0002.CSV	2368.26	-0.0219068
PSB107_map6	0002.CSV	2372.11	-0.01933
PSB107_map6	0002.CSV	2375.97	-0.0174804
PSB107_map6	0002.CSV	2379.83	-0.0174722
PSB107_map6	0002.CSV	2383.69	-0.0173233
PSB107_map6	0002.CSV	2387.54	-0.0177153
PSB107_map6	0002.CSV	2391.4	-0.0178217
PSB107_map6	0002.CSV	2395.26	-0.0179481
PSB107_map6	0002.CSV	2399.11	-0.0177866
PSB107_map6	0002.CSV	2402.97	-0.0179212
PSB107_map6	0002.CSV	2406.83	-0.0177688
PSB107_map6	0002.CSV	2410.68	-0.0178057
PSB107_map6	0002.CSV	2414.54	-0.0175751
PSB107_map6	0002.CSV	2418.4	-0.0175317
PSB107_map6	0002.CSV	2422.26	-0.0171834
PSB107_map6	0002.CSV	2426.11	-0.0171587
PSB107_map6	0002.CSV	2429.97	-0.016935
PSB107_map6	0002.CSV	2433.83	-0.0169075
PSB107_map6	0002.CSV	2437.68	-0.0166442
PSB107_map6	0002.CSV	2441.54	-0.0166437
PSB107_map6	0002.CSV	2445.4	-0.0163498
PSB107_map6	0002.CSV	2449.26	-0.0163084
PSB107_map6	0002.CSV	2453.11	-0.016085
PSB107_map6	0002.CSV	2456.97	-0.0161613
PSB107_map6	0002.CSV	2460.83	-0.0159952
PSB107_map6	0002.CSV	2464.68	-0.0160323
PSB107_map6	0002.CSV	2468.54	-0.015791
PSB107_map6	0002.CSV	2472.4	-0.0157365
PSB107_map6	0002.CSV	2476.26	-0.015461
PSB107_map6	0002.CSV	2480.11	-0.0154854
PSB107_map6	0002.CSV	2483.97	-0.0152135
PSB107_map6	0002.CSV	2487.83	-0.0152134
PSB107_map6	0002.CSV	2491.68	-0.0149754
PSB107_map6	0002.CSV	2495.54	-0.0149004
PSB107_map6	0002.CSV	2499.4	-0.0146131
PSB107_map6	0002.CSV	2503.26	-0.014546
PSB107_map6	0002.CSV	2507.11	-0.0142389
PSB107_map6	0002.CSV	2510.97	-0.0142576
PSB107_map6	0002.CSV	2514.83	-0.0142096
PSB107_map6	0002.CSV	2518.68	-0.0144271
PSB107_map6	0002.CSV	2522.54	-0.0144426
PSB107_map6	0002.CSV	2526.4	-0.0147174
PSB107_map6	0002.CSV	2530.26	-0.0148213
PSB107_map6	0002.CSV	2534.11	-0.0150948
PSB107_map6	0002.CSV	2537.97	-0.0150668
PSB107_map6	0002.CSV	2541.83	-0.0152397
PSB107_map6	0002.CSV	2545.68	-0.0152275
PSB107_map6	0002.CSV	2549.54	-0.015393
PSB107_map6	0002.CSV	2553.4	-0.0153108
PSB107_map6	0002.CSV	2557.26	-0.0153852
PSB107_map6	0002.CSV	2561.11	-0.0152805
PSB107_map6	0002.CSV	2564.97	-0.0153968
PSB107_map6	0002.CSV	2568.83	-0.0153292
PSB107_map6	0002.CSV	2572.68	-0.0154406
PSB107_map6	0002.CSV	2576.54	-0.015372
PSB107_map6	0002.CSV	2580.4	-0.0154774
PSB107_map6	0002.CSV	2584.25	-0.0154053
PSB107_map6	0002.CSV	2588.11	-0.0155154
PSB107_map6	0002.CSV	2591.97	-0.0154978
PSB107_map6	0002.CSV	2595.83	-0.0156674
PSB107_map6	0002.CSV	2599.68	-0.0156036
PSB107_map6	0002.CSV	2603.54	-0.0156855
PSB107_map6	0002.CSV	2607.4	-0.0157042
PSB107_map6	0002.CSV	2611.25	-0.0158129
PSB107_map6	0002.CSV	2615.11	-0.0157217
PSB107_map6	0002.CSV	2618.97	-0.015814
PSB107_map6	0002.CSV	2622.82	-0.0157685
PSB107_map6	0002.CSV	2626.68	-0.0158142
PSB107_map6	0002.CSV	2630.54	-0.015752
PSB107_map6	0002.CSV	2634.4	-0.0158403
PSB107_map6	0002.CSV	2638.25	-0.0158794
PSB107_map6	0002.CSV	2642.11	-0.0160561
PSB107_map6	0002.CSV	2645.97	-0.0160883
PSB107_map6	0002.CSV	2649.82	-0.0162269
PSB107_map6	0002.CSV	2653.68	-0.016187
PSB107_map6	0002.CSV	2657.54	-0.0162125
PSB107_map6	0002.CSV	2661.4	-0.0162233
PSB107_map6	0002.CSV	2665.25	-0.0162918
PSB107_map6	0002.CSV	2669.11	-0.0161784
PSB107_map6	0002.CSV	2672.97	-0.0160281
PSB107_map6	0002.CSV	2676.82	-0.0157941
PSB107_map6	0002.CSV	2680.68	-0.0159278
PSB107_map6	0002.CSV	2684.54	-0.0162085
PSB107_map6	0002.CSV	2688.4	-0.0163449
PSB107_map6	0002.CSV	2692.25	-0.0162991
PSB107_map6	0002.CSV	2696.11	-0.0162868
PSB107_map6	0002.CSV	2699.97	-0.0162094
PSB107_map6	0002.CSV	2703.82	-0.0162595
PSB107_map6	0002.CSV	2707.68	-0.0161701
PSB107_map6	0002.CSV	2711.54	-0.016111
PSB107_map6	0002.CSV	2715.4	-0.0160927
PSB107_map6	0002.CSV	2719.25	-0.0160078
PSB107_map6	0002.CSV	2723.11	-0.0157581
PSB107_map6	0002.CSV	2726.97	-0.0157807
PSB107_map6	0002.CSV	2730.82	-0.0160005
PSB107_map6	0002.CSV	2734.68	-0.015991
PSB107_map6	0002.CSV	2738.54	-0.0158749
PSB107_map6	0002.CSV	2742.4	-0.0158463
PSB107_map6	0002.CSV	2746.25	-0.015631
PSB107_map6	0002.CSV	2750.11	-0.0155491
PSB107_map6	0002.CSV	2753.97	-0.0157331
PSB107_map6	0002.CSV	2757.82	-0.0157988
PSB107_map6	0002.CSV	2761.68	-0.0158249
PSB107_map6	0002.CSV	2765.54	-0.015856
PSB107_map6	0002.CSV	2769.39	-0.0156561
PSB107_map6	0002.CSV	2773.25	-0.0152723
PSB107_map6	0002.CSV	2777.11	-0.0152994
PSB107_map6	0002.CSV	2780.97	-0.0154831
PSB107_map6	0002.CSV	2784.82	-0.0153215
PSB107_map6	0002.CSV	2788.68	-0.0149427
PSB107_map6	0002.CSV	2792.54	-0.0148109
PSB107_map6	0002.CSV	2796.39	-0.0148011
PSB107_map6	0002.CSV	2800.25	-0.0149661
PSB107_map6	0002.CSV	2804.11	-0.0151137
PSB107_map6	0002.CSV	2807.97	-0.0149549
PSB107_map6	0002.CSV	2811.82	-0.0149126
PSB107_map6	0002.CSV	2815.68	-0.0149991
PSB107_map6	0002.CSV	2819.54	-0.014826
PSB107_map6	0002.CSV	2823.39	-0.0147078
PSB107_map6	0002.CSV	2827.25	-0.0146676
PSB107_map6	0002.CSV	2831.11	-0.0144249
PSB107_map6	0002.CSV	2834.97	-0.0139928
PSB107_map6	0002.CSV	2838.82	-0.0138649
PSB107_map6	0002.CSV	2842.68	-0.0139495
PSB107_map6	0002.CSV	2846.54	-0.0138546
PSB107_map6	0002.CSV	2850.39	-0.0138481
PSB107_map6	0002.CSV	2854.25	-0.013986
PSB107_map6	0002.CSV	2858.11	-0.0139016
PSB107_map6	0002.CSV	2861.97	-0.0138822
PSB107_map6	0002.CSV	2865.82	-0.0137876
PSB107_map6	0002.CSV	2869.68	-0.0135098
PSB107_map6	0002.CSV	2873.54	-0.0132748
PSB107_map6	0002.CSV	2877.39	-0.0136376
PSB107_map6	0002.CSV	2881.25	-0.0139654
PSB107_map6	0002.CSV	2885.11	-0.0141036
PSB107_map6	0002.CSV	2888.97	-0.0140126
PSB107_map6	0002.CSV	2892.82	-0.0138119
PSB107_map6	0002.CSV	2896.68	-0.0136566
PSB107_map6	0002.CSV	2900.54	-0.0137958
PSB107_map6	0002.CSV	2904.39	-0.013667
PSB107_map6	0002.CSV	2908.25	-0.0133787
PSB107_map6	0002.CSV	2912.11	-0.0129088
PSB107_map6	0002.CSV	2915.97	-0.0128177
PSB107_map6	0002.CSV	2919.82	-0.0131825
PSB107_map6	0002.CSV	2923.68	-0.0135867
PSB107_map6	0002.CSV	2927.54	-0.0135594
PSB107_map6	0002.CSV	2931.39	-0.0137784
PSB107_map6	0002.CSV	2935.25	-0.0141507
PSB107_map6	0002.CSV	2939.11	-0.0141579
PSB107_map6	0002.CSV	2942.96	-0.0137261
PSB107_map6	0002.CSV	2946.82	-0.0136673
PSB107_map6	0002.CSV	2950.68	-0.0138582
PSB107_map6	0002.CSV	2954.54	-0.0142476
PSB107_map6	0002.CSV	2958.39	-0.0145653
PSB107_map6	0002.CSV	2962.25	-0.0146261
PSB107_map6	0002.CSV	2966.11	-0.0146923
PSB107_map6	0002.CSV	2969.96	-0.0145642
PSB107_map6	0002.CSV	2973.82	-0.0141372
PSB107_map6	0002.CSV	2977.68	-0.013903
PSB107_map6	0002.CSV	2981.53	-0.014026
PSB107_map6	0002.CSV	2985.39	-0.0143632
PSB107_map6	0002.CSV	2989.25	-0.0142859
PSB107_map6	0002.CSV	2993.11	-0.014104
PSB107_map6	0002.CSV	2996.96	-0.0141845
PSB107_map6	0002.CSV	3000.82	-0.0144672
PSB107_map6	0002.CSV	3004.68	-0.0146053
PSB107_map6	0002.CSV	3008.53	-0.014463
PSB107_map6	0002.CSV	3012.39	-0.0141104
PSB107_map6	0002.CSV	3016.25	-0.0140603
PSB107_map6	0002.CSV	3020.11	-0.0142336
PSB107_map6	0002.CSV	3023.96	-0.0143578
PSB107_map6	0002.CSV	3027.82	-0.0143411
PSB107_map6	0002.CSV	3031.68	-0.0141044
PSB107_map6	0002.CSV	3035.53	-0.013989
PSB107_map6	0002.CSV	3039.39	-0.0140237
PSB107_map6	0002.CSV	3043.25	-0.013975
PSB107_map6	0002.CSV	3047.11	-0.0140318
PSB107_map6	0002.CSV	3050.96	-0.0140395
PSB107_map6	0002.CSV	3054.82	-0.0140789
PSB107_map6	0002.CSV	3058.68	-0.0141999
PSB107_map6	0002.CSV	3062.53	-0.014179
PSB107_map6	0002.CSV	3066.39	-0.0139849
PSB107_map6	0002.CSV	3070.25	-0.0140434
PSB107_map6	0002.CSV	3074.11	-0.0140964
PSB107_map6	0002.CSV	3077.96	-0.013887
PSB107_map6	0002.CSV	3081.82	-0.0138014
PSB107_map6	0002.CSV	3085.68	-0.0138218
PSB107_map6	0002.CSV	3089.53	-0.0138672
PSB107_map6	0002.CSV	3093.39	-0.0140729
PSB107_map6	0002.CSV	3097.25	-0.0141787
PSB107_map6	0002.CSV	3101.11	-0.014077
PSB107_map6	0002.CSV	3104.96	-0.0140193
PSB107_map6	0002.CSV	3108.82	-0.0138774
PSB107_map6	0002.CSV	3112.68	-0.0136826
PSB107_map6	0002.CSV	3116.53	-0.0134449
PSB107_map6	0002.CSV	3120.39	-0.0135273
PSB107_map6	0002.CSV	3124.25	-0.0137613
PSB107_map6	0002.CSV	3128.11	-0.0139742
PSB107_map6	0002.CSV	3131.96	-0.0140268
PSB107_map6	0002.CSV	3135.82	-0.0138622
PSB107_map6	0002.CSV	3139.68	-0.0136737
PSB107_map6	0002.CSV	3143.53	-0.0139453
PSB107_map6	0002.CSV	3147.39	-0.0139875
PSB107_map6	0002.CSV	3151.25	-0.0136953
PSB107_map6	0002.CSV	3155.1	-0.0135944
PSB107_map6	0002.CSV	3158.96	-0.0138898
PSB107_map6	0002.CSV	3162.82	-0.0139842
PSB107_map6	0002.CSV	3166.68	-0.014135
PSB107_map6	0002.CSV	3170.53	-0.0141374
PSB107_map6	0002.CSV	3174.39	-0.0141338
PSB107_map6	0002.CSV	3178.25	-0.0139648
PSB107_map6	0002.CSV	3182.1	-0.0140079
PSB107_map6	0002.CSV	3185.96	-0.0139837
PSB107_map6	0002.CSV	3189.82	-0.0140784
PSB107_map6	0002.CSV	3193.68	-0.0141198
PSB107_map6	0002.CSV	3197.53	-0.0141122
PSB107_map6	0002.CSV	3201.39	-0.0139013
PSB107_map6	0002.CSV	3205.25	-0.013846
PSB107_map6	0002.CSV	3209.1	-0.0138061
PSB107_map6	0002.CSV	3212.96	-0.0137468
PSB107_map6	0002.CSV	3216.82	-0.0136144
PSB107_map6	0002.CSV	3220.68	-0.0137419
PSB107_map6	0002.CSV	3224.53	-0.0137271
PSB107_map6	0002.CSV	3228.39	-0.0135135
PSB107_map6	0002.CSV	3232.25	-0.013099
PSB107_map6	0002.CSV	3236.1	-0.0132618
PSB107_map6	0002.CSV	3239.96	-0.0134219
PSB107_map6	0002.CSV	3243.82	-0.0133913
PSB107_map6	0002.CSV	3247.68	-0.0131987
PSB107_map6	0002.CSV	3251.53	-0.0134093
PSB107_map6	0002.CSV	3255.39	-0.0134123
PSB107_map6	0002.CSV	3259.25	-0.013557
PSB107_map6	0002.CSV	3263.1	-0.013624
PSB107_map6	0002.CSV	3266.96	-0.0134575
PSB107_map6	0002.CSV	3270.82	-0.0130031
PSB107_map6	0002.CSV	3274.68	-0.0130681
PSB107_map6	0002.CSV	3278.53	-0.0133577
PSB107_map6	0002.CSV	3282.39	-0.0136181
PSB107_map6	0002.CSV	3286.25	-0.0134249
PSB107_map6	0002.CSV	3290.1	-0.0131377
PSB107_map6	0002.CSV	3293.96	-0.0127474
PSB107_map6	0002.CSV	3297.82	-0.0129897
PSB107_map6	0002.CSV	3301.67	-0.0130698
PSB107_map6	0002.CSV	3305.53	-0.0129626
PSB107_map6	0002.CSV	3309.39	-0.0129085
PSB107_map6	0002.CSV	3313.25	-0.0132753
PSB107_map6	0002.CSV	3317.1	-0.0135047
PSB107_map6	0002.CSV	3320.96	-0.0134109
PSB107_map6	0002.CSV	3324.82	-0.0130721
PSB107_map6	0002.CSV	3328.67	-0.0133196
PSB107_map6	0002.CSV	3332.53	-0.0133214
PSB107_map6	0002.CSV	3336.39	-0.0130848
PSB107_map6	0002.CSV	3340.24	-0.0129341
PSB107_map6	0002.CSV	3344.1	-0.0130888
PSB107_map6	0002.CSV	3347.96	-0.0130574
PSB107_map6	0002.CSV	3351.82	-0.0132249
PSB107_map6	0002.CSV	3355.67	-0.0133519
PSB107_map6	0002.CSV	3359.53	-0.0130808
PSB107_map6	0002.CSV	3363.39	-0.0126153
PSB107_map6	0002.CSV	3367.24	-0.0124614
PSB107_map6	0002.CSV	3371.1	-0.0125865
PSB107_map6	0002.CSV	3374.96	-0.012894
PSB107_map6	0002.CSV	3378.82	-0.0130304
PSB107_map6	0002.CSV	3382.67	-0.0133903
PSB107_map6	0002.CSV	3386.53	-0.0133443
PSB107_map6	0002.CSV	3390.39	-0.0130881
PSB107_map6	0002.CSV	3394.24	-0.0127641
PSB107_map6	0002.CSV	3398.1	-0.012684
PSB107_map6	0002.CSV	3401.96	-0.0126008
PSB107_map6	0002.CSV	3405.82	-0.0127232
PSB107_map6	0002.CSV	3409.67	-0.0127833
PSB107_map6	0002.CSV	3413.53	-0.0131262
PSB107_map6	0002.CSV	3417.39	-0.0134646
PSB107_map6	0002.CSV	3421.24	-0.0134457
PSB107_map6	0002.CSV	3425.1	-0.0131524
PSB107_map6	0002.CSV	3428.96	-0.0127631
PSB107_map6	0002.CSV	3432.82	-0.0125639
PSB107_map6	0002.CSV	3436.67	-0.0128912
PSB107_map6	0002.CSV	3440.53	-0.0133456
PSB107_map6	0002.CSV	3444.39	-0.0135401
PSB107_map6	0002.CSV	3448.24	-0.0134734
PSB107_map6	0002.CSV	3452.1	-0.0136686
PSB107_map6	0002.CSV	3455.96	-0.0136243
PSB107_map6	0002.CSV	3459.82	-0.0133393
PSB107_map6	0002.CSV	3463.67	-0.0130911
PSB107_map6	0002.CSV	3467.53	-0.0130373
PSB107_map6	0002.CSV	3471.39	-0.0132455
PSB107_map6	0002.CSV	3475.24	-0.0133877
PSB107_map6	0002.CSV	3479.1	-0.0134713
PSB107_map6	0002.CSV	3482.96	-0.01361
PSB107_map6	0002.CSV	3486.82	-0.0135643
PSB107_map6	0002.CSV	3490.67	-0.013503
PSB107_map6	0002.CSV	3494.53	-0.0133185
PSB107_map6	0002.CSV	3498.39	-0.0132247
PSB107_map6	0002.CSV	3502.24	-0.013476
PSB107_map6	0002.CSV	3506.1	-0.0139297
PSB107_map6	0002.CSV	3509.96	-0.0141216
PSB107_map6	0002.CSV	3513.81	-0.0140096
PSB107_map6	0002.CSV	3517.67	-0.0144239
PSB107_map6	0002.CSV	3521.53	-0.0143701
PSB107_map6	0002.CSV	3525.39	-0.0142327
PSB107_map6	0002.CSV	3529.24	-0.0144819
PSB107_map6	0002.CSV	3533.1	-0.0146291
PSB107_map6	0002.CSV	3536.96	-0.014465
PSB107_map6	0002.CSV	3540.81	-0.014507
PSB107_map6	0002.CSV	3544.67	-0.0142556
PSB107_map6	0002.CSV	3548.53	-0.0142945
PSB107_map6	0002.CSV	3552.39	-0.0144756
PSB107_map6	0002.CSV	3556.24	-0.0147199
PSB107_map6	0002.CSV	3560.1	-0.0150985
PSB107_map6	0002.CSV	3563.96	-0.0155356
PSB107_map6	0002.CSV	3567.81	-0.0148297
PSB107_map6	0002.CSV	3571.67	-0.0148433
PSB107_map6	0002.CSV	3575.53	-0.0153368
PSB107_map6	0002.CSV	3579.39	-0.0153019
PSB107_map6	0002.CSV	3583.24	-0.0152165
PSB107_map6	0002.CSV	3587.1	-0.0151134
PSB107_map6	0002.CSV	3590.96	-0.014754
PSB107_map6	0002.CSV	3594.81	-0.0150956
PSB107_map6	0002.CSV	3598.67	-0.0149888
PSB107_map6	0002.CSV	3602.53	-0.0150914
PSB107_map6	0002.CSV	3606.39	-0.0155412
PSB107_map6	0002.CSV	3610.24	-0.0159601
PSB107_map6	0002.CSV	3614.1	-0.0157345
PSB107_map6	0002.CSV	3617.96	-0.0154016
PSB107_map6	0002.CSV	3621.81	-0.0149831
PSB107_map6	0002.CSV	3625.67	-0.0159453
PSB107_map6	0002.CSV	3629.53	-0.0160099
PSB107_map6	0002.CSV	3633.39	-0.0153659
PSB107_map6	0002.CSV	3637.24	-0.0154991
PSB107_map6	0002.CSV	3641.1	-0.0158526
PSB107_map6	0002.CSV	3644.96	-0.0163895
PSB107_map6	0002.CSV	3648.81	-0.0160243
PSB107_map6	0002.CSV	3652.67	-0.0146575
PSB107_map6	0002.CSV	3656.53	-0.014683
PSB107_map6	0002.CSV	3660.38	-0.0145232
PSB107_map6	0002.CSV	3664.24	-0.0154525
PSB107_map6	0002.CSV	3668.1	-0.0162619
PSB107_map6	0002.CSV	3671.96	-0.0162132
PSB107_map6	0002.CSV	3675.81	-0.01511
PSB107_map6	0002.CSV	3679.67	-0.0148454
PSB107_map6	0002.CSV	3683.53	-0.0151694
PSB107_map6	0002.CSV	3687.38	-0.015562
PSB107_map6	0002.CSV	3691.24	-0.014598
PSB107_map6	0002.CSV	3695.1	-0.0148632
PSB107_map6	0002.CSV	3698.95	-0.0153089
PSB107_map6	0002.CSV	3702.81	-0.0154441
PSB107_map6	0002.CSV	3706.67	-0.0154538
PSB107_map6	0002.CSV	3710.53	-0.0154355
PSB107_map6	0002.CSV	3714.38	-0.0146698
PSB107_map6	0002.CSV	3718.24	-0.0152951
PSB107_map6	0002.CSV	3722.1	-0.0155768
PSB107_map6	0002.CSV	3725.95	-0.0156477
PSB107_map6	0002.CSV	3729.81	-0.0156939
PSB107_map6	0002.CSV	3733.67	-0.0158087
PSB107_map6	0002.CSV	3737.53	-0.0139888
PSB107_map6	0002.CSV	3741.38	-0.0149148
PSB107_map6	0002.CSV	3745.24	-0.0161758
PSB107_map6	0002.CSV	3749.1	-0.0169018
PSB107_map6	0002.CSV	3752.95	-0.0152759
PSB107_map6	0002.CSV	3756.81	-0.0150989
PSB107_map6	0002.CSV	3760.67	-0.0150327
PSB107_map6	0002.CSV	3764.53	-0.0152847
PSB107_map6	0002.CSV	3768.38	-0.0149164
PSB107_map6	0002.CSV	3772.24	-0.014799
PSB107_map6	0002.CSV	3776.1	-0.0149743
PSB107_map6	0002.CSV	3779.95	-0.0148677
PSB107_map6	0002.CSV	3783.81	-0.0145999
PSB107_map6	0002.CSV	3787.67	-0.0146514
PSB107_map6	0002.CSV	3791.53	-0.0148306
PSB107_map6	0002.CSV	3795.38	-0.0154731
PSB107_map6	0002.CSV	3799.24	-0.0154417
PSB107_map6	0002.CSV	3803.1	-0.0149672
PSB107_map6	0002.CSV	3806.95	-0.0142702
PSB107_map6	0002.CSV	3810.81	-0.0147367
PSB107_map6	0002.CSV	3814.67	-0.0154562
PSB107_map6	0002.CSV	3818.53	-0.0156165
PSB107_map6	0002.CSV	3822.38	-0.0144534
PSB107_map6	0002.CSV	3826.24	-0.0146422
PSB107_map6	0002.CSV	3830.1	-0.0149752
PSB107_map6	0002.CSV	3833.95	-0.0154425
PSB107_map6	0002.CSV	3837.81	-0.015275
PSB107_map6	0002.CSV	3841.67	-0.0145711
PSB107_map6	0002.CSV	3845.53	-0.0145809
PSB107_map6	0002.CSV	3849.38	-0.0157748
PSB107_map6	0002.CSV	3853.24	-0.0157751
PSB107_map6	0002.CSV	3857.1	-0.0148856
PSB107_map6	0002.CSV	3860.95	-0.0155192
PSB107_map6	0002.CSV	3864.81	-0.016031
PSB107_map6	0002.CSV	3868.67	-0.0158628
PSB107_map6	0002.CSV	3872.52	-0.0153531
PSB107_map6	0002.CSV	3876.38	-0.0151122
PSB107_map6	0002.CSV	3880.24	-0.0154054
PSB107_map6	0002.CSV	3884.1	-0.0147359
PSB107_map6	0002.CSV	3887.95	-0.0147985
PSB107_map6	0002.CSV	3891.81	-0.0148684
PSB107_map6	0002.CSV	3895.67	-0.0154168
PSB107_map6	0002.CSV	3899.52	-0.0161181
PSB107_map6	0002.CSV	3903.38	-0.0151511
PSB107_map6	0002.CSV	3907.24	-0.0142992
PSB107_map6	0002.CSV	3911.1	-0.0149999
PSB107_map6	0002.CSV	3914.95	-0.0155053
PSB107_map6	0002.CSV	3918.81	-0.0153509
PSB107_map6	0002.CSV	3922.67	-0.015056
PSB107_map6	0002.CSV	3926.52	-0.0151013
PSB107_map6	0002.CSV	3930.38	-0.01496
PSB107_map6	0002.CSV	3934.24	-0.0146978
PSB107_map6	0002.CSV	3938.09	-0.0149794
PSB107_map6	0002.CSV	3941.95	-0.015135
PSB107_map6	0002.CSV	3945.81	-0.0149013
PSB107_map6	0002.CSV	3949.67	-0.0146938
PSB107_map6	0002.CSV	3953.52	-0.0145228
PSB107_map6	0002.CSV	3957.38	-0.0148082
PSB107_map6	0002.CSV	3961.24	-0.01493
PSB107_map6	0002.CSV	3965.09	-0.0148688
PSB107_map6	0002.CSV	3968.95	-0.0148161
PSB107_map6	0002.CSV	3972.81	-0.0147138
PSB107_map6	0002.CSV	3976.67	-0.0145609
PSB107_map6	0002.CSV	3980.52	-0.0145804
PSB107_map6	0002.CSV	3984.38	-0.014519
PSB107_map6	0002.CSV	3988.24	-0.0145142
PSB107_map6	0002.CSV	3992.09	-0.0144366
PSB107_map6	0002.CSV	3995.95	-0.0143949
PSB107_map6	0002.CSV	3999.81	-0.0143107
PSB107_map6	0003.CSV	674.992	0.01297
PSB107_map6	0003.CSV	678.849	0.0128673
PSB107_map6	0003.CSV	682.706	0.0137496
PSB107_map6	0003.CSV	686.563	0.015301
PSB107_map6	0003.CSV	690.42	0.0195604
PSB107_map6	0003.CSV	694.277	0.026253
PSB107_map6	0003.CSV	698.134	0.0347709
PSB107_map6	0003.CSV	701.991	0.0409745
PSB107_map6	0003.CSV	705.849	0.0523503
PSB107_map6	0003.CSV	709.706	0.0710047
PSB107_map6	0003.CSV	713.563	0.064003
PSB107_map6	0003.CSV	717.42	0.0286596
PSB107_map6	0003.CSV	721.277	0.0089493
PSB107_map6	0003.CSV	725.134	0.00629774
PSB107_map6	0003.CSV	728.991	0.00846741
PSB107_map6	0003.CSV	732.848	0.0116372
PSB107_map6	0003.CSV	736.705	0.015611
PSB107_map6	0003.CSV	740.562	0.0176419
PSB107_map6	0003.CSV	744.42	0.0196307
PSB107_map6	0003.CSV	748.277	0.0205029
PSB107_map6	0003.CSV	752.134	0.0217118
PSB107_map6	0003.CSV	755.991	0.0219454
PSB107_map6	0003.CSV	759.848	0.0221586
PSB107_map6	0003.CSV	763.705	0.0210766
PSB107_map6	0003.CSV	767.562	0.0203863
PSB107_map6	0003.CSV	771.419	0.0196067
PSB107_map6	0003.CSV	775.276	0.0195852
PSB107_map6	0003.CSV	779.133	0.0191949
PSB107_map6	0003.CSV	782.99	0.0199597
PSB107_map6	0003.CSV	786.848	0.0204483
PSB107_map6	0003.CSV	790.705	0.0213287
PSB107_map6	0003.CSV	794.562	0.0219185
PSB107_map6	0003.CSV	798.419	0.023684
PSB107_map6	0003.CSV	802.276	0.0254102
PSB107_map6	0003.CSV	806.133	0.0276603
PSB107_map6	0003.CSV	809.99	0.0287645
PSB107_map6	0003.CSV	813.847	0.0301071
PSB107_map6	0003.CSV	817.704	0.0318433
PSB107_map6	0003.CSV	821.562	0.0355652
PSB107_map6	0003.CSV	825.419	0.039504
PSB107_map6	0003.CSV	829.276	0.0424347
PSB107_map6	0003.CSV	833.133	0.0423432
PSB107_map6	0003.CSV	836.99	0.041577
PSB107_map6	0003.CSV	840.847	0.0420467
PSB107_map6	0003.CSV	844.704	0.0457199
PSB107_map6	0003.CSV	848.561	0.0474902
PSB107_map6	0003.CSV	852.418	0.0498941
PSB107_map6	0003.CSV	856.275	0.0604013
PSB107_map6	0003.CSV	860.132	0.0812025
PSB107_map6	0003.CSV	863.99	0.112193
PSB107_map6	0003.CSV	867.847	0.146676
PSB107_map6	0003.CSV	871.704	0.159606
PSB107_map6	0003.CSV	875.561	0.13569
PSB107_map6	0003.CSV	879.418	0.0948784
PSB107_map6	0003.CSV	883.275	0.0519387
PSB107_map6	0003.CSV	887.132	0.0156571
PSB107_map6	0003.CSV	890.989	-0.000280985
PSB107_map6	0003.CSV	894.846	-0.00214519
PSB107_map6	0003.CSV	898.703	-0.00125701
PSB107_map6	0003.CSV	902.561	-0.000270588
PSB107_map6	0003.CSV	906.418	0.000605516
PSB107_map6	0003.CSV	910.275	0.00164015
PSB107_map6	0003.CSV	914.132	0.00258154
PSB107_map6	0003.CSV	917.989	0.00346252
PSB107_map6	0003.CSV	921.846	0.00445558
PSB107_map6	0003.CSV	925.703	0.00553219
PSB107_map6	0003.CSV	929.56	0.0064218
PSB107_map6	0003.CSV	933.417	0.00727594
PSB107_map6	0003.CSV	937.274	0.00792952
PSB107_map6	0003.CSV	941.131	0.00852485
PSB107_map6	0003.CSV	944.989	0.0089811
PSB107_map6	0003.CSV	948.846	0.00953556
PSB107_map6	0003.CSV	952.703	0.0100443
PSB107_map6	0003.CSV	956.56	0.0106135
PSB107_map6	0003.CSV	960.417	0.0107721
PSB107_map6	0003.CSV	964.274	0.0109076
PSB107_map6	0003.CSV	968.131	0.0108791
PSB107_map6	0003.CSV	971.988	0.0111848
PSB107_map6	0003.CSV	975.845	0.0117139
PSB107_map6	0003.CSV	979.702	0.0126801
PSB107_map6	0003.CSV	983.559	0.0136252
PSB107_map6	0003.CSV	987.417	0.0149566
PSB107_map6	0003.CSV	991.274	0.0161833
PSB107_map6	0003.CSV	995.131	0.0176278
PSB107_map6	0003.CSV	998.988	0.0189318
PSB107_map6	0003.CSV	1002.85	0.0207546
PSB107_map6	0003.CSV	1006.7	0.02283
PSB107_map6	0003.CSV	1010.56	0.0255042
PSB107_map6	0003.CSV	1014.42	0.0273003
PSB107_map6	0003.CSV	1018.27	0.0290904
PSB107_map6	0003.CSV	1022.13	0.0308324
PSB107_map6	0003.CSV	1025.99	0.0331803
PSB107_map6	0003.CSV	1029.85	0.0351616
PSB107_map6	0003.CSV	1033.7	0.0371097
PSB107_map6	0003.CSV	1037.56	0.0381506
PSB107_map6	0003.CSV	1041.42	0.0387915
PSB107_map6	0003.CSV	1045.27	0.0381925
PSB107_map6	0003.CSV	1049.13	0.0383677
PSB107_map6	0003.CSV	1052.99	0.039054
PSB107_map6	0003.CSV	1056.84	0.0411265
PSB107_map6	0003.CSV	1060.7	0.0430953
PSB107_map6	0003.CSV	1064.56	0.0449849
PSB107_map6	0003.CSV	1068.42	0.0453146
PSB107_map6	0003.CSV	1072.27	0.0450769
PSB107_map6	0003.CSV	1076.13	0.0437423
PSB107_map6	0003.CSV	1079.99	0.0431595
PSB107_map6	0003.CSV	1083.84	0.042354
PSB107_map6	0003.CSV	1087.7	0.042012
PSB107_map6	0003.CSV	1091.56	0.0408346
PSB107_map6	0003.CSV	1095.41	0.0404968
PSB107_map6	0003.CSV	1099.27	0.0404584
PSB107_map6	0003.CSV	1103.13	0.0418971
PSB107_map6	0003.CSV	1106.99	0.0430381
PSB107_map6	0003.CSV	1110.84	0.0445559
PSB107_map6	0003.CSV	1114.7	0.044916
PSB107_map6	0003.CSV	1118.56	0.0451265
PSB107_map6	0003.CSV	1122.41	0.043734
PSB107_map6	0003.CSV	1126.27	0.042228
PSB107_map6	0003.CSV	1130.13	0.0399838
PSB107_map6	0003.CSV	1133.99	0.0385793
PSB107_map6	0003.CSV	1137.84	0.0367395
PSB107_map6	0003.CSV	1141.7	0.0358312
PSB107_map6	0003.CSV	1145.56	0.0346062
PSB107_map6	0003.CSV	1149.41	0.0343855
PSB107_map6	0003.CSV	1153.27	0.033897
PSB107_map6	0003.CSV	1157.13	0.0342731
PSB107_map6	0003.CSV	1160.99	0.03399
PSB107_map6	0003.CSV	1164.84	0.0341349
PSB107_map6	0003.CSV	1168.7	0.0337518
PSB107_map6	0003.CSV	1172.56	0.0351672
PSB107_map6	0003.CSV	1176.41	0.037778
PSB107_map6	0003.CSV	1180.27	0.0412646
PSB107_map6	0003.CSV	1184.13	0.0413812
PSB107_map6	0003.CSV	1187.99	0.039227
PSB107_map6	0003.CSV	1191.84	0.03573
PSB107_map6	0003.CSV	1195.7	0.0341817
PSB107_map6	0003.CSV	1199.56	0.0337118
PSB107_map6	0003.CSV	1203.41	0.0352505
PSB107_map6	0003.CSV	1207.27	0.0369198
PSB107_map6	0003.CSV	1211.13	0.0398367
PSB107_map6	0003.CSV	1214.98	0.0424072
PSB107_map6	0003.CSV	1218.84	0.0457912
PSB107_map6	0003.CSV	1222.7	0.0485038
PSB107_map6	0003.CSV	1226.56	0.0518901
PSB107_map6	0003.CSV	1230.41	0.0544145
PSB107_map6	0003.CSV	1234.27	0.057475
PSB107_map6	0003.CSV	1238.13	0.0597066
PSB107_map6	0003.CSV	1241.98	0.0625753
PSB107_map6	0003.CSV	1245.84	0.0645273
PSB107_map6	0003.CSV	1249.7	0.0664055
PSB107_map6	0003.CSV	1253.56	0.0660968
PSB107_map6	0003.CSV	1257.41	0.0650944
PSB107_map6	0003.CSV	1261.27	0.0630521
PSB107_map6	0003.CSV	1265.13	0.0626247
PSB107_map6	0003.CSV	1268.98	0.0624806
PSB107_map6	0003.CSV	1272.84	0.0638524
PSB107_map6	0003.CSV	1276.7	0.0648954
PSB107_map6	0003.CSV	1280.56	0.0670801
PSB107_map6	0003.CSV	1284.41	0.0688183
PSB107_map6	0003.CSV	1288.27	0.0711492
PSB107_map6	0003.CSV	1292.13	0.0721195
PSB107_map6	0003.CSV	1295.98	0.0732346
PSB107_map6	0003.CSV	1299.84	0.0733631
PSB107_map6	0003.CSV	1303.7	0.0743767
PSB107_map6	0003.CSV	1307.56	0.0751204
PSB107_map6	0003.CSV	1311.41	0.077142
PSB107_map6	0003.CSV	1315.27	0.0787532
PSB107_map6	0003.CSV	1319.13	0.0815899
PSB107_map6	0003.CSV	1322.98	0.0838388
PSB107_map6	0003.CSV	1326.84	0.087214
PSB107_map6	0003.CSV	1330.7	0.0904466
PSB107_map6	0003.CSV	1334.56	0.0947656
PSB107_map6	0003.CSV	1338.41	0.0994872
PSB107_map6	0003.CSV	1342.27	0.105999
PSB107_map6	0003.CSV	1346.13	0.110822
PSB107_map6	0003.CSV	1349.98	0.117696
PSB107_map6	0003.CSV	1353.84	0.124929
PSB107_map6	0003.CSV	1357.7	0.133466
PSB107_map6	0003.CSV	1361.56	0.142283
PSB107_map6	0003.CSV	1365.41	0.152604
PSB107_map6	0003.CSV	1369.27	0.159938
PSB107_map6	0003.CSV	1373.13	0.169933
PSB107_map6	0003.CSV	1376.98	0.180429
PSB107_map6	0003.CSV	1380.84	0.18974
PSB107_map6	0003.CSV	1384.7	0.196418
PSB107_map6	0003.CSV	1388.56	0.204132
PSB107_map6	0003.CSV	1392.41	0.208065
PSB107_map6	0003.CSV	1396.27	0.210627
PSB107_map6	0003.CSV	1400.13	0.20872
PSB107_map6	0003.CSV	1403.98	0.207361
PSB107_map6	0003.CSV	1407.84	0.203136
PSB107_map6	0003.CSV	1411.7	0.197801
PSB107_map6	0003.CSV	1415.55	0.190261
PSB107_map6	0003.CSV	1419.41	0.181459
PSB107_map6	0003.CSV	1423.27	0.172453
PSB107_map6	0003.CSV	1427.12	0.167486
PSB107_map6	0003.CSV	1430.98	0.16143
PSB107_map6	0003.CSV	1434.84	0.156289
PSB107_map6	0003.CSV	1438.7	0.148834
PSB107_map6	0003.CSV	1442.55	0.144014
PSB107_map6	0003.CSV	1446.41	0.137937
PSB107_map6	0003.CSV	1450.27	0.13216
PSB107_map6	0003.CSV	1454.12	0.126033
PSB107_map6	0003.CSV	1457.98	0.116564
PSB107_map6	0003.CSV	1461.84	0.108318
PSB107_map6	0003.CSV	1465.7	0.103155
PSB107_map6	0003.CSV	1469.55	0.0972949
PSB107_map6	0003.CSV	1473.41	0.091136
PSB107_map6	0003.CSV	1477.27	0.0835433
PSB107_map6	0003.CSV	1481.12	0.0795315
PSB107_map6	0003.CSV	1484.98	0.0752128
PSB107_map6	0003.CSV	1488.84	0.071009
PSB107_map6	0003.CSV	1492.7	0.0660022
PSB107_map6	0003.CSV	1496.55	0.062569
PSB107_map6	0003.CSV	1500.41	0.0583382
PSB107_map6	0003.CSV	1504.27	0.057132
PSB107_map6	0003.CSV	1508.12	0.0537651
PSB107_map6	0003.CSV	1511.98	0.0500455
PSB107_map6	0003.CSV	1515.84	0.0439972
PSB107_map6	0003.CSV	1519.7	0.0369895
PSB107_map6	0003.CSV	1523.55	0.0299665
PSB107_map6	0003.CSV	1527.41	0.0268348
PSB107_map6	0003.CSV	1531.27	0.023364
PSB107_map6	0003.CSV	1535.12	0.0208476
PSB107_map6	0003.CSV	1538.98	0.0173006
PSB107_map6	0003.CSV	1542.84	0.0122564
PSB107_map6	0003.CSV	1546.7	0.00789399
PSB107_map6	0003.CSV	1550.55	0.00515103
PSB107_map6	0003.CSV	1554.41	0.00202606
PSB107_map6	0003.CSV	1558.27	9.61325e-05
PSB107_map6	0003.CSV	1562.12	-0.00185429
PSB107_map6	0003.CSV	1565.98	-0.00285549
PSB107_map6	0003.CSV	1569.84	-0.00384418
PSB107_map6	0003.CSV	1573.69	-0.00394033
PSB107_map6	0003.CSV	1577.55	-0.0038803
PSB107_map6	0003.CSV	1581.41	-0.0043737
PSB107_map6	0003.CSV	1585.27	-0.00610726
PSB107_map6	0003.CSV	1589.12	-0.00776289
PSB107_map6	0003.CSV	1592.98	-0.00889867
PSB107_map6	0003.CSV	1596.84	-0.00884656
PSB107_map6	0003.CSV	1600.69	-0.00870275
PSB107_map6	0003.CSV	1604.55	-0.00860615
PSB107_map6	0003.CSV	1608.41	-0.00940397
PSB107_map6	0003.CSV	1612.27	-0.010604
PSB107_map6	0003.CSV	1616.12	-0.0122879
PSB107_map6	0003.CSV	1619.98	-0.0134423
PSB107_map6	0003.CSV	1623.84	-0.0142826
PSB107_map6	0003.CSV	1627.69	-0.0146717
PSB107_map6	0003.CSV	1631.55	-0.0153288
PSB107_map6	0003.CSV	1635.41	-0.0153969
PSB107_map6	0003.CSV	1639.27	-0.0152336
PSB107_map6	0003.CSV	1643.12	-0.0156651
PSB107_map6	0003.CSV	1646.98	-0.0158504
PSB107_map6	0003.CSV	1650.84	-0.0155374
PSB107_map6	0003.CSV	1654.69	-0.0154116
PSB107_map6	0003.CSV	1658.55	-0.0157739
PSB107_map6	0003.CSV	1662.41	-0.01631
PSB107_map6	0003.CSV	1666.27	-0.0166566
PSB107_map6	0003.CSV	1670.12	-0.0168998
PSB107_map6	0003.CSV	1673.98	-0.016783
PSB107_map6	0003.CSV	1677.84	-0.0171556
PSB107_map6	0003.CSV	1681.69	-0.0174648
PSB107_map6	0003.CSV	1685.55	-0.0169639
PSB107_map6	0003.CSV	1689.41	-0.0169654
PSB107_map6	0003.CSV	1693.27	-0.0175164
PSB107_map6	0003.CSV	1697.12	-0.0173323
PSB107_map6	0003.CSV	1700.98	-0.0156862
PSB107_map6	0003.CSV	1704.84	-0.0146013
PSB107_map6	0003.CSV	1708.69	-0.0134264
PSB107_map6	0003.CSV	1712.55	-0.0126195
PSB107_map6	0003.CSV	1716.41	-0.00948392
PSB107_map6	0003.CSV	1720.27	-0.00624567
PSB107_map6	0003.CSV	1724.12	-0.00572974
[truncated: 123,136 more rows]

## Sheet: PSB107_map7
Map	Select spectrum number	Wavenumbers	Absorbance
PSB107_map7	0001.CSV	674.992	0.0304091
PSB107_map7	0001.CSV	678.849	0.0333484
PSB107_map7	0001.CSV	682.706	0.035218
PSB107_map7	0001.CSV	686.563	0.0393771
PSB107_map7	0001.CSV	690.42	0.04518
PSB107_map7	0001.CSV	694.277	0.0602068
PSB107_map7	0001.CSV	698.134	0.0789097
PSB107_map7	0001.CSV	701.991	0.0741517
PSB107_map7	0001.CSV	705.849	0.0612538
PSB107_map7	0001.CSV	709.706	0.0816046
PSB107_map7	0001.CSV	713.563	0.0894987
PSB107_map7	0001.CSV	717.42	0.0510941
PSB107_map7	0001.CSV	721.277	0.0199131
PSB107_map7	0001.CSV	725.134	0.0141765
PSB107_map7	0001.CSV	728.991	0.0150428
PSB107_map7	0001.CSV	732.848	0.0180701
PSB107_map7	0001.CSV	736.705	0.0202591
PSB107_map7	0001.CSV	740.562	0.0228987
PSB107_map7	0001.CSV	744.42	0.0241208
PSB107_map7	0001.CSV	748.277	0.0253956
PSB107_map7	0001.CSV	752.134	0.0255589
PSB107_map7	0001.CSV	755.991	0.026603
PSB107_map7	0001.CSV	759.848	0.0270795
PSB107_map7	0001.CSV	763.705	0.0280961
PSB107_map7	0001.CSV	767.562	0.0281827
PSB107_map7	0001.CSV	771.419	0.0291178
PSB107_map7	0001.CSV	775.276	0.0294591
PSB107_map7	0001.CSV	779.133	0.0306671
PSB107_map7	0001.CSV	782.99	0.0311437
PSB107_map7	0001.CSV	786.848	0.0320079
PSB107_map7	0001.CSV	790.705	0.0323672
PSB107_map7	0001.CSV	794.562	0.0339473
PSB107_map7	0001.CSV	798.419	0.0347395
PSB107_map7	0001.CSV	802.276	0.0365215
PSB107_map7	0001.CSV	806.133	0.0381244
PSB107_map7	0001.CSV	809.99	0.0407269
PSB107_map7	0001.CSV	813.847	0.0431506
PSB107_map7	0001.CSV	817.704	0.0468538
PSB107_map7	0001.CSV	821.562	0.0506495
PSB107_map7	0001.CSV	825.419	0.0566176
PSB107_map7	0001.CSV	829.276	0.0638945
PSB107_map7	0001.CSV	833.133	0.0752012
PSB107_map7	0001.CSV	836.99	0.0917878
PSB107_map7	0001.CSV	840.847	0.115528
PSB107_map7	0001.CSV	844.704	0.138825
PSB107_map7	0001.CSV	848.561	0.168584
PSB107_map7	0001.CSV	852.418	0.19305
PSB107_map7	0001.CSV	856.275	0.185913
PSB107_map7	0001.CSV	860.132	0.153317
PSB107_map7	0001.CSV	863.99	0.115687
PSB107_map7	0001.CSV	867.847	0.0796878
PSB107_map7	0001.CSV	871.704	0.0505134
PSB107_map7	0001.CSV	875.561	0.0303877
PSB107_map7	0001.CSV	879.418	0.0215174
PSB107_map7	0001.CSV	883.275	0.0182253
PSB107_map7	0001.CSV	887.132	0.0170486
PSB107_map7	0001.CSV	890.989	0.016671
PSB107_map7	0001.CSV	894.846	0.0175706
PSB107_map7	0001.CSV	898.703	0.0182683
PSB107_map7	0001.CSV	902.561	0.0193329
PSB107_map7	0001.CSV	906.418	0.0201766
PSB107_map7	0001.CSV	910.275	0.0206659
PSB107_map7	0001.CSV	914.132	0.0200121
PSB107_map7	0001.CSV	917.989	0.0203168
PSB107_map7	0001.CSV	921.846	0.0205083
PSB107_map7	0001.CSV	925.703	0.0210733
PSB107_map7	0001.CSV	929.56	0.0213471
PSB107_map7	0001.CSV	933.417	0.0220422
PSB107_map7	0001.CSV	937.274	0.0223425
PSB107_map7	0001.CSV	941.131	0.0228458
PSB107_map7	0001.CSV	944.989	0.022974
PSB107_map7	0001.CSV	948.846	0.0235652
PSB107_map7	0001.CSV	952.703	0.0238893
PSB107_map7	0001.CSV	956.56	0.0246517
PSB107_map7	0001.CSV	960.417	0.0249788
PSB107_map7	0001.CSV	964.274	0.025615
PSB107_map7	0001.CSV	968.131	0.0260434
PSB107_map7	0001.CSV	971.988	0.0268957
PSB107_map7	0001.CSV	975.845	0.0275944
PSB107_map7	0001.CSV	979.702	0.028808
PSB107_map7	0001.CSV	983.559	0.0297496
PSB107_map7	0001.CSV	987.417	0.0311263
PSB107_map7	0001.CSV	991.274	0.0321762
PSB107_map7	0001.CSV	995.131	0.0335761
PSB107_map7	0001.CSV	998.988	0.0347162
PSB107_map7	0001.CSV	1002.85	0.0363815
PSB107_map7	0001.CSV	1006.7	0.0376903
PSB107_map7	0001.CSV	1010.56	0.0390343
PSB107_map7	0001.CSV	1014.42	0.0398865
PSB107_map7	0001.CSV	1018.27	0.0411336
PSB107_map7	0001.CSV	1022.13	0.0419317
PSB107_map7	0001.CSV	1025.99	0.0429214
PSB107_map7	0001.CSV	1029.85	0.0431653
PSB107_map7	0001.CSV	1033.7	0.0438138
PSB107_map7	0001.CSV	1037.56	0.0443296
PSB107_map7	0001.CSV	1041.42	0.045291
PSB107_map7	0001.CSV	1045.27	0.0458736
PSB107_map7	0001.CSV	1049.13	0.0469111
PSB107_map7	0001.CSV	1052.99	0.0477188
PSB107_map7	0001.CSV	1056.84	0.0491082
PSB107_map7	0001.CSV	1060.7	0.0500624
PSB107_map7	0001.CSV	1064.56	0.0512076
PSB107_map7	0001.CSV	1068.42	0.0516733
PSB107_map7	0001.CSV	1072.27	0.0525243
PSB107_map7	0001.CSV	1076.13	0.0547232
PSB107_map7	0001.CSV	1079.99	0.0632691
PSB107_map7	0001.CSV	1083.84	0.0674569
PSB107_map7	0001.CSV	1087.7	0.0565256
PSB107_map7	0001.CSV	1091.56	0.0461578
PSB107_map7	0001.CSV	1095.41	0.0438457
PSB107_map7	0001.CSV	1099.27	0.0436775
PSB107_map7	0001.CSV	1103.13	0.0443306
PSB107_map7	0001.CSV	1106.99	0.0448737
PSB107_map7	0001.CSV	1110.84	0.0458662
PSB107_map7	0001.CSV	1114.7	0.0462966
PSB107_map7	0001.CSV	1118.56	0.0467783
PSB107_map7	0001.CSV	1122.41	0.046682
PSB107_map7	0001.CSV	1126.27	0.0467878
PSB107_map7	0001.CSV	1130.13	0.0464682
PSB107_map7	0001.CSV	1133.99	0.0465177
PSB107_map7	0001.CSV	1137.84	0.0464837
PSB107_map7	0001.CSV	1141.7	0.0467759
PSB107_map7	0001.CSV	1145.56	0.0467775
PSB107_map7	0001.CSV	1149.41	0.0473178
PSB107_map7	0001.CSV	1153.27	0.047888
PSB107_map7	0001.CSV	1157.13	0.0488124
PSB107_map7	0001.CSV	1160.99	0.0490861
PSB107_map7	0001.CSV	1164.84	0.0494718
PSB107_map7	0001.CSV	1168.7	0.0494446
PSB107_map7	0001.CSV	1172.56	0.0496144
PSB107_map7	0001.CSV	1176.41	0.0495543
PSB107_map7	0001.CSV	1180.27	0.0500018
PSB107_map7	0001.CSV	1184.13	0.0501292
PSB107_map7	0001.CSV	1187.99	0.0505825
PSB107_map7	0001.CSV	1191.84	0.0508575
PSB107_map7	0001.CSV	1195.7	0.0515653
PSB107_map7	0001.CSV	1199.56	0.0519762
PSB107_map7	0001.CSV	1203.41	0.052693
PSB107_map7	0001.CSV	1207.27	0.0531988
PSB107_map7	0001.CSV	1211.13	0.0541451
PSB107_map7	0001.CSV	1214.98	0.0548622
PSB107_map7	0001.CSV	1218.84	0.056056
PSB107_map7	0001.CSV	1222.7	0.057078
PSB107_map7	0001.CSV	1226.56	0.0585797
PSB107_map7	0001.CSV	1230.41	0.0599063
PSB107_map7	0001.CSV	1234.27	0.0616265
PSB107_map7	0001.CSV	1238.13	0.0630352
PSB107_map7	0001.CSV	1241.98	0.0648057
PSB107_map7	0001.CSV	1245.84	0.0662352
PSB107_map7	0001.CSV	1249.7	0.0679181
PSB107_map7	0001.CSV	1253.56	0.0689961
PSB107_map7	0001.CSV	1257.41	0.0702276
PSB107_map7	0001.CSV	1261.27	0.0712762
PSB107_map7	0001.CSV	1265.13	0.0728177
PSB107_map7	0001.CSV	1268.98	0.0741816
PSB107_map7	0001.CSV	1272.84	0.0759422
PSB107_map7	0001.CSV	1276.7	0.077188
PSB107_map7	0001.CSV	1280.56	0.0786957
PSB107_map7	0001.CSV	1284.41	0.0796943
PSB107_map7	0001.CSV	1288.27	0.0809561
PSB107_map7	0001.CSV	1292.13	0.081878
PSB107_map7	0001.CSV	1295.98	0.0832538
PSB107_map7	0001.CSV	1299.84	0.0844643
PSB107_map7	0001.CSV	1303.7	0.0862093
PSB107_map7	0001.CSV	1307.56	0.087858
PSB107_map7	0001.CSV	1311.41	0.0900402
PSB107_map7	0001.CSV	1315.27	0.0919938
PSB107_map7	0001.CSV	1319.13	0.0945929
PSB107_map7	0001.CSV	1322.98	0.0967798
PSB107_map7	0001.CSV	1326.84	0.0993408
PSB107_map7	0001.CSV	1330.7	0.101826
PSB107_map7	0001.CSV	1334.56	0.104825
PSB107_map7	0001.CSV	1338.41	0.108223
PSB107_map7	0001.CSV	1342.27	0.112642
PSB107_map7	0001.CSV	1346.13	0.115903
PSB107_map7	0001.CSV	1349.98	0.120102
PSB107_map7	0001.CSV	1353.84	0.124388
PSB107_map7	0001.CSV	1357.7	0.129074
PSB107_map7	0001.CSV	1361.56	0.134093
PSB107_map7	0001.CSV	1365.41	0.140634
PSB107_map7	0001.CSV	1369.27	0.145658
PSB107_map7	0001.CSV	1373.13	0.152174
PSB107_map7	0001.CSV	1376.98	0.159124
PSB107_map7	0001.CSV	1380.84	0.165412
PSB107_map7	0001.CSV	1384.7	0.170964
PSB107_map7	0001.CSV	1388.56	0.178336
PSB107_map7	0001.CSV	1392.41	0.183578
PSB107_map7	0001.CSV	1396.27	0.190399
PSB107_map7	0001.CSV	1400.13	0.196603
PSB107_map7	0001.CSV	1403.98	0.202482
PSB107_map7	0001.CSV	1407.84	0.207989
PSB107_map7	0001.CSV	1411.7	0.213853
PSB107_map7	0001.CSV	1415.55	0.218215
PSB107_map7	0001.CSV	1419.41	0.225329
PSB107_map7	0001.CSV	1423.27	0.230862
PSB107_map7	0001.CSV	1427.12	0.237142
PSB107_map7	0001.CSV	1430.98	0.243569
PSB107_map7	0001.CSV	1434.84	0.253529
PSB107_map7	0001.CSV	1438.7	0.265533
PSB107_map7	0001.CSV	1442.55	0.275931
PSB107_map7	0001.CSV	1446.41	0.282203
PSB107_map7	0001.CSV	1450.27	0.28466
PSB107_map7	0001.CSV	1454.12	0.279955
PSB107_map7	0001.CSV	1457.98	0.270424
PSB107_map7	0001.CSV	1461.84	0.261924
PSB107_map7	0001.CSV	1465.7	0.256106
PSB107_map7	0001.CSV	1469.55	0.246101
PSB107_map7	0001.CSV	1473.41	0.226909
PSB107_map7	0001.CSV	1477.27	0.203348
PSB107_map7	0001.CSV	1481.12	0.189438
PSB107_map7	0001.CSV	1484.98	0.17621
PSB107_map7	0001.CSV	1488.84	0.16069
PSB107_map7	0001.CSV	1492.7	0.145757
PSB107_map7	0001.CSV	1496.55	0.135916
PSB107_map7	0001.CSV	1500.41	0.124741
PSB107_map7	0001.CSV	1504.27	0.118693
PSB107_map7	0001.CSV	1508.12	0.106069
PSB107_map7	0001.CSV	1511.98	0.0975368
PSB107_map7	0001.CSV	1515.84	0.0919767
PSB107_map7	0001.CSV	1519.7	0.0846899
PSB107_map7	0001.CSV	1523.55	0.0751062
PSB107_map7	0001.CSV	1527.41	0.0688682
PSB107_map7	0001.CSV	1531.27	0.0632346
PSB107_map7	0001.CSV	1535.12	0.0580315
PSB107_map7	0001.CSV	1538.98	0.052499
PSB107_map7	0001.CSV	1542.84	0.043844
PSB107_map7	0001.CSV	1546.7	0.0383404
PSB107_map7	0001.CSV	1550.55	0.0344758
PSB107_map7	0001.CSV	1554.41	0.0299309
PSB107_map7	0001.CSV	1558.27	0.0238495
PSB107_map7	0001.CSV	1562.12	0.0177916
PSB107_map7	0001.CSV	1565.98	0.015052
PSB107_map7	0001.CSV	1569.84	0.0109591
PSB107_map7	0001.CSV	1573.69	0.00688504
PSB107_map7	0001.CSV	1577.55	0.00180501
PSB107_map7	0001.CSV	1581.41	-0.00205992
PSB107_map7	0001.CSV	1585.27	-0.00518924
PSB107_map7	0001.CSV	1589.12	-0.00769184
PSB107_map7	0001.CSV	1592.98	-0.00957705
PSB107_map7	0001.CSV	1596.84	-0.0108647
PSB107_map7	0001.CSV	1600.69	-0.0118453
PSB107_map7	0001.CSV	1604.55	-0.0124202
PSB107_map7	0001.CSV	1608.41	-0.0130668
PSB107_map7	0001.CSV	1612.27	-0.0135932
PSB107_map7	0001.CSV	1616.12	-0.0142644
PSB107_map7	0001.CSV	1619.98	-0.0146329
PSB107_map7	0001.CSV	1623.84	-0.0150446
PSB107_map7	0001.CSV	1627.69	-0.015297
PSB107_map7	0001.CSV	1631.55	-0.0158954
PSB107_map7	0001.CSV	1635.41	-0.0160912
PSB107_map7	0001.CSV	1639.27	-0.0160754
PSB107_map7	0001.CSV	1643.12	-0.0163324
PSB107_map7	0001.CSV	1646.98	-0.0166385
PSB107_map7	0001.CSV	1650.84	-0.0167013
PSB107_map7	0001.CSV	1654.69	-0.0167522
PSB107_map7	0001.CSV	1658.55	-0.0169265
PSB107_map7	0001.CSV	1662.41	-0.0173857
PSB107_map7	0001.CSV	1666.27	-0.0177267
PSB107_map7	0001.CSV	1670.12	-0.018194
PSB107_map7	0001.CSV	1673.98	-0.018392
PSB107_map7	0001.CSV	1677.84	-0.018983
PSB107_map7	0001.CSV	1681.69	-0.0193809
PSB107_map7	0001.CSV	1685.55	-0.0195852
PSB107_map7	0001.CSV	1689.41	-0.0196781
PSB107_map7	0001.CSV	1693.27	-0.0203457
PSB107_map7	0001.CSV	1697.12	-0.02057
PSB107_map7	0001.CSV	1700.98	-0.020373
PSB107_map7	0001.CSV	1704.84	-0.0202941
PSB107_map7	0001.CSV	1708.69	-0.0203374
PSB107_map7	0001.CSV	1712.55	-0.0203579
PSB107_map7	0001.CSV	1716.41	-0.0198813
PSB107_map7	0001.CSV	1720.27	-0.0187749
PSB107_map7	0001.CSV	1724.12	-0.0187036
PSB107_map7	0001.CSV	1727.98	-0.0187792
PSB107_map7	0001.CSV	1731.84	-0.0188863
PSB107_map7	0001.CSV	1735.69	-0.0188871
PSB107_map7	0001.CSV	1739.55	-0.0194932
PSB107_map7	0001.CSV	1743.41	-0.0200849
PSB107_map7	0001.CSV	1747.27	-0.0207978
PSB107_map7	0001.CSV	1751.12	-0.0214583
PSB107_map7	0001.CSV	1754.98	-0.0221858
PSB107_map7	0001.CSV	1758.84	-0.0225343
PSB107_map7	0001.CSV	1762.69	-0.0227059
PSB107_map7	0001.CSV	1766.55	-0.0228108
PSB107_map7	0001.CSV	1770.41	-0.022369
PSB107_map7	0001.CSV	1774.26	-0.0200885
PSB107_map7	0001.CSV	1778.12	-0.01755
PSB107_map7	0001.CSV	1781.98	-0.014301
PSB107_map7	0001.CSV	1785.84	-0.0122148
PSB107_map7	0001.CSV	1789.69	-0.0122668
PSB107_map7	0001.CSV	1793.55	-0.0147428
PSB107_map7	0001.CSV	1797.41	-0.0172981
PSB107_map7	0001.CSV	1801.26	-0.0197177
PSB107_map7	0001.CSV	1805.12	-0.0215663
PSB107_map7	0001.CSV	1808.98	-0.0226879
PSB107_map7	0001.CSV	1812.84	-0.0232098
PSB107_map7	0001.CSV	1816.69	-0.0236512
PSB107_map7	0001.CSV	1820.55	-0.0237728
PSB107_map7	0001.CSV	1824.41	-0.0239072
PSB107_map7	0001.CSV	1828.26	-0.0237418
PSB107_map7	0001.CSV	1832.12	-0.0236594
PSB107_map7	0001.CSV	1835.98	-0.0236489
PSB107_map7	0001.CSV	1839.84	-0.023793
PSB107_map7	0001.CSV	1843.69	-0.0236428
PSB107_map7	0001.CSV	1847.55	-0.0234616
PSB107_map7	0001.CSV	1851.41	-0.0234932
PSB107_map7	0001.CSV	1855.26	-0.0235859
PSB107_map7	0001.CSV	1859.12	-0.0234651
PSB107_map7	0001.CSV	1862.98	-0.0235119
PSB107_map7	0001.CSV	1866.84	-0.023443
PSB107_map7	0001.CSV	1870.69	-0.0231687
PSB107_map7	0001.CSV	1874.55	-0.0231937
PSB107_map7	0001.CSV	1878.41	-0.023296
PSB107_map7	0001.CSV	1882.26	-0.02321
PSB107_map7	0001.CSV	1886.12	-0.0232307
PSB107_map7	0001.CSV	1889.98	-0.0231156
PSB107_map7	0001.CSV	1893.83	-0.0230313
PSB107_map7	0001.CSV	1897.69	-0.0229253
PSB107_map7	0001.CSV	1901.55	-0.0229898
PSB107_map7	0001.CSV	1905.41	-0.0229821
PSB107_map7	0001.CSV	1909.26	-0.0228672
PSB107_map7	0001.CSV	1913.12	-0.0227732
PSB107_map7	0001.CSV	1916.98	-0.0227958
PSB107_map7	0001.CSV	1920.83	-0.0225725
PSB107_map7	0001.CSV	1924.69	-0.0225089
PSB107_map7	0001.CSV	1928.55	-0.0225049
PSB107_map7	0001.CSV	1932.4	-0.0225259
PSB107_map7	0001.CSV	1936.26	-0.0224922
PSB107_map7	0001.CSV	1940.12	-0.0225039
PSB107_map7	0001.CSV	1943.98	-0.022236
PSB107_map7	0001.CSV	1947.83	-0.0221748
PSB107_map7	0001.CSV	1951.69	-0.0222012
PSB107_map7	0001.CSV	1955.55	-0.0222023
PSB107_map7	0001.CSV	1959.4	-0.0221031
PSB107_map7	0001.CSV	1963.26	-0.0221418
PSB107_map7	0001.CSV	1967.12	-0.0220699
PSB107_map7	0001.CSV	1970.98	-0.0220108
PSB107_map7	0001.CSV	1974.83	-0.0219241
PSB107_map7	0001.CSV	1978.69	-0.0218912
PSB107_map7	0001.CSV	1982.55	-0.0218439
PSB107_map7	0001.CSV	1986.4	-0.0218309
PSB107_map7	0001.CSV	1990.26	-0.0216751
PSB107_map7	0001.CSV	1994.12	-0.0215852
PSB107_map7	0001.CSV	1997.98	-0.0215452
PSB107_map7	0001.CSV	2001.83	-0.0215454
PSB107_map7	0001.CSV	2005.69	-0.0214158
PSB107_map7	0001.CSV	2009.55	-0.021338
PSB107_map7	0001.CSV	2013.4	-0.0212772
PSB107_map7	0001.CSV	2017.26	-0.0211915
PSB107_map7	0001.CSV	2021.12	-0.0210442
PSB107_map7	0001.CSV	2024.97	-0.0210477
PSB107_map7	0001.CSV	2028.83	-0.0209907
PSB107_map7	0001.CSV	2032.69	-0.0209239
PSB107_map7	0001.CSV	2036.55	-0.0207715
PSB107_map7	0001.CSV	2040.4	-0.0206616
PSB107_map7	0001.CSV	2044.26	-0.0205012
PSB107_map7	0001.CSV	2048.12	-0.0204016
PSB107_map7	0001.CSV	2051.97	-0.0202454
PSB107_map7	0001.CSV	2055.83	-0.0201835
PSB107_map7	0001.CSV	2059.69	-0.0200957
PSB107_map7	0001.CSV	2063.55	-0.019976
PSB107_map7	0001.CSV	2067.4	-0.0198203
PSB107_map7	0001.CSV	2071.26	-0.0198144
PSB107_map7	0001.CSV	2075.12	-0.0197016
PSB107_map7	0001.CSV	2078.97	-0.0195881
PSB107_map7	0001.CSV	2082.83	-0.0194113
PSB107_map7	0001.CSV	2086.69	-0.0192901
PSB107_map7	0001.CSV	2090.55	-0.0191346
PSB107_map7	0001.CSV	2094.4	-0.019048
PSB107_map7	0001.CSV	2098.26	-0.0189131
PSB107_map7	0001.CSV	2102.12	-0.0188101
PSB107_map7	0001.CSV	2105.97	-0.0186238
PSB107_map7	0001.CSV	2109.83	-0.0185211
PSB107_map7	0001.CSV	2113.69	-0.0184196
PSB107_map7	0001.CSV	2117.55	-0.0183156
PSB107_map7	0001.CSV	2121.4	-0.0181973
PSB107_map7	0001.CSV	2125.26	-0.0181278
PSB107_map7	0001.CSV	2129.12	-0.0179652
PSB107_map7	0001.CSV	2132.97	-0.0178994
PSB107_map7	0001.CSV	2136.83	-0.0178171
PSB107_map7	0001.CSV	2140.69	-0.017785
PSB107_map7	0001.CSV	2144.55	-0.0177008
PSB107_map7	0001.CSV	2148.4	-0.0176297
PSB107_map7	0001.CSV	2152.26	-0.0175182
PSB107_map7	0001.CSV	2156.12	-0.0174803
PSB107_map7	0001.CSV	2159.97	-0.0174728
PSB107_map7	0001.CSV	2163.83	-0.0175073
PSB107_map7	0001.CSV	2167.69	-0.0174514
PSB107_map7	0001.CSV	2171.55	-0.0173682
PSB107_map7	0001.CSV	2175.4	-0.0172395
PSB107_map7	0001.CSV	2179.26	-0.0172395
PSB107_map7	0001.CSV	2183.12	-0.0172154
PSB107_map7	0001.CSV	2186.97	-0.0172233
PSB107_map7	0001.CSV	2190.83	-0.0172186
PSB107_map7	0001.CSV	2194.69	-0.0172261
PSB107_map7	0001.CSV	2198.55	-0.0172077
PSB107_map7	0001.CSV	2202.4	-0.0172735
PSB107_map7	0001.CSV	2206.26	-0.0172671
PSB107_map7	0001.CSV	2210.12	-0.0172416
PSB107_map7	0001.CSV	2213.97	-0.0172393
PSB107_map7	0001.CSV	2217.83	-0.0173283
PSB107_map7	0001.CSV	2221.69	-0.0173399
PSB107_map7	0001.CSV	2225.54	-0.0173417
PSB107_map7	0001.CSV	2229.4	-0.0173338
PSB107_map7	0001.CSV	2233.26	-0.0174061
PSB107_map7	0001.CSV	2237.12	-0.0174147
PSB107_map7	0001.CSV	2240.97	-0.0174355
PSB107_map7	0001.CSV	2244.83	-0.0174421
PSB107_map7	0001.CSV	2248.69	-0.0175193
PSB107_map7	0001.CSV	2252.54	-0.0175479
PSB107_map7	0001.CSV	2256.4	-0.0175956
PSB107_map7	0001.CSV	2260.26	-0.0176138
PSB107_map7	0001.CSV	2264.11	-0.0176325
PSB107_map7	0001.CSV	2267.97	-0.0175983
PSB107_map7	0001.CSV	2271.83	-0.0176099
PSB107_map7	0001.CSV	2275.69	-0.0176045
PSB107_map7	0001.CSV	2279.54	-0.0176502
PSB107_map7	0001.CSV	2283.4	-0.017727
PSB107_map7	0001.CSV	2287.26	-0.0178229
PSB107_map7	0001.CSV	2291.11	-0.0177937
PSB107_map7	0001.CSV	2294.97	-0.0177643
PSB107_map7	0001.CSV	2298.83	-0.0177057
PSB107_map7	0001.CSV	2302.69	-0.0177767
PSB107_map7	0001.CSV	2306.54	-0.0178937
PSB107_map7	0001.CSV	2310.4	-0.0179664
PSB107_map7	0001.CSV	2314.26	-0.0179532
PSB107_map7	0001.CSV	2318.11	-0.0181898
PSB107_map7	0001.CSV	2321.97	-0.018354
PSB107_map7	0001.CSV	2325.83	-0.0186021
PSB107_map7	0001.CSV	2329.69	-0.0189408
PSB107_map7	0001.CSV	2333.54	-0.0191005
PSB107_map7	0001.CSV	2337.4	-0.0190504
PSB107_map7	0001.CSV	2341.26	-0.0192431
PSB107_map7	0001.CSV	2345.11	-0.018644
PSB107_map7	0001.CSV	2348.97	-0.018615
PSB107_map7	0001.CSV	2352.83	-0.0193933
PSB107_map7	0001.CSV	2356.69	-0.0209781
PSB107_map7	0001.CSV	2360.54	-0.0216344
PSB107_map7	0001.CSV	2364.4	-0.0208186
PSB107_map7	0001.CSV	2368.26	-0.0193491
PSB107_map7	0001.CSV	2372.11	-0.017995
PSB107_map7	0001.CSV	2375.97	-0.0172033
PSB107_map7	0001.CSV	2379.83	-0.0171252
PSB107_map7	0001.CSV	2383.69	-0.0171646
PSB107_map7	0001.CSV	2387.54	-0.0171836
PSB107_map7	0001.CSV	2391.4	-0.0171506
PSB107_map7	0001.CSV	2395.26	-0.0171303
PSB107_map7	0001.CSV	2399.11	-0.0170594
PSB107_map7	0001.CSV	2402.97	-0.0170169
PSB107_map7	0001.CSV	2406.83	-0.0169526
PSB107_map7	0001.CSV	2410.68	-0.0168701
PSB107_map7	0001.CSV	2414.54	-0.0167749
PSB107_map7	0001.CSV	2418.4	-0.0167239
PSB107_map7	0001.CSV	2422.26	-0.016664
PSB107_map7	0001.CSV	2426.11	-0.0166201
PSB107_map7	0001.CSV	2429.97	-0.0165
PSB107_map7	0001.CSV	2433.83	-0.0164114
PSB107_map7	0001.CSV	2437.68	-0.0163284
PSB107_map7	0001.CSV	2441.54	-0.0162705
PSB107_map7	0001.CSV	2445.4	-0.0161437
PSB107_map7	0001.CSV	2449.26	-0.0160352
PSB107_map7	0001.CSV	2453.11	-0.0159482
PSB107_map7	0001.CSV	2456.97	-0.015823
PSB107_map7	0001.CSV	2460.83	-0.0155984
PSB107_map7	0001.CSV	2464.68	-0.0154341
PSB107_map7	0001.CSV	2468.54	-0.0152593
PSB107_map7	0001.CSV	2472.4	-0.015038
PSB107_map7	0001.CSV	2476.26	-0.0147143
PSB107_map7	0001.CSV	2480.11	-0.0142655
PSB107_map7	0001.CSV	2483.97	-0.0137707
PSB107_map7	0001.CSV	2487.83	-0.0133822
PSB107_map7	0001.CSV	2491.68	-0.0130153
PSB107_map7	0001.CSV	2495.54	-0.0127281
PSB107_map7	0001.CSV	2499.4	-0.0125866
PSB107_map7	0001.CSV	2503.26	-0.0125668
PSB107_map7	0001.CSV	2507.11	-0.0125893
PSB107_map7	0001.CSV	2510.97	-0.012596
PSB107_map7	0001.CSV	2514.83	-0.0124139
PSB107_map7	0001.CSV	2518.68	-0.0121439
PSB107_map7	0001.CSV	2522.54	-0.0119115
PSB107_map7	0001.CSV	2526.4	-0.0119409
PSB107_map7	0001.CSV	2530.26	-0.0122259
PSB107_map7	0001.CSV	2534.11	-0.0126847
PSB107_map7	0001.CSV	2537.97	-0.0131598
PSB107_map7	0001.CSV	2541.83	-0.0135135
PSB107_map7	0001.CSV	2545.68	-0.0136676
PSB107_map7	0001.CSV	2549.54	-0.013816
PSB107_map7	0001.CSV	2553.4	-0.0140298
PSB107_map7	0001.CSV	2557.26	-0.0143263
PSB107_map7	0001.CSV	2561.11	-0.0146237
PSB107_map7	0001.CSV	2564.97	-0.0149182
PSB107_map7	0001.CSV	2568.83	-0.0152316
PSB107_map7	0001.CSV	2572.68	-0.0155164
PSB107_map7	0001.CSV	2576.54	-0.0157241
PSB107_map7	0001.CSV	2580.4	-0.0159589
PSB107_map7	0001.CSV	2584.25	-0.0161305
PSB107_map7	0001.CSV	2588.11	-0.0162487
PSB107_map7	0001.CSV	2591.97	-0.0163234
PSB107_map7	0001.CSV	2595.83	-0.0164051
PSB107_map7	0001.CSV	2599.68	-0.0164129
PSB107_map7	0001.CSV	2603.54	-0.0164345
PSB107_map7	0001.CSV	2607.4	-0.0165004
PSB107_map7	0001.CSV	2611.25	-0.0165804
PSB107_map7	0001.CSV	2615.11	-0.0165717
PSB107_map7	0001.CSV	2618.97	-0.0165684
PSB107_map7	0001.CSV	2622.82	-0.0165442
PSB107_map7	0001.CSV	2626.68	-0.0165427
PSB107_map7	0001.CSV	2630.54	-0.0165412
PSB107_map7	0001.CSV	2634.4	-0.0164957
PSB107_map7	0001.CSV	2638.25	-0.0165428
PSB107_map7	0001.CSV	2642.11	-0.0167848
PSB107_map7	0001.CSV	2645.97	-0.0169751
PSB107_map7	0001.CSV	2649.82	-0.0170664
PSB107_map7	0001.CSV	2653.68	-0.0171939
PSB107_map7	0001.CSV	2657.54	-0.0173138
PSB107_map7	0001.CSV	2661.4	-0.0173749
PSB107_map7	0001.CSV	2665.25	-0.0174041
PSB107_map7	0001.CSV	2669.11	-0.0173364
PSB107_map7	0001.CSV	2672.97	-0.0171754
PSB107_map7	0001.CSV	2676.82	-0.0170082
PSB107_map7	0001.CSV	2680.68	-0.0170309
PSB107_map7	0001.CSV	2684.54	-0.0171899
PSB107_map7	0001.CSV	2688.4	-0.0172863
PSB107_map7	0001.CSV	2692.25	-0.0172876
PSB107_map7	0001.CSV	2696.11	-0.0171692
PSB107_map7	0001.CSV	2699.97	-0.0170767
PSB107_map7	0001.CSV	2703.82	-0.0170484
PSB107_map7	0001.CSV	2707.68	-0.0169254
PSB107_map7	0001.CSV	2711.54	-0.0168518
PSB107_map7	0001.CSV	2715.4	-0.0167777
PSB107_map7	0001.CSV	2719.25	-0.0165727
PSB107_map7	0001.CSV	2723.11	-0.0162628
PSB107_map7	0001.CSV	2726.97	-0.0162206
PSB107_map7	0001.CSV	2730.82	-0.0164253
PSB107_map7	0001.CSV	2734.68	-0.0163546
PSB107_map7	0001.CSV	2738.54	-0.0162201
PSB107_map7	0001.CSV	2742.4	-0.0161961
PSB107_map7	0001.CSV	2746.25	-0.0159079
PSB107_map7	0001.CSV	2750.11	-0.0158101
PSB107_map7	0001.CSV	2753.97	-0.0158994
PSB107_map7	0001.CSV	2757.82	-0.0158229
PSB107_map7	0001.CSV	2761.68	-0.0158038
PSB107_map7	0001.CSV	2765.54	-0.0158533
PSB107_map7	0001.CSV	2769.39	-0.0156324
PSB107_map7	0001.CSV	2773.25	-0.0152327
PSB107_map7	0001.CSV	2777.11	-0.0152069
PSB107_map7	0001.CSV	2780.97	-0.0153442
PSB107_map7	0001.CSV	2784.82	-0.015113
PSB107_map7	0001.CSV	2788.68	-0.0147506
PSB107_map7	0001.CSV	2792.54	-0.0146749
PSB107_map7	0001.CSV	2796.39	-0.0146153
PSB107_map7	0001.CSV	2800.25	-0.0146819
PSB107_map7	0001.CSV	2804.11	-0.0148366
PSB107_map7	0001.CSV	2807.97	-0.0146391
PSB107_map7	0001.CSV	2811.82	-0.0145636
PSB107_map7	0001.CSV	2815.68	-0.0146047
PSB107_map7	0001.CSV	2819.54	-0.0144374
PSB107_map7	0001.CSV	2823.39	-0.0142437
PSB107_map7	0001.CSV	2827.25	-0.0141031
PSB107_map7	0001.CSV	2831.11	-0.0137268
PSB107_map7	0001.CSV	2834.97	-0.0130943
PSB107_map7	0001.CSV	2838.82	-0.0125835
PSB107_map7	0001.CSV	2842.68	-0.0122911
PSB107_map7	0001.CSV	2846.54	-0.0117117
PSB107_map7	0001.CSV	2850.39	-0.0113265
PSB107_map7	0001.CSV	2854.25	-0.0112771
PSB107_map7	0001.CSV	2858.11	-0.0111168
PSB107_map7	0001.CSV	2861.97	-0.0112069
PSB107_map7	0001.CSV	2865.82	-0.011443
PSB107_map7	0001.CSV	2869.68	-0.0113568
PSB107_map7	0001.CSV	2873.54	-0.0113113
PSB107_map7	0001.CSV	2877.39	-0.0116939
PSB107_map7	0001.CSV	2881.25	-0.0119562
PSB107_map7	0001.CSV	2885.11	-0.0118981
PSB107_map7	0001.CSV	2888.97	-0.0116624
PSB107_map7	0001.CSV	2892.82	-0.011161
PSB107_map7	0001.CSV	2896.68	-0.010759
PSB107_map7	0001.CSV	2900.54	-0.010551
PSB107_map7	0001.CSV	2904.39	-0.0100886
PSB107_map7	0001.CSV	2908.25	-0.00930049
PSB107_map7	0001.CSV	2912.11	-0.00822238
PSB107_map7	0001.CSV	2915.97	-0.00750387
PSB107_map7	0001.CSV	2919.82	-0.00748208
PSB107_map7	0001.CSV	2923.68	-0.00770522
PSB107_map7	0001.CSV	2927.54	-0.00767322
PSB107_map7	0001.CSV	2931.39	-0.00810047
PSB107_map7	0001.CSV	2935.25	-0.00906779
PSB107_map7	0001.CSV	2939.11	-0.00956878
PSB107_map7	0001.CSV	2942.96	-0.00955309
PSB107_map7	0001.CSV	2946.82	-0.00977001
PSB107_map7	0001.CSV	2950.68	-0.0101944
PSB107_map7	0001.CSV	2954.54	-0.0107271
PSB107_map7	0001.CSV	2958.39	-0.0112465
PSB107_map7	0001.CSV	2962.25	-0.0114789
PSB107_map7	0001.CSV	2966.11	-0.0118642
PSB107_map7	0001.CSV	2969.96	-0.0120558
PSB107_map7	0001.CSV	2973.82	-0.0118956
PSB107_map7	0001.CSV	2977.68	-0.0118191
PSB107_map7	0001.CSV	2981.53	-0.0121028
PSB107_map7	0001.CSV	2985.39	-0.0126058
PSB107_map7	0001.CSV	2989.25	-0.0126628
PSB107_map7	0001.CSV	2993.11	-0.0124769
PSB107_map7	0001.CSV	2996.96	-0.0125598
PSB107_map7	0001.CSV	3000.82	-0.012838
PSB107_map7	0001.CSV	3004.68	-0.0130579
PSB107_map7	0001.CSV	3008.53	-0.0129464
PSB107_map7	0001.CSV	3012.39	-0.0126513
PSB107_map7	0001.CSV	3016.25	-0.0125971
PSB107_map7	0001.CSV	3020.11	-0.0128104
PSB107_map7	0001.CSV	3023.96	-0.0129339
PSB107_map7	0001.CSV	3027.82	-0.0129067
PSB107_map7	0001.CSV	3031.68	-0.0126808
PSB107_map7	0001.CSV	3035.53	-0.0125714
PSB107_map7	0001.CSV	3039.39	-0.0125741
PSB107_map7	0001.CSV	3043.25	-0.0125243
PSB107_map7	0001.CSV	3047.11	-0.0125293
PSB107_map7	0001.CSV	3050.96	-0.0124829
PSB107_map7	0001.CSV	3054.82	-0.012506
PSB107_map7	0001.CSV	3058.68	-0.0126094
PSB107_map7	0001.CSV	3062.53	-0.0125082
PSB107_map7	0001.CSV	3066.39	-0.0122076
PSB107_map7	0001.CSV	3070.25	-0.0121111
PSB107_map7	0001.CSV	3074.11	-0.0120675
PSB107_map7	0001.CSV	3077.96	-0.0119826
PSB107_map7	0001.CSV	3081.82	-0.0118696
PSB107_map7	0001.CSV	3085.68	-0.0117187
PSB107_map7	0001.CSV	3089.53	-0.0117489
PSB107_map7	0001.CSV	3093.39	-0.0118845
PSB107_map7	0001.CSV	3097.25	-0.0118644
PSB107_map7	0001.CSV	3101.11	-0.0117423
PSB107_map7	0001.CSV	3104.96	-0.0116331
PSB107_map7	0001.CSV	3108.82	-0.0115286
PSB107_map7	0001.CSV	3112.68	-0.0114149
PSB107_map7	0001.CSV	3116.53	-0.0112192
PSB107_map7	0001.CSV	3120.39	-0.0111424
PSB107_map7	0001.CSV	3124.25	-0.0112911
PSB107_map7	0001.CSV	3128.11	-0.0113298
PSB107_map7	0001.CSV	3131.96	-0.0112289
PSB107_map7	0001.CSV	3135.82	-0.0109917
PSB107_map7	0001.CSV	3139.68	-0.0108769
PSB107_map7	0001.CSV	3143.53	-0.0110267
PSB107_map7	0001.CSV	3147.39	-0.0109292
PSB107_map7	0001.CSV	3151.25	-0.0106172
PSB107_map7	0001.CSV	3155.1	-0.0105356
PSB107_map7	0001.CSV	3158.96	-0.0107138
PSB107_map7	0001.CSV	3162.82	-0.0108506
PSB107_map7	0001.CSV	3166.68	-0.0108669
PSB107_map7	0001.CSV	3170.53	-0.0108302
PSB107_map7	0001.CSV	3174.39	-0.0107838
PSB107_map7	0001.CSV	3178.25	-0.0106433
PSB107_map7	0001.CSV	3182.1	-0.0104817
PSB107_map7	0001.CSV	3185.96	-0.010394
PSB107_map7	0001.CSV	3189.82	-0.0103786
PSB107_map7	0001.CSV	3193.68	-0.0103771
PSB107_map7	0001.CSV	3197.53	-0.0102907
PSB107_map7	0001.CSV	3201.39	-0.0101091
PSB107_map7	0001.CSV	3205.25	-0.0100146
PSB107_map7	0001.CSV	3209.1	-0.0100122
PSB107_map7	0001.CSV	3212.96	-0.009973
PSB107_map7	0001.CSV	3216.82	-0.00995778
PSB107_map7	0001.CSV	3220.68	-0.00991186
PSB107_map7	0001.CSV	3224.53	-0.00983733
PSB107_map7	0001.CSV	3228.39	-0.00966102
PSB107_map7	0001.CSV	3232.25	-0.00940595
PSB107_map7	0001.CSV	3236.1	-0.00942306
PSB107_map7	0001.CSV	3239.96	-0.00954538
PSB107_map7	0001.CSV	3243.82	-0.00937436
PSB107_map7	0001.CSV	3247.68	-0.00920283
PSB107_map7	0001.CSV	3251.53	-0.00924542
PSB107_map7	0001.CSV	3255.39	-0.00921126
PSB107_map7	0001.CSV	3259.25	-0.0092386
PSB107_map7	0001.CSV	3263.1	-0.00922433
PSB107_map7	0001.CSV	3266.96	-0.00890243
PSB107_map7	0001.CSV	3270.82	-0.00860855
PSB107_map7	0001.CSV	3274.68	-0.00870765
PSB107_map7	0001.CSV	3278.53	-0.00889513
PSB107_map7	0001.CSV	3282.39	-0.00901765
PSB107_map7	0001.CSV	3286.25	-0.00893291
PSB107_map7	0001.CSV	3290.1	-0.00852604
PSB107_map7	0001.CSV	3293.96	-0.00837916
PSB107_map7	0001.CSV	3297.82	-0.00852782
PSB107_map7	0001.CSV	3301.67	-0.00851275
PSB107_map7	0001.CSV	3305.53	-0.00834555
PSB107_map7	0001.CSV	3309.39	-0.00818112
PSB107_map7	0001.CSV	3313.25	-0.00838835
PSB107_map7	0001.CSV	3317.1	-0.0085619
PSB107_map7	0001.CSV	3320.96	-0.00831564
PSB107_map7	0001.CSV	3324.82	-0.00807208
PSB107_map7	0001.CSV	3328.67	-0.00811192
PSB107_map7	0001.CSV	3332.53	-0.00803253
PSB107_map7	0001.CSV	3336.39	-0.00770108
PSB107_map7	0001.CSV	3340.24	-0.00751866
PSB107_map7	0001.CSV	3344.1	-0.00760319
PSB107_map7	0001.CSV	3347.96	-0.00761761
PSB107_map7	0001.CSV	3351.82	-0.00761631
PSB107_map7	0001.CSV	3355.67	-0.0078123
PSB107_map7	0001.CSV	3359.53	-0.00766895
PSB107_map7	0001.CSV	3363.39	-0.00730341
PSB107_map7	0001.CSV	3367.24	-0.00699948
PSB107_map7	0001.CSV	3371.1	-0.00705794
PSB107_map7	0001.CSV	3374.96	-0.00734075
PSB107_map7	0001.CSV	3378.82	-0.00740463
PSB107_map7	0001.CSV	3382.67	-0.0073902
PSB107_map7	0001.CSV	3386.53	-0.00730168
PSB107_map7	0001.CSV	3390.39	-0.00721559
PSB107_map7	0001.CSV	3394.24	-0.00717395
PSB107_map7	0001.CSV	3398.1	-0.00716987
PSB107_map7	0001.CSV	3401.96	-0.00727327
PSB107_map7	0001.CSV	3405.82	-0.00730973
PSB107_map7	0001.CSV	3409.67	-0.007334
PSB107_map7	0001.CSV	3413.53	-0.00759417
PSB107_map7	0001.CSV	3417.39	-0.00784093
PSB107_map7	0001.CSV	3421.24	-0.00784624
PSB107_map7	0001.CSV	3425.1	-0.00778568
PSB107_map7	0001.CSV	3428.96	-0.00773689
PSB107_map7	0001.CSV	3432.82	-0.00762435
PSB107_map7	0001.CSV	3436.67	-0.00782128
PSB107_map7	0001.CSV	3440.53	-0.00819871
PSB107_map7	0001.CSV	3444.39	-0.0083291
PSB107_map7	0001.CSV	3448.24	-0.00837308
PSB107_map7	0001.CSV	3452.1	-0.00876682
PSB107_map7	0001.CSV	3455.96	-0.00892889
PSB107_map7	0001.CSV	3459.82	-0.00873672
PSB107_map7	0001.CSV	3463.67	-0.0086564
PSB107_map7	0001.CSV	3467.53	-0.00875769
PSB107_map7	0001.CSV	3471.39	-0.0091676
PSB107_map7	0001.CSV	3475.24	-0.00948492
PSB107_map7	0001.CSV	3479.1	-0.00951796
PSB107_map7	0001.CSV	3482.96	-0.00952133
PSB107_map7	0001.CSV	3486.82	-0.00939512
PSB107_map7	0001.CSV	3490.67	-0.00947701
PSB107_map7	0001.CSV	3494.53	-0.00969073
PSB107_map7	0001.CSV	3498.39	-0.00997258
PSB107_map7	0001.CSV	3502.24	-0.0102854
PSB107_map7	0001.CSV	3506.1	-0.0105033
PSB107_map7	0001.CSV	3509.96	-0.0106284
PSB107_map7	0001.CSV	3513.81	-0.0107272
PSB107_map7	0001.CSV	3517.67	-0.0110285
PSB107_map7	0001.CSV	3521.53	-0.0111483
PSB107_map7	0001.CSV	3525.39	-0.0112341
PSB107_map7	0001.CSV	3529.24	-0.0114717
PSB107_map7	0001.CSV	3533.1	-0.0115491
PSB107_map7	0001.CSV	3536.96	-0.011526
PSB107_map7	0001.CSV	3540.81	-0.0116562
PSB107_map7	0001.CSV	3544.67	-0.0117887
PSB107_map7	0001.CSV	3548.53	-0.0117965
PSB107_map7	0001.CSV	3552.39	-0.0120558
PSB107_map7	0001.CSV	3556.24	-0.0124217
PSB107_map7	0001.CSV	3560.1	-0.0128006
PSB107_map7	0001.CSV	3563.96	-0.013162
PSB107_map7	0001.CSV	3567.81	-0.0128428
PSB107_map7	0001.CSV	3571.67	-0.0128939
PSB107_map7	0001.CSV	3575.53	-0.0133669
PSB107_map7	0001.CSV	3579.39	-0.0133805
PSB107_map7	0001.CSV	3583.24	-0.0134602
PSB107_map7	0001.CSV	3587.1	-0.0133636
PSB107_map7	0001.CSV	3590.96	-0.0132657
PSB107_map7	0001.CSV	3594.81	-0.0135415
PSB107_map7	0001.CSV	3598.67	-0.0135345
PSB107_map7	0001.CSV	3602.53	-0.0137569
PSB107_map7	0001.CSV	3606.39	-0.0143009
PSB107_map7	0001.CSV	3610.24	-0.0144609
PSB107_map7	0001.CSV	3614.1	-0.0143955
PSB107_map7	0001.CSV	3617.96	-0.0141865
PSB107_map7	0001.CSV	3621.81	-0.0142002
PSB107_map7	0001.CSV	3625.67	-0.0148245
PSB107_map7	0001.CSV	3629.53	-0.0146508
PSB107_map7	0001.CSV	3633.39	-0.0143008
PSB107_map7	0001.CSV	3637.24	-0.014732
PSB107_map7	0001.CSV	3641.1	-0.0150453
PSB107_map7	0001.CSV	3644.96	-0.0155542
PSB107_map7	0001.CSV	3648.81	-0.0151371
PSB107_map7	0001.CSV	3652.67	-0.0142556
PSB107_map7	0001.CSV	3656.53	-0.014354
PSB107_map7	0001.CSV	3660.38	-0.014566
PSB107_map7	0001.CSV	3664.24	-0.0152558
PSB107_map7	0001.CSV	3668.1	-0.0157281
PSB107_map7	0001.CSV	3671.96	-0.0154457
PSB107_map7	0001.CSV	3675.81	-0.014923
PSB107_map7	0001.CSV	3679.67	-0.0146678
PSB107_map7	0001.CSV	3683.53	-0.0151528
PSB107_map7	0001.CSV	3687.38	-0.0153736
PSB107_map7	0001.CSV	3691.24	-0.0145099
PSB107_map7	0001.CSV	3695.1	-0.0145302
PSB107_map7	0001.CSV	3698.95	-0.0149177
PSB107_map7	0001.CSV	3702.81	-0.0150167
PSB107_map7	0001.CSV	3706.67	-0.015357
PSB107_map7	0001.CSV	3710.53	-0.0152171
PSB107_map7	0001.CSV	3714.38	-0.014626
PSB107_map7	0001.CSV	3718.24	-0.0151314
PSB107_map7	0001.CSV	3722.1	-0.0153673
PSB107_map7	0001.CSV	3725.95	-0.0150313
PSB107_map7	0001.CSV	3729.81	-0.0152012
PSB107_map7	0001.CSV	3733.67	-0.0151412
PSB107_map7	0001.CSV	3737.53	-0.014211
PSB107_map7	0001.CSV	3741.38	-0.0147898
PSB107_map7	0001.CSV	3745.24	-0.0152559
PSB107_map7	0001.CSV	3749.1	-0.0151191
PSB107_map7	0001.CSV	3752.95	-0.0144091
PSB107_map7	0001.CSV	3756.81	-0.0144283
PSB107_map7	0001.CSV	3760.67	-0.0145137
PSB107_map7	0001.CSV	3764.53	-0.0148212
PSB107_map7	0001.CSV	3768.38	-0.0148005
PSB107_map7	0001.CSV	3772.24	-0.014719
PSB107_map7	0001.CSV	3776.1	-0.0149556
PSB107_map7	0001.CSV	3779.95	-0.0147905
PSB107_map7	0001.CSV	3783.81	-0.01462
PSB107_map7	0001.CSV	3787.67	-0.0146508
PSB107_map7	0001.CSV	3791.53	-0.0149222
PSB107_map7	0001.CSV	3795.38	-0.0151986
PSB107_map7	0001.CSV	3799.24	-0.0149601
PSB107_map7	0001.CSV	3803.1	-0.0144799
PSB107_map7	0001.CSV	3806.95	-0.0143028
PSB107_map7	0001.CSV	3810.81	-0.014539
PSB107_map7	0001.CSV	3814.67	-0.0148072
PSB107_map7	0001.CSV	3818.53	-0.0146459
PSB107_map7	0001.CSV	3822.38	-0.0143862
PSB107_map7	0001.CSV	3826.24	-0.0144601
PSB107_map7	0001.CSV	3830.1	-0.0147866
PSB107_map7	0001.CSV	3833.95	-0.0150676
PSB107_map7	0001.CSV	3837.81	-0.0148475
PSB107_map7	0001.CSV	3841.67	-0.0140459
PSB107_map7	0001.CSV	3845.53	-0.0143017
PSB107_map7	0001.CSV	3849.38	-0.0151303
PSB107_map7	0001.CSV	3853.24	-0.014679
PSB107_map7	0001.CSV	3857.1	-0.0141346
PSB107_map7	0001.CSV	3860.95	-0.0147192
PSB107_map7	0001.CSV	3864.81	-0.0145273
PSB107_map7	0001.CSV	3868.67	-0.0142513
PSB107_map7	0001.CSV	3872.52	-0.0138523
PSB107_map7	0001.CSV	3876.38	-0.0139898
PSB107_map7	0001.CSV	3880.24	-0.0143526
PSB107_map7	0001.CSV	3884.1	-0.0141431
PSB107_map7	0001.CSV	3887.95	-0.0141963
PSB107_map7	0001.CSV	3891.81	-0.0141543
PSB107_map7	0001.CSV	3895.67	-0.0142808
PSB107_map7	0001.CSV	3899.52	-0.0146598
PSB107_map7	0001.CSV	3903.38	-0.0139349
PSB107_map7	0001.CSV	3907.24	-0.0135618
PSB107_map7	0001.CSV	3911.1	-0.0140425
PSB107_map7	0001.CSV	3914.95	-0.0142476
PSB107_map7	0001.CSV	3918.81	-0.013907
PSB107_map7	0001.CSV	3922.67	-0.0138292
PSB107_map7	0001.CSV	3926.52	-0.0137345
PSB107_map7	0001.CSV	3930.38	-0.0135461
PSB107_map7	0001.CSV	3934.24	-0.013474
PSB107_map7	0001.CSV	3938.09	-0.0137908
PSB107_map7	0001.CSV	3941.95	-0.0139134
PSB107_map7	0001.CSV	3945.81	-0.0138561
PSB107_map7	0001.CSV	3949.67	-0.0137082
PSB107_map7	0001.CSV	3953.52	-0.0135689
PSB107_map7	0001.CSV	3957.38	-0.0136393
PSB107_map7	0001.CSV	3961.24	-0.0137249
PSB107_map7	0001.CSV	3965.09	-0.0138607
PSB107_map7	0001.CSV	3968.95	-0.0139196
PSB107_map7	0001.CSV	3972.81	-0.0137245
PSB107_map7	0001.CSV	3976.67	-0.0135426
PSB107_map7	0001.CSV	3980.52	-0.0136076
PSB107_map7	0001.CSV	3984.38	-0.0137206
PSB107_map7	0001.CSV	3988.24	-0.0137711
PSB107_map7	0001.CSV	3992.09	-0.0136075
PSB107_map7	0001.CSV	3995.95	-0.0134874
PSB107_map7	0001.CSV	3999.81	-0.0135674
PSB107_map7	0002.CSV	674.992	0.0223644
PSB107_map7	0002.CSV	678.849	0.0250368
PSB107_map7	0002.CSV	682.706	0.0261513
PSB107_map7	0002.CSV	686.563	0.0292508
PSB107_map7	0002.CSV	690.42	0.0347244
PSB107_map7	0002.CSV	694.277	0.0478104
PSB107_map7	0002.CSV	698.134	0.0614559
PSB107_map7	0002.CSV	701.991	0.0541671
PSB107_map7	0002.CSV	705.849	0.0448365
PSB107_map7	0002.CSV	709.706	0.0636098
PSB107_map7	0002.CSV	713.563	0.0658757
PSB107_map7	0002.CSV	717.42	0.0325908
PSB107_map7	0002.CSV	721.277	0.0117596
PSB107_map7	0002.CSV	725.134	0.0100296
PSB107_map7	0002.CSV	728.991	0.011441
PSB107_map7	0002.CSV	732.848	0.0136417
PSB107_map7	0002.CSV	736.705	0.015125
PSB107_map7	0002.CSV	740.562	0.0169197
PSB107_map7	0002.CSV	744.42	0.0178854
PSB107_map7	0002.CSV	748.277	0.018637
PSB107_map7	0002.CSV	752.134	0.0185086
PSB107_map7	0002.CSV	755.991	0.0188954
PSB107_map7	0002.CSV	759.848	0.0189419
PSB107_map7	0002.CSV	763.705	0.0194653
PSB107_map7	0002.CSV	767.562	0.0195516
PSB107_map7	0002.CSV	771.419	0.0201782
PSB107_map7	0002.CSV	775.276	0.020317
PSB107_map7	0002.CSV	779.133	0.0205394
PSB107_map7	0002.CSV	782.99	0.0200729
PSB107_map7	0002.CSV	786.848	0.0205759
PSB107_map7	0002.CSV	790.705	0.0208288
PSB107_map7	0002.CSV	794.562	0.0214793
PSB107_map7	0002.CSV	798.419	0.021687
PSB107_map7	0002.CSV	802.276	0.0227297
PSB107_map7	0002.CSV	806.133	0.0238134
PSB107_map7	0002.CSV	809.99	0.0256174
PSB107_map7	0002.CSV	813.847	0.0270083
PSB107_map7	0002.CSV	817.704	0.0292982
PSB107_map7	0002.CSV	821.562	0.0317876
PSB107_map7	0002.CSV	825.419	0.0357815
PSB107_map7	0002.CSV	829.276	0.0403358
PSB107_map7	0002.CSV	833.133	0.0471539
PSB107_map7	0002.CSV	836.99	0.0569612
PSB107_map7	0002.CSV	840.847	0.0718797
PSB107_map7	0002.CSV	844.704	0.0874243
PSB107_map7	0002.CSV	848.561	0.110606
PSB107_map7	0002.CSV	852.418	0.135904
PSB107_map7	0002.CSV	856.275	0.138814
PSB107_map7	0002.CSV	860.132	0.116778
PSB107_map7	0002.CSV	863.99	0.0870264
PSB107_map7	0002.CSV	867.847	0.0590851
PSB107_map7	0002.CSV	871.704	0.0379186
PSB107_map7	0002.CSV	875.561	0.0240414
PSB107_map7	0002.CSV	879.418	0.0173896
PSB107_map7	0002.CSV	883.275	0.0138866
PSB107_map7	0002.CSV	887.132	0.0120446
PSB107_map7	0002.CSV	890.989	0.0113104
PSB107_map7	0002.CSV	894.846	0.0116815
PSB107_map7	0002.CSV	898.703	0.0120292
PSB107_map7	0002.CSV	902.561	0.0127664
PSB107_map7	0002.CSV	906.418	0.0132832
PSB107_map7	0002.CSV	910.275	0.0133431
PSB107_map7	0002.CSV	914.132	0.0127445
PSB107_map7	0002.CSV	917.989	0.0129794
PSB107_map7	0002.CSV	921.846	0.013142
PSB107_map7	0002.CSV	925.703	0.013452
PSB107_map7	0002.CSV	929.56	0.0134524
PSB107_map7	0002.CSV	933.417	0.0138908
PSB107_map7	0002.CSV	937.274	0.0140933
PSB107_map7	0002.CSV	941.131	0.0144709
PSB107_map7	0002.CSV	944.989	0.0144631
PSB107_map7	0002.CSV	948.846	0.014725
PSB107_map7	0002.CSV	952.703	0.0149441
PSB107_map7	0002.CSV	956.56	0.0154473
PSB107_map7	0002.CSV	960.417	0.0155372
PSB107_map7	0002.CSV	964.274	0.0158466
PSB107_map7	0002.CSV	968.131	0.0160097
PSB107_map7	0002.CSV	971.988	0.0164834
PSB107_map7	0002.CSV	975.845	0.0169578
PSB107_map7	0002.CSV	979.702	0.0178294
PSB107_map7	0002.CSV	983.559	0.0185095
PSB107_map7	0002.CSV	987.417	0.0194797
PSB107_map7	0002.CSV	991.274	0.0202306
PSB107_map7	0002.CSV	995.131	0.0212389
PSB107_map7	0002.CSV	998.988	0.0219408
PSB107_map7	0002.CSV	1002.85	0.0229561
PSB107_map7	0002.CSV	1006.7	0.0238474
PSB107_map7	0002.CSV	1010.56	0.0248677
PSB107_map7	0002.CSV	1014.42	0.025421
PSB107_map7	0002.CSV	1018.27	0.026052
PSB107_map7	0002.CSV	1022.13	0.026182
PSB107_map7	0002.CSV	1025.99	0.0264772
PSB107_map7	0002.CSV	1029.85	0.0264244
PSB107_map7	0002.CSV	1033.7	0.0268011
PSB107_map7	0002.CSV	1037.56	0.0272299
PSB107_map7	0002.CSV	1041.42	0.0279738
PSB107_map7	0002.CSV	1045.27	0.0283413
PSB107_map7	0002.CSV	1049.13	0.0290314
PSB107_map7	0002.CSV	1052.99	0.0295253
PSB107_map7	0002.CSV	1056.84	0.0305009
PSB107_map7	0002.CSV	1060.7	0.0311877
PSB107_map7	0002.CSV	1064.56	0.0320142
PSB107_map7	0002.CSV	1068.42	0.0322756
PSB107_map7	0002.CSV	1072.27	0.032794
PSB107_map7	0002.CSV	1076.13	0.0344077
PSB107_map7	0002.CSV	1079.99	0.0404033
PSB107_map7	0002.CSV	1083.84	0.0418571
PSB107_map7	0002.CSV	1087.7	0.0332664
PSB107_map7	0002.CSV	1091.56	0.0274822
PSB107_map7	0002.CSV	1095.41	0.0269995
PSB107_map7	0002.CSV	1099.27	0.0271956
PSB107_map7	0002.CSV	1103.13	0.0277805
PSB107_map7	0002.CSV	1106.99	0.0282782
PSB107_map7	0002.CSV	1110.84	0.0290533
PSB107_map7	0002.CSV	1114.7	0.0293427
PSB107_map7	0002.CSV	1118.56	0.029574
PSB107_map7	0002.CSV	1122.41	0.0294804
PSB107_map7	0002.CSV	1126.27	0.0294722
PSB107_map7	0002.CSV	1130.13	0.0291947
PSB107_map7	0002.CSV	1133.99	0.0291999
PSB107_map7	0002.CSV	1137.84	0.0291448
PSB107_map7	0002.CSV	1141.7	0.0293525
PSB107_map7	0002.CSV	1145.56	0.0293778
PSB107_map7	0002.CSV	1149.41	0.0297286
PSB107_map7	0002.CSV	1153.27	0.0300537
PSB107_map7	0002.CSV	1157.13	0.0306127
PSB107_map7	0002.CSV	1160.99	0.030781
PSB107_map7	0002.CSV	1164.84	0.0309785
PSB107_map7	0002.CSV	1168.7	0.0308702
PSB107_map7	0002.CSV	1172.56	0.0309389
PSB107_map7	0002.CSV	1176.41	0.0309135
PSB107_map7	0002.CSV	1180.27	0.0312739
PSB107_map7	0002.CSV	1184.13	0.0313443
PSB107_map7	0002.CSV	1187.99	0.0316214
PSB107_map7	0002.CSV	1191.84	0.0317749
PSB107_map7	0002.CSV	1195.7	0.0321422
PSB107_map7	0002.CSV	1199.56	0.0323217
PSB107_map7	0002.CSV	1203.41	0.0327541
PSB107_map7	0002.CSV	1207.27	0.0331144
PSB107_map7	0002.CSV	1211.13	0.033871
PSB107_map7	0002.CSV	1214.98	0.034471
PSB107_map7	0002.CSV	1218.84	0.035318
PSB107_map7	0002.CSV	1222.7	0.035982
PSB107_map7	0002.CSV	1226.56	0.0369659
PSB107_map7	0002.CSV	1230.41	0.0377847
PSB107_map7	0002.CSV	1234.27	0.0388923
PSB107_map7	0002.CSV	1238.13	0.0398587
PSB107_map7	0002.CSV	1241.98	0.0411188
PSB107_map7	0002.CSV	1245.84	0.0421545
PSB107_map7	0002.CSV	1249.7	0.0432693
PSB107_map7	0002.CSV	1253.56	0.0439274
PSB107_map7	0002.CSV	1257.41	0.0446313
PSB107_map7	0002.CSV	1261.27	0.045273
PSB107_map7	0002.CSV	1265.13	0.0463125
PSB107_map7	0002.CSV	1268.98	0.0472244
PSB107_map7	0002.CSV	1272.84	0.0483763
PSB107_map7	0002.CSV	1276.7	0.0491794
PSB107_map7	0002.CSV	1280.56	0.0501093
PSB107_map7	0002.CSV	1284.41	0.0506179
PSB107_map7	0002.CSV	1288.27	0.0512388
PSB107_map7	0002.CSV	1292.13	0.0516812
PSB107_map7	0002.CSV	1295.98	0.0524725
PSB107_map7	0002.CSV	1299.84	0.0531812
PSB107_map7	0002.CSV	1303.7	0.054267
PSB107_map7	0002.CSV	1307.56	0.0552819
PSB107_map7	0002.CSV	1311.41	0.0567206
PSB107_map7	0002.CSV	1315.27	0.0580281
PSB107_map7	0002.CSV	1319.13	0.0596638
PSB107_map7	0002.CSV	1322.98	0.0610232
PSB107_map7	0002.CSV	1326.84	0.0627167
PSB107_map7	0002.CSV	1330.7	0.0644027
PSB107_map7	0002.CSV	1334.56	0.0664097
PSB107_map7	0002.CSV	1338.41	0.0687157
PSB107_map7	0002.CSV	1342.27	0.0716675
PSB107_map7	0002.CSV	1346.13	0.073802
PSB107_map7	0002.CSV	1349.98	0.0765472
PSB107_map7	0002.CSV	1353.84	0.0793753
PSB107_map7	0002.CSV	1357.7	0.0825323
PSB107_map7	0002.CSV	1361.56	0.0859915
PSB107_map7	0002.CSV	1365.41	0.0905403
PSB107_map7	0002.CSV	1369.27	0.0940594
PSB107_map7	0002.CSV	1373.13	0.0986848
PSB107_map7	0002.CSV	1376.98	0.103836
PSB107_map7	0002.CSV	1380.84	0.108559
PSB107_map7	0002.CSV	1384.7	0.112857
PSB107_map7	0002.CSV	1388.56	0.118493
PSB107_map7	0002.CSV	1392.41	0.122508
PSB107_map7	0002.CSV	1396.27	0.127337
PSB107_map7	0002.CSV	1400.13	0.131608
PSB107_map7	0002.CSV	1403.98	0.135489
PSB107_map7	0002.CSV	1407.84	0.138885
PSB107_map7	0002.CSV	1411.7	0.142155
PSB107_map7	0002.CSV	1415.55	0.144465
PSB107_map7	0002.CSV	1419.41	0.148638
PSB107_map7	0002.CSV	1423.27	0.151917
PSB107_map7	0002.CSV	1427.12	0.155612
PSB107_map7	0002.CSV	1430.98	0.159464
PSB107_map7	0002.CSV	1434.84	0.165043
PSB107_map7	0002.CSV	1438.7	0.17095
PSB107_map7	0002.CSV	1442.55	0.175278
PSB107_map7	0002.CSV	1446.41	0.176745
PSB107_map7	0002.CSV	1450.27	0.176319
PSB107_map7	0002.CSV	1454.12	0.172996
PSB107_map7	0002.CSV	1457.98	0.167574
PSB107_map7	0002.CSV	1461.84	0.162903
PSB107_map7	0002.CSV	1465.7	0.159755
PSB107_map7	0002.CSV	1469.55	0.154185
PSB107_map7	0002.CSV	1473.41	0.143947
PSB107_map7	0002.CSV	1477.27	0.131277
PSB107_map7	0002.CSV	1481.12	0.123774
PSB107_map7	0002.CSV	1484.98	0.116466
PSB107_map7	0002.CSV	1488.84	0.107762
PSB107_map7	0002.CSV	1492.7	0.0987724
PSB107_map7	0002.CSV	1496.55	0.0923329
PSB107_map7	0002.CSV	1500.41	0.0847343
PSB107_map7	0002.CSV	1504.27	0.0804018
PSB107_map7	0002.CSV	1508.12	0.0714793
PSB107_map7	0002.CSV	1511.98	0.0655238
PSB107_map7	0002.CSV	1515.84	0.0614492
PSB107_map7	0002.CSV	1519.7	0.0561622
PSB107_map7	0002.CSV	1523.55	0.0493999
PSB107_map7	0002.CSV	1527.41	0.0448528
PSB107_map7	0002.CSV	1531.27	0.0405927
PSB107_map7	0002.CSV	1535.12	0.0366998
PSB107_map7	0002.CSV	1538.98	0.0326604
PSB107_map7	0002.CSV	1542.84	0.0263146
PSB107_map7	0002.CSV	1546.7	0.0220544
PSB107_map7	0002.CSV	1550.55	0.0190049
PSB107_map7	0002.CSV	1554.41	0.0155633
PSB107_map7	0002.CSV	1558.27	0.0112269
PSB107_map7	0002.CSV	1562.12	0.0068749
PSB107_map7	0002.CSV	1565.98	0.00476983
PSB107_map7	0002.CSV	1569.84	0.00173385
PSB107_map7	0002.CSV	1573.69	-0.00110636
PSB107_map7	0002.CSV	1577.55	-0.00437042
PSB107_map7	0002.CSV	1581.41	-0.00688278
PSB107_map7	0002.CSV	1585.27	-0.00883692
PSB107_map7	0002.CSV	1589.12	-0.010287
PSB107_map7	0002.CSV	1592.98	-0.0113477
PSB107_map7	0002.CSV	1596.84	-0.0120033
PSB107_map7	0002.CSV	1600.69	-0.0125165
PSB107_map7	0002.CSV	1604.55	-0.0128195
PSB107_map7	0002.CSV	1608.41	-0.0132268
PSB107_map7	0002.CSV	1612.27	-0.0135343
PSB107_map7	0002.CSV	1616.12	-0.0139053
PSB107_map7	0002.CSV	1619.98	-0.0141816
PSB107_map7	0002.CSV	1623.84	-0.0145287
PSB107_map7	0002.CSV	1627.69	-0.0146701
PSB107_map7	0002.CSV	1631.55	-0.0151274
PSB107_map7	0002.CSV	1635.41	-0.0152398
PSB107_map7	0002.CSV	1639.27	-0.0152281
PSB107_map7	0002.CSV	1643.12	-0.0154748
PSB107_map7	0002.CSV	1646.98	-0.0155763
PSB107_map7	0002.CSV	1650.84	-0.0154734
PSB107_map7	0002.CSV	1654.69	-0.0154507
PSB107_map7	0002.CSV	1658.55	-0.015675
PSB107_map7	0002.CSV	1662.41	-0.0160425
PSB107_map7	0002.CSV	1666.27	-0.0162255
PSB107_map7	0002.CSV	1670.12	-0.016431
PSB107_map7	0002.CSV	1673.98	-0.0163868
PSB107_map7	0002.CSV	1677.84	-0.0167675
PSB107_map7	0002.CSV	1681.69	-0.0169914
PSB107_map7	0002.CSV	1685.55	-0.0169113
PSB107_map7	0002.CSV	1689.41	-0.0168893
PSB107_map7	0002.CSV	1693.27	-0.0173789
PSB107_map7	0002.CSV	1697.12	-0.017344
PSB107_map7	0002.CSV	1700.98	-0.0169429
PSB107_map7	0002.CSV	1704.84	-0.0168435
PSB107_map7	0002.CSV	1708.69	-0.0167524
PSB107_map7	0002.CSV	1712.55	-0.0166315
PSB107_map7	0002.CSV	1716.41	-0.0159564
PSB107_map7	0002.CSV	1720.27	-0.0149812
PSB107_map7	0002.CSV	1724.12	-0.014952
PSB107_map7	0002.CSV	1727.98	-0.0150346
PSB107_map7	0002.CSV	1731.84	-0.0151075
PSB107_map7	0002.CSV	1735.69	-0.0149842
PSB107_map7	0002.CSV	1739.55	-0.0154233
PSB107_map7	0002.CSV	1743.41	-0.0159005
PSB107_map7	0002.CSV	1747.27	-0.016444
PSB107_map7	0002.CSV	1751.12	-0.0168669
PSB107_map7	0002.CSV	1754.98	-0.0173618
PSB107_map7	0002.CSV	1758.84	-0.0175735
PSB107_map7	0002.CSV	1762.69	-0.0176527
PSB107_map7	0002.CSV	1766.55	-0.017734
PSB107_map7	0002.CSV	1770.41	-0.0173144
PSB107_map7	0002.CSV	1774.26	-0.0153753
PSB107_map7	0002.CSV	1778.12	-0.0135249
PSB107_map7	0002.CSV	1781.98	-0.0115237
PSB107_map7	0002.CSV	1785.84	-0.0104944
PSB107_map7	0002.CSV	1789.69	-0.0108886
PSB107_map7	0002.CSV	1793.55	-0.0128461
PSB107_map7	0002.CSV	1797.41	-0.0145635
PSB107_map7	0002.CSV	1801.26	-0.016036
PSB107_map7	0002.CSV	1805.12	-0.0170439
PSB107_map7	0002.CSV	1808.98	-0.0175616
PSB107_map7	0002.CSV	1812.84	-0.0176932
PSB107_map7	0002.CSV	1816.69	-0.0178634
PSB107_map7	0002.CSV	1820.55	-0.0178854
PSB107_map7	0002.CSV	1824.41	-0.0179547
PSB107_map7	0002.CSV	1828.26	-0.0177498
PSB107_map7	0002.CSV	1832.12	-0.0175861
PSB107_map7	0002.CSV	1835.98	-0.0175836
PSB107_map7	0002.CSV	1839.84	-0.017677
PSB107_map7	0002.CSV	1843.69	-0.017458
PSB107_map7	0002.CSV	1847.55	-0.0172519
PSB107_map7	0002.CSV	1851.41	-0.0173417
PSB107_map7	0002.CSV	1855.26	-0.0174574
PSB107_map7	0002.CSV	1859.12	-0.0173663
PSB107_map7	0002.CSV	1862.98	-0.0174136
PSB107_map7	0002.CSV	1866.84	-0.0173042
PSB107_map7	0002.CSV	1870.69	-0.0169975
PSB107_map7	0002.CSV	1874.55	-0.0170351
PSB107_map7	0002.CSV	1878.41	-0.0171338
PSB107_map7	0002.CSV	1882.26	-0.0171257
PSB107_map7	0002.CSV	1886.12	-0.017171
PSB107_map7	0002.CSV	1889.98	-0.0170417
PSB107_map7	0002.CSV	1893.83	-0.0169669
PSB107_map7	0002.CSV	1897.69	-0.0168954
PSB107_map7	0002.CSV	1901.55	-0.0169457
PSB107_map7	0002.CSV	1905.41	-0.0169765
PSB107_map7	0002.CSV	1909.26	-0.0168902
PSB107_map7	0002.CSV	1913.12	-0.0168206
PSB107_map7	0002.CSV	1916.98	-0.0168699
PSB107_map7	0002.CSV	1920.83	-0.0167047
PSB107_map7	0002.CSV	1924.69	-0.0166372
PSB107_map7	0002.CSV	1928.55	-0.0166144
PSB107_map7	0002.CSV	1932.4	-0.0166361
PSB107_map7	0002.CSV	1936.26	-0.0166127
PSB107_map7	0002.CSV	1940.12	-0.01661
PSB107_map7	0002.CSV	1943.98	-0.0164
PSB107_map7	0002.CSV	1947.83	-0.0163705
PSB107_map7	0002.CSV	1951.69	-0.0164321
PSB107_map7	0002.CSV	1955.55	-0.0164384
PSB107_map7	0002.CSV	1959.4	-0.0163647
PSB107_map7	0002.CSV	1963.26	-0.0163925
PSB107_map7	0002.CSV	1967.12	-0.0162274
PSB107_map7	0002.CSV	1970.98	-0.0161476
PSB107_map7	0002.CSV	1974.83	-0.0161534
PSB107_map7	0002.CSV	1978.69	-0.0161778
PSB107_map7	0002.CSV	1982.55	-0.0161616
PSB107_map7	0002.CSV	1986.4	-0.0161587
PSB107_map7	0002.CSV	1990.26	-0.0160318
PSB107_map7	0002.CSV	1994.12	-0.0159088
PSB107_map7	0002.CSV	1997.98	-0.015864
PSB107_map7	0002.CSV	2001.83	-0.0158758
PSB107_map7	0002.CSV	2005.69	-0.0157989
PSB107_map7	0002.CSV	2009.55	-0.0157371
PSB107_map7	0002.CSV	2013.4	-0.0156672
PSB107_map7	0002.CSV	2017.26	-0.0155839
PSB107_map7	0002.CSV	2021.12	-0.0154758
PSB107_map7	0002.CSV	2024.97	-0.0154922
PSB107_map7	0002.CSV	2028.83	-0.0154544
PSB107_map7	0002.CSV	2032.69	-0.0154062
PSB107_map7	0002.CSV	2036.55	-0.0152918
PSB107_map7	0002.CSV	2040.4	-0.015176
PSB107_map7	0002.CSV	2044.26	-0.015049
PSB107_map7	0002.CSV	2048.12	-0.0149914
PSB107_map7	0002.CSV	2051.97	-0.0148505
PSB107_map7	0002.CSV	2055.83	-0.0147508
PSB107_map7	0002.CSV	2059.69	-0.0146649
PSB107_map7	0002.CSV	2063.55	-0.0146204
PSB107_map7	0002.CSV	2067.4	-0.0144939
PSB107_map7	0002.CSV	2071.26	-0.0144598
PSB107_map7	0002.CSV	2075.12	-0.0143949
PSB107_map7	0002.CSV	2078.97	-0.0143145
PSB107_map7	0002.CSV	2082.83	-0.0141543
PSB107_map7	0002.CSV	2086.69	-0.0140328
PSB107_map7	0002.CSV	2090.55	-0.0138928
PSB107_map7	0002.CSV	2094.4	-0.0138348
PSB107_map7	0002.CSV	2098.26	-0.0137339
PSB107_map7	0002.CSV	2102.12	-0.0136312
PSB107_map7	0002.CSV	2105.97	-0.0134833
PSB107_map7	0002.CSV	2109.83	-0.0134197
PSB107_map7	0002.CSV	2113.69	-0.0133352
PSB107_map7	0002.CSV	2117.55	-0.0132302
PSB107_map7	0002.CSV	2121.4	-0.0131167
PSB107_map7	0002.CSV	2125.26	-0.0130558
PSB107_map7	0002.CSV	2129.12	-0.0129867
PSB107_map7	0002.CSV	2132.97	-0.0129671
PSB107_map7	0002.CSV	2136.83	-0.0128462
PSB107_map7	0002.CSV	2140.69	-0.0127498
PSB107_map7	0002.CSV	2144.55	-0.0126853
PSB107_map7	0002.CSV	2148.4	-0.0126601
PSB107_map7	0002.CSV	2152.26	-0.0125997
PSB107_map7	0002.CSV	2156.12	-0.0125831
PSB107_map7	0002.CSV	2159.97	-0.0125503
PSB107_map7	0002.CSV	2163.83	-0.0125703
PSB107_map7	0002.CSV	2167.69	-0.0125287
PSB107_map7	0002.CSV	2171.55	-0.0124867
PSB107_map7	0002.CSV	2175.4	-0.0124079
PSB107_map7	0002.CSV	2179.26	-0.0123551
PSB107_map7	0002.CSV	2183.12	-0.0123108
PSB107_map7	0002.CSV	2186.97	-0.0123134
PSB107_map7	0002.CSV	2190.83	-0.0122915
PSB107_map7	0002.CSV	2194.69	-0.0123083
PSB107_map7	0002.CSV	2198.55	-0.0123345
PSB107_map7	0002.CSV	2202.4	-0.0124036
PSB107_map7	0002.CSV	2206.26	-0.0123985
PSB107_map7	0002.CSV	2210.12	-0.0123846
PSB107_map7	0002.CSV	2213.97	-0.0124046
PSB107_map7	0002.CSV	2217.83	-0.0124949
PSB107_map7	0002.CSV	2221.69	-0.0125095
PSB107_map7	0002.CSV	2225.54	-0.0124647
PSB107_map7	0002.CSV	2229.4	-0.012429
PSB107_map7	0002.CSV	2233.26	-0.0125167
PSB107_map7	0002.CSV	2237.12	-0.0125273
PSB107_map7	0002.CSV	2240.97	-0.0125267
PSB107_map7	0002.CSV	2244.83	-0.0125407
PSB107_map7	0002.CSV	2248.69	-0.0126145
PSB107_map7	0002.CSV	2252.54	-0.0126282
PSB107_map7	0002.CSV	2256.4	-0.0126734
PSB107_map7	0002.CSV	2260.26	-0.0126906
PSB107_map7	0002.CSV	2264.11	-0.0126773
PSB107_map7	0002.CSV	2267.97	-0.0126187
PSB107_map7	0002.CSV	2271.83	-0.0126116
PSB107_map7	0002.CSV	2275.69	-0.0126351
PSB107_map7	0002.CSV	2279.54	-0.0127196
PSB107_map7	0002.CSV	2283.4	-0.0127742
PSB107_map7	0002.CSV	2287.26	-0.0128075
PSB107_map7	0002.CSV	2291.11	-0.0127644
PSB107_map7	0002.CSV	2294.97	-0.0126976
PSB107_map7	0002.CSV	2298.83	-0.0126436
PSB107_map7	0002.CSV	2302.69	-0.0126689
PSB107_map7	0002.CSV	2306.54	-0.0126599
PSB107_map7	0002.CSV	2310.4	-0.0125969
PSB107_map7	0002.CSV	2314.26	-0.0125385
PSB107_map7	0002.CSV	2318.11	-0.012633
PSB107_map7	0002.CSV	2321.97	-0.0127207
PSB107_map7	0002.CSV	2325.83	-0.013018
PSB107_map7	0002.CSV	2329.69	-0.0132865
PSB107_map7	0002.CSV	2333.54	-0.0134045
PSB107_map7	0002.CSV	2337.4	-0.0133871
PSB107_map7	0002.CSV	2341.26	-0.0136063
PSB107_map7	0002.CSV	2345.11	-0.013055
PSB107_map7	0002.CSV	2348.97	-0.0129537
PSB107_map7	0002.CSV	2352.83	-0.0135532
PSB107_map7	0002.CSV	2356.69	-0.0149258
PSB107_map7	0002.CSV	2360.54	-0.0156618
PSB107_map7	0002.CSV	2364.4	-0.0147635
PSB107_map7	0002.CSV	2368.26	-0.0133494
PSB107_map7	0002.CSV	2372.11	-0.0124557
PSB107_map7	0002.CSV	2375.97	-0.0120694
PSB107_map7	0002.CSV	2379.83	-0.0120846
PSB107_map7	0002.CSV	2383.69	-0.0121336
PSB107_map7	0002.CSV	2387.54	-0.0122049
PSB107_map7	0002.CSV	2391.4	-0.012258
PSB107_map7	0002.CSV	2395.26	-0.0122676
PSB107_map7	0002.CSV	2399.11	-0.0121995
PSB107_map7	0002.CSV	2402.97	-0.0121498
PSB107_map7	0002.CSV	2406.83	-0.0120829
PSB107_map7	0002.CSV	2410.68	-0.0120204
PSB107_map7	0002.CSV	2414.54	-0.0119436
PSB107_map7	0002.CSV	2418.4	-0.0118828
PSB107_map7	0002.CSV	2422.26	-0.0117777
PSB107_map7	0002.CSV	2426.11	-0.0117132
PSB107_map7	0002.CSV	2429.97	-0.0116591
PSB107_map7	0002.CSV	2433.83	-0.0116521
PSB107_map7	0002.CSV	2437.68	-0.011577
PSB107_map7	0002.CSV	2441.54	-0.0114778
PSB107_map7	0002.CSV	2445.4	-0.0113834
PSB107_map7	0002.CSV	2449.26	-0.011325
PSB107_map7	0002.CSV	2453.11	-0.011297
PSB107_map7	0002.CSV	2456.97	-0.0112302
PSB107_map7	0002.CSV	2460.83	-0.0110635
PSB107_map7	0002.CSV	2464.68	-0.0109654
PSB107_map7	0002.CSV	2468.54	-0.0108616
PSB107_map7	0002.CSV	2472.4	-0.0107084
PSB107_map7	0002.CSV	2476.26	-0.0105106
PSB107_map7	0002.CSV	2480.11	-0.0102389
PSB107_map7	0002.CSV	2483.97	-0.00993731
PSB107_map7	0002.CSV	2487.83	-0.00973467
PSB107_map7	0002.CSV	2491.68	-0.00957354
PSB107_map7	0002.CSV	2495.54	-0.00943406
PSB107_map7	0002.CSV	2499.4	-0.00933613
PSB107_map7	0002.CSV	2503.26	-0.00940179
PSB107_map7	0002.CSV	2507.11	-0.00950554
PSB107_map7	0002.CSV	2510.97	-0.00946223
PSB107_map7	0002.CSV	2514.83	-0.00929426
PSB107_map7	0002.CSV	2518.68	-0.00916857
PSB107_map7	0002.CSV	2522.54	-0.00910897
PSB107_map7	0002.CSV	2526.4	-0.00925113
PSB107_map7	0002.CSV	2530.26	-0.00950625
PSB107_map7	0002.CSV	2534.11	-0.0098565
PSB107_map7	0002.CSV	2537.97	-0.0101981
PSB107_map7	0002.CSV	2541.83	-0.0103841
PSB107_map7	0002.CSV	2545.68	-0.01043
PSB107_map7	0002.CSV	2549.54	-0.0105191
PSB107_map7	0002.CSV	2553.4	-0.0106702
PSB107_map7	0002.CSV	2557.26	-0.0108944
PSB107_map7	0002.CSV	2561.11	-0.0111104
PSB107_map7	0002.CSV	2564.97	-0.0112802
PSB107_map7	0002.CSV	2568.83	-0.0114296
PSB107_map7	0002.CSV	2572.68	-0.0115652
PSB107_map7	0002.CSV	2576.54	-0.0116753
PSB107_map7	0002.CSV	2580.4	-0.0118515
PSB107_map7	0002.CSV	2584.25	-0.0119832
PSB107_map7	0002.CSV	2588.11	-0.0120607
PSB107_map7	0002.CSV	2591.97	-0.0120735
PSB107_map7	0002.CSV	2595.83	-0.0120967
PSB107_map7	0002.CSV	2599.68	-0.0120645
PSB107_map7	0002.CSV	2603.54	-0.012076
PSB107_map7	0002.CSV	2607.4	-0.0121431
PSB107_map7	0002.CSV	2611.25	-0.0122233
PSB107_map7	0002.CSV	2615.11	-0.0122279
PSB107_map7	0002.CSV	2618.97	-0.0122723
PSB107_map7	0002.CSV	2622.82	-0.0122718
PSB107_map7	0002.CSV	2626.68	-0.0122751
PSB107_map7	0002.CSV	2630.54	-0.0123458
PSB107_map7	0002.CSV	2634.4	-0.0123396
PSB107_map7	0002.CSV	2638.25	-0.0123479
PSB107_map7	0002.CSV	2642.11	-0.0125368
PSB107_map7	0002.CSV	2645.97	-0.0126966
PSB107_map7	0002.CSV	2649.82	-0.0127759
PSB107_map7	0002.CSV	2653.68	-0.0128355
PSB107_map7	0002.CSV	2657.54	-0.0128718
PSB107_map7	0002.CSV	2661.4	-0.0129142
PSB107_map7	0002.CSV	2665.25	-0.0129288
PSB107_map7	0002.CSV	2669.11	-0.0128663
PSB107_map7	0002.CSV	2672.97	-0.012739
PSB107_map7	0002.CSV	2676.82	-0.0125404
PSB107_map7	0002.CSV	2680.68	-0.0124919
PSB107_map7	0002.CSV	2684.54	-0.0126107
PSB107_map7	0002.CSV	2688.4	-0.0126994
PSB107_map7	0002.CSV	2692.25	-0.0126893
PSB107_map7	0002.CSV	2696.11	-0.0126047
PSB107_map7	0002.CSV	2699.97	-0.0125703
PSB107_map7	0002.CSV	2703.82	-0.0125691
PSB107_map7	0002.CSV	2707.68	-0.0124815
PSB107_map7	0002.CSV	2711.54	-0.0124215
PSB107_map7	0002.CSV	2715.4	-0.0123724
PSB107_map7	0002.CSV	2719.25	-0.0122081
PSB107_map7	0002.CSV	2723.11	-0.01194
PSB107_map7	0002.CSV	2726.97	-0.0119005
PSB107_map7	0002.CSV	2730.82	-0.0120926
PSB107_map7	0002.CSV	2734.68	-0.0120494
PSB107_map7	0002.CSV	2738.54	-0.0119272
PSB107_map7	0002.CSV	2742.4	-0.0118974
PSB107_map7	0002.CSV	2746.25	-0.0116278
PSB107_map7	0002.CSV	2750.11	-0.0115382
PSB107_map7	0002.CSV	2753.97	-0.0116578
PSB107_map7	0002.CSV	2757.82	-0.0116429
PSB107_map7	0002.CSV	2761.68	-0.0116518
PSB107_map7	0002.CSV	2765.54	-0.01166
PSB107_map7	0002.CSV	2769.39	-0.011437
PSB107_map7	0002.CSV	2773.25	-0.0111249
PSB107_map7	0002.CSV	2777.11	-0.0111587
PSB107_map7	0002.CSV	2780.97	-0.0112938
PSB107_map7	0002.CSV	2784.82	-0.0111154
PSB107_map7	0002.CSV	2788.68	-0.0107817
PSB107_map7	0002.CSV	2792.54	-0.0106761
PSB107_map7	0002.CSV	2796.39	-0.0106198
PSB107_map7	0002.CSV	2800.25	-0.0106838
PSB107_map7	0002.CSV	2804.11	-0.0108871
PSB107_map7	0002.CSV	2807.97	-0.0107507
PSB107_map7	0002.CSV	2811.82	-0.0106377
PSB107_map7	0002.CSV	2815.68	-0.0106467
PSB107_map7	0002.CSV	2819.54	-0.0105356
PSB107_map7	0002.CSV	2823.39	-0.0104773
PSB107_map7	0002.CSV	2827.25	-0.0104668
PSB107_map7	0002.CSV	2831.11	-0.0101765
PSB107_map7	0002.CSV	2834.97	-0.00964494
PSB107_map7	0002.CSV	2838.82	-0.00930749
PSB107_map7	0002.CSV	2842.68	-0.00923101
PSB107_map7	0002.CSV	2846.54	-0.00887763
PSB107_map7	0002.CSV	2850.39	-0.00866786
PSB107_map7	0002.CSV	2854.25	-0.00875656
PSB107_map7	0002.CSV	2858.11	-0.00869657
PSB107_map7	0002.CSV	2861.97	-0.00880838
PSB107_map7	0002.CSV	2865.82	-0.00903508
PSB107_map7	0002.CSV	2869.68	-0.00892827
PSB107_map7	0002.CSV	2873.54	-0.00885825
PSB107_map7	0002.CSV	2877.39	-0.00918326
PSB107_map7	0002.CSV	2881.25	-0.00942323
PSB107_map7	0002.CSV	2885.11	-0.00940971
PSB107_map7	0002.CSV	2888.97	-0.00927805
PSB107_map7	0002.CSV	2892.82	-0.00893444
PSB107_map7	0002.CSV	2896.68	-0.00863214
PSB107_map7	0002.CSV	2900.54	-0.00856502
PSB107_map7	0002.CSV	2904.39	-0.00832036
PSB107_map7	0002.CSV	2908.25	-0.00776263
PSB107_map7	0002.CSV	2912.11	-0.0069463
PSB107_map7	0002.CSV	2915.97	-0.00650521
PSB107_map7	0002.CSV	2919.82	-0.00671299
PSB107_map7	0002.CSV	2923.68	-0.00708395
PSB107_map7	0002.CSV	2927.54	-0.007163
PSB107_map7	0002.CSV	2931.39	-0.00754813
PSB107_map7	0002.CSV	2935.25	-0.00830745
PSB107_map7	0002.CSV	2939.11	-0.00863194
PSB107_map7	0002.CSV	2942.96	-0.00846979
PSB107_map7	0002.CSV	2946.82	-0.00853357
PSB107_map7	0002.CSV	2950.68	-0.00886893
PSB107_map7	0002.CSV	2954.54	-0.00921207
PSB107_map7	0002.CSV	2958.39	-0.00944664
PSB107_map7	0002.CSV	2962.25	-0.00964018
PSB107_map7	0002.CSV	2966.11	-0.0100204
PSB107_map7	0002.CSV	2969.96	-0.0100843
PSB107_map7	0002.CSV	2973.82	-0.00982133
PSB107_map7	0002.CSV	2977.68	-0.00963827
PSB107_map7	0002.CSV	2981.53	-0.00980137
PSB107_map7	0002.CSV	2985.39	-0.0102163
PSB107_map7	0002.CSV	2989.25	-0.0102145
PSB107_map7	0002.CSV	2993.11	-0.0100088
PSB107_map7	0002.CSV	2996.96	-0.0100178
PSB107_map7	0002.CSV	3000.82	-0.010202
PSB107_map7	0002.CSV	3004.68	-0.0103469
PSB107_map7	0002.CSV	3008.53	-0.0102332
PSB107_map7	0002.CSV	3012.39	-0.00992957
PSB107_map7	0002.CSV	3016.25	-0.00979975
PSB107_map7	0002.CSV	3020.11	-0.00993119
PSB107_map7	0002.CSV	3023.96	-0.010016
PSB107_map7	0002.CSV	3027.82	-0.00997361
PSB107_map7	0002.CSV	3031.68	-0.00977902
PSB107_map7	0002.CSV	3035.53	-0.00973347
PSB107_map7	0002.CSV	3039.39	-0.0097416
PSB107_map7	0002.CSV	3043.25	-0.00961335
PSB107_map7	0002.CSV	3047.11	-0.00955128
PSB107_map7	0002.CSV	3050.96	-0.00955663
PSB107_map7	0002.CSV	3054.82	-0.00968474
PSB107_map7	0002.CSV	3058.68	-0.00981585
PSB107_map7	0002.CSV	3062.53	-0.00966581
PSB107_map7	0002.CSV	3066.39	-0.00941652
PSB107_map7	0002.CSV	3070.25	-0.0094515
PSB107_map7	0002.CSV	3074.11	-0.00944197
PSB107_map7	0002.CSV	3077.96	-0.00931252
PSB107_map7	0002.CSV	3081.82	-0.00914722
PSB107_map7	0002.CSV	3085.68	-0.00910829
PSB107_map7	0002.CSV	3089.53	-0.00926345
PSB107_map7	0002.CSV	3093.39	-0.00932964
PSB107_map7	0002.CSV	3097.25	-0.00919316
PSB107_map7	0002.CSV	3101.11	-0.00909378
PSB107_map7	0002.CSV	3104.96	-0.00912513
PSB107_map7	0002.CSV	3108.82	-0.00910835
PSB107_map7	0002.CSV	3112.68	-0.00900351
PSB107_map7	0002.CSV	3116.53	-0.00880328
PSB107_map7	0002.CSV	3120.39	-0.00872567
PSB107_map7	0002.CSV	3124.25	-0.00882383
PSB107_map7	0002.CSV	3128.11	-0.00880046
PSB107_map7	0002.CSV	3131.96	-0.00867848
PSB107_map7	0002.CSV	3135.82	-0.00852428
PSB107_map7	0002.CSV	3139.68	-0.00847951
PSB107_map7	0002.CSV	3143.53	-0.00867582
PSB107_map7	0002.CSV	3147.39	-0.00868618
PSB107_map7	0002.CSV	3151.25	-0.00844737
PSB107_map7	0002.CSV	3155.1	-0.00839693
PSB107_map7	0002.CSV	3158.96	-0.00862112
PSB107_map7	0002.CSV	3162.82	-0.00878341
PSB107_map7	0002.CSV	3166.68	-0.00867163
PSB107_map7	0002.CSV	3170.53	-0.00854053
PSB107_map7	0002.CSV	3174.39	-0.00859868
PSB107_map7	0002.CSV	3178.25	-0.00861879
PSB107_map7	0002.CSV	3182.1	-0.00849624
PSB107_map7	0002.CSV	3185.96	-0.00844948
PSB107_map7	0002.CSV	3189.82	-0.00850895
PSB107_map7	0002.CSV	3193.68	-0.00855554
PSB107_map7	0002.CSV	3197.53	-0.00852301
PSB107_map7	0002.CSV	3201.39	-0.00845478
PSB107_map7	0002.CSV	3205.25	-0.0084397
PSB107_map7	0002.CSV	3209.1	-0.00843883
PSB107_map7	0002.CSV	3212.96	-0.00831945
PSB107_map7	0002.CSV	3216.82	-0.00822761
PSB107_map7	0002.CSV	3220.68	-0.00828766
PSB107_map7	0002.CSV	3224.53	-0.00836297
PSB107_map7	0002.CSV	3228.39	-0.00821353
PSB107_map7	0002.CSV	3232.25	-0.00787663
PSB107_map7	0002.CSV	3236.1	-0.00782274
PSB107_map7	0002.CSV	3239.96	-0.00796874
PSB107_map7	0002.CSV	3243.82	-0.00787709
PSB107_map7	0002.CSV	3247.68	-0.00784347
PSB107_map7	0002.CSV	3251.53	-0.00802827
PSB107_map7	0002.CSV	3255.39	-0.00800163
PSB107_map7	0002.CSV	3259.25	-0.00801262
PSB107_map7	0002.CSV	3263.1	-0.0079567
PSB107_map7	0002.CSV	3266.96	-0.00774167
PSB107_map7	0002.CSV	3270.82	-0.00762647
PSB107_map7	0002.CSV	3274.68	-0.00770938
PSB107_map7	0002.CSV	3278.53	-0.00785493
PSB107_map7	0002.CSV	3282.39	-0.00799265
PSB107_map7	0002.CSV	3286.25	-0.00792742
PSB107_map7	0002.CSV	3290.1	-0.00755676
PSB107_map7	0002.CSV	3293.96	-0.00742838
PSB107_map7	0002.CSV	3297.82	-0.00767302
PSB107_map7	0002.CSV	3301.67	-0.00769952
PSB107_map7	0002.CSV	3305.53	-0.00751511
PSB107_map7	0002.CSV	3309.39	-0.00742662
PSB107_map7	0002.CSV	3313.25	-0.00760573
PSB107_map7	0002.CSV	3317.1	-0.00780826
PSB107_map7	0002.CSV	3320.96	-0.00769525
PSB107_map7	0002.CSV	3324.82	-0.00752426
PSB107_map7	0002.CSV	3328.67	-0.00752263
PSB107_map7	0002.CSV	3332.53	-0.00739515
PSB107_map7	0002.CSV	3336.39	-0.00708271
PSB107_map7	0002.CSV	3340.24	-0.00695872
PSB107_map7	0002.CSV	3344.1	-0.00704809
PSB107_map7	0002.CSV	3347.96	-0.0070654
PSB107_map7	0002.CSV	3351.82	-0.00710977
PSB107_map7	0002.CSV	3355.67	-0.00725884
PSB107_map7	0002.CSV	3359.53	-0.00714879
PSB107_map7	0002.CSV	3363.39	-0.00688353
PSB107_map7	0002.CSV	3367.24	-0.00661899
PSB107_map7	0002.CSV	3371.1	-0.00668435
PSB107_map7	0002.CSV	3374.96	-0.00689957
PSB107_map7	0002.CSV	3378.82	-0.00695243
PSB107_map7	0002.CSV	3382.67	-0.00699114
PSB107_map7	0002.CSV	3386.53	-0.00690596
PSB107_map7	0002.CSV	3390.39	-0.00675051
PSB107_map7	0002.CSV	3394.24	-0.00664483
PSB107_map7	0002.CSV	3398.1	-0.00665563
PSB107_map7	0002.CSV	3401.96	-0.00682381
PSB107_map7	0002.CSV	3405.82	-0.00695491
PSB107_map7	0002.CSV	3409.67	-0.00695644
PSB107_map7	0002.CSV	3413.53	-0.00707147
PSB107_map7	0002.CSV	3417.39	-0.0071542
PSB107_map7	0002.CSV	3421.24	-0.00716199
PSB107_map7	0002.CSV	3425.1	-0.00711619
PSB107_map7	0002.CSV	3428.96	-0.00690365
PSB107_map7	0002.CSV	3432.82	-0.00678447
PSB107_map7	0002.CSV	3436.67	-0.0069855
PSB107_map7	0002.CSV	3440.53	-0.00731716
PSB107_map7	0002.CSV	3444.39	-0.00744036
PSB107_map7	0002.CSV	3448.24	-0.00749612
PSB107_map7	0002.CSV	3452.1	-0.00784552
PSB107_map7	0002.CSV	3455.96	-0.00788402
PSB107_map7	0002.CSV	3459.82	-0.0075463
PSB107_map7	0002.CSV	3463.67	-0.00740646
PSB107_map7	0002.CSV	3467.53	-0.00746183
PSB107_map7	0002.CSV	3471.39	-0.00778994
PSB107_map7	0002.CSV	3475.24	-0.00800794
PSB107_map7	0002.CSV	3479.1	-0.00797687
PSB107_map7	0002.CSV	3482.96	-0.00786254
PSB107_map7	0002.CSV	3486.82	-0.00768116
PSB107_map7	0002.CSV	3490.67	-0.00770749
PSB107_map7	0002.CSV	3494.53	-0.00780406
PSB107_map7	0002.CSV	3498.39	-0.00796662
PSB107_map7	0002.CSV	3502.24	-0.00817305
PSB107_map7	0002.CSV	3506.1	-0.00842381
PSB107_map7	0002.CSV	3509.96	-0.0085582
PSB107_map7	0002.CSV	3513.81	-0.00858451
PSB107_map7	0002.CSV	3517.67	-0.00875454
PSB107_map7	0002.CSV	3521.53	-0.00866715
PSB107_map7	0002.CSV	3525.39	-0.00868924
PSB107_map7	0002.CSV	3529.24	-0.00892428
PSB107_map7	0002.CSV	3533.1	-0.00893402
PSB107_map7	0002.CSV	3536.96	-0.00881721
PSB107_map7	0002.CSV	3540.81	-0.00885766
PSB107_map7	0002.CSV	3544.67	-0.00881198
PSB107_map7	0002.CSV	3548.53	-0.00882273
PSB107_map7	0002.CSV	3552.39	-0.00912821
PSB107_map7	0002.CSV	3556.24	-0.00938814
PSB107_map7	0002.CSV	3560.1	-0.00966753
PSB107_map7	0002.CSV	3563.96	-0.00992964
PSB107_map7	0002.CSV	3567.81	-0.0095811
PSB107_map7	0002.CSV	3571.67	-0.0094868
PSB107_map7	0002.CSV	3575.53	-0.00977118
PSB107_map7	0002.CSV	3579.39	-0.00969138
PSB107_map7	0002.CSV	3583.24	-0.00972443
PSB107_map7	0002.CSV	3587.1	-0.00955186
PSB107_map7	0002.CSV	3590.96	-0.00938607
PSB107_map7	0002.CSV	3594.81	-0.00965534
PSB107_map7	0002.CSV	3598.67	-0.0096136
PSB107_map7	0002.CSV	3602.53	-0.00969397
PSB107_map7	0002.CSV	3606.39	-0.0101489
PSB107_map7	0002.CSV	3610.24	-0.0103217
PSB107_map7	0002.CSV	3614.1	-0.010325
PSB107_map7	0002.CSV	3617.96	-0.0100661
PSB107_map7	0002.CSV	3621.81	-0.00989761
PSB107_map7	0002.CSV	3625.67	-0.0104138
PSB107_map7	0002.CSV	3629.53	-0.0101502
PSB107_map7	0002.CSV	3633.39	-0.00958369
PSB107_map7	0002.CSV	3637.24	-0.00998326
PSB107_map7	0002.CSV	3641.1	-0.0103325
PSB107_map7	0002.CSV	3644.96	-0.0107157
PSB107_map7	0002.CSV	3648.81	-0.0102755
PSB107_map7	0002.CSV	3652.67	-0.00955147
PSB107_map7	0002.CSV	3656.53	-0.00952327
PSB107_map7	0002.CSV	3660.38	-0.00972799
PSB107_map7	0002.CSV	3664.24	-0.0104123
PSB107_map7	0002.CSV	3668.1	-0.0108819
PSB107_map7	0002.CSV	3671.96	-0.0109036
PSB107_map7	0002.CSV	3675.81	-0.0103405
PSB107_map7	0002.CSV	3679.67	-0.00968798
PSB107_map7	0002.CSV	3683.53	-0.0100578
PSB107_map7	0002.CSV	3687.38	-0.0104442
PSB107_map7	0002.CSV	3691.24	-0.00975258
PSB107_map7	0002.CSV	3695.1	-0.00963979
PSB107_map7	0002.CSV	3698.95	-0.00998741
PSB107_map7	0002.CSV	3702.81	-0.0100833
PSB107_map7	0002.CSV	3706.67	-0.0104499
PSB107_map7	0002.CSV	3710.53	-0.0103639
PSB107_map7	0002.CSV	3714.38	-0.0096698
PSB107_map7	0002.CSV	3718.24	-0.0100098
PSB107_map7	0002.CSV	3722.1	-0.0102378
PSB107_map7	0002.CSV	3725.95	-0.00994006
PSB107_map7	0002.CSV	3729.81	-0.0101296
PSB107_map7	0002.CSV	3733.67	-0.0103103
PSB107_map7	0002.CSV	3737.53	-0.00960991
PSB107_map7	0002.CSV	3741.38	-0.0100329
PSB107_map7	0002.CSV	3745.24	-0.0102946
PSB107_map7	0002.CSV	3749.1	-0.0100159
PSB107_map7	0002.CSV	3752.95	-0.00949413
PSB107_map7	0002.CSV	3756.81	-0.00962556
PSB107_map7	0002.CSV	3760.67	-0.00959017
PSB107_map7	0002.CSV	3764.53	-0.00972362
PSB107_map7	0002.CSV	3768.38	-0.00976726
PSB107_map7	0002.CSV	3772.24	-0.00969041
PSB107_map7	0002.CSV	3776.1	-0.00981352
PSB107_map7	0002.CSV	3779.95	-0.00959883
PSB107_map7	0002.CSV	3783.81	-0.00951634
PSB107_map7	0002.CSV	3787.67	-0.00963208
PSB107_map7	0002.CSV	3791.53	-0.00998452
PSB107_map7	0002.CSV	3795.38	-0.0102732
PSB107_map7	0002.CSV	3799.24	-0.00999722
PSB107_map7	0002.CSV	3803.1	-0.00946294
PSB107_map7	0002.CSV	3806.95	-0.00931226
PSB107_map7	0002.CSV	3810.81	-0.0095975
PSB107_map7	0002.CSV	3814.67	-0.0100013
PSB107_map7	0002.CSV	3818.53	-0.00980675
PSB107_map7	0002.CSV	3822.38	-0.00935948
PSB107_map7	0002.CSV	3826.24	-0.00955604
PSB107_map7	0002.CSV	3830.1	-0.00985968
PSB107_map7	0002.CSV	3833.95	-0.0101193
PSB107_map7	0002.CSV	3837.81	-0.00995007
PSB107_map7	0002.CSV	3841.67	-0.00911951
PSB107_map7	0002.CSV	3845.53	-0.00929955
PSB107_map7	0002.CSV	3849.38	-0.0102057
PSB107_map7	0002.CSV	3853.24	-0.0100616
PSB107_map7	0002.CSV	3857.1	-0.00944404
PSB107_map7	0002.CSV	3860.95	-0.00989071
PSB107_map7	0002.CSV	3864.81	-0.00973872
PSB107_map7	0002.CSV	3868.67	-0.00947098
PSB107_map7	0002.CSV	3872.52	-0.00899526
PSB107_map7	0002.CSV	3876.38	-0.00914719
PSB107_map7	0002.CSV	3880.24	-0.00955569
PSB107_map7	0002.CSV	3884.1	-0.00926283
PSB107_map7	0002.CSV	3887.95	-0.00918404
PSB107_map7	0002.CSV	3891.81	-0.00913136
PSB107_map7	0002.CSV	3895.67	-0.00925738
PSB107_map7	0002.CSV	3899.52	-0.0096779
PSB107_map7	0002.CSV	3903.38	-0.00898264
PSB107_map7	0002.CSV	3907.24	-0.00853208
PSB107_map7	0002.CSV	3911.1	-0.009037
PSB107_map7	0002.CSV	3914.95	-0.00937063
PSB107_map7	0002.CSV	3918.81	-0.00907561
PSB107_map7	0002.CSV	3922.67	-0.00892366
PSB107_map7	0002.CSV	3926.52	-0.0089718
PSB107_map7	0002.CSV	3930.38	-0.00883796
PSB107_map7	0002.CSV	3934.24	-0.00863827
PSB107_map7	0002.CSV	3938.09	-0.00886705
PSB107_map7	0002.CSV	3941.95	-0.00899224
PSB107_map7	0002.CSV	3945.81	-0.00897611
PSB107_map7	0002.CSV	3949.67	-0.00880945
PSB107_map7	0002.CSV	3953.52	-0.00868579
PSB107_map7	0002.CSV	3957.38	-0.00874298
PSB107_map7	0002.CSV	3961.24	-0.0088425
PSB107_map7	0002.CSV	3965.09	-0.00903992
PSB107_map7	0002.CSV	3968.95	-0.00905157
PSB107_map7	0002.CSV	3972.81	-0.0088762
PSB107_map7	0002.CSV	3976.67	-0.00870927
PSB107_map7	0002.CSV	3980.52	-0.00872947
PSB107_map7	0002.CSV	3984.38	-0.00880877
PSB107_map7	0002.CSV	3988.24	-0.00883773
PSB107_map7	0002.CSV	3992.09	-0.00878214
PSB107_map7	0002.CSV	3995.95	-0.00877909
PSB107_map7	0002.CSV	3999.81	-0.00891181
PSB107_map7	0003.CSV	674.992	0.0163345
PSB107_map7	0003.CSV	678.849	0.0191976
PSB107_map7	0003.CSV	682.706	0.0205601
PSB107_map7	0003.CSV	686.563	0.0242287
PSB107_map7	0003.CSV	690.42	0.0296636
PSB107_map7	0003.CSV	694.277	0.0445736
PSB107_map7	0003.CSV	698.134	0.0625957
PSB107_map7	0003.CSV	701.991	0.0565124
PSB107_map7	0003.CSV	705.849	0.0456643
PSB107_map7	0003.CSV	709.706	0.0681953
PSB107_map7	0003.CSV	713.563	0.0729722
PSB107_map7	0003.CSV	717.42	0.0335217
PSB107_map7	0003.CSV	721.277	0.00632295
PSB107_map7	0003.CSV	725.134	0.00240312
PSB107_map7	0003.CSV	728.991	0.00311648
PSB107_map7	0003.CSV	732.848	0.00526202
PSB107_map7	0003.CSV	736.705	0.00642745
PSB107_map7	0003.CSV	740.562	0.00842247
PSB107_map7	0003.CSV	744.42	0.00957173
PSB107_map7	0003.CSV	748.277	0.0105194
PSB107_map7	0003.CSV	752.134	0.0102985
PSB107_map7	0003.CSV	755.991	0.0108047
PSB107_map7	0003.CSV	759.848	0.0107677
PSB107_map7	0003.CSV	763.705	0.0113441
PSB107_map7	0003.CSV	767.562	0.0112871
PSB107_map7	0003.CSV	771.419	0.0116942
PSB107_map7	0003.CSV	775.276	0.0114074
PSB107_map7	0003.CSV	779.133	0.0119676
PSB107_map7	0003.CSV	782.99	0.01214
PSB107_map7	0003.CSV	786.848	0.0129939
PSB107_map7	0003.CSV	790.705	0.013309
PSB107_map7	0003.CSV	794.562	0.0145865
PSB107_map7	0003.CSV	798.419	0.0151364
PSB107_map7	0003.CSV	802.276	0.0162109
PSB107_map7	0003.CSV	806.133	0.0168998
PSB107_map7	0003.CSV	809.99	0.0186325
PSB107_map7	0003.CSV	813.847	0.0203287
PSB107_map7	0003.CSV	817.704	0.0231682
PSB107_map7	0003.CSV	821.562	0.02582
PSB107_map7	0003.CSV	825.419	0.0300093
PSB107_map7	0003.CSV	829.276	0.0348667
PSB107_map7	0003.CSV	833.133	0.0423236
PSB107_map7	0003.CSV	836.99	0.0530253
PSB107_map7	0003.CSV	840.847	0.0704762
PSB107_map7	0003.CSV	844.704	0.0888533
PSB107_map7	0003.CSV	848.561	0.116649
PSB107_map7	0003.CSV	852.418	0.150978
PSB107_map7	0003.CSV	856.275	0.159967
PSB107_map7	0003.CSV	860.132	0.136203
PSB107_map7	0003.CSV	863.99	0.102502
PSB107_map7	0003.CSV	867.847	0.0709329
PSB107_map7	0003.CSV	871.704	0.044873
PSB107_map7	0003.CSV	875.561	0.0248321
PSB107_map7	0003.CSV	879.418	0.014706
PSB107_map7	0003.CSV	883.275	0.0107925
PSB107_map7	0003.CSV	887.132	0.00938551
PSB107_map7	0003.CSV	890.989	0.008667
PSB107_map7	0003.CSV	894.846	0.00895877
PSB107_map7	0003.CSV	898.703	0.00930646
PSB107_map7	0003.CSV	902.561	0.010282
PSB107_map7	0003.CSV	906.418	0.0110349
PSB107_map7	0003.CSV	910.275	0.0111097
PSB107_map7	0003.CSV	914.132	0.0101894
PSB107_map7	0003.CSV	917.989	0.0103091
PSB107_map7	0003.CSV	921.846	0.0104531
PSB107_map7	0003.CSV	925.703	0.0109559
PSB107_map7	0003.CSV	929.56	0.011062
PSB107_map7	0003.CSV	933.417	0.0114821
PSB107_map7	0003.CSV	937.274	0.011678
PSB107_map7	0003.CSV	941.131	0.0121199
PSB107_map7	0003.CSV	944.989	0.0121333
PSB107_map7	0003.CSV	948.846	0.0125962
PSB107_map7	0003.CSV	952.703	0.012908
PSB107_map7	0003.CSV	956.56	0.0136055
PSB107_map7	0003.CSV	960.417	0.0139312
PSB107_map7	0003.CSV	964.274	0.0144258
PSB107_map7	0003.CSV	968.131	0.0146861
PSB107_map7	0003.CSV	971.988	0.0153787
PSB107_map7	0003.CSV	975.845	0.0158188
PSB107_map7	0003.CSV	979.702	0.0166566
PSB107_map7	0003.CSV	983.559	0.0173039
PSB107_map7	0003.CSV	987.417	0.0182985
PSB107_map7	0003.CSV	991.274	0.0189419
PSB107_map7	0003.CSV	995.131	0.0198592
PSB107_map7	0003.CSV	998.988	0.0205905
PSB107_map7	0003.CSV	1002.85	0.0215225
PSB107_map7	0003.CSV	1006.7	0.0219352
PSB107_map7	0003.CSV	1010.56	0.0227352
PSB107_map7	0003.CSV	1014.42	0.0232734
PSB107_map7	0003.CSV	1018.27	0.0242005
PSB107_map7	0003.CSV	1022.13	0.0249464
PSB107_map7	0003.CSV	1025.99	0.026148
PSB107_map7	0003.CSV	1029.85	0.0269783
PSB107_map7	0003.CSV	1033.7	0.0281743
PSB107_map7	0003.CSV	1037.56	0.0290266
PSB107_map7	0003.CSV	1041.42	0.0302264
PSB107_map7	0003.CSV	1045.27	0.0309462
PSB107_map7	0003.CSV	1049.13	0.0317725
PSB107_map7	0003.CSV	1052.99	0.032226
PSB107_map7	0003.CSV	1056.84	0.0333379
PSB107_map7	0003.CSV	1060.7	0.0342152
PSB107_map7	0003.CSV	1064.56	0.0352773
PSB107_map7	0003.CSV	1068.42	0.0357014
PSB107_map7	0003.CSV	1072.27	0.036618
PSB107_map7	0003.CSV	1076.13	0.0390325
PSB107_map7	0003.CSV	1079.99	0.04789
PSB107_map7	0003.CSV	1083.84	0.0514735
PSB107_map7	0003.CSV	1087.7	0.0399
PSB107_map7	0003.CSV	1091.56	0.0311527
PSB107_map7	0003.CSV	1095.41	0.0302426
PSB107_map7	0003.CSV	1099.27	0.0304359
PSB107_map7	0003.CSV	1103.13	0.0310094
PSB107_map7	0003.CSV	1106.99	0.031608
PSB107_map7	0003.CSV	1110.84	0.0325472
PSB107_map7	0003.CSV	1114.7	0.032853
PSB107_map7	0003.CSV	1118.56	0.03315
PSB107_map7	0003.CSV	1122.41	0.0330956
PSB107_map7	0003.CSV	1126.27	0.0331734
PSB107_map7	0003.CSV	1130.13	0.0329606
PSB107_map7	0003.CSV	1133.99	0.0331456
PSB107_map7	0003.CSV	1137.84	0.0331329
PSB107_map7	0003.CSV	1141.7	0.0333663
PSB107_map7	0003.CSV	1145.56	0.033462
PSB107_map7	0003.CSV	1149.41	0.0340964
PSB107_map7	0003.CSV	1153.27	0.0347109
PSB107_map7	0003.CSV	1157.13	0.0356149
PSB107_map7	0003.CSV	1160.99	0.0360572
PSB107_map7	0003.CSV	1164.84	0.0365632
PSB107_map7	0003.CSV	1168.7	0.036713
PSB107_map7	0003.CSV	1172.56	0.0370645
PSB107_map7	0003.CSV	1176.41	0.0371311
PSB107_map7	0003.CSV	1180.27	0.0375375
PSB107_map7	0003.CSV	1184.13	0.0376528
PSB107_map7	0003.CSV	1187.99	0.0380861
PSB107_map7	0003.CSV	1191.84	0.0383773
PSB107_map7	0003.CSV	1195.7	0.0389333
PSB107_map7	0003.CSV	1199.56	0.0392479
PSB107_map7	0003.CSV	1203.41	0.0399428
PSB107_map7	0003.CSV	1207.27	0.0404919
PSB107_map7	0003.CSV	1211.13	0.0414234
PSB107_map7	0003.CSV	1214.98	0.0422015
PSB107_map7	0003.CSV	1218.84	0.043419
PSB107_map7	0003.CSV	1222.7	0.0444253
PSB107_map7	0003.CSV	1226.56	0.0457786
PSB107_map7	0003.CSV	1230.41	0.0469845
PSB107_map7	0003.CSV	1234.27	0.0485696
PSB107_map7	0003.CSV	1238.13	0.0499596
PSB107_map7	0003.CSV	1241.98	0.0516793
PSB107_map7	0003.CSV	1245.84	0.0530367
PSB107_map7	0003.CSV	1249.7	0.0545402
PSB107_map7	0003.CSV	1253.56	0.0555223
PSB107_map7	0003.CSV	1257.41	0.0566928
PSB107_map7	0003.CSV	1261.27	0.057819
PSB107_map7	0003.CSV	1265.13	0.0593796
PSB107_map7	0003.CSV	1268.98	0.0607268
PSB107_map7	0003.CSV	1272.84	0.0623842
PSB107_map7	0003.CSV	1276.7	0.0636144
PSB107_map7	0003.CSV	1280.56	0.0650391
PSB107_map7	0003.CSV	1284.41	0.0659681
PSB107_map7	0003.CSV	1288.27	0.0670543
PSB107_map7	0003.CSV	1292.13	0.0678761
PSB107_map7	0003.CSV	1295.98	0.0691632
PSB107_map7	0003.CSV	1299.84	0.070376
PSB107_map7	0003.CSV	1303.7	0.0721216
PSB107_map7	0003.CSV	1307.56	0.0737478
PSB107_map7	0003.CSV	1311.41	0.0758121
PSB107_map7	0003.CSV	1315.27	0.0776587
PSB107_map7	0003.CSV	1319.13	0.0800545
PSB107_map7	0003.CSV	1322.98	0.0821572
PSB107_map7	0003.CSV	1326.84	0.0846421
PSB107_map7	0003.CSV	1330.7	0.0870831
PSB107_map7	0003.CSV	1334.56	0.0899193
PSB107_map7	0003.CSV	1338.41	0.0930623
PSB107_map7	0003.CSV	1342.27	0.0970577
PSB107_map7	0003.CSV	1346.13	0.100089
PSB107_map7	0003.CSV	1349.98	0.103972
PSB107_map7	0003.CSV	1353.84	0.107886
PSB107_map7	0003.CSV	1357.7	0.112175
PSB107_map7	0003.CSV	1361.56	0.116829
PSB107_map7	0003.CSV	1365.41	0.122767
PSB107_map7	0003.CSV	1369.27	0.127362
PSB107_map7	0003.CSV	1373.13	0.133369
PSB107_map7	0003.CSV	1376.98	0.139894
PSB107_map7	0003.CSV	1380.84	0.145761
PSB107_map7	0003.CSV	1384.7	0.150936
PSB107_map7	0003.CSV	1388.56	0.157795
PSB107_map7	0003.CSV	1392.41	0.162746
PSB107_map7	0003.CSV	1396.27	0.169254
PSB107_map7	0003.CSV	1400.13	0.175401
PSB107_map7	0003.CSV	1403.98	0.180879
PSB107_map7	0003.CSV	1407.84	0.185997
PSB107_map7	0003.CSV	1411.7	0.191514
PSB107_map7	0003.CSV	1415.55	0.19582
PSB107_map7	0003.CSV	1419.41	0.202701
PSB107_map7	0003.CSV	1423.27	0.208089
PSB107_map7	0003.CSV	1427.12	0.213699
PSB107_map7	0003.CSV	1430.98	0.219207
PSB107_map7	0003.CSV	1434.84	0.226769
PSB107_map7	0003.CSV	1438.7	0.234037
PSB107_map7	0003.CSV	1442.55	0.239128
PSB107_map7	0003.CSV	1446.41	0.240257
PSB107_map7	0003.CSV	1450.27	0.238909
PSB107_map7	0003.CSV	1454.12	0.233718
PSB107_map7	0003.CSV	1457.98	0.224762
PSB107_map7	0003.CSV	1461.84	0.216419
PSB107_map7	0003.CSV	1465.7	0.210128
PSB107_map7	0003.CSV	1469.55	0.200919
PSB107_map7	0003.CSV	1473.41	0.18564
PSB107_map7	0003.CSV	1477.27	0.168038
PSB107_map7	0003.CSV	1481.12	0.158096
PSB107_map7	0003.CSV	1484.98	0.148619
PSB107_map7	0003.CSV	1488.84	0.137466
PSB107_map7	0003.CSV	1492.7	0.126153
PSB107_map7	0003.CSV	1496.55	0.118249
PSB107_map7	0003.CSV	1500.41	0.108918
PSB107_map7	0003.CSV	1504.27	0.103639
PSB107_map7	0003.CSV	1508.12	0.0927468
PSB107_map7	0003.CSV	1511.98	0.0854848
PSB107_map7	0003.CSV	1515.84	0.0805658
PSB107_map7	0003.CSV	1519.7	0.0741973
PSB107_map7	0003.CSV	1523.55	0.0657898
PSB107_map7	0003.CSV	1527.41	0.0604457
PSB107_map7	0003.CSV	1531.27	0.0556155
PSB107_map7	0003.CSV	1535.12	0.0513124
PSB107_map7	0003.CSV	1538.98	0.0466407
PSB107_map7	0003.CSV	1542.84	0.0390571
PSB107_map7	0003.CSV	1546.7	0.0338439
PSB107_map7	0003.CSV	1550.55	0.0301034
PSB107_map7	0003.CSV	1554.41	0.0259091
PSB107_map7	0003.CSV	1558.27	0.0205295
PSB107_map7	0003.CSV	1562.12	0.0150326
PSB107_map7	0003.CSV	1565.98	0.0124523
PSB107_map7	0003.CSV	1569.84	0.008624
PSB107_map7	0003.CSV	1573.69	0.00502095
PSB107_map7	0003.CSV	1577.55	0.000617627
PSB107_map7	0003.CSV	1581.41	-0.00282899
PSB107_map7	0003.CSV	1585.27	-0.00562146
PSB107_map7	0003.CSV	1589.12	-0.00779046
PSB107_map7	0003.CSV	1592.98	-0.00936301
PSB107_map7	0003.CSV	1596.84	-0.0103866
PSB107_map7	0003.CSV	1600.69	-0.0112542
PSB107_map7	0003.CSV	1604.55	-0.0118811
PSB107_map7	0003.CSV	1608.41	-0.0125595
PSB107_map7	0003.CSV	1612.27	-0.0130525
PSB107_map7	0003.CSV	1616.12	-0.0136554
PSB107_map7	0003.CSV	1619.98	-0.0140206
PSB107_map7	0003.CSV	1623.84	-0.0145626
PSB107_map7	0003.CSV	1627.69	-0.0148779
PSB107_map7	0003.CSV	1631.55	-0.0153988
PSB107_map7	0003.CSV	1635.41	-0.0156283
PSB107_map7	0003.CSV	1639.27	-0.0157935
PSB107_map7	0003.CSV	1643.12	-0.0161628
PSB107_map7	0003.CSV	1646.98	-0.0165308
PSB107_map7	0003.CSV	1650.84	-0.016535
PSB107_map7	0003.CSV	1654.69	-0.0166593
PSB107_map7	0003.CSV	1658.55	-0.0169712
PSB107_map7	0003.CSV	1662.41	-0.0174282
PSB107_map7	0003.CSV	1666.27	-0.0177993
PSB107_map7	0003.CSV	1670.12	-0.0183107
PSB107_map7	0003.CSV	1673.98	-0.018532
PSB107_map7	0003.CSV	1677.84	-0.0190992
PSB107_map7	0003.CSV	1681.69	-0.0194884
PSB107_map7	0003.CSV	1685.55	-0.0196759
PSB107_map7	0003.CSV	1689.41	-0.019749
PSB107_map7	0003.CSV	1693.27	-0.0203533
PSB107_map7	0003.CSV	1697.12	-0.0205858
PSB107_map7	0003.CSV	1700.98	-0.0204772
PSB107_map7	0003.CSV	1704.84	-0.0204945
PSB107_map7	0003.CSV	1708.69	-0.0206311
PSB107_map7	0003.CSV	1712.55	-0.0206432
PSB107_map7	0003.CSV	1716.41	-0.020143
PSB107_map7	0003.CSV	1720.27	-0.0192997
PSB107_map7	0003.CSV	1724.12	-0.0193769
[truncated: 128,314 more rows]

## Sheet: PSB107_map8
Map	Select spectrum number	Wavenumbers	Absorbance
PSB107_map8	0001.CSV	674.992	0.0102538
PSB107_map8	0001.CSV	678.849	0.0126032
PSB107_map8	0001.CSV	682.706	0.0145377
PSB107_map8	0001.CSV	686.563	0.0143301
PSB107_map8	0001.CSV	690.42	0.0161378
PSB107_map8	0001.CSV	694.277	0.0192991
PSB107_map8	0001.CSV	698.134	0.0247775
PSB107_map8	0001.CSV	701.991	0.0325381
PSB107_map8	0001.CSV	705.849	0.0481713
PSB107_map8	0001.CSV	709.706	0.0685059
PSB107_map8	0001.CSV	713.563	0.0621415
PSB107_map8	0001.CSV	717.42	0.0286325
PSB107_map8	0001.CSV	721.277	0.00801325
PSB107_map8	0001.CSV	725.134	0.00268792
PSB107_map8	0001.CSV	728.991	0.0029321
PSB107_map8	0001.CSV	732.848	0.00492195
PSB107_map8	0001.CSV	736.705	0.00659512
PSB107_map8	0001.CSV	740.562	0.00549102
PSB107_map8	0001.CSV	744.42	0.00473395
PSB107_map8	0001.CSV	748.277	0.00440263
PSB107_map8	0001.CSV	752.134	0.00525817
PSB107_map8	0001.CSV	755.991	0.00590015
PSB107_map8	0001.CSV	759.848	0.00736069
PSB107_map8	0001.CSV	763.705	0.00810176
PSB107_map8	0001.CSV	767.562	0.008796
PSB107_map8	0001.CSV	771.419	0.00880665
PSB107_map8	0001.CSV	775.276	0.00925829
PSB107_map8	0001.CSV	779.133	0.00972402
PSB107_map8	0001.CSV	782.99	0.0107182
PSB107_map8	0001.CSV	786.848	0.0108698
PSB107_map8	0001.CSV	790.705	0.0113936
PSB107_map8	0001.CSV	794.562	0.0117788
PSB107_map8	0001.CSV	798.419	0.0121525
PSB107_map8	0001.CSV	802.276	0.0120158
PSB107_map8	0001.CSV	806.133	0.0128612
PSB107_map8	0001.CSV	809.99	0.0136274
PSB107_map8	0001.CSV	813.847	0.0149321
PSB107_map8	0001.CSV	817.704	0.0159695
PSB107_map8	0001.CSV	821.562	0.0177449
PSB107_map8	0001.CSV	825.419	0.0195813
PSB107_map8	0001.CSV	829.276	0.0217212
PSB107_map8	0001.CSV	833.133	0.0239156
PSB107_map8	0001.CSV	836.99	0.0277193
PSB107_map8	0001.CSV	840.847	0.0327957
PSB107_map8	0001.CSV	844.704	0.0397396
PSB107_map8	0001.CSV	848.561	0.045059
PSB107_map8	0001.CSV	852.418	0.0517034
PSB107_map8	0001.CSV	856.275	0.0660699
PSB107_map8	0001.CSV	860.132	0.0902387
PSB107_map8	0001.CSV	863.99	0.120815
PSB107_map8	0001.CSV	867.847	0.14313
PSB107_map8	0001.CSV	871.704	0.137826
PSB107_map8	0001.CSV	875.561	0.109682
PSB107_map8	0001.CSV	879.418	0.0776997
PSB107_map8	0001.CSV	883.275	0.0435477
PSB107_map8	0001.CSV	887.132	0.0123676
PSB107_map8	0001.CSV	890.989	-0.0011822
PSB107_map8	0001.CSV	894.846	-0.00197279
PSB107_map8	0001.CSV	898.703	-0.000643615
PSB107_map8	0001.CSV	902.561	0.000704404
PSB107_map8	0001.CSV	906.418	0.00194471
PSB107_map8	0001.CSV	910.275	0.00299455
PSB107_map8	0001.CSV	914.132	0.00392063
PSB107_map8	0001.CSV	917.989	0.00500372
PSB107_map8	0001.CSV	921.846	0.00590374
PSB107_map8	0001.CSV	925.703	0.0068123
PSB107_map8	0001.CSV	929.56	0.00743171
PSB107_map8	0001.CSV	933.417	0.00817937
PSB107_map8	0001.CSV	937.274	0.00861542
PSB107_map8	0001.CSV	941.131	0.00908824
PSB107_map8	0001.CSV	944.989	0.00949326
PSB107_map8	0001.CSV	948.846	0.0101594
PSB107_map8	0001.CSV	952.703	0.0107096
PSB107_map8	0001.CSV	956.56	0.0112898
PSB107_map8	0001.CSV	960.417	0.0116784
PSB107_map8	0001.CSV	964.274	0.0122648
PSB107_map8	0001.CSV	968.131	0.0127069
PSB107_map8	0001.CSV	971.988	0.0134777
PSB107_map8	0001.CSV	975.845	0.0140172
PSB107_map8	0001.CSV	979.702	0.0148331
PSB107_map8	0001.CSV	983.559	0.0155136
PSB107_map8	0001.CSV	987.417	0.0164134
PSB107_map8	0001.CSV	991.274	0.0170476
PSB107_map8	0001.CSV	995.131	0.0178731
PSB107_map8	0001.CSV	998.988	0.0183038
PSB107_map8	0001.CSV	1002.85	0.0190377
PSB107_map8	0001.CSV	1006.7	0.0195938
PSB107_map8	0001.CSV	1010.56	0.0204571
PSB107_map8	0001.CSV	1014.42	0.0209323
PSB107_map8	0001.CSV	1018.27	0.0217371
PSB107_map8	0001.CSV	1022.13	0.0221504
PSB107_map8	0001.CSV	1025.99	0.0229091
PSB107_map8	0001.CSV	1029.85	0.0233291
PSB107_map8	0001.CSV	1033.7	0.0241738
PSB107_map8	0001.CSV	1037.56	0.0245365
PSB107_map8	0001.CSV	1041.42	0.0253236
PSB107_map8	0001.CSV	1045.27	0.0257334
PSB107_map8	0001.CSV	1049.13	0.0265211
PSB107_map8	0001.CSV	1052.99	0.0267893
PSB107_map8	0001.CSV	1056.84	0.0278063
PSB107_map8	0001.CSV	1060.7	0.028305
PSB107_map8	0001.CSV	1064.56	0.0292515
PSB107_map8	0001.CSV	1068.42	0.0295787
PSB107_map8	0001.CSV	1072.27	0.0303393
PSB107_map8	0001.CSV	1076.13	0.0307059
PSB107_map8	0001.CSV	1079.99	0.0321822
PSB107_map8	0001.CSV	1083.84	0.0337015
PSB107_map8	0001.CSV	1087.7	0.0354836
PSB107_map8	0001.CSV	1091.56	0.0349257
PSB107_map8	0001.CSV	1095.41	0.0329705
PSB107_map8	0001.CSV	1099.27	0.0302656
PSB107_map8	0001.CSV	1103.13	0.0296036
PSB107_map8	0001.CSV	1106.99	0.0294098
PSB107_map8	0001.CSV	1110.84	0.0302686
PSB107_map8	0001.CSV	1114.7	0.0304978
PSB107_map8	0001.CSV	1118.56	0.031314
PSB107_map8	0001.CSV	1122.41	0.0315044
PSB107_map8	0001.CSV	1126.27	0.0322196
PSB107_map8	0001.CSV	1130.13	0.0321928
PSB107_map8	0001.CSV	1133.99	0.0328283
PSB107_map8	0001.CSV	1137.84	0.0329287
PSB107_map8	0001.CSV	1141.7	0.0337757
PSB107_map8	0001.CSV	1145.56	0.0340587
PSB107_map8	0001.CSV	1149.41	0.0351086
PSB107_map8	0001.CSV	1153.27	0.035657
PSB107_map8	0001.CSV	1157.13	0.0368119
PSB107_map8	0001.CSV	1160.99	0.0371162
PSB107_map8	0001.CSV	1164.84	0.0377832
PSB107_map8	0001.CSV	1168.7	0.0376318
PSB107_map8	0001.CSV	1172.56	0.0383316
PSB107_map8	0001.CSV	1176.41	0.0386527
PSB107_map8	0001.CSV	1180.27	0.0396302
PSB107_map8	0001.CSV	1184.13	0.0398604
PSB107_map8	0001.CSV	1187.99	0.0406464
PSB107_map8	0001.CSV	1191.84	0.0406589
PSB107_map8	0001.CSV	1195.7	0.041467
PSB107_map8	0001.CSV	1199.56	0.0418657
PSB107_map8	0001.CSV	1203.41	0.0430129
PSB107_map8	0001.CSV	1207.27	0.0434592
PSB107_map8	0001.CSV	1211.13	0.0447612
PSB107_map8	0001.CSV	1214.98	0.0455316
PSB107_map8	0001.CSV	1218.84	0.0471126
PSB107_map8	0001.CSV	1222.7	0.04813
PSB107_map8	0001.CSV	1226.56	0.0499341
PSB107_map8	0001.CSV	1230.41	0.0510208
PSB107_map8	0001.CSV	1234.27	0.0528624
PSB107_map8	0001.CSV	1238.13	0.0539167
PSB107_map8	0001.CSV	1241.98	0.0556446
PSB107_map8	0001.CSV	1245.84	0.0567692
PSB107_map8	0001.CSV	1249.7	0.0586131
PSB107_map8	0001.CSV	1253.56	0.0597192
PSB107_map8	0001.CSV	1257.41	0.0615813
PSB107_map8	0001.CSV	1261.27	0.0628191
PSB107_map8	0001.CSV	1265.13	0.0650318
PSB107_map8	0001.CSV	1268.98	0.0666767
PSB107_map8	0001.CSV	1272.84	0.0692336
PSB107_map8	0001.CSV	1276.7	0.0710583
PSB107_map8	0001.CSV	1280.56	0.0736576
PSB107_map8	0001.CSV	1284.41	0.0755364
PSB107_map8	0001.CSV	1288.27	0.078258
PSB107_map8	0001.CSV	1292.13	0.0804085
PSB107_map8	0001.CSV	1295.98	0.0834502
PSB107_map8	0001.CSV	1299.84	0.0859586
PSB107_map8	0001.CSV	1303.7	0.0893636
PSB107_map8	0001.CSV	1307.56	0.0921609
PSB107_map8	0001.CSV	1311.41	0.0958815
PSB107_map8	0001.CSV	1315.27	0.0990106
PSB107_map8	0001.CSV	1319.13	0.103239
PSB107_map8	0001.CSV	1322.98	0.106656
PSB107_map8	0001.CSV	1326.84	0.110773
PSB107_map8	0001.CSV	1330.7	0.114398
PSB107_map8	0001.CSV	1334.56	0.1188
PSB107_map8	0001.CSV	1338.41	0.123302
PSB107_map8	0001.CSV	1342.27	0.129219
PSB107_map8	0001.CSV	1346.13	0.133183
PSB107_map8	0001.CSV	1349.98	0.138276
PSB107_map8	0001.CSV	1353.84	0.142946
PSB107_map8	0001.CSV	1357.7	0.14842
PSB107_map8	0001.CSV	1361.56	0.153443
PSB107_map8	0001.CSV	1365.41	0.159585
PSB107_map8	0001.CSV	1369.27	0.163365
PSB107_map8	0001.CSV	1373.13	0.168235
PSB107_map8	0001.CSV	1376.98	0.172184
PSB107_map8	0001.CSV	1380.84	0.175912
PSB107_map8	0001.CSV	1384.7	0.1778
PSB107_map8	0001.CSV	1388.56	0.179841
PSB107_map8	0001.CSV	1392.41	0.178917
PSB107_map8	0001.CSV	1396.27	0.176046
PSB107_map8	0001.CSV	1400.13	0.169734
PSB107_map8	0001.CSV	1403.98	0.164403
PSB107_map8	0001.CSV	1407.84	0.156199
PSB107_map8	0001.CSV	1411.7	0.148622
PSB107_map8	0001.CSV	1415.55	0.141177
PSB107_map8	0001.CSV	1419.41	0.134482
PSB107_map8	0001.CSV	1423.27	0.128792
PSB107_map8	0001.CSV	1427.12	0.126353
PSB107_map8	0001.CSV	1430.98	0.123259
PSB107_map8	0001.CSV	1434.84	0.121033
PSB107_map8	0001.CSV	1438.7	0.117027
PSB107_map8	0001.CSV	1442.55	0.114498
PSB107_map8	0001.CSV	1446.41	0.110605
PSB107_map8	0001.CSV	1450.27	0.107035
PSB107_map8	0001.CSV	1454.12	0.103184
PSB107_map8	0001.CSV	1457.98	0.0987823
PSB107_map8	0001.CSV	1461.84	0.0943046
PSB107_map8	0001.CSV	1465.7	0.0915643
PSB107_map8	0001.CSV	1469.55	0.0879813
PSB107_map8	0001.CSV	1473.41	0.0845635
PSB107_map8	0001.CSV	1477.27	0.0797951
PSB107_map8	0001.CSV	1481.12	0.0772654
PSB107_map8	0001.CSV	1484.98	0.0739215
PSB107_map8	0001.CSV	1488.84	0.0699454
PSB107_map8	0001.CSV	1492.7	0.0648135
PSB107_map8	0001.CSV	1496.55	0.0611241
PSB107_map8	0001.CSV	1500.41	0.0558526
PSB107_map8	0001.CSV	1504.27	0.0532827
PSB107_map8	0001.CSV	1508.12	0.0469997
PSB107_map8	0001.CSV	1511.98	0.0434295
PSB107_map8	0001.CSV	1515.84	0.0403375
PSB107_map8	0001.CSV	1519.7	0.0374172
PSB107_map8	0001.CSV	1523.55	0.0328961
PSB107_map8	0001.CSV	1527.41	0.0301983
PSB107_map8	0001.CSV	1531.27	0.0266377
PSB107_map8	0001.CSV	1535.12	0.0238918
PSB107_map8	0001.CSV	1538.98	0.0202518
PSB107_map8	0001.CSV	1542.84	0.0146392
PSB107_map8	0001.CSV	1546.7	0.0101715
PSB107_map8	0001.CSV	1550.55	0.00745554
PSB107_map8	0001.CSV	1554.41	0.00407386
PSB107_map8	0001.CSV	1558.27	0.000923466
PSB107_map8	0001.CSV	1562.12	-0.00226018
PSB107_map8	0001.CSV	1565.98	-0.00371341
PSB107_map8	0001.CSV	1569.84	-0.00574531
PSB107_map8	0001.CSV	1573.69	-0.00714869
PSB107_map8	0001.CSV	1577.55	-0.00882942
PSB107_map8	0001.CSV	1581.41	-0.0101536
PSB107_map8	0001.CSV	1585.27	-0.0117148
PSB107_map8	0001.CSV	1589.12	-0.013123
PSB107_map8	0001.CSV	1592.98	-0.0147602
PSB107_map8	0001.CSV	1596.84	-0.0162148
PSB107_map8	0001.CSV	1600.69	-0.0176925
PSB107_map8	0001.CSV	1604.55	-0.0187703
PSB107_map8	0001.CSV	1608.41	-0.0198522
PSB107_map8	0001.CSV	1612.27	-0.0206346
PSB107_map8	0001.CSV	1616.12	-0.0214699
PSB107_map8	0001.CSV	1619.98	-0.0219177
PSB107_map8	0001.CSV	1623.84	-0.0224533
PSB107_map8	0001.CSV	1627.69	-0.0227084
PSB107_map8	0001.CSV	1631.55	-0.0232855
PSB107_map8	0001.CSV	1635.41	-0.023386
PSB107_map8	0001.CSV	1639.27	-0.0232932
PSB107_map8	0001.CSV	1643.12	-0.0236895
PSB107_map8	0001.CSV	1646.98	-0.0238676
PSB107_map8	0001.CSV	1650.84	-0.0236833
PSB107_map8	0001.CSV	1654.69	-0.0235669
PSB107_map8	0001.CSV	1658.55	-0.0238788
PSB107_map8	0001.CSV	1662.41	-0.0242178
PSB107_map8	0001.CSV	1666.27	-0.0243911
PSB107_map8	0001.CSV	1670.12	-0.0244577
PSB107_map8	0001.CSV	1673.98	-0.0243866
PSB107_map8	0001.CSV	1677.84	-0.0247308
PSB107_map8	0001.CSV	1681.69	-0.0250645
PSB107_map8	0001.CSV	1685.55	-0.0246758
PSB107_map8	0001.CSV	1689.41	-0.0246778
PSB107_map8	0001.CSV	1693.27	-0.0251476
PSB107_map8	0001.CSV	1697.12	-0.0254089
PSB107_map8	0001.CSV	1700.98	-0.0248317
PSB107_map8	0001.CSV	1704.84	-0.0249121
PSB107_map8	0001.CSV	1708.69	-0.0251267
PSB107_map8	0001.CSV	1712.55	-0.0256465
PSB107_map8	0001.CSV	1716.41	-0.0252868
PSB107_map8	0001.CSV	1720.27	-0.0248102
PSB107_map8	0001.CSV	1724.12	-0.0250076
PSB107_map8	0001.CSV	1727.98	-0.0254662
PSB107_map8	0001.CSV	1731.84	-0.0254137
PSB107_map8	0001.CSV	1735.69	-0.0250519
PSB107_map8	0001.CSV	1739.55	-0.0250564
PSB107_map8	0001.CSV	1743.41	-0.0254407
PSB107_map8	0001.CSV	1747.27	-0.0253117
PSB107_map8	0001.CSV	1751.12	-0.024997
PSB107_map8	0001.CSV	1754.98	-0.0249597
PSB107_map8	0001.CSV	1758.84	-0.0252255
PSB107_map8	0001.CSV	1762.69	-0.0249297
PSB107_map8	0001.CSV	1766.55	-0.0251416
PSB107_map8	0001.CSV	1770.41	-0.0247923
PSB107_map8	0001.CSV	1774.26	-0.0240231
PSB107_map8	0001.CSV	1778.12	-0.0237765
PSB107_map8	0001.CSV	1781.98	-0.0235691
PSB107_map8	0001.CSV	1785.84	-0.0226648
PSB107_map8	0001.CSV	1789.69	-0.0215246
PSB107_map8	0001.CSV	1793.55	-0.0191347
PSB107_map8	0001.CSV	1797.41	-0.0187999
PSB107_map8	0001.CSV	1801.26	-0.0200152
PSB107_map8	0001.CSV	1805.12	-0.0218778
PSB107_map8	0001.CSV	1808.98	-0.0229563
PSB107_map8	0001.CSV	1812.84	-0.023599
PSB107_map8	0001.CSV	1816.69	-0.0239008
PSB107_map8	0001.CSV	1820.55	-0.024376
PSB107_map8	0001.CSV	1824.41	-0.0245111
PSB107_map8	0001.CSV	1828.26	-0.0246018
PSB107_map8	0001.CSV	1832.12	-0.0244599
PSB107_map8	0001.CSV	1835.98	-0.0248417
PSB107_map8	0001.CSV	1839.84	-0.0250205
PSB107_map8	0001.CSV	1843.69	-0.0251194
PSB107_map8	0001.CSV	1847.55	-0.0247098
PSB107_map8	0001.CSV	1851.41	-0.0249921
PSB107_map8	0001.CSV	1855.26	-0.0250162
PSB107_map8	0001.CSV	1859.12	-0.0250994
PSB107_map8	0001.CSV	1862.98	-0.0250495
PSB107_map8	0001.CSV	1866.84	-0.025165
PSB107_map8	0001.CSV	1870.69	-0.0246714
PSB107_map8	0001.CSV	1874.55	-0.0249002
PSB107_map8	0001.CSV	1878.41	-0.0248907
PSB107_map8	0001.CSV	1882.26	-0.0249761
PSB107_map8	0001.CSV	1886.12	-0.0248646
PSB107_map8	0001.CSV	1889.98	-0.0248724
PSB107_map8	0001.CSV	1893.83	-0.0246676
PSB107_map8	0001.CSV	1897.69	-0.024783
PSB107_map8	0001.CSV	1901.55	-0.024724
PSB107_map8	0001.CSV	1905.41	-0.0249166
PSB107_map8	0001.CSV	1909.26	-0.0247467
PSB107_map8	0001.CSV	1913.12	-0.0248552
PSB107_map8	0001.CSV	1916.98	-0.0247924
PSB107_map8	0001.CSV	1920.83	-0.024761
PSB107_map8	0001.CSV	1924.69	-0.0245478
PSB107_map8	0001.CSV	1928.55	-0.0247009
PSB107_map8	0001.CSV	1932.4	-0.0245981
PSB107_map8	0001.CSV	1936.26	-0.0247435
PSB107_map8	0001.CSV	1940.12	-0.0246505
PSB107_map8	0001.CSV	1943.98	-0.0245355
PSB107_map8	0001.CSV	1947.83	-0.0243643
PSB107_map8	0001.CSV	1951.69	-0.0245116
PSB107_map8	0001.CSV	1955.55	-0.0243672
PSB107_map8	0001.CSV	1959.4	-0.0244199
PSB107_map8	0001.CSV	1963.26	-0.0243651
PSB107_map8	0001.CSV	1967.12	-0.0244022
PSB107_map8	0001.CSV	1970.98	-0.0241966
PSB107_map8	0001.CSV	1974.83	-0.0243018
PSB107_map8	0001.CSV	1978.69	-0.0242
PSB107_map8	0001.CSV	1982.55	-0.0242953
PSB107_map8	0001.CSV	1986.4	-0.024256
PSB107_map8	0001.CSV	1990.26	-0.02424
PSB107_map8	0001.CSV	1994.12	-0.0239217
PSB107_map8	0001.CSV	1997.98	-0.0240066
PSB107_map8	0001.CSV	2001.83	-0.0239467
PSB107_map8	0001.CSV	2005.69	-0.0239004
PSB107_map8	0001.CSV	2009.55	-0.0237349
PSB107_map8	0001.CSV	2013.4	-0.0238289
PSB107_map8	0001.CSV	2017.26	-0.0236623
PSB107_map8	0001.CSV	2021.12	-0.0236161
PSB107_map8	0001.CSV	2024.97	-0.0234977
PSB107_map8	0001.CSV	2028.83	-0.0235177
PSB107_map8	0001.CSV	2032.69	-0.0234254
PSB107_map8	0001.CSV	2036.55	-0.0233829
PSB107_map8	0001.CSV	2040.4	-0.0232021
PSB107_map8	0001.CSV	2044.26	-0.0231696
PSB107_map8	0001.CSV	2048.12	-0.0230194
PSB107_map8	0001.CSV	2051.97	-0.0229227
PSB107_map8	0001.CSV	2055.83	-0.0228197
PSB107_map8	0001.CSV	2059.69	-0.0228332
PSB107_map8	0001.CSV	2063.55	-0.0226891
PSB107_map8	0001.CSV	2067.4	-0.0225956
PSB107_map8	0001.CSV	2071.26	-0.0225021
PSB107_map8	0001.CSV	2075.12	-0.0224575
PSB107_map8	0001.CSV	2078.97	-0.022329
PSB107_map8	0001.CSV	2082.83	-0.0222905
PSB107_map8	0001.CSV	2086.69	-0.0221912
PSB107_map8	0001.CSV	2090.55	-0.0220697
PSB107_map8	0001.CSV	2094.4	-0.0219426
PSB107_map8	0001.CSV	2098.26	-0.0218645
PSB107_map8	0001.CSV	2102.12	-0.0217675
PSB107_map8	0001.CSV	2105.97	-0.0217174
PSB107_map8	0001.CSV	2109.83	-0.0216104
PSB107_map8	0001.CSV	2113.69	-0.021488
PSB107_map8	0001.CSV	2117.55	-0.0214001
PSB107_map8	0001.CSV	2121.4	-0.0213252
PSB107_map8	0001.CSV	2125.26	-0.0212101
PSB107_map8	0001.CSV	2129.12	-0.0210747
PSB107_map8	0001.CSV	2132.97	-0.0210329
PSB107_map8	0001.CSV	2136.83	-0.0209713
PSB107_map8	0001.CSV	2140.69	-0.0209438
PSB107_map8	0001.CSV	2144.55	-0.0209161
PSB107_map8	0001.CSV	2148.4	-0.0208669
PSB107_map8	0001.CSV	2152.26	-0.0207295
PSB107_map8	0001.CSV	2156.12	-0.0206699
PSB107_map8	0001.CSV	2159.97	-0.0206261
PSB107_map8	0001.CSV	2163.83	-0.0205908
PSB107_map8	0001.CSV	2167.69	-0.0204779
PSB107_map8	0001.CSV	2171.55	-0.0204884
PSB107_map8	0001.CSV	2175.4	-0.0204638
PSB107_map8	0001.CSV	2179.26	-0.0205165
PSB107_map8	0001.CSV	2183.12	-0.0204663
PSB107_map8	0001.CSV	2186.97	-0.0205079
PSB107_map8	0001.CSV	2190.83	-0.0204309
PSB107_map8	0001.CSV	2194.69	-0.0204824
PSB107_map8	0001.CSV	2198.55	-0.0204794
PSB107_map8	0001.CSV	2202.4	-0.0206066
PSB107_map8	0001.CSV	2206.26	-0.020573
PSB107_map8	0001.CSV	2210.12	-0.0206576
PSB107_map8	0001.CSV	2213.97	-0.0206438
PSB107_map8	0001.CSV	2217.83	-0.0207721
PSB107_map8	0001.CSV	2221.69	-0.0207848
PSB107_map8	0001.CSV	2225.54	-0.0209367
PSB107_map8	0001.CSV	2229.4	-0.0209174
PSB107_map8	0001.CSV	2233.26	-0.0210606
PSB107_map8	0001.CSV	2237.12	-0.0210658
PSB107_map8	0001.CSV	2240.97	-0.0212423
PSB107_map8	0001.CSV	2244.83	-0.0212492
PSB107_map8	0001.CSV	2248.69	-0.0214619
PSB107_map8	0001.CSV	2252.54	-0.0215548
PSB107_map8	0001.CSV	2256.4	-0.0217373
PSB107_map8	0001.CSV	2260.26	-0.021753
PSB107_map8	0001.CSV	2264.11	-0.0219809
PSB107_map8	0001.CSV	2267.97	-0.0219641
PSB107_map8	0001.CSV	2271.83	-0.0221059
PSB107_map8	0001.CSV	2275.69	-0.0220667
PSB107_map8	0001.CSV	2279.54	-0.0222023
PSB107_map8	0001.CSV	2283.4	-0.0221624
PSB107_map8	0001.CSV	2287.26	-0.0223304
PSB107_map8	0001.CSV	2291.11	-0.0222407
PSB107_map8	0001.CSV	2294.97	-0.0223242
PSB107_map8	0001.CSV	2298.83	-0.0221897
PSB107_map8	0001.CSV	2302.69	-0.0223268
PSB107_map8	0001.CSV	2306.54	-0.0221625
PSB107_map8	0001.CSV	2310.4	-0.022302
PSB107_map8	0001.CSV	2314.26	-0.0220845
PSB107_map8	0001.CSV	2318.11	-0.022427
PSB107_map8	0001.CSV	2321.97	-0.0222993
PSB107_map8	0001.CSV	2325.83	-0.0228571
PSB107_map8	0001.CSV	2329.69	-0.0225251
PSB107_map8	0001.CSV	2333.54	-0.0232148
PSB107_map8	0001.CSV	2337.4	-0.0227328
PSB107_map8	0001.CSV	2341.26	-0.0232281
PSB107_map8	0001.CSV	2345.11	-0.0220811
PSB107_map8	0001.CSV	2348.97	-0.0225445
PSB107_map8	0001.CSV	2352.83	-0.0232142
PSB107_map8	0001.CSV	2356.69	-0.0257417
PSB107_map8	0001.CSV	2360.54	-0.0254061
PSB107_map8	0001.CSV	2364.4	-0.0252913
PSB107_map8	0001.CSV	2368.26	-0.0231007
PSB107_map8	0001.CSV	2372.11	-0.0224658
PSB107_map8	0001.CSV	2375.97	-0.0213499
PSB107_map8	0001.CSV	2379.83	-0.0212861
PSB107_map8	0001.CSV	2383.69	-0.0210974
PSB107_map8	0001.CSV	2387.54	-0.0213716
PSB107_map8	0001.CSV	2391.4	-0.0213438
PSB107_map8	0001.CSV	2395.26	-0.0214597
PSB107_map8	0001.CSV	2399.11	-0.0212853
PSB107_map8	0001.CSV	2402.97	-0.0214072
PSB107_map8	0001.CSV	2406.83	-0.0212713
PSB107_map8	0001.CSV	2410.68	-0.0212799
PSB107_map8	0001.CSV	2414.54	-0.0210365
PSB107_map8	0001.CSV	2418.4	-0.0210421
PSB107_map8	0001.CSV	2422.26	-0.0207941
PSB107_map8	0001.CSV	2426.11	-0.0208157
PSB107_map8	0001.CSV	2429.97	-0.0205359
PSB107_map8	0001.CSV	2433.83	-0.0204752
PSB107_map8	0001.CSV	2437.68	-0.0201953
PSB107_map8	0001.CSV	2441.54	-0.020182
PSB107_map8	0001.CSV	2445.4	-0.0198851
PSB107_map8	0001.CSV	2449.26	-0.0198676
PSB107_map8	0001.CSV	2453.11	-0.0195773
PSB107_map8	0001.CSV	2456.97	-0.0195557
PSB107_map8	0001.CSV	2460.83	-0.0192936
PSB107_map8	0001.CSV	2464.68	-0.0192019
PSB107_map8	0001.CSV	2468.54	-0.0188415
PSB107_map8	0001.CSV	2472.4	-0.0188212
PSB107_map8	0001.CSV	2476.26	-0.0185507
PSB107_map8	0001.CSV	2480.11	-0.0184814
PSB107_map8	0001.CSV	2483.97	-0.018164
PSB107_map8	0001.CSV	2487.83	-0.017998
PSB107_map8	0001.CSV	2491.68	-0.017606
PSB107_map8	0001.CSV	2495.54	-0.0174005
PSB107_map8	0001.CSV	2499.4	-0.0168186
PSB107_map8	0001.CSV	2503.26	-0.0165417
PSB107_map8	0001.CSV	2507.11	-0.0161776
PSB107_map8	0001.CSV	2510.97	-0.0162484
PSB107_map8	0001.CSV	2514.83	-0.0163005
PSB107_map8	0001.CSV	2518.68	-0.0166625
PSB107_map8	0001.CSV	2522.54	-0.016888
PSB107_map8	0001.CSV	2526.4	-0.0174422
PSB107_map8	0001.CSV	2530.26	-0.017792
PSB107_map8	0001.CSV	2534.11	-0.0183424
PSB107_map8	0001.CSV	2537.97	-0.0185605
PSB107_map8	0001.CSV	2541.83	-0.0187807
PSB107_map8	0001.CSV	2545.68	-0.018783
PSB107_map8	0001.CSV	2549.54	-0.0190713
PSB107_map8	0001.CSV	2553.4	-0.0191487
PSB107_map8	0001.CSV	2557.26	-0.019371
PSB107_map8	0001.CSV	2561.11	-0.0193777
PSB107_map8	0001.CSV	2564.97	-0.0195373
PSB107_map8	0001.CSV	2568.83	-0.0194802
PSB107_map8	0001.CSV	2572.68	-0.0195479
PSB107_map8	0001.CSV	2576.54	-0.0195092
PSB107_map8	0001.CSV	2580.4	-0.0197104
PSB107_map8	0001.CSV	2584.25	-0.019641
PSB107_map8	0001.CSV	2588.11	-0.0197739
PSB107_map8	0001.CSV	2591.97	-0.0197513
PSB107_map8	0001.CSV	2595.83	-0.0198938
PSB107_map8	0001.CSV	2599.68	-0.0199259
PSB107_map8	0001.CSV	2603.54	-0.0200681
PSB107_map8	0001.CSV	2607.4	-0.0200659
PSB107_map8	0001.CSV	2611.25	-0.0202725
PSB107_map8	0001.CSV	2615.11	-0.020351
PSB107_map8	0001.CSV	2618.97	-0.0204987
PSB107_map8	0001.CSV	2622.82	-0.0204751
PSB107_map8	0001.CSV	2626.68	-0.0206067
PSB107_map8	0001.CSV	2630.54	-0.0206267
PSB107_map8	0001.CSV	2634.4	-0.0207527
PSB107_map8	0001.CSV	2638.25	-0.0207777
PSB107_map8	0001.CSV	2642.11	-0.0209833
PSB107_map8	0001.CSV	2645.97	-0.0210362
PSB107_map8	0001.CSV	2649.82	-0.0210937
PSB107_map8	0001.CSV	2653.68	-0.0210944
PSB107_map8	0001.CSV	2657.54	-0.0211926
PSB107_map8	0001.CSV	2661.4	-0.021137
PSB107_map8	0001.CSV	2665.25	-0.0211149
PSB107_map8	0001.CSV	2669.11	-0.020927
PSB107_map8	0001.CSV	2672.97	-0.0208008
PSB107_map8	0001.CSV	2676.82	-0.0205111
PSB107_map8	0001.CSV	2680.68	-0.0205103
PSB107_map8	0001.CSV	2684.54	-0.0207842
PSB107_map8	0001.CSV	2688.4	-0.0209899
PSB107_map8	0001.CSV	2692.25	-0.0208957
PSB107_map8	0001.CSV	2696.11	-0.0207633
PSB107_map8	0001.CSV	2699.97	-0.0206979
PSB107_map8	0001.CSV	2703.82	-0.0207593
PSB107_map8	0001.CSV	2707.68	-0.0206162
PSB107_map8	0001.CSV	2711.54	-0.0205121
PSB107_map8	0001.CSV	2715.4	-0.0204284
PSB107_map8	0001.CSV	2719.25	-0.0202376
PSB107_map8	0001.CSV	2723.11	-0.0198881
PSB107_map8	0001.CSV	2726.97	-0.0199225
PSB107_map8	0001.CSV	2730.82	-0.0201483
PSB107_map8	0001.CSV	2734.68	-0.0201145
PSB107_map8	0001.CSV	2738.54	-0.0200149
PSB107_map8	0001.CSV	2742.4	-0.0199016
PSB107_map8	0001.CSV	2746.25	-0.0195111
PSB107_map8	0001.CSV	2750.11	-0.0193931
PSB107_map8	0001.CSV	2753.97	-0.0195058
PSB107_map8	0001.CSV	2757.82	-0.0194826
PSB107_map8	0001.CSV	2761.68	-0.0195252
PSB107_map8	0001.CSV	2765.54	-0.0194972
PSB107_map8	0001.CSV	2769.39	-0.0192435
PSB107_map8	0001.CSV	2773.25	-0.0187829
PSB107_map8	0001.CSV	2777.11	-0.0187294
PSB107_map8	0001.CSV	2780.97	-0.0188991
PSB107_map8	0001.CSV	2784.82	-0.0186919
PSB107_map8	0001.CSV	2788.68	-0.0181857
PSB107_map8	0001.CSV	2792.54	-0.0180335
PSB107_map8	0001.CSV	2796.39	-0.0180359
PSB107_map8	0001.CSV	2800.25	-0.0181263
PSB107_map8	0001.CSV	2804.11	-0.018233
PSB107_map8	0001.CSV	2807.97	-0.018026
PSB107_map8	0001.CSV	2811.82	-0.017899
PSB107_map8	0001.CSV	2815.68	-0.0179632
PSB107_map8	0001.CSV	2819.54	-0.0178523
PSB107_map8	0001.CSV	2823.39	-0.0177411
PSB107_map8	0001.CSV	2827.25	-0.0176066
PSB107_map8	0001.CSV	2831.11	-0.017337
PSB107_map8	0001.CSV	2834.97	-0.0168395
PSB107_map8	0001.CSV	2838.82	-0.0165293
PSB107_map8	0001.CSV	2842.68	-0.0165581
PSB107_map8	0001.CSV	2846.54	-0.0165301
PSB107_map8	0001.CSV	2850.39	-0.0164588
PSB107_map8	0001.CSV	2854.25	-0.016495
PSB107_map8	0001.CSV	2858.11	-0.0162613
PSB107_map8	0001.CSV	2861.97	-0.0161359
PSB107_map8	0001.CSV	2865.82	-0.0160846
PSB107_map8	0001.CSV	2869.68	-0.015899
PSB107_map8	0001.CSV	2873.54	-0.0157437
PSB107_map8	0001.CSV	2877.39	-0.0161645
PSB107_map8	0001.CSV	2881.25	-0.016469
PSB107_map8	0001.CSV	2885.11	-0.0166806
PSB107_map8	0001.CSV	2888.97	-0.0166874
PSB107_map8	0001.CSV	2892.82	-0.0164634
PSB107_map8	0001.CSV	2896.68	-0.0163422
PSB107_map8	0001.CSV	2900.54	-0.0164734
PSB107_map8	0001.CSV	2904.39	-0.0162937
PSB107_map8	0001.CSV	2908.25	-0.0160508
PSB107_map8	0001.CSV	2912.11	-0.0156409
PSB107_map8	0001.CSV	2915.97	-0.0156314
PSB107_map8	0001.CSV	2919.82	-0.0159993
PSB107_map8	0001.CSV	2923.68	-0.0163232
PSB107_map8	0001.CSV	2927.54	-0.0161556
PSB107_map8	0001.CSV	2931.39	-0.0161068
PSB107_map8	0001.CSV	2935.25	-0.0163002
PSB107_map8	0001.CSV	2939.11	-0.0162482
PSB107_map8	0001.CSV	2942.96	-0.0158075
PSB107_map8	0001.CSV	2946.82	-0.0157314
PSB107_map8	0001.CSV	2950.68	-0.0160431
PSB107_map8	0001.CSV	2954.54	-0.0165839
PSB107_map8	0001.CSV	2958.39	-0.0168447
PSB107_map8	0001.CSV	2962.25	-0.0168729
PSB107_map8	0001.CSV	2966.11	-0.0169572
PSB107_map8	0001.CSV	2969.96	-0.0168778
PSB107_map8	0001.CSV	2973.82	-0.016429
PSB107_map8	0001.CSV	2977.68	-0.0161729
PSB107_map8	0001.CSV	2981.53	-0.0163088
PSB107_map8	0001.CSV	2985.39	-0.0168433
PSB107_map8	0001.CSV	2989.25	-0.0169458
PSB107_map8	0001.CSV	2993.11	-0.0166996
PSB107_map8	0001.CSV	2996.96	-0.016698
PSB107_map8	0001.CSV	3000.82	-0.0169618
PSB107_map8	0001.CSV	3004.68	-0.0170396
PSB107_map8	0001.CSV	3008.53	-0.0169693
PSB107_map8	0001.CSV	3012.39	-0.0167493
PSB107_map8	0001.CSV	3016.25	-0.0166568
PSB107_map8	0001.CSV	3020.11	-0.0167387
PSB107_map8	0001.CSV	3023.96	-0.0168685
PSB107_map8	0001.CSV	3027.82	-0.0168952
PSB107_map8	0001.CSV	3031.68	-0.0167116
PSB107_map8	0001.CSV	3035.53	-0.0166213
PSB107_map8	0001.CSV	3039.39	-0.0165718
PSB107_map8	0001.CSV	3043.25	-0.0164196
PSB107_map8	0001.CSV	3047.11	-0.0164163
PSB107_map8	0001.CSV	3050.96	-0.0164393
PSB107_map8	0001.CSV	3054.82	-0.0165003
PSB107_map8	0001.CSV	3058.68	-0.0166471
PSB107_map8	0001.CSV	3062.53	-0.0166259
PSB107_map8	0001.CSV	3066.39	-0.0163057
PSB107_map8	0001.CSV	3070.25	-0.016293
PSB107_map8	0001.CSV	3074.11	-0.016299
PSB107_map8	0001.CSV	3077.96	-0.0160997
PSB107_map8	0001.CSV	3081.82	-0.0158755
PSB107_map8	0001.CSV	3085.68	-0.0158014
PSB107_map8	0001.CSV	3089.53	-0.0158987
PSB107_map8	0001.CSV	3093.39	-0.0160754
PSB107_map8	0001.CSV	3097.25	-0.0160481
PSB107_map8	0001.CSV	3101.11	-0.0159089
PSB107_map8	0001.CSV	3104.96	-0.0158785
PSB107_map8	0001.CSV	3108.82	-0.0157273
PSB107_map8	0001.CSV	3112.68	-0.0155807
PSB107_map8	0001.CSV	3116.53	-0.0153747
PSB107_map8	0001.CSV	3120.39	-0.0154627
PSB107_map8	0001.CSV	3124.25	-0.015609
PSB107_map8	0001.CSV	3128.11	-0.0155958
PSB107_map8	0001.CSV	3131.96	-0.0156106
PSB107_map8	0001.CSV	3135.82	-0.0156393
PSB107_map8	0001.CSV	3139.68	-0.015491
PSB107_map8	0001.CSV	3143.53	-0.0155516
PSB107_map8	0001.CSV	3147.39	-0.0154676
PSB107_map8	0001.CSV	3151.25	-0.0153082
PSB107_map8	0001.CSV	3155.1	-0.0153297
PSB107_map8	0001.CSV	3158.96	-0.0156309
PSB107_map8	0001.CSV	3162.82	-0.0157262
PSB107_map8	0001.CSV	3166.68	-0.0157923
PSB107_map8	0001.CSV	3170.53	-0.0157548
PSB107_map8	0001.CSV	3174.39	-0.0157418
PSB107_map8	0001.CSV	3178.25	-0.0155953
PSB107_map8	0001.CSV	3182.1	-0.0155898
PSB107_map8	0001.CSV	3185.96	-0.0155104
PSB107_map8	0001.CSV	3189.82	-0.0155499
PSB107_map8	0001.CSV	3193.68	-0.0156135
PSB107_map8	0001.CSV	3197.53	-0.0157232
PSB107_map8	0001.CSV	3201.39	-0.0155849
PSB107_map8	0001.CSV	3205.25	-0.0154383
PSB107_map8	0001.CSV	3209.1	-0.0153546
PSB107_map8	0001.CSV	3212.96	-0.0154069
PSB107_map8	0001.CSV	3216.82	-0.015217
PSB107_map8	0001.CSV	3220.68	-0.0153053
PSB107_map8	0001.CSV	3224.53	-0.0153829
PSB107_map8	0001.CSV	3228.39	-0.0153149
PSB107_map8	0001.CSV	3232.25	-0.0150498
PSB107_map8	0001.CSV	3236.1	-0.0152436
PSB107_map8	0001.CSV	3239.96	-0.0153497
PSB107_map8	0001.CSV	3243.82	-0.0152349
PSB107_map8	0001.CSV	3247.68	-0.0151225
PSB107_map8	0001.CSV	3251.53	-0.0153254
PSB107_map8	0001.CSV	3255.39	-0.0152772
PSB107_map8	0001.CSV	3259.25	-0.0154265
PSB107_map8	0001.CSV	3263.1	-0.0153323
PSB107_map8	0001.CSV	3266.96	-0.0152169
PSB107_map8	0001.CSV	3270.82	-0.0149594
PSB107_map8	0001.CSV	3274.68	-0.0150424
PSB107_map8	0001.CSV	3278.53	-0.0151357
PSB107_map8	0001.CSV	3282.39	-0.015288
PSB107_map8	0001.CSV	3286.25	-0.0151939
PSB107_map8	0001.CSV	3290.1	-0.0150015
PSB107_map8	0001.CSV	3293.96	-0.0146954
PSB107_map8	0001.CSV	3297.82	-0.0148024
PSB107_map8	0001.CSV	3301.67	-0.0148428
PSB107_map8	0001.CSV	3305.53	-0.0148166
PSB107_map8	0001.CSV	3309.39	-0.014731
PSB107_map8	0001.CSV	3313.25	-0.0150149
PSB107_map8	0001.CSV	3317.1	-0.0151222
PSB107_map8	0001.CSV	3320.96	-0.0150973
PSB107_map8	0001.CSV	3324.82	-0.0148349
PSB107_map8	0001.CSV	3328.67	-0.0149132
PSB107_map8	0001.CSV	3332.53	-0.0148182
PSB107_map8	0001.CSV	3336.39	-0.0145368
PSB107_map8	0001.CSV	3340.24	-0.0142506
PSB107_map8	0001.CSV	3344.1	-0.0143409
PSB107_map8	0001.CSV	3347.96	-0.0142495
PSB107_map8	0001.CSV	3351.82	-0.0143395
PSB107_map8	0001.CSV	3355.67	-0.0144529
PSB107_map8	0001.CSV	3359.53	-0.0144678
PSB107_map8	0001.CSV	3363.39	-0.0140897
PSB107_map8	0001.CSV	3367.24	-0.0138873
PSB107_map8	0001.CSV	3371.1	-0.013935
PSB107_map8	0001.CSV	3374.96	-0.0141823
PSB107_map8	0001.CSV	3378.82	-0.0141633
PSB107_map8	0001.CSV	3382.67	-0.0142726
PSB107_map8	0001.CSV	3386.53	-0.0140854
PSB107_map8	0001.CSV	3390.39	-0.0138508
PSB107_map8	0001.CSV	3394.24	-0.0137258
PSB107_map8	0001.CSV	3398.1	-0.0138593
PSB107_map8	0001.CSV	3401.96	-0.0138833
PSB107_map8	0001.CSV	3405.82	-0.0140328
PSB107_map8	0001.CSV	3409.67	-0.0139327
PSB107_map8	0001.CSV	3413.53	-0.0140431
PSB107_map8	0001.CSV	3417.39	-0.0142521
PSB107_map8	0001.CSV	3421.24	-0.0142844
PSB107_map8	0001.CSV	3425.1	-0.0140948
PSB107_map8	0001.CSV	3428.96	-0.0138943
PSB107_map8	0001.CSV	3432.82	-0.013712
PSB107_map8	0001.CSV	3436.67	-0.0139499
PSB107_map8	0001.CSV	3440.53	-0.014355
PSB107_map8	0001.CSV	3444.39	-0.0145951
PSB107_map8	0001.CSV	3448.24	-0.014483
PSB107_map8	0001.CSV	3452.1	-0.0146159
PSB107_map8	0001.CSV	3455.96	-0.0146674
PSB107_map8	0001.CSV	3459.82	-0.0144603
PSB107_map8	0001.CSV	3463.67	-0.0142026
PSB107_map8	0001.CSV	3467.53	-0.0141843
PSB107_map8	0001.CSV	3471.39	-0.0144267
PSB107_map8	0001.CSV	3475.24	-0.0145687
PSB107_map8	0001.CSV	3479.1	-0.0144895
PSB107_map8	0001.CSV	3482.96	-0.0145388
PSB107_map8	0001.CSV	3486.82	-0.0146464
PSB107_map8	0001.CSV	3490.67	-0.0147949
PSB107_map8	0001.CSV	3494.53	-0.0147927
PSB107_map8	0001.CSV	3498.39	-0.0148968
PSB107_map8	0001.CSV	3502.24	-0.0149555
PSB107_map8	0001.CSV	3506.1	-0.0149788
PSB107_map8	0001.CSV	3509.96	-0.0151089
PSB107_map8	0001.CSV	3513.81	-0.0149951
PSB107_map8	0001.CSV	3517.67	-0.0151174
PSB107_map8	0001.CSV	3521.53	-0.0151143
PSB107_map8	0001.CSV	3525.39	-0.0150543
PSB107_map8	0001.CSV	3529.24	-0.0151726
PSB107_map8	0001.CSV	3533.1	-0.0153142
PSB107_map8	0001.CSV	3536.96	-0.0152838
PSB107_map8	0001.CSV	3540.81	-0.0153353
PSB107_map8	0001.CSV	3544.67	-0.0151834
PSB107_map8	0001.CSV	3548.53	-0.015366
PSB107_map8	0001.CSV	3552.39	-0.0156263
PSB107_map8	0001.CSV	3556.24	-0.0156987
PSB107_map8	0001.CSV	3560.1	-0.0158041
PSB107_map8	0001.CSV	3563.96	-0.0162558
PSB107_map8	0001.CSV	3567.81	-0.0157494
PSB107_map8	0001.CSV	3571.67	-0.0155042
PSB107_map8	0001.CSV	3575.53	-0.0157709
PSB107_map8	0001.CSV	3579.39	-0.0157731
PSB107_map8	0001.CSV	3583.24	-0.0158181
PSB107_map8	0001.CSV	3587.1	-0.0159277
PSB107_map8	0001.CSV	3590.96	-0.0158963
PSB107_map8	0001.CSV	3594.81	-0.0161968
PSB107_map8	0001.CSV	3598.67	-0.0158887
PSB107_map8	0001.CSV	3602.53	-0.0159249
PSB107_map8	0001.CSV	3606.39	-0.0164795
PSB107_map8	0001.CSV	3610.24	-0.0170179
PSB107_map8	0001.CSV	3614.1	-0.0166994
PSB107_map8	0001.CSV	3617.96	-0.016172
PSB107_map8	0001.CSV	3621.81	-0.015934
PSB107_map8	0001.CSV	3625.67	-0.0168913
PSB107_map8	0001.CSV	3629.53	-0.0168051
PSB107_map8	0001.CSV	3633.39	-0.0162504
PSB107_map8	0001.CSV	3637.24	-0.0163441
PSB107_map8	0001.CSV	3641.1	-0.0166233
PSB107_map8	0001.CSV	3644.96	-0.0169513
PSB107_map8	0001.CSV	3648.81	-0.0166467
PSB107_map8	0001.CSV	3652.67	-0.0156601
PSB107_map8	0001.CSV	3656.53	-0.0158161
PSB107_map8	0001.CSV	3660.38	-0.0157967
PSB107_map8	0001.CSV	3664.24	-0.0165311
PSB107_map8	0001.CSV	3668.1	-0.0171022
PSB107_map8	0001.CSV	3671.96	-0.0171058
PSB107_map8	0001.CSV	3675.81	-0.0160675
PSB107_map8	0001.CSV	3679.67	-0.0156942
PSB107_map8	0001.CSV	3683.53	-0.0160734
PSB107_map8	0001.CSV	3687.38	-0.0166038
PSB107_map8	0001.CSV	3691.24	-0.0156812
PSB107_map8	0001.CSV	3695.1	-0.0157741
PSB107_map8	0001.CSV	3698.95	-0.016107
PSB107_map8	0001.CSV	3702.81	-0.0163232
PSB107_map8	0001.CSV	3706.67	-0.0165427
PSB107_map8	0001.CSV	3710.53	-0.0165811
PSB107_map8	0001.CSV	3714.38	-0.0157507
PSB107_map8	0001.CSV	3718.24	-0.0162773
PSB107_map8	0001.CSV	3722.1	-0.0161556
PSB107_map8	0001.CSV	3725.95	-0.0159653
PSB107_map8	0001.CSV	3729.81	-0.0163081
PSB107_map8	0001.CSV	3733.67	-0.0164731
PSB107_map8	0001.CSV	3737.53	-0.0152126
PSB107_map8	0001.CSV	3741.38	-0.0162468
PSB107_map8	0001.CSV	3745.24	-0.0168968
PSB107_map8	0001.CSV	3749.1	-0.0168043
PSB107_map8	0001.CSV	3752.95	-0.0154677
PSB107_map8	0001.CSV	3756.81	-0.0158555
PSB107_map8	0001.CSV	3760.67	-0.01602
PSB107_map8	0001.CSV	3764.53	-0.0162955
PSB107_map8	0001.CSV	3768.38	-0.0159225
PSB107_map8	0001.CSV	3772.24	-0.0158176
PSB107_map8	0001.CSV	3776.1	-0.0159779
PSB107_map8	0001.CSV	3779.95	-0.0159168
PSB107_map8	0001.CSV	3783.81	-0.0155878
PSB107_map8	0001.CSV	3787.67	-0.015658
PSB107_map8	0001.CSV	3791.53	-0.015896
PSB107_map8	0001.CSV	3795.38	-0.0165277
PSB107_map8	0001.CSV	3799.24	-0.0164568
PSB107_map8	0001.CSV	3803.1	-0.015869
PSB107_map8	0001.CSV	3806.95	-0.0152707
PSB107_map8	0001.CSV	3810.81	-0.0157702
PSB107_map8	0001.CSV	3814.67	-0.0163479
PSB107_map8	0001.CSV	3818.53	-0.0164965
PSB107_map8	0001.CSV	3822.38	-0.0156766
PSB107_map8	0001.CSV	3826.24	-0.0158608
PSB107_map8	0001.CSV	3830.1	-0.0160703
PSB107_map8	0001.CSV	3833.95	-0.0164899
PSB107_map8	0001.CSV	3837.81	-0.0160006
PSB107_map8	0001.CSV	3841.67	-0.0153033
PSB107_map8	0001.CSV	3845.53	-0.0155175
PSB107_map8	0001.CSV	3849.38	-0.0166934
PSB107_map8	0001.CSV	3853.24	-0.0167316
PSB107_map8	0001.CSV	3857.1	-0.0158974
PSB107_map8	0001.CSV	3860.95	-0.0161817
PSB107_map8	0001.CSV	3864.81	-0.0164574
PSB107_map8	0001.CSV	3868.67	-0.0162818
PSB107_map8	0001.CSV	3872.52	-0.0159881
PSB107_map8	0001.CSV	3876.38	-0.0159573
PSB107_map8	0001.CSV	3880.24	-0.0163858
PSB107_map8	0001.CSV	3884.1	-0.0158872
PSB107_map8	0001.CSV	3887.95	-0.0158386
PSB107_map8	0001.CSV	3891.81	-0.0156846
PSB107_map8	0001.CSV	3895.67	-0.0161095
PSB107_map8	0001.CSV	3899.52	-0.0167633
PSB107_map8	0001.CSV	3903.38	-0.0161574
PSB107_map8	0001.CSV	3907.24	-0.0153589
PSB107_map8	0001.CSV	3911.1	-0.0158182
PSB107_map8	0001.CSV	3914.95	-0.0161574
PSB107_map8	0001.CSV	3918.81	-0.0160356
PSB107_map8	0001.CSV	3922.67	-0.0157914
PSB107_map8	0001.CSV	3926.52	-0.015816
PSB107_map8	0001.CSV	3930.38	-0.0157055
PSB107_map8	0001.CSV	3934.24	-0.0155379
PSB107_map8	0001.CSV	3938.09	-0.0157363
PSB107_map8	0001.CSV	3941.95	-0.015876
PSB107_map8	0001.CSV	3945.81	-0.0157447
PSB107_map8	0001.CSV	3949.67	-0.0157849
PSB107_map8	0001.CSV	3953.52	-0.0157542
PSB107_map8	0001.CSV	3957.38	-0.0158603
PSB107_map8	0001.CSV	3961.24	-0.0157794
PSB107_map8	0001.CSV	3965.09	-0.0157439
PSB107_map8	0001.CSV	3968.95	-0.015708
PSB107_map8	0001.CSV	3972.81	-0.0156863
PSB107_map8	0001.CSV	3976.67	-0.0155904
PSB107_map8	0001.CSV	3980.52	-0.0156604
PSB107_map8	0001.CSV	3984.38	-0.0155608
PSB107_map8	0001.CSV	3988.24	-0.0155864
PSB107_map8	0001.CSV	3992.09	-0.0155604
PSB107_map8	0001.CSV	3995.95	-0.0155138
PSB107_map8	0001.CSV	3999.81	-0.0155566
PSB107_map8	0002.CSV	674.992	0.00666618
PSB107_map8	0002.CSV	678.849	0.00788836
PSB107_map8	0002.CSV	682.706	0.00972581
PSB107_map8	0002.CSV	686.563	0.0105522
PSB107_map8	0002.CSV	690.42	0.0123408
PSB107_map8	0002.CSV	694.277	0.0152756
PSB107_map8	0002.CSV	698.134	0.0201939
PSB107_map8	0002.CSV	701.991	0.0277835
PSB107_map8	0002.CSV	705.849	0.0443807
PSB107_map8	0002.CSV	709.706	0.0663319
PSB107_map8	0002.CSV	713.563	0.0585907
PSB107_map8	0002.CSV	717.42	0.0238287
PSB107_map8	0002.CSV	721.277	0.00399818
PSB107_map8	0002.CSV	725.134	-0.000597559
PSB107_map8	0002.CSV	728.991	-0.00014613
PSB107_map8	0002.CSV	732.848	0.00160935
PSB107_map8	0002.CSV	736.705	0.00316944
PSB107_map8	0002.CSV	740.562	0.00260128
PSB107_map8	0002.CSV	744.42	0.00254558
PSB107_map8	0002.CSV	748.277	0.00279215
PSB107_map8	0002.CSV	752.134	0.0036776
PSB107_map8	0002.CSV	755.991	0.00406914
PSB107_map8	0002.CSV	759.848	0.00517292
PSB107_map8	0002.CSV	763.705	0.00586871
PSB107_map8	0002.CSV	767.562	0.00709245
PSB107_map8	0002.CSV	771.419	0.00831691
PSB107_map8	0002.CSV	775.276	0.00965825
PSB107_map8	0002.CSV	779.133	0.0104269
PSB107_map8	0002.CSV	782.99	0.0113067
PSB107_map8	0002.CSV	786.848	0.0111757
PSB107_map8	0002.CSV	790.705	0.0111378
PSB107_map8	0002.CSV	794.562	0.0109407
PSB107_map8	0002.CSV	798.419	0.0113495
PSB107_map8	0002.CSV	802.276	0.0117595
PSB107_map8	0002.CSV	806.133	0.0127353
PSB107_map8	0002.CSV	809.99	0.0133178
PSB107_map8	0002.CSV	813.847	0.0144054
PSB107_map8	0002.CSV	817.704	0.0153355
PSB107_map8	0002.CSV	821.562	0.0165058
PSB107_map8	0002.CSV	825.419	0.0173865
PSB107_map8	0002.CSV	829.276	0.0185889
PSB107_map8	0002.CSV	833.133	0.0198737
PSB107_map8	0002.CSV	836.99	0.0223594
PSB107_map8	0002.CSV	840.847	0.0261769
PSB107_map8	0002.CSV	844.704	0.0323799
PSB107_map8	0002.CSV	848.561	0.0365492
PSB107_map8	0002.CSV	852.418	0.0404972
PSB107_map8	0002.CSV	856.275	0.0526583
PSB107_map8	0002.CSV	860.132	0.0783122
PSB107_map8	0002.CSV	863.99	0.116467
PSB107_map8	0002.CSV	867.847	0.154142
PSB107_map8	0002.CSV	871.704	0.16509
PSB107_map8	0002.CSV	875.561	0.138587
PSB107_map8	0002.CSV	879.418	0.0984324
PSB107_map8	0002.CSV	883.275	0.0565048
PSB107_map8	0002.CSV	887.132	0.0196597
PSB107_map8	0002.CSV	890.989	0.00258938
PSB107_map8	0002.CSV	894.846	0.000232066
PSB107_map8	0002.CSV	898.703	0.000657114
PSB107_map8	0002.CSV	902.561	0.00121258
PSB107_map8	0002.CSV	906.418	0.00158042
PSB107_map8	0002.CSV	910.275	0.00206731
PSB107_map8	0002.CSV	914.132	0.00246886
PSB107_map8	0002.CSV	917.989	0.00322542
PSB107_map8	0002.CSV	921.846	0.00388306
PSB107_map8	0002.CSV	925.703	0.00451882
PSB107_map8	0002.CSV	929.56	0.00486431
PSB107_map8	0002.CSV	933.417	0.00539908
PSB107_map8	0002.CSV	937.274	0.00560989
PSB107_map8	0002.CSV	941.131	0.00583798
PSB107_map8	0002.CSV	944.989	0.00594271
PSB107_map8	0002.CSV	948.846	0.00622832
PSB107_map8	0002.CSV	952.703	0.00621851
PSB107_map8	0002.CSV	956.56	0.00634457
PSB107_map8	0002.CSV	960.417	0.00622933
PSB107_map8	0002.CSV	964.274	0.00634642
PSB107_map8	0002.CSV	968.131	0.00643499
PSB107_map8	0002.CSV	971.988	0.00699442
PSB107_map8	0002.CSV	975.845	0.00738179
PSB107_map8	0002.CSV	979.702	0.00801345
PSB107_map8	0002.CSV	983.559	0.00844585
PSB107_map8	0002.CSV	987.417	0.00931462
PSB107_map8	0002.CSV	991.274	0.00989564
PSB107_map8	0002.CSV	995.131	0.0106304
PSB107_map8	0002.CSV	998.988	0.0109688
PSB107_map8	0002.CSV	1002.85	0.0116436
PSB107_map8	0002.CSV	1006.7	0.0120464
PSB107_map8	0002.CSV	1010.56	0.0127154
PSB107_map8	0002.CSV	1014.42	0.0129856
PSB107_map8	0002.CSV	1018.27	0.0136889
PSB107_map8	0002.CSV	1022.13	0.0141056
PSB107_map8	0002.CSV	1025.99	0.0149068
PSB107_map8	0002.CSV	1029.85	0.0151796
PSB107_map8	0002.CSV	1033.7	0.0158197
PSB107_map8	0002.CSV	1037.56	0.0159598
PSB107_map8	0002.CSV	1041.42	0.0165862
PSB107_map8	0002.CSV	1045.27	0.0168104
PSB107_map8	0002.CSV	1049.13	0.0175496
PSB107_map8	0002.CSV	1052.99	0.0178042
PSB107_map8	0002.CSV	1056.84	0.0187957
PSB107_map8	0002.CSV	1060.7	0.0192321
PSB107_map8	0002.CSV	1064.56	0.0201718
PSB107_map8	0002.CSV	1068.42	0.0203979
PSB107_map8	0002.CSV	1072.27	0.0208882
PSB107_map8	0002.CSV	1076.13	0.0208381
PSB107_map8	0002.CSV	1079.99	0.0218788
PSB107_map8	0002.CSV	1083.84	0.0229126
PSB107_map8	0002.CSV	1087.7	0.0244074
PSB107_map8	0002.CSV	1091.56	0.0240521
PSB107_map8	0002.CSV	1095.41	0.022818
PSB107_map8	0002.CSV	1099.27	0.0206859
PSB107_map8	0002.CSV	1103.13	0.0201343
PSB107_map8	0002.CSV	1106.99	0.0198064
PSB107_map8	0002.CSV	1110.84	0.0205037
PSB107_map8	0002.CSV	1114.7	0.0204229
PSB107_map8	0002.CSV	1118.56	0.0209324
PSB107_map8	0002.CSV	1122.41	0.0207834
PSB107_map8	0002.CSV	1126.27	0.0212413
PSB107_map8	0002.CSV	1130.13	0.021029
PSB107_map8	0002.CSV	1133.99	0.0215244
PSB107_map8	0002.CSV	1137.84	0.0214652
PSB107_map8	0002.CSV	1141.7	0.0221856
PSB107_map8	0002.CSV	1145.56	0.0223506
PSB107_map8	0002.CSV	1149.41	0.0233855
PSB107_map8	0002.CSV	1153.27	0.0238946
PSB107_map8	0002.CSV	1157.13	0.0251138
PSB107_map8	0002.CSV	1160.99	0.0254149
PSB107_map8	0002.CSV	1164.84	0.0259956
PSB107_map8	0002.CSV	1168.7	0.0256838
PSB107_map8	0002.CSV	1172.56	0.0262062
PSB107_map8	0002.CSV	1176.41	0.0262285
PSB107_map8	0002.CSV	1180.27	0.0269715
PSB107_map8	0002.CSV	1184.13	0.0269673
PSB107_map8	0002.CSV	1187.99	0.0277022
PSB107_map8	0002.CSV	1191.84	0.0277629
PSB107_map8	0002.CSV	1195.7	0.0285522
PSB107_map8	0002.CSV	1199.56	0.0287791
PSB107_map8	0002.CSV	1203.41	0.0297755
PSB107_map8	0002.CSV	1207.27	0.030091
PSB107_map8	0002.CSV	1211.13	0.0312572
PSB107_map8	0002.CSV	1214.98	0.0318213
PSB107_map8	0002.CSV	1218.84	0.0332515
PSB107_map8	0002.CSV	1222.7	0.034042
PSB107_map8	0002.CSV	1226.56	0.0356411
PSB107_map8	0002.CSV	1230.41	0.0365419
PSB107_map8	0002.CSV	1234.27	0.0382318
PSB107_map8	0002.CSV	1238.13	0.0391797
PSB107_map8	0002.CSV	1241.98	0.0408169
PSB107_map8	0002.CSV	1245.84	0.0417706
PSB107_map8	0002.CSV	1249.7	0.0436042
PSB107_map8	0002.CSV	1253.56	0.0447851
PSB107_map8	0002.CSV	1257.41	0.0468044
PSB107_map8	0002.CSV	1261.27	0.0481242
PSB107_map8	0002.CSV	1265.13	0.0501934
PSB107_map8	0002.CSV	1268.98	0.0516074
PSB107_map8	0002.CSV	1272.84	0.0539245
PSB107_map8	0002.CSV	1276.7	0.0555196
PSB107_map8	0002.CSV	1280.56	0.0579939
PSB107_map8	0002.CSV	1284.41	0.059797
PSB107_map8	0002.CSV	1288.27	0.0624852
PSB107_map8	0002.CSV	1292.13	0.0645141
PSB107_map8	0002.CSV	1295.98	0.067532
PSB107_map8	0002.CSV	1299.84	0.0700323
PSB107_map8	0002.CSV	1303.7	0.0734886
PSB107_map8	0002.CSV	1307.56	0.0764044
PSB107_map8	0002.CSV	1311.41	0.0803095
PSB107_map8	0002.CSV	1315.27	0.0836602
PSB107_map8	0002.CSV	1319.13	0.088196
PSB107_map8	0002.CSV	1322.98	0.0919632
PSB107_map8	0002.CSV	1326.84	0.096591
PSB107_map8	0002.CSV	1330.7	0.100919
PSB107_map8	0002.CSV	1334.56	0.106349
PSB107_map8	0002.CSV	1338.41	0.112309
PSB107_map8	0002.CSV	1342.27	0.120381
PSB107_map8	0002.CSV	1346.13	0.126536
PSB107_map8	0002.CSV	1349.98	0.134461
PSB107_map8	0002.CSV	1353.84	0.142293
PSB107_map8	0002.CSV	1357.7	0.151039
PSB107_map8	0002.CSV	1361.56	0.160248
PSB107_map8	0002.CSV	1365.41	0.17216
PSB107_map8	0002.CSV	1369.27	0.18103
PSB107_map8	0002.CSV	1373.13	0.191983
PSB107_map8	0002.CSV	1376.98	0.202945
PSB107_map8	0002.CSV	1380.84	0.212971
PSB107_map8	0002.CSV	1384.7	0.221363
PSB107_map8	0002.CSV	1388.56	0.23221
PSB107_map8	0002.CSV	1392.41	0.238397
PSB107_map8	0002.CSV	1396.27	0.242149
PSB107_map8	0002.CSV	1400.13	0.240376
PSB107_map8	0002.CSV	1403.98	0.238294
PSB107_map8	0002.CSV	1407.84	0.231942
PSB107_map8	0002.CSV	1411.7	0.223513
PSB107_map8	0002.CSV	1415.55	0.212784
PSB107_map8	0002.CSV	1419.41	0.201042
PSB107_map8	0002.CSV	1423.27	0.19017
PSB107_map8	0002.CSV	1427.12	0.184102
PSB107_map8	0002.CSV	1430.98	0.177182
PSB107_map8	0002.CSV	1434.84	0.171332
PSB107_map8	0002.CSV	1438.7	0.162957
PSB107_map8	0002.CSV	1442.55	0.157299
PSB107_map8	0002.CSV	1446.41	0.150117
PSB107_map8	0002.CSV	1450.27	0.143293
PSB107_map8	0002.CSV	1454.12	0.136776
PSB107_map8	0002.CSV	1457.98	0.128338
PSB107_map8	0002.CSV	1461.84	0.12096
PSB107_map8	0002.CSV	1465.7	0.116275
PSB107_map8	0002.CSV	1469.55	0.110782
PSB107_map8	0002.CSV	1473.41	0.105269
PSB107_map8	0002.CSV	1477.27	0.0984423
PSB107_map8	0002.CSV	1481.12	0.0946814
PSB107_map8	0002.CSV	1484.98	0.0900589
PSB107_map8	0002.CSV	1488.84	0.0845464
PSB107_map8	0002.CSV	1492.7	0.0779945
PSB107_map8	0002.CSV	1496.55	0.0733268
PSB107_map8	0002.CSV	1500.41	0.0668689
PSB107_map8	0002.CSV	1504.27	0.0635157
PSB107_map8	0002.CSV	1508.12	0.0559845
PSB107_map8	0002.CSV	1511.98	0.0516346
PSB107_map8	0002.CSV	1515.84	0.0480411
PSB107_map8	0002.CSV	1519.7	0.044442
PSB107_map8	0002.CSV	1523.55	0.038808
PSB107_map8	0002.CSV	1527.41	0.0353769
PSB107_map8	0002.CSV	1531.27	0.0314163
PSB107_map8	0002.CSV	1535.12	0.0282058
PSB107_map8	0002.CSV	1538.98	0.0240044
PSB107_map8	0002.CSV	1542.84	0.0179134
PSB107_map8	0002.CSV	1546.7	0.0133317
PSB107_map8	0002.CSV	1550.55	0.0105567
PSB107_map8	0002.CSV	1554.41	0.00713038
PSB107_map8	0002.CSV	1558.27	0.00399814
PSB107_map8	0002.CSV	1562.12	0.00102203
PSB107_map8	0002.CSV	1565.98	-0.000228499
PSB107_map8	0002.CSV	1569.84	-0.00204907
PSB107_map8	0002.CSV	1573.69	-0.00318283
PSB107_map8	0002.CSV	1577.55	-0.00459178
PSB107_map8	0002.CSV	1581.41	-0.00580341
PSB107_map8	0002.CSV	1585.27	-0.0073385
PSB107_map8	0002.CSV	1589.12	-0.00866848
PSB107_map8	0002.CSV	1592.98	-0.0102906
PSB107_map8	0002.CSV	1596.84	-0.0116663
PSB107_map8	0002.CSV	1600.69	-0.0130084
PSB107_map8	0002.CSV	1604.55	-0.0140149
PSB107_map8	0002.CSV	1608.41	-0.015098
PSB107_map8	0002.CSV	1612.27	-0.0158776
PSB107_map8	0002.CSV	1616.12	-0.0167376
PSB107_map8	0002.CSV	1619.98	-0.0171687
PSB107_map8	0002.CSV	1623.84	-0.0177161
PSB107_map8	0002.CSV	1627.69	-0.0179994
PSB107_map8	0002.CSV	1631.55	-0.0185816
PSB107_map8	0002.CSV	1635.41	-0.0187307
PSB107_map8	0002.CSV	1639.27	-0.0187504
PSB107_map8	0002.CSV	1643.12	-0.0191519
PSB107_map8	0002.CSV	1646.98	-0.0195846
PSB107_map8	0002.CSV	1650.84	-0.0196005
PSB107_map8	0002.CSV	1654.69	-0.0194555
PSB107_map8	0002.CSV	1658.55	-0.0197892
PSB107_map8	0002.CSV	1662.41	-0.0203095
PSB107_map8	0002.CSV	1666.27	-0.0205983
PSB107_map8	0002.CSV	1670.12	-0.0207898
PSB107_map8	0002.CSV	1673.98	-0.0208446
PSB107_map8	0002.CSV	1677.84	-0.0212331
PSB107_map8	0002.CSV	1681.69	-0.0216174
PSB107_map8	0002.CSV	1685.55	-0.0214811
PSB107_map8	0002.CSV	1689.41	-0.0215794
PSB107_map8	0002.CSV	1693.27	-0.0220674
PSB107_map8	0002.CSV	1697.12	-0.0224215
PSB107_map8	0002.CSV	1700.98	-0.0219365
PSB107_map8	0002.CSV	1704.84	-0.0219665
PSB107_map8	0002.CSV	1708.69	-0.0222006
PSB107_map8	0002.CSV	1712.55	-0.0226327
PSB107_map8	0002.CSV	1716.41	-0.0221558
PSB107_map8	0002.CSV	1720.27	-0.0217017
PSB107_map8	0002.CSV	1724.12	-0.0220027
PSB107_map8	0002.CSV	1727.98	-0.0225189
PSB107_map8	0002.CSV	1731.84	-0.0226015
PSB107_map8	0002.CSV	1735.69	-0.0223665
PSB107_map8	0002.CSV	1739.55	-0.02245
PSB107_map8	0002.CSV	1743.41	-0.0229413
PSB107_map8	0002.CSV	1747.27	-0.0229586
PSB107_map8	0002.CSV	1751.12	-0.0228286
PSB107_map8	0002.CSV	1754.98	-0.022894
PSB107_map8	0002.CSV	1758.84	-0.0232359
PSB107_map8	0002.CSV	1762.69	-0.0230783
PSB107_map8	0002.CSV	1766.55	-0.0233176
PSB107_map8	0002.CSV	1770.41	-0.0231019
PSB107_map8	0002.CSV	1774.26	-0.0226198
PSB107_map8	0002.CSV	1778.12	-0.0224176
PSB107_map8	0002.CSV	1781.98	-0.0221325
PSB107_map8	0002.CSV	1785.84	-0.0210726
PSB107_map8	0002.CSV	1789.69	-0.0197316
PSB107_map8	0002.CSV	1793.55	-0.0172852
PSB107_map8	0002.CSV	1797.41	-0.0170542
PSB107_map8	0002.CSV	1801.26	-0.018562
PSB107_map8	0002.CSV	1805.12	-0.0206859
PSB107_map8	0002.CSV	1808.98	-0.0218669
PSB107_map8	0002.CSV	1812.84	-0.022523
PSB107_map8	0002.CSV	1816.69	-0.0228219
PSB107_map8	0002.CSV	1820.55	-0.023298
PSB107_map8	0002.CSV	1824.41	-0.0234451
PSB107_map8	0002.CSV	1828.26	-0.0235588
PSB107_map8	0002.CSV	1832.12	-0.0233981
PSB107_map8	0002.CSV	1835.98	-0.023805
PSB107_map8	0002.CSV	1839.84	-0.0240106
PSB107_map8	0002.CSV	1843.69	-0.024117
PSB107_map8	0002.CSV	1847.55	-0.0237825
PSB107_map8	0002.CSV	1851.41	-0.0240716
PSB107_map8	0002.CSV	1855.26	-0.024111
PSB107_map8	0002.CSV	1859.12	-0.024214
PSB107_map8	0002.CSV	1862.98	-0.0242089
PSB107_map8	0002.CSV	1866.84	-0.0243805
PSB107_map8	0002.CSV	1870.69	-0.0239722
PSB107_map8	0002.CSV	1874.55	-0.0242217
PSB107_map8	0002.CSV	1878.41	-0.0242512
PSB107_map8	0002.CSV	1882.26	-0.0243953
PSB107_map8	0002.CSV	1886.12	-0.0243618
PSB107_map8	0002.CSV	1889.98	-0.0244479
PSB107_map8	0002.CSV	1893.83	-0.0242676
PSB107_map8	0002.CSV	1897.69	-0.0244042
PSB107_map8	0002.CSV	1901.55	-0.0243768
PSB107_map8	0002.CSV	1905.41	-0.0245549
PSB107_map8	0002.CSV	1909.26	-0.0243832
PSB107_map8	0002.CSV	1913.12	-0.0245296
PSB107_map8	0002.CSV	1916.98	-0.0245074
PSB107_map8	0002.CSV	1920.83	-0.0245173
PSB107_map8	0002.CSV	1924.69	-0.0243863
PSB107_map8	0002.CSV	1928.55	-0.024598
PSB107_map8	0002.CSV	1932.4	-0.0245514
PSB107_map8	0002.CSV	1936.26	-0.0246599
PSB107_map8	0002.CSV	1940.12	-0.0245973
PSB107_map8	0002.CSV	1943.98	-0.0245869
PSB107_map8	0002.CSV	1947.83	-0.0244345
PSB107_map8	0002.CSV	1951.69	-0.0245887
PSB107_map8	0002.CSV	1955.55	-0.0244974
PSB107_map8	0002.CSV	1959.4	-0.0245977
PSB107_map8	0002.CSV	1963.26	-0.0245528
PSB107_map8	0002.CSV	1967.12	-0.0245917
PSB107_map8	0002.CSV	1970.98	-0.0244473
PSB107_map8	0002.CSV	1974.83	-0.0245601
PSB107_map8	0002.CSV	1978.69	-0.0244688
PSB107_map8	0002.CSV	1982.55	-0.0245916
PSB107_map8	0002.CSV	1986.4	-0.02453
PSB107_map8	0002.CSV	1990.26	-0.0245401
PSB107_map8	0002.CSV	1994.12	-0.0243501
PSB107_map8	0002.CSV	1997.98	-0.0244279
PSB107_map8	0002.CSV	2001.83	-0.0243448
PSB107_map8	0002.CSV	2005.69	-0.0244099
PSB107_map8	0002.CSV	2009.55	-0.0243282
PSB107_map8	0002.CSV	2013.4	-0.024407
PSB107_map8	0002.CSV	2017.26	-0.0242784
PSB107_map8	0002.CSV	2021.12	-0.0242904
PSB107_map8	0002.CSV	2024.97	-0.0241723
PSB107_map8	0002.CSV	2028.83	-0.0242504
PSB107_map8	0002.CSV	2032.69	-0.0242266
PSB107_map8	0002.CSV	2036.55	-0.0242251
PSB107_map8	0002.CSV	2040.4	-0.0241142
PSB107_map8	0002.CSV	2044.26	-0.0241469
PSB107_map8	0002.CSV	2048.12	-0.0240403
PSB107_map8	0002.CSV	2051.97	-0.0239717
PSB107_map8	0002.CSV	2055.83	-0.0239197
PSB107_map8	0002.CSV	2059.69	-0.0239802
PSB107_map8	0002.CSV	2063.55	-0.0239008
PSB107_map8	0002.CSV	2067.4	-0.023876
PSB107_map8	0002.CSV	2071.26	-0.023801
PSB107_map8	0002.CSV	2075.12	-0.023776
PSB107_map8	0002.CSV	2078.97	-0.023673
PSB107_map8	0002.CSV	2082.83	-0.0236598
PSB107_map8	0002.CSV	2086.69	-0.0236227
PSB107_map8	0002.CSV	2090.55	-0.0235435
PSB107_map8	0002.CSV	2094.4	-0.0234632
PSB107_map8	0002.CSV	2098.26	-0.0234698
PSB107_map8	0002.CSV	2102.12	-0.0234541
PSB107_map8	0002.CSV	2105.97	-0.0234399
PSB107_map8	0002.CSV	2109.83	-0.0233682
PSB107_map8	0002.CSV	2113.69	-0.0232662
PSB107_map8	0002.CSV	2117.55	-0.0232026
PSB107_map8	0002.CSV	2121.4	-0.0231576
PSB107_map8	0002.CSV	2125.26	-0.023124
PSB107_map8	0002.CSV	2129.12	-0.0230701
PSB107_map8	0002.CSV	2132.97	-0.0230348
PSB107_map8	0002.CSV	2136.83	-0.0229817
PSB107_map8	0002.CSV	2140.69	-0.0229479
PSB107_map8	0002.CSV	2144.55	-0.0228682
PSB107_map8	0002.CSV	2148.4	-0.022887
PSB107_map8	0002.CSV	2152.26	-0.0228582
PSB107_map8	0002.CSV	2156.12	-0.0228585
PSB107_map8	0002.CSV	2159.97	-0.0228393
PSB107_map8	0002.CSV	2163.83	-0.0228423
PSB107_map8	0002.CSV	2167.69	-0.0227707
PSB107_map8	0002.CSV	2171.55	-0.0228053
PSB107_map8	0002.CSV	2175.4	-0.0228104
PSB107_map8	0002.CSV	2179.26	-0.0229265
PSB107_map8	0002.CSV	2183.12	-0.0229516
PSB107_map8	0002.CSV	2186.97	-0.0230178
PSB107_map8	0002.CSV	2190.83	-0.0229245
PSB107_map8	0002.CSV	2194.69	-0.0229935
PSB107_map8	0002.CSV	2198.55	-0.0230075
PSB107_map8	0002.CSV	2202.4	-0.0231372
PSB107_map8	0002.CSV	2206.26	-0.0231298
PSB107_map8	0002.CSV	2210.12	-0.0232611
PSB107_map8	0002.CSV	2213.97	-0.0232813
PSB107_map8	0002.CSV	2217.83	-0.0234243
PSB107_map8	0002.CSV	2221.69	-0.0234532
PSB107_map8	0002.CSV	2225.54	-0.0236024
PSB107_map8	0002.CSV	2229.4	-0.0235875
PSB107_map8	0002.CSV	2233.26	-0.0237812
PSB107_map8	0002.CSV	2237.12	-0.0238105
PSB107_map8	0002.CSV	2240.97	-0.0240154
PSB107_map8	0002.CSV	2244.83	-0.0240432
PSB107_map8	0002.CSV	2248.69	-0.0242566
PSB107_map8	0002.CSV	2252.54	-0.0243179
PSB107_map8	0002.CSV	2256.4	-0.0245487
PSB107_map8	0002.CSV	2260.26	-0.0246045
PSB107_map8	0002.CSV	2264.11	-0.0247799
PSB107_map8	0002.CSV	2267.97	-0.0247341
PSB107_map8	0002.CSV	2271.83	-0.0249394
PSB107_map8	0002.CSV	2275.69	-0.0249411
PSB107_map8	0002.CSV	2279.54	-0.0250758
PSB107_map8	0002.CSV	2283.4	-0.0250485
PSB107_map8	0002.CSV	2287.26	-0.0252039
PSB107_map8	0002.CSV	2291.11	-0.0250973
PSB107_map8	0002.CSV	2294.97	-0.0251877
PSB107_map8	0002.CSV	2298.83	-0.0250712
PSB107_map8	0002.CSV	2302.69	-0.0251868
PSB107_map8	0002.CSV	2306.54	-0.0249732
PSB107_map8	0002.CSV	2310.4	-0.0251216
PSB107_map8	0002.CSV	2314.26	-0.0249126
PSB107_map8	0002.CSV	2318.11	-0.0251511
PSB107_map8	0002.CSV	2321.97	-0.0248339
PSB107_map8	0002.CSV	2325.83	-0.025312
PSB107_map8	0002.CSV	2329.69	-0.0250259
PSB107_map8	0002.CSV	2333.54	-0.0256747
PSB107_map8	0002.CSV	2337.4	-0.0252462
PSB107_map8	0002.CSV	2341.26	-0.0257487
PSB107_map8	0002.CSV	2345.11	-0.0247387
PSB107_map8	0002.CSV	2348.97	-0.0251057
PSB107_map8	0002.CSV	2352.83	-0.0256864
PSB107_map8	0002.CSV	2356.69	-0.0283097
PSB107_map8	0002.CSV	2360.54	-0.0279105
PSB107_map8	0002.CSV	2364.4	-0.0278718
PSB107_map8	0002.CSV	2368.26	-0.0259448
PSB107_map8	0002.CSV	2372.11	-0.0255261
PSB107_map8	0002.CSV	2375.97	-0.0245789
PSB107_map8	0002.CSV	2379.83	-0.0246523
PSB107_map8	0002.CSV	2383.69	-0.0245925
PSB107_map8	0002.CSV	2387.54	-0.0249584
PSB107_map8	0002.CSV	2391.4	-0.024925
PSB107_map8	0002.CSV	2395.26	-0.025032
PSB107_map8	0002.CSV	2399.11	-0.0249217
PSB107_map8	0002.CSV	2402.97	-0.0251044
PSB107_map8	0002.CSV	2406.83	-0.02493
PSB107_map8	0002.CSV	2410.68	-0.024909
PSB107_map8	0002.CSV	2414.54	-0.0246554
PSB107_map8	0002.CSV	2418.4	-0.0247257
PSB107_map8	0002.CSV	2422.26	-0.024521
PSB107_map8	0002.CSV	2426.11	-0.0245069
PSB107_map8	0002.CSV	2429.97	-0.0242607
PSB107_map8	0002.CSV	2433.83	-0.0242427
PSB107_map8	0002.CSV	2437.68	-0.023979
PSB107_map8	0002.CSV	2441.54	-0.0239861
PSB107_map8	0002.CSV	2445.4	-0.0236883
PSB107_map8	0002.CSV	2449.26	-0.0236474
PSB107_map8	0002.CSV	2453.11	-0.0233823
PSB107_map8	0002.CSV	2456.97	-0.0234008
PSB107_map8	0002.CSV	2460.83	-0.0231591
PSB107_map8	0002.CSV	2464.68	-0.0231082
PSB107_map8	0002.CSV	2468.54	-0.0227942
PSB107_map8	0002.CSV	2472.4	-0.022818
PSB107_map8	0002.CSV	2476.26	-0.0225713
PSB107_map8	0002.CSV	2480.11	-0.0224643
PSB107_map8	0002.CSV	2483.97	-0.0220912
PSB107_map8	0002.CSV	2487.83	-0.0219271
PSB107_map8	0002.CSV	2491.68	-0.0214469
PSB107_map8	0002.CSV	2495.54	-0.0210839
PSB107_map8	0002.CSV	2499.4	-0.0204005
PSB107_map8	0002.CSV	2503.26	-0.0200257
PSB107_map8	0002.CSV	2507.11	-0.0195612
PSB107_map8	0002.CSV	2510.97	-0.0195266
PSB107_map8	0002.CSV	2514.83	-0.0194756
PSB107_map8	0002.CSV	2518.68	-0.0198035
PSB107_map8	0002.CSV	2522.54	-0.0200428
PSB107_map8	0002.CSV	2526.4	-0.020642
PSB107_map8	0002.CSV	2530.26	-0.0210834
PSB107_map8	0002.CSV	2534.11	-0.0217442
PSB107_map8	0002.CSV	2537.97	-0.0220456
PSB107_map8	0002.CSV	2541.83	-0.0223467
PSB107_map8	0002.CSV	2545.68	-0.0223972
PSB107_map8	0002.CSV	2549.54	-0.0227004
PSB107_map8	0002.CSV	2553.4	-0.0227564
PSB107_map8	0002.CSV	2557.26	-0.0229336
PSB107_map8	0002.CSV	2561.11	-0.0229235
PSB107_map8	0002.CSV	2564.97	-0.0231146
PSB107_map8	0002.CSV	2568.83	-0.023048
PSB107_map8	0002.CSV	2572.68	-0.0230872
PSB107_map8	0002.CSV	2576.54	-0.0230481
PSB107_map8	0002.CSV	2580.4	-0.0232878
PSB107_map8	0002.CSV	2584.25	-0.023285
PSB107_map8	0002.CSV	2588.11	-0.0234251
PSB107_map8	0002.CSV	2591.97	-0.0234146
PSB107_map8	0002.CSV	2595.83	-0.0235672
PSB107_map8	0002.CSV	2599.68	-0.0235642
PSB107_map8	0002.CSV	2603.54	-0.0236737
PSB107_map8	0002.CSV	2607.4	-0.0237011
PSB107_map8	0002.CSV	2611.25	-0.023933
PSB107_map8	0002.CSV	2615.11	-0.0240529
PSB107_map8	0002.CSV	2618.97	-0.0242784
PSB107_map8	0002.CSV	2622.82	-0.0242089
PSB107_map8	0002.CSV	2626.68	-0.024324
PSB107_map8	0002.CSV	2630.54	-0.0244438
PSB107_map8	0002.CSV	2634.4	-0.0245867
PSB107_map8	0002.CSV	2638.25	-0.0245712
PSB107_map8	0002.CSV	2642.11	-0.0247778
PSB107_map8	0002.CSV	2645.97	-0.0248875
PSB107_map8	0002.CSV	2649.82	-0.0250064
PSB107_map8	0002.CSV	2653.68	-0.0249683
PSB107_map8	0002.CSV	2657.54	-0.0250407
PSB107_map8	0002.CSV	2661.4	-0.0250239
PSB107_map8	0002.CSV	2665.25	-0.0250891
PSB107_map8	0002.CSV	2669.11	-0.0249844
PSB107_map8	0002.CSV	2672.97	-0.0248577
PSB107_map8	0002.CSV	2676.82	-0.0246293
PSB107_map8	0002.CSV	2680.68	-0.0246666
PSB107_map8	0002.CSV	2684.54	-0.0248538
PSB107_map8	0002.CSV	2688.4	-0.0250185
PSB107_map8	0002.CSV	2692.25	-0.0249922
PSB107_map8	0002.CSV	2696.11	-0.0249327
PSB107_map8	0002.CSV	2699.97	-0.0248916
PSB107_map8	0002.CSV	2703.82	-0.0249526
PSB107_map8	0002.CSV	2707.68	-0.0248421
PSB107_map8	0002.CSV	2711.54	-0.0247886
PSB107_map8	0002.CSV	2715.4	-0.024744
PSB107_map8	0002.CSV	2719.25	-0.0245781
PSB107_map8	0002.CSV	2723.11	-0.0242894
PSB107_map8	0002.CSV	2726.97	-0.0243357
PSB107_map8	0002.CSV	2730.82	-0.0245421
PSB107_map8	0002.CSV	2734.68	-0.0244999
PSB107_map8	0002.CSV	2738.54	-0.0243953
PSB107_map8	0002.CSV	2742.4	-0.0242977
PSB107_map8	0002.CSV	2746.25	-0.0239861
PSB107_map8	0002.CSV	2750.11	-0.0239197
PSB107_map8	0002.CSV	2753.97	-0.0240905
PSB107_map8	0002.CSV	2757.82	-0.0241038
PSB107_map8	0002.CSV	2761.68	-0.0241335
PSB107_map8	0002.CSV	2765.54	-0.0241405
PSB107_map8	0002.CSV	2769.39	-0.0239375
PSB107_map8	0002.CSV	2773.25	-0.0235046
PSB107_map8	0002.CSV	2777.11	-0.0234743
PSB107_map8	0002.CSV	2780.97	-0.0236723
PSB107_map8	0002.CSV	2784.82	-0.0235162
PSB107_map8	0002.CSV	2788.68	-0.0230617
PSB107_map8	0002.CSV	2792.54	-0.0228968
PSB107_map8	0002.CSV	2796.39	-0.0228901
PSB107_map8	0002.CSV	2800.25	-0.0230133
PSB107_map8	0002.CSV	2804.11	-0.0231051
PSB107_map8	0002.CSV	2807.97	-0.0229101
PSB107_map8	0002.CSV	2811.82	-0.0228856
PSB107_map8	0002.CSV	2815.68	-0.0230325
PSB107_map8	0002.CSV	2819.54	-0.022869
PSB107_map8	0002.CSV	2823.39	-0.0227369
PSB107_map8	0002.CSV	2827.25	-0.0226199
PSB107_map8	0002.CSV	2831.11	-0.0222574
PSB107_map8	0002.CSV	2834.97	-0.0215889
PSB107_map8	0002.CSV	2838.82	-0.0211814
PSB107_map8	0002.CSV	2842.68	-0.0210962
PSB107_map8	0002.CSV	2846.54	-0.0207272
PSB107_map8	0002.CSV	2850.39	-0.0203757
PSB107_map8	0002.CSV	2854.25	-0.020392
PSB107_map8	0002.CSV	2858.11	-0.0203298
PSB107_map8	0002.CSV	2861.97	-0.0204695
PSB107_map8	0002.CSV	2865.82	-0.020545
PSB107_map8	0002.CSV	2869.68	-0.0203126
PSB107_map8	0002.CSV	2873.54	-0.0201682
PSB107_map8	0002.CSV	2877.39	-0.020703
PSB107_map8	0002.CSV	2881.25	-0.0211283
PSB107_map8	0002.CSV	2885.11	-0.0213399
PSB107_map8	0002.CSV	2888.97	-0.0212966
PSB107_map8	0002.CSV	2892.82	-0.0210617
PSB107_map8	0002.CSV	2896.68	-0.0208624
PSB107_map8	0002.CSV	2900.54	-0.0209315
PSB107_map8	0002.CSV	2904.39	-0.0207206
PSB107_map8	0002.CSV	2908.25	-0.0203053
PSB107_map8	0002.CSV	2912.11	-0.0195045
PSB107_map8	0002.CSV	2915.97	-0.0190169
PSB107_map8	0002.CSV	2919.82	-0.019165
PSB107_map8	0002.CSV	2923.68	-0.0196271
PSB107_map8	0002.CSV	2927.54	-0.019692
PSB107_map8	0002.CSV	2931.39	-0.0199586
PSB107_map8	0002.CSV	2935.25	-0.0205597
PSB107_map8	0002.CSV	2939.11	-0.0208433
PSB107_map8	0002.CSV	2942.96	-0.0206215
PSB107_map8	0002.CSV	2946.82	-0.0206765
PSB107_map8	0002.CSV	2950.68	-0.0208521
PSB107_map8	0002.CSV	2954.54	-0.0212069
PSB107_map8	0002.CSV	2958.39	-0.0215457
PSB107_map8	0002.CSV	2962.25	-0.0217628
PSB107_map8	0002.CSV	2966.11	-0.0219633
PSB107_map8	0002.CSV	2969.96	-0.0219519
PSB107_map8	0002.CSV	2973.82	-0.0216493
PSB107_map8	0002.CSV	2977.68	-0.0215338
PSB107_map8	0002.CSV	2981.53	-0.0216765
PSB107_map8	0002.CSV	2985.39	-0.0221262
PSB107_map8	0002.CSV	2989.25	-0.0221932
PSB107_map8	0002.CSV	2993.11	-0.0221035
PSB107_map8	0002.CSV	2996.96	-0.0222462
PSB107_map8	0002.CSV	3000.82	-0.0225086
PSB107_map8	0002.CSV	3004.68	-0.0225712
PSB107_map8	0002.CSV	3008.53	-0.0224064
PSB107_map8	0002.CSV	3012.39	-0.0220943
PSB107_map8	0002.CSV	3016.25	-0.0220672
PSB107_map8	0002.CSV	3020.11	-0.0222307
PSB107_map8	0002.CSV	3023.96	-0.0223947
PSB107_map8	0002.CSV	3027.82	-0.0224306
PSB107_map8	0002.CSV	3031.68	-0.0222919
PSB107_map8	0002.CSV	3035.53	-0.0222622
PSB107_map8	0002.CSV	3039.39	-0.0221726
PSB107_map8	0002.CSV	3043.25	-0.0219253
PSB107_map8	0002.CSV	3047.11	-0.0218908
PSB107_map8	0002.CSV	3050.96	-0.0218967
PSB107_map8	0002.CSV	3054.82	-0.0219906
PSB107_map8	0002.CSV	3058.68	-0.0220959
PSB107_map8	0002.CSV	3062.53	-0.0220478
PSB107_map8	0002.CSV	3066.39	-0.0217808
PSB107_map8	0002.CSV	3070.25	-0.0217487
PSB107_map8	0002.CSV	3074.11	-0.021748
PSB107_map8	0002.CSV	3077.96	-0.0215711
PSB107_map8	0002.CSV	3081.82	-0.0214289
PSB107_map8	0002.CSV	3085.68	-0.0214351
PSB107_map8	0002.CSV	3089.53	-0.0215317
PSB107_map8	0002.CSV	3093.39	-0.0216583
PSB107_map8	0002.CSV	3097.25	-0.0216361
PSB107_map8	0002.CSV	3101.11	-0.0215302
PSB107_map8	0002.CSV	3104.96	-0.0214572
PSB107_map8	0002.CSV	3108.82	-0.0211932
PSB107_map8	0002.CSV	3112.68	-0.021095
PSB107_map8	0002.CSV	3116.53	-0.0209634
PSB107_map8	0002.CSV	3120.39	-0.0210037
PSB107_map8	0002.CSV	3124.25	-0.021131
PSB107_map8	0002.CSV	3128.11	-0.0211492
PSB107_map8	0002.CSV	3131.96	-0.0211577
PSB107_map8	0002.CSV	3135.82	-0.0210566
PSB107_map8	0002.CSV	3139.68	-0.0208612
PSB107_map8	0002.CSV	3143.53	-0.0209715
PSB107_map8	0002.CSV	3147.39	-0.0209363
PSB107_map8	0002.CSV	3151.25	-0.0208897
PSB107_map8	0002.CSV	3155.1	-0.0209519
PSB107_map8	0002.CSV	3158.96	-0.0211619
PSB107_map8	0002.CSV	3162.82	-0.0212123
PSB107_map8	0002.CSV	3166.68	-0.0212426
PSB107_map8	0002.CSV	3170.53	-0.0212211
PSB107_map8	0002.CSV	3174.39	-0.0212928
PSB107_map8	0002.CSV	3178.25	-0.0210925
PSB107_map8	0002.CSV	3182.1	-0.0210144
PSB107_map8	0002.CSV	3185.96	-0.0209511
PSB107_map8	0002.CSV	3189.82	-0.0209799
PSB107_map8	0002.CSV	3193.68	-0.0210589
PSB107_map8	0002.CSV	3197.53	-0.0211685
PSB107_map8	0002.CSV	3201.39	-0.0210619
PSB107_map8	0002.CSV	3205.25	-0.0210392
PSB107_map8	0002.CSV	3209.1	-0.0209449
PSB107_map8	0002.CSV	3212.96	-0.0208759
PSB107_map8	0002.CSV	3216.82	-0.0206343
PSB107_map8	0002.CSV	3220.68	-0.0207162
PSB107_map8	0002.CSV	3224.53	-0.0207578
PSB107_map8	0002.CSV	3228.39	-0.0206445
PSB107_map8	0002.CSV	3232.25	-0.0203596
PSB107_map8	0002.CSV	3236.1	-0.0206236
PSB107_map8	0002.CSV	3239.96	-0.0207861
PSB107_map8	0002.CSV	3243.82	-0.0206977
PSB107_map8	0002.CSV	3247.68	-0.0204745
PSB107_map8	0002.CSV	3251.53	-0.0205957
PSB107_map8	0002.CSV	3255.39	-0.02058
PSB107_map8	0002.CSV	3259.25	-0.0206843
PSB107_map8	0002.CSV	3263.1	-0.0205473
PSB107_map8	0002.CSV	3266.96	-0.0203945
PSB107_map8	0002.CSV	3270.82	-0.0201429
PSB107_map8	0002.CSV	3274.68	-0.0202599
PSB107_map8	0002.CSV	3278.53	-0.0203253
PSB107_map8	0002.CSV	3282.39	-0.0204643
PSB107_map8	0002.CSV	3286.25	-0.0203731
PSB107_map8	0002.CSV	3290.1	-0.0202473
PSB107_map8	0002.CSV	3293.96	-0.0199949
PSB107_map8	0002.CSV	3297.82	-0.0200262
PSB107_map8	0002.CSV	3301.67	-0.0198978
PSB107_map8	0002.CSV	3305.53	-0.0199148
PSB107_map8	0002.CSV	3309.39	-0.0199418
PSB107_map8	0002.CSV	3313.25	-0.0201794
PSB107_map8	0002.CSV	3317.1	-0.0202839
PSB107_map8	0002.CSV	3320.96	-0.0202562
PSB107_map8	0002.CSV	3324.82	-0.0199411
PSB107_map8	0002.CSV	3328.67	-0.0200276
PSB107_map8	0002.CSV	3332.53	-0.0199481
PSB107_map8	0002.CSV	3336.39	-0.0197049
PSB107_map8	0002.CSV	3340.24	-0.019471
PSB107_map8	0002.CSV	3344.1	-0.0195739
PSB107_map8	0002.CSV	3347.96	-0.0193945
PSB107_map8	0002.CSV	3351.82	-0.0193873
PSB107_map8	0002.CSV	3355.67	-0.0195312
PSB107_map8	0002.CSV	3359.53	-0.019577
PSB107_map8	0002.CSV	3363.39	-0.0192917
PSB107_map8	0002.CSV	3367.24	-0.0190879
PSB107_map8	0002.CSV	3371.1	-0.0190219
PSB107_map8	0002.CSV	3374.96	-0.0192595
PSB107_map8	0002.CSV	3378.82	-0.0191929
PSB107_map8	0002.CSV	3382.67	-0.0193522
PSB107_map8	0002.CSV	3386.53	-0.0192099
PSB107_map8	0002.CSV	3390.39	-0.0189573
PSB107_map8	0002.CSV	3394.24	-0.0188471
PSB107_map8	0002.CSV	3398.1	-0.0190727
PSB107_map8	0002.CSV	3401.96	-0.019112
PSB107_map8	0002.CSV	3405.82	-0.0191336
PSB107_map8	0002.CSV	3409.67	-0.0189553
PSB107_map8	0002.CSV	3413.53	-0.0191019
PSB107_map8	0002.CSV	3417.39	-0.0193335
PSB107_map8	0002.CSV	3421.24	-0.0194363
PSB107_map8	0002.CSV	3425.1	-0.0193338
PSB107_map8	0002.CSV	3428.96	-0.0190821
PSB107_map8	0002.CSV	3432.82	-0.0188691
PSB107_map8	0002.CSV	3436.67	-0.019022
PSB107_map8	0002.CSV	3440.53	-0.0193845
PSB107_map8	0002.CSV	3444.39	-0.0197367
PSB107_map8	0002.CSV	3448.24	-0.0196847
PSB107_map8	0002.CSV	3452.1	-0.0197071
PSB107_map8	0002.CSV	3455.96	-0.0196861
PSB107_map8	0002.CSV	3459.82	-0.0195525
PSB107_map8	0002.CSV	3463.67	-0.0194595
PSB107_map8	0002.CSV	3467.53	-0.0194929
PSB107_map8	0002.CSV	3471.39	-0.0196268
PSB107_map8	0002.CSV	3475.24	-0.0197745
PSB107_map8	0002.CSV	3479.1	-0.0196973
PSB107_map8	0002.CSV	3482.96	-0.0197782
PSB107_map8	0002.CSV	3486.82	-0.0199901
PSB107_map8	0002.CSV	3490.67	-0.0200233
PSB107_map8	0002.CSV	3494.53	-0.0199254
PSB107_map8	0002.CSV	3498.39	-0.020092
PSB107_map8	0002.CSV	3502.24	-0.0203529
PSB107_map8	0002.CSV	3506.1	-0.0203141
PSB107_map8	0002.CSV	3509.96	-0.0202194
PSB107_map8	0002.CSV	3513.81	-0.0201709
PSB107_map8	0002.CSV	3517.67	-0.0204251
PSB107_map8	0002.CSV	3521.53	-0.0204201
PSB107_map8	0002.CSV	3525.39	-0.0203936
PSB107_map8	0002.CSV	3529.24	-0.0205765
PSB107_map8	0002.CSV	3533.1	-0.0205675
PSB107_map8	0002.CSV	3536.96	-0.0204535
PSB107_map8	0002.CSV	3540.81	-0.0207075
PSB107_map8	0002.CSV	3544.67	-0.020697
PSB107_map8	0002.CSV	3548.53	-0.0207919
PSB107_map8	0002.CSV	3552.39	-0.0210351
PSB107_map8	0002.CSV	3556.24	-0.021162
PSB107_map8	0002.CSV	3560.1	-0.0212809
PSB107_map8	0002.CSV	3563.96	-0.0217896
PSB107_map8	0002.CSV	3567.81	-0.0213206
PSB107_map8	0002.CSV	3571.67	-0.020973
PSB107_map8	0002.CSV	3575.53	-0.0212166
PSB107_map8	0002.CSV	3579.39	-0.021304
PSB107_map8	0002.CSV	3583.24	-0.0214851
PSB107_map8	0002.CSV	3587.1	-0.0216888
PSB107_map8	0002.CSV	3590.96	-0.0215473
PSB107_map8	0002.CSV	3594.81	-0.0218344
PSB107_map8	0002.CSV	3598.67	-0.0215777
PSB107_map8	0002.CSV	3602.53	-0.0215487
PSB107_map8	0002.CSV	3606.39	-0.0218944
PSB107_map8	0002.CSV	3610.24	-0.0222781
PSB107_map8	0002.CSV	3614.1	-0.0221875
PSB107_map8	0002.CSV	3617.96	-0.0220445
PSB107_map8	0002.CSV	3621.81	-0.0216939
PSB107_map8	0002.CSV	3625.67	-0.0223357
PSB107_map8	0002.CSV	3629.53	-0.0223504
PSB107_map8	0002.CSV	3633.39	-0.0219299
PSB107_map8	0002.CSV	3637.24	-0.0219424
PSB107_map8	0002.CSV	3641.1	-0.0222524
PSB107_map8	0002.CSV	3644.96	-0.0226049
PSB107_map8	0002.CSV	3648.81	-0.0222204
PSB107_map8	0002.CSV	3652.67	-0.02138
PSB107_map8	0002.CSV	3656.53	-0.0215883
PSB107_map8	0002.CSV	3660.38	-0.0215847
PSB107_map8	0002.CSV	3664.24	-0.0222627
PSB107_map8	0002.CSV	3668.1	-0.0228339
PSB107_map8	0002.CSV	3671.96	-0.0228886
PSB107_map8	0002.CSV	3675.81	-0.0217516
PSB107_map8	0002.CSV	3679.67	-0.02142
PSB107_map8	0002.CSV	3683.53	-0.0218159
PSB107_map8	0002.CSV	3687.38	-0.0222741
PSB107_map8	0002.CSV	3691.24	-0.0213718
PSB107_map8	0002.CSV	3695.1	-0.0214986
PSB107_map8	0002.CSV	3698.95	-0.0217847
PSB107_map8	0002.CSV	3702.81	-0.0219639
PSB107_map8	0002.CSV	3706.67	-0.0222081
PSB107_map8	0002.CSV	3710.53	-0.0223273
PSB107_map8	0002.CSV	3714.38	-0.0215116
PSB107_map8	0002.CSV	3718.24	-0.0220051
PSB107_map8	0002.CSV	3722.1	-0.0221069
PSB107_map8	0002.CSV	3725.95	-0.022052
PSB107_map8	0002.CSV	3729.81	-0.0220121
PSB107_map8	0002.CSV	3733.67	-0.0219996
PSB107_map8	0002.CSV	3737.53	-0.0208073
PSB107_map8	0002.CSV	3741.38	-0.0215925
PSB107_map8	0002.CSV	3745.24	-0.0222292
PSB107_map8	0002.CSV	3749.1	-0.0226772
PSB107_map8	0002.CSV	3752.95	-0.0214792
PSB107_map8	0002.CSV	3756.81	-0.0215318
PSB107_map8	0002.CSV	3760.67	-0.0215776
PSB107_map8	0002.CSV	3764.53	-0.021918
PSB107_map8	0002.CSV	3768.38	-0.0216193
PSB107_map8	0002.CSV	3772.24	-0.0215659
PSB107_map8	0002.CSV	3776.1	-0.0217347
PSB107_map8	0002.CSV	3779.95	-0.0217029
PSB107_map8	0002.CSV	3783.81	-0.0214547
PSB107_map8	0002.CSV	3787.67	-0.0215218
PSB107_map8	0002.CSV	3791.53	-0.0216741
PSB107_map8	0002.CSV	3795.38	-0.0221898
PSB107_map8	0002.CSV	3799.24	-0.0221133
PSB107_map8	0002.CSV	3803.1	-0.0218051
PSB107_map8	0002.CSV	3806.95	-0.0212287
PSB107_map8	0002.CSV	3810.81	-0.021526
PSB107_map8	0002.CSV	3814.67	-0.0220718
PSB107_map8	0002.CSV	3818.53	-0.0223724
PSB107_map8	0002.CSV	3822.38	-0.0215553
PSB107_map8	0002.CSV	3826.24	-0.0215435
PSB107_map8	0002.CSV	3830.1	-0.0216527
PSB107_map8	0002.CSV	3833.95	-0.0220598
PSB107_map8	0002.CSV	3837.81	-0.0216091
PSB107_map8	0002.CSV	3841.67	-0.0209519
PSB107_map8	0002.CSV	3845.53	-0.0211228
PSB107_map8	0002.CSV	3849.38	-0.0222623
PSB107_map8	0002.CSV	3853.24	-0.0223494
PSB107_map8	0002.CSV	3857.1	-0.0216384
PSB107_map8	0002.CSV	3860.95	-0.0219487
PSB107_map8	0002.CSV	3864.81	-0.0221502
PSB107_map8	0002.CSV	3868.67	-0.0218352
PSB107_map8	0002.CSV	3872.52	-0.0217058
PSB107_map8	0002.CSV	3876.38	-0.0218101
PSB107_map8	0002.CSV	3880.24	-0.0221317
PSB107_map8	0002.CSV	3884.1	-0.021461
PSB107_map8	0002.CSV	3887.95	-0.0214409
PSB107_map8	0002.CSV	3891.81	-0.0214494
PSB107_map8	0002.CSV	3895.67	-0.0219169
PSB107_map8	0002.CSV	3899.52	-0.0224741
PSB107_map8	0002.CSV	3903.38	-0.0218154
PSB107_map8	0002.CSV	3907.24	-0.0210384
PSB107_map8	0002.CSV	3911.1	-0.0214836
PSB107_map8	0002.CSV	3914.95	-0.0218368
PSB107_map8	0002.CSV	3918.81	-0.021646
PSB107_map8	0002.CSV	3922.67	-0.0213786
PSB107_map8	0002.CSV	3926.52	-0.0214285
PSB107_map8	0002.CSV	3930.38	-0.0212936
PSB107_map8	0002.CSV	3934.24	-0.0211636
PSB107_map8	0002.CSV	3938.09	-0.0213078
PSB107_map8	0002.CSV	3941.95	-0.0214578
PSB107_map8	0002.CSV	3945.81	-0.0213156
PSB107_map8	0002.CSV	3949.67	-0.0212917
PSB107_map8	0002.CSV	3953.52	-0.0212662
PSB107_map8	0002.CSV	3957.38	-0.0213457
PSB107_map8	0002.CSV	3961.24	-0.0211612
PSB107_map8	0002.CSV	3965.09	-0.0211175
PSB107_map8	0002.CSV	3968.95	-0.0211418
PSB107_map8	0002.CSV	3972.81	-0.0211975
PSB107_map8	0002.CSV	3976.67	-0.0210742
PSB107_map8	0002.CSV	3980.52	-0.0210797
PSB107_map8	0002.CSV	3984.38	-0.0210485
PSB107_map8	0002.CSV	3988.24	-0.0211088
PSB107_map8	0002.CSV	3992.09	-0.0210407
PSB107_map8	0002.CSV	3995.95	-0.0209872
PSB107_map8	0002.CSV	3999.81	-0.0209747
PSB107_map8	0003.CSV	674.992	0.0139188
PSB107_map8	0003.CSV	678.849	0.0153365
PSB107_map8	0003.CSV	682.706	0.0172048
PSB107_map8	0003.CSV	686.563	0.0178824
PSB107_map8	0003.CSV	690.42	0.0208755
PSB107_map8	0003.CSV	694.277	0.0259899
PSB107_map8	0003.CSV	698.134	0.0323644
PSB107_map8	0003.CSV	701.991	0.0385751
PSB107_map8	0003.CSV	705.849	0.0528104
PSB107_map8	0003.CSV	709.706	0.0731241
PSB107_map8	0003.CSV	713.563	0.0636164
PSB107_map8	0003.CSV	717.42	0.0277713
PSB107_map8	0003.CSV	721.277	0.00865898
PSB107_map8	0003.CSV	725.134	0.00533172
PSB107_map8	0003.CSV	728.991	0.00676713
PSB107_map8	0003.CSV	732.848	0.00857584
PSB107_map8	0003.CSV	736.705	0.0104433
PSB107_map8	0003.CSV	740.562	0.0109925
PSB107_map8	0003.CSV	744.42	0.0114043
PSB107_map8	0003.CSV	748.277	0.0111199
PSB107_map8	0003.CSV	752.134	0.011744
PSB107_map8	0003.CSV	755.991	0.012048
PSB107_map8	0003.CSV	759.848	0.0129004
PSB107_map8	0003.CSV	763.705	0.0130108
PSB107_map8	0003.CSV	767.562	0.0133237
PSB107_map8	0003.CSV	771.419	0.0129456
PSB107_map8	0003.CSV	775.276	0.0128831
PSB107_map8	0003.CSV	779.133	0.0128428
PSB107_map8	0003.CSV	782.99	0.0134719
PSB107_map8	0003.CSV	786.848	0.0133454
PSB107_map8	0003.CSV	790.705	0.0133636
PSB107_map8	0003.CSV	794.562	0.0133064
PSB107_map8	0003.CSV	798.419	0.0137254
PSB107_map8	0003.CSV	802.276	0.0136157
PSB107_map8	0003.CSV	806.133	0.0142052
PSB107_map8	0003.CSV	809.99	0.0145698
PSB107_map8	0003.CSV	813.847	0.0156307
PSB107_map8	0003.CSV	817.704	0.016439
PSB107_map8	0003.CSV	821.562	0.0176996
PSB107_map8	0003.CSV	825.419	0.0190825
PSB107_map8	0003.CSV	829.276	0.0208118
PSB107_map8	0003.CSV	833.133	0.0223527
PSB107_map8	0003.CSV	836.99	0.0252892
PSB107_map8	0003.CSV	840.847	0.0292401
PSB107_map8	0003.CSV	844.704	0.0347882
PSB107_map8	0003.CSV	848.561	0.0382294
PSB107_map8	0003.CSV	852.418	0.0416707
PSB107_map8	0003.CSV	856.275	0.0515021
PSB107_map8	0003.CSV	860.132	0.070544
PSB107_map8	0003.CSV	863.99	0.0999341
PSB107_map8	0003.CSV	867.847	0.133414
PSB107_map8	0003.CSV	871.704	0.147556
PSB107_map8	0003.CSV	875.561	0.127838
PSB107_map8	0003.CSV	879.418	0.0927805
PSB107_map8	0003.CSV	883.275	0.0537205
PSB107_map8	0003.CSV	887.132	0.0191152
PSB107_map8	0003.CSV	890.989	0.00429021
PSB107_map8	0003.CSV	894.846	0.00322912
PSB107_map8	0003.CSV	898.703	0.00429935
PSB107_map8	0003.CSV	902.561	0.00543907
PSB107_map8	0003.CSV	906.418	0.00644027
PSB107_map8	0003.CSV	910.275	0.00728224
PSB107_map8	0003.CSV	914.132	0.00798396
PSB107_map8	0003.CSV	917.989	0.00878988
PSB107_map8	0003.CSV	921.846	0.00950359
PSB107_map8	0003.CSV	925.703	0.010321
PSB107_map8	0003.CSV	929.56	0.0109053
PSB107_map8	0003.CSV	933.417	0.0115319
PSB107_map8	0003.CSV	937.274	0.0118592
PSB107_map8	0003.CSV	941.131	0.0122006
PSB107_map8	0003.CSV	944.989	0.0125015
PSB107_map8	0003.CSV	948.846	0.0129919
PSB107_map8	0003.CSV	952.703	0.0133811
PSB107_map8	0003.CSV	956.56	0.0139779
PSB107_map8	0003.CSV	960.417	0.0143296
PSB107_map8	0003.CSV	964.274	0.0148417
PSB107_map8	0003.CSV	968.131	0.0152634
PSB107_map8	0003.CSV	971.988	0.016007
PSB107_map8	0003.CSV	975.845	0.0165179
PSB107_map8	0003.CSV	979.702	0.0173007
PSB107_map8	0003.CSV	983.559	0.0180288
PSB107_map8	0003.CSV	987.417	0.0190533
PSB107_map8	0003.CSV	991.274	0.0197293
PSB107_map8	0003.CSV	995.131	0.0206104
PSB107_map8	0003.CSV	998.988	0.0211137
PSB107_map8	0003.CSV	1002.85	0.0219032
PSB107_map8	0003.CSV	1006.7	0.0224507
PSB107_map8	0003.CSV	1010.56	0.023313
PSB107_map8	0003.CSV	1014.42	0.0238204
PSB107_map8	0003.CSV	1018.27	0.0246605
PSB107_map8	0003.CSV	1022.13	0.025262
PSB107_map8	0003.CSV	1025.99	0.0262559
PSB107_map8	0003.CSV	1029.85	0.0267474
PSB107_map8	0003.CSV	1033.7	0.027631
PSB107_map8	0003.CSV	1037.56	0.0280327
PSB107_map8	0003.CSV	1041.42	0.0287387
PSB107_map8	0003.CSV	1045.27	0.029008
PSB107_map8	0003.CSV	1049.13	0.0298304
PSB107_map8	0003.CSV	1052.99	0.0304019
PSB107_map8	0003.CSV	1056.84	0.031814
PSB107_map8	0003.CSV	1060.7	0.032655
PSB107_map8	0003.CSV	1064.56	0.0336515
PSB107_map8	0003.CSV	1068.42	0.0336396
PSB107_map8	0003.CSV	1072.27	0.0335963
PSB107_map8	0003.CSV	1076.13	0.0328904
PSB107_map8	0003.CSV	1079.99	0.0332081
PSB107_map8	0003.CSV	1083.84	0.0333479
PSB107_map8	0003.CSV	1087.7	0.034063
PSB107_map8	0003.CSV	1091.56	0.0333971
PSB107_map8	0003.CSV	1095.41	0.0324834
PSB107_map8	0003.CSV	1099.27	0.0312458
PSB107_map8	0003.CSV	1103.13	0.0315134
PSB107_map8	0003.CSV	1106.99	0.0317374
PSB107_map8	0003.CSV	1110.84	0.0328444
PSB107_map8	0003.CSV	1114.7	0.0332347
PSB107_map8	0003.CSV	1118.56	0.0340363
PSB107_map8	0003.CSV	1122.41	0.0338837
PSB107_map8	0003.CSV	1126.27	0.0341028
PSB107_map8	0003.CSV	1130.13	0.033682
PSB107_map8	0003.CSV	1133.99	0.0341024
PSB107_map8	0003.CSV	1137.84	0.0339974
PSB107_map8	0003.CSV	1141.7	0.0345242
PSB107_map8	0003.CSV	1145.56	0.0344294
PSB107_map8	0003.CSV	1149.41	0.0352012
PSB107_map8	0003.CSV	1153.27	0.0356834
PSB107_map8	0003.CSV	1157.13	0.0368789
PSB107_map8	0003.CSV	1160.99	0.0371373
PSB107_map8	0003.CSV	1164.84	0.0376122
PSB107_map8	0003.CSV	1168.7	0.0371948
PSB107_map8	0003.CSV	1172.56	0.0375931
PSB107_map8	0003.CSV	1176.41	0.0375645
PSB107_map8	0003.CSV	1180.27	0.0383415
PSB107_map8	0003.CSV	1184.13	0.0384109
PSB107_map8	0003.CSV	1187.99	0.0391299
PSB107_map8	0003.CSV	1191.84	0.0392393
PSB107_map8	0003.CSV	1195.7	0.0401285
PSB107_map8	0003.CSV	1199.56	0.0404338
PSB107_map8	0003.CSV	1203.41	0.0415013
PSB107_map8	0003.CSV	1207.27	0.042016
PSB107_map8	0003.CSV	1211.13	0.0433913
PSB107_map8	0003.CSV	1214.98	0.0441418
PSB107_map8	0003.CSV	1218.84	0.0457389
PSB107_map8	0003.CSV	1222.7	0.0468399
PSB107_map8	0003.CSV	1226.56	0.0487085
PSB107_map8	0003.CSV	1230.41	0.0498559
PSB107_map8	0003.CSV	1234.27	0.0518596
PSB107_map8	0003.CSV	1238.13	0.0532548
PSB107_map8	0003.CSV	1241.98	0.055369
PSB107_map8	0003.CSV	1245.84	0.0568483
PSB107_map8	0003.CSV	1249.7	0.0590598
PSB107_map8	0003.CSV	1253.56	0.0603696
PSB107_map8	0003.CSV	1257.41	0.0623499
PSB107_map8	0003.CSV	1261.27	0.0636759
PSB107_map8	0003.CSV	1265.13	0.0657518
PSB107_map8	0003.CSV	1268.98	0.0670911
PSB107_map8	0003.CSV	1272.84	0.0693205
PSB107_map8	0003.CSV	1276.7	0.0708488
PSB107_map8	0003.CSV	1280.56	0.0732437
PSB107_map8	0003.CSV	1284.41	0.0749093
PSB107_map8	0003.CSV	1288.27	0.077286
PSB107_map8	0003.CSV	1292.13	0.0788779
PSB107_map8	0003.CSV	1295.98	0.0813854
PSB107_map8	0003.CSV	1299.84	0.0833831
PSB107_map8	0003.CSV	1303.7	0.0863479
PSB107_map8	0003.CSV	1307.56	0.0889244
PSB107_map8	0003.CSV	1311.41	0.0925546
PSB107_map8	0003.CSV	1315.27	0.0956075
PSB107_map8	0003.CSV	1319.13	0.099674
PSB107_map8	0003.CSV	1322.98	0.102904
PSB107_map8	0003.CSV	1326.84	0.107036
PSB107_map8	0003.CSV	1330.7	0.11086
PSB107_map8	0003.CSV	1334.56	0.115631
PSB107_map8	0003.CSV	1338.41	0.1207
PSB107_map8	0003.CSV	1342.27	0.127672
PSB107_map8	0003.CSV	1346.13	0.132824
PSB107_map8	0003.CSV	1349.98	0.13936
PSB107_map8	0003.CSV	1353.84	0.145618
PSB107_map8	0003.CSV	1357.7	0.152762
PSB107_map8	0003.CSV	1361.56	0.160006
PSB107_map8	0003.CSV	1365.41	0.169143
PSB107_map8	0003.CSV	1369.27	0.175526
PSB107_map8	0003.CSV	1373.13	0.183467
PSB107_map8	0003.CSV	1376.98	0.190601
PSB107_map8	0003.CSV	1380.84	0.196874
PSB107_map8	0003.CSV	1384.7	0.201512
PSB107_map8	0003.CSV	1388.56	0.207681
PSB107_map8	0003.CSV	1392.41	0.210289
PSB107_map8	0003.CSV	1396.27	0.210646
PSB107_map8	0003.CSV	1400.13	0.206448
PSB107_map8	0003.CSV	1403.98	0.202736
PSB107_map8	0003.CSV	1407.84	0.195225
PSB107_map8	0003.CSV	1411.7	0.186533
PSB107_map8	0003.CSV	1415.55	0.176605
PSB107_map8	0003.CSV	1419.41	0.16612
PSB107_map8	0003.CSV	1423.27	0.156738
PSB107_map8	0003.CSV	1427.12	0.15151
PSB107_map8	0003.CSV	1430.98	0.145464
PSB107_map8	0003.CSV	1434.84	0.140314
PSB107_map8	0003.CSV	1438.7	0.13288
PSB107_map8	0003.CSV	1442.55	0.12782
PSB107_map8	0003.CSV	1446.41	0.121388
PSB107_map8	0003.CSV	1450.27	0.115213
PSB107_map8	0003.CSV	1454.12	0.109351
PSB107_map8	0003.CSV	1457.98	0.101547
PSB107_map8	0003.CSV	1461.84	0.0948901
PSB107_map8	0003.CSV	1465.7	0.0907466
PSB107_map8	0003.CSV	1469.55	0.085917
PSB107_map8	0003.CSV	1473.41	0.0809769
PSB107_map8	0003.CSV	1477.27	0.0749478
PSB107_map8	0003.CSV	1481.12	0.0717895
PSB107_map8	0003.CSV	1484.98	0.0679616
PSB107_map8	0003.CSV	1488.84	0.0635421
PSB107_map8	0003.CSV	1492.7	0.0583101
PSB107_map8	0003.CSV	1496.55	0.0545963
PSB107_map8	0003.CSV	1500.41	0.0492793
PSB107_map8	0003.CSV	1504.27	0.0465639
PSB107_map8	0003.CSV	1508.12	0.0404789
PSB107_map8	0003.CSV	1511.98	0.0372608
PSB107_map8	0003.CSV	1515.84	0.0341949
PSB107_map8	0003.CSV	1519.7	0.031118
PSB107_map8	0003.CSV	1523.55	0.0266696
PSB107_map8	0003.CSV	1527.41	0.0239999
PSB107_map8	0003.CSV	1531.27	0.0205756
PSB107_map8	0003.CSV	1535.12	0.0178414
PSB107_map8	0003.CSV	1538.98	0.0141829
PSB107_map8	0003.CSV	1542.84	0.00882792
PSB107_map8	0003.CSV	1546.7	0.00473365
PSB107_map8	0003.CSV	1550.55	0.00221172
PSB107_map8	0003.CSV	1554.41	-0.000780532
PSB107_map8	0003.CSV	1558.27	-0.00326531
PSB107_map8	0003.CSV	1562.12	-0.00577435
PSB107_map8	0003.CSV	1565.98	-0.00696205
PSB107_map8	0003.CSV	1569.84	-0.00846554
PSB107_map8	0003.CSV	1573.69	-0.00918884
PSB107_map8	0003.CSV	1577.55	-0.0100498
PSB107_map8	0003.CSV	1581.41	-0.0109543
PSB107_map8	0003.CSV	1585.27	-0.0122801
PSB107_map8	0003.CSV	1589.12	-0.0134014
PSB107_map8	0003.CSV	1592.98	-0.0145449
PSB107_map8	0003.CSV	1596.84	-0.0153798
PSB107_map8	0003.CSV	1600.69	-0.0163014
PSB107_map8	0003.CSV	1604.55	-0.0169913
PSB107_map8	0003.CSV	1608.41	-0.0178117
PSB107_map8	0003.CSV	1612.27	-0.0183948
PSB107_map8	0003.CSV	1616.12	-0.0189633
PSB107_map8	0003.CSV	1619.98	-0.0191641
PSB107_map8	0003.CSV	1623.84	-0.0195183
PSB107_map8	0003.CSV	1627.69	-0.0195627
PSB107_map8	0003.CSV	1631.55	-0.0200225
PSB107_map8	0003.CSV	1635.41	-0.020064
PSB107_map8	0003.CSV	1639.27	-0.0199125
PSB107_map8	0003.CSV	1643.12	-0.0203082
PSB107_map8	0003.CSV	1646.98	-0.0205139
PSB107_map8	0003.CSV	1650.84	-0.0202771
PSB107_map8	0003.CSV	1654.69	-0.0200444
PSB107_map8	0003.CSV	1658.55	-0.0204341
PSB107_map8	0003.CSV	1662.41	-0.0208806
PSB107_map8	0003.CSV	1666.27	-0.0210862
PSB107_map8	0003.CSV	1670.12	-0.0211577
PSB107_map8	0003.CSV	1673.98	-0.0210392
PSB107_map8	0003.CSV	1677.84	-0.0213333
PSB107_map8	0003.CSV	1681.69	-0.0216185
PSB107_map8	0003.CSV	1685.55	-0.0212036
PSB107_map8	0003.CSV	1689.41	-0.0213042
PSB107_map8	0003.CSV	1693.27	-0.0218717
PSB107_map8	0003.CSV	1697.12	-0.0221357
PSB107_map8	0003.CSV	1700.98	-0.021255
PSB107_map8	0003.CSV	1704.84	-0.0209793
PSB107_map8	0003.CSV	1708.69	-0.0207786
PSB107_map8	0003.CSV	1712.55	-0.0208919
PSB107_map8	0003.CSV	1716.41	-0.0197295
PSB107_map8	0003.CSV	1720.27	-0.0183959
PSB107_map8	0003.CSV	1724.12	-0.0183089
[truncated: 129,177 more rows]
