# Supplementary material for: Thermo-microstratigraphy of shells reveals invisible fire use and possible cooking in the archaeological record
Source: Frontiers journal article supplement (doi:10.3389/feart.2022.869487), 2022-09-01
Supplement: Table_12.XLSX [file Table_12.XLSX]

## Sheet: PSB913-1_map1
Map	Select spectrum number	Wavenumbers	Absorbance
PSB913-1_map1	0001.CSV	674.992	0.0170326
PSB913-1_map1	0001.CSV	678.849	0.018843
PSB913-1_map1	0001.CSV	682.706	0.0197091
PSB913-1_map1	0001.CSV	686.563	0.0219771
PSB913-1_map1	0001.CSV	690.42	0.0246765
PSB913-1_map1	0001.CSV	694.277	0.0348298
PSB913-1_map1	0001.CSV	698.134	0.0470823
PSB913-1_map1	0001.CSV	701.991	0.0426053
PSB913-1_map1	0001.CSV	705.849	0.0376172
PSB913-1_map1	0001.CSV	709.706	0.0582947
PSB913-1_map1	0001.CSV	713.563	0.0606948
PSB913-1_map1	0001.CSV	717.42	0.030539
PSB913-1_map1	0001.CSV	721.277	0.0113584
PSB913-1_map1	0001.CSV	725.134	0.00843693
PSB913-1_map1	0001.CSV	728.991	0.0075825
PSB913-1_map1	0001.CSV	732.848	0.00764383
PSB913-1_map1	0001.CSV	736.705	0.00785661
PSB913-1_map1	0001.CSV	740.562	0.0090949
PSB913-1_map1	0001.CSV	744.42	0.00957349
PSB913-1_map1	0001.CSV	748.277	0.0105204
PSB913-1_map1	0001.CSV	752.134	0.0104745
PSB913-1_map1	0001.CSV	755.991	0.0107737
PSB913-1_map1	0001.CSV	759.848	0.0105703
PSB913-1_map1	0001.CSV	763.705	0.0109918
PSB913-1_map1	0001.CSV	767.562	0.0114085
PSB913-1_map1	0001.CSV	771.419	0.0124904
PSB913-1_map1	0001.CSV	775.276	0.0126513
PSB913-1_map1	0001.CSV	779.133	0.0132773
PSB913-1_map1	0001.CSV	782.99	0.013381
PSB913-1_map1	0001.CSV	786.848	0.0142386
PSB913-1_map1	0001.CSV	790.705	0.0146791
PSB913-1_map1	0001.CSV	794.562	0.0154373
PSB913-1_map1	0001.CSV	798.419	0.0159605
PSB913-1_map1	0001.CSV	802.276	0.0171277
PSB913-1_map1	0001.CSV	806.133	0.0180193
PSB913-1_map1	0001.CSV	809.99	0.0196272
PSB913-1_map1	0001.CSV	813.847	0.0213396
PSB913-1_map1	0001.CSV	817.704	0.0243422
PSB913-1_map1	0001.CSV	821.562	0.0275151
PSB913-1_map1	0001.CSV	825.419	0.0321647
PSB913-1_map1	0001.CSV	829.276	0.0377745
PSB913-1_map1	0001.CSV	833.133	0.045719
PSB913-1_map1	0001.CSV	836.99	0.0575075
PSB913-1_map1	0001.CSV	840.847	0.074875
PSB913-1_map1	0001.CSV	844.704	0.0920995
PSB913-1_map1	0001.CSV	848.561	0.116129
PSB913-1_map1	0001.CSV	852.418	0.138337
PSB913-1_map1	0001.CSV	856.275	0.134309
PSB913-1_map1	0001.CSV	860.132	0.109547
PSB913-1_map1	0001.CSV	863.99	0.0812397
PSB913-1_map1	0001.CSV	867.847	0.0540226
PSB913-1_map1	0001.CSV	871.704	0.0291682
PSB913-1_map1	0001.CSV	875.561	0.0103499
PSB913-1_map1	0001.CSV	879.418	0.00213696
PSB913-1_map1	0001.CSV	883.275	9.27521e-05
PSB913-1_map1	0001.CSV	887.132	-0.000171269
PSB913-1_map1	0001.CSV	890.989	8.42018e-05
PSB913-1_map1	0001.CSV	894.846	0.000701982
PSB913-1_map1	0001.CSV	898.703	0.0010017
PSB913-1_map1	0001.CSV	902.561	0.00179819
PSB913-1_map1	0001.CSV	906.418	0.00253568
PSB913-1_map1	0001.CSV	910.275	0.00254641
PSB913-1_map1	0001.CSV	914.132	0.00196728
PSB913-1_map1	0001.CSV	917.989	0.00245917
PSB913-1_map1	0001.CSV	921.846	0.00298164
PSB913-1_map1	0001.CSV	925.703	0.00354252
PSB913-1_map1	0001.CSV	929.56	0.0038993
PSB913-1_map1	0001.CSV	933.417	0.00444343
PSB913-1_map1	0001.CSV	937.274	0.00464399
PSB913-1_map1	0001.CSV	941.131	0.00506021
PSB913-1_map1	0001.CSV	944.989	0.00540442
PSB913-1_map1	0001.CSV	948.846	0.00594469
PSB913-1_map1	0001.CSV	952.703	0.00638868
PSB913-1_map1	0001.CSV	956.56	0.0070544
PSB913-1_map1	0001.CSV	960.417	0.0073211
PSB913-1_map1	0001.CSV	964.274	0.0077782
PSB913-1_map1	0001.CSV	968.131	0.0082876
PSB913-1_map1	0001.CSV	971.988	0.00908814
PSB913-1_map1	0001.CSV	975.845	0.00976268
PSB913-1_map1	0001.CSV	979.702	0.0107914
PSB913-1_map1	0001.CSV	983.559	0.0117373
PSB913-1_map1	0001.CSV	987.417	0.0129266
PSB913-1_map1	0001.CSV	991.274	0.0139964
PSB913-1_map1	0001.CSV	995.131	0.0151387
PSB913-1_map1	0001.CSV	998.988	0.0158564
PSB913-1_map1	0001.CSV	1002.85	0.0167048
PSB913-1_map1	0001.CSV	1006.7	0.0175185
PSB913-1_map1	0001.CSV	1010.56	0.0186482
PSB913-1_map1	0001.CSV	1014.42	0.0196649
PSB913-1_map1	0001.CSV	1018.27	0.0209937
PSB913-1_map1	0001.CSV	1022.13	0.0222122
PSB913-1_map1	0001.CSV	1025.99	0.0234432
PSB913-1_map1	0001.CSV	1029.85	0.0243355
PSB913-1_map1	0001.CSV	1033.7	0.0254457
PSB913-1_map1	0001.CSV	1037.56	0.0262705
PSB913-1_map1	0001.CSV	1041.42	0.0272357
PSB913-1_map1	0001.CSV	1045.27	0.0279255
PSB913-1_map1	0001.CSV	1049.13	0.0287666
PSB913-1_map1	0001.CSV	1052.99	0.0293147
PSB913-1_map1	0001.CSV	1056.84	0.0301799
PSB913-1_map1	0001.CSV	1060.7	0.030747
PSB913-1_map1	0001.CSV	1064.56	0.0315329
PSB913-1_map1	0001.CSV	1068.42	0.0322611
PSB913-1_map1	0001.CSV	1072.27	0.0335902
PSB913-1_map1	0001.CSV	1076.13	0.0366008
PSB913-1_map1	0001.CSV	1079.99	0.0436554
PSB913-1_map1	0001.CSV	1083.84	0.0432831
PSB913-1_map1	0001.CSV	1087.7	0.0325947
PSB913-1_map1	0001.CSV	1091.56	0.02671
PSB913-1_map1	0001.CSV	1095.41	0.0262555
PSB913-1_map1	0001.CSV	1099.27	0.0264232
PSB913-1_map1	0001.CSV	1103.13	0.0267295
PSB913-1_map1	0001.CSV	1106.99	0.0269141
PSB913-1_map1	0001.CSV	1110.84	0.027209
PSB913-1_map1	0001.CSV	1114.7	0.027266
PSB913-1_map1	0001.CSV	1118.56	0.0272955
PSB913-1_map1	0001.CSV	1122.41	0.0270978
PSB913-1_map1	0001.CSV	1126.27	0.027005
PSB913-1_map1	0001.CSV	1130.13	0.0267035
PSB913-1_map1	0001.CSV	1133.99	0.0265589
PSB913-1_map1	0001.CSV	1137.84	0.0263798
PSB913-1_map1	0001.CSV	1141.7	0.0265067
PSB913-1_map1	0001.CSV	1145.56	0.0266363
PSB913-1_map1	0001.CSV	1149.41	0.0271108
PSB913-1_map1	0001.CSV	1153.27	0.0276017
PSB913-1_map1	0001.CSV	1157.13	0.028267
PSB913-1_map1	0001.CSV	1160.99	0.0286551
PSB913-1_map1	0001.CSV	1164.84	0.0288609
PSB913-1_map1	0001.CSV	1168.7	0.0287359
PSB913-1_map1	0001.CSV	1172.56	0.0288262
PSB913-1_map1	0001.CSV	1176.41	0.0288609
PSB913-1_map1	0001.CSV	1180.27	0.029052
PSB913-1_map1	0001.CSV	1184.13	0.0290346
PSB913-1_map1	0001.CSV	1187.99	0.0292567
PSB913-1_map1	0001.CSV	1191.84	0.0293738
PSB913-1_map1	0001.CSV	1195.7	0.0296779
PSB913-1_map1	0001.CSV	1199.56	0.0300109
PSB913-1_map1	0001.CSV	1203.41	0.0306273
PSB913-1_map1	0001.CSV	1207.27	0.0311129
PSB913-1_map1	0001.CSV	1211.13	0.0318382
PSB913-1_map1	0001.CSV	1214.98	0.0325283
PSB913-1_map1	0001.CSV	1218.84	0.0334183
PSB913-1_map1	0001.CSV	1222.7	0.0341948
PSB913-1_map1	0001.CSV	1226.56	0.0352719
PSB913-1_map1	0001.CSV	1230.41	0.036228
PSB913-1_map1	0001.CSV	1234.27	0.0372573
PSB913-1_map1	0001.CSV	1238.13	0.0380583
PSB913-1_map1	0001.CSV	1241.98	0.0390629
PSB913-1_map1	0001.CSV	1245.84	0.0398973
PSB913-1_map1	0001.CSV	1249.7	0.040806
PSB913-1_map1	0001.CSV	1253.56	0.0414296
PSB913-1_map1	0001.CSV	1257.41	0.0421416
PSB913-1_map1	0001.CSV	1261.27	0.0428673
PSB913-1_map1	0001.CSV	1265.13	0.0441736
PSB913-1_map1	0001.CSV	1268.98	0.0454934
PSB913-1_map1	0001.CSV	1272.84	0.0470046
PSB913-1_map1	0001.CSV	1276.7	0.048114
PSB913-1_map1	0001.CSV	1280.56	0.049292
PSB913-1_map1	0001.CSV	1284.41	0.0502659
PSB913-1_map1	0001.CSV	1288.27	0.0514895
PSB913-1_map1	0001.CSV	1292.13	0.0526207
PSB913-1_map1	0001.CSV	1295.98	0.054027
PSB913-1_map1	0001.CSV	1299.84	0.0553758
PSB913-1_map1	0001.CSV	1303.7	0.0569761
PSB913-1_map1	0001.CSV	1307.56	0.0583029
PSB913-1_map1	0001.CSV	1311.41	0.059862
PSB913-1_map1	0001.CSV	1315.27	0.0613549
PSB913-1_map1	0001.CSV	1319.13	0.0633066
PSB913-1_map1	0001.CSV	1322.98	0.0650473
PSB913-1_map1	0001.CSV	1326.84	0.0669919
PSB913-1_map1	0001.CSV	1330.7	0.0688775
PSB913-1_map1	0001.CSV	1334.56	0.0711725
PSB913-1_map1	0001.CSV	1338.41	0.0739569
PSB913-1_map1	0001.CSV	1342.27	0.0773531
PSB913-1_map1	0001.CSV	1346.13	0.079792
PSB913-1_map1	0001.CSV	1349.98	0.0828775
PSB913-1_map1	0001.CSV	1353.84	0.0860865
PSB913-1_map1	0001.CSV	1357.7	0.0896058
PSB913-1_map1	0001.CSV	1361.56	0.0934369
PSB913-1_map1	0001.CSV	1365.41	0.0982102
PSB913-1_map1	0001.CSV	1369.27	0.101859
PSB913-1_map1	0001.CSV	1373.13	0.106628
PSB913-1_map1	0001.CSV	1376.98	0.111762
PSB913-1_map1	0001.CSV	1380.84	0.116293
PSB913-1_map1	0001.CSV	1384.7	0.120497
PSB913-1_map1	0001.CSV	1388.56	0.126105
PSB913-1_map1	0001.CSV	1392.41	0.13027
PSB913-1_map1	0001.CSV	1396.27	0.135945
PSB913-1_map1	0001.CSV	1400.13	0.141685
PSB913-1_map1	0001.CSV	1403.98	0.146948
PSB913-1_map1	0001.CSV	1407.84	0.152009
PSB913-1_map1	0001.CSV	1411.7	0.157175
PSB913-1_map1	0001.CSV	1415.55	0.161263
PSB913-1_map1	0001.CSV	1419.41	0.167251
PSB913-1_map1	0001.CSV	1423.27	0.171831
PSB913-1_map1	0001.CSV	1427.12	0.176379
PSB913-1_map1	0001.CSV	1430.98	0.180775
PSB913-1_map1	0001.CSV	1434.84	0.186378
PSB913-1_map1	0001.CSV	1438.7	0.190588
PSB913-1_map1	0001.CSV	1442.55	0.192262
PSB913-1_map1	0001.CSV	1446.41	0.190123
PSB913-1_map1	0001.CSV	1450.27	0.186217
PSB913-1_map1	0001.CSV	1454.12	0.181245
PSB913-1_map1	0001.CSV	1457.98	0.175395
PSB913-1_map1	0001.CSV	1461.84	0.170677
PSB913-1_map1	0001.CSV	1465.7	0.167282
PSB913-1_map1	0001.CSV	1469.55	0.160346
PSB913-1_map1	0001.CSV	1473.41	0.146246
PSB913-1_map1	0001.CSV	1477.27	0.129528
PSB913-1_map1	0001.CSV	1481.12	0.120337
PSB913-1_map1	0001.CSV	1484.98	0.112074
PSB913-1_map1	0001.CSV	1488.84	0.102781
PSB913-1_map1	0001.CSV	1492.7	0.0936054
PSB913-1_map1	0001.CSV	1496.55	0.0872455
PSB913-1_map1	0001.CSV	1500.41	0.0800175
PSB913-1_map1	0001.CSV	1504.27	0.075755
PSB913-1_map1	0001.CSV	1508.12	0.0676717
PSB913-1_map1	0001.CSV	1511.98	0.0618199
PSB913-1_map1	0001.CSV	1515.84	0.0576259
PSB913-1_map1	0001.CSV	1519.7	0.0523884
PSB913-1_map1	0001.CSV	1523.55	0.0458697
PSB913-1_map1	0001.CSV	1527.41	0.0414996
PSB913-1_map1	0001.CSV	1531.27	0.037441
PSB913-1_map1	0001.CSV	1535.12	0.0336106
PSB913-1_map1	0001.CSV	1538.98	0.0295854
PSB913-1_map1	0001.CSV	1542.84	0.0241147
PSB913-1_map1	0001.CSV	1546.7	0.0202814
PSB913-1_map1	0001.CSV	1550.55	0.0174268
PSB913-1_map1	0001.CSV	1554.41	0.014132
PSB913-1_map1	0001.CSV	1558.27	0.0100096
PSB913-1_map1	0001.CSV	1562.12	0.00590257
PSB913-1_map1	0001.CSV	1565.98	0.00364886
PSB913-1_map1	0001.CSV	1569.84	0.000402765
PSB913-1_map1	0001.CSV	1573.69	-0.0027675
PSB913-1_map1	0001.CSV	1577.55	-0.00657963
PSB913-1_map1	0001.CSV	1581.41	-0.00957173
PSB913-1_map1	0001.CSV	1585.27	-0.0117805
PSB913-1_map1	0001.CSV	1589.12	-0.0134012
PSB913-1_map1	0001.CSV	1592.98	-0.0145616
PSB913-1_map1	0001.CSV	1596.84	-0.0152113
PSB913-1_map1	0001.CSV	1600.69	-0.0156858
PSB913-1_map1	0001.CSV	1604.55	-0.0158188
PSB913-1_map1	0001.CSV	1608.41	-0.0160313
PSB913-1_map1	0001.CSV	1612.27	-0.0163216
PSB913-1_map1	0001.CSV	1616.12	-0.0166826
PSB913-1_map1	0001.CSV	1619.98	-0.0168014
PSB913-1_map1	0001.CSV	1623.84	-0.0170437
PSB913-1_map1	0001.CSV	1627.69	-0.0171196
PSB913-1_map1	0001.CSV	1631.55	-0.0176331
PSB913-1_map1	0001.CSV	1635.41	-0.0175936
PSB913-1_map1	0001.CSV	1639.27	-0.017448
PSB913-1_map1	0001.CSV	1643.12	-0.017733
PSB913-1_map1	0001.CSV	1646.98	-0.0178686
PSB913-1_map1	0001.CSV	1650.84	-0.017595
PSB913-1_map1	0001.CSV	1654.69	-0.0173536
PSB913-1_map1	0001.CSV	1658.55	-0.0176194
PSB913-1_map1	0001.CSV	1662.41	-0.0180984
PSB913-1_map1	0001.CSV	1666.27	-0.0183431
PSB913-1_map1	0001.CSV	1670.12	-0.0185901
PSB913-1_map1	0001.CSV	1673.98	-0.0184529
PSB913-1_map1	0001.CSV	1677.84	-0.01889
PSB913-1_map1	0001.CSV	1681.69	-0.0191371
PSB913-1_map1	0001.CSV	1685.55	-0.0190318
PSB913-1_map1	0001.CSV	1689.41	-0.0192074
PSB913-1_map1	0001.CSV	1693.27	-0.0200576
PSB913-1_map1	0001.CSV	1697.12	-0.0205771
PSB913-1_map1	0001.CSV	1700.98	-0.0205959
PSB913-1_map1	0001.CSV	1704.84	-0.0204704
PSB913-1_map1	0001.CSV	1708.69	-0.0208484
PSB913-1_map1	0001.CSV	1712.55	-0.0212051
PSB913-1_map1	0001.CSV	1716.41	-0.0210895
PSB913-1_map1	0001.CSV	1720.27	-0.0207049
PSB913-1_map1	0001.CSV	1724.12	-0.0211705
PSB913-1_map1	0001.CSV	1727.98	-0.0215586
PSB913-1_map1	0001.CSV	1731.84	-0.0218032
PSB913-1_map1	0001.CSV	1735.69	-0.0214029
PSB913-1_map1	0001.CSV	1739.55	-0.0216333
PSB913-1_map1	0001.CSV	1743.41	-0.0217954
PSB913-1_map1	0001.CSV	1747.27	-0.0219496
PSB913-1_map1	0001.CSV	1751.12	-0.0216725
PSB913-1_map1	0001.CSV	1754.98	-0.0219548
PSB913-1_map1	0001.CSV	1758.84	-0.0220021
PSB913-1_map1	0001.CSV	1762.69	-0.0218842
PSB913-1_map1	0001.CSV	1766.55	-0.0217866
PSB913-1_map1	0001.CSV	1770.41	-0.0212443
PSB913-1_map1	0001.CSV	1774.26	-0.019049
PSB913-1_map1	0001.CSV	1778.12	-0.0171472
PSB913-1_map1	0001.CSV	1781.98	-0.0149727
PSB913-1_map1	0001.CSV	1785.84	-0.0140376
PSB913-1_map1	0001.CSV	1789.69	-0.0146319
PSB913-1_map1	0001.CSV	1793.55	-0.0167218
PSB913-1_map1	0001.CSV	1797.41	-0.0185459
PSB913-1_map1	0001.CSV	1801.26	-0.0201437
PSB913-1_map1	0001.CSV	1805.12	-0.0212451
PSB913-1_map1	0001.CSV	1808.98	-0.0219426
PSB913-1_map1	0001.CSV	1812.84	-0.0220777
PSB913-1_map1	0001.CSV	1816.69	-0.0223326
PSB913-1_map1	0001.CSV	1820.55	-0.0224056
PSB913-1_map1	0001.CSV	1824.41	-0.0224774
PSB913-1_map1	0001.CSV	1828.26	-0.0221091
PSB913-1_map1	0001.CSV	1832.12	-0.0220737
PSB913-1_map1	0001.CSV	1835.98	-0.0221946
PSB913-1_map1	0001.CSV	1839.84	-0.0224865
PSB913-1_map1	0001.CSV	1843.69	-0.0223074
PSB913-1_map1	0001.CSV	1847.55	-0.0220503
PSB913-1_map1	0001.CSV	1851.41	-0.0221189
PSB913-1_map1	0001.CSV	1855.26	-0.0222861
PSB913-1_map1	0001.CSV	1859.12	-0.0221553
PSB913-1_map1	0001.CSV	1862.98	-0.0223077
PSB913-1_map1	0001.CSV	1866.84	-0.022207
PSB913-1_map1	0001.CSV	1870.69	-0.0218475
PSB913-1_map1	0001.CSV	1874.55	-0.0218676
PSB913-1_map1	0001.CSV	1878.41	-0.0220241
PSB913-1_map1	0001.CSV	1882.26	-0.0219402
PSB913-1_map1	0001.CSV	1886.12	-0.0220478
PSB913-1_map1	0001.CSV	1889.98	-0.0219815
PSB913-1_map1	0001.CSV	1893.83	-0.0219712
PSB913-1_map1	0001.CSV	1897.69	-0.0219158
PSB913-1_map1	0001.CSV	1901.55	-0.0220747
PSB913-1_map1	0001.CSV	1905.41	-0.0220899
PSB913-1_map1	0001.CSV	1909.26	-0.022052
PSB913-1_map1	0001.CSV	1913.12	-0.0219956
PSB913-1_map1	0001.CSV	1916.98	-0.022124
PSB913-1_map1	0001.CSV	1920.83	-0.0219427
PSB913-1_map1	0001.CSV	1924.69	-0.0218987
PSB913-1_map1	0001.CSV	1928.55	-0.0218999
PSB913-1_map1	0001.CSV	1932.4	-0.0219564
PSB913-1_map1	0001.CSV	1936.26	-0.0219437
PSB913-1_map1	0001.CSV	1940.12	-0.0220891
PSB913-1_map1	0001.CSV	1943.98	-0.0218583
PSB913-1_map1	0001.CSV	1947.83	-0.0218719
PSB913-1_map1	0001.CSV	1951.69	-0.0219005
PSB913-1_map1	0001.CSV	1955.55	-0.0219457
PSB913-1_map1	0001.CSV	1959.4	-0.0218667
PSB913-1_map1	0001.CSV	1963.26	-0.0219429
PSB913-1_map1	0001.CSV	1967.12	-0.021812
PSB913-1_map1	0001.CSV	1970.98	-0.0217919
PSB913-1_map1	0001.CSV	1974.83	-0.0218355
PSB913-1_map1	0001.CSV	1978.69	-0.0219572
PSB913-1_map1	0001.CSV	1982.55	-0.0218917
PSB913-1_map1	0001.CSV	1986.4	-0.0219513
PSB913-1_map1	0001.CSV	1990.26	-0.0218538
PSB913-1_map1	0001.CSV	1994.12	-0.0217701
PSB913-1_map1	0001.CSV	1997.98	-0.0217628
PSB913-1_map1	0001.CSV	2001.83	-0.0218967
PSB913-1_map1	0001.CSV	2005.69	-0.0217995
PSB913-1_map1	0001.CSV	2009.55	-0.0217492
PSB913-1_map1	0001.CSV	2013.4	-0.021732
PSB913-1_map1	0001.CSV	2017.26	-0.0217274
PSB913-1_map1	0001.CSV	2021.12	-0.0215848
PSB913-1_map1	0001.CSV	2024.97	-0.0216422
PSB913-1_map1	0001.CSV	2028.83	-0.0215827
PSB913-1_map1	0001.CSV	2032.69	-0.0216327
PSB913-1_map1	0001.CSV	2036.55	-0.0215892
PSB913-1_map1	0001.CSV	2040.4	-0.0215665
PSB913-1_map1	0001.CSV	2044.26	-0.021441
PSB913-1_map1	0001.CSV	2048.12	-0.0214991
PSB913-1_map1	0001.CSV	2051.97	-0.0214284
PSB913-1_map1	0001.CSV	2055.83	-0.0214111
PSB913-1_map1	0001.CSV	2059.69	-0.0213218
PSB913-1_map1	0001.CSV	2063.55	-0.0213515
PSB913-1_map1	0001.CSV	2067.4	-0.0212254
PSB913-1_map1	0001.CSV	2071.26	-0.0212081
PSB913-1_map1	0001.CSV	2075.12	-0.0211283
PSB913-1_map1	0001.CSV	2078.97	-0.0211429
PSB913-1_map1	0001.CSV	2082.83	-0.0211123
PSB913-1_map1	0001.CSV	2086.69	-0.0211405
PSB913-1_map1	0001.CSV	2090.55	-0.0210504
PSB913-1_map1	0001.CSV	2094.4	-0.0210329
PSB913-1_map1	0001.CSV	2098.26	-0.0209023
PSB913-1_map1	0001.CSV	2102.12	-0.020847
PSB913-1_map1	0001.CSV	2105.97	-0.0207203
PSB913-1_map1	0001.CSV	2109.83	-0.0206959
PSB913-1_map1	0001.CSV	2113.69	-0.0205956
PSB913-1_map1	0001.CSV	2117.55	-0.0205975
PSB913-1_map1	0001.CSV	2121.4	-0.0204904
PSB913-1_map1	0001.CSV	2125.26	-0.020468
PSB913-1_map1	0001.CSV	2129.12	-0.0204607
PSB913-1_map1	0001.CSV	2132.97	-0.020468
PSB913-1_map1	0001.CSV	2136.83	-0.0202943
PSB913-1_map1	0001.CSV	2140.69	-0.0202394
PSB913-1_map1	0001.CSV	2144.55	-0.020151
PSB913-1_map1	0001.CSV	2148.4	-0.0201206
PSB913-1_map1	0001.CSV	2152.26	-0.0200254
PSB913-1_map1	0001.CSV	2156.12	-0.0200536
PSB913-1_map1	0001.CSV	2159.97	-0.0199789
PSB913-1_map1	0001.CSV	2163.83	-0.0199553
PSB913-1_map1	0001.CSV	2167.69	-0.0198695
PSB913-1_map1	0001.CSV	2171.55	-0.0198392
PSB913-1_map1	0001.CSV	2175.4	-0.0197156
PSB913-1_map1	0001.CSV	2179.26	-0.0197027
PSB913-1_map1	0001.CSV	2183.12	-0.0196383
PSB913-1_map1	0001.CSV	2186.97	-0.0196282
PSB913-1_map1	0001.CSV	2190.83	-0.0195484
PSB913-1_map1	0001.CSV	2194.69	-0.0195599
PSB913-1_map1	0001.CSV	2198.55	-0.0195479
PSB913-1_map1	0001.CSV	2202.4	-0.0195814
PSB913-1_map1	0001.CSV	2206.26	-0.0194831
PSB913-1_map1	0001.CSV	2210.12	-0.0194771
PSB913-1_map1	0001.CSV	2213.97	-0.0193898
PSB913-1_map1	0001.CSV	2217.83	-0.0194152
PSB913-1_map1	0001.CSV	2221.69	-0.0194272
PSB913-1_map1	0001.CSV	2225.54	-0.0194464
PSB913-1_map1	0001.CSV	2229.4	-0.0194103
PSB913-1_map1	0001.CSV	2233.26	-0.0194319
PSB913-1_map1	0001.CSV	2237.12	-0.0193707
PSB913-1_map1	0001.CSV	2240.97	-0.0193907
PSB913-1_map1	0001.CSV	2244.83	-0.0193866
PSB913-1_map1	0001.CSV	2248.69	-0.0194251
PSB913-1_map1	0001.CSV	2252.54	-0.0194041
PSB913-1_map1	0001.CSV	2256.4	-0.0194118
PSB913-1_map1	0001.CSV	2260.26	-0.0193625
PSB913-1_map1	0001.CSV	2264.11	-0.0193815
PSB913-1_map1	0001.CSV	2267.97	-0.019319
PSB913-1_map1	0001.CSV	2271.83	-0.0193108
PSB913-1_map1	0001.CSV	2275.69	-0.0192842
PSB913-1_map1	0001.CSV	2279.54	-0.0192948
PSB913-1_map1	0001.CSV	2283.4	-0.01937
PSB913-1_map1	0001.CSV	2287.26	-0.0195225
PSB913-1_map1	0001.CSV	2291.11	-0.0194789
PSB913-1_map1	0001.CSV	2294.97	-0.0194455
PSB913-1_map1	0001.CSV	2298.83	-0.0194285
PSB913-1_map1	0001.CSV	2302.69	-0.0195757
PSB913-1_map1	0001.CSV	2306.54	-0.0196406
PSB913-1_map1	0001.CSV	2310.4	-0.019746
PSB913-1_map1	0001.CSV	2314.26	-0.0199155
PSB913-1_map1	0001.CSV	2318.11	-0.0204755
PSB913-1_map1	0001.CSV	2321.97	-0.0211675
PSB913-1_map1	0001.CSV	2325.83	-0.0219686
PSB913-1_map1	0001.CSV	2329.69	-0.0222556
PSB913-1_map1	0001.CSV	2333.54	-0.0226401
PSB913-1_map1	0001.CSV	2337.4	-0.0230704
PSB913-1_map1	0001.CSV	2341.26	-0.0231721
PSB913-1_map1	0001.CSV	2345.11	-0.0213686
PSB913-1_map1	0001.CSV	2348.97	-0.0213117
PSB913-1_map1	0001.CSV	2352.83	-0.0233272
PSB913-1_map1	0001.CSV	2356.69	-0.0275157
PSB913-1_map1	0001.CSV	2360.54	-0.0302221
PSB913-1_map1	0001.CSV	2364.4	-0.0287475
PSB913-1_map1	0001.CSV	2368.26	-0.0244224
PSB913-1_map1	0001.CSV	2372.11	-0.0212673
PSB913-1_map1	0001.CSV	2375.97	-0.0198191
PSB913-1_map1	0001.CSV	2379.83	-0.0193978
PSB913-1_map1	0001.CSV	2383.69	-0.0193701
PSB913-1_map1	0001.CSV	2387.54	-0.0195516
PSB913-1_map1	0001.CSV	2391.4	-0.0196689
PSB913-1_map1	0001.CSV	2395.26	-0.0197281
PSB913-1_map1	0001.CSV	2399.11	-0.0197322
PSB913-1_map1	0001.CSV	2402.97	-0.0197052
PSB913-1_map1	0001.CSV	2406.83	-0.0196196
PSB913-1_map1	0001.CSV	2410.68	-0.0195973
PSB913-1_map1	0001.CSV	2414.54	-0.0195726
PSB913-1_map1	0001.CSV	2418.4	-0.0194677
PSB913-1_map1	0001.CSV	2422.26	-0.0193634
PSB913-1_map1	0001.CSV	2426.11	-0.0193735
PSB913-1_map1	0001.CSV	2429.97	-0.0193725
PSB913-1_map1	0001.CSV	2433.83	-0.0193041
PSB913-1_map1	0001.CSV	2437.68	-0.0192474
PSB913-1_map1	0001.CSV	2441.54	-0.0191968
PSB913-1_map1	0001.CSV	2445.4	-0.0191167
PSB913-1_map1	0001.CSV	2449.26	-0.0190313
PSB913-1_map1	0001.CSV	2453.11	-0.0190166
PSB913-1_map1	0001.CSV	2456.97	-0.0189709
PSB913-1_map1	0001.CSV	2460.83	-0.0188755
PSB913-1_map1	0001.CSV	2464.68	-0.0187432
PSB913-1_map1	0001.CSV	2468.54	-0.0185204
PSB913-1_map1	0001.CSV	2472.4	-0.0182732
PSB913-1_map1	0001.CSV	2476.26	-0.0180264
PSB913-1_map1	0001.CSV	2480.11	-0.0176783
PSB913-1_map1	0001.CSV	2483.97	-0.0173233
PSB913-1_map1	0001.CSV	2487.83	-0.0170366
PSB913-1_map1	0001.CSV	2491.68	-0.0167818
PSB913-1_map1	0001.CSV	2495.54	-0.0165853
PSB913-1_map1	0001.CSV	2499.4	-0.016524
PSB913-1_map1	0001.CSV	2503.26	-0.0165143
PSB913-1_map1	0001.CSV	2507.11	-0.016529
PSB913-1_map1	0001.CSV	2510.97	-0.0164675
PSB913-1_map1	0001.CSV	2514.83	-0.0162826
PSB913-1_map1	0001.CSV	2518.68	-0.0159555
PSB913-1_map1	0001.CSV	2522.54	-0.0157789
PSB913-1_map1	0001.CSV	2526.4	-0.0158643
PSB913-1_map1	0001.CSV	2530.26	-0.0160999
PSB913-1_map1	0001.CSV	2534.11	-0.0163836
PSB913-1_map1	0001.CSV	2537.97	-0.0166788
PSB913-1_map1	0001.CSV	2541.83	-0.0168305
PSB913-1_map1	0001.CSV	2545.68	-0.0168805
PSB913-1_map1	0001.CSV	2549.54	-0.0169725
PSB913-1_map1	0001.CSV	2553.4	-0.0171931
PSB913-1_map1	0001.CSV	2557.26	-0.0174094
PSB913-1_map1	0001.CSV	2561.11	-0.0176056
PSB913-1_map1	0001.CSV	2564.97	-0.0177503
PSB913-1_map1	0001.CSV	2568.83	-0.0179143
PSB913-1_map1	0001.CSV	2572.68	-0.0181053
PSB913-1_map1	0001.CSV	2576.54	-0.0183189
PSB913-1_map1	0001.CSV	2580.4	-0.0184642
PSB913-1_map1	0001.CSV	2584.25	-0.0185493
PSB913-1_map1	0001.CSV	2588.11	-0.0185643
PSB913-1_map1	0001.CSV	2591.97	-0.0186743
PSB913-1_map1	0001.CSV	2595.83	-0.018799
PSB913-1_map1	0001.CSV	2599.68	-0.018903
PSB913-1_map1	0001.CSV	2603.54	-0.0189224
PSB913-1_map1	0001.CSV	2607.4	-0.0190042
PSB913-1_map1	0001.CSV	2611.25	-0.0189961
PSB913-1_map1	0001.CSV	2615.11	-0.0190242
PSB913-1_map1	0001.CSV	2618.97	-0.0190918
PSB913-1_map1	0001.CSV	2622.82	-0.0190954
PSB913-1_map1	0001.CSV	2626.68	-0.0189909
PSB913-1_map1	0001.CSV	2630.54	-0.0190407
PSB913-1_map1	0001.CSV	2634.4	-0.0190355
PSB913-1_map1	0001.CSV	2638.25	-0.019132
PSB913-1_map1	0001.CSV	2642.11	-0.0193531
PSB913-1_map1	0001.CSV	2645.97	-0.0195364
PSB913-1_map1	0001.CSV	2649.82	-0.0196257
PSB913-1_map1	0001.CSV	2653.68	-0.0198181
PSB913-1_map1	0001.CSV	2657.54	-0.0199404
PSB913-1_map1	0001.CSV	2661.4	-0.0200921
PSB913-1_map1	0001.CSV	2665.25	-0.0201316
PSB913-1_map1	0001.CSV	2669.11	-0.0201364
PSB913-1_map1	0001.CSV	2672.97	-0.0199954
PSB913-1_map1	0001.CSV	2676.82	-0.0197493
PSB913-1_map1	0001.CSV	2680.68	-0.0197759
PSB913-1_map1	0001.CSV	2684.54	-0.0201941
PSB913-1_map1	0001.CSV	2688.4	-0.0203011
PSB913-1_map1	0001.CSV	2692.25	-0.0202903
PSB913-1_map1	0001.CSV	2696.11	-0.0202632
PSB913-1_map1	0001.CSV	2699.97	-0.020261
PSB913-1_map1	0001.CSV	2703.82	-0.0202628
PSB913-1_map1	0001.CSV	2707.68	-0.0202476
PSB913-1_map1	0001.CSV	2711.54	-0.0201035
PSB913-1_map1	0001.CSV	2715.4	-0.0200776
PSB913-1_map1	0001.CSV	2719.25	-0.0199116
PSB913-1_map1	0001.CSV	2723.11	-0.0196613
PSB913-1_map1	0001.CSV	2726.97	-0.0196111
PSB913-1_map1	0001.CSV	2730.82	-0.0199065
PSB913-1_map1	0001.CSV	2734.68	-0.0199092
PSB913-1_map1	0001.CSV	2738.54	-0.019851
PSB913-1_map1	0001.CSV	2742.4	-0.0197427
PSB913-1_map1	0001.CSV	2746.25	-0.019476
PSB913-1_map1	0001.CSV	2750.11	-0.0193787
PSB913-1_map1	0001.CSV	2753.97	-0.019616
PSB913-1_map1	0001.CSV	2757.82	-0.019596
PSB913-1_map1	0001.CSV	2761.68	-0.0195441
PSB913-1_map1	0001.CSV	2765.54	-0.0194907
PSB913-1_map1	0001.CSV	2769.39	-0.0193212
PSB913-1_map1	0001.CSV	2773.25	-0.0188561
PSB913-1_map1	0001.CSV	2777.11	-0.0189166
PSB913-1_map1	0001.CSV	2780.97	-0.0189948
PSB913-1_map1	0001.CSV	2784.82	-0.0188231
PSB913-1_map1	0001.CSV	2788.68	-0.018412
PSB913-1_map1	0001.CSV	2792.54	-0.0182561
PSB913-1_map1	0001.CSV	2796.39	-0.0180852
PSB913-1_map1	0001.CSV	2800.25	-0.0182144
PSB913-1_map1	0001.CSV	2804.11	-0.0182795
PSB913-1_map1	0001.CSV	2807.97	-0.0179779
PSB913-1_map1	0001.CSV	2811.82	-0.0178353
PSB913-1_map1	0001.CSV	2815.68	-0.0179374
PSB913-1_map1	0001.CSV	2819.54	-0.0176687
PSB913-1_map1	0001.CSV	2823.39	-0.0173775
PSB913-1_map1	0001.CSV	2827.25	-0.0169913
PSB913-1_map1	0001.CSV	2831.11	-0.0162787
PSB913-1_map1	0001.CSV	2834.97	-0.0150232
PSB913-1_map1	0001.CSV	2838.82	-0.0135105
PSB913-1_map1	0001.CSV	2842.68	-0.0111462
PSB913-1_map1	0001.CSV	2846.54	-0.00772514
PSB913-1_map1	0001.CSV	2850.39	-0.00585203
PSB913-1_map1	0001.CSV	2854.25	-0.00748827
PSB913-1_map1	0001.CSV	2858.11	-0.00993799
PSB913-1_map1	0001.CSV	2861.97	-0.0117792
PSB913-1_map1	0001.CSV	2865.82	-0.0127433
PSB913-1_map1	0001.CSV	2869.68	-0.0129117
PSB913-1_map1	0001.CSV	2873.54	-0.0128092
PSB913-1_map1	0001.CSV	2877.39	-0.0131281
PSB913-1_map1	0001.CSV	2881.25	-0.0130428
PSB913-1_map1	0001.CSV	2885.11	-0.0126309
PSB913-1_map1	0001.CSV	2888.97	-0.0118446
PSB913-1_map1	0001.CSV	2892.82	-0.0108478
PSB913-1_map1	0001.CSV	2896.68	-0.00992083
PSB913-1_map1	0001.CSV	2900.54	-0.00930931
PSB913-1_map1	0001.CSV	2904.39	-0.00807969
PSB913-1_map1	0001.CSV	2908.25	-0.00591554
PSB913-1_map1	0001.CSV	2912.11	-0.00252584
PSB913-1_map1	0001.CSV	2915.97	0.000214364
PSB913-1_map1	0001.CSV	2919.82	0.000174751
PSB913-1_map1	0001.CSV	2923.68	-0.00224241
PSB913-1_map1	0001.CSV	2927.54	-0.00461656
PSB913-1_map1	0001.CSV	2931.39	-0.00715475
PSB913-1_map1	0001.CSV	2935.25	-0.00955983
PSB913-1_map1	0001.CSV	2939.11	-0.0111369
PSB913-1_map1	0001.CSV	2942.96	-0.0116226
PSB913-1_map1	0001.CSV	2946.82	-0.0122238
PSB913-1_map1	0001.CSV	2950.68	-0.0130027
PSB913-1_map1	0001.CSV	2954.54	-0.0139016
PSB913-1_map1	0001.CSV	2958.39	-0.0146184
PSB913-1_map1	0001.CSV	2962.25	-0.0151638
PSB913-1_map1	0001.CSV	2966.11	-0.0157023
PSB913-1_map1	0001.CSV	2969.96	-0.0160248
PSB913-1_map1	0001.CSV	2973.82	-0.015957
PSB913-1_map1	0001.CSV	2977.68	-0.0160936
PSB913-1_map1	0001.CSV	2981.53	-0.0164456
PSB913-1_map1	0001.CSV	2985.39	-0.0170835
PSB913-1_map1	0001.CSV	2989.25	-0.0170237
PSB913-1_map1	0001.CSV	2993.11	-0.0167633
PSB913-1_map1	0001.CSV	2996.96	-0.0168133
PSB913-1_map1	0001.CSV	3000.82	-0.0172966
PSB913-1_map1	0001.CSV	3004.68	-0.0176097
PSB913-1_map1	0001.CSV	3008.53	-0.0175137
PSB913-1_map1	0001.CSV	3012.39	-0.017209
PSB913-1_map1	0001.CSV	3016.25	-0.0172325
PSB913-1_map1	0001.CSV	3020.11	-0.0173439
PSB913-1_map1	0001.CSV	3023.96	-0.0176123
PSB913-1_map1	0001.CSV	3027.82	-0.0176452
PSB913-1_map1	0001.CSV	3031.68	-0.017482
PSB913-1_map1	0001.CSV	3035.53	-0.0174436
PSB913-1_map1	0001.CSV	3039.39	-0.0174367
PSB913-1_map1	0001.CSV	3043.25	-0.0172164
PSB913-1_map1	0001.CSV	3047.11	-0.0172886
PSB913-1_map1	0001.CSV	3050.96	-0.0172402
PSB913-1_map1	0001.CSV	3054.82	-0.0173649
PSB913-1_map1	0001.CSV	3058.68	-0.0175182
PSB913-1_map1	0001.CSV	3062.53	-0.0174627
PSB913-1_map1	0001.CSV	3066.39	-0.0170594
PSB913-1_map1	0001.CSV	3070.25	-0.01705
PSB913-1_map1	0001.CSV	3074.11	-0.016955
PSB913-1_map1	0001.CSV	3077.96	-0.0167114
PSB913-1_map1	0001.CSV	3081.82	-0.0163942
PSB913-1_map1	0001.CSV	3085.68	-0.016319
PSB913-1_map1	0001.CSV	3089.53	-0.0163079
PSB913-1_map1	0001.CSV	3093.39	-0.0165701
PSB913-1_map1	0001.CSV	3097.25	-0.0165231
PSB913-1_map1	0001.CSV	3101.11	-0.0164383
PSB913-1_map1	0001.CSV	3104.96	-0.0163001
PSB913-1_map1	0001.CSV	3108.82	-0.0161173
PSB913-1_map1	0001.CSV	3112.68	-0.015855
PSB913-1_map1	0001.CSV	3116.53	-0.0156098
PSB913-1_map1	0001.CSV	3120.39	-0.0155508
PSB913-1_map1	0001.CSV	3124.25	-0.0157663
PSB913-1_map1	0001.CSV	3128.11	-0.0157359
PSB913-1_map1	0001.CSV	3131.96	-0.0157764
PSB913-1_map1	0001.CSV	3135.82	-0.0154549
PSB913-1_map1	0001.CSV	3139.68	-0.0152907
PSB913-1_map1	0001.CSV	3143.53	-0.0154458
PSB913-1_map1	0001.CSV	3147.39	-0.0153979
PSB913-1_map1	0001.CSV	3151.25	-0.0149581
PSB913-1_map1	0001.CSV	3155.1	-0.0150909
PSB913-1_map1	0001.CSV	3158.96	-0.0153536
PSB913-1_map1	0001.CSV	3162.82	-0.0154608
PSB913-1_map1	0001.CSV	3166.68	-0.0153002
PSB913-1_map1	0001.CSV	3170.53	-0.0152725
PSB913-1_map1	0001.CSV	3174.39	-0.015155
PSB913-1_map1	0001.CSV	3178.25	-0.0149704
PSB913-1_map1	0001.CSV	3182.1	-0.0148257
PSB913-1_map1	0001.CSV	3185.96	-0.0147895
PSB913-1_map1	0001.CSV	3189.82	-0.0146773
PSB913-1_map1	0001.CSV	3193.68	-0.0147126
PSB913-1_map1	0001.CSV	3197.53	-0.0146378
PSB913-1_map1	0001.CSV	3201.39	-0.0145298
PSB913-1_map1	0001.CSV	3205.25	-0.014336
PSB913-1_map1	0001.CSV	3209.1	-0.0142862
PSB913-1_map1	0001.CSV	3212.96	-0.0140774
PSB913-1_map1	0001.CSV	3216.82	-0.0140192
PSB913-1_map1	0001.CSV	3220.68	-0.0140645
PSB913-1_map1	0001.CSV	3224.53	-0.0141019
PSB913-1_map1	0001.CSV	3228.39	-0.0137983
PSB913-1_map1	0001.CSV	3232.25	-0.0134426
PSB913-1_map1	0001.CSV	3236.1	-0.0134171
PSB913-1_map1	0001.CSV	3239.96	-0.0136046
PSB913-1_map1	0001.CSV	3243.82	-0.013343
PSB913-1_map1	0001.CSV	3247.68	-0.0132404
PSB913-1_map1	0001.CSV	3251.53	-0.0132661
PSB913-1_map1	0001.CSV	3255.39	-0.0131613
PSB913-1_map1	0001.CSV	3259.25	-0.0131977
PSB913-1_map1	0001.CSV	3263.1	-0.0132412
PSB913-1_map1	0001.CSV	3266.96	-0.0129004
PSB913-1_map1	0001.CSV	3270.82	-0.0126261
PSB913-1_map1	0001.CSV	3274.68	-0.0126427
PSB913-1_map1	0001.CSV	3278.53	-0.0129023
PSB913-1_map1	0001.CSV	3282.39	-0.0129768
PSB913-1_map1	0001.CSV	3286.25	-0.0128856
PSB913-1_map1	0001.CSV	3290.1	-0.0126214
PSB913-1_map1	0001.CSV	3293.96	-0.0124249
PSB913-1_map1	0001.CSV	3297.82	-0.0125343
PSB913-1_map1	0001.CSV	3301.67	-0.0125724
PSB913-1_map1	0001.CSV	3305.53	-0.0122413
PSB913-1_map1	0001.CSV	3309.39	-0.0121274
PSB913-1_map1	0001.CSV	3313.25	-0.0124677
PSB913-1_map1	0001.CSV	3317.1	-0.0128187
PSB913-1_map1	0001.CSV	3320.96	-0.0125593
PSB913-1_map1	0001.CSV	3324.82	-0.0122219
PSB913-1_map1	0001.CSV	3328.67	-0.0123757
PSB913-1_map1	0001.CSV	3332.53	-0.0125091
PSB913-1_map1	0001.CSV	3336.39	-0.0121241
PSB913-1_map1	0001.CSV	3340.24	-0.0119609
PSB913-1_map1	0001.CSV	3344.1	-0.0120879
PSB913-1_map1	0001.CSV	3347.96	-0.0120849
PSB913-1_map1	0001.CSV	3351.82	-0.0121243
PSB913-1_map1	0001.CSV	3355.67	-0.0123278
PSB913-1_map1	0001.CSV	3359.53	-0.0121123
PSB913-1_map1	0001.CSV	3363.39	-0.0118005
PSB913-1_map1	0001.CSV	3367.24	-0.0115676
PSB913-1_map1	0001.CSV	3371.1	-0.011767
PSB913-1_map1	0001.CSV	3374.96	-0.012038
PSB913-1_map1	0001.CSV	3378.82	-0.0121544
PSB913-1_map1	0001.CSV	3382.67	-0.0122999
PSB913-1_map1	0001.CSV	3386.53	-0.0121956
PSB913-1_map1	0001.CSV	3390.39	-0.0119969
PSB913-1_map1	0001.CSV	3394.24	-0.0120501
PSB913-1_map1	0001.CSV	3398.1	-0.0119722
PSB913-1_map1	0001.CSV	3401.96	-0.0118856
PSB913-1_map1	0001.CSV	3405.82	-0.0119781
PSB913-1_map1	0001.CSV	3409.67	-0.011943
PSB913-1_map1	0001.CSV	3413.53	-0.0121751
PSB913-1_map1	0001.CSV	3417.39	-0.0126612
PSB913-1_map1	0001.CSV	3421.24	-0.0127675
PSB913-1_map1	0001.CSV	3425.1	-0.0126695
PSB913-1_map1	0001.CSV	3428.96	-0.0124124
PSB913-1_map1	0001.CSV	3432.82	-0.0121746
PSB913-1_map1	0001.CSV	3436.67	-0.0124221
PSB913-1_map1	0001.CSV	3440.53	-0.0129888
PSB913-1_map1	0001.CSV	3444.39	-0.0132267
PSB913-1_map1	0001.CSV	3448.24	-0.0133063
PSB913-1_map1	0001.CSV	3452.1	-0.0135905
PSB913-1_map1	0001.CSV	3455.96	-0.013669
PSB913-1_map1	0001.CSV	3459.82	-0.0135142
PSB913-1_map1	0001.CSV	3463.67	-0.0133086
PSB913-1_map1	0001.CSV	3467.53	-0.013253
PSB913-1_map1	0001.CSV	3471.39	-0.0135823
PSB913-1_map1	0001.CSV	3475.24	-0.0138085
PSB913-1_map1	0001.CSV	3479.1	-0.0138543
PSB913-1_map1	0001.CSV	3482.96	-0.0140486
PSB913-1_map1	0001.CSV	3486.82	-0.0141858
PSB913-1_map1	0001.CSV	3490.67	-0.0142912
PSB913-1_map1	0001.CSV	3494.53	-0.0143237
PSB913-1_map1	0001.CSV	3498.39	-0.0145804
PSB913-1_map1	0001.CSV	3502.24	-0.0148869
PSB913-1_map1	0001.CSV	3506.1	-0.015217
PSB913-1_map1	0001.CSV	3509.96	-0.0153141
PSB913-1_map1	0001.CSV	3513.81	-0.0153593
PSB913-1_map1	0001.CSV	3517.67	-0.0158501
PSB913-1_map1	0001.CSV	3521.53	-0.0160468
PSB913-1_map1	0001.CSV	3525.39	-0.0161296
PSB913-1_map1	0001.CSV	3529.24	-0.0164788
PSB913-1_map1	0001.CSV	3533.1	-0.0166493
PSB913-1_map1	0001.CSV	3536.96	-0.0167988
PSB913-1_map1	0001.CSV	3540.81	-0.0168837
PSB913-1_map1	0001.CSV	3544.67	-0.0169279
PSB913-1_map1	0001.CSV	3548.53	-0.0171673
PSB913-1_map1	0001.CSV	3552.39	-0.0175549
PSB913-1_map1	0001.CSV	3556.24	-0.0177508
PSB913-1_map1	0001.CSV	3560.1	-0.0181086
PSB913-1_map1	0001.CSV	3563.96	-0.0186192
PSB913-1_map1	0001.CSV	3567.81	-0.0183552
PSB913-1_map1	0001.CSV	3571.67	-0.0184375
PSB913-1_map1	0001.CSV	3575.53	-0.0190126
PSB913-1_map1	0001.CSV	3579.39	-0.0187647
PSB913-1_map1	0001.CSV	3583.24	-0.018957
PSB913-1_map1	0001.CSV	3587.1	-0.0190621
PSB913-1_map1	0001.CSV	3590.96	-0.0190086
PSB913-1_map1	0001.CSV	3594.81	-0.0191309
PSB913-1_map1	0001.CSV	3598.67	-0.019172
PSB913-1_map1	0001.CSV	3602.53	-0.0194926
PSB913-1_map1	0001.CSV	3606.39	-0.0203495
PSB913-1_map1	0001.CSV	3610.24	-0.020706
PSB913-1_map1	0001.CSV	3614.1	-0.020893
PSB913-1_map1	0001.CSV	3617.96	-0.0202958
PSB913-1_map1	0001.CSV	3621.81	-0.0200204
PSB913-1_map1	0001.CSV	3625.67	-0.0209615
PSB913-1_map1	0001.CSV	3629.53	-0.0209372
PSB913-1_map1	0001.CSV	3633.39	-0.0202214
PSB913-1_map1	0001.CSV	3637.24	-0.0206292
PSB913-1_map1	0001.CSV	3641.1	-0.021193
PSB913-1_map1	0001.CSV	3644.96	-0.0222643
PSB913-1_map1	0001.CSV	3648.81	-0.0216923
PSB913-1_map1	0001.CSV	3652.67	-0.0201351
PSB913-1_map1	0001.CSV	3656.53	-0.0199704
PSB913-1_map1	0001.CSV	3660.38	-0.0202434
PSB913-1_map1	0001.CSV	3664.24	-0.0213246
PSB913-1_map1	0001.CSV	3668.1	-0.0222549
PSB913-1_map1	0001.CSV	3671.96	-0.0220612
PSB913-1_map1	0001.CSV	3675.81	-0.0213218
PSB913-1_map1	0001.CSV	3679.67	-0.0204485
PSB913-1_map1	0001.CSV	3683.53	-0.0208574
PSB913-1_map1	0001.CSV	3687.38	-0.0210068
PSB913-1_map1	0001.CSV	3691.24	-0.0199629
PSB913-1_map1	0001.CSV	3695.1	-0.0202993
PSB913-1_map1	0001.CSV	3698.95	-0.0211392
PSB913-1_map1	0001.CSV	3702.81	-0.0211944
PSB913-1_map1	0001.CSV	3706.67	-0.021629
PSB913-1_map1	0001.CSV	3710.53	-0.0215845
PSB913-1_map1	0001.CSV	3714.38	-0.0208014
PSB913-1_map1	0001.CSV	3718.24	-0.0212709
PSB913-1_map1	0001.CSV	3722.1	-0.021568
PSB913-1_map1	0001.CSV	3725.95	-0.0211469
PSB913-1_map1	0001.CSV	3729.81	-0.0214791
PSB913-1_map1	0001.CSV	3733.67	-0.0209846
PSB913-1_map1	0001.CSV	3737.53	-0.0200848
PSB913-1_map1	0001.CSV	3741.38	-0.0211141
PSB913-1_map1	0001.CSV	3745.24	-0.0220648
PSB913-1_map1	0001.CSV	3749.1	-0.0219717
PSB913-1_map1	0001.CSV	3752.95	-0.021087
PSB913-1_map1	0001.CSV	3756.81	-0.0209892
PSB913-1_map1	0001.CSV	3760.67	-0.0209416
PSB913-1_map1	0001.CSV	3764.53	-0.0208735
PSB913-1_map1	0001.CSV	3768.38	-0.0205631
PSB913-1_map1	0001.CSV	3772.24	-0.0203428
PSB913-1_map1	0001.CSV	3776.1	-0.0208299
PSB913-1_map1	0001.CSV	3779.95	-0.0208883
PSB913-1_map1	0001.CSV	3783.81	-0.0207104
PSB913-1_map1	0001.CSV	3787.67	-0.0205454
PSB913-1_map1	0001.CSV	3791.53	-0.0209955
PSB913-1_map1	0001.CSV	3795.38	-0.0214771
PSB913-1_map1	0001.CSV	3799.24	-0.0215394
PSB913-1_map1	0001.CSV	3803.1	-0.0208468
PSB913-1_map1	0001.CSV	3806.95	-0.0202313
PSB913-1_map1	0001.CSV	3810.81	-0.0205468
PSB913-1_map1	0001.CSV	3814.67	-0.021178
PSB913-1_map1	0001.CSV	3818.53	-0.0207056
PSB913-1_map1	0001.CSV	3822.38	-0.0201325
PSB913-1_map1	0001.CSV	3826.24	-0.0203959
PSB913-1_map1	0001.CSV	3830.1	-0.0208978
PSB913-1_map1	0001.CSV	3833.95	-0.0210415
PSB913-1_map1	0001.CSV	3837.81	-0.0207543
PSB913-1_map1	0001.CSV	3841.67	-0.0197197
PSB913-1_map1	0001.CSV	3845.53	-0.0202144
PSB913-1_map1	0001.CSV	3849.38	-0.0214404
PSB913-1_map1	0001.CSV	3853.24	-0.0211112
PSB913-1_map1	0001.CSV	3857.1	-0.020001
PSB913-1_map1	0001.CSV	3860.95	-0.0208694
PSB913-1_map1	0001.CSV	3864.81	-0.0207956
PSB913-1_map1	0001.CSV	3868.67	-0.0207743
PSB913-1_map1	0001.CSV	3872.52	-0.0202167
PSB913-1_map1	0001.CSV	3876.38	-0.0204352
PSB913-1_map1	0001.CSV	3880.24	-0.0207947
PSB913-1_map1	0001.CSV	3884.1	-0.0205759
PSB913-1_map1	0001.CSV	3887.95	-0.0204498
PSB913-1_map1	0001.CSV	3891.81	-0.0204946
PSB913-1_map1	0001.CSV	3895.67	-0.0207772
PSB913-1_map1	0001.CSV	3899.52	-0.0211005
PSB913-1_map1	0001.CSV	3903.38	-0.0199429
PSB913-1_map1	0001.CSV	3907.24	-0.0198992
PSB913-1_map1	0001.CSV	3911.1	-0.0204802
PSB913-1_map1	0001.CSV	3914.95	-0.0207806
PSB913-1_map1	0001.CSV	3918.81	-0.0204076
PSB913-1_map1	0001.CSV	3922.67	-0.0202863
PSB913-1_map1	0001.CSV	3926.52	-0.0203376
PSB913-1_map1	0001.CSV	3930.38	-0.0204091
PSB913-1_map1	0001.CSV	3934.24	-0.02009
PSB913-1_map1	0001.CSV	3938.09	-0.0204228
PSB913-1_map1	0001.CSV	3941.95	-0.0204958
PSB913-1_map1	0001.CSV	3945.81	-0.0204036
PSB913-1_map1	0001.CSV	3949.67	-0.0200684
PSB913-1_map1	0001.CSV	3953.52	-0.0200356
PSB913-1_map1	0001.CSV	3957.38	-0.0201568
PSB913-1_map1	0001.CSV	3961.24	-0.0202463
PSB913-1_map1	0001.CSV	3965.09	-0.0201735
PSB913-1_map1	0001.CSV	3968.95	-0.0202633
PSB913-1_map1	0001.CSV	3972.81	-0.0201604
PSB913-1_map1	0001.CSV	3976.67	-0.020128
PSB913-1_map1	0001.CSV	3980.52	-0.0201358
PSB913-1_map1	0001.CSV	3984.38	-0.0201897
PSB913-1_map1	0001.CSV	3988.24	-0.0201265
PSB913-1_map1	0001.CSV	3992.09	-0.019995
PSB913-1_map1	0001.CSV	3995.95	-0.0199627
PSB913-1_map1	0001.CSV	3999.81	-0.0201234
PSB913-1_map1	0002.CSV	674.992	0.0146143
PSB913-1_map1	0002.CSV	678.849	0.0166621
PSB913-1_map1	0002.CSV	682.706	0.0165317
PSB913-1_map1	0002.CSV	686.563	0.0191938
PSB913-1_map1	0002.CSV	690.42	0.0226861
PSB913-1_map1	0002.CSV	694.277	0.0353573
PSB913-1_map1	0002.CSV	698.134	0.0521515
PSB913-1_map1	0002.CSV	701.991	0.0485377
PSB913-1_map1	0002.CSV	705.849	0.0407387
PSB913-1_map1	0002.CSV	709.706	0.0659201
PSB913-1_map1	0002.CSV	713.563	0.0731154
PSB913-1_map1	0002.CSV	717.42	0.0352209
PSB913-1_map1	0002.CSV	721.277	0.00674899
PSB913-1_map1	0002.CSV	725.134	0.00159781
PSB913-1_map1	0002.CSV	728.991	0.000644073
PSB913-1_map1	0002.CSV	732.848	0.0011849
PSB913-1_map1	0002.CSV	736.705	0.00146677
PSB913-1_map1	0002.CSV	740.562	0.00269795
PSB913-1_map1	0002.CSV	744.42	0.00287469
PSB913-1_map1	0002.CSV	748.277	0.00402015
PSB913-1_map1	0002.CSV	752.134	0.00424581
PSB913-1_map1	0002.CSV	755.991	0.00534135
PSB913-1_map1	0002.CSV	759.848	0.00592554
PSB913-1_map1	0002.CSV	763.705	0.00720533
PSB913-1_map1	0002.CSV	767.562	0.00768174
PSB913-1_map1	0002.CSV	771.419	0.00918051
PSB913-1_map1	0002.CSV	775.276	0.00952679
PSB913-1_map1	0002.CSV	779.133	0.0103462
PSB913-1_map1	0002.CSV	782.99	0.0104752
PSB913-1_map1	0002.CSV	786.848	0.0115704
PSB913-1_map1	0002.CSV	790.705	0.0119983
PSB913-1_map1	0002.CSV	794.562	0.0129785
PSB913-1_map1	0002.CSV	798.419	0.0133174
PSB913-1_map1	0002.CSV	802.276	0.0146088
PSB913-1_map1	0002.CSV	806.133	0.0157083
PSB913-1_map1	0002.CSV	809.99	0.0181603
PSB913-1_map1	0002.CSV	813.847	0.020404
PSB913-1_map1	0002.CSV	817.704	0.0238401
PSB913-1_map1	0002.CSV	821.562	0.0272535
PSB913-1_map1	0002.CSV	825.419	0.0330574
PSB913-1_map1	0002.CSV	829.276	0.040783
PSB913-1_map1	0002.CSV	833.133	0.0531376
PSB913-1_map1	0002.CSV	836.99	0.0726387
PSB913-1_map1	0002.CSV	840.847	0.101746
PSB913-1_map1	0002.CSV	844.704	0.13051
PSB913-1_map1	0002.CSV	848.561	0.166318
PSB913-1_map1	0002.CSV	852.418	0.198615
PSB913-1_map1	0002.CSV	856.275	0.196735
PSB913-1_map1	0002.CSV	860.132	0.164306
PSB913-1_map1	0002.CSV	863.99	0.121816
PSB913-1_map1	0002.CSV	867.847	0.0784121
PSB913-1_map1	0002.CSV	871.704	0.0416868
PSB913-1_map1	0002.CSV	875.561	0.0160763
PSB913-1_map1	0002.CSV	879.418	0.00400878
PSB913-1_map1	0002.CSV	883.275	-0.000585051
PSB913-1_map1	0002.CSV	887.132	-0.00219966
PSB913-1_map1	0002.CSV	890.989	-0.00277346
PSB913-1_map1	0002.CSV	894.846	-0.00249415
PSB913-1_map1	0002.CSV	898.703	-0.00239833
PSB913-1_map1	0002.CSV	902.561	-0.00156339
PSB913-1_map1	0002.CSV	906.418	-0.000850976
PSB913-1_map1	0002.CSV	910.275	-0.000842708
PSB913-1_map1	0002.CSV	914.132	-0.00173672
PSB913-1_map1	0002.CSV	917.989	-0.00153946
PSB913-1_map1	0002.CSV	921.846	-0.00130012
PSB913-1_map1	0002.CSV	925.703	-0.000727875
PSB913-1_map1	0002.CSV	929.56	-0.000441386
PSB913-1_map1	0002.CSV	933.417	0.000113267
PSB913-1_map1	0002.CSV	937.274	0.000217513
PSB913-1_map1	0002.CSV	941.131	0.000634085
PSB913-1_map1	0002.CSV	944.989	0.000836279
PSB913-1_map1	0002.CSV	948.846	0.00136485
PSB913-1_map1	0002.CSV	952.703	0.00162468
PSB913-1_map1	0002.CSV	956.56	0.00218215
PSB913-1_map1	0002.CSV	960.417	0.00237554
PSB913-1_map1	0002.CSV	964.274	0.00284121
PSB913-1_map1	0002.CSV	968.131	0.00319481
PSB913-1_map1	0002.CSV	971.988	0.00399734
PSB913-1_map1	0002.CSV	975.845	0.00463826
PSB913-1_map1	0002.CSV	979.702	0.0057726
PSB913-1_map1	0002.CSV	983.559	0.00677544
PSB913-1_map1	0002.CSV	987.417	0.00818272
PSB913-1_map1	0002.CSV	991.274	0.00924428
PSB913-1_map1	0002.CSV	995.131	0.0102916
PSB913-1_map1	0002.CSV	998.988	0.010914
PSB913-1_map1	0002.CSV	1002.85	0.0118577
PSB913-1_map1	0002.CSV	1006.7	0.0126611
PSB913-1_map1	0002.CSV	1010.56	0.0139496
PSB913-1_map1	0002.CSV	1014.42	0.0149405
PSB913-1_map1	0002.CSV	1018.27	0.0163649
PSB913-1_map1	0002.CSV	1022.13	0.017643
PSB913-1_map1	0002.CSV	1025.99	0.019064
PSB913-1_map1	0002.CSV	1029.85	0.0200255
PSB913-1_map1	0002.CSV	1033.7	0.0213348
PSB913-1_map1	0002.CSV	1037.56	0.0222724
PSB913-1_map1	0002.CSV	1041.42	0.0234994
PSB913-1_map1	0002.CSV	1045.27	0.0243218
PSB913-1_map1	0002.CSV	1049.13	0.0254417
PSB913-1_map1	0002.CSV	1052.99	0.0261924
PSB913-1_map1	0002.CSV	1056.84	0.0273836
PSB913-1_map1	0002.CSV	1060.7	0.0281305
PSB913-1_map1	0002.CSV	1064.56	0.0291809
PSB913-1_map1	0002.CSV	1068.42	0.0301555
PSB913-1_map1	0002.CSV	1072.27	0.0320848
PSB913-1_map1	0002.CSV	1076.13	0.0363531
PSB913-1_map1	0002.CSV	1079.99	0.0472783
PSB913-1_map1	0002.CSV	1083.84	0.0494788
PSB913-1_map1	0002.CSV	1087.7	0.035046
PSB913-1_map1	0002.CSV	1091.56	0.0250433
PSB913-1_map1	0002.CSV	1095.41	0.0232684
PSB913-1_map1	0002.CSV	1099.27	0.0229274
PSB913-1_map1	0002.CSV	1103.13	0.0231112
PSB913-1_map1	0002.CSV	1106.99	0.0232162
PSB913-1_map1	0002.CSV	1110.84	0.0235958
PSB913-1_map1	0002.CSV	1114.7	0.0236842
PSB913-1_map1	0002.CSV	1118.56	0.023835
PSB913-1_map1	0002.CSV	1122.41	0.0235501
PSB913-1_map1	0002.CSV	1126.27	0.0234536
PSB913-1_map1	0002.CSV	1130.13	0.0230831
PSB913-1_map1	0002.CSV	1133.99	0.0229994
PSB913-1_map1	0002.CSV	1137.84	0.0228346
PSB913-1_map1	0002.CSV	1141.7	0.0230429
PSB913-1_map1	0002.CSV	1145.56	0.0231586
PSB913-1_map1	0002.CSV	1149.41	0.0236676
PSB913-1_map1	0002.CSV	1153.27	0.0241685
PSB913-1_map1	0002.CSV	1157.13	0.0250327
PSB913-1_map1	0002.CSV	1160.99	0.0254964
PSB913-1_map1	0002.CSV	1164.84	0.0258554
PSB913-1_map1	0002.CSV	1168.7	0.0257958
PSB913-1_map1	0002.CSV	1172.56	0.0260141
PSB913-1_map1	0002.CSV	1176.41	0.0259529
PSB913-1_map1	0002.CSV	1180.27	0.026064
PSB913-1_map1	0002.CSV	1184.13	0.0259715
PSB913-1_map1	0002.CSV	1187.99	0.0262681
PSB913-1_map1	0002.CSV	1191.84	0.0264914
PSB913-1_map1	0002.CSV	1195.7	0.0270591
PSB913-1_map1	0002.CSV	1199.56	0.0274092
PSB913-1_map1	0002.CSV	1203.41	0.0280822
PSB913-1_map1	0002.CSV	1207.27	0.0285743
PSB913-1_map1	0002.CSV	1211.13	0.0294293
PSB913-1_map1	0002.CSV	1214.98	0.0301961
PSB913-1_map1	0002.CSV	1218.84	0.0313178
PSB913-1_map1	0002.CSV	1222.7	0.0322454
PSB913-1_map1	0002.CSV	1226.56	0.0335492
PSB913-1_map1	0002.CSV	1230.41	0.0345629
PSB913-1_map1	0002.CSV	1234.27	0.0357047
PSB913-1_map1	0002.CSV	1238.13	0.0366265
PSB913-1_map1	0002.CSV	1241.98	0.0378797
PSB913-1_map1	0002.CSV	1245.84	0.0388457
PSB913-1_map1	0002.CSV	1249.7	0.0400286
PSB913-1_map1	0002.CSV	1253.56	0.0408327
PSB913-1_map1	0002.CSV	1257.41	0.0418274
PSB913-1_map1	0002.CSV	1261.27	0.0428079
PSB913-1_map1	0002.CSV	1265.13	0.0444403
PSB913-1_map1	0002.CSV	1268.98	0.0459502
PSB913-1_map1	0002.CSV	1272.84	0.0477552
PSB913-1_map1	0002.CSV	1276.7	0.0490696
PSB913-1_map1	0002.CSV	1280.56	0.0505683
PSB913-1_map1	0002.CSV	1284.41	0.0517586
PSB913-1_map1	0002.CSV	1288.27	0.0532929
PSB913-1_map1	0002.CSV	1292.13	0.054657
PSB913-1_map1	0002.CSV	1295.98	0.0563925
PSB913-1_map1	0002.CSV	1299.84	0.057958
PSB913-1_map1	0002.CSV	1303.7	0.0599765
PSB913-1_map1	0002.CSV	1307.56	0.0617493
PSB913-1_map1	0002.CSV	1311.41	0.063824
PSB913-1_map1	0002.CSV	1315.27	0.0656906
PSB913-1_map1	0002.CSV	1319.13	0.0682198
PSB913-1_map1	0002.CSV	1322.98	0.0704984
PSB913-1_map1	0002.CSV	1326.84	0.0731438
PSB913-1_map1	0002.CSV	1330.7	0.0756904
PSB913-1_map1	0002.CSV	1334.56	0.0786799
PSB913-1_map1	0002.CSV	1338.41	0.0822098
PSB913-1_map1	0002.CSV	1342.27	0.0867432
PSB913-1_map1	0002.CSV	1346.13	0.0901509
PSB913-1_map1	0002.CSV	1349.98	0.0945389
PSB913-1_map1	0002.CSV	1353.84	0.0990717
PSB913-1_map1	0002.CSV	1357.7	0.104022
PSB913-1_map1	0002.CSV	1361.56	0.109351
PSB913-1_map1	0002.CSV	1365.41	0.115989
PSB913-1_map1	0002.CSV	1369.27	0.121
PSB913-1_map1	0002.CSV	1373.13	0.12765
PSB913-1_map1	0002.CSV	1376.98	0.134808
PSB913-1_map1	0002.CSV	1380.84	0.141083
PSB913-1_map1	0002.CSV	1384.7	0.146777
PSB913-1_map1	0002.CSV	1388.56	0.154605
PSB913-1_map1	0002.CSV	1392.41	0.160239
PSB913-1_map1	0002.CSV	1396.27	0.167657
PSB913-1_map1	0002.CSV	1400.13	0.174918
PSB913-1_map1	0002.CSV	1403.98	0.181977
PSB913-1_map1	0002.CSV	1407.84	0.188996
PSB913-1_map1	0002.CSV	1411.7	0.196586
PSB913-1_map1	0002.CSV	1415.55	0.202948
PSB913-1_map1	0002.CSV	1419.41	0.213526
PSB913-1_map1	0002.CSV	1423.27	0.222882
PSB913-1_map1	0002.CSV	1427.12	0.232541
PSB913-1_map1	0002.CSV	1430.98	0.243273
PSB913-1_map1	0002.CSV	1434.84	0.259858
PSB913-1_map1	0002.CSV	1438.7	0.281858
PSB913-1_map1	0002.CSV	1442.55	0.299807
PSB913-1_map1	0002.CSV	1446.41	0.310941
PSB913-1_map1	0002.CSV	1450.27	0.316072
PSB913-1_map1	0002.CSV	1454.12	0.312082
PSB913-1_map1	0002.CSV	1457.98	0.305222
PSB913-1_map1	0002.CSV	1461.84	0.29874
PSB913-1_map1	0002.CSV	1465.7	0.295404
PSB913-1_map1	0002.CSV	1469.55	0.286211
PSB913-1_map1	0002.CSV	1473.41	0.265471
PSB913-1_map1	0002.CSV	1477.27	0.239015
PSB913-1_map1	0002.CSV	1481.12	0.222884
PSB913-1_map1	0002.CSV	1484.98	0.207465
PSB913-1_map1	0002.CSV	1488.84	0.189912
PSB913-1_map1	0002.CSV	1492.7	0.172859
PSB913-1_map1	0002.CSV	1496.55	0.161452
PSB913-1_map1	0002.CSV	1500.41	0.148338
PSB913-1_map1	0002.CSV	1504.27	0.140964
PSB913-1_map1	0002.CSV	1508.12	0.126098
PSB913-1_map1	0002.CSV	1511.98	0.115795
PSB913-1_map1	0002.CSV	1515.84	0.108849
PSB913-1_map1	0002.CSV	1519.7	0.0998434
PSB913-1_map1	0002.CSV	1523.55	0.0881636
PSB913-1_map1	0002.CSV	1527.41	0.0806276
PSB913-1_map1	0002.CSV	1531.27	0.0737322
PSB913-1_map1	0002.CSV	1535.12	0.0671432
PSB913-1_map1	0002.CSV	1538.98	0.0600817
PSB913-1_map1	0002.CSV	1542.84	0.0496037
PSB913-1_map1	0002.CSV	1546.7	0.0433851
PSB913-1_map1	0002.CSV	1550.55	0.0392761
PSB913-1_map1	0002.CSV	1554.41	0.0342793
PSB913-1_map1	0002.CSV	1558.27	0.0278237
PSB913-1_map1	0002.CSV	1562.12	0.0214338
PSB913-1_map1	0002.CSV	1565.98	0.018265
PSB913-1_map1	0002.CSV	1569.84	0.0133177
PSB913-1_map1	0002.CSV	1573.69	0.00839079
PSB913-1_map1	0002.CSV	1577.55	0.00214938
PSB913-1_map1	0002.CSV	1581.41	-0.00248874
PSB913-1_map1	0002.CSV	1585.27	-0.00594871
PSB913-1_map1	0002.CSV	1589.12	-0.00867127
PSB913-1_map1	0002.CSV	1592.98	-0.0108244
PSB913-1_map1	0002.CSV	1596.84	-0.0123151
PSB913-1_map1	0002.CSV	1600.69	-0.0135752
PSB913-1_map1	0002.CSV	1604.55	-0.0143066
PSB913-1_map1	0002.CSV	1608.41	-0.0151199
PSB913-1_map1	0002.CSV	1612.27	-0.0157547
PSB913-1_map1	0002.CSV	1616.12	-0.0165
PSB913-1_map1	0002.CSV	1619.98	-0.0170341
PSB913-1_map1	0002.CSV	1623.84	-0.0177319
PSB913-1_map1	0002.CSV	1627.69	-0.0180468
PSB913-1_map1	0002.CSV	1631.55	-0.0187017
PSB913-1_map1	0002.CSV	1635.41	-0.0187008
PSB913-1_map1	0002.CSV	1639.27	-0.0188887
PSB913-1_map1	0002.CSV	1643.12	-0.0194203
PSB913-1_map1	0002.CSV	1646.98	-0.0199042
PSB913-1_map1	0002.CSV	1650.84	-0.0197498
PSB913-1_map1	0002.CSV	1654.69	-0.019816
PSB913-1_map1	0002.CSV	1658.55	-0.0202245
PSB913-1_map1	0002.CSV	1662.41	-0.0209191
PSB913-1_map1	0002.CSV	1666.27	-0.021398
PSB913-1_map1	0002.CSV	1670.12	-0.0219956
PSB913-1_map1	0002.CSV	1673.98	-0.0221105
PSB913-1_map1	0002.CSV	1677.84	-0.0227083
PSB913-1_map1	0002.CSV	1681.69	-0.0230457
PSB913-1_map1	0002.CSV	1685.55	-0.0232831
PSB913-1_map1	0002.CSV	1689.41	-0.0236275
PSB913-1_map1	0002.CSV	1693.27	-0.0247112
PSB913-1_map1	0002.CSV	1697.12	-0.0254817
PSB913-1_map1	0002.CSV	1700.98	-0.0258843
PSB913-1_map1	0002.CSV	1704.84	-0.026151
PSB913-1_map1	0002.CSV	1708.69	-0.0269052
PSB913-1_map1	0002.CSV	1712.55	-0.0274443
PSB913-1_map1	0002.CSV	1716.41	-0.0277404
PSB913-1_map1	0002.CSV	1720.27	-0.0275898
PSB913-1_map1	0002.CSV	1724.12	-0.0281992
PSB913-1_map1	0002.CSV	1727.98	-0.0286923
PSB913-1_map1	0002.CSV	1731.84	-0.0291712
PSB913-1_map1	0002.CSV	1735.69	-0.0291061
PSB913-1_map1	0002.CSV	1739.55	-0.0295895
PSB913-1_map1	0002.CSV	1743.41	-0.0298385
PSB913-1_map1	0002.CSV	1747.27	-0.0301034
PSB913-1_map1	0002.CSV	1751.12	-0.0298489
PSB913-1_map1	0002.CSV	1754.98	-0.0301669
PSB913-1_map1	0002.CSV	1758.84	-0.030216
PSB913-1_map1	0002.CSV	1762.69	-0.0301674
PSB913-1_map1	0002.CSV	1766.55	-0.0300568
PSB913-1_map1	0002.CSV	1770.41	-0.0294107
PSB913-1_map1	0002.CSV	1774.26	-0.0265505
PSB913-1_map1	0002.CSV	1778.12	-0.0237653
PSB913-1_map1	0002.CSV	1781.98	-0.0205888
PSB913-1_map1	0002.CSV	1785.84	-0.0190696
PSB913-1_map1	0002.CSV	1789.69	-0.0196806
PSB913-1_map1	0002.CSV	1793.55	-0.0226935
PSB913-1_map1	0002.CSV	1797.41	-0.0254216
PSB913-1_map1	0002.CSV	1801.26	-0.0279316
PSB913-1_map1	0002.CSV	1805.12	-0.0297084
PSB913-1_map1	0002.CSV	1808.98	-0.0307787
PSB913-1_map1	0002.CSV	1812.84	-0.0311655
PSB913-1_map1	0002.CSV	1816.69	-0.0316551
PSB913-1_map1	0002.CSV	1820.55	-0.0318121
PSB913-1_map1	0002.CSV	1824.41	-0.0319174
PSB913-1_map1	0002.CSV	1828.26	-0.0316555
PSB913-1_map1	0002.CSV	1832.12	-0.0317642
PSB913-1_map1	0002.CSV	1835.98	-0.0319129
PSB913-1_map1	0002.CSV	1839.84	-0.0322564
PSB913-1_map1	0002.CSV	1843.69	-0.0320819
PSB913-1_map1	0002.CSV	1847.55	-0.0319068
PSB913-1_map1	0002.CSV	1851.41	-0.032032
PSB913-1_map1	0002.CSV	1855.26	-0.0322307
PSB913-1_map1	0002.CSV	1859.12	-0.0321132
PSB913-1_map1	0002.CSV	1862.98	-0.0323265
PSB913-1_map1	0002.CSV	1866.84	-0.0322597
PSB913-1_map1	0002.CSV	1870.69	-0.0320039
PSB913-1_map1	0002.CSV	1874.55	-0.0320398
PSB913-1_map1	0002.CSV	1878.41	-0.0322158
PSB913-1_map1	0002.CSV	1882.26	-0.0321214
PSB913-1_map1	0002.CSV	1886.12	-0.0322276
PSB913-1_map1	0002.CSV	1889.98	-0.0321547
PSB913-1_map1	0002.CSV	1893.83	-0.0321937
PSB913-1_map1	0002.CSV	1897.69	-0.032121
PSB913-1_map1	0002.CSV	1901.55	-0.0322656
PSB913-1_map1	0002.CSV	1905.41	-0.0322559
PSB913-1_map1	0002.CSV	1909.26	-0.0322011
PSB913-1_map1	0002.CSV	1913.12	-0.0321208
PSB913-1_map1	0002.CSV	1916.98	-0.0322953
PSB913-1_map1	0002.CSV	1920.83	-0.0321167
PSB913-1_map1	0002.CSV	1924.69	-0.0321203
PSB913-1_map1	0002.CSV	1928.55	-0.03212
PSB913-1_map1	0002.CSV	1932.4	-0.0321746
PSB913-1_map1	0002.CSV	1936.26	-0.0321457
PSB913-1_map1	0002.CSV	1940.12	-0.0322966
PSB913-1_map1	0002.CSV	1943.98	-0.0320686
PSB913-1_map1	0002.CSV	1947.83	-0.0320918
PSB913-1_map1	0002.CSV	1951.69	-0.0321105
PSB913-1_map1	0002.CSV	1955.55	-0.0321903
PSB913-1_map1	0002.CSV	1959.4	-0.0321117
PSB913-1_map1	0002.CSV	1963.26	-0.0321893
PSB913-1_map1	0002.CSV	1967.12	-0.0320243
PSB913-1_map1	0002.CSV	1970.98	-0.0320457
PSB913-1_map1	0002.CSV	1974.83	-0.0320865
PSB913-1_map1	0002.CSV	1978.69	-0.0321373
PSB913-1_map1	0002.CSV	1982.55	-0.0320237
PSB913-1_map1	0002.CSV	1986.4	-0.0320763
PSB913-1_map1	0002.CSV	1990.26	-0.0319101
PSB913-1_map1	0002.CSV	1994.12	-0.0318394
PSB913-1_map1	0002.CSV	1997.98	-0.0318456
PSB913-1_map1	0002.CSV	2001.83	-0.0319485
PSB913-1_map1	0002.CSV	2005.69	-0.0318373
PSB913-1_map1	0002.CSV	2009.55	-0.0318565
PSB913-1_map1	0002.CSV	2013.4	-0.0318528
PSB913-1_map1	0002.CSV	2017.26	-0.0318112
PSB913-1_map1	0002.CSV	2021.12	-0.0316345
PSB913-1_map1	0002.CSV	2024.97	-0.0316998
PSB913-1_map1	0002.CSV	2028.83	-0.0316283
PSB913-1_map1	0002.CSV	2032.69	-0.0316391
PSB913-1_map1	0002.CSV	2036.55	-0.0315513
PSB913-1_map1	0002.CSV	2040.4	-0.0315212
PSB913-1_map1	0002.CSV	2044.26	-0.0314012
PSB913-1_map1	0002.CSV	2048.12	-0.0314753
PSB913-1_map1	0002.CSV	2051.97	-0.0314271
PSB913-1_map1	0002.CSV	2055.83	-0.0314658
PSB913-1_map1	0002.CSV	2059.69	-0.0313328
PSB913-1_map1	0002.CSV	2063.55	-0.0313119
PSB913-1_map1	0002.CSV	2067.4	-0.0311854
PSB913-1_map1	0002.CSV	2071.26	-0.0312139
PSB913-1_map1	0002.CSV	2075.12	-0.0311448
PSB913-1_map1	0002.CSV	2078.97	-0.0311534
PSB913-1_map1	0002.CSV	2082.83	-0.0310805
PSB913-1_map1	0002.CSV	2086.69	-0.0311346
PSB913-1_map1	0002.CSV	2090.55	-0.0310387
PSB913-1_map1	0002.CSV	2094.4	-0.030978
PSB913-1_map1	0002.CSV	2098.26	-0.0308546
PSB913-1_map1	0002.CSV	2102.12	-0.030857
PSB913-1_map1	0002.CSV	2105.97	-0.0307374
PSB913-1_map1	0002.CSV	2109.83	-0.0306938
PSB913-1_map1	0002.CSV	2113.69	-0.0305732
PSB913-1_map1	0002.CSV	2117.55	-0.0305619
PSB913-1_map1	0002.CSV	2121.4	-0.0304281
PSB913-1_map1	0002.CSV	2125.26	-0.030389
PSB913-1_map1	0002.CSV	2129.12	-0.0303416
PSB913-1_map1	0002.CSV	2132.97	-0.0303766
PSB913-1_map1	0002.CSV	2136.83	-0.0302161
PSB913-1_map1	0002.CSV	2140.69	-0.0302005
PSB913-1_map1	0002.CSV	2144.55	-0.0300504
PSB913-1_map1	0002.CSV	2148.4	-0.0299413
PSB913-1_map1	0002.CSV	2152.26	-0.029845
PSB913-1_map1	0002.CSV	2156.12	-0.0298622
PSB913-1_map1	0002.CSV	2159.97	-0.0297756
PSB913-1_map1	0002.CSV	2163.83	-0.0297568
PSB913-1_map1	0002.CSV	2167.69	-0.0296272
PSB913-1_map1	0002.CSV	2171.55	-0.0295757
PSB913-1_map1	0002.CSV	2175.4	-0.0294695
PSB913-1_map1	0002.CSV	2179.26	-0.0294531
PSB913-1_map1	0002.CSV	2183.12	-0.0293904
PSB913-1_map1	0002.CSV	2186.97	-0.0294157
PSB913-1_map1	0002.CSV	2190.83	-0.0293164
PSB913-1_map1	0002.CSV	2194.69	-0.0293328
PSB913-1_map1	0002.CSV	2198.55	-0.0292923
PSB913-1_map1	0002.CSV	2202.4	-0.029304
PSB913-1_map1	0002.CSV	2206.26	-0.0291829
PSB913-1_map1	0002.CSV	2210.12	-0.0291653
PSB913-1_map1	0002.CSV	2213.97	-0.0290933
PSB913-1_map1	0002.CSV	2217.83	-0.0291345
PSB913-1_map1	0002.CSV	2221.69	-0.0291055
PSB913-1_map1	0002.CSV	2225.54	-0.0291007
PSB913-1_map1	0002.CSV	2229.4	-0.0290306
PSB913-1_map1	0002.CSV	2233.26	-0.0290252
PSB913-1_map1	0002.CSV	2237.12	-0.0289823
PSB913-1_map1	0002.CSV	2240.97	-0.0290359
PSB913-1_map1	0002.CSV	2244.83	-0.0290238
PSB913-1_map1	0002.CSV	2248.69	-0.0290666
PSB913-1_map1	0002.CSV	2252.54	-0.0290566
PSB913-1_map1	0002.CSV	2256.4	-0.0290751
PSB913-1_map1	0002.CSV	2260.26	-0.0289971
PSB913-1_map1	0002.CSV	2264.11	-0.0289964
PSB913-1_map1	0002.CSV	2267.97	-0.0289254
PSB913-1_map1	0002.CSV	2271.83	-0.0289036
PSB913-1_map1	0002.CSV	2275.69	-0.028869
PSB913-1_map1	0002.CSV	2279.54	-0.0289255
PSB913-1_map1	0002.CSV	2283.4	-0.029003
PSB913-1_map1	0002.CSV	2287.26	-0.0290954
PSB913-1_map1	0002.CSV	2291.11	-0.0290146
PSB913-1_map1	0002.CSV	2294.97	-0.0290269
PSB913-1_map1	0002.CSV	2298.83	-0.0289846
PSB913-1_map1	0002.CSV	2302.69	-0.029037
PSB913-1_map1	0002.CSV	2306.54	-0.0290603
PSB913-1_map1	0002.CSV	2310.4	-0.0291703
PSB913-1_map1	0002.CSV	2314.26	-0.0293256
PSB913-1_map1	0002.CSV	2318.11	-0.0299523
PSB913-1_map1	0002.CSV	2321.97	-0.0305336
PSB913-1_map1	0002.CSV	2325.83	-0.0310107
PSB913-1_map1	0002.CSV	2329.69	-0.031357
PSB913-1_map1	0002.CSV	2333.54	-0.0319762
PSB913-1_map1	0002.CSV	2337.4	-0.0324564
PSB913-1_map1	0002.CSV	2341.26	-0.0328369
PSB913-1_map1	0002.CSV	2345.11	-0.0308841
PSB913-1_map1	0002.CSV	2348.97	-0.0306745
PSB913-1_map1	0002.CSV	2352.83	-0.0326323
PSB913-1_map1	0002.CSV	2356.69	-0.0365699
PSB913-1_map1	0002.CSV	2360.54	-0.0385483
PSB913-1_map1	0002.CSV	2364.4	-0.0376139
PSB913-1_map1	0002.CSV	2368.26	-0.0335581
PSB913-1_map1	0002.CSV	2372.11	-0.0306612
PSB913-1_map1	0002.CSV	2375.97	-0.0293798
PSB913-1_map1	0002.CSV	2379.83	-0.0289538
PSB913-1_map1	0002.CSV	2383.69	-0.0289314
PSB913-1_map1	0002.CSV	2387.54	-0.0291414
PSB913-1_map1	0002.CSV	2391.4	-0.0292486
PSB913-1_map1	0002.CSV	2395.26	-0.0293139
PSB913-1_map1	0002.CSV	2399.11	-0.029311
PSB913-1_map1	0002.CSV	2402.97	-0.0292576
PSB913-1_map1	0002.CSV	2406.83	-0.0291894
PSB913-1_map1	0002.CSV	2410.68	-0.0292127
PSB913-1_map1	0002.CSV	2414.54	-0.0292019
PSB913-1_map1	0002.CSV	2418.4	-0.0290918
PSB913-1_map1	0002.CSV	2422.26	-0.028958
PSB913-1_map1	0002.CSV	2426.11	-0.0289167
PSB913-1_map1	0002.CSV	2429.97	-0.0288681
PSB913-1_map1	0002.CSV	2433.83	-0.0288386
PSB913-1_map1	0002.CSV	2437.68	-0.0287667
PSB913-1_map1	0002.CSV	2441.54	-0.0286716
PSB913-1_map1	0002.CSV	2445.4	-0.0286055
PSB913-1_map1	0002.CSV	2449.26	-0.0285493
PSB913-1_map1	0002.CSV	2453.11	-0.0285099
PSB913-1_map1	0002.CSV	2456.97	-0.0284504
PSB913-1_map1	0002.CSV	2460.83	-0.0282893
PSB913-1_map1	0002.CSV	2464.68	-0.0280949
PSB913-1_map1	0002.CSV	2468.54	-0.0278531
PSB913-1_map1	0002.CSV	2472.4	-0.0275102
PSB913-1_map1	0002.CSV	2476.26	-0.0271258
PSB913-1_map1	0002.CSV	2480.11	-0.0266702
PSB913-1_map1	0002.CSV	2483.97	-0.0261614
PSB913-1_map1	0002.CSV	2487.83	-0.0257227
PSB913-1_map1	0002.CSV	2491.68	-0.0253521
PSB913-1_map1	0002.CSV	2495.54	-0.0250385
PSB913-1_map1	0002.CSV	2499.4	-0.0249263
PSB913-1_map1	0002.CSV	2503.26	-0.0249517
PSB913-1_map1	0002.CSV	2507.11	-0.0249771
PSB913-1_map1	0002.CSV	2510.97	-0.0248917
PSB913-1_map1	0002.CSV	2514.83	-0.0246168
PSB913-1_map1	0002.CSV	2518.68	-0.0241056
PSB913-1_map1	0002.CSV	2522.54	-0.0237709
PSB913-1_map1	0002.CSV	2526.4	-0.0238161
PSB913-1_map1	0002.CSV	2530.26	-0.0241752
PSB913-1_map1	0002.CSV	2534.11	-0.0246287
PSB913-1_map1	0002.CSV	2537.97	-0.0250174
PSB913-1_map1	0002.CSV	2541.83	-0.0252104
PSB913-1_map1	0002.CSV	2545.68	-0.0252322
PSB913-1_map1	0002.CSV	2549.54	-0.0252272
PSB913-1_map1	0002.CSV	2553.4	-0.0254449
PSB913-1_map1	0002.CSV	2557.26	-0.0257724
PSB913-1_map1	0002.CSV	2561.11	-0.0260694
PSB913-1_map1	0002.CSV	2564.97	-0.026313
PSB913-1_map1	0002.CSV	2568.83	-0.0265702
PSB913-1_map1	0002.CSV	2572.68	-0.0267933
PSB913-1_map1	0002.CSV	2576.54	-0.0270108
PSB913-1_map1	0002.CSV	2580.4	-0.0271851
PSB913-1_map1	0002.CSV	2584.25	-0.0273131
PSB913-1_map1	0002.CSV	2588.11	-0.0273662
PSB913-1_map1	0002.CSV	2591.97	-0.0274559
PSB913-1_map1	0002.CSV	2595.83	-0.0275538
PSB913-1_map1	0002.CSV	2599.68	-0.0276882
PSB913-1_map1	0002.CSV	2603.54	-0.0277196
PSB913-1_map1	0002.CSV	2607.4	-0.0277647
PSB913-1_map1	0002.CSV	2611.25	-0.0277557
PSB913-1_map1	0002.CSV	2615.11	-0.0277627
PSB913-1_map1	0002.CSV	2618.97	-0.0278216
PSB913-1_map1	0002.CSV	2622.82	-0.0278561
PSB913-1_map1	0002.CSV	2626.68	-0.02776
PSB913-1_map1	0002.CSV	2630.54	-0.0278382
PSB913-1_map1	0002.CSV	2634.4	-0.0278287
PSB913-1_map1	0002.CSV	2638.25	-0.0278719
PSB913-1_map1	0002.CSV	2642.11	-0.0281198
PSB913-1_map1	0002.CSV	2645.97	-0.0283962
PSB913-1_map1	0002.CSV	2649.82	-0.0285588
PSB913-1_map1	0002.CSV	2653.68	-0.0287646
PSB913-1_map1	0002.CSV	2657.54	-0.0288847
PSB913-1_map1	0002.CSV	2661.4	-0.0290445
PSB913-1_map1	0002.CSV	2665.25	-0.0291071
PSB913-1_map1	0002.CSV	2669.11	-0.0290845
PSB913-1_map1	0002.CSV	2672.97	-0.0288909
PSB913-1_map1	0002.CSV	2676.82	-0.0286357
PSB913-1_map1	0002.CSV	2680.68	-0.0286977
PSB913-1_map1	0002.CSV	2684.54	-0.0292049
PSB913-1_map1	0002.CSV	2688.4	-0.0293877
PSB913-1_map1	0002.CSV	2692.25	-0.0293381
PSB913-1_map1	0002.CSV	2696.11	-0.0292124
PSB913-1_map1	0002.CSV	2699.97	-0.029208
PSB913-1_map1	0002.CSV	2703.82	-0.0292419
PSB913-1_map1	0002.CSV	2707.68	-0.0292086
PSB913-1_map1	0002.CSV	2711.54	-0.0290829
PSB913-1_map1	0002.CSV	2715.4	-0.0290629
PSB913-1_map1	0002.CSV	2719.25	-0.0288422
PSB913-1_map1	0002.CSV	2723.11	-0.0285591
PSB913-1_map1	0002.CSV	2726.97	-0.0285057
PSB913-1_map1	0002.CSV	2730.82	-0.028844
PSB913-1_map1	0002.CSV	2734.68	-0.0287908
PSB913-1_map1	0002.CSV	2738.54	-0.0286839
PSB913-1_map1	0002.CSV	2742.4	-0.0286024
PSB913-1_map1	0002.CSV	2746.25	-0.0282408
PSB913-1_map1	0002.CSV	2750.11	-0.0280994
PSB913-1_map1	0002.CSV	2753.97	-0.0283952
PSB913-1_map1	0002.CSV	2757.82	-0.0283693
PSB913-1_map1	0002.CSV	2761.68	-0.0283675
PSB913-1_map1	0002.CSV	2765.54	-0.0283186
PSB913-1_map1	0002.CSV	2769.39	-0.0280934
PSB913-1_map1	0002.CSV	2773.25	-0.0276023
PSB913-1_map1	0002.CSV	2777.11	-0.0276463
PSB913-1_map1	0002.CSV	2780.97	-0.0277696
PSB913-1_map1	0002.CSV	2784.82	-0.027573
PSB913-1_map1	0002.CSV	2788.68	-0.0270619
PSB913-1_map1	0002.CSV	2792.54	-0.0268916
PSB913-1_map1	0002.CSV	2796.39	-0.0267019
PSB913-1_map1	0002.CSV	2800.25	-0.0268662
PSB913-1_map1	0002.CSV	2804.11	-0.0269589
PSB913-1_map1	0002.CSV	2807.97	-0.0266176
PSB913-1_map1	0002.CSV	2811.82	-0.0265623
PSB913-1_map1	0002.CSV	2815.68	-0.0267764
PSB913-1_map1	0002.CSV	2819.54	-0.0264919
PSB913-1_map1	0002.CSV	2823.39	-0.0262016
PSB913-1_map1	0002.CSV	2827.25	-0.0259285
PSB913-1_map1	0002.CSV	2831.11	-0.0254103
PSB913-1_map1	0002.CSV	2834.97	-0.0244855
PSB913-1_map1	0002.CSV	2838.82	-0.0239355
PSB913-1_map1	0002.CSV	2842.68	-0.0236522
PSB913-1_map1	0002.CSV	2846.54	-0.023089
PSB913-1_map1	0002.CSV	2850.39	-0.0226056
PSB913-1_map1	0002.CSV	2854.25	-0.0224538
PSB913-1_map1	0002.CSV	2858.11	-0.0221111
PSB913-1_map1	0002.CSV	2861.97	-0.0222558
PSB913-1_map1	0002.CSV	2865.82	-0.0224745
PSB913-1_map1	0002.CSV	2869.68	-0.0222954
PSB913-1_map1	0002.CSV	2873.54	-0.0220487
PSB913-1_map1	0002.CSV	2877.39	-0.0226054
PSB913-1_map1	0002.CSV	2881.25	-0.0230204
PSB913-1_map1	0002.CSV	2885.11	-0.0230666
PSB913-1_map1	0002.CSV	2888.97	-0.0226584
PSB913-1_map1	0002.CSV	2892.82	-0.0219003
PSB913-1_map1	0002.CSV	2896.68	-0.021258
PSB913-1_map1	0002.CSV	2900.54	-0.0211459
PSB913-1_map1	0002.CSV	2904.39	-0.0205425
PSB913-1_map1	0002.CSV	2908.25	-0.0195018
PSB913-1_map1	0002.CSV	2912.11	-0.0181334
PSB913-1_map1	0002.CSV	2915.97	-0.0174825
PSB913-1_map1	0002.CSV	2919.82	-0.017709
PSB913-1_map1	0002.CSV	2923.68	-0.018283
PSB913-1_map1	0002.CSV	2927.54	-0.0182339
PSB913-1_map1	0002.CSV	2931.39	-0.0188728
PSB913-1_map1	0002.CSV	2935.25	-0.0200256
PSB913-1_map1	0002.CSV	2939.11	-0.0205864
PSB913-1_map1	0002.CSV	2942.96	-0.0202203
PSB913-1_map1	0002.CSV	2946.82	-0.0203168
PSB913-1_map1	0002.CSV	2950.68	-0.0209452
PSB913-1_map1	0002.CSV	2954.54	-0.0218273
PSB913-1_map1	0002.CSV	2958.39	-0.0224815
PSB913-1_map1	0002.CSV	2962.25	-0.0228645
PSB913-1_map1	0002.CSV	2966.11	-0.0233662
PSB913-1_map1	0002.CSV	2969.96	-0.0235278
PSB913-1_map1	0002.CSV	2973.82	-0.0231905
PSB913-1_map1	0002.CSV	2977.68	-0.0232128
PSB913-1_map1	0002.CSV	2981.53	-0.0236658
PSB913-1_map1	0002.CSV	2985.39	-0.0244535
PSB913-1_map1	0002.CSV	2989.25	-0.0243385
PSB913-1_map1	0002.CSV	2993.11	-0.0239629
PSB913-1_map1	0002.CSV	2996.96	-0.0240835
PSB913-1_map1	0002.CSV	3000.82	-0.0245905
PSB913-1_map1	0002.CSV	3004.68	-0.0248835
PSB913-1_map1	0002.CSV	3008.53	-0.0247708
PSB913-1_map1	0002.CSV	3012.39	-0.024332
PSB913-1_map1	0002.CSV	3016.25	-0.0243408
PSB913-1_map1	0002.CSV	3020.11	-0.0245911
PSB913-1_map1	0002.CSV	3023.96	-0.0248529
PSB913-1_map1	0002.CSV	3027.82	-0.0247983
PSB913-1_map1	0002.CSV	3031.68	-0.0245495
PSB913-1_map1	0002.CSV	3035.53	-0.0244919
PSB913-1_map1	0002.CSV	3039.39	-0.0245115
PSB913-1_map1	0002.CSV	3043.25	-0.0242642
PSB913-1_map1	0002.CSV	3047.11	-0.0243192
PSB913-1_map1	0002.CSV	3050.96	-0.0242993
PSB913-1_map1	0002.CSV	3054.82	-0.0244433
PSB913-1_map1	0002.CSV	3058.68	-0.024575
PSB913-1_map1	0002.CSV	3062.53	-0.0244628
PSB913-1_map1	0002.CSV	3066.39	-0.0239859
PSB913-1_map1	0002.CSV	3070.25	-0.0239359
PSB913-1_map1	0002.CSV	3074.11	-0.0238655
PSB913-1_map1	0002.CSV	3077.96	-0.0236446
PSB913-1_map1	0002.CSV	3081.82	-0.0233469
PSB913-1_map1	0002.CSV	3085.68	-0.023298
PSB913-1_map1	0002.CSV	3089.53	-0.0233335
PSB913-1_map1	0002.CSV	3093.39	-0.0235702
PSB913-1_map1	0002.CSV	3097.25	-0.0233973
PSB913-1_map1	0002.CSV	3101.11	-0.0232683
PSB913-1_map1	0002.CSV	3104.96	-0.0231251
PSB913-1_map1	0002.CSV	3108.82	-0.0228776
PSB913-1_map1	0002.CSV	3112.68	-0.0226305
PSB913-1_map1	0002.CSV	3116.53	-0.0224789
PSB913-1_map1	0002.CSV	3120.39	-0.0224296
PSB913-1_map1	0002.CSV	3124.25	-0.0226859
PSB913-1_map1	0002.CSV	3128.11	-0.0226719
PSB913-1_map1	0002.CSV	3131.96	-0.0226502
PSB913-1_map1	0002.CSV	3135.82	-0.0223132
PSB913-1_map1	0002.CSV	3139.68	-0.02211
PSB913-1_map1	0002.CSV	3143.53	-0.0222719
PSB913-1_map1	0002.CSV	3147.39	-0.0222162
PSB913-1_map1	0002.CSV	3151.25	-0.0217259
PSB913-1_map1	0002.CSV	3155.1	-0.0217951
PSB913-1_map1	0002.CSV	3158.96	-0.0220409
PSB913-1_map1	0002.CSV	3162.82	-0.0221388
PSB913-1_map1	0002.CSV	3166.68	-0.0220905
PSB913-1_map1	0002.CSV	3170.53	-0.022065
PSB913-1_map1	0002.CSV	3174.39	-0.0218407
PSB913-1_map1	0002.CSV	3178.25	-0.0216273
PSB913-1_map1	0002.CSV	3182.1	-0.0214753
PSB913-1_map1	0002.CSV	3185.96	-0.0214221
PSB913-1_map1	0002.CSV	3189.82	-0.0212882
PSB913-1_map1	0002.CSV	3193.68	-0.0213146
PSB913-1_map1	0002.CSV	3197.53	-0.0211891
PSB913-1_map1	0002.CSV	3201.39	-0.0210222
PSB913-1_map1	0002.CSV	3205.25	-0.0208171
PSB913-1_map1	0002.CSV	3209.1	-0.0207534
PSB913-1_map1	0002.CSV	3212.96	-0.0205022
PSB913-1_map1	0002.CSV	3216.82	-0.0204052
PSB913-1_map1	0002.CSV	3220.68	-0.0204155
PSB913-1_map1	0002.CSV	3224.53	-0.0204363
PSB913-1_map1	0002.CSV	3228.39	-0.0201671
PSB913-1_map1	0002.CSV	3232.25	-0.0198387
PSB913-1_map1	0002.CSV	3236.1	-0.019805
PSB913-1_map1	0002.CSV	3239.96	-0.02001
PSB913-1_map1	0002.CSV	3243.82	-0.0197935
PSB913-1_map1	0002.CSV	3247.68	-0.0196403
PSB913-1_map1	0002.CSV	3251.53	-0.0195715
PSB913-1_map1	0002.CSV	3255.39	-0.0194805
PSB913-1_map1	0002.CSV	3259.25	-0.019585
PSB913-1_map1	0002.CSV	3263.1	-0.019543
PSB913-1_map1	0002.CSV	3266.96	-0.01913
PSB913-1_map1	0002.CSV	3270.82	-0.0189137
PSB913-1_map1	0002.CSV	3274.68	-0.0190268
PSB913-1_map1	0002.CSV	3278.53	-0.0192674
PSB913-1_map1	0002.CSV	3282.39	-0.0192886
PSB913-1_map1	0002.CSV	3286.25	-0.0192298
PSB913-1_map1	0002.CSV	3290.1	-0.0189394
PSB913-1_map1	0002.CSV	3293.96	-0.018655
PSB913-1_map1	0002.CSV	3297.82	-0.0187359
PSB913-1_map1	0002.CSV	3301.67	-0.0187806
PSB913-1_map1	0002.CSV	3305.53	-0.0184718
PSB913-1_map1	0002.CSV	3309.39	-0.0183025
PSB913-1_map1	0002.CSV	3313.25	-0.0185305
PSB913-1_map1	0002.CSV	3317.1	-0.018929
PSB913-1_map1	0002.CSV	3320.96	-0.0188887
PSB913-1_map1	0002.CSV	3324.82	-0.018669
PSB913-1_map1	0002.CSV	3328.67	-0.0187413
PSB913-1_map1	0002.CSV	3332.53	-0.0187843
PSB913-1_map1	0002.CSV	3336.39	-0.0183545
PSB913-1_map1	0002.CSV	3340.24	-0.0181719
PSB913-1_map1	0002.CSV	3344.1	-0.0182718
PSB913-1_map1	0002.CSV	3347.96	-0.0182895
PSB913-1_map1	0002.CSV	3351.82	-0.0184134
PSB913-1_map1	0002.CSV	3355.67	-0.0185894
PSB913-1_map1	0002.CSV	3359.53	-0.0183917
PSB913-1_map1	0002.CSV	3363.39	-0.0182168
PSB913-1_map1	0002.CSV	3367.24	-0.0179241
PSB913-1_map1	0002.CSV	3371.1	-0.0177996
PSB913-1_map1	0002.CSV	3374.96	-0.0179644
PSB913-1_map1	0002.CSV	3378.82	-0.0181771
PSB913-1_map1	0002.CSV	3382.67	-0.0184152
PSB913-1_map1	0002.CSV	3386.53	-0.0182459
PSB913-1_map1	0002.CSV	3390.39	-0.0179005
PSB913-1_map1	0002.CSV	3394.24	-0.0179733
PSB913-1_map1	0002.CSV	3398.1	-0.0179888
PSB913-1_map1	0002.CSV	3401.96	-0.0179959
PSB913-1_map1	0002.CSV	3405.82	-0.0181047
PSB913-1_map1	0002.CSV	3409.67	-0.0180333
PSB913-1_map1	0002.CSV	3413.53	-0.0181762
PSB913-1_map1	0002.CSV	3417.39	-0.0185952
PSB913-1_map1	0002.CSV	3421.24	-0.018753
PSB913-1_map1	0002.CSV	3425.1	-0.0186359
PSB913-1_map1	0002.CSV	3428.96	-0.0183493
PSB913-1_map1	0002.CSV	3432.82	-0.0182444
PSB913-1_map1	0002.CSV	3436.67	-0.018528
PSB913-1_map1	0002.CSV	3440.53	-0.0190342
PSB913-1_map1	0002.CSV	3444.39	-0.0193084
PSB913-1_map1	0002.CSV	3448.24	-0.019437
PSB913-1_map1	0002.CSV	3452.1	-0.0197732
PSB913-1_map1	0002.CSV	3455.96	-0.0197574
PSB913-1_map1	0002.CSV	3459.82	-0.0193887
PSB913-1_map1	0002.CSV	3463.67	-0.0191871
PSB913-1_map1	0002.CSV	3467.53	-0.0193588
PSB913-1_map1	0002.CSV	3471.39	-0.0197597
PSB913-1_map1	0002.CSV	3475.24	-0.0199993
PSB913-1_map1	0002.CSV	3479.1	-0.0200411
PSB913-1_map1	0002.CSV	3482.96	-0.0202284
PSB913-1_map1	0002.CSV	3486.82	-0.0203821
PSB913-1_map1	0002.CSV	3490.67	-0.0205292
PSB913-1_map1	0002.CSV	3494.53	-0.0205757
PSB913-1_map1	0002.CSV	3498.39	-0.0208198
PSB913-1_map1	0002.CSV	3502.24	-0.0210911
PSB913-1_map1	0002.CSV	3506.1	-0.0213645
PSB913-1_map1	0002.CSV	3509.96	-0.0215403
PSB913-1_map1	0002.CSV	3513.81	-0.021677
PSB913-1_map1	0002.CSV	3517.67	-0.0221193
PSB913-1_map1	0002.CSV	3521.53	-0.0223968
PSB913-1_map1	0002.CSV	3525.39	-0.0225941
PSB913-1_map1	0002.CSV	3529.24	-0.0228795
PSB913-1_map1	0002.CSV	3533.1	-0.0230096
PSB913-1_map1	0002.CSV	3536.96	-0.0232043
PSB913-1_map1	0002.CSV	3540.81	-0.0233737
PSB913-1_map1	0002.CSV	3544.67	-0.023387
PSB913-1_map1	0002.CSV	3548.53	-0.0235258
PSB913-1_map1	0002.CSV	3552.39	-0.0240857
PSB913-1_map1	0002.CSV	3556.24	-0.0244004
PSB913-1_map1	0002.CSV	3560.1	-0.0247023
PSB913-1_map1	0002.CSV	3563.96	-0.0252982
PSB913-1_map1	0002.CSV	3567.81	-0.0251125
PSB913-1_map1	0002.CSV	3571.67	-0.0250912
PSB913-1_map1	0002.CSV	3575.53	-0.0257529
PSB913-1_map1	0002.CSV	3579.39	-0.0256424
PSB913-1_map1	0002.CSV	3583.24	-0.0258267
PSB913-1_map1	0002.CSV	3587.1	-0.0258493
PSB913-1_map1	0002.CSV	3590.96	-0.0259134
PSB913-1_map1	0002.CSV	3594.81	-0.0262246
PSB913-1_map1	0002.CSV	3598.67	-0.0261725
PSB913-1_map1	0002.CSV	3602.53	-0.0264012
PSB913-1_map1	0002.CSV	3606.39	-0.0272024
PSB913-1_map1	0002.CSV	3610.24	-0.027574
PSB913-1_map1	0002.CSV	3614.1	-0.0279067
PSB913-1_map1	0002.CSV	3617.96	-0.0274799
PSB913-1_map1	0002.CSV	3621.81	-0.0272479
PSB913-1_map1	0002.CSV	3625.67	-0.0281018
PSB913-1_map1	0002.CSV	3629.53	-0.0279719
PSB913-1_map1	0002.CSV	3633.39	-0.0274066
PSB913-1_map1	0002.CSV	3637.24	-0.028058
PSB913-1_map1	0002.CSV	3641.1	-0.0286637
PSB913-1_map1	0002.CSV	3644.96	-0.0296794
PSB913-1_map1	0002.CSV	3648.81	-0.0289309
PSB913-1_map1	0002.CSV	3652.67	-0.0274656
PSB913-1_map1	0002.CSV	3656.53	-0.0275386
PSB913-1_map1	0002.CSV	3660.38	-0.0277624
PSB913-1_map1	0002.CSV	3664.24	-0.0287359
PSB913-1_map1	0002.CSV	3668.1	-0.0297261
PSB913-1_map1	0002.CSV	3671.96	-0.0297606
PSB913-1_map1	0002.CSV	3675.81	-0.0291486
PSB913-1_map1	0002.CSV	3679.67	-0.0281888
PSB913-1_map1	0002.CSV	3683.53	-0.0285573
PSB913-1_map1	0002.CSV	3687.38	-0.0287871
PSB913-1_map1	0002.CSV	3691.24	-0.0277025
PSB913-1_map1	0002.CSV	3695.1	-0.0279387
PSB913-1_map1	0002.CSV	3698.95	-0.0288263
PSB913-1_map1	0002.CSV	3702.81	-0.0289279
PSB913-1_map1	0002.CSV	3706.67	-0.0292263
PSB913-1_map1	0002.CSV	3710.53	-0.0290634
PSB913-1_map1	0002.CSV	3714.38	-0.0283396
PSB913-1_map1	0002.CSV	3718.24	-0.0287912
PSB913-1_map1	0002.CSV	3722.1	-0.0290214
PSB913-1_map1	0002.CSV	3725.95	-0.0286844
PSB913-1_map1	0002.CSV	3729.81	-0.0291601
PSB913-1_map1	0002.CSV	3733.67	-0.0289739
PSB913-1_map1	0002.CSV	3737.53	-0.0279468
PSB913-1_map1	0002.CSV	3741.38	-0.0288615
PSB913-1_map1	0002.CSV	3745.24	-0.0302234
PSB913-1_map1	0002.CSV	3749.1	-0.0302082
PSB913-1_map1	0002.CSV	3752.95	-0.0290211
PSB913-1_map1	0002.CSV	3756.81	-0.0288519
PSB913-1_map1	0002.CSV	3760.67	-0.0287949
PSB913-1_map1	0002.CSV	3764.53	-0.0286865
PSB913-1_map1	0002.CSV	3768.38	-0.0283048
PSB913-1_map1	0002.CSV	3772.24	-0.0280736
PSB913-1_map1	0002.CSV	3776.1	-0.028565
PSB913-1_map1	0002.CSV	3779.95	-0.0285389
PSB913-1_map1	0002.CSV	3783.81	-0.0284054
PSB913-1_map1	0002.CSV	3787.67	-0.0283893
PSB913-1_map1	0002.CSV	3791.53	-0.0289356
PSB913-1_map1	0002.CSV	3795.38	-0.0294727
PSB913-1_map1	0002.CSV	3799.24	-0.0295192
PSB913-1_map1	0002.CSV	3803.1	-0.0286721
PSB913-1_map1	0002.CSV	3806.95	-0.0280933
PSB913-1_map1	0002.CSV	3810.81	-0.0284351
PSB913-1_map1	0002.CSV	3814.67	-0.0291415
PSB913-1_map1	0002.CSV	3818.53	-0.0287421
PSB913-1_map1	0002.CSV	3822.38	-0.0280628
PSB913-1_map1	0002.CSV	3826.24	-0.0282749
PSB913-1_map1	0002.CSV	3830.1	-0.028733
PSB913-1_map1	0002.CSV	3833.95	-0.0287924
PSB913-1_map1	0002.CSV	3837.81	-0.0285427
PSB913-1_map1	0002.CSV	3841.67	-0.0274986
PSB913-1_map1	0002.CSV	3845.53	-0.0280226
PSB913-1_map1	0002.CSV	3849.38	-0.0293451
PSB913-1_map1	0002.CSV	3853.24	-0.0290103
PSB913-1_map1	0002.CSV	3857.1	-0.0277362
PSB913-1_map1	0002.CSV	3860.95	-0.0284617
PSB913-1_map1	0002.CSV	3864.81	-0.0283288
PSB913-1_map1	0002.CSV	3868.67	-0.0282377
PSB913-1_map1	0002.CSV	3872.52	-0.0276352
PSB913-1_map1	0002.CSV	3876.38	-0.0280501
PSB913-1_map1	0002.CSV	3880.24	-0.0285406
PSB913-1_map1	0002.CSV	3884.1	-0.0282189
PSB913-1_map1	0002.CSV	3887.95	-0.0281232
PSB913-1_map1	0002.CSV	3891.81	-0.0282992
PSB913-1_map1	0002.CSV	3895.67	-0.0285718
PSB913-1_map1	0002.CSV	3899.52	-0.0289498
PSB913-1_map1	0002.CSV	3903.38	-0.027727
PSB913-1_map1	0002.CSV	3907.24	-0.0275055
PSB913-1_map1	0002.CSV	3911.1	-0.0281869
PSB913-1_map1	0002.CSV	3914.95	-0.0286502
PSB913-1_map1	0002.CSV	3918.81	-0.0283122
PSB913-1_map1	0002.CSV	3922.67	-0.0281442
PSB913-1_map1	0002.CSV	3926.52	-0.0281449
PSB913-1_map1	0002.CSV	3930.38	-0.0280973
PSB913-1_map1	0002.CSV	3934.24	-0.0278018
PSB913-1_map1	0002.CSV	3938.09	-0.0282573
PSB913-1_map1	0002.CSV	3941.95	-0.0283179
PSB913-1_map1	0002.CSV	3945.81	-0.0281464
PSB913-1_map1	0002.CSV	3949.67	-0.0278296
PSB913-1_map1	0002.CSV	3953.52	-0.0278733
PSB913-1_map1	0002.CSV	3957.38	-0.0279927
PSB913-1_map1	0002.CSV	3961.24	-0.0279327
PSB913-1_map1	0002.CSV	3965.09	-0.0278211
PSB913-1_map1	0002.CSV	3968.95	-0.0280353
PSB913-1_map1	0002.CSV	3972.81	-0.0280566
PSB913-1_map1	0002.CSV	3976.67	-0.0279889
PSB913-1_map1	0002.CSV	3980.52	-0.0279743
PSB913-1_map1	0002.CSV	3984.38	-0.0280197
PSB913-1_map1	0002.CSV	3988.24	-0.0279451
PSB913-1_map1	0002.CSV	3992.09	-0.0278468
PSB913-1_map1	0002.CSV	3995.95	-0.0277639
PSB913-1_map1	0002.CSV	3999.81	-0.027929
PSB913-1_map1	0003.CSV	674.992	0.00184158
PSB913-1_map1	0003.CSV	678.849	0.00235731
PSB913-1_map1	0003.CSV	682.706	0.00240835
PSB913-1_map1	0003.CSV	686.563	0.00303045
PSB913-1_map1	0003.CSV	690.42	0.00432488
PSB913-1_map1	0003.CSV	694.277	0.00908956
PSB913-1_map1	0003.CSV	698.134	0.0139884
PSB913-1_map1	0003.CSV	701.991	0.0106787
PSB913-1_map1	0003.CSV	705.849	0.00775078
PSB913-1_map1	0003.CSV	709.706	0.0164188
PSB913-1_map1	0003.CSV	713.563	0.0164668
PSB913-1_map1	0003.CSV	717.42	0.00238726
PSB913-1_map1	0003.CSV	721.277	-0.00612981
PSB913-1_map1	0003.CSV	725.134	-0.00688441
PSB913-1_map1	0003.CSV	728.991	-0.00667527
PSB913-1_map1	0003.CSV	732.848	-0.00621977
PSB913-1_map1	0003.CSV	736.705	-0.00613712
PSB913-1_map1	0003.CSV	740.562	-0.00580377
PSB913-1_map1	0003.CSV	744.42	-0.00555807
PSB913-1_map1	0003.CSV	748.277	-0.00529056
PSB913-1_map1	0003.CSV	752.134	-0.00571738
PSB913-1_map1	0003.CSV	755.991	-0.00572687
PSB913-1_map1	0003.CSV	759.848	-0.00566434
PSB913-1_map1	0003.CSV	763.705	-0.00571555
PSB913-1_map1	0003.CSV	767.562	-0.00603133
PSB913-1_map1	0003.CSV	771.419	-0.00573664
PSB913-1_map1	0003.CSV	775.276	-0.0057697
PSB913-1_map1	0003.CSV	779.133	-0.00563821
PSB913-1_map1	0003.CSV	782.99	-0.0055794
PSB913-1_map1	0003.CSV	786.848	-0.00534326
PSB913-1_map1	0003.CSV	790.705	-0.00538103
PSB913-1_map1	0003.CSV	794.562	-0.00528791
PSB913-1_map1	0003.CSV	798.419	-0.00530238
PSB913-1_map1	0003.CSV	802.276	-0.00494706
PSB913-1_map1	0003.CSV	806.133	-0.00448511
PSB913-1_map1	0003.CSV	809.99	-0.0037552
PSB913-1_map1	0003.CSV	813.847	-0.00315211
PSB913-1_map1	0003.CSV	817.704	-0.00196685
PSB913-1_map1	0003.CSV	821.562	-0.000747291
PSB913-1_map1	0003.CSV	825.419	0.00107178
PSB913-1_map1	0003.CSV	829.276	0.00297627
PSB913-1_map1	0003.CSV	833.133	0.00547276
PSB913-1_map1	0003.CSV	836.99	0.00904381
PSB913-1_map1	0003.CSV	840.847	0.0143683
PSB913-1_map1	0003.CSV	844.704	0.0195436
PSB913-1_map1	0003.CSV	848.561	0.027522
PSB913-1_map1	0003.CSV	852.418	0.0357541
PSB913-1_map1	0003.CSV	856.275	0.036985
PSB913-1_map1	0003.CSV	860.132	0.0313748
PSB913-1_map1	0003.CSV	863.99	0.022505
PSB913-1_map1	0003.CSV	867.847	0.0119197
PSB913-1_map1	0003.CSV	871.704	0.00142637
PSB913-1_map1	0003.CSV	875.561	-0.00650665
PSB913-1_map1	0003.CSV	879.418	-0.00973833
PSB913-1_map1	0003.CSV	883.275	-0.0103605
PSB913-1_map1	0003.CSV	887.132	-0.0103287
PSB913-1_map1	0003.CSV	890.989	-0.0102144
PSB913-1_map1	0003.CSV	894.846	-0.00999136
PSB913-1_map1	0003.CSV	898.703	-0.0100121
PSB913-1_map1	0003.CSV	902.561	-0.00981141
PSB913-1_map1	0003.CSV	906.418	-0.00958055
PSB913-1_map1	0003.CSV	910.275	-0.0096372
PSB913-1_map1	0003.CSV	914.132	-0.0099558
PSB913-1_map1	0003.CSV	917.989	-0.0097602
PSB913-1_map1	0003.CSV	921.846	-0.00948113
PSB913-1_map1	0003.CSV	925.703	-0.00927928
PSB913-1_map1	0003.CSV	929.56	-0.00925009
PSB913-1_map1	0003.CSV	933.417	-0.00905741
PSB913-1_map1	0003.CSV	937.274	-0.00898342
PSB913-1_map1	0003.CSV	941.131	-0.00869982
PSB913-1_map1	0003.CSV	944.989	-0.0084475
PSB913-1_map1	0003.CSV	948.846	-0.00818004
PSB913-1_map1	0003.CSV	952.703	-0.00798146
PSB913-1_map1	0003.CSV	956.56	-0.00770574
PSB913-1_map1	0003.CSV	960.417	-0.00769525
PSB913-1_map1	0003.CSV	964.274	-0.00753754
PSB913-1_map1	0003.CSV	968.131	-0.0073052
PSB913-1_map1	0003.CSV	971.988	-0.00685515
PSB913-1_map1	0003.CSV	975.845	-0.0064775
PSB913-1_map1	0003.CSV	979.702	-0.00602411
PSB913-1_map1	0003.CSV	983.559	-0.00572939
PSB913-1_map1	0003.CSV	987.417	-0.00524634
PSB913-1_map1	0003.CSV	991.274	-0.00480398
PSB913-1_map1	0003.CSV	995.131	-0.00436947
PSB913-1_map1	0003.CSV	998.988	-0.00418255
PSB913-1_map1	0003.CSV	1002.85	-0.00385639
PSB913-1_map1	0003.CSV	1006.7	-0.00362086
PSB913-1_map1	0003.CSV	1010.56	-0.00324236
PSB913-1_map1	0003.CSV	1014.42	-0.00298099
PSB913-1_map1	0003.CSV	1018.27	-0.00259188
PSB913-1_map1	0003.CSV	1022.13	-0.00220444
PSB913-1_map1	0003.CSV	1025.99	-0.00174807
PSB913-1_map1	0003.CSV	1029.85	-0.00156402
PSB913-1_map1	0003.CSV	1033.7	-0.00126513
PSB913-1_map1	0003.CSV	1037.56	-0.00096257
PSB913-1_map1	0003.CSV	1041.42	-0.00052221
PSB913-1_map1	0003.CSV	1045.27	-0.000347371
PSB913-1_map1	0003.CSV	1049.13	-0.000223399
PSB913-1_map1	0003.CSV	1052.99	-0.000182928
PSB913-1_map1	0003.CSV	1056.84	8.6853e-05
PSB913-1_map1	0003.CSV	1060.7	0.000152477
PSB913-1_map1	0003.CSV	1064.56	0.000277288
PSB913-1_map1	0003.CSV	1068.42	0.000395005
PSB913-1_map1	0003.CSV	1072.27	0.00076969
PSB913-1_map1	0003.CSV	1076.13	0.00154477
PSB913-1_map1	0003.CSV	1079.99	0.00361545
PSB913-1_map1	0003.CSV	1083.84	0.00321207
PSB913-1_map1	0003.CSV	1087.7	-0.000249924
PSB913-1_map1	0003.CSV	1091.56	-0.00213392
PSB913-1_map1	0003.CSV	1095.41	-0.00238726
PSB913-1_map1	0003.CSV	1099.27	-0.00245333
PSB913-1_map1	0003.CSV	1103.13	-0.00240295
PSB913-1_map1	0003.CSV	1106.99	-0.00247013
PSB913-1_map1	0003.CSV	1110.84	-0.00237777
PSB913-1_map1	0003.CSV	1114.7	-0.0023231
PSB913-1_map1	0003.CSV	1118.56	-0.0022816
PSB913-1_map1	0003.CSV	1122.41	-0.00241758
PSB913-1_map1	0003.CSV	1126.27	-0.00250357
PSB913-1_map1	0003.CSV	1130.13	-0.00269792
PSB913-1_map1	0003.CSV	1133.99	-0.00282899
PSB913-1_map1	0003.CSV	1137.84	-0.00299507
PSB913-1_map1	0003.CSV	1141.7	-0.00302251
PSB913-1_map1	0003.CSV	1145.56	-0.00312362
PSB913-1_map1	0003.CSV	1149.41	-0.00302561
PSB913-1_map1	0003.CSV	1153.27	-0.00289131
PSB913-1_map1	0003.CSV	1157.13	-0.00270128
PSB913-1_map1	0003.CSV	1160.99	-0.00269526
PSB913-1_map1	0003.CSV	1164.84	-0.00272344
PSB913-1_map1	0003.CSV	1168.7	-0.00280934
PSB913-1_map1	0003.CSV	1172.56	-0.0027537
PSB913-1_map1	0003.CSV	1176.41	-0.00268357
PSB913-1_map1	0003.CSV	1180.27	-0.00258401
PSB913-1_map1	0003.CSV	1184.13	-0.00267296
PSB913-1_map1	0003.CSV	1187.99	-0.00269094
PSB913-1_map1	0003.CSV	1191.84	-0.0028043
PSB913-1_map1	0003.CSV	1195.7	-0.00279469
PSB913-1_map1	0003.CSV	1199.56	-0.00275765
PSB913-1_map1	0003.CSV	1203.41	-0.00256968
PSB913-1_map1	0003.CSV	1207.27	-0.00237836
PSB913-1_map1	0003.CSV	1211.13	-0.00205989
PSB913-1_map1	0003.CSV	1214.98	-0.00182358
PSB913-1_map1	0003.CSV	1218.84	-0.00153563
PSB913-1_map1	0003.CSV	1222.7	-0.001317
PSB913-1_map1	0003.CSV	1226.56	-0.000946204
PSB913-1_map1	0003.CSV	1230.41	-0.00065847
PSB913-1_map1	0003.CSV	1234.27	-0.000408946
PSB913-1_map1	0003.CSV	1238.13	-0.000260753
PSB913-1_map1	0003.CSV	1241.98	-4.56563e-05
PSB913-1_map1	0003.CSV	1245.84	0.00010687
PSB913-1_map1	0003.CSV	1249.7	0.0002999
PSB913-1_map1	0003.CSV	1253.56	0.000265054
PSB913-1_map1	0003.CSV	1257.41	0.00011562
PSB913-1_map1	0003.CSV	1261.27	5.68617e-05
PSB913-1_map1	0003.CSV	1265.13	0.000458983
PSB913-1_map1	0003.CSV	1268.98	0.00104681
PSB913-1_map1	0003.CSV	1272.84	0.0016908
PSB913-1_map1	0003.CSV	1276.7	0.00198575
PSB913-1_map1	0003.CSV	1280.56	0.00228469
PSB913-1_map1	0003.CSV	1284.41	0.00259674
PSB913-1_map1	0003.CSV	1288.27	0.00298704
PSB913-1_map1	0003.CSV	1292.13	0.00326655
PSB913-1_map1	0003.CSV	1295.98	0.00363326
PSB913-1_map1	0003.CSV	1299.84	0.00396711
PSB913-1_map1	0003.CSV	1303.7	0.00435587
PSB913-1_map1	0003.CSV	1307.56	0.00465906
PSB913-1_map1	0003.CSV	1311.41	0.00505957
PSB913-1_map1	0003.CSV	1315.27	0.0053763
PSB913-1_map1	0003.CSV	1319.13	0.00589038
PSB913-1_map1	0003.CSV	1322.98	0.006298
PSB913-1_map1	0003.CSV	1326.84	0.00677901
PSB913-1_map1	0003.CSV	1330.7	0.00725351
PSB913-1_map1	0003.CSV	1334.56	0.0077837
PSB913-1_map1	0003.CSV	1338.41	0.00854195
PSB913-1_map1	0003.CSV	1342.27	0.00949062
PSB913-1_map1	0003.CSV	1346.13	0.0100076
PSB913-1_map1	0003.CSV	1349.98	0.0107863
PSB913-1_map1	0003.CSV	1353.84	0.0115905
PSB913-1_map1	0003.CSV	1357.7	0.0124964
PSB913-1_map1	0003.CSV	1361.56	0.01352
PSB913-1_map1	0003.CSV	1365.41	0.0147438
PSB913-1_map1	0003.CSV	1369.27	0.0155155
PSB913-1_map1	0003.CSV	1373.13	0.016726
PSB913-1_map1	0003.CSV	1376.98	0.0181671
PSB913-1_map1	0003.CSV	1380.84	0.019344
PSB913-1_map1	0003.CSV	1384.7	0.0203162
PSB913-1_map1	0003.CSV	1388.56	0.0217337
PSB913-1_map1	0003.CSV	1392.41	0.0226093
PSB913-1_map1	0003.CSV	1396.27	0.0239074
PSB913-1_map1	0003.CSV	1400.13	0.0251938
PSB913-1_map1	0003.CSV	1403.98	0.0262876
PSB913-1_map1	0003.CSV	1407.84	0.0272769
PSB913-1_map1	0003.CSV	1411.7	0.0282854
PSB913-1_map1	0003.CSV	1415.55	0.0291578
PSB913-1_map1	0003.CSV	1419.41	0.0308711
PSB913-1_map1	0003.CSV	1423.27	0.0322174
PSB913-1_map1	0003.CSV	1427.12	0.0332832
PSB913-1_map1	0003.CSV	1430.98	0.0342658
PSB913-1_map1	0003.CSV	1434.84	0.0357847
PSB913-1_map1	0003.CSV	1438.7	0.0372809
PSB913-1_map1	0003.CSV	1442.55	0.0380026
PSB913-1_map1	0003.CSV	1446.41	0.0381732
PSB913-1_map1	0003.CSV	1450.27	0.0383539
PSB913-1_map1	0003.CSV	1454.12	0.0379035
PSB913-1_map1	0003.CSV	1457.98	0.0380877
PSB913-1_map1	0003.CSV	1461.84	0.037863
PSB913-1_map1	0003.CSV	1465.7	0.0379315
PSB913-1_map1	0003.CSV	1469.55	0.0374261
PSB913-1_map1	0003.CSV	1473.41	0.0364584
PSB913-1_map1	0003.CSV	1477.27	0.0345066
PSB913-1_map1	0003.CSV	1481.12	0.0326819
PSB913-1_map1	0003.CSV	1484.98	0.0305692
PSB913-1_map1	0003.CSV	1488.84	0.0282106
PSB913-1_map1	0003.CSV	1492.7	0.0255591
PSB913-1_map1	0003.CSV	1496.55	0.0234289
PSB913-1_map1	0003.CSV	1500.41	0.0209472
PSB913-1_map1	0003.CSV	1504.27	0.0190666
PSB913-1_map1	0003.CSV	1508.12	0.0158799
PSB913-1_map1	0003.CSV	1511.98	0.0134296
PSB913-1_map1	0003.CSV	1515.84	0.0111497
PSB913-1_map1	0003.CSV	1519.7	0.0082413
PSB913-1_map1	0003.CSV	1523.55	0.00511341
PSB913-1_map1	0003.CSV	1527.41	0.00300172
PSB913-1_map1	0003.CSV	1531.27	0.000812477
PSB913-1_map1	0003.CSV	1535.12	-0.00134481
PSB913-1_map1	0003.CSV	1538.98	-0.00351652
PSB913-1_map1	0003.CSV	1542.84	-0.00575675
PSB913-1_map1	0003.CSV	1546.7	-0.0074014
PSB913-1_map1	0003.CSV	1550.55	-0.0087071
PSB913-1_map1	0003.CSV	1554.41	-0.0101485
PSB913-1_map1	0003.CSV	1558.27	-0.01136
PSB913-1_map1	0003.CSV	1562.12	-0.0127294
PSB913-1_map1	0003.CSV	1565.98	-0.0140072
PSB913-1_map1	0003.CSV	1569.84	-0.0155186
PSB913-1_map1	0003.CSV	1573.69	-0.0168407
PSB913-1_map1	0003.CSV	1577.55	-0.0181754
PSB913-1_map1	0003.CSV	1581.41	-0.0193043
PSB913-1_map1	0003.CSV	1585.27	-0.0201053
PSB913-1_map1	0003.CSV	1589.12	-0.0206208
PSB913-1_map1	0003.CSV	1592.98	-0.0209479
PSB913-1_map1	0003.CSV	1596.84	-0.0211258
PSB913-1_map1	0003.CSV	1600.69	-0.0212708
PSB913-1_map1	0003.CSV	1604.55	-0.021256
PSB913-1_map1	0003.CSV	1608.41	-0.0212884
PSB913-1_map1	0003.CSV	1612.27	-0.0215432
PSB913-1_map1	0003.CSV	1616.12	-0.0217617
PSB913-1_map1	0003.CSV	1619.98	-0.0218139
PSB913-1_map1	0003.CSV	1623.84	-0.0219287
PSB913-1_map1	0003.CSV	1627.69	-0.0219924
PSB913-1_map1	0003.CSV	1631.55	-0.0224198
PSB913-1_map1	0003.CSV	1635.41	-0.0222724
PSB913-1_map1	0003.CSV	1639.27	-0.0220214
PSB913-1_map1	0003.CSV	1643.12	-0.0224814
PSB913-1_map1	0003.CSV	1646.98	-0.0226654
PSB913-1_map1	0003.CSV	1650.84	-0.0223461
PSB913-1_map1	0003.CSV	1654.69	-0.0219144
PSB913-1_map1	0003.CSV	1658.55	-0.0222403
PSB913-1_map1	0003.CSV	1662.41	-0.0224919
PSB913-1_map1	0003.CSV	1666.27	-0.0225859
PSB913-1_map1	0003.CSV	1670.12	-0.0226605
PSB913-1_map1	0003.CSV	1673.98	-0.0224998
PSB913-1_map1	0003.CSV	1677.84	-0.0227696
PSB913-1_map1	0003.CSV	1681.69	-0.0230054
PSB913-1_map1	0003.CSV	1685.55	-0.0225717
PSB913-1_map1	0003.CSV	1689.41	-0.0225405
PSB913-1_map1	0003.CSV	1693.27	-0.023129
PSB913-1_map1	0003.CSV	1697.12	-0.0233169
PSB913-1_map1	0003.CSV	1700.98	-0.0228248
PSB913-1_map1	0003.CSV	1704.84	-0.022794
PSB913-1_map1	0003.CSV	1708.69	-0.0230775
PSB913-1_map1	0003.CSV	1712.55	-0.0234339
PSB913-1_map1	0003.CSV	1716.41	-0.0231201
PSB913-1_map1	0003.CSV	1720.27	-0.0228152
PSB913-1_map1	0003.CSV	1724.12	-0.0232684
[truncated: 30,795 more rows]

## Sheet: PSB913-1_map2
Map	Select spectrum number	Wavenumbers	Absorbance
PSB913-1_map2	0001.CSV	674.992	0.0204925
PSB913-1_map2	0001.CSV	678.849	0.0227383
PSB913-1_map2	0001.CSV	682.706	0.0241378
PSB913-1_map2	0001.CSV	686.563	0.0272732
PSB913-1_map2	0001.CSV	690.42	0.0302791
PSB913-1_map2	0001.CSV	694.277	0.0415454
PSB913-1_map2	0001.CSV	698.134	0.0566289
PSB913-1_map2	0001.CSV	701.991	0.0517422
PSB913-1_map2	0001.CSV	705.849	0.0411339
PSB913-1_map2	0001.CSV	709.706	0.0600519
PSB913-1_map2	0001.CSV	713.563	0.0698254
PSB913-1_map2	0001.CSV	717.42	0.041696
PSB913-1_map2	0001.CSV	721.277	0.0165098
PSB913-1_map2	0001.CSV	725.134	0.010764
PSB913-1_map2	0001.CSV	728.991	0.00991395
PSB913-1_map2	0001.CSV	732.848	0.0102006
PSB913-1_map2	0001.CSV	736.705	0.0102369
PSB913-1_map2	0001.CSV	740.562	0.011355
PSB913-1_map2	0001.CSV	744.42	0.0116124
PSB913-1_map2	0001.CSV	748.277	0.0126109
PSB913-1_map2	0001.CSV	752.134	0.0126614
PSB913-1_map2	0001.CSV	755.991	0.013304
PSB913-1_map2	0001.CSV	759.848	0.0134922
PSB913-1_map2	0001.CSV	763.705	0.0145736
PSB913-1_map2	0001.CSV	767.562	0.0150841
PSB913-1_map2	0001.CSV	771.419	0.0159453
PSB913-1_map2	0001.CSV	775.276	0.0160705
PSB913-1_map2	0001.CSV	779.133	0.016562
PSB913-1_map2	0001.CSV	782.99	0.0166327
PSB913-1_map2	0001.CSV	786.848	0.0172245
PSB913-1_map2	0001.CSV	790.705	0.0176268
PSB913-1_map2	0001.CSV	794.562	0.0190223
PSB913-1_map2	0001.CSV	798.419	0.0196659
PSB913-1_map2	0001.CSV	802.276	0.0209566
PSB913-1_map2	0001.CSV	806.133	0.0222693
PSB913-1_map2	0001.CSV	809.99	0.0250811
PSB913-1_map2	0001.CSV	813.847	0.0278177
PSB913-1_map2	0001.CSV	817.704	0.0308986
PSB913-1_map2	0001.CSV	821.562	0.0339363
PSB913-1_map2	0001.CSV	825.419	0.0389118
PSB913-1_map2	0001.CSV	829.276	0.0452183
PSB913-1_map2	0001.CSV	833.133	0.0548746
PSB913-1_map2	0001.CSV	836.99	0.0697929
PSB913-1_map2	0001.CSV	840.847	0.0916289
PSB913-1_map2	0001.CSV	844.704	0.113506
PSB913-1_map2	0001.CSV	848.561	0.141066
PSB913-1_map2	0001.CSV	852.418	0.165712
PSB913-1_map2	0001.CSV	856.275	0.162806
PSB913-1_map2	0001.CSV	860.132	0.135443
PSB913-1_map2	0001.CSV	863.99	0.102018
PSB913-1_map2	0001.CSV	867.847	0.0700548
PSB913-1_map2	0001.CSV	871.704	0.0445491
PSB913-1_map2	0001.CSV	875.561	0.0268891
PSB913-1_map2	0001.CSV	879.418	0.0180015
PSB913-1_map2	0001.CSV	883.275	0.0139118
PSB913-1_map2	0001.CSV	887.132	0.0120113
PSB913-1_map2	0001.CSV	890.989	0.0112137
PSB913-1_map2	0001.CSV	894.846	0.0113714
PSB913-1_map2	0001.CSV	898.703	0.0114347
PSB913-1_map2	0001.CSV	902.561	0.011899
PSB913-1_map2	0001.CSV	906.418	0.012487
PSB913-1_map2	0001.CSV	910.275	0.0125795
PSB913-1_map2	0001.CSV	914.132	0.0119008
PSB913-1_map2	0001.CSV	917.989	0.0120679
PSB913-1_map2	0001.CSV	921.846	0.0122824
PSB913-1_map2	0001.CSV	925.703	0.0126665
PSB913-1_map2	0001.CSV	929.56	0.0127767
PSB913-1_map2	0001.CSV	933.417	0.013052
PSB913-1_map2	0001.CSV	937.274	0.0131658
PSB913-1_map2	0001.CSV	941.131	0.0135423
PSB913-1_map2	0001.CSV	944.989	0.0137038
PSB913-1_map2	0001.CSV	948.846	0.0140913
PSB913-1_map2	0001.CSV	952.703	0.0142361
PSB913-1_map2	0001.CSV	956.56	0.0146085
PSB913-1_map2	0001.CSV	960.417	0.0147866
PSB913-1_map2	0001.CSV	964.274	0.0152771
PSB913-1_map2	0001.CSV	968.131	0.0156543
PSB913-1_map2	0001.CSV	971.988	0.0162585
PSB913-1_map2	0001.CSV	975.845	0.0167025
PSB913-1_map2	0001.CSV	979.702	0.0175129
PSB913-1_map2	0001.CSV	983.559	0.0181183
PSB913-1_map2	0001.CSV	987.417	0.0189145
PSB913-1_map2	0001.CSV	991.274	0.0195685
PSB913-1_map2	0001.CSV	995.131	0.020313
PSB913-1_map2	0001.CSV	998.988	0.0206948
PSB913-1_map2	0001.CSV	1002.85	0.0212917
PSB913-1_map2	0001.CSV	1006.7	0.0217816
PSB913-1_map2	0001.CSV	1010.56	0.0224731
PSB913-1_map2	0001.CSV	1014.42	0.0231069
PSB913-1_map2	0001.CSV	1018.27	0.0241457
PSB913-1_map2	0001.CSV	1022.13	0.024891
PSB913-1_map2	0001.CSV	1025.99	0.0258521
PSB913-1_map2	0001.CSV	1029.85	0.026584
PSB913-1_map2	0001.CSV	1033.7	0.0274983
PSB913-1_map2	0001.CSV	1037.56	0.0280769
PSB913-1_map2	0001.CSV	1041.42	0.0288487
PSB913-1_map2	0001.CSV	1045.27	0.029452
PSB913-1_map2	0001.CSV	1049.13	0.0303255
PSB913-1_map2	0001.CSV	1052.99	0.0309943
PSB913-1_map2	0001.CSV	1056.84	0.0320495
PSB913-1_map2	0001.CSV	1060.7	0.0329611
PSB913-1_map2	0001.CSV	1064.56	0.03424
PSB913-1_map2	0001.CSV	1068.42	0.0353733
PSB913-1_map2	0001.CSV	1072.27	0.0369619
PSB913-1_map2	0001.CSV	1076.13	0.0400901
PSB913-1_map2	0001.CSV	1079.99	0.0479726
PSB913-1_map2	0001.CSV	1083.84	0.0507319
PSB913-1_map2	0001.CSV	1087.7	0.0414956
PSB913-1_map2	0001.CSV	1091.56	0.0337241
PSB913-1_map2	0001.CSV	1095.41	0.031793
PSB913-1_map2	0001.CSV	1099.27	0.0313378
PSB913-1_map2	0001.CSV	1103.13	0.0315362
PSB913-1_map2	0001.CSV	1106.99	0.0316148
PSB913-1_map2	0001.CSV	1110.84	0.0319407
PSB913-1_map2	0001.CSV	1114.7	0.0320033
PSB913-1_map2	0001.CSV	1118.56	0.0321714
PSB913-1_map2	0001.CSV	1122.41	0.0321243
PSB913-1_map2	0001.CSV	1126.27	0.0322116
PSB913-1_map2	0001.CSV	1130.13	0.0321195
PSB913-1_map2	0001.CSV	1133.99	0.0321692
PSB913-1_map2	0001.CSV	1137.84	0.0321209
PSB913-1_map2	0001.CSV	1141.7	0.0324674
PSB913-1_map2	0001.CSV	1145.56	0.0326957
PSB913-1_map2	0001.CSV	1149.41	0.0332162
PSB913-1_map2	0001.CSV	1153.27	0.0336974
PSB913-1_map2	0001.CSV	1157.13	0.0344643
PSB913-1_map2	0001.CSV	1160.99	0.0349845
PSB913-1_map2	0001.CSV	1164.84	0.0355586
PSB913-1_map2	0001.CSV	1168.7	0.035787
PSB913-1_map2	0001.CSV	1172.56	0.0361097
PSB913-1_map2	0001.CSV	1176.41	0.0362439
PSB913-1_map2	0001.CSV	1180.27	0.036514
PSB913-1_map2	0001.CSV	1184.13	0.0366173
PSB913-1_map2	0001.CSV	1187.99	0.0369549
PSB913-1_map2	0001.CSV	1191.84	0.0370863
PSB913-1_map2	0001.CSV	1195.7	0.0375614
PSB913-1_map2	0001.CSV	1199.56	0.0379263
PSB913-1_map2	0001.CSV	1203.41	0.0385255
PSB913-1_map2	0001.CSV	1207.27	0.0389949
PSB913-1_map2	0001.CSV	1211.13	0.0397417
PSB913-1_map2	0001.CSV	1214.98	0.0403715
PSB913-1_map2	0001.CSV	1218.84	0.0413106
PSB913-1_map2	0001.CSV	1222.7	0.0421616
PSB913-1_map2	0001.CSV	1226.56	0.0432339
PSB913-1_map2	0001.CSV	1230.41	0.0440597
PSB913-1_map2	0001.CSV	1234.27	0.0450571
PSB913-1_map2	0001.CSV	1238.13	0.0458875
PSB913-1_map2	0001.CSV	1241.98	0.0469955
PSB913-1_map2	0001.CSV	1245.84	0.0478676
PSB913-1_map2	0001.CSV	1249.7	0.0488627
PSB913-1_map2	0001.CSV	1253.56	0.0496861
PSB913-1_map2	0001.CSV	1257.41	0.0508454
PSB913-1_map2	0001.CSV	1261.27	0.0519084
PSB913-1_map2	0001.CSV	1265.13	0.0532521
PSB913-1_map2	0001.CSV	1268.98	0.0544164
PSB913-1_map2	0001.CSV	1272.84	0.0558536
PSB913-1_map2	0001.CSV	1276.7	0.0569959
PSB913-1_map2	0001.CSV	1280.56	0.0583482
PSB913-1_map2	0001.CSV	1284.41	0.0593667
PSB913-1_map2	0001.CSV	1288.27	0.0606247
PSB913-1_map2	0001.CSV	1292.13	0.061774
PSB913-1_map2	0001.CSV	1295.98	0.063237
PSB913-1_map2	0001.CSV	1299.84	0.0645985
PSB913-1_map2	0001.CSV	1303.7	0.0663422
PSB913-1_map2	0001.CSV	1307.56	0.0678666
PSB913-1_map2	0001.CSV	1311.41	0.0697254
PSB913-1_map2	0001.CSV	1315.27	0.071523
PSB913-1_map2	0001.CSV	1319.13	0.0738313
PSB913-1_map2	0001.CSV	1322.98	0.0758668
PSB913-1_map2	0001.CSV	1326.84	0.0782064
PSB913-1_map2	0001.CSV	1330.7	0.0805536
PSB913-1_map2	0001.CSV	1334.56	0.0832158
PSB913-1_map2	0001.CSV	1338.41	0.086344
PSB913-1_map2	0001.CSV	1342.27	0.0903592
PSB913-1_map2	0001.CSV	1346.13	0.0934074
PSB913-1_map2	0001.CSV	1349.98	0.0971486
PSB913-1_map2	0001.CSV	1353.84	0.100955
PSB913-1_map2	0001.CSV	1357.7	0.105142
PSB913-1_map2	0001.CSV	1361.56	0.109702
PSB913-1_map2	0001.CSV	1365.41	0.115257
PSB913-1_map2	0001.CSV	1369.27	0.119387
PSB913-1_map2	0001.CSV	1373.13	0.124659
PSB913-1_map2	0001.CSV	1376.98	0.130076
PSB913-1_map2	0001.CSV	1380.84	0.134675
PSB913-1_map2	0001.CSV	1384.7	0.138565
PSB913-1_map2	0001.CSV	1388.56	0.143838
PSB913-1_map2	0001.CSV	1392.41	0.147609
PSB913-1_map2	0001.CSV	1396.27	0.152745
PSB913-1_map2	0001.CSV	1400.13	0.157466
PSB913-1_map2	0001.CSV	1403.98	0.161731
PSB913-1_map2	0001.CSV	1407.84	0.165607
PSB913-1_map2	0001.CSV	1411.7	0.16964
PSB913-1_map2	0001.CSV	1415.55	0.172628
PSB913-1_map2	0001.CSV	1419.41	0.177892
PSB913-1_map2	0001.CSV	1423.27	0.181937
PSB913-1_map2	0001.CSV	1427.12	0.186295
PSB913-1_map2	0001.CSV	1430.98	0.190796
PSB913-1_map2	0001.CSV	1434.84	0.197969
PSB913-1_map2	0001.CSV	1438.7	0.206546
PSB913-1_map2	0001.CSV	1442.55	0.213588
PSB913-1_map2	0001.CSV	1446.41	0.217828
PSB913-1_map2	0001.CSV	1450.27	0.219871
PSB913-1_map2	0001.CSV	1454.12	0.217161
PSB913-1_map2	0001.CSV	1457.98	0.211957
PSB913-1_map2	0001.CSV	1461.84	0.206175
PSB913-1_map2	0001.CSV	1465.7	0.201998
PSB913-1_map2	0001.CSV	1469.55	0.194633
PSB913-1_map2	0001.CSV	1473.41	0.180964
PSB913-1_map2	0001.CSV	1477.27	0.163524
PSB913-1_map2	0001.CSV	1481.12	0.152531
PSB913-1_map2	0001.CSV	1484.98	0.141991
PSB913-1_map2	0001.CSV	1488.84	0.130024
PSB913-1_map2	0001.CSV	1492.7	0.118397
PSB913-1_map2	0001.CSV	1496.55	0.110539
PSB913-1_map2	0001.CSV	1500.41	0.101517
PSB913-1_map2	0001.CSV	1504.27	0.0963711
PSB913-1_map2	0001.CSV	1508.12	0.086371
PSB913-1_map2	0001.CSV	1511.98	0.0796106
PSB913-1_map2	0001.CSV	1515.84	0.0748439
PSB913-1_map2	0001.CSV	1519.7	0.0685318
PSB913-1_map2	0001.CSV	1523.55	0.060593
PSB913-1_map2	0001.CSV	1527.41	0.0556021
PSB913-1_map2	0001.CSV	1531.27	0.0510059
PSB913-1_map2	0001.CSV	1535.12	0.0468059
PSB913-1_map2	0001.CSV	1538.98	0.0421545
PSB913-1_map2	0001.CSV	1542.84	0.0351839
PSB913-1_map2	0001.CSV	1546.7	0.0305763
PSB913-1_map2	0001.CSV	1550.55	0.0273628
PSB913-1_map2	0001.CSV	1554.41	0.0236692
PSB913-1_map2	0001.CSV	1558.27	0.0188924
PSB913-1_map2	0001.CSV	1562.12	0.0141141
PSB913-1_map2	0001.CSV	1565.98	0.0117482
PSB913-1_map2	0001.CSV	1569.84	0.00833451
PSB913-1_map2	0001.CSV	1573.69	0.00515227
PSB913-1_map2	0001.CSV	1577.55	0.000989116
PSB913-1_map2	0001.CSV	1581.41	-0.00244156
PSB913-1_map2	0001.CSV	1585.27	-0.00536957
PSB913-1_map2	0001.CSV	1589.12	-0.00787094
PSB913-1_map2	0001.CSV	1592.98	-0.00977371
PSB913-1_map2	0001.CSV	1596.84	-0.0110445
PSB913-1_map2	0001.CSV	1600.69	-0.0121651
PSB913-1_map2	0001.CSV	1604.55	-0.0129298
PSB913-1_map2	0001.CSV	1608.41	-0.0137144
PSB913-1_map2	0001.CSV	1612.27	-0.0142909
PSB913-1_map2	0001.CSV	1616.12	-0.0149266
PSB913-1_map2	0001.CSV	1619.98	-0.0152635
PSB913-1_map2	0001.CSV	1623.84	-0.015713
PSB913-1_map2	0001.CSV	1627.69	-0.0159765
PSB913-1_map2	0001.CSV	1631.55	-0.0165607
PSB913-1_map2	0001.CSV	1635.41	-0.0167656
PSB913-1_map2	0001.CSV	1639.27	-0.0167841
PSB913-1_map2	0001.CSV	1643.12	-0.0171125
PSB913-1_map2	0001.CSV	1646.98	-0.017523
PSB913-1_map2	0001.CSV	1650.84	-0.0174224
PSB913-1_map2	0001.CSV	1654.69	-0.0174336
PSB913-1_map2	0001.CSV	1658.55	-0.0177518
PSB913-1_map2	0001.CSV	1662.41	-0.0182535
PSB913-1_map2	0001.CSV	1666.27	-0.0184268
PSB913-1_map2	0001.CSV	1670.12	-0.0186924
PSB913-1_map2	0001.CSV	1673.98	-0.0186926
PSB913-1_map2	0001.CSV	1677.84	-0.0190992
PSB913-1_map2	0001.CSV	1681.69	-0.0194223
PSB913-1_map2	0001.CSV	1685.55	-0.0196356
PSB913-1_map2	0001.CSV	1689.41	-0.0197675
PSB913-1_map2	0001.CSV	1693.27	-0.0204372
PSB913-1_map2	0001.CSV	1697.12	-0.0208685
PSB913-1_map2	0001.CSV	1700.98	-0.0211404
PSB913-1_map2	0001.CSV	1704.84	-0.0212231
PSB913-1_map2	0001.CSV	1708.69	-0.0216697
PSB913-1_map2	0001.CSV	1712.55	-0.0220281
PSB913-1_map2	0001.CSV	1716.41	-0.0222408
PSB913-1_map2	0001.CSV	1720.27	-0.0219174
PSB913-1_map2	0001.CSV	1724.12	-0.0222109
PSB913-1_map2	0001.CSV	1727.98	-0.0224825
PSB913-1_map2	0001.CSV	1731.84	-0.0228122
PSB913-1_map2	0001.CSV	1735.69	-0.0227001
PSB913-1_map2	0001.CSV	1739.55	-0.0229943
PSB913-1_map2	0001.CSV	1743.41	-0.0231309
PSB913-1_map2	0001.CSV	1747.27	-0.0232939
PSB913-1_map2	0001.CSV	1751.12	-0.02317
PSB913-1_map2	0001.CSV	1754.98	-0.0235247
PSB913-1_map2	0001.CSV	1758.84	-0.0235931
PSB913-1_map2	0001.CSV	1762.69	-0.0235069
PSB913-1_map2	0001.CSV	1766.55	-0.0234308
PSB913-1_map2	0001.CSV	1770.41	-0.0230219
PSB913-1_map2	0001.CSV	1774.26	-0.0209194
PSB913-1_map2	0001.CSV	1778.12	-0.0188109
PSB913-1_map2	0001.CSV	1781.98	-0.0163294
PSB913-1_map2	0001.CSV	1785.84	-0.015041
PSB913-1_map2	0001.CSV	1789.69	-0.0154209
PSB913-1_map2	0001.CSV	1793.55	-0.0176318
PSB913-1_map2	0001.CSV	1797.41	-0.0195954
PSB913-1_map2	0001.CSV	1801.26	-0.0214439
PSB913-1_map2	0001.CSV	1805.12	-0.0227879
PSB913-1_map2	0001.CSV	1808.98	-0.0236567
PSB913-1_map2	0001.CSV	1812.84	-0.0239257
PSB913-1_map2	0001.CSV	1816.69	-0.0242389
PSB913-1_map2	0001.CSV	1820.55	-0.0243891
PSB913-1_map2	0001.CSV	1824.41	-0.0246363
PSB913-1_map2	0001.CSV	1828.26	-0.0245191
PSB913-1_map2	0001.CSV	1832.12	-0.0245509
PSB913-1_map2	0001.CSV	1835.98	-0.0246378
PSB913-1_map2	0001.CSV	1839.84	-0.0248435
PSB913-1_map2	0001.CSV	1843.69	-0.0246752
PSB913-1_map2	0001.CSV	1847.55	-0.0245786
PSB913-1_map2	0001.CSV	1851.41	-0.024575
PSB913-1_map2	0001.CSV	1855.26	-0.024687
PSB913-1_map2	0001.CSV	1859.12	-0.0246523
PSB913-1_map2	0001.CSV	1862.98	-0.02476
PSB913-1_map2	0001.CSV	1866.84	-0.0246269
PSB913-1_map2	0001.CSV	1870.69	-0.0244844
PSB913-1_map2	0001.CSV	1874.55	-0.02454
PSB913-1_map2	0001.CSV	1878.41	-0.0246662
PSB913-1_map2	0001.CSV	1882.26	-0.0245743
PSB913-1_map2	0001.CSV	1886.12	-0.024613
PSB913-1_map2	0001.CSV	1889.98	-0.0245392
PSB913-1_map2	0001.CSV	1893.83	-0.0245822
PSB913-1_map2	0001.CSV	1897.69	-0.0245761
PSB913-1_map2	0001.CSV	1901.55	-0.0246763
PSB913-1_map2	0001.CSV	1905.41	-0.0246039
PSB913-1_map2	0001.CSV	1909.26	-0.0245611
PSB913-1_map2	0001.CSV	1913.12	-0.0245123
PSB913-1_map2	0001.CSV	1916.98	-0.0245876
PSB913-1_map2	0001.CSV	1920.83	-0.0244399
PSB913-1_map2	0001.CSV	1924.69	-0.0244472
PSB913-1_map2	0001.CSV	1928.55	-0.0244316
PSB913-1_map2	0001.CSV	1932.4	-0.0244832
PSB913-1_map2	0001.CSV	1936.26	-0.0244366
PSB913-1_map2	0001.CSV	1940.12	-0.0245516
PSB913-1_map2	0001.CSV	1943.98	-0.0243821
PSB913-1_map2	0001.CSV	1947.83	-0.0243401
PSB913-1_map2	0001.CSV	1951.69	-0.0242937
PSB913-1_map2	0001.CSV	1955.55	-0.0243358
PSB913-1_map2	0001.CSV	1959.4	-0.0243111
PSB913-1_map2	0001.CSV	1963.26	-0.0244063
PSB913-1_map2	0001.CSV	1967.12	-0.0243037
PSB913-1_map2	0001.CSV	1970.98	-0.0243188
PSB913-1_map2	0001.CSV	1974.83	-0.0242596
PSB913-1_map2	0001.CSV	1978.69	-0.0242939
PSB913-1_map2	0001.CSV	1982.55	-0.0242541
PSB913-1_map2	0001.CSV	1986.4	-0.024284
PSB913-1_map2	0001.CSV	1990.26	-0.0241701
PSB913-1_map2	0001.CSV	1994.12	-0.0241546
PSB913-1_map2	0001.CSV	1997.98	-0.0240944
PSB913-1_map2	0001.CSV	2001.83	-0.0241112
PSB913-1_map2	0001.CSV	2005.69	-0.0239978
PSB913-1_map2	0001.CSV	2009.55	-0.0240005
PSB913-1_map2	0001.CSV	2013.4	-0.0239366
PSB913-1_map2	0001.CSV	2017.26	-0.0238876
PSB913-1_map2	0001.CSV	2021.12	-0.0237579
PSB913-1_map2	0001.CSV	2024.97	-0.0237527
PSB913-1_map2	0001.CSV	2028.83	-0.0236919
PSB913-1_map2	0001.CSV	2032.69	-0.0237368
PSB913-1_map2	0001.CSV	2036.55	-0.0236014
PSB913-1_map2	0001.CSV	2040.4	-0.0235236
PSB913-1_map2	0001.CSV	2044.26	-0.0234058
PSB913-1_map2	0001.CSV	2048.12	-0.0234185
PSB913-1_map2	0001.CSV	2051.97	-0.0233629
PSB913-1_map2	0001.CSV	2055.83	-0.0233846
PSB913-1_map2	0001.CSV	2059.69	-0.0232902
PSB913-1_map2	0001.CSV	2063.55	-0.023261
PSB913-1_map2	0001.CSV	2067.4	-0.0231236
PSB913-1_map2	0001.CSV	2071.26	-0.0231471
PSB913-1_map2	0001.CSV	2075.12	-0.0230634
PSB913-1_map2	0001.CSV	2078.97	-0.023012
PSB913-1_map2	0001.CSV	2082.83	-0.0228623
PSB913-1_map2	0001.CSV	2086.69	-0.0228457
PSB913-1_map2	0001.CSV	2090.55	-0.0227121
PSB913-1_map2	0001.CSV	2094.4	-0.0226466
PSB913-1_map2	0001.CSV	2098.26	-0.0225168
PSB913-1_map2	0001.CSV	2102.12	-0.0224521
PSB913-1_map2	0001.CSV	2105.97	-0.0223284
PSB913-1_map2	0001.CSV	2109.83	-0.0223172
PSB913-1_map2	0001.CSV	2113.69	-0.0221875
PSB913-1_map2	0001.CSV	2117.55	-0.0221347
PSB913-1_map2	0001.CSV	2121.4	-0.0220252
PSB913-1_map2	0001.CSV	2125.26	-0.0220225
PSB913-1_map2	0001.CSV	2129.12	-0.0219144
PSB913-1_map2	0001.CSV	2132.97	-0.0218712
PSB913-1_map2	0001.CSV	2136.83	-0.0217758
PSB913-1_map2	0001.CSV	2140.69	-0.0217702
PSB913-1_map2	0001.CSV	2144.55	-0.0216798
PSB913-1_map2	0001.CSV	2148.4	-0.0216194
PSB913-1_map2	0001.CSV	2152.26	-0.021479
PSB913-1_map2	0001.CSV	2156.12	-0.0214471
PSB913-1_map2	0001.CSV	2159.97	-0.0214119
PSB913-1_map2	0001.CSV	2163.83	-0.0214732
PSB913-1_map2	0001.CSV	2167.69	-0.0213775
PSB913-1_map2	0001.CSV	2171.55	-0.0213184
PSB913-1_map2	0001.CSV	2175.4	-0.0212698
PSB913-1_map2	0001.CSV	2179.26	-0.0212798
PSB913-1_map2	0001.CSV	2183.12	-0.0212042
PSB913-1_map2	0001.CSV	2186.97	-0.0211675
PSB913-1_map2	0001.CSV	2190.83	-0.0211036
PSB913-1_map2	0001.CSV	2194.69	-0.0211849
PSB913-1_map2	0001.CSV	2198.55	-0.0211675
PSB913-1_map2	0001.CSV	2202.4	-0.0211612
PSB913-1_map2	0001.CSV	2206.26	-0.0211169
PSB913-1_map2	0001.CSV	2210.12	-0.0211665
PSB913-1_map2	0001.CSV	2213.97	-0.0211416
PSB913-1_map2	0001.CSV	2217.83	-0.0211381
PSB913-1_map2	0001.CSV	2221.69	-0.0211186
PSB913-1_map2	0001.CSV	2225.54	-0.0212148
PSB913-1_map2	0001.CSV	2229.4	-0.02122
PSB913-1_map2	0001.CSV	2233.26	-0.0212539
PSB913-1_map2	0001.CSV	2237.12	-0.0212618
PSB913-1_map2	0001.CSV	2240.97	-0.0213045
PSB913-1_map2	0001.CSV	2244.83	-0.0212746
PSB913-1_map2	0001.CSV	2248.69	-0.0213053
PSB913-1_map2	0001.CSV	2252.54	-0.0213033
PSB913-1_map2	0001.CSV	2256.4	-0.0214088
PSB913-1_map2	0001.CSV	2260.26	-0.0214355
PSB913-1_map2	0001.CSV	2264.11	-0.0214546
PSB913-1_map2	0001.CSV	2267.97	-0.0214408
PSB913-1_map2	0001.CSV	2271.83	-0.021469
PSB913-1_map2	0001.CSV	2275.69	-0.0213844
PSB913-1_map2	0001.CSV	2279.54	-0.0214165
PSB913-1_map2	0001.CSV	2283.4	-0.0215331
PSB913-1_map2	0001.CSV	2287.26	-0.0215926
PSB913-1_map2	0001.CSV	2291.11	-0.0214982
PSB913-1_map2	0001.CSV	2294.97	-0.0215738
PSB913-1_map2	0001.CSV	2298.83	-0.0216707
PSB913-1_map2	0001.CSV	2302.69	-0.0218263
PSB913-1_map2	0001.CSV	2306.54	-0.0218977
PSB913-1_map2	0001.CSV	2310.4	-0.0220251
PSB913-1_map2	0001.CSV	2314.26	-0.0221787
PSB913-1_map2	0001.CSV	2318.11	-0.0227959
PSB913-1_map2	0001.CSV	2321.97	-0.0236151
PSB913-1_map2	0001.CSV	2325.83	-0.0244152
PSB913-1_map2	0001.CSV	2329.69	-0.0248922
PSB913-1_map2	0001.CSV	2333.54	-0.0258132
PSB913-1_map2	0001.CSV	2337.4	-0.0262557
PSB913-1_map2	0001.CSV	2341.26	-0.0262485
PSB913-1_map2	0001.CSV	2345.11	-0.0242487
PSB913-1_map2	0001.CSV	2348.97	-0.0239204
PSB913-1_map2	0001.CSV	2352.83	-0.0263173
PSB913-1_map2	0001.CSV	2356.69	-0.0330551
PSB913-1_map2	0001.CSV	2360.54	-0.0363868
PSB913-1_map2	0001.CSV	2364.4	-0.0325265
PSB913-1_map2	0001.CSV	2368.26	-0.0270709
PSB913-1_map2	0001.CSV	2372.11	-0.0236217
PSB913-1_map2	0001.CSV	2375.97	-0.0219721
PSB913-1_map2	0001.CSV	2379.83	-0.0214878
PSB913-1_map2	0001.CSV	2383.69	-0.0214271
PSB913-1_map2	0001.CSV	2387.54	-0.0215952
PSB913-1_map2	0001.CSV	2391.4	-0.0216345
PSB913-1_map2	0001.CSV	2395.26	-0.0215891
PSB913-1_map2	0001.CSV	2399.11	-0.0215693
PSB913-1_map2	0001.CSV	2402.97	-0.0215869
PSB913-1_map2	0001.CSV	2406.83	-0.0215654
PSB913-1_map2	0001.CSV	2410.68	-0.0215473
PSB913-1_map2	0001.CSV	2414.54	-0.0215256
PSB913-1_map2	0001.CSV	2418.4	-0.0214485
PSB913-1_map2	0001.CSV	2422.26	-0.021328
PSB913-1_map2	0001.CSV	2426.11	-0.0212504
PSB913-1_map2	0001.CSV	2429.97	-0.0212199
PSB913-1_map2	0001.CSV	2433.83	-0.0211686
PSB913-1_map2	0001.CSV	2437.68	-0.0210615
PSB913-1_map2	0001.CSV	2441.54	-0.020944
PSB913-1_map2	0001.CSV	2445.4	-0.0208477
PSB913-1_map2	0001.CSV	2449.26	-0.0207539
PSB913-1_map2	0001.CSV	2453.11	-0.0206589
PSB913-1_map2	0001.CSV	2456.97	-0.020503
PSB913-1_map2	0001.CSV	2460.83	-0.0203929
PSB913-1_map2	0001.CSV	2464.68	-0.0202999
PSB913-1_map2	0001.CSV	2468.54	-0.0200886
PSB913-1_map2	0001.CSV	2472.4	-0.0198068
PSB913-1_map2	0001.CSV	2476.26	-0.0194675
PSB913-1_map2	0001.CSV	2480.11	-0.0190895
PSB913-1_map2	0001.CSV	2483.97	-0.0187656
PSB913-1_map2	0001.CSV	2487.83	-0.0184051
PSB913-1_map2	0001.CSV	2491.68	-0.0180458
PSB913-1_map2	0001.CSV	2495.54	-0.0178033
PSB913-1_map2	0001.CSV	2499.4	-0.0177463
PSB913-1_map2	0001.CSV	2503.26	-0.017793
PSB913-1_map2	0001.CSV	2507.11	-0.0178865
PSB913-1_map2	0001.CSV	2510.97	-0.0178734
PSB913-1_map2	0001.CSV	2514.83	-0.0177459
PSB913-1_map2	0001.CSV	2518.68	-0.0175668
PSB913-1_map2	0001.CSV	2522.54	-0.017477
PSB913-1_map2	0001.CSV	2526.4	-0.0174503
PSB913-1_map2	0001.CSV	2530.26	-0.0175966
PSB913-1_map2	0001.CSV	2534.11	-0.0179118
PSB913-1_map2	0001.CSV	2537.97	-0.018268
PSB913-1_map2	0001.CSV	2541.83	-0.0185149
PSB913-1_map2	0001.CSV	2545.68	-0.0187148
PSB913-1_map2	0001.CSV	2549.54	-0.0188248
PSB913-1_map2	0001.CSV	2553.4	-0.0189168
PSB913-1_map2	0001.CSV	2557.26	-0.019103
PSB913-1_map2	0001.CSV	2561.11	-0.0193864
PSB913-1_map2	0001.CSV	2564.97	-0.0195836
PSB913-1_map2	0001.CSV	2568.83	-0.0197557
PSB913-1_map2	0001.CSV	2572.68	-0.0199128
PSB913-1_map2	0001.CSV	2576.54	-0.0200716
PSB913-1_map2	0001.CSV	2580.4	-0.0202903
PSB913-1_map2	0001.CSV	2584.25	-0.0204658
PSB913-1_map2	0001.CSV	2588.11	-0.0204825
PSB913-1_map2	0001.CSV	2591.97	-0.0206019
PSB913-1_map2	0001.CSV	2595.83	-0.0206821
PSB913-1_map2	0001.CSV	2599.68	-0.0207817
PSB913-1_map2	0001.CSV	2603.54	-0.0208751
PSB913-1_map2	0001.CSV	2607.4	-0.0210061
PSB913-1_map2	0001.CSV	2611.25	-0.0210728
PSB913-1_map2	0001.CSV	2615.11	-0.0211144
PSB913-1_map2	0001.CSV	2618.97	-0.0211594
PSB913-1_map2	0001.CSV	2622.82	-0.0211544
PSB913-1_map2	0001.CSV	2626.68	-0.0210862
PSB913-1_map2	0001.CSV	2630.54	-0.0211614
PSB913-1_map2	0001.CSV	2634.4	-0.0212065
PSB913-1_map2	0001.CSV	2638.25	-0.0213485
PSB913-1_map2	0001.CSV	2642.11	-0.0215053
PSB913-1_map2	0001.CSV	2645.97	-0.0217097
PSB913-1_map2	0001.CSV	2649.82	-0.0218411
PSB913-1_map2	0001.CSV	2653.68	-0.0219513
PSB913-1_map2	0001.CSV	2657.54	-0.0220105
PSB913-1_map2	0001.CSV	2661.4	-0.02207
PSB913-1_map2	0001.CSV	2665.25	-0.0221005
PSB913-1_map2	0001.CSV	2669.11	-0.0221175
PSB913-1_map2	0001.CSV	2672.97	-0.021973
PSB913-1_map2	0001.CSV	2676.82	-0.0218666
PSB913-1_map2	0001.CSV	2680.68	-0.0218889
PSB913-1_map2	0001.CSV	2684.54	-0.0221323
PSB913-1_map2	0001.CSV	2688.4	-0.0222274
PSB913-1_map2	0001.CSV	2692.25	-0.0222911
PSB913-1_map2	0001.CSV	2696.11	-0.0221705
PSB913-1_map2	0001.CSV	2699.97	-0.0221224
PSB913-1_map2	0001.CSV	2703.82	-0.0221271
PSB913-1_map2	0001.CSV	2707.68	-0.0220996
PSB913-1_map2	0001.CSV	2711.54	-0.0219647
PSB913-1_map2	0001.CSV	2715.4	-0.0219715
PSB913-1_map2	0001.CSV	2719.25	-0.0218014
PSB913-1_map2	0001.CSV	2723.11	-0.0214821
PSB913-1_map2	0001.CSV	2726.97	-0.0214102
PSB913-1_map2	0001.CSV	2730.82	-0.0216375
PSB913-1_map2	0001.CSV	2734.68	-0.0215515
PSB913-1_map2	0001.CSV	2738.54	-0.0215124
PSB913-1_map2	0001.CSV	2742.4	-0.0214467
PSB913-1_map2	0001.CSV	2746.25	-0.0212176
PSB913-1_map2	0001.CSV	2750.11	-0.0210743
PSB913-1_map2	0001.CSV	2753.97	-0.0212175
PSB913-1_map2	0001.CSV	2757.82	-0.0212328
PSB913-1_map2	0001.CSV	2761.68	-0.0212811
PSB913-1_map2	0001.CSV	2765.54	-0.0211509
PSB913-1_map2	0001.CSV	2769.39	-0.0209919
PSB913-1_map2	0001.CSV	2773.25	-0.0206394
PSB913-1_map2	0001.CSV	2777.11	-0.020639
PSB913-1_map2	0001.CSV	2780.97	-0.020739
PSB913-1_map2	0001.CSV	2784.82	-0.0205864
PSB913-1_map2	0001.CSV	2788.68	-0.0201837
PSB913-1_map2	0001.CSV	2792.54	-0.0201703
PSB913-1_map2	0001.CSV	2796.39	-0.0201778
PSB913-1_map2	0001.CSV	2800.25	-0.0202584
PSB913-1_map2	0001.CSV	2804.11	-0.0202661
PSB913-1_map2	0001.CSV	2807.97	-0.0200934
PSB913-1_map2	0001.CSV	2811.82	-0.020005
PSB913-1_map2	0001.CSV	2815.68	-0.0201139
PSB913-1_map2	0001.CSV	2819.54	-0.0198914
PSB913-1_map2	0001.CSV	2823.39	-0.0197733
PSB913-1_map2	0001.CSV	2827.25	-0.0196322
PSB913-1_map2	0001.CSV	2831.11	-0.0192172
PSB913-1_map2	0001.CSV	2834.97	-0.0185327
PSB913-1_map2	0001.CSV	2838.82	-0.0180343
PSB913-1_map2	0001.CSV	2842.68	-0.0175797
PSB913-1_map2	0001.CSV	2846.54	-0.0167833
PSB913-1_map2	0001.CSV	2850.39	-0.0160573
PSB913-1_map2	0001.CSV	2854.25	-0.016061
PSB913-1_map2	0001.CSV	2858.11	-0.0161927
PSB913-1_map2	0001.CSV	2861.97	-0.016681
PSB913-1_map2	0001.CSV	2865.82	-0.0169806
PSB913-1_map2	0001.CSV	2869.68	-0.0168967
PSB913-1_map2	0001.CSV	2873.54	-0.0168582
PSB913-1_map2	0001.CSV	2877.39	-0.01737
PSB913-1_map2	0001.CSV	2881.25	-0.0176016
PSB913-1_map2	0001.CSV	2885.11	-0.0175826
PSB913-1_map2	0001.CSV	2888.97	-0.0172177
PSB913-1_map2	0001.CSV	2892.82	-0.0165693
PSB913-1_map2	0001.CSV	2896.68	-0.0160192
PSB913-1_map2	0001.CSV	2900.54	-0.0158778
PSB913-1_map2	0001.CSV	2904.39	-0.0154278
PSB913-1_map2	0001.CSV	2908.25	-0.0146809
PSB913-1_map2	0001.CSV	2912.11	-0.0134216
PSB913-1_map2	0001.CSV	2915.97	-0.0125211
PSB913-1_map2	0001.CSV	2919.82	-0.0122795
PSB913-1_map2	0001.CSV	2923.68	-0.0125482
PSB913-1_map2	0001.CSV	2927.54	-0.0127826
PSB913-1_map2	0001.CSV	2931.39	-0.0136013
PSB913-1_map2	0001.CSV	2935.25	-0.0146416
PSB913-1_map2	0001.CSV	2939.11	-0.0152975
PSB913-1_map2	0001.CSV	2942.96	-0.0154273
PSB913-1_map2	0001.CSV	2946.82	-0.0157529
PSB913-1_map2	0001.CSV	2950.68	-0.0161028
PSB913-1_map2	0001.CSV	2954.54	-0.0166243
PSB913-1_map2	0001.CSV	2958.39	-0.0170248
PSB913-1_map2	0001.CSV	2962.25	-0.0174452
PSB913-1_map2	0001.CSV	2966.11	-0.0179966
PSB913-1_map2	0001.CSV	2969.96	-0.0183122
PSB913-1_map2	0001.CSV	2973.82	-0.0181992
PSB913-1_map2	0001.CSV	2977.68	-0.0182356
PSB913-1_map2	0001.CSV	2981.53	-0.0184391
PSB913-1_map2	0001.CSV	2985.39	-0.0188984
PSB913-1_map2	0001.CSV	2989.25	-0.0188052
PSB913-1_map2	0001.CSV	2993.11	-0.018656
PSB913-1_map2	0001.CSV	2996.96	-0.0188266
PSB913-1_map2	0001.CSV	3000.82	-0.0191861
PSB913-1_map2	0001.CSV	3004.68	-0.0193076
PSB913-1_map2	0001.CSV	3008.53	-0.0192335
PSB913-1_map2	0001.CSV	3012.39	-0.0189037
PSB913-1_map2	0001.CSV	3016.25	-0.0188905
PSB913-1_map2	0001.CSV	3020.11	-0.0190438
PSB913-1_map2	0001.CSV	3023.96	-0.0192676
PSB913-1_map2	0001.CSV	3027.82	-0.0192343
PSB913-1_map2	0001.CSV	3031.68	-0.0191391
PSB913-1_map2	0001.CSV	3035.53	-0.0190327
PSB913-1_map2	0001.CSV	3039.39	-0.0190983
PSB913-1_map2	0001.CSV	3043.25	-0.0190229
PSB913-1_map2	0001.CSV	3047.11	-0.0190554
PSB913-1_map2	0001.CSV	3050.96	-0.0189369
PSB913-1_map2	0001.CSV	3054.82	-0.0190141
PSB913-1_map2	0001.CSV	3058.68	-0.019082
PSB913-1_map2	0001.CSV	3062.53	-0.0190453
PSB913-1_map2	0001.CSV	3066.39	-0.0187881
PSB913-1_map2	0001.CSV	3070.25	-0.0189054
PSB913-1_map2	0001.CSV	3074.11	-0.0188528
PSB913-1_map2	0001.CSV	3077.96	-0.0186415
PSB913-1_map2	0001.CSV	3081.82	-0.018493
PSB913-1_map2	0001.CSV	3085.68	-0.0185312
PSB913-1_map2	0001.CSV	3089.53	-0.0185323
PSB913-1_map2	0001.CSV	3093.39	-0.0187178
PSB913-1_map2	0001.CSV	3097.25	-0.0186182
PSB913-1_map2	0001.CSV	3101.11	-0.0184412
PSB913-1_map2	0001.CSV	3104.96	-0.0182839
PSB913-1_map2	0001.CSV	3108.82	-0.018255
PSB913-1_map2	0001.CSV	3112.68	-0.0180774
PSB913-1_map2	0001.CSV	3116.53	-0.0179529
PSB913-1_map2	0001.CSV	3120.39	-0.0179655
PSB913-1_map2	0001.CSV	3124.25	-0.0182413
PSB913-1_map2	0001.CSV	3128.11	-0.0182079
PSB913-1_map2	0001.CSV	3131.96	-0.0181897
PSB913-1_map2	0001.CSV	3135.82	-0.0181234
PSB913-1_map2	0001.CSV	3139.68	-0.0180923
PSB913-1_map2	0001.CSV	3143.53	-0.0181486
PSB913-1_map2	0001.CSV	3147.39	-0.0180342
PSB913-1_map2	0001.CSV	3151.25	-0.0177343
PSB913-1_map2	0001.CSV	3155.1	-0.0178838
PSB913-1_map2	0001.CSV	3158.96	-0.018075
PSB913-1_map2	0001.CSV	3162.82	-0.0181406
PSB913-1_map2	0001.CSV	3166.68	-0.0181225
PSB913-1_map2	0001.CSV	3170.53	-0.0182102
PSB913-1_map2	0001.CSV	3174.39	-0.018123
PSB913-1_map2	0001.CSV	3178.25	-0.0180009
PSB913-1_map2	0001.CSV	3182.1	-0.0179023
PSB913-1_map2	0001.CSV	3185.96	-0.0178307
PSB913-1_map2	0001.CSV	3189.82	-0.0176703
PSB913-1_map2	0001.CSV	3193.68	-0.0177443
PSB913-1_map2	0001.CSV	3197.53	-0.0176907
PSB913-1_map2	0001.CSV	3201.39	-0.0176726
PSB913-1_map2	0001.CSV	3205.25	-0.0176613
PSB913-1_map2	0001.CSV	3209.1	-0.0176898
PSB913-1_map2	0001.CSV	3212.96	-0.0174976
PSB913-1_map2	0001.CSV	3216.82	-0.017469
PSB913-1_map2	0001.CSV	3220.68	-0.017515
PSB913-1_map2	0001.CSV	3224.53	-0.0176718
PSB913-1_map2	0001.CSV	3228.39	-0.0175929
PSB913-1_map2	0001.CSV	3232.25	-0.0173374
PSB913-1_map2	0001.CSV	3236.1	-0.0173106
PSB913-1_map2	0001.CSV	3239.96	-0.0174095
PSB913-1_map2	0001.CSV	3243.82	-0.0171983
PSB913-1_map2	0001.CSV	3247.68	-0.0171998
PSB913-1_map2	0001.CSV	3251.53	-0.0173464
PSB913-1_map2	0001.CSV	3255.39	-0.0174211
PSB913-1_map2	0001.CSV	3259.25	-0.0174881
PSB913-1_map2	0001.CSV	3263.1	-0.017473
PSB913-1_map2	0001.CSV	3266.96	-0.0171182
PSB913-1_map2	0001.CSV	3270.82	-0.0168953
PSB913-1_map2	0001.CSV	3274.68	-0.016914
PSB913-1_map2	0001.CSV	3278.53	-0.017179
PSB913-1_map2	0001.CSV	3282.39	-0.0173794
PSB913-1_map2	0001.CSV	3286.25	-0.0172759
PSB913-1_map2	0001.CSV	3290.1	-0.0168715
PSB913-1_map2	0001.CSV	3293.96	-0.0167557
PSB913-1_map2	0001.CSV	3297.82	-0.016949
PSB913-1_map2	0001.CSV	3301.67	-0.016866
PSB913-1_map2	0001.CSV	3305.53	-0.0165791
PSB913-1_map2	0001.CSV	3309.39	-0.0166185
PSB913-1_map2	0001.CSV	3313.25	-0.0168585
PSB913-1_map2	0001.CSV	3317.1	-0.0170396
PSB913-1_map2	0001.CSV	3320.96	-0.0168922
PSB913-1_map2	0001.CSV	3324.82	-0.0166614
PSB913-1_map2	0001.CSV	3328.67	-0.0166722
PSB913-1_map2	0001.CSV	3332.53	-0.0167819
PSB913-1_map2	0001.CSV	3336.39	-0.016574
PSB913-1_map2	0001.CSV	3340.24	-0.0164487
PSB913-1_map2	0001.CSV	3344.1	-0.0164411
PSB913-1_map2	0001.CSV	3347.96	-0.01642
PSB913-1_map2	0001.CSV	3351.82	-0.0164118
PSB913-1_map2	0001.CSV	3355.67	-0.0164153
PSB913-1_map2	0001.CSV	3359.53	-0.0161841
PSB913-1_map2	0001.CSV	3363.39	-0.0160259
PSB913-1_map2	0001.CSV	3367.24	-0.0158604
PSB913-1_map2	0001.CSV	3371.1	-0.015951
PSB913-1_map2	0001.CSV	3374.96	-0.0160931
PSB913-1_map2	0001.CSV	3378.82	-0.0161935
PSB913-1_map2	0001.CSV	3382.67	-0.0163141
PSB913-1_map2	0001.CSV	3386.53	-0.0162313
PSB913-1_map2	0001.CSV	3390.39	-0.016088
PSB913-1_map2	0001.CSV	3394.24	-0.0159609
PSB913-1_map2	0001.CSV	3398.1	-0.0159344
PSB913-1_map2	0001.CSV	3401.96	-0.0159686
PSB913-1_map2	0001.CSV	3405.82	-0.0161201
PSB913-1_map2	0001.CSV	3409.67	-0.0163239
PSB913-1_map2	0001.CSV	3413.53	-0.0164966
PSB913-1_map2	0001.CSV	3417.39	-0.0166796
PSB913-1_map2	0001.CSV	3421.24	-0.0167474
PSB913-1_map2	0001.CSV	3425.1	-0.0166021
PSB913-1_map2	0001.CSV	3428.96	-0.0163912
PSB913-1_map2	0001.CSV	3432.82	-0.0164047
PSB913-1_map2	0001.CSV	3436.67	-0.016669
PSB913-1_map2	0001.CSV	3440.53	-0.0167533
PSB913-1_map2	0001.CSV	3444.39	-0.016762
PSB913-1_map2	0001.CSV	3448.24	-0.0169702
PSB913-1_map2	0001.CSV	3452.1	-0.017203
PSB913-1_map2	0001.CSV	3455.96	-0.0173091
PSB913-1_map2	0001.CSV	3459.82	-0.0172671
PSB913-1_map2	0001.CSV	3463.67	-0.0170404
PSB913-1_map2	0001.CSV	3467.53	-0.0170387
PSB913-1_map2	0001.CSV	3471.39	-0.0174045
PSB913-1_map2	0001.CSV	3475.24	-0.0175518
PSB913-1_map2	0001.CSV	3479.1	-0.0176689
PSB913-1_map2	0001.CSV	3482.96	-0.017822
PSB913-1_map2	0001.CSV	3486.82	-0.0176526
PSB913-1_map2	0001.CSV	3490.67	-0.0176099
PSB913-1_map2	0001.CSV	3494.53	-0.0178056
PSB913-1_map2	0001.CSV	3498.39	-0.017993
PSB913-1_map2	0001.CSV	3502.24	-0.0181825
PSB913-1_map2	0001.CSV	3506.1	-0.0188071
PSB913-1_map2	0001.CSV	3509.96	-0.0190684
PSB913-1_map2	0001.CSV	3513.81	-0.0188849
PSB913-1_map2	0001.CSV	3517.67	-0.0191757
PSB913-1_map2	0001.CSV	3521.53	-0.019449
PSB913-1_map2	0001.CSV	3525.39	-0.0194617
PSB913-1_map2	0001.CSV	3529.24	-0.0195762
PSB913-1_map2	0001.CSV	3533.1	-0.0196023
PSB913-1_map2	0001.CSV	3536.96	-0.0197555
PSB913-1_map2	0001.CSV	3540.81	-0.0199099
PSB913-1_map2	0001.CSV	3544.67	-0.0197766
PSB913-1_map2	0001.CSV	3548.53	-0.0198293
PSB913-1_map2	0001.CSV	3552.39	-0.0203539
PSB913-1_map2	0001.CSV	3556.24	-0.020616
PSB913-1_map2	0001.CSV	3560.1	-0.0208814
PSB913-1_map2	0001.CSV	3563.96	-0.0210031
PSB913-1_map2	0001.CSV	3567.81	-0.0205402
PSB913-1_map2	0001.CSV	3571.67	-0.0206056
PSB913-1_map2	0001.CSV	3575.53	-0.0210946
PSB913-1_map2	0001.CSV	3579.39	-0.0211771
PSB913-1_map2	0001.CSV	3583.24	-0.0214086
PSB913-1_map2	0001.CSV	3587.1	-0.0214152
PSB913-1_map2	0001.CSV	3590.96	-0.0214492
PSB913-1_map2	0001.CSV	3594.81	-0.0215954
PSB913-1_map2	0001.CSV	3598.67	-0.0216547
PSB913-1_map2	0001.CSV	3602.53	-0.0219048
PSB913-1_map2	0001.CSV	3606.39	-0.0225901
PSB913-1_map2	0001.CSV	3610.24	-0.022808
PSB913-1_map2	0001.CSV	3614.1	-0.0228146
PSB913-1_map2	0001.CSV	3617.96	-0.0223383
PSB913-1_map2	0001.CSV	3621.81	-0.0222699
PSB913-1_map2	0001.CSV	3625.67	-0.0231367
PSB913-1_map2	0001.CSV	3629.53	-0.0231911
PSB913-1_map2	0001.CSV	3633.39	-0.0223697
PSB913-1_map2	0001.CSV	3637.24	-0.022591
PSB913-1_map2	0001.CSV	3641.1	-0.0230072
PSB913-1_map2	0001.CSV	3644.96	-0.0238041
PSB913-1_map2	0001.CSV	3648.81	-0.0235861
PSB913-1_map2	0001.CSV	3652.67	-0.0227104
PSB913-1_map2	0001.CSV	3656.53	-0.0226594
PSB913-1_map2	0001.CSV	3660.38	-0.0226859
PSB913-1_map2	0001.CSV	3664.24	-0.0232067
PSB913-1_map2	0001.CSV	3668.1	-0.0238365
PSB913-1_map2	0001.CSV	3671.96	-0.0237692
PSB913-1_map2	0001.CSV	3675.81	-0.0232794
PSB913-1_map2	0001.CSV	3679.67	-0.0228364
PSB913-1_map2	0001.CSV	3683.53	-0.0232661
PSB913-1_map2	0001.CSV	3687.38	-0.0235743
PSB913-1_map2	0001.CSV	3691.24	-0.0230651
PSB913-1_map2	0001.CSV	3695.1	-0.0229138
PSB913-1_map2	0001.CSV	3698.95	-0.0232489
PSB913-1_map2	0001.CSV	3702.81	-0.0233129
PSB913-1_map2	0001.CSV	3706.67	-0.0237858
PSB913-1_map2	0001.CSV	3710.53	-0.0236009
PSB913-1_map2	0001.CSV	3714.38	-0.0229798
PSB913-1_map2	0001.CSV	3718.24	-0.0233675
PSB913-1_map2	0001.CSV	3722.1	-0.0237227
PSB913-1_map2	0001.CSV	3725.95	-0.0235443
PSB913-1_map2	0001.CSV	3729.81	-0.0238264
PSB913-1_map2	0001.CSV	3733.67	-0.0236908
PSB913-1_map2	0001.CSV	3737.53	-0.022886
PSB913-1_map2	0001.CSV	3741.38	-0.0234463
PSB913-1_map2	0001.CSV	3745.24	-0.0242248
PSB913-1_map2	0001.CSV	3749.1	-0.0238724
PSB913-1_map2	0001.CSV	3752.95	-0.0229394
PSB913-1_map2	0001.CSV	3756.81	-0.0229052
PSB913-1_map2	0001.CSV	3760.67	-0.0232559
PSB913-1_map2	0001.CSV	3764.53	-0.0234521
PSB913-1_map2	0001.CSV	3768.38	-0.0234596
PSB913-1_map2	0001.CSV	3772.24	-0.023202
PSB913-1_map2	0001.CSV	3776.1	-0.023399
PSB913-1_map2	0001.CSV	3779.95	-0.0232383
PSB913-1_map2	0001.CSV	3783.81	-0.0230689
PSB913-1_map2	0001.CSV	3787.67	-0.0230343
PSB913-1_map2	0001.CSV	3791.53	-0.0233946
PSB913-1_map2	0001.CSV	3795.38	-0.0238372
PSB913-1_map2	0001.CSV	3799.24	-0.0240306
PSB913-1_map2	0001.CSV	3803.1	-0.0234832
PSB913-1_map2	0001.CSV	3806.95	-0.0229796
PSB913-1_map2	0001.CSV	3810.81	-0.0232274
PSB913-1_map2	0001.CSV	3814.67	-0.023948
PSB913-1_map2	0001.CSV	3818.53	-0.0238343
PSB913-1_map2	0001.CSV	3822.38	-0.0230407
PSB913-1_map2	0001.CSV	3826.24	-0.0231571
PSB913-1_map2	0001.CSV	3830.1	-0.0237179
PSB913-1_map2	0001.CSV	3833.95	-0.0239944
PSB913-1_map2	0001.CSV	3837.81	-0.0238376
PSB913-1_map2	0001.CSV	3841.67	-0.0227853
PSB913-1_map2	0001.CSV	3845.53	-0.0229642
PSB913-1_map2	0001.CSV	3849.38	-0.0237594
PSB913-1_map2	0001.CSV	3853.24	-0.0235838
PSB913-1_map2	0001.CSV	3857.1	-0.0229751
PSB913-1_map2	0001.CSV	3860.95	-0.0237602
PSB913-1_map2	0001.CSV	3864.81	-0.0236346
PSB913-1_map2	0001.CSV	3868.67	-0.0233233
PSB913-1_map2	0001.CSV	3872.52	-0.0229203
PSB913-1_map2	0001.CSV	3876.38	-0.0231815
PSB913-1_map2	0001.CSV	3880.24	-0.0233235
PSB913-1_map2	0001.CSV	3884.1	-0.023101
PSB913-1_map2	0001.CSV	3887.95	-0.0231536
PSB913-1_map2	0001.CSV	3891.81	-0.0233401
PSB913-1_map2	0001.CSV	3895.67	-0.0233929
PSB913-1_map2	0001.CSV	3899.52	-0.0235613
PSB913-1_map2	0001.CSV	3903.38	-0.0227281
PSB913-1_map2	0001.CSV	3907.24	-0.0226726
PSB913-1_map2	0001.CSV	3911.1	-0.0231945
PSB913-1_map2	0001.CSV	3914.95	-0.0233843
PSB913-1_map2	0001.CSV	3918.81	-0.0230264
PSB913-1_map2	0001.CSV	3922.67	-0.0231075
PSB913-1_map2	0001.CSV	3926.52	-0.0232144
PSB913-1_map2	0001.CSV	3930.38	-0.0233524
PSB913-1_map2	0001.CSV	3934.24	-0.0230117
PSB913-1_map2	0001.CSV	3938.09	-0.0231732
PSB913-1_map2	0001.CSV	3941.95	-0.0231611
PSB913-1_map2	0001.CSV	3945.81	-0.0231883
PSB913-1_map2	0001.CSV	3949.67	-0.0229665
PSB913-1_map2	0001.CSV	3953.52	-0.0229681
PSB913-1_map2	0001.CSV	3957.38	-0.0228615
PSB913-1_map2	0001.CSV	3961.24	-0.0227492
PSB913-1_map2	0001.CSV	3965.09	-0.0228686
PSB913-1_map2	0001.CSV	3968.95	-0.0231373
PSB913-1_map2	0001.CSV	3972.81	-0.023107
PSB913-1_map2	0001.CSV	3976.67	-0.0230886
PSB913-1_map2	0001.CSV	3980.52	-0.0230656
PSB913-1_map2	0001.CSV	3984.38	-0.0230976
PSB913-1_map2	0001.CSV	3988.24	-0.0230465
PSB913-1_map2	0001.CSV	3992.09	-0.0230672
PSB913-1_map2	0001.CSV	3995.95	-0.0229623
PSB913-1_map2	0001.CSV	3999.81	-0.0228343
PSB913-1_map2	0002.CSV	674.992	0.0221582
PSB913-1_map2	0002.CSV	678.849	0.0248649
PSB913-1_map2	0002.CSV	682.706	0.0270969
PSB913-1_map2	0002.CSV	686.563	0.0317164
PSB913-1_map2	0002.CSV	690.42	0.0396038
PSB913-1_map2	0002.CSV	694.277	0.057582
PSB913-1_map2	0002.CSV	698.134	0.0732522
PSB913-1_map2	0002.CSV	701.991	0.0657729
PSB913-1_map2	0002.CSV	705.849	0.0532679
PSB913-1_map2	0002.CSV	709.706	0.0627351
PSB913-1_map2	0002.CSV	713.563	0.0601147
PSB913-1_map2	0002.CSV	717.42	0.0308853
PSB913-1_map2	0002.CSV	721.277	0.0111672
PSB913-1_map2	0002.CSV	725.134	0.00873139
PSB913-1_map2	0002.CSV	728.991	0.0104307
PSB913-1_map2	0002.CSV	732.848	0.0136895
PSB913-1_map2	0002.CSV	736.705	0.0171106
PSB913-1_map2	0002.CSV	740.562	0.0202974
PSB913-1_map2	0002.CSV	744.42	0.0213434
PSB913-1_map2	0002.CSV	748.277	0.0219074
PSB913-1_map2	0002.CSV	752.134	0.0211176
PSB913-1_map2	0002.CSV	755.991	0.0207542
PSB913-1_map2	0002.CSV	759.848	0.0201305
PSB913-1_map2	0002.CSV	763.705	0.0198351
PSB913-1_map2	0002.CSV	767.562	0.0190015
PSB913-1_map2	0002.CSV	771.419	0.0184931
PSB913-1_map2	0002.CSV	775.276	0.0176758
PSB913-1_map2	0002.CSV	779.133	0.0172895
PSB913-1_map2	0002.CSV	782.99	0.0167587
PSB913-1_map2	0002.CSV	786.848	0.0168734
PSB913-1_map2	0002.CSV	790.705	0.0170545
PSB913-1_map2	0002.CSV	794.562	0.0182139
PSB913-1_map2	0002.CSV	798.419	0.0185466
PSB913-1_map2	0002.CSV	802.276	0.0186698
PSB913-1_map2	0002.CSV	806.133	0.0185961
PSB913-1_map2	0002.CSV	809.99	0.0199347
PSB913-1_map2	0002.CSV	813.847	0.0215427
PSB913-1_map2	0002.CSV	817.704	0.0238181
PSB913-1_map2	0002.CSV	821.562	0.0262699
PSB913-1_map2	0002.CSV	825.419	0.0297992
PSB913-1_map2	0002.CSV	829.276	0.0340526
PSB913-1_map2	0002.CSV	833.133	0.0402332
PSB913-1_map2	0002.CSV	836.99	0.048656
PSB913-1_map2	0002.CSV	840.847	0.0606225
PSB913-1_map2	0002.CSV	844.704	0.0728947
PSB913-1_map2	0002.CSV	848.561	0.0896136
PSB913-1_map2	0002.CSV	852.418	0.107298
PSB913-1_map2	0002.CSV	856.275	0.110854
PSB913-1_map2	0002.CSV	860.132	0.0987139
PSB913-1_map2	0002.CSV	863.99	0.0829993
PSB913-1_map2	0002.CSV	867.847	0.0706967
PSB913-1_map2	0002.CSV	871.704	0.0587189
PSB913-1_map2	0002.CSV	875.561	0.0418652
PSB913-1_map2	0002.CSV	879.418	0.0262136
PSB913-1_map2	0002.CSV	883.275	0.0154503
PSB913-1_map2	0002.CSV	887.132	0.00999935
PSB913-1_map2	0002.CSV	890.989	0.00884476
PSB913-1_map2	0002.CSV	894.846	0.00983944
PSB913-1_map2	0002.CSV	898.703	0.0109547
PSB913-1_map2	0002.CSV	902.561	0.0125595
PSB913-1_map2	0002.CSV	906.418	0.0139922
PSB913-1_map2	0002.CSV	910.275	0.01451
PSB913-1_map2	0002.CSV	914.132	0.0141807
PSB913-1_map2	0002.CSV	917.989	0.0143946
PSB913-1_map2	0002.CSV	921.846	0.0146369
PSB913-1_map2	0002.CSV	925.703	0.0151501
PSB913-1_map2	0002.CSV	929.56	0.0156315
PSB913-1_map2	0002.CSV	933.417	0.0162443
PSB913-1_map2	0002.CSV	937.274	0.0166167
PSB913-1_map2	0002.CSV	941.131	0.0171505
PSB913-1_map2	0002.CSV	944.989	0.0174775
PSB913-1_map2	0002.CSV	948.846	0.0180178
PSB913-1_map2	0002.CSV	952.703	0.0185834
PSB913-1_map2	0002.CSV	956.56	0.0195305
PSB913-1_map2	0002.CSV	960.417	0.020444
PSB913-1_map2	0002.CSV	964.274	0.0213766
PSB913-1_map2	0002.CSV	968.131	0.021941
PSB913-1_map2	0002.CSV	971.988	0.022812
PSB913-1_map2	0002.CSV	975.845	0.0238276
PSB913-1_map2	0002.CSV	979.702	0.0252474
PSB913-1_map2	0002.CSV	983.559	0.0265363
PSB913-1_map2	0002.CSV	987.417	0.0279204
PSB913-1_map2	0002.CSV	991.274	0.0291011
PSB913-1_map2	0002.CSV	995.131	0.0303578
PSB913-1_map2	0002.CSV	998.988	0.0314294
PSB913-1_map2	0002.CSV	1002.85	0.0325749
PSB913-1_map2	0002.CSV	1006.7	0.0333618
PSB913-1_map2	0002.CSV	1010.56	0.0342779
PSB913-1_map2	0002.CSV	1014.42	0.035187
PSB913-1_map2	0002.CSV	1018.27	0.0364179
PSB913-1_map2	0002.CSV	1022.13	0.0376974
PSB913-1_map2	0002.CSV	1025.99	0.0392281
PSB913-1_map2	0002.CSV	1029.85	0.0403558
PSB913-1_map2	0002.CSV	1033.7	0.0413212
PSB913-1_map2	0002.CSV	1037.56	0.0416687
PSB913-1_map2	0002.CSV	1041.42	0.0418847
PSB913-1_map2	0002.CSV	1045.27	0.0419696
PSB913-1_map2	0002.CSV	1049.13	0.0428377
PSB913-1_map2	0002.CSV	1052.99	0.0443571
PSB913-1_map2	0002.CSV	1056.84	0.0468143
PSB913-1_map2	0002.CSV	1060.7	0.0491615
PSB913-1_map2	0002.CSV	1064.56	0.0507759
PSB913-1_map2	0002.CSV	1068.42	0.0508078
PSB913-1_map2	0002.CSV	1072.27	0.0502162
PSB913-1_map2	0002.CSV	1076.13	0.0503691
PSB913-1_map2	0002.CSV	1079.99	0.0531398
PSB913-1_map2	0002.CSV	1083.84	0.0514232
PSB913-1_map2	0002.CSV	1087.7	0.0431682
PSB913-1_map2	0002.CSV	1091.56	0.0378647
PSB913-1_map2	0002.CSV	1095.41	0.036904
PSB913-1_map2	0002.CSV	1099.27	0.0370636
PSB913-1_map2	0002.CSV	1103.13	0.0378877
PSB913-1_map2	0002.CSV	1106.99	0.0389118
PSB913-1_map2	0002.CSV	1110.84	0.0402341
PSB913-1_map2	0002.CSV	1114.7	0.0410612
PSB913-1_map2	0002.CSV	1118.56	0.0412693
PSB913-1_map2	0002.CSV	1122.41	0.0408164
PSB913-1_map2	0002.CSV	1126.27	0.0402894
PSB913-1_map2	0002.CSV	1130.13	0.0396813
PSB913-1_map2	0002.CSV	1133.99	0.0393636
PSB913-1_map2	0002.CSV	1137.84	0.0389852
PSB913-1_map2	0002.CSV	1141.7	0.0386169
PSB913-1_map2	0002.CSV	1145.56	0.037935
PSB913-1_map2	0002.CSV	1149.41	0.0376399
PSB913-1_map2	0002.CSV	1153.27	0.0376556
PSB913-1_map2	0002.CSV	1157.13	0.0379903
PSB913-1_map2	0002.CSV	1160.99	0.0380865
PSB913-1_map2	0002.CSV	1164.84	0.0380611
PSB913-1_map2	0002.CSV	1168.7	0.0375599
PSB913-1_map2	0002.CSV	1172.56	0.037154
PSB913-1_map2	0002.CSV	1176.41	0.0367961
PSB913-1_map2	0002.CSV	1180.27	0.0367087
PSB913-1_map2	0002.CSV	1184.13	0.0364374
PSB913-1_map2	0002.CSV	1187.99	0.0362765
PSB913-1_map2	0002.CSV	1191.84	0.0361672
PSB913-1_map2	0002.CSV	1195.7	0.0365122
PSB913-1_map2	0002.CSV	1199.56	0.0368735
PSB913-1_map2	0002.CSV	1203.41	0.0375213
PSB913-1_map2	0002.CSV	1207.27	0.0381887
PSB913-1_map2	0002.CSV	1211.13	0.0391828
PSB913-1_map2	0002.CSV	1214.98	0.0402047
PSB913-1_map2	0002.CSV	1218.84	0.0414996
PSB913-1_map2	0002.CSV	1222.7	0.0427659
PSB913-1_map2	0002.CSV	1226.56	0.044327
PSB913-1_map2	0002.CSV	1230.41	0.0458607
PSB913-1_map2	0002.CSV	1234.27	0.0477783
PSB913-1_map2	0002.CSV	1238.13	0.0498392
PSB913-1_map2	0002.CSV	1241.98	0.0522762
PSB913-1_map2	0002.CSV	1245.84	0.0546269
PSB913-1_map2	0002.CSV	1249.7	0.0568991
PSB913-1_map2	0002.CSV	1253.56	0.0584517
PSB913-1_map2	0002.CSV	1257.41	0.0597312
PSB913-1_map2	0002.CSV	1261.27	0.0606257
PSB913-1_map2	0002.CSV	1265.13	0.0616797
PSB913-1_map2	0002.CSV	1268.98	0.0626281
PSB913-1_map2	0002.CSV	1272.84	0.0636922
PSB913-1_map2	0002.CSV	1276.7	0.0644075
PSB913-1_map2	0002.CSV	1280.56	0.0652244
PSB913-1_map2	0002.CSV	1284.41	0.0656006
PSB913-1_map2	0002.CSV	1288.27	0.0657194
PSB913-1_map2	0002.CSV	1292.13	0.0651852
PSB913-1_map2	0002.CSV	1295.98	0.0647032
PSB913-1_map2	0002.CSV	1299.84	0.0643982
PSB913-1_map2	0002.CSV	1303.7	0.0648563
PSB913-1_map2	0002.CSV	1307.56	0.065627
PSB913-1_map2	0002.CSV	1311.41	0.0670541
PSB913-1_map2	0002.CSV	1315.27	0.0685355
PSB913-1_map2	0002.CSV	1319.13	0.0703774
PSB913-1_map2	0002.CSV	1322.98	0.0719637
PSB913-1_map2	0002.CSV	1326.84	0.0739417
PSB913-1_map2	0002.CSV	1330.7	0.0760812
PSB913-1_map2	0002.CSV	1334.56	0.0786279
PSB913-1_map2	0002.CSV	1338.41	0.081822
PSB913-1_map2	0002.CSV	1342.27	0.0859621
PSB913-1_map2	0002.CSV	1346.13	0.0893023
PSB913-1_map2	0002.CSV	1349.98	0.0933933
PSB913-1_map2	0002.CSV	1353.84	0.0976085
PSB913-1_map2	0002.CSV	1357.7	0.102162
PSB913-1_map2	0002.CSV	1361.56	0.107391
PSB913-1_map2	0002.CSV	1365.41	0.113932
PSB913-1_map2	0002.CSV	1369.27	0.119283
PSB913-1_map2	0002.CSV	1373.13	0.126075
PSB913-1_map2	0002.CSV	1376.98	0.133298
PSB913-1_map2	0002.CSV	1380.84	0.139573
PSB913-1_map2	0002.CSV	1384.7	0.14534
PSB913-1_map2	0002.CSV	1388.56	0.152866
PSB913-1_map2	0002.CSV	1392.41	0.158599
PSB913-1_map2	0002.CSV	1396.27	0.164844
PSB913-1_map2	0002.CSV	1400.13	0.169529
PSB913-1_map2	0002.CSV	1403.98	0.173363
PSB913-1_map2	0002.CSV	1407.84	0.176198
PSB913-1_map2	0002.CSV	1411.7	0.177965
PSB913-1_map2	0002.CSV	1415.55	0.177873
PSB913-1_map2	0002.CSV	1419.41	0.177672
PSB913-1_map2	0002.CSV	1423.27	0.176378
PSB913-1_map2	0002.CSV	1427.12	0.176085
PSB913-1_map2	0002.CSV	1430.98	0.175252
PSB913-1_map2	0002.CSV	1434.84	0.175323
PSB913-1_map2	0002.CSV	1438.7	0.174286
PSB913-1_map2	0002.CSV	1442.55	0.172996
PSB913-1_map2	0002.CSV	1446.41	0.169286
PSB913-1_map2	0002.CSV	1450.27	0.164152
PSB913-1_map2	0002.CSV	1454.12	0.158248
PSB913-1_map2	0002.CSV	1457.98	0.149225
PSB913-1_map2	0002.CSV	1461.84	0.142343
PSB913-1_map2	0002.CSV	1465.7	0.137719
PSB913-1_map2	0002.CSV	1469.55	0.131508
PSB913-1_map2	0002.CSV	1473.41	0.122301
PSB913-1_map2	0002.CSV	1477.27	0.111527
PSB913-1_map2	0002.CSV	1481.12	0.105179
PSB913-1_map2	0002.CSV	1484.98	0.0991638
PSB913-1_map2	0002.CSV	1488.84	0.0924697
PSB913-1_map2	0002.CSV	1492.7	0.085376
PSB913-1_map2	0002.CSV	1496.55	0.0792024
PSB913-1_map2	0002.CSV	1500.41	0.0717066
PSB913-1_map2	0002.CSV	1504.27	0.0676476
PSB913-1_map2	0002.CSV	1508.12	0.0599936
PSB913-1_map2	0002.CSV	1511.98	0.0545641
PSB913-1_map2	0002.CSV	1515.84	0.0505444
PSB913-1_map2	0002.CSV	1519.7	0.0450515
PSB913-1_map2	0002.CSV	1523.55	0.0384987
PSB913-1_map2	0002.CSV	1527.41	0.034488
PSB913-1_map2	0002.CSV	1531.27	0.030809
PSB913-1_map2	0002.CSV	1535.12	0.0273577
PSB913-1_map2	0002.CSV	1538.98	0.0237481
PSB913-1_map2	0002.CSV	1542.84	0.0187426
PSB913-1_map2	0002.CSV	1546.7	0.0153741
PSB913-1_map2	0002.CSV	1550.55	0.0131232
PSB913-1_map2	0002.CSV	1554.41	0.010607
PSB913-1_map2	0002.CSV	1558.27	0.00757778
PSB913-1_map2	0002.CSV	1562.12	0.00489075
PSB913-1_map2	0002.CSV	1565.98	0.00356173
PSB913-1_map2	0002.CSV	1569.84	0.00151627
PSB913-1_map2	0002.CSV	1573.69	-0.000459657
PSB913-1_map2	0002.CSV	1577.55	-0.00293916
PSB913-1_map2	0002.CSV	1581.41	-0.00504676
PSB913-1_map2	0002.CSV	1585.27	-0.00716961
PSB913-1_map2	0002.CSV	1589.12	-0.00902986
PSB913-1_map2	0002.CSV	1592.98	-0.0103546
PSB913-1_map2	0002.CSV	1596.84	-0.0109409
PSB913-1_map2	0002.CSV	1600.69	-0.0115202
PSB913-1_map2	0002.CSV	1604.55	-0.0123343
PSB913-1_map2	0002.CSV	1608.41	-0.0134324
PSB913-1_map2	0002.CSV	1612.27	-0.0142007
PSB913-1_map2	0002.CSV	1616.12	-0.0147883
PSB913-1_map2	0002.CSV	1619.98	-0.0150163
PSB913-1_map2	0002.CSV	1623.84	-0.0154353
PSB913-1_map2	0002.CSV	1627.69	-0.0156149
PSB913-1_map2	0002.CSV	1631.55	-0.0159741
PSB913-1_map2	0002.CSV	1635.41	-0.0159096
PSB913-1_map2	0002.CSV	1639.27	-0.0158539
PSB913-1_map2	0002.CSV	1643.12	-0.0160958
PSB913-1_map2	0002.CSV	1646.98	-0.0162955
PSB913-1_map2	0002.CSV	1650.84	-0.0161019
PSB913-1_map2	0002.CSV	1654.69	-0.0160789
PSB913-1_map2	0002.CSV	1658.55	-0.0163055
PSB913-1_map2	0002.CSV	1662.41	-0.0166396
PSB913-1_map2	0002.CSV	1666.27	-0.0166929
PSB913-1_map2	0002.CSV	1670.12	-0.0167499
PSB913-1_map2	0002.CSV	1673.98	-0.0165435
PSB913-1_map2	0002.CSV	1677.84	-0.0168515
PSB913-1_map2	0002.CSV	1681.69	-0.0170101
PSB913-1_map2	0002.CSV	1685.55	-0.0167396
PSB913-1_map2	0002.CSV	1689.41	-0.0164014
PSB913-1_map2	0002.CSV	1693.27	-0.016723
PSB913-1_map2	0002.CSV	1697.12	-0.0166053
PSB913-1_map2	0002.CSV	1700.98	-0.0157505
PSB913-1_map2	0002.CSV	1704.84	-0.0146389
PSB913-1_map2	0002.CSV	1708.69	-0.0136861
PSB913-1_map2	0002.CSV	1712.55	-0.0127278
PSB913-1_map2	0002.CSV	1716.41	-0.0100944
PSB913-1_map2	0002.CSV	1720.27	-0.00654096
PSB913-1_map2	0002.CSV	1724.12	-0.00551796
PSB913-1_map2	0002.CSV	1727.98	-0.00512719
PSB913-1_map2	0002.CSV	1731.84	-0.00542792
PSB913-1_map2	0002.CSV	1735.69	-0.00659588
PSB913-1_map2	0002.CSV	1739.55	-0.00840876
PSB913-1_map2	0002.CSV	1743.41	-0.0103757
PSB913-1_map2	0002.CSV	1747.27	-0.0126674
PSB913-1_map2	0002.CSV	1751.12	-0.0152738
PSB913-1_map2	0002.CSV	1754.98	-0.0171526
PSB913-1_map2	0002.CSV	1758.84	-0.0183166
PSB913-1_map2	0002.CSV	1762.69	-0.019147
PSB913-1_map2	0002.CSV	1766.55	-0.0195852
PSB913-1_map2	0002.CSV	1770.41	-0.0194608
PSB913-1_map2	0002.CSV	1774.26	-0.0179903
PSB913-1_map2	0002.CSV	1778.12	-0.0166767
PSB913-1_map2	0002.CSV	1781.98	-0.0151994
PSB913-1_map2	0002.CSV	1785.84	-0.0144004
PSB913-1_map2	0002.CSV	1789.69	-0.0144347
PSB913-1_map2	0002.CSV	1793.55	-0.0152069
PSB913-1_map2	0002.CSV	1797.41	-0.0162993
PSB913-1_map2	0002.CSV	1801.26	-0.0178812
PSB913-1_map2	0002.CSV	1805.12	-0.0191227
PSB913-1_map2	0002.CSV	1808.98	-0.0198468
PSB913-1_map2	0002.CSV	1812.84	-0.0200489
PSB913-1_map2	0002.CSV	1816.69	-0.0202962
PSB913-1_map2	0002.CSV	1820.55	-0.0204075
PSB913-1_map2	0002.CSV	1824.41	-0.0205772
PSB913-1_map2	0002.CSV	1828.26	-0.0204144
PSB913-1_map2	0002.CSV	1832.12	-0.0203987
PSB913-1_map2	0002.CSV	1835.98	-0.020434
PSB913-1_map2	0002.CSV	1839.84	-0.0205631
PSB913-1_map2	0002.CSV	1843.69	-0.0203973
PSB913-1_map2	0002.CSV	1847.55	-0.0202808
PSB913-1_map2	0002.CSV	1851.41	-0.0202755
PSB913-1_map2	0002.CSV	1855.26	-0.0203604
PSB913-1_map2	0002.CSV	1859.12	-0.0202795
PSB913-1_map2	0002.CSV	1862.98	-0.0203743
PSB913-1_map2	0002.CSV	1866.84	-0.0202422
PSB913-1_map2	0002.CSV	1870.69	-0.0199913
PSB913-1_map2	0002.CSV	1874.55	-0.0200407
PSB913-1_map2	0002.CSV	1878.41	-0.0201707
PSB913-1_map2	0002.CSV	1882.26	-0.0200896
PSB913-1_map2	0002.CSV	1886.12	-0.0201072
PSB913-1_map2	0002.CSV	1889.98	-0.0200049
PSB913-1_map2	0002.CSV	1893.83	-0.0199923
PSB913-1_map2	0002.CSV	1897.69	-0.0199466
PSB913-1_map2	0002.CSV	1901.55	-0.0200631
PSB913-1_map2	0002.CSV	1905.41	-0.0200676
PSB913-1_map2	0002.CSV	1909.26	-0.0199959
PSB913-1_map2	0002.CSV	1913.12	-0.0198906
PSB913-1_map2	0002.CSV	1916.98	-0.0199402
PSB913-1_map2	0002.CSV	1920.83	-0.0198124
PSB913-1_map2	0002.CSV	1924.69	-0.0197915
PSB913-1_map2	0002.CSV	1928.55	-0.0197151
PSB913-1_map2	0002.CSV	1932.4	-0.0197174
PSB913-1_map2	0002.CSV	1936.26	-0.0196174
PSB913-1_map2	0002.CSV	1940.12	-0.0196348
PSB913-1_map2	0002.CSV	1943.98	-0.0193753
PSB913-1_map2	0002.CSV	1947.83	-0.0193517
PSB913-1_map2	0002.CSV	1951.69	-0.0193885
PSB913-1_map2	0002.CSV	1955.55	-0.019424
PSB913-1_map2	0002.CSV	1959.4	-0.0193705
PSB913-1_map2	0002.CSV	1963.26	-0.0194782
PSB913-1_map2	0002.CSV	1967.12	-0.0193836
PSB913-1_map2	0002.CSV	1970.98	-0.0193909
PSB913-1_map2	0002.CSV	1974.83	-0.0193726
PSB913-1_map2	0002.CSV	1978.69	-0.0194322
PSB913-1_map2	0002.CSV	1982.55	-0.0193692
PSB913-1_map2	0002.CSV	1986.4	-0.0193552
PSB913-1_map2	0002.CSV	1990.26	-0.0192555
PSB913-1_map2	0002.CSV	1994.12	-0.0192283
PSB913-1_map2	0002.CSV	1997.98	-0.0191534
PSB913-1_map2	0002.CSV	2001.83	-0.0191552
PSB913-1_map2	0002.CSV	2005.69	-0.0190418
PSB913-1_map2	0002.CSV	2009.55	-0.019054
PSB913-1_map2	0002.CSV	2013.4	-0.0190277
PSB913-1_map2	0002.CSV	2017.26	-0.0189725
PSB913-1_map2	0002.CSV	2021.12	-0.018791
PSB913-1_map2	0002.CSV	2024.97	-0.0187689
PSB913-1_map2	0002.CSV	2028.83	-0.0187587
PSB913-1_map2	0002.CSV	2032.69	-0.0188223
PSB913-1_map2	0002.CSV	2036.55	-0.0186574
PSB913-1_map2	0002.CSV	2040.4	-0.0185632
PSB913-1_map2	0002.CSV	2044.26	-0.0184072
PSB913-1_map2	0002.CSV	2048.12	-0.0184095
PSB913-1_map2	0002.CSV	2051.97	-0.0183616
PSB913-1_map2	0002.CSV	2055.83	-0.0183701
PSB913-1_map2	0002.CSV	2059.69	-0.0183065
PSB913-1_map2	0002.CSV	2063.55	-0.0182673
PSB913-1_map2	0002.CSV	2067.4	-0.0181521
PSB913-1_map2	0002.CSV	2071.26	-0.0181638
PSB913-1_map2	0002.CSV	2075.12	-0.0180532
PSB913-1_map2	0002.CSV	2078.97	-0.0179633
PSB913-1_map2	0002.CSV	2082.83	-0.0178139
PSB913-1_map2	0002.CSV	2086.69	-0.01781
PSB913-1_map2	0002.CSV	2090.55	-0.0177016
PSB913-1_map2	0002.CSV	2094.4	-0.0176349
PSB913-1_map2	0002.CSV	2098.26	-0.0175366
PSB913-1_map2	0002.CSV	2102.12	-0.0175187
PSB913-1_map2	0002.CSV	2105.97	-0.0173719
PSB913-1_map2	0002.CSV	2109.83	-0.0173341
PSB913-1_map2	0002.CSV	2113.69	-0.017244
PSB913-1_map2	0002.CSV	2117.55	-0.017198
PSB913-1_map2	0002.CSV	2121.4	-0.0170943
PSB913-1_map2	0002.CSV	2125.26	-0.0171046
PSB913-1_map2	0002.CSV	2129.12	-0.0170277
PSB913-1_map2	0002.CSV	2132.97	-0.0169947
PSB913-1_map2	0002.CSV	2136.83	-0.0169305
PSB913-1_map2	0002.CSV	2140.69	-0.016938
PSB913-1_map2	0002.CSV	2144.55	-0.016843
PSB913-1_map2	0002.CSV	2148.4	-0.0167521
PSB913-1_map2	0002.CSV	2152.26	-0.0166155
PSB913-1_map2	0002.CSV	2156.12	-0.0166246
PSB913-1_map2	0002.CSV	2159.97	-0.0165665
PSB913-1_map2	0002.CSV	2163.83	-0.0165617
PSB913-1_map2	0002.CSV	2167.69	-0.0164766
PSB913-1_map2	0002.CSV	2171.55	-0.0164693
PSB913-1_map2	0002.CSV	2175.4	-0.0163965
PSB913-1_map2	0002.CSV	2179.26	-0.0163272
PSB913-1_map2	0002.CSV	2183.12	-0.0162832
PSB913-1_map2	0002.CSV	2186.97	-0.0163301
PSB913-1_map2	0002.CSV	2190.83	-0.0162716
PSB913-1_map2	0002.CSV	2194.69	-0.0162982
PSB913-1_map2	0002.CSV	2198.55	-0.0163
PSB913-1_map2	0002.CSV	2202.4	-0.0163264
PSB913-1_map2	0002.CSV	2206.26	-0.0162565
PSB913-1_map2	0002.CSV	2210.12	-0.0162857
PSB913-1_map2	0002.CSV	2213.97	-0.0162556
PSB913-1_map2	0002.CSV	2217.83	-0.0162537
PSB913-1_map2	0002.CSV	2221.69	-0.0162164
PSB913-1_map2	0002.CSV	2225.54	-0.0162706
PSB913-1_map2	0002.CSV	2229.4	-0.0162816
PSB913-1_map2	0002.CSV	2233.26	-0.0163565
PSB913-1_map2	0002.CSV	2237.12	-0.0163434
PSB913-1_map2	0002.CSV	2240.97	-0.016356
PSB913-1_map2	0002.CSV	2244.83	-0.0163807
PSB913-1_map2	0002.CSV	2248.69	-0.0164474
PSB913-1_map2	0002.CSV	2252.54	-0.0164104
PSB913-1_map2	0002.CSV	2256.4	-0.0164196
PSB913-1_map2	0002.CSV	2260.26	-0.0164049
PSB913-1_map2	0002.CSV	2264.11	-0.0164315
PSB913-1_map2	0002.CSV	2267.97	-0.0164489
PSB913-1_map2	0002.CSV	2271.83	-0.0164997
PSB913-1_map2	0002.CSV	2275.69	-0.0164182
PSB913-1_map2	0002.CSV	2279.54	-0.0164556
PSB913-1_map2	0002.CSV	2283.4	-0.0165331
PSB913-1_map2	0002.CSV	2287.26	-0.0165645
PSB913-1_map2	0002.CSV	2291.11	-0.0164621
PSB913-1_map2	0002.CSV	2294.97	-0.0164791
PSB913-1_map2	0002.CSV	2298.83	-0.0165462
PSB913-1_map2	0002.CSV	2302.69	-0.0166504
PSB913-1_map2	0002.CSV	2306.54	-0.0166745
PSB913-1_map2	0002.CSV	2310.4	-0.0167669
PSB913-1_map2	0002.CSV	2314.26	-0.0168003
PSB913-1_map2	0002.CSV	2318.11	-0.0172889
PSB913-1_map2	0002.CSV	2321.97	-0.0179845
PSB913-1_map2	0002.CSV	2325.83	-0.0188535
PSB913-1_map2	0002.CSV	2329.69	-0.0194168
PSB913-1_map2	0002.CSV	2333.54	-0.0198485
PSB913-1_map2	0002.CSV	2337.4	-0.0196991
PSB913-1_map2	0002.CSV	2341.26	-0.0197571
PSB913-1_map2	0002.CSV	2345.11	-0.0183214
PSB913-1_map2	0002.CSV	2348.97	-0.0180923
PSB913-1_map2	0002.CSV	2352.83	-0.0198117
PSB913-1_map2	0002.CSV	2356.69	-0.0249609
PSB913-1_map2	0002.CSV	2360.54	-0.0287639
PSB913-1_map2	0002.CSV	2364.4	-0.0261803
PSB913-1_map2	0002.CSV	2368.26	-0.0208426
PSB913-1_map2	0002.CSV	2372.11	-0.0177053
PSB913-1_map2	0002.CSV	2375.97	-0.0164199
PSB913-1_map2	0002.CSV	2379.83	-0.016183
PSB913-1_map2	0002.CSV	2383.69	-0.0162787
PSB913-1_map2	0002.CSV	2387.54	-0.0164608
PSB913-1_map2	0002.CSV	2391.4	-0.0165804
PSB913-1_map2	0002.CSV	2395.26	-0.0166595
PSB913-1_map2	0002.CSV	2399.11	-0.0166899
PSB913-1_map2	0002.CSV	2402.97	-0.0166175
PSB913-1_map2	0002.CSV	2406.83	-0.0165064
PSB913-1_map2	0002.CSV	2410.68	-0.0164797
PSB913-1_map2	0002.CSV	2414.54	-0.016502
PSB913-1_map2	0002.CSV	2418.4	-0.0164574
PSB913-1_map2	0002.CSV	2422.26	-0.0163647
PSB913-1_map2	0002.CSV	2426.11	-0.0163214
PSB913-1_map2	0002.CSV	2429.97	-0.0163229
PSB913-1_map2	0002.CSV	2433.83	-0.0162765
PSB913-1_map2	0002.CSV	2437.68	-0.0161803
PSB913-1_map2	0002.CSV	2441.54	-0.0160735
PSB913-1_map2	0002.CSV	2445.4	-0.0159677
PSB913-1_map2	0002.CSV	2449.26	-0.0158995
PSB913-1_map2	0002.CSV	2453.11	-0.0158582
PSB913-1_map2	0002.CSV	2456.97	-0.0157418
PSB913-1_map2	0002.CSV	2460.83	-0.015642
PSB913-1_map2	0002.CSV	2464.68	-0.0155971
PSB913-1_map2	0002.CSV	2468.54	-0.015472
PSB913-1_map2	0002.CSV	2472.4	-0.0152535
PSB913-1_map2	0002.CSV	2476.26	-0.0150191
PSB913-1_map2	0002.CSV	2480.11	-0.0147767
PSB913-1_map2	0002.CSV	2483.97	-0.0145501
PSB913-1_map2	0002.CSV	2487.83	-0.0142666
PSB913-1_map2	0002.CSV	2491.68	-0.0139895
PSB913-1_map2	0002.CSV	2495.54	-0.0138116
PSB913-1_map2	0002.CSV	2499.4	-0.0136948
PSB913-1_map2	0002.CSV	2503.26	-0.0135563
PSB913-1_map2	0002.CSV	2507.11	-0.01345
PSB913-1_map2	0002.CSV	2510.97	-0.0133562
PSB913-1_map2	0002.CSV	2514.83	-0.0132585
PSB913-1_map2	0002.CSV	2518.68	-0.0131741
PSB913-1_map2	0002.CSV	2522.54	-0.0132308
PSB913-1_map2	0002.CSV	2526.4	-0.0133628
PSB913-1_map2	0002.CSV	2530.26	-0.0135847
PSB913-1_map2	0002.CSV	2534.11	-0.0138703
PSB913-1_map2	0002.CSV	2537.97	-0.0141595
PSB913-1_map2	0002.CSV	2541.83	-0.0143149
PSB913-1_map2	0002.CSV	2545.68	-0.0144475
PSB913-1_map2	0002.CSV	2549.54	-0.0145517
PSB913-1_map2	0002.CSV	2553.4	-0.014707
PSB913-1_map2	0002.CSV	2557.26	-0.0149004
PSB913-1_map2	0002.CSV	2561.11	-0.0150667
PSB913-1_map2	0002.CSV	2564.97	-0.0151823
PSB913-1_map2	0002.CSV	2568.83	-0.0152853
PSB913-1_map2	0002.CSV	2572.68	-0.0153604
PSB913-1_map2	0002.CSV	2576.54	-0.0154763
PSB913-1_map2	0002.CSV	2580.4	-0.0156565
PSB913-1_map2	0002.CSV	2584.25	-0.0158168
PSB913-1_map2	0002.CSV	2588.11	-0.0158676
PSB913-1_map2	0002.CSV	2591.97	-0.0160035
PSB913-1_map2	0002.CSV	2595.83	-0.0160503
PSB913-1_map2	0002.CSV	2599.68	-0.0161178
PSB913-1_map2	0002.CSV	2603.54	-0.0162075
PSB913-1_map2	0002.CSV	2607.4	-0.016314
PSB913-1_map2	0002.CSV	2611.25	-0.0163677
PSB913-1_map2	0002.CSV	2615.11	-0.0164626
PSB913-1_map2	0002.CSV	2618.97	-0.0164862
PSB913-1_map2	0002.CSV	2622.82	-0.0164412
PSB913-1_map2	0002.CSV	2626.68	-0.0163999
PSB913-1_map2	0002.CSV	2630.54	-0.016531
PSB913-1_map2	0002.CSV	2634.4	-0.0165904
PSB913-1_map2	0002.CSV	2638.25	-0.0167177
PSB913-1_map2	0002.CSV	2642.11	-0.0168407
PSB913-1_map2	0002.CSV	2645.97	-0.0170028
PSB913-1_map2	0002.CSV	2649.82	-0.0170367
PSB913-1_map2	0002.CSV	2653.68	-0.0170642
PSB913-1_map2	0002.CSV	2657.54	-0.01707
PSB913-1_map2	0002.CSV	2661.4	-0.0172012
PSB913-1_map2	0002.CSV	2665.25	-0.0172531
PSB913-1_map2	0002.CSV	2669.11	-0.0172256
PSB913-1_map2	0002.CSV	2672.97	-0.0170475
PSB913-1_map2	0002.CSV	2676.82	-0.016969
PSB913-1_map2	0002.CSV	2680.68	-0.0170223
PSB913-1_map2	0002.CSV	2684.54	-0.0172411
PSB913-1_map2	0002.CSV	2688.4	-0.0172636
PSB913-1_map2	0002.CSV	2692.25	-0.0173047
PSB913-1_map2	0002.CSV	2696.11	-0.0172269
PSB913-1_map2	0002.CSV	2699.97	-0.0171852
PSB913-1_map2	0002.CSV	2703.82	-0.0171497
PSB913-1_map2	0002.CSV	2707.68	-0.0171104
PSB913-1_map2	0002.CSV	2711.54	-0.0169837
PSB913-1_map2	0002.CSV	2715.4	-0.0169421
PSB913-1_map2	0002.CSV	2719.25	-0.0167744
PSB913-1_map2	0002.CSV	2723.11	-0.0164805
PSB913-1_map2	0002.CSV	2726.97	-0.0164611
PSB913-1_map2	0002.CSV	2730.82	-0.0167597
PSB913-1_map2	0002.CSV	2734.68	-0.0166882
PSB913-1_map2	0002.CSV	2738.54	-0.0166233
PSB913-1_map2	0002.CSV	2742.4	-0.0165162
PSB913-1_map2	0002.CSV	2746.25	-0.0162733
PSB913-1_map2	0002.CSV	2750.11	-0.0161447
PSB913-1_map2	0002.CSV	2753.97	-0.0162802
PSB913-1_map2	0002.CSV	2757.82	-0.0162616
PSB913-1_map2	0002.CSV	2761.68	-0.0163164
PSB913-1_map2	0002.CSV	2765.54	-0.0162221
PSB913-1_map2	0002.CSV	2769.39	-0.0160401
PSB913-1_map2	0002.CSV	2773.25	-0.0157278
PSB913-1_map2	0002.CSV	2777.11	-0.0157827
PSB913-1_map2	0002.CSV	2780.97	-0.0158454
PSB913-1_map2	0002.CSV	2784.82	-0.0156503
PSB913-1_map2	0002.CSV	2788.68	-0.0152728
PSB913-1_map2	0002.CSV	2792.54	-0.0152681
PSB913-1_map2	0002.CSV	2796.39	-0.0152065
PSB913-1_map2	0002.CSV	2800.25	-0.0153088
PSB913-1_map2	0002.CSV	2804.11	-0.0153544
PSB913-1_map2	0002.CSV	2807.97	-0.0151694
PSB913-1_map2	0002.CSV	2811.82	-0.0151259
PSB913-1_map2	0002.CSV	2815.68	-0.0152657
PSB913-1_map2	0002.CSV	2819.54	-0.0150452
PSB913-1_map2	0002.CSV	2823.39	-0.0148802
PSB913-1_map2	0002.CSV	2827.25	-0.0147124
PSB913-1_map2	0002.CSV	2831.11	-0.0143614
PSB913-1_map2	0002.CSV	2834.97	-0.0136246
PSB913-1_map2	0002.CSV	2838.82	-0.0130283
PSB913-1_map2	0002.CSV	2842.68	-0.012558
PSB913-1_map2	0002.CSV	2846.54	-0.0118755
PSB913-1_map2	0002.CSV	2850.39	-0.0113544
PSB913-1_map2	0002.CSV	2854.25	-0.0114664
PSB913-1_map2	0002.CSV	2858.11	-0.0115638
PSB913-1_map2	0002.CSV	2861.97	-0.011949
PSB913-1_map2	0002.CSV	2865.82	-0.0121864
PSB913-1_map2	0002.CSV	2869.68	-0.0120635
PSB913-1_map2	0002.CSV	2873.54	-0.0119841
PSB913-1_map2	0002.CSV	2877.39	-0.0124793
PSB913-1_map2	0002.CSV	2881.25	-0.0126888
PSB913-1_map2	0002.CSV	2885.11	-0.0126277
PSB913-1_map2	0002.CSV	2888.97	-0.0122833
PSB913-1_map2	0002.CSV	2892.82	-0.0117447
PSB913-1_map2	0002.CSV	2896.68	-0.0112207
PSB913-1_map2	0002.CSV	2900.54	-0.0109745
PSB913-1_map2	0002.CSV	2904.39	-0.0104229
PSB913-1_map2	0002.CSV	2908.25	-0.00964044
PSB913-1_map2	0002.CSV	2912.11	-0.00849234
PSB913-1_map2	0002.CSV	2915.97	-0.00775593
PSB913-1_map2	0002.CSV	2919.82	-0.00763584
PSB913-1_map2	0002.CSV	2923.68	-0.00795221
PSB913-1_map2	0002.CSV	2927.54	-0.00819503
PSB913-1_map2	0002.CSV	2931.39	-0.00898062
PSB913-1_map2	0002.CSV	2935.25	-0.00996332
PSB913-1_map2	0002.CSV	2939.11	-0.0106586
PSB913-1_map2	0002.CSV	2942.96	-0.0109288
PSB913-1_map2	0002.CSV	2946.82	-0.0112447
PSB913-1_map2	0002.CSV	2950.68	-0.0115265
PSB913-1_map2	0002.CSV	2954.54	-0.0121279
PSB913-1_map2	0002.CSV	2958.39	-0.0126534
PSB913-1_map2	0002.CSV	2962.25	-0.0131495
PSB913-1_map2	0002.CSV	2966.11	-0.0136553
PSB913-1_map2	0002.CSV	2969.96	-0.013886
PSB913-1_map2	0002.CSV	2973.82	-0.0137055
PSB913-1_map2	0002.CSV	2977.68	-0.013713
PSB913-1_map2	0002.CSV	2981.53	-0.0139216
PSB913-1_map2	0002.CSV	2985.39	-0.0144227
PSB913-1_map2	0002.CSV	2989.25	-0.0144032
PSB913-1_map2	0002.CSV	2993.11	-0.0142759
PSB913-1_map2	0002.CSV	2996.96	-0.0143386
PSB913-1_map2	0002.CSV	3000.82	-0.0146093
PSB913-1_map2	0002.CSV	3004.68	-0.0146959
PSB913-1_map2	0002.CSV	3008.53	-0.0146645
PSB913-1_map2	0002.CSV	3012.39	-0.0143747
PSB913-1_map2	0002.CSV	3016.25	-0.0142503
PSB913-1_map2	0002.CSV	3020.11	-0.014097
PSB913-1_map2	0002.CSV	3023.96	-0.0140034
PSB913-1_map2	0002.CSV	3027.82	-0.0138842
PSB913-1_map2	0002.CSV	3031.68	-0.0139677
PSB913-1_map2	0002.CSV	3035.53	-0.0141698
PSB913-1_map2	0002.CSV	3039.39	-0.0144817
PSB913-1_map2	0002.CSV	3043.25	-0.0144956
PSB913-1_map2	0002.CSV	3047.11	-0.0144797
PSB913-1_map2	0002.CSV	3050.96	-0.0143155
PSB913-1_map2	0002.CSV	3054.82	-0.0142899
PSB913-1_map2	0002.CSV	3058.68	-0.0142124
PSB913-1_map2	0002.CSV	3062.53	-0.0141528
PSB913-1_map2	0002.CSV	3066.39	-0.0140937
PSB913-1_map2	0002.CSV	3070.25	-0.0143401
PSB913-1_map2	0002.CSV	3074.11	-0.0143261
PSB913-1_map2	0002.CSV	3077.96	-0.0141472
PSB913-1_map2	0002.CSV	3081.82	-0.0139406
PSB913-1_map2	0002.CSV	3085.68	-0.0140348
PSB913-1_map2	0002.CSV	3089.53	-0.0142145
PSB913-1_map2	0002.CSV	3093.39	-0.0145332
PSB913-1_map2	0002.CSV	3097.25	-0.0144342
PSB913-1_map2	0002.CSV	3101.11	-0.0142802
PSB913-1_map2	0002.CSV	3104.96	-0.0142003
PSB913-1_map2	0002.CSV	3108.82	-0.0142071
PSB913-1_map2	0002.CSV	3112.68	-0.0140907
PSB913-1_map2	0002.CSV	3116.53	-0.0140964
PSB913-1_map2	0002.CSV	3120.39	-0.0140722
PSB913-1_map2	0002.CSV	3124.25	-0.0142428
PSB913-1_map2	0002.CSV	3128.11	-0.0142378
PSB913-1_map2	0002.CSV	3131.96	-0.0142837
PSB913-1_map2	0002.CSV	3135.82	-0.0142175
PSB913-1_map2	0002.CSV	3139.68	-0.0142066
PSB913-1_map2	0002.CSV	3143.53	-0.0142734
PSB913-1_map2	0002.CSV	3147.39	-0.0141757
PSB913-1_map2	0002.CSV	3151.25	-0.0139147
PSB913-1_map2	0002.CSV	3155.1	-0.0141168
PSB913-1_map2	0002.CSV	3158.96	-0.0142778
PSB913-1_map2	0002.CSV	3162.82	-0.0143043
PSB913-1_map2	0002.CSV	3166.68	-0.0143431
PSB913-1_map2	0002.CSV	3170.53	-0.0144108
PSB913-1_map2	0002.CSV	3174.39	-0.0143574
PSB913-1_map2	0002.CSV	3178.25	-0.014354
PSB913-1_map2	0002.CSV	3182.1	-0.0142569
PSB913-1_map2	0002.CSV	3185.96	-0.0141996
PSB913-1_map2	0002.CSV	3189.82	-0.0140907
PSB913-1_map2	0002.CSV	3193.68	-0.0141651
PSB913-1_map2	0002.CSV	3197.53	-0.0141463
PSB913-1_map2	0002.CSV	3201.39	-0.0140967
PSB913-1_map2	0002.CSV	3205.25	-0.0140741
PSB913-1_map2	0002.CSV	3209.1	-0.0141917
PSB913-1_map2	0002.CSV	3212.96	-0.0141126
PSB913-1_map2	0002.CSV	3216.82	-0.0140646
PSB913-1_map2	0002.CSV	3220.68	-0.0140013
PSB913-1_map2	0002.CSV	3224.53	-0.0141433
PSB913-1_map2	0002.CSV	3228.39	-0.0142068
PSB913-1_map2	0002.CSV	3232.25	-0.0140412
PSB913-1_map2	0002.CSV	3236.1	-0.0138994
PSB913-1_map2	0002.CSV	3239.96	-0.0139548
PSB913-1_map2	0002.CSV	3243.82	-0.0138061
PSB913-1_map2	0002.CSV	3247.68	-0.0138101
PSB913-1_map2	0002.CSV	3251.53	-0.013867
PSB913-1_map2	0002.CSV	3255.39	-0.0138571
PSB913-1_map2	0002.CSV	3259.25	-0.0139876
PSB913-1_map2	0002.CSV	3263.1	-0.0140573
PSB913-1_map2	0002.CSV	3266.96	-0.0137405
PSB913-1_map2	0002.CSV	3270.82	-0.0135988
PSB913-1_map2	0002.CSV	3274.68	-0.0136752
PSB913-1_map2	0002.CSV	3278.53	-0.0138492
PSB913-1_map2	0002.CSV	3282.39	-0.0139229
PSB913-1_map2	0002.CSV	3286.25	-0.0139101
PSB913-1_map2	0002.CSV	3290.1	-0.0136639
PSB913-1_map2	0002.CSV	3293.96	-0.0135455
PSB913-1_map2	0002.CSV	3297.82	-0.0137045
PSB913-1_map2	0002.CSV	3301.67	-0.0137653
PSB913-1_map2	0002.CSV	3305.53	-0.0135059
PSB913-1_map2	0002.CSV	3309.39	-0.0133706
PSB913-1_map2	0002.CSV	3313.25	-0.0134873
PSB913-1_map2	0002.CSV	3317.1	-0.0137287
PSB913-1_map2	0002.CSV	3320.96	-0.0137446
PSB913-1_map2	0002.CSV	3324.82	-0.0135323
PSB913-1_map2	0002.CSV	3328.67	-0.0134793
PSB913-1_map2	0002.CSV	3332.53	-0.0135795
PSB913-1_map2	0002.CSV	3336.39	-0.0132517
PSB913-1_map2	0002.CSV	3340.24	-0.0131389
PSB913-1_map2	0002.CSV	3344.1	-0.0132219
PSB913-1_map2	0002.CSV	3347.96	-0.013162
PSB913-1_map2	0002.CSV	3351.82	-0.0132254
PSB913-1_map2	0002.CSV	3355.67	-0.0133409
PSB913-1_map2	0002.CSV	3359.53	-0.0131015
PSB913-1_map2	0002.CSV	3363.39	-0.0129192
PSB913-1_map2	0002.CSV	3367.24	-0.0128047
PSB913-1_map2	0002.CSV	3371.1	-0.0128837
PSB913-1_map2	0002.CSV	3374.96	-0.0128856
PSB913-1_map2	0002.CSV	3378.82	-0.0129128
PSB913-1_map2	0002.CSV	3382.67	-0.0130451
PSB913-1_map2	0002.CSV	3386.53	-0.0130474
PSB913-1_map2	0002.CSV	3390.39	-0.0129238
PSB913-1_map2	0002.CSV	3394.24	-0.0128294
PSB913-1_map2	0002.CSV	3398.1	-0.0128677
PSB913-1_map2	0002.CSV	3401.96	-0.0128826
PSB913-1_map2	0002.CSV	3405.82	-0.0130454
PSB913-1_map2	0002.CSV	3409.67	-0.0131129
PSB913-1_map2	0002.CSV	3413.53	-0.0132236
PSB913-1_map2	0002.CSV	3417.39	-0.013509
PSB913-1_map2	0002.CSV	3421.24	-0.0135729
PSB913-1_map2	0002.CSV	3425.1	-0.0133598
PSB913-1_map2	0002.CSV	3428.96	-0.0130895
PSB913-1_map2	0002.CSV	3432.82	-0.0130756
PSB913-1_map2	0002.CSV	3436.67	-0.0134094
PSB913-1_map2	0002.CSV	3440.53	-0.0137706
PSB913-1_map2	0002.CSV	3444.39	-0.0137748
PSB913-1_map2	0002.CSV	3448.24	-0.0137084
PSB913-1_map2	0002.CSV	3452.1	-0.0138747
PSB913-1_map2	0002.CSV	3455.96	-0.0140873
PSB913-1_map2	0002.CSV	3459.82	-0.0140993
PSB913-1_map2	0002.CSV	3463.67	-0.0137442
PSB913-1_map2	0002.CSV	3467.53	-0.0136444
PSB913-1_map2	0002.CSV	3471.39	-0.0140426
PSB913-1_map2	0002.CSV	3475.24	-0.0142422
PSB913-1_map2	0002.CSV	3479.1	-0.0142265
PSB913-1_map2	0002.CSV	3482.96	-0.0142843
PSB913-1_map2	0002.CSV	3486.82	-0.0141781
PSB913-1_map2	0002.CSV	3490.67	-0.0141888
PSB913-1_map2	0002.CSV	3494.53	-0.0143047
PSB913-1_map2	0002.CSV	3498.39	-0.0144552
PSB913-1_map2	0002.CSV	3502.24	-0.0146507
PSB913-1_map2	0002.CSV	3506.1	-0.0150969
PSB913-1_map2	0002.CSV	3509.96	-0.0151637
PSB913-1_map2	0002.CSV	3513.81	-0.0149874
PSB913-1_map2	0002.CSV	3517.67	-0.0153055
PSB913-1_map2	0002.CSV	3521.53	-0.015631
PSB913-1_map2	0002.CSV	3525.39	-0.0155779
PSB913-1_map2	0002.CSV	3529.24	-0.0155299
PSB913-1_map2	0002.CSV	3533.1	-0.0154893
PSB913-1_map2	0002.CSV	3536.96	-0.0156352
PSB913-1_map2	0002.CSV	3540.81	-0.015755
PSB913-1_map2	0002.CSV	3544.67	-0.0155605
PSB913-1_map2	0002.CSV	3548.53	-0.015642
PSB913-1_map2	0002.CSV	3552.39	-0.0161569
PSB913-1_map2	0002.CSV	3556.24	-0.0163252
PSB913-1_map2	0002.CSV	3560.1	-0.0165857
PSB913-1_map2	0002.CSV	3563.96	-0.0167488
PSB913-1_map2	0002.CSV	3567.81	-0.0162801
PSB913-1_map2	0002.CSV	3571.67	-0.0164685
PSB913-1_map2	0002.CSV	3575.53	-0.0169188
PSB913-1_map2	0002.CSV	3579.39	-0.0167691
PSB913-1_map2	0002.CSV	3583.24	-0.0168984
PSB913-1_map2	0002.CSV	3587.1	-0.0168676
PSB913-1_map2	0002.CSV	3590.96	-0.0170176
PSB913-1_map2	0002.CSV	3594.81	-0.0172458
PSB913-1_map2	0002.CSV	3598.67	-0.017247
PSB913-1_map2	0002.CSV	3602.53	-0.0174219
PSB913-1_map2	0002.CSV	3606.39	-0.0179754
PSB913-1_map2	0002.CSV	3610.24	-0.0178799
PSB913-1_map2	0002.CSV	3614.1	-0.0177738
PSB913-1_map2	0002.CSV	3617.96	-0.0176277
PSB913-1_map2	0002.CSV	3621.81	-0.0175245
PSB913-1_map2	0002.CSV	3625.67	-0.0181935
PSB913-1_map2	0002.CSV	3629.53	-0.0181674
PSB913-1_map2	0002.CSV	3633.39	-0.0174464
PSB913-1_map2	0002.CSV	3637.24	-0.0178162
PSB913-1_map2	0002.CSV	3641.1	-0.0182644
PSB913-1_map2	0002.CSV	3644.96	-0.0190043
PSB913-1_map2	0002.CSV	3648.81	-0.0187382
PSB913-1_map2	0002.CSV	3652.67	-0.0178936
PSB913-1_map2	0002.CSV	3656.53	-0.0177561
PSB913-1_map2	0002.CSV	3660.38	-0.017743
PSB913-1_map2	0002.CSV	3664.24	-0.0183479
PSB913-1_map2	0002.CSV	3668.1	-0.019073
PSB913-1_map2	0002.CSV	3671.96	-0.0189259
PSB913-1_map2	0002.CSV	3675.81	-0.0182213
PSB913-1_map2	0002.CSV	3679.67	-0.0177813
PSB913-1_map2	0002.CSV	3683.53	-0.0182475
PSB913-1_map2	0002.CSV	3687.38	-0.018405
PSB913-1_map2	0002.CSV	3691.24	-0.017837
PSB913-1_map2	0002.CSV	3695.1	-0.0178895
PSB913-1_map2	0002.CSV	3698.95	-0.018318
PSB913-1_map2	0002.CSV	3702.81	-0.0183994
PSB913-1_map2	0002.CSV	3706.67	-0.0188682
PSB913-1_map2	0002.CSV	3710.53	-0.0188321
PSB913-1_map2	0002.CSV	3714.38	-0.0181699
PSB913-1_map2	0002.CSV	3718.24	-0.0184917
PSB913-1_map2	0002.CSV	3722.1	-0.0186518
PSB913-1_map2	0002.CSV	3725.95	-0.0182835
PSB913-1_map2	0002.CSV	3729.81	-0.0186152
PSB913-1_map2	0002.CSV	3733.67	-0.0184036
PSB913-1_map2	0002.CSV	3737.53	-0.0177403
PSB913-1_map2	0002.CSV	3741.38	-0.018516
PSB913-1_map2	0002.CSV	3745.24	-0.0193049
PSB913-1_map2	0002.CSV	3749.1	-0.019036
PSB913-1_map2	0002.CSV	3752.95	-0.0182849
PSB913-1_map2	0002.CSV	3756.81	-0.0181264
PSB913-1_map2	0002.CSV	3760.67	-0.0182708
PSB913-1_map2	0002.CSV	3764.53	-0.0185109
PSB913-1_map2	0002.CSV	3768.38	-0.0185065
PSB913-1_map2	0002.CSV	3772.24	-0.0181145
PSB913-1_map2	0002.CSV	3776.1	-0.0183173
PSB913-1_map2	0002.CSV	3779.95	-0.0182267
PSB913-1_map2	0002.CSV	3783.81	-0.018147
PSB913-1_map2	0002.CSV	3787.67	-0.0181878
PSB913-1_map2	0002.CSV	3791.53	-0.018556
PSB913-1_map2	0002.CSV	3795.38	-0.018963
PSB913-1_map2	0002.CSV	3799.24	-0.0189805
PSB913-1_map2	0002.CSV	3803.1	-0.0182453
PSB913-1_map2	0002.CSV	3806.95	-0.0178757
PSB913-1_map2	0002.CSV	3810.81	-0.0182655
PSB913-1_map2	0002.CSV	3814.67	-0.018951
PSB913-1_map2	0002.CSV	3818.53	-0.0186702
PSB913-1_map2	0002.CSV	3822.38	-0.0178738
PSB913-1_map2	0002.CSV	3826.24	-0.0179439
PSB913-1_map2	0002.CSV	3830.1	-0.0185754
PSB913-1_map2	0002.CSV	3833.95	-0.018962
PSB913-1_map2	0002.CSV	3837.81	-0.0187037
PSB913-1_map2	0002.CSV	3841.67	-0.0178238
PSB913-1_map2	0002.CSV	3845.53	-0.0181746
PSB913-1_map2	0002.CSV	3849.38	-0.0188743
PSB913-1_map2	0002.CSV	3853.24	-0.0185821
PSB913-1_map2	0002.CSV	3857.1	-0.0178521
PSB913-1_map2	0002.CSV	3860.95	-0.0186571
PSB913-1_map2	0002.CSV	3864.81	-0.0185312
PSB913-1_map2	0002.CSV	3868.67	-0.0181555
PSB913-1_map2	0002.CSV	3872.52	-0.0177451
PSB913-1_map2	0002.CSV	3876.38	-0.0181626
PSB913-1_map2	0002.CSV	3880.24	-0.0184096
PSB913-1_map2	0002.CSV	3884.1	-0.0180625
PSB913-1_map2	0002.CSV	3887.95	-0.0180836
PSB913-1_map2	0002.CSV	3891.81	-0.0182371
PSB913-1_map2	0002.CSV	3895.67	-0.0182478
PSB913-1_map2	0002.CSV	3899.52	-0.0183368
PSB913-1_map2	0002.CSV	3903.38	-0.0174109
PSB913-1_map2	0002.CSV	3907.24	-0.0175601
PSB913-1_map2	0002.CSV	3911.1	-0.0181432
PSB913-1_map2	0002.CSV	3914.95	-0.0183439
PSB913-1_map2	0002.CSV	3918.81	-0.0179604
PSB913-1_map2	0002.CSV	3922.67	-0.017954
PSB913-1_map2	0002.CSV	3926.52	-0.0179455
PSB913-1_map2	0002.CSV	3930.38	-0.0179743
PSB913-1_map2	0002.CSV	3934.24	-0.0177683
PSB913-1_map2	0002.CSV	3938.09	-0.0181137
PSB913-1_map2	0002.CSV	3941.95	-0.018106
PSB913-1_map2	0002.CSV	3945.81	-0.0180128
PSB913-1_map2	0002.CSV	3949.67	-0.0178238
PSB913-1_map2	0002.CSV	3953.52	-0.0179435
PSB913-1_map2	0002.CSV	3957.38	-0.0179162
PSB913-1_map2	0002.CSV	3961.24	-0.0178266
PSB913-1_map2	0002.CSV	3965.09	-0.0178314
PSB913-1_map2	0002.CSV	3968.95	-0.0179713
PSB913-1_map2	0002.CSV	3972.81	-0.0180374
PSB913-1_map2	0002.CSV	3976.67	-0.0180392
PSB913-1_map2	0002.CSV	3980.52	-0.0179141
PSB913-1_map2	0002.CSV	3984.38	-0.0179259
PSB913-1_map2	0002.CSV	3988.24	-0.0178884
PSB913-1_map2	0002.CSV	3992.09	-0.0179
PSB913-1_map2	0002.CSV	3995.95	-0.0178595
PSB913-1_map2	0002.CSV	3999.81	-0.0177751
PSB913-1_map2	0003.CSV	674.992	0.0165721
PSB913-1_map2	0003.CSV	678.849	0.0182179
PSB913-1_map2	0003.CSV	682.706	0.0197546
PSB913-1_map2	0003.CSV	686.563	0.0228628
PSB913-1_map2	0003.CSV	690.42	0.0277792
PSB913-1_map2	0003.CSV	694.277	0.0395434
PSB913-1_map2	0003.CSV	698.134	0.0497538
PSB913-1_map2	0003.CSV	701.991	0.0433353
PSB913-1_map2	0003.CSV	705.849	0.0354945
PSB913-1_map2	0003.CSV	709.706	0.0449951
PSB913-1_map2	0003.CSV	713.563	0.0426558
PSB913-1_map2	0003.CSV	717.42	0.0196983
PSB913-1_map2	0003.CSV	721.277	0.00615502
PSB913-1_map2	0003.CSV	725.134	0.00562506
PSB913-1_map2	0003.CSV	728.991	0.00712064
PSB913-1_map2	0003.CSV	732.848	0.00895376
PSB913-1_map2	0003.CSV	736.705	0.0108129
PSB913-1_map2	0003.CSV	740.562	0.0129136
PSB913-1_map2	0003.CSV	744.42	0.0136564
PSB913-1_map2	0003.CSV	748.277	0.0139056
PSB913-1_map2	0003.CSV	752.134	0.0135821
PSB913-1_map2	0003.CSV	755.991	0.0135332
PSB913-1_map2	0003.CSV	759.848	0.0132068
PSB913-1_map2	0003.CSV	763.705	0.0135064
PSB913-1_map2	0003.CSV	767.562	0.0132674
PSB913-1_map2	0003.CSV	771.419	0.0130174
PSB913-1_map2	0003.CSV	775.276	0.0128126
PSB913-1_map2	0003.CSV	779.133	0.0130237
PSB913-1_map2	0003.CSV	782.99	0.0130482
PSB913-1_map2	0003.CSV	786.848	0.0131077
PSB913-1_map2	0003.CSV	790.705	0.0129226
PSB913-1_map2	0003.CSV	794.562	0.0132359
PSB913-1_map2	0003.CSV	798.419	0.0134247
PSB913-1_map2	0003.CSV	802.276	0.0139479
PSB913-1_map2	0003.CSV	806.133	0.0145297
PSB913-1_map2	0003.CSV	809.99	0.0160963
PSB913-1_map2	0003.CSV	813.847	0.0175967
PSB913-1_map2	0003.CSV	817.704	0.0194732
PSB913-1_map2	0003.CSV	821.562	0.0217406
PSB913-1_map2	0003.CSV	825.419	0.0247625
PSB913-1_map2	0003.CSV	829.276	0.0282386
PSB913-1_map2	0003.CSV	833.133	0.033227
PSB913-1_map2	0003.CSV	836.99	0.0406674
PSB913-1_map2	0003.CSV	840.847	0.0509768
PSB913-1_map2	0003.CSV	844.704	0.0608018
PSB913-1_map2	0003.CSV	848.561	0.0747353
PSB913-1_map2	0003.CSV	852.418	0.0883493
PSB913-1_map2	0003.CSV	856.275	0.0852687
PSB913-1_map2	0003.CSV	860.132	0.0665178
PSB913-1_map2	0003.CSV	863.99	0.0456419
PSB913-1_map2	0003.CSV	867.847	0.0290868
PSB913-1_map2	0003.CSV	871.704	0.0176554
PSB913-1_map2	0003.CSV	875.561	0.0107058
PSB913-1_map2	0003.CSV	879.418	0.00774285
PSB913-1_map2	0003.CSV	883.275	0.00632097
PSB913-1_map2	0003.CSV	887.132	0.00544796
PSB913-1_map2	0003.CSV	890.989	0.00518053
PSB913-1_map2	0003.CSV	894.846	0.00554471
PSB913-1_map2	0003.CSV	898.703	0.00590754
PSB913-1_map2	0003.CSV	902.561	0.00650427
PSB913-1_map2	0003.CSV	906.418	0.00711519
PSB913-1_map2	0003.CSV	910.275	0.0069593
PSB913-1_map2	0003.CSV	914.132	0.00648237
PSB913-1_map2	0003.CSV	917.989	0.0066214
PSB913-1_map2	0003.CSV	921.846	0.00685854
PSB913-1_map2	0003.CSV	925.703	0.00719872
PSB913-1_map2	0003.CSV	929.56	0.00746234
PSB913-1_map2	0003.CSV	933.417	0.00769641
PSB913-1_map2	0003.CSV	937.274	0.00786359
PSB913-1_map2	0003.CSV	941.131	0.00805524
PSB913-1_map2	0003.CSV	944.989	0.00811759
PSB913-1_map2	0003.CSV	948.846	0.00844271
PSB913-1_map2	0003.CSV	952.703	0.00873924
PSB913-1_map2	0003.CSV	956.56	0.00907071
PSB913-1_map2	0003.CSV	960.417	0.00931377
PSB913-1_map2	0003.CSV	964.274	0.00962302
PSB913-1_map2	0003.CSV	968.131	0.00986934
PSB913-1_map2	0003.CSV	971.988	0.0102615
PSB913-1_map2	0003.CSV	975.845	0.0106422
PSB913-1_map2	0003.CSV	979.702	0.0112391
PSB913-1_map2	0003.CSV	983.559	0.0117136
PSB913-1_map2	0003.CSV	987.417	0.0121665
PSB913-1_map2	0003.CSV	991.274	0.01252
PSB913-1_map2	0003.CSV	995.131	0.0128866
PSB913-1_map2	0003.CSV	998.988	0.0131475
PSB913-1_map2	0003.CSV	1002.85	0.0135014
PSB913-1_map2	0003.CSV	1006.7	0.0137279
PSB913-1_map2	0003.CSV	1010.56	0.0140613
PSB913-1_map2	0003.CSV	1014.42	0.0144264
PSB913-1_map2	0003.CSV	1018.27	0.0149994
PSB913-1_map2	0003.CSV	1022.13	0.0155891
PSB913-1_map2	0003.CSV	1025.99	0.016328
PSB913-1_map2	0003.CSV	1029.85	0.0169527
PSB913-1_map2	0003.CSV	1033.7	0.017623
PSB913-1_map2	0003.CSV	1037.56	0.0180348
PSB913-1_map2	0003.CSV	1041.42	0.0184159
PSB913-1_map2	0003.CSV	1045.27	0.0187602
PSB913-1_map2	0003.CSV	1049.13	0.0194828
PSB913-1_map2	0003.CSV	1052.99	0.0203913
PSB913-1_map2	0003.CSV	1056.84	0.0217238
PSB913-1_map2	0003.CSV	1060.7	0.0230465
PSB913-1_map2	0003.CSV	1064.56	0.0240296
PSB913-1_map2	0003.CSV	1068.42	0.0241762
PSB913-1_map2	0003.CSV	1072.27	0.0240869
PSB913-1_map2	0003.CSV	1076.13	0.0250353
PSB913-1_map2	0003.CSV	1079.99	0.0281061
PSB913-1_map2	0003.CSV	1083.84	0.0270458
PSB913-1_map2	0003.CSV	1087.7	0.0207478
PSB913-1_map2	0003.CSV	1091.56	0.0173685
PSB913-1_map2	0003.CSV	1095.41	0.0171803
PSB913-1_map2	0003.CSV	1099.27	0.0175432
PSB913-1_map2	0003.CSV	1103.13	0.0181155
PSB913-1_map2	0003.CSV	1106.99	0.0188153
PSB913-1_map2	0003.CSV	1110.84	0.0196968
PSB913-1_map2	0003.CSV	1114.7	0.0203497
PSB913-1_map2	0003.CSV	1118.56	0.0207012
PSB913-1_map2	0003.CSV	1122.41	0.0206487
PSB913-1_map2	0003.CSV	1126.27	0.0204397
PSB913-1_map2	0003.CSV	1130.13	0.0202096
PSB913-1_map2	0003.CSV	1133.99	0.0200619
PSB913-1_map2	0003.CSV	1137.84	0.0198394
PSB913-1_map2	0003.CSV	1141.7	0.0196785
PSB913-1_map2	0003.CSV	1145.56	0.0193829
PSB913-1_map2	0003.CSV	1149.41	0.0193005
PSB913-1_map2	0003.CSV	1153.27	0.0194795
PSB913-1_map2	0003.CSV	1157.13	0.0197476
PSB913-1_map2	0003.CSV	1160.99	0.0197296
PSB913-1_map2	0003.CSV	1164.84	0.0196747
PSB913-1_map2	0003.CSV	1168.7	0.0194539
PSB913-1_map2	0003.CSV	1172.56	0.0192301
PSB913-1_map2	0003.CSV	1176.41	0.0191042
PSB913-1_map2	0003.CSV	1180.27	0.0192029
PSB913-1_map2	0003.CSV	1184.13	0.0192355
PSB913-1_map2	0003.CSV	1187.99	0.0192549
PSB913-1_map2	0003.CSV	1191.84	0.0192748
PSB913-1_map2	0003.CSV	1195.7	0.0195243
PSB913-1_map2	0003.CSV	1199.56	0.0196663
PSB913-1_map2	0003.CSV	1203.41	0.0200467
PSB913-1_map2	0003.CSV	1207.27	0.0204207
PSB913-1_map2	0003.CSV	1211.13	0.0208048
PSB913-1_map2	0003.CSV	1214.98	0.0211906
PSB913-1_map2	0003.CSV	1218.84	0.0218163
PSB913-1_map2	0003.CSV	1222.7	0.0224775
PSB913-1_map2	0003.CSV	1226.56	0.0232806
PSB913-1_map2	0003.CSV	1230.41	0.0240168
PSB913-1_map2	0003.CSV	1234.27	0.0248878
PSB913-1_map2	0003.CSV	1238.13	0.0258271
PSB913-1_map2	0003.CSV	1241.98	0.026957
PSB913-1_map2	0003.CSV	1245.84	0.0279654
PSB913-1_map2	0003.CSV	1249.7	0.0289022
PSB913-1_map2	0003.CSV	1253.56	0.0295484
PSB913-1_map2	0003.CSV	1257.41	0.0301298
PSB913-1_map2	0003.CSV	1261.27	0.0305805
PSB913-1_map2	0003.CSV	1265.13	0.0311577
PSB913-1_map2	0003.CSV	1268.98	0.0317759
PSB913-1_map2	0003.CSV	1272.84	0.032499
PSB913-1_map2	0003.CSV	1276.7	0.0329367
PSB913-1_map2	0003.CSV	1280.56	0.0333982
PSB913-1_map2	0003.CSV	1284.41	0.0336375
PSB913-1_map2	0003.CSV	1288.27	0.0338028
PSB913-1_map2	0003.CSV	1292.13	0.0337095
PSB913-1_map2	0003.CSV	1295.98	0.0336767
PSB913-1_map2	0003.CSV	1299.84	0.0337312
PSB913-1_map2	0003.CSV	1303.7	0.0341217
PSB913-1_map2	0003.CSV	1307.56	0.0345574
PSB913-1_map2	0003.CSV	1311.41	0.0353056
PSB913-1_map2	0003.CSV	1315.27	0.0361563
PSB913-1_map2	0003.CSV	1319.13	0.0372098
PSB913-1_map2	0003.CSV	1322.98	0.038121
PSB913-1_map2	0003.CSV	1326.84	0.0391995
PSB913-1_map2	0003.CSV	1330.7	0.0403409
PSB913-1_map2	0003.CSV	1334.56	0.0416882
PSB913-1_map2	0003.CSV	1338.41	0.0433815
PSB913-1_map2	0003.CSV	1342.27	0.0454942
PSB913-1_map2	0003.CSV	1346.13	0.0470669
PSB913-1_map2	0003.CSV	1349.98	0.0490054
PSB913-1_map2	0003.CSV	1353.84	0.0509776
PSB913-1_map2	0003.CSV	1357.7	0.053115
PSB913-1_map2	0003.CSV	1361.56	0.0555059
PSB913-1_map2	0003.CSV	1365.41	0.0584706
PSB913-1_map2	0003.CSV	1369.27	0.0608339
PSB913-1_map2	0003.CSV	1373.13	0.0639085
PSB913-1_map2	0003.CSV	1376.98	0.0671039
PSB913-1_map2	0003.CSV	1380.84	0.069869
PSB913-1_map2	0003.CSV	1384.7	0.0724494
PSB913-1_map2	0003.CSV	1388.56	0.0758416
PSB913-1_map2	0003.CSV	1392.41	0.0782615
PSB913-1_map2	0003.CSV	1396.27	0.0813552
PSB913-1_map2	0003.CSV	1400.13	0.084203
PSB913-1_map2	0003.CSV	1403.98	0.0865633
PSB913-1_map2	0003.CSV	1407.84	0.0885496
PSB913-1_map2	0003.CSV	1411.7	0.0903927
PSB913-1_map2	0003.CSV	1415.55	0.0917571
PSB913-1_map2	0003.CSV	1419.41	0.0940476
PSB913-1_map2	0003.CSV	1423.27	0.0955888
PSB913-1_map2	0003.CSV	1427.12	0.0971051
PSB913-1_map2	0003.CSV	1430.98	0.0984452
PSB913-1_map2	0003.CSV	1434.84	0.100233
PSB913-1_map2	0003.CSV	1438.7	0.101126
PSB913-1_map2	0003.CSV	1442.55	0.100995
PSB913-1_map2	0003.CSV	1446.41	0.0992414
PSB913-1_map2	0003.CSV	1450.27	0.0966055
PSB913-1_map2	0003.CSV	1454.12	0.0934916
PSB913-1_map2	0003.CSV	1457.98	0.0895949
PSB913-1_map2	0003.CSV	1461.84	0.0862752
PSB913-1_map2	0003.CSV	1465.7	0.0837678
PSB913-1_map2	0003.CSV	1469.55	0.0800526
PSB913-1_map2	0003.CSV	1473.41	0.0744541
PSB913-1_map2	0003.CSV	1477.27	0.0676038
PSB913-1_map2	0003.CSV	1481.12	0.0633538
PSB913-1_map2	0003.CSV	1484.98	0.0592926
PSB913-1_map2	0003.CSV	1488.84	0.0548437
PSB913-1_map2	0003.CSV	1492.7	0.050208
PSB913-1_map2	0003.CSV	1496.55	0.0466085
PSB913-1_map2	0003.CSV	1500.41	0.0422223
PSB913-1_map2	0003.CSV	1504.27	0.0394641
PSB913-1_map2	0003.CSV	1508.12	0.0344013
PSB913-1_map2	0003.CSV	1511.98	0.0307673
PSB913-1_map2	0003.CSV	1515.84	0.0279643
PSB913-1_map2	0003.CSV	1519.7	0.0242033
PSB913-1_map2	0003.CSV	1523.55	0.0197873
PSB913-1_map2	0003.CSV	1527.41	0.0169767
PSB913-1_map2	0003.CSV	1531.27	0.0142425
PSB913-1_map2	0003.CSV	1535.12	0.0117427
PSB913-1_map2	0003.CSV	1538.98	0.00933076
PSB913-1_map2	0003.CSV	1542.84	0.00618197
PSB913-1_map2	0003.CSV	1546.7	0.00364255
PSB913-1_map2	0003.CSV	1550.55	0.00182667
PSB913-1_map2	0003.CSV	1554.41	-0.000151462
PSB913-1_map2	0003.CSV	1558.27	-0.00238515
PSB913-1_map2	0003.CSV	1562.12	-0.00446563
PSB913-1_map2	0003.CSV	1565.98	-0.00564691
PSB913-1_map2	0003.CSV	1569.84	-0.00740131
PSB913-1_map2	0003.CSV	1573.69	-0.00918073
PSB913-1_map2	0003.CSV	1577.55	-0.0113083
PSB913-1_map2	0003.CSV	1581.41	-0.0129352
PSB913-1_map2	0003.CSV	1585.27	-0.0142906
PSB913-1_map2	0003.CSV	1589.12	-0.0153495
PSB913-1_map2	0003.CSV	1592.98	-0.0159739
PSB913-1_map2	0003.CSV	1596.84	-0.0162008
PSB913-1_map2	0003.CSV	1600.69	-0.0164761
PSB913-1_map2	0003.CSV	1604.55	-0.0167658
PSB913-1_map2	0003.CSV	1608.41	-0.0171499
PSB913-1_map2	0003.CSV	1612.27	-0.0174141
PSB913-1_map2	0003.CSV	1616.12	-0.0176341
PSB913-1_map2	0003.CSV	1619.98	-0.0175935
PSB913-1_map2	0003.CSV	1623.84	-0.017649
PSB913-1_map2	0003.CSV	1627.69	-0.0176493
PSB913-1_map2	0003.CSV	1631.55	-0.017975
PSB913-1_map2	0003.CSV	1635.41	-0.0179189
PSB913-1_map2	0003.CSV	1639.27	-0.0176877
PSB913-1_map2	0003.CSV	1643.12	-0.0178507
PSB913-1_map2	0003.CSV	1646.98	-0.0179004
PSB913-1_map2	0003.CSV	1650.84	-0.0177206
PSB913-1_map2	0003.CSV	1654.69	-0.0174304
PSB913-1_map2	0003.CSV	1658.55	-0.0174975
PSB913-1_map2	0003.CSV	1662.41	-0.0177346
PSB913-1_map2	0003.CSV	1666.27	-0.0177393
PSB913-1_map2	0003.CSV	1670.12	-0.0177009
PSB913-1_map2	0003.CSV	1673.98	-0.0173971
PSB913-1_map2	0003.CSV	1677.84	-0.0175431
PSB913-1_map2	0003.CSV	1681.69	-0.0176418
PSB913-1_map2	0003.CSV	1685.55	-0.017419
PSB913-1_map2	0003.CSV	1689.41	-0.0172336
PSB913-1_map2	0003.CSV	1693.27	-0.0175927
PSB913-1_map2	0003.CSV	1697.12	-0.0175178
PSB913-1_map2	0003.CSV	1700.98	-0.0169241
PSB913-1_map2	0003.CSV	1704.84	-0.0164318
PSB913-1_map2	0003.CSV	1708.69	-0.0162044
PSB913-1_map2	0003.CSV	1712.55	-0.0160024
PSB913-1_map2	0003.CSV	1716.41	-0.0148746
PSB913-1_map2	0003.CSV	1720.27	-0.0131154
PSB913-1_map2	0003.CSV	1724.12	-0.0127283
[truncated: 86,027 more rows]

## Sheet: PSB913-1_map3
Map	Select spectrum number	Wavenumbers	Absorbance
PSB913-1_map3	0001.CSV	674.992	0.0200402
PSB913-1_map3	0001.CSV	678.849	0.0242414
PSB913-1_map3	0001.CSV	682.706	0.0249306
PSB913-1_map3	0001.CSV	686.563	0.0287151
PSB913-1_map3	0001.CSV	690.42	0.0316082
PSB913-1_map3	0001.CSV	694.277	0.0444136
PSB913-1_map3	0001.CSV	698.134	0.058064
PSB913-1_map3	0001.CSV	701.991	0.053633
PSB913-1_map3	0001.CSV	705.849	0.04352
PSB913-1_map3	0001.CSV	709.706	0.0629262
PSB913-1_map3	0001.CSV	713.563	0.0708141
PSB913-1_map3	0001.CSV	717.42	0.0421441
PSB913-1_map3	0001.CSV	721.277	0.0154743
PSB913-1_map3	0001.CSV	725.134	0.00873433
PSB913-1_map3	0001.CSV	728.991	0.00613973
PSB913-1_map3	0001.CSV	732.848	0.00686521
PSB913-1_map3	0001.CSV	736.705	0.00677618
PSB913-1_map3	0001.CSV	740.562	0.00857963
PSB913-1_map3	0001.CSV	744.42	0.00845994
PSB913-1_map3	0001.CSV	748.277	0.00967848
PSB913-1_map3	0001.CSV	752.134	0.00942225
PSB913-1_map3	0001.CSV	755.991	0.0107913
PSB913-1_map3	0001.CSV	759.848	0.0105473
PSB913-1_map3	0001.CSV	763.705	0.0117454
PSB913-1_map3	0001.CSV	767.562	0.0114234
PSB913-1_map3	0001.CSV	771.419	0.0126775
PSB913-1_map3	0001.CSV	775.276	0.0128539
PSB913-1_map3	0001.CSV	779.133	0.0142996
PSB913-1_map3	0001.CSV	782.99	0.0141613
PSB913-1_map3	0001.CSV	786.848	0.0155464
PSB913-1_map3	0001.CSV	790.705	0.0158482
PSB913-1_map3	0001.CSV	794.562	0.0175168
PSB913-1_map3	0001.CSV	798.419	0.0179211
PSB913-1_map3	0001.CSV	802.276	0.019885
PSB913-1_map3	0001.CSV	806.133	0.0206179
PSB913-1_map3	0001.CSV	809.99	0.0230944
PSB913-1_map3	0001.CSV	813.847	0.0246021
PSB913-1_map3	0001.CSV	817.704	0.0280215
PSB913-1_map3	0001.CSV	821.562	0.0308933
PSB913-1_map3	0001.CSV	825.419	0.0362632
PSB913-1_map3	0001.CSV	829.276	0.041845
PSB913-1_map3	0001.CSV	833.133	0.0509728
PSB913-1_map3	0001.CSV	836.99	0.0634945
PSB913-1_map3	0001.CSV	840.847	0.0833668
PSB913-1_map3	0001.CSV	844.704	0.102524
PSB913-1_map3	0001.CSV	848.561	0.128296
PSB913-1_map3	0001.CSV	852.418	0.1524
PSB913-1_map3	0001.CSV	856.275	0.151487
PSB913-1_map3	0001.CSV	860.132	0.12538
PSB913-1_map3	0001.CSV	863.99	0.092854
PSB913-1_map3	0001.CSV	867.847	0.06106
PSB913-1_map3	0001.CSV	871.704	0.0381787
PSB913-1_map3	0001.CSV	875.561	0.0243333
PSB913-1_map3	0001.CSV	879.418	0.0181666
PSB913-1_map3	0001.CSV	883.275	0.0142743
PSB913-1_map3	0001.CSV	887.132	0.0124936
PSB913-1_map3	0001.CSV	890.989	0.0111549
PSB913-1_map3	0001.CSV	894.846	0.0113025
PSB913-1_map3	0001.CSV	898.703	0.011029
PSB913-1_map3	0001.CSV	902.561	0.0118499
PSB913-1_map3	0001.CSV	906.418	0.0122761
PSB913-1_map3	0001.CSV	910.275	0.0125705
PSB913-1_map3	0001.CSV	914.132	0.0115962
PSB913-1_map3	0001.CSV	917.989	0.0118431
PSB913-1_map3	0001.CSV	921.846	0.0117837
PSB913-1_map3	0001.CSV	925.703	0.0124402
PSB913-1_map3	0001.CSV	929.56	0.0124851
PSB913-1_map3	0001.CSV	933.417	0.0129996
PSB913-1_map3	0001.CSV	937.274	0.0128299
PSB913-1_map3	0001.CSV	941.131	0.0133469
PSB913-1_map3	0001.CSV	944.989	0.0133592
PSB913-1_map3	0001.CSV	948.846	0.0139144
PSB913-1_map3	0001.CSV	952.703	0.0139423
PSB913-1_map3	0001.CSV	956.56	0.014615
PSB913-1_map3	0001.CSV	960.417	0.0146113
PSB913-1_map3	0001.CSV	964.274	0.0150887
PSB913-1_map3	0001.CSV	968.131	0.015166
PSB913-1_map3	0001.CSV	971.988	0.015999
PSB913-1_map3	0001.CSV	975.845	0.0162561
PSB913-1_map3	0001.CSV	979.702	0.0171054
PSB913-1_map3	0001.CSV	983.559	0.0175348
PSB913-1_map3	0001.CSV	987.417	0.0184912
PSB913-1_map3	0001.CSV	991.274	0.0189159
PSB913-1_map3	0001.CSV	995.131	0.0197561
PSB913-1_map3	0001.CSV	998.988	0.0199035
PSB913-1_map3	0001.CSV	1002.85	0.0206276
PSB913-1_map3	0001.CSV	1006.7	0.0208735
PSB913-1_map3	0001.CSV	1010.56	0.0215982
PSB913-1_map3	0001.CSV	1014.42	0.021927
PSB913-1_map3	0001.CSV	1018.27	0.0228945
PSB913-1_map3	0001.CSV	1022.13	0.0232181
PSB913-1_map3	0001.CSV	1025.99	0.0241277
PSB913-1_map3	0001.CSV	1029.85	0.024462
PSB913-1_map3	0001.CSV	1033.7	0.0252848
PSB913-1_map3	0001.CSV	1037.56	0.0256726
PSB913-1_map3	0001.CSV	1041.42	0.0266583
PSB913-1_map3	0001.CSV	1045.27	0.0270163
PSB913-1_map3	0001.CSV	1049.13	0.0280212
PSB913-1_map3	0001.CSV	1052.99	0.0285344
PSB913-1_map3	0001.CSV	1056.84	0.0296213
PSB913-1_map3	0001.CSV	1060.7	0.030243
PSB913-1_map3	0001.CSV	1064.56	0.0316054
PSB913-1_map3	0001.CSV	1068.42	0.0324565
PSB913-1_map3	0001.CSV	1072.27	0.0343054
PSB913-1_map3	0001.CSV	1076.13	0.0374953
PSB913-1_map3	0001.CSV	1079.99	0.0455293
PSB913-1_map3	0001.CSV	1083.84	0.0481081
PSB913-1_map3	0001.CSV	1087.7	0.0394431
PSB913-1_map3	0001.CSV	1091.56	0.0316597
PSB913-1_map3	0001.CSV	1095.41	0.0294185
PSB913-1_map3	0001.CSV	1099.27	0.0285762
PSB913-1_map3	0001.CSV	1103.13	0.0289219
PSB913-1_map3	0001.CSV	1106.99	0.0290928
PSB913-1_map3	0001.CSV	1110.84	0.0297398
PSB913-1_map3	0001.CSV	1114.7	0.0297998
PSB913-1_map3	0001.CSV	1118.56	0.030254
PSB913-1_map3	0001.CSV	1122.41	0.0303059
PSB913-1_map3	0001.CSV	1126.27	0.030792
PSB913-1_map3	0001.CSV	1130.13	0.0308099
PSB913-1_map3	0001.CSV	1133.99	0.0312166
PSB913-1_map3	0001.CSV	1137.84	0.0313204
PSB913-1_map3	0001.CSV	1141.7	0.0318603
PSB913-1_map3	0001.CSV	1145.56	0.0320414
PSB913-1_map3	0001.CSV	1149.41	0.0326593
PSB913-1_map3	0001.CSV	1153.27	0.0330068
PSB913-1_map3	0001.CSV	1157.13	0.0338989
PSB913-1_map3	0001.CSV	1160.99	0.0343299
PSB913-1_map3	0001.CSV	1164.84	0.035012
PSB913-1_map3	0001.CSV	1168.7	0.0353043
PSB913-1_map3	0001.CSV	1172.56	0.035947
PSB913-1_map3	0001.CSV	1176.41	0.0361841
PSB913-1_map3	0001.CSV	1180.27	0.0367526
PSB913-1_map3	0001.CSV	1184.13	0.0368829
PSB913-1_map3	0001.CSV	1187.99	0.03732
PSB913-1_map3	0001.CSV	1191.84	0.0375124
PSB913-1_map3	0001.CSV	1195.7	0.0381973
PSB913-1_map3	0001.CSV	1199.56	0.0386289
PSB913-1_map3	0001.CSV	1203.41	0.0394209
PSB913-1_map3	0001.CSV	1207.27	0.0399523
PSB913-1_map3	0001.CSV	1211.13	0.040988
PSB913-1_map3	0001.CSV	1214.98	0.0417819
PSB913-1_map3	0001.CSV	1218.84	0.042979
PSB913-1_map3	0001.CSV	1222.7	0.0438919
PSB913-1_map3	0001.CSV	1226.56	0.0451091
PSB913-1_map3	0001.CSV	1230.41	0.045953
PSB913-1_map3	0001.CSV	1234.27	0.047163
PSB913-1_map3	0001.CSV	1238.13	0.0479842
PSB913-1_map3	0001.CSV	1241.98	0.0491371
PSB913-1_map3	0001.CSV	1245.84	0.0499751
PSB913-1_map3	0001.CSV	1249.7	0.0510358
PSB913-1_map3	0001.CSV	1253.56	0.0516171
PSB913-1_map3	0001.CSV	1257.41	0.0525864
PSB913-1_map3	0001.CSV	1261.27	0.0535301
PSB913-1_map3	0001.CSV	1265.13	0.0550505
PSB913-1_map3	0001.CSV	1268.98	0.0563935
PSB913-1_map3	0001.CSV	1272.84	0.0581974
PSB913-1_map3	0001.CSV	1276.7	0.0595443
PSB913-1_map3	0001.CSV	1280.56	0.0610786
PSB913-1_map3	0001.CSV	1284.41	0.062191
PSB913-1_map3	0001.CSV	1288.27	0.063681
PSB913-1_map3	0001.CSV	1292.13	0.0649052
PSB913-1_map3	0001.CSV	1295.98	0.0665571
PSB913-1_map3	0001.CSV	1299.84	0.0680316
PSB913-1_map3	0001.CSV	1303.7	0.0699142
PSB913-1_map3	0001.CSV	1307.56	0.0715725
PSB913-1_map3	0001.CSV	1311.41	0.0736953
PSB913-1_map3	0001.CSV	1315.27	0.0756575
PSB913-1_map3	0001.CSV	1319.13	0.0781808
PSB913-1_map3	0001.CSV	1322.98	0.0803939
PSB913-1_map3	0001.CSV	1326.84	0.0830039
PSB913-1_map3	0001.CSV	1330.7	0.0855437
PSB913-1_map3	0001.CSV	1334.56	0.0884727
PSB913-1_map3	0001.CSV	1338.41	0.0918471
PSB913-1_map3	0001.CSV	1342.27	0.0961687
PSB913-1_map3	0001.CSV	1346.13	0.0993735
PSB913-1_map3	0001.CSV	1349.98	0.103464
PSB913-1_map3	0001.CSV	1353.84	0.107588
PSB913-1_map3	0001.CSV	1357.7	0.11207
PSB913-1_map3	0001.CSV	1361.56	0.116747
PSB913-1_map3	0001.CSV	1365.41	0.122554
PSB913-1_map3	0001.CSV	1369.27	0.126787
PSB913-1_map3	0001.CSV	1373.13	0.132148
PSB913-1_map3	0001.CSV	1376.98	0.137663
PSB913-1_map3	0001.CSV	1380.84	0.14249
PSB913-1_map3	0001.CSV	1384.7	0.146641
PSB913-1_map3	0001.CSV	1388.56	0.152305
PSB913-1_map3	0001.CSV	1392.41	0.156209
PSB913-1_map3	0001.CSV	1396.27	0.161535
PSB913-1_map3	0001.CSV	1400.13	0.166299
PSB913-1_map3	0001.CSV	1403.98	0.170632
PSB913-1_map3	0001.CSV	1407.84	0.174574
PSB913-1_map3	0001.CSV	1411.7	0.178768
PSB913-1_map3	0001.CSV	1415.55	0.181723
PSB913-1_map3	0001.CSV	1419.41	0.186637
PSB913-1_map3	0001.CSV	1423.27	0.190022
PSB913-1_map3	0001.CSV	1427.12	0.193771
PSB913-1_map3	0001.CSV	1430.98	0.197453
PSB913-1_map3	0001.CSV	1434.84	0.203434
PSB913-1_map3	0001.CSV	1438.7	0.210389
PSB913-1_map3	0001.CSV	1442.55	0.216164
PSB913-1_map3	0001.CSV	1446.41	0.219447
PSB913-1_map3	0001.CSV	1450.27	0.221431
PSB913-1_map3	0001.CSV	1454.12	0.219155
PSB913-1_map3	0001.CSV	1457.98	0.215301
PSB913-1_map3	0001.CSV	1461.84	0.210776
PSB913-1_map3	0001.CSV	1465.7	0.207985
PSB913-1_map3	0001.CSV	1469.55	0.201791
PSB913-1_map3	0001.CSV	1473.41	0.189142
PSB913-1_map3	0001.CSV	1477.27	0.172341
PSB913-1_map3	0001.CSV	1481.12	0.161733
PSB913-1_map3	0001.CSV	1484.98	0.151197
PSB913-1_map3	0001.CSV	1488.84	0.138554
PSB913-1_map3	0001.CSV	1492.7	0.125797
PSB913-1_map3	0001.CSV	1496.55	0.116959
PSB913-1_map3	0001.CSV	1500.41	0.106858
PSB913-1_map3	0001.CSV	1504.27	0.101288
PSB913-1_map3	0001.CSV	1508.12	0.0904294
PSB913-1_map3	0001.CSV	1511.98	0.082809
PSB913-1_map3	0001.CSV	1515.84	0.0774473
PSB913-1_map3	0001.CSV	1519.7	0.0707791
PSB913-1_map3	0001.CSV	1523.55	0.0625327
PSB913-1_map3	0001.CSV	1527.41	0.0568657
PSB913-1_map3	0001.CSV	1531.27	0.0519419
PSB913-1_map3	0001.CSV	1535.12	0.0475897
PSB913-1_map3	0001.CSV	1538.98	0.0428857
PSB913-1_map3	0001.CSV	1542.84	0.0356039
PSB913-1_map3	0001.CSV	1546.7	0.0309181
PSB913-1_map3	0001.CSV	1550.55	0.0275169
PSB913-1_map3	0001.CSV	1554.41	0.0237029
PSB913-1_map3	0001.CSV	1558.27	0.0191079
PSB913-1_map3	0001.CSV	1562.12	0.0145113
PSB913-1_map3	0001.CSV	1565.98	0.0119875
PSB913-1_map3	0001.CSV	1569.84	0.00851235
PSB913-1_map3	0001.CSV	1573.69	0.00499618
PSB913-1_map3	0001.CSV	1577.55	0.000583153
PSB913-1_map3	0001.CSV	1581.41	-0.00323065
PSB913-1_map3	0001.CSV	1585.27	-0.00654138
PSB913-1_map3	0001.CSV	1589.12	-0.0094844
PSB913-1_map3	0001.CSV	1592.98	-0.0118005
PSB913-1_map3	0001.CSV	1596.84	-0.0134498
PSB913-1_map3	0001.CSV	1600.69	-0.0147943
PSB913-1_map3	0001.CSV	1604.55	-0.0158059
PSB913-1_map3	0001.CSV	1608.41	-0.0166791
PSB913-1_map3	0001.CSV	1612.27	-0.0175013
PSB913-1_map3	0001.CSV	1616.12	-0.018242
PSB913-1_map3	0001.CSV	1619.98	-0.018638
PSB913-1_map3	0001.CSV	1623.84	-0.0190817
PSB913-1_map3	0001.CSV	1627.69	-0.0194633
PSB913-1_map3	0001.CSV	1631.55	-0.0201581
PSB913-1_map3	0001.CSV	1635.41	-0.0204863
PSB913-1_map3	0001.CSV	1639.27	-0.020457
PSB913-1_map3	0001.CSV	1643.12	-0.0209364
PSB913-1_map3	0001.CSV	1646.98	-0.0212461
PSB913-1_map3	0001.CSV	1650.84	-0.0214114
PSB913-1_map3	0001.CSV	1654.69	-0.0212054
PSB913-1_map3	0001.CSV	1658.55	-0.0215256
PSB913-1_map3	0001.CSV	1662.41	-0.0220483
PSB913-1_map3	0001.CSV	1666.27	-0.0225152
PSB913-1_map3	0001.CSV	1670.12	-0.0228832
PSB913-1_map3	0001.CSV	1673.98	-0.0229524
PSB913-1_map3	0001.CSV	1677.84	-0.023463
PSB913-1_map3	0001.CSV	1681.69	-0.0240028
PSB913-1_map3	0001.CSV	1685.55	-0.0238484
PSB913-1_map3	0001.CSV	1689.41	-0.0241296
PSB913-1_map3	0001.CSV	1693.27	-0.0250163
PSB913-1_map3	0001.CSV	1697.12	-0.0255281
PSB913-1_map3	0001.CSV	1700.98	-0.0256862
PSB913-1_map3	0001.CSV	1704.84	-0.0261376
PSB913-1_map3	0001.CSV	1708.69	-0.0267822
PSB913-1_map3	0001.CSV	1712.55	-0.0274986
PSB913-1_map3	0001.CSV	1716.41	-0.027641
PSB913-1_map3	0001.CSV	1720.27	-0.027401
PSB913-1_map3	0001.CSV	1724.12	-0.0278956
PSB913-1_map3	0001.CSV	1727.98	-0.0284713
PSB913-1_map3	0001.CSV	1731.84	-0.0287345
PSB913-1_map3	0001.CSV	1735.69	-0.0284987
PSB913-1_map3	0001.CSV	1739.55	-0.028782
PSB913-1_map3	0001.CSV	1743.41	-0.0291459
PSB913-1_map3	0001.CSV	1747.27	-0.0293705
PSB913-1_map3	0001.CSV	1751.12	-0.0292888
PSB913-1_map3	0001.CSV	1754.98	-0.029693
PSB913-1_map3	0001.CSV	1758.84	-0.0300123
PSB913-1_map3	0001.CSV	1762.69	-0.0299934
PSB913-1_map3	0001.CSV	1766.55	-0.03017
PSB913-1_map3	0001.CSV	1770.41	-0.0297044
PSB913-1_map3	0001.CSV	1774.26	-0.027587
PSB913-1_map3	0001.CSV	1778.12	-0.0256361
PSB913-1_map3	0001.CSV	1781.98	-0.0234226
PSB913-1_map3	0001.CSV	1785.84	-0.0221975
PSB913-1_map3	0001.CSV	1789.69	-0.0225487
PSB913-1_map3	0001.CSV	1793.55	-0.0241411
PSB913-1_map3	0001.CSV	1797.41	-0.0259016
PSB913-1_map3	0001.CSV	1801.26	-0.0275353
PSB913-1_map3	0001.CSV	1805.12	-0.0289504
PSB913-1_map3	0001.CSV	1808.98	-0.0298904
PSB913-1_map3	0001.CSV	1812.84	-0.0303796
PSB913-1_map3	0001.CSV	1816.69	-0.0308724
PSB913-1_map3	0001.CSV	1820.55	-0.0312626
PSB913-1_map3	0001.CSV	1824.41	-0.0315285
PSB913-1_map3	0001.CSV	1828.26	-0.0313959
PSB913-1_map3	0001.CSV	1832.12	-0.031301
PSB913-1_map3	0001.CSV	1835.98	-0.0315231
PSB913-1_map3	0001.CSV	1839.84	-0.0318505
PSB913-1_map3	0001.CSV	1843.69	-0.031773
PSB913-1_map3	0001.CSV	1847.55	-0.0314669
PSB913-1_map3	0001.CSV	1851.41	-0.031628
PSB913-1_map3	0001.CSV	1855.26	-0.0317701
PSB913-1_map3	0001.CSV	1859.12	-0.0317646
PSB913-1_map3	0001.CSV	1862.98	-0.0318754
PSB913-1_map3	0001.CSV	1866.84	-0.0317616
PSB913-1_map3	0001.CSV	1870.69	-0.0313177
PSB913-1_map3	0001.CSV	1874.55	-0.0314577
PSB913-1_map3	0001.CSV	1878.41	-0.0315828
PSB913-1_map3	0001.CSV	1882.26	-0.0315718
PSB913-1_map3	0001.CSV	1886.12	-0.0315753
PSB913-1_map3	0001.CSV	1889.98	-0.031464
PSB913-1_map3	0001.CSV	1893.83	-0.0313542
PSB913-1_map3	0001.CSV	1897.69	-0.0313665
PSB913-1_map3	0001.CSV	1901.55	-0.0313833
PSB913-1_map3	0001.CSV	1905.41	-0.0313525
PSB913-1_map3	0001.CSV	1909.26	-0.0312875
PSB913-1_map3	0001.CSV	1913.12	-0.0313749
PSB913-1_map3	0001.CSV	1916.98	-0.0314399
PSB913-1_map3	0001.CSV	1920.83	-0.031276
PSB913-1_map3	0001.CSV	1924.69	-0.0311496
PSB913-1_map3	0001.CSV	1928.55	-0.0311527
PSB913-1_map3	0001.CSV	1932.4	-0.0311563
PSB913-1_map3	0001.CSV	1936.26	-0.0312031
PSB913-1_map3	0001.CSV	1940.12	-0.0312459
PSB913-1_map3	0001.CSV	1943.98	-0.0310544
PSB913-1_map3	0001.CSV	1947.83	-0.0310117
PSB913-1_map3	0001.CSV	1951.69	-0.0310953
PSB913-1_map3	0001.CSV	1955.55	-0.0311146
PSB913-1_map3	0001.CSV	1959.4	-0.0311265
PSB913-1_map3	0001.CSV	1963.26	-0.0311684
PSB913-1_map3	0001.CSV	1967.12	-0.0310906
PSB913-1_map3	0001.CSV	1970.98	-0.0310884
PSB913-1_map3	0001.CSV	1974.83	-0.0311943
PSB913-1_map3	0001.CSV	1978.69	-0.0312031
PSB913-1_map3	0001.CSV	1982.55	-0.0311894
PSB913-1_map3	0001.CSV	1986.4	-0.03123
PSB913-1_map3	0001.CSV	1990.26	-0.0311136
PSB913-1_map3	0001.CSV	1994.12	-0.0309074
PSB913-1_map3	0001.CSV	1997.98	-0.0309841
PSB913-1_map3	0001.CSV	2001.83	-0.031042
PSB913-1_map3	0001.CSV	2005.69	-0.0310153
PSB913-1_map3	0001.CSV	2009.55	-0.0309981
PSB913-1_map3	0001.CSV	2013.4	-0.0310364
PSB913-1_map3	0001.CSV	2017.26	-0.0310294
PSB913-1_map3	0001.CSV	2021.12	-0.0310005
PSB913-1_map3	0001.CSV	2024.97	-0.0310034
PSB913-1_map3	0001.CSV	2028.83	-0.0309835
PSB913-1_map3	0001.CSV	2032.69	-0.0309991
PSB913-1_map3	0001.CSV	2036.55	-0.0310028
PSB913-1_map3	0001.CSV	2040.4	-0.0309639
PSB913-1_map3	0001.CSV	2044.26	-0.030903
PSB913-1_map3	0001.CSV	2048.12	-0.0308922
PSB913-1_map3	0001.CSV	2051.97	-0.0308743
PSB913-1_map3	0001.CSV	2055.83	-0.0308566
PSB913-1_map3	0001.CSV	2059.69	-0.0308541
PSB913-1_map3	0001.CSV	2063.55	-0.0308622
PSB913-1_map3	0001.CSV	2067.4	-0.0308075
PSB913-1_map3	0001.CSV	2071.26	-0.0308069
PSB913-1_map3	0001.CSV	2075.12	-0.0307807
PSB913-1_map3	0001.CSV	2078.97	-0.0307747
PSB913-1_map3	0001.CSV	2082.83	-0.0307863
PSB913-1_map3	0001.CSV	2086.69	-0.0307892
PSB913-1_map3	0001.CSV	2090.55	-0.0306918
PSB913-1_map3	0001.CSV	2094.4	-0.0306622
PSB913-1_map3	0001.CSV	2098.26	-0.0306273
PSB913-1_map3	0001.CSV	2102.12	-0.0306172
PSB913-1_map3	0001.CSV	2105.97	-0.0305821
PSB913-1_map3	0001.CSV	2109.83	-0.0305497
PSB913-1_map3	0001.CSV	2113.69	-0.0305503
PSB913-1_map3	0001.CSV	2117.55	-0.0305417
PSB913-1_map3	0001.CSV	2121.4	-0.0305081
PSB913-1_map3	0001.CSV	2125.26	-0.0304695
PSB913-1_map3	0001.CSV	2129.12	-0.0303659
PSB913-1_map3	0001.CSV	2132.97	-0.0302976
PSB913-1_map3	0001.CSV	2136.83	-0.0301976
PSB913-1_map3	0001.CSV	2140.69	-0.0301151
PSB913-1_map3	0001.CSV	2144.55	-0.0300893
PSB913-1_map3	0001.CSV	2148.4	-0.0300963
PSB913-1_map3	0001.CSV	2152.26	-0.030062
PSB913-1_map3	0001.CSV	2156.12	-0.030011
PSB913-1_map3	0001.CSV	2159.97	-0.0299398
PSB913-1_map3	0001.CSV	2163.83	-0.0299004
PSB913-1_map3	0001.CSV	2167.69	-0.0298513
PSB913-1_map3	0001.CSV	2171.55	-0.0298786
PSB913-1_map3	0001.CSV	2175.4	-0.0298342
PSB913-1_map3	0001.CSV	2179.26	-0.0297346
PSB913-1_map3	0001.CSV	2183.12	-0.0296577
PSB913-1_map3	0001.CSV	2186.97	-0.0296471
PSB913-1_map3	0001.CSV	2190.83	-0.0296165
PSB913-1_map3	0001.CSV	2194.69	-0.0296097
PSB913-1_map3	0001.CSV	2198.55	-0.0295454
PSB913-1_map3	0001.CSV	2202.4	-0.0295454
PSB913-1_map3	0001.CSV	2206.26	-0.0295105
PSB913-1_map3	0001.CSV	2210.12	-0.0294794
PSB913-1_map3	0001.CSV	2213.97	-0.0294281
PSB913-1_map3	0001.CSV	2217.83	-0.0293692
PSB913-1_map3	0001.CSV	2221.69	-0.0293212
PSB913-1_map3	0001.CSV	2225.54	-0.0293224
PSB913-1_map3	0001.CSV	2229.4	-0.0292642
PSB913-1_map3	0001.CSV	2233.26	-0.0292686
PSB913-1_map3	0001.CSV	2237.12	-0.0292657
PSB913-1_map3	0001.CSV	2240.97	-0.0292267
PSB913-1_map3	0001.CSV	2244.83	-0.0291598
PSB913-1_map3	0001.CSV	2248.69	-0.0292137
PSB913-1_map3	0001.CSV	2252.54	-0.029215
PSB913-1_map3	0001.CSV	2256.4	-0.0291937
PSB913-1_map3	0001.CSV	2260.26	-0.0291408
PSB913-1_map3	0001.CSV	2264.11	-0.0291665
PSB913-1_map3	0001.CSV	2267.97	-0.0291252
PSB913-1_map3	0001.CSV	2271.83	-0.0290931
PSB913-1_map3	0001.CSV	2275.69	-0.0290698
PSB913-1_map3	0001.CSV	2279.54	-0.029083
PSB913-1_map3	0001.CSV	2283.4	-0.0291151
PSB913-1_map3	0001.CSV	2287.26	-0.0292472
PSB913-1_map3	0001.CSV	2291.11	-0.0292824
PSB913-1_map3	0001.CSV	2294.97	-0.0293405
PSB913-1_map3	0001.CSV	2298.83	-0.0293385
PSB913-1_map3	0001.CSV	2302.69	-0.029417
PSB913-1_map3	0001.CSV	2306.54	-0.0296595
PSB913-1_map3	0001.CSV	2310.4	-0.0300866
PSB913-1_map3	0001.CSV	2314.26	-0.030169
PSB913-1_map3	0001.CSV	2318.11	-0.031016
PSB913-1_map3	0001.CSV	2321.97	-0.0324909
PSB913-1_map3	0001.CSV	2325.83	-0.0342646
PSB913-1_map3	0001.CSV	2329.69	-0.0353969
PSB913-1_map3	0001.CSV	2333.54	-0.0376559
PSB913-1_map3	0001.CSV	2337.4	-0.0393948
PSB913-1_map3	0001.CSV	2341.26	-0.0403966
PSB913-1_map3	0001.CSV	2345.11	-0.0355931
PSB913-1_map3	0001.CSV	2348.97	-0.0342635
PSB913-1_map3	0001.CSV	2352.83	-0.0381755
PSB913-1_map3	0001.CSV	2356.69	-0.053686
PSB913-1_map3	0001.CSV	2360.54	-0.0702243
PSB913-1_map3	0001.CSV	2364.4	-0.0606399
PSB913-1_map3	0001.CSV	2368.26	-0.0415616
PSB913-1_map3	0001.CSV	2372.11	-0.0330219
PSB913-1_map3	0001.CSV	2375.97	-0.0300504
PSB913-1_map3	0001.CSV	2379.83	-0.0292835
PSB913-1_map3	0001.CSV	2383.69	-0.0291558
PSB913-1_map3	0001.CSV	2387.54	-0.029383
PSB913-1_map3	0001.CSV	2391.4	-0.0295303
PSB913-1_map3	0001.CSV	2395.26	-0.02964
PSB913-1_map3	0001.CSV	2399.11	-0.0296608
PSB913-1_map3	0001.CSV	2402.97	-0.0297458
PSB913-1_map3	0001.CSV	2406.83	-0.0297355
PSB913-1_map3	0001.CSV	2410.68	-0.0297876
PSB913-1_map3	0001.CSV	2414.54	-0.0297454
PSB913-1_map3	0001.CSV	2418.4	-0.02974
PSB913-1_map3	0001.CSV	2422.26	-0.0296838
PSB913-1_map3	0001.CSV	2426.11	-0.0296996
PSB913-1_map3	0001.CSV	2429.97	-0.0296875
PSB913-1_map3	0001.CSV	2433.83	-0.0296651
PSB913-1_map3	0001.CSV	2437.68	-0.029579
PSB913-1_map3	0001.CSV	2441.54	-0.0296185
PSB913-1_map3	0001.CSV	2445.4	-0.0295313
PSB913-1_map3	0001.CSV	2449.26	-0.0295267
PSB913-1_map3	0001.CSV	2453.11	-0.0295521
PSB913-1_map3	0001.CSV	2456.97	-0.0295403
PSB913-1_map3	0001.CSV	2460.83	-0.0293704
PSB913-1_map3	0001.CSV	2464.68	-0.0291603
PSB913-1_map3	0001.CSV	2468.54	-0.0288994
PSB913-1_map3	0001.CSV	2472.4	-0.0287362
PSB913-1_map3	0001.CSV	2476.26	-0.0284382
PSB913-1_map3	0001.CSV	2480.11	-0.0281353
PSB913-1_map3	0001.CSV	2483.97	-0.0277344
PSB913-1_map3	0001.CSV	2487.83	-0.0274311
PSB913-1_map3	0001.CSV	2491.68	-0.0271418
PSB913-1_map3	0001.CSV	2495.54	-0.0269616
PSB913-1_map3	0001.CSV	2499.4	-0.026883
PSB913-1_map3	0001.CSV	2503.26	-0.0269805
PSB913-1_map3	0001.CSV	2507.11	-0.0270511
PSB913-1_map3	0001.CSV	2510.97	-0.0270869
PSB913-1_map3	0001.CSV	2514.83	-0.0268584
PSB913-1_map3	0001.CSV	2518.68	-0.0266117
PSB913-1_map3	0001.CSV	2522.54	-0.0263799
PSB913-1_map3	0001.CSV	2526.4	-0.0264274
PSB913-1_map3	0001.CSV	2530.26	-0.0265906
PSB913-1_map3	0001.CSV	2534.11	-0.0269417
PSB913-1_map3	0001.CSV	2537.97	-0.0271554
PSB913-1_map3	0001.CSV	2541.83	-0.0272633
PSB913-1_map3	0001.CSV	2545.68	-0.0273229
PSB913-1_map3	0001.CSV	2549.54	-0.027486
PSB913-1_map3	0001.CSV	2553.4	-0.0275981
PSB913-1_map3	0001.CSV	2557.26	-0.0278487
PSB913-1_map3	0001.CSV	2561.11	-0.0280215
PSB913-1_map3	0001.CSV	2564.97	-0.0281585
PSB913-1_map3	0001.CSV	2568.83	-0.028311
PSB913-1_map3	0001.CSV	2572.68	-0.0285606
PSB913-1_map3	0001.CSV	2576.54	-0.0287028
PSB913-1_map3	0001.CSV	2580.4	-0.02891
PSB913-1_map3	0001.CSV	2584.25	-0.0290425
PSB913-1_map3	0001.CSV	2588.11	-0.0291845
PSB913-1_map3	0001.CSV	2591.97	-0.0292201
PSB913-1_map3	0001.CSV	2595.83	-0.0293693
PSB913-1_map3	0001.CSV	2599.68	-0.0294237
PSB913-1_map3	0001.CSV	2603.54	-0.0294991
PSB913-1_map3	0001.CSV	2607.4	-0.0294779
PSB913-1_map3	0001.CSV	2611.25	-0.0294524
PSB913-1_map3	0001.CSV	2615.11	-0.0293875
PSB913-1_map3	0001.CSV	2618.97	-0.0295066
PSB913-1_map3	0001.CSV	2622.82	-0.0295
PSB913-1_map3	0001.CSV	2626.68	-0.029507
PSB913-1_map3	0001.CSV	2630.54	-0.0295652
PSB913-1_map3	0001.CSV	2634.4	-0.0296783
PSB913-1_map3	0001.CSV	2638.25	-0.0297287
PSB913-1_map3	0001.CSV	2642.11	-0.0299484
PSB913-1_map3	0001.CSV	2645.97	-0.0301014
PSB913-1_map3	0001.CSV	2649.82	-0.0302458
PSB913-1_map3	0001.CSV	2653.68	-0.0303265
PSB913-1_map3	0001.CSV	2657.54	-0.0304261
PSB913-1_map3	0001.CSV	2661.4	-0.030515
PSB913-1_map3	0001.CSV	2665.25	-0.0307252
PSB913-1_map3	0001.CSV	2669.11	-0.0306984
PSB913-1_map3	0001.CSV	2672.97	-0.0305444
PSB913-1_map3	0001.CSV	2676.82	-0.0302703
PSB913-1_map3	0001.CSV	2680.68	-0.0303693
PSB913-1_map3	0001.CSV	2684.54	-0.0307291
PSB913-1_map3	0001.CSV	2688.4	-0.0309637
PSB913-1_map3	0001.CSV	2692.25	-0.0309444
PSB913-1_map3	0001.CSV	2696.11	-0.0309348
PSB913-1_map3	0001.CSV	2699.97	-0.030912
PSB913-1_map3	0001.CSV	2703.82	-0.0309734
PSB913-1_map3	0001.CSV	2707.68	-0.0308509
PSB913-1_map3	0001.CSV	2711.54	-0.030824
PSB913-1_map3	0001.CSV	2715.4	-0.0307751
PSB913-1_map3	0001.CSV	2719.25	-0.0306158
PSB913-1_map3	0001.CSV	2723.11	-0.030232
PSB913-1_map3	0001.CSV	2726.97	-0.0302526
PSB913-1_map3	0001.CSV	2730.82	-0.0304834
PSB913-1_map3	0001.CSV	2734.68	-0.0304595
PSB913-1_map3	0001.CSV	2738.54	-0.0303406
PSB913-1_map3	0001.CSV	2742.4	-0.030258
PSB913-1_map3	0001.CSV	2746.25	-0.0299018
PSB913-1_map3	0001.CSV	2750.11	-0.029837
PSB913-1_map3	0001.CSV	2753.97	-0.0299742
PSB913-1_map3	0001.CSV	2757.82	-0.0300172
PSB913-1_map3	0001.CSV	2761.68	-0.0300073
PSB913-1_map3	0001.CSV	2765.54	-0.0300923
PSB913-1_map3	0001.CSV	2769.39	-0.0299115
PSB913-1_map3	0001.CSV	2773.25	-0.0294768
PSB913-1_map3	0001.CSV	2777.11	-0.0293935
PSB913-1_map3	0001.CSV	2780.97	-0.0296012
PSB913-1_map3	0001.CSV	2784.82	-0.0293473
PSB913-1_map3	0001.CSV	2788.68	-0.0289559
PSB913-1_map3	0001.CSV	2792.54	-0.0288695
PSB913-1_map3	0001.CSV	2796.39	-0.0288783
PSB913-1_map3	0001.CSV	2800.25	-0.0289458
PSB913-1_map3	0001.CSV	2804.11	-0.0291216
PSB913-1_map3	0001.CSV	2807.97	-0.0288939
PSB913-1_map3	0001.CSV	2811.82	-0.0288295
PSB913-1_map3	0001.CSV	2815.68	-0.028862
PSB913-1_map3	0001.CSV	2819.54	-0.0287571
PSB913-1_map3	0001.CSV	2823.39	-0.0286183
PSB913-1_map3	0001.CSV	2827.25	-0.0285827
PSB913-1_map3	0001.CSV	2831.11	-0.0281354
PSB913-1_map3	0001.CSV	2834.97	-0.0275264
PSB913-1_map3	0001.CSV	2838.82	-0.0271287
PSB913-1_map3	0001.CSV	2842.68	-0.0269732
PSB913-1_map3	0001.CSV	2846.54	-0.0263366
PSB913-1_map3	0001.CSV	2850.39	-0.026178
PSB913-1_map3	0001.CSV	2854.25	-0.0265821
PSB913-1_map3	0001.CSV	2858.11	-0.0267728
PSB913-1_map3	0001.CSV	2861.97	-0.0269173
PSB913-1_map3	0001.CSV	2865.82	-0.0270295
PSB913-1_map3	0001.CSV	2869.68	-0.0267549
PSB913-1_map3	0001.CSV	2873.54	-0.0265875
PSB913-1_map3	0001.CSV	2877.39	-0.0268984
PSB913-1_map3	0001.CSV	2881.25	-0.0271613
PSB913-1_map3	0001.CSV	2885.11	-0.0271692
PSB913-1_map3	0001.CSV	2888.97	-0.0269693
PSB913-1_map3	0001.CSV	2892.82	-0.0264456
PSB913-1_map3	0001.CSV	2896.68	-0.0261792
PSB913-1_map3	0001.CSV	2900.54	-0.0261199
PSB913-1_map3	0001.CSV	2904.39	-0.0257887
PSB913-1_map3	0001.CSV	2908.25	-0.0249735
PSB913-1_map3	0001.CSV	2912.11	-0.0237991
PSB913-1_map3	0001.CSV	2915.97	-0.0228876
PSB913-1_map3	0001.CSV	2919.82	-0.0232167
PSB913-1_map3	0001.CSV	2923.68	-0.0242305
PSB913-1_map3	0001.CSV	2927.54	-0.0247141
PSB913-1_map3	0001.CSV	2931.39	-0.0251625
PSB913-1_map3	0001.CSV	2935.25	-0.0258906
PSB913-1_map3	0001.CSV	2939.11	-0.0259471
PSB913-1_map3	0001.CSV	2942.96	-0.0255297
PSB913-1_map3	0001.CSV	2946.82	-0.0255596
PSB913-1_map3	0001.CSV	2950.68	-0.0260364
PSB913-1_map3	0001.CSV	2954.54	-0.0265441
PSB913-1_map3	0001.CSV	2958.39	-0.0270657
PSB913-1_map3	0001.CSV	2962.25	-0.0273126
PSB913-1_map3	0001.CSV	2966.11	-0.0275532
PSB913-1_map3	0001.CSV	2969.96	-0.0273924
PSB913-1_map3	0001.CSV	2973.82	-0.0269457
PSB913-1_map3	0001.CSV	2977.68	-0.0266253
PSB913-1_map3	0001.CSV	2981.53	-0.0268352
PSB913-1_map3	0001.CSV	2985.39	-0.027332
PSB913-1_map3	0001.CSV	2989.25	-0.0272143
PSB913-1_map3	0001.CSV	2993.11	-0.0267849
PSB913-1_map3	0001.CSV	2996.96	-0.0268567
PSB913-1_map3	0001.CSV	3000.82	-0.0272835
PSB913-1_map3	0001.CSV	3004.68	-0.0275542
PSB913-1_map3	0001.CSV	3008.53	-0.0272831
PSB913-1_map3	0001.CSV	3012.39	-0.0268948
PSB913-1_map3	0001.CSV	3016.25	-0.026889
PSB913-1_map3	0001.CSV	3020.11	-0.0271812
PSB913-1_map3	0001.CSV	3023.96	-0.0273816
PSB913-1_map3	0001.CSV	3027.82	-0.0274347
PSB913-1_map3	0001.CSV	3031.68	-0.0272462
PSB913-1_map3	0001.CSV	3035.53	-0.0272092
PSB913-1_map3	0001.CSV	3039.39	-0.0271992
PSB913-1_map3	0001.CSV	3043.25	-0.027034
PSB913-1_map3	0001.CSV	3047.11	-0.0270105
PSB913-1_map3	0001.CSV	3050.96	-0.0270478
PSB913-1_map3	0001.CSV	3054.82	-0.0271402
PSB913-1_map3	0001.CSV	3058.68	-0.0272416
PSB913-1_map3	0001.CSV	3062.53	-0.0271239
PSB913-1_map3	0001.CSV	3066.39	-0.0267991
PSB913-1_map3	0001.CSV	3070.25	-0.0268755
PSB913-1_map3	0001.CSV	3074.11	-0.0267925
PSB913-1_map3	0001.CSV	3077.96	-0.0264504
PSB913-1_map3	0001.CSV	3081.82	-0.0262823
PSB913-1_map3	0001.CSV	3085.68	-0.0263015
PSB913-1_map3	0001.CSV	3089.53	-0.0263284
PSB913-1_map3	0001.CSV	3093.39	-0.0264906
PSB913-1_map3	0001.CSV	3097.25	-0.0264369
PSB913-1_map3	0001.CSV	3101.11	-0.0262266
PSB913-1_map3	0001.CSV	3104.96	-0.0260746
PSB913-1_map3	0001.CSV	3108.82	-0.0258833
PSB913-1_map3	0001.CSV	3112.68	-0.0257447
PSB913-1_map3	0001.CSV	3116.53	-0.0256443
PSB913-1_map3	0001.CSV	3120.39	-0.0256723
PSB913-1_map3	0001.CSV	3124.25	-0.0258501
PSB913-1_map3	0001.CSV	3128.11	-0.0259047
PSB913-1_map3	0001.CSV	3131.96	-0.0258872
PSB913-1_map3	0001.CSV	3135.82	-0.0256356
PSB913-1_map3	0001.CSV	3139.68	-0.0254861
PSB913-1_map3	0001.CSV	3143.53	-0.0256739
PSB913-1_map3	0001.CSV	3147.39	-0.0255567
PSB913-1_map3	0001.CSV	3151.25	-0.0252068
PSB913-1_map3	0001.CSV	3155.1	-0.0253399
PSB913-1_map3	0001.CSV	3158.96	-0.0257269
PSB913-1_map3	0001.CSV	3162.82	-0.0258185
PSB913-1_map3	0001.CSV	3166.68	-0.0257908
PSB913-1_map3	0001.CSV	3170.53	-0.0258799
PSB913-1_map3	0001.CSV	3174.39	-0.0258385
PSB913-1_map3	0001.CSV	3178.25	-0.025685
PSB913-1_map3	0001.CSV	3182.1	-0.0254299
PSB913-1_map3	0001.CSV	3185.96	-0.0253263
PSB913-1_map3	0001.CSV	3189.82	-0.0251975
PSB913-1_map3	0001.CSV	3193.68	-0.0252318
PSB913-1_map3	0001.CSV	3197.53	-0.0251895
PSB913-1_map3	0001.CSV	3201.39	-0.0251326
PSB913-1_map3	0001.CSV	3205.25	-0.0251848
PSB913-1_map3	0001.CSV	3209.1	-0.025302
PSB913-1_map3	0001.CSV	3212.96	-0.025103
PSB913-1_map3	0001.CSV	3216.82	-0.0249619
PSB913-1_map3	0001.CSV	3220.68	-0.0250391
PSB913-1_map3	0001.CSV	3224.53	-0.0252248
PSB913-1_map3	0001.CSV	3228.39	-0.0249631
PSB913-1_map3	0001.CSV	3232.25	-0.0245909
PSB913-1_map3	0001.CSV	3236.1	-0.0247059
PSB913-1_map3	0001.CSV	3239.96	-0.0249437
PSB913-1_map3	0001.CSV	3243.82	-0.0246196
PSB913-1_map3	0001.CSV	3247.68	-0.024527
PSB913-1_map3	0001.CSV	3251.53	-0.0246701
PSB913-1_map3	0001.CSV	3255.39	-0.0247182
PSB913-1_map3	0001.CSV	3259.25	-0.0249048
PSB913-1_map3	0001.CSV	3263.1	-0.0249834
PSB913-1_map3	0001.CSV	3266.96	-0.024495
PSB913-1_map3	0001.CSV	3270.82	-0.0241549
PSB913-1_map3	0001.CSV	3274.68	-0.0242159
PSB913-1_map3	0001.CSV	3278.53	-0.0245872
PSB913-1_map3	0001.CSV	3282.39	-0.0246974
PSB913-1_map3	0001.CSV	3286.25	-0.0246605
PSB913-1_map3	0001.CSV	3290.1	-0.0242644
PSB913-1_map3	0001.CSV	3293.96	-0.0241128
PSB913-1_map3	0001.CSV	3297.82	-0.0243116
PSB913-1_map3	0001.CSV	3301.67	-0.0242588
PSB913-1_map3	0001.CSV	3305.53	-0.0238818
PSB913-1_map3	0001.CSV	3309.39	-0.0240218
PSB913-1_map3	0001.CSV	3313.25	-0.0243806
PSB913-1_map3	0001.CSV	3317.1	-0.0246241
PSB913-1_map3	0001.CSV	3320.96	-0.0244361
PSB913-1_map3	0001.CSV	3324.82	-0.0242438
PSB913-1_map3	0001.CSV	3328.67	-0.0244733
PSB913-1_map3	0001.CSV	3332.53	-0.0246786
PSB913-1_map3	0001.CSV	3336.39	-0.0241278
PSB913-1_map3	0001.CSV	3340.24	-0.0238845
PSB913-1_map3	0001.CSV	3344.1	-0.0240976
PSB913-1_map3	0001.CSV	3347.96	-0.024248
PSB913-1_map3	0001.CSV	3351.82	-0.02423
PSB913-1_map3	0001.CSV	3355.67	-0.0244032
PSB913-1_map3	0001.CSV	3359.53	-0.0241982
PSB913-1_map3	0001.CSV	3363.39	-0.0238759
PSB913-1_map3	0001.CSV	3367.24	-0.0235244
PSB913-1_map3	0001.CSV	3371.1	-0.0237952
PSB913-1_map3	0001.CSV	3374.96	-0.0241635
PSB913-1_map3	0001.CSV	3378.82	-0.0244742
PSB913-1_map3	0001.CSV	3382.67	-0.0245724
PSB913-1_map3	0001.CSV	3386.53	-0.0243368
PSB913-1_map3	0001.CSV	3390.39	-0.023848
PSB913-1_map3	0001.CSV	3394.24	-0.0235888
PSB913-1_map3	0001.CSV	3398.1	-0.0234639
PSB913-1_map3	0001.CSV	3401.96	-0.0237423
PSB913-1_map3	0001.CSV	3405.82	-0.0239791
PSB913-1_map3	0001.CSV	3409.67	-0.0239399
PSB913-1_map3	0001.CSV	3413.53	-0.0239979
PSB913-1_map3	0001.CSV	3417.39	-0.0244435
PSB913-1_map3	0001.CSV	3421.24	-0.0244701
PSB913-1_map3	0001.CSV	3425.1	-0.0241516
PSB913-1_map3	0001.CSV	3428.96	-0.0237878
PSB913-1_map3	0001.CSV	3432.82	-0.0238238
PSB913-1_map3	0001.CSV	3436.67	-0.023908
PSB913-1_map3	0001.CSV	3440.53	-0.0243419
PSB913-1_map3	0001.CSV	3444.39	-0.024498
PSB913-1_map3	0001.CSV	3448.24	-0.0245478
PSB913-1_map3	0001.CSV	3452.1	-0.024602
PSB913-1_map3	0001.CSV	3455.96	-0.0246422
PSB913-1_map3	0001.CSV	3459.82	-0.0243262
PSB913-1_map3	0001.CSV	3463.67	-0.0240742
PSB913-1_map3	0001.CSV	3467.53	-0.0239836
PSB913-1_map3	0001.CSV	3471.39	-0.0244499
PSB913-1_map3	0001.CSV	3475.24	-0.0246719
PSB913-1_map3	0001.CSV	3479.1	-0.0246814
PSB913-1_map3	0001.CSV	3482.96	-0.02463
PSB913-1_map3	0001.CSV	3486.82	-0.0245754
PSB913-1_map3	0001.CSV	3490.67	-0.0245831
PSB913-1_map3	0001.CSV	3494.53	-0.0246493
PSB913-1_map3	0001.CSV	3498.39	-0.0246981
PSB913-1_map3	0001.CSV	3502.24	-0.0249207
PSB913-1_map3	0001.CSV	3506.1	-0.0252912
PSB913-1_map3	0001.CSV	3509.96	-0.0256844
PSB913-1_map3	0001.CSV	3513.81	-0.0255248
PSB913-1_map3	0001.CSV	3517.67	-0.0259574
PSB913-1_map3	0001.CSV	3521.53	-0.0259592
PSB913-1_map3	0001.CSV	3525.39	-0.0258959
PSB913-1_map3	0001.CSV	3529.24	-0.0258493
PSB913-1_map3	0001.CSV	3533.1	-0.0258424
PSB913-1_map3	0001.CSV	3536.96	-0.0256451
PSB913-1_map3	0001.CSV	3540.81	-0.0257284
PSB913-1_map3	0001.CSV	3544.67	-0.0256978
PSB913-1_map3	0001.CSV	3548.53	-0.0259815
PSB913-1_map3	0001.CSV	3552.39	-0.0263708
PSB913-1_map3	0001.CSV	3556.24	-0.0266752
PSB913-1_map3	0001.CSV	3560.1	-0.0271299
PSB913-1_map3	0001.CSV	3563.96	-0.0278323
PSB913-1_map3	0001.CSV	3567.81	-0.0269556
PSB913-1_map3	0001.CSV	3571.67	-0.0269377
PSB913-1_map3	0001.CSV	3575.53	-0.0274946
PSB913-1_map3	0001.CSV	3579.39	-0.0274131
PSB913-1_map3	0001.CSV	3583.24	-0.0274716
PSB913-1_map3	0001.CSV	3587.1	-0.0275395
PSB913-1_map3	0001.CSV	3590.96	-0.0275023
PSB913-1_map3	0001.CSV	3594.81	-0.0279287
PSB913-1_map3	0001.CSV	3598.67	-0.0276133
PSB913-1_map3	0001.CSV	3602.53	-0.0277741
PSB913-1_map3	0001.CSV	3606.39	-0.0283958
PSB913-1_map3	0001.CSV	3610.24	-0.0286776
PSB913-1_map3	0001.CSV	3614.1	-0.0285576
PSB913-1_map3	0001.CSV	3617.96	-0.0283221
PSB913-1_map3	0001.CSV	3621.81	-0.0280497
PSB913-1_map3	0001.CSV	3625.67	-0.0291611
PSB913-1_map3	0001.CSV	3629.53	-0.0288656
PSB913-1_map3	0001.CSV	3633.39	-0.0279168
PSB913-1_map3	0001.CSV	3637.24	-0.0283489
PSB913-1_map3	0001.CSV	3641.1	-0.0289938
PSB913-1_map3	0001.CSV	3644.96	-0.0299886
PSB913-1_map3	0001.CSV	3648.81	-0.0294624
PSB913-1_map3	0001.CSV	3652.67	-0.0278869
PSB913-1_map3	0001.CSV	3656.53	-0.0278839
PSB913-1_map3	0001.CSV	3660.38	-0.0277807
PSB913-1_map3	0001.CSV	3664.24	-0.028751
PSB913-1_map3	0001.CSV	3668.1	-0.0297325
PSB913-1_map3	0001.CSV	3671.96	-0.0299227
PSB913-1_map3	0001.CSV	3675.81	-0.0291464
PSB913-1_map3	0001.CSV	3679.67	-0.0285701
PSB913-1_map3	0001.CSV	3683.53	-0.0290226
PSB913-1_map3	0001.CSV	3687.38	-0.0293246
PSB913-1_map3	0001.CSV	3691.24	-0.0280963
PSB913-1_map3	0001.CSV	3695.1	-0.0283558
PSB913-1_map3	0001.CSV	3698.95	-0.0289356
PSB913-1_map3	0001.CSV	3702.81	-0.0289462
PSB913-1_map3	0001.CSV	3706.67	-0.0293407
PSB913-1_map3	0001.CSV	3710.53	-0.0294399
PSB913-1_map3	0001.CSV	3714.38	-0.0284175
PSB913-1_map3	0001.CSV	3718.24	-0.0289655
PSB913-1_map3	0001.CSV	3722.1	-0.0292245
PSB913-1_map3	0001.CSV	3725.95	-0.0289974
PSB913-1_map3	0001.CSV	3729.81	-0.0292407
PSB913-1_map3	0001.CSV	3733.67	-0.0292662
PSB913-1_map3	0001.CSV	3737.53	-0.0277602
PSB913-1_map3	0001.CSV	3741.38	-0.0288653
PSB913-1_map3	0001.CSV	3745.24	-0.0302188
PSB913-1_map3	0001.CSV	3749.1	-0.0305257
PSB913-1_map3	0001.CSV	3752.95	-0.0288693
PSB913-1_map3	0001.CSV	3756.81	-0.0285112
PSB913-1_map3	0001.CSV	3760.67	-0.0282805
PSB913-1_map3	0001.CSV	3764.53	-0.0284664
PSB913-1_map3	0001.CSV	3768.38	-0.0282638
PSB913-1_map3	0001.CSV	3772.24	-0.027893
PSB913-1_map3	0001.CSV	3776.1	-0.0281115
PSB913-1_map3	0001.CSV	3779.95	-0.0281366
PSB913-1_map3	0001.CSV	3783.81	-0.0279906
PSB913-1_map3	0001.CSV	3787.67	-0.0279651
PSB913-1_map3	0001.CSV	3791.53	-0.0282801
PSB913-1_map3	0001.CSV	3795.38	-0.0289739
PSB913-1_map3	0001.CSV	3799.24	-0.0290598
PSB913-1_map3	0001.CSV	3803.1	-0.0283261
PSB913-1_map3	0001.CSV	3806.95	-0.0275225
PSB913-1_map3	0001.CSV	3810.81	-0.0279495
PSB913-1_map3	0001.CSV	3814.67	-0.0286291
PSB913-1_map3	0001.CSV	3818.53	-0.0285853
PSB913-1_map3	0001.CSV	3822.38	-0.0277313
PSB913-1_map3	0001.CSV	3826.24	-0.0277387
PSB913-1_map3	0001.CSV	3830.1	-0.0282346
PSB913-1_map3	0001.CSV	3833.95	-0.0287585
PSB913-1_map3	0001.CSV	3837.81	-0.028394
PSB913-1_map3	0001.CSV	3841.67	-0.0272221
PSB913-1_map3	0001.CSV	3845.53	-0.0273566
PSB913-1_map3	0001.CSV	3849.38	-0.0286689
PSB913-1_map3	0001.CSV	3853.24	-0.0286078
PSB913-1_map3	0001.CSV	3857.1	-0.0274693
PSB913-1_map3	0001.CSV	3860.95	-0.0282045
PSB913-1_map3	0001.CSV	3864.81	-0.0282015
PSB913-1_map3	0001.CSV	3868.67	-0.0277251
PSB913-1_map3	0001.CSV	3872.52	-0.0270727
PSB913-1_map3	0001.CSV	3876.38	-0.0273287
PSB913-1_map3	0001.CSV	3880.24	-0.0278667
PSB913-1_map3	0001.CSV	3884.1	-0.027213
PSB913-1_map3	0001.CSV	3887.95	-0.0272701
PSB913-1_map3	0001.CSV	3891.81	-0.0273061
PSB913-1_map3	0001.CSV	3895.67	-0.0276949
PSB913-1_map3	0001.CSV	3899.52	-0.028215
PSB913-1_map3	0001.CSV	3903.38	-0.0269363
PSB913-1_map3	0001.CSV	3907.24	-0.026433
PSB913-1_map3	0001.CSV	3911.1	-0.0272391
PSB913-1_map3	0001.CSV	3914.95	-0.0277149
PSB913-1_map3	0001.CSV	3918.81	-0.027555
PSB913-1_map3	0001.CSV	3922.67	-0.0274417
PSB913-1_map3	0001.CSV	3926.52	-0.0273737
PSB913-1_map3	0001.CSV	3930.38	-0.0272239
PSB913-1_map3	0001.CSV	3934.24	-0.0269282
PSB913-1_map3	0001.CSV	3938.09	-0.0271625
PSB913-1_map3	0001.CSV	3941.95	-0.0272587
PSB913-1_map3	0001.CSV	3945.81	-0.0271303
PSB913-1_map3	0001.CSV	3949.67	-0.0270006
PSB913-1_map3	0001.CSV	3953.52	-0.0269395
PSB913-1_map3	0001.CSV	3957.38	-0.0271728
PSB913-1_map3	0001.CSV	3961.24	-0.0272756
PSB913-1_map3	0001.CSV	3965.09	-0.0272508
PSB913-1_map3	0001.CSV	3968.95	-0.0272599
PSB913-1_map3	0001.CSV	3972.81	-0.027215
PSB913-1_map3	0001.CSV	3976.67	-0.0269651
PSB913-1_map3	0001.CSV	3980.52	-0.0268743
PSB913-1_map3	0001.CSV	3984.38	-0.0269556
PSB913-1_map3	0001.CSV	3988.24	-0.0271368
PSB913-1_map3	0001.CSV	3992.09	-0.0270548
PSB913-1_map3	0001.CSV	3995.95	-0.0268766
PSB913-1_map3	0001.CSV	3999.81	-0.0267454
PSB913-1_map3	0002.CSV	674.992	0.00357569
PSB913-1_map3	0002.CSV	678.849	0.00561616
PSB913-1_map3	0002.CSV	682.706	0.00531991
PSB913-1_map3	0002.CSV	686.563	0.00755468
PSB913-1_map3	0002.CSV	690.42	0.00990174
PSB913-1_map3	0002.CSV	694.277	0.0168258
PSB913-1_map3	0002.CSV	698.134	0.0193079
PSB913-1_map3	0002.CSV	701.991	0.013845
PSB913-1_map3	0002.CSV	705.849	0.00723925
PSB913-1_map3	0002.CSV	709.706	0.0113465
PSB913-1_map3	0002.CSV	713.563	0.0102124
PSB913-1_map3	0002.CSV	717.42	0.000584314
PSB913-1_map3	0002.CSV	721.277	-0.00554423
PSB913-1_map3	0002.CSV	725.134	-0.00522925
PSB913-1_map3	0002.CSV	728.991	-0.00525315
PSB913-1_map3	0002.CSV	732.848	-0.00353348
PSB913-1_map3	0002.CSV	736.705	-0.00296852
PSB913-1_map3	0002.CSV	740.562	-0.00199881
PSB913-1_map3	0002.CSV	744.42	-0.00273823
PSB913-1_map3	0002.CSV	748.277	-0.0028705
PSB913-1_map3	0002.CSV	752.134	-0.00413135
PSB913-1_map3	0002.CSV	755.991	-0.00421021
PSB913-1_map3	0002.CSV	759.848	-0.00537016
PSB913-1_map3	0002.CSV	763.705	-0.0054182
PSB913-1_map3	0002.CSV	767.562	-0.00651785
PSB913-1_map3	0002.CSV	771.419	-0.00663661
PSB913-1_map3	0002.CSV	775.276	-0.00745023
PSB913-1_map3	0002.CSV	779.133	-0.0071409
PSB913-1_map3	0002.CSV	782.99	-0.00761725
PSB913-1_map3	0002.CSV	786.848	-0.00706152
PSB913-1_map3	0002.CSV	790.705	-0.00745013
PSB913-1_map3	0002.CSV	794.562	-0.00692413
PSB913-1_map3	0002.CSV	798.419	-0.00728113
PSB913-1_map3	0002.CSV	802.276	-0.00664428
PSB913-1_map3	0002.CSV	806.133	-0.00674278
PSB913-1_map3	0002.CSV	809.99	-0.00555241
PSB913-1_map3	0002.CSV	813.847	-0.00534293
PSB913-1_map3	0002.CSV	817.704	-0.00419597
PSB913-1_map3	0002.CSV	821.562	-0.0040595
PSB913-1_map3	0002.CSV	825.419	-0.0027216
PSB913-1_map3	0002.CSV	829.276	-0.00186871
PSB913-1_map3	0002.CSV	833.133	0.000312865
PSB913-1_map3	0002.CSV	836.99	0.00251975
PSB913-1_map3	0002.CSV	840.847	0.00627081
PSB913-1_map3	0002.CSV	844.704	0.00882633
PSB913-1_map3	0002.CSV	848.561	0.014232
PSB913-1_map3	0002.CSV	852.418	0.0206543
PSB913-1_map3	0002.CSV	856.275	0.0232502
PSB913-1_map3	0002.CSV	860.132	0.0186817
PSB913-1_map3	0002.CSV	863.99	0.0115711
PSB913-1_map3	0002.CSV	867.847	0.00333569
PSB913-1_map3	0002.CSV	871.704	-0.00298678
PSB913-1_map3	0002.CSV	875.561	-0.00804651
PSB913-1_map3	0002.CSV	879.418	-0.0101048
PSB913-1_map3	0002.CSV	883.275	-0.0110694
PSB913-1_map3	0002.CSV	887.132	-0.0108969
PSB913-1_map3	0002.CSV	890.989	-0.0112118
PSB913-1_map3	0002.CSV	894.846	-0.0110115
PSB913-1_map3	0002.CSV	898.703	-0.0111364
PSB913-1_map3	0002.CSV	902.561	-0.0105267
PSB913-1_map3	0002.CSV	906.418	-0.0105071
PSB913-1_map3	0002.CSV	910.275	-0.0102396
PSB913-1_map3	0002.CSV	914.132	-0.0105462
PSB913-1_map3	0002.CSV	917.989	-0.0102964
PSB913-1_map3	0002.CSV	921.846	-0.0104899
PSB913-1_map3	0002.CSV	925.703	-0.0102097
PSB913-1_map3	0002.CSV	929.56	-0.0103341
PSB913-1_map3	0002.CSV	933.417	-0.00999152
PSB913-1_map3	0002.CSV	937.274	-0.0102306
PSB913-1_map3	0002.CSV	941.131	-0.0100325
PSB913-1_map3	0002.CSV	944.989	-0.0101551
PSB913-1_map3	0002.CSV	948.846	-0.00977594
PSB913-1_map3	0002.CSV	952.703	-0.00976969
PSB913-1_map3	0002.CSV	956.56	-0.00932523
PSB913-1_map3	0002.CSV	960.417	-0.00947611
PSB913-1_map3	0002.CSV	964.274	-0.00925038
PSB913-1_map3	0002.CSV	968.131	-0.00918307
PSB913-1_map3	0002.CSV	971.988	-0.00865529
PSB913-1_map3	0002.CSV	975.845	-0.00858974
PSB913-1_map3	0002.CSV	979.702	-0.00799437
PSB913-1_map3	0002.CSV	983.559	-0.00782649
PSB913-1_map3	0002.CSV	987.417	-0.00739561
PSB913-1_map3	0002.CSV	991.274	-0.00735733
PSB913-1_map3	0002.CSV	995.131	-0.00690922
PSB913-1_map3	0002.CSV	998.988	-0.00694183
PSB913-1_map3	0002.CSV	1002.85	-0.00666124
PSB913-1_map3	0002.CSV	1006.7	-0.00676
PSB913-1_map3	0002.CSV	1010.56	-0.00637845
PSB913-1_map3	0002.CSV	1014.42	-0.00637763
PSB913-1_map3	0002.CSV	1018.27	-0.00596787
PSB913-1_map3	0002.CSV	1022.13	-0.00588887
PSB913-1_map3	0002.CSV	1025.99	-0.00540135
PSB913-1_map3	0002.CSV	1029.85	-0.00532261
PSB913-1_map3	0002.CSV	1033.7	-0.00486689
PSB913-1_map3	0002.CSV	1037.56	-0.00486073
PSB913-1_map3	0002.CSV	1041.42	-0.00456069
PSB913-1_map3	0002.CSV	1045.27	-0.00455413
PSB913-1_map3	0002.CSV	1049.13	-0.00403813
PSB913-1_map3	0002.CSV	1052.99	-0.00370339
PSB913-1_map3	0002.CSV	1056.84	-0.00279048
PSB913-1_map3	0002.CSV	1060.7	-0.00244697
PSB913-1_map3	0002.CSV	1064.56	-0.00206744
PSB913-1_map3	0002.CSV	1068.42	-0.00249592
PSB913-1_map3	0002.CSV	1072.27	-0.00284111
PSB913-1_map3	0002.CSV	1076.13	-0.00332733
PSB913-1_map3	0002.CSV	1079.99	-0.00247056
PSB913-1_map3	0002.CSV	1083.84	-0.00329372
PSB913-1_map3	0002.CSV	1087.7	-0.0057443
PSB913-1_map3	0002.CSV	1091.56	-0.00733107
PSB913-1_map3	0002.CSV	1095.41	-0.00731146
PSB913-1_map3	0002.CSV	1099.27	-0.00716508
PSB913-1_map3	0002.CSV	1103.13	-0.00647205
PSB913-1_map3	0002.CSV	1106.99	-0.00605201
PSB913-1_map3	0002.CSV	1110.84	-0.00545492
PSB913-1_map3	0002.CSV	1114.7	-0.00535
PSB913-1_map3	0002.CSV	1118.56	-0.00518115
PSB913-1_map3	0002.CSV	1122.41	-0.00546588
PSB913-1_map3	0002.CSV	1126.27	-0.00551832
PSB913-1_map3	0002.CSV	1130.13	-0.0058836
PSB913-1_map3	0002.CSV	1133.99	-0.00594904
PSB913-1_map3	0002.CSV	1137.84	-0.00624404
PSB913-1_map3	0002.CSV	1141.7	-0.00635252
PSB913-1_map3	0002.CSV	1145.56	-0.00672206
PSB913-1_map3	0002.CSV	1149.41	-0.00673456
PSB913-1_map3	0002.CSV	1153.27	-0.00688643
PSB913-1_map3	0002.CSV	1157.13	-0.00679938
PSB913-1_map3	0002.CSV	1160.99	-0.00692383
PSB913-1_map3	0002.CSV	1164.84	-0.00681549
PSB913-1_map3	0002.CSV	1168.7	-0.00704337
PSB913-1_map3	0002.CSV	1172.56	-0.00710579
PSB913-1_map3	0002.CSV	1176.41	-0.00729898
PSB913-1_map3	0002.CSV	1180.27	-0.0071846
PSB913-1_map3	0002.CSV	1184.13	-0.00734567
PSB913-1_map3	0002.CSV	1187.99	-0.0073356
PSB913-1_map3	0002.CSV	1191.84	-0.00746717
PSB913-1_map3	0002.CSV	1195.7	-0.00732491
PSB913-1_map3	0002.CSV	1199.56	-0.00727793
PSB913-1_map3	0002.CSV	1203.41	-0.00696371
PSB913-1_map3	0002.CSV	1207.27	-0.00682788
PSB913-1_map3	0002.CSV	1211.13	-0.00651076
PSB913-1_map3	0002.CSV	1214.98	-0.00630886
PSB913-1_map3	0002.CSV	1218.84	-0.00584666
PSB913-1_map3	0002.CSV	1222.7	-0.0055427
PSB913-1_map3	0002.CSV	1226.56	-0.00503314
PSB913-1_map3	0002.CSV	1230.41	-0.00467511
PSB913-1_map3	0002.CSV	1234.27	-0.00408386
PSB913-1_map3	0002.CSV	1238.13	-0.00357726
PSB913-1_map3	0002.CSV	1241.98	-0.00285036
PSB913-1_map3	0002.CSV	1245.84	-0.00233371
PSB913-1_map3	0002.CSV	1249.7	-0.00182433
PSB913-1_map3	0002.CSV	1253.56	-0.00176405
PSB913-1_map3	0002.CSV	1257.41	-0.00169204
PSB913-1_map3	0002.CSV	1261.27	-0.00174458
PSB913-1_map3	0002.CSV	1265.13	-0.00154454
PSB913-1_map3	0002.CSV	1268.98	-0.00142289
PSB913-1_map3	0002.CSV	1272.84	-0.00108157
PSB913-1_map3	0002.CSV	1276.7	-0.00100115
PSB913-1_map3	0002.CSV	1280.56	-0.000911256
PSB913-1_map3	0002.CSV	1284.41	-0.00103695
PSB913-1_map3	0002.CSV	1288.27	-0.00113343
PSB913-1_map3	0002.CSV	1292.13	-0.00147874
PSB913-1_map3	0002.CSV	1295.98	-0.00172045
PSB913-1_map3	0002.CSV	1299.84	-0.00200076
PSB913-1_map3	0002.CSV	1303.7	-0.00197757
PSB913-1_map3	0002.CSV	1307.56	-0.00194587
PSB913-1_map3	0002.CSV	1311.41	-0.00174801
PSB913-1_map3	0002.CSV	1315.27	-0.00164999
PSB913-1_map3	0002.CSV	1319.13	-0.00129543
PSB913-1_map3	0002.CSV	1322.98	-0.00108408
PSB913-1_map3	0002.CSV	1326.84	-0.000831034
PSB913-1_map3	0002.CSV	1330.7	-0.000565131
PSB913-1_map3	0002.CSV	1334.56	-0.000153781
PSB913-1_map3	0002.CSV	1338.41	0.000442963
PSB913-1_map3	0002.CSV	1342.27	0.00130156
PSB913-1_map3	0002.CSV	1346.13	0.00169163
PSB913-1_map3	0002.CSV	1349.98	0.00241925
PSB913-1_map3	0002.CSV	1353.84	0.00314708
PSB913-1_map3	0002.CSV	1357.7	0.00394705
PSB913-1_map3	0002.CSV	1361.56	0.00476243
PSB913-1_map3	0002.CSV	1365.41	0.00594573
PSB913-1_map3	0002.CSV	1369.27	0.00671399
PSB913-1_map3	0002.CSV	1373.13	0.00784284
PSB913-1_map3	0002.CSV	1376.98	0.00910302
PSB913-1_map3	0002.CSV	1380.84	0.0101393
PSB913-1_map3	0002.CSV	1384.7	0.0109783
PSB913-1_map3	0002.CSV	1388.56	0.0123256
PSB913-1_map3	0002.CSV	1392.41	0.0131748
PSB913-1_map3	0002.CSV	1396.27	0.014466
PSB913-1_map3	0002.CSV	1400.13	0.0155898
PSB913-1_map3	0002.CSV	1403.98	0.0164807
PSB913-1_map3	0002.CSV	1407.84	0.0174665
PSB913-1_map3	0002.CSV	1411.7	0.0184212
PSB913-1_map3	0002.CSV	1415.55	0.0190081
PSB913-1_map3	0002.CSV	1419.41	0.0200593
PSB913-1_map3	0002.CSV	1423.27	0.0206914
PSB913-1_map3	0002.CSV	1427.12	0.0213124
PSB913-1_map3	0002.CSV	1430.98	0.0219258
PSB913-1_map3	0002.CSV	1434.84	0.0227805
PSB913-1_map3	0002.CSV	1438.7	0.0235393
PSB913-1_map3	0002.CSV	1442.55	0.0236311
PSB913-1_map3	0002.CSV	1446.41	0.02323
PSB913-1_map3	0002.CSV	1450.27	0.0225847
PSB913-1_map3	0002.CSV	1454.12	0.0212033
PSB913-1_map3	0002.CSV	1457.98	0.0198907
PSB913-1_map3	0002.CSV	1461.84	0.0185638
PSB913-1_map3	0002.CSV	1465.7	0.0173391
PSB913-1_map3	0002.CSV	1469.55	0.0157042
PSB913-1_map3	0002.CSV	1473.41	0.0137915
PSB913-1_map3	0002.CSV	1477.27	0.0115956
PSB913-1_map3	0002.CSV	1481.12	0.00989815
PSB913-1_map3	0002.CSV	1484.98	0.00826869
PSB913-1_map3	0002.CSV	1488.84	0.00681462
PSB913-1_map3	0002.CSV	1492.7	0.00531837
PSB913-1_map3	0002.CSV	1496.55	0.00355375
PSB913-1_map3	0002.CSV	1500.41	0.00149526
PSB913-1_map3	0002.CSV	1504.27	-3.20394e-05
PSB913-1_map3	0002.CSV	1508.12	-0.00158489
PSB913-1_map3	0002.CSV	1511.98	-0.00287284
PSB913-1_map3	0002.CSV	1515.84	-0.00423981
PSB913-1_map3	0002.CSV	1519.7	-0.00575581
PSB913-1_map3	0002.CSV	1523.55	-0.00704555
PSB913-1_map3	0002.CSV	1527.41	-0.0083981
PSB913-1_map3	0002.CSV	1531.27	-0.00969478
PSB913-1_map3	0002.CSV	1535.12	-0.0108649
PSB913-1_map3	0002.CSV	1538.98	-0.0118925
PSB913-1_map3	0002.CSV	1542.84	-0.0125924
PSB913-1_map3	0002.CSV	1546.7	-0.0134984
PSB913-1_map3	0002.CSV	1550.55	-0.0145984
PSB913-1_map3	0002.CSV	1554.41	-0.0154919
PSB913-1_map3	0002.CSV	1558.27	-0.0160182
PSB913-1_map3	0002.CSV	1562.12	-0.0165496
PSB913-1_map3	0002.CSV	1565.98	-0.0174592
PSB913-1_map3	0002.CSV	1569.84	-0.0180645
PSB913-1_map3	0002.CSV	1573.69	-0.0186504
PSB913-1_map3	0002.CSV	1577.55	-0.0188703
PSB913-1_map3	0002.CSV	1581.41	-0.0194126
PSB913-1_map3	0002.CSV	1585.27	-0.0200659
PSB913-1_map3	0002.CSV	1589.12	-0.0206281
PSB913-1_map3	0002.CSV	1592.98	-0.020724
PSB913-1_map3	0002.CSV	1596.84	-0.0206709
PSB913-1_map3	0002.CSV	1600.69	-0.0207148
PSB913-1_map3	0002.CSV	1604.55	-0.0209849
PSB913-1_map3	0002.CSV	1608.41	-0.0210948
PSB913-1_map3	0002.CSV	1612.27	-0.0214171
PSB913-1_map3	0002.CSV	1616.12	-0.021483
PSB913-1_map3	0002.CSV	1619.98	-0.0214439
PSB913-1_map3	0002.CSV	1623.84	-0.0213228
PSB913-1_map3	0002.CSV	1627.69	-0.0212892
PSB913-1_map3	0002.CSV	1631.55	-0.0216348
PSB913-1_map3	0002.CSV	1635.41	-0.0217174
PSB913-1_map3	0002.CSV	1639.27	-0.0212544
PSB913-1_map3	0002.CSV	1643.12	-0.0216886
PSB913-1_map3	0002.CSV	1646.98	-0.021871
PSB913-1_map3	0002.CSV	1650.84	-0.0220345
PSB913-1_map3	0002.CSV	1654.69	-0.0213883
PSB913-1_map3	0002.CSV	1658.55	-0.0215992
PSB913-1_map3	0002.CSV	1662.41	-0.0218359
PSB913-1_map3	0002.CSV	1666.27	-0.0220743
PSB913-1_map3	0002.CSV	1670.12	-0.0220041
PSB913-1_map3	0002.CSV	1673.98	-0.0217797
PSB913-1_map3	0002.CSV	1677.84	-0.0219167
PSB913-1_map3	0002.CSV	1681.69	-0.022248
PSB913-1_map3	0002.CSV	1685.55	-0.0216486
PSB913-1_map3	0002.CSV	1689.41	-0.0216081
PSB913-1_map3	0002.CSV	1693.27	-0.021941
PSB913-1_map3	0002.CSV	1697.12	-0.0218019
PSB913-1_map3	0002.CSV	1700.98	-0.0207618
PSB913-1_map3	0002.CSV	1704.84	-0.0206165
PSB913-1_map3	0002.CSV	1708.69	-0.0204502
PSB913-1_map3	0002.CSV	1712.55	-0.0205729
PSB913-1_map3	0002.CSV	1716.41	-0.0195758
PSB913-1_map3	0002.CSV	1720.27	-0.0188005
PSB913-1_map3	0002.CSV	1724.12	-0.0190931
PSB913-1_map3	0002.CSV	1727.98	-0.0196444
PSB913-1_map3	0002.CSV	1731.84	-0.0198504
PSB913-1_map3	0002.CSV	1735.69	-0.0200711
PSB913-1_map3	0002.CSV	1739.55	-0.0206322
PSB913-1_map3	0002.CSV	1743.41	-0.021448
PSB913-1_map3	0002.CSV	1747.27	-0.0219826
PSB913-1_map3	0002.CSV	1751.12	-0.0225668
PSB913-1_map3	0002.CSV	1754.98	-0.0231536
PSB913-1_map3	0002.CSV	1758.84	-0.0236866
PSB913-1_map3	0002.CSV	1762.69	-0.023793
PSB913-1_map3	0002.CSV	1766.55	-0.0241522
PSB913-1_map3	0002.CSV	1770.41	-0.0239424
PSB913-1_map3	0002.CSV	1774.26	-0.0231691
PSB913-1_map3	0002.CSV	1778.12	-0.0228024
PSB913-1_map3	0002.CSV	1781.98	-0.0225286
PSB913-1_map3	0002.CSV	1785.84	-0.0224247
PSB913-1_map3	0002.CSV	1789.69	-0.0227647
PSB913-1_map3	0002.CSV	1793.55	-0.0227463
PSB913-1_map3	0002.CSV	1797.41	-0.0231084
PSB913-1_map3	0002.CSV	1801.26	-0.0233017
PSB913-1_map3	0002.CSV	1805.12	-0.0235653
PSB913-1_map3	0002.CSV	1808.98	-0.0235743
PSB913-1_map3	0002.CSV	1812.84	-0.023446
PSB913-1_map3	0002.CSV	1816.69	-0.0234448
PSB913-1_map3	0002.CSV	1820.55	-0.0236187
PSB913-1_map3	0002.CSV	1824.41	-0.0236477
PSB913-1_map3	0002.CSV	1828.26	-0.0234237
PSB913-1_map3	0002.CSV	1832.12	-0.0231487
PSB913-1_map3	0002.CSV	1835.98	-0.0234034
PSB913-1_map3	0002.CSV	1839.84	-0.0235826
PSB913-1_map3	0002.CSV	1843.69	-0.0234876
PSB913-1_map3	0002.CSV	1847.55	-0.0230922
PSB913-1_map3	0002.CSV	1851.41	-0.0232739
PSB913-1_map3	0002.CSV	1855.26	-0.0233234
PSB913-1_map3	0002.CSV	1859.12	-0.0233584
PSB913-1_map3	0002.CSV	1862.98	-0.023398
PSB913-1_map3	0002.CSV	1866.84	-0.0233363
PSB913-1_map3	0002.CSV	1870.69	-0.0228219
PSB913-1_map3	0002.CSV	1874.55	-0.0230138
PSB913-1_map3	0002.CSV	1878.41	-0.0230824
PSB913-1_map3	0002.CSV	1882.26	-0.023126
PSB913-1_map3	0002.CSV	1886.12	-0.0230437
PSB913-1_map3	0002.CSV	1889.98	-0.0229763
PSB913-1_map3	0002.CSV	1893.83	-0.0228544
PSB913-1_map3	0002.CSV	1897.69	-0.0229615
PSB913-1_map3	0002.CSV	1901.55	-0.0229611
PSB913-1_map3	0002.CSV	1905.41	-0.0230051
PSB913-1_map3	0002.CSV	1909.26	-0.0228992
PSB913-1_map3	0002.CSV	1913.12	-0.0230161
PSB913-1_map3	0002.CSV	1916.98	-0.0230232
PSB913-1_map3	0002.CSV	1920.83	-0.0229113
PSB913-1_map3	0002.CSV	1924.69	-0.0227236
PSB913-1_map3	0002.CSV	1928.55	-0.0228365
PSB913-1_map3	0002.CSV	1932.4	-0.0228262
PSB913-1_map3	0002.CSV	1936.26	-0.02292
PSB913-1_map3	0002.CSV	1940.12	-0.0229206
PSB913-1_map3	0002.CSV	1943.98	-0.0227483
PSB913-1_map3	0002.CSV	1947.83	-0.0226625
PSB913-1_map3	0002.CSV	1951.69	-0.022851
PSB913-1_map3	0002.CSV	1955.55	-0.0228336
PSB913-1_map3	0002.CSV	1959.4	-0.0228648
PSB913-1_map3	0002.CSV	1963.26	-0.022877
PSB913-1_map3	0002.CSV	1967.12	-0.0229094
PSB913-1_map3	0002.CSV	1970.98	-0.0228946
PSB913-1_map3	0002.CSV	1974.83	-0.0230837
PSB913-1_map3	0002.CSV	1978.69	-0.0230863
PSB913-1_map3	0002.CSV	1982.55	-0.0230726
PSB913-1_map3	0002.CSV	1986.4	-0.0230187
PSB913-1_map3	0002.CSV	1990.26	-0.0230258
PSB913-1_map3	0002.CSV	1994.12	-0.0228888
PSB913-1_map3	0002.CSV	1997.98	-0.02303
PSB913-1_map3	0002.CSV	2001.83	-0.0230359
PSB913-1_map3	0002.CSV	2005.69	-0.0230703
PSB913-1_map3	0002.CSV	2009.55	-0.0230178
PSB913-1_map3	0002.CSV	2013.4	-0.0231087
PSB913-1_map3	0002.CSV	2017.26	-0.023069
PSB913-1_map3	0002.CSV	2021.12	-0.023111
PSB913-1_map3	0002.CSV	2024.97	-0.0231498
PSB913-1_map3	0002.CSV	2028.83	-0.0232199
PSB913-1_map3	0002.CSV	2032.69	-0.0231401
PSB913-1_map3	0002.CSV	2036.55	-0.0231415
PSB913-1_map3	0002.CSV	2040.4	-0.0231247
PSB913-1_map3	0002.CSV	2044.26	-0.0232073
PSB913-1_map3	0002.CSV	2048.12	-0.0231869
PSB913-1_map3	0002.CSV	2051.97	-0.0232226
PSB913-1_map3	0002.CSV	2055.83	-0.0232013
PSB913-1_map3	0002.CSV	2059.69	-0.0232828
PSB913-1_map3	0002.CSV	2063.55	-0.0232511
PSB913-1_map3	0002.CSV	2067.4	-0.0232537
PSB913-1_map3	0002.CSV	2071.26	-0.0232719
PSB913-1_map3	0002.CSV	2075.12	-0.0233356
PSB913-1_map3	0002.CSV	2078.97	-0.0232863
PSB913-1_map3	0002.CSV	2082.83	-0.0232938
PSB913-1_map3	0002.CSV	2086.69	-0.0232897
PSB913-1_map3	0002.CSV	2090.55	-0.0233539
PSB913-1_map3	0002.CSV	2094.4	-0.0233403
PSB913-1_map3	0002.CSV	2098.26	-0.0233854
PSB913-1_map3	0002.CSV	2102.12	-0.0234172
PSB913-1_map3	0002.CSV	2105.97	-0.0234546
PSB913-1_map3	0002.CSV	2109.83	-0.0233917
PSB913-1_map3	0002.CSV	2113.69	-0.0233991
PSB913-1_map3	0002.CSV	2117.55	-0.0233845
PSB913-1_map3	0002.CSV	2121.4	-0.0234686
PSB913-1_map3	0002.CSV	2125.26	-0.0234644
PSB913-1_map3	0002.CSV	2129.12	-0.0234632
PSB913-1_map3	0002.CSV	2132.97	-0.0234112
PSB913-1_map3	0002.CSV	2136.83	-0.0233944
PSB913-1_map3	0002.CSV	2140.69	-0.0233532
PSB913-1_map3	0002.CSV	2144.55	-0.0234029
PSB913-1_map3	0002.CSV	2148.4	-0.0234111
PSB913-1_map3	0002.CSV	2152.26	-0.0234575
PSB913-1_map3	0002.CSV	2156.12	-0.0234056
PSB913-1_map3	0002.CSV	2159.97	-0.0233757
PSB913-1_map3	0002.CSV	2163.83	-0.0233265
PSB913-1_map3	0002.CSV	2167.69	-0.0233153
PSB913-1_map3	0002.CSV	2171.55	-0.0233091
PSB913-1_map3	0002.CSV	2175.4	-0.0233234
PSB913-1_map3	0002.CSV	2179.26	-0.0232305
PSB913-1_map3	0002.CSV	2183.12	-0.0232123
PSB913-1_map3	0002.CSV	2186.97	-0.023242
PSB913-1_map3	0002.CSV	2190.83	-0.0233007
PSB913-1_map3	0002.CSV	2194.69	-0.0232745
PSB913-1_map3	0002.CSV	2198.55	-0.0232758
PSB913-1_map3	0002.CSV	2202.4	-0.0232677
PSB913-1_map3	0002.CSV	2206.26	-0.0233287
PSB913-1_map3	0002.CSV	2210.12	-0.0232998
PSB913-1_map3	0002.CSV	2213.97	-0.0232596
PSB913-1_map3	0002.CSV	2217.83	-0.0232405
PSB913-1_map3	0002.CSV	2221.69	-0.0232529
PSB913-1_map3	0002.CSV	2225.54	-0.0232573
PSB913-1_map3	0002.CSV	2229.4	-0.0232863
PSB913-1_map3	0002.CSV	2233.26	-0.023307
PSB913-1_map3	0002.CSV	2237.12	-0.0233545
PSB913-1_map3	0002.CSV	2240.97	-0.0233368
PSB913-1_map3	0002.CSV	2244.83	-0.0233218
PSB913-1_map3	0002.CSV	2248.69	-0.0233601
PSB913-1_map3	0002.CSV	2252.54	-0.0234173
PSB913-1_map3	0002.CSV	2256.4	-0.0233896
PSB913-1_map3	0002.CSV	2260.26	-0.023398
PSB913-1_map3	0002.CSV	2264.11	-0.0234833
PSB913-1_map3	0002.CSV	2267.97	-0.0234848
PSB913-1_map3	0002.CSV	2271.83	-0.0234084
PSB913-1_map3	0002.CSV	2275.69	-0.0234706
PSB913-1_map3	0002.CSV	2279.54	-0.0235502
PSB913-1_map3	0002.CSV	2283.4	-0.0235988
PSB913-1_map3	0002.CSV	2287.26	-0.0236671
PSB913-1_map3	0002.CSV	2291.11	-0.0236964
PSB913-1_map3	0002.CSV	2294.97	-0.0236634
PSB913-1_map3	0002.CSV	2298.83	-0.0236586
PSB913-1_map3	0002.CSV	2302.69	-0.0236298
PSB913-1_map3	0002.CSV	2306.54	-0.0237119
PSB913-1_map3	0002.CSV	2310.4	-0.0238676
PSB913-1_map3	0002.CSV	2314.26	-0.0237261
PSB913-1_map3	0002.CSV	2318.11	-0.0240732
PSB913-1_map3	0002.CSV	2321.97	-0.0249053
PSB913-1_map3	0002.CSV	2325.83	-0.0260065
PSB913-1_map3	0002.CSV	2329.69	-0.0268445
PSB913-1_map3	0002.CSV	2333.54	-0.0278881
PSB913-1_map3	0002.CSV	2337.4	-0.02932
PSB913-1_map3	0002.CSV	2341.26	-0.0305437
PSB913-1_map3	0002.CSV	2345.11	-0.0274333
PSB913-1_map3	0002.CSV	2348.97	-0.0261893
PSB913-1_map3	0002.CSV	2352.83	-0.0286467
PSB913-1_map3	0002.CSV	2356.69	-0.040148
PSB913-1_map3	0002.CSV	2360.54	-0.0522424
PSB913-1_map3	0002.CSV	2364.4	-0.0455797
PSB913-1_map3	0002.CSV	2368.26	-0.0325512
PSB913-1_map3	0002.CSV	2372.11	-0.0264555
PSB913-1_map3	0002.CSV	2375.97	-0.0243496
PSB913-1_map3	0002.CSV	2379.83	-0.0240357
PSB913-1_map3	0002.CSV	2383.69	-0.0241618
PSB913-1_map3	0002.CSV	2387.54	-0.0244963
PSB913-1_map3	0002.CSV	2391.4	-0.0247026
PSB913-1_map3	0002.CSV	2395.26	-0.0248303
PSB913-1_map3	0002.CSV	2399.11	-0.0248513
PSB913-1_map3	0002.CSV	2402.97	-0.0249306
PSB913-1_map3	0002.CSV	2406.83	-0.0249439
PSB913-1_map3	0002.CSV	2410.68	-0.0250108
PSB913-1_map3	0002.CSV	2414.54	-0.0250016
PSB913-1_map3	0002.CSV	2418.4	-0.0250151
PSB913-1_map3	0002.CSV	2422.26	-0.0249491
PSB913-1_map3	0002.CSV	2426.11	-0.0249685
PSB913-1_map3	0002.CSV	2429.97	-0.0249868
PSB913-1_map3	0002.CSV	2433.83	-0.0250315
PSB913-1_map3	0002.CSV	2437.68	-0.0250307
PSB913-1_map3	0002.CSV	2441.54	-0.0250939
PSB913-1_map3	0002.CSV	2445.4	-0.0249929
PSB913-1_map3	0002.CSV	2449.26	-0.0249972
PSB913-1_map3	0002.CSV	2453.11	-0.0250812
PSB913-1_map3	0002.CSV	2456.97	-0.0251623
PSB913-1_map3	0002.CSV	2460.83	-0.0251153
PSB913-1_map3	0002.CSV	2464.68	-0.0251051
PSB913-1_map3	0002.CSV	2468.54	-0.0249755
PSB913-1_map3	0002.CSV	2472.4	-0.0249349
PSB913-1_map3	0002.CSV	2476.26	-0.0248953
PSB913-1_map3	0002.CSV	2480.11	-0.0249699
PSB913-1_map3	0002.CSV	2483.97	-0.0249298
PSB913-1_map3	0002.CSV	2487.83	-0.0249142
PSB913-1_map3	0002.CSV	2491.68	-0.0248198
PSB913-1_map3	0002.CSV	2495.54	-0.0248163
PSB913-1_map3	0002.CSV	2499.4	-0.0247877
PSB913-1_map3	0002.CSV	2503.26	-0.0248481
PSB913-1_map3	0002.CSV	2507.11	-0.0248504
PSB913-1_map3	0002.CSV	2510.97	-0.0248863
PSB913-1_map3	0002.CSV	2514.83	-0.0247682
PSB913-1_map3	0002.CSV	2518.68	-0.0247471
PSB913-1_map3	0002.CSV	2522.54	-0.0246543
PSB913-1_map3	0002.CSV	2526.4	-0.0247355
PSB913-1_map3	0002.CSV	2530.26	-0.0247446
PSB913-1_map3	0002.CSV	2534.11	-0.024841
PSB913-1_map3	0002.CSV	2537.97	-0.0248276
PSB913-1_map3	0002.CSV	2541.83	-0.024812
PSB913-1_map3	0002.CSV	2545.68	-0.0247773
PSB913-1_map3	0002.CSV	2549.54	-0.0249192
PSB913-1_map3	0002.CSV	2553.4	-0.0248852
PSB913-1_map3	0002.CSV	2557.26	-0.0249435
PSB913-1_map3	0002.CSV	2561.11	-0.0249735
PSB913-1_map3	0002.CSV	2564.97	-0.0250448
PSB913-1_map3	0002.CSV	2568.83	-0.0250626
PSB913-1_map3	0002.CSV	2572.68	-0.0251292
PSB913-1_map3	0002.CSV	2576.54	-0.0250944
PSB913-1_map3	0002.CSV	2580.4	-0.0252185
PSB913-1_map3	0002.CSV	2584.25	-0.0252159
PSB913-1_map3	0002.CSV	2588.11	-0.0252573
PSB913-1_map3	0002.CSV	2591.97	-0.025143
PSB913-1_map3	0002.CSV	2595.83	-0.0252534
PSB913-1_map3	0002.CSV	2599.68	-0.0253258
PSB913-1_map3	0002.CSV	2603.54	-0.0254454
PSB913-1_map3	0002.CSV	2607.4	-0.0254077
PSB913-1_map3	0002.CSV	2611.25	-0.0254575
PSB913-1_map3	0002.CSV	2615.11	-0.0253975
PSB913-1_map3	0002.CSV	2618.97	-0.0254838
PSB913-1_map3	0002.CSV	2622.82	-0.0254025
PSB913-1_map3	0002.CSV	2626.68	-0.0254673
PSB913-1_map3	0002.CSV	2630.54	-0.0255525
PSB913-1_map3	0002.CSV	2634.4	-0.0256445
PSB913-1_map3	0002.CSV	2638.25	-0.0255357
PSB913-1_map3	0002.CSV	2642.11	-0.0256816
PSB913-1_map3	0002.CSV	2645.97	-0.0257607
PSB913-1_map3	0002.CSV	2649.82	-0.0258809
PSB913-1_map3	0002.CSV	2653.68	-0.0258791
PSB913-1_map3	0002.CSV	2657.54	-0.0259321
PSB913-1_map3	0002.CSV	2661.4	-0.0259028
PSB913-1_map3	0002.CSV	2665.25	-0.0260686
PSB913-1_map3	0002.CSV	2669.11	-0.0260517
PSB913-1_map3	0002.CSV	2672.97	-0.0260198
PSB913-1_map3	0002.CSV	2676.82	-0.0257347
PSB913-1_map3	0002.CSV	2680.68	-0.0257554
PSB913-1_map3	0002.CSV	2684.54	-0.0259476
PSB913-1_map3	0002.CSV	2688.4	-0.0261972
PSB913-1_map3	0002.CSV	2692.25	-0.0262094
PSB913-1_map3	0002.CSV	2696.11	-0.0262439
PSB913-1_map3	0002.CSV	2699.97	-0.026168
PSB913-1_map3	0002.CSV	2703.82	-0.0262376
PSB913-1_map3	0002.CSV	2707.68	-0.0260534
PSB913-1_map3	0002.CSV	2711.54	-0.026038
PSB913-1_map3	0002.CSV	2715.4	-0.0260096
PSB913-1_map3	0002.CSV	2719.25	-0.0259717
PSB913-1_map3	0002.CSV	2723.11	-0.025694
PSB913-1_map3	0002.CSV	2726.97	-0.0257725
PSB913-1_map3	0002.CSV	2730.82	-0.0258652
PSB913-1_map3	0002.CSV	2734.68	-0.0259009
PSB913-1_map3	0002.CSV	2738.54	-0.025825
PSB913-1_map3	0002.CSV	2742.4	-0.0258647
PSB913-1_map3	0002.CSV	2746.25	-0.0255977
PSB913-1_map3	0002.CSV	2750.11	-0.0256205
PSB913-1_map3	0002.CSV	2753.97	-0.0257069
PSB913-1_map3	0002.CSV	2757.82	-0.0257756
PSB913-1_map3	0002.CSV	2761.68	-0.0257104
PSB913-1_map3	0002.CSV	2765.54	-0.025799
PSB913-1_map3	0002.CSV	2769.39	-0.0256088
PSB913-1_map3	0002.CSV	2773.25	-0.025382
PSB913-1_map3	0002.CSV	2777.11	-0.025325
PSB913-1_map3	0002.CSV	2780.97	-0.025524
PSB913-1_map3	0002.CSV	2784.82	-0.025356
PSB913-1_map3	0002.CSV	2788.68	-0.0252047
PSB913-1_map3	0002.CSV	2792.54	-0.0251274
PSB913-1_map3	0002.CSV	2796.39	-0.025224
PSB913-1_map3	0002.CSV	2800.25	-0.0253117
PSB913-1_map3	0002.CSV	2804.11	-0.0255446
PSB913-1_map3	0002.CSV	2807.97	-0.025361
PSB913-1_map3	0002.CSV	2811.82	-0.0254037
PSB913-1_map3	0002.CSV	2815.68	-0.0254239
PSB913-1_map3	0002.CSV	2819.54	-0.0253945
PSB913-1_map3	0002.CSV	2823.39	-0.0253276
PSB913-1_map3	0002.CSV	2827.25	-0.0254622
PSB913-1_map3	0002.CSV	2831.11	-0.0252031
PSB913-1_map3	0002.CSV	2834.97	-0.0249874
PSB913-1_map3	0002.CSV	2838.82	-0.0249198
PSB913-1_map3	0002.CSV	2842.68	-0.0252012
PSB913-1_map3	0002.CSV	2846.54	-0.0252393
PSB913-1_map3	0002.CSV	2850.39	-0.0255847
PSB913-1_map3	0002.CSV	2854.25	-0.0258196
PSB913-1_map3	0002.CSV	2858.11	-0.0257952
PSB913-1_map3	0002.CSV	2861.97	-0.0256692
PSB913-1_map3	0002.CSV	2865.82	-0.0257659
PSB913-1_map3	0002.CSV	2869.68	-0.025548
PSB913-1_map3	0002.CSV	2873.54	-0.0254469
PSB913-1_map3	0002.CSV	2877.39	-0.0255586
PSB913-1_map3	0002.CSV	2881.25	-0.0257957
PSB913-1_map3	0002.CSV	2885.11	-0.025738
PSB913-1_map3	0002.CSV	2888.97	-0.0257758
PSB913-1_map3	0002.CSV	2892.82	-0.0256125
PSB913-1_map3	0002.CSV	2896.68	-0.0256242
PSB913-1_map3	0002.CSV	2900.54	-0.0256817
PSB913-1_map3	0002.CSV	2904.39	-0.0257979
PSB913-1_map3	0002.CSV	2908.25	-0.0255539
PSB913-1_map3	0002.CSV	2912.11	-0.0253194
PSB913-1_map3	0002.CSV	2915.97	-0.0252616
PSB913-1_map3	0002.CSV	2919.82	-0.0259033
PSB913-1_map3	0002.CSV	2923.68	-0.0265463
PSB913-1_map3	0002.CSV	2927.54	-0.0267289
PSB913-1_map3	0002.CSV	2931.39	-0.0267095
PSB913-1_map3	0002.CSV	2935.25	-0.0269973
PSB913-1_map3	0002.CSV	2939.11	-0.0267166
PSB913-1_map3	0002.CSV	2942.96	-0.0262669
PSB913-1_map3	0002.CSV	2946.82	-0.026127
PSB913-1_map3	0002.CSV	2950.68	-0.0264943
PSB913-1_map3	0002.CSV	2954.54	-0.0268436
PSB913-1_map3	0002.CSV	2958.39	-0.0272056
PSB913-1_map3	0002.CSV	2962.25	-0.0271373
PSB913-1_map3	0002.CSV	2966.11	-0.0271884
PSB913-1_map3	0002.CSV	2969.96	-0.0268881
PSB913-1_map3	0002.CSV	2973.82	-0.0264785
PSB913-1_map3	0002.CSV	2977.68	-0.0261131
PSB913-1_map3	0002.CSV	2981.53	-0.0263135
PSB913-1_map3	0002.CSV	2985.39	-0.026565
PSB913-1_map3	0002.CSV	2989.25	-0.0264313
PSB913-1_map3	0002.CSV	2993.11	-0.0260452
PSB913-1_map3	0002.CSV	2996.96	-0.0261064
PSB913-1_map3	0002.CSV	3000.82	-0.0263274
PSB913-1_map3	0002.CSV	3004.68	-0.0265177
PSB913-1_map3	0002.CSV	3008.53	-0.0262568
PSB913-1_map3	0002.CSV	3012.39	-0.0259643
PSB913-1_map3	0002.CSV	3016.25	-0.0258008
PSB913-1_map3	0002.CSV	3020.11	-0.0259304
PSB913-1_map3	0002.CSV	3023.96	-0.0259194
PSB913-1_map3	0002.CSV	3027.82	-0.0260869
PSB913-1_map3	0002.CSV	3031.68	-0.0260326
PSB913-1_map3	0002.CSV	3035.53	-0.0260555
PSB913-1_map3	0002.CSV	3039.39	-0.0259914
PSB913-1_map3	0002.CSV	3043.25	-0.025944
PSB913-1_map3	0002.CSV	3047.11	-0.0258819
PSB913-1_map3	0002.CSV	3050.96	-0.0259008
PSB913-1_map3	0002.CSV	3054.82	-0.0258598
PSB913-1_map3	0002.CSV	3058.68	-0.025959
PSB913-1_map3	0002.CSV	3062.53	-0.0258634
PSB913-1_map3	0002.CSV	3066.39	-0.0256594
PSB913-1_map3	0002.CSV	3070.25	-0.0257147
PSB913-1_map3	0002.CSV	3074.11	-0.0257448
PSB913-1_map3	0002.CSV	3077.96	-0.0254308
PSB913-1_map3	0002.CSV	3081.82	-0.0253267
PSB913-1_map3	0002.CSV	3085.68	-0.0252683
PSB913-1_map3	0002.CSV	3089.53	-0.0253906
PSB913-1_map3	0002.CSV	3093.39	-0.0256386
PSB913-1_map3	0002.CSV	3097.25	-0.0257539
PSB913-1_map3	0002.CSV	3101.11	-0.0256065
PSB913-1_map3	0002.CSV	3104.96	-0.0255277
PSB913-1_map3	0002.CSV	3108.82	-0.0253986
PSB913-1_map3	0002.CSV	3112.68	-0.0253912
PSB913-1_map3	0002.CSV	3116.53	-0.0252867
PSB913-1_map3	0002.CSV	3120.39	-0.0252926
PSB913-1_map3	0002.CSV	3124.25	-0.025374
PSB913-1_map3	0002.CSV	3128.11	-0.0255791
PSB913-1_map3	0002.CSV	3131.96	-0.0256503
PSB913-1_map3	0002.CSV	3135.82	-0.0254772
PSB913-1_map3	0002.CSV	3139.68	-0.0252618
PSB913-1_map3	0002.CSV	3143.53	-0.0255385
PSB913-1_map3	0002.CSV	3147.39	-0.02554
PSB913-1_map3	0002.CSV	3151.25	-0.0253076
PSB913-1_map3	0002.CSV	3155.1	-0.0253949
PSB913-1_map3	0002.CSV	3158.96	-0.0257036
PSB913-1_map3	0002.CSV	3162.82	-0.0257816
PSB913-1_map3	0002.CSV	3166.68	-0.025874
PSB913-1_map3	0002.CSV	3170.53	-0.0259605
PSB913-1_map3	0002.CSV	3174.39	-0.0260591
PSB913-1_map3	0002.CSV	3178.25	-0.0258305
PSB913-1_map3	0002.CSV	3182.1	-0.0256348
PSB913-1_map3	0002.CSV	3185.96	-0.0255747
PSB913-1_map3	0002.CSV	3189.82	-0.0255427
PSB913-1_map3	0002.CSV	3193.68	-0.0255846
PSB913-1_map3	0002.CSV	3197.53	-0.0256865
PSB913-1_map3	0002.CSV	3201.39	-0.025702
PSB913-1_map3	0002.CSV	3205.25	-0.0257787
PSB913-1_map3	0002.CSV	3209.1	-0.025955
PSB913-1_map3	0002.CSV	3212.96	-0.0259224
PSB913-1_map3	0002.CSV	3216.82	-0.0256841
PSB913-1_map3	0002.CSV	3220.68	-0.0256953
PSB913-1_map3	0002.CSV	3224.53	-0.0258614
PSB913-1_map3	0002.CSV	3228.39	-0.0257043
PSB913-1_map3	0002.CSV	3232.25	-0.0252763
PSB913-1_map3	0002.CSV	3236.1	-0.0254419
PSB913-1_map3	0002.CSV	3239.96	-0.0257238
PSB913-1_map3	0002.CSV	3243.82	-0.0254381
PSB913-1_map3	0002.CSV	3247.68	-0.0253137
PSB913-1_map3	0002.CSV	3251.53	-0.0256038
PSB913-1_map3	0002.CSV	3255.39	-0.0257102
PSB913-1_map3	0002.CSV	3259.25	-0.0258903
PSB913-1_map3	0002.CSV	3263.1	-0.0259906
PSB913-1_map3	0002.CSV	3266.96	-0.0257323
PSB913-1_map3	0002.CSV	3270.82	-0.0254153
PSB913-1_map3	0002.CSV	3274.68	-0.0254351
PSB913-1_map3	0002.CSV	3278.53	-0.0257501
PSB913-1_map3	0002.CSV	3282.39	-0.0259553
PSB913-1_map3	0002.CSV	3286.25	-0.0259449
PSB913-1_map3	0002.CSV	3290.1	-0.0256353
PSB913-1_map3	0002.CSV	3293.96	-0.0254063
PSB913-1_map3	0002.CSV	3297.82	-0.0255313
PSB913-1_map3	0002.CSV	3301.67	-0.0254734
PSB913-1_map3	0002.CSV	3305.53	-0.0251614
PSB913-1_map3	0002.CSV	3309.39	-0.0252978
PSB913-1_map3	0002.CSV	3313.25	-0.0256964
PSB913-1_map3	0002.CSV	3317.1	-0.0260265
PSB913-1_map3	0002.CSV	3320.96	-0.025916
PSB913-1_map3	0002.CSV	3324.82	-0.0257015
PSB913-1_map3	0002.CSV	3328.67	-0.0259302
PSB913-1_map3	0002.CSV	3332.53	-0.0261141
PSB913-1_map3	0002.CSV	3336.39	-0.0256765
PSB913-1_map3	0002.CSV	3340.24	-0.0254675
PSB913-1_map3	0002.CSV	3344.1	-0.0255694
PSB913-1_map3	0002.CSV	3347.96	-0.0256328
PSB913-1_map3	0002.CSV	3351.82	-0.025686
PSB913-1_map3	0002.CSV	3355.67	-0.025901
PSB913-1_map3	0002.CSV	3359.53	-0.0256643
PSB913-1_map3	0002.CSV	3363.39	-0.0253913
PSB913-1_map3	0002.CSV	3367.24	-0.025124
PSB913-1_map3	0002.CSV	3371.1	-0.0253327
PSB913-1_map3	0002.CSV	3374.96	-0.0255608
PSB913-1_map3	0002.CSV	3378.82	-0.0257607
PSB913-1_map3	0002.CSV	3382.67	-0.025934
PSB913-1_map3	0002.CSV	3386.53	-0.025855
PSB913-1_map3	0002.CSV	3390.39	-0.0253315
PSB913-1_map3	0002.CSV	3394.24	-0.0249821
PSB913-1_map3	0002.CSV	3398.1	-0.0248819
PSB913-1_map3	0002.CSV	3401.96	-0.025108
PSB913-1_map3	0002.CSV	3405.82	-0.0251794
PSB913-1_map3	0002.CSV	3409.67	-0.0251385
PSB913-1_map3	0002.CSV	3413.53	-0.0252843
PSB913-1_map3	0002.CSV	3417.39	-0.0257002
PSB913-1_map3	0002.CSV	3421.24	-0.0256351
PSB913-1_map3	0002.CSV	3425.1	-0.0253859
PSB913-1_map3	0002.CSV	3428.96	-0.0249606
PSB913-1_map3	0002.CSV	3432.82	-0.0248419
PSB913-1_map3	0002.CSV	3436.67	-0.024942
PSB913-1_map3	0002.CSV	3440.53	-0.0254995
PSB913-1_map3	0002.CSV	3444.39	-0.0257012
PSB913-1_map3	0002.CSV	3448.24	-0.0256816
PSB913-1_map3	0002.CSV	3452.1	-0.0257379
PSB913-1_map3	0002.CSV	3455.96	-0.0257057
PSB913-1_map3	0002.CSV	3459.82	-0.0253078
PSB913-1_map3	0002.CSV	3463.67	-0.0251014
PSB913-1_map3	0002.CSV	3467.53	-0.0248651
PSB913-1_map3	0002.CSV	3471.39	-0.0253141
PSB913-1_map3	0002.CSV	3475.24	-0.0255249
PSB913-1_map3	0002.CSV	3479.1	-0.0254141
PSB913-1_map3	0002.CSV	3482.96	-0.0253591
PSB913-1_map3	0002.CSV	3486.82	-0.0254845
PSB913-1_map3	0002.CSV	3490.67	-0.0254248
PSB913-1_map3	0002.CSV	3494.53	-0.0253995
PSB913-1_map3	0002.CSV	3498.39	-0.0253934
PSB913-1_map3	0002.CSV	3502.24	-0.0255639
PSB913-1_map3	0002.CSV	3506.1	-0.0256874
PSB913-1_map3	0002.CSV	3509.96	-0.0260884
PSB913-1_map3	0002.CSV	3513.81	-0.0260632
PSB913-1_map3	0002.CSV	3517.67	-0.0264309
PSB913-1_map3	0002.CSV	3521.53	-0.0263054
PSB913-1_map3	0002.CSV	3525.39	-0.0263059
PSB913-1_map3	0002.CSV	3529.24	-0.0264004
PSB913-1_map3	0002.CSV	3533.1	-0.0264531
PSB913-1_map3	0002.CSV	3536.96	-0.026179
PSB913-1_map3	0002.CSV	3540.81	-0.0262801
PSB913-1_map3	0002.CSV	3544.67	-0.0261321
PSB913-1_map3	0002.CSV	3548.53	-0.0262556
PSB913-1_map3	0002.CSV	3552.39	-0.0263834
PSB913-1_map3	0002.CSV	3556.24	-0.026697
PSB913-1_map3	0002.CSV	3560.1	-0.027155
PSB913-1_map3	0002.CSV	3563.96	-0.027762
PSB913-1_map3	0002.CSV	3567.81	-0.0268963
PSB913-1_map3	0002.CSV	3571.67	-0.0268544
PSB913-1_map3	0002.CSV	3575.53	-0.0272475
PSB913-1_map3	0002.CSV	3579.39	-0.0271463
PSB913-1_map3	0002.CSV	3583.24	-0.0271303
PSB913-1_map3	0002.CSV	3587.1	-0.0271899
PSB913-1_map3	0002.CSV	3590.96	-0.0270608
PSB913-1_map3	0002.CSV	3594.81	-0.0275125
PSB913-1_map3	0002.CSV	3598.67	-0.0272108
PSB913-1_map3	0002.CSV	3602.53	-0.0273936
PSB913-1_map3	0002.CSV	3606.39	-0.0279406
PSB913-1_map3	0002.CSV	3610.24	-0.0281201
PSB913-1_map3	0002.CSV	3614.1	-0.0278531
PSB913-1_map3	0002.CSV	3617.96	-0.0278735
PSB913-1_map3	0002.CSV	3621.81	-0.0275153
PSB913-1_map3	0002.CSV	3625.67	-0.0285782
PSB913-1_map3	0002.CSV	3629.53	-0.0283035
PSB913-1_map3	0002.CSV	3633.39	-0.0272546
PSB913-1_map3	0002.CSV	3637.24	-0.0275016
PSB913-1_map3	0002.CSV	3641.1	-0.0281681
PSB913-1_map3	0002.CSV	3644.96	-0.028988
PSB913-1_map3	0002.CSV	3648.81	-0.0283474
PSB913-1_map3	0002.CSV	3652.67	-0.0268264
PSB913-1_map3	0002.CSV	3656.53	-0.0270608
PSB913-1_map3	0002.CSV	3660.38	-0.0270032
PSB913-1_map3	0002.CSV	3664.24	-0.0279613
PSB913-1_map3	0002.CSV	3668.1	-0.0288391
PSB913-1_map3	0002.CSV	3671.96	-0.0292695
PSB913-1_map3	0002.CSV	3675.81	-0.0286171
PSB913-1_map3	0002.CSV	3679.67	-0.0279424
PSB913-1_map3	0002.CSV	3683.53	-0.0281538
PSB913-1_map3	0002.CSV	3687.38	-0.0284452
PSB913-1_map3	0002.CSV	3691.24	-0.0271643
PSB913-1_map3	0002.CSV	3695.1	-0.0274596
PSB913-1_map3	0002.CSV	3698.95	-0.0279259
PSB913-1_map3	0002.CSV	3702.81	-0.0280701
PSB913-1_map3	0002.CSV	3706.67	-0.0284587
PSB913-1_map3	0002.CSV	3710.53	-0.0286179
PSB913-1_map3	0002.CSV	3714.38	-0.0275402
PSB913-1_map3	0002.CSV	3718.24	-0.0280626
PSB913-1_map3	0002.CSV	3722.1	-0.0282042
PSB913-1_map3	0002.CSV	3725.95	-0.0281648
PSB913-1_map3	0002.CSV	3729.81	-0.0283193
PSB913-1_map3	0002.CSV	3733.67	-0.0284736
PSB913-1_map3	0002.CSV	3737.53	-0.0271937
PSB913-1_map3	0002.CSV	3741.38	-0.0281881
PSB913-1_map3	0002.CSV	3745.24	-0.0291183
PSB913-1_map3	0002.CSV	3749.1	-0.0298365
PSB913-1_map3	0002.CSV	3752.95	-0.0281143
PSB913-1_map3	0002.CSV	3756.81	-0.0276837
PSB913-1_map3	0002.CSV	3760.67	-0.0275148
PSB913-1_map3	0002.CSV	3764.53	-0.0278744
PSB913-1_map3	0002.CSV	3768.38	-0.0276225
PSB913-1_map3	0002.CSV	3772.24	-0.0272396
PSB913-1_map3	0002.CSV	3776.1	-0.027461
PSB913-1_map3	0002.CSV	3779.95	-0.02758
PSB913-1_map3	0002.CSV	3783.81	-0.0273854
PSB913-1_map3	0002.CSV	3787.67	-0.0273165
PSB913-1_map3	0002.CSV	3791.53	-0.0274953
PSB913-1_map3	0002.CSV	3795.38	-0.0282124
PSB913-1_map3	0002.CSV	3799.24	-0.0282396
PSB913-1_map3	0002.CSV	3803.1	-0.027697
PSB913-1_map3	0002.CSV	3806.95	-0.0270088
PSB913-1_map3	0002.CSV	3810.81	-0.0275023
PSB913-1_map3	0002.CSV	3814.67	-0.0280453
PSB913-1_map3	0002.CSV	3818.53	-0.0279443
PSB913-1_map3	0002.CSV	3822.38	-0.0269994
PSB913-1_map3	0002.CSV	3826.24	-0.0271398
PSB913-1_map3	0002.CSV	3830.1	-0.0275927
PSB913-1_map3	0002.CSV	3833.95	-0.0280445
PSB913-1_map3	0002.CSV	3837.81	-0.0276587
PSB913-1_map3	0002.CSV	3841.67	-0.0268029
PSB913-1_map3	0002.CSV	3845.53	-0.0268882
PSB913-1_map3	0002.CSV	3849.38	-0.0282871
PSB913-1_map3	0002.CSV	3853.24	-0.0282637
PSB913-1_map3	0002.CSV	3857.1	-0.0271324
PSB913-1_map3	0002.CSV	3860.95	-0.0277297
PSB913-1_map3	0002.CSV	3864.81	-0.0279028
PSB913-1_map3	0002.CSV	3868.67	-0.0274175
PSB913-1_map3	0002.CSV	3872.52	-0.0269032
PSB913-1_map3	0002.CSV	3876.38	-0.0269838
PSB913-1_map3	0002.CSV	3880.24	-0.0274376
PSB913-1_map3	0002.CSV	3884.1	-0.0266939
PSB913-1_map3	0002.CSV	3887.95	-0.0267945
PSB913-1_map3	0002.CSV	3891.81	-0.0268014
PSB913-1_map3	0002.CSV	3895.67	-0.0272339
PSB913-1_map3	0002.CSV	3899.52	-0.0276592
PSB913-1_map3	0002.CSV	3903.38	-0.0268004
PSB913-1_map3	0002.CSV	3907.24	-0.0263103
PSB913-1_map3	0002.CSV	3911.1	-0.0269385
PSB913-1_map3	0002.CSV	3914.95	-0.0271718
PSB913-1_map3	0002.CSV	3918.81	-0.0270578
PSB913-1_map3	0002.CSV	3922.67	-0.0268573
PSB913-1_map3	0002.CSV	3926.52	-0.0269548
PSB913-1_map3	0002.CSV	3930.38	-0.0268708
PSB913-1_map3	0002.CSV	3934.24	-0.0266176
PSB913-1_map3	0002.CSV	3938.09	-0.0268244
PSB913-1_map3	0002.CSV	3941.95	-0.0270207
PSB913-1_map3	0002.CSV	3945.81	-0.0268532
PSB913-1_map3	0002.CSV	3949.67	-0.0267257
PSB913-1_map3	0002.CSV	3953.52	-0.026622
PSB913-1_map3	0002.CSV	3957.38	-0.0268968
PSB913-1_map3	0002.CSV	3961.24	-0.0269408
PSB913-1_map3	0002.CSV	3965.09	-0.0270346
PSB913-1_map3	0002.CSV	3968.95	-0.0269732
PSB913-1_map3	0002.CSV	3972.81	-0.0268921
PSB913-1_map3	0002.CSV	3976.67	-0.0266958
PSB913-1_map3	0002.CSV	3980.52	-0.0267532
PSB913-1_map3	0002.CSV	3984.38	-0.0267244
PSB913-1_map3	0002.CSV	3988.24	-0.026897
PSB913-1_map3	0002.CSV	3992.09	-0.0267565
PSB913-1_map3	0002.CSV	3995.95	-0.0266139
PSB913-1_map3	0002.CSV	3999.81	-0.0265396
PSB913-1_map3	0003.CSV	674.992	0.0193363
PSB913-1_map3	0003.CSV	678.849	0.0229491
PSB913-1_map3	0003.CSV	682.706	0.0229908
PSB913-1_map3	0003.CSV	686.563	0.0267263
PSB913-1_map3	0003.CSV	690.42	0.0289324
PSB913-1_map3	0003.CSV	694.277	0.0399727
PSB913-1_map3	0003.CSV	698.134	0.0507711
PSB913-1_map3	0003.CSV	701.991	0.0457942
PSB913-1_map3	0003.CSV	705.849	0.0385675
PSB913-1_map3	0003.CSV	709.706	0.0579789
PSB913-1_map3	0003.CSV	713.563	0.0615613
PSB913-1_map3	0003.CSV	717.42	0.0327963
PSB913-1_map3	0003.CSV	721.277	0.0106769
PSB913-1_map3	0003.CSV	725.134	0.00703379
PSB913-1_map3	0003.CSV	728.991	0.00564802
PSB913-1_map3	0003.CSV	732.848	0.00674926
PSB913-1_map3	0003.CSV	736.705	0.00665285
PSB913-1_map3	0003.CSV	740.562	0.00838896
PSB913-1_map3	0003.CSV	744.42	0.00854783
PSB913-1_map3	0003.CSV	748.277	0.0100421
PSB913-1_map3	0003.CSV	752.134	0.00997232
PSB913-1_map3	0003.CSV	755.991	0.0114546
PSB913-1_map3	0003.CSV	759.848	0.0113648
PSB913-1_map3	0003.CSV	763.705	0.0126196
PSB913-1_map3	0003.CSV	767.562	0.0121919
PSB913-1_map3	0003.CSV	771.419	0.0131952
PSB913-1_map3	0003.CSV	775.276	0.013211
PSB913-1_map3	0003.CSV	779.133	0.0146229
PSB913-1_map3	0003.CSV	782.99	0.0144868
PSB913-1_map3	0003.CSV	786.848	0.0157369
PSB913-1_map3	0003.CSV	790.705	0.0156949
PSB913-1_map3	0003.CSV	794.562	0.0170242
PSB913-1_map3	0003.CSV	798.419	0.0174557
PSB913-1_map3	0003.CSV	802.276	0.0197392
PSB913-1_map3	0003.CSV	806.133	0.0204568
PSB913-1_map3	0003.CSV	809.99	0.0228129
PSB913-1_map3	0003.CSV	813.847	0.0244678
PSB913-1_map3	0003.CSV	817.704	0.0280957
PSB913-1_map3	0003.CSV	821.562	0.0308081
PSB913-1_map3	0003.CSV	825.419	0.0357063
PSB913-1_map3	0003.CSV	829.276	0.0403091
PSB913-1_map3	0003.CSV	833.133	0.04796
PSB913-1_map3	0003.CSV	836.99	0.05825
PSB913-1_map3	0003.CSV	840.847	0.0744719
PSB913-1_map3	0003.CSV	844.704	0.0895371
PSB913-1_map3	0003.CSV	848.561	0.11136
PSB913-1_map3	0003.CSV	852.418	0.132318
PSB913-1_map3	0003.CSV	856.275	0.133636
PSB913-1_map3	0003.CSV	860.132	0.11324
PSB913-1_map3	0003.CSV	863.99	0.0856508
PSB913-1_map3	0003.CSV	867.847	0.0568427
PSB913-1_map3	0003.CSV	871.704	0.0353775
PSB913-1_map3	0003.CSV	875.561	0.0217838
PSB913-1_map3	0003.CSV	879.418	0.0162625
PSB913-1_map3	0003.CSV	883.275	0.0133432
PSB913-1_map3	0003.CSV	887.132	0.0123131
PSB913-1_map3	0003.CSV	890.989	0.0110908
PSB913-1_map3	0003.CSV	894.846	0.0111504
PSB913-1_map3	0003.CSV	898.703	0.0108138
PSB913-1_map3	0003.CSV	902.561	0.0115878
PSB913-1_map3	0003.CSV	906.418	0.011877
PSB913-1_map3	0003.CSV	910.275	0.012209
PSB913-1_map3	0003.CSV	914.132	0.011299
PSB913-1_map3	0003.CSV	917.989	0.0115725
PSB913-1_map3	0003.CSV	921.846	0.0114947
PSB913-1_map3	0003.CSV	925.703	0.0121344
PSB913-1_map3	0003.CSV	929.56	0.0120212
PSB913-1_map3	0003.CSV	933.417	0.0125292
PSB913-1_map3	0003.CSV	937.274	0.0123694
PSB913-1_map3	0003.CSV	941.131	0.0128245
PSB913-1_map3	0003.CSV	944.989	0.0127347
PSB913-1_map3	0003.CSV	948.846	0.013457
PSB913-1_map3	0003.CSV	952.703	0.0135339
PSB913-1_map3	0003.CSV	956.56	0.0141766
PSB913-1_map3	0003.CSV	960.417	0.0140193
PSB913-1_map3	0003.CSV	964.274	0.0143875
PSB913-1_map3	0003.CSV	968.131	0.0142781
PSB913-1_map3	0003.CSV	971.988	0.0149359
PSB913-1_map3	0003.CSV	975.845	0.0150409
PSB913-1_map3	0003.CSV	979.702	0.0158502
PSB913-1_map3	0003.CSV	983.559	0.0161009
PSB913-1_map3	0003.CSV	987.417	0.0168462
PSB913-1_map3	0003.CSV	991.274	0.0170887
PSB913-1_map3	0003.CSV	995.131	0.0179429
PSB913-1_map3	0003.CSV	998.988	0.018039
PSB913-1_map3	0003.CSV	1002.85	0.0186272
PSB913-1_map3	0003.CSV	1006.7	0.0186654
PSB913-1_map3	0003.CSV	1010.56	0.0194021
PSB913-1_map3	0003.CSV	1014.42	0.0196048
PSB913-1_map3	0003.CSV	1018.27	0.0203648
PSB913-1_map3	0003.CSV	1022.13	0.0204846
PSB913-1_map3	0003.CSV	1025.99	0.0212876
PSB913-1_map3	0003.CSV	1029.85	0.0215413
PSB913-1_map3	0003.CSV	1033.7	0.0224319
PSB913-1_map3	0003.CSV	1037.56	0.0226748
PSB913-1_map3	0003.CSV	1041.42	0.0235121
PSB913-1_map3	0003.CSV	1045.27	0.0238442
PSB913-1_map3	0003.CSV	1049.13	0.0248063
PSB913-1_map3	0003.CSV	1052.99	0.0251515
PSB913-1_map3	0003.CSV	1056.84	0.0261902
PSB913-1_map3	0003.CSV	1060.7	0.0266054
PSB913-1_map3	0003.CSV	1064.56	0.0277919
PSB913-1_map3	0003.CSV	1068.42	0.028575
PSB913-1_map3	0003.CSV	1072.27	0.0303469
PSB913-1_map3	0003.CSV	1076.13	0.0330953
PSB913-1_map3	0003.CSV	1079.99	0.0400214
PSB913-1_map3	0003.CSV	1083.84	0.0411598
PSB913-1_map3	0003.CSV	1087.7	0.0330775
PSB913-1_map3	0003.CSV	1091.56	0.0268268
PSB913-1_map3	0003.CSV	1095.41	0.0254619
PSB913-1_map3	0003.CSV	1099.27	0.0249536
PSB913-1_map3	0003.CSV	1103.13	0.0254775
PSB913-1_map3	0003.CSV	1106.99	0.025691
PSB913-1_map3	0003.CSV	1110.84	0.0263398
PSB913-1_map3	0003.CSV	1114.7	0.0263693
PSB913-1_map3	0003.CSV	1118.56	0.0267283
PSB913-1_map3	0003.CSV	1122.41	0.0266508
PSB913-1_map3	0003.CSV	1126.27	0.0271839
PSB913-1_map3	0003.CSV	1130.13	0.0273201
PSB913-1_map3	0003.CSV	1133.99	0.0277979
PSB913-1_map3	0003.CSV	1137.84	0.0278358
PSB913-1_map3	0003.CSV	1141.7	0.0283344
PSB913-1_map3	0003.CSV	1145.56	0.0284709
PSB913-1_map3	0003.CSV	1149.41	0.0290435
PSB913-1_map3	0003.CSV	1153.27	0.0292177
PSB913-1_map3	0003.CSV	1157.13	0.0299122
PSB913-1_map3	0003.CSV	1160.99	0.0301857
PSB913-1_map3	0003.CSV	1164.84	0.0308011
PSB913-1_map3	0003.CSV	1168.7	0.0309562
PSB913-1_map3	0003.CSV	1172.56	0.031489
PSB913-1_map3	0003.CSV	1176.41	0.0317126
PSB913-1_map3	0003.CSV	1180.27	0.0323611
PSB913-1_map3	0003.CSV	1184.13	0.0325083
PSB913-1_map3	0003.CSV	1187.99	0.032972
PSB913-1_map3	0003.CSV	1191.84	0.0330102
PSB913-1_map3	0003.CSV	1195.7	0.0335217
PSB913-1_map3	0003.CSV	1199.56	0.0338033
PSB913-1_map3	0003.CSV	1203.41	0.0345172
PSB913-1_map3	0003.CSV	1207.27	0.0349819
PSB913-1_map3	0003.CSV	1211.13	0.0358786
PSB913-1_map3	0003.CSV	1214.98	0.0364635
PSB913-1_map3	0003.CSV	1218.84	0.0374968
PSB913-1_map3	0003.CSV	1222.7	0.0381954
PSB913-1_map3	0003.CSV	1226.56	0.0392152
PSB913-1_map3	0003.CSV	1230.41	0.03982
PSB913-1_map3	0003.CSV	1234.27	0.0407903
PSB913-1_map3	0003.CSV	1238.13	0.0414188
PSB913-1_map3	0003.CSV	1241.98	0.0423524
PSB913-1_map3	0003.CSV	1245.84	0.0429299
PSB913-1_map3	0003.CSV	1249.7	0.0438155
PSB913-1_map3	0003.CSV	1253.56	0.044264
PSB913-1_map3	0003.CSV	1257.41	0.0450318
PSB913-1_map3	0003.CSV	1261.27	0.0456469
PSB913-1_map3	0003.CSV	1265.13	0.0469003
PSB913-1_map3	0003.CSV	1268.98	0.0480133
PSB913-1_map3	0003.CSV	1272.84	0.0495181
PSB913-1_map3	0003.CSV	1276.7	0.0505104
PSB913-1_map3	0003.CSV	1280.56	0.0517308
PSB913-1_map3	0003.CSV	1284.41	0.0525827
PSB913-1_map3	0003.CSV	1288.27	0.0538325
PSB913-1_map3	0003.CSV	1292.13	0.0547951
PSB913-1_map3	0003.CSV	1295.98	0.0561374
PSB913-1_map3	0003.CSV	1299.84	0.0572925
PSB913-1_map3	0003.CSV	1303.7	0.0588218
PSB913-1_map3	0003.CSV	1307.56	0.0600954
PSB913-1_map3	0003.CSV	1311.41	0.0617924
PSB913-1_map3	0003.CSV	1315.27	0.0632564
PSB913-1_map3	0003.CSV	1319.13	0.0652676
PSB913-1_map3	0003.CSV	1322.98	0.0669647
PSB913-1_map3	0003.CSV	1326.84	0.0690104
PSB913-1_map3	0003.CSV	1330.7	0.0709589
PSB913-1_map3	0003.CSV	1334.56	0.0733284
PSB913-1_map3	0003.CSV	1338.41	0.0760291
PSB913-1_map3	0003.CSV	1342.27	0.0795034
PSB913-1_map3	0003.CSV	1346.13	0.0819999
PSB913-1_map3	0003.CSV	1349.98	0.0852998
PSB913-1_map3	0003.CSV	1353.84	0.0886195
PSB913-1_map3	0003.CSV	1357.7	0.0922736
PSB913-1_map3	0003.CSV	1361.56	0.0960442
PSB913-1_map3	0003.CSV	1365.41	0.100699
PSB913-1_map3	0003.CSV	1369.27	0.10405
PSB913-1_map3	0003.CSV	1373.13	0.108303
PSB913-1_map3	0003.CSV	1376.98	0.112626
PSB913-1_map3	0003.CSV	1380.84	0.116525
PSB913-1_map3	0003.CSV	1384.7	0.119754
PSB913-1_map3	0003.CSV	1388.56	0.124105
PSB913-1_map3	0003.CSV	1392.41	0.126976
PSB913-1_map3	0003.CSV	1396.27	0.130969
PSB913-1_map3	0003.CSV	1400.13	0.134519
PSB913-1_map3	0003.CSV	1403.98	0.137813
PSB913-1_map3	0003.CSV	1407.84	0.140793
PSB913-1_map3	0003.CSV	1411.7	0.144105
PSB913-1_map3	0003.CSV	1415.55	0.146454
PSB913-1_map3	0003.CSV	1419.41	0.150347
PSB913-1_map3	0003.CSV	1423.27	0.153018
PSB913-1_map3	0003.CSV	1427.12	0.156281
PSB913-1_map3	0003.CSV	1430.98	0.159747
PSB913-1_map3	0003.CSV	1434.84	0.165318
PSB913-1_map3	0003.CSV	1438.7	0.172108
PSB913-1_map3	0003.CSV	1442.55	0.178056
PSB913-1_map3	0003.CSV	1446.41	0.182291
PSB913-1_map3	0003.CSV	1450.27	0.185442
PSB913-1_map3	0003.CSV	1454.12	0.184433
PSB913-1_map3	0003.CSV	1457.98	0.182456
PSB913-1_map3	0003.CSV	1461.84	0.179842
PSB913-1_map3	0003.CSV	1465.7	0.178589
PSB913-1_map3	0003.CSV	1469.55	0.174662
PSB913-1_map3	0003.CSV	1473.41	0.165692
PSB913-1_map3	0003.CSV	1477.27	0.152797
PSB913-1_map3	0003.CSV	1481.12	0.144484
PSB913-1_map3	0003.CSV	1484.98	0.136112
PSB913-1_map3	0003.CSV	1488.84	0.126087
PSB913-1_map3	0003.CSV	1492.7	0.115772
PSB913-1_map3	0003.CSV	1496.55	0.108579
PSB913-1_map3	0003.CSV	1500.41	0.0999661
PSB913-1_map3	0003.CSV	1504.27	0.0948602
PSB913-1_map3	0003.CSV	1508.12	0.0845526
PSB913-1_map3	0003.CSV	1511.98	0.0772947
PSB913-1_map3	0003.CSV	1515.84	0.0721402
PSB913-1_map3	0003.CSV	1519.7	0.0656531
PSB913-1_map3	0003.CSV	1523.55	0.0573748
PSB913-1_map3	0003.CSV	1527.41	0.0518045
PSB913-1_map3	0003.CSV	1531.27	0.0470595
PSB913-1_map3	0003.CSV	1535.12	0.0428609
PSB913-1_map3	0003.CSV	1538.98	0.0383525
PSB913-1_map3	0003.CSV	1542.84	0.0311963
PSB913-1_map3	0003.CSV	1546.7	0.0265761
PSB913-1_map3	0003.CSV	1550.55	0.0231526
PSB913-1_map3	0003.CSV	1554.41	0.0194622
PSB913-1_map3	0003.CSV	1558.27	0.0149669
PSB913-1_map3	0003.CSV	1562.12	0.0105225
PSB913-1_map3	0003.CSV	1565.98	0.00804697
PSB913-1_map3	0003.CSV	1569.84	0.00477435
PSB913-1_map3	0003.CSV	1573.69	0.00159462
PSB913-1_map3	0003.CSV	1577.55	-0.00217641
PSB913-1_map3	0003.CSV	1581.41	-0.00562356
PSB913-1_map3	0003.CSV	1585.27	-0.00858374
PSB913-1_map3	0003.CSV	1589.12	-0.0111257
PSB913-1_map3	0003.CSV	1592.98	-0.0130005
PSB913-1_map3	0003.CSV	1596.84	-0.0143294
PSB913-1_map3	0003.CSV	1600.69	-0.0154105
PSB913-1_map3	0003.CSV	1604.55	-0.0161902
PSB913-1_map3	0003.CSV	1608.41	-0.0168206
PSB913-1_map3	0003.CSV	1612.27	-0.0175937
PSB913-1_map3	0003.CSV	1616.12	-0.0181804
PSB913-1_map3	0003.CSV	1619.98	-0.0183863
PSB913-1_map3	0003.CSV	1623.84	-0.0186643
PSB913-1_map3	0003.CSV	1627.69	-0.0189818
PSB913-1_map3	0003.CSV	1631.55	-0.0195845
PSB913-1_map3	0003.CSV	1635.41	-0.0198268
PSB913-1_map3	0003.CSV	1639.27	-0.0196536
PSB913-1_map3	0003.CSV	1643.12	-0.0201596
PSB913-1_map3	0003.CSV	1646.98	-0.0204273
PSB913-1_map3	0003.CSV	1650.84	-0.0204932
PSB913-1_map3	0003.CSV	1654.69	-0.020095
PSB913-1_map3	0003.CSV	1658.55	-0.0204524
PSB913-1_map3	0003.CSV	1662.41	-0.0209045
PSB913-1_map3	0003.CSV	1666.27	-0.0212918
PSB913-1_map3	0003.CSV	1670.12	-0.0215351
PSB913-1_map3	0003.CSV	1673.98	-0.0215597
PSB913-1_map3	0003.CSV	1677.84	-0.021888
PSB913-1_map3	0003.CSV	1681.69	-0.0223035
PSB913-1_map3	0003.CSV	1685.55	-0.0220356
PSB913-1_map3	0003.CSV	1689.41	-0.0223222
PSB913-1_map3	0003.CSV	1693.27	-0.0231337
PSB913-1_map3	0003.CSV	1697.12	-0.0236529
PSB913-1_map3	0003.CSV	1700.98	-0.0234874
PSB913-1_map3	0003.CSV	1704.84	-0.023857
PSB913-1_map3	0003.CSV	1708.69	-0.0244105
PSB913-1_map3	0003.CSV	1712.55	-0.0251428
PSB913-1_map3	0003.CSV	1716.41	-0.0251438
PSB913-1_map3	0003.CSV	1720.27	-0.0248754
PSB913-1_map3	0003.CSV	1724.12	-0.0252944
[truncated: 128,314 more rows]

## Sheet: PSB913-1_map4
Map	Select spectrum number	Wavenumbers	Absorbance
PSB913-1_map4	0001.CSV	674.992	0.0135953
PSB913-1_map4	0001.CSV	678.849	0.0143967
PSB913-1_map4	0001.CSV	682.706	0.0144593
PSB913-1_map4	0001.CSV	686.563	0.0158587
PSB913-1_map4	0001.CSV	690.42	0.0182156
PSB913-1_map4	0001.CSV	694.277	0.0252705
PSB913-1_map4	0001.CSV	698.134	0.0316887
PSB913-1_map4	0001.CSV	701.991	0.0270949
PSB913-1_map4	0001.CSV	705.849	0.0226895
PSB913-1_map4	0001.CSV	709.706	0.0335066
PSB913-1_map4	0001.CSV	713.563	0.0342338
PSB913-1_map4	0001.CSV	717.42	0.016599
PSB913-1_map4	0001.CSV	721.277	0.00567336
PSB913-1_map4	0001.CSV	725.134	0.00462149
PSB913-1_map4	0001.CSV	728.991	0.00485557
PSB913-1_map4	0001.CSV	732.848	0.00556686
PSB913-1_map4	0001.CSV	736.705	0.0057117
PSB913-1_map4	0001.CSV	740.562	0.00630722
PSB913-1_map4	0001.CSV	744.42	0.0064815
PSB913-1_map4	0001.CSV	748.277	0.00716157
PSB913-1_map4	0001.CSV	752.134	0.00734152
PSB913-1_map4	0001.CSV	755.991	0.00757774
PSB913-1_map4	0001.CSV	759.848	0.00725377
PSB913-1_map4	0001.CSV	763.705	0.00744199
PSB913-1_map4	0001.CSV	767.562	0.00739726
PSB913-1_map4	0001.CSV	771.419	0.00761463
PSB913-1_map4	0001.CSV	775.276	0.0074766
PSB913-1_map4	0001.CSV	779.133	0.00744758
PSB913-1_map4	0001.CSV	782.99	0.00732642
PSB913-1_map4	0001.CSV	786.848	0.00789281
PSB913-1_map4	0001.CSV	790.705	0.00800265
PSB913-1_map4	0001.CSV	794.562	0.00839866
PSB913-1_map4	0001.CSV	798.419	0.00846602
PSB913-1_map4	0001.CSV	802.276	0.00903725
PSB913-1_map4	0001.CSV	806.133	0.00980145
PSB913-1_map4	0001.CSV	809.99	0.0110457
PSB913-1_map4	0001.CSV	813.847	0.0118263
PSB913-1_map4	0001.CSV	817.704	0.0134336
PSB913-1_map4	0001.CSV	821.562	0.0151805
PSB913-1_map4	0001.CSV	825.419	0.0176908
PSB913-1_map4	0001.CSV	829.276	0.0203833
PSB913-1_map4	0001.CSV	833.133	0.0245604
PSB913-1_map4	0001.CSV	836.99	0.030609
PSB913-1_map4	0001.CSV	840.847	0.0393388
PSB913-1_map4	0001.CSV	844.704	0.0476546
PSB913-1_map4	0001.CSV	848.561	0.0605996
PSB913-1_map4	0001.CSV	852.418	0.0749393
PSB913-1_map4	0001.CSV	856.275	0.0762419
PSB913-1_map4	0001.CSV	860.132	0.0634762
PSB913-1_map4	0001.CSV	863.99	0.0451835
PSB913-1_map4	0001.CSV	867.847	0.0262695
PSB913-1_map4	0001.CSV	871.704	0.0110448
PSB913-1_map4	0001.CSV	875.561	0.00154188
PSB913-1_map4	0001.CSV	879.418	-0.00174412
PSB913-1_map4	0001.CSV	883.275	-0.00235751
PSB913-1_map4	0001.CSV	887.132	-0.00218436
PSB913-1_map4	0001.CSV	890.989	-0.00215334
PSB913-1_map4	0001.CSV	894.846	-0.00184126
PSB913-1_map4	0001.CSV	898.703	-0.00161202
PSB913-1_map4	0001.CSV	902.561	-0.00114172
PSB913-1_map4	0001.CSV	906.418	-0.000874752
PSB913-1_map4	0001.CSV	910.275	-0.000673755
PSB913-1_map4	0001.CSV	914.132	-0.000855572
PSB913-1_map4	0001.CSV	917.989	-0.000689634
PSB913-1_map4	0001.CSV	921.846	-0.000515657
PSB913-1_map4	0001.CSV	925.703	-0.000138975
PSB913-1_map4	0001.CSV	929.56	-4.04233e-06
PSB913-1_map4	0001.CSV	933.417	0.000205546
PSB913-1_map4	0001.CSV	937.274	9.27521e-05
PSB913-1_map4	0001.CSV	941.131	0.000323907
PSB913-1_map4	0001.CSV	944.989	0.000505257
PSB913-1_map4	0001.CSV	948.846	0.000855568
PSB913-1_map4	0001.CSV	952.703	0.00111364
PSB913-1_map4	0001.CSV	956.56	0.00150211
PSB913-1_map4	0001.CSV	960.417	0.00161291
PSB913-1_map4	0001.CSV	964.274	0.00193183
PSB913-1_map4	0001.CSV	968.131	0.00215567
PSB913-1_map4	0001.CSV	971.988	0.00264958
PSB913-1_map4	0001.CSV	975.845	0.00298134
PSB913-1_map4	0001.CSV	979.702	0.00349138
PSB913-1_map4	0001.CSV	983.559	0.0038761
PSB913-1_map4	0001.CSV	987.417	0.00435128
PSB913-1_map4	0001.CSV	991.274	0.00457152
PSB913-1_map4	0001.CSV	995.131	0.00490285
PSB913-1_map4	0001.CSV	998.988	0.00504851
PSB913-1_map4	0001.CSV	1002.85	0.00540435
PSB913-1_map4	0001.CSV	1006.7	0.00561109
PSB913-1_map4	0001.CSV	1010.56	0.00594805
PSB913-1_map4	0001.CSV	1014.42	0.00617226
PSB913-1_map4	0001.CSV	1018.27	0.00663997
PSB913-1_map4	0001.CSV	1022.13	0.00681539
PSB913-1_map4	0001.CSV	1025.99	0.00715305
PSB913-1_map4	0001.CSV	1029.85	0.00741893
PSB913-1_map4	0001.CSV	1033.7	0.00776758
PSB913-1_map4	0001.CSV	1037.56	0.00792517
PSB913-1_map4	0001.CSV	1041.42	0.00827781
PSB913-1_map4	0001.CSV	1045.27	0.00847146
PSB913-1_map4	0001.CSV	1049.13	0.00904584
PSB913-1_map4	0001.CSV	1052.99	0.00932819
PSB913-1_map4	0001.CSV	1056.84	0.00970653
PSB913-1_map4	0001.CSV	1060.7	0.0099449
PSB913-1_map4	0001.CSV	1064.56	0.0102856
PSB913-1_map4	0001.CSV	1068.42	0.0103858
PSB913-1_map4	0001.CSV	1072.27	0.0107983
PSB913-1_map4	0001.CSV	1076.13	0.0119936
PSB913-1_map4	0001.CSV	1079.99	0.0154287
PSB913-1_map4	0001.CSV	1083.84	0.0150662
PSB913-1_map4	0001.CSV	1087.7	0.00984392
PSB913-1_map4	0001.CSV	1091.56	0.00717295
PSB913-1_map4	0001.CSV	1095.41	0.00704224
PSB913-1_map4	0001.CSV	1099.27	0.00712903
PSB913-1_map4	0001.CSV	1103.13	0.00751544
PSB913-1_map4	0001.CSV	1106.99	0.00776303
PSB913-1_map4	0001.CSV	1110.84	0.0079793
PSB913-1_map4	0001.CSV	1114.7	0.00806513
PSB913-1_map4	0001.CSV	1118.56	0.00826575
PSB913-1_map4	0001.CSV	1122.41	0.00828946
PSB913-1_map4	0001.CSV	1126.27	0.00831945
PSB913-1_map4	0001.CSV	1130.13	0.00809082
PSB913-1_map4	0001.CSV	1133.99	0.00804461
PSB913-1_map4	0001.CSV	1137.84	0.00798841
PSB913-1_map4	0001.CSV	1141.7	0.00822158
PSB913-1_map4	0001.CSV	1145.56	0.00835184
PSB913-1_map4	0001.CSV	1149.41	0.00864198
PSB913-1_map4	0001.CSV	1153.27	0.00889008
PSB913-1_map4	0001.CSV	1157.13	0.00924465
PSB913-1_map4	0001.CSV	1160.99	0.00935913
PSB913-1_map4	0001.CSV	1164.84	0.00948283
PSB913-1_map4	0001.CSV	1168.7	0.00942299
PSB913-1_map4	0001.CSV	1172.56	0.0094831
PSB913-1_map4	0001.CSV	1176.41	0.00949261
PSB913-1_map4	0001.CSV	1180.27	0.0096091
PSB913-1_map4	0001.CSV	1184.13	0.00952306
PSB913-1_map4	0001.CSV	1187.99	0.00958911
PSB913-1_map4	0001.CSV	1191.84	0.00968014
PSB913-1_map4	0001.CSV	1195.7	0.0099252
PSB913-1_map4	0001.CSV	1199.56	0.0100668
PSB913-1_map4	0001.CSV	1203.41	0.0103921
PSB913-1_map4	0001.CSV	1207.27	0.0105542
PSB913-1_map4	0001.CSV	1211.13	0.0108846
PSB913-1_map4	0001.CSV	1214.98	0.0111431
PSB913-1_map4	0001.CSV	1218.84	0.0115526
PSB913-1_map4	0001.CSV	1222.7	0.0119423
PSB913-1_map4	0001.CSV	1226.56	0.0124965
PSB913-1_map4	0001.CSV	1230.41	0.0128465
PSB913-1_map4	0001.CSV	1234.27	0.0133316
PSB913-1_map4	0001.CSV	1238.13	0.0136834
PSB913-1_map4	0001.CSV	1241.98	0.0141102
PSB913-1_map4	0001.CSV	1245.84	0.0145104
PSB913-1_map4	0001.CSV	1249.7	0.0150114
PSB913-1_map4	0001.CSV	1253.56	0.0152314
PSB913-1_map4	0001.CSV	1257.41	0.0155625
PSB913-1_map4	0001.CSV	1261.27	0.0159225
PSB913-1_map4	0001.CSV	1265.13	0.016581
PSB913-1_map4	0001.CSV	1268.98	0.0171673
PSB913-1_map4	0001.CSV	1272.84	0.0178116
PSB913-1_map4	0001.CSV	1276.7	0.0183121
PSB913-1_map4	0001.CSV	1280.56	0.0188893
PSB913-1_map4	0001.CSV	1284.41	0.0192131
PSB913-1_map4	0001.CSV	1288.27	0.0196624
PSB913-1_map4	0001.CSV	1292.13	0.0200397
PSB913-1_map4	0001.CSV	1295.98	0.0206475
PSB913-1_map4	0001.CSV	1299.84	0.0212254
PSB913-1_map4	0001.CSV	1303.7	0.0219198
PSB913-1_map4	0001.CSV	1307.56	0.0224428
PSB913-1_map4	0001.CSV	1311.41	0.0231631
PSB913-1_map4	0001.CSV	1315.27	0.0238757
PSB913-1_map4	0001.CSV	1319.13	0.0248029
PSB913-1_map4	0001.CSV	1322.98	0.0255933
PSB913-1_map4	0001.CSV	1326.84	0.0265048
PSB913-1_map4	0001.CSV	1330.7	0.0273418
PSB913-1_map4	0001.CSV	1334.56	0.0282955
PSB913-1_map4	0001.CSV	1338.41	0.0294667
PSB913-1_map4	0001.CSV	1342.27	0.0310706
PSB913-1_map4	0001.CSV	1346.13	0.0321306
PSB913-1_map4	0001.CSV	1349.98	0.0335442
PSB913-1_map4	0001.CSV	1353.84	0.034974
PSB913-1_map4	0001.CSV	1357.7	0.0365392
PSB913-1_map4	0001.CSV	1361.56	0.0382451
PSB913-1_map4	0001.CSV	1365.41	0.0404598
PSB913-1_map4	0001.CSV	1369.27	0.0419952
PSB913-1_map4	0001.CSV	1373.13	0.0441687
PSB913-1_map4	0001.CSV	1376.98	0.0465461
PSB913-1_map4	0001.CSV	1380.84	0.0485831
PSB913-1_map4	0001.CSV	1384.7	0.0505381
PSB913-1_map4	0001.CSV	1388.56	0.0533313
PSB913-1_map4	0001.CSV	1392.41	0.0552862
PSB913-1_map4	0001.CSV	1396.27	0.0582255
PSB913-1_map4	0001.CSV	1400.13	0.0612237
PSB913-1_map4	0001.CSV	1403.98	0.0638069
PSB913-1_map4	0001.CSV	1407.84	0.0663201
PSB913-1_map4	0001.CSV	1411.7	0.0687892
PSB913-1_map4	0001.CSV	1415.55	0.0706988
PSB913-1_map4	0001.CSV	1419.41	0.074022
PSB913-1_map4	0001.CSV	1423.27	0.0766416
PSB913-1_map4	0001.CSV	1427.12	0.0789642
PSB913-1_map4	0001.CSV	1430.98	0.08127
PSB913-1_map4	0001.CSV	1434.84	0.0844965
PSB913-1_map4	0001.CSV	1438.7	0.0879314
PSB913-1_map4	0001.CSV	1442.55	0.0902631
PSB913-1_map4	0001.CSV	1446.41	0.0912731
PSB913-1_map4	0001.CSV	1450.27	0.0916738
PSB913-1_map4	0001.CSV	1454.12	0.0903384
PSB913-1_map4	0001.CSV	1457.98	0.0889379
PSB913-1_map4	0001.CSV	1461.84	0.0873397
PSB913-1_map4	0001.CSV	1465.7	0.0865718
PSB913-1_map4	0001.CSV	1469.55	0.0843133
PSB913-1_map4	0001.CSV	1473.41	0.0795281
PSB913-1_map4	0001.CSV	1477.27	0.073041
PSB913-1_map4	0001.CSV	1481.12	0.0686368
PSB913-1_map4	0001.CSV	1484.98	0.06416
PSB913-1_map4	0001.CSV	1488.84	0.0591596
PSB913-1_map4	0001.CSV	1492.7	0.0538803
PSB913-1_map4	0001.CSV	1496.55	0.0498462
PSB913-1_map4	0001.CSV	1500.41	0.0451531
PSB913-1_map4	0001.CSV	1504.27	0.0421658
PSB913-1_map4	0001.CSV	1508.12	0.0368401
PSB913-1_map4	0001.CSV	1511.98	0.0328218
PSB913-1_map4	0001.CSV	1515.84	0.0298193
PSB913-1_map4	0001.CSV	1519.7	0.0262025
PSB913-1_map4	0001.CSV	1523.55	0.0214059
PSB913-1_map4	0001.CSV	1527.41	0.01809
PSB913-1_map4	0001.CSV	1531.27	0.0149979
PSB913-1_map4	0001.CSV	1535.12	0.0121783
PSB913-1_map4	0001.CSV	1538.98	0.00939259
PSB913-1_map4	0001.CSV	1542.84	0.00529174
PSB913-1_map4	0001.CSV	1546.7	0.00233326
PSB913-1_map4	0001.CSV	1550.55	0.000165503
PSB913-1_map4	0001.CSV	1554.41	-0.00210935
PSB913-1_map4	0001.CSV	1558.27	-0.00451443
PSB913-1_map4	0001.CSV	1562.12	-0.00712043
PSB913-1_map4	0001.CSV	1565.98	-0.00872632
PSB913-1_map4	0001.CSV	1569.84	-0.0106585
PSB913-1_map4	0001.CSV	1573.69	-0.012418
PSB913-1_map4	0001.CSV	1577.55	-0.0142497
PSB913-1_map4	0001.CSV	1581.41	-0.0158425
PSB913-1_map4	0001.CSV	1585.27	-0.0170695
PSB913-1_map4	0001.CSV	1589.12	-0.0178024
PSB913-1_map4	0001.CSV	1592.98	-0.0182363
PSB913-1_map4	0001.CSV	1596.84	-0.0184494
PSB913-1_map4	0001.CSV	1600.69	-0.0185353
PSB913-1_map4	0001.CSV	1604.55	-0.0185266
PSB913-1_map4	0001.CSV	1608.41	-0.0186315
PSB913-1_map4	0001.CSV	1612.27	-0.0188043
PSB913-1_map4	0001.CSV	1616.12	-0.0188672
PSB913-1_map4	0001.CSV	1619.98	-0.018825
PSB913-1_map4	0001.CSV	1623.84	-0.0189442
PSB913-1_map4	0001.CSV	1627.69	-0.0188953
PSB913-1_map4	0001.CSV	1631.55	-0.0193383
PSB913-1_map4	0001.CSV	1635.41	-0.0192465
PSB913-1_map4	0001.CSV	1639.27	-0.018987
PSB913-1_map4	0001.CSV	1643.12	-0.0195473
PSB913-1_map4	0001.CSV	1646.98	-0.0198072
PSB913-1_map4	0001.CSV	1650.84	-0.0195164
PSB913-1_map4	0001.CSV	1654.69	-0.0191428
PSB913-1_map4	0001.CSV	1658.55	-0.0194762
PSB913-1_map4	0001.CSV	1662.41	-0.0198545
PSB913-1_map4	0001.CSV	1666.27	-0.0200686
PSB913-1_map4	0001.CSV	1670.12	-0.0201855
PSB913-1_map4	0001.CSV	1673.98	-0.020072
PSB913-1_map4	0001.CSV	1677.84	-0.0205241
PSB913-1_map4	0001.CSV	1681.69	-0.0208674
PSB913-1_map4	0001.CSV	1685.55	-0.0206856
PSB913-1_map4	0001.CSV	1689.41	-0.0208228
PSB913-1_map4	0001.CSV	1693.27	-0.0214591
PSB913-1_map4	0001.CSV	1697.12	-0.0216898
PSB913-1_map4	0001.CSV	1700.98	-0.0214509
PSB913-1_map4	0001.CSV	1704.84	-0.0213446
PSB913-1_map4	0001.CSV	1708.69	-0.0215762
PSB913-1_map4	0001.CSV	1712.55	-0.0220297
PSB913-1_map4	0001.CSV	1716.41	-0.021985
PSB913-1_map4	0001.CSV	1720.27	-0.0215722
PSB913-1_map4	0001.CSV	1724.12	-0.0219454
PSB913-1_map4	0001.CSV	1727.98	-0.0223234
PSB913-1_map4	0001.CSV	1731.84	-0.0225063
PSB913-1_map4	0001.CSV	1735.69	-0.0222477
PSB913-1_map4	0001.CSV	1739.55	-0.0225013
PSB913-1_map4	0001.CSV	1743.41	-0.0227094
PSB913-1_map4	0001.CSV	1747.27	-0.0228392
PSB913-1_map4	0001.CSV	1751.12	-0.0227224
PSB913-1_map4	0001.CSV	1754.98	-0.0229568
PSB913-1_map4	0001.CSV	1758.84	-0.0230656
PSB913-1_map4	0001.CSV	1762.69	-0.0230848
PSB913-1_map4	0001.CSV	1766.55	-0.0232378
PSB913-1_map4	0001.CSV	1770.41	-0.0229246
PSB913-1_map4	0001.CSV	1774.26	-0.0215656
PSB913-1_map4	0001.CSV	1778.12	-0.0207495
PSB913-1_map4	0001.CSV	1781.98	-0.0198855
PSB913-1_map4	0001.CSV	1785.84	-0.0196385
PSB913-1_map4	0001.CSV	1789.69	-0.0202086
PSB913-1_map4	0001.CSV	1793.55	-0.0212004
PSB913-1_map4	0001.CSV	1797.41	-0.0219848
PSB913-1_map4	0001.CSV	1801.26	-0.0226524
PSB913-1_map4	0001.CSV	1805.12	-0.0231504
PSB913-1_map4	0001.CSV	1808.98	-0.023366
PSB913-1_map4	0001.CSV	1812.84	-0.0232235
PSB913-1_map4	0001.CSV	1816.69	-0.0233585
PSB913-1_map4	0001.CSV	1820.55	-0.0234568
PSB913-1_map4	0001.CSV	1824.41	-0.0235145
PSB913-1_map4	0001.CSV	1828.26	-0.0232689
PSB913-1_map4	0001.CSV	1832.12	-0.0230611
PSB913-1_map4	0001.CSV	1835.98	-0.0231565
PSB913-1_map4	0001.CSV	1839.84	-0.0233754
PSB913-1_map4	0001.CSV	1843.69	-0.0231569
PSB913-1_map4	0001.CSV	1847.55	-0.0228185
PSB913-1_map4	0001.CSV	1851.41	-0.0229354
PSB913-1_map4	0001.CSV	1855.26	-0.0230858
PSB913-1_map4	0001.CSV	1859.12	-0.0230109
PSB913-1_map4	0001.CSV	1862.98	-0.0230797
PSB913-1_map4	0001.CSV	1866.84	-0.0229452
PSB913-1_map4	0001.CSV	1870.69	-0.0225449
PSB913-1_map4	0001.CSV	1874.55	-0.0226569
PSB913-1_map4	0001.CSV	1878.41	-0.0227522
PSB913-1_map4	0001.CSV	1882.26	-0.022679
PSB913-1_map4	0001.CSV	1886.12	-0.0226584
PSB913-1_map4	0001.CSV	1889.98	-0.0225162
PSB913-1_map4	0001.CSV	1893.83	-0.0224631
PSB913-1_map4	0001.CSV	1897.69	-0.0224857
PSB913-1_map4	0001.CSV	1901.55	-0.0225714
PSB913-1_map4	0001.CSV	1905.41	-0.0225684
PSB913-1_map4	0001.CSV	1909.26	-0.0224829
PSB913-1_map4	0001.CSV	1913.12	-0.0224814
PSB913-1_map4	0001.CSV	1916.98	-0.0225327
PSB913-1_map4	0001.CSV	1920.83	-0.0223857
PSB913-1_map4	0001.CSV	1924.69	-0.0223254
PSB913-1_map4	0001.CSV	1928.55	-0.0223779
PSB913-1_map4	0001.CSV	1932.4	-0.0224178
PSB913-1_map4	0001.CSV	1936.26	-0.0223943
PSB913-1_map4	0001.CSV	1940.12	-0.0224692
PSB913-1_map4	0001.CSV	1943.98	-0.0222717
PSB913-1_map4	0001.CSV	1947.83	-0.0222942
PSB913-1_map4	0001.CSV	1951.69	-0.0224209
PSB913-1_map4	0001.CSV	1955.55	-0.0224614
PSB913-1_map4	0001.CSV	1959.4	-0.022438
PSB913-1_map4	0001.CSV	1963.26	-0.0224928
PSB913-1_map4	0001.CSV	1967.12	-0.0224498
PSB913-1_map4	0001.CSV	1970.98	-0.0224346
PSB913-1_map4	0001.CSV	1974.83	-0.0225009
PSB913-1_map4	0001.CSV	1978.69	-0.0225313
PSB913-1_map4	0001.CSV	1982.55	-0.0225232
PSB913-1_map4	0001.CSV	1986.4	-0.0226395
PSB913-1_map4	0001.CSV	1990.26	-0.0226369
PSB913-1_map4	0001.CSV	1994.12	-0.0225519
PSB913-1_map4	0001.CSV	1997.98	-0.0226034
PSB913-1_map4	0001.CSV	2001.83	-0.0227425
PSB913-1_map4	0001.CSV	2005.69	-0.0227609
PSB913-1_map4	0001.CSV	2009.55	-0.0227749
PSB913-1_map4	0001.CSV	2013.4	-0.0228038
PSB913-1_map4	0001.CSV	2017.26	-0.0227796
PSB913-1_map4	0001.CSV	2021.12	-0.0227841
PSB913-1_map4	0001.CSV	2024.97	-0.0228975
PSB913-1_map4	0001.CSV	2028.83	-0.0228886
PSB913-1_map4	0001.CSV	2032.69	-0.0229139
PSB913-1_map4	0001.CSV	2036.55	-0.0229644
PSB913-1_map4	0001.CSV	2040.4	-0.0229818
PSB913-1_map4	0001.CSV	2044.26	-0.0229463
PSB913-1_map4	0001.CSV	2048.12	-0.0230165
PSB913-1_map4	0001.CSV	2051.97	-0.023036
PSB913-1_map4	0001.CSV	2055.83	-0.0230406
PSB913-1_map4	0001.CSV	2059.69	-0.023024
PSB913-1_map4	0001.CSV	2063.55	-0.0230567
PSB913-1_map4	0001.CSV	2067.4	-0.0230354
PSB913-1_map4	0001.CSV	2071.26	-0.0230768
PSB913-1_map4	0001.CSV	2075.12	-0.0230771
PSB913-1_map4	0001.CSV	2078.97	-0.02312
PSB913-1_map4	0001.CSV	2082.83	-0.0231293
PSB913-1_map4	0001.CSV	2086.69	-0.023142
PSB913-1_map4	0001.CSV	2090.55	-0.0231102
PSB913-1_map4	0001.CSV	2094.4	-0.0231253
PSB913-1_map4	0001.CSV	2098.26	-0.0231157
PSB913-1_map4	0001.CSV	2102.12	-0.0231132
PSB913-1_map4	0001.CSV	2105.97	-0.0231161
PSB913-1_map4	0001.CSV	2109.83	-0.0231299
PSB913-1_map4	0001.CSV	2113.69	-0.0231159
PSB913-1_map4	0001.CSV	2117.55	-0.0231455
PSB913-1_map4	0001.CSV	2121.4	-0.02316
PSB913-1_map4	0001.CSV	2125.26	-0.0231572
PSB913-1_map4	0001.CSV	2129.12	-0.0231399
PSB913-1_map4	0001.CSV	2132.97	-0.0231629
PSB913-1_map4	0001.CSV	2136.83	-0.0231579
PSB913-1_map4	0001.CSV	2140.69	-0.0231276
PSB913-1_map4	0001.CSV	2144.55	-0.0230707
PSB913-1_map4	0001.CSV	2148.4	-0.0230901
PSB913-1_map4	0001.CSV	2152.26	-0.023019
PSB913-1_map4	0001.CSV	2156.12	-0.0229971
PSB913-1_map4	0001.CSV	2159.97	-0.0230171
PSB913-1_map4	0001.CSV	2163.83	-0.023031
PSB913-1_map4	0001.CSV	2167.69	-0.0229718
PSB913-1_map4	0001.CSV	2171.55	-0.0229088
PSB913-1_map4	0001.CSV	2175.4	-0.0228327
PSB913-1_map4	0001.CSV	2179.26	-0.0228053
PSB913-1_map4	0001.CSV	2183.12	-0.0227774
PSB913-1_map4	0001.CSV	2186.97	-0.0227711
PSB913-1_map4	0001.CSV	2190.83	-0.0226925
PSB913-1_map4	0001.CSV	2194.69	-0.0226366
PSB913-1_map4	0001.CSV	2198.55	-0.0226311
PSB913-1_map4	0001.CSV	2202.4	-0.0226845
PSB913-1_map4	0001.CSV	2206.26	-0.0226489
PSB913-1_map4	0001.CSV	2210.12	-0.0226177
PSB913-1_map4	0001.CSV	2213.97	-0.0225966
PSB913-1_map4	0001.CSV	2217.83	-0.0226045
PSB913-1_map4	0001.CSV	2221.69	-0.0225988
PSB913-1_map4	0001.CSV	2225.54	-0.0225819
PSB913-1_map4	0001.CSV	2229.4	-0.0225693
PSB913-1_map4	0001.CSV	2233.26	-0.0225982
PSB913-1_map4	0001.CSV	2237.12	-0.0225945
PSB913-1_map4	0001.CSV	2240.97	-0.0225702
PSB913-1_map4	0001.CSV	2244.83	-0.0225439
PSB913-1_map4	0001.CSV	2248.69	-0.0226187
PSB913-1_map4	0001.CSV	2252.54	-0.0226595
PSB913-1_map4	0001.CSV	2256.4	-0.0226709
PSB913-1_map4	0001.CSV	2260.26	-0.0226561
PSB913-1_map4	0001.CSV	2264.11	-0.0226514
PSB913-1_map4	0001.CSV	2267.97	-0.0226154
PSB913-1_map4	0001.CSV	2271.83	-0.0226368
PSB913-1_map4	0001.CSV	2275.69	-0.0226601
PSB913-1_map4	0001.CSV	2279.54	-0.0226847
PSB913-1_map4	0001.CSV	2283.4	-0.0227669
PSB913-1_map4	0001.CSV	2287.26	-0.0228707
PSB913-1_map4	0001.CSV	2291.11	-0.0228199
PSB913-1_map4	0001.CSV	2294.97	-0.0228651
PSB913-1_map4	0001.CSV	2298.83	-0.0229418
PSB913-1_map4	0001.CSV	2302.69	-0.023032
PSB913-1_map4	0001.CSV	2306.54	-0.0231989
PSB913-1_map4	0001.CSV	2310.4	-0.0234966
PSB913-1_map4	0001.CSV	2314.26	-0.0238542
PSB913-1_map4	0001.CSV	2318.11	-0.0245623
PSB913-1_map4	0001.CSV	2321.97	-0.0256489
PSB913-1_map4	0001.CSV	2325.83	-0.0278976
PSB913-1_map4	0001.CSV	2329.69	-0.0301706
PSB913-1_map4	0001.CSV	2333.54	-0.0318036
PSB913-1_map4	0001.CSV	2337.4	-0.03298
PSB913-1_map4	0001.CSV	2341.26	-0.0329047
PSB913-1_map4	0001.CSV	2345.11	-0.0286893
PSB913-1_map4	0001.CSV	2348.97	-0.0273696
PSB913-1_map4	0001.CSV	2352.83	-0.0309973
PSB913-1_map4	0001.CSV	2356.69	-0.045549
PSB913-1_map4	0001.CSV	2360.54	-0.0623646
PSB913-1_map4	0001.CSV	2364.4	-0.0523657
PSB913-1_map4	0001.CSV	2368.26	-0.0353514
PSB913-1_map4	0001.CSV	2372.11	-0.0272607
PSB913-1_map4	0001.CSV	2375.97	-0.0245074
PSB913-1_map4	0001.CSV	2379.83	-0.0236287
PSB913-1_map4	0001.CSV	2383.69	-0.0235122
PSB913-1_map4	0001.CSV	2387.54	-0.0237025
PSB913-1_map4	0001.CSV	2391.4	-0.0239203
PSB913-1_map4	0001.CSV	2395.26	-0.0240653
PSB913-1_map4	0001.CSV	2399.11	-0.0240993
PSB913-1_map4	0001.CSV	2402.97	-0.0241415
PSB913-1_map4	0001.CSV	2406.83	-0.0241921
PSB913-1_map4	0001.CSV	2410.68	-0.0242705
PSB913-1_map4	0001.CSV	2414.54	-0.024283
PSB913-1_map4	0001.CSV	2418.4	-0.024274
PSB913-1_map4	0001.CSV	2422.26	-0.0242354
PSB913-1_map4	0001.CSV	2426.11	-0.0242402
PSB913-1_map4	0001.CSV	2429.97	-0.0242849
PSB913-1_map4	0001.CSV	2433.83	-0.0243394
PSB913-1_map4	0001.CSV	2437.68	-0.0243453
PSB913-1_map4	0001.CSV	2441.54	-0.0243226
PSB913-1_map4	0001.CSV	2445.4	-0.0242984
PSB913-1_map4	0001.CSV	2449.26	-0.0243237
PSB913-1_map4	0001.CSV	2453.11	-0.0243419
PSB913-1_map4	0001.CSV	2456.97	-0.0243527
PSB913-1_map4	0001.CSV	2460.83	-0.024351
PSB913-1_map4	0001.CSV	2464.68	-0.024301
PSB913-1_map4	0001.CSV	2468.54	-0.0242022
PSB913-1_map4	0001.CSV	2472.4	-0.0241846
PSB913-1_map4	0001.CSV	2476.26	-0.0241581
PSB913-1_map4	0001.CSV	2480.11	-0.0240411
PSB913-1_map4	0001.CSV	2483.97	-0.0238734
PSB913-1_map4	0001.CSV	2487.83	-0.0237796
PSB913-1_map4	0001.CSV	2491.68	-0.023668
PSB913-1_map4	0001.CSV	2495.54	-0.0235802
PSB913-1_map4	0001.CSV	2499.4	-0.0235588
PSB913-1_map4	0001.CSV	2503.26	-0.0236347
PSB913-1_map4	0001.CSV	2507.11	-0.0237568
PSB913-1_map4	0001.CSV	2510.97	-0.0237922
PSB913-1_map4	0001.CSV	2514.83	-0.0236801
PSB913-1_map4	0001.CSV	2518.68	-0.0234857
PSB913-1_map4	0001.CSV	2522.54	-0.023385
PSB913-1_map4	0001.CSV	2526.4	-0.0234882
PSB913-1_map4	0001.CSV	2530.26	-0.0236745
PSB913-1_map4	0001.CSV	2534.11	-0.0238547
PSB913-1_map4	0001.CSV	2537.97	-0.0239398
PSB913-1_map4	0001.CSV	2541.83	-0.0239817
PSB913-1_map4	0001.CSV	2545.68	-0.0240026
PSB913-1_map4	0001.CSV	2549.54	-0.0240846
PSB913-1_map4	0001.CSV	2553.4	-0.024183
PSB913-1_map4	0001.CSV	2557.26	-0.0242899
PSB913-1_map4	0001.CSV	2561.11	-0.0243651
PSB913-1_map4	0001.CSV	2564.97	-0.024467
PSB913-1_map4	0001.CSV	2568.83	-0.0245847
PSB913-1_map4	0001.CSV	2572.68	-0.0246294
PSB913-1_map4	0001.CSV	2576.54	-0.0246505
PSB913-1_map4	0001.CSV	2580.4	-0.0247661
PSB913-1_map4	0001.CSV	2584.25	-0.0248679
PSB913-1_map4	0001.CSV	2588.11	-0.0249302
PSB913-1_map4	0001.CSV	2591.97	-0.0249054
PSB913-1_map4	0001.CSV	2595.83	-0.0249063
PSB913-1_map4	0001.CSV	2599.68	-0.0249901
PSB913-1_map4	0001.CSV	2603.54	-0.0250904
PSB913-1_map4	0001.CSV	2607.4	-0.0252069
PSB913-1_map4	0001.CSV	2611.25	-0.0252682
PSB913-1_map4	0001.CSV	2615.11	-0.0252416
PSB913-1_map4	0001.CSV	2618.97	-0.0252796
PSB913-1_map4	0001.CSV	2622.82	-0.0252512
PSB913-1_map4	0001.CSV	2626.68	-0.0252394
PSB913-1_map4	0001.CSV	2630.54	-0.0253368
PSB913-1_map4	0001.CSV	2634.4	-0.0254177
PSB913-1_map4	0001.CSV	2638.25	-0.0254582
PSB913-1_map4	0001.CSV	2642.11	-0.0255955
PSB913-1_map4	0001.CSV	2645.97	-0.0257209
PSB913-1_map4	0001.CSV	2649.82	-0.0258363
PSB913-1_map4	0001.CSV	2653.68	-0.0258744
PSB913-1_map4	0001.CSV	2657.54	-0.0259455
PSB913-1_map4	0001.CSV	2661.4	-0.0260467
PSB913-1_map4	0001.CSV	2665.25	-0.026123
PSB913-1_map4	0001.CSV	2669.11	-0.0260572
PSB913-1_map4	0001.CSV	2672.97	-0.0258639
PSB913-1_map4	0001.CSV	2676.82	-0.0257162
PSB913-1_map4	0001.CSV	2680.68	-0.0258044
PSB913-1_map4	0001.CSV	2684.54	-0.0260717
PSB913-1_map4	0001.CSV	2688.4	-0.0262102
PSB913-1_map4	0001.CSV	2692.25	-0.0262487
PSB913-1_map4	0001.CSV	2696.11	-0.0262973
PSB913-1_map4	0001.CSV	2699.97	-0.0262956
PSB913-1_map4	0001.CSV	2703.82	-0.0262407
PSB913-1_map4	0001.CSV	2707.68	-0.0261601
PSB913-1_map4	0001.CSV	2711.54	-0.0261583
PSB913-1_map4	0001.CSV	2715.4	-0.0262238
PSB913-1_map4	0001.CSV	2719.25	-0.0261993
PSB913-1_map4	0001.CSV	2723.11	-0.0259912
PSB913-1_map4	0001.CSV	2726.97	-0.0258945
PSB913-1_map4	0001.CSV	2730.82	-0.0260847
PSB913-1_map4	0001.CSV	2734.68	-0.0261908
PSB913-1_map4	0001.CSV	2738.54	-0.0261746
PSB913-1_map4	0001.CSV	2742.4	-0.0260988
PSB913-1_map4	0001.CSV	2746.25	-0.0258318
PSB913-1_map4	0001.CSV	2750.11	-0.0258193
PSB913-1_map4	0001.CSV	2753.97	-0.0260786
PSB913-1_map4	0001.CSV	2757.82	-0.026085
PSB913-1_map4	0001.CSV	2761.68	-0.0260564
PSB913-1_map4	0001.CSV	2765.54	-0.0260839
PSB913-1_map4	0001.CSV	2769.39	-0.0259535
PSB913-1_map4	0001.CSV	2773.25	-0.0257241
PSB913-1_map4	0001.CSV	2777.11	-0.0257535
PSB913-1_map4	0001.CSV	2780.97	-0.0259203
PSB913-1_map4	0001.CSV	2784.82	-0.0257882
PSB913-1_map4	0001.CSV	2788.68	-0.0254883
PSB913-1_map4	0001.CSV	2792.54	-0.0254279
PSB913-1_map4	0001.CSV	2796.39	-0.0254673
PSB913-1_map4	0001.CSV	2800.25	-0.0256104
PSB913-1_map4	0001.CSV	2804.11	-0.0257161
PSB913-1_map4	0001.CSV	2807.97	-0.0255052
PSB913-1_map4	0001.CSV	2811.82	-0.0254998
PSB913-1_map4	0001.CSV	2815.68	-0.025618
PSB913-1_map4	0001.CSV	2819.54	-0.0255251
PSB913-1_map4	0001.CSV	2823.39	-0.0254809
PSB913-1_map4	0001.CSV	2827.25	-0.0255087
PSB913-1_map4	0001.CSV	2831.11	-0.0252755
PSB913-1_map4	0001.CSV	2834.97	-0.0248395
PSB913-1_map4	0001.CSV	2838.82	-0.0246766
PSB913-1_map4	0001.CSV	2842.68	-0.0248144
PSB913-1_map4	0001.CSV	2846.54	-0.0247844
PSB913-1_map4	0001.CSV	2850.39	-0.0248763
PSB913-1_map4	0001.CSV	2854.25	-0.0250647
PSB913-1_map4	0001.CSV	2858.11	-0.0250526
PSB913-1_map4	0001.CSV	2861.97	-0.0251673
PSB913-1_map4	0001.CSV	2865.82	-0.0253542
PSB913-1_map4	0001.CSV	2869.68	-0.0251951
PSB913-1_map4	0001.CSV	2873.54	-0.0250455
PSB913-1_map4	0001.CSV	2877.39	-0.0253402
PSB913-1_map4	0001.CSV	2881.25	-0.0255496
PSB913-1_map4	0001.CSV	2885.11	-0.0255597
PSB913-1_map4	0001.CSV	2888.97	-0.0254484
PSB913-1_map4	0001.CSV	2892.82	-0.0251874
PSB913-1_map4	0001.CSV	2896.68	-0.0250682
PSB913-1_map4	0001.CSV	2900.54	-0.0251584
PSB913-1_map4	0001.CSV	2904.39	-0.0250199
PSB913-1_map4	0001.CSV	2908.25	-0.0246812
PSB913-1_map4	0001.CSV	2912.11	-0.0242404
PSB913-1_map4	0001.CSV	2915.97	-0.0241497
PSB913-1_map4	0001.CSV	2919.82	-0.0247226
PSB913-1_map4	0001.CSV	2923.68	-0.0254336
PSB913-1_map4	0001.CSV	2927.54	-0.025704
PSB913-1_map4	0001.CSV	2931.39	-0.0260817
PSB913-1_map4	0001.CSV	2935.25	-0.0265933
PSB913-1_map4	0001.CSV	2939.11	-0.0266356
PSB913-1_map4	0001.CSV	2942.96	-0.0262515
PSB913-1_map4	0001.CSV	2946.82	-0.0261559
PSB913-1_map4	0001.CSV	2950.68	-0.0264936
PSB913-1_map4	0001.CSV	2954.54	-0.0269715
PSB913-1_map4	0001.CSV	2958.39	-0.0273842
PSB913-1_map4	0001.CSV	2962.25	-0.0276346
PSB913-1_map4	0001.CSV	2966.11	-0.0278372
PSB913-1_map4	0001.CSV	2969.96	-0.0276407
PSB913-1_map4	0001.CSV	2973.82	-0.0271888
PSB913-1_map4	0001.CSV	2977.68	-0.0269452
PSB913-1_map4	0001.CSV	2981.53	-0.0270856
PSB913-1_map4	0001.CSV	2985.39	-0.0274353
PSB913-1_map4	0001.CSV	2989.25	-0.0273906
PSB913-1_map4	0001.CSV	2993.11	-0.0271658
PSB913-1_map4	0001.CSV	2996.96	-0.0271884
PSB913-1_map4	0001.CSV	3000.82	-0.027385
PSB913-1_map4	0001.CSV	3004.68	-0.0274535
PSB913-1_map4	0001.CSV	3008.53	-0.0272281
PSB913-1_map4	0001.CSV	3012.39	-0.0269574
PSB913-1_map4	0001.CSV	3016.25	-0.0269974
PSB913-1_map4	0001.CSV	3020.11	-0.0271489
PSB913-1_map4	0001.CSV	3023.96	-0.0272314
PSB913-1_map4	0001.CSV	3027.82	-0.0272827
PSB913-1_map4	0001.CSV	3031.68	-0.0271847
PSB913-1_map4	0001.CSV	3035.53	-0.0271309
PSB913-1_map4	0001.CSV	3039.39	-0.027068
PSB913-1_map4	0001.CSV	3043.25	-0.0270112
PSB913-1_map4	0001.CSV	3047.11	-0.0271341
PSB913-1_map4	0001.CSV	3050.96	-0.0271489
PSB913-1_map4	0001.CSV	3054.82	-0.0271812
PSB913-1_map4	0001.CSV	3058.68	-0.0272672
PSB913-1_map4	0001.CSV	3062.53	-0.0271687
PSB913-1_map4	0001.CSV	3066.39	-0.026909
PSB913-1_map4	0001.CSV	3070.25	-0.0270199
PSB913-1_map4	0001.CSV	3074.11	-0.0271074
PSB913-1_map4	0001.CSV	3077.96	-0.0269217
PSB913-1_map4	0001.CSV	3081.82	-0.0267855
PSB913-1_map4	0001.CSV	3085.68	-0.0267803
PSB913-1_map4	0001.CSV	3089.53	-0.0269108
PSB913-1_map4	0001.CSV	3093.39	-0.0272144
PSB913-1_map4	0001.CSV	3097.25	-0.0272146
PSB913-1_map4	0001.CSV	3101.11	-0.0270529
PSB913-1_map4	0001.CSV	3104.96	-0.0268735
PSB913-1_map4	0001.CSV	3108.82	-0.0266535
PSB913-1_map4	0001.CSV	3112.68	-0.0265906
PSB913-1_map4	0001.CSV	3116.53	-0.0265228
PSB913-1_map4	0001.CSV	3120.39	-0.026578
PSB913-1_map4	0001.CSV	3124.25	-0.026774
PSB913-1_map4	0001.CSV	3128.11	-0.0267376
PSB913-1_map4	0001.CSV	3131.96	-0.0267389
PSB913-1_map4	0001.CSV	3135.82	-0.0267118
PSB913-1_map4	0001.CSV	3139.68	-0.0266983
PSB913-1_map4	0001.CSV	3143.53	-0.0269323
PSB913-1_map4	0001.CSV	3147.39	-0.026796
PSB913-1_map4	0001.CSV	3151.25	-0.0264442
PSB913-1_map4	0001.CSV	3155.1	-0.0265967
PSB913-1_map4	0001.CSV	3158.96	-0.0270278
PSB913-1_map4	0001.CSV	3162.82	-0.0271235
PSB913-1_map4	0001.CSV	3166.68	-0.0270281
PSB913-1_map4	0001.CSV	3170.53	-0.0270447
PSB913-1_map4	0001.CSV	3174.39	-0.0270618
PSB913-1_map4	0001.CSV	3178.25	-0.0269655
PSB913-1_map4	0001.CSV	3182.1	-0.0269976
PSB913-1_map4	0001.CSV	3185.96	-0.0270375
PSB913-1_map4	0001.CSV	3189.82	-0.0269784
PSB913-1_map4	0001.CSV	3193.68	-0.0271412
PSB913-1_map4	0001.CSV	3197.53	-0.0271972
PSB913-1_map4	0001.CSV	3201.39	-0.0270103
PSB913-1_map4	0001.CSV	3205.25	-0.0270158
PSB913-1_map4	0001.CSV	3209.1	-0.0271463
PSB913-1_map4	0001.CSV	3212.96	-0.0270254
PSB913-1_map4	0001.CSV	3216.82	-0.0268663
PSB913-1_map4	0001.CSV	3220.68	-0.0270211
PSB913-1_map4	0001.CSV	3224.53	-0.0272892
PSB913-1_map4	0001.CSV	3228.39	-0.027052
PSB913-1_map4	0001.CSV	3232.25	-0.0266238
PSB913-1_map4	0001.CSV	3236.1	-0.0267496
PSB913-1_map4	0001.CSV	3239.96	-0.0269905
PSB913-1_map4	0001.CSV	3243.82	-0.0268682
PSB913-1_map4	0001.CSV	3247.68	-0.0268687
PSB913-1_map4	0001.CSV	3251.53	-0.0270235
PSB913-1_map4	0001.CSV	3255.39	-0.0269869
PSB913-1_map4	0001.CSV	3259.25	-0.0271425
PSB913-1_map4	0001.CSV	3263.1	-0.0272346
PSB913-1_map4	0001.CSV	3266.96	-0.0270017
PSB913-1_map4	0001.CSV	3270.82	-0.0267889
PSB913-1_map4	0001.CSV	3274.68	-0.0268313
PSB913-1_map4	0001.CSV	3278.53	-0.0271365
PSB913-1_map4	0001.CSV	3282.39	-0.0272929
PSB913-1_map4	0001.CSV	3286.25	-0.0272321
PSB913-1_map4	0001.CSV	3290.1	-0.0269352
PSB913-1_map4	0001.CSV	3293.96	-0.0267842
PSB913-1_map4	0001.CSV	3297.82	-0.0269945
PSB913-1_map4	0001.CSV	3301.67	-0.0269613
PSB913-1_map4	0001.CSV	3305.53	-0.0268584
PSB913-1_map4	0001.CSV	3309.39	-0.0270567
PSB913-1_map4	0001.CSV	3313.25	-0.0274149
PSB913-1_map4	0001.CSV	3317.1	-0.0275943
PSB913-1_map4	0001.CSV	3320.96	-0.0274526
PSB913-1_map4	0001.CSV	3324.82	-0.0272656
PSB913-1_map4	0001.CSV	3328.67	-0.0274281
PSB913-1_map4	0001.CSV	3332.53	-0.0275778
PSB913-1_map4	0001.CSV	3336.39	-0.0272173
PSB913-1_map4	0001.CSV	3340.24	-0.0269577
PSB913-1_map4	0001.CSV	3344.1	-0.0270606
PSB913-1_map4	0001.CSV	3347.96	-0.0270444
PSB913-1_map4	0001.CSV	3351.82	-0.0270834
PSB913-1_map4	0001.CSV	3355.67	-0.0273489
PSB913-1_map4	0001.CSV	3359.53	-0.0272346
PSB913-1_map4	0001.CSV	3363.39	-0.0270193
PSB913-1_map4	0001.CSV	3367.24	-0.0267373
PSB913-1_map4	0001.CSV	3371.1	-0.0268138
PSB913-1_map4	0001.CSV	3374.96	-0.027123
PSB913-1_map4	0001.CSV	3378.82	-0.0273035
PSB913-1_map4	0001.CSV	3382.67	-0.0275113
PSB913-1_map4	0001.CSV	3386.53	-0.0273821
PSB913-1_map4	0001.CSV	3390.39	-0.0268692
PSB913-1_map4	0001.CSV	3394.24	-0.0265663
PSB913-1_map4	0001.CSV	3398.1	-0.0266537
PSB913-1_map4	0001.CSV	3401.96	-0.0268567
PSB913-1_map4	0001.CSV	3405.82	-0.0269606
PSB913-1_map4	0001.CSV	3409.67	-0.0268678
PSB913-1_map4	0001.CSV	3413.53	-0.027095
PSB913-1_map4	0001.CSV	3417.39	-0.0275384
PSB913-1_map4	0001.CSV	3421.24	-0.0274384
PSB913-1_map4	0001.CSV	3425.1	-0.0271329
PSB913-1_map4	0001.CSV	3428.96	-0.0269064
PSB913-1_map4	0001.CSV	3432.82	-0.0268076
PSB913-1_map4	0001.CSV	3436.67	-0.0269372
PSB913-1_map4	0001.CSV	3440.53	-0.0274275
PSB913-1_map4	0001.CSV	3444.39	-0.0277613
PSB913-1_map4	0001.CSV	3448.24	-0.0278069
PSB913-1_map4	0001.CSV	3452.1	-0.0279321
PSB913-1_map4	0001.CSV	3455.96	-0.0278614
PSB913-1_map4	0001.CSV	3459.82	-0.0274521
PSB913-1_map4	0001.CSV	3463.67	-0.0271063
PSB913-1_map4	0001.CSV	3467.53	-0.0269328
PSB913-1_map4	0001.CSV	3471.39	-0.027192
PSB913-1_map4	0001.CSV	3475.24	-0.027451
PSB913-1_map4	0001.CSV	3479.1	-0.0275083
PSB913-1_map4	0001.CSV	3482.96	-0.0276447
PSB913-1_map4	0001.CSV	3486.82	-0.0276766
PSB913-1_map4	0001.CSV	3490.67	-0.0276226
PSB913-1_map4	0001.CSV	3494.53	-0.0275699
PSB913-1_map4	0001.CSV	3498.39	-0.0276855
PSB913-1_map4	0001.CSV	3502.24	-0.0277896
PSB913-1_map4	0001.CSV	3506.1	-0.0280636
PSB913-1_map4	0001.CSV	3509.96	-0.0281021
PSB913-1_map4	0001.CSV	3513.81	-0.027927
PSB913-1_map4	0001.CSV	3517.67	-0.0284662
PSB913-1_map4	0001.CSV	3521.53	-0.0288133
PSB913-1_map4	0001.CSV	3525.39	-0.0289829
PSB913-1_map4	0001.CSV	3529.24	-0.02908
PSB913-1_map4	0001.CSV	3533.1	-0.0288706
PSB913-1_map4	0001.CSV	3536.96	-0.0286603
PSB913-1_map4	0001.CSV	3540.81	-0.0288118
PSB913-1_map4	0001.CSV	3544.67	-0.0288489
PSB913-1_map4	0001.CSV	3548.53	-0.0290084
PSB913-1_map4	0001.CSV	3552.39	-0.0293879
PSB913-1_map4	0001.CSV	3556.24	-0.0295705
PSB913-1_map4	0001.CSV	3560.1	-0.0298305
PSB913-1_map4	0001.CSV	3563.96	-0.0304569
PSB913-1_map4	0001.CSV	3567.81	-0.0300009
PSB913-1_map4	0001.CSV	3571.67	-0.0297454
PSB913-1_map4	0001.CSV	3575.53	-0.0301212
PSB913-1_map4	0001.CSV	3579.39	-0.0301382
PSB913-1_map4	0001.CSV	3583.24	-0.030395
PSB913-1_map4	0001.CSV	3587.1	-0.0304127
PSB913-1_map4	0001.CSV	3590.96	-0.0305439
PSB913-1_map4	0001.CSV	3594.81	-0.0309371
PSB913-1_map4	0001.CSV	3598.67	-0.0305362
PSB913-1_map4	0001.CSV	3602.53	-0.0304939
PSB913-1_map4	0001.CSV	3606.39	-0.0312905
PSB913-1_map4	0001.CSV	3610.24	-0.0317891
PSB913-1_map4	0001.CSV	3614.1	-0.0319503
PSB913-1_map4	0001.CSV	3617.96	-0.0315302
PSB913-1_map4	0001.CSV	3621.81	-0.0312592
PSB913-1_map4	0001.CSV	3625.67	-0.0321962
PSB913-1_map4	0001.CSV	3629.53	-0.0319883
PSB913-1_map4	0001.CSV	3633.39	-0.0311921
PSB913-1_map4	0001.CSV	3637.24	-0.0315173
PSB913-1_map4	0001.CSV	3641.1	-0.0320758
PSB913-1_map4	0001.CSV	3644.96	-0.033144
PSB913-1_map4	0001.CSV	3648.81	-0.0327832
PSB913-1_map4	0001.CSV	3652.67	-0.0312479
PSB913-1_map4	0001.CSV	3656.53	-0.0312455
PSB913-1_map4	0001.CSV	3660.38	-0.0313604
PSB913-1_map4	0001.CSV	3664.24	-0.0322908
PSB913-1_map4	0001.CSV	3668.1	-0.0331832
PSB913-1_map4	0001.CSV	3671.96	-0.0334995
PSB913-1_map4	0001.CSV	3675.81	-0.0327455
PSB913-1_map4	0001.CSV	3679.67	-0.0318662
PSB913-1_map4	0001.CSV	3683.53	-0.0323261
PSB913-1_map4	0001.CSV	3687.38	-0.0325542
PSB913-1_map4	0001.CSV	3691.24	-0.0313831
PSB913-1_map4	0001.CSV	3695.1	-0.0316019
PSB913-1_map4	0001.CSV	3698.95	-0.0324762
PSB913-1_map4	0001.CSV	3702.81	-0.0328622
PSB913-1_map4	0001.CSV	3706.67	-0.033423
PSB913-1_map4	0001.CSV	3710.53	-0.0330273
PSB913-1_map4	0001.CSV	3714.38	-0.0318266
PSB913-1_map4	0001.CSV	3718.24	-0.0325478
PSB913-1_map4	0001.CSV	3722.1	-0.0329373
PSB913-1_map4	0001.CSV	3725.95	-0.0327597
PSB913-1_map4	0001.CSV	3729.81	-0.0332448
PSB913-1_map4	0001.CSV	3733.67	-0.0329928
PSB913-1_map4	0001.CSV	3737.53	-0.0314112
PSB913-1_map4	0001.CSV	3741.38	-0.0323166
PSB913-1_map4	0001.CSV	3745.24	-0.0336863
PSB913-1_map4	0001.CSV	3749.1	-0.0339308
PSB913-1_map4	0001.CSV	3752.95	-0.0326259
PSB913-1_map4	0001.CSV	3756.81	-0.0322663
PSB913-1_map4	0001.CSV	3760.67	-0.0321531
PSB913-1_map4	0001.CSV	3764.53	-0.0325955
PSB913-1_map4	0001.CSV	3768.38	-0.0325057
PSB913-1_map4	0001.CSV	3772.24	-0.0320178
PSB913-1_map4	0001.CSV	3776.1	-0.0322858
PSB913-1_map4	0001.CSV	3779.95	-0.0322011
PSB913-1_map4	0001.CSV	3783.81	-0.0320057
PSB913-1_map4	0001.CSV	3787.67	-0.0319194
PSB913-1_map4	0001.CSV	3791.53	-0.0323656
PSB913-1_map4	0001.CSV	3795.38	-0.033114
PSB913-1_map4	0001.CSV	3799.24	-0.0330359
PSB913-1_map4	0001.CSV	3803.1	-0.0320879
PSB913-1_map4	0001.CSV	3806.95	-0.0316137
PSB913-1_map4	0001.CSV	3810.81	-0.0321407
PSB913-1_map4	0001.CSV	3814.67	-0.0328921
PSB913-1_map4	0001.CSV	3818.53	-0.0327741
PSB913-1_map4	0001.CSV	3822.38	-0.0318608
PSB913-1_map4	0001.CSV	3826.24	-0.0319231
PSB913-1_map4	0001.CSV	3830.1	-0.0324596
PSB913-1_map4	0001.CSV	3833.95	-0.0328808
PSB913-1_map4	0001.CSV	3837.81	-0.0326055
PSB913-1_map4	0001.CSV	3841.67	-0.0314809
PSB913-1_map4	0001.CSV	3845.53	-0.0318285
PSB913-1_map4	0001.CSV	3849.38	-0.0332325
PSB913-1_map4	0001.CSV	3853.24	-0.032843
PSB913-1_map4	0001.CSV	3857.1	-0.0317432
PSB913-1_map4	0001.CSV	3860.95	-0.0326817
PSB913-1_map4	0001.CSV	3864.81	-0.032756
PSB913-1_map4	0001.CSV	3868.67	-0.0323719
PSB913-1_map4	0001.CSV	3872.52	-0.0318311
PSB913-1_map4	0001.CSV	3876.38	-0.0320927
PSB913-1_map4	0001.CSV	3880.24	-0.0323934
PSB913-1_map4	0001.CSV	3884.1	-0.0318701
PSB913-1_map4	0001.CSV	3887.95	-0.0320137
PSB913-1_map4	0001.CSV	3891.81	-0.0321513
PSB913-1_map4	0001.CSV	3895.67	-0.0324532
PSB913-1_map4	0001.CSV	3899.52	-0.0328473
PSB913-1_map4	0001.CSV	3903.38	-0.0319125
PSB913-1_map4	0001.CSV	3907.24	-0.0315258
PSB913-1_map4	0001.CSV	3911.1	-0.0322358
PSB913-1_map4	0001.CSV	3914.95	-0.0326559
PSB913-1_map4	0001.CSV	3918.81	-0.0323126
PSB913-1_map4	0001.CSV	3922.67	-0.0322802
PSB913-1_map4	0001.CSV	3926.52	-0.0324328
PSB913-1_map4	0001.CSV	3930.38	-0.0322661
PSB913-1_map4	0001.CSV	3934.24	-0.0319392
PSB913-1_map4	0001.CSV	3938.09	-0.0323632
PSB913-1_map4	0001.CSV	3941.95	-0.0326036
PSB913-1_map4	0001.CSV	3945.81	-0.0324327
PSB913-1_map4	0001.CSV	3949.67	-0.0322688
PSB913-1_map4	0001.CSV	3953.52	-0.032217
PSB913-1_map4	0001.CSV	3957.38	-0.0323053
PSB913-1_map4	0001.CSV	3961.24	-0.0322935
PSB913-1_map4	0001.CSV	3965.09	-0.0323012
PSB913-1_map4	0001.CSV	3968.95	-0.0323333
PSB913-1_map4	0001.CSV	3972.81	-0.032282
PSB913-1_map4	0001.CSV	3976.67	-0.0322284
PSB913-1_map4	0001.CSV	3980.52	-0.0323244
PSB913-1_map4	0001.CSV	3984.38	-0.0323624
PSB913-1_map4	0001.CSV	3988.24	-0.0324575
PSB913-1_map4	0001.CSV	3992.09	-0.032473
PSB913-1_map4	0001.CSV	3995.95	-0.0324523
PSB913-1_map4	0001.CSV	3999.81	-0.0324311
PSB913-1_map4	0002.CSV	674.992	0.0319587
PSB913-1_map4	0002.CSV	678.849	0.0354607
PSB913-1_map4	0002.CSV	682.706	0.0368748
PSB913-1_map4	0002.CSV	686.563	0.0416745
PSB913-1_map4	0002.CSV	690.42	0.0491945
PSB913-1_map4	0002.CSV	694.277	0.0673286
PSB913-1_map4	0002.CSV	698.134	0.0841555
PSB913-1_map4	0002.CSV	701.991	0.0737714
PSB913-1_map4	0002.CSV	705.849	0.0606536
PSB913-1_map4	0002.CSV	709.706	0.0801895
PSB913-1_map4	0002.CSV	713.563	0.0815096
PSB913-1_map4	0002.CSV	717.42	0.0445793
PSB913-1_map4	0002.CSV	721.277	0.0212056
PSB913-1_map4	0002.CSV	725.134	0.0189775
PSB913-1_map4	0002.CSV	728.991	0.0198475
PSB913-1_map4	0002.CSV	732.848	0.0221805
PSB913-1_map4	0002.CSV	736.705	0.0243761
PSB913-1_map4	0002.CSV	740.562	0.0269914
PSB913-1_map4	0002.CSV	744.42	0.0277159
PSB913-1_map4	0002.CSV	748.277	0.0285457
PSB913-1_map4	0002.CSV	752.134	0.0283272
PSB913-1_map4	0002.CSV	755.991	0.0283933
PSB913-1_map4	0002.CSV	759.848	0.0277653
PSB913-1_map4	0002.CSV	763.705	0.0278185
PSB913-1_map4	0002.CSV	767.562	0.0270709
PSB913-1_map4	0002.CSV	771.419	0.0270776
PSB913-1_map4	0002.CSV	775.276	0.0265172
PSB913-1_map4	0002.CSV	779.133	0.0266419
PSB913-1_map4	0002.CSV	782.99	0.0265225
PSB913-1_map4	0002.CSV	786.848	0.0268682
PSB913-1_map4	0002.CSV	790.705	0.0267362
PSB913-1_map4	0002.CSV	794.562	0.0276107
PSB913-1_map4	0002.CSV	798.419	0.0279714
PSB913-1_map4	0002.CSV	802.276	0.0291116
PSB913-1_map4	0002.CSV	806.133	0.0303821
PSB913-1_map4	0002.CSV	809.99	0.0327351
PSB913-1_map4	0002.CSV	813.847	0.0346706
PSB913-1_map4	0002.CSV	817.704	0.0376633
PSB913-1_map4	0002.CSV	821.562	0.0406361
PSB913-1_map4	0002.CSV	825.419	0.0450947
PSB913-1_map4	0002.CSV	829.276	0.050084
PSB913-1_map4	0002.CSV	833.133	0.0576237
PSB913-1_map4	0002.CSV	836.99	0.0691699
PSB913-1_map4	0002.CSV	840.847	0.0878657
PSB913-1_map4	0002.CSV	844.704	0.107666
PSB913-1_map4	0002.CSV	848.561	0.13903
PSB913-1_map4	0002.CSV	852.418	0.179369
PSB913-1_map4	0002.CSV	856.275	0.191767
PSB913-1_map4	0002.CSV	860.132	0.165232
PSB913-1_map4	0002.CSV	863.99	0.123121
PSB913-1_map4	0002.CSV	867.847	0.08185
PSB913-1_map4	0002.CSV	871.704	0.049307
PSB913-1_map4	0002.CSV	875.561	0.0274169
PSB913-1_map4	0002.CSV	879.418	0.017575
PSB913-1_map4	0002.CSV	883.275	0.0143702
PSB913-1_map4	0002.CSV	887.132	0.0135373
PSB913-1_map4	0002.CSV	890.989	0.0132284
PSB913-1_map4	0002.CSV	894.846	0.0135768
PSB913-1_map4	0002.CSV	898.703	0.0140361
PSB913-1_map4	0002.CSV	902.561	0.0150729
PSB913-1_map4	0002.CSV	906.418	0.0159314
PSB913-1_map4	0002.CSV	910.275	0.0161776
PSB913-1_map4	0002.CSV	914.132	0.0155545
PSB913-1_map4	0002.CSV	917.989	0.0157975
PSB913-1_map4	0002.CSV	921.846	0.0160977
PSB913-1_map4	0002.CSV	925.703	0.0167295
PSB913-1_map4	0002.CSV	929.56	0.0170832
PSB913-1_map4	0002.CSV	933.417	0.0175809
PSB913-1_map4	0002.CSV	937.274	0.0177085
PSB913-1_map4	0002.CSV	941.131	0.0180781
PSB913-1_map4	0002.CSV	944.989	0.0182239
PSB913-1_map4	0002.CSV	948.846	0.0187263
PSB913-1_map4	0002.CSV	952.703	0.0191271
PSB913-1_map4	0002.CSV	956.56	0.019901
PSB913-1_map4	0002.CSV	960.417	0.0203763
PSB913-1_map4	0002.CSV	964.274	0.0209686
PSB913-1_map4	0002.CSV	968.131	0.0213066
PSB913-1_map4	0002.CSV	971.988	0.0220323
PSB913-1_map4	0002.CSV	975.845	0.0226847
PSB913-1_map4	0002.CSV	979.702	0.0236669
PSB913-1_map4	0002.CSV	983.559	0.0244535
PSB913-1_map4	0002.CSV	987.417	0.0254326
PSB913-1_map4	0002.CSV	991.274	0.0259862
PSB913-1_map4	0002.CSV	995.131	0.0265948
PSB913-1_map4	0002.CSV	998.988	0.0270221
PSB913-1_map4	0002.CSV	1002.85	0.0277786
PSB913-1_map4	0002.CSV	1006.7	0.0282553
PSB913-1_map4	0002.CSV	1010.56	0.0291104
PSB913-1_map4	0002.CSV	1014.42	0.0299489
PSB913-1_map4	0002.CSV	1018.27	0.0311473
PSB913-1_map4	0002.CSV	1022.13	0.0321654
PSB913-1_map4	0002.CSV	1025.99	0.0334931
PSB913-1_map4	0002.CSV	1029.85	0.0344234
PSB913-1_map4	0002.CSV	1033.7	0.0354373
PSB913-1_map4	0002.CSV	1037.56	0.0361309
PSB913-1_map4	0002.CSV	1041.42	0.0370228
PSB913-1_map4	0002.CSV	1045.27	0.0376676
PSB913-1_map4	0002.CSV	1049.13	0.0390866
PSB913-1_map4	0002.CSV	1052.99	0.0406625
PSB913-1_map4	0002.CSV	1056.84	0.0427119
PSB913-1_map4	0002.CSV	1060.7	0.0443294
PSB913-1_map4	0002.CSV	1064.56	0.0456794
PSB913-1_map4	0002.CSV	1068.42	0.0459559
PSB913-1_map4	0002.CSV	1072.27	0.0462905
PSB913-1_map4	0002.CSV	1076.13	0.0483012
PSB913-1_map4	0002.CSV	1079.99	0.0556658
PSB913-1_map4	0002.CSV	1083.84	0.0557578
PSB913-1_map4	0002.CSV	1087.7	0.0434087
PSB913-1_map4	0002.CSV	1091.56	0.0360926
PSB913-1_map4	0002.CSV	1095.41	0.0356487
PSB913-1_map4	0002.CSV	1099.27	0.0362951
PSB913-1_map4	0002.CSV	1103.13	0.0374609
PSB913-1_map4	0002.CSV	1106.99	0.0386245
PSB913-1_map4	0002.CSV	1110.84	0.0399187
PSB913-1_map4	0002.CSV	1114.7	0.0407156
PSB913-1_map4	0002.CSV	1118.56	0.0412371
PSB913-1_map4	0002.CSV	1122.41	0.0412007
PSB913-1_map4	0002.CSV	1126.27	0.0410368
PSB913-1_map4	0002.CSV	1130.13	0.040565
PSB913-1_map4	0002.CSV	1133.99	0.040515
PSB913-1_map4	0002.CSV	1137.84	0.0404291
PSB913-1_map4	0002.CSV	1141.7	0.0405649
PSB913-1_map4	0002.CSV	1145.56	0.0405202
PSB913-1_map4	0002.CSV	1149.41	0.040981
PSB913-1_map4	0002.CSV	1153.27	0.0415637
PSB913-1_map4	0002.CSV	1157.13	0.0423409
PSB913-1_map4	0002.CSV	1160.99	0.042662
PSB913-1_map4	0002.CSV	1164.84	0.0428907
PSB913-1_map4	0002.CSV	1168.7	0.0427343
PSB913-1_map4	0002.CSV	1172.56	0.0427845
PSB913-1_map4	0002.CSV	1176.41	0.0428451
PSB913-1_map4	0002.CSV	1180.27	0.0431631
PSB913-1_map4	0002.CSV	1184.13	0.0431678
PSB913-1_map4	0002.CSV	1187.99	0.0434887
PSB913-1_map4	0002.CSV	1191.84	0.0438012
PSB913-1_map4	0002.CSV	1195.7	0.0444293
PSB913-1_map4	0002.CSV	1199.56	0.0449292
PSB913-1_map4	0002.CSV	1203.41	0.0457305
PSB913-1_map4	0002.CSV	1207.27	0.0463822
PSB913-1_map4	0002.CSV	1211.13	0.0474422
PSB913-1_map4	0002.CSV	1214.98	0.0484438
PSB913-1_map4	0002.CSV	1218.84	0.0497178
PSB913-1_map4	0002.CSV	1222.7	0.0509274
PSB913-1_map4	0002.CSV	1226.56	0.0524543
PSB913-1_map4	0002.CSV	1230.41	0.0538598
PSB913-1_map4	0002.CSV	1234.27	0.0555918
PSB913-1_map4	0002.CSV	1238.13	0.0571594
PSB913-1_map4	0002.CSV	1241.98	0.0590607
PSB913-1_map4	0002.CSV	1245.84	0.0607501
PSB913-1_map4	0002.CSV	1249.7	0.0624242
PSB913-1_map4	0002.CSV	1253.56	0.0635239
PSB913-1_map4	0002.CSV	1257.41	0.0646721
PSB913-1_map4	0002.CSV	1261.27	0.0656113
PSB913-1_map4	0002.CSV	1265.13	0.0669495
PSB913-1_map4	0002.CSV	1268.98	0.0681155
PSB913-1_map4	0002.CSV	1272.84	0.0694503
PSB913-1_map4	0002.CSV	1276.7	0.0703475
PSB913-1_map4	0002.CSV	1280.56	0.0713551
PSB913-1_map4	0002.CSV	1284.41	0.0718676
PSB913-1_map4	0002.CSV	1288.27	0.0724552
PSB913-1_map4	0002.CSV	1292.13	0.0726495
PSB913-1_map4	0002.CSV	1295.98	0.073183
PSB913-1_map4	0002.CSV	1299.84	0.0738201
PSB913-1_map4	0002.CSV	1303.7	0.0750916
PSB913-1_map4	0002.CSV	1307.56	0.0763387
PSB913-1_map4	0002.CSV	1311.41	0.0781204
PSB913-1_map4	0002.CSV	1315.27	0.0798838
PSB913-1_map4	0002.CSV	1319.13	0.0821426
PSB913-1_map4	0002.CSV	1322.98	0.0840372
PSB913-1_map4	0002.CSV	1326.84	0.086372
PSB913-1_map4	0002.CSV	1330.7	0.0888294
PSB913-1_map4	0002.CSV	1334.56	0.0916941
PSB913-1_map4	0002.CSV	1338.41	0.0951469
PSB913-1_map4	0002.CSV	1342.27	0.0995898
PSB913-1_map4	0002.CSV	1346.13	0.102916
PSB913-1_map4	0002.CSV	1349.98	0.107109
PSB913-1_map4	0002.CSV	1353.84	0.111409
PSB913-1_map4	0002.CSV	1357.7	0.116041
PSB913-1_map4	0002.CSV	1361.56	0.120986
PSB913-1_map4	0002.CSV	1365.41	0.127268
PSB913-1_map4	0002.CSV	1369.27	0.132192
PSB913-1_map4	0002.CSV	1373.13	0.138514
PSB913-1_map4	0002.CSV	1376.98	0.145223
PSB913-1_map4	0002.CSV	1380.84	0.151129
PSB913-1_map4	0002.CSV	1384.7	0.156502
PSB913-1_map4	0002.CSV	1388.56	0.163744
PSB913-1_map4	0002.CSV	1392.41	0.16897
PSB913-1_map4	0002.CSV	1396.27	0.176106
PSB913-1_map4	0002.CSV	1400.13	0.183197
PSB913-1_map4	0002.CSV	1403.98	0.189756
PSB913-1_map4	0002.CSV	1407.84	0.196045
PSB913-1_map4	0002.CSV	1411.7	0.202324
PSB913-1_map4	0002.CSV	1415.55	0.207124
PSB913-1_map4	0002.CSV	1419.41	0.214835
PSB913-1_map4	0002.CSV	1423.27	0.221053
PSB913-1_map4	0002.CSV	1427.12	0.227409
PSB913-1_map4	0002.CSV	1430.98	0.233763
PSB913-1_map4	0002.CSV	1434.84	0.242548
PSB913-1_map4	0002.CSV	1438.7	0.251597
PSB913-1_map4	0002.CSV	1442.55	0.257786
PSB913-1_map4	0002.CSV	1446.41	0.259009
PSB913-1_map4	0002.CSV	1450.27	0.257339
PSB913-1_map4	0002.CSV	1454.12	0.251737
PSB913-1_map4	0002.CSV	1457.98	0.243383
PSB913-1_map4	0002.CSV	1461.84	0.236037
PSB913-1_map4	0002.CSV	1465.7	0.231014
PSB913-1_map4	0002.CSV	1469.55	0.22199
PSB913-1_map4	0002.CSV	1473.41	0.205333
PSB913-1_map4	0002.CSV	1477.27	0.184964
PSB913-1_map4	0002.CSV	1481.12	0.172949
PSB913-1_map4	0002.CSV	1484.98	0.161338
PSB913-1_map4	0002.CSV	1488.84	0.147938
PSB913-1_map4	0002.CSV	1492.7	0.134661
PSB913-1_map4	0002.CSV	1496.55	0.125587
PSB913-1_map4	0002.CSV	1500.41	0.115165
PSB913-1_map4	0002.CSV	1504.27	0.109367
PSB913-1_map4	0002.CSV	1508.12	0.097725
PSB913-1_map4	0002.CSV	1511.98	0.0894935
PSB913-1_map4	0002.CSV	1515.84	0.0837826
PSB913-1_map4	0002.CSV	1519.7	0.0766352
PSB913-1_map4	0002.CSV	1523.55	0.0671562
PSB913-1_map4	0002.CSV	1527.41	0.0606034
PSB913-1_map4	0002.CSV	1531.27	0.0546819
PSB913-1_map4	0002.CSV	1535.12	0.0493804
PSB913-1_map4	0002.CSV	1538.98	0.0439042
PSB913-1_map4	0002.CSV	1542.84	0.0354075
PSB913-1_map4	0002.CSV	1546.7	0.0298234
PSB913-1_map4	0002.CSV	1550.55	0.0258727
PSB913-1_map4	0002.CSV	1554.41	0.0213955
PSB913-1_map4	0002.CSV	1558.27	0.0161819
PSB913-1_map4	0002.CSV	1562.12	0.0110453
PSB913-1_map4	0002.CSV	1565.98	0.00848322
PSB913-1_map4	0002.CSV	1569.84	0.00491169
PSB913-1_map4	0002.CSV	1573.69	0.0015314
PSB913-1_map4	0002.CSV	1577.55	-0.00234587
PSB913-1_map4	0002.CSV	1581.41	-0.00533429
PSB913-1_map4	0002.CSV	1585.27	-0.00773607
PSB913-1_map4	0002.CSV	1589.12	-0.00952337
PSB913-1_map4	0002.CSV	1592.98	-0.0107923
PSB913-1_map4	0002.CSV	1596.84	-0.0114562
PSB913-1_map4	0002.CSV	1600.69	-0.0120204
PSB913-1_map4	0002.CSV	1604.55	-0.0124384
PSB913-1_map4	0002.CSV	1608.41	-0.0130692
PSB913-1_map4	0002.CSV	1612.27	-0.0136252
PSB913-1_map4	0002.CSV	1616.12	-0.0141586
PSB913-1_map4	0002.CSV	1619.98	-0.0143466
PSB913-1_map4	0002.CSV	1623.84	-0.0148364
PSB913-1_map4	0002.CSV	1627.69	-0.0150722
PSB913-1_map4	0002.CSV	1631.55	-0.0157252
PSB913-1_map4	0002.CSV	1635.41	-0.0157645
PSB913-1_map4	0002.CSV	1639.27	-0.0157162
PSB913-1_map4	0002.CSV	1643.12	-0.0162079
PSB913-1_map4	0002.CSV	1646.98	-0.0166491
PSB913-1_map4	0002.CSV	1650.84	-0.0165613
PSB913-1_map4	0002.CSV	1654.69	-0.0166426
PSB913-1_map4	0002.CSV	1658.55	-0.0170196
PSB913-1_map4	0002.CSV	1662.41	-0.0175868
PSB913-1_map4	0002.CSV	1666.27	-0.0179255
PSB913-1_map4	0002.CSV	1670.12	-0.0183246
PSB913-1_map4	0002.CSV	1673.98	-0.0183
PSB913-1_map4	0002.CSV	1677.84	-0.0189538
PSB913-1_map4	0002.CSV	1681.69	-0.019336
PSB913-1_map4	0002.CSV	1685.55	-0.0193737
PSB913-1_map4	0002.CSV	1689.41	-0.0195486
PSB913-1_map4	0002.CSV	1693.27	-0.0204132
PSB913-1_map4	0002.CSV	1697.12	-0.0207143
PSB913-1_map4	0002.CSV	1700.98	-0.0205204
PSB913-1_map4	0002.CSV	1704.84	-0.0202028
PSB913-1_map4	0002.CSV	1708.69	-0.0202816
PSB913-1_map4	0002.CSV	1712.55	-0.0203065
PSB913-1_map4	0002.CSV	1716.41	-0.019291
PSB913-1_map4	0002.CSV	1720.27	-0.0174244
PSB913-1_map4	0002.CSV	1724.12	-0.0172829
PSB913-1_map4	0002.CSV	1727.98	-0.0173457
PSB913-1_map4	0002.CSV	1731.84	-0.0177016
PSB913-1_map4	0002.CSV	1735.69	-0.018054
PSB913-1_map4	0002.CSV	1739.55	-0.0191604
PSB913-1_map4	0002.CSV	1743.41	-0.0203409
PSB913-1_map4	0002.CSV	1747.27	-0.0217184
PSB913-1_map4	0002.CSV	1751.12	-0.0229543
PSB913-1_map4	0002.CSV	1754.98	-0.0242538
PSB913-1_map4	0002.CSV	1758.84	-0.0250899
PSB913-1_map4	0002.CSV	1762.69	-0.025627
PSB913-1_map4	0002.CSV	1766.55	-0.0258973
PSB913-1_map4	0002.CSV	1770.41	-0.0255465
PSB913-1_map4	0002.CSV	1774.26	-0.023211
PSB913-1_map4	0002.CSV	1778.12	-0.0209108
PSB913-1_map4	0002.CSV	1781.98	-0.0183679
PSB913-1_map4	0002.CSV	1785.84	-0.0172788
PSB913-1_map4	0002.CSV	1789.69	-0.0180752
PSB913-1_map4	0002.CSV	1793.55	-0.0208186
PSB913-1_map4	0002.CSV	1797.41	-0.023013
PSB913-1_map4	0002.CSV	1801.26	-0.0248269
PSB913-1_map4	0002.CSV	1805.12	-0.0261632
PSB913-1_map4	0002.CSV	1808.98	-0.0269372
PSB913-1_map4	0002.CSV	1812.84	-0.0270033
PSB913-1_map4	0002.CSV	1816.69	-0.0272429
PSB913-1_map4	0002.CSV	1820.55	-0.0273391
PSB913-1_map4	0002.CSV	1824.41	-0.0274593
PSB913-1_map4	0002.CSV	1828.26	-0.0271776
PSB913-1_map4	0002.CSV	1832.12	-0.0271182
PSB913-1_map4	0002.CSV	1835.98	-0.0271514
PSB913-1_map4	0002.CSV	1839.84	-0.0273808
PSB913-1_map4	0002.CSV	1843.69	-0.027141
PSB913-1_map4	0002.CSV	1847.55	-0.0268406
PSB913-1_map4	0002.CSV	1851.41	-0.0268633
PSB913-1_map4	0002.CSV	1855.26	-0.0270123
PSB913-1_map4	0002.CSV	1859.12	-0.0268657
PSB913-1_map4	0002.CSV	1862.98	-0.0269912
PSB913-1_map4	0002.CSV	1866.84	-0.0267903
PSB913-1_map4	0002.CSV	1870.69	-0.0263414
PSB913-1_map4	0002.CSV	1874.55	-0.0263477
PSB913-1_map4	0002.CSV	1878.41	-0.0264667
PSB913-1_map4	0002.CSV	1882.26	-0.0263409
PSB913-1_map4	0002.CSV	1886.12	-0.0263361
PSB913-1_map4	0002.CSV	1889.98	-0.0260651
PSB913-1_map4	0002.CSV	1893.83	-0.0259881
PSB913-1_map4	0002.CSV	1897.69	-0.0259203
PSB913-1_map4	0002.CSV	1901.55	-0.0260028
PSB913-1_map4	0002.CSV	1905.41	-0.0259365
PSB913-1_map4	0002.CSV	1909.26	-0.0258404
PSB913-1_map4	0002.CSV	1913.12	-0.0257575
PSB913-1_map4	0002.CSV	1916.98	-0.02586
PSB913-1_map4	0002.CSV	1920.83	-0.0256492
PSB913-1_map4	0002.CSV	1924.69	-0.0255845
PSB913-1_map4	0002.CSV	1928.55	-0.0255231
PSB913-1_map4	0002.CSV	1932.4	-0.0255058
PSB913-1_map4	0002.CSV	1936.26	-0.0253905
PSB913-1_map4	0002.CSV	1940.12	-0.0254345
PSB913-1_map4	0002.CSV	1943.98	-0.0251635
PSB913-1_map4	0002.CSV	1947.83	-0.0251749
PSB913-1_map4	0002.CSV	1951.69	-0.0251916
PSB913-1_map4	0002.CSV	1955.55	-0.0252389
PSB913-1_map4	0002.CSV	1959.4	-0.0251408
PSB913-1_map4	0002.CSV	1963.26	-0.0251993
PSB913-1_map4	0002.CSV	1967.12	-0.0251013
PSB913-1_map4	0002.CSV	1970.98	-0.0250872
PSB913-1_map4	0002.CSV	1974.83	-0.0250316
PSB913-1_map4	0002.CSV	1978.69	-0.0250728
PSB913-1_map4	0002.CSV	1982.55	-0.0250336
PSB913-1_map4	0002.CSV	1986.4	-0.0251313
PSB913-1_map4	0002.CSV	1990.26	-0.0250237
PSB913-1_map4	0002.CSV	1994.12	-0.024952
PSB913-1_map4	0002.CSV	1997.98	-0.0249231
PSB913-1_map4	0002.CSV	2001.83	-0.0250313
PSB913-1_map4	0002.CSV	2005.69	-0.0249645
PSB913-1_map4	0002.CSV	2009.55	-0.0249899
PSB913-1_map4	0002.CSV	2013.4	-0.0249748
PSB913-1_map4	0002.CSV	2017.26	-0.0249697
PSB913-1_map4	0002.CSV	2021.12	-0.0248949
PSB913-1_map4	0002.CSV	2024.97	-0.0250033
PSB913-1_map4	0002.CSV	2028.83	-0.0249361
PSB913-1_map4	0002.CSV	2032.69	-0.0249675
PSB913-1_map4	0002.CSV	2036.55	-0.0249187
PSB913-1_map4	0002.CSV	2040.4	-0.024894
PSB913-1_map4	0002.CSV	2044.26	-0.0247736
PSB913-1_map4	0002.CSV	2048.12	-0.0248486
PSB913-1_map4	0002.CSV	2051.97	-0.0248229
PSB913-1_map4	0002.CSV	2055.83	-0.0248451
PSB913-1_map4	0002.CSV	2059.69	-0.0247307
PSB913-1_map4	0002.CSV	2063.55	-0.0247393
PSB913-1_map4	0002.CSV	2067.4	-0.024644
PSB913-1_map4	0002.CSV	2071.26	-0.0247188
PSB913-1_map4	0002.CSV	2075.12	-0.0246797
PSB913-1_map4	0002.CSV	2078.97	-0.0246951
PSB913-1_map4	0002.CSV	2082.83	-0.0246462
PSB913-1_map4	0002.CSV	2086.69	-0.0246659
PSB913-1_map4	0002.CSV	2090.55	-0.0245716
PSB913-1_map4	0002.CSV	2094.4	-0.0246218
PSB913-1_map4	0002.CSV	2098.26	-0.0245672
PSB913-1_map4	0002.CSV	2102.12	-0.0245421
PSB913-1_map4	0002.CSV	2105.97	-0.0244615
PSB913-1_map4	0002.CSV	2109.83	-0.0244494
PSB913-1_map4	0002.CSV	2113.69	-0.0243422
PSB913-1_map4	0002.CSV	2117.55	-0.024341
PSB913-1_map4	0002.CSV	2121.4	-0.0242594
PSB913-1_map4	0002.CSV	2125.26	-0.0242745
PSB913-1_map4	0002.CSV	2129.12	-0.0242101
PSB913-1_map4	0002.CSV	2132.97	-0.0241846
PSB913-1_map4	0002.CSV	2136.83	-0.0240822
PSB913-1_map4	0002.CSV	2140.69	-0.0240278
PSB913-1_map4	0002.CSV	2144.55	-0.0238894
PSB913-1_map4	0002.CSV	2148.4	-0.0239057
PSB913-1_map4	0002.CSV	2152.26	-0.0237987
PSB913-1_map4	0002.CSV	2156.12	-0.0237456
PSB913-1_map4	0002.CSV	2159.97	-0.0236816
PSB913-1_map4	0002.CSV	2163.83	-0.0237182
PSB913-1_map4	0002.CSV	2167.69	-0.0236429
PSB913-1_map4	0002.CSV	2171.55	-0.0235907
PSB913-1_map4	0002.CSV	2175.4	-0.0234837
PSB913-1_map4	0002.CSV	2179.26	-0.0234385
PSB913-1_map4	0002.CSV	2183.12	-0.0233141
PSB913-1_map4	0002.CSV	2186.97	-0.0232461
PSB913-1_map4	0002.CSV	2190.83	-0.0231266
PSB913-1_map4	0002.CSV	2194.69	-0.0231438
PSB913-1_map4	0002.CSV	2198.55	-0.0230861
PSB913-1_map4	0002.CSV	2202.4	-0.0231116
PSB913-1_map4	0002.CSV	2206.26	-0.0230172
PSB913-1_map4	0002.CSV	2210.12	-0.0229556
PSB913-1_map4	0002.CSV	2213.97	-0.0228933
PSB913-1_map4	0002.CSV	2217.83	-0.0229128
PSB913-1_map4	0002.CSV	2221.69	-0.0228591
PSB913-1_map4	0002.CSV	2225.54	-0.0228424
PSB913-1_map4	0002.CSV	2229.4	-0.0227942
PSB913-1_map4	0002.CSV	2233.26	-0.0228013
PSB913-1_map4	0002.CSV	2237.12	-0.0227052
PSB913-1_map4	0002.CSV	2240.97	-0.022675
PSB913-1_map4	0002.CSV	2244.83	-0.0226164
PSB913-1_map4	0002.CSV	2248.69	-0.0226444
PSB913-1_map4	0002.CSV	2252.54	-0.0226098
PSB913-1_map4	0002.CSV	2256.4	-0.0226301
PSB913-1_map4	0002.CSV	2260.26	-0.0225814
PSB913-1_map4	0002.CSV	2264.11	-0.022574
PSB913-1_map4	0002.CSV	2267.97	-0.0224902
PSB913-1_map4	0002.CSV	2271.83	-0.022486
PSB913-1_map4	0002.CSV	2275.69	-0.0224586
PSB913-1_map4	0002.CSV	2279.54	-0.0224553
PSB913-1_map4	0002.CSV	2283.4	-0.0224582
PSB913-1_map4	0002.CSV	2287.26	-0.0225646
PSB913-1_map4	0002.CSV	2291.11	-0.0225704
PSB913-1_map4	0002.CSV	2294.97	-0.0226102
PSB913-1_map4	0002.CSV	2298.83	-0.0225966
PSB913-1_map4	0002.CSV	2302.69	-0.0227478
PSB913-1_map4	0002.CSV	2306.54	-0.0229369
PSB913-1_map4	0002.CSV	2310.4	-0.023294
PSB913-1_map4	0002.CSV	2314.26	-0.0237057
PSB913-1_map4	0002.CSV	2318.11	-0.0246582
PSB913-1_map4	0002.CSV	2321.97	-0.0259545
PSB913-1_map4	0002.CSV	2325.83	-0.0286646
PSB913-1_map4	0002.CSV	2329.69	-0.0310594
PSB913-1_map4	0002.CSV	2333.54	-0.033026
PSB913-1_map4	0002.CSV	2337.4	-0.0348202
PSB913-1_map4	0002.CSV	2341.26	-0.0352895
PSB913-1_map4	0002.CSV	2345.11	-0.0296021
PSB913-1_map4	0002.CSV	2348.97	-0.0277903
PSB913-1_map4	0002.CSV	2352.83	-0.0319035
PSB913-1_map4	0002.CSV	2356.69	-0.0497707
PSB913-1_map4	0002.CSV	2360.54	-0.0711364
PSB913-1_map4	0002.CSV	2364.4	-0.0582407
PSB913-1_map4	0002.CSV	2368.26	-0.037323
PSB913-1_map4	0002.CSV	2372.11	-0.0272597
PSB913-1_map4	0002.CSV	2375.97	-0.023733
PSB913-1_map4	0002.CSV	2379.83	-0.022774
PSB913-1_map4	0002.CSV	2383.69	-0.0226762
PSB913-1_map4	0002.CSV	2387.54	-0.0228666
PSB913-1_map4	0002.CSV	2391.4	-0.0230229
PSB913-1_map4	0002.CSV	2395.26	-0.023124
PSB913-1_map4	0002.CSV	2399.11	-0.0231448
PSB913-1_map4	0002.CSV	2402.97	-0.0231531
PSB913-1_map4	0002.CSV	2406.83	-0.0231537
PSB913-1_map4	0002.CSV	2410.68	-0.0231671
PSB913-1_map4	0002.CSV	2414.54	-0.0231509
PSB913-1_map4	0002.CSV	2418.4	-0.023162
PSB913-1_map4	0002.CSV	2422.26	-0.0231566
PSB913-1_map4	0002.CSV	2426.11	-0.0231854
PSB913-1_map4	0002.CSV	2429.97	-0.0231782
PSB913-1_map4	0002.CSV	2433.83	-0.0231206
PSB913-1_map4	0002.CSV	2437.68	-0.0230836
PSB913-1_map4	0002.CSV	2441.54	-0.0230688
PSB913-1_map4	0002.CSV	2445.4	-0.0230571
PSB913-1_map4	0002.CSV	2449.26	-0.0230506
PSB913-1_map4	0002.CSV	2453.11	-0.0229833
PSB913-1_map4	0002.CSV	2456.97	-0.0229102
PSB913-1_map4	0002.CSV	2460.83	-0.0228341
PSB913-1_map4	0002.CSV	2464.68	-0.0226778
PSB913-1_map4	0002.CSV	2468.54	-0.0224579
PSB913-1_map4	0002.CSV	2472.4	-0.0222554
PSB913-1_map4	0002.CSV	2476.26	-0.0220042
PSB913-1_map4	0002.CSV	2480.11	-0.0216847
PSB913-1_map4	0002.CSV	2483.97	-0.0213492
PSB913-1_map4	0002.CSV	2487.83	-0.0210067
PSB913-1_map4	0002.CSV	2491.68	-0.0207183
PSB913-1_map4	0002.CSV	2495.54	-0.0204994
PSB913-1_map4	0002.CSV	2499.4	-0.0204162
PSB913-1_map4	0002.CSV	2503.26	-0.0204989
PSB913-1_map4	0002.CSV	2507.11	-0.0206345
PSB913-1_map4	0002.CSV	2510.97	-0.0206319
PSB913-1_map4	0002.CSV	2514.83	-0.0204378
PSB913-1_map4	0002.CSV	2518.68	-0.0200553
PSB913-1_map4	0002.CSV	2522.54	-0.0198759
PSB913-1_map4	0002.CSV	2526.4	-0.0200189
PSB913-1_map4	0002.CSV	2530.26	-0.0203361
PSB913-1_map4	0002.CSV	2534.11	-0.020725
PSB913-1_map4	0002.CSV	2537.97	-0.0210775
PSB913-1_map4	0002.CSV	2541.83	-0.0212075
PSB913-1_map4	0002.CSV	2545.68	-0.0212168
PSB913-1_map4	0002.CSV	2549.54	-0.0212891
PSB913-1_map4	0002.CSV	2553.4	-0.021543
PSB913-1_map4	0002.CSV	2557.26	-0.0218447
PSB913-1_map4	0002.CSV	2561.11	-0.0220879
PSB913-1_map4	0002.CSV	2564.97	-0.0222848
PSB913-1_map4	0002.CSV	2568.83	-0.0225177
PSB913-1_map4	0002.CSV	2572.68	-0.0225733
PSB913-1_map4	0002.CSV	2576.54	-0.022661
PSB913-1_map4	0002.CSV	2580.4	-0.0227972
PSB913-1_map4	0002.CSV	2584.25	-0.0229134
PSB913-1_map4	0002.CSV	2588.11	-0.0229759
PSB913-1_map4	0002.CSV	2591.97	-0.0230357
PSB913-1_map4	0002.CSV	2595.83	-0.0230383
PSB913-1_map4	0002.CSV	2599.68	-0.0230957
PSB913-1_map4	0002.CSV	2603.54	-0.0231282
PSB913-1_map4	0002.CSV	2607.4	-0.0232588
PSB913-1_map4	0002.CSV	2611.25	-0.0232504
PSB913-1_map4	0002.CSV	2615.11	-0.0232063
PSB913-1_map4	0002.CSV	2618.97	-0.0232164
PSB913-1_map4	0002.CSV	2622.82	-0.0231918
PSB913-1_map4	0002.CSV	2626.68	-0.0231221
PSB913-1_map4	0002.CSV	2630.54	-0.0232287
PSB913-1_map4	0002.CSV	2634.4	-0.023257
PSB913-1_map4	0002.CSV	2638.25	-0.0233529
PSB913-1_map4	0002.CSV	2642.11	-0.0235314
PSB913-1_map4	0002.CSV	2645.97	-0.0236957
PSB913-1_map4	0002.CSV	2649.82	-0.0237592
PSB913-1_map4	0002.CSV	2653.68	-0.0238519
PSB913-1_map4	0002.CSV	2657.54	-0.0239351
PSB913-1_map4	0002.CSV	2661.4	-0.0240608
PSB913-1_map4	0002.CSV	2665.25	-0.0240645
PSB913-1_map4	0002.CSV	2669.11	-0.0240367
PSB913-1_map4	0002.CSV	2672.97	-0.0238161
PSB913-1_map4	0002.CSV	2676.82	-0.0236578
PSB913-1_map4	0002.CSV	2680.68	-0.0237382
PSB913-1_map4	0002.CSV	2684.54	-0.0240304
PSB913-1_map4	0002.CSV	2688.4	-0.0240997
PSB913-1_map4	0002.CSV	2692.25	-0.0241104
PSB913-1_map4	0002.CSV	2696.11	-0.0240677
PSB913-1_map4	0002.CSV	2699.97	-0.0240885
PSB913-1_map4	0002.CSV	2703.82	-0.0240368
PSB913-1_map4	0002.CSV	2707.68	-0.0239681
PSB913-1_map4	0002.CSV	2711.54	-0.023891
PSB913-1_map4	0002.CSV	2715.4	-0.0239792
PSB913-1_map4	0002.CSV	2719.25	-0.023852
PSB913-1_map4	0002.CSV	2723.11	-0.0236114
PSB913-1_map4	0002.CSV	2726.97	-0.0234985
PSB913-1_map4	0002.CSV	2730.82	-0.0237364
PSB913-1_map4	0002.CSV	2734.68	-0.0237659
PSB913-1_map4	0002.CSV	2738.54	-0.0237237
PSB913-1_map4	0002.CSV	2742.4	-0.0235682
PSB913-1_map4	0002.CSV	2746.25	-0.0232442
PSB913-1_map4	0002.CSV	2750.11	-0.0231295
PSB913-1_map4	0002.CSV	2753.97	-0.0234067
PSB913-1_map4	0002.CSV	2757.82	-0.0234262
PSB913-1_map4	0002.CSV	2761.68	-0.0234935
PSB913-1_map4	0002.CSV	2765.54	-0.0234264
PSB913-1_map4	0002.CSV	2769.39	-0.0232195
PSB913-1_map4	0002.CSV	2773.25	-0.0228373
PSB913-1_map4	0002.CSV	2777.11	-0.0228742
PSB913-1_map4	0002.CSV	2780.97	-0.0229773
PSB913-1_map4	0002.CSV	2784.82	-0.0227758
PSB913-1_map4	0002.CSV	2788.68	-0.0222984
PSB913-1_map4	0002.CSV	2792.54	-0.0221997
PSB913-1_map4	0002.CSV	2796.39	-0.0221519
PSB913-1_map4	0002.CSV	2800.25	-0.0223315
PSB913-1_map4	0002.CSV	2804.11	-0.0224176
PSB913-1_map4	0002.CSV	2807.97	-0.0221414
PSB913-1_map4	0002.CSV	2811.82	-0.0220415
PSB913-1_map4	0002.CSV	2815.68	-0.0221967
PSB913-1_map4	0002.CSV	2819.54	-0.0219987
PSB913-1_map4	0002.CSV	2823.39	-0.0218084
PSB913-1_map4	0002.CSV	2827.25	-0.0215346
PSB913-1_map4	0002.CSV	2831.11	-0.0210911
PSB913-1_map4	0002.CSV	2834.97	-0.0202886
PSB913-1_map4	0002.CSV	2838.82	-0.0197264
PSB913-1_map4	0002.CSV	2842.68	-0.0192939
PSB913-1_map4	0002.CSV	2846.54	-0.0186159
PSB913-1_map4	0002.CSV	2850.39	-0.0181105
PSB913-1_map4	0002.CSV	2854.25	-0.018229
PSB913-1_map4	0002.CSV	2858.11	-0.0183922
PSB913-1_map4	0002.CSV	2861.97	-0.0189657
PSB913-1_map4	0002.CSV	2865.82	-0.0192876
PSB913-1_map4	0002.CSV	2869.68	-0.0191448
PSB913-1_map4	0002.CSV	2873.54	-0.0190228
PSB913-1_map4	0002.CSV	2877.39	-0.0194951
PSB913-1_map4	0002.CSV	2881.25	-0.0196986
PSB913-1_map4	0002.CSV	2885.11	-0.0195811
PSB913-1_map4	0002.CSV	2888.97	-0.0191516
PSB913-1_map4	0002.CSV	2892.82	-0.0186085
PSB913-1_map4	0002.CSV	2896.68	-0.0181127
PSB913-1_map4	0002.CSV	2900.54	-0.0179462
PSB913-1_map4	0002.CSV	2904.39	-0.0173847
PSB913-1_map4	0002.CSV	2908.25	-0.0164598
PSB913-1_map4	0002.CSV	2912.11	-0.0151486
PSB913-1_map4	0002.CSV	2915.97	-0.0143358
PSB913-1_map4	0002.CSV	2919.82	-0.0144152
PSB913-1_map4	0002.CSV	2923.68	-0.0151852
PSB913-1_map4	0002.CSV	2927.54	-0.0157335
PSB913-1_map4	0002.CSV	2931.39	-0.0168096
PSB913-1_map4	0002.CSV	2935.25	-0.0180728
PSB913-1_map4	0002.CSV	2939.11	-0.0187756
PSB913-1_map4	0002.CSV	2942.96	-0.0187705
PSB913-1_map4	0002.CSV	2946.82	-0.018978
PSB913-1_map4	0002.CSV	2950.68	-0.0193808
PSB913-1_map4	0002.CSV	2954.54	-0.0201736
PSB913-1_map4	0002.CSV	2958.39	-0.0209584
PSB913-1_map4	0002.CSV	2962.25	-0.0215554
PSB913-1_map4	0002.CSV	2966.11	-0.0220406
PSB913-1_map4	0002.CSV	2969.96	-0.0221871
PSB913-1_map4	0002.CSV	2973.82	-0.0219343
PSB913-1_map4	0002.CSV	2977.68	-0.0218846
PSB913-1_map4	0002.CSV	2981.53	-0.0221086
PSB913-1_map4	0002.CSV	2985.39	-0.0226688
PSB913-1_map4	0002.CSV	2989.25	-0.0226561
PSB913-1_map4	0002.CSV	2993.11	-0.0225629
PSB913-1_map4	0002.CSV	2996.96	-0.0226313
PSB913-1_map4	0002.CSV	3000.82	-0.0229601
PSB913-1_map4	0002.CSV	3004.68	-0.0231487
PSB913-1_map4	0002.CSV	3008.53	-0.0230673
PSB913-1_map4	0002.CSV	3012.39	-0.0227022
PSB913-1_map4	0002.CSV	3016.25	-0.022698
PSB913-1_map4	0002.CSV	3020.11	-0.0227734
PSB913-1_map4	0002.CSV	3023.96	-0.022879
PSB913-1_map4	0002.CSV	3027.82	-0.0228253
PSB913-1_map4	0002.CSV	3031.68	-0.0227359
PSB913-1_map4	0002.CSV	3035.53	-0.0227075
PSB913-1_map4	0002.CSV	3039.39	-0.0227529
PSB913-1_map4	0002.CSV	3043.25	-0.0226439
PSB913-1_map4	0002.CSV	3047.11	-0.0228098
PSB913-1_map4	0002.CSV	3050.96	-0.0228549
PSB913-1_map4	0002.CSV	3054.82	-0.0229178
PSB913-1_map4	0002.CSV	3058.68	-0.0228888
PSB913-1_map4	0002.CSV	3062.53	-0.0227576
PSB913-1_map4	0002.CSV	3066.39	-0.0224759
PSB913-1_map4	0002.CSV	3070.25	-0.0226794
PSB913-1_map4	0002.CSV	3074.11	-0.0226765
PSB913-1_map4	0002.CSV	3077.96	-0.0224512
PSB913-1_map4	0002.CSV	3081.82	-0.0222407
PSB913-1_map4	0002.CSV	3085.68	-0.022283
PSB913-1_map4	0002.CSV	3089.53	-0.0223578
PSB913-1_map4	0002.CSV	3093.39	-0.0226575
PSB913-1_map4	0002.CSV	3097.25	-0.0226193
PSB913-1_map4	0002.CSV	3101.11	-0.022499
PSB913-1_map4	0002.CSV	3104.96	-0.0222574
PSB913-1_map4	0002.CSV	3108.82	-0.0220848
PSB913-1_map4	0002.CSV	3112.68	-0.022025
PSB913-1_map4	0002.CSV	3116.53	-0.0219322
PSB913-1_map4	0002.CSV	3120.39	-0.0218753
PSB913-1_map4	0002.CSV	3124.25	-0.0220824
PSB913-1_map4	0002.CSV	3128.11	-0.0220276
PSB913-1_map4	0002.CSV	3131.96	-0.0220748
PSB913-1_map4	0002.CSV	3135.82	-0.0219365
PSB913-1_map4	0002.CSV	3139.68	-0.0218105
PSB913-1_map4	0002.CSV	3143.53	-0.0219136
PSB913-1_map4	0002.CSV	3147.39	-0.0218474
PSB913-1_map4	0002.CSV	3151.25	-0.0215029
PSB913-1_map4	0002.CSV	3155.1	-0.0216273
PSB913-1_map4	0002.CSV	3158.96	-0.0218738
PSB913-1_map4	0002.CSV	3162.82	-0.0219741
PSB913-1_map4	0002.CSV	3166.68	-0.0218753
PSB913-1_map4	0002.CSV	3170.53	-0.0218764
PSB913-1_map4	0002.CSV	3174.39	-0.0218004
PSB913-1_map4	0002.CSV	3178.25	-0.0216867
PSB913-1_map4	0002.CSV	3182.1	-0.0216124
PSB913-1_map4	0002.CSV	3185.96	-0.0215484
PSB913-1_map4	0002.CSV	3189.82	-0.0214083
PSB913-1_map4	0002.CSV	3193.68	-0.021634
PSB913-1_map4	0002.CSV	3197.53	-0.0216496
PSB913-1_map4	0002.CSV	3201.39	-0.021453
PSB913-1_map4	0002.CSV	3205.25	-0.0213659
PSB913-1_map4	0002.CSV	3209.1	-0.0215076
PSB913-1_map4	0002.CSV	3212.96	-0.021362
PSB913-1_map4	0002.CSV	3216.82	-0.021197
PSB913-1_map4	0002.CSV	3220.68	-0.0212857
PSB913-1_map4	0002.CSV	3224.53	-0.0214579
PSB913-1_map4	0002.CSV	3228.39	-0.02115
PSB913-1_map4	0002.CSV	3232.25	-0.020815
PSB913-1_map4	0002.CSV	3236.1	-0.02092
PSB913-1_map4	0002.CSV	3239.96	-0.021208
PSB913-1_map4	0002.CSV	3243.82	-0.0209901
PSB913-1_map4	0002.CSV	3247.68	-0.0208912
PSB913-1_map4	0002.CSV	3251.53	-0.0210493
PSB913-1_map4	0002.CSV	3255.39	-0.021036
PSB913-1_map4	0002.CSV	3259.25	-0.021147
PSB913-1_map4	0002.CSV	3263.1	-0.0212618
PSB913-1_map4	0002.CSV	3266.96	-0.021041
PSB913-1_map4	0002.CSV	3270.82	-0.0208124
PSB913-1_map4	0002.CSV	3274.68	-0.0207983
PSB913-1_map4	0002.CSV	3278.53	-0.0211506
PSB913-1_map4	0002.CSV	3282.39	-0.0212612
PSB913-1_map4	0002.CSV	3286.25	-0.0211488
PSB913-1_map4	0002.CSV	3290.1	-0.0208624
PSB913-1_map4	0002.CSV	3293.96	-0.0206721
PSB913-1_map4	0002.CSV	3297.82	-0.0206489
PSB913-1_map4	0002.CSV	3301.67	-0.020608
PSB913-1_map4	0002.CSV	3305.53	-0.0206231
PSB913-1_map4	0002.CSV	3309.39	-0.0207641
PSB913-1_map4	0002.CSV	3313.25	-0.0209981
PSB913-1_map4	0002.CSV	3317.1	-0.0212649
PSB913-1_map4	0002.CSV	3320.96	-0.0211217
PSB913-1_map4	0002.CSV	3324.82	-0.0209125
PSB913-1_map4	0002.CSV	3328.67	-0.0211129
PSB913-1_map4	0002.CSV	3332.53	-0.0212047
PSB913-1_map4	0002.CSV	3336.39	-0.0207813
PSB913-1_map4	0002.CSV	3340.24	-0.0205505
PSB913-1_map4	0002.CSV	3344.1	-0.0207047
PSB913-1_map4	0002.CSV	3347.96	-0.0207566
PSB913-1_map4	0002.CSV	3351.82	-0.0207793
PSB913-1_map4	0002.CSV	3355.67	-0.0210079
PSB913-1_map4	0002.CSV	3359.53	-0.0208672
PSB913-1_map4	0002.CSV	3363.39	-0.0206519
PSB913-1_map4	0002.CSV	3367.24	-0.0203174
PSB913-1_map4	0002.CSV	3371.1	-0.0203418
PSB913-1_map4	0002.CSV	3374.96	-0.0206301
PSB913-1_map4	0002.CSV	3378.82	-0.0208799
PSB913-1_map4	0002.CSV	3382.67	-0.0211067
PSB913-1_map4	0002.CSV	3386.53	-0.0209326
PSB913-1_map4	0002.CSV	3390.39	-0.0204951
PSB913-1_map4	0002.CSV	3394.24	-0.0203277
PSB913-1_map4	0002.CSV	3398.1	-0.0203427
PSB913-1_map4	0002.CSV	3401.96	-0.02047
PSB913-1_map4	0002.CSV	3405.82	-0.020695
PSB913-1_map4	0002.CSV	3409.67	-0.0207062
PSB913-1_map4	0002.CSV	3413.53	-0.0209021
PSB913-1_map4	0002.CSV	3417.39	-0.0212385
PSB913-1_map4	0002.CSV	3421.24	-0.0212848
PSB913-1_map4	0002.CSV	3425.1	-0.0211299
PSB913-1_map4	0002.CSV	3428.96	-0.0208813
PSB913-1_map4	0002.CSV	3432.82	-0.0207259
PSB913-1_map4	0002.CSV	3436.67	-0.0208334
PSB913-1_map4	0002.CSV	3440.53	-0.0213964
PSB913-1_map4	0002.CSV	3444.39	-0.0218224
PSB913-1_map4	0002.CSV	3448.24	-0.0217961
PSB913-1_map4	0002.CSV	3452.1	-0.0220323
PSB913-1_map4	0002.CSV	3455.96	-0.022143
PSB913-1_map4	0002.CSV	3459.82	-0.0218315
PSB913-1_map4	0002.CSV	3463.67	-0.0215133
PSB913-1_map4	0002.CSV	3467.53	-0.021514
PSB913-1_map4	0002.CSV	3471.39	-0.0218156
PSB913-1_map4	0002.CSV	3475.24	-0.0220757
PSB913-1_map4	0002.CSV	3479.1	-0.0221321
PSB913-1_map4	0002.CSV	3482.96	-0.0223555
PSB913-1_map4	0002.CSV	3486.82	-0.0223879
PSB913-1_map4	0002.CSV	3490.67	-0.0224523
PSB913-1_map4	0002.CSV	3494.53	-0.022481
PSB913-1_map4	0002.CSV	3498.39	-0.0226279
PSB913-1_map4	0002.CSV	3502.24	-0.022788
PSB913-1_map4	0002.CSV	3506.1	-0.0231451
PSB913-1_map4	0002.CSV	3509.96	-0.0232185
PSB913-1_map4	0002.CSV	3513.81	-0.0231974
PSB913-1_map4	0002.CSV	3517.67	-0.0238043
PSB913-1_map4	0002.CSV	3521.53	-0.0241824
PSB913-1_map4	0002.CSV	3525.39	-0.0243163
PSB913-1_map4	0002.CSV	3529.24	-0.0244947
PSB913-1_map4	0002.CSV	3533.1	-0.0244403
PSB913-1_map4	0002.CSV	3536.96	-0.0244396
PSB913-1_map4	0002.CSV	3540.81	-0.0246679
PSB913-1_map4	0002.CSV	3544.67	-0.0247923
PSB913-1_map4	0002.CSV	3548.53	-0.0249128
PSB913-1_map4	0002.CSV	3552.39	-0.0252799
PSB913-1_map4	0002.CSV	3556.24	-0.025507
PSB913-1_map4	0002.CSV	3560.1	-0.0259761
PSB913-1_map4	0002.CSV	3563.96	-0.0266202
PSB913-1_map4	0002.CSV	3567.81	-0.0261972
PSB913-1_map4	0002.CSV	3571.67	-0.026019
PSB913-1_map4	0002.CSV	3575.53	-0.0265174
PSB913-1_map4	0002.CSV	3579.39	-0.026627
PSB913-1_map4	0002.CSV	3583.24	-0.0270203
PSB913-1_map4	0002.CSV	3587.1	-0.0269942
PSB913-1_map4	0002.CSV	3590.96	-0.0273048
PSB913-1_map4	0002.CSV	3594.81	-0.0277986
PSB913-1_map4	0002.CSV	3598.67	-0.0275453
PSB913-1_map4	0002.CSV	3602.53	-0.0274839
PSB913-1_map4	0002.CSV	3606.39	-0.0284075
PSB913-1_map4	0002.CSV	3610.24	-0.0289075
PSB913-1_map4	0002.CSV	3614.1	-0.0290248
PSB913-1_map4	0002.CSV	3617.96	-0.0285019
PSB913-1_map4	0002.CSV	3621.81	-0.0284651
PSB913-1_map4	0002.CSV	3625.67	-0.0295463
PSB913-1_map4	0002.CSV	3629.53	-0.0295264
PSB913-1_map4	0002.CSV	3633.39	-0.0286861
PSB913-1_map4	0002.CSV	3637.24	-0.0290785
PSB913-1_map4	0002.CSV	3641.1	-0.0296547
PSB913-1_map4	0002.CSV	3644.96	-0.0308281
PSB913-1_map4	0002.CSV	3648.81	-0.0303551
PSB913-1_map4	0002.CSV	3652.67	-0.029117
PSB913-1_map4	0002.CSV	3656.53	-0.0291347
PSB913-1_map4	0002.CSV	3660.38	-0.0291847
PSB913-1_map4	0002.CSV	3664.24	-0.0300415
PSB913-1_map4	0002.CSV	3668.1	-0.0309389
PSB913-1_map4	0002.CSV	3671.96	-0.0309961
PSB913-1_map4	0002.CSV	3675.81	-0.0305318
PSB913-1_map4	0002.CSV	3679.67	-0.0297406
PSB913-1_map4	0002.CSV	3683.53	-0.0303559
PSB913-1_map4	0002.CSV	3687.38	-0.0306797
PSB913-1_map4	0002.CSV	3691.24	-0.0295256
PSB913-1_map4	0002.CSV	3695.1	-0.0297148
PSB913-1_map4	0002.CSV	3698.95	-0.0305707
PSB913-1_map4	0002.CSV	3702.81	-0.0307338
PSB913-1_map4	0002.CSV	3706.67	-0.0313952
PSB913-1_map4	0002.CSV	3710.53	-0.0311243
PSB913-1_map4	0002.CSV	3714.38	-0.0300829
PSB913-1_map4	0002.CSV	3718.24	-0.0308078
PSB913-1_map4	0002.CSV	3722.1	-0.0312596
PSB913-1_map4	0002.CSV	3725.95	-0.0309547
PSB913-1_map4	0002.CSV	3729.81	-0.0314415
PSB913-1_map4	0002.CSV	3733.67	-0.0310447
PSB913-1_map4	0002.CSV	3737.53	-0.0294967
PSB913-1_map4	0002.CSV	3741.38	-0.0305135
PSB913-1_map4	0002.CSV	3745.24	-0.0322359
PSB913-1_map4	0002.CSV	3749.1	-0.0323095
PSB913-1_map4	0002.CSV	3752.95	-0.0308988
PSB913-1_map4	0002.CSV	3756.81	-0.0304389
PSB913-1_map4	0002.CSV	3760.67	-0.0304682
PSB913-1_map4	0002.CSV	3764.53	-0.0308356
PSB913-1_map4	0002.CSV	3768.38	-0.0308275
PSB913-1_map4	0002.CSV	3772.24	-0.0303655
PSB913-1_map4	0002.CSV	3776.1	-0.0307206
PSB913-1_map4	0002.CSV	3779.95	-0.0306008
PSB913-1_map4	0002.CSV	3783.81	-0.0304783
PSB913-1_map4	0002.CSV	3787.67	-0.0303966
PSB913-1_map4	0002.CSV	3791.53	-0.0308925
PSB913-1_map4	0002.CSV	3795.38	-0.0316548
PSB913-1_map4	0002.CSV	3799.24	-0.0316383
PSB913-1_map4	0002.CSV	3803.1	-0.0303907
PSB913-1_map4	0002.CSV	3806.95	-0.0298526
PSB913-1_map4	0002.CSV	3810.81	-0.0305374
PSB913-1_map4	0002.CSV	3814.67	-0.0314614
PSB913-1_map4	0002.CSV	3818.53	-0.0308796
PSB913-1_map4	0002.CSV	3822.38	-0.0300486
PSB913-1_map4	0002.CSV	3826.24	-0.0304085
PSB913-1_map4	0002.CSV	3830.1	-0.0310593
PSB913-1_map4	0002.CSV	3833.95	-0.0312588
PSB913-1_map4	0002.CSV	3837.81	-0.0308961
PSB913-1_map4	0002.CSV	3841.67	-0.029756
PSB913-1_map4	0002.CSV	3845.53	-0.0303126
PSB913-1_map4	0002.CSV	3849.38	-0.0317259
PSB913-1_map4	0002.CSV	3853.24	-0.0313957
PSB913-1_map4	0002.CSV	3857.1	-0.0302558
PSB913-1_map4	0002.CSV	3860.95	-0.0313464
PSB913-1_map4	0002.CSV	3864.81	-0.031247
PSB913-1_map4	0002.CSV	3868.67	-0.0308046
PSB913-1_map4	0002.CSV	3872.52	-0.0302372
PSB913-1_map4	0002.CSV	3876.38	-0.030669
PSB913-1_map4	0002.CSV	3880.24	-0.0309384
PSB913-1_map4	0002.CSV	3884.1	-0.0304246
PSB913-1_map4	0002.CSV	3887.95	-0.0304622
PSB913-1_map4	0002.CSV	3891.81	-0.0306248
PSB913-1_map4	0002.CSV	3895.67	-0.0309423
PSB913-1_map4	0002.CSV	3899.52	-0.0314516
PSB913-1_map4	0002.CSV	3903.38	-0.030355
PSB913-1_map4	0002.CSV	3907.24	-0.0301715
PSB913-1_map4	0002.CSV	3911.1	-0.0309377
PSB913-1_map4	0002.CSV	3914.95	-0.0314041
PSB913-1_map4	0002.CSV	3918.81	-0.0308836
PSB913-1_map4	0002.CSV	3922.67	-0.0307677
PSB913-1_map4	0002.CSV	3926.52	-0.0308515
PSB913-1_map4	0002.CSV	3930.38	-0.0308953
PSB913-1_map4	0002.CSV	3934.24	-0.030509
PSB913-1_map4	0002.CSV	3938.09	-0.0308481
PSB913-1_map4	0002.CSV	3941.95	-0.0309692
PSB913-1_map4	0002.CSV	3945.81	-0.0308926
PSB913-1_map4	0002.CSV	3949.67	-0.0307301
PSB913-1_map4	0002.CSV	3953.52	-0.030809
PSB913-1_map4	0002.CSV	3957.38	-0.0308871
PSB913-1_map4	0002.CSV	3961.24	-0.0308949
PSB913-1_map4	0002.CSV	3965.09	-0.0308885
PSB913-1_map4	0002.CSV	3968.95	-0.0310486
PSB913-1_map4	0002.CSV	3972.81	-0.0309916
PSB913-1_map4	0002.CSV	3976.67	-0.0309459
PSB913-1_map4	0002.CSV	3980.52	-0.0309143
PSB913-1_map4	0002.CSV	3984.38	-0.0310226
PSB913-1_map4	0002.CSV	3988.24	-0.0311029
PSB913-1_map4	0002.CSV	3992.09	-0.0311296
PSB913-1_map4	0002.CSV	3995.95	-0.0309974
PSB913-1_map4	0002.CSV	3999.81	-0.0309956
PSB913-1_map4	0003.CSV	674.992	0.0277282
PSB913-1_map4	0003.CSV	678.849	0.0303214
PSB913-1_map4	0003.CSV	682.706	0.0318584
PSB913-1_map4	0003.CSV	686.563	0.0365692
PSB913-1_map4	0003.CSV	690.42	0.0439851
PSB913-1_map4	0003.CSV	694.277	0.0610188
PSB913-1_map4	0003.CSV	698.134	0.0764529
PSB913-1_map4	0003.CSV	701.991	0.0673556
PSB913-1_map4	0003.CSV	705.849	0.0542339
PSB913-1_map4	0003.CSV	709.706	0.0670416
PSB913-1_map4	0003.CSV	713.563	0.0658083
PSB913-1_map4	0003.CSV	717.42	0.0353499
PSB913-1_map4	0003.CSV	721.277	0.0170137
PSB913-1_map4	0003.CSV	725.134	0.015802
PSB913-1_map4	0003.CSV	728.991	0.0171116
PSB913-1_map4	0003.CSV	732.848	0.019793
PSB913-1_map4	0003.CSV	736.705	0.0228337
PSB913-1_map4	0003.CSV	740.562	0.0260615
PSB913-1_map4	0003.CSV	744.42	0.0267846
PSB913-1_map4	0003.CSV	748.277	0.0265407
PSB913-1_map4	0003.CSV	752.134	0.0256055
PSB913-1_map4	0003.CSV	755.991	0.0254214
PSB913-1_map4	0003.CSV	759.848	0.0248139
PSB913-1_map4	0003.CSV	763.705	0.0244403
PSB913-1_map4	0003.CSV	767.562	0.0233326
PSB913-1_map4	0003.CSV	771.419	0.0225918
PSB913-1_map4	0003.CSV	775.276	0.0215715
PSB913-1_map4	0003.CSV	779.133	0.0213387
PSB913-1_map4	0003.CSV	782.99	0.0210157
PSB913-1_map4	0003.CSV	786.848	0.0214654
PSB913-1_map4	0003.CSV	790.705	0.0216082
PSB913-1_map4	0003.CSV	794.562	0.0221452
PSB913-1_map4	0003.CSV	798.419	0.0223754
PSB913-1_map4	0003.CSV	802.276	0.0232448
PSB913-1_map4	0003.CSV	806.133	0.0239786
PSB913-1_map4	0003.CSV	809.99	0.0256279
PSB913-1_map4	0003.CSV	813.847	0.0272324
PSB913-1_map4	0003.CSV	817.704	0.0299568
PSB913-1_map4	0003.CSV	821.562	0.0328221
PSB913-1_map4	0003.CSV	825.419	0.0367362
PSB913-1_map4	0003.CSV	829.276	0.041225
PSB913-1_map4	0003.CSV	833.133	0.0479012
PSB913-1_map4	0003.CSV	836.99	0.0579734
PSB913-1_map4	0003.CSV	840.847	0.0736285
PSB913-1_map4	0003.CSV	844.704	0.0893256
PSB913-1_map4	0003.CSV	848.561	0.113326
PSB913-1_map4	0003.CSV	852.418	0.143566
PSB913-1_map4	0003.CSV	856.275	0.152672
PSB913-1_map4	0003.CSV	860.132	0.13203
PSB913-1_map4	0003.CSV	863.99	0.0966282
PSB913-1_map4	0003.CSV	867.847	0.0607285
PSB913-1_map4	0003.CSV	871.704	0.0329393
PSB913-1_map4	0003.CSV	875.561	0.0158775
PSB913-1_map4	0003.CSV	879.418	0.00908282
PSB913-1_map4	0003.CSV	883.275	0.00706342
PSB913-1_map4	0003.CSV	887.132	0.00677595
PSB913-1_map4	0003.CSV	890.989	0.00695011
PSB913-1_map4	0003.CSV	894.846	0.0075858
PSB913-1_map4	0003.CSV	898.703	0.00816408
PSB913-1_map4	0003.CSV	902.561	0.00917381
PSB913-1_map4	0003.CSV	906.418	0.0101006
PSB913-1_map4	0003.CSV	910.275	0.010455
PSB913-1_map4	0003.CSV	914.132	0.0100605
PSB913-1_map4	0003.CSV	917.989	0.010252
PSB913-1_map4	0003.CSV	921.846	0.0105512
PSB913-1_map4	0003.CSV	925.703	0.0109812
PSB913-1_map4	0003.CSV	929.56	0.0113083
PSB913-1_map4	0003.CSV	933.417	0.0118613
PSB913-1_map4	0003.CSV	937.274	0.0120462
PSB913-1_map4	0003.CSV	941.131	0.0124241
PSB913-1_map4	0003.CSV	944.989	0.0126489
PSB913-1_map4	0003.CSV	948.846	0.0131374
PSB913-1_map4	0003.CSV	952.703	0.0135562
PSB913-1_map4	0003.CSV	956.56	0.0142278
PSB913-1_map4	0003.CSV	960.417	0.0147542
PSB913-1_map4	0003.CSV	964.274	0.0153856
PSB913-1_map4	0003.CSV	968.131	0.0157521
PSB913-1_map4	0003.CSV	971.988	0.0163312
PSB913-1_map4	0003.CSV	975.845	0.0168977
PSB913-1_map4	0003.CSV	979.702	0.0177782
PSB913-1_map4	0003.CSV	983.559	0.0184814
PSB913-1_map4	0003.CSV	987.417	0.0191751
PSB913-1_map4	0003.CSV	991.274	0.0195412
PSB913-1_map4	0003.CSV	995.131	0.0199419
PSB913-1_map4	0003.CSV	998.988	0.020228
PSB913-1_map4	0003.CSV	1002.85	0.0207986
PSB913-1_map4	0003.CSV	1006.7	0.0210964
PSB913-1_map4	0003.CSV	1010.56	0.0216364
PSB913-1_map4	0003.CSV	1014.42	0.0222979
PSB913-1_map4	0003.CSV	1018.27	0.0233749
PSB913-1_map4	0003.CSV	1022.13	0.0242405
PSB913-1_map4	0003.CSV	1025.99	0.0253901
PSB913-1_map4	0003.CSV	1029.85	0.0263166
PSB913-1_map4	0003.CSV	1033.7	0.0271358
PSB913-1_map4	0003.CSV	1037.56	0.0277875
PSB913-1_map4	0003.CSV	1041.42	0.0286108
PSB913-1_map4	0003.CSV	1045.27	0.0292146
PSB913-1_map4	0003.CSV	1049.13	0.0305843
PSB913-1_map4	0003.CSV	1052.99	0.0323911
PSB913-1_map4	0003.CSV	1056.84	0.0348515
PSB913-1_map4	0003.CSV	1060.7	0.0370224
PSB913-1_map4	0003.CSV	1064.56	0.0386753
PSB913-1_map4	0003.CSV	1068.42	0.0389037
PSB913-1_map4	0003.CSV	1072.27	0.0385984
PSB913-1_map4	0003.CSV	1076.13	0.0392782
PSB913-1_map4	0003.CSV	1079.99	0.0440911
PSB913-1_map4	0003.CSV	1083.84	0.0427959
PSB913-1_map4	0003.CSV	1087.7	0.0323706
PSB913-1_map4	0003.CSV	1091.56	0.0267252
PSB913-1_map4	0003.CSV	1095.41	0.0263498
PSB913-1_map4	0003.CSV	1099.27	0.0269776
PSB913-1_map4	0003.CSV	1103.13	0.0282902
PSB913-1_map4	0003.CSV	1106.99	0.0298643
PSB913-1_map4	0003.CSV	1110.84	0.0314864
PSB913-1_map4	0003.CSV	1114.7	0.0325642
PSB913-1_map4	0003.CSV	1118.56	0.0331458
PSB913-1_map4	0003.CSV	1122.41	0.033076
PSB913-1_map4	0003.CSV	1126.27	0.0327072
PSB913-1_map4	0003.CSV	1130.13	0.0320498
PSB913-1_map4	0003.CSV	1133.99	0.0317766
PSB913-1_map4	0003.CSV	1137.84	0.0314579
PSB913-1_map4	0003.CSV	1141.7	0.0311803
PSB913-1_map4	0003.CSV	1145.56	0.0306868
PSB913-1_map4	0003.CSV	1149.41	0.0306117
PSB913-1_map4	0003.CSV	1153.27	0.0307869
PSB913-1_map4	0003.CSV	1157.13	0.0311922
PSB913-1_map4	0003.CSV	1160.99	0.0312623
PSB913-1_map4	0003.CSV	1164.84	0.0311631
PSB913-1_map4	0003.CSV	1168.7	0.0307163
PSB913-1_map4	0003.CSV	1172.56	0.0304239
PSB913-1_map4	0003.CSV	1176.41	0.0301488
PSB913-1_map4	0003.CSV	1180.27	0.0300372
PSB913-1_map4	0003.CSV	1184.13	0.0298155
PSB913-1_map4	0003.CSV	1187.99	0.0298891
PSB913-1_map4	0003.CSV	1191.84	0.0299804
PSB913-1_map4	0003.CSV	1195.7	0.030307
PSB913-1_map4	0003.CSV	1199.56	0.0306003
PSB913-1_map4	0003.CSV	1203.41	0.0311467
PSB913-1_map4	0003.CSV	1207.27	0.0315609
PSB913-1_map4	0003.CSV	1211.13	0.0322216
PSB913-1_map4	0003.CSV	1214.98	0.0328639
PSB913-1_map4	0003.CSV	1218.84	0.0337833
PSB913-1_map4	0003.CSV	1222.7	0.0347103
PSB913-1_map4	0003.CSV	1226.56	0.0359595
PSB913-1_map4	0003.CSV	1230.41	0.0371381
PSB913-1_map4	0003.CSV	1234.27	0.0385974
PSB913-1_map4	0003.CSV	1238.13	0.040128
PSB913-1_map4	0003.CSV	1241.98	0.0419937
PSB913-1_map4	0003.CSV	1245.84	0.0438171
PSB913-1_map4	0003.CSV	1249.7	0.0455576
PSB913-1_map4	0003.CSV	1253.56	0.0466561
PSB913-1_map4	0003.CSV	1257.41	0.0475401
PSB913-1_map4	0003.CSV	1261.27	0.0481767
PSB913-1_map4	0003.CSV	1265.13	0.0490175
PSB913-1_map4	0003.CSV	1268.98	0.0496419
PSB913-1_map4	0003.CSV	1272.84	0.050334
PSB913-1_map4	0003.CSV	1276.7	0.050783
PSB913-1_map4	0003.CSV	1280.56	0.0512341
PSB913-1_map4	0003.CSV	1284.41	0.0511127
PSB913-1_map4	0003.CSV	1288.27	0.0508483
PSB913-1_map4	0003.CSV	1292.13	0.05013
PSB913-1_map4	0003.CSV	1295.98	0.0494954
PSB913-1_map4	0003.CSV	1299.84	0.0489559
PSB913-1_map4	0003.CSV	1303.7	0.0490397
PSB913-1_map4	0003.CSV	1307.56	0.0493388
PSB913-1_map4	0003.CSV	1311.41	0.0501383
PSB913-1_map4	0003.CSV	1315.27	0.0509874
PSB913-1_map4	0003.CSV	1319.13	0.0521996
PSB913-1_map4	0003.CSV	1322.98	0.0531554
PSB913-1_map4	0003.CSV	1326.84	0.0543773
PSB913-1_map4	0003.CSV	1330.7	0.0557051
PSB913-1_map4	0003.CSV	1334.56	0.0573464
PSB913-1_map4	0003.CSV	1338.41	0.0594213
PSB913-1_map4	0003.CSV	1342.27	0.0623457
PSB913-1_map4	0003.CSV	1346.13	0.0645156
PSB913-1_map4	0003.CSV	1349.98	0.0672438
PSB913-1_map4	0003.CSV	1353.84	0.0699922
PSB913-1_map4	0003.CSV	1357.7	0.0728502
PSB913-1_map4	0003.CSV	1361.56	0.0759522
PSB913-1_map4	0003.CSV	1365.41	0.0799988
PSB913-1_map4	0003.CSV	1369.27	0.0830969
PSB913-1_map4	0003.CSV	1373.13	0.087264
PSB913-1_map4	0003.CSV	1376.98	0.0917273
PSB913-1_map4	0003.CSV	1380.84	0.0954334
PSB913-1_map4	0003.CSV	1384.7	0.0987724
PSB913-1_map4	0003.CSV	1388.56	0.103637
PSB913-1_map4	0003.CSV	1392.41	0.107201
PSB913-1_map4	0003.CSV	1396.27	0.112151
PSB913-1_map4	0003.CSV	1400.13	0.11727
PSB913-1_map4	0003.CSV	1403.98	0.122096
PSB913-1_map4	0003.CSV	1407.84	0.126982
PSB913-1_map4	0003.CSV	1411.7	0.132024
PSB913-1_map4	0003.CSV	1415.55	0.13613
PSB913-1_map4	0003.CSV	1419.41	0.142632
PSB913-1_map4	0003.CSV	1423.27	0.148243
PSB913-1_map4	0003.CSV	1427.12	0.153841
PSB913-1_map4	0003.CSV	1430.98	0.159843
PSB913-1_map4	0003.CSV	1434.84	0.168018
PSB913-1_map4	0003.CSV	1438.7	0.177305
PSB913-1_map4	0003.CSV	1442.55	0.184524
PSB913-1_map4	0003.CSV	1446.41	0.188863
PSB913-1_map4	0003.CSV	1450.27	0.190762
PSB913-1_map4	0003.CSV	1454.12	0.187926
PSB913-1_map4	0003.CSV	1457.98	0.182959
PSB913-1_map4	0003.CSV	1461.84	0.178434
PSB913-1_map4	0003.CSV	1465.7	0.175892
PSB913-1_map4	0003.CSV	1469.55	0.170651
PSB913-1_map4	0003.CSV	1473.41	0.160255
PSB913-1_map4	0003.CSV	1477.27	0.146542
PSB913-1_map4	0003.CSV	1481.12	0.137814
PSB913-1_map4	0003.CSV	1484.98	0.129124
PSB913-1_map4	0003.CSV	1488.84	0.119051
PSB913-1_map4	0003.CSV	1492.7	0.10864
PSB913-1_map4	0003.CSV	1496.55	0.100883
PSB913-1_map4	0003.CSV	1500.41	0.0918611
PSB913-1_map4	0003.CSV	1504.27	0.0867274
PSB913-1_map4	0003.CSV	1508.12	0.0767905
PSB913-1_map4	0003.CSV	1511.98	0.0696023
PSB913-1_map4	0003.CSV	1515.84	0.0645724
PSB913-1_map4	0003.CSV	1519.7	0.0582849
PSB913-1_map4	0003.CSV	1523.55	0.0501414
PSB913-1_map4	0003.CSV	1527.41	0.0444604
PSB913-1_map4	0003.CSV	1531.27	0.0393274
PSB913-1_map4	0003.CSV	1535.12	0.0346814
PSB913-1_map4	0003.CSV	1538.98	0.0298089
PSB913-1_map4	0003.CSV	1542.84	0.0228535
PSB913-1_map4	0003.CSV	1546.7	0.0184398
PSB913-1_map4	0003.CSV	1550.55	0.0152261
PSB913-1_map4	0003.CSV	1554.41	0.0117215
PSB913-1_map4	0003.CSV	1558.27	0.00783259
PSB913-1_map4	0003.CSV	1562.12	0.00401008
PSB913-1_map4	0003.CSV	1565.98	0.0020694
PSB913-1_map4	0003.CSV	1569.84	-0.000528829
PSB913-1_map4	0003.CSV	1573.69	-0.00282788
PSB913-1_map4	0003.CSV	1577.55	-0.00514183
PSB913-1_map4	0003.CSV	1581.41	-0.00707153
PSB913-1_map4	0003.CSV	1585.27	-0.00883458
PSB913-1_map4	0003.CSV	1589.12	-0.0101095
PSB913-1_map4	0003.CSV	1592.98	-0.0108286
PSB913-1_map4	0003.CSV	1596.84	-0.010934
PSB913-1_map4	0003.CSV	1600.69	-0.0110337
PSB913-1_map4	0003.CSV	1604.55	-0.0112332
PSB913-1_map4	0003.CSV	1608.41	-0.0117605
PSB913-1_map4	0003.CSV	1612.27	-0.0122147
PSB913-1_map4	0003.CSV	1616.12	-0.0125674
PSB913-1_map4	0003.CSV	1619.98	-0.0126113
PSB913-1_map4	0003.CSV	1623.84	-0.0128493
PSB913-1_map4	0003.CSV	1627.69	-0.0128281
PSB913-1_map4	0003.CSV	1631.55	-0.0133661
PSB913-1_map4	0003.CSV	1635.41	-0.0132981
PSB913-1_map4	0003.CSV	1639.27	-0.0131656
PSB913-1_map4	0003.CSV	1643.12	-0.0135763
PSB913-1_map4	0003.CSV	1646.98	-0.0138125
PSB913-1_map4	0003.CSV	1650.84	-0.0135579
PSB913-1_map4	0003.CSV	1654.69	-0.0135681
PSB913-1_map4	0003.CSV	1658.55	-0.013966
PSB913-1_map4	0003.CSV	1662.41	-0.0144785
PSB913-1_map4	0003.CSV	1666.27	-0.0147579
PSB913-1_map4	0003.CSV	1670.12	-0.015092
PSB913-1_map4	0003.CSV	1673.98	-0.0150013
PSB913-1_map4	0003.CSV	1677.84	-0.0154941
PSB913-1_map4	0003.CSV	1681.69	-0.0157262
PSB913-1_map4	0003.CSV	1685.55	-0.0156427
PSB913-1_map4	0003.CSV	1689.41	-0.0157222
PSB913-1_map4	0003.CSV	1693.27	-0.0163635
PSB913-1_map4	0003.CSV	1697.12	-0.0163764
PSB913-1_map4	0003.CSV	1700.98	-0.0158382
PSB913-1_map4	0003.CSV	1704.84	-0.0151947
PSB913-1_map4	0003.CSV	1708.69	-0.014742
PSB913-1_map4	0003.CSV	1712.55	-0.0142643
PSB913-1_map4	0003.CSV	1716.41	-0.0124211
PSB913-1_map4	0003.CSV	1720.27	-0.00953096
PSB913-1_map4	0003.CSV	1724.12	-0.00877873
[truncated: 112,780 more rows]

## Sheet: PSB913-1_map5
Map	Select spectrum number	Wavenumbers	Absorbance
PSB913-1_map5	0001.CSV	674.992	0.0065079
PSB913-1_map5	0001.CSV	678.849	0.00709646
PSB913-1_map5	0001.CSV	682.706	0.00727109
PSB913-1_map5	0001.CSV	686.563	0.00870087
PSB913-1_map5	0001.CSV	690.42	0.0114105
PSB913-1_map5	0001.CSV	694.277	0.0176405
PSB913-1_map5	0001.CSV	698.134	0.0238327
PSB913-1_map5	0001.CSV	701.991	0.0194992
PSB913-1_map5	0001.CSV	705.849	0.0144728
PSB913-1_map5	0001.CSV	709.706	0.0219198
PSB913-1_map5	0001.CSV	713.563	0.0225837
PSB913-1_map5	0001.CSV	717.42	0.00894812
PSB913-1_map5	0001.CSV	721.277	0.000608038
PSB913-1_map5	0001.CSV	725.134	-0.00034949
PSB913-1_map5	0001.CSV	728.991	-0.000103333
PSB913-1_map5	0001.CSV	732.848	0.000451354
PSB913-1_map5	0001.CSV	736.705	0.000973043
PSB913-1_map5	0001.CSV	740.562	0.00180138
PSB913-1_map5	0001.CSV	744.42	0.00214059
PSB913-1_map5	0001.CSV	748.277	0.00219074
PSB913-1_map5	0001.CSV	752.134	0.00199397
PSB913-1_map5	0001.CSV	755.991	0.00184657
PSB913-1_map5	0001.CSV	759.848	0.0016475
PSB913-1_map5	0001.CSV	763.705	0.00171299
PSB913-1_map5	0001.CSV	767.562	0.00132496
PSB913-1_map5	0001.CSV	771.419	0.00112194
PSB913-1_map5	0001.CSV	775.276	0.00107138
PSB913-1_map5	0001.CSV	779.133	0.0011728
PSB913-1_map5	0001.CSV	782.99	0.000927118
PSB913-1_map5	0001.CSV	786.848	0.00107444
PSB913-1_map5	0001.CSV	790.705	0.00126262
PSB913-1_map5	0001.CSV	794.562	0.00174842
PSB913-1_map5	0001.CSV	798.419	0.00217142
PSB913-1_map5	0001.CSV	802.276	0.00243151
PSB913-1_map5	0001.CSV	806.133	0.00274296
PSB913-1_map5	0001.CSV	809.99	0.00361853
PSB913-1_map5	0001.CSV	813.847	0.004521
PSB913-1_map5	0001.CSV	817.704	0.00569669
PSB913-1_map5	0001.CSV	821.562	0.00708912
PSB913-1_map5	0001.CSV	825.419	0.00926398
PSB913-1_map5	0001.CSV	829.276	0.0118594
PSB913-1_map5	0001.CSV	833.133	0.0154314
PSB913-1_map5	0001.CSV	836.99	0.0209099
PSB913-1_map5	0001.CSV	840.847	0.0283912
PSB913-1_map5	0001.CSV	844.704	0.0353056
PSB913-1_map5	0001.CSV	848.561	0.0451051
PSB913-1_map5	0001.CSV	852.418	0.0527066
PSB913-1_map5	0001.CSV	856.275	0.0486863
PSB913-1_map5	0001.CSV	860.132	0.0373029
PSB913-1_map5	0001.CSV	863.99	0.0247811
PSB913-1_map5	0001.CSV	867.847	0.0128389
PSB913-1_map5	0001.CSV	871.704	0.00300936
PSB913-1_map5	0001.CSV	875.561	-0.00349299
PSB913-1_map5	0001.CSV	879.418	-0.00632356
PSB913-1_map5	0001.CSV	883.275	-0.00733742
PSB913-1_map5	0001.CSV	887.132	-0.00776289
PSB913-1_map5	0001.CSV	890.989	-0.00796366
PSB913-1_map5	0001.CSV	894.846	-0.00793051
PSB913-1_map5	0001.CSV	898.703	-0.00789065
PSB913-1_map5	0001.CSV	902.561	-0.00769454
PSB913-1_map5	0001.CSV	906.418	-0.00761309
PSB913-1_map5	0001.CSV	910.275	-0.00770899
PSB913-1_map5	0001.CSV	914.132	-0.00790761
PSB913-1_map5	0001.CSV	917.989	-0.00777113
PSB913-1_map5	0001.CSV	921.846	-0.00770597
PSB913-1_map5	0001.CSV	925.703	-0.00750583
PSB913-1_map5	0001.CSV	929.56	-0.00736297
PSB913-1_map5	0001.CSV	933.417	-0.00726861
PSB913-1_map5	0001.CSV	937.274	-0.00733749
PSB913-1_map5	0001.CSV	941.131	-0.00723068
PSB913-1_map5	0001.CSV	944.989	-0.00718978
PSB913-1_map5	0001.CSV	948.846	-0.00700193
PSB913-1_map5	0001.CSV	952.703	-0.0067448
PSB913-1_map5	0001.CSV	956.56	-0.00647737
PSB913-1_map5	0001.CSV	960.417	-0.00639412
PSB913-1_map5	0001.CSV	964.274	-0.00617515
PSB913-1_map5	0001.CSV	968.131	-0.00604721
PSB913-1_map5	0001.CSV	971.988	-0.00576879
PSB913-1_map5	0001.CSV	975.845	-0.00547762
PSB913-1_map5	0001.CSV	979.702	-0.00508629
PSB913-1_map5	0001.CSV	983.559	-0.00473165
PSB913-1_map5	0001.CSV	987.417	-0.00436677
PSB913-1_map5	0001.CSV	991.274	-0.00416407
PSB913-1_map5	0001.CSV	995.131	-0.00393741
PSB913-1_map5	0001.CSV	998.988	-0.00384188
PSB913-1_map5	0001.CSV	1002.85	-0.00368904
PSB913-1_map5	0001.CSV	1006.7	-0.00359884
PSB913-1_map5	0001.CSV	1010.56	-0.0033949
PSB913-1_map5	0001.CSV	1014.42	-0.00317263
PSB913-1_map5	0001.CSV	1018.27	-0.00282146
PSB913-1_map5	0001.CSV	1022.13	-0.00252116
PSB913-1_map5	0001.CSV	1025.99	-0.00210002
PSB913-1_map5	0001.CSV	1029.85	-0.00185789
PSB913-1_map5	0001.CSV	1033.7	-0.00165365
PSB913-1_map5	0001.CSV	1037.56	-0.00153675
PSB913-1_map5	0001.CSV	1041.42	-0.00129873
PSB913-1_map5	0001.CSV	1045.27	-0.00113501
PSB913-1_map5	0001.CSV	1049.13	-0.000822866
PSB913-1_map5	0001.CSV	1052.99	-0.000540411
PSB913-1_map5	0001.CSV	1056.84	-0.000239261
PSB913-1_map5	0001.CSV	1060.7	-0.000104095
PSB913-1_map5	0001.CSV	1064.56	0.000183867
PSB913-1_map5	0001.CSV	1068.42	0.000226829
PSB913-1_map5	0001.CSV	1072.27	8.40029e-05
PSB913-1_map5	0001.CSV	1076.13	0.000523469
PSB913-1_map5	0001.CSV	1079.99	0.00267908
PSB913-1_map5	0001.CSV	1083.84	0.00220369
PSB913-1_map5	0001.CSV	1087.7	-0.00166738
PSB913-1_map5	0001.CSV	1091.56	-0.00349039
PSB913-1_map5	0001.CSV	1095.41	-0.00349269
PSB913-1_map5	0001.CSV	1099.27	-0.00342941
PSB913-1_map5	0001.CSV	1103.13	-0.00324246
PSB913-1_map5	0001.CSV	1106.99	-0.00309378
PSB913-1_map5	0001.CSV	1110.84	-0.00299234
PSB913-1_map5	0001.CSV	1114.7	-0.00298165
PSB913-1_map5	0001.CSV	1118.56	-0.00301541
PSB913-1_map5	0001.CSV	1122.41	-0.00322427
PSB913-1_map5	0001.CSV	1126.27	-0.00349378
PSB913-1_map5	0001.CSV	1130.13	-0.00383603
PSB913-1_map5	0001.CSV	1133.99	-0.00407588
PSB913-1_map5	0001.CSV	1137.84	-0.00424558
PSB913-1_map5	0001.CSV	1141.7	-0.00426826
PSB913-1_map5	0001.CSV	1145.56	-0.00432892
PSB913-1_map5	0001.CSV	1149.41	-0.00427308
PSB913-1_map5	0001.CSV	1153.27	-0.00410254
PSB913-1_map5	0001.CSV	1157.13	-0.00390257
PSB913-1_map5	0001.CSV	1160.99	-0.00398525
PSB913-1_map5	0001.CSV	1164.84	-0.00410628
PSB913-1_map5	0001.CSV	1168.7	-0.00433453
PSB913-1_map5	0001.CSV	1172.56	-0.00453122
PSB913-1_map5	0001.CSV	1176.41	-0.00468025
PSB913-1_map5	0001.CSV	1180.27	-0.00468291
PSB913-1_map5	0001.CSV	1184.13	-0.00470867
PSB913-1_map5	0001.CSV	1187.99	-0.00466527
PSB913-1_map5	0001.CSV	1191.84	-0.00463521
PSB913-1_map5	0001.CSV	1195.7	-0.00452102
PSB913-1_map5	0001.CSV	1199.56	-0.00441322
PSB913-1_map5	0001.CSV	1203.41	-0.0042236
PSB913-1_map5	0001.CSV	1207.27	-0.00406003
PSB913-1_map5	0001.CSV	1211.13	-0.00384034
PSB913-1_map5	0001.CSV	1214.98	-0.00372984
PSB913-1_map5	0001.CSV	1218.84	-0.00344303
PSB913-1_map5	0001.CSV	1222.7	-0.00315757
PSB913-1_map5	0001.CSV	1226.56	-0.00281043
PSB913-1_map5	0001.CSV	1230.41	-0.00243606
PSB913-1_map5	0001.CSV	1234.27	-0.00206671
PSB913-1_map5	0001.CSV	1238.13	-0.00180437
PSB913-1_map5	0001.CSV	1241.98	-0.00140793
PSB913-1_map5	0001.CSV	1245.84	-0.00100208
PSB913-1_map5	0001.CSV	1249.7	-0.000626609
PSB913-1_map5	0001.CSV	1253.56	-0.000403882
PSB913-1_map5	0001.CSV	1257.41	-0.000178357
PSB913-1_map5	0001.CSV	1261.27	-3.83675e-05
PSB913-1_map5	0001.CSV	1265.13	0.000232431
PSB913-1_map5	0001.CSV	1268.98	0.000568389
PSB913-1_map5	0001.CSV	1272.84	0.000937346
PSB913-1_map5	0001.CSV	1276.7	0.00111742
PSB913-1_map5	0001.CSV	1280.56	0.0013563
PSB913-1_map5	0001.CSV	1284.41	0.00144453
PSB913-1_map5	0001.CSV	1288.27	0.00153652
PSB913-1_map5	0001.CSV	1292.13	0.00154437
PSB913-1_map5	0001.CSV	1295.98	0.0016155
PSB913-1_map5	0001.CSV	1299.84	0.00169832
PSB913-1_map5	0001.CSV	1303.7	0.00189456
PSB913-1_map5	0001.CSV	1307.56	0.00212774
PSB913-1_map5	0001.CSV	1311.41	0.00250222
PSB913-1_map5	0001.CSV	1315.27	0.00278038
PSB913-1_map5	0001.CSV	1319.13	0.00314638
PSB913-1_map5	0001.CSV	1322.98	0.00345147
PSB913-1_map5	0001.CSV	1326.84	0.00376422
PSB913-1_map5	0001.CSV	1330.7	0.00408965
PSB913-1_map5	0001.CSV	1334.56	0.00449803
PSB913-1_map5	0001.CSV	1338.41	0.00508726
PSB913-1_map5	0001.CSV	1342.27	0.00587711
PSB913-1_map5	0001.CSV	1346.13	0.00630426
PSB913-1_map5	0001.CSV	1349.98	0.00684898
PSB913-1_map5	0001.CSV	1353.84	0.0074281
PSB913-1_map5	0001.CSV	1357.7	0.00813298
PSB913-1_map5	0001.CSV	1361.56	0.00902027
PSB913-1_map5	0001.CSV	1365.41	0.0101231
PSB913-1_map5	0001.CSV	1369.27	0.0107282
PSB913-1_map5	0001.CSV	1373.13	0.0116781
PSB913-1_map5	0001.CSV	1376.98	0.0128249
PSB913-1_map5	0001.CSV	1380.84	0.0137419
PSB913-1_map5	0001.CSV	1384.7	0.0145813
PSB913-1_map5	0001.CSV	1388.56	0.0158551
PSB913-1_map5	0001.CSV	1392.41	0.0166661
PSB913-1_map5	0001.CSV	1396.27	0.0180375
PSB913-1_map5	0001.CSV	1400.13	0.019446
PSB913-1_map5	0001.CSV	1403.98	0.020459
PSB913-1_map5	0001.CSV	1407.84	0.0214411
PSB913-1_map5	0001.CSV	1411.7	0.0223708
PSB913-1_map5	0001.CSV	1415.55	0.0230764
PSB913-1_map5	0001.CSV	1419.41	0.0246208
PSB913-1_map5	0001.CSV	1423.27	0.0258742
PSB913-1_map5	0001.CSV	1427.12	0.0267964
PSB913-1_map5	0001.CSV	1430.98	0.0276323
PSB913-1_map5	0001.CSV	1434.84	0.0286379
PSB913-1_map5	0001.CSV	1438.7	0.0294683
PSB913-1_map5	0001.CSV	1442.55	0.0295944
PSB913-1_map5	0001.CSV	1446.41	0.0290952
PSB913-1_map5	0001.CSV	1450.27	0.0284809
PSB913-1_map5	0001.CSV	1454.12	0.0275137
PSB913-1_map5	0001.CSV	1457.98	0.0273808
PSB913-1_map5	0001.CSV	1461.84	0.0271253
PSB913-1_map5	0001.CSV	1465.7	0.0271058
PSB913-1_map5	0001.CSV	1469.55	0.0266997
PSB913-1_map5	0001.CSV	1473.41	0.0262584
PSB913-1_map5	0001.CSV	1477.27	0.0251256
PSB913-1_map5	0001.CSV	1481.12	0.0240588
PSB913-1_map5	0001.CSV	1484.98	0.0228358
PSB913-1_map5	0001.CSV	1488.84	0.0217943
PSB913-1_map5	0001.CSV	1492.7	0.0205162
PSB913-1_map5	0001.CSV	1496.55	0.0191543
PSB913-1_map5	0001.CSV	1500.41	0.0173423
PSB913-1_map5	0001.CSV	1504.27	0.0157423
PSB913-1_map5	0001.CSV	1508.12	0.0132794
PSB913-1_map5	0001.CSV	1511.98	0.0115041
PSB913-1_map5	0001.CSV	1515.84	0.00967065
PSB913-1_map5	0001.CSV	1519.7	0.00738644
PSB913-1_map5	0001.CSV	1523.55	0.00473975
PSB913-1_map5	0001.CSV	1527.41	0.00290298
PSB913-1_map5	0001.CSV	1531.27	0.00111201
PSB913-1_map5	0001.CSV	1535.12	-0.000397824
PSB913-1_map5	0001.CSV	1538.98	-0.00199545
PSB913-1_map5	0001.CSV	1542.84	-0.00367343
PSB913-1_map5	0001.CSV	1546.7	-0.00495001
PSB913-1_map5	0001.CSV	1550.55	-0.00609057
PSB913-1_map5	0001.CSV	1554.41	-0.00737968
PSB913-1_map5	0001.CSV	1558.27	-0.0086017
PSB913-1_map5	0001.CSV	1562.12	-0.00978125
PSB913-1_map5	0001.CSV	1565.98	-0.0106961
PSB913-1_map5	0001.CSV	1569.84	-0.0117612
PSB913-1_map5	0001.CSV	1573.69	-0.0128118
PSB913-1_map5	0001.CSV	1577.55	-0.0140147
PSB913-1_map5	0001.CSV	1581.41	-0.0151726
PSB913-1_map5	0001.CSV	1585.27	-0.0161465
PSB913-1_map5	0001.CSV	1589.12	-0.0167328
PSB913-1_map5	0001.CSV	1592.98	-0.0171219
PSB913-1_map5	0001.CSV	1596.84	-0.0173627
PSB913-1_map5	0001.CSV	1600.69	-0.0176166
PSB913-1_map5	0001.CSV	1604.55	-0.0178071
PSB913-1_map5	0001.CSV	1608.41	-0.0179525
PSB913-1_map5	0001.CSV	1612.27	-0.0182188
PSB913-1_map5	0001.CSV	1616.12	-0.0184576
PSB913-1_map5	0001.CSV	1619.98	-0.0185884
PSB913-1_map5	0001.CSV	1623.84	-0.0187944
PSB913-1_map5	0001.CSV	1627.69	-0.0188146
PSB913-1_map5	0001.CSV	1631.55	-0.0192656
PSB913-1_map5	0001.CSV	1635.41	-0.0193696
PSB913-1_map5	0001.CSV	1639.27	-0.0192106
PSB913-1_map5	0001.CSV	1643.12	-0.0197317
PSB913-1_map5	0001.CSV	1646.98	-0.0199906
PSB913-1_map5	0001.CSV	1650.84	-0.0197907
PSB913-1_map5	0001.CSV	1654.69	-0.0196413
PSB913-1_map5	0001.CSV	1658.55	-0.0199665
PSB913-1_map5	0001.CSV	1662.41	-0.0203088
PSB913-1_map5	0001.CSV	1666.27	-0.0205902
PSB913-1_map5	0001.CSV	1670.12	-0.0207774
PSB913-1_map5	0001.CSV	1673.98	-0.0206717
PSB913-1_map5	0001.CSV	1677.84	-0.0210555
PSB913-1_map5	0001.CSV	1681.69	-0.0214262
PSB913-1_map5	0001.CSV	1685.55	-0.0211252
PSB913-1_map5	0001.CSV	1689.41	-0.0210958
PSB913-1_map5	0001.CSV	1693.27	-0.021661
PSB913-1_map5	0001.CSV	1697.12	-0.0217381
PSB913-1_map5	0001.CSV	1700.98	-0.0213119
PSB913-1_map5	0001.CSV	1704.84	-0.0212381
PSB913-1_map5	0001.CSV	1708.69	-0.0214027
PSB913-1_map5	0001.CSV	1712.55	-0.0217475
PSB913-1_map5	0001.CSV	1716.41	-0.0214597
PSB913-1_map5	0001.CSV	1720.27	-0.0207797
PSB913-1_map5	0001.CSV	1724.12	-0.0210443
PSB913-1_map5	0001.CSV	1727.98	-0.0213102
PSB913-1_map5	0001.CSV	1731.84	-0.0213135
PSB913-1_map5	0001.CSV	1735.69	-0.02093
PSB913-1_map5	0001.CSV	1739.55	-0.0211449
PSB913-1_map5	0001.CSV	1743.41	-0.021411
PSB913-1_map5	0001.CSV	1747.27	-0.0215188
PSB913-1_map5	0001.CSV	1751.12	-0.0214204
PSB913-1_map5	0001.CSV	1754.98	-0.0217655
PSB913-1_map5	0001.CSV	1758.84	-0.0218894
PSB913-1_map5	0001.CSV	1762.69	-0.0218048
PSB913-1_map5	0001.CSV	1766.55	-0.0219513
PSB913-1_map5	0001.CSV	1770.41	-0.0217736
PSB913-1_map5	0001.CSV	1774.26	-0.0208538
PSB913-1_map5	0001.CSV	1778.12	-0.0204834
PSB913-1_map5	0001.CSV	1781.98	-0.0200711
PSB913-1_map5	0001.CSV	1785.84	-0.0199315
PSB913-1_map5	0001.CSV	1789.69	-0.0201738
PSB913-1_map5	0001.CSV	1793.55	-0.0205012
PSB913-1_map5	0001.CSV	1797.41	-0.0208916
PSB913-1_map5	0001.CSV	1801.26	-0.0212302
PSB913-1_map5	0001.CSV	1805.12	-0.0214553
PSB913-1_map5	0001.CSV	1808.98	-0.0215691
PSB913-1_map5	0001.CSV	1812.84	-0.0213891
PSB913-1_map5	0001.CSV	1816.69	-0.021419
PSB913-1_map5	0001.CSV	1820.55	-0.0215508
PSB913-1_map5	0001.CSV	1824.41	-0.021674
PSB913-1_map5	0001.CSV	1828.26	-0.0214287
PSB913-1_map5	0001.CSV	1832.12	-0.0212301
PSB913-1_map5	0001.CSV	1835.98	-0.0213235
PSB913-1_map5	0001.CSV	1839.84	-0.0215444
PSB913-1_map5	0001.CSV	1843.69	-0.0214508
PSB913-1_map5	0001.CSV	1847.55	-0.0211694
PSB913-1_map5	0001.CSV	1851.41	-0.0212575
PSB913-1_map5	0001.CSV	1855.26	-0.0213641
PSB913-1_map5	0001.CSV	1859.12	-0.0213655
PSB913-1_map5	0001.CSV	1862.98	-0.0215048
PSB913-1_map5	0001.CSV	1866.84	-0.0214771
PSB913-1_map5	0001.CSV	1870.69	-0.0211667
PSB913-1_map5	0001.CSV	1874.55	-0.0212793
PSB913-1_map5	0001.CSV	1878.41	-0.0214317
PSB913-1_map5	0001.CSV	1882.26	-0.0214569
PSB913-1_map5	0001.CSV	1886.12	-0.0214532
PSB913-1_map5	0001.CSV	1889.98	-0.0213951
PSB913-1_map5	0001.CSV	1893.83	-0.0214175
PSB913-1_map5	0001.CSV	1897.69	-0.0214722
PSB913-1_map5	0001.CSV	1901.55	-0.0215828
PSB913-1_map5	0001.CSV	1905.41	-0.021657
PSB913-1_map5	0001.CSV	1909.26	-0.0216193
PSB913-1_map5	0001.CSV	1913.12	-0.0216286
PSB913-1_map5	0001.CSV	1916.98	-0.0217113
PSB913-1_map5	0001.CSV	1920.83	-0.0215743
PSB913-1_map5	0001.CSV	1924.69	-0.0215
PSB913-1_map5	0001.CSV	1928.55	-0.0215902
PSB913-1_map5	0001.CSV	1932.4	-0.0216727
PSB913-1_map5	0001.CSV	1936.26	-0.0216943
PSB913-1_map5	0001.CSV	1940.12	-0.021764
PSB913-1_map5	0001.CSV	1943.98	-0.0216471
PSB913-1_map5	0001.CSV	1947.83	-0.021641
PSB913-1_map5	0001.CSV	1951.69	-0.021701
PSB913-1_map5	0001.CSV	1955.55	-0.0216973
PSB913-1_map5	0001.CSV	1959.4	-0.0216953
PSB913-1_map5	0001.CSV	1963.26	-0.0217425
PSB913-1_map5	0001.CSV	1967.12	-0.0216249
PSB913-1_map5	0001.CSV	1970.98	-0.0215965
PSB913-1_map5	0001.CSV	1974.83	-0.0216671
PSB913-1_map5	0001.CSV	1978.69	-0.021709
PSB913-1_map5	0001.CSV	1982.55	-0.0217362
PSB913-1_map5	0001.CSV	1986.4	-0.0217692
PSB913-1_map5	0001.CSV	1990.26	-0.0216646
PSB913-1_map5	0001.CSV	1994.12	-0.0215308
PSB913-1_map5	0001.CSV	1997.98	-0.0215612
PSB913-1_map5	0001.CSV	2001.83	-0.0216429
PSB913-1_map5	0001.CSV	2005.69	-0.0216512
PSB913-1_map5	0001.CSV	2009.55	-0.0216503
PSB913-1_map5	0001.CSV	2013.4	-0.0216612
PSB913-1_map5	0001.CSV	2017.26	-0.0215662
PSB913-1_map5	0001.CSV	2021.12	-0.0214878
PSB913-1_map5	0001.CSV	2024.97	-0.0215589
PSB913-1_map5	0001.CSV	2028.83	-0.0214956
PSB913-1_map5	0001.CSV	2032.69	-0.0214283
PSB913-1_map5	0001.CSV	2036.55	-0.0214468
PSB913-1_map5	0001.CSV	2040.4	-0.0214495
PSB913-1_map5	0001.CSV	2044.26	-0.0213482
PSB913-1_map5	0001.CSV	2048.12	-0.0213303
PSB913-1_map5	0001.CSV	2051.97	-0.0213233
PSB913-1_map5	0001.CSV	2055.83	-0.0213174
PSB913-1_map5	0001.CSV	2059.69	-0.0212922
PSB913-1_map5	0001.CSV	2063.55	-0.0212469
PSB913-1_map5	0001.CSV	2067.4	-0.0211743
PSB913-1_map5	0001.CSV	2071.26	-0.0211459
PSB913-1_map5	0001.CSV	2075.12	-0.0211256
PSB913-1_map5	0001.CSV	2078.97	-0.0210777
PSB913-1_map5	0001.CSV	2082.83	-0.0209746
PSB913-1_map5	0001.CSV	2086.69	-0.0209452
PSB913-1_map5	0001.CSV	2090.55	-0.0208647
PSB913-1_map5	0001.CSV	2094.4	-0.020785
PSB913-1_map5	0001.CSV	2098.26	-0.020737
PSB913-1_map5	0001.CSV	2102.12	-0.0207386
PSB913-1_map5	0001.CSV	2105.97	-0.0207009
PSB913-1_map5	0001.CSV	2109.83	-0.020679
PSB913-1_map5	0001.CSV	2113.69	-0.0206503
PSB913-1_map5	0001.CSV	2117.55	-0.020607
PSB913-1_map5	0001.CSV	2121.4	-0.0205707
PSB913-1_map5	0001.CSV	2125.26	-0.0205327
PSB913-1_map5	0001.CSV	2129.12	-0.0204856
PSB913-1_map5	0001.CSV	2132.97	-0.0204674
PSB913-1_map5	0001.CSV	2136.83	-0.0204509
PSB913-1_map5	0001.CSV	2140.69	-0.020435
PSB913-1_map5	0001.CSV	2144.55	-0.0203815
PSB913-1_map5	0001.CSV	2148.4	-0.0203612
PSB913-1_map5	0001.CSV	2152.26	-0.0203433
PSB913-1_map5	0001.CSV	2156.12	-0.0203353
PSB913-1_map5	0001.CSV	2159.97	-0.0203133
PSB913-1_map5	0001.CSV	2163.83	-0.0203251
PSB913-1_map5	0001.CSV	2167.69	-0.0203523
PSB913-1_map5	0001.CSV	2171.55	-0.020338
PSB913-1_map5	0001.CSV	2175.4	-0.020268
PSB913-1_map5	0001.CSV	2179.26	-0.0202679
PSB913-1_map5	0001.CSV	2183.12	-0.0202919
PSB913-1_map5	0001.CSV	2186.97	-0.0203087
PSB913-1_map5	0001.CSV	2190.83	-0.0202855
PSB913-1_map5	0001.CSV	2194.69	-0.0203101
PSB913-1_map5	0001.CSV	2198.55	-0.0203727
PSB913-1_map5	0001.CSV	2202.4	-0.0204149
PSB913-1_map5	0001.CSV	2206.26	-0.0203748
PSB913-1_map5	0001.CSV	2210.12	-0.0203474
PSB913-1_map5	0001.CSV	2213.97	-0.0203408
PSB913-1_map5	0001.CSV	2217.83	-0.0203839
PSB913-1_map5	0001.CSV	2221.69	-0.0203938
PSB913-1_map5	0001.CSV	2225.54	-0.0203914
PSB913-1_map5	0001.CSV	2229.4	-0.0204165
PSB913-1_map5	0001.CSV	2233.26	-0.0204424
PSB913-1_map5	0001.CSV	2237.12	-0.0204315
PSB913-1_map5	0001.CSV	2240.97	-0.0204301
PSB913-1_map5	0001.CSV	2244.83	-0.0204486
PSB913-1_map5	0001.CSV	2248.69	-0.0204636
PSB913-1_map5	0001.CSV	2252.54	-0.0204548
PSB913-1_map5	0001.CSV	2256.4	-0.0204571
PSB913-1_map5	0001.CSV	2260.26	-0.0204722
PSB913-1_map5	0001.CSV	2264.11	-0.0204585
PSB913-1_map5	0001.CSV	2267.97	-0.0204105
PSB913-1_map5	0001.CSV	2271.83	-0.0203993
PSB913-1_map5	0001.CSV	2275.69	-0.0204235
PSB913-1_map5	0001.CSV	2279.54	-0.020486
PSB913-1_map5	0001.CSV	2283.4	-0.0205129
PSB913-1_map5	0001.CSV	2287.26	-0.0205614
PSB913-1_map5	0001.CSV	2291.11	-0.0205723
PSB913-1_map5	0001.CSV	2294.97	-0.020601
PSB913-1_map5	0001.CSV	2298.83	-0.0206895
PSB913-1_map5	0001.CSV	2302.69	-0.0207749
PSB913-1_map5	0001.CSV	2306.54	-0.0208177
PSB913-1_map5	0001.CSV	2310.4	-0.0208423
PSB913-1_map5	0001.CSV	2314.26	-0.0210719
PSB913-1_map5	0001.CSV	2318.11	-0.0215236
PSB913-1_map5	0001.CSV	2321.97	-0.0218938
PSB913-1_map5	0001.CSV	2325.83	-0.0221956
PSB913-1_map5	0001.CSV	2329.69	-0.0224128
PSB913-1_map5	0001.CSV	2333.54	-0.0226331
PSB913-1_map5	0001.CSV	2337.4	-0.0229805
PSB913-1_map5	0001.CSV	2341.26	-0.0231611
PSB913-1_map5	0001.CSV	2345.11	-0.0219901
PSB913-1_map5	0001.CSV	2348.97	-0.0217517
PSB913-1_map5	0001.CSV	2352.83	-0.0230019
PSB913-1_map5	0001.CSV	2356.69	-0.0253794
PSB913-1_map5	0001.CSV	2360.54	-0.0263815
PSB913-1_map5	0001.CSV	2364.4	-0.024607
PSB913-1_map5	0001.CSV	2368.26	-0.0224217
PSB913-1_map5	0001.CSV	2372.11	-0.0211603
PSB913-1_map5	0001.CSV	2375.97	-0.0203929
PSB913-1_map5	0001.CSV	2379.83	-0.0200701
PSB913-1_map5	0001.CSV	2383.69	-0.0200777
PSB913-1_map5	0001.CSV	2387.54	-0.0201781
PSB913-1_map5	0001.CSV	2391.4	-0.020245
PSB913-1_map5	0001.CSV	2395.26	-0.0202855
PSB913-1_map5	0001.CSV	2399.11	-0.0203705
PSB913-1_map5	0001.CSV	2402.97	-0.0204461
PSB913-1_map5	0001.CSV	2406.83	-0.0204413
PSB913-1_map5	0001.CSV	2410.68	-0.020421
PSB913-1_map5	0001.CSV	2414.54	-0.020436
PSB913-1_map5	0001.CSV	2418.4	-0.0205068
PSB913-1_map5	0001.CSV	2422.26	-0.0205277
PSB913-1_map5	0001.CSV	2426.11	-0.0205014
PSB913-1_map5	0001.CSV	2429.97	-0.0204844
PSB913-1_map5	0001.CSV	2433.83	-0.0204888
PSB913-1_map5	0001.CSV	2437.68	-0.0204896
PSB913-1_map5	0001.CSV	2441.54	-0.0205447
PSB913-1_map5	0001.CSV	2445.4	-0.0205705
PSB913-1_map5	0001.CSV	2449.26	-0.0205716
PSB913-1_map5	0001.CSV	2453.11	-0.020568
PSB913-1_map5	0001.CSV	2456.97	-0.0205905
PSB913-1_map5	0001.CSV	2460.83	-0.0206658
PSB913-1_map5	0001.CSV	2464.68	-0.0206829
PSB913-1_map5	0001.CSV	2468.54	-0.0206256
PSB913-1_map5	0001.CSV	2472.4	-0.020614
PSB913-1_map5	0001.CSV	2476.26	-0.0205935
PSB913-1_map5	0001.CSV	2480.11	-0.0206177
PSB913-1_map5	0001.CSV	2483.97	-0.020626
PSB913-1_map5	0001.CSV	2487.83	-0.0205899
PSB913-1_map5	0001.CSV	2491.68	-0.0205674
PSB913-1_map5	0001.CSV	2495.54	-0.0205753
PSB913-1_map5	0001.CSV	2499.4	-0.0205827
PSB913-1_map5	0001.CSV	2503.26	-0.0206029
PSB913-1_map5	0001.CSV	2507.11	-0.0206937
PSB913-1_map5	0001.CSV	2510.97	-0.0207814
PSB913-1_map5	0001.CSV	2514.83	-0.0207453
PSB913-1_map5	0001.CSV	2518.68	-0.020692
PSB913-1_map5	0001.CSV	2522.54	-0.0207329
PSB913-1_map5	0001.CSV	2526.4	-0.0208205
PSB913-1_map5	0001.CSV	2530.26	-0.0209194
PSB913-1_map5	0001.CSV	2534.11	-0.0210008
PSB913-1_map5	0001.CSV	2537.97	-0.0210191
PSB913-1_map5	0001.CSV	2541.83	-0.0210913
PSB913-1_map5	0001.CSV	2545.68	-0.0211715
PSB913-1_map5	0001.CSV	2549.54	-0.0212265
PSB913-1_map5	0001.CSV	2553.4	-0.0212916
PSB913-1_map5	0001.CSV	2557.26	-0.0213517
PSB913-1_map5	0001.CSV	2561.11	-0.0214075
PSB913-1_map5	0001.CSV	2564.97	-0.0214082
PSB913-1_map5	0001.CSV	2568.83	-0.0213786
PSB913-1_map5	0001.CSV	2572.68	-0.0213594
PSB913-1_map5	0001.CSV	2576.54	-0.0213705
PSB913-1_map5	0001.CSV	2580.4	-0.0214028
PSB913-1_map5	0001.CSV	2584.25	-0.0213814
PSB913-1_map5	0001.CSV	2588.11	-0.0213645
PSB913-1_map5	0001.CSV	2591.97	-0.0213756
PSB913-1_map5	0001.CSV	2595.83	-0.0213739
PSB913-1_map5	0001.CSV	2599.68	-0.0213151
PSB913-1_map5	0001.CSV	2603.54	-0.0212692
PSB913-1_map5	0001.CSV	2607.4	-0.0212799
PSB913-1_map5	0001.CSV	2611.25	-0.0212341
PSB913-1_map5	0001.CSV	2615.11	-0.0211569
PSB913-1_map5	0001.CSV	2618.97	-0.0211727
PSB913-1_map5	0001.CSV	2622.82	-0.0211133
PSB913-1_map5	0001.CSV	2626.68	-0.0210042
PSB913-1_map5	0001.CSV	2630.54	-0.0209552
PSB913-1_map5	0001.CSV	2634.4	-0.0208129
PSB913-1_map5	0001.CSV	2638.25	-0.0206977
PSB913-1_map5	0001.CSV	2642.11	-0.0207905
PSB913-1_map5	0001.CSV	2645.97	-0.0208522
PSB913-1_map5	0001.CSV	2649.82	-0.0208817
PSB913-1_map5	0001.CSV	2653.68	-0.020913
PSB913-1_map5	0001.CSV	2657.54	-0.0208287
PSB913-1_map5	0001.CSV	2661.4	-0.020752
PSB913-1_map5	0001.CSV	2665.25	-0.0207398
PSB913-1_map5	0001.CSV	2669.11	-0.0206656
PSB913-1_map5	0001.CSV	2672.97	-0.0205126
PSB913-1_map5	0001.CSV	2676.82	-0.0202984
PSB913-1_map5	0001.CSV	2680.68	-0.0202953
PSB913-1_map5	0001.CSV	2684.54	-0.0205073
PSB913-1_map5	0001.CSV	2688.4	-0.0206358
PSB913-1_map5	0001.CSV	2692.25	-0.0206675
PSB913-1_map5	0001.CSV	2696.11	-0.020644
PSB913-1_map5	0001.CSV	2699.97	-0.020576
PSB913-1_map5	0001.CSV	2703.82	-0.0205209
PSB913-1_map5	0001.CSV	2707.68	-0.0205089
PSB913-1_map5	0001.CSV	2711.54	-0.020542
PSB913-1_map5	0001.CSV	2715.4	-0.0205298
PSB913-1_map5	0001.CSV	2719.25	-0.0204237
PSB913-1_map5	0001.CSV	2723.11	-0.020198
PSB913-1_map5	0001.CSV	2726.97	-0.0202264
PSB913-1_map5	0001.CSV	2730.82	-0.0205244
PSB913-1_map5	0001.CSV	2734.68	-0.0205147
PSB913-1_map5	0001.CSV	2738.54	-0.0204746
PSB913-1_map5	0001.CSV	2742.4	-0.0205139
PSB913-1_map5	0001.CSV	2746.25	-0.0203396
PSB913-1_map5	0001.CSV	2750.11	-0.0203651
PSB913-1_map5	0001.CSV	2753.97	-0.0205286
PSB913-1_map5	0001.CSV	2757.82	-0.020543
PSB913-1_map5	0001.CSV	2761.68	-0.0206266
PSB913-1_map5	0001.CSV	2765.54	-0.0207002
PSB913-1_map5	0001.CSV	2769.39	-0.0206495
PSB913-1_map5	0001.CSV	2773.25	-0.0204337
PSB913-1_map5	0001.CSV	2777.11	-0.0205417
PSB913-1_map5	0001.CSV	2780.97	-0.0207475
PSB913-1_map5	0001.CSV	2784.82	-0.0205906
PSB913-1_map5	0001.CSV	2788.68	-0.0203328
PSB913-1_map5	0001.CSV	2792.54	-0.020358
PSB913-1_map5	0001.CSV	2796.39	-0.0203944
PSB913-1_map5	0001.CSV	2800.25	-0.0205355
PSB913-1_map5	0001.CSV	2804.11	-0.0207458
PSB913-1_map5	0001.CSV	2807.97	-0.0206419
PSB913-1_map5	0001.CSV	2811.82	-0.0206495
PSB913-1_map5	0001.CSV	2815.68	-0.0208015
PSB913-1_map5	0001.CSV	2819.54	-0.0207602
PSB913-1_map5	0001.CSV	2823.39	-0.0207092
PSB913-1_map5	0001.CSV	2827.25	-0.0206868
PSB913-1_map5	0001.CSV	2831.11	-0.0204579
PSB913-1_map5	0001.CSV	2834.97	-0.0201773
PSB913-1_map5	0001.CSV	2838.82	-0.0202234
PSB913-1_map5	0001.CSV	2842.68	-0.0205479
PSB913-1_map5	0001.CSV	2846.54	-0.0206689
PSB913-1_map5	0001.CSV	2850.39	-0.0208207
PSB913-1_map5	0001.CSV	2854.25	-0.0210198
PSB913-1_map5	0001.CSV	2858.11	-0.0209535
PSB913-1_map5	0001.CSV	2861.97	-0.0208842
PSB913-1_map5	0001.CSV	2865.82	-0.0208607
PSB913-1_map5	0001.CSV	2869.68	-0.0206924
PSB913-1_map5	0001.CSV	2873.54	-0.0205367
PSB913-1_map5	0001.CSV	2877.39	-0.0207594
PSB913-1_map5	0001.CSV	2881.25	-0.0209005
PSB913-1_map5	0001.CSV	2885.11	-0.0208412
PSB913-1_map5	0001.CSV	2888.97	-0.0207751
PSB913-1_map5	0001.CSV	2892.82	-0.020608
PSB913-1_map5	0001.CSV	2896.68	-0.0205861
PSB913-1_map5	0001.CSV	2900.54	-0.0207612
PSB913-1_map5	0001.CSV	2904.39	-0.0206488
PSB913-1_map5	0001.CSV	2908.25	-0.0203532
PSB913-1_map5	0001.CSV	2912.11	-0.0200206
PSB913-1_map5	0001.CSV	2915.97	-0.020061
PSB913-1_map5	0001.CSV	2919.82	-0.0206901
PSB913-1_map5	0001.CSV	2923.68	-0.02128
PSB913-1_map5	0001.CSV	2927.54	-0.0212528
PSB913-1_map5	0001.CSV	2931.39	-0.0213415
PSB913-1_map5	0001.CSV	2935.25	-0.0215753
PSB913-1_map5	0001.CSV	2939.11	-0.021337
PSB913-1_map5	0001.CSV	2942.96	-0.0207874
PSB913-1_map5	0001.CSV	2946.82	-0.0205909
PSB913-1_map5	0001.CSV	2950.68	-0.0207889
PSB913-1_map5	0001.CSV	2954.54	-0.0211802
PSB913-1_map5	0001.CSV	2958.39	-0.0215245
PSB913-1_map5	0001.CSV	2962.25	-0.0214952
PSB913-1_map5	0001.CSV	2966.11	-0.0213769
PSB913-1_map5	0001.CSV	2969.96	-0.0211001
PSB913-1_map5	0001.CSV	2973.82	-0.020616
PSB913-1_map5	0001.CSV	2977.68	-0.0203195
PSB913-1_map5	0001.CSV	2981.53	-0.0204267
PSB913-1_map5	0001.CSV	2985.39	-0.0206598
PSB913-1_map5	0001.CSV	2989.25	-0.0204964
PSB913-1_map5	0001.CSV	2993.11	-0.0201947
PSB913-1_map5	0001.CSV	2996.96	-0.0202464
PSB913-1_map5	0001.CSV	3000.82	-0.0204812
PSB913-1_map5	0001.CSV	3004.68	-0.0205114
PSB913-1_map5	0001.CSV	3008.53	-0.0202342
PSB913-1_map5	0001.CSV	3012.39	-0.0199357
PSB913-1_map5	0001.CSV	3016.25	-0.0199426
PSB913-1_map5	0001.CSV	3020.11	-0.0201354
PSB913-1_map5	0001.CSV	3023.96	-0.0202662
PSB913-1_map5	0001.CSV	3027.82	-0.020271
PSB913-1_map5	0001.CSV	3031.68	-0.0200408
PSB913-1_map5	0001.CSV	3035.53	-0.0199541
PSB913-1_map5	0001.CSV	3039.39	-0.0199718
PSB913-1_map5	0001.CSV	3043.25	-0.0199701
PSB913-1_map5	0001.CSV	3047.11	-0.0201143
PSB913-1_map5	0001.CSV	3050.96	-0.0201967
PSB913-1_map5	0001.CSV	3054.82	-0.0203031
PSB913-1_map5	0001.CSV	3058.68	-0.0205431
PSB913-1_map5	0001.CSV	3062.53	-0.020532
PSB913-1_map5	0001.CSV	3066.39	-0.0203109
PSB913-1_map5	0001.CSV	3070.25	-0.0204535
PSB913-1_map5	0001.CSV	3074.11	-0.0205024
PSB913-1_map5	0001.CSV	3077.96	-0.0202363
PSB913-1_map5	0001.CSV	3081.82	-0.0200822
PSB913-1_map5	0001.CSV	3085.68	-0.0201786
PSB913-1_map5	0001.CSV	3089.53	-0.0203598
PSB913-1_map5	0001.CSV	3093.39	-0.0206561
PSB913-1_map5	0001.CSV	3097.25	-0.0207066
PSB913-1_map5	0001.CSV	3101.11	-0.020618
PSB913-1_map5	0001.CSV	3104.96	-0.0205963
PSB913-1_map5	0001.CSV	3108.82	-0.0204392
PSB913-1_map5	0001.CSV	3112.68	-0.0203647
PSB913-1_map5	0001.CSV	3116.53	-0.0203566
PSB913-1_map5	0001.CSV	3120.39	-0.020466
PSB913-1_map5	0001.CSV	3124.25	-0.0206526
PSB913-1_map5	0001.CSV	3128.11	-0.0207185
PSB913-1_map5	0001.CSV	3131.96	-0.0208118
PSB913-1_map5	0001.CSV	3135.82	-0.0206996
PSB913-1_map5	0001.CSV	3139.68	-0.0206598
PSB913-1_map5	0001.CSV	3143.53	-0.0209202
PSB913-1_map5	0001.CSV	3147.39	-0.0209121
PSB913-1_map5	0001.CSV	3151.25	-0.0206049
PSB913-1_map5	0001.CSV	3155.1	-0.0207044
PSB913-1_map5	0001.CSV	3158.96	-0.0211593
PSB913-1_map5	0001.CSV	3162.82	-0.0213301
PSB913-1_map5	0001.CSV	3166.68	-0.0213127
PSB913-1_map5	0001.CSV	3170.53	-0.0213742
PSB913-1_map5	0001.CSV	3174.39	-0.0214416
PSB913-1_map5	0001.CSV	3178.25	-0.0213467
PSB913-1_map5	0001.CSV	3182.1	-0.0212885
PSB913-1_map5	0001.CSV	3185.96	-0.0212574
PSB913-1_map5	0001.CSV	3189.82	-0.0211627
PSB913-1_map5	0001.CSV	3193.68	-0.0212852
PSB913-1_map5	0001.CSV	3197.53	-0.0213728
PSB913-1_map5	0001.CSV	3201.39	-0.0212128
PSB913-1_map5	0001.CSV	3205.25	-0.0211544
PSB913-1_map5	0001.CSV	3209.1	-0.0211594
PSB913-1_map5	0001.CSV	3212.96	-0.0209879
PSB913-1_map5	0001.CSV	3216.82	-0.0208596
PSB913-1_map5	0001.CSV	3220.68	-0.020932
PSB913-1_map5	0001.CSV	3224.53	-0.0210296
PSB913-1_map5	0001.CSV	3228.39	-0.0208946
PSB913-1_map5	0001.CSV	3232.25	-0.0205976
PSB913-1_map5	0001.CSV	3236.1	-0.0206917
PSB913-1_map5	0001.CSV	3239.96	-0.0208844
PSB913-1_map5	0001.CSV	3243.82	-0.0206861
PSB913-1_map5	0001.CSV	3247.68	-0.0205413
PSB913-1_map5	0001.CSV	3251.53	-0.0206824
PSB913-1_map5	0001.CSV	3255.39	-0.020631
PSB913-1_map5	0001.CSV	3259.25	-0.0207989
PSB913-1_map5	0001.CSV	3263.1	-0.0209099
PSB913-1_map5	0001.CSV	3266.96	-0.0205205
PSB913-1_map5	0001.CSV	3270.82	-0.0201367
PSB913-1_map5	0001.CSV	3274.68	-0.0201942
PSB913-1_map5	0001.CSV	3278.53	-0.0204949
PSB913-1_map5	0001.CSV	3282.39	-0.0206995
PSB913-1_map5	0001.CSV	3286.25	-0.0206484
PSB913-1_map5	0001.CSV	3290.1	-0.0203046
PSB913-1_map5	0001.CSV	3293.96	-0.0200218
PSB913-1_map5	0001.CSV	3297.82	-0.020162
PSB913-1_map5	0001.CSV	3301.67	-0.020118
PSB913-1_map5	0001.CSV	3305.53	-0.0199575
PSB913-1_map5	0001.CSV	3309.39	-0.0201016
PSB913-1_map5	0001.CSV	3313.25	-0.0204762
PSB913-1_map5	0001.CSV	3317.1	-0.0207048
PSB913-1_map5	0001.CSV	3320.96	-0.0205147
PSB913-1_map5	0001.CSV	3324.82	-0.0203009
PSB913-1_map5	0001.CSV	3328.67	-0.0205575
PSB913-1_map5	0001.CSV	3332.53	-0.0206633
PSB913-1_map5	0001.CSV	3336.39	-0.0202442
PSB913-1_map5	0001.CSV	3340.24	-0.0199936
PSB913-1_map5	0001.CSV	3344.1	-0.0201863
PSB913-1_map5	0001.CSV	3347.96	-0.020282
PSB913-1_map5	0001.CSV	3351.82	-0.0203505
PSB913-1_map5	0001.CSV	3355.67	-0.0205192
PSB913-1_map5	0001.CSV	3359.53	-0.0203708
PSB913-1_map5	0001.CSV	3363.39	-0.0201683
PSB913-1_map5	0001.CSV	3367.24	-0.0200162
PSB913-1_map5	0001.CSV	3371.1	-0.020226
PSB913-1_map5	0001.CSV	3374.96	-0.0205084
PSB913-1_map5	0001.CSV	3378.82	-0.020652
PSB913-1_map5	0001.CSV	3382.67	-0.0209753
PSB913-1_map5	0001.CSV	3386.53	-0.0209278
PSB913-1_map5	0001.CSV	3390.39	-0.02059
PSB913-1_map5	0001.CSV	3394.24	-0.0203524
PSB913-1_map5	0001.CSV	3398.1	-0.0202307
PSB913-1_map5	0001.CSV	3401.96	-0.0203201
PSB913-1_map5	0001.CSV	3405.82	-0.0205094
PSB913-1_map5	0001.CSV	3409.67	-0.0204619
PSB913-1_map5	0001.CSV	3413.53	-0.0207054
PSB913-1_map5	0001.CSV	3417.39	-0.0211981
PSB913-1_map5	0001.CSV	3421.24	-0.0213149
PSB913-1_map5	0001.CSV	3425.1	-0.0212304
PSB913-1_map5	0001.CSV	3428.96	-0.0208692
PSB913-1_map5	0001.CSV	3432.82	-0.0205402
PSB913-1_map5	0001.CSV	3436.67	-0.0207503
PSB913-1_map5	0001.CSV	3440.53	-0.0213959
PSB913-1_map5	0001.CSV	3444.39	-0.0217491
PSB913-1_map5	0001.CSV	3448.24	-0.0217306
PSB913-1_map5	0001.CSV	3452.1	-0.0219905
PSB913-1_map5	0001.CSV	3455.96	-0.0219916
PSB913-1_map5	0001.CSV	3459.82	-0.0215177
PSB913-1_map5	0001.CSV	3463.67	-0.0211827
PSB913-1_map5	0001.CSV	3467.53	-0.0210498
PSB913-1_map5	0001.CSV	3471.39	-0.0213621
PSB913-1_map5	0001.CSV	3475.24	-0.0216436
PSB913-1_map5	0001.CSV	3479.1	-0.0216898
PSB913-1_map5	0001.CSV	3482.96	-0.0216655
PSB913-1_map5	0001.CSV	3486.82	-0.0214671
PSB913-1_map5	0001.CSV	3490.67	-0.0214215
PSB913-1_map5	0001.CSV	3494.53	-0.021396
PSB913-1_map5	0001.CSV	3498.39	-0.0214878
PSB913-1_map5	0001.CSV	3502.24	-0.0216312
PSB913-1_map5	0001.CSV	3506.1	-0.0218326
PSB913-1_map5	0001.CSV	3509.96	-0.0218618
PSB913-1_map5	0001.CSV	3513.81	-0.0217816
PSB913-1_map5	0001.CSV	3517.67	-0.0221048
PSB913-1_map5	0001.CSV	3521.53	-0.0222118
PSB913-1_map5	0001.CSV	3525.39	-0.022241
PSB913-1_map5	0001.CSV	3529.24	-0.0222227
PSB913-1_map5	0001.CSV	3533.1	-0.0221089
PSB913-1_map5	0001.CSV	3536.96	-0.0219203
PSB913-1_map5	0001.CSV	3540.81	-0.0217787
PSB913-1_map5	0001.CSV	3544.67	-0.0215571
PSB913-1_map5	0001.CSV	3548.53	-0.0216495
PSB913-1_map5	0001.CSV	3552.39	-0.0220662
PSB913-1_map5	0001.CSV	3556.24	-0.0222955
PSB913-1_map5	0001.CSV	3560.1	-0.0226052
PSB913-1_map5	0001.CSV	3563.96	-0.0231036
PSB913-1_map5	0001.CSV	3567.81	-0.0223057
PSB913-1_map5	0001.CSV	3571.67	-0.0221565
PSB913-1_map5	0001.CSV	3575.53	-0.0226606
PSB913-1_map5	0001.CSV	3579.39	-0.0223344
PSB913-1_map5	0001.CSV	3583.24	-0.0222102
PSB913-1_map5	0001.CSV	3587.1	-0.022042
PSB913-1_map5	0001.CSV	3590.96	-0.0220676
PSB913-1_map5	0001.CSV	3594.81	-0.0224448
PSB913-1_map5	0001.CSV	3598.67	-0.0222753
PSB913-1_map5	0001.CSV	3602.53	-0.0223616
PSB913-1_map5	0001.CSV	3606.39	-0.0232202
PSB913-1_map5	0001.CSV	3610.24	-0.0236791
PSB913-1_map5	0001.CSV	3614.1	-0.0234133
PSB913-1_map5	0001.CSV	3617.96	-0.0228413
PSB913-1_map5	0001.CSV	3621.81	-0.0224855
PSB913-1_map5	0001.CSV	3625.67	-0.0232671
PSB913-1_map5	0001.CSV	3629.53	-0.0230985
PSB913-1_map5	0001.CSV	3633.39	-0.0224223
PSB913-1_map5	0001.CSV	3637.24	-0.022796
PSB913-1_map5	0001.CSV	3641.1	-0.0231941
PSB913-1_map5	0001.CSV	3644.96	-0.0240235
PSB913-1_map5	0001.CSV	3648.81	-0.0236083
PSB913-1_map5	0001.CSV	3652.67	-0.0222581
PSB913-1_map5	0001.CSV	3656.53	-0.02212
PSB913-1_map5	0001.CSV	3660.38	-0.0222073
PSB913-1_map5	0001.CSV	3664.24	-0.0232166
PSB913-1_map5	0001.CSV	3668.1	-0.0241802
PSB913-1_map5	0001.CSV	3671.96	-0.0242145
PSB913-1_map5	0001.CSV	3675.81	-0.0233891
PSB913-1_map5	0001.CSV	3679.67	-0.0228076
PSB913-1_map5	0001.CSV	3683.53	-0.0233418
PSB913-1_map5	0001.CSV	3687.38	-0.0235444
PSB913-1_map5	0001.CSV	3691.24	-0.0226015
PSB913-1_map5	0001.CSV	3695.1	-0.0229099
PSB913-1_map5	0001.CSV	3698.95	-0.0235602
PSB913-1_map5	0001.CSV	3702.81	-0.0236086
PSB913-1_map5	0001.CSV	3706.67	-0.0240123
PSB913-1_map5	0001.CSV	3710.53	-0.0240494
PSB913-1_map5	0001.CSV	3714.38	-0.0232167
PSB913-1_map5	0001.CSV	3718.24	-0.0238286
PSB913-1_map5	0001.CSV	3722.1	-0.0242389
PSB913-1_map5	0001.CSV	3725.95	-0.0240909
PSB913-1_map5	0001.CSV	3729.81	-0.0245601
PSB913-1_map5	0001.CSV	3733.67	-0.0247932
PSB913-1_map5	0001.CSV	3737.53	-0.0234671
PSB913-1_map5	0001.CSV	3741.38	-0.0240018
PSB913-1_map5	0001.CSV	3745.24	-0.0250632
PSB913-1_map5	0001.CSV	3749.1	-0.0250816
PSB913-1_map5	0001.CSV	3752.95	-0.0239518
PSB913-1_map5	0001.CSV	3756.81	-0.0236976
PSB913-1_map5	0001.CSV	3760.67	-0.0234578
PSB913-1_map5	0001.CSV	3764.53	-0.0238166
PSB913-1_map5	0001.CSV	3768.38	-0.0238412
PSB913-1_map5	0001.CSV	3772.24	-0.0235548
PSB913-1_map5	0001.CSV	3776.1	-0.0238471
PSB913-1_map5	0001.CSV	3779.95	-0.0237528
PSB913-1_map5	0001.CSV	3783.81	-0.0236763
PSB913-1_map5	0001.CSV	3787.67	-0.0235806
PSB913-1_map5	0001.CSV	3791.53	-0.0237778
PSB913-1_map5	0001.CSV	3795.38	-0.0243417
PSB913-1_map5	0001.CSV	3799.24	-0.0244789
PSB913-1_map5	0001.CSV	3803.1	-0.0238095
PSB913-1_map5	0001.CSV	3806.95	-0.0233892
PSB913-1_map5	0001.CSV	3810.81	-0.0238228
PSB913-1_map5	0001.CSV	3814.67	-0.0246316
PSB913-1_map5	0001.CSV	3818.53	-0.024309
PSB913-1_map5	0001.CSV	3822.38	-0.0233006
PSB913-1_map5	0001.CSV	3826.24	-0.0234176
PSB913-1_map5	0001.CSV	3830.1	-0.0240045
PSB913-1_map5	0001.CSV	3833.95	-0.0243342
PSB913-1_map5	0001.CSV	3837.81	-0.0238814
PSB913-1_map5	0001.CSV	3841.67	-0.0227701
PSB913-1_map5	0001.CSV	3845.53	-0.0230797
PSB913-1_map5	0001.CSV	3849.38	-0.0244742
PSB913-1_map5	0001.CSV	3853.24	-0.0244555
PSB913-1_map5	0001.CSV	3857.1	-0.0232884
PSB913-1_map5	0001.CSV	3860.95	-0.0238139
PSB913-1_map5	0001.CSV	3864.81	-0.0237182
PSB913-1_map5	0001.CSV	3868.67	-0.0235862
PSB913-1_map5	0001.CSV	3872.52	-0.0230878
PSB913-1_map5	0001.CSV	3876.38	-0.0232112
PSB913-1_map5	0001.CSV	3880.24	-0.0234553
PSB913-1_map5	0001.CSV	3884.1	-0.0228612
PSB913-1_map5	0001.CSV	3887.95	-0.0229994
PSB913-1_map5	0001.CSV	3891.81	-0.0231329
PSB913-1_map5	0001.CSV	3895.67	-0.0233372
PSB913-1_map5	0001.CSV	3899.52	-0.023846
PSB913-1_map5	0001.CSV	3903.38	-0.023027
PSB913-1_map5	0001.CSV	3907.24	-0.0225403
PSB913-1_map5	0001.CSV	3911.1	-0.0231068
PSB913-1_map5	0001.CSV	3914.95	-0.0235835
PSB913-1_map5	0001.CSV	3918.81	-0.0233701
PSB913-1_map5	0001.CSV	3922.67	-0.0232226
PSB913-1_map5	0001.CSV	3926.52	-0.0231823
PSB913-1_map5	0001.CSV	3930.38	-0.0231119
PSB913-1_map5	0001.CSV	3934.24	-0.0228608
PSB913-1_map5	0001.CSV	3938.09	-0.0231123
PSB913-1_map5	0001.CSV	3941.95	-0.0232298
PSB913-1_map5	0001.CSV	3945.81	-0.0232134
PSB913-1_map5	0001.CSV	3949.67	-0.0230688
PSB913-1_map5	0001.CSV	3953.52	-0.022993
PSB913-1_map5	0001.CSV	3957.38	-0.0231756
PSB913-1_map5	0001.CSV	3961.24	-0.0231564
PSB913-1_map5	0001.CSV	3965.09	-0.0231442
PSB913-1_map5	0001.CSV	3968.95	-0.0233267
PSB913-1_map5	0001.CSV	3972.81	-0.0232138
PSB913-1_map5	0001.CSV	3976.67	-0.0230173
PSB913-1_map5	0001.CSV	3980.52	-0.0231045
PSB913-1_map5	0001.CSV	3984.38	-0.0231692
PSB913-1_map5	0001.CSV	3988.24	-0.0232345
PSB913-1_map5	0001.CSV	3992.09	-0.0231669
PSB913-1_map5	0001.CSV	3995.95	-0.0230656
PSB913-1_map5	0001.CSV	3999.81	-0.0230698
PSB913-1_map5	0002.CSV	674.992	0.0346267
PSB913-1_map5	0002.CSV	678.849	0.0370016
PSB913-1_map5	0002.CSV	682.706	0.0382687
PSB913-1_map5	0002.CSV	686.563	0.0419115
PSB913-1_map5	0002.CSV	690.42	0.0459684
PSB913-1_map5	0002.CSV	694.277	0.058155
PSB913-1_map5	0002.CSV	698.134	0.0758378
PSB913-1_map5	0002.CSV	701.991	0.0731835
PSB913-1_map5	0002.CSV	705.849	0.0635074
PSB913-1_map5	0002.CSV	709.706	0.0840035
PSB913-1_map5	0002.CSV	713.563	0.0918812
PSB913-1_map5	0002.CSV	717.42	0.0587005
PSB913-1_map5	0002.CSV	721.277	0.030222
PSB913-1_map5	0002.CSV	725.134	0.0220382
PSB913-1_map5	0002.CSV	728.991	0.0201158
PSB913-1_map5	0002.CSV	732.848	0.0207957
PSB913-1_map5	0002.CSV	736.705	0.0216153
PSB913-1_map5	0002.CSV	740.562	0.023038
PSB913-1_map5	0002.CSV	744.42	0.0232416
PSB913-1_map5	0002.CSV	748.277	0.0243141
PSB913-1_map5	0002.CSV	752.134	0.0249172
PSB913-1_map5	0002.CSV	755.991	0.0259503
PSB913-1_map5	0002.CSV	759.848	0.0261048
PSB913-1_map5	0002.CSV	763.705	0.0269604
PSB913-1_map5	0002.CSV	767.562	0.0274309
PSB913-1_map5	0002.CSV	771.419	0.0287365
PSB913-1_map5	0002.CSV	775.276	0.0294283
PSB913-1_map5	0002.CSV	779.133	0.0305904
PSB913-1_map5	0002.CSV	782.99	0.0311303
PSB913-1_map5	0002.CSV	786.848	0.0322662
PSB913-1_map5	0002.CSV	790.705	0.0327199
PSB913-1_map5	0002.CSV	794.562	0.0340285
PSB913-1_map5	0002.CSV	798.419	0.0351602
PSB913-1_map5	0002.CSV	802.276	0.0365619
PSB913-1_map5	0002.CSV	806.133	0.0374441
PSB913-1_map5	0002.CSV	809.99	0.0397971
PSB913-1_map5	0002.CSV	813.847	0.0421118
PSB913-1_map5	0002.CSV	817.704	0.0456479
PSB913-1_map5	0002.CSV	821.562	0.049272
PSB913-1_map5	0002.CSV	825.419	0.0545684
PSB913-1_map5	0002.CSV	829.276	0.0606412
PSB913-1_map5	0002.CSV	833.133	0.069926
PSB913-1_map5	0002.CSV	836.99	0.0846557
PSB913-1_map5	0002.CSV	840.847	0.107089
PSB913-1_map5	0002.CSV	844.704	0.129848
PSB913-1_map5	0002.CSV	848.561	0.158697
PSB913-1_map5	0002.CSV	852.418	0.183774
PSB913-1_map5	0002.CSV	856.275	0.17951
PSB913-1_map5	0002.CSV	860.132	0.150012
PSB913-1_map5	0002.CSV	863.99	0.115241
PSB913-1_map5	0002.CSV	867.847	0.0826212
PSB913-1_map5	0002.CSV	871.704	0.0553276
PSB913-1_map5	0002.CSV	875.561	0.0346609
PSB913-1_map5	0002.CSV	879.418	0.0242097
PSB913-1_map5	0002.CSV	883.275	0.0203748
PSB913-1_map5	0002.CSV	887.132	0.0191032
PSB913-1_map5	0002.CSV	890.989	0.0185597
PSB913-1_map5	0002.CSV	894.846	0.0188216
PSB913-1_map5	0002.CSV	898.703	0.0189805
PSB913-1_map5	0002.CSV	902.561	0.019713
PSB913-1_map5	0002.CSV	906.418	0.0204136
PSB913-1_map5	0002.CSV	910.275	0.0205471
PSB913-1_map5	0002.CSV	914.132	0.0196691
PSB913-1_map5	0002.CSV	917.989	0.0198517
PSB913-1_map5	0002.CSV	921.846	0.0200874
PSB913-1_map5	0002.CSV	925.703	0.0206821
PSB913-1_map5	0002.CSV	929.56	0.0209269
PSB913-1_map5	0002.CSV	933.417	0.0213836
PSB913-1_map5	0002.CSV	937.274	0.0215443
PSB913-1_map5	0002.CSV	941.131	0.0220891
PSB913-1_map5	0002.CSV	944.989	0.0223703
PSB913-1_map5	0002.CSV	948.846	0.0230107
PSB913-1_map5	0002.CSV	952.703	0.0235057
PSB913-1_map5	0002.CSV	956.56	0.024283
PSB913-1_map5	0002.CSV	960.417	0.0246789
PSB913-1_map5	0002.CSV	964.274	0.0253426
PSB913-1_map5	0002.CSV	968.131	0.025815
PSB913-1_map5	0002.CSV	971.988	0.0267318
PSB913-1_map5	0002.CSV	975.845	0.0274529
PSB913-1_map5	0002.CSV	979.702	0.0285259
PSB913-1_map5	0002.CSV	983.559	0.0292993
PSB913-1_map5	0002.CSV	987.417	0.0303426
PSB913-1_map5	0002.CSV	991.274	0.0312044
PSB913-1_map5	0002.CSV	995.131	0.0322654
PSB913-1_map5	0002.CSV	998.988	0.0330174
PSB913-1_map5	0002.CSV	1002.85	0.0340737
PSB913-1_map5	0002.CSV	1006.7	0.0348863
PSB913-1_map5	0002.CSV	1010.56	0.0361211
PSB913-1_map5	0002.CSV	1014.42	0.0371642
PSB913-1_map5	0002.CSV	1018.27	0.0386672
PSB913-1_map5	0002.CSV	1022.13	0.0399999
PSB913-1_map5	0002.CSV	1025.99	0.0415964
PSB913-1_map5	0002.CSV	1029.85	0.0427938
PSB913-1_map5	0002.CSV	1033.7	0.0442041
PSB913-1_map5	0002.CSV	1037.56	0.0451198
PSB913-1_map5	0002.CSV	1041.42	0.0461509
PSB913-1_map5	0002.CSV	1045.27	0.0466661
PSB913-1_map5	0002.CSV	1049.13	0.0474013
PSB913-1_map5	0002.CSV	1052.99	0.0478112
PSB913-1_map5	0002.CSV	1056.84	0.0487026
PSB913-1_map5	0002.CSV	1060.7	0.0494335
PSB913-1_map5	0002.CSV	1064.56	0.0507078
PSB913-1_map5	0002.CSV	1068.42	0.0517919
PSB913-1_map5	0002.CSV	1072.27	0.0533793
PSB913-1_map5	0002.CSV	1076.13	0.0563856
PSB913-1_map5	0002.CSV	1079.99	0.06469
PSB913-1_map5	0002.CSV	1083.84	0.0684108
PSB913-1_map5	0002.CSV	1087.7	0.0590147
PSB913-1_map5	0002.CSV	1091.56	0.0494864
PSB913-1_map5	0002.CSV	1095.41	0.0461022
PSB913-1_map5	0002.CSV	1099.27	0.0449157
PSB913-1_map5	0002.CSV	1103.13	0.0448742
PSB913-1_map5	0002.CSV	1106.99	0.0448046
PSB913-1_map5	0002.CSV	1110.84	0.0449353
PSB913-1_map5	0002.CSV	1114.7	0.0447185
PSB913-1_map5	0002.CSV	1118.56	0.0446529
PSB913-1_map5	0002.CSV	1122.41	0.0443295
PSB913-1_map5	0002.CSV	1126.27	0.0442521
PSB913-1_map5	0002.CSV	1130.13	0.0438845
PSB913-1_map5	0002.CSV	1133.99	0.0438528
PSB913-1_map5	0002.CSV	1137.84	0.0437893
PSB913-1_map5	0002.CSV	1141.7	0.044181
PSB913-1_map5	0002.CSV	1145.56	0.0444362
PSB913-1_map5	0002.CSV	1149.41	0.0450829
PSB913-1_map5	0002.CSV	1153.27	0.0455754
PSB913-1_map5	0002.CSV	1157.13	0.0462155
PSB913-1_map5	0002.CSV	1160.99	0.0463578
PSB913-1_map5	0002.CSV	1164.84	0.0466715
PSB913-1_map5	0002.CSV	1168.7	0.0466945
PSB913-1_map5	0002.CSV	1172.56	0.0469249
PSB913-1_map5	0002.CSV	1176.41	0.0469716
PSB913-1_map5	0002.CSV	1180.27	0.0473577
PSB913-1_map5	0002.CSV	1184.13	0.0475623
PSB913-1_map5	0002.CSV	1187.99	0.0480681
PSB913-1_map5	0002.CSV	1191.84	0.0484237
PSB913-1_map5	0002.CSV	1195.7	0.0491951
PSB913-1_map5	0002.CSV	1199.56	0.0498163
PSB913-1_map5	0002.CSV	1203.41	0.0507123
PSB913-1_map5	0002.CSV	1207.27	0.0513726
PSB913-1_map5	0002.CSV	1211.13	0.0523519
PSB913-1_map5	0002.CSV	1214.98	0.0531238
PSB913-1_map5	0002.CSV	1218.84	0.0543102
PSB913-1_map5	0002.CSV	1222.7	0.0554084
PSB913-1_map5	0002.CSV	1226.56	0.0568305
PSB913-1_map5	0002.CSV	1230.41	0.058034
PSB913-1_map5	0002.CSV	1234.27	0.0594707
PSB913-1_map5	0002.CSV	1238.13	0.0606061
PSB913-1_map5	0002.CSV	1241.98	0.0619776
PSB913-1_map5	0002.CSV	1245.84	0.0631364
PSB913-1_map5	0002.CSV	1249.7	0.0645404
PSB913-1_map5	0002.CSV	1253.56	0.0655725
PSB913-1_map5	0002.CSV	1257.41	0.0667929
PSB913-1_map5	0002.CSV	1261.27	0.0678687
PSB913-1_map5	0002.CSV	1265.13	0.0694745
PSB913-1_map5	0002.CSV	1268.98	0.0709287
PSB913-1_map5	0002.CSV	1272.84	0.0727061
PSB913-1_map5	0002.CSV	1276.7	0.0740951
PSB913-1_map5	0002.CSV	1280.56	0.0757675
PSB913-1_map5	0002.CSV	1284.41	0.0771371
PSB913-1_map5	0002.CSV	1288.27	0.078752
PSB913-1_map5	0002.CSV	1292.13	0.0800916
PSB913-1_map5	0002.CSV	1295.98	0.0818918
PSB913-1_map5	0002.CSV	1299.84	0.0835627
PSB913-1_map5	0002.CSV	1303.7	0.085611
PSB913-1_map5	0002.CSV	1307.56	0.0874995
PSB913-1_map5	0002.CSV	1311.41	0.0898382
PSB913-1_map5	0002.CSV	1315.27	0.0919434
PSB913-1_map5	0002.CSV	1319.13	0.0944861
PSB913-1_map5	0002.CSV	1322.98	0.0967315
PSB913-1_map5	0002.CSV	1326.84	0.099379
PSB913-1_map5	0002.CSV	1330.7	0.101929
PSB913-1_map5	0002.CSV	1334.56	0.104867
PSB913-1_map5	0002.CSV	1338.41	0.108312
PSB913-1_map5	0002.CSV	1342.27	0.112778
PSB913-1_map5	0002.CSV	1346.13	0.116252
PSB913-1_map5	0002.CSV	1349.98	0.120586
PSB913-1_map5	0002.CSV	1353.84	0.124993
PSB913-1_map5	0002.CSV	1357.7	0.129735
PSB913-1_map5	0002.CSV	1361.56	0.134872
PSB913-1_map5	0002.CSV	1365.41	0.141135
PSB913-1_map5	0002.CSV	1369.27	0.145734
PSB913-1_map5	0002.CSV	1373.13	0.151414
PSB913-1_map5	0002.CSV	1376.98	0.157076
PSB913-1_map5	0002.CSV	1380.84	0.161873
PSB913-1_map5	0002.CSV	1384.7	0.165854
PSB913-1_map5	0002.CSV	1388.56	0.171027
PSB913-1_map5	0002.CSV	1392.41	0.174552
PSB913-1_map5	0002.CSV	1396.27	0.179426
PSB913-1_map5	0002.CSV	1400.13	0.183868
PSB913-1_map5	0002.CSV	1403.98	0.188016
PSB913-1_map5	0002.CSV	1407.84	0.191731
PSB913-1_map5	0002.CSV	1411.7	0.195724
PSB913-1_map5	0002.CSV	1415.55	0.198543
PSB913-1_map5	0002.CSV	1419.41	0.20329
PSB913-1_map5	0002.CSV	1423.27	0.206946
PSB913-1_map5	0002.CSV	1427.12	0.210878
PSB913-1_map5	0002.CSV	1430.98	0.214435
PSB913-1_map5	0002.CSV	1434.84	0.219343
PSB913-1_map5	0002.CSV	1438.7	0.223388
PSB913-1_map5	0002.CSV	1442.55	0.225643
PSB913-1_map5	0002.CSV	1446.41	0.223989
PSB913-1_map5	0002.CSV	1450.27	0.220325
PSB913-1_map5	0002.CSV	1454.12	0.214807
PSB913-1_map5	0002.CSV	1457.98	0.207124
PSB913-1_map5	0002.CSV	1461.84	0.200251
PSB913-1_map5	0002.CSV	1465.7	0.195194
PSB913-1_map5	0002.CSV	1469.55	0.187408
PSB913-1_map5	0002.CSV	1473.41	0.174558
PSB913-1_map5	0002.CSV	1477.27	0.159072
PSB913-1_map5	0002.CSV	1481.12	0.149809
PSB913-1_map5	0002.CSV	1484.98	0.140745
PSB913-1_map5	0002.CSV	1488.84	0.130293
PSB913-1_map5	0002.CSV	1492.7	0.120039
PSB913-1_map5	0002.CSV	1496.55	0.113082
PSB913-1_map5	0002.CSV	1500.41	0.105035
PSB913-1_map5	0002.CSV	1504.27	0.100267
PSB913-1_map5	0002.CSV	1508.12	0.0906077
PSB913-1_map5	0002.CSV	1511.98	0.08441
PSB913-1_map5	0002.CSV	1515.84	0.0799596
PSB913-1_map5	0002.CSV	1519.7	0.0741013
PSB913-1_map5	0002.CSV	1523.55	0.0667694
PSB913-1_map5	0002.CSV	1527.41	0.0621917
PSB913-1_map5	0002.CSV	1531.27	0.0578514
PSB913-1_map5	0002.CSV	1535.12	0.0540144
PSB913-1_map5	0002.CSV	1538.98	0.0497951
PSB913-1_map5	0002.CSV	1542.84	0.0432795
PSB913-1_map5	0002.CSV	1546.7	0.0389623
PSB913-1_map5	0002.CSV	1550.55	0.0358736
PSB913-1_map5	0002.CSV	1554.41	0.0321113
PSB913-1_map5	0002.CSV	1558.27	0.0269765
PSB913-1_map5	0002.CSV	1562.12	0.021818
PSB913-1_map5	0002.CSV	1565.98	0.0192447
PSB913-1_map5	0002.CSV	1569.84	0.0155504
PSB913-1_map5	0002.CSV	1573.69	0.0119194
PSB913-1_map5	0002.CSV	1577.55	0.00718249
PSB913-1_map5	0002.CSV	1581.41	0.00325563
PSB913-1_map5	0002.CSV	1585.27	-0.000110455
PSB913-1_map5	0002.CSV	1589.12	-0.00300827
PSB913-1_map5	0002.CSV	1592.98	-0.00536257
PSB913-1_map5	0002.CSV	1596.84	-0.00705895
PSB913-1_map5	0002.CSV	1600.69	-0.00838972
PSB913-1_map5	0002.CSV	1604.55	-0.00926167
PSB913-1_map5	0002.CSV	1608.41	-0.0100388
PSB913-1_map5	0002.CSV	1612.27	-0.0106423
PSB913-1_map5	0002.CSV	1616.12	-0.0112271
PSB913-1_map5	0002.CSV	1619.98	-0.0115587
PSB913-1_map5	0002.CSV	1623.84	-0.0119858
PSB913-1_map5	0002.CSV	1627.69	-0.0121181
PSB913-1_map5	0002.CSV	1631.55	-0.0127043
PSB913-1_map5	0002.CSV	1635.41	-0.0128122
PSB913-1_map5	0002.CSV	1639.27	-0.0127794
PSB913-1_map5	0002.CSV	1643.12	-0.0133318
PSB913-1_map5	0002.CSV	1646.98	-0.0138259
PSB913-1_map5	0002.CSV	1650.84	-0.0137648
PSB913-1_map5	0002.CSV	1654.69	-0.013819
PSB913-1_map5	0002.CSV	1658.55	-0.0143203
PSB913-1_map5	0002.CSV	1662.41	-0.0150751
PSB913-1_map5	0002.CSV	1666.27	-0.0156483
PSB913-1_map5	0002.CSV	1670.12	-0.0162974
PSB913-1_map5	0002.CSV	1673.98	-0.016787
PSB913-1_map5	0002.CSV	1677.84	-0.0176818
PSB913-1_map5	0002.CSV	1681.69	-0.0184232
PSB913-1_map5	0002.CSV	1685.55	-0.0189486
PSB913-1_map5	0002.CSV	1689.41	-0.0193527
PSB913-1_map5	0002.CSV	1693.27	-0.0203175
PSB913-1_map5	0002.CSV	1697.12	-0.0209887
PSB913-1_map5	0002.CSV	1700.98	-0.0214551
PSB913-1_map5	0002.CSV	1704.84	-0.0217813
PSB913-1_map5	0002.CSV	1708.69	-0.022384
PSB913-1_map5	0002.CSV	1712.55	-0.0229652
PSB913-1_map5	0002.CSV	1716.41	-0.0231589
PSB913-1_map5	0002.CSV	1720.27	-0.0228011
PSB913-1_map5	0002.CSV	1724.12	-0.0233081
PSB913-1_map5	0002.CSV	1727.98	-0.0238003
PSB913-1_map5	0002.CSV	1731.84	-0.0241495
PSB913-1_map5	0002.CSV	1735.69	-0.0239302
PSB913-1_map5	0002.CSV	1739.55	-0.0243308
PSB913-1_map5	0002.CSV	1743.41	-0.0246964
PSB913-1_map5	0002.CSV	1747.27	-0.0249844
PSB913-1_map5	0002.CSV	1751.12	-0.0249773
PSB913-1_map5	0002.CSV	1754.98	-0.0254693
PSB913-1_map5	0002.CSV	1758.84	-0.0257191
PSB913-1_map5	0002.CSV	1762.69	-0.0258046
PSB913-1_map5	0002.CSV	1766.55	-0.0259968
PSB913-1_map5	0002.CSV	1770.41	-0.0257831
PSB913-1_map5	0002.CSV	1774.26	-0.0239285
PSB913-1_map5	0002.CSV	1778.12	-0.0219656
PSB913-1_map5	0002.CSV	1781.98	-0.0193606
PSB913-1_map5	0002.CSV	1785.84	-0.0175546
PSB913-1_map5	0002.CSV	1789.69	-0.0173219
PSB913-1_map5	0002.CSV	1793.55	-0.0188447
PSB913-1_map5	0002.CSV	1797.41	-0.0206649
PSB913-1_map5	0002.CSV	1801.26	-0.0226315
PSB913-1_map5	0002.CSV	1805.12	-0.0242785
PSB913-1_map5	0002.CSV	1808.98	-0.0254933
PSB913-1_map5	0002.CSV	1812.84	-0.026116
PSB913-1_map5	0002.CSV	1816.69	-0.0266845
PSB913-1_map5	0002.CSV	1820.55	-0.0270716
PSB913-1_map5	0002.CSV	1824.41	-0.0274069
PSB913-1_map5	0002.CSV	1828.26	-0.0272932
PSB913-1_map5	0002.CSV	1832.12	-0.02724
PSB913-1_map5	0002.CSV	1835.98	-0.0273726
PSB913-1_map5	0002.CSV	1839.84	-0.0276723
PSB913-1_map5	0002.CSV	1843.69	-0.0275804
PSB913-1_map5	0002.CSV	1847.55	-0.0273471
PSB913-1_map5	0002.CSV	1851.41	-0.0274693
PSB913-1_map5	0002.CSV	1855.26	-0.0276495
PSB913-1_map5	0002.CSV	1859.12	-0.0276413
PSB913-1_map5	0002.CSV	1862.98	-0.0278568
PSB913-1_map5	0002.CSV	1866.84	-0.0278276
PSB913-1_map5	0002.CSV	1870.69	-0.0275172
PSB913-1_map5	0002.CSV	1874.55	-0.0276039
PSB913-1_map5	0002.CSV	1878.41	-0.0277699
PSB913-1_map5	0002.CSV	1882.26	-0.027753
PSB913-1_map5	0002.CSV	1886.12	-0.0277992
PSB913-1_map5	0002.CSV	1889.98	-0.0277554
PSB913-1_map5	0002.CSV	1893.83	-0.0277696
PSB913-1_map5	0002.CSV	1897.69	-0.0277785
PSB913-1_map5	0002.CSV	1901.55	-0.0279065
PSB913-1_map5	0002.CSV	1905.41	-0.0279778
PSB913-1_map5	0002.CSV	1909.26	-0.0279818
PSB913-1_map5	0002.CSV	1913.12	-0.0279699
PSB913-1_map5	0002.CSV	1916.98	-0.0280519
PSB913-1_map5	0002.CSV	1920.83	-0.027906
PSB913-1_map5	0002.CSV	1924.69	-0.0278615
PSB913-1_map5	0002.CSV	1928.55	-0.0279124
PSB913-1_map5	0002.CSV	1932.4	-0.0279801
PSB913-1_map5	0002.CSV	1936.26	-0.0279572
PSB913-1_map5	0002.CSV	1940.12	-0.0280556
PSB913-1_map5	0002.CSV	1943.98	-0.0279479
PSB913-1_map5	0002.CSV	1947.83	-0.0279351
PSB913-1_map5	0002.CSV	1951.69	-0.0279472
PSB913-1_map5	0002.CSV	1955.55	-0.0279506
PSB913-1_map5	0002.CSV	1959.4	-0.0279025
PSB913-1_map5	0002.CSV	1963.26	-0.027972
PSB913-1_map5	0002.CSV	1967.12	-0.0278624
PSB913-1_map5	0002.CSV	1970.98	-0.0278187
PSB913-1_map5	0002.CSV	1974.83	-0.027822
PSB913-1_map5	0002.CSV	1978.69	-0.027823
PSB913-1_map5	0002.CSV	1982.55	-0.0277809
PSB913-1_map5	0002.CSV	1986.4	-0.0278355
PSB913-1_map5	0002.CSV	1990.26	-0.0277629
PSB913-1_map5	0002.CSV	1994.12	-0.0276433
PSB913-1_map5	0002.CSV	1997.98	-0.0275895
PSB913-1_map5	0002.CSV	2001.83	-0.0276259
PSB913-1_map5	0002.CSV	2005.69	-0.0276079
PSB913-1_map5	0002.CSV	2009.55	-0.0275872
PSB913-1_map5	0002.CSV	2013.4	-0.0275267
PSB913-1_map5	0002.CSV	2017.26	-0.0274694
PSB913-1_map5	0002.CSV	2021.12	-0.0273712
PSB913-1_map5	0002.CSV	2024.97	-0.0274119
PSB913-1_map5	0002.CSV	2028.83	-0.0273474
PSB913-1_map5	0002.CSV	2032.69	-0.0273189
PSB913-1_map5	0002.CSV	2036.55	-0.0272799
PSB913-1_map5	0002.CSV	2040.4	-0.0272455
PSB913-1_map5	0002.CSV	2044.26	-0.027095
PSB913-1_map5	0002.CSV	2048.12	-0.0270848
PSB913-1_map5	0002.CSV	2051.97	-0.0270448
PSB913-1_map5	0002.CSV	2055.83	-0.0269979
PSB913-1_map5	0002.CSV	2059.69	-0.0269214
PSB913-1_map5	0002.CSV	2063.55	-0.0268881
PSB913-1_map5	0002.CSV	2067.4	-0.0267548
PSB913-1_map5	0002.CSV	2071.26	-0.0266783
PSB913-1_map5	0002.CSV	2075.12	-0.0265968
PSB913-1_map5	0002.CSV	2078.97	-0.0265363
PSB913-1_map5	0002.CSV	2082.83	-0.0264414
PSB913-1_map5	0002.CSV	2086.69	-0.0263851
PSB913-1_map5	0002.CSV	2090.55	-0.0262256
PSB913-1_map5	0002.CSV	2094.4	-0.0261048
PSB913-1_map5	0002.CSV	2098.26	-0.0259964
PSB913-1_map5	0002.CSV	2102.12	-0.0260065
PSB913-1_map5	0002.CSV	2105.97	-0.0259228
PSB913-1_map5	0002.CSV	2109.83	-0.0258078
PSB913-1_map5	0002.CSV	2113.69	-0.0256936
PSB913-1_map5	0002.CSV	2117.55	-0.0256015
PSB913-1_map5	0002.CSV	2121.4	-0.0255076
PSB913-1_map5	0002.CSV	2125.26	-0.0254223
PSB913-1_map5	0002.CSV	2129.12	-0.0252971
PSB913-1_map5	0002.CSV	2132.97	-0.0252816
PSB913-1_map5	0002.CSV	2136.83	-0.0252502
PSB913-1_map5	0002.CSV	2140.69	-0.0251863
PSB913-1_map5	0002.CSV	2144.55	-0.0250716
PSB913-1_map5	0002.CSV	2148.4	-0.0249979
PSB913-1_map5	0002.CSV	2152.26	-0.0249293
PSB913-1_map5	0002.CSV	2156.12	-0.0248873
PSB913-1_map5	0002.CSV	2159.97	-0.0248046
PSB913-1_map5	0002.CSV	2163.83	-0.0248121
PSB913-1_map5	0002.CSV	2167.69	-0.0248263
PSB913-1_map5	0002.CSV	2171.55	-0.0248137
PSB913-1_map5	0002.CSV	2175.4	-0.0247313
PSB913-1_map5	0002.CSV	2179.26	-0.0247116
PSB913-1_map5	0002.CSV	2183.12	-0.0246872
PSB913-1_map5	0002.CSV	2186.97	-0.0246695
PSB913-1_map5	0002.CSV	2190.83	-0.0246139
PSB913-1_map5	0002.CSV	2194.69	-0.0246104
PSB913-1_map5	0002.CSV	2198.55	-0.024599
PSB913-1_map5	0002.CSV	2202.4	-0.0246133
PSB913-1_map5	0002.CSV	2206.26	-0.0245563
PSB913-1_map5	0002.CSV	2210.12	-0.024528
PSB913-1_map5	0002.CSV	2213.97	-0.0244838
PSB913-1_map5	0002.CSV	2217.83	-0.0244868
PSB913-1_map5	0002.CSV	2221.69	-0.0244768
PSB913-1_map5	0002.CSV	2225.54	-0.0244852
PSB913-1_map5	0002.CSV	2229.4	-0.0244466
PSB913-1_map5	0002.CSV	2233.26	-0.0244197
PSB913-1_map5	0002.CSV	2237.12	-0.0243689
PSB913-1_map5	0002.CSV	2240.97	-0.0243801
PSB913-1_map5	0002.CSV	2244.83	-0.0243671
PSB913-1_map5	0002.CSV	2248.69	-0.0243515
PSB913-1_map5	0002.CSV	2252.54	-0.0243009
PSB913-1_map5	0002.CSV	2256.4	-0.0242834
PSB913-1_map5	0002.CSV	2260.26	-0.0242668
PSB913-1_map5	0002.CSV	2264.11	-0.0242417
PSB913-1_map5	0002.CSV	2267.97	-0.0242043
PSB913-1_map5	0002.CSV	2271.83	-0.0242002
PSB913-1_map5	0002.CSV	2275.69	-0.0241411
PSB913-1_map5	0002.CSV	2279.54	-0.0241506
PSB913-1_map5	0002.CSV	2283.4	-0.0241592
PSB913-1_map5	0002.CSV	2287.26	-0.024184
PSB913-1_map5	0002.CSV	2291.11	-0.0241286
PSB913-1_map5	0002.CSV	2294.97	-0.0241993
PSB913-1_map5	0002.CSV	2298.83	-0.0242691
PSB913-1_map5	0002.CSV	2302.69	-0.0243209
PSB913-1_map5	0002.CSV	2306.54	-0.0244368
PSB913-1_map5	0002.CSV	2310.4	-0.0246313
PSB913-1_map5	0002.CSV	2314.26	-0.0248555
PSB913-1_map5	0002.CSV	2318.11	-0.0253918
PSB913-1_map5	0002.CSV	2321.97	-0.0261715
PSB913-1_map5	0002.CSV	2325.83	-0.0267563
PSB913-1_map5	0002.CSV	2329.69	-0.0269927
PSB913-1_map5	0002.CSV	2333.54	-0.0274414
PSB913-1_map5	0002.CSV	2337.4	-0.0279116
PSB913-1_map5	0002.CSV	2341.26	-0.0280007
PSB913-1_map5	0002.CSV	2345.11	-0.0264391
PSB913-1_map5	0002.CSV	2348.97	-0.0259605
PSB913-1_map5	0002.CSV	2352.83	-0.0274357
PSB913-1_map5	0002.CSV	2356.69	-0.0308682
PSB913-1_map5	0002.CSV	2360.54	-0.0330984
PSB913-1_map5	0002.CSV	2364.4	-0.0312842
PSB913-1_map5	0002.CSV	2368.26	-0.0277939
PSB913-1_map5	0002.CSV	2372.11	-0.0254063
PSB913-1_map5	0002.CSV	2375.97	-0.0239526
PSB913-1_map5	0002.CSV	2379.83	-0.0232613
PSB913-1_map5	0002.CSV	2383.69	-0.023002
PSB913-1_map5	0002.CSV	2387.54	-0.0229955
PSB913-1_map5	0002.CSV	2391.4	-0.0230334
PSB913-1_map5	0002.CSV	2395.26	-0.0230849
PSB913-1_map5	0002.CSV	2399.11	-0.0231151
PSB913-1_map5	0002.CSV	2402.97	-0.0230921
PSB913-1_map5	0002.CSV	2406.83	-0.0230313
PSB913-1_map5	0002.CSV	2410.68	-0.0229913
PSB913-1_map5	0002.CSV	2414.54	-0.0229763
PSB913-1_map5	0002.CSV	2418.4	-0.0229878
PSB913-1_map5	0002.CSV	2422.26	-0.0229326
PSB913-1_map5	0002.CSV	2426.11	-0.0228935
PSB913-1_map5	0002.CSV	2429.97	-0.0228383
PSB913-1_map5	0002.CSV	2433.83	-0.0227495
PSB913-1_map5	0002.CSV	2437.68	-0.022639
PSB913-1_map5	0002.CSV	2441.54	-0.0226167
PSB913-1_map5	0002.CSV	2445.4	-0.0225874
PSB913-1_map5	0002.CSV	2449.26	-0.0225134
PSB913-1_map5	0002.CSV	2453.11	-0.0224139
PSB913-1_map5	0002.CSV	2456.97	-0.0223552
PSB913-1_map5	0002.CSV	2460.83	-0.0223033
PSB913-1_map5	0002.CSV	2464.68	-0.0221752
PSB913-1_map5	0002.CSV	2468.54	-0.0219164
PSB913-1_map5	0002.CSV	2472.4	-0.0216487
PSB913-1_map5	0002.CSV	2476.26	-0.0213162
PSB913-1_map5	0002.CSV	2480.11	-0.020974
PSB913-1_map5	0002.CSV	2483.97	-0.0205618
PSB913-1_map5	0002.CSV	2487.83	-0.0200877
PSB913-1_map5	0002.CSV	2491.68	-0.0196231
PSB913-1_map5	0002.CSV	2495.54	-0.0193117
PSB913-1_map5	0002.CSV	2499.4	-0.01916
PSB913-1_map5	0002.CSV	2503.26	-0.0191489
PSB913-1_map5	0002.CSV	2507.11	-0.019224
PSB913-1_map5	0002.CSV	2510.97	-0.0192683
PSB913-1_map5	0002.CSV	2514.83	-0.0190487
PSB913-1_map5	0002.CSV	2518.68	-0.0187545
PSB913-1_map5	0002.CSV	2522.54	-0.0185888
PSB913-1_map5	0002.CSV	2526.4	-0.0186097
PSB913-1_map5	0002.CSV	2530.26	-0.0187944
PSB913-1_map5	0002.CSV	2534.11	-0.0191668
PSB913-1_map5	0002.CSV	2537.97	-0.0195266
PSB913-1_map5	0002.CSV	2541.83	-0.019823
PSB913-1_map5	0002.CSV	2545.68	-0.02002
PSB913-1_map5	0002.CSV	2549.54	-0.0202152
PSB913-1_map5	0002.CSV	2553.4	-0.0204457
PSB913-1_map5	0002.CSV	2557.26	-0.0206942
PSB913-1_map5	0002.CSV	2561.11	-0.0209451
PSB913-1_map5	0002.CSV	2564.97	-0.0211972
PSB913-1_map5	0002.CSV	2568.83	-0.0213869
PSB913-1_map5	0002.CSV	2572.68	-0.021502
PSB913-1_map5	0002.CSV	2576.54	-0.0216487
PSB913-1_map5	0002.CSV	2580.4	-0.021864
PSB913-1_map5	0002.CSV	2584.25	-0.0220088
PSB913-1_map5	0002.CSV	2588.11	-0.0221313
PSB913-1_map5	0002.CSV	2591.97	-0.0221699
PSB913-1_map5	0002.CSV	2595.83	-0.0222061
PSB913-1_map5	0002.CSV	2599.68	-0.0222419
PSB913-1_map5	0002.CSV	2603.54	-0.0222222
PSB913-1_map5	0002.CSV	2607.4	-0.0221792
PSB913-1_map5	0002.CSV	2611.25	-0.0221276
PSB913-1_map5	0002.CSV	2615.11	-0.0220454
PSB913-1_map5	0002.CSV	2618.97	-0.0220094
PSB913-1_map5	0002.CSV	2622.82	-0.0219367
PSB913-1_map5	0002.CSV	2626.68	-0.021818
PSB913-1_map5	0002.CSV	2630.54	-0.0217529
PSB913-1_map5	0002.CSV	2634.4	-0.0216526
PSB913-1_map5	0002.CSV	2638.25	-0.0215858
PSB913-1_map5	0002.CSV	2642.11	-0.0217684
PSB913-1_map5	0002.CSV	2645.97	-0.0219109
PSB913-1_map5	0002.CSV	2649.82	-0.0219523
PSB913-1_map5	0002.CSV	2653.68	-0.0220221
PSB913-1_map5	0002.CSV	2657.54	-0.0220947
PSB913-1_map5	0002.CSV	2661.4	-0.0221153
PSB913-1_map5	0002.CSV	2665.25	-0.0221542
PSB913-1_map5	0002.CSV	2669.11	-0.0221085
PSB913-1_map5	0002.CSV	2672.97	-0.0218796
PSB913-1_map5	0002.CSV	2676.82	-0.0215797
PSB913-1_map5	0002.CSV	2680.68	-0.0216389
PSB913-1_map5	0002.CSV	2684.54	-0.021949
PSB913-1_map5	0002.CSV	2688.4	-0.0220986
PSB913-1_map5	0002.CSV	2692.25	-0.0221263
PSB913-1_map5	0002.CSV	2696.11	-0.0220831
PSB913-1_map5	0002.CSV	2699.97	-0.021983
PSB913-1_map5	0002.CSV	2703.82	-0.0219628
PSB913-1_map5	0002.CSV	2707.68	-0.0219143
PSB913-1_map5	0002.CSV	2711.54	-0.0218628
PSB913-1_map5	0002.CSV	2715.4	-0.021792
PSB913-1_map5	0002.CSV	2719.25	-0.0215914
PSB913-1_map5	0002.CSV	2723.11	-0.0212686
PSB913-1_map5	0002.CSV	2726.97	-0.0212598
PSB913-1_map5	0002.CSV	2730.82	-0.0215319
PSB913-1_map5	0002.CSV	2734.68	-0.021535
PSB913-1_map5	0002.CSV	2738.54	-0.0214702
PSB913-1_map5	0002.CSV	2742.4	-0.0214295
PSB913-1_map5	0002.CSV	2746.25	-0.021109
PSB913-1_map5	0002.CSV	2750.11	-0.0210784
PSB913-1_map5	0002.CSV	2753.97	-0.0213088
PSB913-1_map5	0002.CSV	2757.82	-0.0213253
PSB913-1_map5	0002.CSV	2761.68	-0.021407
PSB913-1_map5	0002.CSV	2765.54	-0.0214775
PSB913-1_map5	0002.CSV	2769.39	-0.0212843
PSB913-1_map5	0002.CSV	2773.25	-0.0209146
PSB913-1_map5	0002.CSV	2777.11	-0.0209888
PSB913-1_map5	0002.CSV	2780.97	-0.0212069
PSB913-1_map5	0002.CSV	2784.82	-0.0209807
PSB913-1_map5	0002.CSV	2788.68	-0.0205217
PSB913-1_map5	0002.CSV	2792.54	-0.0204374
PSB913-1_map5	0002.CSV	2796.39	-0.0204514
PSB913-1_map5	0002.CSV	2800.25	-0.0205478
PSB913-1_map5	0002.CSV	2804.11	-0.020701
PSB913-1_map5	0002.CSV	2807.97	-0.0204407
PSB913-1_map5	0002.CSV	2811.82	-0.0203534
PSB913-1_map5	0002.CSV	2815.68	-0.0204507
PSB913-1_map5	0002.CSV	2819.54	-0.0202913
PSB913-1_map5	0002.CSV	2823.39	-0.0201251
PSB913-1_map5	0002.CSV	2827.25	-0.0199869
PSB913-1_map5	0002.CSV	2831.11	-0.0194529
PSB913-1_map5	0002.CSV	2834.97	-0.0186445
PSB913-1_map5	0002.CSV	2838.82	-0.0180894
PSB913-1_map5	0002.CSV	2842.68	-0.0176591
PSB913-1_map5	0002.CSV	2846.54	-0.0166567
PSB913-1_map5	0002.CSV	2850.39	-0.0159759
PSB913-1_map5	0002.CSV	2854.25	-0.0160378
PSB913-1_map5	0002.CSV	2858.11	-0.016164
PSB913-1_map5	0002.CSV	2861.97	-0.0164026
PSB913-1_map5	0002.CSV	2865.82	-0.0166001
PSB913-1_map5	0002.CSV	2869.68	-0.016457
PSB913-1_map5	0002.CSV	2873.54	-0.016339
PSB913-1_map5	0002.CSV	2877.39	-0.0167849
PSB913-1_map5	0002.CSV	2881.25	-0.0170928
PSB913-1_map5	0002.CSV	2885.11	-0.0169378
PSB913-1_map5	0002.CSV	2888.97	-0.0165963
PSB913-1_map5	0002.CSV	2892.82	-0.0159113
PSB913-1_map5	0002.CSV	2896.68	-0.015342
PSB913-1_map5	0002.CSV	2900.54	-0.0150837
PSB913-1_map5	0002.CSV	2904.39	-0.014494
PSB913-1_map5	0002.CSV	2908.25	-0.0134552
PSB913-1_map5	0002.CSV	2912.11	-0.0119933
PSB913-1_map5	0002.CSV	2915.97	-0.0109068
PSB913-1_map5	0002.CSV	2919.82	-0.0108738
PSB913-1_map5	0002.CSV	2923.68	-0.0112891
PSB913-1_map5	0002.CSV	2927.54	-0.0114865
PSB913-1_map5	0002.CSV	2931.39	-0.0122071
PSB913-1_map5	0002.CSV	2935.25	-0.013249
PSB913-1_map5	0002.CSV	2939.11	-0.0137026
PSB913-1_map5	0002.CSV	2942.96	-0.0136454
PSB913-1_map5	0002.CSV	2946.82	-0.0138251
PSB913-1_map5	0002.CSV	2950.68	-0.0142969
PSB913-1_map5	0002.CSV	2954.54	-0.0148897
PSB913-1_map5	0002.CSV	2958.39	-0.0155675
PSB913-1_map5	0002.CSV	2962.25	-0.0160079
PSB913-1_map5	0002.CSV	2966.11	-0.0164356
PSB913-1_map5	0002.CSV	2969.96	-0.0165895
PSB913-1_map5	0002.CSV	2973.82	-0.0164555
PSB913-1_map5	0002.CSV	2977.68	-0.0163652
PSB913-1_map5	0002.CSV	2981.53	-0.0166632
PSB913-1_map5	0002.CSV	2985.39	-0.017223
PSB913-1_map5	0002.CSV	2989.25	-0.0172966
PSB913-1_map5	0002.CSV	2993.11	-0.0171056
PSB913-1_map5	0002.CSV	2996.96	-0.0172582
PSB913-1_map5	0002.CSV	3000.82	-0.0175939
PSB913-1_map5	0002.CSV	3004.68	-0.017782
PSB913-1_map5	0002.CSV	3008.53	-0.017602
PSB913-1_map5	0002.CSV	3012.39	-0.0173099
PSB913-1_map5	0002.CSV	3016.25	-0.0173464
PSB913-1_map5	0002.CSV	3020.11	-0.0176231
PSB913-1_map5	0002.CSV	3023.96	-0.0178418
PSB913-1_map5	0002.CSV	3027.82	-0.0179338
PSB913-1_map5	0002.CSV	3031.68	-0.0177273
PSB913-1_map5	0002.CSV	3035.53	-0.0176493
PSB913-1_map5	0002.CSV	3039.39	-0.0175704
PSB913-1_map5	0002.CSV	3043.25	-0.0174701
PSB913-1_map5	0002.CSV	3047.11	-0.0176078
PSB913-1_map5	0002.CSV	3050.96	-0.0176993
PSB913-1_map5	0002.CSV	3054.82	-0.0177552
PSB913-1_map5	0002.CSV	3058.68	-0.0179134
PSB913-1_map5	0002.CSV	3062.53	-0.017903
PSB913-1_map5	0002.CSV	3066.39	-0.0176389
PSB913-1_map5	0002.CSV	3070.25	-0.0176475
PSB913-1_map5	0002.CSV	3074.11	-0.0175906
PSB913-1_map5	0002.CSV	3077.96	-0.017243
PSB913-1_map5	0002.CSV	3081.82	-0.0170502
PSB913-1_map5	0002.CSV	3085.68	-0.0170639
PSB913-1_map5	0002.CSV	3089.53	-0.0171467
PSB913-1_map5	0002.CSV	3093.39	-0.0174266
PSB913-1_map5	0002.CSV	3097.25	-0.0174484
PSB913-1_map5	0002.CSV	3101.11	-0.0172731
PSB913-1_map5	0002.CSV	3104.96	-0.0171647
PSB913-1_map5	0002.CSV	3108.82	-0.0170152
PSB913-1_map5	0002.CSV	3112.68	-0.0168832
PSB913-1_map5	0002.CSV	3116.53	-0.0167226
PSB913-1_map5	0002.CSV	3120.39	-0.0167
PSB913-1_map5	0002.CSV	3124.25	-0.0168672
PSB913-1_map5	0002.CSV	3128.11	-0.0169396
PSB913-1_map5	0002.CSV	3131.96	-0.0169728
PSB913-1_map5	0002.CSV	3135.82	-0.0167352
PSB913-1_map5	0002.CSV	3139.68	-0.0165122
PSB913-1_map5	0002.CSV	3143.53	-0.0166556
PSB913-1_map5	0002.CSV	3147.39	-0.0165343
PSB913-1_map5	0002.CSV	3151.25	-0.0161689
PSB913-1_map5	0002.CSV	3155.1	-0.0162268
PSB913-1_map5	0002.CSV	3158.96	-0.0165521
PSB913-1_map5	0002.CSV	3162.82	-0.016589
PSB913-1_map5	0002.CSV	3166.68	-0.0165182
PSB913-1_map5	0002.CSV	3170.53	-0.0165086
PSB913-1_map5	0002.CSV	3174.39	-0.0164706
PSB913-1_map5	0002.CSV	3178.25	-0.0162573
PSB913-1_map5	0002.CSV	3182.1	-0.0161423
PSB913-1_map5	0002.CSV	3185.96	-0.0160009
PSB913-1_map5	0002.CSV	3189.82	-0.0157601
PSB913-1_map5	0002.CSV	3193.68	-0.0157385
PSB913-1_map5	0002.CSV	3197.53	-0.0156953
PSB913-1_map5	0002.CSV	3201.39	-0.0154816
PSB913-1_map5	0002.CSV	3205.25	-0.0154429
PSB913-1_map5	0002.CSV	3209.1	-0.0153542
PSB913-1_map5	0002.CSV	3212.96	-0.0150719
PSB913-1_map5	0002.CSV	3216.82	-0.0148934
PSB913-1_map5	0002.CSV	3220.68	-0.0149001
PSB913-1_map5	0002.CSV	3224.53	-0.0148944
[truncated: 128,788 more rows]
