# Supplementary material for: Thermo-microstratigraphy of shells reveals invisible fire use and possible cooking in the archaeological record
Source: Frontiers journal article supplement (doi:10.3389/feart.2022.869487), 2022-09-01
Supplement: Table_13.XLSX [file Table_13.XLSX]

## Sheet: PSB913-2_map1
Map	Select spectrum number	Wavenumbers	Absorbance
PSB913-2_map1	0001.CSV	674.992	0.0180043
PSB913-2_map1	0001.CSV	678.849	0.0203498
PSB913-2_map1	0001.CSV	682.706	0.021423
PSB913-2_map1	0001.CSV	686.563	0.0243374
PSB913-2_map1	0001.CSV	690.42	0.0288401
PSB913-2_map1	0001.CSV	694.277	0.0408819
PSB913-2_map1	0001.CSV	698.134	0.054361
PSB913-2_map1	0001.CSV	701.991	0.0504054
PSB913-2_map1	0001.CSV	705.849	0.0408908
PSB913-2_map1	0001.CSV	709.706	0.0552533
PSB913-2_map1	0001.CSV	713.563	0.0601426
PSB913-2_map1	0001.CSV	717.42	0.0329389
PSB913-2_map1	0001.CSV	721.277	0.0111332
PSB913-2_map1	0001.CSV	725.134	0.00721415
PSB913-2_map1	0001.CSV	728.991	0.00744505
PSB913-2_map1	0001.CSV	732.848	0.00917896
PSB913-2_map1	0001.CSV	736.705	0.0106684
PSB913-2_map1	0001.CSV	740.562	0.0125103
PSB913-2_map1	0001.CSV	744.42	0.0135238
PSB913-2_map1	0001.CSV	748.277	0.0144217
PSB913-2_map1	0001.CSV	752.134	0.0141079
PSB913-2_map1	0001.CSV	755.991	0.0145432
PSB913-2_map1	0001.CSV	759.848	0.0144943
PSB913-2_map1	0001.CSV	763.705	0.014901
PSB913-2_map1	0001.CSV	767.562	0.0148732
PSB913-2_map1	0001.CSV	771.419	0.015181
PSB913-2_map1	0001.CSV	775.276	0.0148363
PSB913-2_map1	0001.CSV	779.133	0.0153392
PSB913-2_map1	0001.CSV	782.99	0.0156794
PSB913-2_map1	0001.CSV	786.848	0.0166059
PSB913-2_map1	0001.CSV	790.705	0.017073
PSB913-2_map1	0001.CSV	794.562	0.018264
PSB913-2_map1	0001.CSV	798.419	0.0192746
PSB913-2_map1	0001.CSV	802.276	0.0208965
PSB913-2_map1	0001.CSV	806.133	0.0225331
PSB913-2_map1	0001.CSV	809.99	0.0250557
PSB913-2_map1	0001.CSV	813.847	0.0275886
PSB913-2_map1	0001.CSV	817.704	0.0314255
PSB913-2_map1	0001.CSV	821.562	0.0356858
PSB913-2_map1	0001.CSV	825.419	0.0414162
PSB913-2_map1	0001.CSV	829.276	0.0479093
PSB913-2_map1	0001.CSV	833.133	0.0571949
PSB913-2_map1	0001.CSV	836.99	0.0705417
PSB913-2_map1	0001.CSV	840.847	0.0875704
PSB913-2_map1	0001.CSV	844.704	0.102751
PSB913-2_map1	0001.CSV	848.561	0.12035
PSB913-2_map1	0001.CSV	852.418	0.133393
PSB913-2_map1	0001.CSV	856.275	0.129124
PSB913-2_map1	0001.CSV	860.132	0.107803
PSB913-2_map1	0001.CSV	863.99	0.0793861
PSB913-2_map1	0001.CSV	867.847	0.0505772
PSB913-2_map1	0001.CSV	871.704	0.026247
PSB913-2_map1	0001.CSV	875.561	0.00985002
PSB913-2_map1	0001.CSV	879.418	0.00282903
PSB913-2_map1	0001.CSV	883.275	0.000429132
PSB913-2_map1	0001.CSV	887.132	-0.000522276
PSB913-2_map1	0001.CSV	890.989	-0.00105827
PSB913-2_map1	0001.CSV	894.846	-0.000697177
PSB913-2_map1	0001.CSV	898.703	-0.000308931
PSB913-2_map1	0001.CSV	902.561	0.000343338
PSB913-2_map1	0001.CSV	906.418	0.00102332
PSB913-2_map1	0001.CSV	910.275	0.00129499
PSB913-2_map1	0001.CSV	914.132	0.000767466
PSB913-2_map1	0001.CSV	917.989	0.000912608
PSB913-2_map1	0001.CSV	921.846	0.00115257
PSB913-2_map1	0001.CSV	925.703	0.00159388
PSB913-2_map1	0001.CSV	929.56	0.00190075
PSB913-2_map1	0001.CSV	933.417	0.00236851
PSB913-2_map1	0001.CSV	937.274	0.00256051
PSB913-2_map1	0001.CSV	941.131	0.00299008
PSB913-2_map1	0001.CSV	944.989	0.00324298
PSB913-2_map1	0001.CSV	948.846	0.00369107
PSB913-2_map1	0001.CSV	952.703	0.00406329
PSB913-2_map1	0001.CSV	956.56	0.00475402
PSB913-2_map1	0001.CSV	960.417	0.00526467
PSB913-2_map1	0001.CSV	964.274	0.00584665
PSB913-2_map1	0001.CSV	968.131	0.00618691
PSB913-2_map1	0001.CSV	971.988	0.00683478
PSB913-2_map1	0001.CSV	975.845	0.00734526
PSB913-2_map1	0001.CSV	979.702	0.00802922
PSB913-2_map1	0001.CSV	983.559	0.00858037
PSB913-2_map1	0001.CSV	987.417	0.009303
PSB913-2_map1	0001.CSV	991.274	0.00973608
PSB913-2_map1	0001.CSV	995.131	0.0102063
PSB913-2_map1	0001.CSV	998.988	0.0104195
PSB913-2_map1	0001.CSV	1002.85	0.0107907
PSB913-2_map1	0001.CSV	1006.7	0.0110043
PSB913-2_map1	0001.CSV	1010.56	0.011538
PSB913-2_map1	0001.CSV	1014.42	0.0120442
PSB913-2_map1	0001.CSV	1018.27	0.0129274
PSB913-2_map1	0001.CSV	1022.13	0.0137054
PSB913-2_map1	0001.CSV	1025.99	0.0146562
PSB913-2_map1	0001.CSV	1029.85	0.0153016
PSB913-2_map1	0001.CSV	1033.7	0.0161267
PSB913-2_map1	0001.CSV	1037.56	0.0167726
PSB913-2_map1	0001.CSV	1041.42	0.0175838
PSB913-2_map1	0001.CSV	1045.27	0.0180471
PSB913-2_map1	0001.CSV	1049.13	0.0189123
PSB913-2_map1	0001.CSV	1052.99	0.0198002
PSB913-2_map1	0001.CSV	1056.84	0.0211469
PSB913-2_map1	0001.CSV	1060.7	0.0222627
PSB913-2_map1	0001.CSV	1064.56	0.0232435
PSB913-2_map1	0001.CSV	1068.42	0.0237649
PSB913-2_map1	0001.CSV	1072.27	0.0245331
PSB913-2_map1	0001.CSV	1076.13	0.0266483
PSB913-2_map1	0001.CSV	1079.99	0.033389
PSB913-2_map1	0001.CSV	1083.84	0.0350618
PSB913-2_map1	0001.CSV	1087.7	0.0251555
PSB913-2_map1	0001.CSV	1091.56	0.0176463
PSB913-2_map1	0001.CSV	1095.41	0.0162974
PSB913-2_map1	0001.CSV	1099.27	0.0164007
PSB913-2_map1	0001.CSV	1103.13	0.0169959
PSB913-2_map1	0001.CSV	1106.99	0.0176585
PSB913-2_map1	0001.CSV	1110.84	0.0185047
PSB913-2_map1	0001.CSV	1114.7	0.0189568
PSB913-2_map1	0001.CSV	1118.56	0.019284
PSB913-2_map1	0001.CSV	1122.41	0.0192483
PSB913-2_map1	0001.CSV	1126.27	0.0191991
PSB913-2_map1	0001.CSV	1130.13	0.0189209
PSB913-2_map1	0001.CSV	1133.99	0.0188449
PSB913-2_map1	0001.CSV	1137.84	0.0187796
PSB913-2_map1	0001.CSV	1141.7	0.0189141
PSB913-2_map1	0001.CSV	1145.56	0.0188382
PSB913-2_map1	0001.CSV	1149.41	0.0190859
PSB913-2_map1	0001.CSV	1153.27	0.0194553
PSB913-2_map1	0001.CSV	1157.13	0.0199808
PSB913-2_map1	0001.CSV	1160.99	0.0201594
PSB913-2_map1	0001.CSV	1164.84	0.0202982
PSB913-2_map1	0001.CSV	1168.7	0.0202066
PSB913-2_map1	0001.CSV	1172.56	0.0202541
PSB913-2_map1	0001.CSV	1176.41	0.0202105
PSB913-2_map1	0001.CSV	1180.27	0.0203777
PSB913-2_map1	0001.CSV	1184.13	0.0204227
PSB913-2_map1	0001.CSV	1187.99	0.0207187
PSB913-2_map1	0001.CSV	1191.84	0.0209822
PSB913-2_map1	0001.CSV	1195.7	0.0215092
PSB913-2_map1	0001.CSV	1199.56	0.0219528
PSB913-2_map1	0001.CSV	1203.41	0.0225875
PSB913-2_map1	0001.CSV	1207.27	0.0230252
PSB913-2_map1	0001.CSV	1211.13	0.0237474
PSB913-2_map1	0001.CSV	1214.98	0.0244284
PSB913-2_map1	0001.CSV	1218.84	0.0253255
PSB913-2_map1	0001.CSV	1222.7	0.0261543
PSB913-2_map1	0001.CSV	1226.56	0.0271689
PSB913-2_map1	0001.CSV	1230.41	0.028002
PSB913-2_map1	0001.CSV	1234.27	0.0291378
PSB913-2_map1	0001.CSV	1238.13	0.0301911
PSB913-2_map1	0001.CSV	1241.98	0.0314393
PSB913-2_map1	0001.CSV	1245.84	0.0325444
PSB913-2_map1	0001.CSV	1249.7	0.0337029
PSB913-2_map1	0001.CSV	1253.56	0.0344948
PSB913-2_map1	0001.CSV	1257.41	0.0354088
PSB913-2_map1	0001.CSV	1261.27	0.0362453
PSB913-2_map1	0001.CSV	1265.13	0.0373025
PSB913-2_map1	0001.CSV	1268.98	0.0381775
PSB913-2_map1	0001.CSV	1272.84	0.039243
PSB913-2_map1	0001.CSV	1276.7	0.0399846
PSB913-2_map1	0001.CSV	1280.56	0.0407987
PSB913-2_map1	0001.CSV	1284.41	0.0413338
PSB913-2_map1	0001.CSV	1288.27	0.0419885
PSB913-2_map1	0001.CSV	1292.13	0.0424217
PSB913-2_map1	0001.CSV	1295.98	0.0430888
PSB913-2_map1	0001.CSV	1299.84	0.0436842
PSB913-2_map1	0001.CSV	1303.7	0.0447407
PSB913-2_map1	0001.CSV	1307.56	0.0457881
PSB913-2_map1	0001.CSV	1311.41	0.0471913
PSB913-2_map1	0001.CSV	1315.27	0.0485727
PSB913-2_map1	0001.CSV	1319.13	0.050322
PSB913-2_map1	0001.CSV	1322.98	0.0518052
PSB913-2_map1	0001.CSV	1326.84	0.0535753
PSB913-2_map1	0001.CSV	1330.7	0.055406
PSB913-2_map1	0001.CSV	1334.56	0.0575828
PSB913-2_map1	0001.CSV	1338.41	0.0601924
PSB913-2_map1	0001.CSV	1342.27	0.0635418
PSB913-2_map1	0001.CSV	1346.13	0.0661089
PSB913-2_map1	0001.CSV	1349.98	0.0693434
PSB913-2_map1	0001.CSV	1353.84	0.07266
PSB913-2_map1	0001.CSV	1357.7	0.0763125
PSB913-2_map1	0001.CSV	1361.56	0.0803377
PSB913-2_map1	0001.CSV	1365.41	0.0854108
PSB913-2_map1	0001.CSV	1369.27	0.0894081
PSB913-2_map1	0001.CSV	1373.13	0.0944964
PSB913-2_map1	0001.CSV	1376.98	0.100014
PSB913-2_map1	0001.CSV	1380.84	0.105013
PSB913-2_map1	0001.CSV	1384.7	0.109553
PSB913-2_map1	0001.CSV	1388.56	0.11548
PSB913-2_map1	0001.CSV	1392.41	0.11972
PSB913-2_map1	0001.CSV	1396.27	0.125152
PSB913-2_map1	0001.CSV	1400.13	0.130551
PSB913-2_map1	0001.CSV	1403.98	0.135527
PSB913-2_map1	0001.CSV	1407.84	0.140264
PSB913-2_map1	0001.CSV	1411.7	0.145029
PSB913-2_map1	0001.CSV	1415.55	0.14862
PSB913-2_map1	0001.CSV	1419.41	0.154405
PSB913-2_map1	0001.CSV	1423.27	0.159221
PSB913-2_map1	0001.CSV	1427.12	0.164089
PSB913-2_map1	0001.CSV	1430.98	0.169017
PSB913-2_map1	0001.CSV	1434.84	0.175668
PSB913-2_map1	0001.CSV	1438.7	0.182429
PSB913-2_map1	0001.CSV	1442.55	0.187046
PSB913-2_map1	0001.CSV	1446.41	0.188079
PSB913-2_map1	0001.CSV	1450.27	0.186782
PSB913-2_map1	0001.CSV	1454.12	0.182585
PSB913-2_map1	0001.CSV	1457.98	0.177347
PSB913-2_map1	0001.CSV	1461.84	0.17274
PSB913-2_map1	0001.CSV	1465.7	0.169563
PSB913-2_map1	0001.CSV	1469.55	0.163319
PSB913-2_map1	0001.CSV	1473.41	0.151324
PSB913-2_map1	0001.CSV	1477.27	0.136191
PSB913-2_map1	0001.CSV	1481.12	0.126948
PSB913-2_map1	0001.CSV	1484.98	0.117942
PSB913-2_map1	0001.CSV	1488.84	0.107586
PSB913-2_map1	0001.CSV	1492.7	0.0973389
PSB913-2_map1	0001.CSV	1496.55	0.0902413
PSB913-2_map1	0001.CSV	1500.41	0.0821124
PSB913-2_map1	0001.CSV	1504.27	0.077481
PSB913-2_map1	0001.CSV	1508.12	0.0684311
PSB913-2_map1	0001.CSV	1511.98	0.0622981
PSB913-2_map1	0001.CSV	1515.84	0.0579054
PSB913-2_map1	0001.CSV	1519.7	0.0523769
PSB913-2_map1	0001.CSV	1523.55	0.0456319
PSB913-2_map1	0001.CSV	1527.41	0.0412356
PSB913-2_map1	0001.CSV	1531.27	0.0369569
PSB913-2_map1	0001.CSV	1535.12	0.0330986
PSB913-2_map1	0001.CSV	1538.98	0.0287204
PSB913-2_map1	0001.CSV	1542.84	0.02254
PSB913-2_map1	0001.CSV	1546.7	0.0185572
PSB913-2_map1	0001.CSV	1550.55	0.0155418
PSB913-2_map1	0001.CSV	1554.41	0.0118293
PSB913-2_map1	0001.CSV	1558.27	0.00699917
PSB913-2_map1	0001.CSV	1562.12	0.00237597
PSB913-2_map1	0001.CSV	1565.98	-7.72016e-06
PSB913-2_map1	0001.CSV	1569.84	-0.00365809
PSB913-2_map1	0001.CSV	1573.69	-0.0072719
PSB913-2_map1	0001.CSV	1577.55	-0.0119315
PSB913-2_map1	0001.CSV	1581.41	-0.0155759
PSB913-2_map1	0001.CSV	1585.27	-0.0184896
PSB913-2_map1	0001.CSV	1589.12	-0.0208166
PSB913-2_map1	0001.CSV	1592.98	-0.0225377
PSB913-2_map1	0001.CSV	1596.84	-0.0235968
PSB913-2_map1	0001.CSV	1600.69	-0.024524
PSB913-2_map1	0001.CSV	1604.55	-0.0252223
PSB913-2_map1	0001.CSV	1608.41	-0.0259592
PSB913-2_map1	0001.CSV	1612.27	-0.0265216
PSB913-2_map1	0001.CSV	1616.12	-0.0271485
PSB913-2_map1	0001.CSV	1619.98	-0.0273968
PSB913-2_map1	0001.CSV	1623.84	-0.027762
PSB913-2_map1	0001.CSV	1627.69	-0.0279656
PSB913-2_map1	0001.CSV	1631.55	-0.0285424
PSB913-2_map1	0001.CSV	1635.41	-0.0285379
PSB913-2_map1	0001.CSV	1639.27	-0.0284606
PSB913-2_map1	0001.CSV	1643.12	-0.0289311
PSB913-2_map1	0001.CSV	1646.98	-0.029357
PSB913-2_map1	0001.CSV	1650.84	-0.029321
PSB913-2_map1	0001.CSV	1654.69	-0.0292276
PSB913-2_map1	0001.CSV	1658.55	-0.0294087
PSB913-2_map1	0001.CSV	1662.41	-0.0299472
PSB913-2_map1	0001.CSV	1666.27	-0.0302689
PSB913-2_map1	0001.CSV	1670.12	-0.0305549
PSB913-2_map1	0001.CSV	1673.98	-0.0304476
PSB913-2_map1	0001.CSV	1677.84	-0.0309909
PSB913-2_map1	0001.CSV	1681.69	-0.031459
PSB913-2_map1	0001.CSV	1685.55	-0.0315113
PSB913-2_map1	0001.CSV	1689.41	-0.03154
PSB913-2_map1	0001.CSV	1693.27	-0.0323108
PSB913-2_map1	0001.CSV	1697.12	-0.0326701
PSB913-2_map1	0001.CSV	1700.98	-0.0327429
PSB913-2_map1	0001.CSV	1704.84	-0.0325571
PSB913-2_map1	0001.CSV	1708.69	-0.0326888
PSB913-2_map1	0001.CSV	1712.55	-0.0328814
PSB913-2_map1	0001.CSV	1716.41	-0.0323898
PSB913-2_map1	0001.CSV	1720.27	-0.0313732
PSB913-2_map1	0001.CSV	1724.12	-0.0315438
PSB913-2_map1	0001.CSV	1727.98	-0.0317082
PSB913-2_map1	0001.CSV	1731.84	-0.0319437
PSB913-2_map1	0001.CSV	1735.69	-0.0318057
PSB913-2_map1	0001.CSV	1739.55	-0.0323192
PSB913-2_map1	0001.CSV	1743.41	-0.0328853
PSB913-2_map1	0001.CSV	1747.27	-0.0335671
PSB913-2_map1	0001.CSV	1751.12	-0.034042
PSB913-2_map1	0001.CSV	1754.98	-0.03475
PSB913-2_map1	0001.CSV	1758.84	-0.0350846
PSB913-2_map1	0001.CSV	1762.69	-0.0353247
PSB913-2_map1	0001.CSV	1766.55	-0.0354893
PSB913-2_map1	0001.CSV	1770.41	-0.0352426
PSB913-2_map1	0001.CSV	1774.26	-0.0336094
PSB913-2_map1	0001.CSV	1778.12	-0.0321381
PSB913-2_map1	0001.CSV	1781.98	-0.0301608
PSB913-2_map1	0001.CSV	1785.84	-0.0290144
PSB913-2_map1	0001.CSV	1789.69	-0.0291
PSB913-2_map1	0001.CSV	1793.55	-0.0304994
PSB913-2_map1	0001.CSV	1797.41	-0.0320125
PSB913-2_map1	0001.CSV	1801.26	-0.0335885
PSB913-2_map1	0001.CSV	1805.12	-0.0347409
PSB913-2_map1	0001.CSV	1808.98	-0.0355539
PSB913-2_map1	0001.CSV	1812.84	-0.0357754
PSB913-2_map1	0001.CSV	1816.69	-0.0360452
PSB913-2_map1	0001.CSV	1820.55	-0.0361315
PSB913-2_map1	0001.CSV	1824.41	-0.0362366
PSB913-2_map1	0001.CSV	1828.26	-0.0359852
PSB913-2_map1	0001.CSV	1832.12	-0.0359584
PSB913-2_map1	0001.CSV	1835.98	-0.0360097
PSB913-2_map1	0001.CSV	1839.84	-0.0362184
PSB913-2_map1	0001.CSV	1843.69	-0.0359879
PSB913-2_map1	0001.CSV	1847.55	-0.0357178
PSB913-2_map1	0001.CSV	1851.41	-0.0357692
PSB913-2_map1	0001.CSV	1855.26	-0.0359185
PSB913-2_map1	0001.CSV	1859.12	-0.0357813
PSB913-2_map1	0001.CSV	1862.98	-0.0358899
PSB913-2_map1	0001.CSV	1866.84	-0.0357736
PSB913-2_map1	0001.CSV	1870.69	-0.0354325
PSB913-2_map1	0001.CSV	1874.55	-0.0354398
PSB913-2_map1	0001.CSV	1878.41	-0.0355894
PSB913-2_map1	0001.CSV	1882.26	-0.0355247
PSB913-2_map1	0001.CSV	1886.12	-0.0355654
PSB913-2_map1	0001.CSV	1889.98	-0.0354052
PSB913-2_map1	0001.CSV	1893.83	-0.0353697
PSB913-2_map1	0001.CSV	1897.69	-0.0352821
PSB913-2_map1	0001.CSV	1901.55	-0.0354088
PSB913-2_map1	0001.CSV	1905.41	-0.0354123
PSB913-2_map1	0001.CSV	1909.26	-0.0353775
PSB913-2_map1	0001.CSV	1913.12	-0.0353225
PSB913-2_map1	0001.CSV	1916.98	-0.0354148
PSB913-2_map1	0001.CSV	1920.83	-0.0352493
PSB913-2_map1	0001.CSV	1924.69	-0.0352257
PSB913-2_map1	0001.CSV	1928.55	-0.0351567
PSB913-2_map1	0001.CSV	1932.4	-0.0351947
PSB913-2_map1	0001.CSV	1936.26	-0.0351844
PSB913-2_map1	0001.CSV	1940.12	-0.0353021
PSB913-2_map1	0001.CSV	1943.98	-0.0350771
PSB913-2_map1	0001.CSV	1947.83	-0.0350412
PSB913-2_map1	0001.CSV	1951.69	-0.0350281
PSB913-2_map1	0001.CSV	1955.55	-0.0350833
PSB913-2_map1	0001.CSV	1959.4	-0.0349958
PSB913-2_map1	0001.CSV	1963.26	-0.035013
PSB913-2_map1	0001.CSV	1967.12	-0.0348602
PSB913-2_map1	0001.CSV	1970.98	-0.0348602
PSB913-2_map1	0001.CSV	1974.83	-0.0348713
PSB913-2_map1	0001.CSV	1978.69	-0.034967
PSB913-2_map1	0001.CSV	1982.55	-0.0349375
PSB913-2_map1	0001.CSV	1986.4	-0.0349801
PSB913-2_map1	0001.CSV	1990.26	-0.0348176
PSB913-2_map1	0001.CSV	1994.12	-0.0347477
PSB913-2_map1	0001.CSV	1997.98	-0.0347381
PSB913-2_map1	0001.CSV	2001.83	-0.0348173
PSB913-2_map1	0001.CSV	2005.69	-0.0347275
PSB913-2_map1	0001.CSV	2009.55	-0.0347171
PSB913-2_map1	0001.CSV	2013.4	-0.0346732
PSB913-2_map1	0001.CSV	2017.26	-0.0346768
PSB913-2_map1	0001.CSV	2021.12	-0.0345625
PSB913-2_map1	0001.CSV	2024.97	-0.034609
PSB913-2_map1	0001.CSV	2028.83	-0.0345536
PSB913-2_map1	0001.CSV	2032.69	-0.0345797
PSB913-2_map1	0001.CSV	2036.55	-0.0344886
PSB913-2_map1	0001.CSV	2040.4	-0.0344771
PSB913-2_map1	0001.CSV	2044.26	-0.0344085
PSB913-2_map1	0001.CSV	2048.12	-0.0344608
PSB913-2_map1	0001.CSV	2051.97	-0.0343683
PSB913-2_map1	0001.CSV	2055.83	-0.034336
PSB913-2_map1	0001.CSV	2059.69	-0.0342741
PSB913-2_map1	0001.CSV	2063.55	-0.0343221
PSB913-2_map1	0001.CSV	2067.4	-0.0341828
PSB913-2_map1	0001.CSV	2071.26	-0.034164
PSB913-2_map1	0001.CSV	2075.12	-0.0340734
PSB913-2_map1	0001.CSV	2078.97	-0.0340715
PSB913-2_map1	0001.CSV	2082.83	-0.0340301
PSB913-2_map1	0001.CSV	2086.69	-0.034016
PSB913-2_map1	0001.CSV	2090.55	-0.033887
PSB913-2_map1	0001.CSV	2094.4	-0.033855
PSB913-2_map1	0001.CSV	2098.26	-0.0337299
PSB913-2_map1	0001.CSV	2102.12	-0.0337274
PSB913-2_map1	0001.CSV	2105.97	-0.0335899
PSB913-2_map1	0001.CSV	2109.83	-0.0335542
PSB913-2_map1	0001.CSV	2113.69	-0.0334664
PSB913-2_map1	0001.CSV	2117.55	-0.0334447
PSB913-2_map1	0001.CSV	2121.4	-0.0333428
PSB913-2_map1	0001.CSV	2125.26	-0.0333232
PSB913-2_map1	0001.CSV	2129.12	-0.033232
PSB913-2_map1	0001.CSV	2132.97	-0.0332027
PSB913-2_map1	0001.CSV	2136.83	-0.0330824
PSB913-2_map1	0001.CSV	2140.69	-0.0330555
PSB913-2_map1	0001.CSV	2144.55	-0.0329565
PSB913-2_map1	0001.CSV	2148.4	-0.0328852
PSB913-2_map1	0001.CSV	2152.26	-0.0327498
PSB913-2_map1	0001.CSV	2156.12	-0.0327498
PSB913-2_map1	0001.CSV	2159.97	-0.0326804
PSB913-2_map1	0001.CSV	2163.83	-0.0326922
PSB913-2_map1	0001.CSV	2167.69	-0.0326198
PSB913-2_map1	0001.CSV	2171.55	-0.0325512
PSB913-2_map1	0001.CSV	2175.4	-0.0324409
PSB913-2_map1	0001.CSV	2179.26	-0.0324565
PSB913-2_map1	0001.CSV	2183.12	-0.0324048
PSB913-2_map1	0001.CSV	2186.97	-0.0323898
PSB913-2_map1	0001.CSV	2190.83	-0.0322784
PSB913-2_map1	0001.CSV	2194.69	-0.0322375
PSB913-2_map1	0001.CSV	2198.55	-0.0321716
PSB913-2_map1	0001.CSV	2202.4	-0.032197
PSB913-2_map1	0001.CSV	2206.26	-0.032113
PSB913-2_map1	0001.CSV	2210.12	-0.0320865
PSB913-2_map1	0001.CSV	2213.97	-0.0320561
PSB913-2_map1	0001.CSV	2217.83	-0.0320977
PSB913-2_map1	0001.CSV	2221.69	-0.0320375
PSB913-2_map1	0001.CSV	2225.54	-0.0320167
PSB913-2_map1	0001.CSV	2229.4	-0.0319407
PSB913-2_map1	0001.CSV	2233.26	-0.0319333
PSB913-2_map1	0001.CSV	2237.12	-0.0319181
PSB913-2_map1	0001.CSV	2240.97	-0.0319582
PSB913-2_map1	0001.CSV	2244.83	-0.0318995
PSB913-2_map1	0001.CSV	2248.69	-0.0319159
PSB913-2_map1	0001.CSV	2252.54	-0.0318521
PSB913-2_map1	0001.CSV	2256.4	-0.0318107
PSB913-2_map1	0001.CSV	2260.26	-0.0317662
PSB913-2_map1	0001.CSV	2264.11	-0.0317395
PSB913-2_map1	0001.CSV	2267.97	-0.0316109
PSB913-2_map1	0001.CSV	2271.83	-0.0316251
PSB913-2_map1	0001.CSV	2275.69	-0.0316364
PSB913-2_map1	0001.CSV	2279.54	-0.0316656
PSB913-2_map1	0001.CSV	2283.4	-0.0316569
PSB913-2_map1	0001.CSV	2287.26	-0.0317059
PSB913-2_map1	0001.CSV	2291.11	-0.0316607
PSB913-2_map1	0001.CSV	2294.97	-0.0316516
PSB913-2_map1	0001.CSV	2298.83	-0.0316062
PSB913-2_map1	0001.CSV	2302.69	-0.0316881
PSB913-2_map1	0001.CSV	2306.54	-0.0317471
PSB913-2_map1	0001.CSV	2310.4	-0.0319333
PSB913-2_map1	0001.CSV	2314.26	-0.032121
PSB913-2_map1	0001.CSV	2318.11	-0.0325074
PSB913-2_map1	0001.CSV	2321.97	-0.0328931
PSB913-2_map1	0001.CSV	2325.83	-0.0334069
PSB913-2_map1	0001.CSV	2329.69	-0.0338026
PSB913-2_map1	0001.CSV	2333.54	-0.0342295
PSB913-2_map1	0001.CSV	2337.4	-0.0343713
PSB913-2_map1	0001.CSV	2341.26	-0.0342862
PSB913-2_map1	0001.CSV	2345.11	-0.0329674
PSB913-2_map1	0001.CSV	2348.97	-0.0329459
PSB913-2_map1	0001.CSV	2352.83	-0.0342989
PSB913-2_map1	0001.CSV	2356.69	-0.0368332
PSB913-2_map1	0001.CSV	2360.54	-0.0385523
PSB913-2_map1	0001.CSV	2364.4	-0.0373636
PSB913-2_map1	0001.CSV	2368.26	-0.0342811
PSB913-2_map1	0001.CSV	2372.11	-0.0322158
PSB913-2_map1	0001.CSV	2375.97	-0.0312096
PSB913-2_map1	0001.CSV	2379.83	-0.0308793
PSB913-2_map1	0001.CSV	2383.69	-0.0308577
PSB913-2_map1	0001.CSV	2387.54	-0.0309961
PSB913-2_map1	0001.CSV	2391.4	-0.0310999
PSB913-2_map1	0001.CSV	2395.26	-0.031157
PSB913-2_map1	0001.CSV	2399.11	-0.031179
PSB913-2_map1	0001.CSV	2402.97	-0.0312086
PSB913-2_map1	0001.CSV	2406.83	-0.0311836
PSB913-2_map1	0001.CSV	2410.68	-0.0311427
PSB913-2_map1	0001.CSV	2414.54	-0.0311517
PSB913-2_map1	0001.CSV	2418.4	-0.0311714
PSB913-2_map1	0001.CSV	2422.26	-0.031158
PSB913-2_map1	0001.CSV	2426.11	-0.0311284
PSB913-2_map1	0001.CSV	2429.97	-0.0310944
PSB913-2_map1	0001.CSV	2433.83	-0.0311114
PSB913-2_map1	0001.CSV	2437.68	-0.031125
PSB913-2_map1	0001.CSV	2441.54	-0.0310938
PSB913-2_map1	0001.CSV	2445.4	-0.0310547
PSB913-2_map1	0001.CSV	2449.26	-0.0310433
PSB913-2_map1	0001.CSV	2453.11	-0.031017
PSB913-2_map1	0001.CSV	2456.97	-0.030947
PSB913-2_map1	0001.CSV	2460.83	-0.0308354
PSB913-2_map1	0001.CSV	2464.68	-0.0307588
PSB913-2_map1	0001.CSV	2468.54	-0.0307006
PSB913-2_map1	0001.CSV	2472.4	-0.0305323
PSB913-2_map1	0001.CSV	2476.26	-0.0303282
PSB913-2_map1	0001.CSV	2480.11	-0.0300819
PSB913-2_map1	0001.CSV	2483.97	-0.0297773
PSB913-2_map1	0001.CSV	2487.83	-0.0295167
PSB913-2_map1	0001.CSV	2491.68	-0.0293189
PSB913-2_map1	0001.CSV	2495.54	-0.0291361
PSB913-2_map1	0001.CSV	2499.4	-0.0290025
PSB913-2_map1	0001.CSV	2503.26	-0.0289779
PSB913-2_map1	0001.CSV	2507.11	-0.0290959
PSB913-2_map1	0001.CSV	2510.97	-0.0291078
PSB913-2_map1	0001.CSV	2514.83	-0.0289393
PSB913-2_map1	0001.CSV	2518.68	-0.0287027
PSB913-2_map1	0001.CSV	2522.54	-0.0285927
PSB913-2_map1	0001.CSV	2526.4	-0.0285994
PSB913-2_map1	0001.CSV	2530.26	-0.0287449
PSB913-2_map1	0001.CSV	2534.11	-0.0289966
PSB913-2_map1	0001.CSV	2537.97	-0.0292394
PSB913-2_map1	0001.CSV	2541.83	-0.029388
PSB913-2_map1	0001.CSV	2545.68	-0.0294723
PSB913-2_map1	0001.CSV	2549.54	-0.0294574
PSB913-2_map1	0001.CSV	2553.4	-0.0295728
PSB913-2_map1	0001.CSV	2557.26	-0.0298016
PSB913-2_map1	0001.CSV	2561.11	-0.0300209
PSB913-2_map1	0001.CSV	2564.97	-0.0301663
PSB913-2_map1	0001.CSV	2568.83	-0.0302653
PSB913-2_map1	0001.CSV	2572.68	-0.0303293
PSB913-2_map1	0001.CSV	2576.54	-0.030476
PSB913-2_map1	0001.CSV	2580.4	-0.030585
PSB913-2_map1	0001.CSV	2584.25	-0.0306276
PSB913-2_map1	0001.CSV	2588.11	-0.0306116
PSB913-2_map1	0001.CSV	2591.97	-0.0306661
PSB913-2_map1	0001.CSV	2595.83	-0.0306918
PSB913-2_map1	0001.CSV	2599.68	-0.0306779
PSB913-2_map1	0001.CSV	2603.54	-0.0306083
PSB913-2_map1	0001.CSV	2607.4	-0.0305481
PSB913-2_map1	0001.CSV	2611.25	-0.0304371
PSB913-2_map1	0001.CSV	2615.11	-0.0303597
PSB913-2_map1	0001.CSV	2618.97	-0.0302775
PSB913-2_map1	0001.CSV	2622.82	-0.0302097
PSB913-2_map1	0001.CSV	2626.68	-0.0300733
PSB913-2_map1	0001.CSV	2630.54	-0.0300559
PSB913-2_map1	0001.CSV	2634.4	-0.0299721
PSB913-2_map1	0001.CSV	2638.25	-0.0299796
PSB913-2_map1	0001.CSV	2642.11	-0.0300056
PSB913-2_map1	0001.CSV	2645.97	-0.0300889
PSB913-2_map1	0001.CSV	2649.82	-0.0301115
PSB913-2_map1	0001.CSV	2653.68	-0.0301423
PSB913-2_map1	0001.CSV	2657.54	-0.030089
PSB913-2_map1	0001.CSV	2661.4	-0.0301333
PSB913-2_map1	0001.CSV	2665.25	-0.0301166
PSB913-2_map1	0001.CSV	2669.11	-0.0300373
PSB913-2_map1	0001.CSV	2672.97	-0.0298472
PSB913-2_map1	0001.CSV	2676.82	-0.0296985
PSB913-2_map1	0001.CSV	2680.68	-0.029715
PSB913-2_map1	0001.CSV	2684.54	-0.0299355
PSB913-2_map1	0001.CSV	2688.4	-0.0299644
PSB913-2_map1	0001.CSV	2692.25	-0.0300067
PSB913-2_map1	0001.CSV	2696.11	-0.0299084
PSB913-2_map1	0001.CSV	2699.97	-0.0298731
PSB913-2_map1	0001.CSV	2703.82	-0.0297999
PSB913-2_map1	0001.CSV	2707.68	-0.0297617
PSB913-2_map1	0001.CSV	2711.54	-0.0297665
PSB913-2_map1	0001.CSV	2715.4	-0.0298318
PSB913-2_map1	0001.CSV	2719.25	-0.0296251
PSB913-2_map1	0001.CSV	2723.11	-0.029382
PSB913-2_map1	0001.CSV	2726.97	-0.0293748
PSB913-2_map1	0001.CSV	2730.82	-0.0296644
PSB913-2_map1	0001.CSV	2734.68	-0.0296802
PSB913-2_map1	0001.CSV	2738.54	-0.0296734
PSB913-2_map1	0001.CSV	2742.4	-0.029587
PSB913-2_map1	0001.CSV	2746.25	-0.0293723
PSB913-2_map1	0001.CSV	2750.11	-0.029282
PSB913-2_map1	0001.CSV	2753.97	-0.0295359
PSB913-2_map1	0001.CSV	2757.82	-0.0296589
PSB913-2_map1	0001.CSV	2761.68	-0.0297441
PSB913-2_map1	0001.CSV	2765.54	-0.0296776
PSB913-2_map1	0001.CSV	2769.39	-0.0295853
PSB913-2_map1	0001.CSV	2773.25	-0.0293162
PSB913-2_map1	0001.CSV	2777.11	-0.0294421
PSB913-2_map1	0001.CSV	2780.97	-0.0296444
PSB913-2_map1	0001.CSV	2784.82	-0.0295735
PSB913-2_map1	0001.CSV	2788.68	-0.0292403
PSB913-2_map1	0001.CSV	2792.54	-0.0292531
PSB913-2_map1	0001.CSV	2796.39	-0.029241
PSB913-2_map1	0001.CSV	2800.25	-0.029375
PSB913-2_map1	0001.CSV	2804.11	-0.0294774
PSB913-2_map1	0001.CSV	2807.97	-0.0293247
PSB913-2_map1	0001.CSV	2811.82	-0.0293001
PSB913-2_map1	0001.CSV	2815.68	-0.0294793
PSB913-2_map1	0001.CSV	2819.54	-0.0292875
PSB913-2_map1	0001.CSV	2823.39	-0.0292107
PSB913-2_map1	0001.CSV	2827.25	-0.0291334
PSB913-2_map1	0001.CSV	2831.11	-0.0288428
PSB913-2_map1	0001.CSV	2834.97	-0.0283205
PSB913-2_map1	0001.CSV	2838.82	-0.0281444
PSB913-2_map1	0001.CSV	2842.68	-0.0280364
PSB913-2_map1	0001.CSV	2846.54	-0.0277567
PSB913-2_map1	0001.CSV	2850.39	-0.0275873
PSB913-2_map1	0001.CSV	2854.25	-0.0277708
PSB913-2_map1	0001.CSV	2858.11	-0.0276935
PSB913-2_map1	0001.CSV	2861.97	-0.0277729
PSB913-2_map1	0001.CSV	2865.82	-0.0277909
PSB913-2_map1	0001.CSV	2869.68	-0.0275865
PSB913-2_map1	0001.CSV	2873.54	-0.0272842
PSB913-2_map1	0001.CSV	2877.39	-0.0275378
PSB913-2_map1	0001.CSV	2881.25	-0.0276445
PSB913-2_map1	0001.CSV	2885.11	-0.0275851
PSB913-2_map1	0001.CSV	2888.97	-0.0272701
PSB913-2_map1	0001.CSV	2892.82	-0.0269179
PSB913-2_map1	0001.CSV	2896.68	-0.0266865
PSB913-2_map1	0001.CSV	2900.54	-0.0267174
PSB913-2_map1	0001.CSV	2904.39	-0.0263803
PSB913-2_map1	0001.CSV	2908.25	-0.0258016
PSB913-2_map1	0001.CSV	2912.11	-0.0249435
PSB913-2_map1	0001.CSV	2915.97	-0.0245429
PSB913-2_map1	0001.CSV	2919.82	-0.0248288
PSB913-2_map1	0001.CSV	2923.68	-0.0254831
PSB913-2_map1	0001.CSV	2927.54	-0.0255923
PSB913-2_map1	0001.CSV	2931.39	-0.0259377
PSB913-2_map1	0001.CSV	2935.25	-0.0263596
PSB913-2_map1	0001.CSV	2939.11	-0.0263695
PSB913-2_map1	0001.CSV	2942.96	-0.025907
PSB913-2_map1	0001.CSV	2946.82	-0.0259255
PSB913-2_map1	0001.CSV	2950.68	-0.0262606
PSB913-2_map1	0001.CSV	2954.54	-0.0268674
PSB913-2_map1	0001.CSV	2958.39	-0.027274
PSB913-2_map1	0001.CSV	2962.25	-0.0273995
PSB913-2_map1	0001.CSV	2966.11	-0.0274063
PSB913-2_map1	0001.CSV	2969.96	-0.02729
PSB913-2_map1	0001.CSV	2973.82	-0.0268645
PSB913-2_map1	0001.CSV	2977.68	-0.0266893
PSB913-2_map1	0001.CSV	2981.53	-0.0267672
PSB913-2_map1	0001.CSV	2985.39	-0.0270912
PSB913-2_map1	0001.CSV	2989.25	-0.0268471
PSB913-2_map1	0001.CSV	2993.11	-0.0265945
PSB913-2_map1	0001.CSV	2996.96	-0.0266223
PSB913-2_map1	0001.CSV	3000.82	-0.0268832
PSB913-2_map1	0001.CSV	3004.68	-0.0269815
PSB913-2_map1	0001.CSV	3008.53	-0.0268657
PSB913-2_map1	0001.CSV	3012.39	-0.0265219
PSB913-2_map1	0001.CSV	3016.25	-0.0264985
PSB913-2_map1	0001.CSV	3020.11	-0.0266151
PSB913-2_map1	0001.CSV	3023.96	-0.0267494
PSB913-2_map1	0001.CSV	3027.82	-0.0266993
PSB913-2_map1	0001.CSV	3031.68	-0.026547
PSB913-2_map1	0001.CSV	3035.53	-0.0264765
PSB913-2_map1	0001.CSV	3039.39	-0.0265859
PSB913-2_map1	0001.CSV	3043.25	-0.0265763
PSB913-2_map1	0001.CSV	3047.11	-0.0266765
PSB913-2_map1	0001.CSV	3050.96	-0.0265861
PSB913-2_map1	0001.CSV	3054.82	-0.0267136
PSB913-2_map1	0001.CSV	3058.68	-0.0268843
PSB913-2_map1	0001.CSV	3062.53	-0.0268291
PSB913-2_map1	0001.CSV	3066.39	-0.0264524
PSB913-2_map1	0001.CSV	3070.25	-0.0265799
PSB913-2_map1	0001.CSV	3074.11	-0.0266252
PSB913-2_map1	0001.CSV	3077.96	-0.0264047
PSB913-2_map1	0001.CSV	3081.82	-0.0261866
PSB913-2_map1	0001.CSV	3085.68	-0.0262987
PSB913-2_map1	0001.CSV	3089.53	-0.0264168
PSB913-2_map1	0001.CSV	3093.39	-0.0266807
PSB913-2_map1	0001.CSV	3097.25	-0.0266109
PSB913-2_map1	0001.CSV	3101.11	-0.0265791
PSB913-2_map1	0001.CSV	3104.96	-0.026613
PSB913-2_map1	0001.CSV	3108.82	-0.0265554
PSB913-2_map1	0001.CSV	3112.68	-0.0263388
PSB913-2_map1	0001.CSV	3116.53	-0.0261923
PSB913-2_map1	0001.CSV	3120.39	-0.0262546
PSB913-2_map1	0001.CSV	3124.25	-0.0266091
PSB913-2_map1	0001.CSV	3128.11	-0.0266059
PSB913-2_map1	0001.CSV	3131.96	-0.0265856
PSB913-2_map1	0001.CSV	3135.82	-0.0263586
PSB913-2_map1	0001.CSV	3139.68	-0.0262826
PSB913-2_map1	0001.CSV	3143.53	-0.0264177
PSB913-2_map1	0001.CSV	3147.39	-0.0263675
PSB913-2_map1	0001.CSV	3151.25	-0.0260438
PSB913-2_map1	0001.CSV	3155.1	-0.0261033
PSB913-2_map1	0001.CSV	3158.96	-0.0263211
PSB913-2_map1	0001.CSV	3162.82	-0.0265025
PSB913-2_map1	0001.CSV	3166.68	-0.026514
PSB913-2_map1	0001.CSV	3170.53	-0.0264768
PSB913-2_map1	0001.CSV	3174.39	-0.0264318
PSB913-2_map1	0001.CSV	3178.25	-0.0263895
PSB913-2_map1	0001.CSV	3182.1	-0.0262349
PSB913-2_map1	0001.CSV	3185.96	-0.0261285
PSB913-2_map1	0001.CSV	3189.82	-0.0259448
PSB913-2_map1	0001.CSV	3193.68	-0.0259989
PSB913-2_map1	0001.CSV	3197.53	-0.0259441
PSB913-2_map1	0001.CSV	3201.39	-0.025849
PSB913-2_map1	0001.CSV	3205.25	-0.0257259
PSB913-2_map1	0001.CSV	3209.1	-0.0256445
PSB913-2_map1	0001.CSV	3212.96	-0.0254023
PSB913-2_map1	0001.CSV	3216.82	-0.025291
PSB913-2_map1	0001.CSV	3220.68	-0.0253305
PSB913-2_map1	0001.CSV	3224.53	-0.0253541
PSB913-2_map1	0001.CSV	3228.39	-0.0249125
PSB913-2_map1	0001.CSV	3232.25	-0.024523
PSB913-2_map1	0001.CSV	3236.1	-0.024593
PSB913-2_map1	0001.CSV	3239.96	-0.0247317
PSB913-2_map1	0001.CSV	3243.82	-0.0244354
PSB913-2_map1	0001.CSV	3247.68	-0.0243429
PSB913-2_map1	0001.CSV	3251.53	-0.0244668
PSB913-2_map1	0001.CSV	3255.39	-0.0244796
PSB913-2_map1	0001.CSV	3259.25	-0.0245074
PSB913-2_map1	0001.CSV	3263.1	-0.024442
PSB913-2_map1	0001.CSV	3266.96	-0.0240587
PSB913-2_map1	0001.CSV	3270.82	-0.0237294
PSB913-2_map1	0001.CSV	3274.68	-0.0237065
PSB913-2_map1	0001.CSV	3278.53	-0.0239658
PSB913-2_map1	0001.CSV	3282.39	-0.0239744
PSB913-2_map1	0001.CSV	3286.25	-0.0238688
PSB913-2_map1	0001.CSV	3290.1	-0.0235175
PSB913-2_map1	0001.CSV	3293.96	-0.023197
PSB913-2_map1	0001.CSV	3297.82	-0.0231769
PSB913-2_map1	0001.CSV	3301.67	-0.023101
PSB913-2_map1	0001.CSV	3305.53	-0.0229064
PSB913-2_map1	0001.CSV	3309.39	-0.0231283
PSB913-2_map1	0001.CSV	3313.25	-0.0235553
PSB913-2_map1	0001.CSV	3317.1	-0.0237589
PSB913-2_map1	0001.CSV	3320.96	-0.023528
PSB913-2_map1	0001.CSV	3324.82	-0.0232518
PSB913-2_map1	0001.CSV	3328.67	-0.0233642
PSB913-2_map1	0001.CSV	3332.53	-0.023534
PSB913-2_map1	0001.CSV	3336.39	-0.0231932
PSB913-2_map1	0001.CSV	3340.24	-0.0228172
PSB913-2_map1	0001.CSV	3344.1	-0.0227998
PSB913-2_map1	0001.CSV	3347.96	-0.0228618
PSB913-2_map1	0001.CSV	3351.82	-0.0229778
PSB913-2_map1	0001.CSV	3355.67	-0.0232836
PSB913-2_map1	0001.CSV	3359.53	-0.0231437
PSB913-2_map1	0001.CSV	3363.39	-0.0228556
PSB913-2_map1	0001.CSV	3367.24	-0.0225619
PSB913-2_map1	0001.CSV	3371.1	-0.0225593
PSB913-2_map1	0001.CSV	3374.96	-0.0227585
PSB913-2_map1	0001.CSV	3378.82	-0.0231228
PSB913-2_map1	0001.CSV	3382.67	-0.0234612
PSB913-2_map1	0001.CSV	3386.53	-0.0233365
PSB913-2_map1	0001.CSV	3390.39	-0.0229395
PSB913-2_map1	0001.CSV	3394.24	-0.0227813
PSB913-2_map1	0001.CSV	3398.1	-0.0227937
PSB913-2_map1	0001.CSV	3401.96	-0.0229132
PSB913-2_map1	0001.CSV	3405.82	-0.0230543
PSB913-2_map1	0001.CSV	3409.67	-0.0230712
PSB913-2_map1	0001.CSV	3413.53	-0.0233541
PSB913-2_map1	0001.CSV	3417.39	-0.0238085
PSB913-2_map1	0001.CSV	3421.24	-0.0239621
PSB913-2_map1	0001.CSV	3425.1	-0.023818
PSB913-2_map1	0001.CSV	3428.96	-0.0235862
PSB913-2_map1	0001.CSV	3432.82	-0.0235287
PSB913-2_map1	0001.CSV	3436.67	-0.0237036
PSB913-2_map1	0001.CSV	3440.53	-0.0241137
PSB913-2_map1	0001.CSV	3444.39	-0.0243854
PSB913-2_map1	0001.CSV	3448.24	-0.0245517
PSB913-2_map1	0001.CSV	3452.1	-0.0248572
PSB913-2_map1	0001.CSV	3455.96	-0.0247749
PSB913-2_map1	0001.CSV	3459.82	-0.0244603
PSB913-2_map1	0001.CSV	3463.67	-0.0242514
PSB913-2_map1	0001.CSV	3467.53	-0.0242406
PSB913-2_map1	0001.CSV	3471.39	-0.0247346
PSB913-2_map1	0001.CSV	3475.24	-0.0250723
PSB913-2_map1	0001.CSV	3479.1	-0.0249931
PSB913-2_map1	0001.CSV	3482.96	-0.0250448
PSB913-2_map1	0001.CSV	3486.82	-0.0250895
PSB913-2_map1	0001.CSV	3490.67	-0.025224
PSB913-2_map1	0001.CSV	3494.53	-0.02516
PSB913-2_map1	0001.CSV	3498.39	-0.0252252
PSB913-2_map1	0001.CSV	3502.24	-0.0254477
PSB913-2_map1	0001.CSV	3506.1	-0.0259462
PSB913-2_map1	0001.CSV	3509.96	-0.0261793
PSB913-2_map1	0001.CSV	3513.81	-0.0261064
PSB913-2_map1	0001.CSV	3517.67	-0.0263606
PSB913-2_map1	0001.CSV	3521.53	-0.0264992
PSB913-2_map1	0001.CSV	3525.39	-0.0264853
PSB913-2_map1	0001.CSV	3529.24	-0.0266738
PSB913-2_map1	0001.CSV	3533.1	-0.0267446
PSB913-2_map1	0001.CSV	3536.96	-0.0267189
PSB913-2_map1	0001.CSV	3540.81	-0.0267965
PSB913-2_map1	0001.CSV	3544.67	-0.026575
PSB913-2_map1	0001.CSV	3548.53	-0.0264962
PSB913-2_map1	0001.CSV	3552.39	-0.0269501
PSB913-2_map1	0001.CSV	3556.24	-0.0271693
PSB913-2_map1	0001.CSV	3560.1	-0.0275194
PSB913-2_map1	0001.CSV	3563.96	-0.0280737
PSB913-2_map1	0001.CSV	3567.81	-0.0275213
PSB913-2_map1	0001.CSV	3571.67	-0.0272622
PSB913-2_map1	0001.CSV	3575.53	-0.0278162
PSB913-2_map1	0001.CSV	3579.39	-0.0276873
PSB913-2_map1	0001.CSV	3583.24	-0.0277548
PSB913-2_map1	0001.CSV	3587.1	-0.0276957
PSB913-2_map1	0001.CSV	3590.96	-0.0278779
PSB913-2_map1	0001.CSV	3594.81	-0.028259
PSB913-2_map1	0001.CSV	3598.67	-0.0280475
PSB913-2_map1	0001.CSV	3602.53	-0.0280557
PSB913-2_map1	0001.CSV	3606.39	-0.0287577
PSB913-2_map1	0001.CSV	3610.24	-0.0289871
PSB913-2_map1	0001.CSV	3614.1	-0.029165
PSB913-2_map1	0001.CSV	3617.96	-0.0288373
PSB913-2_map1	0001.CSV	3621.81	-0.0285611
PSB913-2_map1	0001.CSV	3625.67	-0.02943
PSB913-2_map1	0001.CSV	3629.53	-0.0294509
PSB913-2_map1	0001.CSV	3633.39	-0.0285474
PSB913-2_map1	0001.CSV	3637.24	-0.0288332
PSB913-2_map1	0001.CSV	3641.1	-0.029203
PSB913-2_map1	0001.CSV	3644.96	-0.0301528
PSB913-2_map1	0001.CSV	3648.81	-0.0296573
PSB913-2_map1	0001.CSV	3652.67	-0.0284433
PSB913-2_map1	0001.CSV	3656.53	-0.0283403
PSB913-2_map1	0001.CSV	3660.38	-0.0283773
PSB913-2_map1	0001.CSV	3664.24	-0.0292406
PSB913-2_map1	0001.CSV	3668.1	-0.0303083
PSB913-2_map1	0001.CSV	3671.96	-0.0304156
PSB913-2_map1	0001.CSV	3675.81	-0.0296669
PSB913-2_map1	0001.CSV	3679.67	-0.0288934
PSB913-2_map1	0001.CSV	3683.53	-0.0292862
PSB913-2_map1	0001.CSV	3687.38	-0.0293539
PSB913-2_map1	0001.CSV	3691.24	-0.0284407
PSB913-2_map1	0001.CSV	3695.1	-0.0287281
PSB913-2_map1	0001.CSV	3698.95	-0.0294717
PSB913-2_map1	0001.CSV	3702.81	-0.0296266
PSB913-2_map1	0001.CSV	3706.67	-0.030179
PSB913-2_map1	0001.CSV	3710.53	-0.030084
PSB913-2_map1	0001.CSV	3714.38	-0.0291976
PSB913-2_map1	0001.CSV	3718.24	-0.0297504
PSB913-2_map1	0001.CSV	3722.1	-0.0301409
PSB913-2_map1	0001.CSV	3725.95	-0.0298043
PSB913-2_map1	0001.CSV	3729.81	-0.0301959
PSB913-2_map1	0001.CSV	3733.67	-0.0300572
PSB913-2_map1	0001.CSV	3737.53	-0.0288757
PSB913-2_map1	0001.CSV	3741.38	-0.0296097
PSB913-2_map1	0001.CSV	3745.24	-0.03117
PSB913-2_map1	0001.CSV	3749.1	-0.0312404
PSB913-2_map1	0001.CSV	3752.95	-0.0296387
PSB913-2_map1	0001.CSV	3756.81	-0.0293925
PSB913-2_map1	0001.CSV	3760.67	-0.029575
PSB913-2_map1	0001.CSV	3764.53	-0.0297986
PSB913-2_map1	0001.CSV	3768.38	-0.0297089
PSB913-2_map1	0001.CSV	3772.24	-0.0293919
PSB913-2_map1	0001.CSV	3776.1	-0.0297469
PSB913-2_map1	0001.CSV	3779.95	-0.0295944
PSB913-2_map1	0001.CSV	3783.81	-0.0295525
PSB913-2_map1	0001.CSV	3787.67	-0.0295045
PSB913-2_map1	0001.CSV	3791.53	-0.0299357
PSB913-2_map1	0001.CSV	3795.38	-0.0305728
PSB913-2_map1	0001.CSV	3799.24	-0.0306286
PSB913-2_map1	0001.CSV	3803.1	-0.0299339
PSB913-2_map1	0001.CSV	3806.95	-0.0295209
PSB913-2_map1	0001.CSV	3810.81	-0.0298535
PSB913-2_map1	0001.CSV	3814.67	-0.0307059
PSB913-2_map1	0001.CSV	3818.53	-0.0305308
PSB913-2_map1	0001.CSV	3822.38	-0.029646
PSB913-2_map1	0001.CSV	3826.24	-0.0296631
PSB913-2_map1	0001.CSV	3830.1	-0.030222
PSB913-2_map1	0001.CSV	3833.95	-0.0303503
PSB913-2_map1	0001.CSV	3837.81	-0.0300196
PSB913-2_map1	0001.CSV	3841.67	-0.0290427
PSB913-2_map1	0001.CSV	3845.53	-0.0293908
PSB913-2_map1	0001.CSV	3849.38	-0.0305854
PSB913-2_map1	0001.CSV	3853.24	-0.0305717
PSB913-2_map1	0001.CSV	3857.1	-0.0294379
PSB913-2_map1	0001.CSV	3860.95	-0.0301795
PSB913-2_map1	0001.CSV	3864.81	-0.0300938
PSB913-2_map1	0001.CSV	3868.67	-0.0300417
PSB913-2_map1	0001.CSV	3872.52	-0.0294716
PSB913-2_map1	0001.CSV	3876.38	-0.0296026
PSB913-2_map1	0001.CSV	3880.24	-0.0299018
PSB913-2_map1	0001.CSV	3884.1	-0.0295218
PSB913-2_map1	0001.CSV	3887.95	-0.0295246
PSB913-2_map1	0001.CSV	3891.81	-0.0296107
PSB913-2_map1	0001.CSV	3895.67	-0.0297785
PSB913-2_map1	0001.CSV	3899.52	-0.0304037
PSB913-2_map1	0001.CSV	3903.38	-0.0292042
PSB913-2_map1	0001.CSV	3907.24	-0.0286326
PSB913-2_map1	0001.CSV	3911.1	-0.0293124
PSB913-2_map1	0001.CSV	3914.95	-0.0298949
PSB913-2_map1	0001.CSV	3918.81	-0.0295554
PSB913-2_map1	0001.CSV	3922.67	-0.0293671
PSB913-2_map1	0001.CSV	3926.52	-0.0292501
PSB913-2_map1	0001.CSV	3930.38	-0.0291275
PSB913-2_map1	0001.CSV	3934.24	-0.0288167
PSB913-2_map1	0001.CSV	3938.09	-0.0292549
PSB913-2_map1	0001.CSV	3941.95	-0.0293477
PSB913-2_map1	0001.CSV	3945.81	-0.0292543
PSB913-2_map1	0001.CSV	3949.67	-0.0290705
PSB913-2_map1	0001.CSV	3953.52	-0.029083
PSB913-2_map1	0001.CSV	3957.38	-0.0291798
PSB913-2_map1	0001.CSV	3961.24	-0.0292018
PSB913-2_map1	0001.CSV	3965.09	-0.0290773
PSB913-2_map1	0001.CSV	3968.95	-0.029167
PSB913-2_map1	0001.CSV	3972.81	-0.0290532
PSB913-2_map1	0001.CSV	3976.67	-0.0289253
PSB913-2_map1	0001.CSV	3980.52	-0.0288122
PSB913-2_map1	0001.CSV	3984.38	-0.0288967
PSB913-2_map1	0001.CSV	3988.24	-0.0289754
PSB913-2_map1	0001.CSV	3992.09	-0.029032
PSB913-2_map1	0001.CSV	3995.95	-0.0290153
PSB913-2_map1	0001.CSV	3999.81	-0.029104
PSB913-2_map1	0002.CSV	674.992	0.0176393
PSB913-2_map1	0002.CSV	678.849	0.0200194
PSB913-2_map1	0002.CSV	682.706	0.0212072
PSB913-2_map1	0002.CSV	686.563	0.023785
PSB913-2_map1	0002.CSV	690.42	0.0269228
PSB913-2_map1	0002.CSV	694.277	0.0368566
PSB913-2_map1	0002.CSV	698.134	0.0486844
PSB913-2_map1	0002.CSV	701.991	0.0450653
PSB913-2_map1	0002.CSV	705.849	0.0372712
PSB913-2_map1	0002.CSV	709.706	0.0515335
PSB913-2_map1	0002.CSV	713.563	0.0570977
PSB913-2_map1	0002.CSV	717.42	0.0331984
PSB913-2_map1	0002.CSV	721.277	0.0134519
PSB913-2_map1	0002.CSV	725.134	0.00944463
PSB913-2_map1	0002.CSV	728.991	0.00913476
PSB913-2_map1	0002.CSV	732.848	0.0100808
PSB913-2_map1	0002.CSV	736.705	0.010698
PSB913-2_map1	0002.CSV	740.562	0.0119862
PSB913-2_map1	0002.CSV	744.42	0.0125619
PSB913-2_map1	0002.CSV	748.277	0.0132817
PSB913-2_map1	0002.CSV	752.134	0.013069
PSB913-2_map1	0002.CSV	755.991	0.0133994
PSB913-2_map1	0002.CSV	759.848	0.01347
PSB913-2_map1	0002.CSV	763.705	0.0138225
PSB913-2_map1	0002.CSV	767.562	0.0136142
PSB913-2_map1	0002.CSV	771.419	0.0139605
PSB913-2_map1	0002.CSV	775.276	0.0138658
PSB913-2_map1	0002.CSV	779.133	0.0143016
PSB913-2_map1	0002.CSV	782.99	0.0145218
PSB913-2_map1	0002.CSV	786.848	0.0152501
PSB913-2_map1	0002.CSV	790.705	0.015446
PSB913-2_map1	0002.CSV	794.562	0.0164295
PSB913-2_map1	0002.CSV	798.419	0.017397
PSB913-2_map1	0002.CSV	802.276	0.0186313
PSB913-2_map1	0002.CSV	806.133	0.0195288
PSB913-2_map1	0002.CSV	809.99	0.0212281
PSB913-2_map1	0002.CSV	813.847	0.023108
PSB913-2_map1	0002.CSV	817.704	0.0259396
PSB913-2_map1	0002.CSV	821.562	0.0287564
PSB913-2_map1	0002.CSV	825.419	0.0326908
PSB913-2_map1	0002.CSV	829.276	0.0373661
PSB913-2_map1	0002.CSV	833.133	0.0444919
PSB913-2_map1	0002.CSV	836.99	0.0553141
PSB913-2_map1	0002.CSV	840.847	0.0706095
PSB913-2_map1	0002.CSV	844.704	0.0860424
PSB913-2_map1	0002.CSV	848.561	0.106983
PSB913-2_map1	0002.CSV	852.418	0.125879
PSB913-2_map1	0002.CSV	856.275	0.125774
PSB913-2_map1	0002.CSV	860.132	0.108283
PSB913-2_map1	0002.CSV	863.99	0.0840397
PSB913-2_map1	0002.CSV	867.847	0.057866
PSB913-2_map1	0002.CSV	871.704	0.0332333
PSB913-2_map1	0002.CSV	875.561	0.0143098
PSB913-2_map1	0002.CSV	879.418	0.00525401
PSB913-2_map1	0002.CSV	883.275	0.00219071
PSB913-2_map1	0002.CSV	887.132	0.00107351
PSB913-2_map1	0002.CSV	890.989	0.000553359
PSB913-2_map1	0002.CSV	894.846	0.000592907
PSB913-2_map1	0002.CSV	898.703	0.000606976
PSB913-2_map1	0002.CSV	902.561	0.000964276
PSB913-2_map1	0002.CSV	906.418	0.00136069
PSB913-2_map1	0002.CSV	910.275	0.00149779
PSB913-2_map1	0002.CSV	914.132	0.00111314
PSB913-2_map1	0002.CSV	917.989	0.00115978
PSB913-2_map1	0002.CSV	921.846	0.00129409
PSB913-2_map1	0002.CSV	925.703	0.00167823
PSB913-2_map1	0002.CSV	929.56	0.00191529
PSB913-2_map1	0002.CSV	933.417	0.00228529
PSB913-2_map1	0002.CSV	937.274	0.00251765
PSB913-2_map1	0002.CSV	941.131	0.00287099
PSB913-2_map1	0002.CSV	944.989	0.00301507
PSB913-2_map1	0002.CSV	948.846	0.00334821
PSB913-2_map1	0002.CSV	952.703	0.00365331
PSB913-2_map1	0002.CSV	956.56	0.0042435
PSB913-2_map1	0002.CSV	960.417	0.00457189
PSB913-2_map1	0002.CSV	964.274	0.00488693
PSB913-2_map1	0002.CSV	968.131	0.00511716
PSB913-2_map1	0002.CSV	971.988	0.00569817
PSB913-2_map1	0002.CSV	975.845	0.00612901
PSB913-2_map1	0002.CSV	979.702	0.00661568
PSB913-2_map1	0002.CSV	983.559	0.00697695
PSB913-2_map1	0002.CSV	987.417	0.00746137
PSB913-2_map1	0002.CSV	991.274	0.00771081
PSB913-2_map1	0002.CSV	995.131	0.00812684
PSB913-2_map1	0002.CSV	998.988	0.00833431
PSB913-2_map1	0002.CSV	1002.85	0.00855252
PSB913-2_map1	0002.CSV	1006.7	0.00872406
PSB913-2_map1	0002.CSV	1010.56	0.00911558
PSB913-2_map1	0002.CSV	1014.42	0.00937538
PSB913-2_map1	0002.CSV	1018.27	0.00989398
PSB913-2_map1	0002.CSV	1022.13	0.0103146
PSB913-2_map1	0002.CSV	1025.99	0.0108841
PSB913-2_map1	0002.CSV	1029.85	0.0111995
PSB913-2_map1	0002.CSV	1033.7	0.0116689
PSB913-2_map1	0002.CSV	1037.56	0.0120095
PSB913-2_map1	0002.CSV	1041.42	0.0124699
PSB913-2_map1	0002.CSV	1045.27	0.0127784
PSB913-2_map1	0002.CSV	1049.13	0.0134107
PSB913-2_map1	0002.CSV	1052.99	0.0139742
PSB913-2_map1	0002.CSV	1056.84	0.0148733
PSB913-2_map1	0002.CSV	1060.7	0.0156116
PSB913-2_map1	0002.CSV	1064.56	0.0163507
PSB913-2_map1	0002.CSV	1068.42	0.0169434
PSB913-2_map1	0002.CSV	1072.27	0.0178597
PSB913-2_map1	0002.CSV	1076.13	0.0199159
PSB913-2_map1	0002.CSV	1079.99	0.0260362
PSB913-2_map1	0002.CSV	1083.84	0.0279445
PSB913-2_map1	0002.CSV	1087.7	0.0197599
PSB913-2_map1	0002.CSV	1091.56	0.0134258
PSB913-2_map1	0002.CSV	1095.41	0.0121869
PSB913-2_map1	0002.CSV	1099.27	0.012152
PSB913-2_map1	0002.CSV	1103.13	0.0125655
PSB913-2_map1	0002.CSV	1106.99	0.0130757
PSB913-2_map1	0002.CSV	1110.84	0.0137344
PSB913-2_map1	0002.CSV	1114.7	0.0140495
PSB913-2_map1	0002.CSV	1118.56	0.0142543
PSB913-2_map1	0002.CSV	1122.41	0.0141719
PSB913-2_map1	0002.CSV	1126.27	0.0141838
PSB913-2_map1	0002.CSV	1130.13	0.0141154
PSB913-2_map1	0002.CSV	1133.99	0.0142386
PSB913-2_map1	0002.CSV	1137.84	0.0142851
PSB913-2_map1	0002.CSV	1141.7	0.0144917
PSB913-2_map1	0002.CSV	1145.56	0.0145997
PSB913-2_map1	0002.CSV	1149.41	0.0149638
PSB913-2_map1	0002.CSV	1153.27	0.015312
PSB913-2_map1	0002.CSV	1157.13	0.0157413
PSB913-2_map1	0002.CSV	1160.99	0.0159945
PSB913-2_map1	0002.CSV	1164.84	0.0162946
PSB913-2_map1	0002.CSV	1168.7	0.0163988
PSB913-2_map1	0002.CSV	1172.56	0.0166141
PSB913-2_map1	0002.CSV	1176.41	0.0166891
PSB913-2_map1	0002.CSV	1180.27	0.016909
PSB913-2_map1	0002.CSV	1184.13	0.0170651
PSB913-2_map1	0002.CSV	1187.99	0.0174193
PSB913-2_map1	0002.CSV	1191.84	0.0176952
PSB913-2_map1	0002.CSV	1195.7	0.018145
PSB913-2_map1	0002.CSV	1199.56	0.0184723
PSB913-2_map1	0002.CSV	1203.41	0.0188918
PSB913-2_map1	0002.CSV	1207.27	0.0191868
PSB913-2_map1	0002.CSV	1211.13	0.0197527
PSB913-2_map1	0002.CSV	1214.98	0.0202853
PSB913-2_map1	0002.CSV	1218.84	0.0209991
PSB913-2_map1	0002.CSV	1222.7	0.0216346
PSB913-2_map1	0002.CSV	1226.56	0.0223633
PSB913-2_map1	0002.CSV	1230.41	0.0229506
PSB913-2_map1	0002.CSV	1234.27	0.0238373
PSB913-2_map1	0002.CSV	1238.13	0.0246737
PSB913-2_map1	0002.CSV	1241.98	0.0256091
PSB913-2_map1	0002.CSV	1245.84	0.0264222
PSB913-2_map1	0002.CSV	1249.7	0.027288
PSB913-2_map1	0002.CSV	1253.56	0.0278838
PSB913-2_map1	0002.CSV	1257.41	0.0286275
PSB913-2_map1	0002.CSV	1261.27	0.0293878
PSB913-2_map1	0002.CSV	1265.13	0.0303817
PSB913-2_map1	0002.CSV	1268.98	0.0311401
PSB913-2_map1	0002.CSV	1272.84	0.0320491
PSB913-2_map1	0002.CSV	1276.7	0.0327893
PSB913-2_map1	0002.CSV	1280.56	0.0336002
PSB913-2_map1	0002.CSV	1284.41	0.0341388
PSB913-2_map1	0002.CSV	1288.27	0.0347813
PSB913-2_map1	0002.CSV	1292.13	0.0352867
PSB913-2_map1	0002.CSV	1295.98	0.0360122
PSB913-2_map1	0002.CSV	1299.84	0.0367166
PSB913-2_map1	0002.CSV	1303.7	0.0377645
PSB913-2_map1	0002.CSV	1307.56	0.0387298
PSB913-2_map1	0002.CSV	1311.41	0.0399361
PSB913-2_map1	0002.CSV	1315.27	0.0411493
PSB913-2_map1	0002.CSV	1319.13	0.0427022
PSB913-2_map1	0002.CSV	1322.98	0.0440255
PSB913-2_map1	0002.CSV	1326.84	0.0455636
PSB913-2_map1	0002.CSV	1330.7	0.0471443
PSB913-2_map1	0002.CSV	1334.56	0.0490156
PSB913-2_map1	0002.CSV	1338.41	0.0513189
PSB913-2_map1	0002.CSV	1342.27	0.0542159
PSB913-2_map1	0002.CSV	1346.13	0.0563907
PSB913-2_map1	0002.CSV	1349.98	0.0591958
PSB913-2_map1	0002.CSV	1353.84	0.0621203
PSB913-2_map1	0002.CSV	1357.7	0.0652595
PSB913-2_map1	0002.CSV	1361.56	0.0687147
PSB913-2_map1	0002.CSV	1365.41	0.0730532
PSB913-2_map1	0002.CSV	1369.27	0.0764085
PSB913-2_map1	0002.CSV	1373.13	0.080798
PSB913-2_map1	0002.CSV	1376.98	0.0856883
PSB913-2_map1	0002.CSV	1380.84	0.0900566
PSB913-2_map1	0002.CSV	1384.7	0.0940439
PSB913-2_map1	0002.CSV	1388.56	0.0992654
PSB913-2_map1	0002.CSV	1392.41	0.102997
PSB913-2_map1	0002.CSV	1396.27	0.10784
PSB913-2_map1	0002.CSV	1400.13	0.112632
PSB913-2_map1	0002.CSV	1403.98	0.116929
PSB913-2_map1	0002.CSV	1407.84	0.121046
PSB913-2_map1	0002.CSV	1411.7	0.125166
PSB913-2_map1	0002.CSV	1415.55	0.128319
PSB913-2_map1	0002.CSV	1419.41	0.13333
PSB913-2_map1	0002.CSV	1423.27	0.137485
PSB913-2_map1	0002.CSV	1427.12	0.14154
PSB913-2_map1	0002.CSV	1430.98	0.145544
PSB913-2_map1	0002.CSV	1434.84	0.150951
PSB913-2_map1	0002.CSV	1438.7	0.156429
PSB913-2_map1	0002.CSV	1442.55	0.160063
PSB913-2_map1	0002.CSV	1446.41	0.161062
PSB913-2_map1	0002.CSV	1450.27	0.160527
PSB913-2_map1	0002.CSV	1454.12	0.157472
PSB913-2_map1	0002.CSV	1457.98	0.153904
PSB913-2_map1	0002.CSV	1461.84	0.150684
PSB913-2_map1	0002.CSV	1465.7	0.14865
PSB913-2_map1	0002.CSV	1469.55	0.143767
PSB913-2_map1	0002.CSV	1473.41	0.133879
PSB913-2_map1	0002.CSV	1477.27	0.121167
PSB913-2_map1	0002.CSV	1481.12	0.113123
PSB913-2_map1	0002.CSV	1484.98	0.105218
PSB913-2_map1	0002.CSV	1488.84	0.0961466
PSB913-2_map1	0002.CSV	1492.7	0.0872628
PSB913-2_map1	0002.CSV	1496.55	0.081089
PSB913-2_map1	0002.CSV	1500.41	0.0739883
PSB913-2_map1	0002.CSV	1504.27	0.0698468
PSB913-2_map1	0002.CSV	1508.12	0.0619605
PSB913-2_map1	0002.CSV	1511.98	0.0565486
PSB913-2_map1	0002.CSV	1515.84	0.0527359
PSB913-2_map1	0002.CSV	1519.7	0.0478752
PSB913-2_map1	0002.CSV	1523.55	0.04175
PSB913-2_map1	0002.CSV	1527.41	0.0378181
PSB913-2_map1	0002.CSV	1531.27	0.0340184
PSB913-2_map1	0002.CSV	1535.12	0.0305223
PSB913-2_map1	0002.CSV	1538.98	0.0266103
PSB913-2_map1	0002.CSV	1542.84	0.0211792
PSB913-2_map1	0002.CSV	1546.7	0.0176477
PSB913-2_map1	0002.CSV	1550.55	0.0149177
PSB913-2_map1	0002.CSV	1554.41	0.0116248
PSB913-2_map1	0002.CSV	1558.27	0.00754487
PSB913-2_map1	0002.CSV	1562.12	0.00389492
PSB913-2_map1	0002.CSV	1565.98	0.00202986
PSB913-2_map1	0002.CSV	1569.84	-0.000784865
PSB913-2_map1	0002.CSV	1573.69	-0.00360874
PSB913-2_map1	0002.CSV	1577.55	-0.00727803
PSB913-2_map1	0002.CSV	1581.41	-0.0101744
PSB913-2_map1	0002.CSV	1585.27	-0.0125919
PSB913-2_map1	0002.CSV	1589.12	-0.014513
PSB913-2_map1	0002.CSV	1592.98	-0.0158883
PSB913-2_map1	0002.CSV	1596.84	-0.0168238
PSB913-2_map1	0002.CSV	1600.69	-0.0176764
PSB913-2_map1	0002.CSV	1604.55	-0.0182447
PSB913-2_map1	0002.CSV	1608.41	-0.0188672
PSB913-2_map1	0002.CSV	1612.27	-0.0194192
PSB913-2_map1	0002.CSV	1616.12	-0.0199972
PSB913-2_map1	0002.CSV	1619.98	-0.020213
PSB913-2_map1	0002.CSV	1623.84	-0.0206108
PSB913-2_map1	0002.CSV	1627.69	-0.0208327
PSB913-2_map1	0002.CSV	1631.55	-0.0214358
PSB913-2_map1	0002.CSV	1635.41	-0.0215839
PSB913-2_map1	0002.CSV	1639.27	-0.0215287
PSB913-2_map1	0002.CSV	1643.12	-0.0219425
PSB913-2_map1	0002.CSV	1646.98	-0.0223552
PSB913-2_map1	0002.CSV	1650.84	-0.0222854
PSB913-2_map1	0002.CSV	1654.69	-0.0221085
PSB913-2_map1	0002.CSV	1658.55	-0.022369
PSB913-2_map1	0002.CSV	1662.41	-0.0229669
PSB913-2_map1	0002.CSV	1666.27	-0.0233568
PSB913-2_map1	0002.CSV	1670.12	-0.0237016
PSB913-2_map1	0002.CSV	1673.98	-0.0236337
PSB913-2_map1	0002.CSV	1677.84	-0.0240956
PSB913-2_map1	0002.CSV	1681.69	-0.0244771
PSB913-2_map1	0002.CSV	1685.55	-0.0245137
PSB913-2_map1	0002.CSV	1689.41	-0.0245822
PSB913-2_map1	0002.CSV	1693.27	-0.025333
PSB913-2_map1	0002.CSV	1697.12	-0.0257466
PSB913-2_map1	0002.CSV	1700.98	-0.0257781
PSB913-2_map1	0002.CSV	1704.84	-0.0256495
PSB913-2_map1	0002.CSV	1708.69	-0.0258504
PSB913-2_map1	0002.CSV	1712.55	-0.0261263
PSB913-2_map1	0002.CSV	1716.41	-0.0259866
PSB913-2_map1	0002.CSV	1720.27	-0.025235
PSB913-2_map1	0002.CSV	1724.12	-0.0254759
PSB913-2_map1	0002.CSV	1727.98	-0.0257387
PSB913-2_map1	0002.CSV	1731.84	-0.0260318
PSB913-2_map1	0002.CSV	1735.69	-0.0259504
PSB913-2_map1	0002.CSV	1739.55	-0.0263673
PSB913-2_map1	0002.CSV	1743.41	-0.026746
PSB913-2_map1	0002.CSV	1747.27	-0.0272082
PSB913-2_map1	0002.CSV	1751.12	-0.0273649
PSB913-2_map1	0002.CSV	1754.98	-0.027928
PSB913-2_map1	0002.CSV	1758.84	-0.028213
PSB913-2_map1	0002.CSV	1762.69	-0.0283868
PSB913-2_map1	0002.CSV	1766.55	-0.0285528
PSB913-2_map1	0002.CSV	1770.41	-0.02842
PSB913-2_map1	0002.CSV	1774.26	-0.0270182
PSB913-2_map1	0002.CSV	1778.12	-0.0258185
PSB913-2_map1	0002.CSV	1781.98	-0.024172
PSB913-2_map1	0002.CSV	1785.84	-0.0232417
PSB913-2_map1	0002.CSV	1789.69	-0.0233234
PSB913-2_map1	0002.CSV	1793.55	-0.0244276
PSB913-2_map1	0002.CSV	1797.41	-0.0256571
PSB913-2_map1	0002.CSV	1801.26	-0.0269752
PSB913-2_map1	0002.CSV	1805.12	-0.0279182
PSB913-2_map1	0002.CSV	1808.98	-0.0286211
PSB913-2_map1	0002.CSV	1812.84	-0.0288065
PSB913-2_map1	0002.CSV	1816.69	-0.0290718
PSB913-2_map1	0002.CSV	1820.55	-0.0291975
PSB913-2_map1	0002.CSV	1824.41	-0.0293465
PSB913-2_map1	0002.CSV	1828.26	-0.0291242
PSB913-2_map1	0002.CSV	1832.12	-0.0290968
PSB913-2_map1	0002.CSV	1835.98	-0.029181
PSB913-2_map1	0002.CSV	1839.84	-0.0294327
PSB913-2_map1	0002.CSV	1843.69	-0.0292144
PSB913-2_map1	0002.CSV	1847.55	-0.0290234
PSB913-2_map1	0002.CSV	1851.41	-0.0291308
PSB913-2_map1	0002.CSV	1855.26	-0.02928
PSB913-2_map1	0002.CSV	1859.12	-0.0291557
PSB913-2_map1	0002.CSV	1862.98	-0.0292756
PSB913-2_map1	0002.CSV	1866.84	-0.0292313
PSB913-2_map1	0002.CSV	1870.69	-0.0289521
PSB913-2_map1	0002.CSV	1874.55	-0.0289322
PSB913-2_map1	0002.CSV	1878.41	-0.0290775
PSB913-2_map1	0002.CSV	1882.26	-0.0290485
PSB913-2_map1	0002.CSV	1886.12	-0.0291721
PSB913-2_map1	0002.CSV	1889.98	-0.029105
PSB913-2_map1	0002.CSV	1893.83	-0.029084
PSB913-2_map1	0002.CSV	1897.69	-0.0290137
PSB913-2_map1	0002.CSV	1901.55	-0.0291187
PSB913-2_map1	0002.CSV	1905.41	-0.0291156
PSB913-2_map1	0002.CSV	1909.26	-0.0290875
PSB913-2_map1	0002.CSV	1913.12	-0.0290626
PSB913-2_map1	0002.CSV	1916.98	-0.0292204
PSB913-2_map1	0002.CSV	1920.83	-0.029073
PSB913-2_map1	0002.CSV	1924.69	-0.0290253
PSB913-2_map1	0002.CSV	1928.55	-0.0290066
PSB913-2_map1	0002.CSV	1932.4	-0.0290755
PSB913-2_map1	0002.CSV	1936.26	-0.0290905
PSB913-2_map1	0002.CSV	1940.12	-0.0292192
PSB913-2_map1	0002.CSV	1943.98	-0.0290343
PSB913-2_map1	0002.CSV	1947.83	-0.0290364
PSB913-2_map1	0002.CSV	1951.69	-0.0290657
PSB913-2_map1	0002.CSV	1955.55	-0.0291698
PSB913-2_map1	0002.CSV	1959.4	-0.0291267
PSB913-2_map1	0002.CSV	1963.26	-0.029165
PSB913-2_map1	0002.CSV	1967.12	-0.0290425
PSB913-2_map1	0002.CSV	1970.98	-0.029038
PSB913-2_map1	0002.CSV	1974.83	-0.0290558
PSB913-2_map1	0002.CSV	1978.69	-0.0291749
PSB913-2_map1	0002.CSV	1982.55	-0.0291363
PSB913-2_map1	0002.CSV	1986.4	-0.0291875
PSB913-2_map1	0002.CSV	1990.26	-0.0290989
PSB913-2_map1	0002.CSV	1994.12	-0.0290493
PSB913-2_map1	0002.CSV	1997.98	-0.0290524
PSB913-2_map1	0002.CSV	2001.83	-0.0291504
PSB913-2_map1	0002.CSV	2005.69	-0.0290996
PSB913-2_map1	0002.CSV	2009.55	-0.0291671
PSB913-2_map1	0002.CSV	2013.4	-0.0291737
PSB913-2_map1	0002.CSV	2017.26	-0.0291573
PSB913-2_map1	0002.CSV	2021.12	-0.029027
PSB913-2_map1	0002.CSV	2024.97	-0.029124
PSB913-2_map1	0002.CSV	2028.83	-0.0291224
PSB913-2_map1	0002.CSV	2032.69	-0.0291747
PSB913-2_map1	0002.CSV	2036.55	-0.0290904
PSB913-2_map1	0002.CSV	2040.4	-0.0290803
PSB913-2_map1	0002.CSV	2044.26	-0.0290415
PSB913-2_map1	0002.CSV	2048.12	-0.0291287
PSB913-2_map1	0002.CSV	2051.97	-0.0290866
PSB913-2_map1	0002.CSV	2055.83	-0.0290975
PSB913-2_map1	0002.CSV	2059.69	-0.0290293
PSB913-2_map1	0002.CSV	2063.55	-0.0290891
PSB913-2_map1	0002.CSV	2067.4	-0.0290661
PSB913-2_map1	0002.CSV	2071.26	-0.0291073
PSB913-2_map1	0002.CSV	2075.12	-0.0290462
PSB913-2_map1	0002.CSV	2078.97	-0.0290847
PSB913-2_map1	0002.CSV	2082.83	-0.0290515
PSB913-2_map1	0002.CSV	2086.69	-0.0290581
PSB913-2_map1	0002.CSV	2090.55	-0.0289776
PSB913-2_map1	0002.CSV	2094.4	-0.0290055
PSB913-2_map1	0002.CSV	2098.26	-0.0289075
PSB913-2_map1	0002.CSV	2102.12	-0.0289122
PSB913-2_map1	0002.CSV	2105.97	-0.0288077
PSB913-2_map1	0002.CSV	2109.83	-0.0288019
PSB913-2_map1	0002.CSV	2113.69	-0.0287227
PSB913-2_map1	0002.CSV	2117.55	-0.0287367
PSB913-2_map1	0002.CSV	2121.4	-0.0286976
PSB913-2_map1	0002.CSV	2125.26	-0.0286991
PSB913-2_map1	0002.CSV	2129.12	-0.0286149
PSB913-2_map1	0002.CSV	2132.97	-0.0286266
PSB913-2_map1	0002.CSV	2136.83	-0.0285625
PSB913-2_map1	0002.CSV	2140.69	-0.0285748
PSB913-2_map1	0002.CSV	2144.55	-0.0285008
PSB913-2_map1	0002.CSV	2148.4	-0.0284998
PSB913-2_map1	0002.CSV	2152.26	-0.0284432
PSB913-2_map1	0002.CSV	2156.12	-0.0284433
PSB913-2_map1	0002.CSV	2159.97	-0.0283714
PSB913-2_map1	0002.CSV	2163.83	-0.0283828
PSB913-2_map1	0002.CSV	2167.69	-0.0283114
PSB913-2_map1	0002.CSV	2171.55	-0.0282768
PSB913-2_map1	0002.CSV	2175.4	-0.0282092
PSB913-2_map1	0002.CSV	2179.26	-0.0282625
PSB913-2_map1	0002.CSV	2183.12	-0.0282256
PSB913-2_map1	0002.CSV	2186.97	-0.0282049
PSB913-2_map1	0002.CSV	2190.83	-0.028116
PSB913-2_map1	0002.CSV	2194.69	-0.0280825
PSB913-2_map1	0002.CSV	2198.55	-0.028027
PSB913-2_map1	0002.CSV	2202.4	-0.0280739
PSB913-2_map1	0002.CSV	2206.26	-0.0280411
PSB913-2_map1	0002.CSV	2210.12	-0.0280564
PSB913-2_map1	0002.CSV	2213.97	-0.0280373
PSB913-2_map1	0002.CSV	2217.83	-0.0280616
PSB913-2_map1	0002.CSV	2221.69	-0.0280386
PSB913-2_map1	0002.CSV	2225.54	-0.0280055
PSB913-2_map1	0002.CSV	2229.4	-0.0279205
PSB913-2_map1	0002.CSV	2233.26	-0.0279721
PSB913-2_map1	0002.CSV	2237.12	-0.0279913
PSB913-2_map1	0002.CSV	2240.97	-0.0280193
PSB913-2_map1	0002.CSV	2244.83	-0.0279813
PSB913-2_map1	0002.CSV	2248.69	-0.0279833
PSB913-2_map1	0002.CSV	2252.54	-0.0279209
PSB913-2_map1	0002.CSV	2256.4	-0.0279243
PSB913-2_map1	0002.CSV	2260.26	-0.0278757
PSB913-2_map1	0002.CSV	2264.11	-0.027827
PSB913-2_map1	0002.CSV	2267.97	-0.027759
PSB913-2_map1	0002.CSV	2271.83	-0.027836
PSB913-2_map1	0002.CSV	2275.69	-0.0278383
PSB913-2_map1	0002.CSV	2279.54	-0.0278361
PSB913-2_map1	0002.CSV	2283.4	-0.0278371
PSB913-2_map1	0002.CSV	2287.26	-0.0278698
PSB913-2_map1	0002.CSV	2291.11	-0.0278275
PSB913-2_map1	0002.CSV	2294.97	-0.0278436
PSB913-2_map1	0002.CSV	2298.83	-0.0278077
PSB913-2_map1	0002.CSV	2302.69	-0.0278387
PSB913-2_map1	0002.CSV	2306.54	-0.0278944
PSB913-2_map1	0002.CSV	2310.4	-0.0280278
PSB913-2_map1	0002.CSV	2314.26	-0.0280677
PSB913-2_map1	0002.CSV	2318.11	-0.0283498
PSB913-2_map1	0002.CSV	2321.97	-0.0286613
PSB913-2_map1	0002.CSV	2325.83	-0.0291362
PSB913-2_map1	0002.CSV	2329.69	-0.0295898
PSB913-2_map1	0002.CSV	2333.54	-0.0300468
PSB913-2_map1	0002.CSV	2337.4	-0.0301777
PSB913-2_map1	0002.CSV	2341.26	-0.0300997
PSB913-2_map1	0002.CSV	2345.11	-0.0288367
PSB913-2_map1	0002.CSV	2348.97	-0.028879
PSB913-2_map1	0002.CSV	2352.83	-0.0302604
PSB913-2_map1	0002.CSV	2356.69	-0.0328304
PSB913-2_map1	0002.CSV	2360.54	-0.0342977
PSB913-2_map1	0002.CSV	2364.4	-0.0326572
PSB913-2_map1	0002.CSV	2368.26	-0.0298556
PSB913-2_map1	0002.CSV	2372.11	-0.0282653
PSB913-2_map1	0002.CSV	2375.97	-0.0275626
PSB913-2_map1	0002.CSV	2379.83	-0.027416
PSB913-2_map1	0002.CSV	2383.69	-0.0275058
PSB913-2_map1	0002.CSV	2387.54	-0.0277071
PSB913-2_map1	0002.CSV	2391.4	-0.0278577
PSB913-2_map1	0002.CSV	2395.26	-0.0279119
PSB913-2_map1	0002.CSV	2399.11	-0.0279363
PSB913-2_map1	0002.CSV	2402.97	-0.0279814
PSB913-2_map1	0002.CSV	2406.83	-0.0279959
PSB913-2_map1	0002.CSV	2410.68	-0.0279837
PSB913-2_map1	0002.CSV	2414.54	-0.0280062
PSB913-2_map1	0002.CSV	2418.4	-0.0280293
PSB913-2_map1	0002.CSV	2422.26	-0.0280016
PSB913-2_map1	0002.CSV	2426.11	-0.0279958
PSB913-2_map1	0002.CSV	2429.97	-0.0279998
PSB913-2_map1	0002.CSV	2433.83	-0.0280199
PSB913-2_map1	0002.CSV	2437.68	-0.0280474
PSB913-2_map1	0002.CSV	2441.54	-0.0280459
PSB913-2_map1	0002.CSV	2445.4	-0.0280236
PSB913-2_map1	0002.CSV	2449.26	-0.0280291
PSB913-2_map1	0002.CSV	2453.11	-0.0280347
PSB913-2_map1	0002.CSV	2456.97	-0.0280184
PSB913-2_map1	0002.CSV	2460.83	-0.0279734
PSB913-2_map1	0002.CSV	2464.68	-0.0279136
PSB913-2_map1	0002.CSV	2468.54	-0.0278624
PSB913-2_map1	0002.CSV	2472.4	-0.0277729
PSB913-2_map1	0002.CSV	2476.26	-0.0276043
PSB913-2_map1	0002.CSV	2480.11	-0.0273505
PSB913-2_map1	0002.CSV	2483.97	-0.0271112
PSB913-2_map1	0002.CSV	2487.83	-0.0269389
PSB913-2_map1	0002.CSV	2491.68	-0.0267639
PSB913-2_map1	0002.CSV	2495.54	-0.0266013
PSB913-2_map1	0002.CSV	2499.4	-0.0265387
PSB913-2_map1	0002.CSV	2503.26	-0.0265211
PSB913-2_map1	0002.CSV	2507.11	-0.0265953
PSB913-2_map1	0002.CSV	2510.97	-0.0266105
PSB913-2_map1	0002.CSV	2514.83	-0.0265002
PSB913-2_map1	0002.CSV	2518.68	-0.026296
PSB913-2_map1	0002.CSV	2522.54	-0.0261763
PSB913-2_map1	0002.CSV	2526.4	-0.0261581
PSB913-2_map1	0002.CSV	2530.26	-0.0262665
PSB913-2_map1	0002.CSV	2534.11	-0.0264736
PSB913-2_map1	0002.CSV	2537.97	-0.0267282
PSB913-2_map1	0002.CSV	2541.83	-0.0269228
PSB913-2_map1	0002.CSV	2545.68	-0.0270425
PSB913-2_map1	0002.CSV	2549.54	-0.0270182
PSB913-2_map1	0002.CSV	2553.4	-0.0270917
PSB913-2_map1	0002.CSV	2557.26	-0.0272597
PSB913-2_map1	0002.CSV	2561.11	-0.0274693
PSB913-2_map1	0002.CSV	2564.97	-0.0275881
PSB913-2_map1	0002.CSV	2568.83	-0.0276818
PSB913-2_map1	0002.CSV	2572.68	-0.0277448
PSB913-2_map1	0002.CSV	2576.54	-0.0278465
PSB913-2_map1	0002.CSV	2580.4	-0.0279364
PSB913-2_map1	0002.CSV	2584.25	-0.0279984
PSB913-2_map1	0002.CSV	2588.11	-0.0279866
PSB913-2_map1	0002.CSV	2591.97	-0.0280406
PSB913-2_map1	0002.CSV	2595.83	-0.0280798
PSB913-2_map1	0002.CSV	2599.68	-0.0280795
PSB913-2_map1	0002.CSV	2603.54	-0.0280125
PSB913-2_map1	0002.CSV	2607.4	-0.0279658
PSB913-2_map1	0002.CSV	2611.25	-0.0278451
PSB913-2_map1	0002.CSV	2615.11	-0.0277519
PSB913-2_map1	0002.CSV	2618.97	-0.0276937
PSB913-2_map1	0002.CSV	2622.82	-0.0276597
PSB913-2_map1	0002.CSV	2626.68	-0.0275184
PSB913-2_map1	0002.CSV	2630.54	-0.0274998
PSB913-2_map1	0002.CSV	2634.4	-0.0274433
PSB913-2_map1	0002.CSV	2638.25	-0.0274482
PSB913-2_map1	0002.CSV	2642.11	-0.0274979
PSB913-2_map1	0002.CSV	2645.97	-0.0276067
PSB913-2_map1	0002.CSV	2649.82	-0.0276623
PSB913-2_map1	0002.CSV	2653.68	-0.0276994
PSB913-2_map1	0002.CSV	2657.54	-0.0276089
PSB913-2_map1	0002.CSV	2661.4	-0.0276555
PSB913-2_map1	0002.CSV	2665.25	-0.0276586
PSB913-2_map1	0002.CSV	2669.11	-0.027614
PSB913-2_map1	0002.CSV	2672.97	-0.0274401
PSB913-2_map1	0002.CSV	2676.82	-0.0272803
PSB913-2_map1	0002.CSV	2680.68	-0.0272644
PSB913-2_map1	0002.CSV	2684.54	-0.0275029
PSB913-2_map1	0002.CSV	2688.4	-0.0275732
PSB913-2_map1	0002.CSV	2692.25	-0.0276054
PSB913-2_map1	0002.CSV	2696.11	-0.027522
PSB913-2_map1	0002.CSV	2699.97	-0.0275547
PSB913-2_map1	0002.CSV	2703.82	-0.0275179
PSB913-2_map1	0002.CSV	2707.68	-0.027485
PSB913-2_map1	0002.CSV	2711.54	-0.0274612
PSB913-2_map1	0002.CSV	2715.4	-0.0275212
PSB913-2_map1	0002.CSV	2719.25	-0.0273577
PSB913-2_map1	0002.CSV	2723.11	-0.0271471
PSB913-2_map1	0002.CSV	2726.97	-0.0271331
PSB913-2_map1	0002.CSV	2730.82	-0.0274245
PSB913-2_map1	0002.CSV	2734.68	-0.0274613
PSB913-2_map1	0002.CSV	2738.54	-0.0274877
PSB913-2_map1	0002.CSV	2742.4	-0.0273848
PSB913-2_map1	0002.CSV	2746.25	-0.0271622
PSB913-2_map1	0002.CSV	2750.11	-0.0271047
PSB913-2_map1	0002.CSV	2753.97	-0.0273901
PSB913-2_map1	0002.CSV	2757.82	-0.0274897
PSB913-2_map1	0002.CSV	2761.68	-0.0276206
PSB913-2_map1	0002.CSV	2765.54	-0.0275973
PSB913-2_map1	0002.CSV	2769.39	-0.0274597
PSB913-2_map1	0002.CSV	2773.25	-0.0271705
PSB913-2_map1	0002.CSV	2777.11	-0.0273309
PSB913-2_map1	0002.CSV	2780.97	-0.0275093
PSB913-2_map1	0002.CSV	2784.82	-0.0274499
PSB913-2_map1	0002.CSV	2788.68	-0.0271576
PSB913-2_map1	0002.CSV	2792.54	-0.0271554
PSB913-2_map1	0002.CSV	2796.39	-0.0271365
PSB913-2_map1	0002.CSV	2800.25	-0.0273028
PSB913-2_map1	0002.CSV	2804.11	-0.0274479
PSB913-2_map1	0002.CSV	2807.97	-0.0273315
PSB913-2_map1	0002.CSV	2811.82	-0.0273121
PSB913-2_map1	0002.CSV	2815.68	-0.0275502
PSB913-2_map1	0002.CSV	2819.54	-0.0274213
PSB913-2_map1	0002.CSV	2823.39	-0.027312
PSB913-2_map1	0002.CSV	2827.25	-0.0272059
PSB913-2_map1	0002.CSV	2831.11	-0.0269646
PSB913-2_map1	0002.CSV	2834.97	-0.0265152
PSB913-2_map1	0002.CSV	2838.82	-0.0264316
PSB913-2_map1	0002.CSV	2842.68	-0.0264215
PSB913-2_map1	0002.CSV	2846.54	-0.0262308
PSB913-2_map1	0002.CSV	2850.39	-0.0261988
PSB913-2_map1	0002.CSV	2854.25	-0.0264779
PSB913-2_map1	0002.CSV	2858.11	-0.0263749
PSB913-2_map1	0002.CSV	2861.97	-0.0264353
PSB913-2_map1	0002.CSV	2865.82	-0.0264821
PSB913-2_map1	0002.CSV	2869.68	-0.0262698
PSB913-2_map1	0002.CSV	2873.54	-0.0259565
PSB913-2_map1	0002.CSV	2877.39	-0.0262212
PSB913-2_map1	0002.CSV	2881.25	-0.0263453
PSB913-2_map1	0002.CSV	2885.11	-0.0263282
PSB913-2_map1	0002.CSV	2888.97	-0.0260359
PSB913-2_map1	0002.CSV	2892.82	-0.0257212
PSB913-2_map1	0002.CSV	2896.68	-0.0255537
PSB913-2_map1	0002.CSV	2900.54	-0.0256714
PSB913-2_map1	0002.CSV	2904.39	-0.0254429
PSB913-2_map1	0002.CSV	2908.25	-0.0249831
PSB913-2_map1	0002.CSV	2912.11	-0.0242005
PSB913-2_map1	0002.CSV	2915.97	-0.0238967
PSB913-2_map1	0002.CSV	2919.82	-0.0243263
PSB913-2_map1	0002.CSV	2923.68	-0.0250356
PSB913-2_map1	0002.CSV	2927.54	-0.0250614
PSB913-2_map1	0002.CSV	2931.39	-0.0252273
PSB913-2_map1	0002.CSV	2935.25	-0.0255144
PSB913-2_map1	0002.CSV	2939.11	-0.0254451
PSB913-2_map1	0002.CSV	2942.96	-0.0248911
PSB913-2_map1	0002.CSV	2946.82	-0.0248149
PSB913-2_map1	0002.CSV	2950.68	-0.0251599
PSB913-2_map1	0002.CSV	2954.54	-0.0257672
PSB913-2_map1	0002.CSV	2958.39	-0.0260895
PSB913-2_map1	0002.CSV	2962.25	-0.026112
PSB913-2_map1	0002.CSV	2966.11	-0.0260793
PSB913-2_map1	0002.CSV	2969.96	-0.0259381
PSB913-2_map1	0002.CSV	2973.82	-0.0254424
PSB913-2_map1	0002.CSV	2977.68	-0.0251577
PSB913-2_map1	0002.CSV	2981.53	-0.0251855
PSB913-2_map1	0002.CSV	2985.39	-0.0255308
PSB913-2_map1	0002.CSV	2989.25	-0.0253448
PSB913-2_map1	0002.CSV	2993.11	-0.0250017
PSB913-2_map1	0002.CSV	2996.96	-0.0249192
PSB913-2_map1	0002.CSV	3000.82	-0.0252043
PSB913-2_map1	0002.CSV	3004.68	-0.0253519
PSB913-2_map1	0002.CSV	3008.53	-0.0252368
PSB913-2_map1	0002.CSV	3012.39	-0.0248712
PSB913-2_map1	0002.CSV	3016.25	-0.0248105
PSB913-2_map1	0002.CSV	3020.11	-0.024905
PSB913-2_map1	0002.CSV	3023.96	-0.0250803
PSB913-2_map1	0002.CSV	3027.82	-0.0250343
PSB913-2_map1	0002.CSV	3031.68	-0.0249028
PSB913-2_map1	0002.CSV	3035.53	-0.0248644
PSB913-2_map1	0002.CSV	3039.39	-0.0249029
PSB913-2_map1	0002.CSV	3043.25	-0.0248607
PSB913-2_map1	0002.CSV	3047.11	-0.0250345
PSB913-2_map1	0002.CSV	3050.96	-0.024997
PSB913-2_map1	0002.CSV	3054.82	-0.0251332
PSB913-2_map1	0002.CSV	3058.68	-0.0252986
PSB913-2_map1	0002.CSV	3062.53	-0.0252579
PSB913-2_map1	0002.CSV	3066.39	-0.0249352
PSB913-2_map1	0002.CSV	3070.25	-0.0250636
PSB913-2_map1	0002.CSV	3074.11	-0.0250649
PSB913-2_map1	0002.CSV	3077.96	-0.0248469
PSB913-2_map1	0002.CSV	3081.82	-0.0246512
PSB913-2_map1	0002.CSV	3085.68	-0.0247832
PSB913-2_map1	0002.CSV	3089.53	-0.0248744
PSB913-2_map1	0002.CSV	3093.39	-0.0251211
PSB913-2_map1	0002.CSV	3097.25	-0.0251089
PSB913-2_map1	0002.CSV	3101.11	-0.0251166
PSB913-2_map1	0002.CSV	3104.96	-0.0251522
PSB913-2_map1	0002.CSV	3108.82	-0.0250709
PSB913-2_map1	0002.CSV	3112.68	-0.0248828
PSB913-2_map1	0002.CSV	3116.53	-0.0247326
PSB913-2_map1	0002.CSV	3120.39	-0.0247963
PSB913-2_map1	0002.CSV	3124.25	-0.0251847
PSB913-2_map1	0002.CSV	3128.11	-0.0251768
PSB913-2_map1	0002.CSV	3131.96	-0.0251941
PSB913-2_map1	0002.CSV	3135.82	-0.0250072
PSB913-2_map1	0002.CSV	3139.68	-0.024953
PSB913-2_map1	0002.CSV	3143.53	-0.0251187
PSB913-2_map1	0002.CSV	3147.39	-0.0250474
PSB913-2_map1	0002.CSV	3151.25	-0.0246972
PSB913-2_map1	0002.CSV	3155.1	-0.0247978
PSB913-2_map1	0002.CSV	3158.96	-0.0250581
PSB913-2_map1	0002.CSV	3162.82	-0.0252414
PSB913-2_map1	0002.CSV	3166.68	-0.0252775
PSB913-2_map1	0002.CSV	3170.53	-0.0253167
PSB913-2_map1	0002.CSV	3174.39	-0.0252675
PSB913-2_map1	0002.CSV	3178.25	-0.0251927
PSB913-2_map1	0002.CSV	3182.1	-0.0250358
PSB913-2_map1	0002.CSV	3185.96	-0.0250038
PSB913-2_map1	0002.CSV	3189.82	-0.0249573
PSB913-2_map1	0002.CSV	3193.68	-0.0250397
PSB913-2_map1	0002.CSV	3197.53	-0.0249639
PSB913-2_map1	0002.CSV	3201.39	-0.0248332
PSB913-2_map1	0002.CSV	3205.25	-0.024735
PSB913-2_map1	0002.CSV	3209.1	-0.0247855
PSB913-2_map1	0002.CSV	3212.96	-0.0246649
PSB913-2_map1	0002.CSV	3216.82	-0.0245858
PSB913-2_map1	0002.CSV	3220.68	-0.0245678
PSB913-2_map1	0002.CSV	3224.53	-0.0245741
PSB913-2_map1	0002.CSV	3228.39	-0.0241232
PSB913-2_map1	0002.CSV	3232.25	-0.0236317
PSB913-2_map1	0002.CSV	3236.1	-0.0237273
PSB913-2_map1	0002.CSV	3239.96	-0.024077
PSB913-2_map1	0002.CSV	3243.82	-0.0239254
PSB913-2_map1	0002.CSV	3247.68	-0.0238083
PSB913-2_map1	0002.CSV	3251.53	-0.0238404
PSB913-2_map1	0002.CSV	3255.39	-0.0238071
PSB913-2_map1	0002.CSV	3259.25	-0.023922
PSB913-2_map1	0002.CSV	3263.1	-0.0239347
PSB913-2_map1	0002.CSV	3266.96	-0.023544
PSB913-2_map1	0002.CSV	3270.82	-0.0232222
PSB913-2_map1	0002.CSV	3274.68	-0.0232042
PSB913-2_map1	0002.CSV	3278.53	-0.023557
PSB913-2_map1	0002.CSV	3282.39	-0.0236518
PSB913-2_map1	0002.CSV	3286.25	-0.0234988
PSB913-2_map1	0002.CSV	3290.1	-0.0230985
PSB913-2_map1	0002.CSV	3293.96	-0.0228255
PSB913-2_map1	0002.CSV	3297.82	-0.0229217
PSB913-2_map1	0002.CSV	3301.67	-0.0228717
PSB913-2_map1	0002.CSV	3305.53	-0.0226029
PSB913-2_map1	0002.CSV	3309.39	-0.0228423
PSB913-2_map1	0002.CSV	3313.25	-0.023306
PSB913-2_map1	0002.CSV	3317.1	-0.0235787
PSB913-2_map1	0002.CSV	3320.96	-0.023399
PSB913-2_map1	0002.CSV	3324.82	-0.0231613
PSB913-2_map1	0002.CSV	3328.67	-0.0233046
PSB913-2_map1	0002.CSV	3332.53	-0.0233641
PSB913-2_map1	0002.CSV	3336.39	-0.0229548
PSB913-2_map1	0002.CSV	3340.24	-0.0226973
PSB913-2_map1	0002.CSV	3344.1	-0.0228235
PSB913-2_map1	0002.CSV	3347.96	-0.0228584
PSB913-2_map1	0002.CSV	3351.82	-0.0229546
PSB913-2_map1	0002.CSV	3355.67	-0.0232563
PSB913-2_map1	0002.CSV	3359.53	-0.0230755
PSB913-2_map1	0002.CSV	3363.39	-0.0227527
PSB913-2_map1	0002.CSV	3367.24	-0.0225252
PSB913-2_map1	0002.CSV	3371.1	-0.0226563
PSB913-2_map1	0002.CSV	3374.96	-0.0229242
PSB913-2_map1	0002.CSV	3378.82	-0.0231968
PSB913-2_map1	0002.CSV	3382.67	-0.0234658
PSB913-2_map1	0002.CSV	3386.53	-0.0234075
PSB913-2_map1	0002.CSV	3390.39	-0.023084
PSB913-2_map1	0002.CSV	3394.24	-0.0228801
PSB913-2_map1	0002.CSV	3398.1	-0.0228452
PSB913-2_map1	0002.CSV	3401.96	-0.0229283
PSB913-2_map1	0002.CSV	3405.82	-0.0229903
PSB913-2_map1	0002.CSV	3409.67	-0.0230422
PSB913-2_map1	0002.CSV	3413.53	-0.0234229
PSB913-2_map1	0002.CSV	3417.39	-0.0238683
PSB913-2_map1	0002.CSV	3421.24	-0.0238785
PSB913-2_map1	0002.CSV	3425.1	-0.0236179
PSB913-2_map1	0002.CSV	3428.96	-0.0233728
PSB913-2_map1	0002.CSV	3432.82	-0.0233546
PSB913-2_map1	0002.CSV	3436.67	-0.0235027
PSB913-2_map1	0002.CSV	3440.53	-0.02393
PSB913-2_map1	0002.CSV	3444.39	-0.024285
PSB913-2_map1	0002.CSV	3448.24	-0.0244192
PSB913-2_map1	0002.CSV	3452.1	-0.0245848
PSB913-2_map1	0002.CSV	3455.96	-0.0245057
PSB913-2_map1	0002.CSV	3459.82	-0.0242577
PSB913-2_map1	0002.CSV	3463.67	-0.0238862
PSB913-2_map1	0002.CSV	3467.53	-0.0237465
PSB913-2_map1	0002.CSV	3471.39	-0.0242825
PSB913-2_map1	0002.CSV	3475.24	-0.024778
PSB913-2_map1	0002.CSV	3479.1	-0.0246994
PSB913-2_map1	0002.CSV	3482.96	-0.0245771
PSB913-2_map1	0002.CSV	3486.82	-0.024571
PSB913-2_map1	0002.CSV	3490.67	-0.0247144
PSB913-2_map1	0002.CSV	3494.53	-0.0246258
PSB913-2_map1	0002.CSV	3498.39	-0.0245778
PSB913-2_map1	0002.CSV	3502.24	-0.0247635
PSB913-2_map1	0002.CSV	3506.1	-0.0252712
PSB913-2_map1	0002.CSV	3509.96	-0.0253566
PSB913-2_map1	0002.CSV	3513.81	-0.025229
PSB913-2_map1	0002.CSV	3517.67	-0.0255807
PSB913-2_map1	0002.CSV	3521.53	-0.0256654
PSB913-2_map1	0002.CSV	3525.39	-0.0255227
PSB913-2_map1	0002.CSV	3529.24	-0.0256933
PSB913-2_map1	0002.CSV	3533.1	-0.0257235
PSB913-2_map1	0002.CSV	3536.96	-0.0256559
PSB913-2_map1	0002.CSV	3540.81	-0.0258286
PSB913-2_map1	0002.CSV	3544.67	-0.0257924
PSB913-2_map1	0002.CSV	3548.53	-0.0256896
PSB913-2_map1	0002.CSV	3552.39	-0.0260122
PSB913-2_map1	0002.CSV	3556.24	-0.0261294
PSB913-2_map1	0002.CSV	3560.1	-0.0264054
PSB913-2_map1	0002.CSV	3563.96	-0.0268794
PSB913-2_map1	0002.CSV	3567.81	-0.0262736
PSB913-2_map1	0002.CSV	3571.67	-0.0261019
PSB913-2_map1	0002.CSV	3575.53	-0.0266704
PSB913-2_map1	0002.CSV	3579.39	-0.0264669
PSB913-2_map1	0002.CSV	3583.24	-0.0266124
PSB913-2_map1	0002.CSV	3587.1	-0.0267077
PSB913-2_map1	0002.CSV	3590.96	-0.0266922
PSB913-2_map1	0002.CSV	3594.81	-0.0268799
PSB913-2_map1	0002.CSV	3598.67	-0.0265872
PSB913-2_map1	0002.CSV	3602.53	-0.0264442
PSB913-2_map1	0002.CSV	3606.39	-0.0271551
PSB913-2_map1	0002.CSV	3610.24	-0.0274358
PSB913-2_map1	0002.CSV	3614.1	-0.0275804
PSB913-2_map1	0002.CSV	3617.96	-0.0274861
PSB913-2_map1	0002.CSV	3621.81	-0.0271953
PSB913-2_map1	0002.CSV	3625.67	-0.0279124
PSB913-2_map1	0002.CSV	3629.53	-0.0278183
PSB913-2_map1	0002.CSV	3633.39	-0.0269228
PSB913-2_map1	0002.CSV	3637.24	-0.0273318
PSB913-2_map1	0002.CSV	3641.1	-0.0277386
PSB913-2_map1	0002.CSV	3644.96	-0.0286372
PSB913-2_map1	0002.CSV	3648.81	-0.0281213
PSB913-2_map1	0002.CSV	3652.67	-0.0267626
PSB913-2_map1	0002.CSV	3656.53	-0.0266678
PSB913-2_map1	0002.CSV	3660.38	-0.0268003
PSB913-2_map1	0002.CSV	3664.24	-0.0276904
PSB913-2_map1	0002.CSV	3668.1	-0.0287422
PSB913-2_map1	0002.CSV	3671.96	-0.0287946
PSB913-2_map1	0002.CSV	3675.81	-0.0280784
PSB913-2_map1	0002.CSV	3679.67	-0.0272335
PSB913-2_map1	0002.CSV	3683.53	-0.0276953
PSB913-2_map1	0002.CSV	3687.38	-0.0280255
PSB913-2_map1	0002.CSV	3691.24	-0.0270193
PSB913-2_map1	0002.CSV	3695.1	-0.0271294
PSB913-2_map1	0002.CSV	3698.95	-0.0279172
PSB913-2_map1	0002.CSV	3702.81	-0.0281368
PSB913-2_map1	0002.CSV	3706.67	-0.0287459
PSB913-2_map1	0002.CSV	3710.53	-0.0286007
PSB913-2_map1	0002.CSV	3714.38	-0.0275787
PSB913-2_map1	0002.CSV	3718.24	-0.0280734
PSB913-2_map1	0002.CSV	3722.1	-0.0285582
PSB913-2_map1	0002.CSV	3725.95	-0.0283518
PSB913-2_map1	0002.CSV	3729.81	-0.0287136
PSB913-2_map1	0002.CSV	3733.67	-0.0284656
PSB913-2_map1	0002.CSV	3737.53	-0.0272454
PSB913-2_map1	0002.CSV	3741.38	-0.02798
PSB913-2_map1	0002.CSV	3745.24	-0.0293465
PSB913-2_map1	0002.CSV	3749.1	-0.0295239
PSB913-2_map1	0002.CSV	3752.95	-0.0282274
PSB913-2_map1	0002.CSV	3756.81	-0.027944
PSB913-2_map1	0002.CSV	3760.67	-0.0280141
PSB913-2_map1	0002.CSV	3764.53	-0.028186
PSB913-2_map1	0002.CSV	3768.38	-0.0280926
PSB913-2_map1	0002.CSV	3772.24	-0.0277927
PSB913-2_map1	0002.CSV	3776.1	-0.0282094
PSB913-2_map1	0002.CSV	3779.95	-0.0280247
PSB913-2_map1	0002.CSV	3783.81	-0.0278674
PSB913-2_map1	0002.CSV	3787.67	-0.0278212
PSB913-2_map1	0002.CSV	3791.53	-0.0282782
PSB913-2_map1	0002.CSV	3795.38	-0.0289981
PSB913-2_map1	0002.CSV	3799.24	-0.0291904
PSB913-2_map1	0002.CSV	3803.1	-0.0284182
PSB913-2_map1	0002.CSV	3806.95	-0.02803
PSB913-2_map1	0002.CSV	3810.81	-0.0284217
PSB913-2_map1	0002.CSV	3814.67	-0.0291479
PSB913-2_map1	0002.CSV	3818.53	-0.028843
PSB913-2_map1	0002.CSV	3822.38	-0.0279394
PSB913-2_map1	0002.CSV	3826.24	-0.0279495
PSB913-2_map1	0002.CSV	3830.1	-0.0285818
PSB913-2_map1	0002.CSV	3833.95	-0.0287953
PSB913-2_map1	0002.CSV	3837.81	-0.0285908
PSB913-2_map1	0002.CSV	3841.67	-0.0275132
PSB913-2_map1	0002.CSV	3845.53	-0.0277516
PSB913-2_map1	0002.CSV	3849.38	-0.0289832
PSB913-2_map1	0002.CSV	3853.24	-0.0290278
PSB913-2_map1	0002.CSV	3857.1	-0.0277585
PSB913-2_map1	0002.CSV	3860.95	-0.0285633
PSB913-2_map1	0002.CSV	3864.81	-0.0285416
PSB913-2_map1	0002.CSV	3868.67	-0.0282704
PSB913-2_map1	0002.CSV	3872.52	-0.0276206
PSB913-2_map1	0002.CSV	3876.38	-0.0279972
PSB913-2_map1	0002.CSV	3880.24	-0.0282588
PSB913-2_map1	0002.CSV	3884.1	-0.0277323
PSB913-2_map1	0002.CSV	3887.95	-0.0277502
PSB913-2_map1	0002.CSV	3891.81	-0.0279481
PSB913-2_map1	0002.CSV	3895.67	-0.0281392
PSB913-2_map1	0002.CSV	3899.52	-0.0286928
PSB913-2_map1	0002.CSV	3903.38	-0.0275638
PSB913-2_map1	0002.CSV	3907.24	-0.0270345
PSB913-2_map1	0002.CSV	3911.1	-0.0277076
PSB913-2_map1	0002.CSV	3914.95	-0.0282608
PSB913-2_map1	0002.CSV	3918.81	-0.0278949
PSB913-2_map1	0002.CSV	3922.67	-0.027697
PSB913-2_map1	0002.CSV	3926.52	-0.027594
PSB913-2_map1	0002.CSV	3930.38	-0.027624
PSB913-2_map1	0002.CSV	3934.24	-0.0273472
PSB913-2_map1	0002.CSV	3938.09	-0.027682
PSB913-2_map1	0002.CSV	3941.95	-0.0277008
PSB913-2_map1	0002.CSV	3945.81	-0.0276212
PSB913-2_map1	0002.CSV	3949.67	-0.0275182
PSB913-2_map1	0002.CSV	3953.52	-0.027528
PSB913-2_map1	0002.CSV	3957.38	-0.0275818
PSB913-2_map1	0002.CSV	3961.24	-0.0275724
PSB913-2_map1	0002.CSV	3965.09	-0.0274993
PSB913-2_map1	0002.CSV	3968.95	-0.0275272
PSB913-2_map1	0002.CSV	3972.81	-0.0272699
PSB913-2_map1	0002.CSV	3976.67	-0.0271992
PSB913-2_map1	0002.CSV	3980.52	-0.02723
PSB913-2_map1	0002.CSV	3984.38	-0.0273732
PSB913-2_map1	0002.CSV	3988.24	-0.0274852
PSB913-2_map1	0002.CSV	3992.09	-0.0275497
PSB913-2_map1	0002.CSV	3995.95	-0.0274505
PSB913-2_map1	0002.CSV	3999.81	-0.027401
PSB913-2_map1	0003.CSV	674.992	0.0131238
PSB913-2_map1	0003.CSV	678.849	0.0140643
PSB913-2_map1	0003.CSV	682.706	0.0147995
PSB913-2_map1	0003.CSV	686.563	0.0173312
PSB913-2_map1	0003.CSV	690.42	0.0212721
PSB913-2_map1	0003.CSV	694.277	0.0311725
PSB913-2_map1	0003.CSV	698.134	0.0396395
PSB913-2_map1	0003.CSV	701.991	0.0331371
PSB913-2_map1	0003.CSV	705.849	0.0266581
PSB913-2_map1	0003.CSV	709.706	0.0365673
PSB913-2_map1	0003.CSV	713.563	0.0343388
PSB913-2_map1	0003.CSV	717.42	0.0140762
PSB913-2_map1	0003.CSV	721.277	0.00399326
PSB913-2_map1	0003.CSV	725.134	0.00377733
PSB913-2_map1	0003.CSV	728.991	0.00443473
PSB913-2_map1	0003.CSV	732.848	0.00562197
PSB913-2_map1	0003.CSV	736.705	0.00689426
PSB913-2_map1	0003.CSV	740.562	0.00823816
PSB913-2_map1	0003.CSV	744.42	0.00875999
PSB913-2_map1	0003.CSV	748.277	0.00887618
PSB913-2_map1	0003.CSV	752.134	0.00835731
PSB913-2_map1	0003.CSV	755.991	0.00804282
PSB913-2_map1	0003.CSV	759.848	0.00768194
PSB913-2_map1	0003.CSV	763.705	0.00771968
PSB913-2_map1	0003.CSV	767.562	0.00749049
PSB913-2_map1	0003.CSV	771.419	0.00734489
PSB913-2_map1	0003.CSV	775.276	0.00678059
PSB913-2_map1	0003.CSV	779.133	0.00678783
PSB913-2_map1	0003.CSV	782.99	0.00686215
PSB913-2_map1	0003.CSV	786.848	0.00722173
PSB913-2_map1	0003.CSV	790.705	0.00733613
PSB913-2_map1	0003.CSV	794.562	0.00783964
PSB913-2_map1	0003.CSV	798.419	0.00828925
PSB913-2_map1	0003.CSV	802.276	0.00916809
PSB913-2_map1	0003.CSV	806.133	0.00985947
PSB913-2_map1	0003.CSV	809.99	0.0110188
PSB913-2_map1	0003.CSV	813.847	0.0122969
PSB913-2_map1	0003.CSV	817.704	0.0141976
PSB913-2_map1	0003.CSV	821.562	0.0163379
PSB913-2_map1	0003.CSV	825.419	0.0192393
PSB913-2_map1	0003.CSV	829.276	0.0225527
PSB913-2_map1	0003.CSV	833.133	0.0272676
PSB913-2_map1	0003.CSV	836.99	0.0334806
PSB913-2_map1	0003.CSV	840.847	0.041635
PSB913-2_map1	0003.CSV	844.704	0.0493118
PSB913-2_map1	0003.CSV	848.561	0.0614672
PSB913-2_map1	0003.CSV	852.418	0.0736478
PSB913-2_map1	0003.CSV	856.275	0.0733629
PSB913-2_map1	0003.CSV	860.132	0.061325
PSB913-2_map1	0003.CSV	863.99	0.0452596
PSB913-2_map1	0003.CSV	867.847	0.0286064
PSB913-2_map1	0003.CSV	871.704	0.0133792
PSB913-2_map1	0003.CSV	875.561	0.00188481
PSB913-2_map1	0003.CSV	879.418	-0.00323598
PSB913-2_map1	0003.CSV	883.275	-0.00458722
PSB913-2_map1	0003.CSV	887.132	-0.00480699
PSB913-2_map1	0003.CSV	890.989	-0.00495459
PSB913-2_map1	0003.CSV	894.846	-0.00485025
PSB913-2_map1	0003.CSV	898.703	-0.00475095
PSB913-2_map1	0003.CSV	902.561	-0.00449082
PSB913-2_map1	0003.CSV	906.418	-0.00429788
PSB913-2_map1	0003.CSV	910.275	-0.00421792
PSB913-2_map1	0003.CSV	914.132	-0.0044677
PSB913-2_map1	0003.CSV	917.989	-0.00432521
PSB913-2_map1	0003.CSV	921.846	-0.00423036
PSB913-2_map1	0003.CSV	925.703	-0.00405986
PSB913-2_map1	0003.CSV	929.56	-0.0040142
PSB913-2_map1	0003.CSV	933.417	-0.00379087
PSB913-2_map1	0003.CSV	937.274	-0.00366019
PSB913-2_map1	0003.CSV	941.131	-0.0034475
PSB913-2_map1	0003.CSV	944.989	-0.00346686
PSB913-2_map1	0003.CSV	948.846	-0.00323617
PSB913-2_map1	0003.CSV	952.703	-0.00299738
PSB913-2_map1	0003.CSV	956.56	-0.00259955
PSB913-2_map1	0003.CSV	960.417	-0.00237062
PSB913-2_map1	0003.CSV	964.274	-0.00216982
PSB913-2_map1	0003.CSV	968.131	-0.00206002
PSB913-2_map1	0003.CSV	971.988	-0.00162827
PSB913-2_map1	0003.CSV	975.845	-0.00124819
PSB913-2_map1	0003.CSV	979.702	-0.000838938
PSB913-2_map1	0003.CSV	983.559	-0.000621349
PSB913-2_map1	0003.CSV	987.417	-0.00028678
PSB913-2_map1	0003.CSV	991.274	-9.737e-05
PSB913-2_map1	0003.CSV	995.131	0.000157183
PSB913-2_map1	0003.CSV	998.988	0.000220828
PSB913-2_map1	0003.CSV	1002.85	0.00033412
PSB913-2_map1	0003.CSV	1006.7	0.000322514
PSB913-2_map1	0003.CSV	1010.56	0.000631596
PSB913-2_map1	0003.CSV	1014.42	0.00092423
PSB913-2_map1	0003.CSV	1018.27	0.00136023
PSB913-2_map1	0003.CSV	1022.13	0.0016639
PSB913-2_map1	0003.CSV	1025.99	0.00211918
PSB913-2_map1	0003.CSV	1029.85	0.002469
PSB913-2_map1	0003.CSV	1033.7	0.0029769
PSB913-2_map1	0003.CSV	1037.56	0.00325283
PSB913-2_map1	0003.CSV	1041.42	0.00358428
PSB913-2_map1	0003.CSV	1045.27	0.00367165
PSB913-2_map1	0003.CSV	1049.13	0.00403078
PSB913-2_map1	0003.CSV	1052.99	0.00449254
PSB913-2_map1	0003.CSV	1056.84	0.00538593
PSB913-2_map1	0003.CSV	1060.7	0.00609503
PSB913-2_map1	0003.CSV	1064.56	0.00658833
PSB913-2_map1	0003.CSV	1068.42	0.00673142
PSB913-2_map1	0003.CSV	1072.27	0.00700409
PSB913-2_map1	0003.CSV	1076.13	0.00786909
PSB913-2_map1	0003.CSV	1079.99	0.0108975
PSB913-2_map1	0003.CSV	1083.84	0.0097599
PSB913-2_map1	0003.CSV	1087.7	0.00393571
PSB913-2_map1	0003.CSV	1091.56	0.00147401
PSB913-2_map1	0003.CSV	1095.41	0.00160499
PSB913-2_map1	0003.CSV	1099.27	0.00182614
PSB913-2_map1	0003.CSV	1103.13	0.00222824
PSB913-2_map1	0003.CSV	1106.99	0.00268208
PSB913-2_map1	0003.CSV	1110.84	0.00317876
PSB913-2_map1	0003.CSV	1114.7	0.00338
PSB913-2_map1	0003.CSV	1118.56	0.00340061
PSB913-2_map1	0003.CSV	1122.41	0.00314471
PSB913-2_map1	0003.CSV	1126.27	0.00288784
PSB913-2_map1	0003.CSV	1130.13	0.00249612
PSB913-2_map1	0003.CSV	1133.99	0.00228802
PSB913-2_map1	0003.CSV	1137.84	0.00211672
PSB913-2_map1	0003.CSV	1141.7	0.00205329
PSB913-2_map1	0003.CSV	1145.56	0.00191392
PSB913-2_map1	0003.CSV	1149.41	0.00198272
PSB913-2_map1	0003.CSV	1153.27	0.002105
PSB913-2_map1	0003.CSV	1157.13	0.00231767
PSB913-2_map1	0003.CSV	1160.99	0.00234102
PSB913-2_map1	0003.CSV	1164.84	0.0023218
PSB913-2_map1	0003.CSV	1168.7	0.00214435
PSB913-2_map1	0003.CSV	1172.56	0.00202356
PSB913-2_map1	0003.CSV	1176.41	0.00186121
PSB913-2_map1	0003.CSV	1180.27	0.00187416
PSB913-2_map1	0003.CSV	1184.13	0.00184777
PSB913-2_map1	0003.CSV	1187.99	0.00195629
PSB913-2_map1	0003.CSV	1191.84	0.00202546
PSB913-2_map1	0003.CSV	1195.7	0.0022336
PSB913-2_map1	0003.CSV	1199.56	0.00241902
PSB913-2_map1	0003.CSV	1203.41	0.00269022
PSB913-2_map1	0003.CSV	1207.27	0.002827
PSB913-2_map1	0003.CSV	1211.13	0.00315359
PSB913-2_map1	0003.CSV	1214.98	0.00344539
PSB913-2_map1	0003.CSV	1218.84	0.0038273
PSB913-2_map1	0003.CSV	1222.7	0.00422339
PSB913-2_map1	0003.CSV	1226.56	0.00471895
PSB913-2_map1	0003.CSV	1230.41	0.00516981
PSB913-2_map1	0003.CSV	1234.27	0.00588581
PSB913-2_map1	0003.CSV	1238.13	0.00652711
PSB913-2_map1	0003.CSV	1241.98	0.00727153
PSB913-2_map1	0003.CSV	1245.84	0.00795082
PSB913-2_map1	0003.CSV	1249.7	0.00852958
PSB913-2_map1	0003.CSV	1253.56	0.00883157
PSB913-2_map1	0003.CSV	1257.41	0.00918826
PSB913-2_map1	0003.CSV	1261.27	0.00948357
PSB913-2_map1	0003.CSV	1265.13	0.00993557
PSB913-2_map1	0003.CSV	1268.98	0.0102867
PSB913-2_map1	0003.CSV	1272.84	0.010686
PSB913-2_map1	0003.CSV	1276.7	0.0108626
PSB913-2_map1	0003.CSV	1280.56	0.0110335
PSB913-2_map1	0003.CSV	1284.41	0.0110278
PSB913-2_map1	0003.CSV	1288.27	0.0110932
PSB913-2_map1	0003.CSV	1292.13	0.0110346
PSB913-2_map1	0003.CSV	1295.98	0.0110493
PSB913-2_map1	0003.CSV	1299.84	0.0110523
PSB913-2_map1	0003.CSV	1303.7	0.0113025
PSB913-2_map1	0003.CSV	1307.56	0.0115524
PSB913-2_map1	0003.CSV	1311.41	0.0119863
PSB913-2_map1	0003.CSV	1315.27	0.0124644
PSB913-2_map1	0003.CSV	1319.13	0.0131125
PSB913-2_map1	0003.CSV	1322.98	0.0135654
PSB913-2_map1	0003.CSV	1326.84	0.0141186
PSB913-2_map1	0003.CSV	1330.7	0.0147408
PSB913-2_map1	0003.CSV	1334.56	0.0154958
PSB913-2_map1	0003.CSV	1338.41	0.0164684
PSB913-2_map1	0003.CSV	1342.27	0.0177435
PSB913-2_map1	0003.CSV	1346.13	0.0185641
PSB913-2_map1	0003.CSV	1349.98	0.0196445
PSB913-2_map1	0003.CSV	1353.84	0.020735
PSB913-2_map1	0003.CSV	1357.7	0.0219084
PSB913-2_map1	0003.CSV	1361.56	0.0232283
PSB913-2_map1	0003.CSV	1365.41	0.0249121
PSB913-2_map1	0003.CSV	1369.27	0.0260499
PSB913-2_map1	0003.CSV	1373.13	0.0276724
PSB913-2_map1	0003.CSV	1376.98	0.0294209
PSB913-2_map1	0003.CSV	1380.84	0.0308607
PSB913-2_map1	0003.CSV	1384.7	0.032257
PSB913-2_map1	0003.CSV	1388.56	0.0342564
PSB913-2_map1	0003.CSV	1392.41	0.035541
PSB913-2_map1	0003.CSV	1396.27	0.0376346
PSB913-2_map1	0003.CSV	1400.13	0.039952
PSB913-2_map1	0003.CSV	1403.98	0.0419566
PSB913-2_map1	0003.CSV	1407.84	0.0439622
PSB913-2_map1	0003.CSV	1411.7	0.0459361
PSB913-2_map1	0003.CSV	1415.55	0.0475211
PSB913-2_map1	0003.CSV	1419.41	0.0502385
PSB913-2_map1	0003.CSV	1423.27	0.0525333
PSB913-2_map1	0003.CSV	1427.12	0.0546111
PSB913-2_map1	0003.CSV	1430.98	0.0567564
PSB913-2_map1	0003.CSV	1434.84	0.059375
PSB913-2_map1	0003.CSV	1438.7	0.0616039
PSB913-2_map1	0003.CSV	1442.55	0.0620796
PSB913-2_map1	0003.CSV	1446.41	0.0605056
PSB913-2_map1	0003.CSV	1450.27	0.0579513
PSB913-2_map1	0003.CSV	1454.12	0.055224
PSB913-2_map1	0003.CSV	1457.98	0.0534779
PSB913-2_map1	0003.CSV	1461.84	0.0523631
PSB913-2_map1	0003.CSV	1465.7	0.0515999
PSB913-2_map1	0003.CSV	1469.55	0.0495966
PSB913-2_map1	0003.CSV	1473.41	0.0460759
PSB913-2_map1	0003.CSV	1477.27	0.0414877
PSB913-2_map1	0003.CSV	1481.12	0.0382997
PSB913-2_map1	0003.CSV	1484.98	0.0350582
PSB913-2_map1	0003.CSV	1488.84	0.0314172
PSB913-2_map1	0003.CSV	1492.7	0.0275875
PSB913-2_map1	0003.CSV	1496.55	0.0246115
PSB913-2_map1	0003.CSV	1500.41	0.0210534
PSB913-2_map1	0003.CSV	1504.27	0.0187145
PSB913-2_map1	0003.CSV	1508.12	0.014943
PSB913-2_map1	0003.CSV	1511.98	0.0121489
PSB913-2_map1	0003.CSV	1515.84	0.00987859
PSB913-2_map1	0003.CSV	1519.7	0.00710828
PSB913-2_map1	0003.CSV	1523.55	0.00395581
PSB913-2_map1	0003.CSV	1527.41	0.00184611
PSB913-2_map1	0003.CSV	1531.27	-0.000164049
PSB913-2_map1	0003.CSV	1535.12	-0.00194181
PSB913-2_map1	0003.CSV	1538.98	-0.00380454
PSB913-2_map1	0003.CSV	1542.84	-0.00603711
PSB913-2_map1	0003.CSV	1546.7	-0.00778105
PSB913-2_map1	0003.CSV	1550.55	-0.0094362
PSB913-2_map1	0003.CSV	1554.41	-0.0112575
PSB913-2_map1	0003.CSV	1558.27	-0.0131345
PSB913-2_map1	0003.CSV	1562.12	-0.015031
PSB913-2_map1	0003.CSV	1565.98	-0.0162849
PSB913-2_map1	0003.CSV	1569.84	-0.017834
PSB913-2_map1	0003.CSV	1573.69	-0.0192643
PSB913-2_map1	0003.CSV	1577.55	-0.0207199
PSB913-2_map1	0003.CSV	1581.41	-0.0218806
PSB913-2_map1	0003.CSV	1585.27	-0.0228289
PSB913-2_map1	0003.CSV	1589.12	-0.0235012
PSB913-2_map1	0003.CSV	1592.98	-0.0238196
PSB913-2_map1	0003.CSV	1596.84	-0.0239256
PSB913-2_map1	0003.CSV	1600.69	-0.0241257
PSB913-2_map1	0003.CSV	1604.55	-0.0242992
PSB913-2_map1	0003.CSV	1608.41	-0.024495
PSB913-2_map1	0003.CSV	1612.27	-0.0247153
PSB913-2_map1	0003.CSV	1616.12	-0.024881
PSB913-2_map1	0003.CSV	1619.98	-0.0248821
PSB913-2_map1	0003.CSV	1623.84	-0.0250037
PSB913-2_map1	0003.CSV	1627.69	-0.0250609
PSB913-2_map1	0003.CSV	1631.55	-0.0253957
PSB913-2_map1	0003.CSV	1635.41	-0.0253426
PSB913-2_map1	0003.CSV	1639.27	-0.0251155
PSB913-2_map1	0003.CSV	1643.12	-0.0255439
PSB913-2_map1	0003.CSV	1646.98	-0.0257675
PSB913-2_map1	0003.CSV	1650.84	-0.0256291
PSB913-2_map1	0003.CSV	1654.69	-0.0253959
PSB913-2_map1	0003.CSV	1658.55	-0.0256466
PSB913-2_map1	0003.CSV	1662.41	-0.0260614
PSB913-2_map1	0003.CSV	1666.27	-0.0263185
PSB913-2_map1	0003.CSV	1670.12	-0.0264454
PSB913-2_map1	0003.CSV	1673.98	-0.0263852
PSB913-2_map1	0003.CSV	1677.84	-0.0268296
PSB913-2_map1	0003.CSV	1681.69	-0.0272065
PSB913-2_map1	0003.CSV	1685.55	-0.0269187
PSB913-2_map1	0003.CSV	1689.41	-0.02694
PSB913-2_map1	0003.CSV	1693.27	-0.0275885
PSB913-2_map1	0003.CSV	1697.12	-0.0277861
PSB913-2_map1	0003.CSV	1700.98	-0.0273047
PSB913-2_map1	0003.CSV	1704.84	-0.0271243
PSB913-2_map1	0003.CSV	1708.69	-0.0270806
PSB913-2_map1	0003.CSV	1712.55	-0.027161
PSB913-2_map1	0003.CSV	1716.41	-0.0266038
PSB913-2_map1	0003.CSV	1720.27	-0.025626
PSB913-2_map1	0003.CSV	1724.12	-0.0256344
[truncated: 108,465 more rows]

## Sheet: PSB913-2_map2
Map	Select spectrum number	Wavenumbers	Absorbance
PSB913-2_map2	0001.CSV	674.992	0.00666318
PSB913-2_map2	0001.CSV	678.849	0.00682182
PSB913-2_map2	0001.CSV	682.706	0.00693254
PSB913-2_map2	0001.CSV	686.563	0.00771351
PSB913-2_map2	0001.CSV	690.42	0.00968996
PSB913-2_map2	0001.CSV	694.277	0.0145982
PSB913-2_map2	0001.CSV	698.134	0.0181744
PSB913-2_map2	0001.CSV	701.991	0.0140529
PSB913-2_map2	0001.CSV	705.849	0.0112742
PSB913-2_map2	0001.CSV	709.706	0.0174086
PSB913-2_map2	0001.CSV	713.563	0.0156509
PSB913-2_map2	0001.CSV	717.42	0.00329529
PSB913-2_map2	0001.CSV	721.277	-0.00304061
PSB913-2_map2	0001.CSV	725.134	-0.00288337
PSB913-2_map2	0001.CSV	728.991	-0.00214839
PSB913-2_map2	0001.CSV	732.848	-0.00149502
PSB913-2_map2	0001.CSV	736.705	-0.000863839
PSB913-2_map2	0001.CSV	740.562	-0.000209224
PSB913-2_map2	0001.CSV	744.42	5.00327e-06
PSB913-2_map2	0001.CSV	748.277	-0.000155768
PSB913-2_map2	0001.CSV	752.134	-0.000770577
PSB913-2_map2	0001.CSV	755.991	-0.000964157
PSB913-2_map2	0001.CSV	759.848	-0.000916282
PSB913-2_map2	0001.CSV	763.705	-0.000717223
PSB913-2_map2	0001.CSV	767.562	-0.000722615
PSB913-2_map2	0001.CSV	771.419	-0.000536804
PSB913-2_map2	0001.CSV	775.276	-0.00056973
PSB913-2_map2	0001.CSV	779.133	-0.00058568
PSB913-2_map2	0001.CSV	782.99	-0.000606492
PSB913-2_map2	0001.CSV	786.848	-0.000304892
PSB913-2_map2	0001.CSV	790.705	-0.000164711
PSB913-2_map2	0001.CSV	794.562	0.00015483
PSB913-2_map2	0001.CSV	798.419	0.000644338
PSB913-2_map2	0001.CSV	802.276	0.00129465
PSB913-2_map2	0001.CSV	806.133	0.00174862
PSB913-2_map2	0001.CSV	809.99	0.00249082
PSB913-2_map2	0001.CSV	813.847	0.00354773
PSB913-2_map2	0001.CSV	817.704	0.00511713
PSB913-2_map2	0001.CSV	821.562	0.0068093
PSB913-2_map2	0001.CSV	825.419	0.0090496
PSB913-2_map2	0001.CSV	829.276	0.0115385
PSB913-2_map2	0001.CSV	833.133	0.0144386
PSB913-2_map2	0001.CSV	836.99	0.0181314
PSB913-2_map2	0001.CSV	840.847	0.0220877
PSB913-2_map2	0001.CSV	844.704	0.0251448
PSB913-2_map2	0001.CSV	848.561	0.0299
PSB913-2_map2	0001.CSV	852.418	0.0321137
PSB913-2_map2	0001.CSV	856.275	0.0269325
PSB913-2_map2	0001.CSV	860.132	0.0180562
PSB913-2_map2	0001.CSV	863.99	0.00981073
PSB913-2_map2	0001.CSV	867.847	0.00333005
PSB913-2_map2	0001.CSV	871.704	-0.00126808
PSB913-2_map2	0001.CSV	875.561	-0.00455095
PSB913-2_map2	0001.CSV	879.418	-0.00625606
PSB913-2_map2	0001.CSV	883.275	-0.00702573
PSB913-2_map2	0001.CSV	887.132	-0.00737417
PSB913-2_map2	0001.CSV	890.989	-0.00753084
PSB913-2_map2	0001.CSV	894.846	-0.00745639
PSB913-2_map2	0001.CSV	898.703	-0.00741209
PSB913-2_map2	0001.CSV	902.561	-0.00722798
PSB913-2_map2	0001.CSV	906.418	-0.00717121
PSB913-2_map2	0001.CSV	910.275	-0.0073701
PSB913-2_map2	0001.CSV	914.132	-0.00764281
PSB913-2_map2	0001.CSV	917.989	-0.0075676
PSB913-2_map2	0001.CSV	921.846	-0.00751058
PSB913-2_map2	0001.CSV	925.703	-0.00732908
PSB913-2_map2	0001.CSV	929.56	-0.00724558
PSB913-2_map2	0001.CSV	933.417	-0.00720168
PSB913-2_map2	0001.CSV	937.274	-0.007249
PSB913-2_map2	0001.CSV	941.131	-0.00724619
PSB913-2_map2	0001.CSV	944.989	-0.00736437
PSB913-2_map2	0001.CSV	948.846	-0.00728846
PSB913-2_map2	0001.CSV	952.703	-0.00715583
PSB913-2_map2	0001.CSV	956.56	-0.00699215
PSB913-2_map2	0001.CSV	960.417	-0.00697708
PSB913-2_map2	0001.CSV	964.274	-0.00697219
PSB913-2_map2	0001.CSV	968.131	-0.00697809
PSB913-2_map2	0001.CSV	971.988	-0.00669577
PSB913-2_map2	0001.CSV	975.845	-0.00635677
PSB913-2_map2	0001.CSV	979.702	-0.0060109
PSB913-2_map2	0001.CSV	983.559	-0.00578615
PSB913-2_map2	0001.CSV	987.417	-0.00557341
PSB913-2_map2	0001.CSV	991.274	-0.00543499
PSB913-2_map2	0001.CSV	995.131	-0.00526356
PSB913-2_map2	0001.CSV	998.988	-0.00526336
PSB913-2_map2	0001.CSV	1002.85	-0.00524205
PSB913-2_map2	0001.CSV	1006.7	-0.0052448
PSB913-2_map2	0001.CSV	1010.56	-0.00508793
PSB913-2_map2	0001.CSV	1014.42	-0.00491741
PSB913-2_map2	0001.CSV	1018.27	-0.00463892
PSB913-2_map2	0001.CSV	1022.13	-0.00436195
PSB913-2_map2	0001.CSV	1025.99	-0.00404516
PSB913-2_map2	0001.CSV	1029.85	-0.00384431
PSB913-2_map2	0001.CSV	1033.7	-0.00366949
PSB913-2_map2	0001.CSV	1037.56	-0.00352576
PSB913-2_map2	0001.CSV	1041.42	-0.00321878
PSB913-2_map2	0001.CSV	1045.27	-0.00309378
PSB913-2_map2	0001.CSV	1049.13	-0.00292596
PSB913-2_map2	0001.CSV	1052.99	-0.00268317
PSB913-2_map2	0001.CSV	1056.84	-0.00226512
PSB913-2_map2	0001.CSV	1060.7	-0.00192928
PSB913-2_map2	0001.CSV	1064.56	-0.00174375
PSB913-2_map2	0001.CSV	1068.42	-0.00188824
PSB913-2_map2	0001.CSV	1072.27	-0.00192542
PSB913-2_map2	0001.CSV	1076.13	-0.00152232
PSB913-2_map2	0001.CSV	1079.99	-0.000331479
PSB913-2_map2	0001.CSV	1083.84	-0.00117721
PSB913-2_map2	0001.CSV	1087.7	-0.00396804
PSB913-2_map2	0001.CSV	1091.56	-0.00518659
PSB913-2_map2	0001.CSV	1095.41	-0.00513774
PSB913-2_map2	0001.CSV	1099.27	-0.00493906
PSB913-2_map2	0001.CSV	1103.13	-0.00456246
PSB913-2_map2	0001.CSV	1106.99	-0.0042596
PSB913-2_map2	0001.CSV	1110.84	-0.0039644
PSB913-2_map2	0001.CSV	1114.7	-0.00378732
PSB913-2_map2	0001.CSV	1118.56	-0.0037009
PSB913-2_map2	0001.CSV	1122.41	-0.00380828
PSB913-2_map2	0001.CSV	1126.27	-0.00397625
PSB913-2_map2	0001.CSV	1130.13	-0.00419472
PSB913-2_map2	0001.CSV	1133.99	-0.00438104
PSB913-2_map2	0001.CSV	1137.84	-0.00457374
PSB913-2_map2	0001.CSV	1141.7	-0.00468061
PSB913-2_map2	0001.CSV	1145.56	-0.00475728
PSB913-2_map2	0001.CSV	1149.41	-0.00480391
PSB913-2_map2	0001.CSV	1153.27	-0.00482993
PSB913-2_map2	0001.CSV	1157.13	-0.0047229
PSB913-2_map2	0001.CSV	1160.99	-0.00469284
PSB913-2_map2	0001.CSV	1164.84	-0.00470805
PSB913-2_map2	0001.CSV	1168.7	-0.00487479
PSB913-2_map2	0001.CSV	1172.56	-0.00501814
PSB913-2_map2	0001.CSV	1176.41	-0.00511809
PSB913-2_map2	0001.CSV	1180.27	-0.00513093
PSB913-2_map2	0001.CSV	1184.13	-0.00519926
PSB913-2_map2	0001.CSV	1187.99	-0.00523098
PSB913-2_map2	0001.CSV	1191.84	-0.00525488
PSB913-2_map2	0001.CSV	1195.7	-0.00520142
PSB913-2_map2	0001.CSV	1199.56	-0.00517834
PSB913-2_map2	0001.CSV	1203.41	-0.00505099
PSB913-2_map2	0001.CSV	1207.27	-0.0049011
PSB913-2_map2	0001.CSV	1211.13	-0.00466852
PSB913-2_map2	0001.CSV	1214.98	-0.00444011
PSB913-2_map2	0001.CSV	1218.84	-0.00417802
PSB913-2_map2	0001.CSV	1222.7	-0.00398899
PSB913-2_map2	0001.CSV	1226.56	-0.00370655
PSB913-2_map2	0001.CSV	1230.41	-0.00344884
PSB913-2_map2	0001.CSV	1234.27	-0.0031751
PSB913-2_map2	0001.CSV	1238.13	-0.00293567
PSB913-2_map2	0001.CSV	1241.98	-0.00257311
PSB913-2_map2	0001.CSV	1245.84	-0.00222662
PSB913-2_map2	0001.CSV	1249.7	-0.00192525
PSB913-2_map2	0001.CSV	1253.56	-0.00181675
PSB913-2_map2	0001.CSV	1257.41	-0.00177926
PSB913-2_map2	0001.CSV	1261.27	-0.00175824
PSB913-2_map2	0001.CSV	1265.13	-0.0015732
PSB913-2_map2	0001.CSV	1268.98	-0.001437
PSB913-2_map2	0001.CSV	1272.84	-0.00130878
PSB913-2_map2	0001.CSV	1276.7	-0.00121852
PSB913-2_map2	0001.CSV	1280.56	-0.00112246
PSB913-2_map2	0001.CSV	1284.41	-0.00113234
PSB913-2_map2	0001.CSV	1288.27	-0.00112437
PSB913-2_map2	0001.CSV	1292.13	-0.00117378
PSB913-2_map2	0001.CSV	1295.98	-0.0011866
PSB913-2_map2	0001.CSV	1299.84	-0.00121366
PSB913-2_map2	0001.CSV	1303.7	-0.00116931
PSB913-2_map2	0001.CSV	1307.56	-0.00111261
PSB913-2_map2	0001.CSV	1311.41	-0.00095523
PSB913-2_map2	0001.CSV	1315.27	-0.000793398
PSB913-2_map2	0001.CSV	1319.13	-0.000556659
PSB913-2_map2	0001.CSV	1322.98	-0.000381073
PSB913-2_map2	0001.CSV	1326.84	-0.000157921
PSB913-2_map2	0001.CSV	1330.7	-7.09063e-06
PSB913-2_map2	0001.CSV	1334.56	0.00017253
PSB913-2_map2	0001.CSV	1338.41	0.000587997
PSB913-2_map2	0001.CSV	1342.27	0.00113134
PSB913-2_map2	0001.CSV	1346.13	0.00135438
PSB913-2_map2	0001.CSV	1349.98	0.00177956
PSB913-2_map2	0001.CSV	1353.84	0.00225462
PSB913-2_map2	0001.CSV	1357.7	0.0027457
PSB913-2_map2	0001.CSV	1361.56	0.00328528
PSB913-2_map2	0001.CSV	1365.41	0.00395494
PSB913-2_map2	0001.CSV	1369.27	0.00431738
PSB913-2_map2	0001.CSV	1373.13	0.00497664
PSB913-2_map2	0001.CSV	1376.98	0.00569726
PSB913-2_map2	0001.CSV	1380.84	0.00615223
PSB913-2_map2	0001.CSV	1384.7	0.00653525
PSB913-2_map2	0001.CSV	1388.56	0.00723696
PSB913-2_map2	0001.CSV	1392.41	0.00756746
PSB913-2_map2	0001.CSV	1396.27	0.00820196
PSB913-2_map2	0001.CSV	1400.13	0.00872372
PSB913-2_map2	0001.CSV	1403.98	0.00910928
PSB913-2_map2	0001.CSV	1407.84	0.00950653
PSB913-2_map2	0001.CSV	1411.7	0.00986618
PSB913-2_map2	0001.CSV	1415.55	0.0101136
PSB913-2_map2	0001.CSV	1419.41	0.0108623
PSB913-2_map2	0001.CSV	1423.27	0.01131
PSB913-2_map2	0001.CSV	1427.12	0.0116042
PSB913-2_map2	0001.CSV	1430.98	0.0118945
PSB913-2_map2	0001.CSV	1434.84	0.0123752
PSB913-2_map2	0001.CSV	1438.7	0.0127273
PSB913-2_map2	0001.CSV	1442.55	0.0125416
PSB913-2_map2	0001.CSV	1446.41	0.0121668
PSB913-2_map2	0001.CSV	1450.27	0.0117779
PSB913-2_map2	0001.CSV	1454.12	0.0109619
PSB913-2_map2	0001.CSV	1457.98	0.0103968
PSB913-2_map2	0001.CSV	1461.84	0.00968136
PSB913-2_map2	0001.CSV	1465.7	0.00918149
PSB913-2_map2	0001.CSV	1469.55	0.00852833
PSB913-2_map2	0001.CSV	1473.41	0.0081524
PSB913-2_map2	0001.CSV	1477.27	0.00763881
PSB913-2_map2	0001.CSV	1481.12	0.00690944
PSB913-2_map2	0001.CSV	1484.98	0.00607044
PSB913-2_map2	0001.CSV	1488.84	0.00553796
PSB913-2_map2	0001.CSV	1492.7	0.00481275
PSB913-2_map2	0001.CSV	1496.55	0.00375754
PSB913-2_map2	0001.CSV	1500.41	0.00248446
PSB913-2_map2	0001.CSV	1504.27	0.0014536
PSB913-2_map2	0001.CSV	1508.12	0.000203889
PSB913-2_map2	0001.CSV	1511.98	-0.0010272
PSB913-2_map2	0001.CSV	1515.84	-0.00249125
PSB913-2_map2	0001.CSV	1519.7	-0.00428614
PSB913-2_map2	0001.CSV	1523.55	-0.00637545
PSB913-2_map2	0001.CSV	1527.41	-0.00797993
PSB913-2_map2	0001.CSV	1531.27	-0.00949971
PSB913-2_map2	0001.CSV	1535.12	-0.0108152
PSB913-2_map2	0001.CSV	1538.98	-0.0121914
PSB913-2_map2	0001.CSV	1542.84	-0.0132364
PSB913-2_map2	0001.CSV	1546.7	-0.0140469
PSB913-2_map2	0001.CSV	1550.55	-0.014921
PSB913-2_map2	0001.CSV	1554.41	-0.0158152
PSB913-2_map2	0001.CSV	1558.27	-0.0165089
PSB913-2_map2	0001.CSV	1562.12	-0.0171365
PSB913-2_map2	0001.CSV	1565.98	-0.0178238
PSB913-2_map2	0001.CSV	1569.84	-0.0185316
PSB913-2_map2	0001.CSV	1573.69	-0.0192233
PSB913-2_map2	0001.CSV	1577.55	-0.0198583
PSB913-2_map2	0001.CSV	1581.41	-0.0206587
PSB913-2_map2	0001.CSV	1585.27	-0.021448
PSB913-2_map2	0001.CSV	1589.12	-0.0219815
PSB913-2_map2	0001.CSV	1592.98	-0.0222811
PSB913-2_map2	0001.CSV	1596.84	-0.0223903
PSB913-2_map2	0001.CSV	1600.69	-0.0225009
PSB913-2_map2	0001.CSV	1604.55	-0.0225927
PSB913-2_map2	0001.CSV	1608.41	-0.0226823
PSB913-2_map2	0001.CSV	1612.27	-0.0228957
PSB913-2_map2	0001.CSV	1616.12	-0.0230254
PSB913-2_map2	0001.CSV	1619.98	-0.0230681
PSB913-2_map2	0001.CSV	1623.84	-0.0232654
PSB913-2_map2	0001.CSV	1627.69	-0.0232506
PSB913-2_map2	0001.CSV	1631.55	-0.0235236
PSB913-2_map2	0001.CSV	1635.41	-0.0234572
PSB913-2_map2	0001.CSV	1639.27	-0.0231569
PSB913-2_map2	0001.CSV	1643.12	-0.0235045
PSB913-2_map2	0001.CSV	1646.98	-0.0235102
PSB913-2_map2	0001.CSV	1650.84	-0.0232155
PSB913-2_map2	0001.CSV	1654.69	-0.0229031
PSB913-2_map2	0001.CSV	1658.55	-0.0233173
PSB913-2_map2	0001.CSV	1662.41	-0.0236569
PSB913-2_map2	0001.CSV	1666.27	-0.0238029
PSB913-2_map2	0001.CSV	1670.12	-0.0237812
PSB913-2_map2	0001.CSV	1673.98	-0.0235415
PSB913-2_map2	0001.CSV	1677.84	-0.023848
PSB913-2_map2	0001.CSV	1681.69	-0.0240901
PSB913-2_map2	0001.CSV	1685.55	-0.0236485
PSB913-2_map2	0001.CSV	1689.41	-0.0236236
PSB913-2_map2	0001.CSV	1693.27	-0.0241203
PSB913-2_map2	0001.CSV	1697.12	-0.024165
PSB913-2_map2	0001.CSV	1700.98	-0.0235659
PSB913-2_map2	0001.CSV	1704.84	-0.023369
PSB913-2_map2	0001.CSV	1708.69	-0.0234895
PSB913-2_map2	0001.CSV	1712.55	-0.0238257
PSB913-2_map2	0001.CSV	1716.41	-0.0234359
PSB913-2_map2	0001.CSV	1720.27	-0.0227591
PSB913-2_map2	0001.CSV	1724.12	-0.0230866
PSB913-2_map2	0001.CSV	1727.98	-0.0234906
PSB913-2_map2	0001.CSV	1731.84	-0.0236528
PSB913-2_map2	0001.CSV	1735.69	-0.0235781
PSB913-2_map2	0001.CSV	1739.55	-0.0240627
PSB913-2_map2	0001.CSV	1743.41	-0.0245313
PSB913-2_map2	0001.CSV	1747.27	-0.0248034
PSB913-2_map2	0001.CSV	1751.12	-0.0250204
PSB913-2_map2	0001.CSV	1754.98	-0.0255601
PSB913-2_map2	0001.CSV	1758.84	-0.0258818
PSB913-2_map2	0001.CSV	1762.69	-0.0259077
PSB913-2_map2	0001.CSV	1766.55	-0.0260719
PSB913-2_map2	0001.CSV	1770.41	-0.0259492
PSB913-2_map2	0001.CSV	1774.26	-0.0252046
PSB913-2_map2	0001.CSV	1778.12	-0.0249641
PSB913-2_map2	0001.CSV	1781.98	-0.0246066
PSB913-2_map2	0001.CSV	1785.84	-0.0245081
PSB913-2_map2	0001.CSV	1789.69	-0.0247347
PSB913-2_map2	0001.CSV	1793.55	-0.0248821
PSB913-2_map2	0001.CSV	1797.41	-0.025137
PSB913-2_map2	0001.CSV	1801.26	-0.0252831
PSB913-2_map2	0001.CSV	1805.12	-0.0254414
PSB913-2_map2	0001.CSV	1808.98	-0.025558
PSB913-2_map2	0001.CSV	1812.84	-0.0254263
PSB913-2_map2	0001.CSV	1816.69	-0.0255125
PSB913-2_map2	0001.CSV	1820.55	-0.025567
PSB913-2_map2	0001.CSV	1824.41	-0.0255262
PSB913-2_map2	0001.CSV	1828.26	-0.0251983
PSB913-2_map2	0001.CSV	1832.12	-0.0249989
PSB913-2_map2	0001.CSV	1835.98	-0.0250539
PSB913-2_map2	0001.CSV	1839.84	-0.0251756
PSB913-2_map2	0001.CSV	1843.69	-0.0249874
PSB913-2_map2	0001.CSV	1847.55	-0.0246517
PSB913-2_map2	0001.CSV	1851.41	-0.0247172
PSB913-2_map2	0001.CSV	1855.26	-0.024786
PSB913-2_map2	0001.CSV	1859.12	-0.0246923
PSB913-2_map2	0001.CSV	1862.98	-0.0246946
PSB913-2_map2	0001.CSV	1866.84	-0.0245235
PSB913-2_map2	0001.CSV	1870.69	-0.0240958
PSB913-2_map2	0001.CSV	1874.55	-0.0241882
PSB913-2_map2	0001.CSV	1878.41	-0.0242394
PSB913-2_map2	0001.CSV	1882.26	-0.0242055
PSB913-2_map2	0001.CSV	1886.12	-0.024221
PSB913-2_map2	0001.CSV	1889.98	-0.0241181
PSB913-2_map2	0001.CSV	1893.83	-0.0239867
PSB913-2_map2	0001.CSV	1897.69	-0.0239129
PSB913-2_map2	0001.CSV	1901.55	-0.0239333
PSB913-2_map2	0001.CSV	1905.41	-0.0239543
PSB913-2_map2	0001.CSV	1909.26	-0.0238862
PSB913-2_map2	0001.CSV	1913.12	-0.0238899
PSB913-2_map2	0001.CSV	1916.98	-0.0239136
PSB913-2_map2	0001.CSV	1920.83	-0.0237822
PSB913-2_map2	0001.CSV	1924.69	-0.0237397
PSB913-2_map2	0001.CSV	1928.55	-0.0238435
PSB913-2_map2	0001.CSV	1932.4	-0.0238687
PSB913-2_map2	0001.CSV	1936.26	-0.0238347
PSB913-2_map2	0001.CSV	1940.12	-0.0238539
PSB913-2_map2	0001.CSV	1943.98	-0.0236919
PSB913-2_map2	0001.CSV	1947.83	-0.0236824
PSB913-2_map2	0001.CSV	1951.69	-0.0237412
PSB913-2_map2	0001.CSV	1955.55	-0.0237404
PSB913-2_map2	0001.CSV	1959.4	-0.0237531
PSB913-2_map2	0001.CSV	1963.26	-0.0238476
PSB913-2_map2	0001.CSV	1967.12	-0.0237998
PSB913-2_map2	0001.CSV	1970.98	-0.0237692
PSB913-2_map2	0001.CSV	1974.83	-0.023833
PSB913-2_map2	0001.CSV	1978.69	-0.0238981
PSB913-2_map2	0001.CSV	1982.55	-0.023933
PSB913-2_map2	0001.CSV	1986.4	-0.0239944
PSB913-2_map2	0001.CSV	1990.26	-0.0239991
PSB913-2_map2	0001.CSV	1994.12	-0.0239451
PSB913-2_map2	0001.CSV	1997.98	-0.0239746
PSB913-2_map2	0001.CSV	2001.83	-0.0240296
PSB913-2_map2	0001.CSV	2005.69	-0.0240742
PSB913-2_map2	0001.CSV	2009.55	-0.0240931
PSB913-2_map2	0001.CSV	2013.4	-0.0241302
PSB913-2_map2	0001.CSV	2017.26	-0.0241104
PSB913-2_map2	0001.CSV	2021.12	-0.0240446
PSB913-2_map2	0001.CSV	2024.97	-0.0240976
PSB913-2_map2	0001.CSV	2028.83	-0.024163
PSB913-2_map2	0001.CSV	2032.69	-0.0242053
PSB913-2_map2	0001.CSV	2036.55	-0.0241932
PSB913-2_map2	0001.CSV	2040.4	-0.0241995
PSB913-2_map2	0001.CSV	2044.26	-0.0242364
PSB913-2_map2	0001.CSV	2048.12	-0.024251
PSB913-2_map2	0001.CSV	2051.97	-0.0242301
PSB913-2_map2	0001.CSV	2055.83	-0.0242417
PSB913-2_map2	0001.CSV	2059.69	-0.0242769
PSB913-2_map2	0001.CSV	2063.55	-0.0242899
PSB913-2_map2	0001.CSV	2067.4	-0.0242099
PSB913-2_map2	0001.CSV	2071.26	-0.0241741
PSB913-2_map2	0001.CSV	2075.12	-0.0241373
PSB913-2_map2	0001.CSV	2078.97	-0.0241012
PSB913-2_map2	0001.CSV	2082.83	-0.024097
PSB913-2_map2	0001.CSV	2086.69	-0.0241238
PSB913-2_map2	0001.CSV	2090.55	-0.0240471
PSB913-2_map2	0001.CSV	2094.4	-0.0240126
PSB913-2_map2	0001.CSV	2098.26	-0.0239793
PSB913-2_map2	0001.CSV	2102.12	-0.0238937
PSB913-2_map2	0001.CSV	2105.97	-0.0238203
PSB913-2_map2	0001.CSV	2109.83	-0.0238092
PSB913-2_map2	0001.CSV	2113.69	-0.0237517
PSB913-2_map2	0001.CSV	2117.55	-0.0236683
PSB913-2_map2	0001.CSV	2121.4	-0.0235592
PSB913-2_map2	0001.CSV	2125.26	-0.023494
PSB913-2_map2	0001.CSV	2129.12	-0.0234376
PSB913-2_map2	0001.CSV	2132.97	-0.0233509
PSB913-2_map2	0001.CSV	2136.83	-0.0232556
PSB913-2_map2	0001.CSV	2140.69	-0.023184
PSB913-2_map2	0001.CSV	2144.55	-0.023102
PSB913-2_map2	0001.CSV	2148.4	-0.0230386
PSB913-2_map2	0001.CSV	2152.26	-0.0229526
PSB913-2_map2	0001.CSV	2156.12	-0.0228708
PSB913-2_map2	0001.CSV	2159.97	-0.0227596
PSB913-2_map2	0001.CSV	2163.83	-0.0226642
PSB913-2_map2	0001.CSV	2167.69	-0.0225793
PSB913-2_map2	0001.CSV	2171.55	-0.0225069
PSB913-2_map2	0001.CSV	2175.4	-0.022426
PSB913-2_map2	0001.CSV	2179.26	-0.0223533
PSB913-2_map2	0001.CSV	2183.12	-0.0222494
PSB913-2_map2	0001.CSV	2186.97	-0.0222057
PSB913-2_map2	0001.CSV	2190.83	-0.0221788
PSB913-2_map2	0001.CSV	2194.69	-0.0221395
PSB913-2_map2	0001.CSV	2198.55	-0.022093
PSB913-2_map2	0001.CSV	2202.4	-0.0220771
PSB913-2_map2	0001.CSV	2206.26	-0.0220347
PSB913-2_map2	0001.CSV	2210.12	-0.0219607
PSB913-2_map2	0001.CSV	2213.97	-0.0219208
PSB913-2_map2	0001.CSV	2217.83	-0.0219377
PSB913-2_map2	0001.CSV	2221.69	-0.0219247
PSB913-2_map2	0001.CSV	2225.54	-0.0219273
PSB913-2_map2	0001.CSV	2229.4	-0.0219663
PSB913-2_map2	0001.CSV	2233.26	-0.0219461
PSB913-2_map2	0001.CSV	2237.12	-0.0219188
PSB913-2_map2	0001.CSV	2240.97	-0.021956
PSB913-2_map2	0001.CSV	2244.83	-0.0219932
PSB913-2_map2	0001.CSV	2248.69	-0.0220322
PSB913-2_map2	0001.CSV	2252.54	-0.0220291
PSB913-2_map2	0001.CSV	2256.4	-0.0220108
PSB913-2_map2	0001.CSV	2260.26	-0.0220145
PSB913-2_map2	0001.CSV	2264.11	-0.0220318
PSB913-2_map2	0001.CSV	2267.97	-0.0220591
PSB913-2_map2	0001.CSV	2271.83	-0.0221485
PSB913-2_map2	0001.CSV	2275.69	-0.0222316
PSB913-2_map2	0001.CSV	2279.54	-0.0222698
PSB913-2_map2	0001.CSV	2283.4	-0.0222959
PSB913-2_map2	0001.CSV	2287.26	-0.0223926
PSB913-2_map2	0001.CSV	2291.11	-0.0224315
PSB913-2_map2	0001.CSV	2294.97	-0.0224461
PSB913-2_map2	0001.CSV	2298.83	-0.0224791
PSB913-2_map2	0001.CSV	2302.69	-0.0225932
PSB913-2_map2	0001.CSV	2306.54	-0.0227525
PSB913-2_map2	0001.CSV	2310.4	-0.0229234
PSB913-2_map2	0001.CSV	2314.26	-0.0230242
PSB913-2_map2	0001.CSV	2318.11	-0.0232273
PSB913-2_map2	0001.CSV	2321.97	-0.0237408
PSB913-2_map2	0001.CSV	2325.83	-0.0245368
PSB913-2_map2	0001.CSV	2329.69	-0.0252969
PSB913-2_map2	0001.CSV	2333.54	-0.0257256
PSB913-2_map2	0001.CSV	2337.4	-0.0258892
PSB913-2_map2	0001.CSV	2341.26	-0.025631
PSB913-2_map2	0001.CSV	2345.11	-0.0241802
PSB913-2_map2	0001.CSV	2348.97	-0.0240685
PSB913-2_map2	0001.CSV	2352.83	-0.0257983
PSB913-2_map2	0001.CSV	2356.69	-0.029147
PSB913-2_map2	0001.CSV	2360.54	-0.0310294
PSB913-2_map2	0001.CSV	2364.4	-0.0289431
PSB913-2_map2	0001.CSV	2368.26	-0.0255339
PSB913-2_map2	0001.CSV	2372.11	-0.0233956
PSB913-2_map2	0001.CSV	2375.97	-0.0226257
PSB913-2_map2	0001.CSV	2379.83	-0.02251
PSB913-2_map2	0001.CSV	2383.69	-0.0226273
PSB913-2_map2	0001.CSV	2387.54	-0.0228733
PSB913-2_map2	0001.CSV	2391.4	-0.0230107
PSB913-2_map2	0001.CSV	2395.26	-0.0229646
PSB913-2_map2	0001.CSV	2399.11	-0.0229382
PSB913-2_map2	0001.CSV	2402.97	-0.0229197
PSB913-2_map2	0001.CSV	2406.83	-0.02291
PSB913-2_map2	0001.CSV	2410.68	-0.0229242
PSB913-2_map2	0001.CSV	2414.54	-0.0228859
PSB913-2_map2	0001.CSV	2418.4	-0.0228833
PSB913-2_map2	0001.CSV	2422.26	-0.0228342
PSB913-2_map2	0001.CSV	2426.11	-0.0227626
PSB913-2_map2	0001.CSV	2429.97	-0.0227633
PSB913-2_map2	0001.CSV	2433.83	-0.0227829
PSB913-2_map2	0001.CSV	2437.68	-0.0227514
PSB913-2_map2	0001.CSV	2441.54	-0.022694
PSB913-2_map2	0001.CSV	2445.4	-0.0226502
PSB913-2_map2	0001.CSV	2449.26	-0.0226659
PSB913-2_map2	0001.CSV	2453.11	-0.0226302
PSB913-2_map2	0001.CSV	2456.97	-0.0225687
PSB913-2_map2	0001.CSV	2460.83	-0.022512
PSB913-2_map2	0001.CSV	2464.68	-0.0224554
PSB913-2_map2	0001.CSV	2468.54	-0.0224597
PSB913-2_map2	0001.CSV	2472.4	-0.0224787
PSB913-2_map2	0001.CSV	2476.26	-0.0224105
PSB913-2_map2	0001.CSV	2480.11	-0.02237
PSB913-2_map2	0001.CSV	2483.97	-0.0223259
PSB913-2_map2	0001.CSV	2487.83	-0.022253
PSB913-2_map2	0001.CSV	2491.68	-0.0222397
PSB913-2_map2	0001.CSV	2495.54	-0.0222481
PSB913-2_map2	0001.CSV	2499.4	-0.0222277
PSB913-2_map2	0001.CSV	2503.26	-0.0222133
PSB913-2_map2	0001.CSV	2507.11	-0.0222325
PSB913-2_map2	0001.CSV	2510.97	-0.0222569
PSB913-2_map2	0001.CSV	2514.83	-0.0222264
PSB913-2_map2	0001.CSV	2518.68	-0.0221675
PSB913-2_map2	0001.CSV	2522.54	-0.0221306
PSB913-2_map2	0001.CSV	2526.4	-0.0221899
PSB913-2_map2	0001.CSV	2530.26	-0.0222981
PSB913-2_map2	0001.CSV	2534.11	-0.022337
PSB913-2_map2	0001.CSV	2537.97	-0.0223337
PSB913-2_map2	0001.CSV	2541.83	-0.022392
PSB913-2_map2	0001.CSV	2545.68	-0.0224619
PSB913-2_map2	0001.CSV	2549.54	-0.0225653
PSB913-2_map2	0001.CSV	2553.4	-0.0226695
PSB913-2_map2	0001.CSV	2557.26	-0.0227025
PSB913-2_map2	0001.CSV	2561.11	-0.0227156
PSB913-2_map2	0001.CSV	2564.97	-0.0227623
PSB913-2_map2	0001.CSV	2568.83	-0.0228076
PSB913-2_map2	0001.CSV	2572.68	-0.0228183
PSB913-2_map2	0001.CSV	2576.54	-0.0228418
PSB913-2_map2	0001.CSV	2580.4	-0.0229435
PSB913-2_map2	0001.CSV	2584.25	-0.023016
PSB913-2_map2	0001.CSV	2588.11	-0.0231212
PSB913-2_map2	0001.CSV	2591.97	-0.0231828
PSB913-2_map2	0001.CSV	2595.83	-0.0232077
PSB913-2_map2	0001.CSV	2599.68	-0.0232793
PSB913-2_map2	0001.CSV	2603.54	-0.0232968
PSB913-2_map2	0001.CSV	2607.4	-0.0232706
PSB913-2_map2	0001.CSV	2611.25	-0.0232452
PSB913-2_map2	0001.CSV	2615.11	-0.0232477
PSB913-2_map2	0001.CSV	2618.97	-0.0232872
PSB913-2_map2	0001.CSV	2622.82	-0.0232638
PSB913-2_map2	0001.CSV	2626.68	-0.0232637
PSB913-2_map2	0001.CSV	2630.54	-0.0232958
PSB913-2_map2	0001.CSV	2634.4	-0.0232633
PSB913-2_map2	0001.CSV	2638.25	-0.0232893
PSB913-2_map2	0001.CSV	2642.11	-0.0234689
PSB913-2_map2	0001.CSV	2645.97	-0.0236232
PSB913-2_map2	0001.CSV	2649.82	-0.0236523
PSB913-2_map2	0001.CSV	2653.68	-0.0236609
PSB913-2_map2	0001.CSV	2657.54	-0.0236501
PSB913-2_map2	0001.CSV	2661.4	-0.0236411
PSB913-2_map2	0001.CSV	2665.25	-0.023634
PSB913-2_map2	0001.CSV	2669.11	-0.0236003
PSB913-2_map2	0001.CSV	2672.97	-0.0234543
PSB913-2_map2	0001.CSV	2676.82	-0.023263
PSB913-2_map2	0001.CSV	2680.68	-0.0232351
PSB913-2_map2	0001.CSV	2684.54	-0.0234142
PSB913-2_map2	0001.CSV	2688.4	-0.0235235
PSB913-2_map2	0001.CSV	2692.25	-0.0235612
PSB913-2_map2	0001.CSV	2696.11	-0.0235221
PSB913-2_map2	0001.CSV	2699.97	-0.0234579
PSB913-2_map2	0001.CSV	2703.82	-0.0234411
PSB913-2_map2	0001.CSV	2707.68	-0.0233566
PSB913-2_map2	0001.CSV	2711.54	-0.0232983
PSB913-2_map2	0001.CSV	2715.4	-0.0232439
PSB913-2_map2	0001.CSV	2719.25	-0.0230597
PSB913-2_map2	0001.CSV	2723.11	-0.022784
PSB913-2_map2	0001.CSV	2726.97	-0.0228041
PSB913-2_map2	0001.CSV	2730.82	-0.0230501
PSB913-2_map2	0001.CSV	2734.68	-0.0229695
PSB913-2_map2	0001.CSV	2738.54	-0.0228292
PSB913-2_map2	0001.CSV	2742.4	-0.0227309
PSB913-2_map2	0001.CSV	2746.25	-0.0224724
PSB913-2_map2	0001.CSV	2750.11	-0.0223976
PSB913-2_map2	0001.CSV	2753.97	-0.0225167
PSB913-2_map2	0001.CSV	2757.82	-0.0225667
PSB913-2_map2	0001.CSV	2761.68	-0.0226541
PSB913-2_map2	0001.CSV	2765.54	-0.0226872
PSB913-2_map2	0001.CSV	2769.39	-0.0224862
PSB913-2_map2	0001.CSV	2773.25	-0.0221581
PSB913-2_map2	0001.CSV	2777.11	-0.0222263
PSB913-2_map2	0001.CSV	2780.97	-0.0224302
PSB913-2_map2	0001.CSV	2784.82	-0.0222357
PSB913-2_map2	0001.CSV	2788.68	-0.0219035
PSB913-2_map2	0001.CSV	2792.54	-0.0218754
PSB913-2_map2	0001.CSV	2796.39	-0.0218707
PSB913-2_map2	0001.CSV	2800.25	-0.0219478
PSB913-2_map2	0001.CSV	2804.11	-0.022114
PSB913-2_map2	0001.CSV	2807.97	-0.0220474
PSB913-2_map2	0001.CSV	2811.82	-0.0221607
PSB913-2_map2	0001.CSV	2815.68	-0.0223008
PSB913-2_map2	0001.CSV	2819.54	-0.022209
PSB913-2_map2	0001.CSV	2823.39	-0.0221784
PSB913-2_map2	0001.CSV	2827.25	-0.0222045
PSB913-2_map2	0001.CSV	2831.11	-0.022018
PSB913-2_map2	0001.CSV	2834.97	-0.0217093
PSB913-2_map2	0001.CSV	2838.82	-0.0216153
PSB913-2_map2	0001.CSV	2842.68	-0.0218234
PSB913-2_map2	0001.CSV	2846.54	-0.0219333
PSB913-2_map2	0001.CSV	2850.39	-0.0222543
PSB913-2_map2	0001.CSV	2854.25	-0.0225416
PSB913-2_map2	0001.CSV	2858.11	-0.0224131
PSB913-2_map2	0001.CSV	2861.97	-0.0224101
PSB913-2_map2	0001.CSV	2865.82	-0.0224792
PSB913-2_map2	0001.CSV	2869.68	-0.02229
PSB913-2_map2	0001.CSV	2873.54	-0.0221887
PSB913-2_map2	0001.CSV	2877.39	-0.022514
PSB913-2_map2	0001.CSV	2881.25	-0.022779
PSB913-2_map2	0001.CSV	2885.11	-0.0228114
PSB913-2_map2	0001.CSV	2888.97	-0.0227731
PSB913-2_map2	0001.CSV	2892.82	-0.0225421
PSB913-2_map2	0001.CSV	2896.68	-0.0224585
PSB913-2_map2	0001.CSV	2900.54	-0.0226641
PSB913-2_map2	0001.CSV	2904.39	-0.0226687
PSB913-2_map2	0001.CSV	2908.25	-0.0223928
PSB913-2_map2	0001.CSV	2912.11	-0.0220028
PSB913-2_map2	0001.CSV	2915.97	-0.0220494
PSB913-2_map2	0001.CSV	2919.82	-0.0226747
PSB913-2_map2	0001.CSV	2923.68	-0.0233323
PSB913-2_map2	0001.CSV	2927.54	-0.0234687
PSB913-2_map2	0001.CSV	2931.39	-0.0236355
PSB913-2_map2	0001.CSV	2935.25	-0.0238758
PSB913-2_map2	0001.CSV	2939.11	-0.0236286
PSB913-2_map2	0001.CSV	2942.96	-0.0231665
PSB913-2_map2	0001.CSV	2946.82	-0.0230507
PSB913-2_map2	0001.CSV	2950.68	-0.0233132
PSB913-2_map2	0001.CSV	2954.54	-0.0237515
PSB913-2_map2	0001.CSV	2958.39	-0.0240756
PSB913-2_map2	0001.CSV	2962.25	-0.0240501
PSB913-2_map2	0001.CSV	2966.11	-0.0240507
PSB913-2_map2	0001.CSV	2969.96	-0.0238453
PSB913-2_map2	0001.CSV	2973.82	-0.0233669
PSB913-2_map2	0001.CSV	2977.68	-0.0230055
PSB913-2_map2	0001.CSV	2981.53	-0.0231175
PSB913-2_map2	0001.CSV	2985.39	-0.0234379
PSB913-2_map2	0001.CSV	2989.25	-0.0232338
PSB913-2_map2	0001.CSV	2993.11	-0.0228592
PSB913-2_map2	0001.CSV	2996.96	-0.0228905
PSB913-2_map2	0001.CSV	3000.82	-0.0230549
PSB913-2_map2	0001.CSV	3004.68	-0.0231112
PSB913-2_map2	0001.CSV	3008.53	-0.0228347
PSB913-2_map2	0001.CSV	3012.39	-0.0224512
PSB913-2_map2	0001.CSV	3016.25	-0.0223982
PSB913-2_map2	0001.CSV	3020.11	-0.022568
PSB913-2_map2	0001.CSV	3023.96	-0.0226998
PSB913-2_map2	0001.CSV	3027.82	-0.0226845
PSB913-2_map2	0001.CSV	3031.68	-0.022389
PSB913-2_map2	0001.CSV	3035.53	-0.0223181
PSB913-2_map2	0001.CSV	3039.39	-0.0222921
PSB913-2_map2	0001.CSV	3043.25	-0.0222426
PSB913-2_map2	0001.CSV	3047.11	-0.0223355
PSB913-2_map2	0001.CSV	3050.96	-0.0223247
PSB913-2_map2	0001.CSV	3054.82	-0.0223447
PSB913-2_map2	0001.CSV	3058.68	-0.0223917
PSB913-2_map2	0001.CSV	3062.53	-0.0223113
PSB913-2_map2	0001.CSV	3066.39	-0.022134
PSB913-2_map2	0001.CSV	3070.25	-0.0221799
PSB913-2_map2	0001.CSV	3074.11	-0.0221198
PSB913-2_map2	0001.CSV	3077.96	-0.0218046
PSB913-2_map2	0001.CSV	3081.82	-0.0217127
PSB913-2_map2	0001.CSV	3085.68	-0.0217871
PSB913-2_map2	0001.CSV	3089.53	-0.021944
PSB913-2_map2	0001.CSV	3093.39	-0.0222277
PSB913-2_map2	0001.CSV	3097.25	-0.0221682
PSB913-2_map2	0001.CSV	3101.11	-0.0220395
PSB913-2_map2	0001.CSV	3104.96	-0.0220931
PSB913-2_map2	0001.CSV	3108.82	-0.0219705
PSB913-2_map2	0001.CSV	3112.68	-0.0217501
PSB913-2_map2	0001.CSV	3116.53	-0.0215982
PSB913-2_map2	0001.CSV	3120.39	-0.0218204
PSB913-2_map2	0001.CSV	3124.25	-0.0221288
PSB913-2_map2	0001.CSV	3128.11	-0.0220743
PSB913-2_map2	0001.CSV	3131.96	-0.0221482
PSB913-2_map2	0001.CSV	3135.82	-0.0221386
PSB913-2_map2	0001.CSV	3139.68	-0.0221737
PSB913-2_map2	0001.CSV	3143.53	-0.0224826
PSB913-2_map2	0001.CSV	3147.39	-0.0223646
PSB913-2_map2	0001.CSV	3151.25	-0.0220514
PSB913-2_map2	0001.CSV	3155.1	-0.0222395
PSB913-2_map2	0001.CSV	3158.96	-0.0226802
PSB913-2_map2	0001.CSV	3162.82	-0.0229134
PSB913-2_map2	0001.CSV	3166.68	-0.0230188
PSB913-2_map2	0001.CSV	3170.53	-0.0230873
PSB913-2_map2	0001.CSV	3174.39	-0.0230873
PSB913-2_map2	0001.CSV	3178.25	-0.0229748
PSB913-2_map2	0001.CSV	3182.1	-0.0229455
PSB913-2_map2	0001.CSV	3185.96	-0.0229008
PSB913-2_map2	0001.CSV	3189.82	-0.0229469
PSB913-2_map2	0001.CSV	3193.68	-0.023149
PSB913-2_map2	0001.CSV	3197.53	-0.0232491
PSB913-2_map2	0001.CSV	3201.39	-0.0231988
PSB913-2_map2	0001.CSV	3205.25	-0.0231931
PSB913-2_map2	0001.CSV	3209.1	-0.0231695
PSB913-2_map2	0001.CSV	3212.96	-0.0229087
PSB913-2_map2	0001.CSV	3216.82	-0.0228413
PSB913-2_map2	0001.CSV	3220.68	-0.0230546
PSB913-2_map2	0001.CSV	3224.53	-0.0232528
PSB913-2_map2	0001.CSV	3228.39	-0.0231021
PSB913-2_map2	0001.CSV	3232.25	-0.0226931
PSB913-2_map2	0001.CSV	3236.1	-0.0227694
PSB913-2_map2	0001.CSV	3239.96	-0.0230489
PSB913-2_map2	0001.CSV	3243.82	-0.0228275
PSB913-2_map2	0001.CSV	3247.68	-0.02266
PSB913-2_map2	0001.CSV	3251.53	-0.0227855
PSB913-2_map2	0001.CSV	3255.39	-0.0227331
PSB913-2_map2	0001.CSV	3259.25	-0.0229232
PSB913-2_map2	0001.CSV	3263.1	-0.0230403
PSB913-2_map2	0001.CSV	3266.96	-0.0226536
PSB913-2_map2	0001.CSV	3270.82	-0.0223322
PSB913-2_map2	0001.CSV	3274.68	-0.0224503
PSB913-2_map2	0001.CSV	3278.53	-0.0227832
PSB913-2_map2	0001.CSV	3282.39	-0.0229929
PSB913-2_map2	0001.CSV	3286.25	-0.0228658
PSB913-2_map2	0001.CSV	3290.1	-0.0223768
PSB913-2_map2	0001.CSV	3293.96	-0.022022
PSB913-2_map2	0001.CSV	3297.82	-0.0220618
PSB913-2_map2	0001.CSV	3301.67	-0.0220667
PSB913-2_map2	0001.CSV	3305.53	-0.0219541
PSB913-2_map2	0001.CSV	3309.39	-0.0221344
PSB913-2_map2	0001.CSV	3313.25	-0.0225623
PSB913-2_map2	0001.CSV	3317.1	-0.0228235
PSB913-2_map2	0001.CSV	3320.96	-0.0226258
PSB913-2_map2	0001.CSV	3324.82	-0.0223504
PSB913-2_map2	0001.CSV	3328.67	-0.0226284
PSB913-2_map2	0001.CSV	3332.53	-0.0226694
PSB913-2_map2	0001.CSV	3336.39	-0.0221152
PSB913-2_map2	0001.CSV	3340.24	-0.0218877
PSB913-2_map2	0001.CSV	3344.1	-0.0221401
PSB913-2_map2	0001.CSV	3347.96	-0.022096
PSB913-2_map2	0001.CSV	3351.82	-0.0220219
PSB913-2_map2	0001.CSV	3355.67	-0.0222766
PSB913-2_map2	0001.CSV	3359.53	-0.0222819
PSB913-2_map2	0001.CSV	3363.39	-0.0220627
PSB913-2_map2	0001.CSV	3367.24	-0.021631
PSB913-2_map2	0001.CSV	3371.1	-0.0215605
PSB913-2_map2	0001.CSV	3374.96	-0.0218505
PSB913-2_map2	0001.CSV	3378.82	-0.022089
PSB913-2_map2	0001.CSV	3382.67	-0.0224164
PSB913-2_map2	0001.CSV	3386.53	-0.0223452
PSB913-2_map2	0001.CSV	3390.39	-0.0218232
PSB913-2_map2	0001.CSV	3394.24	-0.0213575
PSB913-2_map2	0001.CSV	3398.1	-0.0211974
PSB913-2_map2	0001.CSV	3401.96	-0.0214058
PSB913-2_map2	0001.CSV	3405.82	-0.0216948
PSB913-2_map2	0001.CSV	3409.67	-0.0217727
PSB913-2_map2	0001.CSV	3413.53	-0.0221079
PSB913-2_map2	0001.CSV	3417.39	-0.0225889
PSB913-2_map2	0001.CSV	3421.24	-0.0226311
PSB913-2_map2	0001.CSV	3425.1	-0.0224252
PSB913-2_map2	0001.CSV	3428.96	-0.0220262
PSB913-2_map2	0001.CSV	3432.82	-0.021702
PSB913-2_map2	0001.CSV	3436.67	-0.021985
PSB913-2_map2	0001.CSV	3440.53	-0.0227545
PSB913-2_map2	0001.CSV	3444.39	-0.0231239
PSB913-2_map2	0001.CSV	3448.24	-0.023084
PSB913-2_map2	0001.CSV	3452.1	-0.0233061
PSB913-2_map2	0001.CSV	3455.96	-0.0231714
PSB913-2_map2	0001.CSV	3459.82	-0.0226802
PSB913-2_map2	0001.CSV	3463.67	-0.0223283
PSB913-2_map2	0001.CSV	3467.53	-0.0220966
PSB913-2_map2	0001.CSV	3471.39	-0.0222634
PSB913-2_map2	0001.CSV	3475.24	-0.0225363
PSB913-2_map2	0001.CSV	3479.1	-0.0226639
PSB913-2_map2	0001.CSV	3482.96	-0.0226768
PSB913-2_map2	0001.CSV	3486.82	-0.0225541
PSB913-2_map2	0001.CSV	3490.67	-0.0227196
PSB913-2_map2	0001.CSV	3494.53	-0.0228153
PSB913-2_map2	0001.CSV	3498.39	-0.0228888
PSB913-2_map2	0001.CSV	3502.24	-0.0229675
PSB913-2_map2	0001.CSV	3506.1	-0.0232811
PSB913-2_map2	0001.CSV	3509.96	-0.0234682
PSB913-2_map2	0001.CSV	3513.81	-0.02338
PSB913-2_map2	0001.CSV	3517.67	-0.0237378
PSB913-2_map2	0001.CSV	3521.53	-0.0236976
PSB913-2_map2	0001.CSV	3525.39	-0.0236548
PSB913-2_map2	0001.CSV	3529.24	-0.024059
PSB913-2_map2	0001.CSV	3533.1	-0.02409
PSB913-2_map2	0001.CSV	3536.96	-0.0237654
PSB913-2_map2	0001.CSV	3540.81	-0.0235558
PSB913-2_map2	0001.CSV	3544.67	-0.0232855
PSB913-2_map2	0001.CSV	3548.53	-0.0235503
PSB913-2_map2	0001.CSV	3552.39	-0.0239798
PSB913-2_map2	0001.CSV	3556.24	-0.0240948
PSB913-2_map2	0001.CSV	3560.1	-0.0244204
PSB913-2_map2	0001.CSV	3563.96	-0.0250079
PSB913-2_map2	0001.CSV	3567.81	-0.0244476
PSB913-2_map2	0001.CSV	3571.67	-0.0242911
PSB913-2_map2	0001.CSV	3575.53	-0.0246932
PSB913-2_map2	0001.CSV	3579.39	-0.0242737
PSB913-2_map2	0001.CSV	3583.24	-0.0240407
PSB913-2_map2	0001.CSV	3587.1	-0.0240196
PSB913-2_map2	0001.CSV	3590.96	-0.024077
PSB913-2_map2	0001.CSV	3594.81	-0.0243171
PSB913-2_map2	0001.CSV	3598.67	-0.0240231
PSB913-2_map2	0001.CSV	3602.53	-0.0241857
PSB913-2_map2	0001.CSV	3606.39	-0.0251304
PSB913-2_map2	0001.CSV	3610.24	-0.0256535
PSB913-2_map2	0001.CSV	3614.1	-0.0255334
PSB913-2_map2	0001.CSV	3617.96	-0.0249053
PSB913-2_map2	0001.CSV	3621.81	-0.0243918
PSB913-2_map2	0001.CSV	3625.67	-0.02524
PSB913-2_map2	0001.CSV	3629.53	-0.0254263
PSB913-2_map2	0001.CSV	3633.39	-0.0246287
PSB913-2_map2	0001.CSV	3637.24	-0.0247883
PSB913-2_map2	0001.CSV	3641.1	-0.025104
PSB913-2_map2	0001.CSV	3644.96	-0.0258336
PSB913-2_map2	0001.CSV	3648.81	-0.025004
PSB913-2_map2	0001.CSV	3652.67	-0.0238335
PSB913-2_map2	0001.CSV	3656.53	-0.0239582
PSB913-2_map2	0001.CSV	3660.38	-0.0239705
PSB913-2_map2	0001.CSV	3664.24	-0.0250221
PSB913-2_map2	0001.CSV	3668.1	-0.0260499
PSB913-2_map2	0001.CSV	3671.96	-0.0261084
PSB913-2_map2	0001.CSV	3675.81	-0.0253645
PSB913-2_map2	0001.CSV	3679.67	-0.0245133
PSB913-2_map2	0001.CSV	3683.53	-0.0247787
PSB913-2_map2	0001.CSV	3687.38	-0.0250056
PSB913-2_map2	0001.CSV	3691.24	-0.0240766
PSB913-2_map2	0001.CSV	3695.1	-0.0242723
PSB913-2_map2	0001.CSV	3698.95	-0.0250136
PSB913-2_map2	0001.CSV	3702.81	-0.0252088
PSB913-2_map2	0001.CSV	3706.67	-0.0257778
PSB913-2_map2	0001.CSV	3710.53	-0.0259356
PSB913-2_map2	0001.CSV	3714.38	-0.0247573
PSB913-2_map2	0001.CSV	3718.24	-0.0251334
PSB913-2_map2	0001.CSV	3722.1	-0.0255333
PSB913-2_map2	0001.CSV	3725.95	-0.025407
PSB913-2_map2	0001.CSV	3729.81	-0.0257673
PSB913-2_map2	0001.CSV	3733.67	-0.0256214
PSB913-2_map2	0001.CSV	3737.53	-0.0240928
PSB913-2_map2	0001.CSV	3741.38	-0.0250019
PSB913-2_map2	0001.CSV	3745.24	-0.0264837
PSB913-2_map2	0001.CSV	3749.1	-0.0267716
PSB913-2_map2	0001.CSV	3752.95	-0.0253511
PSB913-2_map2	0001.CSV	3756.81	-0.02493
PSB913-2_map2	0001.CSV	3760.67	-0.0249608
PSB913-2_map2	0001.CSV	3764.53	-0.0252951
PSB913-2_map2	0001.CSV	3768.38	-0.0250786
PSB913-2_map2	0001.CSV	3772.24	-0.0246711
PSB913-2_map2	0001.CSV	3776.1	-0.0249718
PSB913-2_map2	0001.CSV	3779.95	-0.0250099
PSB913-2_map2	0001.CSV	3783.81	-0.0249913
PSB913-2_map2	0001.CSV	3787.67	-0.0249538
PSB913-2_map2	0001.CSV	3791.53	-0.0252476
PSB913-2_map2	0001.CSV	3795.38	-0.0258661
PSB913-2_map2	0001.CSV	3799.24	-0.0260616
PSB913-2_map2	0001.CSV	3803.1	-0.0255452
PSB913-2_map2	0001.CSV	3806.95	-0.0248146
PSB913-2_map2	0001.CSV	3810.81	-0.0251399
PSB913-2_map2	0001.CSV	3814.67	-0.026042
PSB913-2_map2	0001.CSV	3818.53	-0.0259088
PSB913-2_map2	0001.CSV	3822.38	-0.0250163
PSB913-2_map2	0001.CSV	3826.24	-0.0250116
PSB913-2_map2	0001.CSV	3830.1	-0.0255106
PSB913-2_map2	0001.CSV	3833.95	-0.0259149
PSB913-2_map2	0001.CSV	3837.81	-0.0256788
PSB913-2_map2	0001.CSV	3841.67	-0.0248128
PSB913-2_map2	0001.CSV	3845.53	-0.024963
PSB913-2_map2	0001.CSV	3849.38	-0.0262168
PSB913-2_map2	0001.CSV	3853.24	-0.0263332
PSB913-2_map2	0001.CSV	3857.1	-0.0251936
PSB913-2_map2	0001.CSV	3860.95	-0.0258212
PSB913-2_map2	0001.CSV	3864.81	-0.0258921
PSB913-2_map2	0001.CSV	3868.67	-0.0257027
PSB913-2_map2	0001.CSV	3872.52	-0.0252456
PSB913-2_map2	0001.CSV	3876.38	-0.0255622
PSB913-2_map2	0001.CSV	3880.24	-0.0259588
PSB913-2_map2	0001.CSV	3884.1	-0.0253502
PSB913-2_map2	0001.CSV	3887.95	-0.0252606
PSB913-2_map2	0001.CSV	3891.81	-0.0252691
PSB913-2_map2	0001.CSV	3895.67	-0.0255019
PSB913-2_map2	0001.CSV	3899.52	-0.0259992
PSB913-2_map2	0001.CSV	3903.38	-0.0253126
PSB913-2_map2	0001.CSV	3907.24	-0.0249565
PSB913-2_map2	0001.CSV	3911.1	-0.0255129
PSB913-2_map2	0001.CSV	3914.95	-0.0258026
PSB913-2_map2	0001.CSV	3918.81	-0.0254616
PSB913-2_map2	0001.CSV	3922.67	-0.0255525
PSB913-2_map2	0001.CSV	3926.52	-0.0257562
PSB913-2_map2	0001.CSV	3930.38	-0.0255771
PSB913-2_map2	0001.CSV	3934.24	-0.0252441
PSB913-2_map2	0001.CSV	3938.09	-0.0255944
PSB913-2_map2	0001.CSV	3941.95	-0.0258186
PSB913-2_map2	0001.CSV	3945.81	-0.0258315
PSB913-2_map2	0001.CSV	3949.67	-0.0256889
PSB913-2_map2	0001.CSV	3953.52	-0.0254697
PSB913-2_map2	0001.CSV	3957.38	-0.0255367
PSB913-2_map2	0001.CSV	3961.24	-0.0256096
PSB913-2_map2	0001.CSV	3965.09	-0.0256432
PSB913-2_map2	0001.CSV	3968.95	-0.025651
PSB913-2_map2	0001.CSV	3972.81	-0.0255734
PSB913-2_map2	0001.CSV	3976.67	-0.0255488
PSB913-2_map2	0001.CSV	3980.52	-0.0255996
PSB913-2_map2	0001.CSV	3984.38	-0.0256426
PSB913-2_map2	0001.CSV	3988.24	-0.0257273
PSB913-2_map2	0001.CSV	3992.09	-0.025703
PSB913-2_map2	0001.CSV	3995.95	-0.0256087
PSB913-2_map2	0001.CSV	3999.81	-0.0256848
PSB913-2_map2	0002.CSV	674.992	0.0150029
PSB913-2_map2	0002.CSV	678.849	0.0163098
PSB913-2_map2	0002.CSV	682.706	0.0172619
PSB913-2_map2	0002.CSV	686.563	0.0191224
PSB913-2_map2	0002.CSV	690.42	0.0221558
PSB913-2_map2	0002.CSV	694.277	0.0307476
PSB913-2_map2	0002.CSV	698.134	0.0379328
PSB913-2_map2	0002.CSV	701.991	0.0317031
PSB913-2_map2	0002.CSV	705.849	0.0268343
PSB913-2_map2	0002.CSV	709.706	0.0365457
PSB913-2_map2	0002.CSV	713.563	0.0327719
PSB913-2_map2	0002.CSV	717.42	0.0129438
PSB913-2_map2	0002.CSV	721.277	0.00336427
PSB913-2_map2	0002.CSV	725.134	0.00331539
PSB913-2_map2	0002.CSV	728.991	0.0041259
PSB913-2_map2	0002.CSV	732.848	0.00528973
PSB913-2_map2	0002.CSV	736.705	0.00616134
PSB913-2_map2	0002.CSV	740.562	0.00729882
PSB913-2_map2	0002.CSV	744.42	0.00771961
PSB913-2_map2	0002.CSV	748.277	0.00779929
PSB913-2_map2	0002.CSV	752.134	0.00747158
PSB913-2_map2	0002.CSV	755.991	0.00754656
PSB913-2_map2	0002.CSV	759.848	0.00733629
PSB913-2_map2	0002.CSV	763.705	0.00742142
PSB913-2_map2	0002.CSV	767.562	0.0071391
PSB913-2_map2	0002.CSV	771.419	0.00726617
PSB913-2_map2	0002.CSV	775.276	0.00719553
PSB913-2_map2	0002.CSV	779.133	0.00737164
PSB913-2_map2	0002.CSV	782.99	0.00743973
PSB913-2_map2	0002.CSV	786.848	0.00794464
PSB913-2_map2	0002.CSV	790.705	0.00819896
PSB913-2_map2	0002.CSV	794.562	0.00864922
PSB913-2_map2	0002.CSV	798.419	0.00900647
PSB913-2_map2	0002.CSV	802.276	0.00981168
PSB913-2_map2	0002.CSV	806.133	0.0105323
PSB913-2_map2	0002.CSV	809.99	0.0116206
PSB913-2_map2	0002.CSV	813.847	0.0128176
PSB913-2_map2	0002.CSV	817.704	0.014573
PSB913-2_map2	0002.CSV	821.562	0.0165238
PSB913-2_map2	0002.CSV	825.419	0.0192833
PSB913-2_map2	0002.CSV	829.276	0.0222053
PSB913-2_map2	0002.CSV	833.133	0.0260078
PSB913-2_map2	0002.CSV	836.99	0.031308
PSB913-2_map2	0002.CSV	840.847	0.0388235
PSB913-2_map2	0002.CSV	844.704	0.0458028
PSB913-2_map2	0002.CSV	848.561	0.0580441
PSB913-2_map2	0002.CSV	852.418	0.0726109
PSB913-2_map2	0002.CSV	856.275	0.072982
PSB913-2_map2	0002.CSV	860.132	0.0582286
PSB913-2_map2	0002.CSV	863.99	0.0400503
PSB913-2_map2	0002.CSV	867.847	0.0245964
PSB913-2_map2	0002.CSV	871.704	0.0136137
PSB913-2_map2	0002.CSV	875.561	0.00584164
PSB913-2_map2	0002.CSV	879.418	0.00182814
PSB913-2_map2	0002.CSV	883.275	0.000366352
PSB913-2_map2	0002.CSV	887.132	4.10864e-06
PSB913-2_map2	0002.CSV	890.989	-3.05816e-05
PSB913-2_map2	0002.CSV	894.846	0.000270922
PSB913-2_map2	0002.CSV	898.703	0.000583252
PSB913-2_map2	0002.CSV	902.561	0.00110118
PSB913-2_map2	0002.CSV	906.418	0.00136541
PSB913-2_map2	0002.CSV	910.275	0.00123819
PSB913-2_map2	0002.CSV	914.132	0.000850422
PSB913-2_map2	0002.CSV	917.989	0.00100934
PSB913-2_map2	0002.CSV	921.846	0.00117121
PSB913-2_map2	0002.CSV	925.703	0.00149047
PSB913-2_map2	0002.CSV	929.56	0.00169549
PSB913-2_map2	0002.CSV	933.417	0.00197353
PSB913-2_map2	0002.CSV	937.274	0.00201108
PSB913-2_map2	0002.CSV	941.131	0.00217992
PSB913-2_map2	0002.CSV	944.989	0.00215351
PSB913-2_map2	0002.CSV	948.846	0.00237747
PSB913-2_map2	0002.CSV	952.703	0.00267845
PSB913-2_map2	0002.CSV	956.56	0.00312118
PSB913-2_map2	0002.CSV	960.417	0.00333142
PSB913-2_map2	0002.CSV	964.274	0.00355288
PSB913-2_map2	0002.CSV	968.131	0.00371991
PSB913-2_map2	0002.CSV	971.988	0.00423888
PSB913-2_map2	0002.CSV	975.845	0.00473452
PSB913-2_map2	0002.CSV	979.702	0.00535604
PSB913-2_map2	0002.CSV	983.559	0.00575763
PSB913-2_map2	0002.CSV	987.417	0.00620943
PSB913-2_map2	0002.CSV	991.274	0.00653898
PSB913-2_map2	0002.CSV	995.131	0.00690153
PSB913-2_map2	0002.CSV	998.988	0.0071135
PSB913-2_map2	0002.CSV	1002.85	0.00742604
PSB913-2_map2	0002.CSV	1006.7	0.0075998
PSB913-2_map2	0002.CSV	1010.56	0.00797822
PSB913-2_map2	0002.CSV	1014.42	0.00834562
PSB913-2_map2	0002.CSV	1018.27	0.00898062
PSB913-2_map2	0002.CSV	1022.13	0.00954613
PSB913-2_map2	0002.CSV	1025.99	0.0102266
PSB913-2_map2	0002.CSV	1029.85	0.0105535
PSB913-2_map2	0002.CSV	1033.7	0.0109504
PSB913-2_map2	0002.CSV	1037.56	0.0113085
PSB913-2_map2	0002.CSV	1041.42	0.0117572
PSB913-2_map2	0002.CSV	1045.27	0.0119624
PSB913-2_map2	0002.CSV	1049.13	0.012433
PSB913-2_map2	0002.CSV	1052.99	0.0128081
PSB913-2_map2	0002.CSV	1056.84	0.0133221
PSB913-2_map2	0002.CSV	1060.7	0.0136453
PSB913-2_map2	0002.CSV	1064.56	0.014014
PSB913-2_map2	0002.CSV	1068.42	0.0139347
PSB913-2_map2	0002.CSV	1072.27	0.0139556
PSB913-2_map2	0002.CSV	1076.13	0.0147952
PSB913-2_map2	0002.CSV	1079.99	0.0176292
PSB913-2_map2	0002.CSV	1083.84	0.0164044
PSB913-2_map2	0002.CSV	1087.7	0.011077
PSB913-2_map2	0002.CSV	1091.56	0.00910529
PSB913-2_map2	0002.CSV	1095.41	0.00947561
PSB913-2_map2	0002.CSV	1099.27	0.00976793
PSB913-2_map2	0002.CSV	1103.13	0.010249
PSB913-2_map2	0002.CSV	1106.99	0.0106678
PSB913-2_map2	0002.CSV	1110.84	0.0110596
PSB913-2_map2	0002.CSV	1114.7	0.011186
PSB913-2_map2	0002.CSV	1118.56	0.0112511
PSB913-2_map2	0002.CSV	1122.41	0.0109995
PSB913-2_map2	0002.CSV	1126.27	0.0107292
PSB913-2_map2	0002.CSV	1130.13	0.0104223
PSB913-2_map2	0002.CSV	1133.99	0.0102131
PSB913-2_map2	0002.CSV	1137.84	0.0100516
PSB913-2_map2	0002.CSV	1141.7	0.0101607
PSB913-2_map2	0002.CSV	1145.56	0.0102658
PSB913-2_map2	0002.CSV	1149.41	0.010553
PSB913-2_map2	0002.CSV	1153.27	0.010793
PSB913-2_map2	0002.CSV	1157.13	0.0111267
PSB913-2_map2	0002.CSV	1160.99	0.0112654
PSB913-2_map2	0002.CSV	1164.84	0.0112633
PSB913-2_map2	0002.CSV	1168.7	0.0109712
PSB913-2_map2	0002.CSV	1172.56	0.0108251
PSB913-2_map2	0002.CSV	1176.41	0.0107346
PSB913-2_map2	0002.CSV	1180.27	0.010814
PSB913-2_map2	0002.CSV	1184.13	0.0108335
PSB913-2_map2	0002.CSV	1187.99	0.0109259
PSB913-2_map2	0002.CSV	1191.84	0.0110353
PSB913-2_map2	0002.CSV	1195.7	0.0113975
PSB913-2_map2	0002.CSV	1199.56	0.011616
PSB913-2_map2	0002.CSV	1203.41	0.0119382
PSB913-2_map2	0002.CSV	1207.27	0.0122795
PSB913-2_map2	0002.CSV	1211.13	0.0127634
PSB913-2_map2	0002.CSV	1214.98	0.01322
PSB913-2_map2	0002.CSV	1218.84	0.0137638
PSB913-2_map2	0002.CSV	1222.7	0.0141645
PSB913-2_map2	0002.CSV	1226.56	0.0147492
PSB913-2_map2	0002.CSV	1230.41	0.015283
PSB913-2_map2	0002.CSV	1234.27	0.015878
PSB913-2_map2	0002.CSV	1238.13	0.0164455
PSB913-2_map2	0002.CSV	1241.98	0.0171668
PSB913-2_map2	0002.CSV	1245.84	0.017762
PSB913-2_map2	0002.CSV	1249.7	0.0183658
PSB913-2_map2	0002.CSV	1253.56	0.0187422
PSB913-2_map2	0002.CSV	1257.41	0.0191582
PSB913-2_map2	0002.CSV	1261.27	0.0195531
PSB913-2_map2	0002.CSV	1265.13	0.0201173
PSB913-2_map2	0002.CSV	1268.98	0.0205581
PSB913-2_map2	0002.CSV	1272.84	0.0210571
PSB913-2_map2	0002.CSV	1276.7	0.0214084
PSB913-2_map2	0002.CSV	1280.56	0.0218531
PSB913-2_map2	0002.CSV	1284.41	0.0220906
PSB913-2_map2	0002.CSV	1288.27	0.0224379
PSB913-2_map2	0002.CSV	1292.13	0.0227407
PSB913-2_map2	0002.CSV	1295.98	0.0232099
PSB913-2_map2	0002.CSV	1299.84	0.0236304
PSB913-2_map2	0002.CSV	1303.7	0.0242129
PSB913-2_map2	0002.CSV	1307.56	0.0247194
PSB913-2_map2	0002.CSV	1311.41	0.0254048
PSB913-2_map2	0002.CSV	1315.27	0.0260916
PSB913-2_map2	0002.CSV	1319.13	0.0269589
PSB913-2_map2	0002.CSV	1322.98	0.0277237
PSB913-2_map2	0002.CSV	1326.84	0.0286509
PSB913-2_map2	0002.CSV	1330.7	0.0295036
PSB913-2_map2	0002.CSV	1334.56	0.0304455
PSB913-2_map2	0002.CSV	1338.41	0.0315993
PSB913-2_map2	0002.CSV	1342.27	0.033137
PSB913-2_map2	0002.CSV	1346.13	0.0342195
PSB913-2_map2	0002.CSV	1349.98	0.0356326
PSB913-2_map2	0002.CSV	1353.84	0.0370337
PSB913-2_map2	0002.CSV	1357.7	0.0385717
PSB913-2_map2	0002.CSV	1361.56	0.0402709
PSB913-2_map2	0002.CSV	1365.41	0.0423433
PSB913-2_map2	0002.CSV	1369.27	0.0437796
PSB913-2_map2	0002.CSV	1373.13	0.0458662
PSB913-2_map2	0002.CSV	1376.98	0.0480678
PSB913-2_map2	0002.CSV	1380.84	0.0497348
PSB913-2_map2	0002.CSV	1384.7	0.0511506
PSB913-2_map2	0002.CSV	1388.56	0.0532805
PSB913-2_map2	0002.CSV	1392.41	0.0548015
PSB913-2_map2	0002.CSV	1396.27	0.0570275
PSB913-2_map2	0002.CSV	1400.13	0.0592254
PSB913-2_map2	0002.CSV	1403.98	0.0611259
PSB913-2_map2	0002.CSV	1407.84	0.0628059
PSB913-2_map2	0002.CSV	1411.7	0.0644025
PSB913-2_map2	0002.CSV	1415.55	0.065529
PSB913-2_map2	0002.CSV	1419.41	0.067595
PSB913-2_map2	0002.CSV	1423.27	0.0693317
PSB913-2_map2	0002.CSV	1427.12	0.0709161
PSB913-2_map2	0002.CSV	1430.98	0.0722846
PSB913-2_map2	0002.CSV	1434.84	0.0740829
PSB913-2_map2	0002.CSV	1438.7	0.0755307
PSB913-2_map2	0002.CSV	1442.55	0.0757277
PSB913-2_map2	0002.CSV	1446.41	0.0741831
PSB913-2_map2	0002.CSV	1450.27	0.071539
PSB913-2_map2	0002.CSV	1454.12	0.0682708
PSB913-2_map2	0002.CSV	1457.98	0.0642913
PSB913-2_map2	0002.CSV	1461.84	0.0609404
PSB913-2_map2	0002.CSV	1465.7	0.0582967
PSB913-2_map2	0002.CSV	1469.55	0.0547645
PSB913-2_map2	0002.CSV	1473.41	0.0501043
PSB913-2_map2	0002.CSV	1477.27	0.0450171
PSB913-2_map2	0002.CSV	1481.12	0.0417931
PSB913-2_map2	0002.CSV	1484.98	0.0386541
PSB913-2_map2	0002.CSV	1488.84	0.0353516
PSB913-2_map2	0002.CSV	1492.7	0.031976
PSB913-2_map2	0002.CSV	1496.55	0.0292085
PSB913-2_map2	0002.CSV	1500.41	0.025998
PSB913-2_map2	0002.CSV	1504.27	0.0237675
PSB913-2_map2	0002.CSV	1508.12	0.0201004
PSB913-2_map2	0002.CSV	1511.98	0.0171743
PSB913-2_map2	0002.CSV	1515.84	0.014734
PSB913-2_map2	0002.CSV	1519.7	0.0117477
PSB913-2_map2	0002.CSV	1523.55	0.00839592
PSB913-2_map2	0002.CSV	1527.41	0.0059724
PSB913-2_map2	0002.CSV	1531.27	0.0036911
PSB913-2_map2	0002.CSV	1535.12	0.00169416
PSB913-2_map2	0002.CSV	1538.98	-0.00034406
PSB913-2_map2	0002.CSV	1542.84	-0.00258503
PSB913-2_map2	0002.CSV	1546.7	-0.00437252
PSB913-2_map2	0002.CSV	1550.55	-0.00595015
PSB913-2_map2	0002.CSV	1554.41	-0.00762175
PSB913-2_map2	0002.CSV	1558.27	-0.00945448
PSB913-2_map2	0002.CSV	1562.12	-0.0112813
PSB913-2_map2	0002.CSV	1565.98	-0.0125158
PSB913-2_map2	0002.CSV	1569.84	-0.0138703
PSB913-2_map2	0002.CSV	1573.69	-0.0151641
PSB913-2_map2	0002.CSV	1577.55	-0.0164573
PSB913-2_map2	0002.CSV	1581.41	-0.017652
PSB913-2_map2	0002.CSV	1585.27	-0.0186765
PSB913-2_map2	0002.CSV	1589.12	-0.0193531
PSB913-2_map2	0002.CSV	1592.98	-0.019688
PSB913-2_map2	0002.CSV	1596.84	-0.0197647
PSB913-2_map2	0002.CSV	1600.69	-0.0198506
PSB913-2_map2	0002.CSV	1604.55	-0.0199287
PSB913-2_map2	0002.CSV	1608.41	-0.0200343
PSB913-2_map2	0002.CSV	1612.27	-0.0202527
PSB913-2_map2	0002.CSV	1616.12	-0.020416
PSB913-2_map2	0002.CSV	1619.98	-0.0203687
PSB913-2_map2	0002.CSV	1623.84	-0.0205386
PSB913-2_map2	0002.CSV	1627.69	-0.0205303
PSB913-2_map2	0002.CSV	1631.55	-0.020769
PSB913-2_map2	0002.CSV	1635.41	-0.0206254
PSB913-2_map2	0002.CSV	1639.27	-0.020344
PSB913-2_map2	0002.CSV	1643.12	-0.0207734
PSB913-2_map2	0002.CSV	1646.98	-0.0208705
PSB913-2_map2	0002.CSV	1650.84	-0.0205949
PSB913-2_map2	0002.CSV	1654.69	-0.0203266
PSB913-2_map2	0002.CSV	1658.55	-0.0207034
PSB913-2_map2	0002.CSV	1662.41	-0.0210693
PSB913-2_map2	0002.CSV	1666.27	-0.0212473
PSB913-2_map2	0002.CSV	1670.12	-0.0213013
PSB913-2_map2	0002.CSV	1673.98	-0.0211326
PSB913-2_map2	0002.CSV	1677.84	-0.0215333
PSB913-2_map2	0002.CSV	1681.69	-0.0218822
PSB913-2_map2	0002.CSV	1685.55	-0.0216254
PSB913-2_map2	0002.CSV	1689.41	-0.0216188
PSB913-2_map2	0002.CSV	1693.27	-0.022163
PSB913-2_map2	0002.CSV	1697.12	-0.0222874
PSB913-2_map2	0002.CSV	1700.98	-0.0217926
PSB913-2_map2	0002.CSV	1704.84	-0.0215391
PSB913-2_map2	0002.CSV	1708.69	-0.0216701
PSB913-2_map2	0002.CSV	1712.55	-0.0219803
PSB913-2_map2	0002.CSV	1716.41	-0.0214827
PSB913-2_map2	0002.CSV	1720.27	-0.0206911
PSB913-2_map2	0002.CSV	1724.12	-0.0210026
PSB913-2_map2	0002.CSV	1727.98	-0.0213663
PSB913-2_map2	0002.CSV	1731.84	-0.0215174
PSB913-2_map2	0002.CSV	1735.69	-0.0214233
PSB913-2_map2	0002.CSV	1739.55	-0.0219384
PSB913-2_map2	0002.CSV	1743.41	-0.0224565
PSB913-2_map2	0002.CSV	1747.27	-0.0228583
PSB913-2_map2	0002.CSV	1751.12	-0.0231152
PSB913-2_map2	0002.CSV	1754.98	-0.0236884
PSB913-2_map2	0002.CSV	1758.84	-0.0239776
PSB913-2_map2	0002.CSV	1762.69	-0.0239252
PSB913-2_map2	0002.CSV	1766.55	-0.0240186
PSB913-2_map2	0002.CSV	1770.41	-0.023754
PSB913-2_map2	0002.CSV	1774.26	-0.0224151
PSB913-2_map2	0002.CSV	1778.12	-0.0215367
PSB913-2_map2	0002.CSV	1781.98	-0.0206615
PSB913-2_map2	0002.CSV	1785.84	-0.0204239
PSB913-2_map2	0002.CSV	1789.69	-0.0210273
PSB913-2_map2	0002.CSV	1793.55	-0.0219517
PSB913-2_map2	0002.CSV	1797.41	-0.0226142
PSB913-2_map2	0002.CSV	1801.26	-0.0231466
PSB913-2_map2	0002.CSV	1805.12	-0.0235808
PSB913-2_map2	0002.CSV	1808.98	-0.0237377
PSB913-2_map2	0002.CSV	1812.84	-0.0235455
PSB913-2_map2	0002.CSV	1816.69	-0.0235968
PSB913-2_map2	0002.CSV	1820.55	-0.0236079
PSB913-2_map2	0002.CSV	1824.41	-0.0235941
PSB913-2_map2	0002.CSV	1828.26	-0.0232302
PSB913-2_map2	0002.CSV	1832.12	-0.023037
PSB913-2_map2	0002.CSV	1835.98	-0.0230767
PSB913-2_map2	0002.CSV	1839.84	-0.0231887
PSB913-2_map2	0002.CSV	1843.69	-0.023
PSB913-2_map2	0002.CSV	1847.55	-0.0226583
PSB913-2_map2	0002.CSV	1851.41	-0.0226599
PSB913-2_map2	0002.CSV	1855.26	-0.0227072
PSB913-2_map2	0002.CSV	1859.12	-0.0225886
PSB913-2_map2	0002.CSV	1862.98	-0.0225985
PSB913-2_map2	0002.CSV	1866.84	-0.0224497
PSB913-2_map2	0002.CSV	1870.69	-0.0219707
PSB913-2_map2	0002.CSV	1874.55	-0.021984
PSB913-2_map2	0002.CSV	1878.41	-0.0220457
PSB913-2_map2	0002.CSV	1882.26	-0.022006
PSB913-2_map2	0002.CSV	1886.12	-0.0220293
PSB913-2_map2	0002.CSV	1889.98	-0.0218161
PSB913-2_map2	0002.CSV	1893.83	-0.0216014
PSB913-2_map2	0002.CSV	1897.69	-0.0215302
PSB913-2_map2	0002.CSV	1901.55	-0.0215718
PSB913-2_map2	0002.CSV	1905.41	-0.0215815
PSB913-2_map2	0002.CSV	1909.26	-0.0215195
PSB913-2_map2	0002.CSV	1913.12	-0.0215303
PSB913-2_map2	0002.CSV	1916.98	-0.0215384
PSB913-2_map2	0002.CSV	1920.83	-0.0213228
PSB913-2_map2	0002.CSV	1924.69	-0.021236
PSB913-2_map2	0002.CSV	1928.55	-0.021287
PSB913-2_map2	0002.CSV	1932.4	-0.0212921
PSB913-2_map2	0002.CSV	1936.26	-0.0212223
PSB913-2_map2	0002.CSV	1940.12	-0.0212182
PSB913-2_map2	0002.CSV	1943.98	-0.0210447
PSB913-2_map2	0002.CSV	1947.83	-0.0210179
PSB913-2_map2	0002.CSV	1951.69	-0.0210974
PSB913-2_map2	0002.CSV	1955.55	-0.0211299
PSB913-2_map2	0002.CSV	1959.4	-0.0210937
PSB913-2_map2	0002.CSV	1963.26	-0.0211203
PSB913-2_map2	0002.CSV	1967.12	-0.0210159
PSB913-2_map2	0002.CSV	1970.98	-0.0210165
PSB913-2_map2	0002.CSV	1974.83	-0.0211102
PSB913-2_map2	0002.CSV	1978.69	-0.0211764
PSB913-2_map2	0002.CSV	1982.55	-0.0211877
PSB913-2_map2	0002.CSV	1986.4	-0.0212313
PSB913-2_map2	0002.CSV	1990.26	-0.0211481
PSB913-2_map2	0002.CSV	1994.12	-0.0210656
PSB913-2_map2	0002.CSV	1997.98	-0.0211105
PSB913-2_map2	0002.CSV	2001.83	-0.0211304
PSB913-2_map2	0002.CSV	2005.69	-0.021109
PSB913-2_map2	0002.CSV	2009.55	-0.0211359
PSB913-2_map2	0002.CSV	2013.4	-0.0211713
PSB913-2_map2	0002.CSV	2017.26	-0.0211117
PSB913-2_map2	0002.CSV	2021.12	-0.0210256
PSB913-2_map2	0002.CSV	2024.97	-0.0210918
PSB913-2_map2	0002.CSV	2028.83	-0.0211601
PSB913-2_map2	0002.CSV	2032.69	-0.0211972
PSB913-2_map2	0002.CSV	2036.55	-0.0211418
PSB913-2_map2	0002.CSV	2040.4	-0.021085
PSB913-2_map2	0002.CSV	2044.26	-0.021045
PSB913-2_map2	0002.CSV	2048.12	-0.0210682
PSB913-2_map2	0002.CSV	2051.97	-0.0210607
PSB913-2_map2	0002.CSV	2055.83	-0.0210552
PSB913-2_map2	0002.CSV	2059.69	-0.0210521
PSB913-2_map2	0002.CSV	2063.55	-0.0210516
PSB913-2_map2	0002.CSV	2067.4	-0.0209474
PSB913-2_map2	0002.CSV	2071.26	-0.0209405
PSB913-2_map2	0002.CSV	2075.12	-0.0209117
PSB913-2_map2	0002.CSV	2078.97	-0.0208395
PSB913-2_map2	0002.CSV	2082.83	-0.0207721
PSB913-2_map2	0002.CSV	2086.69	-0.0207945
PSB913-2_map2	0002.CSV	2090.55	-0.0207096
PSB913-2_map2	0002.CSV	2094.4	-0.0206495
PSB913-2_map2	0002.CSV	2098.26	-0.0206182
PSB913-2_map2	0002.CSV	2102.12	-0.0205519
PSB913-2_map2	0002.CSV	2105.97	-0.0204503
PSB913-2_map2	0002.CSV	2109.83	-0.0203968
PSB913-2_map2	0002.CSV	2113.69	-0.0202705
PSB913-2_map2	0002.CSV	2117.55	-0.0201829
PSB913-2_map2	0002.CSV	2121.4	-0.0201208
PSB913-2_map2	0002.CSV	2125.26	-0.0200247
PSB913-2_map2	0002.CSV	2129.12	-0.0199038
PSB913-2_map2	0002.CSV	2132.97	-0.0198545
PSB913-2_map2	0002.CSV	2136.83	-0.0197403
PSB913-2_map2	0002.CSV	2140.69	-0.0196321
PSB913-2_map2	0002.CSV	2144.55	-0.0195272
PSB913-2_map2	0002.CSV	2148.4	-0.0194699
PSB913-2_map2	0002.CSV	2152.26	-0.0193915
PSB913-2_map2	0002.CSV	2156.12	-0.0193043
PSB913-2_map2	0002.CSV	2159.97	-0.0191714
PSB913-2_map2	0002.CSV	2163.83	-0.0190735
PSB913-2_map2	0002.CSV	2167.69	-0.0189441
PSB913-2_map2	0002.CSV	2171.55	-0.0188113
PSB913-2_map2	0002.CSV	2175.4	-0.0186959
PSB913-2_map2	0002.CSV	2179.26	-0.0186822
PSB913-2_map2	0002.CSV	2183.12	-0.0186264
PSB913-2_map2	0002.CSV	2186.97	-0.0185455
PSB913-2_map2	0002.CSV	2190.83	-0.0184685
PSB913-2_map2	0002.CSV	2194.69	-0.0184346
PSB913-2_map2	0002.CSV	2198.55	-0.0183434
PSB913-2_map2	0002.CSV	2202.4	-0.0183127
PSB913-2_map2	0002.CSV	2206.26	-0.0182825
PSB913-2_map2	0002.CSV	2210.12	-0.0182214
PSB913-2_map2	0002.CSV	2213.97	-0.0181605
PSB913-2_map2	0002.CSV	2217.83	-0.0181465
PSB913-2_map2	0002.CSV	2221.69	-0.0181001
PSB913-2_map2	0002.CSV	2225.54	-0.0180933
PSB913-2_map2	0002.CSV	2229.4	-0.0180949
PSB913-2_map2	0002.CSV	2233.26	-0.0180752
PSB913-2_map2	0002.CSV	2237.12	-0.0180573
PSB913-2_map2	0002.CSV	2240.97	-0.0180949
PSB913-2_map2	0002.CSV	2244.83	-0.0180801
PSB913-2_map2	0002.CSV	2248.69	-0.0181112
PSB913-2_map2	0002.CSV	2252.54	-0.0181573
PSB913-2_map2	0002.CSV	2256.4	-0.0182289
PSB913-2_map2	0002.CSV	2260.26	-0.0182482
PSB913-2_map2	0002.CSV	2264.11	-0.0181651
PSB913-2_map2	0002.CSV	2267.97	-0.0181048
PSB913-2_map2	0002.CSV	2271.83	-0.0181869
PSB913-2_map2	0002.CSV	2275.69	-0.0182278
PSB913-2_map2	0002.CSV	2279.54	-0.0182596
PSB913-2_map2	0002.CSV	2283.4	-0.0182907
PSB913-2_map2	0002.CSV	2287.26	-0.01837
PSB913-2_map2	0002.CSV	2291.11	-0.0184074
PSB913-2_map2	0002.CSV	2294.97	-0.0184114
PSB913-2_map2	0002.CSV	2298.83	-0.0184129
PSB913-2_map2	0002.CSV	2302.69	-0.01845
PSB913-2_map2	0002.CSV	2306.54	-0.0185136
PSB913-2_map2	0002.CSV	2310.4	-0.0187007
PSB913-2_map2	0002.CSV	2314.26	-0.0188823
PSB913-2_map2	0002.CSV	2318.11	-0.0191409
PSB913-2_map2	0002.CSV	2321.97	-0.0195362
PSB913-2_map2	0002.CSV	2325.83	-0.0202659
PSB913-2_map2	0002.CSV	2329.69	-0.0210442
PSB913-2_map2	0002.CSV	2333.54	-0.0216351
PSB913-2_map2	0002.CSV	2337.4	-0.0217326
PSB913-2_map2	0002.CSV	2341.26	-0.0216161
PSB913-2_map2	0002.CSV	2345.11	-0.0202806
PSB913-2_map2	0002.CSV	2348.97	-0.0200801
PSB913-2_map2	0002.CSV	2352.83	-0.0216941
PSB913-2_map2	0002.CSV	2356.69	-0.0253403
PSB913-2_map2	0002.CSV	2360.54	-0.0271109
PSB913-2_map2	0002.CSV	2364.4	-0.0249389
PSB913-2_map2	0002.CSV	2368.26	-0.0216127
PSB913-2_map2	0002.CSV	2372.11	-0.0194625
PSB913-2_map2	0002.CSV	2375.97	-0.0184657
PSB913-2_map2	0002.CSV	2379.83	-0.0182066
PSB913-2_map2	0002.CSV	2383.69	-0.0183032
PSB913-2_map2	0002.CSV	2387.54	-0.0185571
PSB913-2_map2	0002.CSV	2391.4	-0.0187246
PSB913-2_map2	0002.CSV	2395.26	-0.0187086
PSB913-2_map2	0002.CSV	2399.11	-0.0186409
PSB913-2_map2	0002.CSV	2402.97	-0.0186377
PSB913-2_map2	0002.CSV	2406.83	-0.0186276
PSB913-2_map2	0002.CSV	2410.68	-0.0186305
PSB913-2_map2	0002.CSV	2414.54	-0.0185862
PSB913-2_map2	0002.CSV	2418.4	-0.0185477
PSB913-2_map2	0002.CSV	2422.26	-0.0184764
PSB913-2_map2	0002.CSV	2426.11	-0.018418
PSB913-2_map2	0002.CSV	2429.97	-0.0183837
PSB913-2_map2	0002.CSV	2433.83	-0.0183645
PSB913-2_map2	0002.CSV	2437.68	-0.0183358
PSB913-2_map2	0002.CSV	2441.54	-0.0182859
PSB913-2_map2	0002.CSV	2445.4	-0.0182348
PSB913-2_map2	0002.CSV	2449.26	-0.0182125
PSB913-2_map2	0002.CSV	2453.11	-0.0181335
PSB913-2_map2	0002.CSV	2456.97	-0.0180786
PSB913-2_map2	0002.CSV	2460.83	-0.0180439
PSB913-2_map2	0002.CSV	2464.68	-0.0180006
PSB913-2_map2	0002.CSV	2468.54	-0.0179773
PSB913-2_map2	0002.CSV	2472.4	-0.0179089
PSB913-2_map2	0002.CSV	2476.26	-0.0177638
PSB913-2_map2	0002.CSV	2480.11	-0.0176722
PSB913-2_map2	0002.CSV	2483.97	-0.0175476
PSB913-2_map2	0002.CSV	2487.83	-0.01743
PSB913-2_map2	0002.CSV	2491.68	-0.0173743
PSB913-2_map2	0002.CSV	2495.54	-0.0173147
PSB913-2_map2	0002.CSV	2499.4	-0.0172941
PSB913-2_map2	0002.CSV	2503.26	-0.0173676
PSB913-2_map2	0002.CSV	2507.11	-0.017399
PSB913-2_map2	0002.CSV	2510.97	-0.0173529
PSB913-2_map2	0002.CSV	2514.83	-0.0172176
PSB913-2_map2	0002.CSV	2518.68	-0.0170987
PSB913-2_map2	0002.CSV	2522.54	-0.0171097
PSB913-2_map2	0002.CSV	2526.4	-0.0172915
PSB913-2_map2	0002.CSV	2530.26	-0.017508
PSB913-2_map2	0002.CSV	2534.11	-0.0176222
PSB913-2_map2	0002.CSV	2537.97	-0.0176943
PSB913-2_map2	0002.CSV	2541.83	-0.0177716
PSB913-2_map2	0002.CSV	2545.68	-0.0178202
PSB913-2_map2	0002.CSV	2549.54	-0.0179522
PSB913-2_map2	0002.CSV	2553.4	-0.0180874
PSB913-2_map2	0002.CSV	2557.26	-0.0181687
PSB913-2_map2	0002.CSV	2561.11	-0.0182383
PSB913-2_map2	0002.CSV	2564.97	-0.0183061
PSB913-2_map2	0002.CSV	2568.83	-0.0183847
PSB913-2_map2	0002.CSV	2572.68	-0.0184514
PSB913-2_map2	0002.CSV	2576.54	-0.0184597
PSB913-2_map2	0002.CSV	2580.4	-0.0185672
PSB913-2_map2	0002.CSV	2584.25	-0.0187004
PSB913-2_map2	0002.CSV	2588.11	-0.0187985
PSB913-2_map2	0002.CSV	2591.97	-0.0188164
PSB913-2_map2	0002.CSV	2595.83	-0.0188467
PSB913-2_map2	0002.CSV	2599.68	-0.0189123
PSB913-2_map2	0002.CSV	2603.54	-0.0189508
PSB913-2_map2	0002.CSV	2607.4	-0.0188968
PSB913-2_map2	0002.CSV	2611.25	-0.0188423
PSB913-2_map2	0002.CSV	2615.11	-0.0188619
PSB913-2_map2	0002.CSV	2618.97	-0.0189055
PSB913-2_map2	0002.CSV	2622.82	-0.0188424
PSB913-2_map2	0002.CSV	2626.68	-0.0188316
PSB913-2_map2	0002.CSV	2630.54	-0.0189064
PSB913-2_map2	0002.CSV	2634.4	-0.0188826
PSB913-2_map2	0002.CSV	2638.25	-0.0188939
PSB913-2_map2	0002.CSV	2642.11	-0.019078
PSB913-2_map2	0002.CSV	2645.97	-0.0192255
PSB913-2_map2	0002.CSV	2649.82	-0.0192629
PSB913-2_map2	0002.CSV	2653.68	-0.0192721
PSB913-2_map2	0002.CSV	2657.54	-0.0192567
PSB913-2_map2	0002.CSV	2661.4	-0.0192577
PSB913-2_map2	0002.CSV	2665.25	-0.0192908
PSB913-2_map2	0002.CSV	2669.11	-0.0192738
PSB913-2_map2	0002.CSV	2672.97	-0.019103
PSB913-2_map2	0002.CSV	2676.82	-0.0188049
PSB913-2_map2	0002.CSV	2680.68	-0.0187554
PSB913-2_map2	0002.CSV	2684.54	-0.0190218
PSB913-2_map2	0002.CSV	2688.4	-0.0191984
PSB913-2_map2	0002.CSV	2692.25	-0.0192172
PSB913-2_map2	0002.CSV	2696.11	-0.0190951
PSB913-2_map2	0002.CSV	2699.97	-0.0189913
PSB913-2_map2	0002.CSV	2703.82	-0.0190143
PSB913-2_map2	0002.CSV	2707.68	-0.0189233
PSB913-2_map2	0002.CSV	2711.54	-0.0188615
PSB913-2_map2	0002.CSV	2715.4	-0.0187789
PSB913-2_map2	0002.CSV	2719.25	-0.0185622
PSB913-2_map2	0002.CSV	2723.11	-0.0183003
PSB913-2_map2	0002.CSV	2726.97	-0.0183314
PSB913-2_map2	0002.CSV	2730.82	-0.0185435
PSB913-2_map2	0002.CSV	2734.68	-0.0184689
PSB913-2_map2	0002.CSV	2738.54	-0.0183649
PSB913-2_map2	0002.CSV	2742.4	-0.0182822
PSB913-2_map2	0002.CSV	2746.25	-0.0179923
PSB913-2_map2	0002.CSV	2750.11	-0.0179072
PSB913-2_map2	0002.CSV	2753.97	-0.0180184
PSB913-2_map2	0002.CSV	2757.82	-0.0180334
PSB913-2_map2	0002.CSV	2761.68	-0.0181154
PSB913-2_map2	0002.CSV	2765.54	-0.0181132
PSB913-2_map2	0002.CSV	2769.39	-0.0178977
PSB913-2_map2	0002.CSV	2773.25	-0.0175655
PSB913-2_map2	0002.CSV	2777.11	-0.0175526
PSB913-2_map2	0002.CSV	2780.97	-0.0176969
PSB913-2_map2	0002.CSV	2784.82	-0.0175322
PSB913-2_map2	0002.CSV	2788.68	-0.017189
PSB913-2_map2	0002.CSV	2792.54	-0.0170993
PSB913-2_map2	0002.CSV	2796.39	-0.0170989
PSB913-2_map2	0002.CSV	2800.25	-0.0171593
PSB913-2_map2	0002.CSV	2804.11	-0.0172724
PSB913-2_map2	0002.CSV	2807.97	-0.0171711
PSB913-2_map2	0002.CSV	2811.82	-0.0172016
PSB913-2_map2	0002.CSV	2815.68	-0.0172303
PSB913-2_map2	0002.CSV	2819.54	-0.0170745
PSB913-2_map2	0002.CSV	2823.39	-0.0169878
PSB913-2_map2	0002.CSV	2827.25	-0.0169168
PSB913-2_map2	0002.CSV	2831.11	-0.016531
PSB913-2_map2	0002.CSV	2834.97	-0.015899
PSB913-2_map2	0002.CSV	2838.82	-0.0153122
PSB913-2_map2	0002.CSV	2842.68	-0.0148845
PSB913-2_map2	0002.CSV	2846.54	-0.0142077
PSB913-2_map2	0002.CSV	2850.39	-0.0137276
PSB913-2_map2	0002.CSV	2854.25	-0.0137671
PSB913-2_map2	0002.CSV	2858.11	-0.0140983
PSB913-2_map2	0002.CSV	2861.97	-0.0146333
PSB913-2_map2	0002.CSV	2865.82	-0.0150039
PSB913-2_map2	0002.CSV	2869.68	-0.0149549
PSB913-2_map2	0002.CSV	2873.54	-0.0149622
PSB913-2_map2	0002.CSV	2877.39	-0.0154369
PSB913-2_map2	0002.CSV	2881.25	-0.0157512
PSB913-2_map2	0002.CSV	2885.11	-0.0156447
PSB913-2_map2	0002.CSV	2888.97	-0.0153836
PSB913-2_map2	0002.CSV	2892.82	-0.014869
PSB913-2_map2	0002.CSV	2896.68	-0.0144285
PSB913-2_map2	0002.CSV	2900.54	-0.0141634
PSB913-2_map2	0002.CSV	2904.39	-0.0136786
PSB913-2_map2	0002.CSV	2908.25	-0.0129291
PSB913-2_map2	0002.CSV	2912.11	-0.0118505
PSB913-2_map2	0002.CSV	2915.97	-0.0110085
PSB913-2_map2	0002.CSV	2919.82	-0.010881
PSB913-2_map2	0002.CSV	2923.68	-0.0113118
PSB913-2_map2	0002.CSV	2927.54	-0.0119324
PSB913-2_map2	0002.CSV	2931.39	-0.0130684
PSB913-2_map2	0002.CSV	2935.25	-0.0144107
PSB913-2_map2	0002.CSV	2939.11	-0.0150804
PSB913-2_map2	0002.CSV	2942.96	-0.0151338
PSB913-2_map2	0002.CSV	2946.82	-0.0151665
PSB913-2_map2	0002.CSV	2950.68	-0.0153732
PSB913-2_map2	0002.CSV	2954.54	-0.0157922
PSB913-2_map2	0002.CSV	2958.39	-0.0163815
PSB913-2_map2	0002.CSV	2962.25	-0.016822
PSB913-2_map2	0002.CSV	2966.11	-0.0173028
PSB913-2_map2	0002.CSV	2969.96	-0.0175895
PSB913-2_map2	0002.CSV	2973.82	-0.017559
PSB913-2_map2	0002.CSV	2977.68	-0.0175205
PSB913-2_map2	0002.CSV	2981.53	-0.0177683
PSB913-2_map2	0002.CSV	2985.39	-0.0181595
PSB913-2_map2	0002.CSV	2989.25	-0.0181011
PSB913-2_map2	0002.CSV	2993.11	-0.0178738
PSB913-2_map2	0002.CSV	2996.96	-0.0179458
PSB913-2_map2	0002.CSV	3000.82	-0.018155
PSB913-2_map2	0002.CSV	3004.68	-0.018194
PSB913-2_map2	0002.CSV	3008.53	-0.0179177
PSB913-2_map2	0002.CSV	3012.39	-0.0175715
PSB913-2_map2	0002.CSV	3016.25	-0.0175169
PSB913-2_map2	0002.CSV	3020.11	-0.0176691
PSB913-2_map2	0002.CSV	3023.96	-0.0177583
PSB913-2_map2	0002.CSV	3027.82	-0.0177479
PSB913-2_map2	0002.CSV	3031.68	-0.0175169
PSB913-2_map2	0002.CSV	3035.53	-0.0174387
PSB913-2_map2	0002.CSV	3039.39	-0.0173731
PSB913-2_map2	0002.CSV	3043.25	-0.0172938
PSB913-2_map2	0002.CSV	3047.11	-0.017349
PSB913-2_map2	0002.CSV	3050.96	-0.0173151
PSB913-2_map2	0002.CSV	3054.82	-0.0173201
PSB913-2_map2	0002.CSV	3058.68	-0.0173468
PSB913-2_map2	0002.CSV	3062.53	-0.0172056
PSB913-2_map2	0002.CSV	3066.39	-0.016964
PSB913-2_map2	0002.CSV	3070.25	-0.017104
PSB913-2_map2	0002.CSV	3074.11	-0.0171389
PSB913-2_map2	0002.CSV	3077.96	-0.016758
PSB913-2_map2	0002.CSV	3081.82	-0.016598
PSB913-2_map2	0002.CSV	3085.68	-0.0167071
PSB913-2_map2	0002.CSV	3089.53	-0.0168713
PSB913-2_map2	0002.CSV	3093.39	-0.017143
PSB913-2_map2	0002.CSV	3097.25	-0.0170533
PSB913-2_map2	0002.CSV	3101.11	-0.0169135
PSB913-2_map2	0002.CSV	3104.96	-0.0169016
PSB913-2_map2	0002.CSV	3108.82	-0.0167078
PSB913-2_map2	0002.CSV	3112.68	-0.0165665
PSB913-2_map2	0002.CSV	3116.53	-0.0165158
PSB913-2_map2	0002.CSV	3120.39	-0.0166625
PSB913-2_map2	0002.CSV	3124.25	-0.0169071
PSB913-2_map2	0002.CSV	3128.11	-0.0169731
PSB913-2_map2	0002.CSV	3131.96	-0.0170557
PSB913-2_map2	0002.CSV	3135.82	-0.0169538
PSB913-2_map2	0002.CSV	3139.68	-0.0168799
PSB913-2_map2	0002.CSV	3143.53	-0.0171586
PSB913-2_map2	0002.CSV	3147.39	-0.0170746
PSB913-2_map2	0002.CSV	3151.25	-0.0167362
PSB913-2_map2	0002.CSV	3155.1	-0.0169409
PSB913-2_map2	0002.CSV	3158.96	-0.0173942
PSB913-2_map2	0002.CSV	3162.82	-0.0175355
PSB913-2_map2	0002.CSV	3166.68	-0.0175899
PSB913-2_map2	0002.CSV	3170.53	-0.0176629
PSB913-2_map2	0002.CSV	3174.39	-0.0176539
PSB913-2_map2	0002.CSV	3178.25	-0.017553
PSB913-2_map2	0002.CSV	3182.1	-0.0175379
PSB913-2_map2	0002.CSV	3185.96	-0.0174772
PSB913-2_map2	0002.CSV	3189.82	-0.0173965
PSB913-2_map2	0002.CSV	3193.68	-0.0175339
PSB913-2_map2	0002.CSV	3197.53	-0.0176618
PSB913-2_map2	0002.CSV	3201.39	-0.0176398
PSB913-2_map2	0002.CSV	3205.25	-0.0176265
PSB913-2_map2	0002.CSV	3209.1	-0.0176676
PSB913-2_map2	0002.CSV	3212.96	-0.0175461
PSB913-2_map2	0002.CSV	3216.82	-0.0174088
PSB913-2_map2	0002.CSV	3220.68	-0.017477
PSB913-2_map2	0002.CSV	3224.53	-0.017581
PSB913-2_map2	0002.CSV	3228.39	-0.0174171
PSB913-2_map2	0002.CSV	3232.25	-0.0170044
PSB913-2_map2	0002.CSV	3236.1	-0.0170058
PSB913-2_map2	0002.CSV	3239.96	-0.0172935
PSB913-2_map2	0002.CSV	3243.82	-0.0171534
PSB913-2_map2	0002.CSV	3247.68	-0.01708
PSB913-2_map2	0002.CSV	3251.53	-0.0171946
PSB913-2_map2	0002.CSV	3255.39	-0.0170714
PSB913-2_map2	0002.CSV	3259.25	-0.0172478
PSB913-2_map2	0002.CSV	3263.1	-0.01736
PSB913-2_map2	0002.CSV	3266.96	-0.0168927
PSB913-2_map2	0002.CSV	3270.82	-0.016516
PSB913-2_map2	0002.CSV	3274.68	-0.0166525
PSB913-2_map2	0002.CSV	3278.53	-0.0169662
PSB913-2_map2	0002.CSV	3282.39	-0.0171647
PSB913-2_map2	0002.CSV	3286.25	-0.0170877
PSB913-2_map2	0002.CSV	3290.1	-0.0165799
PSB913-2_map2	0002.CSV	3293.96	-0.0161817
PSB913-2_map2	0002.CSV	3297.82	-0.0162034
PSB913-2_map2	0002.CSV	3301.67	-0.0161391
PSB913-2_map2	0002.CSV	3305.53	-0.0159457
PSB913-2_map2	0002.CSV	3309.39	-0.0161294
PSB913-2_map2	0002.CSV	3313.25	-0.0166396
PSB913-2_map2	0002.CSV	3317.1	-0.0169433
PSB913-2_map2	0002.CSV	3320.96	-0.0167291
PSB913-2_map2	0002.CSV	3324.82	-0.0164436
PSB913-2_map2	0002.CSV	3328.67	-0.0166517
PSB913-2_map2	0002.CSV	3332.53	-0.0167082
PSB913-2_map2	0002.CSV	3336.39	-0.0162324
PSB913-2_map2	0002.CSV	3340.24	-0.0159527
PSB913-2_map2	0002.CSV	3344.1	-0.016159
PSB913-2_map2	0002.CSV	3347.96	-0.0161954
PSB913-2_map2	0002.CSV	3351.82	-0.0161941
PSB913-2_map2	0002.CSV	3355.67	-0.0163904
PSB913-2_map2	0002.CSV	3359.53	-0.016311
PSB913-2_map2	0002.CSV	3363.39	-0.0160982
PSB913-2_map2	0002.CSV	3367.24	-0.0156962
PSB913-2_map2	0002.CSV	3371.1	-0.0157182
PSB913-2_map2	0002.CSV	3374.96	-0.016012
PSB913-2_map2	0002.CSV	3378.82	-0.0162319
PSB913-2_map2	0002.CSV	3382.67	-0.0164928
PSB913-2_map2	0002.CSV	3386.53	-0.016431
PSB913-2_map2	0002.CSV	3390.39	-0.0159409
PSB913-2_map2	0002.CSV	3394.24	-0.0156193
PSB913-2_map2	0002.CSV	3398.1	-0.0155035
PSB913-2_map2	0002.CSV	3401.96	-0.0157158
PSB913-2_map2	0002.CSV	3405.82	-0.0161007
PSB913-2_map2	0002.CSV	3409.67	-0.0162272
PSB913-2_map2	0002.CSV	3413.53	-0.0166284
PSB913-2_map2	0002.CSV	3417.39	-0.0170708
PSB913-2_map2	0002.CSV	3421.24	-0.016983
PSB913-2_map2	0002.CSV	3425.1	-0.0167574
PSB913-2_map2	0002.CSV	3428.96	-0.016503
PSB913-2_map2	0002.CSV	3432.82	-0.0163072
PSB913-2_map2	0002.CSV	3436.67	-0.0165474
PSB913-2_map2	0002.CSV	3440.53	-0.0171982
PSB913-2_map2	0002.CSV	3444.39	-0.0175124
PSB913-2_map2	0002.CSV	3448.24	-0.0175541
PSB913-2_map2	0002.CSV	3452.1	-0.017819
PSB913-2_map2	0002.CSV	3455.96	-0.0177797
PSB913-2_map2	0002.CSV	3459.82	-0.0174738
PSB913-2_map2	0002.CSV	3463.67	-0.0172668
PSB913-2_map2	0002.CSV	3467.53	-0.0170823
PSB913-2_map2	0002.CSV	3471.39	-0.0173045
PSB913-2_map2	0002.CSV	3475.24	-0.0175464
PSB913-2_map2	0002.CSV	3479.1	-0.0176084
PSB913-2_map2	0002.CSV	3482.96	-0.0176162
PSB913-2_map2	0002.CSV	3486.82	-0.0176174
PSB913-2_map2	0002.CSV	3490.67	-0.0178823
PSB913-2_map2	0002.CSV	3494.53	-0.0180291
PSB913-2_map2	0002.CSV	3498.39	-0.0180422
PSB913-2_map2	0002.CSV	3502.24	-0.0181391
PSB913-2_map2	0002.CSV	3506.1	-0.0185036
PSB913-2_map2	0002.CSV	3509.96	-0.0187792
PSB913-2_map2	0002.CSV	3513.81	-0.0187934
PSB913-2_map2	0002.CSV	3517.67	-0.0192278
PSB913-2_map2	0002.CSV	3521.53	-0.0191924
PSB913-2_map2	0002.CSV	3525.39	-0.019189
PSB913-2_map2	0002.CSV	3529.24	-0.0195901
PSB913-2_map2	0002.CSV	3533.1	-0.0195811
PSB913-2_map2	0002.CSV	3536.96	-0.0193163
PSB913-2_map2	0002.CSV	3540.81	-0.0192454
PSB913-2_map2	0002.CSV	3544.67	-0.0191292
PSB913-2_map2	0002.CSV	3548.53	-0.0193415
PSB913-2_map2	0002.CSV	3552.39	-0.0196421
PSB913-2_map2	0002.CSV	3556.24	-0.019726
PSB913-2_map2	0002.CSV	3560.1	-0.0201878
PSB913-2_map2	0002.CSV	3563.96	-0.0208857
PSB913-2_map2	0002.CSV	3567.81	-0.020337
PSB913-2_map2	0002.CSV	3571.67	-0.0200965
PSB913-2_map2	0002.CSV	3575.53	-0.0204212
PSB913-2_map2	0002.CSV	3579.39	-0.0201218
PSB913-2_map2	0002.CSV	3583.24	-0.0199768
PSB913-2_map2	0002.CSV	3587.1	-0.0199807
PSB913-2_map2	0002.CSV	3590.96	-0.0200672
PSB913-2_map2	0002.CSV	3594.81	-0.0204322
PSB913-2_map2	0002.CSV	3598.67	-0.020328
PSB913-2_map2	0002.CSV	3602.53	-0.0204294
PSB913-2_map2	0002.CSV	3606.39	-0.0211412
PSB913-2_map2	0002.CSV	3610.24	-0.0215182
PSB913-2_map2	0002.CSV	3614.1	-0.0216443
PSB913-2_map2	0002.CSV	3617.96	-0.0213152
PSB913-2_map2	0002.CSV	3621.81	-0.0207159
PSB913-2_map2	0002.CSV	3625.67	-0.0214076
PSB913-2_map2	0002.CSV	3629.53	-0.0214585
PSB913-2_map2	0002.CSV	3633.39	-0.0207593
PSB913-2_map2	0002.CSV	3637.24	-0.0210551
PSB913-2_map2	0002.CSV	3641.1	-0.0215009
PSB913-2_map2	0002.CSV	3644.96	-0.0222729
PSB913-2_map2	0002.CSV	3648.81	-0.0214325
PSB913-2_map2	0002.CSV	3652.67	-0.0202083
PSB913-2_map2	0002.CSV	3656.53	-0.0204073
PSB913-2_map2	0002.CSV	3660.38	-0.0204973
PSB913-2_map2	0002.CSV	3664.24	-0.0214656
PSB913-2_map2	0002.CSV	3668.1	-0.0223972
PSB913-2_map2	0002.CSV	3671.96	-0.0223473
PSB913-2_map2	0002.CSV	3675.81	-0.0214021
PSB913-2_map2	0002.CSV	3679.67	-0.020754
PSB913-2_map2	0002.CSV	3683.53	-0.0212059
PSB913-2_map2	0002.CSV	3687.38	-0.0213951
PSB913-2_map2	0002.CSV	3691.24	-0.0203143
PSB913-2_map2	0002.CSV	3695.1	-0.0206186
PSB913-2_map2	0002.CSV	3698.95	-0.021491
PSB913-2_map2	0002.CSV	3702.81	-0.0217644
PSB913-2_map2	0002.CSV	3706.67	-0.0222147
PSB913-2_map2	0002.CSV	3710.53	-0.0222412
PSB913-2_map2	0002.CSV	3714.38	-0.0211694
PSB913-2_map2	0002.CSV	3718.24	-0.021647
PSB913-2_map2	0002.CSV	3722.1	-0.0219765
PSB913-2_map2	0002.CSV	3725.95	-0.021765
PSB913-2_map2	0002.CSV	3729.81	-0.0221347
PSB913-2_map2	0002.CSV	3733.67	-0.0219551
PSB913-2_map2	0002.CSV	3737.53	-0.0203964
PSB913-2_map2	0002.CSV	3741.38	-0.0213794
PSB913-2_map2	0002.CSV	3745.24	-0.0229479
PSB913-2_map2	0002.CSV	3749.1	-0.0232341
PSB913-2_map2	0002.CSV	3752.95	-0.0217677
PSB913-2_map2	0002.CSV	3756.81	-0.0214533
PSB913-2_map2	0002.CSV	3760.67	-0.0214871
PSB913-2_map2	0002.CSV	3764.53	-0.0218953
PSB913-2_map2	0002.CSV	3768.38	-0.0217221
PSB913-2_map2	0002.CSV	3772.24	-0.0212691
PSB913-2_map2	0002.CSV	3776.1	-0.0214997
PSB913-2_map2	0002.CSV	3779.95	-0.0214405
PSB913-2_map2	0002.CSV	3783.81	-0.0213544
PSB913-2_map2	0002.CSV	3787.67	-0.0213401
PSB913-2_map2	0002.CSV	3791.53	-0.021719
PSB913-2_map2	0002.CSV	3795.38	-0.0223885
PSB913-2_map2	0002.CSV	3799.24	-0.02251
PSB913-2_map2	0002.CSV	3803.1	-0.0220346
PSB913-2_map2	0002.CSV	3806.95	-0.0214318
PSB913-2_map2	0002.CSV	3810.81	-0.0217153
PSB913-2_map2	0002.CSV	3814.67	-0.0225195
PSB913-2_map2	0002.CSV	3818.53	-0.0223288
PSB913-2_map2	0002.CSV	3822.38	-0.0215173
PSB913-2_map2	0002.CSV	3826.24	-0.021743
PSB913-2_map2	0002.CSV	3830.1	-0.0222924
PSB913-2_map2	0002.CSV	3833.95	-0.0224785
PSB913-2_map2	0002.CSV	3837.81	-0.022009
PSB913-2_map2	0002.CSV	3841.67	-0.0212742
PSB913-2_map2	0002.CSV	3845.53	-0.0216258
PSB913-2_map2	0002.CSV	3849.38	-0.0228372
PSB913-2_map2	0002.CSV	3853.24	-0.0228171
PSB913-2_map2	0002.CSV	3857.1	-0.0219268
PSB913-2_map2	0002.CSV	3860.95	-0.0226937
PSB913-2_map2	0002.CSV	3864.81	-0.0227225
PSB913-2_map2	0002.CSV	3868.67	-0.0223862
PSB913-2_map2	0002.CSV	3872.52	-0.0218048
PSB913-2_map2	0002.CSV	3876.38	-0.0220207
PSB913-2_map2	0002.CSV	3880.24	-0.0224485
PSB913-2_map2	0002.CSV	3884.1	-0.0219698
PSB913-2_map2	0002.CSV	3887.95	-0.0219509
PSB913-2_map2	0002.CSV	3891.81	-0.0219426
PSB913-2_map2	0002.CSV	3895.67	-0.0222528
PSB913-2_map2	0002.CSV	3899.52	-0.0228598
PSB913-2_map2	0002.CSV	3903.38	-0.0220038
PSB913-2_map2	0002.CSV	3907.24	-0.0214818
PSB913-2_map2	0002.CSV	3911.1	-0.0221402
PSB913-2_map2	0002.CSV	3914.95	-0.0226036
PSB913-2_map2	0002.CSV	3918.81	-0.0223155
PSB913-2_map2	0002.CSV	3922.67	-0.0221765
PSB913-2_map2	0002.CSV	3926.52	-0.0221868
PSB913-2_map2	0002.CSV	3930.38	-0.0221431
PSB913-2_map2	0002.CSV	3934.24	-0.0219981
PSB913-2_map2	0002.CSV	3938.09	-0.0223575
PSB913-2_map2	0002.CSV	3941.95	-0.0225216
PSB913-2_map2	0002.CSV	3945.81	-0.0225101
PSB913-2_map2	0002.CSV	3949.67	-0.0223425
PSB913-2_map2	0002.CSV	3953.52	-0.0221178
PSB913-2_map2	0002.CSV	3957.38	-0.0221866
PSB913-2_map2	0002.CSV	3961.24	-0.0222489
PSB913-2_map2	0002.CSV	3965.09	-0.0222876
PSB913-2_map2	0002.CSV	3968.95	-0.0223447
PSB913-2_map2	0002.CSV	3972.81	-0.0223977
PSB913-2_map2	0002.CSV	3976.67	-0.0223524
PSB913-2_map2	0002.CSV	3980.52	-0.0222976
PSB913-2_map2	0002.CSV	3984.38	-0.0223191
PSB913-2_map2	0002.CSV	3988.24	-0.022429
PSB913-2_map2	0002.CSV	3992.09	-0.0224463
PSB913-2_map2	0002.CSV	3995.95	-0.0224607
PSB913-2_map2	0002.CSV	3999.81	-0.0224581
PSB913-2_map2	0003.CSV	674.992	0.0293576
PSB913-2_map2	0003.CSV	678.849	0.031195
PSB913-2_map2	0003.CSV	682.706	0.0333495
PSB913-2_map2	0003.CSV	686.563	0.0374325
PSB913-2_map2	0003.CSV	690.42	0.0443312
PSB913-2_map2	0003.CSV	694.277	0.0602859
PSB913-2_map2	0003.CSV	698.134	0.0735674
PSB913-2_map2	0003.CSV	701.991	0.0638175
PSB913-2_map2	0003.CSV	705.849	0.0494428
PSB913-2_map2	0003.CSV	709.706	0.055494
PSB913-2_map2	0003.CSV	713.563	0.0517656
PSB913-2_map2	0003.CSV	717.42	0.0277922
PSB913-2_map2	0003.CSV	721.277	0.0149044
PSB913-2_map2	0003.CSV	725.134	0.0152071
PSB913-2_map2	0003.CSV	728.991	0.0178148
PSB913-2_map2	0003.CSV	732.848	0.0217057
PSB913-2_map2	0003.CSV	736.705	0.0255743
PSB913-2_map2	0003.CSV	740.562	0.0284507
PSB913-2_map2	0003.CSV	744.42	0.0284753
PSB913-2_map2	0003.CSV	748.277	0.0267908
PSB913-2_map2	0003.CSV	752.134	0.0244603
PSB913-2_map2	0003.CSV	755.991	0.0232469
PSB913-2_map2	0003.CSV	759.848	0.0221795
PSB913-2_map2	0003.CSV	763.705	0.0215962
PSB913-2_map2	0003.CSV	767.562	0.0203599
PSB913-2_map2	0003.CSV	771.419	0.0192966
PSB913-2_map2	0003.CSV	775.276	0.0180384
PSB913-2_map2	0003.CSV	779.133	0.0173688
PSB913-2_map2	0003.CSV	782.99	0.0168357
PSB913-2_map2	0003.CSV	786.848	0.0171628
PSB913-2_map2	0003.CSV	790.705	0.017347
PSB913-2_map2	0003.CSV	794.562	0.0178694
PSB913-2_map2	0003.CSV	798.419	0.0181747
PSB913-2_map2	0003.CSV	802.276	0.0188626
PSB913-2_map2	0003.CSV	806.133	0.0195385
PSB913-2_map2	0003.CSV	809.99	0.020885
PSB913-2_map2	0003.CSV	813.847	0.0221067
PSB913-2_map2	0003.CSV	817.704	0.0240797
PSB913-2_map2	0003.CSV	821.562	0.0262635
PSB913-2_map2	0003.CSV	825.419	0.0291246
PSB913-2_map2	0003.CSV	829.276	0.0321969
PSB913-2_map2	0003.CSV	833.133	0.036472
PSB913-2_map2	0003.CSV	836.99	0.0425517
PSB913-2_map2	0003.CSV	840.847	0.0514414
PSB913-2_map2	0003.CSV	844.704	0.0596618
PSB913-2_map2	0003.CSV	848.561	0.0735229
PSB913-2_map2	0003.CSV	852.418	0.0940991
PSB913-2_map2	0003.CSV	856.275	0.103308
PSB913-2_map2	0003.CSV	860.132	0.0917633
PSB913-2_map2	0003.CSV	863.99	0.0697715
PSB913-2_map2	0003.CSV	867.847	0.0481242
PSB913-2_map2	0003.CSV	871.704	0.0324426
PSB913-2_map2	0003.CSV	875.561	0.0216251
PSB913-2_map2	0003.CSV	879.418	0.0152076
PSB913-2_map2	0003.CSV	883.275	0.0120211
PSB913-2_map2	0003.CSV	887.132	0.0108957
PSB913-2_map2	0003.CSV	890.989	0.0105411
PSB913-2_map2	0003.CSV	894.846	0.0108007
PSB913-2_map2	0003.CSV	898.703	0.0111428
PSB913-2_map2	0003.CSV	902.561	0.011922
PSB913-2_map2	0003.CSV	906.418	0.0125012
PSB913-2_map2	0003.CSV	910.275	0.0125511
PSB913-2_map2	0003.CSV	914.132	0.011894
PSB913-2_map2	0003.CSV	917.989	0.0116982
PSB913-2_map2	0003.CSV	921.846	0.0115548
PSB913-2_map2	0003.CSV	925.703	0.0117673
PSB913-2_map2	0003.CSV	929.56	0.0119445
PSB913-2_map2	0003.CSV	933.417	0.0123023
PSB913-2_map2	0003.CSV	937.274	0.0123822
PSB913-2_map2	0003.CSV	941.131	0.012397
PSB913-2_map2	0003.CSV	944.989	0.0120681
PSB913-2_map2	0003.CSV	948.846	0.012109
PSB913-2_map2	0003.CSV	952.703	0.0124177
PSB913-2_map2	0003.CSV	956.56	0.0130948
PSB913-2_map2	0003.CSV	960.417	0.0135511
PSB913-2_map2	0003.CSV	964.274	0.0139621
PSB913-2_map2	0003.CSV	968.131	0.0142129
PSB913-2_map2	0003.CSV	971.988	0.0149166
PSB913-2_map2	0003.CSV	975.845	0.0157338
PSB913-2_map2	0003.CSV	979.702	0.0168285
PSB913-2_map2	0003.CSV	983.559	0.0176662
PSB913-2_map2	0003.CSV	987.417	0.0184711
PSB913-2_map2	0003.CSV	991.274	0.0189771
PSB913-2_map2	0003.CSV	995.131	0.0193972
PSB913-2_map2	0003.CSV	998.988	0.0196643
PSB913-2_map2	0003.CSV	1002.85	0.0201665
PSB913-2_map2	0003.CSV	1006.7	0.0204519
PSB913-2_map2	0003.CSV	1010.56	0.0210085
PSB913-2_map2	0003.CSV	1014.42	0.0216452
PSB913-2_map2	0003.CSV	1018.27	0.022763
PSB913-2_map2	0003.CSV	1022.13	0.0239227
PSB913-2_map2	0003.CSV	1025.99	0.0252879
PSB913-2_map2	0003.CSV	1029.85	0.0262287
PSB913-2_map2	0003.CSV	1033.7	0.0271727
PSB913-2_map2	0003.CSV	1037.56	0.0278972
PSB913-2_map2	0003.CSV	1041.42	0.0284826
PSB913-2_map2	0003.CSV	1045.27	0.028709
PSB913-2_map2	0003.CSV	1049.13	0.0297884
PSB913-2_map2	0003.CSV	1052.99	0.0317466
PSB913-2_map2	0003.CSV	1056.84	0.034534
PSB913-2_map2	0003.CSV	1060.7	0.0368999
PSB913-2_map2	0003.CSV	1064.56	0.0380181
PSB913-2_map2	0003.CSV	1068.42	0.0368846
PSB913-2_map2	0003.CSV	1072.27	0.0347286
PSB913-2_map2	0003.CSV	1076.13	0.0331965
PSB913-2_map2	0003.CSV	1079.99	0.0346019
PSB913-2_map2	0003.CSV	1083.84	0.032503
PSB913-2_map2	0003.CSV	1087.7	0.0253381
PSB913-2_map2	0003.CSV	1091.56	0.0217362
PSB913-2_map2	0003.CSV	1095.41	0.0219466
PSB913-2_map2	0003.CSV	1099.27	0.0230275
PSB913-2_map2	0003.CSV	1103.13	0.0247313
PSB913-2_map2	0003.CSV	1106.99	0.0265492
PSB913-2_map2	0003.CSV	1110.84	0.0283563
PSB913-2_map2	0003.CSV	1114.7	0.0294311
PSB913-2_map2	0003.CSV	1118.56	0.0296584
PSB913-2_map2	0003.CSV	1122.41	0.0288537
PSB913-2_map2	0003.CSV	1126.27	0.0275805
PSB913-2_map2	0003.CSV	1130.13	0.0262307
PSB913-2_map2	0003.CSV	1133.99	0.0253259
PSB913-2_map2	0003.CSV	1137.84	0.0244166
PSB913-2_map2	0003.CSV	1141.7	0.023417
PSB913-2_map2	0003.CSV	1145.56	0.0221942
PSB913-2_map2	0003.CSV	1149.41	0.0216561
PSB913-2_map2	0003.CSV	1153.27	0.0216511
PSB913-2_map2	0003.CSV	1157.13	0.021859
PSB913-2_map2	0003.CSV	1160.99	0.0216966
PSB913-2_map2	0003.CSV	1164.84	0.0212226
PSB913-2_map2	0003.CSV	1168.7	0.0201768
PSB913-2_map2	0003.CSV	1172.56	0.0193042
PSB913-2_map2	0003.CSV	1176.41	0.0186792
PSB913-2_map2	0003.CSV	1180.27	0.018381
PSB913-2_map2	0003.CSV	1184.13	0.0180361
PSB913-2_map2	0003.CSV	1187.99	0.0178995
PSB913-2_map2	0003.CSV	1191.84	0.0178017
PSB913-2_map2	0003.CSV	1195.7	0.0180821
PSB913-2_map2	0003.CSV	1199.56	0.0184025
PSB913-2_map2	0003.CSV	1203.41	0.0189465
PSB913-2_map2	0003.CSV	1207.27	0.0194859
PSB913-2_map2	0003.CSV	1211.13	0.0202261
PSB913-2_map2	0003.CSV	1214.98	0.0210272
PSB913-2_map2	0003.CSV	1218.84	0.0220801
PSB913-2_map2	0003.CSV	1222.7	0.0231128
PSB913-2_map2	0003.CSV	1226.56	0.0245035
PSB913-2_map2	0003.CSV	1230.41	0.026053
PSB913-2_map2	0003.CSV	1234.27	0.0280044
PSB913-2_map2	0003.CSV	1238.13	0.030188
PSB913-2_map2	0003.CSV	1241.98	0.032774
PSB913-2_map2	0003.CSV	1245.84	0.0351759
PSB913-2_map2	0003.CSV	1249.7	0.0372226
PSB913-2_map2	0003.CSV	1253.56	0.0383779
PSB913-2_map2	0003.CSV	1257.41	0.0388987
PSB913-2_map2	0003.CSV	1261.27	0.038964
PSB913-2_map2	0003.CSV	1265.13	0.0391758
PSB913-2_map2	0003.CSV	1268.98	0.0392318
PSB913-2_map2	0003.CSV	1272.84	0.03931
PSB913-2_map2	0003.CSV	1276.7	0.0391258
PSB913-2_map2	0003.CSV	1280.56	0.0388968
PSB913-2_map2	0003.CSV	1284.41	0.0381587
PSB913-2_map2	0003.CSV	1288.27	0.0370605
PSB913-2_map2	0003.CSV	1292.13	0.0353645
PSB913-2_map2	0003.CSV	1295.98	0.0336056
PSB913-2_map2	0003.CSV	1299.84	0.0320175
PSB913-2_map2	0003.CSV	1303.7	0.0311953
PSB913-2_map2	0003.CSV	1307.56	0.030841
PSB913-2_map2	0003.CSV	1311.41	0.0310277
PSB913-2_map2	0003.CSV	1315.27	0.0312958
PSB913-2_map2	0003.CSV	1319.13	0.0317829
PSB913-2_map2	0003.CSV	1322.98	0.0321017
PSB913-2_map2	0003.CSV	1326.84	0.0326236
PSB913-2_map2	0003.CSV	1330.7	0.0332607
PSB913-2_map2	0003.CSV	1334.56	0.0343352
PSB913-2_map2	0003.CSV	1338.41	0.0359966
PSB913-2_map2	0003.CSV	1342.27	0.038206
PSB913-2_map2	0003.CSV	1346.13	0.039828
PSB913-2_map2	0003.CSV	1349.98	0.0419178
PSB913-2_map2	0003.CSV	1353.84	0.0439264
PSB913-2_map2	0003.CSV	1357.7	0.0460043
PSB913-2_map2	0003.CSV	1361.56	0.0483946
PSB913-2_map2	0003.CSV	1365.41	0.0514896
PSB913-2_map2	0003.CSV	1369.27	0.0539174
PSB913-2_map2	0003.CSV	1373.13	0.057209
PSB913-2_map2	0003.CSV	1376.98	0.0605458
PSB913-2_map2	0003.CSV	1380.84	0.0628561
PSB913-2_map2	0003.CSV	1384.7	0.0647296
PSB913-2_map2	0003.CSV	1388.56	0.0676856
PSB913-2_map2	0003.CSV	1392.41	0.0698235
PSB913-2_map2	0003.CSV	1396.27	0.072648
PSB913-2_map2	0003.CSV	1400.13	0.0754004
PSB913-2_map2	0003.CSV	1403.98	0.0780156
PSB913-2_map2	0003.CSV	1407.84	0.0806544
PSB913-2_map2	0003.CSV	1411.7	0.0832466
PSB913-2_map2	0003.CSV	1415.55	0.0851746
PSB913-2_map2	0003.CSV	1419.41	0.0883314
PSB913-2_map2	0003.CSV	1423.27	0.0908999
PSB913-2_map2	0003.CSV	1427.12	0.0932652
PSB913-2_map2	0003.CSV	1430.98	0.0955452
PSB913-2_map2	0003.CSV	1434.84	0.0985753
PSB913-2_map2	0003.CSV	1438.7	0.101536
PSB913-2_map2	0003.CSV	1442.55	0.103165
PSB913-2_map2	0003.CSV	1446.41	0.102879
PSB913-2_map2	0003.CSV	1450.27	0.101159
PSB913-2_map2	0003.CSV	1454.12	0.097608
PSB913-2_map2	0003.CSV	1457.98	0.0917277
PSB913-2_map2	0003.CSV	1461.84	0.0872033
PSB913-2_map2	0003.CSV	1465.7	0.0843106
PSB913-2_map2	0003.CSV	1469.55	0.0805288
PSB913-2_map2	0003.CSV	1473.41	0.0754198
PSB913-2_map2	0003.CSV	1477.27	0.0695564
PSB913-2_map2	0003.CSV	1481.12	0.0659614
PSB913-2_map2	0003.CSV	1484.98	0.0623991
PSB913-2_map2	0003.CSV	1488.84	0.0587693
PSB913-2_map2	0003.CSV	1492.7	0.0546095
PSB913-2_map2	0003.CSV	1496.55	0.0499089
PSB913-2_map2	0003.CSV	1500.41	0.0441335
PSB913-2_map2	0003.CSV	1504.27	0.0409328
PSB913-2_map2	0003.CSV	1508.12	0.0357847
PSB913-2_map2	0003.CSV	1511.98	0.0319328
PSB913-2_map2	0003.CSV	1515.84	0.0289158
PSB913-2_map2	0003.CSV	1519.7	0.0250737
PSB913-2_map2	0003.CSV	1523.55	0.020272
PSB913-2_map2	0003.CSV	1527.41	0.016921
PSB913-2_map2	0003.CSV	1531.27	0.0138516
PSB913-2_map2	0003.CSV	1535.12	0.0110058
PSB913-2_map2	0003.CSV	1538.98	0.00825525
PSB913-2_map2	0003.CSV	1542.84	0.00515649
PSB913-2_map2	0003.CSV	1546.7	0.00287029
PSB913-2_map2	0003.CSV	1550.55	0.00117636
PSB913-2_map2	0003.CSV	1554.41	-0.00065096
PSB913-2_map2	0003.CSV	1558.27	-0.00272891
PSB913-2_map2	0003.CSV	1562.12	-0.00458496
PSB913-2_map2	0003.CSV	1565.98	-0.0057098
PSB913-2_map2	0003.CSV	1569.84	-0.0069911
PSB913-2_map2	0003.CSV	1573.69	-0.00807136
PSB913-2_map2	0003.CSV	1577.55	-0.00893083
PSB913-2_map2	0003.CSV	1581.41	-0.00993773
PSB913-2_map2	0003.CSV	1585.27	-0.0112392
PSB913-2_map2	0003.CSV	1589.12	-0.0122517
PSB913-2_map2	0003.CSV	1592.98	-0.0125695
PSB913-2_map2	0003.CSV	1596.84	-0.0122385
PSB913-2_map2	0003.CSV	1600.69	-0.0122668
PSB913-2_map2	0003.CSV	1604.55	-0.0129588
PSB913-2_map2	0003.CSV	1608.41	-0.0138721
PSB913-2_map2	0003.CSV	1612.27	-0.01453
PSB913-2_map2	0003.CSV	1616.12	-0.0149193
PSB913-2_map2	0003.CSV	1619.98	-0.0150392
PSB913-2_map2	0003.CSV	1623.84	-0.0154026
PSB913-2_map2	0003.CSV	1627.69	-0.0155064
PSB913-2_map2	0003.CSV	1631.55	-0.0157978
PSB913-2_map2	0003.CSV	1635.41	-0.0156495
PSB913-2_map2	0003.CSV	1639.27	-0.0154697
PSB913-2_map2	0003.CSV	1643.12	-0.0159561
PSB913-2_map2	0003.CSV	1646.98	-0.0161712
PSB913-2_map2	0003.CSV	1650.84	-0.0159675
PSB913-2_map2	0003.CSV	1654.69	-0.0158269
PSB913-2_map2	0003.CSV	1658.55	-0.0161774
PSB913-2_map2	0003.CSV	1662.41	-0.0165225
PSB913-2_map2	0003.CSV	1666.27	-0.0166687
PSB913-2_map2	0003.CSV	1670.12	-0.0166957
PSB913-2_map2	0003.CSV	1673.98	-0.0163613
PSB913-2_map2	0003.CSV	1677.84	-0.0165899
PSB913-2_map2	0003.CSV	1681.69	-0.0167571
PSB913-2_map2	0003.CSV	1685.55	-0.0161761
PSB913-2_map2	0003.CSV	1689.41	-0.0157729
PSB913-2_map2	0003.CSV	1693.27	-0.0160351
PSB913-2_map2	0003.CSV	1697.12	-0.015599
PSB913-2_map2	0003.CSV	1700.98	-0.0139237
PSB913-2_map2	0003.CSV	1704.84	-0.012408
PSB913-2_map2	0003.CSV	1708.69	-0.0109463
PSB913-2_map2	0003.CSV	1712.55	-0.00969938
PSB913-2_map2	0003.CSV	1716.41	-0.00680505
PSB913-2_map2	0003.CSV	1720.27	-0.00382217
PSB913-2_map2	0003.CSV	1724.12	-0.00352145
[truncated: 98,109 more rows]

## Sheet: PSB913-2_map3
Map	Select spectrum number	Wavenumbers	Absorbance
PSB913-2_map3	0001.CSV	674.992	0.0392093
PSB913-2_map3	0001.CSV	678.849	0.0412444
PSB913-2_map3	0001.CSV	682.706	0.0434595
PSB913-2_map3	0001.CSV	686.563	0.0470448
PSB913-2_map3	0001.CSV	690.42	0.0529755
PSB913-2_map3	0001.CSV	694.277	0.0658742
PSB913-2_map3	0001.CSV	698.134	0.0755374
PSB913-2_map3	0001.CSV	701.991	0.0664428
PSB913-2_map3	0001.CSV	705.849	0.0553227
PSB913-2_map3	0001.CSV	709.706	0.0625452
PSB913-2_map3	0001.CSV	713.563	0.0602805
PSB913-2_map3	0001.CSV	717.42	0.0389391
PSB913-2_map3	0001.CSV	721.277	0.0272348
PSB913-2_map3	0001.CSV	725.134	0.0274569
PSB913-2_map3	0001.CSV	728.991	0.0292685
PSB913-2_map3	0001.CSV	732.848	0.0321778
PSB913-2_map3	0001.CSV	736.705	0.0352357
PSB913-2_map3	0001.CSV	740.562	0.0376507
PSB913-2_map3	0001.CSV	744.42	0.0379668
PSB913-2_map3	0001.CSV	748.277	0.0377416
PSB913-2_map3	0001.CSV	752.134	0.0369816
PSB913-2_map3	0001.CSV	755.991	0.0365692
PSB913-2_map3	0001.CSV	759.848	0.035714
PSB913-2_map3	0001.CSV	763.705	0.0351152
PSB913-2_map3	0001.CSV	767.562	0.0341243
PSB913-2_map3	0001.CSV	771.419	0.0333606
PSB913-2_map3	0001.CSV	775.276	0.0324282
PSB913-2_map3	0001.CSV	779.133	0.0323301
PSB913-2_map3	0001.CSV	782.99	0.0325031
PSB913-2_map3	0001.CSV	786.848	0.0332433
PSB913-2_map3	0001.CSV	790.705	0.0336075
PSB913-2_map3	0001.CSV	794.562	0.034415
PSB913-2_map3	0001.CSV	798.419	0.0349956
PSB913-2_map3	0001.CSV	802.276	0.0360008
PSB913-2_map3	0001.CSV	806.133	0.0369705
PSB913-2_map3	0001.CSV	809.99	0.0387853
PSB913-2_map3	0001.CSV	813.847	0.0405571
PSB913-2_map3	0001.CSV	817.704	0.0427174
PSB913-2_map3	0001.CSV	821.562	0.0449527
PSB913-2_map3	0001.CSV	825.419	0.0480527
PSB913-2_map3	0001.CSV	829.276	0.0514675
PSB913-2_map3	0001.CSV	833.133	0.0564354
PSB913-2_map3	0001.CSV	836.99	0.0637771
PSB913-2_map3	0001.CSV	840.847	0.074163
PSB913-2_map3	0001.CSV	844.704	0.0842509
PSB913-2_map3	0001.CSV	848.561	0.101113
PSB913-2_map3	0001.CSV	852.418	0.12242
PSB913-2_map3	0001.CSV	856.275	0.124391
PSB913-2_map3	0001.CSV	860.132	0.103388
PSB913-2_map3	0001.CSV	863.99	0.0768862
PSB913-2_map3	0001.CSV	867.847	0.0545939
PSB913-2_map3	0001.CSV	871.704	0.0399372
PSB913-2_map3	0001.CSV	875.561	0.0316382
PSB913-2_map3	0001.CSV	879.418	0.0280538
PSB913-2_map3	0001.CSV	883.275	0.026653
PSB913-2_map3	0001.CSV	887.132	0.0264582
PSB913-2_map3	0001.CSV	890.989	0.026755
PSB913-2_map3	0001.CSV	894.846	0.0274314
PSB913-2_map3	0001.CSV	898.703	0.0278782
PSB913-2_map3	0001.CSV	902.561	0.0286583
PSB913-2_map3	0001.CSV	906.418	0.0291543
PSB913-2_map3	0001.CSV	910.275	0.0291201
PSB913-2_map3	0001.CSV	914.132	0.0286238
PSB913-2_map3	0001.CSV	917.989	0.028652
PSB913-2_map3	0001.CSV	921.846	0.0287013
PSB913-2_map3	0001.CSV	925.703	0.0290029
PSB913-2_map3	0001.CSV	929.56	0.0291741
PSB913-2_map3	0001.CSV	933.417	0.0294777
PSB913-2_map3	0001.CSV	937.274	0.0294673
PSB913-2_map3	0001.CSV	941.131	0.0294884
PSB913-2_map3	0001.CSV	944.989	0.0294151
PSB913-2_map3	0001.CSV	948.846	0.0296174
PSB913-2_map3	0001.CSV	952.703	0.0297459
PSB913-2_map3	0001.CSV	956.56	0.0300937
PSB913-2_map3	0001.CSV	960.417	0.0303612
PSB913-2_map3	0001.CSV	964.274	0.0307372
PSB913-2_map3	0001.CSV	968.131	0.030769
PSB913-2_map3	0001.CSV	971.988	0.0310526
PSB913-2_map3	0001.CSV	975.845	0.0312977
PSB913-2_map3	0001.CSV	979.702	0.0319274
PSB913-2_map3	0001.CSV	983.559	0.0324841
PSB913-2_map3	0001.CSV	987.417	0.0331581
PSB913-2_map3	0001.CSV	991.274	0.0335705
PSB913-2_map3	0001.CSV	995.131	0.0339239
PSB913-2_map3	0001.CSV	998.988	0.0340799
PSB913-2_map3	0001.CSV	1002.85	0.0344549
PSB913-2_map3	0001.CSV	1006.7	0.0346653
PSB913-2_map3	0001.CSV	1010.56	0.0351578
PSB913-2_map3	0001.CSV	1014.42	0.0356717
PSB913-2_map3	0001.CSV	1018.27	0.0366553
PSB913-2_map3	0001.CSV	1022.13	0.0377524
PSB913-2_map3	0001.CSV	1025.99	0.0390341
PSB913-2_map3	0001.CSV	1029.85	0.0398029
PSB913-2_map3	0001.CSV	1033.7	0.0405257
PSB913-2_map3	0001.CSV	1037.56	0.0411341
PSB913-2_map3	0001.CSV	1041.42	0.0418708
PSB913-2_map3	0001.CSV	1045.27	0.0423223
PSB913-2_map3	0001.CSV	1049.13	0.0433916
PSB913-2_map3	0001.CSV	1052.99	0.0447845
PSB913-2_map3	0001.CSV	1056.84	0.046676
PSB913-2_map3	0001.CSV	1060.7	0.0482974
PSB913-2_map3	0001.CSV	1064.56	0.0493021
PSB913-2_map3	0001.CSV	1068.42	0.0488348
PSB913-2_map3	0001.CSV	1072.27	0.0479057
PSB913-2_map3	0001.CSV	1076.13	0.0477121
PSB913-2_map3	0001.CSV	1079.99	0.0499592
PSB913-2_map3	0001.CSV	1083.84	0.0481864
PSB913-2_map3	0001.CSV	1087.7	0.041322
PSB913-2_map3	0001.CSV	1091.56	0.037871
PSB913-2_map3	0001.CSV	1095.41	0.0380407
PSB913-2_map3	0001.CSV	1099.27	0.0388041
PSB913-2_map3	0001.CSV	1103.13	0.0398351
PSB913-2_map3	0001.CSV	1106.99	0.0408492
PSB913-2_map3	0001.CSV	1110.84	0.042044
PSB913-2_map3	0001.CSV	1114.7	0.0427798
PSB913-2_map3	0001.CSV	1118.56	0.0429162
PSB913-2_map3	0001.CSV	1122.41	0.0423347
PSB913-2_map3	0001.CSV	1126.27	0.0417175
PSB913-2_map3	0001.CSV	1130.13	0.0409941
PSB913-2_map3	0001.CSV	1133.99	0.040586
PSB913-2_map3	0001.CSV	1137.84	0.0401811
PSB913-2_map3	0001.CSV	1141.7	0.0397824
PSB913-2_map3	0001.CSV	1145.56	0.0391899
PSB913-2_map3	0001.CSV	1149.41	0.0390964
PSB913-2_map3	0001.CSV	1153.27	0.0392876
PSB913-2_map3	0001.CSV	1157.13	0.0395942
PSB913-2_map3	0001.CSV	1160.99	0.0395302
PSB913-2_map3	0001.CSV	1164.84	0.0392458
PSB913-2_map3	0001.CSV	1168.7	0.038515
PSB913-2_map3	0001.CSV	1172.56	0.0379569
PSB913-2_map3	0001.CSV	1176.41	0.0375325
PSB913-2_map3	0001.CSV	1180.27	0.0374537
PSB913-2_map3	0001.CSV	1184.13	0.0372523
PSB913-2_map3	0001.CSV	1187.99	0.0372888
PSB913-2_map3	0001.CSV	1191.84	0.0373718
PSB913-2_map3	0001.CSV	1195.7	0.0377417
PSB913-2_map3	0001.CSV	1199.56	0.0380665
PSB913-2_map3	0001.CSV	1203.41	0.0384823
PSB913-2_map3	0001.CSV	1207.27	0.0387856
PSB913-2_map3	0001.CSV	1211.13	0.0393358
PSB913-2_map3	0001.CSV	1214.98	0.0398727
PSB913-2_map3	0001.CSV	1218.84	0.0406283
PSB913-2_map3	0001.CSV	1222.7	0.0413234
PSB913-2_map3	0001.CSV	1226.56	0.0422975
PSB913-2_map3	0001.CSV	1230.41	0.0433298
PSB913-2_map3	0001.CSV	1234.27	0.0446684
PSB913-2_map3	0001.CSV	1238.13	0.046037
PSB913-2_map3	0001.CSV	1241.98	0.0476464
PSB913-2_map3	0001.CSV	1245.84	0.0490445
PSB913-2_map3	0001.CSV	1249.7	0.050371
PSB913-2_map3	0001.CSV	1253.56	0.0511597
PSB913-2_map3	0001.CSV	1257.41	0.051686
PSB913-2_map3	0001.CSV	1261.27	0.0518882
PSB913-2_map3	0001.CSV	1265.13	0.0522967
PSB913-2_map3	0001.CSV	1268.98	0.0525548
PSB913-2_map3	0001.CSV	1272.84	0.0527996
PSB913-2_map3	0001.CSV	1276.7	0.0528142
PSB913-2_map3	0001.CSV	1280.56	0.0528817
PSB913-2_map3	0001.CSV	1284.41	0.0526013
PSB913-2_map3	0001.CSV	1288.27	0.0521719
PSB913-2_map3	0001.CSV	1292.13	0.0513082
PSB913-2_map3	0001.CSV	1295.98	0.050537
PSB913-2_map3	0001.CSV	1299.84	0.0498573
PSB913-2_map3	0001.CSV	1303.7	0.0497434
PSB913-2_map3	0001.CSV	1307.56	0.0498768
PSB913-2_map3	0001.CSV	1311.41	0.0504261
PSB913-2_map3	0001.CSV	1315.27	0.0509476
PSB913-2_map3	0001.CSV	1319.13	0.0516583
PSB913-2_map3	0001.CSV	1322.98	0.0522015
PSB913-2_map3	0001.CSV	1326.84	0.0529882
PSB913-2_map3	0001.CSV	1330.7	0.0538211
PSB913-2_map3	0001.CSV	1334.56	0.0549977
PSB913-2_map3	0001.CSV	1338.41	0.0564091
PSB913-2_map3	0001.CSV	1342.27	0.0582245
PSB913-2_map3	0001.CSV	1346.13	0.0597106
PSB913-2_map3	0001.CSV	1349.98	0.0615273
PSB913-2_map3	0001.CSV	1353.84	0.063237
PSB913-2_map3	0001.CSV	1357.7	0.0651613
PSB913-2_map3	0001.CSV	1361.56	0.0673048
PSB913-2_map3	0001.CSV	1365.41	0.0700157
PSB913-2_map3	0001.CSV	1369.27	0.0721477
PSB913-2_map3	0001.CSV	1373.13	0.074998
PSB913-2_map3	0001.CSV	1376.98	0.0778173
PSB913-2_map3	0001.CSV	1380.84	0.0799523
PSB913-2_map3	0001.CSV	1384.7	0.0817534
PSB913-2_map3	0001.CSV	1388.56	0.0845353
PSB913-2_map3	0001.CSV	1392.41	0.0867792
PSB913-2_map3	0001.CSV	1396.27	0.0898385
PSB913-2_map3	0001.CSV	1400.13	0.0928273
PSB913-2_map3	0001.CSV	1403.98	0.0958187
PSB913-2_map3	0001.CSV	1407.84	0.0989245
PSB913-2_map3	0001.CSV	1411.7	0.10203
PSB913-2_map3	0001.CSV	1415.55	0.104358
PSB913-2_map3	0001.CSV	1419.41	0.107856
PSB913-2_map3	0001.CSV	1423.27	0.110754
PSB913-2_map3	0001.CSV	1427.12	0.11369
PSB913-2_map3	0001.CSV	1430.98	0.116737
PSB913-2_map3	0001.CSV	1434.84	0.120817
PSB913-2_map3	0001.CSV	1438.7	0.124855
PSB913-2_map3	0001.CSV	1442.55	0.127505
PSB913-2_map3	0001.CSV	1446.41	0.127916
PSB913-2_map3	0001.CSV	1450.27	0.126875
PSB913-2_map3	0001.CSV	1454.12	0.124215
PSB913-2_map3	0001.CSV	1457.98	0.119668
PSB913-2_map3	0001.CSV	1461.84	0.116089
PSB913-2_map3	0001.CSV	1465.7	0.114039
PSB913-2_map3	0001.CSV	1469.55	0.110462
PSB913-2_map3	0001.CSV	1473.41	0.103571
PSB913-2_map3	0001.CSV	1477.27	0.0950397
PSB913-2_map3	0001.CSV	1481.12	0.0900752
PSB913-2_map3	0001.CSV	1484.98	0.0852897
PSB913-2_map3	0001.CSV	1488.84	0.0797644
PSB913-2_map3	0001.CSV	1492.7	0.0740724
PSB913-2_map3	0001.CSV	1496.55	0.0693127
PSB913-2_map3	0001.CSV	1500.41	0.0635892
PSB913-2_map3	0001.CSV	1504.27	0.0605408
PSB913-2_map3	0001.CSV	1508.12	0.0541397
PSB913-2_map3	0001.CSV	1511.98	0.0496924
PSB913-2_map3	0001.CSV	1515.84	0.0468144
PSB913-2_map3	0001.CSV	1519.7	0.042971
PSB913-2_map3	0001.CSV	1523.55	0.0377377
PSB913-2_map3	0001.CSV	1527.41	0.0342487
PSB913-2_map3	0001.CSV	1531.27	0.0310941
PSB913-2_map3	0001.CSV	1535.12	0.0279909
PSB913-2_map3	0001.CSV	1538.98	0.0247791
PSB913-2_map3	0001.CSV	1542.84	0.0199684
PSB913-2_map3	0001.CSV	1546.7	0.0171216
PSB913-2_map3	0001.CSV	1550.55	0.0152446
PSB913-2_map3	0001.CSV	1554.41	0.0130757
PSB913-2_map3	0001.CSV	1558.27	0.0104344
PSB913-2_map3	0001.CSV	1562.12	0.00799351
PSB913-2_map3	0001.CSV	1565.98	0.00682202
PSB913-2_map3	0001.CSV	1569.84	0.00509028
PSB913-2_map3	0001.CSV	1573.69	0.00352465
PSB913-2_map3	0001.CSV	1577.55	0.00187738
PSB913-2_map3	0001.CSV	1581.41	0.000624429
PSB913-2_map3	0001.CSV	1585.27	-0.000575058
PSB913-2_map3	0001.CSV	1589.12	-0.00145133
PSB913-2_map3	0001.CSV	1592.98	-0.00185145
PSB913-2_map3	0001.CSV	1596.84	-0.00188356
PSB913-2_map3	0001.CSV	1600.69	-0.00201566
PSB913-2_map3	0001.CSV	1604.55	-0.00240502
PSB913-2_map3	0001.CSV	1608.41	-0.0030671
PSB913-2_map3	0001.CSV	1612.27	-0.00348155
PSB913-2_map3	0001.CSV	1616.12	-0.00372225
PSB913-2_map3	0001.CSV	1619.98	-0.00378138
PSB913-2_map3	0001.CSV	1623.84	-0.00385462
PSB913-2_map3	0001.CSV	1627.69	-0.00376998
PSB913-2_map3	0001.CSV	1631.55	-0.00391839
PSB913-2_map3	0001.CSV	1635.41	-0.00391012
PSB913-2_map3	0001.CSV	1639.27	-0.00387899
PSB913-2_map3	0001.CSV	1643.12	-0.00396262
PSB913-2_map3	0001.CSV	1646.98	-0.0039645
PSB913-2_map3	0001.CSV	1650.84	-0.0038425
PSB913-2_map3	0001.CSV	1654.69	-0.00382552
PSB913-2_map3	0001.CSV	1658.55	-0.0038497
PSB913-2_map3	0001.CSV	1662.41	-0.00407447
PSB913-2_map3	0001.CSV	1666.27	-0.00429477
PSB913-2_map3	0001.CSV	1670.12	-0.00439472
PSB913-2_map3	0001.CSV	1673.98	-0.00423213
PSB913-2_map3	0001.CSV	1677.84	-0.00436566
PSB913-2_map3	0001.CSV	1681.69	-0.00440522
PSB913-2_map3	0001.CSV	1685.55	-0.00420181
PSB913-2_map3	0001.CSV	1689.41	-0.00401716
PSB913-2_map3	0001.CSV	1693.27	-0.00416322
PSB913-2_map3	0001.CSV	1697.12	-0.00392253
PSB913-2_map3	0001.CSV	1700.98	-0.00319523
PSB913-2_map3	0001.CSV	1704.84	-0.0024268
PSB913-2_map3	0001.CSV	1708.69	-0.00158324
PSB913-2_map3	0001.CSV	1712.55	-0.000650332
PSB913-2_map3	0001.CSV	1716.41	0.0012996
PSB913-2_map3	0001.CSV	1720.27	0.00356116
PSB913-2_map3	0001.CSV	1724.12	0.00420857
PSB913-2_map3	0001.CSV	1727.98	0.0043466
PSB913-2_map3	0001.CSV	1731.84	0.00381356
PSB913-2_map3	0001.CSV	1735.69	0.00243521
PSB913-2_map3	0001.CSV	1739.55	0.000923665
PSB913-2_map3	0001.CSV	1743.41	-0.000894592
PSB913-2_map3	0001.CSV	1747.27	-0.0030463
PSB913-2_map3	0001.CSV	1751.12	-0.00547163
PSB913-2_map3	0001.CSV	1754.98	-0.0071024
PSB913-2_map3	0001.CSV	1758.84	-0.00821952
PSB913-2_map3	0001.CSV	1762.69	-0.00896758
PSB913-2_map3	0001.CSV	1766.55	-0.00929371
PSB913-2_map3	0001.CSV	1770.41	-0.00916133
PSB913-2_map3	0001.CSV	1774.26	-0.00799935
PSB913-2_map3	0001.CSV	1778.12	-0.00673123
PSB913-2_map3	0001.CSV	1781.98	-0.00555467
PSB913-2_map3	0001.CSV	1785.84	-0.0050971
PSB913-2_map3	0001.CSV	1789.69	-0.00556887
PSB913-2_map3	0001.CSV	1793.55	-0.00699554
PSB913-2_map3	0001.CSV	1797.41	-0.00813224
PSB913-2_map3	0001.CSV	1801.26	-0.00910073
PSB913-2_map3	0001.CSV	1805.12	-0.00977328
PSB913-2_map3	0001.CSV	1808.98	-0.0100843
PSB913-2_map3	0001.CSV	1812.84	-0.0101598
PSB913-2_map3	0001.CSV	1816.69	-0.0102518
PSB913-2_map3	0001.CSV	1820.55	-0.0102927
PSB913-2_map3	0001.CSV	1824.41	-0.0103477
PSB913-2_map3	0001.CSV	1828.26	-0.0101935
PSB913-2_map3	0001.CSV	1832.12	-0.0100374
PSB913-2_map3	0001.CSV	1835.98	-0.00998757
PSB913-2_map3	0001.CSV	1839.84	-0.0100039
PSB913-2_map3	0001.CSV	1843.69	-0.00988899
PSB913-2_map3	0001.CSV	1847.55	-0.00977951
PSB913-2_map3	0001.CSV	1851.41	-0.00976518
PSB913-2_map3	0001.CSV	1855.26	-0.00972871
PSB913-2_map3	0001.CSV	1859.12	-0.0095894
PSB913-2_map3	0001.CSV	1862.98	-0.00953786
PSB913-2_map3	0001.CSV	1866.84	-0.00945727
PSB913-2_map3	0001.CSV	1870.69	-0.00929021
PSB913-2_map3	0001.CSV	1874.55	-0.00923666
PSB913-2_map3	0001.CSV	1878.41	-0.00924704
PSB913-2_map3	0001.CSV	1882.26	-0.00921531
PSB913-2_map3	0001.CSV	1886.12	-0.00918271
PSB913-2_map3	0001.CSV	1889.98	-0.00906445
PSB913-2_map3	0001.CSV	1893.83	-0.0089789
PSB913-2_map3	0001.CSV	1897.69	-0.00891658
PSB913-2_map3	0001.CSV	1901.55	-0.00894612
PSB913-2_map3	0001.CSV	1905.41	-0.00889399
PSB913-2_map3	0001.CSV	1909.26	-0.00874191
PSB913-2_map3	0001.CSV	1913.12	-0.00864938
PSB913-2_map3	0001.CSV	1916.98	-0.00861498
PSB913-2_map3	0001.CSV	1920.83	-0.00842076
PSB913-2_map3	0001.CSV	1924.69	-0.0083213
PSB913-2_map3	0001.CSV	1928.55	-0.00827439
PSB913-2_map3	0001.CSV	1932.4	-0.00821298
PSB913-2_map3	0001.CSV	1936.26	-0.00809975
PSB913-2_map3	0001.CSV	1940.12	-0.00805552
PSB913-2_map3	0001.CSV	1943.98	-0.00789732
PSB913-2_map3	0001.CSV	1947.83	-0.00779742
PSB913-2_map3	0001.CSV	1951.69	-0.00777302
PSB913-2_map3	0001.CSV	1955.55	-0.00779824
PSB913-2_map3	0001.CSV	1959.4	-0.00778083
PSB913-2_map3	0001.CSV	1963.26	-0.00777249
PSB913-2_map3	0001.CSV	1967.12	-0.00770577
PSB913-2_map3	0001.CSV	1970.98	-0.00767638
PSB913-2_map3	0001.CSV	1974.83	-0.00764682
PSB913-2_map3	0001.CSV	1978.69	-0.00766072
PSB913-2_map3	0001.CSV	1982.55	-0.00766677
PSB913-2_map3	0001.CSV	1986.4	-0.0076628
PSB913-2_map3	0001.CSV	1990.26	-0.00756395
PSB913-2_map3	0001.CSV	1994.12	-0.0075
PSB913-2_map3	0001.CSV	1997.98	-0.00746147
PSB913-2_map3	0001.CSV	2001.83	-0.00744544
PSB913-2_map3	0001.CSV	2005.69	-0.00741173
PSB913-2_map3	0001.CSV	2009.55	-0.00742375
PSB913-2_map3	0001.CSV	2013.4	-0.00736681
PSB913-2_map3	0001.CSV	2017.26	-0.00733544
PSB913-2_map3	0001.CSV	2021.12	-0.00732303
PSB913-2_map3	0001.CSV	2024.97	-0.00733124
PSB913-2_map3	0001.CSV	2028.83	-0.0073128
PSB913-2_map3	0001.CSV	2032.69	-0.00731661
PSB913-2_map3	0001.CSV	2036.55	-0.00730403
PSB913-2_map3	0001.CSV	2040.4	-0.00733065
PSB913-2_map3	0001.CSV	2044.26	-0.00732638
PSB913-2_map3	0001.CSV	2048.12	-0.00732863
PSB913-2_map3	0001.CSV	2051.97	-0.0072794
PSB913-2_map3	0001.CSV	2055.83	-0.00729787
PSB913-2_map3	0001.CSV	2059.69	-0.00728572
PSB913-2_map3	0001.CSV	2063.55	-0.0072851
PSB913-2_map3	0001.CSV	2067.4	-0.00727542
PSB913-2_map3	0001.CSV	2071.26	-0.00727233
PSB913-2_map3	0001.CSV	2075.12	-0.00723534
PSB913-2_map3	0001.CSV	2078.97	-0.00726545
PSB913-2_map3	0001.CSV	2082.83	-0.00726021
PSB913-2_map3	0001.CSV	2086.69	-0.00727523
PSB913-2_map3	0001.CSV	2090.55	-0.00726177
PSB913-2_map3	0001.CSV	2094.4	-0.00721357
PSB913-2_map3	0001.CSV	2098.26	-0.00717587
PSB913-2_map3	0001.CSV	2102.12	-0.00719278
PSB913-2_map3	0001.CSV	2105.97	-0.00715423
PSB913-2_map3	0001.CSV	2109.83	-0.00712949
PSB913-2_map3	0001.CSV	2113.69	-0.00710107
PSB913-2_map3	0001.CSV	2117.55	-0.00712786
PSB913-2_map3	0001.CSV	2121.4	-0.00710902
PSB913-2_map3	0001.CSV	2125.26	-0.00705536
PSB913-2_map3	0001.CSV	2129.12	-0.00696991
PSB913-2_map3	0001.CSV	2132.97	-0.00695452
PSB913-2_map3	0001.CSV	2136.83	-0.00693244
PSB913-2_map3	0001.CSV	2140.69	-0.0069539
PSB913-2_map3	0001.CSV	2144.55	-0.00692436
PSB913-2_map3	0001.CSV	2148.4	-0.00688532
PSB913-2_map3	0001.CSV	2152.26	-0.00683369
PSB913-2_map3	0001.CSV	2156.12	-0.00682211
PSB913-2_map3	0001.CSV	2159.97	-0.00677749
PSB913-2_map3	0001.CSV	2163.83	-0.00672865
PSB913-2_map3	0001.CSV	2167.69	-0.00673583
PSB913-2_map3	0001.CSV	2171.55	-0.00676526
PSB913-2_map3	0001.CSV	2175.4	-0.00672467
PSB913-2_map3	0001.CSV	2179.26	-0.00668444
PSB913-2_map3	0001.CSV	2183.12	-0.00663426
PSB913-2_map3	0001.CSV	2186.97	-0.00667785
PSB913-2_map3	0001.CSV	2190.83	-0.00669041
PSB913-2_map3	0001.CSV	2194.69	-0.00665361
PSB913-2_map3	0001.CSV	2198.55	-0.00655933
PSB913-2_map3	0001.CSV	2202.4	-0.0065512
PSB913-2_map3	0001.CSV	2206.26	-0.00658266
PSB913-2_map3	0001.CSV	2210.12	-0.00657098
PSB913-2_map3	0001.CSV	2213.97	-0.00649663
PSB913-2_map3	0001.CSV	2217.83	-0.00647133
PSB913-2_map3	0001.CSV	2221.69	-0.0064394
PSB913-2_map3	0001.CSV	2225.54	-0.00648266
PSB913-2_map3	0001.CSV	2229.4	-0.0065248
PSB913-2_map3	0001.CSV	2233.26	-0.00647522
PSB913-2_map3	0001.CSV	2237.12	-0.00638704
PSB913-2_map3	0001.CSV	2240.97	-0.00636911
PSB913-2_map3	0001.CSV	2244.83	-0.0063519
PSB913-2_map3	0001.CSV	2248.69	-0.00630197
PSB913-2_map3	0001.CSV	2252.54	-0.00624002
PSB913-2_map3	0001.CSV	2256.4	-0.00627177
PSB913-2_map3	0001.CSV	2260.26	-0.00628368
PSB913-2_map3	0001.CSV	2264.11	-0.00627728
PSB913-2_map3	0001.CSV	2267.97	-0.00626154
PSB913-2_map3	0001.CSV	2271.83	-0.00626314
PSB913-2_map3	0001.CSV	2275.69	-0.00626386
PSB913-2_map3	0001.CSV	2279.54	-0.00624675
PSB913-2_map3	0001.CSV	2283.4	-0.00624975
PSB913-2_map3	0001.CSV	2287.26	-0.00627402
PSB913-2_map3	0001.CSV	2291.11	-0.00627013
PSB913-2_map3	0001.CSV	2294.97	-0.00626144
PSB913-2_map3	0001.CSV	2298.83	-0.00621627
PSB913-2_map3	0001.CSV	2302.69	-0.00622562
PSB913-2_map3	0001.CSV	2306.54	-0.00620755
PSB913-2_map3	0001.CSV	2310.4	-0.00625772
PSB913-2_map3	0001.CSV	2314.26	-0.00639262
PSB913-2_map3	0001.CSV	2318.11	-0.00665733
PSB913-2_map3	0001.CSV	2321.97	-0.00709562
PSB913-2_map3	0001.CSV	2325.83	-0.00754679
PSB913-2_map3	0001.CSV	2329.69	-0.00762585
PSB913-2_map3	0001.CSV	2333.54	-0.00767107
PSB913-2_map3	0001.CSV	2337.4	-0.00782229
PSB913-2_map3	0001.CSV	2341.26	-0.00866595
PSB913-2_map3	0001.CSV	2345.11	-0.00801473
PSB913-2_map3	0001.CSV	2348.97	-0.00723616
PSB913-2_map3	0001.CSV	2352.83	-0.00776166
PSB913-2_map3	0001.CSV	2356.69	-0.010294
PSB913-2_map3	0001.CSV	2360.54	-0.0125052
PSB913-2_map3	0001.CSV	2364.4	-0.0113989
PSB913-2_map3	0001.CSV	2368.26	-0.00870979
PSB913-2_map3	0001.CSV	2372.11	-0.00715521
PSB913-2_map3	0001.CSV	2375.97	-0.00633218
PSB913-2_map3	0001.CSV	2379.83	-0.00607675
PSB913-2_map3	0001.CSV	2383.69	-0.00608259
PSB913-2_map3	0001.CSV	2387.54	-0.0062019
PSB913-2_map3	0001.CSV	2391.4	-0.00630259
PSB913-2_map3	0001.CSV	2395.26	-0.00632101
PSB913-2_map3	0001.CSV	2399.11	-0.0062509
PSB913-2_map3	0001.CSV	2402.97	-0.00623231
PSB913-2_map3	0001.CSV	2406.83	-0.00627552
PSB913-2_map3	0001.CSV	2410.68	-0.0063328
PSB913-2_map3	0001.CSV	2414.54	-0.00632385
PSB913-2_map3	0001.CSV	2418.4	-0.0063056
PSB913-2_map3	0001.CSV	2422.26	-0.00627937
PSB913-2_map3	0001.CSV	2426.11	-0.00629734
PSB913-2_map3	0001.CSV	2429.97	-0.00629629
PSB913-2_map3	0001.CSV	2433.83	-0.00628522
PSB913-2_map3	0001.CSV	2437.68	-0.00624381
PSB913-2_map3	0001.CSV	2441.54	-0.00624201
PSB913-2_map3	0001.CSV	2445.4	-0.00621709
PSB913-2_map3	0001.CSV	2449.26	-0.00615493
PSB913-2_map3	0001.CSV	2453.11	-0.00613111
PSB913-2_map3	0001.CSV	2456.97	-0.00607714
PSB913-2_map3	0001.CSV	2460.83	-0.00597711
PSB913-2_map3	0001.CSV	2464.68	-0.00592446
PSB913-2_map3	0001.CSV	2468.54	-0.00586595
PSB913-2_map3	0001.CSV	2472.4	-0.00576163
PSB913-2_map3	0001.CSV	2476.26	-0.00560838
PSB913-2_map3	0001.CSV	2480.11	-0.00546745
PSB913-2_map3	0001.CSV	2483.97	-0.00530781
PSB913-2_map3	0001.CSV	2487.83	-0.00510489
PSB913-2_map3	0001.CSV	2491.68	-0.004958
PSB913-2_map3	0001.CSV	2495.54	-0.00494381
PSB913-2_map3	0001.CSV	2499.4	-0.00496963
PSB913-2_map3	0001.CSV	2503.26	-0.00502158
PSB913-2_map3	0001.CSV	2507.11	-0.00504254
PSB913-2_map3	0001.CSV	2510.97	-0.00498918
PSB913-2_map3	0001.CSV	2514.83	-0.00484743
PSB913-2_map3	0001.CSV	2518.68	-0.00467055
PSB913-2_map3	0001.CSV	2522.54	-0.00460161
PSB913-2_map3	0001.CSV	2526.4	-0.00471126
PSB913-2_map3	0001.CSV	2530.26	-0.00495492
PSB913-2_map3	0001.CSV	2534.11	-0.005221
PSB913-2_map3	0001.CSV	2537.97	-0.00538927
PSB913-2_map3	0001.CSV	2541.83	-0.00542082
PSB913-2_map3	0001.CSV	2545.68	-0.00539945
PSB913-2_map3	0001.CSV	2549.54	-0.00544389
PSB913-2_map3	0001.CSV	2553.4	-0.00555993
PSB913-2_map3	0001.CSV	2557.26	-0.00569989
PSB913-2_map3	0001.CSV	2561.11	-0.0058056
PSB913-2_map3	0001.CSV	2564.97	-0.00589658
PSB913-2_map3	0001.CSV	2568.83	-0.00593423
PSB913-2_map3	0001.CSV	2572.68	-0.00596787
PSB913-2_map3	0001.CSV	2576.54	-0.00599754
PSB913-2_map3	0001.CSV	2580.4	-0.006061
PSB913-2_map3	0001.CSV	2584.25	-0.00611671
PSB913-2_map3	0001.CSV	2588.11	-0.00615712
PSB913-2_map3	0001.CSV	2591.97	-0.00612553
PSB913-2_map3	0001.CSV	2595.83	-0.00612001
PSB913-2_map3	0001.CSV	2599.68	-0.0061169
PSB913-2_map3	0001.CSV	2603.54	-0.00610674
PSB913-2_map3	0001.CSV	2607.4	-0.00603505
PSB913-2_map3	0001.CSV	2611.25	-0.00594933
PSB913-2_map3	0001.CSV	2615.11	-0.00587442
PSB913-2_map3	0001.CSV	2618.97	-0.00587252
PSB913-2_map3	0001.CSV	2622.82	-0.00587925
PSB913-2_map3	0001.CSV	2626.68	-0.00589024
PSB913-2_map3	0001.CSV	2630.54	-0.00586997
PSB913-2_map3	0001.CSV	2634.4	-0.00579978
PSB913-2_map3	0001.CSV	2638.25	-0.00578661
PSB913-2_map3	0001.CSV	2642.11	-0.00592969
PSB913-2_map3	0001.CSV	2645.97	-0.00600153
PSB913-2_map3	0001.CSV	2649.82	-0.00592479
PSB913-2_map3	0001.CSV	2653.68	-0.00591848
PSB913-2_map3	0001.CSV	2657.54	-0.0060011
PSB913-2_map3	0001.CSV	2661.4	-0.00602492
PSB913-2_map3	0001.CSV	2665.25	-0.00597963
PSB913-2_map3	0001.CSV	2669.11	-0.00591374
PSB913-2_map3	0001.CSV	2672.97	-0.00584856
PSB913-2_map3	0001.CSV	2676.82	-0.00575247
PSB913-2_map3	0001.CSV	2680.68	-0.00577225
PSB913-2_map3	0001.CSV	2684.54	-0.0058431
PSB913-2_map3	0001.CSV	2688.4	-0.00584882
PSB913-2_map3	0001.CSV	2692.25	-0.00585951
PSB913-2_map3	0001.CSV	2696.11	-0.00584689
PSB913-2_map3	0001.CSV	2699.97	-0.00581512
PSB913-2_map3	0001.CSV	2703.82	-0.00577215
PSB913-2_map3	0001.CSV	2707.68	-0.00570198
PSB913-2_map3	0001.CSV	2711.54	-0.00572474
PSB913-2_map3	0001.CSV	2715.4	-0.00567595
PSB913-2_map3	0001.CSV	2719.25	-0.00556069
PSB913-2_map3	0001.CSV	2723.11	-0.00547677
PSB913-2_map3	0001.CSV	2726.97	-0.00543672
PSB913-2_map3	0001.CSV	2730.82	-0.00550641
PSB913-2_map3	0001.CSV	2734.68	-0.00547314
PSB913-2_map3	0001.CSV	2738.54	-0.00545007
PSB913-2_map3	0001.CSV	2742.4	-0.00546915
PSB913-2_map3	0001.CSV	2746.25	-0.00535438
PSB913-2_map3	0001.CSV	2750.11	-0.0053358
PSB913-2_map3	0001.CSV	2753.97	-0.00542789
PSB913-2_map3	0001.CSV	2757.82	-0.00543744
PSB913-2_map3	0001.CSV	2761.68	-0.00548004
PSB913-2_map3	0001.CSV	2765.54	-0.00550537
PSB913-2_map3	0001.CSV	2769.39	-0.00541444
PSB913-2_map3	0001.CSV	2773.25	-0.00528251
PSB913-2_map3	0001.CSV	2777.11	-0.00525842
PSB913-2_map3	0001.CSV	2780.97	-0.00525969
PSB913-2_map3	0001.CSV	2784.82	-0.00509274
PSB913-2_map3	0001.CSV	2788.68	-0.00483842
PSB913-2_map3	0001.CSV	2792.54	-0.00478477
PSB913-2_map3	0001.CSV	2796.39	-0.00481466
PSB913-2_map3	0001.CSV	2800.25	-0.00489218
PSB913-2_map3	0001.CSV	2804.11	-0.00488946
PSB913-2_map3	0001.CSV	2807.97	-0.00466078
PSB913-2_map3	0001.CSV	2811.82	-0.00458168
PSB913-2_map3	0001.CSV	2815.68	-0.00453322
PSB913-2_map3	0001.CSV	2819.54	-0.00435812
PSB913-2_map3	0001.CSV	2823.39	-0.0041173
PSB913-2_map3	0001.CSV	2827.25	-0.00381068
PSB913-2_map3	0001.CSV	2831.11	-0.00331743
PSB913-2_map3	0001.CSV	2834.97	-0.00257169
PSB913-2_map3	0001.CSV	2838.82	-0.00162285
PSB913-2_map3	0001.CSV	2842.68	-0.000497819
PSB913-2_map3	0001.CSV	2846.54	0.000905801
PSB913-2_map3	0001.CSV	2850.39	0.0020472
PSB913-2_map3	0001.CSV	2854.25	0.00243558
PSB913-2_map3	0001.CSV	2858.11	0.00202243
PSB913-2_map3	0001.CSV	2861.97	0.00127564
PSB913-2_map3	0001.CSV	2865.82	0.000747252
PSB913-2_map3	0001.CSV	2869.68	0.000576882
PSB913-2_map3	0001.CSV	2873.54	0.000470991
PSB913-2_map3	0001.CSV	2877.39	9.01255e-06
PSB913-2_map3	0001.CSV	2881.25	-0.000269495
PSB913-2_map3	0001.CSV	2885.11	6.77975e-05
PSB913-2_map3	0001.CSV	2888.97	0.000675266
PSB913-2_map3	0001.CSV	2892.82	0.00141743
PSB913-2_map3	0001.CSV	2896.68	0.00217599
PSB913-2_map3	0001.CSV	2900.54	0.00290428
PSB913-2_map3	0001.CSV	2904.39	0.00376964
PSB913-2_map3	0001.CSV	2908.25	0.00484565
PSB913-2_map3	0001.CSV	2912.11	0.00630248
PSB913-2_map3	0001.CSV	2915.97	0.00789443
PSB913-2_map3	0001.CSV	2919.82	0.00903015
PSB913-2_map3	0001.CSV	2923.68	0.00922532
PSB913-2_map3	0001.CSV	2927.54	0.00847406
PSB913-2_map3	0001.CSV	2931.39	0.00684323
PSB913-2_map3	0001.CSV	2935.25	0.00484166
PSB913-2_map3	0001.CSV	2939.11	0.00333572
PSB913-2_map3	0001.CSV	2942.96	0.00255618
PSB913-2_map3	0001.CSV	2946.82	0.00217892
PSB913-2_map3	0001.CSV	2950.68	0.00197723
PSB913-2_map3	0001.CSV	2954.54	0.00164211
PSB913-2_map3	0001.CSV	2958.39	0.000986692
PSB913-2_map3	0001.CSV	2962.25	0.000151515
PSB913-2_map3	0001.CSV	2966.11	-0.000917869
PSB913-2_map3	0001.CSV	2969.96	-0.00173761
PSB913-2_map3	0001.CSV	2973.82	-0.00216863
PSB913-2_map3	0001.CSV	2977.68	-0.00254725
PSB913-2_map3	0001.CSV	2981.53	-0.00303528
PSB913-2_map3	0001.CSV	2985.39	-0.00350867
PSB913-2_map3	0001.CSV	2989.25	-0.00363929
PSB913-2_map3	0001.CSV	2993.11	-0.00354692
PSB913-2_map3	0001.CSV	2996.96	-0.0036319
PSB913-2_map3	0001.CSV	3000.82	-0.00384306
PSB913-2_map3	0001.CSV	3004.68	-0.00406499
PSB913-2_map3	0001.CSV	3008.53	-0.00400567
PSB913-2_map3	0001.CSV	3012.39	-0.00378512
PSB913-2_map3	0001.CSV	3016.25	-0.00367034
PSB913-2_map3	0001.CSV	3020.11	-0.00352595
PSB913-2_map3	0001.CSV	3023.96	-0.00341232
PSB913-2_map3	0001.CSV	3027.82	-0.003452
PSB913-2_map3	0001.CSV	3031.68	-0.00354538
PSB913-2_map3	0001.CSV	3035.53	-0.00374781
PSB913-2_map3	0001.CSV	3039.39	-0.00391166
PSB913-2_map3	0001.CSV	3043.25	-0.00390306
PSB913-2_map3	0001.CSV	3047.11	-0.00391866
PSB913-2_map3	0001.CSV	3050.96	-0.00388493
PSB913-2_map3	0001.CSV	3054.82	-0.00376568
PSB913-2_map3	0001.CSV	3058.68	-0.00372573
PSB913-2_map3	0001.CSV	3062.53	-0.00370011
PSB913-2_map3	0001.CSV	3066.39	-0.00366712
PSB913-2_map3	0001.CSV	3070.25	-0.00381514
PSB913-2_map3	0001.CSV	3074.11	-0.00387607
PSB913-2_map3	0001.CSV	3077.96	-0.00370136
PSB913-2_map3	0001.CSV	3081.82	-0.00348704
PSB913-2_map3	0001.CSV	3085.68	-0.00346048
PSB913-2_map3	0001.CSV	3089.53	-0.00361705
PSB913-2_map3	0001.CSV	3093.39	-0.00383314
PSB913-2_map3	0001.CSV	3097.25	-0.00390992
PSB913-2_map3	0001.CSV	3101.11	-0.00381606
PSB913-2_map3	0001.CSV	3104.96	-0.00368595
PSB913-2_map3	0001.CSV	3108.82	-0.00365737
PSB913-2_map3	0001.CSV	3112.68	-0.00362362
PSB913-2_map3	0001.CSV	3116.53	-0.00350038
PSB913-2_map3	0001.CSV	3120.39	-0.00354383
PSB913-2_map3	0001.CSV	3124.25	-0.00362549
PSB913-2_map3	0001.CSV	3128.11	-0.00358508
PSB913-2_map3	0001.CSV	3131.96	-0.00355103
PSB913-2_map3	0001.CSV	3135.82	-0.0034044
PSB913-2_map3	0001.CSV	3139.68	-0.00332358
PSB913-2_map3	0001.CSV	3143.53	-0.0033634
PSB913-2_map3	0001.CSV	3147.39	-0.003281
PSB913-2_map3	0001.CSV	3151.25	-0.00311362
PSB913-2_map3	0001.CSV	3155.1	-0.00310394
PSB913-2_map3	0001.CSV	3158.96	-0.00313385
PSB913-2_map3	0001.CSV	3162.82	-0.00307134
PSB913-2_map3	0001.CSV	3166.68	-0.00303558
PSB913-2_map3	0001.CSV	3170.53	-0.00298293
PSB913-2_map3	0001.CSV	3174.39	-0.0028626
PSB913-2_map3	0001.CSV	3178.25	-0.00274284
PSB913-2_map3	0001.CSV	3182.1	-0.002708
PSB913-2_map3	0001.CSV	3185.96	-0.00264412
PSB913-2_map3	0001.CSV	3189.82	-0.00252208
PSB913-2_map3	0001.CSV	3193.68	-0.00241062
PSB913-2_map3	0001.CSV	3197.53	-0.00231687
PSB913-2_map3	0001.CSV	3201.39	-0.00218136
PSB913-2_map3	0001.CSV	3205.25	-0.00205448
PSB913-2_map3	0001.CSV	3209.1	-0.00198661
PSB913-2_map3	0001.CSV	3212.96	-0.00196992
PSB913-2_map3	0001.CSV	3216.82	-0.00192915
PSB913-2_map3	0001.CSV	3220.68	-0.0018468
PSB913-2_map3	0001.CSV	3224.53	-0.00176715
PSB913-2_map3	0001.CSV	3228.39	-0.00163615
PSB913-2_map3	0001.CSV	3232.25	-0.00147996
PSB913-2_map3	0001.CSV	3236.1	-0.00148115
PSB913-2_map3	0001.CSV	3239.96	-0.00148445
PSB913-2_map3	0001.CSV	3243.82	-0.00139152
PSB913-2_map3	0001.CSV	3247.68	-0.0013281
PSB913-2_map3	0001.CSV	3251.53	-0.0012879
PSB913-2_map3	0001.CSV	3255.39	-0.00128106
PSB913-2_map3	0001.CSV	3259.25	-0.00132447
PSB913-2_map3	0001.CSV	3263.1	-0.00128307
PSB913-2_map3	0001.CSV	3266.96	-0.00111875
PSB913-2_map3	0001.CSV	3270.82	-0.000987993
PSB913-2_map3	0001.CSV	3274.68	-0.000967364
PSB913-2_map3	0001.CSV	3278.53	-0.000927293
PSB913-2_map3	0001.CSV	3282.39	-0.000827397
PSB913-2_map3	0001.CSV	3286.25	-0.000792836
PSB913-2_map3	0001.CSV	3290.1	-0.000709251
PSB913-2_map3	0001.CSV	3293.96	-0.000540742
PSB913-2_map3	0001.CSV	3297.82	-0.000510362
PSB913-2_map3	0001.CSV	3301.67	-0.000581477
PSB913-2_map3	0001.CSV	3305.53	-0.00051344
PSB913-2_map3	0001.CSV	3309.39	-0.000500499
PSB913-2_map3	0001.CSV	3313.25	-0.00063809
PSB913-2_map3	0001.CSV	3317.1	-0.000718017
PSB913-2_map3	0001.CSV	3320.96	-0.00058525
PSB913-2_map3	0001.CSV	3324.82	-0.000488651
PSB913-2_map3	0001.CSV	3328.67	-0.000571716
PSB913-2_map3	0001.CSV	3332.53	-0.000585812
PSB913-2_map3	0001.CSV	3336.39	-0.00038061
PSB913-2_map3	0001.CSV	3340.24	-0.000221279
PSB913-2_map3	0001.CSV	3344.1	-0.000318335
PSB913-2_map3	0001.CSV	3347.96	-0.000311183
PSB913-2_map3	0001.CSV	3351.82	-0.000275323
PSB913-2_map3	0001.CSV	3355.67	-0.000455354
PSB913-2_map3	0001.CSV	3359.53	-0.000472268
PSB913-2_map3	0001.CSV	3363.39	-0.000239957
PSB913-2_map3	0001.CSV	3367.24	-3.44249e-05
PSB913-2_map3	0001.CSV	3371.1	-0.00010648
PSB913-2_map3	0001.CSV	3374.96	-0.00025966
PSB913-2_map3	0001.CSV	3378.82	-0.000251911
PSB913-2_map3	0001.CSV	3382.67	-0.000321679
PSB913-2_map3	0001.CSV	3386.53	-0.000380974
PSB913-2_map3	0001.CSV	3390.39	-0.000332969
PSB913-2_map3	0001.CSV	3394.24	-0.000261515
PSB913-2_map3	0001.CSV	3398.1	-0.000179649
PSB913-2_map3	0001.CSV	3401.96	-0.000125162
PSB913-2_map3	0001.CSV	3405.82	-0.000325619
PSB913-2_map3	0001.CSV	3409.67	-0.000441949
PSB913-2_map3	0001.CSV	3413.53	-0.000516319
PSB913-2_map3	0001.CSV	3417.39	-0.000725592
PSB913-2_map3	0001.CSV	3421.24	-0.000927326
PSB913-2_map3	0001.CSV	3425.1	-0.000872503
PSB913-2_map3	0001.CSV	3428.96	-0.000692413
PSB913-2_map3	0001.CSV	3432.82	-0.000665649
PSB913-2_map3	0001.CSV	3436.67	-0.000738063
PSB913-2_map3	0001.CSV	3440.53	-0.000925176
PSB913-2_map3	0001.CSV	3444.39	-0.00122879
PSB913-2_map3	0001.CSV	3448.24	-0.00132823
PSB913-2_map3	0001.CSV	3452.1	-0.00148263
PSB913-2_map3	0001.CSV	3455.96	-0.00153863
PSB913-2_map3	0001.CSV	3459.82	-0.00156468
PSB913-2_map3	0001.CSV	3463.67	-0.00148286
PSB913-2_map3	0001.CSV	3467.53	-0.00133352
PSB913-2_map3	0001.CSV	3471.39	-0.00154616
PSB913-2_map3	0001.CSV	3475.24	-0.00181288
PSB913-2_map3	0001.CSV	3479.1	-0.00189388
PSB913-2_map3	0001.CSV	3482.96	-0.00202714
PSB913-2_map3	0001.CSV	3486.82	-0.00214401
PSB913-2_map3	0001.CSV	3490.67	-0.00218944
PSB913-2_map3	0001.CSV	3494.53	-0.00220978
PSB913-2_map3	0001.CSV	3498.39	-0.00228843
PSB913-2_map3	0001.CSV	3502.24	-0.0024756
PSB913-2_map3	0001.CSV	3506.1	-0.00272664
PSB913-2_map3	0001.CSV	3509.96	-0.00278136
PSB913-2_map3	0001.CSV	3513.81	-0.0028043
PSB913-2_map3	0001.CSV	3517.67	-0.00305854
PSB913-2_map3	0001.CSV	3521.53	-0.00320526
PSB913-2_map3	0001.CSV	3525.39	-0.00335068
PSB913-2_map3	0001.CSV	3529.24	-0.00347317
PSB913-2_map3	0001.CSV	3533.1	-0.00344549
PSB913-2_map3	0001.CSV	3536.96	-0.00341117
PSB913-2_map3	0001.CSV	3540.81	-0.0034327
PSB913-2_map3	0001.CSV	3544.67	-0.00343892
PSB913-2_map3	0001.CSV	3548.53	-0.00355882
PSB913-2_map3	0001.CSV	3552.39	-0.00381649
PSB913-2_map3	0001.CSV	3556.24	-0.00401693
PSB913-2_map3	0001.CSV	3560.1	-0.00427626
PSB913-2_map3	0001.CSV	3563.96	-0.00461492
PSB913-2_map3	0001.CSV	3567.81	-0.00458204
PSB913-2_map3	0001.CSV	3571.67	-0.0045016
PSB913-2_map3	0001.CSV	3575.53	-0.0046363
PSB913-2_map3	0001.CSV	3579.39	-0.00465596
PSB913-2_map3	0001.CSV	3583.24	-0.00477652
PSB913-2_map3	0001.CSV	3587.1	-0.00484753
PSB913-2_map3	0001.CSV	3590.96	-0.00502531
PSB913-2_map3	0001.CSV	3594.81	-0.00535655
PSB913-2_map3	0001.CSV	3598.67	-0.00526225
PSB913-2_map3	0001.CSV	3602.53	-0.00513502
PSB913-2_map3	0001.CSV	3606.39	-0.00543783
PSB913-2_map3	0001.CSV	3610.24	-0.00564956
PSB913-2_map3	0001.CSV	3614.1	-0.00565263
PSB913-2_map3	0001.CSV	3617.96	-0.00553167
PSB913-2_map3	0001.CSV	3621.81	-0.00549663
PSB913-2_map3	0001.CSV	3625.67	-0.00583712
PSB913-2_map3	0001.CSV	3629.53	-0.00605574
PSB913-2_map3	0001.CSV	3633.39	-0.00586915
PSB913-2_map3	0001.CSV	3637.24	-0.00591031
PSB913-2_map3	0001.CSV	3641.1	-0.00603727
PSB913-2_map3	0001.CSV	3644.96	-0.00642259
PSB913-2_map3	0001.CSV	3648.81	-0.00626997
PSB913-2_map3	0001.CSV	3652.67	-0.00593201
PSB913-2_map3	0001.CSV	3656.53	-0.00618093
PSB913-2_map3	0001.CSV	3660.38	-0.006244
PSB913-2_map3	0001.CSV	3664.24	-0.00639141
PSB913-2_map3	0001.CSV	3668.1	-0.0065184
PSB913-2_map3	0001.CSV	3671.96	-0.00647358
PSB913-2_map3	0001.CSV	3675.81	-0.00632895
PSB913-2_map3	0001.CSV	3679.67	-0.00617041
PSB913-2_map3	0001.CSV	3683.53	-0.00642808
PSB913-2_map3	0001.CSV	3687.38	-0.00660153
PSB913-2_map3	0001.CSV	3691.24	-0.00614585
PSB913-2_map3	0001.CSV	3695.1	-0.00604299
PSB913-2_map3	0001.CSV	3698.95	-0.00622454
PSB913-2_map3	0001.CSV	3702.81	-0.0063632
PSB913-2_map3	0001.CSV	3706.67	-0.00663602
PSB913-2_map3	0001.CSV	3710.53	-0.00673691
PSB913-2_map3	0001.CSV	3714.38	-0.00635086
PSB913-2_map3	0001.CSV	3718.24	-0.00638671
PSB913-2_map3	0001.CSV	3722.1	-0.00651393
PSB913-2_map3	0001.CSV	3725.95	-0.00658253
PSB913-2_map3	0001.CSV	3729.81	-0.00684357
PSB913-2_map3	0001.CSV	3733.67	-0.00675684
PSB913-2_map3	0001.CSV	3737.53	-0.00610011
PSB913-2_map3	0001.CSV	3741.38	-0.00639389
PSB913-2_map3	0001.CSV	3745.24	-0.00672134
PSB913-2_map3	0001.CSV	3749.1	-0.00666588
PSB913-2_map3	0001.CSV	3752.95	-0.0063711
PSB913-2_map3	0001.CSV	3756.81	-0.00642644
PSB913-2_map3	0001.CSV	3760.67	-0.00642994
PSB913-2_map3	0001.CSV	3764.53	-0.00657098
PSB913-2_map3	0001.CSV	3768.38	-0.00654836
PSB913-2_map3	0001.CSV	3772.24	-0.00645119
PSB913-2_map3	0001.CSV	3776.1	-0.00649797
PSB913-2_map3	0001.CSV	3779.95	-0.00647143
PSB913-2_map3	0001.CSV	3783.81	-0.00651781
PSB913-2_map3	0001.CSV	3787.67	-0.00667563
PSB913-2_map3	0001.CSV	3791.53	-0.00677958
PSB913-2_map3	0001.CSV	3795.38	-0.00673919
PSB913-2_map3	0001.CSV	3799.24	-0.00675984
PSB913-2_map3	0001.CSV	3803.1	-0.00675694
PSB913-2_map3	0001.CSV	3806.95	-0.00671825
PSB913-2_map3	0001.CSV	3810.81	-0.00677498
PSB913-2_map3	0001.CSV	3814.67	-0.00685189
PSB913-2_map3	0001.CSV	3818.53	-0.00658609
PSB913-2_map3	0001.CSV	3822.38	-0.00636849
PSB913-2_map3	0001.CSV	3826.24	-0.00653351
PSB913-2_map3	0001.CSV	3830.1	-0.00669267
PSB913-2_map3	0001.CSV	3833.95	-0.00693877
PSB913-2_map3	0001.CSV	3837.81	-0.00681712
PSB913-2_map3	0001.CSV	3841.67	-0.00627389
PSB913-2_map3	0001.CSV	3845.53	-0.00661889
PSB913-2_map3	0001.CSV	3849.38	-0.00715178
PSB913-2_map3	0001.CSV	3853.24	-0.00690247
PSB913-2_map3	0001.CSV	3857.1	-0.00646496
PSB913-2_map3	0001.CSV	3860.95	-0.00681066
PSB913-2_map3	0001.CSV	3864.81	-0.00681432
PSB913-2_map3	0001.CSV	3868.67	-0.00674637
PSB913-2_map3	0001.CSV	3872.52	-0.00672379
PSB913-2_map3	0001.CSV	3876.38	-0.00689934
PSB913-2_map3	0001.CSV	3880.24	-0.00697738
PSB913-2_map3	0001.CSV	3884.1	-0.00678261
PSB913-2_map3	0001.CSV	3887.95	-0.00661481
PSB913-2_map3	0001.CSV	3891.81	-0.00663602
PSB913-2_map3	0001.CSV	3895.67	-0.00676845
PSB913-2_map3	0001.CSV	3899.52	-0.00670601
PSB913-2_map3	0001.CSV	3903.38	-0.00635471
PSB913-2_map3	0001.CSV	3907.24	-0.00649506
PSB913-2_map3	0001.CSV	3911.1	-0.00678098
PSB913-2_map3	0001.CSV	3914.95	-0.00691728
PSB913-2_map3	0001.CSV	3918.81	-0.00682384
PSB913-2_map3	0001.CSV	3922.67	-0.0066323
PSB913-2_map3	0001.CSV	3926.52	-0.00652969
PSB913-2_map3	0001.CSV	3930.38	-0.00647965
PSB913-2_map3	0001.CSV	3934.24	-0.00643003
PSB913-2_map3	0001.CSV	3938.09	-0.00659464
PSB913-2_map3	0001.CSV	3941.95	-0.00663801
PSB913-2_map3	0001.CSV	3945.81	-0.00664568
PSB913-2_map3	0001.CSV	3949.67	-0.00657741
PSB913-2_map3	0001.CSV	3953.52	-0.00654275
PSB913-2_map3	0001.CSV	3957.38	-0.00662414
PSB913-2_map3	0001.CSV	3961.24	-0.00654911
PSB913-2_map3	0001.CSV	3965.09	-0.00644293
PSB913-2_map3	0001.CSV	3968.95	-0.00655283
PSB913-2_map3	0001.CSV	3972.81	-0.00667808
PSB913-2_map3	0001.CSV	3976.67	-0.00663488
PSB913-2_map3	0001.CSV	3980.52	-0.0066306
PSB913-2_map3	0001.CSV	3984.38	-0.00650822
PSB913-2_map3	0001.CSV	3988.24	-0.00637397
PSB913-2_map3	0001.CSV	3992.09	-0.00631135
PSB913-2_map3	0001.CSV	3995.95	-0.00629038
PSB913-2_map3	0001.CSV	3999.81	-0.00638191
PSB913-2_map3	0002.CSV	674.992	0.0328355
PSB913-2_map3	0002.CSV	678.849	0.0345326
PSB913-2_map3	0002.CSV	682.706	0.0363461
PSB913-2_map3	0002.CSV	686.563	0.0404212
PSB913-2_map3	0002.CSV	690.42	0.0465001
PSB913-2_map3	0002.CSV	694.277	0.0619947
PSB913-2_map3	0002.CSV	698.134	0.0758216
PSB913-2_map3	0002.CSV	701.991	0.06642
PSB913-2_map3	0002.CSV	705.849	0.0550671
PSB913-2_map3	0002.CSV	709.706	0.068447
PSB913-2_map3	0002.CSV	713.563	0.0662518
PSB913-2_map3	0002.CSV	717.42	0.036239
PSB913-2_map3	0002.CSV	721.277	0.0198397
PSB913-2_map3	0002.CSV	725.134	0.0193071
PSB913-2_map3	0002.CSV	728.991	0.0208654
PSB913-2_map3	0002.CSV	732.848	0.0237047
PSB913-2_map3	0002.CSV	736.705	0.0266672
PSB913-2_map3	0002.CSV	740.562	0.0294518
PSB913-2_map3	0002.CSV	744.42	0.0305076
PSB913-2_map3	0002.CSV	748.277	0.0310083
PSB913-2_map3	0002.CSV	752.134	0.0305013
PSB913-2_map3	0002.CSV	755.991	0.0302043
PSB913-2_map3	0002.CSV	759.848	0.0295763
PSB913-2_map3	0002.CSV	763.705	0.0295118
PSB913-2_map3	0002.CSV	767.562	0.0291109
PSB913-2_map3	0002.CSV	771.419	0.0288484
PSB913-2_map3	0002.CSV	775.276	0.0282034
PSB913-2_map3	0002.CSV	779.133	0.0285275
PSB913-2_map3	0002.CSV	782.99	0.0287433
PSB913-2_map3	0002.CSV	786.848	0.0293145
PSB913-2_map3	0002.CSV	790.705	0.0293858
PSB913-2_map3	0002.CSV	794.562	0.0301969
PSB913-2_map3	0002.CSV	798.419	0.0307462
PSB913-2_map3	0002.CSV	802.276	0.0317306
PSB913-2_map3	0002.CSV	806.133	0.0324205
PSB913-2_map3	0002.CSV	809.99	0.0340569
PSB913-2_map3	0002.CSV	813.847	0.035995
PSB913-2_map3	0002.CSV	817.704	0.0385125
PSB913-2_map3	0002.CSV	821.562	0.0406522
PSB913-2_map3	0002.CSV	825.419	0.0439179
PSB913-2_map3	0002.CSV	829.276	0.0477796
PSB913-2_map3	0002.CSV	833.133	0.0533124
PSB913-2_map3	0002.CSV	836.99	0.0612125
PSB913-2_map3	0002.CSV	840.847	0.073334
PSB913-2_map3	0002.CSV	844.704	0.0854369
PSB913-2_map3	0002.CSV	848.561	0.106157
PSB913-2_map3	0002.CSV	852.418	0.137842
PSB913-2_map3	0002.CSV	856.275	0.151085
PSB913-2_map3	0002.CSV	860.132	0.131625
PSB913-2_map3	0002.CSV	863.99	0.0994784
PSB913-2_map3	0002.CSV	867.847	0.0693142
PSB913-2_map3	0002.CSV	871.704	0.0461036
PSB913-2_map3	0002.CSV	875.561	0.0306281
PSB913-2_map3	0002.CSV	879.418	0.0238252
PSB913-2_map3	0002.CSV	883.275	0.0216101
PSB913-2_map3	0002.CSV	887.132	0.0211824
PSB913-2_map3	0002.CSV	890.989	0.0213204
PSB913-2_map3	0002.CSV	894.846	0.0220289
PSB913-2_map3	0002.CSV	898.703	0.0224291
PSB913-2_map3	0002.CSV	902.561	0.0231979
PSB913-2_map3	0002.CSV	906.418	0.0236117
PSB913-2_map3	0002.CSV	910.275	0.0233583
PSB913-2_map3	0002.CSV	914.132	0.0225834
PSB913-2_map3	0002.CSV	917.989	0.0226423
PSB913-2_map3	0002.CSV	921.846	0.0227496
PSB913-2_map3	0002.CSV	925.703	0.0231182
PSB913-2_map3	0002.CSV	929.56	0.0232829
PSB913-2_map3	0002.CSV	933.417	0.0237482
PSB913-2_map3	0002.CSV	937.274	0.0239304
PSB913-2_map3	0002.CSV	941.131	0.0243047
PSB913-2_map3	0002.CSV	944.989	0.0244325
PSB913-2_map3	0002.CSV	948.846	0.0247534
PSB913-2_map3	0002.CSV	952.703	0.0249228
PSB913-2_map3	0002.CSV	956.56	0.0253159
PSB913-2_map3	0002.CSV	960.417	0.0254867
PSB913-2_map3	0002.CSV	964.274	0.0259266
PSB913-2_map3	0002.CSV	968.131	0.0261498
PSB913-2_map3	0002.CSV	971.988	0.0266077
PSB913-2_map3	0002.CSV	975.845	0.0270001
PSB913-2_map3	0002.CSV	979.702	0.0278529
PSB913-2_map3	0002.CSV	983.559	0.0285548
PSB913-2_map3	0002.CSV	987.417	0.0294581
PSB913-2_map3	0002.CSV	991.274	0.0300721
PSB913-2_map3	0002.CSV	995.131	0.0307447
PSB913-2_map3	0002.CSV	998.988	0.0311247
PSB913-2_map3	0002.CSV	1002.85	0.0316385
PSB913-2_map3	0002.CSV	1006.7	0.0319551
PSB913-2_map3	0002.CSV	1010.56	0.0327304
PSB913-2_map3	0002.CSV	1014.42	0.0335466
PSB913-2_map3	0002.CSV	1018.27	0.0349209
PSB913-2_map3	0002.CSV	1022.13	0.0362516
PSB913-2_map3	0002.CSV	1025.99	0.0376664
PSB913-2_map3	0002.CSV	1029.85	0.0386396
PSB913-2_map3	0002.CSV	1033.7	0.0397216
PSB913-2_map3	0002.CSV	1037.56	0.04046
PSB913-2_map3	0002.CSV	1041.42	0.0412652
PSB913-2_map3	0002.CSV	1045.27	0.0417322
PSB913-2_map3	0002.CSV	1049.13	0.042847
PSB913-2_map3	0002.CSV	1052.99	0.0441689
PSB913-2_map3	0002.CSV	1056.84	0.0460544
PSB913-2_map3	0002.CSV	1060.7	0.0476781
PSB913-2_map3	0002.CSV	1064.56	0.0490202
PSB913-2_map3	0002.CSV	1068.42	0.0490146
PSB913-2_map3	0002.CSV	1072.27	0.0486906
PSB913-2_map3	0002.CSV	1076.13	0.049256
PSB913-2_map3	0002.CSV	1079.99	0.0532232
PSB913-2_map3	0002.CSV	1083.84	0.0517461
PSB913-2_map3	0002.CSV	1087.7	0.0428995
PSB913-2_map3	0002.CSV	1091.56	0.03837
PSB913-2_map3	0002.CSV	1095.41	0.0383987
PSB913-2_map3	0002.CSV	1099.27	0.0389618
PSB913-2_map3	0002.CSV	1103.13	0.0396776
PSB913-2_map3	0002.CSV	1106.99	0.0403853
PSB913-2_map3	0002.CSV	1110.84	0.041312
PSB913-2_map3	0002.CSV	1114.7	0.0417495
PSB913-2_map3	0002.CSV	1118.56	0.0418091
PSB913-2_map3	0002.CSV	1122.41	0.0411986
PSB913-2_map3	0002.CSV	1126.27	0.040471
PSB913-2_map3	0002.CSV	1130.13	0.0395356
PSB913-2_map3	0002.CSV	1133.99	0.0390218
PSB913-2_map3	0002.CSV	1137.84	0.0386101
PSB913-2_map3	0002.CSV	1141.7	0.0383874
PSB913-2_map3	0002.CSV	1145.56	0.038043
PSB913-2_map3	0002.CSV	1149.41	0.0382349
PSB913-2_map3	0002.CSV	1153.27	0.0386679
PSB913-2_map3	0002.CSV	1157.13	0.0392127
PSB913-2_map3	0002.CSV	1160.99	0.0392734
PSB913-2_map3	0002.CSV	1164.84	0.0390917
PSB913-2_map3	0002.CSV	1168.7	0.0383774
PSB913-2_map3	0002.CSV	1172.56	0.0378441
PSB913-2_map3	0002.CSV	1176.41	0.0373868
PSB913-2_map3	0002.CSV	1180.27	0.037312
PSB913-2_map3	0002.CSV	1184.13	0.037132
PSB913-2_map3	0002.CSV	1187.99	0.0372641
PSB913-2_map3	0002.CSV	1191.84	0.0374747
PSB913-2_map3	0002.CSV	1195.7	0.0379789
PSB913-2_map3	0002.CSV	1199.56	0.0383128
PSB913-2_map3	0002.CSV	1203.41	0.0387973
PSB913-2_map3	0002.CSV	1207.27	0.0390822
PSB913-2_map3	0002.CSV	1211.13	0.0396355
PSB913-2_map3	0002.CSV	1214.98	0.040194
PSB913-2_map3	0002.CSV	1218.84	0.0410896
PSB913-2_map3	0002.CSV	1222.7	0.0418969
PSB913-2_map3	0002.CSV	1226.56	0.0429971
PSB913-2_map3	0002.CSV	1230.41	0.0440894
PSB913-2_map3	0002.CSV	1234.27	0.0454965
PSB913-2_map3	0002.CSV	1238.13	0.0468511
PSB913-2_map3	0002.CSV	1241.98	0.0484873
PSB913-2_map3	0002.CSV	1245.84	0.0499047
PSB913-2_map3	0002.CSV	1249.7	0.0513293
PSB913-2_map3	0002.CSV	1253.56	0.0523537
PSB913-2_map3	0002.CSV	1257.41	0.0533682
PSB913-2_map3	0002.CSV	1261.27	0.0541005
PSB913-2_map3	0002.CSV	1265.13	0.0550211
PSB913-2_map3	0002.CSV	1268.98	0.0556028
PSB913-2_map3	0002.CSV	1272.84	0.0562242
PSB913-2_map3	0002.CSV	1276.7	0.0565691
PSB913-2_map3	0002.CSV	1280.56	0.056973
PSB913-2_map3	0002.CSV	1284.41	0.057019
PSB913-2_map3	0002.CSV	1288.27	0.057056
PSB913-2_map3	0002.CSV	1292.13	0.0566909
PSB913-2_map3	0002.CSV	1295.98	0.0565705
PSB913-2_map3	0002.CSV	1299.84	0.056497
PSB913-2_map3	0002.CSV	1303.7	0.0569196
PSB913-2_map3	0002.CSV	1307.56	0.0575288
PSB913-2_map3	0002.CSV	1311.41	0.0585905
PSB913-2_map3	0002.CSV	1315.27	0.0595733
PSB913-2_map3	0002.CSV	1319.13	0.0608595
PSB913-2_map3	0002.CSV	1322.98	0.0619247
PSB913-2_map3	0002.CSV	1326.84	0.0632855
PSB913-2_map3	0002.CSV	1330.7	0.0647108
PSB913-2_map3	0002.CSV	1334.56	0.0664631
PSB913-2_map3	0002.CSV	1338.41	0.0684574
PSB913-2_map3	0002.CSV	1342.27	0.0710832
PSB913-2_map3	0002.CSV	1346.13	0.0731569
PSB913-2_map3	0002.CSV	1349.98	0.075715
PSB913-2_map3	0002.CSV	1353.84	0.0782531
PSB913-2_map3	0002.CSV	1357.7	0.0810268
PSB913-2_map3	0002.CSV	1361.56	0.0840005
PSB913-2_map3	0002.CSV	1365.41	0.0877239
PSB913-2_map3	0002.CSV	1369.27	0.0906793
PSB913-2_map3	0002.CSV	1373.13	0.0945757
PSB913-2_map3	0002.CSV	1376.98	0.0985913
PSB913-2_map3	0002.CSV	1380.84	0.101996
PSB913-2_map3	0002.CSV	1384.7	0.105196
PSB913-2_map3	0002.CSV	1388.56	0.10985
PSB913-2_map3	0002.CSV	1392.41	0.11353
PSB913-2_map3	0002.CSV	1396.27	0.118646
PSB913-2_map3	0002.CSV	1400.13	0.124014
PSB913-2_map3	0002.CSV	1403.98	0.129216
PSB913-2_map3	0002.CSV	1407.84	0.134507
PSB913-2_map3	0002.CSV	1411.7	0.139602
PSB913-2_map3	0002.CSV	1415.55	0.143493
PSB913-2_map3	0002.CSV	1419.41	0.149322
PSB913-2_map3	0002.CSV	1423.27	0.154233
PSB913-2_map3	0002.CSV	1427.12	0.158749
PSB913-2_map3	0002.CSV	1430.98	0.163031
PSB913-2_map3	0002.CSV	1434.84	0.168159
PSB913-2_map3	0002.CSV	1438.7	0.172036
PSB913-2_map3	0002.CSV	1442.55	0.173104
PSB913-2_map3	0002.CSV	1446.41	0.170127
PSB913-2_map3	0002.CSV	1450.27	0.165031
PSB913-2_map3	0002.CSV	1454.12	0.159482
PSB913-2_map3	0002.CSV	1457.98	0.153688
PSB913-2_map3	0002.CSV	1461.84	0.149273
PSB913-2_map3	0002.CSV	1465.7	0.145959
PSB913-2_map3	0002.CSV	1469.55	0.140302
PSB913-2_map3	0002.CSV	1473.41	0.130584
PSB913-2_map3	0002.CSV	1477.27	0.118975
PSB913-2_map3	0002.CSV	1481.12	0.112156
PSB913-2_map3	0002.CSV	1484.98	0.105646
PSB913-2_map3	0002.CSV	1488.84	0.0981228
PSB913-2_map3	0002.CSV	1492.7	0.0905446
PSB913-2_map3	0002.CSV	1496.55	0.0848533
PSB913-2_map3	0002.CSV	1500.41	0.0780795
PSB913-2_map3	0002.CSV	1504.27	0.0742407
PSB913-2_map3	0002.CSV	1508.12	0.0659647
PSB913-2_map3	0002.CSV	1511.98	0.060127
PSB913-2_map3	0002.CSV	1515.84	0.0563344
PSB913-2_map3	0002.CSV	1519.7	0.0511715
PSB913-2_map3	0002.CSV	1523.55	0.0442526
PSB913-2_map3	0002.CSV	1527.41	0.039656
PSB913-2_map3	0002.CSV	1531.27	0.0355475
PSB913-2_map3	0002.CSV	1535.12	0.0315996
PSB913-2_map3	0002.CSV	1538.98	0.0276364
PSB913-2_map3	0002.CSV	1542.84	0.0216796
PSB913-2_map3	0002.CSV	1546.7	0.0180529
PSB913-2_map3	0002.CSV	1550.55	0.0156272
PSB913-2_map3	0002.CSV	1554.41	0.0129071
PSB913-2_map3	0002.CSV	1558.27	0.00964809
PSB913-2_map3	0002.CSV	1562.12	0.00652044
PSB913-2_map3	0002.CSV	1565.98	0.00504445
PSB913-2_map3	0002.CSV	1569.84	0.00289007
PSB913-2_map3	0002.CSV	1573.69	0.0010027
PSB913-2_map3	0002.CSV	1577.55	-0.000941278
PSB913-2_map3	0002.CSV	1581.41	-0.00235306
PSB913-2_map3	0002.CSV	1585.27	-0.00352513
PSB913-2_map3	0002.CSV	1589.12	-0.00438774
PSB913-2_map3	0002.CSV	1592.98	-0.00490411
PSB913-2_map3	0002.CSV	1596.84	-0.00512621
PSB913-2_map3	0002.CSV	1600.69	-0.00534637
PSB913-2_map3	0002.CSV	1604.55	-0.00563147
PSB913-2_map3	0002.CSV	1608.41	-0.00619122
PSB913-2_map3	0002.CSV	1612.27	-0.00654937
PSB913-2_map3	0002.CSV	1616.12	-0.00683343
PSB913-2_map3	0002.CSV	1619.98	-0.00691294
PSB913-2_map3	0002.CSV	1623.84	-0.00702534
PSB913-2_map3	0002.CSV	1627.69	-0.00707978
PSB913-2_map3	0002.CSV	1631.55	-0.00731152
PSB913-2_map3	0002.CSV	1635.41	-0.00732211
PSB913-2_map3	0002.CSV	1639.27	-0.0074101
PSB913-2_map3	0002.CSV	1643.12	-0.0075816
PSB913-2_map3	0002.CSV	1646.98	-0.00769773
PSB913-2_map3	0002.CSV	1650.84	-0.00770714
PSB913-2_map3	0002.CSV	1654.69	-0.00774502
PSB913-2_map3	0002.CSV	1658.55	-0.00776325
PSB913-2_map3	0002.CSV	1662.41	-0.00806414
PSB913-2_map3	0002.CSV	1666.27	-0.00836625
PSB913-2_map3	0002.CSV	1670.12	-0.00861183
PSB913-2_map3	0002.CSV	1673.98	-0.00863503
PSB913-2_map3	0002.CSV	1677.84	-0.0089284
PSB913-2_map3	0002.CSV	1681.69	-0.00902505
PSB913-2_map3	0002.CSV	1685.55	-0.00915468
PSB913-2_map3	0002.CSV	1689.41	-0.00921126
PSB913-2_map3	0002.CSV	1693.27	-0.00947504
PSB913-2_map3	0002.CSV	1697.12	-0.00958262
PSB913-2_map3	0002.CSV	1700.98	-0.0096079
PSB913-2_map3	0002.CSV	1704.84	-0.00927857
PSB913-2_map3	0002.CSV	1708.69	-0.00892915
PSB913-2_map3	0002.CSV	1712.55	-0.00848474
PSB913-2_map3	0002.CSV	1716.41	-0.00719285
PSB913-2_map3	0002.CSV	1720.27	-0.00521969
PSB913-2_map3	0002.CSV	1724.12	-0.00450557
PSB913-2_map3	0002.CSV	1727.98	-0.00413368
PSB913-2_map3	0002.CSV	1731.84	-0.00425914
PSB913-2_map3	0002.CSV	1735.69	-0.00479228
PSB913-2_map3	0002.CSV	1739.55	-0.00570633
PSB913-2_map3	0002.CSV	1743.41	-0.00695279
PSB913-2_map3	0002.CSV	1747.27	-0.00848568
PSB913-2_map3	0002.CSV	1751.12	-0.0101164
PSB913-2_map3	0002.CSV	1754.98	-0.0112725
PSB913-2_map3	0002.CSV	1758.84	-0.012006
PSB913-2_map3	0002.CSV	1762.69	-0.0125236
PSB913-2_map3	0002.CSV	1766.55	-0.0128162
PSB913-2_map3	0002.CSV	1770.41	-0.0127392
PSB913-2_map3	0002.CSV	1774.26	-0.0113701
PSB913-2_map3	0002.CSV	1778.12	-0.00976749
PSB913-2_map3	0002.CSV	1781.98	-0.00830437
PSB913-2_map3	0002.CSV	1785.84	-0.00774457
PSB913-2_map3	0002.CSV	1789.69	-0.00834639
PSB913-2_map3	0002.CSV	1793.55	-0.0101794
PSB913-2_map3	0002.CSV	1797.41	-0.0115944
PSB913-2_map3	0002.CSV	1801.26	-0.0128033
PSB913-2_map3	0002.CSV	1805.12	-0.0136618
PSB913-2_map3	0002.CSV	1808.98	-0.0140369
PSB913-2_map3	0002.CSV	1812.84	-0.014098
PSB913-2_map3	0002.CSV	1816.69	-0.0142441
PSB913-2_map3	0002.CSV	1820.55	-0.014315
PSB913-2_map3	0002.CSV	1824.41	-0.0144161
PSB913-2_map3	0002.CSV	1828.26	-0.0142866
PSB913-2_map3	0002.CSV	1832.12	-0.0141636
PSB913-2_map3	0002.CSV	1835.98	-0.014142
PSB913-2_map3	0002.CSV	1839.84	-0.0142421
PSB913-2_map3	0002.CSV	1843.69	-0.0141863
PSB913-2_map3	0002.CSV	1847.55	-0.0140709
PSB913-2_map3	0002.CSV	1851.41	-0.0140563
PSB913-2_map3	0002.CSV	1855.26	-0.0140715
PSB913-2_map3	0002.CSV	1859.12	-0.0139657
PSB913-2_map3	0002.CSV	1862.98	-0.0139585
PSB913-2_map3	0002.CSV	1866.84	-0.0138807
PSB913-2_map3	0002.CSV	1870.69	-0.013747
PSB913-2_map3	0002.CSV	1874.55	-0.013717
PSB913-2_map3	0002.CSV	1878.41	-0.0137078
PSB913-2_map3	0002.CSV	1882.26	-0.0136644
PSB913-2_map3	0002.CSV	1886.12	-0.0136822
PSB913-2_map3	0002.CSV	1889.98	-0.0136241
PSB913-2_map3	0002.CSV	1893.83	-0.0135816
PSB913-2_map3	0002.CSV	1897.69	-0.0135032
PSB913-2_map3	0002.CSV	1901.55	-0.0135058
PSB913-2_map3	0002.CSV	1905.41	-0.0134491
PSB913-2_map3	0002.CSV	1909.26	-0.0133714
PSB913-2_map3	0002.CSV	1913.12	-0.0133239
PSB913-2_map3	0002.CSV	1916.98	-0.0133028
PSB913-2_map3	0002.CSV	1920.83	-0.0131688
PSB913-2_map3	0002.CSV	1924.69	-0.0130741
PSB913-2_map3	0002.CSV	1928.55	-0.0129631
PSB913-2_map3	0002.CSV	1932.4	-0.0128747
PSB913-2_map3	0002.CSV	1936.26	-0.0127679
PSB913-2_map3	0002.CSV	1940.12	-0.0127987
PSB913-2_map3	0002.CSV	1943.98	-0.0127306
PSB913-2_map3	0002.CSV	1947.83	-0.012646
PSB913-2_map3	0002.CSV	1951.69	-0.0125369
PSB913-2_map3	0002.CSV	1955.55	-0.0125014
PSB913-2_map3	0002.CSV	1959.4	-0.0124476
PSB913-2_map3	0002.CSV	1963.26	-0.0124352
PSB913-2_map3	0002.CSV	1967.12	-0.0123699
PSB913-2_map3	0002.CSV	1970.98	-0.0123694
PSB913-2_map3	0002.CSV	1974.83	-0.0123187
PSB913-2_map3	0002.CSV	1978.69	-0.0123135
PSB913-2_map3	0002.CSV	1982.55	-0.012309
PSB913-2_map3	0002.CSV	1986.4	-0.0123215
PSB913-2_map3	0002.CSV	1990.26	-0.0122322
PSB913-2_map3	0002.CSV	1994.12	-0.0121795
PSB913-2_map3	0002.CSV	1997.98	-0.0121171
PSB913-2_map3	0002.CSV	2001.83	-0.0120421
PSB913-2_map3	0002.CSV	2005.69	-0.0119767
PSB913-2_map3	0002.CSV	2009.55	-0.0120021
PSB913-2_map3	0002.CSV	2013.4	-0.0119752
PSB913-2_map3	0002.CSV	2017.26	-0.0119484
PSB913-2_map3	0002.CSV	2021.12	-0.0119162
PSB913-2_map3	0002.CSV	2024.97	-0.0119321
PSB913-2_map3	0002.CSV	2028.83	-0.0118913
PSB913-2_map3	0002.CSV	2032.69	-0.0118921
PSB913-2_map3	0002.CSV	2036.55	-0.0118453
PSB913-2_map3	0002.CSV	2040.4	-0.0118219
PSB913-2_map3	0002.CSV	2044.26	-0.0117828
PSB913-2_map3	0002.CSV	2048.12	-0.0118502
PSB913-2_map3	0002.CSV	2051.97	-0.0118167
PSB913-2_map3	0002.CSV	2055.83	-0.0117686
PSB913-2_map3	0002.CSV	2059.69	-0.0117491
PSB913-2_map3	0002.CSV	2063.55	-0.0117702
PSB913-2_map3	0002.CSV	2067.4	-0.0117033
PSB913-2_map3	0002.CSV	2071.26	-0.0116791
PSB913-2_map3	0002.CSV	2075.12	-0.0116608
PSB913-2_map3	0002.CSV	2078.97	-0.0116791
PSB913-2_map3	0002.CSV	2082.83	-0.0116384
PSB913-2_map3	0002.CSV	2086.69	-0.0116355
PSB913-2_map3	0002.CSV	2090.55	-0.0116502
PSB913-2_map3	0002.CSV	2094.4	-0.011634
PSB913-2_map3	0002.CSV	2098.26	-0.011545
PSB913-2_map3	0002.CSV	2102.12	-0.0114942
PSB913-2_map3	0002.CSV	2105.97	-0.0114257
PSB913-2_map3	0002.CSV	2109.83	-0.0113804
PSB913-2_map3	0002.CSV	2113.69	-0.0113173
PSB913-2_map3	0002.CSV	2117.55	-0.0113452
PSB913-2_map3	0002.CSV	2121.4	-0.0113449
PSB913-2_map3	0002.CSV	2125.26	-0.0113026
PSB913-2_map3	0002.CSV	2129.12	-0.0112032
PSB913-2_map3	0002.CSV	2132.97	-0.0111432
PSB913-2_map3	0002.CSV	2136.83	-0.0111067
PSB913-2_map3	0002.CSV	2140.69	-0.0111132
PSB913-2_map3	0002.CSV	2144.55	-0.0110461
PSB913-2_map3	0002.CSV	2148.4	-0.0110134
PSB913-2_map3	0002.CSV	2152.26	-0.0109378
PSB913-2_map3	0002.CSV	2156.12	-0.0108768
PSB913-2_map3	0002.CSV	2159.97	-0.0108667
PSB913-2_map3	0002.CSV	2163.83	-0.0108895
PSB913-2_map3	0002.CSV	2167.69	-0.0108252
PSB913-2_map3	0002.CSV	2171.55	-0.0107893
PSB913-2_map3	0002.CSV	2175.4	-0.0107679
PSB913-2_map3	0002.CSV	2179.26	-0.0107336
PSB913-2_map3	0002.CSV	2183.12	-0.0106433
PSB913-2_map3	0002.CSV	2186.97	-0.0106327
PSB913-2_map3	0002.CSV	2190.83	-0.010631
PSB913-2_map3	0002.CSV	2194.69	-0.0105801
PSB913-2_map3	0002.CSV	2198.55	-0.01051
PSB913-2_map3	0002.CSV	2202.4	-0.0105432
PSB913-2_map3	0002.CSV	2206.26	-0.0105472
PSB913-2_map3	0002.CSV	2210.12	-0.0105044
PSB913-2_map3	0002.CSV	2213.97	-0.0104209
PSB913-2_map3	0002.CSV	2217.83	-0.0104175
PSB913-2_map3	0002.CSV	2221.69	-0.0103507
PSB913-2_map3	0002.CSV	2225.54	-0.0103011
PSB913-2_map3	0002.CSV	2229.4	-0.0103121
PSB913-2_map3	0002.CSV	2233.26	-0.0103142
PSB913-2_map3	0002.CSV	2237.12	-0.0102653
PSB913-2_map3	0002.CSV	2240.97	-0.0102654
PSB913-2_map3	0002.CSV	2244.83	-0.0102089
PSB913-2_map3	0002.CSV	2248.69	-0.0101716
PSB913-2_map3	0002.CSV	2252.54	-0.0101038
PSB913-2_map3	0002.CSV	2256.4	-0.0100549
PSB913-2_map3	0002.CSV	2260.26	-0.0100298
PSB913-2_map3	0002.CSV	2264.11	-0.0100045
PSB913-2_map3	0002.CSV	2267.97	-0.010001
PSB913-2_map3	0002.CSV	2271.83	-0.0100569
PSB913-2_map3	0002.CSV	2275.69	-0.0100646
PSB913-2_map3	0002.CSV	2279.54	-0.0100769
PSB913-2_map3	0002.CSV	2283.4	-0.0100946
PSB913-2_map3	0002.CSV	2287.26	-0.010101
PSB913-2_map3	0002.CSV	2291.11	-0.0100652
PSB913-2_map3	0002.CSV	2294.97	-0.010037
PSB913-2_map3	0002.CSV	2298.83	-0.0100181
PSB913-2_map3	0002.CSV	2302.69	-0.0100921
PSB913-2_map3	0002.CSV	2306.54	-0.0101174
PSB913-2_map3	0002.CSV	2310.4	-0.0102101
PSB913-2_map3	0002.CSV	2314.26	-0.0103333
PSB913-2_map3	0002.CSV	2318.11	-0.0104926
PSB913-2_map3	0002.CSV	2321.97	-0.0108423
PSB913-2_map3	0002.CSV	2325.83	-0.0117236
PSB913-2_map3	0002.CSV	2329.69	-0.012181
PSB913-2_map3	0002.CSV	2333.54	-0.0123175
PSB913-2_map3	0002.CSV	2337.4	-0.0126538
PSB913-2_map3	0002.CSV	2341.26	-0.0130071
PSB913-2_map3	0002.CSV	2345.11	-0.0117927
PSB913-2_map3	0002.CSV	2348.97	-0.0110996
PSB913-2_map3	0002.CSV	2352.83	-0.0119221
PSB913-2_map3	0002.CSV	2356.69	-0.0155036
PSB913-2_map3	0002.CSV	2360.54	-0.0185096
PSB913-2_map3	0002.CSV	2364.4	-0.0167713
PSB913-2_map3	0002.CSV	2368.26	-0.0134038
PSB913-2_map3	0002.CSV	2372.11	-0.011333
PSB913-2_map3	0002.CSV	2375.97	-0.0102491
PSB913-2_map3	0002.CSV	2379.83	-0.00983943
PSB913-2_map3	0002.CSV	2383.69	-0.00978696
PSB913-2_map3	0002.CSV	2387.54	-0.00986749
PSB913-2_map3	0002.CSV	2391.4	-0.00989139
PSB913-2_map3	0002.CSV	2395.26	-0.00989916
PSB913-2_map3	0002.CSV	2399.11	-0.00986055
PSB913-2_map3	0002.CSV	2402.97	-0.00980082
PSB913-2_map3	0002.CSV	2406.83	-0.00975336
PSB913-2_map3	0002.CSV	2410.68	-0.00982554
PSB913-2_map3	0002.CSV	2414.54	-0.00987548
PSB913-2_map3	0002.CSV	2418.4	-0.00986946
PSB913-2_map3	0002.CSV	2422.26	-0.00979434
PSB913-2_map3	0002.CSV	2426.11	-0.00977652
PSB913-2_map3	0002.CSV	2429.97	-0.00979684
PSB913-2_map3	0002.CSV	2433.83	-0.00981835
PSB913-2_map3	0002.CSV	2437.68	-0.00978245
PSB913-2_map3	0002.CSV	2441.54	-0.00974018
PSB913-2_map3	0002.CSV	2445.4	-0.00966844
PSB913-2_map3	0002.CSV	2449.26	-0.00966248
PSB913-2_map3	0002.CSV	2453.11	-0.00963072
PSB913-2_map3	0002.CSV	2456.97	-0.00953805
PSB913-2_map3	0002.CSV	2460.83	-0.00944615
PSB913-2_map3	0002.CSV	2464.68	-0.00938876
PSB913-2_map3	0002.CSV	2468.54	-0.00930688
PSB913-2_map3	0002.CSV	2472.4	-0.00917587
PSB913-2_map3	0002.CSV	2476.26	-0.00897287
PSB913-2_map3	0002.CSV	2480.11	-0.00876769
PSB913-2_map3	0002.CSV	2483.97	-0.00857464
PSB913-2_map3	0002.CSV	2487.83	-0.00840262
PSB913-2_map3	0002.CSV	2491.68	-0.00823359
PSB913-2_map3	0002.CSV	2495.54	-0.0081579
PSB913-2_map3	0002.CSV	2499.4	-0.00815348
PSB913-2_map3	0002.CSV	2503.26	-0.00825573
PSB913-2_map3	0002.CSV	2507.11	-0.00833209
PSB913-2_map3	0002.CSV	2510.97	-0.00830593
PSB913-2_map3	0002.CSV	2514.83	-0.0081299
PSB913-2_map3	0002.CSV	2518.68	-0.00791603
PSB913-2_map3	0002.CSV	2522.54	-0.00787438
PSB913-2_map3	0002.CSV	2526.4	-0.00800966
PSB913-2_map3	0002.CSV	2530.26	-0.00821246
PSB913-2_map3	0002.CSV	2534.11	-0.00843752
PSB913-2_map3	0002.CSV	2537.97	-0.00862525
PSB913-2_map3	0002.CSV	2541.83	-0.00868556
PSB913-2_map3	0002.CSV	2545.68	-0.00868141
PSB913-2_map3	0002.CSV	2549.54	-0.0087308
PSB913-2_map3	0002.CSV	2553.4	-0.00885766
PSB913-2_map3	0002.CSV	2557.26	-0.00904599
PSB913-2_map3	0002.CSV	2561.11	-0.00914732
PSB913-2_map3	0002.CSV	2564.97	-0.00922959
PSB913-2_map3	0002.CSV	2568.83	-0.00932118
PSB913-2_map3	0002.CSV	2572.68	-0.00936801
PSB913-2_map3	0002.CSV	2576.54	-0.00941917
PSB913-2_map3	0002.CSV	2580.4	-0.00953582
PSB913-2_map3	0002.CSV	2584.25	-0.00955867
PSB913-2_map3	0002.CSV	2588.11	-0.00957815
PSB913-2_map3	0002.CSV	2591.97	-0.00955958
PSB913-2_map3	0002.CSV	2595.83	-0.00950321
PSB913-2_map3	0002.CSV	2599.68	-0.00947549
PSB913-2_map3	0002.CSV	2603.54	-0.00947812
PSB913-2_map3	0002.CSV	2607.4	-0.00943007
PSB913-2_map3	0002.CSV	2611.25	-0.00938837
PSB913-2_map3	0002.CSV	2615.11	-0.00932929
PSB913-2_map3	0002.CSV	2618.97	-0.0093001
PSB913-2_map3	0002.CSV	2622.82	-0.00925661
PSB913-2_map3	0002.CSV	2626.68	-0.00925531
PSB913-2_map3	0002.CSV	2630.54	-0.0092736
PSB913-2_map3	0002.CSV	2634.4	-0.0091736
PSB913-2_map3	0002.CSV	2638.25	-0.00913479
PSB913-2_map3	0002.CSV	2642.11	-0.00929793
PSB913-2_map3	0002.CSV	2645.97	-0.00942929
PSB913-2_map3	0002.CSV	2649.82	-0.00946593
PSB913-2_map3	0002.CSV	2653.68	-0.00946123
PSB913-2_map3	0002.CSV	2657.54	-0.00949287
PSB913-2_map3	0002.CSV	2661.4	-0.00948878
PSB913-2_map3	0002.CSV	2665.25	-0.00944764
PSB913-2_map3	0002.CSV	2669.11	-0.00942326
PSB913-2_map3	0002.CSV	2672.97	-0.00930694
PSB913-2_map3	0002.CSV	2676.82	-0.00910864
PSB913-2_map3	0002.CSV	2680.68	-0.00908437
PSB913-2_map3	0002.CSV	2684.54	-0.00923144
PSB913-2_map3	0002.CSV	2688.4	-0.00929118
PSB913-2_map3	0002.CSV	2692.25	-0.00925661
PSB913-2_map3	0002.CSV	2696.11	-0.00922868
PSB913-2_map3	0002.CSV	2699.97	-0.009275
PSB913-2_map3	0002.CSV	2703.82	-0.00933847
PSB913-2_map3	0002.CSV	2707.68	-0.00919611
PSB913-2_map3	0002.CSV	2711.54	-0.00913749
PSB913-2_map3	0002.CSV	2715.4	-0.00909339
PSB913-2_map3	0002.CSV	2719.25	-0.00892989
PSB913-2_map3	0002.CSV	2723.11	-0.00874194
PSB913-2_map3	0002.CSV	2726.97	-0.00878071
PSB913-2_map3	0002.CSV	2730.82	-0.00900792
PSB913-2_map3	0002.CSV	2734.68	-0.00896881
PSB913-2_map3	0002.CSV	2738.54	-0.00888948
PSB913-2_map3	0002.CSV	2742.4	-0.00893385
PSB913-2_map3	0002.CSV	2746.25	-0.00872532
PSB913-2_map3	0002.CSV	2750.11	-0.00863788
PSB913-2_map3	0002.CSV	2753.97	-0.00879052
PSB913-2_map3	0002.CSV	2757.82	-0.00880861
PSB913-2_map3	0002.CSV	2761.68	-0.00881721
PSB913-2_map3	0002.CSV	2765.54	-0.00884708
PSB913-2_map3	0002.CSV	2769.39	-0.00875727
PSB913-2_map3	0002.CSV	2773.25	-0.00850852
PSB913-2_map3	0002.CSV	2777.11	-0.00848539
PSB913-2_map3	0002.CSV	2780.97	-0.00861905
PSB913-2_map3	0002.CSV	2784.82	-0.00845046
PSB913-2_map3	0002.CSV	2788.68	-0.00809767
PSB913-2_map3	0002.CSV	2792.54	-0.00801526
PSB913-2_map3	0002.CSV	2796.39	-0.00804225
PSB913-2_map3	0002.CSV	2800.25	-0.00815796
PSB913-2_map3	0002.CSV	2804.11	-0.00822836
PSB913-2_map3	0002.CSV	2807.97	-0.00791294
PSB913-2_map3	0002.CSV	2811.82	-0.0077845
PSB913-2_map3	0002.CSV	2815.68	-0.00786713
PSB913-2_map3	0002.CSV	2819.54	-0.0077515
PSB913-2_map3	0002.CSV	2823.39	-0.0075437
PSB913-2_map3	0002.CSV	2827.25	-0.00733723
PSB913-2_map3	0002.CSV	2831.11	-0.00685724
PSB913-2_map3	0002.CSV	2834.97	-0.0061003
PSB913-2_map3	0002.CSV	2838.82	-0.00543515
PSB913-2_map3	0002.CSV	2842.68	-0.00484844
PSB913-2_map3	0002.CSV	2846.54	-0.00406206
PSB913-2_map3	0002.CSV	2850.39	-0.00356391
PSB913-2_map3	0002.CSV	2854.25	-0.00348385
PSB913-2_map3	0002.CSV	2858.11	-0.003634
PSB913-2_map3	0002.CSV	2861.97	-0.00397842
PSB913-2_map3	0002.CSV	2865.82	-0.00420198
PSB913-2_map3	0002.CSV	2869.68	-0.00413414
PSB913-2_map3	0002.CSV	2873.54	-0.00407447
PSB913-2_map3	0002.CSV	2877.39	-0.00443982
PSB913-2_map3	0002.CSV	2881.25	-0.00464115
PSB913-2_map3	0002.CSV	2885.11	-0.00441548
PSB913-2_map3	0002.CSV	2888.97	-0.00401236
PSB913-2_map3	0002.CSV	2892.82	-0.00338329
PSB913-2_map3	0002.CSV	2896.68	-0.00280513
PSB913-2_map3	0002.CSV	2900.54	-0.00243468
PSB913-2_map3	0002.CSV	2904.39	-0.00188913
PSB913-2_map3	0002.CSV	2908.25	-0.00107195
PSB913-2_map3	0002.CSV	2912.11	-1.48438e-05
PSB913-2_map3	0002.CSV	2915.97	0.000842089
PSB913-2_map3	0002.CSV	2919.82	0.00106129
PSB913-2_map3	0002.CSV	2923.68	0.00068114
PSB913-2_map3	0002.CSV	2927.54	5.25206e-05
PSB913-2_map3	0002.CSV	2931.39	-0.0010188
PSB913-2_map3	0002.CSV	2935.25	-0.00239751
PSB913-2_map3	0002.CSV	2939.11	-0.00325972
PSB913-2_map3	0002.CSV	2942.96	-0.00344184
PSB913-2_map3	0002.CSV	2946.82	-0.00350748
PSB913-2_map3	0002.CSV	2950.68	-0.00374837
PSB913-2_map3	0002.CSV	2954.54	-0.00421694
PSB913-2_map3	0002.CSV	2958.39	-0.00484943
PSB913-2_map3	0002.CSV	2962.25	-0.00539127
PSB913-2_map3	0002.CSV	2966.11	-0.00605156
PSB913-2_map3	0002.CSV	2969.96	-0.00635843
PSB913-2_map3	0002.CSV	2973.82	-0.00626824
PSB913-2_map3	0002.CSV	2977.68	-0.00634527
PSB913-2_map3	0002.CSV	2981.53	-0.00668226
PSB913-2_map3	0002.CSV	2985.39	-0.00706485
PSB913-2_map3	0002.CSV	2989.25	-0.00710325
PSB913-2_map3	0002.CSV	2993.11	-0.00694174
PSB913-2_map3	0002.CSV	2996.96	-0.00698279
PSB913-2_map3	0002.CSV	3000.82	-0.00720393
PSB913-2_map3	0002.CSV	3004.68	-0.00736847
PSB913-2_map3	0002.CSV	3008.53	-0.00717225
PSB913-2_map3	0002.CSV	3012.39	-0.00689331
PSB913-2_map3	0002.CSV	3016.25	-0.00680088
PSB913-2_map3	0002.CSV	3020.11	-0.00677136
PSB913-2_map3	0002.CSV	3023.96	-0.00676265
PSB913-2_map3	0002.CSV	3027.82	-0.00678538
PSB913-2_map3	0002.CSV	3031.68	-0.00676056
PSB913-2_map3	0002.CSV	3035.53	-0.00685724
PSB913-2_map3	0002.CSV	3039.39	-0.00690619
PSB913-2_map3	0002.CSV	3043.25	-0.00683108
PSB913-2_map3	0002.CSV	3047.11	-0.00687844
PSB913-2_map3	0002.CSV	3050.96	-0.00690225
PSB913-2_map3	0002.CSV	3054.82	-0.00679951
PSB913-2_map3	0002.CSV	3058.68	-0.00676203
PSB913-2_map3	0002.CSV	3062.53	-0.00673051
PSB913-2_map3	0002.CSV	3066.39	-0.00663514
PSB913-2_map3	0002.CSV	3070.25	-0.00669678
PSB913-2_map3	0002.CSV	3074.11	-0.0067157
PSB913-2_map3	0002.CSV	3077.96	-0.00654412
PSB913-2_map3	0002.CSV	3081.82	-0.00639252
PSB913-2_map3	0002.CSV	3085.68	-0.00637397
PSB913-2_map3	0002.CSV	3089.53	-0.00643376
PSB913-2_map3	0002.CSV	3093.39	-0.00659934
PSB913-2_map3	0002.CSV	3097.25	-0.00669185
PSB913-2_map3	0002.CSV	3101.11	-0.00657604
PSB913-2_map3	0002.CSV	3104.96	-0.00640219
PSB913-2_map3	0002.CSV	3108.82	-0.00625282
PSB913-2_map3	0002.CSV	3112.68	-0.00609674
PSB913-2_map3	0002.CSV	3116.53	-0.00590985
PSB913-2_map3	0002.CSV	3120.39	-0.00595368
PSB913-2_map3	0002.CSV	3124.25	-0.00607675
PSB913-2_map3	0002.CSV	3128.11	-0.00599009
PSB913-2_map3	0002.CSV	3131.96	-0.00595711
PSB913-2_map3	0002.CSV	3135.82	-0.00595587
PSB913-2_map3	0002.CSV	3139.68	-0.00585039
PSB913-2_map3	0002.CSV	3143.53	-0.00572805
PSB913-2_map3	0002.CSV	3147.39	-0.00557583
PSB913-2_map3	0002.CSV	3151.25	-0.00537981
PSB913-2_map3	0002.CSV	3155.1	-0.00535674
PSB913-2_map3	0002.CSV	3158.96	-0.00542088
PSB913-2_map3	0002.CSV	3162.82	-0.00536718
PSB913-2_map3	0002.CSV	3166.68	-0.0053718
PSB913-2_map3	0002.CSV	3170.53	-0.00532634
PSB913-2_map3	0002.CSV	3174.39	-0.00516996
PSB913-2_map3	0002.CSV	3178.25	-0.0050074
PSB913-2_map3	0002.CSV	3182.1	-0.00490011
PSB913-2_map3	0002.CSV	3185.96	-0.00480434
PSB913-2_map3	0002.CSV	3189.82	-0.00463256
PSB913-2_map3	0002.CSV	3193.68	-0.00447147
PSB913-2_map3	0002.CSV	3197.53	-0.00444326
PSB913-2_map3	0002.CSV	3201.39	-0.00431353
PSB913-2_map3	0002.CSV	3205.25	-0.00409088
PSB913-2_map3	0002.CSV	3209.1	-0.00396128
PSB913-2_map3	0002.CSV	3212.96	-0.0039445
PSB913-2_map3	0002.CSV	3216.82	-0.00390329
PSB913-2_map3	0002.CSV	3220.68	-0.00381222
PSB913-2_map3	0002.CSV	3224.53	-0.00372593
PSB913-2_map3	0002.CSV	3228.39	-0.00359421
PSB913-2_map3	0002.CSV	3232.25	-0.00347461
PSB913-2_map3	0002.CSV	3236.1	-0.00347652
PSB913-2_map3	0002.CSV	3239.96	-0.00339736
PSB913-2_map3	0002.CSV	3243.82	-0.00327094
PSB913-2_map3	0002.CSV	3247.68	-0.00326347
PSB913-2_map3	0002.CSV	3251.53	-0.00319457
PSB913-2_map3	0002.CSV	3255.39	-0.00312339
PSB913-2_map3	0002.CSV	3259.25	-0.00310095
PSB913-2_map3	0002.CSV	3263.1	-0.00294021
PSB913-2_map3	0002.CSV	3266.96	-0.00279203
PSB913-2_map3	0002.CSV	3270.82	-0.00269753
PSB913-2_map3	0002.CSV	3274.68	-0.00266378
PSB913-2_map3	0002.CSV	3278.53	-0.00264813
PSB913-2_map3	0002.CSV	3282.39	-0.00260295
PSB913-2_map3	0002.CSV	3286.25	-0.00252511
PSB913-2_map3	0002.CSV	3290.1	-0.00232181
PSB913-2_map3	0002.CSV	3293.96	-0.00219145
PSB913-2_map3	0002.CSV	3297.82	-0.00222448
PSB913-2_map3	0002.CSV	3301.67	-0.00232326
PSB913-2_map3	0002.CSV	3305.53	-0.00226825
PSB913-2_map3	0002.CSV	3309.39	-0.0022103
PSB913-2_map3	0002.CSV	3313.25	-0.00224136
PSB913-2_map3	0002.CSV	3317.1	-0.0022375
PSB913-2_map3	0002.CSV	3320.96	-0.0021323
PSB913-2_map3	0002.CSV	3324.82	-0.0020864
PSB913-2_map3	0002.CSV	3328.67	-0.00220628
PSB913-2_map3	0002.CSV	3332.53	-0.00219695
PSB913-2_map3	0002.CSV	3336.39	-0.001895
PSB913-2_map3	0002.CSV	3340.24	-0.00163579
PSB913-2_map3	0002.CSV	3344.1	-0.00171966
PSB913-2_map3	0002.CSV	3347.96	-0.00175649
PSB913-2_map3	0002.CSV	3351.82	-0.00175273
PSB913-2_map3	0002.CSV	3355.67	-0.00185284
PSB913-2_map3	0002.CSV	3359.53	-0.00185762
PSB913-2_map3	0002.CSV	3363.39	-0.00176283
PSB913-2_map3	0002.CSV	3367.24	-0.00165236
PSB913-2_map3	0002.CSV	3371.1	-0.00164576
PSB913-2_map3	0002.CSV	3374.96	-0.00168481
PSB913-2_map3	0002.CSV	3378.82	-0.00167672
PSB913-2_map3	0002.CSV	3382.67	-0.00176477
PSB913-2_map3	0002.CSV	3386.53	-0.00183532
PSB913-2_map3	0002.CSV	3390.39	-0.00172715
PSB913-2_map3	0002.CSV	3394.24	-0.00168497
PSB913-2_map3	0002.CSV	3398.1	-0.00168269
PSB913-2_map3	0002.CSV	3401.96	-0.00161678
PSB913-2_map3	0002.CSV	3405.82	-0.00169837
PSB913-2_map3	0002.CSV	3409.67	-0.00178236
PSB913-2_map3	0002.CSV	3413.53	-0.00190652
PSB913-2_map3	0002.CSV	3417.39	-0.00214681
PSB913-2_map3	0002.CSV	3421.24	-0.0022962
PSB913-2_map3	0002.CSV	3425.1	-0.00214272
PSB913-2_map3	0002.CSV	3428.96	-0.00206503
PSB913-2_map3	0002.CSV	3432.82	-0.00222276
PSB913-2_map3	0002.CSV	3436.67	-0.00240015
PSB913-2_map3	0002.CSV	3440.53	-0.00263638
PSB913-2_map3	0002.CSV	3444.39	-0.00285497
PSB913-2_map3	0002.CSV	3448.24	-0.00294726
PSB913-2_map3	0002.CSV	3452.1	-0.00305687
PSB913-2_map3	0002.CSV	3455.96	-0.00310029
PSB913-2_map3	0002.CSV	3459.82	-0.00318191
PSB913-2_map3	0002.CSV	3463.67	-0.00320361
PSB913-2_map3	0002.CSV	3467.53	-0.00321842
PSB913-2_map3	0002.CSV	3471.39	-0.00352267
PSB913-2_map3	0002.CSV	3475.24	-0.00376325
PSB913-2_map3	0002.CSV	3479.1	-0.00377612
PSB913-2_map3	0002.CSV	3482.96	-0.00390329
PSB913-2_map3	0002.CSV	3486.82	-0.00409269
PSB913-2_map3	0002.CSV	3490.67	-0.00425215
PSB913-2_map3	0002.CSV	3494.53	-0.00427151
PSB913-2_map3	0002.CSV	3498.39	-0.00428604
PSB913-2_map3	0002.CSV	3502.24	-0.00445658
PSB913-2_map3	0002.CSV	3506.1	-0.00480562
PSB913-2_map3	0002.CSV	3509.96	-0.00498584
PSB913-2_map3	0002.CSV	3513.81	-0.00500065
PSB913-2_map3	0002.CSV	3517.67	-0.00526378
PSB913-2_map3	0002.CSV	3521.53	-0.00545815
PSB913-2_map3	0002.CSV	3525.39	-0.00559909
PSB913-2_map3	0002.CSV	3529.24	-0.00580756
PSB913-2_map3	0002.CSV	3533.1	-0.00593698
PSB913-2_map3	0002.CSV	3536.96	-0.00591802
PSB913-2_map3	0002.CSV	3540.81	-0.00587706
PSB913-2_map3	0002.CSV	3544.67	-0.00591338
PSB913-2_map3	0002.CSV	3548.53	-0.00606815
PSB913-2_map3	0002.CSV	3552.39	-0.00636333
PSB913-2_map3	0002.CSV	3556.24	-0.00656968
PSB913-2_map3	0002.CSV	3560.1	-0.00676836
PSB913-2_map3	0002.CSV	3563.96	-0.00697764
PSB913-2_map3	0002.CSV	3567.81	-0.00686259
PSB913-2_map3	0002.CSV	3571.67	-0.00699029
PSB913-2_map3	0002.CSV	3575.53	-0.00733039
PSB913-2_map3	0002.CSV	3579.39	-0.00741199
PSB913-2_map3	0002.CSV	3583.24	-0.00757489
PSB913-2_map3	0002.CSV	3587.1	-0.00766202
PSB913-2_map3	0002.CSV	3590.96	-0.00775557
PSB913-2_map3	0002.CSV	3594.81	-0.0079904
PSB913-2_map3	0002.CSV	3598.67	-0.00794538
PSB913-2_map3	0002.CSV	3602.53	-0.00792036
PSB913-2_map3	0002.CSV	3606.39	-0.00824162
PSB913-2_map3	0002.CSV	3610.24	-0.00853023
PSB913-2_map3	0002.CSV	3614.1	-0.00861265
PSB913-2_map3	0002.CSV	3617.96	-0.00838699
PSB913-2_map3	0002.CSV	3621.81	-0.00823584
PSB913-2_map3	0002.CSV	3625.67	-0.00862834
PSB913-2_map3	0002.CSV	3629.53	-0.00894654
PSB913-2_map3	0002.CSV	3633.39	-0.00874074
PSB913-2_map3	0002.CSV	3637.24	-0.00881698
PSB913-2_map3	0002.CSV	3641.1	-0.00897332
PSB913-2_map3	0002.CSV	3644.96	-0.00929812
PSB913-2_map3	0002.CSV	3648.81	-0.00918171
PSB913-2_map3	0002.CSV	3652.67	-0.00887331
PSB913-2_map3	0002.CSV	3656.53	-0.00899189
PSB913-2_map3	0002.CSV	3660.38	-0.00899588
PSB913-2_map3	0002.CSV	3664.24	-0.00914683
PSB913-2_map3	0002.CSV	3668.1	-0.0092447
PSB913-2_map3	0002.CSV	3671.96	-0.00933941
PSB913-2_map3	0002.CSV	3675.81	-0.00940251
PSB913-2_map3	0002.CSV	3679.67	-0.00916179
PSB913-2_map3	0002.CSV	3683.53	-0.00939703
PSB913-2_map3	0002.CSV	3687.38	-0.00960327
PSB913-2_map3	0002.CSV	3691.24	-0.00925706
PSB913-2_map3	0002.CSV	3695.1	-0.00915173
PSB913-2_map3	0002.CSV	3698.95	-0.00927302
PSB913-2_map3	0002.CSV	3702.81	-0.00932806
PSB913-2_map3	0002.CSV	3706.67	-0.00954382
PSB913-2_map3	0002.CSV	3710.53	-0.00938273
PSB913-2_map3	0002.CSV	3714.38	-0.00898786
PSB913-2_map3	0002.CSV	3718.24	-0.00923481
PSB913-2_map3	0002.CSV	3722.1	-0.00948531
PSB913-2_map3	0002.CSV	3725.95	-0.00949086
PSB913-2_map3	0002.CSV	3729.81	-0.00950959
PSB913-2_map3	0002.CSV	3733.67	-0.00935974
PSB913-2_map3	0002.CSV	3737.53	-0.00872515
PSB913-2_map3	0002.CSV	3741.38	-0.00925479
PSB913-2_map3	0002.CSV	3745.24	-0.00996895
PSB913-2_map3	0002.CSV	3749.1	-0.00996251
PSB913-2_map3	0002.CSV	3752.95	-0.00937245
PSB913-2_map3	0002.CSV	3756.81	-0.00925271
PSB913-2_map3	0002.CSV	3760.67	-0.00931191
PSB913-2_map3	0002.CSV	3764.53	-0.00948356
PSB913-2_map3	0002.CSV	3768.38	-0.00941911
PSB913-2_map3	0002.CSV	3772.24	-0.00932974
PSB913-2_map3	0002.CSV	3776.1	-0.00935134
PSB913-2_map3	0002.CSV	3779.95	-0.00929481
PSB913-2_map3	0002.CSV	3783.81	-0.00945474
PSB913-2_map3	0002.CSV	3787.67	-0.00965852
PSB913-2_map3	0002.CSV	3791.53	-0.00970593
PSB913-2_map3	0002.CSV	3795.38	-0.00977228
PSB913-2_map3	0002.CSV	3799.24	-0.00988038
PSB913-2_map3	0002.CSV	3803.1	-0.00978171
PSB913-2_map3	0002.CSV	3806.95	-0.00959665
PSB913-2_map3	0002.CSV	3810.81	-0.00962884
PSB913-2_map3	0002.CSV	3814.67	-0.00989278
PSB913-2_map3	0002.CSV	3818.53	-0.00979748
PSB913-2_map3	0002.CSV	3822.38	-0.00941619
PSB913-2_map3	0002.CSV	3826.24	-0.00954454
PSB913-2_map3	0002.CSV	3830.1	-0.00966902
PSB913-2_map3	0002.CSV	3833.95	-0.00973026
PSB913-2_map3	0002.CSV	3837.81	-0.00978589
PSB913-2_map3	0002.CSV	3841.67	-0.00938814
PSB913-2_map3	0002.CSV	3845.53	-0.00949701
PSB913-2_map3	0002.CSV	3849.38	-0.00989942
PSB913-2_map3	0002.CSV	3853.24	-0.00962618
PSB913-2_map3	0002.CSV	3857.1	-0.00927146
PSB913-2_map3	0002.CSV	3860.95	-0.00967806
PSB913-2_map3	0002.CSV	3864.81	-0.00978378
PSB913-2_map3	0002.CSV	3868.67	-0.009745
PSB913-2_map3	0002.CSV	3872.52	-0.00955669
PSB913-2_map3	0002.CSV	3876.38	-0.00958716
PSB913-2_map3	0002.CSV	3880.24	-0.00982985
PSB913-2_map3	0002.CSV	3884.1	-0.0096918
PSB913-2_map3	0002.CSV	3887.95	-0.00946933
PSB913-2_map3	0002.CSV	3891.81	-0.00945558
PSB913-2_map3	0002.CSV	3895.67	-0.00962015
PSB913-2_map3	0002.CSV	3899.52	-0.00969585
PSB913-2_map3	0002.CSV	3903.38	-0.00934155
PSB913-2_map3	0002.CSV	3907.24	-0.0093503
PSB913-2_map3	0002.CSV	3911.1	-0.00961441
PSB913-2_map3	0002.CSV	3914.95	-0.00973114
PSB913-2_map3	0002.CSV	3918.81	-0.00960709
PSB913-2_map3	0002.CSV	3922.67	-0.00954677
PSB913-2_map3	0002.CSV	3926.52	-0.0095225
PSB913-2_map3	0002.CSV	3930.38	-0.00940001
PSB913-2_map3	0002.CSV	3934.24	-0.00926173
PSB913-2_map3	0002.CSV	3938.09	-0.00931768
PSB913-2_map3	0002.CSV	3941.95	-0.00941911
PSB913-2_map3	0002.CSV	3945.81	-0.00959422
PSB913-2_map3	0002.CSV	3949.67	-0.0096102
PSB913-2_map3	0002.CSV	3953.52	-0.00946978
PSB913-2_map3	0002.CSV	3957.38	-0.00949526
PSB913-2_map3	0002.CSV	3961.24	-0.00955867
PSB913-2_map3	0002.CSV	3965.09	-0.0095341
PSB913-2_map3	0002.CSV	3968.95	-0.00953591
PSB913-2_map3	0002.CSV	3972.81	-0.00958936
PSB913-2_map3	0002.CSV	3976.67	-0.00961461
PSB913-2_map3	0002.CSV	3980.52	-0.00959458
PSB913-2_map3	0002.CSV	3984.38	-0.00949095
PSB913-2_map3	0002.CSV	3988.24	-0.00943305
PSB913-2_map3	0002.CSV	3992.09	-0.00942799
PSB913-2_map3	0002.CSV	3995.95	-0.00934038
PSB913-2_map3	0002.CSV	3999.81	-0.00936833
PSB913-2_map3	0003.CSV	674.992	0.0339246
PSB913-2_map3	0003.CSV	678.849	0.0357558
PSB913-2_map3	0003.CSV	682.706	0.0376478
PSB913-2_map3	0003.CSV	686.563	0.0408185
PSB913-2_map3	0003.CSV	690.42	0.0457927
PSB913-2_map3	0003.CSV	694.277	0.0596539
PSB913-2_map3	0003.CSV	698.134	0.072677
PSB913-2_map3	0003.CSV	701.991	0.0647551
PSB913-2_map3	0003.CSV	705.849	0.0544143
PSB913-2_map3	0003.CSV	709.706	0.0679734
PSB913-2_map3	0003.CSV	713.563	0.0689036
PSB913-2_map3	0003.CSV	717.42	0.0411984
PSB913-2_map3	0003.CSV	721.277	0.0236214
PSB913-2_map3	0003.CSV	725.134	0.0222223
PSB913-2_map3	0003.CSV	728.991	0.0236711
PSB913-2_map3	0003.CSV	732.848	0.0259517
PSB913-2_map3	0003.CSV	736.705	0.027807
PSB913-2_map3	0003.CSV	740.562	0.0299293
PSB913-2_map3	0003.CSV	744.42	0.0309507
PSB913-2_map3	0003.CSV	748.277	0.0316739
PSB913-2_map3	0003.CSV	752.134	0.0317839
PSB913-2_map3	0003.CSV	755.991	0.0322991
PSB913-2_map3	0003.CSV	759.848	0.0322191
PSB913-2_map3	0003.CSV	763.705	0.032405
PSB913-2_map3	0003.CSV	767.562	0.0318613
PSB913-2_map3	0003.CSV	771.419	0.0315411
PSB913-2_map3	0003.CSV	775.276	0.0308356
PSB913-2_map3	0003.CSV	779.133	0.030987
PSB913-2_map3	0003.CSV	782.99	0.0311918
PSB913-2_map3	0003.CSV	786.848	0.0319002
PSB913-2_map3	0003.CSV	790.705	0.0320931
PSB913-2_map3	0003.CSV	794.562	0.0328938
PSB913-2_map3	0003.CSV	798.419	0.0335117
PSB913-2_map3	0003.CSV	802.276	0.0344049
PSB913-2_map3	0003.CSV	806.133	0.0351001
PSB913-2_map3	0003.CSV	809.99	0.0369749
PSB913-2_map3	0003.CSV	813.847	0.0387757
PSB913-2_map3	0003.CSV	817.704	0.0408931
PSB913-2_map3	0003.CSV	821.562	0.0427874
PSB913-2_map3	0003.CSV	825.419	0.0458286
PSB913-2_map3	0003.CSV	829.276	0.0494463
PSB913-2_map3	0003.CSV	833.133	0.0550099
PSB913-2_map3	0003.CSV	836.99	0.0632688
PSB913-2_map3	0003.CSV	840.847	0.0753768
PSB913-2_map3	0003.CSV	844.704	0.087574
PSB913-2_map3	0003.CSV	848.561	0.107443
PSB913-2_map3	0003.CSV	852.418	0.132095
PSB913-2_map3	0003.CSV	856.275	0.134335
PSB913-2_map3	0003.CSV	860.132	0.111202
PSB913-2_map3	0003.CSV	863.99	0.083665
PSB913-2_map3	0003.CSV	867.847	0.0603665
PSB913-2_map3	0003.CSV	871.704	0.0422287
PSB913-2_map3	0003.CSV	875.561	0.029329
PSB913-2_map3	0003.CSV	879.418	0.0234874
PSB913-2_map3	0003.CSV	883.275	0.0217205
PSB913-2_map3	0003.CSV	887.132	0.0214582
PSB913-2_map3	0003.CSV	890.989	0.0216206
PSB913-2_map3	0003.CSV	894.846	0.0222831
PSB913-2_map3	0003.CSV	898.703	0.0226528
PSB913-2_map3	0003.CSV	902.561	0.0233415
PSB913-2_map3	0003.CSV	906.418	0.0238378
PSB913-2_map3	0003.CSV	910.275	0.0238498
PSB913-2_map3	0003.CSV	914.132	0.0231797
PSB913-2_map3	0003.CSV	917.989	0.0231165
PSB913-2_map3	0003.CSV	921.846	0.0231522
PSB913-2_map3	0003.CSV	925.703	0.0235614
PSB913-2_map3	0003.CSV	929.56	0.0237438
PSB913-2_map3	0003.CSV	933.417	0.0240661
PSB913-2_map3	0003.CSV	937.274	0.0240564
PSB913-2_map3	0003.CSV	941.131	0.0242935
PSB913-2_map3	0003.CSV	944.989	0.024349
PSB913-2_map3	0003.CSV	948.846	0.0245323
PSB913-2_map3	0003.CSV	952.703	0.0246168
PSB913-2_map3	0003.CSV	956.56	0.0249414
PSB913-2_map3	0003.CSV	960.417	0.0250332
PSB913-2_map3	0003.CSV	964.274	0.0254236
PSB913-2_map3	0003.CSV	968.131	0.0255998
PSB913-2_map3	0003.CSV	971.988	0.0260126
PSB913-2_map3	0003.CSV	975.845	0.0263421
PSB913-2_map3	0003.CSV	979.702	0.0270338
PSB913-2_map3	0003.CSV	983.559	0.0276527
PSB913-2_map3	0003.CSV	987.417	0.0284826
PSB913-2_map3	0003.CSV	991.274	0.0291025
PSB913-2_map3	0003.CSV	995.131	0.0297741
PSB913-2_map3	0003.CSV	998.988	0.0301189
PSB913-2_map3	0003.CSV	1002.85	0.0306524
PSB913-2_map3	0003.CSV	1006.7	0.0309719
PSB913-2_map3	0003.CSV	1010.56	0.0316206
PSB913-2_map3	0003.CSV	1014.42	0.0323457
PSB913-2_map3	0003.CSV	1018.27	0.0336006
PSB913-2_map3	0003.CSV	1022.13	0.0347643
PSB913-2_map3	0003.CSV	1025.99	0.0360675
PSB913-2_map3	0003.CSV	1029.85	0.0369321
PSB913-2_map3	0003.CSV	1033.7	0.037875
PSB913-2_map3	0003.CSV	1037.56	0.0385674
PSB913-2_map3	0003.CSV	1041.42	0.0394304
PSB913-2_map3	0003.CSV	1045.27	0.0399036
PSB913-2_map3	0003.CSV	1049.13	0.0408266
PSB913-2_map3	0003.CSV	1052.99	0.0419195
PSB913-2_map3	0003.CSV	1056.84	0.043509
PSB913-2_map3	0003.CSV	1060.7	0.0448136
PSB913-2_map3	0003.CSV	1064.56	0.0459994
PSB913-2_map3	0003.CSV	1068.42	0.0463188
PSB913-2_map3	0003.CSV	1072.27	0.0464726
PSB913-2_map3	0003.CSV	1076.13	0.0473841
PSB913-2_map3	0003.CSV	1079.99	0.0517104
PSB913-2_map3	0003.CSV	1083.84	0.0513578
PSB913-2_map3	0003.CSV	1087.7	0.042914
PSB913-2_map3	0003.CSV	1091.56	0.0378389
PSB913-2_map3	0003.CSV	1095.41	0.0376786
PSB913-2_map3	0003.CSV	1099.27	0.0381515
PSB913-2_map3	0003.CSV	1103.13	0.0388093
PSB913-2_map3	0003.CSV	1106.99	0.0394042
PSB913-2_map3	0003.CSV	1110.84	0.0401912
PSB913-2_map3	0003.CSV	1114.7	0.0405947
PSB913-2_map3	0003.CSV	1118.56	0.0407383
PSB913-2_map3	0003.CSV	1122.41	0.0403137
PSB913-2_map3	0003.CSV	1126.27	0.0398392
PSB913-2_map3	0003.CSV	1130.13	0.0392122
PSB913-2_map3	0003.CSV	1133.99	0.0389501
PSB913-2_map3	0003.CSV	1137.84	0.0387081
PSB913-2_map3	0003.CSV	1141.7	0.0386351
PSB913-2_map3	0003.CSV	1145.56	0.038386
PSB913-2_map3	0003.CSV	1149.41	0.0386562
PSB913-2_map3	0003.CSV	1153.27	0.0390621
PSB913-2_map3	0003.CSV	1157.13	0.039626
PSB913-2_map3	0003.CSV	1160.99	0.0398269
PSB913-2_map3	0003.CSV	1164.84	0.0398419
PSB913-2_map3	0003.CSV	1168.7	0.0393121
PSB913-2_map3	0003.CSV	1172.56	0.0389439
PSB913-2_map3	0003.CSV	1176.41	0.0386139
PSB913-2_map3	0003.CSV	1180.27	0.0385492
PSB913-2_map3	0003.CSV	1184.13	0.0383748
PSB913-2_map3	0003.CSV	1187.99	0.0385988
PSB913-2_map3	0003.CSV	1191.84	0.0388327
PSB913-2_map3	0003.CSV	1195.7	0.0393325
PSB913-2_map3	0003.CSV	1199.56	0.0396784
PSB913-2_map3	0003.CSV	1203.41	0.0401667
PSB913-2_map3	0003.CSV	1207.27	0.0405
PSB913-2_map3	0003.CSV	1211.13	0.0411502
PSB913-2_map3	0003.CSV	1214.98	0.0417924
PSB913-2_map3	0003.CSV	1218.84	0.0427064
PSB913-2_map3	0003.CSV	1222.7	0.043507
PSB913-2_map3	0003.CSV	1226.56	0.0445777
PSB913-2_map3	0003.CSV	1230.41	0.0456187
PSB913-2_map3	0003.CSV	1234.27	0.0469531
PSB913-2_map3	0003.CSV	1238.13	0.0481946
PSB913-2_map3	0003.CSV	1241.98	0.0497216
PSB913-2_map3	0003.CSV	1245.84	0.0510577
PSB913-2_map3	0003.CSV	1249.7	0.052427
PSB913-2_map3	0003.CSV	1253.56	0.053421
PSB913-2_map3	0003.CSV	1257.41	0.054464
PSB913-2_map3	0003.CSV	1261.27	0.0552568
PSB913-2_map3	0003.CSV	1265.13	0.0562249
PSB913-2_map3	0003.CSV	1268.98	0.0569047
PSB913-2_map3	0003.CSV	1272.84	0.0576843
PSB913-2_map3	0003.CSV	1276.7	0.0582885
PSB913-2_map3	0003.CSV	1280.56	0.0590045
PSB913-2_map3	0003.CSV	1284.41	0.0593544
PSB913-2_map3	0003.CSV	1288.27	0.0597109
PSB913-2_map3	0003.CSV	1292.13	0.0597279
PSB913-2_map3	0003.CSV	1295.98	0.0599839
PSB913-2_map3	0003.CSV	1299.84	0.0602624
PSB913-2_map3	0003.CSV	1303.7	0.0610263
PSB913-2_map3	0003.CSV	1307.56	0.0618866
PSB913-2_map3	0003.CSV	1311.41	0.0631384
PSB913-2_map3	0003.CSV	1315.27	0.0643295
PSB913-2_map3	0003.CSV	1319.13	0.0658921
PSB913-2_map3	0003.CSV	1322.98	0.0672417
PSB913-2_map3	0003.CSV	1326.84	0.0688717
PSB913-2_map3	0003.CSV	1330.7	0.0705233
PSB913-2_map3	0003.CSV	1334.56	0.072519
PSB913-2_map3	0003.CSV	1338.41	0.0748678
PSB913-2_map3	0003.CSV	1342.27	0.0778937
PSB913-2_map3	0003.CSV	1346.13	0.0802275
PSB913-2_map3	0003.CSV	1349.98	0.0830391
PSB913-2_map3	0003.CSV	1353.84	0.0858811
PSB913-2_map3	0003.CSV	1357.7	0.0889724
PSB913-2_map3	0003.CSV	1361.56	0.0923416
PSB913-2_map3	0003.CSV	1365.41	0.096512
PSB913-2_map3	0003.CSV	1369.27	0.0997597
PSB913-2_map3	0003.CSV	1373.13	0.103988
PSB913-2_map3	0003.CSV	1376.98	0.108429
PSB913-2_map3	0003.CSV	1380.84	0.112246
PSB913-2_map3	0003.CSV	1384.7	0.115694
PSB913-2_map3	0003.CSV	1388.56	0.120327
PSB913-2_map3	0003.CSV	1392.41	0.123783
PSB913-2_map3	0003.CSV	1396.27	0.128354
PSB913-2_map3	0003.CSV	1400.13	0.132773
PSB913-2_map3	0003.CSV	1403.98	0.136741
PSB913-2_map3	0003.CSV	1407.84	0.140301
PSB913-2_map3	0003.CSV	1411.7	0.143506
PSB913-2_map3	0003.CSV	1415.55	0.145711
PSB913-2_map3	0003.CSV	1419.41	0.149353
PSB913-2_map3	0003.CSV	1423.27	0.15215
PSB913-2_map3	0003.CSV	1427.12	0.154902
PSB913-2_map3	0003.CSV	1430.98	0.15734
PSB913-2_map3	0003.CSV	1434.84	0.160647
PSB913-2_map3	0003.CSV	1438.7	0.162891
PSB913-2_map3	0003.CSV	1442.55	0.163031
PSB913-2_map3	0003.CSV	1446.41	0.159942
PSB913-2_map3	0003.CSV	1450.27	0.155256
PSB913-2_map3	0003.CSV	1454.12	0.150079
PSB913-2_map3	0003.CSV	1457.98	0.143894
PSB913-2_map3	0003.CSV	1461.84	0.139048
PSB913-2_map3	0003.CSV	1465.7	0.13545
PSB913-2_map3	0003.CSV	1469.55	0.129778
PSB913-2_map3	0003.CSV	1473.41	0.120053
PSB913-2_map3	0003.CSV	1477.27	0.108656
PSB913-2_map3	0003.CSV	1481.12	0.102039
PSB913-2_map3	0003.CSV	1484.98	0.0958431
PSB913-2_map3	0003.CSV	1488.84	0.0888872
PSB913-2_map3	0003.CSV	1492.7	0.0819791
PSB913-2_map3	0003.CSV	1496.55	0.0768585
PSB913-2_map3	0003.CSV	1500.41	0.0709013
PSB913-2_map3	0003.CSV	1504.27	0.067569
PSB913-2_map3	0003.CSV	1508.12	0.0605526
PSB913-2_map3	0003.CSV	1511.98	0.0556679
PSB913-2_map3	0003.CSV	1515.84	0.0524487
PSB913-2_map3	0003.CSV	1519.7	0.0482625
PSB913-2_map3	0003.CSV	1523.55	0.0425911
PSB913-2_map3	0003.CSV	1527.41	0.0386811
PSB913-2_map3	0003.CSV	1531.27	0.0352601
PSB913-2_map3	0003.CSV	1535.12	0.0320143
PSB913-2_map3	0003.CSV	1538.98	0.0285541
PSB913-2_map3	0003.CSV	1542.84	0.0233897
PSB913-2_map3	0003.CSV	1546.7	0.0201639
PSB913-2_map3	0003.CSV	1550.55	0.0179266
PSB913-2_map3	0003.CSV	1554.41	0.015309
PSB913-2_map3	0003.CSV	1558.27	0.0119437
PSB913-2_map3	0003.CSV	1562.12	0.00892813
PSB913-2_map3	0003.CSV	1565.98	0.00744404
PSB913-2_map3	0003.CSV	1569.84	0.00520334
PSB913-2_map3	0003.CSV	1573.69	0.00313804
PSB913-2_map3	0003.CSV	1577.55	0.000864067
PSB913-2_map3	0003.CSV	1581.41	-0.000780334
PSB913-2_map3	0003.CSV	1585.27	-0.00211321
PSB913-2_map3	0003.CSV	1589.12	-0.0031174
PSB913-2_map3	0003.CSV	1592.98	-0.00376177
PSB913-2_map3	0003.CSV	1596.84	-0.0040772
PSB913-2_map3	0003.CSV	1600.69	-0.004324
PSB913-2_map3	0003.CSV	1604.55	-0.00448209
PSB913-2_map3	0003.CSV	1608.41	-0.00482184
PSB913-2_map3	0003.CSV	1612.27	-0.00512667
PSB913-2_map3	0003.CSV	1616.12	-0.00541499
PSB913-2_map3	0003.CSV	1619.98	-0.00547451
PSB913-2_map3	0003.CSV	1623.84	-0.00559173
PSB913-2_map3	0003.CSV	1627.69	-0.00560403
PSB913-2_map3	0003.CSV	1631.55	-0.00578661
PSB913-2_map3	0003.CSV	1635.41	-0.00578386
PSB913-2_map3	0003.CSV	1639.27	-0.0057473
PSB913-2_map3	0003.CSV	1643.12	-0.00588233
PSB913-2_map3	0003.CSV	1646.98	-0.00599045
PSB913-2_map3	0003.CSV	1650.84	-0.00589651
PSB913-2_map3	0003.CSV	1654.69	-0.00584647
PSB913-2_map3	0003.CSV	1658.55	-0.00592508
PSB913-2_map3	0003.CSV	1662.41	-0.00620285
PSB913-2_map3	0003.CSV	1666.27	-0.00647822
PSB913-2_map3	0003.CSV	1670.12	-0.00666983
PSB913-2_map3	0003.CSV	1673.98	-0.00660133
PSB913-2_map3	0003.CSV	1677.84	-0.00687113
PSB913-2_map3	0003.CSV	1681.69	-0.00701122
PSB913-2_map3	0003.CSV	1685.55	-0.00707655
PSB913-2_map3	0003.CSV	1689.41	-0.00710856
PSB913-2_map3	0003.CSV	1693.27	-0.00736603
PSB913-2_map3	0003.CSV	1697.12	-0.00736274
PSB913-2_map3	0003.CSV	1700.98	-0.00725516
PSB913-2_map3	0003.CSV	1704.84	-0.00708633
PSB913-2_map3	0003.CSV	1708.69	-0.00688826
PSB913-2_map3	0003.CSV	1712.55	-0.00656073
PSB913-2_map3	0003.CSV	1716.41	-0.00553278
PSB913-2_map3	0003.CSV	1720.27	-0.00412679
PSB913-2_map3	0003.CSV	1724.12	-0.00376686
[truncated: 128,314 more rows]

## Sheet: PSB913-2_map4
Map	Select spectrum number	Wavenumbers	Absorbance
PSB913-2_map4	0001.CSV	674.992	0.0258084
PSB913-2_map4	0001.CSV	678.849	0.0275493
PSB913-2_map4	0001.CSV	682.706	0.0286431
PSB913-2_map4	0001.CSV	686.563	0.0313326
PSB913-2_map4	0001.CSV	690.42	0.0345661
PSB913-2_map4	0001.CSV	694.277	0.0445225
PSB913-2_map4	0001.CSV	698.134	0.0547629
PSB913-2_map4	0001.CSV	701.991	0.0489067
PSB913-2_map4	0001.CSV	705.849	0.043893
PSB913-2_map4	0001.CSV	709.706	0.0597649
PSB913-2_map4	0001.CSV	713.563	0.0582873
PSB913-2_map4	0001.CSV	717.42	0.0303887
PSB913-2_map4	0001.CSV	721.277	0.0147604
PSB913-2_map4	0001.CSV	725.134	0.0141672
PSB913-2_map4	0001.CSV	728.991	0.0150684
PSB913-2_map4	0001.CSV	732.848	0.0168025
PSB913-2_map4	0001.CSV	736.705	0.0184966
PSB913-2_map4	0001.CSV	740.562	0.0203426
PSB913-2_map4	0001.CSV	744.42	0.0216111
PSB913-2_map4	0001.CSV	748.277	0.0229247
PSB913-2_map4	0001.CSV	752.134	0.0231463
PSB913-2_map4	0001.CSV	755.991	0.0231143
PSB913-2_map4	0001.CSV	759.848	0.0223374
PSB913-2_map4	0001.CSV	763.705	0.0227105
PSB913-2_map4	0001.CSV	767.562	0.0236998
PSB913-2_map4	0001.CSV	771.419	0.0245187
PSB913-2_map4	0001.CSV	775.276	0.0245948
PSB913-2_map4	0001.CSV	779.133	0.0250368
PSB913-2_map4	0001.CSV	782.99	0.0250421
PSB913-2_map4	0001.CSV	786.848	0.0257441
PSB913-2_map4	0001.CSV	790.705	0.0264189
PSB913-2_map4	0001.CSV	794.562	0.0272729
PSB913-2_map4	0001.CSV	798.419	0.0279417
PSB913-2_map4	0001.CSV	802.276	0.0295087
PSB913-2_map4	0001.CSV	806.133	0.0309684
PSB913-2_map4	0001.CSV	809.99	0.0331724
PSB913-2_map4	0001.CSV	813.847	0.0353044
PSB913-2_map4	0001.CSV	817.704	0.0383214
PSB913-2_map4	0001.CSV	821.562	0.0416013
PSB913-2_map4	0001.CSV	825.419	0.0460964
PSB913-2_map4	0001.CSV	829.276	0.0511311
PSB913-2_map4	0001.CSV	833.133	0.0576337
PSB913-2_map4	0001.CSV	836.99	0.0656923
PSB913-2_map4	0001.CSV	840.847	0.0760839
PSB913-2_map4	0001.CSV	844.704	0.0859557
PSB913-2_map4	0001.CSV	848.561	0.101292
PSB913-2_map4	0001.CSV	852.418	0.115564
PSB913-2_map4	0001.CSV	856.275	0.111657
PSB913-2_map4	0001.CSV	860.132	0.0911827
PSB913-2_map4	0001.CSV	863.99	0.0669532
PSB913-2_map4	0001.CSV	867.847	0.0447711
PSB913-2_map4	0001.CSV	871.704	0.0279572
PSB913-2_map4	0001.CSV	875.561	0.0172034
PSB913-2_map4	0001.CSV	879.418	0.0122111
PSB913-2_map4	0001.CSV	883.275	0.0098472
PSB913-2_map4	0001.CSV	887.132	0.00872024
PSB913-2_map4	0001.CSV	890.989	0.00814494
PSB913-2_map4	0001.CSV	894.846	0.00819281
PSB913-2_map4	0001.CSV	898.703	0.00824464
PSB913-2_map4	0001.CSV	902.561	0.00868751
PSB913-2_map4	0001.CSV	906.418	0.00892914
PSB913-2_map4	0001.CSV	910.275	0.0085972
PSB913-2_map4	0001.CSV	914.132	0.00775614
PSB913-2_map4	0001.CSV	917.989	0.00775156
PSB913-2_map4	0001.CSV	921.846	0.00783603
PSB913-2_map4	0001.CSV	925.703	0.00802203
PSB913-2_map4	0001.CSV	929.56	0.00797555
PSB913-2_map4	0001.CSV	933.417	0.00810864
PSB913-2_map4	0001.CSV	937.274	0.00790071
PSB913-2_map4	0001.CSV	941.131	0.00778323
PSB913-2_map4	0001.CSV	944.989	0.00757326
PSB913-2_map4	0001.CSV	948.846	0.0076293
PSB913-2_map4	0001.CSV	952.703	0.00743663
PSB913-2_map4	0001.CSV	956.56	0.00729259
PSB913-2_map4	0001.CSV	960.417	0.00695893
PSB913-2_map4	0001.CSV	964.274	0.00691308
PSB913-2_map4	0001.CSV	968.131	0.00676343
PSB913-2_map4	0001.CSV	971.988	0.00700402
PSB913-2_map4	0001.CSV	975.845	0.00738401
PSB913-2_map4	0001.CSV	979.702	0.00796445
PSB913-2_map4	0001.CSV	983.559	0.00826433
PSB913-2_map4	0001.CSV	987.417	0.0088406
PSB913-2_map4	0001.CSV	991.274	0.00933364
PSB913-2_map4	0001.CSV	995.131	0.00988645
PSB913-2_map4	0001.CSV	998.988	0.0100734
PSB913-2_map4	0001.CSV	1002.85	0.0103864
PSB913-2_map4	0001.CSV	1006.7	0.0105969
PSB913-2_map4	0001.CSV	1010.56	0.0111683
PSB913-2_map4	0001.CSV	1014.42	0.0117223
PSB913-2_map4	0001.CSV	1018.27	0.0125363
PSB913-2_map4	0001.CSV	1022.13	0.0130607
PSB913-2_map4	0001.CSV	1025.99	0.0137272
PSB913-2_map4	0001.CSV	1029.85	0.0141536
PSB913-2_map4	0001.CSV	1033.7	0.0147219
PSB913-2_map4	0001.CSV	1037.56	0.0149289
PSB913-2_map4	0001.CSV	1041.42	0.0153263
PSB913-2_map4	0001.CSV	1045.27	0.015606
PSB913-2_map4	0001.CSV	1049.13	0.0161831
PSB913-2_map4	0001.CSV	1052.99	0.0164286
PSB913-2_map4	0001.CSV	1056.84	0.0169607
PSB913-2_map4	0001.CSV	1060.7	0.0173206
PSB913-2_map4	0001.CSV	1064.56	0.0177752
PSB913-2_map4	0001.CSV	1068.42	0.0179712
PSB913-2_map4	0001.CSV	1072.27	0.0184938
PSB913-2_map4	0001.CSV	1076.13	0.0201061
PSB913-2_map4	0001.CSV	1079.99	0.024705
PSB913-2_map4	0001.CSV	1083.84	0.0242611
PSB913-2_map4	0001.CSV	1087.7	0.0169957
PSB913-2_map4	0001.CSV	1091.56	0.013404
PSB913-2_map4	0001.CSV	1095.41	0.0134813
PSB913-2_map4	0001.CSV	1099.27	0.0136713
PSB913-2_map4	0001.CSV	1103.13	0.0139299
PSB913-2_map4	0001.CSV	1106.99	0.0141235
PSB913-2_map4	0001.CSV	1110.84	0.014452
PSB913-2_map4	0001.CSV	1114.7	0.0145355
PSB913-2_map4	0001.CSV	1118.56	0.014606
PSB913-2_map4	0001.CSV	1122.41	0.0144276
PSB913-2_map4	0001.CSV	1126.27	0.0142642
PSB913-2_map4	0001.CSV	1130.13	0.0139358
PSB913-2_map4	0001.CSV	1133.99	0.0138656
PSB913-2_map4	0001.CSV	1137.84	0.0138279
PSB913-2_map4	0001.CSV	1141.7	0.0140574
PSB913-2_map4	0001.CSV	1145.56	0.0141945
PSB913-2_map4	0001.CSV	1149.41	0.0145358
PSB913-2_map4	0001.CSV	1153.27	0.0148763
PSB913-2_map4	0001.CSV	1157.13	0.0153634
PSB913-2_map4	0001.CSV	1160.99	0.0155273
PSB913-2_map4	0001.CSV	1164.84	0.0156518
PSB913-2_map4	0001.CSV	1168.7	0.0154818
PSB913-2_map4	0001.CSV	1172.56	0.015472
PSB913-2_map4	0001.CSV	1176.41	0.0154416
PSB913-2_map4	0001.CSV	1180.27	0.0155114
PSB913-2_map4	0001.CSV	1184.13	0.0154878
PSB913-2_map4	0001.CSV	1187.99	0.0156949
PSB913-2_map4	0001.CSV	1191.84	0.0157622
PSB913-2_map4	0001.CSV	1195.7	0.0160439
PSB913-2_map4	0001.CSV	1199.56	0.0162919
PSB913-2_map4	0001.CSV	1203.41	0.0167242
PSB913-2_map4	0001.CSV	1207.27	0.0170402
PSB913-2_map4	0001.CSV	1211.13	0.0175052
PSB913-2_map4	0001.CSV	1214.98	0.0178455
PSB913-2_map4	0001.CSV	1218.84	0.0184532
PSB913-2_map4	0001.CSV	1222.7	0.0189943
PSB913-2_map4	0001.CSV	1226.56	0.0196056
PSB913-2_map4	0001.CSV	1230.41	0.0200708
PSB913-2_map4	0001.CSV	1234.27	0.0207215
PSB913-2_map4	0001.CSV	1238.13	0.0212682
PSB913-2_map4	0001.CSV	1241.98	0.0218991
PSB913-2_map4	0001.CSV	1245.84	0.0223719
PSB913-2_map4	0001.CSV	1249.7	0.0229618
PSB913-2_map4	0001.CSV	1253.56	0.0232969
PSB913-2_map4	0001.CSV	1257.41	0.0238065
PSB913-2_map4	0001.CSV	1261.27	0.0243103
PSB913-2_map4	0001.CSV	1265.13	0.0250532
PSB913-2_map4	0001.CSV	1268.98	0.0256558
PSB913-2_map4	0001.CSV	1272.84	0.0263885
PSB913-2_map4	0001.CSV	1276.7	0.0268969
PSB913-2_map4	0001.CSV	1280.56	0.0274397
PSB913-2_map4	0001.CSV	1284.41	0.0278346
PSB913-2_map4	0001.CSV	1288.27	0.0284387
PSB913-2_map4	0001.CSV	1292.13	0.0289118
PSB913-2_map4	0001.CSV	1295.98	0.0295818
PSB913-2_map4	0001.CSV	1299.84	0.0301963
PSB913-2_map4	0001.CSV	1303.7	0.0310138
PSB913-2_map4	0001.CSV	1307.56	0.0317129
PSB913-2_map4	0001.CSV	1311.41	0.0326127
PSB913-2_map4	0001.CSV	1315.27	0.0335088
PSB913-2_map4	0001.CSV	1319.13	0.0346538
PSB913-2_map4	0001.CSV	1322.98	0.0355256
PSB913-2_map4	0001.CSV	1326.84	0.0366026
PSB913-2_map4	0001.CSV	1330.7	0.0376847
PSB913-2_map4	0001.CSV	1334.56	0.0389353
PSB913-2_map4	0001.CSV	1338.41	0.0404562
PSB913-2_map4	0001.CSV	1342.27	0.0424159
PSB913-2_map4	0001.CSV	1346.13	0.0437723
PSB913-2_map4	0001.CSV	1349.98	0.0455798
PSB913-2_map4	0001.CSV	1353.84	0.0473613
PSB913-2_map4	0001.CSV	1357.7	0.0493247
PSB913-2_map4	0001.CSV	1361.56	0.0515681
PSB913-2_map4	0001.CSV	1365.41	0.0544254
PSB913-2_map4	0001.CSV	1369.27	0.0564532
PSB913-2_map4	0001.CSV	1373.13	0.0592427
PSB913-2_map4	0001.CSV	1376.98	0.0622214
PSB913-2_map4	0001.CSV	1380.84	0.0648131
PSB913-2_map4	0001.CSV	1384.7	0.0672851
PSB913-2_map4	0001.CSV	1388.56	0.0707701
PSB913-2_map4	0001.CSV	1392.41	0.073219
PSB913-2_map4	0001.CSV	1396.27	0.0766046
PSB913-2_map4	0001.CSV	1400.13	0.0799557
PSB913-2_map4	0001.CSV	1403.98	0.0828487
PSB913-2_map4	0001.CSV	1407.84	0.085571
PSB913-2_map4	0001.CSV	1411.7	0.0881391
PSB913-2_map4	0001.CSV	1415.55	0.0898895
PSB913-2_map4	0001.CSV	1419.41	0.0929272
PSB913-2_map4	0001.CSV	1423.27	0.0955466
PSB913-2_map4	0001.CSV	1427.12	0.0981281
PSB913-2_map4	0001.CSV	1430.98	0.100542
PSB913-2_map4	0001.CSV	1434.84	0.103519
PSB913-2_map4	0001.CSV	1438.7	0.106065
PSB913-2_map4	0001.CSV	1442.55	0.106988
PSB913-2_map4	0001.CSV	1446.41	0.10573
PSB913-2_map4	0001.CSV	1450.27	0.103442
PSB913-2_map4	0001.CSV	1454.12	0.100397
PSB913-2_map4	0001.CSV	1457.98	0.0973816
PSB913-2_map4	0001.CSV	1461.84	0.0947597
PSB913-2_map4	0001.CSV	1465.7	0.0929704
PSB913-2_map4	0001.CSV	1469.55	0.0896779
PSB913-2_map4	0001.CSV	1473.41	0.084089
PSB913-2_map4	0001.CSV	1477.27	0.0769814
PSB913-2_map4	0001.CSV	1481.12	0.0723579
PSB913-2_map4	0001.CSV	1484.98	0.0678268
PSB913-2_map4	0001.CSV	1488.84	0.0626582
PSB913-2_map4	0001.CSV	1492.7	0.0570535
PSB913-2_map4	0001.CSV	1496.55	0.0528322
PSB913-2_map4	0001.CSV	1500.41	0.047779
PSB913-2_map4	0001.CSV	1504.27	0.0445209
PSB913-2_map4	0001.CSV	1508.12	0.0385532
PSB913-2_map4	0001.CSV	1511.98	0.0344661
PSB913-2_map4	0001.CSV	1515.84	0.0313641
PSB913-2_map4	0001.CSV	1519.7	0.0272965
PSB913-2_map4	0001.CSV	1523.55	0.0224085
PSB913-2_map4	0001.CSV	1527.41	0.0190643
PSB913-2_map4	0001.CSV	1531.27	0.0159975
PSB913-2_map4	0001.CSV	1535.12	0.0133043
PSB913-2_map4	0001.CSV	1538.98	0.0104086
PSB913-2_map4	0001.CSV	1542.84	0.00646882
PSB913-2_map4	0001.CSV	1546.7	0.00361996
PSB913-2_map4	0001.CSV	1550.55	0.00145669
PSB913-2_map4	0001.CSV	1554.41	-0.000947163
PSB913-2_map4	0001.CSV	1558.27	-0.00376279
PSB913-2_map4	0001.CSV	1562.12	-0.00637881
PSB913-2_map4	0001.CSV	1565.98	-0.00791349
PSB913-2_map4	0001.CSV	1569.84	-0.00996807
PSB913-2_map4	0001.CSV	1573.69	-0.0120854
PSB913-2_map4	0001.CSV	1577.55	-0.014725
PSB913-2_map4	0001.CSV	1581.41	-0.0168914
PSB913-2_map4	0001.CSV	1585.27	-0.0185943
PSB913-2_map4	0001.CSV	1589.12	-0.0197838
PSB913-2_map4	0001.CSV	1592.98	-0.0205167
PSB913-2_map4	0001.CSV	1596.84	-0.0208947
PSB913-2_map4	0001.CSV	1600.69	-0.0213006
PSB913-2_map4	0001.CSV	1604.55	-0.021594
PSB913-2_map4	0001.CSV	1608.41	-0.0217919
PSB913-2_map4	0001.CSV	1612.27	-0.0220249
PSB913-2_map4	0001.CSV	1616.12	-0.0222261
PSB913-2_map4	0001.CSV	1619.98	-0.0222089
PSB913-2_map4	0001.CSV	1623.84	-0.0223914
PSB913-2_map4	0001.CSV	1627.69	-0.0225326
PSB913-2_map4	0001.CSV	1631.55	-0.0229991
PSB913-2_map4	0001.CSV	1635.41	-0.0229609
PSB913-2_map4	0001.CSV	1639.27	-0.0228265
PSB913-2_map4	0001.CSV	1643.12	-0.0232533
PSB913-2_map4	0001.CSV	1646.98	-0.0234993
PSB913-2_map4	0001.CSV	1650.84	-0.023421
PSB913-2_map4	0001.CSV	1654.69	-0.0232602
PSB913-2_map4	0001.CSV	1658.55	-0.0236212
PSB913-2_map4	0001.CSV	1662.41	-0.0240609
PSB913-2_map4	0001.CSV	1666.27	-0.0243147
PSB913-2_map4	0001.CSV	1670.12	-0.0245494
PSB913-2_map4	0001.CSV	1673.98	-0.0245695
PSB913-2_map4	0001.CSV	1677.84	-0.0250078
PSB913-2_map4	0001.CSV	1681.69	-0.0253515
PSB913-2_map4	0001.CSV	1685.55	-0.0253776
PSB913-2_map4	0001.CSV	1689.41	-0.0255467
PSB913-2_map4	0001.CSV	1693.27	-0.0262348
PSB913-2_map4	0001.CSV	1697.12	-0.026535
PSB913-2_map4	0001.CSV	1700.98	-0.026361
PSB913-2_map4	0001.CSV	1704.84	-0.0263447
PSB913-2_map4	0001.CSV	1708.69	-0.0265076
PSB913-2_map4	0001.CSV	1712.55	-0.026725
PSB913-2_map4	0001.CSV	1716.41	-0.0264907
PSB913-2_map4	0001.CSV	1720.27	-0.0259448
PSB913-2_map4	0001.CSV	1724.12	-0.0262461
PSB913-2_map4	0001.CSV	1727.98	-0.0265598
PSB913-2_map4	0001.CSV	1731.84	-0.0267003
PSB913-2_map4	0001.CSV	1735.69	-0.026429
PSB913-2_map4	0001.CSV	1739.55	-0.0266137
PSB913-2_map4	0001.CSV	1743.41	-0.0268425
PSB913-2_map4	0001.CSV	1747.27	-0.0270807
PSB913-2_map4	0001.CSV	1751.12	-0.0271604
PSB913-2_map4	0001.CSV	1754.98	-0.0275054
PSB913-2_map4	0001.CSV	1758.84	-0.0274933
PSB913-2_map4	0001.CSV	1762.69	-0.0274259
PSB913-2_map4	0001.CSV	1766.55	-0.0274993
PSB913-2_map4	0001.CSV	1770.41	-0.0270902
PSB913-2_map4	0001.CSV	1774.26	-0.025579
PSB913-2_map4	0001.CSV	1778.12	-0.0244357
PSB913-2_map4	0001.CSV	1781.98	-0.0232072
PSB913-2_map4	0001.CSV	1785.84	-0.0226773
PSB913-2_map4	0001.CSV	1789.69	-0.023134
PSB913-2_map4	0001.CSV	1793.55	-0.0243444
PSB913-2_map4	0001.CSV	1797.41	-0.0253877
PSB913-2_map4	0001.CSV	1801.26	-0.0261982
PSB913-2_map4	0001.CSV	1805.12	-0.026724
PSB913-2_map4	0001.CSV	1808.98	-0.0269909
PSB913-2_map4	0001.CSV	1812.84	-0.026901
PSB913-2_map4	0001.CSV	1816.69	-0.0269725
PSB913-2_map4	0001.CSV	1820.55	-0.0270014
PSB913-2_map4	0001.CSV	1824.41	-0.0269961
PSB913-2_map4	0001.CSV	1828.26	-0.0266721
PSB913-2_map4	0001.CSV	1832.12	-0.0264416
PSB913-2_map4	0001.CSV	1835.98	-0.0264717
PSB913-2_map4	0001.CSV	1839.84	-0.0266539
PSB913-2_map4	0001.CSV	1843.69	-0.0264163
PSB913-2_map4	0001.CSV	1847.55	-0.0260922
PSB913-2_map4	0001.CSV	1851.41	-0.026146
PSB913-2_map4	0001.CSV	1855.26	-0.0262533
PSB913-2_map4	0001.CSV	1859.12	-0.0262222
PSB913-2_map4	0001.CSV	1862.98	-0.0262718
PSB913-2_map4	0001.CSV	1866.84	-0.0261489
PSB913-2_map4	0001.CSV	1870.69	-0.0257922
PSB913-2_map4	0001.CSV	1874.55	-0.025838
PSB913-2_map4	0001.CSV	1878.41	-0.0259727
PSB913-2_map4	0001.CSV	1882.26	-0.0258906
PSB913-2_map4	0001.CSV	1886.12	-0.0257979
PSB913-2_map4	0001.CSV	1889.98	-0.0256346
PSB913-2_map4	0001.CSV	1893.83	-0.0256401
PSB913-2_map4	0001.CSV	1897.69	-0.0256735
PSB913-2_map4	0001.CSV	1901.55	-0.0257266
PSB913-2_map4	0001.CSV	1905.41	-0.0257072
PSB913-2_map4	0001.CSV	1909.26	-0.0256266
PSB913-2_map4	0001.CSV	1913.12	-0.0256592
PSB913-2_map4	0001.CSV	1916.98	-0.0258262
PSB913-2_map4	0001.CSV	1920.83	-0.0257222
PSB913-2_map4	0001.CSV	1924.69	-0.0256618
PSB913-2_map4	0001.CSV	1928.55	-0.0256789
PSB913-2_map4	0001.CSV	1932.4	-0.025675
PSB913-2_map4	0001.CSV	1936.26	-0.02565
PSB913-2_map4	0001.CSV	1940.12	-0.0257686
PSB913-2_map4	0001.CSV	1943.98	-0.025662
PSB913-2_map4	0001.CSV	1947.83	-0.0256187
PSB913-2_map4	0001.CSV	1951.69	-0.0256552
PSB913-2_map4	0001.CSV	1955.55	-0.0256977
PSB913-2_map4	0001.CSV	1959.4	-0.0256758
PSB913-2_map4	0001.CSV	1963.26	-0.0257783
PSB913-2_map4	0001.CSV	1967.12	-0.0256898
PSB913-2_map4	0001.CSV	1970.98	-0.0256315
PSB913-2_map4	0001.CSV	1974.83	-0.0257161
PSB913-2_map4	0001.CSV	1978.69	-0.025814
PSB913-2_map4	0001.CSV	1982.55	-0.0258122
PSB913-2_map4	0001.CSV	1986.4	-0.0258147
PSB913-2_map4	0001.CSV	1990.26	-0.0257045
PSB913-2_map4	0001.CSV	1994.12	-0.025623
PSB913-2_map4	0001.CSV	1997.98	-0.0256528
PSB913-2_map4	0001.CSV	2001.83	-0.0257494
PSB913-2_map4	0001.CSV	2005.69	-0.0257587
PSB913-2_map4	0001.CSV	2009.55	-0.0257515
PSB913-2_map4	0001.CSV	2013.4	-0.0257325
PSB913-2_map4	0001.CSV	2017.26	-0.0256796
PSB913-2_map4	0001.CSV	2021.12	-0.0256107
PSB913-2_map4	0001.CSV	2024.97	-0.0256898
PSB913-2_map4	0001.CSV	2028.83	-0.0256356
PSB913-2_map4	0001.CSV	2032.69	-0.0255777
PSB913-2_map4	0001.CSV	2036.55	-0.0255321
PSB913-2_map4	0001.CSV	2040.4	-0.0254983
PSB913-2_map4	0001.CSV	2044.26	-0.025407
PSB913-2_map4	0001.CSV	2048.12	-0.0253726
PSB913-2_map4	0001.CSV	2051.97	-0.0253427
PSB913-2_map4	0001.CSV	2055.83	-0.025377
PSB913-2_map4	0001.CSV	2059.69	-0.025301
PSB913-2_map4	0001.CSV	2063.55	-0.0252534
PSB913-2_map4	0001.CSV	2067.4	-0.0251427
PSB913-2_map4	0001.CSV	2071.26	-0.0251035
PSB913-2_map4	0001.CSV	2075.12	-0.0250593
PSB913-2_map4	0001.CSV	2078.97	-0.025021
PSB913-2_map4	0001.CSV	2082.83	-0.0249189
PSB913-2_map4	0001.CSV	2086.69	-0.0248833
PSB913-2_map4	0001.CSV	2090.55	-0.0248305
PSB913-2_map4	0001.CSV	2094.4	-0.0248171
PSB913-2_map4	0001.CSV	2098.26	-0.0247142
PSB913-2_map4	0001.CSV	2102.12	-0.0246039
PSB913-2_map4	0001.CSV	2105.97	-0.0244928
PSB913-2_map4	0001.CSV	2109.83	-0.0244329
PSB913-2_map4	0001.CSV	2113.69	-0.0243476
PSB913-2_map4	0001.CSV	2117.55	-0.0242835
PSB913-2_map4	0001.CSV	2121.4	-0.0241581
PSB913-2_map4	0001.CSV	2125.26	-0.0240666
PSB913-2_map4	0001.CSV	2129.12	-0.0239558
PSB913-2_map4	0001.CSV	2132.97	-0.023863
PSB913-2_map4	0001.CSV	2136.83	-0.0237476
PSB913-2_map4	0001.CSV	2140.69	-0.0236918
PSB913-2_map4	0001.CSV	2144.55	-0.0236277
PSB913-2_map4	0001.CSV	2148.4	-0.0236103
PSB913-2_map4	0001.CSV	2152.26	-0.0235711
PSB913-2_map4	0001.CSV	2156.12	-0.0235216
PSB913-2_map4	0001.CSV	2159.97	-0.0234405
PSB913-2_map4	0001.CSV	2163.83	-0.0234368
PSB913-2_map4	0001.CSV	2167.69	-0.0233972
PSB913-2_map4	0001.CSV	2171.55	-0.0232916
PSB913-2_map4	0001.CSV	2175.4	-0.0231629
PSB913-2_map4	0001.CSV	2179.26	-0.0231529
PSB913-2_map4	0001.CSV	2183.12	-0.0231297
PSB913-2_map4	0001.CSV	2186.97	-0.0231578
PSB913-2_map4	0001.CSV	2190.83	-0.0231363
PSB913-2_map4	0001.CSV	2194.69	-0.0230978
PSB913-2_map4	0001.CSV	2198.55	-0.0230894
PSB913-2_map4	0001.CSV	2202.4	-0.0231598
PSB913-2_map4	0001.CSV	2206.26	-0.0231847
PSB913-2_map4	0001.CSV	2210.12	-0.0232378
PSB913-2_map4	0001.CSV	2213.97	-0.02328
PSB913-2_map4	0001.CSV	2217.83	-0.0233285
PSB913-2_map4	0001.CSV	2221.69	-0.0232962
PSB913-2_map4	0001.CSV	2225.54	-0.023314
PSB913-2_map4	0001.CSV	2229.4	-0.0233602
PSB913-2_map4	0001.CSV	2233.26	-0.023472
PSB913-2_map4	0001.CSV	2237.12	-0.0234865
PSB913-2_map4	0001.CSV	2240.97	-0.0234886
PSB913-2_map4	0001.CSV	2244.83	-0.0235252
PSB913-2_map4	0001.CSV	2248.69	-0.0235925
PSB913-2_map4	0001.CSV	2252.54	-0.023612
PSB913-2_map4	0001.CSV	2256.4	-0.0236858
PSB913-2_map4	0001.CSV	2260.26	-0.0237078
PSB913-2_map4	0001.CSV	2264.11	-0.0237262
PSB913-2_map4	0001.CSV	2267.97	-0.0237839
PSB913-2_map4	0001.CSV	2271.83	-0.0238655
PSB913-2_map4	0001.CSV	2275.69	-0.0238318
PSB913-2_map4	0001.CSV	2279.54	-0.0238796
PSB913-2_map4	0001.CSV	2283.4	-0.0239979
PSB913-2_map4	0001.CSV	2287.26	-0.0241061
PSB913-2_map4	0001.CSV	2291.11	-0.0241328
PSB913-2_map4	0001.CSV	2294.97	-0.0241778
PSB913-2_map4	0001.CSV	2298.83	-0.024217
PSB913-2_map4	0001.CSV	2302.69	-0.0244514
PSB913-2_map4	0001.CSV	2306.54	-0.0247011
PSB913-2_map4	0001.CSV	2310.4	-0.0248902
PSB913-2_map4	0001.CSV	2314.26	-0.025124
PSB913-2_map4	0001.CSV	2318.11	-0.0257648
PSB913-2_map4	0001.CSV	2321.97	-0.0264869
PSB913-2_map4	0001.CSV	2325.83	-0.0276142
PSB913-2_map4	0001.CSV	2329.69	-0.0292933
PSB913-2_map4	0001.CSV	2333.54	-0.0303227
PSB913-2_map4	0001.CSV	2337.4	-0.0306733
PSB913-2_map4	0001.CSV	2341.26	-0.0307971
PSB913-2_map4	0001.CSV	2345.11	-0.0279954
PSB913-2_map4	0001.CSV	2348.97	-0.0271756
PSB913-2_map4	0001.CSV	2352.83	-0.0298018
PSB913-2_map4	0001.CSV	2356.69	-0.0380637
PSB913-2_map4	0001.CSV	2360.54	-0.0444221
PSB913-2_map4	0001.CSV	2364.4	-0.038858
PSB913-2_map4	0001.CSV	2368.26	-0.0312669
PSB913-2_map4	0001.CSV	2372.11	-0.0267446
PSB913-2_map4	0001.CSV	2375.97	-0.0246257
PSB913-2_map4	0001.CSV	2379.83	-0.0239865
PSB913-2_map4	0001.CSV	2383.69	-0.0238079
PSB913-2_map4	0001.CSV	2387.54	-0.0238635
PSB913-2_map4	0001.CSV	2391.4	-0.0239101
PSB913-2_map4	0001.CSV	2395.26	-0.0238954
PSB913-2_map4	0001.CSV	2399.11	-0.0238421
PSB913-2_map4	0001.CSV	2402.97	-0.023818
PSB913-2_map4	0001.CSV	2406.83	-0.0238041
PSB913-2_map4	0001.CSV	2410.68	-0.0238037
PSB913-2_map4	0001.CSV	2414.54	-0.0237656
PSB913-2_map4	0001.CSV	2418.4	-0.0237187
PSB913-2_map4	0001.CSV	2422.26	-0.0236783
PSB913-2_map4	0001.CSV	2426.11	-0.0236867
PSB913-2_map4	0001.CSV	2429.97	-0.0235953
PSB913-2_map4	0001.CSV	2433.83	-0.0234773
PSB913-2_map4	0001.CSV	2437.68	-0.0234592
PSB913-2_map4	0001.CSV	2441.54	-0.0235119
PSB913-2_map4	0001.CSV	2445.4	-0.0235078
PSB913-2_map4	0001.CSV	2449.26	-0.0234397
PSB913-2_map4	0001.CSV	2453.11	-0.0233271
PSB913-2_map4	0001.CSV	2456.97	-0.0232783
PSB913-2_map4	0001.CSV	2460.83	-0.0232793
PSB913-2_map4	0001.CSV	2464.68	-0.0232139
PSB913-2_map4	0001.CSV	2468.54	-0.0231225
PSB913-2_map4	0001.CSV	2472.4	-0.0230527
PSB913-2_map4	0001.CSV	2476.26	-0.0228954
PSB913-2_map4	0001.CSV	2480.11	-0.0227971
PSB913-2_map4	0001.CSV	2483.97	-0.0226965
PSB913-2_map4	0001.CSV	2487.83	-0.0225664
PSB913-2_map4	0001.CSV	2491.68	-0.0224409
PSB913-2_map4	0001.CSV	2495.54	-0.0223991
PSB913-2_map4	0001.CSV	2499.4	-0.0223826
PSB913-2_map4	0001.CSV	2503.26	-0.0224217
PSB913-2_map4	0001.CSV	2507.11	-0.0224779
PSB913-2_map4	0001.CSV	2510.97	-0.0225075
PSB913-2_map4	0001.CSV	2514.83	-0.0223791
PSB913-2_map4	0001.CSV	2518.68	-0.0222452
PSB913-2_map4	0001.CSV	2522.54	-0.0222777
PSB913-2_map4	0001.CSV	2526.4	-0.0224412
PSB913-2_map4	0001.CSV	2530.26	-0.0226345
PSB913-2_map4	0001.CSV	2534.11	-0.0228733
PSB913-2_map4	0001.CSV	2537.97	-0.0230764
PSB913-2_map4	0001.CSV	2541.83	-0.0231861
PSB913-2_map4	0001.CSV	2545.68	-0.0231444
PSB913-2_map4	0001.CSV	2549.54	-0.0232334
PSB913-2_map4	0001.CSV	2553.4	-0.0234407
PSB913-2_map4	0001.CSV	2557.26	-0.0236275
PSB913-2_map4	0001.CSV	2561.11	-0.0237453
PSB913-2_map4	0001.CSV	2564.97	-0.0238723
PSB913-2_map4	0001.CSV	2568.83	-0.0239355
PSB913-2_map4	0001.CSV	2572.68	-0.0239592
PSB913-2_map4	0001.CSV	2576.54	-0.0240054
PSB913-2_map4	0001.CSV	2580.4	-0.0241364
PSB913-2_map4	0001.CSV	2584.25	-0.0242241
PSB913-2_map4	0001.CSV	2588.11	-0.0242407
PSB913-2_map4	0001.CSV	2591.97	-0.0242543
PSB913-2_map4	0001.CSV	2595.83	-0.0243148
PSB913-2_map4	0001.CSV	2599.68	-0.0243286
PSB913-2_map4	0001.CSV	2603.54	-0.024342
PSB913-2_map4	0001.CSV	2607.4	-0.0243194
PSB913-2_map4	0001.CSV	2611.25	-0.0243163
PSB913-2_map4	0001.CSV	2615.11	-0.0243224
PSB913-2_map4	0001.CSV	2618.97	-0.0243048
PSB913-2_map4	0001.CSV	2622.82	-0.0241845
PSB913-2_map4	0001.CSV	2626.68	-0.024088
PSB913-2_map4	0001.CSV	2630.54	-0.0241522
PSB913-2_map4	0001.CSV	2634.4	-0.0241867
PSB913-2_map4	0001.CSV	2638.25	-0.0241347
PSB913-2_map4	0001.CSV	2642.11	-0.0242097
PSB913-2_map4	0001.CSV	2645.97	-0.0243094
PSB913-2_map4	0001.CSV	2649.82	-0.0243015
PSB913-2_map4	0001.CSV	2653.68	-0.0242454
PSB913-2_map4	0001.CSV	2657.54	-0.0242151
PSB913-2_map4	0001.CSV	2661.4	-0.0241926
PSB913-2_map4	0001.CSV	2665.25	-0.0242505
PSB913-2_map4	0001.CSV	2669.11	-0.0241118
PSB913-2_map4	0001.CSV	2672.97	-0.0238005
PSB913-2_map4	0001.CSV	2676.82	-0.0235372
PSB913-2_map4	0001.CSV	2680.68	-0.023578
PSB913-2_map4	0001.CSV	2684.54	-0.0238064
PSB913-2_map4	0001.CSV	2688.4	-0.0238716
PSB913-2_map4	0001.CSV	2692.25	-0.023834
PSB913-2_map4	0001.CSV	2696.11	-0.0237241
PSB913-2_map4	0001.CSV	2699.97	-0.0236354
PSB913-2_map4	0001.CSV	2703.82	-0.0235746
PSB913-2_map4	0001.CSV	2707.68	-0.0233628
PSB913-2_map4	0001.CSV	2711.54	-0.0232835
PSB913-2_map4	0001.CSV	2715.4	-0.0233073
PSB913-2_map4	0001.CSV	2719.25	-0.0231215
PSB913-2_map4	0001.CSV	2723.11	-0.0227362
PSB913-2_map4	0001.CSV	2726.97	-0.0226978
PSB913-2_map4	0001.CSV	2730.82	-0.0229539
PSB913-2_map4	0001.CSV	2734.68	-0.0229539
PSB913-2_map4	0001.CSV	2738.54	-0.0228902
PSB913-2_map4	0001.CSV	2742.4	-0.0228665
PSB913-2_map4	0001.CSV	2746.25	-0.0225286
PSB913-2_map4	0001.CSV	2750.11	-0.0224264
PSB913-2_map4	0001.CSV	2753.97	-0.0227007
PSB913-2_map4	0001.CSV	2757.82	-0.0227741
PSB913-2_map4	0001.CSV	2761.68	-0.0227903
PSB913-2_map4	0001.CSV	2765.54	-0.02278
PSB913-2_map4	0001.CSV	2769.39	-0.022665
PSB913-2_map4	0001.CSV	2773.25	-0.0223736
PSB913-2_map4	0001.CSV	2777.11	-0.0224449
PSB913-2_map4	0001.CSV	2780.97	-0.0226799
PSB913-2_map4	0001.CSV	2784.82	-0.0225169
PSB913-2_map4	0001.CSV	2788.68	-0.0221853
PSB913-2_map4	0001.CSV	2792.54	-0.0220681
PSB913-2_map4	0001.CSV	2796.39	-0.0220192
PSB913-2_map4	0001.CSV	2800.25	-0.0222181
PSB913-2_map4	0001.CSV	2804.11	-0.0225422
PSB913-2_map4	0001.CSV	2807.97	-0.0224961
PSB913-2_map4	0001.CSV	2811.82	-0.0224739
PSB913-2_map4	0001.CSV	2815.68	-0.0226196
PSB913-2_map4	0001.CSV	2819.54	-0.0225633
PSB913-2_map4	0001.CSV	2823.39	-0.0224756
PSB913-2_map4	0001.CSV	2827.25	-0.0224476
PSB913-2_map4	0001.CSV	2831.11	-0.0220957
PSB913-2_map4	0001.CSV	2834.97	-0.0216133
PSB913-2_map4	0001.CSV	2838.82	-0.0214859
PSB913-2_map4	0001.CSV	2842.68	-0.021649
PSB913-2_map4	0001.CSV	2846.54	-0.0215688
PSB913-2_map4	0001.CSV	2850.39	-0.0218432
PSB913-2_map4	0001.CSV	2854.25	-0.022383
PSB913-2_map4	0001.CSV	2858.11	-0.0225025
PSB913-2_map4	0001.CSV	2861.97	-0.022615
PSB913-2_map4	0001.CSV	2865.82	-0.0226753
PSB913-2_map4	0001.CSV	2869.68	-0.0224011
PSB913-2_map4	0001.CSV	2873.54	-0.0221974
PSB913-2_map4	0001.CSV	2877.39	-0.0225148
PSB913-2_map4	0001.CSV	2881.25	-0.022804
PSB913-2_map4	0001.CSV	2885.11	-0.0227397
PSB913-2_map4	0001.CSV	2888.97	-0.0225145
PSB913-2_map4	0001.CSV	2892.82	-0.0221542
PSB913-2_map4	0001.CSV	2896.68	-0.0219586
PSB913-2_map4	0001.CSV	2900.54	-0.0220277
PSB913-2_map4	0001.CSV	2904.39	-0.0218536
PSB913-2_map4	0001.CSV	2908.25	-0.0213977
PSB913-2_map4	0001.CSV	2912.11	-0.0208157
PSB913-2_map4	0001.CSV	2915.97	-0.0207852
PSB913-2_map4	0001.CSV	2919.82	-0.0216528
PSB913-2_map4	0001.CSV	2923.68	-0.0226402
PSB913-2_map4	0001.CSV	2927.54	-0.0229931
PSB913-2_map4	0001.CSV	2931.39	-0.0234254
PSB913-2_map4	0001.CSV	2935.25	-0.0239825
PSB913-2_map4	0001.CSV	2939.11	-0.0238464
PSB913-2_map4	0001.CSV	2942.96	-0.0231365
PSB913-2_map4	0001.CSV	2946.82	-0.0229877
PSB913-2_map4	0001.CSV	2950.68	-0.0233382
PSB913-2_map4	0001.CSV	2954.54	-0.0238185
PSB913-2_map4	0001.CSV	2958.39	-0.0242069
PSB913-2_map4	0001.CSV	2962.25	-0.0242504
PSB913-2_map4	0001.CSV	2966.11	-0.0242292
PSB913-2_map4	0001.CSV	2969.96	-0.0238527
PSB913-2_map4	0001.CSV	2973.82	-0.023177
PSB913-2_map4	0001.CSV	2977.68	-0.0227413
PSB913-2_map4	0001.CSV	2981.53	-0.022752
PSB913-2_map4	0001.CSV	2985.39	-0.0230478
PSB913-2_map4	0001.CSV	2989.25	-0.022882
PSB913-2_map4	0001.CSV	2993.11	-0.0225119
PSB913-2_map4	0001.CSV	2996.96	-0.0225226
PSB913-2_map4	0001.CSV	3000.82	-0.0226753
PSB913-2_map4	0001.CSV	3004.68	-0.0226375
PSB913-2_map4	0001.CSV	3008.53	-0.0222147
PSB913-2_map4	0001.CSV	3012.39	-0.0216622
PSB913-2_map4	0001.CSV	3016.25	-0.0215002
PSB913-2_map4	0001.CSV	3020.11	-0.0217068
PSB913-2_map4	0001.CSV	3023.96	-0.0218584
PSB913-2_map4	0001.CSV	3027.82	-0.0218461
PSB913-2_map4	0001.CSV	3031.68	-0.0216135
PSB913-2_map4	0001.CSV	3035.53	-0.0215109
PSB913-2_map4	0001.CSV	3039.39	-0.0214711
PSB913-2_map4	0001.CSV	3043.25	-0.0212886
PSB913-2_map4	0001.CSV	3047.11	-0.0213137
PSB913-2_map4	0001.CSV	3050.96	-0.0214042
PSB913-2_map4	0001.CSV	3054.82	-0.0215148
PSB913-2_map4	0001.CSV	3058.68	-0.0216151
PSB913-2_map4	0001.CSV	3062.53	-0.0214956
PSB913-2_map4	0001.CSV	3066.39	-0.0211765
PSB913-2_map4	0001.CSV	3070.25	-0.021231
PSB913-2_map4	0001.CSV	3074.11	-0.0212291
PSB913-2_map4	0001.CSV	3077.96	-0.0209328
PSB913-2_map4	0001.CSV	3081.82	-0.0207871
PSB913-2_map4	0001.CSV	3085.68	-0.0207969
PSB913-2_map4	0001.CSV	3089.53	-0.0209032
PSB913-2_map4	0001.CSV	3093.39	-0.0212148
PSB913-2_map4	0001.CSV	3097.25	-0.0212889
PSB913-2_map4	0001.CSV	3101.11	-0.0212359
PSB913-2_map4	0001.CSV	3104.96	-0.0211925
PSB913-2_map4	0001.CSV	3108.82	-0.0209929
PSB913-2_map4	0001.CSV	3112.68	-0.0208163
PSB913-2_map4	0001.CSV	3116.53	-0.0207187
PSB913-2_map4	0001.CSV	3120.39	-0.0208046
PSB913-2_map4	0001.CSV	3124.25	-0.0210835
PSB913-2_map4	0001.CSV	3128.11	-0.0212484
PSB913-2_map4	0001.CSV	3131.96	-0.021332
PSB913-2_map4	0001.CSV	3135.82	-0.0211877
PSB913-2_map4	0001.CSV	3139.68	-0.0210887
PSB913-2_map4	0001.CSV	3143.53	-0.0213421
PSB913-2_map4	0001.CSV	3147.39	-0.0212786
PSB913-2_map4	0001.CSV	3151.25	-0.021056
PSB913-2_map4	0001.CSV	3155.1	-0.0212348
PSB913-2_map4	0001.CSV	3158.96	-0.0215688
PSB913-2_map4	0001.CSV	3162.82	-0.0217076
PSB913-2_map4	0001.CSV	3166.68	-0.021663
PSB913-2_map4	0001.CSV	3170.53	-0.0216903
PSB913-2_map4	0001.CSV	3174.39	-0.0217652
PSB913-2_map4	0001.CSV	3178.25	-0.021605
PSB913-2_map4	0001.CSV	3182.1	-0.0214811
PSB913-2_map4	0001.CSV	3185.96	-0.0214625
PSB913-2_map4	0001.CSV	3189.82	-0.0214608
PSB913-2_map4	0001.CSV	3193.68	-0.0216388
PSB913-2_map4	0001.CSV	3197.53	-0.0217122
PSB913-2_map4	0001.CSV	3201.39	-0.0215573
PSB913-2_map4	0001.CSV	3205.25	-0.0214728
PSB913-2_map4	0001.CSV	3209.1	-0.0215035
PSB913-2_map4	0001.CSV	3212.96	-0.0214287
PSB913-2_map4	0001.CSV	3216.82	-0.0213234
PSB913-2_map4	0001.CSV	3220.68	-0.0213073
PSB913-2_map4	0001.CSV	3224.53	-0.0212687
PSB913-2_map4	0001.CSV	3228.39	-0.0210023
PSB913-2_map4	0001.CSV	3232.25	-0.0206911
PSB913-2_map4	0001.CSV	3236.1	-0.0207999
PSB913-2_map4	0001.CSV	3239.96	-0.0210259
PSB913-2_map4	0001.CSV	3243.82	-0.0208745
PSB913-2_map4	0001.CSV	3247.68	-0.0207363
PSB913-2_map4	0001.CSV	3251.53	-0.020771
PSB913-2_map4	0001.CSV	3255.39	-0.0207267
PSB913-2_map4	0001.CSV	3259.25	-0.0208829
PSB913-2_map4	0001.CSV	3263.1	-0.0209452
PSB913-2_map4	0001.CSV	3266.96	-0.0206201
PSB913-2_map4	0001.CSV	3270.82	-0.0201729
PSB913-2_map4	0001.CSV	3274.68	-0.0201442
PSB913-2_map4	0001.CSV	3278.53	-0.0204165
PSB913-2_map4	0001.CSV	3282.39	-0.0205501
PSB913-2_map4	0001.CSV	3286.25	-0.0205247
PSB913-2_map4	0001.CSV	3290.1	-0.0201227
PSB913-2_map4	0001.CSV	3293.96	-0.019821
PSB913-2_map4	0001.CSV	3297.82	-0.0199822
PSB913-2_map4	0001.CSV	3301.67	-0.0199284
PSB913-2_map4	0001.CSV	3305.53	-0.0197167
PSB913-2_map4	0001.CSV	3309.39	-0.0198198
PSB913-2_map4	0001.CSV	3313.25	-0.0201079
PSB913-2_map4	0001.CSV	3317.1	-0.0203636
PSB913-2_map4	0001.CSV	3320.96	-0.0202826
PSB913-2_map4	0001.CSV	3324.82	-0.0200166
PSB913-2_map4	0001.CSV	3328.67	-0.0201582
PSB913-2_map4	0001.CSV	3332.53	-0.0202632
PSB913-2_map4	0001.CSV	3336.39	-0.0197629
PSB913-2_map4	0001.CSV	3340.24	-0.0193849
PSB913-2_map4	0001.CSV	3344.1	-0.0194828
PSB913-2_map4	0001.CSV	3347.96	-0.0195809
PSB913-2_map4	0001.CSV	3351.82	-0.0196724
PSB913-2_map4	0001.CSV	3355.67	-0.0198437
PSB913-2_map4	0001.CSV	3359.53	-0.0196597
PSB913-2_map4	0001.CSV	3363.39	-0.0193558
PSB913-2_map4	0001.CSV	3367.24	-0.0190699
PSB913-2_map4	0001.CSV	3371.1	-0.0191766
PSB913-2_map4	0001.CSV	3374.96	-0.0194275
PSB913-2_map4	0001.CSV	3378.82	-0.0195992
PSB913-2_map4	0001.CSV	3382.67	-0.0198117
PSB913-2_map4	0001.CSV	3386.53	-0.019826
PSB913-2_map4	0001.CSV	3390.39	-0.0195001
PSB913-2_map4	0001.CSV	3394.24	-0.0192586
PSB913-2_map4	0001.CSV	3398.1	-0.0190134
PSB913-2_map4	0001.CSV	3401.96	-0.0191374
PSB913-2_map4	0001.CSV	3405.82	-0.0195319
PSB913-2_map4	0001.CSV	3409.67	-0.0195183
PSB913-2_map4	0001.CSV	3413.53	-0.0196684
PSB913-2_map4	0001.CSV	3417.39	-0.0200955
PSB913-2_map4	0001.CSV	3421.24	-0.0201606
PSB913-2_map4	0001.CSV	3425.1	-0.0199748
PSB913-2_map4	0001.CSV	3428.96	-0.0196487
PSB913-2_map4	0001.CSV	3432.82	-0.0194294
PSB913-2_map4	0001.CSV	3436.67	-0.0196812
PSB913-2_map4	0001.CSV	3440.53	-0.0203567
PSB913-2_map4	0001.CSV	3444.39	-0.0206993
PSB913-2_map4	0001.CSV	3448.24	-0.0205854
PSB913-2_map4	0001.CSV	3452.1	-0.0206757
PSB913-2_map4	0001.CSV	3455.96	-0.0207433
PSB913-2_map4	0001.CSV	3459.82	-0.0204827
PSB913-2_map4	0001.CSV	3463.67	-0.0201509
PSB913-2_map4	0001.CSV	3467.53	-0.019972
PSB913-2_map4	0001.CSV	3471.39	-0.0203977
PSB913-2_map4	0001.CSV	3475.24	-0.0207635
PSB913-2_map4	0001.CSV	3479.1	-0.020926
PSB913-2_map4	0001.CSV	3482.96	-0.0210932
PSB913-2_map4	0001.CSV	3486.82	-0.0210058
PSB913-2_map4	0001.CSV	3490.67	-0.0211165
PSB913-2_map4	0001.CSV	3494.53	-0.0212324
PSB913-2_map4	0001.CSV	3498.39	-0.021336
PSB913-2_map4	0001.CSV	3502.24	-0.021475
PSB913-2_map4	0001.CSV	3506.1	-0.0216696
PSB913-2_map4	0001.CSV	3509.96	-0.0218741
PSB913-2_map4	0001.CSV	3513.81	-0.0218292
PSB913-2_map4	0001.CSV	3517.67	-0.0221505
PSB913-2_map4	0001.CSV	3521.53	-0.0221771
PSB913-2_map4	0001.CSV	3525.39	-0.02228
PSB913-2_map4	0001.CSV	3529.24	-0.0225225
PSB913-2_map4	0001.CSV	3533.1	-0.0225104
PSB913-2_map4	0001.CSV	3536.96	-0.0223979
PSB913-2_map4	0001.CSV	3540.81	-0.0224344
PSB913-2_map4	0001.CSV	3544.67	-0.0222721
PSB913-2_map4	0001.CSV	3548.53	-0.022342
PSB913-2_map4	0001.CSV	3552.39	-0.0227504
PSB913-2_map4	0001.CSV	3556.24	-0.0229658
PSB913-2_map4	0001.CSV	3560.1	-0.02321
PSB913-2_map4	0001.CSV	3563.96	-0.0236418
PSB913-2_map4	0001.CSV	3567.81	-0.0231744
PSB913-2_map4	0001.CSV	3571.67	-0.0232936
PSB913-2_map4	0001.CSV	3575.53	-0.0237473
PSB913-2_map4	0001.CSV	3579.39	-0.0235538
PSB913-2_map4	0001.CSV	3583.24	-0.0235611
PSB913-2_map4	0001.CSV	3587.1	-0.0236706
PSB913-2_map4	0001.CSV	3590.96	-0.0239904
PSB913-2_map4	0001.CSV	3594.81	-0.0243666
PSB913-2_map4	0001.CSV	3598.67	-0.0239508
PSB913-2_map4	0001.CSV	3602.53	-0.0237944
PSB913-2_map4	0001.CSV	3606.39	-0.0245758
PSB913-2_map4	0001.CSV	3610.24	-0.025198
PSB913-2_map4	0001.CSV	3614.1	-0.025031
PSB913-2_map4	0001.CSV	3617.96	-0.0244678
PSB913-2_map4	0001.CSV	3621.81	-0.0241289
PSB913-2_map4	0001.CSV	3625.67	-0.0249848
PSB913-2_map4	0001.CSV	3629.53	-0.0252008
PSB913-2_map4	0001.CSV	3633.39	-0.0244997
PSB913-2_map4	0001.CSV	3637.24	-0.0245591
PSB913-2_map4	0001.CSV	3641.1	-0.0249206
PSB913-2_map4	0001.CSV	3644.96	-0.0257182
PSB913-2_map4	0001.CSV	3648.81	-0.0253083
PSB913-2_map4	0001.CSV	3652.67	-0.0241587
PSB913-2_map4	0001.CSV	3656.53	-0.0240716
PSB913-2_map4	0001.CSV	3660.38	-0.0241752
PSB913-2_map4	0001.CSV	3664.24	-0.0251785
PSB913-2_map4	0001.CSV	3668.1	-0.0261773
PSB913-2_map4	0001.CSV	3671.96	-0.0261449
PSB913-2_map4	0001.CSV	3675.81	-0.0252525
PSB913-2_map4	0001.CSV	3679.67	-0.0245561
PSB913-2_map4	0001.CSV	3683.53	-0.0249201
PSB913-2_map4	0001.CSV	3687.38	-0.0250909
PSB913-2_map4	0001.CSV	3691.24	-0.0241377
PSB913-2_map4	0001.CSV	3695.1	-0.0243669
PSB913-2_map4	0001.CSV	3698.95	-0.0250466
PSB913-2_map4	0001.CSV	3702.81	-0.0252239
PSB913-2_map4	0001.CSV	3706.67	-0.0256959
PSB913-2_map4	0001.CSV	3710.53	-0.0259169
PSB913-2_map4	0001.CSV	3714.38	-0.0250285
PSB913-2_map4	0001.CSV	3718.24	-0.0254844
PSB913-2_map4	0001.CSV	3722.1	-0.0259042
PSB913-2_map4	0001.CSV	3725.95	-0.0258153
PSB913-2_map4	0001.CSV	3729.81	-0.0260544
PSB913-2_map4	0001.CSV	3733.67	-0.0258566
PSB913-2_map4	0001.CSV	3737.53	-0.0247265
PSB913-2_map4	0001.CSV	3741.38	-0.0258167
PSB913-2_map4	0001.CSV	3745.24	-0.0270045
PSB913-2_map4	0001.CSV	3749.1	-0.0268035
PSB913-2_map4	0001.CSV	3752.95	-0.0253173
PSB913-2_map4	0001.CSV	3756.81	-0.0251381
PSB913-2_map4	0001.CSV	3760.67	-0.0252132
PSB913-2_map4	0001.CSV	3764.53	-0.0256554
PSB913-2_map4	0001.CSV	3768.38	-0.0255443
PSB913-2_map4	0001.CSV	3772.24	-0.0250895
PSB913-2_map4	0001.CSV	3776.1	-0.02534
PSB913-2_map4	0001.CSV	3779.95	-0.0252984
PSB913-2_map4	0001.CSV	3783.81	-0.0252924
PSB913-2_map4	0001.CSV	3787.67	-0.0254149
PSB913-2_map4	0001.CSV	3791.53	-0.0256502
PSB913-2_map4	0001.CSV	3795.38	-0.0262047
PSB913-2_map4	0001.CSV	3799.24	-0.0263655
PSB913-2_map4	0001.CSV	3803.1	-0.0256919
PSB913-2_map4	0001.CSV	3806.95	-0.0251868
PSB913-2_map4	0001.CSV	3810.81	-0.02553
PSB913-2_map4	0001.CSV	3814.67	-0.0262097
PSB913-2_map4	0001.CSV	3818.53	-0.026113
PSB913-2_map4	0001.CSV	3822.38	-0.0253561
PSB913-2_map4	0001.CSV	3826.24	-0.0253933
PSB913-2_map4	0001.CSV	3830.1	-0.0257715
PSB913-2_map4	0001.CSV	3833.95	-0.026161
PSB913-2_map4	0001.CSV	3837.81	-0.0261235
PSB913-2_map4	0001.CSV	3841.67	-0.0251952
PSB913-2_map4	0001.CSV	3845.53	-0.0252415
PSB913-2_map4	0001.CSV	3849.38	-0.0263895
PSB913-2_map4	0001.CSV	3853.24	-0.0264178
PSB913-2_map4	0001.CSV	3857.1	-0.0254865
PSB913-2_map4	0001.CSV	3860.95	-0.0261805
PSB913-2_map4	0001.CSV	3864.81	-0.0264781
PSB913-2_map4	0001.CSV	3868.67	-0.0264352
PSB913-2_map4	0001.CSV	3872.52	-0.0259638
PSB913-2_map4	0001.CSV	3876.38	-0.0260403
PSB913-2_map4	0001.CSV	3880.24	-0.0263935
PSB913-2_map4	0001.CSV	3884.1	-0.0259063
PSB913-2_map4	0001.CSV	3887.95	-0.0258091
PSB913-2_map4	0001.CSV	3891.81	-0.0258695
PSB913-2_map4	0001.CSV	3895.67	-0.0262659
PSB913-2_map4	0001.CSV	3899.52	-0.0269382
PSB913-2_map4	0001.CSV	3903.38	-0.0260763
PSB913-2_map4	0001.CSV	3907.24	-0.0255911
PSB913-2_map4	0001.CSV	3911.1	-0.0262208
PSB913-2_map4	0001.CSV	3914.95	-0.0264376
PSB913-2_map4	0001.CSV	3918.81	-0.0260072
PSB913-2_map4	0001.CSV	3922.67	-0.0260008
PSB913-2_map4	0001.CSV	3926.52	-0.0261425
PSB913-2_map4	0001.CSV	3930.38	-0.0260441
PSB913-2_map4	0001.CSV	3934.24	-0.0258326
PSB913-2_map4	0001.CSV	3938.09	-0.0262304
PSB913-2_map4	0001.CSV	3941.95	-0.0263861
PSB913-2_map4	0001.CSV	3945.81	-0.0262762
PSB913-2_map4	0001.CSV	3949.67	-0.0261989
PSB913-2_map4	0001.CSV	3953.52	-0.0261432
PSB913-2_map4	0001.CSV	3957.38	-0.0262161
PSB913-2_map4	0001.CSV	3961.24	-0.0262418
PSB913-2_map4	0001.CSV	3965.09	-0.026191
PSB913-2_map4	0001.CSV	3968.95	-0.0261471
PSB913-2_map4	0001.CSV	3972.81	-0.0261455
PSB913-2_map4	0001.CSV	3976.67	-0.0262164
PSB913-2_map4	0001.CSV	3980.52	-0.0262998
PSB913-2_map4	0001.CSV	3984.38	-0.0262576
PSB913-2_map4	0001.CSV	3988.24	-0.026247
PSB913-2_map4	0001.CSV	3992.09	-0.0260469
PSB913-2_map4	0001.CSV	3995.95	-0.0260048
PSB913-2_map4	0001.CSV	3999.81	-0.0262319
PSB913-2_map4	0002.CSV	674.992	0.0478495
PSB913-2_map4	0002.CSV	678.849	0.0516972
PSB913-2_map4	0002.CSV	682.706	0.0571598
PSB913-2_map4	0002.CSV	686.563	0.0707036
PSB913-2_map4	0002.CSV	690.42	0.0989089
PSB913-2_map4	0002.CSV	694.277	0.150158
PSB913-2_map4	0002.CSV	698.134	0.190564
PSB913-2_map4	0002.CSV	701.991	0.17403
PSB913-2_map4	0002.CSV	705.849	0.130374
PSB913-2_map4	0002.CSV	709.706	0.108384
PSB913-2_map4	0002.CSV	713.563	0.0886817
PSB913-2_map4	0002.CSV	717.42	0.0541159
PSB913-2_map4	0002.CSV	721.277	0.0336112
PSB913-2_map4	0002.CSV	725.134	0.0348704
PSB913-2_map4	0002.CSV	728.991	0.0433774
PSB913-2_map4	0002.CSV	732.848	0.0575435
PSB913-2_map4	0002.CSV	736.705	0.0730487
PSB913-2_map4	0002.CSV	740.562	0.0847806
PSB913-2_map4	0002.CSV	744.42	0.0881654
PSB913-2_map4	0002.CSV	748.277	0.0864376
PSB913-2_map4	0002.CSV	752.134	0.0822141
PSB913-2_map4	0002.CSV	755.991	0.079195
PSB913-2_map4	0002.CSV	759.848	0.0752756
PSB913-2_map4	0002.CSV	763.705	0.0706291
PSB913-2_map4	0002.CSV	767.562	0.0647203
PSB913-2_map4	0002.CSV	771.419	0.0588462
PSB913-2_map4	0002.CSV	775.276	0.0527022
PSB913-2_map4	0002.CSV	779.133	0.0488494
PSB913-2_map4	0002.CSV	782.99	0.0469357
PSB913-2_map4	0002.CSV	786.848	0.0476717
PSB913-2_map4	0002.CSV	790.705	0.0478272
PSB913-2_map4	0002.CSV	794.562	0.0478452
PSB913-2_map4	0002.CSV	798.419	0.0482798
PSB913-2_map4	0002.CSV	802.276	0.0501483
PSB913-2_map4	0002.CSV	806.133	0.0519106
PSB913-2_map4	0002.CSV	809.99	0.0555029
PSB913-2_map4	0002.CSV	813.847	0.0598619
PSB913-2_map4	0002.CSV	817.704	0.0658829
PSB913-2_map4	0002.CSV	821.562	0.0718292
PSB913-2_map4	0002.CSV	825.419	0.0776799
PSB913-2_map4	0002.CSV	829.276	0.0824754
PSB913-2_map4	0002.CSV	833.133	0.0891687
PSB913-2_map4	0002.CSV	836.99	0.0990417
PSB913-2_map4	0002.CSV	840.847	0.113621
PSB913-2_map4	0002.CSV	844.704	0.127158
PSB913-2_map4	0002.CSV	848.561	0.14777
PSB913-2_map4	0002.CSV	852.418	0.178206
PSB913-2_map4	0002.CSV	856.275	0.19327
PSB913-2_map4	0002.CSV	860.132	0.174015
PSB913-2_map4	0002.CSV	863.99	0.134093
PSB913-2_map4	0002.CSV	867.847	0.0938212
PSB913-2_map4	0002.CSV	871.704	0.0664351
PSB913-2_map4	0002.CSV	875.561	0.0511991
PSB913-2_map4	0002.CSV	879.418	0.0432472
PSB913-2_map4	0002.CSV	883.275	0.0382406
PSB913-2_map4	0002.CSV	887.132	0.0355975
PSB913-2_map4	0002.CSV	890.989	0.0339482
PSB913-2_map4	0002.CSV	894.846	0.0334701
PSB913-2_map4	0002.CSV	898.703	0.0338324
PSB913-2_map4	0002.CSV	902.561	0.0353452
PSB913-2_map4	0002.CSV	906.418	0.0365243
PSB913-2_map4	0002.CSV	910.275	0.0365893
PSB913-2_map4	0002.CSV	914.132	0.0352075
PSB913-2_map4	0002.CSV	917.989	0.0343765
PSB913-2_map4	0002.CSV	921.846	0.0335967
PSB913-2_map4	0002.CSV	925.703	0.0332217
PSB913-2_map4	0002.CSV	929.56	0.0328761
PSB913-2_map4	0002.CSV	933.417	0.0332856
PSB913-2_map4	0002.CSV	937.274	0.0334921
PSB913-2_map4	0002.CSV	941.131	0.033236
PSB913-2_map4	0002.CSV	944.989	0.0318676
PSB913-2_map4	0002.CSV	948.846	0.0305485
PSB913-2_map4	0002.CSV	952.703	0.0295945
PSB913-2_map4	0002.CSV	956.56	0.0298313
PSB913-2_map4	0002.CSV	960.417	0.0302324
PSB913-2_map4	0002.CSV	964.274	0.0305556
PSB913-2_map4	0002.CSV	968.131	0.0299893
PSB913-2_map4	0002.CSV	971.988	0.0295726
PSB913-2_map4	0002.CSV	975.845	0.0296417
PSB913-2_map4	0002.CSV	979.702	0.0307576
PSB913-2_map4	0002.CSV	983.559	0.0318912
PSB913-2_map4	0002.CSV	987.417	0.0330568
PSB913-2_map4	0002.CSV	991.274	0.0333398
PSB913-2_map4	0002.CSV	995.131	0.0333016
PSB913-2_map4	0002.CSV	998.988	0.0331679
PSB913-2_map4	0002.CSV	1002.85	0.0336628
PSB913-2_map4	0002.CSV	1006.7	0.0335929
PSB913-2_map4	0002.CSV	1010.56	0.0339443
PSB913-2_map4	0002.CSV	1014.42	0.0351183
PSB913-2_map4	0002.CSV	1018.27	0.0374659
PSB913-2_map4	0002.CSV	1022.13	0.0404796
PSB913-2_map4	0002.CSV	1025.99	0.0448864
PSB913-2_map4	0002.CSV	1029.85	0.0488642
PSB913-2_map4	0002.CSV	1033.7	0.0519257
PSB913-2_map4	0002.CSV	1037.56	0.0546357
PSB913-2_map4	0002.CSV	1041.42	0.0574354
PSB913-2_map4	0002.CSV	1045.27	0.0591585
PSB913-2_map4	0002.CSV	1049.13	0.0631968
PSB913-2_map4	0002.CSV	1052.99	0.0717524
PSB913-2_map4	0002.CSV	1056.84	0.0845268
PSB913-2_map4	0002.CSV	1060.7	0.0968587
PSB913-2_map4	0002.CSV	1064.56	0.104423
PSB913-2_map4	0002.CSV	1068.42	0.104369
PSB913-2_map4	0002.CSV	1072.27	0.0987399
PSB913-2_map4	0002.CSV	1076.13	0.0913243
PSB913-2_map4	0002.CSV	1079.99	0.0878819
PSB913-2_map4	0002.CSV	1083.84	0.0804827
PSB913-2_map4	0002.CSV	1087.7	0.064256
PSB913-2_map4	0002.CSV	1091.56	0.0532987
PSB913-2_map4	0002.CSV	1095.41	0.0513426
PSB913-2_map4	0002.CSV	1099.27	0.0534594
PSB913-2_map4	0002.CSV	1103.13	0.058743
PSB913-2_map4	0002.CSV	1106.99	0.0660627
PSB913-2_map4	0002.CSV	1110.84	0.0746496
PSB913-2_map4	0002.CSV	1114.7	0.0819262
PSB913-2_map4	0002.CSV	1118.56	0.0862639
PSB913-2_map4	0002.CSV	1122.41	0.0866916
PSB913-2_map4	0002.CSV	1126.27	0.0848734
PSB913-2_map4	0002.CSV	1130.13	0.0821226
PSB913-2_map4	0002.CSV	1133.99	0.0803481
PSB913-2_map4	0002.CSV	1137.84	0.0786145
PSB913-2_map4	0002.CSV	1141.7	0.0754733
PSB913-2_map4	0002.CSV	1145.56	0.0702528
PSB913-2_map4	0002.CSV	1149.41	0.0659304
PSB913-2_map4	0002.CSV	1153.27	0.063683
PSB913-2_map4	0002.CSV	1157.13	0.0626241
PSB913-2_map4	0002.CSV	1160.99	0.0609355
PSB913-2_map4	0002.CSV	1164.84	0.0588105
PSB913-2_map4	0002.CSV	1168.7	0.0556019
PSB913-2_map4	0002.CSV	1172.56	0.0524274
PSB913-2_map4	0002.CSV	1176.41	0.0499506
PSB913-2_map4	0002.CSV	1180.27	0.0485713
PSB913-2_map4	0002.CSV	1184.13	0.0469904
PSB913-2_map4	0002.CSV	1187.99	0.0453887
PSB913-2_map4	0002.CSV	1191.84	0.043866
PSB913-2_map4	0002.CSV	1195.7	0.0432088
PSB913-2_map4	0002.CSV	1199.56	0.0429105
PSB913-2_map4	0002.CSV	1203.41	0.0432798
PSB913-2_map4	0002.CSV	1207.27	0.0438219
PSB913-2_map4	0002.CSV	1211.13	0.0450172
PSB913-2_map4	0002.CSV	1214.98	0.0465148
PSB913-2_map4	0002.CSV	1218.84	0.0488254
PSB913-2_map4	0002.CSV	1222.7	0.0515517
PSB913-2_map4	0002.CSV	1226.56	0.0552196
PSB913-2_map4	0002.CSV	1230.41	0.0597233
PSB913-2_map4	0002.CSV	1234.27	0.065937
PSB913-2_map4	0002.CSV	1238.13	0.0737242
PSB913-2_map4	0002.CSV	1241.98	0.0831932
PSB913-2_map4	0002.CSV	1245.84	0.0930713
PSB913-2_map4	0002.CSV	1249.7	0.102343
PSB913-2_map4	0002.CSV	1253.56	0.109111
PSB913-2_map4	0002.CSV	1257.41	0.113281
PSB913-2_map4	0002.CSV	1261.27	0.114942
PSB913-2_map4	0002.CSV	1265.13	0.115446
PSB913-2_map4	0002.CSV	1268.98	0.114953
PSB913-2_map4	0002.CSV	1272.84	0.114365
PSB913-2_map4	0002.CSV	1276.7	0.113451
PSB913-2_map4	0002.CSV	1280.56	0.112454
PSB913-2_map4	0002.CSV	1284.41	0.11023
PSB913-2_map4	0002.CSV	1288.27	0.105969
PSB913-2_map4	0002.CSV	1292.13	0.0986618
PSB913-2_map4	0002.CSV	1295.98	0.0897592
PSB913-2_map4	0002.CSV	1299.84	0.0807431
PSB913-2_map4	0002.CSV	1303.7	0.0738754
PSB913-2_map4	0002.CSV	1307.56	0.0690214
PSB913-2_map4	0002.CSV	1311.41	0.0660486
PSB913-2_map4	0002.CSV	1315.27	0.0638159
PSB913-2_map4	0002.CSV	1319.13	0.0620613
PSB913-2_map4	0002.CSV	1322.98	0.0598117
PSB913-2_map4	0002.CSV	1326.84	0.057853
PSB913-2_map4	0002.CSV	1330.7	0.056188
PSB913-2_map4	0002.CSV	1334.56	0.0556608
PSB913-2_map4	0002.CSV	1338.41	0.056218
PSB913-2_map4	0002.CSV	1342.27	0.0582971
PSB913-2_map4	0002.CSV	1346.13	0.0604181
PSB913-2_map4	0002.CSV	1349.98	0.0635524
PSB913-2_map4	0002.CSV	1353.84	0.0666722
PSB913-2_map4	0002.CSV	1357.7	0.069771
PSB913-2_map4	0002.CSV	1361.56	0.0731486
PSB913-2_map4	0002.CSV	1365.41	0.0781054
PSB913-2_map4	0002.CSV	1369.27	0.0825926
PSB913-2_map4	0002.CSV	1373.13	0.0888673
PSB913-2_map4	0002.CSV	1376.98	0.0953669
PSB913-2_map4	0002.CSV	1380.84	0.0995593
PSB913-2_map4	0002.CSV	1384.7	0.102168
PSB913-2_map4	0002.CSV	1388.56	0.106377
PSB913-2_map4	0002.CSV	1392.41	0.109664
PSB913-2_map4	0002.CSV	1396.27	0.113594
PSB913-2_map4	0002.CSV	1400.13	0.117216
PSB913-2_map4	0002.CSV	1403.98	0.121436
PSB913-2_map4	0002.CSV	1407.84	0.126599
PSB913-2_map4	0002.CSV	1411.7	0.132611
PSB913-2_map4	0002.CSV	1415.55	0.137877
PSB913-2_map4	0002.CSV	1419.41	0.146419
PSB913-2_map4	0002.CSV	1423.27	0.154399
PSB913-2_map4	0002.CSV	1427.12	0.162717
PSB913-2_map4	0002.CSV	1430.98	0.172467
PSB913-2_map4	0002.CSV	1434.84	0.186076
PSB913-2_map4	0002.CSV	1438.7	0.203474
PSB913-2_map4	0002.CSV	1442.55	0.217953
PSB913-2_map4	0002.CSV	1446.41	0.229815
PSB913-2_map4	0002.CSV	1450.27	0.238742
PSB913-2_map4	0002.CSV	1454.12	0.236562
PSB913-2_map4	0002.CSV	1457.98	0.218289
PSB913-2_map4	0002.CSV	1461.84	0.204815
PSB913-2_map4	0002.CSV	1465.7	0.200826
PSB913-2_map4	0002.CSV	1469.55	0.195746
PSB913-2_map4	0002.CSV	1473.41	0.186544
PSB913-2_map4	0002.CSV	1477.27	0.173583
PSB913-2_map4	0002.CSV	1481.12	0.165614
PSB913-2_map4	0002.CSV	1484.98	0.158804
PSB913-2_map4	0002.CSV	1488.84	0.15517
PSB913-2_map4	0002.CSV	1492.7	0.151123
PSB913-2_map4	0002.CSV	1496.55	0.138218
PSB913-2_map4	0002.CSV	1500.41	0.118098
PSB913-2_map4	0002.CSV	1504.27	0.108427
PSB913-2_map4	0002.CSV	1508.12	0.0959993
PSB913-2_map4	0002.CSV	1511.98	0.0880382
PSB913-2_map4	0002.CSV	1515.84	0.0820018
PSB913-2_map4	0002.CSV	1519.7	0.0739414
PSB913-2_map4	0002.CSV	1523.55	0.0641948
PSB913-2_map4	0002.CSV	1527.41	0.0580225
PSB913-2_map4	0002.CSV	1531.27	0.0525936
PSB913-2_map4	0002.CSV	1535.12	0.0477807
PSB913-2_map4	0002.CSV	1538.98	0.0426742
PSB913-2_map4	0002.CSV	1542.84	0.0361867
PSB913-2_map4	0002.CSV	1546.7	0.0320223
PSB913-2_map4	0002.CSV	1550.55	0.0291172
PSB913-2_map4	0002.CSV	1554.41	0.0257315
PSB913-2_map4	0002.CSV	1558.27	0.022066
PSB913-2_map4	0002.CSV	1562.12	0.0187521
PSB913-2_map4	0002.CSV	1565.98	0.0171699
PSB913-2_map4	0002.CSV	1569.84	0.0149372
PSB913-2_map4	0002.CSV	1573.69	0.0132986
PSB913-2_map4	0002.CSV	1577.55	0.0124687
PSB913-2_map4	0002.CSV	1581.41	0.0116447
PSB913-2_map4	0002.CSV	1585.27	0.00895765
PSB913-2_map4	0002.CSV	1589.12	0.00552273
PSB913-2_map4	0002.CSV	1592.98	0.00398534
PSB913-2_map4	0002.CSV	1596.84	0.00585864
PSB913-2_map4	0002.CSV	1600.69	0.00769941
PSB913-2_map4	0002.CSV	1604.55	0.00616285
PSB913-2_map4	0002.CSV	1608.41	0.00124863
PSB913-2_map4	0002.CSV	1612.27	-0.00263354
PSB913-2_map4	0002.CSV	1616.12	-0.00475082
PSB913-2_map4	0002.CSV	1619.98	-0.0057988
PSB913-2_map4	0002.CSV	1623.84	-0.00669087
PSB913-2_map4	0002.CSV	1627.69	-0.00708737
PSB913-2_map4	0002.CSV	1631.55	-0.00782554
PSB913-2_map4	0002.CSV	1635.41	-0.00796545
PSB913-2_map4	0002.CSV	1639.27	-0.00807435
PSB913-2_map4	0002.CSV	1643.12	-0.00853088
PSB913-2_map4	0002.CSV	1646.98	-0.00890227
PSB913-2_map4	0002.CSV	1650.84	-0.00866504
PSB913-2_map4	0002.CSV	1654.69	-0.00845452
PSB913-2_map4	0002.CSV	1658.55	-0.00857337
PSB913-2_map4	0002.CSV	1662.41	-0.00887649
PSB913-2_map4	0002.CSV	1666.27	-0.00870612
PSB913-2_map4	0002.CSV	1670.12	-0.00845046
PSB913-2_map4	0002.CSV	1673.98	-0.00736802
PSB913-2_map4	0002.CSV	1677.84	-0.00691141
PSB913-2_map4	0002.CSV	1681.69	-0.0061023
PSB913-2_map4	0002.CSV	1685.55	-0.00374216
PSB913-2_map4	0002.CSV	1689.41	-0.00150373
PSB913-2_map4	0002.CSV	1693.27	-0.000399744
PSB913-2_map4	0002.CSV	1697.12	0.0028238
PSB913-2_map4	0002.CSV	1700.98	0.00997622
PSB913-2_map4	0002.CSV	1704.84	0.0179522
PSB913-2_map4	0002.CSV	1708.69	0.0270281
PSB913-2_map4	0002.CSV	1712.55	0.0355974
PSB913-2_map4	0002.CSV	1716.41	0.051813
PSB913-2_map4	0002.CSV	1720.27	0.0688961
PSB913-2_map4	0002.CSV	1724.12	0.0743297
PSB913-2_map4	0002.CSV	1727.98	0.0756047
PSB913-2_map4	0002.CSV	1731.84	0.0724881
PSB913-2_map4	0002.CSV	1735.69	0.0630349
PSB913-2_map4	0002.CSV	1739.55	0.0536259
PSB913-2_map4	0002.CSV	1743.41	0.0422816
PSB913-2_map4	0002.CSV	1747.27	0.0292115
PSB913-2_map4	0002.CSV	1751.12	0.0126574
PSB913-2_map4	0002.CSV	1754.98	0.00129768
PSB913-2_map4	0002.CSV	1758.84	-0.00767774
PSB913-2_map4	0002.CSV	1762.69	-0.0151838
PSB913-2_map4	0002.CSV	1766.55	-0.0196649
PSB913-2_map4	0002.CSV	1770.41	-0.0220149
PSB913-2_map4	0002.CSV	1774.26	-0.022678
PSB913-2_map4	0002.CSV	1778.12	-0.0218704
PSB913-2_map4	0002.CSV	1781.98	-0.0205552
PSB913-2_map4	0002.CSV	1785.84	-0.0197684
PSB913-2_map4	0002.CSV	1789.69	-0.0202972
PSB913-2_map4	0002.CSV	1793.55	-0.0220598
PSB913-2_map4	0002.CSV	1797.41	-0.0237852
PSB913-2_map4	0002.CSV	1801.26	-0.0251061
PSB913-2_map4	0002.CSV	1805.12	-0.0262576
PSB913-2_map4	0002.CSV	1808.98	-0.0269029
PSB913-2_map4	0002.CSV	1812.84	-0.0271204
PSB913-2_map4	0002.CSV	1816.69	-0.0274002
PSB913-2_map4	0002.CSV	1820.55	-0.0276087
PSB913-2_map4	0002.CSV	1824.41	-0.027688
PSB913-2_map4	0002.CSV	1828.26	-0.0275747
PSB913-2_map4	0002.CSV	1832.12	-0.027512
PSB913-2_map4	0002.CSV	1835.98	-0.0276327
PSB913-2_map4	0002.CSV	1839.84	-0.0278339
PSB913-2_map4	0002.CSV	1843.69	-0.0276602
PSB913-2_map4	0002.CSV	1847.55	-0.0272907
PSB913-2_map4	0002.CSV	1851.41	-0.0273319
PSB913-2_map4	0002.CSV	1855.26	-0.0273336
PSB913-2_map4	0002.CSV	1859.12	-0.0271562
PSB913-2_map4	0002.CSV	1862.98	-0.027108
PSB913-2_map4	0002.CSV	1866.84	-0.0269297
PSB913-2_map4	0002.CSV	1870.69	-0.0263964
PSB913-2_map4	0002.CSV	1874.55	-0.0264206
PSB913-2_map4	0002.CSV	1878.41	-0.0265544
PSB913-2_map4	0002.CSV	1882.26	-0.0265282
PSB913-2_map4	0002.CSV	1886.12	-0.0265753
PSB913-2_map4	0002.CSV	1889.98	-0.0265841
PSB913-2_map4	0002.CSV	1893.83	-0.0267025
PSB913-2_map4	0002.CSV	1897.69	-0.0268454
PSB913-2_map4	0002.CSV	1901.55	-0.0269765
PSB913-2_map4	0002.CSV	1905.41	-0.0270691
PSB913-2_map4	0002.CSV	1909.26	-0.0271004
PSB913-2_map4	0002.CSV	1913.12	-0.0271641
PSB913-2_map4	0002.CSV	1916.98	-0.02728
PSB913-2_map4	0002.CSV	1920.83	-0.0270868
PSB913-2_map4	0002.CSV	1924.69	-0.0268629
PSB913-2_map4	0002.CSV	1928.55	-0.0267702
PSB913-2_map4	0002.CSV	1932.4	-0.0266455
PSB913-2_map4	0002.CSV	1936.26	-0.0263927
PSB913-2_map4	0002.CSV	1940.12	-0.0262566
PSB913-2_map4	0002.CSV	1943.98	-0.0259615
PSB913-2_map4	0002.CSV	1947.83	-0.0258424
PSB913-2_map4	0002.CSV	1951.69	-0.0259532
PSB913-2_map4	0002.CSV	1955.55	-0.0261115
PSB913-2_map4	0002.CSV	1959.4	-0.0262359
PSB913-2_map4	0002.CSV	1963.26	-0.0264965
PSB913-2_map4	0002.CSV	1967.12	-0.0265751
PSB913-2_map4	0002.CSV	1970.98	-0.0266606
PSB913-2_map4	0002.CSV	1974.83	-0.0268366
PSB913-2_map4	0002.CSV	1978.69	-0.0269862
PSB913-2_map4	0002.CSV	1982.55	-0.0270645
PSB913-2_map4	0002.CSV	1986.4	-0.0271737
PSB913-2_map4	0002.CSV	1990.26	-0.0271616
PSB913-2_map4	0002.CSV	1994.12	-0.0271342
PSB913-2_map4	0002.CSV	1997.98	-0.0271988
PSB913-2_map4	0002.CSV	2001.83	-0.0272899
PSB913-2_map4	0002.CSV	2005.69	-0.0273207
PSB913-2_map4	0002.CSV	2009.55	-0.0274002
PSB913-2_map4	0002.CSV	2013.4	-0.0274669
PSB913-2_map4	0002.CSV	2017.26	-0.0274599
PSB913-2_map4	0002.CSV	2021.12	-0.0273671
PSB913-2_map4	0002.CSV	2024.97	-0.0273776
PSB913-2_map4	0002.CSV	2028.83	-0.027315
PSB913-2_map4	0002.CSV	2032.69	-0.0272721
PSB913-2_map4	0002.CSV	2036.55	-0.0272605
PSB913-2_map4	0002.CSV	2040.4	-0.0272768
PSB913-2_map4	0002.CSV	2044.26	-0.0271742
PSB913-2_map4	0002.CSV	2048.12	-0.0271109
PSB913-2_map4	0002.CSV	2051.97	-0.027038
PSB913-2_map4	0002.CSV	2055.83	-0.027014
PSB913-2_map4	0002.CSV	2059.69	-0.0269303
PSB913-2_map4	0002.CSV	2063.55	-0.0268593
PSB913-2_map4	0002.CSV	2067.4	-0.0267083
PSB913-2_map4	0002.CSV	2071.26	-0.0266177
PSB913-2_map4	0002.CSV	2075.12	-0.0264953
PSB913-2_map4	0002.CSV	2078.97	-0.0264351
PSB913-2_map4	0002.CSV	2082.83	-0.0264019
PSB913-2_map4	0002.CSV	2086.69	-0.0263327
PSB913-2_map4	0002.CSV	2090.55	-0.0261517
PSB913-2_map4	0002.CSV	2094.4	-0.0260938
PSB913-2_map4	0002.CSV	2098.26	-0.0259856
PSB913-2_map4	0002.CSV	2102.12	-0.0258227
PSB913-2_map4	0002.CSV	2105.97	-0.0256792
PSB913-2_map4	0002.CSV	2109.83	-0.0256298
PSB913-2_map4	0002.CSV	2113.69	-0.0255138
PSB913-2_map4	0002.CSV	2117.55	-0.0253944
PSB913-2_map4	0002.CSV	2121.4	-0.0252571
PSB913-2_map4	0002.CSV	2125.26	-0.0252123
PSB913-2_map4	0002.CSV	2129.12	-0.02513
PSB913-2_map4	0002.CSV	2132.97	-0.0249771
PSB913-2_map4	0002.CSV	2136.83	-0.0247965
PSB913-2_map4	0002.CSV	2140.69	-0.024721
PSB913-2_map4	0002.CSV	2144.55	-0.0246299
PSB913-2_map4	0002.CSV	2148.4	-0.0245172
PSB913-2_map4	0002.CSV	2152.26	-0.0243953
PSB913-2_map4	0002.CSV	2156.12	-0.0243619
PSB913-2_map4	0002.CSV	2159.97	-0.0242662
PSB913-2_map4	0002.CSV	2163.83	-0.0242107
PSB913-2_map4	0002.CSV	2167.69	-0.0241812
PSB913-2_map4	0002.CSV	2171.55	-0.0240835
PSB913-2_map4	0002.CSV	2175.4	-0.0238775
PSB913-2_map4	0002.CSV	2179.26	-0.0237702
PSB913-2_map4	0002.CSV	2183.12	-0.023686
PSB913-2_map4	0002.CSV	2186.97	-0.023661
PSB913-2_map4	0002.CSV	2190.83	-0.0236264
PSB913-2_map4	0002.CSV	2194.69	-0.0235939
PSB913-2_map4	0002.CSV	2198.55	-0.0235528
PSB913-2_map4	0002.CSV	2202.4	-0.0235954
PSB913-2_map4	0002.CSV	2206.26	-0.0236171
PSB913-2_map4	0002.CSV	2210.12	-0.0236494
PSB913-2_map4	0002.CSV	2213.97	-0.0236615
PSB913-2_map4	0002.CSV	2217.83	-0.0236956
PSB913-2_map4	0002.CSV	2221.69	-0.0236898
PSB913-2_map4	0002.CSV	2225.54	-0.0236919
PSB913-2_map4	0002.CSV	2229.4	-0.0236716
PSB913-2_map4	0002.CSV	2233.26	-0.0237042
PSB913-2_map4	0002.CSV	2237.12	-0.0236994
PSB913-2_map4	0002.CSV	2240.97	-0.0236957
PSB913-2_map4	0002.CSV	2244.83	-0.023719
PSB913-2_map4	0002.CSV	2248.69	-0.0237657
PSB913-2_map4	0002.CSV	2252.54	-0.0237563
PSB913-2_map4	0002.CSV	2256.4	-0.0237975
PSB913-2_map4	0002.CSV	2260.26	-0.0237851
PSB913-2_map4	0002.CSV	2264.11	-0.0237607
PSB913-2_map4	0002.CSV	2267.97	-0.0237989
PSB913-2_map4	0002.CSV	2271.83	-0.0238639
PSB913-2_map4	0002.CSV	2275.69	-0.0238223
PSB913-2_map4	0002.CSV	2279.54	-0.0238449
PSB913-2_map4	0002.CSV	2283.4	-0.0239151
PSB913-2_map4	0002.CSV	2287.26	-0.0239844
PSB913-2_map4	0002.CSV	2291.11	-0.0239277
PSB913-2_map4	0002.CSV	2294.97	-0.0238815
PSB913-2_map4	0002.CSV	2298.83	-0.0238764
PSB913-2_map4	0002.CSV	2302.69	-0.0241021
PSB913-2_map4	0002.CSV	2306.54	-0.0243906
PSB913-2_map4	0002.CSV	2310.4	-0.0245771
PSB913-2_map4	0002.CSV	2314.26	-0.0247227
PSB913-2_map4	0002.CSV	2318.11	-0.0253364
PSB913-2_map4	0002.CSV	2321.97	-0.0263731
PSB913-2_map4	0002.CSV	2325.83	-0.0279248
PSB913-2_map4	0002.CSV	2329.69	-0.0293258
PSB913-2_map4	0002.CSV	2333.54	-0.0301308
PSB913-2_map4	0002.CSV	2337.4	-0.0305973
PSB913-2_map4	0002.CSV	2341.26	-0.0303075
PSB913-2_map4	0002.CSV	2345.11	-0.0268675
PSB913-2_map4	0002.CSV	2348.97	-0.0262016
PSB913-2_map4	0002.CSV	2352.83	-0.0292752
PSB913-2_map4	0002.CSV	2356.69	-0.0386444
PSB913-2_map4	0002.CSV	2360.54	-0.0455882
PSB913-2_map4	0002.CSV	2364.4	-0.0397826
PSB913-2_map4	0002.CSV	2368.26	-0.0311357
PSB913-2_map4	0002.CSV	2372.11	-0.025975
PSB913-2_map4	0002.CSV	2375.97	-0.0234896
PSB913-2_map4	0002.CSV	2379.83	-0.0226863
PSB913-2_map4	0002.CSV	2383.69	-0.022498
PSB913-2_map4	0002.CSV	2387.54	-0.0225761
PSB913-2_map4	0002.CSV	2391.4	-0.0226217
PSB913-2_map4	0002.CSV	2395.26	-0.022573
PSB913-2_map4	0002.CSV	2399.11	-0.0224946
PSB913-2_map4	0002.CSV	2402.97	-0.0224839
PSB913-2_map4	0002.CSV	2406.83	-0.022462
PSB913-2_map4	0002.CSV	2410.68	-0.0223797
PSB913-2_map4	0002.CSV	2414.54	-0.0222651
PSB913-2_map4	0002.CSV	2418.4	-0.0221976
PSB913-2_map4	0002.CSV	2422.26	-0.0221496
PSB913-2_map4	0002.CSV	2426.11	-0.0221429
PSB913-2_map4	0002.CSV	2429.97	-0.0220206
PSB913-2_map4	0002.CSV	2433.83	-0.0218822
PSB913-2_map4	0002.CSV	2437.68	-0.0217702
PSB913-2_map4	0002.CSV	2441.54	-0.0217303
PSB913-2_map4	0002.CSV	2445.4	-0.0216842
PSB913-2_map4	0002.CSV	2449.26	-0.0215753
PSB913-2_map4	0002.CSV	2453.11	-0.0214618
PSB913-2_map4	0002.CSV	2456.97	-0.0214038
PSB913-2_map4	0002.CSV	2460.83	-0.0212754
PSB913-2_map4	0002.CSV	2464.68	-0.0211245
PSB913-2_map4	0002.CSV	2468.54	-0.0209791
PSB913-2_map4	0002.CSV	2472.4	-0.0208077
PSB913-2_map4	0002.CSV	2476.26	-0.0205934
PSB913-2_map4	0002.CSV	2480.11	-0.0203886
PSB913-2_map4	0002.CSV	2483.97	-0.0200907
PSB913-2_map4	0002.CSV	2487.83	-0.0197901
PSB913-2_map4	0002.CSV	2491.68	-0.0195413
PSB913-2_map4	0002.CSV	2495.54	-0.019391
PSB913-2_map4	0002.CSV	2499.4	-0.0192426
PSB913-2_map4	0002.CSV	2503.26	-0.0192124
PSB913-2_map4	0002.CSV	2507.11	-0.0192924
PSB913-2_map4	0002.CSV	2510.97	-0.0193061
PSB913-2_map4	0002.CSV	2514.83	-0.019052
PSB913-2_map4	0002.CSV	2518.68	-0.0187337
PSB913-2_map4	0002.CSV	2522.54	-0.0185618
PSB913-2_map4	0002.CSV	2526.4	-0.0186421
PSB913-2_map4	0002.CSV	2530.26	-0.0188691
PSB913-2_map4	0002.CSV	2534.11	-0.0192032
PSB913-2_map4	0002.CSV	2537.97	-0.0194846
PSB913-2_map4	0002.CSV	2541.83	-0.0196585
PSB913-2_map4	0002.CSV	2545.68	-0.0196918
PSB913-2_map4	0002.CSV	2549.54	-0.019792
PSB913-2_map4	0002.CSV	2553.4	-0.019984
PSB913-2_map4	0002.CSV	2557.26	-0.0202043
PSB913-2_map4	0002.CSV	2561.11	-0.0203707
PSB913-2_map4	0002.CSV	2564.97	-0.0205183
PSB913-2_map4	0002.CSV	2568.83	-0.0206213
PSB913-2_map4	0002.CSV	2572.68	-0.0206557
PSB913-2_map4	0002.CSV	2576.54	-0.020653
PSB913-2_map4	0002.CSV	2580.4	-0.0207868
PSB913-2_map4	0002.CSV	2584.25	-0.0208634
PSB913-2_map4	0002.CSV	2588.11	-0.0208502
PSB913-2_map4	0002.CSV	2591.97	-0.0208497
PSB913-2_map4	0002.CSV	2595.83	-0.0208488
PSB913-2_map4	0002.CSV	2599.68	-0.0207376
PSB913-2_map4	0002.CSV	2603.54	-0.0206563
PSB913-2_map4	0002.CSV	2607.4	-0.0206067
PSB913-2_map4	0002.CSV	2611.25	-0.020589
PSB913-2_map4	0002.CSV	2615.11	-0.0205816
PSB913-2_map4	0002.CSV	2618.97	-0.0205928
PSB913-2_map4	0002.CSV	2622.82	-0.020444
PSB913-2_map4	0002.CSV	2626.68	-0.0203196
PSB913-2_map4	0002.CSV	2630.54	-0.0203405
PSB913-2_map4	0002.CSV	2634.4	-0.0202885
PSB913-2_map4	0002.CSV	2638.25	-0.0201914
PSB913-2_map4	0002.CSV	2642.11	-0.0202547
PSB913-2_map4	0002.CSV	2645.97	-0.0204157
PSB913-2_map4	0002.CSV	2649.82	-0.0204657
PSB913-2_map4	0002.CSV	2653.68	-0.0203922
PSB913-2_map4	0002.CSV	2657.54	-0.0203245
PSB913-2_map4	0002.CSV	2661.4	-0.0202751
PSB913-2_map4	0002.CSV	2665.25	-0.0203305
PSB913-2_map4	0002.CSV	2669.11	-0.0202257
PSB913-2_map4	0002.CSV	2672.97	-0.0199338
PSB913-2_map4	0002.CSV	2676.82	-0.019616
PSB913-2_map4	0002.CSV	2680.68	-0.019559
PSB913-2_map4	0002.CSV	2684.54	-0.0197337
PSB913-2_map4	0002.CSV	2688.4	-0.0197991
PSB913-2_map4	0002.CSV	2692.25	-0.0197437
PSB913-2_map4	0002.CSV	2696.11	-0.0196371
PSB913-2_map4	0002.CSV	2699.97	-0.0195615
PSB913-2_map4	0002.CSV	2703.82	-0.0194323
PSB913-2_map4	0002.CSV	2707.68	-0.0191808
PSB913-2_map4	0002.CSV	2711.54	-0.0190677
PSB913-2_map4	0002.CSV	2715.4	-0.0190301
PSB913-2_map4	0002.CSV	2719.25	-0.0187801
PSB913-2_map4	0002.CSV	2723.11	-0.0183212
PSB913-2_map4	0002.CSV	2726.97	-0.0182327
PSB913-2_map4	0002.CSV	2730.82	-0.0184569
PSB913-2_map4	0002.CSV	2734.68	-0.0183988
PSB913-2_map4	0002.CSV	2738.54	-0.0182725
PSB913-2_map4	0002.CSV	2742.4	-0.0181798
PSB913-2_map4	0002.CSV	2746.25	-0.0178051
PSB913-2_map4	0002.CSV	2750.11	-0.0177012
PSB913-2_map4	0002.CSV	2753.97	-0.0178751
PSB913-2_map4	0002.CSV	2757.82	-0.0178774
PSB913-2_map4	0002.CSV	2761.68	-0.0178556
PSB913-2_map4	0002.CSV	2765.54	-0.0177761
PSB913-2_map4	0002.CSV	2769.39	-0.017542
PSB913-2_map4	0002.CSV	2773.25	-0.0171158
PSB913-2_map4	0002.CSV	2777.11	-0.0170695
PSB913-2_map4	0002.CSV	2780.97	-0.0171937
PSB913-2_map4	0002.CSV	2784.82	-0.0169467
PSB913-2_map4	0002.CSV	2788.68	-0.0164724
PSB913-2_map4	0002.CSV	2792.54	-0.0162364
PSB913-2_map4	0002.CSV	2796.39	-0.0161036
PSB913-2_map4	0002.CSV	2800.25	-0.0161246
PSB913-2_map4	0002.CSV	2804.11	-0.016246
PSB913-2_map4	0002.CSV	2807.97	-0.0159618
PSB913-2_map4	0002.CSV	2811.82	-0.0157595
PSB913-2_map4	0002.CSV	2815.68	-0.0157353
PSB913-2_map4	0002.CSV	2819.54	-0.0154131
PSB913-2_map4	0002.CSV	2823.39	-0.0149485
PSB913-2_map4	0002.CSV	2827.25	-0.0144477
PSB913-2_map4	0002.CSV	2831.11	-0.0134139
PSB913-2_map4	0002.CSV	2834.97	-0.0118259
PSB913-2_map4	0002.CSV	2838.82	-0.0100494
PSB913-2_map4	0002.CSV	2842.68	-0.00803503
PSB913-2_map4	0002.CSV	2846.54	-0.00548027
PSB913-2_map4	0002.CSV	2850.39	-0.00360131
PSB913-2_map4	0002.CSV	2854.25	-0.00302742
PSB913-2_map4	0002.CSV	2858.11	-0.00329234
PSB913-2_map4	0002.CSV	2861.97	-0.00426235
PSB913-2_map4	0002.CSV	2865.82	-0.005095
PSB913-2_map4	0002.CSV	2869.68	-0.0051233
PSB913-2_map4	0002.CSV	2873.54	-0.00495505
PSB913-2_map4	0002.CSV	2877.39	-0.00533098
PSB913-2_map4	0002.CSV	2881.25	-0.00545164
PSB913-2_map4	0002.CSV	2885.11	-0.00492262
PSB913-2_map4	0002.CSV	2888.97	-0.00393531
PSB913-2_map4	0002.CSV	2892.82	-0.00248532
PSB913-2_map4	0002.CSV	2896.68	-0.000978406
PSB913-2_map4	0002.CSV	2900.54	0.000522606
PSB913-2_map4	0002.CSV	2904.39	0.00259031
PSB913-2_map4	0002.CSV	2908.25	0.0051801
PSB913-2_map4	0002.CSV	2912.11	0.00809872
PSB913-2_map4	0002.CSV	2915.97	0.0105022
PSB913-2_map4	0002.CSV	2919.82	0.011651
PSB913-2_map4	0002.CSV	2923.68	0.0119633
PSB913-2_map4	0002.CSV	2927.54	0.0121482
PSB913-2_map4	0002.CSV	2931.39	0.011211
PSB913-2_map4	0002.CSV	2935.25	0.00908888
PSB913-2_map4	0002.CSV	2939.11	0.00712088
PSB913-2_map4	0002.CSV	2942.96	0.00546917
PSB913-2_map4	0002.CSV	2946.82	0.00336391
PSB913-2_map4	0002.CSV	2950.68	0.00108391
PSB913-2_map4	0002.CSV	2954.54	-0.000976653
PSB913-2_map4	0002.CSV	2958.39	-0.00266967
PSB913-2_map4	0002.CSV	2962.25	-0.00388001
PSB913-2_map4	0002.CSV	2966.11	-0.00511727
PSB913-2_map4	0002.CSV	2969.96	-0.00587491
PSB913-2_map4	0002.CSV	2973.82	-0.00609027
PSB913-2_map4	0002.CSV	2977.68	-0.00638749
PSB913-2_map4	0002.CSV	2981.53	-0.00711384
PSB913-2_map4	0002.CSV	2985.39	-0.00808223
PSB913-2_map4	0002.CSV	2989.25	-0.0084564
PSB913-2_map4	0002.CSV	2993.11	-0.00848412
PSB913-2_map4	0002.CSV	2996.96	-0.00871278
PSB913-2_map4	0002.CSV	3000.82	-0.00898601
PSB913-2_map4	0002.CSV	3004.68	-0.0091809
PSB913-2_map4	0002.CSV	3008.53	-0.00915452
PSB913-2_map4	0002.CSV	3012.39	-0.0088674
PSB913-2_map4	0002.CSV	3016.25	-0.00843476
PSB913-2_map4	0002.CSV	3020.11	-0.00731762
PSB913-2_map4	0002.CSV	3023.96	-0.00558601
PSB913-2_map4	0002.CSV	3027.82	-0.00455279
PSB913-2_map4	0002.CSV	3031.68	-0.00488331
PSB913-2_map4	0002.CSV	3035.53	-0.00631559
PSB913-2_map4	0002.CSV	3039.39	-0.00780117
PSB913-2_map4	0002.CSV	3043.25	-0.00868293
PSB913-2_map4	0002.CSV	3047.11	-0.00916331
PSB913-2_map4	0002.CSV	3050.96	-0.00908882
PSB913-2_map4	0002.CSV	3054.82	-0.00852896
PSB913-2_map4	0002.CSV	3058.68	-0.00791389
PSB913-2_map4	0002.CSV	3062.53	-0.00755204
PSB913-2_map4	0002.CSV	3066.39	-0.00757805
PSB913-2_map4	0002.CSV	3070.25	-0.00819458
PSB913-2_map4	0002.CSV	3074.11	-0.00864006
PSB913-2_map4	0002.CSV	3077.96	-0.00851138
PSB913-2_map4	0002.CSV	3081.82	-0.00814343
PSB913-2_map4	0002.CSV	3085.68	-0.00809062
PSB913-2_map4	0002.CSV	3089.53	-0.00867813
PSB913-2_map4	0002.CSV	3093.39	-0.00967965
PSB913-2_map4	0002.CSV	3097.25	-0.010299
PSB913-2_map4	0002.CSV	3101.11	-0.0105881
PSB913-2_map4	0002.CSV	3104.96	-0.0106996
PSB913-2_map4	0002.CSV	3108.82	-0.0106126
PSB913-2_map4	0002.CSV	3112.68	-0.010617
PSB913-2_map4	0002.CSV	3116.53	-0.0107304
PSB913-2_map4	0002.CSV	3120.39	-0.010989
PSB913-2_map4	0002.CSV	3124.25	-0.0113523
PSB913-2_map4	0002.CSV	3128.11	-0.0115765
PSB913-2_map4	0002.CSV	3131.96	-0.0116393
PSB913-2_map4	0002.CSV	3135.82	-0.0113715
PSB913-2_map4	0002.CSV	3139.68	-0.0111322
PSB913-2_map4	0002.CSV	3143.53	-0.0113408
PSB913-2_map4	0002.CSV	3147.39	-0.0112802
PSB913-2_map4	0002.CSV	3151.25	-0.0109452
PSB913-2_map4	0002.CSV	3155.1	-0.0110215
PSB913-2_map4	0002.CSV	3158.96	-0.0112938
PSB913-2_map4	0002.CSV	3162.82	-0.0112682
PSB913-2_map4	0002.CSV	3166.68	-0.0111312
PSB913-2_map4	0002.CSV	3170.53	-0.0110882
PSB913-2_map4	0002.CSV	3174.39	-0.0110295
PSB913-2_map4	0002.CSV	3178.25	-0.0108445
PSB913-2_map4	0002.CSV	3182.1	-0.0106435
PSB913-2_map4	0002.CSV	3185.96	-0.0104948
PSB913-2_map4	0002.CSV	3189.82	-0.0103735
PSB913-2_map4	0002.CSV	3193.68	-0.0104548
PSB913-2_map4	0002.CSV	3197.53	-0.0104653
PSB913-2_map4	0002.CSV	3201.39	-0.0101826
PSB913-2_map4	0002.CSV	3205.25	-0.00997374
PSB913-2_map4	0002.CSV	3209.1	-0.0100074
PSB913-2_map4	0002.CSV	3212.96	-0.00989391
PSB913-2_map4	0002.CSV	3216.82	-0.00971827
PSB913-2_map4	0002.CSV	3220.68	-0.00960119
PSB913-2_map4	0002.CSV	3224.53	-0.00946729
PSB913-2_map4	0002.CSV	3228.39	-0.00918174
PSB913-2_map4	0002.CSV	3232.25	-0.00883867
PSB913-2_map4	0002.CSV	3236.1	-0.008815
PSB913-2_map4	0002.CSV	3239.96	-0.00892265
PSB913-2_map4	0002.CSV	3243.82	-0.00870437
PSB913-2_map4	0002.CSV	3247.68	-0.00853835
PSB913-2_map4	0002.CSV	3251.53	-0.00859406
PSB913-2_map4	0002.CSV	3255.39	-0.00853127
PSB913-2_map4	0002.CSV	3259.25	-0.00850047
PSB913-2_map4	0002.CSV	3263.1	-0.00838332
PSB913-2_map4	0002.CSV	3266.96	-0.00795442
PSB913-2_map4	0002.CSV	3270.82	-0.00749648
PSB913-2_map4	0002.CSV	3274.68	-0.00750289
PSB913-2_map4	0002.CSV	3278.53	-0.00782349
PSB913-2_map4	0002.CSV	3282.39	-0.00791659
PSB913-2_map4	0002.CSV	3286.25	-0.00769818
PSB913-2_map4	0002.CSV	3290.1	-0.00722645
PSB913-2_map4	0002.CSV	3293.96	-0.00683014
PSB913-2_map4	0002.CSV	3297.82	-0.00690306
PSB913-2_map4	0002.CSV	3301.67	-0.00689556
PSB913-2_map4	0002.CSV	3305.53	-0.00670503
PSB913-2_map4	0002.CSV	3309.39	-0.0067281
PSB913-2_map4	0002.CSV	3313.25	-0.00691014
PSB913-2_map4	0002.CSV	3317.1	-0.00704121
PSB913-2_map4	0002.CSV	3320.96	-0.00685042
PSB913-2_map4	0002.CSV	3324.82	-0.00656984
PSB913-2_map4	0002.CSV	3328.67	-0.00670617
PSB913-2_map4	0002.CSV	3332.53	-0.00676757
PSB913-2_map4	0002.CSV	3336.39	-0.00632069
PSB913-2_map4	0002.CSV	3340.24	-0.0059878
PSB913-2_map4	0002.CSV	3344.1	-0.00594832
PSB913-2_map4	0002.CSV	3347.96	-0.00596956
PSB913-2_map4	0002.CSV	3351.82	-0.00602205
PSB913-2_map4	0002.CSV	3355.67	-0.00607707
PSB913-2_map4	0002.CSV	3359.53	-0.00581211
PSB913-2_map4	0002.CSV	3363.39	-0.0056229
PSB913-2_map4	0002.CSV	3367.24	-0.0053591
PSB913-2_map4	0002.CSV	3371.1	-0.00542471
PSB913-2_map4	0002.CSV	3374.96	-0.00569168
PSB913-2_map4	0002.CSV	3378.82	-0.00589439
PSB913-2_map4	0002.CSV	3382.67	-0.00612226
PSB913-2_map4	0002.CSV	3386.53	-0.0060541
PSB913-2_map4	0002.CSV	3390.39	-0.005651
PSB913-2_map4	0002.CSV	3394.24	-0.00536083
PSB913-2_map4	0002.CSV	3398.1	-0.00521553
PSB913-2_map4	0002.CSV	3401.96	-0.00539709
PSB913-2_map4	0002.CSV	3405.82	-0.00572585
PSB913-2_map4	0002.CSV	3409.67	-0.00567827
PSB913-2_map4	0002.CSV	3413.53	-0.00567641
PSB913-2_map4	0002.CSV	3417.39	-0.00603077
PSB913-2_map4	0002.CSV	3421.24	-0.00623143
PSB913-2_map4	0002.CSV	3425.1	-0.00621079
PSB913-2_map4	0002.CSV	3428.96	-0.00585892
PSB913-2_map4	0002.CSV	3432.82	-0.00553285
PSB913-2_map4	0002.CSV	3436.67	-0.0059377
PSB913-2_map4	0002.CSV	3440.53	-0.00700825
PSB913-2_map4	0002.CSV	3444.39	-0.00744691
PSB913-2_map4	0002.CSV	3448.24	-0.00735381
PSB913-2_map4	0002.CSV	3452.1	-0.00757844
PSB913-2_map4	0002.CSV	3455.96	-0.00757509
PSB913-2_map4	0002.CSV	3459.82	-0.0071305
PSB913-2_map4	0002.CSV	3463.67	-0.00683115
PSB913-2_map4	0002.CSV	3467.53	-0.00675132
PSB913-2_map4	0002.CSV	3471.39	-0.00727011
PSB913-2_map4	0002.CSV	3475.24	-0.00768913
PSB913-2_map4	0002.CSV	3479.1	-0.00791063
PSB913-2_map4	0002.CSV	3482.96	-0.00817595
PSB913-2_map4	0002.CSV	3486.82	-0.00813143
PSB913-2_map4	0002.CSV	3490.67	-0.00826503
PSB913-2_map4	0002.CSV	3494.53	-0.00842862
PSB913-2_map4	0002.CSV	3498.39	-0.0084761
PSB913-2_map4	0002.CSV	3502.24	-0.0086742
PSB913-2_map4	0002.CSV	3506.1	-0.00908645
PSB913-2_map4	0002.CSV	3509.96	-0.00931995
PSB913-2_map4	0002.CSV	3513.81	-0.00928693
PSB913-2_map4	0002.CSV	3517.67	-0.00962884
PSB913-2_map4	0002.CSV	3521.53	-0.00972145
PSB913-2_map4	0002.CSV	3525.39	-0.00984105
PSB913-2_map4	0002.CSV	3529.24	-0.010174
PSB913-2_map4	0002.CSV	3533.1	-0.0103985
PSB913-2_map4	0002.CSV	3536.96	-0.0104019
PSB913-2_map4	0002.CSV	3540.81	-0.0105717
PSB913-2_map4	0002.CSV	3544.67	-0.010611
PSB913-2_map4	0002.CSV	3548.53	-0.0107406
PSB913-2_map4	0002.CSV	3552.39	-0.0111424
PSB913-2_map4	0002.CSV	3556.24	-0.0116191
PSB913-2_map4	0002.CSV	3560.1	-0.0121092
PSB913-2_map4	0002.CSV	3563.96	-0.0126656
PSB913-2_map4	0002.CSV	3567.81	-0.0123823
PSB913-2_map4	0002.CSV	3571.67	-0.0126465
PSB913-2_map4	0002.CSV	3575.53	-0.013374
PSB913-2_map4	0002.CSV	3579.39	-0.0135074
PSB913-2_map4	0002.CSV	3583.24	-0.0137427
PSB913-2_map4	0002.CSV	3587.1	-0.0138292
PSB913-2_map4	0002.CSV	3590.96	-0.014039
PSB913-2_map4	0002.CSV	3594.81	-0.0144965
PSB913-2_map4	0002.CSV	3598.67	-0.0143694
PSB913-2_map4	0002.CSV	3602.53	-0.0144916
PSB913-2_map4	0002.CSV	3606.39	-0.0152641
PSB913-2_map4	0002.CSV	3610.24	-0.0158342
PSB913-2_map4	0002.CSV	3614.1	-0.0158418
PSB913-2_map4	0002.CSV	3617.96	-0.0154265
PSB913-2_map4	0002.CSV	3621.81	-0.0151808
PSB913-2_map4	0002.CSV	3625.67	-0.016029
PSB913-2_map4	0002.CSV	3629.53	-0.0161796
PSB913-2_map4	0002.CSV	3633.39	-0.0158046
PSB913-2_map4	0002.CSV	3637.24	-0.0161539
PSB913-2_map4	0002.CSV	3641.1	-0.0166826
PSB913-2_map4	0002.CSV	3644.96	-0.0175126
PSB913-2_map4	0002.CSV	3648.81	-0.0169833
PSB913-2_map4	0002.CSV	3652.67	-0.0158264
PSB913-2_map4	0002.CSV	3656.53	-0.0159337
PSB913-2_map4	0002.CSV	3660.38	-0.0162086
PSB913-2_map4	0002.CSV	3664.24	-0.0173188
PSB913-2_map4	0002.CSV	3668.1	-0.0183332
PSB913-2_map4	0002.CSV	3671.96	-0.0182416
PSB913-2_map4	0002.CSV	3675.81	-0.0175342
PSB913-2_map4	0002.CSV	3679.67	-0.0171487
PSB913-2_map4	0002.CSV	3683.53	-0.0176819
PSB913-2_map4	0002.CSV	3687.38	-0.0179379
PSB913-2_map4	0002.CSV	3691.24	-0.0168525
PSB913-2_map4	0002.CSV	3695.1	-0.0171516
PSB913-2_map4	0002.CSV	3698.95	-0.0179122
PSB913-2_map4	0002.CSV	3702.81	-0.0180872
PSB913-2_map4	0002.CSV	3706.67	-0.018481
PSB913-2_map4	0002.CSV	3710.53	-0.018384
PSB913-2_map4	0002.CSV	3714.38	-0.0174738
PSB913-2_map4	0002.CSV	3718.24	-0.01808
PSB913-2_map4	0002.CSV	3722.1	-0.0183761
PSB913-2_map4	0002.CSV	3725.95	-0.0181291
PSB913-2_map4	0002.CSV	3729.81	-0.0185057
PSB913-2_map4	0002.CSV	3733.67	-0.0184945
PSB913-2_map4	0002.CSV	3737.53	-0.0170437
PSB913-2_map4	0002.CSV	3741.38	-0.0178351
PSB913-2_map4	0002.CSV	3745.24	-0.0189422
PSB913-2_map4	0002.CSV	3749.1	-0.0189658
PSB913-2_map4	0002.CSV	3752.95	-0.0177076
PSB913-2_map4	0002.CSV	3756.81	-0.0175604
PSB913-2_map4	0002.CSV	3760.67	-0.0175509
PSB913-2_map4	0002.CSV	3764.53	-0.017961
PSB913-2_map4	0002.CSV	3768.38	-0.0177769
PSB913-2_map4	0002.CSV	3772.24	-0.017378
PSB913-2_map4	0002.CSV	3776.1	-0.0177519
PSB913-2_map4	0002.CSV	3779.95	-0.0176531
PSB913-2_map4	0002.CSV	3783.81	-0.0174814
PSB913-2_map4	0002.CSV	3787.67	-0.0176205
PSB913-2_map4	0002.CSV	3791.53	-0.0179955
PSB913-2_map4	0002.CSV	3795.38	-0.0185437
PSB913-2_map4	0002.CSV	3799.24	-0.018372
PSB913-2_map4	0002.CSV	3803.1	-0.0175738
PSB913-2_map4	0002.CSV	3806.95	-0.0172731
PSB913-2_map4	0002.CSV	3810.81	-0.0178121
PSB913-2_map4	0002.CSV	3814.67	-0.0185593
PSB913-2_map4	0002.CSV	3818.53	-0.0182828
PSB913-2_map4	0002.CSV	3822.38	-0.0175317
PSB913-2_map4	0002.CSV	3826.24	-0.0176099
PSB913-2_map4	0002.CSV	3830.1	-0.0179989
PSB913-2_map4	0002.CSV	3833.95	-0.0185116
PSB913-2_map4	0002.CSV	3837.81	-0.01844
PSB913-2_map4	0002.CSV	3841.67	-0.0172137
PSB913-2_map4	0002.CSV	3845.53	-0.0173699
PSB913-2_map4	0002.CSV	3849.38	-0.0186788
PSB913-2_map4	0002.CSV	3853.24	-0.0183682
PSB913-2_map4	0002.CSV	3857.1	-0.0172444
PSB913-2_map4	0002.CSV	3860.95	-0.0180151
PSB913-2_map4	0002.CSV	3864.81	-0.0181842
PSB913-2_map4	0002.CSV	3868.67	-0.0181133
PSB913-2_map4	0002.CSV	3872.52	-0.0175804
PSB913-2_map4	0002.CSV	3876.38	-0.0177064
PSB913-2_map4	0002.CSV	3880.24	-0.0179441
PSB913-2_map4	0002.CSV	3884.1	-0.0174525
PSB913-2_map4	0002.CSV	3887.95	-0.0176285
PSB913-2_map4	0002.CSV	3891.81	-0.0178093
PSB913-2_map4	0002.CSV	3895.67	-0.0180566
PSB913-2_map4	0002.CSV	3899.52	-0.0184819
PSB913-2_map4	0002.CSV	3903.38	-0.0174312
PSB913-2_map4	0002.CSV	3907.24	-0.0170861
PSB913-2_map4	0002.CSV	3911.1	-0.017791
PSB913-2_map4	0002.CSV	3914.95	-0.0181295
PSB913-2_map4	0002.CSV	3918.81	-0.0177495
PSB913-2_map4	0002.CSV	3922.67	-0.017608
PSB913-2_map4	0002.CSV	3926.52	-0.0176817
PSB913-2_map4	0002.CSV	3930.38	-0.0175714
PSB913-2_map4	0002.CSV	3934.24	-0.0173095
PSB913-2_map4	0002.CSV	3938.09	-0.0176326
PSB913-2_map4	0002.CSV	3941.95	-0.0179012
PSB913-2_map4	0002.CSV	3945.81	-0.0179463
PSB913-2_map4	0002.CSV	3949.67	-0.0177151
PSB913-2_map4	0002.CSV	3953.52	-0.017482
PSB913-2_map4	0002.CSV	3957.38	-0.017545
PSB913-2_map4	0002.CSV	3961.24	-0.0175852
PSB913-2_map4	0002.CSV	3965.09	-0.017492
PSB913-2_map4	0002.CSV	3968.95	-0.0175212
PSB913-2_map4	0002.CSV	3972.81	-0.0175465
PSB913-2_map4	0002.CSV	3976.67	-0.017441
PSB913-2_map4	0002.CSV	3980.52	-0.0174228
PSB913-2_map4	0002.CSV	3984.38	-0.0173531
PSB913-2_map4	0002.CSV	3988.24	-0.0173461
PSB913-2_map4	0002.CSV	3992.09	-0.0172737
PSB913-2_map4	0002.CSV	3995.95	-0.0172932
PSB913-2_map4	0002.CSV	3999.81	-0.0174196
PSB913-2_map4	0003.CSV	674.992	0.0297271
PSB913-2_map4	0003.CSV	678.849	0.0332768
PSB913-2_map4	0003.CSV	682.706	0.0354948
PSB913-2_map4	0003.CSV	686.563	0.0406269
PSB913-2_map4	0003.CSV	690.42	0.0486815
PSB913-2_map4	0003.CSV	694.277	0.0699318
PSB913-2_map4	0003.CSV	698.134	0.0902889
PSB913-2_map4	0003.CSV	701.991	0.0805626
PSB913-2_map4	0003.CSV	705.849	0.0641711
PSB913-2_map4	0003.CSV	709.706	0.0793512
PSB913-2_map4	0003.CSV	713.563	0.0785239
PSB913-2_map4	0003.CSV	717.42	0.0404961
PSB913-2_map4	0003.CSV	721.277	0.0159762
PSB913-2_map4	0003.CSV	725.134	0.0138432
PSB913-2_map4	0003.CSV	728.991	0.0156356
PSB913-2_map4	0003.CSV	732.848	0.0195789
PSB913-2_map4	0003.CSV	736.705	0.0235698
PSB913-2_map4	0003.CSV	740.562	0.0275062
PSB913-2_map4	0003.CSV	744.42	0.0287746
PSB913-2_map4	0003.CSV	748.277	0.0293889
PSB913-2_map4	0003.CSV	752.134	0.0286804
PSB913-2_map4	0003.CSV	755.991	0.0290718
PSB913-2_map4	0003.CSV	759.848	0.028585
PSB913-2_map4	0003.CSV	763.705	0.0284983
PSB913-2_map4	0003.CSV	767.562	0.0275828
PSB913-2_map4	0003.CSV	771.419	0.0273447
PSB913-2_map4	0003.CSV	775.276	0.0265789
PSB913-2_map4	0003.CSV	779.133	0.0270988
PSB913-2_map4	0003.CSV	782.99	0.0273743
PSB913-2_map4	0003.CSV	786.848	0.0285808
PSB913-2_map4	0003.CSV	790.705	0.0291708
PSB913-2_map4	0003.CSV	794.562	0.0303712
PSB913-2_map4	0003.CSV	798.419	0.0311865
PSB913-2_map4	0003.CSV	802.276	0.0331204
PSB913-2_map4	0003.CSV	806.133	0.0347918
PSB913-2_map4	0003.CSV	809.99	0.0379623
PSB913-2_map4	0003.CSV	813.847	0.0409623
PSB913-2_map4	0003.CSV	817.704	0.0450522
PSB913-2_map4	0003.CSV	821.562	0.0486428
PSB913-2_map4	0003.CSV	825.419	0.0533227
PSB913-2_map4	0003.CSV	829.276	0.0582524
PSB913-2_map4	0003.CSV	833.133	0.0657909
PSB913-2_map4	0003.CSV	836.99	0.0768804
PSB913-2_map4	0003.CSV	840.847	0.0946608
PSB913-2_map4	0003.CSV	844.704	0.112296
PSB913-2_map4	0003.CSV	848.561	0.140221
PSB913-2_map4	0003.CSV	852.418	0.178849
PSB913-2_map4	0003.CSV	856.275	0.191889
PSB913-2_map4	0003.CSV	860.132	0.161787
PSB913-2_map4	0003.CSV	863.99	0.114653
PSB913-2_map4	0003.CSV	867.847	0.0716416
PSB913-2_map4	0003.CSV	871.704	0.0422535
PSB913-2_map4	0003.CSV	875.561	0.0251198
PSB913-2_map4	0003.CSV	879.418	0.0175197
PSB913-2_map4	0003.CSV	883.275	0.0141712
PSB913-2_map4	0003.CSV	887.132	0.0130481
PSB913-2_map4	0003.CSV	890.989	0.0126044
PSB913-2_map4	0003.CSV	894.846	0.013315
PSB913-2_map4	0003.CSV	898.703	0.0140187
PSB913-2_map4	0003.CSV	902.561	0.0151347
PSB913-2_map4	0003.CSV	906.418	0.0158718
PSB913-2_map4	0003.CSV	910.275	0.015826
PSB913-2_map4	0003.CSV	914.132	0.0146488
PSB913-2_map4	0003.CSV	917.989	0.0146636
PSB913-2_map4	0003.CSV	921.846	0.0148441
PSB913-2_map4	0003.CSV	925.703	0.0153748
PSB913-2_map4	0003.CSV	929.56	0.0155291
PSB913-2_map4	0003.CSV	933.417	0.0162001
PSB913-2_map4	0003.CSV	937.274	0.0164847
PSB913-2_map4	0003.CSV	941.131	0.0168286
PSB913-2_map4	0003.CSV	944.989	0.0166335
PSB913-2_map4	0003.CSV	948.846	0.0168457
PSB913-2_map4	0003.CSV	952.703	0.0168506
PSB913-2_map4	0003.CSV	956.56	0.017259
PSB913-2_map4	0003.CSV	960.417	0.0172593
PSB913-2_map4	0003.CSV	964.274	0.0174747
PSB913-2_map4	0003.CSV	968.131	0.0174822
PSB913-2_map4	0003.CSV	971.988	0.0181035
PSB913-2_map4	0003.CSV	975.845	0.0186037
PSB913-2_map4	0003.CSV	979.702	0.0195538
PSB913-2_map4	0003.CSV	983.559	0.0203113
PSB913-2_map4	0003.CSV	987.417	0.021439
PSB913-2_map4	0003.CSV	991.274	0.0221579
PSB913-2_map4	0003.CSV	995.131	0.0229171
PSB913-2_map4	0003.CSV	998.988	0.0232383
PSB913-2_map4	0003.CSV	1002.85	0.0238692
PSB913-2_map4	0003.CSV	1006.7	0.0241761
PSB913-2_map4	0003.CSV	1010.56	0.0251219
PSB913-2_map4	0003.CSV	1014.42	0.0261465
PSB913-2_map4	0003.CSV	1018.27	0.0278366
PSB913-2_map4	0003.CSV	1022.13	0.0292837
PSB913-2_map4	0003.CSV	1025.99	0.0310324
PSB913-2_map4	0003.CSV	1029.85	0.032207
PSB913-2_map4	0003.CSV	1033.7	0.0335979
PSB913-2_map4	0003.CSV	1037.56	0.0345814
PSB913-2_map4	0003.CSV	1041.42	0.0357298
PSB913-2_map4	0003.CSV	1045.27	0.0363512
PSB913-2_map4	0003.CSV	1049.13	0.037951
PSB913-2_map4	0003.CSV	1052.99	0.0399315
PSB913-2_map4	0003.CSV	1056.84	0.0431089
PSB913-2_map4	0003.CSV	1060.7	0.0459967
PSB913-2_map4	0003.CSV	1064.56	0.0482809
PSB913-2_map4	0003.CSV	1068.42	0.0486365
PSB913-2_map4	0003.CSV	1072.27	0.048312
PSB913-2_map4	0003.CSV	1076.13	0.0491832
PSB913-2_map4	0003.CSV	1079.99	0.0553724
PSB913-2_map4	0003.CSV	1083.84	0.0543436
PSB913-2_map4	0003.CSV	1087.7	0.0413494
PSB913-2_map4	0003.CSV	1091.56	0.0334618
PSB913-2_map4	0003.CSV	1095.41	0.0329496
PSB913-2_map4	0003.CSV	1099.27	0.0338122
PSB913-2_map4	0003.CSV	1103.13	0.0353143
PSB913-2_map4	0003.CSV	1106.99	0.0368782
PSB913-2_map4	0003.CSV	1110.84	0.0388012
PSB913-2_map4	0003.CSV	1114.7	0.0400359
PSB913-2_map4	0003.CSV	1118.56	0.0407049
PSB913-2_map4	0003.CSV	1122.41	0.0402818
PSB913-2_map4	0003.CSV	1126.27	0.0396128
PSB913-2_map4	0003.CSV	1130.13	0.0385922
PSB913-2_map4	0003.CSV	1133.99	0.0381951
PSB913-2_map4	0003.CSV	1137.84	0.0377761
PSB913-2_map4	0003.CSV	1141.7	0.037489
PSB913-2_map4	0003.CSV	1145.56	0.0367654
PSB913-2_map4	0003.CSV	1149.41	0.0367362
PSB913-2_map4	0003.CSV	1153.27	0.0370657
PSB913-2_map4	0003.CSV	1157.13	0.0377199
PSB913-2_map4	0003.CSV	1160.99	0.0377771
PSB913-2_map4	0003.CSV	1164.84	0.0376813
PSB913-2_map4	0003.CSV	1168.7	0.0369379
PSB913-2_map4	0003.CSV	1172.56	0.0364487
PSB913-2_map4	0003.CSV	1176.41	0.0359107
PSB913-2_map4	0003.CSV	1180.27	0.0358362
PSB913-2_map4	0003.CSV	1184.13	0.035605
PSB913-2_map4	0003.CSV	1187.99	0.035797
PSB913-2_map4	0003.CSV	1191.84	0.0358472
PSB913-2_map4	0003.CSV	1195.7	0.0363883
PSB913-2_map4	0003.CSV	1199.56	0.036886
PSB913-2_map4	0003.CSV	1203.41	0.0377595
PSB913-2_map4	0003.CSV	1207.27	0.0383513
PSB913-2_map4	0003.CSV	1211.13	0.0392924
PSB913-2_map4	0003.CSV	1214.98	0.040146
PSB913-2_map4	0003.CSV	1218.84	0.0414816
PSB913-2_map4	0003.CSV	1222.7	0.042734
PSB913-2_map4	0003.CSV	1226.56	0.044409
PSB913-2_map4	0003.CSV	1230.41	0.0460096
PSB913-2_map4	0003.CSV	1234.27	0.0481593
PSB913-2_map4	0003.CSV	1238.13	0.0503389
PSB913-2_map4	0003.CSV	1241.98	0.0529733
PSB913-2_map4	0003.CSV	1245.84	0.0553772
PSB913-2_map4	0003.CSV	1249.7	0.0579037
PSB913-2_map4	0003.CSV	1253.56	0.0596074
PSB913-2_map4	0003.CSV	1257.41	0.0610941
PSB913-2_map4	0003.CSV	1261.27	0.0620962
PSB913-2_map4	0003.CSV	1265.13	0.0633479
PSB913-2_map4	0003.CSV	1268.98	0.0642553
PSB913-2_map4	0003.CSV	1272.84	0.0653699
PSB913-2_map4	0003.CSV	1276.7	0.0659804
PSB913-2_map4	0003.CSV	1280.56	0.0666446
PSB913-2_map4	0003.CSV	1284.41	0.0667573
PSB913-2_map4	0003.CSV	1288.27	0.0667782
PSB913-2_map4	0003.CSV	1292.13	0.0660238
PSB913-2_map4	0003.CSV	1295.98	0.0654222
PSB913-2_map4	0003.CSV	1299.84	0.0648819
PSB913-2_map4	0003.CSV	1303.7	0.0651977
PSB913-2_map4	0003.CSV	1307.56	0.0657817
PSB913-2_map4	0003.CSV	1311.41	0.0671213
PSB913-2_map4	0003.CSV	1315.27	0.0684244
PSB913-2_map4	0003.CSV	1319.13	0.0702035
PSB913-2_map4	0003.CSV	1322.98	0.0715683
PSB913-2_map4	0003.CSV	1326.84	0.0734539
PSB913-2_map4	0003.CSV	1330.7	0.075474
PSB913-2_map4	0003.CSV	1334.56	0.0780639
PSB913-2_map4	0003.CSV	1338.41	0.0812735
PSB913-2_map4	0003.CSV	1342.27	0.0855205
PSB913-2_map4	0003.CSV	1346.13	0.0887324
PSB913-2_map4	0003.CSV	1349.98	0.0928171
PSB913-2_map4	0003.CSV	1353.84	0.096899
PSB913-2_map4	0003.CSV	1357.7	0.101392
PSB913-2_map4	0003.CSV	1361.56	0.1064
PSB913-2_map4	0003.CSV	1365.41	0.112866
PSB913-2_map4	0003.CSV	1369.27	0.117918
PSB913-2_map4	0003.CSV	1373.13	0.124577
PSB913-2_map4	0003.CSV	1376.98	0.131569
PSB913-2_map4	0003.CSV	1380.84	0.137445
PSB913-2_map4	0003.CSV	1384.7	0.142735
PSB913-2_map4	0003.CSV	1388.56	0.150081
PSB913-2_map4	0003.CSV	1392.41	0.15563
PSB913-2_map4	0003.CSV	1396.27	0.16301
PSB913-2_map4	0003.CSV	1400.13	0.170249
PSB913-2_map4	0003.CSV	1403.98	0.177158
PSB913-2_map4	0003.CSV	1407.84	0.183953
PSB913-2_map4	0003.CSV	1411.7	0.190767
PSB913-2_map4	0003.CSV	1415.55	0.195843
PSB913-2_map4	0003.CSV	1419.41	0.203817
PSB913-2_map4	0003.CSV	1423.27	0.210473
PSB913-2_map4	0003.CSV	1427.12	0.217299
PSB913-2_map4	0003.CSV	1430.98	0.224285
PSB913-2_map4	0003.CSV	1434.84	0.23392
PSB913-2_map4	0003.CSV	1438.7	0.244106
PSB913-2_map4	0003.CSV	1442.55	0.251192
PSB913-2_map4	0003.CSV	1446.41	0.252971
PSB913-2_map4	0003.CSV	1450.27	0.250837
PSB913-2_map4	0003.CSV	1454.12	0.244269
PSB913-2_map4	0003.CSV	1457.98	0.235532
PSB913-2_map4	0003.CSV	1461.84	0.228558
PSB913-2_map4	0003.CSV	1465.7	0.224076
PSB913-2_map4	0003.CSV	1469.55	0.215479
PSB913-2_map4	0003.CSV	1473.41	0.199305
PSB913-2_map4	0003.CSV	1477.27	0.179044
PSB913-2_map4	0003.CSV	1481.12	0.166619
PSB913-2_map4	0003.CSV	1484.98	0.154783
PSB913-2_map4	0003.CSV	1488.84	0.14109
PSB913-2_map4	0003.CSV	1492.7	0.127326
PSB913-2_map4	0003.CSV	1496.55	0.117424
PSB913-2_map4	0003.CSV	1500.41	0.105983
PSB913-2_map4	0003.CSV	1504.27	0.0994512
PSB913-2_map4	0003.CSV	1508.12	0.0868758
PSB913-2_map4	0003.CSV	1511.98	0.0781972
PSB913-2_map4	0003.CSV	1515.84	0.0722747
PSB913-2_map4	0003.CSV	1519.7	0.0643812
PSB913-2_map4	0003.CSV	1523.55	0.0544365
PSB913-2_map4	0003.CSV	1527.41	0.0478214
PSB913-2_map4	0003.CSV	1531.27	0.0419132
PSB913-2_map4	0003.CSV	1535.12	0.0365155
PSB913-2_map4	0003.CSV	1538.98	0.0308321
PSB913-2_map4	0003.CSV	1542.84	0.0224602
PSB913-2_map4	0003.CSV	1546.7	0.0172821
PSB913-2_map4	0003.CSV	1550.55	0.0136393
PSB913-2_map4	0003.CSV	1554.41	0.00953397
PSB913-2_map4	0003.CSV	1558.27	0.0045952
PSB913-2_map4	0003.CSV	1562.12	0.000217347
PSB913-2_map4	0003.CSV	1565.98	-0.00197698
PSB913-2_map4	0003.CSV	1569.84	-0.00517038
PSB913-2_map4	0003.CSV	1573.69	-0.00827108
PSB913-2_map4	0003.CSV	1577.55	-0.011901
PSB913-2_map4	0003.CSV	1581.41	-0.0148864
PSB913-2_map4	0003.CSV	1585.27	-0.0174639
PSB913-2_map4	0003.CSV	1589.12	-0.0194638
PSB913-2_map4	0003.CSV	1592.98	-0.0207751
PSB913-2_map4	0003.CSV	1596.84	-0.021415
PSB913-2_map4	0003.CSV	1600.69	-0.0220492
PSB913-2_map4	0003.CSV	1604.55	-0.0227097
PSB913-2_map4	0003.CSV	1608.41	-0.023491
PSB913-2_map4	0003.CSV	1612.27	-0.0240674
PSB913-2_map4	0003.CSV	1616.12	-0.0245859
PSB913-2_map4	0003.CSV	1619.98	-0.0248573
PSB913-2_map4	0003.CSV	1623.84	-0.0252404
PSB913-2_map4	0003.CSV	1627.69	-0.0253581
PSB913-2_map4	0003.CSV	1631.55	-0.0258871
PSB913-2_map4	0003.CSV	1635.41	-0.0257954
PSB913-2_map4	0003.CSV	1639.27	-0.0256535
PSB913-2_map4	0003.CSV	1643.12	-0.0261621
PSB913-2_map4	0003.CSV	1646.98	-0.0265782
PSB913-2_map4	0003.CSV	1650.84	-0.0264323
PSB913-2_map4	0003.CSV	1654.69	-0.0263355
PSB913-2_map4	0003.CSV	1658.55	-0.0267348
PSB913-2_map4	0003.CSV	1662.41	-0.0273802
PSB913-2_map4	0003.CSV	1666.27	-0.0277938
PSB913-2_map4	0003.CSV	1670.12	-0.0282704
PSB913-2_map4	0003.CSV	1673.98	-0.0283557
PSB913-2_map4	0003.CSV	1677.84	-0.0288632
PSB913-2_map4	0003.CSV	1681.69	-0.0292409
PSB913-2_map4	0003.CSV	1685.55	-0.029382
PSB913-2_map4	0003.CSV	1689.41	-0.0294958
PSB913-2_map4	0003.CSV	1693.27	-0.0303322
PSB913-2_map4	0003.CSV	1697.12	-0.0307247
PSB913-2_map4	0003.CSV	1700.98	-0.0303133
PSB913-2_map4	0003.CSV	1704.84	-0.0295927
PSB913-2_map4	0003.CSV	1708.69	-0.0289865
PSB913-2_map4	0003.CSV	1712.55	-0.0282736
PSB913-2_map4	0003.CSV	1716.41	-0.0258994
PSB913-2_map4	0003.CSV	1720.27	-0.0226312
PSB913-2_map4	0003.CSV	1724.12	-0.0216577
[truncated: 125,725 more rows]
[truncated: 8 more columns]

## Sheet: PSB913-2_map5
Map	Select spectrum number	Wavenumbers	Absorbance
PSB913-2_map5	0001.CSV	674.992	0.0253449
PSB913-2_map5	0001.CSV	678.849	0.026698
PSB913-2_map5	0001.CSV	682.706	0.0274508
PSB913-2_map5	0001.CSV	686.563	0.0299486
PSB913-2_map5	0001.CSV	690.42	0.0341526
PSB913-2_map5	0001.CSV	694.277	0.0448434
PSB913-2_map5	0001.CSV	698.134	0.0548981
PSB913-2_map5	0001.CSV	701.991	0.0494385
PSB913-2_map5	0001.CSV	705.849	0.0421648
PSB913-2_map5	0001.CSV	709.706	0.053039
PSB913-2_map5	0001.CSV	713.563	0.053589
PSB913-2_map5	0001.CSV	717.42	0.0314857
PSB913-2_map5	0001.CSV	721.277	0.0168723
PSB913-2_map5	0001.CSV	725.134	0.0158628
PSB913-2_map5	0001.CSV	728.991	0.0169343
PSB913-2_map5	0001.CSV	732.848	0.0186544
PSB913-2_map5	0001.CSV	736.705	0.0202829
PSB913-2_map5	0001.CSV	740.562	0.0222621
PSB913-2_map5	0001.CSV	744.42	0.0232601
PSB913-2_map5	0001.CSV	748.277	0.0240878
PSB913-2_map5	0001.CSV	752.134	0.0244038
PSB913-2_map5	0001.CSV	755.991	0.025157
PSB913-2_map5	0001.CSV	759.848	0.0252624
PSB913-2_map5	0001.CSV	763.705	0.0251184
PSB913-2_map5	0001.CSV	767.562	0.0242739
PSB913-2_map5	0001.CSV	771.419	0.0237121
PSB913-2_map5	0001.CSV	775.276	0.0231522
PSB913-2_map5	0001.CSV	779.133	0.0233235
PSB913-2_map5	0001.CSV	782.99	0.0235331
PSB913-2_map5	0001.CSV	786.848	0.0243075
PSB913-2_map5	0001.CSV	790.705	0.0248379
PSB913-2_map5	0001.CSV	794.562	0.0257942
PSB913-2_map5	0001.CSV	798.419	0.0266504
PSB913-2_map5	0001.CSV	802.276	0.0282524
PSB913-2_map5	0001.CSV	806.133	0.0297754
PSB913-2_map5	0001.CSV	809.99	0.0313511
PSB913-2_map5	0001.CSV	813.847	0.0326024
PSB913-2_map5	0001.CSV	817.704	0.0351018
PSB913-2_map5	0001.CSV	821.562	0.0387739
PSB913-2_map5	0001.CSV	825.419	0.0434839
PSB913-2_map5	0001.CSV	829.276	0.0470286
PSB913-2_map5	0001.CSV	833.133	0.0497847
PSB913-2_map5	0001.CSV	836.99	0.0535394
PSB913-2_map5	0001.CSV	840.847	0.0607825
PSB913-2_map5	0001.CSV	844.704	0.0682207
PSB913-2_map5	0001.CSV	848.561	0.0819205
PSB913-2_map5	0001.CSV	852.418	0.101108
PSB913-2_map5	0001.CSV	856.275	0.105581
PSB913-2_map5	0001.CSV	860.132	0.0889878
PSB913-2_map5	0001.CSV	863.99	0.0651629
PSB913-2_map5	0001.CSV	867.847	0.0439701
PSB913-2_map5	0001.CSV	871.704	0.0300251
PSB913-2_map5	0001.CSV	875.561	0.0224183
PSB913-2_map5	0001.CSV	879.418	0.0187104
PSB913-2_map5	0001.CSV	883.275	0.0159762
PSB913-2_map5	0001.CSV	887.132	0.0144319
PSB913-2_map5	0001.CSV	890.989	0.0137716
PSB913-2_map5	0001.CSV	894.846	0.0139972
PSB913-2_map5	0001.CSV	898.703	0.014153
PSB913-2_map5	0001.CSV	902.561	0.014529
PSB913-2_map5	0001.CSV	906.418	0.0147758
PSB913-2_map5	0001.CSV	910.275	0.0146186
PSB913-2_map5	0001.CSV	914.132	0.0141386
PSB913-2_map5	0001.CSV	917.989	0.0143697
PSB913-2_map5	0001.CSV	921.846	0.0144859
PSB913-2_map5	0001.CSV	925.703	0.0147446
PSB913-2_map5	0001.CSV	929.56	0.0148221
PSB913-2_map5	0001.CSV	933.417	0.0151091
PSB913-2_map5	0001.CSV	937.274	0.0151462
PSB913-2_map5	0001.CSV	941.131	0.0152637
PSB913-2_map5	0001.CSV	944.989	0.0151621
PSB913-2_map5	0001.CSV	948.846	0.0151704
PSB913-2_map5	0001.CSV	952.703	0.0150464
PSB913-2_map5	0001.CSV	956.56	0.0151621
PSB913-2_map5	0001.CSV	960.417	0.0150653
PSB913-2_map5	0001.CSV	964.274	0.0150911
PSB913-2_map5	0001.CSV	968.131	0.0149986
PSB913-2_map5	0001.CSV	971.988	0.0151867
PSB913-2_map5	0001.CSV	975.845	0.0153254
PSB913-2_map5	0001.CSV	979.702	0.0158411
PSB913-2_map5	0001.CSV	983.559	0.0164597
PSB913-2_map5	0001.CSV	987.417	0.0173691
PSB913-2_map5	0001.CSV	991.274	0.0179861
PSB913-2_map5	0001.CSV	995.131	0.0186689
PSB913-2_map5	0001.CSV	998.988	0.0192646
PSB913-2_map5	0001.CSV	1002.85	0.0202873
PSB913-2_map5	0001.CSV	1006.7	0.0214723
PSB913-2_map5	0001.CSV	1010.56	0.0230084
PSB913-2_map5	0001.CSV	1014.42	0.0240946
PSB913-2_map5	0001.CSV	1018.27	0.0253008
PSB913-2_map5	0001.CSV	1022.13	0.0265753
PSB913-2_map5	0001.CSV	1025.99	0.0281569
PSB913-2_map5	0001.CSV	1029.85	0.0293381
PSB913-2_map5	0001.CSV	1033.7	0.0304395
PSB913-2_map5	0001.CSV	1037.56	0.0310061
PSB913-2_map5	0001.CSV	1041.42	0.0312615
PSB913-2_map5	0001.CSV	1045.27	0.0309536
PSB913-2_map5	0001.CSV	1049.13	0.0309652
PSB913-2_map5	0001.CSV	1052.99	0.0311321
PSB913-2_map5	0001.CSV	1056.84	0.0319395
PSB913-2_map5	0001.CSV	1060.7	0.0328193
PSB913-2_map5	0001.CSV	1064.56	0.0337097
PSB913-2_map5	0001.CSV	1068.42	0.0339225
PSB913-2_map5	0001.CSV	1072.27	0.0341183
PSB913-2_map5	0001.CSV	1076.13	0.0350867
PSB913-2_map5	0001.CSV	1079.99	0.0386198
PSB913-2_map5	0001.CSV	1083.84	0.0381505
PSB913-2_map5	0001.CSV	1087.7	0.0315844
PSB913-2_map5	0001.CSV	1091.56	0.0275266
PSB913-2_map5	0001.CSV	1095.41	0.0272198
PSB913-2_map5	0001.CSV	1099.27	0.0276577
PSB913-2_map5	0001.CSV	1103.13	0.0284216
PSB913-2_map5	0001.CSV	1106.99	0.0289684
PSB913-2_map5	0001.CSV	1110.84	0.0294399
PSB913-2_map5	0001.CSV	1114.7	0.0294147
PSB913-2_map5	0001.CSV	1118.56	0.0290983
PSB913-2_map5	0001.CSV	1122.41	0.0282776
PSB913-2_map5	0001.CSV	1126.27	0.0273118
PSB913-2_map5	0001.CSV	1130.13	0.0260494
PSB913-2_map5	0001.CSV	1133.99	0.0250293
PSB913-2_map5	0001.CSV	1137.84	0.0240839
PSB913-2_map5	0001.CSV	1141.7	0.0234418
PSB913-2_map5	0001.CSV	1145.56	0.0228975
PSB913-2_map5	0001.CSV	1149.41	0.022786
PSB913-2_map5	0001.CSV	1153.27	0.0228658
PSB913-2_map5	0001.CSV	1157.13	0.0230811
PSB913-2_map5	0001.CSV	1160.99	0.0229299
PSB913-2_map5	0001.CSV	1164.84	0.0227698
PSB913-2_map5	0001.CSV	1168.7	0.0225328
PSB913-2_map5	0001.CSV	1172.56	0.0229913
PSB913-2_map5	0001.CSV	1176.41	0.0242801
PSB913-2_map5	0001.CSV	1180.27	0.0257482
PSB913-2_map5	0001.CSV	1184.13	0.0255269
PSB913-2_map5	0001.CSV	1187.99	0.0241457
PSB913-2_map5	0001.CSV	1191.84	0.0227057
PSB913-2_map5	0001.CSV	1195.7	0.0221455
PSB913-2_map5	0001.CSV	1199.56	0.0221339
PSB913-2_map5	0001.CSV	1203.41	0.0228099
PSB913-2_map5	0001.CSV	1207.27	0.0237301
PSB913-2_map5	0001.CSV	1211.13	0.0250247
PSB913-2_map5	0001.CSV	1214.98	0.0263004
PSB913-2_map5	0001.CSV	1218.84	0.0278563
PSB913-2_map5	0001.CSV	1222.7	0.0293459
PSB913-2_map5	0001.CSV	1226.56	0.0309502
PSB913-2_map5	0001.CSV	1230.41	0.0323387
PSB913-2_map5	0001.CSV	1234.27	0.0337469
PSB913-2_map5	0001.CSV	1238.13	0.0349345
PSB913-2_map5	0001.CSV	1241.98	0.0362627
PSB913-2_map5	0001.CSV	1245.84	0.0372985
PSB913-2_map5	0001.CSV	1249.7	0.0379311
PSB913-2_map5	0001.CSV	1253.56	0.0375471
PSB913-2_map5	0001.CSV	1257.41	0.0365767
PSB913-2_map5	0001.CSV	1261.27	0.0354177
PSB913-2_map5	0001.CSV	1265.13	0.0349797
PSB913-2_map5	0001.CSV	1268.98	0.0350095
PSB913-2_map5	0001.CSV	1272.84	0.0355147
PSB913-2_map5	0001.CSV	1276.7	0.0359689
PSB913-2_map5	0001.CSV	1280.56	0.0366988
PSB913-2_map5	0001.CSV	1284.41	0.0373777
PSB913-2_map5	0001.CSV	1288.27	0.0381301
PSB913-2_map5	0001.CSV	1292.13	0.0384469
PSB913-2_map5	0001.CSV	1295.98	0.0387216
PSB913-2_map5	0001.CSV	1299.84	0.0388013
PSB913-2_map5	0001.CSV	1303.7	0.0390817
PSB913-2_map5	0001.CSV	1307.56	0.0393748
PSB913-2_map5	0001.CSV	1311.41	0.0400257
PSB913-2_map5	0001.CSV	1315.27	0.0406891
PSB913-2_map5	0001.CSV	1319.13	0.041737
PSB913-2_map5	0001.CSV	1322.98	0.0427306
PSB913-2_map5	0001.CSV	1326.84	0.0440528
PSB913-2_map5	0001.CSV	1330.7	0.0454212
PSB913-2_map5	0001.CSV	1334.56	0.0469774
PSB913-2_map5	0001.CSV	1338.41	0.0489234
PSB913-2_map5	0001.CSV	1342.27	0.0514606
PSB913-2_map5	0001.CSV	1346.13	0.0533067
PSB913-2_map5	0001.CSV	1349.98	0.0556771
PSB913-2_map5	0001.CSV	1353.84	0.0582404
PSB913-2_map5	0001.CSV	1357.7	0.0612194
PSB913-2_map5	0001.CSV	1361.56	0.0643765
PSB913-2_map5	0001.CSV	1365.41	0.0677351
PSB913-2_map5	0001.CSV	1369.27	0.0700814
PSB913-2_map5	0001.CSV	1373.13	0.0733449
PSB913-2_map5	0001.CSV	1376.98	0.0770994
PSB913-2_map5	0001.CSV	1380.84	0.080433
PSB913-2_map5	0001.CSV	1384.7	0.0832683
PSB913-2_map5	0001.CSV	1388.56	0.0868013
PSB913-2_map5	0001.CSV	1392.41	0.0893307
PSB913-2_map5	0001.CSV	1396.27	0.092934
PSB913-2_map5	0001.CSV	1400.13	0.096464
PSB913-2_map5	0001.CSV	1403.98	0.0994785
PSB913-2_map5	0001.CSV	1407.84	0.102224
PSB913-2_map5	0001.CSV	1411.7	0.104718
PSB913-2_map5	0001.CSV	1415.55	0.106207
PSB913-2_map5	0001.CSV	1419.41	0.108715
PSB913-2_map5	0001.CSV	1423.27	0.110462
PSB913-2_map5	0001.CSV	1427.12	0.112148
PSB913-2_map5	0001.CSV	1430.98	0.113651
PSB913-2_map5	0001.CSV	1434.84	0.115863
PSB913-2_map5	0001.CSV	1438.7	0.117477
PSB913-2_map5	0001.CSV	1442.55	0.117904
PSB913-2_map5	0001.CSV	1446.41	0.116403
PSB913-2_map5	0001.CSV	1450.27	0.11389
PSB913-2_map5	0001.CSV	1454.12	0.110497
PSB913-2_map5	0001.CSV	1457.98	0.106083
PSB913-2_map5	0001.CSV	1461.84	0.102096
PSB913-2_map5	0001.CSV	1465.7	0.0991788
PSB913-2_map5	0001.CSV	1469.55	0.0949886
PSB913-2_map5	0001.CSV	1473.41	0.0883379
PSB913-2_map5	0001.CSV	1477.27	0.0800112
PSB913-2_map5	0001.CSV	1481.12	0.0747169
PSB913-2_map5	0001.CSV	1484.98	0.0697805
PSB913-2_map5	0001.CSV	1488.84	0.0643432
PSB913-2_map5	0001.CSV	1492.7	0.0590013
PSB913-2_map5	0001.CSV	1496.55	0.055523
PSB913-2_map5	0001.CSV	1500.41	0.0519947
PSB913-2_map5	0001.CSV	1504.27	0.0501703
PSB913-2_map5	0001.CSV	1508.12	0.04583
PSB913-2_map5	0001.CSV	1511.98	0.0410652
PSB913-2_map5	0001.CSV	1515.84	0.036251
PSB913-2_map5	0001.CSV	1519.7	0.0302118
PSB913-2_map5	0001.CSV	1523.55	0.0244919
PSB913-2_map5	0001.CSV	1527.41	0.0212079
PSB913-2_map5	0001.CSV	1531.27	0.0183116
PSB913-2_map5	0001.CSV	1535.12	0.0157638
PSB913-2_map5	0001.CSV	1538.98	0.0130568
PSB913-2_map5	0001.CSV	1542.84	0.00922295
PSB913-2_map5	0001.CSV	1546.7	0.00663061
PSB913-2_map5	0001.CSV	1550.55	0.00468602
PSB913-2_map5	0001.CSV	1554.41	0.00255501
PSB913-2_map5	0001.CSV	1558.27	7.25033e-05
PSB913-2_map5	0001.CSV	1562.12	-0.00242212
PSB913-2_map5	0001.CSV	1565.98	-0.0037051
PSB913-2_map5	0001.CSV	1569.84	-0.00536656
PSB913-2_map5	0001.CSV	1573.69	-0.0067784
PSB913-2_map5	0001.CSV	1577.55	-0.00857854
PSB913-2_map5	0001.CSV	1581.41	-0.010386
PSB913-2_map5	0001.CSV	1585.27	-0.0120538
PSB913-2_map5	0001.CSV	1589.12	-0.0133085
PSB913-2_map5	0001.CSV	1592.98	-0.0140947
PSB913-2_map5	0001.CSV	1596.84	-0.0143795
PSB913-2_map5	0001.CSV	1600.69	-0.0144006
PSB913-2_map5	0001.CSV	1604.55	-0.0143134
PSB913-2_map5	0001.CSV	1608.41	-0.0145799
PSB913-2_map5	0001.CSV	1612.27	-0.0152017
PSB913-2_map5	0001.CSV	1616.12	-0.0161631
PSB913-2_map5	0001.CSV	1619.98	-0.0167554
PSB913-2_map5	0001.CSV	1623.84	-0.0170733
PSB913-2_map5	0001.CSV	1627.69	-0.0173142
PSB913-2_map5	0001.CSV	1631.55	-0.0177283
PSB913-2_map5	0001.CSV	1635.41	-0.0178583
PSB913-2_map5	0001.CSV	1639.27	-0.0177553
PSB913-2_map5	0001.CSV	1643.12	-0.0179617
PSB913-2_map5	0001.CSV	1646.98	-0.0181741
PSB913-2_map5	0001.CSV	1650.84	-0.0180968
PSB913-2_map5	0001.CSV	1654.69	-0.0182034
PSB913-2_map5	0001.CSV	1658.55	-0.0184693
PSB913-2_map5	0001.CSV	1662.41	-0.018778
PSB913-2_map5	0001.CSV	1666.27	-0.0189575
PSB913-2_map5	0001.CSV	1670.12	-0.0192133
PSB913-2_map5	0001.CSV	1673.98	-0.0193101
PSB913-2_map5	0001.CSV	1677.84	-0.0196587
PSB913-2_map5	0001.CSV	1681.69	-0.0199469
PSB913-2_map5	0001.CSV	1685.55	-0.0198845
PSB913-2_map5	0001.CSV	1689.41	-0.0198555
PSB913-2_map5	0001.CSV	1693.27	-0.0202908
PSB913-2_map5	0001.CSV	1697.12	-0.0205198
PSB913-2_map5	0001.CSV	1700.98	-0.0204613
PSB913-2_map5	0001.CSV	1704.84	-0.0202894
PSB913-2_map5	0001.CSV	1708.69	-0.0201043
PSB913-2_map5	0001.CSV	1712.55	-0.0198322
PSB913-2_map5	0001.CSV	1716.41	-0.0188796
PSB913-2_map5	0001.CSV	1720.27	-0.017715
PSB913-2_map5	0001.CSV	1724.12	-0.0174884
PSB913-2_map5	0001.CSV	1727.98	-0.0174243
PSB913-2_map5	0001.CSV	1731.84	-0.017514
PSB913-2_map5	0001.CSV	1735.69	-0.0176946
PSB913-2_map5	0001.CSV	1739.55	-0.0182481
PSB913-2_map5	0001.CSV	1743.41	-0.0189828
PSB913-2_map5	0001.CSV	1747.27	-0.0199582
PSB913-2_map5	0001.CSV	1751.12	-0.0208696
PSB913-2_map5	0001.CSV	1754.98	-0.0215309
PSB913-2_map5	0001.CSV	1758.84	-0.0219184
PSB913-2_map5	0001.CSV	1762.69	-0.0221395
PSB913-2_map5	0001.CSV	1766.55	-0.0222388
PSB913-2_map5	0001.CSV	1770.41	-0.0220622
PSB913-2_map5	0001.CSV	1774.26	-0.0209343
PSB913-2_map5	0001.CSV	1778.12	-0.0197143
PSB913-2_map5	0001.CSV	1781.98	-0.0183722
PSB913-2_map5	0001.CSV	1785.84	-0.0177042
PSB913-2_map5	0001.CSV	1789.69	-0.0180266
PSB913-2_map5	0001.CSV	1793.55	-0.0193445
PSB913-2_map5	0001.CSV	1797.41	-0.0205149
PSB913-2_map5	0001.CSV	1801.26	-0.0215406
PSB913-2_map5	0001.CSV	1805.12	-0.0222577
PSB913-2_map5	0001.CSV	1808.98	-0.0226436
PSB913-2_map5	0001.CSV	1812.84	-0.0227428
PSB913-2_map5	0001.CSV	1816.69	-0.022907
PSB913-2_map5	0001.CSV	1820.55	-0.023002
PSB913-2_map5	0001.CSV	1824.41	-0.023056
PSB913-2_map5	0001.CSV	1828.26	-0.0228978
PSB913-2_map5	0001.CSV	1832.12	-0.0227866
PSB913-2_map5	0001.CSV	1835.98	-0.0227901
PSB913-2_map5	0001.CSV	1839.84	-0.0229171
PSB913-2_map5	0001.CSV	1843.69	-0.0228626
PSB913-2_map5	0001.CSV	1847.55	-0.0227323
PSB913-2_map5	0001.CSV	1851.41	-0.0227945
PSB913-2_map5	0001.CSV	1855.26	-0.0229103
PSB913-2_map5	0001.CSV	1859.12	-0.0228452
PSB913-2_map5	0001.CSV	1862.98	-0.0228478
PSB913-2_map5	0001.CSV	1866.84	-0.0228311
PSB913-2_map5	0001.CSV	1870.69	-0.0226539
PSB913-2_map5	0001.CSV	1874.55	-0.0226466
PSB913-2_map5	0001.CSV	1878.41	-0.022759
PSB913-2_map5	0001.CSV	1882.26	-0.0227559
PSB913-2_map5	0001.CSV	1886.12	-0.0227699
PSB913-2_map5	0001.CSV	1889.98	-0.0227478
PSB913-2_map5	0001.CSV	1893.83	-0.0227336
PSB913-2_map5	0001.CSV	1897.69	-0.0226991
PSB913-2_map5	0001.CSV	1901.55	-0.0227868
PSB913-2_map5	0001.CSV	1905.41	-0.0228335
PSB913-2_map5	0001.CSV	1909.26	-0.0228271
PSB913-2_map5	0001.CSV	1913.12	-0.0227961
PSB913-2_map5	0001.CSV	1916.98	-0.0228034
PSB913-2_map5	0001.CSV	1920.83	-0.0227062
PSB913-2_map5	0001.CSV	1924.69	-0.0227355
PSB913-2_map5	0001.CSV	1928.55	-0.0227538
PSB913-2_map5	0001.CSV	1932.4	-0.0227544
PSB913-2_map5	0001.CSV	1936.26	-0.0227394
PSB913-2_map5	0001.CSV	1940.12	-0.0227534
PSB913-2_map5	0001.CSV	1943.98	-0.0225841
PSB913-2_map5	0001.CSV	1947.83	-0.0225674
PSB913-2_map5	0001.CSV	1951.69	-0.0226137
PSB913-2_map5	0001.CSV	1955.55	-0.0226261
PSB913-2_map5	0001.CSV	1959.4	-0.0225421
PSB913-2_map5	0001.CSV	1963.26	-0.0225319
PSB913-2_map5	0001.CSV	1967.12	-0.0224943
PSB913-2_map5	0001.CSV	1970.98	-0.0224731
PSB913-2_map5	0001.CSV	1974.83	-0.0224613
PSB913-2_map5	0001.CSV	1978.69	-0.0225131
PSB913-2_map5	0001.CSV	1982.55	-0.0225442
PSB913-2_map5	0001.CSV	1986.4	-0.022594
PSB913-2_map5	0001.CSV	1990.26	-0.0225465
PSB913-2_map5	0001.CSV	1994.12	-0.0224775
PSB913-2_map5	0001.CSV	1997.98	-0.022406
PSB913-2_map5	0001.CSV	2001.83	-0.0223554
PSB913-2_map5	0001.CSV	2005.69	-0.0223033
PSB913-2_map5	0001.CSV	2009.55	-0.0223295
PSB913-2_map5	0001.CSV	2013.4	-0.0222937
PSB913-2_map5	0001.CSV	2017.26	-0.0222368
PSB913-2_map5	0001.CSV	2021.12	-0.0221322
PSB913-2_map5	0001.CSV	2024.97	-0.0221219
PSB913-2_map5	0001.CSV	2028.83	-0.0221261
PSB913-2_map5	0001.CSV	2032.69	-0.02214
PSB913-2_map5	0001.CSV	2036.55	-0.0220952
PSB913-2_map5	0001.CSV	2040.4	-0.0220811
PSB913-2_map5	0001.CSV	2044.26	-0.0220165
PSB913-2_map5	0001.CSV	2048.12	-0.0219626
PSB913-2_map5	0001.CSV	2051.97	-0.0218944
PSB913-2_map5	0001.CSV	2055.83	-0.0218929
PSB913-2_map5	0001.CSV	2059.69	-0.0218283
PSB913-2_map5	0001.CSV	2063.55	-0.0217758
PSB913-2_map5	0001.CSV	2067.4	-0.0217168
PSB913-2_map5	0001.CSV	2071.26	-0.0216601
PSB913-2_map5	0001.CSV	2075.12	-0.0215602
PSB913-2_map5	0001.CSV	2078.97	-0.0215673
PSB913-2_map5	0001.CSV	2082.83	-0.0215543
PSB913-2_map5	0001.CSV	2086.69	-0.021536
PSB913-2_map5	0001.CSV	2090.55	-0.0215263
PSB913-2_map5	0001.CSV	2094.4	-0.0215362
PSB913-2_map5	0001.CSV	2098.26	-0.021459
PSB913-2_map5	0001.CSV	2102.12	-0.0214539
PSB913-2_map5	0001.CSV	2105.97	-0.0213928
PSB913-2_map5	0001.CSV	2109.83	-0.0213208
PSB913-2_map5	0001.CSV	2113.69	-0.0212268
PSB913-2_map5	0001.CSV	2117.55	-0.0211817
PSB913-2_map5	0001.CSV	2121.4	-0.0211563
PSB913-2_map5	0001.CSV	2125.26	-0.021193
PSB913-2_map5	0001.CSV	2129.12	-0.0211566
PSB913-2_map5	0001.CSV	2132.97	-0.0211565
PSB913-2_map5	0001.CSV	2136.83	-0.0211569
PSB913-2_map5	0001.CSV	2140.69	-0.0211418
PSB913-2_map5	0001.CSV	2144.55	-0.0210975
PSB913-2_map5	0001.CSV	2148.4	-0.0210992
PSB913-2_map5	0001.CSV	2152.26	-0.0210724
PSB913-2_map5	0001.CSV	2156.12	-0.0210884
PSB913-2_map5	0001.CSV	2159.97	-0.0211244
PSB913-2_map5	0001.CSV	2163.83	-0.0211832
PSB913-2_map5	0001.CSV	2167.69	-0.0211344
PSB913-2_map5	0001.CSV	2171.55	-0.0210833
PSB913-2_map5	0001.CSV	2175.4	-0.0210539
PSB913-2_map5	0001.CSV	2179.26	-0.021096
PSB913-2_map5	0001.CSV	2183.12	-0.0211182
PSB913-2_map5	0001.CSV	2186.97	-0.0211573
PSB913-2_map5	0001.CSV	2190.83	-0.0211568
PSB913-2_map5	0001.CSV	2194.69	-0.0211651
PSB913-2_map5	0001.CSV	2198.55	-0.0211415
PSB913-2_map5	0001.CSV	2202.4	-0.0211638
PSB913-2_map5	0001.CSV	2206.26	-0.0211707
PSB913-2_map5	0001.CSV	2210.12	-0.0212287
PSB913-2_map5	0001.CSV	2213.97	-0.0212606
PSB913-2_map5	0001.CSV	2217.83	-0.0212857
PSB913-2_map5	0001.CSV	2221.69	-0.0213053
PSB913-2_map5	0001.CSV	2225.54	-0.0213446
PSB913-2_map5	0001.CSV	2229.4	-0.0213742
PSB913-2_map5	0001.CSV	2233.26	-0.0213795
PSB913-2_map5	0001.CSV	2237.12	-0.0213249
PSB913-2_map5	0001.CSV	2240.97	-0.0213414
PSB913-2_map5	0001.CSV	2244.83	-0.0213392
PSB913-2_map5	0001.CSV	2248.69	-0.0214039
PSB913-2_map5	0001.CSV	2252.54	-0.021458
PSB913-2_map5	0001.CSV	2256.4	-0.0215113
PSB913-2_map5	0001.CSV	2260.26	-0.0215178
PSB913-2_map5	0001.CSV	2264.11	-0.0215449
PSB913-2_map5	0001.CSV	2267.97	-0.0215059
PSB913-2_map5	0001.CSV	2271.83	-0.0214909
PSB913-2_map5	0001.CSV	2275.69	-0.0215198
PSB913-2_map5	0001.CSV	2279.54	-0.0215662
PSB913-2_map5	0001.CSV	2283.4	-0.0215461
PSB913-2_map5	0001.CSV	2287.26	-0.0215602
PSB913-2_map5	0001.CSV	2291.11	-0.0215599
PSB913-2_map5	0001.CSV	2294.97	-0.0216154
PSB913-2_map5	0001.CSV	2298.83	-0.0216988
PSB913-2_map5	0001.CSV	2302.69	-0.0217939
PSB913-2_map5	0001.CSV	2306.54	-0.0218472
PSB913-2_map5	0001.CSV	2310.4	-0.022059
PSB913-2_map5	0001.CSV	2314.26	-0.0222966
PSB913-2_map5	0001.CSV	2318.11	-0.0227234
PSB913-2_map5	0001.CSV	2321.97	-0.0234713
PSB913-2_map5	0001.CSV	2325.83	-0.0245082
PSB913-2_map5	0001.CSV	2329.69	-0.0250847
PSB913-2_map5	0001.CSV	2333.54	-0.0258273
PSB913-2_map5	0001.CSV	2337.4	-0.0264842
PSB913-2_map5	0001.CSV	2341.26	-0.0267927
PSB913-2_map5	0001.CSV	2345.11	-0.0247877
PSB913-2_map5	0001.CSV	2348.97	-0.0242981
PSB913-2_map5	0001.CSV	2352.83	-0.0266527
PSB913-2_map5	0001.CSV	2356.69	-0.0340738
PSB913-2_map5	0001.CSV	2360.54	-0.0399602
PSB913-2_map5	0001.CSV	2364.4	-0.0358456
PSB913-2_map5	0001.CSV	2368.26	-0.0286893
PSB913-2_map5	0001.CSV	2372.11	-0.0244608
PSB913-2_map5	0001.CSV	2375.97	-0.0225714
PSB913-2_map5	0001.CSV	2379.83	-0.0218848
PSB913-2_map5	0001.CSV	2383.69	-0.0216437
PSB913-2_map5	0001.CSV	2387.54	-0.0217134
PSB913-2_map5	0001.CSV	2391.4	-0.0218226
PSB913-2_map5	0001.CSV	2395.26	-0.0218665
PSB913-2_map5	0001.CSV	2399.11	-0.0218552
PSB913-2_map5	0001.CSV	2402.97	-0.0218193
PSB913-2_map5	0001.CSV	2406.83	-0.0217752
PSB913-2_map5	0001.CSV	2410.68	-0.0218266
PSB913-2_map5	0001.CSV	2414.54	-0.0218079
PSB913-2_map5	0001.CSV	2418.4	-0.0217952
PSB913-2_map5	0001.CSV	2422.26	-0.0217959
PSB913-2_map5	0001.CSV	2426.11	-0.0218161
PSB913-2_map5	0001.CSV	2429.97	-0.0218095
PSB913-2_map5	0001.CSV	2433.83	-0.0218281
PSB913-2_map5	0001.CSV	2437.68	-0.0218452
PSB913-2_map5	0001.CSV	2441.54	-0.0218772
PSB913-2_map5	0001.CSV	2445.4	-0.0218183
PSB913-2_map5	0001.CSV	2449.26	-0.0217676
PSB913-2_map5	0001.CSV	2453.11	-0.0217547
PSB913-2_map5	0001.CSV	2456.97	-0.0217567
PSB913-2_map5	0001.CSV	2460.83	-0.02173
PSB913-2_map5	0001.CSV	2464.68	-0.0216642
PSB913-2_map5	0001.CSV	2468.54	-0.0215916
PSB913-2_map5	0001.CSV	2472.4	-0.0215333
PSB913-2_map5	0001.CSV	2476.26	-0.0213962
PSB913-2_map5	0001.CSV	2480.11	-0.021252
PSB913-2_map5	0001.CSV	2483.97	-0.0211002
PSB913-2_map5	0001.CSV	2487.83	-0.0209439
PSB913-2_map5	0001.CSV	2491.68	-0.0208171
PSB913-2_map5	0001.CSV	2495.54	-0.0207486
PSB913-2_map5	0001.CSV	2499.4	-0.0207188
PSB913-2_map5	0001.CSV	2503.26	-0.0207997
PSB913-2_map5	0001.CSV	2507.11	-0.0208067
PSB913-2_map5	0001.CSV	2510.97	-0.0207544
PSB913-2_map5	0001.CSV	2514.83	-0.0206614
PSB913-2_map5	0001.CSV	2518.68	-0.0205378
PSB913-2_map5	0001.CSV	2522.54	-0.0205229
PSB913-2_map5	0001.CSV	2526.4	-0.0206426
PSB913-2_map5	0001.CSV	2530.26	-0.0207544
PSB913-2_map5	0001.CSV	2534.11	-0.0209662
PSB913-2_map5	0001.CSV	2537.97	-0.0211698
PSB913-2_map5	0001.CSV	2541.83	-0.0212914
PSB913-2_map5	0001.CSV	2545.68	-0.0213801
PSB913-2_map5	0001.CSV	2549.54	-0.0214924
PSB913-2_map5	0001.CSV	2553.4	-0.0216229
PSB913-2_map5	0001.CSV	2557.26	-0.0217934
PSB913-2_map5	0001.CSV	2561.11	-0.0219348
PSB913-2_map5	0001.CSV	2564.97	-0.0220863
PSB913-2_map5	0001.CSV	2568.83	-0.0222103
PSB913-2_map5	0001.CSV	2572.68	-0.0222595
PSB913-2_map5	0001.CSV	2576.54	-0.0223251
PSB913-2_map5	0001.CSV	2580.4	-0.0224781
PSB913-2_map5	0001.CSV	2584.25	-0.0225993
PSB913-2_map5	0001.CSV	2588.11	-0.0226579
PSB913-2_map5	0001.CSV	2591.97	-0.0226605
PSB913-2_map5	0001.CSV	2595.83	-0.0227088
PSB913-2_map5	0001.CSV	2599.68	-0.0227288
PSB913-2_map5	0001.CSV	2603.54	-0.0227347
PSB913-2_map5	0001.CSV	2607.4	-0.0226856
PSB913-2_map5	0001.CSV	2611.25	-0.0226426
PSB913-2_map5	0001.CSV	2615.11	-0.0226176
PSB913-2_map5	0001.CSV	2618.97	-0.0226208
PSB913-2_map5	0001.CSV	2622.82	-0.0225785
PSB913-2_map5	0001.CSV	2626.68	-0.0225237
PSB913-2_map5	0001.CSV	2630.54	-0.0225035
PSB913-2_map5	0001.CSV	2634.4	-0.022464
PSB913-2_map5	0001.CSV	2638.25	-0.0224578
PSB913-2_map5	0001.CSV	2642.11	-0.0225495
PSB913-2_map5	0001.CSV	2645.97	-0.0226768
PSB913-2_map5	0001.CSV	2649.82	-0.0227975
PSB913-2_map5	0001.CSV	2653.68	-0.0228595
PSB913-2_map5	0001.CSV	2657.54	-0.0228603
PSB913-2_map5	0001.CSV	2661.4	-0.0228921
PSB913-2_map5	0001.CSV	2665.25	-0.0229131
PSB913-2_map5	0001.CSV	2669.11	-0.0228328
PSB913-2_map5	0001.CSV	2672.97	-0.0226662
PSB913-2_map5	0001.CSV	2676.82	-0.0224533
PSB913-2_map5	0001.CSV	2680.68	-0.0224632
PSB913-2_map5	0001.CSV	2684.54	-0.0227455
PSB913-2_map5	0001.CSV	2688.4	-0.0228717
PSB913-2_map5	0001.CSV	2692.25	-0.0227725
PSB913-2_map5	0001.CSV	2696.11	-0.0226891
PSB913-2_map5	0001.CSV	2699.97	-0.0226777
PSB913-2_map5	0001.CSV	2703.82	-0.0226762
PSB913-2_map5	0001.CSV	2707.68	-0.0225566
PSB913-2_map5	0001.CSV	2711.54	-0.0224347
PSB913-2_map5	0001.CSV	2715.4	-0.0223885
PSB913-2_map5	0001.CSV	2719.25	-0.0222499
PSB913-2_map5	0001.CSV	2723.11	-0.0219953
PSB913-2_map5	0001.CSV	2726.97	-0.0220192
PSB913-2_map5	0001.CSV	2730.82	-0.0222677
PSB913-2_map5	0001.CSV	2734.68	-0.0222455
PSB913-2_map5	0001.CSV	2738.54	-0.0221787
PSB913-2_map5	0001.CSV	2742.4	-0.0221264
PSB913-2_map5	0001.CSV	2746.25	-0.021819
PSB913-2_map5	0001.CSV	2750.11	-0.0217197
PSB913-2_map5	0001.CSV	2753.97	-0.0219007
PSB913-2_map5	0001.CSV	2757.82	-0.021942
PSB913-2_map5	0001.CSV	2761.68	-0.0220114
PSB913-2_map5	0001.CSV	2765.54	-0.0220856
PSB913-2_map5	0001.CSV	2769.39	-0.0219784
PSB913-2_map5	0001.CSV	2773.25	-0.0216366
PSB913-2_map5	0001.CSV	2777.11	-0.0215559
PSB913-2_map5	0001.CSV	2780.97	-0.0216416
PSB913-2_map5	0001.CSV	2784.82	-0.0214889
PSB913-2_map5	0001.CSV	2788.68	-0.0211216
PSB913-2_map5	0001.CSV	2792.54	-0.0208764
PSB913-2_map5	0001.CSV	2796.39	-0.0207226
PSB913-2_map5	0001.CSV	2800.25	-0.0208126
PSB913-2_map5	0001.CSV	2804.11	-0.0209785
PSB913-2_map5	0001.CSV	2807.97	-0.0207359
PSB913-2_map5	0001.CSV	2811.82	-0.0205996
PSB913-2_map5	0001.CSV	2815.68	-0.0206168
PSB913-2_map5	0001.CSV	2819.54	-0.0204861
PSB913-2_map5	0001.CSV	2823.39	-0.0203205
PSB913-2_map5	0001.CSV	2827.25	-0.020124
PSB913-2_map5	0001.CSV	2831.11	-0.0196553
PSB913-2_map5	0001.CSV	2834.97	-0.0189963
PSB913-2_map5	0001.CSV	2838.82	-0.0184024
PSB913-2_map5	0001.CSV	2842.68	-0.017896
PSB913-2_map5	0001.CSV	2846.54	-0.0171003
PSB913-2_map5	0001.CSV	2850.39	-0.0167257
PSB913-2_map5	0001.CSV	2854.25	-0.0168161
PSB913-2_map5	0001.CSV	2858.11	-0.0168087
PSB913-2_map5	0001.CSV	2861.97	-0.0169153
PSB913-2_map5	0001.CSV	2865.82	-0.0169935
PSB913-2_map5	0001.CSV	2869.68	-0.0168331
PSB913-2_map5	0001.CSV	2873.54	-0.0167997
PSB913-2_map5	0001.CSV	2877.39	-0.0172489
PSB913-2_map5	0001.CSV	2881.25	-0.0175391
PSB913-2_map5	0001.CSV	2885.11	-0.0175395
PSB913-2_map5	0001.CSV	2888.97	-0.01727
PSB913-2_map5	0001.CSV	2892.82	-0.0166296
PSB913-2_map5	0001.CSV	2896.68	-0.0161758
PSB913-2_map5	0001.CSV	2900.54	-0.0160679
PSB913-2_map5	0001.CSV	2904.39	-0.0156502
PSB913-2_map5	0001.CSV	2908.25	-0.0147551
PSB913-2_map5	0001.CSV	2912.11	-0.013591
PSB913-2_map5	0001.CSV	2915.97	-0.0128649
PSB913-2_map5	0001.CSV	2919.82	-0.0130856
PSB913-2_map5	0001.CSV	2923.68	-0.0137375
PSB913-2_map5	0001.CSV	2927.54	-0.0141209
PSB913-2_map5	0001.CSV	2931.39	-0.0146874
PSB913-2_map5	0001.CSV	2935.25	-0.01553
PSB913-2_map5	0001.CSV	2939.11	-0.0159318
PSB913-2_map5	0001.CSV	2942.96	-0.0158947
PSB913-2_map5	0001.CSV	2946.82	-0.0160863
PSB913-2_map5	0001.CSV	2950.68	-0.0165604
PSB913-2_map5	0001.CSV	2954.54	-0.0172292
PSB913-2_map5	0001.CSV	2958.39	-0.017876
PSB913-2_map5	0001.CSV	2962.25	-0.0182923
PSB913-2_map5	0001.CSV	2966.11	-0.0188552
PSB913-2_map5	0001.CSV	2969.96	-0.0192266
PSB913-2_map5	0001.CSV	2973.82	-0.0193101
PSB913-2_map5	0001.CSV	2977.68	-0.0194884
PSB913-2_map5	0001.CSV	2981.53	-0.0199288
PSB913-2_map5	0001.CSV	2985.39	-0.0205153
PSB913-2_map5	0001.CSV	2989.25	-0.0207007
PSB913-2_map5	0001.CSV	2993.11	-0.0206831
PSB913-2_map5	0001.CSV	2996.96	-0.020811
PSB913-2_map5	0001.CSV	3000.82	-0.0210395
PSB913-2_map5	0001.CSV	3004.68	-0.0212276
PSB913-2_map5	0001.CSV	3008.53	-0.0211574
PSB913-2_map5	0001.CSV	3012.39	-0.0209324
PSB913-2_map5	0001.CSV	3016.25	-0.0209287
PSB913-2_map5	0001.CSV	3020.11	-0.0210678
PSB913-2_map5	0001.CSV	3023.96	-0.0211082
PSB913-2_map5	0001.CSV	3027.82	-0.0210131
PSB913-2_map5	0001.CSV	3031.68	-0.0208727
PSB913-2_map5	0001.CSV	3035.53	-0.0208852
PSB913-2_map5	0001.CSV	3039.39	-0.020949
PSB913-2_map5	0001.CSV	3043.25	-0.0210382
PSB913-2_map5	0001.CSV	3047.11	-0.0210864
PSB913-2_map5	0001.CSV	3050.96	-0.0209104
PSB913-2_map5	0001.CSV	3054.82	-0.0208615
PSB913-2_map5	0001.CSV	3058.68	-0.0209574
PSB913-2_map5	0001.CSV	3062.53	-0.0209841
PSB913-2_map5	0001.CSV	3066.39	-0.0208927
PSB913-2_map5	0001.CSV	3070.25	-0.0209032
PSB913-2_map5	0001.CSV	3074.11	-0.0208942
PSB913-2_map5	0001.CSV	3077.96	-0.0207863
PSB913-2_map5	0001.CSV	3081.82	-0.0206974
PSB913-2_map5	0001.CSV	3085.68	-0.0207257
PSB913-2_map5	0001.CSV	3089.53	-0.0208115
PSB913-2_map5	0001.CSV	3093.39	-0.0209207
PSB913-2_map5	0001.CSV	3097.25	-0.0208166
PSB913-2_map5	0001.CSV	3101.11	-0.0207456
PSB913-2_map5	0001.CSV	3104.96	-0.0207481
PSB913-2_map5	0001.CSV	3108.82	-0.0205847
PSB913-2_map5	0001.CSV	3112.68	-0.0205174
PSB913-2_map5	0001.CSV	3116.53	-0.0204974
PSB913-2_map5	0001.CSV	3120.39	-0.0204847
PSB913-2_map5	0001.CSV	3124.25	-0.0205994
PSB913-2_map5	0001.CSV	3128.11	-0.0205859
PSB913-2_map5	0001.CSV	3131.96	-0.0204701
PSB913-2_map5	0001.CSV	3135.82	-0.0202584
PSB913-2_map5	0001.CSV	3139.68	-0.0201399
PSB913-2_map5	0001.CSV	3143.53	-0.0202767
PSB913-2_map5	0001.CSV	3147.39	-0.0202215
PSB913-2_map5	0001.CSV	3151.25	-0.0199493
PSB913-2_map5	0001.CSV	3155.1	-0.0199347
PSB913-2_map5	0001.CSV	3158.96	-0.0200814
PSB913-2_map5	0001.CSV	3162.82	-0.020103
PSB913-2_map5	0001.CSV	3166.68	-0.0200604
PSB913-2_map5	0001.CSV	3170.53	-0.0200449
PSB913-2_map5	0001.CSV	3174.39	-0.019974
PSB913-2_map5	0001.CSV	3178.25	-0.0197818
PSB913-2_map5	0001.CSV	3182.1	-0.0196226
PSB913-2_map5	0001.CSV	3185.96	-0.0194718
PSB913-2_map5	0001.CSV	3189.82	-0.019453
PSB913-2_map5	0001.CSV	3193.68	-0.0195461
PSB913-2_map5	0001.CSV	3197.53	-0.0194712
PSB913-2_map5	0001.CSV	3201.39	-0.0193242
PSB913-2_map5	0001.CSV	3205.25	-0.0191494
PSB913-2_map5	0001.CSV	3209.1	-0.0190951
PSB913-2_map5	0001.CSV	3212.96	-0.0190535
PSB913-2_map5	0001.CSV	3216.82	-0.0188719
PSB913-2_map5	0001.CSV	3220.68	-0.0187364
PSB913-2_map5	0001.CSV	3224.53	-0.018732
PSB913-2_map5	0001.CSV	3228.39	-0.018703
PSB913-2_map5	0001.CSV	3232.25	-0.0184522
PSB913-2_map5	0001.CSV	3236.1	-0.0183189
PSB913-2_map5	0001.CSV	3239.96	-0.0184113
PSB913-2_map5	0001.CSV	3243.82	-0.0182895
PSB913-2_map5	0001.CSV	3247.68	-0.0181933
PSB913-2_map5	0001.CSV	3251.53	-0.0181777
PSB913-2_map5	0001.CSV	3255.39	-0.0181145
PSB913-2_map5	0001.CSV	3259.25	-0.0181558
PSB913-2_map5	0001.CSV	3263.1	-0.0180589
PSB913-2_map5	0001.CSV	3266.96	-0.0178096
PSB913-2_map5	0001.CSV	3270.82	-0.0177056
PSB913-2_map5	0001.CSV	3274.68	-0.0176744
PSB913-2_map5	0001.CSV	3278.53	-0.0177636
PSB913-2_map5	0001.CSV	3282.39	-0.0178885
PSB913-2_map5	0001.CSV	3286.25	-0.0178998
PSB913-2_map5	0001.CSV	3290.1	-0.0176508
PSB913-2_map5	0001.CSV	3293.96	-0.0174404
PSB913-2_map5	0001.CSV	3297.82	-0.0173972
PSB913-2_map5	0001.CSV	3301.67	-0.0173892
PSB913-2_map5	0001.CSV	3305.53	-0.0173385
PSB913-2_map5	0001.CSV	3309.39	-0.0174206
PSB913-2_map5	0001.CSV	3313.25	-0.0176041
PSB913-2_map5	0001.CSV	3317.1	-0.0176834
PSB913-2_map5	0001.CSV	3320.96	-0.0174917
PSB913-2_map5	0001.CSV	3324.82	-0.0172658
PSB913-2_map5	0001.CSV	3328.67	-0.0173643
PSB913-2_map5	0001.CSV	3332.53	-0.0175136
PSB913-2_map5	0001.CSV	3336.39	-0.0172775
PSB913-2_map5	0001.CSV	3340.24	-0.016858
PSB913-2_map5	0001.CSV	3344.1	-0.016867
PSB913-2_map5	0001.CSV	3347.96	-0.0171027
PSB913-2_map5	0001.CSV	3351.82	-0.0171169
PSB913-2_map5	0001.CSV	3355.67	-0.0172633
PSB913-2_map5	0001.CSV	3359.53	-0.0172745
PSB913-2_map5	0001.CSV	3363.39	-0.0171476
PSB913-2_map5	0001.CSV	3367.24	-0.0169986
PSB913-2_map5	0001.CSV	3371.1	-0.0169386
PSB913-2_map5	0001.CSV	3374.96	-0.0170121
PSB913-2_map5	0001.CSV	3378.82	-0.0171475
PSB913-2_map5	0001.CSV	3382.67	-0.0172501
PSB913-2_map5	0001.CSV	3386.53	-0.017346
PSB913-2_map5	0001.CSV	3390.39	-0.0172131
PSB913-2_map5	0001.CSV	3394.24	-0.0170213
PSB913-2_map5	0001.CSV	3398.1	-0.0170563
PSB913-2_map5	0001.CSV	3401.96	-0.0170889
PSB913-2_map5	0001.CSV	3405.82	-0.017138
PSB913-2_map5	0001.CSV	3409.67	-0.017213
PSB913-2_map5	0001.CSV	3413.53	-0.0174022
PSB913-2_map5	0001.CSV	3417.39	-0.0176069
PSB913-2_map5	0001.CSV	3421.24	-0.0176696
PSB913-2_map5	0001.CSV	3425.1	-0.0176422
PSB913-2_map5	0001.CSV	3428.96	-0.0175216
PSB913-2_map5	0001.CSV	3432.82	-0.0175082
PSB913-2_map5	0001.CSV	3436.67	-0.0176962
PSB913-2_map5	0001.CSV	3440.53	-0.0180842
PSB913-2_map5	0001.CSV	3444.39	-0.0183772
PSB913-2_map5	0001.CSV	3448.24	-0.0184705
PSB913-2_map5	0001.CSV	3452.1	-0.0186835
PSB913-2_map5	0001.CSV	3455.96	-0.0188668
PSB913-2_map5	0001.CSV	3459.82	-0.018801
PSB913-2_map5	0001.CSV	3463.67	-0.0186809
PSB913-2_map5	0001.CSV	3467.53	-0.0185737
PSB913-2_map5	0001.CSV	3471.39	-0.0187751
PSB913-2_map5	0001.CSV	3475.24	-0.0190222
PSB913-2_map5	0001.CSV	3479.1	-0.0191224
PSB913-2_map5	0001.CSV	3482.96	-0.0191029
PSB913-2_map5	0001.CSV	3486.82	-0.0191304
PSB913-2_map5	0001.CSV	3490.67	-0.0192651
PSB913-2_map5	0001.CSV	3494.53	-0.0194078
PSB913-2_map5	0001.CSV	3498.39	-0.0195522
PSB913-2_map5	0001.CSV	3502.24	-0.019851
PSB913-2_map5	0001.CSV	3506.1	-0.0203119
PSB913-2_map5	0001.CSV	3509.96	-0.0204015
PSB913-2_map5	0001.CSV	3513.81	-0.0202502
PSB913-2_map5	0001.CSV	3517.67	-0.0204482
PSB913-2_map5	0001.CSV	3521.53	-0.0206025
PSB913-2_map5	0001.CSV	3525.39	-0.0207518
PSB913-2_map5	0001.CSV	3529.24	-0.0208978
PSB913-2_map5	0001.CSV	3533.1	-0.0210382
PSB913-2_map5	0001.CSV	3536.96	-0.0210364
PSB913-2_map5	0001.CSV	3540.81	-0.0210464
PSB913-2_map5	0001.CSV	3544.67	-0.021027
PSB913-2_map5	0001.CSV	3548.53	-0.0212121
PSB913-2_map5	0001.CSV	3552.39	-0.0215485
PSB913-2_map5	0001.CSV	3556.24	-0.0217209
PSB913-2_map5	0001.CSV	3560.1	-0.021918
PSB913-2_map5	0001.CSV	3563.96	-0.0223028
PSB913-2_map5	0001.CSV	3567.81	-0.0220903
PSB913-2_map5	0001.CSV	3571.67	-0.0220209
PSB913-2_map5	0001.CSV	3575.53	-0.0224481
PSB913-2_map5	0001.CSV	3579.39	-0.022572
PSB913-2_map5	0001.CSV	3583.24	-0.0227288
PSB913-2_map5	0001.CSV	3587.1	-0.0228973
PSB913-2_map5	0001.CSV	3590.96	-0.0228082
PSB913-2_map5	0001.CSV	3594.81	-0.0230173
PSB913-2_map5	0001.CSV	3598.67	-0.0231474
PSB913-2_map5	0001.CSV	3602.53	-0.0233069
PSB913-2_map5	0001.CSV	3606.39	-0.0236066
PSB913-2_map5	0001.CSV	3610.24	-0.0240419
PSB913-2_map5	0001.CSV	3614.1	-0.0242825
PSB913-2_map5	0001.CSV	3617.96	-0.0238488
PSB913-2_map5	0001.CSV	3621.81	-0.023604
PSB913-2_map5	0001.CSV	3625.67	-0.0241722
PSB913-2_map5	0001.CSV	3629.53	-0.0243534
PSB913-2_map5	0001.CSV	3633.39	-0.0240096
PSB913-2_map5	0001.CSV	3637.24	-0.0240933
PSB913-2_map5	0001.CSV	3641.1	-0.0242935
PSB913-2_map5	0001.CSV	3644.96	-0.0247936
PSB913-2_map5	0001.CSV	3648.81	-0.0247639
PSB913-2_map5	0001.CSV	3652.67	-0.0241231
PSB913-2_map5	0001.CSV	3656.53	-0.0240564
PSB913-2_map5	0001.CSV	3660.38	-0.0241076
PSB913-2_map5	0001.CSV	3664.24	-0.0245533
PSB913-2_map5	0001.CSV	3668.1	-0.0249725
PSB913-2_map5	0001.CSV	3671.96	-0.0252149
PSB913-2_map5	0001.CSV	3675.81	-0.0250363
PSB913-2_map5	0001.CSV	3679.67	-0.0245818
PSB913-2_map5	0001.CSV	3683.53	-0.0247012
PSB913-2_map5	0001.CSV	3687.38	-0.0248425
PSB913-2_map5	0001.CSV	3691.24	-0.0243224
PSB913-2_map5	0001.CSV	3695.1	-0.0242914
PSB913-2_map5	0001.CSV	3698.95	-0.0247397
PSB913-2_map5	0001.CSV	3702.81	-0.025024
PSB913-2_map5	0001.CSV	3706.67	-0.0251759
PSB913-2_map5	0001.CSV	3710.53	-0.0249911
PSB913-2_map5	0001.CSV	3714.38	-0.024591
PSB913-2_map5	0001.CSV	3718.24	-0.0249511
PSB913-2_map5	0001.CSV	3722.1	-0.0252698
PSB913-2_map5	0001.CSV	3725.95	-0.0253558
PSB913-2_map5	0001.CSV	3729.81	-0.0254467
PSB913-2_map5	0001.CSV	3733.67	-0.0255236
PSB913-2_map5	0001.CSV	3737.53	-0.0248558
PSB913-2_map5	0001.CSV	3741.38	-0.0250285
PSB913-2_map5	0001.CSV	3745.24	-0.0254664
PSB913-2_map5	0001.CSV	3749.1	-0.0253679
PSB913-2_map5	0001.CSV	3752.95	-0.0248435
PSB913-2_map5	0001.CSV	3756.81	-0.0248296
PSB913-2_map5	0001.CSV	3760.67	-0.0248854
PSB913-2_map5	0001.CSV	3764.53	-0.0250317
PSB913-2_map5	0001.CSV	3768.38	-0.0247972
PSB913-2_map5	0001.CSV	3772.24	-0.0246269
PSB913-2_map5	0001.CSV	3776.1	-0.0248966
PSB913-2_map5	0001.CSV	3779.95	-0.0249357
PSB913-2_map5	0001.CSV	3783.81	-0.0248845
PSB913-2_map5	0001.CSV	3787.67	-0.0248566
PSB913-2_map5	0001.CSV	3791.53	-0.0249631
PSB913-2_map5	0001.CSV	3795.38	-0.0251933
PSB913-2_map5	0001.CSV	3799.24	-0.0252153
PSB913-2_map5	0001.CSV	3803.1	-0.0249863
PSB913-2_map5	0001.CSV	3806.95	-0.0247499
PSB913-2_map5	0001.CSV	3810.81	-0.0249741
PSB913-2_map5	0001.CSV	3814.67	-0.0253749
PSB913-2_map5	0001.CSV	3818.53	-0.0253245
PSB913-2_map5	0001.CSV	3822.38	-0.0248163
PSB913-2_map5	0001.CSV	3826.24	-0.024753
PSB913-2_map5	0001.CSV	3830.1	-0.0248708
PSB913-2_map5	0001.CSV	3833.95	-0.0250778
PSB913-2_map5	0001.CSV	3837.81	-0.025281
PSB913-2_map5	0001.CSV	3841.67	-0.024672
PSB913-2_map5	0001.CSV	3845.53	-0.0244584
PSB913-2_map5	0001.CSV	3849.38	-0.024979
PSB913-2_map5	0001.CSV	3853.24	-0.0250218
PSB913-2_map5	0001.CSV	3857.1	-0.0247052
PSB913-2_map5	0001.CSV	3860.95	-0.0250768
PSB913-2_map5	0001.CSV	3864.81	-0.0250699
PSB913-2_map5	0001.CSV	3868.67	-0.0250478
PSB913-2_map5	0001.CSV	3872.52	-0.0247749
PSB913-2_map5	0001.CSV	3876.38	-0.0247535
PSB913-2_map5	0001.CSV	3880.24	-0.0249679
PSB913-2_map5	0001.CSV	3884.1	-0.0247455
PSB913-2_map5	0001.CSV	3887.95	-0.0246899
PSB913-2_map5	0001.CSV	3891.81	-0.0246111
PSB913-2_map5	0001.CSV	3895.67	-0.0247409
PSB913-2_map5	0001.CSV	3899.52	-0.0250616
PSB913-2_map5	0001.CSV	3903.38	-0.0247363
PSB913-2_map5	0001.CSV	3907.24	-0.0244909
PSB913-2_map5	0001.CSV	3911.1	-0.0247029
PSB913-2_map5	0001.CSV	3914.95	-0.024833
PSB913-2_map5	0001.CSV	3918.81	-0.0247338
PSB913-2_map5	0001.CSV	3922.67	-0.024616
PSB913-2_map5	0001.CSV	3926.52	-0.0245131
PSB913-2_map5	0001.CSV	3930.38	-0.0244562
PSB913-2_map5	0001.CSV	3934.24	-0.0244027
PSB913-2_map5	0001.CSV	3938.09	-0.0245521
PSB913-2_map5	0001.CSV	3941.95	-0.0246519
PSB913-2_map5	0001.CSV	3945.81	-0.02458
PSB913-2_map5	0001.CSV	3949.67	-0.024532
PSB913-2_map5	0001.CSV	3953.52	-0.0246046
PSB913-2_map5	0001.CSV	3957.38	-0.0245851
PSB913-2_map5	0001.CSV	3961.24	-0.0245123
PSB913-2_map5	0001.CSV	3965.09	-0.0245922
PSB913-2_map5	0001.CSV	3968.95	-0.0246272
PSB913-2_map5	0001.CSV	3972.81	-0.0244915
PSB913-2_map5	0001.CSV	3976.67	-0.024306
PSB913-2_map5	0001.CSV	3980.52	-0.0242075
PSB913-2_map5	0001.CSV	3984.38	-0.0241231
PSB913-2_map5	0001.CSV	3988.24	-0.0240963
PSB913-2_map5	0001.CSV	3992.09	-0.0242192
PSB913-2_map5	0001.CSV	3995.95	-0.0244003
PSB913-2_map5	0001.CSV	3999.81	-0.0244185
PSB913-2_map5	0002.CSV	674.992	0.0247258
PSB913-2_map5	0002.CSV	678.849	0.0265937
PSB913-2_map5	0002.CSV	682.706	0.0276008
PSB913-2_map5	0002.CSV	686.563	0.0303668
PSB913-2_map5	0002.CSV	690.42	0.0348758
PSB913-2_map5	0002.CSV	694.277	0.045917
PSB913-2_map5	0002.CSV	698.134	0.0550963
PSB913-2_map5	0002.CSV	701.991	0.0475997
PSB913-2_map5	0002.CSV	705.849	0.0408715
PSB913-2_map5	0002.CSV	709.706	0.0530055
PSB913-2_map5	0002.CSV	713.563	0.0511368
PSB913-2_map5	0002.CSV	717.42	0.0280108
PSB913-2_map5	0002.CSV	721.277	0.015759
PSB913-2_map5	0002.CSV	725.134	0.0157946
PSB913-2_map5	0002.CSV	728.991	0.0170696
PSB913-2_map5	0002.CSV	732.848	0.0187138
PSB913-2_map5	0002.CSV	736.705	0.0199643
PSB913-2_map5	0002.CSV	740.562	0.0211468
PSB913-2_map5	0002.CSV	744.42	0.0213982
PSB913-2_map5	0002.CSV	748.277	0.0213924
PSB913-2_map5	0002.CSV	752.134	0.0213596
PSB913-2_map5	0002.CSV	755.991	0.0221744
PSB913-2_map5	0002.CSV	759.848	0.0221506
PSB913-2_map5	0002.CSV	763.705	0.0222204
PSB913-2_map5	0002.CSV	767.562	0.0216858
PSB913-2_map5	0002.CSV	771.419	0.0216319
PSB913-2_map5	0002.CSV	775.276	0.0219902
PSB913-2_map5	0002.CSV	779.133	0.0225396
PSB913-2_map5	0002.CSV	782.99	0.0224714
PSB913-2_map5	0002.CSV	786.848	0.0227859
PSB913-2_map5	0002.CSV	790.705	0.0229106
PSB913-2_map5	0002.CSV	794.562	0.0233585
PSB913-2_map5	0002.CSV	798.419	0.0239079
PSB913-2_map5	0002.CSV	802.276	0.02496
PSB913-2_map5	0002.CSV	806.133	0.0258177
PSB913-2_map5	0002.CSV	809.99	0.0271464
PSB913-2_map5	0002.CSV	813.847	0.0282168
PSB913-2_map5	0002.CSV	817.704	0.0298671
PSB913-2_map5	0002.CSV	821.562	0.0317579
PSB913-2_map5	0002.CSV	825.419	0.0346632
PSB913-2_map5	0002.CSV	829.276	0.0378146
PSB913-2_map5	0002.CSV	833.133	0.042269
PSB913-2_map5	0002.CSV	836.99	0.0486716
PSB913-2_map5	0002.CSV	840.847	0.0582156
PSB913-2_map5	0002.CSV	844.704	0.0679124
PSB913-2_map5	0002.CSV	848.561	0.0835604
PSB913-2_map5	0002.CSV	852.418	0.100602
PSB913-2_map5	0002.CSV	856.275	0.0984574
PSB913-2_map5	0002.CSV	860.132	0.0776159
PSB913-2_map5	0002.CSV	863.99	0.0548313
PSB913-2_map5	0002.CSV	867.847	0.0367113
PSB913-2_map5	0002.CSV	871.704	0.0242149
PSB913-2_map5	0002.CSV	875.561	0.0166827
PSB913-2_map5	0002.CSV	879.418	0.0135895
PSB913-2_map5	0002.CSV	883.275	0.0122179
PSB913-2_map5	0002.CSV	887.132	0.0117411
PSB913-2_map5	0002.CSV	890.989	0.0116381
PSB913-2_map5	0002.CSV	894.846	0.0120648
PSB913-2_map5	0002.CSV	898.703	0.0122931
PSB913-2_map5	0002.CSV	902.561	0.0126895
PSB913-2_map5	0002.CSV	906.418	0.0128264
PSB913-2_map5	0002.CSV	910.275	0.0124353
PSB913-2_map5	0002.CSV	914.132	0.011816
PSB913-2_map5	0002.CSV	917.989	0.0118956
PSB913-2_map5	0002.CSV	921.846	0.0118881
PSB913-2_map5	0002.CSV	925.703	0.012112
PSB913-2_map5	0002.CSV	929.56	0.0121551
PSB913-2_map5	0002.CSV	933.417	0.0123709
PSB913-2_map5	0002.CSV	937.274	0.0123855
PSB913-2_map5	0002.CSV	941.131	0.0125179
PSB913-2_map5	0002.CSV	944.989	0.0124572
PSB913-2_map5	0002.CSV	948.846	0.0124648
PSB913-2_map5	0002.CSV	952.703	0.0124225
PSB913-2_map5	0002.CSV	956.56	0.0126126
PSB913-2_map5	0002.CSV	960.417	0.0126192
PSB913-2_map5	0002.CSV	964.274	0.0127857
PSB913-2_map5	0002.CSV	968.131	0.0127497
PSB913-2_map5	0002.CSV	971.988	0.0129154
PSB913-2_map5	0002.CSV	975.845	0.0131379
PSB913-2_map5	0002.CSV	979.702	0.0136944
PSB913-2_map5	0002.CSV	983.559	0.0141799
PSB913-2_map5	0002.CSV	987.417	0.0147754
PSB913-2_map5	0002.CSV	991.274	0.0150709
PSB913-2_map5	0002.CSV	995.131	0.0153746
PSB913-2_map5	0002.CSV	998.988	0.0154948
PSB913-2_map5	0002.CSV	1002.85	0.0158169
PSB913-2_map5	0002.CSV	1006.7	0.0159851
PSB913-2_map5	0002.CSV	1010.56	0.0165441
PSB913-2_map5	0002.CSV	1014.42	0.0172237
PSB913-2_map5	0002.CSV	1018.27	0.0182161
PSB913-2_map5	0002.CSV	1022.13	0.0189083
PSB913-2_map5	0002.CSV	1025.99	0.0197251
PSB913-2_map5	0002.CSV	1029.85	0.0203458
PSB913-2_map5	0002.CSV	1033.7	0.0209819
PSB913-2_map5	0002.CSV	1037.56	0.0213597
PSB913-2_map5	0002.CSV	1041.42	0.0219216
PSB913-2_map5	0002.CSV	1045.27	0.0223623
PSB913-2_map5	0002.CSV	1049.13	0.0231213
PSB913-2_map5	0002.CSV	1052.99	0.023833
PSB913-2_map5	0002.CSV	1056.84	0.0249157
PSB913-2_map5	0002.CSV	1060.7	0.0257531
PSB913-2_map5	0002.CSV	1064.56	0.0265027
PSB913-2_map5	0002.CSV	1068.42	0.0267433
PSB913-2_map5	0002.CSV	1072.27	0.0269572
PSB913-2_map5	0002.CSV	1076.13	0.0277822
PSB913-2_map5	0002.CSV	1079.99	0.0308984
PSB913-2_map5	0002.CSV	1083.84	0.0296872
PSB913-2_map5	0002.CSV	1087.7	0.0233884
PSB913-2_map5	0002.CSV	1091.56	0.0203598
PSB913-2_map5	0002.CSV	1095.41	0.0203724
PSB913-2_map5	0002.CSV	1099.27	0.0207226
PSB913-2_map5	0002.CSV	1103.13	0.0212856
PSB913-2_map5	0002.CSV	1106.99	0.021765
PSB913-2_map5	0002.CSV	1110.84	0.0222893
PSB913-2_map5	0002.CSV	1114.7	0.0224155
PSB913-2_map5	0002.CSV	1118.56	0.022404
PSB913-2_map5	0002.CSV	1122.41	0.0221024
PSB913-2_map5	0002.CSV	1126.27	0.0217254
PSB913-2_map5	0002.CSV	1130.13	0.021185
PSB913-2_map5	0002.CSV	1133.99	0.0209764
PSB913-2_map5	0002.CSV	1137.84	0.0207515
PSB913-2_map5	0002.CSV	1141.7	0.0206011
PSB913-2_map5	0002.CSV	1145.56	0.0203886
PSB913-2_map5	0002.CSV	1149.41	0.0205972
PSB913-2_map5	0002.CSV	1153.27	0.0209939
PSB913-2_map5	0002.CSV	1157.13	0.0214095
PSB913-2_map5	0002.CSV	1160.99	0.0214876
PSB913-2_map5	0002.CSV	1164.84	0.0214783
PSB913-2_map5	0002.CSV	1168.7	0.0210855
PSB913-2_map5	0002.CSV	1172.56	0.0207593
PSB913-2_map5	0002.CSV	1176.41	0.0204774
PSB913-2_map5	0002.CSV	1180.27	0.02046
PSB913-2_map5	0002.CSV	1184.13	0.0203527
PSB913-2_map5	0002.CSV	1187.99	0.0204706
PSB913-2_map5	0002.CSV	1191.84	0.0206341
PSB913-2_map5	0002.CSV	1195.7	0.0210435
PSB913-2_map5	0002.CSV	1199.56	0.0212714
PSB913-2_map5	0002.CSV	1203.41	0.0215826
PSB913-2_map5	0002.CSV	1207.27	0.0218888
PSB913-2_map5	0002.CSV	1211.13	0.0223815
PSB913-2_map5	0002.CSV	1214.98	0.0227149
PSB913-2_map5	0002.CSV	1218.84	0.0232832
PSB913-2_map5	0002.CSV	1222.7	0.0238422
PSB913-2_map5	0002.CSV	1226.56	0.0245756
PSB913-2_map5	0002.CSV	1230.41	0.0252484
PSB913-2_map5	0002.CSV	1234.27	0.0261107
PSB913-2_map5	0002.CSV	1238.13	0.0268935
PSB913-2_map5	0002.CSV	1241.98	0.0278912
PSB913-2_map5	0002.CSV	1245.84	0.0287631
PSB913-2_map5	0002.CSV	1249.7	0.0296228
PSB913-2_map5	0002.CSV	1253.56	0.0302375
PSB913-2_map5	0002.CSV	1257.41	0.0309203
PSB913-2_map5	0002.CSV	1261.27	0.0314096
PSB913-2_map5	0002.CSV	1265.13	0.0319963
PSB913-2_map5	0002.CSV	1268.98	0.0324102
PSB913-2_map5	0002.CSV	1272.84	0.0329461
PSB913-2_map5	0002.CSV	1276.7	0.0332663
PSB913-2_map5	0002.CSV	1280.56	0.0336604
PSB913-2_map5	0002.CSV	1284.41	0.0338834
PSB913-2_map5	0002.CSV	1288.27	0.03411
PSB913-2_map5	0002.CSV	1292.13	0.034045
PSB913-2_map5	0002.CSV	1295.98	0.034234
PSB913-2_map5	0002.CSV	1299.84	0.0345287
PSB913-2_map5	0002.CSV	1303.7	0.035145
PSB913-2_map5	0002.CSV	1307.56	0.0357652
PSB913-2_map5	0002.CSV	1311.41	0.0366298
PSB913-2_map5	0002.CSV	1315.27	0.0374217
PSB913-2_map5	0002.CSV	1319.13	0.0385115
PSB913-2_map5	0002.CSV	1322.98	0.0394873
PSB913-2_map5	0002.CSV	1326.84	0.0406182
PSB913-2_map5	0002.CSV	1330.7	0.0417549
PSB913-2_map5	0002.CSV	1334.56	0.0430847
PSB913-2_map5	0002.CSV	1338.41	0.0446871
PSB913-2_map5	0002.CSV	1342.27	0.046796
PSB913-2_map5	0002.CSV	1346.13	0.0483304
PSB913-2_map5	0002.CSV	1349.98	0.0502442
PSB913-2_map5	0002.CSV	1353.84	0.0521279
PSB913-2_map5	0002.CSV	1357.7	0.0542069
PSB913-2_map5	0002.CSV	1361.56	0.0565186
PSB913-2_map5	0002.CSV	1365.41	0.0594135
PSB913-2_map5	0002.CSV	1369.27	0.0615312
PSB913-2_map5	0002.CSV	1373.13	0.0643216
PSB913-2_map5	0002.CSV	1376.98	0.0673111
PSB913-2_map5	0002.CSV	1380.84	0.0698818
PSB913-2_map5	0002.CSV	1384.7	0.0722762
PSB913-2_map5	0002.CSV	1388.56	0.075494
PSB913-2_map5	0002.CSV	1392.41	0.0777806
PSB913-2_map5	0002.CSV	1396.27	0.0809511
PSB913-2_map5	0002.CSV	1400.13	0.0840338
PSB913-2_map5	0002.CSV	1403.98	0.0866661
PSB913-2_map5	0002.CSV	1407.84	0.0890861
PSB913-2_map5	0002.CSV	1411.7	0.0913169
PSB913-2_map5	0002.CSV	1415.55	0.0928132
PSB913-2_map5	0002.CSV	1419.41	0.0954367
PSB913-2_map5	0002.CSV	1423.27	0.0975107
PSB913-2_map5	0002.CSV	1427.12	0.0994741
PSB913-2_map5	0002.CSV	1430.98	0.101224
PSB913-2_map5	0002.CSV	1434.84	0.103479
PSB913-2_map5	0002.CSV	1438.7	0.104925
PSB913-2_map5	0002.CSV	1442.55	0.104878
PSB913-2_map5	0002.CSV	1446.41	0.102653
PSB913-2_map5	0002.CSV	1450.27	0.0993314
PSB913-2_map5	0002.CSV	1454.12	0.0955512
PSB913-2_map5	0002.CSV	1457.98	0.0910988
PSB913-2_map5	0002.CSV	1461.84	0.0876944
PSB913-2_map5	0002.CSV	1465.7	0.0853269
PSB913-2_map5	0002.CSV	1469.55	0.0817178
PSB913-2_map5	0002.CSV	1473.41	0.0764022
PSB913-2_map5	0002.CSV	1477.27	0.0699385
PSB913-2_map5	0002.CSV	1481.12	0.0658805
PSB913-2_map5	0002.CSV	1484.98	0.0618153
PSB913-2_map5	0002.CSV	1488.84	0.0569429
PSB913-2_map5	0002.CSV	1492.7	0.0518085
PSB913-2_map5	0002.CSV	1496.55	0.047792
PSB913-2_map5	0002.CSV	1500.41	0.0429114
PSB913-2_map5	0002.CSV	1504.27	0.0399366
PSB913-2_map5	0002.CSV	1508.12	0.0342011
PSB913-2_map5	0002.CSV	1511.98	0.0302181
PSB913-2_map5	0002.CSV	1515.84	0.027338
PSB913-2_map5	0002.CSV	1519.7	0.0233765
PSB913-2_map5	0002.CSV	1523.55	0.0186868
PSB913-2_map5	0002.CSV	1527.41	0.0156011
PSB913-2_map5	0002.CSV	1531.27	0.0126801
PSB913-2_map5	0002.CSV	1535.12	0.0100315
PSB913-2_map5	0002.CSV	1538.98	0.00713711
PSB913-2_map5	0002.CSV	1542.84	0.00324802
PSB913-2_map5	0002.CSV	1546.7	0.000865926
PSB913-2_map5	0002.CSV	1550.55	-0.00105622
PSB913-2_map5	0002.CSV	1554.41	-0.00319105
PSB913-2_map5	0002.CSV	1558.27	-0.00572288
PSB913-2_map5	0002.CSV	1562.12	-0.00806632
PSB913-2_map5	0002.CSV	1565.98	-0.00923491
PSB913-2_map5	0002.CSV	1569.84	-0.0108265
PSB913-2_map5	0002.CSV	1573.69	-0.0123128
PSB913-2_map5	0002.CSV	1577.55	-0.0139005
PSB913-2_map5	0002.CSV	1581.41	-0.0151082
PSB913-2_map5	0002.CSV	1585.27	-0.0160472
PSB913-2_map5	0002.CSV	1589.12	-0.0166915
PSB913-2_map5	0002.CSV	1592.98	-0.017077
PSB913-2_map5	0002.CSV	1596.84	-0.01725
PSB913-2_map5	0002.CSV	1600.69	-0.017425
PSB913-2_map5	0002.CSV	1604.55	-0.0176579
PSB913-2_map5	0002.CSV	1608.41	-0.0179577
PSB913-2_map5	0002.CSV	1612.27	-0.0181273
PSB913-2_map5	0002.CSV	1616.12	-0.0183755
PSB913-2_map5	0002.CSV	1619.98	-0.0184867
PSB913-2_map5	0002.CSV	1623.84	-0.0185687
PSB913-2_map5	0002.CSV	1627.69	-0.0185904
PSB913-2_map5	0002.CSV	1631.55	-0.018866
PSB913-2_map5	0002.CSV	1635.41	-0.0189262
PSB913-2_map5	0002.CSV	1639.27	-0.0187707
PSB913-2_map5	0002.CSV	1643.12	-0.0188998
PSB913-2_map5	0002.CSV	1646.98	-0.0190491
PSB913-2_map5	0002.CSV	1650.84	-0.0190416
PSB913-2_map5	0002.CSV	1654.69	-0.0189647
PSB913-2_map5	0002.CSV	1658.55	-0.0191115
PSB913-2_map5	0002.CSV	1662.41	-0.0193824
PSB913-2_map5	0002.CSV	1666.27	-0.0195068
PSB913-2_map5	0002.CSV	1670.12	-0.0195318
PSB913-2_map5	0002.CSV	1673.98	-0.0194453
PSB913-2_map5	0002.CSV	1677.84	-0.0197437
PSB913-2_map5	0002.CSV	1681.69	-0.0199302
PSB913-2_map5	0002.CSV	1685.55	-0.0196841
PSB913-2_map5	0002.CSV	1689.41	-0.0195756
PSB913-2_map5	0002.CSV	1693.27	-0.0199319
PSB913-2_map5	0002.CSV	1697.12	-0.0201159
PSB913-2_map5	0002.CSV	1700.98	-0.0200172
PSB913-2_map5	0002.CSV	1704.84	-0.0197752
PSB913-2_map5	0002.CSV	1708.69	-0.0195765
PSB913-2_map5	0002.CSV	1712.55	-0.0194216
PSB913-2_map5	0002.CSV	1716.41	-0.0186134
PSB913-2_map5	0002.CSV	1720.27	-0.0174192
PSB913-2_map5	0002.CSV	1724.12	-0.0172054
PSB913-2_map5	0002.CSV	1727.98	-0.0171865
PSB913-2_map5	0002.CSV	1731.84	-0.0172981
PSB913-2_map5	0002.CSV	1735.69	-0.0174444
PSB913-2_map5	0002.CSV	1739.55	-0.0179221
PSB913-2_map5	0002.CSV	1743.41	-0.0185786
PSB913-2_map5	0002.CSV	1747.27	-0.0194218
PSB913-2_map5	0002.CSV	1751.12	-0.0201376
PSB913-2_map5	0002.CSV	1754.98	-0.0206749
PSB913-2_map5	0002.CSV	1758.84	-0.0209581
PSB913-2_map5	0002.CSV	1762.69	-0.0210693
PSB913-2_map5	0002.CSV	1766.55	-0.0211507
PSB913-2_map5	0002.CSV	1770.41	-0.020994
PSB913-2_map5	0002.CSV	1774.26	-0.0198287
PSB913-2_map5	0002.CSV	1778.12	-0.0186851
PSB913-2_map5	0002.CSV	1781.98	-0.0176008
PSB913-2_map5	0002.CSV	1785.84	-0.0172008
PSB913-2_map5	0002.CSV	1789.69	-0.0176712
PSB913-2_map5	0002.CSV	1793.55	-0.0189173
PSB913-2_map5	0002.CSV	1797.41	-0.0198947
PSB913-2_map5	0002.CSV	1801.26	-0.0206575
PSB913-2_map5	0002.CSV	1805.12	-0.0211407
PSB913-2_map5	0002.CSV	1808.98	-0.0213677
PSB913-2_map5	0002.CSV	1812.84	-0.0213429
PSB913-2_map5	0002.CSV	1816.69	-0.0214379
PSB913-2_map5	0002.CSV	1820.55	-0.0215241
PSB913-2_map5	0002.CSV	1824.41	-0.0215495
PSB913-2_map5	0002.CSV	1828.26	-0.0213505
PSB913-2_map5	0002.CSV	1832.12	-0.0212957
PSB913-2_map5	0002.CSV	1835.98	-0.0213377
PSB913-2_map5	0002.CSV	1839.84	-0.0214507
PSB913-2_map5	0002.CSV	1843.69	-0.021397
PSB913-2_map5	0002.CSV	1847.55	-0.021221
PSB913-2_map5	0002.CSV	1851.41	-0.0212773
PSB913-2_map5	0002.CSV	1855.26	-0.0213856
PSB913-2_map5	0002.CSV	1859.12	-0.0213535
PSB913-2_map5	0002.CSV	1862.98	-0.0213692
PSB913-2_map5	0002.CSV	1866.84	-0.0213189
PSB913-2_map5	0002.CSV	1870.69	-0.0211464
PSB913-2_map5	0002.CSV	1874.55	-0.0211489
PSB913-2_map5	0002.CSV	1878.41	-0.0212581
PSB913-2_map5	0002.CSV	1882.26	-0.0212287
PSB913-2_map5	0002.CSV	1886.12	-0.0212282
PSB913-2_map5	0002.CSV	1889.98	-0.0212407
PSB913-2_map5	0002.CSV	1893.83	-0.0212661
PSB913-2_map5	0002.CSV	1897.69	-0.0212363
PSB913-2_map5	0002.CSV	1901.55	-0.021302
PSB913-2_map5	0002.CSV	1905.41	-0.0213358
PSB913-2_map5	0002.CSV	1909.26	-0.0212945
PSB913-2_map5	0002.CSV	1913.12	-0.0212792
PSB913-2_map5	0002.CSV	1916.98	-0.0213148
PSB913-2_map5	0002.CSV	1920.83	-0.021222
PSB913-2_map5	0002.CSV	1924.69	-0.021218
PSB913-2_map5	0002.CSV	1928.55	-0.021249
PSB913-2_map5	0002.CSV	1932.4	-0.0212913
PSB913-2_map5	0002.CSV	1936.26	-0.0213016
PSB913-2_map5	0002.CSV	1940.12	-0.0212924
PSB913-2_map5	0002.CSV	1943.98	-0.0211007
PSB913-2_map5	0002.CSV	1947.83	-0.0211232
PSB913-2_map5	0002.CSV	1951.69	-0.0212182
PSB913-2_map5	0002.CSV	1955.55	-0.0212101
PSB913-2_map5	0002.CSV	1959.4	-0.0211212
PSB913-2_map5	0002.CSV	1963.26	-0.0211552
PSB913-2_map5	0002.CSV	1967.12	-0.0211521
PSB913-2_map5	0002.CSV	1970.98	-0.0211297
PSB913-2_map5	0002.CSV	1974.83	-0.0211036
PSB913-2_map5	0002.CSV	1978.69	-0.0211113
PSB913-2_map5	0002.CSV	1982.55	-0.0211214
PSB913-2_map5	0002.CSV	1986.4	-0.0211597
PSB913-2_map5	0002.CSV	1990.26	-0.0210761
PSB913-2_map5	0002.CSV	1994.12	-0.020981
PSB913-2_map5	0002.CSV	1997.98	-0.021003
PSB913-2_map5	0002.CSV	2001.83	-0.0210369
PSB913-2_map5	0002.CSV	2005.69	-0.0210192
PSB913-2_map5	0002.CSV	2009.55	-0.0210312
PSB913-2_map5	0002.CSV	2013.4	-0.0209784
PSB913-2_map5	0002.CSV	2017.26	-0.0209426
PSB913-2_map5	0002.CSV	2021.12	-0.0208734
PSB913-2_map5	0002.CSV	2024.97	-0.020854
PSB913-2_map5	0002.CSV	2028.83	-0.0207973
PSB913-2_map5	0002.CSV	2032.69	-0.020785
PSB913-2_map5	0002.CSV	2036.55	-0.0207966
PSB913-2_map5	0002.CSV	2040.4	-0.0208172
PSB913-2_map5	0002.CSV	2044.26	-0.020778
PSB913-2_map5	0002.CSV	2048.12	-0.0207629
PSB913-2_map5	0002.CSV	2051.97	-0.020737
PSB913-2_map5	0002.CSV	2055.83	-0.0207509
PSB913-2_map5	0002.CSV	2059.69	-0.0207101
PSB913-2_map5	0002.CSV	2063.55	-0.0207168
PSB913-2_map5	0002.CSV	2067.4	-0.0206752
PSB913-2_map5	0002.CSV	2071.26	-0.0206191
PSB913-2_map5	0002.CSV	2075.12	-0.0205733
PSB913-2_map5	0002.CSV	2078.97	-0.0205786
PSB913-2_map5	0002.CSV	2082.83	-0.0205412
PSB913-2_map5	0002.CSV	2086.69	-0.0205775
PSB913-2_map5	0002.CSV	2090.55	-0.0205858
PSB913-2_map5	0002.CSV	2094.4	-0.0206057
PSB913-2_map5	0002.CSV	2098.26	-0.020601
PSB913-2_map5	0002.CSV	2102.12	-0.0206102
PSB913-2_map5	0002.CSV	2105.97	-0.0205377
PSB913-2_map5	0002.CSV	2109.83	-0.0204735
PSB913-2_map5	0002.CSV	2113.69	-0.0204339
PSB913-2_map5	0002.CSV	2117.55	-0.0204623
PSB913-2_map5	0002.CSV	2121.4	-0.0204767
PSB913-2_map5	0002.CSV	2125.26	-0.0205425
PSB913-2_map5	0002.CSV	2129.12	-0.0205457
PSB913-2_map5	0002.CSV	2132.97	-0.0205415
PSB913-2_map5	0002.CSV	2136.83	-0.0205247
PSB913-2_map5	0002.CSV	2140.69	-0.0205172
PSB913-2_map5	0002.CSV	2144.55	-0.0204709
PSB913-2_map5	0002.CSV	2148.4	-0.0204615
PSB913-2_map5	0002.CSV	2152.26	-0.0204706
PSB913-2_map5	0002.CSV	2156.12	-0.0205573
PSB913-2_map5	0002.CSV	2159.97	-0.0206255
PSB913-2_map5	0002.CSV	2163.83	-0.020644
PSB913-2_map5	0002.CSV	2167.69	-0.0205942
PSB913-2_map5	0002.CSV	2171.55	-0.0206401
PSB913-2_map5	0002.CSV	2175.4	-0.0206402
PSB913-2_map5	0002.CSV	2179.26	-0.0206113
PSB913-2_map5	0002.CSV	2183.12	-0.0206053
PSB913-2_map5	0002.CSV	2186.97	-0.0206798
PSB913-2_map5	0002.CSV	2190.83	-0.0207145
PSB913-2_map5	0002.CSV	2194.69	-0.0207387
PSB913-2_map5	0002.CSV	2198.55	-0.0207184
PSB913-2_map5	0002.CSV	2202.4	-0.0207523
PSB913-2_map5	0002.CSV	2206.26	-0.0207872
PSB913-2_map5	0002.CSV	2210.12	-0.0208186
PSB913-2_map5	0002.CSV	2213.97	-0.0208069
PSB913-2_map5	0002.CSV	2217.83	-0.020794
PSB913-2_map5	0002.CSV	2221.69	-0.020825
PSB913-2_map5	0002.CSV	2225.54	-0.0208757
PSB913-2_map5	0002.CSV	2229.4	-0.0208892
PSB913-2_map5	0002.CSV	2233.26	-0.0209337
PSB913-2_map5	0002.CSV	2237.12	-0.0209148
PSB913-2_map5	0002.CSV	2240.97	-0.0209308
PSB913-2_map5	0002.CSV	2244.83	-0.0209117
PSB913-2_map5	0002.CSV	2248.69	-0.0209682
PSB913-2_map5	0002.CSV	2252.54	-0.0210471
PSB913-2_map5	0002.CSV	2256.4	-0.0210672
PSB913-2_map5	0002.CSV	2260.26	-0.0210674
PSB913-2_map5	0002.CSV	2264.11	-0.0211218
PSB913-2_map5	0002.CSV	2267.97	-0.0211015
PSB913-2_map5	0002.CSV	2271.83	-0.0210967
PSB913-2_map5	0002.CSV	2275.69	-0.0211162
PSB913-2_map5	0002.CSV	2279.54	-0.02116
PSB913-2_map5	0002.CSV	2283.4	-0.0211441
PSB913-2_map5	0002.CSV	2287.26	-0.0211641
PSB913-2_map5	0002.CSV	2291.11	-0.0211507
PSB913-2_map5	0002.CSV	2294.97	-0.0211567
PSB913-2_map5	0002.CSV	2298.83	-0.0211758
PSB913-2_map5	0002.CSV	2302.69	-0.0212864
PSB913-2_map5	0002.CSV	2306.54	-0.021421
PSB913-2_map5	0002.CSV	2310.4	-0.0216153
PSB913-2_map5	0002.CSV	2314.26	-0.0218191
PSB913-2_map5	0002.CSV	2318.11	-0.0223661
PSB913-2_map5	0002.CSV	2321.97	-0.0230363
PSB913-2_map5	0002.CSV	2325.83	-0.0240179
PSB913-2_map5	0002.CSV	2329.69	-0.0245491
PSB913-2_map5	0002.CSV	2333.54	-0.0253645
PSB913-2_map5	0002.CSV	2337.4	-0.0261029
PSB913-2_map5	0002.CSV	2341.26	-0.025757
PSB913-2_map5	0002.CSV	2345.11	-0.0241779
PSB913-2_map5	0002.CSV	2348.97	-0.0239092
PSB913-2_map5	0002.CSV	2352.83	-0.0257467
PSB913-2_map5	0002.CSV	2356.69	-0.0325955
PSB913-2_map5	0002.CSV	2360.54	-0.038961
PSB913-2_map5	0002.CSV	2364.4	-0.0350244
PSB913-2_map5	0002.CSV	2368.26	-0.0281415
PSB913-2_map5	0002.CSV	2372.11	-0.0240509
PSB913-2_map5	0002.CSV	2375.97	-0.0220255
PSB913-2_map5	0002.CSV	2379.83	-0.0213874
PSB913-2_map5	0002.CSV	2383.69	-0.0213058
PSB913-2_map5	0002.CSV	2387.54	-0.0214361
PSB913-2_map5	0002.CSV	2391.4	-0.0215564
PSB913-2_map5	0002.CSV	2395.26	-0.0216345
PSB913-2_map5	0002.CSV	2399.11	-0.0216602
PSB913-2_map5	0002.CSV	2402.97	-0.0216518
PSB913-2_map5	0002.CSV	2406.83	-0.0216091
PSB913-2_map5	0002.CSV	2410.68	-0.0216561
PSB913-2_map5	0002.CSV	2414.54	-0.0217007
PSB913-2_map5	0002.CSV	2418.4	-0.0217017
PSB913-2_map5	0002.CSV	2422.26	-0.0217009
PSB913-2_map5	0002.CSV	2426.11	-0.0217509
PSB913-2_map5	0002.CSV	2429.97	-0.0217568
PSB913-2_map5	0002.CSV	2433.83	-0.021773
PSB913-2_map5	0002.CSV	2437.68	-0.0217577
PSB913-2_map5	0002.CSV	2441.54	-0.0217514
PSB913-2_map5	0002.CSV	2445.4	-0.0217444
PSB913-2_map5	0002.CSV	2449.26	-0.021779
PSB913-2_map5	0002.CSV	2453.11	-0.0218288
PSB913-2_map5	0002.CSV	2456.97	-0.0218252
PSB913-2_map5	0002.CSV	2460.83	-0.0217912
PSB913-2_map5	0002.CSV	2464.68	-0.0217995
PSB913-2_map5	0002.CSV	2468.54	-0.0217234
PSB913-2_map5	0002.CSV	2472.4	-0.0216581
PSB913-2_map5	0002.CSV	2476.26	-0.0215741
PSB913-2_map5	0002.CSV	2480.11	-0.0214657
PSB913-2_map5	0002.CSV	2483.97	-0.0213544
PSB913-2_map5	0002.CSV	2487.83	-0.021288
PSB913-2_map5	0002.CSV	2491.68	-0.0212362
PSB913-2_map5	0002.CSV	2495.54	-0.0212299
PSB913-2_map5	0002.CSV	2499.4	-0.0212698
PSB913-2_map5	0002.CSV	2503.26	-0.0213755
PSB913-2_map5	0002.CSV	2507.11	-0.0213986
PSB913-2_map5	0002.CSV	2510.97	-0.0213228
PSB913-2_map5	0002.CSV	2514.83	-0.0212217
PSB913-2_map5	0002.CSV	2518.68	-0.0211601
PSB913-2_map5	0002.CSV	2522.54	-0.0212452
PSB913-2_map5	0002.CSV	2526.4	-0.0213986
PSB913-2_map5	0002.CSV	2530.26	-0.0215151
PSB913-2_map5	0002.CSV	2534.11	-0.0217187
PSB913-2_map5	0002.CSV	2537.97	-0.0218648
PSB913-2_map5	0002.CSV	2541.83	-0.0219219
PSB913-2_map5	0002.CSV	2545.68	-0.0219474
PSB913-2_map5	0002.CSV	2549.54	-0.0220013
PSB913-2_map5	0002.CSV	2553.4	-0.0220765
PSB913-2_map5	0002.CSV	2557.26	-0.0222086
PSB913-2_map5	0002.CSV	2561.11	-0.0223816
PSB913-2_map5	0002.CSV	2564.97	-0.0225072
PSB913-2_map5	0002.CSV	2568.83	-0.0225643
PSB913-2_map5	0002.CSV	2572.68	-0.0225543
PSB913-2_map5	0002.CSV	2576.54	-0.0225588
PSB913-2_map5	0002.CSV	2580.4	-0.0226803
PSB913-2_map5	0002.CSV	2584.25	-0.0227737
PSB913-2_map5	0002.CSV	2588.11	-0.0228185
PSB913-2_map5	0002.CSV	2591.97	-0.0228411
PSB913-2_map5	0002.CSV	2595.83	-0.0228656
PSB913-2_map5	0002.CSV	2599.68	-0.0228825
PSB913-2_map5	0002.CSV	2603.54	-0.0228666
PSB913-2_map5	0002.CSV	2607.4	-0.0227702
PSB913-2_map5	0002.CSV	2611.25	-0.022701
PSB913-2_map5	0002.CSV	2615.11	-0.0226917
PSB913-2_map5	0002.CSV	2618.97	-0.0227515
PSB913-2_map5	0002.CSV	2622.82	-0.0227468
PSB913-2_map5	0002.CSV	2626.68	-0.022661
PSB913-2_map5	0002.CSV	2630.54	-0.0226199
PSB913-2_map5	0002.CSV	2634.4	-0.0225923
PSB913-2_map5	0002.CSV	2638.25	-0.0225579
PSB913-2_map5	0002.CSV	2642.11	-0.0226284
PSB913-2_map5	0002.CSV	2645.97	-0.0227694
PSB913-2_map5	0002.CSV	2649.82	-0.0228435
PSB913-2_map5	0002.CSV	2653.68	-0.0228644
PSB913-2_map5	0002.CSV	2657.54	-0.022865
PSB913-2_map5	0002.CSV	2661.4	-0.0228914
PSB913-2_map5	0002.CSV	2665.25	-0.0229197
PSB913-2_map5	0002.CSV	2669.11	-0.0228244
PSB913-2_map5	0002.CSV	2672.97	-0.0227089
PSB913-2_map5	0002.CSV	2676.82	-0.0225976
PSB913-2_map5	0002.CSV	2680.68	-0.0226246
PSB913-2_map5	0002.CSV	2684.54	-0.0228437
PSB913-2_map5	0002.CSV	2688.4	-0.0229792
PSB913-2_map5	0002.CSV	2692.25	-0.0229767
PSB913-2_map5	0002.CSV	2696.11	-0.0228775
PSB913-2_map5	0002.CSV	2699.97	-0.0228039
PSB913-2_map5	0002.CSV	2703.82	-0.0228843
PSB913-2_map5	0002.CSV	2707.68	-0.0229057
PSB913-2_map5	0002.CSV	2711.54	-0.0228567
PSB913-2_map5	0002.CSV	2715.4	-0.0228265
PSB913-2_map5	0002.CSV	2719.25	-0.0227093
PSB913-2_map5	0002.CSV	2723.11	-0.0224855
PSB913-2_map5	0002.CSV	2726.97	-0.0224575
PSB913-2_map5	0002.CSV	2730.82	-0.0226122
PSB913-2_map5	0002.CSV	2734.68	-0.0226153
PSB913-2_map5	0002.CSV	2738.54	-0.0225759
PSB913-2_map5	0002.CSV	2742.4	-0.0225653
PSB913-2_map5	0002.CSV	2746.25	-0.0223666
PSB913-2_map5	0002.CSV	2750.11	-0.0223746
PSB913-2_map5	0002.CSV	2753.97	-0.0225348
PSB913-2_map5	0002.CSV	2757.82	-0.0225415
PSB913-2_map5	0002.CSV	2761.68	-0.0225712
PSB913-2_map5	0002.CSV	2765.54	-0.0226621
PSB913-2_map5	0002.CSV	2769.39	-0.0226454
PSB913-2_map5	0002.CSV	2773.25	-0.0224348
PSB913-2_map5	0002.CSV	2777.11	-0.0224584
PSB913-2_map5	0002.CSV	2780.97	-0.0226336
PSB913-2_map5	0002.CSV	2784.82	-0.022563
PSB913-2_map5	0002.CSV	2788.68	-0.022305
PSB913-2_map5	0002.CSV	2792.54	-0.0222052
PSB913-2_map5	0002.CSV	2796.39	-0.022201
PSB913-2_map5	0002.CSV	2800.25	-0.0223737
PSB913-2_map5	0002.CSV	2804.11	-0.0225911
PSB913-2_map5	0002.CSV	2807.97	-0.0224255
PSB913-2_map5	0002.CSV	2811.82	-0.0223495
PSB913-2_map5	0002.CSV	2815.68	-0.0224103
PSB913-2_map5	0002.CSV	2819.54	-0.0223762
PSB913-2_map5	0002.CSV	2823.39	-0.0224026
PSB913-2_map5	0002.CSV	2827.25	-0.0224218
PSB913-2_map5	0002.CSV	2831.11	-0.0220957
PSB913-2_map5	0002.CSV	2834.97	-0.0216231
PSB913-2_map5	0002.CSV	2838.82	-0.0213842
PSB913-2_map5	0002.CSV	2842.68	-0.0213681
PSB913-2_map5	0002.CSV	2846.54	-0.0211664
PSB913-2_map5	0002.CSV	2850.39	-0.0211957
PSB913-2_map5	0002.CSV	2854.25	-0.0214649
PSB913-2_map5	0002.CSV	2858.11	-0.0214796
PSB913-2_map5	0002.CSV	2861.97	-0.0215244
PSB913-2_map5	0002.CSV	2865.82	-0.0215755
PSB913-2_map5	0002.CSV	2869.68	-0.02142
PSB913-2_map5	0002.CSV	2873.54	-0.0213347
PSB913-2_map5	0002.CSV	2877.39	-0.0215812
PSB913-2_map5	0002.CSV	2881.25	-0.0216868
PSB913-2_map5	0002.CSV	2885.11	-0.0216281
PSB913-2_map5	0002.CSV	2888.97	-0.021432
PSB913-2_map5	0002.CSV	2892.82	-0.021012
PSB913-2_map5	0002.CSV	2896.68	-0.0207091
PSB913-2_map5	0002.CSV	2900.54	-0.0207278
PSB913-2_map5	0002.CSV	2904.39	-0.0206241
PSB913-2_map5	0002.CSV	2908.25	-0.0201903
PSB913-2_map5	0002.CSV	2912.11	-0.0196185
PSB913-2_map5	0002.CSV	2915.97	-0.0194692
PSB913-2_map5	0002.CSV	2919.82	-0.0199145
PSB913-2_map5	0002.CSV	2923.68	-0.0205537
PSB913-2_map5	0002.CSV	2927.54	-0.0208608
PSB913-2_map5	0002.CSV	2931.39	-0.0211754
PSB913-2_map5	0002.CSV	2935.25	-0.0216741
PSB913-2_map5	0002.CSV	2939.11	-0.0218136
PSB913-2_map5	0002.CSV	2942.96	-0.0216118
PSB913-2_map5	0002.CSV	2946.82	-0.0216205
PSB913-2_map5	0002.CSV	2950.68	-0.0219458
PSB913-2_map5	0002.CSV	2954.54	-0.0224432
PSB913-2_map5	0002.CSV	2958.39	-0.0228537
PSB913-2_map5	0002.CSV	2962.25	-0.0229476
PSB913-2_map5	0002.CSV	2966.11	-0.0231065
PSB913-2_map5	0002.CSV	2969.96	-0.0231008
PSB913-2_map5	0002.CSV	2973.82	-0.0227859
PSB913-2_map5	0002.CSV	2977.68	-0.0225252
PSB913-2_map5	0002.CSV	2981.53	-0.0226201
PSB913-2_map5	0002.CSV	2985.39	-0.0229468
PSB913-2_map5	0002.CSV	2989.25	-0.0228598
PSB913-2_map5	0002.CSV	2993.11	-0.022628
PSB913-2_map5	0002.CSV	2996.96	-0.0226396
PSB913-2_map5	0002.CSV	3000.82	-0.0227546
PSB913-2_map5	0002.CSV	3004.68	-0.0229162
PSB913-2_map5	0002.CSV	3008.53	-0.0229056
PSB913-2_map5	0002.CSV	3012.39	-0.0226872
PSB913-2_map5	0002.CSV	3016.25	-0.0226131
PSB913-2_map5	0002.CSV	3020.11	-0.0227339
PSB913-2_map5	0002.CSV	3023.96	-0.0227956
PSB913-2_map5	0002.CSV	3027.82	-0.0227751
PSB913-2_map5	0002.CSV	3031.68	-0.0227176
PSB913-2_map5	0002.CSV	3035.53	-0.0226845
PSB913-2_map5	0002.CSV	3039.39	-0.0226918
PSB913-2_map5	0002.CSV	3043.25	-0.0227668
PSB913-2_map5	0002.CSV	3047.11	-0.0228741
PSB913-2_map5	0002.CSV	3050.96	-0.0228053
PSB913-2_map5	0002.CSV	3054.82	-0.0227648
PSB913-2_map5	0002.CSV	3058.68	-0.0228385
PSB913-2_map5	0002.CSV	3062.53	-0.0228373
PSB913-2_map5	0002.CSV	3066.39	-0.022744
PSB913-2_map5	0002.CSV	3070.25	-0.0228322
PSB913-2_map5	0002.CSV	3074.11	-0.022901
PSB913-2_map5	0002.CSV	3077.96	-0.0228373
PSB913-2_map5	0002.CSV	3081.82	-0.0227176
PSB913-2_map5	0002.CSV	3085.68	-0.0226971
PSB913-2_map5	0002.CSV	3089.53	-0.0227804
PSB913-2_map5	0002.CSV	3093.39	-0.022842
PSB913-2_map5	0002.CSV	3097.25	-0.0228029
PSB913-2_map5	0002.CSV	3101.11	-0.022859
PSB913-2_map5	0002.CSV	3104.96	-0.0228529
PSB913-2_map5	0002.CSV	3108.82	-0.0226437
PSB913-2_map5	0002.CSV	3112.68	-0.0225293
PSB913-2_map5	0002.CSV	3116.53	-0.0225462
PSB913-2_map5	0002.CSV	3120.39	-0.0226409
PSB913-2_map5	0002.CSV	3124.25	-0.0228318
PSB913-2_map5	0002.CSV	3128.11	-0.0228004
PSB913-2_map5	0002.CSV	3131.96	-0.0227111
PSB913-2_map5	0002.CSV	3135.82	-0.0226323
PSB913-2_map5	0002.CSV	3139.68	-0.022477
PSB913-2_map5	0002.CSV	3143.53	-0.0225497
PSB913-2_map5	0002.CSV	3147.39	-0.0225546
PSB913-2_map5	0002.CSV	3151.25	-0.0223466
[truncated: 20,932 more rows]

## Sheet: PSB913-2_map6
Map	Select spectrum number	Wavenumbers	Absorbance
[truncated: 130,313 more rows]
