# Supplementary material for: Thermo-microstratigraphy of shells reveals invisible fire use and possible cooking in the archaeological record
Source: Frontiers journal article supplement (doi:10.3389/feart.2022.869487), 2022-09-01
Supplement: Table_14.XLSX [file Table_14.XLSX]

## Sheet: PSB913-4_map1
Map	Select spectrum number	Wavenumbers	Absrobance
PSB913-4_map1	0001.CSV	674.992	0.00889735
PSB913-4_map1	0001.CSV	678.849	0.0103819
PSB913-4_map1	0001.CSV	682.706	0.0108529
PSB913-4_map1	0001.CSV	686.563	0.012141
PSB913-4_map1	0001.CSV	690.42	0.0133738
PSB913-4_map1	0001.CSV	694.277	0.0201825
PSB913-4_map1	0001.CSV	698.134	0.0305378
PSB913-4_map1	0001.CSV	701.991	0.0302457
PSB913-4_map1	0001.CSV	705.849	0.0241313
PSB913-4_map1	0001.CSV	709.706	0.0369275
PSB913-4_map1	0001.CSV	713.563	0.0453101
PSB913-4_map1	0001.CSV	717.42	0.0282347
PSB913-4_map1	0001.CSV	721.277	0.0105497
PSB913-4_map1	0001.CSV	725.134	0.00507566
PSB913-4_map1	0001.CSV	728.991	0.00320719
PSB913-4_map1	0001.CSV	732.848	0.00323914
PSB913-4_map1	0001.CSV	736.705	0.00316414
PSB913-4_map1	0001.CSV	740.562	0.00376589
PSB913-4_map1	0001.CSV	744.42	0.00351389
PSB913-4_map1	0001.CSV	748.277	0.00380403
PSB913-4_map1	0001.CSV	752.134	0.00352906
PSB913-4_map1	0001.CSV	755.991	0.00421268
PSB913-4_map1	0001.CSV	759.848	0.00439891
PSB913-4_map1	0001.CSV	763.705	0.00487939
PSB913-4_map1	0001.CSV	767.562	0.00473734
PSB913-4_map1	0001.CSV	771.419	0.00525938
PSB913-4_map1	0001.CSV	775.276	0.00528393
PSB913-4_map1	0001.CSV	779.133	0.00597879
PSB913-4_map1	0001.CSV	782.99	0.0062812
PSB913-4_map1	0001.CSV	786.848	0.00733057
PSB913-4_map1	0001.CSV	790.705	0.00784203
PSB913-4_map1	0001.CSV	794.562	0.00883445
PSB913-4_map1	0001.CSV	798.419	0.00957966
PSB913-4_map1	0001.CSV	802.276	0.010977
PSB913-4_map1	0001.CSV	806.133	0.0121843
PSB913-4_map1	0001.CSV	809.99	0.0142507
PSB913-4_map1	0001.CSV	813.847	0.0162872
PSB913-4_map1	0001.CSV	817.704	0.0194763
PSB913-4_map1	0001.CSV	821.562	0.0229105
PSB913-4_map1	0001.CSV	825.419	0.0278824
PSB913-4_map1	0001.CSV	829.276	0.0335613
PSB913-4_map1	0001.CSV	833.133	0.0420302
PSB913-4_map1	0001.CSV	836.99	0.053639
PSB913-4_map1	0001.CSV	840.847	0.0666669
PSB913-4_map1	0001.CSV	844.704	0.0754653
PSB913-4_map1	0001.CSV	848.561	0.0849357
PSB913-4_map1	0001.CSV	852.418	0.0945575
PSB913-4_map1	0001.CSV	856.275	0.0983298
PSB913-4_map1	0001.CSV	860.132	0.0920576
PSB913-4_map1	0001.CSV	863.99	0.0778265
PSB913-4_map1	0001.CSV	867.847	0.0570253
PSB913-4_map1	0001.CSV	871.704	0.034397
PSB913-4_map1	0001.CSV	875.561	0.0158983
PSB913-4_map1	0001.CSV	879.418	0.00574077
PSB913-4_map1	0001.CSV	883.275	0.000832296
PSB913-4_map1	0001.CSV	887.132	-0.00146398
PSB913-4_map1	0001.CSV	890.989	-0.00300494
PSB913-4_map1	0001.CSV	894.846	-0.00374249
PSB913-4_map1	0001.CSV	898.703	-0.004386
PSB913-4_map1	0001.CSV	902.561	-0.00443474
PSB913-4_map1	0001.CSV	906.418	-0.00447107
PSB913-4_map1	0001.CSV	910.275	-0.00465298
PSB913-4_map1	0001.CSV	914.132	-0.00541627
PSB913-4_map1	0001.CSV	917.989	-0.00548106
PSB913-4_map1	0001.CSV	921.846	-0.00560956
PSB913-4_map1	0001.CSV	925.703	-0.00541444
PSB913-4_map1	0001.CSV	929.56	-0.00541218
PSB913-4_map1	0001.CSV	933.417	-0.00520394
PSB913-4_map1	0001.CSV	937.274	-0.00536273
PSB913-4_map1	0001.CSV	941.131	-0.00522391
PSB913-4_map1	0001.CSV	944.989	-0.00525907
PSB913-4_map1	0001.CSV	948.846	-0.00500815
PSB913-4_map1	0001.CSV	952.703	-0.00498113
PSB913-4_map1	0001.CSV	956.56	-0.00477216
PSB913-4_map1	0001.CSV	960.417	-0.00484084
PSB913-4_map1	0001.CSV	964.274	-0.00462312
PSB913-4_map1	0001.CSV	968.131	-0.00455535
PSB913-4_map1	0001.CSV	971.988	-0.00426022
PSB913-4_map1	0001.CSV	975.845	-0.00409134
PSB913-4_map1	0001.CSV	979.702	-0.00370727
PSB913-4_map1	0001.CSV	983.559	-0.00355323
PSB913-4_map1	0001.CSV	987.417	-0.00320253
PSB913-4_map1	0001.CSV	991.274	-0.0031227
PSB913-4_map1	0001.CSV	995.131	-0.00284193
PSB913-4_map1	0001.CSV	998.988	-0.00277603
PSB913-4_map1	0001.CSV	1002.85	-0.00249708
PSB913-4_map1	0001.CSV	1006.7	-0.0025347
PSB913-4_map1	0001.CSV	1010.56	-0.00242249
PSB913-4_map1	0001.CSV	1014.42	-0.0025291
PSB913-4_map1	0001.CSV	1018.27	-0.00234314
PSB913-4_map1	0001.CSV	1022.13	-0.00235988
PSB913-4_map1	0001.CSV	1025.99	-0.00213787
PSB913-4_map1	0001.CSV	1029.85	-0.0021415
PSB913-4_map1	0001.CSV	1033.7	-0.001808
PSB913-4_map1	0001.CSV	1037.56	-0.00169428
PSB913-4_map1	0001.CSV	1041.42	-0.00137517
PSB913-4_map1	0001.CSV	1045.27	-0.00131664
PSB913-4_map1	0001.CSV	1049.13	-0.000929872
PSB913-4_map1	0001.CSV	1052.99	-0.000672398
PSB913-4_map1	0001.CSV	1056.84	-6.92496e-06
PSB913-4_map1	0001.CSV	1060.7	0.000440741
PSB913-4_map1	0001.CSV	1064.56	0.00110091
PSB913-4_map1	0001.CSV	1068.42	0.0016145
PSB913-4_map1	0001.CSV	1072.27	0.00275453
PSB913-4_map1	0001.CSV	1076.13	0.00530516
PSB913-4_map1	0001.CSV	1079.99	0.0125727
PSB913-4_map1	0001.CSV	1083.84	0.0167826
PSB913-4_map1	0001.CSV	1087.7	0.0102
PSB913-4_map1	0001.CSV	1091.56	0.00292743
PSB913-4_map1	0001.CSV	1095.41	0.000333291
PSB913-4_map1	0001.CSV	1099.27	-0.000468329
PSB913-4_map1	0001.CSV	1103.13	-0.000377762
PSB913-4_map1	0001.CSV	1106.99	-0.000423743
PSB913-4_map1	0001.CSV	1110.84	-0.000223498
PSB913-4_map1	0001.CSV	1114.7	-0.000172528
PSB913-4_map1	0001.CSV	1118.56	5.4045e-05
PSB913-4_map1	0001.CSV	1122.41	0.00015188
PSB913-4_map1	0001.CSV	1126.27	0.000389665
PSB913-4_map1	0001.CSV	1130.13	0.000354745
PSB913-4_map1	0001.CSV	1133.99	0.000557142
PSB913-4_map1	0001.CSV	1137.84	0.000589026
PSB913-4_map1	0001.CSV	1141.7	0.000808295
PSB913-4_map1	0001.CSV	1145.56	0.000811913
PSB913-4_map1	0001.CSV	1149.41	0.00104873
PSB913-4_map1	0001.CSV	1153.27	0.00120899
PSB913-4_map1	0001.CSV	1157.13	0.00159462
PSB913-4_map1	0001.CSV	1160.99	0.00170827
PSB913-4_map1	0001.CSV	1164.84	0.00202599
PSB913-4_map1	0001.CSV	1168.7	0.00226158
PSB913-4_map1	0001.CSV	1172.56	0.00264601
PSB913-4_map1	0001.CSV	1176.41	0.00285655
PSB913-4_map1	0001.CSV	1180.27	0.00322442
PSB913-4_map1	0001.CSV	1184.13	0.00329576
PSB913-4_map1	0001.CSV	1187.99	0.00356801
PSB913-4_map1	0001.CSV	1191.84	0.00370818
PSB913-4_map1	0001.CSV	1195.7	0.004015
PSB913-4_map1	0001.CSV	1199.56	0.00423416
PSB913-4_map1	0001.CSV	1203.41	0.00461489
PSB913-4_map1	0001.CSV	1207.27	0.00484923
PSB913-4_map1	0001.CSV	1211.13	0.00538248
PSB913-4_map1	0001.CSV	1214.98	0.00581035
PSB913-4_map1	0001.CSV	1218.84	0.00641383
PSB913-4_map1	0001.CSV	1222.7	0.00684252
PSB913-4_map1	0001.CSV	1226.56	0.00754548
PSB913-4_map1	0001.CSV	1230.41	0.00813842
PSB913-4_map1	0001.CSV	1234.27	0.00884432
PSB913-4_map1	0001.CSV	1238.13	0.00933835
PSB913-4_map1	0001.CSV	1241.98	0.0100638
PSB913-4_map1	0001.CSV	1245.84	0.0105427
PSB913-4_map1	0001.CSV	1249.7	0.0111568
PSB913-4_map1	0001.CSV	1253.56	0.0116035
PSB913-4_map1	0001.CSV	1257.41	0.0122253
PSB913-4_map1	0001.CSV	1261.27	0.0127482
PSB913-4_map1	0001.CSV	1265.13	0.01358
PSB913-4_map1	0001.CSV	1268.98	0.0143193
PSB913-4_map1	0001.CSV	1272.84	0.0153591
PSB913-4_map1	0001.CSV	1276.7	0.0161652
PSB913-4_map1	0001.CSV	1280.56	0.0171046
PSB913-4_map1	0001.CSV	1284.41	0.0178747
PSB913-4_map1	0001.CSV	1288.27	0.0188334
PSB913-4_map1	0001.CSV	1292.13	0.019601
PSB913-4_map1	0001.CSV	1295.98	0.0206644
PSB913-4_map1	0001.CSV	1299.84	0.0215969
PSB913-4_map1	0001.CSV	1303.7	0.0227535
PSB913-4_map1	0001.CSV	1307.56	0.0238552
PSB913-4_map1	0001.CSV	1311.41	0.0252565
PSB913-4_map1	0001.CSV	1315.27	0.026576
PSB913-4_map1	0001.CSV	1319.13	0.0282537
PSB913-4_map1	0001.CSV	1322.98	0.0297577
PSB913-4_map1	0001.CSV	1326.84	0.0314983
PSB913-4_map1	0001.CSV	1330.7	0.0332395
PSB913-4_map1	0001.CSV	1334.56	0.0352325
PSB913-4_map1	0001.CSV	1338.41	0.0377083
PSB913-4_map1	0001.CSV	1342.27	0.0409518
PSB913-4_map1	0001.CSV	1346.13	0.0434223
PSB913-4_map1	0001.CSV	1349.98	0.0465728
PSB913-4_map1	0001.CSV	1353.84	0.0498917
PSB913-4_map1	0001.CSV	1357.7	0.0534655
PSB913-4_map1	0001.CSV	1361.56	0.0574221
PSB913-4_map1	0001.CSV	1365.41	0.0623775
PSB913-4_map1	0001.CSV	1369.27	0.0661858
PSB913-4_map1	0001.CSV	1373.13	0.0709207
PSB913-4_map1	0001.CSV	1376.98	0.0761599
PSB913-4_map1	0001.CSV	1380.84	0.0809277
PSB913-4_map1	0001.CSV	1384.7	0.0852279
PSB913-4_map1	0001.CSV	1388.56	0.0907243
PSB913-4_map1	0001.CSV	1392.41	0.0946655
PSB913-4_map1	0001.CSV	1396.27	0.0997772
PSB913-4_map1	0001.CSV	1400.13	0.104628
PSB913-4_map1	0001.CSV	1403.98	0.108863
PSB913-4_map1	0001.CSV	1407.84	0.113016
PSB913-4_map1	0001.CSV	1411.7	0.11721
PSB913-4_map1	0001.CSV	1415.55	0.120416
PSB913-4_map1	0001.CSV	1419.41	0.125782
PSB913-4_map1	0001.CSV	1423.27	0.130447
PSB913-4_map1	0001.CSV	1427.12	0.134867
PSB913-4_map1	0001.CSV	1430.98	0.139327
PSB913-4_map1	0001.CSV	1434.84	0.145648
PSB913-4_map1	0001.CSV	1438.7	0.153275
PSB913-4_map1	0001.CSV	1442.55	0.159111
PSB913-4_map1	0001.CSV	1446.41	0.162663
PSB913-4_map1	0001.CSV	1450.27	0.164821
PSB913-4_map1	0001.CSV	1454.12	0.163372
PSB913-4_map1	0001.CSV	1457.98	0.160972
PSB913-4_map1	0001.CSV	1461.84	0.158001
PSB913-4_map1	0001.CSV	1465.7	0.156228
PSB913-4_map1	0001.CSV	1469.55	0.152249
PSB913-4_map1	0001.CSV	1473.41	0.144289
PSB913-4_map1	0001.CSV	1477.27	0.132968
PSB913-4_map1	0001.CSV	1481.12	0.125166
PSB913-4_map1	0001.CSV	1484.98	0.117432
PSB913-4_map1	0001.CSV	1488.84	0.108646
PSB913-4_map1	0001.CSV	1492.7	0.0996877
PSB913-4_map1	0001.CSV	1496.55	0.0933079
PSB913-4_map1	0001.CSV	1500.41	0.0860415
PSB913-4_map1	0001.CSV	1504.27	0.0817368
PSB913-4_map1	0001.CSV	1508.12	0.0737839
PSB913-4_map1	0001.CSV	1511.98	0.0679901
PSB913-4_map1	0001.CSV	1515.84	0.0638585
PSB913-4_map1	0001.CSV	1519.7	0.0588848
PSB913-4_map1	0001.CSV	1523.55	0.0527629
PSB913-4_map1	0001.CSV	1527.41	0.0486598
PSB913-4_map1	0001.CSV	1531.27	0.0449049
PSB913-4_map1	0001.CSV	1535.12	0.0416326
PSB913-4_map1	0001.CSV	1538.98	0.0383151
PSB913-4_map1	0001.CSV	1542.84	0.0337996
PSB913-4_map1	0001.CSV	1546.7	0.0302956
PSB913-4_map1	0001.CSV	1550.55	0.027837
PSB913-4_map1	0001.CSV	1554.41	0.0250114
PSB913-4_map1	0001.CSV	1558.27	0.0215613
PSB913-4_map1	0001.CSV	1562.12	0.0175875
PSB913-4_map1	0001.CSV	1565.98	0.015208
PSB913-4_map1	0001.CSV	1569.84	0.0118242
PSB913-4_map1	0001.CSV	1573.69	0.00858527
PSB913-4_map1	0001.CSV	1577.55	0.00456332
PSB913-4_map1	0001.CSV	1581.41	0.00115769
PSB913-4_map1	0001.CSV	1585.27	-0.00174392
PSB913-4_map1	0001.CSV	1589.12	-0.00410434
PSB913-4_map1	0001.CSV	1592.98	-0.00599999
PSB913-4_map1	0001.CSV	1596.84	-0.00741489
PSB913-4_map1	0001.CSV	1600.69	-0.00857503
PSB913-4_map1	0001.CSV	1604.55	-0.00935533
PSB913-4_map1	0001.CSV	1608.41	-0.0101465
PSB913-4_map1	0001.CSV	1612.27	-0.0108596
PSB913-4_map1	0001.CSV	1616.12	-0.0115926
PSB913-4_map1	0001.CSV	1619.98	-0.0120041
PSB913-4_map1	0001.CSV	1623.84	-0.0125028
PSB913-4_map1	0001.CSV	1627.69	-0.0128346
PSB913-4_map1	0001.CSV	1631.55	-0.0135581
PSB913-4_map1	0001.CSV	1635.41	-0.0137706
PSB913-4_map1	0001.CSV	1639.27	-0.0137978
PSB913-4_map1	0001.CSV	1643.12	-0.014399
PSB913-4_map1	0001.CSV	1646.98	-0.014844
PSB913-4_map1	0001.CSV	1650.84	-0.01473
PSB913-4_map1	0001.CSV	1654.69	-0.0146806
PSB913-4_map1	0001.CSV	1658.55	-0.0150747
PSB913-4_map1	0001.CSV	1662.41	-0.015664
PSB913-4_map1	0001.CSV	1666.27	-0.016113
PSB913-4_map1	0001.CSV	1670.12	-0.0165427
PSB913-4_map1	0001.CSV	1673.98	-0.0167128
PSB913-4_map1	0001.CSV	1677.84	-0.0173405
PSB913-4_map1	0001.CSV	1681.69	-0.0178321
PSB913-4_map1	0001.CSV	1685.55	-0.0179499
PSB913-4_map1	0001.CSV	1689.41	-0.0181961
PSB913-4_map1	0001.CSV	1693.27	-0.0189902
PSB913-4_map1	0001.CSV	1697.12	-0.0194675
PSB913-4_map1	0001.CSV	1700.98	-0.0197107
PSB913-4_map1	0001.CSV	1704.84	-0.0199521
PSB913-4_map1	0001.CSV	1708.69	-0.0205514
PSB913-4_map1	0001.CSV	1712.55	-0.021165
PSB913-4_map1	0001.CSV	1716.41	-0.0213598
PSB913-4_map1	0001.CSV	1720.27	-0.0210986
PSB913-4_map1	0001.CSV	1724.12	-0.0216198
PSB913-4_map1	0001.CSV	1727.98	-0.0221969
PSB913-4_map1	0001.CSV	1731.84	-0.0226223
PSB913-4_map1	0001.CSV	1735.69	-0.0224934
PSB913-4_map1	0001.CSV	1739.55	-0.0229198
PSB913-4_map1	0001.CSV	1743.41	-0.023236
PSB913-4_map1	0001.CSV	1747.27	-0.0233918
PSB913-4_map1	0001.CSV	1751.12	-0.0231989
PSB913-4_map1	0001.CSV	1754.98	-0.0234964
PSB913-4_map1	0001.CSV	1758.84	-0.0235869
PSB913-4_map1	0001.CSV	1762.69	-0.0235766
PSB913-4_map1	0001.CSV	1766.55	-0.0236899
PSB913-4_map1	0001.CSV	1770.41	-0.0235345
PSB913-4_map1	0001.CSV	1774.26	-0.0222127
PSB913-4_map1	0001.CSV	1778.12	-0.0210513
PSB913-4_map1	0001.CSV	1781.98	-0.0194722
PSB913-4_map1	0001.CSV	1785.84	-0.0184721
PSB913-4_map1	0001.CSV	1789.69	-0.0184806
PSB913-4_map1	0001.CSV	1793.55	-0.0193763
PSB913-4_map1	0001.CSV	1797.41	-0.0205323
PSB913-4_map1	0001.CSV	1801.26	-0.021801
PSB913-4_map1	0001.CSV	1805.12	-0.0228459
PSB913-4_map1	0001.CSV	1808.98	-0.023634
PSB913-4_map1	0001.CSV	1812.84	-0.0239013
PSB913-4_map1	0001.CSV	1816.69	-0.0242562
PSB913-4_map1	0001.CSV	1820.55	-0.0245046
PSB913-4_map1	0001.CSV	1824.41	-0.0247123
PSB913-4_map1	0001.CSV	1828.26	-0.0245604
PSB913-4_map1	0001.CSV	1832.12	-0.0244966
PSB913-4_map1	0001.CSV	1835.98	-0.0245732
PSB913-4_map1	0001.CSV	1839.84	-0.0247703
PSB913-4_map1	0001.CSV	1843.69	-0.0245983
PSB913-4_map1	0001.CSV	1847.55	-0.0243889
PSB913-4_map1	0001.CSV	1851.41	-0.0245853
PSB913-4_map1	0001.CSV	1855.26	-0.0247823
PSB913-4_map1	0001.CSV	1859.12	-0.0247499
PSB913-4_map1	0001.CSV	1862.98	-0.024886
PSB913-4_map1	0001.CSV	1866.84	-0.0248284
PSB913-4_map1	0001.CSV	1870.69	-0.0244911
PSB913-4_map1	0001.CSV	1874.55	-0.0245534
PSB913-4_map1	0001.CSV	1878.41	-0.0247438
PSB913-4_map1	0001.CSV	1882.26	-0.0247776
PSB913-4_map1	0001.CSV	1886.12	-0.0248029
PSB913-4_map1	0001.CSV	1889.98	-0.0246493
PSB913-4_map1	0001.CSV	1893.83	-0.0246324
PSB913-4_map1	0001.CSV	1897.69	-0.0246469
PSB913-4_map1	0001.CSV	1901.55	-0.0247683
PSB913-4_map1	0001.CSV	1905.41	-0.0248333
PSB913-4_map1	0001.CSV	1909.26	-0.024839
PSB913-4_map1	0001.CSV	1913.12	-0.0248927
PSB913-4_map1	0001.CSV	1916.98	-0.0250152
PSB913-4_map1	0001.CSV	1920.83	-0.0248308
PSB913-4_map1	0001.CSV	1924.69	-0.0248062
PSB913-4_map1	0001.CSV	1928.55	-0.0249247
PSB913-4_map1	0001.CSV	1932.4	-0.0250538
PSB913-4_map1	0001.CSV	1936.26	-0.0251024
PSB913-4_map1	0001.CSV	1940.12	-0.0252047
PSB913-4_map1	0001.CSV	1943.98	-0.0250863
PSB913-4_map1	0001.CSV	1947.83	-0.0251336
PSB913-4_map1	0001.CSV	1951.69	-0.0252673
PSB913-4_map1	0001.CSV	1955.55	-0.0253968
PSB913-4_map1	0001.CSV	1959.4	-0.0254657
PSB913-4_map1	0001.CSV	1963.26	-0.0256519
PSB913-4_map1	0001.CSV	1967.12	-0.0256429
PSB913-4_map1	0001.CSV	1970.98	-0.0257012
PSB913-4_map1	0001.CSV	1974.83	-0.0258181
PSB913-4_map1	0001.CSV	1978.69	-0.0259484
PSB913-4_map1	0001.CSV	1982.55	-0.026018
PSB913-4_map1	0001.CSV	1986.4	-0.0261961
PSB913-4_map1	0001.CSV	1990.26	-0.0262622
PSB913-4_map1	0001.CSV	1994.12	-0.0263136
PSB913-4_map1	0001.CSV	1997.98	-0.0264484
PSB913-4_map1	0001.CSV	2001.83	-0.0265727
PSB913-4_map1	0001.CSV	2005.69	-0.0266203
PSB913-4_map1	0001.CSV	2009.55	-0.0267435
PSB913-4_map1	0001.CSV	2013.4	-0.0268659
PSB913-4_map1	0001.CSV	2017.26	-0.026977
PSB913-4_map1	0001.CSV	2021.12	-0.0270866
PSB913-4_map1	0001.CSV	2024.97	-0.0272758
PSB913-4_map1	0001.CSV	2028.83	-0.0273262
PSB913-4_map1	0001.CSV	2032.69	-0.0274221
PSB913-4_map1	0001.CSV	2036.55	-0.0275319
PSB913-4_map1	0001.CSV	2040.4	-0.0276314
PSB913-4_map1	0001.CSV	2044.26	-0.0275817
PSB913-4_map1	0001.CSV	2048.12	-0.0276587
PSB913-4_map1	0001.CSV	2051.97	-0.0277244
PSB913-4_map1	0001.CSV	2055.83	-0.0278048
PSB913-4_map1	0001.CSV	2059.69	-0.0278604
PSB913-4_map1	0001.CSV	2063.55	-0.0279451
PSB913-4_map1	0001.CSV	2067.4	-0.0279493
PSB913-4_map1	0001.CSV	2071.26	-0.0280239
PSB913-4_map1	0001.CSV	2075.12	-0.0280333
PSB913-4_map1	0001.CSV	2078.97	-0.028092
PSB913-4_map1	0001.CSV	2082.83	-0.0280807
PSB913-4_map1	0001.CSV	2086.69	-0.0280731
PSB913-4_map1	0001.CSV	2090.55	-0.0280332
PSB913-4_map1	0001.CSV	2094.4	-0.0280752
PSB913-4_map1	0001.CSV	2098.26	-0.0280741
PSB913-4_map1	0001.CSV	2102.12	-0.0280691
PSB913-4_map1	0001.CSV	2105.97	-0.0279911
PSB913-4_map1	0001.CSV	2109.83	-0.0279722
PSB913-4_map1	0001.CSV	2113.69	-0.0279058
PSB913-4_map1	0001.CSV	2117.55	-0.02784
PSB913-4_map1	0001.CSV	2121.4	-0.0277643
PSB913-4_map1	0001.CSV	2125.26	-0.0277575
PSB913-4_map1	0001.CSV	2129.12	-0.0277044
PSB913-4_map1	0001.CSV	2132.97	-0.0276646
PSB913-4_map1	0001.CSV	2136.83	-0.0275964
PSB913-4_map1	0001.CSV	2140.69	-0.0276189
PSB913-4_map1	0001.CSV	2144.55	-0.0276089
PSB913-4_map1	0001.CSV	2148.4	-0.0275626
PSB913-4_map1	0001.CSV	2152.26	-0.0274779
PSB913-4_map1	0001.CSV	2156.12	-0.0274805
PSB913-4_map1	0001.CSV	2159.97	-0.0274957
PSB913-4_map1	0001.CSV	2163.83	-0.0275468
PSB913-4_map1	0001.CSV	2167.69	-0.0275013
PSB913-4_map1	0001.CSV	2171.55	-0.0274577
PSB913-4_map1	0001.CSV	2175.4	-0.0273835
PSB913-4_map1	0001.CSV	2179.26	-0.0273356
PSB913-4_map1	0001.CSV	2183.12	-0.0272646
PSB913-4_map1	0001.CSV	2186.97	-0.0273003
PSB913-4_map1	0001.CSV	2190.83	-0.0273094
PSB913-4_map1	0001.CSV	2194.69	-0.0272877
PSB913-4_map1	0001.CSV	2198.55	-0.0272688
PSB913-4_map1	0001.CSV	2202.4	-0.0273039
PSB913-4_map1	0001.CSV	2206.26	-0.0272672
PSB913-4_map1	0001.CSV	2210.12	-0.0273243
PSB913-4_map1	0001.CSV	2213.97	-0.0273898
PSB913-4_map1	0001.CSV	2217.83	-0.0274609
PSB913-4_map1	0001.CSV	2221.69	-0.0274704
PSB913-4_map1	0001.CSV	2225.54	-0.0275377
PSB913-4_map1	0001.CSV	2229.4	-0.0275854
PSB913-4_map1	0001.CSV	2233.26	-0.0276172
PSB913-4_map1	0001.CSV	2237.12	-0.0276554
PSB913-4_map1	0001.CSV	2240.97	-0.0277469
PSB913-4_map1	0001.CSV	2244.83	-0.0277798
PSB913-4_map1	0001.CSV	2248.69	-0.0278482
PSB913-4_map1	0001.CSV	2252.54	-0.0278737
PSB913-4_map1	0001.CSV	2256.4	-0.0278998
PSB913-4_map1	0001.CSV	2260.26	-0.0279771
PSB913-4_map1	0001.CSV	2264.11	-0.0281137
PSB913-4_map1	0001.CSV	2267.97	-0.0281317
PSB913-4_map1	0001.CSV	2271.83	-0.0281622
PSB913-4_map1	0001.CSV	2275.69	-0.0282093
PSB913-4_map1	0001.CSV	2279.54	-0.0283042
PSB913-4_map1	0001.CSV	2283.4	-0.0284407
PSB913-4_map1	0001.CSV	2287.26	-0.0285587
PSB913-4_map1	0001.CSV	2291.11	-0.0285811
PSB913-4_map1	0001.CSV	2294.97	-0.0286913
PSB913-4_map1	0001.CSV	2298.83	-0.028785
PSB913-4_map1	0001.CSV	2302.69	-0.0288991
PSB913-4_map1	0001.CSV	2306.54	-0.0289788
PSB913-4_map1	0001.CSV	2310.4	-0.0290648
PSB913-4_map1	0001.CSV	2314.26	-0.0292016
PSB913-4_map1	0001.CSV	2318.11	-0.0296772
PSB913-4_map1	0001.CSV	2321.97	-0.0301192
PSB913-4_map1	0001.CSV	2325.83	-0.0306044
PSB913-4_map1	0001.CSV	2329.69	-0.03101
PSB913-4_map1	0001.CSV	2333.54	-0.0316672
PSB913-4_map1	0001.CSV	2337.4	-0.0321331
PSB913-4_map1	0001.CSV	2341.26	-0.0320162
PSB913-4_map1	0001.CSV	2345.11	-0.0306517
PSB913-4_map1	0001.CSV	2348.97	-0.0306676
PSB913-4_map1	0001.CSV	2352.83	-0.0322268
PSB913-4_map1	0001.CSV	2356.69	-0.0356596
PSB913-4_map1	0001.CSV	2360.54	-0.0377242
PSB913-4_map1	0001.CSV	2364.4	-0.0359871
PSB913-4_map1	0001.CSV	2368.26	-0.03296
PSB913-4_map1	0001.CSV	2372.11	-0.0311685
PSB913-4_map1	0001.CSV	2375.97	-0.0302079
PSB913-4_map1	0001.CSV	2379.83	-0.0300506
PSB913-4_map1	0001.CSV	2383.69	-0.0302673
PSB913-4_map1	0001.CSV	2387.54	-0.0305486
PSB913-4_map1	0001.CSV	2391.4	-0.0306922
PSB913-4_map1	0001.CSV	2395.26	-0.0307719
PSB913-4_map1	0001.CSV	2399.11	-0.0308409
PSB913-4_map1	0001.CSV	2402.97	-0.0309218
PSB913-4_map1	0001.CSV	2406.83	-0.0309622
PSB913-4_map1	0001.CSV	2410.68	-0.0310065
PSB913-4_map1	0001.CSV	2414.54	-0.0310249
PSB913-4_map1	0001.CSV	2418.4	-0.0310641
PSB913-4_map1	0001.CSV	2422.26	-0.0310598
PSB913-4_map1	0001.CSV	2426.11	-0.0310313
PSB913-4_map1	0001.CSV	2429.97	-0.0309818
PSB913-4_map1	0001.CSV	2433.83	-0.031005
PSB913-4_map1	0001.CSV	2437.68	-0.0310869
PSB913-4_map1	0001.CSV	2441.54	-0.0311947
PSB913-4_map1	0001.CSV	2445.4	-0.0312253
PSB913-4_map1	0001.CSV	2449.26	-0.0312343
PSB913-4_map1	0001.CSV	2453.11	-0.0312095
PSB913-4_map1	0001.CSV	2456.97	-0.0311723
PSB913-4_map1	0001.CSV	2460.83	-0.0311374
PSB913-4_map1	0001.CSV	2464.68	-0.0310787
PSB913-4_map1	0001.CSV	2468.54	-0.0309834
PSB913-4_map1	0001.CSV	2472.4	-0.0309202
PSB913-4_map1	0001.CSV	2476.26	-0.0307585
PSB913-4_map1	0001.CSV	2480.11	-0.0305387
PSB913-4_map1	0001.CSV	2483.97	-0.0303372
PSB913-4_map1	0001.CSV	2487.83	-0.0301516
PSB913-4_map1	0001.CSV	2491.68	-0.0299503
PSB913-4_map1	0001.CSV	2495.54	-0.0297457
PSB913-4_map1	0001.CSV	2499.4	-0.0296098
PSB913-4_map1	0001.CSV	2503.26	-0.0295959
PSB913-4_map1	0001.CSV	2507.11	-0.0296011
PSB913-4_map1	0001.CSV	2510.97	-0.0295971
PSB913-4_map1	0001.CSV	2514.83	-0.0294629
PSB913-4_map1	0001.CSV	2518.68	-0.0292796
PSB913-4_map1	0001.CSV	2522.54	-0.029201
PSB913-4_map1	0001.CSV	2526.4	-0.029211
PSB913-4_map1	0001.CSV	2530.26	-0.0292501
PSB913-4_map1	0001.CSV	2534.11	-0.0294303
PSB913-4_map1	0001.CSV	2537.97	-0.0296516
PSB913-4_map1	0001.CSV	2541.83	-0.0298143
PSB913-4_map1	0001.CSV	2545.68	-0.0299411
PSB913-4_map1	0001.CSV	2549.54	-0.0301049
PSB913-4_map1	0001.CSV	2553.4	-0.0302348
PSB913-4_map1	0001.CSV	2557.26	-0.030394
PSB913-4_map1	0001.CSV	2561.11	-0.0305306
PSB913-4_map1	0001.CSV	2564.97	-0.0306813
PSB913-4_map1	0001.CSV	2568.83	-0.0308795
PSB913-4_map1	0001.CSV	2572.68	-0.0310681
PSB913-4_map1	0001.CSV	2576.54	-0.031157
PSB913-4_map1	0001.CSV	2580.4	-0.0312535
PSB913-4_map1	0001.CSV	2584.25	-0.0314127
PSB913-4_map1	0001.CSV	2588.11	-0.0315744
PSB913-4_map1	0001.CSV	2591.97	-0.0316971
PSB913-4_map1	0001.CSV	2595.83	-0.031851
PSB913-4_map1	0001.CSV	2599.68	-0.0319264
PSB913-4_map1	0001.CSV	2603.54	-0.0319566
PSB913-4_map1	0001.CSV	2607.4	-0.0320214
PSB913-4_map1	0001.CSV	2611.25	-0.0320945
PSB913-4_map1	0001.CSV	2615.11	-0.0320555
PSB913-4_map1	0001.CSV	2618.97	-0.0320694
PSB913-4_map1	0001.CSV	2622.82	-0.0320531
PSB913-4_map1	0001.CSV	2626.68	-0.0319923
PSB913-4_map1	0001.CSV	2630.54	-0.0320582
PSB913-4_map1	0001.CSV	2634.4	-0.0321342
PSB913-4_map1	0001.CSV	2638.25	-0.032158
PSB913-4_map1	0001.CSV	2642.11	-0.0323574
PSB913-4_map1	0001.CSV	2645.97	-0.032557
PSB913-4_map1	0001.CSV	2649.82	-0.0326883
PSB913-4_map1	0001.CSV	2653.68	-0.0328122
PSB913-4_map1	0001.CSV	2657.54	-0.032877
PSB913-4_map1	0001.CSV	2661.4	-0.0328966
PSB913-4_map1	0001.CSV	2665.25	-0.0329282
PSB913-4_map1	0001.CSV	2669.11	-0.032938
PSB913-4_map1	0001.CSV	2672.97	-0.0328558
PSB913-4_map1	0001.CSV	2676.82	-0.0327438
PSB913-4_map1	0001.CSV	2680.68	-0.0328643
PSB913-4_map1	0001.CSV	2684.54	-0.0331422
PSB913-4_map1	0001.CSV	2688.4	-0.0332395
PSB913-4_map1	0001.CSV	2692.25	-0.033268
PSB913-4_map1	0001.CSV	2696.11	-0.033275
PSB913-4_map1	0001.CSV	2699.97	-0.0332104
PSB913-4_map1	0001.CSV	2703.82	-0.033207
PSB913-4_map1	0001.CSV	2707.68	-0.0331678
PSB913-4_map1	0001.CSV	2711.54	-0.033165
PSB913-4_map1	0001.CSV	2715.4	-0.0332319
PSB913-4_map1	0001.CSV	2719.25	-0.0331094
PSB913-4_map1	0001.CSV	2723.11	-0.0327989
PSB913-4_map1	0001.CSV	2726.97	-0.03276
PSB913-4_map1	0001.CSV	2730.82	-0.0330396
PSB913-4_map1	0001.CSV	2734.68	-0.0330495
PSB913-4_map1	0001.CSV	2738.54	-0.0329094
PSB913-4_map1	0001.CSV	2742.4	-0.0328239
PSB913-4_map1	0001.CSV	2746.25	-0.0325586
PSB913-4_map1	0001.CSV	2750.11	-0.0324912
PSB913-4_map1	0001.CSV	2753.97	-0.0326569
PSB913-4_map1	0001.CSV	2757.82	-0.0327473
PSB913-4_map1	0001.CSV	2761.68	-0.0328885
PSB913-4_map1	0001.CSV	2765.54	-0.0328904
PSB913-4_map1	0001.CSV	2769.39	-0.0326191
PSB913-4_map1	0001.CSV	2773.25	-0.0322764
PSB913-4_map1	0001.CSV	2777.11	-0.0323907
PSB913-4_map1	0001.CSV	2780.97	-0.0326451
PSB913-4_map1	0001.CSV	2784.82	-0.0325129
PSB913-4_map1	0001.CSV	2788.68	-0.0321627
PSB913-4_map1	0001.CSV	2792.54	-0.0321176
PSB913-4_map1	0001.CSV	2796.39	-0.0321596
PSB913-4_map1	0001.CSV	2800.25	-0.0323612
PSB913-4_map1	0001.CSV	2804.11	-0.0325663
PSB913-4_map1	0001.CSV	2807.97	-0.0323586
PSB913-4_map1	0001.CSV	2811.82	-0.0324064
PSB913-4_map1	0001.CSV	2815.68	-0.0326106
PSB913-4_map1	0001.CSV	2819.54	-0.0325242
PSB913-4_map1	0001.CSV	2823.39	-0.0324718
PSB913-4_map1	0001.CSV	2827.25	-0.0324463
PSB913-4_map1	0001.CSV	2831.11	-0.0321057
PSB913-4_map1	0001.CSV	2834.97	-0.0317804
PSB913-4_map1	0001.CSV	2838.82	-0.0319345
PSB913-4_map1	0001.CSV	2842.68	-0.03252
PSB913-4_map1	0001.CSV	2846.54	-0.032973
PSB913-4_map1	0001.CSV	2850.39	-0.0337018
PSB913-4_map1	0001.CSV	2854.25	-0.0342981
PSB913-4_map1	0001.CSV	2858.11	-0.0340517
PSB913-4_map1	0001.CSV	2861.97	-0.0336837
PSB913-4_map1	0001.CSV	2865.82	-0.0334459
PSB913-4_map1	0001.CSV	2869.68	-0.0329903
PSB913-4_map1	0001.CSV	2873.54	-0.0326529
PSB913-4_map1	0001.CSV	2877.39	-0.0329649
PSB913-4_map1	0001.CSV	2881.25	-0.0332616
PSB913-4_map1	0001.CSV	2885.11	-0.0332714
PSB913-4_map1	0001.CSV	2888.97	-0.0331822
PSB913-4_map1	0001.CSV	2892.82	-0.0328766
PSB913-4_map1	0001.CSV	2896.68	-0.032827
PSB913-4_map1	0001.CSV	2900.54	-0.0332685
PSB913-4_map1	0001.CSV	2904.39	-0.0333259
PSB913-4_map1	0001.CSV	2908.25	-0.032958
PSB913-4_map1	0001.CSV	2912.11	-0.032575
PSB913-4_map1	0001.CSV	2915.97	-0.032982
PSB913-4_map1	0001.CSV	2919.82	-0.0344344
PSB913-4_map1	0001.CSV	2923.68	-0.0357745
PSB913-4_map1	0001.CSV	2927.54	-0.0358489
PSB913-4_map1	0001.CSV	2931.39	-0.0356906
PSB913-4_map1	0001.CSV	2935.25	-0.0356134
PSB913-4_map1	0001.CSV	2939.11	-0.0349256
PSB913-4_map1	0001.CSV	2942.96	-0.0337531
PSB913-4_map1	0001.CSV	2946.82	-0.0333069
PSB913-4_map1	0001.CSV	2950.68	-0.0337368
PSB913-4_map1	0001.CSV	2954.54	-0.0345297
PSB913-4_map1	0001.CSV	2958.39	-0.0349462
PSB913-4_map1	0001.CSV	2962.25	-0.0347177
PSB913-4_map1	0001.CSV	2966.11	-0.0344703
PSB913-4_map1	0001.CSV	2969.96	-0.0337933
PSB913-4_map1	0001.CSV	2973.82	-0.0328029
PSB913-4_map1	0001.CSV	2977.68	-0.0321768
PSB913-4_map1	0001.CSV	2981.53	-0.0320989
PSB913-4_map1	0001.CSV	2985.39	-0.03241
PSB913-4_map1	0001.CSV	2989.25	-0.0322156
PSB913-4_map1	0001.CSV	2993.11	-0.0317601
PSB913-4_map1	0001.CSV	2996.96	-0.0317575
PSB913-4_map1	0001.CSV	3000.82	-0.0320756
PSB913-4_map1	0001.CSV	3004.68	-0.0321951
PSB913-4_map1	0001.CSV	3008.53	-0.0318785
PSB913-4_map1	0001.CSV	3012.39	-0.0314697
PSB913-4_map1	0001.CSV	3016.25	-0.0314761
PSB913-4_map1	0001.CSV	3020.11	-0.0318369
PSB913-4_map1	0001.CSV	3023.96	-0.0322293
PSB913-4_map1	0001.CSV	3027.82	-0.032279
PSB913-4_map1	0001.CSV	3031.68	-0.0319163
PSB913-4_map1	0001.CSV	3035.53	-0.0318184
PSB913-4_map1	0001.CSV	3039.39	-0.0319406
PSB913-4_map1	0001.CSV	3043.25	-0.0319342
PSB913-4_map1	0001.CSV	3047.11	-0.0319972
PSB913-4_map1	0001.CSV	3050.96	-0.032046
PSB913-4_map1	0001.CSV	3054.82	-0.0321145
PSB913-4_map1	0001.CSV	3058.68	-0.0322795
PSB913-4_map1	0001.CSV	3062.53	-0.0321907
PSB913-4_map1	0001.CSV	3066.39	-0.0318091
PSB913-4_map1	0001.CSV	3070.25	-0.0319419
PSB913-4_map1	0001.CSV	3074.11	-0.0320572
PSB913-4_map1	0001.CSV	3077.96	-0.0318432
PSB913-4_map1	0001.CSV	3081.82	-0.0316825
PSB913-4_map1	0001.CSV	3085.68	-0.0317188
PSB913-4_map1	0001.CSV	3089.53	-0.0319172
PSB913-4_map1	0001.CSV	3093.39	-0.0322393
PSB913-4_map1	0001.CSV	3097.25	-0.0321721
PSB913-4_map1	0001.CSV	3101.11	-0.0321349
PSB913-4_map1	0001.CSV	3104.96	-0.0322055
PSB913-4_map1	0001.CSV	3108.82	-0.0320528
PSB913-4_map1	0001.CSV	3112.68	-0.0318926
PSB913-4_map1	0001.CSV	3116.53	-0.0317296
PSB913-4_map1	0001.CSV	3120.39	-0.031868
PSB913-4_map1	0001.CSV	3124.25	-0.0321939
PSB913-4_map1	0001.CSV	3128.11	-0.0322964
PSB913-4_map1	0001.CSV	3131.96	-0.0323392
PSB913-4_map1	0001.CSV	3135.82	-0.0321852
PSB913-4_map1	0001.CSV	3139.68	-0.0321067
PSB913-4_map1	0001.CSV	3143.53	-0.0324353
PSB913-4_map1	0001.CSV	3147.39	-0.0323884
PSB913-4_map1	0001.CSV	3151.25	-0.0320156
PSB913-4_map1	0001.CSV	3155.1	-0.0321573
PSB913-4_map1	0001.CSV	3158.96	-0.0326618
PSB913-4_map1	0001.CSV	3162.82	-0.032839
PSB913-4_map1	0001.CSV	3166.68	-0.032823
PSB913-4_map1	0001.CSV	3170.53	-0.0328257
PSB913-4_map1	0001.CSV	3174.39	-0.0329037
PSB913-4_map1	0001.CSV	3178.25	-0.032839
PSB913-4_map1	0001.CSV	3182.1	-0.0328143
PSB913-4_map1	0001.CSV	3185.96	-0.0328144
PSB913-4_map1	0001.CSV	3189.82	-0.032685
PSB913-4_map1	0001.CSV	3193.68	-0.0328003
PSB913-4_map1	0001.CSV	3197.53	-0.0329818
PSB913-4_map1	0001.CSV	3201.39	-0.0329376
PSB913-4_map1	0001.CSV	3205.25	-0.0329211
PSB913-4_map1	0001.CSV	3209.1	-0.0329123
PSB913-4_map1	0001.CSV	3212.96	-0.0327317
PSB913-4_map1	0001.CSV	3216.82	-0.0325396
PSB913-4_map1	0001.CSV	3220.68	-0.0326987
PSB913-4_map1	0001.CSV	3224.53	-0.0329059
PSB913-4_map1	0001.CSV	3228.39	-0.0326384
PSB913-4_map1	0001.CSV	3232.25	-0.0323147
PSB913-4_map1	0001.CSV	3236.1	-0.0324172
PSB913-4_map1	0001.CSV	3239.96	-0.0326521
PSB913-4_map1	0001.CSV	3243.82	-0.0325662
PSB913-4_map1	0001.CSV	3247.68	-0.03255
PSB913-4_map1	0001.CSV	3251.53	-0.0325921
PSB913-4_map1	0001.CSV	3255.39	-0.0325446
PSB913-4_map1	0001.CSV	3259.25	-0.0327837
PSB913-4_map1	0001.CSV	3263.1	-0.0328778
PSB913-4_map1	0001.CSV	3266.96	-0.0324709
PSB913-4_map1	0001.CSV	3270.82	-0.0321436
PSB913-4_map1	0001.CSV	3274.68	-0.0322458
PSB913-4_map1	0001.CSV	3278.53	-0.0325915
PSB913-4_map1	0001.CSV	3282.39	-0.0328165
PSB913-4_map1	0001.CSV	3286.25	-0.0327313
PSB913-4_map1	0001.CSV	3290.1	-0.0323707
PSB913-4_map1	0001.CSV	3293.96	-0.0321331
PSB913-4_map1	0001.CSV	3297.82	-0.0322644
PSB913-4_map1	0001.CSV	3301.67	-0.0323112
PSB913-4_map1	0001.CSV	3305.53	-0.0321096
PSB913-4_map1	0001.CSV	3309.39	-0.0322379
PSB913-4_map1	0001.CSV	3313.25	-0.0327499
PSB913-4_map1	0001.CSV	3317.1	-0.0331404
PSB913-4_map1	0001.CSV	3320.96	-0.0329793
PSB913-4_map1	0001.CSV	3324.82	-0.0326831
PSB913-4_map1	0001.CSV	3328.67	-0.0328737
PSB913-4_map1	0001.CSV	3332.53	-0.032968
PSB913-4_map1	0001.CSV	3336.39	-0.0324833
PSB913-4_map1	0001.CSV	3340.24	-0.0322671
PSB913-4_map1	0001.CSV	3344.1	-0.0324685
PSB913-4_map1	0001.CSV	3347.96	-0.0325374
PSB913-4_map1	0001.CSV	3351.82	-0.0326646
PSB913-4_map1	0001.CSV	3355.67	-0.0329126
PSB913-4_map1	0001.CSV	3359.53	-0.0327723
PSB913-4_map1	0001.CSV	3363.39	-0.0325543
PSB913-4_map1	0001.CSV	3367.24	-0.0322397
PSB913-4_map1	0001.CSV	3371.1	-0.0322828
PSB913-4_map1	0001.CSV	3374.96	-0.0326008
PSB913-4_map1	0001.CSV	3378.82	-0.0328309
PSB913-4_map1	0001.CSV	3382.67	-0.0331369
PSB913-4_map1	0001.CSV	3386.53	-0.0331221
PSB913-4_map1	0001.CSV	3390.39	-0.0327086
PSB913-4_map1	0001.CSV	3394.24	-0.0325219
PSB913-4_map1	0001.CSV	3398.1	-0.0325113
PSB913-4_map1	0001.CSV	3401.96	-0.0325442
PSB913-4_map1	0001.CSV	3405.82	-0.0326824
PSB913-4_map1	0001.CSV	3409.67	-0.032724
PSB913-4_map1	0001.CSV	3413.53	-0.0329717
PSB913-4_map1	0001.CSV	3417.39	-0.0334127
PSB913-4_map1	0001.CSV	3421.24	-0.0335019
PSB913-4_map1	0001.CSV	3425.1	-0.0333007
PSB913-4_map1	0001.CSV	3428.96	-0.0328939
PSB913-4_map1	0001.CSV	3432.82	-0.0326787
PSB913-4_map1	0001.CSV	3436.67	-0.0329349
PSB913-4_map1	0001.CSV	3440.53	-0.0336247
PSB913-4_map1	0001.CSV	3444.39	-0.0339986
PSB913-4_map1	0001.CSV	3448.24	-0.0340547
PSB913-4_map1	0001.CSV	3452.1	-0.0341633
PSB913-4_map1	0001.CSV	3455.96	-0.0340722
PSB913-4_map1	0001.CSV	3459.82	-0.0337306
PSB913-4_map1	0001.CSV	3463.67	-0.0334671
PSB913-4_map1	0001.CSV	3467.53	-0.0332589
PSB913-4_map1	0001.CSV	3471.39	-0.0335757
PSB913-4_map1	0001.CSV	3475.24	-0.0338125
PSB913-4_map1	0001.CSV	3479.1	-0.0337875
PSB913-4_map1	0001.CSV	3482.96	-0.0337115
PSB913-4_map1	0001.CSV	3486.82	-0.0338049
PSB913-4_map1	0001.CSV	3490.67	-0.0339597
PSB913-4_map1	0001.CSV	3494.53	-0.0338908
PSB913-4_map1	0001.CSV	3498.39	-0.034002
PSB913-4_map1	0001.CSV	3502.24	-0.034178
PSB913-4_map1	0001.CSV	3506.1	-0.0345341
PSB913-4_map1	0001.CSV	3509.96	-0.0347131
PSB913-4_map1	0001.CSV	3513.81	-0.0345532
PSB913-4_map1	0001.CSV	3517.67	-0.0348619
PSB913-4_map1	0001.CSV	3521.53	-0.0350502
PSB913-4_map1	0001.CSV	3525.39	-0.0352117
PSB913-4_map1	0001.CSV	3529.24	-0.0354678
PSB913-4_map1	0001.CSV	3533.1	-0.0355082
PSB913-4_map1	0001.CSV	3536.96	-0.0353299
PSB913-4_map1	0001.CSV	3540.81	-0.0353918
PSB913-4_map1	0001.CSV	3544.67	-0.0353975
PSB913-4_map1	0001.CSV	3548.53	-0.0356014
PSB913-4_map1	0001.CSV	3552.39	-0.0358641
PSB913-4_map1	0001.CSV	3556.24	-0.035903
PSB913-4_map1	0001.CSV	3560.1	-0.0362449
PSB913-4_map1	0001.CSV	3563.96	-0.0369737
PSB913-4_map1	0001.CSV	3567.81	-0.0364651
PSB913-4_map1	0001.CSV	3571.67	-0.0362268
PSB913-4_map1	0001.CSV	3575.53	-0.036758
PSB913-4_map1	0001.CSV	3579.39	-0.0367752
PSB913-4_map1	0001.CSV	3583.24	-0.0368686
PSB913-4_map1	0001.CSV	3587.1	-0.0369629
PSB913-4_map1	0001.CSV	3590.96	-0.0369549
PSB913-4_map1	0001.CSV	3594.81	-0.0371949
PSB913-4_map1	0001.CSV	3598.67	-0.0369932
PSB913-4_map1	0001.CSV	3602.53	-0.0371634
PSB913-4_map1	0001.CSV	3606.39	-0.0381382
PSB913-4_map1	0001.CSV	3610.24	-0.0386157
PSB913-4_map1	0001.CSV	3614.1	-0.0384044
PSB913-4_map1	0001.CSV	3617.96	-0.0379536
PSB913-4_map1	0001.CSV	3621.81	-0.0376422
PSB913-4_map1	0001.CSV	3625.67	-0.0385146
PSB913-4_map1	0001.CSV	3629.53	-0.0384499
PSB913-4_map1	0001.CSV	3633.39	-0.0378412
PSB913-4_map1	0001.CSV	3637.24	-0.0383121
PSB913-4_map1	0001.CSV	3641.1	-0.0387591
PSB913-4_map1	0001.CSV	3644.96	-0.0394492
PSB913-4_map1	0001.CSV	3648.81	-0.0390766
PSB913-4_map1	0001.CSV	3652.67	-0.0380627
PSB913-4_map1	0001.CSV	3656.53	-0.0378987
PSB913-4_map1	0001.CSV	3660.38	-0.0378811
PSB913-4_map1	0001.CSV	3664.24	-0.0388445
PSB913-4_map1	0001.CSV	3668.1	-0.0398199
PSB913-4_map1	0001.CSV	3671.96	-0.039906
PSB913-4_map1	0001.CSV	3675.81	-0.0391847
PSB913-4_map1	0001.CSV	3679.67	-0.0387176
PSB913-4_map1	0001.CSV	3683.53	-0.0392407
PSB913-4_map1	0001.CSV	3687.38	-0.0395464
PSB913-4_map1	0001.CSV	3691.24	-0.0383317
PSB913-4_map1	0001.CSV	3695.1	-0.0384156
PSB913-4_map1	0001.CSV	3698.95	-0.0391106
PSB913-4_map1	0001.CSV	3702.81	-0.0392762
PSB913-4_map1	0001.CSV	3706.67	-0.0397358
PSB913-4_map1	0001.CSV	3710.53	-0.0397285
PSB913-4_map1	0001.CSV	3714.38	-0.0388296
PSB913-4_map1	0001.CSV	3718.24	-0.0394359
PSB913-4_map1	0001.CSV	3722.1	-0.0398396
PSB913-4_map1	0001.CSV	3725.95	-0.0396681
PSB913-4_map1	0001.CSV	3729.81	-0.0399192
PSB913-4_map1	0001.CSV	3733.67	-0.0396524
PSB913-4_map1	0001.CSV	3737.53	-0.0383179
PSB913-4_map1	0001.CSV	3741.38	-0.0393584
PSB913-4_map1	0001.CSV	3745.24	-0.0407013
PSB913-4_map1	0001.CSV	3749.1	-0.0410155
PSB913-4_map1	0001.CSV	3752.95	-0.0396188
PSB913-4_map1	0001.CSV	3756.81	-0.0393237
PSB913-4_map1	0001.CSV	3760.67	-0.0392594
PSB913-4_map1	0001.CSV	3764.53	-0.0395566
PSB913-4_map1	0001.CSV	3768.38	-0.0392138
PSB913-4_map1	0001.CSV	3772.24	-0.0388236
PSB913-4_map1	0001.CSV	3776.1	-0.0391909
PSB913-4_map1	0001.CSV	3779.95	-0.039205
PSB913-4_map1	0001.CSV	3783.81	-0.0391402
PSB913-4_map1	0001.CSV	3787.67	-0.039248
PSB913-4_map1	0001.CSV	3791.53	-0.039701
PSB913-4_map1	0001.CSV	3795.38	-0.0402988
PSB913-4_map1	0001.CSV	3799.24	-0.0403384
PSB913-4_map1	0001.CSV	3803.1	-0.0394871
PSB913-4_map1	0001.CSV	3806.95	-0.0387026
PSB913-4_map1	0001.CSV	3810.81	-0.0391646
PSB913-4_map1	0001.CSV	3814.67	-0.0400784
PSB913-4_map1	0001.CSV	3818.53	-0.0399828
PSB913-4_map1	0001.CSV	3822.38	-0.0391651
PSB913-4_map1	0001.CSV	3826.24	-0.0394211
PSB913-4_map1	0001.CSV	3830.1	-0.0399444
PSB913-4_map1	0001.CSV	3833.95	-0.0402644
PSB913-4_map1	0001.CSV	3837.81	-0.0396504
PSB913-4_map1	0001.CSV	3841.67	-0.0383663
PSB913-4_map1	0001.CSV	3845.53	-0.0389338
PSB913-4_map1	0001.CSV	3849.38	-0.0404898
PSB913-4_map1	0001.CSV	3853.24	-0.0402964
PSB913-4_map1	0001.CSV	3857.1	-0.03916
PSB913-4_map1	0001.CSV	3860.95	-0.0399965
PSB913-4_map1	0001.CSV	3864.81	-0.0401586
PSB913-4_map1	0001.CSV	3868.67	-0.039865
PSB913-4_map1	0001.CSV	3872.52	-0.0392941
PSB913-4_map1	0001.CSV	3876.38	-0.0396547
PSB913-4_map1	0001.CSV	3880.24	-0.0401733
PSB913-4_map1	0001.CSV	3884.1	-0.0396693
PSB913-4_map1	0001.CSV	3887.95	-0.0395557
PSB913-4_map1	0001.CSV	3891.81	-0.0395538
PSB913-4_map1	0001.CSV	3895.67	-0.0399412
PSB913-4_map1	0001.CSV	3899.52	-0.0403083
PSB913-4_map1	0001.CSV	3903.38	-0.0391118
PSB913-4_map1	0001.CSV	3907.24	-0.0388293
PSB913-4_map1	0001.CSV	3911.1	-0.0395912
PSB913-4_map1	0001.CSV	3914.95	-0.0400976
PSB913-4_map1	0001.CSV	3918.81	-0.0399616
PSB913-4_map1	0001.CSV	3922.67	-0.0397409
PSB913-4_map1	0001.CSV	3926.52	-0.0396268
PSB913-4_map1	0001.CSV	3930.38	-0.0395714
PSB913-4_map1	0001.CSV	3934.24	-0.039366
PSB913-4_map1	0001.CSV	3938.09	-0.0397728
PSB913-4_map1	0001.CSV	3941.95	-0.0399962
PSB913-4_map1	0001.CSV	3945.81	-0.0398394
PSB913-4_map1	0001.CSV	3949.67	-0.0397047
PSB913-4_map1	0001.CSV	3953.52	-0.0397423
PSB913-4_map1	0001.CSV	3957.38	-0.040004
PSB913-4_map1	0001.CSV	3961.24	-0.04001
PSB913-4_map1	0001.CSV	3965.09	-0.0399113
PSB913-4_map1	0001.CSV	3968.95	-0.0398837
PSB913-4_map1	0001.CSV	3972.81	-0.0397779
PSB913-4_map1	0001.CSV	3976.67	-0.0396987
PSB913-4_map1	0001.CSV	3980.52	-0.0397508
PSB913-4_map1	0001.CSV	3984.38	-0.0397927
PSB913-4_map1	0001.CSV	3988.24	-0.0398718
PSB913-4_map1	0001.CSV	3992.09	-0.0399581
PSB913-4_map1	0001.CSV	3995.95	-0.040042
PSB913-4_map1	0001.CSV	3999.81	-0.0400255
PSB913-4_map1	0002.CSV	674.992	0.00544273
PSB913-4_map1	0002.CSV	678.849	0.00564698
PSB913-4_map1	0002.CSV	682.706	0.00608835
PSB913-4_map1	0002.CSV	686.563	0.00737822
PSB913-4_map1	0002.CSV	690.42	0.00895606
PSB913-4_map1	0002.CSV	694.277	0.0140285
PSB913-4_map1	0002.CSV	698.134	0.0181337
PSB913-4_map1	0002.CSV	701.991	0.0143375
PSB913-4_map1	0002.CSV	705.849	0.0106067
PSB913-4_map1	0002.CSV	709.706	0.0151922
PSB913-4_map1	0002.CSV	713.563	0.0138689
PSB913-4_map1	0002.CSV	717.42	0.00402811
PSB913-4_map1	0002.CSV	721.277	-0.000823263
PSB913-4_map1	0002.CSV	725.134	-0.00072073
PSB913-4_map1	0002.CSV	728.991	-0.000428708
PSB913-4_map1	0002.CSV	732.848	0.000318734
PSB913-4_map1	0002.CSV	736.705	0.00112154
PSB913-4_map1	0002.CSV	740.562	0.00179553
PSB913-4_map1	0002.CSV	744.42	0.00196678
PSB913-4_map1	0002.CSV	748.277	0.00193905
PSB913-4_map1	0002.CSV	752.134	0.00131682
PSB913-4_map1	0002.CSV	755.991	0.000811315
PSB913-4_map1	0002.CSV	759.848	0.000626984
PSB913-4_map1	0002.CSV	763.705	0.000647225
PSB913-4_map1	0002.CSV	767.562	0.000247317
PSB913-4_map1	0002.CSV	771.419	-5.74506e-05
PSB913-4_map1	0002.CSV	775.276	-0.00059425
PSB913-4_map1	0002.CSV	779.133	-0.000704884
PSB913-4_map1	0002.CSV	782.99	-0.00080881
PSB913-4_map1	0002.CSV	786.848	-0.000766542
PSB913-4_map1	0002.CSV	790.705	-0.00081559
PSB913-4_map1	0002.CSV	794.562	-0.000688079
PSB913-4_map1	0002.CSV	798.419	-0.000650762
PSB913-4_map1	0002.CSV	802.276	-0.000249991
PSB913-4_map1	0002.CSV	806.133	0.000186717
PSB913-4_map1	0002.CSV	809.99	0.000756114
PSB913-4_map1	0002.CSV	813.847	0.00125361
PSB913-4_map1	0002.CSV	817.704	0.00214059
PSB913-4_map1	0002.CSV	821.562	0.00309896
PSB913-4_map1	0002.CSV	825.419	0.00427448
PSB913-4_map1	0002.CSV	829.276	0.00557468
PSB913-4_map1	0002.CSV	833.133	0.00750489
PSB913-4_map1	0002.CSV	836.99	0.00988554
PSB913-4_map1	0002.CSV	840.847	0.0129606
PSB913-4_map1	0002.CSV	844.704	0.0157624
PSB913-4_map1	0002.CSV	848.561	0.0203063
PSB913-4_map1	0002.CSV	852.418	0.025721
PSB913-4_map1	0002.CSV	856.275	0.0286629
PSB913-4_map1	0002.CSV	860.132	0.0274612
PSB913-4_map1	0002.CSV	863.99	0.0219114
PSB913-4_map1	0002.CSV	867.847	0.0129041
PSB913-4_map1	0002.CSV	871.704	0.00353741
PSB913-4_map1	0002.CSV	875.561	-0.00306134
PSB913-4_map1	0002.CSV	879.418	-0.00594204
PSB913-4_map1	0002.CSV	883.275	-0.00698272
PSB913-4_map1	0002.CSV	887.132	-0.00736603
PSB913-4_map1	0002.CSV	890.989	-0.00770261
PSB913-4_map1	0002.CSV	894.846	-0.00786752
PSB913-4_map1	0002.CSV	898.703	-0.00796965
PSB913-4_map1	0002.CSV	902.561	-0.00789885
PSB913-4_map1	0002.CSV	906.418	-0.00789361
PSB913-4_map1	0002.CSV	910.275	-0.00794206
PSB913-4_map1	0002.CSV	914.132	-0.00808447
PSB913-4_map1	0002.CSV	917.989	-0.00798211
PSB913-4_map1	0002.CSV	921.846	-0.00792228
PSB913-4_map1	0002.CSV	925.703	-0.00781695
PSB913-4_map1	0002.CSV	929.56	-0.00773083
PSB913-4_map1	0002.CSV	933.417	-0.00756542
PSB913-4_map1	0002.CSV	937.274	-0.00754432
PSB913-4_map1	0002.CSV	941.131	-0.00742584
PSB913-4_map1	0002.CSV	944.989	-0.00734915
PSB913-4_map1	0002.CSV	948.846	-0.00714018
PSB913-4_map1	0002.CSV	952.703	-0.00701859
PSB913-4_map1	0002.CSV	956.56	-0.00691679
PSB913-4_map1	0002.CSV	960.417	-0.00686158
PSB913-4_map1	0002.CSV	964.274	-0.00663948
PSB913-4_map1	0002.CSV	968.131	-0.00651677
PSB913-4_map1	0002.CSV	971.988	-0.00642795
PSB913-4_map1	0002.CSV	975.845	-0.00638044
PSB913-4_map1	0002.CSV	979.702	-0.00619086
PSB913-4_map1	0002.CSV	983.559	-0.0061071
PSB913-4_map1	0002.CSV	987.417	-0.00600499
PSB913-4_map1	0002.CSV	991.274	-0.00597385
PSB913-4_map1	0002.CSV	995.131	-0.00591763
PSB913-4_map1	0002.CSV	998.988	-0.0059257
PSB913-4_map1	0002.CSV	1002.85	-0.00593479
PSB913-4_map1	0002.CSV	1006.7	-0.006036
PSB913-4_map1	0002.CSV	1010.56	-0.00604411
PSB913-4_map1	0002.CSV	1014.42	-0.00610589
PSB913-4_map1	0002.CSV	1018.27	-0.00603992
PSB913-4_map1	0002.CSV	1022.13	-0.00603747
PSB913-4_map1	0002.CSV	1025.99	-0.00597365
PSB913-4_map1	0002.CSV	1029.85	-0.00598401
PSB913-4_map1	0002.CSV	1033.7	-0.00593672
PSB913-4_map1	0002.CSV	1037.56	-0.00595976
PSB913-4_map1	0002.CSV	1041.42	-0.00593064
PSB913-4_map1	0002.CSV	1045.27	-0.0059642
PSB913-4_map1	0002.CSV	1049.13	-0.00584026
PSB913-4_map1	0002.CSV	1052.99	-0.00569394
PSB913-4_map1	0002.CSV	1056.84	-0.00537281
PSB913-4_map1	0002.CSV	1060.7	-0.00521317
PSB913-4_map1	0002.CSV	1064.56	-0.00510827
PSB913-4_map1	0002.CSV	1068.42	-0.00532054
PSB913-4_map1	0002.CSV	1072.27	-0.00553108
PSB913-4_map1	0002.CSV	1076.13	-0.00536856
PSB913-4_map1	0002.CSV	1079.99	-0.0042695
PSB913-4_map1	0002.CSV	1083.84	-0.00498221
PSB913-4_map1	0002.CSV	1087.7	-0.00745984
PSB913-4_map1	0002.CSV	1091.56	-0.00845215
PSB913-4_map1	0002.CSV	1095.41	-0.00842193
PSB913-4_map1	0002.CSV	1099.27	-0.00828821
PSB913-4_map1	0002.CSV	1103.13	-0.00799853
PSB913-4_map1	0002.CSV	1106.99	-0.00770522
PSB913-4_map1	0002.CSV	1110.84	-0.00739825
PSB913-4_map1	0002.CSV	1114.7	-0.00724196
PSB913-4_map1	0002.CSV	1118.56	-0.00716062
PSB913-4_map1	0002.CSV	1122.41	-0.00720073
PSB913-4_map1	0002.CSV	1126.27	-0.00724844
PSB913-4_map1	0002.CSV	1130.13	-0.00733286
PSB913-4_map1	0002.CSV	1133.99	-0.00737753
PSB913-4_map1	0002.CSV	1137.84	-0.00745932
PSB913-4_map1	0002.CSV	1141.7	-0.00749619
PSB913-4_map1	0002.CSV	1145.56	-0.00760364
PSB913-4_map1	0002.CSV	1149.41	-0.0076364
PSB913-4_map1	0002.CSV	1153.27	-0.00758567
PSB913-4_map1	0002.CSV	1157.13	-0.00746401
PSB913-4_map1	0002.CSV	1160.99	-0.00754679
PSB913-4_map1	0002.CSV	1164.84	-0.00765232
PSB913-4_map1	0002.CSV	1168.7	-0.00772514
PSB913-4_map1	0002.CSV	1172.56	-0.00769148
PSB913-4_map1	0002.CSV	1176.41	-0.00763714
PSB913-4_map1	0002.CSV	1180.27	-0.00754985
PSB913-4_map1	0002.CSV	1184.13	-0.00758981
PSB913-4_map1	0002.CSV	1187.99	-0.00748316
PSB913-4_map1	0002.CSV	1191.84	-0.00736476
PSB913-4_map1	0002.CSV	1195.7	-0.00725271
PSB913-4_map1	0002.CSV	1199.56	-0.00714217
PSB913-4_map1	0002.CSV	1203.41	-0.00701412
PSB913-4_map1	0002.CSV	1207.27	-0.00686758
PSB913-4_map1	0002.CSV	1211.13	-0.00659461
PSB913-4_map1	0002.CSV	1214.98	-0.00637518
PSB913-4_map1	0002.CSV	1218.84	-0.0061514
PSB913-4_map1	0002.CSV	1222.7	-0.00596486
PSB913-4_map1	0002.CSV	1226.56	-0.00570649
PSB913-4_map1	0002.CSV	1230.41	-0.00547625
PSB913-4_map1	0002.CSV	1234.27	-0.00518787
PSB913-4_map1	0002.CSV	1238.13	-0.00493051
PSB913-4_map1	0002.CSV	1241.98	-0.00463144
PSB913-4_map1	0002.CSV	1245.84	-0.00440368
PSB913-4_map1	0002.CSV	1249.7	-0.00416854
PSB913-4_map1	0002.CSV	1253.56	-0.00404142
PSB913-4_map1	0002.CSV	1257.41	-0.0039945
PSB913-4_map1	0002.CSV	1261.27	-0.00398597
PSB913-4_map1	0002.CSV	1265.13	-0.00381531
PSB913-4_map1	0002.CSV	1268.98	-0.003639
PSB913-4_map1	0002.CSV	1272.84	-0.0034163
PSB913-4_map1	0002.CSV	1276.7	-0.00330842
PSB913-4_map1	0002.CSV	1280.56	-0.00317401
PSB913-4_map1	0002.CSV	1284.41	-0.00310332
PSB913-4_map1	0002.CSV	1288.27	-0.0030669
PSB913-4_map1	0002.CSV	1292.13	-0.00315566
PSB913-4_map1	0002.CSV	1295.98	-0.00316069
PSB913-4_map1	0002.CSV	1299.84	-0.00316362
PSB913-4_map1	0002.CSV	1303.7	-0.00311177
PSB913-4_map1	0002.CSV	1307.56	-0.00299846
PSB913-4_map1	0002.CSV	1311.41	-0.00273576
PSB913-4_map1	0002.CSV	1315.27	-0.00249672
PSB913-4_map1	0002.CSV	1319.13	-0.00224333
PSB913-4_map1	0002.CSV	1322.98	-0.00201184
PSB913-4_map1	0002.CSV	1326.84	-0.00169286
PSB913-4_map1	0002.CSV	1330.7	-0.00142068
PSB913-4_map1	0002.CSV	1334.56	-0.00116697
PSB913-4_map1	0002.CSV	1338.41	-0.000715636
PSB913-4_map1	0002.CSV	1342.27	-6.92778e-05
PSB913-4_map1	0002.CSV	1346.13	0.000267739
PSB913-4_map1	0002.CSV	1349.98	0.000721098
PSB913-4_map1	0002.CSV	1353.84	0.00117264
PSB913-4_map1	0002.CSV	1357.7	0.00168102
PSB913-4_map1	0002.CSV	1361.56	0.0022765
PSB913-4_map1	0002.CSV	1365.41	0.00309458
PSB913-4_map1	0002.CSV	1369.27	0.0035923
PSB913-4_map1	0002.CSV	1373.13	0.00426294
PSB913-4_map1	0002.CSV	1376.98	0.00510302
PSB913-4_map1	0002.CSV	1380.84	0.00595755
PSB913-4_map1	0002.CSV	1384.7	0.0068469
PSB913-4_map1	0002.CSV	1388.56	0.00813882
PSB913-4_map1	0002.CSV	1392.41	0.00894125
PSB913-4_map1	0002.CSV	1396.27	0.0101324
PSB913-4_map1	0002.CSV	1400.13	0.011301
PSB913-4_map1	0002.CSV	1403.98	0.0121646
PSB913-4_map1	0002.CSV	1407.84	0.0130215
PSB913-4_map1	0002.CSV	1411.7	0.0137579
PSB913-4_map1	0002.CSV	1415.55	0.0141622
PSB913-4_map1	0002.CSV	1419.41	0.0152319
PSB913-4_map1	0002.CSV	1423.27	0.0162095
PSB913-4_map1	0002.CSV	1427.12	0.0169176
PSB913-4_map1	0002.CSV	1430.98	0.0176604
PSB913-4_map1	0002.CSV	1434.84	0.0189157
PSB913-4_map1	0002.CSV	1438.7	0.0206298
PSB913-4_map1	0002.CSV	1442.55	0.0216745
PSB913-4_map1	0002.CSV	1446.41	0.0224786
PSB913-4_map1	0002.CSV	1450.27	0.0231825
PSB913-4_map1	0002.CSV	1454.12	0.0229071
PSB913-4_map1	0002.CSV	1457.98	0.0230348
PSB913-4_map1	0002.CSV	1461.84	0.0228647
PSB913-4_map1	0002.CSV	1465.7	0.0232442
PSB913-4_map1	0002.CSV	1469.55	0.0234583
PSB913-4_map1	0002.CSV	1473.41	0.0239094
PSB913-4_map1	0002.CSV	1477.27	0.0234825
PSB913-4_map1	0002.CSV	1481.12	0.0222883
PSB913-4_map1	0002.CSV	1484.98	0.0207874
PSB913-4_map1	0002.CSV	1488.84	0.0192455
PSB913-4_map1	0002.CSV	1492.7	0.0174864
PSB913-4_map1	0002.CSV	1496.55	0.0158181
PSB913-4_map1	0002.CSV	1500.41	0.0139465
PSB913-4_map1	0002.CSV	1504.27	0.0125092
PSB913-4_map1	0002.CSV	1508.12	0.010616
PSB913-4_map1	0002.CSV	1511.98	0.00901854
PSB913-4_map1	0002.CSV	1515.84	0.00747249
PSB913-4_map1	0002.CSV	1519.7	0.00587096
PSB913-4_map1	0002.CSV	1523.55	0.00427776
PSB913-4_map1	0002.CSV	1527.41	0.00296446
PSB913-4_map1	0002.CSV	1531.27	0.00158966
PSB913-4_map1	0002.CSV	1535.12	0.000331799
PSB913-4_map1	0002.CSV	1538.98	-0.000953875
PSB913-4_map1	0002.CSV	1542.84	-0.00183862
PSB913-4_map1	0002.CSV	1546.7	-0.00286145
PSB913-4_map1	0002.CSV	1550.55	-0.00403905
PSB913-4_map1	0002.CSV	1554.41	-0.00525861
PSB913-4_map1	0002.CSV	1558.27	-0.00613621
PSB913-4_map1	0002.CSV	1562.12	-0.00692344
PSB913-4_map1	0002.CSV	1565.98	-0.00781985
PSB913-4_map1	0002.CSV	1569.84	-0.00869492
PSB913-4_map1	0002.CSV	1573.69	-0.0093993
PSB913-4_map1	0002.CSV	1577.55	-0.00988222
PSB913-4_map1	0002.CSV	1581.41	-0.0104639
PSB913-4_map1	0002.CSV	1585.27	-0.0110922
PSB913-4_map1	0002.CSV	1589.12	-0.0115254
PSB913-4_map1	0002.CSV	1592.98	-0.0117741
PSB913-4_map1	0002.CSV	1596.84	-0.0119432
PSB913-4_map1	0002.CSV	1600.69	-0.0121047
PSB913-4_map1	0002.CSV	1604.55	-0.0122381
PSB913-4_map1	0002.CSV	1608.41	-0.0123921
PSB913-4_map1	0002.CSV	1612.27	-0.0126293
PSB913-4_map1	0002.CSV	1616.12	-0.0127464
PSB913-4_map1	0002.CSV	1619.98	-0.0126555
PSB913-4_map1	0002.CSV	1623.84	-0.0127017
PSB913-4_map1	0002.CSV	1627.69	-0.0127606
PSB913-4_map1	0002.CSV	1631.55	-0.0132177
PSB913-4_map1	0002.CSV	1635.41	-0.0132485
PSB913-4_map1	0002.CSV	1639.27	-0.0131183
PSB913-4_map1	0002.CSV	1643.12	-0.0136893
PSB913-4_map1	0002.CSV	1646.98	-0.0139878
PSB913-4_map1	0002.CSV	1650.84	-0.013733
PSB913-4_map1	0002.CSV	1654.69	-0.013303
PSB913-4_map1	0002.CSV	1658.55	-0.0136512
PSB913-4_map1	0002.CSV	1662.41	-0.0140015
PSB913-4_map1	0002.CSV	1666.27	-0.0142313
PSB913-4_map1	0002.CSV	1670.12	-0.0143328
PSB913-4_map1	0002.CSV	1673.98	-0.0141438
PSB913-4_map1	0002.CSV	1677.84	-0.0144944
PSB913-4_map1	0002.CSV	1681.69	-0.0148996
PSB913-4_map1	0002.CSV	1685.55	-0.0145344
PSB913-4_map1	0002.CSV	1689.41	-0.0144967
PSB913-4_map1	0002.CSV	1693.27	-0.0150647
PSB913-4_map1	0002.CSV	1697.12	-0.0152835
PSB913-4_map1	0002.CSV	1700.98	-0.0149353
PSB913-4_map1	0002.CSV	1704.84	-0.0148108
PSB913-4_map1	0002.CSV	1708.69	-0.0149258
PSB913-4_map1	0002.CSV	1712.55	-0.015285
PSB913-4_map1	0002.CSV	1716.41	-0.0149131
PSB913-4_map1	0002.CSV	1720.27	-0.0141602
PSB913-4_map1	0002.CSV	1724.12	-0.0144499
PSB913-4_map1	0002.CSV	1727.98	-0.0148823
PSB913-4_map1	0002.CSV	1731.84	-0.0151315
PSB913-4_map1	0002.CSV	1735.69	-0.0150462
PSB913-4_map1	0002.CSV	1739.55	-0.0154631
PSB913-4_map1	0002.CSV	1743.41	-0.0158894
PSB913-4_map1	0002.CSV	1747.27	-0.0161263
PSB913-4_map1	0002.CSV	1751.12	-0.0160396
PSB913-4_map1	0002.CSV	1754.98	-0.0162751
PSB913-4_map1	0002.CSV	1758.84	-0.0163774
PSB913-4_map1	0002.CSV	1762.69	-0.0163358
PSB913-4_map1	0002.CSV	1766.55	-0.0165282
PSB913-4_map1	0002.CSV	1770.41	-0.0164848
PSB913-4_map1	0002.CSV	1774.26	-0.0157607
PSB913-4_map1	0002.CSV	1778.12	-0.0155677
PSB913-4_map1	0002.CSV	1781.98	-0.0153467
PSB913-4_map1	0002.CSV	1785.84	-0.015314
PSB913-4_map1	0002.CSV	1789.69	-0.015578
PSB913-4_map1	0002.CSV	1793.55	-0.0156598
PSB913-4_map1	0002.CSV	1797.41	-0.0158543
PSB913-4_map1	0002.CSV	1801.26	-0.0160542
PSB913-4_map1	0002.CSV	1805.12	-0.0161965
PSB913-4_map1	0002.CSV	1808.98	-0.0163182
PSB913-4_map1	0002.CSV	1812.84	-0.016142
PSB913-4_map1	0002.CSV	1816.69	-0.0161701
PSB913-4_map1	0002.CSV	1820.55	-0.0162505
PSB913-4_map1	0002.CSV	1824.41	-0.0163245
PSB913-4_map1	0002.CSV	1828.26	-0.0161521
PSB913-4_map1	0002.CSV	1832.12	-0.0159607
PSB913-4_map1	0002.CSV	1835.98	-0.0160004
PSB913-4_map1	0002.CSV	1839.84	-0.0161577
PSB913-4_map1	0002.CSV	1843.69	-0.016024
PSB913-4_map1	0002.CSV	1847.55	-0.015723
PSB913-4_map1	0002.CSV	1851.41	-0.0158501
PSB913-4_map1	0002.CSV	1855.26	-0.0159816
PSB913-4_map1	0002.CSV	1859.12	-0.0159473
PSB913-4_map1	0002.CSV	1862.98	-0.0160407
PSB913-4_map1	0002.CSV	1866.84	-0.016002
PSB913-4_map1	0002.CSV	1870.69	-0.0155868
PSB913-4_map1	0002.CSV	1874.55	-0.0156786
PSB913-4_map1	0002.CSV	1878.41	-0.015885
PSB913-4_map1	0002.CSV	1882.26	-0.0159325
PSB913-4_map1	0002.CSV	1886.12	-0.0159585
PSB913-4_map1	0002.CSV	1889.98	-0.0158315
PSB913-4_map1	0002.CSV	1893.83	-0.0157413
PSB913-4_map1	0002.CSV	1897.69	-0.015766
PSB913-4_map1	0002.CSV	1901.55	-0.0158709
PSB913-4_map1	0002.CSV	1905.41	-0.0159702
PSB913-4_map1	0002.CSV	1909.26	-0.0159508
PSB913-4_map1	0002.CSV	1913.12	-0.0159656
PSB913-4_map1	0002.CSV	1916.98	-0.0160394
PSB913-4_map1	0002.CSV	1920.83	-0.0159225
PSB913-4_map1	0002.CSV	1924.69	-0.0158572
PSB913-4_map1	0002.CSV	1928.55	-0.0159536
PSB913-4_map1	0002.CSV	1932.4	-0.0160588
PSB913-4_map1	0002.CSV	1936.26	-0.0161289
PSB913-4_map1	0002.CSV	1940.12	-0.0162387
PSB913-4_map1	0002.CSV	1943.98	-0.0161363
PSB913-4_map1	0002.CSV	1947.83	-0.0161217
PSB913-4_map1	0002.CSV	1951.69	-0.016252
PSB913-4_map1	0002.CSV	1955.55	-0.0163764
PSB913-4_map1	0002.CSV	1959.4	-0.0164683
PSB913-4_map1	0002.CSV	1963.26	-0.0165787
PSB913-4_map1	0002.CSV	1967.12	-0.0165427
PSB913-4_map1	0002.CSV	1970.98	-0.0165918
PSB913-4_map1	0002.CSV	1974.83	-0.0167455
PSB913-4_map1	0002.CSV	1978.69	-0.0168377
PSB913-4_map1	0002.CSV	1982.55	-0.0169169
PSB913-4_map1	0002.CSV	1986.4	-0.0170663
PSB913-4_map1	0002.CSV	1990.26	-0.0171243
PSB913-4_map1	0002.CSV	1994.12	-0.0171566
PSB913-4_map1	0002.CSV	1997.98	-0.0173248
PSB913-4_map1	0002.CSV	2001.83	-0.017477
PSB913-4_map1	0002.CSV	2005.69	-0.0175783
PSB913-4_map1	0002.CSV	2009.55	-0.0176958
PSB913-4_map1	0002.CSV	2013.4	-0.0178306
PSB913-4_map1	0002.CSV	2017.26	-0.0178957
PSB913-4_map1	0002.CSV	2021.12	-0.0179901
PSB913-4_map1	0002.CSV	2024.97	-0.0181728
PSB913-4_map1	0002.CSV	2028.83	-0.0182654
PSB913-4_map1	0002.CSV	2032.69	-0.0183593
PSB913-4_map1	0002.CSV	2036.55	-0.0184852
PSB913-4_map1	0002.CSV	2040.4	-0.018563
PSB913-4_map1	0002.CSV	2044.26	-0.0185564
PSB913-4_map1	0002.CSV	2048.12	-0.0186494
PSB913-4_map1	0002.CSV	2051.97	-0.0187391
PSB913-4_map1	0002.CSV	2055.83	-0.0188229
PSB913-4_map1	0002.CSV	2059.69	-0.0189055
PSB913-4_map1	0002.CSV	2063.55	-0.0189791
PSB913-4_map1	0002.CSV	2067.4	-0.0190195
PSB913-4_map1	0002.CSV	2071.26	-0.0191035
PSB913-4_map1	0002.CSV	2075.12	-0.0191585
PSB913-4_map1	0002.CSV	2078.97	-0.0191737
PSB913-4_map1	0002.CSV	2082.83	-0.0191613
PSB913-4_map1	0002.CSV	2086.69	-0.0191746
PSB913-4_map1	0002.CSV	2090.55	-0.0191452
PSB913-4_map1	0002.CSV	2094.4	-0.019161
PSB913-4_map1	0002.CSV	2098.26	-0.0192173
PSB913-4_map1	0002.CSV	2102.12	-0.0192262
PSB913-4_map1	0002.CSV	2105.97	-0.0191691
PSB913-4_map1	0002.CSV	2109.83	-0.0191786
PSB913-4_map1	0002.CSV	2113.69	-0.0192196
PSB913-4_map1	0002.CSV	2117.55	-0.0192076
PSB913-4_map1	0002.CSV	2121.4	-0.0191432
PSB913-4_map1	0002.CSV	2125.26	-0.0191218
PSB913-4_map1	0002.CSV	2129.12	-0.0191053
PSB913-4_map1	0002.CSV	2132.97	-0.0190626
PSB913-4_map1	0002.CSV	2136.83	-0.0190206
PSB913-4_map1	0002.CSV	2140.69	-0.0190475
PSB913-4_map1	0002.CSV	2144.55	-0.0190842
PSB913-4_map1	0002.CSV	2148.4	-0.0190798
PSB913-4_map1	0002.CSV	2152.26	-0.0190756
PSB913-4_map1	0002.CSV	2156.12	-0.0191176
PSB913-4_map1	0002.CSV	2159.97	-0.0191245
PSB913-4_map1	0002.CSV	2163.83	-0.0191134
PSB913-4_map1	0002.CSV	2167.69	-0.0190755
PSB913-4_map1	0002.CSV	2171.55	-0.0190506
PSB913-4_map1	0002.CSV	2175.4	-0.0190195
PSB913-4_map1	0002.CSV	2179.26	-0.0189663
PSB913-4_map1	0002.CSV	2183.12	-0.0189459
PSB913-4_map1	0002.CSV	2186.97	-0.0190089
PSB913-4_map1	0002.CSV	2190.83	-0.0190518
PSB913-4_map1	0002.CSV	2194.69	-0.0190474
PSB913-4_map1	0002.CSV	2198.55	-0.0190571
PSB913-4_map1	0002.CSV	2202.4	-0.0190974
PSB913-4_map1	0002.CSV	2206.26	-0.0191044
PSB913-4_map1	0002.CSV	2210.12	-0.0191458
PSB913-4_map1	0002.CSV	2213.97	-0.019207
PSB913-4_map1	0002.CSV	2217.83	-0.0192723
PSB913-4_map1	0002.CSV	2221.69	-0.0193315
PSB913-4_map1	0002.CSV	2225.54	-0.0194125
PSB913-4_map1	0002.CSV	2229.4	-0.0195129
PSB913-4_map1	0002.CSV	2233.26	-0.019599
PSB913-4_map1	0002.CSV	2237.12	-0.0196498
PSB913-4_map1	0002.CSV	2240.97	-0.0197271
PSB913-4_map1	0002.CSV	2244.83	-0.019748
PSB913-4_map1	0002.CSV	2248.69	-0.0197804
PSB913-4_map1	0002.CSV	2252.54	-0.0198678
PSB913-4_map1	0002.CSV	2256.4	-0.0199293
PSB913-4_map1	0002.CSV	2260.26	-0.0199925
PSB913-4_map1	0002.CSV	2264.11	-0.0201119
PSB913-4_map1	0002.CSV	2267.97	-0.020174
PSB913-4_map1	0002.CSV	2271.83	-0.0202139
PSB913-4_map1	0002.CSV	2275.69	-0.0202751
PSB913-4_map1	0002.CSV	2279.54	-0.0203744
PSB913-4_map1	0002.CSV	2283.4	-0.0205145
PSB913-4_map1	0002.CSV	2287.26	-0.0206151
PSB913-4_map1	0002.CSV	2291.11	-0.0206782
PSB913-4_map1	0002.CSV	2294.97	-0.0207917
PSB913-4_map1	0002.CSV	2298.83	-0.0208735
PSB913-4_map1	0002.CSV	2302.69	-0.0209584
PSB913-4_map1	0002.CSV	2306.54	-0.0209792
PSB913-4_map1	0002.CSV	2310.4	-0.0210135
PSB913-4_map1	0002.CSV	2314.26	-0.0212107
PSB913-4_map1	0002.CSV	2318.11	-0.021657
PSB913-4_map1	0002.CSV	2321.97	-0.0221402
PSB913-4_map1	0002.CSV	2325.83	-0.0226203
PSB913-4_map1	0002.CSV	2329.69	-0.0230223
PSB913-4_map1	0002.CSV	2333.54	-0.023598
PSB913-4_map1	0002.CSV	2337.4	-0.0241547
PSB913-4_map1	0002.CSV	2341.26	-0.0239868
PSB913-4_map1	0002.CSV	2345.11	-0.0228033
PSB913-4_map1	0002.CSV	2348.97	-0.0227693
PSB913-4_map1	0002.CSV	2352.83	-0.024257
PSB913-4_map1	0002.CSV	2356.69	-0.0274019
PSB913-4_map1	0002.CSV	2360.54	-0.0294853
PSB913-4_map1	0002.CSV	2364.4	-0.0274033
PSB913-4_map1	0002.CSV	2368.26	-0.0243007
PSB913-4_map1	0002.CSV	2372.11	-0.0228164
PSB913-4_map1	0002.CSV	2375.97	-0.0222829
PSB913-4_map1	0002.CSV	2379.83	-0.0222473
PSB913-4_map1	0002.CSV	2383.69	-0.0224872
PSB913-4_map1	0002.CSV	2387.54	-0.0227961
PSB913-4_map1	0002.CSV	2391.4	-0.0230286
PSB913-4_map1	0002.CSV	2395.26	-0.0231432
PSB913-4_map1	0002.CSV	2399.11	-0.0231953
PSB913-4_map1	0002.CSV	2402.97	-0.0232285
PSB913-4_map1	0002.CSV	2406.83	-0.0232621
PSB913-4_map1	0002.CSV	2410.68	-0.0233248
PSB913-4_map1	0002.CSV	2414.54	-0.0234049
PSB913-4_map1	0002.CSV	2418.4	-0.0234507
PSB913-4_map1	0002.CSV	2422.26	-0.0234479
PSB913-4_map1	0002.CSV	2426.11	-0.0234497
PSB913-4_map1	0002.CSV	2429.97	-0.0234211
PSB913-4_map1	0002.CSV	2433.83	-0.0234564
PSB913-4_map1	0002.CSV	2437.68	-0.0235592
PSB913-4_map1	0002.CSV	2441.54	-0.0236195
PSB913-4_map1	0002.CSV	2445.4	-0.0236746
PSB913-4_map1	0002.CSV	2449.26	-0.0237431
PSB913-4_map1	0002.CSV	2453.11	-0.0237793
PSB913-4_map1	0002.CSV	2456.97	-0.0237695
PSB913-4_map1	0002.CSV	2460.83	-0.0237682
PSB913-4_map1	0002.CSV	2464.68	-0.0237946
PSB913-4_map1	0002.CSV	2468.54	-0.0238093
PSB913-4_map1	0002.CSV	2472.4	-0.0238575
PSB913-4_map1	0002.CSV	2476.26	-0.0238889
PSB913-4_map1	0002.CSV	2480.11	-0.0238561
PSB913-4_map1	0002.CSV	2483.97	-0.0238515
PSB913-4_map1	0002.CSV	2487.83	-0.0238502
PSB913-4_map1	0002.CSV	2491.68	-0.0238423
PSB913-4_map1	0002.CSV	2495.54	-0.02382
PSB913-4_map1	0002.CSV	2499.4	-0.0238396
PSB913-4_map1	0002.CSV	2503.26	-0.0238806
PSB913-4_map1	0002.CSV	2507.11	-0.0238799
PSB913-4_map1	0002.CSV	2510.97	-0.0238199
PSB913-4_map1	0002.CSV	2514.83	-0.0237649
PSB913-4_map1	0002.CSV	2518.68	-0.0237678
PSB913-4_map1	0002.CSV	2522.54	-0.0238193
PSB913-4_map1	0002.CSV	2526.4	-0.023877
PSB913-4_map1	0002.CSV	2530.26	-0.0239378
PSB913-4_map1	0002.CSV	2534.11	-0.0240036
PSB913-4_map1	0002.CSV	2537.97	-0.0240343
PSB913-4_map1	0002.CSV	2541.83	-0.0240536
PSB913-4_map1	0002.CSV	2545.68	-0.0241235
PSB913-4_map1	0002.CSV	2549.54	-0.0242111
PSB913-4_map1	0002.CSV	2553.4	-0.0242462
PSB913-4_map1	0002.CSV	2557.26	-0.024279
PSB913-4_map1	0002.CSV	2561.11	-0.02434
PSB913-4_map1	0002.CSV	2564.97	-0.024444
PSB913-4_map1	0002.CSV	2568.83	-0.0244961
PSB913-4_map1	0002.CSV	2572.68	-0.0245047
PSB913-4_map1	0002.CSV	2576.54	-0.0245227
PSB913-4_map1	0002.CSV	2580.4	-0.0245617
PSB913-4_map1	0002.CSV	2584.25	-0.0246624
PSB913-4_map1	0002.CSV	2588.11	-0.0247176
PSB913-4_map1	0002.CSV	2591.97	-0.0247248
PSB913-4_map1	0002.CSV	2595.83	-0.0248007
PSB913-4_map1	0002.CSV	2599.68	-0.024847
PSB913-4_map1	0002.CSV	2603.54	-0.0248737
PSB913-4_map1	0002.CSV	2607.4	-0.024915
PSB913-4_map1	0002.CSV	2611.25	-0.0249373
PSB913-4_map1	0002.CSV	2615.11	-0.0249455
PSB913-4_map1	0002.CSV	2618.97	-0.0250074
PSB913-4_map1	0002.CSV	2622.82	-0.0249959
PSB913-4_map1	0002.CSV	2626.68	-0.0249627
PSB913-4_map1	0002.CSV	2630.54	-0.0250169
PSB913-4_map1	0002.CSV	2634.4	-0.0249823
PSB913-4_map1	0002.CSV	2638.25	-0.0249565
PSB913-4_map1	0002.CSV	2642.11	-0.0251253
PSB913-4_map1	0002.CSV	2645.97	-0.0253043
PSB913-4_map1	0002.CSV	2649.82	-0.025396
PSB913-4_map1	0002.CSV	2653.68	-0.0254652
PSB913-4_map1	0002.CSV	2657.54	-0.0254905
PSB913-4_map1	0002.CSV	2661.4	-0.0255194
PSB913-4_map1	0002.CSV	2665.25	-0.0255952
PSB913-4_map1	0002.CSV	2669.11	-0.025555
PSB913-4_map1	0002.CSV	2672.97	-0.0253745
PSB913-4_map1	0002.CSV	2676.82	-0.0252537
PSB913-4_map1	0002.CSV	2680.68	-0.0253727
PSB913-4_map1	0002.CSV	2684.54	-0.0256156
PSB913-4_map1	0002.CSV	2688.4	-0.0257029
PSB913-4_map1	0002.CSV	2692.25	-0.0257712
PSB913-4_map1	0002.CSV	2696.11	-0.0258117
PSB913-4_map1	0002.CSV	2699.97	-0.0257386
PSB913-4_map1	0002.CSV	2703.82	-0.0257139
PSB913-4_map1	0002.CSV	2707.68	-0.0256658
PSB913-4_map1	0002.CSV	2711.54	-0.0256348
PSB913-4_map1	0002.CSV	2715.4	-0.0256875
PSB913-4_map1	0002.CSV	2719.25	-0.0256187
PSB913-4_map1	0002.CSV	2723.11	-0.0253976
PSB913-4_map1	0002.CSV	2726.97	-0.0254387
PSB913-4_map1	0002.CSV	2730.82	-0.0257103
PSB913-4_map1	0002.CSV	2734.68	-0.025686
PSB913-4_map1	0002.CSV	2738.54	-0.0255483
PSB913-4_map1	0002.CSV	2742.4	-0.0255105
PSB913-4_map1	0002.CSV	2746.25	-0.0253395
PSB913-4_map1	0002.CSV	2750.11	-0.0253042
PSB913-4_map1	0002.CSV	2753.97	-0.0254785
PSB913-4_map1	0002.CSV	2757.82	-0.0255867
PSB913-4_map1	0002.CSV	2761.68	-0.0257237
PSB913-4_map1	0002.CSV	2765.54	-0.0257862
PSB913-4_map1	0002.CSV	2769.39	-0.0256362
PSB913-4_map1	0002.CSV	2773.25	-0.0253786
PSB913-4_map1	0002.CSV	2777.11	-0.0254732
PSB913-4_map1	0002.CSV	2780.97	-0.0256787
PSB913-4_map1	0002.CSV	2784.82	-0.0255818
PSB913-4_map1	0002.CSV	2788.68	-0.0253117
PSB913-4_map1	0002.CSV	2792.54	-0.025319
PSB913-4_map1	0002.CSV	2796.39	-0.0254309
PSB913-4_map1	0002.CSV	2800.25	-0.0256586
PSB913-4_map1	0002.CSV	2804.11	-0.0259213
PSB913-4_map1	0002.CSV	2807.97	-0.0258299
PSB913-4_map1	0002.CSV	2811.82	-0.0258292
PSB913-4_map1	0002.CSV	2815.68	-0.0260417
PSB913-4_map1	0002.CSV	2819.54	-0.0260978
PSB913-4_map1	0002.CSV	2823.39	-0.0261243
PSB913-4_map1	0002.CSV	2827.25	-0.0261965
PSB913-4_map1	0002.CSV	2831.11	-0.026085
PSB913-4_map1	0002.CSV	2834.97	-0.0260602
PSB913-4_map1	0002.CSV	2838.82	-0.0264702
PSB913-4_map1	0002.CSV	2842.68	-0.0273307
PSB913-4_map1	0002.CSV	2846.54	-0.0282557
PSB913-4_map1	0002.CSV	2850.39	-0.0293832
PSB913-4_map1	0002.CSV	2854.25	-0.0300706
PSB913-4_map1	0002.CSV	2858.11	-0.0298224
PSB913-4_map1	0002.CSV	2861.97	-0.0294085
PSB913-4_map1	0002.CSV	2865.82	-0.0290837
PSB913-4_map1	0002.CSV	2869.68	-0.0286403
PSB913-4_map1	0002.CSV	2873.54	-0.0282915
PSB913-4_map1	0002.CSV	2877.39	-0.0284146
PSB913-4_map1	0002.CSV	2881.25	-0.028634
PSB913-4_map1	0002.CSV	2885.11	-0.0287317
PSB913-4_map1	0002.CSV	2888.97	-0.0288351
PSB913-4_map1	0002.CSV	2892.82	-0.0288781
PSB913-4_map1	0002.CSV	2896.68	-0.0290717
PSB913-4_map1	0002.CSV	2900.54	-0.0295916
PSB913-4_map1	0002.CSV	2904.39	-0.0299239
PSB913-4_map1	0002.CSV	2908.25	-0.030086
PSB913-4_map1	0002.CSV	2912.11	-0.0304382
PSB913-4_map1	0002.CSV	2915.97	-0.0314046
PSB913-4_map1	0002.CSV	2919.82	-0.0329788
PSB913-4_map1	0002.CSV	2923.68	-0.0342081
PSB913-4_map1	0002.CSV	2927.54	-0.0342599
PSB913-4_map1	0002.CSV	2931.39	-0.0338828
PSB913-4_map1	0002.CSV	2935.25	-0.0334475
PSB913-4_map1	0002.CSV	2939.11	-0.0326585
PSB913-4_map1	0002.CSV	2942.96	-0.0315877
PSB913-4_map1	0002.CSV	2946.82	-0.0310474
PSB913-4_map1	0002.CSV	2950.68	-0.0312598
PSB913-4_map1	0002.CSV	2954.54	-0.0318322
PSB913-4_map1	0002.CSV	2958.39	-0.0320193
PSB913-4_map1	0002.CSV	2962.25	-0.0316714
PSB913-4_map1	0002.CSV	2966.11	-0.0312894
PSB913-4_map1	0002.CSV	2969.96	-0.0304727
PSB913-4_map1	0002.CSV	2973.82	-0.029463
PSB913-4_map1	0002.CSV	2977.68	-0.028848
PSB913-4_map1	0002.CSV	2981.53	-0.0286836
PSB913-4_map1	0002.CSV	2985.39	-0.0287876
PSB913-4_map1	0002.CSV	2989.25	-0.028542
PSB913-4_map1	0002.CSV	2993.11	-0.0281544
PSB913-4_map1	0002.CSV	2996.96	-0.0281783
PSB913-4_map1	0002.CSV	3000.82	-0.0283666
PSB913-4_map1	0002.CSV	3004.68	-0.0283868
PSB913-4_map1	0002.CSV	3008.53	-0.0281121
PSB913-4_map1	0002.CSV	3012.39	-0.0277868
PSB913-4_map1	0002.CSV	3016.25	-0.027697
PSB913-4_map1	0002.CSV	3020.11	-0.0278824
PSB913-4_map1	0002.CSV	3023.96	-0.02817
PSB913-4_map1	0002.CSV	3027.82	-0.0282566
PSB913-4_map1	0002.CSV	3031.68	-0.0280231
PSB913-4_map1	0002.CSV	3035.53	-0.0279098
PSB913-4_map1	0002.CSV	3039.39	-0.0279646
PSB913-4_map1	0002.CSV	3043.25	-0.0280039
PSB913-4_map1	0002.CSV	3047.11	-0.0280962
PSB913-4_map1	0002.CSV	3050.96	-0.0281208
PSB913-4_map1	0002.CSV	3054.82	-0.0281647
PSB913-4_map1	0002.CSV	3058.68	-0.0283018
PSB913-4_map1	0002.CSV	3062.53	-0.0282772
PSB913-4_map1	0002.CSV	3066.39	-0.0281027
PSB913-4_map1	0002.CSV	3070.25	-0.0282382
PSB913-4_map1	0002.CSV	3074.11	-0.0282558
PSB913-4_map1	0002.CSV	3077.96	-0.0280711
PSB913-4_map1	0002.CSV	3081.82	-0.0280351
PSB913-4_map1	0002.CSV	3085.68	-0.0281049
PSB913-4_map1	0002.CSV	3089.53	-0.0282613
PSB913-4_map1	0002.CSV	3093.39	-0.0285546
PSB913-4_map1	0002.CSV	3097.25	-0.0285962
PSB913-4_map1	0002.CSV	3101.11	-0.0286126
PSB913-4_map1	0002.CSV	3104.96	-0.0287251
PSB913-4_map1	0002.CSV	3108.82	-0.0286853
PSB913-4_map1	0002.CSV	3112.68	-0.0285711
PSB913-4_map1	0002.CSV	3116.53	-0.0284048
PSB913-4_map1	0002.CSV	3120.39	-0.0285136
PSB913-4_map1	0002.CSV	3124.25	-0.0288331
PSB913-4_map1	0002.CSV	3128.11	-0.0289566
PSB913-4_map1	0002.CSV	3131.96	-0.029019
PSB913-4_map1	0002.CSV	3135.82	-0.0289151
PSB913-4_map1	0002.CSV	3139.68	-0.0288318
PSB913-4_map1	0002.CSV	3143.53	-0.0291208
PSB913-4_map1	0002.CSV	3147.39	-0.0291364
PSB913-4_map1	0002.CSV	3151.25	-0.0288699
PSB913-4_map1	0002.CSV	3155.1	-0.029056
PSB913-4_map1	0002.CSV	3158.96	-0.0295287
PSB913-4_map1	0002.CSV	3162.82	-0.0297424
PSB913-4_map1	0002.CSV	3166.68	-0.0298309
PSB913-4_map1	0002.CSV	3170.53	-0.0299285
PSB913-4_map1	0002.CSV	3174.39	-0.030032
PSB913-4_map1	0002.CSV	3178.25	-0.0300708
PSB913-4_map1	0002.CSV	3182.1	-0.0300537
PSB913-4_map1	0002.CSV	3185.96	-0.0299808
PSB913-4_map1	0002.CSV	3189.82	-0.0299031
PSB913-4_map1	0002.CSV	3193.68	-0.029951
PSB913-4_map1	0002.CSV	3197.53	-0.0301033
PSB913-4_map1	0002.CSV	3201.39	-0.0301493
PSB913-4_map1	0002.CSV	3205.25	-0.0302311
PSB913-4_map1	0002.CSV	3209.1	-0.0302801
PSB913-4_map1	0002.CSV	3212.96	-0.030142
PSB913-4_map1	0002.CSV	3216.82	-0.0300192
PSB913-4_map1	0002.CSV	3220.68	-0.0301546
PSB913-4_map1	0002.CSV	3224.53	-0.0303137
PSB913-4_map1	0002.CSV	3228.39	-0.0300717
PSB913-4_map1	0002.CSV	3232.25	-0.0297534
PSB913-4_map1	0002.CSV	3236.1	-0.0299924
PSB913-4_map1	0002.CSV	3239.96	-0.0303691
PSB913-4_map1	0002.CSV	3243.82	-0.0300956
PSB913-4_map1	0002.CSV	3247.68	-0.0298345
PSB913-4_map1	0002.CSV	3251.53	-0.0300437
PSB913-4_map1	0002.CSV	3255.39	-0.0300793
PSB913-4_map1	0002.CSV	3259.25	-0.0301904
PSB913-4_map1	0002.CSV	3263.1	-0.0303558
PSB913-4_map1	0002.CSV	3266.96	-0.0301018
PSB913-4_map1	0002.CSV	3270.82	-0.0297904
PSB913-4_map1	0002.CSV	3274.68	-0.0298629
PSB913-4_map1	0002.CSV	3278.53	-0.0301837
PSB913-4_map1	0002.CSV	3282.39	-0.030463
PSB913-4_map1	0002.CSV	3286.25	-0.0304163
PSB913-4_map1	0002.CSV	3290.1	-0.0299817
PSB913-4_map1	0002.CSV	3293.96	-0.029643
PSB913-4_map1	0002.CSV	3297.82	-0.0297567
PSB913-4_map1	0002.CSV	3301.67	-0.0298875
PSB913-4_map1	0002.CSV	3305.53	-0.0297947
PSB913-4_map1	0002.CSV	3309.39	-0.0298725
PSB913-4_map1	0002.CSV	3313.25	-0.0303011
PSB913-4_map1	0002.CSV	3317.1	-0.0306452
PSB913-4_map1	0002.CSV	3320.96	-0.0305818
PSB913-4_map1	0002.CSV	3324.82	-0.0302933
PSB913-4_map1	0002.CSV	3328.67	-0.0304974
PSB913-4_map1	0002.CSV	3332.53	-0.0305791
PSB913-4_map1	0002.CSV	3336.39	-0.0300426
PSB913-4_map1	0002.CSV	3340.24	-0.029856
PSB913-4_map1	0002.CSV	3344.1	-0.0300853
PSB913-4_map1	0002.CSV	3347.96	-0.0300664
PSB913-4_map1	0002.CSV	3351.82	-0.0301151
PSB913-4_map1	0002.CSV	3355.67	-0.0303866
PSB913-4_map1	0002.CSV	3359.53	-0.0302555
PSB913-4_map1	0002.CSV	3363.39	-0.0299887
PSB913-4_map1	0002.CSV	3367.24	-0.0297699
PSB913-4_map1	0002.CSV	3371.1	-0.0298672
PSB913-4_map1	0002.CSV	3374.96	-0.0301181
PSB913-4_map1	0002.CSV	3378.82	-0.0302702
PSB913-4_map1	0002.CSV	3382.67	-0.0306195
PSB913-4_map1	0002.CSV	3386.53	-0.0306209
PSB913-4_map1	0002.CSV	3390.39	-0.0302495
PSB913-4_map1	0002.CSV	3394.24	-0.0301017
PSB913-4_map1	0002.CSV	3398.1	-0.0300641
PSB913-4_map1	0002.CSV	3401.96	-0.030082
PSB913-4_map1	0002.CSV	3405.82	-0.0302196
PSB913-4_map1	0002.CSV	3409.67	-0.0301841
PSB913-4_map1	0002.CSV	3413.53	-0.0303431
PSB913-4_map1	0002.CSV	3417.39	-0.0307148
PSB913-4_map1	0002.CSV	3421.24	-0.0307957
PSB913-4_map1	0002.CSV	3425.1	-0.030604
PSB913-4_map1	0002.CSV	3428.96	-0.03018
PSB913-4_map1	0002.CSV	3432.82	-0.0299531
PSB913-4_map1	0002.CSV	3436.67	-0.0303041
PSB913-4_map1	0002.CSV	3440.53	-0.0309787
PSB913-4_map1	0002.CSV	3444.39	-0.0313309
PSB913-4_map1	0002.CSV	3448.24	-0.0313432
PSB913-4_map1	0002.CSV	3452.1	-0.0314904
PSB913-4_map1	0002.CSV	3455.96	-0.0314327
PSB913-4_map1	0002.CSV	3459.82	-0.0310858
PSB913-4_map1	0002.CSV	3463.67	-0.030695
PSB913-4_map1	0002.CSV	3467.53	-0.0303685
PSB913-4_map1	0002.CSV	3471.39	-0.0305826
PSB913-4_map1	0002.CSV	3475.24	-0.0307536
PSB913-4_map1	0002.CSV	3479.1	-0.0307574
PSB913-4_map1	0002.CSV	3482.96	-0.0308203
PSB913-4_map1	0002.CSV	3486.82	-0.0307816
PSB913-4_map1	0002.CSV	3490.67	-0.0307538
PSB913-4_map1	0002.CSV	3494.53	-0.0306871
PSB913-4_map1	0002.CSV	3498.39	-0.0307777
PSB913-4_map1	0002.CSV	3502.24	-0.0308405
PSB913-4_map1	0002.CSV	3506.1	-0.0312178
PSB913-4_map1	0002.CSV	3509.96	-0.0314485
PSB913-4_map1	0002.CSV	3513.81	-0.0312348
PSB913-4_map1	0002.CSV	3517.67	-0.0315269
PSB913-4_map1	0002.CSV	3521.53	-0.0317865
PSB913-4_map1	0002.CSV	3525.39	-0.0319405
PSB913-4_map1	0002.CSV	3529.24	-0.0320418
PSB913-4_map1	0002.CSV	3533.1	-0.0319226
PSB913-4_map1	0002.CSV	3536.96	-0.0316045
PSB913-4_map1	0002.CSV	3540.81	-0.0315495
PSB913-4_map1	0002.CSV	3544.67	-0.0315705
PSB913-4_map1	0002.CSV	3548.53	-0.0315909
PSB913-4_map1	0002.CSV	3552.39	-0.0318404
PSB913-4_map1	0002.CSV	3556.24	-0.0320349
PSB913-4_map1	0002.CSV	3560.1	-0.0323507
PSB913-4_map1	0002.CSV	3563.96	-0.0330266
PSB913-4_map1	0002.CSV	3567.81	-0.0323957
PSB913-4_map1	0002.CSV	3571.67	-0.031949
PSB913-4_map1	0002.CSV	3575.53	-0.0323402
PSB913-4_map1	0002.CSV	3579.39	-0.0322654
PSB913-4_map1	0002.CSV	3583.24	-0.0324546
PSB913-4_map1	0002.CSV	3587.1	-0.0325969
PSB913-4_map1	0002.CSV	3590.96	-0.0325334
PSB913-4_map1	0002.CSV	3594.81	-0.0327529
PSB913-4_map1	0002.CSV	3598.67	-0.0325043
PSB913-4_map1	0002.CSV	3602.53	-0.0326015
PSB913-4_map1	0002.CSV	3606.39	-0.0335781
PSB913-4_map1	0002.CSV	3610.24	-0.0340041
PSB913-4_map1	0002.CSV	3614.1	-0.0338321
PSB913-4_map1	0002.CSV	3617.96	-0.0333168
PSB913-4_map1	0002.CSV	3621.81	-0.0328824
PSB913-4_map1	0002.CSV	3625.67	-0.0338859
PSB913-4_map1	0002.CSV	3629.53	-0.0339026
PSB913-4_map1	0002.CSV	3633.39	-0.0330618
PSB913-4_map1	0002.CSV	3637.24	-0.0333648
PSB913-4_map1	0002.CSV	3641.1	-0.0338751
PSB913-4_map1	0002.CSV	3644.96	-0.034771
PSB913-4_map1	0002.CSV	3648.81	-0.0342229
PSB913-4_map1	0002.CSV	3652.67	-0.0329892
PSB913-4_map1	0002.CSV	3656.53	-0.0328273
PSB913-4_map1	0002.CSV	3660.38	-0.0327623
PSB913-4_map1	0002.CSV	3664.24	-0.0336957
PSB913-4_map1	0002.CSV	3668.1	-0.0348562
PSB913-4_map1	0002.CSV	3671.96	-0.0352391
PSB913-4_map1	0002.CSV	3675.81	-0.0342551
PSB913-4_map1	0002.CSV	3679.67	-0.0334383
PSB913-4_map1	0002.CSV	3683.53	-0.0339879
PSB913-4_map1	0002.CSV	3687.38	-0.0344355
PSB913-4_map1	0002.CSV	3691.24	-0.0332976
PSB913-4_map1	0002.CSV	3695.1	-0.0333004
PSB913-4_map1	0002.CSV	3698.95	-0.0339914
PSB913-4_map1	0002.CSV	3702.81	-0.0340165
PSB913-4_map1	0002.CSV	3706.67	-0.0344097
PSB913-4_map1	0002.CSV	3710.53	-0.0343941
PSB913-4_map1	0002.CSV	3714.38	-0.0336161
PSB913-4_map1	0002.CSV	3718.24	-0.0342864
PSB913-4_map1	0002.CSV	3722.1	-0.0346407
PSB913-4_map1	0002.CSV	3725.95	-0.0343641
PSB913-4_map1	0002.CSV	3729.81	-0.0348204
PSB913-4_map1	0002.CSV	3733.67	-0.0349124
PSB913-4_map1	0002.CSV	3737.53	-0.0336951
PSB913-4_map1	0002.CSV	3741.38	-0.0345164
PSB913-4_map1	0002.CSV	3745.24	-0.0355867
PSB913-4_map1	0002.CSV	3749.1	-0.035935
PSB913-4_map1	0002.CSV	3752.95	-0.0346163
PSB913-4_map1	0002.CSV	3756.81	-0.0342185
PSB913-4_map1	0002.CSV	3760.67	-0.0341717
PSB913-4_map1	0002.CSV	3764.53	-0.0344956
PSB913-4_map1	0002.CSV	3768.38	-0.0342281
PSB913-4_map1	0002.CSV	3772.24	-0.0339225
PSB913-4_map1	0002.CSV	3776.1	-0.0343591
PSB913-4_map1	0002.CSV	3779.95	-0.0343033
PSB913-4_map1	0002.CSV	3783.81	-0.0341047
PSB913-4_map1	0002.CSV	3787.67	-0.0340551
PSB913-4_map1	0002.CSV	3791.53	-0.0344184
PSB913-4_map1	0002.CSV	3795.38	-0.0350789
PSB913-4_map1	0002.CSV	3799.24	-0.035263
PSB913-4_map1	0002.CSV	3803.1	-0.034582
PSB913-4_map1	0002.CSV	3806.95	-0.033862
PSB913-4_map1	0002.CSV	3810.81	-0.0342187
PSB913-4_map1	0002.CSV	3814.67	-0.0351245
PSB913-4_map1	0002.CSV	3818.53	-0.0351739
PSB913-4_map1	0002.CSV	3822.38	-0.0343516
PSB913-4_map1	0002.CSV	3826.24	-0.0344785
PSB913-4_map1	0002.CSV	3830.1	-0.0349546
PSB913-4_map1	0002.CSV	3833.95	-0.0353407
PSB913-4_map1	0002.CSV	3837.81	-0.0349602
PSB913-4_map1	0002.CSV	3841.67	-0.0337049
PSB913-4_map1	0002.CSV	3845.53	-0.0340115
PSB913-4_map1	0002.CSV	3849.38	-0.035501
PSB913-4_map1	0002.CSV	3853.24	-0.0355133
PSB913-4_map1	0002.CSV	3857.1	-0.0342245
PSB913-4_map1	0002.CSV	3860.95	-0.0349251
PSB913-4_map1	0002.CSV	3864.81	-0.0350769
PSB913-4_map1	0002.CSV	3868.67	-0.0348228
PSB913-4_map1	0002.CSV	3872.52	-0.0343118
PSB913-4_map1	0002.CSV	3876.38	-0.0346275
PSB913-4_map1	0002.CSV	3880.24	-0.0350497
PSB913-4_map1	0002.CSV	3884.1	-0.0344154
PSB913-4_map1	0002.CSV	3887.95	-0.0343131
PSB913-4_map1	0002.CSV	3891.81	-0.0343911
PSB913-4_map1	0002.CSV	3895.67	-0.0347628
PSB913-4_map1	0002.CSV	3899.52	-0.0351903
PSB913-4_map1	0002.CSV	3903.38	-0.0338951
PSB913-4_map1	0002.CSV	3907.24	-0.0335261
PSB913-4_map1	0002.CSV	3911.1	-0.0344243
PSB913-4_map1	0002.CSV	3914.95	-0.0350563
PSB913-4_map1	0002.CSV	3918.81	-0.0348684
PSB913-4_map1	0002.CSV	3922.67	-0.0345309
PSB913-4_map1	0002.CSV	3926.52	-0.0343569
PSB913-4_map1	0002.CSV	3930.38	-0.0343542
PSB913-4_map1	0002.CSV	3934.24	-0.0342328
PSB913-4_map1	0002.CSV	3938.09	-0.0345805
PSB913-4_map1	0002.CSV	3941.95	-0.0346627
PSB913-4_map1	0002.CSV	3945.81	-0.0344856
PSB913-4_map1	0002.CSV	3949.67	-0.0344619
PSB913-4_map1	0002.CSV	3953.52	-0.0345159
PSB913-4_map1	0002.CSV	3957.38	-0.0347348
PSB913-4_map1	0002.CSV	3961.24	-0.0347169
PSB913-4_map1	0002.CSV	3965.09	-0.0345617
PSB913-4_map1	0002.CSV	3968.95	-0.0345498
PSB913-4_map1	0002.CSV	3972.81	-0.0345163
PSB913-4_map1	0002.CSV	3976.67	-0.0344718
PSB913-4_map1	0002.CSV	3980.52	-0.0345021
PSB913-4_map1	0002.CSV	3984.38	-0.0345285
PSB913-4_map1	0002.CSV	3988.24	-0.0345661
PSB913-4_map1	0002.CSV	3992.09	-0.0346532
PSB913-4_map1	0002.CSV	3995.95	-0.0348164
PSB913-4_map1	0002.CSV	3999.81	-0.0348928
PSB913-4_map1	0003.CSV	674.992	0.0183764
PSB913-4_map1	0003.CSV	678.849	0.0204779
PSB913-4_map1	0003.CSV	682.706	0.0221585
PSB913-4_map1	0003.CSV	686.563	0.0248644
PSB913-4_map1	0003.CSV	690.42	0.028347
PSB913-4_map1	0003.CSV	694.277	0.0403548
PSB913-4_map1	0003.CSV	698.134	0.0523376
PSB913-4_map1	0003.CSV	701.991	0.0463122
PSB913-4_map1	0003.CSV	705.849	0.0376975
PSB913-4_map1	0003.CSV	709.706	0.0493091
PSB913-4_map1	0003.CSV	713.563	0.0487268
PSB913-4_map1	0003.CSV	717.42	0.0248269
PSB913-4_map1	0003.CSV	721.277	0.0109337
PSB913-4_map1	0003.CSV	725.134	0.0101081
PSB913-4_map1	0003.CSV	728.991	0.0104933
PSB913-4_map1	0003.CSV	732.848	0.0120423
PSB913-4_map1	0003.CSV	736.705	0.0140578
PSB913-4_map1	0003.CSV	740.562	0.0163263
PSB913-4_map1	0003.CSV	744.42	0.0168403
PSB913-4_map1	0003.CSV	748.277	0.0168734
PSB913-4_map1	0003.CSV	752.134	0.0160723
PSB913-4_map1	0003.CSV	755.991	0.0160845
PSB913-4_map1	0003.CSV	759.848	0.0159142
PSB913-4_map1	0003.CSV	763.705	0.0160838
PSB913-4_map1	0003.CSV	767.562	0.0155849
PSB913-4_map1	0003.CSV	771.419	0.0153755
PSB913-4_map1	0003.CSV	775.276	0.0146368
PSB913-4_map1	0003.CSV	779.133	0.0148711
PSB913-4_map1	0003.CSV	782.99	0.0149834
PSB913-4_map1	0003.CSV	786.848	0.0158227
PSB913-4_map1	0003.CSV	790.705	0.0162068
PSB913-4_map1	0003.CSV	794.562	0.0169996
PSB913-4_map1	0003.CSV	798.419	0.017664
PSB913-4_map1	0003.CSV	802.276	0.0189957
PSB913-4_map1	0003.CSV	806.133	0.0200282
PSB913-4_map1	0003.CSV	809.99	0.0217707
PSB913-4_map1	0003.CSV	813.847	0.0235827
PSB913-4_map1	0003.CSV	817.704	0.0264099
PSB913-4_map1	0003.CSV	821.562	0.0292867
PSB913-4_map1	0003.CSV	825.419	0.0335672
PSB913-4_map1	0003.CSV	829.276	0.0383002
PSB913-4_map1	0003.CSV	833.133	0.0446195
PSB913-4_map1	0003.CSV	836.99	0.0530349
PSB913-4_map1	0003.CSV	840.847	0.0645982
PSB913-4_map1	0003.CSV	844.704	0.0752045
PSB913-4_map1	0003.CSV	848.561	0.0909139
PSB913-4_map1	0003.CSV	852.418	0.107466
PSB913-4_map1	0003.CSV	856.275	0.110181
PSB913-4_map1	0003.CSV	860.132	0.0959121
PSB913-4_map1	0003.CSV	863.99	0.0716604
PSB913-4_map1	0003.CSV	867.847	0.0446473
PSB913-4_map1	0003.CSV	871.704	0.0229614
PSB913-4_map1	0003.CSV	875.561	0.0101151
PSB913-4_map1	0003.CSV	879.418	0.00487781
PSB913-4_map1	0003.CSV	883.275	0.00255751
PSB913-4_map1	0003.CSV	887.132	0.00150101
PSB913-4_map1	0003.CSV	890.989	0.000867852
PSB913-4_map1	0003.CSV	894.846	0.000874459
PSB913-4_map1	0003.CSV	898.703	0.000821872
PSB913-4_map1	0003.CSV	902.561	0.00127149
PSB913-4_map1	0003.CSV	906.418	0.00163799
PSB913-4_map1	0003.CSV	910.275	0.00170471
PSB913-4_map1	0003.CSV	914.132	0.00134002
PSB913-4_map1	0003.CSV	917.989	0.00153962
PSB913-4_map1	0003.CSV	921.846	0.00155298
PSB913-4_map1	0003.CSV	925.703	0.00180345
PSB913-4_map1	0003.CSV	929.56	0.00192893
PSB913-4_map1	0003.CSV	933.417	0.00231854
PSB913-4_map1	0003.CSV	937.274	0.00239716
PSB913-4_map1	0003.CSV	941.131	0.00268525
PSB913-4_map1	0003.CSV	944.989	0.00272186
PSB913-4_map1	0003.CSV	948.846	0.00299061
PSB913-4_map1	0003.CSV	952.703	0.00309392
PSB913-4_map1	0003.CSV	956.56	0.0035005
PSB913-4_map1	0003.CSV	960.417	0.00373498
PSB913-4_map1	0003.CSV	964.274	0.00412908
PSB913-4_map1	0003.CSV	968.131	0.0042604
PSB913-4_map1	0003.CSV	971.988	0.00465066
PSB913-4_map1	0003.CSV	975.845	0.00493401
PSB913-4_map1	0003.CSV	979.702	0.00548534
PSB913-4_map1	0003.CSV	983.559	0.00586475
PSB913-4_map1	0003.CSV	987.417	0.00633865
PSB913-4_map1	0003.CSV	991.274	0.00654429
PSB913-4_map1	0003.CSV	995.131	0.00686817
PSB913-4_map1	0003.CSV	998.988	0.00696297
PSB913-4_map1	0003.CSV	1002.85	0.00731058
PSB913-4_map1	0003.CSV	1006.7	0.00741536
PSB913-4_map1	0003.CSV	1010.56	0.00773503
PSB913-4_map1	0003.CSV	1014.42	0.00785661
PSB913-4_map1	0003.CSV	1018.27	0.00824994
PSB913-4_map1	0003.CSV	1022.13	0.00857283
PSB913-4_map1	0003.CSV	1025.99	0.00917354
PSB913-4_map1	0003.CSV	1029.85	0.00953397
PSB913-4_map1	0003.CSV	1033.7	0.0100903
PSB913-4_map1	0003.CSV	1037.56	0.0103597
PSB913-4_map1	0003.CSV	1041.42	0.0107361
PSB913-4_map1	0003.CSV	1045.27	0.0108183
PSB913-4_map1	0003.CSV	1049.13	0.011475
PSB913-4_map1	0003.CSV	1052.99	0.0124064
PSB913-4_map1	0003.CSV	1056.84	0.0140804
PSB913-4_map1	0003.CSV	1060.7	0.0156592
PSB913-4_map1	0003.CSV	1064.56	0.0171479
PSB913-4_map1	0003.CSV	1068.42	0.0176467
PSB913-4_map1	0003.CSV	1072.27	0.0180642
PSB913-4_map1	0003.CSV	1076.13	0.0195061
PSB913-4_map1	0003.CSV	1079.99	0.0241996
PSB913-4_map1	0003.CSV	1083.84	0.0230269
PSB913-4_map1	0003.CSV	1087.7	0.014517
PSB913-4_map1	0003.CSV	1091.56	0.010308
PSB913-4_map1	0003.CSV	1095.41	0.0102779
PSB913-4_map1	0003.CSV	1099.27	0.010859
PSB913-4_map1	0003.CSV	1103.13	0.0119379
PSB913-4_map1	0003.CSV	1106.99	0.0130037
PSB913-4_map1	0003.CSV	1110.84	0.0141879
PSB913-4_map1	0003.CSV	1114.7	0.0149805
PSB913-4_map1	0003.CSV	1118.56	0.0154529
PSB913-4_map1	0003.CSV	1122.41	0.0153483
PSB913-4_map1	0003.CSV	1126.27	0.0150531
PSB913-4_map1	0003.CSV	1130.13	0.0145504
PSB913-4_map1	0003.CSV	1133.99	0.0143735
PSB913-4_map1	0003.CSV	1137.84	0.014116
PSB913-4_map1	0003.CSV	1141.7	0.0138919
PSB913-4_map1	0003.CSV	1145.56	0.0134785
PSB913-4_map1	0003.CSV	1149.41	0.0134046
PSB913-4_map1	0003.CSV	1153.27	0.0134129
PSB913-4_map1	0003.CSV	1157.13	0.0137153
PSB913-4_map1	0003.CSV	1160.99	0.0137707
PSB913-4_map1	0003.CSV	1164.84	0.0138892
PSB913-4_map1	0003.CSV	1168.7	0.0137834
PSB913-4_map1	0003.CSV	1172.56	0.0138688
PSB913-4_map1	0003.CSV	1176.41	0.0139498
PSB913-4_map1	0003.CSV	1180.27	0.0141653
PSB913-4_map1	0003.CSV	1184.13	0.0139881
PSB913-4_map1	0003.CSV	1187.99	0.0139098
PSB913-4_map1	0003.CSV	1191.84	0.0138101
PSB913-4_map1	0003.CSV	1195.7	0.0139558
PSB913-4_map1	0003.CSV	1199.56	0.0140847
PSB913-4_map1	0003.CSV	1203.41	0.0144608
PSB913-4_map1	0003.CSV	1207.27	0.0148489
PSB913-4_map1	0003.CSV	1211.13	0.0155462
PSB913-4_map1	0003.CSV	1214.98	0.0161332
PSB913-4_map1	0003.CSV	1218.84	0.0168706
PSB913-4_map1	0003.CSV	1222.7	0.0175439
PSB913-4_map1	0003.CSV	1226.56	0.0184951
PSB913-4_map1	0003.CSV	1230.41	0.019405
PSB913-4_map1	0003.CSV	1234.27	0.0205875
PSB913-4_map1	0003.CSV	1238.13	0.021718
PSB913-4_map1	0003.CSV	1241.98	0.0231046
PSB913-4_map1	0003.CSV	1245.84	0.0243543
PSB913-4_map1	0003.CSV	1249.7	0.0255027
PSB913-4_map1	0003.CSV	1253.56	0.0261237
PSB913-4_map1	0003.CSV	1257.41	0.0266379
PSB913-4_map1	0003.CSV	1261.27	0.0269923
PSB913-4_map1	0003.CSV	1265.13	0.0276091
PSB913-4_map1	0003.CSV	1268.98	0.0280751
PSB913-4_map1	0003.CSV	1272.84	0.0287335
PSB913-4_map1	0003.CSV	1276.7	0.0291733
PSB913-4_map1	0003.CSV	1280.56	0.0296567
PSB913-4_map1	0003.CSV	1284.41	0.0298238
PSB913-4_map1	0003.CSV	1288.27	0.0298544
PSB913-4_map1	0003.CSV	1292.13	0.0294152
PSB913-4_map1	0003.CSV	1295.98	0.0290948
PSB913-4_map1	0003.CSV	1299.84	0.0287461
PSB913-4_map1	0003.CSV	1303.7	0.0288115
PSB913-4_map1	0003.CSV	1307.56	0.0290579
PSB913-4_map1	0003.CSV	1311.41	0.029716
PSB913-4_map1	0003.CSV	1315.27	0.0304045
PSB913-4_map1	0003.CSV	1319.13	0.0314227
PSB913-4_map1	0003.CSV	1322.98	0.0322556
PSB913-4_map1	0003.CSV	1326.84	0.0332993
PSB913-4_map1	0003.CSV	1330.7	0.0343674
PSB913-4_map1	0003.CSV	1334.56	0.0356908
PSB913-4_map1	0003.CSV	1338.41	0.0374078
PSB913-4_map1	0003.CSV	1342.27	0.0397361
PSB913-4_map1	0003.CSV	1346.13	0.0414553
PSB913-4_map1	0003.CSV	1349.98	0.0436017
PSB913-4_map1	0003.CSV	1353.84	0.0457246
PSB913-4_map1	0003.CSV	1357.7	0.0479909
PSB913-4_map1	0003.CSV	1361.56	0.0505532
PSB913-4_map1	0003.CSV	1365.41	0.0539681
PSB913-4_map1	0003.CSV	1369.27	0.0566015
PSB913-4_map1	0003.CSV	1373.13	0.06008
PSB913-4_map1	0003.CSV	1376.98	0.0639659
PSB913-4_map1	0003.CSV	1380.84	0.0674427
PSB913-4_map1	0003.CSV	1384.7	0.0706697
PSB913-4_map1	0003.CSV	1388.56	0.0751953
PSB913-4_map1	0003.CSV	1392.41	0.0786623
PSB913-4_map1	0003.CSV	1396.27	0.083353
PSB913-4_map1	0003.CSV	1400.13	0.0882895
PSB913-4_map1	0003.CSV	1403.98	0.0928418
PSB913-4_map1	0003.CSV	1407.84	0.0973616
PSB913-4_map1	0003.CSV	1411.7	0.101829
PSB913-4_map1	0003.CSV	1415.55	0.105315
PSB913-4_map1	0003.CSV	1419.41	0.110641
PSB913-4_map1	0003.CSV	1423.27	0.115351
PSB913-4_map1	0003.CSV	1427.12	0.11993
PSB913-4_map1	0003.CSV	1430.98	0.124811
PSB913-4_map1	0003.CSV	1434.84	0.13112
PSB913-4_map1	0003.CSV	1438.7	0.137798
PSB913-4_map1	0003.CSV	1442.55	0.141704
PSB913-4_map1	0003.CSV	1446.41	0.14244
PSB913-4_map1	0003.CSV	1450.27	0.141403
PSB913-4_map1	0003.CSV	1454.12	0.138208
PSB913-4_map1	0003.CSV	1457.98	0.134675
PSB913-4_map1	0003.CSV	1461.84	0.132167
PSB913-4_map1	0003.CSV	1465.7	0.130965
PSB913-4_map1	0003.CSV	1469.55	0.127426
PSB913-4_map1	0003.CSV	1473.41	0.120357
PSB913-4_map1	0003.CSV	1477.27	0.111101
PSB913-4_map1	0003.CSV	1481.12	0.105052
PSB913-4_map1	0003.CSV	1484.98	0.0988869
PSB913-4_map1	0003.CSV	1488.84	0.0917926
PSB913-4_map1	0003.CSV	1492.7	0.0845652
PSB913-4_map1	0003.CSV	1496.55	0.0790949
PSB913-4_map1	0003.CSV	1500.41	0.0727998
PSB913-4_map1	0003.CSV	1504.27	0.069166
PSB913-4_map1	0003.CSV	1508.12	0.0620859
PSB913-4_map1	0003.CSV	1511.98	0.0569597
PSB913-4_map1	0003.CSV	1515.84	0.0532538
PSB913-4_map1	0003.CSV	1519.7	0.0486252
PSB913-4_map1	0003.CSV	1523.55	0.0429034
PSB913-4_map1	0003.CSV	1527.41	0.0389287
PSB913-4_map1	0003.CSV	1531.27	0.035311
PSB913-4_map1	0003.CSV	1535.12	0.0321551
PSB913-4_map1	0003.CSV	1538.98	0.0285928
PSB913-4_map1	0003.CSV	1542.84	0.0235158
PSB913-4_map1	0003.CSV	1546.7	0.0201106
PSB913-4_map1	0003.CSV	1550.55	0.0175103
PSB913-4_map1	0003.CSV	1554.41	0.0144152
PSB913-4_map1	0003.CSV	1558.27	0.0107204
PSB913-4_map1	0003.CSV	1562.12	0.00735099
PSB913-4_map1	0003.CSV	1565.98	0.00550571
PSB913-4_map1	0003.CSV	1569.84	0.00286535
PSB913-4_map1	0003.CSV	1573.69	0.00030819
PSB913-4_map1	0003.CSV	1577.55	-0.00267744
PSB913-4_map1	0003.CSV	1581.41	-0.00517641
PSB913-4_map1	0003.CSV	1585.27	-0.00727653
PSB913-4_map1	0003.CSV	1589.12	-0.00879883
PSB913-4_map1	0003.CSV	1592.98	-0.00976554
PSB913-4_map1	0003.CSV	1596.84	-0.0103053
PSB913-4_map1	0003.CSV	1600.69	-0.0108056
PSB913-4_map1	0003.CSV	1604.55	-0.0112129
PSB913-4_map1	0003.CSV	1608.41	-0.0116712
PSB913-4_map1	0003.CSV	1612.27	-0.0121662
PSB913-4_map1	0003.CSV	1616.12	-0.0126227
PSB913-4_map1	0003.CSV	1619.98	-0.0126989
PSB913-4_map1	0003.CSV	1623.84	-0.012951
PSB913-4_map1	0003.CSV	1627.69	-0.013037
PSB913-4_map1	0003.CSV	1631.55	-0.0135243
PSB913-4_map1	0003.CSV	1635.41	-0.013566
PSB913-4_map1	0003.CSV	1639.27	-0.0133703
PSB913-4_map1	0003.CSV	1643.12	-0.01385
PSB913-4_map1	0003.CSV	1646.98	-0.0142267
PSB913-4_map1	0003.CSV	1650.84	-0.0140364
PSB913-4_map1	0003.CSV	1654.69	-0.013785
PSB913-4_map1	0003.CSV	1658.55	-0.0140806
PSB913-4_map1	0003.CSV	1662.41	-0.0146034
PSB913-4_map1	0003.CSV	1666.27	-0.0149962
PSB913-4_map1	0003.CSV	1670.12	-0.0154095
PSB913-4_map1	0003.CSV	1673.98	-0.0155138
PSB913-4_map1	0003.CSV	1677.84	-0.0160405
PSB913-4_map1	0003.CSV	1681.69	-0.0164403
PSB913-4_map1	0003.CSV	1685.55	-0.0164325
PSB913-4_map1	0003.CSV	1689.41	-0.0165157
PSB913-4_map1	0003.CSV	1693.27	-0.0172405
PSB913-4_map1	0003.CSV	1697.12	-0.0176831
PSB913-4_map1	0003.CSV	1700.98	-0.0176051
PSB913-4_map1	0003.CSV	1704.84	-0.0172703
PSB913-4_map1	0003.CSV	1708.69	-0.0171557
PSB913-4_map1	0003.CSV	1712.55	-0.0171957
PSB913-4_map1	0003.CSV	1716.41	-0.0160651
PSB913-4_map1	0003.CSV	1720.27	-0.0140705
PSB913-4_map1	0003.CSV	1724.12	-0.0137921
[truncated: 81,712 more rows]

## Sheet: PSB913-4_map2
Map	Select spectrum number	Wavenumbers	Absrobance
PSB913-4_map2	0001.CSV	674.992	0.00129598
PSB913-4_map2	0001.CSV	678.849	0.00139652
PSB913-4_map2	0001.CSV	682.706	0.00179114
PSB913-4_map2	0001.CSV	686.563	0.00260678
PSB913-4_map2	0001.CSV	690.42	0.00380012
PSB913-4_map2	0001.CSV	694.277	0.00490057
PSB913-4_map2	0001.CSV	698.134	0.00420194
PSB913-4_map2	0001.CSV	701.991	0.00219031
PSB913-4_map2	0001.CSV	705.849	0.000270657
PSB913-4_map2	0001.CSV	709.706	-0.000790653
PSB913-4_map2	0001.CSV	713.563	-0.00117658
PSB913-4_map2	0001.CSV	717.42	-0.00158882
PSB913-4_map2	0001.CSV	721.277	-0.00162229
PSB913-4_map2	0001.CSV	725.134	-0.00129464
PSB913-4_map2	0001.CSV	728.991	-0.00093212
PSB913-4_map2	0001.CSV	732.848	-0.00082657
PSB913-4_map2	0001.CSV	736.705	-0.000675872
PSB913-4_map2	0001.CSV	740.562	-0.000561722
PSB913-4_map2	0001.CSV	744.42	-0.000770081
PSB913-4_map2	0001.CSV	748.277	-0.00128106
PSB913-4_map2	0001.CSV	752.134	-0.00176504
PSB913-4_map2	0001.CSV	755.991	-0.00193515
PSB913-4_map2	0001.CSV	759.848	-0.00209847
PSB913-4_map2	0001.CSV	763.705	-0.002424
PSB913-4_map2	0001.CSV	767.562	-0.00287814
PSB913-4_map2	0001.CSV	771.419	-0.00331625
PSB913-4_map2	0001.CSV	775.276	-0.00357137
PSB913-4_map2	0001.CSV	779.133	-0.00374062
PSB913-4_map2	0001.CSV	782.99	-0.00402162
PSB913-4_map2	0001.CSV	786.848	-0.0040575
PSB913-4_map2	0001.CSV	790.705	-0.00411632
PSB913-4_map2	0001.CSV	794.562	-0.00418875
PSB913-4_map2	0001.CSV	798.419	-0.00423807
PSB913-4_map2	0001.CSV	802.276	-0.00423997
PSB913-4_map2	0001.CSV	806.133	-0.00408839
PSB913-4_map2	0001.CSV	809.99	-0.0040162
PSB913-4_map2	0001.CSV	813.847	-0.0040078
PSB913-4_map2	0001.CSV	817.704	-0.00379642
PSB913-4_map2	0001.CSV	821.562	-0.00369039
PSB913-4_map2	0001.CSV	825.419	-0.00368579
PSB913-4_map2	0001.CSV	829.276	-0.00380174
PSB913-4_map2	0001.CSV	833.133	-0.00391248
PSB913-4_map2	0001.CSV	836.99	-0.00399605
PSB913-4_map2	0001.CSV	840.847	-0.00423581
PSB913-4_map2	0001.CSV	844.704	-0.00456551
PSB913-4_map2	0001.CSV	848.561	-0.00470274
PSB913-4_map2	0001.CSV	852.418	-0.00468455
PSB913-4_map2	0001.CSV	856.275	-0.00480273
PSB913-4_map2	0001.CSV	860.132	-0.00513869
PSB913-4_map2	0001.CSV	863.99	-0.00550281
PSB913-4_map2	0001.CSV	867.847	-0.00572121
PSB913-4_map2	0001.CSV	871.704	-0.00567736
PSB913-4_map2	0001.CSV	875.561	-0.00566689
PSB913-4_map2	0001.CSV	879.418	-0.00586896
PSB913-4_map2	0001.CSV	883.275	-0.00601362
PSB913-4_map2	0001.CSV	887.132	-0.0060114
PSB913-4_map2	0001.CSV	890.989	-0.00599881
PSB913-4_map2	0001.CSV	894.846	-0.00599084
PSB913-4_map2	0001.CSV	898.703	-0.00613007
PSB913-4_map2	0001.CSV	902.561	-0.00619387
PSB913-4_map2	0001.CSV	906.418	-0.00620353
PSB913-4_map2	0001.CSV	910.275	-0.00630508
PSB913-4_map2	0001.CSV	914.132	-0.00643885
PSB913-4_map2	0001.CSV	917.989	-0.00648236
PSB913-4_map2	0001.CSV	921.846	-0.00645546
PSB913-4_map2	0001.CSV	925.703	-0.00648863
PSB913-4_map2	0001.CSV	929.56	-0.00663658
PSB913-4_map2	0001.CSV	933.417	-0.00672167
PSB913-4_map2	0001.CSV	937.274	-0.00661621
PSB913-4_map2	0001.CSV	941.131	-0.00651494
PSB913-4_map2	0001.CSV	944.989	-0.00650149
PSB913-4_map2	0001.CSV	948.846	-0.00644766
PSB913-4_map2	0001.CSV	952.703	-0.00639108
PSB913-4_map2	0001.CSV	956.56	-0.00644476
PSB913-4_map2	0001.CSV	960.417	-0.00648625
PSB913-4_map2	0001.CSV	964.274	-0.00643033
PSB913-4_map2	0001.CSV	968.131	-0.00638126
PSB913-4_map2	0001.CSV	971.988	-0.00635027
PSB913-4_map2	0001.CSV	975.845	-0.00633793
PSB913-4_map2	0001.CSV	979.702	-0.00632591
PSB913-4_map2	0001.CSV	983.559	-0.00628849
PSB913-4_map2	0001.CSV	987.417	-0.00627523
PSB913-4_map2	0001.CSV	991.274	-0.00623747
PSB913-4_map2	0001.CSV	995.131	-0.00622013
PSB913-4_map2	0001.CSV	998.988	-0.00622562
PSB913-4_map2	0001.CSV	1002.85	-0.00613814
PSB913-4_map2	0001.CSV	1006.7	-0.00608714
PSB913-4_map2	0001.CSV	1010.56	-0.00612925
PSB913-4_map2	0001.CSV	1014.42	-0.00619746
PSB913-4_map2	0001.CSV	1018.27	-0.00621062
PSB913-4_map2	0001.CSV	1022.13	-0.00625109
PSB913-4_map2	0001.CSV	1025.99	-0.00628395
PSB913-4_map2	0001.CSV	1029.85	-0.00623032
PSB913-4_map2	0001.CSV	1033.7	-0.00623159
PSB913-4_map2	0001.CSV	1037.56	-0.00630491
PSB913-4_map2	0001.CSV	1041.42	-0.00641129
PSB913-4_map2	0001.CSV	1045.27	-0.00655319
PSB913-4_map2	0001.CSV	1049.13	-0.00652137
PSB913-4_map2	0001.CSV	1052.99	-0.00644743
PSB913-4_map2	0001.CSV	1056.84	-0.00648429
PSB913-4_map2	0001.CSV	1060.7	-0.00652969
PSB913-4_map2	0001.CSV	1064.56	-0.00660048
PSB913-4_map2	0001.CSV	1068.42	-0.00665942
PSB913-4_map2	0001.CSV	1072.27	-0.00673338
PSB913-4_map2	0001.CSV	1076.13	-0.00686396
PSB913-4_map2	0001.CSV	1079.99	-0.00697946
PSB913-4_map2	0001.CSV	1083.84	-0.00707437
PSB913-4_map2	0001.CSV	1087.7	-0.00712871
PSB913-4_map2	0001.CSV	1091.56	-0.00710605
PSB913-4_map2	0001.CSV	1095.41	-0.00708493
PSB913-4_map2	0001.CSV	1099.27	-0.00713927
PSB913-4_map2	0001.CSV	1103.13	-0.00711293
PSB913-4_map2	0001.CSV	1106.99	-0.00712372
PSB913-4_map2	0001.CSV	1110.84	-0.007123
PSB913-4_map2	0001.CSV	1114.7	-0.00707381
PSB913-4_map2	0001.CSV	1118.56	-0.00706107
PSB913-4_map2	0001.CSV	1122.41	-0.00714207
PSB913-4_map2	0001.CSV	1126.27	-0.00728073
PSB913-4_map2	0001.CSV	1130.13	-0.0074232
PSB913-4_map2	0001.CSV	1133.99	-0.00744824
PSB913-4_map2	0001.CSV	1137.84	-0.00749957
PSB913-4_map2	0001.CSV	1141.7	-0.00762608
PSB913-4_map2	0001.CSV	1145.56	-0.00770095
PSB913-4_map2	0001.CSV	1149.41	-0.00770512
PSB913-4_map2	0001.CSV	1153.27	-0.00770277
PSB913-4_map2	0001.CSV	1157.13	-0.0077488
PSB913-4_map2	0001.CSV	1160.99	-0.00782762
PSB913-4_map2	0001.CSV	1164.84	-0.00791187
PSB913-4_map2	0001.CSV	1168.7	-0.00798858
PSB913-4_map2	0001.CSV	1172.56	-0.00795208
PSB913-4_map2	0001.CSV	1176.41	-0.0078315
PSB913-4_map2	0001.CSV	1180.27	-0.00772038
PSB913-4_map2	0001.CSV	1184.13	-0.00774926
PSB913-4_map2	0001.CSV	1187.99	-0.00793864
PSB913-4_map2	0001.CSV	1191.84	-0.00806375
PSB913-4_map2	0001.CSV	1195.7	-0.00809501
PSB913-4_map2	0001.CSV	1199.56	-0.0080925
PSB913-4_map2	0001.CSV	1203.41	-0.00807588
PSB913-4_map2	0001.CSV	1207.27	-0.00802013
PSB913-4_map2	0001.CSV	1211.13	-0.00796269
PSB913-4_map2	0001.CSV	1214.98	-0.00792716
PSB913-4_map2	0001.CSV	1218.84	-0.00787653
PSB913-4_map2	0001.CSV	1222.7	-0.00778362
PSB913-4_map2	0001.CSV	1226.56	-0.00770206
PSB913-4_map2	0001.CSV	1230.41	-0.0077073
PSB913-4_map2	0001.CSV	1234.27	-0.00770014
PSB913-4_map2	0001.CSV	1238.13	-0.00761234
PSB913-4_map2	0001.CSV	1241.98	-0.00756353
PSB913-4_map2	0001.CSV	1245.84	-0.00759583
PSB913-4_map2	0001.CSV	1249.7	-0.00762109
PSB913-4_map2	0001.CSV	1253.56	-0.00768904
PSB913-4_map2	0001.CSV	1257.41	-0.00781161
PSB913-4_map2	0001.CSV	1261.27	-0.00796727
PSB913-4_map2	0001.CSV	1265.13	-0.00808987
PSB913-4_map2	0001.CSV	1268.98	-0.00811273
PSB913-4_map2	0001.CSV	1272.84	-0.00810964
PSB913-4_map2	0001.CSV	1276.7	-0.00818824
PSB913-4_map2	0001.CSV	1280.56	-0.00819871
PSB913-4_map2	0001.CSV	1284.41	-0.00814632
PSB913-4_map2	0001.CSV	1288.27	-0.00815169
PSB913-4_map2	0001.CSV	1292.13	-0.00821903
PSB913-4_map2	0001.CSV	1295.98	-0.00830602
PSB913-4_map2	0001.CSV	1299.84	-0.00839485
PSB913-4_map2	0001.CSV	1303.7	-0.00849576
PSB913-4_map2	0001.CSV	1307.56	-0.00856138
PSB913-4_map2	0001.CSV	1311.41	-0.00858575
PSB913-4_map2	0001.CSV	1315.27	-0.00860345
PSB913-4_map2	0001.CSV	1319.13	-0.00858393
PSB913-4_map2	0001.CSV	1322.98	-0.00862336
PSB913-4_map2	0001.CSV	1326.84	-0.00870495
PSB913-4_map2	0001.CSV	1330.7	-0.00870343
PSB913-4_map2	0001.CSV	1334.56	-0.00877422
PSB913-4_map2	0001.CSV	1338.41	-0.00877169
PSB913-4_map2	0001.CSV	1342.27	-0.00867689
PSB913-4_map2	0001.CSV	1346.13	-0.00873334
PSB913-4_map2	0001.CSV	1349.98	-0.00878172
PSB913-4_map2	0001.CSV	1353.84	-0.00878143
PSB913-4_map2	0001.CSV	1357.7	-0.00874211
PSB913-4_map2	0001.CSV	1361.56	-0.00872502
PSB913-4_map2	0001.CSV	1365.41	-0.00877302
PSB913-4_map2	0001.CSV	1369.27	-0.00890902
PSB913-4_map2	0001.CSV	1373.13	-0.00898079
PSB913-4_map2	0001.CSV	1376.98	-0.00895161
PSB913-4_map2	0001.CSV	1380.84	-0.00898234
PSB913-4_map2	0001.CSV	1384.7	-0.00902454
PSB913-4_map2	0001.CSV	1388.56	-0.00897417
PSB913-4_map2	0001.CSV	1392.41	-0.00903083
PSB913-4_map2	0001.CSV	1396.27	-0.00898747
PSB913-4_map2	0001.CSV	1400.13	-0.00888912
PSB913-4_map2	0001.CSV	1403.98	-0.00891717
PSB913-4_map2	0001.CSV	1407.84	-0.008901
PSB913-4_map2	0001.CSV	1411.7	-0.00896852
PSB913-4_map2	0001.CSV	1415.55	-0.00908742
PSB913-4_map2	0001.CSV	1419.41	-0.00905254
PSB913-4_map2	0001.CSV	1423.27	-0.0090048
PSB913-4_map2	0001.CSV	1427.12	-0.00904524
PSB913-4_map2	0001.CSV	1430.98	-0.00912117
PSB913-4_map2	0001.CSV	1434.84	-0.009159
PSB913-4_map2	0001.CSV	1438.7	-0.00914875
PSB913-4_map2	0001.CSV	1442.55	-0.00948564
PSB913-4_map2	0001.CSV	1446.41	-0.0098187
PSB913-4_map2	0001.CSV	1450.27	-0.00999673
PSB913-4_map2	0001.CSV	1454.12	-0.0102653
PSB913-4_map2	0001.CSV	1457.98	-0.0104338
PSB913-4_map2	0001.CSV	1461.84	-0.0106113
PSB913-4_map2	0001.CSV	1465.7	-0.0107581
PSB913-4_map2	0001.CSV	1469.55	-0.0109433
PSB913-4_map2	0001.CSV	1473.41	-0.0108
PSB913-4_map2	0001.CSV	1477.27	-0.0103432
PSB913-4_map2	0001.CSV	1481.12	-0.0102778
PSB913-4_map2	0001.CSV	1484.98	-0.0102515
PSB913-4_map2	0001.CSV	1488.84	-0.00996247
PSB913-4_map2	0001.CSV	1492.7	-0.00974141
PSB913-4_map2	0001.CSV	1496.55	-0.00971934
PSB913-4_map2	0001.CSV	1500.41	-0.00953015
PSB913-4_map2	0001.CSV	1504.27	-0.00968013
PSB913-4_map2	0001.CSV	1508.12	-0.00918956
PSB913-4_map2	0001.CSV	1511.98	-0.00903073
PSB913-4_map2	0001.CSV	1515.84	-0.00933026
PSB913-4_map2	0001.CSV	1519.7	-0.00957219
PSB913-4_map2	0001.CSV	1523.55	-0.00933577
PSB913-4_map2	0001.CSV	1527.41	-0.0091383
PSB913-4_map2	0001.CSV	1531.27	-0.0092001
PSB913-4_map2	0001.CSV	1535.12	-0.00926598
PSB913-4_map2	0001.CSV	1538.98	-0.00926377
PSB913-4_map2	0001.CSV	1542.84	-0.00878305
PSB913-4_map2	0001.CSV	1546.7	-0.0086742
PSB913-4_map2	0001.CSV	1550.55	-0.0088214
PSB913-4_map2	0001.CSV	1554.41	-0.00881997
PSB913-4_map2	0001.CSV	1558.27	-0.00838553
PSB913-4_map2	0001.CSV	1562.12	-0.00823701
PSB913-4_map2	0001.CSV	1565.98	-0.00853198
PSB913-4_map2	0001.CSV	1569.84	-0.00848178
PSB913-4_map2	0001.CSV	1573.69	-0.00845696
PSB913-4_map2	0001.CSV	1577.55	-0.00833229
PSB913-4_map2	0001.CSV	1581.41	-0.00832452
PSB913-4_map2	0001.CSV	1585.27	-0.0084231
PSB913-4_map2	0001.CSV	1589.12	-0.00846268
PSB913-4_map2	0001.CSV	1592.98	-0.00845868
PSB913-4_map2	0001.CSV	1596.84	-0.00849634
PSB913-4_map2	0001.CSV	1600.69	-0.00853828
PSB913-4_map2	0001.CSV	1604.55	-0.00857256
PSB913-4_map2	0001.CSV	1608.41	-0.00861817
PSB913-4_map2	0001.CSV	1612.27	-0.00876214
PSB913-4_map2	0001.CSV	1616.12	-0.00886312
PSB913-4_map2	0001.CSV	1619.98	-0.00885494
PSB913-4_map2	0001.CSV	1623.84	-0.00888136
PSB913-4_map2	0001.CSV	1627.69	-0.00891645
PSB913-4_map2	0001.CSV	1631.55	-0.00914223
PSB913-4_map2	0001.CSV	1635.41	-0.00923001
PSB913-4_map2	0001.CSV	1639.27	-0.00915348
PSB913-4_map2	0001.CSV	1643.12	-0.00936859
PSB913-4_map2	0001.CSV	1646.98	-0.00941389
PSB913-4_map2	0001.CSV	1650.84	-0.00939939
PSB913-4_map2	0001.CSV	1654.69	-0.00917749
PSB913-4_map2	0001.CSV	1658.55	-0.00935689
PSB913-4_map2	0001.CSV	1662.41	-0.00958022
PSB913-4_map2	0001.CSV	1666.27	-0.00970576
PSB913-4_map2	0001.CSV	1670.12	-0.00974384
PSB913-4_map2	0001.CSV	1673.98	-0.00968542
PSB913-4_map2	0001.CSV	1677.84	-0.00984526
PSB913-4_map2	0001.CSV	1681.69	-0.0100272
PSB913-4_map2	0001.CSV	1685.55	-0.00972906
PSB913-4_map2	0001.CSV	1689.41	-0.00965969
PSB913-4_map2	0001.CSV	1693.27	-0.00997679
PSB913-4_map2	0001.CSV	1697.12	-0.0100554
PSB913-4_map2	0001.CSV	1700.98	-0.00976444
PSB913-4_map2	0001.CSV	1704.84	-0.00973603
PSB913-4_map2	0001.CSV	1708.69	-0.00978038
PSB913-4_map2	0001.CSV	1712.55	-0.0100001
PSB913-4_map2	0001.CSV	1716.41	-0.00986586
PSB913-4_map2	0001.CSV	1720.27	-0.00960907
PSB913-4_map2	0001.CSV	1724.12	-0.00974951
PSB913-4_map2	0001.CSV	1727.98	-0.00991759
PSB913-4_map2	0001.CSV	1731.84	-0.009957
PSB913-4_map2	0001.CSV	1735.69	-0.00981851
PSB913-4_map2	0001.CSV	1739.55	-0.0099536
PSB913-4_map2	0001.CSV	1743.41	-0.0100758
PSB913-4_map2	0001.CSV	1747.27	-0.0100649
PSB913-4_map2	0001.CSV	1751.12	-0.00986982
PSB913-4_map2	0001.CSV	1754.98	-0.0100032
PSB913-4_map2	0001.CSV	1758.84	-0.0101919
PSB913-4_map2	0001.CSV	1762.69	-0.0102022
PSB913-4_map2	0001.CSV	1766.55	-0.0102383
PSB913-4_map2	0001.CSV	1770.41	-0.0101669
PSB913-4_map2	0001.CSV	1774.26	-0.0100542
PSB913-4_map2	0001.CSV	1778.12	-0.0101842
PSB913-4_map2	0001.CSV	1781.98	-0.0101507
PSB913-4_map2	0001.CSV	1785.84	-0.010149
PSB913-4_map2	0001.CSV	1789.69	-0.0102714
PSB913-4_map2	0001.CSV	1793.55	-0.0102071
PSB913-4_map2	0001.CSV	1797.41	-0.0101722
PSB913-4_map2	0001.CSV	1801.26	-0.0101012
PSB913-4_map2	0001.CSV	1805.12	-0.0100813
PSB913-4_map2	0001.CSV	1808.98	-0.010149
PSB913-4_map2	0001.CSV	1812.84	-0.0100971
PSB913-4_map2	0001.CSV	1816.69	-0.0100908
PSB913-4_map2	0001.CSV	1820.55	-0.0101464
PSB913-4_map2	0001.CSV	1824.41	-0.0102215
PSB913-4_map2	0001.CSV	1828.26	-0.010162
PSB913-4_map2	0001.CSV	1832.12	-0.0101059
PSB913-4_map2	0001.CSV	1835.98	-0.0101584
PSB913-4_map2	0001.CSV	1839.84	-0.0102461
PSB913-4_map2	0001.CSV	1843.69	-0.010212
PSB913-4_map2	0001.CSV	1847.55	-0.0100465
PSB913-4_map2	0001.CSV	1851.41	-0.0100908
PSB913-4_map2	0001.CSV	1855.26	-0.0101839
PSB913-4_map2	0001.CSV	1859.12	-0.0102369
PSB913-4_map2	0001.CSV	1862.98	-0.0102875
PSB913-4_map2	0001.CSV	1866.84	-0.0102627
PSB913-4_map2	0001.CSV	1870.69	-0.0100993
PSB913-4_map2	0001.CSV	1874.55	-0.0101753
PSB913-4_map2	0001.CSV	1878.41	-0.010288
PSB913-4_map2	0001.CSV	1882.26	-0.010338
PSB913-4_map2	0001.CSV	1886.12	-0.0103669
PSB913-4_map2	0001.CSV	1889.98	-0.010404
PSB913-4_map2	0001.CSV	1893.83	-0.0104623
PSB913-4_map2	0001.CSV	1897.69	-0.0105354
PSB913-4_map2	0001.CSV	1901.55	-0.0105832
PSB913-4_map2	0001.CSV	1905.41	-0.0106676
PSB913-4_map2	0001.CSV	1909.26	-0.0107017
PSB913-4_map2	0001.CSV	1913.12	-0.0107456
PSB913-4_map2	0001.CSV	1916.98	-0.0108317
PSB913-4_map2	0001.CSV	1920.83	-0.0108632
PSB913-4_map2	0001.CSV	1924.69	-0.0108833
PSB913-4_map2	0001.CSV	1928.55	-0.0109114
PSB913-4_map2	0001.CSV	1932.4	-0.0109681
PSB913-4_map2	0001.CSV	1936.26	-0.0110883
PSB913-4_map2	0001.CSV	1940.12	-0.0111866
PSB913-4_map2	0001.CSV	1943.98	-0.0111614
PSB913-4_map2	0001.CSV	1947.83	-0.0112146
PSB913-4_map2	0001.CSV	1951.69	-0.0113472
PSB913-4_map2	0001.CSV	1955.55	-0.0113932
PSB913-4_map2	0001.CSV	1959.4	-0.0114276
PSB913-4_map2	0001.CSV	1963.26	-0.011489
PSB913-4_map2	0001.CSV	1967.12	-0.0114889
PSB913-4_map2	0001.CSV	1970.98	-0.0115537
PSB913-4_map2	0001.CSV	1974.83	-0.011655
PSB913-4_map2	0001.CSV	1978.69	-0.0116715
PSB913-4_map2	0001.CSV	1982.55	-0.0117227
PSB913-4_map2	0001.CSV	1986.4	-0.0117914
PSB913-4_map2	0001.CSV	1990.26	-0.0118336
PSB913-4_map2	0001.CSV	1994.12	-0.0118816
PSB913-4_map2	0001.CSV	1997.98	-0.0119392
PSB913-4_map2	0001.CSV	2001.83	-0.0119496
PSB913-4_map2	0001.CSV	2005.69	-0.0119962
PSB913-4_map2	0001.CSV	2009.55	-0.0120509
PSB913-4_map2	0001.CSV	2013.4	-0.012093
PSB913-4_map2	0001.CSV	2017.26	-0.0120774
PSB913-4_map2	0001.CSV	2021.12	-0.0120672
PSB913-4_map2	0001.CSV	2024.97	-0.0121566
PSB913-4_map2	0001.CSV	2028.83	-0.0121982
PSB913-4_map2	0001.CSV	2032.69	-0.0122251
PSB913-4_map2	0001.CSV	2036.55	-0.0123007
PSB913-4_map2	0001.CSV	2040.4	-0.0123434
PSB913-4_map2	0001.CSV	2044.26	-0.0123564
PSB913-4_map2	0001.CSV	2048.12	-0.0123911
PSB913-4_map2	0001.CSV	2051.97	-0.0124243
PSB913-4_map2	0001.CSV	2055.83	-0.0124003
PSB913-4_map2	0001.CSV	2059.69	-0.0124171
PSB913-4_map2	0001.CSV	2063.55	-0.0124537
PSB913-4_map2	0001.CSV	2067.4	-0.0124817
PSB913-4_map2	0001.CSV	2071.26	-0.012534
PSB913-4_map2	0001.CSV	2075.12	-0.0124959
PSB913-4_map2	0001.CSV	2078.97	-0.0124366
PSB913-4_map2	0001.CSV	2082.83	-0.0124795
PSB913-4_map2	0001.CSV	2086.69	-0.0125317
PSB913-4_map2	0001.CSV	2090.55	-0.0125145
PSB913-4_map2	0001.CSV	2094.4	-0.012511
PSB913-4_map2	0001.CSV	2098.26	-0.012505
PSB913-4_map2	0001.CSV	2102.12	-0.0125203
PSB913-4_map2	0001.CSV	2105.97	-0.0125499
PSB913-4_map2	0001.CSV	2109.83	-0.0125453
PSB913-4_map2	0001.CSV	2113.69	-0.012525
PSB913-4_map2	0001.CSV	2117.55	-0.0125176
PSB913-4_map2	0001.CSV	2121.4	-0.0124876
PSB913-4_map2	0001.CSV	2125.26	-0.0125057
PSB913-4_map2	0001.CSV	2129.12	-0.0125278
PSB913-4_map2	0001.CSV	2132.97	-0.0125421
PSB913-4_map2	0001.CSV	2136.83	-0.0124981
PSB913-4_map2	0001.CSV	2140.69	-0.0124435
PSB913-4_map2	0001.CSV	2144.55	-0.0124543
PSB913-4_map2	0001.CSV	2148.4	-0.0125111
PSB913-4_map2	0001.CSV	2152.26	-0.0125564
PSB913-4_map2	0001.CSV	2156.12	-0.0125256
PSB913-4_map2	0001.CSV	2159.97	-0.012513
PSB913-4_map2	0001.CSV	2163.83	-0.0125607
PSB913-4_map2	0001.CSV	2167.69	-0.0125522
PSB913-4_map2	0001.CSV	2171.55	-0.0124951
PSB913-4_map2	0001.CSV	2175.4	-0.012455
PSB913-4_map2	0001.CSV	2179.26	-0.012489
PSB913-4_map2	0001.CSV	2183.12	-0.0125515
PSB913-4_map2	0001.CSV	2186.97	-0.0125778
PSB913-4_map2	0001.CSV	2190.83	-0.0126132
PSB913-4_map2	0001.CSV	2194.69	-0.0126508
PSB913-4_map2	0001.CSV	2198.55	-0.0126762
PSB913-4_map2	0001.CSV	2202.4	-0.0126866
PSB913-4_map2	0001.CSV	2206.26	-0.012719
PSB913-4_map2	0001.CSV	2210.12	-0.0127571
PSB913-4_map2	0001.CSV	2213.97	-0.0127884
PSB913-4_map2	0001.CSV	2217.83	-0.0128462
PSB913-4_map2	0001.CSV	2221.69	-0.0128798
PSB913-4_map2	0001.CSV	2225.54	-0.012863
PSB913-4_map2	0001.CSV	2229.4	-0.0128754
PSB913-4_map2	0001.CSV	2233.26	-0.0129057
PSB913-4_map2	0001.CSV	2237.12	-0.0129151
PSB913-4_map2	0001.CSV	2240.97	-0.0129346
PSB913-4_map2	0001.CSV	2244.83	-0.0129544
PSB913-4_map2	0001.CSV	2248.69	-0.0130295
PSB913-4_map2	0001.CSV	2252.54	-0.013121
PSB913-4_map2	0001.CSV	2256.4	-0.0131766
PSB913-4_map2	0001.CSV	2260.26	-0.0132429
PSB913-4_map2	0001.CSV	2264.11	-0.0133039
PSB913-4_map2	0001.CSV	2267.97	-0.0133165
PSB913-4_map2	0001.CSV	2271.83	-0.0133562
PSB913-4_map2	0001.CSV	2275.69	-0.0134284
PSB913-4_map2	0001.CSV	2279.54	-0.0134702
PSB913-4_map2	0001.CSV	2283.4	-0.0135562
PSB913-4_map2	0001.CSV	2287.26	-0.0136608
PSB913-4_map2	0001.CSV	2291.11	-0.0136948
PSB913-4_map2	0001.CSV	2294.97	-0.0137321
PSB913-4_map2	0001.CSV	2298.83	-0.0138282
PSB913-4_map2	0001.CSV	2302.69	-0.0139519
PSB913-4_map2	0001.CSV	2306.54	-0.0141189
PSB913-4_map2	0001.CSV	2310.4	-0.0143468
PSB913-4_map2	0001.CSV	2314.26	-0.0144962
PSB913-4_map2	0001.CSV	2318.11	-0.0146355
PSB913-4_map2	0001.CSV	2321.97	-0.014929
PSB913-4_map2	0001.CSV	2325.83	-0.0153662
PSB913-4_map2	0001.CSV	2329.69	-0.016098
PSB913-4_map2	0001.CSV	2333.54	-0.0162907
PSB913-4_map2	0001.CSV	2337.4	-0.0159615
PSB913-4_map2	0001.CSV	2341.26	-0.0160376
PSB913-4_map2	0001.CSV	2345.11	-0.0157077
PSB913-4_map2	0001.CSV	2348.97	-0.0155748
PSB913-4_map2	0001.CSV	2352.83	-0.0163935
PSB913-4_map2	0001.CSV	2356.69	-0.0183968
PSB913-4_map2	0001.CSV	2360.54	-0.0197333
PSB913-4_map2	0001.CSV	2364.4	-0.0186437
PSB913-4_map2	0001.CSV	2368.26	-0.0166076
PSB913-4_map2	0001.CSV	2372.11	-0.0152896
PSB913-4_map2	0001.CSV	2375.97	-0.0147664
PSB913-4_map2	0001.CSV	2379.83	-0.0145828
PSB913-4_map2	0001.CSV	2383.69	-0.0145711
PSB913-4_map2	0001.CSV	2387.54	-0.0146241
PSB913-4_map2	0001.CSV	2391.4	-0.0146781
PSB913-4_map2	0001.CSV	2395.26	-0.0146839
PSB913-4_map2	0001.CSV	2399.11	-0.0147052
PSB913-4_map2	0001.CSV	2402.97	-0.0147309
PSB913-4_map2	0001.CSV	2406.83	-0.0147558
PSB913-4_map2	0001.CSV	2410.68	-0.0147545
PSB913-4_map2	0001.CSV	2414.54	-0.014746
PSB913-4_map2	0001.CSV	2418.4	-0.0147613
PSB913-4_map2	0001.CSV	2422.26	-0.0147605
PSB913-4_map2	0001.CSV	2426.11	-0.0147672
PSB913-4_map2	0001.CSV	2429.97	-0.0147933
PSB913-4_map2	0001.CSV	2433.83	-0.0148218
PSB913-4_map2	0001.CSV	2437.68	-0.0148489
PSB913-4_map2	0001.CSV	2441.54	-0.0148459
PSB913-4_map2	0001.CSV	2445.4	-0.0148598
PSB913-4_map2	0001.CSV	2449.26	-0.0148672
PSB913-4_map2	0001.CSV	2453.11	-0.0148823
PSB913-4_map2	0001.CSV	2456.97	-0.0149004
PSB913-4_map2	0001.CSV	2460.83	-0.0149109
PSB913-4_map2	0001.CSV	2464.68	-0.0148851
PSB913-4_map2	0001.CSV	2468.54	-0.0148375
PSB913-4_map2	0001.CSV	2472.4	-0.0148358
PSB913-4_map2	0001.CSV	2476.26	-0.0148688
PSB913-4_map2	0001.CSV	2480.11	-0.0148729
PSB913-4_map2	0001.CSV	2483.97	-0.0148781
PSB913-4_map2	0001.CSV	2487.83	-0.0149215
PSB913-4_map2	0001.CSV	2491.68	-0.0149869
PSB913-4_map2	0001.CSV	2495.54	-0.0150404
PSB913-4_map2	0001.CSV	2499.4	-0.0150511
PSB913-4_map2	0001.CSV	2503.26	-0.015032
PSB913-4_map2	0001.CSV	2507.11	-0.0150603
PSB913-4_map2	0001.CSV	2510.97	-0.0151122
PSB913-4_map2	0001.CSV	2514.83	-0.01513
PSB913-4_map2	0001.CSV	2518.68	-0.0151374
PSB913-4_map2	0001.CSV	2522.54	-0.0151525
PSB913-4_map2	0001.CSV	2526.4	-0.0151865
PSB913-4_map2	0001.CSV	2530.26	-0.0152316
PSB913-4_map2	0001.CSV	2534.11	-0.0152348
PSB913-4_map2	0001.CSV	2537.97	-0.0152896
PSB913-4_map2	0001.CSV	2541.83	-0.0153557
PSB913-4_map2	0001.CSV	2545.68	-0.0153408
PSB913-4_map2	0001.CSV	2549.54	-0.0153303
PSB913-4_map2	0001.CSV	2553.4	-0.0153938
PSB913-4_map2	0001.CSV	2557.26	-0.0154842
PSB913-4_map2	0001.CSV	2561.11	-0.0155247
PSB913-4_map2	0001.CSV	2564.97	-0.0155328
PSB913-4_map2	0001.CSV	2568.83	-0.0155423
PSB913-4_map2	0001.CSV	2572.68	-0.015541
PSB913-4_map2	0001.CSV	2576.54	-0.0155416
PSB913-4_map2	0001.CSV	2580.4	-0.0156082
PSB913-4_map2	0001.CSV	2584.25	-0.0156614
PSB913-4_map2	0001.CSV	2588.11	-0.0156488
PSB913-4_map2	0001.CSV	2591.97	-0.0156303
PSB913-4_map2	0001.CSV	2595.83	-0.0156718
PSB913-4_map2	0001.CSV	2599.68	-0.0157099
PSB913-4_map2	0001.CSV	2603.54	-0.0156614
PSB913-4_map2	0001.CSV	2607.4	-0.0156292
PSB913-4_map2	0001.CSV	2611.25	-0.0156987
PSB913-4_map2	0001.CSV	2615.11	-0.0157414
PSB913-4_map2	0001.CSV	2618.97	-0.0157441
PSB913-4_map2	0001.CSV	2622.82	-0.0157409
PSB913-4_map2	0001.CSV	2626.68	-0.0157249
PSB913-4_map2	0001.CSV	2630.54	-0.0157094
PSB913-4_map2	0001.CSV	2634.4	-0.0156828
PSB913-4_map2	0001.CSV	2638.25	-0.0156996
PSB913-4_map2	0001.CSV	2642.11	-0.0157699
PSB913-4_map2	0001.CSV	2645.97	-0.0158591
PSB913-4_map2	0001.CSV	2649.82	-0.0159261
PSB913-4_map2	0001.CSV	2653.68	-0.0159238
PSB913-4_map2	0001.CSV	2657.54	-0.0158461
PSB913-4_map2	0001.CSV	2661.4	-0.0158299
PSB913-4_map2	0001.CSV	2665.25	-0.0158456
PSB913-4_map2	0001.CSV	2669.11	-0.0158338
PSB913-4_map2	0001.CSV	2672.97	-0.0157861
PSB913-4_map2	0001.CSV	2676.82	-0.01569
PSB913-4_map2	0001.CSV	2680.68	-0.0157101
PSB913-4_map2	0001.CSV	2684.54	-0.0158489
PSB913-4_map2	0001.CSV	2688.4	-0.0159062
PSB913-4_map2	0001.CSV	2692.25	-0.0158712
PSB913-4_map2	0001.CSV	2696.11	-0.0158641
PSB913-4_map2	0001.CSV	2699.97	-0.0158947
PSB913-4_map2	0001.CSV	2703.82	-0.0158752
PSB913-4_map2	0001.CSV	2707.68	-0.0158728
PSB913-4_map2	0001.CSV	2711.54	-0.0159288
PSB913-4_map2	0001.CSV	2715.4	-0.0159281
PSB913-4_map2	0001.CSV	2719.25	-0.0158726
PSB913-4_map2	0001.CSV	2723.11	-0.0157884
PSB913-4_map2	0001.CSV	2726.97	-0.0158206
PSB913-4_map2	0001.CSV	2730.82	-0.015827
PSB913-4_map2	0001.CSV	2734.68	-0.0157335
PSB913-4_map2	0001.CSV	2738.54	-0.0157809
PSB913-4_map2	0001.CSV	2742.4	-0.015857
PSB913-4_map2	0001.CSV	2746.25	-0.0157081
PSB913-4_map2	0001.CSV	2750.11	-0.0156333
PSB913-4_map2	0001.CSV	2753.97	-0.015763
PSB913-4_map2	0001.CSV	2757.82	-0.0157668
PSB913-4_map2	0001.CSV	2761.68	-0.0157385
PSB913-4_map2	0001.CSV	2765.54	-0.015823
PSB913-4_map2	0001.CSV	2769.39	-0.0158104
PSB913-4_map2	0001.CSV	2773.25	-0.0156585
PSB913-4_map2	0001.CSV	2777.11	-0.0156923
PSB913-4_map2	0001.CSV	2780.97	-0.0158286
PSB913-4_map2	0001.CSV	2784.82	-0.0158213
PSB913-4_map2	0001.CSV	2788.68	-0.0156786
PSB913-4_map2	0001.CSV	2792.54	-0.0155876
PSB913-4_map2	0001.CSV	2796.39	-0.0155664
PSB913-4_map2	0001.CSV	2800.25	-0.0156877
PSB913-4_map2	0001.CSV	2804.11	-0.0158487
PSB913-4_map2	0001.CSV	2807.97	-0.0158407
PSB913-4_map2	0001.CSV	2811.82	-0.015832
PSB913-4_map2	0001.CSV	2815.68	-0.0158602
PSB913-4_map2	0001.CSV	2819.54	-0.0158564
PSB913-4_map2	0001.CSV	2823.39	-0.0158326
PSB913-4_map2	0001.CSV	2827.25	-0.0158238
PSB913-4_map2	0001.CSV	2831.11	-0.0158122
PSB913-4_map2	0001.CSV	2834.97	-0.0158162
PSB913-4_map2	0001.CSV	2838.82	-0.0159589
PSB913-4_map2	0001.CSV	2842.68	-0.0163555
PSB913-4_map2	0001.CSV	2846.54	-0.0167586
PSB913-4_map2	0001.CSV	2850.39	-0.0171559
PSB913-4_map2	0001.CSV	2854.25	-0.017447
PSB913-4_map2	0001.CSV	2858.11	-0.0173357
PSB913-4_map2	0001.CSV	2861.97	-0.0171249
PSB913-4_map2	0001.CSV	2865.82	-0.0170462
PSB913-4_map2	0001.CSV	2869.68	-0.0169527
PSB913-4_map2	0001.CSV	2873.54	-0.0168198
PSB913-4_map2	0001.CSV	2877.39	-0.0168524
PSB913-4_map2	0001.CSV	2881.25	-0.0168855
PSB913-4_map2	0001.CSV	2885.11	-0.0168439
PSB913-4_map2	0001.CSV	2888.97	-0.0169181
PSB913-4_map2	0001.CSV	2892.82	-0.0170675
PSB913-4_map2	0001.CSV	2896.68	-0.0172118
PSB913-4_map2	0001.CSV	2900.54	-0.0174204
PSB913-4_map2	0001.CSV	2904.39	-0.0175531
PSB913-4_map2	0001.CSV	2908.25	-0.017569
PSB913-4_map2	0001.CSV	2912.11	-0.0176841
PSB913-4_map2	0001.CSV	2915.97	-0.0181546
PSB913-4_map2	0001.CSV	2919.82	-0.0187968
PSB913-4_map2	0001.CSV	2923.68	-0.019223
PSB913-4_map2	0001.CSV	2927.54	-0.0192243
PSB913-4_map2	0001.CSV	2931.39	-0.0190124
PSB913-4_map2	0001.CSV	2935.25	-0.0188392
PSB913-4_map2	0001.CSV	2939.11	-0.0184875
PSB913-4_map2	0001.CSV	2942.96	-0.0180169
PSB913-4_map2	0001.CSV	2946.82	-0.0178091
PSB913-4_map2	0001.CSV	2950.68	-0.0179008
PSB913-4_map2	0001.CSV	2954.54	-0.0181229
PSB913-4_map2	0001.CSV	2958.39	-0.0182899
PSB913-4_map2	0001.CSV	2962.25	-0.0181438
PSB913-4_map2	0001.CSV	2966.11	-0.0179505
PSB913-4_map2	0001.CSV	2969.96	-0.0176631
PSB913-4_map2	0001.CSV	2973.82	-0.0172878
PSB913-4_map2	0001.CSV	2977.68	-0.0170269
PSB913-4_map2	0001.CSV	2981.53	-0.0169044
PSB913-4_map2	0001.CSV	2985.39	-0.0168964
PSB913-4_map2	0001.CSV	2989.25	-0.0167704
PSB913-4_map2	0001.CSV	2993.11	-0.0166417
PSB913-4_map2	0001.CSV	2996.96	-0.0166683
PSB913-4_map2	0001.CSV	3000.82	-0.0167416
PSB913-4_map2	0001.CSV	3004.68	-0.0167845
PSB913-4_map2	0001.CSV	3008.53	-0.0166342
PSB913-4_map2	0001.CSV	3012.39	-0.0164531
PSB913-4_map2	0001.CSV	3016.25	-0.0164435
PSB913-4_map2	0001.CSV	3020.11	-0.0164957
PSB913-4_map2	0001.CSV	3023.96	-0.0166305
PSB913-4_map2	0001.CSV	3027.82	-0.0167304
PSB913-4_map2	0001.CSV	3031.68	-0.0166729
PSB913-4_map2	0001.CSV	3035.53	-0.0165994
PSB913-4_map2	0001.CSV	3039.39	-0.0166424
PSB913-4_map2	0001.CSV	3043.25	-0.0167074
PSB913-4_map2	0001.CSV	3047.11	-0.0166777
PSB913-4_map2	0001.CSV	3050.96	-0.0166138
PSB913-4_map2	0001.CSV	3054.82	-0.0166928
PSB913-4_map2	0001.CSV	3058.68	-0.0168131
PSB913-4_map2	0001.CSV	3062.53	-0.0168269
PSB913-4_map2	0001.CSV	3066.39	-0.0167376
PSB913-4_map2	0001.CSV	3070.25	-0.0167791
PSB913-4_map2	0001.CSV	3074.11	-0.0168383
PSB913-4_map2	0001.CSV	3077.96	-0.016795
PSB913-4_map2	0001.CSV	3081.82	-0.016753
PSB913-4_map2	0001.CSV	3085.68	-0.0168059
PSB913-4_map2	0001.CSV	3089.53	-0.0169033
PSB913-4_map2	0001.CSV	3093.39	-0.0170361
PSB913-4_map2	0001.CSV	3097.25	-0.0171205
PSB913-4_map2	0001.CSV	3101.11	-0.0170709
PSB913-4_map2	0001.CSV	3104.96	-0.0170706
PSB913-4_map2	0001.CSV	3108.82	-0.0170741
PSB913-4_map2	0001.CSV	3112.68	-0.0170719
PSB913-4_map2	0001.CSV	3116.53	-0.0170727
PSB913-4_map2	0001.CSV	3120.39	-0.017145
PSB913-4_map2	0001.CSV	3124.25	-0.0172193
PSB913-4_map2	0001.CSV	3128.11	-0.0172545
PSB913-4_map2	0001.CSV	3131.96	-0.0173478
PSB913-4_map2	0001.CSV	3135.82	-0.0173151
PSB913-4_map2	0001.CSV	3139.68	-0.0172925
PSB913-4_map2	0001.CSV	3143.53	-0.0175248
PSB913-4_map2	0001.CSV	3147.39	-0.0175382
PSB913-4_map2	0001.CSV	3151.25	-0.0172996
PSB913-4_map2	0001.CSV	3155.1	-0.017346
PSB913-4_map2	0001.CSV	3158.96	-0.0175892
PSB913-4_map2	0001.CSV	3162.82	-0.0177439
PSB913-4_map2	0001.CSV	3166.68	-0.0178019
PSB913-4_map2	0001.CSV	3170.53	-0.0178323
PSB913-4_map2	0001.CSV	3174.39	-0.0178282
PSB913-4_map2	0001.CSV	3178.25	-0.017801
PSB913-4_map2	0001.CSV	3182.1	-0.017777
PSB913-4_map2	0001.CSV	3185.96	-0.0178177
PSB913-4_map2	0001.CSV	3189.82	-0.0178751
PSB913-4_map2	0001.CSV	3193.68	-0.0179333
PSB913-4_map2	0001.CSV	3197.53	-0.0179211
PSB913-4_map2	0001.CSV	3201.39	-0.0178454
PSB913-4_map2	0001.CSV	3205.25	-0.0178991
PSB913-4_map2	0001.CSV	3209.1	-0.0180229
PSB913-4_map2	0001.CSV	3212.96	-0.01794
PSB913-4_map2	0001.CSV	3216.82	-0.0178326
PSB913-4_map2	0001.CSV	3220.68	-0.0179278
PSB913-4_map2	0001.CSV	3224.53	-0.0180015
PSB913-4_map2	0001.CSV	3228.39	-0.0178694
PSB913-4_map2	0001.CSV	3232.25	-0.0177014
PSB913-4_map2	0001.CSV	3236.1	-0.0177544
PSB913-4_map2	0001.CSV	3239.96	-0.0177896
PSB913-4_map2	0001.CSV	3243.82	-0.0176678
PSB913-4_map2	0001.CSV	3247.68	-0.0176369
PSB913-4_map2	0001.CSV	3251.53	-0.0177621
PSB913-4_map2	0001.CSV	3255.39	-0.0178426
PSB913-4_map2	0001.CSV	3259.25	-0.0179804
PSB913-4_map2	0001.CSV	3263.1	-0.0180236
PSB913-4_map2	0001.CSV	3266.96	-0.0177802
PSB913-4_map2	0001.CSV	3270.82	-0.017419
PSB913-4_map2	0001.CSV	3274.68	-0.0174383
PSB913-4_map2	0001.CSV	3278.53	-0.0176348
PSB913-4_map2	0001.CSV	3282.39	-0.01776
PSB913-4_map2	0001.CSV	3286.25	-0.0177611
PSB913-4_map2	0001.CSV	3290.1	-0.0175299
PSB913-4_map2	0001.CSV	3293.96	-0.0174245
PSB913-4_map2	0001.CSV	3297.82	-0.0176073
PSB913-4_map2	0001.CSV	3301.67	-0.0176756
PSB913-4_map2	0001.CSV	3305.53	-0.0176392
PSB913-4_map2	0001.CSV	3309.39	-0.0177089
PSB913-4_map2	0001.CSV	3313.25	-0.0178358
PSB913-4_map2	0001.CSV	3317.1	-0.0179648
PSB913-4_map2	0001.CSV	3320.96	-0.0179779
PSB913-4_map2	0001.CSV	3324.82	-0.0177701
PSB913-4_map2	0001.CSV	3328.67	-0.0178318
PSB913-4_map2	0001.CSV	3332.53	-0.0179355
PSB913-4_map2	0001.CSV	3336.39	-0.017662
PSB913-4_map2	0001.CSV	3340.24	-0.0175048
PSB913-4_map2	0001.CSV	3344.1	-0.0177012
PSB913-4_map2	0001.CSV	3347.96	-0.0177506
PSB913-4_map2	0001.CSV	3351.82	-0.0177391
PSB913-4_map2	0001.CSV	3355.67	-0.0178388
PSB913-4_map2	0001.CSV	3359.53	-0.0176804
PSB913-4_map2	0001.CSV	3363.39	-0.0174487
PSB913-4_map2	0001.CSV	3367.24	-0.0173101
PSB913-4_map2	0001.CSV	3371.1	-0.0174321
PSB913-4_map2	0001.CSV	3374.96	-0.0177052
PSB913-4_map2	0001.CSV	3378.82	-0.0178518
PSB913-4_map2	0001.CSV	3382.67	-0.0180123
PSB913-4_map2	0001.CSV	3386.53	-0.0179144
PSB913-4_map2	0001.CSV	3390.39	-0.0176034
PSB913-4_map2	0001.CSV	3394.24	-0.0176156
PSB913-4_map2	0001.CSV	3398.1	-0.0176906
PSB913-4_map2	0001.CSV	3401.96	-0.0176502
PSB913-4_map2	0001.CSV	3405.82	-0.0176066
PSB913-4_map2	0001.CSV	3409.67	-0.0177235
PSB913-4_map2	0001.CSV	3413.53	-0.0180604
PSB913-4_map2	0001.CSV	3417.39	-0.0181815
PSB913-4_map2	0001.CSV	3421.24	-0.0180505
PSB913-4_map2	0001.CSV	3425.1	-0.0179126
PSB913-4_map2	0001.CSV	3428.96	-0.0176487
PSB913-4_map2	0001.CSV	3432.82	-0.017491
PSB913-4_map2	0001.CSV	3436.67	-0.017748
PSB913-4_map2	0001.CSV	3440.53	-0.018184
PSB913-4_map2	0001.CSV	3444.39	-0.0182702
PSB913-4_map2	0001.CSV	3448.24	-0.018249
PSB913-4_map2	0001.CSV	3452.1	-0.0184001
PSB913-4_map2	0001.CSV	3455.96	-0.0183738
PSB913-4_map2	0001.CSV	3459.82	-0.0181706
PSB913-4_map2	0001.CSV	3463.67	-0.018027
PSB913-4_map2	0001.CSV	3467.53	-0.0178838
PSB913-4_map2	0001.CSV	3471.39	-0.0179753
PSB913-4_map2	0001.CSV	3475.24	-0.0181824
PSB913-4_map2	0001.CSV	3479.1	-0.0180772
PSB913-4_map2	0001.CSV	3482.96	-0.0178754
PSB913-4_map2	0001.CSV	3486.82	-0.017926
PSB913-4_map2	0001.CSV	3490.67	-0.0181319
PSB913-4_map2	0001.CSV	3494.53	-0.018135
PSB913-4_map2	0001.CSV	3498.39	-0.0180797
PSB913-4_map2	0001.CSV	3502.24	-0.0179945
PSB913-4_map2	0001.CSV	3506.1	-0.0181336
PSB913-4_map2	0001.CSV	3509.96	-0.0182882
PSB913-4_map2	0001.CSV	3513.81	-0.0182543
PSB913-4_map2	0001.CSV	3517.67	-0.0183935
PSB913-4_map2	0001.CSV	3521.53	-0.0183514
PSB913-4_map2	0001.CSV	3525.39	-0.0182557
PSB913-4_map2	0001.CSV	3529.24	-0.0181709
PSB913-4_map2	0001.CSV	3533.1	-0.0179416
PSB913-4_map2	0001.CSV	3536.96	-0.017833
PSB913-4_map2	0001.CSV	3540.81	-0.0178491
PSB913-4_map2	0001.CSV	3544.67	-0.017938
PSB913-4_map2	0001.CSV	3548.53	-0.0180405
PSB913-4_map2	0001.CSV	3552.39	-0.0181832
PSB913-4_map2	0001.CSV	3556.24	-0.0182852
PSB913-4_map2	0001.CSV	3560.1	-0.018403
PSB913-4_map2	0001.CSV	3563.96	-0.0184347
PSB913-4_map2	0001.CSV	3567.81	-0.0180618
PSB913-4_map2	0001.CSV	3571.67	-0.0182007
PSB913-4_map2	0001.CSV	3575.53	-0.0184396
PSB913-4_map2	0001.CSV	3579.39	-0.0182251
PSB913-4_map2	0001.CSV	3583.24	-0.0182914
PSB913-4_map2	0001.CSV	3587.1	-0.0183498
PSB913-4_map2	0001.CSV	3590.96	-0.0182583
PSB913-4_map2	0001.CSV	3594.81	-0.0182953
PSB913-4_map2	0001.CSV	3598.67	-0.0180345
PSB913-4_map2	0001.CSV	3602.53	-0.0181468
PSB913-4_map2	0001.CSV	3606.39	-0.018525
PSB913-4_map2	0001.CSV	3610.24	-0.0185429
PSB913-4_map2	0001.CSV	3614.1	-0.0185314
PSB913-4_map2	0001.CSV	3617.96	-0.0184029
PSB913-4_map2	0001.CSV	3621.81	-0.0182233
PSB913-4_map2	0001.CSV	3625.67	-0.0187525
PSB913-4_map2	0001.CSV	3629.53	-0.0187523
PSB913-4_map2	0001.CSV	3633.39	-0.0180792
PSB913-4_map2	0001.CSV	3637.24	-0.0181419
PSB913-4_map2	0001.CSV	3641.1	-0.0184553
PSB913-4_map2	0001.CSV	3644.96	-0.0190368
PSB913-4_map2	0001.CSV	3648.81	-0.0187934
PSB913-4_map2	0001.CSV	3652.67	-0.018072
PSB913-4_map2	0001.CSV	3656.53	-0.0178943
PSB913-4_map2	0001.CSV	3660.38	-0.017656
PSB913-4_map2	0001.CSV	3664.24	-0.0181449
PSB913-4_map2	0001.CSV	3668.1	-0.0188226
PSB913-4_map2	0001.CSV	3671.96	-0.0189204
PSB913-4_map2	0001.CSV	3675.81	-0.0184687
PSB913-4_map2	0001.CSV	3679.67	-0.0179409
PSB913-4_map2	0001.CSV	3683.53	-0.0182127
PSB913-4_map2	0001.CSV	3687.38	-0.0183699
PSB913-4_map2	0001.CSV	3691.24	-0.0178343
PSB913-4_map2	0001.CSV	3695.1	-0.0179666
PSB913-4_map2	0001.CSV	3698.95	-0.0182521
PSB913-4_map2	0001.CSV	3702.81	-0.0182988
PSB913-4_map2	0001.CSV	3706.67	-0.0186904
PSB913-4_map2	0001.CSV	3710.53	-0.0188124
PSB913-4_map2	0001.CSV	3714.38	-0.0180662
PSB913-4_map2	0001.CSV	3718.24	-0.0183243
PSB913-4_map2	0001.CSV	3722.1	-0.0187554
PSB913-4_map2	0001.CSV	3725.95	-0.0187843
PSB913-4_map2	0001.CSV	3729.81	-0.0189809
PSB913-4_map2	0001.CSV	3733.67	-0.0187295
PSB913-4_map2	0001.CSV	3737.53	-0.0178084
PSB913-4_map2	0001.CSV	3741.38	-0.0183761
PSB913-4_map2	0001.CSV	3745.24	-0.0190771
PSB913-4_map2	0001.CSV	3749.1	-0.0190334
PSB913-4_map2	0001.CSV	3752.95	-0.0182701
PSB913-4_map2	0001.CSV	3756.81	-0.0182203
PSB913-4_map2	0001.CSV	3760.67	-0.0182841
PSB913-4_map2	0001.CSV	3764.53	-0.0184553
PSB913-4_map2	0001.CSV	3768.38	-0.0182846
PSB913-4_map2	0001.CSV	3772.24	-0.0180669
PSB913-4_map2	0001.CSV	3776.1	-0.0182385
PSB913-4_map2	0001.CSV	3779.95	-0.0183414
PSB913-4_map2	0001.CSV	3783.81	-0.0183323
PSB913-4_map2	0001.CSV	3787.67	-0.0182578
PSB913-4_map2	0001.CSV	3791.53	-0.018424
PSB913-4_map2	0001.CSV	3795.38	-0.0188949
PSB913-4_map2	0001.CSV	3799.24	-0.0191126
PSB913-4_map2	0001.CSV	3803.1	-0.0185851
PSB913-4_map2	0001.CSV	3806.95	-0.0181712
PSB913-4_map2	0001.CSV	3810.81	-0.0184569
PSB913-4_map2	0001.CSV	3814.67	-0.0188864
PSB913-4_map2	0001.CSV	3818.53	-0.0187051
PSB913-4_map2	0001.CSV	3822.38	-0.0183694
PSB913-4_map2	0001.CSV	3826.24	-0.0185835
PSB913-4_map2	0001.CSV	3830.1	-0.0188743
PSB913-4_map2	0001.CSV	3833.95	-0.0192253
PSB913-4_map2	0001.CSV	3837.81	-0.019358
PSB913-4_map2	0001.CSV	3841.67	-0.0185874
PSB913-4_map2	0001.CSV	3845.53	-0.0185895
PSB913-4_map2	0001.CSV	3849.38	-0.0192953
PSB913-4_map2	0001.CSV	3853.24	-0.0191693
PSB913-4_map2	0001.CSV	3857.1	-0.0187344
PSB913-4_map2	0001.CSV	3860.95	-0.0191291
PSB913-4_map2	0001.CSV	3864.81	-0.0189532
PSB913-4_map2	0001.CSV	3868.67	-0.0187502
PSB913-4_map2	0001.CSV	3872.52	-0.018448
PSB913-4_map2	0001.CSV	3876.38	-0.0185227
PSB913-4_map2	0001.CSV	3880.24	-0.0188704
PSB913-4_map2	0001.CSV	3884.1	-0.0186892
PSB913-4_map2	0001.CSV	3887.95	-0.018614
PSB913-4_map2	0001.CSV	3891.81	-0.0186415
PSB913-4_map2	0001.CSV	3895.67	-0.0187356
PSB913-4_map2	0001.CSV	3899.52	-0.0188774
PSB913-4_map2	0001.CSV	3903.38	-0.0182748
PSB913-4_map2	0001.CSV	3907.24	-0.0181625
PSB913-4_map2	0001.CSV	3911.1	-0.0185836
PSB913-4_map2	0001.CSV	3914.95	-0.0188636
PSB913-4_map2	0001.CSV	3918.81	-0.0186469
PSB913-4_map2	0001.CSV	3922.67	-0.0184612
PSB913-4_map2	0001.CSV	3926.52	-0.01852
PSB913-4_map2	0001.CSV	3930.38	-0.0186958
PSB913-4_map2	0001.CSV	3934.24	-0.0185513
PSB913-4_map2	0001.CSV	3938.09	-0.0185743
PSB913-4_map2	0001.CSV	3941.95	-0.0186159
PSB913-4_map2	0001.CSV	3945.81	-0.0184844
PSB913-4_map2	0001.CSV	3949.67	-0.0184042
PSB913-4_map2	0001.CSV	3953.52	-0.0184335
PSB913-4_map2	0001.CSV	3957.38	-0.0184727
PSB913-4_map2	0001.CSV	3961.24	-0.0182431
PSB913-4_map2	0001.CSV	3965.09	-0.0181661
PSB913-4_map2	0001.CSV	3968.95	-0.0182451
PSB913-4_map2	0001.CSV	3972.81	-0.0181804
PSB913-4_map2	0001.CSV	3976.67	-0.0182321
PSB913-4_map2	0001.CSV	3980.52	-0.0183346
PSB913-4_map2	0001.CSV	3984.38	-0.0183271
PSB913-4_map2	0001.CSV	3988.24	-0.0182953
PSB913-4_map2	0001.CSV	3992.09	-0.0181944
PSB913-4_map2	0001.CSV	3995.95	-0.0180981
PSB913-4_map2	0001.CSV	3999.81	-0.0181102
PSB913-4_map2	0002.CSV	674.992	-0.00213092
PSB913-4_map2	0002.CSV	678.849	-0.00194551
PSB913-4_map2	0002.CSV	682.706	-0.00165372
PSB913-4_map2	0002.CSV	686.563	-0.00183347
PSB913-4_map2	0002.CSV	690.42	-0.00176794
PSB913-4_map2	0002.CSV	694.277	-0.00117807
PSB913-4_map2	0002.CSV	698.134	-0.00123956
PSB913-4_map2	0002.CSV	701.991	-0.00176933
PSB913-4_map2	0002.CSV	705.849	-0.00207127
PSB913-4_map2	0002.CSV	709.706	-0.00188877
PSB913-4_map2	0002.CSV	713.563	-0.00243076
PSB913-4_map2	0002.CSV	717.42	-0.0035485
PSB913-4_map2	0002.CSV	721.277	-0.00397214
PSB913-4_map2	0002.CSV	725.134	-0.00379784
PSB913-4_map2	0002.CSV	728.991	-0.00355813
PSB913-4_map2	0002.CSV	732.848	-0.00374561
PSB913-4_map2	0002.CSV	736.705	-0.00387035
PSB913-4_map2	0002.CSV	740.562	-0.00357749
PSB913-4_map2	0002.CSV	744.42	-0.00362543
PSB913-4_map2	0002.CSV	748.277	-0.0040121
PSB913-4_map2	0002.CSV	752.134	-0.00429703
PSB913-4_map2	0002.CSV	755.991	-0.00456761
PSB913-4_map2	0002.CSV	759.848	-0.00472798
PSB913-4_map2	0002.CSV	763.705	-0.00469894
PSB913-4_map2	0002.CSV	767.562	-0.0046932
PSB913-4_map2	0002.CSV	771.419	-0.00470615
PSB913-4_map2	0002.CSV	775.276	-0.00490709
PSB913-4_map2	0002.CSV	779.133	-0.00515306
PSB913-4_map2	0002.CSV	782.99	-0.0053212
PSB913-4_map2	0002.CSV	786.848	-0.00521023
PSB913-4_map2	0002.CSV	790.705	-0.00526843
PSB913-4_map2	0002.CSV	794.562	-0.00545864
PSB913-4_map2	0002.CSV	798.419	-0.00568458
PSB913-4_map2	0002.CSV	802.276	-0.00577588
PSB913-4_map2	0002.CSV	806.133	-0.0057443
PSB913-4_map2	0002.CSV	809.99	-0.00565718
PSB913-4_map2	0002.CSV	813.847	-0.00560023
PSB913-4_map2	0002.CSV	817.704	-0.00551459
PSB913-4_map2	0002.CSV	821.562	-0.00539169
PSB913-4_map2	0002.CSV	825.419	-0.00531154
PSB913-4_map2	0002.CSV	829.276	-0.00549159
PSB913-4_map2	0002.CSV	833.133	-0.00551741
PSB913-4_map2	0002.CSV	836.99	-0.00535062
PSB913-4_map2	0002.CSV	840.847	-0.00546381
PSB913-4_map2	0002.CSV	844.704	-0.00567817
PSB913-4_map2	0002.CSV	848.561	-0.00560076
PSB913-4_map2	0002.CSV	852.418	-0.00567062
PSB913-4_map2	0002.CSV	856.275	-0.00618077
PSB913-4_map2	0002.CSV	860.132	-0.00669906
PSB913-4_map2	0002.CSV	863.99	-0.00683278
PSB913-4_map2	0002.CSV	867.847	-0.00691904
PSB913-4_map2	0002.CSV	871.704	-0.00701393
PSB913-4_map2	0002.CSV	875.561	-0.00701569
PSB913-4_map2	0002.CSV	879.418	-0.00712072
PSB913-4_map2	0002.CSV	883.275	-0.0073099
PSB913-4_map2	0002.CSV	887.132	-0.00734186
PSB913-4_map2	0002.CSV	890.989	-0.00730058
PSB913-4_map2	0002.CSV	894.846	-0.00737798
PSB913-4_map2	0002.CSV	898.703	-0.0075042
PSB913-4_map2	0002.CSV	902.561	-0.00750283
PSB913-4_map2	0002.CSV	906.418	-0.00753891
PSB913-4_map2	0002.CSV	910.275	-0.00761634
PSB913-4_map2	0002.CSV	914.132	-0.00763425
PSB913-4_map2	0002.CSV	917.989	-0.00763002
PSB913-4_map2	0002.CSV	921.846	-0.00764235
PSB913-4_map2	0002.CSV	925.703	-0.00764799
PSB913-4_map2	0002.CSV	929.56	-0.00767885
PSB913-4_map2	0002.CSV	933.417	-0.00768227
PSB913-4_map2	0002.CSV	937.274	-0.00764346
PSB913-4_map2	0002.CSV	941.131	-0.00754803
PSB913-4_map2	0002.CSV	944.989	-0.00746137
PSB913-4_map2	0002.CSV	948.846	-0.00736925
PSB913-4_map2	0002.CSV	952.703	-0.00729497
PSB913-4_map2	0002.CSV	956.56	-0.00726754
PSB913-4_map2	0002.CSV	960.417	-0.00726711
PSB913-4_map2	0002.CSV	964.274	-0.00724059
PSB913-4_map2	0002.CSV	968.131	-0.00716687
PSB913-4_map2	0002.CSV	971.988	-0.00709067
PSB913-4_map2	0002.CSV	975.845	-0.00707355
PSB913-4_map2	0002.CSV	979.702	-0.00711681
PSB913-4_map2	0002.CSV	983.559	-0.00715873
PSB913-4_map2	0002.CSV	987.417	-0.00719578
PSB913-4_map2	0002.CSV	991.274	-0.0072329
PSB913-4_map2	0002.CSV	995.131	-0.00728086
PSB913-4_map2	0002.CSV	998.988	-0.007307
PSB913-4_map2	0002.CSV	1002.85	-0.00730093
PSB913-4_map2	0002.CSV	1006.7	-0.00728784
PSB913-4_map2	0002.CSV	1010.56	-0.00728184
PSB913-4_map2	0002.CSV	1014.42	-0.00731569
PSB913-4_map2	0002.CSV	1018.27	-0.00737714
PSB913-4_map2	0002.CSV	1022.13	-0.00741825
PSB913-4_map2	0002.CSV	1025.99	-0.0073975
PSB913-4_map2	0002.CSV	1029.85	-0.00743522
PSB913-4_map2	0002.CSV	1033.7	-0.00746489
PSB913-4_map2	0002.CSV	1037.56	-0.00750237
PSB913-4_map2	0002.CSV	1041.42	-0.00757763
PSB913-4_map2	0002.CSV	1045.27	-0.00761481
PSB913-4_map2	0002.CSV	1049.13	-0.00762956
PSB913-4_map2	0002.CSV	1052.99	-0.00768236
PSB913-4_map2	0002.CSV	1056.84	-0.00774245
PSB913-4_map2	0002.CSV	1060.7	-0.00780221
PSB913-4_map2	0002.CSV	1064.56	-0.00787448
PSB913-4_map2	0002.CSV	1068.42	-0.00787256
PSB913-4_map2	0002.CSV	1072.27	-0.00785564
PSB913-4_map2	0002.CSV	1076.13	-0.00793627
PSB913-4_map2	0002.CSV	1079.99	-0.00802384
PSB913-4_map2	0002.CSV	1083.84	-0.00814145
PSB913-4_map2	0002.CSV	1087.7	-0.00823285
PSB913-4_map2	0002.CSV	1091.56	-0.00821392
PSB913-4_map2	0002.CSV	1095.41	-0.00814597
PSB913-4_map2	0002.CSV	1099.27	-0.00812447
PSB913-4_map2	0002.CSV	1103.13	-0.00812548
PSB913-4_map2	0002.CSV	1106.99	-0.00817279
PSB913-4_map2	0002.CSV	1110.84	-0.00817699
PSB913-4_map2	0002.CSV	1114.7	-0.00815634
PSB913-4_map2	0002.CSV	1118.56	-0.00817608
PSB913-4_map2	0002.CSV	1122.41	-0.00825063
PSB913-4_map2	0002.CSV	1126.27	-0.00830762
PSB913-4_map2	0002.CSV	1130.13	-0.00833817
PSB913-4_map2	0002.CSV	1133.99	-0.00832992
PSB913-4_map2	0002.CSV	1137.84	-0.0083788
PSB913-4_map2	0002.CSV	1141.7	-0.00844503
PSB913-4_map2	0002.CSV	1145.56	-0.00845507
PSB913-4_map2	0002.CSV	1149.41	-0.00844191
PSB913-4_map2	0002.CSV	1153.27	-0.00844584
PSB913-4_map2	0002.CSV	1157.13	-0.00848568
PSB913-4_map2	0002.CSV	1160.99	-0.00852977
PSB913-4_map2	0002.CSV	1164.84	-0.00857327
PSB913-4_map2	0002.CSV	1168.7	-0.00860206
PSB913-4_map2	0002.CSV	1172.56	-0.00859728
PSB913-4_map2	0002.CSV	1176.41	-0.00852223
PSB913-4_map2	0002.CSV	1180.27	-0.00844757
PSB913-4_map2	0002.CSV	1184.13	-0.00847259
PSB913-4_map2	0002.CSV	1187.99	-0.00851372
PSB913-4_map2	0002.CSV	1191.84	-0.00854865
PSB913-4_map2	0002.CSV	1195.7	-0.00859432
PSB913-4_map2	0002.CSV	1199.56	-0.00857084
PSB913-4_map2	0002.CSV	1203.41	-0.00851337
PSB913-4_map2	0002.CSV	1207.27	-0.00852188
PSB913-4_map2	0002.CSV	1211.13	-0.00846817
PSB913-4_map2	0002.CSV	1214.98	-0.008388
PSB913-4_map2	0002.CSV	1218.84	-0.00835904
PSB913-4_map2	0002.CSV	1222.7	-0.00836118
PSB913-4_map2	0002.CSV	1226.56	-0.00839791
PSB913-4_map2	0002.CSV	1230.41	-0.00845478
PSB913-4_map2	0002.CSV	1234.27	-0.00845748
PSB913-4_map2	0002.CSV	1238.13	-0.00838341
PSB913-4_map2	0002.CSV	1241.98	-0.00836843
PSB913-4_map2	0002.CSV	1245.84	-0.0084425
PSB913-4_map2	0002.CSV	1249.7	-0.008503
PSB913-4_map2	0002.CSV	1253.56	-0.00855372
PSB913-4_map2	0002.CSV	1257.41	-0.00862249
PSB913-4_map2	0002.CSV	1261.27	-0.00872892
PSB913-4_map2	0002.CSV	1265.13	-0.00875688
PSB913-4_map2	0002.CSV	1268.98	-0.00870122
PSB913-4_map2	0002.CSV	1272.84	-0.00870518
PSB913-4_map2	0002.CSV	1276.7	-0.00881081
PSB913-4_map2	0002.CSV	1280.56	-0.00884033
PSB913-4_map2	0002.CSV	1284.41	-0.00877312
PSB913-4_map2	0002.CSV	1288.27	-0.00875701
PSB913-4_map2	0002.CSV	1292.13	-0.00880919
PSB913-4_map2	0002.CSV	1295.98	-0.00882452
PSB913-4_map2	0002.CSV	1299.84	-0.00884789
PSB913-4_map2	0002.CSV	1303.7	-0.00891434
PSB913-4_map2	0002.CSV	1307.56	-0.00896676
PSB913-4_map2	0002.CSV	1311.41	-0.00897777
PSB913-4_map2	0002.CSV	1315.27	-0.00898426
PSB913-4_map2	0002.CSV	1319.13	-0.00902135
PSB913-4_map2	0002.CSV	1322.98	-0.00903132
PSB913-4_map2	0002.CSV	1326.84	-0.00904618
PSB913-4_map2	0002.CSV	1330.7	-0.00905248
PSB913-4_map2	0002.CSV	1334.56	-0.00912324
PSB913-4_map2	0002.CSV	1338.41	-0.00912863
PSB913-4_map2	0002.CSV	1342.27	-0.00903898
PSB913-4_map2	0002.CSV	1346.13	-0.00911371
PSB913-4_map2	0002.CSV	1349.98	-0.0092027
PSB913-4_map2	0002.CSV	1353.84	-0.0092085
PSB913-4_map2	0002.CSV	1357.7	-0.00918576
PSB913-4_map2	0002.CSV	1361.56	-0.00917373
PSB913-4_map2	0002.CSV	1365.41	-0.00923299
PSB913-4_map2	0002.CSV	1369.27	-0.00935841
PSB913-4_map2	0002.CSV	1373.13	-0.00940008
PSB913-4_map2	0002.CSV	1376.98	-0.00941577
PSB913-4_map2	0002.CSV	1380.84	-0.00949017
PSB913-4_map2	0002.CSV	1384.7	-0.00951196
PSB913-4_map2	0002.CSV	1388.56	-0.00943801
PSB913-4_map2	0002.CSV	1392.41	-0.00945027
PSB913-4_map2	0002.CSV	1396.27	-0.00935731
PSB913-4_map2	0002.CSV	1400.13	-0.00934245
PSB913-4_map2	0002.CSV	1403.98	-0.00944261
PSB913-4_map2	0002.CSV	1407.84	-0.00943513
PSB913-4_map2	0002.CSV	1411.7	-0.00949718
PSB913-4_map2	0002.CSV	1415.55	-0.009582
PSB913-4_map2	0002.CSV	1419.41	-0.00951095
PSB913-4_map2	0002.CSV	1423.27	-0.00952155
PSB913-4_map2	0002.CSV	1427.12	-0.00962203
PSB913-4_map2	0002.CSV	1430.98	-0.00971574
PSB913-4_map2	0002.CSV	1434.84	-0.00980996
PSB913-4_map2	0002.CSV	1438.7	-0.0098943
PSB913-4_map2	0002.CSV	1442.55	-0.0102532
PSB913-4_map2	0002.CSV	1446.41	-0.0106224
PSB913-4_map2	0002.CSV	1450.27	-0.0109035
PSB913-4_map2	0002.CSV	1454.12	-0.0111918
PSB913-4_map2	0002.CSV	1457.98	-0.011201
PSB913-4_map2	0002.CSV	1461.84	-0.0113915
PSB913-4_map2	0002.CSV	1465.7	-0.011637
PSB913-4_map2	0002.CSV	1469.55	-0.0118436
PSB913-4_map2	0002.CSV	1473.41	-0.0116654
PSB913-4_map2	0002.CSV	1477.27	-0.0112843
PSB913-4_map2	0002.CSV	1481.12	-0.0112901
PSB913-4_map2	0002.CSV	1484.98	-0.0113323
PSB913-4_map2	0002.CSV	1488.84	-0.0111064
PSB913-4_map2	0002.CSV	1492.7	-0.0108571
PSB913-4_map2	0002.CSV	1496.55	-0.0107446
PSB913-4_map2	0002.CSV	1500.41	-0.0105508
PSB913-4_map2	0002.CSV	1504.27	-0.0107758
PSB913-4_map2	0002.CSV	1508.12	-0.0103412
PSB913-4_map2	0002.CSV	1511.98	-0.0101913
PSB913-4_map2	0002.CSV	1515.84	-0.0103659
PSB913-4_map2	0002.CSV	1519.7	-0.0105062
PSB913-4_map2	0002.CSV	1523.55	-0.0103218
PSB913-4_map2	0002.CSV	1527.41	-0.0101316
PSB913-4_map2	0002.CSV	1531.27	-0.0101507
PSB913-4_map2	0002.CSV	1535.12	-0.0102209
PSB913-4_map2	0002.CSV	1538.98	-0.0102665
PSB913-4_map2	0002.CSV	1542.84	-0.00964815
PSB913-4_map2	0002.CSV	1546.7	-0.00964941
PSB913-4_map2	0002.CSV	1550.55	-0.00985686
PSB913-4_map2	0002.CSV	1554.41	-0.00987827
PSB913-4_map2	0002.CSV	1558.27	-0.00940899
PSB913-4_map2	0002.CSV	1562.12	-0.00926504
PSB913-4_map2	0002.CSV	1565.98	-0.00953715
PSB913-4_map2	0002.CSV	1569.84	-0.00946369
PSB913-4_map2	0002.CSV	1573.69	-0.00946369
PSB913-4_map2	0002.CSV	1577.55	-0.00934868
PSB913-4_map2	0002.CSV	1581.41	-0.00934939
PSB913-4_map2	0002.CSV	1585.27	-0.00942154
PSB913-4_map2	0002.CSV	1589.12	-0.00941207
PSB913-4_map2	0002.CSV	1592.98	-0.00941353
PSB913-4_map2	0002.CSV	1596.84	-0.00952139
PSB913-4_map2	0002.CSV	1600.69	-0.00958165
PSB913-4_map2	0002.CSV	1604.55	-0.00952995
PSB913-4_map2	0002.CSV	1608.41	-0.00950142
PSB913-4_map2	0002.CSV	1612.27	-0.00960395
PSB913-4_map2	0002.CSV	1616.12	-0.00963584
PSB913-4_map2	0002.CSV	1619.98	-0.00959795
PSB913-4_map2	0002.CSV	1623.84	-0.00963153
PSB913-4_map2	0002.CSV	1627.69	-0.00967352
PSB913-4_map2	0002.CSV	1631.55	-0.00989213
PSB913-4_map2	0002.CSV	1635.41	-0.0099764
PSB913-4_map2	0002.CSV	1639.27	-0.00993773
PSB913-4_map2	0002.CSV	1643.12	-0.0102223
PSB913-4_map2	0002.CSV	1646.98	-0.0102804
PSB913-4_map2	0002.CSV	1650.84	-0.0101521
PSB913-4_map2	0002.CSV	1654.69	-0.00990285
PSB913-4_map2	0002.CSV	1658.55	-0.0100959
PSB913-4_map2	0002.CSV	1662.41	-0.0103445
PSB913-4_map2	0002.CSV	1666.27	-0.0104841
PSB913-4_map2	0002.CSV	1670.12	-0.0104856
PSB913-4_map2	0002.CSV	1673.98	-0.0104577
PSB913-4_map2	0002.CSV	1677.84	-0.0107041
PSB913-4_map2	0002.CSV	1681.69	-0.0108102
PSB913-4_map2	0002.CSV	1685.55	-0.0104091
PSB913-4_map2	0002.CSV	1689.41	-0.0104104
PSB913-4_map2	0002.CSV	1693.27	-0.0107379
PSB913-4_map2	0002.CSV	1697.12	-0.0107808
PSB913-4_map2	0002.CSV	1700.98	-0.0105554
PSB913-4_map2	0002.CSV	1704.84	-0.0106944
PSB913-4_map2	0002.CSV	1708.69	-0.0107637
PSB913-4_map2	0002.CSV	1712.55	-0.0109769
PSB913-4_map2	0002.CSV	1716.41	-0.0109203
PSB913-4_map2	0002.CSV	1720.27	-0.0106597
PSB913-4_map2	0002.CSV	1724.12	-0.010824
PSB913-4_map2	0002.CSV	1727.98	-0.011001
PSB913-4_map2	0002.CSV	1731.84	-0.0110133
PSB913-4_map2	0002.CSV	1735.69	-0.0108167
PSB913-4_map2	0002.CSV	1739.55	-0.0109105
PSB913-4_map2	0002.CSV	1743.41	-0.0110007
PSB913-4_map2	0002.CSV	1747.27	-0.0109346
PSB913-4_map2	0002.CSV	1751.12	-0.0107106
PSB913-4_map2	0002.CSV	1754.98	-0.0107911
PSB913-4_map2	0002.CSV	1758.84	-0.0109446
PSB913-4_map2	0002.CSV	1762.69	-0.0109707
PSB913-4_map2	0002.CSV	1766.55	-0.0110128
PSB913-4_map2	0002.CSV	1770.41	-0.0109827
PSB913-4_map2	0002.CSV	1774.26	-0.0108942
PSB913-4_map2	0002.CSV	1778.12	-0.0109584
PSB913-4_map2	0002.CSV	1781.98	-0.0109095
PSB913-4_map2	0002.CSV	1785.84	-0.0109286
PSB913-4_map2	0002.CSV	1789.69	-0.0110325
PSB913-4_map2	0002.CSV	1793.55	-0.0109425
PSB913-4_map2	0002.CSV	1797.41	-0.010935
PSB913-4_map2	0002.CSV	1801.26	-0.0108744
PSB913-4_map2	0002.CSV	1805.12	-0.0108553
PSB913-4_map2	0002.CSV	1808.98	-0.0109269
PSB913-4_map2	0002.CSV	1812.84	-0.0109207
PSB913-4_map2	0002.CSV	1816.69	-0.0109988
PSB913-4_map2	0002.CSV	1820.55	-0.0110944
PSB913-4_map2	0002.CSV	1824.41	-0.0111476
PSB913-4_map2	0002.CSV	1828.26	-0.0110256
PSB913-4_map2	0002.CSV	1832.12	-0.0109746
PSB913-4_map2	0002.CSV	1835.98	-0.011037
PSB913-4_map2	0002.CSV	1839.84	-0.0110979
PSB913-4_map2	0002.CSV	1843.69	-0.0110619
PSB913-4_map2	0002.CSV	1847.55	-0.0109048
PSB913-4_map2	0002.CSV	1851.41	-0.0109346
PSB913-4_map2	0002.CSV	1855.26	-0.0110374
PSB913-4_map2	0002.CSV	1859.12	-0.0111232
PSB913-4_map2	0002.CSV	1862.98	-0.011217
PSB913-4_map2	0002.CSV	1866.84	-0.0112267
PSB913-4_map2	0002.CSV	1870.69	-0.0110525
PSB913-4_map2	0002.CSV	1874.55	-0.0111386
PSB913-4_map2	0002.CSV	1878.41	-0.0112398
PSB913-4_map2	0002.CSV	1882.26	-0.0112812
PSB913-4_map2	0002.CSV	1886.12	-0.0113591
PSB913-4_map2	0002.CSV	1889.98	-0.0113771
PSB913-4_map2	0002.CSV	1893.83	-0.0113909
PSB913-4_map2	0002.CSV	1897.69	-0.0114813
PSB913-4_map2	0002.CSV	1901.55	-0.0115541
PSB913-4_map2	0002.CSV	1905.41	-0.0116247
PSB913-4_map2	0002.CSV	1909.26	-0.0116535
PSB913-4_map2	0002.CSV	1913.12	-0.0116689
PSB913-4_map2	0002.CSV	1916.98	-0.0117281
PSB913-4_map2	0002.CSV	1920.83	-0.0117568
PSB913-4_map2	0002.CSV	1924.69	-0.0118025
PSB913-4_map2	0002.CSV	1928.55	-0.0118745
PSB913-4_map2	0002.CSV	1932.4	-0.0119345
PSB913-4_map2	0002.CSV	1936.26	-0.0120351
PSB913-4_map2	0002.CSV	1940.12	-0.0121485
PSB913-4_map2	0002.CSV	1943.98	-0.0121439
PSB913-4_map2	0002.CSV	1947.83	-0.0121404
PSB913-4_map2	0002.CSV	1951.69	-0.0122392
PSB913-4_map2	0002.CSV	1955.55	-0.012314
PSB913-4_map2	0002.CSV	1959.4	-0.012401
PSB913-4_map2	0002.CSV	1963.26	-0.0125056
PSB913-4_map2	0002.CSV	1967.12	-0.0125204
PSB913-4_map2	0002.CSV	1970.98	-0.0125171
PSB913-4_map2	0002.CSV	1974.83	-0.0125822
PSB913-4_map2	0002.CSV	1978.69	-0.0126781
PSB913-4_map2	0002.CSV	1982.55	-0.0127677
PSB913-4_map2	0002.CSV	1986.4	-0.0128238
PSB913-4_map2	0002.CSV	1990.26	-0.0128475
PSB913-4_map2	0002.CSV	1994.12	-0.0128673
PSB913-4_map2	0002.CSV	1997.98	-0.0129451
PSB913-4_map2	0002.CSV	2001.83	-0.0129945
PSB913-4_map2	0002.CSV	2005.69	-0.013024
PSB913-4_map2	0002.CSV	2009.55	-0.0130553
PSB913-4_map2	0002.CSV	2013.4	-0.0130875
PSB913-4_map2	0002.CSV	2017.26	-0.0130821
PSB913-4_map2	0002.CSV	2021.12	-0.0131216
PSB913-4_map2	0002.CSV	2024.97	-0.0132247
PSB913-4_map2	0002.CSV	2028.83	-0.0132857
PSB913-4_map2	0002.CSV	2032.69	-0.0133042
PSB913-4_map2	0002.CSV	2036.55	-0.0133268
PSB913-4_map2	0002.CSV	2040.4	-0.0133683
PSB913-4_map2	0002.CSV	2044.26	-0.0134009
PSB913-4_map2	0002.CSV	2048.12	-0.0134406
PSB913-4_map2	0002.CSV	2051.97	-0.0134533
PSB913-4_map2	0002.CSV	2055.83	-0.0134271
PSB913-4_map2	0002.CSV	2059.69	-0.0134294
PSB913-4_map2	0002.CSV	2063.55	-0.0134378
PSB913-4_map2	0002.CSV	2067.4	-0.0134704
PSB913-4_map2	0002.CSV	2071.26	-0.0135096
PSB913-4_map2	0002.CSV	2075.12	-0.0134694
PSB913-4_map2	0002.CSV	2078.97	-0.0134375
PSB913-4_map2	0002.CSV	2082.83	-0.0134982
PSB913-4_map2	0002.CSV	2086.69	-0.0135462
PSB913-4_map2	0002.CSV	2090.55	-0.0135498
PSB913-4_map2	0002.CSV	2094.4	-0.0135582
PSB913-4_map2	0002.CSV	2098.26	-0.0135461
PSB913-4_map2	0002.CSV	2102.12	-0.0135247
PSB913-4_map2	0002.CSV	2105.97	-0.0135212
PSB913-4_map2	0002.CSV	2109.83	-0.0135246
PSB913-4_map2	0002.CSV	2113.69	-0.0135236
PSB913-4_map2	0002.CSV	2117.55	-0.0135673
PSB913-4_map2	0002.CSV	2121.4	-0.0135821
PSB913-4_map2	0002.CSV	2125.26	-0.0135616
PSB913-4_map2	0002.CSV	2129.12	-0.01353
PSB913-4_map2	0002.CSV	2132.97	-0.0135474
PSB913-4_map2	0002.CSV	2136.83	-0.0135642
PSB913-4_map2	0002.CSV	2140.69	-0.0135256
PSB913-4_map2	0002.CSV	2144.55	-0.0135205
PSB913-4_map2	0002.CSV	2148.4	-0.0135505
PSB913-4_map2	0002.CSV	2152.26	-0.0135557
PSB913-4_map2	0002.CSV	2156.12	-0.0135614
PSB913-4_map2	0002.CSV	2159.97	-0.0135822
PSB913-4_map2	0002.CSV	2163.83	-0.0136221
PSB913-4_map2	0002.CSV	2167.69	-0.0136182
PSB913-4_map2	0002.CSV	2171.55	-0.0135914
PSB913-4_map2	0002.CSV	2175.4	-0.0135282
PSB913-4_map2	0002.CSV	2179.26	-0.0135027
PSB913-4_map2	0002.CSV	2183.12	-0.0135437
PSB913-4_map2	0002.CSV	2186.97	-0.0135977
PSB913-4_map2	0002.CSV	2190.83	-0.013642
PSB913-4_map2	0002.CSV	2194.69	-0.0136556
PSB913-4_map2	0002.CSV	2198.55	-0.0137095
PSB913-4_map2	0002.CSV	2202.4	-0.0137623
PSB913-4_map2	0002.CSV	2206.26	-0.0137752
PSB913-4_map2	0002.CSV	2210.12	-0.0137915
PSB913-4_map2	0002.CSV	2213.97	-0.0137953
PSB913-4_map2	0002.CSV	2217.83	-0.0138162
PSB913-4_map2	0002.CSV	2221.69	-0.0138659
PSB913-4_map2	0002.CSV	2225.54	-0.0138792
PSB913-4_map2	0002.CSV	2229.4	-0.0139025
PSB913-4_map2	0002.CSV	2233.26	-0.0139501
PSB913-4_map2	0002.CSV	2237.12	-0.0140034
PSB913-4_map2	0002.CSV	2240.97	-0.0140979
PSB913-4_map2	0002.CSV	2244.83	-0.0141077
PSB913-4_map2	0002.CSV	2248.69	-0.0141002
PSB913-4_map2	0002.CSV	2252.54	-0.014156
PSB913-4_map2	0002.CSV	2256.4	-0.0141899
PSB913-4_map2	0002.CSV	2260.26	-0.0142573
PSB913-4_map2	0002.CSV	2264.11	-0.0143275
PSB913-4_map2	0002.CSV	2267.97	-0.0143963
PSB913-4_map2	0002.CSV	2271.83	-0.0144508
PSB913-4_map2	0002.CSV	2275.69	-0.0144814
PSB913-4_map2	0002.CSV	2279.54	-0.0145038
PSB913-4_map2	0002.CSV	2283.4	-0.0146009
PSB913-4_map2	0002.CSV	2287.26	-0.0146989
PSB913-4_map2	0002.CSV	2291.11	-0.0147247
PSB913-4_map2	0002.CSV	2294.97	-0.0147567
PSB913-4_map2	0002.CSV	2298.83	-0.014808
PSB913-4_map2	0002.CSV	2302.69	-0.0149121
PSB913-4_map2	0002.CSV	2306.54	-0.015095
PSB913-4_map2	0002.CSV	2310.4	-0.0153181
PSB913-4_map2	0002.CSV	2314.26	-0.0154371
PSB913-4_map2	0002.CSV	2318.11	-0.0155566
PSB913-4_map2	0002.CSV	2321.97	-0.015865
PSB913-4_map2	0002.CSV	2325.83	-0.0162434
PSB913-4_map2	0002.CSV	2329.69	-0.0165313
PSB913-4_map2	0002.CSV	2333.54	-0.0164247
PSB913-4_map2	0002.CSV	2337.4	-0.0164448
PSB913-4_map2	0002.CSV	2341.26	-0.0166434
PSB913-4_map2	0002.CSV	2345.11	-0.0159225
PSB913-4_map2	0002.CSV	2348.97	-0.0159983
PSB913-4_map2	0002.CSV	2352.83	-0.0171361
PSB913-4_map2	0002.CSV	2356.69	-0.0192953
PSB913-4_map2	0002.CSV	2360.54	-0.0205368
PSB913-4_map2	0002.CSV	2364.4	-0.0193957
PSB913-4_map2	0002.CSV	2368.26	-0.0175761
PSB913-4_map2	0002.CSV	2372.11	-0.0162071
PSB913-4_map2	0002.CSV	2375.97	-0.0156271
PSB913-4_map2	0002.CSV	2379.83	-0.015455
PSB913-4_map2	0002.CSV	2383.69	-0.0155001
PSB913-4_map2	0002.CSV	2387.54	-0.0156523
PSB913-4_map2	0002.CSV	2391.4	-0.0157528
PSB913-4_map2	0002.CSV	2395.26	-0.0157306
PSB913-4_map2	0002.CSV	2399.11	-0.0156873
PSB913-4_map2	0002.CSV	2402.97	-0.015678
PSB913-4_map2	0002.CSV	2406.83	-0.0157296
PSB913-4_map2	0002.CSV	2410.68	-0.0157546
PSB913-4_map2	0002.CSV	2414.54	-0.0157945
PSB913-4_map2	0002.CSV	2418.4	-0.0158624
PSB913-4_map2	0002.CSV	2422.26	-0.0158292
PSB913-4_map2	0002.CSV	2426.11	-0.0158296
PSB913-4_map2	0002.CSV	2429.97	-0.0158918
PSB913-4_map2	0002.CSV	2433.83	-0.0158894
PSB913-4_map2	0002.CSV	2437.68	-0.0158466
PSB913-4_map2	0002.CSV	2441.54	-0.0158398
PSB913-4_map2	0002.CSV	2445.4	-0.0158778
PSB913-4_map2	0002.CSV	2449.26	-0.0158781
PSB913-4_map2	0002.CSV	2453.11	-0.0159075
PSB913-4_map2	0002.CSV	2456.97	-0.015919
PSB913-4_map2	0002.CSV	2460.83	-0.0159253
PSB913-4_map2	0002.CSV	2464.68	-0.0159309
PSB913-4_map2	0002.CSV	2468.54	-0.0159253
PSB913-4_map2	0002.CSV	2472.4	-0.0159222
PSB913-4_map2	0002.CSV	2476.26	-0.015938
PSB913-4_map2	0002.CSV	2480.11	-0.01596
PSB913-4_map2	0002.CSV	2483.97	-0.0159542
PSB913-4_map2	0002.CSV	2487.83	-0.0159642
PSB913-4_map2	0002.CSV	2491.68	-0.0159968
PSB913-4_map2	0002.CSV	2495.54	-0.0160499
PSB913-4_map2	0002.CSV	2499.4	-0.0160959
PSB913-4_map2	0002.CSV	2503.26	-0.0160805
PSB913-4_map2	0002.CSV	2507.11	-0.0160572
PSB913-4_map2	0002.CSV	2510.97	-0.0160536
PSB913-4_map2	0002.CSV	2514.83	-0.0160713
PSB913-4_map2	0002.CSV	2518.68	-0.0161122
PSB913-4_map2	0002.CSV	2522.54	-0.016168
PSB913-4_map2	0002.CSV	2526.4	-0.0162237
PSB913-4_map2	0002.CSV	2530.26	-0.0162707
PSB913-4_map2	0002.CSV	2534.11	-0.0162797
PSB913-4_map2	0002.CSV	2537.97	-0.0163042
PSB913-4_map2	0002.CSV	2541.83	-0.0163487
PSB913-4_map2	0002.CSV	2545.68	-0.0163754
PSB913-4_map2	0002.CSV	2549.54	-0.0163749
PSB913-4_map2	0002.CSV	2553.4	-0.0164177
PSB913-4_map2	0002.CSV	2557.26	-0.0164922
PSB913-4_map2	0002.CSV	2561.11	-0.0165335
PSB913-4_map2	0002.CSV	2564.97	-0.016566
PSB913-4_map2	0002.CSV	2568.83	-0.0165749
PSB913-4_map2	0002.CSV	2572.68	-0.0165698
PSB913-4_map2	0002.CSV	2576.54	-0.0165759
PSB913-4_map2	0002.CSV	2580.4	-0.0166256
PSB913-4_map2	0002.CSV	2584.25	-0.0166783
PSB913-4_map2	0002.CSV	2588.11	-0.0166727
PSB913-4_map2	0002.CSV	2591.97	-0.0166744
PSB913-4_map2	0002.CSV	2595.83	-0.0167568
PSB913-4_map2	0002.CSV	2599.68	-0.0167926
PSB913-4_map2	0002.CSV	2603.54	-0.0167656
PSB913-4_map2	0002.CSV	2607.4	-0.0167398
PSB913-4_map2	0002.CSV	2611.25	-0.0167542
PSB913-4_map2	0002.CSV	2615.11	-0.0167622
PSB913-4_map2	0002.CSV	2618.97	-0.0167775
PSB913-4_map2	0002.CSV	2622.82	-0.016752
PSB913-4_map2	0002.CSV	2626.68	-0.0167148
PSB913-4_map2	0002.CSV	2630.54	-0.0167366
PSB913-4_map2	0002.CSV	2634.4	-0.0167361
PSB913-4_map2	0002.CSV	2638.25	-0.0167418
PSB913-4_map2	0002.CSV	2642.11	-0.0167916
PSB913-4_map2	0002.CSV	2645.97	-0.0168511
PSB913-4_map2	0002.CSV	2649.82	-0.0169087
PSB913-4_map2	0002.CSV	2653.68	-0.0169005
PSB913-4_map2	0002.CSV	2657.54	-0.0168758
PSB913-4_map2	0002.CSV	2661.4	-0.016906
PSB913-4_map2	0002.CSV	2665.25	-0.0169186
PSB913-4_map2	0002.CSV	2669.11	-0.0169078
PSB913-4_map2	0002.CSV	2672.97	-0.0168353
PSB913-4_map2	0002.CSV	2676.82	-0.0167126
PSB913-4_map2	0002.CSV	2680.68	-0.0167043
PSB913-4_map2	0002.CSV	2684.54	-0.0168303
PSB913-4_map2	0002.CSV	2688.4	-0.0169141
PSB913-4_map2	0002.CSV	2692.25	-0.0168962
PSB913-4_map2	0002.CSV	2696.11	-0.0169209
PSB913-4_map2	0002.CSV	2699.97	-0.0169562
PSB913-4_map2	0002.CSV	2703.82	-0.016921
PSB913-4_map2	0002.CSV	2707.68	-0.0168752
PSB913-4_map2	0002.CSV	2711.54	-0.0168806
PSB913-4_map2	0002.CSV	2715.4	-0.0168938
PSB913-4_map2	0002.CSV	2719.25	-0.0168549
PSB913-4_map2	0002.CSV	2723.11	-0.0167711
PSB913-4_map2	0002.CSV	2726.97	-0.0168124
PSB913-4_map2	0002.CSV	2730.82	-0.0168995
PSB913-4_map2	0002.CSV	2734.68	-0.0168389
PSB913-4_map2	0002.CSV	2738.54	-0.0168469
PSB913-4_map2	0002.CSV	2742.4	-0.0168765
PSB913-4_map2	0002.CSV	2746.25	-0.0167706
PSB913-4_map2	0002.CSV	2750.11	-0.016735
PSB913-4_map2	0002.CSV	2753.97	-0.0167884
PSB913-4_map2	0002.CSV	2757.82	-0.0167246
PSB913-4_map2	0002.CSV	2761.68	-0.0167528
PSB913-4_map2	0002.CSV	2765.54	-0.0168495
PSB913-4_map2	0002.CSV	2769.39	-0.0168255
PSB913-4_map2	0002.CSV	2773.25	-0.0167148
PSB913-4_map2	0002.CSV	2777.11	-0.0167356
PSB913-4_map2	0002.CSV	2780.97	-0.0168806
PSB913-4_map2	0002.CSV	2784.82	-0.0168795
PSB913-4_map2	0002.CSV	2788.68	-0.0167489
PSB913-4_map2	0002.CSV	2792.54	-0.0166773
PSB913-4_map2	0002.CSV	2796.39	-0.016687
PSB913-4_map2	0002.CSV	2800.25	-0.0167904
PSB913-4_map2	0002.CSV	2804.11	-0.0169141
PSB913-4_map2	0002.CSV	2807.97	-0.0169091
PSB913-4_map2	0002.CSV	2811.82	-0.0169062
PSB913-4_map2	0002.CSV	2815.68	-0.0169757
PSB913-4_map2	0002.CSV	2819.54	-0.0169723
PSB913-4_map2	0002.CSV	2823.39	-0.0169082
PSB913-4_map2	0002.CSV	2827.25	-0.0169255
PSB913-4_map2	0002.CSV	2831.11	-0.0169322
PSB913-4_map2	0002.CSV	2834.97	-0.0168672
PSB913-4_map2	0002.CSV	2838.82	-0.0170006
PSB913-4_map2	0002.CSV	2842.68	-0.0174585
PSB913-4_map2	0002.CSV	2846.54	-0.0178679
PSB913-4_map2	0002.CSV	2850.39	-0.018243
PSB913-4_map2	0002.CSV	2854.25	-0.0185611
PSB913-4_map2	0002.CSV	2858.11	-0.0184372
PSB913-4_map2	0002.CSV	2861.97	-0.0181962
PSB913-4_map2	0002.CSV	2865.82	-0.0180859
PSB913-4_map2	0002.CSV	2869.68	-0.0179323
PSB913-4_map2	0002.CSV	2873.54	-0.0178284
PSB913-4_map2	0002.CSV	2877.39	-0.0179588
PSB913-4_map2	0002.CSV	2881.25	-0.0180513
PSB913-4_map2	0002.CSV	2885.11	-0.0180126
PSB913-4_map2	0002.CSV	2888.97	-0.0180467
PSB913-4_map2	0002.CSV	2892.82	-0.0181357
PSB913-4_map2	0002.CSV	2896.68	-0.0182628
PSB913-4_map2	0002.CSV	2900.54	-0.0184841
PSB913-4_map2	0002.CSV	2904.39	-0.0186842
PSB913-4_map2	0002.CSV	2908.25	-0.0188326
PSB913-4_map2	0002.CSV	2912.11	-0.018959
PSB913-4_map2	0002.CSV	2915.97	-0.0193146
PSB913-4_map2	0002.CSV	2919.82	-0.0199091
PSB913-4_map2	0002.CSV	2923.68	-0.0203585
PSB913-4_map2	0002.CSV	2927.54	-0.0203723
PSB913-4_map2	0002.CSV	2931.39	-0.0201509
PSB913-4_map2	0002.CSV	2935.25	-0.0199326
PSB913-4_map2	0002.CSV	2939.11	-0.0195515
PSB913-4_map2	0002.CSV	2942.96	-0.0190506
PSB913-4_map2	0002.CSV	2946.82	-0.0188736
PSB913-4_map2	0002.CSV	2950.68	-0.0190267
PSB913-4_map2	0002.CSV	2954.54	-0.0192765
PSB913-4_map2	0002.CSV	2958.39	-0.0193936
PSB913-4_map2	0002.CSV	2962.25	-0.0191986
PSB913-4_map2	0002.CSV	2966.11	-0.0189477
PSB913-4_map2	0002.CSV	2969.96	-0.0186359
PSB913-4_map2	0002.CSV	2973.82	-0.018262
PSB913-4_map2	0002.CSV	2977.68	-0.0180406
PSB913-4_map2	0002.CSV	2981.53	-0.0179386
PSB913-4_map2	0002.CSV	2985.39	-0.0179441
PSB913-4_map2	0002.CSV	2989.25	-0.0177977
PSB913-4_map2	0002.CSV	2993.11	-0.0175838
PSB913-4_map2	0002.CSV	2996.96	-0.017629
PSB913-4_map2	0002.CSV	3000.82	-0.0177814
PSB913-4_map2	0002.CSV	3004.68	-0.0177764
PSB913-4_map2	0002.CSV	3008.53	-0.0176229
PSB913-4_map2	0002.CSV	3012.39	-0.0174915
PSB913-4_map2	0002.CSV	3016.25	-0.017471
PSB913-4_map2	0002.CSV	3020.11	-0.0175515
PSB913-4_map2	0002.CSV	3023.96	-0.0177316
PSB913-4_map2	0002.CSV	3027.82	-0.0178309
PSB913-4_map2	0002.CSV	3031.68	-0.0177051
PSB913-4_map2	0002.CSV	3035.53	-0.0176217
PSB913-4_map2	0002.CSV	3039.39	-0.0177096
PSB913-4_map2	0002.CSV	3043.25	-0.0177484
PSB913-4_map2	0002.CSV	3047.11	-0.0177255
PSB913-4_map2	0002.CSV	3050.96	-0.0176747
PSB913-4_map2	0002.CSV	3054.82	-0.0176956
PSB913-4_map2	0002.CSV	3058.68	-0.0177615
PSB913-4_map2	0002.CSV	3062.53	-0.0178379
PSB913-4_map2	0002.CSV	3066.39	-0.0177926
PSB913-4_map2	0002.CSV	3070.25	-0.0178444
PSB913-4_map2	0002.CSV	3074.11	-0.0178968
PSB913-4_map2	0002.CSV	3077.96	-0.0177693
PSB913-4_map2	0002.CSV	3081.82	-0.017701
PSB913-4_map2	0002.CSV	3085.68	-0.0178032
PSB913-4_map2	0002.CSV	3089.53	-0.0179179
PSB913-4_map2	0002.CSV	3093.39	-0.0181476
PSB913-4_map2	0002.CSV	3097.25	-0.0182184
PSB913-4_map2	0002.CSV	3101.11	-0.0180979
PSB913-4_map2	0002.CSV	3104.96	-0.0180729
PSB913-4_map2	0002.CSV	3108.82	-0.018039
PSB913-4_map2	0002.CSV	3112.68	-0.01809
PSB913-4_map2	0002.CSV	3116.53	-0.0181348
PSB913-4_map2	0002.CSV	3120.39	-0.0181862
PSB913-4_map2	0002.CSV	3124.25	-0.018242
PSB913-4_map2	0002.CSV	3128.11	-0.0182956
PSB913-4_map2	0002.CSV	3131.96	-0.0184248
PSB913-4_map2	0002.CSV	3135.82	-0.0183566
PSB913-4_map2	0002.CSV	3139.68	-0.0183221
PSB913-4_map2	0002.CSV	3143.53	-0.018564
PSB913-4_map2	0002.CSV	3147.39	-0.0185546
PSB913-4_map2	0002.CSV	3151.25	-0.0183634
PSB913-4_map2	0002.CSV	3155.1	-0.0184324
PSB913-4_map2	0002.CSV	3158.96	-0.018609
PSB913-4_map2	0002.CSV	3162.82	-0.0186798
PSB913-4_map2	0002.CSV	3166.68	-0.0187654
PSB913-4_map2	0002.CSV	3170.53	-0.0188709
PSB913-4_map2	0002.CSV	3174.39	-0.0189547
PSB913-4_map2	0002.CSV	3178.25	-0.0189385
PSB913-4_map2	0002.CSV	3182.1	-0.0187658
PSB913-4_map2	0002.CSV	3185.96	-0.0187414
PSB913-4_map2	0002.CSV	3189.82	-0.0188316
PSB913-4_map2	0002.CSV	3193.68	-0.0188093
PSB913-4_map2	0002.CSV	3197.53	-0.018816
PSB913-4_map2	0002.CSV	3201.39	-0.0189508
PSB913-4_map2	0002.CSV	3205.25	-0.019003
PSB913-4_map2	0002.CSV	3209.1	-0.0190457
PSB913-4_map2	0002.CSV	3212.96	-0.0189868
PSB913-4_map2	0002.CSV	3216.82	-0.0189287
PSB913-4_map2	0002.CSV	3220.68	-0.0190678
PSB913-4_map2	0002.CSV	3224.53	-0.0191635
PSB913-4_map2	0002.CSV	3228.39	-0.0189276
PSB913-4_map2	0002.CSV	3232.25	-0.018627
PSB913-4_map2	0002.CSV	3236.1	-0.0187045
PSB913-4_map2	0002.CSV	3239.96	-0.0187925
PSB913-4_map2	0002.CSV	3243.82	-0.0186912
PSB913-4_map2	0002.CSV	3247.68	-0.0187553
PSB913-4_map2	0002.CSV	3251.53	-0.0189773
PSB913-4_map2	0002.CSV	3255.39	-0.0189273
PSB913-4_map2	0002.CSV	3259.25	-0.0189602
PSB913-4_map2	0002.CSV	3263.1	-0.0190688
PSB913-4_map2	0002.CSV	3266.96	-0.0189364
PSB913-4_map2	0002.CSV	3270.82	-0.0186739
PSB913-4_map2	0002.CSV	3274.68	-0.0186208
PSB913-4_map2	0002.CSV	3278.53	-0.0186779
PSB913-4_map2	0002.CSV	3282.39	-0.0188175
PSB913-4_map2	0002.CSV	3286.25	-0.0189099
PSB913-4_map2	0002.CSV	3290.1	-0.0187025
PSB913-4_map2	0002.CSV	3293.96	-0.0185198
PSB913-4_map2	0002.CSV	3297.82	-0.0186731
PSB913-4_map2	0002.CSV	3301.67	-0.0187283
PSB913-4_map2	0002.CSV	3305.53	-0.0186645
PSB913-4_map2	0002.CSV	3309.39	-0.0187273
PSB913-4_map2	0002.CSV	3313.25	-0.0188366
PSB913-4_map2	0002.CSV	3317.1	-0.0189051
PSB913-4_map2	0002.CSV	3320.96	-0.0188965
PSB913-4_map2	0002.CSV	3324.82	-0.0187507
PSB913-4_map2	0002.CSV	3328.67	-0.018847
PSB913-4_map2	0002.CSV	3332.53	-0.0189066
PSB913-4_map2	0002.CSV	3336.39	-0.0186471
PSB913-4_map2	0002.CSV	3340.24	-0.0185338
PSB913-4_map2	0002.CSV	3344.1	-0.0187349
PSB913-4_map2	0002.CSV	3347.96	-0.0187903
PSB913-4_map2	0002.CSV	3351.82	-0.0187362
PSB913-4_map2	0002.CSV	3355.67	-0.0188246
PSB913-4_map2	0002.CSV	3359.53	-0.0187778
PSB913-4_map2	0002.CSV	3363.39	-0.0186693
PSB913-4_map2	0002.CSV	3367.24	-0.0185407
PSB913-4_map2	0002.CSV	3371.1	-0.0186578
PSB913-4_map2	0002.CSV	3374.96	-0.0189687
PSB913-4_map2	0002.CSV	3378.82	-0.0190547
PSB913-4_map2	0002.CSV	3382.67	-0.0191118
PSB913-4_map2	0002.CSV	3386.53	-0.0190201
PSB913-4_map2	0002.CSV	3390.39	-0.0187598
PSB913-4_map2	0002.CSV	3394.24	-0.0186788
PSB913-4_map2	0002.CSV	3398.1	-0.0186671
PSB913-4_map2	0002.CSV	3401.96	-0.0186621
PSB913-4_map2	0002.CSV	3405.82	-0.0187174
PSB913-4_map2	0002.CSV	3409.67	-0.018798
PSB913-4_map2	0002.CSV	3413.53	-0.0189933
PSB913-4_map2	0002.CSV	3417.39	-0.0191532
PSB913-4_map2	0002.CSV	3421.24	-0.0191598
PSB913-4_map2	0002.CSV	3425.1	-0.0189965
PSB913-4_map2	0002.CSV	3428.96	-0.0187431
PSB913-4_map2	0002.CSV	3432.82	-0.0186329
PSB913-4_map2	0002.CSV	3436.67	-0.0188548
PSB913-4_map2	0002.CSV	3440.53	-0.0192449
PSB913-4_map2	0002.CSV	3444.39	-0.0193822
PSB913-4_map2	0002.CSV	3448.24	-0.0193115
PSB913-4_map2	0002.CSV	3452.1	-0.0194357
PSB913-4_map2	0002.CSV	3455.96	-0.0194565
PSB913-4_map2	0002.CSV	3459.82	-0.0192416
PSB913-4_map2	0002.CSV	3463.67	-0.019023
PSB913-4_map2	0002.CSV	3467.53	-0.0189074
PSB913-4_map2	0002.CSV	3471.39	-0.0191292
PSB913-4_map2	0002.CSV	3475.24	-0.0193995
PSB913-4_map2	0002.CSV	3479.1	-0.0193086
PSB913-4_map2	0002.CSV	3482.96	-0.019109
PSB913-4_map2	0002.CSV	3486.82	-0.0191484
PSB913-4_map2	0002.CSV	3490.67	-0.0192413
PSB913-4_map2	0002.CSV	3494.53	-0.019086
PSB913-4_map2	0002.CSV	3498.39	-0.0190207
PSB913-4_map2	0002.CSV	3502.24	-0.0190371
PSB913-4_map2	0002.CSV	3506.1	-0.019201
PSB913-4_map2	0002.CSV	3509.96	-0.019269
PSB913-4_map2	0002.CSV	3513.81	-0.0192223
PSB913-4_map2	0002.CSV	3517.67	-0.0194888
PSB913-4_map2	0002.CSV	3521.53	-0.0195074
PSB913-4_map2	0002.CSV	3525.39	-0.0193421
PSB913-4_map2	0002.CSV	3529.24	-0.0192576
PSB913-4_map2	0002.CSV	3533.1	-0.0191146
PSB913-4_map2	0002.CSV	3536.96	-0.0190444
PSB913-4_map2	0002.CSV	3540.81	-0.0190907
PSB913-4_map2	0002.CSV	3544.67	-0.0190625
PSB913-4_map2	0002.CSV	3548.53	-0.0190343
PSB913-4_map2	0002.CSV	3552.39	-0.0192853
PSB913-4_map2	0002.CSV	3556.24	-0.0194333
PSB913-4_map2	0002.CSV	3560.1	-0.0195281
PSB913-4_map2	0002.CSV	3563.96	-0.0196874
PSB913-4_map2	0002.CSV	3567.81	-0.0193946
PSB913-4_map2	0002.CSV	3571.67	-0.0192802
PSB913-4_map2	0002.CSV	3575.53	-0.019448
PSB913-4_map2	0002.CSV	3579.39	-0.0193942
PSB913-4_map2	0002.CSV	3583.24	-0.019446
PSB913-4_map2	0002.CSV	3587.1	-0.0193244
PSB913-4_map2	0002.CSV	3590.96	-0.0191402
PSB913-4_map2	0002.CSV	3594.81	-0.0191816
PSB913-4_map2	0002.CSV	3598.67	-0.0190991
PSB913-4_map2	0002.CSV	3602.53	-0.0192807
PSB913-4_map2	0002.CSV	3606.39	-0.0196549
PSB913-4_map2	0002.CSV	3610.24	-0.0195859
PSB913-4_map2	0002.CSV	3614.1	-0.0195066
PSB913-4_map2	0002.CSV	3617.96	-0.0193535
PSB913-4_map2	0002.CSV	3621.81	-0.0192843
PSB913-4_map2	0002.CSV	3625.67	-0.0199342
PSB913-4_map2	0002.CSV	3629.53	-0.019903
PSB913-4_map2	0002.CSV	3633.39	-0.0193261
PSB913-4_map2	0002.CSV	3637.24	-0.0194424
PSB913-4_map2	0002.CSV	3641.1	-0.0196814
PSB913-4_map2	0002.CSV	3644.96	-0.0201161
PSB913-4_map2	0002.CSV	3648.81	-0.0197971
PSB913-4_map2	0002.CSV	3652.67	-0.0190591
PSB913-4_map2	0002.CSV	3656.53	-0.0190198
PSB913-4_map2	0002.CSV	3660.38	-0.0190013
PSB913-4_map2	0002.CSV	3664.24	-0.0195434
PSB913-4_map2	0002.CSV	3668.1	-0.020129
PSB913-4_map2	0002.CSV	3671.96	-0.0200533
PSB913-4_map2	0002.CSV	3675.81	-0.0196284
PSB913-4_map2	0002.CSV	3679.67	-0.0192475
PSB913-4_map2	0002.CSV	3683.53	-0.0194154
PSB913-4_map2	0002.CSV	3687.38	-0.0196881
PSB913-4_map2	0002.CSV	3691.24	-0.019389
PSB913-4_map2	0002.CSV	3695.1	-0.0193671
PSB913-4_map2	0002.CSV	3698.95	-0.0195368
PSB913-4_map2	0002.CSV	3702.81	-0.0195237
PSB913-4_map2	0002.CSV	3706.67	-0.0198224
PSB913-4_map2	0002.CSV	3710.53	-0.0198496
PSB913-4_map2	0002.CSV	3714.38	-0.0191386
PSB913-4_map2	0002.CSV	3718.24	-0.0193724
PSB913-4_map2	0002.CSV	3722.1	-0.0198015
PSB913-4_map2	0002.CSV	3725.95	-0.0200074
PSB913-4_map2	0002.CSV	3729.81	-0.0202377
PSB913-4_map2	0002.CSV	3733.67	-0.0199582
PSB913-4_map2	0002.CSV	3737.53	-0.0190106
PSB913-4_map2	0002.CSV	3741.38	-0.0195955
PSB913-4_map2	0002.CSV	3745.24	-0.0203893
PSB913-4_map2	0002.CSV	3749.1	-0.0203906
PSB913-4_map2	0002.CSV	3752.95	-0.019555
PSB913-4_map2	0002.CSV	3756.81	-0.0194137
PSB913-4_map2	0002.CSV	3760.67	-0.0195332
PSB913-4_map2	0002.CSV	3764.53	-0.01965
PSB913-4_map2	0002.CSV	3768.38	-0.0193906
PSB913-4_map2	0002.CSV	3772.24	-0.0191874
PSB913-4_map2	0002.CSV	3776.1	-0.0193914
PSB913-4_map2	0002.CSV	3779.95	-0.0195371
PSB913-4_map2	0002.CSV	3783.81	-0.0196131
PSB913-4_map2	0002.CSV	3787.67	-0.0195597
PSB913-4_map2	0002.CSV	3791.53	-0.0197386
PSB913-4_map2	0002.CSV	3795.38	-0.0202002
PSB913-4_map2	0002.CSV	3799.24	-0.0203251
PSB913-4_map2	0002.CSV	3803.1	-0.0198416
PSB913-4_map2	0002.CSV	3806.95	-0.0194987
PSB913-4_map2	0002.CSV	3810.81	-0.0196763
PSB913-4_map2	0002.CSV	3814.67	-0.0200149
PSB913-4_map2	0002.CSV	3818.53	-0.0199292
PSB913-4_map2	0002.CSV	3822.38	-0.0196018
PSB913-4_map2	0002.CSV	3826.24	-0.0197452
PSB913-4_map2	0002.CSV	3830.1	-0.0200883
PSB913-4_map2	0002.CSV	3833.95	-0.0206015
PSB913-4_map2	0002.CSV	3837.81	-0.0207399
PSB913-4_map2	0002.CSV	3841.67	-0.0198673
PSB913-4_map2	0002.CSV	3845.53	-0.0198028
PSB913-4_map2	0002.CSV	3849.38	-0.0204305
PSB913-4_map2	0002.CSV	3853.24	-0.020409
PSB913-4_map2	0002.CSV	3857.1	-0.019897
PSB913-4_map2	0002.CSV	3860.95	-0.0201829
PSB913-4_map2	0002.CSV	3864.81	-0.0201065
PSB913-4_map2	0002.CSV	3868.67	-0.0198492
PSB913-4_map2	0002.CSV	3872.52	-0.0195495
PSB913-4_map2	0002.CSV	3876.38	-0.0197726
PSB913-4_map2	0002.CSV	3880.24	-0.0201527
PSB913-4_map2	0002.CSV	3884.1	-0.019985
PSB913-4_map2	0002.CSV	3887.95	-0.0199357
PSB913-4_map2	0002.CSV	3891.81	-0.0200165
PSB913-4_map2	0002.CSV	3895.67	-0.0201574
PSB913-4_map2	0002.CSV	3899.52	-0.0203564
PSB913-4_map2	0002.CSV	3903.38	-0.0198215
PSB913-4_map2	0002.CSV	3907.24	-0.0196447
PSB913-4_map2	0002.CSV	3911.1	-0.0199533
PSB913-4_map2	0002.CSV	3914.95	-0.0200829
PSB913-4_map2	0002.CSV	3918.81	-0.0197621
PSB913-4_map2	0002.CSV	3922.67	-0.0196273
PSB913-4_map2	0002.CSV	3926.52	-0.019702
PSB913-4_map2	0002.CSV	3930.38	-0.0198571
PSB913-4_map2	0002.CSV	3934.24	-0.0197983
PSB913-4_map2	0002.CSV	3938.09	-0.019878
PSB913-4_map2	0002.CSV	3941.95	-0.0199137
PSB913-4_map2	0002.CSV	3945.81	-0.0198628
PSB913-4_map2	0002.CSV	3949.67	-0.0198945
PSB913-4_map2	0002.CSV	3953.52	-0.0198869
PSB913-4_map2	0002.CSV	3957.38	-0.0197534
PSB913-4_map2	0002.CSV	3961.24	-0.0195061
PSB913-4_map2	0002.CSV	3965.09	-0.019521
PSB913-4_map2	0002.CSV	3968.95	-0.0196425
PSB913-4_map2	0002.CSV	3972.81	-0.0195371
PSB913-4_map2	0002.CSV	3976.67	-0.0195447
PSB913-4_map2	0002.CSV	3980.52	-0.0196516
PSB913-4_map2	0002.CSV	3984.38	-0.019621
PSB913-4_map2	0002.CSV	3988.24	-0.019665
PSB913-4_map2	0002.CSV	3992.09	-0.019656
PSB913-4_map2	0002.CSV	3995.95	-0.0194977
PSB913-4_map2	0002.CSV	3999.81	-0.0194182
PSB913-4_map2	0003.CSV	674.992	0.026013
PSB913-4_map2	0003.CSV	678.849	0.0273112
PSB913-4_map2	0003.CSV	682.706	0.029555
PSB913-4_map2	0003.CSV	686.563	0.0333217
PSB913-4_map2	0003.CSV	690.42	0.0412294
PSB913-4_map2	0003.CSV	694.277	0.0517336
PSB913-4_map2	0003.CSV	698.134	0.0527504
PSB913-4_map2	0003.CSV	701.991	0.0405076
PSB913-4_map2	0003.CSV	705.849	0.0267044
PSB913-4_map2	0003.CSV	709.706	0.0195821
PSB913-4_map2	0003.CSV	713.563	0.0169833
PSB913-4_map2	0003.CSV	717.42	0.0155286
PSB913-4_map2	0003.CSV	721.277	0.0157803
PSB913-4_map2	0003.CSV	725.134	0.017254
PSB913-4_map2	0003.CSV	728.991	0.0193432
PSB913-4_map2	0003.CSV	732.848	0.0217513
PSB913-4_map2	0003.CSV	736.705	0.0241437
PSB913-4_map2	0003.CSV	740.562	0.0261343
PSB913-4_map2	0003.CSV	744.42	0.0267292
PSB913-4_map2	0003.CSV	748.277	0.0259412
PSB913-4_map2	0003.CSV	752.134	0.0248387
PSB913-4_map2	0003.CSV	755.991	0.0241354
PSB913-4_map2	0003.CSV	759.848	0.022995
PSB913-4_map2	0003.CSV	763.705	0.0213201
PSB913-4_map2	0003.CSV	767.562	0.019752
PSB913-4_map2	0003.CSV	771.419	0.0184713
PSB913-4_map2	0003.CSV	775.276	0.0175764
PSB913-4_map2	0003.CSV	779.133	0.0168708
PSB913-4_map2	0003.CSV	782.99	0.0161321
PSB913-4_map2	0003.CSV	786.848	0.0159816
PSB913-4_map2	0003.CSV	790.705	0.0161472
PSB913-4_map2	0003.CSV	794.562	0.0164401
PSB913-4_map2	0003.CSV	798.419	0.0162724
PSB913-4_map2	0003.CSV	802.276	0.0154134
PSB913-4_map2	0003.CSV	806.133	0.0145813
PSB913-4_map2	0003.CSV	809.99	0.0142727
PSB913-4_map2	0003.CSV	813.847	0.0145257
PSB913-4_map2	0003.CSV	817.704	0.0151143
PSB913-4_map2	0003.CSV	821.562	0.01565
PSB913-4_map2	0003.CSV	825.419	0.0164113
PSB913-4_map2	0003.CSV	829.276	0.0168164
PSB913-4_map2	0003.CSV	833.133	0.0170791
PSB913-4_map2	0003.CSV	836.99	0.0174761
PSB913-4_map2	0003.CSV	840.847	0.0177613
PSB913-4_map2	0003.CSV	844.704	0.0176399
PSB913-4_map2	0003.CSV	848.561	0.0180786
PSB913-4_map2	0003.CSV	852.418	0.0196902
PSB913-4_map2	0003.CSV	856.275	0.0208085
PSB913-4_map2	0003.CSV	860.132	0.0197016
PSB913-4_map2	0003.CSV	863.99	0.0169418
PSB913-4_map2	0003.CSV	867.847	0.0141881
PSB913-4_map2	0003.CSV	871.704	0.0128126
PSB913-4_map2	0003.CSV	875.561	0.0123774
PSB913-4_map2	0003.CSV	879.418	0.0117733
PSB913-4_map2	0003.CSV	883.275	0.0111778
PSB913-4_map2	0003.CSV	887.132	0.0110321
PSB913-4_map2	0003.CSV	890.989	0.0110099
PSB913-4_map2	0003.CSV	894.846	0.0111453
PSB913-4_map2	0003.CSV	898.703	0.0113763
PSB913-4_map2	0003.CSV	902.561	0.011705
PSB913-4_map2	0003.CSV	906.418	0.0118339
PSB913-4_map2	0003.CSV	910.275	0.0116221
PSB913-4_map2	0003.CSV	914.132	0.0112154
PSB913-4_map2	0003.CSV	917.989	0.0109336
PSB913-4_map2	0003.CSV	921.846	0.010761
PSB913-4_map2	0003.CSV	925.703	0.0107108
PSB913-4_map2	0003.CSV	929.56	0.0107042
PSB913-4_map2	0003.CSV	933.417	0.010782
PSB913-4_map2	0003.CSV	937.274	0.0109696
PSB913-4_map2	0003.CSV	941.131	0.0110776
PSB913-4_map2	0003.CSV	944.989	0.011012
PSB913-4_map2	0003.CSV	948.846	0.0109676
PSB913-4_map2	0003.CSV	952.703	0.0109601
PSB913-4_map2	0003.CSV	956.56	0.0111398
PSB913-4_map2	0003.CSV	960.417	0.0113332
PSB913-4_map2	0003.CSV	964.274	0.0114316
PSB913-4_map2	0003.CSV	968.131	0.0115299
PSB913-4_map2	0003.CSV	971.988	0.0116861
PSB913-4_map2	0003.CSV	975.845	0.0118864
PSB913-4_map2	0003.CSV	979.702	0.01219
PSB913-4_map2	0003.CSV	983.559	0.0124452
PSB913-4_map2	0003.CSV	987.417	0.0126554
PSB913-4_map2	0003.CSV	991.274	0.01285
PSB913-4_map2	0003.CSV	995.131	0.0129235
PSB913-4_map2	0003.CSV	998.988	0.01305
PSB913-4_map2	0003.CSV	1002.85	0.0132938
PSB913-4_map2	0003.CSV	1006.7	0.0133834
PSB913-4_map2	0003.CSV	1010.56	0.0134215
PSB913-4_map2	0003.CSV	1014.42	0.0135052
PSB913-4_map2	0003.CSV	1018.27	0.0137719
PSB913-4_map2	0003.CSV	1022.13	0.0140821
PSB913-4_map2	0003.CSV	1025.99	0.014413
PSB913-4_map2	0003.CSV	1029.85	0.0144224
PSB913-4_map2	0003.CSV	1033.7	0.0141648
PSB913-4_map2	0003.CSV	1037.56	0.0140121
PSB913-4_map2	0003.CSV	1041.42	0.0137842
PSB913-4_map2	0003.CSV	1045.27	0.0133909
PSB913-4_map2	0003.CSV	1049.13	0.0133371
PSB913-4_map2	0003.CSV	1052.99	0.0138574
PSB913-4_map2	0003.CSV	1056.84	0.0147978
PSB913-4_map2	0003.CSV	1060.7	0.0155906
PSB913-4_map2	0003.CSV	1064.56	0.0157775
PSB913-4_map2	0003.CSV	1068.42	0.0152269
PSB913-4_map2	0003.CSV	1072.27	0.0141869
PSB913-4_map2	0003.CSV	1076.13	0.0130682
PSB913-4_map2	0003.CSV	1079.99	0.0122017
PSB913-4_map2	0003.CSV	1083.84	0.0113188
PSB913-4_map2	0003.CSV	1087.7	0.010442
PSB913-4_map2	0003.CSV	1091.56	0.00994056
PSB913-4_map2	0003.CSV	1095.41	0.00981802
PSB913-4_map2	0003.CSV	1099.27	0.00990527
PSB913-4_map2	0003.CSV	1103.13	0.010196
PSB913-4_map2	0003.CSV	1106.99	0.010554
PSB913-4_map2	0003.CSV	1110.84	0.0109453
PSB913-4_map2	0003.CSV	1114.7	0.0112244
PSB913-4_map2	0003.CSV	1118.56	0.0111513
PSB913-4_map2	0003.CSV	1122.41	0.010721
PSB913-4_map2	0003.CSV	1126.27	0.0100794
PSB913-4_map2	0003.CSV	1130.13	0.00937667
PSB913-4_map2	0003.CSV	1133.99	0.00885207
PSB913-4_map2	0003.CSV	1137.84	0.00846092
PSB913-4_map2	0003.CSV	1141.7	0.00796718
PSB913-4_map2	0003.CSV	1145.56	0.00733127
PSB913-4_map2	0003.CSV	1149.41	0.00683535
PSB913-4_map2	0003.CSV	1153.27	0.00648234
PSB913-4_map2	0003.CSV	1157.13	0.00608962
PSB913-4_map2	0003.CSV	1160.99	0.00578731
PSB913-4_map2	0003.CSV	1164.84	0.00554101
PSB913-4_map2	0003.CSV	1168.7	0.00514419
PSB913-4_map2	0003.CSV	1172.56	0.0048231
PSB913-4_map2	0003.CSV	1176.41	0.00462018
PSB913-4_map2	0003.CSV	1180.27	0.00435948
PSB913-4_map2	0003.CSV	1184.13	0.0038754
PSB913-4_map2	0003.CSV	1187.99	0.00327339
PSB913-4_map2	0003.CSV	1191.84	0.00271672
PSB913-4_map2	0003.CSV	1195.7	0.00234762
PSB913-4_map2	0003.CSV	1199.56	0.00208881
PSB913-4_map2	0003.CSV	1203.41	0.00188271
PSB913-4_map2	0003.CSV	1207.27	0.00176402
PSB913-4_map2	0003.CSV	1211.13	0.00178791
PSB913-4_map2	0003.CSV	1214.98	0.00185542
PSB913-4_map2	0003.CSV	1218.84	0.0019508
PSB913-4_map2	0003.CSV	1222.7	0.0020988
PSB913-4_map2	0003.CSV	1226.56	0.00234129
PSB913-4_map2	0003.CSV	1230.41	0.00267722
PSB913-4_map2	0003.CSV	1234.27	0.00311988
PSB913-4_map2	0003.CSV	1238.13	0.00367793
PSB913-4_map2	0003.CSV	1241.98	0.00435266
PSB913-4_map2	0003.CSV	1245.84	0.0050109
PSB913-4_map2	0003.CSV	1249.7	0.00552189
PSB913-4_map2	0003.CSV	1253.56	0.00566433
PSB913-4_map2	0003.CSV	1257.41	0.00551913
PSB913-4_map2	0003.CSV	1261.27	0.005274
PSB913-4_map2	0003.CSV	1265.13	0.00506634
PSB913-4_map2	0003.CSV	1268.98	0.00494521
PSB913-4_map2	0003.CSV	1272.84	0.00485506
PSB913-4_map2	0003.CSV	1276.7	0.00462678
PSB913-4_map2	0003.CSV	1280.56	0.00433382
PSB913-4_map2	0003.CSV	1284.41	0.00398734
PSB913-4_map2	0003.CSV	1288.27	0.00342084
PSB913-4_map2	0003.CSV	1292.13	0.00253948
PSB913-4_map2	0003.CSV	1295.98	0.00154407
PSB913-4_map2	0003.CSV	1299.84	0.000607805
PSB913-4_map2	0003.CSV	1303.7	-0.000108037
PSB913-4_map2	0003.CSV	1307.56	-0.000564469
PSB913-4_map2	0003.CSV	1311.41	-0.000783575
PSB913-4_map2	0003.CSV	1315.27	-0.000949378
PSB913-4_map2	0003.CSV	1319.13	-0.0011899
PSB913-4_map2	0003.CSV	1322.98	-0.00147573
PSB913-4_map2	0003.CSV	1326.84	-0.00171728
PSB913-4_map2	0003.CSV	1330.7	-0.00189774
PSB913-4_map2	0003.CSV	1334.56	-0.00206394
PSB913-4_map2	0003.CSV	1338.41	-0.00205425
PSB913-4_map2	0003.CSV	1342.27	-0.00179576
PSB913-4_map2	0003.CSV	1346.13	-0.0016792
PSB913-4_map2	0003.CSV	1349.98	-0.00161506
PSB913-4_map2	0003.CSV	1353.84	-0.00155009
PSB913-4_map2	0003.CSV	1357.7	-0.00149049
PSB913-4_map2	0003.CSV	1361.56	-0.00139803
PSB913-4_map2	0003.CSV	1365.41	-0.00124194
PSB913-4_map2	0003.CSV	1369.27	-0.00119605
PSB913-4_map2	0003.CSV	1373.13	-0.000986637
PSB913-4_map2	0003.CSV	1376.98	-0.000758041
PSB913-4_map2	0003.CSV	1380.84	-0.000856663
PSB913-4_map2	0003.CSV	1384.7	-0.00107288
PSB913-4_map2	0003.CSV	1388.56	-0.00111512
PSB913-4_map2	0003.CSV	1392.41	-0.00120695
PSB913-4_map2	0003.CSV	1396.27	-0.00123348
PSB913-4_map2	0003.CSV	1400.13	-0.001228
PSB913-4_map2	0003.CSV	1403.98	-0.00118329
PSB913-4_map2	0003.CSV	1407.84	-0.00100565
PSB913-4_map2	0003.CSV	1411.7	-0.000798988
PSB913-4_map2	0003.CSV	1415.55	-0.00067392
PSB913-4_map2	0003.CSV	1419.41	-0.00028625
PSB913-4_map2	0003.CSV	1423.27	0.000150421
PSB913-4_map2	0003.CSV	1427.12	0.000540686
PSB913-4_map2	0003.CSV	1430.98	0.00106119
PSB913-4_map2	0003.CSV	1434.84	0.00178798
PSB913-4_map2	0003.CSV	1438.7	0.00280876
PSB913-4_map2	0003.CSV	1442.55	0.00349896
PSB913-4_map2	0003.CSV	1446.41	0.00423697
PSB913-4_map2	0003.CSV	1450.27	0.00492316
PSB913-4_map2	0003.CSV	1454.12	0.00446629
PSB913-4_map2	0003.CSV	1457.98	0.00263091
PSB913-4_map2	0003.CSV	1461.84	0.00173558
PSB913-4_map2	0003.CSV	1465.7	0.00170794
PSB913-4_map2	0003.CSV	1469.55	0.00159701
PSB913-4_map2	0003.CSV	1473.41	0.0016745
PSB913-4_map2	0003.CSV	1477.27	0.00186926
PSB913-4_map2	0003.CSV	1481.12	0.00182744
PSB913-4_map2	0003.CSV	1484.98	0.00191203
PSB913-4_map2	0003.CSV	1488.84	0.00275834
PSB913-4_map2	0003.CSV	1492.7	0.0032115
PSB913-4_map2	0003.CSV	1496.55	0.00183865
PSB913-4_map2	0003.CSV	1500.41	0.000305902
PSB913-4_map2	0003.CSV	1504.27	-0.000301779
PSB913-4_map2	0003.CSV	1508.12	-0.000231976
PSB913-4_map2	0003.CSV	1511.98	-0.000411595
PSB913-4_map2	0003.CSV	1515.84	-0.00111922
PSB913-4_map2	0003.CSV	1519.7	-0.00187293
PSB913-4_map2	0003.CSV	1523.55	-0.00214397
PSB913-4_map2	0003.CSV	1527.41	-0.00230441
PSB913-4_map2	0003.CSV	1531.27	-0.00265413
PSB913-4_map2	0003.CSV	1535.12	-0.00300221
PSB913-4_map2	0003.CSV	1538.98	-0.00322766
PSB913-4_map2	0003.CSV	1542.84	-0.00310786
PSB913-4_map2	0003.CSV	1546.7	-0.00345847
PSB913-4_map2	0003.CSV	1550.55	-0.00385938
PSB913-4_map2	0003.CSV	1554.41	-0.00419722
PSB913-4_map2	0003.CSV	1558.27	-0.00414199
PSB913-4_map2	0003.CSV	1562.12	-0.00390664
PSB913-4_map2	0003.CSV	1565.98	-0.00404847
PSB913-4_map2	0003.CSV	1569.84	-0.00393938
PSB913-4_map2	0003.CSV	1573.69	-0.00382506
PSB913-4_map2	0003.CSV	1577.55	-0.00348766
PSB913-4_map2	0003.CSV	1581.41	-0.00348171
PSB913-4_map2	0003.CSV	1585.27	-0.00384681
PSB913-4_map2	0003.CSV	1589.12	-0.00407263
PSB913-4_map2	0003.CSV	1592.98	-0.00389791
PSB913-4_map2	0003.CSV	1596.84	-0.00352654
PSB913-4_map2	0003.CSV	1600.69	-0.00348017
PSB913-4_map2	0003.CSV	1604.55	-0.00396144
PSB913-4_map2	0003.CSV	1608.41	-0.00452184
PSB913-4_map2	0003.CSV	1612.27	-0.00482957
PSB913-4_map2	0003.CSV	1616.12	-0.00497428
PSB913-4_map2	0003.CSV	1619.98	-0.00498646
PSB913-4_map2	0003.CSV	1623.84	-0.00496219
PSB913-4_map2	0003.CSV	1627.69	-0.00498384
PSB913-4_map2	0003.CSV	1631.55	-0.00523282
PSB913-4_map2	0003.CSV	1635.41	-0.00528752
PSB913-4_map2	0003.CSV	1639.27	-0.00517202
PSB913-4_map2	0003.CSV	1643.12	-0.0054181
PSB913-4_map2	0003.CSV	1646.98	-0.00549843
PSB913-4_map2	0003.CSV	1650.84	-0.00540501
PSB913-4_map2	0003.CSV	1654.69	-0.0050933
PSB913-4_map2	0003.CSV	1658.55	-0.00518976
PSB913-4_map2	0003.CSV	1662.41	-0.00535455
PSB913-4_map2	0003.CSV	1666.27	-0.00548996
PSB913-4_map2	0003.CSV	1670.12	-0.00554158
PSB913-4_map2	0003.CSV	1673.98	-0.00539971
PSB913-4_map2	0003.CSV	1677.84	-0.00554476
PSB913-4_map2	0003.CSV	1681.69	-0.00564426
PSB913-4_map2	0003.CSV	1685.55	-0.00522732
PSB913-4_map2	0003.CSV	1689.41	-0.00504552
PSB913-4_map2	0003.CSV	1693.27	-0.00525171
PSB913-4_map2	0003.CSV	1697.12	-0.00509435
PSB913-4_map2	0003.CSV	1700.98	-0.00428063
PSB913-4_map2	0003.CSV	1704.84	-0.00382418
PSB913-4_map2	0003.CSV	1708.69	-0.00337902
PSB913-4_map2	0003.CSV	1712.55	-0.00305104
PSB913-4_map2	0003.CSV	1716.41	-0.00185512
PSB913-4_map2	0003.CSV	1720.27	-0.000430529
PSB913-4_map2	0003.CSV	1724.12	-0.000142983
[truncated: 108,465 more rows]

## Sheet: PSB913-4_map3
Map	Select spectrum number	Wavenumbers	Absrobance
PSB913-4_map3	0001.CSV	674.992	0.0141219
PSB913-4_map3	0001.CSV	678.849	0.0138839
PSB913-4_map3	0001.CSV	682.706	0.015415
PSB913-4_map3	0001.CSV	686.563	0.0155419
PSB913-4_map3	0001.CSV	690.42	0.0183081
PSB913-4_map3	0001.CSV	694.277	0.0243808
PSB913-4_map3	0001.CSV	698.134	0.0322935
PSB913-4_map3	0001.CSV	701.991	0.027154
PSB913-4_map3	0001.CSV	705.849	0.0244544
PSB913-4_map3	0001.CSV	709.706	0.036373
PSB913-4_map3	0001.CSV	713.563	0.0359743
PSB913-4_map3	0001.CSV	717.42	0.0152358
PSB913-4_map3	0001.CSV	721.277	0.00471935
PSB913-4_map3	0001.CSV	725.134	0.00361619
PSB913-4_map3	0001.CSV	728.991	0.0049689
PSB913-4_map3	0001.CSV	732.848	0.00563143
PSB913-4_map3	0001.CSV	736.705	0.00682253
PSB913-4_map3	0001.CSV	740.562	0.00733174
PSB913-4_map3	0001.CSV	744.42	0.00853515
PSB913-4_map3	0001.CSV	748.277	0.00843595
PSB913-4_map3	0001.CSV	752.134	0.00922779
PSB913-4_map3	0001.CSV	755.991	0.009538
PSB913-4_map3	0001.CSV	759.848	0.0102063
PSB913-4_map3	0001.CSV	763.705	0.0101831
PSB913-4_map3	0001.CSV	767.562	0.0110748
PSB913-4_map3	0001.CSV	771.419	0.0114246
PSB913-4_map3	0001.CSV	775.276	0.0120548
PSB913-4_map3	0001.CSV	779.133	0.0120024
PSB913-4_map3	0001.CSV	782.99	0.0129793
PSB913-4_map3	0001.CSV	786.848	0.0135273
PSB913-4_map3	0001.CSV	790.705	0.0144171
PSB913-4_map3	0001.CSV	794.562	0.0147918
PSB913-4_map3	0001.CSV	798.419	0.0160747
PSB913-4_map3	0001.CSV	802.276	0.0170364
PSB913-4_map3	0001.CSV	806.133	0.0186849
PSB913-4_map3	0001.CSV	809.99	0.0201765
PSB913-4_map3	0001.CSV	813.847	0.0223292
PSB913-4_map3	0001.CSV	817.704	0.0244646
PSB913-4_map3	0001.CSV	821.562	0.0276035
PSB913-4_map3	0001.CSV	825.419	0.0310393
PSB913-4_map3	0001.CSV	829.276	0.0355985
PSB913-4_map3	0001.CSV	833.133	0.0411591
PSB913-4_map3	0001.CSV	836.99	0.049498
PSB913-4_map3	0001.CSV	840.847	0.0584888
PSB913-4_map3	0001.CSV	844.704	0.0666281
PSB913-4_map3	0001.CSV	848.561	0.0760355
PSB913-4_map3	0001.CSV	852.418	0.0826257
PSB913-4_map3	0001.CSV	856.275	0.0787463
PSB913-4_map3	0001.CSV	860.132	0.0668003
PSB913-4_map3	0001.CSV	863.99	0.0506498
PSB913-4_map3	0001.CSV	867.847	0.0337216
PSB913-4_map3	0001.CSV	871.704	0.0174951
PSB913-4_map3	0001.CSV	875.561	0.00573839
PSB913-4_map3	0001.CSV	879.418	0.00067978
PSB913-4_map3	0001.CSV	883.275	-0.000364388
PSB913-4_map3	0001.CSV	887.132	-0.000558149
PSB913-4_map3	0001.CSV	890.989	-0.000203428
PSB913-4_map3	0001.CSV	894.846	0.000269563
PSB913-4_map3	0001.CSV	898.703	0.000886942
PSB913-4_map3	0001.CSV	902.561	0.00163892
PSB913-4_map3	0001.CSV	906.418	0.0023848
PSB913-4_map3	0001.CSV	910.275	0.00267058
PSB913-4_map3	0001.CSV	914.132	0.00277471
PSB913-4_map3	0001.CSV	917.989	0.00314224
PSB913-4_map3	0001.CSV	921.846	0.00353581
PSB913-4_map3	0001.CSV	925.703	0.00412149
PSB913-4_map3	0001.CSV	929.56	0.00480203
PSB913-4_map3	0001.CSV	933.417	0.00538251
PSB913-4_map3	0001.CSV	937.274	0.00572221
PSB913-4_map3	0001.CSV	941.131	0.00629128
PSB913-4_map3	0001.CSV	944.989	0.00683108
PSB913-4_map3	0001.CSV	948.846	0.00744654
PSB913-4_map3	0001.CSV	952.703	0.00802135
PSB913-4_map3	0001.CSV	956.56	0.00877233
PSB913-4_map3	0001.CSV	960.417	0.00922011
PSB913-4_map3	0001.CSV	964.274	0.00969396
PSB913-4_map3	0001.CSV	968.131	0.0100015
PSB913-4_map3	0001.CSV	971.988	0.0104995
PSB913-4_map3	0001.CSV	975.845	0.0110203
PSB913-4_map3	0001.CSV	979.702	0.0119724
PSB913-4_map3	0001.CSV	983.559	0.0127741
PSB913-4_map3	0001.CSV	987.417	0.0137677
PSB913-4_map3	0001.CSV	991.274	0.0145644
PSB913-4_map3	0001.CSV	995.131	0.015742
PSB913-4_map3	0001.CSV	998.988	0.0168323
PSB913-4_map3	0001.CSV	1002.85	0.018249
PSB913-4_map3	0001.CSV	1006.7	0.0195428
PSB913-4_map3	0001.CSV	1010.56	0.0213154
PSB913-4_map3	0001.CSV	1014.42	0.0227723
PSB913-4_map3	0001.CSV	1018.27	0.024475
PSB913-4_map3	0001.CSV	1022.13	0.0256182
PSB913-4_map3	0001.CSV	1025.99	0.0267145
PSB913-4_map3	0001.CSV	1029.85	0.0270482
PSB913-4_map3	0001.CSV	1033.7	0.0273606
PSB913-4_map3	0001.CSV	1037.56	0.0269513
PSB913-4_map3	0001.CSV	1041.42	0.0268026
PSB913-4_map3	0001.CSV	1045.27	0.0260728
PSB913-4_map3	0001.CSV	1049.13	0.0257741
PSB913-4_map3	0001.CSV	1052.99	0.0251197
PSB913-4_map3	0001.CSV	1056.84	0.0250225
PSB913-4_map3	0001.CSV	1060.7	0.0243924
PSB913-4_map3	0001.CSV	1064.56	0.0241982
PSB913-4_map3	0001.CSV	1068.42	0.0235181
PSB913-4_map3	0001.CSV	1072.27	0.0235668
PSB913-4_map3	0001.CSV	1076.13	0.0242096
PSB913-4_map3	0001.CSV	1079.99	0.0272763
PSB913-4_map3	0001.CSV	1083.84	0.0257219
PSB913-4_map3	0001.CSV	1087.7	0.0198677
PSB913-4_map3	0001.CSV	1091.56	0.0166567
PSB913-4_map3	0001.CSV	1095.41	0.0165706
PSB913-4_map3	0001.CSV	1099.27	0.0162069
PSB913-4_map3	0001.CSV	1103.13	0.0161797
PSB913-4_map3	0001.CSV	1106.99	0.0154515
PSB913-4_map3	0001.CSV	1110.84	0.0151559
PSB913-4_map3	0001.CSV	1114.7	0.0142025
PSB913-4_map3	0001.CSV	1118.56	0.0136926
PSB913-4_map3	0001.CSV	1122.41	0.0127091
PSB913-4_map3	0001.CSV	1126.27	0.0123843
PSB913-4_map3	0001.CSV	1130.13	0.0116276
PSB913-4_map3	0001.CSV	1133.99	0.0114969
PSB913-4_map3	0001.CSV	1137.84	0.0110075
PSB913-4_map3	0001.CSV	1141.7	0.0112374
PSB913-4_map3	0001.CSV	1145.56	0.0109653
PSB913-4_map3	0001.CSV	1149.41	0.0113642
PSB913-4_map3	0001.CSV	1153.27	0.0112617
PSB913-4_map3	0001.CSV	1157.13	0.0117759
PSB913-4_map3	0001.CSV	1160.99	0.0117278
PSB913-4_map3	0001.CSV	1164.84	0.0121736
PSB913-4_map3	0001.CSV	1168.7	0.011993
PSB913-4_map3	0001.CSV	1172.56	0.012447
PSB913-4_map3	0001.CSV	1176.41	0.0123592
PSB913-4_map3	0001.CSV	1180.27	0.0128337
PSB913-4_map3	0001.CSV	1184.13	0.0127635
PSB913-4_map3	0001.CSV	1187.99	0.0133032
PSB913-4_map3	0001.CSV	1191.84	0.0132287
PSB913-4_map3	0001.CSV	1195.7	0.0137727
PSB913-4_map3	0001.CSV	1199.56	0.0137631
PSB913-4_map3	0001.CSV	1203.41	0.0144247
PSB913-4_map3	0001.CSV	1207.27	0.0144958
PSB913-4_map3	0001.CSV	1211.13	0.0152265
PSB913-4_map3	0001.CSV	1214.98	0.0154193
PSB913-4_map3	0001.CSV	1218.84	0.0162684
PSB913-4_map3	0001.CSV	1222.7	0.0164939
PSB913-4_map3	0001.CSV	1226.56	0.0173496
PSB913-4_map3	0001.CSV	1230.41	0.0176141
PSB913-4_map3	0001.CSV	1234.27	0.0185259
PSB913-4_map3	0001.CSV	1238.13	0.0187327
PSB913-4_map3	0001.CSV	1241.98	0.0195698
PSB913-4_map3	0001.CSV	1245.84	0.0198327
PSB913-4_map3	0001.CSV	1249.7	0.0206866
PSB913-4_map3	0001.CSV	1253.56	0.0208214
PSB913-4_map3	0001.CSV	1257.41	0.0215354
PSB913-4_map3	0001.CSV	1261.27	0.0216211
PSB913-4_map3	0001.CSV	1265.13	0.0224262
PSB913-4_map3	0001.CSV	1268.98	0.0227592
PSB913-4_map3	0001.CSV	1272.84	0.0237732
PSB913-4_map3	0001.CSV	1276.7	0.0240189
PSB913-4_map3	0001.CSV	1280.56	0.0248222
PSB913-4_map3	0001.CSV	1284.41	0.024998
PSB913-4_map3	0001.CSV	1288.27	0.0257909
PSB913-4_map3	0001.CSV	1292.13	0.0259432
PSB913-4_map3	0001.CSV	1295.98	0.0267718
PSB913-4_map3	0001.CSV	1299.84	0.027077
PSB913-4_map3	0001.CSV	1303.7	0.0280361
PSB913-4_map3	0001.CSV	1307.56	0.0284104
PSB913-4_map3	0001.CSV	1311.41	0.0294852
PSB913-4_map3	0001.CSV	1315.27	0.0300041
PSB913-4_map3	0001.CSV	1319.13	0.0312192
PSB913-4_map3	0001.CSV	1322.98	0.0317472
PSB913-4_map3	0001.CSV	1326.84	0.032941
PSB913-4_map3	0001.CSV	1330.7	0.033637
PSB913-4_map3	0001.CSV	1334.56	0.0349112
PSB913-4_map3	0001.CSV	1338.41	0.0358903
PSB913-4_map3	0001.CSV	1342.27	0.0378882
PSB913-4_map3	0001.CSV	1346.13	0.0387347
PSB913-4_map3	0001.CSV	1349.98	0.0403638
PSB913-4_map3	0001.CSV	1353.84	0.0415663
PSB913-4_map3	0001.CSV	1357.7	0.0433982
PSB913-4_map3	0001.CSV	1361.56	0.0447936
PSB913-4_map3	0001.CSV	1365.41	0.0472865
PSB913-4_map3	0001.CSV	1369.27	0.0486523
PSB913-4_map3	0001.CSV	1373.13	0.0510186
PSB913-4_map3	0001.CSV	1376.98	0.0530171
PSB913-4_map3	0001.CSV	1380.84	0.0554583
PSB913-4_map3	0001.CSV	1384.7	0.0571999
PSB913-4_map3	0001.CSV	1388.56	0.0601465
PSB913-4_map3	0001.CSV	1392.41	0.061704
PSB913-4_map3	0001.CSV	1396.27	0.0645832
PSB913-4_map3	0001.CSV	1400.13	0.0668003
PSB913-4_map3	0001.CSV	1403.98	0.0693188
PSB913-4_map3	0001.CSV	1407.84	0.0711042
PSB913-4_map3	0001.CSV	1411.7	0.0733613
PSB913-4_map3	0001.CSV	1415.55	0.0744894
PSB913-4_map3	0001.CSV	1419.41	0.0771485
PSB913-4_map3	0001.CSV	1423.27	0.0787572
PSB913-4_map3	0001.CSV	1427.12	0.0808402
PSB913-4_map3	0001.CSV	1430.98	0.0821758
PSB913-4_map3	0001.CSV	1434.84	0.0844669
PSB913-4_map3	0001.CSV	1438.7	0.0855233
PSB913-4_map3	0001.CSV	1442.55	0.086022
PSB913-4_map3	0001.CSV	1446.41	0.0844297
PSB913-4_map3	0001.CSV	1450.27	0.0829156
PSB913-4_map3	0001.CSV	1454.12	0.0804582
PSB913-4_map3	0001.CSV	1457.98	0.0785962
PSB913-4_map3	0001.CSV	1461.84	0.0761513
PSB913-4_map3	0001.CSV	1465.7	0.0748032
PSB913-4_map3	0001.CSV	1469.55	0.0718997
PSB913-4_map3	0001.CSV	1473.41	0.0682319
PSB913-4_map3	0001.CSV	1477.27	0.0630071
PSB913-4_map3	0001.CSV	1481.12	0.0599018
PSB913-4_map3	0001.CSV	1484.98	0.0561695
PSB913-4_map3	0001.CSV	1488.84	0.0524297
PSB913-4_map3	0001.CSV	1492.7	0.0480865
PSB913-4_map3	0001.CSV	1496.55	0.0454226
PSB913-4_map3	0001.CSV	1500.41	0.0417257
PSB913-4_map3	0001.CSV	1504.27	0.0397197
PSB913-4_map3	0001.CSV	1508.12	0.0353225
PSB913-4_map3	0001.CSV	1511.98	0.0330745
PSB913-4_map3	0001.CSV	1515.84	0.0305158
PSB913-4_map3	0001.CSV	1519.7	0.0283254
PSB913-4_map3	0001.CSV	1523.55	0.0247615
PSB913-4_map3	0001.CSV	1527.41	0.0228976
PSB913-4_map3	0001.CSV	1531.27	0.0205967
PSB913-4_map3	0001.CSV	1535.12	0.0192039
PSB913-4_map3	0001.CSV	1538.98	0.0167564
PSB913-4_map3	0001.CSV	1542.84	0.0142933
PSB913-4_map3	0001.CSV	1546.7	0.0117576
PSB913-4_map3	0001.CSV	1550.55	0.0100712
PSB913-4_map3	0001.CSV	1554.41	0.00767921
PSB913-4_map3	0001.CSV	1558.27	0.00538909
PSB913-4_map3	0001.CSV	1562.12	0.00240402
PSB913-4_map3	0001.CSV	1565.98	0.000808726
PSB913-4_map3	0001.CSV	1569.84	-0.00138947
PSB913-4_map3	0001.CSV	1573.69	-0.00316865
PSB913-4_map3	0001.CSV	1577.55	-0.00540135
PSB913-4_map3	0001.CSV	1581.41	-0.00704196
PSB913-4_map3	0001.CSV	1585.27	-0.0085261
PSB913-4_map3	0001.CSV	1589.12	-0.00939197
PSB913-4_map3	0001.CSV	1592.98	-0.00997128
PSB913-4_map3	0001.CSV	1596.84	-0.0102028
PSB913-4_map3	0001.CSV	1600.69	-0.0105969
PSB913-4_map3	0001.CSV	1604.55	-0.0107143
PSB913-4_map3	0001.CSV	1608.41	-0.0109065
PSB913-4_map3	0001.CSV	1612.27	-0.0111229
PSB913-4_map3	0001.CSV	1616.12	-0.0113054
PSB913-4_map3	0001.CSV	1619.98	-0.0111181
PSB913-4_map3	0001.CSV	1623.84	-0.0113043
PSB913-4_map3	0001.CSV	1627.69	-0.0112504
PSB913-4_map3	0001.CSV	1631.55	-0.0117305
PSB913-4_map3	0001.CSV	1635.41	-0.0117414
PSB913-4_map3	0001.CSV	1639.27	-0.0114779
PSB913-4_map3	0001.CSV	1643.12	-0.0119896
PSB913-4_map3	0001.CSV	1646.98	-0.0121932
PSB913-4_map3	0001.CSV	1650.84	-0.0119347
PSB913-4_map3	0001.CSV	1654.69	-0.0115768
PSB913-4_map3	0001.CSV	1658.55	-0.0120113
PSB913-4_map3	0001.CSV	1662.41	-0.01249
PSB913-4_map3	0001.CSV	1666.27	-0.0127669
PSB913-4_map3	0001.CSV	1670.12	-0.0128997
PSB913-4_map3	0001.CSV	1673.98	-0.0128255
PSB913-4_map3	0001.CSV	1677.84	-0.013131
PSB913-4_map3	0001.CSV	1681.69	-0.0134929
PSB913-4_map3	0001.CSV	1685.55	-0.0130724
PSB913-4_map3	0001.CSV	1689.41	-0.0134194
PSB913-4_map3	0001.CSV	1693.27	-0.0142288
PSB913-4_map3	0001.CSV	1697.12	-0.0147943
PSB913-4_map3	0001.CSV	1700.98	-0.0143691
PSB913-4_map3	0001.CSV	1704.84	-0.0144456
PSB913-4_map3	0001.CSV	1708.69	-0.0145605
PSB913-4_map3	0001.CSV	1712.55	-0.0151154
PSB913-4_map3	0001.CSV	1716.41	-0.0146672
PSB913-4_map3	0001.CSV	1720.27	-0.0143469
PSB913-4_map3	0001.CSV	1724.12	-0.0147172
PSB913-4_map3	0001.CSV	1727.98	-0.0153222
PSB913-4_map3	0001.CSV	1731.84	-0.0154189
PSB913-4_map3	0001.CSV	1735.69	-0.0151885
PSB913-4_map3	0001.CSV	1739.55	-0.015317
PSB913-4_map3	0001.CSV	1743.41	-0.0159453
PSB913-4_map3	0001.CSV	1747.27	-0.0161176
PSB913-4_map3	0001.CSV	1751.12	-0.0162862
PSB913-4_map3	0001.CSV	1754.98	-0.0165383
PSB913-4_map3	0001.CSV	1758.84	-0.0169408
PSB913-4_map3	0001.CSV	1762.69	-0.0167643
PSB913-4_map3	0001.CSV	1766.55	-0.0172298
PSB913-4_map3	0001.CSV	1770.41	-0.0169046
PSB913-4_map3	0001.CSV	1774.26	-0.0156748
PSB913-4_map3	0001.CSV	1778.12	-0.0146
PSB913-4_map3	0001.CSV	1781.98	-0.0138136
PSB913-4_map3	0001.CSV	1785.84	-0.0132617
PSB913-4_map3	0001.CSV	1789.69	-0.0138759
PSB913-4_map3	0001.CSV	1793.55	-0.0145483
PSB913-4_map3	0001.CSV	1797.41	-0.0155873
PSB913-4_map3	0001.CSV	1801.26	-0.0161103
PSB913-4_map3	0001.CSV	1805.12	-0.0168258
PSB913-4_map3	0001.CSV	1808.98	-0.0170037
PSB913-4_map3	0001.CSV	1812.84	-0.0170478
PSB913-4_map3	0001.CSV	1816.69	-0.0170185
PSB913-4_map3	0001.CSV	1820.55	-0.0173045
PSB913-4_map3	0001.CSV	1824.41	-0.0171433
PSB913-4_map3	0001.CSV	1828.26	-0.0169391
PSB913-4_map3	0001.CSV	1832.12	-0.0165407
PSB913-4_map3	0001.CSV	1835.98	-0.0167968
PSB913-4_map3	0001.CSV	1839.84	-0.016797
PSB913-4_map3	0001.CSV	1843.69	-0.0167703
PSB913-4_map3	0001.CSV	1847.55	-0.0162554
PSB913-4_map3	0001.CSV	1851.41	-0.0165335
PSB913-4_map3	0001.CSV	1855.26	-0.0164312
PSB913-4_map3	0001.CSV	1859.12	-0.0164696
PSB913-4_map3	0001.CSV	1862.98	-0.0163585
PSB913-4_map3	0001.CSV	1866.84	-0.0163855
PSB913-4_map3	0001.CSV	1870.69	-0.0157345
PSB913-4_map3	0001.CSV	1874.55	-0.0159979
PSB913-4_map3	0001.CSV	1878.41	-0.0159608
PSB913-4_map3	0001.CSV	1882.26	-0.016026
PSB913-4_map3	0001.CSV	1886.12	-0.015831
PSB913-4_map3	0001.CSV	1889.98	-0.0158387
PSB913-4_map3	0001.CSV	1893.83	-0.0156095
PSB913-4_map3	0001.CSV	1897.69	-0.0157239
PSB913-4_map3	0001.CSV	1901.55	-0.0155293
PSB913-4_map3	0001.CSV	1905.41	-0.0156373
PSB913-4_map3	0001.CSV	1909.26	-0.015397
PSB913-4_map3	0001.CSV	1913.12	-0.0155342
PSB913-4_map3	0001.CSV	1916.98	-0.0153881
PSB913-4_map3	0001.CSV	1920.83	-0.0153604
PSB913-4_map3	0001.CSV	1924.69	-0.0151099
PSB913-4_map3	0001.CSV	1928.55	-0.0152759
PSB913-4_map3	0001.CSV	1932.4	-0.0151412
PSB913-4_map3	0001.CSV	1936.26	-0.0152563
PSB913-4_map3	0001.CSV	1940.12	-0.015135
PSB913-4_map3	0001.CSV	1943.98	-0.0150388
PSB913-4_map3	0001.CSV	1947.83	-0.0148547
PSB913-4_map3	0001.CSV	1951.69	-0.0151129
PSB913-4_map3	0001.CSV	1955.55	-0.014939
PSB913-4_map3	0001.CSV	1959.4	-0.014996
PSB913-4_map3	0001.CSV	1963.26	-0.0149076
PSB913-4_map3	0001.CSV	1967.12	-0.0149637
PSB913-4_map3	0001.CSV	1970.98	-0.0148195
PSB913-4_map3	0001.CSV	1974.83	-0.0150071
PSB913-4_map3	0001.CSV	1978.69	-0.0149071
PSB913-4_map3	0001.CSV	1982.55	-0.0150734
PSB913-4_map3	0001.CSV	1986.4	-0.0150409
PSB913-4_map3	0001.CSV	1990.26	-0.015126
PSB913-4_map3	0001.CSV	1994.12	-0.0148965
PSB913-4_map3	0001.CSV	1997.98	-0.0151054
PSB913-4_map3	0001.CSV	2001.83	-0.0150707
PSB913-4_map3	0001.CSV	2005.69	-0.0151662
PSB913-4_map3	0001.CSV	2009.55	-0.0150901
PSB913-4_map3	0001.CSV	2013.4	-0.0152726
PSB913-4_map3	0001.CSV	2017.26	-0.0151573
PSB913-4_map3	0001.CSV	2021.12	-0.0152701
PSB913-4_map3	0001.CSV	2024.97	-0.0152901
PSB913-4_map3	0001.CSV	2028.83	-0.0154319
PSB913-4_map3	0001.CSV	2032.69	-0.0154268
PSB913-4_map3	0001.CSV	2036.55	-0.0156154
PSB913-4_map3	0001.CSV	2040.4	-0.0155332
PSB913-4_map3	0001.CSV	2044.26	-0.0155744
PSB913-4_map3	0001.CSV	2048.12	-0.0155889
PSB913-4_map3	0001.CSV	2051.97	-0.0157438
PSB913-4_map3	0001.CSV	2055.83	-0.0157057
PSB913-4_map3	0001.CSV	2059.69	-0.0157476
PSB913-4_map3	0001.CSV	2063.55	-0.0156812
PSB913-4_map3	0001.CSV	2067.4	-0.0157637
PSB913-4_map3	0001.CSV	2071.26	-0.0157701
PSB913-4_map3	0001.CSV	2075.12	-0.0158882
PSB913-4_map3	0001.CSV	2078.97	-0.0158741
PSB913-4_map3	0001.CSV	2082.83	-0.0159126
PSB913-4_map3	0001.CSV	2086.69	-0.0158524
PSB913-4_map3	0001.CSV	2090.55	-0.0158827
PSB913-4_map3	0001.CSV	2094.4	-0.015867
PSB913-4_map3	0001.CSV	2098.26	-0.0159644
PSB913-4_map3	0001.CSV	2102.12	-0.0159362
PSB913-4_map3	0001.CSV	2105.97	-0.0159105
PSB913-4_map3	0001.CSV	2109.83	-0.015821
PSB913-4_map3	0001.CSV	2113.69	-0.0158134
PSB913-4_map3	0001.CSV	2117.55	-0.0157436
PSB913-4_map3	0001.CSV	2121.4	-0.0157245
PSB913-4_map3	0001.CSV	2125.26	-0.0156986
PSB913-4_map3	0001.CSV	2129.12	-0.0156817
PSB913-4_map3	0001.CSV	2132.97	-0.0156041
PSB913-4_map3	0001.CSV	2136.83	-0.0155548
PSB913-4_map3	0001.CSV	2140.69	-0.0155511
PSB913-4_map3	0001.CSV	2144.55	-0.0155272
PSB913-4_map3	0001.CSV	2148.4	-0.0154409
PSB913-4_map3	0001.CSV	2152.26	-0.0153815
PSB913-4_map3	0001.CSV	2156.12	-0.0153816
PSB913-4_map3	0001.CSV	2159.97	-0.0153316
PSB913-4_map3	0001.CSV	2163.83	-0.0153289
PSB913-4_map3	0001.CSV	2167.69	-0.0152727
PSB913-4_map3	0001.CSV	2171.55	-0.0152193
PSB913-4_map3	0001.CSV	2175.4	-0.0151512
PSB913-4_map3	0001.CSV	2179.26	-0.0151351
PSB913-4_map3	0001.CSV	2183.12	-0.0150708
PSB913-4_map3	0001.CSV	2186.97	-0.0150903
PSB913-4_map3	0001.CSV	2190.83	-0.0150282
PSB913-4_map3	0001.CSV	2194.69	-0.0150511
PSB913-4_map3	0001.CSV	2198.55	-0.0149962
PSB913-4_map3	0001.CSV	2202.4	-0.0150321
PSB913-4_map3	0001.CSV	2206.26	-0.0150315
PSB913-4_map3	0001.CSV	2210.12	-0.0151615
PSB913-4_map3	0001.CSV	2213.97	-0.0151846
PSB913-4_map3	0001.CSV	2217.83	-0.0152494
PSB913-4_map3	0001.CSV	2221.69	-0.0151939
PSB913-4_map3	0001.CSV	2225.54	-0.0153225
PSB913-4_map3	0001.CSV	2229.4	-0.0153557
PSB913-4_map3	0001.CSV	2233.26	-0.0155496
PSB913-4_map3	0001.CSV	2237.12	-0.0155465
PSB913-4_map3	0001.CSV	2240.97	-0.0157269
PSB913-4_map3	0001.CSV	2244.83	-0.015788
PSB913-4_map3	0001.CSV	2248.69	-0.01599
PSB913-4_map3	0001.CSV	2252.54	-0.016018
PSB913-4_map3	0001.CSV	2256.4	-0.0161417
PSB913-4_map3	0001.CSV	2260.26	-0.0161633
PSB913-4_map3	0001.CSV	2264.11	-0.0163795
PSB913-4_map3	0001.CSV	2267.97	-0.0164202
PSB913-4_map3	0001.CSV	2271.83	-0.0165856
PSB913-4_map3	0001.CSV	2275.69	-0.0165618
PSB913-4_map3	0001.CSV	2279.54	-0.0168104
PSB913-4_map3	0001.CSV	2283.4	-0.0169113
PSB913-4_map3	0001.CSV	2287.26	-0.0169917
PSB913-4_map3	0001.CSV	2291.11	-0.0168009
PSB913-4_map3	0001.CSV	2294.97	-0.0169234
PSB913-4_map3	0001.CSV	2298.83	-0.0167832
PSB913-4_map3	0001.CSV	2302.69	-0.0167999
PSB913-4_map3	0001.CSV	2306.54	-0.0165663
PSB913-4_map3	0001.CSV	2310.4	-0.0167577
PSB913-4_map3	0001.CSV	2314.26	-0.0164823
PSB913-4_map3	0001.CSV	2318.11	-0.0170449
PSB913-4_map3	0001.CSV	2321.97	-0.0169997
PSB913-4_map3	0001.CSV	2325.83	-0.0182829
PSB913-4_map3	0001.CSV	2329.69	-0.0183926
PSB913-4_map3	0001.CSV	2333.54	-0.0201807
PSB913-4_map3	0001.CSV	2337.4	-0.0198159
PSB913-4_map3	0001.CSV	2341.26	-0.0218462
PSB913-4_map3	0001.CSV	2345.11	-0.0187059
PSB913-4_map3	0001.CSV	2348.97	-0.0187456
PSB913-4_map3	0001.CSV	2352.83	-0.0202205
PSB913-4_map3	0001.CSV	2356.69	-0.0301195
PSB913-4_map3	0001.CSV	2360.54	-0.0341439
PSB913-4_map3	0001.CSV	2364.4	-0.0329093
PSB913-4_map3	0001.CSV	2368.26	-0.0238143
PSB913-4_map3	0001.CSV	2372.11	-0.0204755
PSB913-4_map3	0001.CSV	2375.97	-0.0177311
PSB913-4_map3	0001.CSV	2379.83	-0.017224
PSB913-4_map3	0001.CSV	2383.69	-0.0169149
PSB913-4_map3	0001.CSV	2387.54	-0.0174151
PSB913-4_map3	0001.CSV	2391.4	-0.0176812
PSB913-4_map3	0001.CSV	2395.26	-0.0178903
PSB913-4_map3	0001.CSV	2399.11	-0.0176906
PSB913-4_map3	0001.CSV	2402.97	-0.01786
PSB913-4_map3	0001.CSV	2406.83	-0.0178277
PSB913-4_map3	0001.CSV	2410.68	-0.0180132
PSB913-4_map3	0001.CSV	2414.54	-0.0178652
PSB913-4_map3	0001.CSV	2418.4	-0.017916
PSB913-4_map3	0001.CSV	2422.26	-0.0176878
PSB913-4_map3	0001.CSV	2426.11	-0.0177767
PSB913-4_map3	0001.CSV	2429.97	-0.0176336
PSB913-4_map3	0001.CSV	2433.83	-0.0177149
PSB913-4_map3	0001.CSV	2437.68	-0.0174865
PSB913-4_map3	0001.CSV	2441.54	-0.0175328
PSB913-4_map3	0001.CSV	2445.4	-0.017303
PSB913-4_map3	0001.CSV	2449.26	-0.0173365
PSB913-4_map3	0001.CSV	2453.11	-0.0171146
PSB913-4_map3	0001.CSV	2456.97	-0.0172179
PSB913-4_map3	0001.CSV	2460.83	-0.0170171
PSB913-4_map3	0001.CSV	2464.68	-0.0171127
PSB913-4_map3	0001.CSV	2468.54	-0.0169048
PSB913-4_map3	0001.CSV	2472.4	-0.016979
PSB913-4_map3	0001.CSV	2476.26	-0.0167287
PSB913-4_map3	0001.CSV	2480.11	-0.0166852
PSB913-4_map3	0001.CSV	2483.97	-0.0164142
PSB913-4_map3	0001.CSV	2487.83	-0.0164473
PSB913-4_map3	0001.CSV	2491.68	-0.0162074
PSB913-4_map3	0001.CSV	2495.54	-0.0163297
PSB913-4_map3	0001.CSV	2499.4	-0.0162133
PSB913-4_map3	0001.CSV	2503.26	-0.0163595
PSB913-4_map3	0001.CSV	2507.11	-0.0162715
PSB913-4_map3	0001.CSV	2510.97	-0.0163891
PSB913-4_map3	0001.CSV	2514.83	-0.0161542
PSB913-4_map3	0001.CSV	2518.68	-0.0161434
PSB913-4_map3	0001.CSV	2522.54	-0.0159579
PSB913-4_map3	0001.CSV	2526.4	-0.0161336
PSB913-4_map3	0001.CSV	2530.26	-0.016148
PSB913-4_map3	0001.CSV	2534.11	-0.016462
PSB913-4_map3	0001.CSV	2537.97	-0.0164581
PSB913-4_map3	0001.CSV	2541.83	-0.0166186
PSB913-4_map3	0001.CSV	2545.68	-0.0165772
PSB913-4_map3	0001.CSV	2549.54	-0.0167795
PSB913-4_map3	0001.CSV	2553.4	-0.0166722
PSB913-4_map3	0001.CSV	2557.26	-0.0168364
PSB913-4_map3	0001.CSV	2561.11	-0.0167948
PSB913-4_map3	0001.CSV	2564.97	-0.0169901
PSB913-4_map3	0001.CSV	2568.83	-0.0169422
PSB913-4_map3	0001.CSV	2572.68	-0.0170525
PSB913-4_map3	0001.CSV	2576.54	-0.0169543
PSB913-4_map3	0001.CSV	2580.4	-0.0171656
PSB913-4_map3	0001.CSV	2584.25	-0.0171401
PSB913-4_map3	0001.CSV	2588.11	-0.0172661
PSB913-4_map3	0001.CSV	2591.97	-0.017147
PSB913-4_map3	0001.CSV	2595.83	-0.017299
PSB913-4_map3	0001.CSV	2599.68	-0.017248
PSB913-4_map3	0001.CSV	2603.54	-0.0173467
PSB913-4_map3	0001.CSV	2607.4	-0.0172361
PSB913-4_map3	0001.CSV	2611.25	-0.017315
PSB913-4_map3	0001.CSV	2615.11	-0.0171865
PSB913-4_map3	0001.CSV	2618.97	-0.0173321
PSB913-4_map3	0001.CSV	2622.82	-0.0172589
PSB913-4_map3	0001.CSV	2626.68	-0.0173517
PSB913-4_map3	0001.CSV	2630.54	-0.0173143
PSB913-4_map3	0001.CSV	2634.4	-0.0173617
PSB913-4_map3	0001.CSV	2638.25	-0.0172054
PSB913-4_map3	0001.CSV	2642.11	-0.0173792
PSB913-4_map3	0001.CSV	2645.97	-0.0174124
PSB913-4_map3	0001.CSV	2649.82	-0.0175525
PSB913-4_map3	0001.CSV	2653.68	-0.0174844
PSB913-4_map3	0001.CSV	2657.54	-0.0176279
PSB913-4_map3	0001.CSV	2661.4	-0.0176053
PSB913-4_map3	0001.CSV	2665.25	-0.0177199
PSB913-4_map3	0001.CSV	2669.11	-0.0176566
PSB913-4_map3	0001.CSV	2672.97	-0.0175887
PSB913-4_map3	0001.CSV	2676.82	-0.0172844
PSB913-4_map3	0001.CSV	2680.68	-0.0173633
PSB913-4_map3	0001.CSV	2684.54	-0.0175381
PSB913-4_map3	0001.CSV	2688.4	-0.0177274
PSB913-4_map3	0001.CSV	2692.25	-0.017679
PSB913-4_map3	0001.CSV	2696.11	-0.0176823
PSB913-4_map3	0001.CSV	2699.97	-0.0175711
PSB913-4_map3	0001.CSV	2703.82	-0.0176583
PSB913-4_map3	0001.CSV	2707.68	-0.0175529
PSB913-4_map3	0001.CSV	2711.54	-0.0175621
PSB913-4_map3	0001.CSV	2715.4	-0.0175486
PSB913-4_map3	0001.CSV	2719.25	-0.017493
PSB913-4_map3	0001.CSV	2723.11	-0.0171883
PSB913-4_map3	0001.CSV	2726.97	-0.0172693
PSB913-4_map3	0001.CSV	2730.82	-0.0174089
PSB913-4_map3	0001.CSV	2734.68	-0.0173985
PSB913-4_map3	0001.CSV	2738.54	-0.0173261
PSB913-4_map3	0001.CSV	2742.4	-0.0173558
PSB913-4_map3	0001.CSV	2746.25	-0.0170907
PSB913-4_map3	0001.CSV	2750.11	-0.0170885
PSB913-4_map3	0001.CSV	2753.97	-0.0172223
PSB913-4_map3	0001.CSV	2757.82	-0.0173564
PSB913-4_map3	0001.CSV	2761.68	-0.0173722
PSB913-4_map3	0001.CSV	2765.54	-0.0173781
PSB913-4_map3	0001.CSV	2769.39	-0.0171576
PSB913-4_map3	0001.CSV	2773.25	-0.0169304
PSB913-4_map3	0001.CSV	2777.11	-0.0169963
PSB913-4_map3	0001.CSV	2780.97	-0.0171715
PSB913-4_map3	0001.CSV	2784.82	-0.0169413
PSB913-4_map3	0001.CSV	2788.68	-0.0165953
PSB913-4_map3	0001.CSV	2792.54	-0.0164898
PSB913-4_map3	0001.CSV	2796.39	-0.0165884
PSB913-4_map3	0001.CSV	2800.25	-0.016706
PSB913-4_map3	0001.CSV	2804.11	-0.0169098
PSB913-4_map3	0001.CSV	2807.97	-0.0166839
PSB913-4_map3	0001.CSV	2811.82	-0.0166447
PSB913-4_map3	0001.CSV	2815.68	-0.0167659
PSB913-4_map3	0001.CSV	2819.54	-0.0167451
PSB913-4_map3	0001.CSV	2823.39	-0.0165875
PSB913-4_map3	0001.CSV	2827.25	-0.0165623
PSB913-4_map3	0001.CSV	2831.11	-0.0163397
PSB913-4_map3	0001.CSV	2834.97	-0.0159944
PSB913-4_map3	0001.CSV	2838.82	-0.0159445
PSB913-4_map3	0001.CSV	2842.68	-0.0162601
PSB913-4_map3	0001.CSV	2846.54	-0.01638
PSB913-4_map3	0001.CSV	2850.39	-0.0169309
PSB913-4_map3	0001.CSV	2854.25	-0.0175232
PSB913-4_map3	0001.CSV	2858.11	-0.0175872
PSB913-4_map3	0001.CSV	2861.97	-0.0175398
PSB913-4_map3	0001.CSV	2865.82	-0.0175502
PSB913-4_map3	0001.CSV	2869.68	-0.0173145
PSB913-4_map3	0001.CSV	2873.54	-0.0171013
PSB913-4_map3	0001.CSV	2877.39	-0.0172539
PSB913-4_map3	0001.CSV	2881.25	-0.0173563
PSB913-4_map3	0001.CSV	2885.11	-0.0172767
PSB913-4_map3	0001.CSV	2888.97	-0.0172982
PSB913-4_map3	0001.CSV	2892.82	-0.0172076
PSB913-4_map3	0001.CSV	2896.68	-0.0171838
PSB913-4_map3	0001.CSV	2900.54	-0.017239
PSB913-4_map3	0001.CSV	2904.39	-0.0172023
PSB913-4_map3	0001.CSV	2908.25	-0.0169065
PSB913-4_map3	0001.CSV	2912.11	-0.0165381
PSB913-4_map3	0001.CSV	2915.97	-0.0167154
PSB913-4_map3	0001.CSV	2919.82	-0.0178561
PSB913-4_map3	0001.CSV	2923.68	-0.0190823
PSB913-4_map3	0001.CSV	2927.54	-0.0195164
PSB913-4_map3	0001.CSV	2931.39	-0.0197383
PSB913-4_map3	0001.CSV	2935.25	-0.0200477
PSB913-4_map3	0001.CSV	2939.11	-0.0196564
PSB913-4_map3	0001.CSV	2942.96	-0.0188735
PSB913-4_map3	0001.CSV	2946.82	-0.018565
PSB913-4_map3	0001.CSV	2950.68	-0.018896
PSB913-4_map3	0001.CSV	2954.54	-0.0194173
PSB913-4_map3	0001.CSV	2958.39	-0.0197842
PSB913-4_map3	0001.CSV	2962.25	-0.0197318
PSB913-4_map3	0001.CSV	2966.11	-0.0196961
PSB913-4_map3	0001.CSV	2969.96	-0.0191537
PSB913-4_map3	0001.CSV	2973.82	-0.0183584
PSB913-4_map3	0001.CSV	2977.68	-0.0177896
PSB913-4_map3	0001.CSV	2981.53	-0.0177441
PSB913-4_map3	0001.CSV	2985.39	-0.0179933
PSB913-4_map3	0001.CSV	2989.25	-0.0178717
PSB913-4_map3	0001.CSV	2993.11	-0.0174662
PSB913-4_map3	0001.CSV	2996.96	-0.0173957
PSB913-4_map3	0001.CSV	3000.82	-0.0175186
PSB913-4_map3	0001.CSV	3004.68	-0.0176746
PSB913-4_map3	0001.CSV	3008.53	-0.0173834
PSB913-4_map3	0001.CSV	3012.39	-0.0170004
PSB913-4_map3	0001.CSV	3016.25	-0.0168422
PSB913-4_map3	0001.CSV	3020.11	-0.0170483
PSB913-4_map3	0001.CSV	3023.96	-0.0171559
PSB913-4_map3	0001.CSV	3027.82	-0.0172219
PSB913-4_map3	0001.CSV	3031.68	-0.017026
PSB913-4_map3	0001.CSV	3035.53	-0.0169791
PSB913-4_map3	0001.CSV	3039.39	-0.0169598
PSB913-4_map3	0001.CSV	3043.25	-0.0169093
PSB913-4_map3	0001.CSV	3047.11	-0.0169446
PSB913-4_map3	0001.CSV	3050.96	-0.0170489
PSB913-4_map3	0001.CSV	3054.82	-0.0170299
PSB913-4_map3	0001.CSV	3058.68	-0.0171556
PSB913-4_map3	0001.CSV	3062.53	-0.0170792
PSB913-4_map3	0001.CSV	3066.39	-0.0168689
PSB913-4_map3	0001.CSV	3070.25	-0.0168309
PSB913-4_map3	0001.CSV	3074.11	-0.0168522
PSB913-4_map3	0001.CSV	3077.96	-0.0165499
PSB913-4_map3	0001.CSV	3081.82	-0.0164331
PSB913-4_map3	0001.CSV	3085.68	-0.0163781
PSB913-4_map3	0001.CSV	3089.53	-0.0165921
PSB913-4_map3	0001.CSV	3093.39	-0.0168266
PSB913-4_map3	0001.CSV	3097.25	-0.016905
PSB913-4_map3	0001.CSV	3101.11	-0.0167443
PSB913-4_map3	0001.CSV	3104.96	-0.0167333
PSB913-4_map3	0001.CSV	3108.82	-0.0164455
PSB913-4_map3	0001.CSV	3112.68	-0.0163409
PSB913-4_map3	0001.CSV	3116.53	-0.0161163
PSB913-4_map3	0001.CSV	3120.39	-0.0162615
PSB913-4_map3	0001.CSV	3124.25	-0.0165231
PSB913-4_map3	0001.CSV	3128.11	-0.0166896
PSB913-4_map3	0001.CSV	3131.96	-0.0166431
PSB913-4_map3	0001.CSV	3135.82	-0.0166878
PSB913-4_map3	0001.CSV	3139.68	-0.0165239
PSB913-4_map3	0001.CSV	3143.53	-0.0167544
PSB913-4_map3	0001.CSV	3147.39	-0.0166734
PSB913-4_map3	0001.CSV	3151.25	-0.0164326
PSB913-4_map3	0001.CSV	3155.1	-0.0163676
PSB913-4_map3	0001.CSV	3158.96	-0.0167825
PSB913-4_map3	0001.CSV	3162.82	-0.0168158
PSB913-4_map3	0001.CSV	3166.68	-0.0169912
PSB913-4_map3	0001.CSV	3170.53	-0.0171681
PSB913-4_map3	0001.CSV	3174.39	-0.0172974
PSB913-4_map3	0001.CSV	3178.25	-0.017113
PSB913-4_map3	0001.CSV	3182.1	-0.0171411
PSB913-4_map3	0001.CSV	3185.96	-0.0169801
PSB913-4_map3	0001.CSV	3189.82	-0.0170293
PSB913-4_map3	0001.CSV	3193.68	-0.0170992
PSB913-4_map3	0001.CSV	3197.53	-0.017274
PSB913-4_map3	0001.CSV	3201.39	-0.0171176
PSB913-4_map3	0001.CSV	3205.25	-0.017165
PSB913-4_map3	0001.CSV	3209.1	-0.0171165
PSB913-4_map3	0001.CSV	3212.96	-0.0171823
PSB913-4_map3	0001.CSV	3216.82	-0.0170361
PSB913-4_map3	0001.CSV	3220.68	-0.017131
PSB913-4_map3	0001.CSV	3224.53	-0.0171383
PSB913-4_map3	0001.CSV	3228.39	-0.0170703
PSB913-4_map3	0001.CSV	3232.25	-0.0165722
PSB913-4_map3	0001.CSV	3236.1	-0.0167592
PSB913-4_map3	0001.CSV	3239.96	-0.0169143
PSB913-4_map3	0001.CSV	3243.82	-0.0168748
PSB913-4_map3	0001.CSV	3247.68	-0.0167491
PSB913-4_map3	0001.CSV	3251.53	-0.0170653
PSB913-4_map3	0001.CSV	3255.39	-0.0169659
PSB913-4_map3	0001.CSV	3259.25	-0.0171656
PSB913-4_map3	0001.CSV	3263.1	-0.0171735
PSB913-4_map3	0001.CSV	3266.96	-0.0171282
PSB913-4_map3	0001.CSV	3270.82	-0.0167926
PSB913-4_map3	0001.CSV	3274.68	-0.0169852
PSB913-4_map3	0001.CSV	3278.53	-0.0171965
PSB913-4_map3	0001.CSV	3282.39	-0.0174297
PSB913-4_map3	0001.CSV	3286.25	-0.0172142
PSB913-4_map3	0001.CSV	3290.1	-0.0169739
PSB913-4_map3	0001.CSV	3293.96	-0.0166594
PSB913-4_map3	0001.CSV	3297.82	-0.016987
PSB913-4_map3	0001.CSV	3301.67	-0.0169166
PSB913-4_map3	0001.CSV	3305.53	-0.0167817
PSB913-4_map3	0001.CSV	3309.39	-0.0168261
PSB913-4_map3	0001.CSV	3313.25	-0.0173193
PSB913-4_map3	0001.CSV	3317.1	-0.0175116
PSB913-4_map3	0001.CSV	3320.96	-0.0173647
PSB913-4_map3	0001.CSV	3324.82	-0.0170085
PSB913-4_map3	0001.CSV	3328.67	-0.0174042
PSB913-4_map3	0001.CSV	3332.53	-0.0175075
PSB913-4_map3	0001.CSV	3336.39	-0.0172087
PSB913-4_map3	0001.CSV	3340.24	-0.0168906
PSB913-4_map3	0001.CSV	3344.1	-0.0170762
PSB913-4_map3	0001.CSV	3347.96	-0.0169571
PSB913-4_map3	0001.CSV	3351.82	-0.0171549
PSB913-4_map3	0001.CSV	3355.67	-0.0174651
PSB913-4_map3	0001.CSV	3359.53	-0.0174175
PSB913-4_map3	0001.CSV	3363.39	-0.0169231
PSB913-4_map3	0001.CSV	3367.24	-0.0166162
PSB913-4_map3	0001.CSV	3371.1	-0.0165865
PSB913-4_map3	0001.CSV	3374.96	-0.0169371
PSB913-4_map3	0001.CSV	3378.82	-0.0171769
PSB913-4_map3	0001.CSV	3382.67	-0.017527
PSB913-4_map3	0001.CSV	3386.53	-0.0172972
PSB913-4_map3	0001.CSV	3390.39	-0.0170233
PSB913-4_map3	0001.CSV	3394.24	-0.0167515
PSB913-4_map3	0001.CSV	3398.1	-0.0166118
PSB913-4_map3	0001.CSV	3401.96	-0.0165905
PSB913-4_map3	0001.CSV	3405.82	-0.0169226
PSB913-4_map3	0001.CSV	3409.67	-0.0169413
PSB913-4_map3	0001.CSV	3413.53	-0.0172179
PSB913-4_map3	0001.CSV	3417.39	-0.0175411
PSB913-4_map3	0001.CSV	3421.24	-0.0175564
PSB913-4_map3	0001.CSV	3425.1	-0.0173249
PSB913-4_map3	0001.CSV	3428.96	-0.017159
PSB913-4_map3	0001.CSV	3432.82	-0.0169189
PSB913-4_map3	0001.CSV	3436.67	-0.0170509
PSB913-4_map3	0001.CSV	3440.53	-0.0175858
PSB913-4_map3	0001.CSV	3444.39	-0.0179938
PSB913-4_map3	0001.CSV	3448.24	-0.0178382
PSB913-4_map3	0001.CSV	3452.1	-0.0180142
PSB913-4_map3	0001.CSV	3455.96	-0.0181341
PSB913-4_map3	0001.CSV	3459.82	-0.0179135
PSB913-4_map3	0001.CSV	3463.67	-0.0174797
PSB913-4_map3	0001.CSV	3467.53	-0.0172324
PSB913-4_map3	0001.CSV	3471.39	-0.0174912
PSB913-4_map3	0001.CSV	3475.24	-0.0178703
PSB913-4_map3	0001.CSV	3479.1	-0.0179305
PSB913-4_map3	0001.CSV	3482.96	-0.0178055
PSB913-4_map3	0001.CSV	3486.82	-0.0177207
PSB913-4_map3	0001.CSV	3490.67	-0.0178355
PSB913-4_map3	0001.CSV	3494.53	-0.0178535
PSB913-4_map3	0001.CSV	3498.39	-0.0179188
PSB913-4_map3	0001.CSV	3502.24	-0.018152
PSB913-4_map3	0001.CSV	3506.1	-0.0183842
PSB913-4_map3	0001.CSV	3509.96	-0.0185599
PSB913-4_map3	0001.CSV	3513.81	-0.0183184
PSB913-4_map3	0001.CSV	3517.67	-0.0186466
PSB913-4_map3	0001.CSV	3521.53	-0.0188638
PSB913-4_map3	0001.CSV	3525.39	-0.019113
PSB913-4_map3	0001.CSV	3529.24	-0.0192213
PSB913-4_map3	0001.CSV	3533.1	-0.0191822
PSB913-4_map3	0001.CSV	3536.96	-0.0190428
PSB913-4_map3	0001.CSV	3540.81	-0.0191697
PSB913-4_map3	0001.CSV	3544.67	-0.0190362
PSB913-4_map3	0001.CSV	3548.53	-0.0190876
PSB913-4_map3	0001.CSV	3552.39	-0.019208
PSB913-4_map3	0001.CSV	3556.24	-0.0195089
PSB913-4_map3	0001.CSV	3560.1	-0.0197089
PSB913-4_map3	0001.CSV	3563.96	-0.0202368
PSB913-4_map3	0001.CSV	3567.81	-0.0197647
PSB913-4_map3	0001.CSV	3571.67	-0.0196435
PSB913-4_map3	0001.CSV	3575.53	-0.0199713
PSB913-4_map3	0001.CSV	3579.39	-0.0199526
PSB913-4_map3	0001.CSV	3583.24	-0.0197257
PSB913-4_map3	0001.CSV	3587.1	-0.0197623
PSB913-4_map3	0001.CSV	3590.96	-0.0198355
PSB913-4_map3	0001.CSV	3594.81	-0.0203858
PSB913-4_map3	0001.CSV	3598.67	-0.0200856
PSB913-4_map3	0001.CSV	3602.53	-0.0202418
PSB913-4_map3	0001.CSV	3606.39	-0.0208723
PSB913-4_map3	0001.CSV	3610.24	-0.0213107
PSB913-4_map3	0001.CSV	3614.1	-0.02095
PSB913-4_map3	0001.CSV	3617.96	-0.020861
PSB913-4_map3	0001.CSV	3621.81	-0.0205637
PSB913-4_map3	0001.CSV	3625.67	-0.0214966
PSB913-4_map3	0001.CSV	3629.53	-0.0213647
PSB913-4_map3	0001.CSV	3633.39	-0.0208416
PSB913-4_map3	0001.CSV	3637.24	-0.0209559
PSB913-4_map3	0001.CSV	3641.1	-0.0214259
PSB913-4_map3	0001.CSV	3644.96	-0.021936
PSB913-4_map3	0001.CSV	3648.81	-0.0215217
PSB913-4_map3	0001.CSV	3652.67	-0.02036
PSB913-4_map3	0001.CSV	3656.53	-0.0205378
PSB913-4_map3	0001.CSV	3660.38	-0.0204629
PSB913-4_map3	0001.CSV	3664.24	-0.0214595
PSB913-4_map3	0001.CSV	3668.1	-0.0223179
PSB913-4_map3	0001.CSV	3671.96	-0.0226314
PSB913-4_map3	0001.CSV	3675.81	-0.0216098
PSB913-4_map3	0001.CSV	3679.67	-0.0211283
PSB913-4_map3	0001.CSV	3683.53	-0.0213224
PSB913-4_map3	0001.CSV	3687.38	-0.0215669
PSB913-4_map3	0001.CSV	3691.24	-0.0205145
PSB913-4_map3	0001.CSV	3695.1	-0.0209324
PSB913-4_map3	0001.CSV	3698.95	-0.0214278
PSB913-4_map3	0001.CSV	3702.81	-0.0218707
PSB913-4_map3	0001.CSV	3706.67	-0.0222062
PSB913-4_map3	0001.CSV	3710.53	-0.0223424
PSB913-4_map3	0001.CSV	3714.38	-0.0211417
PSB913-4_map3	0001.CSV	3718.24	-0.021789
PSB913-4_map3	0001.CSV	3722.1	-0.0220543
PSB913-4_map3	0001.CSV	3725.95	-0.0220995
PSB913-4_map3	0001.CSV	3729.81	-0.0221986
PSB913-4_map3	0001.CSV	3733.67	-0.022544
PSB913-4_map3	0001.CSV	3737.53	-0.020747
PSB913-4_map3	0001.CSV	3741.38	-0.0216514
PSB913-4_map3	0001.CSV	3745.24	-0.0225873
PSB913-4_map3	0001.CSV	3749.1	-0.0230392
PSB913-4_map3	0001.CSV	3752.95	-0.0214238
PSB913-4_map3	0001.CSV	3756.81	-0.0216602
PSB913-4_map3	0001.CSV	3760.67	-0.0215234
PSB913-4_map3	0001.CSV	3764.53	-0.021889
PSB913-4_map3	0001.CSV	3768.38	-0.0216642
PSB913-4_map3	0001.CSV	3772.24	-0.0215207
PSB913-4_map3	0001.CSV	3776.1	-0.021541
PSB913-4_map3	0001.CSV	3779.95	-0.0215032
PSB913-4_map3	0001.CSV	3783.81	-0.0211982
PSB913-4_map3	0001.CSV	3787.67	-0.021385
PSB913-4_map3	0001.CSV	3791.53	-0.021622
PSB913-4_map3	0001.CSV	3795.38	-0.0224215
PSB913-4_map3	0001.CSV	3799.24	-0.0223943
PSB913-4_map3	0001.CSV	3803.1	-0.0219471
PSB913-4_map3	0001.CSV	3806.95	-0.0211747
PSB913-4_map3	0001.CSV	3810.81	-0.0216659
PSB913-4_map3	0001.CSV	3814.67	-0.0221219
PSB913-4_map3	0001.CSV	3818.53	-0.0223068
PSB913-4_map3	0001.CSV	3822.38	-0.0215038
PSB913-4_map3	0001.CSV	3826.24	-0.0217078
PSB913-4_map3	0001.CSV	3830.1	-0.021906
PSB913-4_map3	0001.CSV	3833.95	-0.0225664
PSB913-4_map3	0001.CSV	3837.81	-0.0223785
PSB913-4_map3	0001.CSV	3841.67	-0.0218797
PSB913-4_map3	0001.CSV	3845.53	-0.021753
PSB913-4_map3	0001.CSV	3849.38	-0.0230095
PSB913-4_map3	0001.CSV	3853.24	-0.0227588
PSB913-4_map3	0001.CSV	3857.1	-0.0218497
PSB913-4_map3	0001.CSV	3860.95	-0.0222558
PSB913-4_map3	0001.CSV	3864.81	-0.0227181
PSB913-4_map3	0001.CSV	3868.67	-0.0223671
PSB913-4_map3	0001.CSV	3872.52	-0.0220149
PSB913-4_map3	0001.CSV	3876.38	-0.0219447
PSB913-4_map3	0001.CSV	3880.24	-0.022441
PSB913-4_map3	0001.CSV	3884.1	-0.0216892
PSB913-4_map3	0001.CSV	3887.95	-0.0218455
PSB913-4_map3	0001.CSV	3891.81	-0.0219745
PSB913-4_map3	0001.CSV	3895.67	-0.0225376
PSB913-4_map3	0001.CSV	3899.52	-0.0230498
PSB913-4_map3	0001.CSV	3903.38	-0.0224125
PSB913-4_map3	0001.CSV	3907.24	-0.0215767
PSB913-4_map3	0001.CSV	3911.1	-0.0222134
PSB913-4_map3	0001.CSV	3914.95	-0.0225651
PSB913-4_map3	0001.CSV	3918.81	-0.0223729
PSB913-4_map3	0001.CSV	3922.67	-0.0221518
PSB913-4_map3	0001.CSV	3926.52	-0.0224978
PSB913-4_map3	0001.CSV	3930.38	-0.0222661
PSB913-4_map3	0001.CSV	3934.24	-0.0219116
PSB913-4_map3	0001.CSV	3938.09	-0.0221639
PSB913-4_map3	0001.CSV	3941.95	-0.0224303
PSB913-4_map3	0001.CSV	3945.81	-0.0220569
PSB913-4_map3	0001.CSV	3949.67	-0.0220463
PSB913-4_map3	0001.CSV	3953.52	-0.0219678
PSB913-4_map3	0001.CSV	3957.38	-0.0221687
PSB913-4_map3	0001.CSV	3961.24	-0.0220708
PSB913-4_map3	0001.CSV	3965.09	-0.022159
PSB913-4_map3	0001.CSV	3968.95	-0.0222334
PSB913-4_map3	0001.CSV	3972.81	-0.0223168
PSB913-4_map3	0001.CSV	3976.67	-0.0220681
PSB913-4_map3	0001.CSV	3980.52	-0.0221119
PSB913-4_map3	0001.CSV	3984.38	-0.0219777
PSB913-4_map3	0001.CSV	3988.24	-0.0221814
PSB913-4_map3	0001.CSV	3992.09	-0.0221634
PSB913-4_map3	0001.CSV	3995.95	-0.0221483
PSB913-4_map3	0001.CSV	3999.81	-0.0220789
PSB913-4_map3	0002.CSV	674.992	0.00281076
PSB913-4_map3	0002.CSV	678.849	0.00242041
PSB913-4_map3	0002.CSV	682.706	0.00398086
PSB913-4_map3	0002.CSV	686.563	0.00361906
PSB913-4_map3	0002.CSV	690.42	0.00578012
PSB913-4_map3	0002.CSV	694.277	0.010344
PSB913-4_map3	0002.CSV	698.134	0.0163716
PSB913-4_map3	0002.CSV	701.991	0.0115241
PSB913-4_map3	0002.CSV	705.849	0.00985469
PSB913-4_map3	0002.CSV	709.706	0.0200544
PSB913-4_map3	0002.CSV	713.563	0.0198642
PSB913-4_map3	0002.CSV	717.42	0.00321541
PSB913-4_map3	0002.CSV	721.277	-0.00447983
PSB913-4_map3	0002.CSV	725.134	-0.00498601
PSB913-4_map3	0002.CSV	728.991	-0.00396696
PSB913-4_map3	0002.CSV	732.848	-0.00422002
PSB913-4_map3	0002.CSV	736.705	-0.00328445
PSB913-4_map3	0002.CSV	740.562	-0.00320727
PSB913-4_map3	0002.CSV	744.42	-0.00236594
PSB913-4_map3	0002.CSV	748.277	-0.00263104
PSB913-4_map3	0002.CSV	752.134	-0.00210424
PSB913-4_map3	0002.CSV	755.991	-0.00243076
PSB913-4_map3	0002.CSV	759.848	-0.00187907
PSB913-4_map3	0002.CSV	763.705	-0.00195118
PSB913-4_map3	0002.CSV	767.562	-0.00131786
PSB913-4_map3	0002.CSV	771.419	-0.00133071
PSB913-4_map3	0002.CSV	775.276	-0.000805801
PSB913-4_map3	0002.CSV	779.133	-0.00116238
PSB913-4_map3	0002.CSV	782.99	-0.000559075
PSB913-4_map3	0002.CSV	786.848	-0.000507284
PSB913-4_map3	0002.CSV	790.705	5.67292e-05
PSB913-4_map3	0002.CSV	794.562	0.000158973
PSB913-4_map3	0002.CSV	798.419	0.000912508
PSB913-4_map3	0002.CSV	802.276	0.00124075
PSB913-4_map3	0002.CSV	806.133	0.00242055
PSB913-4_map3	0002.CSV	809.99	0.00335946
PSB913-4_map3	0002.CSV	813.847	0.00491806
PSB913-4_map3	0002.CSV	817.704	0.00612854
PSB913-4_map3	0002.CSV	821.562	0.00816087
PSB913-4_map3	0002.CSV	825.419	0.0102698
PSB913-4_map3	0002.CSV	829.276	0.013435
PSB913-4_map3	0002.CSV	833.133	0.0171032
PSB913-4_map3	0002.CSV	836.99	0.0232711
PSB913-4_map3	0002.CSV	840.847	0.0305303
PSB913-4_map3	0002.CSV	844.704	0.0375696
PSB913-4_map3	0002.CSV	848.561	0.0469051
PSB913-4_map3	0002.CSV	852.418	0.0553221
PSB913-4_map3	0002.CSV	856.275	0.0537929
PSB913-4_map3	0002.CSV	860.132	0.0455439
PSB913-4_map3	0002.CSV	863.99	0.0342746
PSB913-4_map3	0002.CSV	867.847	0.0227868
PSB913-4_map3	0002.CSV	871.704	0.0111088
PSB913-4_map3	0002.CSV	875.561	0.00153087
PSB913-4_map3	0002.CSV	879.418	-0.00346232
PSB913-4_map3	0002.CSV	883.275	-0.00481676
PSB913-4_map3	0002.CSV	887.132	-0.00533783
PSB913-4_map3	0002.CSV	890.989	-0.00530847
PSB913-4_map3	0002.CSV	894.846	-0.00525125
PSB913-4_map3	0002.CSV	898.703	-0.00503167
PSB913-4_map3	0002.CSV	902.561	-0.00473027
PSB913-4_map3	0002.CSV	906.418	-0.00425887
PSB913-4_map3	0002.CSV	910.275	-0.00428647
PSB913-4_map3	0002.CSV	914.132	-0.0044495
PSB913-4_map3	0002.CSV	917.989	-0.00430956
PSB913-4_map3	0002.CSV	921.846	-0.00398124
PSB913-4_map3	0002.CSV	925.703	-0.00358271
PSB913-4_map3	0002.CSV	929.56	-0.00322631
PSB913-4_map3	0002.CSV	933.417	-0.00301804
PSB913-4_map3	0002.CSV	937.274	-0.00289407
PSB913-4_map3	0002.CSV	941.131	-0.0027
PSB913-4_map3	0002.CSV	944.989	-0.00242469
PSB913-4_map3	0002.CSV	948.846	-0.00200804
PSB913-4_map3	0002.CSV	952.703	-0.00160529
PSB913-4_map3	0002.CSV	956.56	-0.00112437
PSB913-4_map3	0002.CSV	960.417	-0.000994604
PSB913-4_map3	0002.CSV	964.274	-0.000746597
PSB913-4_map3	0002.CSV	968.131	-0.00047614
PSB913-4_map3	0002.CSV	971.988	-7.28225e-05
PSB913-4_map3	0002.CSV	975.845	0.000275166
PSB913-4_map3	0002.CSV	979.702	0.000909255
PSB913-4_map3	0002.CSV	983.559	0.0013444
PSB913-4_map3	0002.CSV	987.417	0.00177863
PSB913-4_map3	0002.CSV	991.274	0.00195599
PSB913-4_map3	0002.CSV	995.131	0.00248553
PSB913-4_map3	0002.CSV	998.988	0.00288163
PSB913-4_map3	0002.CSV	1002.85	0.00346757
PSB913-4_map3	0002.CSV	1006.7	0.00377773
PSB913-4_map3	0002.CSV	1010.56	0.00436065
PSB913-4_map3	0002.CSV	1014.42	0.0047772
PSB913-4_map3	0002.CSV	1018.27	0.00545706
PSB913-4_map3	0002.CSV	1022.13	0.00568897
PSB913-4_map3	0002.CSV	1025.99	0.00601718
PSB913-4_map3	0002.CSV	1029.85	0.00594227
PSB913-4_map3	0002.CSV	1033.7	0.00619498
PSB913-4_map3	0002.CSV	1037.56	0.00598792
PSB913-4_map3	0002.CSV	1041.42	0.00600297
PSB913-4_map3	0002.CSV	1045.27	0.00561237
PSB913-4_map3	0002.CSV	1049.13	0.00574843
PSB913-4_map3	0002.CSV	1052.99	0.00562959
PSB913-4_map3	0002.CSV	1056.84	0.00591342
PSB913-4_map3	0002.CSV	1060.7	0.00564295
PSB913-4_map3	0002.CSV	1064.56	0.0058533
PSB913-4_map3	0002.CSV	1068.42	0.00561247
PSB913-4_map3	0002.CSV	1072.27	0.00601157
PSB913-4_map3	0002.CSV	1076.13	0.00688951
PSB913-4_map3	0002.CSV	1079.99	0.00973283
PSB913-4_map3	0002.CSV	1083.84	0.00869843
PSB913-4_map3	0002.CSV	1087.7	0.00455153
PSB913-4_map3	0002.CSV	1091.56	0.00259511
PSB913-4_map3	0002.CSV	1095.41	0.0028913
PSB913-4_map3	0002.CSV	1099.27	0.00292553
PSB913-4_map3	0002.CSV	1103.13	0.00333602
PSB913-4_map3	0002.CSV	1106.99	0.00306969
PSB913-4_map3	0002.CSV	1110.84	0.00324498
PSB913-4_map3	0002.CSV	1114.7	0.00295458
PSB913-4_map3	0002.CSV	1118.56	0.00314328
PSB913-4_map3	0002.CSV	1122.41	0.00281543
PSB913-4_map3	0002.CSV	1126.27	0.00294821
PSB913-4_map3	0002.CSV	1130.13	0.00260748
PSB913-4_map3	0002.CSV	1133.99	0.00285742
PSB913-4_map3	0002.CSV	1137.84	0.00266795
PSB913-4_map3	0002.CSV	1141.7	0.00293907
PSB913-4_map3	0002.CSV	1145.56	0.00269262
PSB913-4_map3	0002.CSV	1149.41	0.00307023
PSB913-4_map3	0002.CSV	1153.27	0.0029771
PSB913-4_map3	0002.CSV	1157.13	0.00345394
PSB913-4_map3	0002.CSV	1160.99	0.00341553
PSB913-4_map3	0002.CSV	1164.84	0.00388469
PSB913-4_map3	0002.CSV	1168.7	0.00371419
PSB913-4_map3	0002.CSV	1172.56	0.00408653
PSB913-4_map3	0002.CSV	1176.41	0.00398477
PSB913-4_map3	0002.CSV	1180.27	0.00440581
PSB913-4_map3	0002.CSV	1184.13	0.00424497
PSB913-4_map3	0002.CSV	1187.99	0.00471235
PSB913-4_map3	0002.CSV	1191.84	0.00464845
PSB913-4_map3	0002.CSV	1195.7	0.00510908
PSB913-4_map3	0002.CSV	1199.56	0.0050289
PSB913-4_map3	0002.CSV	1203.41	0.00556739
PSB913-4_map3	0002.CSV	1207.27	0.00558042
PSB913-4_map3	0002.CSV	1211.13	0.00622963
PSB913-4_map3	0002.CSV	1214.98	0.00631397
PSB913-4_map3	0002.CSV	1218.84	0.00695217
PSB913-4_map3	0002.CSV	1222.7	0.00706844
PSB913-4_map3	0002.CSV	1226.56	0.00778043
PSB913-4_map3	0002.CSV	1230.41	0.00791714
PSB913-4_map3	0002.CSV	1234.27	0.00864993
PSB913-4_map3	0002.CSV	1238.13	0.00873724
PSB913-4_map3	0002.CSV	1241.98	0.00938351
PSB913-4_map3	0002.CSV	1245.84	0.00947568
PSB913-4_map3	0002.CSV	1249.7	0.0101601
PSB913-4_map3	0002.CSV	1253.56	0.0101564
PSB913-4_map3	0002.CSV	1257.41	0.0106847
PSB913-4_map3	0002.CSV	1261.27	0.0106268
PSB913-4_map3	0002.CSV	1265.13	0.0112599
PSB913-4_map3	0002.CSV	1268.98	0.0114954
PSB913-4_map3	0002.CSV	1272.84	0.0123226
PSB913-4_map3	0002.CSV	1276.7	0.0124225
PSB913-4_map3	0002.CSV	1280.56	0.0130726
PSB913-4_map3	0002.CSV	1284.41	0.0131431
PSB913-4_map3	0002.CSV	1288.27	0.0137935
PSB913-4_map3	0002.CSV	1292.13	0.0138748
PSB913-4_map3	0002.CSV	1295.98	0.0145039
PSB913-4_map3	0002.CSV	1299.84	0.0146053
PSB913-4_map3	0002.CSV	1303.7	0.0153669
PSB913-4_map3	0002.CSV	1307.56	0.0155778
PSB913-4_map3	0002.CSV	1311.41	0.016373
PSB913-4_map3	0002.CSV	1315.27	0.0166242
PSB913-4_map3	0002.CSV	1319.13	0.0175848
PSB913-4_map3	0002.CSV	1322.98	0.0179195
PSB913-4_map3	0002.CSV	1326.84	0.0187909
PSB913-4_map3	0002.CSV	1330.7	0.0191919
PSB913-4_map3	0002.CSV	1334.56	0.0201687
PSB913-4_map3	0002.CSV	1338.41	0.0208091
PSB913-4_map3	0002.CSV	1342.27	0.0222756
PSB913-4_map3	0002.CSV	1346.13	0.0227188
PSB913-4_map3	0002.CSV	1349.98	0.0239007
PSB913-4_map3	0002.CSV	1353.84	0.0246717
PSB913-4_map3	0002.CSV	1357.7	0.0259725
PSB913-4_map3	0002.CSV	1361.56	0.0267761
PSB913-4_map3	0002.CSV	1365.41	0.0284781
PSB913-4_map3	0002.CSV	1369.27	0.0291974
PSB913-4_map3	0002.CSV	1373.13	0.030738
PSB913-4_map3	0002.CSV	1376.98	0.0318748
PSB913-4_map3	0002.CSV	1380.84	0.0335465
PSB913-4_map3	0002.CSV	1384.7	0.0345839
PSB913-4_map3	0002.CSV	1388.56	0.0365991
PSB913-4_map3	0002.CSV	1392.41	0.0374882
PSB913-4_map3	0002.CSV	1396.27	0.0394481
PSB913-4_map3	0002.CSV	1400.13	0.0406881
PSB913-4_map3	0002.CSV	1403.98	0.0422846
PSB913-4_map3	0002.CSV	1407.84	0.0431315
PSB913-4_map3	0002.CSV	1411.7	0.0444239
PSB913-4_map3	0002.CSV	1415.55	0.0448666
PSB913-4_map3	0002.CSV	1419.41	0.0465114
PSB913-4_map3	0002.CSV	1423.27	0.0470845
PSB913-4_map3	0002.CSV	1427.12	0.0481065
PSB913-4_map3	0002.CSV	1430.98	0.0484173
PSB913-4_map3	0002.CSV	1434.84	0.049375
PSB913-4_map3	0002.CSV	1438.7	0.0490648
PSB913-4_map3	0002.CSV	1442.55	0.0487489
PSB913-4_map3	0002.CSV	1446.41	0.0471303
PSB913-4_map3	0002.CSV	1450.27	0.0459384
PSB913-4_map3	0002.CSV	1454.12	0.0441845
PSB913-4_map3	0002.CSV	1457.98	0.0437013
PSB913-4_map3	0002.CSV	1461.84	0.0425434
PSB913-4_map3	0002.CSV	1465.7	0.0422989
PSB913-4_map3	0002.CSV	1469.55	0.0409731
PSB913-4_map3	0002.CSV	1473.41	0.040031
PSB913-4_map3	0002.CSV	1477.27	0.0380631
PSB913-4_map3	0002.CSV	1481.12	0.0369484
PSB913-4_map3	0002.CSV	1484.98	0.0350937
PSB913-4_map3	0002.CSV	1488.84	0.0334541
PSB913-4_map3	0002.CSV	1492.7	0.0309936
PSB913-4_map3	0002.CSV	1496.55	0.0294166
PSB913-4_map3	0002.CSV	1500.41	0.026836
PSB913-4_map3	0002.CSV	1504.27	0.0253838
PSB913-4_map3	0002.CSV	1508.12	0.0221901
PSB913-4_map3	0002.CSV	1511.98	0.020603
PSB913-4_map3	0002.CSV	1515.84	0.0183906
PSB913-4_map3	0002.CSV	1519.7	0.0168233
PSB913-4_map3	0002.CSV	1523.55	0.0143375
PSB913-4_map3	0002.CSV	1527.41	0.0131493
PSB913-4_map3	0002.CSV	1531.27	0.0113299
PSB913-4_map3	0002.CSV	1535.12	0.0103893
PSB913-4_map3	0002.CSV	1538.98	0.00871608
PSB913-4_map3	0002.CSV	1542.84	0.00777686
PSB913-4_map3	0002.CSV	1546.7	0.00608593
PSB913-4_map3	0002.CSV	1550.55	0.0050358
PSB913-4_map3	0002.CSV	1554.41	0.00333429
PSB913-4_map3	0002.CSV	1558.27	0.00216983
PSB913-4_map3	0002.CSV	1562.12	0.000623268
PSB913-4_map3	0002.CSV	1565.98	-0.000390078
PSB913-4_map3	0002.CSV	1569.84	-0.00203067
PSB913-4_map3	0002.CSV	1573.69	-0.00336222
PSB913-4_map3	0002.CSV	1577.55	-0.00494427
PSB913-4_map3	0002.CSV	1581.41	-0.00602512
PSB913-4_map3	0002.CSV	1585.27	-0.00704855
PSB913-4_map3	0002.CSV	1589.12	-0.00758948
PSB913-4_map3	0002.CSV	1592.98	-0.00799736
PSB913-4_map3	0002.CSV	1596.84	-0.00813884
PSB913-4_map3	0002.CSV	1600.69	-0.00844994
PSB913-4_map3	0002.CSV	1604.55	-0.00853757
PSB913-4_map3	0002.CSV	1608.41	-0.00871161
PSB913-4_map3	0002.CSV	1612.27	-0.00887656
PSB913-4_map3	0002.CSV	1616.12	-0.00905565
PSB913-4_map3	0002.CSV	1619.98	-0.00895099
PSB913-4_map3	0002.CSV	1623.84	-0.00914261
PSB913-4_map3	0002.CSV	1627.69	-0.00917506
PSB913-4_map3	0002.CSV	1631.55	-0.0096407
PSB913-4_map3	0002.CSV	1635.41	-0.0095976
PSB913-4_map3	0002.CSV	1639.27	-0.00936918
PSB913-4_map3	0002.CSV	1643.12	-0.0098692
PSB913-4_map3	0002.CSV	1646.98	-0.0100682
PSB913-4_map3	0002.CSV	1650.84	-0.00990687
PSB913-4_map3	0002.CSV	1654.69	-0.00959118
PSB913-4_map3	0002.CSV	1658.55	-0.00998048
PSB913-4_map3	0002.CSV	1662.41	-0.0103539
PSB913-4_map3	0002.CSV	1666.27	-0.0105823
PSB913-4_map3	0002.CSV	1670.12	-0.010738
PSB913-4_map3	0002.CSV	1673.98	-0.0107115
PSB913-4_map3	0002.CSV	1677.84	-0.0109451
PSB913-4_map3	0002.CSV	1681.69	-0.0112396
PSB913-4_map3	0002.CSV	1685.55	-0.0108498
PSB913-4_map3	0002.CSV	1689.41	-0.0111233
PSB913-4_map3	0002.CSV	1693.27	-0.0116857
PSB913-4_map3	0002.CSV	1697.12	-0.0120742
PSB913-4_map3	0002.CSV	1700.98	-0.0117599
PSB913-4_map3	0002.CSV	1704.84	-0.0119775
PSB913-4_map3	0002.CSV	1708.69	-0.0121141
PSB913-4_map3	0002.CSV	1712.55	-0.0127328
PSB913-4_map3	0002.CSV	1716.41	-0.012434
PSB913-4_map3	0002.CSV	1720.27	-0.0121428
PSB913-4_map3	0002.CSV	1724.12	-0.0124799
PSB913-4_map3	0002.CSV	1727.98	-0.013063
PSB913-4_map3	0002.CSV	1731.84	-0.0131068
PSB913-4_map3	0002.CSV	1735.69	-0.0129213
PSB913-4_map3	0002.CSV	1739.55	-0.0130055
PSB913-4_map3	0002.CSV	1743.41	-0.0135114
PSB913-4_map3	0002.CSV	1747.27	-0.0135251
PSB913-4_map3	0002.CSV	1751.12	-0.0136029
PSB913-4_map3	0002.CSV	1754.98	-0.013753
PSB913-4_map3	0002.CSV	1758.84	-0.0141054
PSB913-4_map3	0002.CSV	1762.69	-0.0139125
PSB913-4_map3	0002.CSV	1766.55	-0.014279
PSB913-4_map3	0002.CSV	1770.41	-0.0139342
PSB913-4_map3	0002.CSV	1774.26	-0.0131209
PSB913-4_map3	0002.CSV	1778.12	-0.0124829
PSB913-4_map3	0002.CSV	1781.98	-0.012132
PSB913-4_map3	0002.CSV	1785.84	-0.0118402
PSB913-4_map3	0002.CSV	1789.69	-0.0124343
PSB913-4_map3	0002.CSV	1793.55	-0.0127009
PSB913-4_map3	0002.CSV	1797.41	-0.0133527
PSB913-4_map3	0002.CSV	1801.26	-0.0135515
PSB913-4_map3	0002.CSV	1805.12	-0.0140231
PSB913-4_map3	0002.CSV	1808.98	-0.0140605
PSB913-4_map3	0002.CSV	1812.84	-0.0140675
PSB913-4_map3	0002.CSV	1816.69	-0.0140047
PSB913-4_map3	0002.CSV	1820.55	-0.0142416
PSB913-4_map3	0002.CSV	1824.41	-0.0140878
PSB913-4_map3	0002.CSV	1828.26	-0.01401
PSB913-4_map3	0002.CSV	1832.12	-0.0136517
PSB913-4_map3	0002.CSV	1835.98	-0.0139175
PSB913-4_map3	0002.CSV	1839.84	-0.0139057
PSB913-4_map3	0002.CSV	1843.69	-0.0138906
PSB913-4_map3	0002.CSV	1847.55	-0.0134105
PSB913-4_map3	0002.CSV	1851.41	-0.0136985
PSB913-4_map3	0002.CSV	1855.26	-0.0135722
PSB913-4_map3	0002.CSV	1859.12	-0.0136095
PSB913-4_map3	0002.CSV	1862.98	-0.0135217
PSB913-4_map3	0002.CSV	1866.84	-0.0136006
PSB913-4_map3	0002.CSV	1870.69	-0.0129597
PSB913-4_map3	0002.CSV	1874.55	-0.0132188
PSB913-4_map3	0002.CSV	1878.41	-0.0132264
PSB913-4_map3	0002.CSV	1882.26	-0.0133598
PSB913-4_map3	0002.CSV	1886.12	-0.0131934
PSB913-4_map3	0002.CSV	1889.98	-0.0132123
PSB913-4_map3	0002.CSV	1893.83	-0.0129607
PSB913-4_map3	0002.CSV	1897.69	-0.0130925
PSB913-4_map3	0002.CSV	1901.55	-0.0129298
PSB913-4_map3	0002.CSV	1905.41	-0.0130594
PSB913-4_map3	0002.CSV	1909.26	-0.0128188
PSB913-4_map3	0002.CSV	1913.12	-0.0129798
PSB913-4_map3	0002.CSV	1916.98	-0.0128664
PSB913-4_map3	0002.CSV	1920.83	-0.012869
PSB913-4_map3	0002.CSV	1924.69	-0.0126249
PSB913-4_map3	0002.CSV	1928.55	-0.0128453
PSB913-4_map3	0002.CSV	1932.4	-0.012718
PSB913-4_map3	0002.CSV	1936.26	-0.0128295
PSB913-4_map3	0002.CSV	1940.12	-0.0127374
PSB913-4_map3	0002.CSV	1943.98	-0.0127195
PSB913-4_map3	0002.CSV	1947.83	-0.0125419
PSB913-4_map3	0002.CSV	1951.69	-0.0128079
PSB913-4_map3	0002.CSV	1955.55	-0.012675
PSB913-4_map3	0002.CSV	1959.4	-0.0127983
PSB913-4_map3	0002.CSV	1963.26	-0.0127476
PSB913-4_map3	0002.CSV	1967.12	-0.0128263
PSB913-4_map3	0002.CSV	1970.98	-0.0126876
PSB913-4_map3	0002.CSV	1974.83	-0.0129049
PSB913-4_map3	0002.CSV	1978.69	-0.0128228
PSB913-4_map3	0002.CSV	1982.55	-0.0129664
PSB913-4_map3	0002.CSV	1986.4	-0.012895
PSB913-4_map3	0002.CSV	1990.26	-0.0130043
PSB913-4_map3	0002.CSV	1994.12	-0.0128471
PSB913-4_map3	0002.CSV	1997.98	-0.0131143
PSB913-4_map3	0002.CSV	2001.83	-0.013131
PSB913-4_map3	0002.CSV	2005.69	-0.0132587
PSB913-4_map3	0002.CSV	2009.55	-0.0131463
PSB913-4_map3	0002.CSV	2013.4	-0.0132899
PSB913-4_map3	0002.CSV	2017.26	-0.0131885
PSB913-4_map3	0002.CSV	2021.12	-0.0133886
PSB913-4_map3	0002.CSV	2024.97	-0.0134389
PSB913-4_map3	0002.CSV	2028.83	-0.0135776
PSB913-4_map3	0002.CSV	2032.69	-0.0135714
PSB913-4_map3	0002.CSV	2036.55	-0.0138062
PSB913-4_map3	0002.CSV	2040.4	-0.0138001
PSB913-4_map3	0002.CSV	2044.26	-0.0139071
PSB913-4_map3	0002.CSV	2048.12	-0.0139074
PSB913-4_map3	0002.CSV	2051.97	-0.0140663
PSB913-4_map3	0002.CSV	2055.83	-0.0140208
PSB913-4_map3	0002.CSV	2059.69	-0.0140938
PSB913-4_map3	0002.CSV	2063.55	-0.014058
PSB913-4_map3	0002.CSV	2067.4	-0.014127
PSB913-4_map3	0002.CSV	2071.26	-0.0141253
PSB913-4_map3	0002.CSV	2075.12	-0.0142639
PSB913-4_map3	0002.CSV	2078.97	-0.0142756
PSB913-4_map3	0002.CSV	2082.83	-0.0143525
PSB913-4_map3	0002.CSV	2086.69	-0.0142935
PSB913-4_map3	0002.CSV	2090.55	-0.0143343
PSB913-4_map3	0002.CSV	2094.4	-0.0143234
PSB913-4_map3	0002.CSV	2098.26	-0.0144004
PSB913-4_map3	0002.CSV	2102.12	-0.0143344
PSB913-4_map3	0002.CSV	2105.97	-0.0143305
PSB913-4_map3	0002.CSV	2109.83	-0.0142982
PSB913-4_map3	0002.CSV	2113.69	-0.0143415
PSB913-4_map3	0002.CSV	2117.55	-0.0143043
PSB913-4_map3	0002.CSV	2121.4	-0.0143195
PSB913-4_map3	0002.CSV	2125.26	-0.0142674
PSB913-4_map3	0002.CSV	2129.12	-0.0142236
PSB913-4_map3	0002.CSV	2132.97	-0.0141858
PSB913-4_map3	0002.CSV	2136.83	-0.0141979
PSB913-4_map3	0002.CSV	2140.69	-0.0141691
PSB913-4_map3	0002.CSV	2144.55	-0.0141397
PSB913-4_map3	0002.CSV	2148.4	-0.014093
PSB913-4_map3	0002.CSV	2152.26	-0.014048
PSB913-4_map3	0002.CSV	2156.12	-0.01402
PSB913-4_map3	0002.CSV	2159.97	-0.0139687
PSB913-4_map3	0002.CSV	2163.83	-0.0139602
PSB913-4_map3	0002.CSV	2167.69	-0.0139714
PSB913-4_map3	0002.CSV	2171.55	-0.0139629
PSB913-4_map3	0002.CSV	2175.4	-0.0138649
PSB913-4_map3	0002.CSV	2179.26	-0.0138199
PSB913-4_map3	0002.CSV	2183.12	-0.0137639
PSB913-4_map3	0002.CSV	2186.97	-0.0137942
PSB913-4_map3	0002.CSV	2190.83	-0.0137654
PSB913-4_map3	0002.CSV	2194.69	-0.0137963
PSB913-4_map3	0002.CSV	2198.55	-0.0137574
PSB913-4_map3	0002.CSV	2202.4	-0.0138314
PSB913-4_map3	0002.CSV	2206.26	-0.0138178
PSB913-4_map3	0002.CSV	2210.12	-0.013895
PSB913-4_map3	0002.CSV	2213.97	-0.0139285
PSB913-4_map3	0002.CSV	2217.83	-0.014008
PSB913-4_map3	0002.CSV	2221.69	-0.0139695
PSB913-4_map3	0002.CSV	2225.54	-0.0141154
PSB913-4_map3	0002.CSV	2229.4	-0.0141711
PSB913-4_map3	0002.CSV	2233.26	-0.014369
PSB913-4_map3	0002.CSV	2237.12	-0.0143911
PSB913-4_map3	0002.CSV	2240.97	-0.0145386
PSB913-4_map3	0002.CSV	2244.83	-0.0146088
PSB913-4_map3	0002.CSV	2248.69	-0.0148497
PSB913-4_map3	0002.CSV	2252.54	-0.0148964
PSB913-4_map3	0002.CSV	2256.4	-0.0150365
PSB913-4_map3	0002.CSV	2260.26	-0.015109
PSB913-4_map3	0002.CSV	2264.11	-0.0153758
PSB913-4_map3	0002.CSV	2267.97	-0.0153955
PSB913-4_map3	0002.CSV	2271.83	-0.0155395
PSB913-4_map3	0002.CSV	2275.69	-0.0155677
PSB913-4_map3	0002.CSV	2279.54	-0.0158214
PSB913-4_map3	0002.CSV	2283.4	-0.0159151
PSB913-4_map3	0002.CSV	2287.26	-0.0160123
PSB913-4_map3	0002.CSV	2291.11	-0.0158428
PSB913-4_map3	0002.CSV	2294.97	-0.0159503
PSB913-4_map3	0002.CSV	2298.83	-0.0158341
PSB913-4_map3	0002.CSV	2302.69	-0.015872
PSB913-4_map3	0002.CSV	2306.54	-0.0156456
PSB913-4_map3	0002.CSV	2310.4	-0.0158498
PSB913-4_map3	0002.CSV	2314.26	-0.0155701
PSB913-4_map3	0002.CSV	2318.11	-0.0159834
PSB913-4_map3	0002.CSV	2321.97	-0.0159168
PSB913-4_map3	0002.CSV	2325.83	-0.0173035
PSB913-4_map3	0002.CSV	2329.69	-0.0173166
PSB913-4_map3	0002.CSV	2333.54	-0.0189669
PSB913-4_map3	0002.CSV	2337.4	-0.0183498
PSB913-4_map3	0002.CSV	2341.26	-0.019918
PSB913-4_map3	0002.CSV	2345.11	-0.0173005
PSB913-4_map3	0002.CSV	2348.97	-0.0178903
PSB913-4_map3	0002.CSV	2352.83	-0.0196158
PSB913-4_map3	0002.CSV	2356.69	-0.0292915
PSB913-4_map3	0002.CSV	2360.54	-0.0330533
PSB913-4_map3	0002.CSV	2364.4	-0.0315907
PSB913-4_map3	0002.CSV	2368.26	-0.0225155
PSB913-4_map3	0002.CSV	2372.11	-0.0192423
PSB913-4_map3	0002.CSV	2375.97	-0.0168339
PSB913-4_map3	0002.CSV	2379.83	-0.0166028
PSB913-4_map3	0002.CSV	2383.69	-0.0163501
PSB913-4_map3	0002.CSV	2387.54	-0.0167615
PSB913-4_map3	0002.CSV	2391.4	-0.0170098
PSB913-4_map3	0002.CSV	2395.26	-0.0172832
PSB913-4_map3	0002.CSV	2399.11	-0.0171471
PSB913-4_map3	0002.CSV	2402.97	-0.0173392
PSB913-4_map3	0002.CSV	2406.83	-0.0172725
PSB913-4_map3	0002.CSV	2410.68	-0.0173837
PSB913-4_map3	0002.CSV	2414.54	-0.0172767
PSB913-4_map3	0002.CSV	2418.4	-0.0173917
PSB913-4_map3	0002.CSV	2422.26	-0.0171602
PSB913-4_map3	0002.CSV	2426.11	-0.017246
PSB913-4_map3	0002.CSV	2429.97	-0.0171131
PSB913-4_map3	0002.CSV	2433.83	-0.0171895
PSB913-4_map3	0002.CSV	2437.68	-0.0169709
PSB913-4_map3	0002.CSV	2441.54	-0.0170672
PSB913-4_map3	0002.CSV	2445.4	-0.0168517
PSB913-4_map3	0002.CSV	2449.26	-0.0168742
PSB913-4_map3	0002.CSV	2453.11	-0.0166756
PSB913-4_map3	0002.CSV	2456.97	-0.0167877
PSB913-4_map3	0002.CSV	2460.83	-0.0166037
PSB913-4_map3	0002.CSV	2464.68	-0.0166765
PSB913-4_map3	0002.CSV	2468.54	-0.0164406
PSB913-4_map3	0002.CSV	2472.4	-0.0165127
PSB913-4_map3	0002.CSV	2476.26	-0.0163065
PSB913-4_map3	0002.CSV	2480.11	-0.0163749
PSB913-4_map3	0002.CSV	2483.97	-0.0162071
PSB913-4_map3	0002.CSV	2487.83	-0.0163103
PSB913-4_map3	0002.CSV	2491.68	-0.0161407
PSB913-4_map3	0002.CSV	2495.54	-0.0162875
PSB913-4_map3	0002.CSV	2499.4	-0.0161563
PSB913-4_map3	0002.CSV	2503.26	-0.0162667
PSB913-4_map3	0002.CSV	2507.11	-0.0161529
PSB913-4_map3	0002.CSV	2510.97	-0.0162634
PSB913-4_map3	0002.CSV	2514.83	-0.0160694
PSB913-4_map3	0002.CSV	2518.68	-0.0161416
PSB913-4_map3	0002.CSV	2522.54	-0.0159971
PSB913-4_map3	0002.CSV	2526.4	-0.016184
PSB913-4_map3	0002.CSV	2530.26	-0.0161847
PSB913-4_map3	0002.CSV	2534.11	-0.0164227
PSB913-4_map3	0002.CSV	2537.97	-0.0163506
PSB913-4_map3	0002.CSV	2541.83	-0.016459
PSB913-4_map3	0002.CSV	2545.68	-0.0163377
PSB913-4_map3	0002.CSV	2549.54	-0.0165387
PSB913-4_map3	0002.CSV	2553.4	-0.0164775
PSB913-4_map3	0002.CSV	2557.26	-0.0166734
PSB913-4_map3	0002.CSV	2561.11	-0.0166255
PSB913-4_map3	0002.CSV	2564.97	-0.0167472
PSB913-4_map3	0002.CSV	2568.83	-0.0166204
PSB913-4_map3	0002.CSV	2572.68	-0.0167091
PSB913-4_map3	0002.CSV	2576.54	-0.0166481
PSB913-4_map3	0002.CSV	2580.4	-0.016875
PSB913-4_map3	0002.CSV	2584.25	-0.016857
PSB913-4_map3	0002.CSV	2588.11	-0.0169861
PSB913-4_map3	0002.CSV	2591.97	-0.0168394
PSB913-4_map3	0002.CSV	2595.83	-0.0169601
PSB913-4_map3	0002.CSV	2599.68	-0.0169151
PSB913-4_map3	0002.CSV	2603.54	-0.0170373
PSB913-4_map3	0002.CSV	2607.4	-0.0169381
PSB913-4_map3	0002.CSV	2611.25	-0.0170054
PSB913-4_map3	0002.CSV	2615.11	-0.0168609
PSB913-4_map3	0002.CSV	2618.97	-0.0169969
PSB913-4_map3	0002.CSV	2622.82	-0.0168996
PSB913-4_map3	0002.CSV	2626.68	-0.0169815
PSB913-4_map3	0002.CSV	2630.54	-0.0169917
PSB913-4_map3	0002.CSV	2634.4	-0.0170539
PSB913-4_map3	0002.CSV	2638.25	-0.0168681
PSB913-4_map3	0002.CSV	2642.11	-0.0170241
PSB913-4_map3	0002.CSV	2645.97	-0.0171206
PSB913-4_map3	0002.CSV	2649.82	-0.0173413
PSB913-4_map3	0002.CSV	2653.68	-0.0172839
PSB913-4_map3	0002.CSV	2657.54	-0.0173418
PSB913-4_map3	0002.CSV	2661.4	-0.0173097
PSB913-4_map3	0002.CSV	2665.25	-0.0174434
PSB913-4_map3	0002.CSV	2669.11	-0.0173379
PSB913-4_map3	0002.CSV	2672.97	-0.0172872
PSB913-4_map3	0002.CSV	2676.82	-0.0170614
PSB913-4_map3	0002.CSV	2680.68	-0.0171256
PSB913-4_map3	0002.CSV	2684.54	-0.0172837
PSB913-4_map3	0002.CSV	2688.4	-0.0174733
PSB913-4_map3	0002.CSV	2692.25	-0.017434
PSB913-4_map3	0002.CSV	2696.11	-0.0174515
PSB913-4_map3	0002.CSV	2699.97	-0.0173155
PSB913-4_map3	0002.CSV	2703.82	-0.0174038
PSB913-4_map3	0002.CSV	2707.68	-0.0172774
PSB913-4_map3	0002.CSV	2711.54	-0.0173307
PSB913-4_map3	0002.CSV	2715.4	-0.0173708
PSB913-4_map3	0002.CSV	2719.25	-0.0173118
PSB913-4_map3	0002.CSV	2723.11	-0.0170576
PSB913-4_map3	0002.CSV	2726.97	-0.0171426
PSB913-4_map3	0002.CSV	2730.82	-0.0172985
PSB913-4_map3	0002.CSV	2734.68	-0.0172812
PSB913-4_map3	0002.CSV	2738.54	-0.0171629
PSB913-4_map3	0002.CSV	2742.4	-0.0171765
PSB913-4_map3	0002.CSV	2746.25	-0.0169195
PSB913-4_map3	0002.CSV	2750.11	-0.0169608
PSB913-4_map3	0002.CSV	2753.97	-0.0171274
PSB913-4_map3	0002.CSV	2757.82	-0.0172257
PSB913-4_map3	0002.CSV	2761.68	-0.0172318
PSB913-4_map3	0002.CSV	2765.54	-0.0173059
PSB913-4_map3	0002.CSV	2769.39	-0.0171494
PSB913-4_map3	0002.CSV	2773.25	-0.0169193
PSB913-4_map3	0002.CSV	2777.11	-0.0169585
PSB913-4_map3	0002.CSV	2780.97	-0.0171689
PSB913-4_map3	0002.CSV	2784.82	-0.0169805
PSB913-4_map3	0002.CSV	2788.68	-0.0166481
PSB913-4_map3	0002.CSV	2792.54	-0.0165411
PSB913-4_map3	0002.CSV	2796.39	-0.0165844
PSB913-4_map3	0002.CSV	2800.25	-0.016689
PSB913-4_map3	0002.CSV	2804.11	-0.0169402
PSB913-4_map3	0002.CSV	2807.97	-0.0167577
PSB913-4_map3	0002.CSV	2811.82	-0.0166977
PSB913-4_map3	0002.CSV	2815.68	-0.0168741
PSB913-4_map3	0002.CSV	2819.54	-0.0169233
PSB913-4_map3	0002.CSV	2823.39	-0.0168071
PSB913-4_map3	0002.CSV	2827.25	-0.0168525
PSB913-4_map3	0002.CSV	2831.11	-0.016741
PSB913-4_map3	0002.CSV	2834.97	-0.0165023
PSB913-4_map3	0002.CSV	2838.82	-0.0166348
PSB913-4_map3	0002.CSV	2842.68	-0.0173012
PSB913-4_map3	0002.CSV	2846.54	-0.0178208
PSB913-4_map3	0002.CSV	2850.39	-0.0185654
PSB913-4_map3	0002.CSV	2854.25	-0.0191847
PSB913-4_map3	0002.CSV	2858.11	-0.0191133
PSB913-4_map3	0002.CSV	2861.97	-0.0188223
PSB913-4_map3	0002.CSV	2865.82	-0.0186912
PSB913-4_map3	0002.CSV	2869.68	-0.0183983
PSB913-4_map3	0002.CSV	2873.54	-0.018167
PSB913-4_map3	0002.CSV	2877.39	-0.0182452
PSB913-4_map3	0002.CSV	2881.25	-0.01828
PSB913-4_map3	0002.CSV	2885.11	-0.0182696
PSB913-4_map3	0002.CSV	2888.97	-0.0184535
PSB913-4_map3	0002.CSV	2892.82	-0.0184517
PSB913-4_map3	0002.CSV	2896.68	-0.0185864
PSB913-4_map3	0002.CSV	2900.54	-0.0188861
PSB913-4_map3	0002.CSV	2904.39	-0.0190622
PSB913-4_map3	0002.CSV	2908.25	-0.0190506
PSB913-4_map3	0002.CSV	2912.11	-0.0190588
PSB913-4_map3	0002.CSV	2915.97	-0.0196218
PSB913-4_map3	0002.CSV	2919.82	-0.0209529
PSB913-4_map3	0002.CSV	2923.68	-0.0221466
PSB913-4_map3	0002.CSV	2927.54	-0.022404
PSB913-4_map3	0002.CSV	2931.39	-0.0223032
PSB913-4_map3	0002.CSV	2935.25	-0.0222972
PSB913-4_map3	0002.CSV	2939.11	-0.021661
PSB913-4_map3	0002.CSV	2942.96	-0.0206778
PSB913-4_map3	0002.CSV	2946.82	-0.0202288
PSB913-4_map3	0002.CSV	2950.68	-0.0204753
PSB913-4_map3	0002.CSV	2954.54	-0.0209711
PSB913-4_map3	0002.CSV	2958.39	-0.0213016
PSB913-4_map3	0002.CSV	2962.25	-0.0211063
PSB913-4_map3	0002.CSV	2966.11	-0.0208711
PSB913-4_map3	0002.CSV	2969.96	-0.0201855
PSB913-4_map3	0002.CSV	2973.82	-0.0193007
PSB913-4_map3	0002.CSV	2977.68	-0.0186776
PSB913-4_map3	0002.CSV	2981.53	-0.018626
PSB913-4_map3	0002.CSV	2985.39	-0.0187983
PSB913-4_map3	0002.CSV	2989.25	-0.0186024
PSB913-4_map3	0002.CSV	2993.11	-0.018165
PSB913-4_map3	0002.CSV	2996.96	-0.0181149
PSB913-4_map3	0002.CSV	3000.82	-0.018248
PSB913-4_map3	0002.CSV	3004.68	-0.0183524
PSB913-4_map3	0002.CSV	3008.53	-0.0180819
PSB913-4_map3	0002.CSV	3012.39	-0.0176862
PSB913-4_map3	0002.CSV	3016.25	-0.0174468
PSB913-4_map3	0002.CSV	3020.11	-0.0175921
PSB913-4_map3	0002.CSV	3023.96	-0.0177176
PSB913-4_map3	0002.CSV	3027.82	-0.0178513
PSB913-4_map3	0002.CSV	3031.68	-0.0176772
PSB913-4_map3	0002.CSV	3035.53	-0.0176251
PSB913-4_map3	0002.CSV	3039.39	-0.0175755
PSB913-4_map3	0002.CSV	3043.25	-0.0174863
PSB913-4_map3	0002.CSV	3047.11	-0.0175454
PSB913-4_map3	0002.CSV	3050.96	-0.0177418
PSB913-4_map3	0002.CSV	3054.82	-0.0177284
PSB913-4_map3	0002.CSV	3058.68	-0.0177864
PSB913-4_map3	0002.CSV	3062.53	-0.0176855
PSB913-4_map3	0002.CSV	3066.39	-0.0175143
PSB913-4_map3	0002.CSV	3070.25	-0.0175981
PSB913-4_map3	0002.CSV	3074.11	-0.0177626
PSB913-4_map3	0002.CSV	3077.96	-0.0174986
PSB913-4_map3	0002.CSV	3081.82	-0.0173934
PSB913-4_map3	0002.CSV	3085.68	-0.0172998
PSB913-4_map3	0002.CSV	3089.53	-0.0174487
PSB913-4_map3	0002.CSV	3093.39	-0.0176668
PSB913-4_map3	0002.CSV	3097.25	-0.0177646
PSB913-4_map3	0002.CSV	3101.11	-0.0175722
PSB913-4_map3	0002.CSV	3104.96	-0.0175639
PSB913-4_map3	0002.CSV	3108.82	-0.0173415
PSB913-4_map3	0002.CSV	3112.68	-0.0172291
PSB913-4_map3	0002.CSV	3116.53	-0.0169922
PSB913-4_map3	0002.CSV	3120.39	-0.0171997
PSB913-4_map3	0002.CSV	3124.25	-0.0174603
PSB913-4_map3	0002.CSV	3128.11	-0.0175783
PSB913-4_map3	0002.CSV	3131.96	-0.0174301
PSB913-4_map3	0002.CSV	3135.82	-0.0174523
PSB913-4_map3	0002.CSV	3139.68	-0.0173821
PSB913-4_map3	0002.CSV	3143.53	-0.0176577
PSB913-4_map3	0002.CSV	3147.39	-0.0175523
PSB913-4_map3	0002.CSV	3151.25	-0.0173599
PSB913-4_map3	0002.CSV	3155.1	-0.017402
PSB913-4_map3	0002.CSV	3158.96	-0.017891
PSB913-4_map3	0002.CSV	3162.82	-0.0179174
PSB913-4_map3	0002.CSV	3166.68	-0.0180053
PSB913-4_map3	0002.CSV	3170.53	-0.0180707
PSB913-4_map3	0002.CSV	3174.39	-0.0181519
PSB913-4_map3	0002.CSV	3178.25	-0.0179792
PSB913-4_map3	0002.CSV	3182.1	-0.018081
PSB913-4_map3	0002.CSV	3185.96	-0.017911
PSB913-4_map3	0002.CSV	3189.82	-0.017933
PSB913-4_map3	0002.CSV	3193.68	-0.0180481
PSB913-4_map3	0002.CSV	3197.53	-0.0182509
PSB913-4_map3	0002.CSV	3201.39	-0.0181237
PSB913-4_map3	0002.CSV	3205.25	-0.018162
PSB913-4_map3	0002.CSV	3209.1	-0.0180861
PSB913-4_map3	0002.CSV	3212.96	-0.0182064
PSB913-4_map3	0002.CSV	3216.82	-0.0181444
PSB913-4_map3	0002.CSV	3220.68	-0.0182329
PSB913-4_map3	0002.CSV	3224.53	-0.0181609
PSB913-4_map3	0002.CSV	3228.39	-0.0180707
PSB913-4_map3	0002.CSV	3232.25	-0.0177032
PSB913-4_map3	0002.CSV	3236.1	-0.0179727
PSB913-4_map3	0002.CSV	3239.96	-0.0180679
PSB913-4_map3	0002.CSV	3243.82	-0.0179617
PSB913-4_map3	0002.CSV	3247.68	-0.0177851
PSB913-4_map3	0002.CSV	3251.53	-0.0181465
PSB913-4_map3	0002.CSV	3255.39	-0.0181462
PSB913-4_map3	0002.CSV	3259.25	-0.018378
PSB913-4_map3	0002.CSV	3263.1	-0.0184006
PSB913-4_map3	0002.CSV	3266.96	-0.0182861
PSB913-4_map3	0002.CSV	3270.82	-0.01786
PSB913-4_map3	0002.CSV	3274.68	-0.0180072
PSB913-4_map3	0002.CSV	3278.53	-0.0182586
PSB913-4_map3	0002.CSV	3282.39	-0.0185758
PSB913-4_map3	0002.CSV	3286.25	-0.0183902
PSB913-4_map3	0002.CSV	3290.1	-0.0182079
PSB913-4_map3	0002.CSV	3293.96	-0.0179453
PSB913-4_map3	0002.CSV	3297.82	-0.0182037
PSB913-4_map3	0002.CSV	3301.67	-0.0180594
PSB913-4_map3	0002.CSV	3305.53	-0.0179644
PSB913-4_map3	0002.CSV	3309.39	-0.0179632
PSB913-4_map3	0002.CSV	3313.25	-0.0184645
PSB913-4_map3	0002.CSV	3317.1	-0.0187339
PSB913-4_map3	0002.CSV	3320.96	-0.0187282
PSB913-4_map3	0002.CSV	3324.82	-0.0184497
PSB913-4_map3	0002.CSV	3328.67	-0.0187728
PSB913-4_map3	0002.CSV	3332.53	-0.0187258
PSB913-4_map3	0002.CSV	3336.39	-0.0182987
PSB913-4_map3	0002.CSV	3340.24	-0.0180468
PSB913-4_map3	0002.CSV	3344.1	-0.0184066
PSB913-4_map3	0002.CSV	3347.96	-0.0182786
PSB913-4_map3	0002.CSV	3351.82	-0.0184318
PSB913-4_map3	0002.CSV	3355.67	-0.0187432
PSB913-4_map3	0002.CSV	3359.53	-0.0187432
PSB913-4_map3	0002.CSV	3363.39	-0.018327
PSB913-4_map3	0002.CSV	3367.24	-0.0180486
PSB913-4_map3	0002.CSV	3371.1	-0.0180084
PSB913-4_map3	0002.CSV	3374.96	-0.0183281
PSB913-4_map3	0002.CSV	3378.82	-0.0184581
PSB913-4_map3	0002.CSV	3382.67	-0.0187879
PSB913-4_map3	0002.CSV	3386.53	-0.0185986
PSB913-4_map3	0002.CSV	3390.39	-0.0182249
PSB913-4_map3	0002.CSV	3394.24	-0.0178797
PSB913-4_map3	0002.CSV	3398.1	-0.0178873
PSB913-4_map3	0002.CSV	3401.96	-0.0178947
PSB913-4_map3	0002.CSV	3405.82	-0.0181146
PSB913-4_map3	0002.CSV	3409.67	-0.0180785
PSB913-4_map3	0002.CSV	3413.53	-0.0183973
PSB913-4_map3	0002.CSV	3417.39	-0.0187623
PSB913-4_map3	0002.CSV	3421.24	-0.0187674
PSB913-4_map3	0002.CSV	3425.1	-0.0185353
PSB913-4_map3	0002.CSV	3428.96	-0.0182882
PSB913-4_map3	0002.CSV	3432.82	-0.0179743
PSB913-4_map3	0002.CSV	3436.67	-0.0180622
PSB913-4_map3	0002.CSV	3440.53	-0.0184838
PSB913-4_map3	0002.CSV	3444.39	-0.0188596
PSB913-4_map3	0002.CSV	3448.24	-0.0187692
PSB913-4_map3	0002.CSV	3452.1	-0.0188933
PSB913-4_map3	0002.CSV	3455.96	-0.0188752
PSB913-4_map3	0002.CSV	3459.82	-0.0186855
PSB913-4_map3	0002.CSV	3463.67	-0.0184597
PSB913-4_map3	0002.CSV	3467.53	-0.0181832
PSB913-4_map3	0002.CSV	3471.39	-0.0183495
PSB913-4_map3	0002.CSV	3475.24	-0.0187632
PSB913-4_map3	0002.CSV	3479.1	-0.0188465
PSB913-4_map3	0002.CSV	3482.96	-0.0187711
PSB913-4_map3	0002.CSV	3486.82	-0.0185673
PSB913-4_map3	0002.CSV	3490.67	-0.0185578
PSB913-4_map3	0002.CSV	3494.53	-0.0186536
PSB913-4_map3	0002.CSV	3498.39	-0.0187667
PSB913-4_map3	0002.CSV	3502.24	-0.0189809
PSB913-4_map3	0002.CSV	3506.1	-0.0191519
PSB913-4_map3	0002.CSV	3509.96	-0.0192414
PSB913-4_map3	0002.CSV	3513.81	-0.0188739
PSB913-4_map3	0002.CSV	3517.67	-0.0191994
PSB913-4_map3	0002.CSV	3521.53	-0.0194546
PSB913-4_map3	0002.CSV	3525.39	-0.0195278
PSB913-4_map3	0002.CSV	3529.24	-0.0194937
PSB913-4_map3	0002.CSV	3533.1	-0.0194783
PSB913-4_map3	0002.CSV	3536.96	-0.0194477
PSB913-4_map3	0002.CSV	3540.81	-0.0195784
PSB913-4_map3	0002.CSV	3544.67	-0.0192312
PSB913-4_map3	0002.CSV	3548.53	-0.0191949
PSB913-4_map3	0002.CSV	3552.39	-0.0194418
PSB913-4_map3	0002.CSV	3556.24	-0.0196796
PSB913-4_map3	0002.CSV	3560.1	-0.0198708
PSB913-4_map3	0002.CSV	3563.96	-0.0205589
PSB913-4_map3	0002.CSV	3567.81	-0.0200674
PSB913-4_map3	0002.CSV	3571.67	-0.0197731
PSB913-4_map3	0002.CSV	3575.53	-0.0199895
PSB913-4_map3	0002.CSV	3579.39	-0.0199548
PSB913-4_map3	0002.CSV	3583.24	-0.0198158
PSB913-4_map3	0002.CSV	3587.1	-0.0200193
PSB913-4_map3	0002.CSV	3590.96	-0.0200126
PSB913-4_map3	0002.CSV	3594.81	-0.0203058
PSB913-4_map3	0002.CSV	3598.67	-0.0199397
PSB913-4_map3	0002.CSV	3602.53	-0.0200588
PSB913-4_map3	0002.CSV	3606.39	-0.0206085
PSB913-4_map3	0002.CSV	3610.24	-0.0211593
PSB913-4_map3	0002.CSV	3614.1	-0.0211031
PSB913-4_map3	0002.CSV	3617.96	-0.0209457
PSB913-4_map3	0002.CSV	3621.81	-0.0204052
PSB913-4_map3	0002.CSV	3625.67	-0.0212506
PSB913-4_map3	0002.CSV	3629.53	-0.0211943
PSB913-4_map3	0002.CSV	3633.39	-0.0206779
PSB913-4_map3	0002.CSV	3637.24	-0.0207565
PSB913-4_map3	0002.CSV	3641.1	-0.0212777
PSB913-4_map3	0002.CSV	3644.96	-0.0219284
PSB913-4_map3	0002.CSV	3648.81	-0.0216009
PSB913-4_map3	0002.CSV	3652.67	-0.0201068
PSB913-4_map3	0002.CSV	3656.53	-0.0202268
PSB913-4_map3	0002.CSV	3660.38	-0.0202228
PSB913-4_map3	0002.CSV	3664.24	-0.0211544
PSB913-4_map3	0002.CSV	3668.1	-0.0219743
PSB913-4_map3	0002.CSV	3671.96	-0.0222876
PSB913-4_map3	0002.CSV	3675.81	-0.0211952
PSB913-4_map3	0002.CSV	3679.67	-0.0207621
PSB913-4_map3	0002.CSV	3683.53	-0.0209675
PSB913-4_map3	0002.CSV	3687.38	-0.021128
PSB913-4_map3	0002.CSV	3691.24	-0.020095
PSB913-4_map3	0002.CSV	3695.1	-0.0206577
PSB913-4_map3	0002.CSV	3698.95	-0.0211222
PSB913-4_map3	0002.CSV	3702.81	-0.0214531
PSB913-4_map3	0002.CSV	3706.67	-0.0217792
PSB913-4_map3	0002.CSV	3710.53	-0.0220531
PSB913-4_map3	0002.CSV	3714.38	-0.0209122
PSB913-4_map3	0002.CSV	3718.24	-0.0214517
PSB913-4_map3	0002.CSV	3722.1	-0.0216728
PSB913-4_map3	0002.CSV	3725.95	-0.0218205
PSB913-4_map3	0002.CSV	3729.81	-0.0218745
PSB913-4_map3	0002.CSV	3733.67	-0.0222812
PSB913-4_map3	0002.CSV	3737.53	-0.0206511
PSB913-4_map3	0002.CSV	3741.38	-0.0214572
PSB913-4_map3	0002.CSV	3745.24	-0.0226167
PSB913-4_map3	0002.CSV	3749.1	-0.0232777
PSB913-4_map3	0002.CSV	3752.95	-0.0216115
PSB913-4_map3	0002.CSV	3756.81	-0.0214384
PSB913-4_map3	0002.CSV	3760.67	-0.0210805
PSB913-4_map3	0002.CSV	3764.53	-0.0215619
PSB913-4_map3	0002.CSV	3768.38	-0.0213652
PSB913-4_map3	0002.CSV	3772.24	-0.0212188
PSB913-4_map3	0002.CSV	3776.1	-0.0211881
PSB913-4_map3	0002.CSV	3779.95	-0.0212602
PSB913-4_map3	0002.CSV	3783.81	-0.0210449
PSB913-4_map3	0002.CSV	3787.67	-0.0211218
PSB913-4_map3	0002.CSV	3791.53	-0.0213005
PSB913-4_map3	0002.CSV	3795.38	-0.0220724
PSB913-4_map3	0002.CSV	3799.24	-0.0220251
PSB913-4_map3	0002.CSV	3803.1	-0.0216297
PSB913-4_map3	0002.CSV	3806.95	-0.0209398
PSB913-4_map3	0002.CSV	3810.81	-0.0213556
PSB913-4_map3	0002.CSV	3814.67	-0.0218214
PSB913-4_map3	0002.CSV	3818.53	-0.0220353
PSB913-4_map3	0002.CSV	3822.38	-0.0211976
PSB913-4_map3	0002.CSV	3826.24	-0.0214769
PSB913-4_map3	0002.CSV	3830.1	-0.0216959
PSB913-4_map3	0002.CSV	3833.95	-0.0223838
PSB913-4_map3	0002.CSV	3837.81	-0.0221693
PSB913-4_map3	0002.CSV	3841.67	-0.0215041
PSB913-4_map3	0002.CSV	3845.53	-0.0214161
PSB913-4_map3	0002.CSV	3849.38	-0.0227167
PSB913-4_map3	0002.CSV	3853.24	-0.0224613
PSB913-4_map3	0002.CSV	3857.1	-0.0214118
PSB913-4_map3	0002.CSV	3860.95	-0.0218144
PSB913-4_map3	0002.CSV	3864.81	-0.0222766
PSB913-4_map3	0002.CSV	3868.67	-0.0219576
PSB913-4_map3	0002.CSV	3872.52	-0.0218297
PSB913-4_map3	0002.CSV	3876.38	-0.0218652
PSB913-4_map3	0002.CSV	3880.24	-0.0223877
PSB913-4_map3	0002.CSV	3884.1	-0.0216397
PSB913-4_map3	0002.CSV	3887.95	-0.0216617
PSB913-4_map3	0002.CSV	3891.81	-0.0216884
PSB913-4_map3	0002.CSV	3895.67	-0.0222549
PSB913-4_map3	0002.CSV	3899.52	-0.0228057
PSB913-4_map3	0002.CSV	3903.38	-0.0222755
PSB913-4_map3	0002.CSV	3907.24	-0.0213088
PSB913-4_map3	0002.CSV	3911.1	-0.0218243
PSB913-4_map3	0002.CSV	3914.95	-0.0222633
PSB913-4_map3	0002.CSV	3918.81	-0.0222357
PSB913-4_map3	0002.CSV	3922.67	-0.0219878
PSB913-4_map3	0002.CSV	3926.52	-0.0221835
PSB913-4_map3	0002.CSV	3930.38	-0.0219278
PSB913-4_map3	0002.CSV	3934.24	-0.0216333
PSB913-4_map3	0002.CSV	3938.09	-0.0217938
PSB913-4_map3	0002.CSV	3941.95	-0.0220938
PSB913-4_map3	0002.CSV	3945.81	-0.0219481
PSB913-4_map3	0002.CSV	3949.67	-0.0220058
PSB913-4_map3	0002.CSV	3953.52	-0.0218343
PSB913-4_map3	0002.CSV	3957.38	-0.0219608
PSB913-4_map3	0002.CSV	3961.24	-0.021811
PSB913-4_map3	0002.CSV	3965.09	-0.0218966
PSB913-4_map3	0002.CSV	3968.95	-0.0218767
PSB913-4_map3	0002.CSV	3972.81	-0.0219935
PSB913-4_map3	0002.CSV	3976.67	-0.0219549
PSB913-4_map3	0002.CSV	3980.52	-0.0219657
PSB913-4_map3	0002.CSV	3984.38	-0.0217031
PSB913-4_map3	0002.CSV	3988.24	-0.0219011
PSB913-4_map3	0002.CSV	3992.09	-0.021912
PSB913-4_map3	0002.CSV	3995.95	-0.0218519
PSB913-4_map3	0002.CSV	3999.81	-0.0217784
PSB913-4_map3	0003.CSV	674.992	0.00701692
PSB913-4_map3	0003.CSV	678.849	0.00603455
PSB913-4_map3	0003.CSV	682.706	0.00764771
PSB913-4_map3	0003.CSV	686.563	0.00739932
PSB913-4_map3	0003.CSV	690.42	0.00947737
PSB913-4_map3	0003.CSV	694.277	0.0132659
PSB913-4_map3	0003.CSV	698.134	0.0183438
PSB913-4_map3	0003.CSV	701.991	0.0133508
PSB913-4_map3	0003.CSV	705.849	0.0122897
PSB913-4_map3	0003.CSV	709.706	0.0214261
PSB913-4_map3	0003.CSV	713.563	0.0200812
PSB913-4_map3	0003.CSV	717.42	0.00460541
PSB913-4_map3	0003.CSV	721.277	-0.00182582
PSB913-4_map3	0003.CSV	725.134	-0.00251138
PSB913-4_map3	0003.CSV	728.991	-0.00120956
PSB913-4_map3	0003.CSV	732.848	-0.000923854
PSB913-4_map3	0003.CSV	736.705	0.000245195
PSB913-4_map3	0003.CSV	740.562	0.000199546
PSB913-4_map3	0003.CSV	744.42	0.000915231
PSB913-4_map3	0003.CSV	748.277	0.000634516
PSB913-4_map3	0003.CSV	752.134	0.00144765
PSB913-4_map3	0003.CSV	755.991	0.00137718
PSB913-4_map3	0003.CSV	759.848	0.00211102
PSB913-4_map3	0003.CSV	763.705	0.00193812
PSB913-4_map3	0003.CSV	767.562	0.00254601
PSB913-4_map3	0003.CSV	771.419	0.00239456
PSB913-4_map3	0003.CSV	775.276	0.00289984
PSB913-4_map3	0003.CSV	779.133	0.00261951
PSB913-4_map3	0003.CSV	782.99	0.00332617
PSB913-4_map3	0003.CSV	786.848	0.00348958
PSB913-4_map3	0003.CSV	790.705	0.00420214
PSB913-4_map3	0003.CSV	794.562	0.00420004
PSB913-4_map3	0003.CSV	798.419	0.00503453
PSB913-4_map3	0003.CSV	802.276	0.00529087
PSB913-4_map3	0003.CSV	806.133	0.00632322
PSB913-4_map3	0003.CSV	809.99	0.00709057
PSB913-4_map3	0003.CSV	813.847	0.00870063
PSB913-4_map3	0003.CSV	817.704	0.0097884
PSB913-4_map3	0003.CSV	821.562	0.011671
PSB913-4_map3	0003.CSV	825.419	0.0134555
PSB913-4_map3	0003.CSV	829.276	0.0162224
PSB913-4_map3	0003.CSV	833.133	0.0191396
PSB913-4_map3	0003.CSV	836.99	0.0237264
PSB913-4_map3	0003.CSV	840.847	0.0284384
PSB913-4_map3	0003.CSV	844.704	0.0329774
PSB913-4_map3	0003.CSV	848.561	0.0386822
PSB913-4_map3	0003.CSV	852.418	0.0434917
PSB913-4_map3	0003.CSV	856.275	0.0417763
PSB913-4_map3	0003.CSV	860.132	0.0358478
PSB913-4_map3	0003.CSV	863.99	0.0272637
PSB913-4_map3	0003.CSV	867.847	0.0182125
PSB913-4_map3	0003.CSV	871.704	0.00845856
PSB913-4_map3	0003.CSV	875.561	0.000133219
PSB913-4_map3	0003.CSV	879.418	-0.00421596
PSB913-4_map3	0003.CSV	883.275	-0.0050486
PSB913-4_map3	0003.CSV	887.132	-0.00528905
PSB913-4_map3	0003.CSV	890.989	-0.00514851
PSB913-4_map3	0003.CSV	894.846	-0.00498954
PSB913-4_map3	0003.CSV	898.703	-0.00457489
PSB913-4_map3	0003.CSV	902.561	-0.00430881
PSB913-4_map3	0003.CSV	906.418	-0.00396426
PSB913-4_map3	0003.CSV	910.275	-0.00403515
PSB913-4_map3	0003.CSV	914.132	-0.00412033
PSB913-4_map3	0003.CSV	917.989	-0.00399319
PSB913-4_map3	0003.CSV	921.846	-0.0036643
PSB913-4_map3	0003.CSV	925.703	-0.00338349
PSB913-4_map3	0003.CSV	929.56	-0.00310714
PSB913-4_map3	0003.CSV	933.417	-0.00289427
PSB913-4_map3	0003.CSV	937.274	-0.00279973
PSB913-4_map3	0003.CSV	941.131	-0.00267586
PSB913-4_map3	0003.CSV	944.989	-0.00242552
PSB913-4_map3	0003.CSV	948.846	-0.00208647
PSB913-4_map3	0003.CSV	952.703	-0.00176154
PSB913-4_map3	0003.CSV	956.56	-0.001476
PSB913-4_map3	0003.CSV	960.417	-0.00140886
PSB913-4_map3	0003.CSV	964.274	-0.00118749
PSB913-4_map3	0003.CSV	968.131	-0.000889466
PSB913-4_map3	0003.CSV	971.988	-0.000510163
PSB913-4_map3	0003.CSV	975.845	-0.000296647
PSB913-4_map3	0003.CSV	979.702	7.16086e-05
PSB913-4_map3	0003.CSV	983.559	0.00032951
PSB913-4_map3	0003.CSV	987.417	0.000704172
PSB913-4_map3	0003.CSV	991.274	0.000844977
PSB913-4_map3	0003.CSV	995.131	0.00115231
PSB913-4_map3	0003.CSV	998.988	0.00126521
PSB913-4_map3	0003.CSV	1002.85	0.00151551
PSB913-4_map3	0003.CSV	1006.7	0.00158291
PSB913-4_map3	0003.CSV	1010.56	0.00192264
PSB913-4_map3	0003.CSV	1014.42	0.00202463
PSB913-4_map3	0003.CSV	1018.27	0.00235838
PSB913-4_map3	0003.CSV	1022.13	0.00239049
PSB913-4_map3	0003.CSV	1025.99	0.00261764
PSB913-4_map3	0003.CSV	1029.85	0.00249819
PSB913-4_map3	0003.CSV	1033.7	0.00259704
PSB913-4_map3	0003.CSV	1037.56	0.00243964
PSB913-4_map3	0003.CSV	1041.42	0.00268412
PSB913-4_map3	0003.CSV	1045.27	0.00247659
PSB913-4_map3	0003.CSV	1049.13	0.00273059
PSB913-4_map3	0003.CSV	1052.99	0.00266871
PSB913-4_map3	0003.CSV	1056.84	0.00288997
PSB913-4_map3	0003.CSV	1060.7	0.00267935
PSB913-4_map3	0003.CSV	1064.56	0.00295635
PSB913-4_map3	0003.CSV	1068.42	0.00284661
PSB913-4_map3	0003.CSV	1072.27	0.0032569
PSB913-4_map3	0003.CSV	1076.13	0.00392194
PSB913-4_map3	0003.CSV	1079.99	0.00620731
PSB913-4_map3	0003.CSV	1083.84	0.00514744
PSB913-4_map3	0003.CSV	1087.7	0.00172616
PSB913-4_map3	0003.CSV	1091.56	0.000254842
PSB913-4_map3	0003.CSV	1095.41	0.00062204
PSB913-4_map3	0003.CSV	1099.27	0.000621509
PSB913-4_map3	0003.CSV	1103.13	0.000983404
PSB913-4_map3	0003.CSV	1106.99	0.000788411
PSB913-4_map3	0003.CSV	1110.84	0.00100755
PSB913-4_map3	0003.CSV	1114.7	0.000767731
PSB913-4_map3	0003.CSV	1118.56	0.000960391
PSB913-4_map3	0003.CSV	1122.41	0.000651937
PSB913-4_map3	0003.CSV	1126.27	0.000836545
PSB913-4_map3	0003.CSV	1130.13	0.000584845
PSB913-4_map3	0003.CSV	1133.99	0.000808328
PSB913-4_map3	0003.CSV	1137.84	0.000566066
PSB913-4_map3	0003.CSV	1141.7	0.000840097
PSB913-4_map3	0003.CSV	1145.56	0.000651141
PSB913-4_map3	0003.CSV	1149.41	0.00103548
PSB913-4_map3	0003.CSV	1153.27	0.000838338
PSB913-4_map3	0003.CSV	1157.13	0.00120387
PSB913-4_map3	0003.CSV	1160.99	0.00110762
PSB913-4_map3	0003.CSV	1164.84	0.00143299
PSB913-4_map3	0003.CSV	1168.7	0.00117825
PSB913-4_map3	0003.CSV	1172.56	0.00151823
PSB913-4_map3	0003.CSV	1176.41	0.00139237
PSB913-4_map3	0003.CSV	1180.27	0.00174722
PSB913-4_map3	0003.CSV	1184.13	0.00154237
PSB913-4_map3	0003.CSV	1187.99	0.0019316
PSB913-4_map3	0003.CSV	1191.84	0.00181356
PSB913-4_map3	0003.CSV	1195.7	0.00217888
PSB913-4_map3	0003.CSV	1199.56	0.00201524
PSB913-4_map3	0003.CSV	1203.41	0.00240679
PSB913-4_map3	0003.CSV	1207.27	0.00226271
PSB913-4_map3	0003.CSV	1211.13	0.00277191
PSB913-4_map3	0003.CSV	1214.98	0.00276867
PSB913-4_map3	0003.CSV	1218.84	0.00329269
PSB913-4_map3	0003.CSV	1222.7	0.00327269
PSB913-4_map3	0003.CSV	1226.56	0.0038506
PSB913-4_map3	0003.CSV	1230.41	0.00385855
PSB913-4_map3	0003.CSV	1234.27	0.00443275
PSB913-4_map3	0003.CSV	1238.13	0.00436972
PSB913-4_map3	0003.CSV	1241.98	0.00486471
PSB913-4_map3	0003.CSV	1245.84	0.00480829
PSB913-4_map3	0003.CSV	1249.7	0.0052747
PSB913-4_map3	0003.CSV	1253.56	0.00510657
PSB913-4_map3	0003.CSV	1257.41	0.0054738
PSB913-4_map3	0003.CSV	1261.27	0.00528778
PSB913-4_map3	0003.CSV	1265.13	0.00578996
PSB913-4_map3	0003.CSV	1268.98	0.00587862
PSB913-4_map3	0003.CSV	1272.84	0.00654147
PSB913-4_map3	0003.CSV	1276.7	0.00652216
PSB913-4_map3	0003.CSV	1280.56	0.00704834
PSB913-4_map3	0003.CSV	1284.41	0.00700948
PSB913-4_map3	0003.CSV	1288.27	0.00752232
PSB913-4_map3	0003.CSV	1292.13	0.00751028
PSB913-4_map3	0003.CSV	1295.98	0.00807566
PSB913-4_map3	0003.CSV	1299.84	0.00810311
PSB913-4_map3	0003.CSV	1303.7	0.00866821
PSB913-4_map3	0003.CSV	1307.56	0.00865466
PSB913-4_map3	0003.CSV	1311.41	0.00926323
PSB913-4_map3	0003.CSV	1315.27	0.00937444
PSB913-4_map3	0003.CSV	1319.13	0.0100922
PSB913-4_map3	0003.CSV	1322.98	0.0101788
PSB913-4_map3	0003.CSV	1326.84	0.0107998
PSB913-4_map3	0003.CSV	1330.7	0.0109424
PSB913-4_map3	0003.CSV	1334.56	0.0116045
PSB913-4_map3	0003.CSV	1338.41	0.0118973
PSB913-4_map3	0003.CSV	1342.27	0.0129587
PSB913-4_map3	0003.CSV	1346.13	0.0130879
PSB913-4_map3	0003.CSV	1349.98	0.0138803
PSB913-4_map3	0003.CSV	1353.84	0.0142136
PSB913-4_map3	0003.CSV	1357.7	0.015053
PSB913-4_map3	0003.CSV	1361.56	0.0154094
PSB913-4_map3	0003.CSV	1365.41	0.0165802
PSB913-4_map3	0003.CSV	1369.27	0.0168368
PSB913-4_map3	0003.CSV	1373.13	0.0178295
PSB913-4_map3	0003.CSV	1376.98	0.0183859
PSB913-4_map3	0003.CSV	1380.84	0.0194976
PSB913-4_map3	0003.CSV	1384.7	0.0200294
PSB913-4_map3	0003.CSV	1388.56	0.0214121
PSB913-4_map3	0003.CSV	1392.41	0.0217849
PSB913-4_map3	0003.CSV	1396.27	0.0231082
PSB913-4_map3	0003.CSV	1400.13	0.0237014
PSB913-4_map3	0003.CSV	1403.98	0.0246979
PSB913-4_map3	0003.CSV	1407.84	0.0250781
PSB913-4_map3	0003.CSV	1411.7	0.0259042
PSB913-4_map3	0003.CSV	1415.55	0.0258884
PSB913-4_map3	0003.CSV	1419.41	0.0269892
PSB913-4_map3	0003.CSV	1423.27	0.0272744
PSB913-4_map3	0003.CSV	1427.12	0.0278505
PSB913-4_map3	0003.CSV	1430.98	0.0276013
PSB913-4_map3	0003.CSV	1434.84	0.027904
PSB913-4_map3	0003.CSV	1438.7	0.0271268
PSB913-4_map3	0003.CSV	1442.55	0.0263869
PSB913-4_map3	0003.CSV	1446.41	0.0245178
PSB913-4_map3	0003.CSV	1450.27	0.0232736
PSB913-4_map3	0003.CSV	1454.12	0.0217504
PSB913-4_map3	0003.CSV	1457.98	0.0215945
PSB913-4_map3	0003.CSV	1461.84	0.0207513
PSB913-4_map3	0003.CSV	1465.7	0.020653
PSB913-4_map3	0003.CSV	1469.55	0.0197841
PSB913-4_map3	0003.CSV	1473.41	0.0199558
PSB913-4_map3	0003.CSV	1477.27	0.0192502
PSB913-4_map3	0003.CSV	1481.12	0.0188005
PSB913-4_map3	0003.CSV	1484.98	0.0176869
PSB913-4_map3	0003.CSV	1488.84	0.0170563
PSB913-4_map3	0003.CSV	1492.7	0.0155737
PSB913-4_map3	0003.CSV	1496.55	0.0145832
PSB913-4_map3	0003.CSV	1500.41	0.0127284
PSB913-4_map3	0003.CSV	1504.27	0.0116663
PSB913-4_map3	0003.CSV	1508.12	0.00934522
PSB913-4_map3	0003.CSV	1511.98	0.00847569
PSB913-4_map3	0003.CSV	1515.84	0.00684474
PSB913-4_map3	0003.CSV	1519.7	0.00604104
PSB913-4_map3	0003.CSV	1523.55	0.00436233
PSB913-4_map3	0003.CSV	1527.41	0.00355802
PSB913-4_map3	0003.CSV	1531.27	0.00222427
PSB913-4_map3	0003.CSV	1535.12	0.00172966
PSB913-4_map3	0003.CSV	1538.98	0.000402434
PSB913-4_map3	0003.CSV	1542.84	0.000247781
PSB913-4_map3	0003.CSV	1546.7	-0.000797962
PSB913-4_map3	0003.CSV	1550.55	-0.00147286
PSB913-4_map3	0003.CSV	1554.41	-0.00273497
PSB913-4_map3	0003.CSV	1558.27	-0.00319411
PSB913-4_map3	0003.CSV	1562.12	-0.00415787
PSB913-4_map3	0003.CSV	1565.98	-0.00493569
PSB913-4_map3	0003.CSV	1569.84	-0.00615784
PSB913-4_map3	0003.CSV	1573.69	-0.00709663
PSB913-4_map3	0003.CSV	1577.55	-0.0084229
PSB913-4_map3	0003.CSV	1581.41	-0.00938678
PSB913-4_map3	0003.CSV	1585.27	-0.010307
PSB913-4_map3	0003.CSV	1589.12	-0.0107671
PSB913-4_map3	0003.CSV	1592.98	-0.0111205
PSB913-4_map3	0003.CSV	1596.84	-0.0112407
PSB913-4_map3	0003.CSV	1600.69	-0.011517
PSB913-4_map3	0003.CSV	1604.55	-0.0115787
PSB913-4_map3	0003.CSV	1608.41	-0.0117133
PSB913-4_map3	0003.CSV	1612.27	-0.0118679
PSB913-4_map3	0003.CSV	1616.12	-0.01211
PSB913-4_map3	0003.CSV	1619.98	-0.0120402
PSB913-4_map3	0003.CSV	1623.84	-0.0120798
PSB913-4_map3	0003.CSV	1627.69	-0.0119252
PSB913-4_map3	0003.CSV	1631.55	-0.0123711
PSB913-4_map3	0003.CSV	1635.41	-0.012453
PSB913-4_map3	0003.CSV	1639.27	-0.012144
PSB913-4_map3	0003.CSV	1643.12	-0.0126311
PSB913-4_map3	0003.CSV	1646.98	-0.0128821
PSB913-4_map3	0003.CSV	1650.84	-0.0126439
PSB913-4_map3	0003.CSV	1654.69	-0.012262
PSB913-4_map3	0003.CSV	1658.55	-0.0127212
PSB913-4_map3	0003.CSV	1662.41	-0.013116
PSB913-4_map3	0003.CSV	1666.27	-0.0133852
PSB913-4_map3	0003.CSV	1670.12	-0.0135113
PSB913-4_map3	0003.CSV	1673.98	-0.0134585
PSB913-4_map3	0003.CSV	1677.84	-0.0137127
PSB913-4_map3	0003.CSV	1681.69	-0.0140765
PSB913-4_map3	0003.CSV	1685.55	-0.013625
PSB913-4_map3	0003.CSV	1689.41	-0.0138688
PSB913-4_map3	0003.CSV	1693.27	-0.0145514
PSB913-4_map3	0003.CSV	1697.12	-0.0150134
PSB913-4_map3	0003.CSV	1700.98	-0.0144895
PSB913-4_map3	0003.CSV	1704.84	-0.014603
PSB913-4_map3	0003.CSV	1708.69	-0.0147277
PSB913-4_map3	0003.CSV	1712.55	-0.0154182
PSB913-4_map3	0003.CSV	1716.41	-0.0152089
PSB913-4_map3	0003.CSV	1720.27	-0.0148657
PSB913-4_map3	0003.CSV	1724.12	-0.0151626
[truncated: 69,630 more rows]

## Sheet: PSB913-4_map4
Map	Select spectrum number	Wavenumbers	Absrobance
PSB913-4_map4	0001.CSV	674.992	0.0296633
PSB913-4_map4	0001.CSV	678.849	0.0334003
PSB913-4_map4	0001.CSV	682.706	0.0347627
PSB913-4_map4	0001.CSV	686.563	0.0394153
PSB913-4_map4	0001.CSV	690.42	0.0478977
PSB913-4_map4	0001.CSV	694.277	0.0680697
PSB913-4_map4	0001.CSV	698.134	0.0865411
PSB913-4_map4	0001.CSV	701.991	0.0784452
PSB913-4_map4	0001.CSV	705.849	0.0629138
PSB913-4_map4	0001.CSV	709.706	0.0722253
PSB913-4_map4	0001.CSV	713.563	0.069394
PSB913-4_map4	0001.CSV	717.42	0.0376028
PSB913-4_map4	0001.CSV	721.277	0.0183812
PSB913-4_map4	0001.CSV	725.134	0.0178309
PSB913-4_map4	0001.CSV	728.991	0.020056
PSB913-4_map4	0001.CSV	732.848	0.0242622
PSB913-4_map4	0001.CSV	736.705	0.0288928
PSB913-4_map4	0001.CSV	740.562	0.0333436
PSB913-4_map4	0001.CSV	744.42	0.0343196
PSB913-4_map4	0001.CSV	748.277	0.033611
PSB913-4_map4	0001.CSV	752.134	0.0315681
PSB913-4_map4	0001.CSV	755.991	0.0308441
PSB913-4_map4	0001.CSV	759.848	0.029758
PSB913-4_map4	0001.CSV	763.705	0.029107
PSB913-4_map4	0001.CSV	767.562	0.0275595
PSB913-4_map4	0001.CSV	771.419	0.0264607
PSB913-4_map4	0001.CSV	775.276	0.0246685
PSB913-4_map4	0001.CSV	779.133	0.0240375
PSB913-4_map4	0001.CSV	782.99	0.0234498
PSB913-4_map4	0001.CSV	786.848	0.0237533
PSB913-4_map4	0001.CSV	790.705	0.0235604
PSB913-4_map4	0001.CSV	794.562	0.0240366
PSB913-4_map4	0001.CSV	798.419	0.0241101
PSB913-4_map4	0001.CSV	802.276	0.0249845
PSB913-4_map4	0001.CSV	806.133	0.0254924
PSB913-4_map4	0001.CSV	809.99	0.0270392
PSB913-4_map4	0001.CSV	813.847	0.0283821
PSB913-4_map4	0001.CSV	817.704	0.0308588
PSB913-4_map4	0001.CSV	821.562	0.0335569
PSB913-4_map4	0001.CSV	825.419	0.0377356
PSB913-4_map4	0001.CSV	829.276	0.0421488
PSB913-4_map4	0001.CSV	833.133	0.048927
PSB913-4_map4	0001.CSV	836.99	0.0593772
PSB913-4_map4	0001.CSV	840.847	0.0764539
PSB913-4_map4	0001.CSV	844.704	0.0936956
PSB913-4_map4	0001.CSV	848.561	0.121896
PSB913-4_map4	0001.CSV	852.418	0.163405
PSB913-4_map4	0001.CSV	856.275	0.180776
PSB913-4_map4	0001.CSV	860.132	0.155052
PSB913-4_map4	0001.CSV	863.99	0.110431
PSB913-4_map4	0001.CSV	867.847	0.0672659
PSB913-4_map4	0001.CSV	871.704	0.0355325
PSB913-4_map4	0001.CSV	875.561	0.0169535
PSB913-4_map4	0001.CSV	879.418	0.00965774
PSB913-4_map4	0001.CSV	883.275	0.00710428
PSB913-4_map4	0001.CSV	887.132	0.00658271
PSB913-4_map4	0001.CSV	890.989	0.00642338
PSB913-4_map4	0001.CSV	894.846	0.00684619
PSB913-4_map4	0001.CSV	898.703	0.00728834
PSB913-4_map4	0001.CSV	902.561	0.00845687
PSB913-4_map4	0001.CSV	906.418	0.00945032
PSB913-4_map4	0001.CSV	910.275	0.00990008
PSB913-4_map4	0001.CSV	914.132	0.00950887
PSB913-4_map4	0001.CSV	917.989	0.0097556
PSB913-4_map4	0001.CSV	921.846	0.00984198
PSB913-4_map4	0001.CSV	925.703	0.0102564
PSB913-4_map4	0001.CSV	929.56	0.0104498
PSB913-4_map4	0001.CSV	933.417	0.0110664
PSB913-4_map4	0001.CSV	937.274	0.0112935
PSB913-4_map4	0001.CSV	941.131	0.0117422
PSB913-4_map4	0001.CSV	944.989	0.0118091
PSB913-4_map4	0001.CSV	948.846	0.0120711
PSB913-4_map4	0001.CSV	952.703	0.0123336
PSB913-4_map4	0001.CSV	956.56	0.0131214
PSB913-4_map4	0001.CSV	960.417	0.013545
PSB913-4_map4	0001.CSV	964.274	0.0141557
PSB913-4_map4	0001.CSV	968.131	0.0144656
PSB913-4_map4	0001.CSV	971.988	0.0150114
PSB913-4_map4	0001.CSV	975.845	0.0153894
PSB913-4_map4	0001.CSV	979.702	0.0161926
PSB913-4_map4	0001.CSV	983.559	0.0167877
PSB913-4_map4	0001.CSV	987.417	0.0174578
PSB913-4_map4	0001.CSV	991.274	0.0176592
PSB913-4_map4	0001.CSV	995.131	0.0178868
PSB913-4_map4	0001.CSV	998.988	0.0178611
PSB913-4_map4	0001.CSV	1002.85	0.0182406
PSB913-4_map4	0001.CSV	1006.7	0.0183979
PSB913-4_map4	0001.CSV	1010.56	0.0189494
PSB913-4_map4	0001.CSV	1014.42	0.0194309
PSB913-4_map4	0001.CSV	1018.27	0.0204481
PSB913-4_map4	0001.CSV	1022.13	0.0213871
PSB913-4_map4	0001.CSV	1025.99	0.0227706
PSB913-4_map4	0001.CSV	1029.85	0.0238381
PSB913-4_map4	0001.CSV	1033.7	0.0251399
PSB913-4_map4	0001.CSV	1037.56	0.0262278
PSB913-4_map4	0001.CSV	1041.42	0.0274305
PSB913-4_map4	0001.CSV	1045.27	0.0279522
PSB913-4_map4	0001.CSV	1049.13	0.0295601
PSB913-4_map4	0001.CSV	1052.99	0.0324416
PSB913-4_map4	0001.CSV	1056.84	0.0369336
PSB913-4_map4	0001.CSV	1060.7	0.0412366
PSB913-4_map4	0001.CSV	1064.56	0.0443668
PSB913-4_map4	0001.CSV	1068.42	0.0448668
PSB913-4_map4	0001.CSV	1072.27	0.0439918
PSB913-4_map4	0001.CSV	1076.13	0.043847
PSB913-4_map4	0001.CSV	1079.99	0.0490122
PSB913-4_map4	0001.CSV	1083.84	0.0481442
PSB913-4_map4	0001.CSV	1087.7	0.0355695
PSB913-4_map4	0001.CSV	1091.56	0.027713
PSB913-4_map4	0001.CSV	1095.41	0.0270414
PSB913-4_map4	0001.CSV	1099.27	0.0280855
PSB913-4_map4	0001.CSV	1103.13	0.0303147
PSB913-4_map4	0001.CSV	1106.99	0.033005
PSB913-4_map4	0001.CSV	1110.84	0.0360854
PSB913-4_map4	0001.CSV	1114.7	0.0383678
PSB913-4_map4	0001.CSV	1118.56	0.0397241
PSB913-4_map4	0001.CSV	1122.41	0.0398155
PSB913-4_map4	0001.CSV	1126.27	0.0393631
PSB913-4_map4	0001.CSV	1130.13	0.0384345
PSB913-4_map4	0001.CSV	1133.99	0.0380273
PSB913-4_map4	0001.CSV	1137.84	0.0375239
PSB913-4_map4	0001.CSV	1141.7	0.0368115
PSB913-4_map4	0001.CSV	1145.56	0.0354054
PSB913-4_map4	0001.CSV	1149.41	0.0345821
PSB913-4_map4	0001.CSV	1153.27	0.0342885
PSB913-4_map4	0001.CSV	1157.13	0.0344123
PSB913-4_map4	0001.CSV	1160.99	0.0342225
PSB913-4_map4	0001.CSV	1164.84	0.0340704
PSB913-4_map4	0001.CSV	1168.7	0.0332501
PSB913-4_map4	0001.CSV	1172.56	0.0325855
PSB913-4_map4	0001.CSV	1176.41	0.0320524
PSB913-4_map4	0001.CSV	1180.27	0.0318756
PSB913-4_map4	0001.CSV	1184.13	0.0315139
PSB913-4_map4	0001.CSV	1187.99	0.0314149
PSB913-4_map4	0001.CSV	1191.84	0.0312236
PSB913-4_map4	0001.CSV	1195.7	0.0314495
PSB913-4_map4	0001.CSV	1199.56	0.0316323
PSB913-4_map4	0001.CSV	1203.41	0.0321738
PSB913-4_map4	0001.CSV	1207.27	0.0327153
PSB913-4_map4	0001.CSV	1211.13	0.0336414
PSB913-4_map4	0001.CSV	1214.98	0.0344814
PSB913-4_map4	0001.CSV	1218.84	0.0357283
PSB913-4_map4	0001.CSV	1222.7	0.036972
PSB913-4_map4	0001.CSV	1226.56	0.0387212
PSB913-4_map4	0001.CSV	1230.41	0.0405365
PSB913-4_map4	0001.CSV	1234.27	0.0429767
PSB913-4_map4	0001.CSV	1238.13	0.0457744
PSB913-4_map4	0001.CSV	1241.98	0.0492271
PSB913-4_map4	0001.CSV	1245.84	0.0526566
PSB913-4_map4	0001.CSV	1249.7	0.0560222
PSB913-4_map4	0001.CSV	1253.56	0.0583315
PSB913-4_map4	0001.CSV	1257.41	0.0599821
PSB913-4_map4	0001.CSV	1261.27	0.0608891
PSB913-4_map4	0001.CSV	1265.13	0.0617718
PSB913-4_map4	0001.CSV	1268.98	0.0623442
PSB913-4_map4	0001.CSV	1272.84	0.0631188
PSB913-4_map4	0001.CSV	1276.7	0.0634775
PSB913-4_map4	0001.CSV	1280.56	0.0638035
PSB913-4_map4	0001.CSV	1284.41	0.063466
PSB913-4_map4	0001.CSV	1288.27	0.0625971
PSB913-4_map4	0001.CSV	1292.13	0.0606368
PSB913-4_map4	0001.CSV	1295.98	0.0585207
PSB913-4_map4	0001.CSV	1299.84	0.0564887
PSB913-4_map4	0001.CSV	1303.7	0.0554048
PSB913-4_map4	0001.CSV	1307.56	0.0548406
PSB913-4_map4	0001.CSV	1311.41	0.0550822
PSB913-4_map4	0001.CSV	1315.27	0.0554461
PSB913-4_map4	0001.CSV	1319.13	0.0562595
PSB913-4_map4	0001.CSV	1322.98	0.056753
PSB913-4_map4	0001.CSV	1326.84	0.0576055
PSB913-4_map4	0001.CSV	1330.7	0.0586092
PSB913-4_map4	0001.CSV	1334.56	0.0601315
PSB913-4_map4	0001.CSV	1338.41	0.0623097
PSB913-4_map4	0001.CSV	1342.27	0.0654035
PSB913-4_map4	0001.CSV	1346.13	0.0678056
PSB913-4_map4	0001.CSV	1349.98	0.0709344
PSB913-4_map4	0001.CSV	1353.84	0.0740492
PSB913-4_map4	0001.CSV	1357.7	0.0773686
PSB913-4_map4	0001.CSV	1361.56	0.0810696
PSB913-4_map4	0001.CSV	1365.41	0.0859197
PSB913-4_map4	0001.CSV	1369.27	0.0899516
PSB913-4_map4	0001.CSV	1373.13	0.0954918
PSB913-4_map4	0001.CSV	1376.98	0.101387
PSB913-4_map4	0001.CSV	1380.84	0.106212
PSB913-4_map4	0001.CSV	1384.7	0.110613
PSB913-4_map4	0001.CSV	1388.56	0.117159
PSB913-4_map4	0001.CSV	1392.41	0.122307
PSB913-4_map4	0001.CSV	1396.27	0.128975
PSB913-4_map4	0001.CSV	1400.13	0.136215
PSB913-4_map4	0001.CSV	1403.98	0.143661
PSB913-4_map4	0001.CSV	1407.84	0.151625
PSB913-4_map4	0001.CSV	1411.7	0.159948
PSB913-4_map4	0001.CSV	1415.55	0.166874
PSB913-4_map4	0001.CSV	1419.41	0.176407
PSB913-4_map4	0001.CSV	1423.27	0.184514
PSB913-4_map4	0001.CSV	1427.12	0.19241
PSB913-4_map4	0001.CSV	1430.98	0.200497
PSB913-4_map4	0001.CSV	1434.84	0.210859
PSB913-4_map4	0001.CSV	1438.7	0.22232
PSB913-4_map4	0001.CSV	1442.55	0.231002
PSB913-4_map4	0001.CSV	1446.41	0.234708
PSB913-4_map4	0001.CSV	1450.27	0.234339
PSB913-4_map4	0001.CSV	1454.12	0.229227
PSB913-4_map4	0001.CSV	1457.98	0.222168
PSB913-4_map4	0001.CSV	1461.84	0.217074
PSB913-4_map4	0001.CSV	1465.7	0.214083
PSB913-4_map4	0001.CSV	1469.55	0.206444
PSB913-4_map4	0001.CSV	1473.41	0.190665
PSB913-4_map4	0001.CSV	1477.27	0.171548
PSB913-4_map4	0001.CSV	1481.12	0.160261
PSB913-4_map4	0001.CSV	1484.98	0.149533
PSB913-4_map4	0001.CSV	1488.84	0.137363
PSB913-4_map4	0001.CSV	1492.7	0.125143
PSB913-4_map4	0001.CSV	1496.55	0.116307
PSB913-4_map4	0001.CSV	1500.41	0.106389
PSB913-4_map4	0001.CSV	1504.27	0.100859
PSB913-4_map4	0001.CSV	1508.12	0.0900334
PSB913-4_map4	0001.CSV	1511.98	0.0823721
PSB913-4_map4	0001.CSV	1515.84	0.0770649
PSB913-4_map4	0001.CSV	1519.7	0.0702733
PSB913-4_map4	0001.CSV	1523.55	0.0616572
PSB913-4_map4	0001.CSV	1527.41	0.0557254
PSB913-4_map4	0001.CSV	1531.27	0.0505733
PSB913-4_map4	0001.CSV	1535.12	0.0462964
PSB913-4_map4	0001.CSV	1538.98	0.0418275
PSB913-4_map4	0001.CSV	1542.84	0.0350035
PSB913-4_map4	0001.CSV	1546.7	0.0299286
PSB913-4_map4	0001.CSV	1550.55	0.0263431
PSB913-4_map4	0001.CSV	1554.41	0.0226098
PSB913-4_map4	0001.CSV	1558.27	0.0185418
PSB913-4_map4	0001.CSV	1562.12	0.0149604
PSB913-4_map4	0001.CSV	1565.98	0.0134149
PSB913-4_map4	0001.CSV	1569.84	0.0112677
PSB913-4_map4	0001.CSV	1573.69	0.00895248
PSB913-4_map4	0001.CSV	1577.55	0.00590415
PSB913-4_map4	0001.CSV	1581.41	0.00297133
PSB913-4_map4	0001.CSV	1585.27	3.54549e-05
PSB913-4_map4	0001.CSV	1589.12	-0.00240693
PSB913-4_map4	0001.CSV	1592.98	-0.00394854
PSB913-4_map4	0001.CSV	1596.84	-0.00444018
PSB913-4_map4	0001.CSV	1600.69	-0.00490683
PSB913-4_map4	0001.CSV	1604.55	-0.00567546
PSB913-4_map4	0001.CSV	1608.41	-0.00679174
PSB913-4_map4	0001.CSV	1612.27	-0.00769011
PSB913-4_map4	0001.CSV	1616.12	-0.0084202
PSB913-4_map4	0001.CSV	1619.98	-0.00864006
PSB913-4_map4	0001.CSV	1623.84	-0.00907782
PSB913-4_map4	0001.CSV	1627.69	-0.00936532
PSB913-4_map4	0001.CSV	1631.55	-0.0100241
PSB913-4_map4	0001.CSV	1635.41	-0.0101477
PSB913-4_map4	0001.CSV	1639.27	-0.0102991
PSB913-4_map4	0001.CSV	1643.12	-0.0109321
PSB913-4_map4	0001.CSV	1646.98	-0.0114459
PSB913-4_map4	0001.CSV	1650.84	-0.0113646
PSB913-4_map4	0001.CSV	1654.69	-0.011202
PSB913-4_map4	0001.CSV	1658.55	-0.0115186
PSB913-4_map4	0001.CSV	1662.41	-0.0120646
PSB913-4_map4	0001.CSV	1666.27	-0.0124217
PSB913-4_map4	0001.CSV	1670.12	-0.0127815
PSB913-4_map4	0001.CSV	1673.98	-0.0127102
PSB913-4_map4	0001.CSV	1677.84	-0.0132118
PSB913-4_map4	0001.CSV	1681.69	-0.0135295
PSB913-4_map4	0001.CSV	1685.55	-0.0131944
PSB913-4_map4	0001.CSV	1689.41	-0.0130531
PSB913-4_map4	0001.CSV	1693.27	-0.013615
PSB913-4_map4	0001.CSV	1697.12	-0.0132747
PSB913-4_map4	0001.CSV	1700.98	-0.012105
PSB913-4_map4	0001.CSV	1704.84	-0.010785
PSB913-4_map4	0001.CSV	1708.69	-0.00927334
PSB913-4_map4	0001.CSV	1712.55	-0.0075845
PSB913-4_map4	0001.CSV	1716.41	-0.00292524
PSB913-4_map4	0001.CSV	1720.27	0.00284901
PSB913-4_map4	0001.CSV	1724.12	0.00475134
PSB913-4_map4	0001.CSV	1727.98	0.00554115
PSB913-4_map4	0001.CSV	1731.84	0.00526266
PSB913-4_map4	0001.CSV	1735.69	0.00365114
PSB913-4_map4	0001.CSV	1739.55	0.000990578
PSB913-4_map4	0001.CSV	1743.41	-0.00238894
PSB913-4_map4	0001.CSV	1747.27	-0.00623711
PSB913-4_map4	0001.CSV	1751.12	-0.0108644
PSB913-4_map4	0001.CSV	1754.98	-0.0144005
PSB913-4_map4	0001.CSV	1758.84	-0.0168889
PSB913-4_map4	0001.CSV	1762.69	-0.0187162
PSB913-4_map4	0001.CSV	1766.55	-0.0198944
PSB913-4_map4	0001.CSV	1770.41	-0.0201355
PSB913-4_map4	0001.CSV	1774.26	-0.0185226
PSB913-4_map4	0001.CSV	1778.12	-0.0165481
PSB913-4_map4	0001.CSV	1781.98	-0.0141931
PSB913-4_map4	0001.CSV	1785.84	-0.0129566
PSB913-4_map4	0001.CSV	1789.69	-0.0136322
PSB913-4_map4	0001.CSV	1793.55	-0.0162483
PSB913-4_map4	0001.CSV	1797.41	-0.0185768
PSB913-4_map4	0001.CSV	1801.26	-0.0204577
PSB913-4_map4	0001.CSV	1805.12	-0.0219133
PSB913-4_map4	0001.CSV	1808.98	-0.0227458
PSB913-4_map4	0001.CSV	1812.84	-0.0229493
PSB913-4_map4	0001.CSV	1816.69	-0.0232677
PSB913-4_map4	0001.CSV	1820.55	-0.0234913
PSB913-4_map4	0001.CSV	1824.41	-0.0236899
PSB913-4_map4	0001.CSV	1828.26	-0.0235222
PSB913-4_map4	0001.CSV	1832.12	-0.0234306
PSB913-4_map4	0001.CSV	1835.98	-0.0235296
PSB913-4_map4	0001.CSV	1839.84	-0.0237384
PSB913-4_map4	0001.CSV	1843.69	-0.0235594
PSB913-4_map4	0001.CSV	1847.55	-0.0233577
PSB913-4_map4	0001.CSV	1851.41	-0.0235007
PSB913-4_map4	0001.CSV	1855.26	-0.023627
PSB913-4_map4	0001.CSV	1859.12	-0.0235273
PSB913-4_map4	0001.CSV	1862.98	-0.0235877
PSB913-4_map4	0001.CSV	1866.84	-0.0234565
PSB913-4_map4	0001.CSV	1870.69	-0.0230042
PSB913-4_map4	0001.CSV	1874.55	-0.0230249
PSB913-4_map4	0001.CSV	1878.41	-0.023172
PSB913-4_map4	0001.CSV	1882.26	-0.0231144
PSB913-4_map4	0001.CSV	1886.12	-0.0230559
PSB913-4_map4	0001.CSV	1889.98	-0.0229428
PSB913-4_map4	0001.CSV	1893.83	-0.0229024
PSB913-4_map4	0001.CSV	1897.69	-0.0228347
PSB913-4_map4	0001.CSV	1901.55	-0.0228774
PSB913-4_map4	0001.CSV	1905.41	-0.0228285
PSB913-4_map4	0001.CSV	1909.26	-0.0227154
PSB913-4_map4	0001.CSV	1913.12	-0.0226681
PSB913-4_map4	0001.CSV	1916.98	-0.0226685
PSB913-4_map4	0001.CSV	1920.83	-0.0224407
PSB913-4_map4	0001.CSV	1924.69	-0.0223744
PSB913-4_map4	0001.CSV	1928.55	-0.0223502
PSB913-4_map4	0001.CSV	1932.4	-0.0222846
PSB913-4_map4	0001.CSV	1936.26	-0.0221969
PSB913-4_map4	0001.CSV	1940.12	-0.022173
PSB913-4_map4	0001.CSV	1943.98	-0.0218231
PSB913-4_map4	0001.CSV	1947.83	-0.0217126
PSB913-4_map4	0001.CSV	1951.69	-0.0217285
PSB913-4_map4	0001.CSV	1955.55	-0.0217348
PSB913-4_map4	0001.CSV	1959.4	-0.0217219
PSB913-4_map4	0001.CSV	1963.26	-0.0218206
PSB913-4_map4	0001.CSV	1967.12	-0.0217116
PSB913-4_map4	0001.CSV	1970.98	-0.0216688
PSB913-4_map4	0001.CSV	1974.83	-0.0216658
PSB913-4_map4	0001.CSV	1978.69	-0.0216874
PSB913-4_map4	0001.CSV	1982.55	-0.0216814
PSB913-4_map4	0001.CSV	1986.4	-0.0217139
PSB913-4_map4	0001.CSV	1990.26	-0.0216105
PSB913-4_map4	0001.CSV	1994.12	-0.0215888
PSB913-4_map4	0001.CSV	1997.98	-0.0216388
PSB913-4_map4	0001.CSV	2001.83	-0.0216544
PSB913-4_map4	0001.CSV	2005.69	-0.0215834
PSB913-4_map4	0001.CSV	2009.55	-0.0215942
PSB913-4_map4	0001.CSV	2013.4	-0.0216332
PSB913-4_map4	0001.CSV	2017.26	-0.0216462
PSB913-4_map4	0001.CSV	2021.12	-0.0215704
PSB913-4_map4	0001.CSV	2024.97	-0.0216307
PSB913-4_map4	0001.CSV	2028.83	-0.0216539
PSB913-4_map4	0001.CSV	2032.69	-0.0217341
PSB913-4_map4	0001.CSV	2036.55	-0.021741
PSB913-4_map4	0001.CSV	2040.4	-0.0217599
PSB913-4_map4	0001.CSV	2044.26	-0.0217064
PSB913-4_map4	0001.CSV	2048.12	-0.0217598
PSB913-4_map4	0001.CSV	2051.97	-0.0217364
PSB913-4_map4	0001.CSV	2055.83	-0.0217431
PSB913-4_map4	0001.CSV	2059.69	-0.0217563
PSB913-4_map4	0001.CSV	2063.55	-0.0217989
PSB913-4_map4	0001.CSV	2067.4	-0.0217336
PSB913-4_map4	0001.CSV	2071.26	-0.021765
PSB913-4_map4	0001.CSV	2075.12	-0.0217632
PSB913-4_map4	0001.CSV	2078.97	-0.0218538
PSB913-4_map4	0001.CSV	2082.83	-0.0219083
PSB913-4_map4	0001.CSV	2086.69	-0.0219081
PSB913-4_map4	0001.CSV	2090.55	-0.0218052
PSB913-4_map4	0001.CSV	2094.4	-0.0218183
PSB913-4_map4	0001.CSV	2098.26	-0.0217999
PSB913-4_map4	0001.CSV	2102.12	-0.0217905
PSB913-4_map4	0001.CSV	2105.97	-0.021712
PSB913-4_map4	0001.CSV	2109.83	-0.0216885
PSB913-4_map4	0001.CSV	2113.69	-0.0216665
PSB913-4_map4	0001.CSV	2117.55	-0.0216557
PSB913-4_map4	0001.CSV	2121.4	-0.0215649
PSB913-4_map4	0001.CSV	2125.26	-0.0215691
PSB913-4_map4	0001.CSV	2129.12	-0.021543
PSB913-4_map4	0001.CSV	2132.97	-0.0215233
PSB913-4_map4	0001.CSV	2136.83	-0.0214585
PSB913-4_map4	0001.CSV	2140.69	-0.0213949
PSB913-4_map4	0001.CSV	2144.55	-0.0212878
PSB913-4_map4	0001.CSV	2148.4	-0.0212327
PSB913-4_map4	0001.CSV	2152.26	-0.0211397
PSB913-4_map4	0001.CSV	2156.12	-0.0211041
PSB913-4_map4	0001.CSV	2159.97	-0.0210936
PSB913-4_map4	0001.CSV	2163.83	-0.0211318
PSB913-4_map4	0001.CSV	2167.69	-0.0210944
PSB913-4_map4	0001.CSV	2171.55	-0.0209941
PSB913-4_map4	0001.CSV	2175.4	-0.0208364
PSB913-4_map4	0001.CSV	2179.26	-0.0207973
PSB913-4_map4	0001.CSV	2183.12	-0.0207719
PSB913-4_map4	0001.CSV	2186.97	-0.0207715
PSB913-4_map4	0001.CSV	2190.83	-0.02068
PSB913-4_map4	0001.CSV	2194.69	-0.0206295
PSB913-4_map4	0001.CSV	2198.55	-0.0205997
PSB913-4_map4	0001.CSV	2202.4	-0.0205901
PSB913-4_map4	0001.CSV	2206.26	-0.0205143
PSB913-4_map4	0001.CSV	2210.12	-0.0204973
PSB913-4_map4	0001.CSV	2213.97	-0.020434
PSB913-4_map4	0001.CSV	2217.83	-0.0203792
PSB913-4_map4	0001.CSV	2221.69	-0.0203192
PSB913-4_map4	0001.CSV	2225.54	-0.0202887
PSB913-4_map4	0001.CSV	2229.4	-0.0202265
PSB913-4_map4	0001.CSV	2233.26	-0.0202347
PSB913-4_map4	0001.CSV	2237.12	-0.020189
PSB913-4_map4	0001.CSV	2240.97	-0.0201877
PSB913-4_map4	0001.CSV	2244.83	-0.0201333
PSB913-4_map4	0001.CSV	2248.69	-0.0201135
PSB913-4_map4	0001.CSV	2252.54	-0.0200909
PSB913-4_map4	0001.CSV	2256.4	-0.0200634
PSB913-4_map4	0001.CSV	2260.26	-0.0199585
PSB913-4_map4	0001.CSV	2264.11	-0.019921
PSB913-4_map4	0001.CSV	2267.97	-0.0199062
PSB913-4_map4	0001.CSV	2271.83	-0.019881
PSB913-4_map4	0001.CSV	2275.69	-0.0198109
PSB913-4_map4	0001.CSV	2279.54	-0.0198155
PSB913-4_map4	0001.CSV	2283.4	-0.0199218
PSB913-4_map4	0001.CSV	2287.26	-0.0200508
PSB913-4_map4	0001.CSV	2291.11	-0.0200034
PSB913-4_map4	0001.CSV	2294.97	-0.0200061
PSB913-4_map4	0001.CSV	2298.83	-0.0200589
PSB913-4_map4	0001.CSV	2302.69	-0.0202254
PSB913-4_map4	0001.CSV	2306.54	-0.0204777
PSB913-4_map4	0001.CSV	2310.4	-0.0209054
PSB913-4_map4	0001.CSV	2314.26	-0.0212579
PSB913-4_map4	0001.CSV	2318.11	-0.0218394
PSB913-4_map4	0001.CSV	2321.97	-0.0226934
PSB913-4_map4	0001.CSV	2325.83	-0.024055
PSB913-4_map4	0001.CSV	2329.69	-0.0257333
PSB913-4_map4	0001.CSV	2333.54	-0.0272262
PSB913-4_map4	0001.CSV	2337.4	-0.0274153
PSB913-4_map4	0001.CSV	2341.26	-0.0275414
PSB913-4_map4	0001.CSV	2345.11	-0.0246692
PSB913-4_map4	0001.CSV	2348.97	-0.023881
PSB913-4_map4	0001.CSV	2352.83	-0.0265178
PSB913-4_map4	0001.CSV	2356.69	-0.0348555
PSB913-4_map4	0001.CSV	2360.54	-0.0413827
PSB913-4_map4	0001.CSV	2364.4	-0.0369188
PSB913-4_map4	0001.CSV	2368.26	-0.0285019
PSB913-4_map4	0001.CSV	2372.11	-0.0233047
PSB913-4_map4	0001.CSV	2375.97	-0.0210012
PSB913-4_map4	0001.CSV	2379.83	-0.0201225
PSB913-4_map4	0001.CSV	2383.69	-0.0199235
PSB913-4_map4	0001.CSV	2387.54	-0.0201613
PSB913-4_map4	0001.CSV	2391.4	-0.0203505
PSB913-4_map4	0001.CSV	2395.26	-0.0204092
PSB913-4_map4	0001.CSV	2399.11	-0.0204424
PSB913-4_map4	0001.CSV	2402.97	-0.0205651
PSB913-4_map4	0001.CSV	2406.83	-0.020608
PSB913-4_map4	0001.CSV	2410.68	-0.0206997
PSB913-4_map4	0001.CSV	2414.54	-0.0207751
PSB913-4_map4	0001.CSV	2418.4	-0.0207575
PSB913-4_map4	0001.CSV	2422.26	-0.0207447
PSB913-4_map4	0001.CSV	2426.11	-0.0207911
PSB913-4_map4	0001.CSV	2429.97	-0.020849
PSB913-4_map4	0001.CSV	2433.83	-0.0209216
PSB913-4_map4	0001.CSV	2437.68	-0.0209014
PSB913-4_map4	0001.CSV	2441.54	-0.0208757
PSB913-4_map4	0001.CSV	2445.4	-0.0208958
PSB913-4_map4	0001.CSV	2449.26	-0.0209526
PSB913-4_map4	0001.CSV	2453.11	-0.0209762
PSB913-4_map4	0001.CSV	2456.97	-0.0209801
PSB913-4_map4	0001.CSV	2460.83	-0.020865
PSB913-4_map4	0001.CSV	2464.68	-0.0207811
PSB913-4_map4	0001.CSV	2468.54	-0.0207314
PSB913-4_map4	0001.CSV	2472.4	-0.0205866
PSB913-4_map4	0001.CSV	2476.26	-0.0202668
PSB913-4_map4	0001.CSV	2480.11	-0.0199424
PSB913-4_map4	0001.CSV	2483.97	-0.0196062
PSB913-4_map4	0001.CSV	2487.83	-0.0193278
PSB913-4_map4	0001.CSV	2491.68	-0.0190401
PSB913-4_map4	0001.CSV	2495.54	-0.0187827
PSB913-4_map4	0001.CSV	2499.4	-0.0186407
PSB913-4_map4	0001.CSV	2503.26	-0.018689
PSB913-4_map4	0001.CSV	2507.11	-0.0187966
PSB913-4_map4	0001.CSV	2510.97	-0.0187946
PSB913-4_map4	0001.CSV	2514.83	-0.0185243
PSB913-4_map4	0001.CSV	2518.68	-0.0181571
PSB913-4_map4	0001.CSV	2522.54	-0.017994
PSB913-4_map4	0001.CSV	2526.4	-0.0181625
PSB913-4_map4	0001.CSV	2530.26	-0.0184597
PSB913-4_map4	0001.CSV	2534.11	-0.0188748
PSB913-4_map4	0001.CSV	2537.97	-0.0192825
PSB913-4_map4	0001.CSV	2541.83	-0.0194665
PSB913-4_map4	0001.CSV	2545.68	-0.0193987
PSB913-4_map4	0001.CSV	2549.54	-0.0194512
PSB913-4_map4	0001.CSV	2553.4	-0.0196961
PSB913-4_map4	0001.CSV	2557.26	-0.0200253
PSB913-4_map4	0001.CSV	2561.11	-0.0202651
PSB913-4_map4	0001.CSV	2564.97	-0.0205094
PSB913-4_map4	0001.CSV	2568.83	-0.0207405
PSB913-4_map4	0001.CSV	2572.68	-0.0208516
PSB913-4_map4	0001.CSV	2576.54	-0.0209005
PSB913-4_map4	0001.CSV	2580.4	-0.0210223
PSB913-4_map4	0001.CSV	2584.25	-0.0211067
PSB913-4_map4	0001.CSV	2588.11	-0.0211715
PSB913-4_map4	0001.CSV	2591.97	-0.0212142
PSB913-4_map4	0001.CSV	2595.83	-0.0212466
PSB913-4_map4	0001.CSV	2599.68	-0.0212365
PSB913-4_map4	0001.CSV	2603.54	-0.0212003
PSB913-4_map4	0001.CSV	2607.4	-0.0211609
PSB913-4_map4	0001.CSV	2611.25	-0.0211208
PSB913-4_map4	0001.CSV	2615.11	-0.0210751
PSB913-4_map4	0001.CSV	2618.97	-0.021135
PSB913-4_map4	0001.CSV	2622.82	-0.0211303
PSB913-4_map4	0001.CSV	2626.68	-0.0209817
PSB913-4_map4	0001.CSV	2630.54	-0.0209393
PSB913-4_map4	0001.CSV	2634.4	-0.0210061
PSB913-4_map4	0001.CSV	2638.25	-0.0210877
PSB913-4_map4	0001.CSV	2642.11	-0.0212085
PSB913-4_map4	0001.CSV	2645.97	-0.0213378
PSB913-4_map4	0001.CSV	2649.82	-0.0215215
PSB913-4_map4	0001.CSV	2653.68	-0.0216613
PSB913-4_map4	0001.CSV	2657.54	-0.0216901
PSB913-4_map4	0001.CSV	2661.4	-0.0216824
PSB913-4_map4	0001.CSV	2665.25	-0.0217105
PSB913-4_map4	0001.CSV	2669.11	-0.0217243
PSB913-4_map4	0001.CSV	2672.97	-0.0215677
PSB913-4_map4	0001.CSV	2676.82	-0.0212467
PSB913-4_map4	0001.CSV	2680.68	-0.0212944
PSB913-4_map4	0001.CSV	2684.54	-0.0216719
PSB913-4_map4	0001.CSV	2688.4	-0.0218443
PSB913-4_map4	0001.CSV	2692.25	-0.0218015
PSB913-4_map4	0001.CSV	2696.11	-0.0217198
PSB913-4_map4	0001.CSV	2699.97	-0.0217246
PSB913-4_map4	0001.CSV	2703.82	-0.0217623
PSB913-4_map4	0001.CSV	2707.68	-0.0217156
PSB913-4_map4	0001.CSV	2711.54	-0.0216825
PSB913-4_map4	0001.CSV	2715.4	-0.0216621
PSB913-4_map4	0001.CSV	2719.25	-0.0214622
PSB913-4_map4	0001.CSV	2723.11	-0.021147
PSB913-4_map4	0001.CSV	2726.97	-0.021176
PSB913-4_map4	0001.CSV	2730.82	-0.0214661
PSB913-4_map4	0001.CSV	2734.68	-0.0214713
PSB913-4_map4	0001.CSV	2738.54	-0.0214076
PSB913-4_map4	0001.CSV	2742.4	-0.0214085
PSB913-4_map4	0001.CSV	2746.25	-0.0210946
PSB913-4_map4	0001.CSV	2750.11	-0.0209797
PSB913-4_map4	0001.CSV	2753.97	-0.0212554
PSB913-4_map4	0001.CSV	2757.82	-0.0213556
PSB913-4_map4	0001.CSV	2761.68	-0.0213955
PSB913-4_map4	0001.CSV	2765.54	-0.0213975
PSB913-4_map4	0001.CSV	2769.39	-0.0211214
PSB913-4_map4	0001.CSV	2773.25	-0.0207171
PSB913-4_map4	0001.CSV	2777.11	-0.0208031
PSB913-4_map4	0001.CSV	2780.97	-0.0210764
PSB913-4_map4	0001.CSV	2784.82	-0.0208774
PSB913-4_map4	0001.CSV	2788.68	-0.0204155
PSB913-4_map4	0001.CSV	2792.54	-0.0202637
PSB913-4_map4	0001.CSV	2796.39	-0.0202155
PSB913-4_map4	0001.CSV	2800.25	-0.0202803
PSB913-4_map4	0001.CSV	2804.11	-0.020334
PSB913-4_map4	0001.CSV	2807.97	-0.020009
PSB913-4_map4	0001.CSV	2811.82	-0.0199815
PSB913-4_map4	0001.CSV	2815.68	-0.0200727
PSB913-4_map4	0001.CSV	2819.54	-0.0198031
PSB913-4_map4	0001.CSV	2823.39	-0.0194881
PSB913-4_map4	0001.CSV	2827.25	-0.0192219
PSB913-4_map4	0001.CSV	2831.11	-0.0185796
PSB913-4_map4	0001.CSV	2834.97	-0.0174294
PSB913-4_map4	0001.CSV	2838.82	-0.0161089
PSB913-4_map4	0001.CSV	2842.68	-0.0145243
PSB913-4_map4	0001.CSV	2846.54	-0.0121311
PSB913-4_map4	0001.CSV	2850.39	-0.0105296
PSB913-4_map4	0001.CSV	2854.25	-0.0109062
PSB913-4_map4	0001.CSV	2858.11	-0.0121435
PSB913-4_map4	0001.CSV	2861.97	-0.013469
PSB913-4_map4	0001.CSV	2865.82	-0.0143568
PSB913-4_map4	0001.CSV	2869.68	-0.0144423
PSB913-4_map4	0001.CSV	2873.54	-0.0144597
PSB913-4_map4	0001.CSV	2877.39	-0.01504
PSB913-4_map4	0001.CSV	2881.25	-0.0153336
PSB913-4_map4	0001.CSV	2885.11	-0.0150468
PSB913-4_map4	0001.CSV	2888.97	-0.0143917
PSB913-4_map4	0001.CSV	2892.82	-0.0132236
PSB913-4_map4	0001.CSV	2896.68	-0.0121295
PSB913-4_map4	0001.CSV	2900.54	-0.011305
PSB913-4_map4	0001.CSV	2904.39	-0.0101176
PSB913-4_map4	0001.CSV	2908.25	-0.00822426
PSB913-4_map4	0001.CSV	2912.11	-0.00548662
PSB913-4_map4	0001.CSV	2915.97	-0.00293972
PSB913-4_map4	0001.CSV	2919.82	-0.00203746
PSB913-4_map4	0001.CSV	2923.68	-0.00286399
PSB913-4_map4	0001.CSV	2927.54	-0.00432029
PSB913-4_map4	0001.CSV	2931.39	-0.0064255
PSB913-4_map4	0001.CSV	2935.25	-0.0087799
PSB913-4_map4	0001.CSV	2939.11	-0.0103407
PSB913-4_map4	0001.CSV	2942.96	-0.0111188
PSB913-4_map4	0001.CSV	2946.82	-0.0118231
PSB913-4_map4	0001.CSV	2950.68	-0.012473
PSB913-4_map4	0001.CSV	2954.54	-0.0131911
PSB913-4_map4	0001.CSV	2958.39	-0.0140921
PSB913-4_map4	0001.CSV	2962.25	-0.0149235
PSB913-4_map4	0001.CSV	2966.11	-0.0159168
PSB913-4_map4	0001.CSV	2969.96	-0.0164765
PSB913-4_map4	0001.CSV	2973.82	-0.016461
PSB913-4_map4	0001.CSV	2977.68	-0.0164696
PSB913-4_map4	0001.CSV	2981.53	-0.0168969
PSB913-4_map4	0001.CSV	2985.39	-0.0175976
PSB913-4_map4	0001.CSV	2989.25	-0.0177481
PSB913-4_map4	0001.CSV	2993.11	-0.0176682
PSB913-4_map4	0001.CSV	2996.96	-0.0178791
PSB913-4_map4	0001.CSV	3000.82	-0.0182779
PSB913-4_map4	0001.CSV	3004.68	-0.0186065
PSB913-4_map4	0001.CSV	3008.53	-0.0185229
PSB913-4_map4	0001.CSV	3012.39	-0.0181266
PSB913-4_map4	0001.CSV	3016.25	-0.0179704
PSB913-4_map4	0001.CSV	3020.11	-0.0179194
PSB913-4_map4	0001.CSV	3023.96	-0.017681
PSB913-4_map4	0001.CSV	3027.82	-0.0175313
PSB913-4_map4	0001.CSV	3031.68	-0.0175614
PSB913-4_map4	0001.CSV	3035.53	-0.0178266
PSB913-4_map4	0001.CSV	3039.39	-0.0180604
PSB913-4_map4	0001.CSV	3043.25	-0.0182283
PSB913-4_map4	0001.CSV	3047.11	-0.018451
PSB913-4_map4	0001.CSV	3050.96	-0.0184551
PSB913-4_map4	0001.CSV	3054.82	-0.0183958
PSB913-4_map4	0001.CSV	3058.68	-0.0184052
PSB913-4_map4	0001.CSV	3062.53	-0.0182842
PSB913-4_map4	0001.CSV	3066.39	-0.0180701
PSB913-4_map4	0001.CSV	3070.25	-0.0183093
PSB913-4_map4	0001.CSV	3074.11	-0.0183234
PSB913-4_map4	0001.CSV	3077.96	-0.0179106
PSB913-4_map4	0001.CSV	3081.82	-0.0177324
PSB913-4_map4	0001.CSV	3085.68	-0.0178665
PSB913-4_map4	0001.CSV	3089.53	-0.0181544
PSB913-4_map4	0001.CSV	3093.39	-0.01857
PSB913-4_map4	0001.CSV	3097.25	-0.018682
PSB913-4_map4	0001.CSV	3101.11	-0.0186551
PSB913-4_map4	0001.CSV	3104.96	-0.0185609
PSB913-4_map4	0001.CSV	3108.82	-0.0183729
PSB913-4_map4	0001.CSV	3112.68	-0.0182442
PSB913-4_map4	0001.CSV	3116.53	-0.0181101
PSB913-4_map4	0001.CSV	3120.39	-0.0181521
PSB913-4_map4	0001.CSV	3124.25	-0.0184586
PSB913-4_map4	0001.CSV	3128.11	-0.0185195
PSB913-4_map4	0001.CSV	3131.96	-0.0185133
PSB913-4_map4	0001.CSV	3135.82	-0.0183314
PSB913-4_map4	0001.CSV	3139.68	-0.0182615
PSB913-4_map4	0001.CSV	3143.53	-0.0184919
PSB913-4_map4	0001.CSV	3147.39	-0.0184024
PSB913-4_map4	0001.CSV	3151.25	-0.0180579
PSB913-4_map4	0001.CSV	3155.1	-0.0180974
PSB913-4_map4	0001.CSV	3158.96	-0.018454
PSB913-4_map4	0001.CSV	3162.82	-0.0186466
PSB913-4_map4	0001.CSV	3166.68	-0.0186847
PSB913-4_map4	0001.CSV	3170.53	-0.0186101
PSB913-4_map4	0001.CSV	3174.39	-0.0185003
PSB913-4_map4	0001.CSV	3178.25	-0.0184223
PSB913-4_map4	0001.CSV	3182.1	-0.0183918
PSB913-4_map4	0001.CSV	3185.96	-0.0183168
PSB913-4_map4	0001.CSV	3189.82	-0.0182804
PSB913-4_map4	0001.CSV	3193.68	-0.0184215
PSB913-4_map4	0001.CSV	3197.53	-0.0183897
PSB913-4_map4	0001.CSV	3201.39	-0.0181618
PSB913-4_map4	0001.CSV	3205.25	-0.0180834
PSB913-4_map4	0001.CSV	3209.1	-0.0181538
PSB913-4_map4	0001.CSV	3212.96	-0.0179738
PSB913-4_map4	0001.CSV	3216.82	-0.017753
PSB913-4_map4	0001.CSV	3220.68	-0.0177992
PSB913-4_map4	0001.CSV	3224.53	-0.0179581
PSB913-4_map4	0001.CSV	3228.39	-0.0177705
PSB913-4_map4	0001.CSV	3232.25	-0.017396
PSB913-4_map4	0001.CSV	3236.1	-0.0174812
PSB913-4_map4	0001.CSV	3239.96	-0.0177481
PSB913-4_map4	0001.CSV	3243.82	-0.0174853
PSB913-4_map4	0001.CSV	3247.68	-0.0173179
PSB913-4_map4	0001.CSV	3251.53	-0.0175351
PSB913-4_map4	0001.CSV	3255.39	-0.0175187
PSB913-4_map4	0001.CSV	3259.25	-0.0176771
PSB913-4_map4	0001.CSV	3263.1	-0.0178345
PSB913-4_map4	0001.CSV	3266.96	-0.0174798
PSB913-4_map4	0001.CSV	3270.82	-0.0170323
PSB913-4_map4	0001.CSV	3274.68	-0.0170597
PSB913-4_map4	0001.CSV	3278.53	-0.0174283
PSB913-4_map4	0001.CSV	3282.39	-0.0176529
PSB913-4_map4	0001.CSV	3286.25	-0.0176526
PSB913-4_map4	0001.CSV	3290.1	-0.0173127
PSB913-4_map4	0001.CSV	3293.96	-0.0169882
PSB913-4_map4	0001.CSV	3297.82	-0.0170141
PSB913-4_map4	0001.CSV	3301.67	-0.0169854
PSB913-4_map4	0001.CSV	3305.53	-0.0168676
PSB913-4_map4	0001.CSV	3309.39	-0.017094
PSB913-4_map4	0001.CSV	3313.25	-0.0175128
PSB913-4_map4	0001.CSV	3317.1	-0.017768
PSB913-4_map4	0001.CSV	3320.96	-0.0176516
PSB913-4_map4	0001.CSV	3324.82	-0.0174005
PSB913-4_map4	0001.CSV	3328.67	-0.017602
PSB913-4_map4	0001.CSV	3332.53	-0.0177152
PSB913-4_map4	0001.CSV	3336.39	-0.017255
PSB913-4_map4	0001.CSV	3340.24	-0.0170347
PSB913-4_map4	0001.CSV	3344.1	-0.0172092
PSB913-4_map4	0001.CSV	3347.96	-0.0171916
PSB913-4_map4	0001.CSV	3351.82	-0.0172428
PSB913-4_map4	0001.CSV	3355.67	-0.0175212
PSB913-4_map4	0001.CSV	3359.53	-0.0173275
PSB913-4_map4	0001.CSV	3363.39	-0.0170719
PSB913-4_map4	0001.CSV	3367.24	-0.0167258
PSB913-4_map4	0001.CSV	3371.1	-0.0168646
PSB913-4_map4	0001.CSV	3374.96	-0.017217
PSB913-4_map4	0001.CSV	3378.82	-0.0173079
PSB913-4_map4	0001.CSV	3382.67	-0.0175466
PSB913-4_map4	0001.CSV	3386.53	-0.0175133
PSB913-4_map4	0001.CSV	3390.39	-0.0170104
PSB913-4_map4	0001.CSV	3394.24	-0.0166998
PSB913-4_map4	0001.CSV	3398.1	-0.0166041
PSB913-4_map4	0001.CSV	3401.96	-0.0168345
PSB913-4_map4	0001.CSV	3405.82	-0.0171193
PSB913-4_map4	0001.CSV	3409.67	-0.0170882
PSB913-4_map4	0001.CSV	3413.53	-0.0172762
PSB913-4_map4	0001.CSV	3417.39	-0.017732
PSB913-4_map4	0001.CSV	3421.24	-0.0177811
PSB913-4_map4	0001.CSV	3425.1	-0.0175871
PSB913-4_map4	0001.CSV	3428.96	-0.0171809
PSB913-4_map4	0001.CSV	3432.82	-0.0168534
PSB913-4_map4	0001.CSV	3436.67	-0.0171194
PSB913-4_map4	0001.CSV	3440.53	-0.0178642
PSB913-4_map4	0001.CSV	3444.39	-0.0181277
PSB913-4_map4	0001.CSV	3448.24	-0.0181124
PSB913-4_map4	0001.CSV	3452.1	-0.0182554
PSB913-4_map4	0001.CSV	3455.96	-0.0181987
PSB913-4_map4	0001.CSV	3459.82	-0.0177658
PSB913-4_map4	0001.CSV	3463.67	-0.017499
PSB913-4_map4	0001.CSV	3467.53	-0.0174687
PSB913-4_map4	0001.CSV	3471.39	-0.0179187
PSB913-4_map4	0001.CSV	3475.24	-0.0181833
PSB913-4_map4	0001.CSV	3479.1	-0.0180846
PSB913-4_map4	0001.CSV	3482.96	-0.0182005
PSB913-4_map4	0001.CSV	3486.82	-0.0182142
PSB913-4_map4	0001.CSV	3490.67	-0.0181598
PSB913-4_map4	0001.CSV	3494.53	-0.0181445
PSB913-4_map4	0001.CSV	3498.39	-0.0182361
PSB913-4_map4	0001.CSV	3502.24	-0.0184396
PSB913-4_map4	0001.CSV	3506.1	-0.0187498
PSB913-4_map4	0001.CSV	3509.96	-0.0189194
PSB913-4_map4	0001.CSV	3513.81	-0.0189206
PSB913-4_map4	0001.CSV	3517.67	-0.0193843
PSB913-4_map4	0001.CSV	3521.53	-0.0194576
PSB913-4_map4	0001.CSV	3525.39	-0.019564
PSB913-4_map4	0001.CSV	3529.24	-0.0196354
PSB913-4_map4	0001.CSV	3533.1	-0.0195323
PSB913-4_map4	0001.CSV	3536.96	-0.0194378
PSB913-4_map4	0001.CSV	3540.81	-0.0195092
PSB913-4_map4	0001.CSV	3544.67	-0.0194264
PSB913-4_map4	0001.CSV	3548.53	-0.0196527
PSB913-4_map4	0001.CSV	3552.39	-0.0201205
PSB913-4_map4	0001.CSV	3556.24	-0.0204312
PSB913-4_map4	0001.CSV	3560.1	-0.0207956
PSB913-4_map4	0001.CSV	3563.96	-0.0214335
PSB913-4_map4	0001.CSV	3567.81	-0.0209947
PSB913-4_map4	0001.CSV	3571.67	-0.0208275
PSB913-4_map4	0001.CSV	3575.53	-0.021457
PSB913-4_map4	0001.CSV	3579.39	-0.0214951
PSB913-4_map4	0001.CSV	3583.24	-0.0216417
PSB913-4_map4	0001.CSV	3587.1	-0.0217484
PSB913-4_map4	0001.CSV	3590.96	-0.0217567
PSB913-4_map4	0001.CSV	3594.81	-0.0219844
PSB913-4_map4	0001.CSV	3598.67	-0.0218013
PSB913-4_map4	0001.CSV	3602.53	-0.0220399
PSB913-4_map4	0001.CSV	3606.39	-0.022714
PSB913-4_map4	0001.CSV	3610.24	-0.0230473
PSB913-4_map4	0001.CSV	3614.1	-0.0233207
PSB913-4_map4	0001.CSV	3617.96	-0.0230684
PSB913-4_map4	0001.CSV	3621.81	-0.0227512
PSB913-4_map4	0001.CSV	3625.67	-0.0237416
PSB913-4_map4	0001.CSV	3629.53	-0.0236398
PSB913-4_map4	0001.CSV	3633.39	-0.0228692
PSB913-4_map4	0001.CSV	3637.24	-0.0232819
PSB913-4_map4	0001.CSV	3641.1	-0.0239259
PSB913-4_map4	0001.CSV	3644.96	-0.0249202
PSB913-4_map4	0001.CSV	3648.81	-0.0243489
PSB913-4_map4	0001.CSV	3652.67	-0.0231344
PSB913-4_map4	0001.CSV	3656.53	-0.0231677
PSB913-4_map4	0001.CSV	3660.38	-0.0231189
PSB913-4_map4	0001.CSV	3664.24	-0.0240503
PSB913-4_map4	0001.CSV	3668.1	-0.025232
PSB913-4_map4	0001.CSV	3671.96	-0.025527
PSB913-4_map4	0001.CSV	3675.81	-0.0245422
PSB913-4_map4	0001.CSV	3679.67	-0.0237878
PSB913-4_map4	0001.CSV	3683.53	-0.0242578
PSB913-4_map4	0001.CSV	3687.38	-0.0245852
PSB913-4_map4	0001.CSV	3691.24	-0.0235961
PSB913-4_map4	0001.CSV	3695.1	-0.0237528
PSB913-4_map4	0001.CSV	3698.95	-0.0242841
PSB913-4_map4	0001.CSV	3702.81	-0.0243869
PSB913-4_map4	0001.CSV	3706.67	-0.0249896
PSB913-4_map4	0001.CSV	3710.53	-0.0250193
PSB913-4_map4	0001.CSV	3714.38	-0.0241189
PSB913-4_map4	0001.CSV	3718.24	-0.024725
PSB913-4_map4	0001.CSV	3722.1	-0.0250526
PSB913-4_map4	0001.CSV	3725.95	-0.0247798
PSB913-4_map4	0001.CSV	3729.81	-0.0251643
PSB913-4_map4	0001.CSV	3733.67	-0.0251655
PSB913-4_map4	0001.CSV	3737.53	-0.0239511
PSB913-4_map4	0001.CSV	3741.38	-0.0247642
PSB913-4_map4	0001.CSV	3745.24	-0.0257346
PSB913-4_map4	0001.CSV	3749.1	-0.0256272
PSB913-4_map4	0001.CSV	3752.95	-0.0244243
PSB913-4_map4	0001.CSV	3756.81	-0.0244655
PSB913-4_map4	0001.CSV	3760.67	-0.0243918
PSB913-4_map4	0001.CSV	3764.53	-0.0245498
PSB913-4_map4	0001.CSV	3768.38	-0.0244567
PSB913-4_map4	0001.CSV	3772.24	-0.0242475
PSB913-4_map4	0001.CSV	3776.1	-0.0245867
PSB913-4_map4	0001.CSV	3779.95	-0.0246003
PSB913-4_map4	0001.CSV	3783.81	-0.0243832
PSB913-4_map4	0001.CSV	3787.67	-0.0243452
PSB913-4_map4	0001.CSV	3791.53	-0.0246746
PSB913-4_map4	0001.CSV	3795.38	-0.0253582
PSB913-4_map4	0001.CSV	3799.24	-0.0255092
PSB913-4_map4	0001.CSV	3803.1	-0.0247483
PSB913-4_map4	0001.CSV	3806.95	-0.0241014
PSB913-4_map4	0001.CSV	3810.81	-0.0245302
PSB913-4_map4	0001.CSV	3814.67	-0.025269
PSB913-4_map4	0001.CSV	3818.53	-0.0250429
PSB913-4_map4	0001.CSV	3822.38	-0.0241906
PSB913-4_map4	0001.CSV	3826.24	-0.0243953
PSB913-4_map4	0001.CSV	3830.1	-0.024933
PSB913-4_map4	0001.CSV	3833.95	-0.0253214
PSB913-4_map4	0001.CSV	3837.81	-0.0250715
PSB913-4_map4	0001.CSV	3841.67	-0.0240501
PSB913-4_map4	0001.CSV	3845.53	-0.0243874
PSB913-4_map4	0001.CSV	3849.38	-0.0257512
PSB913-4_map4	0001.CSV	3853.24	-0.0254495
PSB913-4_map4	0001.CSV	3857.1	-0.0242706
PSB913-4_map4	0001.CSV	3860.95	-0.0251276
PSB913-4_map4	0001.CSV	3864.81	-0.0253351
PSB913-4_map4	0001.CSV	3868.67	-0.0250269
PSB913-4_map4	0001.CSV	3872.52	-0.0244167
PSB913-4_map4	0001.CSV	3876.38	-0.0246571
PSB913-4_map4	0001.CSV	3880.24	-0.0251861
PSB913-4_map4	0001.CSV	3884.1	-0.0248773
PSB913-4_map4	0001.CSV	3887.95	-0.0248195
PSB913-4_map4	0001.CSV	3891.81	-0.0249199
PSB913-4_map4	0001.CSV	3895.67	-0.0253979
PSB913-4_map4	0001.CSV	3899.52	-0.0259403
PSB913-4_map4	0001.CSV	3903.38	-0.0249155
PSB913-4_map4	0001.CSV	3907.24	-0.0243922
PSB913-4_map4	0001.CSV	3911.1	-0.025028
PSB913-4_map4	0001.CSV	3914.95	-0.0254323
PSB913-4_map4	0001.CSV	3918.81	-0.0252104
PSB913-4_map4	0001.CSV	3922.67	-0.0250524
PSB913-4_map4	0001.CSV	3926.52	-0.0251268
PSB913-4_map4	0001.CSV	3930.38	-0.0251531
PSB913-4_map4	0001.CSV	3934.24	-0.0248989
PSB913-4_map4	0001.CSV	3938.09	-0.0250968
PSB913-4_map4	0001.CSV	3941.95	-0.0252212
PSB913-4_map4	0001.CSV	3945.81	-0.0251744
PSB913-4_map4	0001.CSV	3949.67	-0.0250776
PSB913-4_map4	0001.CSV	3953.52	-0.0249629
PSB913-4_map4	0001.CSV	3957.38	-0.0249654
PSB913-4_map4	0001.CSV	3961.24	-0.0249175
PSB913-4_map4	0001.CSV	3965.09	-0.0251863
PSB913-4_map4	0001.CSV	3968.95	-0.025441
PSB913-4_map4	0001.CSV	3972.81	-0.0253736
PSB913-4_map4	0001.CSV	3976.67	-0.0252172
PSB913-4_map4	0001.CSV	3980.52	-0.0251288
PSB913-4_map4	0001.CSV	3984.38	-0.0251167
PSB913-4_map4	0001.CSV	3988.24	-0.0251782
PSB913-4_map4	0001.CSV	3992.09	-0.0250543
PSB913-4_map4	0001.CSV	3995.95	-0.0249865
PSB913-4_map4	0001.CSV	3999.81	-0.0250565
PSB913-4_map4	0002.CSV	674.992	0.0402295
PSB913-4_map4	0002.CSV	678.849	0.0450434
PSB913-4_map4	0002.CSV	682.706	0.051027
PSB913-4_map4	0002.CSV	686.563	0.0639106
PSB913-4_map4	0002.CSV	690.42	0.0955376
PSB913-4_map4	0002.CSV	694.277	0.154117
PSB913-4_map4	0002.CSV	698.134	0.193601
PSB913-4_map4	0002.CSV	701.991	0.16794
PSB913-4_map4	0002.CSV	705.849	0.116145
PSB913-4_map4	0002.CSV	709.706	0.0808192
PSB913-4_map4	0002.CSV	713.563	0.056618
PSB913-4_map4	0002.CSV	717.42	0.0355183
PSB913-4_map4	0002.CSV	721.277	0.0274135
PSB913-4_map4	0002.CSV	725.134	0.0311845
PSB913-4_map4	0002.CSV	728.991	0.0401247
PSB913-4_map4	0002.CSV	732.848	0.0554122
PSB913-4_map4	0002.CSV	736.705	0.073479
PSB913-4_map4	0002.CSV	740.562	0.0875975
PSB913-4_map4	0002.CSV	744.42	0.0923353
PSB913-4_map4	0002.CSV	748.277	0.0898189
PSB913-4_map4	0002.CSV	752.134	0.0844649
PSB913-4_map4	0002.CSV	755.991	0.0807251
PSB913-4_map4	0002.CSV	759.848	0.0772877
PSB913-4_map4	0002.CSV	763.705	0.0732107
PSB913-4_map4	0002.CSV	767.562	0.0675439
PSB913-4_map4	0002.CSV	771.419	0.0610979
PSB913-4_map4	0002.CSV	775.276	0.0544451
PSB913-4_map4	0002.CSV	779.133	0.0487887
PSB913-4_map4	0002.CSV	782.99	0.0439832
PSB913-4_map4	0002.CSV	786.848	0.0414336
PSB913-4_map4	0002.CSV	790.705	0.0399145
PSB913-4_map4	0002.CSV	794.562	0.0397808
PSB913-4_map4	0002.CSV	798.419	0.0403023
PSB913-4_map4	0002.CSV	802.276	0.0405169
PSB913-4_map4	0002.CSV	806.133	0.0398792
PSB913-4_map4	0002.CSV	809.99	0.0404851
PSB913-4_map4	0002.CSV	813.847	0.0420819
PSB913-4_map4	0002.CSV	817.704	0.0448239
PSB913-4_map4	0002.CSV	821.562	0.0474698
PSB913-4_map4	0002.CSV	825.419	0.050196
PSB913-4_map4	0002.CSV	829.276	0.0518785
PSB913-4_map4	0002.CSV	833.133	0.0538376
PSB913-4_map4	0002.CSV	836.99	0.0572537
PSB913-4_map4	0002.CSV	840.847	0.0633791
PSB913-4_map4	0002.CSV	844.704	0.068381
PSB913-4_map4	0002.CSV	848.561	0.0773995
PSB913-4_map4	0002.CSV	852.418	0.100183
PSB913-4_map4	0002.CSV	856.275	0.124047
PSB913-4_map4	0002.CSV	860.132	0.120394
PSB913-4_map4	0002.CSV	863.99	0.0890826
PSB913-4_map4	0002.CSV	867.847	0.0558522
PSB913-4_map4	0002.CSV	871.704	0.0369242
PSB913-4_map4	0002.CSV	875.561	0.0293048
PSB913-4_map4	0002.CSV	879.418	0.026175
PSB913-4_map4	0002.CSV	883.275	0.0241236
PSB913-4_map4	0002.CSV	887.132	0.0233195
PSB913-4_map4	0002.CSV	890.989	0.0227371
PSB913-4_map4	0002.CSV	894.846	0.0224876
PSB913-4_map4	0002.CSV	898.703	0.0229246
PSB913-4_map4	0002.CSV	902.561	0.024486
PSB913-4_map4	0002.CSV	906.418	0.0259221
PSB913-4_map4	0002.CSV	910.275	0.0262846
PSB913-4_map4	0002.CSV	914.132	0.0254156
PSB913-4_map4	0002.CSV	917.989	0.0245873
PSB913-4_map4	0002.CSV	921.846	0.0236472
PSB913-4_map4	0002.CSV	925.703	0.0230036
PSB913-4_map4	0002.CSV	929.56	0.0225976
PSB913-4_map4	0002.CSV	933.417	0.0228767
PSB913-4_map4	0002.CSV	937.274	0.0229703
PSB913-4_map4	0002.CSV	941.131	0.0226114
PSB913-4_map4	0002.CSV	944.989	0.0211878
PSB913-4_map4	0002.CSV	948.846	0.0195063
PSB913-4_map4	0002.CSV	952.703	0.0185205
PSB913-4_map4	0002.CSV	956.56	0.0188597
PSB913-4_map4	0002.CSV	960.417	0.0194125
PSB913-4_map4	0002.CSV	964.274	0.0196557
PSB913-4_map4	0002.CSV	968.131	0.0190381
PSB913-4_map4	0002.CSV	971.988	0.0184716
PSB913-4_map4	0002.CSV	975.845	0.0187674
PSB913-4_map4	0002.CSV	979.702	0.0202007
PSB913-4_map4	0002.CSV	983.559	0.021738
PSB913-4_map4	0002.CSV	987.417	0.0229818
PSB913-4_map4	0002.CSV	991.274	0.0232902
PSB913-4_map4	0002.CSV	995.131	0.0231331
PSB913-4_map4	0002.CSV	998.988	0.0231388
PSB913-4_map4	0002.CSV	1002.85	0.0237708
PSB913-4_map4	0002.CSV	1006.7	0.0239199
PSB913-4_map4	0002.CSV	1010.56	0.0244561
PSB913-4_map4	0002.CSV	1014.42	0.0257614
PSB913-4_map4	0002.CSV	1018.27	0.028089
PSB913-4_map4	0002.CSV	1022.13	0.0313861
PSB913-4_map4	0002.CSV	1025.99	0.0359497
PSB913-4_map4	0002.CSV	1029.85	0.0397414
PSB913-4_map4	0002.CSV	1033.7	0.0424406
PSB913-4_map4	0002.CSV	1037.56	0.0453252
PSB913-4_map4	0002.CSV	1041.42	0.047695
PSB913-4_map4	0002.CSV	1045.27	0.0486705
PSB913-4_map4	0002.CSV	1049.13	0.0530116
PSB913-4_map4	0002.CSV	1052.99	0.0635857
PSB913-4_map4	0002.CSV	1056.84	0.0795888
PSB913-4_map4	0002.CSV	1060.7	0.0960262
PSB913-4_map4	0002.CSV	1064.56	0.106948
PSB913-4_map4	0002.CSV	1068.42	0.108567
PSB913-4_map4	0002.CSV	1072.27	0.103097
PSB913-4_map4	0002.CSV	1076.13	0.0946691
PSB913-4_map4	0002.CSV	1079.99	0.0873381
PSB913-4_map4	0002.CSV	1083.84	0.0779618
PSB913-4_map4	0002.CSV	1087.7	0.0659788
PSB913-4_map4	0002.CSV	1091.56	0.058285
PSB913-4_map4	0002.CSV	1095.41	0.0562876
PSB913-4_map4	0002.CSV	1099.27	0.0580627
PSB913-4_map4	0002.CSV	1103.13	0.063196
PSB913-4_map4	0002.CSV	1106.99	0.070519
PSB913-4_map4	0002.CSV	1110.84	0.078828
PSB913-4_map4	0002.CSV	1114.7	0.0853114
PSB913-4_map4	0002.CSV	1118.56	0.0880611
PSB913-4_map4	0002.CSV	1122.41	0.0868258
PSB913-4_map4	0002.CSV	1126.27	0.0833228
PSB913-4_map4	0002.CSV	1130.13	0.0792586
PSB913-4_map4	0002.CSV	1133.99	0.0765648
PSB913-4_map4	0002.CSV	1137.84	0.0742945
PSB913-4_map4	0002.CSV	1141.7	0.0706458
PSB913-4_map4	0002.CSV	1145.56	0.0652064
PSB913-4_map4	0002.CSV	1149.41	0.0608814
PSB913-4_map4	0002.CSV	1153.27	0.0586256
PSB913-4_map4	0002.CSV	1157.13	0.057203
PSB913-4_map4	0002.CSV	1160.99	0.0554298
PSB913-4_map4	0002.CSV	1164.84	0.0531364
PSB913-4_map4	0002.CSV	1168.7	0.0495544
PSB913-4_map4	0002.CSV	1172.56	0.0458093
PSB913-4_map4	0002.CSV	1176.41	0.0428098
PSB913-4_map4	0002.CSV	1180.27	0.0407211
PSB913-4_map4	0002.CSV	1184.13	0.038263
PSB913-4_map4	0002.CSV	1187.99	0.0355254
PSB913-4_map4	0002.CSV	1191.84	0.032937
PSB913-4_map4	0002.CSV	1195.7	0.0311207
PSB913-4_map4	0002.CSV	1199.56	0.0298998
PSB913-4_map4	0002.CSV	1203.41	0.0293549
PSB913-4_map4	0002.CSV	1207.27	0.0291466
PSB913-4_map4	0002.CSV	1211.13	0.029583
PSB913-4_map4	0002.CSV	1214.98	0.0303699
PSB913-4_map4	0002.CSV	1218.84	0.0318241
PSB913-4_map4	0002.CSV	1222.7	0.0339426
PSB913-4_map4	0002.CSV	1226.56	0.0371098
PSB913-4_map4	0002.CSV	1230.41	0.0413245
PSB913-4_map4	0002.CSV	1234.27	0.0472994
PSB913-4_map4	0002.CSV	1238.13	0.0550864
PSB913-4_map4	0002.CSV	1241.98	0.0646919
PSB913-4_map4	0002.CSV	1245.84	0.0750118
PSB913-4_map4	0002.CSV	1249.7	0.0845224
PSB913-4_map4	0002.CSV	1253.56	0.0911701
PSB913-4_map4	0002.CSV	1257.41	0.0947078
PSB913-4_map4	0002.CSV	1261.27	0.0957723
PSB913-4_map4	0002.CSV	1265.13	0.0957915
PSB913-4_map4	0002.CSV	1268.98	0.0951874
PSB913-4_map4	0002.CSV	1272.84	0.094498
PSB913-4_map4	0002.CSV	1276.7	0.0934598
PSB913-4_map4	0002.CSV	1280.56	0.092082
PSB913-4_map4	0002.CSV	1284.41	0.0894382
PSB913-4_map4	0002.CSV	1288.27	0.0844502
PSB913-4_map4	0002.CSV	1292.13	0.0762632
PSB913-4_map4	0002.CSV	1295.98	0.0662731
PSB913-4_map4	0002.CSV	1299.84	0.0564234
PSB913-4_map4	0002.CSV	1303.7	0.048717
PSB913-4_map4	0002.CSV	1307.56	0.0431708
PSB913-4_map4	0002.CSV	1311.41	0.0394705
PSB913-4_map4	0002.CSV	1315.27	0.0365074
PSB913-4_map4	0002.CSV	1319.13	0.0337212
PSB913-4_map4	0002.CSV	1322.98	0.0304981
PSB913-4_map4	0002.CSV	1326.84	0.0274342
PSB913-4_map4	0002.CSV	1330.7	0.0247692
PSB913-4_map4	0002.CSV	1334.56	0.0231834
PSB913-4_map4	0002.CSV	1338.41	0.0227116
PSB913-4_map4	0002.CSV	1342.27	0.0234471
PSB913-4_map4	0002.CSV	1346.13	0.0244147
PSB913-4_map4	0002.CSV	1349.98	0.0260001
PSB913-4_map4	0002.CSV	1353.84	0.0273187
PSB913-4_map4	0002.CSV	1357.7	0.0283217
PSB913-4_map4	0002.CSV	1361.56	0.029406
PSB913-4_map4	0002.CSV	1365.41	0.0315436
PSB913-4_map4	0002.CSV	1369.27	0.0339668
PSB913-4_map4	0002.CSV	1373.13	0.0378485
PSB913-4_map4	0002.CSV	1376.98	0.0415805
PSB913-4_map4	0002.CSV	1380.84	0.0428299
PSB913-4_map4	0002.CSV	1384.7	0.0423705
PSB913-4_map4	0002.CSV	1388.56	0.0427751
PSB913-4_map4	0002.CSV	1392.41	0.0430968
PSB913-4_map4	0002.CSV	1396.27	0.0431412
PSB913-4_map4	0002.CSV	1400.13	0.0428063
PSB913-4_map4	0002.CSV	1403.98	0.0436831
PSB913-4_map4	0002.CSV	1407.84	0.0456497
PSB913-4_map4	0002.CSV	1411.7	0.0487124
PSB913-4_map4	0002.CSV	1415.55	0.0518958
PSB913-4_map4	0002.CSV	1419.41	0.0572657
PSB913-4_map4	0002.CSV	1423.27	0.0624813
PSB913-4_map4	0002.CSV	1427.12	0.0681477
PSB913-4_map4	0002.CSV	1430.98	0.0757436
PSB913-4_map4	0002.CSV	1434.84	0.0871479
PSB913-4_map4	0002.CSV	1438.7	0.103619
PSB913-4_map4	0002.CSV	1442.55	0.119494
PSB913-4_map4	0002.CSV	1446.41	0.136189
PSB913-4_map4	0002.CSV	1450.27	0.151062
PSB913-4_map4	0002.CSV	1454.12	0.153034
PSB913-4_map4	0002.CSV	1457.98	0.14069
PSB913-4_map4	0002.CSV	1461.84	0.133301
PSB913-4_map4	0002.CSV	1465.7	0.134374
PSB913-4_map4	0002.CSV	1469.55	0.134699
PSB913-4_map4	0002.CSV	1473.41	0.131329
PSB913-4_map4	0002.CSV	1477.27	0.124215
PSB913-4_map4	0002.CSV	1481.12	0.119425
PSB913-4_map4	0002.CSV	1484.98	0.115597
PSB913-4_map4	0002.CSV	1488.84	0.114971
PSB913-4_map4	0002.CSV	1492.7	0.112891
PSB913-4_map4	0002.CSV	1496.55	0.101383
PSB913-4_map4	0002.CSV	1500.41	0.0853634
PSB913-4_map4	0002.CSV	1504.27	0.0785372
PSB913-4_map4	0002.CSV	1508.12	0.0704894
PSB913-4_map4	0002.CSV	1511.98	0.0647584
PSB913-4_map4	0002.CSV	1515.84	0.0596273
PSB913-4_map4	0002.CSV	1519.7	0.0526455
PSB913-4_map4	0002.CSV	1523.55	0.0444499
PSB913-4_map4	0002.CSV	1527.41	0.039274
PSB913-4_map4	0002.CSV	1531.27	0.0351271
PSB913-4_map4	0002.CSV	1535.12	0.0319673
PSB913-4_map4	0002.CSV	1538.98	0.0290237
PSB913-4_map4	0002.CSV	1542.84	0.0256116
PSB913-4_map4	0002.CSV	1546.7	0.0222502
PSB913-4_map4	0002.CSV	1550.55	0.0196446
PSB913-4_map4	0002.CSV	1554.41	0.0170417
PSB913-4_map4	0002.CSV	1558.27	0.0148815
PSB913-4_map4	0002.CSV	1562.12	0.0131598
PSB913-4_map4	0002.CSV	1565.98	0.0125298
PSB913-4_map4	0002.CSV	1569.84	0.0122323
PSB913-4_map4	0002.CSV	1573.69	0.0127596
PSB913-4_map4	0002.CSV	1577.55	0.014272
PSB913-4_map4	0002.CSV	1581.41	0.0139542
PSB913-4_map4	0002.CSV	1585.27	0.0104657
PSB913-4_map4	0002.CSV	1589.12	0.00671016
PSB913-4_map4	0002.CSV	1592.98	0.00593377
PSB913-4_map4	0002.CSV	1596.84	0.00880601
PSB913-4_map4	0002.CSV	1600.69	0.0107941
PSB913-4_map4	0002.CSV	1604.55	0.00828162
PSB913-4_map4	0002.CSV	1608.41	0.00290338
PSB913-4_map4	0002.CSV	1612.27	-0.000632466
PSB913-4_map4	0002.CSV	1616.12	-0.00240931
PSB913-4_map4	0002.CSV	1619.98	-0.00316359
PSB913-4_map4	0002.CSV	1623.84	-0.00378976
PSB913-4_map4	0002.CSV	1627.69	-0.00411054
PSB913-4_map4	0002.CSV	1631.55	-0.00484222
PSB913-4_map4	0002.CSV	1635.41	-0.0050186
PSB913-4_map4	0002.CSV	1639.27	-0.00505587
PSB913-4_map4	0002.CSV	1643.12	-0.00551953
PSB913-4_map4	0002.CSV	1646.98	-0.00588641
PSB913-4_map4	0002.CSV	1650.84	-0.00555359
PSB913-4_map4	0002.CSV	1654.69	-0.00520568
PSB913-4_map4	0002.CSV	1658.55	-0.00529135
PSB913-4_map4	0002.CSV	1662.41	-0.00550726
PSB913-4_map4	0002.CSV	1666.27	-0.00534817
PSB913-4_map4	0002.CSV	1670.12	-0.00495155
PSB913-4_map4	0002.CSV	1673.98	-0.00374153
PSB913-4_map4	0002.CSV	1677.84	-0.00325298
PSB913-4_map4	0002.CSV	1681.69	-0.00241151
PSB913-4_map4	0002.CSV	1685.55	0.000167657
PSB913-4_map4	0002.CSV	1689.41	0.00243774
PSB913-4_map4	0002.CSV	1693.27	0.00364108
PSB913-4_map4	0002.CSV	1697.12	0.00724825
PSB913-4_map4	0002.CSV	1700.98	0.0146333
PSB913-4_map4	0002.CSV	1704.84	0.0223632
PSB913-4_map4	0002.CSV	1708.69	0.0315788
PSB913-4_map4	0002.CSV	1712.55	0.0406105
PSB913-4_map4	0002.CSV	1716.41	0.0583778
PSB913-4_map4	0002.CSV	1720.27	0.077687
PSB913-4_map4	0002.CSV	1724.12	0.0842293
PSB913-4_map4	0002.CSV	1727.98	0.0858997
PSB913-4_map4	0002.CSV	1731.84	0.0828456
PSB913-4_map4	0002.CSV	1735.69	0.0727191
PSB913-4_map4	0002.CSV	1739.55	0.0621592
PSB913-4_map4	0002.CSV	1743.41	0.0494568
PSB913-4_map4	0002.CSV	1747.27	0.0352674
PSB913-4_map4	0002.CSV	1751.12	0.0179284
PSB913-4_map4	0002.CSV	1754.98	0.00623094
PSB913-4_map4	0002.CSV	1758.84	-0.00259748
PSB913-4_map4	0002.CSV	1762.69	-0.00941055
PSB913-4_map4	0002.CSV	1766.55	-0.0134338
PSB913-4_map4	0002.CSV	1770.41	-0.0156604
PSB913-4_map4	0002.CSV	1774.26	-0.016714
PSB913-4_map4	0002.CSV	1778.12	-0.0167021
PSB913-4_map4	0002.CSV	1781.98	-0.0164282
PSB913-4_map4	0002.CSV	1785.84	-0.0163749
PSB913-4_map4	0002.CSV	1789.69	-0.0170968
PSB913-4_map4	0002.CSV	1793.55	-0.0181634
PSB913-4_map4	0002.CSV	1797.41	-0.0191499
PSB913-4_map4	0002.CSV	1801.26	-0.0198259
PSB913-4_map4	0002.CSV	1805.12	-0.0204864
PSB913-4_map4	0002.CSV	1808.98	-0.0208959
PSB913-4_map4	0002.CSV	1812.84	-0.0210527
PSB913-4_map4	0002.CSV	1816.69	-0.0212687
PSB913-4_map4	0002.CSV	1820.55	-0.0215555
PSB913-4_map4	0002.CSV	1824.41	-0.0217689
PSB913-4_map4	0002.CSV	1828.26	-0.021659
PSB913-4_map4	0002.CSV	1832.12	-0.0215691
PSB913-4_map4	0002.CSV	1835.98	-0.0217663
PSB913-4_map4	0002.CSV	1839.84	-0.0219142
PSB913-4_map4	0002.CSV	1843.69	-0.0217688
PSB913-4_map4	0002.CSV	1847.55	-0.0214324
PSB913-4_map4	0002.CSV	1851.41	-0.0215041
PSB913-4_map4	0002.CSV	1855.26	-0.0214984
PSB913-4_map4	0002.CSV	1859.12	-0.0212932
PSB913-4_map4	0002.CSV	1862.98	-0.0211526
PSB913-4_map4	0002.CSV	1866.84	-0.0208596
PSB913-4_map4	0002.CSV	1870.69	-0.0202646
PSB913-4_map4	0002.CSV	1874.55	-0.0202902
PSB913-4_map4	0002.CSV	1878.41	-0.0203896
PSB913-4_map4	0002.CSV	1882.26	-0.020413
PSB913-4_map4	0002.CSV	1886.12	-0.0204465
PSB913-4_map4	0002.CSV	1889.98	-0.0204758
PSB913-4_map4	0002.CSV	1893.83	-0.0204633
PSB913-4_map4	0002.CSV	1897.69	-0.0205162
PSB913-4_map4	0002.CSV	1901.55	-0.0206793
PSB913-4_map4	0002.CSV	1905.41	-0.0207599
PSB913-4_map4	0002.CSV	1909.26	-0.0206551
PSB913-4_map4	0002.CSV	1913.12	-0.0205717
PSB913-4_map4	0002.CSV	1916.98	-0.0205168
PSB913-4_map4	0002.CSV	1920.83	-0.020363
PSB913-4_map4	0002.CSV	1924.69	-0.0201999
PSB913-4_map4	0002.CSV	1928.55	-0.0200065
PSB913-4_map4	0002.CSV	1932.4	-0.0197219
PSB913-4_map4	0002.CSV	1936.26	-0.0194255
PSB913-4_map4	0002.CSV	1940.12	-0.0191677
PSB913-4_map4	0002.CSV	1943.98	-0.0186739
PSB913-4_map4	0002.CSV	1947.83	-0.0185233
PSB913-4_map4	0002.CSV	1951.69	-0.0186803
PSB913-4_map4	0002.CSV	1955.55	-0.0188017
PSB913-4_map4	0002.CSV	1959.4	-0.0189116
PSB913-4_map4	0002.CSV	1963.26	-0.0190902
PSB913-4_map4	0002.CSV	1967.12	-0.019183
PSB913-4_map4	0002.CSV	1970.98	-0.0192559
PSB913-4_map4	0002.CSV	1974.83	-0.0193704
PSB913-4_map4	0002.CSV	1978.69	-0.0194679
PSB913-4_map4	0002.CSV	1982.55	-0.0195796
PSB913-4_map4	0002.CSV	1986.4	-0.0196864
PSB913-4_map4	0002.CSV	1990.26	-0.0196637
PSB913-4_map4	0002.CSV	1994.12	-0.0196595
PSB913-4_map4	0002.CSV	1997.98	-0.0197736
PSB913-4_map4	0002.CSV	2001.83	-0.0198697
PSB913-4_map4	0002.CSV	2005.69	-0.0199275
PSB913-4_map4	0002.CSV	2009.55	-0.0199737
PSB913-4_map4	0002.CSV	2013.4	-0.0200623
PSB913-4_map4	0002.CSV	2017.26	-0.0201054
PSB913-4_map4	0002.CSV	2021.12	-0.0200661
PSB913-4_map4	0002.CSV	2024.97	-0.0201039
PSB913-4_map4	0002.CSV	2028.83	-0.0201741
PSB913-4_map4	0002.CSV	2032.69	-0.0202536
PSB913-4_map4	0002.CSV	2036.55	-0.0202846
PSB913-4_map4	0002.CSV	2040.4	-0.020311
PSB913-4_map4	0002.CSV	2044.26	-0.0203111
PSB913-4_map4	0002.CSV	2048.12	-0.0203508
PSB913-4_map4	0002.CSV	2051.97	-0.0203661
PSB913-4_map4	0002.CSV	2055.83	-0.0203881
PSB913-4_map4	0002.CSV	2059.69	-0.0204039
PSB913-4_map4	0002.CSV	2063.55	-0.0204223
PSB913-4_map4	0002.CSV	2067.4	-0.020408
PSB913-4_map4	0002.CSV	2071.26	-0.0204626
PSB913-4_map4	0002.CSV	2075.12	-0.0204698
PSB913-4_map4	0002.CSV	2078.97	-0.0204774
PSB913-4_map4	0002.CSV	2082.83	-0.0205273
PSB913-4_map4	0002.CSV	2086.69	-0.0205702
PSB913-4_map4	0002.CSV	2090.55	-0.0205172
PSB913-4_map4	0002.CSV	2094.4	-0.0204952
PSB913-4_map4	0002.CSV	2098.26	-0.0205061
PSB913-4_map4	0002.CSV	2102.12	-0.0205433
PSB913-4_map4	0002.CSV	2105.97	-0.0205182
PSB913-4_map4	0002.CSV	2109.83	-0.020528
PSB913-4_map4	0002.CSV	2113.69	-0.0205435
PSB913-4_map4	0002.CSV	2117.55	-0.0205247
PSB913-4_map4	0002.CSV	2121.4	-0.0204938
PSB913-4_map4	0002.CSV	2125.26	-0.0205201
PSB913-4_map4	0002.CSV	2129.12	-0.0205217
PSB913-4_map4	0002.CSV	2132.97	-0.0205155
PSB913-4_map4	0002.CSV	2136.83	-0.0205016
PSB913-4_map4	0002.CSV	2140.69	-0.0204358
PSB913-4_map4	0002.CSV	2144.55	-0.0203458
PSB913-4_map4	0002.CSV	2148.4	-0.0203184
PSB913-4_map4	0002.CSV	2152.26	-0.0202788
PSB913-4_map4	0002.CSV	2156.12	-0.0202229
PSB913-4_map4	0002.CSV	2159.97	-0.0201942
PSB913-4_map4	0002.CSV	2163.83	-0.0201752
PSB913-4_map4	0002.CSV	2167.69	-0.0201
PSB913-4_map4	0002.CSV	2171.55	-0.0199885
PSB913-4_map4	0002.CSV	2175.4	-0.0198619
PSB913-4_map4	0002.CSV	2179.26	-0.0197822
PSB913-4_map4	0002.CSV	2183.12	-0.0197327
PSB913-4_map4	0002.CSV	2186.97	-0.0196961
PSB913-4_map4	0002.CSV	2190.83	-0.0196121
PSB913-4_map4	0002.CSV	2194.69	-0.0195867
PSB913-4_map4	0002.CSV	2198.55	-0.01958
PSB913-4_map4	0002.CSV	2202.4	-0.0195284
PSB913-4_map4	0002.CSV	2206.26	-0.0194788
PSB913-4_map4	0002.CSV	2210.12	-0.0195005
PSB913-4_map4	0002.CSV	2213.97	-0.0194901
PSB913-4_map4	0002.CSV	2217.83	-0.0194485
PSB913-4_map4	0002.CSV	2221.69	-0.0193826
PSB913-4_map4	0002.CSV	2225.54	-0.0193351
PSB913-4_map4	0002.CSV	2229.4	-0.0192888
PSB913-4_map4	0002.CSV	2233.26	-0.0192839
PSB913-4_map4	0002.CSV	2237.12	-0.0192247
PSB913-4_map4	0002.CSV	2240.97	-0.0191908
PSB913-4_map4	0002.CSV	2244.83	-0.0191825
PSB913-4_map4	0002.CSV	2248.69	-0.0191574
PSB913-4_map4	0002.CSV	2252.54	-0.019106
PSB913-4_map4	0002.CSV	2256.4	-0.0190814
PSB913-4_map4	0002.CSV	2260.26	-0.0190166
PSB913-4_map4	0002.CSV	2264.11	-0.018998
PSB913-4_map4	0002.CSV	2267.97	-0.0189971
PSB913-4_map4	0002.CSV	2271.83	-0.018975
PSB913-4_map4	0002.CSV	2275.69	-0.0189125
PSB913-4_map4	0002.CSV	2279.54	-0.0188914
PSB913-4_map4	0002.CSV	2283.4	-0.0189932
PSB913-4_map4	0002.CSV	2287.26	-0.0190714
PSB913-4_map4	0002.CSV	2291.11	-0.0190444
PSB913-4_map4	0002.CSV	2294.97	-0.019076
PSB913-4_map4	0002.CSV	2298.83	-0.0191413
PSB913-4_map4	0002.CSV	2302.69	-0.0192687
PSB913-4_map4	0002.CSV	2306.54	-0.0194666
PSB913-4_map4	0002.CSV	2310.4	-0.0197755
PSB913-4_map4	0002.CSV	2314.26	-0.0201874
PSB913-4_map4	0002.CSV	2318.11	-0.0210134
PSB913-4_map4	0002.CSV	2321.97	-0.0222445
PSB913-4_map4	0002.CSV	2325.83	-0.0236127
PSB913-4_map4	0002.CSV	2329.69	-0.02506
PSB913-4_map4	0002.CSV	2333.54	-0.0265009
PSB913-4_map4	0002.CSV	2337.4	-0.0272214
PSB913-4_map4	0002.CSV	2341.26	-0.0272501
PSB913-4_map4	0002.CSV	2345.11	-0.0240921
PSB913-4_map4	0002.CSV	2348.97	-0.0230406
PSB913-4_map4	0002.CSV	2352.83	-0.0258501
PSB913-4_map4	0002.CSV	2356.69	-0.0354065
PSB913-4_map4	0002.CSV	2360.54	-0.0426796
PSB913-4_map4	0002.CSV	2364.4	-0.0373864
PSB913-4_map4	0002.CSV	2368.26	-0.0282525
PSB913-4_map4	0002.CSV	2372.11	-0.0224357
PSB913-4_map4	0002.CSV	2375.97	-0.0201307
PSB913-4_map4	0002.CSV	2379.83	-0.0193453
PSB913-4_map4	0002.CSV	2383.69	-0.0191277
PSB913-4_map4	0002.CSV	2387.54	-0.0193207
PSB913-4_map4	0002.CSV	2391.4	-0.0194937
PSB913-4_map4	0002.CSV	2395.26	-0.0195732
PSB913-4_map4	0002.CSV	2399.11	-0.0196669
PSB913-4_map4	0002.CSV	2402.97	-0.0198133
PSB913-4_map4	0002.CSV	2406.83	-0.0198866
PSB913-4_map4	0002.CSV	2410.68	-0.0199207
PSB913-4_map4	0002.CSV	2414.54	-0.0199698
PSB913-4_map4	0002.CSV	2418.4	-0.0199668
PSB913-4_map4	0002.CSV	2422.26	-0.0199465
PSB913-4_map4	0002.CSV	2426.11	-0.0199991
PSB913-4_map4	0002.CSV	2429.97	-0.0200961
PSB913-4_map4	0002.CSV	2433.83	-0.0201704
PSB913-4_map4	0002.CSV	2437.68	-0.0201765
PSB913-4_map4	0002.CSV	2441.54	-0.0201751
PSB913-4_map4	0002.CSV	2445.4	-0.0202091
PSB913-4_map4	0002.CSV	2449.26	-0.0202723
PSB913-4_map4	0002.CSV	2453.11	-0.0203216
PSB913-4_map4	0002.CSV	2456.97	-0.0203852
PSB913-4_map4	0002.CSV	2460.83	-0.0204103
PSB913-4_map4	0002.CSV	2464.68	-0.02042
PSB913-4_map4	0002.CSV	2468.54	-0.0203925
PSB913-4_map4	0002.CSV	2472.4	-0.0203317
PSB913-4_map4	0002.CSV	2476.26	-0.0202409
PSB913-4_map4	0002.CSV	2480.11	-0.0201407
PSB913-4_map4	0002.CSV	2483.97	-0.020024
PSB913-4_map4	0002.CSV	2487.83	-0.0199873
PSB913-4_map4	0002.CSV	2491.68	-0.0199252
PSB913-4_map4	0002.CSV	2495.54	-0.0198298
PSB913-4_map4	0002.CSV	2499.4	-0.0197964
PSB913-4_map4	0002.CSV	2503.26	-0.0198213
PSB913-4_map4	0002.CSV	2507.11	-0.0198733
PSB913-4_map4	0002.CSV	2510.97	-0.0198642
PSB913-4_map4	0002.CSV	2514.83	-0.0197298
PSB913-4_map4	0002.CSV	2518.68	-0.0195657
PSB913-4_map4	0002.CSV	2522.54	-0.0195451
PSB913-4_map4	0002.CSV	2526.4	-0.0196857
PSB913-4_map4	0002.CSV	2530.26	-0.0198052
PSB913-4_map4	0002.CSV	2534.11	-0.0199615
PSB913-4_map4	0002.CSV	2537.97	-0.0201065
PSB913-4_map4	0002.CSV	2541.83	-0.0201171
PSB913-4_map4	0002.CSV	2545.68	-0.0200723
PSB913-4_map4	0002.CSV	2549.54	-0.0201611
PSB913-4_map4	0002.CSV	2553.4	-0.0203075
PSB913-4_map4	0002.CSV	2557.26	-0.0204245
PSB913-4_map4	0002.CSV	2561.11	-0.0204766
PSB913-4_map4	0002.CSV	2564.97	-0.0205224
PSB913-4_map4	0002.CSV	2568.83	-0.0205642
PSB913-4_map4	0002.CSV	2572.68	-0.020569
PSB913-4_map4	0002.CSV	2576.54	-0.020522
PSB913-4_map4	0002.CSV	2580.4	-0.0205403
PSB913-4_map4	0002.CSV	2584.25	-0.0205824
PSB913-4_map4	0002.CSV	2588.11	-0.0206099
PSB913-4_map4	0002.CSV	2591.97	-0.0205858
PSB913-4_map4	0002.CSV	2595.83	-0.0205699
PSB913-4_map4	0002.CSV	2599.68	-0.0205585
PSB913-4_map4	0002.CSV	2603.54	-0.0205302
PSB913-4_map4	0002.CSV	2607.4	-0.0205058
PSB913-4_map4	0002.CSV	2611.25	-0.0204929
PSB913-4_map4	0002.CSV	2615.11	-0.0204581
PSB913-4_map4	0002.CSV	2618.97	-0.0204066
PSB913-4_map4	0002.CSV	2622.82	-0.0203192
PSB913-4_map4	0002.CSV	2626.68	-0.0201882
PSB913-4_map4	0002.CSV	2630.54	-0.0201379
PSB913-4_map4	0002.CSV	2634.4	-0.0201319
PSB913-4_map4	0002.CSV	2638.25	-0.0201951
PSB913-4_map4	0002.CSV	2642.11	-0.0202779
PSB913-4_map4	0002.CSV	2645.97	-0.0203214
PSB913-4_map4	0002.CSV	2649.82	-0.0203808
PSB913-4_map4	0002.CSV	2653.68	-0.0204271
PSB913-4_map4	0002.CSV	2657.54	-0.0204245
PSB913-4_map4	0002.CSV	2661.4	-0.0203835
PSB913-4_map4	0002.CSV	2665.25	-0.0203872
PSB913-4_map4	0002.CSV	2669.11	-0.0203889
PSB913-4_map4	0002.CSV	2672.97	-0.0202412
PSB913-4_map4	0002.CSV	2676.82	-0.0199721
PSB913-4_map4	0002.CSV	2680.68	-0.0199785
PSB913-4_map4	0002.CSV	2684.54	-0.0202333
PSB913-4_map4	0002.CSV	2688.4	-0.0203502
PSB913-4_map4	0002.CSV	2692.25	-0.0202867
PSB913-4_map4	0002.CSV	2696.11	-0.0201718
PSB913-4_map4	0002.CSV	2699.97	-0.0201589
PSB913-4_map4	0002.CSV	2703.82	-0.0202217
PSB913-4_map4	0002.CSV	2707.68	-0.0201388
PSB913-4_map4	0002.CSV	2711.54	-0.020059
PSB913-4_map4	0002.CSV	2715.4	-0.0200237
PSB913-4_map4	0002.CSV	2719.25	-0.0198559
PSB913-4_map4	0002.CSV	2723.11	-0.0195833
PSB913-4_map4	0002.CSV	2726.97	-0.0195743
PSB913-4_map4	0002.CSV	2730.82	-0.0198254
PSB913-4_map4	0002.CSV	2734.68	-0.0197856
PSB913-4_map4	0002.CSV	2738.54	-0.0196526
PSB913-4_map4	0002.CSV	2742.4	-0.0195823
PSB913-4_map4	0002.CSV	2746.25	-0.0193712
PSB913-4_map4	0002.CSV	2750.11	-0.0193856
PSB913-4_map4	0002.CSV	2753.97	-0.0195582
PSB913-4_map4	0002.CSV	2757.82	-0.0195276
PSB913-4_map4	0002.CSV	2761.68	-0.0195064
PSB913-4_map4	0002.CSV	2765.54	-0.0194669
PSB913-4_map4	0002.CSV	2769.39	-0.019165
PSB913-4_map4	0002.CSV	2773.25	-0.0187602
PSB913-4_map4	0002.CSV	2777.11	-0.0187471
PSB913-4_map4	0002.CSV	2780.97	-0.0188268
PSB913-4_map4	0002.CSV	2784.82	-0.0185691
PSB913-4_map4	0002.CSV	2788.68	-0.0181863
PSB913-4_map4	0002.CSV	2792.54	-0.0180347
PSB913-4_map4	0002.CSV	2796.39	-0.0178943
PSB913-4_map4	0002.CSV	2800.25	-0.0178445
PSB913-4_map4	0002.CSV	2804.11	-0.0177711
PSB913-4_map4	0002.CSV	2807.97	-0.01739
PSB913-4_map4	0002.CSV	2811.82	-0.0172406
PSB913-4_map4	0002.CSV	2815.68	-0.017135
PSB913-4_map4	0002.CSV	2819.54	-0.0167072
PSB913-4_map4	0002.CSV	2823.39	-0.0162105
PSB913-4_map4	0002.CSV	2827.25	-0.0156596
PSB913-4_map4	0002.CSV	2831.11	-0.0146312
PSB913-4_map4	0002.CSV	2834.97	-0.0128763
PSB913-4_map4	0002.CSV	2838.82	-0.0104417
PSB913-4_map4	0002.CSV	2842.68	-0.00717114
PSB913-4_map4	0002.CSV	2846.54	-0.00296246
PSB913-4_map4	0002.CSV	2850.39	-4.95988e-05
PSB913-4_map4	0002.CSV	2854.25	-0.000127746
PSB913-4_map4	0002.CSV	2858.11	-0.00183417
PSB913-4_map4	0002.CSV	2861.97	-0.00383275
PSB913-4_map4	0002.CSV	2865.82	-0.00519032
PSB913-4_map4	0002.CSV	2869.68	-0.00540197
PSB913-4_map4	0002.CSV	2873.54	-0.00544255
PSB913-4_map4	0002.CSV	2877.39	-0.00592982
PSB913-4_map4	0002.CSV	2881.25	-0.00602793
PSB913-4_map4	0002.CSV	2885.11	-0.00544026
PSB913-4_map4	0002.CSV	2888.97	-0.00430441
PSB913-4_map4	0002.CSV	2892.82	-0.00252613
PSB913-4_map4	0002.CSV	2896.68	-0.000666113
PSB913-4_map4	0002.CSV	2900.54	0.00124059
PSB913-4_map4	0002.CSV	2904.39	0.00379995
PSB913-4_map4	0002.CSV	2908.25	0.00716622
PSB913-4_map4	0002.CSV	2912.11	0.011497
PSB913-4_map4	0002.CSV	2915.97	0.0156743
PSB913-4_map4	0002.CSV	2919.82	0.0178597
PSB913-4_map4	0002.CSV	2923.68	0.0176708
PSB913-4_map4	0002.CSV	2927.54	0.015917
PSB913-4_map4	0002.CSV	2931.39	0.0127878
PSB913-4_map4	0002.CSV	2935.25	0.00904869
PSB913-4_map4	0002.CSV	2939.11	0.00580326
PSB913-4_map4	0002.CSV	2942.96	0.00329416
PSB913-4_map4	0002.CSV	2946.82	0.00121005
PSB913-4_map4	0002.CSV	2950.68	-0.000479979
PSB913-4_map4	0002.CSV	2954.54	-0.00200567
PSB913-4_map4	0002.CSV	2958.39	-0.00366574
PSB913-4_map4	0002.CSV	2962.25	-0.00531851
PSB913-4_map4	0002.CSV	2966.11	-0.00708731
PSB913-4_map4	0002.CSV	2969.96	-0.00830739
PSB913-4_map4	0002.CSV	2973.82	-0.00879042
PSB913-4_map4	0002.CSV	2977.68	-0.00914453
PSB913-4_map4	0002.CSV	2981.53	-0.00993997
PSB913-4_map4	0002.CSV	2985.39	-0.0110527
PSB913-4_map4	0002.CSV	2989.25	-0.0115727
PSB913-4_map4	0002.CSV	2993.11	-0.0117563
PSB913-4_map4	0002.CSV	2996.96	-0.0120858
PSB913-4_map4	0002.CSV	3000.82	-0.0124482
PSB913-4_map4	0002.CSV	3004.68	-0.0128495
PSB913-4_map4	0002.CSV	3008.53	-0.0130551
PSB913-4_map4	0002.CSV	3012.39	-0.0128827
PSB913-4_map4	0002.CSV	3016.25	-0.0121053
PSB913-4_map4	0002.CSV	3020.11	-0.0103405
PSB913-4_map4	0002.CSV	3023.96	-0.00825619
PSB913-4_map4	0002.CSV	3027.82	-0.00756001
PSB913-4_map4	0002.CSV	3031.68	-0.00865624
PSB913-4_map4	0002.CSV	3035.53	-0.0106818
PSB913-4_map4	0002.CSV	3039.39	-0.0123316
PSB913-4_map4	0002.CSV	3043.25	-0.0132299
PSB913-4_map4	0002.CSV	3047.11	-0.0135867
PSB913-4_map4	0002.CSV	3050.96	-0.0132678
PSB913-4_map4	0002.CSV	3054.82	-0.0125288
PSB913-4_map4	0002.CSV	3058.68	-0.0118709
PSB913-4_map4	0002.CSV	3062.53	-0.0116339
PSB913-4_map4	0002.CSV	3066.39	-0.0120152
PSB913-4_map4	0002.CSV	3070.25	-0.0129409
PSB913-4_map4	0002.CSV	3074.11	-0.0132935
PSB913-4_map4	0002.CSV	3077.96	-0.0128826
PSB913-4_map4	0002.CSV	3081.82	-0.0124892
PSB913-4_map4	0002.CSV	3085.68	-0.0127341
PSB913-4_map4	0002.CSV	3089.53	-0.0137075
PSB913-4_map4	0002.CSV	3093.39	-0.0148929
PSB913-4_map4	0002.CSV	3097.25	-0.0154269
PSB913-4_map4	0002.CSV	3101.11	-0.01549
PSB913-4_map4	0002.CSV	3104.96	-0.0154632
PSB913-4_map4	0002.CSV	3108.82	-0.0154684
PSB913-4_map4	0002.CSV	3112.68	-0.0156018
PSB913-4_map4	0002.CSV	3116.53	-0.0156492
PSB913-4_map4	0002.CSV	3120.39	-0.0157872
PSB913-4_map4	0002.CSV	3124.25	-0.0161631
PSB913-4_map4	0002.CSV	3128.11	-0.0163266
PSB913-4_map4	0002.CSV	3131.96	-0.0163539
PSB913-4_map4	0002.CSV	3135.82	-0.0161332
PSB913-4_map4	0002.CSV	3139.68	-0.0159505
PSB913-4_map4	0002.CSV	3143.53	-0.0161272
PSB913-4_map4	0002.CSV	3147.39	-0.0159884
PSB913-4_map4	0002.CSV	3151.25	-0.0156201
PSB913-4_map4	0002.CSV	3155.1	-0.015762
PSB913-4_map4	0002.CSV	3158.96	-0.0161535
PSB913-4_map4	0002.CSV	3162.82	-0.0162909
PSB913-4_map4	0002.CSV	3166.68	-0.0163606
PSB913-4_map4	0002.CSV	3170.53	-0.0162736
PSB913-4_map4	0002.CSV	3174.39	-0.0161182
PSB913-4_map4	0002.CSV	3178.25	-0.0159766
PSB913-4_map4	0002.CSV	3182.1	-0.0159157
PSB913-4_map4	0002.CSV	3185.96	-0.0158486
PSB913-4_map4	0002.CSV	3189.82	-0.0157948
PSB913-4_map4	0002.CSV	3193.68	-0.0159513
PSB913-4_map4	0002.CSV	3197.53	-0.0159011
PSB913-4_map4	0002.CSV	3201.39	-0.0156743
PSB913-4_map4	0002.CSV	3205.25	-0.0156052
PSB913-4_map4	0002.CSV	3209.1	-0.0155629
PSB913-4_map4	0002.CSV	3212.96	-0.0154311
PSB913-4_map4	0002.CSV	3216.82	-0.015283
PSB913-4_map4	0002.CSV	3220.68	-0.0153114
PSB913-4_map4	0002.CSV	3224.53	-0.0153687
PSB913-4_map4	0002.CSV	3228.39	-0.0150734
PSB913-4_map4	0002.CSV	3232.25	-0.0147649
PSB913-4_map4	0002.CSV	3236.1	-0.0149636
PSB913-4_map4	0002.CSV	3239.96	-0.0151707
PSB913-4_map4	0002.CSV	3243.82	-0.0148689
PSB913-4_map4	0002.CSV	3247.68	-0.0146596
PSB913-4_map4	0002.CSV	3251.53	-0.0148729
PSB913-4_map4	0002.CSV	3255.39	-0.0148576
PSB913-4_map4	0002.CSV	3259.25	-0.0149193
PSB913-4_map4	0002.CSV	3263.1	-0.0149365
PSB913-4_map4	0002.CSV	3266.96	-0.0146041
PSB913-4_map4	0002.CSV	3270.82	-0.0142767
PSB913-4_map4	0002.CSV	3274.68	-0.0143269
PSB913-4_map4	0002.CSV	3278.53	-0.014535
PSB913-4_map4	0002.CSV	3282.39	-0.0147012
PSB913-4_map4	0002.CSV	3286.25	-0.0147998
PSB913-4_map4	0002.CSV	3290.1	-0.0144842
PSB913-4_map4	0002.CSV	3293.96	-0.0141266
PSB913-4_map4	0002.CSV	3297.82	-0.0142513
PSB913-4_map4	0002.CSV	3301.67	-0.0142875
PSB913-4_map4	0002.CSV	3305.53	-0.0141592
PSB913-4_map4	0002.CSV	3309.39	-0.014314
PSB913-4_map4	0002.CSV	3313.25	-0.0146824
PSB913-4_map4	0002.CSV	3317.1	-0.0148901
PSB913-4_map4	0002.CSV	3320.96	-0.0147594
PSB913-4_map4	0002.CSV	3324.82	-0.014425
PSB913-4_map4	0002.CSV	3328.67	-0.0145989
PSB913-4_map4	0002.CSV	3332.53	-0.0147602
PSB913-4_map4	0002.CSV	3336.39	-0.0143561
PSB913-4_map4	0002.CSV	3340.24	-0.0141682
PSB913-4_map4	0002.CSV	3344.1	-0.0143817
PSB913-4_map4	0002.CSV	3347.96	-0.0142908
PSB913-4_map4	0002.CSV	3351.82	-0.0142814
PSB913-4_map4	0002.CSV	3355.67	-0.0146824
PSB913-4_map4	0002.CSV	3359.53	-0.0145874
PSB913-4_map4	0002.CSV	3363.39	-0.0142276
PSB913-4_map4	0002.CSV	3367.24	-0.0138327
PSB913-4_map4	0002.CSV	3371.1	-0.0139642
PSB913-4_map4	0002.CSV	3374.96	-0.0143475
PSB913-4_map4	0002.CSV	3378.82	-0.0144919
PSB913-4_map4	0002.CSV	3382.67	-0.0147192
PSB913-4_map4	0002.CSV	3386.53	-0.014479
PSB913-4_map4	0002.CSV	3390.39	-0.01393
PSB913-4_map4	0002.CSV	3394.24	-0.013747
PSB913-4_map4	0002.CSV	3398.1	-0.0137865
PSB913-4_map4	0002.CSV	3401.96	-0.0139453
PSB913-4_map4	0002.CSV	3405.82	-0.0141851
PSB913-4_map4	0002.CSV	3409.67	-0.0141291
PSB913-4_map4	0002.CSV	3413.53	-0.0143967
PSB913-4_map4	0002.CSV	3417.39	-0.0149841
PSB913-4_map4	0002.CSV	3421.24	-0.0151925
PSB913-4_map4	0002.CSV	3425.1	-0.0149628
PSB913-4_map4	0002.CSV	3428.96	-0.014269
PSB913-4_map4	0002.CSV	3432.82	-0.013911
PSB913-4_map4	0002.CSV	3436.67	-0.0143255
PSB913-4_map4	0002.CSV	3440.53	-0.0153169
PSB913-4_map4	0002.CSV	3444.39	-0.0158101
PSB913-4_map4	0002.CSV	3448.24	-0.0159091
PSB913-4_map4	0002.CSV	3452.1	-0.0161208
PSB913-4_map4	0002.CSV	3455.96	-0.0158978
PSB913-4_map4	0002.CSV	3459.82	-0.0152739
PSB913-4_map4	0002.CSV	3463.67	-0.0148172
PSB913-4_map4	0002.CSV	3467.53	-0.0146089
PSB913-4_map4	0002.CSV	3471.39	-0.0153239
PSB913-4_map4	0002.CSV	3475.24	-0.0158647
PSB913-4_map4	0002.CSV	3479.1	-0.0157632
PSB913-4_map4	0002.CSV	3482.96	-0.0158851
PSB913-4_map4	0002.CSV	3486.82	-0.0157838
PSB913-4_map4	0002.CSV	3490.67	-0.015749
PSB913-4_map4	0002.CSV	3494.53	-0.0157818
PSB913-4_map4	0002.CSV	3498.39	-0.0158169
PSB913-4_map4	0002.CSV	3502.24	-0.015972
PSB913-4_map4	0002.CSV	3506.1	-0.0164848
PSB913-4_map4	0002.CSV	3509.96	-0.0166087
PSB913-4_map4	0002.CSV	3513.81	-0.0163206
PSB913-4_map4	0002.CSV	3517.67	-0.0167125
PSB913-4_map4	0002.CSV	3521.53	-0.017041
PSB913-4_map4	0002.CSV	3525.39	-0.0172771
PSB913-4_map4	0002.CSV	3529.24	-0.0173212
PSB913-4_map4	0002.CSV	3533.1	-0.0171298
PSB913-4_map4	0002.CSV	3536.96	-0.0170117
PSB913-4_map4	0002.CSV	3540.81	-0.0171845
PSB913-4_map4	0002.CSV	3544.67	-0.0171572
PSB913-4_map4	0002.CSV	3548.53	-0.0173246
PSB913-4_map4	0002.CSV	3552.39	-0.0178609
PSB913-4_map4	0002.CSV	3556.24	-0.0182189
PSB913-4_map4	0002.CSV	3560.1	-0.0186218
PSB913-4_map4	0002.CSV	3563.96	-0.0193612
PSB913-4_map4	0002.CSV	3567.81	-0.019273
PSB913-4_map4	0002.CSV	3571.67	-0.019245
PSB913-4_map4	0002.CSV	3575.53	-0.0197112
PSB913-4_map4	0002.CSV	3579.39	-0.0197207
PSB913-4_map4	0002.CSV	3583.24	-0.0198786
PSB913-4_map4	0002.CSV	3587.1	-0.02014
PSB913-4_map4	0002.CSV	3590.96	-0.0203775
PSB913-4_map4	0002.CSV	3594.81	-0.0207396
PSB913-4_map4	0002.CSV	3598.67	-0.0207717
PSB913-4_map4	0002.CSV	3602.53	-0.0210381
PSB913-4_map4	0002.CSV	3606.39	-0.0217213
PSB913-4_map4	0002.CSV	3610.24	-0.0221886
PSB913-4_map4	0002.CSV	3614.1	-0.022388
PSB913-4_map4	0002.CSV	3617.96	-0.0221084
PSB913-4_map4	0002.CSV	3621.81	-0.0219337
PSB913-4_map4	0002.CSV	3625.67	-0.0229326
PSB913-4_map4	0002.CSV	3629.53	-0.0231052
PSB913-4_map4	0002.CSV	3633.39	-0.02247
PSB913-4_map4	0002.CSV	3637.24	-0.0227635
PSB913-4_map4	0002.CSV	3641.1	-0.0232536
PSB913-4_map4	0002.CSV	3644.96	-0.0241833
PSB913-4_map4	0002.CSV	3648.81	-0.0237367
PSB913-4_map4	0002.CSV	3652.67	-0.0228059
PSB913-4_map4	0002.CSV	3656.53	-0.0228945
PSB913-4_map4	0002.CSV	3660.38	-0.0230029
PSB913-4_map4	0002.CSV	3664.24	-0.023958
PSB913-4_map4	0002.CSV	3668.1	-0.0250456
PSB913-4_map4	0002.CSV	3671.96	-0.0252321
PSB913-4_map4	0002.CSV	3675.81	-0.0244841
PSB913-4_map4	0002.CSV	3679.67	-0.0240499
PSB913-4_map4	0002.CSV	3683.53	-0.0245107
PSB913-4_map4	0002.CSV	3687.38	-0.0248386
PSB913-4_map4	0002.CSV	3691.24	-0.0240971
PSB913-4_map4	0002.CSV	3695.1	-0.0241857
PSB913-4_map4	0002.CSV	3698.95	-0.0246396
PSB913-4_map4	0002.CSV	3702.81	-0.0247759
PSB913-4_map4	0002.CSV	3706.67	-0.0252891
PSB913-4_map4	0002.CSV	3710.53	-0.02532
PSB913-4_map4	0002.CSV	3714.38	-0.0245611
PSB913-4_map4	0002.CSV	3718.24	-0.02518
PSB913-4_map4	0002.CSV	3722.1	-0.0256926
PSB913-4_map4	0002.CSV	3725.95	-0.0254649
PSB913-4_map4	0002.CSV	3729.81	-0.0255133
PSB913-4_map4	0002.CSV	3733.67	-0.025449
PSB913-4_map4	0002.CSV	3737.53	-0.024475
PSB913-4_map4	0002.CSV	3741.38	-0.0251883
PSB913-4_map4	0002.CSV	3745.24	-0.026298
PSB913-4_map4	0002.CSV	3749.1	-0.0266042
PSB913-4_map4	0002.CSV	3752.95	-0.0252235
PSB913-4_map4	0002.CSV	3756.81	-0.0249389
PSB913-4_map4	0002.CSV	3760.67	-0.0248922
PSB913-4_map4	0002.CSV	3764.53	-0.0250594
PSB913-4_map4	0002.CSV	3768.38	-0.0249142
PSB913-4_map4	0002.CSV	3772.24	-0.0246177
PSB913-4_map4	0002.CSV	3776.1	-0.0248674
PSB913-4_map4	0002.CSV	3779.95	-0.0249039
PSB913-4_map4	0002.CSV	3783.81	-0.0248335
PSB913-4_map4	0002.CSV	3787.67	-0.0247844
PSB913-4_map4	0002.CSV	3791.53	-0.0251423
PSB913-4_map4	0002.CSV	3795.38	-0.0258339
PSB913-4_map4	0002.CSV	3799.24	-0.0258565
PSB913-4_map4	0002.CSV	3803.1	-0.0250232
PSB913-4_map4	0002.CSV	3806.95	-0.0245362
PSB913-4_map4	0002.CSV	3810.81	-0.0250384
PSB913-4_map4	0002.CSV	3814.67	-0.0256653
PSB913-4_map4	0002.CSV	3818.53	-0.0254133
PSB913-4_map4	0002.CSV	3822.38	-0.0247801
PSB913-4_map4	0002.CSV	3826.24	-0.024968
PSB913-4_map4	0002.CSV	3830.1	-0.0254172
PSB913-4_map4	0002.CSV	3833.95	-0.0257987
PSB913-4_map4	0002.CSV	3837.81	-0.0256173
PSB913-4_map4	0002.CSV	3841.67	-0.0246369
PSB913-4_map4	0002.CSV	3845.53	-0.0249151
PSB913-4_map4	0002.CSV	3849.38	-0.0261226
PSB913-4_map4	0002.CSV	3853.24	-0.0258977
PSB913-4_map4	0002.CSV	3857.1	-0.0249061
PSB913-4_map4	0002.CSV	3860.95	-0.0256999
PSB913-4_map4	0002.CSV	3864.81	-0.025925
PSB913-4_map4	0002.CSV	3868.67	-0.0257293
PSB913-4_map4	0002.CSV	3872.52	-0.02519
PSB913-4_map4	0002.CSV	3876.38	-0.0253557
PSB913-4_map4	0002.CSV	3880.24	-0.0257351
PSB913-4_map4	0002.CSV	3884.1	-0.0253728
PSB913-4_map4	0002.CSV	3887.95	-0.0254188
PSB913-4_map4	0002.CSV	3891.81	-0.025527
PSB913-4_map4	0002.CSV	3895.67	-0.0258357
PSB913-4_map4	0002.CSV	3899.52	-0.0263181
PSB913-4_map4	0002.CSV	3903.38	-0.0254718
PSB913-4_map4	0002.CSV	3907.24	-0.0250264
PSB913-4_map4	0002.CSV	3911.1	-0.0256068
PSB913-4_map4	0002.CSV	3914.95	-0.0259727
PSB913-4_map4	0002.CSV	3918.81	-0.025805
PSB913-4_map4	0002.CSV	3922.67	-0.0257812
PSB913-4_map4	0002.CSV	3926.52	-0.025836
PSB913-4_map4	0002.CSV	3930.38	-0.0256804
PSB913-4_map4	0002.CSV	3934.24	-0.0253076
PSB913-4_map4	0002.CSV	3938.09	-0.0254961
PSB913-4_map4	0002.CSV	3941.95	-0.0256878
PSB913-4_map4	0002.CSV	3945.81	-0.0256646
PSB913-4_map4	0002.CSV	3949.67	-0.0255178
PSB913-4_map4	0002.CSV	3953.52	-0.0255007
PSB913-4_map4	0002.CSV	3957.38	-0.0255484
PSB913-4_map4	0002.CSV	3961.24	-0.0254363
PSB913-4_map4	0002.CSV	3965.09	-0.0256193
PSB913-4_map4	0002.CSV	3968.95	-0.025873
PSB913-4_map4	0002.CSV	3972.81	-0.0258079
PSB913-4_map4	0002.CSV	3976.67	-0.0256074
PSB913-4_map4	0002.CSV	3980.52	-0.0255525
PSB913-4_map4	0002.CSV	3984.38	-0.0255923
PSB913-4_map4	0002.CSV	3988.24	-0.0256238
PSB913-4_map4	0002.CSV	3992.09	-0.0255007
PSB913-4_map4	0002.CSV	3995.95	-0.0254131
PSB913-4_map4	0002.CSV	3999.81	-0.0254304
PSB913-4_map4	0003.CSV	674.992	-0.000948651
PSB913-4_map4	0003.CSV	678.849	-6.15587e-05
PSB913-4_map4	0003.CSV	682.706	0.000153073
PSB913-4_map4	0003.CSV	686.563	0.00158378
PSB913-4_map4	0003.CSV	690.42	0.00418859
PSB913-4_map4	0003.CSV	694.277	0.00962383
PSB913-4_map4	0003.CSV	698.134	0.0146366
PSB913-4_map4	0003.CSV	701.991	0.0111057
PSB913-4_map4	0003.CSV	705.849	0.00678763
PSB913-4_map4	0003.CSV	709.706	0.0108109
PSB913-4_map4	0003.CSV	713.563	0.00939732
PSB913-4_map4	0003.CSV	717.42	-0.00150928
PSB913-4_map4	0003.CSV	721.277	-0.00736313
PSB913-4_map4	0003.CSV	725.134	-0.00753123
PSB913-4_map4	0003.CSV	728.991	-0.00697676
PSB913-4_map4	0003.CSV	732.848	-0.00622369
PSB913-4_map4	0003.CSV	736.705	-0.0054287
PSB913-4_map4	0003.CSV	740.562	-0.00466462
PSB913-4_map4	0003.CSV	744.42	-0.00430609
PSB913-4_map4	0003.CSV	748.277	-0.00430251
PSB913-4_map4	0003.CSV	752.134	-0.00481876
PSB913-4_map4	0003.CSV	755.991	-0.00516613
PSB913-4_map4	0003.CSV	759.848	-0.00516013
PSB913-4_map4	0003.CSV	763.705	-0.00541653
PSB913-4_map4	0003.CSV	767.562	-0.00598675
PSB913-4_map4	0003.CSV	771.419	-0.00631177
PSB913-4_map4	0003.CSV	775.276	-0.00655665
PSB913-4_map4	0003.CSV	779.133	-0.00678747
PSB913-4_map4	0003.CSV	782.99	-0.00699293
PSB913-4_map4	0003.CSV	786.848	-0.00683281
PSB913-4_map4	0003.CSV	790.705	-0.0068212
PSB913-4_map4	0003.CSV	794.562	-0.00687267
PSB913-4_map4	0003.CSV	798.419	-0.00672262
PSB913-4_map4	0003.CSV	802.276	-0.00635034
PSB913-4_map4	0003.CSV	806.133	-0.00606181
PSB913-4_map4	0003.CSV	809.99	-0.00554279
PSB913-4_map4	0003.CSV	813.847	-0.00501319
PSB913-4_map4	0003.CSV	817.704	-0.00419403
PSB913-4_map4	0003.CSV	821.562	-0.0032148
PSB913-4_map4	0003.CSV	825.419	-0.0019301
PSB913-4_map4	0003.CSV	829.276	-0.000630745
PSB913-4_map4	0003.CSV	833.133	0.00123384
PSB913-4_map4	0003.CSV	836.99	0.00414705
PSB913-4_map4	0003.CSV	840.847	0.00806412
PSB913-4_map4	0003.CSV	844.704	0.01161
PSB913-4_map4	0003.CSV	848.561	0.0167066
PSB913-4_map4	0003.CSV	852.418	0.0219435
PSB913-4_map4	0003.CSV	856.275	0.0211443
PSB913-4_map4	0003.CSV	860.132	0.0150176
PSB913-4_map4	0003.CSV	863.99	0.00792534
PSB913-4_map4	0003.CSV	867.847	0.000865163
PSB913-4_map4	0003.CSV	871.704	-0.00579203
PSB913-4_map4	0003.CSV	875.561	-0.0105293
PSB913-4_map4	0003.CSV	879.418	-0.01245
PSB913-4_map4	0003.CSV	883.275	-0.0129098
PSB913-4_map4	0003.CSV	887.132	-0.0130672
PSB913-4_map4	0003.CSV	890.989	-0.0131601
PSB913-4_map4	0003.CSV	894.846	-0.0131536
PSB913-4_map4	0003.CSV	898.703	-0.0131909
PSB913-4_map4	0003.CSV	902.561	-0.0131082
PSB913-4_map4	0003.CSV	906.418	-0.0130013
PSB913-4_map4	0003.CSV	910.275	-0.0129081
PSB913-4_map4	0003.CSV	914.132	-0.0128685
PSB913-4_map4	0003.CSV	917.989	-0.0127564
PSB913-4_map4	0003.CSV	921.846	-0.0126739
PSB913-4_map4	0003.CSV	925.703	-0.0125741
PSB913-4_map4	0003.CSV	929.56	-0.0125097
PSB913-4_map4	0003.CSV	933.417	-0.0123681
PSB913-4_map4	0003.CSV	937.274	-0.0122603
PSB913-4_map4	0003.CSV	941.131	-0.0120443
PSB913-4_map4	0003.CSV	944.989	-0.0118864
PSB913-4_map4	0003.CSV	948.846	-0.0117679
PSB913-4_map4	0003.CSV	952.703	-0.0115903
PSB913-4_map4	0003.CSV	956.56	-0.0113369
PSB913-4_map4	0003.CSV	960.417	-0.0112914
PSB913-4_map4	0003.CSV	964.274	-0.0111531
PSB913-4_map4	0003.CSV	968.131	-0.0109663
PSB913-4_map4	0003.CSV	971.988	-0.0107638
PSB913-4_map4	0003.CSV	975.845	-0.0104601
PSB913-4_map4	0003.CSV	979.702	-0.0101573
PSB913-4_map4	0003.CSV	983.559	-0.00998372
PSB913-4_map4	0003.CSV	987.417	-0.00983237
PSB913-4_map4	0003.CSV	991.274	-0.00976075
PSB913-4_map4	0003.CSV	995.131	-0.00973104
PSB913-4_map4	0003.CSV	998.988	-0.00968247
PSB913-4_map4	0003.CSV	1002.85	-0.00960268
PSB913-4_map4	0003.CSV	1006.7	-0.00958803
PSB913-4_map4	0003.CSV	1010.56	-0.00957364
PSB913-4_map4	0003.CSV	1014.42	-0.00959714
PSB913-4_map4	0003.CSV	1018.27	-0.00951562
PSB913-4_map4	0003.CSV	1022.13	-0.00938454
PSB913-4_map4	0003.CSV	1025.99	-0.00927244
PSB913-4_map4	0003.CSV	1029.85	-0.00918566
PSB913-4_map4	0003.CSV	1033.7	-0.0090122
PSB913-4_map4	0003.CSV	1037.56	-0.00887468
PSB913-4_map4	0003.CSV	1041.42	-0.00876484
PSB913-4_map4	0003.CSV	1045.27	-0.00881182
PSB913-4_map4	0003.CSV	1049.13	-0.00858419
PSB913-4_map4	0003.CSV	1052.99	-0.00813478
PSB913-4_map4	0003.CSV	1056.84	-0.00752644
PSB913-4_map4	0003.CSV	1060.7	-0.00694809
PSB913-4_map4	0003.CSV	1064.56	-0.00651873
PSB913-4_map4	0003.CSV	1068.42	-0.00636558
PSB913-4_map4	0003.CSV	1072.27	-0.00634181
PSB913-4_map4	0003.CSV	1076.13	-0.00610164
PSB913-4_map4	0003.CSV	1079.99	-0.00501306
PSB913-4_map4	0003.CSV	1083.84	-0.00542206
PSB913-4_map4	0003.CSV	1087.7	-0.00757799
PSB913-4_map4	0003.CSV	1091.56	-0.00845741
PSB913-4_map4	0003.CSV	1095.41	-0.00829907
PSB913-4_map4	0003.CSV	1099.27	-0.00793438
PSB913-4_map4	0003.CSV	1103.13	-0.0074716
PSB913-4_map4	0003.CSV	1106.99	-0.00697271
PSB913-4_map4	0003.CSV	1110.84	-0.00654911
PSB913-4_map4	0003.CSV	1114.7	-0.00622696
PSB913-4_map4	0003.CSV	1118.56	-0.00603228
PSB913-4_map4	0003.CSV	1122.41	-0.00599679
PSB913-4_map4	0003.CSV	1126.27	-0.00601659
PSB913-4_map4	0003.CSV	1130.13	-0.00608328
PSB913-4_map4	0003.CSV	1133.99	-0.00614304
PSB913-4_map4	0003.CSV	1137.84	-0.00617495
PSB913-4_map4	0003.CSV	1141.7	-0.00610619
PSB913-4_map4	0003.CSV	1145.56	-0.0060607
PSB913-4_map4	0003.CSV	1149.41	-0.00599607
PSB913-4_map4	0003.CSV	1153.27	-0.00595035
PSB913-4_map4	0003.CSV	1157.13	-0.00585425
PSB913-4_map4	0003.CSV	1160.99	-0.00578644
PSB913-4_map4	0003.CSV	1164.84	-0.00577016
PSB913-4_map4	0003.CSV	1168.7	-0.00589269
PSB913-4_map4	0003.CSV	1172.56	-0.00594044
PSB913-4_map4	0003.CSV	1176.41	-0.0058786
PSB913-4_map4	0003.CSV	1180.27	-0.00578477
PSB913-4_map4	0003.CSV	1184.13	-0.00573521
PSB913-4_map4	0003.CSV	1187.99	-0.00568704
PSB913-4_map4	0003.CSV	1191.84	-0.00563428
PSB913-4_map4	0003.CSV	1195.7	-0.00550517
PSB913-4_map4	0003.CSV	1199.56	-0.00535638
PSB913-4_map4	0003.CSV	1203.41	-0.00524846
PSB913-4_map4	0003.CSV	1207.27	-0.0051472
PSB913-4_map4	0003.CSV	1211.13	-0.00494336
PSB913-4_map4	0003.CSV	1214.98	-0.00477969
PSB913-4_map4	0003.CSV	1218.84	-0.00460135
PSB913-4_map4	0003.CSV	1222.7	-0.00443234
PSB913-4_map4	0003.CSV	1226.56	-0.00422314
PSB913-4_map4	0003.CSV	1230.41	-0.00396512
PSB913-4_map4	0003.CSV	1234.27	-0.00360463
PSB913-4_map4	0003.CSV	1238.13	-0.00324805
PSB913-4_map4	0003.CSV	1241.98	-0.00285707
PSB913-4_map4	0003.CSV	1245.84	-0.00243349
PSB913-4_map4	0003.CSV	1249.7	-0.00205791
PSB913-4_map4	0003.CSV	1253.56	-0.00182522
PSB913-4_map4	0003.CSV	1257.41	-0.00166035
PSB913-4_map4	0003.CSV	1261.27	-0.00148643
PSB913-4_map4	0003.CSV	1265.13	-0.00127967
PSB913-4_map4	0003.CSV	1268.98	-0.00111333
PSB913-4_map4	0003.CSV	1272.84	-0.000906396
PSB913-4_map4	0003.CSV	1276.7	-0.000718811
PSB913-4_map4	0003.CSV	1280.56	-0.000601165
PSB913-4_map4	0003.CSV	1284.41	-0.000572477
PSB913-4_map4	0003.CSV	1288.27	-0.000536837
PSB913-4_map4	0003.CSV	1292.13	-0.000621183
PSB913-4_map4	0003.CSV	1295.98	-0.000720233
PSB913-4_map4	0003.CSV	1299.84	-0.000770709
PSB913-4_map4	0003.CSV	1303.7	-0.000770676
PSB913-4_map4	0003.CSV	1307.56	-0.000718712
PSB913-4_map4	0003.CSV	1311.41	-0.00060325
PSB913-4_map4	0003.CSV	1315.27	-0.000458929
PSB913-4_map4	0003.CSV	1319.13	-0.000177794
PSB913-4_map4	0003.CSV	1322.98	6.50139e-05
PSB913-4_map4	0003.CSV	1326.84	0.000237835
PSB913-4_map4	0003.CSV	1330.7	0.000422399
PSB913-4_map4	0003.CSV	1334.56	0.000584679
PSB913-4_map4	0003.CSV	1338.41	0.00100459
PSB913-4_map4	0003.CSV	1342.27	0.00155361
PSB913-4_map4	0003.CSV	1346.13	0.00177716
PSB913-4_map4	0003.CSV	1349.98	0.00213
PSB913-4_map4	0003.CSV	1353.84	0.00251292
PSB913-4_map4	0003.CSV	1357.7	0.00282577
PSB913-4_map4	0003.CSV	1361.56	0.00326311
PSB913-4_map4	0003.CSV	1365.41	0.00385437
PSB913-4_map4	0003.CSV	1369.27	0.00413377
PSB913-4_map4	0003.CSV	1373.13	0.00465608
PSB913-4_map4	0003.CSV	1376.98	0.00539781
PSB913-4_map4	0003.CSV	1380.84	0.0059114
PSB913-4_map4	0003.CSV	1384.7	0.00639278
PSB913-4_map4	0003.CSV	1388.56	0.00727106
PSB913-4_map4	0003.CSV	1392.41	0.00781983
PSB913-4_map4	0003.CSV	1396.27	0.00867011
PSB913-4_map4	0003.CSV	1400.13	0.00958471
PSB913-4_map4	0003.CSV	1403.98	0.0102743
PSB913-4_map4	0003.CSV	1407.84	0.011079
PSB913-4_map4	0003.CSV	1411.7	0.0118057
PSB913-4_map4	0003.CSV	1415.55	0.0123245
PSB913-4_map4	0003.CSV	1419.41	0.0132762
PSB913-4_map4	0003.CSV	1423.27	0.0141114
PSB913-4_map4	0003.CSV	1427.12	0.0145472
PSB913-4_map4	0003.CSV	1430.98	0.0148575
PSB913-4_map4	0003.CSV	1434.84	0.0149722
PSB913-4_map4	0003.CSV	1438.7	0.0141712
PSB913-4_map4	0003.CSV	1442.55	0.0122232
PSB913-4_map4	0003.CSV	1446.41	0.00946813
PSB913-4_map4	0003.CSV	1450.27	0.00663001
PSB913-4_map4	0003.CSV	1454.12	0.00446964
PSB913-4_map4	0003.CSV	1457.98	0.00290668
PSB913-4_map4	0003.CSV	1461.84	0.00171479
PSB913-4_map4	0003.CSV	1465.7	0.000184463
PSB913-4_map4	0003.CSV	1469.55	-0.00144958
PSB913-4_map4	0003.CSV	1473.41	-0.00218835
PSB913-4_map4	0003.CSV	1477.27	-0.00232867
PSB913-4_map4	0003.CSV	1481.12	-0.00263344
PSB913-4_map4	0003.CSV	1484.98	-0.00292981
PSB913-4_map4	0003.CSV	1488.84	-0.00268495
PSB913-4_map4	0003.CSV	1492.7	-0.00255262
PSB913-4_map4	0003.CSV	1496.55	-0.00280243
PSB913-4_map4	0003.CSV	1500.41	-0.00300001
PSB913-4_map4	0003.CSV	1504.27	-0.00359497
PSB913-4_map4	0003.CSV	1508.12	-0.00345269
PSB913-4_map4	0003.CSV	1511.98	-0.00351261
PSB913-4_map4	0003.CSV	1515.84	-0.00403262
PSB913-4_map4	0003.CSV	1519.7	-0.00446999
PSB913-4_map4	0003.CSV	1523.55	-0.00458391
PSB913-4_map4	0003.CSV	1527.41	-0.00485998
PSB913-4_map4	0003.CSV	1531.27	-0.00542991
PSB913-4_map4	0003.CSV	1535.12	-0.00581875
PSB913-4_map4	0003.CSV	1538.98	-0.00614186
PSB913-4_map4	0003.CSV	1542.84	-0.00572968
PSB913-4_map4	0003.CSV	1546.7	-0.00616698
PSB913-4_map4	0003.CSV	1550.55	-0.00691359
PSB913-4_map4	0003.CSV	1554.41	-0.00743372
PSB913-4_map4	0003.CSV	1558.27	-0.00750967
PSB913-4_map4	0003.CSV	1562.12	-0.00768933
PSB913-4_map4	0003.CSV	1565.98	-0.00809367
PSB913-4_map4	0003.CSV	1569.84	-0.00819458
PSB913-4_map4	0003.CSV	1573.69	-0.00838484
PSB913-4_map4	0003.CSV	1577.55	-0.0085096
PSB913-4_map4	0003.CSV	1581.41	-0.00889607
PSB913-4_map4	0003.CSV	1585.27	-0.0093012
PSB913-4_map4	0003.CSV	1589.12	-0.00957325
PSB913-4_map4	0003.CSV	1592.98	-0.0096651
PSB913-4_map4	0003.CSV	1596.84	-0.00967074
PSB913-4_map4	0003.CSV	1600.69	-0.00970094
PSB913-4_map4	0003.CSV	1604.55	-0.00973114
PSB913-4_map4	0003.CSV	1608.41	-0.00971422
PSB913-4_map4	0003.CSV	1612.27	-0.00982142
PSB913-4_map4	0003.CSV	1616.12	-0.00990985
PSB913-4_map4	0003.CSV	1619.98	-0.00987497
PSB913-4_map4	0003.CSV	1623.84	-0.00988572
PSB913-4_map4	0003.CSV	1627.69	-0.00986094
PSB913-4_map4	0003.CSV	1631.55	-0.0101815
PSB913-4_map4	0003.CSV	1635.41	-0.0101036
PSB913-4_map4	0003.CSV	1639.27	-0.00979813
PSB913-4_map4	0003.CSV	1643.12	-0.0102544
PSB913-4_map4	0003.CSV	1646.98	-0.0104344
PSB913-4_map4	0003.CSV	1650.84	-0.0101975
PSB913-4_map4	0003.CSV	1654.69	-0.00980225
PSB913-4_map4	0003.CSV	1658.55	-0.0101154
PSB913-4_map4	0003.CSV	1662.41	-0.0103553
PSB913-4_map4	0003.CSV	1666.27	-0.0105336
PSB913-4_map4	0003.CSV	1670.12	-0.0105876
PSB913-4_map4	0003.CSV	1673.98	-0.0103383
PSB913-4_map4	0003.CSV	1677.84	-0.0105451
PSB913-4_map4	0003.CSV	1681.69	-0.0108143
PSB913-4_map4	0003.CSV	1685.55	-0.0103246
PSB913-4_map4	0003.CSV	1689.41	-0.0102589
PSB913-4_map4	0003.CSV	1693.27	-0.0107548
PSB913-4_map4	0003.CSV	1697.12	-0.010741
PSB913-4_map4	0003.CSV	1700.98	-0.010117
PSB913-4_map4	0003.CSV	1704.84	-0.0100978
PSB913-4_map4	0003.CSV	1708.69	-0.0101719
PSB913-4_map4	0003.CSV	1712.55	-0.0103706
PSB913-4_map4	0003.CSV	1716.41	-0.00975466
PSB913-4_map4	0003.CSV	1720.27	-0.00887218
PSB913-4_map4	0003.CSV	1724.12	-0.00899929
[truncated: 128,314 more rows]

## Sheet: PSB913-4_map5
Map	Select spectrum number	Wavenumbers	Absrobance
PSB913-4_map5	0001.CSV	674.992	0.0239595
PSB913-4_map5	0001.CSV	678.849	0.0242403
PSB913-4_map5	0001.CSV	682.706	0.02623
PSB913-4_map5	0001.CSV	686.563	0.0282482
PSB913-4_map5	0001.CSV	690.42	0.0331882
PSB913-4_map5	0001.CSV	694.277	0.04386
PSB913-4_map5	0001.CSV	698.134	0.0547247
PSB913-4_map5	0001.CSV	701.991	0.0465312
PSB913-4_map5	0001.CSV	705.849	0.0401448
PSB913-4_map5	0001.CSV	709.706	0.0529408
PSB913-4_map5	0001.CSV	713.563	0.0506656
PSB913-4_map5	0001.CSV	717.42	0.0247121
PSB913-4_map5	0001.CSV	721.277	0.0117909
PSB913-4_map5	0001.CSV	725.134	0.0109551
PSB913-4_map5	0001.CSV	728.991	0.0128568
PSB913-4_map5	0001.CSV	732.848	0.0145323
PSB913-4_map5	0001.CSV	736.705	0.0170509
PSB913-4_map5	0001.CSV	740.562	0.0184955
PSB913-4_map5	0001.CSV	744.42	0.0196876
PSB913-4_map5	0001.CSV	748.277	0.0197589
PSB913-4_map5	0001.CSV	752.134	0.0201399
PSB913-4_map5	0001.CSV	755.991	0.0200738
PSB913-4_map5	0001.CSV	759.848	0.0206211
PSB913-4_map5	0001.CSV	763.705	0.0204798
PSB913-4_map5	0001.CSV	767.562	0.0205545
PSB913-4_map5	0001.CSV	771.419	0.0201586
PSB913-4_map5	0001.CSV	775.276	0.0203134
PSB913-4_map5	0001.CSV	779.133	0.0201929
PSB913-4_map5	0001.CSV	782.99	0.0207324
PSB913-4_map5	0001.CSV	786.848	0.0211067
PSB913-4_map5	0001.CSV	790.705	0.0216974
PSB913-4_map5	0001.CSV	794.562	0.0220438
PSB913-4_map5	0001.CSV	798.419	0.0226768
PSB913-4_map5	0001.CSV	802.276	0.0230245
PSB913-4_map5	0001.CSV	806.133	0.0240226
PSB913-4_map5	0001.CSV	809.99	0.0250578
PSB913-4_map5	0001.CSV	813.847	0.0267212
PSB913-4_map5	0001.CSV	817.704	0.0283803
PSB913-4_map5	0001.CSV	821.562	0.0306495
PSB913-4_map5	0001.CSV	825.419	0.0335335
PSB913-4_map5	0001.CSV	829.276	0.0375633
PSB913-4_map5	0001.CSV	833.133	0.0429297
PSB913-4_map5	0001.CSV	836.99	0.051441
PSB913-4_map5	0001.CSV	840.847	0.0627758
PSB913-4_map5	0001.CSV	844.704	0.0741284
PSB913-4_map5	0001.CSV	848.561	0.0901067
PSB913-4_map5	0001.CSV	852.418	0.105959
PSB913-4_map5	0001.CSV	856.275	0.10302
PSB913-4_map5	0001.CSV	860.132	0.0847763
PSB913-4_map5	0001.CSV	863.99	0.0633504
PSB913-4_map5	0001.CSV	867.847	0.0443477
PSB913-4_map5	0001.CSV	871.704	0.0295318
PSB913-4_map5	0001.CSV	875.561	0.0193984
PSB913-4_map5	0001.CSV	879.418	0.014405
PSB913-4_map5	0001.CSV	883.275	0.0129503
PSB913-4_map5	0001.CSV	887.132	0.012622
PSB913-4_map5	0001.CSV	890.989	0.012852
PSB913-4_map5	0001.CSV	894.846	0.0133721
PSB913-4_map5	0001.CSV	898.703	0.014011
PSB913-4_map5	0001.CSV	902.561	0.0146962
PSB913-4_map5	0001.CSV	906.418	0.0153613
PSB913-4_map5	0001.CSV	910.275	0.0155389
PSB913-4_map5	0001.CSV	914.132	0.0153741
PSB913-4_map5	0001.CSV	917.989	0.0155501
PSB913-4_map5	0001.CSV	921.846	0.0158081
PSB913-4_map5	0001.CSV	925.703	0.016213
PSB913-4_map5	0001.CSV	929.56	0.0163888
PSB913-4_map5	0001.CSV	933.417	0.0167324
PSB913-4_map5	0001.CSV	937.274	0.0170191
PSB913-4_map5	0001.CSV	941.131	0.0173422
PSB913-4_map5	0001.CSV	944.989	0.0173907
PSB913-4_map5	0001.CSV	948.846	0.0176998
PSB913-4_map5	0001.CSV	952.703	0.0179948
PSB913-4_map5	0001.CSV	956.56	0.0184288
PSB913-4_map5	0001.CSV	960.417	0.0185284
PSB913-4_map5	0001.CSV	964.274	0.0189372
PSB913-4_map5	0001.CSV	968.131	0.0191747
PSB913-4_map5	0001.CSV	971.988	0.0196104
PSB913-4_map5	0001.CSV	975.845	0.0198138
PSB913-4_map5	0001.CSV	979.702	0.0202569
PSB913-4_map5	0001.CSV	983.559	0.0205296
PSB913-4_map5	0001.CSV	987.417	0.0210412
PSB913-4_map5	0001.CSV	991.274	0.0211243
PSB913-4_map5	0001.CSV	995.131	0.0214921
PSB913-4_map5	0001.CSV	998.988	0.0215736
PSB913-4_map5	0001.CSV	1002.85	0.0219171
PSB913-4_map5	0001.CSV	1006.7	0.0219532
PSB913-4_map5	0001.CSV	1010.56	0.0223941
PSB913-4_map5	0001.CSV	1014.42	0.0225544
PSB913-4_map5	0001.CSV	1018.27	0.0231161
PSB913-4_map5	0001.CSV	1022.13	0.0233035
PSB913-4_map5	0001.CSV	1025.99	0.0239992
PSB913-4_map5	0001.CSV	1029.85	0.0242663
PSB913-4_map5	0001.CSV	1033.7	0.0248858
PSB913-4_map5	0001.CSV	1037.56	0.0250502
PSB913-4_map5	0001.CSV	1041.42	0.0256284
PSB913-4_map5	0001.CSV	1045.27	0.0257222
PSB913-4_map5	0001.CSV	1049.13	0.0265199
PSB913-4_map5	0001.CSV	1052.99	0.0270749
PSB913-4_map5	0001.CSV	1056.84	0.0283934
PSB913-4_map5	0001.CSV	1060.7	0.0292608
PSB913-4_map5	0001.CSV	1064.56	0.0304995
PSB913-4_map5	0001.CSV	1068.42	0.0307588
PSB913-4_map5	0001.CSV	1072.27	0.0313672
PSB913-4_map5	0001.CSV	1076.13	0.0324096
PSB913-4_map5	0001.CSV	1079.99	0.0364832
PSB913-4_map5	0001.CSV	1083.84	0.0354336
PSB913-4_map5	0001.CSV	1087.7	0.0289458
PSB913-4_map5	0001.CSV	1091.56	0.0256136
PSB913-4_map5	0001.CSV	1095.41	0.0260545
PSB913-4_map5	0001.CSV	1099.27	0.0262556
PSB913-4_map5	0001.CSV	1103.13	0.0270232
PSB913-4_map5	0001.CSV	1106.99	0.0274927
PSB913-4_map5	0001.CSV	1110.84	0.0285874
PSB913-4_map5	0001.CSV	1114.7	0.0288939
PSB913-4_map5	0001.CSV	1118.56	0.029455
PSB913-4_map5	0001.CSV	1122.41	0.02917
PSB913-4_map5	0001.CSV	1126.27	0.0293508
PSB913-4_map5	0001.CSV	1130.13	0.0289994
PSB913-4_map5	0001.CSV	1133.99	0.0292557
PSB913-4_map5	0001.CSV	1137.84	0.0289542
PSB913-4_map5	0001.CSV	1141.7	0.0292154
PSB913-4_map5	0001.CSV	1145.56	0.0289307
PSB913-4_map5	0001.CSV	1149.41	0.0293903
PSB913-4_map5	0001.CSV	1153.27	0.0293285
PSB913-4_map5	0001.CSV	1157.13	0.0299029
PSB913-4_map5	0001.CSV	1160.99	0.0298069
PSB913-4_map5	0001.CSV	1164.84	0.0302226
PSB913-4_map5	0001.CSV	1168.7	0.0299689
PSB913-4_map5	0001.CSV	1172.56	0.0302727
PSB913-4_map5	0001.CSV	1176.41	0.0299381
PSB913-4_map5	0001.CSV	1180.27	0.0302927
PSB913-4_map5	0001.CSV	1184.13	0.030089
PSB913-4_map5	0001.CSV	1187.99	0.0305234
PSB913-4_map5	0001.CSV	1191.84	0.0303612
PSB913-4_map5	0001.CSV	1195.7	0.0309163
PSB913-4_map5	0001.CSV	1199.56	0.0308967
PSB913-4_map5	0001.CSV	1203.41	0.0315228
PSB913-4_map5	0001.CSV	1207.27	0.0315644
PSB913-4_map5	0001.CSV	1211.13	0.0323071
PSB913-4_map5	0001.CSV	1214.98	0.0324593
PSB913-4_map5	0001.CSV	1218.84	0.0333587
PSB913-4_map5	0001.CSV	1222.7	0.0336574
PSB913-4_map5	0001.CSV	1226.56	0.0346414
PSB913-4_map5	0001.CSV	1230.41	0.0350854
PSB913-4_map5	0001.CSV	1234.27	0.0362601
PSB913-4_map5	0001.CSV	1238.13	0.036834
PSB913-4_map5	0001.CSV	1241.98	0.0380642
PSB913-4_map5	0001.CSV	1245.84	0.0386462
PSB913-4_map5	0001.CSV	1249.7	0.0398565
PSB913-4_map5	0001.CSV	1253.56	0.0402854
PSB913-4_map5	0001.CSV	1257.41	0.0412464
PSB913-4_map5	0001.CSV	1261.27	0.0415273
PSB913-4_map5	0001.CSV	1265.13	0.0424366
PSB913-4_map5	0001.CSV	1268.98	0.0427114
PSB913-4_map5	0001.CSV	1272.84	0.0436742
PSB913-4_map5	0001.CSV	1276.7	0.0438478
PSB913-4_map5	0001.CSV	1280.56	0.0445532
PSB913-4_map5	0001.CSV	1284.41	0.0445485
PSB913-4_map5	0001.CSV	1288.27	0.0450823
PSB913-4_map5	0001.CSV	1292.13	0.0448241
PSB913-4_map5	0001.CSV	1295.98	0.0451546
PSB913-4_map5	0001.CSV	1299.84	0.0449703
PSB913-4_map5	0001.CSV	1303.7	0.0456386
PSB913-4_map5	0001.CSV	1307.56	0.0458819
PSB913-4_map5	0001.CSV	1311.41	0.0468614
PSB913-4_map5	0001.CSV	1315.27	0.0473107
PSB913-4_map5	0001.CSV	1319.13	0.0485748
PSB913-4_map5	0001.CSV	1322.98	0.0491069
PSB913-4_map5	0001.CSV	1326.84	0.0502991
PSB913-4_map5	0001.CSV	1330.7	0.0510034
PSB913-4_map5	0001.CSV	1334.56	0.0524649
PSB913-4_map5	0001.CSV	1338.41	0.0535987
PSB913-4_map5	0001.CSV	1342.27	0.0556807
PSB913-4_map5	0001.CSV	1346.13	0.0567503
PSB913-4_map5	0001.CSV	1349.98	0.0586869
PSB913-4_map5	0001.CSV	1353.84	0.0600963
PSB913-4_map5	0001.CSV	1357.7	0.0621613
PSB913-4_map5	0001.CSV	1361.56	0.0638331
PSB913-4_map5	0001.CSV	1365.41	0.0666068
PSB913-4_map5	0001.CSV	1369.27	0.0683052
PSB913-4_map5	0001.CSV	1373.13	0.0711585
PSB913-4_map5	0001.CSV	1376.98	0.0734382
PSB913-4_map5	0001.CSV	1380.84	0.0759828
PSB913-4_map5	0001.CSV	1384.7	0.0777407
PSB913-4_map5	0001.CSV	1388.56	0.0808354
PSB913-4_map5	0001.CSV	1392.41	0.0826103
PSB913-4_map5	0001.CSV	1396.27	0.0855637
PSB913-4_map5	0001.CSV	1400.13	0.0877533
PSB913-4_map5	0001.CSV	1403.98	0.0904139
PSB913-4_map5	0001.CSV	1407.84	0.0922185
PSB913-4_map5	0001.CSV	1411.7	0.0944914
PSB913-4_map5	0001.CSV	1415.55	0.0955967
PSB913-4_map5	0001.CSV	1419.41	0.0981439
PSB913-4_map5	0001.CSV	1423.27	0.0995245
PSB913-4_map5	0001.CSV	1427.12	0.101558
PSB913-4_map5	0001.CSV	1430.98	0.10279
PSB913-4_map5	0001.CSV	1434.84	0.105056
PSB913-4_map5	0001.CSV	1438.7	0.106172
PSB913-4_map5	0001.CSV	1442.55	0.107058
PSB913-4_map5	0001.CSV	1446.41	0.105721
PSB913-4_map5	0001.CSV	1450.27	0.103897
PSB913-4_map5	0001.CSV	1454.12	0.10049
PSB913-4_map5	0001.CSV	1457.98	0.0970377
PSB913-4_map5	0001.CSV	1461.84	0.0938824
PSB913-4_map5	0001.CSV	1465.7	0.0923634
PSB913-4_map5	0001.CSV	1469.55	0.089041
PSB913-4_map5	0001.CSV	1473.41	0.0844989
PSB913-4_map5	0001.CSV	1477.27	0.0782191
PSB913-4_map5	0001.CSV	1481.12	0.0748867
PSB913-4_map5	0001.CSV	1484.98	0.0711503
PSB913-4_map5	0001.CSV	1488.84	0.067491
PSB913-4_map5	0001.CSV	1492.7	0.0629852
PSB913-4_map5	0001.CSV	1496.55	0.0599315
PSB913-4_map5	0001.CSV	1500.41	0.0553897
PSB913-4_map5	0001.CSV	1504.27	0.0528686
PSB913-4_map5	0001.CSV	1508.12	0.046798
PSB913-4_map5	0001.CSV	1511.98	0.0433394
PSB913-4_map5	0001.CSV	1515.84	0.0399435
PSB913-4_map5	0001.CSV	1519.7	0.0362493
PSB913-4_map5	0001.CSV	1523.55	0.0309289
PSB913-4_map5	0001.CSV	1527.41	0.0279386
PSB913-4_map5	0001.CSV	1531.27	0.0245713
PSB913-4_map5	0001.CSV	1535.12	0.0222355
PSB913-4_map5	0001.CSV	1538.98	0.0193296
PSB913-4_map5	0001.CSV	1542.84	0.0160278
PSB913-4_map5	0001.CSV	1546.7	0.0130353
PSB913-4_map5	0001.CSV	1550.55	0.0112425
PSB913-4_map5	0001.CSV	1554.41	0.00893002
PSB913-4_map5	0001.CSV	1558.27	0.00699624
PSB913-4_map5	0001.CSV	1562.12	0.00480946
PSB913-4_map5	0001.CSV	1565.98	0.00381744
PSB913-4_map5	0001.CSV	1569.84	0.00226008
PSB913-4_map5	0001.CSV	1573.69	0.00108045
PSB913-4_map5	0001.CSV	1577.55	-0.000587169
PSB913-4_map5	0001.CSV	1581.41	-0.00193373
PSB913-4_map5	0001.CSV	1585.27	-0.0033441
PSB913-4_map5	0001.CSV	1589.12	-0.00420637
PSB913-4_map5	0001.CSV	1592.98	-0.00479461
PSB913-4_map5	0001.CSV	1596.84	-0.00493487
PSB913-4_map5	0001.CSV	1600.69	-0.00519644
PSB913-4_map5	0001.CSV	1604.55	-0.00535465
PSB913-4_map5	0001.CSV	1608.41	-0.00573305
PSB913-4_map5	0001.CSV	1612.27	-0.00602486
PSB913-4_map5	0001.CSV	1616.12	-0.00632549
PSB913-4_map5	0001.CSV	1619.98	-0.00622676
PSB913-4_map5	0001.CSV	1623.84	-0.00642599
PSB913-4_map5	0001.CSV	1627.69	-0.00655789
PSB913-4_map5	0001.CSV	1631.55	-0.00698543
PSB913-4_map5	0001.CSV	1635.41	-0.00700799
PSB913-4_map5	0001.CSV	1639.27	-0.00694927
PSB913-4_map5	0001.CSV	1643.12	-0.00734094
PSB913-4_map5	0001.CSV	1646.98	-0.00759283
PSB913-4_map5	0001.CSV	1650.84	-0.00745912
PSB913-4_map5	0001.CSV	1654.69	-0.00726966
PSB913-4_map5	0001.CSV	1658.55	-0.00749179
PSB913-4_map5	0001.CSV	1662.41	-0.0078151
PSB913-4_map5	0001.CSV	1666.27	-0.00803217
PSB913-4_map5	0001.CSV	1670.12	-0.00813507
PSB913-4_map5	0001.CSV	1673.98	-0.00807491
PSB913-4_map5	0001.CSV	1677.84	-0.00832488
PSB913-4_map5	0001.CSV	1681.69	-0.00866351
PSB913-4_map5	0001.CSV	1685.55	-0.00839411
PSB913-4_map5	0001.CSV	1689.41	-0.008436
PSB913-4_map5	0001.CSV	1693.27	-0.00882094
PSB913-4_map5	0001.CSV	1697.12	-0.00895557
PSB913-4_map5	0001.CSV	1700.98	-0.00835621
PSB913-4_map5	0001.CSV	1704.84	-0.00835036
PSB913-4_map5	0001.CSV	1708.69	-0.00812762
PSB913-4_map5	0001.CSV	1712.55	-0.00821103
PSB913-4_map5	0001.CSV	1716.41	-0.00702084
PSB913-4_map5	0001.CSV	1720.27	-0.00574171
PSB913-4_map5	0001.CSV	1724.12	-0.00558215
PSB913-4_map5	0001.CSV	1727.98	-0.00581829
PSB913-4_map5	0001.CSV	1731.84	-0.00576408
PSB913-4_map5	0001.CSV	1735.69	-0.00598473
PSB913-4_map5	0001.CSV	1739.55	-0.00651781
PSB913-4_map5	0001.CSV	1743.41	-0.00770603
PSB913-4_map5	0001.CSV	1747.27	-0.00842475
PSB913-4_map5	0001.CSV	1751.12	-0.00929173
PSB913-4_map5	0001.CSV	1754.98	-0.0099616
PSB913-4_map5	0001.CSV	1758.84	-0.0106803
PSB913-4_map5	0001.CSV	1762.69	-0.0107971
PSB913-4_map5	0001.CSV	1766.55	-0.0111973
PSB913-4_map5	0001.CSV	1770.41	-0.0107813
PSB913-4_map5	0001.CSV	1774.26	-0.00963493
PSB913-4_map5	0001.CSV	1778.12	-0.00833095
PSB913-4_map5	0001.CSV	1781.98	-0.00735391
PSB913-4_map5	0001.CSV	1785.84	-0.00678395
PSB913-4_map5	0001.CSV	1789.69	-0.00749511
PSB913-4_map5	0001.CSV	1793.55	-0.00845407
PSB913-4_map5	0001.CSV	1797.41	-0.00956697
PSB913-4_map5	0001.CSV	1801.26	-0.0101782
PSB913-4_map5	0001.CSV	1805.12	-0.0109339
PSB913-4_map5	0001.CSV	1808.98	-0.0111192
PSB913-4_map5	0001.CSV	1812.84	-0.0111855
PSB913-4_map5	0001.CSV	1816.69	-0.0111021
PSB913-4_map5	0001.CSV	1820.55	-0.0113171
PSB913-4_map5	0001.CSV	1824.41	-0.011186
PSB913-4_map5	0001.CSV	1828.26	-0.0111702
PSB913-4_map5	0001.CSV	1832.12	-0.0108433
PSB913-4_map5	0001.CSV	1835.98	-0.0109799
PSB913-4_map5	0001.CSV	1839.84	-0.0108911
PSB913-4_map5	0001.CSV	1843.69	-0.0109186
PSB913-4_map5	0001.CSV	1847.55	-0.0104939
PSB913-4_map5	0001.CSV	1851.41	-0.0107121
PSB913-4_map5	0001.CSV	1855.26	-0.0106153
PSB913-4_map5	0001.CSV	1859.12	-0.0106924
PSB913-4_map5	0001.CSV	1862.98	-0.0105609
PSB913-4_map5	0001.CSV	1866.84	-0.0105935
PSB913-4_map5	0001.CSV	1870.69	-0.0101051
PSB913-4_map5	0001.CSV	1874.55	-0.0103037
PSB913-4_map5	0001.CSV	1878.41	-0.0101928
PSB913-4_map5	0001.CSV	1882.26	-0.0102412
PSB913-4_map5	0001.CSV	1886.12	-0.0100502
PSB913-4_map5	0001.CSV	1889.98	-0.0100635
PSB913-4_map5	0001.CSV	1893.83	-0.00979855
PSB913-4_map5	0001.CSV	1897.69	-0.0098728
PSB913-4_map5	0001.CSV	1901.55	-0.00975339
PSB913-4_map5	0001.CSV	1905.41	-0.00989647
PSB913-4_map5	0001.CSV	1909.26	-0.00965768
PSB913-4_map5	0001.CSV	1913.12	-0.00978297
PSB913-4_map5	0001.CSV	1916.98	-0.00964815
PSB913-4_map5	0001.CSV	1920.83	-0.00964232
PSB913-4_map5	0001.CSV	1924.69	-0.00940332
PSB913-4_map5	0001.CSV	1928.55	-0.00950107
PSB913-4_map5	0001.CSV	1932.4	-0.00933049
PSB913-4_map5	0001.CSV	1936.26	-0.00947244
PSB913-4_map5	0001.CSV	1940.12	-0.00936382
PSB913-4_map5	0001.CSV	1943.98	-0.00930976
PSB913-4_map5	0001.CSV	1947.83	-0.00907944
PSB913-4_map5	0001.CSV	1951.69	-0.00923461
PSB913-4_map5	0001.CSV	1955.55	-0.00910365
PSB913-4_map5	0001.CSV	1959.4	-0.00918323
PSB913-4_map5	0001.CSV	1963.26	-0.00906987
PSB913-4_map5	0001.CSV	1967.12	-0.00911718
PSB913-4_map5	0001.CSV	1970.98	-0.00897322
PSB913-4_map5	0001.CSV	1974.83	-0.00910972
PSB913-4_map5	0001.CSV	1978.69	-0.00897494
PSB913-4_map5	0001.CSV	1982.55	-0.00908123
PSB913-4_map5	0001.CSV	1986.4	-0.00901834
PSB913-4_map5	0001.CSV	1990.26	-0.00912873
PSB913-4_map5	0001.CSV	1994.12	-0.00894528
PSB913-4_map5	0001.CSV	1997.98	-0.00905679
PSB913-4_map5	0001.CSV	2001.83	-0.00898695
PSB913-4_map5	0001.CSV	2005.69	-0.00908048
PSB913-4_map5	0001.CSV	2009.55	-0.00895807
PSB913-4_map5	0001.CSV	2013.4	-0.00906023
PSB913-4_map5	0001.CSV	2017.26	-0.00892437
PSB913-4_map5	0001.CSV	2021.12	-0.00899776
PSB913-4_map5	0001.CSV	2024.97	-0.00895972
PSB913-4_map5	0001.CSV	2028.83	-0.00902067
PSB913-4_map5	0001.CSV	2032.69	-0.00890948
PSB913-4_map5	0001.CSV	2036.55	-0.00904264
PSB913-4_map5	0001.CSV	2040.4	-0.00903528
PSB913-4_map5	0001.CSV	2044.26	-0.0091273
PSB913-4_map5	0001.CSV	2048.12	-0.0090404
PSB913-4_map5	0001.CSV	2051.97	-0.00905887
PSB913-4_map5	0001.CSV	2055.83	-0.00893518
PSB913-4_map5	0001.CSV	2059.69	-0.00896167
PSB913-4_map5	0001.CSV	2063.55	-0.008937
PSB913-4_map5	0001.CSV	2067.4	-0.00900247
PSB913-4_map5	0001.CSV	2071.26	-0.0089554
PSB913-4_map5	0001.CSV	2075.12	-0.0089938
PSB913-4_map5	0001.CSV	2078.97	-0.00894356
PSB913-4_map5	0001.CSV	2082.83	-0.00900497
PSB913-4_map5	0001.CSV	2086.69	-0.00896758
PSB913-4_map5	0001.CSV	2090.55	-0.00900516
PSB913-4_map5	0001.CSV	2094.4	-0.00892311
PSB913-4_map5	0001.CSV	2098.26	-0.00893492
PSB913-4_map5	0001.CSV	2102.12	-0.00891561
PSB913-4_map5	0001.CSV	2105.97	-0.00889253
PSB913-4_map5	0001.CSV	2109.83	-0.00881705
PSB913-4_map5	0001.CSV	2113.69	-0.00883354
PSB913-4_map5	0001.CSV	2117.55	-0.00884851
PSB913-4_map5	0001.CSV	2121.4	-0.00888334
PSB913-4_map5	0001.CSV	2125.26	-0.00879971
PSB913-4_map5	0001.CSV	2129.12	-0.00873551
PSB913-4_map5	0001.CSV	2132.97	-0.00871781
PSB913-4_map5	0001.CSV	2136.83	-0.00868254
PSB913-4_map5	0001.CSV	2140.69	-0.00864285
PSB913-4_map5	0001.CSV	2144.55	-0.00861661
PSB913-4_map5	0001.CSV	2148.4	-0.0085518
PSB913-4_map5	0001.CSV	2152.26	-0.0084694
PSB913-4_map5	0001.CSV	2156.12	-0.00849868
PSB913-4_map5	0001.CSV	2159.97	-0.00849241
PSB913-4_map5	0001.CSV	2163.83	-0.00845722
PSB913-4_map5	0001.CSV	2167.69	-0.00834412
PSB913-4_map5	0001.CSV	2171.55	-0.00830121
PSB913-4_map5	0001.CSV	2175.4	-0.00825502
PSB913-4_map5	0001.CSV	2179.26	-0.00830375
PSB913-4_map5	0001.CSV	2183.12	-0.00826311
PSB913-4_map5	0001.CSV	2186.97	-0.00828441
PSB913-4_map5	0001.CSV	2190.83	-0.00820615
PSB913-4_map5	0001.CSV	2194.69	-0.00821487
PSB913-4_map5	0001.CSV	2198.55	-0.00814437
PSB913-4_map5	0001.CSV	2202.4	-0.00818986
PSB913-4_map5	0001.CSV	2206.26	-0.0081804
PSB913-4_map5	0001.CSV	2210.12	-0.00828707
PSB913-4_map5	0001.CSV	2213.97	-0.00827072
PSB913-4_map5	0001.CSV	2217.83	-0.00835631
PSB913-4_map5	0001.CSV	2221.69	-0.00835868
PSB913-4_map5	0001.CSV	2225.54	-0.00852412
PSB913-4_map5	0001.CSV	2229.4	-0.00853711
PSB913-4_map5	0001.CSV	2233.26	-0.00866218
PSB913-4_map5	0001.CSV	2237.12	-0.00863974
PSB913-4_map5	0001.CSV	2240.97	-0.00884815
PSB913-4_map5	0001.CSV	2244.83	-0.00891688
PSB913-4_map5	0001.CSV	2248.69	-0.00906912
PSB913-4_map5	0001.CSV	2252.54	-0.00907276
PSB913-4_map5	0001.CSV	2256.4	-0.00928298
PSB913-4_map5	0001.CSV	2260.26	-0.00930941
PSB913-4_map5	0001.CSV	2264.11	-0.00951501
PSB913-4_map5	0001.CSV	2267.97	-0.00949565
PSB913-4_map5	0001.CSV	2271.83	-0.00961147
PSB913-4_map5	0001.CSV	2275.69	-0.00957478
PSB913-4_map5	0001.CSV	2279.54	-0.0097704
PSB913-4_map5	0001.CSV	2283.4	-0.00974212
PSB913-4_map5	0001.CSV	2287.26	-0.00973635
PSB913-4_map5	0001.CSV	2291.11	-0.00952214
PSB913-4_map5	0001.CSV	2294.97	-0.00961344
PSB913-4_map5	0001.CSV	2298.83	-0.00949689
PSB913-4_map5	0001.CSV	2302.69	-0.00953786
PSB913-4_map5	0001.CSV	2306.54	-0.00910757
PSB913-4_map5	0001.CSV	2310.4	-0.00913684
PSB913-4_map5	0001.CSV	2314.26	-0.00885341
PSB913-4_map5	0001.CSV	2318.11	-0.00953086
PSB913-4_map5	0001.CSV	2321.97	-0.00944641
PSB913-4_map5	0001.CSV	2325.83	-0.0110076
PSB913-4_map5	0001.CSV	2329.69	-0.0107847
PSB913-4_map5	0001.CSV	2333.54	-0.0128994
PSB913-4_map5	0001.CSV	2337.4	-0.0128413
PSB913-4_map5	0001.CSV	2341.26	-0.0149192
PSB913-4_map5	0001.CSV	2345.11	-0.0106329
PSB913-4_map5	0001.CSV	2348.97	-0.0110712
PSB913-4_map5	0001.CSV	2352.83	-0.013285
PSB913-4_map5	0001.CSV	2356.69	-0.0268386
PSB913-4_map5	0001.CSV	2360.54	-0.0340941
PSB913-4_map5	0001.CSV	2364.4	-0.0308546
PSB913-4_map5	0001.CSV	2368.26	-0.0164115
PSB913-4_map5	0001.CSV	2372.11	-0.0124178
PSB913-4_map5	0001.CSV	2375.97	-0.00960758
PSB913-4_map5	0001.CSV	2379.83	-0.00926167
PSB913-4_map5	0001.CSV	2383.69	-0.00905186
PSB913-4_map5	0001.CSV	2387.54	-0.0094727
PSB913-4_map5	0001.CSV	2391.4	-0.00959134
PSB913-4_map5	0001.CSV	2395.26	-0.00986036
PSB913-4_map5	0001.CSV	2399.11	-0.00980413
PSB913-4_map5	0001.CSV	2402.97	-0.00996834
PSB913-4_map5	0001.CSV	2406.83	-0.00982269
PSB913-4_map5	0001.CSV	2410.68	-0.00987762
PSB913-4_map5	0001.CSV	2414.54	-0.00966662
PSB913-4_map5	0001.CSV	2418.4	-0.00973901
PSB913-4_map5	0001.CSV	2422.26	-0.00954651
PSB913-4_map5	0001.CSV	2426.11	-0.00959805
PSB913-4_map5	0001.CSV	2429.97	-0.00935238
PSB913-4_map5	0001.CSV	2433.83	-0.00941953
PSB913-4_map5	0001.CSV	2437.68	-0.00919786
PSB913-4_map5	0001.CSV	2441.54	-0.0092099
PSB913-4_map5	0001.CSV	2445.4	-0.00897092
PSB913-4_map5	0001.CSV	2449.26	-0.00902726
PSB913-4_map5	0001.CSV	2453.11	-0.00883049
PSB913-4_map5	0001.CSV	2456.97	-0.0089508
PSB913-4_map5	0001.CSV	2460.83	-0.00873749
PSB913-4_map5	0001.CSV	2464.68	-0.00873207
PSB913-4_map5	0001.CSV	2468.54	-0.00847756
PSB913-4_map5	0001.CSV	2472.4	-0.00852779
PSB913-4_map5	0001.CSV	2476.26	-0.00826129
PSB913-4_map5	0001.CSV	2480.11	-0.00828379
PSB913-4_map5	0001.CSV	2483.97	-0.00805074
PSB913-4_map5	0001.CSV	2487.83	-0.00808798
PSB913-4_map5	0001.CSV	2491.68	-0.00784705
PSB913-4_map5	0001.CSV	2495.54	-0.00789631
PSB913-4_map5	0001.CSV	2499.4	-0.00775339
PSB913-4_map5	0001.CSV	2503.26	-0.00797964
PSB913-4_map5	0001.CSV	2507.11	-0.00797313
PSB913-4_map5	0001.CSV	2510.97	-0.00814821
PSB913-4_map5	0001.CSV	2514.83	-0.00791044
PSB913-4_map5	0001.CSV	2518.68	-0.00788649
PSB913-4_map5	0001.CSV	2522.54	-0.00775541
PSB913-4_map5	0001.CSV	2526.4	-0.00802729
PSB913-4_map5	0001.CSV	2530.26	-0.00807055
PSB913-4_map5	0001.CSV	2534.11	-0.00836193
PSB913-4_map5	0001.CSV	2537.97	-0.00835894
PSB913-4_map5	0001.CSV	2541.83	-0.00857886
PSB913-4_map5	0001.CSV	2545.68	-0.00853468
PSB913-4_map5	0001.CSV	2549.54	-0.00876432
PSB913-4_map5	0001.CSV	2553.4	-0.00876906
PSB913-4_map5	0001.CSV	2557.26	-0.00897154
PSB913-4_map5	0001.CSV	2561.11	-0.00897001
PSB913-4_map5	0001.CSV	2564.97	-0.00923017
PSB913-4_map5	0001.CSV	2568.83	-0.00916322
PSB913-4_map5	0001.CSV	2572.68	-0.0093193
PSB913-4_map5	0001.CSV	2576.54	-0.00928615
PSB913-4_map5	0001.CSV	2580.4	-0.009449
PSB913-4_map5	0001.CSV	2584.25	-0.00939207
PSB913-4_map5	0001.CSV	2588.11	-0.0095305
PSB913-4_map5	0001.CSV	2591.97	-0.00943179
PSB913-4_map5	0001.CSV	2595.83	-0.00958713
PSB913-4_map5	0001.CSV	2599.68	-0.00952778
PSB913-4_map5	0001.CSV	2603.54	-0.00965123
PSB913-4_map5	0001.CSV	2607.4	-0.00957316
PSB913-4_map5	0001.CSV	2611.25	-0.00963224
PSB913-4_map5	0001.CSV	2615.11	-0.00948366
PSB913-4_map5	0001.CSV	2618.97	-0.00960566
PSB913-4_map5	0001.CSV	2622.82	-0.00954295
PSB913-4_map5	0001.CSV	2626.68	-0.0096163
PSB913-4_map5	0001.CSV	2630.54	-0.00953374
PSB913-4_map5	0001.CSV	2634.4	-0.00959089
PSB913-4_map5	0001.CSV	2638.25	-0.00948924
PSB913-4_map5	0001.CSV	2642.11	-0.00969459
PSB913-4_map5	0001.CSV	2645.97	-0.0097692
PSB913-4_map5	0001.CSV	2649.82	-0.00990949
PSB913-4_map5	0001.CSV	2653.68	-0.00986431
PSB913-4_map5	0001.CSV	2657.54	-0.0100092
PSB913-4_map5	0001.CSV	2661.4	-0.00994978
PSB913-4_map5	0001.CSV	2665.25	-0.0100124
PSB913-4_map5	0001.CSV	2669.11	-0.00995062
PSB913-4_map5	0001.CSV	2672.97	-0.00999434
PSB913-4_map5	0001.CSV	2676.82	-0.00977487
PSB913-4_map5	0001.CSV	2680.68	-0.00985077
PSB913-4_map5	0001.CSV	2684.54	-0.0100147
PSB913-4_map5	0001.CSV	2688.4	-0.010169
PSB913-4_map5	0001.CSV	2692.25	-0.0100753
PSB913-4_map5	0001.CSV	2696.11	-0.010092
PSB913-4_map5	0001.CSV	2699.97	-0.0100005
PSB913-4_map5	0001.CSV	2703.82	-0.0100795
PSB913-4_map5	0001.CSV	2707.68	-0.0100128
PSB913-4_map5	0001.CSV	2711.54	-0.0101129
PSB913-4_map5	0001.CSV	2715.4	-0.0101235
PSB913-4_map5	0001.CSV	2719.25	-0.010068
PSB913-4_map5	0001.CSV	2723.11	-0.00979081
PSB913-4_map5	0001.CSV	2726.97	-0.00989634
PSB913-4_map5	0001.CSV	2730.82	-0.0100288
PSB913-4_map5	0001.CSV	2734.68	-0.00997957
PSB913-4_map5	0001.CSV	2738.54	-0.00985346
PSB913-4_map5	0001.CSV	2742.4	-0.00991914
PSB913-4_map5	0001.CSV	2746.25	-0.00976687
PSB913-4_map5	0001.CSV	2750.11	-0.00983347
PSB913-4_map5	0001.CSV	2753.97	-0.00998507
PSB913-4_map5	0001.CSV	2757.82	-0.010086
PSB913-4_map5	0001.CSV	2761.68	-0.0100897
PSB913-4_map5	0001.CSV	2765.54	-0.0101526
PSB913-4_map5	0001.CSV	2769.39	-0.00996736
PSB913-4_map5	0001.CSV	2773.25	-0.00970521
PSB913-4_map5	0001.CSV	2777.11	-0.0097056
PSB913-4_map5	0001.CSV	2780.97	-0.00991866
PSB913-4_map5	0001.CSV	2784.82	-0.00977905
PSB913-4_map5	0001.CSV	2788.68	-0.0095258
PSB913-4_map5	0001.CSV	2792.54	-0.00935815
PSB913-4_map5	0001.CSV	2796.39	-0.00934453
PSB913-4_map5	0001.CSV	2800.25	-0.00947731
PSB913-4_map5	0001.CSV	2804.11	-0.00964258
PSB913-4_map5	0001.CSV	2807.97	-0.00937877
PSB913-4_map5	0001.CSV	2811.82	-0.00938487
PSB913-4_map5	0001.CSV	2815.68	-0.00958641
PSB913-4_map5	0001.CSV	2819.54	-0.00956911
PSB913-4_map5	0001.CSV	2823.39	-0.00934498
PSB913-4_map5	0001.CSV	2827.25	-0.00925443
PSB913-4_map5	0001.CSV	2831.11	-0.00896118
PSB913-4_map5	0001.CSV	2834.97	-0.00849316
PSB913-4_map5	0001.CSV	2838.82	-0.00815003
PSB913-4_map5	0001.CSV	2842.68	-0.00811507
PSB913-4_map5	0001.CSV	2846.54	-0.0077874
PSB913-4_map5	0001.CSV	2850.39	-0.00782834
PSB913-4_map5	0001.CSV	2854.25	-0.00829263
PSB913-4_map5	0001.CSV	2858.11	-0.00859163
PSB913-4_map5	0001.CSV	2861.97	-0.00881841
PSB913-4_map5	0001.CSV	2865.82	-0.00902428
PSB913-4_map5	0001.CSV	2869.68	-0.00888055
PSB913-4_map5	0001.CSV	2873.54	-0.00876756
PSB913-4_map5	0001.CSV	2877.39	-0.0089506
PSB913-4_map5	0001.CSV	2881.25	-0.00909644
PSB913-4_map5	0001.CSV	2885.11	-0.00895791
PSB913-4_map5	0001.CSV	2888.97	-0.00877448
PSB913-4_map5	0001.CSV	2892.82	-0.00848006
PSB913-4_map5	0001.CSV	2896.68	-0.00834919
PSB913-4_map5	0001.CSV	2900.54	-0.0082782
PSB913-4_map5	0001.CSV	2904.39	-0.00802664
PSB913-4_map5	0001.CSV	2908.25	-0.0075155
PSB913-4_map5	0001.CSV	2912.11	-0.00685156
PSB913-4_map5	0001.CSV	2915.97	-0.00648961
PSB913-4_map5	0001.CSV	2919.82	-0.00697174
PSB913-4_map5	0001.CSV	2923.68	-0.00783433
PSB913-4_map5	0001.CSV	2927.54	-0.00851258
PSB913-4_map5	0001.CSV	2931.39	-0.00910394
PSB913-4_map5	0001.CSV	2935.25	-0.0097773
PSB913-4_map5	0001.CSV	2939.11	-0.00992782
PSB913-4_map5	0001.CSV	2942.96	-0.00967391
PSB913-4_map5	0001.CSV	2946.82	-0.00963464
PSB913-4_map5	0001.CSV	2950.68	-0.00993767
PSB913-4_map5	0001.CSV	2954.54	-0.0103418
PSB913-4_map5	0001.CSV	2958.39	-0.0107988
PSB913-4_map5	0001.CSV	2962.25	-0.0109195
PSB913-4_map5	0001.CSV	2966.11	-0.0111906
PSB913-4_map5	0001.CSV	2969.96	-0.0110927
PSB913-4_map5	0001.CSV	2973.82	-0.0106733
PSB913-4_map5	0001.CSV	2977.68	-0.0103698
PSB913-4_map5	0001.CSV	2981.53	-0.0104378
PSB913-4_map5	0001.CSV	2985.39	-0.010677
PSB913-4_map5	0001.CSV	2989.25	-0.0106493
PSB913-4_map5	0001.CSV	2993.11	-0.0103957
PSB913-4_map5	0001.CSV	2996.96	-0.0104201
PSB913-4_map5	0001.CSV	3000.82	-0.0105825
PSB913-4_map5	0001.CSV	3004.68	-0.0107412
PSB913-4_map5	0001.CSV	3008.53	-0.0104925
PSB913-4_map5	0001.CSV	3012.39	-0.0101606
PSB913-4_map5	0001.CSV	3016.25	-0.010026
PSB913-4_map5	0001.CSV	3020.11	-0.0102226
PSB913-4_map5	0001.CSV	3023.96	-0.010284
PSB913-4_map5	0001.CSV	3027.82	-0.01029
PSB913-4_map5	0001.CSV	3031.68	-0.0101497
PSB913-4_map5	0001.CSV	3035.53	-0.0103068
PSB913-4_map5	0001.CSV	3039.39	-0.0103095
PSB913-4_map5	0001.CSV	3043.25	-0.0102469
PSB913-4_map5	0001.CSV	3047.11	-0.0102647
PSB913-4_map5	0001.CSV	3050.96	-0.010314
PSB913-4_map5	0001.CSV	3054.82	-0.0102164
PSB913-4_map5	0001.CSV	3058.68	-0.0103865
PSB913-4_map5	0001.CSV	3062.53	-0.0103877
PSB913-4_map5	0001.CSV	3066.39	-0.0102485
PSB913-4_map5	0001.CSV	3070.25	-0.0102148
PSB913-4_map5	0001.CSV	3074.11	-0.0102763
PSB913-4_map5	0001.CSV	3077.96	-0.0100286
PSB913-4_map5	0001.CSV	3081.82	-0.00993867
PSB913-4_map5	0001.CSV	3085.68	-0.00989903
PSB913-4_map5	0001.CSV	3089.53	-0.0100659
PSB913-4_map5	0001.CSV	3093.39	-0.0102769
PSB913-4_map5	0001.CSV	3097.25	-0.0103848
PSB913-4_map5	0001.CSV	3101.11	-0.0101684
PSB913-4_map5	0001.CSV	3104.96	-0.0101813
PSB913-4_map5	0001.CSV	3108.82	-0.0101581
PSB913-4_map5	0001.CSV	3112.68	-0.0101461
PSB913-4_map5	0001.CSV	3116.53	-0.00988941
PSB913-4_map5	0001.CSV	3120.39	-0.00999576
PSB913-4_map5	0001.CSV	3124.25	-0.0101351
PSB913-4_map5	0001.CSV	3128.11	-0.0102607
PSB913-4_map5	0001.CSV	3131.96	-0.0101928
PSB913-4_map5	0001.CSV	3135.82	-0.0102121
PSB913-4_map5	0001.CSV	3139.68	-0.0100813
PSB913-4_map5	0001.CSV	3143.53	-0.0103413
PSB913-4_map5	0001.CSV	3147.39	-0.010278
PSB913-4_map5	0001.CSV	3151.25	-0.0101367
PSB913-4_map5	0001.CSV	3155.1	-0.0100449
PSB913-4_map5	0001.CSV	3158.96	-0.0104575
PSB913-4_map5	0001.CSV	3162.82	-0.0105447
PSB913-4_map5	0001.CSV	3166.68	-0.0105983
PSB913-4_map5	0001.CSV	3170.53	-0.0104663
PSB913-4_map5	0001.CSV	3174.39	-0.0105448
PSB913-4_map5	0001.CSV	3178.25	-0.0103817
PSB913-4_map5	0001.CSV	3182.1	-0.0103846
PSB913-4_map5	0001.CSV	3185.96	-0.0103381
PSB913-4_map5	0001.CSV	3189.82	-0.0104872
PSB913-4_map5	0001.CSV	3193.68	-0.0104667
PSB913-4_map5	0001.CSV	3197.53	-0.0106561
PSB913-4_map5	0001.CSV	3201.39	-0.0105813
PSB913-4_map5	0001.CSV	3205.25	-0.0106127
PSB913-4_map5	0001.CSV	3209.1	-0.010526
PSB913-4_map5	0001.CSV	3212.96	-0.0106442
PSB913-4_map5	0001.CSV	3216.82	-0.0104947
PSB913-4_map5	0001.CSV	3220.68	-0.0106293
PSB913-4_map5	0001.CSV	3224.53	-0.0105778
PSB913-4_map5	0001.CSV	3228.39	-0.0105293
PSB913-4_map5	0001.CSV	3232.25	-0.010298
PSB913-4_map5	0001.CSV	3236.1	-0.0105299
PSB913-4_map5	0001.CSV	3239.96	-0.0106245
PSB913-4_map5	0001.CSV	3243.82	-0.0106022
PSB913-4_map5	0001.CSV	3247.68	-0.010496
PSB913-4_map5	0001.CSV	3251.53	-0.0108123
PSB913-4_map5	0001.CSV	3255.39	-0.0107257
PSB913-4_map5	0001.CSV	3259.25	-0.0109157
PSB913-4_map5	0001.CSV	3263.1	-0.0108113
PSB913-4_map5	0001.CSV	3266.96	-0.0105493
PSB913-4_map5	0001.CSV	3270.82	-0.0102114
PSB913-4_map5	0001.CSV	3274.68	-0.0104136
PSB913-4_map5	0001.CSV	3278.53	-0.0107075
PSB913-4_map5	0001.CSV	3282.39	-0.0110547
PSB913-4_map5	0001.CSV	3286.25	-0.0109201
PSB913-4_map5	0001.CSV	3290.1	-0.0107425
PSB913-4_map5	0001.CSV	3293.96	-0.0104528
PSB913-4_map5	0001.CSV	3297.82	-0.0107332
PSB913-4_map5	0001.CSV	3301.67	-0.0107899
PSB913-4_map5	0001.CSV	3305.53	-0.0108592
PSB913-4_map5	0001.CSV	3309.39	-0.010818
PSB913-4_map5	0001.CSV	3313.25	-0.011118
PSB913-4_map5	0001.CSV	3317.1	-0.011333
PSB913-4_map5	0001.CSV	3320.96	-0.0113671
PSB913-4_map5	0001.CSV	3324.82	-0.0109074
PSB913-4_map5	0001.CSV	3328.67	-0.011117
PSB913-4_map5	0001.CSV	3332.53	-0.0113176
PSB913-4_map5	0001.CSV	3336.39	-0.0111804
PSB913-4_map5	0001.CSV	3340.24	-0.0109052
PSB913-4_map5	0001.CSV	3344.1	-0.0111871
PSB913-4_map5	0001.CSV	3347.96	-0.0111678
PSB913-4_map5	0001.CSV	3351.82	-0.0111887
PSB913-4_map5	0001.CSV	3355.67	-0.0113195
PSB913-4_map5	0001.CSV	3359.53	-0.0113813
PSB913-4_map5	0001.CSV	3363.39	-0.0111403
PSB913-4_map5	0001.CSV	3367.24	-0.0110255
PSB913-4_map5	0001.CSV	3371.1	-0.011029
PSB913-4_map5	0001.CSV	3374.96	-0.0112754
PSB913-4_map5	0001.CSV	3378.82	-0.0112567
PSB913-4_map5	0001.CSV	3382.67	-0.0114401
PSB913-4_map5	0001.CSV	3386.53	-0.0112955
PSB913-4_map5	0001.CSV	3390.39	-0.0110799
PSB913-4_map5	0001.CSV	3394.24	-0.0108994
PSB913-4_map5	0001.CSV	3398.1	-0.0110977
PSB913-4_map5	0001.CSV	3401.96	-0.0112124
PSB913-4_map5	0001.CSV	3405.82	-0.011282
PSB913-4_map5	0001.CSV	3409.67	-0.0111393
PSB913-4_map5	0001.CSV	3413.53	-0.0114003
PSB913-4_map5	0001.CSV	3417.39	-0.0116415
PSB913-4_map5	0001.CSV	3421.24	-0.0115695
PSB913-4_map5	0001.CSV	3425.1	-0.0112288
PSB913-4_map5	0001.CSV	3428.96	-0.0111185
PSB913-4_map5	0001.CSV	3432.82	-0.0111651
PSB913-4_map5	0001.CSV	3436.67	-0.0114465
PSB913-4_map5	0001.CSV	3440.53	-0.0117253
PSB913-4_map5	0001.CSV	3444.39	-0.0119732
PSB913-4_map5	0001.CSV	3448.24	-0.012034
PSB913-4_map5	0001.CSV	3452.1	-0.0121822
PSB913-4_map5	0001.CSV	3455.96	-0.0121074
PSB913-4_map5	0001.CSV	3459.82	-0.0118032
PSB913-4_map5	0001.CSV	3463.67	-0.0115297
PSB913-4_map5	0001.CSV	3467.53	-0.0113102
PSB913-4_map5	0001.CSV	3471.39	-0.0114307
PSB913-4_map5	0001.CSV	3475.24	-0.0117487
PSB913-4_map5	0001.CSV	3479.1	-0.0118185
PSB913-4_map5	0001.CSV	3482.96	-0.0118331
PSB913-4_map5	0001.CSV	3486.82	-0.0118573
PSB913-4_map5	0001.CSV	3490.67	-0.0118648
PSB913-4_map5	0001.CSV	3494.53	-0.0118078
PSB913-4_map5	0001.CSV	3498.39	-0.0119016
PSB913-4_map5	0001.CSV	3502.24	-0.0121057
PSB913-4_map5	0001.CSV	3506.1	-0.0123506
PSB913-4_map5	0001.CSV	3509.96	-0.0126073
PSB913-4_map5	0001.CSV	3513.81	-0.0125708
PSB913-4_map5	0001.CSV	3517.67	-0.0127588
PSB913-4_map5	0001.CSV	3521.53	-0.0126517
PSB913-4_map5	0001.CSV	3525.39	-0.0125611
PSB913-4_map5	0001.CSV	3529.24	-0.0128021
PSB913-4_map5	0001.CSV	3533.1	-0.0129881
PSB913-4_map5	0001.CSV	3536.96	-0.0127677
PSB913-4_map5	0001.CSV	3540.81	-0.012812
PSB913-4_map5	0001.CSV	3544.67	-0.0128024
PSB913-4_map5	0001.CSV	3548.53	-0.0131191
PSB913-4_map5	0001.CSV	3552.39	-0.0133242
PSB913-4_map5	0001.CSV	3556.24	-0.013546
PSB913-4_map5	0001.CSV	3560.1	-0.0137769
PSB913-4_map5	0001.CSV	3563.96	-0.0143544
PSB913-4_map5	0001.CSV	3567.81	-0.0139628
PSB913-4_map5	0001.CSV	3571.67	-0.0137971
PSB913-4_map5	0001.CSV	3575.53	-0.0139723
PSB913-4_map5	0001.CSV	3579.39	-0.0140127
PSB913-4_map5	0001.CSV	3583.24	-0.0140208
PSB913-4_map5	0001.CSV	3587.1	-0.0141292
PSB913-4_map5	0001.CSV	3590.96	-0.0138792
PSB913-4_map5	0001.CSV	3594.81	-0.0142705
PSB913-4_map5	0001.CSV	3598.67	-0.0142185
PSB913-4_map5	0001.CSV	3602.53	-0.0145642
PSB913-4_map5	0001.CSV	3606.39	-0.0150369
PSB913-4_map5	0001.CSV	3610.24	-0.0155136
PSB913-4_map5	0001.CSV	3614.1	-0.0153289
PSB913-4_map5	0001.CSV	3617.96	-0.0152654
PSB913-4_map5	0001.CSV	3621.81	-0.0150931
PSB913-4_map5	0001.CSV	3625.67	-0.0157665
PSB913-4_map5	0001.CSV	3629.53	-0.0156198
PSB913-4_map5	0001.CSV	3633.39	-0.0152495
PSB913-4_map5	0001.CSV	3637.24	-0.0151022
PSB913-4_map5	0001.CSV	3641.1	-0.0154764
PSB913-4_map5	0001.CSV	3644.96	-0.0158504
PSB913-4_map5	0001.CSV	3648.81	-0.01592
PSB913-4_map5	0001.CSV	3652.67	-0.01501
PSB913-4_map5	0001.CSV	3656.53	-0.0151239
PSB913-4_map5	0001.CSV	3660.38	-0.0150305
PSB913-4_map5	0001.CSV	3664.24	-0.0157115
PSB913-4_map5	0001.CSV	3668.1	-0.0162433
PSB913-4_map5	0001.CSV	3671.96	-0.0165154
PSB913-4_map5	0001.CSV	3675.81	-0.0158321
PSB913-4_map5	0001.CSV	3679.67	-0.015692
PSB913-4_map5	0001.CSV	3683.53	-0.0156945
PSB913-4_map5	0001.CSV	3687.38	-0.0159215
PSB913-4_map5	0001.CSV	3691.24	-0.0152151
PSB913-4_map5	0001.CSV	3695.1	-0.0155868
PSB913-4_map5	0001.CSV	3698.95	-0.0158068
PSB913-4_map5	0001.CSV	3702.81	-0.0160652
PSB913-4_map5	0001.CSV	3706.67	-0.0162213
PSB913-4_map5	0001.CSV	3710.53	-0.0164118
PSB913-4_map5	0001.CSV	3714.38	-0.015697
PSB913-4_map5	0001.CSV	3718.24	-0.0162556
PSB913-4_map5	0001.CSV	3722.1	-0.0163671
PSB913-4_map5	0001.CSV	3725.95	-0.0164221
PSB913-4_map5	0001.CSV	3729.81	-0.0162321
PSB913-4_map5	0001.CSV	3733.67	-0.0163316
PSB913-4_map5	0001.CSV	3737.53	-0.0151823
PSB913-4_map5	0001.CSV	3741.38	-0.0160114
PSB913-4_map5	0001.CSV	3745.24	-0.016538
PSB913-4_map5	0001.CSV	3749.1	-0.0169886
PSB913-4_map5	0001.CSV	3752.95	-0.0160723
PSB913-4_map5	0001.CSV	3756.81	-0.0162691
PSB913-4_map5	0001.CSV	3760.67	-0.0160897
PSB913-4_map5	0001.CSV	3764.53	-0.0164608
PSB913-4_map5	0001.CSV	3768.38	-0.0160937
PSB913-4_map5	0001.CSV	3772.24	-0.0160247
PSB913-4_map5	0001.CSV	3776.1	-0.0161464
PSB913-4_map5	0001.CSV	3779.95	-0.0164048
PSB913-4_map5	0001.CSV	3783.81	-0.0161598
PSB913-4_map5	0001.CSV	3787.67	-0.0160501
PSB913-4_map5	0001.CSV	3791.53	-0.0161367
PSB913-4_map5	0001.CSV	3795.38	-0.0169192
PSB913-4_map5	0001.CSV	3799.24	-0.0169669
PSB913-4_map5	0001.CSV	3803.1	-0.0167292
PSB913-4_map5	0001.CSV	3806.95	-0.0161378
PSB913-4_map5	0001.CSV	3810.81	-0.0165012
PSB913-4_map5	0001.CSV	3814.67	-0.0167992
PSB913-4_map5	0001.CSV	3818.53	-0.0170525
PSB913-4_map5	0001.CSV	3822.38	-0.0163273
PSB913-4_map5	0001.CSV	3826.24	-0.0165594
PSB913-4_map5	0001.CSV	3830.1	-0.0167704
PSB913-4_map5	0001.CSV	3833.95	-0.0171956
PSB913-4_map5	0001.CSV	3837.81	-0.0168916
PSB913-4_map5	0001.CSV	3841.67	-0.0165686
PSB913-4_map5	0001.CSV	3845.53	-0.0162905
PSB913-4_map5	0001.CSV	3849.38	-0.0172631
PSB913-4_map5	0001.CSV	3853.24	-0.0171263
PSB913-4_map5	0001.CSV	3857.1	-0.0167432
PSB913-4_map5	0001.CSV	3860.95	-0.0170504
PSB913-4_map5	0001.CSV	3864.81	-0.0173564
PSB913-4_map5	0001.CSV	3868.67	-0.0170118
PSB913-4_map5	0001.CSV	3872.52	-0.0170556
PSB913-4_map5	0001.CSV	3876.38	-0.0171153
PSB913-4_map5	0001.CSV	3880.24	-0.0174547
PSB913-4_map5	0001.CSV	3884.1	-0.0168777
PSB913-4_map5	0001.CSV	3887.95	-0.0171103
PSB913-4_map5	0001.CSV	3891.81	-0.0171479
PSB913-4_map5	0001.CSV	3895.67	-0.0175582
PSB913-4_map5	0001.CSV	3899.52	-0.0177637
PSB913-4_map5	0001.CSV	3903.38	-0.0172597
PSB913-4_map5	0001.CSV	3907.24	-0.0166654
PSB913-4_map5	0001.CSV	3911.1	-0.0172311
PSB913-4_map5	0001.CSV	3914.95	-0.0174257
PSB913-4_map5	0001.CSV	3918.81	-0.0175576
PSB913-4_map5	0001.CSV	3922.67	-0.0174492
PSB913-4_map5	0001.CSV	3926.52	-0.0174164
PSB913-4_map5	0001.CSV	3930.38	-0.017013
PSB913-4_map5	0001.CSV	3934.24	-0.0169429
PSB913-4_map5	0001.CSV	3938.09	-0.0172522
PSB913-4_map5	0001.CSV	3941.95	-0.0175486
PSB913-4_map5	0001.CSV	3945.81	-0.0173252
PSB913-4_map5	0001.CSV	3949.67	-0.0173436
PSB913-4_map5	0001.CSV	3953.52	-0.0172038
PSB913-4_map5	0001.CSV	3957.38	-0.0174075
PSB913-4_map5	0001.CSV	3961.24	-0.0173459
PSB913-4_map5	0001.CSV	3965.09	-0.0173893
PSB913-4_map5	0001.CSV	3968.95	-0.0173594
PSB913-4_map5	0001.CSV	3972.81	-0.0174369
PSB913-4_map5	0001.CSV	3976.67	-0.0172613
PSB913-4_map5	0001.CSV	3980.52	-0.0173198
PSB913-4_map5	0001.CSV	3984.38	-0.0172954
PSB913-4_map5	0001.CSV	3988.24	-0.0175022
PSB913-4_map5	0001.CSV	3992.09	-0.0174814
PSB913-4_map5	0001.CSV	3995.95	-0.0173991
PSB913-4_map5	0001.CSV	3999.81	-0.0173416
PSB913-4_map5	0002.CSV	674.992	0.0175238
PSB913-4_map5	0002.CSV	678.849	0.0174759
PSB913-4_map5	0002.CSV	682.706	0.0189865
PSB913-4_map5	0002.CSV	686.563	0.0216817
PSB913-4_map5	0002.CSV	690.42	0.0271421
PSB913-4_map5	0002.CSV	694.277	0.0409065
PSB913-4_map5	0002.CSV	698.134	0.0587225
PSB913-4_map5	0002.CSV	701.991	0.0527795
PSB913-4_map5	0002.CSV	705.849	0.0420407
PSB913-4_map5	0002.CSV	709.706	0.0601479
PSB913-4_map5	0002.CSV	713.563	0.0674878
PSB913-4_map5	0002.CSV	717.42	0.0353935
PSB913-4_map5	0002.CSV	721.277	0.00992188
PSB913-4_map5	0002.CSV	725.134	0.00378899
PSB913-4_map5	0002.CSV	728.991	0.00414126
PSB913-4_map5	0002.CSV	732.848	0.00578976
PSB913-4_map5	0002.CSV	736.705	0.00803425
PSB913-4_map5	0002.CSV	740.562	0.00969061
PSB913-4_map5	0002.CSV	744.42	0.0107311
PSB913-4_map5	0002.CSV	748.277	0.0110036
PSB913-4_map5	0002.CSV	752.134	0.0112345
PSB913-4_map5	0002.CSV	755.991	0.0112727
PSB913-4_map5	0002.CSV	759.848	0.0116018
PSB913-4_map5	0002.CSV	763.705	0.0115143
PSB913-4_map5	0002.CSV	767.562	0.0111101
PSB913-4_map5	0002.CSV	771.419	0.010656
PSB913-4_map5	0002.CSV	775.276	0.010754
PSB913-4_map5	0002.CSV	779.133	0.0106726
PSB913-4_map5	0002.CSV	782.99	0.0107916
PSB913-4_map5	0002.CSV	786.848	0.0111043
PSB913-4_map5	0002.CSV	790.705	0.0115024
PSB913-4_map5	0002.CSV	794.562	0.0118975
PSB913-4_map5	0002.CSV	798.419	0.0125197
PSB913-4_map5	0002.CSV	802.276	0.0131149
PSB913-4_map5	0002.CSV	806.133	0.0138948
PSB913-4_map5	0002.CSV	809.99	0.0150998
PSB913-4_map5	0002.CSV	813.847	0.0168019
PSB913-4_map5	0002.CSV	817.704	0.0188247
PSB913-4_map5	0002.CSV	821.562	0.0212531
PSB913-4_map5	0002.CSV	825.419	0.0244769
PSB913-4_map5	0002.CSV	829.276	0.0287713
PSB913-4_map5	0002.CSV	833.133	0.0352846
PSB913-4_map5	0002.CSV	836.99	0.0463341
PSB913-4_map5	0002.CSV	840.847	0.0637091
PSB913-4_map5	0002.CSV	844.704	0.0825286
PSB913-4_map5	0002.CSV	848.561	0.110533
PSB913-4_map5	0002.CSV	852.418	0.145027
PSB913-4_map5	0002.CSV	856.275	0.153533
PSB913-4_map5	0002.CSV	860.132	0.131976
PSB913-4_map5	0002.CSV	863.99	0.100768
PSB913-4_map5	0002.CSV	867.847	0.0703455
PSB913-4_map5	0002.CSV	871.704	0.0441486
PSB913-4_map5	0002.CSV	875.561	0.0249011
PSB913-4_map5	0002.CSV	879.418	0.0149272
PSB913-4_map5	0002.CSV	883.275	0.0107505
PSB913-4_map5	0002.CSV	887.132	0.0087125
PSB913-4_map5	0002.CSV	890.989	0.0076981
PSB913-4_map5	0002.CSV	894.846	0.00761086
PSB913-4_map5	0002.CSV	898.703	0.00770407
PSB913-4_map5	0002.CSV	902.561	0.00830496
PSB913-4_map5	0002.CSV	906.418	0.00899124
PSB913-4_map5	0002.CSV	910.275	0.00900924
PSB913-4_map5	0002.CSV	914.132	0.00831165
PSB913-4_map5	0002.CSV	917.989	0.0083364
PSB913-4_map5	0002.CSV	921.846	0.00837653
PSB913-4_map5	0002.CSV	925.703	0.00872139
PSB913-4_map5	0002.CSV	929.56	0.00883093
PSB913-4_map5	0002.CSV	933.417	0.0091396
PSB913-4_map5	0002.CSV	937.274	0.00919859
PSB913-4_map5	0002.CSV	941.131	0.00949678
PSB913-4_map5	0002.CSV	944.989	0.00953847
PSB913-4_map5	0002.CSV	948.846	0.00997307
PSB913-4_map5	0002.CSV	952.703	0.0101928
PSB913-4_map5	0002.CSV	956.56	0.0108061
PSB913-4_map5	0002.CSV	960.417	0.0110018
PSB913-4_map5	0002.CSV	964.274	0.0113617
PSB913-4_map5	0002.CSV	968.131	0.0114999
PSB913-4_map5	0002.CSV	971.988	0.0121611
PSB913-4_map5	0002.CSV	975.845	0.0125508
PSB913-4_map5	0002.CSV	979.702	0.0132667
PSB913-4_map5	0002.CSV	983.559	0.0137305
PSB913-4_map5	0002.CSV	987.417	0.0145922
PSB913-4_map5	0002.CSV	991.274	0.0148947
PSB913-4_map5	0002.CSV	995.131	0.0155211
PSB913-4_map5	0002.CSV	998.988	0.0157478
PSB913-4_map5	0002.CSV	1002.85	0.016381
PSB913-4_map5	0002.CSV	1006.7	0.0166595
PSB913-4_map5	0002.CSV	1010.56	0.0174557
PSB913-4_map5	0002.CSV	1014.42	0.0178588
PSB913-4_map5	0002.CSV	1018.27	0.018784
PSB913-4_map5	0002.CSV	1022.13	0.0191926
PSB913-4_map5	0002.CSV	1025.99	0.0202447
PSB913-4_map5	0002.CSV	1029.85	0.020734
PSB913-4_map5	0002.CSV	1033.7	0.0216408
PSB913-4_map5	0002.CSV	1037.56	0.0220353
PSB913-4_map5	0002.CSV	1041.42	0.0229517
PSB913-4_map5	0002.CSV	1045.27	0.0232494
PSB913-4_map5	0002.CSV	1049.13	0.0243829
PSB913-4_map5	0002.CSV	1052.99	0.0251995
PSB913-4_map5	0002.CSV	1056.84	0.027037
PSB913-4_map5	0002.CSV	1060.7	0.0282524
PSB913-4_map5	0002.CSV	1064.56	0.0298957
PSB913-4_map5	0002.CSV	1068.42	0.0305452
PSB913-4_map5	0002.CSV	1072.27	0.0317561
PSB913-4_map5	0002.CSV	1076.13	0.0338651
PSB913-4_map5	0002.CSV	1079.99	0.0417431
PSB913-4_map5	0002.CSV	1083.84	0.044321
PSB913-4_map5	0002.CSV	1087.7	0.0347406
PSB913-4_map5	0002.CSV	1091.56	0.0264549
PSB913-4_map5	0002.CSV	1095.41	0.0250771
PSB913-4_map5	0002.CSV	1099.27	0.0249332
PSB913-4_map5	0002.CSV	1103.13	0.0259139
PSB913-4_map5	0002.CSV	1106.99	0.026509
PSB913-4_map5	0002.CSV	1110.84	0.0279132
PSB913-4_map5	0002.CSV	1114.7	0.0284278
PSB913-4_map5	0002.CSV	1118.56	0.0292734
PSB913-4_map5	0002.CSV	1122.41	0.0291158
PSB913-4_map5	0002.CSV	1126.27	0.0295141
PSB913-4_map5	0002.CSV	1130.13	0.0292326
PSB913-4_map5	0002.CSV	1133.99	0.029731
PSB913-4_map5	0002.CSV	1137.84	0.0295812
PSB913-4_map5	0002.CSV	1141.7	0.0300282
PSB913-4_map5	0002.CSV	1145.56	0.0298189
PSB913-4_map5	0002.CSV	1149.41	0.0305497
PSB913-4_map5	0002.CSV	1153.27	0.0307509
PSB913-4_map5	0002.CSV	1157.13	0.0316523
PSB913-4_map5	0002.CSV	1160.99	0.0317521
PSB913-4_map5	0002.CSV	1164.84	0.0324585
PSB913-4_map5	0002.CSV	1168.7	0.0323709
PSB913-4_map5	0002.CSV	1172.56	0.0329103
PSB913-4_map5	0002.CSV	1176.41	0.0327369
PSB913-4_map5	0002.CSV	1180.27	0.03334
PSB913-4_map5	0002.CSV	1184.13	0.0332201
PSB913-4_map5	0002.CSV	1187.99	0.0338291
PSB913-4_map5	0002.CSV	1191.84	0.0337713
PSB913-4_map5	0002.CSV	1195.7	0.034521
PSB913-4_map5	0002.CSV	1199.56	0.0346103
PSB913-4_map5	0002.CSV	1203.41	0.0355074
PSB913-4_map5	0002.CSV	1207.27	0.0358097
PSB913-4_map5	0002.CSV	1211.13	0.0369616
PSB913-4_map5	0002.CSV	1214.98	0.0374597
PSB913-4_map5	0002.CSV	1218.84	0.0388643
PSB913-4_map5	0002.CSV	1222.7	0.0396091
PSB913-4_map5	0002.CSV	1226.56	0.0412086
PSB913-4_map5	0002.CSV	1230.41	0.04223
PSB913-4_map5	0002.CSV	1234.27	0.0441221
PSB913-4_map5	0002.CSV	1238.13	0.0452961
PSB913-4_map5	0002.CSV	1241.98	0.0472777
PSB913-4_map5	0002.CSV	1245.84	0.0485767
PSB913-4_map5	0002.CSV	1249.7	0.0505965
PSB913-4_map5	0002.CSV	1253.56	0.0516435
PSB913-4_map5	0002.CSV	1257.41	0.0532188
PSB913-4_map5	0002.CSV	1261.27	0.054043
PSB913-4_map5	0002.CSV	1265.13	0.0557039
PSB913-4_map5	0002.CSV	1268.98	0.0566028
PSB913-4_map5	0002.CSV	1272.84	0.0583127
PSB913-4_map5	0002.CSV	1276.7	0.0592169
PSB913-4_map5	0002.CSV	1280.56	0.0607722
PSB913-4_map5	0002.CSV	1284.41	0.0614522
PSB913-4_map5	0002.CSV	1288.27	0.0627426
PSB913-4_map5	0002.CSV	1292.13	0.0630813
PSB913-4_map5	0002.CSV	1295.98	0.0641398
PSB913-4_map5	0002.CSV	1299.84	0.0646423
PSB913-4_map5	0002.CSV	1303.7	0.0661813
PSB913-4_map5	0002.CSV	1307.56	0.06722
PSB913-4_map5	0002.CSV	1311.41	0.0691412
PSB913-4_map5	0002.CSV	1315.27	0.0704882
PSB913-4_map5	0002.CSV	1319.13	0.0729378
PSB913-4_map5	0002.CSV	1322.98	0.0745809
PSB913-4_map5	0002.CSV	1326.84	0.077058
PSB913-4_map5	0002.CSV	1330.7	0.0790681
PSB913-4_map5	0002.CSV	1334.56	0.0820044
PSB913-4_map5	0002.CSV	1338.41	0.0848406
PSB913-4_map5	0002.CSV	1342.27	0.0891932
PSB913-4_map5	0002.CSV	1346.13	0.0922613
PSB913-4_map5	0002.CSV	1349.98	0.096606
PSB913-4_map5	0002.CSV	1353.84	0.100503
PSB913-4_map5	0002.CSV	1357.7	0.105323
PSB913-4_map5	0002.CSV	1361.56	0.109969
PSB913-4_map5	0002.CSV	1365.41	0.116237
PSB913-4_map5	0002.CSV	1369.27	0.120713
PSB913-4_map5	0002.CSV	1373.13	0.12702
PSB913-4_map5	0002.CSV	1376.98	0.133148
PSB913-4_map5	0002.CSV	1380.84	0.139174
PSB913-4_map5	0002.CSV	1384.7	0.144074
PSB913-4_map5	0002.CSV	1388.56	0.151155
PSB913-4_map5	0002.CSV	1392.41	0.15601
PSB913-4_map5	0002.CSV	1396.27	0.162659
PSB913-4_map5	0002.CSV	1400.13	0.168365
PSB913-4_map5	0002.CSV	1403.98	0.174438
PSB913-4_map5	0002.CSV	1407.84	0.179529
PSB913-4_map5	0002.CSV	1411.7	0.185115
PSB913-4_map5	0002.CSV	1415.55	0.18881
PSB913-4_map5	0002.CSV	1419.41	0.195027
PSB913-4_map5	0002.CSV	1423.27	0.199405
PSB913-4_map5	0002.CSV	1427.12	0.204531
PSB913-4_map5	0002.CSV	1430.98	0.208653
PSB913-4_map5	0002.CSV	1434.84	0.214277
PSB913-4_map5	0002.CSV	1438.7	0.217848
PSB913-4_map5	0002.CSV	1442.55	0.21995
PSB913-4_map5	0002.CSV	1446.41	0.217501
PSB913-4_map5	0002.CSV	1450.27	0.213349
PSB913-4_map5	0002.CSV	1454.12	0.206662
PSB913-4_map5	0002.CSV	1457.98	0.1981
PSB913-4_map5	0002.CSV	1461.84	0.1903
PSB913-4_map5	0002.CSV	1465.7	0.18512
PSB913-4_map5	0002.CSV	1469.55	0.17683
PSB913-4_map5	0002.CSV	1473.41	0.164522
PSB913-4_map5	0002.CSV	1477.27	0.149215
PSB913-4_map5	0002.CSV	1481.12	0.140665
PSB913-4_map5	0002.CSV	1484.98	0.132075
PSB913-4_map5	0002.CSV	1488.84	0.122924
PSB913-4_map5	0002.CSV	1492.7	0.113352
PSB913-4_map5	0002.CSV	1496.55	0.107286
PSB913-4_map5	0002.CSV	1500.41	0.0994372
PSB913-4_map5	0002.CSV	1504.27	0.0952665
PSB913-4_map5	0002.CSV	1508.12	0.0857445
PSB913-4_map5	0002.CSV	1511.98	0.0799496
PSB913-4_map5	0002.CSV	1515.84	0.0750673
PSB913-4_map5	0002.CSV	1519.7	0.0695978
PSB913-4_map5	0002.CSV	1523.55	0.0618024
PSB913-4_map5	0002.CSV	1527.41	0.0573829
PSB913-4_map5	0002.CSV	1531.27	0.0526377
PSB913-4_map5	0002.CSV	1535.12	0.0490373
PSB913-4_map5	0002.CSV	1538.98	0.0446035
PSB913-4_map5	0002.CSV	1542.84	0.0388359
PSB913-4_map5	0002.CSV	1546.7	0.0341822
PSB913-4_map5	0002.CSV	1550.55	0.0312948
PSB913-4_map5	0002.CSV	1554.41	0.0275681
PSB913-4_map5	0002.CSV	1558.27	0.0234662
PSB913-4_map5	0002.CSV	1562.12	0.019092
PSB913-4_map5	0002.CSV	1565.98	0.0172621
PSB913-4_map5	0002.CSV	1569.84	0.0143471
PSB913-4_map5	0002.CSV	1573.69	0.011799
PSB913-4_map5	0002.CSV	1577.55	0.00805295
PSB913-4_map5	0002.CSV	1581.41	0.00483221
PSB913-4_map5	0002.CSV	1585.27	0.00177683
PSB913-4_map5	0002.CSV	1589.12	-0.0006234
PSB913-4_map5	0002.CSV	1592.98	-0.00264072
PSB913-4_map5	0002.CSV	1596.84	-0.00387784
PSB913-4_map5	0002.CSV	1600.69	-0.00505482
PSB913-4_map5	0002.CSV	1604.55	-0.00589138
PSB913-4_map5	0002.CSV	1608.41	-0.00698524
PSB913-4_map5	0002.CSV	1612.27	-0.00786296
PSB913-4_map5	0002.CSV	1616.12	-0.00873405
PSB913-4_map5	0002.CSV	1619.98	-0.00907048
PSB913-4_map5	0002.CSV	1623.84	-0.00974018
PSB913-4_map5	0002.CSV	1627.69	-0.0102422
PSB913-4_map5	0002.CSV	1631.55	-0.0110463
PSB913-4_map5	0002.CSV	1635.41	-0.0113923
PSB913-4_map5	0002.CSV	1639.27	-0.0116736
PSB913-4_map5	0002.CSV	1643.12	-0.0122161
PSB913-4_map5	0002.CSV	1646.98	-0.0127888
PSB913-4_map5	0002.CSV	1650.84	-0.0128513
PSB913-4_map5	0002.CSV	1654.69	-0.0130234
PSB913-4_map5	0002.CSV	1658.55	-0.01352
PSB913-4_map5	0002.CSV	1662.41	-0.0141366
PSB913-4_map5	0002.CSV	1666.27	-0.0146307
PSB913-4_map5	0002.CSV	1670.12	-0.0150994
PSB913-4_map5	0002.CSV	1673.98	-0.0153434
PSB913-4_map5	0002.CSV	1677.84	-0.0159381
PSB913-4_map5	0002.CSV	1681.69	-0.0165823
PSB913-4_map5	0002.CSV	1685.55	-0.0168105
PSB913-4_map5	0002.CSV	1689.41	-0.0171468
PSB913-4_map5	0002.CSV	1693.27	-0.0178118
PSB913-4_map5	0002.CSV	1697.12	-0.0183299
PSB913-4_map5	0002.CSV	1700.98	-0.0182799
PSB913-4_map5	0002.CSV	1704.84	-0.0184799
PSB913-4_map5	0002.CSV	1708.69	-0.0185604
PSB913-4_map5	0002.CSV	1712.55	-0.0188157
PSB913-4_map5	0002.CSV	1716.41	-0.0178616
PSB913-4_map5	0002.CSV	1720.27	-0.0167375
PSB913-4_map5	0002.CSV	1724.12	-0.0166736
PSB913-4_map5	0002.CSV	1727.98	-0.0169434
PSB913-4_map5	0002.CSV	1731.84	-0.0170049
PSB913-4_map5	0002.CSV	1735.69	-0.0173074
PSB913-4_map5	0002.CSV	1739.55	-0.0180018
PSB913-4_map5	0002.CSV	1743.41	-0.0192846
PSB913-4_map5	0002.CSV	1747.27	-0.0202241
PSB913-4_map5	0002.CSV	1751.12	-0.0213453
PSB913-4_map5	0002.CSV	1754.98	-0.0222544
PSB913-4_map5	0002.CSV	1758.84	-0.0231883
PSB913-4_map5	0002.CSV	1762.69	-0.0235404
PSB913-4_map5	0002.CSV	1766.55	-0.0241094
PSB913-4_map5	0002.CSV	1770.41	-0.0237873
PSB913-4_map5	0002.CSV	1774.26	-0.0221141
PSB913-4_map5	0002.CSV	1778.12	-0.0197512
PSB913-4_map5	0002.CSV	1781.98	-0.017164
PSB913-4_map5	0002.CSV	1785.84	-0.015324
PSB913-4_map5	0002.CSV	1789.69	-0.0156201
PSB913-4_map5	0002.CSV	1793.55	-0.0174415
PSB913-4_map5	0002.CSV	1797.41	-0.0197913
PSB913-4_map5	0002.CSV	1801.26	-0.0216698
PSB913-4_map5	0002.CSV	1805.12	-0.0234724
PSB913-4_map5	0002.CSV	1808.98	-0.0244331
PSB913-4_map5	0002.CSV	1812.84	-0.0250341
PSB913-4_map5	0002.CSV	1816.69	-0.0252356
PSB913-4_map5	0002.CSV	1820.55	-0.0255835
PSB913-4_map5	0002.CSV	1824.41	-0.0256053
PSB913-4_map5	0002.CSV	1828.26	-0.0256823
PSB913-4_map5	0002.CSV	1832.12	-0.0254689
PSB913-4_map5	0002.CSV	1835.98	-0.0256903
PSB913-4_map5	0002.CSV	1839.84	-0.0257016
PSB913-4_map5	0002.CSV	1843.69	-0.0257331
PSB913-4_map5	0002.CSV	1847.55	-0.0253853
PSB913-4_map5	0002.CSV	1851.41	-0.0256512
PSB913-4_map5	0002.CSV	1855.26	-0.0256304
PSB913-4_map5	0002.CSV	1859.12	-0.0257257
PSB913-4_map5	0002.CSV	1862.98	-0.0256399
PSB913-4_map5	0002.CSV	1866.84	-0.0256993
PSB913-4_map5	0002.CSV	1870.69	-0.025213
PSB913-4_map5	0002.CSV	1874.55	-0.0253756
PSB913-4_map5	0002.CSV	1878.41	-0.0253051
PSB913-4_map5	0002.CSV	1882.26	-0.0254004
PSB913-4_map5	0002.CSV	1886.12	-0.0252398
PSB913-4_map5	0002.CSV	1889.98	-0.0252535
PSB913-4_map5	0002.CSV	1893.83	-0.0250241
PSB913-4_map5	0002.CSV	1897.69	-0.0250848
PSB913-4_map5	0002.CSV	1901.55	-0.0249929
PSB913-4_map5	0002.CSV	1905.41	-0.0251318
PSB913-4_map5	0002.CSV	1909.26	-0.0248954
PSB913-4_map5	0002.CSV	1913.12	-0.0250501
PSB913-4_map5	0002.CSV	1916.98	-0.0250055
PSB913-4_map5	0002.CSV	1920.83	-0.024981
PSB913-4_map5	0002.CSV	1924.69	-0.0247131
PSB913-4_map5	0002.CSV	1928.55	-0.0248029
PSB913-4_map5	0002.CSV	1932.4	-0.0246428
PSB913-4_map5	0002.CSV	1936.26	-0.0247404
PSB913-4_map5	0002.CSV	1940.12	-0.0246132
PSB913-4_map5	0002.CSV	1943.98	-0.0245017
PSB913-4_map5	0002.CSV	1947.83	-0.0243191
PSB913-4_map5	0002.CSV	1951.69	-0.0244993
PSB913-4_map5	0002.CSV	1955.55	-0.0243618
PSB913-4_map5	0002.CSV	1959.4	-0.0244301
PSB913-4_map5	0002.CSV	1963.26	-0.0243282
PSB913-4_map5	0002.CSV	1967.12	-0.0243568
PSB913-4_map5	0002.CSV	1970.98	-0.0242356
PSB913-4_map5	0002.CSV	1974.83	-0.0243902
PSB913-4_map5	0002.CSV	1978.69	-0.0242816
PSB913-4_map5	0002.CSV	1982.55	-0.0243435
PSB913-4_map5	0002.CSV	1986.4	-0.0242689
PSB913-4_map5	0002.CSV	1990.26	-0.0243384
PSB913-4_map5	0002.CSV	1994.12	-0.0241247
PSB913-4_map5	0002.CSV	1997.98	-0.0242062
PSB913-4_map5	0002.CSV	2001.83	-0.0241756
PSB913-4_map5	0002.CSV	2005.69	-0.0242948
PSB913-4_map5	0002.CSV	2009.55	-0.0241963
PSB913-4_map5	0002.CSV	2013.4	-0.0242697
PSB913-4_map5	0002.CSV	2017.26	-0.0241093
PSB913-4_map5	0002.CSV	2021.12	-0.0241406
PSB913-4_map5	0002.CSV	2024.97	-0.024106
PSB913-4_map5	0002.CSV	2028.83	-0.0241733
PSB913-4_map5	0002.CSV	2032.69	-0.0241378
PSB913-4_map5	0002.CSV	2036.55	-0.0242521
PSB913-4_map5	0002.CSV	2040.4	-0.0241868
PSB913-4_map5	0002.CSV	2044.26	-0.0242151
PSB913-4_map5	0002.CSV	2048.12	-0.024116
PSB913-4_map5	0002.CSV	2051.97	-0.0241126
PSB913-4_map5	0002.CSV	2055.83	-0.0240368
PSB913-4_map5	0002.CSV	2059.69	-0.0240876
PSB913-4_map5	0002.CSV	2063.55	-0.0240459
PSB913-4_map5	0002.CSV	2067.4	-0.024054
PSB913-4_map5	0002.CSV	2071.26	-0.023999
PSB913-4_map5	0002.CSV	2075.12	-0.0240431
PSB913-4_map5	0002.CSV	2078.97	-0.0240203
PSB913-4_map5	0002.CSV	2082.83	-0.0240713
PSB913-4_map5	0002.CSV	2086.69	-0.0240481
PSB913-4_map5	0002.CSV	2090.55	-0.0240248
PSB913-4_map5	0002.CSV	2094.4	-0.0239492
PSB913-4_map5	0002.CSV	2098.26	-0.0239711
PSB913-4_map5	0002.CSV	2102.12	-0.0238999
PSB913-4_map5	0002.CSV	2105.97	-0.0237928
PSB913-4_map5	0002.CSV	2109.83	-0.0236666
PSB913-4_map5	0002.CSV	2113.69	-0.0236349
PSB913-4_map5	0002.CSV	2117.55	-0.0236604
PSB913-4_map5	0002.CSV	2121.4	-0.0236317
PSB913-4_map5	0002.CSV	2125.26	-0.0235405
PSB913-4_map5	0002.CSV	2129.12	-0.0234923
PSB913-4_map5	0002.CSV	2132.97	-0.0234378
PSB913-4_map5	0002.CSV	2136.83	-0.0233287
PSB913-4_map5	0002.CSV	2140.69	-0.0232701
PSB913-4_map5	0002.CSV	2144.55	-0.0232153
PSB913-4_map5	0002.CSV	2148.4	-0.0231564
PSB913-4_map5	0002.CSV	2152.26	-0.023068
PSB913-4_map5	0002.CSV	2156.12	-0.0230946
PSB913-4_map5	0002.CSV	2159.97	-0.0230425
PSB913-4_map5	0002.CSV	2163.83	-0.023029
PSB913-4_map5	0002.CSV	2167.69	-0.022932
PSB913-4_map5	0002.CSV	2171.55	-0.0228599
PSB913-4_map5	0002.CSV	2175.4	-0.0228107
PSB913-4_map5	0002.CSV	2179.26	-0.0228519
PSB913-4_map5	0002.CSV	2183.12	-0.0227407
PSB913-4_map5	0002.CSV	2186.97	-0.0227451
PSB913-4_map5	0002.CSV	2190.83	-0.0226394
PSB913-4_map5	0002.CSV	2194.69	-0.0226527
PSB913-4_map5	0002.CSV	2198.55	-0.0226088
PSB913-4_map5	0002.CSV	2202.4	-0.02267
PSB913-4_map5	0002.CSV	2206.26	-0.0226098
PSB913-4_map5	0002.CSV	2210.12	-0.0226703
PSB913-4_map5	0002.CSV	2213.97	-0.0226001
PSB913-4_map5	0002.CSV	2217.83	-0.0226297
PSB913-4_map5	0002.CSV	2221.69	-0.0226025
PSB913-4_map5	0002.CSV	2225.54	-0.0227963
PSB913-4_map5	0002.CSV	2229.4	-0.022841
PSB913-4_map5	0002.CSV	2233.26	-0.0229903
PSB913-4_map5	0002.CSV	2237.12	-0.0229525
PSB913-4_map5	0002.CSV	2240.97	-0.0231401
PSB913-4_map5	0002.CSV	2244.83	-0.0231458
PSB913-4_map5	0002.CSV	2248.69	-0.0232658
PSB913-4_map5	0002.CSV	2252.54	-0.0232496
PSB913-4_map5	0002.CSV	2256.4	-0.0234205
PSB913-4_map5	0002.CSV	2260.26	-0.0234173
PSB913-4_map5	0002.CSV	2264.11	-0.0236312
PSB913-4_map5	0002.CSV	2267.97	-0.0236173
PSB913-4_map5	0002.CSV	2271.83	-0.0237088
PSB913-4_map5	0002.CSV	2275.69	-0.0236413
PSB913-4_map5	0002.CSV	2279.54	-0.0238322
PSB913-4_map5	0002.CSV	2283.4	-0.0237734
PSB913-4_map5	0002.CSV	2287.26	-0.0237743
PSB913-4_map5	0002.CSV	2291.11	-0.0235617
PSB913-4_map5	0002.CSV	2294.97	-0.0235934
PSB913-4_map5	0002.CSV	2298.83	-0.0233539
PSB913-4_map5	0002.CSV	2302.69	-0.0234293
PSB913-4_map5	0002.CSV	2306.54	-0.0230884
PSB913-4_map5	0002.CSV	2310.4	-0.0232408
PSB913-4_map5	0002.CSV	2314.26	-0.0229917
PSB913-4_map5	0002.CSV	2318.11	-0.0237273
PSB913-4_map5	0002.CSV	2321.97	-0.0237506
PSB913-4_map5	0002.CSV	2325.83	-0.0254504
PSB913-4_map5	0002.CSV	2329.69	-0.0254223
PSB913-4_map5	0002.CSV	2333.54	-0.0277096
PSB913-4_map5	0002.CSV	2337.4	-0.0271561
PSB913-4_map5	0002.CSV	2341.26	-0.0292406
PSB913-4_map5	0002.CSV	2345.11	-0.0249368
PSB913-4_map5	0002.CSV	2348.97	-0.0252989
PSB913-4_map5	0002.CSV	2352.83	-0.0275245
PSB913-4_map5	0002.CSV	2356.69	-0.0417449
PSB913-4_map5	0002.CSV	2360.54	-0.0496971
PSB913-4_map5	0002.CSV	2364.4	-0.0454819
PSB913-4_map5	0002.CSV	2368.26	-0.0309097
PSB913-4_map5	0002.CSV	2372.11	-0.0264909
PSB913-4_map5	0002.CSV	2375.97	-0.0232676
PSB913-4_map5	0002.CSV	2379.83	-0.0227969
PSB913-4_map5	0002.CSV	2383.69	-0.0225357
PSB913-4_map5	0002.CSV	2387.54	-0.0229411
PSB913-4_map5	0002.CSV	2391.4	-0.0230631
PSB913-4_map5	0002.CSV	2395.26	-0.0233046
PSB913-4_map5	0002.CSV	2399.11	-0.0231549
PSB913-4_map5	0002.CSV	2402.97	-0.0232808
PSB913-4_map5	0002.CSV	2406.83	-0.0231726
PSB913-4_map5	0002.CSV	2410.68	-0.0232653
PSB913-4_map5	0002.CSV	2414.54	-0.0230304
PSB913-4_map5	0002.CSV	2418.4	-0.0230659
PSB913-4_map5	0002.CSV	2422.26	-0.0227909
PSB913-4_map5	0002.CSV	2426.11	-0.0227509
PSB913-4_map5	0002.CSV	2429.97	-0.0224717
PSB913-4_map5	0002.CSV	2433.83	-0.0225371
PSB913-4_map5	0002.CSV	2437.68	-0.0222838
PSB913-4_map5	0002.CSV	2441.54	-0.0222238
PSB913-4_map5	0002.CSV	2445.4	-0.021923
PSB913-4_map5	0002.CSV	2449.26	-0.0219824
PSB913-4_map5	0002.CSV	2453.11	-0.0217518
PSB913-4_map5	0002.CSV	2456.97	-0.0217952
PSB913-4_map5	0002.CSV	2460.83	-0.0215037
PSB913-4_map5	0002.CSV	2464.68	-0.0214363
PSB913-4_map5	0002.CSV	2468.54	-0.0210572
PSB913-4_map5	0002.CSV	2472.4	-0.0209604
PSB913-4_map5	0002.CSV	2476.26	-0.020495
PSB913-4_map5	0002.CSV	2480.11	-0.0202508
PSB913-4_map5	0002.CSV	2483.97	-0.0197129
PSB913-4_map5	0002.CSV	2487.83	-0.0195023
PSB913-4_map5	0002.CSV	2491.68	-0.0190696
PSB913-4_map5	0002.CSV	2495.54	-0.0189319
PSB913-4_map5	0002.CSV	2499.4	-0.0186291
PSB913-4_map5	0002.CSV	2503.26	-0.0187749
PSB913-4_map5	0002.CSV	2507.11	-0.0187784
PSB913-4_map5	0002.CSV	2510.97	-0.0189522
PSB913-4_map5	0002.CSV	2514.83	-0.0186076
PSB913-4_map5	0002.CSV	2518.68	-0.0184067
PSB913-4_map5	0002.CSV	2522.54	-0.0181014
PSB913-4_map5	0002.CSV	2526.4	-0.0182825
PSB913-4_map5	0002.CSV	2530.26	-0.0183196
PSB913-4_map5	0002.CSV	2534.11	-0.0188177
PSB913-4_map5	0002.CSV	2537.97	-0.0191117
PSB913-4_map5	0002.CSV	2541.83	-0.0195009
PSB913-4_map5	0002.CSV	2545.68	-0.0194681
PSB913-4_map5	0002.CSV	2549.54	-0.0197094
PSB913-4_map5	0002.CSV	2553.4	-0.0197902
PSB913-4_map5	0002.CSV	2557.26	-0.0201167
PSB913-4_map5	0002.CSV	2561.11	-0.0202151
PSB913-4_map5	0002.CSV	2564.97	-0.0205907
PSB913-4_map5	0002.CSV	2568.83	-0.020739
PSB913-4_map5	0002.CSV	2572.68	-0.0210611
PSB913-4_map5	0002.CSV	2576.54	-0.0210694
PSB913-4_map5	0002.CSV	2580.4	-0.0212949
PSB913-4_map5	0002.CSV	2584.25	-0.0213132
PSB913-4_map5	0002.CSV	2588.11	-0.0215234
PSB913-4_map5	0002.CSV	2591.97	-0.0214725
PSB913-4_map5	0002.CSV	2595.83	-0.021652
PSB913-4_map5	0002.CSV	2599.68	-0.0215474
PSB913-4_map5	0002.CSV	2603.54	-0.0216227
PSB913-4_map5	0002.CSV	2607.4	-0.021502
PSB913-4_map5	0002.CSV	2611.25	-0.0215732
PSB913-4_map5	0002.CSV	2615.11	-0.0214217
PSB913-4_map5	0002.CSV	2618.97	-0.0215013
PSB913-4_map5	0002.CSV	2622.82	-0.021412
PSB913-4_map5	0002.CSV	2626.68	-0.0214706
PSB913-4_map5	0002.CSV	2630.54	-0.0213197
PSB913-4_map5	0002.CSV	2634.4	-0.0213493
PSB913-4_map5	0002.CSV	2638.25	-0.0212251
PSB913-4_map5	0002.CSV	2642.11	-0.0214853
PSB913-4_map5	0002.CSV	2645.97	-0.0216535
PSB913-4_map5	0002.CSV	2649.82	-0.0218219
PSB913-4_map5	0002.CSV	2653.68	-0.0218172
PSB913-4_map5	0002.CSV	2657.54	-0.022014
PSB913-4_map5	0002.CSV	2661.4	-0.0220291
PSB913-4_map5	0002.CSV	2665.25	-0.022138
PSB913-4_map5	0002.CSV	2669.11	-0.022055
PSB913-4_map5	0002.CSV	2672.97	-0.0220329
PSB913-4_map5	0002.CSV	2676.82	-0.0217346
PSB913-4_map5	0002.CSV	2680.68	-0.0218035
PSB913-4_map5	0002.CSV	2684.54	-0.0220699
PSB913-4_map5	0002.CSV	2688.4	-0.0223081
PSB913-4_map5	0002.CSV	2692.25	-0.0221722
PSB913-4_map5	0002.CSV	2696.11	-0.0221413
PSB913-4_map5	0002.CSV	2699.97	-0.0220742
PSB913-4_map5	0002.CSV	2703.82	-0.0221556
PSB913-4_map5	0002.CSV	2707.68	-0.0220305
PSB913-4_map5	0002.CSV	2711.54	-0.0220655
PSB913-4_map5	0002.CSV	2715.4	-0.0220381
PSB913-4_map5	0002.CSV	2719.25	-0.0219272
PSB913-4_map5	0002.CSV	2723.11	-0.0216299
PSB913-4_map5	0002.CSV	2726.97	-0.0217081
PSB913-4_map5	0002.CSV	2730.82	-0.021837
PSB913-4_map5	0002.CSV	2734.68	-0.0218332
PSB913-4_map5	0002.CSV	2738.54	-0.0217275
PSB913-4_map5	0002.CSV	2742.4	-0.0216982
PSB913-4_map5	0002.CSV	2746.25	-0.0214045
PSB913-4_map5	0002.CSV	2750.11	-0.0214156
PSB913-4_map5	0002.CSV	2753.97	-0.0216
PSB913-4_map5	0002.CSV	2757.82	-0.0217492
PSB913-4_map5	0002.CSV	2761.68	-0.0217655
PSB913-4_map5	0002.CSV	2765.54	-0.0218187
PSB913-4_map5	0002.CSV	2769.39	-0.0215401
PSB913-4_map5	0002.CSV	2773.25	-0.021152
PSB913-4_map5	0002.CSV	2777.11	-0.0211355
PSB913-4_map5	0002.CSV	2780.97	-0.0213883
PSB913-4_map5	0002.CSV	2784.82	-0.021162
PSB913-4_map5	0002.CSV	2788.68	-0.0207551
PSB913-4_map5	0002.CSV	2792.54	-0.0205667
PSB913-4_map5	0002.CSV	2796.39	-0.0205884
PSB913-4_map5	0002.CSV	2800.25	-0.0207199
PSB913-4_map5	0002.CSV	2804.11	-0.0208616
PSB913-4_map5	0002.CSV	2807.97	-0.0205032
PSB913-4_map5	0002.CSV	2811.82	-0.0204223
PSB913-4_map5	0002.CSV	2815.68	-0.0205602
PSB913-4_map5	0002.CSV	2819.54	-0.0204761
PSB913-4_map5	0002.CSV	2823.39	-0.0201872
PSB913-4_map5	0002.CSV	2827.25	-0.0199674
PSB913-4_map5	0002.CSV	2831.11	-0.0194697
PSB913-4_map5	0002.CSV	2834.97	-0.018726
PSB913-4_map5	0002.CSV	2838.82	-0.0180307
PSB913-4_map5	0002.CSV	2842.68	-0.0175152
PSB913-4_map5	0002.CSV	2846.54	-0.0165086
PSB913-4_map5	0002.CSV	2850.39	-0.0159093
PSB913-4_map5	0002.CSV	2854.25	-0.0161313
PSB913-4_map5	0002.CSV	2858.11	-0.0165595
PSB913-4_map5	0002.CSV	2861.97	-0.0170941
PSB913-4_map5	0002.CSV	2865.82	-0.0175466
PSB913-4_map5	0002.CSV	2869.68	-0.017415
PSB913-4_map5	0002.CSV	2873.54	-0.0173346
PSB913-4_map5	0002.CSV	2877.39	-0.0177671
PSB913-4_map5	0002.CSV	2881.25	-0.0180223
PSB913-4_map5	0002.CSV	2885.11	-0.0177785
PSB913-4_map5	0002.CSV	2888.97	-0.0172752
PSB913-4_map5	0002.CSV	2892.82	-0.0165746
PSB913-4_map5	0002.CSV	2896.68	-0.0161576
PSB913-4_map5	0002.CSV	2900.54	-0.0158877
PSB913-4_map5	0002.CSV	2904.39	-0.0152262
PSB913-4_map5	0002.CSV	2908.25	-0.0140669
PSB913-4_map5	0002.CSV	2912.11	-0.0125429
PSB913-4_map5	0002.CSV	2915.97	-0.0113353
PSB913-4_map5	0002.CSV	2919.82	-0.0114204
PSB913-4_map5	0002.CSV	2923.68	-0.012335
PSB913-4_map5	0002.CSV	2927.54	-0.0131128
PSB913-4_map5	0002.CSV	2931.39	-0.0139958
PSB913-4_map5	0002.CSV	2935.25	-0.0151974
PSB913-4_map5	0002.CSV	2939.11	-0.0157498
PSB913-4_map5	0002.CSV	2942.96	-0.015673
PSB913-4_map5	0002.CSV	2946.82	-0.0158664
PSB913-4_map5	0002.CSV	2950.68	-0.0164314
PSB913-4_map5	0002.CSV	2954.54	-0.0170491
PSB913-4_map5	0002.CSV	2958.39	-0.0177486
PSB913-4_map5	0002.CSV	2962.25	-0.0181064
PSB913-4_map5	0002.CSV	2966.11	-0.0185933
PSB913-4_map5	0002.CSV	2969.96	-0.0187228
PSB913-4_map5	0002.CSV	2973.82	-0.0185142
PSB913-4_map5	0002.CSV	2977.68	-0.0183688
PSB913-4_map5	0002.CSV	2981.53	-0.0186188
PSB913-4_map5	0002.CSV	2985.39	-0.0189898
PSB913-4_map5	0002.CSV	2989.25	-0.0190014
PSB913-4_map5	0002.CSV	2993.11	-0.0187268
PSB913-4_map5	0002.CSV	2996.96	-0.0188205
PSB913-4_map5	0002.CSV	3000.82	-0.0191186
PSB913-4_map5	0002.CSV	3004.68	-0.0193284
PSB913-4_map5	0002.CSV	3008.53	-0.0190649
PSB913-4_map5	0002.CSV	3012.39	-0.0187407
PSB913-4_map5	0002.CSV	3016.25	-0.018642
PSB913-4_map5	0002.CSV	3020.11	-0.0188563
PSB913-4_map5	0002.CSV	3023.96	-0.0189057
PSB913-4_map5	0002.CSV	3027.82	-0.0188487
PSB913-4_map5	0002.CSV	3031.68	-0.0186064
PSB913-4_map5	0002.CSV	3035.53	-0.0187182
PSB913-4_map5	0002.CSV	3039.39	-0.0187648
PSB913-4_map5	0002.CSV	3043.25	-0.0187159
PSB913-4_map5	0002.CSV	3047.11	-0.018779
[truncated: 85,684 more rows]

## Sheet: PSB913-4_map6
Map	Select spectrum number	Wavenumbers	Absrobance
[truncated: 65,588 more rows]

[truncated: 1 more sheets: PSB913-4_map7]
